# Supplementary material
Source: PubMed Central journal article supplement (PMC5839053)
Supplement: 41431_2017_12_MOESM7_ESM.pdf [file 41431_2017_12_MOESM7_ESM.pdf]

```
1 ##fileformat=VCFv4.1
2 ##ALT=<ID=NON_REF,Description="Represents any possible alternative allele at this location">
3 ##FILTER=<ID=LowQual,Description="Low quality">
4 ##FILTER=<ID=my_snp_filter,Description="QD < 2.0 || FS > 60.0 || MQ < 40.0 || MQRankSum < -12.5 ||
5 ##FORMAT=<ID=AD,Number=.,Type=Integer,Description="Allelic depths for the ref and alt alleles in
6 ##FORMAT=<ID=DP,Number=1,Type=Integer,Description="Approximate read depth (reads with MQ=255 or w
7 ##FORMAT=<ID=GQ,Number=1,Type=Integer,Description="Genotype Quality">
8 ##FORMAT=<ID=GT,Number=1,Type=String,Description="Genotype">
9 ##FORMAT=<ID=MIN_DP,Number=1,Type=Integer,Description="Minimum DP observed within the GVCf block"
10 ##FORMAT=<ID=PGT,Number=1,Type=String,Description="Physical phasing haplotype information, descri
11 ##FORMAT=<ID=PID,Number=1,Type=String,Description="Physical phasing ID information, where each un
12 ##FORMAT=<ID=PL,Number=G,Type=Integer,Description="Normalized, Phred-scaled likelihoods for genot
13 ##FORMAT=<ID=RGQ,Number=1,Type=Integer,Description="Unconditional reference genotype confidence,
14 ##FORMAT=<ID=SB,Number=4,Type=Integer,Description="Per-sample component statistics which comprise
15 ##GATKCommandLine.GenotypeGVCFs=<ID=GenotypeGVCFs,Version=3.4-46-gbc02625,Date="Tue Dec 27 11:11:
16 ##GATKCommandLine.HaplotypeCaller=<ID=HaplotypeCaller,Version=3.4-46-gbc02625,Date="Wed Dec 14 16
17 ##GATKCommandLine.SelectVariants=<ID=SelectVariants,Version=3.4-46-gbc02625,Date="Tue Dec 27 13:1
18 ##GATKCommandLine.VariantFiltration=<ID=VariantFiltration,Version=3.4-46-gbc02625,Date="Tue Dec 2
19 ##GVCfBlock0-1=minGQ=0 (inclusive),maxGQ=1 (exclusive)
20 ##GVCfBlock1-2=minGQ=1 (inclusive),maxGQ=2 (exclusive)
21 ##GVCfBlock10-11=minGQ=10 (inclusive),maxGQ=11 (exclusive)
22 ##GVCfBlock11-12=minGQ=11 (inclusive),maxGQ=12 (exclusive)
23 ##GVCfBlock12-13=minGQ=12 (inclusive),maxGQ=13 (exclusive)
24 ##GVCfBlock13-14=minGQ=13 (inclusive),maxGQ=14 (exclusive)
25 ##GVCfBlock14-15=minGQ=14 (inclusive),maxGQ=15 (exclusive)
26 ##GVCfBlock15-16=minGQ=15 (inclusive),maxGQ=16 (exclusive)
27 ##GVCfBlock16-17=minGQ=16 (inclusive),maxGQ=17 (exclusive)
28 ##GVCfBlock17-18=minGQ=17 (inclusive),maxGQ=18 (exclusive)
29 ##GVCfBlock18-19=minGQ=18 (inclusive),maxGQ=19 (exclusive)
30 ##GVCfBlock19-20=minGQ=19 (inclusive),maxGQ=20 (exclusive)
31 ##GVCfBlock2-3=minGQ=2 (inclusive),maxGQ=3 (exclusive)
32 ##GVCfBlock20-21=minGQ=20 (inclusive),maxGQ=21 (exclusive)
33 ##GVCfBlock21-22=minGQ=21 (inclusive),maxGQ=22 (exclusive)
34 ##GVCfBlock22-23=minGQ=22 (inclusive),maxGQ=23 (exclusive)
35 ##GVCfBlock23-24=minGQ=23 (inclusive),maxGQ=24 (exclusive)
36 ##GVCfBlock24-25=minGQ=24 (inclusive),maxGQ=25 (exclusive)
37 ##GVCfBlock25-26=minGQ=25 (inclusive),maxGQ=26 (exclusive)
38 ##GVCfBlock26-27=minGQ=26 (inclusive),maxGQ=27 (exclusive)
39 ##GVCfBlock27-28=minGQ=27 (inclusive),maxGQ=28 (exclusive)
40 ##GVCfBlock28-29=minGQ=28 (inclusive),maxGQ=29 (exclusive)
41 ##GVCfBlock29-30=minGQ=29 (inclusive),maxGQ=30 (exclusive)
42 ##GVCfBlock3-4=minGQ=3 (inclusive),maxGQ=4 (exclusive)
43 ##GVCfBlock30-31=minGQ=30 (inclusive),maxGQ=31 (exclusive)
44 ##GVCfBlock31-32=minGQ=31 (inclusive),maxGQ=32 (exclusive)
45 ##GVCfBlock32-33=minGQ=32 (inclusive),maxGQ=33 (exclusive)
46 ##GVCfBlock33-34=minGQ=33 (inclusive),maxGQ=34 (exclusive)
47 ##GVCfBlock34-35=minGQ=34 (inclusive),maxGQ=35 (exclusive)
48 ##GVCfBlock35-36=minGQ=35 (inclusive),maxGQ=36 (exclusive)
49 ##GVCfBlock36-37=minGQ=36 (inclusive),maxGQ=37 (exclusive)
50 ##GVCfBlock37-38=minGQ=37 (inclusive),maxGQ=38 (exclusive)
51 ##GVCfBlock38-39=minGQ=38 (inclusive),maxGQ=39 (exclusive)
52 ##GVCfBlock39-40=minGQ=39 (inclusive),maxGQ=40 (exclusive)
53 ##GVCfBlock4-5=minGQ=4 (inclusive),maxGQ=5 (exclusive)
54 ##GVCfBlock40-41=minGQ=40 (inclusive),maxGQ=41 (exclusive)
55 ##GVCfBlock41-42=minGQ=41 (inclusive),maxGQ=42 (exclusive)
56 ##GVCfBlock42-43=minGQ=42 (inclusive),maxGQ=43 (exclusive)
57 ##GVCfBlock43-44=minGQ=43 (inclusive),maxGQ=44 (exclusive)
58 ##GVCfBlock44-45=minGQ=44 (inclusive),maxGQ=45 (exclusive)
59 ##GVCfBlock45-46=minGQ=45 (inclusive),maxGQ=46 (exclusive)
60 ##GVCfBlock46-47=minGQ=46 (inclusive),maxGQ=47 (exclusive)
61 ##GVCfBlock47-48=minGQ=47 (inclusive),maxGQ=48 (exclusive)
62 ##GVCfBlock48-49=minGQ=48 (inclusive),maxGQ=49 (exclusive)
63 ##GVCfBlock49-50=minGQ=49 (inclusive),maxGQ=50 (exclusive)
64 ##GVCfBlock5-6=minGQ=5 (inclusive),maxGQ=6 (exclusive)
65 ##GVCfBlock50-51=minGQ=50 (inclusive),maxGQ=51 (exclusive)
66 ##GVCfBlock51-52=minGQ=51 (inclusive),maxGQ=52 (exclusive)
67 ##GVCfBlock52-53=minGQ=52 (inclusive),maxGQ=53 (exclusive)
68 ##GVCfBlock53-54=minGQ=53 (inclusive),maxGQ=54 (exclusive)
69 ##GVCfBlock54-55=minGQ=54 (inclusive),maxGQ=55 (exclusive)
70 ##GVCfBlock55-56=minGQ=55 (inclusive),maxGQ=56 (exclusive)
71 ##GVCfBlock56-57=minGQ=56 (inclusive),maxGQ=57 (exclusive)
72 ##GVCfBlock57-58=minGQ=57 (inclusive),maxGQ=58 (exclusive)
73 ##GVCfBlock58-59=minGQ=58 (inclusive),maxGQ=59 (exclusive)
74 ##GVCfBlock59-60=minGQ=59 (inclusive),maxGQ=60 (exclusive)
75 ##GVCfBlock6-7=minGQ=6 (inclusive),maxGQ=7 (exclusive)
76 ##GVCfBlock60-70=minGQ=60 (inclusive),maxGQ=70 (exclusive)
```

```

77 ##GVCBlock7-8=minGQ=7 (inclusive),maxGQ=8 (exclusive)
78 ##GVCBlock70-80=minGQ=70 (inclusive),maxGQ=80 (exclusive)
79 ##GVCBlock8-9=minGQ=8 (inclusive),maxGQ=9 (exclusive)
80 ##GVCBlock80-90=minGQ=80 (inclusive),maxGQ=90 (exclusive)
81 ##GVCBlock9-10=minGQ=9 (inclusive),maxGQ=10 (exclusive)
82 ##GVCBlock90-99=minGQ=90 (inclusive),maxGQ=99 (exclusive)
83 ##GVCBlock99-2147483647=minGQ=99 (inclusive),maxGQ=2147483647 (exclusive)
84 ##INFO=<ID=AC,Number=A,Type=Integer,Description="Allele count in genotypes, for each ALT allele,
85 ##INFO=<ID=AF,Number=A,Type=Float,Description="Allele Frequency, for each ALT allele, in the same
86 ##INFO=<ID=AN,Number=1,Type=Integer,Description="Total number of alleles in called genotypes">
87 ##INFO=<ID=BaseQRankSum,Number=1,Type=Float,Description="Z-score from Wilcoxon rank sum test of A
88 ##INFO=<ID=ClippingRankSum,Number=1,Type=Float,Description="Z-score From Wilcoxon rank sum test o
89 ##INFO=<ID=DB,Number=0,Type=Flag,Description="dbSNP Membership">
90 ##INFO=<ID=DP,Number=1,Type=Integer,Description="Approximate read depth; some reads may have been
91 ##INFO=<ID=DS,Number=0,Type=Flag,Description="Were any of the samples downsampled?">
92 ##INFO=<ID=END,Number=1,Type=Integer,Description="Stop position of the interval">
93 ##INFO=<ID=FS,Number=1,Type=Float,Description="Phred-scaled p-value using Fisher's exact test to
94 ##INFO=<ID=HaplotypeScore,Number=1,Type=Float,Description="Consistency of the site with at most t
95 ##INFO=<ID=InbreedingCoeff,Number=1,Type=Float,Description="Inbreeding coefficient as estimated f
96 ##INFO=<ID=MLEAC,Number=A,Type=Integer,Description="Maximum likelihood expectation (MLE) for the
97 ##INFO=<ID=MLEAF,Number=A,Type=Float,Description="Maximum likelihood expectation (MLE) for the al
98 ##INFO=<ID=MQ,Number=1,Type=Float,Description="RMS Mapping Quality">
99 ##INFO=<ID=MQRankSum,Number=1,Type=Float,Description="Z-score From Wilcoxon rank sum test of Alt
100 ##INFO=<ID=QD,Number=1,Type=Float,Description="Variant Confidence/Quality by Depth">
101 ##INFO=<ID=ReadPosRankSum,Number=1,Type=Float,Description="Z-score from Wilcoxon rank sum test of
102 ##INFO=<ID=SOR,Number=1,Type=Float,Description="Symmetric Odds Ratio of 2x2 contingency table to
103 ##contig=<ID=chrY,length=59373566>
104 ##reference=file:///home/Lab/download/pipeline/chrY.fa
105 ##source=SelectVariants
106 #CHROM POS ID REF ALT QUAL FILTER INFO FORMAT AAGC022166D AAGC02217
107 chrY 922101 . A C 132.94 my_snp_filter AC=10;AF=1.00;AN=10;DP=17;FS=0.00
108 chrY 922139 . T C 562.74 my_snp_filter AC=10;AF=1.00;AN=10;DP=17;FS=0.00
109 chrY 922140 . G A 562.74 my_snp_filter AC=10;AF=1.00;AN=10;DP=17;FS=0.00
110 chrY 922153 . A T 562.74 my_snp_filter AC=10;AF=1.00;AN=10;DP=17;FS=0.00
111 chrY 922184 . G T 459.65 my_snp_filter AC=8;AF=1.00;AN=8;DP=17;FS=0.000;
112 chrY 922185 . G A 459.65 my_snp_filter AC=8;AF=1.00;AN=8;DP=17;FS=0.000;
113 chrY 1432461 . G A 35.84 my_snp_filter AC=2;AF=1.00;AN=2;DP=2;FS=0.000;M
114 chrY 1581920 . C G 67.84 my_snp_filter AC=2;AF=1.00;AN=2;DP=2;FS=0.000;M
115 chrY 1581921 . C A 67.84 my_snp_filter AC=2;AF=1.00;AN=2;DP=2;FS=0.000;M
116 chrY 1581926 . C T 67.84 my_snp_filter AC=2;AF=1.00;AN=2;DP=2;FS=0.000;M
117 chrY 1581935 . C A 67.84 my_snp_filter AC=2;AF=1.00;AN=2;DP=2;FS=0.000;M
118 chrY 1581939 . G T 67.84 my_snp_filter AC=2;AF=1.00;AN=2;DP=2;FS=0.000;M
119 chrY 2649476 . A T 3118.42 PASS AC=40;AF=1.00;AN=40;DP=84;FS=0.000;Inbre
120 chrY 2649480 . C G 3068.45 PASS AC=40;AF=1.00;AN=40;DP=82;FS=0.000;Inbre
121 chrY 2653141 . T C 443.96 PASS AC=6;AF=0.086;AN=70;DP=273;FS=0.000;Inbre
122 chrY 2658159 . G A 924.74 PASS AC=6;AF=0.094;AN=64;DP=325;FS=0.000;Inbre
123 chrY 2661694 . A G 6444.13 PASS AC=60;AF=1.00;AN=60;DP=228;FS=0.000;Inbre
124 chrY 2663171 . T C 68.60 PASS AC=2;AF=0.029;AN=70;DP=421;FS=0.000;Inbre
125 chrY 2666847 . T C 368.23 PASS AC=2;AF=0.029;AN=70;DP=507;FS=0.000;Inbre
126 chrY 2667652 . A G 926.62 PASS AC=6;AF=0.091;AN=66;DP=682;FS=0.000;Inbre
127 chrY 2668456 . T C 12970.90 PASS AC=70;AF=1.00;AN=70;DP=469;FS=0.0
128 chrY 2680737 . A G 222.28 PASS AC=8;AF=0.267;AN=30;DP=156;FS=0.000;Inbre
129 chrY 2681382 . A G 1013.82 PASS AC=6;AF=0.086;AN=70;DP=434;FS=0.000;Inbre
130 chrY 2683469 . C T 16074.27 PASS AC=46;AF=0.657;AN=70;BaseQRankSum
131 chrY 2686422 . A T 788.38 PASS AC=6;AF=0.273;AN=22;DP=95;FS=0.000;Inbre
132 chrY 2686555 . A G 1264.93 PASS AC=18;AF=1.00;AN=18;DP=78;FS=0.000;MLEAC=
133 chrY 2686727 . A G 13351.91 PASS AC=68;AF=1.00;AN=68;DP=462;FS=0.0
134 chrY 2687563 . A G 31.18 PASS AC=1;AF=0.015;AN=68;BaseQRankSum=-1.568e+
135 chrY 2692806 . C T 185.90 PASS AC=2;AF=0.029;AN=70;DP=376;FS=0.000;Inbre
136 chrY 2696691 . G A 272.47 PASS AC=2;AF=0.032;AN=62;DP=200;FS=0.000;Inbre
137 chrY 2698086 . G C 1229.03 PASS AC=6;AF=0.158;AN=38;DP=194;FS=0.000;Inbre
138 chrY 2700275 . A G 46.82 PASS AC=2;AF=0.037;AN=54;DP=172;FS=0.000;Inbre
139 chrY 2707859 . G C 15814.27 PASS AC=54;AF=0.818;AN=66;DP=642;FS=0.
140 chrY 2709436 . A G 190.66 PASS AC=4;AF=0.057;AN=70;DP=424;FS=0.000;Inbre
141 chrY 2713096 . G A 75.03 PASS AC=2;AF=0.029;AN=70;DP=567;FS=0.000;Inbre
142 chrY 2722506 . A G 13966.91 PASS AC=58;AF=0.829;AN=70;DP=533;FS=0.
143 chrY 2724768 . G C 1422.21 PASS AC=6;AF=0.143;AN=42;DP=179;FS=0.000;Inbre
144 chrY 2726063 . G A 226.41 PASS AC=2;AF=0.029;AN=70;DP=364;FS=0.000;Inbre
145 chrY 2726256 . C T 12693.30 PASS AC=50;AF=0.735;AN=68;DP=577;FS=0.
146 chrY 2726402 . T G 1093.29 PASS AC=6;AF=0.086;AN=70;DP=552;FS=0.000;Inbre
147 chrY 2728927 . A G 958.79 PASS AC=6;AF=0.086;AN=70;DP=746;FS=0.000;Inbre
148 chrY 2730980 . G T 457.47 PASS AC=2;AF=0.029;AN=68;DP=522;FS=0.000;Inbre
149 chrY 2734854 . C T 10234.72 PASS AC=50;AF=0.735;AN=68;BaseQRankSum
150 chrY 2735198 . G A 886.64 PASS AC=2;AF=0.029;AN=70;DP=574;FS=0.000;Inbre
151 chrY 2737043 . C T 1422.94 PASS AC=6;AF=0.086;AN=70;DP=646;FS=0.000;Inbre
152 chrY 2738273 . G A 2764.12 PASS AC=12;AF=0.171;AN=70;DP=643;FS=0.000;Inbre

```

|     |      |         |   |   |   |          |               |                                           |
|-----|------|---------|---|---|---|----------|---------------|-------------------------------------------|
| 153 | chrY | 2738986 | . | C | T | 653.25   | PASS          | AC=18;AF=0.500;AN=36;DP=144;FS=0.000;Inbr |
| 154 | chrY | 2742403 | . | T | C | 36.86    | PASS          | AC=1;AF=0.014;AN=70;BaseQRankSum=-1.026e+ |
| 155 | chrY | 2746126 | . | A | C | 47.96    | PASS          | AC=2;AF=0.037;AN=54;DP=215;FS=0.000;Inbre |
| 156 | chrY | 2746127 | . | G | C | 48.01    | PASS          | AC=2;AF=0.037;AN=54;DP=215;FS=0.000;Inbre |
| 157 | chrY | 2746129 | . | A | G | 47.99    | PASS          | AC=2;AF=0.037;AN=54;DP=216;FS=0.000;Inbre |
| 158 | chrY | 2750408 | . | A | G | 1010.29  | PASS          | AC=6;AF=0.088;AN=68;DP=498;FS=0.000;Inbre |
| 159 | chrY | 2752344 | . | G | A | 101.83   | PASS          | AC=2;AF=0.048;AN=42;DP=130;FS=0.000;Inbre |
| 160 | chrY | 2755358 | . | C | T | 1298.56  | PASS          | AC=6;AF=0.088;AN=68;DP=372;FS=0.000;Inbre |
| 161 | chrY | 2756333 | . | G | C | 547.28   | PASS          | AC=2;AF=0.029;AN=70;DP=472;FS=0.000;Inbre |
| 162 | chrY | 2756471 | . | T | A | 14086.97 | PASS          | AC=58;AF=0.829;AN=70;DP=571;FS=0.000      |
| 163 | chrY | 2758358 | . | G | T | 46.32    | PASS          | AC=1;AF=0.056;AN=18;BaseQRankSum=-2.616e+ |
| 164 | chrY | 2758368 | . | A | T | 46.35    | PASS          | AC=1;AF=0.056;AN=18;BaseQRankSum=-2.616e+ |
| 165 | chrY | 2759925 | . | G | T | 81.03    | PASS          | AC=1;AF=0.050;AN=20;BaseQRankSum=0.296;Cl |
| 166 | chrY | 2759928 | . | G | T | 81.09    | PASS          | AC=1;AF=0.050;AN=20;BaseQRankSum=2.05;Cli |
| 167 | chrY | 2759936 | . | G | A | 126.04   | PASS          | AC=1;AF=0.050;AN=20;BaseQRankSum=2.07;Cli |
| 168 | chrY | 2759943 | . | G | A | 127.08   | PASS          | AC=1;AF=0.056;AN=18;BaseQRankSum=1.65;Cli |
| 169 | chrY | 2759947 | . | C | G | 129.51   | PASS          | AC=1;AF=0.071;AN=14;BaseQRankSum=1.65;Cli |
| 170 | chrY | 2759959 | . | C | T | 244.11   | PASS          | AC=2;AF=0.333;AN=6;BaseQRankSum=1.23;Clip |
| 171 | chrY | 2759966 | . | G | A | 243.99   | PASS          | AC=2;AF=0.200;AN=10;BaseQRankSum=1.22;Cli |
| 172 | chrY | 2759968 | . | G | A | 244.09   | PASS          | AC=2;AF=0.200;AN=10;BaseQRankSum=1.23;Cli |
| 173 | chrY | 2759969 | . | C | T | 244.09   | PASS          | AC=2;AF=0.200;AN=10;BaseQRankSum=1.22;Cli |
| 174 | chrY | 2759997 | . | T | C | 51.25    | my_snp_filter | AC=3;AF=0.063;AN=48;BaseQRankSum=         |
| 175 | chrY | 2760000 | . | A | G | 50.77    | my_snp_filter | AC=3;AF=0.060;AN=50;BaseQRankSum=         |
| 176 | chrY | 2760821 | . | G | C | 178.33   | PASS          | AC=2;AF=0.029;AN=68;DP=293;FS=0.000;Inbre |
| 177 | chrY | 2761008 | . | A | G | 428.32   | PASS          | AC=2;AF=0.029;AN=70;DP=296;FS=0.000;Inbre |
| 178 | chrY | 2765681 | . | G | C | 1234.50  | PASS          | AC=6;AF=0.088;AN=68;DP=353;FS=0.000;Inbre |
| 179 | chrY | 2768208 | . | G | A | 117.84   | PASS          | AC=4;AF=0.059;AN=68;DP=253;FS=0.000;Inbre |
| 180 | chrY | 2786167 | . | G | A | 133.73   | PASS          | AC=3;AF=0.167;AN=18;BaseQRankSum=-4.670e- |
| 181 | chrY | 2786194 | . | G | C | 452.15   | PASS          | AC=6;AF=0.333;AN=18;BaseQRankSum=-1.240e- |
| 182 | chrY | 2786242 | . | A | G | 2588.09  | PASS          | AC=9;AF=0.500;AN=18;BaseQRankSum=-1.493e+ |
| 183 | chrY | 2786244 | . | C | T | 2610.09  | PASS          | AC=9;AF=0.500;AN=18;BaseQRankSum=-1.813e+ |
| 184 | chrY | 2786264 | . | G | A | 1409.09  | PASS          | AC=9;AF=0.500;AN=18;BaseQRankSum=-2.136e+ |
| 185 | chrY | 2786276 | . | T | C | 1386.09  | PASS          | AC=9;AF=0.500;AN=18;BaseQRankSum=-9.130e- |
| 186 | chrY | 2786278 | . | G | A | 2248.09  | PASS          | AC=9;AF=0.500;AN=18;BaseQRankSum=0.053;Cl |
| 187 | chrY | 2786282 | . | T | C | 349      | PASS          | AC=6;AF=0.300;AN=20;BaseQRankSum=-1.920e+ |
| 188 | chrY | 2786289 | . | T | G | 1725.09  | PASS          | AC=9;AF=0.500;AN=18;BaseQRankSum=-2.650e+ |
| 189 | chrY | 2786326 | . | T | C | 148.30   | PASS          | AC=3;AF=0.167;AN=18;BaseQRankSum=-7.420e- |
| 190 | chrY | 2786337 | . | T | G | 330.33   | PASS          | AC=1;AF=0.056;AN=18;BaseQRankSum=-1.694e+ |
| 191 | chrY | 2786386 | . | G | T | 76.60    | PASS          | AC=2;AF=0.111;AN=18;BaseQRankSum=0.00;Cli |
| 192 | chrY | 2786397 | . | T | C | 48.30    | my_snp_filter | AC=2;AF=0.111;AN=18;BaseQRankSum=         |
| 193 | chrY | 2786402 | . | G | C | 71.17    | PASS          | AC=2;AF=0.111;AN=18;BaseQRankSum=0.773;Cl |
| 194 | chrY | 2786417 | . | G | A | 44.81    | my_snp_filter | AC=2;AF=0.111;AN=18;BaseQRankSum=         |
| 195 | chrY | 2786440 | . | T | G | 33.48    | my_snp_filter | AC=1;AF=0.056;AN=18;BaseQRankSum=         |
| 196 | chrY | 2786452 | . | C | A | 46.17    | PASS          | AC=1;AF=0.050;AN=20;BaseQRankSum=1.40;Cli |
| 197 | chrY | 2786455 | . | T | C | 229.72   | PASS          | AC=2;AF=0.100;AN=20;BaseQRankSum=1.96;Cli |
| 198 | chrY | 2786460 | . | C | T | 223.27   | PASS          | AC=2;AF=0.100;AN=20;BaseQRankSum=1.27;Cli |
| 199 | chrY | 2786464 | . | C | A | 223.43   | PASS          | AC=2;AF=0.100;AN=20;BaseQRankSum=1.86;Cli |
| 200 | chrY | 2786474 | . | T | G | 328.82   | PASS          | AC=2;AF=0.100;AN=20;BaseQRankSum=-1.470e+ |
| 201 | chrY | 2786789 | . | T | C | 39.58    | my_snp_filter | AC=2;AF=0.100;AN=20;BaseQRankSum=         |
| 202 | chrY | 2787770 | . | A | G | 479.36   | PASS          | AC=2;AF=0.029;AN=70;DP=570;FS=0.000;Inbre |
| 203 | chrY | 2790145 | . | C | G | 1189.06  | PASS          | AC=26;AF=0.591;AN=44;DP=174;FS=0.000;Inbr |
| 204 | chrY | 2794263 | . | C | G | 3115.75  | PASS          | AC=34;AF=0.531;AN=64;DP=295;FS=0.000;Inbr |
| 205 | chrY | 2794569 | . | C | G | 1804.85  | PASS          | AC=6;AF=0.086;AN=70;DP=528;FS=0.000;Inbre |
| 206 | chrY | 2794730 | . | C | T | 560.36   | PASS          | AC=2;AF=0.029;AN=70;DP=455;FS=0.000;Inbre |
| 207 | chrY | 2802435 | . | G | C | 6876.26  | PASS          | AC=40;AF=0.571;AN=70;DP=468;FS=0.000;Inbr |
| 208 | chrY | 2803297 | . | C | T | 3001.79  | PASS          | AC=36;AF=0.667;AN=54;DP=200;FS=0.000;Inbr |
| 209 | chrY | 2803717 | . | T | C | 5434.03  | PASS          | AC=52;AF=1.00;AN=52;DP=208;FS=0.000;Inbre |
| 210 | chrY | 2808087 | . | A | G | 1102.81  | PASS          | AC=6;AF=0.086;AN=70;DP=325;FS=0.000;Inbre |
| 211 | chrY | 2810003 | . | G | A | 1144.99  | PASS          | AC=6;AF=0.086;AN=70;BaseQRankSum=1.55;Cli |
| 212 | chrY | 2810583 | . | G | A | 1696.95  | PASS          | AC=16;AF=1.00;AN=16;DP=79;FS=0.000;MLEAC= |
| 213 | chrY | 2811034 | . | G | C | 4308.82  | PASS          | AC=42;AF=0.700;AN=60;DP=253;FS=0.000;Inbr |
| 214 | chrY | 2811158 | . | G | A | 633.59   | PASS          | AC=6;AF=0.086;AN=70;DP=380;FS=0.000;Inbre |
| 215 | chrY | 2811660 | . | G | A | 355.45   | PASS          | AC=2;AF=0.029;AN=70;DP=507;FS=0.000;Inbre |
| 216 | chrY | 2817429 | . | G | C | 14195.94 | PASS          | AC=68;AF=1.00;AN=68;DP=460;FS=0.000       |
| 217 | chrY | 2821176 | . | T | C | 526.26   | PASS          | AC=6;AF=0.111;AN=54;DP=148;FS=0.000;Inbre |
| 218 | chrY | 2824720 | . | A | C | 217.60   | PASS          | AC=3;AF=0.050;AN=60;BaseQRankSum=0.573;Cl |
| 219 | chrY | 2824737 | . | G | C | 132.81   | PASS          | AC=3;AF=0.050;AN=60;BaseQRankSum=-7.510e- |
| 220 | chrY | 2825845 | . | T | C | 9009.59  | PASS          | AC=46;AF=0.657;AN=70;DP=480;FS=0.000;Inbr |
| 221 | chrY | 2828425 | . | A | G | 1086.23  | PASS          | AC=6;AF=0.086;AN=70;DP=315;FS=0.000;Inbre |
| 222 | chrY | 2830077 | . | C | T | 217.78   | PASS          | AC=3;AF=0.043;AN=70;BaseQRankSum=-1.495e+ |
| 223 | chrY | 2832907 | . | T | C | 1280.76  | PASS          | AC=6;AF=0.115;AN=52;DP=204;FS=0.000;Inbre |
| 224 | chrY | 2834410 | . | G | A | 1225.93  | PASS          | AC=6;AF=0.091;AN=66;DP=251;FS=0.000;Inbre |
| 225 | chrY | 2837595 | . | G | A | 9930.32  | PASS          | AC=52;AF=0.743;AN=70;DP=502;FS=0.000;Inbr |
| 226 | chrY | 2838019 | . | G | T | 49.60    | PASS          | AC=2;AF=0.042;AN=48;DP=172;FS=0.000;Inbre |
| 227 | chrY | 2838021 | . | A | T | 49.54    | PASS          | AC=2;AF=0.043;AN=46;DP=173;FS=0.000;Inbre |
| 228 | chrY | 2838031 | . | C | T | 49.24    | PASS          | AC=2;AF=0.043;AN=46;DP=182;FS=0.000;Inbre |

|     |      |         |   |   |     |          |               |                                            |
|-----|------|---------|---|---|-----|----------|---------------|--------------------------------------------|
| 229 | chrY | 2838244 | . | G | A   | 908.64   | PASS          | AC=6;AF=0.091;AN=66;DP=301;FS=0.000;Inbre  |
| 230 | chrY | 2842212 | . | A | T,* | 7902.05  | PASS          | AC=49,2;AF=0.942,0.038;AN=52;BaseQRankSum  |
| 231 | chrY | 2842214 | . | T | A   | 7735.48  | PASS          | AC=49;AF=0.980;AN=50;DP=176;FS=0.000;Inbr  |
| 232 | chrY | 2849874 | . | C | T   | 6862.02  | PASS          | AC=42;AF=0.636;AN=66;DP=401;FS=0.000;Inbr  |
| 233 | chrY | 2854733 | . | T | C   | 1025.14  | PASS          | AC=6;AF=0.086;AN=70;DP=510;FS=0.000;Inbre  |
| 234 | chrY | 2858606 | . | G | A   | 33.30    | my_snp_filter | AC=2;AF=0.077;AN=26;DP=189;FS=0.0          |
| 235 | chrY | 2858619 | . | G | A   | 32.08    | my_snp_filter | AC=2;AF=0.063;AN=32;DP=192;FS=0.0          |
| 236 | chrY | 2859544 | . | A | G   | 999.82   | PASS          | AC=6;AF=0.150;AN=40;DP=157;FS=0.000;Inbre  |
| 237 | chrY | 2860310 | . | G | A   | 31.54    | PASS          | AC=1;AF=0.015;AN=68;BaseQRankSum=-9.220e-  |
| 238 | chrY | 2860316 | . | C | A   | 31.49    | PASS          | AC=1;AF=0.014;AN=70;BaseQRankSum=-1.495e+  |
| 239 | chrY | 2860628 | . | G | T   | 35.86    | PASS          | AC=1;AF=0.016;AN=62;BaseQRankSum=-1.380e+  |
| 240 | chrY | 2860635 | . | C | A   | 36.33    | PASS          | AC=1;AF=0.017;AN=60;BaseQRankSum=-1.380e+  |
| 241 | chrY | 2860701 | . | T | C   | 617.11   | PASS          | AC=6;AF=0.097;AN=62;DP=210;FS=0.000;Inbre  |
| 242 | chrY | 2863171 | . | G | A   | 1006.73  | PASS          | AC=6;AF=0.086;AN=70;DP=433;FS=0.000;Inbre  |
| 243 | chrY | 2863665 | . | G | A   | 3498.11  | PASS          | AC=40;AF=0.769;AN=52;DP=227;FS=0.000;Inbr  |
| 244 | chrY | 2864163 | . | T | G   | 766.56   | PASS          | AC=6;AF=0.086;AN=70;DP=315;FS=0.000;Inbre  |
| 245 | chrY | 2864281 | . | T | A   | 1731.32  | PASS          | AC=6;AF=0.088;AN=68;DP=307;FS=0.000;Inbre  |
| 246 | chrY | 2864283 | . | G | A   | 1698.31  | PASS          | AC=6;AF=0.088;AN=68;DP=305;FS=0.000;Inbre  |
| 247 | chrY | 2864284 | . | T | A   | 1698.35  | PASS          | AC=6;AF=0.088;AN=68;DP=303;FS=0.000;Inbre  |
| 248 | chrY | 2864957 | . | G | A   | 2757.63  | PASS          | AC=40;AF=0.625;AN=64;DP=247;FS=0.000;Inbr  |
| 249 | chrY | 2865199 | . | C | G   | 46.36    | PASS          | AC=2;AF=0.029;AN=70;DP=306;FS=0.000;Inbre  |
| 250 | chrY | 2866613 | . | T | C   | 2695.36  | my_snp_filter | AC=9;AF=0.500;AN=18;BaseQRankSum=          |
| 251 | chrY | 2866614 | . | G | A   | 2695.36  | my_snp_filter | AC=9;AF=0.500;AN=18;BaseQRankSum=          |
| 252 | chrY | 2866644 | . | G | A   | 739.86   | my_snp_filter | AC=6;AF=0.333;AN=18;BaseQRankSum=          |
| 253 | chrY | 2866886 | . | A | G   | 1304.59  | PASS          | AC=18;AF=0.500;AN=36;DP=183;FS=0.000;Inbr  |
| 254 | chrY | 2866903 | . | A | G   | 1652.33  | PASS          | AC=30;AF=0.625;AN=48;DP=204;FS=0.000;Inbr  |
| 255 | chrY | 2866931 | . | T | C   | 3631.13  | PASS          | AC=38;AF=0.679;AN=56;DP=258;FS=0.000;Inbr  |
| 256 | chrY | 2868167 | . | A | G   | 1600.19  | PASS          | AC=6;AF=0.086;AN=70;DP=595;FS=0.000;Inbre  |
| 257 | chrY | 2869848 | . | C | T   | 4198.61  | PASS          | AC=44;AF=0.710;AN=62;DP=298;FS=0.000;Inbr  |
| 258 | chrY | 2871758 | . | A | C   | 428.18   | PASS          | AC=2;AF=0.029;AN=70;DP=541;FS=0.000;Inbre  |
| 259 | chrY | 2873519 | . | G | A   | 12317.31 | PASS          | AC=50;AF=0.735;AN=68;DP=572;FS=0.0         |
| 260 | chrY | 2876872 | . | G | A   | 37.40    | PASS          | AC=1;AF=0.014;AN=70;BaseQRankSum=0.358;Cl  |
| 261 | chrY | 2876873 | . | C | A   | 37.40    | PASS          | AC=1;AF=0.014;AN=70;BaseQRankSum=1.23;Cli  |
| 262 | chrY | 2887726 | . | G | C   | 241.64   | PASS          | AC=2;AF=0.030;AN=66;DP=367;FS=0.000;Inbre  |
| 263 | chrY | 2887824 | . | A | C   | 9820.04  | PASS          | AC=66;AF=1.00;AN=66;DP=356;FS=0.000;Inbre  |
| 264 | chrY | 2888614 | . | C | T   | 3545.30  | PASS          | AC=32;AF=0.516;AN=62;DP=262;FS=0.000;Inbr  |
| 265 | chrY | 2888660 | . | G | C   | 108.12   | PASS          | AC=2;AF=0.032;AN=62;DP=140;FS=0.000;Inbre  |
| 266 | chrY | 2897433 | . | G | C   | 4708.86  | PASS          | AC=18;AF=1.00;AN=18;DP=185;FS=0.000;MLEAC  |
| 267 | chrY | 2902839 | . | C | T   | 10575.91 | PASS          | AC=54;AF=0.818;AN=66;DP=459;FS=0.0         |
| 268 | chrY | 2904375 | . | G | A   | 30.83    | PASS          | AC=1;AF=0.014;AN=70;BaseQRankSum=-9.220e-  |
| 269 | chrY | 2904379 | . | G | T   | 30.90    | PASS          | AC=1;AF=0.014;AN=70;BaseQRankSum=-1.980e-  |
| 270 | chrY | 2906977 | . | T | G   | 4131.76  | PASS          | AC=44;AF=0.710;AN=62;DP=307;FS=0.000;Inbr  |
| 271 | chrY | 2912385 | . | C | T   | 4973.66  | PASS          | AC=54;AF=0.818;AN=66;DP=266;FS=0.000;Inbr  |
| 272 | chrY | 2918242 | . | A | G   | 1296.41  | PASS          | AC=6;AF=0.086;AN=70;DP=593;FS=0.000;Inbre  |
| 273 | chrY | 2920188 | . | G | A   | 141.86   | PASS          | AC=3;AF=0.063;AN=48;BaseQRankSum=-2.510e-  |
| 274 | chrY | 2921781 | . | C | A   | 50.79    | PASS          | AC=2;AF=0.029;AN=70;BaseQRankSum=-1.890e-  |
| 275 | chrY | 2924386 | . | T | C   | 710.33   | PASS          | AC=11;AF=0.157;AN=70;BaseQRankSum=0.085;C  |
| 276 | chrY | 2924522 | . | A | T   | 1139.41  | PASS          | AC=10;AF=0.185;AN=54;BaseQRankSum=0.099;C  |
| 277 | chrY | 2925191 | . | C | G   | 6348.62  | PASS          | AC=50;AF=0.735;AN=68;DP=327;FS=0.000;Inbr  |
| 278 | chrY | 2925874 | . | A | G   | 1757.18  | PASS          | AC=18;AF=0.273;AN=66;BaseQRankSum=0.358;C  |
| 279 | chrY | 2927171 | . | G | A   | 861.93   | PASS          | AC=4;AF=0.065;AN=62;BaseQRankSum=1.50;Cli  |
| 280 | chrY | 2929155 | . | T | C   | 1332.66  | PASS          | AC=6;AF=0.097;AN=62;DP=257;FS=0.000;Inbre  |
| 281 | chrY | 2930985 | . | A | T   | 56.95    | my_snp_filter | AC=2;AF=0.042;AN=48;BaseQRankSum=          |
| 282 | chrY | 2931732 | . | A | G   | 358.90   | PASS          | AC=6;AF=0.200;AN=30;DP=73;FS=0.000;Inbre   |
| 283 | chrY | 2932676 | . | C | A   | 41.69    | PASS          | AC=2;AF=0.029;AN=68;DP=302;FS=0.000;Inbre  |
| 284 | chrY | 2932746 | . | A | G   | 4118.88  | PASS          | AC=22;AF=0.314;AN=70;BaseQRankSum=-2.920e- |
| 285 | chrY | 2934179 | . | G | A   | 3390.96  | PASS          | AC=15;AF=0.833;AN=18;BaseQRankSum=1.70;Cl  |
| 286 | chrY | 2934185 | . | T | C   | 3465.01  | PASS          | AC=15;AF=0.833;AN=18;BaseQRankSum=0.373;C  |
| 287 | chrY | 2934326 | . | C | T   | 603.23   | my_snp_filter | AC=8;AF=0.148;AN=54;BaseQRankSum=          |
| 288 | chrY | 2934458 | . | C | T   | 242.55   | PASS          | AC=4;AF=0.057;AN=70;BaseQRankSum=1.35;Cli  |
| 289 | chrY | 2934644 | . | G | A   | 556.94   | PASS          | AC=5;AF=0.093;AN=54;BaseQRankSum=-6.110e-  |
| 290 | chrY | 2936019 | . | C | G   | 707.24   | PASS          | AC=5;AF=0.125;AN=40;BaseQRankSum=-5.880e-  |
| 291 | chrY | 2936811 | . | A | G   | 187.69   | PASS          | AC=2;AF=0.029;AN=70;DP=466;FS=0.000;Inbre  |
| 292 | chrY | 2936920 | . | T | G   | 5560.12  | PASS          | AC=52;AF=1.00;AN=52;DP=193;FS=0.000;Inbre  |
| 293 | chrY | 2938681 | . | C | T   | 188.02   | PASS          | AC=2;AF=0.029;AN=70;DP=475;FS=0.000;Inbre  |
| 294 | chrY | 2939584 | . | G | A   | 56.33    | PASS          | AC=1;AF=0.056;AN=18;BaseQRankSum=1.74;Cli  |
| 295 | chrY | 2940096 | . | G | A   | 39.66    | my_snp_filter | AC=3;AF=0.045;AN=66;BaseQRankSum=          |
| 296 | chrY | 2940194 | . | A | T   | 82.77    | PASS          | AC=2;AF=0.029;AN=70;BaseQRankSum=0.849;Cl  |
| 297 | chrY | 2940479 | . | T | A   | 182.94   | PASS          | AC=5;AF=0.076;AN=66;BaseQRankSum=-7.510e-  |
| 298 | chrY | 2942311 | . | A | G   | 607.25   | PASS          | AC=6;AF=0.088;AN=68;DP=206;FS=0.000;Inbre  |
| 299 | chrY | 2945811 | . | G | C   | 537.25   | PASS          | AC=11;AF=0.157;AN=70;BaseQRankSum=1.44;Cl  |
| 300 | chrY | 2945859 | . | T | C   | 102.92   | PASS          | AC=2;AF=0.029;AN=70;BaseQRankSum=1.61;Cli  |
| 301 | chrY | 2945865 | . | C | A   | 112.49   | PASS          | AC=2;AF=0.029;AN=70;BaseQRankSum=1.61;Cli  |
| 302 | chrY | 2947292 | . | C | A   | 183.72   | PASS          | AC=3;AF=0.065;AN=46;BaseQRankSum=-2.548e+  |
| 303 | chrY | 2956378 | . | C | G   | 917.49   | PASS          | AC=6;AF=0.086;AN=70;DP=568;FS=0.000;Inbre  |
| 304 | chrY | 2957650 | . | A | G   | 32.64    | my_snp_filter | AC=3;AF=0.043;AN=70;BaseQRankSum=          |

|     |      |         |   |   |   |          |               |                                           |
|-----|------|---------|---|---|---|----------|---------------|-------------------------------------------|
| 305 | chrY | 2958525 | . | C | G | 100.25   | PASS          | AC=3;AF=0.044;AN=68;BaseQRankSum=1.83;Cli |
| 306 | chrY | 2960755 | . | C | T | 690.26   | PASS          | AC=10;AF=0.143;AN=70;BaseQRankSum=0.831;C |
| 307 | chrY | 2961302 | . | C | T | 249.27   | PASS          | AC=4;AF=0.059;AN=68;BaseQRankSum=2.22;Cli |
| 308 | chrY | 2963726 | . | G | A | 52.83    | PASS          | AC=1;AF=0.014;AN=70;BaseQRankSum=0.258;Cl |
| 309 | chrY | 2964550 | . | G | A | 91.62    | PASS          | AC=3;AF=0.048;AN=62;BaseQRankSum=2.38;Cli |
| 310 | chrY | 2964926 | . | G | A | 1062.07  | PASS          | AC=9;AF=0.173;AN=52;BaseQRankSum=1.70;Cli |
| 311 | chrY | 2965133 | . | C | T | 483.69   | PASS          | AC=5;AF=0.071;AN=70;BaseQRankSum=0.350;Cl |
| 312 | chrY | 2965271 | . | A | G | 182.67   | PASS          | AC=5;AF=0.071;AN=70;BaseQRankSum=-1.370e- |
| 313 | chrY | 2967294 | . | C | A | 753.19   | PASS          | AC=12;AF=0.176;AN=68;BaseQRankSum=0.793;C |
| 314 | chrY | 2967614 | . | A | C | 3404.27  | PASS          | AC=36;AF=1.00;AN=36;BaseQRankSum=1.39;Cli |
| 315 | chrY | 2969875 | . | A | G | 520.38   | PASS          | AC=5;AF=0.086;AN=58;BaseQRankSum=0.00;Cli |
| 316 | chrY | 2970099 | . | C | G | 107.35   | PASS          | AC=2;AF=0.029;AN=70;BaseQRankSum=0.536;Cl |
| 317 | chrY | 2971032 | . | T | C | 170.52   | PASS          | AC=5;AF=0.076;AN=66;BaseQRankSum=-5.660e- |
| 318 | chrY | 2971140 | . | T | A | 510.41   | PASS          | AC=8;AF=0.125;AN=64;BaseQRankSum=-9.560e- |
| 319 | chrY | 2971503 | . | A | G | 40.30    | PASS          | AC=1;AF=0.050;AN=20;BaseQRankSum=-2.578e+ |
| 320 | chrY | 2973369 | . | C | T | 255.90   | PASS          | AC=5;AF=0.071;AN=70;BaseQRankSum=0.382;Cl |
| 321 | chrY | 2973474 | . | C | T | 3262.42  | PASS          | AC=20;AF=0.286;AN=70;BaseQRankSum=0.618;C |
| 322 | chrY | 2973480 | . | T | A | 3066.40  | PASS          | AC=20;AF=0.286;AN=70;BaseQRankSum=-3.700e |
| 323 | chrY | 2973568 | . | G | A | 230.36   | PASS          | AC=4;AF=0.059;AN=68;BaseQRankSum=1.84;Cli |
| 324 | chrY | 2973581 | . | T | C | 277.30   | PASS          | AC=2;AF=0.030;AN=66;DP=319;FS=0.000;Inbre |
| 325 | chrY | 2979895 | . | G | A | 1357.29  | PASS          | AC=4;AF=0.059;AN=68;BaseQRankSum=-2.800e- |
| 326 | chrY | 2985960 | . | A | G | 466.36   | PASS          | AC=2;AF=0.032;AN=62;DP=248;FS=0.000;Inbre |
| 327 | chrY | 2987520 | . | T | C | 559.77   | my_snp_filter | AC=6;AF=0.111;AN=54;BaseQRankSum=         |
| 328 | chrY | 2987545 | . | A | G | 598.44   | my_snp_filter | AC=6;AF=0.107;AN=56;BaseQRankSum=         |
| 329 | chrY | 2987695 | . | A | G | 1021.66  | PASS          | AC=12;AF=0.353;AN=34;BaseQRankSum=-6.140e |
| 330 | chrY | 2987865 | . | A | T | 56.25    | PASS          | AC=2;AF=0.033;AN=60;BaseQRankSum=1.23;Cli |
| 331 | chrY | 2988075 | . | G | A | 83.99    | my_snp_filter | AC=3;AF=0.048;AN=62;BaseQRankSum=         |
| 332 | chrY | 2988358 | . | G | T | 332.20   | PASS          | AC=6;AF=0.086;AN=70;BaseQRankSum=2.64;Cli |
| 333 | chrY | 2988441 | . | G | C | 302.45   | my_snp_filter | AC=7;AF=0.100;AN=70;BaseQRankSum=         |
| 334 | chrY | 2988458 | . | T | C | 868.63   | PASS          | AC=3;AF=0.043;AN=70;BaseQRankSum=-1.774e+ |
| 335 | chrY | 2988490 | . | C | G | 703.72   | PASS          | AC=11;AF=0.157;AN=70;BaseQRankSum=1.00;Cl |
| 336 | chrY | 2993302 | . | A | G | 673.36   | PASS          | AC=4;AF=0.143;AN=28;BaseQRankSum=-1.480e+ |
| 337 | chrY | 2993527 | . | G | A | 968.09   | PASS          | AC=6;AF=0.103;AN=58;BaseQRankSum=0.743;Cl |
| 338 | chrY | 2993701 | . | A | G | 595.31   | PASS          | AC=6;AF=0.086;AN=70;DP=331;FS=0.000;Inbre |
| 339 | chrY | 2996541 | . | C | T | 1085.74  | PASS          | AC=6;AF=0.167;AN=36;BaseQRankSum=-9.100e- |
| 340 | chrY | 2997827 | . | T | C | 1071.51  | PASS          | AC=6;AF=0.091;AN=66;DP=389;FS=0.000;Inbre |
| 341 | chrY | 2998670 | . | A | G | 148.45   | PASS          | AC=3;AF=0.045;AN=66;BaseQRankSum=-1.920e+ |
| 342 | chrY | 3003675 | . | T | C | 36.04    | my_snp_filter | AC=2;AF=0.029;AN=68;BaseQRankSum=         |
| 343 | chrY | 3004917 | . | A | G | 92.75    | PASS          | AC=1;AF=0.015;AN=66;BaseQRankSum=1.46;Cli |
| 344 | chrY | 3007422 | . | A | C | 48.18    | PASS          | AC=2;AF=0.045;AN=44;DP=250;FS=0.000;Inbre |
| 345 | chrY | 3007854 | . | G | A | 123.27   | PASS          | AC=1;AF=0.015;AN=68;BaseQRankSum=0.811;Cl |
| 346 | chrY | 3008588 | . | C | G | 81.26    | PASS          | AC=1;AF=0.015;AN=68;BaseQRankSum=1.01;Cli |
| 347 | chrY | 3009637 | . | G | A | 244.52   | PASS          | AC=1;AF=0.017;AN=60;BaseQRankSum=-1.883e+ |
| 348 | chrY | 3009913 | . | C | T | 343.76   | PASS          | AC=4;AF=0.069;AN=58;BaseQRankSum=-1.201e+ |
| 349 | chrY | 3010175 | . | C | G | 37.29    | my_snp_filter | AC=3;AF=0.044;AN=68;BaseQRankSum=         |
| 350 | chrY | 3012053 | . | A | G | 243.06   | PASS          | AC=4;AF=0.057;AN=70;BaseQRankSum=0.967;Cl |
| 351 | chrY | 3012107 | . | T | C | 2448.26  | PASS          | AC=19;AF=0.271;AN=70;BaseQRankSum=-1.303e |
| 352 | chrY | 3013550 | . | G | A | 1762.26  | PASS          | AC=15;AF=0.221;AN=68;BaseQRankSum=0.071;C |
| 353 | chrY | 3014131 | . | G | A | 1155.85  | PASS          | AC=6;AF=0.091;AN=66;DP=378;FS=0.000;Inbre |
| 354 | chrY | 3014401 | . | G | A | 761.66   | PASS          | AC=16;AF=0.421;AN=38;DP=199;FS=0.000;Inbr |
| 355 | chrY | 3015855 | . | G | T | 154.87   | PASS          | AC=3;AF=0.045;AN=66;BaseQRankSum=2.51;Cli |
| 356 | chrY | 3018801 | . | T | C | 919.60   | PASS          | AC=6;AF=0.088;AN=68;BaseQRankSum=-1.734e+ |
| 357 | chrY | 3019744 | . | A | C | 482.20   | PASS          | AC=6;AF=0.097;AN=62;DP=250;FS=0.000;Inbre |
| 358 | chrY | 3022593 | . | G | A | 7730.90  | PASS          | AC=48;AF=0.727;AN=66;DP=417;FS=0.000;Inbr |
| 359 | chrY | 3024346 | . | G | C | 133.53   | PASS          | AC=4;AF=0.059;AN=68;BaseQRankSum=1.22;Cli |
| 360 | chrY | 3027636 | . | G | A | 6288.18  | PASS          | AC=62;AF=1.00;AN=62;DP=223;FS=0.000;Inbre |
| 361 | chrY | 3028535 | . | C | T | 53.82    | PASS          | AC=1;AF=0.015;AN=68;BaseQRankSum=1.84;Cli |
| 362 | chrY | 3028697 | . | G | A | 472.63   | PASS          | AC=5;AF=0.083;AN=60;BaseQRankSum=0.976;Cl |
| 363 | chrY | 3028916 | . | A | C | 3236.35  | PASS          | AC=18;AF=0.281;AN=64;BaseQRankSum=-5.900e |
| 364 | chrY | 3029097 | . | C | T | 37.52    | PASS          | AC=1;AF=0.016;AN=62;BaseQRankSum=1.53;Cli |
| 365 | chrY | 3029098 | . | A | G | 37.34    | PASS          | AC=1;AF=0.016;AN=62;BaseQRankSum=-1.953e+ |
| 366 | chrY | 3029131 | . | C | T | 70.58    | PASS          | AC=1;AF=0.015;AN=68;BaseQRankSum=2.83;Cli |
| 367 | chrY | 3029156 | . | G | A | 89.39    | PASS          | AC=1;AF=0.015;AN=68;BaseQRankSum=1.36;Cli |
| 368 | chrY | 3029494 | . | C | T | 439.91   | PASS          | AC=7;AF=0.389;AN=18;BaseQRankSum=0.933;Cl |
| 369 | chrY | 3030080 | . | T | C | 10534.03 | PASS          | AC=66;AF=1.00;AN=66;BaseQRankSum=         |
| 370 | chrY | 3030097 | . | C | T | 854.55   | PASS          | AC=6;AF=0.086;AN=70;DP=491;FS=0.000;Inbre |
| 371 | chrY | 3031075 | . | A | G | 87.86    | PASS          | AC=1;AF=0.014;AN=70;BaseQRankSum=-4.650e- |
| 372 | chrY | 3031166 | . | A | G | 244.03   | PASS          | AC=7;AF=0.109;AN=64;BaseQRankSum=0.731;Cl |
| 373 | chrY | 3031203 | . | C | T | 221.91   | PASS          | AC=5;AF=0.076;AN=66;BaseQRankSum=1.03;Cli |
| 374 | chrY | 3031684 | . | G | A | 57.01    | PASS          | AC=2;AF=0.033;AN=60;DP=172;FS=0.000;Inbre |
| 375 | chrY | 3035200 | . | A | G | 175.42   | PASS          | AC=4;AF=0.057;AN=70;BaseQRankSum=0.493;Cl |
| 376 | chrY | 3035243 | . | A | G | 515.73   | PASS          | AC=6;AF=0.086;AN=70;BaseQRankSum=-2.550e- |
| 377 | chrY | 3035320 | . | C | T | 1698.66  | PASS          | AC=15;AF=0.214;AN=70;BaseQRankSum=-5.330e |
| 378 | chrY | 3035361 | . | T | C | 181.08   | my_snp_filter | AC=5;AF=0.071;AN=70;BaseQRankSum=         |
| 379 | chrY | 3036366 | . | T | A | 1505.12  | PASS          | AC=22;AF=1.00;AN=22;DP=69;FS=0.000;Inbre  |
| 380 | chrY | 3037566 | . | C | T | 41.44    | PASS          | AC=2;AF=0.029;AN=68;BaseQRankSum=1.08;Cli |

|     |      |         |   |   |   |         |               |                                           |
|-----|------|---------|---|---|---|---------|---------------|-------------------------------------------|
| 381 | chrY | 3037778 | . | G | A | 79.69   | PASS          | AC=2;AF=0.030;AN=66;BaseQRankSum=2.26;Cli |
| 382 | chrY | 3037897 | . | G | A | 303.87  | PASS          | AC=4;AF=0.111;AN=36;BaseQRankSum=0.672;Cl |
| 383 | chrY | 3039370 | . | A | G | 100.64  | PASS          | AC=3;AF=0.047;AN=64;BaseQRankSum=0.425;Cl |
| 384 | chrY | 3039675 | . | T | C | 207.49  | PASS          | AC=4;AF=0.057;AN=70;BaseQRankSum=1.08;Cli |
| 385 | chrY | 3039772 | . | C | T | 75.83   | PASS          | AC=2;AF=0.029;AN=70;BaseQRankSum=0.849;Cl |
| 386 | chrY | 3040016 | . | G | T | 243.02  | PASS          | AC=5;AF=0.167;AN=30;BaseQRankSum=0.156;Cl |
| 387 | chrY | 3040098 | . | A | C | 415.87  | PASS          | AC=4;AF=0.059;AN=68;BaseQRankSum=-3.360e- |
| 388 | chrY | 3040546 | . | T | A | 1102.50 | PASS          | AC=6;AF=0.086;AN=70;DP=476;FS=0.000;Inbre |
| 389 | chrY | 3041018 | . | G | C | 711.26  | PASS          | AC=7;AF=0.100;AN=70;BaseQRankSum=-1.596e+ |
| 390 | chrY | 3041026 | . | T | C | 658.52  | PASS          | AC=7;AF=0.100;AN=70;BaseQRankSum=-2.620e+ |
| 391 | chrY | 3041209 | . | C | T | 714.18  | PASS          | AC=12;AF=0.171;AN=70;BaseQRankSum=1.42;Cl |
| 392 | chrY | 3041276 | . | C | G | 151.93  | PASS          | AC=4;AF=0.061;AN=66;DP=213;FS=0.000;Inbre |
| 393 | chrY | 3041551 | . | G | A | 5353.12 | PASS          | AC=48;AF=1.00;AN=48;DP=201;FS=0.000;Inbre |
| 394 | chrY | 3044007 | . | A | G | 12828   | PASS          | AC=68;AF=1.00;AN=68;DP=426;FS=0.000;Inbre |
| 395 | chrY | 3044275 | . | T | A | 54.58   | my_snp_filter | AC=3;AF=0.054;AN=56;BaseQRankSum=         |
| 396 | chrY | 3045026 | . | T | G | 62.40   | my_snp_filter | AC=4;AF=0.133;AN=30;BaseQRankSum=         |
| 397 | chrY | 3046188 | . | T | C | 73.56   | PASS          | AC=2;AF=0.029;AN=70;BaseQRankSum=1.59;Cli |
| 398 | chrY | 3046249 | . | T | C | 323.49  | PASS          | AC=10;AF=0.143;AN=70;BaseQRankSum=-1.179e |
| 399 | chrY | 3046930 | . | G | A | 7441.07 | PASS          | AC=56;AF=1.00;AN=56;DP=277;FS=0.000;Inbre |
| 400 | chrY | 3047687 | . | G | C | 117.26  | PASS          | AC=2;AF=0.029;AN=70;BaseQRankSum=-1.488e+ |
| 401 | chrY | 3047856 | . | T | A | 95.08   | PASS          | AC=4;AF=0.057;AN=70;BaseQRankSum=0.869;Cl |
| 402 | chrY | 3051192 | . | T | C | 39.01   | PASS          | AC=1;AF=0.014;AN=70;BaseQRankSum=0.736;Cl |
| 403 | chrY | 3052823 | . | C | G | 37.59   | PASS          | AC=1;AF=0.015;AN=68;BaseQRankSum=-3.580e- |
| 404 | chrY | 3052833 | . | G | A | 37.85   | PASS          | AC=1;AF=0.015;AN=68;BaseQRankSum=-1.231e+ |
| 405 | chrY | 3053441 | . | A | G | 477.44  | PASS          | AC=7;AF=0.106;AN=66;BaseQRankSum=-1.537e+ |
| 406 | chrY | 3054906 | . | G | T | 52.37   | my_snp_filter | AC=2;AF=0.029;AN=70;BaseQRankSum=         |
| 407 | chrY | 3055413 | . | A | C | 3350.51 | PASS          | AC=38;AF=0.576;AN=66;DP=328;FS=0.000;Inbr |
| 408 | chrY | 3058481 | . | C | T | 234.41  | PASS          | AC=5;AF=0.071;AN=70;BaseQRankSum=0.00;Cli |
| 409 | chrY | 3059524 | . | A | G | 182.44  | PASS          | AC=5;AF=0.278;AN=18;BaseQRankSum=-1.021e+ |
| 410 | chrY | 3060620 | . | T | C | 162.53  | PASS          | AC=6;AF=0.088;AN=68;BaseQRankSum=-1.396e+ |
| 411 | chrY | 3060706 | . | G | A | 50.69   | PASS          | AC=2;AF=0.029;AN=70;BaseQRankSum=0.727;Cl |
| 412 | chrY | 3061694 | . | C | G | 804.63  | PASS          | AC=5;AF=0.074;AN=68;BaseQRankSum=-3.550e- |
| 413 | chrY | 3062015 | . | T | A | 57.43   | PASS          | AC=2;AF=0.032;AN=62;BaseQRankSum=-3.650e- |
| 414 | chrY | 3064734 | . | G | A | 543.43  | PASS          | AC=7;AF=0.103;AN=68;BaseQRankSum=1.86;Cli |
| 415 | chrY | 3064831 | . | A | G | 1649.85 | PASS          | AC=23;AF=0.500;AN=46;BaseQRankSum=-1.466e |
| 416 | chrY | 3065950 | . | T | C | 2090.01 | PASS          | AC=38;AF=0.679;AN=56;DP=227;FS=0.000;Inbr |
| 417 | chrY | 3066317 | . | T | C | 32.58   | my_snp_filter | AC=1;AF=0.017;AN=58;BaseQRankSum=         |
| 418 | chrY | 3066506 | . | T | C | 220.83  | PASS          | AC=5;AF=0.071;AN=70;BaseQRankSum=1.15;Cli |
| 419 | chrY | 3066664 | . | G | A | 917.73  | PASS          | AC=9;AF=0.136;AN=66;BaseQRankSum=0.888;Cl |
| 420 | chrY | 3068099 | . | T | C | 520.76  | PASS          | AC=9;AF=0.141;AN=64;BaseQRankSum=-1.231e+ |
| 421 | chrY | 3068227 | . | A | G | 123.03  | PASS          | AC=3;AF=0.044;AN=68;BaseQRankSum=0.392;Cl |
| 422 | chrY | 3068820 | . | T | C | 563.81  | PASS          | AC=6;AF=0.086;AN=70;DP=455;FS=0.000;Inbre |
| 423 | chrY | 3069109 | . | G | A | 2965.95 | PASS          | AC=22;AF=0.314;AN=70;BaseQRankSum=0.983;C |
| 424 | chrY | 3072315 | . | T | A | 274.63  | PASS          | AC=4;AF=0.063;AN=64;BaseQRankSum=0.653;Cl |
| 425 | chrY | 3072352 | . | G | A | 37.70   | my_snp_filter | AC=2;AF=0.029;AN=70;BaseQRankSum=         |
| 426 | chrY | 3072412 | . | G | C | 35.37   | PASS          | AC=1;AF=0.016;AN=64;BaseQRankSum=-1.380e+ |
| 427 | chrY | 3072420 | . | T | C | 41.73   | PASS          | AC=1;AF=0.016;AN=64;BaseQRankSum=-1.026e+ |
| 428 | chrY | 3072957 | . | G | A | 441.56  | my_snp_filter | AC=6;AF=0.086;AN=70;BaseQRankSum=         |
| 429 | chrY | 3075109 | . | C | G | 1361.76 | PASS          | AC=6;AF=0.086;AN=70;DP=506;FS=0.000;Inbre |
| 430 | chrY | 3076132 | . | T | C | 816.38  | PASS          | AC=22;AF=1.00;AN=22;DP=48;FS=0.000;Inbre  |
| 431 | chrY | 3077253 | . | T | C | 194.97  | PASS          | AC=2;AF=0.029;AN=70;DP=448;FS=0.000;Inbre |
| 432 | chrY | 3081263 | . | C | G | 34.36   | my_snp_filter | AC=3;AF=0.044;AN=68;BaseQRankSum=         |
| 433 | chrY | 3081286 | . | T | C | 203.92  | PASS          | AC=5;AF=0.074;AN=68;BaseQRankSum=-1.422e+ |
| 434 | chrY | 3081568 | . | T | G | 31.85   | my_snp_filter | AC=2;AF=0.037;AN=54;BaseQRankSum=         |
| 435 | chrY | 3081622 | . | A | T | 95.77   | PASS          | AC=2;AF=0.034;AN=58;BaseQRankSum=1.82;Cli |
| 436 | chrY | 3081645 | . | C | A | 52.77   | PASS          | AC=1;AF=0.015;AN=68;BaseQRankSum=2.19;Cli |
| 437 | chrY | 3083069 | . | A | C | 127.15  | PASS          | AC=3;AF=0.068;AN=44;BaseQRankSum=-3.059e+ |
| 438 | chrY | 3083158 | . | G | A | 378.41  | PASS          | AC=5;AF=0.192;AN=26;BaseQRankSum=-4.250e- |
| 439 | chrY | 3083277 | . | A | G | 90.85   | PASS          | AC=2;AF=0.067;AN=30;BaseQRankSum=-4.290e- |
| 440 | chrY | 3083954 | . | C | T | 75.24   | my_snp_filter | AC=3;AF=0.043;AN=70;BaseQRankSum=         |
| 441 | chrY | 3084051 | . | A | G | 597.90  | PASS          | AC=4;AF=0.057;AN=70;BaseQRankSum=-1.313e+ |
| 442 | chrY | 3086364 | . | G | A | 102.16  | PASS          | AC=3;AF=0.044;AN=68;BaseQRankSum=-1.380e+ |
| 443 | chrY | 3086728 | . | G | A | 127.05  | PASS          | AC=4;AF=0.057;AN=70;BaseQRankSum=1.86;Cli |
| 444 | chrY | 3087153 | . | A | T | 1068.85 | PASS          | AC=6;AF=0.231;AN=26;DP=157;FS=0.000;Inbre |
| 445 | chrY | 3087852 | . | G | A | 950.48  | PASS          | AC=4;AF=0.057;AN=70;BaseQRankSum=-1.064e+ |
| 446 | chrY | 3087854 | . | C | A | 205.94  | PASS          | AC=4;AF=0.057;AN=70;BaseQRankSum=0.509;Cl |
| 447 | chrY | 3087892 | . | T | G | 56.76   | my_snp_filter | AC=2;AF=0.029;AN=70;BaseQRankSum=         |
| 448 | chrY | 3087945 | . | A | T | 783.81  | PASS          | AC=7;AF=0.103;AN=68;BaseQRankSum=-5.720e- |
| 449 | chrY | 3087953 | . | C | T | 911.91  | PASS          | AC=8;AF=0.118;AN=68;BaseQRankSum=0.248;Cl |
| 450 | chrY | 3088019 | . | C | T | 2853.92 | PASS          | AC=21;AF=0.300;AN=70;BaseQRankSum=-3.580e |
| 451 | chrY | 3088180 | . | G | T | 135.62  | PASS          | AC=1;AF=0.016;AN=64;BaseQRankSum=1.42;Cli |
| 452 | chrY | 3088324 | . | G | A | 4792.53 | PASS          | AC=40;AF=0.625;AN=64;BaseQRankSum=1.95;Cl |
| 453 | chrY | 3088328 | . | A | C | 69.45   | PASS          | AC=1;AF=0.015;AN=66;BaseQRankSum=0.355;Cl |
| 454 | chrY | 3090217 | . | A | G | 674.41  | PASS          | AC=8;AF=0.129;AN=62;BaseQRankSum=0.462;Cl |
| 455 | chrY | 3090313 | . | C | T | 139.91  | PASS          | AC=3;AF=0.047;AN=64;BaseQRankSum=2.35;Cli |
| 456 | chrY | 3096657 | . | C | T | 239.97  | PASS          | AC=2;AF=0.053;AN=38;BaseQRankSum=1.00;Cli |

|     |      |         |   |   |   |          |               |                                           |
|-----|------|---------|---|---|---|----------|---------------|-------------------------------------------|
| 457 | chrY | 3096996 | . | C | T | 223.40   | PASS          | AC=4;AF=0.222;AN=18;BaseQRankSum=2.42;Cli |
| 458 | chrY | 3097907 | . | C | T | 1133.76  | PASS          | AC=5;AF=0.167;AN=30;BaseQRankSum=1.20;Cli |
| 459 | chrY | 3101776 | . | C | A | 1935.67  | PASS          | AC=22;AF=0.647;AN=34;DP=169;FS=0.000;Inbr |
| 460 | chrY | 3102808 | . | A | G | 384.54   | my_snp_filter | AC=6;AF=0.214;AN=28;BaseQRankSum=         |
| 461 | chrY | 3103115 | . | T | C | 2321.45  | PASS          | AC=20;AF=0.286;AN=70;BaseQRankSum=1.24;Cl |
| 462 | chrY | 3103153 | . | G | T | 1563.34  | my_snp_filter | AC=17;AF=0.243;AN=70;BaseQRankSum         |
| 463 | chrY | 3103156 | . | T | C | 1564.11  | my_snp_filter | AC=16;AF=0.229;AN=70;BaseQRankSum         |
| 464 | chrY | 3103284 | . | T | C | 60.96    | my_snp_filter | AC=2;AF=0.030;AN=66;BaseQRankSum=         |
| 465 | chrY | 3103536 | . | A | G | 1015.05  | PASS          | AC=6;AF=0.086;AN=70;DP=461;FS=0.000;Inbre |
| 466 | chrY | 3105334 | . | C | T | 376.53   | PASS          | AC=7;AF=0.100;AN=70;BaseQRankSum=0.593;Cl |
| 467 | chrY | 3106175 | . | T | C | 13627.08 | PASS          | AC=46;AF=0.657;AN=70;DP=673;FS=0.0        |
| 468 | chrY | 3106645 | . | C | T | 265.01   | my_snp_filter | AC=5;AF=0.071;AN=70;BaseQRankSum=         |
| 469 | chrY | 3107155 | . | A | T | 52.07    | my_snp_filter | AC=2;AF=0.029;AN=70;BaseQRankSum=         |
| 470 | chrY | 3107172 | . | G | T | 219.62   | PASS          | AC=3;AF=0.043;AN=70;BaseQRankSum=0.600;Cl |
| 471 | chrY | 3107332 | . | A | C | 86.31    | my_snp_filter | AC=3;AF=0.043;AN=70;BaseQRankSum=         |
| 472 | chrY | 3107628 | . | C | T | 240.10   | PASS          | AC=3;AF=0.043;AN=70;BaseQRankSum=0.373;Cl |
| 473 | chrY | 3110540 | . | G | A | 4728.32  | PASS          | AC=19;AF=0.271;AN=70;BaseQRankSum=0.665;C |
| 474 | chrY | 3110654 | . | T | C | 2148.46  | my_snp_filter | AC=15;AF=0.214;AN=70;BaseQRankSum         |
| 475 | chrY | 3112471 | . | A | T | 2197.54  | PASS          | AC=12;AF=0.188;AN=64;DP=241;FS=0.000;Inbr |
| 476 | chrY | 3112602 | . | G | C | 279.32   | PASS          | AC=6;AF=0.250;AN=24;DP=76;FS=0.000;Inbree |
| 477 | chrY | 3117632 | . | G | C | 216.54   | PASS          | AC=6;AF=0.125;AN=48;BaseQRankSum=-1.026e+ |
| 478 | chrY | 3118152 | . | C | T | 5661.33  | PASS          | AC=48;AF=1.00;AN=48;BaseQRankSum=1.54;Cli |
| 479 | chrY | 3120176 | . | T | G | 1081.44  | PASS          | AC=6;AF=0.150;AN=40;DP=144;FS=0.000;Inbre |
| 480 | chrY | 3123954 | . | G | A | 21826.97 | PASS          | AC=68;AF=1.00;AN=68;DP=492;FS=0.0         |
| 481 | chrY | 3123955 | . | T | G | 21826.97 | PASS          | AC=68;AF=1.00;AN=68;DP=492;FS=0.0         |
| 482 | chrY | 3126754 | . | T | C | 40.52    | my_snp_filter | AC=3;AF=0.043;AN=70;BaseQRankSum=         |
| 483 | chrY | 3126786 | . | A | G | 539.62   | PASS          | AC=6;AF=0.086;AN=70;BaseQRankSum=-1.733e+ |
| 484 | chrY | 3126862 | . | A | C | 257.03   | PASS          | AC=4;AF=0.061;AN=66;BaseQRankSum=0.223;Cl |
| 485 | chrY | 3128883 | . | G | C | 113.97   | PASS          | AC=1;AF=0.014;AN=70;BaseQRankSum=0.432;Cl |
| 486 | chrY | 3130529 | . | C | T | 202.56   | PASS          | AC=2;AF=0.029;AN=70;DP=399;FS=0.000;Inbre |
| 487 | chrY | 3131201 | . | T | G | 46.34    | PASS          | AC=1;AF=0.016;AN=64;BaseQRankSum=0.736;Cl |
| 488 | chrY | 3131202 | . | G | A | 46.42    | PASS          | AC=1;AF=0.016;AN=64;BaseQRankSum=-7.360e- |
| 489 | chrY | 3131532 | . | C | T | 145.53   | PASS          | AC=3;AF=0.071;AN=42;BaseQRankSum=0.736;Cl |
| 490 | chrY | 3134793 | . | G | C | 167.83   | PASS          | AC=1;AF=0.015;AN=68;BaseQRankSum=2.49;Cli |
| 491 | chrY | 3136593 | . | G | T | 1074.22  | PASS          | AC=4;AF=0.071;AN=56;BaseQRankSum=-1.131e+ |
| 492 | chrY | 3136688 | . | C | T | 859.25   | PASS          | AC=6;AF=0.086;AN=70;DP=295;FS=0.000;Inbre |
| 493 | chrY | 3137173 | . | T | C | 491.71   | PASS          | AC=6;AF=0.091;AN=66;DP=247;FS=0.000;Inbre |
| 494 | chrY | 3138559 | . | T | G | 209.80   | PASS          | AC=2;AF=0.100;AN=20;DP=136;FS=0.000;Inbre |
| 495 | chrY | 3138808 | . | C | A | 103.69   | PASS          | AC=5;AF=0.071;AN=70;BaseQRankSum=-7.510e- |
| 496 | chrY | 3138819 | . | G | A | 160.71   | PASS          | AC=6;AF=0.086;AN=70;BaseQRankSum=-1.271e+ |
| 497 | chrY | 3141361 | . | G | A | 293.84   | PASS          | AC=6;AF=0.111;AN=54;BaseQRankSum=0.862;Cl |
| 498 | chrY | 3141715 | . | T | C | 371.10   | PASS          | AC=7;AF=0.103;AN=68;BaseQRankSum=0.761;Cl |
| 499 | chrY | 3142057 | . | T | C | 305.82   | PASS          | AC=6;AF=0.086;AN=70;BaseQRankSum=0.296;Cl |
| 500 | chrY | 3144004 | . | G | C | 189.48   | PASS          | AC=4;AF=0.222;AN=18;BaseQRankSum=-2.100e- |
| 501 | chrY | 3145232 | . | C | T | 182.38   | PASS          | AC=4;AF=0.200;AN=20;BaseQRankSum=0.580;Cl |
| 502 | chrY | 3145875 | . | A | C | 39.53    | PASS          | AC=1;AF=0.019;AN=52;BaseQRankSum=-1.231e+ |
| 503 | chrY | 3145878 | . | T | C | 42.44    | PASS          | AC=1;AF=0.019;AN=54;BaseQRankSum=-1.026e+ |
| 504 | chrY | 3146745 | . | T | C | 64.12    | PASS          | AC=2;AF=0.029;AN=68;BaseQRankSum=0.873;Cl |
| 505 | chrY | 3146867 | . | A | C | 326.62   | PASS          | AC=2;AF=0.031;AN=64;BaseQRankSum=-7.710e- |
| 506 | chrY | 3150048 | . | T | G | 4522.22  | PASS          | AC=34;AF=0.531;AN=64;DP=350;FS=0.000;Inbr |
| 507 | chrY | 3153728 | . | T | C | 5808.32  | PASS          | AC=54;AF=1.00;AN=54;DP=214;FS=0.000;Inbre |
| 508 | chrY | 3153909 | . | T | G | 384.11   | PASS          | AC=1;AF=0.022;AN=46;BaseQRankSum=0.533;Cl |
| 509 | chrY | 3154138 | . | T | G | 164.07   | my_snp_filter | AC=4;AF=0.154;AN=26;BaseQRankSum=         |
| 510 | chrY | 3156807 | . | G | A | 8277.77  | PASS          | AC=50;AF=0.735;AN=68;DP=451;FS=0.000;Inbr |
| 511 | chrY | 3157728 | . | G | A | 62.83    | PASS          | AC=2;AF=0.029;AN=68;BaseQRankSum=0.456;Cl |
| 512 | chrY | 3164119 | . | G | T | 114.77   | PASS          | AC=5;AF=0.081;AN=62;BaseQRankSum=1.03;Cli |
| 513 | chrY | 3166904 | . | T | C | 260.54   | PASS          | AC=2;AF=0.111;AN=18;BaseQRankSum=-5.700e- |
| 514 | chrY | 3166913 | . | G | A | 260.66   | PASS          | AC=2;AF=0.111;AN=18;BaseQRankSum=-1.390e- |
| 515 | chrY | 3167079 | . | C | A | 265.89   | PASS          | AC=5;AF=0.278;AN=18;BaseQRankSum=1.53;Cli |
| 516 | chrY | 3168537 | . | C | A | 887.86   | PASS          | AC=6;AF=0.086;AN=70;DP=419;FS=0.000;Inbre |
| 517 | chrY | 3170806 | . | A | G | 74.63    | my_snp_filter | AC=3;AF=0.043;AN=70;BaseQRankSum=         |
| 518 | chrY | 3171120 | . | T | A | 106.90   | PASS          | AC=2;AF=0.029;AN=70;BaseQRankSum=0.938;Cl |
| 519 | chrY | 3171196 | . | C | T | 261.33   | PASS          | AC=7;AF=0.100;AN=70;BaseQRankSum=-1.026e+ |
| 520 | chrY | 3172307 | . | C | T | 338.69   | PASS          | AC=2;AF=0.043;AN=46;DP=148;FS=0.000;Inbre |
| 521 | chrY | 3172416 | . | A | G | 65.98    | my_snp_filter | AC=3;AF=0.136;AN=22;BaseQRankSum=         |
| 522 | chrY | 3172631 | . | G | A | 121.83   | PASS          | AC=3;AF=0.044;AN=68;BaseQRankSum=1.05;Cli |
| 523 | chrY | 3172792 | . | A | T | 43.81    | my_snp_filter | AC=1;AF=0.015;AN=66;BaseQRankSum=         |
| 524 | chrY | 3175149 | . | G | A | 137.87   | PASS          | AC=3;AF=0.043;AN=70;BaseQRankSum=1.21;Cli |
| 525 | chrY | 3176879 | . | C | G | 1918.60  | PASS          | AC=23;AF=0.338;AN=68;BaseQRankSum=0.265;C |
| 526 | chrY | 3176973 | . | G | A | 863.42   | PASS          | AC=5;AF=0.132;AN=38;BaseQRankSum=0.694;Cl |
| 527 | chrY | 3177027 | . | C | T | 388.46   | PASS          | AC=10;AF=0.200;AN=50;BaseQRankSum=0.00;Cl |
| 528 | chrY | 3177113 | . | C | G | 157.56   | my_snp_filter | AC=4;AF=0.059;AN=68;BaseQRankSum=         |
| 529 | chrY | 3177692 | . | A | G | 55.24    | PASS          | AC=2;AF=0.029;AN=68;BaseQRankSum=1.76;Cli |
| 530 | chrY | 3178102 | . | T | A | 87.15    | PASS          | AC=2;AF=0.029;AN=70;BaseQRankSum=-1.490e+ |
| 531 | chrY | 3178526 | . | G | C | 957.24   | PASS          | AC=2;AF=0.029;AN=70;DP=433;FS=0.000;Inbre |
| 532 | chrY | 3179708 | . | C | A | 1001.56  | PASS          | AC=13;AF=0.197;AN=66;BaseQRankSum=-9.060e |

|     |      |         |   |   |     |          |               |                                           |
|-----|------|---------|---|---|-----|----------|---------------|-------------------------------------------|
| 533 | chrY | 3179754 | . | T | G   | 100.81   | PASS          | AC=3;AF=0.044;AN=68;BaseQRankSum=0.919;C  |
| 534 | chrY | 3181270 | . | C | G   | 1531.23  | PASS          | AC=23;AF=0.329;AN=70;BaseQRankSum=0.047;C |
| 535 | chrY | 3181632 | . | C | T   | 542.10   | PASS          | AC=6;AF=0.086;AN=70;BaseQRankSum=0.348;C  |
| 536 | chrY | 3182173 | . | C | G   | 4673.12  | PASS          | AC=44;AF=0.647;AN=68;DP=302;FS=0.000;Inbr |
| 537 | chrY | 3183649 | . | C | A   | 239.80   | PASS          | AC=2;AF=0.029;AN=70;DP=354;FS=0.000;Inbre |
| 538 | chrY | 3185111 | . | C | G   | 829.74   | PASS          | AC=5;AF=0.071;AN=70;BaseQRankSum=0.173;C  |
| 539 | chrY | 3185675 | . | C | A   | 178.08   | my_snp_filter | AC=5;AF=0.076;AN=66;BaseQRankSum=         |
| 540 | chrY | 3185978 | . | G | A   | 164.39   | PASS          | AC=3;AF=0.054;AN=56;BaseQRankSum=-2.541e+ |
| 541 | chrY | 3185985 | . | A | T   | 602.67   | PASS          | AC=2;AF=0.038;AN=52;DP=233;FS=0.000;Inbre |
| 542 | chrY | 3190811 | . | T | C   | 342.37   | PASS          | AC=6;AF=0.086;AN=70;DP=299;FS=0.000;Inbre |
| 543 | chrY | 3191215 | . | T | C   | 5699.17  | PASS          | AC=44;AF=0.647;AN=68;DP=367;FS=0.000;Inbr |
| 544 | chrY | 3192629 | . | A | G   | 633.62   | PASS          | AC=6;AF=0.086;AN=70;DP=422;FS=0.000;Inbre |
| 545 | chrY | 3192659 | . | T | C   | 11494.58 | PASS          | AC=58;AF=0.829;AN=70;BaseQRankSum         |
| 546 | chrY | 3193223 | . | T | A   | 173.30   | PASS          | AC=2;AF=0.029;AN=70;DP=282;FS=0.000;Inbre |
| 547 | chrY | 3193883 | . | T | C   | 231      | PASS          | AC=3;AF=0.043;AN=70;BaseQRankSum=-2.117e+ |
| 548 | chrY | 3193898 | . | A | G   | 198.48   | PASS          | AC=3;AF=0.045;AN=66;BaseQRankSum=-2.758e+ |
| 549 | chrY | 3194078 | . | A | G   | 5583.42  | PASS          | AC=26;AF=0.371;AN=70;BaseQRankSum=-3.360e |
| 550 | chrY | 3194083 | . | G | A   | 5486.16  | PASS          | AC=27;AF=0.386;AN=70;BaseQRankSum=0.714;C |
| 551 | chrY | 3194113 | . | T | G   | 1909.03  | PASS          | AC=18;AF=0.265;AN=68;BaseQRankSum=0.289;C |
| 552 | chrY | 3194136 | . | C | G   | 1425.94  | PASS          | AC=17;AF=0.243;AN=70;BaseQRankSum=-3.240e |
| 553 | chrY | 3194437 | . | C | T   | 111.12   | PASS          | AC=3;AF=0.048;AN=62;BaseQRankSum=0.269;C  |
| 554 | chrY | 3194779 | . | C | T   | 33.78    | my_snp_filter | AC=1;AF=0.014;AN=70;BaseQRankSum=         |
| 555 | chrY | 3195016 | . | G | A   | 60.83    | my_snp_filter | AC=3;AF=0.048;AN=62;BaseQRankSum=         |
| 556 | chrY | 3195276 | . | T | C   | 677.64   | my_snp_filter | AC=4;AF=0.057;AN=70;BaseQRankSum=         |
| 557 | chrY | 3195371 | . | T | C   | 6837.84  | PASS          | AC=22;AF=0.314;AN=70;BaseQRankSum=-1.097e |
| 558 | chrY | 3195531 | . | A | G   | 188.70   | my_snp_filter | AC=2;AF=0.029;AN=68;BaseQRankSum=         |
| 559 | chrY | 3195624 | . | T | G   | 110.31   | PASS          | AC=1;AF=0.015;AN=68;BaseQRankSum=2.14;Cli |
| 560 | chrY | 3195646 | . | T | C   | 109.70   | PASS          | AC=1;AF=0.014;AN=70;BaseQRankSum=-2.688e+ |
| 561 | chrY | 3195921 | . | G | A   | 68.84    | PASS          | AC=2;AF=0.033;AN=60;DP=229;FS=0.000;Inbre |
| 562 | chrY | 3196326 | . | A | G   | 10207.98 | PASS          | AC=40;AF=0.571;AN=70;DP=508;FS=0.         |
| 563 | chrY | 3200161 | . | A | C   | 213.87   | PASS          | AC=5;AF=0.074;AN=68;BaseQRankSum=1.29;Cli |
| 564 | chrY | 3201251 | . | G | C   | 159.76   | PASS          | AC=3;AF=0.043;AN=70;BaseQRankSum=-2.240e  |
| 565 | chrY | 3203304 | . | G | A   | 92.08    | PASS          | AC=2;AF=0.032;AN=62;BaseQRankSum=-1.171e+ |
| 566 | chrY | 3208566 | . | C | T   | 1353.18  | PASS          | AC=6;AF=0.333;AN=18;DP=187;FS=0.000;MLEAC |
| 567 | chrY | 3214736 | . | A | C   | 1335.55  | PASS          | AC=8;AF=0.444;AN=18;BaseQRankSum=0.752;C  |
| 568 | chrY | 3214906 | . | G | T   | 909.06   | PASS          | AC=8;AF=0.222;AN=36;BaseQRankSum=-3.130e- |
| 569 | chrY | 3215068 | . | T | A,* | 1439.44  | PASS          | AC=13,1;AF=0.210,0.016;AN=62;BaseQRankSum |
| 570 | chrY | 3218805 | . | A | G   | 1276.21  | PASS          | AC=12;AF=0.667;AN=18;BaseQRankSum=0.528;C |
| 571 | chrY | 3222095 | . | C | A   | 5544.71  | PASS          | AC=45;AF=0.682;AN=66;BaseQRankSum=0.290;C |
| 572 | chrY | 3223114 | . | T | C   | 337.27   | PASS          | AC=2;AF=0.029;AN=70;DP=622;FS=0.000;Inbre |
| 573 | chrY | 3223365 | . | T | C   | 72.27    | PASS          | AC=2;AF=0.030;AN=66;BaseQRankSum=2.40;Cli |
| 574 | chrY | 3224603 | . | A | T   | 952.20   | PASS          | AC=5;AF=0.071;AN=70;BaseQRankSum=-7.640e- |
| 575 | chrY | 3226995 | . | C | T   | 53.87    | PASS          | AC=2;AF=0.030;AN=66;BaseQRankSum=-3.580e- |
| 576 | chrY | 3229175 | . | G | A   | 56.31    | PASS          | AC=1;AF=0.015;AN=66;DP=180;FS=0.000;Inbre |
| 577 | chrY | 3229180 | . | G | A   | 47.77    | PASS          | AC=1;AF=0.015;AN=66;BaseQRankSum=-7.270e- |
| 578 | chrY | 3229184 | . | G | A   | 44.86    | PASS          | AC=1;AF=0.014;AN=70;BaseQRankSum=-9.370e- |
| 579 | chrY | 3230193 | . | T | C   | 350.71   | PASS          | AC=2;AF=0.029;AN=68;DP=217;FS=0.000;Inbre |
| 580 | chrY | 3237522 | . | G | A   | 732.78   | PASS          | AC=3;AF=0.167;AN=18;BaseQRankSum=1.44;Cli |
| 581 | chrY | 3238590 | . | A | C   | 321.48   | PASS          | AC=6;AF=0.088;AN=68;DP=280;FS=0.000;Inbre |
| 582 | chrY | 3239049 | . | G | A   | 1770.24  | PASS          | AC=20;AF=0.294;AN=68;BaseQRankSum=0.307;C |
| 583 | chrY | 3239356 | . | G | T   | 34.44    | PASS          | AC=1;AF=0.015;AN=66;BaseQRankSum=-1.380e- |
| 584 | chrY | 3240431 | . | C | A   | 938.09   | PASS          | AC=6;AF=0.143;AN=42;DP=151;FS=0.000;Inbre |
| 585 | chrY | 3240513 | . | A | G   | 185.49   | PASS          | AC=2;AF=0.091;AN=22;DP=138;FS=0.000;Inbre |
| 586 | chrY | 3241219 | . | C | T   | 52.36    | PASS          | AC=2;AF=0.029;AN=70;BaseQRankSum=0.572;C  |
| 587 | chrY | 3241230 | . | G | C   | 188.54   | PASS          | AC=2;AF=0.029;AN=70;DP=374;FS=0.000;Inbre |
| 588 | chrY | 3242116 | . | A | G   | 2774.93  | PASS          | AC=20;AF=1.00;AN=20;DP=123;FS=0.000;Inbre |
| 589 | chrY | 3242444 | . | G | C   | 137.04   | PASS          | AC=2;AF=0.029;AN=68;BaseQRankSum=0.727;C  |
| 590 | chrY | 3242531 | . | A | G   | 170.81   | PASS          | AC=2;AF=0.029;AN=68;BaseQRankSum=0.731;C  |
| 591 | chrY | 3243366 | . | A | G   | 44.80    | my_snp_filter | AC=2;AF=0.029;AN=70;BaseQRankSum=         |
| 592 | chrY | 3244438 | . | C | G   | 36.80    | PASS          | AC=1;AF=0.015;AN=68;BaseQRankSum=-3.580e- |
| 593 | chrY | 3245641 | . | C | G   | 248.83   | PASS          | AC=3;AF=0.043;AN=70;BaseQRankSum=-6.670e- |
| 594 | chrY | 3245714 | . | C | A   | 428.96   | PASS          | AC=3;AF=0.043;AN=70;BaseQRankSum=-9.290e- |
| 595 | chrY | 3245721 | . | C | T   | 434.96   | PASS          | AC=3;AF=0.043;AN=70;BaseQRankSum=0.382;C  |
| 596 | chrY | 3246170 | . | G | A   | 2217.82  | PASS          | AC=24;AF=0.667;AN=36;DP=180;FS=0.000;Inbr |
| 597 | chrY | 3246483 | . | A | T   | 44.10    | PASS          | AC=1;AF=0.016;AN=64;DP=243;FS=0.000;Inbre |
| 598 | chrY | 3246499 | . | C | T   | 43.88    | PASS          | AC=1;AF=0.016;AN=62;BaseQRankSum=0.804;C  |
| 599 | chrY | 3247711 | . | T | C   | 112.31   | PASS          | AC=2;AF=0.029;AN=68;BaseQRankSum=-1.452e+ |
| 600 | chrY | 3248399 | . | C | A   | 257.87   | PASS          | AC=1;AF=0.016;AN=62;BaseQRankSum=-1.280e+ |
| 601 | chrY | 3248400 | . | T | C   | 257.83   | PASS          | AC=1;AF=0.016;AN=62;BaseQRankSum=-3.088e+ |
| 602 | chrY | 3248513 | . | T | C   | 56.80    | my_snp_filter | AC=1;AF=0.015;AN=68;BaseQRankSum=         |
| 603 | chrY | 3252166 | . | G | T   | 50.33    | PASS          | AC=1;AF=0.056;AN=18;BaseQRankSum=2.07;Cli |
| 604 | chrY | 3252488 | . | G | A   | 627.24   | PASS          | AC=3;AF=0.043;AN=70;BaseQRankSum=0.398;C  |
| 605 | chrY | 3252731 | . | G | A   | 141.50   | PASS          | AC=2;AF=0.032;AN=62;BaseQRankSum=2.10;Cli |
| 606 | chrY | 3252831 | . | G | A   | 140.54   | PASS          | AC=1;AF=0.015;AN=68;BaseQRankSum=2.21;Cli |
| 607 | chrY | 3252861 | . | G | A   | 153.74   | PASS          | AC=1;AF=0.015;AN=68;BaseQRankSum=-1.466e+ |
| 608 | chrY | 3252927 | . | C | T   | 221.45   | PASS          | AC=3;AF=0.043;AN=70;BaseQRankSum=-5.720e- |



|     |      |         |   |   |   |          |               |                                           |
|-----|------|---------|---|---|---|----------|---------------|-------------------------------------------|
| 609 | chrY | 3253065 | . | T | C | 75.05    | my_snp_filter | AC=4;AF=0.059;AN=68;BaseQRankSum=         |
| 610 | chrY | 3253095 | . | C | G | 213.25   | PASS          | AC=7;AF=0.103;AN=68;BaseQRankSum=-1.179e+ |
| 611 | chrY | 3253170 | . | C | T | 155.74   | PASS          | AC=1;AF=0.033;AN=30;BaseQRankSum=0.720;Cl |
| 612 | chrY | 3253180 | . | T | C | 64.88    | PASS          | AC=2;AF=0.091;AN=22;DP=57;FS=0.000;Inbre  |
| 613 | chrY | 3253810 | . | G | A | 67.12    | PASS          | AC=2;AF=0.091;AN=22;DP=101;FS=0.000;Inbre |
| 614 | chrY | 3253843 | . | A | T | 677.62   | PASS          | AC=6;AF=0.158;AN=38;DP=93;FS=0.000;Inbre  |
| 615 | chrY | 3253848 | . | T | A | 246.48   | PASS          | AC=6;AF=0.143;AN=42;BaseQRankSum=0.731;Cl |
| 616 | chrY | 3254237 | . | A | G | 5097.31  | PASS          | AC=44;AF=0.647;AN=68;DP=374;FS=0.000;Inbr |
| 617 | chrY | 3256326 | . | G | A | 732.18   | PASS          | AC=20;AF=0.500;AN=40;DP=177;FS=0.000;Inbr |
| 618 | chrY | 3258177 | . | A | C | 116.14   | PASS          | AC=1;AF=0.024;AN=42;BaseQRankSum=0.433;Cl |
| 619 | chrY | 3258676 | . | A | G | 264.42   | PASS          | AC=2;AF=0.029;AN=70;BaseQRankSum=0.350;Cl |
| 620 | chrY | 3259610 | . | T | C | 41.08    | PASS          | AC=1;AF=0.016;AN=64;BaseQRankSum=-1.026e+ |
| 621 | chrY | 3259619 | . | T | C | 34.94    | PASS          | AC=1;AF=0.015;AN=66;BaseQRankSum=-1.380e+ |
| 622 | chrY | 3261906 | . | C | T | 949.05   | PASS          | AC=6;AF=0.086;AN=70;DP=424;FS=0.000;Inbre |
| 623 | chrY | 3263947 | . | T | C | 317.02   | PASS          | AC=2;AF=0.111;AN=18;DP=162;FS=0.000;MLEAC |
| 624 | chrY | 3266087 | . | C | T | 12440.99 | PASS          | AC=66;AF=1.00;AN=66;BaseQRankSum=         |
| 625 | chrY | 3266992 | . | G | A | 102.84   | PASS          | AC=3;AF=0.043;AN=70;BaseQRankSum=-5.660e- |
| 626 | chrY | 3269225 | . | G | C | 1518.90  | PASS          | AC=6;AF=0.086;AN=70;BaseQRankSum=0.851;Cl |
| 627 | chrY | 3270639 | . | G | T | 7948.58  | PASS          | AC=46;AF=0.657;AN=70;BaseQRankSum=1.45;Cl |
| 628 | chrY | 3271292 | . | G | A | 148.59   | PASS          | AC=3;AF=0.043;AN=70;BaseQRankSum=0.752;Cl |
| 629 | chrY | 3271346 | . | G | T | 54.27    | my_snp_filter | AC=1;AF=0.014;AN=70;BaseQRankSum=         |
| 630 | chrY | 3271448 | . | T | C | 86.34    | PASS          | AC=1;AF=0.014;AN=70;BaseQRankSum=-9.220e- |
| 631 | chrY | 3274923 | . | C | A | 19335.97 | PASS          | AC=68;AF=1.00;AN=68;DP=637;FS=0.0         |
| 632 | chrY | 3276994 | . | A | G | 11564.30 | PASS          | AC=49;AF=0.721;AN=68;BaseQRankSum         |
| 633 | chrY | 3277949 | . | T | C | 1360.54  | PASS          | AC=8;AF=0.400;AN=20;BaseQRankSum=1.35;Cli |
| 634 | chrY | 3278206 | . | G | C | 565.57   | PASS          | AC=10;AF=0.143;AN=70;BaseQRankSum=1.54;Cl |
| 635 | chrY | 3278326 | . | C | T | 33.65    | my_snp_filter | AC=2;AF=0.029;AN=70;BaseQRankSum=         |
| 636 | chrY | 3279458 | . | G | C | 162.80   | PASS          | AC=4;AF=0.065;AN=62;DP=222;FS=0.000;Inbre |
| 637 | chrY | 3279512 | . | T | C | 3205.15  | PASS          | AC=26;AF=1.00;AN=26;DP=132;FS=0.000;Inbre |
| 638 | chrY | 3279636 | . | T | A | 724.17   | PASS          | AC=6;AF=0.300;AN=20;BaseQRankSum=-1.107e+ |
| 639 | chrY | 3279734 | . | T | C | 175.01   | PASS          | AC=3;AF=0.045;AN=66;BaseQRankSum=-2.363e+ |
| 640 | chrY | 3280099 | . | A | G | 232.87   | PASS          | AC=4;AF=0.071;AN=56;BaseQRankSum=-1.304e+ |
| 641 | chrY | 3283471 | . | G | A | 225.64   | my_snp_filter | AC=7;AF=0.100;AN=70;BaseQRankSum=         |
| 642 | chrY | 3284303 | . | C | G | 11027.74 | PASS          | AC=50;AF=0.735;AN=68;DP=515;FS=0.         |
| 643 | chrY | 3284375 | . | A | T | 7155.91  | PASS          | AC=52;AF=0.743;AN=70;DP=374;FS=0.000;Inbr |
| 644 | chrY | 3285671 | . | G | A | 1176.62  | PASS          | AC=6;AF=0.094;AN=64;DP=197;FS=0.000;Inbre |
| 645 | chrY | 3287098 | . | C | T | 188.85   | PASS          | AC=3;AF=0.043;AN=70;BaseQRankSum=-4.520e- |
| 646 | chrY | 3289275 | . | A | G | 1173.07  | PASS          | AC=6;AF=0.088;AN=68;BaseQRankSum=-1.724e+ |
| 647 | chrY | 3289276 | . | C | T | 986.96   | PASS          | AC=5;AF=0.074;AN=68;BaseQRankSum=0.910;Cl |
| 648 | chrY | 3289390 | . | C | G | 1046.30  | PASS          | AC=24;AF=0.444;AN=54;BaseQRankSum=0.198;C |
| 649 | chrY | 3291496 | . | G | A | 836.42   | PASS          | AC=5;AF=0.208;AN=24;BaseQRankSum=1.40;Cli |
| 650 | chrY | 3292652 | . | T | A | 108.76   | PASS          | AC=2;AF=0.029;AN=68;BaseQRankSum=-4.210e- |
| 651 | chrY | 3292871 | . | C | T | 809.77   | PASS          | AC=11;AF=0.177;AN=62;BaseQRankSum=0.283;C |
| 652 | chrY | 3293024 | . | G | A | 485.27   | PASS          | AC=5;AF=0.078;AN=64;BaseQRankSum=2.05;Cli |
| 653 | chrY | 3293192 | . | G | A | 235.09   | PASS          | AC=5;AF=0.071;AN=70;BaseQRankSum=1.07;Cli |
| 654 | chrY | 3293273 | . | G | T | 1226.56  | PASS          | AC=23;AF=0.479;AN=48;BaseQRankSum=0.736;C |
| 655 | chrY | 3295904 | . | T | A | 524.04   | PASS          | AC=6;AF=0.088;AN=68;BaseQRankSum=1.50;Cli |
| 656 | chrY | 3297672 | . | A | T | 145.94   | PASS          | AC=3;AF=0.050;AN=60;BaseQRankSum=-2.230e- |
| 657 | chrY | 3301831 | . | C | T | 40.96    | PASS          | AC=1;AF=0.015;AN=68;BaseQRankSum=-7.360e- |
| 658 | chrY | 3304261 | . | T | C | 686      | PASS          | AC=5;AF=0.125;AN=40;BaseQRankSum=1.94;Cli |
| 659 | chrY | 3304713 | . | T | G | 169.40   | PASS          | AC=6;AF=0.086;AN=70;BaseQRankSum=-6.700e- |
| 660 | chrY | 3306294 | . | C | G | 304      | PASS          | AC=6;AF=0.158;AN=38;BaseQRankSum=0.751;Cl |
| 661 | chrY | 3307549 | . | A | G | 188.92   | PASS          | AC=2;AF=0.045;AN=44;BaseQRankSum=-1.107e+ |
| 662 | chrY | 3308883 | . | G | C | 581.96   | PASS          | AC=6;AF=0.091;AN=66;DP=425;FS=0.000;Inbre |
| 663 | chrY | 3312122 | . | A | G | 488.05   | my_snp_filter | AC=6;AF=0.333;AN=18;DP=123;FS=0.0         |
| 664 | chrY | 3312535 | . | A | T | 72.60    | my_snp_filter | AC=2;AF=0.111;AN=18;BaseQRankSum=         |
| 665 | chrY | 3312536 | . | C | T | 151.97   | my_snp_filter | AC=3;AF=0.167;AN=18;BaseQRankSum=         |
| 666 | chrY | 3312565 | . | C | T | 88.69    | my_snp_filter | AC=3;AF=0.167;AN=18;BaseQRankSum=         |
| 667 | chrY | 3312796 | . | C | T | 1021.46  | PASS          | AC=6;AF=0.333;AN=18;BaseQRankSum=2.83;Cli |
| 668 | chrY | 3312813 | . | C | G | 1232.78  | PASS          | AC=6;AF=0.333;AN=18;BaseQRankSum=0.386;Cl |
| 669 | chrY | 3312933 | . | C | T | 89.52    | PASS          | AC=1;AF=0.056;AN=18;BaseQRankSum=0.239;Cl |
| 670 | chrY | 3313079 | . | T | G | 275.24   | PASS          | AC=1;AF=0.056;AN=18;BaseQRankSum=-2.662e+ |
| 671 | chrY | 3315365 | . | T | A | 36.34    | my_snp_filter | AC=1;AF=0.050;AN=20;BaseQRankSum=         |
| 672 | chrY | 3316011 | . | G | T | 38.09    | my_snp_filter | AC=1;AF=0.056;AN=18;BaseQRankSum=         |
| 673 | chrY | 3317045 | . | G | A | 129.27   | my_snp_filter | AC=2;AF=0.111;AN=18;BaseQRankSum=         |
| 674 | chrY | 3317052 | . | A | G | 134.97   | my_snp_filter | AC=2;AF=0.111;AN=18;BaseQRankSum=         |
| 675 | chrY | 3317065 | . | C | A | 156.79   | my_snp_filter | AC=2;AF=0.111;AN=18;BaseQRankSum=         |
| 676 | chrY | 3317069 | . | T | C | 156.65   | my_snp_filter | AC=2;AF=0.111;AN=18;BaseQRankSum=         |
| 677 | chrY | 3317073 | . | C | T | 59.32    | my_snp_filter | AC=1;AF=0.056;AN=18;BaseQRankSum=         |
| 678 | chrY | 3317084 | . | C | A | 59.97    | my_snp_filter | AC=2;AF=0.111;AN=18;BaseQRankSum=         |
| 679 | chrY | 3317882 | . | A | G | 7624.17  | PASS          | AC=40;AF=0.571;AN=70;DP=479;FS=0.000;Inbr |
| 680 | chrY | 3319321 | . | T | G | 41.28    | my_snp_filter | AC=2;AF=0.032;AN=62;BaseQRankSum=         |
| 681 | chrY | 3319685 | . | A | G | 1068.18  | PASS          | AC=6;AF=0.094;AN=64;BaseQRankSum=-1.044e+ |
| 682 | chrY | 3320972 | . | A | G | 837.61   | PASS          | AC=8;AF=0.444;AN=18;DP=118;FS=0.000;MLEAC |
| 683 | chrY | 3320995 | . | T | A | 358.03   | PASS          | AC=2;AF=0.111;AN=18;DP=120;FS=0.000;MLEAC |
| 684 | chrY | 3327625 | . | C | T | 654.91   | PASS          | AC=6;AF=0.086;AN=70;DP=271;FS=0.000;Inbre |

|     |      |         |   |   |   |          |               |                                           |
|-----|------|---------|---|---|---|----------|---------------|-------------------------------------------|
| 685 | chrY | 3331464 | . | T | A | 280.78   | PASS          | AC=2;AF=0.059;AN=34;DP=107;FS=0.000;Inbre |
| 686 | chrY | 3335911 | . | G | C | 65.50    | PASS          | AC=2;AF=0.038;AN=52;BaseQRankSum=1.29;Cli |
| 687 | chrY | 3348468 | . | T | G | 454.01   | PASS          | AC=5;AF=0.078;AN=64;BaseQRankSum=-1.444e+ |
| 688 | chrY | 3349125 | . | C | A | 623.90   | PASS          | AC=6;AF=0.300;AN=20;DP=120;FS=0.000;Inbre |
| 689 | chrY | 3351812 | . | G | A | 4272.08  | PASS          | AC=33;AF=0.471;AN=70;BaseQRankSum=0.00;Cl |
| 690 | chrY | 3351835 | . | A | G | 789.59   | PASS          | AC=10;AF=0.143;AN=70;BaseQRankSum=-1.200e |
| 691 | chrY | 3351864 | . | G | A | 146.61   | PASS          | AC=3;AF=0.047;AN=64;BaseQRankSum=1.03;Cli |
| 692 | chrY | 3359049 | . | C | T | 104.41   | PASS          | AC=1;AF=0.015;AN=66;BaseQRankSum=2.90;Cli |
| 693 | chrY | 3359057 | . | C | A | 135.44   | PASS          | AC=1;AF=0.016;AN=64;BaseQRankSum=2.60;Cli |
| 694 | chrY | 3359297 | . | G | A | 299.42   | my_snp_filter | AC=8;AF=0.114;AN=70;BaseQRankSum=         |
| 695 | chrY | 3359420 | . | C | G | 5550.63  | PASS          | AC=22;AF=0.314;AN=70;BaseQRankSum=0.062;C |
| 696 | chrY | 3359450 | . | A | T | 5811.90  | PASS          | AC=21;AF=0.300;AN=70;BaseQRankSum=1.08;Cl |
| 697 | chrY | 3359578 | . | G | C | 282.82   | PASS          | AC=6;AF=0.086;AN=70;BaseQRankSum=1.11;Cli |
| 698 | chrY | 3359651 | . | C | G | 263.05   | PASS          | AC=5;AF=0.071;AN=70;BaseQRankSum=-1.170e- |
| 699 | chrY | 3359675 | . | A | G | 413.48   | my_snp_filter | AC=5;AF=0.071;AN=70;BaseQRankSum=         |
| 700 | chrY | 3359703 | . | C | T | 339.76   | my_snp_filter | AC=5;AF=0.074;AN=68;BaseQRankSum=         |
| 701 | chrY | 3369006 | . | T | C | 6166.13  | PASS          | AC=47;AF=0.691;AN=68;BaseQRankSum=0.736;C |
| 702 | chrY | 3369342 | . | A | C | 45.62    | PASS          | AC=2;AF=0.063;AN=32;DP=141;FS=0.000;Inbre |
| 703 | chrY | 3370956 | . | A | G | 51.37    | PASS          | AC=2;AF=0.032;AN=62;DP=190;FS=0.000;Inbre |
| 704 | chrY | 3371154 | . | T | A | 105.07   | PASS          | AC=2;AF=0.067;AN=30;BaseQRankSum=0.00;Cli |
| 705 | chrY | 3371939 | . | T | C | 1295.33  | PASS          | AC=6;AF=0.088;AN=68;DP=564;FS=0.000;Inbre |
| 706 | chrY | 3372611 | . | T | G | 1595.13  | PASS          | AC=7;AF=0.350;AN=20;BaseQRankSum=-2.001e+ |
| 707 | chrY | 3372628 | . | T | C | 1611.86  | PASS          | AC=7;AF=0.292;AN=24;BaseQRankSum=-1.971e+ |
| 708 | chrY | 3376114 | . | A | T | 1874.17  | PASS          | AC=15;AF=0.227;AN=66;BaseQRankSum=-3.230e |
| 709 | chrY | 3376240 | . | T | C | 91.51    | my_snp_filter | AC=4;AF=0.095;AN=42;BaseQRankSum=         |
| 710 | chrY | 3377471 | . | G | C | 90.48    | my_snp_filter | AC=3;AF=0.044;AN=68;BaseQRankSum=         |
| 711 | chrY | 3377786 | . | T | A | 34.76    | my_snp_filter | AC=1;AF=0.015;AN=68;BaseQRankSum=         |
| 712 | chrY | 3377855 | . | G | C | 989.48   | PASS          | AC=6;AF=0.091;AN=66;BaseQRankSum=1.62;Cli |
| 713 | chrY | 3379309 | . | T | A | 277.25   | PASS          | AC=6;AF=0.333;AN=18;BaseQRankSum=0.212;Cl |
| 714 | chrY | 3383291 | . | T | C | 976.30   | PASS          | AC=6;AF=0.091;AN=66;BaseQRankSum=-4.740e- |
| 715 | chrY | 3384596 | . | C | A | 32.46    | PASS          | AC=1;AF=0.016;AN=64;BaseQRankSum=-1.495e+ |
| 716 | chrY | 3384599 | . | G | A | 32.47    | PASS          | AC=1;AF=0.015;AN=66;BaseQRankSum=0.922;Cl |
| 717 | chrY | 3385259 | . | T | C | 3683.14  | PASS          | AC=24;AF=1.00;AN=24;DP=150;FS=0.000;Inbre |
| 718 | chrY | 3387363 | . | A | T | 38.69    | PASS          | AC=1;AF=0.016;AN=62;BaseQRankSum=0.296;Cl |
| 719 | chrY | 3387546 | . | T | A | 262.89   | PASS          | AC=4;AF=0.059;AN=68;BaseQRankSum=1.65;Cli |
| 720 | chrY | 3387981 | . | C | T | 98.54    | PASS          | AC=2;AF=0.042;AN=48;BaseQRankSum=1.67;Cli |
| 721 | chrY | 3387992 | . | C | T | 99.92    | PASS          | AC=2;AF=0.036;AN=56;BaseQRankSum=1.27;Cli |
| 722 | chrY | 3388103 | . | A | T | 240.23   | PASS          | AC=3;AF=0.047;AN=64;BaseQRankSum=-8.500e- |
| 723 | chrY | 3388418 | . | A | G | 796.36   | PASS          | AC=7;AF=0.100;AN=70;BaseQRankSum=-5.780e- |
| 724 | chrY | 3388652 | . | G | A | 2334.94  | PASS          | AC=15;AF=0.214;AN=70;BaseQRankSum=-1.960e |
| 725 | chrY | 3388757 | . | A | C | 2522.62  | PASS          | AC=21;AF=0.300;AN=70;BaseQRankSum=-7.360e |
| 726 | chrY | 3388884 | . | T | C | 41       | PASS          | AC=1;AF=0.018;AN=56;BaseQRankSum=1.42;Cli |
| 727 | chrY | 3389980 | . | C | T | 8197.08  | PASS          | AC=68;AF=1.00;AN=68;BaseQRankSum=1.50;Cli |
| 728 | chrY | 3390275 | . | T | G | 63.25    | my_snp_filter | AC=4;AF=0.057;AN=70;BaseQRankSum=         |
| 729 | chrY | 3390366 | . | C | T | 71.17    | PASS          | AC=2;AF=0.029;AN=68;BaseQRankSum=1.77;Cli |
| 730 | chrY | 3394622 | . | G | A | 836.78   | PASS          | AC=6;AF=0.107;AN=56;BaseQRankSum=1.37;Cli |
| 731 | chrY | 3395665 | . | G | C | 86.61    | my_snp_filter | AC=3;AF=0.088;AN=34;BaseQRankSum=         |
| 732 | chrY | 3396386 | . | C | A | 1519.26  | PASS          | AC=6;AF=0.086;AN=70;DP=690;FS=0.000;Inbre |
| 733 | chrY | 3397017 | . | T | G | 13000.11 | PASS          | AC=70;AF=1.00;AN=70;BaseQRankSum=         |
| 734 | chrY | 3397528 | . | A | G | 621.56   | PASS          | AC=6;AF=0.086;AN=70;BaseQRankSum=-1.735e+ |
| 735 | chrY | 3399501 | . | C | T | 1846.42  | PASS          | AC=32;AF=0.640;AN=50;DP=223;FS=0.000;Inbr |
| 736 | chrY | 3400597 | . | A | G | 1231.04  | PASS          | AC=9;AF=0.141;AN=64;BaseQRankSum=0.00;Cli |
| 737 | chrY | 3400655 | . | A | C | 1869.39  | PASS          | AC=8;AF=0.129;AN=62;BaseQRankSum=1.02;Cli |
| 738 | chrY | 3400837 | . | A | G | 1195.46  | PASS          | AC=12;AF=0.176;AN=68;BaseQRankSum=0.922;C |
| 739 | chrY | 3400869 | . | A | C | 768.98   | PASS          | AC=12;AF=0.176;AN=68;BaseQRankSum=-5.890e |
| 740 | chrY | 3400962 | . | C | G | 785.97   | my_snp_filter | AC=6;AF=0.086;AN=70;BaseQRankSum=         |
| 741 | chrY | 3400985 | . | T | C | 252.11   | PASS          | AC=1;AF=0.015;AN=66;BaseQRankSum=1.47;Cli |
| 742 | chrY | 3401367 | . | C | T | 1047.14  | PASS          | AC=6;AF=0.107;AN=56;DP=178;FS=0.000;Inbre |
| 743 | chrY | 3401800 | . | T | C | 55.83    | PASS          | AC=2;AF=0.029;AN=70;DP=304;FS=0.000;Inbre |
| 744 | chrY | 3402559 | . | A | T | 153.49   | PASS          | AC=4;AF=0.057;AN=70;BaseQRankSum=0.480;Cl |
| 745 | chrY | 3402868 | . | G | A | 56.90    | my_snp_filter | AC=2;AF=0.031;AN=64;BaseQRankSum=         |
| 746 | chrY | 3402899 | . | C | T | 72.31    | my_snp_filter | AC=3;AF=0.048;AN=62;BaseQRankSum=         |
| 747 | chrY | 3402937 | . | A | G | 162.39   | PASS          | AC=2;AF=0.032;AN=62;DP=240;FS=0.000;Inbre |
| 748 | chrY | 3402948 | . | C | T | 610.63   | PASS          | AC=4;AF=0.061;AN=66;BaseQRankSum=0.887;Cl |
| 749 | chrY | 3402951 | . | G | T | 612.48   | PASS          | AC=4;AF=0.061;AN=66;BaseQRankSum=0.037;Cl |
| 750 | chrY | 3403002 | . | C | T | 302.93   | my_snp_filter | AC=5;AF=0.071;AN=70;BaseQRankSum=         |
| 751 | chrY | 3403262 | . | A | C | 282.27   | PASS          | AC=2;AF=0.167;AN=12;BaseQRankSum=2.22;Cli |
| 752 | chrY | 3403397 | . | T | C | 38.99    | my_snp_filter | AC=2;AF=0.111;AN=18;BaseQRankSum=         |
| 753 | chrY | 3406444 | . | A | G | 143.53   | PASS          | AC=4;AF=0.065;AN=62;DP=215;FS=0.000;Inbre |
| 754 | chrY | 3407304 | . | C | G | 243      | PASS          | AC=2;AF=0.030;AN=66;DP=202;FS=0.000;Inbre |
| 755 | chrY | 3416449 | . | A | G | 70.40    | my_snp_filter | AC=4;AF=0.095;AN=42;BaseQRankSum=         |
| 756 | chrY | 3419864 | . | T | C | 101.29   | PASS          | AC=2;AF=0.029;AN=70;DP=412;FS=0.000;Inbre |
| 757 | chrY | 3422189 | . | A | G | 1025.07  | PASS          | AC=6;AF=0.107;AN=56;DP=190;FS=0.000;Inbre |
| 758 | chrY | 3423756 | . | T | C | 641.98   | PASS          | AC=6;AF=0.097;AN=62;DP=154;FS=0.000;Inbre |
| 759 | chrY | 3423861 | . | C | T | 1257.33  | PASS          | AC=6;AF=0.086;AN=70;DP=320;FS=0.000;Inbre |
| 760 | chrY | 3426131 | . | G | A | 53.29    | my_snp_filter | AC=2;AF=0.029;AN=70;BaseQRankSum=         |

|     |      |         |   |   |   |         |               |                                            |
|-----|------|---------|---|---|---|---------|---------------|--------------------------------------------|
| 761 | chrY | 3426238 | . | C | T | 82.03   | my_snp_filter | AC=3;AF=0.043;AN=70;BaseQRankSum=          |
| 762 | chrY | 3427960 | . | C | T | 1215.25 | PASS          | AC=6;AF=0.120;AN=50;BaseQRankSum=1.60;Cli  |
| 763 | chrY | 3430200 | . | G | A | 1355.80 | PASS          | AC=6;AF=0.091;AN=66;BaseQRankSum=-1.580e-  |
| 764 | chrY | 3435055 | . | C | T | 514.68  | PASS          | AC=6;AF=0.088;AN=68;DP=449;FS=0.000;Inbre  |
| 765 | chrY | 3436252 | . | G | T | 552.06  | PASS          | AC=6;AF=0.200;AN=30;DP=115;FS=0.000;Inbre  |
| 766 | chrY | 3436318 | . | T | A | 1018.37 | PASS          | AC=8;AF=0.400;AN=20;DP=140;FS=0.000;Inbre  |
| 767 | chrY | 3436319 | . | C | T | 83.30   | PASS          | AC=2;AF=0.091;AN=22;DP=141;FS=0.000;Inbre  |
| 768 | chrY | 3436324 | . | G | A | 51.64   | PASS          | AC=2;AF=0.091;AN=22;DP=140;FS=0.000;Inbre  |
| 769 | chrY | 3436391 | . | T | C | 5657.85 | PASS          | AC=44;AF=0.786;AN=56;DP=225;FS=0.000;Inbr  |
| 770 | chrY | 3436397 | . | C | T | 7151.26 | PASS          | AC=50;AF=0.893;AN=56;DP=236;FS=0.000;Inb   |
| 771 | chrY | 3436403 | . | T | C | 1789.73 | PASS          | AC=6;AF=0.094;AN=64;DP=248;FS=0.000;Inbre  |
| 772 | chrY | 3436409 | . | T | G | 1825    | PASS          | AC=6;AF=0.094;AN=64;DP=277;FS=0.000;Inbre  |
| 773 | chrY | 3436413 | . | T | C | 1690.68 | PASS          | AC=6;AF=0.091;AN=66;DP=299;FS=0.000;Inbre  |
| 774 | chrY | 3440416 | . | C | T | 116.76  | PASS          | AC=1;AF=0.018;AN=56;BaseQRankSum=0.950;Cl  |
| 775 | chrY | 3442397 | . | T | G | 456.52  | PASS          | AC=6;AF=0.100;AN=60;DP=173;FS=0.000;Inbre  |
| 776 | chrY | 3443439 | . | C | G | 585.87  | PASS          | AC=4;AF=0.057;AN=70;DP=334;FS=0.000;Inbre  |
| 777 | chrY | 3443453 | . | T | A | 654.63  | PASS          | AC=3;AF=0.044;AN=68;BaseQRankSum=-7.510e-  |
| 778 | chrY | 3443607 | . | A | G | 57.14   | my_snp_filter | AC=2;AF=0.029;AN=70;BaseQRankSum=          |
| 779 | chrY | 3443946 | . | T | C | 39.66   | PASS          | AC=1;AF=0.014;AN=70;BaseQRankSum=0.00;Cli  |
| 780 | chrY | 3443951 | . | T | C | 42.62   | PASS          | AC=1;AF=0.014;AN=70;BaseQRankSum=-7.360e-  |
| 781 | chrY | 3444838 | . | G | A | 593.45  | PASS          | AC=6;AF=0.086;AN=70;BaseQRankSum=2.32;Cli  |
| 782 | chrY | 3447245 | . | G | T | 2442.71 | PASS          | AC=12;AF=0.182;AN=66;DP=378;FS=0.000;Inbr  |
| 783 | chrY | 3448944 | . | A | T | 155.24  | PASS          | AC=3;AF=0.043;AN=70;BaseQRankSum=0.00;Cli  |
| 784 | chrY | 3448993 | . | G | A | 777.31  | PASS          | AC=4;AF=0.057;AN=70;BaseQRankSum=2.22;Cli  |
| 785 | chrY | 3449497 | . | C | T | 301.02  | PASS          | AC=4;AF=0.182;AN=22;BaseQRankSum=2.00;Cli  |
| 786 | chrY | 3449579 | . | G | A | 125.67  | my_snp_filter | AC=3;AF=0.088;AN=34;BaseQRankSum=          |
| 787 | chrY | 3449886 | . | T | A | 799.28  | PASS          | AC=6;AF=0.086;AN=70;DP=254;FS=0.000;Inbre  |
| 788 | chrY | 3452051 | . | G | A | 1097.64 | PASS          | AC=6;AF=0.273;AN=22;DP=159;FS=0.000;Inbre  |
| 789 | chrY | 3453461 | . | A | G | 39.35   | my_snp_filter | AC=1;AF=0.016;AN=64;BaseQRankSum=          |
| 790 | chrY | 3456103 | . | G | A | 228.43  | PASS          | AC=4;AF=0.061;AN=66;BaseQRankSum=0.882;Cl  |
| 791 | chrY | 3456391 | . | T | C | 132.82  | PASS          | AC=4;AF=0.057;AN=70;BaseQRankSum=2.00;Cl   |
| 792 | chrY | 3456606 | . | A | G | 1048.89 | PASS          | AC=15;AF=0.214;AN=70;BaseQRankSum=0.289;C  |
| 793 | chrY | 3456712 | . | A | G | 420.50  | PASS          | AC=4;AF=0.057;AN=70;BaseQRankSum=1.20;Cli  |
| 794 | chrY | 3456714 | . | C | A | 421.55  | PASS          | AC=4;AF=0.057;AN=70;BaseQRankSum=1.92;Cli  |
| 795 | chrY | 3456889 | . | A | G | 83.88   | PASS          | AC=1;AF=0.016;AN=62;BaseQRankSum=0.950;Cl  |
| 796 | chrY | 3456891 | . | T | G | 84.11   | PASS          | AC=1;AF=0.016;AN=64;BaseQRankSum=0.250;Cl  |
| 797 | chrY | 3458994 | . | A | T | 4017.86 | PASS          | AC=18;AF=1.00;AN=18;DP=160;FS=0.000;MLEAC  |
| 798 | chrY | 3462160 | . | C | T | 52.75   | my_snp_filter | AC=2;AF=0.111;AN=18;BaseQRankSum=          |
| 799 | chrY | 3464788 | . | G | A | 261.36  | PASS          | AC=4;AF=0.061;AN=66;DP=359;FS=0.000;Inbre  |
| 800 | chrY | 3475225 | . | A | G | 239.90  | PASS          | AC=1;AF=0.015;AN=68;BaseQRankSum=-1.768e+  |
| 801 | chrY | 3475365 | . | G | A | 304.38  | PASS          | AC=6;AF=0.086;AN=70;BaseQRankSum=1.87;Cli  |
| 802 | chrY | 3475494 | . | C | T | 148.60  | PASS          | AC=3;AF=0.048;AN=62;BaseQRankSum=-1.440e-  |
| 803 | chrY | 3476096 | . | C | T | 37.61   | PASS          | AC=1;AF=0.015;AN=66;BaseQRankSum=-1.231e+  |
| 804 | chrY | 3476100 | . | G | A | 40.57   | PASS          | AC=1;AF=0.015;AN=66;BaseQRankSum=-1.026e+  |
| 805 | chrY | 3477173 | . | G | C | 9484    | PASS          | AC=66;AF=1.00;AN=66;DP=329;FS=0.000;Inbre  |
| 806 | chrY | 3483850 | . | C | T | 273.03  | PASS          | AC=6;AF=0.086;AN=70;DP=191;FS=0.000;Inbre  |
| 807 | chrY | 3483889 | . | A | G | 72.77   | PASS          | AC=3;AF=0.044;AN=68;BaseQRankSum=-3.820e-  |
| 808 | chrY | 3485566 | . | C | T | 355.25  | PASS          | AC=2;AF=0.029;AN=70;DP=623;FS=0.000;Inbre  |
| 809 | chrY | 3486861 | . | T | A | 532.30  | PASS          | AC=6;AF=0.088;AN=68;DP=408;FS=0.000;Inbre  |
| 810 | chrY | 3487032 | . | C | T | 8656.04 | PASS          | AC=58;AF=1.00;AN=58;DP=318;FS=0.000;Inbre  |
| 811 | chrY | 3489769 | . | G | C | 194.48  | PASS          | AC=4;AF=0.071;AN=56;DP=186;FS=0.000;Inbre  |
| 812 | chrY | 3495506 | . | C | T | 2025.55 | PASS          | AC=33;AF=0.569;AN=58;BaseQRankSum=-7.310e- |
| 813 | chrY | 3496479 | . | C | A | 162.91  | my_snp_filter | AC=6;AF=0.086;AN=70;BaseQRankSum=          |
| 814 | chrY | 3502269 | . | T | C | 301.86  | my_snp_filter | AC=6;AF=0.086;AN=70;BaseQRankSum=          |
| 815 | chrY | 3502305 | . | T | A | 30.69   | PASS          | AC=1;AF=0.014;AN=70;BaseQRankSum=0.198;Cl  |
| 816 | chrY | 3507403 | . | T | C | 3412.01 | PASS          | AC=22;AF=1.00;AN=22;DP=139;FS=0.000;Inbre  |
| 817 | chrY | 3509153 | . | T | C | 45.07   | my_snp_filter | AC=3;AF=0.060;AN=50;BaseQRankSum=          |
| 818 | chrY | 3509217 | . | A | T | 589.11  | PASS          | AC=7;AF=0.121;AN=58;BaseQRankSum=-1.026e+  |
| 819 | chrY | 3509255 | . | G | C | 1863.29 | PASS          | AC=15;AF=0.221;AN=68;BaseQRankSum=0.353;C  |
| 820 | chrY | 3509300 | . | G | A | 4366.79 | PASS          | AC=21;AF=0.300;AN=70;BaseQRankSum=-7.310e- |
| 821 | chrY | 3509410 | . | C | T | 1204.24 | PASS          | AC=5;AF=0.071;AN=70;BaseQRankSum=-1.001e+  |
| 822 | chrY | 3509520 | . | T | C | 105.07  | PASS          | AC=3;AF=0.043;AN=70;BaseQRankSum=0.053;Cl  |
| 823 | chrY | 3509664 | . | A | G | 57.24   | PASS          | AC=2;AF=0.071;AN=28;BaseQRankSum=-8.490e-  |
| 824 | chrY | 3510746 | . | T | A | 1433.68 | PASS          | AC=6;AF=0.086;AN=70;DP=467;FS=0.000;Inbre  |
| 825 | chrY | 3511444 | . | C | T | 1629.34 | my_snp_filter | AC=14;AF=0.200;AN=70;BaseQRankSum=         |
| 826 | chrY | 3511523 | . | A | G | 2867.37 | PASS          | AC=18;AF=0.257;AN=70;BaseQRankSum=0.529;C  |
| 827 | chrY | 3511733 | . | C | T | 2816.19 | PASS          | AC=33;AF=0.569;AN=58;BaseQRankSum=-7.310e- |
| 828 | chrY | 3511785 | . | G | A | 109.27  | my_snp_filter | AC=4;AF=0.059;AN=68;BaseQRankSum=          |
| 829 | chrY | 3511986 | . | T | C | 42.36   | PASS          | AC=1;AF=0.050;AN=20;BaseQRankSum=0.00;Cli  |
| 830 | chrY | 3511987 | . | G | A | 40.43   | PASS          | AC=1;AF=0.050;AN=20;BaseQRankSum=-7.200e-  |
| 831 | chrY | 3512515 | . | G | A | 3973.86 | PASS          | AC=18;AF=0.257;AN=70;BaseQRankSum=-2.003e- |
| 832 | chrY | 3515500 | . | G | A | 138.20  | PASS          | AC=3;AF=0.043;AN=70;BaseQRankSum=-1.589e+  |
| 833 | chrY | 3515508 | . | G | A | 141.93  | PASS          | AC=3;AF=0.043;AN=70;BaseQRankSum=-1.380e+  |
| 834 | chrY | 3515512 | . | C | T | 144.34  | PASS          | AC=3;AF=0.043;AN=70;BaseQRankSum=-1.380e+  |
| 835 | chrY | 3515526 | . | A | G | 153.74  | PASS          | AC=3;AF=0.045;AN=66;BaseQRankSum=-1.380e+  |
| 836 | chrY | 3515528 | . | G | A | 153.77  | PASS          | AC=3;AF=0.045;AN=66;BaseQRankSum=-1.380e+  |

|     |      |         |   |   |   |          |               |                                            |
|-----|------|---------|---|---|---|----------|---------------|--------------------------------------------|
| 837 | chrY | 3517518 | . | T | G | 215.40   | PASS          | AC=2;AF=0.029;AN=70;DP=764;FS=0.000;Inbre  |
| 838 | chrY | 3519590 | . | C | T | 41.04    | my_snp_filter | AC=2;AF=0.032;AN=62;BaseQRankSum=          |
| 839 | chrY | 3522891 | . | T | C | 45.57    | PASS          | AC=1;AF=0.042;AN=24;BaseQRankSum=-3.610e-  |
| 840 | chrY | 3523642 | . | A | G | 240.47   | PASS          | AC=3;AF=0.043;AN=70;BaseQRankSum=0.400;Cl  |
| 841 | chrY | 3524746 | . | A | G | 840.95   | PASS          | AC=6;AF=0.086;AN=70;DP=317;FS=0.000;Inbre  |
| 842 | chrY | 3528560 | . | T | C | 5596.44  | PASS          | AC=50;AF=0.735;AN=68;DP=325;FS=0.000;Inbr  |
| 843 | chrY | 3530927 | . | G | A | 386.56   | PASS          | AC=2;AF=0.032;AN=62;DP=229;FS=0.000;Inbre  |
| 844 | chrY | 3541196 | . | C | T | 843.58   | PASS          | AC=4;AF=0.057;AN=70;BaseQRankSum=0.528;Cl  |
| 845 | chrY | 3541462 | . | T | C | 87.62    | my_snp_filter | AC=2;AF=0.091;AN=22;BaseQRankSum=          |
| 846 | chrY | 3543839 | . | C | T | 646.18   | PASS          | AC=5;AF=0.074;AN=68;BaseQRankSum=1.37;Cli  |
| 847 | chrY | 3543923 | . | C | G | 878.51   | PASS          | AC=5;AF=0.071;AN=70;BaseQRankSum=-3.550e-  |
| 848 | chrY | 3544218 | . | C | G | 1020.26  | PASS          | AC=6;AF=0.088;AN=68;DP=399;FS=0.000;Inbre  |
| 849 | chrY | 3544322 | . | A | G | 12214.97 | PASS          | AC=70;AF=1.00;AN=70;DP=419;FS=0.0          |
| 850 | chrY | 3546060 | . | T | C | 55.65    | my_snp_filter | AC=2;AF=0.029;AN=70;BaseQRankSum=          |
| 851 | chrY | 3546329 | . | C | T | 580.47   | PASS          | AC=7;AF=0.130;AN=54;BaseQRankSum=1.66;Cli  |
| 852 | chrY | 3547060 | . | C | A | 206.42   | PASS          | AC=2;AF=0.029;AN=70;BaseQRankSum=2.04;Cli  |
| 853 | chrY | 3547140 | . | T | A | 261.03   | PASS          | AC=4;AF=0.069;AN=58;BaseQRankSum=1.82;Cli  |
| 854 | chrY | 3549820 | . | C | T | 127.79   | PASS          | AC=4;AF=0.071;AN=56;DP=239;FS=0.000;Inbre  |
| 855 | chrY | 3554057 | . | C | A | 149.21   | PASS          | AC=3;AF=0.043;AN=70;BaseQRankSum=-3.610e-  |
| 856 | chrY | 3555139 | . | C | T | 126.37   | PASS          | AC=2;AF=0.056;AN=36;BaseQRankSum=1.63;Cli  |
| 857 | chrY | 3555279 | . | G | A | 436.63   | PASS          | AC=7;AF=0.117;AN=60;BaseQRankSum=1.18;Cli  |
| 858 | chrY | 3555449 | . | A | T | 141.35   | my_snp_filter | AC=4;AF=0.061;AN=66;BaseQRankSum=          |
| 859 | chrY | 3557770 | . | G | A | 36       | PASS          | AC=1;AF=0.015;AN=66;BaseQRankSum=1.38;Cli  |
| 860 | chrY | 3557780 | . | A | G | 35.97    | PASS          | AC=1;AF=0.015;AN=66;BaseQRankSum=0.720;Cl  |
| 861 | chrY | 3558263 | . | G | A | 64.79    | PASS          | AC=1;AF=0.016;AN=62;BaseQRankSum=0.742;Cl  |
| 862 | chrY | 3558271 | . | G | A | 58.70    | PASS          | AC=1;AF=0.015;AN=66;BaseQRankSum=0.592;Cl  |
| 863 | chrY | 3558272 | . | T | A | 58.50    | PASS          | AC=1;AF=0.015;AN=68;BaseQRankSum=0.254;Cl  |
| 864 | chrY | 3558273 | . | T | A | 57.77    | PASS          | AC=1;AF=0.015;AN=68;BaseQRankSum=-8.500e-  |
| 865 | chrY | 3558275 | . | T | A | 58.08    | PASS          | AC=1;AF=0.015;AN=66;BaseQRankSum=-2.620e+  |
| 866 | chrY | 3558403 | . | C | T | 267.58   | PASS          | AC=5;AF=0.071;AN=70;BaseQRankSum=1.15;Cli  |
| 867 | chrY | 3558474 | . | C | T | 49.69    | my_snp_filter | AC=2;AF=0.029;AN=70;BaseQRankSum=          |
| 868 | chrY | 3558537 | . | C | A | 142.65   | PASS          | AC=3;AF=0.043;AN=70;BaseQRankSum=1.27;Cli  |
| 869 | chrY | 3558731 | . | C | T | 91.93    | my_snp_filter | AC=3;AF=0.043;AN=70;BaseQRankSum=          |
| 870 | chrY | 3559501 | . | C | A | 113.75   | my_snp_filter | AC=3;AF=0.043;AN=70;BaseQRankSum=          |
| 871 | chrY | 3560926 | . | G | A | 33.63    | my_snp_filter | AC=1;AF=0.018;AN=56;BaseQRankSum=          |
| 872 | chrY | 3560973 | . | T | G | 742.57   | PASS          | AC=7;AF=0.106;AN=66;BaseQRankSum=0.406;Cl  |
| 873 | chrY | 3560975 | . | T | C | 744.89   | PASS          | AC=7;AF=0.106;AN=66;BaseQRankSum=0.00;Cli  |
| 874 | chrY | 3562015 | . | C | G | 583.53   | PASS          | AC=7;AF=0.140;AN=50;BaseQRankSum=-5.730e-  |
| 875 | chrY | 3562444 | . | T | G | 1261.21  | PASS          | AC=6;AF=0.086;AN=70;BaseQRankSum=1.42;Cli  |
| 876 | chrY | 3562978 | . | C | T | 1859.63  | PASS          | AC=14;AF=0.212;AN=66;DP=201;FS=0.000;Inbr  |
| 877 | chrY | 3563016 | . | C | T | 1497.99  | PASS          | AC=6;AF=0.094;AN=64;DP=187;FS=0.000;Inbre  |
| 878 | chrY | 3563017 | . | A | G | 1498     | PASS          | AC=6;AF=0.094;AN=64;DP=186;FS=0.000;Inbre  |
| 879 | chrY | 3563992 | . | A | G | 6051.13  | PASS          | AC=44;AF=1.00;AN=44;DP=237;FS=0.000;Inbre  |
| 880 | chrY | 3564720 | . | G | C | 1108.89  | PASS          | AC=6;AF=0.231;AN=26;DP=141;FS=0.000;Inbre  |
| 881 | chrY | 3567440 | . | G | T | 33.46    | PASS          | AC=1;AF=0.014;AN=70;BaseQRankSum=0.00;Cli  |
| 882 | chrY | 3568313 | . | G | A | 413.29   | PASS          | AC=6;AF=0.111;AN=54;BaseQRankSum=0.583;Cl  |
| 883 | chrY | 3568761 | . | A | G | 7689.06  | PASS          | AC=52;AF=1.00;AN=52;DP=262;FS=0.000;Inbre  |
| 884 | chrY | 3570900 | . | G | A | 87.13    | PASS          | AC=1;AF=0.015;AN=66;BaseQRankSum=0.053;Cl  |
| 885 | chrY | 3570934 | . | A | T | 258.44   | PASS          | AC=2;AF=0.045;AN=44;BaseQRankSum=1.99;Cli  |
| 886 | chrY | 3571089 | . | C | A | 171.35   | PASS          | AC=3;AF=0.056;AN=54;BaseQRankSum=-7.000e-  |
| 887 | chrY | 3571826 | . | C | A | 521.11   | PASS          | AC=9;AF=0.900;AN=10;BaseQRankSum=0.736;Cl  |
| 888 | chrY | 3571940 | . | C | T | 116.79   | PASS          | AC=3;AF=0.115;AN=26;BaseQRankSum=0.00;Cli  |
| 889 | chrY | 3572410 | . | T | G | 271.43   | PASS          | AC=6;AF=0.086;AN=70;BaseQRankSum=-7.500e-  |
| 890 | chrY | 3572452 | . | T | C | 112.20   | PASS          | AC=2;AF=0.029;AN=70;BaseQRankSum=-9.220e-  |
| 891 | chrY | 3572543 | . | T | G | 556.18   | PASS          | AC=5;AF=0.071;AN=70;BaseQRankSum=-7.420e-  |
| 892 | chrY | 3572567 | . | A | G | 95.33    | PASS          | AC=2;AF=0.029;AN=68;BaseQRankSum=1.19;Cli  |
| 893 | chrY | 3572890 | . | T | C | 31.87    | PASS          | AC=1;AF=0.016;AN=62;BaseQRankSum=-1.495e+  |
| 894 | chrY | 3572897 | . | C | A | 31.85    | PASS          | AC=1;AF=0.016;AN=62;BaseQRankSum=-1.495e+  |
| 895 | chrY | 3572950 | . | A | G | 41.49    | PASS          | AC=1;AF=0.014;AN=70;BaseQRankSum=-1.890e-  |
| 896 | chrY | 3573209 | . | C | T | 398.81   | PASS          | AC=6;AF=0.086;AN=70;BaseQRankSum=2.34;Cli  |
| 897 | chrY | 3573338 | . | G | A | 103.25   | PASS          | AC=2;AF=0.029;AN=70;BaseQRankSum=2.43;Cli  |
| 898 | chrY | 3573351 | . | G | A | 32.01    | PASS          | AC=1;AF=0.014;AN=70;BaseQRankSum=1.38;Cli  |
| 899 | chrY | 3574303 | . | C | T | 33.25    | my_snp_filter | AC=3;AF=0.043;AN=70;BaseQRankSum=          |
| 900 | chrY | 3574800 | . | C | T | 80.33    | PASS          | AC=1;AF=0.014;AN=70;BaseQRankSum=3.20;Cli  |
| 901 | chrY | 3577784 | . | T | G | 73.09    | PASS          | AC=2;AF=0.029;AN=68;BaseQRankSum=1.18;Cli  |
| 902 | chrY | 3577835 | . | T | C | 418.34   | PASS          | AC=10;AF=0.143;AN=70;BaseQRankSum=-4.100e- |
| 903 | chrY | 3577936 | . | A | C | 974.01   | PASS          | AC=11;AF=0.177;AN=62;BaseQRankSum=0.00;Cl  |
| 904 | chrY | 3580080 | . | A | G | 80.67    | my_snp_filter | AC=3;AF=0.043;AN=70;BaseQRankSum=          |
| 905 | chrY | 3580129 | . | A | C | 51.30    | PASS          | AC=1;AF=0.014;AN=70;BaseQRankSum=-7.930e-  |
| 906 | chrY | 3580421 | . | G | A | 79.27    | my_snp_filter | AC=4;AF=0.059;AN=68;BaseQRankSum=          |
| 907 | chrY | 3582771 | . | C | G | 196.19   | my_snp_filter | AC=5;AF=0.076;AN=66;BaseQRankSum=          |
| 908 | chrY | 3582829 | . | C | T | 167.46   | PASS          | AC=3;AF=0.043;AN=70;BaseQRankSum=0.930;Cl  |
| 909 | chrY | 3584768 | . | T | C | 1215.78  | PASS          | AC=6;AF=0.214;AN=28;DP=136;FS=0.000;Inbre  |
| 910 | chrY | 3586023 | . | C | T | 6223.33  | PASS          | AC=46;AF=0.719;AN=64;DP=391;FS=0.000;Inbr  |
| 911 | chrY | 3586552 | . | C | T | 840.66   | PASS          | AC=6;AF=0.086;AN=70;DP=284;FS=0.000;Inbre  |
| 912 | chrY | 3589222 | . | G | C | 300.19   | PASS          | AC=2;AF=0.029;AN=70;DP=606;FS=0.000;Inbre  |

|     |      |         |   |   |   |         |               |                                           |
|-----|------|---------|---|---|---|---------|---------------|-------------------------------------------|
| 913 | chrY | 3599201 | . | C | T | 263.85  | PASS          | AC=2;AF=0.029;AN=70;DP=446;FS=0.000;Inbre |
| 914 | chrY | 3600599 | . | C | A | 1057.34 | PASS          | AC=6;AF=0.086;AN=70;DP=454;FS=0.000;Inbre |
| 915 | chrY | 3601987 | . | T | C | 4597.66 | PASS          | AC=50;AF=0.735;AN=68;BaseQRankSum=-9.920e |
| 916 | chrY | 3603528 | . | C | T | 249.99  | PASS          | AC=4;AF=0.250;AN=16;DP=89;FS=0.000;MLEAC= |
| 917 | chrY | 3606920 | . | T | C | 485.30  | PASS          | AC=6;AF=0.094;AN=64;DP=197;FS=0.000;Inbre |
| 918 | chrY | 3607350 | . | A | T | 33.96   | PASS          | AC=1;AF=0.014;AN=70;BaseQRankSum=0.217;Cl |
| 919 | chrY | 3607671 | . | T | C | 1159.65 | PASS          | AC=8;AF=0.114;AN=70;BaseQRankSum=0.326;Cl |
| 920 | chrY | 3607929 | . | C | A | 242.99  | PASS          | AC=3;AF=0.043;AN=70;BaseQRankSum=1.09;Cli |
| 921 | chrY | 3607966 | . | A | G | 283.12  | PASS          | AC=3;AF=0.043;AN=70;BaseQRankSum=-5.380e- |
| 922 | chrY | 3607971 | . | T | C | 263.09  | PASS          | AC=3;AF=0.043;AN=70;BaseQRankSum=-5.770e- |
| 923 | chrY | 3609328 | . | A | G | 318.30  | PASS          | AC=4;AF=0.069;AN=58;BaseQRankSum=-2.480e+ |
| 924 | chrY | 3609342 | . | T | A | 273.23  | PASS          | AC=4;AF=0.067;AN=60;BaseQRankSum=0.650;Cl |
| 925 | chrY | 3609639 | . | G | T | 41.28   | my_snp_filter | AC=2;AF=0.029;AN=70;BaseQRankSum=         |
| 926 | chrY | 3611316 | . | G | A | 259.36  | PASS          | AC=7;AF=0.100;AN=70;BaseQRankSum=0.911;Cl |
| 927 | chrY | 3611633 | . | A | C | 79.74   | PASS          | AC=2;AF=0.029;AN=70;BaseQRankSum=-1.488e+ |
| 928 | chrY | 3612442 | . | G | A | 639.77  | PASS          | AC=4;AF=0.143;AN=28;BaseQRankSum=1.42;Cli |
| 929 | chrY | 3614628 | . | G | A | 99.27   | PASS          | AC=2;AF=0.029;AN=70;BaseQRankSum=0.417;Cl |
| 930 | chrY | 3615877 | . | A | G | 1202.27 | PASS          | AC=6;AF=0.086;AN=70;DP=464;FS=0.000;Inbre |
| 931 | chrY | 3618146 | . | C | A | 388.43  | PASS          | AC=2;AF=0.029;AN=70;DP=450;FS=0.000;Inbre |
| 932 | chrY | 3619050 | . | T | C | 4577.20 | PASS          | AC=52;AF=1.00;AN=52;DP=234;FS=0.000;Inbre |
| 933 | chrY | 3619422 | . | T | C | 302.31  | PASS          | AC=4;AF=0.057;AN=70;BaseQRankSum=-1.070e- |
| 934 | chrY | 3623298 | . | C | T | 360.12  | PASS          | AC=6;AF=0.088;AN=68;DP=233;FS=0.000;Inbre |
| 935 | chrY | 3623766 | . | A | T | 386.78  | PASS          | AC=2;AF=0.100;AN=20;BaseQRankSum=0.158;Cl |
| 936 | chrY | 3628666 | . | C | T | 496.09  | PASS          | AC=6;AF=0.188;AN=32;DP=88;FS=0.000;Inbre  |
| 937 | chrY | 3632066 | . | C | A | 3497.86 | PASS          | AC=18;AF=1.00;AN=18;DP=143;FS=0.000;MLEAC |
| 938 | chrY | 3633398 | . | G | T | 937.40  | PASS          | AC=6;AF=0.214;AN=28;DP=153;FS=0.000;Inbre |
| 939 | chrY | 3636170 | . | T | C | 34.69   | PASS          | AC=2;AF=0.100;AN=20;DP=175;FS=0.000;Inbre |
| 940 | chrY | 3636611 | . | A | G | 528.10  | PASS          | AC=2;AF=0.029;AN=70;DP=535;FS=0.000;Inbre |
| 941 | chrY | 3638916 | . | T | C | 112.37  | PASS          | AC=2;AF=0.029;AN=70;BaseQRankSum=1.71;Cli |
| 942 | chrY | 3641044 | . | C | T | 183.48  | PASS          | AC=3;AF=0.054;AN=56;BaseQRankSum=-4.060e- |
| 943 | chrY | 3641047 | . | T | C | 110.99  | PASS          | AC=3;AF=0.056;AN=54;BaseQRankSum=-7.270e- |
| 944 | chrY | 3641482 | . | C | T | 181.74  | PASS          | AC=2;AF=0.029;AN=70;DP=658;FS=0.000;Inbre |
| 945 | chrY | 3645499 | . | A | G | 88.44   | PASS          | AC=1;AF=0.015;AN=68;BaseQRankSum=2.18;Cli |
| 946 | chrY | 3645582 | . | G | A | 273.61  | PASS          | AC=4;AF=0.059;AN=68;BaseQRankSum=0.421;Cl |
| 947 | chrY | 3649831 | . | C | T | 84.39   | my_snp_filter | AC=2;AF=0.034;AN=58;BaseQRankSum=         |
| 948 | chrY | 3650113 | . | C | T | 1945.89 | PASS          | AC=10;AF=0.143;AN=70;BaseQRankSum=0.027;C |
| 949 | chrY | 3650366 | . | G | C | 100.37  | PASS          | AC=3;AF=0.043;AN=70;BaseQRankSum=0.967;Cl |
| 950 | chrY | 3650490 | . | A | G | 381.76  | PASS          | AC=6;AF=0.094;AN=64;DP=286;FS=0.000;Inbre |
| 951 | chrY | 3652665 | . | A | G | 3052.79 | PASS          | AC=25;AF=0.893;AN=28;BaseQRankSum=1.03;Cl |
| 952 | chrY | 3653209 | . | C | G | 238.50  | PASS          | AC=4;AF=0.057;AN=70;BaseQRankSum=1.27;Cli |
| 953 | chrY | 3653308 | . | G | A | 114.61  | PASS          | AC=2;AF=0.029;AN=70;BaseQRankSum=-4.370e- |
| 954 | chrY | 3654067 | . | C | T | 8690.06 | PASS          | AC=56;AF=1.00;AN=56;DP=301;FS=0.000;Inbre |
| 955 | chrY | 3655664 | . | T | C | 2860.29 | PASS          | AC=11;AF=0.157;AN=70;BaseQRankSum=-1.204e |
| 956 | chrY | 3656058 | . | C | T | 318.01  | PASS          | AC=4;AF=0.133;AN=30;BaseQRankSum=2.64;Cli |
| 957 | chrY | 3656828 | . | C | T | 1252.70 | PASS          | AC=6;AF=0.088;AN=68;DP=602;FS=0.000;Inbre |
| 958 | chrY | 3657418 | . | T | C | 105.15  | my_snp_filter | AC=3;AF=0.043;AN=70;BaseQRankSum=         |
| 959 | chrY | 3657477 | . | A | G | 385.79  | PASS          | AC=3;AF=0.043;AN=70;BaseQRankSum=1.43;Cli |
| 960 | chrY | 3657497 | . | G | A | 495.73  | PASS          | AC=4;AF=0.057;AN=70;BaseQRankSum=-1.065e+ |
| 961 | chrY | 3657513 | . | T | C | 586.24  | PASS          | AC=3;AF=0.043;AN=70;BaseQRankSum=-1.203e+ |
| 962 | chrY | 3657573 | . | A | G | 1071.37 | PASS          | AC=4;AF=0.057;AN=70;BaseQRankSum=1.47;Cli |
| 963 | chrY | 3658007 | . | A | G | 47.06   | my_snp_filter | AC=2;AF=0.029;AN=68;BaseQRankSum=         |
| 964 | chrY | 3659594 | . | A | T | 4744.39 | PASS          | AC=44;AF=0.647;AN=68;DP=327;FS=0.000;Inbr |
| 965 | chrY | 3660206 | . | C | T | 38.33   | my_snp_filter | AC=2;AF=0.034;AN=58;BaseQRankSum=         |
| 966 | chrY | 3660510 | . | G | T | 409.51  | PASS          | AC=7;AF=0.100;AN=70;BaseQRankSum=-8.880e- |
| 967 | chrY | 3662214 | . | G | T | 55.75   | PASS          | AC=2;AF=0.029;AN=70;BaseQRankSum=0.365;Cl |
| 968 | chrY | 3662680 | . | C | T | 580.04  | PASS          | AC=10;AF=1.00;AN=10;DP=40;FS=0.000;MLEAC= |
| 969 | chrY | 3665127 | . | G | T | 223.26  | PASS          | AC=6;AF=0.088;AN=68;DP=291;FS=0.000;Inbre |
| 970 | chrY | 3666521 | . | G | A | 1238.28 | PASS          | AC=6;AF=0.094;AN=64;DP=262;FS=0.000;Inbre |
| 971 | chrY | 3667005 | . | T | A | 46.49   | PASS          | AC=2;AF=0.029;AN=68;DP=291;FS=0.000;Inbre |
| 972 | chrY | 3667006 | . | A | T | 46.49   | PASS          | AC=2;AF=0.029;AN=68;DP=293;FS=0.000;Inbre |
| 973 | chrY | 3670067 | . | C | T | 1023.24 | PASS          | AC=6;AF=0.086;AN=70;DP=610;FS=0.000;Inbre |
| 974 | chrY | 3671526 | . | C | T | 47.63   | my_snp_filter | AC=2;AF=0.029;AN=68;BaseQRankSum=         |
| 975 | chrY | 3671886 | . | C | T | 314.54  | PASS          | AC=6;AF=0.088;AN=68;BaseQRankSum=-3.610e- |
| 976 | chrY | 3672241 | . | C | T | 728.78  | PASS          | AC=3;AF=0.167;AN=18;BaseQRankSum=2.39;Cli |
| 977 | chrY | 3672642 | . | G | T | 37.72   | PASS          | AC=1;AF=0.014;AN=70;BaseQRankSum=-2.832e+ |
| 978 | chrY | 3672888 | . | A | G | 47.59   | my_snp_filter | AC=1;AF=0.014;AN=70;BaseQRankSum=         |
| 979 | chrY | 3676226 | . | G | A | 38.17   | my_snp_filter | AC=1;AF=0.014;AN=70;BaseQRankSum=         |
| 980 | chrY | 3676289 | . | A | T | 115.24  | PASS          | AC=4;AF=0.057;AN=70;BaseQRankSum=1.50;Cli |
| 981 | chrY | 3676814 | . | G | A | 851.46  | PASS          | AC=6;AF=0.094;AN=64;BaseQRankSum=1.35;Cli |
| 982 | chrY | 3679254 | . | T | C | 321.10  | PASS          | AC=6;AF=0.086;AN=70;BaseQRankSum=-8.210e- |
| 983 | chrY | 3679310 | . | C | G | 232.70  | PASS          | AC=5;AF=0.071;AN=70;BaseQRankSum=1.44;Cli |
| 984 | chrY | 3679366 | . | C | T | 896.57  | PASS          | AC=6;AF=0.088;AN=68;DP=411;FS=0.000;Inbre |
| 985 | chrY | 3679613 | . | A | G | 439.88  | PASS          | AC=5;AF=0.083;AN=60;BaseQRankSum=-7.360e- |
| 986 | chrY | 3682071 | . | T | C | 228.25  | PASS          | AC=2;AF=0.100;AN=20;BaseQRankSum=-1.085e+ |
| 987 | chrY | 3682248 | . | T | A | 185.63  | PASS          | AC=3;AF=0.167;AN=18;BaseQRankSum=-1.505e+ |
| 988 | chrY | 3682382 | . | A | G | 159.07  | PASS          | AC=4;AF=0.077;AN=52;BaseQRankSum=-1.240e+ |

|      |      |         |   |   |   |          |               |                                           |
|------|------|---------|---|---|---|----------|---------------|-------------------------------------------|
| 989  | chrY | 3687624 | . | C | G | 4274.60  | PASS          | AC=44;AF=0.647;AN=68;DP=280;FS=0.000;Inbr |
| 990  | chrY | 3688418 | . | T | C | 71.91    | my_snp_filter | AC=3;AF=0.043;AN=70;BaseQRankSum=         |
| 991  | chrY | 3688601 | . | T | C | 34.71    | PASS          | AC=1;AF=0.015;AN=68;BaseQRankSum=-7.200e- |
| 992  | chrY | 3688605 | . | A | G | 34.76    | PASS          | AC=1;AF=0.015;AN=66;BaseQRankSum=-1.380e+ |
| 993  | chrY | 3689559 | . | T | A | 1166.17  | PASS          | AC=28;AF=0.609;AN=46;DP=207;FS=0.000;Inbr |
| 994  | chrY | 3694513 | . | A | G | 445.98   | PASS          | AC=2;AF=0.031;AN=64;DP=260;FS=0.000;Inbr  |
| 995  | chrY | 3696719 | . | G | A | 417.84   | PASS          | AC=2;AF=0.029;AN=70;BaseQRankSum=-5.200e- |
| 996  | chrY | 3697997 | . | C | T | 42.23    | my_snp_filter | AC=2;AF=0.030;AN=66;BaseQRankSum=         |
| 997  | chrY | 3698889 | . | T | A | 117.80   | my_snp_filter | AC=4;AF=0.057;AN=70;BaseQRankSum=         |
| 998  | chrY | 3699160 | . | G | A | 437.82   | PASS          | AC=6;AF=0.088;AN=68;BaseQRankSum=-5.330e  |
| 999  | chrY | 3699182 | . | C | A | 238.35   | PASS          | AC=4;AF=0.057;AN=70;BaseQRankSum=0.728;Cl |
| 1000 | chrY | 3699324 | . | G | A | 165.71   | PASS          | AC=3;AF=0.047;AN=64;BaseQRankSum=2.34;Cli |
| 1001 | chrY | 3701287 | . | A | G | 686.35   | PASS          | AC=5;AF=0.071;AN=70;BaseQRankSum=-6.330e- |
| 1002 | chrY | 3705398 | . | A | G | 578.13   | PASS          | AC=6;AF=0.086;AN=70;DP=231;FS=0.000;Inbre |
| 1003 | chrY | 3706503 | . | T | C | 2974.20  | PASS          | AC=32;AF=1.00;AN=32;DP=121;FS=0.000;Inbre |
| 1004 | chrY | 3708734 | . | C | A | 51.82    | PASS          | AC=2;AF=0.029;AN=70;BaseQRankSum=1.67;Cli |
| 1005 | chrY | 3709722 | . | C | T | 125.31   | PASS          | AC=2;AF=0.031;AN=64;BaseQRankSum=2.36;Cli |
| 1006 | chrY | 3709865 | . | T | A | 337.03   | PASS          | AC=4;AF=0.057;AN=70;BaseQRankSum=-5.370e- |
| 1007 | chrY | 3711559 | . | G | A | 151.52   | PASS          | AC=2;AF=0.029;AN=70;BaseQRankSum=1.38;Cli |
| 1008 | chrY | 3712373 | . | T | C | 1378.19  | PASS          | AC=11;AF=0.157;AN=70;BaseQRankSum=-9.860e |
| 1009 | chrY | 3712374 | . | G | C | 1378.18  | PASS          | AC=11;AF=0.157;AN=70;BaseQRankSum=-2.640e |
| 1010 | chrY | 3712435 | . | A | T | 3894.68  | PASS          | AC=30;AF=0.429;AN=70;BaseQRankSum=1.40;Cl |
| 1011 | chrY | 3712461 | . | A | G | 2596.94  | PASS          | AC=17;AF=0.243;AN=70;BaseQRankSum=-9.350e |
| 1012 | chrY | 3712546 | . | T | C | 3626.75  | PASS          | AC=19;AF=0.271;AN=70;BaseQRankSum=0.296;C |
| 1013 | chrY | 3712570 | . | C | T | 4243.59  | PASS          | AC=19;AF=0.271;AN=70;BaseQRankSum=1.59;Cl |
| 1014 | chrY | 3712788 | . | G | A | 2266.17  | PASS          | AC=18;AF=0.257;AN=70;BaseQRankSum=0.039;C |
| 1015 | chrY | 3712825 | . | C | A | 797.80   | PASS          | AC=4;AF=0.059;AN=68;BaseQRankSum=0.406;Cl |
| 1016 | chrY | 3712828 | . | T | C | 1620.29  | PASS          | AC=9;AF=0.132;AN=68;BaseQRankSum=-1.479e+ |
| 1017 | chrY | 3712875 | . | C | T | 2654.88  | PASS          | AC=15;AF=0.221;AN=68;BaseQRankSum=0.00;Cl |
| 1018 | chrY | 3712907 | . | T | G | 4082.09  | PASS          | AC=19;AF=0.271;AN=70;BaseQRankSum=0.198;C |
| 1019 | chrY | 3712924 | . | G | A | 95.91    | PASS          | AC=1;AF=0.014;AN=70;BaseQRankSum=2.18;Cli |
| 1020 | chrY | 3713006 | . | G | A | 4523.94  | PASS          | AC=19;AF=0.279;AN=68;BaseQRankSum=-3.860e |
| 1021 | chrY | 3713095 | . | A | G | 4824.27  | PASS          | AC=19;AF=0.271;AN=70;BaseQRankSum=-3.610e |
| 1022 | chrY | 3713191 | . | C | A | 8303.55  | PASS          | AC=20;AF=0.286;AN=70;BaseQRankSum=0.315;C |
| 1023 | chrY | 3713204 | . | G | C | 7922.56  | PASS          | AC=20;AF=0.286;AN=70;BaseQRankSum=0.358;C |
| 1024 | chrY | 3713245 | . | T | A | 2491.42  | PASS          | AC=13;AF=0.186;AN=70;BaseQRankSum=0.231;C |
| 1025 | chrY | 3713292 | . | G | T | 5170.50  | PASS          | AC=18;AF=0.257;AN=70;BaseQRankSum=0.866;C |
| 1026 | chrY | 3713309 | . | A | C | 3876.65  | PASS          | AC=12;AF=0.171;AN=70;BaseQRankSum=0.255;C |
| 1027 | chrY | 3713315 | . | G | T | 5081.28  | PASS          | AC=17;AF=0.243;AN=70;BaseQRankSum=1.03;Cl |
| 1028 | chrY | 3713348 | . | G | C | 3268.09  | PASS          | AC=17;AF=0.243;AN=70;BaseQRankSum=-6.450e |
| 1029 | chrY | 3713460 | . | G | A | 2992.04  | PASS          | AC=16;AF=0.229;AN=70;BaseQRankSum=0.988;C |
| 1030 | chrY | 3713563 | . | G | A | 3666.46  | PASS          | AC=18;AF=0.265;AN=68;BaseQRankSum=0.582;C |
| 1031 | chrY | 3713606 | . | A | G | 3400.44  | PASS          | AC=11;AF=0.162;AN=68;BaseQRankSum=-4.280e |
| 1032 | chrY | 3713630 | . | T | C | 4535.86  | PASS          | AC=19;AF=0.279;AN=68;BaseQRankSum=-1.003e |
| 1033 | chrY | 3713800 | . | A | T | 4818.15  | PASS          | AC=19;AF=0.271;AN=70;BaseQRankSum=0.546;C |
| 1034 | chrY | 3713808 | . | G | A | 303.75   | PASS          | AC=1;AF=0.014;AN=70;BaseQRankSum=1.24;Cli |
| 1035 | chrY | 3713937 | . | G | A | 4574.58  | PASS          | AC=18;AF=0.257;AN=70;BaseQRankSum=1.65;Cl |
| 1036 | chrY | 3713954 | . | T | C | 3165.06  | PASS          | AC=18;AF=0.257;AN=70;BaseQRankSum=-1.307e |
| 1037 | chrY | 3713985 | . | C | G | 3569.06  | PASS          | AC=18;AF=0.265;AN=68;BaseQRankSum=-1.300e |
| 1038 | chrY | 3714028 | . | T | C | 4707.34  | PASS          | AC=16;AF=0.229;AN=70;BaseQRankSum=-1.812e |
| 1039 | chrY | 3714032 | . | A | G | 4718.10  | PASS          | AC=16;AF=0.229;AN=70;BaseQRankSum=-1.237e |
| 1040 | chrY | 3714070 | . | G | C | 3526.66  | PASS          | AC=16;AF=0.229;AN=70;BaseQRankSum=-2.060e |
| 1041 | chrY | 3714112 | . | A | G | 4543.45  | PASS          | AC=19;AF=0.279;AN=68;BaseQRankSum=0.421;C |
| 1042 | chrY | 3714170 | . | A | G | 1710.62  | PASS          | AC=6;AF=0.086;AN=70;BaseQRankSum=0.252;Cl |
| 1043 | chrY | 3714315 | . | T | C | 14856.93 | PASS          | AC=70;AF=1.00;AN=70;DP=523;FS=0.0         |
| 1044 | chrY | 3714345 | . | G | T | 3670.37  | PASS          | AC=12;AF=0.176;AN=68;BaseQRankSum=0.296;C |
| 1045 | chrY | 3714353 | . | A | T | 2256.69  | PASS          | AC=6;AF=0.088;AN=68;BaseQRankSum=0.760;Cl |
| 1046 | chrY | 3714363 | . | G | A | 5523.99  | PASS          | AC=17;AF=0.243;AN=70;BaseQRankSum=0.550;C |
| 1047 | chrY | 3714435 | . | A | G | 2818.75  | PASS          | AC=18;AF=0.257;AN=70;BaseQRankSum=-1.480e |
| 1048 | chrY | 3714501 | . | A | T | 3444.79  | PASS          | AC=17;AF=0.250;AN=68;BaseQRankSum=-1.420e |
| 1049 | chrY | 3714714 | . | T | A | 2609.64  | PASS          | AC=14;AF=0.212;AN=66;BaseQRankSum=-1.068e |
| 1050 | chrY | 3714776 | . | G | A | 1967.89  | PASS          | AC=11;AF=0.172;AN=64;BaseQRankSum=0.573;C |
| 1051 | chrY | 3714803 | . | C | T | 3778.65  | PASS          | AC=12;AF=0.176;AN=68;BaseQRankSum=0.550;C |
| 1052 | chrY | 3714821 | . | G | T | 4067.92  | PASS          | AC=13;AF=0.191;AN=68;BaseQRankSum=0.290;C |
| 1053 | chrY | 3714894 | . | A | G | 2584.65  | PASS          | AC=14;AF=0.206;AN=68;BaseQRankSum=-5.330e |
| 1054 | chrY | 3714924 | . | T | C | 5453.79  | PASS          | AC=15;AF=0.221;AN=68;BaseQRankSum=0.115;C |
| 1055 | chrY | 3714926 | . | G | A | 5454.18  | PASS          | AC=15;AF=0.221;AN=68;BaseQRankSum=-1.026e |
| 1056 | chrY | 3715022 | . | T | A | 4172.15  | PASS          | AC=19;AF=0.271;AN=70;BaseQRankSum=0.00;Cl |
| 1057 | chrY | 3715130 | . | T | C | 5588.51  | PASS          | AC=19;AF=0.271;AN=70;BaseQRankSum=0.382;C |
| 1058 | chrY | 3715248 | . | A | G | 5586.60  | PASS          | AC=17;AF=0.243;AN=70;BaseQRankSum=0.406;C |
| 1059 | chrY | 3715249 | . | G | A | 5630.84  | PASS          | AC=18;AF=0.257;AN=70;BaseQRankSum=0.825;C |
| 1060 | chrY | 3715286 | . | T | C | 3558.24  | PASS          | AC=17;AF=0.250;AN=68;BaseQRankSum=-1.330e |
| 1061 | chrY | 3715338 | . | G | T | 3846     | PASS          | AC=18;AF=0.273;AN=66;BaseQRankSum=0.684;C |
| 1062 | chrY | 3715431 | . | G | A | 2461.18  | PASS          | AC=11;AF=0.157;AN=70;BaseQRankSum=0.358;C |
| 1063 | chrY | 3715498 | . | G | A | 4227.92  | PASS          | AC=18;AF=0.257;AN=70;BaseQRankSum=0.787;C |
| 1064 | chrY | 3715593 | . | G | A | 4629.43  | PASS          | AC=18;AF=0.257;AN=70;BaseQRankSum=-3.580e |

|      |      |         |   |   |     |          |      |                                           |
|------|------|---------|---|---|-----|----------|------|-------------------------------------------|
| 1065 | chrY | 3715642 | . | A | G   | 6526.39  | PASS | AC=18;AF=0.265;AN=68;BaseQRankSum=-1.111e |
| 1066 | chrY | 3715698 | . | C | T   | 3636.98  | PASS | AC=17;AF=0.258;AN=66;BaseQRankSum=0.731;C |
| 1067 | chrY | 3715806 | . | T | G   | 4394.57  | PASS | AC=18;AF=0.273;AN=66;BaseQRankSum=0.103;C |
| 1068 | chrY | 3715866 | . | A | C   | 4311.04  | PASS | AC=19;AF=0.279;AN=68;BaseQRankSum=-5.970e |
| 1069 | chrY | 3716030 | . | C | G   | 7694.27  | PASS | AC=19;AF=0.279;AN=68;BaseQRankSum=2.00;C1 |
| 1070 | chrY | 3716034 | . | A | G   | 7638.02  | PASS | AC=19;AF=0.279;AN=68;BaseQRankSum=-6.190e |
| 1071 | chrY | 3716079 | . | T | G   | 2613.20  | PASS | AC=18;AF=0.281;AN=64;BaseQRankSum=-1.537e |
| 1072 | chrY | 3716162 | . | C | T   | 2199.30  | PASS | AC=10;AF=0.278;AN=36;BaseQRankSum=0.829;C |
| 1073 | chrY | 3716204 | . | A | G   | 2273.34  | PASS | AC=11;AF=0.220;AN=50;BaseQRankSum=0.536;C |
| 1074 | chrY | 3716287 | . | A | C   | 2647.68  | PASS | AC=17;AF=0.243;AN=70;BaseQRankSum=-9.470e |
| 1075 | chrY | 3716311 | . | T | C   | 5456.66  | PASS | AC=18;AF=0.257;AN=70;BaseQRankSum=-3.580e |
| 1076 | chrY | 3716315 | . | A | C   | 5453.99  | PASS | AC=18;AF=0.257;AN=70;BaseQRankSum=-9.680e |
| 1077 | chrY | 3716332 | . | C | T   | 3752.05  | PASS | AC=18;AF=0.257;AN=70;BaseQRankSum=-7.270e |
| 1078 | chrY | 3716385 | . | G | A   | 4541.29  | PASS | AC=19;AF=0.271;AN=70;BaseQRankSum=0.937;C |
| 1079 | chrY | 3716589 | . | A | G   | 7612.51  | PASS | AC=19;AF=0.271;AN=70;BaseQRankSum=0.123;C |
| 1080 | chrY | 3716591 | . | C | A   | 7612.92  | PASS | AC=19;AF=0.271;AN=70;BaseQRankSum=0.921;C |
| 1081 | chrY | 3716678 | . | T | C   | 3797.55  | PASS | AC=13;AF=0.217;AN=60;BaseQRankSum=0.143;C |
| 1082 | chrY | 3716687 | . | G | A   | 3972.37  | PASS | AC=14;AF=0.226;AN=62;BaseQRankSum=1.50;C1 |
| 1083 | chrY | 3716911 | . | C | T   | 1784.43  | PASS | AC=10;AF=0.208;AN=48;BaseQRankSum=1.77;C1 |
| 1084 | chrY | 3717000 | . | T | C   | 2228.15  | PASS | AC=20;AF=0.313;AN=64;BaseQRankSum=-3.580e |
| 1085 | chrY | 3717070 | . | G | C   | 999.19   | PASS | AC=6;AF=0.091;AN=66;BaseQRankSum=-4.580e- |
| 1086 | chrY | 3717095 | . | C | T   | 3021.37  | PASS | AC=17;AF=0.243;AN=70;BaseQRankSum=0.736;C |
| 1087 | chrY | 3717186 | . | C | T   | 3618.42  | PASS | AC=19;AF=0.271;AN=70;BaseQRankSum=0.696;C |
| 1088 | chrY | 3717336 | . | T | G   | 1223.83  | PASS | AC=12;AF=0.261;AN=46;BaseQRankSum=-1.484e |
| 1089 | chrY | 3717472 | . | A | G   | 2879.15  | PASS | AC=20;AF=0.313;AN=64;BaseQRankSum=-3.980e |
| 1090 | chrY | 3717546 | . | C | A,* | 4809.41  | PASS | AC=12,6;AF=0.171,0.086;AN=70;BaseQRankSum |
| 1091 | chrY | 3717568 | . | T | C   | 1146.38  | PASS | AC=6;AF=0.086;AN=70;BaseQRankSum=-7.270e- |
| 1092 | chrY | 3717723 | . | C | T   | 5277.77  | PASS | AC=19;AF=0.271;AN=70;BaseQRankSum=-9.060e |
| 1093 | chrY | 3717754 | . | A | G   | 4231.49  | PASS | AC=18;AF=0.257;AN=70;BaseQRankSum=-6.530e |
| 1094 | chrY | 3717868 | . | A | T   | 5986.40  | PASS | AC=16;AF=0.235;AN=68;BaseQRankSum=0.405;C |
| 1095 | chrY | 3717869 | . | A | C   | 5980.11  | PASS | AC=16;AF=0.235;AN=68;BaseQRankSum=0.296;C |
| 1096 | chrY | 3717921 | . | C | A   | 4212.09  | PASS | AC=13;AF=0.186;AN=70;BaseQRankSum=-5.660e |
| 1097 | chrY | 3718005 | . | A | G   | 358.69   | PASS | AC=1;AF=0.015;AN=68;BaseQRankSum=-1.540e- |
| 1098 | chrY | 3718066 | . | A | G   | 2977.19  | PASS | AC=19;AF=0.271;AN=70;BaseQRankSum=0.762;C |
| 1099 | chrY | 3718196 | . | C | T   | 13471.92 | PASS | AC=66;AF=1.00;AN=66;DP=461;FS=0.0         |
| 1100 | chrY | 3718267 | . | C | T   | 3672.96  | PASS | AC=19;AF=0.271;AN=70;BaseQRankSum=0.101;C |
| 1101 | chrY | 3718283 | . | G | C   | 3927.42  | PASS | AC=19;AF=0.271;AN=70;BaseQRankSum=-6.910e |
| 1102 | chrY | 3718469 | . | C | G   | 4698.33  | PASS | AC=19;AF=0.271;AN=70;BaseQRankSum=1.22;C1 |
| 1103 | chrY | 3718512 | . | C | T   | 8392.06  | PASS | AC=18;AF=0.257;AN=70;BaseQRankSum=0.470;C |
| 1104 | chrY | 3718514 | . | T | C   | 8391.96  | PASS | AC=18;AF=0.257;AN=70;BaseQRankSum=-1.560e |
| 1105 | chrY | 3718538 | . | C | T   | 4738.62  | PASS | AC=17;AF=0.243;AN=70;BaseQRankSum=-3.910e |
| 1106 | chrY | 3718592 | . | C | T   | 7653.74  | PASS | AC=19;AF=0.271;AN=70;BaseQRankSum=-7.970e |
| 1107 | chrY | 3718595 | . | T | G   | 7734.48  | PASS | AC=19;AF=0.271;AN=70;BaseQRankSum=-3.610e |
| 1108 | chrY | 3718601 | . | C | T   | 7314.72  | PASS | AC=19;AF=0.271;AN=70;BaseQRankSum=-8.130e |
| 1109 | chrY | 3718671 | . | A | C   | 4639.82  | PASS | AC=18;AF=0.257;AN=70;BaseQRankSum=-3.070e |
| 1110 | chrY | 3718715 | . | G | A   | 7109.22  | PASS | AC=18;AF=0.257;AN=70;BaseQRankSum=-7.880e |
| 1111 | chrY | 3718725 | . | A | G   | 7097.66  | PASS | AC=19;AF=0.271;AN=70;BaseQRankSum=-1.410e |
| 1112 | chrY | 3718809 | . | C | T   | 4162.01  | PASS | AC=19;AF=0.271;AN=70;BaseQRankSum=0.248;C |
| 1113 | chrY | 3718825 | . | T | C   | 4444.20  | PASS | AC=18;AF=0.257;AN=70;BaseQRankSum=-4.700e |
| 1114 | chrY | 3718862 | . | A | G   | 3647.70  | PASS | AC=18;AF=0.257;AN=70;BaseQRankSum=-1.724e |
| 1115 | chrY | 3718895 | . | G | A   | 4261.28  | PASS | AC=13;AF=0.186;AN=70;BaseQRankSum=-4.700e |
| 1116 | chrY | 3718925 | . | G | C   | 7368.66  | PASS | AC=19;AF=0.271;AN=70;BaseQRankSum=0.717;C |
| 1117 | chrY | 3719001 | . | A | T   | 7086.45  | PASS | AC=18;AF=0.257;AN=70;BaseQRankSum=0.00;C1 |
| 1118 | chrY | 3719030 | . | A | G   | 6285.46  | PASS | AC=19;AF=0.271;AN=70;BaseQRankSum=-1.092e |
| 1119 | chrY | 3719066 | . | G | A   | 11023.75 | PASS | AC=19;AF=0.271;AN=70;BaseQRankSum         |
| 1120 | chrY | 3719071 | . | A | G   | 11530.39 | PASS | AC=19;AF=0.271;AN=70;BaseQRankSum         |
| 1121 | chrY | 3719078 | . | G | C   | 11455.39 | PASS | AC=19;AF=0.271;AN=70;BaseQRankSum         |
| 1122 | chrY | 3719094 | . | G | A   | 7793.42  | PASS | AC=19;AF=0.271;AN=70;BaseQRankSum=-1.241e |
| 1123 | chrY | 3719115 | . | G | T   | 7470.08  | PASS | AC=19;AF=0.271;AN=70;BaseQRankSum=0.431;C |
| 1124 | chrY | 3719194 | . | C | A   | 6983.61  | PASS | AC=18;AF=0.257;AN=70;BaseQRankSum=-4.700e |
| 1125 | chrY | 3719228 | . | C | G   | 8109.28  | PASS | AC=18;AF=0.257;AN=70;BaseQRankSum=-8.710e |
| 1126 | chrY | 3719253 | . | A | G   | 7352.32  | PASS | AC=19;AF=0.271;AN=70;BaseQRankSum=-5.630e |
| 1127 | chrY | 3719265 | . | G | A   | 7754.83  | PASS | AC=19;AF=0.271;AN=70;BaseQRankSum=-2.820e |
| 1128 | chrY | 3719304 | . | A | G   | 6207.51  | PASS | AC=20;AF=0.294;AN=68;BaseQRankSum=-1.260e |
| 1129 | chrY | 3719366 | . | G | T   | 6889.99  | PASS | AC=18;AF=0.257;AN=70;BaseQRankSum=-4.230e |
| 1130 | chrY | 3719373 | . | C | T   | 6685.17  | PASS | AC=18;AF=0.257;AN=70;BaseQRankSum=1.20;C1 |
| 1131 | chrY | 3719389 | . | A | G   | 1087     | PASS | AC=5;AF=0.071;AN=70;BaseQRankSum=-2.011e+ |
| 1132 | chrY | 3719413 | . | A | T   | 3390.42  | PASS | AC=14;AF=0.206;AN=68;BaseQRankSum=-6.500e |
| 1133 | chrY | 3719473 | . | T | A   | 4450.44  | PASS | AC=18;AF=0.265;AN=68;BaseQRankSum=0.204;C |
| 1134 | chrY | 3719485 | . | G | A   | 5765.58  | PASS | AC=18;AF=0.265;AN=68;BaseQRankSum=1.71;C1 |
| 1135 | chrY | 3719491 | . | G | A   | 5723.64  | PASS | AC=18;AF=0.257;AN=70;BaseQRankSum=-6.000e |
| 1136 | chrY | 3719514 | . | C | T   | 52.90    | PASS | AC=1;AF=0.014;AN=70;BaseQRankSum=-1.031e+ |
| 1137 | chrY | 3719534 | . | G | T   | 5215.51  | PASS | AC=17;AF=0.243;AN=70;BaseQRankSum=-9.370e |
| 1138 | chrY | 3719626 | . | C | T   | 7936.98  | PASS | AC=19;AF=0.271;AN=70;BaseQRankSum=0.097;C |
| 1139 | chrY | 3719651 | . | A | G   | 8997.94  | PASS | AC=19;AF=0.271;AN=70;BaseQRankSum=0.322;C |
| 1140 | chrY | 3719800 | . | C | T   | 324.55   | PASS | AC=1;AF=0.014;AN=70;BaseQRankSum=1.03;Cli |

|      |      |         |   |   |   |          |               |                                           |
|------|------|---------|---|---|---|----------|---------------|-------------------------------------------|
| 1141 | chrY | 3719801 | . | A | G | 9232.47  | PASS          | AC=19;AF=0.271;AN=70;BaseQRankSum=-1.106e |
| 1142 | chrY | 3719824 | . | T | C | 9118.55  | PASS          | AC=19;AF=0.271;AN=70;BaseQRankSum=-5.300e |
| 1143 | chrY | 3719856 | . | C | T | 5646.05  | PASS          | AC=19;AF=0.279;AN=68;BaseQRankSum=0.243;C |
| 1144 | chrY | 3719919 | . | A | G | 6873.49  | PASS          | AC=19;AF=0.271;AN=70;BaseQRankSum=-9.900e |
| 1145 | chrY | 3720007 | . | C | A | 6451.87  | PASS          | AC=18;AF=0.257;AN=70;BaseQRankSum=0.527;C |
| 1146 | chrY | 3720058 | . | T | C | 6888.09  | PASS          | AC=18;AF=0.257;AN=70;BaseQRankSum=-5.540e |
| 1147 | chrY | 3720173 | . | A | C | 10667.16 | PASS          | AC=20;AF=0.333;AN=60;BaseQRankSum         |
| 1148 | chrY | 3720174 | . | C | T | 10650.82 | PASS          | AC=19;AF=0.279;AN=68;BaseQRankSum         |
| 1149 | chrY | 3720176 | . | C | T | 10622.23 | PASS          | AC=19;AF=0.279;AN=68;BaseQRankSum         |
| 1150 | chrY | 3720217 | . | A | G | 4412.65  | PASS          | AC=19;AF=0.271;AN=70;BaseQRankSum=-1.799e |
| 1151 | chrY | 3720251 | . | A | G | 3914.66  | PASS          | AC=19;AF=0.271;AN=70;BaseQRankSum=-7.000e |
| 1152 | chrY | 3720277 | . | T | G | 6876.82  | PASS          | AC=18;AF=0.265;AN=68;BaseQRankSum=1.05;C1 |
| 1153 | chrY | 3720302 | . | G | A | 7260.26  | PASS          | AC=18;AF=0.257;AN=70;BaseQRankSum=0.248;C |
| 1154 | chrY | 3720319 | . | A | C | 7808.27  | PASS          | AC=17;AF=0.243;AN=70;BaseQRankSum=-2.640e |
| 1155 | chrY | 3720321 | . | A | G | 7847.32  | PASS          | AC=17;AF=0.243;AN=70;BaseQRankSum=0.286;C |
| 1156 | chrY | 3720336 | . | G | A | 7136.95  | PASS          | AC=17;AF=0.243;AN=70;BaseQRankSum=0.285;C |
| 1157 | chrY | 3720388 | . | A | G | 8233.57  | PASS          | AC=19;AF=0.271;AN=70;BaseQRankSum=-4.670e |
| 1158 | chrY | 3720391 | . | A | G | 8212.30  | PASS          | AC=19;AF=0.271;AN=70;BaseQRankSum=0.811;C |
| 1159 | chrY | 3720392 | . | T | A | 8214.73  | PASS          | AC=19;AF=0.271;AN=70;BaseQRankSum=0.377;C |
| 1160 | chrY | 3720463 | . | G | A | 8100.02  | PASS          | AC=19;AF=0.271;AN=70;BaseQRankSum=0.736;C |
| 1161 | chrY | 3720464 | . | C | A | 8100.01  | PASS          | AC=19;AF=0.271;AN=70;BaseQRankSum=0.053;C |
| 1162 | chrY | 3720581 | . | A | G | 6195.83  | PASS          | AC=17;AF=0.250;AN=68;BaseQRankSum=-1.025e |
| 1163 | chrY | 3720601 | . | T | C | 6800.61  | PASS          | AC=16;AF=0.229;AN=70;BaseQRankSum=0.697;C |
| 1164 | chrY | 3720617 | . | T | A | 6764.13  | PASS          | AC=16;AF=0.242;AN=66;BaseQRankSum=0.135;C |
| 1165 | chrY | 3720816 | . | T | C | 316.57   | PASS          | AC=2;AF=0.029;AN=68;BaseQRankSum=-9.850e- |
| 1166 | chrY | 3720852 | . | G | A | 183.73   | PASS          | AC=1;AF=0.014;AN=70;BaseQRankSum=-3.430e- |
| 1167 | chrY | 3720887 | . | A | G | 10391.08 | PASS          | AC=19;AF=0.271;AN=70;BaseQRankSum         |
| 1168 | chrY | 3720893 | . | A | G | 10714.93 | PASS          | AC=19;AF=0.271;AN=70;BaseQRankSum         |
| 1169 | chrY | 3720900 | . | T | C | 2385.26  | PASS          | AC=6;AF=0.086;AN=70;BaseQRankSum=-1.460e+ |
| 1170 | chrY | 3721154 | . | A | G | 4884.06  | PASS          | AC=19;AF=0.279;AN=68;BaseQRankSum=0.643;C |
| 1171 | chrY | 3721230 | . | C | G | 1422.46  | my_snp_filter | AC=16;AF=0.229;AN=70;BaseQRankSum         |
| 1172 | chrY | 3721267 | . | A | C | 190.07   | my_snp_filter | AC=4;AF=0.057;AN=70;BaseQRankSum          |
| 1173 | chrY | 3721328 | . | G | A | 186.01   | PASS          | AC=4;AF=0.057;AN=70;BaseQRankSum=1.20;Cli |
| 1174 | chrY | 3721351 | . | T | C | 484.95   | PASS          | AC=4;AF=0.057;AN=70;BaseQRankSum=2.43;Cli |
| 1175 | chrY | 3721360 | . | A | G | 491.60   | PASS          | AC=4;AF=0.057;AN=70;BaseQRankSum=-2.467e+ |
| 1176 | chrY | 3721405 | . | C | T | 217.89   | PASS          | AC=4;AF=0.057;AN=70;BaseQRankSum=-5.840e- |
| 1177 | chrY | 3722691 | . | A | G | 3666.50  | PASS          | AC=20;AF=0.286;AN=70;BaseQRankSum=-3.480e |
| 1178 | chrY | 3727085 | . | C | G | 48.01    | my_snp_filter | AC=1;AF=0.014;AN=70;BaseQRankSum          |
| 1179 | chrY | 3727195 | . | T | C | 176.90   | PASS          | AC=3;AF=0.044;AN=68;BaseQRankSum=-2.074e+ |
| 1180 | chrY | 3727299 | . | G | A | 623.05   | PASS          | AC=11;AF=0.157;AN=70;BaseQRankSum=2.15;Cl |
| 1181 | chrY | 3727374 | . | A | T | 1337.89  | PASS          | AC=11;AF=0.157;AN=70;BaseQRankSum=-1.380e |
| 1182 | chrY | 3727468 | . | A | G | 500.89   | PASS          | AC=7;AF=0.100;AN=70;BaseQRankSum=0.315;Cl |
| 1183 | chrY | 3727485 | . | T | C | 246.72   | PASS          | AC=4;AF=0.057;AN=70;BaseQRankSum=0.924;Cl |
| 1184 | chrY | 3728095 | . | G | A | 1225.02  | PASS          | AC=9;AF=0.129;AN=70;BaseQRankSum=0.186;Cl |
| 1185 | chrY | 3735649 | . | G | T | 1105.52  | PASS          | AC=8;AF=0.400;AN=20;DP=142;FS=0.000;Inbre |
| 1186 | chrY | 3736125 | . | G | T | 5283.96  | PASS          | AC=48;AF=0.727;AN=66;DP=310;FS=0.000;Inbr |
| 1187 | chrY | 3736996 | . | A | T | 302.48   | PASS          | AC=7;AF=0.103;AN=68;BaseQRankSum=-7.790e- |
| 1188 | chrY | 3738544 | . | G | A | 244.32   | PASS          | AC=4;AF=0.069;AN=58;DP=225;FS=0.000;Inbre |
| 1189 | chrY | 3741383 | . | C | T | 41.24    | PASS          | AC=1;AF=0.016;AN=62;BaseQRankSum=0.00;Cli |
| 1190 | chrY | 3742783 | . | A | G | 382.50   | PASS          | AC=2;AF=0.029;AN=70;DP=391;FS=0.000;Inbre |
| 1191 | chrY | 3744841 | . | T | A | 291.93   | PASS          | AC=5;AF=0.071;AN=70;BaseQRankSum=0.580;Cl |
| 1192 | chrY | 3746789 | . | G | A | 592.75   | PASS          | AC=6;AF=0.086;AN=70;DP=354;FS=0.000;Inbre |
| 1193 | chrY | 3747495 | . | T | A | 569.82   | PASS          | AC=14;AF=0.304;AN=46;DP=197;FS=0.000;Inbr |
| 1194 | chrY | 3750476 | . | A | C | 108.52   | PASS          | AC=2;AF=0.034;AN=58;BaseQRankSum=1.65;Cli |
| 1195 | chrY | 3750599 | . | T | C | 61.84    | my_snp_filter | AC=2;AF=0.038;AN=52;BaseQRankSum          |
| 1196 | chrY | 3750938 | . | T | C | 87.06    | PASS          | AC=2;AF=0.029;AN=68;BaseQRankSum=1.07;Cli |
| 1197 | chrY | 3753136 | . | G | T | 231.88   | PASS          | AC=3;AF=0.079;AN=38;BaseQRankSum=0.537;Cl |
| 1198 | chrY | 3754404 | . | A | T | 437.44   | my_snp_filter | AC=7;AF=0.100;AN=70;BaseQRankSum          |
| 1199 | chrY | 3754410 | . | C | T | 408.38   | PASS          | AC=1;AF=0.015;AN=68;BaseQRankSum=0.271;Cl |
| 1200 | chrY | 3756296 | . | T | A | 1951.14  | PASS          | AC=11;AF=0.157;AN=70;BaseQRankSum=-7.960e |
| 1201 | chrY | 3756315 | . | C | T | 2731.45  | PASS          | AC=11;AF=0.157;AN=70;BaseQRankSum=-5.530e |
| 1202 | chrY | 3756412 | . | G | A | 1108.42  | PASS          | AC=9;AF=0.129;AN=70;BaseQRankSum=-5.370e- |
| 1203 | chrY | 3758146 | . | G | A | 242.16   | PASS          | AC=6;AF=0.086;AN=70;BaseQRankSum=1.61;Cli |
| 1204 | chrY | 3759022 | . | T | C | 6490.07  | PASS          | AC=58;AF=1.00;AN=58;DP=241;FS=0.000;Inbre |
| 1205 | chrY | 3765902 | . | A | G | 861.38   | PASS          | AC=4;AF=0.063;AN=64;BaseQRankSum=-2.120e- |
| 1206 | chrY | 3766631 | . | A | T | 1772.18  | PASS          | AC=6;AF=0.120;AN=50;DP=171;FS=0.000;Inbre |
| 1207 | chrY | 3767176 | . | C | T | 1176.44  | PASS          | AC=10;AF=0.156;AN=64;BaseQRankSum=-3.180e |
| 1208 | chrY | 3767723 | . | A | G | 932.11   | PASS          | AC=5;AF=0.227;AN=22;BaseQRankSum=0.751;Cl |
| 1209 | chrY | 3770261 | . | G | A | 472.56   | PASS          | AC=2;AF=0.029;AN=70;DP=430;FS=0.000;Inbre |
| 1210 | chrY | 3781183 | . | T | C | 1100.98  | PASS          | AC=6;AF=0.086;AN=70;DP=290;FS=0.000;Inbre |
| 1211 | chrY | 3782442 | . | T | C | 235.04   | PASS          | AC=2;AF=0.029;AN=68;DP=353;FS=0.000;Inbre |
| 1212 | chrY | 3785117 | . | T | C | 1108.68  | PASS          | AC=6;AF=0.086;AN=70;DP=546;FS=0.000;Inbre |
| 1213 | chrY | 3787595 | . | T | C | 1263.36  | PASS          | AC=6;AF=0.088;AN=68;DP=381;FS=0.000;Inbre |
| 1214 | chrY | 3788114 | . | T | C | 11127.05 | PASS          | AC=70;AF=1.00;AN=70;DP=377;FS=0.0         |
| 1215 | chrY | 3789656 | . | A | G | 693.44   | PASS          | AC=4;AF=0.074;AN=54;BaseQRankSum=0.740;Cl |
| 1216 | chrY | 3789795 | . | G | C | 1071.78  | PASS          | AC=6;AF=0.086;AN=70;BaseQRankSum=-6.110e- |



|      |      |         |   |   |     |          |               |                                           |
|------|------|---------|---|---|-----|----------|---------------|-------------------------------------------|
| 1217 | chrY | 3790759 | . | G | T   | 379.37   | PASS          | AC=6;AF=0.086;AN=70;DP=263;FS=0.000;Inbre |
| 1218 | chrY | 3793262 | . | A | G   | 58.65    | my_snp_filter | AC=2;AF=0.029;AN=70;BaseQRankSum=         |
| 1219 | chrY | 3793344 | . | G | T   | 30.36    | PASS          | AC=1;AF=0.016;AN=62;BaseQRankSum=-9.560e- |
| 1220 | chrY | 3797921 | . | T | C   | 79.65    | PASS          | AC=3;AF=0.044;AN=68;BaseQRankSum=-1.327e+ |
| 1221 | chrY | 3798457 | . | A | G   | 69.81    | PASS          | AC=2;AF=0.029;AN=68;BaseQRankSum=-1.001e+ |
| 1222 | chrY | 3800017 | . | A | T   | 1011     | PASS          | AC=6;AF=0.100;AN=60;DP=241;FS=0.000;Inbre |
| 1223 | chrY | 3802669 | . | A | C   | 182.70   | PASS          | AC=4;AF=0.067;AN=60;DP=227;FS=0.000;Inbre |
| 1224 | chrY | 3803569 | . | T | C   | 30.53    | PASS          | AC=2;AF=0.029;AN=68;BaseQRankSum=1.67;Cli |
| 1225 | chrY | 3807395 | . | A | G   | 979.48   | PASS          | AC=6;AF=0.088;AN=68;DP=453;FS=0.000;Inbre |
| 1226 | chrY | 3810719 | . | G | A   | 773.02   | PASS          | AC=8;AF=0.114;AN=70;BaseQRankSum=2.10;Cli |
| 1227 | chrY | 3811173 | . | C | A   | 560.88   | PASS          | AC=6;AF=0.300;AN=20;BaseQRankSum=-1.620e+ |
| 1228 | chrY | 3812743 | . | A | C   | 259.60   | PASS          | AC=6;AF=0.091;AN=66;DP=139;FS=0.000;Inbre |
| 1229 | chrY | 3813060 | . | C | T   | 3200.90  | PASS          | AC=24;AF=1.00;AN=24;DP=133;FS=0.000;Inbre |
| 1230 | chrY | 3814188 | . | G | T   | 2145.90  | PASS          | AC=36;AF=0.667;AN=54;DP=229;FS=0.000;Inbr |
| 1231 | chrY | 3821237 | . | A | C   | 1629.75  | PASS          | AC=6;AF=0.088;AN=68;DP=302;FS=0.000;Inbre |
| 1232 | chrY | 3822467 | . | G | A   | 1208.63  | PASS          | AC=6;AF=0.111;AN=54;DP=193;FS=0.000;Inbre |
| 1233 | chrY | 3827532 | . | T | C   | 5799.24  | PASS          | AC=64;AF=1.00;AN=64;BaseQRankSum=1.39;Cli |
| 1234 | chrY | 3829646 | . | T | C   | 174.35   | PASS          | AC=4;AF=0.065;AN=62;BaseQRankSum=0.358;Cl |
| 1235 | chrY | 3829722 | . | C | T   | 95.77    | PASS          | AC=3;AF=0.050;AN=60;BaseQRankSum=-1.026e+ |
| 1236 | chrY | 3830130 | . | C | T   | 340.97   | PASS          | AC=6;AF=0.125;AN=48;BaseQRankSum=0.265;Cl |
| 1237 | chrY | 3834492 | . | T | A   | 301.23   | PASS          | AC=6;AF=0.091;AN=66;DP=330;FS=0.000;Inbre |
| 1238 | chrY | 3836264 | . | C | G   | 1068.50  | PASS          | AC=6;AF=0.086;AN=70;DP=320;FS=0.000;Inbre |
| 1239 | chrY | 3839913 | . | C | T   | 1574.44  | PASS          | AC=30;AF=0.536;AN=56;DP=254;FS=0.000;Inbr |
| 1240 | chrY | 3841080 | . | A | G   | 279.08   | PASS          | AC=2;AF=0.037;AN=54;BaseQRankSum=0.332;Cl |
| 1241 | chrY | 3841528 | . | G | A   | 82.96    | my_snp_filter | AC=3;AF=0.043;AN=70;BaseQRankSum=         |
| 1242 | chrY | 3841567 | . | G | A   | 110.84   | PASS          | AC=3;AF=0.043;AN=70;BaseQRankSum=-1.350e- |
| 1243 | chrY | 3841754 | . | G | T   | 326.75   | PASS          | AC=3;AF=0.043;AN=70;BaseQRankSum=1.08;Cli |
| 1244 | chrY | 3841830 | . | C | G   | 444.16   | PASS          | AC=4;AF=0.057;AN=70;BaseQRankSum=3.47;Cli |
| 1245 | chrY | 3844998 | . | C | G   | 5490.51  | PASS          | AC=38;AF=0.613;AN=62;DP=356;FS=0.000;Inbr |
| 1246 | chrY | 3845142 | . | G | C   | 157.31   | PASS          | AC=1;AF=0.018;AN=56;BaseQRankSum=0.387;Cl |
| 1247 | chrY | 3845315 | . | G | A   | 66.70    | PASS          | AC=1;AF=0.016;AN=64;BaseQRankSum=1.44;Cli |
| 1248 | chrY | 3845447 | . | C | T   | 41.39    | PASS          | AC=2;AF=0.030;AN=66;DP=232;FS=0.000;Inbre |
| 1249 | chrY | 3845501 | . | C | G   | 217.13   | PASS          | AC=4;AF=0.059;AN=68;DP=326;FS=0.000;Inbre |
| 1250 | chrY | 3845618 | . | C | T   | 5448.66  | PASS          | AC=38;AF=0.559;AN=68;DP=310;FS=0.000;Inbr |
| 1251 | chrY | 3845886 | . | C | T   | 98.48    | PASS          | AC=6;AF=0.091;AN=66;DP=127;FS=0.000;Inbre |
| 1252 | chrY | 3851466 | . | G | A   | 273.68   | PASS          | AC=4;AF=0.059;AN=68;BaseQRankSum=-1.500e- |
| 1253 | chrY | 3852181 | . | G | A   | 91.41    | my_snp_filter | AC=2;AF=0.029;AN=70;BaseQRankSum=         |
| 1254 | chrY | 3852427 | . | C | T   | 1281.81  | PASS          | AC=5;AF=0.100;AN=50;BaseQRankSum=0.867;Cl |
| 1255 | chrY | 3855502 | . | A | G   | 898.98   | PASS          | AC=6;AF=0.088;AN=68;DP=420;FS=0.000;Inbre |
| 1256 | chrY | 3856313 | . | G | A   | 135.87   | my_snp_filter | AC=3;AF=0.043;AN=70;BaseQRankSum=         |
| 1257 | chrY | 3856507 | . | C | T   | 264.52   | PASS          | AC=2;AF=0.029;AN=68;DP=393;FS=0.000;Inbre |
| 1258 | chrY | 3861383 | . | C | T   | 40.51    | PASS          | AC=1;AF=0.015;AN=68;BaseQRankSum=1.96;Cli |
| 1259 | chrY | 3861406 | . | C | A   | 69.28    | PASS          | AC=1;AF=0.015;AN=66;BaseQRankSum=-1.250e+ |
| 1260 | chrY | 3861770 | . | T | G   | 1317.57  | PASS          | AC=11;AF=0.157;AN=70;BaseQRankSum=0.311;C |
| 1261 | chrY | 3865716 | . | A | G   | 42.70    | PASS          | AC=1;AF=0.014;AN=70;BaseQRankSum=0.289;Cl |
| 1262 | chrY | 3865745 | . | A | C   | 230.36   | PASS          | AC=3;AF=0.043;AN=70;BaseQRankSum=-5.920e- |
| 1263 | chrY | 3865794 | . | G | C   | 210.13   | PASS          | AC=5;AF=0.074;AN=68;BaseQRankSum=-1.070e- |
| 1264 | chrY | 3869273 | . | C | G   | 3640.87  | PASS          | AC=18;AF=1.00;AN=18;DP=142;FS=0.000;MLEAC |
| 1265 | chrY | 3869745 | . | G | A   | 3833.87  | PASS          | AC=18;AF=1.00;AN=18;DP=147;FS=0.000;MLEAC |
| 1266 | chrY | 3875772 | . | T | A   | 1329.74  | PASS          | AC=5;AF=0.076;AN=66;BaseQRankSum=1.37;Cli |
| 1267 | chrY | 3877388 | . | G | A   | 562.39   | PASS          | AC=4;AF=0.067;AN=60;DP=260;FS=0.000;Inbre |
| 1268 | chrY | 3881881 | . | G | A   | 270.77   | PASS          | AC=2;AF=0.034;AN=58;BaseQRankSum=0.175;Cl |
| 1269 | chrY | 3881944 | . | G | T   | 92.96    | my_snp_filter | AC=2;AF=0.048;AN=42;BaseQRankSum=         |
| 1270 | chrY | 3882455 | . | C | T   | 13674.55 | PASS          | AC=46;AF=0.657;AN=70;DP=578;FS=0          |
| 1271 | chrY | 3885614 | . | G | C   | 148.35   | my_snp_filter | AC=3;AF=0.054;AN=56;BaseQRankSum=         |
| 1272 | chrY | 3885995 | . | T | A   | 605.62   | PASS          | AC=6;AF=0.086;AN=70;BaseQRankSum=1.36;Cli |
| 1273 | chrY | 3886122 | . | T | C   | 227.62   | PASS          | AC=3;AF=0.043;AN=70;BaseQRankSum=0.930;Cl |
| 1274 | chrY | 3887741 | . | G | T   | 5826.55  | PASS          | AC=56;AF=0.824;AN=68;DP=289;FS=0.000;Inbr |
| 1275 | chrY | 3891474 | . | C | T   | 938.31   | PASS          | AC=10;AF=0.143;AN=70;BaseQRankSum=0.736;C |
| 1276 | chrY | 3894680 | . | G | A   | 78.16    | PASS          | AC=2;AF=0.029;AN=70;BaseQRankSum=2.17;Cli |
| 1277 | chrY | 3897610 | . | A | T   | 1050.51  | PASS          | AC=6;AF=0.086;AN=70;DP=334;FS=0.000;Inbre |
| 1278 | chrY | 3898381 | . | A | G   | 671.33   | PASS          | AC=18;AF=1.00;AN=18;DP=39;FS=0.000;MLEAC  |
| 1279 | chrY | 3903702 | . | C | T   | 242.17   | PASS          | AC=2;AF=0.029;AN=70;DP=562;FS=0.000;Inbre |
| 1280 | chrY | 3903888 | . | A | C   | 86.25    | PASS          | AC=5;AF=0.074;AN=68;BaseQRankSum=0.747;Cl |
| 1281 | chrY | 3904002 | . | C | T   | 633.04   | PASS          | AC=7;AF=0.113;AN=62;BaseQRankSum=-5.500e- |
| 1282 | chrY | 3904003 | . | A | G   | 626.25   | PASS          | AC=7;AF=0.113;AN=62;BaseQRankSum=0.406;Cl |
| 1283 | chrY | 3904005 | . | A | G   | 558.84   | PASS          | AC=7;AF=0.113;AN=62;BaseQRankSum=-4.960e- |
| 1284 | chrY | 3904010 | . | C | T,* | 526.93   | PASS          | AC=6,3;AF=0.094,0.047;AN=64;BaseQRankSum= |
| 1285 | chrY | 3904011 | . | T | C   | 482.26   | PASS          | AC=6;AF=0.094;AN=64;BaseQRankSum=-1.026e+ |
| 1286 | chrY | 3904013 | . | T | C   | 484.81   | PASS          | AC=6;AF=0.091;AN=66;BaseQRankSum=-5.030e- |
| 1287 | chrY | 3904015 | . | T | G   | 505.34   | PASS          | AC=6;AF=0.094;AN=64;BaseQRankSum=0.099;Cl |
| 1288 | chrY | 3904016 | . | G | C   | 33.85    | PASS          | AC=1;AF=0.015;AN=68;BaseQRankSum=1.38;Cli |
| 1289 | chrY | 3904019 | . | A | G   | 33.94    | PASS          | AC=1;AF=0.015;AN=68;BaseQRankSum=-1.380e+ |
| 1290 | chrY | 3904026 | . | C | A   | 177.40   | PASS          | AC=6;AF=0.091;AN=66;BaseQRankSum=0.731;Cl |
| 1291 | chrY | 3905521 | . | C | T   | 171.09   | PASS          | AC=4;AF=0.071;AN=56;BaseQRankSum=1.75;Cli |
| 1292 | chrY | 3908328 | . | C | T   | 2959.07  | PASS          | AC=22;AF=1.00;AN=22;DP=118;FS=0.000;Inbre |

|      |      |         |   |   |   |         |               |                                           |
|------|------|---------|---|---|---|---------|---------------|-------------------------------------------|
| 1293 | chrY | 3909630 | . | T | C | 2618.98 | PASS          | AC=12;AF=0.182;AN=66;DP=240;FS=0.000;Inbr |
| 1294 | chrY | 3915727 | . | A | G | 30.75   | PASS          | AC=1;AF=0.015;AN=68;BaseQRankSum=-1.495e+ |
| 1295 | chrY | 3915732 | . | G | A | 30.75   | PASS          | AC=1;AF=0.015;AN=68;BaseQRankSum=-1.380e+ |
| 1296 | chrY | 3917511 | . | T | C | 640.37  | PASS          | AC=6;AF=0.333;AN=18;DP=112;FS=0.000;MLEAC |
| 1297 | chrY | 3917650 | . | C | A | 152.88  | PASS          | AC=2;AF=0.032;AN=62;BaseQRankSum=0.727;Cl |
| 1298 | chrY | 3917689 | . | A | G | 78.12   | PASS          | AC=2;AF=0.032;AN=62;BaseQRankSum=1.55;Cli |
| 1299 | chrY | 3917844 | . | G | A | 1456.31 | PASS          | AC=7;AF=0.106;AN=66;BaseQRankSum=0.766;Cl |
| 1300 | chrY | 3918060 | . | G | T | 215.78  | PASS          | AC=5;AF=0.071;AN=70;BaseQRankSum=1.52;Cli |
| 1301 | chrY | 3918659 | . | G | A | 2693.92 | PASS          | AC=12;AF=0.176;AN=68;BaseQRankSum=1.58;Cl |
| 1302 | chrY | 3919894 | . | A | G | 111.39  | my_snp_filter | AC=3;AF=0.044;AN=68;BaseQRankSum=         |
| 1303 | chrY | 3920101 | . | T | C | 629.88  | PASS          | AC=8;AF=0.114;AN=70;BaseQRankSum=0.107;Cl |
| 1304 | chrY | 3920175 | . | A | G | 166.07  | PASS          | AC=3;AF=0.043;AN=70;BaseQRankSum=-4.240e- |
| 1305 | chrY | 3920370 | . | A | G | 58.90   | my_snp_filter | AC=3;AF=0.044;AN=68;BaseQRankSum=         |
| 1306 | chrY | 3920475 | . | T | C | 200     | PASS          | AC=3;AF=0.043;AN=70;BaseQRankSum=-1.273e+ |
| 1307 | chrY | 3920754 | . | C | T | 67.12   | PASS          | AC=1;AF=0.023;AN=44;BaseQRankSum=2.26;Cli |
| 1308 | chrY | 3920768 | . | C | T | 197.30  | PASS          | AC=3;AF=0.063;AN=48;BaseQRankSum=0.600;Cl |
| 1309 | chrY | 3921849 | . | T | G | 438.06  | PASS          | AC=7;AF=0.106;AN=66;BaseQRankSum=-1.380e+ |
| 1310 | chrY | 3923086 | . | G | A | 86.44   | my_snp_filter | AC=3;AF=0.100;AN=30;BaseQRankSum=         |
| 1311 | chrY | 3923120 | . | A | T | 793.96  | PASS          | AC=7;AF=0.146;AN=48;BaseQRankSum=1.69;Cli |
| 1312 | chrY | 3923136 | . | C | G | 921.43  | PASS          | AC=6;AF=0.120;AN=50;BaseQRankSum=0.764;Cl |
| 1313 | chrY | 3923174 | . | T | C | 457.99  | PASS          | AC=7;AF=0.113;AN=62;BaseQRankSum=-1.568e+ |
| 1314 | chrY | 3923867 | . | G | A | 95.53   | PASS          | AC=2;AF=0.030;AN=66;BaseQRankSum=1.80;Cli |
| 1315 | chrY | 3924003 | . | C | T | 434.50  | PASS          | AC=4;AF=0.063;AN=64;BaseQRankSum=0.732;Cl |
| 1316 | chrY | 3924037 | . | T | A | 826.17  | PASS          | AC=7;AF=0.103;AN=68;BaseQRankSum=-6.330e- |
| 1317 | chrY | 3924067 | . | G | A | 294.07  | PASS          | AC=2;AF=0.029;AN=68;DP=398;FS=0.000;Inbre |
| 1318 | chrY | 3924392 | . | C | T | 1039.08 | PASS          | AC=3;AF=0.043;AN=70;BaseQRankSum=-5.700e- |
| 1319 | chrY | 3924394 | . | C | A | 1039.16 | PASS          | AC=3;AF=0.043;AN=70;BaseQRankSum=-5.720e- |
| 1320 | chrY | 3926508 | . | T | A | 485.08  | PASS          | AC=7;AF=0.100;AN=70;BaseQRankSum=-1.157e+ |
| 1321 | chrY | 3926582 | . | C | A | 106.63  | PASS          | AC=1;AF=0.014;AN=70;BaseQRankSum=0.171;Cl |
| 1322 | chrY | 3926641 | . | A | T | 372.19  | PASS          | AC=3;AF=0.044;AN=68;BaseQRankSum=-7.020e- |
| 1323 | chrY | 3926651 | . | T | C | 347.51  | PASS          | AC=3;AF=0.043;AN=70;BaseQRankSum=-2.969e+ |
| 1324 | chrY | 3926742 | . | G | A | 91.21   | PASS          | AC=2;AF=0.029;AN=68;BaseQRankSum=1.38;Cli |
| 1325 | chrY | 3926975 | . | T | C | 2465.70 | PASS          | AC=27;AF=0.482;AN=56;BaseQRankSum=-1.130e |
| 1326 | chrY | 3927001 | . | A | C | 591.11  | PASS          | AC=9;AF=0.145;AN=62;BaseQRankSum=-1.231e+ |
| 1327 | chrY | 3927009 | . | T | A | 38.76   | PASS          | AC=1;AF=0.017;AN=60;BaseQRankSum=-1.231e+ |
| 1328 | chrY | 3927020 | . | G | T | 172.47  | PASS          | AC=1;AF=0.017;AN=58;BaseQRankSum=-1.246e+ |
| 1329 | chrY | 3927259 | . | A | C | 217.87  | PASS          | AC=3;AF=0.045;AN=66;BaseQRankSum=-1.457e+ |
| 1330 | chrY | 3927437 | . | C | G | 425.23  | PASS          | AC=5;AF=0.071;AN=70;BaseQRankSum=0.446;Cl |
| 1331 | chrY | 3927594 | . | T | G | 324.14  | PASS          | AC=5;AF=0.071;AN=70;BaseQRankSum=0.839;Cl |
| 1332 | chrY | 3927608 | . | T | C | 275.99  | PASS          | AC=5;AF=0.071;AN=70;BaseQRankSum=-1.479e+ |
| 1333 | chrY | 3927689 | . | A | G | 135.41  | PASS          | AC=2;AF=0.030;AN=66;BaseQRankSum=0.741;Cl |
| 1334 | chrY | 3929446 | . | T | C | 1055.24 | PASS          | AC=6;AF=0.088;AN=68;DP=429;FS=0.000;Inbre |
| 1335 | chrY | 3931004 | . | G | A | 754.48  | PASS          | AC=6;AF=0.091;AN=66;DP=226;FS=0.000;Inbre |
| 1336 | chrY | 3932521 | . | G | A | 269.03  | PASS          | AC=3;AF=0.044;AN=68;BaseQRankSum=-3.060e- |
| 1337 | chrY | 3933645 | . | C | T | 988.23  | PASS          | AC=6;AF=0.086;AN=70;DP=596;FS=0.000;Inbre |
| 1338 | chrY | 3934370 | . | A | G | 547.78  | PASS          | AC=2;AF=0.029;AN=68;DP=324;FS=0.000;Inbre |
| 1339 | chrY | 3936668 | . | C | T | 1334.53 | PASS          | AC=6;AF=0.088;AN=68;DP=311;FS=0.000;Inbre |
| 1340 | chrY | 3940967 | . | A | G | 233.40  | PASS          | AC=4;AF=0.063;AN=64;BaseQRankSum=1.52;Cli |
| 1341 | chrY | 3945008 | . | G | A | 48.80   | my_snp_filter | AC=3;AF=0.043;AN=70;BaseQRankSum=         |
| 1342 | chrY | 3946434 | . | C | A | 42.43   | my_snp_filter | AC=2;AF=0.040;AN=50;BaseQRankSum=         |
| 1343 | chrY | 3949203 | . | C | G | 1286.03 | PASS          | AC=28;AF=0.609;AN=46;DP=166;FS=0.000;Inbr |
| 1344 | chrY | 3959958 | . | G | A | 39.90   | my_snp_filter | AC=1;AF=0.014;AN=70;BaseQRankSum=         |
| 1345 | chrY | 3960764 | . | G | A | 3428.60 | PASS          | AC=44;AF=0.647;AN=68;DP=258;FS=0.000;Inbr |
| 1346 | chrY | 3962049 | . | T | C | 1372.28 | PASS          | AC=14;AF=0.538;AN=26;DP=175;FS=0.000;Inbr |
| 1347 | chrY | 3963211 | . | T | A | 1894.91 | PASS          | AC=28;AF=0.538;AN=52;DP=211;FS=0.000;Inbr |
| 1348 | chrY | 3966689 | . | C | G | 1032.07 | PASS          | AC=5;AF=0.074;AN=68;BaseQRankSum=-3.910e- |
| 1349 | chrY | 3966708 | . | T | C | 8307.12 | PASS          | AC=66;AF=1.00;AN=66;DP=280;FS=0.000;Inbre |
| 1350 | chrY | 3966984 | . | G | A | 838.67  | PASS          | AC=4;AF=0.057;AN=70;DP=398;FS=0.000;Inbre |
| 1351 | chrY | 3966991 | . | T | C | 783.01  | PASS          | AC=4;AF=0.057;AN=70;DP=359;FS=0.000;Inbre |
| 1352 | chrY | 3967342 | . | C | T | 2476.99 | PASS          | AC=11;AF=0.611;AN=18;BaseQRankSum=0.00;Cl |
| 1353 | chrY | 3967343 | . | A | G | 2476.98 | PASS          | AC=11;AF=0.611;AN=18;BaseQRankSum=2.36;Cl |
| 1354 | chrY | 3967554 | . | G | A | 472.75  | PASS          | AC=2;AF=0.100;AN=20;DP=151;FS=0.000;Inbre |
| 1355 | chrY | 3968094 | . | G | A | 1467.57 | PASS          | AC=6;AF=0.097;AN=62;DP=291;FS=0.000;Inbre |
| 1356 | chrY | 3968852 | . | T | G | 1179.62 | PASS          | AC=6;AF=0.088;AN=68;DP=616;FS=0.000;Inbre |
| 1357 | chrY | 3969202 | . | A | G | 835.23  | PASS          | AC=6;AF=0.086;AN=70;BaseQRankSum=-6.590e- |
| 1358 | chrY | 3970314 | . | T | C | 123.82  | PASS          | AC=3;AF=0.045;AN=66;BaseQRankSum=2.24;Cli |
| 1359 | chrY | 3970414 | . | A | G | 106.97  | PASS          | AC=2;AF=0.031;AN=64;DP=230;FS=0.000;Inbre |
| 1360 | chrY | 3980147 | . | T | G | 62.72   | my_snp_filter | AC=2;AF=0.029;AN=70;BaseQRankSum=         |
| 1361 | chrY | 3980500 | . | G | T | 154.70  | PASS          | AC=3;AF=0.050;AN=60;BaseQRankSum=0.382;Cl |
| 1362 | chrY | 3985570 | . | T | C | 42.03   | PASS          | AC=1;AF=0.014;AN=70;BaseQRankSum=-7.360e- |
| 1363 | chrY | 3986278 | . | G | C | 837.54  | PASS          | AC=6;AF=0.097;AN=62;DP=174;FS=0.000;Inbre |
| 1364 | chrY | 3989146 | . | T | C | 50.57   | PASS          | AC=1;AF=0.026;AN=38;BaseQRankSum=0.942;Cl |
| 1365 | chrY | 3989162 | . | T | G | 76.10   | PASS          | AC=1;AF=0.028;AN=36;BaseQRankSum=1.35;Cli |
| 1366 | chrY | 3989233 | . | T | A | 555.41  | PASS          | AC=14;AF=0.333;AN=42;DP=169;FS=0.000;Inbr |
| 1367 | chrY | 3989734 | . | T | C | 39.31   | PASS          | AC=1;AF=0.022;AN=46;BaseQRankSum=-3.387e+ |
| 1368 | chrY | 3989883 | . | T | A | 153.35  | PASS          | AC=1;AF=0.019;AN=52;BaseQRankSum=-2.800e- |

|      |      |         |   |   |   |          |               |                                           |
|------|------|---------|---|---|---|----------|---------------|-------------------------------------------|
| 1369 | chrY | 3990031 | . | G | A | 687.28   | PASS          | AC=4;AF=0.087;AN=46;BaseQRankSum=3.18;Cli |
| 1370 | chrY | 3990111 | . | C | A | 351.14   | PASS          | AC=2;AF=0.033;AN=60;BaseQRankSum=2.49;Cli |
| 1371 | chrY | 3990155 | . | T | C | 399.97   | PASS          | AC=2;AF=0.033;AN=60;BaseQRankSum=-7.940e- |
| 1372 | chrY | 3990160 | . | C | G | 397.10   | PASS          | AC=2;AF=0.032;AN=62;BaseQRankSum=-6.730e- |
| 1373 | chrY | 3990193 | . | A | C | 66.33    | PASS          | AC=2;AF=0.034;AN=58;BaseQRankSum=0.817;Cl |
| 1374 | chrY | 3990303 | . | C | T | 184.38   | PASS          | AC=2;AF=0.037;AN=54;BaseQRankSum=-1.950e- |
| 1375 | chrY | 3997322 | . | T | C | 739.85   | PASS          | AC=5;AF=0.089;AN=56;BaseQRankSum=-1.531e+ |
| 1376 | chrY | 3997336 | . | A | T | 179.66   | PASS          | AC=2;AF=0.036;AN=56;BaseQRankSum=-3.370e- |
| 1377 | chrY | 3997496 | . | C | T | 931.39   | PASS          | AC=9;AF=0.145;AN=62;BaseQRankSum=-4.120e- |
| 1378 | chrY | 3997812 | . | A | G | 602.34   | PASS          | AC=3;AF=0.063;AN=48;BaseQRankSum=-2.401e+ |
| 1379 | chrY | 3998068 | . | T | A | 117.05   | PASS          | AC=2;AF=0.043;AN=46;BaseQRankSum=-7.450e- |
| 1380 | chrY | 3998074 | . | G | T | 833.96   | PASS          | AC=3;AF=0.065;AN=46;BaseQRankSum=1.04;Cli |
| 1381 | chrY | 3999570 | . | T | C | 765.80   | PASS          | AC=4;AF=0.059;AN=68;BaseQRankSum=-1.670e- |
| 1382 | chrY | 3999610 | . | A | G | 918.37   | PASS          | AC=5;AF=0.071;AN=70;BaseQRankSum=-7.180e- |
| 1383 | chrY | 3999627 | . | A | G | 735.68   | PASS          | AC=5;AF=0.071;AN=70;BaseQRankSum=-4.800e- |
| 1384 | chrY | 4001833 | . | G | A | 11245.09 | PASS          | AC=65;AF=0.985;AN=66;BaseQRankSum         |
| 1385 | chrY | 4004405 | . | A | G | 402.83   | PASS          | AC=6;AF=0.086;AN=70;DP=384;FS=0.000;Inbre |
| 1386 | chrY | 4005199 | . | A | T | 213.49   | PASS          | AC=2;AF=0.029;AN=70;DP=482;FS=0.000;Inbre |
| 1387 | chrY | 4009223 | . | T | C | 8369.05  | PASS          | AC=66;AF=1.00;AN=66;DP=345;FS=0.000;Inbre |
| 1388 | chrY | 4009318 | . | T | C | 105.97   | PASS          | AC=1;AF=0.015;AN=66;BaseQRankSum=-3.464e+ |
| 1389 | chrY | 4009475 | . | C | T | 215      | PASS          | AC=2;AF=0.077;AN=26;BaseQRankSum=-7.640e- |
| 1390 | chrY | 4009674 | . | T | C | 308.72   | PASS          | AC=2;AF=0.029;AN=70;DP=280;FS=0.000;Inbre |
| 1391 | chrY | 4010757 | . | A | G | 52.68    | PASS          | AC=1;AF=0.014;AN=70;BaseQRankSum=-2.708e+ |
| 1392 | chrY | 4010763 | . | C | T | 52.85    | PASS          | AC=1;AF=0.014;AN=70;BaseQRankSum=1.43;Cli |
| 1393 | chrY | 4011459 | . | C | T | 502.57   | PASS          | AC=5;AF=0.071;AN=70;BaseQRankSum=0.423;Cl |
| 1394 | chrY | 4011488 | . | T | A | 78.52    | PASS          | AC=2;AF=0.029;AN=70;BaseQRankSum=0.198;Cl |
| 1395 | chrY | 4011493 | . | A | T | 81.52    | PASS          | AC=2;AF=0.029;AN=70;BaseQRankSum=0.00;Cli |
| 1396 | chrY | 4014087 | . | C | T | 546.82   | PASS          | AC=7;AF=0.100;AN=70;BaseQRankSum=0.549;Cl |
| 1397 | chrY | 4014142 | . | A | G | 5621.46  | PASS          | AC=46;AF=0.676;AN=68;BaseQRankSum=0.079;C |
| 1398 | chrY | 4014266 | . | C | T | 129.73   | PASS          | AC=2;AF=0.040;AN=50;BaseQRankSum=1.71;Cli |
| 1399 | chrY | 4015346 | . | G | A | 171.45   | PASS          | AC=2;AF=0.029;AN=70;DP=385;FS=0.000;Inbre |
| 1400 | chrY | 4017692 | . | G | A | 381.84   | PASS          | AC=1;AF=0.033;AN=30;BaseQRankSum=-3.650e- |
| 1401 | chrY | 4017815 | . | C | A | 1047.76  | PASS          | AC=6;AF=0.088;AN=68;DP=336;FS=0.000;Inbre |
| 1402 | chrY | 4018338 | . | G | A | 1474.18  | PASS          | AC=6;AF=0.333;AN=18;DP=173;FS=0.000;MLEAC |
| 1403 | chrY | 4021173 | . | T | A | 211.88   | PASS          | AC=3;AF=0.107;AN=28;BaseQRankSum=1.33;Cli |
| 1404 | chrY | 4021390 | . | C | T | 152.84   | PASS          | AC=2;AF=0.063;AN=32;BaseQRankSum=2.00;Cli |
| 1405 | chrY | 4021919 | . | T | C | 32.06    | PASS          | AC=1;AF=0.019;AN=52;BaseQRankSum=-1.026e+ |
| 1406 | chrY | 4021930 | . | C | T | 83.63    | PASS          | AC=1;AF=0.024;AN=42;BaseQRankSum=-7.310e- |
| 1407 | chrY | 4022150 | . | C | T | 50.74    | PASS          | AC=1;AF=0.016;AN=64;BaseQRankSum=0.789;Cl |
| 1408 | chrY | 4022566 | . | A | T | 918.11   | PASS          | AC=9;AF=0.129;AN=70;BaseQRankSum=0.00;Cli |
| 1409 | chrY | 4022634 | . | C | T | 49.62    | PASS          | AC=1;AF=0.014;AN=70;BaseQRankSum=0.793;Cl |
| 1410 | chrY | 4022671 | . | G | C | 8201.19  | PASS          | AC=33;AF=0.500;AN=66;BaseQRankSum=-1.179e |
| 1411 | chrY | 4022679 | . | G | C | 7663.66  | PASS          | AC=33;AF=0.500;AN=66;BaseQRankSum=-1.067e |
| 1412 | chrY | 4023373 | . | T | C | 259.17   | PASS          | AC=4;AF=0.069;AN=58;BaseQRankSum=-1.479e+ |
| 1413 | chrY | 4023570 | . | C | A | 68.11    | PASS          | AC=1;AF=0.026;AN=38;BaseQRankSum=2.86;Cli |
| 1414 | chrY | 4023919 | . | T | C | 3152.96  | PASS          | AC=38;AF=0.679;AN=56;DP=258;FS=0.000;Inbr |
| 1415 | chrY | 4024546 | . | A | G | 144.53   | PASS          | AC=2;AF=0.029;AN=68;BaseQRankSum=-1.050e+ |
| 1416 | chrY | 4024585 | . | A | G | 178.95   | PASS          | AC=2;AF=0.029;AN=68;BaseQRankSum=0.382;Cl |
| 1417 | chrY | 4024633 | . | C | T | 99.70    | PASS          | AC=2;AF=0.029;AN=70;BaseQRankSum=2.52;Cli |
| 1418 | chrY | 4024687 | . | T | A | 154.39   | PASS          | AC=4;AF=0.059;AN=68;BaseQRankSum=0.358;Cl |
| 1419 | chrY | 4024906 | . | A | C | 203.32   | PASS          | AC=3;AF=0.045;AN=66;BaseQRankSum=0.674;Cl |
| 1420 | chrY | 4024945 | . | T | C | 233.71   | PASS          | AC=1;AF=0.016;AN=62;BaseQRankSum=-7.520e- |
| 1421 | chrY | 4024960 | . | T | A | 279.29   | PASS          | AC=3;AF=0.054;AN=56;BaseQRankSum=1.16;Cli |
| 1422 | chrY | 4025436 | . | C | T | 146.61   | PASS          | AC=2;AF=0.036;AN=56;BaseQRankSum=0.588;Cl |
| 1423 | chrY | 4025577 | . | T | G | 43.65    | PASS          | AC=1;AF=0.014;AN=70;BaseQRankSum=0.551;Cl |
| 1424 | chrY | 4025776 | . | C | A | 333.89   | PASS          | AC=3;AF=0.107;AN=28;BaseQRankSum=-1.473e+ |
| 1425 | chrY | 4025890 | . | C | T | 1084.56  | PASS          | AC=7;AF=0.130;AN=54;BaseQRankSum=0.604;Cl |
| 1426 | chrY | 4026208 | . | C | A | 50.95    | my_snp_filter | AC=3;AF=0.045;AN=66;BaseQRankSum=         |
| 1427 | chrY | 4026241 | . | A | T | 209.29   | PASS          | AC=3;AF=0.056;AN=54;BaseQRankSum=-7.410e- |
| 1428 | chrY | 4026389 | . | G | A | 132.37   | PASS          | AC=3;AF=0.115;AN=26;BaseQRankSum=-7.500e- |
| 1429 | chrY | 4028292 | . | A | G | 45.50    | PASS          | AC=1;AF=0.015;AN=68;BaseQRankSum=0.529;Cl |
| 1430 | chrY | 4029687 | . | T | C | 92.34    | my_snp_filter | AC=2;AF=0.053;AN=38;BaseQRankSum=         |
| 1431 | chrY | 4029778 | . | T | G | 465.47   | PASS          | AC=4;AF=0.063;AN=64;BaseQRankSum=-2.760e- |
| 1432 | chrY | 4029893 | . | A | G | 1405.80  | PASS          | AC=8;AF=0.114;AN=70;BaseQRankSum=-4.660e- |
| 1433 | chrY | 4030172 | . | G | C | 36.50    | my_snp_filter | AC=2;AF=0.032;AN=62;BaseQRankSum=         |
| 1434 | chrY | 4032759 | . | A | T | 121.20   | PASS          | AC=3;AF=0.044;AN=68;BaseQRankSum=-7.270e- |
| 1435 | chrY | 4033966 | . | C | T | 680.63   | PASS          | AC=5;AF=0.071;AN=70;BaseQRankSum=0.503;Cl |
| 1436 | chrY | 4033988 | . | C | T | 398.07   | PASS          | AC=4;AF=0.057;AN=70;BaseQRankSum=1.35;Cli |
| 1437 | chrY | 4034014 | . | G | T | 157.06   | PASS          | AC=2;AF=0.029;AN=70;BaseQRankSum=1.41;Cli |
| 1438 | chrY | 4034059 | . | T | C | 33.42    | my_snp_filter | AC=2;AF=0.030;AN=66;BaseQRankSum=         |
| 1439 | chrY | 4034107 | . | T | G | 331.87   | PASS          | AC=3;AF=0.052;AN=58;BaseQRankSum=0.615;Cl |
| 1440 | chrY | 4035291 | . | A | G | 36.96    | PASS          | AC=1;AF=0.014;AN=70;BaseQRankSum=-1.231e+ |
| 1441 | chrY | 4035390 | . | A | C | 398.75   | PASS          | AC=2;AF=0.031;AN=64;BaseQRankSum=-1.509e+ |
| 1442 | chrY | 4035392 | . | G | T | 399.33   | PASS          | AC=2;AF=0.031;AN=64;BaseQRankSum=0.755;Cl |
| 1443 | chrY | 4035411 | . | T | A | 273.35   | PASS          | AC=2;AF=0.031;AN=64;BaseQRankSum=0.151;Cl |
| 1444 | chrY | 4035623 | . | C | T | 1467.20  | PASS          | AC=8;AF=0.118;AN=68;BaseQRankSum=0.00;Cli |

|      |      |         |   |   |   |         |               |                                           |
|------|------|---------|---|---|---|---------|---------------|-------------------------------------------|
| 1445 | chrY | 4035825 | . | A | G | 303.65  | PASS          | AC=4;AF=0.059;AN=68;BaseQRankSum=-1.087e+ |
| 1446 | chrY | 4036770 | . | A | G | 430.87  | PASS          | AC=6;AF=0.088;AN=68;DP=266;FS=0.000;Inbre |
| 1447 | chrY | 4041316 | . | T | C | 523.70  | PASS          | AC=4;AF=0.057;AN=70;DP=421;FS=0.000;Inbre |
| 1448 | chrY | 4043165 | . | T | C | 509.32  | PASS          | AC=2;AF=0.029;AN=68;DP=292;FS=0.000;Inbre |
| 1449 | chrY | 4043442 | . | C | G | 1012.37 | PASS          | AC=6;AF=0.111;AN=54;BaseQRankSum=-9.100e- |
| 1450 | chrY | 4043575 | . | G | T | 284.40  | PASS          | AC=4;AF=0.059;AN=68;BaseQRankSum=0.270;Cl |
| 1451 | chrY | 4046091 | . | A | G | 1930.82 | PASS          | AC=34;AF=0.739;AN=46;DP=171;FS=0.000;Inbr |
| 1452 | chrY | 4051033 | . | T | G | 905.88  | PASS          | AC=14;AF=0.412;AN=34;DP=175;FS=0.000;Inbr |
| 1453 | chrY | 4053473 | . | A | G | 689.02  | PASS          | AC=6;AF=0.086;AN=70;DP=344;FS=0.000;Inbre |
| 1454 | chrY | 4057182 | . | C | A | 3326.76 | PASS          | AC=40;AF=0.625;AN=64;DP=265;FS=0.000;Inb  |
| 1455 | chrY | 4068544 | . | C | A | 1139.91 | PASS          | AC=6;AF=0.097;AN=62;DP=234;FS=0.000;Inbre |
| 1456 | chrY | 4070838 | . | T | C | 927.48  | PASS          | AC=6;AF=0.088;AN=68;DP=518;FS=0.000;Inbre |
| 1457 | chrY | 4076270 | . | A | G | 44.76   | PASS          | AC=1;AF=0.019;AN=54;BaseQRankSum=-7.360e- |
| 1458 | chrY | 4076583 | . | A | T | 1078.13 | PASS          | AC=6;AF=0.300;AN=20;DP=117;FS=0.000;Inbre |
| 1459 | chrY | 4077007 | . | T | A | 1140.31 | PASS          | AC=6;AF=0.086;AN=70;DP=402;FS=0.000;Inbre |
| 1460 | chrY | 4077503 | . | G | C | 235.40  | my_snp_filter | AC=4;AF=0.063;AN=64;BaseQRankSum=         |
| 1461 | chrY | 4077509 | . | A | C | 107.26  | PASS          | AC=2;AF=0.032;AN=62;BaseQRankSum=-7.200e- |
| 1462 | chrY | 4083245 | . | C | A | 200.20  | PASS          | AC=6;AF=0.094;AN=64;DP=198;FS=0.000;Inbre |
| 1463 | chrY | 4087880 | . | G | C | 1045.69 | PASS          | AC=6;AF=0.086;AN=70;DP=326;FS=0.000;Inbre |
| 1464 | chrY | 4088082 | . | A | G | 158.72  | PASS          | AC=1;AF=0.016;AN=64;BaseQRankSum=0.00;Cli |
| 1465 | chrY | 4089811 | . | G | A | 229.32  | PASS          | AC=1;AF=0.056;AN=18;BaseQRankSum=2.58;Cli |
| 1466 | chrY | 4090818 | . | T | C | 112.08  | PASS          | AC=2;AF=0.111;AN=18;BaseQRankSum=-1.857e+ |
| 1467 | chrY | 4090820 | . | T | C | 114.13  | PASS          | AC=2;AF=0.111;AN=18;BaseQRankSum=-1.739e+ |
| 1468 | chrY | 4090858 | . | G | T | 389.14  | PASS          | AC=4;AF=0.222;AN=18;BaseQRankSum=1.40;Cli |
| 1469 | chrY | 4090860 | . | C | G | 389.14  | PASS          | AC=4;AF=0.222;AN=18;BaseQRankSum=-1.940e- |
| 1470 | chrY | 4090893 | . | A | G | 103.56  | my_snp_filter | AC=4;AF=0.222;AN=18;BaseQRankSum=         |
| 1471 | chrY | 4090923 | . | C | A | 50.59   | my_snp_filter | AC=3;AF=0.167;AN=18;BaseQRankSum=         |
| 1472 | chrY | 4099600 | . | T | G | 3696.86 | PASS          | AC=18;AF=1.00;AN=18;DP=150;FS=0.000;MLEAC |
| 1473 | chrY | 4100795 | . | G | A | 2991.87 | PASS          | AC=18;AF=1.00;AN=18;DP=120;FS=0.000;MLEAC |
| 1474 | chrY | 4105081 | . | A | T | 1285.76 | PASS          | AC=6;AF=0.094;AN=64;DP=253;FS=0.000;Inbre |
| 1475 | chrY | 4110020 | . | A | G | 43.50   | PASS          | AC=1;AF=0.015;AN=68;BaseQRankSum=-7.360e- |
| 1476 | chrY | 4110021 | . | T | C | 43.51   | PASS          | AC=1;AF=0.015;AN=68;BaseQRankSum=-7.360e- |
| 1477 | chrY | 4114586 | . | G | T | 393.70  | PASS          | AC=2;AF=0.029;AN=70;DP=404;FS=0.000;Inbre |
| 1478 | chrY | 4120380 | . | A | G | 170.53  | PASS          | AC=2;AF=0.029;AN=70;DP=390;FS=0.000;Inbre |
| 1479 | chrY | 4120857 | . | A | G | 923.77  | PASS          | AC=6;AF=0.150;AN=40;DP=138;FS=0.000;Inbre |
| 1480 | chrY | 4123617 | . | G | C | 828.44  | PASS          | AC=6;AF=0.273;AN=22;DP=121;FS=0.000;Inbre |
| 1481 | chrY | 4123983 | . | G | A | 4743.87 | PASS          | AC=46;AF=0.719;AN=64;DP=324;FS=0.000;Inbr |
| 1482 | chrY | 4126329 | . | G | A | 2118.45 | PASS          | AC=12;AF=0.171;AN=70;DP=332;FS=0.000;Inbr |
| 1483 | chrY | 4127325 | . | C | G | 453.68  | PASS          | AC=6;AF=0.088;AN=68;DP=337;FS=0.000;Inbre |
| 1484 | chrY | 4127795 | . | G | A | 1443.91 | PASS          | AC=28;AF=0.538;AN=52;DP=198;FS=0.000;Inbr |
| 1485 | chrY | 4127817 | . | G | T | 966.58  | PASS          | AC=6;AF=0.103;AN=58;DP=195;FS=0.000;Inbre |
| 1486 | chrY | 4130162 | . | T | A | 325.33  | PASS          | AC=2;AF=0.032;AN=62;DP=254;FS=0.000;Inbre |
| 1487 | chrY | 4131646 | . | T | A | 833.54  | PASS          | AC=5;AF=0.104;AN=48;BaseQRankSum=1.40;Cli |
| 1488 | chrY | 4134667 | . | A | C | 493.45  | PASS          | AC=5;AF=0.071;AN=70;BaseQRankSum=-1.735e+ |
| 1489 | chrY | 4134701 | . | G | A | 7308.46 | PASS          | AC=48;AF=0.727;AN=66;DP=398;FS=0.000;Inbr |
| 1490 | chrY | 4136676 | . | A | T | 38.27   | PASS          | AC=1;AF=0.015;AN=66;BaseQRankSum=0.433;Cl |
| 1491 | chrY | 4136678 | . | A | T | 37.82   | PASS          | AC=1;AF=0.015;AN=66;BaseQRankSum=-1.495e+ |
| 1492 | chrY | 4136680 | . | A | T | 39.49   | PASS          | AC=1;AF=0.015;AN=66;BaseQRankSum=-1.495e+ |
| 1493 | chrY | 4142040 | . | T | C | 869.65  | PASS          | AC=6;AF=0.143;AN=42;DP=161;FS=0.000;Inbre |
| 1494 | chrY | 4144872 | . | A | C | 1262.79 | PASS          | AC=24;AF=0.500;AN=48;DP=225;FS=0.000;Inbr |
| 1495 | chrY | 4144980 | . | G | C | 447.10  | PASS          | AC=6;AF=0.086;AN=70;DP=365;FS=0.000;Inbre |
| 1496 | chrY | 4146825 | . | A | G | 1757.16 | PASS          | AC=26;AF=0.520;AN=50;DP=250;FS=0.000;Inbr |
| 1497 | chrY | 4154183 | . | G | T | 921.16  | PASS          | AC=6;AF=0.086;AN=70;BaseQRankSum=1.53;Cli |
| 1498 | chrY | 4155252 | . | G | C | 1717.50 | PASS          | AC=30;AF=0.625;AN=48;DP=240;FS=0.000;Inbr |
| 1499 | chrY | 4156276 | . | G | A | 806.93  | PASS          | AC=6;AF=0.091;AN=66;DP=225;FS=0.000;Inbre |
| 1500 | chrY | 4156708 | . | A | C | 1459.46 | PASS          | AC=6;AF=0.086;AN=70;DP=578;FS=0.000;Inbre |
| 1501 | chrY | 4157646 | . | A | C | 5960.58 | PASS          | AC=50;AF=0.735;AN=68;DP=372;FS=0.000;Inbr |
| 1502 | chrY | 4158400 | . | A | G | 516.53  | PASS          | AC=6;AF=0.086;AN=70;DP=318;FS=0.000;Inbre |
| 1503 | chrY | 4158596 | . | C | T | 884.39  | PASS          | AC=17;AF=0.944;AN=18;BaseQRankSum=0.804;C |
| 1504 | chrY | 4164161 | . | C | G | 50.98   | my_snp_filter | AC=2;AF=0.111;AN=18;BaseQRankSum=         |
| 1505 | chrY | 4164187 | . | A | G | 90.36   | PASS          | AC=2;AF=0.111;AN=18;BaseQRankSum=-9.670e- |
| 1506 | chrY | 4164189 | . | A | C | 51.33   | PASS          | AC=1;AF=0.056;AN=18;BaseQRankSum=-6.300e- |
| 1507 | chrY | 4164195 | . | G | A | 92.69   | PASS          | AC=2;AF=0.111;AN=18;BaseQRankSum=1.18;Cli |
| 1508 | chrY | 4164262 | . | C | A | 267.60  | PASS          | AC=2;AF=0.111;AN=18;BaseQRankSum=2.27;Cli |
| 1509 | chrY | 4164272 | . | A | G | 237.26  | PASS          | AC=2;AF=0.111;AN=18;BaseQRankSum=-1.179e+ |
| 1510 | chrY | 4164297 | . | G | A | 240.17  | PASS          | AC=2;AF=0.111;AN=18;BaseQRankSum=2.01;Cli |
| 1511 | chrY | 4164798 | . | C | T | 331.90  | PASS          | AC=2;AF=0.029;AN=68;DP=460;FS=0.000;Inbre |
| 1512 | chrY | 4171208 | . | C | T | 927.65  | PASS          | AC=6;AF=0.120;AN=50;DP=156;FS=0.000;Inbre |
| 1513 | chrY | 4171600 | . | C | G | 445.44  | PASS          | AC=6;AF=0.086;AN=70;DP=523;FS=0.000;Inbre |
| 1514 | chrY | 4173236 | . | A | T | 489.57  | PASS          | AC=6;AF=0.094;AN=64;DP=273;FS=0.000;Inbre |
| 1515 | chrY | 4179142 | . | G | A | 187.69  | PASS          | AC=2;AF=0.029;AN=70;DP=523;FS=0.000;Inbre |
| 1516 | chrY | 4185783 | . | G | C | 195.25  | PASS          | AC=6;AF=0.094;AN=64;DP=257;FS=0.000;Inbre |
| 1517 | chrY | 4188644 | . | T | C | 2650.39 | PASS          | AC=34;AF=1.00;AN=34;DP=164;FS=0.000;Inbre |
| 1518 | chrY | 4189157 | . | C | T | 67.64   | PASS          | AC=1;AF=0.014;AN=70;BaseQRankSum=3.61;Cli |
| 1519 | chrY | 4190338 | . | A | G | 939.91  | PASS          | AC=6;AF=0.088;AN=68;DP=281;FS=0.000;Inbre |
| 1520 | chrY | 4195277 | . | C | T | 1223.97 | PASS          | AC=6;AF=0.111;AN=54;DP=198;FS=0.000;Inbre |

|      |      |         |   |   |   |          |               |                                           |
|------|------|---------|---|---|---|----------|---------------|-------------------------------------------|
| 1521 | chrY | 4199635 | . | A | G | 1085.37  | PASS          | AC=6;AF=0.091;AN=66;DP=226;FS=0.000;Inbre |
| 1522 | chrY | 4202999 | . | A | T | 791.99   | PASS          | AC=5;AF=0.093;AN=54;BaseQRankSum=0.771;Cl |
| 1523 | chrY | 4203639 | . | T | C | 963.43   | PASS          | AC=6;AF=0.086;AN=70;DP=361;FS=0.000;Inbre |
| 1524 | chrY | 4212879 | . | C | T | 30.86    | PASS          | AC=1;AF=0.015;AN=68;BaseQRankSum=-1.495e+ |
| 1525 | chrY | 4223155 | . | G | A | 2816.51  | PASS          | AC=12;AF=0.171;AN=70;DP=431;FS=0.000;Inbr |
| 1526 | chrY | 4223442 | . | A | G | 3097.26  | PASS          | AC=40;AF=1.00;AN=40;DP=192;FS=0.000;Inbre |
| 1527 | chrY | 4223608 | . | G | A | 902.41   | PASS          | AC=6;AF=0.250;AN=24;DP=152;FS=0.000;Inbre |
| 1528 | chrY | 4224076 | . | G | A | 86.56    | PASS          | AC=6;AF=0.250;AN=24;DP=140;FS=0.000;Inbre |
| 1529 | chrY | 4227538 | . | C | T | 863.77   | PASS          | AC=6;AF=0.300;AN=20;DP=153;FS=0.000;Inbre |
| 1530 | chrY | 4230151 | . | G | C | 1167.06  | PASS          | AC=6;AF=0.094;AN=64;DP=364;FS=0.000;Inbre |
| 1531 | chrY | 4231783 | . | C | T | 1186.13  | PASS          | AC=6;AF=0.088;AN=68;DP=281;FS=0.000;Inbre |
| 1532 | chrY | 4237765 | . | G | T | 226.69   | PASS          | AC=8;AF=0.308;AN=26;DP=155;FS=0.000;Inbre |
| 1533 | chrY | 4238487 | . | A | G | 396.32   | PASS          | AC=4;AF=0.063;AN=64;DP=213;FS=0.000;Inbre |
| 1534 | chrY | 4244747 | . | T | G | 536.75   | PASS          | AC=6;AF=0.103;AN=58;BaseQRankSum=-9.920e- |
| 1535 | chrY | 4248585 | . | C | G | 194.36   | PASS          | AC=6;AF=0.088;AN=68;DP=292;FS=0.000;Inbre |
| 1536 | chrY | 4260696 | . | T | C | 336.50   | PASS          | AC=2;AF=0.048;AN=42;DP=168;FS=0.000;Inbre |
| 1537 | chrY | 4263667 | . | G | A | 1356.06  | PASS          | AC=6;AF=0.088;AN=68;DP=362;FS=0.000;Inbre |
| 1538 | chrY | 4265904 | . | C | T | 1130.13  | PASS          | AC=6;AF=0.086;AN=70;DP=473;FS=0.000;Inbre |
| 1539 | chrY | 4270633 | . | T | C | 12915.52 | PASS          | AC=46;AF=0.657;AN=70;DP=650;FS=0.         |
| 1540 | chrY | 4277355 | . | C | T | 491.99   | PASS          | AC=6;AF=0.300;AN=20;BaseQRankSum=1.40;Cli |
| 1541 | chrY | 4277827 | . | C | A | 44.35    | PASS          | AC=2;AF=0.036;AN=56;DP=236;FS=0.000;Inbre |
| 1542 | chrY | 4278096 | . | G | A | 99.80    | PASS          | AC=1;AF=0.015;AN=66;BaseQRankSum=-7.790e- |
| 1543 | chrY | 4279760 | . | A | G | 4421.42  | PASS          | AC=39;AF=0.591;AN=66;BaseQRankSum=-4.950e |
| 1544 | chrY | 4279995 | . | A | G | 3990.65  | PASS          | AC=44;AF=0.710;AN=62;DP=295;FS=0.000;Inbr |
| 1545 | chrY | 4280606 | . | C | T | 399.78   | PASS          | AC=2;AF=0.029;AN=70;DP=319;FS=0.000;Inbre |
| 1546 | chrY | 4282216 | . | A | G | 75.31    | PASS          | AC=1;AF=0.016;AN=62;BaseQRankSum=0.322;Cl |
| 1547 | chrY | 4282662 | . | T | C | 797.24   | PASS          | AC=16;AF=0.400;AN=40;DP=184;FS=0.000;Inbr |
| 1548 | chrY | 4288284 | . | G | A | 1434.19  | PASS          | AC=6;AF=0.333;AN=18;DP=176;FS=0.000;MLEAC |
| 1549 | chrY | 4289464 | . | G | C | 42.33    | PASS          | AC=1;AF=0.056;AN=18;BaseQRankSum=-2.739e+ |
| 1550 | chrY | 4289470 | . | A | C | 42.32    | PASS          | AC=1;AF=0.056;AN=18;BaseQRankSum=-9.530e- |
| 1551 | chrY | 4289481 | . | A | G | 42.32    | PASS          | AC=1;AF=0.056;AN=18;BaseQRankSum=0.056;Cl |
| 1552 | chrY | 4289483 | . | T | C | 42.32    | PASS          | AC=1;AF=0.056;AN=18;BaseQRankSum=0.423;Cl |
| 1553 | chrY | 4289528 | . | G | A | 48.40    | PASS          | AC=1;AF=0.056;AN=18;BaseQRankSum=0.948;Cl |
| 1554 | chrY | 4289542 | . | C | A | 48.34    | PASS          | AC=1;AF=0.056;AN=18;BaseQRankSum=2.13;Cli |
| 1555 | chrY | 4289556 | . | C | T | 48.33    | PASS          | AC=1;AF=0.056;AN=18;BaseQRankSum=2.61;Cli |
| 1556 | chrY | 4292121 | . | G | A | 1690.85  | PASS          | AC=6;AF=0.231;AN=26;DP=189;FS=0.000;Inbre |
| 1557 | chrY | 4294678 | . | G | C | 36.79    | PASS          | AC=1;AF=0.015;AN=68;BaseQRankSum=-1.231e+ |
| 1558 | chrY | 4294686 | . | T | A | 36.86    | PASS          | AC=1;AF=0.015;AN=68;BaseQRankSum=-3.580e- |
| 1559 | chrY | 4295883 | . | T | C | 10185.75 | PASS          | AC=52;AF=0.743;AN=70;BaseQRankSum         |
| 1560 | chrY | 4302569 | . | G | T | 638.03   | PASS          | AC=14;AF=0.412;AN=34;DP=165;FS=0.000;Inbr |
| 1561 | chrY | 4303101 | . | G | C | 174.15   | PASS          | AC=2;AF=0.029;AN=70;BaseQRankSum=2.67;Cl  |
| 1562 | chrY | 4303158 | . | T | C | 1162.87  | PASS          | AC=5;AF=0.074;AN=68;BaseQRankSum=0.747;Cl |
| 1563 | chrY | 4304759 | . | G | T | 726.68   | PASS          | AC=3;AF=0.043;AN=70;BaseQRankSum=0.167;Cl |
| 1564 | chrY | 4311201 | . | C | G | 1231.46  | PASS          | AC=6;AF=0.088;AN=68;DP=478;FS=0.000;Inbre |
| 1565 | chrY | 4311481 | . | A | C | 138.74   | PASS          | AC=1;AF=0.014;AN=70;BaseQRankSum=-2.103e+ |
| 1566 | chrY | 4311526 | . | T | C | 111.74   | PASS          | AC=1;AF=0.014;AN=70;BaseQRankSum=0.057;Cl |
| 1567 | chrY | 4311527 | . | G | A | 111.74   | PASS          | AC=1;AF=0.014;AN=70;BaseQRankSum=-1.538e+ |
| 1568 | chrY | 4315074 | . | T | C | 36.45    | PASS          | AC=2;AF=0.030;AN=66;DP=237;FS=0.000;Inbre |
| 1569 | chrY | 4315114 | . | G | A | 106.77   | PASS          | AC=1;AF=0.015;AN=68;BaseQRankSum=-2.480e- |
| 1570 | chrY | 4315403 | . | A | C | 50.03    | PASS          | AC=1;AF=0.015;AN=68;BaseQRankSum=1.35;Cli |
| 1571 | chrY | 4315892 | . | C | T | 67.83    | PASS          | AC=1;AF=0.014;AN=70;BaseQRankSum=-8.390e- |
| 1572 | chrY | 4317897 | . | T | C | 67.86    | PASS          | AC=1;AF=0.014;AN=70;BaseQRankSum=0.787;Cl |
| 1573 | chrY | 4318888 | . | G | A | 32.06    | PASS          | AC=1;AF=0.015;AN=66;BaseQRankSum=0.406;Cl |
| 1574 | chrY | 4319659 | . | C | G | 53.93    | my_snp_filter | AC=2;AF=0.029;AN=68;BaseQRankSum          |
| 1575 | chrY | 4319851 | . | A | G | 292.93   | PASS          | AC=2;AF=0.083;AN=24;BaseQRankSum=2.36;Cli |
| 1576 | chrY | 4320529 | . | G | C | 1459.77  | PASS          | AC=6;AF=0.188;AN=32;DP=185;FS=0.000;Inbre |
| 1577 | chrY | 4321938 | . | G | C | 1180.90  | PASS          | AC=6;AF=0.086;AN=70;DP=660;FS=0.000;Inbre |
| 1578 | chrY | 4324067 | . | C | G | 137.33   | PASS          | AC=1;AF=0.015;AN=68;BaseQRankSum=-1.310e+ |
| 1579 | chrY | 4324451 | . | T | C | 179.82   | PASS          | AC=3;AF=0.045;AN=66;BaseQRankSum=-1.231e+ |
| 1580 | chrY | 4325972 | . | T | C | 2403.86  | PASS          | AC=18;AF=1.00;AN=18;DP=138;FS=0.000;MLEAC |
| 1581 | chrY | 4327478 | . | T | C | 101.90   | PASS          | AC=3;AF=0.054;AN=56;BaseQRankSum=-7.270e- |
| 1582 | chrY | 4327885 | . | A | G | 413      | PASS          | AC=3;AF=0.043;AN=70;BaseQRankSum=-2.205e+ |
| 1583 | chrY | 4327996 | . | G | C | 178.91   | PASS          | AC=4;AF=0.069;AN=58;BaseQRankSum=-1.026e+ |
| 1584 | chrY | 4328695 | . | G | A | 784.61   | PASS          | AC=7;AF=0.103;AN=68;BaseQRankSum=-2.280e- |
| 1585 | chrY | 4328714 | . | A | G | 1030.97  | PASS          | AC=9;AF=0.132;AN=68;BaseQRankSum=0.101;Cl |
| 1586 | chrY | 4328987 | . | G | C | 37.70    | PASS          | AC=2;AF=0.053;AN=38;DP=118;FS=0.000;Inbre |
| 1587 | chrY | 4329802 | . | A | G | 678.77   | PASS          | AC=5;AF=0.071;AN=70;BaseQRankSum=-7.470e- |
| 1588 | chrY | 4331093 | . | A | G | 380.89   | PASS          | AC=2;AF=0.029;AN=68;DP=327;FS=0.000;Inbre |
| 1589 | chrY | 4336978 | . | G | C | 46.92    | PASS          | AC=2;AF=0.033;AN=60;DP=201;FS=0.000;Inbre |
| 1590 | chrY | 4337372 | . | C | T | 469.86   | PASS          | AC=2;AF=0.029;AN=70;DP=309;FS=0.000;Inbre |
| 1591 | chrY | 4338502 | . | G | T | 36.59    | PASS          | AC=1;AF=0.016;AN=62;BaseQRankSum=2.52;Cli |
| 1592 | chrY | 4340626 | . | A | G | 3462.20  | PASS          | AC=42;AF=1.00;AN=42;DP=177;FS=0.000;Inbre |
| 1593 | chrY | 4340996 | . | G | A | 297.93   | PASS          | AC=4;AF=0.057;AN=70;BaseQRankSum=0.849;Cl |
| 1594 | chrY | 4342048 | . | G | C | 6524.15  | PASS          | AC=60;AF=1.00;AN=60;DP=223;FS=0.000;Inbre |
| 1595 | chrY | 4342513 | . | A | C | 201.69   | PASS          | AC=2;AF=0.031;AN=64;BaseQRankSum=0.668;Cl |
| 1596 | chrY | 4345610 | . | C | T | 66.42    | my_snp_filter | AC=2;AF=0.029;AN=68;BaseQRankSum          |

|      |      |         |   |   |   |          |               |                                           |
|------|------|---------|---|---|---|----------|---------------|-------------------------------------------|
| 1597 | chrY | 4347628 | . | C | T | 756.81   | PASS          | AC=6;AF=0.086;AN=70;DP=447;FS=0.000;Inbre |
| 1598 | chrY | 4349622 | . | A | T | 35.14    | my_snp_filter | AC=1;AF=0.014;AN=70;BaseQRankSum=         |
| 1599 | chrY | 4349670 | . | G | A | 49.82    | PASS          | AC=1;AF=0.014;AN=70;BaseQRankSum=1.81;Cli |
| 1600 | chrY | 4349792 | . | G | A | 178.72   | PASS          | AC=3;AF=0.047;AN=64;BaseQRankSum=-7.800e- |
| 1601 | chrY | 4350032 | . | A | G | 34.31    | PASS          | AC=1;AF=0.014;AN=70;BaseQRankSum=2.49;Cli |
| 1602 | chrY | 4350267 | . | G | C | 995.58   | PASS          | AC=6;AF=0.086;AN=70;DP=452;FS=0.000;Inbre |
| 1603 | chrY | 4351077 | . | T | C | 371.56   | PASS          | AC=2;AF=0.029;AN=70;DP=310;FS=0.000;Inbre |
| 1604 | chrY | 4351447 | . | T | A | 1103.37  | PASS          | AC=5;AF=0.071;AN=70;BaseQRankSum=0.925;Cl |
| 1605 | chrY | 4351631 | . | A | G | 191.24   | PASS          | AC=3;AF=0.044;AN=68;BaseQRankSum=0.00;Cli |
| 1606 | chrY | 4352151 | . | A | G | 6625.22  | PASS          | AC=66;AF=1.00;AN=66;DP=239;FS=0.000;Inbre |
| 1607 | chrY | 4352240 | . | T | C | 226.75   | PASS          | AC=2;AF=0.031;AN=64;DP=233;FS=0.000;Inbre |
| 1608 | chrY | 4354762 | . | G | C | 7869.22  | PASS          | AC=52;AF=1.00;AN=52;DP=227;FS=0.000;Inbre |
| 1609 | chrY | 4354763 | . | A | C | 4090.30  | PASS          | AC=12;AF=0.188;AN=64;DP=231;FS=0.000;Inbr |
| 1610 | chrY | 4355755 | . | T | C | 6895.61  | PASS          | AC=46;AF=0.657;AN=70;DP=398;FS=0.000;Inbr |
| 1611 | chrY | 4357591 | . | T | C | 8081.09  | PASS          | AC=68;AF=1.00;AN=68;DP=285;FS=0.000;Inbre |
| 1612 | chrY | 4358743 | . | C | T | 1957.90  | PASS          | AC=18;AF=1.00;AN=18;DP=76;FS=0.000;MLEAC= |
| 1613 | chrY | 4359188 | . | C | T | 94.13    | PASS          | AC=1;AF=0.015;AN=68;BaseQRankSum=3.51;Cli |
| 1614 | chrY | 4360347 | . | C | A | 1064.51  | PASS          | AC=6;AF=0.111;AN=54;BaseQRankSum=-1.736e+ |
| 1615 | chrY | 4363561 | . | T | G | 1088.58  | PASS          | AC=24;AF=0.522;AN=46;DP=196;FS=0.000;Inbr |
| 1616 | chrY | 4365734 | . | G | T | 4713.71  | PASS          | AC=38;AF=0.559;AN=68;DP=295;FS=0.000;Inbr |
| 1617 | chrY | 4368015 | . | A | G | 178.91   | PASS          | AC=2;AF=0.029;AN=70;DP=447;FS=0.000;Inbre |
| 1618 | chrY | 4368613 | . | C | T | 2611.81  | PASS          | AC=39;AF=0.609;AN=64;BaseQRankSum=0.358;C |
| 1619 | chrY | 4370117 | . | T | A | 323.04   | PASS          | AC=2;AF=0.111;AN=18;BaseQRankSum=-1.230e- |
| 1620 | chrY | 4372216 | . | A | G | 559.78   | PASS          | AC=6;AF=0.086;AN=70;DP=401;FS=0.000;Inbre |
| 1621 | chrY | 4372325 | . | C | A | 826.56   | PASS          | AC=6;AF=0.088;AN=68;DP=231;FS=0.000;Inbre |
| 1622 | chrY | 4373263 | . | C | T | 36.11    | my_snp_filter | AC=1;AF=0.014;AN=70;BaseQRankSum=         |
| 1623 | chrY | 4375068 | . | G | A | 539.55   | PASS          | AC=6;AF=0.091;AN=66;DP=247;FS=0.000;Inbre |
| 1624 | chrY | 4375325 | . | T | G | 224.95   | PASS          | AC=2;AF=0.029;AN=70;BaseQRankSum=-1.141e+ |
| 1625 | chrY | 4375372 | . | T | C | 168.11   | PASS          | AC=2;AF=0.029;AN=70;BaseQRankSum=2.22;Cli |
| 1626 | chrY | 4375715 | . | T | C | 200.36   | PASS          | AC=3;AF=0.045;AN=66;BaseQRankSum=0.118;Cl |
| 1627 | chrY | 4376820 | . | G | A | 647.02   | PASS          | AC=2;AF=0.111;AN=18;DP=183;FS=0.000;MLEAC |
| 1628 | chrY | 4377471 | . | T | G | 86.06    | PASS          | AC=1;AF=0.014;AN=70;BaseQRankSum=-6.340e- |
| 1629 | chrY | 4379306 | . | A | G | 89.25    | my_snp_filter | AC=6;AF=0.188;AN=32;BaseQRankSum=         |
| 1630 | chrY | 4379831 | . | T | G | 124.02   | PASS          | AC=3;AF=0.044;AN=68;BaseQRankSum=1.58;Cli |
| 1631 | chrY | 4379974 | . | T | A | 121.19   | PASS          | AC=2;AF=0.077;AN=26;BaseQRankSum=2.08;Cli |
| 1632 | chrY | 4381160 | . | T | G | 364.04   | PASS          | AC=2;AF=0.029;AN=70;BaseQRankSum=0.00;Cli |
| 1633 | chrY | 4382462 | . | A | G | 410.46   | PASS          | AC=6;AF=0.107;AN=56;DP=123;FS=0.000;Inbre |
| 1634 | chrY | 4386358 | . | G | A | 10942.93 | PASS          | AC=46;AF=0.657;AN=70;DP=539;FS=0.0        |
| 1635 | chrY | 4386550 | . | C | G | 55.48    | my_snp_filter | AC=2;AF=0.029;AN=70;BaseQRankSum=         |
| 1636 | chrY | 4386601 | . | G | A | 1155.23  | PASS          | AC=14;AF=0.200;AN=70;BaseQRankSum=0.067;C |
| 1637 | chrY | 4389042 | . | T | A | 122.95   | PASS          | AC=1;AF=0.014;AN=70;BaseQRankSum=0.593;Cl |
| 1638 | chrY | 4389854 | . | G | A | 30.93    | PASS          | AC=1;AF=0.014;AN=70;BaseQRankSum=-1.495e+ |
| 1639 | chrY | 4390891 | . | T | C | 179.77   | PASS          | AC=2;AF=0.043;AN=46;DP=161;FS=0.000;Inbre |
| 1640 | chrY | 4391630 | . | G | A | 216.46   | PASS          | AC=2;AF=0.034;AN=58;BaseQRankSum=2.07;Cli |
| 1641 | chrY | 4393100 | . | C | T | 112.13   | PASS          | AC=1;AF=0.014;AN=70;BaseQRankSum=1.58;Cli |
| 1642 | chrY | 4393781 | . | C | T | 35.30    | my_snp_filter | AC=1;AF=0.038;AN=26;BaseQRankSum=         |
| 1643 | chrY | 4397050 | . | T | G | 209.96   | my_snp_filter | AC=6;AF=0.176;AN=34;BaseQRankSum=         |
| 1644 | chrY | 4397076 | . | G | T | 238.11   | my_snp_filter | AC=5;AF=0.192;AN=26;BaseQRankSum=         |
| 1645 | chrY | 4397231 | . | T | C | 86.99    | my_snp_filter | AC=3;AF=0.068;AN=44;BaseQRankSum=         |
| 1646 | chrY | 4397475 | . | C | T | 75.09    | PASS          | AC=1;AF=0.016;AN=62;BaseQRankSum=1.97;Cli |
| 1647 | chrY | 4401571 | . | C | T | 41.74    | my_snp_filter | AC=3;AF=0.045;AN=66;BaseQRankSum=         |
| 1648 | chrY | 4402237 | . | C | A | 9444.05  | PASS          | AC=48;AF=0.727;AN=66;DP=491;FS=0.000;Inbr |
| 1649 | chrY | 4403059 | . | T | C | 1900.80  | my_snp_filter | AC=16;AF=0.229;AN=70;BaseQRankSum         |
| 1650 | chrY | 4403101 | . | C | G | 2743.47  | my_snp_filter | AC=23;AF=0.329;AN=70;BaseQRankSum         |
| 1651 | chrY | 4403137 | . | T | G | 3743.80  | PASS          | AC=23;AF=0.338;AN=68;BaseQRankSum=1.02;Cl |
| 1652 | chrY | 4403286 | . | T | G | 5892.63  | PASS          | AC=28;AF=0.400;AN=70;BaseQRankSum=0.660;C |
| 1653 | chrY | 4403405 | . | A | G | 1894.37  | PASS          | AC=11;AF=0.250;AN=44;BaseQRankSum=-2.490e |
| 1654 | chrY | 4403980 | . | A | G | 982.93   | PASS          | AC=10;AF=0.238;AN=42;BaseQRankSum=0.156;C |
| 1655 | chrY | 4404041 | . | T | C | 1750.13  | PASS          | AC=20;AF=0.323;AN=62;BaseQRankSum=-1.467e |
| 1656 | chrY | 4405072 | . | T | G | 107.29   | PASS          | AC=2;AF=0.029;AN=68;BaseQRankSum=0.203;Cl |
| 1657 | chrY | 4405573 | . | T | C | 6145.26  | PASS          | AC=52;AF=1.00;AN=52;DP=232;FS=0.000;Inbre |
| 1658 | chrY | 4406411 | . | G | A | 1510.15  | PASS          | AC=6;AF=0.086;AN=70;DP=425;FS=0.000;Inbre |
| 1659 | chrY | 4407347 | . | C | T | 453.78   | PASS          | AC=1;AF=0.016;AN=62;BaseQRankSum=0.415;Cl |
| 1660 | chrY | 4407355 | . | G | A | 1217.23  | my_snp_filter | AC=10;AF=0.152;AN=66;BaseQRankSum         |
| 1661 | chrY | 4407462 | . | G | A | 99.66    | my_snp_filter | AC=4;AF=0.057;AN=70;BaseQRankSum=         |
| 1662 | chrY | 4409580 | . | T | G | 292.96   | PASS          | AC=2;AF=0.050;AN=40;BaseQRankSum=1.09;Cli |
| 1663 | chrY | 4409982 | . | C | T | 984.09   | PASS          | AC=9;AF=0.500;AN=18;BaseQRankSum=1.04;Cli |
| 1664 | chrY | 4411847 | . | A | G | 89.05    | PASS          | AC=2;AF=0.030;AN=66;BaseQRankSum=-1.746e+ |
| 1665 | chrY | 4413115 | . | A | G | 43.51    | my_snp_filter | AC=1;AF=0.014;AN=70;BaseQRankSum=         |
| 1666 | chrY | 4413362 | . | T | C | 103.36   | my_snp_filter | AC=3;AF=0.083;AN=36;BaseQRankSum=         |
| 1667 | chrY | 4415274 | . | G | A | 66.58    | PASS          | AC=1;AF=0.015;AN=66;BaseQRankSum=0.251;Cl |
| 1668 | chrY | 4416011 | . | T | C | 475.77   | PASS          | AC=7;AF=0.100;AN=70;BaseQRankSum=-1.506e+ |
| 1669 | chrY | 4416149 | . | C | T | 77.43    | PASS          | AC=2;AF=0.029;AN=68;BaseQRankSum=1.61;Cli |
| 1670 | chrY | 4416157 | . | T | G | 109.20   | PASS          | AC=2;AF=0.029;AN=68;BaseQRankSum=1.80;Cli |
| 1671 | chrY | 4416201 | . | A | T | 513.75   | PASS          | AC=7;AF=0.135;AN=52;BaseQRankSum=1.27;Cli |
| 1672 | chrY | 4416259 | . | C | G | 616.21   | PASS          | AC=9;AF=0.205;AN=44;BaseQRankSum=1.15;Cli |

|      |      |         |   |   |   |          |               |                                            |
|------|------|---------|---|---|---|----------|---------------|--------------------------------------------|
| 1673 | chrY | 4416424 | . | T | C | 65.20    | my_snp_filter | AC=2;AF=0.031;AN=64;BaseQRankSum=          |
| 1674 | chrY | 4416473 | . | A | T | 72.69    | my_snp_filter | AC=3;AF=0.044;AN=68;BaseQRankSum=          |
| 1675 | chrY | 4416549 | . | C | T | 290.01   | PASS          | AC=5;AF=0.074;AN=68;BaseQRankSum=-2.890e-  |
| 1676 | chrY | 4416630 | . | T | G | 124.18   | PASS          | AC=2;AF=0.037;AN=54;BaseQRankSum=1.66;Cli  |
| 1677 | chrY | 4416688 | . | C | A | 40.48    | PASS          | AC=1;AF=0.024;AN=42;BaseQRankSum=2.02;Cli  |
| 1678 | chrY | 4416697 | . | G | A | 36.24    | PASS          | AC=1;AF=0.036;AN=28;BaseQRankSum=2.02;Cli  |
| 1679 | chrY | 4416884 | . | A | C | 250.25   | PASS          | AC=2;AF=0.029;AN=70;BaseQRankSum=-1.652e+  |
| 1680 | chrY | 4416906 | . | G | A | 311.31   | PASS          | AC=3;AF=0.044;AN=68;BaseQRankSum=1.37;Cli  |
| 1681 | chrY | 4416920 | . | G | A | 360.78   | PASS          | AC=4;AF=0.057;AN=70;BaseQRankSum=1.92;Cli  |
| 1682 | chrY | 4416935 | . | G | A | 351.87   | PASS          | AC=4;AF=0.057;AN=70;BaseQRankSum=1.03;Cli  |
| 1683 | chrY | 4416967 | . | T | T | 97.30    | my_snp_filter | AC=4;AF=0.057;AN=70;BaseQRankSum=          |
| 1684 | chrY | 4417098 | . | G | C | 429.25   | PASS          | AC=6;AF=0.091;AN=66;BaseQRankSum=1.98;Cli  |
| 1685 | chrY | 4417357 | . | G | C | 12922.83 | PASS          | AC=32;AF=0.457;AN=70;BaseQRankSum=         |
| 1686 | chrY | 4418322 | . | G | C | 3248.18  | PASS          | AC=28;AF=1.00;AN=28;DP=136;FS=0.000;Inbre  |
| 1687 | chrY | 4419900 | . | C | T | 151.38   | PASS          | AC=3;AF=0.150;AN=20;BaseQRankSum=0.950;Cl  |
| 1688 | chrY | 4419952 | . | A | G | 860.01   | my_snp_filter | AC=8;AF=0.444;AN=18;BaseQRankSum=          |
| 1689 | chrY | 4420080 | . | C | T | 162.22   | my_snp_filter | AC=5;AF=0.250;AN=20;BaseQRankSum=          |
| 1690 | chrY | 4420889 | . | C | A | 142.84   | PASS          | AC=3;AF=0.044;AN=68;BaseQRankSum=-8.100e-  |
| 1691 | chrY | 4420997 | . | C | T | 62.86    | PASS          | AC=1;AF=0.014;AN=70;BaseQRankSum=2.53;Cli  |
| 1692 | chrY | 4421034 | . | G | T | 192.03   | PASS          | AC=3;AF=0.045;AN=66;BaseQRankSum=1.92;Cli  |
| 1693 | chrY | 4421431 | . | G | T | 681.20   | PASS          | AC=7;AF=0.350;AN=20;BaseQRankSum=1.12;Cli  |
| 1694 | chrY | 4421864 | . | T | G | 447.41   | PASS          | AC=9;AF=0.129;AN=70;BaseQRankSum=0.320;Cl  |
| 1695 | chrY | 4424113 | . | C | T | 1837.26  | PASS          | AC=4;AF=0.059;AN=68;DP=598;FS=0.000;Inbre  |
| 1696 | chrY | 4424172 | . | A | G | 194.44   | PASS          | AC=3;AF=0.043;AN=70;BaseQRankSum=-8.800e-  |
| 1697 | chrY | 4427466 | . | T | A | 30.25    | my_snp_filter | AC=1;AF=0.015;AN=68;BaseQRankSum=          |
| 1698 | chrY | 4427482 | . | T | C | 132.49   | PASS          | AC=1;AF=0.015;AN=68;BaseQRankSum=-1.573e+  |
| 1699 | chrY | 4427484 | . | T | C | 132.47   | PASS          | AC=1;AF=0.015;AN=68;BaseQRankSum=-2.657e+  |
| 1700 | chrY | 4427485 | . | C | T | 132.47   | PASS          | AC=1;AF=0.015;AN=68;BaseQRankSum=-2.652e+  |
| 1701 | chrY | 4427911 | . | A | T | 44.49    | PASS          | AC=2;AF=0.034;AN=58;DP=166;FS=0.000;Inbre  |
| 1702 | chrY | 4428086 | . | A | G | 442.40   | my_snp_filter | AC=6;AF=0.086;AN=70;BaseQRankSum=          |
| 1703 | chrY | 4428328 | . | T | C | 566.70   | PASS          | AC=11;AF=0.344;AN=32;BaseQRankSum=-3.891e- |
| 1704 | chrY | 4428370 | . | G | C | 2572.99  | PASS          | AC=9;AF=0.409;AN=22;BaseQRankSum=1.93;Cli  |
| 1705 | chrY | 4428487 | . | G | T | 106.08   | my_snp_filter | AC=3;AF=0.136;AN=22;BaseQRankSum=          |
| 1706 | chrY | 4431344 | . | A | G | 770.53   | PASS          | AC=8;AF=0.444;AN=18;BaseQRankSum=-8.490e-  |
| 1707 | chrY | 4431426 | . | A | G | 215.32   | PASS          | AC=1;AF=0.056;AN=18;BaseQRankSum=-1.015e+  |
| 1708 | chrY | 4431531 | . | A | G | 474.56   | my_snp_filter | AC=8;AF=0.444;AN=18;BaseQRankSum=          |
| 1709 | chrY | 4431604 | . | A | T | 397.43   | PASS          | AC=3;AF=0.167;AN=18;BaseQRankSum=-2.540e-  |
| 1710 | chrY | 4431613 | . | G | A | 359.40   | PASS          | AC=3;AF=0.167;AN=18;BaseQRankSum=-1.484e+  |
| 1711 | chrY | 4431623 | . | T | C | 332.32   | PASS          | AC=3;AF=0.167;AN=18;BaseQRankSum=-1.678e+  |
| 1712 | chrY | 4433972 | . | C | A | 58       | my_snp_filter | AC=2;AF=0.029;AN=68;BaseQRankSum=          |
| 1713 | chrY | 4435218 | . | T | G | 44.98    | my_snp_filter | AC=2;AF=0.029;AN=68;BaseQRankSum=          |
| 1714 | chrY | 4435570 | . | G | C | 56.40    | PASS          | AC=2;AF=0.043;AN=46;DP=167;FS=0.000;Inbre  |
| 1715 | chrY | 4436767 | . | A | G | 35.68    | PASS          | AC=1;AF=0.014;AN=70;BaseQRankSum=1.23;Cli  |
| 1716 | chrY | 4439043 | . | C | T | 85.70    | PASS          | AC=2;AF=0.043;AN=46;BaseQRankSum=0.922;Cl  |
| 1717 | chrY | 4439047 | . | G | A | 39.50    | PASS          | AC=1;AF=0.021;AN=48;BaseQRankSum=-1.231e+  |
| 1718 | chrY | 4439169 | . | C | T | 543.49   | PASS          | AC=9;AF=0.167;AN=54;BaseQRankSum=-1.473e+  |
| 1719 | chrY | 4440554 | . | T | C | 37.15    | my_snp_filter | AC=2;AF=0.029;AN=70;BaseQRankSum=          |
| 1720 | chrY | 4441552 | . | A | G | 829.89   | PASS          | AC=4;AF=0.057;AN=70;DP=424;FS=0.000;Inbre  |
| 1721 | chrY | 4441852 | . | A | C | 123.86   | PASS          | AC=3;AF=0.050;AN=60;BaseQRankSum=0.00;Cli  |
| 1722 | chrY | 4441959 | . | T | G | 476.94   | PASS          | AC=8;AF=0.174;AN=46;BaseQRankSum=0.690;Cl  |
| 1723 | chrY | 4442007 | . | C | T | 1175.88  | PASS          | AC=16;AF=0.258;AN=62;BaseQRankSum=2.40;Cl  |
| 1724 | chrY | 4442072 | . | C | T | 1791.92  | PASS          | AC=21;AF=0.309;AN=68;BaseQRankSum=0.134;C  |
| 1725 | chrY | 4442562 | . | A | G | 40.20    | my_snp_filter | AC=1;AF=0.016;AN=64;BaseQRankSum=          |
| 1726 | chrY | 4443221 | . | T | C | 5376.23  | PASS          | AC=50;AF=1.00;AN=50;DP=189;FS=0.000;Inbre  |
| 1727 | chrY | 4443713 | . | C | A | 1114.19  | PASS          | AC=6;AF=0.088;AN=68;BaseQRankSum=1.53;Cli  |
| 1728 | chrY | 4444044 | . | C | G | 47.44    | PASS          | AC=2;AF=0.032;AN=62;DP=286;FS=0.000;Inbre  |
| 1729 | chrY | 4444110 | . | C | T | 5058.36  | PASS          | AC=25;AF=0.391;AN=64;BaseQRankSum=0.00;Cl  |
| 1730 | chrY | 4446430 | . | A | T | 6508.07  | PASS          | AC=54;AF=1.00;AN=54;BaseQRankSum=1.04;Cli  |
| 1731 | chrY | 4447773 | . | C | G | 1020.28  | PASS          | AC=6;AF=0.136;AN=44;DP=146;FS=0.000;Inbre  |
| 1732 | chrY | 4447931 | . | C | T | 956.41   | PASS          | AC=6;AF=0.088;AN=68;DP=286;FS=0.000;Inbre  |
| 1733 | chrY | 4449892 | . | A | C | 1468.77  | PASS          | AC=6;AF=0.086;AN=70;DP=376;FS=0.000;Inbre  |
| 1734 | chrY | 4450299 | . | T | C | 114.33   | PASS          | AC=2;AF=0.029;AN=70;BaseQRankSum=1.10;Cli  |
| 1735 | chrY | 4450335 | . | G | A | 244.90   | PASS          | AC=3;AF=0.043;AN=70;BaseQRankSum=1.16;Cli  |
| 1736 | chrY | 4450487 | . | C | T | 284.93   | PASS          | AC=6;AF=0.136;AN=44;BaseQRankSum=1.32;Cli  |
| 1737 | chrY | 4450551 | . | C | T | 42.79    | my_snp_filter | AC=3;AF=0.115;AN=26;BaseQRankSum=          |
| 1738 | chrY | 4450756 | . | A | C | 301.96   | PASS          | AC=5;AF=0.093;AN=54;BaseQRankSum=0.720;Cl  |
| 1739 | chrY | 4450757 | . | G | A | 301.50   | PASS          | AC=5;AF=0.086;AN=58;BaseQRankSum=1.40;Cli  |
| 1740 | chrY | 4450932 | . | A | G | 395.93   | PASS          | AC=7;AF=0.117;AN=60;BaseQRankSum=0.361;Cl  |
| 1741 | chrY | 4453480 | . | C | A | 57.94    | PASS          | AC=2;AF=0.029;AN=70;BaseQRankSum=0.00;Cli  |
| 1742 | chrY | 4453852 | . | T | A | 548      | PASS          | AC=7;AF=0.117;AN=60;BaseQRankSum=1.46;Cli  |
| 1743 | chrY | 4453978 | . | A | T | 1114.77  | PASS          | AC=14;AF=0.206;AN=68;BaseQRankSum=-8.730e- |
| 1744 | chrY | 4456367 | . | G | C | 7040.98  | PASS          | AC=43;AF=0.672;AN=64;BaseQRankSum=0.067;C  |
| 1745 | chrY | 4456434 | . | A | T | 277.93   | PASS          | AC=2;AF=0.030;AN=66;BaseQRankSum=-1.026e+  |
| 1746 | chrY | 4456446 | . | G | T | 275.26   | PASS          | AC=2;AF=0.029;AN=68;BaseQRankSum=0.358;Cl  |
| 1747 | chrY | 4456637 | . | C | T | 49.34    | my_snp_filter | AC=3;AF=0.043;AN=70;BaseQRankSum=          |
| 1748 | chrY | 4456669 | . | A | G | 190.33   | PASS          | AC=7;AF=0.103;AN=68;BaseQRankSum=-1.300e+  |

|      |      |         |   |   |   |          |               |                                           |
|------|------|---------|---|---|---|----------|---------------|-------------------------------------------|
| 1749 | chrY | 4456726 | . | A | G | 160.84   | my_snp_filter | AC=7;AF=0.100;AN=70;BaseQRankSum=         |
| 1750 | chrY | 4459062 | . | G | A | 391.19   | PASS          | AC=5;AF=0.071;AN=70;BaseQRankSum=-9.100e- |
| 1751 | chrY | 4460350 | . | A | G | 94.92    | my_snp_filter | AC=4;AF=0.059;AN=68;BaseQRankSum=         |
| 1752 | chrY | 4460933 | . | T | C | 705.18   | PASS          | AC=6;AF=0.094;AN=64;BaseQRankSum=-7.510e- |
| 1753 | chrY | 4461159 | . | C | G | 12996.94 | PASS          | AC=68;AF=1.00;AN=68;DP=448;FS=0.0         |
| 1754 | chrY | 4462151 | . | T | C | 423.90   | PASS          | AC=4;AF=0.061;AN=66;BaseQRankSum=0.594;Cl |
| 1755 | chrY | 4462311 | . | C | T | 149.55   | my_snp_filter | AC=3;AF=0.043;AN=70;BaseQRankSum=         |
| 1756 | chrY | 4465514 | . | G | T | 49.17    | PASS          | AC=1;AF=0.014;AN=70;BaseQRankSum=1.24;Cli |
| 1757 | chrY | 4466272 | . | G | A | 848.50   | PASS          | AC=8;AF=0.143;AN=56;BaseQRankSum=1.03;Cli |
| 1758 | chrY | 4466493 | . | G | A | 398.58   | PASS          | AC=7;AF=0.103;AN=68;BaseQRankSum=2.15;Cli |
| 1759 | chrY | 4468493 | . | T | G | 1426.16  | PASS          | AC=30;AF=0.625;AN=48;DP=180;FS=0.000;Inbr |
| 1760 | chrY | 4469135 | . | G | T | 187.46   | PASS          | AC=6;AF=0.086;AN=70;BaseQRankSum=-7.400e- |
| 1761 | chrY | 4472623 | . | G | A | 93.54    | my_snp_filter | AC=4;AF=0.059;AN=68;BaseQRankSum=         |
| 1762 | chrY | 4472721 | . | A | G | 3406.56  | PASS          | AC=24;AF=0.353;AN=68;BaseQRankSum=-1.311e |
| 1763 | chrY | 4472748 | . | C | G | 5174.67  | PASS          | AC=25;AF=0.357;AN=70;BaseQRankSum=1.00;Cl |
| 1764 | chrY | 4472851 | . | G | C | 2378.99  | PASS          | AC=20;AF=0.286;AN=70;BaseQRankSum=-6.190e |
| 1765 | chrY | 4473089 | . | G | A | 449.60   | PASS          | AC=6;AF=0.086;AN=70;BaseQRankSum=2.76;Cli |
| 1766 | chrY | 4473258 | . | A | C | 983.29   | my_snp_filter | AC=13;AF=0.186;AN=70;BaseQRankSum=        |
| 1767 | chrY | 4473350 | . | G | A | 3290.89  | PASS          | AC=22;AF=0.314;AN=70;BaseQRankSum=-2.700e |
| 1768 | chrY | 4473970 | . | G | C | 140.99   | PASS          | AC=4;AF=0.080;AN=50;BaseQRankSum=-7.270e- |
| 1769 | chrY | 4474188 | . | T | C | 135.54   | PASS          | AC=2;AF=0.029;AN=70;BaseQRankSum=-1.589e+ |
| 1770 | chrY | 4474196 | . | C | T | 135.54   | PASS          | AC=2;AF=0.029;AN=70;BaseQRankSum=1.92;Cli |
| 1771 | chrY | 4474293 | . | C | G | 218.80   | PASS          | AC=4;AF=0.182;AN=22;BaseQRankSum=1.30;Cli |
| 1772 | chrY | 4474309 | . | G | T | 171.47   | PASS          | AC=3;AF=0.150;AN=20;BaseQRankSum=0.898;Cl |
| 1773 | chrY | 4474593 | . | G | A | 75       | PASS          | AC=2;AF=0.038;AN=52;BaseQRankSum=-7.200e- |
| 1774 | chrY | 4476895 | . | G | A | 1153.75  | PASS          | AC=6;AF=0.086;AN=70;DP=440;FS=0.000;Inbre |
| 1775 | chrY | 4480357 | . | T | G | 45.48    | PASS          | AC=1;AF=0.014;AN=70;BaseQRankSum=1.10;Cli |
| 1776 | chrY | 4480421 | . | C | T | 348.79   | PASS          | AC=4;AF=0.057;AN=70;BaseQRankSum=-1.026e+ |
| 1777 | chrY | 4480443 | . | A | G | 452.20   | PASS          | AC=4;AF=0.057;AN=70;BaseQRankSum=-9.780e- |
| 1778 | chrY | 4481384 | . | A | G | 1058.15  | PASS          | AC=6;AF=0.091;AN=66;DP=260;FS=0.000;Inbre |
| 1779 | chrY | 4481718 | . | C | T | 809.89   | PASS          | AC=6;AF=0.097;AN=62;DP=214;FS=0.000;Inbre |
| 1780 | chrY | 4483156 | . | A | G | 154.25   | PASS          | AC=2;AF=0.077;AN=26;BaseQRankSum=0.403;Cl |
| 1781 | chrY | 4483744 | . | G | A | 275.45   | PASS          | AC=2;AF=0.029;AN=70;BaseQRankSum=3.17;Cli |
| 1782 | chrY | 4483756 | . | A | G | 222.42   | PASS          | AC=2;AF=0.029;AN=70;BaseQRankSum=-2.546e+ |
| 1783 | chrY | 4483835 | . | A | T | 191.22   | PASS          | AC=2;AF=0.029;AN=70;BaseQRankSum=0.809;Cl |
| 1784 | chrY | 4483910 | . | C | T | 199.99   | PASS          | AC=2;AF=0.030;AN=66;BaseQRankSum=1.33;Cli |
| 1785 | chrY | 4484099 | . | T | C | 38.21    | PASS          | AC=1;AF=0.015;AN=68;BaseQRankSum=-1.231e+ |
| 1786 | chrY | 4484102 | . | T | C | 38.05    | PASS          | AC=1;AF=0.015;AN=68;BaseQRankSum=-1.231e+ |
| 1787 | chrY | 4484787 | . | C | T | 432.60   | PASS          | AC=6;AF=0.086;AN=70;BaseQRankSum=-5.500e- |
| 1788 | chrY | 4484790 | . | A | G | 137.59   | PASS          | AC=1;AF=0.014;AN=70;BaseQRankSum=0.739;Cl |
| 1789 | chrY | 4485719 | . | G | T | 35.16    | PASS          | AC=1;AF=0.015;AN=68;BaseQRankSum=-1.231e+ |
| 1790 | chrY | 4485724 | . | T | C | 31.30    | PASS          | AC=1;AF=0.015;AN=68;BaseQRankSum=-1.495e+ |
| 1791 | chrY | 4488266 | . | G | A | 1224.44  | PASS          | AC=6;AF=0.136;AN=44;BaseQRankSum=1.52;Cli |
| 1792 | chrY | 4489035 | . | A | G | 283.12   | PASS          | AC=2;AF=0.036;AN=56;BaseQRankSum=0.604;Cl |
| 1793 | chrY | 4489362 | . | C | T | 129.93   | PASS          | AC=2;AF=0.045;AN=44;BaseQRankSum=2.85;Cli |
| 1794 | chrY | 4489540 | . | C | T | 126.82   | PASS          | AC=2;AF=0.059;AN=34;BaseQRankSum=3.53;Cli |
| 1795 | chrY | 4490140 | . | T | C | 3635.66  | PASS          | AC=45;AF=0.703;AN=64;BaseQRankSum=0.00;Cl |
| 1796 | chrY | 4490836 | . | A | G | 155.02   | PASS          | AC=2;AF=0.029;AN=70;BaseQRankSum=1.52;Cli |
| 1797 | chrY | 4492401 | . | A | G | 67.04    | my_snp_filter | AC=2;AF=0.111;AN=18;BaseQRankSum=         |
| 1798 | chrY | 4493229 | . | T | C | 220.05   | PASS          | AC=2;AF=0.111;AN=18;BaseQRankSum=-1.870e- |
| 1799 | chrY | 4493529 | . | A | G | 197.93   | PASS          | AC=2;AF=0.029;AN=70;BaseQRankSum=1.03;Cli |
| 1800 | chrY | 4496473 | . | A | G | 763.73   | PASS          | AC=6;AF=0.086;AN=70;BaseQRankSum=-6.960e- |
| 1801 | chrY | 4499916 | . | T | C | 90.56    | PASS          | AC=1;AF=0.014;AN=70;BaseQRankSum=-3.400e- |
| 1802 | chrY | 4500084 | . | C | T | 53.50    | PASS          | AC=1;AF=0.016;AN=64;BaseQRankSum=1.09;Cli |
| 1803 | chrY | 4500403 | . | C | T | 144.04   | PASS          | AC=2;AF=0.111;AN=18;BaseQRankSum=0.324;Cl |
| 1804 | chrY | 4502360 | . | C | T | 1013.11  | PASS          | AC=6;AF=0.214;AN=28;DP=156;FS=0.000;Inbre |
| 1805 | chrY | 4502602 | . | A | G | 6081.99  | PASS          | AC=54;AF=0.844;AN=64;DP=276;FS=0.000;Inbr |
| 1806 | chrY | 4502617 | . | G | A | 806.20   | PASS          | AC=2;AF=0.030;AN=66;DP=259;FS=0.000;Inbre |
| 1807 | chrY | 4502637 | . | A | G | 390.13   | PASS          | AC=4;AF=0.065;AN=62;DP=240;FS=0.000;Inbre |
| 1808 | chrY | 4502646 | . | G | A | 411.01   | PASS          | AC=4;AF=0.065;AN=62;DP=230;FS=0.000;Inbre |
| 1809 | chrY | 4502656 | . | A | G | 243.48   | PASS          | AC=4;AF=0.067;AN=60;DP=225;FS=0.000;Inbre |
| 1810 | chrY | 4503405 | . | A | G | 122.85   | PASS          | AC=7;AF=0.350;AN=20;BaseQRankSum=-7.510e- |
| 1811 | chrY | 4508193 | . | T | C | 140.74   | my_snp_filter | AC=3;AF=0.043;AN=70;BaseQRankSum=         |
| 1812 | chrY | 4511456 | . | G | A | 267.10   | PASS          | AC=2;AF=0.029;AN=70;DP=277;FS=0.000;Inbre |
| 1813 | chrY | 4511508 | . | T | C | 75.02    | PASS          | AC=1;AF=0.015;AN=68;BaseQRankSum=0.705;Cl |
| 1814 | chrY | 4512708 | . | T | C | 541.92   | PASS          | AC=6;AF=0.086;AN=70;DP=353;FS=0.000;Inbre |
| 1815 | chrY | 4514306 | . | G | C | 1343.17  | my_snp_filter | AC=8;AF=0.114;AN=70;BaseQRankSum=         |
| 1816 | chrY | 4514307 | . | A | C | 1344.12  | my_snp_filter | AC=8;AF=0.114;AN=70;BaseQRankSum=         |
| 1817 | chrY | 4515487 | . | G | A | 176.16   | PASS          | AC=1;AF=0.038;AN=26;BaseQRankSum=2.25;Cli |
| 1818 | chrY | 4515492 | . | C | A | 147.15   | PASS          | AC=1;AF=0.038;AN=26;BaseQRankSum=1.25;Cli |
| 1819 | chrY | 4518528 | . | C | T | 1962.55  | PASS          | AC=33;AF=0.635;AN=52;BaseQRankSum=0.736;C |
| 1820 | chrY | 4519866 | . | A | T | 1016.05  | PASS          | AC=16;AF=1.00;AN=16;BaseQRankSum=0.742;Cl |
| 1821 | chrY | 4523395 | . | G | T | 399.95   | PASS          | AC=6;AF=0.086;AN=70;DP=298;FS=0.000;Inbre |
| 1822 | chrY | 4523433 | . | C | G | 385.44   | PASS          | AC=4;AF=0.057;AN=70;BaseQRankSum=-1.500e- |
| 1823 | chrY | 4523539 | . | T | C | 61.05    | my_snp_filter | AC=2;AF=0.032;AN=62;BaseQRankSum=         |
| 1824 | chrY | 4525943 | . | C | G | 5430.41  | PASS          | AC=42;AF=0.700;AN=60;DP=321;FS=0.000;Inbr |



|      |      |         |   |   |   |          |               |                                           |
|------|------|---------|---|---|---|----------|---------------|-------------------------------------------|
| 1825 | chrY | 4535621 | . | A | G | 40.38    | PASS          | AC=1;AF=0.014;AN=70;BaseQRankSum=-1.739e+ |
| 1826 | chrY | 4537758 | . | C | G | 45.72    | PASS          | AC=2;AF=0.100;AN=20;DP=137;FS=0.000;Inbre |
| 1827 | chrY | 4538166 | . | C | T | 207.68   | PASS          | AC=2;AF=0.029;AN=70;BaseQRankSum=0.727;Cl |
| 1828 | chrY | 4539402 | . | T | G | 1027.91  | PASS          | AC=6;AF=0.086;AN=70;DP=498;FS=0.000;Inbre |
| 1829 | chrY | 4543649 | . | T | C | 55.03    | PASS          | AC=1;AF=0.015;AN=68;BaseQRankSum=1.90;Cli |
| 1830 | chrY | 4543694 | . | C | G | 94.05    | PASS          | AC=3;AF=0.043;AN=70;BaseQRankSum=0.762;Cl |
| 1831 | chrY | 4550201 | . | C | T | 126.72   | PASS          | AC=2;AF=0.029;AN=68;BaseQRankSum=0.566;Cl |
| 1832 | chrY | 4553250 | . | C | T | 2625     | PASS          | AC=28;AF=0.483;AN=58;DP=281;FS=0.000;Inbr |
| 1833 | chrY | 4554698 | . | A | C | 93.45    | my_snp_filter | AC=2;AF=0.029;AN=70;BaseQRankSum=         |
| 1834 | chrY | 4554737 | . | C | T | 91.55    | PASS          | AC=2;AF=0.029;AN=70;BaseQRankSum=-5.310e+ |
| 1835 | chrY | 4554780 | . | A | G | 143.56   | PASS          | AC=2;AF=0.029;AN=68;BaseQRankSum=-1.280e+ |
| 1836 | chrY | 4554832 | . | C | G | 31.85    | PASS          | AC=1;AF=0.014;AN=70;BaseQRankSum=-2.310e+ |
| 1837 | chrY | 4555064 | . | T | C | 146.50   | PASS          | AC=2;AF=0.029;AN=70;BaseQRankSum=2.04;Cli |
| 1838 | chrY | 4555206 | . | T | C | 95.31    | PASS          | AC=2;AF=0.030;AN=66;BaseQRankSum=2.37;Cli |
| 1839 | chrY | 4555311 | . | T | C | 193.91   | PASS          | AC=1;AF=0.016;AN=62;BaseQRankSum=-2.512e+ |
| 1840 | chrY | 4555316 | . | T | G | 194.21   | PASS          | AC=1;AF=0.017;AN=60;BaseQRankSum=0.030;Cl |
| 1841 | chrY | 4555551 | . | T | C | 373.15   | PASS          | AC=12;AF=1.00;AN=12;DP=45;FS=0.000;MLEAC= |
| 1842 | chrY | 4556094 | . | G | T | 118.10   | PASS          | AC=4;AF=0.065;AN=62;BaseQRankSum=-7.200e- |
| 1843 | chrY | 4556713 | . | G | T | 12474.95 | PASS          | AC=68;AF=1.00;AN=68;DP=427;FS=0.0         |
| 1844 | chrY | 4556902 | . | A | G | 285.09   | PASS          | AC=4;AF=0.061;AN=66;DP=313;FS=0.000;Inbre |
| 1845 | chrY | 4557737 | . | G | A | 409.94   | PASS          | AC=4;AF=0.077;AN=52;BaseQRankSum=2.13;Cl  |
| 1846 | chrY | 4557909 | . | T | C | 432.60   | PASS          | AC=3;AF=0.045;AN=66;BaseQRankSum=0.412;Cl |
| 1847 | chrY | 4558065 | . | T | C | 37.76    | my_snp_filter | AC=1;AF=0.015;AN=66;BaseQRankSum=         |
| 1848 | chrY | 4559543 | . | T | G | 103.77   | PASS          | AC=1;AF=0.014;AN=70;BaseQRankSum=-1.108e+ |
| 1849 | chrY | 4559964 | . | C | T | 280.72   | PASS          | AC=2;AF=0.033;AN=60;BaseQRankSum=1.18;Cli |
| 1850 | chrY | 4559967 | . | G | T | 277.65   | PASS          | AC=2;AF=0.033;AN=60;BaseQRankSum=-2.149e+ |
| 1851 | chrY | 4560606 | . | C | T | 61.21    | my_snp_filter | AC=2;AF=0.030;AN=66;BaseQRankSum=         |
| 1852 | chrY | 4561016 | . | A | G | 46.25    | PASS          | AC=1;AF=0.024;AN=42;BaseQRankSum=0.736;Cl |
| 1853 | chrY | 4561308 | . | A | C | 920.46   | PASS          | AC=6;AF=0.125;AN=48;DP=143;FS=0.000;Inbre |
| 1854 | chrY | 4563881 | . | C | A | 32.46    | PASS          | AC=1;AF=0.015;AN=66;BaseQRankSum=-6.000e- |
| 1855 | chrY | 4564239 | . | G | T | 1617.18  | PASS          | AC=16;AF=0.571;AN=28;BaseQRankSum=0.731;C |
| 1856 | chrY | 4564926 | . | C | T | 774.69   | PASS          | AC=6;AF=0.150;AN=40;BaseQRankSum=0.747;Cl |
| 1857 | chrY | 4571235 | . | A | G | 86.92    | PASS          | AC=4;AF=0.167;AN=24;DP=85;FS=0.000;Inbre  |
| 1858 | chrY | 4571329 | . | G | A | 550.76   | PASS          | AC=6;AF=0.086;AN=70;DP=373;FS=0.000;Inbre |
| 1859 | chrY | 4575563 | . | A | G | 134.49   | PASS          | AC=2;AF=0.029;AN=70;BaseQRankSum=1.70;Cli |
| 1860 | chrY | 4577558 | . | C | T | 632.32   | PASS          | AC=5;AF=0.074;AN=68;BaseQRankSum=-1.000e+ |
| 1861 | chrY | 4577698 | . | T | G | 127.28   | my_snp_filter | AC=4;AF=0.057;AN=70;BaseQRankSum=         |
| 1862 | chrY | 4579790 | . | A | G | 447.66   | PASS          | AC=5;AF=0.081;AN=62;BaseQRankSum=-1.302e+ |
| 1863 | chrY | 4583128 | . | T | C | 72.21    | PASS          | AC=2;AF=0.100;AN=20;DP=68;FS=0.000;Inbre  |
| 1864 | chrY | 4585112 | . | G | C | 267.51   | PASS          | AC=4;AF=0.059;AN=68;BaseQRankSum=-5.730e- |
| 1865 | chrY | 4585401 | . | A | G | 32.83    | my_snp_filter | AC=1;AF=0.016;AN=64;BaseQRankSum=         |
| 1866 | chrY | 4589198 | . | G | A | 291.63   | PASS          | AC=2;AF=0.029;AN=70;DP=535;FS=0.000;Inbre |
| 1867 | chrY | 4589434 | . | A | G | 65.20    | my_snp_filter | AC=2;AF=0.029;AN=70;BaseQRankSum=         |
| 1868 | chrY | 4590046 | . | T | C | 6315.04  | PASS          | AC=54;AF=1.00;AN=54;DP=283;FS=0.000;Inbre |
| 1869 | chrY | 4592437 | . | A | G | 122.02   | PASS          | AC=2;AF=0.029;AN=70;DP=399;FS=0.000;Inbre |
| 1870 | chrY | 4593105 | . | A | G | 4291.83  | PASS          | AC=34;AF=0.500;AN=68;BaseQRankSum=0.537;C |
| 1871 | chrY | 4594811 | . | T | A | 583.06   | PASS          | AC=2;AF=0.030;AN=66;DP=272;FS=0.000;Inbre |
| 1872 | chrY | 4603976 | . | A | G | 1110.14  | PASS          | AC=6;AF=0.086;AN=70;DP=678;FS=0.000;Inbre |
| 1873 | chrY | 4605789 | . | T | C | 237.57   | PASS          | AC=4;AF=0.061;AN=66;BaseQRankSum=-8.620e- |
| 1874 | chrY | 4609387 | . | C | T | 116.69   | my_snp_filter | AC=3;AF=0.065;AN=46;BaseQRankSum=         |
| 1875 | chrY | 4611254 | . | C | T | 12012    | PASS          | AC=70;AF=1.00;AN=70;BaseQRankSum=1.39;Cli |
| 1876 | chrY | 4611471 | . | T | C | 859.74   | PASS          | AC=10;AF=0.147;AN=68;BaseQRankSum=0.278;C |
| 1877 | chrY | 4611504 | . | G | A | 100.42   | PASS          | AC=2;AF=0.029;AN=68;BaseQRankSum=1.38;Cli |
| 1878 | chrY | 4612253 | . | C | A | 485.69   | PASS          | AC=6;AF=0.094;AN=64;DP=175;FS=0.000;Inbre |
| 1879 | chrY | 4614006 | . | A | C | 172.32   | PASS          | AC=2;AF=0.029;AN=70;BaseQRankSum=3.78;Cli |
| 1880 | chrY | 4617193 | . | C | T | 384.07   | PASS          | AC=5;AF=0.089;AN=56;BaseQRankSum=-1.798e+ |
| 1881 | chrY | 4617352 | . | C | G | 208.83   | PASS          | AC=2;AF=0.029;AN=68;BaseQRankSum=2.39;Cli |
| 1882 | chrY | 4617807 | . | C | A | 318.40   | PASS          | AC=2;AF=0.045;AN=44;BaseQRankSum=0.820;Cl |
| 1883 | chrY | 4618583 | . | C | T | 30.90    | PASS          | AC=2;AF=0.032;AN=62;DP=195;FS=0.000;Inbre |
| 1884 | chrY | 4619210 | . | T | A | 1232.91  | PASS          | AC=7;AF=0.389;AN=18;BaseQRankSum=0.720;Cl |
| 1885 | chrY | 4619419 | . | T | C | 87.04    | my_snp_filter | AC=2;AF=0.111;AN=18;BaseQRankSum=         |
| 1886 | chrY | 4622307 | . | T | C | 30.07    | my_snp_filter | AC=1;AF=0.056;AN=18;BaseQRankSum=         |
| 1887 | chrY | 4622337 | . | C | G | 71.20    | PASS          | AC=2;AF=0.100;AN=20;BaseQRankSum=2.40;Cli |
| 1888 | chrY | 4622346 | . | A | C | 44.87    | my_snp_filter | AC=2;AF=0.100;AN=20;BaseQRankSum=         |
| 1889 | chrY | 4623422 | . | G | C | 1212.64  | PASS          | AC=6;AF=0.273;AN=22;DP=172;FS=0.000;Inbre |
| 1890 | chrY | 4624062 | . | G | A | 510.17   | PASS          | AC=2;AF=0.091;AN=22;DP=170;FS=0.000;Inbre |
| 1891 | chrY | 4625885 | . | G | A | 44.46    | PASS          | AC=1;AF=0.015;AN=68;BaseQRankSum=0.929;Cl |
| 1892 | chrY | 4625886 | . | T | C | 3961.76  | PASS          | AC=41;AF=0.621;AN=66;BaseQRankSum=-6.000e |
| 1893 | chrY | 4626652 | . | C | T | 6132.29  | PASS          | AC=54;AF=0.818;AN=66;DP=302;FS=0.000;Inbr |
| 1894 | chrY | 4629301 | . | T | C | 1107.56  | PASS          | AC=6;AF=0.086;AN=70;BaseQRankSum=0.668;Cl |
| 1895 | chrY | 4629741 | . | G | A | 96.42    | PASS          | AC=2;AF=0.100;AN=20;BaseQRankSum=1.71;Cli |
| 1896 | chrY | 4630981 | . | A | T | 343.85   | PASS          | AC=4;AF=0.057;AN=70;DP=512;FS=0.000;Inbre |
| 1897 | chrY | 4631650 | . | G | A | 899.86   | PASS          | AC=6;AF=0.107;AN=56;DP=154;FS=0.000;Inbre |
| 1898 | chrY | 4632020 | . | T | A | 5343.29  | PASS          | AC=46;AF=1.00;AN=46;DP=193;FS=0.000;Inbre |
| 1899 | chrY | 4632812 | . | G | A | 617.07   | PASS          | AC=6;AF=0.111;AN=54;BaseQRankSum=1.38;Cli |
| 1900 | chrY | 4632859 | . | C | T | 215.66   | PASS          | AC=3;AF=0.063;AN=48;BaseQRankSum=1.25;Cli |

|      |      |         |   |   |   |          |               |                                           |
|------|------|---------|---|---|---|----------|---------------|-------------------------------------------|
| 1901 | chrY | 4632965 | . | T | A | 50.67    | my_snp_filter | AC=2;AF=0.029;AN=68;BaseQRankSum=         |
| 1902 | chrY | 4633690 | . | C | T | 439.26   | PASS          | AC=2;AF=0.034;AN=58;DP=186;FS=0.000;Inbre |
| 1903 | chrY | 4635281 | . | A | G | 355.09   | PASS          | AC=4;AF=0.065;AN=62;BaseQRankSum=-1.156e+ |
| 1904 | chrY | 4640974 | . | G | A | 84.80    | PASS          | AC=1;AF=0.026;AN=38;BaseQRankSum=1.59;Cli |
| 1905 | chrY | 4643090 | . | T | C | 1543.03  | PASS          | AC=12;AF=0.182;AN=66;BaseQRankSum=-2.900e |
| 1906 | chrY | 4644185 | . | A | G | 4133.07  | PASS          | AC=40;AF=1.00;AN=40;DP=163;FS=0.000;Inbre |
| 1907 | chrY | 4646340 | . | G | A | 1267.07  | PASS          | AC=6;AF=0.088;AN=68;BaseQRankSum=1.66;Cli |
| 1908 | chrY | 4646572 | . | G | T | 13412.98 | PASS          | AC=66;AF=1.00;AN=66;DP=464;FS=0.0         |
| 1909 | chrY | 4647538 | . | T | C | 356.39   | PASS          | AC=6;AF=0.088;AN=68;DP=303;FS=0.000;Inbre |
| 1910 | chrY | 4659522 | . | G | A | 1389.57  | PASS          | AC=6;AF=0.088;AN=68;DP=306;FS=0.000;Inbre |
| 1911 | chrY | 4661072 | . | T | C | 1835.97  | PASS          | AC=13;AF=0.186;AN=70;BaseQRankSum=-7.950e |
| 1912 | chrY | 4661084 | . | G | A | 1985.90  | PASS          | AC=12;AF=0.171;AN=70;BaseQRankSum=0.572;C |
| 1913 | chrY | 4661465 | . | G | T | 988.47   | PASS          | AC=6;AF=0.088;AN=68;BaseQRankSum=0.600;Cl |
| 1914 | chrY | 4662848 | . | T | C | 318.47   | PASS          | AC=6;AF=0.086;AN=70;BaseQRankSum=-5.560e- |
| 1915 | chrY | 4663958 | . | A | G | 84.41    | PASS          | AC=1;AF=0.014;AN=70;BaseQRankSum=0.274;Cl |
| 1916 | chrY | 4664074 | . | T | A | 492.59   | PASS          | AC=2;AF=0.029;AN=68;DP=541;FS=0.000;Inbre |
| 1917 | chrY | 4667256 | . | T | G | 37.70    | PASS          | AC=2;AF=0.100;AN=20;DP=162;FS=0.000;Inbre |
| 1918 | chrY | 4667522 | . | A | G | 43.51    | my_snp_filter | AC=1;AF=0.014;AN=70;BaseQRankSum=         |
| 1919 | chrY | 4670852 | . | A | C | 1227.16  | PASS          | AC=6;AF=0.086;AN=70;DP=646;FS=0.000;Inbre |
| 1920 | chrY | 4672306 | . | G | A | 131.56   | my_snp_filter | AC=2;AF=0.029;AN=70;BaseQRankSum=         |
| 1921 | chrY | 4672316 | . | G | A | 250.85   | PASS          | AC=2;AF=0.029;AN=70;BaseQRankSum=0.847;Cl |
| 1922 | chrY | 4672485 | . | A | T | 469.61   | my_snp_filter | AC=6;AF=0.086;AN=70;BaseQRankSum=         |
| 1923 | chrY | 4672538 | . | G | A | 31.07    | my_snp_filter | AC=1;AF=0.014;AN=70;BaseQRankSum=         |
| 1924 | chrY | 4673342 | . | T | A | 311.69   | PASS          | AC=2;AF=0.036;AN=56;DP=198;FS=0.000;Inbre |
| 1925 | chrY | 4673384 | . | C | T | 90.76    | my_snp_filter | AC=3;AF=0.075;AN=40;BaseQRankSum=         |
| 1926 | chrY | 4673808 | . | A | T | 202.88   | PASS          | AC=6;AF=0.086;AN=70;BaseQRankSum=0.550;Cl |
| 1927 | chrY | 4674129 | . | C | G | 313.96   | PASS          | AC=2;AF=0.030;AN=66;BaseQRankSum=-8.670e- |
| 1928 | chrY | 4675616 | . | C | T | 233.78   | PASS          | AC=3;AF=0.167;AN=18;BaseQRankSum=-6.900e- |
| 1929 | chrY | 4675632 | . | G | C | 372.78   | PASS          | AC=2;AF=0.100;AN=20;BaseQRankSum=0.515;Cl |
| 1930 | chrY | 4675655 | . | C | T | 346.77   | PASS          | AC=2;AF=0.100;AN=20;BaseQRankSum=0.187;Cl |
| 1931 | chrY | 4677293 | . | T | G | 853.09   | PASS          | AC=6;AF=0.088;AN=68;DP=405;FS=0.000;Inbre |
| 1932 | chrY | 4677807 | . | G | A | 6013.28  | PASS          | AC=58;AF=1.00;AN=58;DP=214;FS=0.000;Inbre |
| 1933 | chrY | 4686515 | . | A | C | 103.29   | PASS          | AC=2;AF=0.077;AN=26;DP=102;FS=0.000;Inbre |
| 1934 | chrY | 4687696 | . | G | A | 1015.10  | PASS          | AC=6;AF=0.250;AN=24;DP=150;FS=0.000;Inbre |
| 1935 | chrY | 4688514 | . | T | C | 49.15    | PASS          | AC=1;AF=0.015;AN=68;BaseQRankSum=0.551;Cl |
| 1936 | chrY | 4688849 | . | T | C | 259.70   | PASS          | AC=5;AF=0.083;AN=60;BaseQRankSum=-1.980e- |
| 1937 | chrY | 4689988 | . | G | T | 48.32    | PASS          | AC=1;AF=0.056;AN=18;BaseQRankSum=-6.800e- |
| 1938 | chrY | 4691208 | . | T | A | 122.14   | PASS          | AC=1;AF=0.017;AN=58;BaseQRankSum=0.248;Cl |
| 1939 | chrY | 4692745 | . | A | G | 903.16   | PASS          | AC=11;AF=0.157;AN=70;BaseQRankSum=0.423;C |
| 1940 | chrY | 4693308 | . | G | A | 101.89   | PASS          | AC=4;AF=0.067;AN=60;DP=216;FS=0.000;Inbre |
| 1941 | chrY | 4694533 | . | A | G | 84.14    | my_snp_filter | AC=3;AF=0.043;AN=70;BaseQRankSum=         |
| 1942 | chrY | 4695807 | . | C | G | 424.85   | PASS          | AC=6;AF=0.086;AN=70;BaseQRankSum=0.727;Cl |
| 1943 | chrY | 4699800 | . | G | T | 36.89    | PASS          | AC=1;AF=0.014;AN=70;BaseQRankSum=-1.231e+ |
| 1944 | chrY | 4699801 | . | A | C | 36.88    | PASS          | AC=1;AF=0.014;AN=70;BaseQRankSum=-3.580e- |
| 1945 | chrY | 4700138 | . | A | G | 36.05    | PASS          | AC=1;AF=0.017;AN=60;BaseQRankSum=-1.231e+ |
| 1946 | chrY | 4700146 | . | C | T | 32.49    | PASS          | AC=1;AF=0.016;AN=62;BaseQRankSum=-9.220e- |
| 1947 | chrY | 4703765 | . | T | C | 40.54    | PASS          | AC=1;AF=0.016;AN=64;BaseQRankSum=0.736;Cl |
| 1948 | chrY | 4705224 | . | A | G | 1632.09  | PASS          | AC=12;AF=0.171;AN=70;BaseQRankSum=-3.800e |
| 1949 | chrY | 4705673 | . | C | T | 245.71   | PASS          | AC=2;AF=0.029;AN=70;DP=317;FS=0.000;Inbre |
| 1950 | chrY | 4705698 | . | G | A | 44.42    | PASS          | AC=2;AF=0.029;AN=70;BaseQRankSum=0.731;Cl |
| 1951 | chrY | 4706034 | . | A | G | 1050.38  | PASS          | AC=6;AF=0.088;AN=68;DP=261;FS=0.000;Inbre |
| 1952 | chrY | 4708255 | . | T | C | 669.30   | PASS          | AC=6;AF=0.088;AN=68;DP=376;FS=0.000;Inbre |
| 1953 | chrY | 4708453 | . | T | C | 84.87    | PASS          | AC=2;AF=0.034;AN=58;DP=243;FS=0.000;Inbre |
| 1954 | chrY | 4708598 | . | A | G | 152.61   | PASS          | AC=4;AF=0.059;AN=68;BaseQRankSum=0.322;Cl |
| 1955 | chrY | 4708824 | . | C | T | 338.38   | PASS          | AC=7;AF=0.113;AN=62;BaseQRankSum=0.00;Cli |
| 1956 | chrY | 4711716 | . | A | T | 34.70    | PASS          | AC=1;AF=0.016;AN=64;BaseQRankSum=-1.380e+ |
| 1957 | chrY | 4711721 | . | T | C | 34.93    | PASS          | AC=1;AF=0.015;AN=66;BaseQRankSum=-1.380e+ |
| 1958 | chrY | 4711910 | . | G | A | 91.33    | PASS          | AC=2;AF=0.029;AN=70;BaseQRankSum=1.38;Cli |
| 1959 | chrY | 4711956 | . | A | G | 1708.28  | PASS          | AC=14;AF=0.200;AN=70;BaseQRankSum=0.710;C |
| 1960 | chrY | 4712526 | . | C | T | 71.51    | my_snp_filter | AC=1;AF=0.014;AN=70;BaseQRankSum=         |
| 1961 | chrY | 4712527 | . | A | G | 71.52    | my_snp_filter | AC=1;AF=0.014;AN=70;BaseQRankSum=         |
| 1962 | chrY | 4713483 | . | G | T | 943.94   | PASS          | AC=6;AF=0.176;AN=34;DP=154;FS=0.000;Inbre |
| 1963 | chrY | 4715572 | . | G | A | 5683.22  | PASS          | AC=54;AF=0.818;AN=66;DP=294;FS=0.000;Inbr |
| 1964 | chrY | 4718404 | . | T | C | 263.68   | PASS          | AC=10;AF=0.313;AN=32;DP=156;FS=0.000;Inbr |
| 1965 | chrY | 4719769 | . | T | C | 546.14   | PASS          | AC=6;AF=0.086;AN=70;DP=381;FS=0.000;Inbre |
| 1966 | chrY | 4721055 | . | C | T | 1738.37  | PASS          | AC=14;AF=0.200;AN=70;BaseQRankSum=-6.350e |
| 1967 | chrY | 4721614 | . | G | T | 1433.75  | PASS          | AC=28;AF=0.519;AN=54;BaseQRankSum=1.50;Cl |
| 1968 | chrY | 4721971 | . | A | T | 5973.24  | PASS          | AC=50;AF=1.00;AN=50;DP=212;FS=0.000;Inbre |
| 1969 | chrY | 4722587 | . | C | T | 87.21    | PASS          | AC=2;AF=0.056;AN=36;BaseQRankSum=2.92;Cli |
| 1970 | chrY | 4723741 | . | C | T | 3481.60  | PASS          | AC=42;AF=0.700;AN=60;DP=248;FS=0.000;Inbr |
| 1971 | chrY | 4726768 | . | C | T | 51.64    | PASS          | AC=2;AF=0.091;AN=22;DP=189;FS=0.000;Inbre |
| 1972 | chrY | 4726769 | . | C | G | 51.63    | PASS          | AC=2;AF=0.091;AN=22;DP=189;FS=0.000;Inbre |
| 1973 | chrY | 4726784 | . | G | C | 51.63    | PASS          | AC=2;AF=0.091;AN=22;DP=192;FS=0.000;Inbre |
| 1974 | chrY | 4726789 | . | T | G | 51.63    | PASS          | AC=2;AF=0.091;AN=22;DP=195;FS=0.000;Inbre |
| 1975 | chrY | 4726795 | . | G | A | 51.63    | PASS          | AC=2;AF=0.091;AN=22;DP=191;FS=0.000;Inbre |
| 1976 | chrY | 4726797 | . | T | G | 51.63    | PASS          | AC=2;AF=0.091;AN=22;DP=190;FS=0.000;Inbre |

|      |      |         |   |   |   |          |               |                                            |
|------|------|---------|---|---|---|----------|---------------|--------------------------------------------|
| 1977 | chrY | 4726801 | . | C | T | 51.64    | PASS          | AC=2;AF=0.091;AN=22;DP=186;FS=0.000;Inbre  |
| 1978 | chrY | 4728909 | . | A | T | 1400.18  | PASS          | AC=6;AF=0.333;AN=18;DP=164;FS=0.000;MLEAC  |
| 1979 | chrY | 4734255 | . | A | G | 175.90   | my_snp_filter | AC=2;AF=0.029;AN=70;BaseQRankSum=          |
| 1980 | chrY | 4734305 | . | C | G | 185.72   | PASS          | AC=2;AF=0.029;AN=70;DP=509;FS=0.000;Inbre  |
| 1981 | chrY | 4734812 | . | T | A | 405.24   | PASS          | AC=2;AF=0.083;AN=24;DP=156;FS=0.000;Inbre  |
| 1982 | chrY | 4735034 | . | G | A | 1014.30  | PASS          | AC=6;AF=0.167;AN=36;DP=167;FS=0.000;Inbre  |
| 1983 | chrY | 4736563 | . | G | C | 1013.75  | PASS          | AC=6;AF=0.300;AN=20;DP=176;FS=0.000;Inbre  |
| 1984 | chrY | 4738242 | . | C | A | 1086.19  | PASS          | AC=6;AF=0.333;AN=18;DP=154;FS=0.000;MLEAC  |
| 1985 | chrY | 4741735 | . | C | T | 104.29   | PASS          | AC=2;AF=0.029;AN=70;BaseQRankSum=0.037;Cl  |
| 1986 | chrY | 4741738 | . | T | C | 103.51   | PASS          | AC=2;AF=0.029;AN=70;BaseQRankSum=-2.557e+  |
| 1987 | chrY | 4741866 | . | A | G | 11389.99 | PASS          | AC=70;AF=1.00;AN=70;DP=372;FS=0.0          |
| 1988 | chrY | 4742384 | . | G | A | 247.53   | PASS          | AC=4;AF=0.067;AN=60;BaseQRankSum=0.727;Cl  |
| 1989 | chrY | 4742556 | . | T | C | 49.84    | PASS          | AC=2;AF=0.048;AN=42;DP=77;FS=0.000;Inbre   |
| 1990 | chrY | 4746512 | . | C | A | 92.32    | PASS          | AC=2;AF=0.045;AN=44;BaseQRankSum=0.978;Cl  |
| 1991 | chrY | 4746786 | . | T | C | 2208.53  | PASS          | AC=33;AF=0.589;AN=56;BaseQRankSum=0.727;C  |
| 1992 | chrY | 4748455 | . | C | T | 328.01   | PASS          | AC=2;AF=0.100;AN=20;BaseQRankSum=-4.650e-  |
| 1993 | chrY | 4748808 | . | T | A | 191.32   | PASS          | AC=2;AF=0.029;AN=70;BaseQRankSum=2.38;Cli  |
| 1994 | chrY | 4752144 | . | T | G | 112.23   | my_snp_filter | AC=4;AF=0.059;AN=68;BaseQRankSum=          |
| 1995 | chrY | 4754322 | . | G | A | 1458.68  | PASS          | AC=6;AF=0.200;AN=30;DP=173;FS=0.000;Inbre  |
| 1996 | chrY | 4755190 | . | G | C | 73.25    | my_snp_filter | AC=3;AF=0.043;AN=70;BaseQRankSum=          |
| 1997 | chrY | 4757028 | . | C | A | 198.03   | PASS          | AC=4;AF=0.057;AN=70;BaseQRankSum=0.067;Cl  |
| 1998 | chrY | 4759573 | . | A | G | 40.91    | PASS          | AC=1;AF=0.038;AN=26;BaseQRankSum=-2.598e+  |
| 1999 | chrY | 4762829 | . | C | T | 285.27   | PASS          | AC=2;AF=0.029;AN=70;BaseQRankSum=1.19;Cli  |
| 2000 | chrY | 4763853 | . | G | A | 716.39   | PASS          | AC=5;AF=0.179;AN=28;BaseQRankSum=2.80;Cli  |
| 2001 | chrY | 4764660 | . | C | G | 67.91    | PASS          | AC=2;AF=0.031;AN=64;DP=132;FS=0.000;Inbre  |
| 2002 | chrY | 4773391 | . | C | T | 33.68    | PASS          | AC=1;AF=0.014;AN=70;BaseQRankSum=0.00;Cli  |
| 2003 | chrY | 4773401 | . | A | T | 33.56    | PASS          | AC=1;AF=0.014;AN=70;BaseQRankSum=0.720;Cl  |
| 2004 | chrY | 4775278 | . | T | A | 999.67   | PASS          | AC=6;AF=0.094;AN=64;BaseQRankSum=1.20;Cli  |
| 2005 | chrY | 4778570 | . | G | A | 595.85   | PASS          | AC=6;AF=0.086;AN=70;DP=424;FS=0.000;Inbre  |
| 2006 | chrY | 4778834 | . | T | C | 42.06    | PASS          | AC=1;AF=0.015;AN=68;BaseQRankSum=-7.200e-  |
| 2007 | chrY | 4779579 | . | G | T | 31.40    | PASS          | AC=1;AF=0.017;AN=58;BaseQRankSum=0.572;Cl  |
| 2008 | chrY | 4782498 | . | C | G | 4195.86  | PASS          | AC=18;AF=1.00;AN=18;DP=186;FS=0.000;MLEAC  |
| 2009 | chrY | 4783252 | . | C | T | 1543.19  | PASS          | AC=6;AF=0.333;AN=18;DP=163;FS=0.000;MLEAC  |
| 2010 | chrY | 4784938 | . | A | T | 267.14   | PASS          | AC=6;AF=0.097;AN=62;DP=296;FS=0.000;Inbre  |
| 2011 | chrY | 4784975 | . | T | C | 44.71    | my_snp_filter | AC=2;AF=0.042;AN=48;BaseQRankSum=          |
| 2012 | chrY | 4784997 | . | A | G | 111.59   | PASS          | AC=2;AF=0.050;AN=40;BaseQRankSum=-5.530e-  |
| 2013 | chrY | 4785008 | . | G | C | 169.08   | PASS          | AC=2;AF=0.050;AN=40;BaseQRankSum=-3.810e-  |
| 2014 | chrY | 4786112 | . | C | T | 430.69   | PASS          | AC=6;AF=0.300;AN=20;DP=80;FS=0.000;Inbre   |
| 2015 | chrY | 4788875 | . | G | A | 1310.78  | PASS          | AC=6;AF=0.086;AN=70;DP=578;FS=0.000;Inbre  |
| 2016 | chrY | 4789878 | . | C | T | 67.66    | PASS          | AC=1;AF=0.015;AN=68;BaseQRankSum=2.32;Cli  |
| 2017 | chrY | 4790048 | . | A | G | 109.15   | PASS          | AC=4;AF=0.057;AN=70;BaseQRankSum=-1.850e-  |
| 2018 | chrY | 4790553 | . | G | A | 216.91   | PASS          | AC=2;AF=0.031;AN=64;DP=301;FS=0.000;Inbre  |
| 2019 | chrY | 4792162 | . | C | G | 1280.88  | my_snp_filter | AC=10;AF=0.147;AN=68;BaseQRankSum=         |
| 2020 | chrY | 4792384 | . | A | T | 30.95    | PASS          | AC=1;AF=0.015;AN=68;BaseQRankSum=-7.200e-  |
| 2021 | chrY | 4792953 | . | A | G | 1320.69  | PASS          | AC=6;AF=0.091;AN=66;DP=401;FS=0.000;Inbre  |
| 2022 | chrY | 4795302 | . | A | G | 645.23   | PASS          | AC=6;AF=0.091;AN=66;BaseQRankSum=-9.080e-  |
| 2023 | chrY | 4795912 | . | T | C | 108.24   | PASS          | AC=2;AF=0.033;AN=60;BaseQRankSum=1.38;Cli  |
| 2024 | chrY | 4795967 | . | A | T | 100.60   | PASS          | AC=1;AF=0.015;AN=66;BaseQRankSum=-4.900e-  |
| 2025 | chrY | 4796240 | . | A | G | 981.73   | PASS          | AC=14;AF=0.206;AN=68;BaseQRankSum=-5.500e- |
| 2026 | chrY | 4796316 | . | G | A | 35.79    | PASS          | AC=1;AF=0.014;AN=70;BaseQRankSum=0.00;Cli  |
| 2027 | chrY | 4797787 | . | A | C | 92.84    | PASS          | AC=2;AF=0.036;AN=56;BaseQRankSum=1.23;Cli  |
| 2028 | chrY | 4800088 | . | A | G | 96.21    | PASS          | AC=3;AF=0.044;AN=68;BaseQRankSum=1.73;Cli  |
| 2029 | chrY | 4802141 | . | C | T | 7251.24  | PASS          | AC=48;AF=0.727;AN=66;DP=370;FS=0.000;Inbr  |
| 2030 | chrY | 4803453 | . | C | T | 4504.06  | PASS          | AC=50;AF=0.735;AN=68;DP=266;FS=0.000;Inbr  |
| 2031 | chrY | 4807096 | . | G | C | 38.15    | PASS          | AC=1;AF=0.014;AN=70;BaseQRankSum=1.53;Cli  |
| 2032 | chrY | 4807735 | . | A | G | 1092.52  | PASS          | AC=6;AF=0.107;AN=56;BaseQRankSum=1.53;Cli  |
| 2033 | chrY | 4809309 | . | C | T | 129.07   | PASS          | AC=4;AF=0.061;AN=66;BaseQRankSum=0.550;Cl  |
| 2034 | chrY | 4809830 | . | G | A | 444.79   | PASS          | AC=6;AF=0.088;AN=68;BaseQRankSum=0.916;Cl  |
| 2035 | chrY | 4811910 | . | T | C | 49.31    | my_snp_filter | AC=2;AF=0.031;AN=64;BaseQRankSum=          |
| 2036 | chrY | 4812825 | . | T | C | 440.12   | PASS          | AC=9;AF=0.129;AN=70;BaseQRankSum=-6.840e-  |
| 2037 | chrY | 4813078 | . | C | T | 148.77   | my_snp_filter | AC=4;AF=0.057;AN=70;BaseQRankSum=          |
| 2038 | chrY | 4813210 | . | A | G | 44.69    | my_snp_filter | AC=1;AF=0.014;AN=70;BaseQRankSum=          |
| 2039 | chrY | 4814588 | . | G | A | 2448     | PASS          | AC=20;AF=1.00;AN=20;DP=104;FS=0.000;Inbre  |
| 2040 | chrY | 4816630 | . | T | G | 42.89    | PASS          | AC=2;AF=0.033;AN=60;DP=202;FS=0.000;Inbre  |
| 2041 | chrY | 4818883 | . | A | T | 70.96    | my_snp_filter | AC=2;AF=0.111;AN=18;BaseQRankSum=          |
| 2042 | chrY | 4818961 | . | C | T | 211.42   | PASS          | AC=1;AF=0.056;AN=18;BaseQRankSum=0.417;Cl  |
| 2043 | chrY | 4818964 | . | G | A | 290.03   | PASS          | AC=2;AF=0.111;AN=18;BaseQRankSum=-2.091e+  |
| 2044 | chrY | 4818989 | . | A | G | 71.97    | my_snp_filter | AC=2;AF=0.111;AN=18;BaseQRankSum=          |
| 2045 | chrY | 4819010 | . | G | A | 46.36    | my_snp_filter | AC=1;AF=0.056;AN=18;BaseQRankSum=          |
| 2046 | chrY | 4819107 | . | C | A | 319.96   | PASS          | AC=4;AF=0.222;AN=18;BaseQRankSum=1.63;Cli  |
| 2047 | chrY | 4819271 | . | G | A | 99.94    | my_snp_filter | AC=2;AF=0.111;AN=18;BaseQRankSum=          |
| 2048 | chrY | 4819352 | . | G | A | 30.22    | my_snp_filter | AC=2;AF=0.111;AN=18;BaseQRankSum=          |
| 2049 | chrY | 4819353 | . | G | T | 30.14    | my_snp_filter | AC=2;AF=0.111;AN=18;BaseQRankSum=          |
| 2050 | chrY | 4819377 | . | T | G | 35.45    | my_snp_filter | AC=2;AF=0.111;AN=18;BaseQRankSum=          |
| 2051 | chrY | 4819405 | . | G | A | 151.13   | my_snp_filter | AC=3;AF=0.167;AN=18;BaseQRankSum=          |
| 2052 | chrY | 4819416 | . | C | A | 151.62   | my_snp_filter | AC=2;AF=0.111;AN=18;BaseQRankSum=          |

|      |      |         |   |   |   |          |               |                                            |
|------|------|---------|---|---|---|----------|---------------|--------------------------------------------|
| 2053 | chrY | 4819441 | . | G | A | 80.95    | my_snp_filter | AC=2;AF=0.111;AN=18;BaseQRankSum=          |
| 2054 | chrY | 4820086 | . | A | G | 99.33    | PASS          | AC=1;AF=0.056;AN=18;BaseQRankSum=2.34;Cli  |
| 2055 | chrY | 4820092 | . | T | A | 132.32   | PASS          | AC=1;AF=0.056;AN=18;BaseQRankSum=-1.773e+  |
| 2056 | chrY | 4820100 | . | A | G | 129.32   | PASS          | AC=1;AF=0.056;AN=18;BaseQRankSum=-1.016e+  |
| 2057 | chrY | 4820118 | . | A | T | 159.32   | PASS          | AC=1;AF=0.056;AN=18;BaseQRankSum=-1.459e+  |
| 2058 | chrY | 4820132 | . | G | T | 155.24   | PASS          | AC=1;AF=0.056;AN=18;BaseQRankSum=2.91;Cli  |
| 2059 | chrY | 4821316 | . | G | A | 177.16   | my_snp_filter | AC=3;AF=0.167;AN=18;BaseQRankSum=          |
| 2060 | chrY | 4821987 | . | T | C | 674.78   | my_snp_filter | AC=3;AF=0.167;AN=18;BaseQRankSum=          |
| 2061 | chrY | 4821988 | . | G | A | 674.78   | my_snp_filter | AC=3;AF=0.167;AN=18;BaseQRankSum=          |
| 2062 | chrY | 4822246 | . | A | G | 57.44    | my_snp_filter | AC=2;AF=0.100;AN=20;BaseQRankSum=          |
| 2063 | chrY | 4822377 | . | C | T | 187.43   | my_snp_filter | AC=2;AF=0.111;AN=18;BaseQRankSum=          |
| 2064 | chrY | 4822557 | . | C | A | 892.24   | PASS          | AC=6;AF=0.333;AN=18;BaseQRankSum=1.50;Cli  |
| 2065 | chrY | 4822614 | . | T | G | 98.42    | my_snp_filter | AC=2;AF=0.111;AN=18;BaseQRankSum=          |
| 2066 | chrY | 4822826 | . | T | C | 1142.71  | my_snp_filter | AC=9;AF=0.500;AN=18;BaseQRankSum=          |
| 2067 | chrY | 4822945 | . | T | C | 871.29   | PASS          | AC=10;AF=0.455;AN=22;DP=143;FS=0.000;Inbr  |
| 2068 | chrY | 4824331 | . | G | A | 896.98   | PASS          | AC=5;AF=0.071;AN=70;BaseQRankSum=-8.500e-  |
| 2069 | chrY | 4827776 | . | C | T | 388.44   | PASS          | AC=2;AF=0.031;AN=64;DP=223;FS=0.000;Inbre  |
| 2070 | chrY | 4828081 | . | G | A | 232.43   | PASS          | AC=2;AF=0.029;AN=70;BaseQRankSum=-4.120e-  |
| 2071 | chrY | 4828969 | . | A | G | 172.61   | PASS          | AC=8;AF=0.286;AN=28;DP=126;FS=0.000;Inbre  |
| 2072 | chrY | 4830185 | . | T | C | 163.82   | PASS          | AC=2;AF=0.029;AN=70;DP=532;FS=0.000;Inbre  |
| 2073 | chrY | 4830642 | . | C | T | 1643.75  | PASS          | AC=18;AF=0.600;AN=30;DP=169;FS=0.000;Inbr  |
| 2074 | chrY | 4832128 | . | G | C | 979.23   | PASS          | AC=6;AF=0.088;AN=68;DP=562;FS=0.000;Inbre  |
| 2075 | chrY | 4832939 | . | A | C | 50.04    | my_snp_filter | AC=2;AF=0.029;AN=70;BaseQRankSum=          |
| 2076 | chrY | 4834281 | . | C | A | 116.05   | PASS          | AC=5;AF=0.071;AN=70;BaseQRankSum=0.00;Cli  |
| 2077 | chrY | 4843273 | . | G | A | 122.69   | PASS          | AC=2;AF=0.111;AN=18;BaseQRankSum=2.37;Cli  |
| 2078 | chrY | 4848709 | . | C | T | 370.99   | PASS          | AC=6;AF=0.333;AN=18;DP=84;FS=0.000;MLEAC=  |
| 2079 | chrY | 4851190 | . | C | T | 381.55   | PASS          | AC=3;AF=0.136;AN=22;BaseQRankSum=0.786;Cl  |
| 2080 | chrY | 4851694 | . | C | G | 599.77   | PASS          | AC=6;AF=0.086;AN=70;DP=494;FS=0.000;Inbre  |
| 2081 | chrY | 4852881 | . | T | C | 32.16    | PASS          | AC=1;AF=0.014;AN=70;BaseQRankSum=0.00;Cli  |
| 2082 | chrY | 4854094 | . | T | A | 91.50    | PASS          | AC=2;AF=0.029;AN=68;BaseQRankSum=1.00;Cli  |
| 2083 | chrY | 4854252 | . | G | A | 44.97    | my_snp_filter | AC=1;AF=0.014;AN=70;BaseQRankSum=          |
| 2084 | chrY | 4854274 | . | G | A | 115.73   | PASS          | AC=2;AF=0.029;AN=68;BaseQRankSum=1.87;Cli  |
| 2085 | chrY | 4859035 | . | T | C | 1371.06  | PASS          | AC=22;AF=1.00;AN=22;DP=91;FS=0.000;Inbre   |
| 2086 | chrY | 4862235 | . | A | G | 34.01    | PASS          | AC=1;AF=0.015;AN=68;BaseQRankSum=-7.200e-  |
| 2087 | chrY | 4862249 | . | A | G | 31.09    | PASS          | AC=1;AF=0.015;AN=66;BaseQRankSum=-1.495e+  |
| 2088 | chrY | 4866424 | . | G | C | 1265.12  | PASS          | AC=6;AF=0.086;AN=70;DP=555;FS=0.000;Inbre  |
| 2089 | chrY | 4866502 | . | A | G | 32.89    | PASS          | AC=1;AF=0.014;AN=70;BaseQRankSum=-5.330e-  |
| 2090 | chrY | 4866955 | . | C | A | 380.17   | PASS          | AC=2;AF=0.030;AN=66;DP=270;FS=0.000;Inbre  |
| 2091 | chrY | 4867799 | . | G | A | 882.93   | PASS          | AC=6;AF=0.086;AN=70;DP=511;FS=0.000;Inbre  |
| 2092 | chrY | 4869764 | . | G | T | 1284.90  | PASS          | AC=6;AF=0.091;AN=66;DP=362;FS=0.000;Inbre  |
| 2093 | chrY | 4874629 | . | C | T | 5967.37  | PASS          | AC=56;AF=0.824;AN=68;DP=280;FS=0.000;Inbr  |
| 2094 | chrY | 4875190 | . | A | C | 31.01    | PASS          | AC=1;AF=0.014;AN=70;BaseQRankSum=-1.980e-  |
| 2095 | chrY | 4875199 | . | A | G | 31.52    | PASS          | AC=1;AF=0.014;AN=70;BaseQRankSum=-1.495e+  |
| 2096 | chrY | 4875320 | . | A | G | 186.04   | PASS          | AC=1;AF=0.016;AN=62;BaseQRankSum=-1.678e+  |
| 2097 | chrY | 4876695 | . | T | C | 1242.59  | PASS          | AC=6;AF=0.088;AN=68;DP=350;FS=0.000;Inbre  |
| 2098 | chrY | 4878729 | . | A | G | 743.73   | PASS          | AC=6;AF=0.086;AN=70;BaseQRankSum=-9.190e-  |
| 2099 | chrY | 4880990 | . | A | C | 33.08    | PASS          | AC=1;AF=0.033;AN=30;BaseQRankSum=-5.720e-  |
| 2100 | chrY | 4881000 | . | C | T | 30.11    | PASS          | AC=1;AF=0.036;AN=28;BaseQRankSum=-5.720e-  |
| 2101 | chrY | 4886645 | . | C | A | 378.58   | PASS          | AC=2;AF=0.030;AN=66;BaseQRankSum=-6.000e-  |
| 2102 | chrY | 4890141 | . | C | T | 12171.93 | PASS          | AC=70;AF=1.00;AN=70;DP=417;FS=0.000        |
| 2103 | chrY | 4891313 | . | T | C | 4356.71  | PASS          | AC=50;AF=0.735;AN=68;DP=281;FS=0.000;Inbr  |
| 2104 | chrY | 4895671 | . | C | T | 285.75   | PASS          | AC=3;AF=0.188;AN=16;BaseQRankSum=0.736;Cl  |
| 2105 | chrY | 4901576 | . | C | T | 2140.89  | PASS          | AC=18;AF=1.00;AN=18;DP=91;FS=0.000;MLEAC=  |
| 2106 | chrY | 4904399 | . | T | C | 3610.28  | PASS          | AC=45;AF=0.682;AN=66;BaseQRankSum=0.731;C  |
| 2107 | chrY | 4905277 | . | A | T | 516.38   | PASS          | AC=3;AF=0.052;AN=58;BaseQRankSum=0.456;Cl  |
| 2108 | chrY | 4909304 | . | C | G | 293.34   | PASS          | AC=3;AF=0.150;AN=20;BaseQRankSum=-2.180e+  |
| 2109 | chrY | 4909318 | . | G | C | 262.52   | PASS          | AC=3;AF=0.150;AN=20;BaseQRankSum=-6.700e-  |
| 2110 | chrY | 4909353 | . | T | C | 136.78   | PASS          | AC=2;AF=0.111;AN=18;BaseQRankSum=-1.032e+  |
| 2111 | chrY | 4909354 | . | G | A | 137.65   | PASS          | AC=2;AF=0.111;AN=18;BaseQRankSum=1.30;Cli  |
| 2112 | chrY | 4909365 | . | G | T | 94.92    | PASS          | AC=1;AF=0.056;AN=18;BaseQRankSum=1.65;Cli  |
| 2113 | chrY | 4909370 | . | G | A | 87.18    | PASS          | AC=1;AF=0.056;AN=18;BaseQRankSum=0.809;Cl  |
| 2114 | chrY | 4909486 | . | A | T | 118.30   | PASS          | AC=3;AF=0.167;AN=18;BaseQRankSum=0.718;Cl  |
| 2115 | chrY | 4917915 | . | G | T | 4152.07  | PASS          | AC=48;AF=0.727;AN=66;DP=287;FS=0.000;Inbr  |
| 2116 | chrY | 4920762 | . | A | G | 2821.56  | PASS          | AC=42;AF=0.700;AN=60;DP=250;FS=0.000;Inbr  |
| 2117 | chrY | 4928191 | . | G | T | 83.89    | PASS          | AC=3;AF=0.047;AN=64;BaseQRankSum=0.736;Cl  |
| 2118 | chrY | 4928622 | . | T | C | 559.06   | PASS          | AC=14;AF=0.389;AN=36;DP=128;FS=0.000;Inbr  |
| 2119 | chrY | 4934022 | . | C | T | 1386.24  | PASS          | AC=6;AF=0.088;AN=68;DP=283;FS=0.000;Inbre  |
| 2120 | chrY | 4934549 | . | A | T | 1295.12  | PASS          | AC=6;AF=0.086;AN=70;DP=299;FS=0.000;Inbre  |
| 2121 | chrY | 4937735 | . | G | C | 276.70   | PASS          | AC=6;AF=0.158;AN=38;DP=144;FS=0.000;Inbre  |
| 2122 | chrY | 4939870 | . | C | T | 8283.13  | PASS          | AC=66;AF=1.00;AN=66;DP=291;FS=0.000;Inbre  |
| 2123 | chrY | 4943364 | . | G | C | 203.47   | PASS          | AC=2;AF=0.034;AN=58;DP=161;FS=0.000;Inbre  |
| 2124 | chrY | 4943702 | . | G | A | 1074.02  | PASS          | AC=6;AF=0.086;AN=70;DP=307;FS=0.000;Inbre  |
| 2125 | chrY | 4945246 | . | C | A | 372.85   | PASS          | AC=2;AF=0.029;AN=68;DP=194;FS=0.000;Inbre  |
| 2126 | chrY | 4955162 | . | A | G | 13662.80 | PASS          | AC=46;AF=0.657;AN=70;DP=627;FS=0.000       |
| 2127 | chrY | 4955528 | . | C | T | 1279.08  | PASS          | AC=6;AF=0.091;AN=66;BaseQRankSum=-4.340e-  |
| 2128 | chrY | 4957120 | . | T | C | 7364     | PASS          | AC=61;AF=0.984;AN=62;BaseQRankSum=-7.420e- |

|      |      |         |   |   |   |          |               |                                            |
|------|------|---------|---|---|---|----------|---------------|--------------------------------------------|
| 2129 | chrY | 4960392 | . | G | A | 816.60   | PASS          | AC=6;AF=0.086;AN=70;DP=493;FS=0.000;Inbre  |
| 2130 | chrY | 4961905 | . | G | A | 232.98   | PASS          | AC=2;AF=0.029;AN=70;DP=311;FS=0.000;Inbre  |
| 2131 | chrY | 4962580 | . | A | T | 807.63   | PASS          | AC=6;AF=0.094;AN=64;BaseQRankSum=-4.960e-  |
| 2132 | chrY | 4963906 | . | A | G | 31.65    | PASS          | AC=1;AF=0.016;AN=64;BaseQRankSum=-9.220e-  |
| 2133 | chrY | 4965038 | . | A | G | 3122.23  | PASS          | AC=46;AF=1.00;AN=46;DP=119;FS=0.000;Inbre  |
| 2134 | chrY | 4968368 | . | G | T | 7063.10  | PASS          | AC=60;AF=1.00;AN=60;BaseQRankSum=1.40;Cli  |
| 2135 | chrY | 4968655 | . | T | G | 9146.09  | PASS          | AC=64;AF=1.00;AN=64;DP=296;FS=0.000;Inbre  |
| 2136 | chrY | 4970060 | . | C | T | 508.47   | PASS          | AC=2;AF=0.029;AN=70;DP=379;FS=0.000;Inbre  |
| 2137 | chrY | 4975602 | . | G | C | 4949.77  | PASS          | AC=46;AF=0.793;AN=58;DP=289;FS=0.000;Inbr  |
| 2138 | chrY | 4975826 | . | T | C | 521.76   | PASS          | AC=4;AF=0.069;AN=58;DP=210;FS=0.000;Inbre  |
| 2139 | chrY | 4975828 | . | T | C | 520.35   | PASS          | AC=4;AF=0.069;AN=58;DP=207;FS=0.000;Inbre  |
| 2140 | chrY | 4975960 | . | C | T | 53.89    | PASS          | AC=1;AF=0.045;AN=22;BaseQRankSum=2.08;Cli  |
| 2141 | chrY | 4975963 | . | G | A | 52.13    | PASS          | AC=1;AF=0.045;AN=22;BaseQRankSum=-2.205e+  |
| 2142 | chrY | 4975972 | . | C | T | 54.28    | PASS          | AC=1;AF=0.042;AN=24;BaseQRankSum=-7.640e-  |
| 2143 | chrY | 4976064 | . | C | T | 85.31    | PASS          | AC=2;AF=0.050;AN=40;BaseQRankSum=0.720;Cl  |
| 2144 | chrY | 4976524 | . | T | C | 285.27   | PASS          | AC=2;AF=0.031;AN=64;BaseQRankSum=0.139;Cl  |
| 2145 | chrY | 4976534 | . | A | T | 241.85   | PASS          | AC=2;AF=0.029;AN=68;BaseQRankSum=2.25;Cli  |
| 2146 | chrY | 4976541 | . | T | C | 162.54   | PASS          | AC=4;AF=0.063;AN=64;DP=231;FS=0.000;Inbre  |
| 2147 | chrY | 4976705 | . | A | G | 584.68   | PASS          | AC=6;AF=0.300;AN=20;DP=89;FS=0.000;Inbre   |
| 2148 | chrY | 4976706 | . | C | T | 588.36   | PASS          | AC=6;AF=0.300;AN=20;DP=87;FS=0.000;Inbre   |
| 2149 | chrY | 4978496 | . | A | T | 842.01   | PASS          | AC=6;AF=0.150;AN=40;DP=160;FS=0.000;Inbre  |
| 2150 | chrY | 4980827 | . | A | G | 42.05    | my_snp_filter | AC=1;AF=0.014;AN=70;BaseQRankSum=          |
| 2151 | chrY | 4981239 | . | G | A | 327.83   | PASS          | AC=5;AF=0.076;AN=66;BaseQRankSum=2.00;Cli  |
| 2152 | chrY | 4983355 | . | A | G | 797.07   | PASS          | AC=6;AF=0.091;AN=66;BaseQRankSum=-4.340e-  |
| 2153 | chrY | 4983598 | . | G | A | 40.72    | PASS          | AC=1;AF=0.015;AN=66;BaseQRankSum=-1.026e+  |
| 2154 | chrY | 4983606 | . | A | G | 41.07    | PASS          | AC=1;AF=0.015;AN=66;BaseQRankSum=-1.026e+  |
| 2155 | chrY | 4983844 | . | C | T | 1791.48  | PASS          | AC=16;AF=0.889;AN=18;BaseQRankSum=2.00;Cl  |
| 2156 | chrY | 4985903 | . | T | C | 117.08   | PASS          | AC=4;AF=0.222;AN=18;DP=24;FS=0.000;MLEAC=  |
| 2157 | chrY | 4987221 | . | G | A | 70.07    | my_snp_filter | AC=3;AF=0.043;AN=70;BaseQRankSum=          |
| 2158 | chrY | 4989199 | . | C | G | 3749.21  | PASS          | AC=32;AF=1.00;AN=32;DP=165;FS=0.000;Inbre  |
| 2159 | chrY | 4994974 | . | G | A | 603.04   | PASS          | AC=6;AF=0.086;AN=70;DP=254;FS=0.000;Inbre  |
| 2160 | chrY | 4997166 | . | C | A | 37.47    | PASS          | AC=1;AF=0.015;AN=66;BaseQRankSum=-1.231e+  |
| 2161 | chrY | 4997172 | . | C | A | 37.67    | PASS          | AC=1;AF=0.015;AN=66;BaseQRankSum=-3.580e-  |
| 2162 | chrY | 4997440 | . | C | T | 1102.21  | PASS          | AC=13;AF=0.191;AN=68;BaseQRankSum=1.27;Cl  |
| 2163 | chrY | 5000942 | . | T | C | 903.81   | PASS          | AC=6;AF=0.103;AN=58;DP=208;FS=0.000;Inbre  |
| 2164 | chrY | 5005053 | . | C | A | 5275.19  | PASS          | AC=44;AF=1.00;AN=44;DP=201;FS=0.000;Inbre  |
| 2165 | chrY | 5006965 | . | A | T | 2659.17  | PASS          | AC=38;AF=0.655;AN=58;DP=243;FS=0.000;Inbr  |
| 2166 | chrY | 5007379 | . | A | G | 40.09    | my_snp_filter | AC=2;AF=0.029;AN=70;BaseQRankSum=          |
| 2167 | chrY | 5007935 | . | A | C | 2434.87  | PASS          | AC=18;AF=1.00;AN=18;DP=107;FS=0.000;MLEAC  |
| 2168 | chrY | 5009348 | . | C | T | 90.55    | my_snp_filter | AC=2;AF=0.111;AN=18;BaseQRankSum=          |
| 2169 | chrY | 5009382 | . | A | G | 185.56   | my_snp_filter | AC=3;AF=0.167;AN=18;BaseQRankSum=          |
| 2170 | chrY | 5009445 | . | C | A | 216.33   | PASS          | AC=4;AF=0.200;AN=20;BaseQRankSum=-2.083e+  |
| 2171 | chrY | 5012892 | . | G | A | 3665.07  | PASS          | AC=24;AF=1.00;AN=24;DP=149;FS=0.000;Inbre  |
| 2172 | chrY | 5014630 | . | C | T | 102.81   | PASS          | AC=1;AF=0.016;AN=64;BaseQRankSum=3.44;Cli  |
| 2173 | chrY | 5015151 | . | C | T | 103.07   | PASS          | AC=3;AF=0.071;AN=42;BaseQRankSum=1.75;Cli  |
| 2174 | chrY | 5015450 | . | C | A | 10775.98 | PASS          | AC=66;AF=1.00;AN=66;DP=379;FS=0.000;Inbr   |
| 2175 | chrY | 5015966 | . | C | A | 378.27   | PASS          | AC=2;AF=0.029;AN=70;DP=381;FS=0.000;Inbre  |
| 2176 | chrY | 5017198 | . | T | C | 1932.46  | PASS          | AC=30;AF=0.556;AN=54;DP=219;FS=0.000;Inbr  |
| 2177 | chrY | 5018300 | . | A | C | 139.64   | PASS          | AC=2;AF=0.034;AN=58;DP=165;FS=0.000;Inbre  |
| 2178 | chrY | 5018545 | . | C | G | 916.61   | PASS          | AC=6;AF=0.086;AN=70;DP=494;FS=0.000;Inbre  |
| 2179 | chrY | 5022234 | . | G | A | 156.30   | PASS          | AC=2;AF=0.029;AN=68;BaseQRankSum=0.731;Cl  |
| 2180 | chrY | 5025819 | . | G | A | 1080.44  | PASS          | AC=6;AF=0.086;AN=70;DP=564;FS=0.000;Inbre  |
| 2181 | chrY | 5026636 | . | G | A | 62.20    | PASS          | AC=1;AF=0.016;AN=62;BaseQRankSum=2.18;Cli  |
| 2182 | chrY | 5028342 | . | C | T | 379.90   | PASS          | AC=4;AF=0.061;AN=66;DP=224;FS=0.000;Inbre  |
| 2183 | chrY | 5031687 | . | A | G | 1286.96  | PASS          | AC=6;AF=0.086;AN=70;DP=442;FS=0.000;Inbre  |
| 2184 | chrY | 5035553 | . | T | C | 405.27   | PASS          | AC=8;AF=0.118;AN=68;BaseQRankSum=-1.160e-  |
| 2185 | chrY | 5039264 | . | A | C | 68.44    | PASS          | AC=1;AF=0.014;AN=70;BaseQRankSum=-1.055e+  |
| 2186 | chrY | 5039469 | . | G | T | 968.27   | PASS          | AC=13;AF=0.186;AN=70;BaseQRankSum=1.02;Cl  |
| 2187 | chrY | 5039631 | . | C | T | 1456.89  | PASS          | AC=17;AF=0.243;AN=70;BaseQRankSum=-5.720e- |
| 2188 | chrY | 5040012 | . | T | C | 117.65   | PASS          | AC=2;AF=0.029;AN=70;BaseQRankSum=2.06;Cli  |
| 2189 | chrY | 5044438 | . | A | G | 84.31    | PASS          | AC=2;AF=0.032;AN=62;DP=265;FS=0.000;Inbre  |
| 2190 | chrY | 5047618 | . | C | T | 155.84   | PASS          | AC=2;AF=0.031;AN=64;BaseQRankSum=1.25;Cli  |
| 2191 | chrY | 5047690 | . | G | T | 122.88   | PASS          | AC=2;AF=0.029;AN=70;BaseQRankSum=1.30;Cli  |
| 2192 | chrY | 5050520 | . | C | T | 44.88    | my_snp_filter | AC=2;AF=0.031;AN=64;BaseQRankSum=          |
| 2193 | chrY | 5050804 | . | A | G | 849.51   | PASS          | AC=5;AF=0.071;AN=70;BaseQRankSum=-1.340e-  |
| 2194 | chrY | 5051998 | . | A | G | 1675.96  | PASS          | AC=28;AF=0.700;AN=40;DP=160;FS=0.000;Inbr  |
| 2195 | chrY | 5055812 | . | G | A | 95.40    | PASS          | AC=2;AF=0.029;AN=70;BaseQRankSum=1.67;Cli  |
| 2196 | chrY | 5055987 | . | A | G | 180.21   | PASS          | AC=2;AF=0.029;AN=68;DP=558;FS=0.000;Inbre  |
| 2197 | chrY | 5056411 | . | A | G | 5315.34  | PASS          | AC=52;AF=1.00;AN=52;DP=241;FS=0.000;Inbre  |
| 2198 | chrY | 5056960 | . | G | T | 255.30   | PASS          | AC=2;AF=0.032;AN=62;BaseQRankSum=1.27;Cli  |
| 2199 | chrY | 5057534 | . | A | C | 5045.11  | PASS          | AC=48;AF=0.800;AN=60;DP=249;FS=0.000;Inbr  |
| 2200 | chrY | 5061189 | . | T | C | 7120.05  | PASS          | AC=54;AF=1.00;AN=54;DP=261;FS=0.000;Inbre  |
| 2201 | chrY | 5064680 | . | G | C | 323.84   | PASS          | AC=1;AF=0.033;AN=30;BaseQRankSum=2.40;Cli  |
| 2202 | chrY | 5065868 | . | G | T | 30.10    | PASS          | AC=1;AF=0.063;AN=16;BaseQRankSum=0.480;Cl  |
| 2203 | chrY | 5065876 | . | G | T | 52.59    | PASS          | AC=1;AF=0.056;AN=18;BaseQRankSum=0.898;Cl  |
| 2204 | chrY | 5065884 | . | G | T | 63.29    | PASS          | AC=1;AF=0.050;AN=20;BaseQRankSum=-7.360e-  |

|      |      |         |   |   |   |          |               |                                           |
|------|------|---------|---|---|---|----------|---------------|-------------------------------------------|
| 2205 | chrY | 5065885 | . | G | A | 53.42    | PASS          | AC=1;AF=0.050;AN=20;BaseQRankSum=-7.150e- |
| 2206 | chrY | 5067905 | . | C | T | 1318.89  | PASS          | AC=6;AF=0.086;AN=70;DP=444;FS=0.000;Inbre |
| 2207 | chrY | 5071123 | . | T | G | 90.11    | PASS          | AC=2;AF=0.029;AN=70;BaseQRankSum=1.28;Cli |
| 2208 | chrY | 5071339 | . | A | G | 2700.26  | PASS          | AC=32;AF=1.00;AN=32;BaseQRankSum=1.45;Cli |
| 2209 | chrY | 5074444 | . | A | G | 995.67   | PASS          | AC=6;AF=0.273;AN=22;BaseQRankSum=-1.552e+ |
| 2210 | chrY | 5076531 | . | C | T | 83.25    | PASS          | AC=1;AF=0.018;AN=56;BaseQRankSum=0.803;Cl |
| 2211 | chrY | 5076539 | . | A | G | 89.02    | PASS          | AC=1;AF=0.017;AN=58;BaseQRankSum=-1.858e+ |
| 2212 | chrY | 5076828 | . | A | G | 209.39   | PASS          | AC=5;AF=0.081;AN=62;BaseQRankSum=-1.380e+ |
| 2213 | chrY | 5078183 | . | A | G | 323.40   | PASS          | AC=2;AF=0.029;AN=70;DP=336;FS=0.000;Inbre |
| 2214 | chrY | 5078642 | . | C | T | 314.01   | PASS          | AC=4;AF=0.167;AN=24;BaseQRankSum=0.410;Cl |
| 2215 | chrY | 5081233 | . | G | A | 3312.56  | PASS          | AC=20;AF=0.909;AN=22;DP=132;FS=0.000;Inbr |
| 2216 | chrY | 5085067 | . | G | A | 132.59   | PASS          | AC=2;AF=0.029;AN=70;BaseQRankSum=1.45;Cli |
| 2217 | chrY | 5085904 | . | A | G | 234.93   | PASS          | AC=2;AF=0.029;AN=68;DP=375;FS=0.000;Inbre |
| 2218 | chrY | 5086303 | . | C | T | 1182.57  | PASS          | AC=6;AF=0.086;AN=70;DP=321;FS=0.000;Inbre |
| 2219 | chrY | 5086909 | . | T | C | 33.10    | my_snp_filter | AC=2;AF=0.029;AN=70;BaseQRankSum=         |
| 2220 | chrY | 5087053 | . | A | G | 63.41    | my_snp_filter | AC=3;AF=0.043;AN=70;BaseQRankSum=         |
| 2221 | chrY | 5087118 | . | T | C | 87.68    | PASS          | AC=2;AF=0.032;AN=62;BaseQRankSum=-5.460e- |
| 2222 | chrY | 5095644 | . | C | T | 295.91   | PASS          | AC=5;AF=0.071;AN=70;BaseQRankSum=-5.700e- |
| 2223 | chrY | 5101719 | . | A | G | 4981.38  | PASS          | AC=60;AF=1.00;AN=60;DP=194;FS=0.000;Inbre |
| 2224 | chrY | 5110314 | . | T | G | 144.15   | PASS          | AC=2;AF=0.063;AN=32;BaseQRankSum=1.03;Cli |
| 2225 | chrY | 5110349 | . | A | G | 500.30   | PASS          | AC=14;AF=0.389;AN=36;DP=159;FS=0.000;Inbr |
| 2226 | chrY | 5110830 | . | A | T | 941.36   | PASS          | AC=6;AF=0.088;AN=68;DP=284;FS=0.000;Inbre |
| 2227 | chrY | 5111430 | . | C | T | 953.12   | PASS          | AC=6;AF=0.088;AN=68;BaseQRankSum=1.67;Cli |
| 2228 | chrY | 5111786 | . | A | G | 751.31   | PASS          | AC=5;AF=0.074;AN=68;BaseQRankSum=-5.600e- |
| 2229 | chrY | 5112302 | . | G | A | 1520.08  | PASS          | AC=6;AF=0.088;AN=68;DP=331;FS=0.000;Inbre |
| 2230 | chrY | 5112966 | . | G | T | 78.95    | PASS          | AC=2;AF=0.032;AN=62;DP=202;FS=0.000;Inbre |
| 2231 | chrY | 5114140 | . | G | A | 43.44    | PASS          | AC=1;AF=0.015;AN=66;BaseQRankSum=-7.360e- |
| 2232 | chrY | 5114142 | . | T | A | 43.55    | PASS          | AC=1;AF=0.015;AN=66;BaseQRankSum=-7.360e- |
| 2233 | chrY | 5114150 | . | A | G | 44.07    | PASS          | AC=1;AF=0.015;AN=66;BaseQRankSum=-7.360e- |
| 2234 | chrY | 5114698 | . | A | G | 531.19   | PASS          | AC=5;AF=0.089;AN=56;BaseQRankSum=1.03;Cli |
| 2235 | chrY | 5114902 | . | A | G | 70.56    | my_snp_filter | AC=2;AF=0.077;AN=26;BaseQRankSum=         |
| 2236 | chrY | 5121220 | . | C | G | 87.16    | PASS          | AC=2;AF=0.063;AN=32;BaseQRankSum=-1.820e- |
| 2237 | chrY | 5122318 | . | A | G | 378.12   | PASS          | AC=7;AF=0.103;AN=68;BaseQRankSum=-2.170e- |
| 2238 | chrY | 5122331 | . | C | T | 132.59   | PASS          | AC=4;AF=0.059;AN=68;BaseQRankSum=0.727;Cl |
| 2239 | chrY | 5123392 | . | T | A | 470.80   | PASS          | AC=6;AF=0.086;AN=70;BaseQRankSum=0.736;Cl |
| 2240 | chrY | 5123560 | . | A | T | 572.76   | my_snp_filter | AC=5;AF=0.071;AN=70;BaseQRankSum=         |
| 2241 | chrY | 5128384 | . | G | A | 631.79   | PASS          | AC=3;AF=0.167;AN=18;BaseQRankSum=2.15;Cli |
| 2242 | chrY | 5128781 | . | T | C | 76.49    | my_snp_filter | AC=2;AF=0.029;AN=70;BaseQRankSum=         |
| 2243 | chrY | 5128791 | . | T | A | 2326.15  | PASS          | AC=5;AF=0.071;AN=70;BaseQRankSum=0.080;Cl |
| 2244 | chrY | 5130967 | . | A | T | 88.71    | PASS          | AC=1;AF=0.015;AN=66;BaseQRankSum=-2.650e- |
| 2245 | chrY | 5130971 | . | C | T | 88.20    | PASS          | AC=1;AF=0.015;AN=66;BaseQRankSum=-2.283e+ |
| 2246 | chrY | 5132431 | . | G | C | 664.21   | PASS          | AC=5;AF=0.074;AN=68;BaseQRankSum=0.00;Cli |
| 2247 | chrY | 5132705 | . | C | T | 78.87    | PASS          | AC=3;AF=0.052;AN=58;BaseQRankSum=0.358;Cl |
| 2248 | chrY | 5134289 | . | G | A | 210.30   | PASS          | AC=2;AF=0.029;AN=68;DP=287;FS=0.000;Inbre |
| 2249 | chrY | 5135765 | . | C | A | 166.23   | PASS          | AC=4;AF=0.069;AN=58;DP=223;FS=0.000;Inbre |
| 2250 | chrY | 5135960 | . | C | T | 215.91   | PASS          | AC=3;AF=0.043;AN=70;BaseQRankSum=2.25;Cli |
| 2251 | chrY | 5136277 | . | A | T | 133.87   | PASS          | AC=2;AF=0.050;AN=40;BaseQRankSum=-1.750e- |
| 2252 | chrY | 5136311 | . | A | T | 78.53    | my_snp_filter | AC=2;AF=0.050;AN=40;BaseQRankSum=         |
| 2253 | chrY | 5137411 | . | G | C | 178.45   | my_snp_filter | AC=5;AF=0.071;AN=70;BaseQRankSum=         |
| 2254 | chrY | 5137794 | . | T | C | 404.52   | PASS          | AC=4;AF=0.057;AN=70;BaseQRankSum=0.584;Cl |
| 2255 | chrY | 5137799 | . | A | G | 404.61   | PASS          | AC=4;AF=0.057;AN=70;BaseQRankSum=0.761;Cl |
| 2256 | chrY | 5138593 | . | G | T | 48.49    | my_snp_filter | AC=4;AF=0.057;AN=70;BaseQRankSum=         |
| 2257 | chrY | 5139407 | . | A | G | 278.14   | PASS          | AC=5;AF=0.074;AN=68;BaseQRankSum=-1.278e+ |
| 2258 | chrY | 5139530 | . | A | T | 655.72   | PASS          | AC=5;AF=0.109;AN=46;BaseQRankSum=-4.100e- |
| 2259 | chrY | 5139674 | . | G | A | 2011.31  | PASS          | AC=12;AF=0.176;AN=68;BaseQRankSum=0.020;C |
| 2260 | chrY | 5139929 | . | T | G | 189.42   | my_snp_filter | AC=5;AF=0.083;AN=60;BaseQRankSum=         |
| 2261 | chrY | 5143006 | . | C | T | 71.81    | PASS          | AC=3;AF=0.043;AN=70;BaseQRankSum=-1.420e- |
| 2262 | chrY | 5147169 | . | C | T | 827.42   | PASS          | AC=6;AF=0.094;AN=64;DP=186;FS=0.000;Inbre |
| 2263 | chrY | 5149801 | . | A | G | 184.65   | PASS          | AC=3;AF=0.054;AN=56;BaseQRankSum=-6.330e- |
| 2264 | chrY | 5150478 | . | G | T | 464.15   | PASS          | AC=4;AF=0.059;AN=68;BaseQRankSum=1.73;Cli |
| 2265 | chrY | 5150815 | . | A | G | 58.51    | PASS          | AC=1;AF=0.014;AN=70;BaseQRankSum=-3.500e- |
| 2266 | chrY | 5154147 | . | C | T | 958.71   | PASS          | AC=9;AF=0.129;AN=70;BaseQRankSum=0.423;Cl |
| 2267 | chrY | 5157397 | . | A | G | 38.38    | my_snp_filter | AC=2;AF=0.031;AN=64;BaseQRankSum=         |
| 2268 | chrY | 5158985 | . | T | A | 218.11   | PASS          | AC=3;AF=0.068;AN=44;BaseQRankSum=0.127;Cl |
| 2269 | chrY | 5161936 | . | G | C | 3713.43  | PASS          | AC=31;AF=0.443;AN=70;BaseQRankSum=0.934;C |
| 2270 | chrY | 5163631 | . | T | C | 97.12    | PASS          | AC=2;AF=0.030;AN=66;BaseQRankSum=-1.003e+ |
| 2271 | chrY | 5163935 | . | T | C | 1583     | PASS          | AC=6;AF=0.086;AN=70;DP=406;FS=0.000;Inbre |
| 2272 | chrY | 5164827 | . | G | A | 9334.29  | PASS          | AC=46;AF=0.657;AN=70;DP=490;FS=0.000;Inbr |
| 2273 | chrY | 5165705 | . | A | G | 65.53    | my_snp_filter | AC=2;AF=0.029;AN=68;BaseQRankSum=         |
| 2274 | chrY | 5166408 | . | G | A | 10220.51 | PASS          | AC=64;AF=0.970;AN=66;BaseQRankSum=        |
| 2275 | chrY | 5166634 | . | T | C | 5703.33  | PASS          | AC=46;AF=0.719;AN=64;DP=329;FS=0.000;Inbr |
| 2276 | chrY | 5168299 | . | A | G | 1063.13  | PASS          | AC=6;AF=0.088;AN=68;DP=291;FS=0.000;Inbre |
| 2277 | chrY | 5169277 | . | T | C | 38.24    | my_snp_filter | AC=2;AF=0.029;AN=70;BaseQRankSum=         |
| 2278 | chrY | 5170131 | . | T | C | 1398.38  | PASS          | AC=34;AF=0.654;AN=52;DP=186;FS=0.000;Inbr |
| 2279 | chrY | 5170984 | . | A | G | 1162.80  | PASS          | AC=20;AF=0.526;AN=38;DP=175;FS=0.000;Inbr |
| 2280 | chrY | 5173299 | . | A | G | 34.52    | PASS          | AC=1;AF=0.015;AN=66;BaseQRankSum=-1.380e+ |

|      |      |         |   |   |     |         |               |                                           |
|------|------|---------|---|---|-----|---------|---------------|-------------------------------------------|
| 2281 | chrY | 5173321 | . | C | T   | 40.50   | PASS          | AC=1;AF=0.015;AN=66;BaseQRankSum=-1.026e+ |
| 2282 | chrY | 5174709 | . | T | C   | 637.59  | PASS          | AC=6;AF=0.091;AN=66;DP=297;FS=0.000;Inbre |
| 2283 | chrY | 5177713 | . | T | C   | 176.37  | PASS          | AC=2;AF=0.029;AN=70;DP=472;FS=0.000;Inbre |
| 2284 | chrY | 5178233 | . | C | T   | 674.43  | PASS          | AC=6;AF=0.111;AN=54;DP=176;FS=0.000;Inbre |
| 2285 | chrY | 5194431 | . | A | G   | 1093.18 | PASS          | AC=6;AF=0.333;AN=18;DP=165;FS=0.000;MLEAC |
| 2286 | chrY | 5195236 | . | C | G   | 9208.19 | PASS          | AC=46;AF=0.657;AN=70;DP=501;FS=0.000;Inbr |
| 2287 | chrY | 5195386 | . | C | T   | 1047.30 | PASS          | AC=20;AF=0.476;AN=42;DP=206;FS=0.000;Inbr |
| 2288 | chrY | 5198181 | . | A | G   | 387.66  | PASS          | AC=6;AF=0.300;AN=20;DP=138;FS=0.000;Inbre |
| 2289 | chrY | 5200023 | . | C | T   | 1210.27 | PASS          | AC=6;AF=0.091;AN=66;DP=449;FS=0.000;Inbre |
| 2290 | chrY | 5206937 | . | A | G   | 5727.02 | PASS          | AC=50;AF=0.806;AN=62;DP=336;FS=0.000;Inb  |
| 2291 | chrY | 5209002 | . | G | A   | 306.46  | PASS          | AC=2;AF=0.029;AN=70;DP=419;FS=0.000;Inbre |
| 2292 | chrY | 5209769 | . | A | G   | 95.09   | PASS          | AC=2;AF=0.032;AN=62;BaseQRankSum=2.05;Cli |
| 2293 | chrY | 5210576 | . | C | T   | 495.18  | PASS          | AC=2;AF=0.029;AN=70;DP=531;FS=0.000;Inbre |
| 2294 | chrY | 5211395 | . | C | T   | 1612.62 | PASS          | AC=12;AF=0.375;AN=32;BaseQRankSum=1.61;Cl |
| 2295 | chrY | 5211589 | . | C | A   | 868.20  | PASS          | AC=6;AF=0.333;AN=18;DP=129;FS=0.000;MLEAC |
| 2296 | chrY | 5216415 | . | C | T   | 214.90  | PASS          | AC=3;AF=0.043;AN=70;BaseQRankSum=0.708;Cl |
| 2297 | chrY | 5220413 | . | T | G   | 3121.25 | PASS          | AC=42;AF=0.636;AN=66;DP=239;FS=0.000;Inbr |
| 2298 | chrY | 5221425 | . | C | T   | 39.57   | PASS          | AC=2;AF=0.037;AN=54;DP=189;FS=0.000;Inbre |
| 2299 | chrY | 5224862 | . | A | G   | 1558.08 | PASS          | AC=20;AF=1.00;AN=20;DP=74;FS=0.000;Inbre  |
| 2300 | chrY | 5226695 | . | G | C   | 130.42  | PASS          | AC=2;AF=0.029;AN=70;BaseQRankSum=2.39;Cli |
| 2301 | chrY | 5226699 | . | C | T   | 136.67  | PASS          | AC=2;AF=0.029;AN=70;BaseQRankSum=-4.100e- |
| 2302 | chrY | 5226724 | . | A | G   | 39.99   | PASS          | AC=1;AF=0.014;AN=70;BaseQRankSum=-2.800e- |
| 2303 | chrY | 5226725 | . | A | G   | 39.99   | PASS          | AC=1;AF=0.014;AN=70;BaseQRankSum=-2.180e+ |
| 2304 | chrY | 5226729 | . | T | C   | 39.99   | PASS          | AC=1;AF=0.014;AN=70;BaseQRankSum=-8.390e- |
| 2305 | chrY | 5226731 | . | T | C   | 37.26   | PASS          | AC=1;AF=0.014;AN=70;BaseQRankSum=0.118;Cl |
| 2306 | chrY | 5226738 | . | A | G   | 40.12   | PASS          | AC=1;AF=0.014;AN=70;BaseQRankSum=-2.800e- |
| 2307 | chrY | 5226744 | . | A | G   | 39.91   | PASS          | AC=1;AF=0.014;AN=70;BaseQRankSum=-1.180e- |
| 2308 | chrY | 5226746 | . | G | C   | 42.88   | PASS          | AC=1;AF=0.014;AN=70;BaseQRankSum=0.237;Cl |
| 2309 | chrY | 5226748 | . | T | C   | 37.14   | PASS          | AC=1;AF=0.014;AN=70;BaseQRankSum=-1.180e- |
| 2310 | chrY | 5226759 | . | T | G   | 36.98   | my_snp_filter | AC=1;AF=0.014;AN=70;BaseQRankSum=         |
| 2311 | chrY | 5226825 | . | C | T   | 55.86   | PASS          | AC=1;AF=0.014;AN=70;BaseQRankSum=-9.340e- |
| 2312 | chrY | 5226830 | . | C | G   | 56.40   | PASS          | AC=1;AF=0.014;AN=70;BaseQRankSum=-2.335e+ |
| 2313 | chrY | 5228328 | . | T | C   | 30.83   | PASS          | AC=1;AF=0.015;AN=68;BaseQRankSum=0.720;Cl |
| 2314 | chrY | 5230639 | . | G | A   | 770.92  | PASS          | AC=6;AF=0.333;AN=18;BaseQRankSum=1.48;Cli |
| 2315 | chrY | 5231564 | . | A | G   | 6324.93 | PASS          | AC=46;AF=0.657;AN=70;DP=366;FS=0.000;Inbr |
| 2316 | chrY | 5240956 | . | T | C,* | 1014.35 | PASS          | AC=6,4;AF=0.600,0.400;AN=10;BaseQRankSum= |
| 2317 | chrY | 5241129 | . | C | T   | 58.10   | PASS          | AC=2;AF=0.111;AN=18;DP=58;FS=0.000;MLEAC= |
| 2318 | chrY | 5241133 | . | C | T   | 58.49   | PASS          | AC=2;AF=0.111;AN=18;DP=57;FS=0.000;MLEAC= |
| 2319 | chrY | 5241137 | . | C | T   | 59.16   | PASS          | AC=2;AF=0.111;AN=18;DP=51;FS=0.000;MLEAC= |
| 2320 | chrY | 5241141 | . | C | T   | 56.69   | PASS          | AC=2;AF=0.111;AN=18;DP=52;FS=0.000;MLEAC= |
| 2321 | chrY | 5241773 | . | A | G   | 122.12  | PASS          | AC=4;AF=0.071;AN=56;DP=141;FS=0.000;Inbre |
| 2322 | chrY | 5241907 | . | T | C   | 257.26  | PASS          | AC=2;AF=0.029;AN=68;DP=278;FS=0.000;Inbre |
| 2323 | chrY | 5246747 | . | T | C   | 1088.50 | PASS          | AC=6;AF=0.094;AN=64;DP=287;FS=0.000;Inbre |
| 2324 | chrY | 5252998 | . | C | A   | 412.10  | PASS          | AC=6;AF=0.086;AN=70;BaseQRankSum=0.747;Cl |
| 2325 | chrY | 5253957 | . | T | C   | 146.44  | PASS          | AC=2;AF=0.029;AN=70;DP=430;FS=0.000;Inbre |
| 2326 | chrY | 5258790 | . | G | C   | 561.58  | PASS          | AC=6;AF=0.086;AN=70;DP=411;FS=0.000;Inbre |
| 2327 | chrY | 5259553 | . | G | A   | 1170.84 | PASS          | AC=6;AF=0.136;AN=44;BaseQRankSum=0.639;Cl |
| 2328 | chrY | 5259908 | . | T | A   | 286.27  | PASS          | AC=7;AF=0.100;AN=70;BaseQRankSum=0.934;Cl |
| 2329 | chrY | 5259932 | . | C | G   | 336.83  | PASS          | AC=7;AF=0.103;AN=68;BaseQRankSum=-5.970e- |
| 2330 | chrY | 5260032 | . | G | A   | 59.03   | PASS          | AC=3;AF=0.047;AN=64;BaseQRankSum=1.67;Cli |
| 2331 | chrY | 5261767 | . | C | T   | 242.89  | PASS          | AC=4;AF=0.067;AN=60;DP=142;FS=0.000;Inbre |
| 2332 | chrY | 5262270 | . | C | T   | 55.61   | my_snp_filter | AC=3;AF=0.043;AN=70;BaseQRankSum=         |
| 2333 | chrY | 5262529 | . | C | T   | 1739.27 | PASS          | AC=12;AF=0.171;AN=70;BaseQRankSum=0.922;C |
| 2334 | chrY | 5263891 | . | G | C   | 70.62   | PASS          | AC=1;AF=0.026;AN=38;BaseQRankSum=2.42;Cli |
| 2335 | chrY | 5263976 | . | T | C   | 91.83   | PASS          | AC=3;AF=0.150;AN=20;BaseQRankSum=0.742;Cl |
| 2336 | chrY | 5264057 | . | T | A   | 191.26  | PASS          | AC=4;AF=0.200;AN=20;BaseQRankSum=0.406;Cl |
| 2337 | chrY | 5264088 | . | G | A   | 664.70  | PASS          | AC=4;AF=0.200;AN=20;BaseQRankSum=-9.350e- |
| 2338 | chrY | 5264107 | . | G | C   | 830.58  | PASS          | AC=4;AF=0.182;AN=22;BaseQRankSum=-1.555e+ |
| 2339 | chrY | 5264182 | . | T | C   | 592.26  | PASS          | AC=4;AF=0.200;AN=20;BaseQRankSum=-1.777e+ |
| 2340 | chrY | 5264186 | . | A | T   | 177.31  | PASS          | AC=1;AF=0.050;AN=20;BaseQRankSum=0.272;Cl |
| 2341 | chrY | 5264274 | . | C | G   | 863.16  | PASS          | AC=5;AF=0.139;AN=36;BaseQRankSum=-2.398e+ |
| 2342 | chrY | 5264285 | . | T | C   | 861.18  | PASS          | AC=5;AF=0.132;AN=38;BaseQRankSum=-2.599e+ |
| 2343 | chrY | 5264335 | . | G | A   | 299.78  | PASS          | AC=3;AF=0.044;AN=68;BaseQRankSum=1.64;Cli |
| 2344 | chrY | 5264429 | . | A | G   | 118.65  | my_snp_filter | AC=5;AF=0.071;AN=70;BaseQRankSum=         |
| 2345 | chrY | 5264527 | . | C | G   | 175.35  | my_snp_filter | AC=4;AF=0.057;AN=70;BaseQRankSum=         |
| 2346 | chrY | 5265422 | . | T | C   | 129.05  | PASS          | AC=3;AF=0.048;AN=62;BaseQRankSum=0.922;Cl |
| 2347 | chrY | 5266407 | . | A | G   | 841.76  | PASS          | AC=4;AF=0.067;AN=60;BaseQRankSum=-8.500e- |
| 2348 | chrY | 5266976 | . | A | G   | 1244.70 | PASS          | AC=6;AF=0.086;AN=70;DP=243;FS=0.000;Inbre |
| 2349 | chrY | 5268062 | . | C | T   | 1379.03 | PASS          | AC=6;AF=0.088;AN=68;DP=296;FS=0.000;Inbre |
| 2350 | chrY | 5268320 | . | G | A   | 117.95  | PASS          | AC=2;AF=0.056;AN=36;DP=178;FS=0.000;Inbre |
| 2351 | chrY | 5272101 | . | G | A   | 80.05   | PASS          | AC=3;AF=0.045;AN=66;BaseQRankSum=0.922;Cl |
| 2352 | chrY | 5273555 | . | C | T   | 246.83  | PASS          | AC=2;AF=0.031;AN=64;BaseQRankSum=2.48;Cli |
| 2353 | chrY | 5273889 | . | G | T   | 337.91  | PASS          | AC=6;AF=0.086;AN=70;BaseQRankSum=0.942;Cl |
| 2354 | chrY | 5275698 | . | T | A   | 148.83  | PASS          | AC=2;AF=0.034;AN=58;DP=196;FS=0.000;Inbre |
| 2355 | chrY | 5275721 | . | A | G   | 859.96  | PASS          | AC=5;AF=0.104;AN=48;BaseQRankSum=-2.318e+ |
| 2356 | chrY | 5276053 | . | G | A   | 566.63  | PASS          | AC=2;AF=0.029;AN=70;DP=433;FS=0.000;Inbre |

|      |      |         |   |   |   |         |               |                                           |
|------|------|---------|---|---|---|---------|---------------|-------------------------------------------|
| 2357 | chrY | 5276161 | . | T | C | 1899.39 | PASS          | AC=13;AF=0.186;AN=70;BaseQRankSum=-1.199e |
| 2358 | chrY | 5276400 | . | C | A | 67.63   | PASS          | AC=1;AF=0.016;AN=62;BaseQRankSum=2.10;Cli |
| 2359 | chrY | 5277726 | . | C | T | 53.90   | my_snp_filter | AC=2;AF=0.031;AN=64;BaseQRankSum=         |
| 2360 | chrY | 5278135 | . | G | A | 387.47  | PASS          | AC=4;AF=0.061;AN=66;BaseQRankSum=0.248;Cl |
| 2361 | chrY | 5278710 | . | A | G | 370.20  | my_snp_filter | AC=8;AF=0.118;AN=68;BaseQRankSum=         |
| 2362 | chrY | 5278775 | . | A | G | 108.61  | PASS          | AC=2;AF=0.029;AN=70;BaseQRankSum=1.69;Cli |
| 2363 | chrY | 5279012 | . | T | C | 8035.34 | PASS          | AC=46;AF=0.657;AN=70;DP=495;FS=0.000;Inbr |
| 2364 | chrY | 5279901 | . | C | T | 1558.90 | PASS          | AC=6;AF=0.086;AN=70;DP=717;FS=0.000;Inbre |
| 2365 | chrY | 5281438 | . | T | C | 85.96   | PASS          | AC=1;AF=0.014;AN=70;BaseQRankSum=-1.009e+ |
| 2366 | chrY | 5281445 | . | A | C | 82.70   | PASS          | AC=1;AF=0.014;AN=70;BaseQRankSum=-9.920e  |
| 2367 | chrY | 5281446 | . | G | A | 82.91   | PASS          | AC=1;AF=0.014;AN=70;BaseQRankSum=0.050;Cl |
| 2368 | chrY | 5281448 | . | C | T | 86.15   | PASS          | AC=1;AF=0.014;AN=70;BaseQRankSum=-3.500e- |
| 2369 | chrY | 5281457 | . | T | G | 88.75   | PASS          | AC=1;AF=0.014;AN=70;BaseQRankSum=0.265;Cl |
| 2370 | chrY | 5281459 | . | T | C | 88.91   | PASS          | AC=1;AF=0.014;AN=70;BaseQRankSum=-7.960e- |
| 2371 | chrY | 5281462 | . | C | T | 86.20   | PASS          | AC=1;AF=0.014;AN=70;BaseQRankSum=-7.360e- |
| 2372 | chrY | 5281465 | . | T | G | 85.88   | PASS          | AC=1;AF=0.014;AN=70;BaseQRankSum=-9.030e- |
| 2373 | chrY | 5281466 | . | A | G | 85.94   | PASS          | AC=1;AF=0.014;AN=70;BaseQRankSum=0.962;Cl |
| 2374 | chrY | 5281468 | . | T | C | 89      | PASS          | AC=1;AF=0.014;AN=70;BaseQRankSum=-5.300e- |
| 2375 | chrY | 5284138 | . | T | A | 7914.92 | PASS          | AC=46;AF=0.657;AN=70;BaseQRankSum=0.736;C |
| 2376 | chrY | 5285896 | . | T | C | 791.15  | PASS          | AC=6;AF=0.091;AN=66;DP=208;FS=0.000;Inbre |
| 2377 | chrY | 5293365 | . | T | C | 32.21   | PASS          | AC=2;AF=0.030;AN=66;BaseQRankSum=0.736;Cl |
| 2378 | chrY | 5293609 | . | C | G | 33.24   | PASS          | AC=1;AF=0.015;AN=68;BaseQRankSum=0.358;Cl |
| 2379 | chrY | 5293923 | . | T | G | 971.82  | PASS          | AC=6;AF=0.103;AN=58;DP=195;FS=0.000;Inbre |
| 2380 | chrY | 5294712 | . | C | T | 487.99  | PASS          | AC=14;AF=0.368;AN=38;BaseQRankSum=0.736;C |
| 2381 | chrY | 5294757 | . | G | A | 254.44  | PASS          | AC=5;AF=0.086;AN=58;BaseQRankSum=-7.270e- |
| 2382 | chrY | 5297176 | . | G | A | 98.84   | PASS          | AC=3;AF=0.043;AN=70;BaseQRankSum=0.382;Cl |
| 2383 | chrY | 5298208 | . | A | C | 3023.64 | PASS          | AC=26;AF=0.371;AN=70;BaseQRankSum=-9.060e |
| 2384 | chrY | 5298221 | . | C | G | 458.12  | PASS          | AC=5;AF=0.074;AN=68;BaseQRankSum=0.727;Cl |
| 2385 | chrY | 5298293 | . | T | C | 179.52  | PASS          | AC=4;AF=0.057;AN=70;BaseQRankSum=1.55;Cli |
| 2386 | chrY | 5302847 | . | C | T | 176.46  | PASS          | AC=4;AF=0.061;AN=66;BaseQRankSum=2.10;Cli |
| 2387 | chrY | 5303229 | . | A | G | 178.70  | my_snp_filter | AC=4;AF=0.057;AN=70;BaseQRankSum=         |
| 2388 | chrY | 5304628 | . | G | C | 510.59  | PASS          | AC=6;AF=0.086;AN=70;DP=446;FS=0.000;Inbre |
| 2389 | chrY | 5308865 | . | G | A | 70.44   | PASS          | AC=1;AF=0.016;AN=64;BaseQRankSum=0.876;Cl |
| 2390 | chrY | 5308974 | . | G | A | 199.82  | PASS          | AC=5;AF=0.074;AN=68;BaseQRankSum=1.03;Cli |
| 2391 | chrY | 5309358 | . | T | A | 40.19   | PASS          | AC=1;AF=0.016;AN=64;BaseQRankSum=-1.026e+ |
| 2392 | chrY | 5309555 | . | T | C | 49.52   | PASS          | AC=1;AF=0.017;AN=58;BaseQRankSum=1.21;Cli |
| 2393 | chrY | 5309717 | . | A | G | 131.11  | PASS          | AC=3;AF=0.044;AN=68;BaseQRankSum=0.658;Cl |
| 2394 | chrY | 5310049 | . | C | T | 140.74  | PASS          | AC=3;AF=0.094;AN=32;BaseQRankSum=0.600;Cl |
| 2395 | chrY | 5310084 | . | T | C | 142.30  | PASS          | AC=4;AF=0.133;AN=30;BaseQRankSum=-1.182e+ |
| 2396 | chrY | 5313019 | . | G | A | 75.19   | my_snp_filter | AC=2;AF=0.033;AN=60;BaseQRankSum=         |
| 2397 | chrY | 5313053 | . | G | T | 202.45  | PASS          | AC=3;AF=0.058;AN=52;BaseQRankSum=1.40;Cli |
| 2398 | chrY | 5316065 | . | T | C | 83.53   | PASS          | AC=1;AF=0.016;AN=64;BaseQRankSum=-7.090e- |
| 2399 | chrY | 5317066 | . | T | C | 165.27  | PASS          | AC=2;AF=0.030;AN=66;BaseQRankSum=0.421;Cl |
| 2400 | chrY | 5320617 | . | T | G | 293.85  | PASS          | AC=1;AF=0.014;AN=70;BaseQRankSum=-1.054e+ |
| 2401 | chrY | 5323138 | . | A | G | 54.31   | my_snp_filter | AC=2;AF=0.029;AN=70;BaseQRankSum=         |
| 2402 | chrY | 5325562 | . | G | T | 48.60   | PASS          | AC=1;AF=0.014;AN=70;BaseQRankSum=1.54;Cli |
| 2403 | chrY | 5325662 | . | T | C | 426.33  | PASS          | AC=3;AF=0.045;AN=66;BaseQRankSum=-2.025e+ |
| 2404 | chrY | 5325721 | . | C | T | 97.59   | PASS          | AC=2;AF=0.030;AN=66;BaseQRankSum=2.22;Cli |
| 2405 | chrY | 5326721 | . | C | T | 313.58  | PASS          | AC=4;AF=0.059;AN=68;BaseQRankSum=0.277;Cl |
| 2406 | chrY | 5331974 | . | G | A | 155.75  | PASS          | AC=2;AF=0.029;AN=68;BaseQRankSum=1.03;Cli |
| 2407 | chrY | 5333890 | . | T | G | 1027.28 | PASS          | AC=6;AF=0.086;AN=70;BaseQRankSum=-4.340e- |
| 2408 | chrY | 5334036 | . | T | A | 243.07  | PASS          | AC=2;AF=0.029;AN=68;BaseQRankSum=0.550;Cl |
| 2409 | chrY | 5334953 | . | T | G | 271.25  | PASS          | AC=2;AF=0.036;AN=56;BaseQRankSum=1.03;Cli |
| 2410 | chrY | 5335042 | . | T | C | 721.26  | PASS          | AC=3;AF=0.047;AN=64;BaseQRankSum=-4.210e- |
| 2411 | chrY | 5335057 | . | T | C | 681.09  | PASS          | AC=3;AF=0.050;AN=60;BaseQRankSum=-1.026e+ |
| 2412 | chrY | 5335069 | . | A | C | 492.65  | PASS          | AC=2;AF=0.033;AN=60;BaseQRankSum=0.358;Cl |
| 2413 | chrY | 5335081 | . | T | A | 499.24  | PASS          | AC=2;AF=0.037;AN=54;BaseQRankSum=1.23;Cli |
| 2414 | chrY | 5335300 | . | G | A | 195.19  | PASS          | AC=1;AF=0.014;AN=70;BaseQRankSum=0.988;Cl |
| 2415 | chrY | 5336063 | . | A | C | 31.93   | PASS          | AC=1;AF=0.014;AN=70;BaseQRankSum=0.358;Cl |
| 2416 | chrY | 5337678 | . | A | T | 102.51  | PASS          | AC=2;AF=0.029;AN=70;BaseQRankSum=0.061;Cl |
| 2417 | chrY | 5338026 | . | C | A | 2128.88 | PASS          | AC=22;AF=0.314;AN=70;BaseQRankSum=0.00;Cl |
| 2418 | chrY | 5338261 | . | C | G | 228.93  | PASS          | AC=7;AF=0.109;AN=64;BaseQRankSum=-1.926e+ |
| 2419 | chrY | 5342248 | . | G | A | 628.81  | PASS          | AC=7;AF=0.389;AN=18;BaseQRankSum=2.61;Cli |
| 2420 | chrY | 5343883 | . | T | C | 3601.05 | PASS          | AC=24;AF=1.00;AN=24;DP=154;FS=0.000;Inbre |
| 2421 | chrY | 5344531 | . | T | C | 239.46  | PASS          | AC=6;AF=0.115;AN=52;BaseQRankSum=-7.310e- |
| 2422 | chrY | 5344623 | . | G | C | 372.94  | PASS          | AC=4;AF=0.057;AN=70;BaseQRankSum=1.04;Cli |
| 2423 | chrY | 5345475 | . | G | A | 1338.77 | PASS          | AC=6;AF=0.333;AN=18;BaseQRankSum=1.53;Cli |
| 2424 | chrY | 5345986 | . | A | T | 63.51   | my_snp_filter | AC=2;AF=0.111;AN=18;BaseQRankSum=         |
| 2425 | chrY | 5345994 | . | A | T | 103.66  | PASS          | AC=2;AF=0.111;AN=18;BaseQRankSum=2.55;Cli |
| 2426 | chrY | 5346098 | . | A | G | 297.35  | PASS          | AC=6;AF=0.273;AN=22;BaseQRankSum=0.540;Cl |
| 2427 | chrY | 5346296 | . | T | C | 70.30   | PASS          | AC=1;AF=0.050;AN=20;BaseQRankSum=0.405;Cl |
| 2428 | chrY | 5346513 | . | G | T | 35.06   | PASS          | AC=1;AF=0.056;AN=18;BaseQRankSum=-1.531e+ |
| 2429 | chrY | 5350604 | . | G | T | 7476.13 | PASS          | AC=50;AF=0.735;AN=68;DP=401;FS=0.000;Inbr |
| 2430 | chrY | 5358659 | . | G | C | 197.90  | PASS          | AC=2;AF=0.029;AN=68;DP=278;FS=0.000;Inbre |
| 2431 | chrY | 5359089 | . | G | C | 1299.55 | PASS          | AC=6;AF=0.088;AN=68;DP=412;FS=0.000;Inbre |
| 2432 | chrY | 5364092 | . | G | C | 39.49   | PASS          | AC=1;AF=0.015;AN=68;BaseQRankSum=-1.537e+ |



|      |      |         |   |   |     |         |               |                                            |
|------|------|---------|---|---|-----|---------|---------------|--------------------------------------------|
| 2433 | chrY | 5366381 | . | A | G   | 116.33  | PASS          | AC=2;AF=0.029;AN=68;BaseQRankSum=1.42;Cli  |
| 2434 | chrY | 5366445 | . | A | G   | 227.85  | PASS          | AC=4;AF=0.057;AN=70;BaseQRankSum=-3.650e-  |
| 2435 | chrY | 5366640 | . | T | G   | 198.16  | PASS          | AC=3;AF=0.043;AN=70;BaseQRankSum=0.397;Cl  |
| 2436 | chrY | 5366649 | . | G | A   | 215.70  | PASS          | AC=3;AF=0.043;AN=70;BaseQRankSum=0.426;Cl  |
| 2437 | chrY | 5366840 | . | T | C   | 369.31  | PASS          | AC=3;AF=0.043;AN=70;BaseQRankSum=-1.327e+  |
| 2438 | chrY | 5366960 | . | A | G   | 57.87   | PASS          | AC=1;AF=0.014;AN=70;BaseQRankSum=-2.383e+  |
| 2439 | chrY | 5370698 | . | T | C   | 876.09  | PASS          | AC=6;AF=0.091;AN=66;DP=334;FS=0.000;Inbre  |
| 2440 | chrY | 5371849 | . | T | C   | 62.68   | PASS          | AC=1;AF=0.014;AN=70;BaseQRankSum=-1.668e+  |
| 2441 | chrY | 5371937 | . | T | G   | 123.62  | PASS          | AC=2;AF=0.029;AN=70;BaseQRankSum=2.20;Cli  |
| 2442 | chrY | 5377091 | . | T | A   | 67.85   | PASS          | AC=1;AF=0.014;AN=70;BaseQRankSum=0.573;Cl  |
| 2443 | chrY | 5377471 | . | A | G   | 344.66  | PASS          | AC=5;AF=0.078;AN=64;BaseQRankSum=-3.010e-  |
| 2444 | chrY | 5377803 | . | G | A   | 442.95  | PASS          | AC=2;AF=0.167;AN=36;BaseQRankSum=1.11;Cli  |
| 2445 | chrY | 5377909 | . | T | C   | 266.85  | PASS          | AC=7;AF=0.146;AN=48;BaseQRankSum=-2.266e+  |
| 2446 | chrY | 5377938 | . | T | C   | 488     | PASS          | AC=8;AF=0.154;AN=52;BaseQRankSum=-7.200e-  |
| 2447 | chrY | 5378471 | . | A | G   | 417.91  | PASS          | AC=5;AF=0.278;AN=18;BaseQRankSum=0.135;Cl  |
| 2448 | chrY | 5378905 | . | A | G   | 143.37  | PASS          | AC=4;AF=0.061;AN=66;BaseQRankSum=0.978;Cl  |
| 2449 | chrY | 5381038 | . | G | A   | 104.29  | PASS          | AC=2;AF=0.029;AN=68;BaseQRankSum=1.98;Cli  |
| 2450 | chrY | 5381063 | . | T | G   | 136.09  | PASS          | AC=2;AF=0.067;AN=30;BaseQRankSum=-5.270e-  |
| 2451 | chrY | 5381372 | . | C | A   | 247.14  | PASS          | AC=7;AF=0.117;AN=60;BaseQRankSum=-1.246e+  |
| 2452 | chrY | 5382462 | . | C | A   | 148.75  | PASS          | AC=3;AF=0.043;AN=70;BaseQRankSum=0.113;Cl  |
| 2453 | chrY | 5385314 | . | G | A   | 387.40  | PASS          | AC=3;AF=0.044;AN=68;BaseQRankSum=1.28;Cli  |
| 2454 | chrY | 5385331 | . | T | C   | 408.10  | PASS          | AC=3;AF=0.045;AN=66;BaseQRankSum=-1.676e+  |
| 2455 | chrY | 5386209 | . | T | C   | 791.36  | my_snp_filter | AC=8;AF=0.167;AN=48;BaseQRankSum=          |
| 2456 | chrY | 5387356 | . | A | G   | 92.27   | PASS          | AC=2;AF=0.050;AN=40;DP=112;FS=0.000;Inbre  |
| 2457 | chrY | 5387427 | . | T | A   | 37.69   | PASS          | AC=1;AF=0.026;AN=38;BaseQRankSum=-1.380e+  |
| 2458 | chrY | 5387622 | . | T | A   | 60.49   | PASS          | AC=2;AF=0.029;AN=68;BaseQRankSum=0.429;Cl  |
| 2459 | chrY | 5387701 | . | T | C   | 108.94  | my_snp_filter | AC=3;AF=0.043;AN=70;BaseQRankSum=          |
| 2460 | chrY | 5388069 | . | A | G   | 64.35   | PASS          | AC=2;AF=0.091;AN=22;BaseQRankSum=-7.360e-  |
| 2461 | chrY | 5389482 | . | G | C   | 995.64  | PASS          | AC=6;AF=0.097;AN=62;DP=230;FS=0.000;Inbre  |
| 2462 | chrY | 5389615 | . | G | A   | 1449.44 | PASS          | AC=6;AF=0.111;AN=54;BaseQRankSum=0.347;Cl  |
| 2463 | chrY | 5392009 | . | C | T   | 75.93   | PASS          | AC=1;AF=0.017;AN=60;BaseQRankSum=0.305;Cl  |
| 2464 | chrY | 5392022 | . | G | A   | 302.13  | PASS          | AC=2;AF=0.034;AN=58;BaseQRankSum=3.81;Cli  |
| 2465 | chrY | 5392054 | . | A | G   | 316.84  | PASS          | AC=2;AF=0.033;AN=60;BaseQRankSum=-2.543e+  |
| 2466 | chrY | 5392134 | . | G | T   | 908.46  | PASS          | AC=5;AF=0.076;AN=66;BaseQRankSum=1.31;Cli  |
| 2467 | chrY | 5392204 | . | A | C   | 77.62   | my_snp_filter | AC=3;AF=0.045;AN=66;BaseQRankSum=          |
| 2468 | chrY | 5392287 | . | G | A   | 5073.80 | PASS          | AC=50;AF=0.735;AN=68;DP=319;FS=0.000;Inbr  |
| 2469 | chrY | 5393186 | . | G | A   | 9792.01 | PASS          | AC=62;AF=1.00;AN=62;DP=244;FS=0.000;Inbre  |
| 2470 | chrY | 5393198 | . | G | A   | 8429.03 | PASS          | AC=58;AF=1.00;AN=58;DP=196;FS=0.000;Inbre  |
| 2471 | chrY | 5394326 | . | G | T   | 55.92   | PASS          | AC=2;AF=0.032;AN=62;BaseQRankSum=1.75;Cli  |
| 2472 | chrY | 5395573 | . | G | A   | 901     | PASS          | AC=7;AF=0.206;AN=34;BaseQRankSum=2.55;Cli  |
| 2473 | chrY | 5400013 | . | G | C   | 47.17   | my_snp_filter | AC=2;AF=0.031;AN=64;BaseQRankSum=          |
| 2474 | chrY | 5403822 | . | T | C   | 282.48  | PASS          | AC=4;AF=0.065;AN=62;DP=229;FS=0.000;Inbre  |
| 2475 | chrY | 5403925 | . | C | T   | 363.89  | PASS          | AC=2;AF=0.067;AN=30;DP=147;FS=0.000;Inbre  |
| 2476 | chrY | 5406828 | . | T | C   | 270.90  | PASS          | AC=6;AF=0.086;AN=70;BaseQRankSum=-1.755e+  |
| 2477 | chrY | 5407406 | . | A | G   | 203.89  | PASS          | AC=1;AF=0.014;AN=70;BaseQRankSum=-2.220e-  |
| 2478 | chrY | 5408743 | . | A | T   | 203.63  | PASS          | AC=3;AF=0.044;AN=68;BaseQRankSum=0.071;Cl  |
| 2479 | chrY | 5408786 | . | A | C   | 3027.20 | PASS          | AC=28;AF=0.438;AN=64;BaseQRankSum=0.358;C  |
| 2480 | chrY | 5408825 | . | T | A   | 1262.90 | PASS          | AC=11;AF=0.212;AN=52;BaseQRankSum=-4.800e  |
| 2481 | chrY | 5408906 | . | T | G   | 548.32  | PASS          | AC=9;AF=0.136;AN=66;BaseQRankSum=0.660;Cl  |
| 2482 | chrY | 5409139 | . | A | T   | 446.02  | PASS          | AC=8;AF=0.114;AN=70;BaseQRankSum=0.762;Cl  |
| 2483 | chrY | 5409996 | . | G | C   | 694.99  | PASS          | AC=6;AF=0.086;AN=70;DP=391;FS=0.000;Inbre  |
| 2484 | chrY | 5410914 | . | A | G   | 675.84  | PASS          | AC=10;AF=0.143;AN=70;BaseQRankSum=1.21;Cl  |
| 2485 | chrY | 5410968 | . | T | C   | 1008.17 | PASS          | AC=4;AF=0.057;AN=70;BaseQRankSum=-1.199e+  |
| 2486 | chrY | 5411068 | . | A | G   | 530.20  | PASS          | AC=9;AF=0.136;AN=66;BaseQRankSum=-2.120e-  |
| 2487 | chrY | 5411321 | . | A | C   | 61.13   | PASS          | AC=1;AF=0.014;AN=70;BaseQRankSum=-3.610e-  |
| 2488 | chrY | 5411341 | . | C | A   | 8320    | PASS          | AC=66;AF=1.00;AN=66;BaseQRankSum=1.58;Cli  |
| 2489 | chrY | 5411547 | . | A | G   | 289.51  | PASS          | AC=3;AF=0.045;AN=66;BaseQRankSum=-4.120e-  |
| 2490 | chrY | 5412228 | . | G | A   | 6885.18 | PASS          | AC=60;AF=1.00;AN=60;DP=243;FS=0.000;Inbre  |
| 2491 | chrY | 5412408 | . | G | T   | 153.75  | PASS          | AC=2;AF=0.029;AN=68;DP=309;FS=0.000;Inbre  |
| 2492 | chrY | 5414404 | . | T | C   | 36.07   | PASS          | AC=1;AF=0.017;AN=58;BaseQRankSum=-1.380e+  |
| 2493 | chrY | 5414418 | . | T | C   | 35.39   | PASS          | AC=1;AF=0.016;AN=62;BaseQRankSum=-1.380e+  |
| 2494 | chrY | 5415322 | . | G | C,* | 7825.79 | PASS          | AC=45,7;AF=0.833,0.130;AN=54;BaseQRankSum  |
| 2495 | chrY | 5418710 | . | C | T   | 59.75   | PASS          | AC=2;AF=0.045;AN=44;DP=178;FS=0.000;Inbre  |
| 2496 | chrY | 5421066 | . | G | A   | 2100.26 | PASS          | AC=17;AF=0.243;AN=70;BaseQRankSum=-7.200e  |
| 2497 | chrY | 5421073 | . | C | G   | 2206.36 | PASS          | AC=17;AF=0.250;AN=68;BaseQRankSum=0.572;Cl |
| 2498 | chrY | 5421316 | . | A | C   | 37.47   | PASS          | AC=1;AF=0.014;AN=70;BaseQRankSum=0.197;C   |
| 2499 | chrY | 5425400 | . | T | G   | 826.37  | PASS          | AC=4;AF=0.059;AN=68;BaseQRankSum=-1.123e+  |
| 2500 | chrY | 5429801 | . | G | A   | 304.64  | PASS          | AC=2;AF=0.029;AN=68;BaseQRankSum=1.42;Cli  |
| 2501 | chrY | 5430637 | . | C | T   | 600.42  | PASS          | AC=5;AF=0.227;AN=22;BaseQRankSum=0.747;Cl  |
| 2502 | chrY | 5431304 | . | T | C   | 31.19   | PASS          | AC=1;AF=0.014;AN=70;BaseQRankSum=0.00;Cli  |
| 2503 | chrY | 5432059 | . | A | G   | 384.67  | PASS          | AC=4;AF=0.057;AN=70;BaseQRankSum=-1.741e+  |
| 2504 | chrY | 5441527 | . | T | C   | 77.09   | PASS          | AC=2;AF=0.053;AN=38;BaseQRankSum=1.82;Cli  |
| 2505 | chrY | 5441542 | . | C | T   | 109.62  | PASS          | AC=2;AF=0.053;AN=38;BaseQRankSum=1.58;Cli  |
| 2506 | chrY | 5441546 | . | A | C   | 214.58  | PASS          | AC=3;AF=0.079;AN=38;BaseQRankSum=-2.293e+  |
| 2507 | chrY | 5441549 | . | T | A   | 252.43  | PASS          | AC=3;AF=0.079;AN=38;BaseQRankSum=-2.960e-  |
| 2508 | chrY | 5441552 | . | A | G   | 245.32  | PASS          | AC=3;AF=0.071;AN=42;BaseQRankSum=-1.680e-  |

|      |      |         |   |   |   |         |               |                                           |
|------|------|---------|---|---|---|---------|---------------|-------------------------------------------|
| 2509 | chrY | 5441577 | . | C | T | 211.17  | PASS          | AC=3;AF=0.058;AN=52;BaseQRankSum=-2.034e+ |
| 2510 | chrY | 5441580 | . | C | G | 212.18  | PASS          | AC=3;AF=0.058;AN=52;BaseQRankSum=-2.030e- |
| 2511 | chrY | 5441595 | . | T | C | 81.61   | my_snp_filter | AC=3;AF=0.052;AN=58;BaseQRankSum=         |
| 2512 | chrY | 5441619 | . | C | T | 43.16   | my_snp_filter | AC=2;AF=0.031;AN=64;BaseQRankSum=         |
| 2513 | chrY | 5442693 | . | A | G | 107.90  | PASS          | AC=3;AF=0.044;AN=68;BaseQRankSum=1.07;Cli |
| 2514 | chrY | 5443524 | . | T | A | 7110.17 | PASS          | AC=62;AF=1.00;AN=62;BaseQRankSum=1.11;Cli |
| 2515 | chrY | 5444803 | . | C | T | 1579.85 | PASS          | AC=6;AF=0.086;AN=70;DP=279;FS=0.000;Inbre |
| 2516 | chrY | 5452253 | . | T | G | 4864.94 | PASS          | AC=46;AF=0.657;AN=70;DP=325;FS=0.000;Inbr |
| 2517 | chrY | 5452402 | . | A | G | 1278.02 | PASS          | AC=6;AF=0.088;AN=68;BaseQRankSum=-9.800e- |
| 2518 | chrY | 5453123 | . | A | T | 3629.04 | PASS          | AC=26;AF=1.00;AN=26;DP=146;FS=0.000;Inbre |
| 2519 | chrY | 5457572 | . | C | T | 44.96   | PASS          | AC=1;AF=0.014;AN=70;BaseQRankSum=-8.000e- |
| 2520 | chrY | 5457736 | . | C | T | 330.79  | PASS          | AC=5;AF=0.076;AN=66;BaseQRankSum=-4.060e- |
| 2521 | chrY | 5458035 | . | G | T | 1222.24 | PASS          | AC=13;AF=0.191;AN=68;BaseQRankSum=0.532;C |
| 2522 | chrY | 5458626 | . | G | C | 994.98  | my_snp_filter | AC=13;AF=0.186;AN=70;BaseQRankSum         |
| 2523 | chrY | 5458875 | . | C | T | 4782.49 | PASS          | AC=24;AF=0.343;AN=70;BaseQRankSum=0.467;C |
| 2524 | chrY | 5458918 | . | A | G | 878.56  | my_snp_filter | AC=11;AF=0.157;AN=70;BaseQRankSum         |
| 2525 | chrY | 5458959 | . | T | C | 125.91  | my_snp_filter | AC=3;AF=0.043;AN=70;BaseQRankSum=         |
| 2526 | chrY | 5459014 | . | G | A | 186.45  | PASS          | AC=3;AF=0.044;AN=68;BaseQRankSum=0.170;Cl |
| 2527 | chrY | 5464893 | . | A | G | 68.88   | PASS          | AC=1;AF=0.022;AN=46;BaseQRankSum=-2.293e+ |
| 2528 | chrY | 5465148 | . | A | G | 8430.07 | PASS          | AC=68;AF=1.00;AN=68;DP=280;FS=0.000;Inbre |
| 2529 | chrY | 5466618 | . | T | C | 60.47   | PASS          | AC=2;AF=0.029;AN=68;DP=265;FS=0.000;Inbre |
| 2530 | chrY | 5469843 | . | T | C | 292.66  | PASS          | AC=7;AF=0.103;AN=68;BaseQRankSum=-1.271e+ |
| 2531 | chrY | 5470944 | . | T | C | 217.93  | PASS          | AC=6;AF=0.231;AN=26;DP=39;FS=0.000;Inbre  |
| 2532 | chrY | 5471797 | . | G | A | 507.28  | PASS          | AC=2;AF=0.029;AN=70;DP=547;FS=0.000;Inbre |
| 2533 | chrY | 5473702 | . | A | G | 37.07   | PASS          | AC=1;AF=0.015;AN=68;BaseQRankSum=-1.231e+ |
| 2534 | chrY | 5473703 | . | T | C | 37.05   | PASS          | AC=1;AF=0.014;AN=70;BaseQRankSum=-1.231e+ |
| 2535 | chrY | 5474604 | . | C | G | 120.32  | my_snp_filter | AC=1;AF=0.056;AN=18;BaseQRankSum=         |
| 2536 | chrY | 5474635 | . | A | C | 973.27  | PASS          | AC=6;AF=0.333;AN=18;BaseQRankSum=-4.129e+ |
| 2537 | chrY | 5474788 | . | T | A | 215.32  | PASS          | AC=1;AF=0.056;AN=18;BaseQRankSum=1.10;Cli |
| 2538 | chrY | 5474838 | . | G | C | 1701.39 | PASS          | AC=4;AF=0.222;AN=18;BaseQRankSum=1.70;Cli |
| 2539 | chrY | 5474949 | . | C | A | 1339.24 | my_snp_filter | AC=6;AF=0.333;AN=18;BaseQRankSum=         |
| 2540 | chrY | 5474977 | . | C | T | 114.24  | my_snp_filter | AC=1;AF=0.056;AN=18;BaseQRankSum=         |
| 2541 | chrY | 5475000 | . | A | G | 74.13   | my_snp_filter | AC=2;AF=0.111;AN=18;BaseQRankSum=         |
| 2542 | chrY | 5475033 | . | C | T | 178.06  | my_snp_filter | AC=2;AF=0.111;AN=18;BaseQRankSum=         |
| 2543 | chrY | 5475054 | . | G | T | 93.32   | my_snp_filter | AC=1;AF=0.056;AN=18;BaseQRankSum=         |
| 2544 | chrY | 5475085 | . | G | T | 384.79  | my_snp_filter | AC=3;AF=0.167;AN=18;BaseQRankSum=         |
| 2545 | chrY | 5475431 | . | G | T | 210.97  | my_snp_filter | AC=3;AF=0.167;AN=18;BaseQRankSum=         |
| 2546 | chrY | 5475445 | . | C | T | 464.31  | my_snp_filter | AC=3;AF=0.167;AN=18;BaseQRankSum=         |
| 2547 | chrY | 5475455 | . | T | C | 390.57  | my_snp_filter | AC=3;AF=0.167;AN=18;BaseQRankSum=         |
| 2548 | chrY | 5475635 | . | T | A | 47.57   | my_snp_filter | AC=1;AF=0.056;AN=18;BaseQRankSum=         |
| 2549 | chrY | 5475644 | . | G | A | 53.24   | my_snp_filter | AC=1;AF=0.056;AN=18;BaseQRankSum=         |
| 2550 | chrY | 5475645 | . | T | A | 52.32   | my_snp_filter | AC=1;AF=0.056;AN=18;BaseQRankSum=         |
| 2551 | chrY | 5475761 | . | A | C | 88.20   | my_snp_filter | AC=2;AF=0.111;AN=18;BaseQRankSum=         |
| 2552 | chrY | 5476031 | . | A | T | 528.28  | my_snp_filter | AC=4;AF=0.182;AN=22;BaseQRankSum=         |
| 2553 | chrY | 5476527 | . | G | A | 145.78  | my_snp_filter | AC=3;AF=0.167;AN=18;BaseQRankSum=         |
| 2554 | chrY | 5476999 | . | G | A | 294.44  | my_snp_filter | AC=3;AF=0.167;AN=18;BaseQRankSum=         |
| 2555 | chrY | 5477341 | . | G | A | 168.32  | PASS          | AC=1;AF=0.056;AN=18;BaseQRankSum=2.20;Cli |
| 2556 | chrY | 5477636 | . | C | A | 802.88  | my_snp_filter | AC=7;AF=0.350;AN=20;BaseQRankSum=         |
| 2557 | chrY | 5477660 | . | T | A | 57.08   | my_snp_filter | AC=2;AF=0.100;AN=20;BaseQRankSum=         |
| 2558 | chrY | 5477715 | . | A | G | 576.24  | PASS          | AC=3;AF=0.150;AN=20;BaseQRankSum=1.84;Cli |
| 2559 | chrY | 5479419 | . | G | A | 592.78  | my_snp_filter | AC=3;AF=0.167;AN=18;BaseQRankSum=         |
| 2560 | chrY | 5479832 | . | T | G | 194.64  | my_snp_filter | AC=3;AF=0.167;AN=18;BaseQRankSum=         |
| 2561 | chrY | 5480537 | . | C | T | 966.87  | PASS          | AC=6;AF=0.094;AN=64;DP=261;FS=0.000;Inbre |
| 2562 | chrY | 5482834 | . | C | T | 1169.49 | PASS          | AC=8;AF=0.400;AN=20;DP=147;FS=0.000;Inbre |
| 2563 | chrY | 5483301 | . | A | G | 741.24  | PASS          | AC=5;AF=0.071;AN=70;BaseQRankSum=0.385;Cl |
| 2564 | chrY | 5483473 | . | G | A | 768.51  | PASS          | AC=10;AF=0.147;AN=68;BaseQRankSum=0.00;Cl |
| 2565 | chrY | 5483610 | . | T | C | 74.36   | PASS          | AC=1;AF=0.016;AN=64;BaseQRankSum=-6.890e- |
| 2566 | chrY | 5483618 | . | C | A | 71.16   | PASS          | AC=1;AF=0.016;AN=64;BaseQRankSum=1.05;Cli |
| 2567 | chrY | 5483755 | . | T | C | 143.22  | PASS          | AC=2;AF=0.029;AN=70;BaseQRankSum=1.34;Cli |
| 2568 | chrY | 5486366 | . | G | C | 160.46  | PASS          | AC=6;AF=0.107;AN=56;BaseQRankSum=0.736;Cl |
| 2569 | chrY | 5486696 | . | C | A | 191.65  | PASS          | AC=4;AF=0.065;AN=62;DP=135;FS=0.000;Inbre |
| 2570 | chrY | 5489307 | . | G | A | 56.16   | PASS          | AC=2;AF=0.037;AN=54;DP=218;FS=0.000;Inbre |
| 2571 | chrY | 5490986 | . | G | A | 1206.40 | PASS          | AC=6;AF=0.130;AN=46;DP=188;FS=0.000;Inbre |
| 2572 | chrY | 5491646 | . | G | T | 1005.54 | PASS          | AC=6;AF=0.086;AN=70;BaseQRankSum=0.747;Cl |
| 2573 | chrY | 5492487 | . | A | T | 35.76   | PASS          | AC=1;AF=0.014;AN=70;BaseQRankSum=-1.380e+ |
| 2574 | chrY | 5497431 | . | G | A | 589.08  | PASS          | AC=10;AF=0.143;AN=70;BaseQRankSum=0.589;C |
| 2575 | chrY | 5497590 | . | A | G | 378.46  | PASS          | AC=7;AF=0.100;AN=70;BaseQRankSum=1.87;Cli |
| 2576 | chrY | 5497651 | . | G | A | 216.46  | PASS          | AC=5;AF=0.071;AN=70;BaseQRankSum=0.170;Cl |
| 2577 | chrY | 5499451 | . | C | A | 5371.20 | PASS          | AC=52;AF=0.813;AN=64;DP=300;FS=0.000;Inbr |
| 2578 | chrY | 5502555 | . | T | G | 109.45  | PASS          | AC=3;AF=0.043;AN=70;BaseQRankSum=0.480;Cl |
| 2579 | chrY | 5503178 | . | G | T | 5811.34 | PASS          | AC=40;AF=0.571;AN=70;DP=409;FS=0.000;Inbr |
| 2580 | chrY | 5504458 | . | T | C | 166.74  | PASS          | AC=3;AF=0.044;AN=68;BaseQRankSum=1.03;Cli |
| 2581 | chrY | 5505035 | . | C | T | 51.55   | my_snp_filter | AC=2;AF=0.029;AN=70;BaseQRankSum=         |
| 2582 | chrY | 5509991 | . | G | A | 157.64  | PASS          | AC=2;AF=0.029;AN=68;DP=318;FS=0.000;Inbre |
| 2583 | chrY | 5513838 | . | C | A | 42.51   | my_snp_filter | AC=1;AF=0.015;AN=68;BaseQRankSum=         |
| 2584 | chrY | 5513847 | . | T | G | 363.92  | PASS          | AC=2;AF=0.029;AN=70;DP=409;FS=0.000;Inbre |

|      |      |         |   |   |   |          |               |                                           |
|------|------|---------|---|---|---|----------|---------------|-------------------------------------------|
| 2585 | chrY | 5516782 | . | C | G | 1798.38  | PASS          | AC=10;AF=0.161;AN=62;BaseQRankSum=-7.310e |
| 2586 | chrY | 5520604 | . | A | G | 257.31   | PASS          | AC=6;AF=0.086;AN=70;BaseQRankSum=1.85;Cli |
| 2587 | chrY | 5521759 | . | A | G | 1229.28  | PASS          | AC=5;AF=0.250;AN=20;BaseQRankSum=0.529;Cl |
| 2588 | chrY | 5525466 | . | G | A | 154.09   | PASS          | AC=3;AF=0.043;AN=70;BaseQRankSum=1.53;Cli |
| 2589 | chrY | 5525823 | . | A | G | 86.18    | PASS          | AC=2;AF=0.030;AN=66;BaseQRankSum=-9.190e- |
| 2590 | chrY | 5526098 | . | C | G | 116.58   | my_snp_filter | AC=3;AF=0.043;AN=70;BaseQRankSum=         |
| 2591 | chrY | 5526283 | . | T | C | 1544.35  | PASS          | AC=17;AF=0.243;AN=70;BaseQRankSum=-2.010e |
| 2592 | chrY | 5527703 | . | G | A | 9093.34  | PASS          | AC=50;AF=0.735;AN=68;BaseQRankSum=0.747;C |
| 2593 | chrY | 5529441 | . | G | A | 321.86   | PASS          | AC=2;AF=0.033;AN=60;DP=220;FS=0.000;Inbre |
| 2594 | chrY | 5537166 | . | T | A | 1118.99  | PASS          | AC=6;AF=0.091;AN=66;DP=239;FS=0.000;Inbre |
| 2595 | chrY | 5539494 | . | G | C | 173.54   | PASS          | AC=3;AF=0.054;AN=56;BaseQRankSum=0.158;Cl |
| 2596 | chrY | 5540526 | . | T | C | 900.35   | PASS          | AC=6;AF=0.086;AN=70;DP=304;FS=0.000;Inbre |
| 2597 | chrY | 5541777 | . | A | G | 338.37   | PASS          | AC=6;AF=0.086;AN=70;DP=259;FS=0.000;Inbre |
| 2598 | chrY | 5543143 | . | G | A | 154.17   | PASS          | AC=3;AF=0.044;AN=68;BaseQRankSum=-1.231e+ |
| 2599 | chrY | 5546876 | . | G | A | 892.67   | PASS          | AC=6;AF=0.086;AN=70;DP=508;FS=0.000;Inbre |
| 2600 | chrY | 5548543 | . | C | T | 63.90    | PASS          | AC=1;AF=0.014;AN=70;BaseQRankSum=2.63;Cli |
| 2601 | chrY | 5548997 | . | T | C | 52.81    | my_snp_filter | AC=2;AF=0.029;AN=68;BaseQRankSum=         |
| 2602 | chrY | 5549152 | . | A | C | 42.78    | my_snp_filter | AC=1;AF=0.019;AN=54;BaseQRankSum=         |
| 2603 | chrY | 5549568 | . | T | C | 37.46    | my_snp_filter | AC=2;AF=0.050;AN=40;BaseQRankSum=         |
| 2604 | chrY | 5549624 | . | T | C | 44.27    | my_snp_filter | AC=2;AF=0.031;AN=64;BaseQRankSum=         |
| 2605 | chrY | 5550948 | . | T | C | 4922.26  | PASS          | AC=46;AF=1.00;AN=46;DP=191;FS=0.000;Inbre |
| 2606 | chrY | 5551548 | . | T | G | 391.50   | PASS          | AC=5;AF=0.071;AN=70;BaseQRankSum=-1.875e+ |
| 2607 | chrY | 5552404 | . | T | G | 36.18    | PASS          | AC=1;AF=0.026;AN=38;BaseQRankSum=1.03;Cli |
| 2608 | chrY | 5552488 | . | T | C | 162.07   | PASS          | AC=4;AF=0.069;AN=58;BaseQRankSum=-1.026e+ |
| 2609 | chrY | 5552714 | . | C | T | 350.67   | PASS          | AC=5;AF=0.074;AN=68;BaseQRankSum=-1.780e- |
| 2610 | chrY | 5554426 | . | C | T | 92.50    | PASS          | AC=2;AF=0.029;AN=70;BaseQRankSum=2.32;Cli |
| 2611 | chrY | 5554449 | . | C | T | 239.27   | PASS          | AC=2;AF=0.029;AN=70;BaseQRankSum=3.64;Cli |
| 2612 | chrY | 5554844 | . | C | T | 69.77    | my_snp_filter | AC=2;AF=0.100;AN=20;BaseQRankSum=         |
| 2613 | chrY | 5557995 | . | T | A | 1091.56  | PASS          | AC=4;AF=0.071;AN=56;BaseQRankSum=0.465;Cl |
| 2614 | chrY | 5564152 | . | A | T | 6795.19  | PASS          | AC=44;AF=0.710;AN=62;DP=371;FS=0.000;Inbr |
| 2615 | chrY | 5566334 | . | T | C | 401.04   | PASS          | AC=3;AF=0.043;AN=70;BaseQRankSum=-1.225e+ |
| 2616 | chrY | 5566376 | . | A | G | 181.55   | PASS          | AC=3;AF=0.043;AN=70;BaseQRankSum=-1.180e- |
| 2617 | chrY | 5567387 | . | A | G | 16565.98 | PASS          | AC=68;AF=1.00;AN=68;BaseQRankSum=         |
| 2618 | chrY | 5568496 | . | C | T | 117.97   | PASS          | AC=2;AF=0.029;AN=70;DP=727;FS=0.000;Inbre |
| 2619 | chrY | 5568536 | . | T | A | 321.23   | PASS          | AC=2;AF=0.029;AN=70;DP=712;FS=0.000;Inbre |
| 2620 | chrY | 5570756 | . | G | C | 1162.51  | PASS          | AC=4;AF=0.059;AN=68;BaseQRankSum=-6.660e- |
| 2621 | chrY | 5570889 | . | C | T | 852.50   | PASS          | AC=1;AF=0.014;AN=70;BaseQRankSum=-2.009e+ |
| 2622 | chrY | 5570902 | . | T | C | 802.58   | PASS          | AC=1;AF=0.014;AN=70;BaseQRankSum=0.613;Cl |
| 2623 | chrY | 5572302 | . | G | A | 208.26   | PASS          | AC=2;AF=0.030;AN=66;DP=263;FS=0.000;Inbre |
| 2624 | chrY | 5573583 | . | C | A | 70.62    | PASS          | AC=2;AF=0.032;AN=62;BaseQRankSum=1.65;Cli |
| 2625 | chrY | 5580667 | . | A | G | 142.80   | PASS          | AC=2;AF=0.033;AN=60;DP=246;FS=0.000;Inbre |
| 2626 | chrY | 5582386 | . | C | G | 7789.36  | PASS          | AC=44;AF=0.647;AN=68;DP=447;FS=0.000;Inbr |
| 2627 | chrY | 5583580 | . | C | A | 43.10    | my_snp_filter | AC=1;AF=0.022;AN=46;BaseQRankSum=         |
| 2628 | chrY | 5586914 | . | T | C | 33.43    | PASS          | AC=1;AF=0.015;AN=66;BaseQRankSum=1.38;Cli |
| 2629 | chrY | 5588608 | . | A | T | 284.14   | PASS          | AC=2;AF=0.040;AN=50;DP=144;FS=0.000;Inbre |
| 2630 | chrY | 5590152 | . | C | T | 52.38    | PASS          | AC=1;AF=0.016;AN=64;BaseQRankSum=2.10;Cli |
| 2631 | chrY | 5590948 | . | C | T | 310.96   | PASS          | AC=6;AF=0.086;AN=70;BaseQRankSum=2.11;Cli |
| 2632 | chrY | 5591951 | . | C | T | 48.20    | my_snp_filter | AC=2;AF=0.032;AN=62;BaseQRankSum=         |
| 2633 | chrY | 5592162 | . | C | T | 130.94   | PASS          | AC=2;AF=0.029;AN=70;BaseQRankSum=-5.820e- |
| 2634 | chrY | 5592218 | . | G | A | 33.68    | my_snp_filter | AC=1;AF=0.016;AN=64;BaseQRankSum=         |
| 2635 | chrY | 5592307 | . | T | G | 168.54   | PASS          | AC=3;AF=0.052;AN=58;BaseQRankSum=0.91;Cl  |
| 2636 | chrY | 5596723 | . | A | G | 676.78   | PASS          | AC=6;AF=0.086;AN=70;BaseQRankSum=-1.734e+ |
| 2637 | chrY | 5597281 | . | T | C | 6101.19  | PASS          | AC=52;AF=0.813;AN=64;DP=335;FS=0.000;Inbr |
| 2638 | chrY | 5598902 | . | A | T | 93.08    | my_snp_filter | AC=3;AF=0.044;AN=68;BaseQRankSum=         |
| 2639 | chrY | 5599503 | . | T | C | 6377.07  | PASS          | AC=40;AF=0.606;AN=66;BaseQRankSum=-1.085e |
| 2640 | chrY | 5600977 | . | A | G | 670.43   | PASS          | AC=6;AF=0.094;AN=64;DP=285;FS=0.000;Inbre |
| 2641 | chrY | 5601432 | . | A | G | 423.01   | PASS          | AC=2;AF=0.029;AN=68;DP=391;FS=0.000;Inbre |
| 2642 | chrY | 5601486 | . | G | A | 1135.50  | PASS          | AC=6;AF=0.088;AN=68;DP=423;FS=0.000;Inbre |
| 2643 | chrY | 5607448 | . | T | C | 3850.60  | PASS          | AC=48;AF=0.727;AN=66;BaseQRankSum=1.45;Cl |
| 2644 | chrY | 5607951 | . | C | T | 190.82   | PASS          | AC=3;AF=0.043;AN=70;BaseQRankSum=1.83;Cli |
| 2645 | chrY | 5607994 | . | G | T | 88.94    | my_snp_filter | AC=2;AF=0.029;AN=70;BaseQRankSum=         |
| 2646 | chrY | 5608146 | . | C | A | 493.52   | PASS          | AC=4;AF=0.061;AN=66;BaseQRankSum=-3.480e- |
| 2647 | chrY | 5608220 | . | G | T | 598.14   | PASS          | AC=6;AF=0.086;AN=70;BaseQRankSum=-3.010e- |
| 2648 | chrY | 5609405 | . | T | C | 4661.14  | PASS          | AC=62;AF=1.00;AN=62;DP=213;FS=0.000;Inbre |
| 2649 | chrY | 5609547 | . | A | G | 741.34   | PASS          | AC=6;AF=0.176;AN=34;BaseQRankSum=1.42;Cli |
| 2650 | chrY | 5612184 | . | C | A | 44.66    | my_snp_filter | AC=1;AF=0.014;AN=70;BaseQRankSum=         |
| 2651 | chrY | 5612834 | . | A | G | 332.75   | PASS          | AC=6;AF=0.086;AN=70;BaseQRankSum=-1.231e+ |
| 2652 | chrY | 5612927 | . | T | C | 137.19   | PASS          | AC=3;AF=0.045;AN=66;BaseQRankSum=1.50;Cli |
| 2653 | chrY | 5614335 | . | C | T | 187.10   | PASS          | AC=6;AF=0.094;AN=64;DP=239;FS=0.000;Inbre |
| 2654 | chrY | 5615418 | . | G | A | 9633.62  | PASS          | AC=58;AF=0.829;AN=70;DP=395;FS=0.000;Inbr |
| 2655 | chrY | 5616180 | . | T | C | 82.39    | my_snp_filter | AC=1;AF=0.014;AN=70;BaseQRankSum=         |
| 2656 | chrY | 5618756 | . | T | C | 342.44   | PASS          | AC=4;AF=0.057;AN=70;BaseQRankSum=-1.504e+ |
| 2657 | chrY | 5618791 | . | T | C | 76.43    | PASS          | AC=1;AF=0.014;AN=70;BaseQRankSum=-2.011e+ |
| 2658 | chrY | 5618845 | . | A | G | 35.50    | PASS          | AC=1;AF=0.014;AN=70;BaseQRankSum=0.00;Cli |
| 2659 | chrY | 5619798 | . | A | G | 210.63   | PASS          | AC=2;AF=0.029;AN=70;BaseQRankSum=-1.580e- |
| 2660 | chrY | 5619806 | . | T | C | 247.61   | PASS          | AC=2;AF=0.029;AN=70;BaseQRankSum=1.28;Cli |

|      |      |         |   |   |   |         |               |                                            |
|------|------|---------|---|---|---|---------|---------------|--------------------------------------------|
| 2661 | chrY | 5620912 | . | G | A | 203.01  | PASS          | AC=5;AF=0.081;AN=62;BaseQRankSum=-5.550e-  |
| 2662 | chrY | 5623075 | . | G | A | 1225.69 | PASS          | AC=6;AF=0.086;AN=70;DP=470;FS=0.000;Inbre  |
| 2663 | chrY | 5626957 | . | A | G | 258.02  | PASS          | AC=4;AF=0.065;AN=62;DP=273;FS=0.000;Inbre  |
| 2664 | chrY | 5628400 | . | C | T | 140.24  | PASS          | AC=1;AF=0.015;AN=68;BaseQRankSum=1.31;Cli  |
| 2665 | chrY | 5628834 | . | G | A | 1083.19 | PASS          | AC=4;AF=0.057;AN=70;BaseQRankSum=-2.740e-  |
| 2666 | chrY | 5630188 | . | T | C | 1441.78 | PASS          | AC=7;AF=0.100;AN=70;BaseQRankSum=-1.860e-  |
| 2667 | chrY | 5630211 | . | A | C | 1218.14 | PASS          | AC=7;AF=0.100;AN=70;BaseQRankSum=-1.276e+  |
| 2668 | chrY | 5630318 | . | T | G | 1032.39 | PASS          | AC=3;AF=0.054;AN=56;BaseQRankSum=1.46;Cli  |
| 2669 | chrY | 5630459 | . | C | T | 647.37  | PASS          | AC=8;AF=0.118;AN=68;BaseQRankSum=-7.500e-  |
| 2670 | chrY | 5630538 | . | C | T | 540.49  | PASS          | AC=3;AF=0.043;AN=70;BaseQRankSum=-1.446e+  |
| 2671 | chrY | 5630603 | . | G | A | 818.46  | PASS          | AC=10;AF=0.147;AN=68;BaseQRankSum=1.27;Cl  |
| 2672 | chrY | 5630641 | . | C | T | 89.97   | my_snp_filter | AC=3;AF=0.044;AN=68;BaseQRankSum=          |
| 2673 | chrY | 5631203 | . | T | A | 297.81  | PASS          | AC=4;AF=0.059;AN=68;DP=373;FS=0.000;Inbre  |
| 2674 | chrY | 5631514 | . | T | C | 129.88  | PASS          | AC=4;AF=0.067;AN=60;BaseQRankSum=0.724;Cl  |
| 2675 | chrY | 5632507 | . | T | C | 30.51   | my_snp_filter | AC=2;AF=0.029;AN=70;BaseQRankSum=          |
| 2676 | chrY | 5632856 | . | G | T | 95.91   | PASS          | AC=1;AF=0.015;AN=68;BaseQRankSum=-1.529e+  |
| 2677 | chrY | 5632865 | . | T | A | 102.10  | PASS          | AC=1;AF=0.015;AN=66;BaseQRankSum=0.037;Cl  |
| 2678 | chrY | 5633332 | . | A | G | 231.47  | PASS          | AC=3;AF=0.043;AN=70;BaseQRankSum=0.493;Cl  |
| 2679 | chrY | 5633390 | . | C | G | 435.03  | PASS          | AC=6;AF=0.086;AN=70;BaseQRankSum=0.854;Cl  |
| 2680 | chrY | 5633674 | . | G | A | 1357.45 | PASS          | AC=11;AF=0.157;AN=70;BaseQRankSum=1.15;Cl  |
| 2681 | chrY | 5633771 | . | C | T | 2060.06 | PASS          | AC=17;AF=0.243;AN=70;BaseQRankSum=0.178;C  |
| 2682 | chrY | 5634005 | . | C | A | 587.24  | PASS          | AC=8;AF=0.200;AN=40;BaseQRankSum=1.65;Cl   |
| 2683 | chrY | 5634055 | . | A | G | 81.44   | my_snp_filter | AC=3;AF=0.083;AN=36;BaseQRankSum=          |
| 2684 | chrY | 5634073 | . | T | C | 149.93  | PASS          | AC=2;AF=0.056;AN=36;BaseQRankSum=-3.107e+  |
| 2685 | chrY | 5634075 | . | A | G | 142.42  | PASS          | AC=1;AF=0.028;AN=36;BaseQRankSum=2.11;Cli  |
| 2686 | chrY | 5634122 | . | T | A | 779.11  | PASS          | AC=7;AF=0.194;AN=36;BaseQRankSum=0.585;Cl  |
| 2687 | chrY | 5634163 | . | T | C | 1028.57 | PASS          | AC=7;AF=0.125;AN=56;BaseQRankSum=-5.640e-  |
| 2688 | chrY | 5634233 | . | A | T | 695.06  | PASS          | AC=8;AF=0.125;AN=64;BaseQRankSum=0.774;Cl  |
| 2689 | chrY | 5634316 | . | T | G | 170.16  | PASS          | AC=3;AF=0.044;AN=68;BaseQRankSum=-4.060e-  |
| 2690 | chrY | 5634893 | . | A | G | 109.37  | my_snp_filter | AC=5;AF=0.071;AN=70;BaseQRankSum=          |
| 2691 | chrY | 5634963 | . | A | G | 474.64  | PASS          | AC=5;AF=0.071;AN=70;BaseQRankSum=-2.020e-  |
| 2692 | chrY | 5635087 | . | A | G | 1459.52 | PASS          | AC=13;AF=0.191;AN=68;BaseQRankSum=0.227;C  |
| 2693 | chrY | 5636687 | . | C | T | 133.17  | PASS          | AC=4;AF=0.063;AN=64;BaseQRankSum=0.00;Cli  |
| 2694 | chrY | 5636776 | . | G | A | 4292.15 | PASS          | AC=36;AF=1.00;AN=36;DP=168;FS=0.000;Inbre  |
| 2695 | chrY | 5637205 | . | C | T | 86.03   | PASS          | AC=2;AF=0.029;AN=70;BaseQRankSum=1.97;Cli  |
| 2696 | chrY | 5637289 | . | G | A | 80.16   | PASS          | AC=1;AF=0.014;AN=70;BaseQRankSum=-2.240e-  |
| 2697 | chrY | 5637298 | . | T | A | 86.24   | PASS          | AC=1;AF=0.014;AN=70;BaseQRankSum=-1.850e+  |
| 2698 | chrY | 5637400 | . | T | C | 697.21  | PASS          | AC=10;AF=0.167;AN=60;BaseQRankSum=-3.021e- |
| 2699 | chrY | 5637519 | . | T | A | 441.47  | PASS          | AC=2;AF=0.038;AN=52;BaseQRankSum=-8.130e-  |
| 2700 | chrY | 5637628 | . | C | G | 655.44  | PASS          | AC=8;AF=0.129;AN=62;BaseQRankSum=1.28;Cli  |
| 2701 | chrY | 5637843 | . | C | A | 89.58   | PASS          | AC=2;AF=0.034;AN=58;BaseQRankSum=0.710;Cl  |
| 2702 | chrY | 5637970 | . | A | C | 65.71   | my_snp_filter | AC=4;AF=0.105;AN=38;BaseQRankSum=          |
| 2703 | chrY | 5638002 | . | G | A | 235.71  | PASS          | AC=4;AF=0.087;AN=46;BaseQRankSum=-6.300e-  |
| 2704 | chrY | 5638083 | . | C | T | 328.69  | PASS          | AC=8;AF=0.138;AN=58;BaseQRankSum=2.40;Cli  |
| 2705 | chrY | 5638240 | . | A | T | 31.81   | PASS          | AC=1;AF=0.015;AN=66;BaseQRankSum=1.49;Cli  |
| 2706 | chrY | 5639704 | . | G | A | 184.44  | PASS          | AC=5;AF=0.076;AN=66;BaseQRankSum=2.03;Cli  |
| 2707 | chrY | 5640864 | . | C | T | 263.17  | PASS          | AC=2;AF=0.030;AN=66;DP=246;FS=0.000;Inbre  |
| 2708 | chrY | 5643924 | . | G | A | 159.19  | PASS          | AC=5;AF=0.071;AN=70;BaseQRankSum=-1.344e+  |
| 2709 | chrY | 5644508 | . | T | A | 900.82  | PASS          | AC=5;AF=0.071;AN=70;BaseQRankSum=-1.450e+  |
| 2710 | chrY | 5644518 | . | T | G | 718.24  | PASS          | AC=5;AF=0.071;AN=70;BaseQRankSum=-1.449e+  |
| 2711 | chrY | 5645057 | . | A | G | 155.26  | PASS          | AC=4;AF=0.057;AN=70;BaseQRankSum=1.32;Cli  |
| 2712 | chrY | 5645838 | . | T | C | 276.18  | PASS          | AC=5;AF=0.074;AN=68;BaseQRankSum=-3.610e-  |
| 2713 | chrY | 5651967 | . | A | G | 6531.50 | PASS          | AC=48;AF=0.727;AN=66;BaseQRankSum=1.42;Cl  |
| 2714 | chrY | 5653464 | . | T | C | 287.35  | PASS          | AC=5;AF=0.081;AN=62;BaseQRankSum=2.22;Cli  |
| 2715 | chrY | 5653482 | . | T | C | 584.19  | PASS          | AC=8;AF=0.143;AN=56;BaseQRankSum=-4.250e-  |
| 2716 | chrY | 5653551 | . | A | G | 817.60  | PASS          | AC=8;AF=0.125;AN=64;BaseQRankSum=-1.231e+  |
| 2717 | chrY | 5653785 | . | C | G | 36.91   | my_snp_filter | AC=2;AF=0.031;AN=64;BaseQRankSum=          |
| 2718 | chrY | 5653841 | . | G | A | 1281.52 | PASS          | AC=5;AF=0.100;AN=50;BaseQRankSum=-2.980e-  |
| 2719 | chrY | 5653861 | . | A | G | 59.31   | my_snp_filter | AC=3;AF=0.065;AN=46;BaseQRankSum=          |
| 2720 | chrY | 5654396 | . | T | C | 357.18  | PASS          | AC=2;AF=0.030;AN=66;BaseQRankSum=-1.800e-  |
| 2721 | chrY | 5656060 | . | C | T | 96.61   | PASS          | AC=3;AF=0.115;AN=26;BaseQRankSum=1.84;Cli  |
| 2722 | chrY | 5656598 | . | G | C | 303.80  | PASS          | AC=2;AF=0.036;AN=56;DP=197;FS=0.000;Inbre  |
| 2723 | chrY | 5657848 | . | C | T | 78.11   | PASS          | AC=2;AF=0.029;AN=70;BaseQRankSum=-1.246e+  |
| 2724 | chrY | 5658903 | . | C | T | 988.17  | PASS          | AC=6;AF=0.086;AN=70;BaseQRankSum=0.741;Cl  |
| 2725 | chrY | 5658904 | . | T | G | 1011.18 | PASS          | AC=7;AF=0.100;AN=70;BaseQRankSum=0.358;Cl  |
| 2726 | chrY | 5658998 | . | T | G | 622     | PASS          | AC=6;AF=0.088;AN=68;BaseQRankSum=-4.770e-  |
| 2727 | chrY | 5659335 | . | G | C | 824.04  | PASS          | AC=5;AF=0.089;AN=56;BaseQRankSum=-7.940e-  |
| 2728 | chrY | 5660629 | . | A | T | 72.05   | PASS          | AC=2;AF=0.029;AN=68;BaseQRankSum=0.555;Cl  |
| 2729 | chrY | 5660896 | . | G | C | 43.70   | PASS          | AC=1;AF=0.014;AN=70;BaseQRankSum=0.727;Cl  |
| 2730 | chrY | 5661275 | . | C | T | 62.21   | PASS          | AC=1;AF=0.015;AN=68;BaseQRankSum=1.00;Cli  |
| 2731 | chrY | 5662067 | . | C | T | 1186.76 | PASS          | AC=6;AF=0.094;AN=64;DP=242;FS=0.000;Inbre  |
| 2732 | chrY | 5666511 | . | G | A | 1101.10 | PASS          | AC=6;AF=0.086;AN=70;DP=356;FS=0.000;Inbre  |
| 2733 | chrY | 5667405 | . | C | T | 57.71   | PASS          | AC=1;AF=0.014;AN=70;BaseQRankSum=-9.370e-  |
| 2734 | chrY | 5669089 | . | C | T | 1501.30 | PASS          | AC=6;AF=0.094;AN=64;DP=254;FS=0.000;Inbre  |
| 2735 | chrY | 5670077 | . | G | T | 63.38   | PASS          | AC=2;AF=0.030;AN=66;BaseQRankSum=2.68;Cli  |
| 2736 | chrY | 5670495 | . | G | T | 47.59   | PASS          | AC=1;AF=0.014;AN=70;BaseQRankSum=-2.120e-  |

|      |      |         |   |   |   |          |               |                                            |
|------|------|---------|---|---|---|----------|---------------|--------------------------------------------|
| 2737 | chrY | 5673651 | . | G | T | 189.89   | PASS          | AC=2;AF=0.029;AN=70;DP=483;FS=0.000;Inbre  |
| 2738 | chrY | 5674765 | . | G | A | 36.94    | PASS          | AC=1;AF=0.018;AN=56;BaseQRankSum=1.23;Cli  |
| 2739 | chrY | 5677718 | . | G | C | 495.41   | PASS          | AC=2;AF=0.029;AN=70;DP=496;FS=0.000;Inbre  |
| 2740 | chrY | 5677907 | . | A | G | 740.84   | PASS          | AC=6;AF=0.091;AN=66;DP=475;FS=0.000;Inbre  |
| 2741 | chrY | 5680070 | . | G | A | 409.49   | PASS          | AC=7;AF=0.100;AN=70;BaseQRankSum=2.52;Cli  |
| 2742 | chrY | 5680111 | . | C | T | 1332.41  | PASS          | AC=15;AF=0.214;AN=70;BaseQRankSum=0.572;C  |
| 2743 | chrY | 5680126 | . | A | G | 1628.48  | PASS          | AC=16;AF=0.229;AN=70;BaseQRankSum=0.622;C  |
| 2744 | chrY | 5680164 | . | T | G | 2112.35  | PASS          | AC=9;AF=0.129;AN=70;BaseQRankSum=-2.390e-  |
| 2745 | chrY | 5680165 | . | C | A | 1917.15  | PASS          | AC=8;AF=0.114;AN=70;BaseQRankSum=-5.530e-  |
| 2746 | chrY | 5680174 | . | A | C | 1884.96  | PASS          | AC=9;AF=0.129;AN=70;BaseQRankSum=0.305;Cl  |
| 2747 | chrY | 5680402 | . | G | A | 36.34    | my_snp_filter | AC=2;AF=0.029;AN=68;BaseQRankSum=          |
| 2748 | chrY | 5681342 | . | C | T | 11220.92 | PASS          | AC=64;AF=1.00;AN=64;DP=376;FS=0.0          |
| 2749 | chrY | 5682456 | . | G | A | 11481.23 | PASS          | AC=48;AF=0.727;AN=66;DP=514;FS=0.          |
| 2750 | chrY | 5686902 | . | T | C | 617.46   | PASS          | AC=6;AF=0.086;AN=70;DP=334;FS=0.000;Inbre  |
| 2751 | chrY | 5687843 | . | T | C | 87.85    | PASS          | AC=2;AF=0.042;AN=48;BaseQRankSum=0.135;Cl  |
| 2752 | chrY | 5687883 | . | C | G | 237.02   | PASS          | AC=3;AF=0.054;AN=56;BaseQRankSum=-5.300e-  |
| 2753 | chrY | 5689782 | . | G | A | 35.83    | PASS          | AC=2;AF=0.111;AN=18;BaseQRankSum=0.727;Cl  |
| 2754 | chrY | 5690510 | . | C | G | 402.61   | PASS          | AC=2;AF=0.029;AN=70;DP=420;FS=0.000;Inbre  |
| 2755 | chrY | 5691763 | . | C | A | 115.32   | PASS          | AC=4;AF=0.059;AN=68;BaseQRankSum=0.736;Cl  |
| 2756 | chrY | 5693294 | . | A | G | 204.08   | my_snp_filter | AC=7;AF=0.100;AN=70;BaseQRankSum=          |
| 2757 | chrY | 5698031 | . | T | G | 2434.90  | PASS          | AC=32;AF=0.571;AN=56;DP=249;FS=0.000;Inbr  |
| 2758 | chrY | 5698271 | . | A | G | 946.45   | PASS          | AC=5;AF=0.139;AN=36;BaseQRankSum=-7.940e-  |
| 2759 | chrY | 5699728 | . | T | G | 521.03   | PASS          | AC=11;AF=0.157;AN=70;BaseQRankSum=0.467;C  |
| 2760 | chrY | 5705396 | . | G | A | 38.38    | PASS          | AC=1;AF=0.056;AN=18;BaseQRankSum=-2.083e+  |
| 2761 | chrY | 5705740 | . | G | A | 4137.97  | PASS          | AC=20;AF=1.00;AN=20;DP=160;FS=0.000;Inbre  |
| 2762 | chrY | 5707334 | . | C | T | 913.91   | PASS          | AC=6;AF=0.088;AN=68;BaseQRankSum=2.04;Cli  |
| 2763 | chrY | 5708644 | . | A | G | 5248.77  | PASS          | AC=40;AF=0.571;AN=70;DP=350;FS=0.000;Inbr  |
| 2764 | chrY | 5716216 | . | A | G | 12282.02 | PASS          | AC=64;AF=1.00;AN=64;BaseQRankSum=          |
| 2765 | chrY | 5721612 | . | A | G | 1342.15  | PASS          | AC=8;AF=0.114;AN=70;BaseQRankSum=0.439;Cl  |
| 2766 | chrY | 5723355 | . | T | C | 199.14   | PASS          | AC=2;AF=0.029;AN=70;DP=595;FS=0.000;Inbre  |
| 2767 | chrY | 5723643 | . | C | A | 196.25   | PASS          | AC=2;AF=0.067;AN=30;BaseQRankSum=-1.107e+  |
| 2768 | chrY | 5724216 | . | T | C | 472.18   | PASS          | AC=2;AF=0.029;AN=70;DP=533;FS=0.000;Inbre  |
| 2769 | chrY | 5728934 | . | T | G | 7539.93  | PASS          | AC=58;AF=1.00;AN=58;DP=272;FS=0.000;Inbre  |
| 2770 | chrY | 5729492 | . | A | G | 1000.51  | PASS          | AC=5;AF=0.071;AN=70;BaseQRankSum=-4.560e-  |
| 2771 | chrY | 5730873 | . | G | T | 4719.07  | PASS          | AC=26;AF=1.00;AN=26;DP=187;FS=0.000;Inbre  |
| 2772 | chrY | 5733798 | . | T | C | 1871.02  | PASS          | AC=8;AF=0.114;AN=70;BaseQRankSum=-8.210e-  |
| 2773 | chrY | 5736264 | . | A | C | 421.19   | PASS          | AC=6;AF=0.086;AN=70;DP=433;FS=0.000;Inbre  |
| 2774 | chrY | 5737257 | . | T | C | 214.27   | PASS          | AC=2;AF=0.029;AN=68;DP=218;FS=0.000;Inbre  |
| 2775 | chrY | 5738911 | . | T | C | 1405.13  | PASS          | AC=12;AF=0.171;AN=70;DP=308;FS=0.000;Inbr  |
| 2776 | chrY | 5741624 | . | G | A | 90.55    | PASS          | AC=2;AF=0.029;AN=70;DP=457;FS=0.000;Inbre  |
| 2777 | chrY | 5746249 | . | T | C | 942.52   | PASS          | AC=6;AF=0.091;AN=66;DP=455;FS=0.000;Inbre  |
| 2778 | chrY | 5747985 | . | G | C | 1874.12  | PASS          | AC=17;AF=0.243;AN=70;BaseQRankSum=0.922;C  |
| 2779 | chrY | 5748309 | . | C | G | 581.17   | PASS          | AC=8;AF=0.114;AN=70;BaseQRankSum=2.25;Cli  |
| 2780 | chrY | 5749086 | . | C | T | 846.21   | PASS          | AC=7;AF=0.100;AN=70;BaseQRankSum=-8.660e-  |
| 2781 | chrY | 5751527 | . | G | C | 199.49   | PASS          | AC=3;AF=0.043;AN=70;BaseQRankSum=0.933;Cl  |
| 2782 | chrY | 5751708 | . | C | G | 7834.50  | PASS          | AC=54;AF=0.818;AN=66;DP=341;FS=0.000;Inbr  |
| 2783 | chrY | 5752367 | . | C | A | 12686.35 | PASS          | AC=60;AF=0.857;AN=70;BaseQRankSum=         |
| 2784 | chrY | 5752375 | . | T | C | 114.30   | my_snp_filter | AC=3;AF=0.043;AN=70;BaseQRankSum=          |
| 2785 | chrY | 5753238 | . | C | T | 299.81   | PASS          | AC=2;AF=0.029;AN=68;BaseQRankSum=3.70;Cli  |
| 2786 | chrY | 5755023 | . | C | T | 1053.49  | PASS          | AC=6;AF=0.088;AN=68;BaseQRankSum=2.26;Cli  |
| 2787 | chrY | 5755550 | . | T | C | 10068.06 | PASS          | AC=66;AF=1.00;AN=66;BaseQRankSum=          |
| 2788 | chrY | 5761433 | . | A | C | 39.31    | PASS          | AC=1;AF=0.020;AN=50;BaseQRankSum=1.23;Cli  |
| 2789 | chrY | 5763616 | . | A | G | 947.98   | PASS          | AC=6;AF=0.088;AN=68;BaseQRankSum=-1.930e-  |
| 2790 | chrY | 5765740 | . | C | T | 65.04    | my_snp_filter | AC=4;AF=0.065;AN=62;BaseQRankSum=          |
| 2791 | chrY | 5765772 | . | T | C | 136.72   | my_snp_filter | AC=5;AF=0.100;AN=50;BaseQRankSum=          |
| 2792 | chrY | 5766369 | . | A | G | 31.34    | my_snp_filter | AC=2;AF=0.029;AN=68;BaseQRankSum=          |
| 2793 | chrY | 5768041 | . | G | A | 64.50    | PASS          | AC=1;AF=0.014;AN=70;BaseQRankSum=0.322;Cl  |
| 2794 | chrY | 5768083 | . | A | C | 137.71   | PASS          | AC=4;AF=0.057;AN=70;BaseQRankSum=-1.026e+  |
| 2795 | chrY | 5770167 | . | G | A | 732.48   | PASS          | AC=11;AF=0.157;AN=70;BaseQRankSum=1.13;Cl  |
| 2796 | chrY | 5770228 | . | C | A | 2613.60  | PASS          | AC=18;AF=0.257;AN=70;BaseQRankSum=-6.510e- |
| 2797 | chrY | 5770319 | . | G | C | 1187.11  | PASS          | AC=11;AF=0.167;AN=66;BaseQRankSum=0.727;C  |
| 2798 | chrY | 5770841 | . | G | A | 1055.18  | PASS          | AC=6;AF=0.333;AN=18;DP=152;FS=0.000;MLEAC  |
| 2799 | chrY | 5771971 | . | G | A | 72.24    | PASS          | AC=1;AF=0.014;AN=70;BaseQRankSum=1.26;Cli  |
| 2800 | chrY | 5773148 | . | T | C | 2303.26  | PASS          | AC=18;AF=0.265;AN=68;BaseQRankSum=-8.530e- |
| 2801 | chrY | 5773193 | . | T | C | 147.16   | PASS          | AC=2;AF=0.029;AN=70;BaseQRankSum=1.15;Cli  |
| 2802 | chrY | 5773320 | . | A | T | 3014.64  | PASS          | AC=29;AF=0.426;AN=68;BaseQRankSum=0.198;C  |
| 2803 | chrY | 5773392 | . | G | A | 1481.54  | PASS          | AC=13;AF=0.241;AN=54;BaseQRankSum=1.16;Cl  |
| 2804 | chrY | 5773606 | . | T | C | 3259.87  | PASS          | AC=26;AF=0.394;AN=66;BaseQRankSum=-2.780e- |
| 2805 | chrY | 5774153 | . | C | T | 34.12    | PASS          | AC=1;AF=0.015;AN=66;BaseQRankSum=2.29;Cli  |
| 2806 | chrY | 5775109 | . | G | A | 952.41   | PASS          | AC=6;AF=0.094;AN=64;BaseQRankSum=0.880;Cl  |
| 2807 | chrY | 5777425 | . | A | G | 368.18   | my_snp_filter | AC=6;AF=0.086;AN=70;BaseQRankSum=          |
| 2808 | chrY | 5778266 | . | A | G | 3529.19  | PASS          | AC=34;AF=0.607;AN=56;DP=284;FS=0.000;Inbr  |
| 2809 | chrY | 5780428 | . | G | C | 158.33   | PASS          | AC=3;AF=0.150;AN=20;BaseQRankSum=-4.740e-  |
| 2810 | chrY | 5781413 | . | C | A | 355.94   | PASS          | AC=4;AF=0.061;AN=66;BaseQRankSum=1.31;Cli  |
| 2811 | chrY | 5784293 | . | G | C | 645.02   | PASS          | AC=6;AF=0.088;AN=68;DP=201;FS=0.000;Inbre  |
| 2812 | chrY | 5784602 | . | A | T | 707.41   | PASS          | AC=8;AF=0.800;AN=10;BaseQRankSum=0.736;Cl  |

|      |      |         |   |   |   |          |               |                                           |
|------|------|---------|---|---|---|----------|---------------|-------------------------------------------|
| 2813 | chrY | 5785679 | . | G | A | 209.79   | PASS          | AC=3;AF=0.088;AN=34;BaseQRankSum=1.23;Cli |
| 2814 | chrY | 5785683 | . | G | A | 211.89   | PASS          | AC=3;AF=0.088;AN=34;BaseQRankSum=0.358;Cl |
| 2815 | chrY | 5785688 | . | G | A | 165.74   | PASS          | AC=2;AF=0.056;AN=36;BaseQRankSum=0.727;Cl |
| 2816 | chrY | 5786846 | . | G | T | 533.23   | PASS          | AC=6;AF=0.086;AN=70;DP=429;FS=0.000;Inbre |
| 2817 | chrY | 5788339 | . | C | T | 1147.67  | PASS          | AC=6;AF=0.130;AN=46;BaseQRankSum=1.37;Cli |
| 2818 | chrY | 5790075 | . | A | G | 73.33    | PASS          | AC=2;AF=0.029;AN=70;BaseQRankSum=-6.360e- |
| 2819 | chrY | 5790739 | . | T | G | 203.30   | PASS          | AC=1;AF=0.050;AN=20;BaseQRankSum=-1.000e+ |
| 2820 | chrY | 5795728 | . | G | T | 256.65   | PASS          | AC=2;AF=0.048;AN=42;BaseQRankSum=1.03;Cli |
| 2821 | chrY | 5797153 | . | T | C | 158.09   | PASS          | AC=4;AF=0.071;AN=56;DP=135;FS=0.000;Inbre |
| 2822 | chrY | 5807062 | . | A | G | 51.03    | my_snp_filter | AC=3;AF=0.043;AN=70;BaseQRankSum=         |
| 2823 | chrY | 5812068 | . | T | A | 418.51   | PASS          | AC=2;AF=0.067;AN=30;DP=165;FS=0.000;Inbre |
| 2824 | chrY | 5814645 | . | T | C | 10117.94 | PASS          | AC=68;AF=1.00;AN=68;DP=398;FS=0.0         |
| 2825 | chrY | 5815358 | . | A | G | 756.41   | PASS          | AC=6;AF=0.120;AN=50;DP=154;FS=0.000;Inbre |
| 2826 | chrY | 5822164 | . | G | A | 471.53   | PASS          | AC=4;AF=0.059;AN=68;DP=439;FS=0.000;Inbre |
| 2827 | chrY | 5822419 | . | C | T | 417.55   | PASS          | AC=2;AF=0.034;AN=58;DP=223;FS=0.000;Inbre |
| 2828 | chrY | 5826571 | . | C | G | 56.27    | my_snp_filter | AC=2;AF=0.077;AN=26;BaseQRankSum=         |
| 2829 | chrY | 5827851 | . | A | G | 194.04   | PASS          | AC=2;AF=0.050;AN=40;BaseQRankSum=1.09;Cli |
| 2830 | chrY | 5831341 | . | T | C | 525.18   | PASS          | AC=12;AF=0.333;AN=36;DP=203;FS=0.000;Inbr |
| 2831 | chrY | 5831397 | . | G | T | 269.22   | PASS          | AC=4;AF=0.125;AN=32;BaseQRankSum=1.50;Cli |
| 2832 | chrY | 5832276 | . | C | T | 50.73    | PASS          | AC=1;AF=0.017;AN=58;BaseQRankSum=2.63;Cli |
| 2833 | chrY | 5832403 | . | C | T | 418.62   | PASS          | AC=5;AF=0.074;AN=68;BaseQRankSum=-5.040e- |
| 2834 | chrY | 5832456 | . | C | T | 178.23   | PASS          | AC=3;AF=0.058;AN=52;BaseQRankSum=-5.730e- |
| 2835 | chrY | 5832504 | . | G | T | 31.75    | my_snp_filter | AC=1;AF=0.019;AN=52;BaseQRankSum=         |
| 2836 | chrY | 5832555 | . | C | A | 706.63   | PASS          | AC=7;AF=0.117;AN=60;BaseQRankSum=-1.217e+ |
| 2837 | chrY | 5832693 | . | C | A | 731.26   | PASS          | AC=10;AF=0.143;AN=70;BaseQRankSum=1.13;Cl |
| 2838 | chrY | 5832772 | . | A | G | 150.70   | PASS          | AC=1;AF=0.014;AN=70;BaseQRankSum=0.061;Cl |
| 2839 | chrY | 5832773 | . | C | T | 324.81   | PASS          | AC=3;AF=0.043;AN=70;BaseQRankSum=0.950;Cl |
| 2840 | chrY | 5833007 | . | G | T | 1448.10  | PASS          | AC=16;AF=0.229;AN=70;BaseQRankSum=0.582;C |
| 2841 | chrY | 5833035 | . | A | G | 477.79   | my_snp_filter | AC=15;AF=0.214;AN=70;BaseQRankSum         |
| 2842 | chrY | 5833068 | . | C | A | 97.02    | PASS          | AC=2;AF=0.029;AN=68;BaseQRankSum=0.727;Cl |
| 2843 | chrY | 5833077 | . | C | T | 69.99    | PASS          | AC=2;AF=0.029;AN=70;BaseQRankSum=0.673;Cl |
| 2844 | chrY | 5833108 | . | T | G | 194.46   | PASS          | AC=2;AF=0.029;AN=70;DP=487;FS=0.000;Inbre |
| 2845 | chrY | 5833190 | . | G | T | 165.62   | PASS          | AC=3;AF=0.043;AN=70;BaseQRankSum=1.13;Cli |
| 2846 | chrY | 5833333 | . | T | G | 341.04   | PASS          | AC=7;AF=0.106;AN=66;BaseQRankSum=-1.099e+ |
| 2847 | chrY | 5836038 | . | G | C | 1563.11  | PASS          | AC=6;AF=0.088;AN=68;BaseQRankSum=-1.580e- |
| 2848 | chrY | 5836961 | . | G | A | 53.04    | PASS          | AC=1;AF=0.050;AN=20;BaseQRankSum=-5.680e- |
| 2849 | chrY | 5837230 | . | G | T | 96.38    | my_snp_filter | AC=2;AF=0.091;AN=22;DP=169;FS=0.0         |
| 2850 | chrY | 5837241 | . | A | T | 136.50   | my_snp_filter | AC=2;AF=0.100;AN=20;DP=162;FS=0.0         |
| 2851 | chrY | 5837244 | . | G | A | 136.52   | my_snp_filter | AC=2;AF=0.100;AN=20;DP=162;FS=0.0         |
| 2852 | chrY | 5837776 | . | C | T | 470.72   | PASS          | AC=4;AF=0.057;AN=70;DP=333;FS=0.000;Inbre |
| 2853 | chrY | 5839522 | . | G | A | 276.93   | PASS          | AC=2;AF=0.030;AN=66;BaseQRankSum=0.00;Cli |
| 2854 | chrY | 5840452 | . | G | T | 70.73    | my_snp_filter | AC=2;AF=0.033;AN=60;BaseQRankSum=         |
| 2855 | chrY | 5840897 | . | C | A | 1989.30  | PASS          | AC=11;AF=0.162;AN=68;BaseQRankSum=0.898;C |
| 2856 | chrY | 5841289 | . | G | A | 256.61   | PASS          | AC=3;AF=0.048;AN=62;BaseQRankSum=-1.369e+ |
| 2857 | chrY | 5841814 | . | T | C | 1287.82  | PASS          | AC=6;AF=0.086;AN=70;DP=404;FS=0.000;Inbre |
| 2858 | chrY | 5841891 | . | A | G | 10326.94 | PASS          | AC=64;AF=1.00;AN=64;DP=366;FS=0.0         |
| 2859 | chrY | 5841991 | . | T | A | 218.12   | PASS          | AC=3;AF=0.045;AN=66;BaseQRankSum=-9.880e- |
| 2860 | chrY | 5842046 | . | G | A | 90.14    | PASS          | AC=1;AF=0.015;AN=68;BaseQRankSum=-1.813e+ |
| 2861 | chrY | 5845366 | . | G | T | 1047.84  | PASS          | AC=6;AF=0.300;AN=20;DP=143;FS=0.000;Inbre |
| 2862 | chrY | 5846307 | . | A | G | 3336.32  | PASS          | AC=40;AF=0.690;AN=58;DP=226;FS=0.000;Inbr |
| 2863 | chrY | 5849375 | . | G | T | 101.81   | my_snp_filter | AC=5;AF=0.071;AN=70;BaseQRankSum=         |
| 2864 | chrY | 5851534 | . | C | T | 625.39   | PASS          | AC=6;AF=0.086;AN=70;DP=295;FS=0.000;Inbre |
| 2865 | chrY | 5853280 | . | T | C | 51.38    | PASS          | AC=2;AF=0.030;AN=66;DP=251;FS=0.000;Inbre |
| 2866 | chrY | 5854424 | . | G | A | 1239.73  | PASS          | AC=6;AF=0.167;AN=36;DP=161;FS=0.000;Inbre |
| 2867 | chrY | 5855877 | . | A | T | 1371.49  | PASS          | AC=6;AF=0.086;AN=70;DP=386;FS=0.000;Inbre |
| 2868 | chrY | 5855990 | . | C | T | 2806.84  | PASS          | AC=40;AF=0.625;AN=64;DP=255;FS=0.000;Inbr |
| 2869 | chrY | 5857039 | . | C | T | 503.24   | PASS          | AC=2;AF=0.029;AN=70;DP=541;FS=0.000;Inbre |
| 2870 | chrY | 5857248 | . | G | A | 3754.06  | PASS          | AC=22;AF=1.00;AN=22;DP=148;FS=0.000;Inbre |
| 2871 | chrY | 5857921 | . | T | C | 41.68    | my_snp_filter | AC=2;AF=0.036;AN=56;BaseQRankSum=         |
| 2872 | chrY | 5857964 | . | C | T | 225.68   | PASS          | AC=4;AF=0.061;AN=66;BaseQRankSum=1.88;Cli |
| 2873 | chrY | 5858215 | . | G | A | 4144.56  | PASS          | AC=24;AF=0.364;AN=66;BaseQRankSum=0.00;Cl |
| 2874 | chrY | 5858687 | . | C | T | 81.57    | PASS          | AC=1;AF=0.015;AN=66;BaseQRankSum=0.696;Cl |
| 2875 | chrY | 5858838 | . | T | C | 226.70   | PASS          | AC=3;AF=0.043;AN=70;BaseQRankSum=-7.400e- |
| 2876 | chrY | 5862368 | . | G | T | 41.70    | PASS          | AC=1;AF=0.018;AN=56;BaseQRankSum=0.00;Cli |
| 2877 | chrY | 5862369 | . | A | T | 41.74    | PASS          | AC=1;AF=0.018;AN=56;BaseQRankSum=-7.360e- |
| 2878 | chrY | 5862533 | . | T | G | 104.18   | PASS          | AC=2;AF=0.056;AN=36;BaseQRankSum=0.524;Cl |
| 2879 | chrY | 5862541 | . | T | C | 161.97   | PASS          | AC=2;AF=0.059;AN=34;BaseQRankSum=0.524;Cl |
| 2880 | chrY | 5863819 | . | C | A | 935.93   | PASS          | AC=6;AF=0.086;AN=70;DP=502;FS=0.000;Inbre |
| 2881 | chrY | 5872192 | . | C | G | 191.36   | PASS          | AC=4;AF=0.250;AN=16;DP=61;FS=0.000;MLEAC= |
| 2882 | chrY | 5872835 | . | G | A | 5873.22  | PASS          | AC=52;AF=1.00;AN=52;DP=205;FS=0.000;Inbre |
| 2883 | chrY | 5877093 | . | T | C | 30.71    | my_snp_filter | AC=2;AF=0.029;AN=70;BaseQRankSum=         |
| 2884 | chrY | 5877272 | . | C | T | 1243.58  | PASS          | AC=9;AF=0.129;AN=70;BaseQRankSum=0.394;Cl |
| 2885 | chrY | 5877496 | . | T | G | 78.61    | PASS          | AC=1;AF=0.015;AN=68;BaseQRankSum=-1.858e+ |
| 2886 | chrY | 5880022 | . | T | C | 213.23   | PASS          | AC=2;AF=0.083;AN=24;BaseQRankSum=0.813;Cl |
| 2887 | chrY | 5880438 | . | C | T | 4490.71  | PASS          | AC=37;AF=0.597;AN=62;BaseQRankSum=0.742;C |
| 2888 | chrY | 5882121 | . | T | G | 799.15   | PASS          | AC=6;AF=0.088;AN=68;DP=222;FS=0.000;Inbre |

|      |      |         |   |   |   |          |               |                                           |
|------|------|---------|---|---|---|----------|---------------|-------------------------------------------|
| 2889 | chrY | 5885943 | . | T | C | 74.41    | PASS          | AC=2;AF=0.111;AN=18;DP=115;FS=0.000;MLEAC |
| 2890 | chrY | 5886046 | . | A | T | 3177.59  | PASS          | AC=18;AF=1.00;AN=18;BaseQRankSum=-1.734e+ |
| 2891 | chrY | 5886954 | . | T | C | 2482.77  | PASS          | AC=40;AF=0.625;AN=64;DP=239;FS=0.000;Inbr |
| 2892 | chrY | 5891420 | . | C | G | 124.98   | PASS          | AC=4;AF=0.071;AN=56;DP=219;FS=0.000;Inbre |
| 2893 | chrY | 5894396 | . | T | A | 32.06    | PASS          | AC=1;AF=0.015;AN=66;BaseQRankSum=-1.980e- |
| 2894 | chrY | 5894398 | . | C | A | 31.98    | PASS          | AC=1;AF=0.015;AN=66;BaseQRankSum=-7.200e- |
| 2895 | chrY | 5894739 | . | G | C | 183.21   | PASS          | AC=2;AF=0.029;AN=68;DP=298;FS=0.000;Inbre |
| 2896 | chrY | 5900896 | . | G | A | 998.45   | PASS          | AC=6;AF=0.086;AN=70;BaseQRankSum=2.06;Cli |
| 2897 | chrY | 5900917 | . | A | G | 1066.74  | PASS          | AC=12;AF=0.176;AN=68;BaseQRankSum=-5.360e |
| 2898 | chrY | 5904420 | . | G | T | 747.13   | PASS          | AC=4;AF=0.057;AN=70;DP=351;FS=0.000;Inbre |
| 2899 | chrY | 5909017 | . | C | T | 129.82   | PASS          | AC=3;AF=0.071;AN=42;BaseQRankSum=2.79;Cli |
| 2900 | chrY | 5912156 | . | C | T | 407.67   | PASS          | AC=6;AF=0.091;AN=68;DP=280;FS=0.000;Inbre |
| 2901 | chrY | 5915653 | . | C | A | 92.25    | PASS          | AC=4;AF=0.059;AN=68;BaseQRankSum=1.50;Cli |
| 2902 | chrY | 5920261 | . | T | A | 1346.36  | PASS          | AC=32;AF=0.640;AN=50;DP=187;FS=0.000;Inbr |
| 2903 | chrY | 5925867 | . | G | T | 221.42   | PASS          | AC=4;AF=0.057;AN=70;BaseQRankSum=1.01;Cli |
| 2904 | chrY | 5927785 | . | C | T | 45.68    | my_snp_filter | AC=2;AF=0.029;AN=70;BaseQRankSum=         |
| 2905 | chrY | 5928002 | . | T | C | 274.87   | PASS          | AC=4;AF=0.074;AN=54;BaseQRankSum=1.53;Cli |
| 2906 | chrY | 5930421 | . | A | G | 40.17    | PASS          | AC=1;AF=0.015;AN=66;BaseQRankSum=1.62;Cli |
| 2907 | chrY | 5930426 | . | C | T | 41.58    | my_snp_filter | AC=2;AF=0.030;AN=66;BaseQRankSum=         |
| 2908 | chrY | 5930530 | . | T | C | 545.71   | PASS          | AC=6;AF=0.097;AN=62;BaseQRankSum=0.252;Cl |
| 2909 | chrY | 5930731 | . | C | T | 2017.33  | PASS          | AC=8;AF=0.114;AN=70;BaseQRankSum=0.550;Cl |
| 2910 | chrY | 5931219 | . | T | A | 33.70    | PASS          | AC=1;AF=0.014;AN=70;BaseQRankSum=0.00;Cli |
| 2911 | chrY | 5931222 | . | C | T | 36.72    | PASS          | AC=1;AF=0.014;AN=70;BaseQRankSum=-1.231e+ |
| 2912 | chrY | 5931579 | . | C | A | 174.44   | PASS          | AC=4;AF=0.067;AN=60;BaseQRankSum=1.07;Cli |
| 2913 | chrY | 5931891 | . | G | T | 373.97   | PASS          | AC=6;AF=0.086;AN=70;BaseQRankSum=0.358;Cl |
| 2914 | chrY | 5938423 | . | A | G | 775.25   | PASS          | AC=3;AF=0.150;AN=20;BaseQRankSum=-1.886e+ |
| 2915 | chrY | 5940701 | . | G | T | 10732.99 | PASS          | AC=68;AF=1.00;AN=68;DP=363;FS=0.0         |
| 2916 | chrY | 5945148 | . | T | C | 996.95   | PASS          | AC=6;AF=0.086;AN=70;DP=265;FS=0.000;Inbre |
| 2917 | chrY | 5946781 | . | G | A | 1044.95  | PASS          | AC=6;AF=0.086;AN=70;DP=294;FS=0.000;Inbre |
| 2918 | chrY | 5948795 | . | C | G | 4628.18  | PASS          | AC=56;AF=1.00;AN=56;DP=203;FS=0.000;Inbre |
| 2919 | chrY | 5949230 | . | G | A | 149.49   | PASS          | AC=1;AF=0.045;AN=22;BaseQRankSum=1.78;Cli |
| 2920 | chrY | 5949241 | . | C | T | 144.87   | PASS          | AC=1;AF=0.042;AN=24;BaseQRankSum=0.685;Cl |
| 2921 | chrY | 5949242 | . | A | G | 144.62   | PASS          | AC=1;AF=0.042;AN=24;BaseQRankSum=-8.960e- |
| 2922 | chrY | 5949245 | . | C | T | 144.71   | PASS          | AC=1;AF=0.042;AN=24;BaseQRankSum=2.06;Cli |
| 2923 | chrY | 5953282 | . | C | T | 73.89    | PASS          | AC=3;AF=0.043;AN=70;BaseQRankSum=0.118;Cl |
| 2924 | chrY | 5957087 | . | T | C | 91.80    | PASS          | AC=2;AF=0.037;AN=54;DP=180;FS=0.000;Inbre |
| 2925 | chrY | 5957089 | . | T | C | 2556.30  | PASS          | AC=33;AF=0.825;AN=40;BaseQRankSum=0.358;C |
| 2926 | chrY | 5961858 | . | T | C | 121.15   | PASS          | AC=2;AF=0.029;AN=70;DP=280;FS=0.000;Inbre |
| 2927 | chrY | 5964174 | . | T | C | 229.28   | PASS          | AC=6;AF=0.088;AN=68;BaseQRankSum=-1.231e+ |
| 2928 | chrY | 5966272 | . | C | T | 265.22   | PASS          | AC=2;AF=0.067;AN=30;DP=139;FS=0.000;Inbre |
| 2929 | chrY | 5966649 | . | G | T | 2237.78  | PASS          | AC=27;AF=0.397;AN=68;BaseQRankSum=-6.760e |
| 2930 | chrY | 5966672 | . | T | A | 378.10   | PASS          | AC=3;AF=0.043;AN=70;BaseQRankSum=-1.881e+ |
| 2931 | chrY | 5966753 | . | A | C | 81.69    | PASS          | AC=3;AF=0.045;AN=66;BaseQRankSum=0.956;Cl |
| 2932 | chrY | 5967673 | . | A | G | 4777.01  | PASS          | AC=44;AF=0.710;AN=62;DP=308;FS=0.000;Inbr |
| 2933 | chrY | 5969632 | . | T | C | 569.77   | PASS          | AC=2;AF=0.029;AN=68;DP=382;FS=0.000;Inbre |
| 2934 | chrY | 5972099 | . | T | G | 113.96   | PASS          | AC=4;AF=0.059;AN=68;BaseQRankSum=-7.940e- |
| 2935 | chrY | 5972377 | . | C | A | 776.73   | PASS          | AC=7;AF=0.106;AN=66;BaseQRankSum=1.12;Cli |
| 2936 | chrY | 5973770 | . | C | G | 30.89    | my_snp_filter | AC=2;AF=0.029;AN=70;BaseQRankSum=         |
| 2937 | chrY | 5974830 | . | A | G | 722.35   | PASS          | AC=6;AF=0.091;AN=66;DP=313;FS=0.000;Inbre |
| 2938 | chrY | 5976699 | . | C | A | 323.20   | PASS          | AC=6;AF=0.167;AN=36;DP=122;FS=0.000;Inbre |
| 2939 | chrY | 5976701 | . | C | A | 331.80   | PASS          | AC=6;AF=0.200;AN=30;DP=123;FS=0.000;Inbre |
| 2940 | chrY | 5976703 | . | C | A | 1329.36  | PASS          | AC=13;AF=0.500;AN=26;BaseQRankSum=-6.700e |
| 2941 | chrY | 5976705 | . | C | A | 3285.63  | PASS          | AC=26;AF=1.00;AN=26;BaseQRankSum=-7.360e- |
| 2942 | chrY | 5979105 | . | G | A | 1295.43  | PASS          | AC=20;AF=0.526;AN=38;DP=171;FS=0.000;Inbr |
| 2943 | chrY | 5981178 | . | G | A | 332.41   | PASS          | AC=4;AF=0.154;AN=26;BaseQRankSum=2.71;Cli |
| 2944 | chrY | 5981186 | . | A | T | 440.72   | PASS          | AC=4;AF=0.133;AN=30;BaseQRankSum=1.48;Cli |
| 2945 | chrY | 5987414 | . | C | A | 49.46    | PASS          | AC=2;AF=0.030;AN=66;BaseQRankSum=1.40;Cli |
| 2946 | chrY | 5995260 | . | G | A | 3556.58  | PASS          | AC=23;AF=0.329;AN=70;BaseQRankSum=-4.680e |
| 2947 | chrY | 5995332 | . | C | A | 1420.71  | PASS          | AC=6;AF=0.086;AN=70;BaseQRankSum=-1.003e+ |
| 2948 | chrY | 5995474 | . | T | A | 62.94    | my_snp_filter | AC=3;AF=0.043;AN=70;BaseQRankSum=         |
| 2949 | chrY | 5998261 | . | C | T | 1075.48  | PASS          | AC=4;AF=0.059;AN=68;BaseQRankSum=-2.162e+ |
| 2950 | chrY | 5998402 | . | A | G | 31.12    | PASS          | AC=1;AF=0.014;AN=70;BaseQRankSum=-9.220e- |
| 2951 | chrY | 5999381 | . | A | C | 36.77    | PASS          | AC=2;AF=0.038;AN=52;DP=148;FS=0.000;Inbre |
| 2952 | chrY | 5999533 | . | C | T | 1185.53  | PASS          | AC=15;AF=0.214;AN=70;BaseQRankSum=-3.130e |
| 2953 | chrY | 5999580 | . | G | A | 398.04   | PASS          | AC=7;AF=0.100;AN=70;BaseQRankSum=0.212;Cl |
| 2954 | chrY | 6000081 | . | G | T | 3003.73  | PASS          | AC=38;AF=0.679;AN=56;DP=220;FS=0.000;Inbr |
| 2955 | chrY | 6000087 | . | T | C | 39.50    | PASS          | AC=2;AF=0.030;AN=66;DP=217;FS=0.000;Inbre |
| 2956 | chrY | 6000234 | . | C | A | 174.55   | PASS          | AC=6;AF=0.088;AN=68;BaseQRankSum=0.198;Cl |
| 2957 | chrY | 6000954 | . | C | T | 132.59   | my_snp_filter | AC=3;AF=0.044;AN=68;BaseQRankSum=         |
| 2958 | chrY | 6001245 | . | A | G | 1210.77  | PASS          | AC=17;AF=0.266;AN=64;BaseQRankSum=0.00;Cl |
| 2959 | chrY | 6001553 | . | A | G | 37.05    | my_snp_filter | AC=1;AF=0.014;AN=70;BaseQRankSum=         |
| 2960 | chrY | 6001865 | . | C | T | 37.51    | my_snp_filter | AC=2;AF=0.029;AN=70;BaseQRankSum=         |
| 2961 | chrY | 6001994 | . | G | T | 1306.92  | PASS          | AC=18;AF=0.257;AN=70;BaseQRankSum=1.40;Cl |
| 2962 | chrY | 6002047 | . | G | T | 36.87    | my_snp_filter | AC=2;AF=0.029;AN=68;BaseQRankSum=         |
| 2963 | chrY | 6005917 | . | C | T | 127.31   | PASS          | AC=3;AF=0.044;AN=68;BaseQRankSum=2.72;Cli |
| 2964 | chrY | 6006277 | . | G | A | 419.21   | PASS          | AC=6;AF=0.086;AN=70;DP=393;FS=0.000;Inbre |



|      |      |         |   |   |   |          |               |                                            |
|------|------|---------|---|---|---|----------|---------------|--------------------------------------------|
| 2965 | chrY | 6006707 | . | C | T | 42.53    | PASS          | AC=2;AF=0.032;AN=62;BaseQRankSum=0.736;Cli |
| 2966 | chrY | 6006768 | . | T | C | 311.47   | PASS          | AC=12;AF=0.176;AN=68;BaseQRankSum=-1.401e  |
| 2967 | chrY | 6006838 | . | G | T | 246.45   | PASS          | AC=4;AF=0.057;AN=70;BaseQRankSum=0.311;Cl  |
| 2968 | chrY | 6006845 | . | C | T | 188.91   | PASS          | AC=3;AF=0.043;AN=70;BaseQRankSum=0.505;Cl  |
| 2969 | chrY | 6011467 | . | A | C | 160.99   | PASS          | AC=2;AF=0.091;AN=22;BaseQRankSum=2.64;Cli  |
| 2970 | chrY | 6011471 | . | A | G | 156.85   | PASS          | AC=2;AF=0.091;AN=22;BaseQRankSum=0.213;Cl  |
| 2971 | chrY | 6012235 | . | C | G | 102.39   | PASS          | AC=1;AF=0.056;AN=18;BaseQRankSum=0.071;Cl  |
| 2972 | chrY | 6012243 | . | G | A | 96.63    | PASS          | AC=1;AF=0.056;AN=18;BaseQRankSum=1.98;Cli  |
| 2973 | chrY | 6012309 | . | T | C | 30.98    | my_snp_filter | AC=2;AF=0.111;AN=18;BaseQRankSum=          |
| 2974 | chrY | 6012387 | . | C | T | 330.82   | PASS          | AC=3;AF=0.100;AN=30;BaseQRankSum=1.74;Cli  |
| 2975 | chrY | 6012400 | . | G | C | 388.65   | PASS          | AC=3;AF=0.094;AN=32;BaseQRankSum=0.949;Cl  |
| 2976 | chrY | 6012402 | . | T | C | 383.59   | PASS          | AC=3;AF=0.094;AN=32;BaseQRankSum=0.691;Cl  |
| 2977 | chrY | 6012407 | . | G | A | 383.26   | PASS          | AC=3;AF=0.088;AN=34;BaseQRankSum=1.70;Cli  |
| 2978 | chrY | 6012416 | . | C | T | 338.60   | PASS          | AC=3;AF=0.094;AN=32;BaseQRankSum=0.195;Cl  |
| 2979 | chrY | 6012430 | . | C | T | 187.92   | PASS          | AC=3;AF=0.100;AN=30;BaseQRankSum=-1.423e+  |
| 2980 | chrY | 6012479 | . | T | C | 50.58    | PASS          | AC=2;AF=0.063;AN=32;BaseQRankSum=2.01;Cli  |
| 2981 | chrY | 6012481 | . | C | G | 50.40    | PASS          | AC=2;AF=0.063;AN=32;BaseQRankSum=1.78;Cli  |
| 2982 | chrY | 6014001 | . | T | C | 1003.75  | PASS          | AC=6;AF=0.300;AN=20;DP=165;FS=0.000;Inbre  |
| 2983 | chrY | 6019965 | . | C | G | 5302.21  | PASS          | AC=52;AF=1.00;AN=52;DP=207;FS=0.000;Inbre  |
| 2984 | chrY | 6020696 | . | T | G | 211.11   | PASS          | AC=9;AF=0.281;AN=32;BaseQRankSum=0.804;Cl  |
| 2985 | chrY | 6021573 | . | A | T | 570.92   | PASS          | AC=2;AF=0.029;AN=68;DP=407;FS=0.000;Inbre  |
| 2986 | chrY | 6021680 | . | T | A | 6470.49  | PASS          | AC=34;AF=0.531;AN=64;DP=449;FS=0.000;Inbr  |
| 2987 | chrY | 6022074 | . | A | G | 148.56   | PASS          | AC=4;AF=0.063;AN=64;BaseQRankSum=0.727;Cl  |
| 2988 | chrY | 6022092 | . | T | C | 67.69    | PASS          | AC=1;AF=0.015;AN=68;BaseQRankSum=0.633;Cl  |
| 2989 | chrY | 6022724 | . | C | A | 157.82   | PASS          | AC=4;AF=0.057;AN=70;DP=332;FS=0.000;Inbre  |
| 2990 | chrY | 6024313 | . | T | G | 337.95   | PASS          | AC=5;AF=0.119;AN=42;BaseQRankSum=-1.992e+  |
| 2991 | chrY | 6025256 | . | G | T | 137.08   | PASS          | AC=2;AF=0.029;AN=70;DP=517;FS=0.000;Inbre  |
| 2992 | chrY | 6029112 | . | C | A | 239.29   | PASS          | AC=2;AF=0.029;AN=70;DP=298;FS=0.000;Inbre  |
| 2993 | chrY | 6031388 | . | A | G | 46.89    | PASS          | AC=2;AF=0.029;AN=70;DP=444;FS=0.000;Inbre  |
| 2994 | chrY | 6032696 | . | A | G | 13406.48 | PASS          | AC=56;AF=0.824;AN=68;DP=523;FS=0.000;Inbre |
| 2995 | chrY | 6032961 | . | G | A | 7432.12  | PASS          | AC=66;AF=1.00;AN=66;DP=255;FS=0.000;Inbre  |
| 2996 | chrY | 6036823 | . | T | C | 134.20   | my_snp_filter | AC=5;AF=0.076;AN=66;BaseQRankSum=          |
| 2997 | chrY | 6037387 | . | G | T | 212.60   | PASS          | AC=2;AF=0.029;AN=70;DP=374;FS=0.000;Inbre  |
| 2998 | chrY | 6037524 | . | C | T | 4150     | PASS          | AC=45;AF=0.776;AN=58;BaseQRankSum=-7.420e  |
| 2999 | chrY | 6040277 | . | A | C | 62.04    | PASS          | AC=1;AF=0.015;AN=68;BaseQRankSum=1.03;Cli  |
| 3000 | chrY | 6046001 | . | G | A | 1020.73  | PASS          | AC=6;AF=0.333;AN=18;BaseQRankSum=0.224;Cl  |
| 3001 | chrY | 6046194 | . | A | G | 5626.86  | PASS          | AC=18;AF=1.00;AN=18;DP=138;FS=0.000;MLEAC  |
| 3002 | chrY | 6046219 | . | G | A | 5809.86  | PASS          | AC=18;AF=1.00;AN=18;DP=144;FS=0.000;MLEAC  |
| 3003 | chrY | 6047570 | . | A | G | 341.26   | PASS          | AC=4;AF=0.095;AN=42;DP=126;FS=0.000;Inbre  |
| 3004 | chrY | 6048900 | . | T | C | 654.20   | PASS          | AC=2;AF=0.029;AN=70;DP=607;FS=0.000;Inbre  |
| 3005 | chrY | 6051248 | . | C | G | 10630.01 | PASS          | AC=66;AF=1.00;AN=66;DP=383;FS=0.000;Inbre  |
| 3006 | chrY | 6053948 | . | T | C | 63.46    | PASS          | AC=2;AF=0.034;AN=58;DP=205;FS=0.000;Inbre  |
| 3007 | chrY | 6068115 | . | C | T | 355.07   | PASS          | AC=4;AF=0.059;AN=68;BaseQRankSum=0.822;Cl  |
| 3008 | chrY | 6070053 | . | C | A | 112.13   | PASS          | AC=3;AF=0.043;AN=70;BaseQRankSum=2.33;Cli  |
| 3009 | chrY | 6072302 | . | G | A | 1492.72  | PASS          | AC=6;AF=0.088;AN=68;DP=447;FS=0.000;Inbre  |
| 3010 | chrY | 6077314 | . | C | T | 76.90    | PASS          | AC=1;AF=0.016;AN=64;BaseQRankSum=1.91;Cli  |
| 3011 | chrY | 6078134 | . | T | C | 722.31   | PASS          | AC=6;AF=0.094;AN=64;DP=261;FS=0.000;Inbre  |
| 3012 | chrY | 6085430 | . | C | T | 3206.91  | PASS          | AC=36;AF=0.563;AN=64;DP=299;FS=0.000;Inbr  |
| 3013 | chrY | 6089232 | . | T | A | 225.27   | PASS          | AC=2;AF=0.032;AN=62;DP=173;FS=0.000;Inbre  |
| 3014 | chrY | 6090116 | . | G | A | 922.02   | PASS          | AC=6;AF=0.167;AN=36;DP=123;FS=0.000;Inbre  |
| 3015 | chrY | 6090296 | . | A | T | 1152.60  | PASS          | AC=18;AF=0.500;AN=36;DP=177;FS=0.000;Inbr  |
| 3016 | chrY | 6091206 | . | T | C | 106.57   | PASS          | AC=2;AF=0.029;AN=68;BaseQRankSum=-1.362e+  |
| 3017 | chrY | 6091221 | . | T | A | 206.50   | PASS          | AC=2;AF=0.029;AN=70;BaseQRankSum=-1.833e+  |
| 3018 | chrY | 6093152 | . | G | A | 55.77    | my_snp_filter | AC=2;AF=0.029;AN=70;BaseQRankSum=          |
| 3019 | chrY | 6094558 | . | C | T | 17353.95 | PASS          | AC=70;AF=1.00;AN=70;DP=570;FS=0.000;Inbre  |
| 3020 | chrY | 6094700 | . | C | T | 848.36   | PASS          | AC=2;AF=0.029;AN=68;BaseQRankSum=0.889;Cl  |
| 3021 | chrY | 6094746 | . | C | A | 786.58   | PASS          | AC=6;AF=0.086;AN=70;DP=488;FS=0.000;Inbre  |
| 3022 | chrY | 6096026 | . | G | A | 181.83   | PASS          | AC=2;AF=0.029;AN=70;BaseQRankSum=2.67;Cli  |
| 3023 | chrY | 6101182 | . | T | A | 4228.84  | PASS          | AC=44;AF=0.647;AN=68;DP=315;FS=0.000;Inbr  |
| 3024 | chrY | 6101806 | . | G | A | 654.37   | PASS          | AC=14;AF=0.212;AN=66;BaseQRankSum=-5.720e  |
| 3025 | chrY | 6104602 | . | A | T | 9287.17  | PASS          | AC=50;AF=0.735;AN=68;DP=400;FS=0.000;Inbr  |
| 3026 | chrY | 6105265 | . | A | C | 425.54   | my_snp_filter | AC=7;AF=0.130;AN=54;BaseQRankSum=          |
| 3027 | chrY | 6112124 | . | G | T | 193.22   | my_snp_filter | AC=6;AF=0.107;AN=56;DP=82;FS=0.000;Inbre   |
| 3028 | chrY | 6115655 | . | G | T | 217.93   | my_snp_filter | AC=2;AF=0.032;AN=62;DP=306;FS=0.000;Inbre  |
| 3029 | chrY | 6115668 | . | C | T | 261.91   | my_snp_filter | AC=2;AF=0.032;AN=62;DP=279;FS=0.000;Inbre  |
| 3030 | chrY | 6117377 | . | A | G | 893.53   | my_snp_filter | AC=6;AF=0.094;AN=64;DP=257;FS=0.000;Inbre  |
| 3031 | chrY | 6118638 | . | C | A | 51.02    | my_snp_filter | AC=3;AF=0.188;AN=16;BaseQRankSum=          |
| 3032 | chrY | 6120981 | . | G | A | 1023.48  | my_snp_filter | AC=19;AF=0.396;AN=48;BaseQRankSum=         |
| 3033 | chrY | 6122258 | . | A | T | 39.44    | my_snp_filter | AC=1;AF=0.021;AN=48;BaseQRankSum=          |
| 3034 | chrY | 6124962 | . | A | G | 398.18   | my_snp_filter | AC=16;AF=0.364;AN=44;DP=107;FS=0.000;Inbre |
| 3035 | chrY | 6125066 | . | C | A | 1771.56  | my_snp_filter | AC=6;AF=0.091;AN=66;BaseQRankSum=          |
| 3036 | chrY | 6126064 | . | A | C | 509.17   | my_snp_filter | AC=4;AF=0.167;AN=24;BaseQRankSum=          |
| 3037 | chrY | 6126065 | . | C | T | 506.85   | my_snp_filter | AC=4;AF=0.167;AN=24;BaseQRankSum=          |
| 3038 | chrY | 6129266 | . | C | T | 297.10   | PASS          | AC=2;AF=0.045;AN=44;DP=154;FS=0.000;Inbre  |
| 3039 | chrY | 6129663 | . | G | A | 309.77   | my_snp_filter | AC=5;AF=0.192;AN=26;BaseQRankSum=          |
| 3040 | chrY | 6129782 | . | C | T | 97.17    | PASS          | AC=2;AF=0.042;AN=48;BaseQRankSum=2.46;Cli  |



|      |      |         |   |   |     |          |               |                                            |
|------|------|---------|---|---|-----|----------|---------------|--------------------------------------------|
| 3041 | chrY | 6129800 | . | T | A   | 325.92   | PASS          | AC=5;AF=0.100;AN=50;BaseQRankSum=0.880;C   |
| 3042 | chrY | 6129870 | . | G | C   | 1075.75  | PASS          | AC=6;AF=0.103;AN=58;BaseQRankSum=0.627;C   |
| 3043 | chrY | 6130016 | . | G | T   | 372.67   | PASS          | AC=5;AF=0.139;AN=36;BaseQRankSum=0.313;C   |
| 3044 | chrY | 6130189 | . | C | T   | 238.86   | PASS          | AC=4;AF=0.167;AN=24;BaseQRankSum=-7.420e-  |
| 3045 | chrY | 6130283 | . | A | T   | 852.98   | PASS          | AC=6;AF=0.125;AN=48;BaseQRankSum=0.322;C   |
| 3046 | chrY | 6130433 | . | C | T   | 50.73    | my_snp_filter | AC=2;AF=0.032;AN=62;BaseQRankSum=          |
| 3047 | chrY | 6130513 | . | G | C   | 63.45    | my_snp_filter | AC=4;AF=0.061;AN=66;BaseQRankSum=          |
| 3048 | chrY | 6130552 | . | C | A   | 135.99   | my_snp_filter | AC=4;AF=0.059;AN=68;BaseQRankSum=          |
| 3049 | chrY | 6131605 | . | C | A   | 240.51   | my_snp_filter | AC=2;AF=0.033;AN=60;DP=288;FS=0.0          |
| 3050 | chrY | 6132744 | . | T | C   | 37.91    | my_snp_filter | AC=1;AF=0.045;AN=22;BaseQRankSum=          |
| 3051 | chrY | 6132816 | . | C | T   | 51.33    | my_snp_filter | AC=3;AF=0.115;AN=26;BaseQRankSum=          |
| 3052 | chrY | 6134290 | . | G | C   | 462.83   | my_snp_filter | AC=6;AF=0.176;AN=34;DP=67;FS=0.00          |
| 3053 | chrY | 6134446 | . | A | G   | 1741.17  | my_snp_filter | AC=26;AF=1.00;AN=26;DP=112;FS=0.0          |
| 3054 | chrY | 6134628 | . | T | C   | 2160.95  | my_snp_filter | AC=20;AF=1.00;AN=20;DP=113;FS=0.0          |
| 3055 | chrY | 6136156 | . | A | G   | 447.10   | my_snp_filter | AC=2;AF=0.029;AN=70;DP=840;FS=0.0          |
| 3056 | chrY | 6139591 | . | G | A   | 1653.29  | my_snp_filter | AC=6;AF=0.086;AN=70;DP=788;FS=0.0          |
| 3057 | chrY | 6140657 | . | A | C   | 646.70   | PASS          | AC=6;AF=0.086;AN=70;BaseQRankSum=-1.735e+  |
| 3058 | chrY | 6141514 | . | T | C   | 68.99    | my_snp_filter | AC=4;AF=0.667;AN=6;DP=8;FS=0.000;          |
| 3059 | chrY | 6144363 | . | G | A   | 179.75   | my_snp_filter | AC=2;AF=0.029;AN=70;DP=552;FS=0.0          |
| 3060 | chrY | 6145866 | . | G | A   | 202.16   | PASS          | AC=2;AF=0.029;AN=68;DP=383;FS=0.000;Inbre  |
| 3061 | chrY | 6149739 | . | A | G   | 17348.32 | PASS          | AC=52;AF=0.743;AN=70;BaseQRankSum=         |
| 3062 | chrY | 6152998 | . | C | T   | 1103.99  | my_snp_filter | AC=6;AF=0.086;AN=70;DP=428;FS=0.0          |
| 3063 | chrY | 6156282 | . | T | A   | 71.60    | my_snp_filter | AC=4;AF=0.077;AN=52;DP=105;FS=0.0          |
| 3064 | chrY | 6158039 | . | A | G   | 1123.17  | my_snp_filter | AC=18;AF=1.00;AN=18;DP=43;FS=0.00          |
| 3065 | chrY | 6158386 | . | G | T   | 151.08   | PASS          | AC=2;AF=0.100;AN=20;DP=100;FS=0.000;Inbre  |
| 3066 | chrY | 6166498 | . | A | G   | 71.24    | my_snp_filter | AC=4;AF=0.222;AN=18;BaseQRankSum=          |
| 3067 | chrY | 6167051 | . | C | G,* | 1913.25  | PASS          | AC=18,5;AF=0.257,0.071;AN=70;BaseQRankSum  |
| 3068 | chrY | 6172468 | . | G | A   | 1293.18  | my_snp_filter | AC=6;AF=0.333;AN=18;DP=159;FS=0.0          |
| 3069 | chrY | 6182285 | . | A | G   | 185.32   | my_snp_filter | AC=3;AF=0.044;AN=68;BaseQRankSum=          |
| 3070 | chrY | 6190098 | . | C | G   | 448.44   | PASS          | AC=2;AF=0.029;AN=70;DP=622;FS=0.000;Inbre  |
| 3071 | chrY | 6190103 | . | T | C   | 472.52   | PASS          | AC=2;AF=0.029;AN=70;DP=616;FS=0.000;Inbre  |
| 3072 | chrY | 6203053 | . | G | A   | 53.18    | my_snp_filter | AC=2;AF=0.125;AN=16;DP=137;FS=0.0          |
| 3073 | chrY | 6203060 | . | G | A   | 53.17    | my_snp_filter | AC=2;AF=0.125;AN=16;DP=135;FS=0.0          |
| 3074 | chrY | 6203064 | . | G | A   | 53.19    | my_snp_filter | AC=2;AF=0.125;AN=16;DP=131;FS=0.0          |
| 3075 | chrY | 6205799 | . | G | A   | 183.21   | my_snp_filter | AC=4;AF=0.182;AN=22;DP=24;FS=0.00          |
| 3076 | chrY | 6231926 | . | C | G   | 2181.69  | my_snp_filter | AC=6;AF=0.086;AN=70;DP=1118;FS=0.0         |
| 3077 | chrY | 6242855 | . | T | A   | 653.79   | my_snp_filter | AC=6;AF=0.103;AN=58;DP=490;FS=0.0          |
| 3078 | chrY | 6272602 | . | C | T   | 359.90   | my_snp_filter | AC=6;AF=0.500;AN=12;DP=33;FS=0.00          |
| 3079 | chrY | 6287107 | . | G | A   | 289.80   | my_snp_filter | AC=3;AF=0.043;AN=70;BaseQRankSum=          |
| 3080 | chrY | 6289565 | . | G | C   | 357.49   | my_snp_filter | AC=3;AF=0.043;AN=70;BaseQRankSum=          |
| 3081 | chrY | 6293363 | . | G | T   | 202.81   | PASS          | AC=5;AF=0.119;AN=42;BaseQRankSum=-2.740e-  |
| 3082 | chrY | 6293368 | . | G | T   | 102.06   | PASS          | AC=3;AF=0.063;AN=48;BaseQRankSum=-2.960e-  |
| 3083 | chrY | 6293373 | . | G | T   | 100.46   | PASS          | AC=3;AF=0.065;AN=46;BaseQRankSum=-2.960e-  |
| 3084 | chrY | 6325742 | . | T | C   | 2613.64  | my_snp_filter | AC=21;AF=0.328;AN=64;BaseQRankSum          |
| 3085 | chrY | 6325912 | . | T | C   | 12454.65 | my_snp_filter | AC=26;AF=0.371;AN=70;Base                  |
| 3086 | chrY | 6332504 | . | T | C   | 3531.65  | PASS          | AC=29;AF=0.500;AN=58;BaseQRankSum=-5.790e- |
| 3087 | chrY | 6341905 | . | G | C   | 17748.38 | my_snp_filter | AC=31;AF=0.456;AN=68;Base                  |
| 3088 | chrY | 6349483 | . | G | A   | 10588.45 | PASS          | AC=54;AF=0.818;AN=66;DP=454;FS=0.          |
| 3089 | chrY | 6351297 | . | T | C   | 425.18   | PASS          | AC=2;AF=0.029;AN=70;DP=698;FS=0.000;Inbre  |
| 3090 | chrY | 6363842 | . | A | C   | 438.74   | PASS          | AC=6;AF=0.231;AN=26;DP=112;FS=0.000;Inbre  |
| 3091 | chrY | 6366560 | . | C | A   | 4141.87  | PASS          | AC=18;AF=1.00;AN=18;DP=169;FS=0.000;MLEAC  |
| 3092 | chrY | 6368189 | . | C | G   | 1411.01  | PASS          | AC=6;AF=0.086;AN=70;DP=417;FS=0.000;Inbre  |
| 3093 | chrY | 6368233 | . | T | C   | 3859.20  | my_snp_filter | AC=46;AF=0.719;AN=64;DP=308;FS=0.          |
| 3094 | chrY | 6371166 | . | G | A   | 13549.49 | my_snp_filter | AC=40;AF=0.571;AN=70;Base                  |
| 3095 | chrY | 6381736 | . | A | C   | 108.86   | my_snp_filter | AC=3;AF=0.043;AN=70;BaseQRankSum=          |
| 3096 | chrY | 6381946 | . | T | A   | 288.90   | my_snp_filter | AC=2;AF=0.029;AN=70;DP=397;FS=0.0          |
| 3097 | chrY | 6385537 | . | G | T   | 714.98   | PASS          | AC=6;AF=0.088;AN=68;DP=300;FS=0.000;Inbre  |
| 3098 | chrY | 6385996 | . | G | A   | 851.65   | PASS          | AC=6;AF=0.088;AN=68;DP=520;FS=0.000;Inbre  |
| 3099 | chrY | 6388343 | . | A | C   | 6613.13  | my_snp_filter | AC=58;AF=1.00;AN=58;DP=229;FS=0.0          |
| 3100 | chrY | 6390285 | . | C | A   | 8941     | my_snp_filter | AC=64;AF=1.00;AN=64;DP=294;FS=0.0          |
| 3101 | chrY | 6391191 | . | T | C   | 9403.83  | my_snp_filter | AC=40;AF=0.571;AN=70;DP=550;FS=0.0         |
| 3102 | chrY | 6397746 | . | C | T   | 37.35    | PASS          | AC=1;AF=0.015;AN=68;BaseQRankSum=-1.231e+  |
| 3103 | chrY | 6398918 | . | A | C   | 633.50   | my_snp_filter | AC=6;AF=0.111;AN=54;DP=178;FS=0.0          |
| 3104 | chrY | 6400897 | . | G | A   | 855.64   | PASS          | AC=6;AF=0.086;AN=70;BaseQRankSum=2.18;Cli  |
| 3105 | chrY | 6401062 | . | A | G   | 489.56   | PASS          | AC=6;AF=0.086;AN=70;BaseQRankSum=-1.621e+  |
| 3106 | chrY | 6401064 | . | G | A   | 554.82   | PASS          | AC=9;AF=0.129;AN=70;BaseQRankSum=-1.482e+  |
| 3107 | chrY | 6401066 | . | T | C   | 506.58   | PASS          | AC=6;AF=0.086;AN=70;BaseQRankSum=-1.525e+  |
| 3108 | chrY | 6401516 | . | T | C   | 767.33   | PASS          | AC=7;AF=0.100;AN=70;BaseQRankSum=-1.447e+  |
| 3109 | chrY | 6401523 | . | G | A   | 196.21   | PASS          | AC=2;AF=0.029;AN=70;BaseQRankSum=0.869;C   |
| 3110 | chrY | 6401878 | . | C | T   | 197.73   | PASS          | AC=5;AF=0.074;AN=68;BaseQRankSum=1.28;Cli  |
| 3111 | chrY | 6401894 | . | A | C   | 32.06    | my_snp_filter | AC=1;AF=0.014;AN=70;BaseQRankSum=          |
| 3112 | chrY | 6401950 | . | T | C   | 3279.75  | PASS          | AC=15;AF=0.214;AN=70;BaseQRankSum=0.136;C  |
| 3113 | chrY | 6401964 | . | C | T   | 3428.43  | PASS          | AC=15;AF=0.214;AN=70;BaseQRankSum=-5.360e- |
| 3114 | chrY | 6401978 | . | T | C   | 3761.99  | PASS          | AC=13;AF=0.191;AN=68;BaseQRankSum=-4.920e- |
| 3115 | chrY | 6401980 | . | A | G   | 3744.98  | PASS          | AC=13;AF=0.186;AN=70;BaseQRankSum=0.556;C  |
| 3116 | chrY | 6402018 | . | C | T,G | 5791.90  | PASS          | AC=8,1;AF=0.308,0.038;AN=26;BaseQRankSum=  |

|      |      |         |   |   |     |          |               |                                           |
|------|------|---------|---|---|-----|----------|---------------|-------------------------------------------|
| 3117 | chrY | 6402020 | . | G | A   | 3237.16  | PASS          | AC=9;AF=0.321;AN=28;BaseQRankSum=1.46;Cli |
| 3118 | chrY | 6402032 | . | A | G   | 318.23   | PASS          | AC=1;AF=0.014;AN=70;BaseQRankSum=0.123;Cl |
| 3119 | chrY | 6402047 | . | A | G   | 261.28   | my_snp_filter | AC=3;AF=0.043;AN=70;BaseQRankSum=         |
| 3120 | chrY | 6402057 | . | G | A   | 103.68   | my_snp_filter | AC=2;AF=0.029;AN=70;BaseQRankSum=         |
| 3121 | chrY | 6402078 | . | T | C   | 607.79   | PASS          | AC=4;AF=0.057;AN=70;BaseQRankSum=0.061;Cl |
| 3122 | chrY | 6402079 | . | A | T   | 310.95   | PASS          | AC=3;AF=0.043;AN=70;BaseQRankSum=0.801;Cl |
| 3123 | chrY | 6402090 | . | G | A   | 583.68   | PASS          | AC=4;AF=0.057;AN=70;BaseQRankSum=1.37;Cli |
| 3124 | chrY | 6402104 | . | G | A   | 19537.48 | PASS          | AC=19;AF=0.452;AN=42;BaseQRankSum         |
| 3125 | chrY | 6402114 | . | A | G   | 203.28   | my_snp_filter | AC=3;AF=0.043;AN=70;BaseQRankSum=         |
| 3126 | chrY | 6402122 | . | T | C   | 1131.85  | PASS          | AC=3;AF=0.043;AN=70;BaseQRankSum=0.761;Cl |
| 3127 | chrY | 6402126 | . | T | C   | 18735.26 | PASS          | AC=16;AF=0.421;AN=38;BaseQRankSum         |
| 3128 | chrY | 6402127 | . | G | T   | 16318.13 | PASS          | AC=16;AF=0.421;AN=38;BaseQRankSum         |
| 3129 | chrY | 6402136 | . | G | A   | 92.44    | PASS          | AC=1;AF=0.014;AN=70;BaseQRankSum=1.24;Cli |
| 3130 | chrY | 6402149 | . | G | A   | 795.95   | PASS          | AC=4;AF=0.057;AN=70;BaseQRankSum=2.10;Cli |
| 3131 | chrY | 6402155 | . | C | G   | 733.33   | PASS          | AC=6;AF=0.086;AN=70;BaseQRankSum=-1.049e+ |
| 3132 | chrY | 6402207 | . | G | C   | 121.67   | PASS          | AC=1;AF=0.014;AN=70;BaseQRankSum=0.135;Cl |
| 3133 | chrY | 6402211 | . | T | G   | 76.66    | my_snp_filter | AC=3;AF=0.043;AN=70;BaseQRankSum=         |
| 3134 | chrY | 6402219 | . | T | C   | 17842.63 | PASS          | AC=30;AF=0.484;AN=62;BaseQRankSum         |
| 3135 | chrY | 6402223 | . | G | T   | 766.60   | PASS          | AC=1;AF=0.014;AN=70;BaseQRankSum=4.05;Cli |
| 3136 | chrY | 6402241 | . | G | A,* | 324.88   | my_snp_filter | AC=2,3;AF=0.029,0.043;AN=70;BaseQ         |
| 3137 | chrY | 6402247 | . | G | A   | 2516.74  | PASS          | AC=11;AF=0.157;AN=70;BaseQRankSum=1.84;Cl |
| 3138 | chrY | 6402256 | . | C | T,* | 3571.24  | PASS          | AC=11,2;AF=0.157,0.029;AN=70;BaseQRankSum |
| 3139 | chrY | 6402257 | . | A | G   | 4930.33  | PASS          | AC=16;AF=0.229;AN=70;BaseQRankSum=-1.729e |
| 3140 | chrY | 6402258 | . | A | C   | 2677.73  | PASS          | AC=11;AF=0.157;AN=70;BaseQRankSum=-3.750e |
| 3141 | chrY | 6402259 | . | T | C   | 5124.05  | PASS          | AC=19;AF=0.279;AN=68;BaseQRankSum=-2.015e |
| 3142 | chrY | 6402264 | . | A | C   | 919.98   | PASS          | AC=3;AF=0.048;AN=62;BaseQRankSum=1.58;Cli |
| 3143 | chrY | 6402266 | . | G | C   | 80.49    | PASS          | AC=1;AF=0.014;AN=70;BaseQRankSum=-1.160e- |
| 3144 | chrY | 6402270 | . | T | G   | 140.77   | PASS          | AC=1;AF=0.014;AN=70;BaseQRankSum=0.579;Cl |
| 3145 | chrY | 6402275 | . | G | A,* | 3341.41  | PASS          | AC=11,2;AF=0.157,0.029;AN=70;BaseQRankSum |
| 3146 | chrY | 6402277 | . | A | C,* | 1008.87  | PASS          | AC=1,2;AF=0.017,0.034;AN=58;BaseQRankSum  |
| 3147 | chrY | 6402278 | . | C | G   | 6886.95  | PASS          | AC=26;AF=0.448;AN=58;BaseQRankSum=0.863;C |
| 3148 | chrY | 6402283 | . | C | T   | 503.80   | PASS          | AC=2;AF=0.029;AN=70;BaseQRankSum=1.41;Cli |
| 3149 | chrY | 6402297 | . | G | C   | 247.31   | PASS          | AC=2;AF=0.029;AN=70;BaseQRankSum=3.03;Cli |
| 3150 | chrY | 6402301 | . | A | C,* | 864.39   | PASS          | AC=2,3;AF=0.029,0.043;AN=70;BaseQRankSum= |
| 3151 | chrY | 6402302 | . | T | G,* | 747.41   | PASS          | AC=1,3;AF=0.014,0.043;AN=70;BaseQRankSum= |
| 3152 | chrY | 6402307 | . | T | C   | 149.42   | PASS          | AC=1;AF=0.014;AN=70;BaseQRankSum=0.584;Cl |
| 3153 | chrY | 6402309 | . | T | G   | 149.40   | PASS          | AC=1;AF=0.014;AN=70;BaseQRankSum=2.01;Cli |
| 3154 | chrY | 6402312 | . | T | G,* | 779.88   | PASS          | AC=1,2;AF=0.014,0.029;AN=70;BaseQRankSum= |
| 3155 | chrY | 6402314 | . | C | T,* | 761.79   | PASS          | AC=1,2;AF=0.014,0.029;AN=70;BaseQRankSum= |
| 3156 | chrY | 6402316 | . | G | A,* | 918.38   | PASS          | AC=1,4;AF=0.014,0.057;AN=70;BaseQRankSum= |
| 3157 | chrY | 6402338 | . | T | C,* | 1343.09  | PASS          | AC=8,3;AF=0.121,0.045;AN=66;BaseQRankSum= |
| 3158 | chrY | 6402346 | . | A | T   | 1329.65  | PASS          | AC=10;AF=0.161;AN=62;BaseQRankSum=-6.700e |
| 3159 | chrY | 6402352 | . | G | A   | 249.45   | PASS          | AC=1;AF=0.014;AN=70;BaseQRankSum=1.33;Cli |
| 3160 | chrY | 6402380 | . | A | T   | 605.49   | PASS          | AC=1;AF=0.018;AN=56;BaseQRankSum=0.895;Cl |
| 3161 | chrY | 6402389 | . | G | A   | 548.79   | PASS          | AC=1;AF=0.016;AN=62;BaseQRankSum=-5.600e- |
| 3162 | chrY | 6402390 | . | G | T   | 110.42   | PASS          | AC=1;AF=0.015;AN=66;BaseQRankSum=0.262;Cl |
| 3163 | chrY | 6402391 | . | G | T   | 705.67   | PASS          | AC=2;AF=0.045;AN=44;BaseQRankSum=-7.110e- |
| 3164 | chrY | 6402395 | . | A | G   | 622.62   | PASS          | AC=2;AF=0.042;AN=48;BaseQRankSum=2.44;Cli |
| 3165 | chrY | 6402403 | . | A | C   | 68.99    | PASS          | AC=1;AF=0.014;AN=70;BaseQRankSum=-5.200e- |
| 3166 | chrY | 6402425 | . | T | C   | 248.66   | PASS          | AC=1;AF=0.014;AN=70;BaseQRankSum=-1.114e+ |
| 3167 | chrY | 6402426 | . | G | T   | 249.42   | PASS          | AC=1;AF=0.014;AN=70;BaseQRankSum=-1.238e+ |
| 3168 | chrY | 6402621 | . | A | G   | 238.67   | PASS          | AC=3;AF=0.045;AN=66;BaseQRankSum=-1.552e+ |
| 3169 | chrY | 6402623 | . | C | A   | 230.02   | PASS          | AC=3;AF=0.045;AN=66;BaseQRankSum=1.21;Cli |
| 3170 | chrY | 6402630 | . | C | A   | 164.68   | PASS          | AC=3;AF=0.047;AN=64;BaseQRankSum=1.55;Cli |
| 3171 | chrY | 6402639 | . | G | C   | 67.08    | PASS          | AC=2;AF=0.032;AN=62;BaseQRankSum=1.37;Cli |
| 3172 | chrY | 6402863 | . | T | C   | 1842.30  | PASS          | AC=17;AF=0.243;AN=70;BaseQRankSum=-1.179e |
| 3173 | chrY | 6402987 | . | T | C   | 45.33    | my_snp_filter | AC=2;AF=0.029;AN=68;BaseQRankSum=         |
| 3174 | chrY | 6403070 | . | T | C   | 82.59    | PASS          | AC=2;AF=0.029;AN=70;BaseQRankSum=-7.200e- |
| 3175 | chrY | 6403090 | . | G | A   | 1154.41  | PASS          | AC=7;AF=0.103;AN=68;BaseQRankSum=1.30;Cli |
| 3176 | chrY | 6403096 | . | T | C   | 412.41   | PASS          | AC=4;AF=0.057;AN=70;BaseQRankSum=-1.470e+ |
| 3177 | chrY | 6403110 | . | A | T   | 45.12    | my_snp_filter | AC=1;AF=0.014;AN=70;BaseQRankSum=         |
| 3178 | chrY | 6403127 | . | G | A   | 2820.30  | PASS          | AC=16;AF=0.235;AN=68;BaseQRankSum=1.00;Cl |
| 3179 | chrY | 6403154 | . | G | A   | 679.64   | PASS          | AC=7;AF=0.103;AN=68;BaseQRankSum=-3.110e- |
| 3180 | chrY | 6403160 | . | T | C   | 834.72   | PASS          | AC=8;AF=0.114;AN=70;BaseQRankSum=0.143;Cl |
| 3181 | chrY | 6403161 | . | A | G   | 48.11    | my_snp_filter | AC=2;AF=0.029;AN=70;BaseQRankSum=         |
| 3182 | chrY | 6403163 | . | C | G   | 206.42   | PASS          | AC=4;AF=0.057;AN=70;BaseQRankSum=-1.396e+ |
| 3183 | chrY | 6403169 | . | A | G   | 4430.29  | PASS          | AC=17;AF=0.274;AN=62;BaseQRankSum=0.355;C |
| 3184 | chrY | 6403171 | . | A | G   | 145.27   | PASS          | AC=2;AF=0.029;AN=70;BaseQRankSum=-1.280e- |
| 3185 | chrY | 6403185 | . | G | A   | 104.91   | PASS          | AC=2;AF=0.029;AN=70;BaseQRankSum=1.06;Cli |
| 3186 | chrY | 6403200 | . | T | C   | 5307.74  | PASS          | AC=15;AF=0.268;AN=56;BaseQRankSum=-6.150e |
| 3187 | chrY | 6403221 | . | C | T   | 98.63    | my_snp_filter | AC=3;AF=0.043;AN=70;BaseQRankSum=         |
| 3188 | chrY | 6403225 | . | A | G   | 6800.37  | PASS          | AC=19;AF=0.339;AN=56;BaseQRankSum=-7.950e |
| 3189 | chrY | 6403259 | . | A | G   | 68.59    | PASS          | AC=2;AF=0.029;AN=70;BaseQRankSum=1.06;Cli |
| 3190 | chrY | 6403276 | . | A | C,T | 2235.67  | my_snp_filter | AC=3,8;AF=0.044,0.118;AN=68;BaseQ         |
| 3191 | chrY | 6403278 | . | C | G   | 2342.95  | PASS          | AC=12;AF=0.176;AN=68;BaseQRankSum=1.22;Cl |
| 3192 | chrY | 6403289 | . | A | G   | 1573.32  | my_snp_filter | AC=11;AF=0.157;AN=70;BaseQRankSum         |

|      |      |         |   |   |     |         |               |                                           |
|------|------|---------|---|---|-----|---------|---------------|-------------------------------------------|
| 3193 | chrY | 6403301 | . | T | C   | 711.79  | PASS          | AC=7;AF=0.100;AN=70;BaseQRankSum=0.229;Cl |
| 3194 | chrY | 6403654 | . | A | G   | 250.96  | PASS          | AC=2;AF=0.045;AN=44;BaseQRankSum=-2.122e+ |
| 3195 | chrY | 6403690 | . | G | C   | 30.49   | PASS          | AC=1;AF=0.014;AN=70;BaseQRankSum=-9.780e- |
| 3196 | chrY | 6406956 | . | C | T   | 1119.17 | PASS          | AC=6;AF=0.088;AN=68;DP=281;FS=0.000;Inbre |
| 3197 | chrY | 6408124 | . | A | T   | 297.07  | PASS          | AC=4;AF=0.059;AN=68;BaseQRankSum=0.350;Cl |
| 3198 | chrY | 6408252 | . | G | T   | 2245.88 | PASS          | AC=6;AF=0.088;AN=68;BaseQRankSum=0.382;Cl |
| 3199 | chrY | 6408535 | . | G | A   | 249.15  | PASS          | AC=3;AF=0.045;AN=66;BaseQRankSum=3.17;Cli |
| 3200 | chrY | 6408665 | . | A | C   | 218.14  | PASS          | AC=3;AF=0.052;AN=58;BaseQRankSum=0.667;Cl |
| 3201 | chrY | 6411386 | . | A | G   | 41.88   | PASS          | AC=2;AF=0.029;AN=68;DP=245;FS=0.000;Inbre |
| 3202 | chrY | 6413389 | . | C | T   | 33.95   | my_snp_filter | AC=2;AF=0.030;AN=66;BaseQRankSum=         |
| 3203 | chrY | 6414804 | . | C | T   | 66.68   | PASS          | AC=2;AF=0.031;AN=64;BaseQRankSum=1.12;Cli |
| 3204 | chrY | 6414897 | . | T | C   | 33.41   | my_snp_filter | AC=2;AF=0.042;AN=48;BaseQRankSum=         |
| 3205 | chrY | 6420592 | . | A | C   | 1320.48 | PASS          | AC=6;AF=0.086;AN=70;BaseQRankSum=1.19;Cli |
| 3206 | chrY | 6421452 | . | T | C   | 171.95  | PASS          | AC=3;AF=0.043;AN=70;BaseQRankSum=-5.620e- |
| 3207 | chrY | 6422901 | . | T | C   | 487.38  | PASS          | AC=6;AF=0.086;AN=70;DP=287;FS=0.000;Inbre |
| 3208 | chrY | 6424725 | . | T | C   | 709.92  | PASS          | AC=4;AF=0.059;AN=68;DP=451;FS=0.000;Inbre |
| 3209 | chrY | 6430393 | . | A | C   | 373.14  | PASS          | AC=8;AF=0.182;AN=44;DP=64;FS=0.000;Inbre  |
| 3210 | chrY | 6435794 | . | A | G   | 1063.38 | PASS          | AC=6;AF=0.120;AN=50;BaseQRankSum=-1.187e+ |
| 3211 | chrY | 6438060 | . | A | G   | 582.19  | PASS          | AC=6;AF=0.091;AN=66;DP=252;FS=0.000;Inbre |
| 3212 | chrY | 6438067 | . | G | A   | 154.22  | PASS          | AC=4;AF=0.061;AN=66;BaseQRankSum=0.322;Cl |
| 3213 | chrY | 6438236 | . | T | C   | 1184.23 | PASS          | AC=20;AF=0.500;AN=40;DP=174;FS=0.000;Inbr |
| 3214 | chrY | 6439207 | . | A | G   | 2922.98 | PASS          | AC=20;AF=1.00;AN=20;DP=120;FS=0.000;Inbr  |
| 3215 | chrY | 6447588 | . | A | C   | 2331.02 | PASS          | AC=20;AF=1.00;AN=20;DP=99;FS=0.000;Inbre  |
| 3216 | chrY | 6447781 | . | T | C   | 44.35   | PASS          | AC=1;AF=0.016;AN=64;BaseQRankSum=-7.360e- |
| 3217 | chrY | 6451572 | . | A | G   | 2084.86 | PASS          | AC=18;AF=1.00;AN=18;DP=141;FS=0.000;MLEAC |
| 3218 | chrY | 6451908 | . | C | G   | 920.63  | PASS          | AC=6;AF=0.088;AN=68;DP=386;FS=0.000;Inbre |
| 3219 | chrY | 6454260 | . | T | C   | 430.83  | PASS          | AC=6;AF=0.086;AN=70;DP=378;FS=0.000;Inbre |
| 3220 | chrY | 6454869 | . | T | G   | 263.44  | PASS          | AC=6;AF=0.097;AN=62;DP=251;FS=0.000;Inbre |
| 3221 | chrY | 6458403 | . | C | T   | 3411.27 | PASS          | AC=40;AF=0.571;AN=70;DP=308;FS=0.000;Inbr |
| 3222 | chrY | 6458735 | . | A | T   | 47.77   | PASS          | AC=2;AF=0.033;AN=60;DP=197;FS=0.000;Inbre |
| 3223 | chrY | 6458737 | . | G | T   | 47.89   | PASS          | AC=2;AF=0.034;AN=58;DP=192;FS=0.000;Inbre |
| 3224 | chrY | 6461307 | . | G | A   | 7044.25 | PASS          | AC=52;AF=0.743;AN=70;DP=399;FS=0.000;Inbr |
| 3225 | chrY | 6464032 | . | G | C   | 48.30   | PASS          | AC=1;AF=0.014;AN=70;BaseQRankSum=-2.890e- |
| 3226 | chrY | 6464415 | . | C | G   | 473.75  | PASS          | AC=4;AF=0.057;AN=70;BaseQRankSum=0.933;Cl |
| 3227 | chrY | 6470376 | . | A | G   | 3283.15 | PASS          | AC=40;AF=0.690;AN=58;DP=261;FS=0.000;Inbr |
| 3228 | chrY | 6472886 | . | G | A   | 1505.57 | PASS          | AC=6;AF=0.086;AN=70;DP=584;FS=0.000;Inbre |
| 3229 | chrY | 6473692 | . | G | A   | 142.11  | PASS          | AC=2;AF=0.029;AN=70;BaseQRankSum=1.70;Cli |
| 3230 | chrY | 6476956 | . | C | T   | 91.59   | PASS          | AC=2;AF=0.091;AN=22;DP=198;FS=0.000;Inbre |
| 3231 | chrY | 6481240 | . | C | T   | 30.31   | PASS          | AC=2;AF=0.032;AN=62;DP=216;FS=0.000;Inbre |
| 3232 | chrY | 6482140 | . | T | G   | 5500.15 | PASS          | AC=52;AF=1.00;AN=52;DP=216;FS=0.000;Inbre |
| 3233 | chrY | 6484246 | . | G | A   | 1254.76 | PASS          | AC=6;AF=0.088;AN=68;DP=287;FS=0.000;Inbre |
| 3234 | chrY | 6486261 | . | G | C   | 479.66  | PASS          | AC=4;AF=0.063;AN=64;DP=424;FS=0.000;Inbre |
| 3235 | chrY | 6486531 | . | T | C   | 34.01   | PASS          | AC=1;AF=0.015;AN=68;BaseQRankSum=-5.100e- |
| 3236 | chrY | 6486643 | . | G | C   | 1414.62 | PASS          | AC=10;AF=0.147;AN=68;BaseQRankSum=-8.360e |
| 3237 | chrY | 6486831 | . | T | C   | 634.23  | PASS          | AC=7;AF=0.103;AN=68;BaseQRankSum=0.524;Cl |
| 3238 | chrY | 6487321 | . | C | T   | 1887.92 | PASS          | AC=7;AF=0.135;AN=52;BaseQRankSum=-1.759e+ |
| 3239 | chrY | 6487617 | . | C | T   | 987.96  | PASS          | AC=6;AF=0.086;AN=70;DP=602;FS=0.000;Inbre |
| 3240 | chrY | 6490714 | . | C | A   | 1256.80 | PASS          | AC=6;AF=0.086;AN=70;BaseQRankSum=1.55;Cli |
| 3241 | chrY | 6495386 | . | G | A   | 360.02  | PASS          | AC=2;AF=0.111;AN=18;DP=167;FS=0.000;MLEAC |
| 3242 | chrY | 6499875 | . | A | G   | 145.38  | PASS          | AC=3;AF=0.167;AN=18;BaseQRankSum=-1.070e+ |
| 3243 | chrY | 6499931 | . | A | T   | 161.39  | PASS          | AC=2;AF=0.111;AN=18;BaseQRankSum=-2.008e+ |
| 3244 | chrY | 6499947 | . | A | G   | 149.34  | PASS          | AC=1;AF=0.056;AN=18;BaseQRankSum=0.350;Cl |
| 3245 | chrY | 6500127 | . | T | G   | 239.63  | PASS          | AC=5;AF=0.278;AN=18;BaseQRankSum=-1.770e+ |
| 3246 | chrY | 6500136 | . | T | G,A | 504.49  | PASS          | AC=5,1;AF=0.278,0.056;AN=18;BaseQRankSum= |
| 3247 | chrY | 6500139 | . | T | A   | 230.64  | PASS          | AC=5;AF=0.278;AN=18;BaseQRankSum=-1.893e+ |
| 3248 | chrY | 6500147 | . | A | C   | 146.37  | PASS          | AC=1;AF=0.056;AN=18;BaseQRankSum=-1.884e+ |
| 3249 | chrY | 6500179 | . | C | A   | 105.84  | PASS          | AC=1;AF=0.056;AN=18;BaseQRankSum=-2.230e- |
| 3250 | chrY | 6500199 | . | G | T   | 37.24   | my_snp_filter | AC=1;AF=0.056;AN=18;BaseQRankSum=         |
| 3251 | chrY | 6500343 | . | T | G   | 3705.94 | PASS          | AC=17;AF=0.944;AN=18;BaseQRankSum=1.68;Cl |
| 3252 | chrY | 6503326 | . | C | T   | 40.61   | PASS          | AC=1;AF=0.017;AN=60;BaseQRankSum=2.48;Cli |
| 3253 | chrY | 6503431 | . | T | A   | 42.05   | PASS          | AC=1;AF=0.016;AN=64;BaseQRankSum=0.365;Cl |
| 3254 | chrY | 6503473 | . | G | T   | 47.58   | PASS          | AC=1;AF=0.014;AN=70;BaseQRankSum=0.296;Cl |
| 3255 | chrY | 6503902 | . | T | G   | 922.18  | PASS          | AC=6;AF=0.097;AN=62;DP=236;FS=0.000;Inbre |
| 3256 | chrY | 6504248 | . | C | T   | 165.63  | PASS          | AC=4;AF=0.077;AN=52;DP=185;FS=0.000;Inbre |
| 3257 | chrY | 6505528 | . | A | G   | 2707.48 | PASS          | AC=38;AF=0.760;AN=50;DP=172;FS=0.000;Inbr |
| 3258 | chrY | 6508516 | . | A | T   | 113.32  | PASS          | AC=1;AF=0.056;AN=18;BaseQRankSum=-2.990e- |
| 3259 | chrY | 6517234 | . | G | T   | 327.47  | PASS          | AC=6;AF=0.088;AN=68;BaseQRankSum=-1.850e- |
| 3260 | chrY | 6517272 | . | G | C   | 1533.51 | PASS          | AC=11;AF=0.157;AN=70;BaseQRankSum=1.46;Cl |
| 3261 | chrY | 6518864 | . | C | A   | 415.11  | PASS          | AC=6;AF=0.176;AN=34;DP=96;FS=0.000;Inbre  |
| 3262 | chrY | 6525350 | . | T | A   | 255.73  | PASS          | AC=2;AF=0.029;AN=68;DP=288;FS=0.000;Inbre |
| 3263 | chrY | 6527693 | . | A | G   | 4585.80 | my_snp_filter | AC=37;AF=0.529;AN=70;BaseQRankSum=        |
| 3264 | chrY | 6532192 | . | G | T   | 143.37  | my_snp_filter | AC=4;AF=0.057;AN=70;BaseQRankSum=         |
| 3265 | chrY | 6532642 | . | C | G   | 258.09  | PASS          | AC=4;AF=0.059;AN=68;BaseQRankSum=1.39;Cli |
| 3266 | chrY | 6536614 | . | T | C   | 34.09   | my_snp_filter | AC=2;AF=0.029;AN=68;BaseQRankSum=         |
| 3267 | chrY | 6537379 | . | G | A   | 753.82  | PASS          | AC=11;AF=0.167;AN=66;BaseQRankSum=-5.970e |
| 3268 | chrY | 6540152 | . | C | A   | 105.22  | PASS          | AC=4;AF=0.182;AN=22;DP=112;FS=0.000;Inbre |

|      |      |         |   |   |   |          |               |                                           |
|------|------|---------|---|---|---|----------|---------------|-------------------------------------------|
| 3269 | chrY | 6576454 | . | T | G | 1980.14  | PASS          | AC=18;AF=0.900;AN=20;DP=89;FS=0.000;Inbre |
| 3270 | chrY | 6577568 | . | A | C | 224.24   | PASS          | AC=3;AF=0.063;AN=48;BaseQRankSum=0.265;Cl |
| 3271 | chrY | 6577596 | . | G | A | 331.44   | PASS          | AC=2;AF=0.038;AN=52;DP=220;FS=0.000;Inbre |
| 3272 | chrY | 6581343 | . | C | T | 993.63   | PASS          | AC=6;AF=0.088;AN=68;DP=411;FS=0.000;Inbre |
| 3273 | chrY | 6582209 | . | C | T | 264.39   | PASS          | AC=6;AF=0.086;AN=70;DP=257;FS=0.000;Inbre |
| 3274 | chrY | 6583280 | . | A | C | 1263.22  | PASS          | AC=22;AF=0.500;AN=44;BaseQRankSum=0.727;C |
| 3275 | chrY | 6584471 | . | T | C | 127.35   | my_snp_filter | AC=3;AF=0.047;AN=64;BaseQRankSum=         |
| 3276 | chrY | 6585757 | . | G | A | 164.50   | PASS          | AC=3;AF=0.048;AN=62;BaseQRankSum=-1.123e+ |
| 3277 | chrY | 6586098 | . | C | G | 2810.40  | PASS          | AC=24;AF=0.343;AN=70;BaseQRankSum=-6.840e |
| 3278 | chrY | 6586167 | . | C | T | 690.45   | PASS          | AC=11;AF=0.157;AN=70;BaseQRankSum=0.248;G |
| 3279 | chrY | 6588023 | . | T | C | 2919.81  | PASS          | AC=20;AF=0.286;AN=70;BaseQRankSum=-1.170e |
| 3280 | chrY | 6590979 | . | C | G | 271.41   | PASS          | AC=5;AF=0.250;AN=20;BaseQRankSum=0.768;Cl |
| 3281 | chrY | 6597368 | . | A | C | 681.86   | PASS          | AC=10;AF=0.156;AN=64;BaseQRankSum=0.720;C |
| 3282 | chrY | 6597531 | . | T | G | 458.24   | PASS          | AC=10;AF=0.143;AN=70;BaseQRankSum=0.358;C |
| 3283 | chrY | 6597755 | . | C | A | 1926.73  | PASS          | AC=20;AF=0.286;AN=70;BaseQRankSum=0.555;C |
| 3284 | chrY | 6597779 | . | A | G | 934.67   | PASS          | AC=18;AF=0.257;AN=70;BaseQRankSum=0.791;C |
| 3285 | chrY | 6597902 | . | T | G | 350.53   | PASS          | AC=4;AF=0.069;AN=58;BaseQRankSum=-1.917e+ |
| 3286 | chrY | 6597904 | . | C | T | 355.33   | PASS          | AC=4;AF=0.071;AN=56;BaseQRankSum=1.16;Cli |
| 3287 | chrY | 6597965 | . | A | G | 38.36    | my_snp_filter | AC=2;AF=0.053;AN=38;BaseQRankSum=         |
| 3288 | chrY | 6598389 | . | A | G | 76.09    | PASS          | AC=2;AF=0.029;AN=70;BaseQRankSum=1.29;Cli |
| 3289 | chrY | 6598643 | . | C | T | 54.09    | PASS          | AC=1;AF=0.014;AN=70;BaseQRankSum=2.49;Cl  |
| 3290 | chrY | 6598674 | . | G | T | 3899.70  | PASS          | AC=26;AF=0.382;AN=68;BaseQRankSum=0.623;C |
| 3291 | chrY | 6598738 | . | A | G | 379.46   | PASS          | AC=3;AF=0.045;AN=66;BaseQRankSum=0.00;Cli |
| 3292 | chrY | 6598944 | . | A | G | 1451.14  | PASS          | AC=28;AF=0.519;AN=54;DP=272;FS=0.000;Inbr |
| 3293 | chrY | 6598964 | . | G | A | 1014.66  | PASS          | AC=8;AF=0.138;AN=58;BaseQRankSum=3.02;Cl  |
| 3294 | chrY | 6599145 | . | G | C | 363.01   | PASS          | AC=6;AF=0.086;AN=70;BaseQRankSum=0.672;Cl |
| 3295 | chrY | 6599177 | . | T | C | 180.64   | PASS          | AC=1;AF=0.014;AN=70;BaseQRankSum=-9.550e- |
| 3296 | chrY | 6599194 | . | T | G | 3141.19  | PASS          | AC=20;AF=0.286;AN=70;BaseQRankSum=-3.790e |
| 3297 | chrY | 6599198 | . | T | G | 3209.92  | PASS          | AC=20;AF=0.286;AN=70;BaseQRankSum=-8.510e |
| 3298 | chrY | 6599289 | . | A | T | 173.33   | PASS          | AC=3;AF=0.043;AN=70;BaseQRankSum=1.05;Cli |
| 3299 | chrY | 6599290 | . | A | T | 172.36   | PASS          | AC=3;AF=0.043;AN=70;BaseQRankSum=0.185;Cl |
| 3300 | chrY | 6599422 | . | C | G | 114.81   | PASS          | AC=3;AF=0.045;AN=66;BaseQRankSum=-1.083e+ |
| 3301 | chrY | 6599640 | . | T | C | 1701.79  | PASS          | AC=20;AF=0.294;AN=68;BaseQRankSum=-5.330e |
| 3302 | chrY | 6599779 | . | C | G | 142.98   | my_snp_filter | AC=6;AF=0.200;AN=30;BaseQRankSum=         |
| 3303 | chrY | 6600294 | . | T | G | 52.10    | my_snp_filter | AC=3;AF=0.043;AN=70;BaseQRankSum=         |
| 3304 | chrY | 6600473 | . | C | T | 184.91   | PASS          | AC=3;AF=0.044;AN=68;BaseQRankSum=0.694;Cl |
| 3305 | chrY | 6600651 | . | T | C | 867.36   | PASS          | AC=4;AF=0.067;AN=60;BaseQRankSum=0.289;Cl |
| 3306 | chrY | 6600661 | . | T | C | 360.05   | PASS          | AC=11;AF=0.190;AN=58;BaseQRankSum=-7.360e |
| 3307 | chrY | 6601068 | . | G | A | 72.21    | PASS          | AC=3;AF=0.044;AN=68;BaseQRankSum=0.967;Cl |
| 3308 | chrY | 6601362 | . | T | C | 419.59   | PASS          | AC=6;AF=0.086;AN=70;DP=403;FS=0.000;Inbre |
| 3309 | chrY | 6601496 | . | A | G | 1057.37  | PASS          | AC=5;AF=0.076;AN=66;BaseQRankSum=1.27;Cli |
| 3310 | chrY | 6603027 | . | C | T | 441.18   | PASS          | AC=2;AF=0.029;AN=68;DP=229;FS=0.000;Inbre |
| 3311 | chrY | 6603191 | . | A | G | 8258.44  | PASS          | AC=58;AF=0.829;AN=70;DP=406;FS=0.000;Inbr |
| 3312 | chrY | 6604911 | . | G | A | 4867.41  | PASS          | AC=45;AF=0.978;AN=46;BaseQRankSum=0.736;C |
| 3313 | chrY | 6605228 | . | A | G | 39.32    | my_snp_filter | AC=2;AF=0.029;AN=70;BaseQRankSum=         |
| 3314 | chrY | 6605366 | . | A | G | 93.10    | PASS          | AC=2;AF=0.029;AN=70;BaseQRankSum=0.817;Cl |
| 3315 | chrY | 6605543 | . | A | T | 924      | PASS          | AC=8;AF=0.167;AN=48;BaseQRankSum=0.736;Cl |
| 3316 | chrY | 6605600 | . | G | A | 501.66   | PASS          | AC=8;AF=0.125;AN=64;BaseQRankSum=0.406;Cl |
| 3317 | chrY | 6605758 | . | T | C | 104.10   | PASS          | AC=3;AF=0.054;AN=56;BaseQRankSum=0.636;Cl |
| 3318 | chrY | 6607435 | . | T | C | 122.41   | my_snp_filter | AC=3;AF=0.043;AN=70;BaseQRankSum=         |
| 3319 | chrY | 6607699 | . | T | C | 67.07    | my_snp_filter | AC=3;AF=0.083;AN=36;BaseQRankSum=         |
| 3320 | chrY | 6607744 | . | C | T | 338.73   | my_snp_filter | AC=7;AF=0.194;AN=36;BaseQRankSum=         |
| 3321 | chrY | 6608055 | . | T | C | 1146.12  | PASS          | AC=15;AF=0.259;AN=58;BaseQRankSum=-1.581e |
| 3322 | chrY | 6608183 | . | C | T | 467.63   | PASS          | AC=6;AF=0.094;AN=64;BaseQRankSum=1.36;Cli |
| 3323 | chrY | 6608194 | . | G | A | 215.41   | my_snp_filter | AC=5;AF=0.081;AN=62;BaseQRankSum=         |
| 3324 | chrY | 6608258 | . | G | C | 1009.71  | PASS          | AC=4;AF=0.057;AN=70;BaseQRankSum=-2.500e- |
| 3325 | chrY | 6610224 | . | A | C | 1264.41  | PASS          | AC=26;AF=0.464;AN=56;DP=220;FS=0.000;Inbr |
| 3326 | chrY | 6612108 | . | G | A | 942.48   | PASS          | AC=6;AF=0.094;AN=64;DP=178;FS=0.000;Inbre |
| 3327 | chrY | 6612281 | . | A | T | 1356.33  | PASS          | AC=6;AF=0.097;AN=62;DP=163;FS=0.000;Inbre |
| 3328 | chrY | 6612283 | . | C | T | 1356.63  | PASS          | AC=6;AF=0.097;AN=62;DP=160;FS=0.000;Inbre |
| 3329 | chrY | 6613151 | . | C | G | 864.22   | PASS          | AC=7;AF=0.109;AN=64;BaseQRankSum=-6.340e- |
| 3330 | chrY | 6616258 | . | C | T | 4560.33  | PASS          | AC=44;AF=1.00;AN=44;DP=165;FS=0.000;Inbre |
| 3331 | chrY | 6617193 | . | A | G | 1615.38  | PASS          | AC=6;AF=0.250;AN=24;BaseQRankSum=-8.670e- |
| 3332 | chrY | 6617345 | . | C | T | 690.11   | PASS          | AC=7;AF=0.219;AN=32;BaseQRankSum=2.01;Cli |
| 3333 | chrY | 6617387 | . | C | A | 560.11   | PASS          | AC=3;AF=0.094;AN=32;BaseQRankSum=1.20;Cli |
| 3334 | chrY | 6617389 | . | T | C | 558.99   | PASS          | AC=3;AF=0.094;AN=32;BaseQRankSum=-1.982e+ |
| 3335 | chrY | 6617489 | . | C | G | 58.85    | PASS          | AC=1;AF=0.026;AN=38;BaseQRankSum=0.284;Cl |
| 3336 | chrY | 6617504 | . | T | C | 86.44    | PASS          | AC=1;AF=0.026;AN=38;BaseQRankSum=-5.480e- |
| 3337 | chrY | 6617575 | . | T | C | 64.20    | my_snp_filter | AC=4;AF=0.200;AN=20;BaseQRankSum=         |
| 3338 | chrY | 6628186 | . | G | A | 574.23   | PASS          | AC=6;AF=0.086;AN=70;DP=392;FS=0.000;Inbre |
| 3339 | chrY | 6629930 | . | A | T | 9688.25  | PASS          | AC=52;AF=0.743;AN=70;BaseQRankSum=-8.420e |
| 3340 | chrY | 6630211 | . | T | C | 859.58   | PASS          | AC=6;AF=0.097;AN=62;DP=193;FS=0.000;Inbre |
| 3341 | chrY | 6630931 | . | G | A | 24134.88 | PASS          | AC=70;AF=1.00;AN=70;DP=789;FS=0.0         |
| 3342 | chrY | 6632955 | . | A | C | 443.85   | PASS          | AC=2;AF=0.034;AN=58;DP=214;FS=0.000;Inbre |
| 3343 | chrY | 6636242 | . | G | T | 408.16   | PASS          | AC=2;AF=0.029;AN=70;DP=592;FS=0.000;Inbre |
| 3344 | chrY | 6648362 | . | T | A | 479.50   | PASS          | AC=6;AF=0.088;AN=68;DP=263;FS=0.000;Inbre |

|      |      |         |   |   |   |          |               |                                            |
|------|------|---------|---|---|---|----------|---------------|--------------------------------------------|
| 3345 | chrY | 6648543 | . | T | G | 698.51   | PASS          | AC=6;AF=0.094;AN=64;DP=219;FS=0.000;Inbre  |
| 3346 | chrY | 6650199 | . | G | C | 600.87   | PASS          | AC=6;AF=0.086;AN=70;DP=374;FS=0.000;Inbre  |
| 3347 | chrY | 6653593 | . | A | T | 1008.41  | PASS          | AC=6;AF=0.086;AN=70;DP=402;FS=0.000;Inbre  |
| 3348 | chrY | 6654601 | . | A | G | 195.66   | PASS          | AC=4;AF=0.067;AN=60;DP=272;FS=0.000;Inbre  |
| 3349 | chrY | 6660143 | . | T | G | 1130.40  | PASS          | AC=6;AF=0.094;AN=64;BaseQRankSum=1.56;Cli  |
| 3350 | chrY | 6664543 | . | G | A | 1456.01  | PASS          | AC=6;AF=0.214;AN=28;DP=181;FS=0.000;Inbre  |
| 3351 | chrY | 6670461 | . | G | T | 1913.94  | PASS          | AC=35;AF=0.729;AN=48;BaseQRankSum=0.727;C  |
| 3352 | chrY | 6674832 | . | T | C | 7941.90  | PASS          | AC=40;AF=0.571;AN=70;DP=483;FS=0.000;Inbr  |
| 3353 | chrY | 6676374 | . | C | A | 2457.87  | PASS          | AC=36;AF=0.600;AN=60;DP=207;FS=0.000;Inbr  |
| 3354 | chrY | 6682532 | . | C | T | 4854.49  | PASS          | AC=38;AF=0.559;AN=68;DP=376;FS=0.000;Inb   |
| 3355 | chrY | 6684237 | . | C | A | 49.24    | PASS          | AC=1;AF=0.056;AN=18;BaseQRankSum=0.736;Cl  |
| 3356 | chrY | 6685652 | . | A | T | 451.62   | PASS          | AC=14;AF=0.389;AN=36;DP=173;FS=0.000;Inbr  |
| 3357 | chrY | 6690341 | . | A | G | 1123.17  | PASS          | AC=6;AF=0.150;AN=40;DP=169;FS=0.000;Inbre  |
| 3358 | chrY | 6692135 | . | G | T | 308.67   | PASS          | AC=2;AF=0.029;AN=70;DP=562;FS=0.000;Inbre  |
| 3359 | chrY | 6692153 | . | G | A | 1002.31  | PASS          | AC=6;AF=0.086;AN=70;DP=542;FS=0.000;Inbre  |
| 3360 | chrY | 6692214 | . | T | C | 33.85    | PASS          | AC=1;AF=0.014;AN=70;BaseQRankSum=-7.200e-  |
| 3361 | chrY | 6693670 | . | A | T | 460.76   | PASS          | AC=2;AF=0.029;AN=68;DP=315;FS=0.000;Inbre  |
| 3362 | chrY | 6696055 | . | C | T | 616.61   | PASS          | AC=6;AF=0.086;AN=70;DP=483;FS=0.000;Inbre  |
| 3363 | chrY | 6697158 | . | G | A | 533.68   | PASS          | AC=6;AF=0.088;AN=68;DP=274;FS=0.000;Inbre  |
| 3364 | chrY | 6701239 | . | A | G | 9762.06  | PASS          | AC=68;AF=1.00;AN=68;DP=320;FS=0.000;Inbre  |
| 3365 | chrY | 6707890 | . | T | G | 19178.94 | PASS          | AC=68;AF=1.00;AN=68;BaseQRankSum=          |
| 3366 | chrY | 6722445 | . | A | C | 56.06    | my_snp_filter | AC=1;AF=0.056;AN=18;BaseQRankSum=          |
| 3367 | chrY | 6728766 | . | G | A | 4274.98  | PASS          | AC=26;AF=0.371;AN=70;DP=437;FS=0.000;Inbr  |
| 3368 | chrY | 6740034 | . | C | A | 474.51   | PASS          | AC=6;AF=0.086;AN=70;BaseQRankSum=-2.003e+  |
| 3369 | chrY | 6742916 | . | C | A | 353.19   | PASS          | AC=2;AF=0.031;AN=64;DP=239;FS=0.000;Inbre  |
| 3370 | chrY | 6745207 | . | C | T | 1412     | PASS          | AC=6;AF=0.086;AN=70;DP=587;FS=0.000;Inbre  |
| 3371 | chrY | 6747482 | . | A | G | 1300.19  | PASS          | AC=6;AF=0.333;AN=18;DP=184;FS=0.000;MLEAC  |
| 3372 | chrY | 6753175 | . | G | T | 42.52    | PASS          | AC=1;AF=0.014;AN=70;BaseQRankSum=-7.360e-  |
| 3373 | chrY | 6753182 | . | A | T | 42.57    | PASS          | AC=1;AF=0.014;AN=70;BaseQRankSum=-7.360e-  |
| 3374 | chrY | 6753258 | . | T | C | 772.58   | PASS          | AC=6;AF=0.094;AN=64;DP=278;FS=0.000;Inbre  |
| 3375 | chrY | 6753287 | . | A | G | 2722.63  | PASS          | AC=36;AF=0.667;AN=54;DP=227;FS=0.000;Inbr  |
| 3376 | chrY | 6753291 | . | G | C | 2619.02  | PASS          | AC=36;AF=0.667;AN=54;DP=223;FS=0.000;Inbr  |
| 3377 | chrY | 6753295 | . | C | T | 2321.83  | PASS          | AC=36;AF=0.667;AN=54;DP=214;FS=0.000;Inbr  |
| 3378 | chrY | 6753303 | . | G | T | 991.12   | PASS          | AC=6;AF=0.107;AN=56;DP=202;FS=0.000;Inbre  |
| 3379 | chrY | 6753459 | . | G | T | 1683.86  | PASS          | AC=6;AF=0.086;AN=70;BaseQRankSum=1.59;Cli  |
| 3380 | chrY | 6753511 | . | A | G | 15445.98 | PASS          | AC=70;AF=1.00;AN=70;DP=397;FS=0.000;Inbre  |
| 3381 | chrY | 6753519 | . | G | A | 14119.35 | PASS          | AC=58;AF=0.829;AN=70;DP=460;FS=0.000;Inbre |
| 3382 | chrY | 6753986 | . | G | A | 1541.76  | PASS          | AC=6;AF=0.086;AN=70;DP=496;FS=0.000;Inbre  |
| 3383 | chrY | 6759928 | . | A | G | 731.33   | PASS          | AC=8;AF=0.118;AN=68;BaseQRankSum=1.20;Cli  |
| 3384 | chrY | 6759936 | . | C | T | 692.25   | PASS          | AC=8;AF=0.118;AN=68;BaseQRankSum=1.29;Cli  |
| 3385 | chrY | 6759946 | . | C | T | 691.30   | PASS          | AC=8;AF=0.114;AN=70;BaseQRankSum=-1.445e+  |
| 3386 | chrY | 6759952 | . | G | A | 689.88   | PASS          | AC=8;AF=0.114;AN=70;BaseQRankSum=0.478;Cl  |
| 3387 | chrY | 6759955 | . | T | C | 644.60   | PASS          | AC=8;AF=0.114;AN=70;BaseQRankSum=1.28;Cli  |
| 3388 | chrY | 6759959 | . | T | C | 644.67   | PASS          | AC=8;AF=0.114;AN=70;BaseQRankSum=0.213;Cl  |
| 3389 | chrY | 6759960 | . | G | A | 642.31   | PASS          | AC=8;AF=0.114;AN=70;BaseQRankSum=-1.300e-  |
| 3390 | chrY | 6759977 | . | T | C | 642.09   | PASS          | AC=8;AF=0.114;AN=70;BaseQRankSum=-1.490e+  |
| 3391 | chrY | 6759978 | . | G | T | 633.37   | PASS          | AC=8;AF=0.114;AN=70;BaseQRankSum=0.900;Cl  |
| 3392 | chrY | 6759995 | . | A | G | 393.03   | PASS          | AC=7;AF=0.100;AN=70;BaseQRankSum=1.02;Cli  |
| 3393 | chrY | 6760000 | . | T | C | 314.76   | PASS          | AC=7;AF=0.100;AN=70;BaseQRankSum=0.00;Cli  |
| 3394 | chrY | 6760009 | . | A | T | 72.23    | my_snp_filter | AC=3;AF=0.044;AN=68;BaseQRankSum=          |
| 3395 | chrY | 6762498 | . | T | C | 1217.31  | PASS          | AC=2;AF=0.029;AN=70;DP=595;FS=0.000;Inbre  |
| 3396 | chrY | 6766034 | . | T | C | 6622.12  | PASS          | AC=54;AF=1.00;AN=54;DP=225;FS=0.000;Inbre  |
| 3397 | chrY | 6768930 | . | G | A | 289.96   | PASS          | AC=5;AF=0.100;AN=50;BaseQRankSum=0.747;Cl  |
| 3398 | chrY | 6773590 | . | T | C | 46.98    | PASS          | AC=2;AF=0.056;AN=36;DP=185;FS=0.000;Inbre  |
| 3399 | chrY | 6775433 | . | G | A | 124.13   | PASS          | AC=1;AF=0.016;AN=64;BaseQRankSum=0.731;Cl  |
| 3400 | chrY | 6775434 | . | T | A | 124.45   | PASS          | AC=1;AF=0.016;AN=62;BaseQRankSum=0.550;Cl  |
| 3401 | chrY | 6778648 | . | A | C | 139.95   | PASS          | AC=2;AF=0.040;AN=50;DP=199;FS=0.000;Inbre  |
| 3402 | chrY | 6778762 | . | C | T | 2000.79  | PASS          | AC=28;AF=0.583;AN=48;DP=215;FS=0.000;Inbr  |
| 3403 | chrY | 6785844 | . | C | T | 1075.33  | PASS          | AC=6;AF=0.086;AN=70;DP=536;FS=0.000;Inbre  |
| 3404 | chrY | 6792143 | . | G | T | 105.83   | PASS          | AC=2;AF=0.033;AN=60;DP=273;FS=0.000;Inbre  |
| 3405 | chrY | 6793581 | . | T | C | 1134.63  | PASS          | AC=6;AF=0.273;AN=22;DP=168;FS=0.000;Inbre  |
| 3406 | chrY | 6801568 | . | T | C | 774.04   | PASS          | AC=6;AF=0.086;AN=70;DP=622;FS=0.000;Inbre  |
| 3407 | chrY | 6802019 | . | A | T | 77.65    | PASS          | AC=2;AF=0.029;AN=70;DP=358;FS=0.000;Inbre  |
| 3408 | chrY | 6823967 | . | T | G | 590.97   | PASS          | AC=2;AF=0.029;AN=68;DP=336;FS=0.000;Inbre  |
| 3409 | chrY | 6824927 | . | G | A | 403.19   | PASS          | AC=2;AF=0.029;AN=70;DP=755;FS=0.000;Inbre  |
| 3410 | chrY | 6826729 | . | T | G | 358.52   | PASS          | AC=2;AF=0.063;AN=32;DP=177;FS=0.000;Inbre  |
| 3411 | chrY | 6826765 | . | G | A | 521.27   | PASS          | AC=14;AF=0.368;AN=38;DP=187;FS=0.000;Inbr  |
| 3412 | chrY | 6827381 | . | A | C | 150.12   | PASS          | AC=2;AF=0.056;AN=36;BaseQRankSum=2.07;Cli  |
| 3413 | chrY | 6827403 | . | T | C | 135.71   | PASS          | AC=2;AF=0.063;AN=32;BaseQRankSum=0.567;Cl  |
| 3414 | chrY | 6827405 | . | T | C | 136.40   | PASS          | AC=2;AF=0.063;AN=32;BaseQRankSum=0.886;Cl  |
| 3415 | chrY | 6828599 | . | C | T | 449.34   | PASS          | AC=2;AF=0.029;AN=70;DP=518;FS=0.000;Inbre  |
| 3416 | chrY | 6829852 | . | G | A | 1959.24  | PASS          | AC=22;AF=0.647;AN=34;DP=186;FS=0.000;Inbr  |
| 3417 | chrY | 6832631 | . | A | G | 14123.23 | PASS          | AC=52;AF=0.743;AN=70;BaseQRankSum=         |
| 3418 | chrY | 6834376 | . | A | C | 1092.13  | PASS          | AC=6;AF=0.088;AN=68;BaseQRankSum=0.158;Cl  |
| 3419 | chrY | 6844888 | . | C | T | 491.95   | PASS          | AC=2;AF=0.031;AN=64;DP=586;FS=0.000;Inbre  |
| 3420 | chrY | 6846771 | . | T | A | 1029.01  | PASS          | AC=6;AF=0.088;AN=68;DP=244;FS=0.000;Inbre  |

|      |      |         |   |   |   |          |               |                                            |
|------|------|---------|---|---|---|----------|---------------|--------------------------------------------|
| 3421 | chrY | 6851169 | . | C | T | 1279.01  | PASS          | AC=6;AF=0.086;AN=70;DP=455;FS=0.000;Inbre  |
| 3422 | chrY | 6858319 | . | C | T | 1150.65  | PASS          | AC=6;AF=0.088;AN=68;DP=564;FS=0.000;Inbre  |
| 3423 | chrY | 6866201 | . | G | A | 1309.24  | PASS          | AC=6;AF=0.086;AN=70;DP=608;FS=0.000;Inbre  |
| 3424 | chrY | 6868118 | . | A | G | 12758.90 | PASS          | AC=70;AF=1.00;AN=70;DP=505;FS=0.0          |
| 3425 | chrY | 6876175 | . | G | A | 352.50   | PASS          | AC=2;AF=0.029;AN=70;DP=485;FS=0.000;Inbre  |
| 3426 | chrY | 6877440 | . | A | G | 207.64   | PASS          | AC=2;AF=0.029;AN=68;DP=318;FS=0.000;Inbre  |
| 3427 | chrY | 6878091 | . | C | A | 46.61    | PASS          | AC=1;AF=0.021;AN=48;BaseQRankSum=-1.300e+  |
| 3428 | chrY | 6878095 | . | C | A | 46.60    | PASS          | AC=1;AF=0.020;AN=50;BaseQRankSum=-9.880e-  |
| 3429 | chrY | 6879365 | . | C | T | 4657.33  | PASS          | AC=45;AF=0.703;AN=64;BaseQRankSum=-7.360e  |
| 3430 | chrY | 6882314 | . | G | C | 8418.87  | PASS          | AC=46;AF=0.657;AN=70;DP=467;FS=0.000;Inbre |
| 3431 | chrY | 6885366 | . | T | C | 1348.93  | PASS          | AC=6;AF=0.088;AN=68;DP=288;FS=0.000;Inbre  |
| 3432 | chrY | 6890973 | . | G | A | 1135.76  | PASS          | AC=6;AF=0.088;AN=68;DP=558;FS=0.000;Inbre  |
| 3433 | chrY | 6892596 | . | T | G | 1255.18  | PASS          | AC=6;AF=0.333;AN=18;DP=190;FS=0.000;MLEAC  |
| 3434 | chrY | 6894817 | . | G | A | 1334.18  | PASS          | AC=6;AF=0.086;AN=70;DP=756;FS=0.000;Inbre  |
| 3435 | chrY | 6895718 | . | G | A | 234.22   | PASS          | AC=2;AF=0.033;AN=60;DP=207;FS=0.000;Inbre  |
| 3436 | chrY | 6904485 | . | C | T | 1456.85  | PASS          | AC=6;AF=0.086;AN=70;DP=471;FS=0.000;Inbre  |
| 3437 | chrY | 6912992 | . | G | T | 18250.92 | PASS          | AC=70;AF=1.00;AN=70;DP=597;FS=0.0          |
| 3438 | chrY | 6913949 | . | C | T | 533.77   | PASS          | AC=4;AF=0.059;AN=68;DP=518;FS=0.000;Inbre  |
| 3439 | chrY | 6916511 | . | A | T | 1274.56  | PASS          | AC=6;AF=0.120;AN=50;BaseQRankSum=-1.734e+  |
| 3440 | chrY | 6921589 | . | G | T | 647.24   | PASS          | AC=6;AF=0.086;AN=70;DP=468;FS=0.000;Inbre  |
| 3441 | chrY | 6922657 | . | C | T | 5854.45  | PASS          | AC=46;AF=0.676;AN=68;DP=375;FS=0.000;Inbr  |
| 3442 | chrY | 6926894 | . | C | G | 3593.24  | PASS          | AC=14;AF=0.200;AN=70;DP=638;FS=0.000;Inbr  |
| 3443 | chrY | 6927527 | . | A | G | 509.90   | my_snp_filter | AC=6;AF=0.086;AN=70;DP=664;FS=0.0          |
| 3444 | chrY | 6930408 | . | C | G | 803.88   | PASS          | AC=6;AF=0.088;AN=68;DP=543;FS=0.000;Inbre  |
| 3445 | chrY | 6931040 | . | G | C | 10018.01 | PASS          | AC=64;AF=1.00;AN=64;DP=347;FS=0.0          |
| 3446 | chrY | 6931590 | . | T | C | 1211.75  | PASS          | AC=6;AF=0.094;AN=64;DP=299;FS=0.000;Inbre  |
| 3447 | chrY | 6932654 | . | G | C | 147.62   | PASS          | AC=2;AF=0.029;AN=70;DP=590;FS=0.000;Inbre  |
| 3448 | chrY | 6932790 | . | A | T | 18970.92 | PASS          | AC=70;AF=1.00;AN=70;DP=630;FS=0.0          |
| 3449 | chrY | 6933016 | . | T | C | 1143.89  | PASS          | AC=6;AF=0.086;AN=70;DP=628;FS=0.000;Inbre  |
| 3450 | chrY | 6936866 | . | T | C | 39.79    | PASS          | AC=1;AF=0.015;AN=68;BaseQRankSum=-1.026e+  |
| 3451 | chrY | 6936874 | . | A | G | 39.78    | PASS          | AC=1;AF=0.015;AN=68;BaseQRankSum=-1.026e+  |
| 3452 | chrY | 6941218 | . | A | G | 9737.13  | PASS          | AC=56;AF=0.824;AN=68;DP=465;FS=0.000;Inbr  |
| 3453 | chrY | 6947173 | . | A | G | 9674.65  | PASS          | AC=46;AF=0.719;AN=64;DP=455;FS=0.000;Inbr  |
| 3454 | chrY | 6952633 | . | G | C | 720.07   | PASS          | AC=6;AF=0.086;AN=70;DP=529;FS=0.000;Inbre  |
| 3455 | chrY | 6953790 | . | C | T | 836.62   | PASS          | AC=6;AF=0.086;AN=70;DP=503;FS=0.000;Inbre  |
| 3456 | chrY | 6957102 | . | A | G | 879.21   | PASS          | AC=6;AF=0.091;AN=66;DP=302;FS=0.000;Inbre  |
| 3457 | chrY | 6957400 | . | T | C | 1099.38  | PASS          | AC=6;AF=0.086;AN=70;DP=551;FS=0.000;Inbre  |
| 3458 | chrY | 6958838 | . | G | A | 195.14   | PASS          | AC=2;AF=0.029;AN=70;DP=433;FS=0.000;Inbre  |
| 3459 | chrY | 6960376 | . | A | G | 591.23   | PASS          | AC=2;AF=0.029;AN=70;DP=545;FS=0.000;Inbre  |
| 3460 | chrY | 6961447 | . | T | G | 950.48   | PASS          | AC=6;AF=0.094;AN=64;DP=242;FS=0.000;Inbre  |
| 3461 | chrY | 6964531 | . | A | G | 2474.83  | PASS          | AC=12;AF=0.176;AN=68;DP=322;FS=0.000;Inbr  |
| 3462 | chrY | 6965613 | . | C | T | 2290.30  | PASS          | AC=12;AF=0.188;AN=64;DP=295;FS=0.000;Inbr  |
| 3463 | chrY | 6973364 | . | T | A | 13039    | PASS          | AC=50;AF=0.735;AN=68;DP=595;FS=0.000;Inbr  |
| 3464 | chrY | 6978940 | . | G | A | 10637.56 | PASS          | AC=50;AF=0.735;AN=68;DP=530;FS=0.0         |
| 3465 | chrY | 6984228 | . | G | A | 1769.26  | PASS          | AC=6;AF=0.086;AN=70;DP=651;FS=0.000;Inbre  |
| 3466 | chrY | 6984429 | . | C | T | 40.59    | PASS          | AC=2;AF=0.042;AN=48;DP=207;FS=0.000;Inbre  |
| 3467 | chrY | 6989718 | . | G | A | 835.30   | PASS          | AC=6;AF=0.086;AN=70;DP=533;FS=0.000;Inbre  |
| 3468 | chrY | 6999771 | . | A | T | 47.62    | PASS          | AC=4;AF=0.182;AN=22;DP=165;FS=0.000;Inbre  |
| 3469 | chrY | 7001800 | . | G | C | 1386.18  | PASS          | AC=6;AF=0.333;AN=18;DP=167;FS=0.000;MLEAC  |
| 3470 | chrY | 7002911 | . | C | T | 1289.43  | PASS          | AC=6;AF=0.300;AN=20;DP=136;FS=0.000;Inbre  |
| 3471 | chrY | 7002962 | . | C | T | 280.80   | PASS          | AC=3;AF=0.136;AN=22;BaseQRankSum=2.05;Cli  |
| 3472 | chrY | 7002968 | . | A | G | 282.83   | PASS          | AC=3;AF=0.136;AN=22;BaseQRankSum=-1.419e+  |
| 3473 | chrY | 7002983 | . | G | A | 142.68   | PASS          | AC=4;AF=0.182;AN=22;BaseQRankSum=-1.041e+  |
| 3474 | chrY | 7002995 | . | G | C | 667.75   | PASS          | AC=6;AF=0.273;AN=22;BaseQRankSum=-1.737e+  |
| 3475 | chrY | 7003002 | . | C | T | 664.71   | PASS          | AC=6;AF=0.273;AN=22;BaseQRankSum=-1.159e+  |
| 3476 | chrY | 7003007 | . | C | T | 668.95   | PASS          | AC=6;AF=0.273;AN=22;BaseQRankSum=-7.500e-  |
| 3477 | chrY | 7003011 | . | C | T | 667.94   | PASS          | AC=6;AF=0.273;AN=22;BaseQRankSum=2.02;Cli  |
| 3478 | chrY | 7003020 | . | A | C | 660.86   | PASS          | AC=6;AF=0.273;AN=22;BaseQRankSum=0.580;Cl  |
| 3479 | chrY | 7003088 | . | G | A | 349.82   | PASS          | AC=6;AF=0.273;AN=22;BaseQRankSum=2.20;Cli  |
| 3480 | chrY | 7003106 | . | G | T | 274.52   | PASS          | AC=4;AF=0.182;AN=22;BaseQRankSum=2.61;Cli  |
| 3481 | chrY | 7003116 | . | T | A | 250.22   | PASS          | AC=4;AF=0.182;AN=22;BaseQRankSum=1.03;Cli  |
| 3482 | chrY | 7009187 | . | C | T | 82.92    | PASS          | AC=2;AF=0.038;AN=52;DP=145;FS=24.693;Inbr  |
| 3483 | chrY | 7010756 | . | G | A | 1207.95  | PASS          | AC=6;AF=0.086;AN=70;DP=423;FS=0.000;Inbre  |
| 3484 | chrY | 7012698 | . | G | A | 259.71   | PASS          | AC=6;AF=0.086;AN=70;DP=273;FS=0.000;Inbre  |
| 3485 | chrY | 7017708 | . | A | G | 621.31   | PASS          | AC=6;AF=0.086;AN=70;DP=279;FS=0.000;Inbre  |
| 3486 | chrY | 7025662 | . | G | A | 145.63   | PASS          | AC=4;AF=0.222;AN=18;BaseQRankSum=-2.310e-  |
| 3487 | chrY | 7025700 | . | C | A | 172.40   | my_snp_filter | AC=3;AF=0.136;AN=22;BaseQRankSum=          |
| 3488 | chrY | 7025718 | . | T | G | 392.64   | my_snp_filter | AC=6;AF=0.273;AN=22;BaseQRankSum=          |
| 3489 | chrY | 7025724 | . | A | G | 471.49   | my_snp_filter | AC=7;AF=0.318;AN=22;BaseQRankSum=          |
| 3490 | chrY | 7025735 | . | G | A | 469.34   | my_snp_filter | AC=7;AF=0.318;AN=22;BaseQRankSum=          |
| 3491 | chrY | 7025737 | . | T | A | 466.59   | my_snp_filter | AC=7;AF=0.318;AN=22;BaseQRankSum=          |
| 3492 | chrY | 7025747 | . | G | A | 474.84   | my_snp_filter | AC=7;AF=0.318;AN=22;BaseQRankSum=          |
| 3493 | chrY | 7025761 | . | C | T | 162.42   | PASS          | AC=4;AF=0.200;AN=20;BaseQRankSum=-4.800e-  |
| 3494 | chrY | 7025995 | . | G | A | 450.66   | my_snp_filter | AC=7;AF=0.389;AN=18;BaseQRankSum=          |
| 3495 | chrY | 7026009 | . | C | A | 771.15   | my_snp_filter | AC=7;AF=0.389;AN=18;BaseQRankSum=          |
| 3496 | chrY | 7026017 | . | C | G | 769.86   | my_snp_filter | AC=7;AF=0.389;AN=18;BaseQRankSum=          |

|      |      |         |   |   |     |          |               |                                           |
|------|------|---------|---|---|-----|----------|---------------|-------------------------------------------|
| 3497 | chrY | 7026762 | . | C | A   | 314.65   | PASS          | AC=2;AF=0.100;AN=20;BaseQRankSum=-1.607e+ |
| 3498 | chrY | 7026779 | . | G | A   | 311.23   | PASS          | AC=2;AF=0.100;AN=20;BaseQRankSum=1.49;Cli |
| 3499 | chrY | 7026935 | . | C | T   | 52.17    | PASS          | AC=1;AF=0.050;AN=20;BaseQRankSum=2.62;Cli |
| 3500 | chrY | 7026941 | . | G | T   | 52.18    | PASS          | AC=1;AF=0.050;AN=20;BaseQRankSum=2.85;Cli |
| 3501 | chrY | 7027030 | . | A | T   | 110.76   | my_snp_filter | AC=2;AF=0.111;AN=18;BaseQRankSum=         |
| 3502 | chrY | 7027037 | . | T | A   | 266.67   | PASS          | AC=3;AF=0.167;AN=18;BaseQRankSum=-1.362e+ |
| 3503 | chrY | 7027040 | . | T | C   | 265.24   | PASS          | AC=3;AF=0.167;AN=18;BaseQRankSum=-9.810e- |
| 3504 | chrY | 7028062 | . | A | C   | 43.33    | my_snp_filter | AC=2;AF=0.048;AN=42;BaseQRankSum=         |
| 3505 | chrY | 7028096 | . | A | T   | 281.87   | PASS          | AC=2;AF=0.038;AN=52;BaseQRankSum=-6.890e- |
| 3506 | chrY | 7028103 | . | G | A   | 291.40   | PASS          | AC=2;AF=0.034;AN=58;BaseQRankSum=2.76;Cli |
| 3507 | chrY | 7028144 | . | G | C   | 394.35   | PASS          | AC=7;AF=0.113;AN=62;BaseQRankSum=0.457;Cl |
| 3508 | chrY | 7028165 | . | C | T   | 325.85   | PASS          | AC=5;AF=0.078;AN=64;BaseQRankSum=0.164;Cl |
| 3509 | chrY | 7028171 | . | C | T   | 310.17   | PASS          | AC=4;AF=0.063;AN=64;BaseQRankSum=1.98;Cli |
| 3510 | chrY | 7028172 | . | C | T   | 313.16   | PASS          | AC=4;AF=0.063;AN=64;BaseQRankSum=1.33;Cli |
| 3511 | chrY | 7028176 | . | C | G   | 268.94   | PASS          | AC=2;AF=0.031;AN=64;BaseQRankSum=2.48;Cli |
| 3512 | chrY | 7028179 | . | G | T   | 263.25   | PASS          | AC=2;AF=0.031;AN=64;BaseQRankSum=2.93;Cli |
| 3513 | chrY | 7028180 | . | A | T   | 265.91   | PASS          | AC=2;AF=0.030;AN=66;BaseQRankSum=2.80;Cli |
| 3514 | chrY | 7028182 | . | G | C   | 265.84   | PASS          | AC=2;AF=0.030;AN=66;BaseQRankSum=2.81;Cli |
| 3515 | chrY | 7028186 | . | A | G   | 143.23   | PASS          | AC=1;AF=0.015;AN=66;BaseQRankSum=2.39;Cli |
| 3516 | chrY | 7028191 | . | C | T   | 56.45    | PASS          | AC=1;AF=0.015;AN=66;BaseQRankSum=2.04;Cli |
| 3517 | chrY | 7030312 | . | T | G   | 1036.34  | PASS          | AC=6;AF=0.086;AN=70;DP=557;FS=0.000;Inbre |
| 3518 | chrY | 7034465 | . | A | C   | 47.21    | my_snp_filter | AC=2;AF=0.043;AN=46;BaseQRankSum=         |
| 3519 | chrY | 7034477 | . | A | C   | 57.05    | PASS          | AC=2;AF=0.042;AN=48;BaseQRankSum=-1.733e+ |
| 3520 | chrY | 7034480 | . | A | C   | 55.39    | PASS          | AC=2;AF=0.036;AN=56;BaseQRankSum=-1.734e+ |
| 3521 | chrY | 7034704 | . | G | A   | 230.06   | PASS          | AC=2;AF=0.029;AN=70;DP=498;FS=0.000;Inbre |
| 3522 | chrY | 7038533 | . | T | A   | 719.95   | PASS          | AC=4;AF=0.057;AN=70;DP=592;FS=0.000;Inbre |
| 3523 | chrY | 7038957 | . | G | C   | 127.42   | PASS          | AC=2;AF=0.029;AN=68;DP=284;FS=0.000;Inbre |
| 3524 | chrY | 7040096 | . | T | A   | 1498.22  | PASS          | AC=6;AF=0.086;AN=70;DP=334;FS=0.000;Inbre |
| 3525 | chrY | 7043074 | . | C | T   | 6510.32  | PASS          | AC=52;AF=0.743;AN=70;DP=392;FS=0.000;Inbr |
| 3526 | chrY | 7054179 | . | G | A   | 495.89   | PASS          | AC=2;AF=0.029;AN=70;DP=379;FS=0.000;Inbre |
| 3527 | chrY | 7057466 | . | T | C   | 898.71   | PASS          | AC=6;AF=0.088;AN=68;DP=518;FS=0.000;Inbre |
| 3528 | chrY | 7060243 | . | G | A   | 1516.18  | PASS          | AC=6;AF=0.333;AN=18;DP=203;FS=0.000;MLEAC |
| 3529 | chrY | 7060992 | . | A | G   | 862.39   | PASS          | AC=6;AF=0.273;AN=22;BaseQRankSum=-1.486e+ |
| 3530 | chrY | 7070119 | . | G | A   | 198.56   | PASS          | AC=2;AF=0.029;AN=70;DP=457;FS=0.000;Inbre |
| 3531 | chrY | 7072858 | . | C | A   | 986.14   | PASS          | AC=6;AF=0.086;AN=70;DP=566;FS=0.000;Inbre |
| 3532 | chrY | 7073299 | . | G | A   | 289.08   | PASS          | AC=6;AF=0.086;AN=70;DP=413;FS=0.000;Inbre |
| 3533 | chrY | 7073423 | . | A | G   | 5028.10  | PASS          | AC=26;AF=1.00;AN=26;DP=197;FS=0.000;Inbre |
| 3534 | chrY | 7078387 | . | A | G   | 778.16   | PASS          | AC=16;AF=0.444;AN=36;DP=148;FS=0.000;Inbr |
| 3535 | chrY | 7081561 | . | T | C   | 2167.14  | PASS          | AC=24;AF=1.00;AN=24;DP=154;FS=0.000;Inbre |
| 3536 | chrY | 7083553 | . | A | G   | 10651.43 | PASS          | AC=50;AF=0.735;AN=68;DP=513;FS=0.000      |
| 3537 | chrY | 7084535 | . | A | G   | 2530.87  | PASS          | AC=18;AF=1.00;AN=18;DP=103;FS=0.000;MLEAC |
| 3538 | chrY | 7088609 | . | A | G   | 504.11   | PASS          | AC=4;AF=0.057;AN=70;DP=587;FS=0.000;Inbre |
| 3539 | chrY | 7090393 | . | C | T   | 4695.88  | PASS          | AC=46;AF=0.719;AN=64;BaseQRankSum=1.33;Cl |
| 3540 | chrY | 7092819 | . | A | T   | 1363.84  | PASS          | AC=6;AF=0.086;AN=70;DP=641;FS=0.000;Inbre |
| 3541 | chrY | 7096860 | . | C | T   | 68.34    | my_snp_filter | AC=3;AF=0.043;AN=70;BaseQRankSum=         |
| 3542 | chrY | 7100362 | . | T | C   | 9968.99  | PASS          | AC=68;AF=1.00;AN=68;DP=369;FS=0.000;Inbre |
| 3543 | chrY | 7100722 | . | T | C   | 442.71   | PASS          | AC=1;AF=0.014;AN=70;BaseQRankSum=2.48;Cli |
| 3544 | chrY | 7101405 | . | C | T   | 166.41   | PASS          | AC=4;AF=0.065;AN=62;DP=255;FS=0.000;Inbre |
| 3545 | chrY | 7107013 | . | A | C,* | 844.27   | PASS          | AC=7,5;AF=0.583,0.417;AN=12;DP=35;FS=0.00 |
| 3546 | chrY | 7107015 | . | A | C,* | 787.38   | PASS          | AC=5,5;AF=0.500,0.500;AN=10;DP=33;FS=0.00 |
| 3547 | chrY | 7107023 | . | A | C   | 138.80   | PASS          | AC=5;AF=0.833;AN=6;BaseQRankSum=-7.360e-0 |
| 3548 | chrY | 7107025 | . | A | C   | 208.20   | PASS          | AC=6;AF=0.750;AN=8;DP=17;FS=0.000;MLEAC=7 |
| 3549 | chrY | 7107027 | . | A | C   | 208.20   | PASS          | AC=6;AF=0.750;AN=8;DP=17;FS=0.000;MLEAC=7 |
| 3550 | chrY | 7107029 | . | A | C   | 208.20   | PASS          | AC=6;AF=0.750;AN=8;DP=16;FS=0.000;MLEAC=7 |
| 3551 | chrY | 7107031 | . | A | C   | 207.36   | PASS          | AC=6;AF=0.750;AN=8;DP=16;FS=0.000;MLEAC=7 |
| 3552 | chrY | 7107033 | . | A | C   | 207.36   | PASS          | AC=6;AF=0.750;AN=8;DP=16;FS=0.000;MLEAC=7 |
| 3553 | chrY | 7108256 | . | C | T   | 276.94   | PASS          | AC=4;AF=0.067;AN=60;DP=187;FS=0.000;Inbre |
| 3554 | chrY | 7108907 | . | C | A   | 831.27   | PASS          | AC=6;AF=0.088;AN=68;DP=183;FS=0.000;Inbre |
| 3555 | chrY | 7112510 | . | G | C   | 370.02   | PASS          | AC=2;AF=0.030;AN=66;DP=310;FS=0.000;Inbre |
| 3556 | chrY | 7112537 | . | T | C   | 31.37    | PASS          | AC=1;AF=0.014;AN=70;BaseQRankSum=0.198;Cl |
| 3557 | chrY | 7112545 | . | T | C   | 34.35    | PASS          | AC=1;AF=0.014;AN=70;BaseQRankSum=-7.200e- |
| 3558 | chrY | 7112550 | . | A | T   | 34.35    | PASS          | AC=1;AF=0.014;AN=70;BaseQRankSum=0.00;Cli |
| 3559 | chrY | 7118738 | . | T | C   | 2143.86  | PASS          | AC=18;AF=1.00;AN=18;BaseQRankSum=-1.404e+ |
| 3560 | chrY | 7123085 | . | A | C   | 3611.54  | PASS          | AC=8;AF=0.444;AN=18;BaseQRankSum=1.10;Cli |
| 3561 | chrY | 7123086 | . | G | T   | 3611.54  | PASS          | AC=8;AF=0.444;AN=18;BaseQRankSum=1.93;Cli |
| 3562 | chrY | 7123183 | . | C | A   | 84.31    | PASS          | AC=1;AF=0.050;AN=20;BaseQRankSum=1.40;Cli |
| 3563 | chrY | 7123189 | . | C | A   | 81.54    | PASS          | AC=1;AF=0.050;AN=20;BaseQRankSum=-1.567e+ |
| 3564 | chrY | 7123198 | . | G | T   | 81.50    | PASS          | AC=1;AF=0.050;AN=20;BaseQRankSum=2.11;Cli |
| 3565 | chrY | 7126871 | . | A | T   | 1227.98  | PASS          | AC=6;AF=0.086;AN=70;DP=714;FS=0.000;Inbre |
| 3566 | chrY | 7129691 | . | A | C   | 754.36   | PASS          | AC=6;AF=0.091;AN=66;DP=286;FS=0.000;Inbre |
| 3567 | chrY | 7131956 | . | G | C   | 151.98   | PASS          | AC=5;AF=0.081;AN=62;BaseQRankSum=-7.420e- |
| 3568 | chrY | 7131961 | . | T | C   | 152.63   | PASS          | AC=5;AF=0.083;AN=60;BaseQRankSum=0.198;Cl |
| 3569 | chrY | 7131966 | . | G | C   | 88.84    | PASS          | AC=4;AF=0.065;AN=62;BaseQRankSum=0.736;Cl |
| 3570 | chrY | 7132713 | . | A | G   | 3697.26  | PASS          | AC=30;AF=1.00;AN=30;DP=197;FS=0.000;Inbre |
| 3571 | chrY | 7133986 | . | C | G   | 5575.17  | PASS          | AC=54;AF=1.00;AN=54;DP=202;FS=0.000;Inbre |
| 3572 | chrY | 7144630 | . | C | T   | 380.15   | PASS          | AC=2;AF=0.029;AN=70;DP=557;FS=0.000;Inbre |

|      |      |         |   |   |   |          |      |                                           |
|------|------|---------|---|---|---|----------|------|-------------------------------------------|
| 3573 | chrY | 7146647 | . | C | T | 890.66   | PASS | AC=6;AF=0.086;AN=70;DP=444;FS=0.000;Inbre |
| 3574 | chrY | 7152131 | . | C | T | 5293.19  | PASS | AC=38;AF=0.559;AN=68;DP=369;FS=0.000;Inbr |
| 3575 | chrY | 7153509 | . | A | G | 13696.25 | PASS | AC=40;AF=0.571;AN=70;DP=716;FS=0.         |
| 3576 | chrY | 7153953 | . | G | A | 964.20   | PASS | AC=6;AF=0.231;AN=26;DP=130;FS=0.000;Inbre |
| 3577 | chrY | 7158634 | . | C | T | 547.48   | PASS | AC=6;AF=0.086;AN=70;DP=412;FS=0.000;Inbre |
| 3578 | chrY | 7159950 | . | G | A | 6610.41  | PASS | AC=48;AF=0.727;AN=66;DP=343;FS=0.000;Inbr |
| 3579 | chrY | 7164283 | . | C | T | 2755.88  | PASS | AC=18;AF=1.00;AN=18;DP=109;FS=0.000;MLEAC |
| 3580 | chrY | 7165589 | . | T | C | 126.45   | PASS | AC=2;AF=0.029;AN=70;BaseQRankSum=1.28;Cli |
| 3581 | chrY | 7165692 | . | G | C | 689.77   | PASS | AC=3;AF=0.043;AN=70;BaseQRankSum=1.35;Cli |
| 3582 | chrY | 7165693 | . | T | C | 910.49   | PASS | AC=6;AF=0.086;AN=70;BaseQRankSum=-1.579e+ |
| 3583 | chrY | 7166132 | . | G | A | 108.49   | PASS | AC=1;AF=0.015;AN=66;BaseQRankSum=-1.491e+ |
| 3584 | chrY | 7166134 | . | C | T | 185.74   | PASS | AC=2;AF=0.030;AN=66;BaseQRankSum=0.778;Cl |
| 3585 | chrY | 7166142 | . | A | G | 79.40    | PASS | AC=1;AF=0.015;AN=66;BaseQRankSum=0.382;Cl |
| 3586 | chrY | 7169899 | . | C | T | 1257.20  | PASS | AC=6;AF=0.333;AN=18;DP=160;FS=0.000;MLEAC |
| 3587 | chrY | 7172700 | . | C | G | 1365.50  | PASS | AC=6;AF=0.086;AN=70;DP=358;FS=0.000;Inbre |
| 3588 | chrY | 7173143 | . | A | G | 22403.12 | PASS | AC=57;AF=0.814;AN=70;BaseQRankSum         |
| 3589 | chrY | 7177189 | . | A | G | 10754.98 | PASS | AC=68;AF=1.00;AN=68;DP=362;FS=0.0         |
| 3590 | chrY | 7179772 | . | C | T | 36.61    | PASS | AC=1;AF=0.019;AN=52;BaseQRankSum=-1.307e+ |
| 3591 | chrY | 7179784 | . | C | T | 401.35   | PASS | AC=6;AF=0.111;AN=54;DP=114;FS=0.000;Inbre |
| 3592 | chrY | 7182258 | . | C | T | 1102.97  | PASS | AC=5;AF=0.071;AN=70;BaseQRankSum=-2.540e+ |
| 3593 | chrY | 7188420 | . | C | T | 19750    | PASS | AC=52;AF=0.743;AN=70;DP=802;FS=0.000;Inbr |
| 3594 | chrY | 7188451 | . | T | G | 347.17   | PASS | AC=2;AF=0.029;AN=70;DP=730;FS=0.000;Inbre |
| 3595 | chrY | 7189535 | . | G | A | 1303.21  | PASS | AC=6;AF=0.086;AN=70;DP=548;FS=0.000;Inbre |
| 3596 | chrY | 7192731 | . | C | A | 340.14   | PASS | AC=2;AF=0.029;AN=70;DP=481;FS=0.000;Inbre |
| 3597 | chrY | 7196061 | . | T | C | 38.40    | PASS | AC=1;AF=0.017;AN=60;BaseQRankSum=-1.231e+ |
| 3598 | chrY | 7197052 | . | A | T | 1405.29  | PASS | AC=6;AF=0.086;AN=70;DP=497;FS=0.000;Inbre |
| 3599 | chrY | 7197103 | . | A | G | 1358.67  | PASS | AC=6;AF=0.115;AN=52;DP=205;FS=0.000;Inbre |
| 3600 | chrY | 7198973 | . | T | A | 1638.93  | PASS | AC=30;AF=0.625;AN=48;DP=165;FS=0.000;Inbr |
| 3601 | chrY | 7202703 | . | T | C | 10783.55 | PASS | AC=54;AF=0.818;AN=66;DP=463;FS=0.         |
| 3602 | chrY | 7203967 | . | T | C | 981.29   | PASS | AC=18;AF=1.00;AN=18;DP=57;FS=0.000;MLEAC  |
| 3603 | chrY | 7211965 | . | A | C | 55.51    | PASS | AC=2;AF=0.050;AN=40;DP=190;FS=0.000;Inbre |
| 3604 | chrY | 7211969 | . | A | C | 51.31    | PASS | AC=1;AF=0.023;AN=44;BaseQRankSum=-7.360e- |
| 3605 | chrY | 7211973 | . | A | C | 51.16    | PASS | AC=1;AF=0.019;AN=54;BaseQRankSum=-7.360e- |
| 3606 | chrY | 7213725 | . | A | T | 1375.38  | PASS | AC=6;AF=0.086;AN=70;DP=560;FS=0.000;Inbre |
| 3607 | chrY | 7217239 | . | C | T | 198.95   | PASS | AC=2;AF=0.059;AN=34;DP=147;FS=0.000;Inbre |
| 3608 | chrY | 7217702 | . | G | C | 1111.83  | PASS | AC=6;AF=0.091;AN=66;BaseQRankSum=1.54;Cli |
| 3609 | chrY | 7218079 | . | A | G | 12504.78 | PASS | AC=52;AF=0.813;AN=64;BaseQRankSum         |
| 3610 | chrY | 7218128 | . | T | C | 12686.63 | PASS | AC=50;AF=0.735;AN=68;DP=598;FS=0.         |
| 3611 | chrY | 7218538 | . | G | C | 610.23   | PASS | AC=6;AF=0.086;AN=70;BaseQRankSum=-7.960e- |
| 3612 | chrY | 7218540 | . | C | G | 609.45   | PASS | AC=6;AF=0.086;AN=70;BaseQRankSum=-2.310e- |
| 3613 | chrY | 7218552 | . | C | A | 261.54   | PASS | AC=6;AF=0.088;AN=68;BaseQRankSum=-1.700e- |
| 3614 | chrY | 7220727 | . | G | A | 12526.93 | PASS | AC=68;AF=1.00;AN=68;DP=428;FS=0.0         |
| 3615 | chrY | 7223308 | . | T | G | 107.55   | PASS | AC=6;AF=0.100;AN=60;DP=138;FS=0.000;Inbre |
| 3616 | chrY | 7225331 | . | G | A | 413.89   | PASS | AC=2;AF=0.029;AN=70;BaseQRankSum=1.10;Cli |
| 3617 | chrY | 7240836 | . | A | C | 1229.31  | PASS | AC=6;AF=0.086;AN=70;DP=462;FS=0.000;Inbre |
| 3618 | chrY | 7241249 | . | G | A | 3429.20  | PASS | AC=40;AF=0.645;AN=62;DP=302;FS=0.000;Inbr |
| 3619 | chrY | 7246839 | . | G | T | 279.31   | PASS | AC=2;AF=0.037;AN=54;DP=237;FS=0.000;Inbre |
| 3620 | chrY | 7247717 | . | C | T | 2984.34  | PASS | AC=34;AF=0.654;AN=52;DP=240;FS=0.000;Inbr |
| 3621 | chrY | 7250235 | . | G | A | 3508.31  | PASS | AC=32;AF=1.00;AN=32;BaseQRankSum=0.727;Cl |
| 3622 | chrY | 7250799 | . | C | G | 929.05   | PASS | AC=6;AF=0.086;AN=70;DP=729;FS=0.000;Inbre |
| 3623 | chrY | 7254185 | . | G | C | 30.42    | PASS | AC=2;AF=0.029;AN=68;BaseQRankSum=-2.900e- |
| 3624 | chrY | 7254187 | . | G | A | 30.42    | PASS | AC=2;AF=0.029;AN=68;BaseQRankSum=-8.690e- |
| 3625 | chrY | 7257494 | . | A | T | 864.25   | PASS | AC=6;AF=0.103;AN=58;DP=195;FS=0.000;Inbre |
| 3626 | chrY | 7259850 | . | A | G | 525.64   | PASS | AC=2;AF=0.029;AN=70;DP=409;FS=0.000;Inbre |
| 3627 | chrY | 7264987 | . | C | G | 1744.42  | PASS | AC=6;AF=0.086;AN=70;DP=499;FS=0.000;Inbre |
| 3628 | chrY | 7271355 | . | C | T | 322.78   | PASS | AC=4;AF=0.059;AN=68;DP=325;FS=0.000;Inbre |
| 3629 | chrY | 7272375 | . | T | C | 1731.86  | PASS | AC=6;AF=0.088;AN=68;BaseQRankSum=1.60;Cli |
| 3630 | chrY | 7273163 | . | A | G | 462.14   | PASS | AC=2;AF=0.029;AN=68;DP=343;FS=0.000;Inbre |
| 3631 | chrY | 7280398 | . | A | G | 7548.44  | PASS | AC=42;AF=0.636;AN=66;DP=432;FS=0.000;Inbr |
| 3632 | chrY | 7289091 | . | T | A | 216.46   | PASS | AC=2;AF=0.029;AN=70;DP=367;FS=0.000;Inbre |
| 3633 | chrY | 7289301 | . | G | T | 43.36    | PASS | AC=2;AF=0.045;AN=44;DP=156;FS=0.000;Inbre |
| 3634 | chrY | 7293744 | . | C | T | 222.55   | PASS | AC=2;AF=0.033;AN=60;DP=163;FS=0.000;Inbre |
| 3635 | chrY | 7299397 | . | C | A | 956.19   | PASS | AC=6;AF=0.333;AN=18;DP=144;FS=0.000;MLEAC |
| 3636 | chrY | 7303056 | . | C | T | 1260.07  | PASS | AC=6;AF=0.115;AN=52;DP=166;FS=0.000;Inbre |
| 3637 | chrY | 7306539 | . | G | C | 4278.32  | PASS | AC=46;AF=1.00;AN=46;DP=174;FS=0.000;Inbre |
| 3638 | chrY | 7307496 | . | G | T | 473.50   | PASS | AC=6;AF=0.130;AN=46;BaseQRankSum=0.736;Cl |
| 3639 | chrY | 7309148 | . | G | A | 1531.26  | PASS | AC=6;AF=0.086;AN=70;DP=423;FS=0.000;Inbre |
| 3640 | chrY | 7309210 | . | T | G | 1251.59  | PASS | AC=6;AF=0.086;AN=70;DP=426;FS=0.000;Inbre |
| 3641 | chrY | 7310355 | . | C | T | 530.25   | PASS | AC=12;AF=0.400;AN=30;DP=194;FS=0.000;Inbr |
| 3642 | chrY | 7311620 | . | A | T | 80.11    | PASS | AC=1;AF=0.017;AN=58;BaseQRankSum=-1.231e+ |
| 3643 | chrY | 7311623 | . | T | C | 68.25    | PASS | AC=1;AF=0.017;AN=60;BaseQRankSum=-5.500e- |
| 3644 | chrY | 7311624 | . | C | A | 65.97    | PASS | AC=1;AF=0.016;AN=62;BaseQRankSum=-1.495e+ |
| 3645 | chrY | 7318551 | . | G | T | 1036.57  | PASS | AC=6;AF=0.333;AN=18;DP=113;FS=0.000;MLEAC |
| 3646 | chrY | 7320623 | . | G | A | 1358.18  | PASS | AC=6;AF=0.086;AN=70;DP=585;FS=0.000;Inbre |
| 3647 | chrY | 7320813 | . | A | T | 421.82   | PASS | AC=2;AF=0.029;AN=70;BaseQRankSum=1.01;Cli |
| 3648 | chrY | 7321330 | . | A | C | 10758    | PASS | AC=60;AF=1.00;AN=60;DP=389;FS=0.000;Inbre |



|      |      |         |   |   |   |          |               |                                           |
|------|------|---------|---|---|---|----------|---------------|-------------------------------------------|
| 3649 | chrY | 7329532 | . | G | C | 466.36   | PASS          | AC=6;AF=0.091;AN=66;DP=291;FS=0.000;Inbre |
| 3650 | chrY | 7330034 | . | G | T | 1220.58  | PASS          | AC=6;AF=0.086;AN=70;DP=456;FS=0.000;Inbre |
| 3651 | chrY | 7332132 | . | C | T | 1386.25  | PASS          | AC=6;AF=0.088;AN=68;DP=477;FS=0.000;Inbre |
| 3652 | chrY | 7335904 | . | A | G | 213.07   | PASS          | AC=2;AF=0.030;AN=66;DP=266;FS=0.000;Inbre |
| 3653 | chrY | 7336797 | . | A | T | 2485.69  | PASS          | AC=12;AF=0.176;AN=68;DP=409;FS=0.000;Inbr |
| 3654 | chrY | 7340314 | . | C | T | 5549.35  | PASS          | AC=44;AF=1.00;AN=44;DP=202;FS=0.000;Inbre |
| 3655 | chrY | 7341035 | . | G | A | 308.29   | PASS          | AC=2;AF=0.034;AN=58;DP=178;FS=0.000;Inbre |
| 3656 | chrY | 7341797 | . | G | T | 157.98   | PASS          | AC=1;AF=0.014;AN=70;BaseQRankSum=-7.540e- |
| 3657 | chrY | 7341800 | . | C | A | 135.91   | PASS          | AC=1;AF=0.014;AN=70;BaseQRankSum=1.25;Cli |
| 3658 | chrY | 7341804 | . | G | T | 93.60    | PASS          | AC=1;AF=0.014;AN=70;BaseQRankSum=0.061;Cl |
| 3659 | chrY | 7341961 | . | A | G | 56.64    | PASS          | AC=1;AF=0.015;AN=68;BaseQRankSum=-9.620e- |
| 3660 | chrY | 7341988 | . | C | T | 193.81   | PASS          | AC=4;AF=0.059;AN=68;BaseQRankSum=0.053;Cl |
| 3661 | chrY | 7355532 | . | G | T | 287.55   | PASS          | AC=2;AF=0.029;AN=68;DP=643;FS=0.000;Inbre |
| 3662 | chrY | 7356357 | . | T | C | 143.12   | PASS          | AC=2;AF=0.031;AN=64;DP=264;FS=0.000;Inbre |
| 3663 | chrY | 7362192 | . | C | G | 91.75    | PASS          | AC=1;AF=0.056;AN=18;BaseQRankSum=-5.360e- |
| 3664 | chrY | 7362206 | . | T | C | 83.70    | PASS          | AC=1;AF=0.045;AN=22;BaseQRankSum=-9.100e- |
| 3665 | chrY | 7362211 | . | G | A | 79.55    | PASS          | AC=1;AF=0.045;AN=22;BaseQRankSum=-1.189e+ |
| 3666 | chrY | 7362260 | . | T | C | 31.40    | PASS          | AC=1;AF=0.028;AN=36;BaseQRankSum=-1.179e+ |
| 3667 | chrY | 7362262 | . | G | A | 31.83    | PASS          | AC=1;AF=0.026;AN=38;BaseQRankSum=0.067;Cl |
| 3668 | chrY | 7364282 | . | G | A | 7007.97  | PASS          | AC=62;AF=1.00;AN=62;DP=240;FS=0.000;Inbre |
| 3669 | chrY | 7374464 | . | G | A | 4841.34  | PASS          | AC=42;AF=0.700;AN=60;DP=324;FS=0.000;Inbr |
| 3670 | chrY | 7375015 | . | T | C | 13228.90 | PASS          | AC=66;AF=1.00;AN=66;DP=449;FS=0.0         |
| 3671 | chrY | 7380778 | . | G | C | 498.92   | PASS          | AC=4;AF=0.057;AN=70;DP=608;FS=0.000;Inbre |
| 3672 | chrY | 7384470 | . | C | T | 3076.19  | PASS          | AC=38;AF=0.613;AN=62;DP=264;FS=0.000;Inbr |
| 3673 | chrY | 7387961 | . | G | T | 60.23    | PASS          | AC=2;AF=0.038;AN=52;DP=176;FS=0.000;Inbre |
| 3674 | chrY | 7391109 | . | C | T | 7888.28  | PASS          | AC=34;AF=1.00;AN=34;DP=179;FS=0.000;Inbre |
| 3675 | chrY | 7391110 | . | A | G | 7978.28  | PASS          | AC=34;AF=1.00;AN=34;DP=180;FS=0.000;Inbre |
| 3676 | chrY | 7391117 | . | C | T | 8347.18  | PASS          | AC=32;AF=1.00;AN=32;DP=190;FS=0.000;Inbre |
| 3677 | chrY | 7391134 | . | C | T | 8667     | PASS          | AC=32;AF=1.00;AN=32;BaseQRankSum=0.00;Cli |
| 3678 | chrY | 7391135 | . | A | G | 8667     | PASS          | AC=32;AF=1.00;AN=32;BaseQRankSum=1.35;Cli |
| 3679 | chrY | 7391142 | . | G | A | 8972.98  | PASS          | AC=32;AF=1.00;AN=32;BaseQRankSum=1.60;Cli |
| 3680 | chrY | 7391161 | . | T | C | 9635.94  | PASS          | AC=32;AF=1.00;AN=32;DP=251;FS=0.000;Inbre |
| 3681 | chrY | 7391164 | . | A | G | 9466.93  | PASS          | AC=32;AF=1.00;AN=32;DP=260;FS=0.000;Inbre |
| 3682 | chrY | 7393819 | . | G | A | 168.07   | PASS          | AC=1;AF=0.056;AN=18;BaseQRankSum=2.28;Cli |
| 3683 | chrY | 7393835 | . | T | A | 201.53   | PASS          | AC=1;AF=0.056;AN=18;BaseQRankSum=-3.130e- |
| 3684 | chrY | 7394383 | . | C | A | 97.30    | PASS          | AC=1;AF=0.056;AN=18;BaseQRankSum=-6.100e- |
| 3685 | chrY | 7394387 | . | A | T | 96.37    | PASS          | AC=1;AF=0.056;AN=18;BaseQRankSum=-6.100e- |
| 3686 | chrY | 7394394 | . | A | T | 99.34    | PASS          | AC=1;AF=0.056;AN=18;BaseQRankSum=-7.880e- |
| 3687 | chrY | 7395806 | . | G | C | 8276     | PASS          | AC=58;AF=0.829;AN=70;DP=369;FS=0.000;Inbr |
| 3688 | chrY | 7396487 | . | C | G | 1142.63  | PASS          | AC=6;AF=0.091;AN=66;DP=289;FS=0.000;Inbre |
| 3689 | chrY | 7396970 | . | T | A | 852.06   | PASS          | AC=6;AF=0.086;AN=70;DP=409;FS=0.000;Inbre |
| 3690 | chrY | 7398260 | . | G | T | 1166.32  | PASS          | AC=6;AF=0.086;AN=70;DP=458;FS=0.000;Inbre |
| 3691 | chrY | 7398704 | . | T | C | 314.50   | PASS          | AC=4;AF=0.057;AN=70;DP=343;FS=0.000;Inbre |
| 3692 | chrY | 7402264 | . | C | A | 693.45   | PASS          | AC=6;AF=0.088;AN=68;DP=328;FS=0.000;Inbre |
| 3693 | chrY | 7406806 | . | T | G | 1043.96  | PASS          | AC=6;AF=0.094;AN=64;DP=317;FS=0.000;Inbre |
| 3694 | chrY | 7409655 | . | T | C | 1481.78  | PASS          | AC=26;AF=0.481;AN=54;DP=220;FS=0.000;Inbr |
| 3695 | chrY | 7410009 | . | T | C | 735.73   | PASS          | AC=6;AF=0.086;AN=70;DP=422;FS=0.000;Inbre |
| 3696 | chrY | 7415220 | . | G | C | 1437.46  | PASS          | AC=6;AF=0.086;AN=70;DP=589;FS=0.000;Inbre |
| 3697 | chrY | 7420609 | . | A | T | 232.54   | PASS          | AC=6;AF=0.231;AN=26;DP=197;FS=0.000;Inbre |
| 3698 | chrY | 7423722 | . | T | C | 11850.80 | PASS          | AC=54;AF=0.818;AN=66;DP=521;FS=0.0        |
| 3699 | chrY | 7425541 | . | T | C | 12149.73 | PASS          | AC=38;AF=0.559;AN=68;BaseQRankSum=        |
| 3700 | chrY | 7428072 | . | A | G | 336.45   | PASS          | AC=4;AF=0.065;AN=62;BaseQRankSum=0.198;Cl |
| 3701 | chrY | 7428075 | . | G | C | 337.69   | PASS          | AC=4;AF=0.065;AN=62;BaseQRankSum=2.74;Cli |
| 3702 | chrY | 7428457 | . | T | C | 120.01   | my_snp_filter | AC=3;AF=0.043;AN=70;BaseQRankSum=         |
| 3703 | chrY | 7428503 | . | C | T | 196.83   | PASS          | AC=3;AF=0.043;AN=70;BaseQRankSum=-8.120e- |
| 3704 | chrY | 7428558 | . | A | G | 238.30   | PASS          | AC=3;AF=0.044;AN=68;BaseQRankSum=-5.710e- |
| 3705 | chrY | 7428577 | . | T | C | 32.29    | my_snp_filter | AC=1;AF=0.015;AN=68;BaseQRankSum=         |
| 3706 | chrY | 7429635 | . | A | G | 30.92    | my_snp_filter | AC=1;AF=0.014;AN=70;BaseQRankSum=         |
| 3707 | chrY | 7429647 | . | T | G | 33.99    | my_snp_filter | AC=1;AF=0.014;AN=70;BaseQRankSum=         |
| 3708 | chrY | 7431124 | . | T | C | 60.14    | my_snp_filter | AC=1;AF=0.014;AN=70;BaseQRankSum=         |
| 3709 | chrY | 7431131 | . | T | C | 57.14    | my_snp_filter | AC=1;AF=0.014;AN=70;BaseQRankSum=         |
| 3710 | chrY | 7431134 | . | A | G | 57.13    | my_snp_filter | AC=1;AF=0.014;AN=70;BaseQRankSum=         |
| 3711 | chrY | 7431160 | . | A | G | 212.53   | PASS          | AC=2;AF=0.029;AN=70;BaseQRankSum=-1.135e+ |
| 3712 | chrY | 7431164 | . | A | C | 209.30   | PASS          | AC=2;AF=0.029;AN=70;BaseQRankSum=-1.114e+ |
| 3713 | chrY | 7431177 | . | G | C | 11631.19 | PASS          | AC=45;AF=0.643;AN=70;BaseQRankSum         |
| 3714 | chrY | 7438251 | . | C | T | 1139.98  | PASS          | AC=6;AF=0.273;AN=22;DP=148;FS=0.000;Inbre |
| 3715 | chrY | 7446194 | . | T | A | 1056.83  | my_snp_filter | AC=6;AF=0.097;AN=62;DP=211;FS=0.0         |
| 3716 | chrY | 7450355 | . | G | T | 1027.55  | PASS          | AC=6;AF=0.091;AN=66;DP=293;FS=0.000;Inbre |
| 3717 | chrY | 7451254 | . | G | A | 557.42   | PASS          | AC=14;AF=1.00;AN=14;DP=36;FS=0.000;MLEAC= |
| 3718 | chrY | 7452920 | . | T | C | 119.03   | my_snp_filter | AC=2;AF=0.029;AN=70;DP=267;FS=0.0         |
| 3719 | chrY | 7453594 | . | T | C | 31.30    | PASS          | AC=1;AF=0.014;AN=70;BaseQRankSum=-1.495e+ |
| 3720 | chrY | 7458829 | . | T | C | 1010.65  | my_snp_filter | AC=6;AF=0.086;AN=70;DP=687;FS=0.0         |
| 3721 | chrY | 7459474 | . | A | G | 6822.11  | my_snp_filter | AC=64;AF=1.00;AN=64;DP=238;FS=0.0         |
| 3722 | chrY | 7464530 | . | A | G | 715.13   | my_snp_filter | AC=4;AF=0.057;AN=70;DP=541;FS=0.0         |
| 3723 | chrY | 7471514 | . | T | A | 382.58   | my_snp_filter | AC=6;AF=0.086;AN=70;DP=340;FS=0.0         |
| 3724 | chrY | 7474117 | . | C | T | 1998.45  | my_snp_filter | AC=18;AF=0.257;AN=70;BaseQRankSum         |

|      |      |         |   |   |   |          |               |                                            |
|------|------|---------|---|---|---|----------|---------------|--------------------------------------------|
| 3725 | chrY | 7474294 | . | T | C | 12061.85 | PASS          | AC=30;AF=0.429;AN=70;BaseQRankSum          |
| 3726 | chrY | 7474805 | . | A | C | 208.83   | my_snp_filter | AC=6;AF=0.600;AN=10;DP=13;FS=0.00          |
| 3727 | chrY | 7477530 | . | T | C | 91.59    | my_snp_filter | AC=4;AF=0.182;AN=22;DP=134;FS=0.0          |
| 3728 | chrY | 7479693 | . | C | G | 89.06    | my_snp_filter | AC=1;AF=0.045;AN=22;BaseQRankSum=          |
| 3729 | chrY | 7490451 | . | G | A | 491.49   | my_snp_filter | AC=12;AF=1.00;AN=12;DP=25;FS=0.00          |
| 3730 | chrY | 7490497 | . | T | C | 44.41    | my_snp_filter | AC=2;AF=0.091;AN=22;DP=25;FS=0.00          |
| 3731 | chrY | 7499495 | . | A | G | 966.81   | my_snp_filter | AC=6;AF=0.097;AN=62;BaseQRankSum=          |
| 3732 | chrY | 7510771 | . | G | A | 222.52   | PASS          | AC=4;AF=0.057;AN=70;DP=300;FS=0.000;Inbre  |
| 3733 | chrY | 7511356 | . | T | A | 30.87    | PASS          | AC=1;AF=0.015;AN=68;BaseQRankSum=-1.495e+  |
| 3734 | chrY | 7511359 | . | C | T | 30.94    | PASS          | AC=1;AF=0.015;AN=68;BaseQRankSum=-1.495e+  |
| 3735 | chrY | 7511362 | . | C | A | 30.95    | PASS          | AC=1;AF=0.015;AN=68;BaseQRankSum=-1.495e+  |
| 3736 | chrY | 7512329 | . | G | A | 1020.88  | PASS          | AC=6;AF=0.088;AN=68;DP=318;FS=0.000;Inbre  |
| 3737 | chrY | 7514216 | . | C | A | 951.90   | PASS          | AC=6;AF=0.086;AN=70;DP=317;FS=0.000;Inbre  |
| 3738 | chrY | 7517055 | . | C | G | 6325.97  | PASS          | AC=52;AF=0.813;AN=64;DP=319;FS=0.000;Inbr  |
| 3739 | chrY | 7520390 | . | A | G | 619.35   | PASS          | AC=6;AF=0.086;AN=70;DP=494;FS=0.000;Inbre  |
| 3740 | chrY | 7522256 | . | A | G | 847.38   | PASS          | AC=2;AF=0.029;AN=70;DP=445;FS=0.000;Inbre  |
| 3741 | chrY | 7526451 | . | G | A | 1431.48  | PASS          | AC=6;AF=0.086;AN=70;DP=610;FS=0.000;Inbre  |
| 3742 | chrY | 7527930 | . | G | A | 1771.90  | PASS          | AC=6;AF=0.088;AN=68;DP=672;FS=0.000;Inbre  |
| 3743 | chrY | 7530417 | . | C | A | 324.30   | PASS          | AC=2;AF=0.029;AN=70;DP=635;FS=0.000;Inbre  |
| 3744 | chrY | 7531194 | . | C | T | 874.97   | PASS          | AC=4;AF=0.061;AN=66;DP=556;FS=0.000;Inbre  |
| 3745 | chrY | 7534418 | . | T | G | 1044.50  | PASS          | AC=18;AF=0.450;AN=40;BaseQRankSum=0.731;C  |
| 3746 | chrY | 7534525 | . | C | G | 31.89    | PASS          | AC=1;AF=0.016;AN=64;BaseQRankSum=0.922;Cl  |
| 3747 | chrY | 7534593 | . | G | T | 181.62   | PASS          | AC=6;AF=0.097;AN=62;DP=142;FS=0.000;Inbre  |
| 3748 | chrY | 7534645 | . | A | C | 684.39   | PASS          | AC=16;AF=1.00;AN=16;DP=69;FS=0.000;MLEAC=  |
| 3749 | chrY | 7534646 | . | A | C | 107.13   | PASS          | AC=4;AF=0.133;AN=30;DP=84;FS=0.000;Inbre   |
| 3750 | chrY | 7534647 | . | A | C | 81.53    | PASS          | AC=2;AF=0.077;AN=26;DP=98;FS=0.000;Inbre   |
| 3751 | chrY | 7535856 | . | A | T | 33       | my_snp_filter | AC=2;AF=0.036;AN=56;BaseQRankSum=          |
| 3752 | chrY | 7540450 | . | A | G | 1097.34  | PASS          | AC=6;AF=0.100;AN=60;DP=221;FS=0.000;Inbre  |
| 3753 | chrY | 7543143 | . | A | T | 923.83   | PASS          | AC=6;AF=0.088;AN=68;DP=308;FS=0.000;Inbre  |
| 3754 | chrY | 7545653 | . | G | A | 274.63   | PASS          | AC=2;AF=0.029;AN=70;DP=474;FS=0.000;Inbre  |
| 3755 | chrY | 7547127 | . | T | C | 691.08   | PASS          | AC=6;AF=0.088;AN=68;DP=446;FS=0.000;Inbre  |
| 3756 | chrY | 7548138 | . | C | T | 304.76   | PASS          | AC=2;AF=0.031;AN=64;DP=427;FS=0.000;Inbre  |
| 3757 | chrY | 7548900 | . | A | G | 17427.91 | PASS          | AC=68;AF=1.00;AN=68;BaseQRankSum=          |
| 3758 | chrY | 7549445 | . | A | T | 23978.87 | PASS          | AC=68;AF=1.00;AN=68;DP=757;FS=0.0          |
| 3759 | chrY | 7550780 | . | C | T | 595.31   | PASS          | AC=6;AF=0.086;AN=70;DP=413;FS=0.000;Inbre  |
| 3760 | chrY | 7551043 | . | A | G | 10260.33 | PASS          | AC=38;AF=0.559;AN=68;DP=561;FS=0.0         |
| 3761 | chrY | 7556207 | . | G | A | 1404.18  | PASS          | AC=6;AF=0.086;AN=70;DP=681;FS=0.000;Inbre  |
| 3762 | chrY | 7557268 | . | C | T | 605.44   | PASS          | AC=6;AF=0.086;AN=70;DP=447;FS=0.000;Inbre  |
| 3763 | chrY | 7568568 | . | C | A | 1472.04  | PASS          | AC=6;AF=0.086;AN=70;DP=410;FS=0.000;Inbre  |
| 3764 | chrY | 7570822 | . | C | G | 19947.88 | PASS          | AC=70;AF=1.00;AN=70;DP=664;FS=0.0          |
| 3765 | chrY | 7575406 | . | T | C | 799.46   | PASS          | AC=8;AF=0.400;AN=20;DP=146;FS=0.000;Inbre  |
| 3766 | chrY | 7578040 | . | A | C | 184.51   | PASS          | AC=6;AF=0.250;AN=24;DP=180;FS=0.000;Inbre  |
| 3767 | chrY | 7578261 | . | C | T | 1465.02  | PASS          | AC=6;AF=0.086;AN=70;DP=712;FS=0.000;Inbre  |
| 3768 | chrY | 7581976 | . | G | A | 107.24   | PASS          | AC=2;AF=0.077;AN=26;DP=134;FS=0.000;Inbre  |
| 3769 | chrY | 7582425 | . | C | T | 478.44   | PASS          | AC=2;AF=0.029;AN=70;DP=416;FS=0.000;Inbre  |
| 3770 | chrY | 7582754 | . | G | A | 1288.95  | PASS          | AC=6;AF=0.088;AN=68;DP=246;FS=0.000;Inbre  |
| 3771 | chrY | 7584247 | . | G | C | 3623.41  | PASS          | AC=48;AF=0.727;AN=66;DP=287;FS=0.000;Inbr  |
| 3772 | chrY | 7586195 | . | C | T | 204.31   | PASS          | AC=3;AF=0.043;AN=70;BaseQRankSum=-4.260e-  |
| 3773 | chrY | 7586196 | . | T | G | 204.35   | PASS          | AC=3;AF=0.043;AN=70;BaseQRankSum=-1.189e+  |
| 3774 | chrY | 7586343 | . | C | G | 131.25   | PASS          | AC=1;AF=0.015;AN=68;BaseQRankSum=0.950;Cl  |
| 3775 | chrY | 7586344 | . | G | A | 131.49   | PASS          | AC=1;AF=0.015;AN=68;BaseQRankSum=0.950;Cl  |
| 3776 | chrY | 7586349 | . | G | C | 134.74   | PASS          | AC=1;AF=0.015;AN=68;BaseQRankSum=1.05;Cli  |
| 3777 | chrY | 7586355 | . | C | T | 134.18   | PASS          | AC=1;AF=0.014;AN=70;BaseQRankSum=-1.440e+  |
| 3778 | chrY | 7586356 | . | A | T | 134.21   | PASS          | AC=1;AF=0.014;AN=70;BaseQRankSum=-1.518e+  |
| 3779 | chrY | 7587362 | . | G | T | 800.44   | PASS          | AC=6;AF=0.088;AN=68;DP=500;FS=0.000;Inbre  |
| 3780 | chrY | 7605776 | . | C | T | 1306.56  | PASS          | AC=6;AF=0.086;AN=70;DP=490;FS=0.000;Inbre  |
| 3781 | chrY | 7614289 | . | A | G | 204.54   | PASS          | AC=2;AF=0.029;AN=70;DP=449;FS=0.000;Inbre  |
| 3782 | chrY | 7616766 | . | A | C | 230.35   | PASS          | AC=2;AF=0.029;AN=70;DP=518;FS=0.000;Inbre  |
| 3783 | chrY | 7617817 | . | G | A | 901.17   | PASS          | AC=6;AF=0.086;AN=70;BaseQRankSum=1.39;Cli  |
| 3784 | chrY | 7620552 | . | C | A | 1452.36  | PASS          | AC=6;AF=0.086;AN=70;DP=573;FS=0.000;Inbre  |
| 3785 | chrY | 7626218 | . | T | C | 564.10   | PASS          | AC=6;AF=0.120;AN=50;DP=136;FS=0.000;Inbre  |
| 3786 | chrY | 7628900 | . | A | G | 15777.94 | PASS          | AC=70;AF=1.00;AN=70;DP=541;FS=0.0          |
| 3787 | chrY | 7629098 | . | T | C | 11136.61 | PASS          | AC=52;AF=0.743;AN=70;BaseQRankSum          |
| 3788 | chrY | 7629583 | . | G | A | 7085.44  | PASS          | AC=54;AF=0.818;AN=66;DP=332;FS=0.000;Inbr  |
| 3789 | chrY | 7631033 | . | A | G | 1009.44  | PASS          | AC=6;AF=0.214;AN=28;DP=179;FS=0.000;Inbre  |
| 3790 | chrY | 7632898 | . | C | A | 1014.75  | PASS          | AC=6;AF=0.300;AN=20;DP=166;FS=0.000;Inbre  |
| 3791 | chrY | 7633726 | . | C | T | 193.75   | PASS          | AC=2;AF=0.029;AN=70;DP=420;FS=0.000;Inbre  |
| 3792 | chrY | 7637836 | . | A | G | 211.87   | PASS          | AC=2;AF=0.036;AN=56;DP=218;FS=0.000;Inbre  |
| 3793 | chrY | 7638779 | . | A | C | 5151.63  | PASS          | AC=48;AF=0.727;AN=66;DP=355;FS=0.000;Inbr  |
| 3794 | chrY | 7643541 | . | A | G | 866.44   | PASS          | AC=10;AF=0.385;AN=26;BaseQRankSum=-7.270e- |
| 3795 | chrY | 7643984 | . | C | G | 2237.38  | PASS          | AC=6;AF=0.086;AN=70;DP=348;FS=0.000;Inbre  |
| 3796 | chrY | 7643998 | . | A | G | 2206.61  | PASS          | AC=6;AF=0.086;AN=70;DP=355;FS=0.000;Inbre  |
| 3797 | chrY | 7647357 | . | A | G | 6796.04  | PASS          | AC=60;AF=1.00;AN=60;DP=246;FS=0.000;Inbre  |
| 3798 | chrY | 7649354 | . | T | G | 44.55    | PASS          | AC=1;AF=0.026;AN=38;BaseQRankSum=-9.500e-  |
| 3799 | chrY | 7650121 | . | G | A | 220.54   | PASS          | AC=2;AF=0.029;AN=68;DP=285;FS=0.000;Inbre  |
| 3800 | chrY | 7650752 | . | C | T | 168.34   | PASS          | AC=6;AF=0.250;AN=24;DP=171;FS=0.000;Inbre  |

|      |      |         |   |   |   |          |               |                                            |
|------|------|---------|---|---|---|----------|---------------|--------------------------------------------|
| 3801 | chrY | 7653382 | . | C | T | 42.50    | PASS          | AC=2;AF=0.029;AN=70;DP=354;FS=0.000;Inbre  |
| 3802 | chrY | 7655193 | . | A | G | 967.86   | PASS          | AC=6;AF=0.100;AN=60;DP=191;FS=0.000;Inbre  |
| 3803 | chrY | 7664979 | . | T | A | 1232.60  | PASS          | AC=6;AF=0.086;AN=70;DP=390;FS=0.000;Inbre  |
| 3804 | chrY | 7671399 | . | A | G | 6848.32  | PASS          | AC=50;AF=0.735;AN=68;DP=393;FS=0.000;Inbr  |
| 3805 | chrY | 7671530 | . | A | G | 6423.99  | PASS          | AC=48;AF=0.800;AN=60;DP=271;FS=0.000;Inbr  |
| 3806 | chrY | 7671535 | . | T | C | 9185.03  | PASS          | AC=60;AF=1.00;AN=60;DP=265;FS=0.000;Inbre  |
| 3807 | chrY | 7674905 | . | C | T | 1610.07  | PASS          | AC=6;AF=0.086;AN=70;DP=464;FS=0.000;Inbre  |
| 3808 | chrY | 7675570 | . | C | T | 3384.36  | PASS          | AC=36;AF=0.545;AN=66;DP=294;FS=0.000;Inbr  |
| 3809 | chrY | 7676386 | . | A | G | 31.08    | PASS          | AC=1;AF=0.015;AN=68;BaseQRankSum=0.00;Cli  |
| 3810 | chrY | 7676409 | . | T | C | 248.26   | PASS          | AC=2;AF=0.029;AN=68;DP=287;FS=0.000;Inbre  |
| 3811 | chrY | 7681275 | . | C | T | 1503.09  | PASS          | AC=6;AF=0.086;AN=70;DP=387;FS=0.000;Inbre  |
| 3812 | chrY | 7681806 | . | A | G | 202      | PASS          | AC=4;AF=0.182;AN=22;DP=169;FS=0.000;Inbre  |
| 3813 | chrY | 7682654 | . | G | C | 823.66   | PASS          | AC=4;AF=0.061;AN=66;DP=537;FS=0.000;Inbre  |
| 3814 | chrY | 7683539 | . | C | T | 522.57   | PASS          | AC=2;AF=0.029;AN=70;DP=412;FS=0.000;Inbre  |
| 3815 | chrY | 7690182 | . | A | T | 2686.11  | PASS          | AC=12;AF=0.171;AN=70;DP=359;FS=0.000;Inbr  |
| 3816 | chrY | 7691543 | . | C | T | 220.79   | PASS          | AC=2;AF=0.029;AN=70;DP=412;FS=0.000;Inbre  |
| 3817 | chrY | 7694041 | . | C | G | 782.60   | PASS          | AC=6;AF=0.086;AN=70;DP=509;FS=0.000;Inbre  |
| 3818 | chrY | 7699333 | . | G | A | 11115.23 | PASS          | AC=44;AF=0.647;AN=68;DP=453;FS=0.000       |
| 3819 | chrY | 7699334 | . | G | C | 11139.23 | PASS          | AC=44;AF=0.647;AN=68;DP=452;FS=0.000       |
| 3820 | chrY | 7699339 | . | T | A | 10602.85 | PASS          | AC=44;AF=0.647;AN=68;BaseQRankSum=-7.440e+ |
| 3821 | chrY | 7699953 | . | T | C | 631.38   | PASS          | AC=6;AF=0.086;AN=70;DP=548;FS=0.000;Inbre  |
| 3822 | chrY | 7701588 | . | G | A | 285.37   | PASS          | AC=2;AF=0.029;AN=70;DP=314;FS=0.000;Inbre  |
| 3823 | chrY | 7702437 | . | A | G | 934.48   | PASS          | AC=6;AF=0.086;AN=70;DP=518;FS=0.000;Inbre  |
| 3824 | chrY | 7702973 | . | A | T | 6480.42  | PASS          | AC=48;AF=0.800;AN=60;DP=322;FS=0.000;Inbr  |
| 3825 | chrY | 7708883 | . | T | G | 39.30    | my_snp_filter | AC=4;AF=0.057;AN=70;BaseQRankSum=-7.440e+  |
| 3826 | chrY | 7710366 | . | A | C | 1345.87  | PASS          | AC=6;AF=0.333;AN=18;BaseQRankSum=-7.440e+  |
| 3827 | chrY | 7710511 | . | G | A | 445.02   | PASS          | AC=2;AF=0.111;AN=18;DP=155;FS=0.000;MLEAC  |
| 3828 | chrY | 7711495 | . | G | A | 1835.75  | PASS          | AC=6;AF=0.300;AN=20;DP=218;FS=0.000;Inbre  |
| 3829 | chrY | 7711996 | . | T | C | 406.43   | PASS          | AC=2;AF=0.100;AN=20;DP=157;FS=0.000;Inbre  |
| 3830 | chrY | 7714986 | . | G | T | 5772.25  | PASS          | AC=52;AF=0.867;AN=60;DP=255;FS=0.000;Inbr  |
| 3831 | chrY | 7715846 | . | A | C | 39.38    | PASS          | AC=1;AF=0.016;AN=62;BaseQRankSum=-7.360e-  |
| 3832 | chrY | 7717741 | . | T | C | 82.44    | PASS          | AC=6;AF=0.429;AN=14;BaseQRankSum=0.804;Cl  |
| 3833 | chrY | 7721500 | . | G | A | 504.52   | PASS          | AC=4;AF=0.067;AN=60;DP=251;FS=0.000;Inbre  |
| 3834 | chrY | 7722315 | . | G | T | 1317.38  | PASS          | AC=6;AF=0.086;AN=70;DP=385;FS=0.000;Inbre  |
| 3835 | chrY | 7723814 | . | G | A | 147.09   | PASS          | AC=4;AF=0.182;AN=22;DP=88;FS=0.000;Inbre   |
| 3836 | chrY | 7726849 | . | G | A | 8670.08  | PASS          | AC=56;AF=0.824;AN=68;DP=382;FS=0.000;Inbr  |
| 3837 | chrY | 7727088 | . | G | A | 7353.87  | PASS          | AC=42;AF=0.656;AN=64;DP=391;FS=0.000;Inbr  |
| 3838 | chrY | 7731706 | . | G | A | 1559.79  | PASS          | AC=6;AF=0.086;AN=70;DP=471;FS=0.000;Inbre  |
| 3839 | chrY | 7738280 | . | A | C | 523.64   | PASS          | AC=2;AF=0.029;AN=68;DP=476;FS=0.000;Inbre  |
| 3840 | chrY | 7740265 | . | G | A | 109.40   | PASS          | AC=2;AF=0.029;AN=70;DP=423;FS=0.000;Inbre  |
| 3841 | chrY | 7742928 | . | C | T | 31.82    | PASS          | AC=1;AF=0.015;AN=66;BaseQRankSum=-1.495e+  |
| 3842 | chrY | 7747987 | . | T | C | 36.90    | PASS          | AC=1;AF=0.014;AN=70;BaseQRankSum=-1.231e+  |
| 3843 | chrY | 7747992 | . | A | G | 36.58    | PASS          | AC=1;AF=0.014;AN=70;BaseQRankSum=-1.231e+  |
| 3844 | chrY | 7750789 | . | A | G | 883.43   | PASS          | AC=6;AF=0.094;AN=64;BaseQRankSum=-1.734e+  |
| 3845 | chrY | 7751468 | . | G | C | 218.45   | PASS          | AC=2;AF=0.029;AN=70;DP=366;FS=0.000;Inbre  |
| 3846 | chrY | 7751812 | . | T | C | 2887.05  | PASS          | AC=12;AF=0.171;AN=70;DP=452;FS=0.000;Inbr  |
| 3847 | chrY | 7755382 | . | A | C | 102.50   | PASS          | AC=2;AF=0.029;AN=70;DP=452;FS=0.000;Inbre  |
| 3848 | chrY | 7757444 | . | T | C | 888.71   | PASS          | AC=6;AF=0.086;AN=70;DP=487;FS=0.000;Inbre  |
| 3849 | chrY | 7758127 | . | C | T | 12617.79 | PASS          | AC=52;AF=0.743;AN=70;DP=564;FS=0.000       |
| 3850 | chrY | 7759944 | . | A | G | 12202.89 | PASS          | AC=64;AF=1.00;AN=64;DP=428;FS=0.000        |
| 3851 | chrY | 7760736 | . | G | T | 1461.52  | PASS          | AC=6;AF=0.086;AN=70;DP=498;FS=0.000;Inbre  |
| 3852 | chrY | 7762037 | . | T | C | 341.38   | PASS          | AC=2;AF=0.029;AN=68;DP=305;FS=0.000;Inbre  |
| 3853 | chrY | 7762947 | . | C | T | 11712.02 | PASS          | AC=68;AF=1.00;AN=68;DP=399;FS=0.000        |
| 3854 | chrY | 7766712 | . | C | T | 6820.10  | PASS          | AC=60;AF=1.00;AN=60;DP=240;FS=0.000;Inbre  |
| 3855 | chrY | 7767509 | . | G | C | 10471.32 | PASS          | AC=46;AF=0.657;AN=70;DP=510;FS=0.000       |
| 3856 | chrY | 7767839 | . | A | T | 48.40    | PASS          | AC=1;AF=0.016;AN=64;BaseQRankSum=-7.310e-  |
| 3857 | chrY | 7770244 | . | A | C | 1633.49  | PASS          | AC=6;AF=0.086;AN=70;DP=485;FS=0.000;Inbre  |
| 3858 | chrY | 7771131 | . | A | G | 14263.96 | PASS          | AC=68;AF=1.00;AN=68;DP=480;FS=0.000        |
| 3859 | chrY | 7772417 | . | T | A | 103.43   | PASS          | AC=2;AF=0.029;AN=70;DP=398;FS=0.000;Inbre  |
| 3860 | chrY | 7773172 | . | T | A | 1059.84  | PASS          | AC=6;AF=0.125;AN=48;DP=178;FS=0.000;Inbre  |
| 3861 | chrY | 7786240 | . | C | G | 1199.35  | PASS          | AC=6;AF=0.086;AN=70;DP=508;FS=0.000;Inbre  |
| 3862 | chrY | 7788727 | . | C | T | 384.52   | PASS          | AC=6;AF=0.086;AN=70;DP=306;FS=0.000;Inbre  |
| 3863 | chrY | 7791102 | . | A | T | 479.38   | PASS          | AC=2;AF=0.029;AN=70;DP=314;FS=0.000;Inbre  |
| 3864 | chrY | 7792496 | . | G | A | 1097.01  | PASS          | AC=6;AF=0.086;AN=70;DP=405;FS=0.000;Inbre  |
| 3865 | chrY | 7792789 | . | A | G | 12621.71 | PASS          | AC=56;AF=0.824;AN=68;BaseQRankSum=-9.220e- |
| 3866 | chrY | 7797386 | . | T | G | 9667.82  | PASS          | AC=48;AF=0.727;AN=66;BaseQRankSum=0.751;C  |
| 3867 | chrY | 7800481 | . | G | A | 1062.99  | PASS          | AC=6;AF=0.086;AN=70;DP=546;FS=0.000;Inbre  |
| 3868 | chrY | 7801788 | . | C | T | 595.06   | PASS          | AC=6;AF=0.086;AN=70;DP=417;FS=0.000;Inbre  |
| 3869 | chrY | 7805127 | . | C | T | 1332.55  | PASS          | AC=6;AF=0.088;AN=68;DP=456;FS=0.000;Inbre  |
| 3870 | chrY | 7806898 | . | C | A | 1609.34  | PASS          | AC=6;AF=0.086;AN=70;DP=545;FS=0.000;Inbre  |
| 3871 | chrY | 7811508 | . | A | G | 105.99   | PASS          | AC=1;AF=0.015;AN=68;BaseQRankSum=0.361;Cl  |
| 3872 | chrY | 7811520 | . | T | C | 66.78    | PASS          | AC=1;AF=0.015;AN=68;BaseQRankSum=-2.960e-  |
| 3873 | chrY | 7811532 | . | C | T | 30.74    | PASS          | AC=1;AF=0.014;AN=70;BaseQRankSum=-9.220e-  |
| 3874 | chrY | 7820451 | . | C | A | 484.25   | PASS          | AC=2;AF=0.029;AN=70;DP=507;FS=0.000;Inbre  |
| 3875 | chrY | 7821143 | . | A | G | 542.94   | PASS          | AC=4;AF=0.061;AN=66;DP=435;FS=0.000;Inbre  |
| 3876 | chrY | 7822893 | . | C | G | 30.64    | PASS          | AC=1;AF=0.014;AN=70;BaseQRankSum=-9.220e-  |

|      |      |         |   |   |   |          |               |                                           |
|------|------|---------|---|---|---|----------|---------------|-------------------------------------------|
| 3877 | chrY | 7830165 | . | T | C | 1073.26  | PASS          | AC=6;AF=0.086;AN=70;DP=453;FS=0.000;Inbre |
| 3878 | chrY | 7841657 | . | A | G | 1157.91  | PASS          | AC=6;AF=0.086;AN=70;DP=474;FS=0.000;Inbre |
| 3879 | chrY | 7841766 | . | A | T | 758.79   | PASS          | AC=6;AF=0.088;AN=68;DP=440;FS=0.000;Inbre |
| 3880 | chrY | 7843210 | . | C | T | 224.38   | PASS          | AC=2;AF=0.029;AN=70;DP=543;FS=0.000;Inbre |
| 3881 | chrY | 7844490 | . | G | A | 13367.89 | PASS          | AC=68;AF=1.00;AN=68;DP=436;FS=0.0         |
| 3882 | chrY | 7848043 | . | G | C | 18538.94 | PASS          | AC=70;AF=1.00;AN=70;DP=613;FS=0.0         |
| 3883 | chrY | 7850291 | . | G | C | 49.02    | PASS          | AC=2;AF=0.031;AN=64;BaseQRankSum=-7.360e- |
| 3884 | chrY | 7850298 | . | A | C | 447.37   | PASS          | AC=6;AF=0.094;AN=64;DP=180;FS=0.000;Inbre |
| 3885 | chrY | 7851096 | . | T | A | 1292.64  | PASS          | AC=6;AF=0.086;AN=70;DP=422;FS=0.000;Inbre |
| 3886 | chrY | 7852612 | . | G | A | 275.55   | PASS          | AC=4;AF=0.071;AN=56;DP=224;FS=0.000;Inbre |
| 3887 | chrY | 7853310 | . | T | C | 1237.04  | PASS          | AC=22;AF=0.500;AN=44;DP=219;FS=0.000;Inbr |
| 3888 | chrY | 7854412 | . | G | A | 7917.08  | PASS          | AC=66;AF=1.00;AN=66;DP=271;FS=0.000;Inbre |
| 3889 | chrY | 7858686 | . | G | A | 1308.09  | PASS          | AC=6;AF=0.091;AN=66;DP=254;FS=0.000;Inbre |
| 3890 | chrY | 7863189 | . | A | G | 12210.90 | PASS          | AC=68;AF=1.00;AN=68;DP=403;FS=0.0         |
| 3891 | chrY | 7867317 | . | A | G | 319.89   | PASS          | AC=2;AF=0.029;AN=68;DP=258;FS=0.000;Inbre |
| 3892 | chrY | 7869808 | . | C | T | 10118.50 | PASS          | AC=52;AF=0.743;AN=70;DP=499;FS=0.0        |
| 3893 | chrY | 7879301 | . | G | T | 480.35   | PASS          | AC=2;AF=0.029;AN=70;DP=624;FS=0.000;Inbre |
| 3894 | chrY | 7879850 | . | G | A | 471.29   | PASS          | AC=2;AF=0.029;AN=70;DP=584;FS=0.000;Inbre |
| 3895 | chrY | 7885579 | . | C | T | 1102.43  | PASS          | AC=6;AF=0.333;AN=18;DP=177;FS=0.000;MLEAC |
| 3896 | chrY | 7891188 | . | C | T | 12401    | PASS          | AC=68;AF=1.00;AN=68;DP=414;FS=0.000;Inbre |
| 3897 | chrY | 7891316 | . | A | T | 859.70   | PASS          | AC=6;AF=0.088;AN=68;DP=478;FS=0.000;Inbre |
| 3898 | chrY | 7891525 | . | A | T | 1310.36  | PASS          | AC=6;AF=0.086;AN=70;DP=435;FS=0.000;Inbre |
| 3899 | chrY | 7892174 | . | A | T | 46.76    | PASS          | AC=1;AF=0.014;AN=70;BaseQRankSum=0.588;Cl |
| 3900 | chrY | 7894337 | . | T | C | 46.50    | PASS          | AC=1;AF=0.014;AN=70;BaseQRankSum=-1.434e+ |
| 3901 | chrY | 7894778 | . | G | A | 1002.09  | PASS          | AC=6;AF=0.250;AN=24;DP=142;FS=0.000;Inbre |
| 3902 | chrY | 7900883 | . | A | C | 15870.89 | PASS          | AC=66;AF=1.00;AN=66;DP=517;FS=0.0         |
| 3903 | chrY | 7903359 | . | T | A | 8219.54  | PASS          | AC=40;AF=0.571;AN=70;DP=495;FS=0.000;Inbr |
| 3904 | chrY | 7904140 | . | T | C | 932.09   | PASS          | AC=6;AF=0.086;AN=70;DP=728;FS=0.000;Inbre |
| 3905 | chrY | 7906599 | . | C | A | 501.88   | PASS          | AC=2;AF=0.029;AN=68;DP=435;FS=0.000;Inbre |
| 3906 | chrY | 7913741 | . | G | C | 269.32   | PASS          | AC=2;AF=0.029;AN=70;DP=552;FS=0.000;Inbre |
| 3907 | chrY | 7915372 | . | A | C | 38.63    | my_snp_filter | AC=2;AF=0.029;AN=68;BaseQRankSum=         |
| 3908 | chrY | 7917153 | . | A | G | 678.09   | PASS          | AC=6;AF=0.086;AN=70;DP=567;FS=0.000;Inbre |
| 3909 | chrY | 7917959 | . | G | A | 11591.02 | PASS          | AC=68;AF=1.00;AN=68;BaseQRankSum=         |
| 3910 | chrY | 7918677 | . | C | G | 6479.53  | PASS          | AC=46;AF=0.657;AN=70;DP=384;FS=0.000;Inbr |
| 3911 | chrY | 7922775 | . | G | A | 1289.69  | PASS          | AC=6;AF=0.094;AN=64;DP=215;FS=0.000;Inbre |
| 3912 | chrY | 7923226 | . | C | T | 1215.64  | PASS          | AC=6;AF=0.086;AN=70;DP=347;FS=0.000;Inbre |
| 3913 | chrY | 7923436 | . | C | T | 831.44   | PASS          | AC=6;AF=0.086;AN=70;DP=449;FS=0.000;Inbre |
| 3914 | chrY | 7926414 | . | G | T | 335.41   | PASS          | AC=2;AF=0.029;AN=70;DP=568;FS=0.000;Inbre |
| 3915 | chrY | 7927211 | . | G | T | 39.78    | PASS          | AC=1;AF=0.015;AN=68;BaseQRankSum=0.00;Cli |
| 3916 | chrY | 7927219 | . | G | T | 39.81    | PASS          | AC=1;AF=0.015;AN=66;BaseQRankSum=1.03;Cli |
| 3917 | chrY | 7927225 | . | A | G | 39.80    | PASS          | AC=1;AF=0.015;AN=68;BaseQRankSum=1.03;Cli |
| 3918 | chrY | 7927232 | . | T | C | 39.90    | PASS          | AC=1;AF=0.015;AN=68;BaseQRankSum=-1.026e+ |
| 3919 | chrY | 7939131 | . | G | C | 6358.43  | PASS          | AC=46;AF=0.657;AN=70;DP=358;FS=0.000;Inbr |
| 3920 | chrY | 7947749 | . | C | T | 15842.81 | PASS          | AC=52;AF=0.743;AN=70;DP=694;FS=0.0        |
| 3921 | chrY | 7948701 | . | T | G | 6373.40  | PASS          | AC=62;AF=1.00;AN=62;BaseQRankSum=1.55;Cli |
| 3922 | chrY | 7949214 | . | G | C | 649.89   | PASS          | AC=6;AF=0.086;AN=70;DP=387;FS=0.000;Inbre |
| 3923 | chrY | 7952791 | . | C | A | 878.71   | PASS          | AC=6;AF=0.086;AN=70;BaseQRankSum=0.935;Cl |
| 3924 | chrY | 7953764 | . | C | T | 1170.24  | PASS          | AC=6;AF=0.086;AN=70;DP=442;FS=0.000;Inbre |
| 3925 | chrY | 7956941 | . | C | A | 1305.22  | PASS          | AC=8;AF=0.114;AN=70;DP=583;FS=0.000;Inbre |
| 3926 | chrY | 7960019 | . | A | G | 12853.89 | PASS          | AC=68;AF=1.00;AN=68;DP=443;FS=0.0         |
| 3927 | chrY | 7962668 | . | C | A | 10763.99 | PASS          | AC=52;AF=0.743;AN=70;DP=507;FS=0.0        |
| 3928 | chrY | 7963031 | . | G | T | 9332.98  | PASS          | AC=66;AF=1.00;AN=66;DP=318;FS=0.000;Inbre |
| 3929 | chrY | 7969351 | . | G | A | 1299.37  | PASS          | AC=6;AF=0.086;AN=70;DP=370;FS=0.000;Inbre |
| 3930 | chrY | 7970023 | . | C | A | 3166.27  | PASS          | AC=44;AF=0.786;AN=56;DP=212;FS=0.000;Inbr |
| 3931 | chrY | 7971505 | . | C | T | 6325.03  | PASS          | AC=50;AF=1.00;AN=50;DP=230;FS=0.000;Inbre |
| 3932 | chrY | 7979575 | . | C | T | 1327.07  | PASS          | AC=6;AF=0.120;AN=50;DP=196;FS=0.000;Inbre |
| 3933 | chrY | 7980793 | . | T | G | 960.22   | PASS          | AC=6;AF=0.086;AN=70;DP=478;FS=0.000;Inbre |
| 3934 | chrY | 7981758 | . | T | A | 992.11   | PASS          | AC=6;AF=0.120;AN=50;DP=191;FS=0.000;Inbre |
| 3935 | chrY | 7984930 | . | G | A | 1560.18  | PASS          | AC=6;AF=0.333;AN=18;DP=184;FS=0.000;MLEAC |
| 3936 | chrY | 7987189 | . | T | C | 32       | PASS          | AC=1;AF=0.016;AN=64;BaseQRankSum=-1.495e+ |
| 3937 | chrY | 7987514 | . | T | G | 476.59   | PASS          | AC=2;AF=0.029;AN=68;DP=269;FS=0.000;Inbre |
| 3938 | chrY | 7989541 | . | C | T | 732.94   | PASS          | AC=2;AF=0.030;AN=66;DP=274;FS=0.000;Inbre |
| 3939 | chrY | 7996584 | . | A | G | 4457.12  | PASS          | AC=36;AF=0.750;AN=48;BaseQRankSum=1.59;Cl |
| 3940 | chrY | 7996768 | . | A | G | 4842.05  | PASS          | AC=34;AF=1.00;AN=34;DP=184;FS=0.000;Inbre |
| 3941 | chrY | 8002854 | . | G | A | 45.34    | PASS          | AC=1;AF=0.056;AN=18;BaseQRankSum=0.948;Cl |
| 3942 | chrY | 8002859 | . | T | C | 45.33    | PASS          | AC=1;AF=0.056;AN=18;BaseQRankSum=0.118;Cl |
| 3943 | chrY | 8003985 | . | C | T | 1559.75  | PASS          | AC=6;AF=0.300;AN=20;DP=185;FS=0.000;Inbre |
| 3944 | chrY | 8005623 | . | T | C | 51.57    | PASS          | AC=2;AF=0.083;AN=24;DP=238;FS=0.000;Inbre |
| 3945 | chrY | 8005624 | . | A | T | 53.28    | PASS          | AC=2;AF=0.083;AN=24;DP=238;FS=0.000;Inbre |
| 3946 | chrY | 8005933 | . | G | A | 1618.18  | PASS          | AC=6;AF=0.333;AN=18;BaseQRankSum=1.58;Cli |
| 3947 | chrY | 8006013 | . | A | C | 1474.22  | PASS          | AC=6;AF=0.333;AN=18;DP=177;FS=0.000;MLEAC |
| 3948 | chrY | 8008136 | . | C | T | 1081.78  | PASS          | AC=6;AF=0.300;AN=20;DP=127;FS=0.000;Inbre |
| 3949 | chrY | 8021340 | . | C | T | 2764.49  | PASS          | AC=12;AF=0.171;AN=70;DP=609;FS=0.000;Inbr |
| 3950 | chrY | 8025084 | . | G | T | 567.41   | PASS          | AC=6;AF=0.176;AN=34;DP=115;FS=0.000;Inbre |
| 3951 | chrY | 8027681 | . | T | A | 31.45    | PASS          | AC=1;AF=0.015;AN=68;BaseQRankSum=-9.220e- |
| 3952 | chrY | 8027859 | . | C | G | 4411.27  | PASS          | AC=40;AF=1.00;AN=40;DP=167;FS=0.000;Inbre |

|      |      |         |   |   |   |          |               |                                                       |
|------|------|---------|---|---|---|----------|---------------|-------------------------------------------------------|
| 3953 | chrY | 8034368 | . | G | A | 8168.98  | PASS          | AC=40;AF=0.571;AN=70;DP=477;FS=0.000;Inbre            |
| 3954 | chrY | 8039638 | . | T | G | 957.70   | PASS          | AC=6;AF=0.086;AN=70;DP=547;FS=0.000;Inbre             |
| 3955 | chrY | 8041217 | . | G | C | 6265.65  | PASS          | AC=52;AF=0.743;AN=70;DP=376;FS=0.000;Inbre            |
| 3956 | chrY | 8050994 | . | C | G | 10783.93 | PASS          | AC=68;AF=1.00;AN=68;DP=369;FS=0.000;Inbre             |
| 3957 | chrY | 8053502 | . | G | C | 946.84   | PASS          | AC=6;AF=0.125;AN=48;DP=152;FS=0.000;Inbre             |
| 3958 | chrY | 8059894 | . | C | T | 10032.60 | PASS          | AC=58;AF=0.829;AN=70;DP=404;FS=0.000;Inbre            |
| 3959 | chrY | 8060848 | . | A | G | 4664.98  | PASS          | AC=44;AF=0.710;AN=62;DP=294;FS=0.000;Inbre            |
| 3960 | chrY | 8068059 | . | G | C | 438.21   | PASS          | AC=2;AF=0.029;AN=70;DP=598;FS=0.000;Inbre             |
| 3961 | chrY | 8068262 | . | G | A | 1151.99  | PASS          | AC=6;AF=0.091;AN=66;DP=408;FS=0.000;Inbre             |
| 3962 | chrY | 8068842 | . | C | G | 1219.83  | PASS          | AC=6;AF=0.086;AN=70;DP=428;FS=0.000;Inbre             |
| 3963 | chrY | 8069557 | . | T | G | 1049.74  | PASS          | AC=6;AF=0.086;AN=70;DP=671;FS=0.000;Inbre             |
| 3964 | chrY | 8070532 | . | A | T | 12076.95 | PASS          | AC=70;AF=1.00;AN=70;DP=398;FS=0.000;Inbre             |
| 3965 | chrY | 8072664 | . | C | T | 1085.95  | PASS          | AC=6;AF=0.097;AN=62;BaseQRankSum=1.53;Cli             |
| 3966 | chrY | 8078131 | . | G | A | 1270.21  | PASS          | AC=6;AF=0.086;AN=70;DP=560;FS=0.000;Inbre             |
| 3967 | chrY | 8079352 | . | C | A | 390.22   | PASS          | AC=2;AF=0.032;AN=62;DP=233;FS=0.000;Inbre             |
| 3968 | chrY | 8080119 | . | G | C | 1058.22  | PASS          | AC=6;AF=0.107;AN=56;BaseQRankSum=0.102;Cli            |
| 3969 | chrY | 8080632 | . | A | G | 1196.23  | PASS          | AC=6;AF=0.086;AN=70;DP=474;FS=0.000;Inbre             |
| 3970 | chrY | 8086815 | . | G | A | 11884.02 | PASS          | AC=68;AF=1.00;AN=68;BaseQRankSum=1.00;Inbre           |
| 3971 | chrY | 8096754 | . | C | T | 10611.96 | PASS          | AC=68;AF=1.00;AN=68;DP=365;FS=0.000;Inbre             |
| 3972 | chrY | 8098341 | . | T | C | 1296.66  | PASS          | AC=6;AF=0.086;AN=70;DP=552;FS=0.000;Inbre             |
| 3973 | chrY | 8103496 | . | A | C | 615.52   | PASS          | AC=6;AF=0.086;AN=70;DP=350;FS=0.000;Inbre             |
| 3974 | chrY | 8110520 | . | A | T | 12182.96 | PASS          | AC=68;AF=1.00;AN=68;BaseQRankSum=1.00;Inbre           |
| 3975 | chrY | 8113354 | . | C | T | 11251.56 | PASS          | AC=52;AF=0.743;AN=70;DP=519;FS=0.000;Inbre            |
| 3976 | chrY | 8114740 | . | T | C | 1753.65  | PASS          | AC=6;AF=0.086;AN=70;BaseQRankSum=-5.200e-05;Inbre     |
| 3977 | chrY | 8116284 | . | G | A | 788.92   | PASS          | AC=6;AF=0.086;AN=70;DP=414;FS=0.000;Inbre             |
| 3978 | chrY | 8117397 | . | A | G | 473.49   | PASS          | AC=6;AF=0.088;AN=68;DP=298;FS=0.000;Inbre             |
| 3979 | chrY | 8119070 | . | G | T | 41.99    | my_snp_filter | AC=3;AF=0.045;AN=66;BaseQRankSum=0.045;Inbre          |
| 3980 | chrY | 8123701 | . | C | G | 277.12   | PASS          | AC=2;AF=0.029;AN=70;DP=677;FS=0.000;Inbre             |
| 3981 | chrY | 8124176 | . | T | C | 1220.09  | PASS          | AC=2;AF=0.029;AN=70;DP=682;FS=0.000;Inbre             |
| 3982 | chrY | 8127435 | . | A | G | 22488.85 | PASS          | AC=52;AF=0.743;AN=70;DP=910;FS=0.000;Inbre            |
| 3983 | chrY | 8131538 | . | T | G | 3699.91  | PASS          | AC=38;AF=0.760;AN=50;DP=244;FS=0.000;Inbre            |
| 3984 | chrY | 8132296 | . | T | G | 6050.72  | PASS          | AC=50;AF=0.806;AN=62;DP=316;FS=0.000;Inbre            |
| 3985 | chrY | 8133554 | . | A | C | 1499.14  | PASS          | AC=6;AF=0.097;AN=62;DP=251;FS=0.000;Inbre             |
| 3986 | chrY | 8134704 | . | A | T | 7098.22  | PASS          | AC=58;AF=1.00;AN=58;DP=245;FS=0.000;Inbre             |
| 3987 | chrY | 8134707 | . | A | G | 47.92    | PASS          | AC=2;AF=0.031;AN=64;DP=220;FS=0.000;Inbre             |
| 3988 | chrY | 8143636 | . | G | A | 3256.65  | PASS          | AC=36;AF=0.667;AN=54;DP=259;FS=0.000;Inbre            |
| 3989 | chrY | 8145871 | . | A | G | 7373.06  | PASS          | AC=52;AF=0.743;AN=70;DP=382;FS=0.000;Inbre            |
| 3990 | chrY | 8147497 | . | A | G | 318.03   | PASS          | AC=2;AF=0.029;AN=68;DP=381;FS=0.000;Inbre             |
| 3991 | chrY | 8149348 | . | G | A | 13018.94 | PASS          | AC=64;AF=1.00;AN=64;DP=445;FS=0.000;Inbre             |
| 3992 | chrY | 8151565 | . | C | T | 1295.45  | PASS          | AC=6;AF=0.086;AN=70;DP=503;FS=0.000;Inbre             |
| 3993 | chrY | 8151578 | . | G | A | 336.81   | PASS          | AC=2;AF=0.029;AN=70;DP=474;FS=0.000;Inbre             |
| 3994 | chrY | 8155906 | . | C | T | 434.54   | PASS          | AC=6;AF=0.088;AN=68;DP=245;FS=0.000;Inbre             |
| 3995 | chrY | 8159650 | . | T | C | 314.85   | PASS          | AC=6;AF=0.094;AN=64;DP=224;FS=0.000;Inbre             |
| 3996 | chrY | 8164021 | . | T | G | 1432.96  | PASS          | AC=6;AF=0.086;AN=70;BaseQRankSum=1.42;Cli             |
| 3997 | chrY | 8167736 | . | C | T | 1340.18  | PASS          | AC=6;AF=0.333;AN=18;DP=159;FS=0.000;MLEAC=0.333;Inbre |
| 3998 | chrY | 8173271 | . | T | C | 14716.79 | PASS          | AC=52;AF=0.743;AN=70;BaseQRankSum=1.00;Inbre          |
| 3999 | chrY | 8173788 | . | C | G | 149.92   | PASS          | AC=2;AF=0.071;AN=28;BaseQRankSum=2.83;Cli             |
| 4000 | chrY | 8173809 | . | T | C | 142.44   | PASS          | AC=2;AF=0.063;AN=32;BaseQRankSum=-1.050e-05;Inbre     |
| 4001 | chrY | 8173815 | . | T | G | 136.48   | PASS          | AC=2;AF=0.063;AN=32;BaseQRankSum=0.672;Cli            |
| 4002 | chrY | 8173822 | . | C | G | 145.52   | PASS          | AC=2;AF=0.063;AN=32;BaseQRankSum=2.18;Cli             |
| 4003 | chrY | 8173912 | . | C | A | 101.57   | PASS          | AC=2;AF=0.083;AN=24;BaseQRankSum=0.099;Cli            |
| 4004 | chrY | 8173916 | . | A | T | 66.12    | PASS          | AC=2;AF=0.083;AN=24;BaseQRankSum=1.88;Cli             |
| 4005 | chrY | 8174152 | . | A | G | 56.34    | my_snp_filter | AC=3;AF=0.150;AN=20;BaseQRankSum=0.150;Inbre          |
| 4006 | chrY | 8174193 | . | T | A | 172.57   | my_snp_filter | AC=4;AF=0.200;AN=20;BaseQRankSum=0.200;Inbre          |
| 4007 | chrY | 8174279 | . | G | A | 60.33    | PASS          | AC=1;AF=0.056;AN=18;BaseQRankSum=-3.110e-05;Inbre     |
| 4008 | chrY | 8174288 | . | T | A | 60.33    | PASS          | AC=1;AF=0.056;AN=18;BaseQRankSum=-2.180e-05;Inbre     |
| 4009 | chrY | 8175535 | . | G | C | 53.66    | PASS          | AC=1;AF=0.045;AN=22;BaseQRankSum=1.48;Cli             |
| 4010 | chrY | 8175605 | . | G | A | 82.40    | PASS          | AC=1;AF=0.056;AN=18;BaseQRankSum=1.06;Cli             |
| 4011 | chrY | 8175615 | . | A | T | 70.31    | PASS          | AC=1;AF=0.056;AN=18;BaseQRankSum=-1.743e-05;Inbre     |
| 4012 | chrY | 8177946 | . | C | A | 584.43   | my_snp_filter | AC=2;AF=0.100;AN=20;DP=177;FS=0.000;Inbre             |
| 4013 | chrY | 8177948 | . | A | C | 584.43   | my_snp_filter | AC=2;AF=0.100;AN=20;DP=179;FS=0.000;Inbre             |
| 4014 | chrY | 8182224 | . | C | A | 65.98    | PASS          | AC=2;AF=0.034;AN=58;BaseQRankSum=0.406;Cli            |
| 4015 | chrY | 8182228 | . | C | A | 48.81    | PASS          | AC=1;AF=0.016;AN=62;BaseQRankSum=-3.580e-05;Inbre     |
| 4016 | chrY | 8182229 | . | A | G | 329.44   | PASS          | AC=5;AF=0.078;AN=64;BaseQRankSum=0.731;Cli            |
| 4017 | chrY | 8188380 | . | G | C | 7375.54  | PASS          | AC=44;AF=0.647;AN=68;DP=444;FS=0.000;Inbre            |
| 4018 | chrY | 8189029 | . | T | G | 1690.49  | PASS          | AC=4;AF=0.057;AN=70;DP=535;FS=0.000;Inbre             |
| 4019 | chrY | 8190099 | . | T | C | 302.75   | PASS          | AC=2;AF=0.030;AN=66;DP=481;FS=0.000;Inbre             |
| 4020 | chrY | 8194310 | . | A | C | 10005.98 | PASS          | AC=68;AF=1.00;AN=68;DP=332;FS=0.000;Inbre             |
| 4021 | chrY | 8195260 | . | G | A | 1497.45  | PASS          | AC=6;AF=0.088;AN=68;DP=667;FS=0.000;Inbre             |
| 4022 | chrY | 8207956 | . | G | A | 1196.03  | PASS          | AC=6;AF=0.115;AN=52;DP=170;FS=0.000;Inbre             |
| 4023 | chrY | 8214698 | . | C | A | 18616.94 | PASS          | AC=52;AF=0.743;AN=70;DP=702;FS=0.000;Inbre            |
| 4024 | chrY | 8214827 | . | T | C | 10974.99 | PASS          | AC=66;AF=1.00;AN=66;DP=406;FS=0.000;Inbre             |
| 4025 | chrY | 8222809 | . | C | G | 1292.97  | PASS          | AC=6;AF=0.086;AN=70;DP=585;FS=0.000;Inbre             |
| 4026 | chrY | 8222893 | . | C | T | 1453.18  | PASS          | AC=6;AF=0.086;AN=70;DP=658;FS=0.000;Inbre             |
| 4027 | chrY | 8226939 | . | G | A | 539.25   | PASS          | AC=2;AF=0.029;AN=70;DP=437;FS=0.000;Inbre             |
| 4028 | chrY | 8227605 | . | G | A | 17780.81 | PASS          | AC=58;AF=0.829;AN=70;DP=674;FS=0.000;Inbre            |

|      |      |         |   |   |   |          |      |                                           |
|------|------|---------|---|---|---|----------|------|-------------------------------------------|
| 4029 | chrY | 8227896 | . | G | C | 1277.47  | PASS | AC=6;AF=0.086;AN=70;BaseQRankSum=1.59;Cli |
| 4030 | chrY | 8233186 | . | T | C | 7234.08  | PASS | AC=62;AF=1.00;AN=62;DP=261;FS=0.000;Inbre |
| 4031 | chrY | 8239331 | . | C | A | 1491.09  | PASS | AC=6;AF=0.088;AN=68;DP=341;FS=0.000;Inbre |
| 4032 | chrY | 8252836 | . | C | A | 770.60   | PASS | AC=6;AF=0.086;AN=70;DP=366;FS=0.000;Inbre |
| 4033 | chrY | 8254132 | . | C | A | 1383.55  | PASS | AC=6;AF=0.086;AN=70;DP=522;FS=0.000;Inbre |
| 4034 | chrY | 8257661 | . | G | A | 15608.97 | PASS | AC=70;AF=1.00;AN=70;DP=513;FS=0.0         |
| 4035 | chrY | 8274331 | . | T | C | 944.71   | PASS | AC=6;AF=0.086;AN=70;DP=549;FS=0.000;Inbre |
| 4036 | chrY | 8280242 | . | G | A | 9748.37  | PASS | AC=51;AF=0.729;AN=70;BaseQRankSum=-7.510e |
| 4037 | chrY | 8280433 | . | C | T | 1208.07  | PASS | AC=6;AF=0.086;AN=70;DP=630;FS=0.000;Inbre |
| 4038 | chrY | 8281961 | . | A | G | 324.91   | PASS | AC=6;AF=0.088;AN=68;DP=328;FS=0.000;Inbre |
| 4039 | chrY | 8283411 | . | T | G | 4141.56  | PASS | AC=46;AF=0.719;AN=64;DP=265;FS=0.000;Inbr |
| 4040 | chrY | 8287857 | . | A | G | 449.93   | PASS | AC=4;AF=0.065;AN=62;DP=280;FS=0.000;Inbre |
| 4041 | chrY | 8289580 | . | T | A | 583.02   | PASS | AC=2;AF=0.031;AN=64;DP=255;FS=0.000;Inbre |
| 4042 | chrY | 8290483 | . | A | T | 2044.74  | PASS | AC=12;AF=0.171;AN=70;DP=219;FS=0.000;Inbr |
| 4043 | chrY | 8290951 | . | T | A | 4681.23  | PASS | AC=32;AF=1.00;AN=32;DP=191;FS=0.000;Inbre |
| 4044 | chrY | 8293360 | . | G | A | 483.02   | PASS | AC=2;AF=0.111;AN=18;BaseQRankSum=0.630;Cl |
| 4045 | chrY | 8295295 | . | C | T | 273.35   | PASS | AC=2;AF=0.029;AN=70;DP=478;FS=0.000;Inbre |
| 4046 | chrY | 8295929 | . | C | G | 646.60   | PASS | AC=6;AF=0.086;AN=70;DP=331;FS=0.000;Inbre |
| 4047 | chrY | 8296284 | . | A | C | 607.55   | PASS | AC=6;AF=0.333;AN=18;DP=140;FS=0.000;MLEAC |
| 4048 | chrY | 8296441 | . | T | G | 4001.87  | PASS | AC=18;AF=1.00;AN=18;DP=149;FS=0.000;MLEAC |
| 4049 | chrY | 8296886 | . | A | G | 1425.98  | PASS | AC=6;AF=0.088;AN=68;DP=498;FS=0.000;Inbre |
| 4050 | chrY | 8297696 | . | C | T | 457.33   | PASS | AC=2;AF=0.029;AN=70;DP=536;FS=0.000;Inbre |
| 4051 | chrY | 8302035 | . | T | A | 393.61   | PASS | AC=2;AF=0.029;AN=70;DP=523;FS=0.000;Inbre |
| 4052 | chrY | 8302284 | . | T | C | 66.66    | PASS | AC=1;AF=0.014;AN=70;BaseQRankSum=-5.560e- |
| 4053 | chrY | 8302290 | . | A | G | 66.68    | PASS | AC=1;AF=0.014;AN=70;BaseQRankSum=-9.270e- |
| 4054 | chrY | 8302490 | . | T | A | 302.11   | PASS | AC=2;AF=0.029;AN=70;DP=710;FS=0.000;Inbre |
| 4055 | chrY | 8303516 | . | T | C | 530.92   | PASS | AC=6;AF=0.086;AN=70;DP=455;FS=0.000;Inbre |
| 4056 | chrY | 8306942 | . | A | G | 911.84   | PASS | AC=6;AF=0.086;AN=70;DP=464;FS=0.000;Inbre |
| 4057 | chrY | 8307194 | . | G | A | 1125.61  | PASS | AC=6;AF=0.088;AN=68;DP=383;FS=0.000;Inbre |
| 4058 | chrY | 8311520 | . | A | T | 1184.04  | PASS | AC=6;AF=0.088;AN=68;DP=497;FS=0.000;Inbre |
| 4059 | chrY | 8312279 | . | T | A | 1045.09  | PASS | AC=6;AF=0.086;AN=70;DP=567;FS=0.000;Inbre |
| 4060 | chrY | 8316170 | . | T | A | 912.49   | PASS | AC=6;AF=0.086;AN=70;DP=533;FS=0.000;Inbre |
| 4061 | chrY | 8319509 | . | G | A | 1518.17  | PASS | AC=6;AF=0.091;AN=66;DP=473;FS=0.000;Inbre |
| 4062 | chrY | 8319751 | . | C | T | 1053.96  | PASS | AC=6;AF=0.086;AN=70;DP=588;FS=0.000;Inbre |
| 4063 | chrY | 8323509 | . | A | C | 947.19   | PASS | AC=6;AF=0.333;AN=18;DP=146;FS=0.000;MLEAC |
| 4064 | chrY | 8323848 | . | C | T | 1377.75  | PASS | AC=6;AF=0.300;AN=20;DP=163;FS=0.000;Inbre |
| 4065 | chrY | 8326618 | . | T | C | 12488.97 | PASS | AC=70;AF=1.00;AN=70;BaseQRankSum=         |
| 4066 | chrY | 8326977 | . | A | G | 162.24   | PASS | AC=2;AF=0.029;AN=70;DP=624;FS=0.000;Inbre |
| 4067 | chrY | 8330236 | . | G | A | 360.26   | PASS | AC=2;AF=0.029;AN=70;DP=541;FS=0.000;Inbre |
| 4068 | chrY | 8332538 | . | A | G | 1017.06  | PASS | AC=6;AF=0.088;AN=68;DP=482;FS=0.000;Inbre |
| 4069 | chrY | 8334875 | . | G | A | 13532.41 | PASS | AC=67;AF=0.985;AN=68;BaseQRankSum         |
| 4070 | chrY | 8355219 | . | G | A | 30.62    | PASS | AC=1;AF=0.014;AN=70;BaseQRankSum=-3.650e- |
| 4071 | chrY | 8357196 | . | T | C | 127.08   | PASS | AC=2;AF=0.029;AN=70;DP=628;FS=0.000;Inbre |
| 4072 | chrY | 8357498 | . | G | T | 1087.86  | PASS | AC=4;AF=0.057;AN=70;DP=579;FS=0.000;Inbre |
| 4073 | chrY | 8378220 | . | T | C | 6830.66  | PASS | AC=58;AF=0.829;AN=70;DP=342;FS=0.000;Inbr |
| 4074 | chrY | 8379245 | . | T | C | 797.76   | PASS | AC=6;AF=0.150;AN=40;DP=166;FS=0.000;Inbre |
| 4075 | chrY | 8379348 | . | A | T | 64.31    | PASS | AC=1;AF=0.050;AN=20;BaseQRankSum=1.24;Cli |
| 4076 | chrY | 8379349 | . | A | T | 69.83    | PASS | AC=2;AF=0.100;AN=20;BaseQRankSum=-1.239e+ |
| 4077 | chrY | 8382727 | . | A | T | 1213.28  | PASS | AC=6;AF=0.086;AN=70;DP=689;FS=0.000;Inbre |
| 4078 | chrY | 8383601 | . | C | G | 997.62   | PASS | AC=6;AF=0.086;AN=70;DP=644;FS=0.000;Inbre |
| 4079 | chrY | 8391108 | . | G | T | 1527.03  | PASS | AC=6;AF=0.086;AN=70;DP=568;FS=0.000;Inbre |
| 4080 | chrY | 8392395 | . | G | T | 1666.38  | PASS | AC=6;AF=0.086;AN=70;DP=476;FS=0.000;Inbre |
| 4081 | chrY | 8392756 | . | A | G | 1105.20  | PASS | AC=6;AF=0.086;AN=70;DP=659;FS=0.000;Inbre |
| 4082 | chrY | 8394931 | . | C | T | 943.03   | PASS | AC=6;AF=0.086;AN=70;DP=701;FS=0.000;Inbre |
| 4083 | chrY | 8395251 | . | C | T | 1385.77  | PASS | AC=6;AF=0.086;AN=70;DP=541;FS=0.000;Inbre |
| 4084 | chrY | 8395838 | . | C | T | 1135.24  | PASS | AC=6;AF=0.086;AN=70;DP=575;FS=0.000;Inbre |
| 4085 | chrY | 8397349 | . | G | A | 1021.14  | PASS | AC=6;AF=0.086;AN=70;DP=646;FS=0.000;Inbre |
| 4086 | chrY | 8398614 | . | T | C | 858.26   | PASS | AC=6;AF=0.086;AN=70;DP=643;FS=0.000;Inbre |
| 4087 | chrY | 8401239 | . | T | C | 1078.32  | PASS | AC=6;AF=0.086;AN=70;DP=629;FS=0.000;Inbre |
| 4088 | chrY | 8408989 | . | C | T | 1386.76  | PASS | AC=6;AF=0.300;AN=20;BaseQRankSum=1.40;Cli |
| 4089 | chrY | 8410157 | . | T | C | 623.44   | PASS | AC=2;AF=0.029;AN=70;DP=461;FS=0.000;Inbre |
| 4090 | chrY | 8410758 | . | G | A | 1545.82  | PASS | AC=6;AF=0.086;AN=70;DP=413;FS=0.000;Inbre |
| 4091 | chrY | 8411202 | . | G | A | 14317.95 | PASS | AC=68;AF=1.00;AN=68;BaseQRankSum=         |
| 4092 | chrY | 8416058 | . | A | C | 25061.89 | PASS | AC=70;AF=1.00;AN=70;DP=785;FS=0.0         |
| 4093 | chrY | 8420377 | . | C | T | 1221.54  | PASS | AC=6;AF=0.086;AN=70;DP=539;FS=0.000;Inbre |
| 4094 | chrY | 8422865 | . | A | C | 31.97    | PASS | AC=1;AF=0.015;AN=68;BaseQRankSum=-1.495e+ |
| 4095 | chrY | 8424089 | . | A | G | 14388.33 | PASS | AC=58;AF=0.829;AN=70;DP=580;FS=0.         |
| 4096 | chrY | 8428370 | . | G | A | 14216.41 | PASS | AC=50;AF=0.735;AN=68;DP=651;FS=0.         |
| 4097 | chrY | 8428411 | . | G | A | 1638.25  | PASS | AC=6;AF=0.088;AN=68;BaseQRankSum=-1.734e+ |
| 4098 | chrY | 8430640 | . | G | T | 665.46   | PASS | AC=6;AF=0.086;AN=70;DP=479;FS=0.000;Inbre |
| 4099 | chrY | 8436397 | . | A | G | 31.49    | PASS | AC=1;AF=0.014;AN=70;BaseQRankSum=-6.840e- |
| 4100 | chrY | 8438277 | . | A | G | 2997.41  | PASS | AC=12;AF=0.171;AN=70;DP=443;FS=0.000;Inbr |
| 4101 | chrY | 8439542 | . | A | G | 10729.98 | PASS | AC=67;AF=0.985;AN=68;BaseQRankSum         |
| 4102 | chrY | 8442334 | . | T | C | 19956.37 | PASS | AC=52;AF=0.743;AN=70;DP=641;FS=0.         |
| 4103 | chrY | 8442341 | . | G | A | 21227.50 | PASS | AC=58;AF=0.829;AN=70;DP=638;FS=0.         |
| 4104 | chrY | 8448515 | . | C | T | 1308.69  | PASS | AC=6;AF=0.086;AN=70;DP=473;FS=0.000;Inbre |

|      |      |         |   |   |   |          |               |                                            |
|------|------|---------|---|---|---|----------|---------------|--------------------------------------------|
| 4105 | chrY | 8449068 | . | G | A | 297.58   | PASS          | AC=2;AF=0.029;AN=68;DP=378;FS=0.000;Inbre  |
| 4106 | chrY | 8449511 | . | C | T | 1109.88  | PASS          | AC=6;AF=0.088;AN=68;DP=629;FS=0.000;Inbre  |
| 4107 | chrY | 8452166 | . | T | C | 492.52   | PASS          | AC=6;AF=0.097;AN=62;DP=237;FS=0.000;Inbre  |
| 4108 | chrY | 8453537 | . | A | C | 842.36   | PASS          | AC=6;AF=0.086;AN=70;DP=728;FS=0.000;Inbre  |
| 4109 | chrY | 8454895 | . | T | C | 15846.96 | PASS          | AC=52;AF=0.743;AN=70;DP=644;FS=0.000       |
| 4110 | chrY | 8457950 | . | G | A | 10535.14 | PASS          | AC=50;AF=0.735;AN=68;DP=499;FS=0.000       |
| 4111 | chrY | 8458859 | . | G | A | 1146.09  | PASS          | AC=6;AF=0.086;AN=70;BaseQRankSum=-6.670e-  |
| 4112 | chrY | 8459148 | . | T | G | 310.19   | PASS          | AC=2;AF=0.029;AN=70;DP=669;FS=0.000;Inbre  |
| 4113 | chrY | 8462601 | . | T | A | 1727.82  | PASS          | AC=6;AF=0.086;AN=70;DP=630;FS=0.000;Inbre  |
| 4114 | chrY | 8463332 | . | T | C | 611.16   | PASS          | AC=6;AF=0.088;AN=68;DP=464;FS=0.000;Inbre  |
| 4115 | chrY | 8464280 | . | G | A | 1170.27  | PASS          | AC=6;AF=0.088;AN=68;DP=511;FS=0.000;Inbre  |
| 4116 | chrY | 8471989 | . | G | T | 1419.85  | PASS          | AC=6;AF=0.086;AN=70;DP=558;FS=0.000;Inbre  |
| 4117 | chrY | 8474189 | . | C | A | 19289.28 | PASS          | AC=58;AF=0.829;AN=70;DP=695;FS=0.000       |
| 4118 | chrY | 8480384 | . | G | A | 552.62   | PASS          | AC=6;AF=0.086;AN=70;DP=480;FS=0.000;Inbre  |
| 4119 | chrY | 8482599 | . | C | G | 1078.61  | PASS          | AC=6;AF=0.086;AN=70;DP=382;FS=0.000;Inbre  |
| 4120 | chrY | 8482631 | . | G | C | 6726.59  | PASS          | AC=50;AF=0.735;AN=68;DP=346;FS=0.000;Inbre |
| 4121 | chrY | 8483638 | . | G | A | 904.29   | PASS          | AC=6;AF=0.091;AN=66;DP=469;FS=0.000;Inbre  |
| 4122 | chrY | 8484112 | . | G | T | 18551.72 | PASS          | AC=52;AF=0.743;AN=70;DP=742;FS=0.000       |
| 4123 | chrY | 8484577 | . | A | G | 978.31   | PASS          | AC=2;AF=0.029;AN=70;DP=630;FS=0.000;Inbre  |
| 4124 | chrY | 8486344 | . | G | A | 1146.39  | PASS          | AC=6;AF=0.086;AN=70;DP=546;FS=0.000;Inbre  |
| 4125 | chrY | 8488523 | . | C | A | 456.40   | PASS          | AC=2;AF=0.029;AN=70;DP=518;FS=0.000;Inbre  |
| 4126 | chrY | 8491160 | . | C | G | 792.54   | PASS          | AC=6;AF=0.088;AN=68;DP=412;FS=0.000;Inbre  |
| 4127 | chrY | 8492876 | . | C | T | 1032.24  | PASS          | AC=6;AF=0.088;AN=68;DP=515;FS=0.000;Inbre  |
| 4128 | chrY | 8496195 | . | C | A | 1396.22  | PASS          | AC=6;AF=0.086;AN=70;DP=642;FS=0.000;Inbre  |
| 4129 | chrY | 8498289 | . | G | T | 346.80   | PASS          | AC=6;AF=0.091;AN=66;DP=307;FS=0.000;Inbre  |
| 4130 | chrY | 8499322 | . | A | G | 462.52   | PASS          | AC=2;AF=0.029;AN=70;DP=621;FS=0.000;Inbre  |
| 4131 | chrY | 8502236 | . | A | G | 14848.91 | PASS          | AC=70;AF=1.00;AN=70;DP=561;FS=0.000        |
| 4132 | chrY | 8503447 | . | G | A | 1026.81  | PASS          | AC=6;AF=0.086;AN=70;DP=686;FS=0.000;Inbre  |
| 4133 | chrY | 8503823 | . | C | T | 1198.19  | PASS          | AC=6;AF=0.088;AN=68;DP=657;FS=0.000;Inbre  |
| 4134 | chrY | 8505317 | . | G | A | 1444.69  | PASS          | AC=6;AF=0.088;AN=68;DP=610;FS=0.000;Inbre  |
| 4135 | chrY | 8506721 | . | C | T | 1248.79  | PASS          | AC=6;AF=0.086;AN=70;DP=557;FS=0.000;Inbre  |
| 4136 | chrY | 8508188 | . | T | C | 12878.39 | PASS          | AC=40;AF=0.571;AN=70;DP=668;FS=0.000       |
| 4137 | chrY | 8511769 | . | T | C | 1030.67  | PASS          | AC=6;AF=0.086;AN=70;DP=601;FS=0.000;Inbre  |
| 4138 | chrY | 8514733 | . | G | A | 12231.65 | PASS          | AC=40;AF=0.571;AN=70;DP=635;FS=0.000       |
| 4139 | chrY | 8516929 | . | A | G | 10765.02 | PASS          | AC=70;AF=1.00;AN=70;BaseQRankSum=          |
| 4140 | chrY | 8525582 | . | G | A | 1104.66  | PASS          | AC=6;AF=0.086;AN=70;DP=642;FS=0.000;Inbre  |
| 4141 | chrY | 8526333 | . | C | T | 527.47   | PASS          | AC=2;AF=0.029;AN=70;DP=558;FS=0.000;Inbre  |
| 4142 | chrY | 8527146 | . | G | A | 603.04   | PASS          | AC=6;AF=0.088;AN=68;DP=327;FS=0.000;Inbre  |
| 4143 | chrY | 8533410 | . | T | C | 46.43    | PASS          | AC=1;AF=0.016;AN=62;BaseQRankSum=0.727;Cl  |
| 4144 | chrY | 8534318 | . | T | A | 392.37   | PASS          | AC=2;AF=0.029;AN=68;DP=567;FS=0.000;Inbre  |
| 4145 | chrY | 8534979 | . | C | T | 11732.18 | PASS          | AC=52;AF=0.813;AN=64;DP=493;FS=0.000       |
| 4146 | chrY | 8535125 | . | G | T | 158.26   | PASS          | AC=2;AF=0.030;AN=66;DP=253;FS=0.000;Inbre  |
| 4147 | chrY | 8537273 | . | G | A | 12634.22 | PASS          | AC=52;AF=0.743;AN=70;DP=578;FS=0.000       |
| 4148 | chrY | 8539998 | . | G | A | 589.27   | PASS          | AC=2;AF=0.029;AN=70;DP=772;FS=0.000;Inbre  |
| 4149 | chrY | 8542721 | . | C | T | 1500.50  | PASS          | AC=6;AF=0.086;AN=70;BaseQRankSum=-1.239e+  |
| 4150 | chrY | 8548898 | . | T | G | 477.08   | PASS          | AC=2;AF=0.029;AN=70;DP=674;FS=0.000;Inbre  |
| 4151 | chrY | 8550825 | . | C | T | 539.25   | PASS          | AC=6;AF=0.091;AN=66;DP=217;FS=0.000;Inbre  |
| 4152 | chrY | 8553421 | . | T | C | 14628.41 | PASS          | AC=58;AF=0.829;AN=70;DP=590;FS=0.000       |
| 4153 | chrY | 8558505 | . | C | T | 9821.57  | PASS          | AC=63;AF=0.984;AN=64;BaseQRankSum=1.50;Cl  |
| 4154 | chrY | 8559960 | . | G | T | 35.58    | PASS          | AC=1;AF=0.014;AN=70;BaseQRankSum=0.00;Cli  |
| 4155 | chrY | 8559992 | . | C | T | 1402.26  | PASS          | AC=6;AF=0.086;AN=70;DP=550;FS=0.000;Inbre  |
| 4156 | chrY | 8560645 | . | A | G | 8468.42  | PASS          | AC=52;AF=0.743;AN=70;DP=443;FS=0.000;Inbr  |
| 4157 | chrY | 8572150 | . | A | G | 14332.31 | PASS          | AC=58;AF=0.829;AN=70;DP=596;FS=0.000       |
| 4158 | chrY | 8578180 | . | T | A | 1323.27  | PASS          | AC=6;AF=0.086;AN=70;DP=474;FS=0.000;Inbre  |
| 4159 | chrY | 8579009 | . | T | A | 1592.02  | PASS          | AC=6;AF=0.086;AN=70;DP=731;FS=0.000;Inbre  |
| 4160 | chrY | 8583808 | . | C | G | 183.66   | PASS          | AC=2;AF=0.029;AN=70;DP=453;FS=0.000;Inbre  |
| 4161 | chrY | 8585701 | . | A | G | 5631.66  | PASS          | AC=48;AF=0.727;AN=66;DP=349;FS=0.000;Inbr  |
| 4162 | chrY | 8589031 | . | T | C | 15154.95 | PASS          | AC=58;AF=0.829;AN=70;DP=603;FS=0.000       |
| 4163 | chrY | 8589604 | . | G | A | 1077.99  | PASS          | AC=6;AF=0.086;AN=70;DP=438;FS=0.000;Inbre  |
| 4164 | chrY | 8589875 | . | A | G | 178.33   | PASS          | AC=2;AF=0.029;AN=70;DP=646;FS=0.000;Inbre  |
| 4165 | chrY | 8590647 | . | A | G | 1527.26  | PASS          | AC=4;AF=0.057;AN=70;DP=550;FS=0.000;Inbre  |
| 4166 | chrY | 8592725 | . | A | G | 598.69   | PASS          | AC=6;AF=0.086;AN=70;DP=495;FS=0.000;Inbre  |
| 4167 | chrY | 8593845 | . | G | A | 1215     | PASS          | AC=6;AF=0.086;AN=70;DP=842;FS=0.000;Inbre  |
| 4168 | chrY | 8597350 | . | T | G | 313.42   | PASS          | AC=2;AF=0.029;AN=70;DP=555;FS=0.000;Inbre  |
| 4169 | chrY | 8600938 | . | C | T | 219.58   | PASS          | AC=2;AF=0.029;AN=70;DP=588;FS=0.000;Inbre  |
| 4170 | chrY | 8602394 | . | T | C | 56.35    | PASS          | AC=2;AF=0.029;AN=68;BaseQRankSum=-1.231e+  |
| 4171 | chrY | 8602415 | . | T | C | 15446.67 | PASS          | AC=56;AF=0.824;AN=68;DP=648;FS=0.000       |
| 4172 | chrY | 8604667 | . | G | A | 1267.14  | PASS          | AC=6;AF=0.086;AN=70;DP=677;FS=0.000;Inbre  |
| 4173 | chrY | 8605895 | . | C | A | 1786.88  | PASS          | AC=6;AF=0.086;AN=70;DP=578;FS=0.000;Inbre  |
| 4174 | chrY | 8613265 | . | T | C | 31.62    | PASS          | AC=1;AF=0.014;AN=70;BaseQRankSum=-6.840e-  |
| 4175 | chrY | 8614327 | . | C | T | 388.90   | PASS          | AC=2;AF=0.029;AN=70;DP=515;FS=0.000;Inbre  |
| 4176 | chrY | 8619144 | . | C | T | 1184.14  | PASS          | AC=6;AF=0.086;AN=70;DP=691;FS=0.000;Inbre  |
| 4177 | chrY | 8619538 | . | A | G | 11319    | my_snp_filter | AC=66;AF=1.00;AN=66;DP=377;FS=0.000        |
| 4178 | chrY | 8620323 | . | T | C | 256.23   | my_snp_filter | AC=6;AF=0.088;AN=68;BaseQRankSum=          |
| 4179 | chrY | 8620877 | . | T | C | 2631.69  | PASS          | AC=6;AF=0.086;AN=70;DP=598;FS=0.000;Inbre  |
| 4180 | chrY | 8620881 | . | T | C | 3512.03  | PASS          | AC=12;AF=0.171;AN=70;DP=578;FS=0.000;Inbr  |

|      |      |         |   |   |   |          |      |                                           |
|------|------|---------|---|---|---|----------|------|-------------------------------------------|
| 4181 | chrY | 8623513 | . | G | A | 1267.43  | PASS | AC=6;AF=0.086;AN=70;DP=499;FS=0.000;Inbre |
| 4182 | chrY | 8623586 | . | G | T | 1541.53  | PASS | AC=6;AF=0.086;AN=70;DP=494;FS=0.000;Inbre |
| 4183 | chrY | 8631385 | . | T | C | 55.45    | PASS | AC=1;AF=0.050;AN=20;BaseQRankSum=-7.310e- |
| 4184 | chrY | 8633545 | . | C | T | 16186.91 | PASS | AC=70;AF=1.00;AN=70;DP=511;FS=0.0         |
| 4185 | chrY | 8635807 | . | G | A | 1460.76  | PASS | AC=6;AF=0.086;AN=70;DP=661;FS=0.000;Inbre |
| 4186 | chrY | 8640245 | . | C | G | 13361.87 | PASS | AC=52;AF=0.743;AN=70;DP=606;FS=0.0        |
| 4187 | chrY | 8645760 | . | T | A | 1285.90  | PASS | AC=6;AF=0.115;AN=52;DP=209;FS=0.000;Inbre |
| 4188 | chrY | 8652927 | . | G | C | 490.22   | PASS | AC=2;AF=0.029;AN=68;BaseQRankSum=1.13;Cli |
| 4189 | chrY | 8660345 | . | G | A | 303.30   | PASS | AC=2;AF=0.030;AN=66;DP=205;FS=0.000;Inbre |
| 4190 | chrY | 8660432 | . | G | A | 4137.17  | PASS | AC=50;AF=0.806;AN=62;DP=224;FS=0.000;Inb  |
| 4191 | chrY | 8661715 | . | T | G | 30.91    | PASS | AC=1;AF=0.014;AN=70;BaseQRankSum=-9.220e- |
| 4192 | chrY | 8661717 | . | G | A | 30.92    | PASS | AC=1;AF=0.014;AN=70;BaseQRankSum=0.922;Cl |
| 4193 | chrY | 8661851 | . | G | A | 479.26   | PASS | AC=2;AF=0.033;AN=60;DP=214;FS=0.000;Inbre |
| 4194 | chrY | 8661991 | . | C | G | 5671.02  | PASS | AC=38;AF=0.559;AN=68;DP=398;FS=0.000;Inbr |
| 4195 | chrY | 8667179 | . | G | A | 9394.99  | PASS | AC=64;AF=1.00;AN=64;DP=318;FS=0.000;Inbre |
| 4196 | chrY | 8668533 | . | C | T | 11381.53 | PASS | AC=52;AF=0.743;AN=70;BaseQRankSum         |
| 4197 | chrY | 8670380 | . | A | C | 1342.76  | PASS | AC=22;AF=0.423;AN=52;DP=255;FS=0.000;Inbr |
| 4198 | chrY | 8673832 | . | C | T | 12040.91 | PASS | AC=52;AF=0.743;AN=70;DP=552;FS=0.0        |
| 4199 | chrY | 8674808 | . | C | T | 2670.17  | PASS | AC=12;AF=0.176;AN=68;BaseQRankSum=1.09;Cl |
| 4200 | chrY | 8676330 | . | A | G | 15968.92 | PASS | AC=68;AF=1.00;AN=68;DP=597;FS=0.0         |
| 4201 | chrY | 8677479 | . | G | T | 1174.80  | PASS | AC=6;AF=0.091;AN=66;DP=359;FS=0.000;Inbre |
| 4202 | chrY | 8677493 | . | C | T | 1114.55  | PASS | AC=6;AF=0.091;AN=66;DP=360;FS=0.000;Inbre |
| 4203 | chrY | 8678225 | . | G | C | 679.14   | PASS | AC=6;AF=0.086;AN=70;DP=369;FS=0.000;Inbre |
| 4204 | chrY | 8679843 | . | T | G | 6789.54  | PASS | AC=56;AF=0.824;AN=68;BaseQRankSum=1.58;Cl |
| 4205 | chrY | 8679954 | . | T | C | 927.29   | PASS | AC=6;AF=0.086;AN=70;DP=315;FS=0.000;Inbre |
| 4206 | chrY | 8680661 | . | C | T | 7568.21  | PASS | AC=58;AF=0.829;AN=70;DP=339;FS=0.000;Inbr |
| 4207 | chrY | 8682970 | . | T | A | 79.72    | PASS | AC=2;AF=0.029;AN=68;DP=267;FS=0.000;Inbre |
| 4208 | chrY | 8685038 | . | G | A | 7904.77  | PASS | AC=52;AF=0.743;AN=70;DP=425;FS=0.000;Inbr |
| 4209 | chrY | 8685083 | . | G | A | 11355.03 | PASS | AC=68;AF=1.00;AN=68;BaseQRankSum          |
| 4210 | chrY | 8688351 | . | G | A | 995.56   | PASS | AC=6;AF=0.091;AN=66;DP=449;FS=0.000;Inbre |
| 4211 | chrY | 8690479 | . | A | G | 497.22   | PASS | AC=6;AF=0.111;AN=54;DP=152;FS=0.000;Inbre |
| 4212 | chrY | 8690860 | . | A | T | 4140.17  | PASS | AC=44;AF=0.647;AN=68;DP=294;FS=0.000;Inbr |
| 4213 | chrY | 8694916 | . | A | G | 7849.04  | PASS | AC=64;AF=1.00;AN=64;DP=281;FS=0.000;Inbre |
| 4214 | chrY | 8696594 | . | A | G | 9244.02  | PASS | AC=70;AF=1.00;AN=70;DP=374;FS=0.000;Inbre |
| 4215 | chrY | 8701691 | . | G | C | 649.54   | PASS | AC=6;AF=0.086;AN=70;DP=423;FS=0.000;Inbre |
| 4216 | chrY | 8705980 | . | T | C | 4235.19  | PASS | AC=34;AF=1.00;AN=34;DP=166;FS=0.000;Inbre |
| 4217 | chrY | 8722476 | . | T | A | 4853.50  | PASS | AC=53;AF=0.981;AN=54;BaseQRankSum=0.736;C |
| 4218 | chrY | 8726111 | . | G | A | 901.71   | PASS | AC=6;AF=0.088;AN=68;DP=379;FS=0.000;Inbre |
| 4219 | chrY | 8730475 | . | A | T | 1345.50  | PASS | AC=6;AF=0.094;AN=64;DP=271;FS=0.000;Inbre |
| 4220 | chrY | 8738853 | . | T | G | 13400.92 | PASS | AC=70;AF=1.00;AN=70;DP=451;FS=0.0         |
| 4221 | chrY | 8745965 | . | C | T | 239.23   | PASS | AC=2;AF=0.029;AN=70;DP=457;FS=0.000;Inbr  |
| 4222 | chrY | 8746611 | . | C | T | 16143.73 | PASS | AC=46;AF=0.657;AN=70;DP=726;FS=0.0        |
| 4223 | chrY | 8746792 | . | G | A | 4044.35  | PASS | AC=38;AF=0.679;AN=56;DP=231;FS=0.000;Inbr |
| 4224 | chrY | 8760488 | . | A | C | 1204.85  | PASS | AC=6;AF=0.086;AN=70;DP=546;FS=0.000;Inbre |
| 4225 | chrY | 8762969 | . | C | A | 533.17   | PASS | AC=2;AF=0.029;AN=70;DP=537;FS=0.000;Inbre |
| 4226 | chrY | 8764464 | . | T | G | 1120.62  | PASS | AC=6;AF=0.088;AN=68;DP=296;FS=0.000;Inbre |
| 4227 | chrY | 8768573 | . | T | G | 45.89    | PASS | AC=1;AF=0.019;AN=52;BaseQRankSum=-2.014e+ |
| 4228 | chrY | 8768579 | . | T | C | 51.88    | PASS | AC=1;AF=0.020;AN=50;BaseQRankSum=-1.371e+ |
| 4229 | chrY | 8769425 | . | C | T | 1449.88  | PASS | AC=6;AF=0.088;AN=68;DP=589;FS=0.000;Inbre |
| 4230 | chrY | 8771750 | . | G | A | 997.36   | PASS | AC=6;AF=0.086;AN=70;DP=473;FS=0.000;Inbre |
| 4231 | chrY | 8773674 | . | C | T | 5745.73  | PASS | AC=52;AF=0.743;AN=70;DP=323;FS=0.000;Inbr |
| 4232 | chrY | 8774422 | . | T | C | 30.08    | PASS | AC=1;AF=0.016;AN=62;BaseQRankSum=1.23;Cli |
| 4233 | chrY | 8778211 | . | T | G | 257.68   | PASS | AC=6;AF=0.100;AN=60;DP=279;FS=0.000;Inbre |
| 4234 | chrY | 8789892 | . | A | G | 25821.48 | PASS | AC=44;AF=0.647;AN=68;DP=1077;FS=0.0       |
| 4235 | chrY | 8790693 | . | C | T | 1440.81  | PASS | AC=6;AF=0.086;AN=70;DP=901;FS=0.000;Inbre |
| 4236 | chrY | 8792176 | . | A | C | 5517.48  | PASS | AC=44;AF=0.710;AN=62;DP=302;FS=0.000;Inbr |
| 4237 | chrY | 8793919 | . | G | T | 19676.12 | PASS | AC=58;AF=0.829;AN=70;BaseQRankSum         |
| 4238 | chrY | 8796086 | . | A | G | 960.74   | PASS | AC=6;AF=0.088;AN=68;DP=689;FS=0.000;Inbre |
| 4239 | chrY | 8798524 | . | G | C | 299.23   | PASS | AC=2;AF=0.029;AN=70;DP=753;FS=0.000;Inbre |
| 4240 | chrY | 8799540 | . | G | A | 8388.25  | PASS | AC=46;AF=0.657;AN=70;DP=450;FS=0.000;Inbr |
| 4241 | chrY | 8804908 | . | T | C | 1742.78  | PASS | AC=6;AF=0.086;AN=70;DP=672;FS=0.000;Inbre |
| 4242 | chrY | 8805525 | . | A | G | 21060.88 | PASS | AC=70;AF=1.00;AN=70;DP=731;FS=0.0         |
| 4243 | chrY | 8807995 | . | C | A | 16716.57 | PASS | AC=40;AF=0.571;AN=70;BaseQRankSum         |
| 4244 | chrY | 8808332 | . | A | G | 30.65    | PASS | AC=1;AF=0.014;AN=70;BaseQRankSum=-9.220e- |
| 4245 | chrY | 8808339 | . | G | C | 33.99    | PASS | AC=1;AF=0.014;AN=70;BaseQRankSum=-1.380e+ |
| 4246 | chrY | 8809390 | . | T | C | 1172.90  | PASS | AC=6;AF=0.091;AN=66;DP=267;FS=0.000;Inbre |
| 4247 | chrY | 8810919 | . | A | C | 730.32   | PASS | AC=6;AF=0.086;AN=70;DP=404;FS=0.000;Inbre |
| 4248 | chrY | 8811466 | . | C | T | 4707.86  | PASS | AC=18;AF=1.00;AN=18;DP=187;FS=0.000;MLEAC |
| 4249 | chrY | 8812759 | . | G | A | 1418.64  | PASS | AC=6;AF=0.273;AN=22;DP=180;FS=0.000;Inbre |
| 4250 | chrY | 8816007 | . | T | G | 1218.11  | PASS | AC=6;AF=0.088;AN=68;DP=254;FS=0.000;Inbre |
| 4251 | chrY | 8816136 | . | C | A | 1661.96  | PASS | AC=6;AF=0.250;AN=24;DP=197;FS=0.000;Inbre |
| 4252 | chrY | 8818442 | . | A | G | 6742.21  | PASS | AC=42;AF=0.636;AN=66;DP=437;FS=0.000;Inbr |
| 4253 | chrY | 8819574 | . | T | G | 594.95   | PASS | AC=6;AF=0.111;AN=54;DP=162;FS=0.000;Inbre |
| 4254 | chrY | 8826595 | . | T | C | 832.96   | PASS | AC=18;AF=1.00;AN=18;DP=72;FS=0.000;MLEAC  |
| 4255 | chrY | 8831327 | . | C | A | 39.75    | PASS | AC=1;AF=0.015;AN=68;BaseQRankSum=-1.300e+ |
| 4256 | chrY | 8831341 | . | T | A | 108.65   | PASS | AC=1;AF=0.014;AN=70;BaseQRankSum=-1.398e+ |



|      |      |         |   |   |   |          |               |                                           |
|------|------|---------|---|---|---|----------|---------------|-------------------------------------------|
| 4257 | chrY | 8836635 | . | G | C | 1011.48  | PASS          | AC=4;AF=0.057;AN=70;DP=725;FS=0.000;Inbre |
| 4258 | chrY | 8840859 | . | G | A | 1103.84  | PASS          | AC=6;AF=0.086;AN=70;DP=664;FS=0.000;Inbre |
| 4259 | chrY | 8842966 | . | G | A | 73.89    | PASS          | AC=3;AF=0.054;AN=56;BaseQRankSum=0.248;Cl |
| 4260 | chrY | 8842969 | . | C | A | 68.41    | PASS          | AC=3;AF=0.052;AN=58;BaseQRankSum=-7.510e- |
| 4261 | chrY | 8845191 | . | G | A | 33.68    | PASS          | AC=1;AF=0.014;AN=70;BaseQRankSum=0.00;Cli |
| 4262 | chrY | 8845213 | . | A | G | 33.56    | PASS          | AC=1;AF=0.014;AN=70;BaseQRankSum=1.38;Cli |
| 4263 | chrY | 8845380 | . | T | C | 18000.87 | PASS          | AC=70;AF=1.00;AN=70;DP=636;FS=0.0         |
| 4264 | chrY | 8845654 | . | C | A | 506.24   | PASS          | AC=2;AF=0.029;AN=70;DP=443;FS=0.000;Inbre |
| 4265 | chrY | 8848038 | . | G | A | 1219.77  | PASS          | AC=6;AF=0.088;AN=68;DP=420;FS=0.000;Inbre |
| 4266 | chrY | 8855352 | . | G | A | 4515.51  | PASS          | AC=48;AF=0.800;AN=60;DP=281;FS=0.000;Inb  |
| 4267 | chrY | 8855867 | . | A | G | 7176.81  | PASS          | AC=40;AF=0.571;AN=70;DP=443;FS=0.000;Inbr |
| 4268 | chrY | 8856026 | . | G | A | 9364.52  | PASS          | AC=52;AF=0.743;AN=70;DP=462;FS=0.000;Inbr |
| 4269 | chrY | 8857621 | . | T | A | 8017.77  | PASS          | AC=40;AF=0.571;AN=70;DP=506;FS=0.000;Inbr |
| 4270 | chrY | 8857950 | . | A | G | 1058.23  | PASS          | AC=18;AF=0.321;AN=56;DP=279;FS=0.000;Inbr |
| 4271 | chrY | 8861569 | . | T | C | 362.25   | PASS          | AC=2;AF=0.029;AN=70;DP=612;FS=0.000;Inbre |
| 4272 | chrY | 8866856 | . | T | A | 203.77   | PASS          | AC=2;AF=0.029;AN=68;DP=428;FS=0.000;Inbre |
| 4273 | chrY | 8869318 | . | A | G | 934.44   | PASS          | AC=6;AF=0.086;AN=70;BaseQRankSum=1.49;Cli |
| 4274 | chrY | 8870417 | . | G | C | 1682.64  | PASS          | AC=6;AF=0.086;AN=70;DP=774;FS=0.000;Inbre |
| 4275 | chrY | 8870437 | . | A | C | 1770.60  | PASS          | AC=6;AF=0.086;AN=70;DP=763;FS=0.000;Inbre |
| 4276 | chrY | 8870440 | . | G | T | 1819.62  | PASS          | AC=6;AF=0.086;AN=70;DP=750;FS=0.000;Inbre |
| 4277 | chrY | 8875060 | . | C | T | 702.03   | PASS          | AC=6;AF=0.088;AN=68;DP=351;FS=0.000;Inbre |
| 4278 | chrY | 8876758 | . | G | A | 1333.54  | PASS          | AC=6;AF=0.086;AN=70;DP=412;FS=0.000;Inbre |
| 4279 | chrY | 8880943 | . | G | A | 287.96   | PASS          | AC=2;AF=0.030;AN=66;DP=259;FS=0.000;Inbre |
| 4280 | chrY | 8886095 | . | A | G | 13071.16 | PASS          | AC=38;AF=0.559;AN=68;BaseQRankSum         |
| 4281 | chrY | 8889226 | . | C | A | 767.70   | PASS          | AC=6;AF=0.086;AN=70;DP=482;FS=0.000;Inbre |
| 4282 | chrY | 8895766 | . | G | A | 1078.92  | PASS          | AC=6;AF=0.086;AN=70;DP=599;FS=0.000;Inbre |
| 4283 | chrY | 8901991 | . | C | T | 109.62   | PASS          | AC=2;AF=0.042;AN=48;BaseQRankSum=-7.310e- |
| 4284 | chrY | 8905099 | . | C | T | 874.34   | PASS          | AC=6;AF=0.088;AN=68;DP=257;FS=0.000;Inbre |
| 4285 | chrY | 8909837 | . | G | C | 648.35   | PASS          | AC=6;AF=0.088;AN=68;DP=480;FS=0.000;Inbre |
| 4286 | chrY | 8910408 | . | T | C | 792.19   | PASS          | AC=6;AF=0.086;AN=70;DP=497;FS=0.000;Inbre |
| 4287 | chrY | 8914314 | . | C | T | 668.06   | PASS          | AC=6;AF=0.088;AN=68;DP=346;FS=0.000;Inbre |
| 4288 | chrY | 8969429 | . | T | C | 149.65   | PASS          | AC=1;AF=0.015;AN=68;BaseQRankSum=-3.360e- |
| 4289 | chrY | 8970859 | . | C | A | 30.46    | my_snp_filter | AC=2;AF=0.034;AN=58;BaseQRankSum=         |
| 4290 | chrY | 8970861 | . | C | A | 30.83    | PASS          | AC=2;AF=0.033;AN=60;BaseQRankSum=1.39;Cli |
| 4291 | chrY | 8972605 | . | T | C | 52.63    | PASS          | AC=2;AF=0.100;AN=20;DP=163;FS=0.000;Inbre |
| 4292 | chrY | 8972629 | . | T | A | 52.12    | PASS          | AC=2;AF=0.100;AN=20;DP=151;FS=0.000;Inbre |
| 4293 | chrY | 8980266 | . | G | A | 1596.81  | PASS          | AC=6;AF=0.086;AN=70;DP=663;FS=0.000;Inbre |
| 4294 | chrY | 8987653 | . | T | C | 7642.06  | PASS          | AC=56;AF=0.824;AN=68;DP=345;FS=0.000;Inbr |
| 4295 | chrY | 9004556 | . | C | T | 2771.72  | PASS          | AC=12;AF=0.171;AN=70;DP=757;FS=0.000;Inbr |
| 4296 | chrY | 9006521 | . | C | T | 1000.84  | PASS          | AC=6;AF=0.086;AN=70;DP=328;FS=0.000;Inbre |
| 4297 | chrY | 9006786 | . | C | G | 374.75   | PASS          | AC=6;AF=0.120;AN=50;DP=192;FS=0.000;Inbre |
| 4298 | chrY | 9013185 | . | G | A | 150.91   | PASS          | AC=2;AF=0.063;AN=32;BaseQRankSum=-8.980e- |
| 4299 | chrY | 9013206 | . | C | G | 149.60   | PASS          | AC=2;AF=0.056;AN=36;BaseQRankSum=0.762;Cl |
| 4300 | chrY | 9013215 | . | G | T | 158.10   | PASS          | AC=2;AF=0.048;AN=42;BaseQRankSum=1.59;Cli |
| 4301 | chrY | 9015043 | . | C | T | 1009.55  | PASS          | AC=6;AF=0.088;AN=68;DP=550;FS=0.000;Inbre |
| 4302 | chrY | 9016522 | . | C | T | 963.91   | PASS          | AC=6;AF=0.086;AN=70;DP=488;FS=0.000;Inbre |
| 4303 | chrY | 9017255 | . | G | A | 319.68   | PASS          | AC=4;AF=0.059;AN=68;DP=595;FS=0.000;Inbre |
| 4304 | chrY | 9018408 | . | A | C | 9043.33  | PASS          | AC=46;AF=0.657;AN=70;BaseQRankSum=-1.735e |
| 4305 | chrY | 9018928 | . | G | A | 1254.48  | PASS          | AC=6;AF=0.086;AN=70;DP=533;FS=0.000;Inbre |
| 4306 | chrY | 9023747 | . | A | G | 34.32    | PASS          | AC=2;AF=0.029;AN=68;DP=206;FS=0.000;Inbre |
| 4307 | chrY | 9026967 | . | G | C | 4819.80  | PASS          | AC=46;AF=0.719;AN=64;DP=282;FS=0.000;Inbr |
| 4308 | chrY | 9030938 | . | C | T | 1379.42  | PASS          | AC=6;AF=0.086;AN=70;DP=364;FS=0.000;Inbre |
| 4309 | chrY | 9030988 | . | T | C | 330.43   | my_snp_filter | AC=6;AF=0.086;AN=70;DP=315;FS=0.0         |
| 4310 | chrY | 9031181 | . | G | C | 4308.22  | PASS          | AC=40;AF=1.00;AN=40;DP=162;FS=0.000;Inbre |
| 4311 | chrY | 9040209 | . | T | A | 399.62   | PASS          | AC=6;AF=0.333;AN=18;DP=48;FS=0.000;MLEAC= |
| 4312 | chrY | 9044835 | . | C | T | 1287.61  | PASS          | AC=6;AF=0.086;AN=70;DP=606;FS=0.000;Inbre |
| 4313 | chrY | 9046046 | . | A | T | 466.44   | my_snp_filter | AC=6;AF=0.086;AN=70;BaseQRankSum=         |
| 4314 | chrY | 9046301 | . | A | G | 47.59    | my_snp_filter | AC=2;AF=0.029;AN=68;BaseQRankSum=         |
| 4315 | chrY | 9049597 | . | G | C | 31.56    | PASS          | AC=1;AF=0.014;AN=70;BaseQRankSum=-9.220e- |
| 4316 | chrY | 9049598 | . | C | T | 31.71    | PASS          | AC=1;AF=0.014;AN=70;BaseQRankSum=-1.980e- |
| 4317 | chrY | 9049615 | . | G | T | 31.65    | PASS          | AC=1;AF=0.014;AN=70;BaseQRankSum=-9.220e- |
| 4318 | chrY | 9049620 | . | G | T | 31.92    | PASS          | AC=1;AF=0.014;AN=70;BaseQRankSum=-1.495e+ |
| 4319 | chrY | 9049623 | . | T | G | 35.95    | PASS          | AC=2;AF=0.029;AN=70;BaseQRankSum=-7.470e- |
| 4320 | chrY | 9051841 | . | A | C | 1386.92  | PASS          | AC=6;AF=0.086;AN=70;DP=559;FS=0.000;Inbre |
| 4321 | chrY | 9052103 | . | G | A | 52.59    | my_snp_filter | AC=2;AF=0.029;AN=70;BaseQRankSum=         |
| 4322 | chrY | 9063599 | . | G | A | 53.33    | PASS          | AC=1;AF=0.056;AN=18;BaseQRankSum=-2.833e+ |
| 4323 | chrY | 9063606 | . | A | T | 53.32    | PASS          | AC=1;AF=0.056;AN=18;BaseQRankSum=-1.953e+ |
| 4324 | chrY | 9063607 | . | T | G | 53.32    | PASS          | AC=1;AF=0.056;AN=18;BaseQRankSum=-1.953e+ |
| 4325 | chrY | 9063903 | . | A | G | 79.23    | PASS          | AC=1;AF=0.014;AN=70;BaseQRankSum=-4.060e- |
| 4326 | chrY | 9063913 | . | A | G | 78.81    | PASS          | AC=1;AF=0.014;AN=70;BaseQRankSum=-1.537e+ |
| 4327 | chrY | 9063946 | . | C | G | 1085.30  | PASS          | AC=6;AF=0.086;AN=70;DP=537;FS=0.000;Inbre |
| 4328 | chrY | 9064229 | . | G | A | 1437.27  | PASS          | AC=6;AF=0.086;AN=70;DP=609;FS=0.000;Inbre |
| 4329 | chrY | 9064682 | . | C | A | 13934.02 | PASS          | AC=54;AF=0.818;AN=66;BaseQRankSum         |
| 4330 | chrY | 9065289 | . | A | T | 12666.91 | PASS          | AC=44;AF=0.647;AN=68;BaseQRankSum         |
| 4331 | chrY | 9067880 | . | G | C | 45.83    | PASS          | AC=1;AF=0.014;AN=70;BaseQRankSum=-2.709e+ |
| 4332 | chrY | 9067884 | . | G | T | 46.08    | PASS          | AC=1;AF=0.014;AN=70;BaseQRankSum=-1.449e+ |

|      |      |         |   |   |   |          |               |                                           |
|------|------|---------|---|---|---|----------|---------------|-------------------------------------------|
| 4333 | chrY | 9067886 | . | C | T | 45.89    | PASS          | AC=1;AF=0.014;AN=70;BaseQRankSum=0.441;Cl |
| 4334 | chrY | 9067897 | . | A | T | 43.06    | PASS          | AC=1;AF=0.014;AN=70;BaseQRankSum=-3.550e- |
| 4335 | chrY | 9067903 | . | A | C | 43.14    | PASS          | AC=1;AF=0.014;AN=70;BaseQRankSum=-2.488e+ |
| 4336 | chrY | 9067904 | . | A | C | 40.45    | PASS          | AC=1;AF=0.014;AN=70;BaseQRankSum=0.355;Cl |
| 4337 | chrY | 9067906 | . | A | G | 40.20    | PASS          | AC=1;AF=0.014;AN=70;BaseQRankSum=-2.369e+ |
| 4338 | chrY | 9067917 | . | T | C | 43.24    | PASS          | AC=1;AF=0.014;AN=70;BaseQRankSum=-1.066e+ |
| 4339 | chrY | 9067921 | . | A | C | 43.25    | PASS          | AC=1;AF=0.014;AN=70;BaseQRankSum=-2.606e+ |
| 4340 | chrY | 9067931 | . | G | C | 40.75    | PASS          | AC=1;AF=0.014;AN=70;BaseQRankSum=-7.270e- |
| 4341 | chrY | 9067944 | . | A | G | 40.28    | PASS          | AC=1;AF=0.014;AN=70;BaseQRankSum=-2.739e+ |
| 4342 | chrY | 9067949 | . | G | A | 41.24    | PASS          | AC=1;AF=0.014;AN=70;BaseQRankSum=1.29;Cli |
| 4343 | chrY | 9067950 | . | T | C | 37.60    | my_snp_filter | AC=1;AF=0.014;AN=70;BaseQRankSum=         |
| 4344 | chrY | 9067951 | . | C | T | 38.32    | PASS          | AC=1;AF=0.014;AN=70;BaseQRankSum=0.839;Cl |
| 4345 | chrY | 9067955 | . | T | C | 37.61    | my_snp_filter | AC=1;AF=0.014;AN=70;BaseQRankSum=         |
| 4346 | chrY | 9067959 | . | T | G | 38.21    | my_snp_filter | AC=1;AF=0.015;AN=68;BaseQRankSum=         |
| 4347 | chrY | 9067963 | . | A | C | 31.73    | my_snp_filter | AC=1;AF=0.015;AN=68;BaseQRankSum=         |
| 4348 | chrY | 9067969 | . | A | G | 35.21    | my_snp_filter | AC=1;AF=0.015;AN=68;BaseQRankSum=         |
| 4349 | chrY | 9068071 | . | A | T | 1260.29  | PASS          | AC=6;AF=0.088;AN=68;DP=279;FS=0.000;Inbre |
| 4350 | chrY | 9068133 | . | G | A | 41.57    | my_snp_filter | AC=4;AF=0.057;AN=70;BaseQRankSum=         |
| 4351 | chrY | 9068135 | . | C | T | 47.68    | my_snp_filter | AC=4;AF=0.057;AN=70;BaseQRankSum=         |
| 4352 | chrY | 9068144 | . | T | G | 49.34    | my_snp_filter | AC=4;AF=0.057;AN=70;BaseQRankSum=         |
| 4353 | chrY | 9068164 | . | C | T | 77.26    | PASS          | AC=4;AF=0.059;AN=68;BaseQRankSum=-2.900e- |
| 4354 | chrY | 9068169 | . | T | C | 79.13    | PASS          | AC=4;AF=0.059;AN=68;BaseQRankSum=0.935;Cl |
| 4355 | chrY | 9068192 | . | T | A | 86.48    | PASS          | AC=2;AF=0.030;AN=66;BaseQRankSum=-1.267e+ |
| 4356 | chrY | 9068196 | . | G | A | 80.49    | PASS          | AC=2;AF=0.030;AN=66;BaseQRankSum=0.761;Cl |
| 4357 | chrY | 9074523 | . | C | T | 9748.11  | PASS          | AC=44;AF=0.647;AN=68;DP=533;FS=0.000;Inbr |
| 4358 | chrY | 9075738 | . | G | A | 4238.77  | PASS          | AC=42;AF=0.636;AN=66;DP=324;FS=0.000;Inbr |
| 4359 | chrY | 9076128 | . | C | A | 1298.03  | PASS          | AC=6;AF=0.086;AN=70;DP=633;FS=0.000;Inbre |
| 4360 | chrY | 9076205 | . | C | T | 19035.12 | PASS          | AC=52;AF=0.743;AN=70;DP=781;FS=0.         |
| 4361 | chrY | 9077533 | . | C | T | 1152.36  | PASS          | AC=6;AF=0.086;AN=70;DP=531;FS=0.000;Inbre |
| 4362 | chrY | 9078835 | . | A | G | 8257.94  | PASS          | AC=56;AF=0.824;AN=68;DP=423;FS=0.000;Inbr |
| 4363 | chrY | 9080852 | . | A | G | 446.85   | PASS          | AC=6;AF=0.086;AN=70;DP=335;FS=0.000;Inbre |
| 4364 | chrY | 9082750 | . | G | A | 1082.11  | PASS          | AC=6;AF=0.086;AN=70;DP=456;FS=0.000;Inbre |
| 4365 | chrY | 9082814 | . | G | A | 37.21    | my_snp_filter | AC=1;AF=0.014;AN=70;BaseQRankSum=         |
| 4366 | chrY | 9082819 | . | A | C | 35.67    | my_snp_filter | AC=1;AF=0.014;AN=70;BaseQRankSum=         |
| 4367 | chrY | 9082831 | . | C | T | 31.31    | my_snp_filter | AC=1;AF=0.014;AN=70;BaseQRankSum=         |
| 4368 | chrY | 9082835 | . | T | C | 31.02    | my_snp_filter | AC=1;AF=0.014;AN=70;BaseQRankSum=         |
| 4369 | chrY | 9082840 | . | A | G | 31.12    | my_snp_filter | AC=1;AF=0.014;AN=70;BaseQRankSum=         |
| 4370 | chrY | 9082841 | . | G | T | 31.23    | my_snp_filter | AC=1;AF=0.014;AN=70;BaseQRankSum=         |
| 4371 | chrY | 9082861 | . | G | T | 37.35    | my_snp_filter | AC=1;AF=0.014;AN=70;BaseQRankSum=         |
| 4372 | chrY | 9082868 | . | C | T | 40.10    | PASS          | AC=1;AF=0.014;AN=70;BaseQRankSum=0.945;Cl |
| 4373 | chrY | 9082870 | . | T | C | 43.41    | PASS          | AC=1;AF=0.014;AN=70;BaseQRankSum=-2.132e+ |
| 4374 | chrY | 9082881 | . | G | T | 35.17    | my_snp_filter | AC=1;AF=0.014;AN=70;BaseQRankSum=         |
| 4375 | chrY | 9082886 | . | T | A | 31.90    | my_snp_filter | AC=1;AF=0.014;AN=70;BaseQRankSum=         |
| 4376 | chrY | 9082898 | . | A | C | 34.86    | my_snp_filter | AC=1;AF=0.014;AN=70;BaseQRankSum=         |
| 4377 | chrY | 9083036 | . | G | A | 10489.90 | PASS          | AC=56;AF=0.800;AN=70;BaseQRankSum=        |
| 4378 | chrY | 9083205 | . | G | C | 808.46   | PASS          | AC=6;AF=0.086;AN=70;DP=528;FS=0.000;Inbre |
| 4379 | chrY | 9084870 | . | T | G | 22954.95 | PASS          | AC=70;AF=1.00;AN=70;DP=751;FS=0.0         |
| 4380 | chrY | 9085444 | . | C | T | 2263.93  | PASS          | AC=6;AF=0.086;AN=70;DP=766;FS=0.000;Inbre |
| 4381 | chrY | 9091751 | . | C | T | 973.29   | PASS          | AC=6;AF=0.086;AN=70;BaseQRankSum=-4.250e- |
| 4382 | chrY | 9093383 | . | C | G | 3645.06  | PASS          | AC=22;AF=1.00;AN=22;DP=153;FS=0.000;Inbre |
| 4383 | chrY | 9097669 | . | G | A | 988.94   | PASS          | AC=6;AF=0.088;AN=68;DP=630;FS=0.000;Inbre |
| 4384 | chrY | 9098922 | . | T | C | 25559.90 | PASS          | AC=70;AF=1.00;AN=70;DP=796;FS=0.0         |
| 4385 | chrY | 9099362 | . | A | G | 344.82   | PASS          | AC=2;AF=0.029;AN=68;DP=504;FS=0.000;Inbre |
| 4386 | chrY | 9099427 | . | C | T | 1032.16  | PASS          | AC=6;AF=0.086;AN=70;DP=506;FS=0.000;Inbre |
| 4387 | chrY | 9105097 | . | G | A | 881.07   | PASS          | AC=6;AF=0.086;AN=70;DP=443;FS=0.000;Inbre |
| 4388 | chrY | 9108252 | . | T | G | 19020.29 | PASS          | AC=58;AF=0.829;AN=70;DP=705;FS=0.         |
| 4389 | chrY | 9108931 | . | C | T | 540.17   | PASS          | AC=2;AF=0.029;AN=70;DP=800;FS=0.000;Inbre |
| 4390 | chrY | 9108951 | . | C | A | 18367.12 | PASS          | AC=40;AF=0.571;AN=70;DP=878;FS=0.         |
| 4391 | chrY | 9118085 | . | C | G | 15893.13 | PASS          | AC=52;AF=0.743;AN=70;DP=664;FS=0.         |
| 4392 | chrY | 9118497 | . | G | A | 1044.46  | PASS          | AC=6;AF=0.086;AN=70;DP=613;FS=0.000;Inbre |
| 4393 | chrY | 9128713 | . | C | T | 1144.81  | PASS          | AC=6;AF=0.086;AN=70;DP=828;FS=0.000;Inbre |
| 4394 | chrY | 9131166 | . | C | A | 12420.10 | PASS          | AC=63;AF=0.984;AN=64;BaseQRankSum         |
| 4395 | chrY | 9131177 | . | C | T | 11517.52 | PASS          | AC=61;AF=0.953;AN=64;BaseQRankSum         |
| 4396 | chrY | 9139609 | . | G | A | 2005.78  | PASS          | AC=6;AF=0.086;AN=70;DP=697;FS=0.000;Inbre |
| 4397 | chrY | 9142309 | . | C | T | 1055.04  | PASS          | AC=6;AF=0.086;AN=70;DP=734;FS=0.000;Inbre |
| 4398 | chrY | 9145517 | . | A | G | 64.03    | my_snp_filter | AC=2;AF=0.029;AN=70;BaseQRankSum=         |
| 4399 | chrY | 9145524 | . | C | T | 145.60   | PASS          | AC=2;AF=0.029;AN=70;BaseQRankSum=1.38;Cli |
| 4400 | chrY | 9145525 | . | A | G | 151.78   | PASS          | AC=2;AF=0.029;AN=70;BaseQRankSum=2.65;Cli |
| 4401 | chrY | 9147889 | . | C | T | 2688.97  | PASS          | AC=12;AF=0.171;AN=70;DP=755;FS=0.000;Inbr |
| 4402 | chrY | 9151036 | . | T | C | 397.86   | PASS          | AC=4;AF=0.063;AN=64;DP=297;FS=0.000;Inbre |
| 4403 | chrY | 9152146 | . | A | G | 1156.40  | PASS          | AC=2;AF=0.029;AN=70;DP=769;FS=0.000;Inbre |
| 4404 | chrY | 9153355 | . | T | G | 1610.71  | PASS          | AC=6;AF=0.120;AN=50;DP=199;FS=0.000;Inbre |
| 4405 | chrY | 9153654 | . | C | T | 344.44   | PASS          | AC=2;AF=0.037;AN=54;DP=224;FS=0.000;Inbre |
| 4406 | chrY | 9154397 | . | T | C | 1176.71  | PASS          | AC=6;AF=0.111;AN=54;DP=247;FS=0.000;Inbre |
| 4407 | chrY | 9155526 | . | T | C | 10037.54 | PASS          | AC=52;AF=0.743;AN=70;DP=471;FS=0.         |
| 4408 | chrY | 9156793 | . | G | T | 1239.85  | PASS          | AC=6;AF=0.086;AN=70;BaseQRankSum=-1.281e+ |

|      |      |         |   |   |   |          |               |                                           |
|------|------|---------|---|---|---|----------|---------------|-------------------------------------------|
| 4409 | chrY | 9163105 | . | C | G | 5721.16  | PASS          | AC=48;AF=0.727;AN=66;DP=350;FS=0.000;Inbr |
| 4410 | chrY | 9164082 | . | A | T | 961.38   | PASS          | AC=6;AF=0.088;AN=68;DP=470;FS=0.000;Inbre |
| 4411 | chrY | 9170545 | . | A | C | 11637.93 | PASS          | AC=68;AF=1.00;AN=68;DP=410;FS=0.0         |
| 4412 | chrY | 9170598 | . | G | A | 1259.72  | PASS          | AC=6;AF=0.086;AN=70;DP=386;FS=0.000;Inbre |
| 4413 | chrY | 9171794 | . | A | G | 601.59   | PASS          | AC=6;AF=0.086;AN=70;BaseQRankSum=-1.488e+ |
| 4414 | chrY | 9171836 | . | G | A | 365.50   | PASS          | AC=2;AF=0.029;AN=70;DP=516;FS=0.000;Inbre |
| 4415 | chrY | 9171850 | . | C | T | 591.84   | PASS          | AC=4;AF=0.057;AN=70;DP=533;FS=0.000;Inbre |
| 4416 | chrY | 9171896 | . | G | A | 1229.99  | PASS          | AC=6;AF=0.086;AN=70;DP=595;FS=0.000;Inbre |
| 4417 | chrY | 9171956 | . | A | T | 19794.96 | PASS          | AC=70;AF=1.00;AN=70;DP=664;FS=0.0         |
| 4418 | chrY | 9172015 | . | G | T | 427.52   | PASS          | AC=2;AF=0.029;AN=70;DP=524;FS=0.000;Inbre |
| 4419 | chrY | 9172586 | . | G | A | 2249.01  | PASS          | AC=4;AF=0.059;AN=68;DP=672;FS=0.000;Inbre |
| 4420 | chrY | 9172681 | . | T | G | 2334.69  | PASS          | AC=12;AF=0.182;AN=66;DP=351;FS=0.000;Inbr |
| 4421 | chrY | 9173145 | . | G | T | 1380.54  | my_snp_filter | AC=31;AF=0.620;AN=50;BaseQRankSum         |
| 4422 | chrY | 9173672 | . | C | A | 50.51    | my_snp_filter | AC=2;AF=0.045;AN=44;BaseQRankSum=         |
| 4423 | chrY | 9175032 | . | C | T | 79.60    | my_snp_filter | AC=1;AF=0.056;AN=18;BaseQRankSum=         |
| 4424 | chrY | 9175247 | . | G | A | 80.25    | my_snp_filter | AC=2;AF=0.125;AN=16;DP=41;FS=0.00         |
| 4425 | chrY | 9175550 | . | G | A | 75.10    | my_snp_filter | AC=3;AF=0.125;AN=24;BaseQRankSum=         |
| 4426 | chrY | 9177493 | . | C | A | 268.93   | my_snp_filter | AC=6;AF=0.250;AN=24;DP=125;FS=0.0         |
| 4427 | chrY | 9177907 | . | G | A | 522.68   | my_snp_filter | AC=4;AF=0.222;AN=18;BaseQRankSum=         |
| 4428 | chrY | 9177980 | . | G | A | 439.39   | my_snp_filter | AC=4;AF=0.222;AN=18;BaseQRankSum=         |
| 4429 | chrY | 9179397 | . | A | C | 328.89   | my_snp_filter | AC=5;AF=0.625;AN=8;BaseQRankSum=0         |
| 4430 | chrY | 9179421 | . | C | G | 300.09   | my_snp_filter | AC=5;AF=0.625;AN=8;BaseQRankSum=0         |
| 4431 | chrY | 9179552 | . | G | A | 632.55   | my_snp_filter | AC=10;AF=0.625;AN=16;BaseQRankSum         |
| 4432 | chrY | 9179618 | . | A | G | 38.15    | my_snp_filter | AC=2;AF=0.071;AN=28;BaseQRankSum=         |
| 4433 | chrY | 9179756 | . | C | T | 1153.48  | my_snp_filter | AC=3;AF=0.083;AN=36;BaseQRankSum=         |
| 4434 | chrY | 9179835 | . | G | C | 1466.12  | my_snp_filter | AC=9;AF=0.214;AN=42;BaseQRankSum=         |
| 4435 | chrY | 9181104 | . | T | C | 32.81    | PASS          | AC=2;AF=0.250;AN=8;DP=12;FS=0.000;MLEAC=3 |
| 4436 | chrY | 9183915 | . | G | T | 158.11   | my_snp_filter | AC=1;AF=0.028;AN=36;BaseQRankSum=         |
| 4437 | chrY | 9184559 | . | G | A | 238.65   | my_snp_filter | AC=1;AF=0.017;AN=60;BaseQRankSum=         |
| 4438 | chrY | 9185900 | . | A | G | 659.21   | my_snp_filter | AC=6;AF=0.273;AN=22;BaseQRankSum=         |
| 4439 | chrY | 9186113 | . | T | C | 711.02   | my_snp_filter | AC=6;AF=0.097;AN=62;BaseQRankSum=         |
| 4440 | chrY | 9186234 | . | G | C | 224.27   | my_snp_filter | AC=3;AF=0.054;AN=56;BaseQRankSum=         |
| 4441 | chrY | 9186471 | . | G | A | 849.15   | my_snp_filter | AC=6;AF=0.143;AN=42;BaseQRankSum=         |
| 4442 | chrY | 9188626 | . | A | G | 88.44    | my_snp_filter | AC=1;AF=0.018;AN=56;BaseQRankSum=         |
| 4443 | chrY | 9188703 | . | A | C | 167.17   | my_snp_filter | AC=2;AF=0.038;AN=52;BaseQRankSum=         |
| 4444 | chrY | 9188749 | . | A | T | 61.91    | my_snp_filter | AC=2;AF=0.045;AN=44;BaseQRankSum=         |
| 4445 | chrY | 9188833 | . | A | G | 1103.83  | my_snp_filter | AC=8;AF=0.250;AN=32;BaseQRankSum=         |
| 4446 | chrY | 9191148 | . | A | G | 57.32    | my_snp_filter | AC=1;AF=0.167;AN=6;BaseQRankSum=0         |
| 4447 | chrY | 9191188 | . | A | G | 111.48   | my_snp_filter | AC=3;AF=0.300;AN=10;BaseQRankSum=         |
| 4448 | chrY | 9191779 | . | G | A | 372.28   | my_snp_filter | AC=4;AF=0.133;AN=30;BaseQRankSum=         |
| 4449 | chrY | 9192278 | . | G | T | 40.92    | my_snp_filter | AC=1;AF=0.071;AN=14;BaseQRankSum=         |
| 4450 | chrY | 9192852 | . | T | C | 81.02    | my_snp_filter | AC=2;AF=0.048;AN=42;BaseQRankSum=         |
| 4451 | chrY | 9193253 | . | T | G | 66.55    | my_snp_filter | AC=3;AF=0.063;AN=48;BaseQRankSum=         |
| 4452 | chrY | 9196113 | . | C | T | 85.73    | my_snp_filter | AC=2;AF=0.111;AN=18;BaseQRankSum=         |
| 4453 | chrY | 9196142 | . | A | C | 492.02   | my_snp_filter | AC=8;AF=0.444;AN=18;BaseQRankSum=         |
| 4454 | chrY | 9198243 | . | T | A | 75.25    | my_snp_filter | AC=4;AF=0.133;AN=30;DP=501;FS=0.0         |
| 4455 | chrY | 9198340 | . | C | A | 32.40    | my_snp_filter | AC=1;AF=0.038;AN=26;BaseQRankSum=         |
| 4456 | chrY | 9198785 | . | G | C | 501.68   | my_snp_filter | AC=9;AF=0.145;AN=62;BaseQRankSum=         |
| 4457 | chrY | 9198798 | . | C | T | 221.70   | my_snp_filter | AC=7;AF=0.121;AN=58;BaseQRankSum=         |
| 4458 | chrY | 9198800 | . | G | T | 87.46    | my_snp_filter | AC=3;AF=0.052;AN=58;BaseQRankSum=         |
| 4459 | chrY | 9200409 | . | G | A | 299.22   | my_snp_filter | AC=4;AF=0.250;AN=16;BaseQRankSum=         |
| 4460 | chrY | 9200466 | . | G | A | 120.06   | my_snp_filter | AC=4;AF=0.200;AN=20;BaseQRankSum=         |
| 4461 | chrY | 9205084 | . | C | T | 460.30   | my_snp_filter | AC=5;AF=0.208;AN=24;BaseQRankSum=         |
| 4462 | chrY | 9206174 | . | A | G | 234.08   | my_snp_filter | AC=3;AF=0.060;AN=50;BaseQRankSum=         |
| 4463 | chrY | 9206526 | . | G | C | 43.26    | my_snp_filter | AC=2;AF=0.125;AN=16;BaseQRankSum=         |
| 4464 | chrY | 9211129 | . | G | A | 177.73   | my_snp_filter | AC=2;AF=0.111;AN=18;BaseQRankSum=         |
| 4465 | chrY | 9211340 | . | A | T | 1815.12  | my_snp_filter | AC=7;AF=0.135;AN=52;BaseQRankSum=         |
| 4466 | chrY | 9211350 | . | C | T | 431.05   | my_snp_filter | AC=2;AF=0.043;AN=46;BaseQRankSum=         |
| 4467 | chrY | 9211360 | . | C | G | 867.13   | my_snp_filter | AC=7;AF=0.219;AN=32;BaseQRankSum=         |
| 4468 | chrY | 9211432 | . | G | C | 59.87    | my_snp_filter | AC=2;AF=0.036;AN=56;BaseQRankSum=         |
| 4469 | chrY | 9215395 | . | C | T | 144.30   | my_snp_filter | AC=2;AF=0.071;AN=28;DP=55;FS=0.00         |
| 4470 | chrY | 9215644 | . | C | T | 46.14    | my_snp_filter | AC=4;AF=1.00;AN=4;DP=7;FS=0.000;M         |
| 4471 | chrY | 9215757 | . | C | T | 40.41    | my_snp_filter | AC=2;AF=0.100;AN=20;BaseQRankSum=         |
| 4472 | chrY | 9220009 | . | C | G | 250.51   | PASS          | AC=5;AF=0.278;AN=18;BaseQRankSum=0.736;Cl |
| 4473 | chrY | 9220064 | . | C | A | 93.54    | my_snp_filter | AC=2;AF=0.083;AN=24;BaseQRankSum=         |
| 4474 | chrY | 9220133 | . | C | G | 62.57    | my_snp_filter | AC=1;AF=0.033;AN=30;BaseQRankSum=         |
| 4475 | chrY | 9220142 | . | G | A | 147.48   | my_snp_filter | AC=1;AF=0.029;AN=34;BaseQRankSum=         |
| 4476 | chrY | 9220156 | . | G | A | 168.53   | my_snp_filter | AC=3;AF=0.083;AN=36;BaseQRankSum=         |
| 4477 | chrY | 9220161 | . | G | T | 1595.02  | my_snp_filter | AC=22;AF=0.688;AN=32;BaseQRankSum=        |
| 4478 | chrY | 9220307 | . | G | C | 590.29   | my_snp_filter | AC=5;AF=0.071;AN=70;BaseQRankSum=         |
| 4479 | chrY | 9220400 | . | G | C | 799.36   | PASS          | AC=8;AF=0.114;AN=70;BaseQRankSum=-1.247e+ |
| 4480 | chrY | 9220546 | . | G | A | 1291.05  | my_snp_filter | AC=6;AF=0.088;AN=68;DP=346;FS=0.0         |
| 4481 | chrY | 9226845 | . | G | C | 64.25    | my_snp_filter | AC=1;AF=0.056;AN=18;BaseQRankSum=         |
| 4482 | chrY | 9227801 | . | A | T | 186.26   | my_snp_filter | AC=6;AF=0.750;AN=8;DP=15;FS=0.000         |
| 4483 | chrY | 9231287 | . | C | A | 367.22   | PASS          | AC=9;AF=0.643;AN=14;BaseQRankSum=0.736;Cl |
| 4484 | chrY | 9231469 | . | G | A | 269.29   | my_snp_filter | AC=5;AF=0.278;AN=18;BaseQRankSum=         |

|      |      |         |   |   |   |         |               |                                           |
|------|------|---------|---|---|---|---------|---------------|-------------------------------------------|
| 4485 | chrY | 9231735 | . | A | T | 829.20  | my_snp_filter | AC=9;AF=0.250;AN=36;BaseQRankSum=         |
| 4486 | chrY | 9231774 | . | G | A | 467.45  | my_snp_filter | AC=5;AF=0.109;AN=46;BaseQRankSum=         |
| 4487 | chrY | 9231864 | . | G | C | 619.16  | my_snp_filter | AC=5;AF=0.109;AN=46;BaseQRankSum=         |
| 4488 | chrY | 9231873 | . | C | T | 296.89  | my_snp_filter | AC=4;AF=0.083;AN=48;BaseQRankSum=         |
| 4489 | chrY | 9231953 | . | G | C | 35.23   | my_snp_filter | AC=1;AF=0.017;AN=60;BaseQRankSum=         |
| 4490 | chrY | 9234317 | . | G | A | 151.60  | my_snp_filter | AC=9;AF=0.129;AN=70;BaseQRankSum=         |
| 4491 | chrY | 9234434 | . | G | A | 511.51  | my_snp_filter | AC=7;AF=0.109;AN=64;BaseQRankSum=         |
| 4492 | chrY | 9234629 | . | C | A | 101.27  | my_snp_filter | AC=4;AF=0.200;AN=20;BaseQRankSum=         |
| 4493 | chrY | 9234631 | . | T | C | 574.75  | my_snp_filter | AC=9;AF=0.450;AN=20;BaseQRankSum=         |
| 4494 | chrY | 9234770 | . | G | A | 6763.08 | my_snp_filter | AC=34;AF=1.00;AN=34;BaseQRankSum=         |
| 4495 | chrY | 9237917 | . | G | A | 84.08   | my_snp_filter | AC=4;AF=0.333;AN=12;DP=28;FS=0.00         |
| 4496 | chrY | 9239350 | . | T | C | 1218.56 | my_snp_filter | AC=29;AF=0.967;AN=30;BaseQRankSum=        |
| 4497 | chrY | 9239420 | . | C | T | 7097.94 | my_snp_filter | AC=56;AF=1.00;AN=56;DP=289;FS=0.0         |
| 4498 | chrY | 9240361 | . | G | C | 40.41   | my_snp_filter | AC=1;AF=0.056;AN=18;BaseQRankSum=         |
| 4499 | chrY | 9240670 | . | G | A | 722.61  | my_snp_filter | AC=4;AF=0.063;AN=64;BaseQRankSum=         |
| 4500 | chrY | 9240701 | . | G | C | 571.63  | my_snp_filter | AC=3;AF=0.044;AN=68;BaseQRankSum=         |
| 4501 | chrY | 9296073 | . | C | G | 98.23   | my_snp_filter | AC=3;AF=0.167;AN=18;BaseQRankSum=         |
| 4502 | chrY | 9296499 | . | C | A | 54.31   | my_snp_filter | AC=1;AF=0.050;AN=20;BaseQRankSum=         |
| 4503 | chrY | 9296508 | . | A | G | 30.91   | my_snp_filter | AC=1;AF=0.042;AN=24;BaseQRankSum=         |
| 4504 | chrY | 9297072 | . | C | A | 63.99   | my_snp_filter | AC=3;AF=0.045;AN=66;BaseQRankSum=         |
| 4505 | chrY | 9297866 | . | A | C | 46.74   | my_snp_filter | AC=1;AF=0.024;AN=42;BaseQRankSum=         |
| 4506 | chrY | 9297996 | . | A | G | 38.73   | my_snp_filter | AC=2;AF=0.053;AN=38;BaseQRankSum=         |
| 4507 | chrY | 9299968 | . | C | T | 48.53   | my_snp_filter | AC=1;AF=0.056;AN=18;BaseQRankSum=         |
| 4508 | chrY | 9300163 | . | C | A | 331.48  | my_snp_filter | AC=5;AF=0.179;AN=28;BaseQRankSum=         |
| 4509 | chrY | 9300172 | . | C | A | 1312.70 | my_snp_filter | AC=6;AF=0.231;AN=26;BaseQRankSum=         |
| 4510 | chrY | 9300182 | . | G | C | 351.90  | my_snp_filter | AC=5;AF=0.250;AN=20;BaseQRankSum=         |
| 4511 | chrY | 9300192 | . | A | T | 730.34  | my_snp_filter | AC=5;AF=0.250;AN=20;BaseQRankSum=         |
| 4512 | chrY | 9300198 | . | A | T | 244.59  | my_snp_filter | AC=3;AF=0.150;AN=20;BaseQRankSum=         |
| 4513 | chrY | 9304534 | . | G | C | 1408.09 | my_snp_filter | AC=11;AF=0.167;AN=66;BaseQRankSum=        |
| 4514 | chrY | 9304544 | . | C | T | 144.04  | my_snp_filter | AC=3;AF=0.045;AN=66;BaseQRankSum=         |
| 4515 | chrY | 9304636 | . | C | T | 157.51  | my_snp_filter | AC=5;AF=0.086;AN=58;BaseQRankSum=         |
| 4516 | chrY | 9306051 | . | A | G | 200.82  | my_snp_filter | AC=3;AF=0.052;AN=58;BaseQRankSum=         |
| 4517 | chrY | 9306296 | . | T | G | 123.80  | my_snp_filter | AC=1;AF=0.022;AN=46;BaseQRankSum=         |
| 4518 | chrY | 9306576 | . | C | T | 259.80  | PASS          | AC=4;AF=0.063;AN=64;BaseQRankSum=-6.190e- |
| 4519 | chrY | 9306772 | . | G | A | 123.55  | my_snp_filter | AC=4;AF=0.111;AN=36;BaseQRankSum=         |
| 4520 | chrY | 9306953 | . | A | G | 139.63  | my_snp_filter | AC=4;AF=0.222;AN=18;DP=28;FS=0.00         |
| 4521 | chrY | 9307401 | . | T | A | 1307.95 | my_snp_filter | AC=4;AF=0.125;AN=32;BaseQRankSum=         |
| 4522 | chrY | 9307436 | . | A | T | 885.94  | my_snp_filter | AC=7;AF=0.130;AN=54;BaseQRankSum=         |
| 4523 | chrY | 9307492 | . | A | C | 93.54   | my_snp_filter | AC=4;AF=0.065;AN=62;BaseQRankSum=         |
| 4524 | chrY | 9307512 | . | G | A | 1477.40 | my_snp_filter | AC=9;AF=0.145;AN=62;BaseQRankSum=         |
| 4525 | chrY | 9307519 | . | C | G | 35.71   | my_snp_filter | AC=1;AF=0.016;AN=62;BaseQRankSum=         |
| 4526 | chrY | 9307626 | . | C | T | 442.18  | my_snp_filter | AC=3;AF=0.065;AN=46;BaseQRankSum=         |
| 4527 | chrY | 9307635 | . | G | A | 674.62  | my_snp_filter | AC=7;AF=0.175;AN=40;BaseQRankSum=         |
| 4528 | chrY | 9309611 | . | G | A | 37.27   | my_snp_filter | AC=2;AF=0.111;AN=18;BaseQRankSum=         |
| 4529 | chrY | 9309883 | . | C | T | 73.84   | my_snp_filter | AC=1;AF=0.033;AN=30;BaseQRankSum=         |
| 4530 | chrY | 9311383 | . | A | T | 227.37  | my_snp_filter | AC=9;AF=0.409;AN=22;BaseQRankSum=         |
| 4531 | chrY | 9311713 | . | A | G | 55.23   | my_snp_filter | AC=2;AF=0.063;AN=32;BaseQRankSum=         |
| 4532 | chrY | 9312661 | . | C | A | 288.99  | my_snp_filter | AC=2;AF=0.125;AN=16;BaseQRankSum=         |
| 4533 | chrY | 9313713 | . | C | A | 322.13  | my_snp_filter | AC=3;AF=0.056;AN=54;BaseQRankSum=         |
| 4534 | chrY | 9314182 | . | G | A | 50.22   | my_snp_filter | AC=2;AF=0.033;AN=60;BaseQRankSum=         |
| 4535 | chrY | 9314525 | . | A | G | 1213.16 | my_snp_filter | AC=14;AF=0.250;AN=56;BaseQRankSum=        |
| 4536 | chrY | 9316380 | . | T | G | 151.91  | my_snp_filter | AC=5;AF=0.227;AN=22;BaseQRankSum=         |
| 4537 | chrY | 9316383 | . | C | G | 84.94   | my_snp_filter | AC=3;AF=0.136;AN=22;BaseQRankSum=         |
| 4538 | chrY | 9316819 | . | A | G | 196.11  | my_snp_filter | AC=3;AF=0.079;AN=38;BaseQRankSum=         |
| 4539 | chrY | 9316833 | . | A | G | 169.20  | my_snp_filter | AC=7;AF=0.583;AN=12;BaseQRankSum=         |
| 4540 | chrY | 9318328 | . | A | T | 528.08  | my_snp_filter | AC=3;AF=0.100;AN=30;BaseQRankSum=         |
| 4541 | chrY | 9319672 | . | G | A | 368.79  | my_snp_filter | AC=6;AF=0.250;AN=24;BaseQRankSum=         |
| 4542 | chrY | 9320510 | . | A | G | 1284.25 | my_snp_filter | AC=13;AF=0.929;AN=14;BaseQRankSum=        |
| 4543 | chrY | 9320581 | . | A | T | 473.11  | my_snp_filter | AC=10;AF=1.00;AN=10;DP=11;FS=0.00         |
| 4544 | chrY | 9320620 | . | A | G | 67.84   | my_snp_filter | AC=2;AF=1.00;AN=2;DP=5;FS=0.000;M         |
| 4545 | chrY | 9321804 | . | G | C | 182.12  | my_snp_filter | AC=8;AF=0.267;AN=30;DP=275;FS=0.0         |
| 4546 | chrY | 9321887 | . | A | G | 95.76   | my_snp_filter | AC=2;AF=0.037;AN=54;BaseQRankSum=         |
| 4547 | chrY | 9323103 | . | C | T | 32.94   | my_snp_filter | AC=1;AF=0.056;AN=18;BaseQRankSum=         |
| 4548 | chrY | 9325716 | . | A | G | 187.75  | my_snp_filter | AC=2;AF=0.036;AN=56;BaseQRankSum=         |
| 4549 | chrY | 9327621 | . | G | A | 119.98  | my_snp_filter | AC=3;AF=0.167;AN=18;BaseQRankSum=         |
| 4550 | chrY | 9328133 | . | G | A | 150.41  | my_snp_filter | AC=2;AF=0.091;AN=22;BaseQRankSum=         |
| 4551 | chrY | 9328907 | . | T | C | 276.04  | my_snp_filter | AC=4;AF=0.083;AN=48;BaseQRankSum=         |
| 4552 | chrY | 9329010 | . | C | A | 3578.62 | my_snp_filter | AC=19;AF=0.559;AN=34;BaseQRankSum=        |
| 4553 | chrY | 9329221 | . | A | C | 97.78   | my_snp_filter | AC=2;AF=0.100;AN=20;BaseQRankSum=         |
| 4554 | chrY | 9329329 | . | G | A | 2785.85 | my_snp_filter | AC=9;AF=0.375;AN=24;BaseQRankSum=         |
| 4555 | chrY | 9329338 | . | C | G | 435.83  | my_snp_filter | AC=5;AF=0.139;AN=36;BaseQRankSum=         |
| 4556 | chrY | 9329366 | . | G | A | 949.43  | my_snp_filter | AC=11;AF=0.204;AN=54;BaseQRankSum=        |
| 4557 | chrY | 9329416 | . | A | G | 584.59  | my_snp_filter | AC=11;AF=0.183;AN=60;BaseQRankSum=        |
| 4558 | chrY | 9329566 | . | G | A | 4192.86 | my_snp_filter | AC=23;AF=0.329;AN=70;BaseQRankSum=        |
| 4559 | chrY | 9329572 | . | T | C | 5716.67 | my_snp_filter | AC=19;AF=0.271;AN=70;BaseQRankSum=        |
| 4560 | chrY | 9330881 | . | C | T | 931.47  | my_snp_filter | AC=13;AF=0.722;AN=18;BaseQRankSum=        |

|      |      |         |   |   |   |          |               |                                            |
|------|------|---------|---|---|---|----------|---------------|--------------------------------------------|
| 4561 | chrY | 9333895 | . | C | A | 243.70   | my_snp_filter | AC=3;AF=0.088;AN=34;BaseQRankSum=          |
| 4562 | chrY | 9334568 | . | C | T | 145.59   | my_snp_filter | AC=4;AF=0.065;AN=62;BaseQRankSum=          |
| 4563 | chrY | 9334691 | . | T | C | 174.02   | my_snp_filter | AC=1;AF=0.016;AN=64;BaseQRankSum=          |
| 4564 | chrY | 9334703 | . | T | G | 365.34   | my_snp_filter | AC=8;AF=0.133;AN=60;BaseQRankSum=          |
| 4565 | chrY | 9334731 | . | C | G | 162.75   | my_snp_filter | AC=4;AF=0.071;AN=56;BaseQRankSum=          |
| 4566 | chrY | 9334965 | . | G | A | 56.91    | my_snp_filter | AC=2;AF=0.100;AN=20;BaseQRankSum=          |
| 4567 | chrY | 9336402 | . | C | A | 82.56    | my_snp_filter | AC=2;AF=0.111;AN=18;BaseQRankSum=          |
| 4568 | chrY | 9336572 | . | C | T | 101.87   | my_snp_filter | AC=3;AF=0.167;AN=18;BaseQRankSum=          |
| 4569 | chrY | 9336636 | . | G | A | 2453.93  | my_snp_filter | AC=18;AF=1.00;AN=18;DP=92;FS=0.00          |
| 4570 | chrY | 9336652 | . | A | C | 1165.01  | my_snp_filter | AC=8;AF=0.444;AN=18;BaseQRankSum=          |
| 4571 | chrY | 9336653 | . | C | T | 1259.31  | my_snp_filter | AC=8;AF=0.444;AN=18;BaseQRankSum=          |
| 4572 | chrY | 9336710 | . | G | A | 366.72   | my_snp_filter | AC=7;AF=0.389;AN=18;BaseQRankSum=          |
| 4573 | chrY | 9339830 | . | C | G | 43.68    | my_snp_filter | AC=1;AF=0.063;AN=16;BaseQRankSum=          |
| 4574 | chrY | 9340207 | . | C | T | 1632     | my_snp_filter | AC=15;AF=0.395;AN=38;BaseQRankSum=         |
| 4575 | chrY | 9340380 | . | G | T | 477.92   | my_snp_filter | AC=4;AF=0.067;AN=60;BaseQRankSum=          |
| 4576 | chrY | 9340583 | . | T | A | 108.68   | my_snp_filter | AC=1;AF=0.019;AN=52;BaseQRankSum=          |
| 4577 | chrY | 9340763 | . | C | A | 254.39   | PASS          | AC=2;AF=0.063;AN=32;BaseQRankSum=-7.360e-  |
| 4578 | chrY | 9341086 | . | G | C | 65.24    | my_snp_filter | AC=2;AF=0.029;AN=70;BaseQRankSum=          |
| 4579 | chrY | 9341121 | . | G | A | 1361.27  | my_snp_filter | AC=12;AF=0.171;AN=70;BaseQRankSum=         |
| 4580 | chrY | 9341165 | . | A | G | 278.16   | my_snp_filter | AC=2;AF=0.029;AN=70;BaseQRankSum=          |
| 4581 | chrY | 9341280 | . | G | C | 44.64    | my_snp_filter | AC=1;AF=0.017;AN=58;BaseQRankSum=          |
| 4582 | chrY | 9341350 | . | A | G | 632.84   | my_snp_filter | AC=5;AF=0.192;AN=26;BaseQRankSum=          |
| 4583 | chrY | 9341419 | . | G | C | 41.09    | my_snp_filter | AC=1;AF=0.045;AN=22;BaseQRankSum=          |
| 4584 | chrY | 9341808 | . | T | A | 56.50    | my_snp_filter | AC=2;AF=0.111;AN=18;BaseQRankSum=          |
| 4585 | chrY | 9342037 | . | G | T | 57.41    | my_snp_filter | AC=1;AF=0.015;AN=66;BaseQRankSum=          |
| 4586 | chrY | 9342178 | . | G | C | 1033.06  | my_snp_filter | AC=15;AF=0.214;AN=70;BaseQRankSum=         |
| 4587 | chrY | 9342180 | . | T | A | 122.05   | my_snp_filter | AC=2;AF=0.029;AN=70;BaseQRankSum=          |
| 4588 | chrY | 9347709 | . | T | G | 349.39   | my_snp_filter | AC=4;AF=0.222;AN=18;BaseQRankSum=          |
| 4589 | chrY | 9347881 | . | G | T | 401.39   | my_snp_filter | AC=3;AF=0.088;AN=34;BaseQRankSum=          |
| 4590 | chrY | 9348011 | . | T | A | 112.74   | my_snp_filter | AC=4;AF=0.061;AN=66;BaseQRankSum=          |
| 4591 | chrY | 9348028 | . | G | T | 1248.76  | my_snp_filter | AC=5;AF=0.071;AN=70;BaseQRankSum=          |
| 4592 | chrY | 9348032 | . | G | A | 1105.21  | my_snp_filter | AC=3;AF=0.043;AN=70;BaseQRankSum=          |
| 4593 | chrY | 9348085 | . | A | G | 356.67   | PASS          | AC=10;AF=0.147;AN=68;BaseQRankSum=0.358;C  |
| 4594 | chrY | 9348169 | . | G | T | 74.16    | my_snp_filter | AC=2;AF=0.033;AN=60;BaseQRankSum=          |
| 4595 | chrY | 9348522 | . | C | T | 1282.74  | my_snp_filter | AC=9;AF=0.214;AN=42;BaseQRankSum=          |
| 4596 | chrY | 9348661 | . | G | C | 152.46   | my_snp_filter | AC=4;AF=0.200;AN=20;BaseQRankSum=          |
| 4597 | chrY | 9348990 | . | C | T | 2223.33  | my_snp_filter | AC=8;AF=0.364;AN=22;BaseQRankSum=          |
| 4598 | chrY | 9348992 | . | C | T | 2223.33  | my_snp_filter | AC=8;AF=0.364;AN=22;BaseQRankSum=          |
| 4599 | chrY | 9349081 | . | C | T | 76.70    | my_snp_filter | AC=3;AF=0.136;AN=22;BaseQRankSum=          |
| 4600 | chrY | 9349119 | . | G | C | 143.24   | my_snp_filter | AC=3;AF=0.107;AN=28;BaseQRankSum=          |
| 4601 | chrY | 9349188 | . | T | C | 244.61   | my_snp_filter | AC=7;AF=0.130;AN=54;BaseQRankSum=          |
| 4602 | chrY | 9350446 | . | A | C | 61.49    | my_snp_filter | AC=1;AF=0.050;AN=20;BaseQRankSum=          |
| 4603 | chrY | 9353045 | . | T | C | 306.44   | my_snp_filter | AC=3;AF=0.044;AN=68;BaseQRankSum=          |
| 4604 | chrY | 9353147 | . | T | A | 191.41   | my_snp_filter | AC=3;AF=0.044;AN=68;BaseQRankSum=          |
| 4605 | chrY | 9353320 | . | A | G | 108.63   | my_snp_filter | AC=2;AF=0.034;AN=58;BaseQRankSum=          |
| 4606 | chrY | 9353451 | . | G | T | 957.64   | my_snp_filter | AC=7;AF=0.269;AN=26;BaseQRankSum=          |
| 4607 | chrY | 9354054 | . | A | C | 19684.80 | PASS          | AC=35;AF=0.500;AN=70;BaseQRankSum=         |
| 4608 | chrY | 9354286 | . | C | T | 81.85    | my_snp_filter | AC=1;AF=0.019;AN=54;BaseQRankSum=          |
| 4609 | chrY | 9354500 | . | C | T | 99.56    | my_snp_filter | AC=1;AF=0.014;AN=70;BaseQRankSum=          |
| 4610 | chrY | 9356849 | . | T | G | 148.11   | my_snp_filter | AC=1;AF=0.028;AN=36;BaseQRankSum=          |
| 4611 | chrY | 9360757 | . | C | A | 135.54   | my_snp_filter | AC=4;AF=0.667;AN=6;DP=12;FS=0.000          |
| 4612 | chrY | 9360939 | . | G | A | 65.01    | my_snp_filter | AC=2;AF=0.111;AN=18;BaseQRankSum=          |
| 4613 | chrY | 9361194 | . | A | C | 3758.42  | PASS          | AC=28;AF=0.636;AN=44;BaseQRankSum=-1.026e- |
| 4614 | chrY | 9361539 | . | C | T | 1180.25  | my_snp_filter | AC=18;AF=1.00;AN=18;DP=52;FS=0.00          |
| 4615 | chrY | 9364805 | . | G | T | 287.81   | my_snp_filter | AC=2;AF=0.071;AN=28;BaseQRankSum=          |
| 4616 | chrY | 9364806 | . | G | T | 288.13   | my_snp_filter | AC=2;AF=0.077;AN=26;BaseQRankSum=          |
| 4617 | chrY | 9364870 | . | A | C | 113.79   | my_snp_filter | AC=2;AF=0.083;AN=24;BaseQRankSum=          |
| 4618 | chrY | 9365024 | . | C | T | 201.41   | my_snp_filter | AC=4;AF=0.087;AN=46;BaseQRankSum=          |
| 4619 | chrY | 9365160 | . | C | T | 1204.79  | my_snp_filter | AC=16;AF=0.276;AN=58;BaseQRankSum=         |
| 4620 | chrY | 9365448 | . | C | T | 217.78   | my_snp_filter | AC=3;AF=0.167;AN=18;BaseQRankSum=          |
| 4621 | chrY | 9366584 | . | G | T | 1269.68  | my_snp_filter | AC=16;AF=0.250;AN=64;BaseQRankSum=         |
| 4622 | chrY | 9368022 | . | T | G | 1027.70  | my_snp_filter | AC=6;AF=0.333;AN=18;BaseQRankSum=          |
| 4623 | chrY | 9368210 | . | C | G | 1881.38  | my_snp_filter | AC=11;AF=0.423;AN=26;BaseQRankSum=         |
| 4624 | chrY | 9368326 | . | T | A | 13375.90 | PASS          | AC=25;AF=0.368;AN=68;BaseQRankSum=         |
| 4625 | chrY | 9368411 | . | C | A | 1105.45  | PASS          | AC=11;AF=0.162;AN=68;BaseQRankSum=0.197;C  |
| 4626 | chrY | 9370414 | . | G | A | 323.51   | my_snp_filter | AC=5;AF=0.278;AN=18;BaseQRankSum=          |
| 4627 | chrY | 9371386 | . | A | G | 1288.19  | my_snp_filter | AC=19;AF=0.365;AN=52;BaseQRankSum=         |
| 4628 | chrY | 9372135 | . | A | C | 132.76   | my_snp_filter | AC=2;AF=0.091;AN=22;BaseQRankSum=          |
| 4629 | chrY | 9372498 | . | A | C | 632.70   | my_snp_filter | AC=16;AF=1.00;AN=16;BaseQRankSum=          |
| 4630 | chrY | 9372790 | . | G | C | 230.20   | my_snp_filter | AC=3;AF=0.071;AN=42;BaseQRankSum=          |
| 4631 | chrY | 9372997 | . | G | A | 418.51   | my_snp_filter | AC=3;AF=0.044;AN=68;BaseQRankSum=          |
| 4632 | chrY | 9373020 | . | C | T | 193.69   | my_snp_filter | AC=1;AF=0.015;AN=68;BaseQRankSum=          |
| 4633 | chrY | 9373061 | . | A | G | 315.60   | my_snp_filter | AC=4;AF=0.059;AN=68;BaseQRankSum=          |
| 4634 | chrY | 9373315 | . | G | C | 422.37   | my_snp_filter | AC=6;AF=0.086;AN=70;BaseQRankSum=          |
| 4635 | chrY | 9373438 | . | A | G | 551.24   | my_snp_filter | AC=3;AF=0.044;AN=68;BaseQRankSum=          |
| 4636 | chrY | 9373455 | . | T | C | 5012.70  | my_snp_filter | AC=26;AF=0.382;AN=68;BaseQRankSum=         |

|      |      |         |   |   |   |          |               |                                           |
|------|------|---------|---|---|---|----------|---------------|-------------------------------------------|
| 4637 | chrY | 9373462 | . | A | T | 2757.29  | my_snp_filter | AC=9;AF=0.132;AN=68;BaseQRankSum=         |
| 4638 | chrY | 9374685 | . | G | C | 1958.89  | my_snp_filter | AC=18;AF=1.00;AN=18;DP=95;FS=0.00         |
| 4639 | chrY | 9379892 | . | C | T | 265.87   | PASS          | AC=2;AF=0.029;AN=70;DP=294;FS=0.000;Inbre |
| 4640 | chrY | 9383633 | . | T | C | 599.57   | my_snp_filter | AC=6;AF=0.094;AN=64;DP=192;FS=0.0         |
| 4641 | chrY | 9383960 | . | T | C | 668.31   | PASS          | AC=6;AF=0.086;AN=70;DP=697;FS=0.000;Inbre |
| 4642 | chrY | 9384220 | . | A | G | 2058.69  | PASS          | AC=2;AF=0.029;AN=70;DP=597;FS=0.000;Inbre |
| 4643 | chrY | 9384222 | . | C | G | 2058.71  | PASS          | AC=2;AF=0.029;AN=70;DP=595;FS=0.000;Inbre |
| 4644 | chrY | 9384231 | . | T | C | 1982.80  | PASS          | AC=2;AF=0.029;AN=70;DP=548;FS=0.000;Inbre |
| 4645 | chrY | 9384243 | . | C | G | 890.77   | PASS          | AC=2;AF=0.029;AN=68;DP=521;FS=0.000;Inbre |
| 4646 | chrY | 9384255 | . | A | C | 891.58   | PASS          | AC=2;AF=0.029;AN=70;DP=500;FS=0.000;Inbre |
| 4647 | chrY | 9384709 | . | C | T | 126.19   | PASS          | AC=2;AF=0.029;AN=70;DP=345;FS=0.000;Inbre |
| 4648 | chrY | 9384825 | . | C | T | 10046.80 | PASS          | AC=54;AF=0.818;AN=66;DP=418;FS=0.         |
| 4649 | chrY | 9385175 | . | C | A | 120.58   | PASS          | AC=2;AF=0.030;AN=66;DP=270;FS=0.000;Inbre |
| 4650 | chrY | 9387281 | . | C | T | 1045.89  | PASS          | AC=6;AF=0.086;AN=70;DP=732;FS=0.000;Inbre |
| 4651 | chrY | 9392582 | . | T | G | 6678.32  | PASS          | AC=46;AF=0.657;AN=70;DP=438;FS=0.000;Inbr |
| 4652 | chrY | 9392948 | . | T | C | 19165.88 | PASS          | AC=68;AF=1.00;AN=68;BaseQRankSum=         |
| 4653 | chrY | 9395118 | . | G | A | 436.44   | PASS          | AC=2;AF=0.029;AN=68;DP=486;FS=0.000;Inbre |
| 4654 | chrY | 9397750 | . | C | T | 545.22   | PASS          | AC=12;AF=0.261;AN=46;DP=185;FS=0.000;Inbr |
| 4655 | chrY | 9398519 | . | A | C | 1059.92  | PASS          | AC=6;AF=0.086;AN=70;DP=705;FS=0.000;Inbre |
| 4656 | chrY | 9398534 | . | T | C | 714.87   | PASS          | AC=6;AF=0.086;AN=70;DP=658;FS=0.000;Inbre |
| 4657 | chrY | 9399483 | . | C | T | 9549.14  | PASS          | AC=56;AF=0.824;AN=68;DP=385;FS=0.000;Inbr |
| 4658 | chrY | 9405160 | . | A | G | 378.71   | PASS          | AC=2;AF=0.029;AN=70;DP=343;FS=0.000;Inbre |
| 4659 | chrY | 9410828 | . | T | C | 3185.18  | PASS          | AC=28;AF=1.00;AN=28;DP=177;FS=0.000;Inbre |
| 4660 | chrY | 9414575 | . | T | C | 376.36   | PASS          | AC=6;AF=0.300;AN=20;DP=108;FS=0.000;Inbre |
| 4661 | chrY | 9419771 | . | C | A | 30.71    | PASS          | AC=1;AF=0.014;AN=70;BaseQRankSum=-9.220e- |
| 4662 | chrY | 9422514 | . | T | A | 35.30    | PASS          | AC=1;AF=0.015;AN=66;BaseQRankSum=-1.380e+ |
| 4663 | chrY | 9422515 | . | T | A | 35.12    | PASS          | AC=1;AF=0.016;AN=64;BaseQRankSum=-1.380e+ |
| 4664 | chrY | 9423206 | . | A | G | 37.50    | PASS          | AC=1;AF=0.015;AN=68;BaseQRankSum=-1.231e+ |
| 4665 | chrY | 9423211 | . | T | C | 37.21    | PASS          | AC=1;AF=0.014;AN=70;BaseQRankSum=-1.231e+ |
| 4666 | chrY | 9423440 | . | G | C | 462.48   | PASS          | AC=6;AF=0.086;AN=70;DP=276;FS=0.000;Inbre |
| 4667 | chrY | 9428867 | . | G | T | 57.82    | my_snp_filter | AC=2;AF=0.111;AN=18;BaseQRankSum=         |
| 4668 | chrY | 9429170 | . | A | G | 271.02   | my_snp_filter | AC=3;AF=0.167;AN=18;BaseQRankSum=         |
| 4669 | chrY | 9429344 | . | G | A | 40.97    | my_snp_filter | AC=1;AF=0.050;AN=20;BaseQRankSum=         |
| 4670 | chrY | 9430089 | . | C | T | 1506.95  | PASS          | AC=6;AF=0.300;AN=20;DP=185;FS=0.000;Inbre |
| 4671 | chrY | 9430090 | . | G | A | 1516.95  | PASS          | AC=6;AF=0.300;AN=20;DP=182;FS=0.000;Inbre |
| 4672 | chrY | 9432663 | . | C | A | 32.36    | my_snp_filter | AC=1;AF=0.056;AN=18;BaseQRankSum=         |
| 4673 | chrY | 9432723 | . | A | G | 60.33    | PASS          | AC=1;AF=0.056;AN=18;BaseQRankSum=-1.516e+ |
| 4674 | chrY | 9432727 | . | G | A | 60.39    | PASS          | AC=1;AF=0.056;AN=18;BaseQRankSum=1.66;Cli |
| 4675 | chrY | 9434337 | . | G | A | 110.38   | PASS          | AC=2;AF=0.111;AN=18;DP=113;FS=0.000;MLEAC |
| 4676 | chrY | 9439231 | . | T | A | 33.69    | PASS          | AC=1;AF=0.014;AN=70;BaseQRankSum=-7.200e- |
| 4677 | chrY | 9441630 | . | G | C | 268.06   | PASS          | AC=2;AF=0.029;AN=68;DP=337;FS=0.000;Inbre |
| 4678 | chrY | 9444789 | . | A | G | 307.20   | PASS          | AC=4;AF=0.061;AN=66;DP=328;FS=0.000;Inbre |
| 4679 | chrY | 9445154 | . | C | T | 1425.78  | PASS          | AC=6;AF=0.086;AN=70;DP=802;FS=0.000;Inbre |
| 4680 | chrY | 9445166 | . | T | C | 17016.63 | PASS          | AC=40;AF=0.571;AN=70;DP=846;FS=0.         |
| 4681 | chrY | 9453918 | . | T | C | 487.06   | PASS          | AC=6;AF=0.214;AN=28;DP=161;FS=0.000;Inbre |
| 4682 | chrY | 9455412 | . | C | A | 202.68   | PASS          | AC=2;AF=0.029;AN=68;DP=286;FS=0.000;Inbre |
| 4683 | chrY | 9461504 | . | C | T | 366      | PASS          | AC=2;AF=0.029;AN=68;DP=384;FS=0.000;Inbre |
| 4684 | chrY | 9463207 | . | G | C | 636.41   | PASS          | AC=6;AF=0.086;AN=70;DP=662;FS=0.000;Inbre |
| 4685 | chrY | 9464078 | . | T | C | 18107.98 | PASS          | AC=70;AF=1.00;AN=70;DP=582;FS=0.0         |
| 4686 | chrY | 9468170 | . | T | G | 311.01   | PASS          | AC=3;AF=0.068;AN=44;DP=311;FS=0.000;Inbre |
| 4687 | chrY | 9472921 | . | C | G | 1029.19  | PASS          | AC=6;AF=0.333;AN=18;DP=166;FS=0.000;MLEAC |
| 4688 | chrY | 9476738 | . | T | C | 339.90   | PASS          | AC=2;AF=0.045;AN=44;DP=154;FS=0.000;Inbre |
| 4689 | chrY | 9478192 | . | A | C | 431.29   | PASS          | AC=6;AF=0.097;AN=62;DP=164;FS=0.000;Inbre |
| 4690 | chrY | 9478486 | . | T | G | 631.70   | my_snp_filter | AC=6;AF=0.100;AN=60;DP=307;FS=0.0         |
| 4691 | chrY | 9483388 | . | G | T | 93.42    | my_snp_filter | AC=2;AF=0.031;AN=64;DP=272;FS=0.0         |
| 4692 | chrY | 9484649 | . | G | C | 7349.19  | PASS          | AC=44;AF=0.710;AN=62;DP=367;FS=0.000;Inbr |
| 4693 | chrY | 9492917 | . | C | A | 1208.88  | PASS          | AC=6;AF=0.086;AN=70;DP=489;FS=0.000;Inbre |
| 4694 | chrY | 9495836 | . | T | C | 511.09   | PASS          | AC=6;AF=0.086;AN=70;DP=608;FS=0.000;Inbre |
| 4695 | chrY | 9496068 | . | G | A | 1394.49  | PASS          | AC=6;AF=0.086;AN=70;DP=542;FS=0.000;Inbre |
| 4696 | chrY | 9504074 | . | C | T | 625.31   | PASS          | AC=14;AF=0.438;AN=32;DP=163;FS=0.000;Inbr |
| 4697 | chrY | 9509568 | . | C | T | 67.07    | PASS          | AC=2;AF=0.029;AN=70;BaseQRankSum=1.93;Cli |
| 4698 | chrY | 9509573 | . | T | A | 38.44    | my_snp_filter | AC=2;AF=0.029;AN=70;BaseQRankSum=         |
| 4699 | chrY | 9512657 | . | G | T | 989.17   | PASS          | AC=6;AF=0.086;AN=70;DP=655;FS=0.000;Inbre |
| 4700 | chrY | 9514704 | . | G | C | 1384.86  | PASS          | AC=6;AF=0.086;AN=70;DP=656;FS=0.000;Inbre |
| 4701 | chrY | 9515104 | . | C | T | 2686.59  | my_snp_filter | AC=12;AF=0.300;AN=40;DP=161;FS=0.         |
| 4702 | chrY | 9516116 | . | T | C | 36.51    | PASS          | AC=1;AF=0.014;AN=70;BaseQRankSum=-1.231e+ |
| 4703 | chrY | 9516120 | . | G | A | 36.51    | PASS          | AC=1;AF=0.014;AN=70;BaseQRankSum=-1.026e+ |
| 4704 | chrY | 9519795 | . | G | A | 547.47   | PASS          | AC=6;AF=0.214;AN=28;DP=119;FS=0.000;Inbre |
| 4705 | chrY | 9520012 | . | T | G | 3876.60  | PASS          | AC=36;AF=0.667;AN=54;DP=296;FS=0.000;Inbr |
| 4706 | chrY | 9521120 | . | G | T | 9891.47  | PASS          | AC=46;AF=0.657;AN=70;DP=530;FS=0.000;Inbr |
| 4707 | chrY | 9537177 | . | G | T | 6394.30  | my_snp_filter | AC=42;AF=0.636;AN=66;DP=363;FS=0.         |
| 4708 | chrY | 9537877 | . | A | G | 350.48   | PASS          | AC=9;AF=0.129;AN=70;BaseQRankSum=-3.580e- |
| 4709 | chrY | 9538342 | . | A | G | 28697.28 | my_snp_filter | AC=52;AF=0.743;AN=70;Base                 |
| 4710 | chrY | 9610422 | . | T | C | 671.89   | my_snp_filter | AC=6;AF=0.088;AN=68;DP=204;FS=0.0         |
| 4711 | chrY | 9627884 | . | C | T | 51.30    | my_snp_filter | AC=2;AF=0.034;AN=58;DP=140;FS=0.0         |
| 4712 | chrY | 9628186 | . | G | C | 213.06   | my_snp_filter | AC=4;AF=0.061;AN=66;DP=333;FS=0.0         |

|      |      |         |   |   |     |          |               |                                            |
|------|------|---------|---|---|-----|----------|---------------|--------------------------------------------|
| 4713 | chrY | 9641025 | . | C | T   | 6648.58  | PASS          | AC=38;AF=0.576;AN=66;DP=396;FS=0.000;Inbre |
| 4714 | chrY | 9641766 | . | G | A   | 700.71   | PASS          | AC=2;AF=0.030;AN=66;DP=622;FS=0.000;Inbre  |
| 4715 | chrY | 9645475 | . | T | G   | 270.83   | PASS          | AC=1;AF=0.015;AN=66;BaseQRankSum=1.39;Cli  |
| 4716 | chrY | 9645478 | . | T | G   | 135.87   | PASS          | AC=1;AF=0.015;AN=66;BaseQRankSum=0.964;Cl  |
| 4717 | chrY | 9645479 | . | T | G   | 96.84    | PASS          | AC=1;AF=0.015;AN=66;BaseQRankSum=0.751;Cl  |
| 4718 | chrY | 9645820 | . | G | A   | 208.59   | PASS          | AC=1;AF=0.017;AN=60;BaseQRankSum=-1.969e+  |
| 4719 | chrY | 9645821 | . | A | T   | 208.22   | PASS          | AC=1;AF=0.017;AN=60;BaseQRankSum=-3.307e+  |
| 4720 | chrY | 9645824 | . | A | T   | 211.53   | PASS          | AC=1;AF=0.017;AN=58;BaseQRankSum=-2.691e+  |
| 4721 | chrY | 9646653 | . | G | A   | 1582.32  | PASS          | AC=6;AF=0.091;AN=66;DP=530;FS=0.000;Inbre  |
| 4722 | chrY | 9646980 | . | T | C   | 14442.88 | PASS          | AC=62;AF=1.00;AN=62;DP=566;FS=0.0          |
| 4723 | chrY | 9647267 | . | G | A   | 105.99   | PASS          | AC=1;AF=0.016;AN=64;BaseQRankSum=-1.176e+  |
| 4724 | chrY | 9647280 | . | T | A   | 289.17   | PASS          | AC=1;AF=0.015;AN=66;BaseQRankSum=-3.550e-  |
| 4725 | chrY | 9647282 | . | T | G   | 247.11   | PASS          | AC=1;AF=0.015;AN=66;BaseQRankSum=-2.340e-  |
| 4726 | chrY | 9647285 | . | T | G   | 64.11    | PASS          | AC=1;AF=0.015;AN=66;BaseQRankSum=-2.500e-  |
| 4727 | chrY | 9647970 | . | G | C   | 63.82    | PASS          | AC=1;AF=0.015;AN=66;BaseQRankSum=0.00;Cli  |
| 4728 | chrY | 9648414 | . | A | G   | 39.80    | my_snp_filter | AC=1;AF=0.015;AN=66;BaseQRankSum=0.00      |
| 4729 | chrY | 9650514 | . | A | G   | 411.53   | PASS          | AC=8;AF=0.400;AN=20;DP=102;FS=0.000;Inbre  |
| 4730 | chrY | 9654393 | . | G | A   | 243.81   | PASS          | AC=3;AF=0.250;AN=12;BaseQRankSum=0.731;Cl  |
| 4731 | chrY | 9654405 | . | G | A   | 245.23   | PASS          | AC=3;AF=0.214;AN=14;BaseQRankSum=1.38;Cli  |
| 4732 | chrY | 9654413 | . | G | A   | 115.18   | PASS          | AC=1;AF=0.071;AN=14;BaseQRankSum=0.720;Cl  |
| 4733 | chrY | 9676905 | . | C | A   | 458.42   | my_snp_filter | AC=6;AF=0.333;AN=18;DP=94;FS=0.000         |
| 4734 | chrY | 9697181 | . | T | C   | 466.13   | PASS          | AC=5;AF=0.086;AN=58;BaseQRankSum=1.04;Cli  |
| 4735 | chrY | 9730114 | . | C | T   | 316.17   | PASS          | AC=6;AF=0.250;AN=24;DP=39;FS=0.000;Inbre   |
| 4736 | chrY | 9730810 | . | G | A   | 486.73   | PASS          | AC=6;AF=0.150;AN=40;DP=128;FS=0.000;Inbre  |
| 4737 | chrY | 9730999 | . | A | G   | 51.08    | PASS          | AC=2;AF=0.071;AN=28;DP=101;FS=0.000;Inbre  |
| 4738 | chrY | 9732725 | . | G | A   | 789.86   | PASS          | AC=6;AF=0.130;AN=46;DP=158;FS=0.000;Inbre  |
| 4739 | chrY | 9733430 | . | T | C   | 49       | my_snp_filter | AC=2;AF=0.029;AN=70;DP=231;FS=0.0          |
| 4740 | chrY | 9739792 | . | C | T   | 10501.99 | my_snp_filter | AC=46;AF=0.657;AN=70;DP=5                  |
| 4741 | chrY | 9740775 | . | C | T   | 19701.32 | my_snp_filter | AC=40;AF=0.571;AN=70;Base                  |
| 4742 | chrY | 9745951 | . | A | G   | 262.90   | my_snp_filter | AC=4;AF=0.143;AN=28;DP=96;FS=0.00          |
| 4743 | chrY | 9745972 | . | G | A   | 275.04   | my_snp_filter | AC=4;AF=0.143;AN=28;DP=86;FS=0.00          |
| 4744 | chrY | 9754357 | . | A | G   | 1967.65  | my_snp_filter | AC=27;AF=0.964;AN=28;BaseQRankSum          |
| 4745 | chrY | 9754793 | . | G | T   | 68.21    | my_snp_filter | AC=4;AF=0.057;AN=70;BaseQRankSum=          |
| 4746 | chrY | 9758675 | . | T | G   | 964.14   | PASS          | AC=6;AF=0.086;AN=70;DP=463;FS=0.000;Inbre  |
| 4747 | chrY | 9758934 | . | A | G   | 12876.32 | PASS          | AC=50;AF=0.735;AN=68;DP=566;FS=0.          |
| 4748 | chrY | 9771941 | . | T | A,* | 1747.14  | PASS          | AC=20,2;AF=0.769,0.077;AN=26;BaseQRankSum  |
| 4749 | chrY | 9771942 | . | T | A   | 88.06    | PASS          | AC=3;AF=0.107;AN=28;BaseQRankSum=0.736;Cl  |
| 4750 | chrY | 9777859 | . | G | A   | 1164.71  | PASS          | AC=6;AF=0.086;AN=70;DP=414;FS=0.000;Inbre  |
| 4751 | chrY | 9779442 | . | T | C   | 43.57    | my_snp_filter | AC=2;AF=0.083;AN=24;BaseQRankSum=          |
| 4752 | chrY | 9779453 | . | G | A   | 37.14    | my_snp_filter | AC=2;AF=0.091;AN=22;BaseQRankSum=          |
| 4753 | chrY | 9779486 | . | A | T   | 157.85   | PASS          | AC=2;AF=0.083;AN=24;BaseQRankSum=-1.590e-  |
| 4754 | chrY | 9779488 | . | C | T   | 158.74   | PASS          | AC=2;AF=0.083;AN=24;BaseQRankSum=1.18;Cli  |
| 4755 | chrY | 9779961 | . | C | T   | 112.24   | my_snp_filter | AC=1;AF=0.056;AN=18;BaseQRankSum=          |
| 4756 | chrY | 9780396 | . | G | A   | 47.99    | my_snp_filter | AC=1;AF=0.050;AN=20;BaseQRankSum=          |
| 4757 | chrY | 9780404 | . | C | T   | 45.56    | my_snp_filter | AC=1;AF=0.050;AN=20;BaseQRankSum=          |
| 4758 | chrY | 9781153 | . | T | C   | 191.32   | PASS          | AC=1;AF=0.056;AN=18;BaseQRankSum=0.495;Cl  |
| 4759 | chrY | 9781931 | . | A | G   | 55.64    | my_snp_filter | AC=3;AF=0.167;AN=18;BaseQRankSum=          |
| 4760 | chrY | 9782201 | . | A | T   | 2133.09  | my_snp_filter | AC=9;AF=0.500;AN=18;BaseQRankSum=          |
| 4761 | chrY | 9782921 | . | A | G   | 458.67   | my_snp_filter | AC=3;AF=0.167;AN=18;BaseQRankSum=          |
| 4762 | chrY | 9782972 | . | A | C   | 69.48    | my_snp_filter | AC=4;AF=0.222;AN=18;BaseQRankSum=          |
| 4763 | chrY | 9783000 | . | G | A   | 162.04   | my_snp_filter | AC=3;AF=0.167;AN=18;BaseQRankSum=          |
| 4764 | chrY | 9783214 | . | C | T   | 31.95    | my_snp_filter | AC=1;AF=0.056;AN=18;BaseQRankSum=          |
| 4765 | chrY | 9783219 | . | A | C   | 44.07    | my_snp_filter | AC=2;AF=0.111;AN=18;BaseQRankSum=          |
| 4766 | chrY | 9783237 | . | G | A   | 82.63    | PASS          | AC=1;AF=0.056;AN=18;BaseQRankSum=1.50;Cli  |
| 4767 | chrY | 9783254 | . | G | T   | 258.93   | my_snp_filter | AC=5;AF=0.278;AN=18;BaseQRankSum=          |
| 4768 | chrY | 9783260 | . | A | T   | 88.15    | PASS          | AC=1;AF=0.056;AN=18;BaseQRankSum=0.365;Cl  |
| 4769 | chrY | 9783278 | . | C | T   | 83.66    | PASS          | AC=1;AF=0.056;AN=18;BaseQRankSum=-5.560e-  |
| 4770 | chrY | 9783279 | . | T | G   | 83.66    | PASS          | AC=1;AF=0.056;AN=18;BaseQRankSum=-2.590e-  |
| 4771 | chrY | 9783283 | . | T | G   | 135.95   | my_snp_filter | AC=5;AF=0.278;AN=18;BaseQRankSum=          |
| 4772 | chrY | 9783285 | . | T | A   | 135.95   | my_snp_filter | AC=5;AF=0.278;AN=18;BaseQRankSum=          |
| 4773 | chrY | 9783319 | . | G | C   | 349.70   | PASS          | AC=4;AF=0.222;AN=18;BaseQRankSum=-1.588e+  |
| 4774 | chrY | 9783372 | . | A | G   | 53.31    | my_snp_filter | AC=1;AF=0.056;AN=18;BaseQRankSum=          |
| 4775 | chrY | 9783379 | . | G | T   | 64.08    | my_snp_filter | AC=1;AF=0.056;AN=18;BaseQRankSum=          |
| 4776 | chrY | 9783389 | . | C | G   | 341.65   | my_snp_filter | AC=2;AF=0.111;AN=18;BaseQRankSum=          |
| 4777 | chrY | 9783401 | . | T | C   | 288.17   | my_snp_filter | AC=2;AF=0.111;AN=18;BaseQRankSum=          |
| 4778 | chrY | 9783477 | . | G | C   | 112.24   | my_snp_filter | AC=1;AF=0.056;AN=18;BaseQRankSum=          |
| 4779 | chrY | 9783485 | . | C | T   | 108.42   | my_snp_filter | AC=1;AF=0.056;AN=18;BaseQRankSum=          |
| 4780 | chrY | 9783489 | . | C | A   | 328.78   | my_snp_filter | AC=3;AF=0.167;AN=18;BaseQRankSum=          |
| 4781 | chrY | 9783498 | . | A | T   | 99.33    | my_snp_filter | AC=1;AF=0.056;AN=18;BaseQRankSum=          |
| 4782 | chrY | 9783504 | . | T | A   | 314.80   | my_snp_filter | AC=3;AF=0.167;AN=18;BaseQRankSum=          |
| 4783 | chrY | 9787464 | . | G | C   | 1045.24  | PASS          | AC=6;AF=0.086;AN=70;DP=369;FS=0.000;Inbre  |
| 4784 | chrY | 9788914 | . | G | T   | 12414.97 | PASS          | AC=70;AF=1.00;AN=70;DP=423;FS=0.0          |
| 4785 | chrY | 9792633 | . | T | C   | 66.33    | PASS          | AC=2;AF=0.029;AN=70;DP=265;FS=0.000;Inbre  |
| 4786 | chrY | 9801474 | . | A | G   | 60.45    | PASS          | AC=1;AF=0.056;AN=18;BaseQRankSum=1.56;Cli  |
| 4787 | chrY | 9801482 | . | G | C   | 60.81    | PASS          | AC=1;AF=0.056;AN=18;BaseQRankSum=0.156;Cl  |
| 4788 | chrY | 9801483 | . | G | A   | 42.32    | PASS          | AC=1;AF=0.056;AN=18;BaseQRankSum=-2.120e-  |



|      |      |         |   |   |     |          |               |                                           |
|------|------|---------|---|---|-----|----------|---------------|-------------------------------------------|
| 4789 | chrY | 9801488 | . | T | G   | 191.43   | PASS          | AC=2;AF=0.111;AN=18;BaseQRankSum=2.34;Cli |
| 4790 | chrY | 9801496 | . | G | A   | 61.24    | PASS          | AC=1;AF=0.056;AN=18;BaseQRankSum=1.10;Cli |
| 4791 | chrY | 9801497 | . | T | C   | 45.32    | PASS          | AC=1;AF=0.056;AN=18;BaseQRankSum=-3.910e- |
| 4792 | chrY | 9801507 | . | A | G   | 48.32    | PASS          | AC=1;AF=0.056;AN=18;BaseQRankSum=1.78;Cli |
| 4793 | chrY | 9801533 | . | G | A   | 243.10   | PASS          | AC=4;AF=0.222;AN=18;BaseQRankSum=2.23;Cli |
| 4794 | chrY | 9801675 | . | A | G   | 159.41   | PASS          | AC=1;AF=0.056;AN=18;BaseQRankSum=-8.990e- |
| 4795 | chrY | 9801678 | . | C | T   | 73.08    | PASS          | AC=1;AF=0.056;AN=18;BaseQRankSum=0.853;Cl |
| 4796 | chrY | 9801680 | . | C | G   | 68.86    | PASS          | AC=1;AF=0.056;AN=18;BaseQRankSum=-1.740e+ |
| 4797 | chrY | 9801694 | . | T | C   | 69.44    | PASS          | AC=1;AF=0.056;AN=18;BaseQRankSum=1.13;Cli |
| 4798 | chrY | 9801699 | . | G | A   | 67.11    | PASS          | AC=1;AF=0.056;AN=18;BaseQRankSum=-6.240e  |
| 4799 | chrY | 9802644 | . | A | G   | 1087.95  | PASS          | AC=6;AF=0.300;AN=20;DP=165;FS=0.000;Inbre |
| 4800 | chrY | 9805135 | . | G | T   | 41.08    | PASS          | AC=2;AF=0.091;AN=22;DP=167;FS=0.000;Inbre |
| 4801 | chrY | 9806976 | . | C | T   | 346.27   | PASS          | AC=6;AF=0.273;AN=22;DP=59;FS=0.000;Inbre  |
| 4802 | chrY | 9808936 | . | A | G   | 2008.50  | PASS          | AC=6;AF=0.086;AN=70;DP=675;FS=0.000;Inbre |
| 4803 | chrY | 9810794 | . | C | T   | 8382.03  | PASS          | AC=62;AF=1.00;AN=62;DP=305;FS=0.000;Inbre |
| 4804 | chrY | 9810873 | . | A | G   | 87.32    | PASS          | AC=2;AF=0.036;AN=56;DP=219;FS=0.000;Inbre |
| 4805 | chrY | 9816143 | . | A | G   | 30.51    | my_snp_filter | AC=2;AF=0.029;AN=70;BaseQRankSum=         |
| 4806 | chrY | 9816208 | . | G | T   | 36.32    | my_snp_filter | AC=2;AF=0.029;AN=70;BaseQRankSum=         |
| 4807 | chrY | 9816212 | . | T | C   | 37.08    | my_snp_filter | AC=2;AF=0.029;AN=70;BaseQRankSum=         |
| 4808 | chrY | 9816213 | . | T | C   | 36.77    | my_snp_filter | AC=2;AF=0.029;AN=70;BaseQRankSum=         |
| 4809 | chrY | 9818338 | . | T | C   | 1069.35  | PASS          | AC=6;AF=0.086;AN=70;DP=418;FS=0.000;Inbre |
| 4810 | chrY | 9828418 | . | C | T   | 1082.99  | PASS          | AC=6;AF=0.086;AN=70;DP=422;FS=0.000;Inbre |
| 4811 | chrY | 9832636 | . | A | G   | 1501.64  | PASS          | AC=8;AF=0.400;AN=20;DP=120;FS=0.000;Inbre |
| 4812 | chrY | 9832637 | . | C | A   | 1523.63  | PASS          | AC=8;AF=0.400;AN=20;DP=121;FS=0.000;Inbre |
| 4813 | chrY | 9832648 | . | T | C   | 1632.54  | PASS          | AC=8;AF=0.400;AN=20;DP=121;FS=0.000;Inbre |
| 4814 | chrY | 9840447 | . | T | C   | 587.91   | PASS          | AC=6;AF=0.086;AN=70;DP=826;FS=0.000;Inbre |
| 4815 | chrY | 9841700 | . | C | G   | 16696.88 | PASS          | AC=70;AF=1.00;AN=70;DP=548;FS=0.0         |
| 4816 | chrY | 9844119 | . | G | T   | 215.76   | PASS          | AC=2;AF=0.029;AN=70;DP=543;FS=0.000;Inbre |
| 4817 | chrY | 9844137 | . | T | C   | 1234.50  | PASS          | AC=6;AF=0.086;AN=70;DP=524;FS=0.000;Inbre |
| 4818 | chrY | 9845876 | . | T | C   | 867.41   | PASS          | AC=6;AF=0.086;AN=70;DP=678;FS=0.000;Inbre |
| 4819 | chrY | 9846894 | . | C | T   | 1287.91  | PASS          | AC=6;AF=0.086;AN=70;DP=642;FS=0.000;Inbre |
| 4820 | chrY | 9850207 | . | C | G   | 88.60    | PASS          | AC=2;AF=0.029;AN=70;DP=448;FS=0.000;Inbre |
| 4821 | chrY | 9850494 | . | T | G   | 20331.34 | PASS          | AC=58;AF=0.829;AN=70;DP=558;FS=0.         |
| 4822 | chrY | 9850498 | . | G | T   | 20495.27 | PASS          | AC=58;AF=0.829;AN=70;DP=561;FS=0.         |
| 4823 | chrY | 9850623 | . | G | T   | 2447.45  | PASS          | AC=6;AF=0.086;AN=70;DP=791;FS=0.000;Inbre |
| 4824 | chrY | 9850624 | . | G | A   | 2447.45  | PASS          | AC=6;AF=0.086;AN=70;DP=791;FS=0.000;Inbre |
| 4825 | chrY | 9850801 | . | C | A   | 2011.53  | PASS          | AC=6;AF=0.086;AN=70;DP=489;FS=0.000;Inbre |
| 4826 | chrY | 9850809 | . | A | G   | 2010.32  | PASS          | AC=6;AF=0.086;AN=70;DP=511;FS=0.000;Inbre |
| 4827 | chrY | 9851457 | . | G | T   | 1245.72  | PASS          | AC=6;AF=0.088;AN=68;DP=605;FS=0.000;Inbre |
| 4828 | chrY | 9852978 | . | G | A,* | 2331.31  | PASS          | AC=6,4;AF=0.500,0.333;AN=12;BaseQRankSum= |
| 4829 | chrY | 9852981 | . | G | A,* | 2353.21  | PASS          | AC=6,4;AF=0.600,0.400;AN=10;BaseQRankSum= |
| 4830 | chrY | 9854010 | . | G | A   | 751.65   | PASS          | AC=6;AF=0.086;AN=70;DP=580;FS=0.000;Inbre |
| 4831 | chrY | 9854445 | . | T | C   | 14296.90 | PASS          | AC=50;AF=0.735;AN=68;DP=586;FS=0.         |
| 4832 | chrY | 9855869 | . | C | T   | 1214.68  | PASS          | AC=6;AF=0.088;AN=68;DP=296;FS=0.000;Inbre |
| 4833 | chrY | 9856283 | . | G | A   | 1243.02  | PASS          | AC=6;AF=0.086;AN=70;DP=718;FS=0.000;Inbre |
| 4834 | chrY | 9863192 | . | T | C   | 940.58   | PASS          | AC=4;AF=0.057;AN=70;DP=583;FS=0.000;Inbre |
| 4835 | chrY | 9866740 | . | A | G   | 8742.51  | PASS          | AC=56;AF=0.824;AN=68;DP=410;FS=0.000;Inbr |
| 4836 | chrY | 9868798 | . | A | C   | 5785.51  | PASS          | AC=55;AF=0.809;AN=68;BaseQRankSum=0.727;C |
| 4837 | chrY | 9869534 | . | A | T   | 10220.85 | PASS          | AC=52;AF=0.743;AN=70;BaseQRankSum         |
| 4838 | chrY | 9874072 | . | C | T   | 449.15   | PASS          | AC=6;AF=0.088;AN=68;DP=360;FS=0.000;Inbre |
| 4839 | chrY | 9875601 | . | C | G   | 991.01   | PASS          | AC=6;AF=0.086;AN=70;DP=761;FS=0.000;Inbre |
| 4840 | chrY | 9877478 | . | C | A   | 350.88   | PASS          | AC=2;AF=0.029;AN=70;DP=371;FS=0.000;Inbre |
| 4841 | chrY | 9879053 | . | G | T   | 282.13   | PASS          | AC=2;AF=0.029;AN=70;DP=789;FS=0.000;Inbre |
| 4842 | chrY | 9882063 | . | G | A   | 170.04   | PASS          | AC=2;AF=0.029;AN=70;DP=563;FS=0.000;Inbre |
| 4843 | chrY | 9885733 | . | G | A   | 8636.85  | PASS          | AC=67;AF=0.985;AN=68;BaseQRankSum=0.727;C |
| 4844 | chrY | 9885898 | . | G | A   | 923.94   | PASS          | AC=6;AF=0.086;AN=70;DP=477;FS=0.000;Inbre |
| 4845 | chrY | 9889199 | . | A | G   | 16296.94 | PASS          | AC=68;AF=1.00;AN=68;DP=622;FS=0.0         |
| 4846 | chrY | 9890279 | . | G | A   | 1310.03  | PASS          | AC=6;AF=0.094;AN=64;DP=263;FS=0.000;Inbre |
| 4847 | chrY | 9890330 | . | A | G   | 610.24   | PASS          | AC=2;AF=0.029;AN=70;DP=309;FS=0.000;Inbre |
| 4848 | chrY | 9893879 | . | G | A   | 772.87   | PASS          | AC=6;AF=0.088;AN=68;DP=431;FS=0.000;Inbre |
| 4849 | chrY | 9897463 | . | C | A   | 17415.59 | PASS          | AC=46;AF=0.657;AN=70;BaseQRankSum         |
| 4850 | chrY | 9899034 | . | G | T   | 1258.46  | PASS          | AC=4;AF=0.057;AN=70;DP=502;FS=0.000;Inbre |
| 4851 | chrY | 9901153 | . | A | G   | 1031.27  | PASS          | AC=6;AF=0.086;AN=70;DP=456;FS=0.000;Inbre |
| 4852 | chrY | 9902395 | . | G | A   | 497.24   | PASS          | AC=2;AF=0.029;AN=70;DP=605;FS=0.000;Inbre |
| 4853 | chrY | 9902733 | . | C | T   | 1402.51  | PASS          | AC=6;AF=0.088;AN=68;DP=680;FS=0.000;Inbre |
| 4854 | chrY | 9905889 | . | T | A   | 11693.13 | PASS          | AC=50;AF=0.735;AN=68;BaseQRankSum         |
| 4855 | chrY | 9906499 | . | C | T   | 66.28    | PASS          | AC=2;AF=0.032;AN=62;DP=344;FS=0.000;Inbre |
| 4856 | chrY | 9906752 | . | A | G   | 651.32   | PASS          | AC=6;AF=0.088;AN=68;DP=295;FS=0.000;Inbre |
| 4857 | chrY | 9908890 | . | A | G   | 155.50   | PASS          | AC=2;AF=0.033;AN=60;BaseQRankSum=-2.594e+ |
| 4858 | chrY | 9908904 | . | G | T   | 198.35   | PASS          | AC=2;AF=0.043;AN=46;BaseQRankSum=2.83;Cli |
| 4859 | chrY | 9908907 | . | C | G   | 198.60   | PASS          | AC=2;AF=0.045;AN=44;BaseQRankSum=0.442;Cl |
| 4860 | chrY | 9908909 | . | G | A   | 198.94   | PASS          | AC=2;AF=0.050;AN=40;BaseQRankSum=2.88;Cli |
| 4861 | chrY | 9908910 | . | T | C   | 198.94   | PASS          | AC=2;AF=0.050;AN=40;BaseQRankSum=-1.757e+ |
| 4862 | chrY | 9908915 | . | T | G   | 204.54   | PASS          | AC=2;AF=0.050;AN=40;BaseQRankSum=1.59;Cli |
| 4863 | chrY | 9908919 | . | T | G   | 201.41   | PASS          | AC=2;AF=0.043;AN=46;BaseQRankSum=1.08;Cli |
| 4864 | chrY | 9908927 | . | G | T   | 125.18   | PASS          | AC=2;AF=0.056;AN=36;BaseQRankSum=0.624;Cl |



|      |      |         |   |   |     |         |               |                                           |
|------|------|---------|---|---|-----|---------|---------------|-------------------------------------------|
| 4865 | chrY | 9908937 | . | G | A   | 67.23   | PASS          | AC=1;AF=0.026;AN=38;BaseQRankSum=2.90;Cli |
| 4866 | chrY | 9908942 | . | G | C   | 69.83   | PASS          | AC=1;AF=0.045;AN=22;BaseQRankSum=2.52;Cli |
| 4867 | chrY | 9909081 | . | C | T   | 64.51   | PASS          | AC=1;AF=0.017;AN=60;BaseQRankSum=-2.840e- |
| 4868 | chrY | 9909085 | . | T | C   | 41.11   | PASS          | AC=1;AF=0.014;AN=70;BaseQRankSum=0.387;Cl |
| 4869 | chrY | 9909092 | . | A | G   | 88.17   | my_snp_filter | AC=1;AF=0.014;AN=70;BaseQRankSum=         |
| 4870 | chrY | 9909093 | . | T | C   | 111.62  | my_snp_filter | AC=1;AF=0.014;AN=70;BaseQRankSum=         |
| 4871 | chrY | 9909098 | . | C | G   | 341.51  | PASS          | AC=2;AF=0.029;AN=70;BaseQRankSum=0.886;Cl |
| 4872 | chrY | 9909100 | . | G | T   | 40.62   | PASS          | AC=1;AF=0.015;AN=68;BaseQRankSum=-1.026e+ |
| 4873 | chrY | 9909108 | . | A | C   | 111.47  | my_snp_filter | AC=1;AF=0.014;AN=70;BaseQRankSum=         |
| 4874 | chrY | 9909109 | . | C | A   | 176.98  | PASS          | AC=1;AF=0.015;AN=68;BaseQRankSum=0.736;Cl |
| 4875 | chrY | 9909110 | . | T | A   | 556.23  | PASS          | AC=4;AF=0.057;AN=70;BaseQRankSum=0.648;Cl |
| 4876 | chrY | 9909111 | . | C | G   | 255.02  | my_snp_filter | AC=2;AF=0.029;AN=70;BaseQRankSum=         |
| 4877 | chrY | 9909113 | . | C | G   | 44.21   | my_snp_filter | AC=1;AF=0.015;AN=68;BaseQRankSum=         |
| 4878 | chrY | 9909117 | . | T | C   | 631.60  | PASS          | AC=6;AF=0.086;AN=70;BaseQRankSum=-7.360e- |
| 4879 | chrY | 9909120 | . | T | C   | 157.08  | my_snp_filter | AC=2;AF=0.029;AN=70;BaseQRankSum=         |
| 4880 | chrY | 9909123 | . | A | C   | 204.04  | my_snp_filter | AC=1;AF=0.014;AN=70;BaseQRankSum=         |
| 4881 | chrY | 9909135 | . | G | T   | 74.31   | my_snp_filter | AC=1;AF=0.014;AN=70;BaseQRankSum=         |
| 4882 | chrY | 9909137 | . | C | T   | 997.19  | PASS          | AC=4;AF=0.061;AN=66;BaseQRankSum=0.912;Cl |
| 4883 | chrY | 9909138 | . | A | G   | 64.67   | PASS          | AC=2;AF=0.029;AN=68;BaseQRankSum=-3.330e- |
| 4884 | chrY | 9909140 | . | T | A   | 134.93  | PASS          | AC=1;AF=0.015;AN=68;BaseQRankSum=-2.395e+ |
| 4885 | chrY | 9909141 | . | T | C   | 590.48  | PASS          | AC=3;AF=0.044;AN=68;BaseQRankSum=0.364;Cl |
| 4886 | chrY | 9909145 | . | G | T   | 34.02   | my_snp_filter | AC=2;AF=0.032;AN=62;BaseQRankSum=         |
| 4887 | chrY | 9909146 | . | T | C   | 1025.42 | PASS          | AC=6;AF=0.143;AN=42;BaseQRankSum=-4.830e- |
| 4888 | chrY | 9909147 | . | G | A   | 1578.03 | PASS          | AC=6;AF=0.115;AN=52;BaseQRankSum=-8.080e- |
| 4889 | chrY | 9909148 | . | C | T   | 51.14   | PASS          | AC=1;AF=0.016;AN=62;BaseQRankSum=0.606;Cl |
| 4890 | chrY | 9909151 | . | T | G   | 935.88  | PASS          | AC=4;AF=0.065;AN=62;BaseQRankSum=-2.255e+ |
| 4891 | chrY | 9909153 | . | A | T   | 771.37  | PASS          | AC=3;AF=0.060;AN=50;BaseQRankSum=-1.318e+ |
| 4892 | chrY | 9909154 | . | T | G,A | 4927.13 | PASS          | AC=14,4;AF=0.500,0.143;AN=28;BaseQRankSum |
| 4893 | chrY | 9909159 | . | A | G   | 173.20  | PASS          | AC=2;AF=0.033;AN=60;BaseQRankSum=-1.078e+ |
| 4894 | chrY | 9909160 | . | T | C   | 136.74  | PASS          | AC=1;AF=0.016;AN=62;BaseQRankSum=-1.125e+ |
| 4895 | chrY | 9909161 | . | G | C   | 113.62  | PASS          | AC=1;AF=0.017;AN=58;BaseQRankSum=-9.770e- |
| 4896 | chrY | 9909162 | . | G | A   | 103.29  | PASS          | AC=1;AF=0.016;AN=62;BaseQRankSum=0.925;Cl |
| 4897 | chrY | 9909165 | . | G | A   | 145.92  | PASS          | AC=1;AF=0.017;AN=60;BaseQRankSum=0.299;Cl |
| 4898 | chrY | 9909172 | . | A | T   | 448.42  | PASS          | AC=3;AF=0.048;AN=62;BaseQRankSum=-1.603e+ |
| 4899 | chrY | 9909179 | . | T | G   | 88.92   | PASS          | AC=1;AF=0.016;AN=62;BaseQRankSum=-1.605e+ |
| 4900 | chrY | 9909186 | . | A | G   | 87.87   | PASS          | AC=2;AF=0.037;AN=54;DP=6871;FS=0.000;Inbr |
| 4901 | chrY | 9909192 | . | T | C   | 115.97  | PASS          | AC=2;AF=0.043;AN=46;BaseQRankSum=0.717;Cl |
| 4902 | chrY | 9909194 | . | G | A   | 79.40   | PASS          | AC=2;AF=0.043;AN=46;BaseQRankSum=1.22;Cli |
| 4903 | chrY | 9909196 | . | T | C   | 337.37  | PASS          | AC=3;AF=0.094;AN=32;BaseQRankSum=1.13;Cli |
| 4904 | chrY | 9909202 | . | A | C   | 149.96  | PASS          | AC=2;AF=0.059;AN=34;BaseQRankSum=-1.333e+ |
| 4905 | chrY | 9909203 | . | A | T   | 50.25   | PASS          | AC=2;AF=0.042;AN=48;DP=4377;FS=0.000;Inbr |
| 4906 | chrY | 9909317 | . | A | G   | 40.09   | my_snp_filter | AC=1;AF=0.038;AN=26;BaseQRankSum=         |
| 4907 | chrY | 9909332 | . | G | T   | 36.57   | my_snp_filter | AC=1;AF=0.038;AN=26;BaseQRankSum=         |
| 4908 | chrY | 9909335 | . | G | A   | 36.02   | my_snp_filter | AC=1;AF=0.042;AN=24;BaseQRankSum=         |
| 4909 | chrY | 9909337 | . | A | T   | 36.02   | my_snp_filter | AC=1;AF=0.042;AN=24;BaseQRankSum=         |
| 4910 | chrY | 9909504 | . | G | T   | 184.26  | my_snp_filter | AC=2;AF=0.030;AN=66;BaseQRankSum=         |
| 4911 | chrY | 9909507 | . | G | A   | 373.79  | PASS          | AC=4;AF=0.059;AN=68;BaseQRankSum=-8.510e- |
| 4912 | chrY | 9909508 | . | A | C   | 357.36  | PASS          | AC=4;AF=0.059;AN=68;BaseQRankSum=-5.070e- |
| 4913 | chrY | 9909511 | . | A | T   | 152.44  | my_snp_filter | AC=2;AF=0.029;AN=68;BaseQRankSum=         |
| 4914 | chrY | 9909514 | . | A | G   | 244.98  | my_snp_filter | AC=4;AF=0.059;AN=68;BaseQRankSum=         |
| 4915 | chrY | 9909518 | . | A | G   | 248.37  | PASS          | AC=3;AF=0.043;AN=70;BaseQRankSum=-2.821e+ |
| 4916 | chrY | 9909525 | . | C | A   | 269.52  | my_snp_filter | AC=4;AF=0.059;AN=68;BaseQRankSum=         |
| 4917 | chrY | 9909527 | . | T | G   | 231.92  | PASS          | AC=3;AF=0.043;AN=70;BaseQRankSum=-6.780e- |
| 4918 | chrY | 9909528 | . | G | A   | 2650.79 | my_snp_filter | AC=8;AF=0.114;AN=70;BaseQRankSum=         |
| 4919 | chrY | 9909532 | . | T | C   | 162.49  | my_snp_filter | AC=2;AF=0.029;AN=70;BaseQRankSum=         |
| 4920 | chrY | 9909536 | . | G | C   | 442.39  | PASS          | AC=4;AF=0.057;AN=70;BaseQRankSum=-1.100e- |
| 4921 | chrY | 9909538 | . | C | A   | 286.31  | PASS          | AC=2;AF=0.029;AN=70;BaseQRankSum=-8.840e- |
| 4922 | chrY | 9909543 | . | G | T   | 187.25  | PASS          | AC=2;AF=0.029;AN=70;BaseQRankSum=0.647;Cl |
| 4923 | chrY | 9909552 | . | G | A   | 37.42   | my_snp_filter | AC=1;AF=0.014;AN=70;BaseQRankSum=         |
| 4924 | chrY | 9909555 | . | A | G   | 94.23   | PASS          | AC=1;AF=0.014;AN=70;BaseQRankSum=-3.116e+ |
| 4925 | chrY | 9909557 | . | T | A   | 289.35  | PASS          | AC=3;AF=0.043;AN=70;BaseQRankSum=0.065;Cl |
| 4926 | chrY | 9909558 | . | T | A   | 245.63  | PASS          | AC=3;AF=0.043;AN=70;BaseQRankSum=-2.068e+ |
| 4927 | chrY | 9909562 | . | T | C   | 230.95  | PASS          | AC=1;AF=0.014;AN=70;BaseQRankSum=-7.580e- |
| 4928 | chrY | 9909563 | . | T | G,A | 629.89  | my_snp_filter | AC=4,1;AF=0.057,0.014;AN=70;BaseQ         |
| 4929 | chrY | 9909566 | . | T | A   | 1118.53 | PASS          | AC=5;AF=0.071;AN=70;BaseQRankSum=-6.600e- |
| 4930 | chrY | 9909567 | . | T | C   | 91.06   | PASS          | AC=1;AF=0.014;AN=70;BaseQRankSum=0.470;Cl |
| 4931 | chrY | 9909569 | . | T | C   | 196.55  | PASS          | AC=3;AF=0.043;AN=70;BaseQRankSum=-2.341e+ |
| 4932 | chrY | 9909570 | . | C | G   | 772.24  | PASS          | AC=5;AF=0.071;AN=70;BaseQRankSum=-1.960e+ |
| 4933 | chrY | 9909573 | . | C | T   | 160.43  | PASS          | AC=1;AF=0.014;AN=70;BaseQRankSum=0.524;Cl |
| 4934 | chrY | 9909577 | . | C | A   | 58.34   | PASS          | AC=2;AF=0.029;AN=70;BaseQRankSum=-1.055e+ |
| 4935 | chrY | 9909578 | . | A | G   | 37.08   | my_snp_filter | AC=1;AF=0.014;AN=70;BaseQRankSum=         |
| 4936 | chrY | 9909580 | . | C | A   | 72.01   | PASS          | AC=1;AF=0.014;AN=70;BaseQRankSum=-3.830e- |
| 4937 | chrY | 9909584 | . | G | C   | 367.16  | PASS          | AC=3;AF=0.043;AN=70;BaseQRankSum=0.069;Cl |
| 4938 | chrY | 9909588 | . | G | A   | 123.89  | PASS          | AC=2;AF=0.029;AN=70;BaseQRankSum=1.59;Cli |
| 4939 | chrY | 9909800 | . | C | T   | 40.95   | PASS          | AC=1;AF=0.022;AN=46;BaseQRankSum=-1.890e- |
| 4940 | chrY | 9909802 | . | T | C   | 34.20   | my_snp_filter | AC=1;AF=0.022;AN=46;BaseQRankSum=         |

|      |      |         |   |   |     |         |               |                                           |
|------|------|---------|---|---|-----|---------|---------------|-------------------------------------------|
| 4941 | chrY | 9909805 | . | A | T   | 37.41   | my_snp_filter | AC=1;AF=0.022;AN=46;BaseQRankSum=         |
| 4942 | chrY | 9909806 | . | T | G   | 38.05   | my_snp_filter | AC=1;AF=0.022;AN=46;BaseQRankSum=         |
| 4943 | chrY | 9909813 | . | C | A   | 33.44   | my_snp_filter | AC=1;AF=0.024;AN=42;BaseQRankSum=         |
| 4944 | chrY | 9909816 | . | A | G   | 75.51   | PASS          | AC=1;AF=0.024;AN=42;BaseQRankSum=-1.278e+ |
| 4945 | chrY | 9909821 | . | G | C   | 78.69   | PASS          | AC=1;AF=0.026;AN=38;BaseQRankSum=-2.717e+ |
| 4946 | chrY | 9909826 | . | G | T   | 75.65   | PASS          | AC=1;AF=0.028;AN=36;BaseQRankSum=-8.520e- |
| 4947 | chrY | 9909828 | . | A | T   | 75.51   | PASS          | AC=1;AF=0.028;AN=36;BaseQRankSum=-1.433e+ |
| 4948 | chrY | 9909840 | . | A | T   | 78.71   | PASS          | AC=1;AF=0.031;AN=32;BaseQRankSum=-1.014e+ |
| 4949 | chrY | 9909844 | . | T | C   | 71.37   | PASS          | AC=1;AF=0.026;AN=38;BaseQRankSum=-2.038e+ |
| 4950 | chrY | 9909880 | . | T | C   | 459.71  | PASS          | AC=3;AF=0.083;AN=36;BaseQRankSum=-9.310e  |
| 4951 | chrY | 9909901 | . | C | A,* | 174.48  | PASS          | AC=2,1;AF=0.045,0.023;AN=44;BaseQRankSum= |
| 4952 | chrY | 9910104 | . | C | G   | 538.55  | PASS          | AC=5;AF=0.114;AN=44;BaseQRankSum=0.074;Cl |
| 4953 | chrY | 9910106 | . | G | A   | 469.90  | PASS          | AC=5;AF=0.114;AN=44;BaseQRankSum=0.992;Cl |
| 4954 | chrY | 9910107 | . | T | C   | 359.39  | PASS          | AC=3;AF=0.065;AN=46;BaseQRankSum=0.370;Cl |
| 4955 | chrY | 9910109 | . | A | T   | 421.72  | PASS          | AC=5;AF=0.104;AN=48;BaseQRankSum=-5.550e- |
| 4956 | chrY | 9910177 | . | G | C   | 407.44  | PASS          | AC=3;AF=0.048;AN=62;BaseQRankSum=-1.270e+ |
| 4957 | chrY | 9910179 | . | C | T   | 401.51  | PASS          | AC=3;AF=0.050;AN=60;BaseQRankSum=0.420;Cl |
| 4958 | chrY | 9910182 | . | C | T   | 354.53  | PASS          | AC=3;AF=0.047;AN=64;BaseQRankSum=-9.400e- |
| 4959 | chrY | 9910183 | . | C | T   | 359.97  | PASS          | AC=3;AF=0.045;AN=66;BaseQRankSum=-1.319e+ |
| 4960 | chrY | 9910345 | . | T | C   | 69.41   | my_snp_filter | AC=3;AF=0.048;AN=62;BaseQRankSum=         |
| 4961 | chrY | 9910374 | . | T | C   | 50.96   | my_snp_filter | AC=3;AF=0.043;AN=70;BaseQRankSum=         |
| 4962 | chrY | 9911559 | . | G | T   | 173.44  | PASS          | AC=3;AF=0.043;AN=70;BaseQRankSum=-2.860e- |
| 4963 | chrY | 9911563 | . | A | G   | 168.60  | PASS          | AC=3;AF=0.043;AN=70;BaseQRankSum=-5.500e- |
| 4964 | chrY | 9911565 | . | C | A   | 168.46  | PASS          | AC=3;AF=0.047;AN=64;BaseQRankSum=0.083;Cl |
| 4965 | chrY | 9911568 | . | G | T   | 162.21  | PASS          | AC=3;AF=0.043;AN=70;BaseQRankSum=-2.246e+ |
| 4966 | chrY | 9914040 | . | G | T   | 50.76   | PASS          | AC=2;AF=0.063;AN=32;DP=605;FS=0.000;Inbre |
| 4967 | chrY | 9914042 | . | G | A   | 73.17   | PASS          | AC=3;AF=0.100;AN=30;BaseQRankSum=0.261;Cl |
| 4968 | chrY | 9914044 | . | C | G   | 141.49  | PASS          | AC=3;AF=0.100;AN=30;BaseQRankSum=-1.735e+ |
| 4969 | chrY | 9914055 | . | T | C   | 81.43   | PASS          | AC=2;AF=0.067;AN=30;DP=638;FS=6.201;Inbre |
| 4970 | chrY | 9914115 | . | A | G   | 201.38  | PASS          | AC=2;AF=0.071;AN=28;BaseQRankSum=0.544;Cl |
| 4971 | chrY | 9914123 | . | G | T   | 56.09   | PASS          | AC=2;AF=0.056;AN=36;DP=725;FS=0.000;Inbre |
| 4972 | chrY | 9914127 | . | G | C   | 56.51   | PASS          | AC=2;AF=0.053;AN=38;DP=706;FS=0.000;Inbre |
| 4973 | chrY | 9914128 | . | A | T   | 56.51   | PASS          | AC=2;AF=0.053;AN=38;DP=706;FS=0.000;Inbre |
| 4974 | chrY | 9914139 | . | C | T   | 55.16   | PASS          | AC=2;AF=0.059;AN=34;DP=661;FS=0.000;Inbre |
| 4975 | chrY | 9914178 | . | T | A   | 255.76  | PASS          | AC=3;AF=0.068;AN=44;BaseQRankSum=0.146;Cl |
| 4976 | chrY | 9914179 | . | C | A   | 252.15  | PASS          | AC=3;AF=0.068;AN=44;BaseQRankSum=1.88;Cl  |
| 4977 | chrY | 9914183 | . | C | G   | 306.57  | PASS          | AC=4;AF=0.087;AN=46;BaseQRankSum=0.962;Cl |
| 4978 | chrY | 9914192 | . | G | A   | 102.87  | PASS          | AC=1;AF=0.019;AN=54;BaseQRankSum=-3.750e- |
| 4979 | chrY | 9914194 | . | A | G   | 41.31   | my_snp_filter | AC=1;AF=0.019;AN=54;BaseQRankSum=         |
| 4980 | chrY | 9914195 | . | T | A   | 954.61  | PASS          | AC=8;AF=0.154;AN=52;BaseQRankSum=0.847;Cl |
| 4981 | chrY | 9914201 | . | C | T   | 1264.04 | PASS          | AC=7;AF=0.135;AN=52;BaseQRankSum=1.30;Cli |
| 4982 | chrY | 9914202 | . | T | C   | 1151.11 | PASS          | AC=7;AF=0.135;AN=52;BaseQRankSum=1.75;Cli |
| 4983 | chrY | 9914204 | . | C | A   | 114.23  | PASS          | AC=1;AF=0.019;AN=52;BaseQRankSum=0.995;Cl |
| 4984 | chrY | 9914205 | . | A | T   | 94.15   | PASS          | AC=2;AF=0.038;AN=52;BaseQRankSum=-7.500e- |
| 4985 | chrY | 9914215 | . | G | A,* | 580.93  | PASS          | AC=3,3;AF=0.060,0.060;AN=50;BaseQRankSum= |
| 4986 | chrY | 9914216 | . | G | T,* | 682.86  | PASS          | AC=4,3;AF=0.080,0.060;AN=50;BaseQRankSum= |
| 4987 | chrY | 9914219 | . | C | T   | 133.86  | PASS          | AC=1;AF=0.019;AN=52;BaseQRankSum=-7.830e- |
| 4988 | chrY | 9914223 | . | T | A,C | 251.61  | PASS          | AC=1,2;AF=0.019,0.038;AN=52;BaseQRankSum= |
| 4989 | chrY | 9914224 | . | G | T,C | 218.32  | PASS          | AC=1,1;AF=0.019,0.019;AN=52;BaseQRankSum= |
| 4990 | chrY | 9914227 | . | T | G   | 118.98  | PASS          | AC=1;AF=0.019;AN=54;BaseQRankSum=1.08;Cli |
| 4991 | chrY | 9914228 | . | G | C   | 120.65  | PASS          | AC=1;AF=0.019;AN=54;BaseQRankSum=-1.528e+ |
| 4992 | chrY | 9914231 | . | C | G   | 206.29  | PASS          | AC=2;AF=0.042;AN=48;BaseQRankSum=1.80;Cli |
| 4993 | chrY | 9914233 | . | T | G   | 164.55  | PASS          | AC=2;AF=0.043;AN=46;BaseQRankSum=0.878;Cl |
| 4994 | chrY | 9914238 | . | G | C   | 273.08  | PASS          | AC=2;AF=0.040;AN=50;BaseQRankSum=1.61;Cli |
| 4995 | chrY | 9914240 | . | A | G   | 269.56  | PASS          | AC=2;AF=0.042;AN=48;BaseQRankSum=1.53;Cli |
| 4996 | chrY | 9914241 | . | A | G   | 311.62  | PASS          | AC=2;AF=0.042;AN=48;BaseQRankSum=1.58;Cli |
| 4997 | chrY | 9914244 | . | A | C   | 502.18  | PASS          | AC=3;AF=0.068;AN=44;BaseQRankSum=1.43;Cli |
| 4998 | chrY | 9914250 | . | T | C,* | 519.07  | PASS          | AC=2,1;AF=0.045,0.023;AN=44;BaseQRankSum= |
| 4999 | chrY | 9914251 | . | C | T,* | 544.73  | PASS          | AC=3,1;AF=0.075,0.025;AN=40;BaseQRankSum= |
| 5000 | chrY | 9914259 | . | C | A   | 426.51  | PASS          | AC=2;AF=0.042;AN=48;BaseQRankSum=2.67;Cli |
| 5001 | chrY | 9914270 | . | A | C   | 123.69  | PASS          | AC=2;AF=0.053;AN=38;BaseQRankSum=-1.110e- |
| 5002 | chrY | 9914276 | . | G | A   | 462.12  | PASS          | AC=2;AF=0.042;AN=48;BaseQRankSum=0.027;Cl |
| 5003 | chrY | 9914289 | . | C | A   | 444.04  | PASS          | AC=2;AF=0.048;AN=42;BaseQRankSum=1.57;Cli |
| 5004 | chrY | 9914290 | . | T | C   | 563.45  | PASS          | AC=3;AF=0.088;AN=34;BaseQRankSum=0.305;Cl |
| 5005 | chrY | 9914299 | . | A | G   | 63.88   | PASS          | AC=1;AF=0.025;AN=40;BaseQRankSum=1.60;Cli |
| 5006 | chrY | 9914303 | . | G | C   | 487.11  | PASS          | AC=2;AF=0.053;AN=38;BaseQRankSum=-3.976e+ |
| 5007 | chrY | 9914337 | . | T | A   | 62.99   | my_snp_filter | AC=3;AF=0.100;AN=30;BaseQRankSum=         |
| 5008 | chrY | 9914349 | . | A | T   | 289.63  | PASS          | AC=5;AF=0.357;AN=14;BaseQRankSum=0.392;Cl |
| 5009 | chrY | 9914356 | . | A | G   | 340.75  | PASS          | AC=6;AF=0.333;AN=18;BaseQRankSum=0.600;Cl |
| 5010 | chrY | 9914359 | . | G | A   | 50.32   | my_snp_filter | AC=2;AF=0.077;AN=26;BaseQRankSum=         |
| 5011 | chrY | 9914361 | . | G | A   | 141.51  | my_snp_filter | AC=3;AF=0.150;AN=20;BaseQRankSum=         |
| 5012 | chrY | 9914362 | . | A | T   | 437.27  | PASS          | AC=5;AF=0.250;AN=20;BaseQRankSum=0.501;Cl |
| 5013 | chrY | 9914363 | . | G | C   | 227.78  | PASS          | AC=3;AF=0.136;AN=22;BaseQRankSum=0.453;Cl |
| 5014 | chrY | 9914371 | . | C | T   | 49.01   | PASS          | AC=2;AF=0.071;AN=28;BaseQRankSum=0.248;Cl |
| 5015 | chrY | 9914373 | . | C | G   | 231.68  | PASS          | AC=1;AF=0.036;AN=28;BaseQRankSum=-1.567e+ |
| 5016 | chrY | 9914383 | . | A | T   | 296.34  | PASS          | AC=3;AF=0.125;AN=24;BaseQRankSum=-4.150e- |

|      |      |         |   |   |     |         |               |                                           |
|------|------|---------|---|---|-----|---------|---------------|-------------------------------------------|
| 5017 | chrY | 9914385 | . | T | A,* | 594.13  | PASS          | AC=3,1;AF=0.136,0.045;AN=22;BaseQRankSum= |
| 5018 | chrY | 9914391 | . | T | A   | 51.37   | my_snp_filter | AC=2;AF=0.083;AN=24;DP=858;FS=0.0         |
| 5019 | chrY | 9914395 | . | G | C   | 348.98  | PASS          | AC=3;AF=0.115;AN=26;BaseQRankSum=-1.272e+ |
| 5020 | chrY | 9914417 | . | G | A,* | 940.45  | PASS          | AC=3,4;AF=0.136,0.182;AN=22;BaseQRankSum= |
| 5021 | chrY | 9914419 | . | T | A   | 92.39   | my_snp_filter | AC=2;AF=0.083;AN=24;BaseQRankSum=         |
| 5022 | chrY | 9914427 | . | A | G   | 94.50   | my_snp_filter | AC=2;AF=0.071;AN=28;BaseQRankSum=         |
| 5023 | chrY | 9914436 | . | G | A   | 156.67  | PASS          | AC=2;AF=0.071;AN=28;BaseQRankSum=2.21;Cli |
| 5024 | chrY | 9914437 | . | T | G   | 125.92  | PASS          | AC=1;AF=0.033;AN=30;BaseQRankSum=2.72;Cli |
| 5025 | chrY | 9914442 | . | A | G   | 148.17  | PASS          | AC=2;AF=0.059;AN=34;BaseQRankSum=-7.840e- |
| 5026 | chrY | 9914445 | . | T | C   | 562.79  | PASS          | AC=3;AF=0.088;AN=34;BaseQRankSum=-2.427e+ |
| 5027 | chrY | 9914446 | . | G | C   | 434.13  | PASS          | AC=2;AF=0.059;AN=34;BaseQRankSum=-2.814e+ |
| 5028 | chrY | 9914451 | . | T | G   | 886.94  | PASS          | AC=4;AF=0.182;AN=22;BaseQRankSum=-1.300e+ |
| 5029 | chrY | 9914452 | . | C | G   | 131.60  | PASS          | AC=1;AF=0.033;AN=30;BaseQRankSum=-1.775e+ |
| 5030 | chrY | 9914458 | . | A | G   | 102.28  | my_snp_filter | AC=2;AF=0.063;AN=32;BaseQRankSum=         |
| 5031 | chrY | 9914459 | . | G | C   | 180.09  | PASS          | AC=1;AF=0.028;AN=36;BaseQRankSum=2.86;Cli |
| 5032 | chrY | 9914463 | . | A | G   | 97.01   | my_snp_filter | AC=2;AF=0.050;AN=40;BaseQRankSum=         |
| 5033 | chrY | 9914466 | . | G | A   | 138.76  | PASS          | AC=1;AF=0.023;AN=44;BaseQRankSum=2.86;Cli |
| 5034 | chrY | 9914479 | . | T | C   | 132.78  | PASS          | AC=1;AF=0.018;AN=56;BaseQRankSum=-9.900e- |
| 5035 | chrY | 9914492 | . | T | A   | 863.80  | PASS          | AC=3;AF=0.063;AN=48;BaseQRankSum=-1.016e+ |
| 5036 | chrY | 9914500 | . | A | C   | 348.74  | PASS          | AC=2;AF=0.032;AN=62;BaseQRankSum=-7.830e- |
| 5037 | chrY | 9914518 | . | C | A   | 142.68  | PASS          | AC=1;AF=0.015;AN=68;BaseQRankSum=2.29;Cli |
| 5038 | chrY | 9914521 | . | C | A   | 111.30  | PASS          | AC=1;AF=0.015;AN=68;BaseQRankSum=-1.420e- |
| 5039 | chrY | 9914525 | . | T | C   | 278.58  | PASS          | AC=3;AF=0.047;AN=64;BaseQRankSum=-2.289e+ |
| 5040 | chrY | 9914527 | . | G | A   | 44.65   | my_snp_filter | AC=2;AF=0.029;AN=68;BaseQRankSum=         |
| 5041 | chrY | 9914530 | . | G | T   | 43.77   | my_snp_filter | AC=2;AF=0.029;AN=68;BaseQRankSum=         |
| 5042 | chrY | 9914557 | . | A | C   | 175.36  | PASS          | AC=3;AF=0.044;AN=68;BaseQRankSum=-7.730e- |
| 5043 | chrY | 9914561 | . | G | C   | 112.22  | PASS          | AC=2;AF=0.036;AN=56;BaseQRankSum=0.492;Cl |
| 5044 | chrY | 9915364 | . | C | T   | 60.71   | PASS          | AC=1;AF=0.019;AN=54;BaseQRankSum=1.74;Cli |
| 5045 | chrY | 9915365 | . | T | A   | 60.71   | PASS          | AC=1;AF=0.019;AN=54;BaseQRankSum=-3.184e+ |
| 5046 | chrY | 9915370 | . | T | A   | 54.52   | my_snp_filter | AC=1;AF=0.018;AN=56;BaseQRankSum=         |
| 5047 | chrY | 9915373 | . | A | G   | 58.96   | PASS          | AC=1;AF=0.018;AN=56;BaseQRankSum=0.348;Cl |
| 5048 | chrY | 9915377 | . | A | T   | 49.24   | my_snp_filter | AC=1;AF=0.017;AN=58;BaseQRankSum=         |
| 5049 | chrY | 9915386 | . | G | A   | 37.29   | my_snp_filter | AC=1;AF=0.016;AN=62;BaseQRankSum=         |
| 5050 | chrY | 9915389 | . | T | C   | 35.59   | my_snp_filter | AC=1;AF=0.016;AN=62;BaseQRankSum=         |
| 5051 | chrY | 9915393 | . | T | A   | 36.77   | my_snp_filter | AC=1;AF=0.015;AN=66;BaseQRankSum=         |
| 5052 | chrY | 9915396 | . | G | T   | 36.06   | my_snp_filter | AC=1;AF=0.015;AN=66;BaseQRankSum=         |
| 5053 | chrY | 9915403 | . | A | T   | 35.36   | my_snp_filter | AC=1;AF=0.015;AN=68;BaseQRankSum=         |
| 5054 | chrY | 9915415 | . | T | G   | 31.69   | my_snp_filter | AC=1;AF=0.015;AN=68;BaseQRankSum=         |
| 5055 | chrY | 9915430 | . | C | A   | 34.01   | my_snp_filter | AC=1;AF=0.014;AN=70;BaseQRankSum=         |
| 5056 | chrY | 9915434 | . | C | A   | 34.18   | my_snp_filter | AC=1;AF=0.014;AN=70;BaseQRankSum=         |
| 5057 | chrY | 9915443 | . | G | A   | 37.49   | my_snp_filter | AC=1;AF=0.014;AN=70;BaseQRankSum=         |
| 5058 | chrY | 9915629 | . | G | C   | 130.17  | PASS          | AC=1;AF=0.019;AN=52;BaseQRankSum=-1.257e+ |
| 5059 | chrY | 9915666 | . | C | A   | 54.33   | PASS          | AC=2;AF=0.077;AN=26;DP=1011;FS=0.000;Inbr |
| 5060 | chrY | 9915670 | . | A | C   | 56.56   | PASS          | AC=2;AF=0.125;AN=16;DP=1089;FS=0.000;MLEA |
| 5061 | chrY | 9915683 | . | C | A   | 57.95   | PASS          | AC=2;AF=0.125;AN=16;DP=802;FS=0.000;MLEAC |
| 5062 | chrY | 9915684 | . | T | A   | 182.23  | PASS          | AC=2;AF=0.125;AN=16;BaseQRankSum=1.80;Cli |
| 5063 | chrY | 9915818 | . | C | T   | 394.76  | PASS          | AC=2;AF=0.100;AN=20;BaseQRankSum=1.19;Cli |
| 5064 | chrY | 9915954 | . | A | T   | 246.77  | PASS          | AC=3;AF=0.088;AN=34;BaseQRankSum=1.39;Cli |
| 5065 | chrY | 9915959 | . | C | A   | 236     | PASS          | AC=4;AF=0.105;AN=38;BaseQRankSum=-1.701e+ |
| 5066 | chrY | 9915962 | . | C | A   | 226.20  | PASS          | AC=3;AF=0.079;AN=38;BaseQRankSum=0.694;Cl |
| 5067 | chrY | 9915966 | . | T | G   | 63.32   | my_snp_filter | AC=2;AF=0.056;AN=36;BaseQRankSum=         |
| 5068 | chrY | 9915974 | . | T | C   | 327.25  | PASS          | AC=3;AF=0.088;AN=34;BaseQRankSum=0.724;Cl |
| 5069 | chrY | 9915975 | . | G | A   | 387.59  | PASS          | AC=3;AF=0.088;AN=34;BaseQRankSum=0.298;Cl |
| 5070 | chrY | 9915977 | . | A | T   | 315.32  | PASS          | AC=3;AF=0.088;AN=34;BaseQRankSum=-1.010e- |
| 5071 | chrY | 9915978 | . | G | A   | 245.65  | PASS          | AC=4;AF=0.118;AN=34;BaseQRankSum=0.531;Cl |
| 5072 | chrY | 9915979 | . | A | C,G | 1169.80 | PASS          | AC=5,2;AF=0.250,0.100;AN=20;BaseQRankSum= |
| 5073 | chrY | 9915980 | . | G | A   | 284.33  | PASS          | AC=3;AF=0.094;AN=32;BaseQRankSum=0.891;Cl |
| 5074 | chrY | 9915986 | . | C | T   | 118.54  | PASS          | AC=2;AF=0.067;AN=30;BaseQRankSum=0.654;Cl |
| 5075 | chrY | 9915987 | . | A | G   | 56.72   | my_snp_filter | AC=2;AF=0.067;AN=30;BaseQRankSum=         |
| 5076 | chrY | 9915989 | . | C | T   | 113.61  | PASS          | AC=1;AF=0.031;AN=32;BaseQRankSum=1.16;Cli |
| 5077 | chrY | 9915991 | . | T | C   | 258.25  | PASS          | AC=4;AF=0.133;AN=30;BaseQRankSum=1.23;Cli |
| 5078 | chrY | 9915993 | . | T | C   | 252.02  | PASS          | AC=1;AF=0.033;AN=30;BaseQRankSum=-3.124e+ |
| 5079 | chrY | 9915996 | . | C | T   | 683.33  | PASS          | AC=4;AF=0.167;AN=24;BaseQRankSum=-4.260e- |
| 5080 | chrY | 9916002 | . | A | G   | 462.15  | PASS          | AC=4;AF=0.133;AN=30;BaseQRankSum=-2.710e- |
| 5081 | chrY | 9916009 | . | G | A   | 917.35  | PASS          | AC=6;AF=0.375;AN=16;BaseQRankSum=0.741;Cl |
| 5082 | chrY | 9916011 | . | C | A   | 490.83  | PASS          | AC=5;AF=0.179;AN=28;BaseQRankSum=0.382;Cl |
| 5083 | chrY | 9916018 | . | T | A   | 129.48  | PASS          | AC=1;AF=0.033;AN=30;BaseQRankSum=0.538;Cl |
| 5084 | chrY | 9916021 | . | T | A   | 1219.73 | PASS          | AC=6;AF=0.429;AN=14;BaseQRankSum=0.544;Cl |
| 5085 | chrY | 9916031 | . | T | G   | 1748.15 | PASS          | AC=6;AF=0.429;AN=14;BaseQRankSum=1.10;Cli |
| 5086 | chrY | 9916037 | . | A | T   | 235.26  | PASS          | AC=1;AF=0.029;AN=34;BaseQRankSum=-2.306e+ |
| 5087 | chrY | 9916078 | . | A | G   | 48.47   | PASS          | AC=2;AF=0.038;AN=52;DP=2734;FS=0.000;Inbr |
| 5088 | chrY | 9916084 | . | A | C   | 48.37   | PASS          | AC=2;AF=0.038;AN=52;BaseQRankSum=-1.102e+ |
| 5089 | chrY | 9916085 | . | A | C   | 120.73  | my_snp_filter | AC=2;AF=0.042;AN=48;BaseQRankSum=         |
| 5090 | chrY | 9916088 | . | T | G   | 171.05  | PASS          | AC=1;AF=0.019;AN=52;BaseQRankSum=-2.255e+ |
| 5091 | chrY | 9916089 | . | T | G   | 172.90  | PASS          | AC=2;AF=0.040;AN=50;BaseQRankSum=-9.830e- |
| 5092 | chrY | 9916090 | . | C | A   | 171.09  | PASS          | AC=1;AF=0.019;AN=52;BaseQRankSum=3.28;Cli |

|      |      |         |   |   |   |         |               |                                            |
|------|------|---------|---|---|---|---------|---------------|--------------------------------------------|
| 5093 | chrY | 9916091 | . | T | C | 32.01   | PASS          | AC=3;AF=0.058;AN=52;BaseQRankSum=0.736;C   |
| 5094 | chrY | 9916100 | . | A | T | 32.60   | PASS          | AC=3;AF=0.063;AN=48;BaseQRankSum=0.736;C   |
| 5095 | chrY | 9916101 | . | G | A | 281.52  | PASS          | AC=2;AF=0.043;AN=46;BaseQRankSum=1.16;C    |
| 5096 | chrY | 9916102 | . | C | G | 175.37  | PASS          | AC=1;AF=0.021;AN=48;BaseQRankSum=-3.880e-  |
| 5097 | chrY | 9916103 | . | A | G | 138.85  | PASS          | AC=2;AF=0.040;AN=50;BaseQRankSum=-3.710e-  |
| 5098 | chrY | 9916107 | . | T | C | 340.24  | PASS          | AC=3;AF=0.063;AN=48;BaseQRankSum=-3.250e-  |
| 5099 | chrY | 9916109 | . | G | T | 327.56  | PASS          | AC=1;AF=0.024;AN=42;BaseQRankSum=-1.320e+  |
| 5100 | chrY | 9916115 | . | C | T | 312.01  | PASS          | AC=3;AF=0.063;AN=48;BaseQRankSum=0.876;C   |
| 5101 | chrY | 9916117 | . | C | T | 139.19  | PASS          | AC=4;AF=0.083;AN=48;BaseQRankSum=1.95;C    |
| 5102 | chrY | 9916125 | . | A | G | 246.10  | PASS          | AC=4;AF=0.111;AN=36;BaseQRankSum=0.00;C    |
| 5103 | chrY | 9916126 | . | G | A | 85.49   | my_snp_filter | AC=3;AF=0.075;AN=40;BaseQRankSum=          |
| 5104 | chrY | 9916127 | . | A | G | 63.52   | my_snp_filter | AC=3;AF=0.075;AN=40;BaseQRankSum=          |
| 5105 | chrY | 9916133 | . | A | C | 1067.26 | PASS          | AC=5;AF=0.156;AN=32;BaseQRankSum=-1.378e+  |
| 5106 | chrY | 9916136 | . | G | T | 174.15  | PASS          | AC=3;AF=0.107;AN=28;BaseQRankSum=2.00;C    |
| 5107 | chrY | 9916145 | . | A | T | 408.87  | PASS          | AC=3;AF=0.167;AN=18;BaseQRankSum=-6.000e-  |
| 5108 | chrY | 9916149 | . | T | G | 534.21  | PASS          | AC=3;AF=0.188;AN=16;BaseQRankSum=-1.737e+  |
| 5109 | chrY | 9916160 | . | C | A | 76.73   | PASS          | AC=1;AF=0.036;AN=28;BaseQRankSum=-9.550e-  |
| 5110 | chrY | 9916164 | . | T | A | 41.50   | my_snp_filter | AC=1;AF=0.036;AN=28;BaseQRankSum=          |
| 5111 | chrY | 9916173 | . | A | T | 214.68  | PASS          | AC=2;AF=0.091;AN=22;BaseQRankSum=-8.670e-  |
| 5112 | chrY | 9916193 | . | A | T | 42.07   | my_snp_filter | AC=2;AF=0.100;AN=20;BaseQRankSum=          |
| 5113 | chrY | 9916199 | . | T | A | 72.20   | my_snp_filter | AC=3;AF=0.167;AN=18;BaseQRankSum=          |
| 5114 | chrY | 9916200 | . | C | T | 42.93   | PASS          | AC=1;AF=0.056;AN=18;BaseQRankSum=-5.670e-  |
| 5115 | chrY | 9916488 | . | T | A | 42.16   | PASS          | AC=1;AF=0.017;AN=58;BaseQRankSum=-3.580e-  |
| 5116 | chrY | 9916490 | . | G | A | 38.92   | PASS          | AC=1;AF=0.017;AN=58;BaseQRankSum=-1.231e+  |
| 5117 | chrY | 9916493 | . | G | T | 41.57   | PASS          | AC=1;AF=0.021;AN=48;BaseQRankSum=-1.231e+  |
| 5118 | chrY | 9916647 | . | G | A | 31.64   | PASS          | AC=1;AF=0.014;AN=70;BaseQRankSum=-9.220e-  |
| 5119 | chrY | 9916805 | . | A | G | 128.37  | PASS          | AC=4;AF=0.067;AN=60;DP=294;FS=0.000;Inbre  |
| 5120 | chrY | 9916818 | . | T | G | 47.76   | PASS          | AC=1;AF=0.017;AN=58;BaseQRankSum=-7.360e-  |
| 5121 | chrY | 9916820 | . | G | T | 45.46   | PASS          | AC=1;AF=0.019;AN=54;BaseQRankSum=-7.360e-  |
| 5122 | chrY | 9917076 | . | A | G | 79.80   | my_snp_filter | AC=3;AF=0.065;AN=46;BaseQRankSum=          |
| 5123 | chrY | 9917083 | . | T | A | 54.51   | PASS          | AC=1;AF=0.020;AN=50;BaseQRankSum=-1.174e+  |
| 5124 | chrY | 9917092 | . | G | A | 61.22   | PASS          | AC=1;AF=0.019;AN=54;BaseQRankSum=0.168;C   |
| 5125 | chrY | 9917098 | . | C | A | 41.47   | PASS          | AC=1;AF=0.017;AN=58;BaseQRankSum=1.38;C    |
| 5126 | chrY | 9917101 | . | T | A | 34.80   | my_snp_filter | AC=1;AF=0.017;AN=60;BaseQRankSum=          |
| 5127 | chrY | 9917111 | . | T | A | 41.76   | PASS          | AC=1;AF=0.017;AN=60;BaseQRankSum=2.13;C    |
| 5128 | chrY | 9917118 | . | C | T | 95.10   | PASS          | AC=2;AF=0.033;AN=60;BaseQRankSum=-9.100e-  |
| 5129 | chrY | 9917589 | . | T | C | 102.13  | PASS          | AC=1;AF=0.015;AN=66;BaseQRankSum=-4.950e-  |
| 5130 | chrY | 9917591 | . | T | G | 101.76  | PASS          | AC=1;AF=0.015;AN=66;BaseQRankSum=-2.051e+  |
| 5131 | chrY | 9917656 | . | T | A | 1063.27 | PASS          | AC=22;AF=0.524;AN=42;DP=233;FS=0.000;Inbr  |
| 5132 | chrY | 9917709 | . | C | T | 174.37  | PASS          | AC=2;AF=0.056;AN=36;BaseQRankSum=0.248;C   |
| 5133 | chrY | 9917727 | . | G | T | 151.80  | PASS          | AC=2;AF=0.071;AN=28;BaseQRankSum=0.762;C   |
| 5134 | chrY | 9917729 | . | G | A | 153.11  | PASS          | AC=2;AF=0.071;AN=28;BaseQRankSum=0.067;C   |
| 5135 | chrY | 9917731 | . | A | T | 150.70  | PASS          | AC=2;AF=0.071;AN=28;BaseQRankSum=1.67;C    |
| 5136 | chrY | 9917738 | . | A | G | 144.99  | PASS          | AC=2;AF=0.071;AN=28;BaseQRankSum=-1.050e+  |
| 5137 | chrY | 9917743 | . | C | G | 139.24  | PASS          | AC=2;AF=0.071;AN=28;BaseQRankSum=0.762;C   |
| 5138 | chrY | 9917753 | . | A | G | 146.18  | PASS          | AC=2;AF=0.077;AN=26;BaseQRankSum=-7.470e-  |
| 5139 | chrY | 9917756 | . | T | C | 106.56  | PASS          | AC=2;AF=0.077;AN=26;BaseQRankSum=-7.470e-  |
| 5140 | chrY | 9918281 | . | T | C | 80.22   | my_snp_filter | AC=3;AF=0.044;AN=68;BaseQRankSum=          |
| 5141 | chrY | 9918282 | . | G | C | 124.60  | my_snp_filter | AC=5;AF=0.074;AN=68;BaseQRankSum=          |
| 5142 | chrY | 9918284 | . | T | A | 77.42   | my_snp_filter | AC=3;AF=0.044;AN=68;BaseQRankSum=          |
| 5143 | chrY | 9918292 | . | G | C | 119.69  | my_snp_filter | AC=3;AF=0.044;AN=68;BaseQRankSum=          |
| 5144 | chrY | 9918299 | . | A | G | 72.64   | my_snp_filter | AC=3;AF=0.044;AN=68;BaseQRankSum=          |
| 5145 | chrY | 9918301 | . | C | A | 119.13  | my_snp_filter | AC=3;AF=0.044;AN=68;BaseQRankSum=          |
| 5146 | chrY | 9918307 | . | T | A | 72.90   | my_snp_filter | AC=3;AF=0.044;AN=68;BaseQRankSum=          |
| 5147 | chrY | 9918323 | . | A | G | 35.53   | my_snp_filter | AC=2;AF=0.029;AN=68;BaseQRankSum=          |
| 5148 | chrY | 9918331 | . | A | G | 44.66   | my_snp_filter | AC=2;AF=0.029;AN=68;BaseQRankSum=          |
| 5149 | chrY | 9918332 | . | C | T | 48.08   | my_snp_filter | AC=2;AF=0.029;AN=68;BaseQRankSum=          |
| 5150 | chrY | 9918335 | . | C | G | 53.67   | my_snp_filter | AC=2;AF=0.029;AN=68;BaseQRankSum=          |
| 5151 | chrY | 9918339 | . | A | G | 53.72   | my_snp_filter | AC=2;AF=0.029;AN=68;BaseQRankSum=          |
| 5152 | chrY | 9919190 | . | C | T | 306.56  | PASS          | AC=2;AF=0.143;AN=14;BaseQRankSum=1.12;C    |
| 5153 | chrY | 9919244 | . | C | T | 710.15  | PASS          | AC=16;AF=0.533;AN=30;BaseQRankSum=0.731;C  |
| 5154 | chrY | 9919248 | . | T | C | 47.42   | PASS          | AC=2;AF=0.033;AN=60;DP=4778;FS=0.000;Inbr  |
| 5155 | chrY | 9919261 | . | T | C | 617.25  | PASS          | AC=14;AF=0.389;AN=36;BaseQRankSum=-7.360e- |
| 5156 | chrY | 9919267 | . | G | A | 507.39  | PASS          | AC=10;AF=0.333;AN=30;BaseQRankSum=-7.360e- |
| 5157 | chrY | 9919283 | . | G | T | 384.49  | PASS          | AC=7;AF=0.318;AN=22;BaseQRankSum=1.33;C    |
| 5158 | chrY | 9919404 | . | T | C | 697.10  | PASS          | AC=1;AF=0.016;AN=64;BaseQRankSum=-4.040e+  |
| 5159 | chrY | 9919414 | . | T | C | 1450.88 | my_snp_filter | AC=1;AF=0.016;AN=64;BaseQRankSum=          |
| 5160 | chrY | 9919422 | . | C | A | 2453.86 | my_snp_filter | AC=1;AF=0.014;AN=70;BaseQRankSum=          |
| 5161 | chrY | 9919429 | . | G | C | 2501.67 | my_snp_filter | AC=1;AF=0.020;AN=50;BaseQRankSum=          |
| 5162 | chrY | 9919430 | . | A | G | 2539.73 | my_snp_filter | AC=2;AF=0.042;AN=48;BaseQRankSum=          |
| 5163 | chrY | 9919439 | . | C | T | 2527.99 | my_snp_filter | AC=2;AF=0.037;AN=54;BaseQRankSum=          |
| 5164 | chrY | 9919444 | . | T | C | 2531.67 | my_snp_filter | AC=2;AF=0.042;AN=48;BaseQRankSum=          |
| 5165 | chrY | 9919447 | . | A | T | 2485.06 | my_snp_filter | AC=1;AF=0.019;AN=54;BaseQRankSum=          |
| 5166 | chrY | 9919448 | . | C | T | 2528.78 | my_snp_filter | AC=2;AF=0.037;AN=54;BaseQRankSum=          |
| 5167 | chrY | 9919453 | . | C | A | 2521.15 | my_snp_filter | AC=2;AF=0.036;AN=56;BaseQRankSum=          |
| 5168 | chrY | 9919456 | . | T | C | 2473.94 | my_snp_filter | AC=1;AF=0.019;AN=54;BaseQRankSum=          |

|      |      |         |   |   |     |          |               |                                            |
|------|------|---------|---|---|-----|----------|---------------|--------------------------------------------|
| 5169 | chrY | 9919458 | . | C | T   | 2476.53  | my_snp_filter | AC=1;AF=0.019;AN=54;BaseQRankSum=          |
| 5170 | chrY | 9919463 | . | T | C   | 599.56   | PASS          | AC=1;AF=0.014;AN=70;BaseQRankSum=1.55;Cli  |
| 5171 | chrY | 9919477 | . | G | A   | 40.12    | PASS          | AC=1;AF=0.015;AN=66;BaseQRankSum=-1.231e+  |
| 5172 | chrY | 9919491 | . | C | G   | 147.76   | PASS          | AC=3;AF=0.050;AN=60;BaseQRankSum=-1.026e+  |
| 5173 | chrY | 9919497 | . | A | C   | 509.59   | PASS          | AC=3;AF=0.044;AN=68;BaseQRankSum=2.45;Cli  |
| 5174 | chrY | 9919504 | . | G | T   | 42.52    | PASS          | AC=1;AF=0.017;AN=60;BaseQRankSum=-1.026e+  |
| 5175 | chrY | 9919510 | . | A | G,* | 408.18   | PASS          | AC=2,3;AF=0.032,0.048;AN=62;BaseQRankSum=  |
| 5176 | chrY | 9919512 | . | A | T   | 193.53   | PASS          | AC=2;AF=0.040;AN=50;BaseQRankSum=-1.257e+  |
| 5177 | chrY | 9919519 | . | G | A   | 562.27   | PASS          | AC=4;AF=0.069;AN=58;BaseQRankSum=2.94;Cli  |
| 5178 | chrY | 9919526 | . | A | G,* | 494.60   | PASS          | AC=1,1;AF=0.021,0.021;AN=48;BaseQRankSum=  |
| 5179 | chrY | 9919528 | . | A | T   | 249.74   | PASS          | AC=1;AF=0.020;AN=50;BaseQRankSum=-5.920e-  |
| 5180 | chrY | 9919534 | . | A | G   | 680.44   | PASS          | AC=4;AF=0.077;AN=52;BaseQRankSum=0.063;Cl  |
| 5181 | chrY | 9919540 | . | G | C   | 663.80   | PASS          | AC=4;AF=0.080;AN=50;BaseQRankSum=1.05;Cli  |
| 5182 | chrY | 9919549 | . | C | G   | 633.65   | PASS          | AC=4;AF=0.080;AN=50;BaseQRankSum=0.300;Cl  |
| 5183 | chrY | 9919551 | . | G | C   | 250.88   | PASS          | AC=1;AF=0.022;AN=46;BaseQRankSum=-2.149e+  |
| 5184 | chrY | 9919553 | . | A | G   | 251.07   | PASS          | AC=1;AF=0.023;AN=44;BaseQRankSum=-1.422e+  |
| 5185 | chrY | 9919554 | . | G | T   | 1005.39  | PASS          | AC=5;AF=0.109;AN=46;BaseQRankSum=0.066;Cl  |
| 5186 | chrY | 9919555 | . | A | G   | 633.15   | PASS          | AC=4;AF=0.091;AN=44;BaseQRankSum=-2.739e+  |
| 5187 | chrY | 9919562 | . | T | C   | 252.06   | PASS          | AC=1;AF=0.025;AN=40;BaseQRankSum=-9.990e-  |
| 5188 | chrY | 9919563 | . | G | C   | 255.22   | PASS          | AC=1;AF=0.024;AN=42;BaseQRankSum=0.590;Cl  |
| 5189 | chrY | 9919573 | . | T | A   | 995.40   | PASS          | AC=5;AF=0.100;AN=50;BaseQRankSum=-3.191e+  |
| 5190 | chrY | 9919574 | . | T | G   | 996.14   | PASS          | AC=5;AF=0.100;AN=50;BaseQRankSum=-1.714e+  |
| 5191 | chrY | 9919575 | . | T | G   | 616.15   | PASS          | AC=4;AF=0.067;AN=60;BaseQRankSum=-1.054e+  |
| 5192 | chrY | 9919584 | . | C | T,* | 541.80   | PASS          | AC=1,3;AF=0.015,0.045;AN=66;BaseQRankSum=  |
| 5193 | chrY | 9919594 | . | A | G,* | 533.14   | PASS          | AC=1,3;AF=0.015,0.044;AN=68;BaseQRankSum=  |
| 5194 | chrY | 9919601 | . | A | G   | 634.91   | PASS          | AC=4;AF=0.063;AN=64;BaseQRankSum=-1.416e+  |
| 5195 | chrY | 9919606 | . | C | A   | 909.71   | PASS          | AC=5;AF=0.078;AN=64;BaseQRankSum=-8.300e-  |
| 5196 | chrY | 9919609 | . | G | T   | 637.58   | PASS          | AC=4;AF=0.059;AN=68;BaseQRankSum=1.09;Cli  |
| 5197 | chrY | 9919611 | . | C | G   | 639.94   | PASS          | AC=4;AF=0.059;AN=68;BaseQRankSum=-2.823e+  |
| 5198 | chrY | 9919623 | . | C | A   | 164.54   | PASS          | AC=1;AF=0.015;AN=68;BaseQRankSum=-3.396e+  |
| 5199 | chrY | 9919633 | . | T | C   | 124.87   | PASS          | AC=1;AF=0.015;AN=68;BaseQRankSum=-2.824e+  |
| 5200 | chrY | 9919643 | . | A | G   | 131.94   | PASS          | AC=1;AF=0.016;AN=62;BaseQRankSum=-3.154e+  |
| 5201 | chrY | 9919644 | . | T | C   | 137.13   | PASS          | AC=1;AF=0.016;AN=62;BaseQRankSum=-2.161e+  |
| 5202 | chrY | 9919646 | . | A | G   | 140.69   | PASS          | AC=1;AF=0.016;AN=64;BaseQRankSum=-3.004e+  |
| 5203 | chrY | 9919652 | . | A | C   | 95.43    | PASS          | AC=1;AF=0.015;AN=66;BaseQRankSum=-1.415e+  |
| 5204 | chrY | 9919820 | . | C | T   | 119.65   | PASS          | AC=3;AF=0.047;AN=64;BaseQRankSum=0.771;Cl  |
| 5205 | chrY | 9919848 | . | T | C   | 38.71    | PASS          | AC=1;AF=0.016;AN=64;BaseQRankSum=-1.231e+  |
| 5206 | chrY | 9919855 | . | C | T   | 39.04    | PASS          | AC=1;AF=0.019;AN=54;BaseQRankSum=-1.231e+  |
| 5207 | chrY | 9919857 | . | C | G   | 355.60   | PASS          | AC=3;AF=0.060;AN=50;BaseQRankSum=-2.103e+  |
| 5208 | chrY | 9919859 | . | G | A   | 283.22   | PASS          | AC=2;AF=0.038;AN=52;BaseQRankSum=-1.646e+  |
| 5209 | chrY | 9919882 | . | T | G   | 410.83   | PASS          | AC=5;AF=0.125;AN=40;BaseQRankSum=-1.240e-  |
| 5210 | chrY | 9919891 | . | T | G   | 411.57   | PASS          | AC=5;AF=0.125;AN=40;BaseQRankSum=0.405;Cl  |
| 5211 | chrY | 9919909 | . | A | G   | 335.69   | PASS          | AC=2;AF=0.071;AN=28;BaseQRankSum=-1.746e+  |
| 5212 | chrY | 9919914 | . | A | T   | 211.50   | PASS          | AC=2;AF=0.077;AN=26;BaseQRankSum=-4.040e-  |
| 5213 | chrY | 9919917 | . | T | G   | 207.79   | PASS          | AC=2;AF=0.071;AN=28;BaseQRankSum=0.186;Cl  |
| 5214 | chrY | 9919934 | . | T | C   | 49.19    | PASS          | AC=2;AF=0.067;AN=30;BaseQRankSum=1.06;Cli  |
| 5215 | chrY | 9920078 | . | A | G   | 83.11    | PASS          | AC=2;AF=0.029;AN=70;BaseQRankSum=-7.420e-  |
| 5216 | chrY | 9920084 | . | T | A   | 49.68    | PASS          | AC=2;AF=0.029;AN=70;BaseQRankSum=-5.780e-  |
| 5217 | chrY | 9920087 | . | G | T   | 47.59    | PASS          | AC=1;AF=0.014;AN=70;BaseQRankSum=0.592;Cl  |
| 5218 | chrY | 9920122 | . | A | G   | 88.09    | PASS          | AC=2;AF=0.034;AN=58;BaseQRankSum=1.20;Cli  |
| 5219 | chrY | 9920124 | . | C | G   | 118.69   | PASS          | AC=1;AF=0.017;AN=60;BaseQRankSum=-5.670e-  |
| 5220 | chrY | 9920133 | . | A | T   | 73.51    | PASS          | AC=1;AF=0.015;AN=68;BaseQRankSum=-8.520e-  |
| 5221 | chrY | 9920264 | . | C | A   | 380.27   | PASS          | AC=4;AF=0.074;AN=54;BaseQRankSum=-7.610e-  |
| 5222 | chrY | 9920270 | . | T | G   | 326.66   | PASS          | AC=3;AF=0.068;AN=44;BaseQRankSum=-1.775e+  |
| 5223 | chrY | 9920271 | . | A | T   | 350.60   | PASS          | AC=3;AF=0.060;AN=50;BaseQRankSum=-1.280e+  |
| 5224 | chrY | 9920279 | . | C | G   | 355.62   | PASS          | AC=4;AF=0.071;AN=56;BaseQRankSum=-3.820e+  |
| 5225 | chrY | 9920527 | . | G | T   | 17568.95 | PASS          | AC=10;AF=0.143;AN=70;BaseQRankSum=         |
| 5226 | chrY | 9920528 | . | G | A   | 914.30   | my_snp_filter | AC=7;AF=0.100;AN=70;BaseQRankSum=          |
| 5227 | chrY | 9920534 | . | C | G   | 2031.57  | PASS          | AC=9;AF=0.129;AN=70;BaseQRankSum=-1.545e+  |
| 5228 | chrY | 9920535 | . | T | A   | 17416.01 | PASS          | AC=10;AF=0.143;AN=70;BaseQRankSum=         |
| 5229 | chrY | 9920543 | . | G | A   | 22816.09 | PASS          | AC=13;AF=0.186;AN=70;BaseQRankSum=         |
| 5230 | chrY | 9920548 | . | T | G   | 1720.25  | PASS          | AC=8;AF=0.114;AN=70;BaseQRankSum=-1.732e+  |
| 5231 | chrY | 9920561 | . | A | G   | 227.77   | PASS          | AC=3;AF=0.044;AN=68;BaseQRankSum=-1.666e+  |
| 5232 | chrY | 9920577 | . | C | T   | 279.45   | PASS          | AC=4;AF=0.083;AN=48;BaseQRankSum=-7.360e-  |
| 5233 | chrY | 9920578 | . | A | G   | 276.46   | PASS          | AC=4;AF=0.083;AN=48;BaseQRankSum=-7.360e-  |
| 5234 | chrY | 9920580 | . | T | C   | 240      | PASS          | AC=3;AF=0.045;AN=66;BaseQRankSum=-1.231e+  |
| 5235 | chrY | 9920787 | . | T | A   | 162.03   | PASS          | AC=3;AF=0.079;AN=38;BaseQRankSum=-9.450e-  |
| 5236 | chrY | 9920810 | . | G | T   | 151.93   | PASS          | AC=2;AF=0.048;AN=42;BaseQRankSum=-2.218e+  |
| 5237 | chrY | 9920813 | . | A | C   | 109.74   | PASS          | AC=2;AF=0.048;AN=42;BaseQRankSum=1.09;Cli  |
| 5238 | chrY | 9920821 | . | A | C   | 63.79    | PASS          | AC=1;AF=0.020;AN=50;BaseQRankSum=-2.648e+  |
| 5239 | chrY | 9920943 | . | G | A   | 11133.01 | PASS          | AC=68;AF=1.00;AN=68;DP=388;FS=0.0          |
| 5240 | chrY | 9921064 | . | A | G   | 4910.50  | PASS          | AC=53;AF=0.946;AN=56;BaseQRankSum=-1.734e- |
| 5241 | chrY | 9921516 | . | G | A   | 298.86   | PASS          | AC=2;AF=0.048;AN=42;BaseQRankSum=-4.540e-  |
| 5242 | chrY | 9921530 | . | G | T   | 470.04   | PASS          | AC=2;AF=0.059;AN=34;BaseQRankSum=0.868;Cl  |
| 5243 | chrY | 9921538 | . | G | A   | 442.11   | PASS          | AC=1;AF=0.031;AN=32;BaseQRankSum=-1.088e+  |
| 5244 | chrY | 9921540 | . | T | C   | 388.33   | PASS          | AC=1;AF=0.028;AN=36;BaseQRankSum=-2.627e+  |

|      |      |         |   |   |     |         |               |                                            |
|------|------|---------|---|---|-----|---------|---------------|--------------------------------------------|
| 5245 | chrY | 9921543 | . | C | A   | 490.83  | PASS          | AC=1;AF=0.038;AN=26;BaseQRankSum=0.317;Cl  |
| 5246 | chrY | 9921545 | . | A | C   | 436.04  | PASS          | AC=1;AF=0.036;AN=28;BaseQRankSum=-3.908e+  |
| 5247 | chrY | 9921564 | . | C | T   | 403.41  | PASS          | AC=1;AF=0.100;AN=10;BaseQRankSum=-3.743e+  |
| 5248 | chrY | 9921577 | . | C | G   | 109.02  | PASS          | AC=1;AF=0.026;AN=38;BaseQRankSum=-1.672e+  |
| 5249 | chrY | 9921580 | . | T | C   | 399.92  | PASS          | AC=1;AF=0.036;AN=28;BaseQRankSum=-2.627e+  |
| 5250 | chrY | 9921582 | . | A | G   | 400.84  | PASS          | AC=1;AF=0.036;AN=28;BaseQRankSum=1.58;Cl   |
| 5251 | chrY | 9921588 | . | A | T   | 400.53  | PASS          | AC=1;AF=0.167;AN=6;BaseQRankSum=-6.600e-0  |
| 5252 | chrY | 9921592 | . | T | G   | 416.68  | PASS          | AC=1;AF=0.031;AN=32;BaseQRankSum=2.00;Cli  |
| 5253 | chrY | 9921603 | . | A | T   | 399.08  | PASS          | AC=1;AF=0.250;AN=4;BaseQRankSum=0.058;Cli  |
| 5254 | chrY | 9921604 | . | C | A   | 395.26  | PASS          | AC=1;AF=0.056;AN=18;BaseQRankSum=1.94;Cli  |
| 5255 | chrY | 9921609 | . | C | A   | 399.64  | PASS          | AC=1;AF=0.031;AN=32;BaseQRankSum=-1.077e+  |
| 5256 | chrY | 9921613 | . | G | C   | 401.06  | PASS          | AC=1;AF=0.038;AN=26;BaseQRankSum=-1.262e+  |
| 5257 | chrY | 9921618 | . | T | G   | 402.70  | PASS          | AC=1;AF=0.063;AN=16;BaseQRankSum=3.29;Cli  |
| 5258 | chrY | 9921634 | . | A | T   | 435.90  | PASS          | AC=1;AF=0.125;AN=8;BaseQRankSum=3.94;Clip  |
| 5259 | chrY | 9921648 | . | C | G   | 389.66  | PASS          | AC=1;AF=0.056;AN=18;BaseQRankSum=2.03;Cli  |
| 5260 | chrY | 9921656 | . | T | G   | 258.04  | PASS          | AC=1;AF=0.056;AN=18;BaseQRankSum=2.11;Cli  |
| 5261 | chrY | 9921672 | . | C | T   | 341.59  | PASS          | AC=1;AF=0.063;AN=16;BaseQRankSum=2.36;Cli  |
| 5262 | chrY | 9921674 | . | C | T   | 384.42  | PASS          | AC=1;AF=0.063;AN=16;BaseQRankSum=1.85;Cli  |
| 5263 | chrY | 9921675 | . | A | G   | 428.59  | PASS          | AC=1;AF=0.063;AN=16;BaseQRankSum=0.386;Cl  |
| 5264 | chrY | 9921779 | . | T | A   | 67.84   | PASS          | AC=2;AF=1.000;AN=2;DP=850;FS=0.000;MLEAC=2 |
| 5265 | chrY | 9921787 | . | G | C   | 60.81   | PASS          | AC=2;AF=0.111;AN=18;DP=864;FS=0.000;MLEAC  |
| 5266 | chrY | 9921795 | . | T | A   | 60.11   | PASS          | AC=2;AF=0.167;AN=12;DP=904;FS=0.000;MLEAC  |
| 5267 | chrY | 9921796 | . | C | A   | 60.11   | PASS          | AC=2;AF=0.167;AN=12;DP=904;FS=0.000;MLEAC  |
| 5268 | chrY | 9921879 | . | C | T   | 129.13  | PASS          | AC=2;AF=0.071;AN=28;DP=745;FS=0.000;Inbre  |
| 5269 | chrY | 9921880 | . | A | G   | 102.45  | PASS          | AC=2;AF=0.071;AN=28;DP=756;FS=0.000;Inbre  |
| 5270 | chrY | 9921886 | . | T | C   | 59.79   | PASS          | AC=2;AF=0.167;AN=12;DP=864;FS=0.000;MLEAC  |
| 5271 | chrY | 9921892 | . | T | G   | 208.87  | PASS          | AC=2;AF=0.091;AN=22;DP=528;FS=0.000;Inbre  |
| 5272 | chrY | 9921897 | . | T | C   | 142.50  | PASS          | AC=2;AF=0.111;AN=18;BaseQRankSum=-3.030e-  |
| 5273 | chrY | 9921900 | . | C | A   | 197.93  | PASS          | AC=2;AF=0.100;AN=20;BaseQRankSum=0.490;Cl  |
| 5274 | chrY | 9921915 | . | A | G   | 127.25  | PASS          | AC=2;AF=0.059;AN=34;DP=769;FS=0.000;Inbre  |
| 5275 | chrY | 9921917 | . | T | A   | 139.97  | PASS          | AC=1;AF=0.028;AN=36;BaseQRankSum=-4.570e-  |
| 5276 | chrY | 9921963 | . | A | T   | 340.98  | PASS          | AC=7;AF=0.250;AN=28;BaseQRankSum=-1.931e+  |
| 5277 | chrY | 9921965 | . | C | G   | 340.98  | PASS          | AC=7;AF=0.250;AN=28;BaseQRankSum=-1.464e+  |
| 5278 | chrY | 9922459 | . | T | A   | 33.96   | PASS          | AC=1;AF=0.014;AN=70;BaseQRankSum=-7.200e-  |
| 5279 | chrY | 9922460 | . | C | A   | 34.21   | PASS          | AC=1;AF=0.014;AN=70;BaseQRankSum=0.00;Cli  |
| 5280 | chrY | 9923168 | . | T | A   | 216.02  | PASS          | AC=2;AF=0.029;AN=70;BaseQRankSum=2.21;Cli  |
| 5281 | chrY | 9923171 | . | C | G   | 216.33  | PASS          | AC=2;AF=0.029;AN=70;BaseQRankSum=2.31;Cli  |
| 5282 | chrY | 9923181 | . | T | C   | 199.43  | PASS          | AC=2;AF=0.029;AN=70;BaseQRankSum=2.07;Cli  |
| 5283 | chrY | 9923191 | . | T | G   | 124.71  | PASS          | AC=2;AF=0.029;AN=70;BaseQRankSum=1.27;Cli  |
| 5284 | chrY | 9923586 | . | C | T   | 1136.09 | PASS          | AC=6;AF=0.250;AN=24;DP=179;FS=0.000;Inbre  |
| 5285 | chrY | 9923923 | . | T | C   | 1675.79 | PASS          | AC=4;AF=0.100;AN=40;BaseQRankSum=-1.641e+  |
| 5286 | chrY | 9923929 | . | A | C   | 36.56   | my_snp_filter | AC=1;AF=0.023;AN=44;BaseQRankSum=          |
| 5287 | chrY | 9923931 | . | A | C   | 36.80   | my_snp_filter | AC=1;AF=0.024;AN=42;BaseQRankSum=          |
| 5288 | chrY | 9923935 | . | G | T   | 1658.26 | PASS          | AC=4;AF=0.091;AN=44;BaseQRankSum=-9.470e-  |
| 5289 | chrY | 9923937 | . | T | C   | 1691.92 | PASS          | AC=5;AF=0.147;AN=34;BaseQRankSum=-1.746e+  |
| 5290 | chrY | 9923940 | . | C | G   | 1639.47 | PASS          | AC=4;AF=0.100;AN=40;BaseQRankSum=-6.970e-  |
| 5291 | chrY | 9923946 | . | A | T   | 1673.80 | PASS          | AC=5;AF=0.156;AN=32;BaseQRankSum=0.060;Cl  |
| 5292 | chrY | 9923953 | . | A | G   | 64.46   | my_snp_filter | AC=1;AF=0.023;AN=44;BaseQRankSum=          |
| 5293 | chrY | 9923954 | . | T | C   | 1505.29 | PASS          | AC=4;AF=0.105;AN=38;BaseQRankSum=-2.417e+  |
| 5294 | chrY | 9923959 | . | A | C   | 1505.99 | PASS          | AC=4;AF=0.087;AN=46;BaseQRankSum=-1.097e+  |
| 5295 | chrY | 9923972 | . | A | G   | 1412.01 | PASS          | AC=4;AF=0.100;AN=40;BaseQRankSum=-1.110e+  |
| 5296 | chrY | 9923974 | . | A | C   | 1228.18 | PASS          | AC=3;AF=0.079;AN=38;BaseQRankSum=-1.123e+  |
| 5297 | chrY | 9923982 | . | T | A   | 1266.27 | PASS          | AC=5;AF=0.114;AN=44;BaseQRankSum=-1.073e+  |
| 5298 | chrY | 9923983 | . | G | A   | 1229.28 | PASS          | AC=3;AF=0.068;AN=44;BaseQRankSum=0.335;Cl  |
| 5299 | chrY | 9923984 | . | T | A   | 1269.45 | PASS          | AC=3;AF=0.075;AN=40;BaseQRankSum=-1.172e+  |
| 5300 | chrY | 9923997 | . | C | A   | 1290.55 | PASS          | AC=3;AF=0.079;AN=38;BaseQRankSum=-5.620e-  |
| 5301 | chrY | 9924008 | . | A | T   | 1048.06 | PASS          | AC=3;AF=0.088;AN=34;BaseQRankSum=-5.860e-  |
| 5302 | chrY | 9924010 | . | G | T   | 884.40  | PASS          | AC=3;AF=0.088;AN=34;BaseQRankSum=1.45;Cli  |
| 5303 | chrY | 9924014 | . | T | C   | 702.38  | PASS          | AC=3;AF=0.107;AN=28;BaseQRankSum=0.659;Cl  |
| 5304 | chrY | 9924015 | . | G | A   | 591.89  | PASS          | AC=3;AF=0.100;AN=30;BaseQRankSum=0.945;Cl  |
| 5305 | chrY | 9924016 | . | A | G   | 334.84  | PASS          | AC=3;AF=0.094;AN=32;BaseQRankSum=-1.071e+  |
| 5306 | chrY | 9924024 | . | T | A   | 40.40   | my_snp_filter | AC=2;AF=0.059;AN=34;BaseQRankSum=          |
| 5307 | chrY | 9924148 | . | A | G   | 307.80  | PASS          | AC=2;AF=0.034;AN=58;DP=700;FS=0.000;Inbre  |
| 5308 | chrY | 9924402 | . | G | A   | 98.56   | PASS          | AC=1;AF=0.015;AN=66;BaseQRankSum=1.48;Cli  |
| 5309 | chrY | 9924403 | . | C | T   | 104.59  | PASS          | AC=1;AF=0.015;AN=66;BaseQRankSum=0.360;Cl  |
| 5310 | chrY | 9924406 | . | C | T   | 47.40   | my_snp_filter | AC=1;AF=0.016;AN=64;BaseQRankSum=          |
| 5311 | chrY | 9924411 | . | C | T,A | 445.96  | PASS          | AC=3,1;AF=0.052,0.017;AN=58;BaseQRankSum=  |
| 5312 | chrY | 9924414 | . | T | C   | 104.57  | PASS          | AC=1;AF=0.016;AN=62;BaseQRankSum=-9.180e-  |
| 5313 | chrY | 9924422 | . | T | G   | 37.98   | PASS          | AC=1;AF=0.016;AN=62;BaseQRankSum=-1.380e+  |
| 5314 | chrY | 9924424 | . | A | T   | 143.58  | my_snp_filter | AC=2;AF=0.032;AN=62;BaseQRankSum=          |
| 5315 | chrY | 9924430 | . | T | C   | 165.77  | my_snp_filter | AC=2;AF=0.033;AN=60;BaseQRankSum=          |
| 5316 | chrY | 9924433 | . | C | G   | 74.62   | PASS          | AC=1;AF=0.017;AN=60;BaseQRankSum=-1.700e-  |
| 5317 | chrY | 9924434 | . | C | G   | 200.82  | my_snp_filter | AC=3;AF=0.052;AN=58;BaseQRankSum=          |
| 5318 | chrY | 9924438 | . | T | A   | 92.84   | my_snp_filter | AC=3;AF=0.052;AN=58;BaseQRankSum=          |
| 5319 | chrY | 9924441 | . | A | T   | 86.41   | my_snp_filter | AC=2;AF=0.034;AN=58;BaseQRankSum=          |
| 5320 | chrY | 9924443 | . | A | C   | 544.78  | PASS          | AC=5;AF=0.089;AN=56;BaseQRankSum=-3.300e-  |

|      |      |         |   |   |     |          |               |                                           |
|------|------|---------|---|---|-----|----------|---------------|-------------------------------------------|
| 5321 | chrY | 9924448 | . | G | A   | 255.99   | PASS          | AC=3;AF=0.054;AN=56;BaseQRankSum=-4.800e- |
| 5322 | chrY | 9924455 | . | T | G,* | 364.83   | PASS          | AC=3,2;AF=0.058,0.038;AN=52;BaseQRankSum= |
| 5323 | chrY | 9924461 | . | C | A   | 114.12   | PASS          | AC=2;AF=0.042;AN=48;BaseQRankSum=-2.358e+ |
| 5324 | chrY | 9924469 | . | C | T   | 111.71   | PASS          | AC=1;AF=0.023;AN=44;BaseQRankSum=-6.510e- |
| 5325 | chrY | 9924475 | . | G | A   | 91.84    | PASS          | AC=1;AF=0.024;AN=42;BaseQRankSum=1.04;Cli |
| 5326 | chrY | 9924485 | . | T | C   | 184.09   | PASS          | AC=2;AF=0.067;AN=30;BaseQRankSum=0.578;Cl |
| 5327 | chrY | 9924556 | . | G | A   | 1403.66  | PASS          | AC=3;AF=0.107;AN=28;BaseQRankSum=-1.579e+ |
| 5328 | chrY | 9924574 | . | G | C   | 259.72   | PASS          | AC=1;AF=0.031;AN=32;BaseQRankSum=1.12;Cli |
| 5329 | chrY | 9924606 | . | T | C   | 51.93    | PASS          | AC=2;AF=0.031;AN=64;BaseQRankSum=-7.360e- |
| 5330 | chrY | 9924618 | . | G | T   | 47.14    | PASS          | AC=2;AF=0.029;AN=70;BaseQRankSum=-7.360e- |
| 5331 | chrY | 9924623 | . | C | G   | 43.51    | PASS          | AC=2;AF=0.029;AN=70;BaseQRankSum=-7.470e- |
| 5332 | chrY | 9924629 | . | G | T   | 38.18    | PASS          | AC=2;AF=0.029;AN=68;BaseQRankSum=0.747;Cl |
| 5333 | chrY | 9924637 | . | T | C   | 33.43    | PASS          | AC=2;AF=0.029;AN=68;BaseQRankSum=-7.510e- |
| 5334 | chrY | 9924642 | . | A | C   | 32.70    | PASS          | AC=2;AF=0.029;AN=68;BaseQRankSum=-1.393e+ |
| 5335 | chrY | 9924926 | . | G | A   | 173.18   | PASS          | AC=3;AF=0.094;AN=32;BaseQRankSum=0.714;Cl |
| 5336 | chrY | 9924937 | . | A | C   | 163.79   | PASS          | AC=4;AF=0.143;AN=28;BaseQRankSum=-2.480e- |
| 5337 | chrY | 9924939 | . | A | G   | 407.65   | PASS          | AC=4;AF=0.222;AN=18;BaseQRankSum=-1.575e+ |
| 5338 | chrY | 9924940 | . | G | T   | 281.65   | PASS          | AC=4;AF=0.222;AN=18;BaseQRankSum=0.352;Cl |
| 5339 | chrY | 9924958 | . | C | G   | 338.64   | PASS          | AC=4;AF=0.167;AN=24;BaseQRankSum=1.20;Cli |
| 5340 | chrY | 9924989 | . | A | C   | 91.66    | PASS          | AC=2;AF=0.111;AN=18;BaseQRankSum=-6.510e- |
| 5341 | chrY | 9924990 | . | A | T   | 30.79    | PASS          | AC=1;AF=0.038;AN=26;BaseQRankSum=-1.917e+ |
| 5342 | chrY | 9924995 | . | A | C   | 126.26   | PASS          | AC=2;AF=0.143;AN=14;BaseQRankSum=1.12;Cli |
| 5343 | chrY | 9925035 | . | G | A   | 71.84    | PASS          | AC=1;AF=0.029;AN=34;BaseQRankSum=0.566;Cl |
| 5344 | chrY | 9925038 | . | A | T   | 70.88    | PASS          | AC=1;AF=0.038;AN=26;BaseQRankSum=1.11;Cli |
| 5345 | chrY | 9925040 | . | C | A   | 71.04    | PASS          | AC=1;AF=0.038;AN=26;BaseQRankSum=0.566;Cl |
| 5346 | chrY | 9925042 | . | C | A   | 70.75    | PASS          | AC=1;AF=0.026;AN=38;BaseQRankSum=1.53;Cl  |
| 5347 | chrY | 9925057 | . | T | G   | 88.27    | PASS          | AC=1;AF=0.028;AN=36;BaseQRankSum=-1.479e+ |
| 5348 | chrY | 9925058 | . | T | C   | 88.27    | PASS          | AC=1;AF=0.028;AN=36;BaseQRankSum=-7.400e- |
| 5349 | chrY | 9925060 | . | T | C   | 85.27    | PASS          | AC=1;AF=0.028;AN=36;BaseQRankSum=-1.312e+ |
| 5350 | chrY | 9925071 | . | G | T   | 67.45    | PASS          | AC=1;AF=0.028;AN=36;BaseQRankSum=-2.480e- |
| 5351 | chrY | 9925072 | . | A | T   | 71.54    | PASS          | AC=1;AF=0.028;AN=36;BaseQRankSum=-2.054e+ |
| 5352 | chrY | 9925259 | . | T | G   | 40.88    | my_snp_filter | AC=1;AF=0.033;AN=30;BaseQRankSum=         |
| 5353 | chrY | 9925263 | . | A | C   | 352.94   | PASS          | AC=2;AF=0.083;AN=24;BaseQRankSum=-5.000e- |
| 5354 | chrY | 9925265 | . | A | G   | 452.12   | PASS          | AC=4;AF=0.182;AN=22;BaseQRankSum=-2.080e- |
| 5355 | chrY | 9925273 | . | T | C   | 47.81    | my_snp_filter | AC=1;AF=0.033;AN=30;BaseQRankSum=         |
| 5356 | chrY | 9925282 | . | A | G   | 50.54    | my_snp_filter | AC=1;AF=0.033;AN=30;BaseQRankSum=         |
| 5357 | chrY | 9925283 | . | T | C   | 47.22    | my_snp_filter | AC=1;AF=0.033;AN=30;BaseQRankSum=         |
| 5358 | chrY | 9925298 | . | A | C   | 35.47    | my_snp_filter | AC=1;AF=0.036;AN=28;BaseQRankSum=         |
| 5359 | chrY | 9925312 | . | T | G   | 222.79   | PASS          | AC=1;AF=0.050;AN=20;BaseQRankSum=-3.130e- |
| 5360 | chrY | 9925315 | . | T | C   | 41.32    | my_snp_filter | AC=1;AF=0.029;AN=34;BaseQRankSum=         |
| 5361 | chrY | 9925318 | . | T | A   | 88.29    | PASS          | AC=1;AF=0.050;AN=20;BaseQRankSum=0.950;Cl |
| 5362 | chrY | 9925326 | . | T | A   | 50.74    | PASS          | AC=1;AF=0.063;AN=16;BaseQRankSum=-8.290e- |
| 5363 | chrY | 9925344 | . | A | T   | 47.67    | PASS          | AC=1;AF=0.033;AN=30;BaseQRankSum=-1.659e+ |
| 5364 | chrY | 9925346 | . | C | G   | 55.44    | PASS          | AC=1;AF=0.036;AN=28;BaseQRankSum=0.948;Cl |
| 5365 | chrY | 9925353 | . | G | T   | 50.94    | PASS          | AC=1;AF=0.100;AN=10;BaseQRankSum=-5.600e- |
| 5366 | chrY | 9925356 | . | A | T   | 44.45    | PASS          | AC=1;AF=0.031;AN=32;BaseQRankSum=-1.733e+ |
| 5367 | chrY | 9925364 | . | C | A   | 45.40    | PASS          | AC=1;AF=0.028;AN=36;BaseQRankSum=-2.516e+ |
| 5368 | chrY | 9925370 | . | A | T   | 49.93    | PASS          | AC=1;AF=0.026;AN=38;BaseQRankSum=-2.205e+ |
| 5369 | chrY | 9925375 | . | A | T   | 49.60    | PASS          | AC=1;AF=0.024;AN=42;BaseQRankSum=-2.205e+ |
| 5370 | chrY | 9925384 | . | C | A   | 46.21    | PASS          | AC=1;AF=0.021;AN=48;BaseQRankSum=0.315;Cl |
| 5371 | chrY | 9925473 | . | C | T   | 1140.09  | PASS          | AC=6;AF=0.097;AN=62;DP=361;FS=0.000;Inbre |
| 5372 | chrY | 9925535 | . | A | C   | 42.25    | PASS          | AC=1;AF=0.014;AN=70;BaseQRankSum=1.03;Cli |
| 5373 | chrY | 9925536 | . | G | A   | 41.57    | PASS          | AC=1;AF=0.014;AN=70;BaseQRankSum=1.03;Cli |
| 5374 | chrY | 9925552 | . | T | G   | 45       | PASS          | AC=1;AF=0.014;AN=70;BaseQRankSum=0.736;Cl |
| 5375 | chrY | 9925555 | . | G | C   | 44.07    | PASS          | AC=1;AF=0.014;AN=70;BaseQRankSum=0.736;Cl |
| 5376 | chrY | 9925571 | . | T | G   | 38.34    | PASS          | AC=1;AF=0.015;AN=68;BaseQRankSum=1.23;Cl  |
| 5377 | chrY | 9925577 | . | A | T   | 35.29    | PASS          | AC=1;AF=0.015;AN=68;BaseQRankSum=0.358;Cl |
| 5378 | chrY | 9925582 | . | C | T   | 39       | PASS          | AC=1;AF=0.015;AN=68;BaseQRankSum=0.358;Cl |
| 5379 | chrY | 9925583 | . | T | C   | 39       | PASS          | AC=1;AF=0.015;AN=68;BaseQRankSum=0.358;Cl |
| 5380 | chrY | 9925584 | . | G | A   | 39.03    | PASS          | AC=1;AF=0.015;AN=68;BaseQRankSum=0.358;Cl |
| 5381 | chrY | 9925629 | . | T | G   | 596.49   | PASS          | AC=4;AF=0.057;AN=70;BaseQRankSum=1.07;Cl  |
| 5382 | chrY | 9925633 | . | G | A   | 594.40   | PASS          | AC=4;AF=0.057;AN=70;BaseQRankSum=0.646;Cl |
| 5383 | chrY | 9925635 | . | G | A   | 596.68   | PASS          | AC=4;AF=0.057;AN=70;BaseQRankSum=2.40;Cli |
| 5384 | chrY | 9925645 | . | A | T   | 67.61    | my_snp_filter | AC=2;AF=0.029;AN=70;BaseQRankSum=         |
| 5385 | chrY | 9925650 | . | C | T   | 962.65   | PASS          | AC=9;AF=0.132;AN=68;BaseQRankSum=1.05;Cli |
| 5386 | chrY | 9925651 | . | T | G   | 2577.25  | PASS          | AC=10;AF=0.147;AN=68;BaseQRankSum=-6.780e |
| 5387 | chrY | 9925655 | . | T | C   | 2170.26  | PASS          | AC=10;AF=0.147;AN=68;BaseQRankSum=-1.569e |
| 5388 | chrY | 9925658 | . | T | C   | 82.35    | my_snp_filter | AC=2;AF=0.029;AN=70;BaseQRankSum=         |
| 5389 | chrY | 9925708 | . | G | T   | 26219.85 | PASS          | AC=34;AF=0.486;AN=70;BaseQRankSum=        |
| 5390 | chrY | 9925723 | . | T | C   | 1553.43  | PASS          | AC=14;AF=0.200;AN=70;BaseQRankSum=0.129;C |
| 5391 | chrY | 9925724 | . | C | A   | 1549.63  | PASS          | AC=14;AF=0.200;AN=70;BaseQRankSum=-3.060e |
| 5392 | chrY | 9925728 | . | A | G   | 25615.78 | PASS          | AC=35;AF=0.500;AN=70;BaseQRankSum=        |
| 5393 | chrY | 9925732 | . | A | G   | 19065.29 | PASS          | AC=33;AF=0.471;AN=70;BaseQRankSum=        |
| 5394 | chrY | 9925735 | . | T | C   | 29465.25 | PASS          | AC=35;AF=0.500;AN=70;BaseQRankSum=        |
| 5395 | chrY | 9925736 | . | G | C   | 24382.25 | PASS          | AC=35;AF=0.500;AN=70;BaseQRankSum=        |
| 5396 | chrY | 9925743 | . | A | G   | 4137.01  | PASS          | AC=26;AF=0.371;AN=70;BaseQRankSum=-1.522e |



|      |      |         |   |   |     |          |               |                                           |
|------|------|---------|---|---|-----|----------|---------------|-------------------------------------------|
| 5397 | chrY | 9925750 | . | G | A   | 22084.84 | PASS          | AC=34;AF=0.486;AN=70;BaseQRankSum         |
| 5398 | chrY | 9925765 | . | A | G   | 23063.56 | PASS          | AC=34;AF=0.486;AN=70;BaseQRankSum         |
| 5399 | chrY | 9925770 | . | C | T   | 15830.79 | PASS          | AC=34;AF=0.486;AN=70;BaseQRankSum         |
| 5400 | chrY | 9925771 | . | A | G   | 20892.84 | PASS          | AC=34;AF=0.486;AN=70;BaseQRankSum         |
| 5401 | chrY | 9925783 | . | T | C   | 236.52   | PASS          | AC=2;AF=0.029;AN=70;BaseQRankSum=0.904;C  |
| 5402 | chrY | 9925798 | . | A | G   | 11330.91 | PASS          | AC=24;AF=0.353;AN=68;BaseQRankSum         |
| 5403 | chrY | 9925799 | . | G | A   | 11264.91 | PASS          | AC=23;AF=0.338;AN=68;BaseQRankSum         |
| 5404 | chrY | 9925806 | . | C | T   | 278.23   | PASS          | AC=3;AF=0.043;AN=70;BaseQRankSum=2.05;C   |
| 5405 | chrY | 9925811 | . | C | A,T | 1598.37  | PASS          | AC=4,8;AF=0.057,0.114;AN=70;BaseQRankSum  |
| 5406 | chrY | 9925813 | . | A | G   | 8170.96  | PASS          | AC=18;AF=0.265;AN=68;BaseQRankSum=1.39;C  |
| 5407 | chrY | 9925815 | . | C | G,A | 6437.20  | PASS          | AC=16,1;AF=0.235,0.015;AN=68;BaseQRankSum |
| 5408 | chrY | 9925819 | . | A | G   | 6337.92  | PASS          | AC=17;AF=0.250;AN=68;BaseQRankSum=1.09;C  |
| 5409 | chrY | 9925849 | . | C | A   | 409.22   | PASS          | AC=6;AF=0.086;AN=70;BaseQRankSum=2.85;C   |
| 5410 | chrY | 9925851 | . | T | C   | 2118.57  | PASS          | AC=9;AF=0.132;AN=68;BaseQRankSum=-3.030e  |
| 5411 | chrY | 9925855 | . | C | G   | 1897.08  | PASS          | AC=9;AF=0.129;AN=70;BaseQRankSum=0.613;C  |
| 5412 | chrY | 9925856 | . | A | G   | 1895.07  | PASS          | AC=9;AF=0.129;AN=70;BaseQRankSum=1.58;C   |
| 5413 | chrY | 9925863 | . | T | G   | 1570.42  | PASS          | AC=9;AF=0.129;AN=70;BaseQRankSum=-5.840e  |
| 5414 | chrY | 9925867 | . | G | A   | 935.61   | PASS          | AC=7;AF=0.100;AN=70;BaseQRankSum=-1.680e  |
| 5415 | chrY | 9925879 | . | T | A   | 940.60   | PASS          | AC=6;AF=0.086;AN=70;BaseQRankSum=1.37;C   |
| 5416 | chrY | 9925882 | . | G | C   | 83.67    | PASS          | AC=1;AF=0.014;AN=70;BaseQRankSum=0.901;C  |
| 5417 | chrY | 9925887 | . | T | A   | 1109.60  | PASS          | AC=8;AF=0.114;AN=70;BaseQRankSum=0.570;C  |
| 5418 | chrY | 9925889 | . | G | T   | 974.50   | PASS          | AC=7;AF=0.100;AN=70;BaseQRankSum=0.938;C  |
| 5419 | chrY | 9925891 | . | A | T   | 1217.72  | PASS          | AC=8;AF=0.114;AN=70;BaseQRankSum=1.05;C   |
| 5420 | chrY | 9925896 | . | T | G   | 68.32    | my_snp_filter | AC=3;AF=0.043;AN=70;BaseQRankSum          |
| 5421 | chrY | 9925899 | . | T | A   | 1405.94  | PASS          | AC=9;AF=0.129;AN=70;BaseQRankSum=0.945;C  |
| 5422 | chrY | 9925900 | . | T | C   | 1441.71  | PASS          | AC=9;AF=0.129;AN=70;BaseQRankSum=-4.200e  |
| 5423 | chrY | 9925913 | . | C | T   | 1150.01  | PASS          | AC=8;AF=0.114;AN=70;BaseQRankSum=-3.990e  |
| 5424 | chrY | 9925935 | . | C | G   | 212.21   | PASS          | AC=1;AF=0.014;AN=70;BaseQRankSum=-1.884e+ |
| 5425 | chrY | 9925945 | . | A | T   | 206.48   | PASS          | AC=1;AF=0.014;AN=70;BaseQRankSum=-4.700e  |
| 5426 | chrY | 9925954 | . | C | T   | 1047.40  | PASS          | AC=10;AF=0.143;AN=70;BaseQRankSum=-2.120e |
| 5427 | chrY | 9925960 | . | C | G   | 1114.08  | PASS          | AC=10;AF=0.143;AN=70;BaseQRankSum=2.79;C  |
| 5428 | chrY | 9925961 | . | G | A   | 1348.02  | PASS          | AC=4;AF=0.057;AN=70;BaseQRankSum=-1.353e+ |
| 5429 | chrY | 9925965 | . | A | G   | 5038.38  | my_snp_filter | AC=10;AF=0.143;AN=70;BaseQRankSum         |
| 5430 | chrY | 9925968 | . | A | C   | 5660.21  | my_snp_filter | AC=10;AF=0.152;AN=66;BaseQRankSum         |
| 5431 | chrY | 9925969 | . | G | A   | 372.56   | PASS          | AC=1;AF=0.015;AN=66;BaseQRankSum=1.25;C   |
| 5432 | chrY | 9925972 | . | T | C   | 2577.96  | my_snp_filter | AC=8;AF=0.114;AN=70;BaseQRankSum          |
| 5433 | chrY | 9926022 | . | G | A   | 234.10   | PASS          | AC=3;AF=0.063;AN=48;BaseQRankSum=0.720;C  |
| 5434 | chrY | 9926023 | . | T | A   | 225.40   | PASS          | AC=3;AF=0.063;AN=48;BaseQRankSum=0.736;C  |
| 5435 | chrY | 9926032 | . | G | T   | 83.89    | PASS          | AC=1;AF=0.015;AN=68;BaseQRankSum=-1.537e+ |
| 5436 | chrY | 9926039 | . | G | A   | 191.40   | PASS          | AC=5;AF=0.119;AN=42;BaseQRankSum=-7.420e  |
| 5437 | chrY | 9926042 | . | T | C   | 83.68    | PASS          | AC=1;AF=0.016;AN=64;BaseQRankSum=-1.231e+ |
| 5438 | chrY | 9926043 | . | G | A   | 83.39    | PASS          | AC=1;AF=0.016;AN=64;BaseQRankSum=0.358;C  |
| 5439 | chrY | 9926048 | . | G | A   | 41.61    | PASS          | AC=1;AF=0.015;AN=68;BaseQRankSum=-3.580e  |
| 5440 | chrY | 9926056 | . | A | T   | 120.96   | PASS          | AC=1;AF=0.020;AN=50;BaseQRankSum=-7.310e  |
| 5441 | chrY | 9926400 | . | C | T   | 31.93    | my_snp_filter | AC=2;AF=0.030;AN=66;BaseQRankSum          |
| 5442 | chrY | 9926427 | . | A | G   | 199.68   | PASS          | AC=3;AF=0.048;AN=62;BaseQRankSum=-2.166e+ |
| 5443 | chrY | 9926429 | . | G | A   | 195.99   | PASS          | AC=3;AF=0.048;AN=62;BaseQRankSum=-1.931e+ |
| 5444 | chrY | 9926435 | . | C | T   | 161.78   | PASS          | AC=3;AF=0.048;AN=62;BaseQRankSum=-1.733e+ |
| 5445 | chrY | 9926436 | . | A | G   | 160.52   | PASS          | AC=3;AF=0.048;AN=62;BaseQRankSum=-7.150e  |
| 5446 | chrY | 9926439 | . | G | T   | 118.45   | PASS          | AC=2;AF=0.032;AN=62;BaseQRankSum=1.73;C   |
| 5447 | chrY | 9928950 | . | T | C   | 295.99   | PASS          | AC=7;AF=0.109;AN=64;BaseQRankSum=-7.470e  |
| 5448 | chrY | 9928954 | . | C | A   | 294.23   | PASS          | AC=7;AF=0.100;AN=70;BaseQRankSum=-7.290e  |
| 5449 | chrY | 9928955 | . | A | G   | 296.84   | PASS          | AC=7;AF=0.100;AN=70;BaseQRankSum=-7.200e  |
| 5450 | chrY | 9928990 | . | T | G   | 539.33   | PASS          | AC=9;AF=0.132;AN=68;BaseQRankSum=-1.133e+ |
| 5451 | chrY | 9929013 | . | T | C   | 1146.27  | PASS          | AC=14;AF=0.206;AN=68;BaseQRankSum=-4.410e |
| 5452 | chrY | 9929016 | . | C | A   | 392.41   | PASS          | AC=7;AF=0.100;AN=70;BaseQRankSum=-1.369e+ |
| 5453 | chrY | 9929041 | . | T | A   | 697.68   | PASS          | AC=9;AF=0.136;AN=66;BaseQRankSum=-4.200e  |
| 5454 | chrY | 9929042 | . | C | A   | 701.31   | PASS          | AC=9;AF=0.136;AN=66;BaseQRankSum=-1.580e  |
| 5455 | chrY | 9929078 | . | C | A   | 37.81    | PASS          | AC=1;AF=0.015;AN=66;BaseQRankSum=-1.231e+ |
| 5456 | chrY | 9929096 | . | C | G   | 1563.80  | PASS          | AC=14;AF=0.250;AN=56;BaseQRankSum=-7.200e |
| 5457 | chrY | 9929156 | . | T | G   | 819.98   | PASS          | AC=9;AF=0.150;AN=60;BaseQRankSum=-1.844e+ |
| 5458 | chrY | 9929184 | . | C | T   | 655.34   | PASS          | AC=8;AF=0.138;AN=58;BaseQRankSum=0.824;C  |
| 5459 | chrY | 9929214 | . | C | T   | 692.58   | PASS          | AC=8;AF=0.121;AN=66;BaseQRankSum=0.139;C  |
| 5460 | chrY | 9929223 | . | T | C   | 575.84   | PASS          | AC=6;AF=0.088;AN=68;BaseQRankSum=-3.490e  |
| 5461 | chrY | 9929226 | . | T | C   | 545.56   | PASS          | AC=6;AF=0.088;AN=68;BaseQRankSum=0.429;C  |
| 5462 | chrY | 9929230 | . | A | C   | 477.83   | PASS          | AC=6;AF=0.088;AN=68;BaseQRankSum=0.212;C  |
| 5463 | chrY | 9929252 | . | A | C   | 86.26    | PASS          | AC=2;AF=0.030;AN=66;BaseQRankSum=1.53;C   |
| 5464 | chrY | 9929261 | . | A | G   | 246.71   | PASS          | AC=3;AF=0.044;AN=68;BaseQRankSum=-1.741e+ |
| 5465 | chrY | 9929292 | . | T | C   | 2572.36  | PASS          | AC=22;AF=0.314;AN=70;BaseQRankSum=-5.500e |
| 5466 | chrY | 9929301 | . | G | A   | 2917.33  | PASS          | AC=22;AF=0.314;AN=70;BaseQRankSum=-5.500e |
| 5467 | chrY | 9929308 | . | C | T   | 3117.01  | PASS          | AC=22;AF=0.324;AN=68;BaseQRankSum=-6.840e |
| 5468 | chrY | 9929314 | . | G | C   | 3171.05  | PASS          | AC=23;AF=0.329;AN=70;BaseQRankSum=-6.480e |
| 5469 | chrY | 9929351 | . | A | T   | 2379.97  | PASS          | AC=21;AF=0.318;AN=66;BaseQRankSum=0.058;C |
| 5470 | chrY | 9929359 | . | C | A   | 2097.94  | PASS          | AC=20;AF=0.303;AN=66;BaseQRankSum=0.922;C |
| 5471 | chrY | 9929372 | . | T | C   | 1303.15  | PASS          | AC=13;AF=0.210;AN=62;BaseQRankSum=0.262;C |
| 5472 | chrY | 9929373 | . | G | A   | 1298.79  | PASS          | AC=13;AF=0.210;AN=62;BaseQRankSum=0.731;C |



|      |      |         |   |   |     |          |               |                                           |
|------|------|---------|---|---|-----|----------|---------------|-------------------------------------------|
| 5473 | chrY | 9929374 | . | T | C   | 1298.02  | PASS          | AC=13;AF=0.210;AN=62;BaseQRankSum=-2.237e |
| 5474 | chrY | 9929378 | . | A | T   | 1142.74  | PASS          | AC=13;AF=0.210;AN=62;BaseQRankSum=0.00;Cl |
| 5475 | chrY | 9929379 | . | G | C   | 1146.36  | PASS          | AC=13;AF=0.210;AN=62;BaseQRankSum=0.731;C |
| 5476 | chrY | 9929440 | . | G | T   | 345.05   | PASS          | AC=6;AF=0.086;AN=70;BaseQRankSum=0.950;Cl |
| 5477 | chrY | 9929446 | . | G | A   | 341.98   | PASS          | AC=6;AF=0.091;AN=66;BaseQRankSum=0.736;Cl |
| 5478 | chrY | 9929908 | . | C | G   | 82.67    | PASS          | AC=2;AF=0.034;AN=58;BaseQRankSum=2.17;Cli |
| 5479 | chrY | 9929923 | . | C | A   | 138.15   | PASS          | AC=2;AF=0.029;AN=68;BaseQRankSum=1.59;Cli |
| 5480 | chrY | 9929929 | . | G | A   | 132.70   | PASS          | AC=2;AF=0.031;AN=64;BaseQRankSum=1.75;Cli |
| 5481 | chrY | 9929932 | . | A | G   | 176.35   | PASS          | AC=2;AF=0.032;AN=62;BaseQRankSum=1.39;Cli |
| 5482 | chrY | 9929935 | . | C | T   | 171.27   | PASS          | AC=2;AF=0.036;AN=56;BaseQRankSum=0.546;Cl |
| 5483 | chrY | 9929936 | . | A | G   | 231.30   | PASS          | AC=2;AF=0.036;AN=56;BaseQRankSum=0.804;Cl |
| 5484 | chrY | 9929945 | . | C | G   | 248.92   | PASS          | AC=3;AF=0.071;AN=42;BaseQRankSum=0.804;Cl |
| 5485 | chrY | 9929946 | . | A | G   | 245.92   | PASS          | AC=3;AF=0.071;AN=42;BaseQRankSum=0.804;Cl |
| 5486 | chrY | 9929952 | . | G | A   | 310.85   | PASS          | AC=3;AF=0.044;AN=68;BaseQRankSum=-2.740e- |
| 5487 | chrY | 9929958 | . | G | A   | 320.79   | PASS          | AC=3;AF=0.044;AN=68;BaseQRankSum=0.370;Cl |
| 5488 | chrY | 9929969 | . | A | C   | 48.63    | PASS          | AC=2;AF=0.029;AN=68;DP=982;FS=0.000;Inbre |
| 5489 | chrY | 9929987 | . | T | C   | 10270.15 |               | my_snp_filter AC=31;AF=0.470;AN=66;Base   |
| 5490 | chrY | 9929998 | . | G | T   | 2734.95  | PASS          | AC=15;AF=0.214;AN=70;BaseQRankSum=1.11;Cl |
| 5491 | chrY | 9930003 | . | C | T   | 150.94   | PASS          | AC=4;AF=0.057;AN=70;BaseQRankSum=-6.330e- |
| 5492 | chrY | 9930004 | . | C | A   | 14419.30 |               | my_snp_filter AC=32;AF=0.500;AN=64;Base   |
| 5493 | chrY | 9930008 | . | G | A   | 247.95   | my_snp_filter | AC=8;AF=0.114;AN=70;BaseQRankSum=         |
| 5494 | chrY | 9930009 | . | G | A   | 1598.99  | PASS          | AC=19;AF=0.271;AN=70;BaseQRankSum=0.248;C |
| 5495 | chrY | 9930013 | . | C | G   | 3028.78  | PASS          | AC=17;AF=0.243;AN=70;BaseQRankSum=0.053;C |
| 5496 | chrY | 9930015 | . | A | G   | 18153.63 |               | my_snp_filter AC=33;AF=0.516;AN=64;Base   |
| 5497 | chrY | 9930025 | . | A | G   | 21949.81 |               | PASS AC=35;AF=0.530;AN=66;BaseQRankSum    |
| 5498 | chrY | 9930026 | . | C | G   | 22571.71 |               | PASS AC=35;AF=0.530;AN=66;BaseQRankSum    |
| 5499 | chrY | 9930039 | . | G | A   | 2268.27  | PASS          | AC=14;AF=0.200;AN=70;BaseQRankSum=1.47;Cl |
| 5500 | chrY | 9930046 | . | G | A   | 1633.70  | PASS          | AC=13;AF=0.186;AN=70;BaseQRankSum=0.579;C |
| 5501 | chrY | 9930048 | . | G | A   | 461.21   | PASS          | AC=5;AF=0.071;AN=70;BaseQRankSum=0.321;Cl |
| 5502 | chrY | 9930050 | . | A | T,G | 2307.14  | PASS          | AC=4,11;AF=0.059,0.162;AN=68;BaseQRankSum |
| 5503 | chrY | 9930054 | . | A | T   | 10242.16 |               | PASS AC=27;AF=0.386;AN=70;BaseQRankSum    |
| 5504 | chrY | 9930055 | . | A | C,G | 10772.69 |               | PASS AC=2,26;AF=0.029,0.371;AN=70;Base    |
| 5505 | chrY | 9930057 | . | G | A,C | 1500.10  | PASS          | AC=10,5;AF=0.143,0.071;AN=70;BaseQRankSum |
| 5506 | chrY | 9930060 | . | C | A   | 943.45   | PASS          | AC=9;AF=0.129;AN=70;BaseQRankSum=-1.087e+ |
| 5507 | chrY | 9930079 | . | C | A   | 8579.01  | PASS          | AC=19;AF=0.271;AN=70;BaseQRankSum=0.110;C |
| 5508 | chrY | 9930095 | . | C | T   | 2443.15  | PASS          | AC=21;AF=0.309;AN=68;BaseQRankSum=0.888;C |
| 5509 | chrY | 9930096 | . | G | A   | 676.86   | my_snp_filter | AC=10;AF=0.143;AN=70;BaseQRankSum         |
| 5510 | chrY | 9930097 | . | G | A   | 679.97   | my_snp_filter | AC=10;AF=0.143;AN=70;BaseQRankSum         |
| 5511 | chrY | 9930105 | . | G | C   | 1755.42  | PASS          | AC=18;AF=0.257;AN=70;BaseQRankSum=-7.180e |
| 5512 | chrY | 9930106 | . | G | C,A | 2911.90  | PASS          | AC=21,5;AF=0.300,0.071;AN=70;BaseQRankSum |
| 5513 | chrY | 9930110 | . | G | C   | 6658.30  | PASS          | AC=19;AF=0.271;AN=70;BaseQRankSum=-1.799e |
| 5514 | chrY | 9930111 | . | G | T   | 83.71    | my_snp_filter | AC=2;AF=0.029;AN=70;BaseQRankSum=         |
| 5515 | chrY | 9930114 | . | C | A   | 511.10   | my_snp_filter | AC=12;AF=0.171;AN=70;BaseQRankSum         |
| 5516 | chrY | 9930123 | . | C | A   | 74.22    | my_snp_filter | AC=2;AF=0.029;AN=70;BaseQRankSum=         |
| 5517 | chrY | 9930129 | . | C | T,* | 1869.38  | PASS          | AC=16,6;AF=0.229,0.086;AN=70;BaseQRankSum |
| 5518 | chrY | 9930139 | . | C | T,* | 330.40   | PASS          | AC=3,5;AF=0.043,0.071;AN=70;BaseQRankSum= |
| 5519 | chrY | 9930146 | . | C | A   | 4916.17  | PASS          | AC=11;AF=0.157;AN=70;BaseQRankSum=-2.976e |
| 5520 | chrY | 9930149 | . | C | T   | 1064.47  | PASS          | AC=17;AF=0.243;AN=70;BaseQRankSum=1.23;Cl |
| 5521 | chrY | 9930156 | . | G | C   | 210.68   | PASS          | AC=6;AF=0.086;AN=70;BaseQRankSum=1.19;Cli |
| 5522 | chrY | 9930160 | . | A | G   | 11371.73 |               | PASS AC=34;AF=0.567;AN=60;BaseQRankSum    |
| 5523 | chrY | 9930163 | . | G | A   | 207.60   | PASS          | AC=3;AF=0.043;AN=70;BaseQRankSum=-2.546e+ |
| 5524 | chrY | 9930165 | . | A | C,G | 7202.58  | PASS          | AC=9,12;AF=0.180,0.240;AN=50;BaseQRankSum |
| 5525 | chrY | 9930166 | . | G | A   | 931.95   | PASS          | AC=2;AF=0.032;AN=62;BaseQRankSum=0.441;Cl |
| 5526 | chrY | 9930167 | . | C | T   | 170.65   | PASS          | AC=4;AF=0.063;AN=64;BaseQRankSum=0.482;Cl |
| 5527 | chrY | 9930169 | . | G | T   | 9381.63  | PASS          | AC=31;AF=0.596;AN=52;BaseQRankSum=-5.400e |
| 5528 | chrY | 9930171 | . | G | A,T | 301.63   | PASS          | AC=2,4;AF=0.029,0.057;AN=70;BaseQRankSum= |
| 5529 | chrY | 9930174 | . | A | G   | 8321.99  | my_snp_filter | AC=29;AF=0.580;AN=50;BaseQRankSum         |
| 5530 | chrY | 9930177 | . | T | A   | 230.55   | PASS          | AC=6;AF=0.088;AN=68;BaseQRankSum=0.731;Cl |
| 5531 | chrY | 9930182 | . | G | T   | 485.17   | PASS          | AC=11;AF=0.162;AN=68;BaseQRankSum=-7.310e |
| 5532 | chrY | 9930192 | . | T | G   | 4704.77  | my_snp_filter | AC=10;AF=0.278;AN=36;BaseQRankSum         |
| 5533 | chrY | 9930193 | . | C | T   | 964.13   | PASS          | AC=9;AF=0.196;AN=46;BaseQRankSum=-1.015e+ |
| 5534 | chrY | 9930196 | . | G | T   | 34.30    | my_snp_filter | AC=3;AF=0.048;AN=62;BaseQRankSum=         |
| 5535 | chrY | 9930204 | . | A | G   | 2916.61  | PASS          | AC=9;AF=0.205;AN=44;BaseQRankSum=0.028;Cl |
| 5536 | chrY | 9930207 | . | A | G   | 2022.97  | PASS          | AC=9;AF=0.180;AN=50;BaseQRankSum=0.708;Cl |
| 5537 | chrY | 9930211 | . | C | G   | 1607.78  | PASS          | AC=9;AF=0.196;AN=46;BaseQRankSum=-2.154e+ |
| 5538 | chrY | 9930222 | . | T | C   | 773.69   | PASS          | AC=8;AF=0.138;AN=58;BaseQRankSum=-2.331e+ |
| 5539 | chrY | 9930224 | . | C | G   | 1087.56  | PASS          | AC=8;AF=0.138;AN=58;BaseQRankSum=2.08;Cli |
| 5540 | chrY | 9930237 | . | G | C   | 1060.51  | my_snp_filter | AC=7;AF=0.135;AN=52;BaseQRankSum=         |
| 5541 | chrY | 9930240 | . | C | T   | 53.05    | PASS          | AC=1;AF=0.016;AN=64;BaseQRankSum=2.33;Cli |
| 5542 | chrY | 9930253 | . | C | A   | 944.91   | my_snp_filter | AC=8;AF=0.125;AN=64;BaseQRankSum=         |
| 5543 | chrY | 9930258 | . | G | G   | 650.20   | PASS          | AC=3;AF=0.048;AN=62;BaseQRankSum=1.93;Cli |
| 5544 | chrY | 9930307 | . | A | T   | 1709.98  | my_snp_filter | AC=12;AF=0.182;AN=66;BaseQRankSum         |
| 5545 | chrY | 9930334 | . | C | T   | 2315.83  | my_snp_filter | AC=12;AF=0.207;AN=58;BaseQRankSum         |
| 5546 | chrY | 9930338 | . | T | G   | 2326.74  | my_snp_filter | AC=12;AF=0.200;AN=60;BaseQRankSum         |
| 5547 | chrY | 9930349 | . | C | G   | 1989.79  | my_snp_filter | AC=11;AF=0.190;AN=58;BaseQRankSum         |
| 5548 | chrY | 9930372 | . | C | T   | 1994.89  | my_snp_filter | AC=10;AF=0.185;AN=54;BaseQRankSum         |

|      |      |         |   |   |     |          |               |                                            |
|------|------|---------|---|---|-----|----------|---------------|--------------------------------------------|
| 5549 | chrY | 9930380 | . | A | G   | 1654.79  | my_snp_filter | AC=7;AF=0.130;AN=54;BaseQRankSum=          |
| 5550 | chrY | 9930387 | . | A | G   | 1005.94  | PASS          | AC=6;AF=0.111;AN=54;BaseQRankSum=-1.187e+  |
| 5551 | chrY | 9930392 | . | T | G   | 679.94   | PASS          | AC=6;AF=0.115;AN=52;BaseQRankSum=-1.423e+  |
| 5552 | chrY | 9930393 | . | G | T   | 643      | PASS          | AC=6;AF=0.115;AN=52;BaseQRankSum=-1.736e+  |
| 5553 | chrY | 9930488 | . | C | T   | 87       | PASS          | AC=1;AF=0.019;AN=52;BaseQRankSum=0.736;Cl  |
| 5554 | chrY | 9930490 | . | A | T   | 65.65    | PASS          | AC=2;AF=0.040;AN=50;BaseQRankSum=0.736;Cl  |
| 5555 | chrY | 9930497 | . | T | G   | 88.95    | PASS          | AC=1;AF=0.019;AN=54;BaseQRankSum=0.727;Cl  |
| 5556 | chrY | 9930537 | . | C | A   | 1580.02  | PASS          | AC=12;AF=0.214;AN=56;BaseQRankSum=-7.360e  |
| 5557 | chrY | 9930540 | . | G | A   | 592.01   | PASS          | AC=6;AF=0.100;AN=60;BaseQRankSum=0.237;Cl  |
| 5558 | chrY | 9930543 | . | T | C   | 1793.68  | PASS          | AC=12;AF=0.200;AN=60;BaseQRankSum=-4.900e  |
| 5559 | chrY | 9930558 | . | C | T   | 750.40   | PASS          | AC=6;AF=0.111;AN=54;BaseQRankSum=1.94;Cli  |
| 5560 | chrY | 9930569 | . | C | T   | 91.20    | PASS          | AC=3;AF=0.058;AN=52;BaseQRankSum=0.743;Cl  |
| 5561 | chrY | 9930570 | . | A | G   | 1486.42  | PASS          | AC=9;AF=0.167;AN=54;BaseQRankSum=-2.901e+  |
| 5562 | chrY | 9930577 | . | T | A,C | 293.85   | PASS          | AC=2,3;AF=0.037,0.056;AN=54;BaseQRankSum=  |
| 5563 | chrY | 9930582 | . | T | C   | 601.21   | PASS          | AC=6;AF=0.111;AN=54;BaseQRankSum=0.927;Cl  |
| 5564 | chrY | 9930605 | . | T | C   | 1214.70  | PASS          | AC=7;AF=0.140;AN=50;BaseQRankSum=2.61;Cli  |
| 5565 | chrY | 9930607 | . | G | A   | 64.11    | PASS          | AC=1;AF=0.019;AN=54;BaseQRankSum=0.370;Cl  |
| 5566 | chrY | 9930611 | . | C | T   | 171.71   | PASS          | AC=2;AF=0.037;AN=54;BaseQRankSum=2.27;Cli  |
| 5567 | chrY | 9930626 | . | C | T   | 270.78   | PASS          | AC=4;AF=0.083;AN=48;BaseQRankSum=0.040;Cl  |
| 5568 | chrY | 9930637 | . | T | G   | 666.81   | PASS          | AC=4;AF=0.095;AN=42;BaseQRankSum=1.68;Cli  |
| 5569 | chrY | 9930644 | . | C | A   | 583.14   | PASS          | AC=4;AF=0.087;AN=46;BaseQRankSum=0.795;Cl  |
| 5570 | chrY | 9930646 | . | T | C   | 782.34   | PASS          | AC=5;AF=0.109;AN=46;BaseQRankSum=0.00;Cli  |
| 5571 | chrY | 9930650 | . | C | A   | 49.43    | my_snp_filter | AC=2;AF=0.042;AN=48;BaseQRankSum=          |
| 5572 | chrY | 9930652 | . | A | C   | 450.67   | PASS          | AC=4;AF=0.087;AN=46;BaseQRankSum=1.26;Cli  |
| 5573 | chrY | 9930654 | . | C | A   | 49.53    | my_snp_filter | AC=2;AF=0.043;AN=46;BaseQRankSum=          |
| 5574 | chrY | 9930655 | . | G | C   | 223.69   | PASS          | AC=4;AF=0.087;AN=46;BaseQRankSum=1.95;Cli  |
| 5575 | chrY | 9930713 | . | C | G   | 66.04    | PASS          | AC=1;AF=0.024;AN=42;BaseQRankSum=1.29;Cli  |
| 5576 | chrY | 9930722 | . | T | G   | 195.33   | PASS          | AC=1;AF=0.025;AN=40;BaseQRankSum=0.437;Cl  |
| 5577 | chrY | 9930723 | . | C | G   | 195.97   | PASS          | AC=1;AF=0.025;AN=40;BaseQRankSum=-4.520e-  |
| 5578 | chrY | 9930730 | . | A | C   | 198.69   | PASS          | AC=1;AF=0.024;AN=42;BaseQRankSum=0.710;Cl  |
| 5579 | chrY | 9930731 | . | G | A   | 198.73   | PASS          | AC=1;AF=0.024;AN=42;BaseQRankSum=-9.840e-  |
| 5580 | chrY | 9930758 | . | T | C   | 1722.96  | PASS          | AC=8;AF=0.182;AN=44;BaseQRankSum=1.87;Cli  |
| 5581 | chrY | 9930772 | . | T | C   | 2208.94  | PASS          | AC=8;AF=0.174;AN=46;BaseQRankSum=1.37;Cli  |
| 5582 | chrY | 9930773 | . | G | A   | 2207.04  | PASS          | AC=8;AF=0.182;AN=44;BaseQRankSum=-1.900e-  |
| 5583 | chrY | 9930775 | . | C | A   | 2747.73  | PASS          | AC=8;AF=0.190;AN=42;BaseQRankSum=2.37;Cli  |
| 5584 | chrY | 9930777 | . | A | C   | 2349.76  | PASS          | AC=8;AF=0.182;AN=44;BaseQRankSum=-2.383e+  |
| 5585 | chrY | 9930790 | . | C | G   | 293.41   | PASS          | AC=4;AF=0.074;AN=54;BaseQRankSum=-3.770e-  |
| 5586 | chrY | 9930801 | . | A | G   | 73.57    | my_snp_filter | AC=2;AF=0.033;AN=60;BaseQRankSum=          |
| 5587 | chrY | 9930805 | . | G | A   | 296.18   | PASS          | AC=4;AF=0.065;AN=62;BaseQRankSum=-1.490e+  |
| 5588 | chrY | 9930807 | . | C | G   | 230.38   | PASS          | AC=3;AF=0.050;AN=60;BaseQRankSum=2.24;Cli  |
| 5589 | chrY | 9930818 | . | C | T   | 6129.84  | PASS          | AC=25;AF=0.403;AN=62;BaseQRankSum=1.03;Cl  |
| 5590 | chrY | 9930823 | . | C | T   | 5929.98  | PASS          | AC=26;AF=0.406;AN=64;BaseQRankSum=1.03;Cl  |
| 5591 | chrY | 9930830 | . | G | C   | 7106.47  | PASS          | AC=26;AF=0.419;AN=62;BaseQRankSum=1.23;Cl  |
| 5592 | chrY | 9930843 | . | C | G,T | 6076.62  | PASS          | AC=26,4;AF=0.406,0.063;AN=64;BaseQRankSum= |
| 5593 | chrY | 9930851 | . | A | G   | 1425.01  | PASS          | AC=11;AF=0.172;AN=64;BaseQRankSum=-7.310e  |
| 5594 | chrY | 9930860 | . | A | C   | 717.40   | PASS          | AC=10;AF=0.156;AN=64;BaseQRankSum=-3.370e  |
| 5595 | chrY | 9930871 | . | C | T   | 711.68   | PASS          | AC=5;AF=0.078;AN=64;BaseQRankSum=-1.991e+  |
| 5596 | chrY | 9930873 | . | G | A   | 714.75   | PASS          | AC=5;AF=0.078;AN=64;BaseQRankSum=-1.713e+  |
| 5597 | chrY | 9930875 | . | A | C   | 4953.66  | PASS          | AC=22;AF=0.367;AN=60;BaseQRankSum=-1.067e  |
| 5598 | chrY | 9930899 | . | T | C   | 3393.83  | PASS          | AC=14;AF=0.206;AN=68;BaseQRankSum=-3.820e  |
| 5599 | chrY | 9930903 | . | C | A   | 456.04   | PASS          | AC=7;AF=0.103;AN=68;BaseQRankSum=0.922;Cl  |
| 5600 | chrY | 9930909 | . | C | T   | 1964.63  | PASS          | AC=11;AF=0.162;AN=68;BaseQRankSum=2.49;Cl  |
| 5601 | chrY | 9930915 | . | A | G   | 38.87    | PASS          | AC=2;AF=0.029;AN=68;BaseQRankSum=0.668;Cl  |
| 5602 | chrY | 9930918 | . | T | C   | 3807.30  | PASS          | AC=19;AF=0.306;AN=62;BaseQRankSum=0.529;C  |
| 5603 | chrY | 9930924 | . | T | G   | 3248.54  | PASS          | AC=19;AF=0.288;AN=66;BaseQRankSum=-1.231e  |
| 5604 | chrY | 9930926 | . | C | G,A | 2702.42  | PASS          | AC=14,5;AF=0.206,0.074;AN=68;BaseQRankSum= |
| 5605 | chrY | 9930932 | . | C | T   | 1180.22  | PASS          | AC=9;AF=0.132;AN=68;BaseQRankSum=-3.400e-  |
| 5606 | chrY | 9930933 | . | C | G   | 64.73    | PASS          | AC=1;AF=0.015;AN=68;BaseQRankSum=-4.440e-  |
| 5607 | chrY | 9930934 | . | C | G,T | 2345.65  | PASS          | AC=15,4;AF=0.227,0.061;AN=66;BaseQRankSum= |
| 5608 | chrY | 9930940 | . | C | T   | 659      | PASS          | AC=7;AF=0.103;AN=68;BaseQRankSum=0.720;Cl  |
| 5609 | chrY | 9930941 | . | G | A   | 33.85    | PASS          | AC=1;AF=0.015;AN=68;BaseQRankSum=-1.380e+  |
| 5610 | chrY | 9930955 | . | A | C   | 275.52   | PASS          | AC=4;AF=0.059;AN=68;BaseQRankSum=-4.230e-  |
| 5611 | chrY | 9930967 | . | A | G   | 96.18    | PASS          | AC=3;AF=0.045;AN=66;BaseQRankSum=-7.620e-  |
| 5612 | chrY | 9930978 | . | C | T   | 83.27    | PASS          | AC=3;AF=0.044;AN=68;BaseQRankSum=0.751;Cl  |
| 5613 | chrY | 9931120 | . | T | C   | 33.41    | PASS          | AC=2;AF=0.029;AN=70;BaseQRankSum=0.762;Cl  |
| 5614 | chrY | 9931142 | . | G | T   | 7411.93  | my_snp_filter | AC=20;AF=0.286;AN=70;BaseQRankSum=         |
| 5615 | chrY | 9931146 | . | A | G   | 3598.28  | my_snp_filter | AC=9;AF=0.129;AN=70;BaseQRankSum=          |
| 5616 | chrY | 9931147 | . | T | C   | 241.23   | PASS          | AC=6;AF=0.086;AN=70;BaseQRankSum=-1.106e+  |
| 5617 | chrY | 9931150 | . | T | A   | 3336.90  | my_snp_filter | AC=9;AF=0.129;AN=70;BaseQRankSum=          |
| 5618 | chrY | 9931155 | . | G | A   | 85.11    | my_snp_filter | AC=1;AF=0.015;AN=68;BaseQRankSum=          |
| 5619 | chrY | 9931162 | . | G | A   | 4873.28  | my_snp_filter | AC=9;AF=0.132;AN=68;BaseQRankSum=          |
| 5620 | chrY | 9931171 | . | T | C   | 128.52   | PASS          | AC=1;AF=0.015;AN=68;BaseQRankSum=1.56;Cli  |
| 5621 | chrY | 9931177 | . | T | C   | 13736.88 | my_snp_filter | AC=23;AF=0.338;AN=68;Base                  |
| 5622 | chrY | 9931178 | . | C | T   | 467.01   | PASS          | AC=5;AF=0.071;AN=70;BaseQRankSum=-1.393e+  |
| 5623 | chrY | 9931187 | . | A | G   | 183.26   | PASS          | AC=4;AF=0.057;AN=70;BaseQRankSum=0.720;Cl  |
| 5624 | chrY | 9931193 | . | T | C   | 6743.80  | PASS          | AC=14;AF=0.200;AN=70;BaseQRankSum=-3.220e  |

|      |      |         |   |   |     |           |               |                                           |
|------|------|---------|---|---|-----|-----------|---------------|-------------------------------------------|
| 5625 | chrY | 9931194 | . | A | G   | 3337.06   | PASS          | AC=9;AF=0.129;AN=70;BaseQRankSum=2.01;Cli |
| 5626 | chrY | 9931201 | . | G | C   | 5545.67   | PASS          | AC=10;AF=0.143;AN=70;BaseQRankSum=4.63;Cl |
| 5627 | chrY | 9931209 | . | T | C   | 25403.79  |               | my_snp_filter AC=22;AF=0.314;AN=70;Base   |
| 5628 | chrY | 9931216 | . | T | C   | 264.91    | PASS          | AC=1;AF=0.014;AN=70;BaseQRankSum=1.57;Cli |
| 5629 | chrY | 9931224 | . | T | C   | 7666.17   | PASS          | AC=13;AF=0.186;AN=70;BaseQRankSum=-9.100e |
| 5630 | chrY | 9931233 | . | T | C   | 30601.77  |               | my_snp_filter AC=20;AF=0.286;AN=70;Base   |
| 5631 | chrY | 9931259 | . | G | A   | 39142.37  |               | my_snp_filter AC=19;AF=0.279;AN=68;Base   |
| 5632 | chrY | 9931285 | . | T | C   | 7487.91   | PASS          | AC=11;AF=0.157;AN=70;BaseQRankSum=0.055;C |
| 5633 | chrY | 9931293 | . | C | T   | 2505.13   | PASS          | AC=7;AF=0.100;AN=70;BaseQRankSum=-8.000e- |
| 5634 | chrY | 9931294 | . | T | G   | 4722.20   | PASS          | AC=8;AF=0.114;AN=70;BaseQRankSum=-1.688e+ |
| 5635 | chrY | 9931303 | . | T | C   | 44677.35  |               | PASS AC=26;AF=0.406;AN=64;BaseQRankSum    |
| 5636 | chrY | 9931316 | . | T | C   | 12416.04  |               | PASS AC=15;AF=0.221;AN=68;BaseQRankSum    |
| 5637 | chrY | 9931330 | . | T | A   | 53517.29  |               | PASS AC=29;AF=0.453;AN=64;BaseQRankSum    |
| 5638 | chrY | 9931339 | . | T | A   | 4669.01   | PASS          | AC=10;AF=0.152;AN=66;BaseQRankSum=-7.080e |
| 5639 | chrY | 9931347 | . | C | T   | 16814.85  |               | PASS AC=16;AF=0.242;AN=66;BaseQRankSum    |
| 5640 | chrY | 9931357 | . | G | A   | 2220.59   | PASS          | AC=14;AF=0.206;AN=68;BaseQRankSum=1.15;Cl |
| 5641 | chrY | 9931365 | . | T | C,* | 11323.38  |               | PASS AC=12,19;AF=0.182,0.288;AN=66;Bas    |
| 5642 | chrY | 9931378 | . | A | G   | 15861.36  |               | PASS AC=25;AF=0.357;AN=70;BaseQRankSum    |
| 5643 | chrY | 9931379 | . | G | A   | 51944.17  |               | PASS AC=32;AF=0.457;AN=70;BaseQRankSum    |
| 5644 | chrY | 9931380 | . | T | C   | 1971.99   | my_snp_filter | AC=13;AF=0.186;AN=70;BaseQRankSum         |
| 5645 | chrY | 9931405 | . | C | T   | 350.98    | PASS          | AC=4;AF=0.057;AN=70;BaseQRankSum=0.963;Cl |
| 5646 | chrY | 9931411 | . | A | G   | 44682.56  |               | PASS AC=31;AF=0.500;AN=62;BaseQRankSum    |
| 5647 | chrY | 9931413 | . | C | T   | 308.52    | my_snp_filter | AC=4;AF=0.057;AN=70;BaseQRankSum=         |
| 5648 | chrY | 9931428 | . | C | T   | 74613.97  |               | PASS AC=38;AF=0.543;AN=70;BaseQRankSum    |
| 5649 | chrY | 9931444 | . | A | C   | 3598.81   | PASS          | AC=21;AF=0.300;AN=70;BaseQRankSum=-8.640e |
| 5650 | chrY | 9931448 | . | G | A   | 3174.48   | PASS          | AC=16;AF=0.229;AN=70;BaseQRankSum=1.68;Cl |
| 5651 | chrY | 9931461 | . | C | G   | 1826.31   | PASS          | AC=8;AF=0.114;AN=70;BaseQRankSum=-1.151e+ |
| 5652 | chrY | 9931467 | . | T | A   | 21510.72  |               | PASS AC=33;AF=0.471;AN=70;BaseQRankSum    |
| 5653 | chrY | 9931469 | . | T | A   | 22745.72  |               | PASS AC=33;AF=0.471;AN=70;BaseQRankSum    |
| 5654 | chrY | 9931470 | . | C | T   | 119241.34 |               | PASS AC=40;AF=0.571;AN=70;BaseQRankSum    |
| 5655 | chrY | 9931478 | . | T | C   | 102791.72 |               | PASS AC=35;AF=0.500;AN=70;BaseQRankSum    |
| 5656 | chrY | 9931484 | . | C | T   | 80.97     | my_snp_filter | AC=1;AF=0.014;AN=70;BaseQRankSum=         |
| 5657 | chrY | 9931494 | . | C | G   | 61523.72  |               | PASS AC=35;AF=0.500;AN=70;BaseQRankSum    |
| 5658 | chrY | 9931499 | . | G | T   | 29414.66  |               | PASS AC=33;AF=0.471;AN=70;BaseQRankSum    |
| 5659 | chrY | 9931505 | . | T | G   | 4075.20   | my_snp_filter | AC=19;AF=0.271;AN=70;BaseQRankSum         |
| 5660 | chrY | 9931511 | . | A | G   | 152.42    | my_snp_filter | AC=1;AF=0.014;AN=70;BaseQRankSum=         |
| 5661 | chrY | 9931516 | . | T | A   | 30148.81  |               | PASS AC=33;AF=0.471;AN=70;BaseQRankSum    |
| 5662 | chrY | 9931518 | . | A | C   | 6940.02   | PASS          | AC=18;AF=0.257;AN=70;BaseQRankSum=0.855;C |
| 5663 | chrY | 9931519 | . | C | T   | 7538.08   | PASS          | AC=16;AF=0.229;AN=70;BaseQRankSum=1.15;Cl |
| 5664 | chrY | 9931520 | . | T | A,C | 2844.44   | my_snp_filter | AC=13,3;AF=0.186,0.043;AN=70;Base         |
| 5665 | chrY | 9931521 | . | T | G   | 6503.05   | PASS          | AC=14;AF=0.200;AN=70;BaseQRankSum=-1.754e |
| 5666 | chrY | 9931522 | . | T | C   | 221.42    | my_snp_filter | AC=1;AF=0.014;AN=70;BaseQRankSum=         |
| 5667 | chrY | 9931523 | . | T | C   | 107.06    | my_snp_filter | AC=2;AF=0.029;AN=70;BaseQRankSum=         |
| 5668 | chrY | 9931528 | . | G | T   | 3929.83   | PASS          | AC=12;AF=0.171;AN=70;BaseQRankSum=-7.390e |
| 5669 | chrY | 9931533 | . | A | G   | 5132.23   | PASS          | AC=14;AF=0.200;AN=70;BaseQRankSum=-1.018e |
| 5670 | chrY | 9931539 | . | T | A   | 1606.26   | my_snp_filter | AC=9;AF=0.129;AN=70;BaseQRankSum=         |
| 5671 | chrY | 9931548 | . | G | A   | 141.95    | my_snp_filter | AC=4;AF=0.057;AN=70;BaseQRankSum=         |
| 5672 | chrY | 9931550 | . | A | C   | 12386.19  |               | PASS AC=16;AF=0.229;AN=70;BaseQRankSum    |
| 5673 | chrY | 9931562 | . | G | A   | 54.77     | my_snp_filter | AC=1;AF=0.014;AN=70;BaseQRankSum=         |
| 5674 | chrY | 9931578 | . | G | A   | 1004.23   | my_snp_filter | AC=7;AF=0.100;AN=70;BaseQRankSum=         |
| 5675 | chrY | 9931580 | . | T | C   | 135.82    | my_snp_filter | AC=4;AF=0.057;AN=70;BaseQRankSum=         |
| 5676 | chrY | 9931581 | . | C | T   | 285.67    | my_snp_filter | AC=6;AF=0.086;AN=70;BaseQRankSum=         |
| 5677 | chrY | 9931585 | . | A | G   | 8638.19   | PASS          | AC=19;AF=0.271;AN=70;BaseQRankSum=-6.590e |
| 5678 | chrY | 9931598 | . | T | G   | 23368.53  |               | PASS AC=27;AF=0.386;AN=70;BaseQRankSum    |
| 5679 | chrY | 9931606 | . | T | G   | 38390.38  |               | my_snp_filter AC=29;AF=0.500;AN=58;Base   |
| 5680 | chrY | 9931608 | . | T | A   | 37298.38  |               | my_snp_filter AC=29;AF=0.500;AN=58;Base   |
| 5681 | chrY | 9931618 | . | C | A   | 3407.25   | PASS          | AC=9;AF=0.129;AN=70;BaseQRankSum=-1.070e- |
| 5682 | chrY | 9931619 | . | T | C   | 2712.69   | PASS          | AC=9;AF=0.129;AN=70;BaseQRankSum=1.09;Cli |
| 5683 | chrY | 9931631 | . | G | A   | 1316.44   | PASS          | AC=4;AF=0.057;AN=70;BaseQRankSum=0.274;Cl |
| 5684 | chrY | 9931633 | . | T | A   | 1301      | PASS          | AC=5;AF=0.071;AN=70;BaseQRankSum=-2.050e+ |
| 5685 | chrY | 9931636 | . | C | G   | 7959.40   | PASS          | AC=10;AF=0.143;AN=70;BaseQRankSum=-2.453e |
| 5686 | chrY | 9931640 | . | G | T   | 9931.26   | my_snp_filter | AC=14;AF=0.226;AN=62;BaseQRankSum         |
| 5687 | chrY | 9931650 | . | C | T   | 6978.64   | my_snp_filter | AC=8;AF=0.121;AN=66;BaseQRankSum=         |
| 5688 | chrY | 9931661 | . | T | G   | 425.08    | PASS          | AC=1;AF=0.014;AN=70;BaseQRankSum=-2.023e+ |
| 5689 | chrY | 9931675 | . | T | C   | 44.75     | PASS          | AC=1;AF=0.014;AN=70;BaseQRankSum=0.474;Cl |
| 5690 | chrY | 9931926 | . | T | C   | 184.53    | PASS          | AC=2;AF=0.030;AN=66;BaseQRankSum=-4.450e- |
| 5691 | chrY | 9931927 | . | A | G   | 5276.33   | PASS          | AC=11;AF=0.167;AN=66;BaseQRankSum=-1.289e |
| 5692 | chrY | 9931935 | . | G | T   | 81.57     | my_snp_filter | AC=1;AF=0.015;AN=66;BaseQRankSum=         |
| 5693 | chrY | 9931938 | . | C | T   | 3079.79   | PASS          | AC=10;AF=0.156;AN=64;BaseQRankSum=-9.740e |
| 5694 | chrY | 9931941 | . | A | T   | 2018.84   | PASS          | AC=9;AF=0.136;AN=66;BaseQRankSum=-4.310e- |
| 5695 | chrY | 9931953 | . | A | G   | 15482.55  |               | PASS AC=14;AF=0.259;AN=54;BaseQRankSum    |
| 5696 | chrY | 9931962 | . | T | C   | 505.39    | PASS          | AC=3;AF=0.048;AN=62;BaseQRankSum=0.804;Cl |
| 5697 | chrY | 9931964 | . | G | A   | 5008.02   | PASS          | AC=11;AF=0.183;AN=60;BaseQRankSum=-1.026e |
| 5698 | chrY | 9931989 | . | T | C   | 45.10     | PASS          | AC=1;AF=0.017;AN=60;BaseQRankSum=-7.360e- |
| 5699 | chrY | 9931991 | . | A | T   | 5673.89   | PASS          | AC=18;AF=0.333;AN=54;BaseQRankSum=1.22;Cl |
| 5700 | chrY | 9931992 | . | A | G   | 7516.29   | PASS          | AC=12;AF=0.200;AN=60;BaseQRankSum=-2.930e |

|      |      |         |   |   |     |          |               |                                            |
|------|------|---------|---|---|-----|----------|---------------|--------------------------------------------|
| 5701 | chrY | 9931995 | . | T | C,G | 1682.27  | PASS          | AC=5,4;AF=0.086,0.069;AN=58;BaseQRankSum=  |
| 5702 | chrY | 9932001 | . | A | G   | 7450.53  | PASS          | AC=12;AF=0.214;AN=56;BaseQRankSum=0.858;C  |
| 5703 | chrY | 9932008 | . | T | C   | 160.81   | my_snp_filter | AC=3;AF=0.056;AN=54;BaseQRankSum=          |
| 5704 | chrY | 9932010 | . | A | C   | 1414.35  | PASS          | AC=6;AF=0.107;AN=56;BaseQRankSum=1.49;Cli  |
| 5705 | chrY | 9932019 | . | G | T   | 195.46   | my_snp_filter | AC=2;AF=0.038;AN=52;BaseQRankSum=          |
| 5706 | chrY | 9932029 | . | G | A   | 6266.09  | PASS          | AC=10;AF=0.238;AN=42;BaseQRankSum=0.942;C  |
| 5707 | chrY | 9932049 | . | C | T   | 4987.49  | PASS          | AC=9;AF=0.237;AN=38;BaseQRankSum=2.17;Cli  |
| 5708 | chrY | 9932078 | . | G | C,* | 2368.96  | PASS          | AC=6,3;AF=0.200,0.100;AN=30;BaseQRankSum=  |
| 5709 | chrY | 9932082 | . | T | C   | 754.37   | PASS          | AC=3;AF=0.107;AN=28;BaseQRankSum=-7.000e-  |
| 5710 | chrY | 9932092 | . | A | T   | 417.09   | PASS          | AC=4;AF=0.125;AN=32;BaseQRankSum=0.894;Cl  |
| 5711 | chrY | 9932094 | . | A | T   | 373.24   | PASS          | AC=4;AF=0.111;AN=36;BaseQRankSum=-6.780e-  |
| 5712 | chrY | 9932098 | . | C | G   | 792.58   | PASS          | AC=4;AF=0.111;AN=36;BaseQRankSum=1.73;Cli  |
| 5713 | chrY | 9932113 | . | C | A   | 2725.98  | PASS          | AC=9;AF=0.196;AN=46;BaseQRankSum=0.073;Cl  |
| 5714 | chrY | 9932125 | . | C | T   | 56.46    | PASS          | AC=1;AF=0.019;AN=52;BaseQRankSum=1.51;Cli  |
| 5715 | chrY | 9932131 | . | A | T   | 2496.65  | PASS          | AC=9;AF=0.173;AN=52;BaseQRankSum=0.141;Cl  |
| 5716 | chrY | 9932136 | . | A | T   | 2725.46  | PASS          | AC=9;AF=0.167;AN=54;BaseQRankSum=1.68;Cli  |
| 5717 | chrY | 9932158 | . | A | C   | 186.19   | PASS          | AC=1;AF=0.020;AN=50;BaseQRankSum=1.20;Cli  |
| 5718 | chrY | 9932159 | . | C | T   | 195.54   | PASS          | AC=2;AF=0.038;AN=52;BaseQRankSum=1.16;Cli  |
| 5719 | chrY | 9932160 | . | A | C   | 2790.35  | PASS          | AC=9;AF=0.145;AN=62;BaseQRankSum=-2.154e+  |
| 5720 | chrY | 9932163 | . | G | A   | 236.79   | PASS          | AC=2;AF=0.031;AN=64;BaseQRankSum=2.25;Cli  |
| 5721 | chrY | 9932203 | . | T | C   | 77.58    | PASS          | AC=4;AF=0.059;AN=68;BaseQRankSum=-3.580e-  |
| 5722 | chrY | 9932225 | . | T | G   | 118.57   | my_snp_filter | AC=2;AF=0.029;AN=70;BaseQRankSum=          |
| 5723 | chrY | 9932231 | . | G | A   | 141.79   | PASS          | AC=1;AF=0.014;AN=70;BaseQRankSum=2.81;Cli  |
| 5724 | chrY | 9932236 | . | A | T   | 15838.99 | PASS          | AC=24;AF=0.364;AN=66;BaseQRankSum=         |
| 5725 | chrY | 9932239 | . | A | G   | 1953.81  | PASS          | AC=17;AF=0.258;AN=66;BaseQRankSum=-9.720e- |
| 5726 | chrY | 9932240 | . | C | T   | 174.72   | PASS          | AC=1;AF=0.014;AN=70;BaseQRankSum=-5.700e-  |
| 5727 | chrY | 9932249 | . | C | T,A | 351.65   | my_snp_filter | AC=2,1;AF=0.029,0.014;AN=70;BaseQ          |
| 5728 | chrY | 9932250 | . | T | C   | 78.71    | my_snp_filter | AC=4;AF=0.057;AN=70;BaseQRankSum=          |
| 5729 | chrY | 9932259 | . | C | T   | 1461.15  | PASS          | AC=7;AF=0.100;AN=70;BaseQRankSum=-4.030e-  |
| 5730 | chrY | 9932261 | . | G | C   | 79.44    | my_snp_filter | AC=2;AF=0.029;AN=70;BaseQRankSum=          |
| 5731 | chrY | 9932263 | . | A | T   | 56.88    | my_snp_filter | AC=4;AF=0.057;AN=70;BaseQRankSum=          |
| 5732 | chrY | 9932296 | . | G | A   | 1463.78  | PASS          | AC=8;AF=0.114;AN=70;BaseQRankSum=-1.773e+  |
| 5733 | chrY | 9932301 | . | A | T   | 1020.07  | PASS          | AC=6;AF=0.086;AN=70;BaseQRankSum=-2.299e+  |
| 5734 | chrY | 9932303 | . | A | T   | 957.11   | PASS          | AC=6;AF=0.086;AN=70;BaseQRankSum=-1.690e+  |
| 5735 | chrY | 9932313 | . | T | C   | 5642.51  | PASS          | AC=16;AF=0.229;AN=70;BaseQRankSum=-1.698e  |
| 5736 | chrY | 9932323 | . | T | C   | 56.07    | PASS          | AC=3;AF=0.043;AN=70;BaseQRankSum=0.865;Cl  |
| 5737 | chrY | 9932329 | . | A | T   | 9161.84  | PASS          | AC=18;AF=0.257;AN=70;BaseQRankSum=0.041;C  |
| 5738 | chrY | 9932337 | . | T | C   | 7606.84  | PASS          | AC=16;AF=0.229;AN=70;BaseQRankSum=0.566;C  |
| 5739 | chrY | 9932353 | . | T | G   | 37.57    | my_snp_filter | AC=1;AF=0.014;AN=70;BaseQRankSum=          |
| 5740 | chrY | 9932357 | . | A | T   | 7008.21  | PASS          | AC=25;AF=0.357;AN=70;BaseQRankSum=0.572;C  |
| 5741 | chrY | 9932366 | . | T | C   | 105.91   | my_snp_filter | AC=4;AF=0.057;AN=70;BaseQRankSum=          |
| 5742 | chrY | 9932371 | . | C | G   | 72.68    | my_snp_filter | AC=2;AF=0.029;AN=70;BaseQRankSum=          |
| 5743 | chrY | 9932400 | . | A | G   | 34.31    | my_snp_filter | AC=4;AF=0.057;AN=70;BaseQRankSum=          |
| 5744 | chrY | 9932408 | . | C | T   | 302.31   | my_snp_filter | AC=9;AF=0.129;AN=70;BaseQRankSum=          |
| 5745 | chrY | 9932426 | . | C | G   | 68.41    | PASS          | AC=2;AF=0.029;AN=70;BaseQRankSum=0.291;Cl  |
| 5746 | chrY | 9932436 | . | C | G   | 371.37   | PASS          | AC=7;AF=0.100;AN=70;BaseQRankSum=-6.230e-  |
| 5747 | chrY | 9932437 | . | G | C   | 5123.86  | PASS          | AC=26;AF=0.394;AN=66;BaseQRankSum=0.710;C  |
| 5748 | chrY | 9932444 | . | G | A   | 1404.58  | PASS          | AC=12;AF=0.171;AN=70;BaseQRankSum=0.050;C  |
| 5749 | chrY | 9932450 | . | C | A   | 4180.42  | PASS          | AC=22;AF=0.355;AN=62;BaseQRankSum=0.735;C  |
| 5750 | chrY | 9932465 | . | G | C   | 1162.44  | my_snp_filter | AC=9;AF=0.129;AN=70;BaseQRankSum=          |
| 5751 | chrY | 9932471 | . | C | T   | 5964.54  | PASS          | AC=20;AF=0.400;AN=50;BaseQRankSum=0.346;C  |
| 5752 | chrY | 9932478 | . | T | C   | 2612.93  | PASS          | AC=12;AF=0.176;AN=68;BaseQRankSum=0.060;C  |
| 5753 | chrY | 9932483 | . | A | C   | 164.09   | PASS          | AC=2;AF=0.029;AN=70;BaseQRankSum=-6.560e-  |
| 5754 | chrY | 9932485 | . | C | A   | 52.24    | my_snp_filter | AC=1;AF=0.014;AN=70;BaseQRankSum=          |
| 5755 | chrY | 9932492 | . | C | A   | 64.44    | PASS          | AC=1;AF=0.014;AN=70;BaseQRankSum=-1.110e-  |
| 5756 | chrY | 9932495 | . | G | A   | 892.03   | PASS          | AC=5;AF=0.071;AN=70;BaseQRankSum=0.399;Cl  |
| 5757 | chrY | 9932498 | . | C | G   | 267.51   | my_snp_filter | AC=6;AF=0.086;AN=70;BaseQRankSum=          |
| 5758 | chrY | 9932504 | . | T | G   | 35003.72 | PASS          | AC=35;AF=0.500;AN=70;BaseQRankSum=         |
| 5759 | chrY | 9932513 | . | G | A   | 1005.11  | my_snp_filter | AC=8;AF=0.114;AN=70;BaseQRankSum=          |
| 5760 | chrY | 9932515 | . | A | T   | 832.31   | PASS          | AC=5;AF=0.071;AN=70;BaseQRankSum=-1.471e+  |
| 5761 | chrY | 9932521 | . | A | G   | 1010.13  | my_snp_filter | AC=7;AF=0.100;AN=70;BaseQRankSum=          |
| 5762 | chrY | 9932522 | . | G | C   | 79.44    | PASS          | AC=1;AF=0.014;AN=70;BaseQRankSum=-1.466e+  |
| 5763 | chrY | 9932524 | . | C | T   | 5656.46  | PASS          | AC=27;AF=0.386;AN=70;BaseQRankSum=-8.740e- |
| 5764 | chrY | 9932557 | . | C | T   | 13567.72 | PASS          | AC=35;AF=0.500;AN=70;BaseQRankSum=         |
| 5765 | chrY | 9932565 | . | C | A   | 1228.98  | PASS          | AC=6;AF=0.086;AN=70;BaseQRankSum=1.06;Cli  |
| 5766 | chrY | 9932571 | . | A | C,T | 41817.20 | PASS          | AC=35,2;AF=0.500,0.029;AN=70;Base          |
| 5767 | chrY | 9932584 | . | C | T   | 1293.13  | PASS          | AC=6;AF=0.086;AN=70;BaseQRankSum=0.032;Cl  |
| 5768 | chrY | 9932585 | . | T | G   | 314.29   | my_snp_filter | AC=4;AF=0.057;AN=70;BaseQRankSum=          |
| 5769 | chrY | 9932608 | . | G | T   | 35.05    | my_snp_filter | AC=1;AF=0.014;AN=70;BaseQRankSum=          |
| 5770 | chrY | 9932616 | . | C | A   | 43.84    | my_snp_filter | AC=1;AF=0.014;AN=70;BaseQRankSum=          |
| 5771 | chrY | 9932625 | . | G | C   | 14827.84 | PASS          | AC=24;AF=0.353;AN=68;BaseQRankSum=         |
| 5772 | chrY | 9932635 | . | C | T   | 2490.97  | PASS          | AC=12;AF=0.171;AN=70;BaseQRankSum=1.67;Cl  |
| 5773 | chrY | 9932637 | . | A | G   | 94.10    | PASS          | AC=1;AF=0.015;AN=68;BaseQRankSum=-2.408e+  |
| 5774 | chrY | 9932647 | . | C | T   | 106.02   | my_snp_filter | AC=1;AF=0.015;AN=68;BaseQRankSum=          |
| 5775 | chrY | 9932648 | . | C | A   | 108.88   | my_snp_filter | AC=1;AF=0.015;AN=68;BaseQRankSum=          |
| 5776 | chrY | 9932651 | . | G | T   | 111.70   | PASS          | AC=1;AF=0.015;AN=68;BaseQRankSum=1.14;Cli  |

|      |      |         |   |   |     |          |               |                                           |
|------|------|---------|---|---|-----|----------|---------------|-------------------------------------------|
| 5777 | chrY | 9932659 | . | C | T   | 41.41    | PASS          | AC=1;AF=0.014;AN=70;BaseQRankSum=2.29;Cli |
| 5778 | chrY | 9932662 | . | A | G   | 712.44   | PASS          | AC=5;AF=0.083;AN=60;BaseQRankSum=2.74;Cli |
| 5779 | chrY | 9932756 | . | T | G   | 3148.81  | PASS          | AC=11;AF=0.162;AN=68;BaseQRankSum=-1.800e |
| 5780 | chrY | 9932760 | . | G | T   | 622.50   | PASS          | AC=3;AF=0.043;AN=70;BaseQRankSum=1.38;Cli |
| 5781 | chrY | 9932773 | . | C | A   | 1511.60  | PASS          | AC=5;AF=0.071;AN=70;BaseQRankSum=0.621;Cl |
| 5782 | chrY | 9932776 | . | A | G   | 7304.59  | PASS          | AC=28;AF=0.412;AN=68;BaseQRankSum=-3.110e |
| 5783 | chrY | 9932777 | . | G | T   | 235.77   | PASS          | AC=1;AF=0.015;AN=68;BaseQRankSum=-2.550e- |
| 5784 | chrY | 9932790 | . | C | T   | 42.52    | my_snp_filter | AC=4;AF=0.057;AN=70;BaseQRankSum=         |
| 5785 | chrY | 9932796 | . | G | A   | 890.85   | my_snp_filter | AC=11;AF=0.157;AN=70;BaseQRankSum         |
| 5786 | chrY | 9932807 | . | T | A   | 33.13    | my_snp_filter | AC=2;AF=0.029;AN=70;BaseQRankSum=         |
| 5787 | chrY | 9932817 | . | C | A   | 2961.52  | my_snp_filter | AC=25;AF=0.357;AN=70;BaseQRankSum         |
| 5788 | chrY | 9932829 | . | C | T   | 1193.08  | my_snp_filter | AC=15;AF=0.214;AN=70;BaseQRankSum         |
| 5789 | chrY | 9932839 | . | A | G   | 97.77    | my_snp_filter | AC=4;AF=0.057;AN=70;BaseQRankSum=         |
| 5790 | chrY | 9932853 | . | G | T   | 1148.02  | my_snp_filter | AC=9;AF=0.129;AN=70;BaseQRankSum=         |
| 5791 | chrY | 9932864 | . | T | A   | 1727.51  | PASS          | AC=10;AF=0.143;AN=70;BaseQRankSum=-7.050e |
| 5792 | chrY | 9932882 | . | G | C   | 1722.15  | PASS          | AC=11;AF=0.157;AN=70;BaseQRankSum=0.419;C |
| 5793 | chrY | 9932886 | . | T | A   | 383.53   | PASS          | AC=5;AF=0.071;AN=70;BaseQRankSum=0.134;Cl |
| 5794 | chrY | 9932892 | . | C | T   | 35038.57 | PASS          | AC=24;AF=0.429;AN=56;BaseQRankSum         |
| 5795 | chrY | 9932899 | . | T | A   | 245.94   | my_snp_filter | AC=3;AF=0.043;AN=70;BaseQRankSum=         |
| 5796 | chrY | 9932903 | . | A | G   | 33883.23 | PASS          | AC=21;AF=0.328;AN=64;BaseQRankSum         |
| 5797 | chrY | 9932905 | . | T | C   | 505.84   | my_snp_filter | AC=6;AF=0.088;AN=68;BaseQRankSum=         |
| 5798 | chrY | 9932906 | . | C | T   | 263.33   | my_snp_filter | AC=3;AF=0.044;AN=68;BaseQRankSum=         |
| 5799 | chrY | 9932923 | . | G | C   | 1417.74  | PASS          | AC=6;AF=0.086;AN=70;BaseQRankSum=-2.410e+ |
| 5800 | chrY | 9932936 | . | T | C   | 2930.26  | PASS          | AC=19;AF=0.279;AN=68;BaseQRankSum=-7.620e |
| 5801 | chrY | 9932959 | . | C | T,* | 6017.55  | PASS          | AC=21,2;AF=0.300,0.029;AN=70;BaseQRankSum |
| 5802 | chrY | 9932968 | . | A | G   | 4494.21  | PASS          | AC=18;AF=0.257;AN=70;BaseQRankSum=-8.320e |
| 5803 | chrY | 9932971 | . | G | T   | 9281.76  | PASS          | AC=25;AF=0.431;AN=58;BaseQRankSum=0.727;C |
| 5804 | chrY | 9932977 | . | C | G,T | 2788.95  | PASS          | AC=3,16;AF=0.043,0.229;AN=70;BaseQRankSum |
| 5805 | chrY | 9932985 | . | T | C   | 3668.80  | PASS          | AC=17;AF=0.243;AN=70;BaseQRankSum=0.550;C |
| 5806 | chrY | 9932988 | . | A | C   | 4835.56  | PASS          | AC=16;AF=0.258;AN=62;BaseQRankSum=0.894;C |
| 5807 | chrY | 9932994 | . | A | T   | 41.42    | my_snp_filter | AC=1;AF=0.015;AN=66;BaseQRankSum=         |
| 5808 | chrY | 9933010 | . | C | T   | 487.65   | PASS          | AC=8;AF=0.143;AN=56;BaseQRankSum=0.804;Cl |
| 5809 | chrY | 9933011 | . | A | G   | 477.28   | PASS          | AC=8;AF=0.143;AN=56;BaseQRankSum=0.804;Cl |
| 5810 | chrY | 9933012 | . | C | G   | 8542.59  | PASS          | AC=24;AF=0.632;AN=38;BaseQRankSum=1.12;Cl |
| 5811 | chrY | 9933036 | . | C | T   | 389.70   | my_snp_filter | AC=6;AF=0.158;AN=38;BaseQRankSum=         |
| 5812 | chrY | 9933043 | . | T | C   | 1759.56  | PASS          | AC=4;AF=0.118;AN=34;BaseQRankSum=0.726;Cl |
| 5813 | chrY | 9933046 | . | A | G   | 1779.26  | PASS          | AC=4;AF=0.125;AN=32;BaseQRankSum=-1.138e+ |
| 5814 | chrY | 9933052 | . | G | T,* | 873.88   | PASS          | AC=2,5;AF=0.063,0.156;AN=32;BaseQRankSum= |
| 5815 | chrY | 9933053 | . | T | C,* | 2463.23  | PASS          | AC=6,3;AF=0.188,0.094;AN=32;BaseQRankSum= |
| 5816 | chrY | 9933068 | . | G | A   | 9866.72  | PASS          | AC=14;AF=0.412;AN=34;BaseQRankSum=2.00;Cl |
| 5817 | chrY | 9933087 | . | T | C   | 461.24   | PASS          | AC=2;AF=0.048;AN=42;BaseQRankSum=-6.170e- |
| 5818 | chrY | 9933091 | . | T | C   | 10383.65 | PASS          | AC=13;AF=0.361;AN=36;BaseQRankSum         |
| 5819 | chrY | 9933094 | . | C | G   | 425.45   | PASS          | AC=2;AF=0.045;AN=44;BaseQRankSum=-2.439e+ |
| 5820 | chrY | 9933108 | . | G | A   | 557.46   | PASS          | AC=4;AF=0.083;AN=48;BaseQRankSum=-1.361e+ |
| 5821 | chrY | 9933113 | . | T | G   | 277.66   | my_snp_filter | AC=3;AF=0.058;AN=52;BaseQRankSum=         |
| 5822 | chrY | 9933118 | . | T | C   | 917.89   | my_snp_filter | AC=8;AF=0.154;AN=52;BaseQRankSum=         |
| 5823 | chrY | 9933122 | . | G | T   | 9461.92  | PASS          | AC=19;AF=0.475;AN=40;BaseQRankSum=0.782;C |
| 5824 | chrY | 9933123 | . | G | C   | 512.97   | PASS          | AC=4;AF=0.077;AN=52;BaseQRankSum=0.438;Cl |
| 5825 | chrY | 9933124 | . | T | C   | 189.28   | my_snp_filter | AC=2;AF=0.038;AN=52;BaseQRankSum=         |
| 5826 | chrY | 9933126 | . | G | A   | 50.05    | PASS          | AC=2;AF=0.042;AN=48;DP=999;FS=0.000;Inbre |
| 5827 | chrY | 9933127 | . | T | C   | 544.56   | PASS          | AC=4;AF=0.080;AN=50;BaseQRankSum=0.245;Cl |
| 5828 | chrY | 9933138 | . | T | C   | 255.27   | my_snp_filter | AC=3;AF=0.058;AN=52;BaseQRankSum=         |
| 5829 | chrY | 9933157 | . | A | C   | 112.63   | my_snp_filter | AC=3;AF=0.056;AN=54;BaseQRankSum=         |
| 5830 | chrY | 9933158 | . | C | A   | 112.38   | my_snp_filter | AC=3;AF=0.056;AN=54;BaseQRankSum=         |
| 5831 | chrY | 9933163 | . | A | T   | 114.89   | PASS          | AC=1;AF=0.018;AN=56;BaseQRankSum=-6.740e- |
| 5832 | chrY | 9933171 | . | A | G   | 87.57    | my_snp_filter | AC=1;AF=0.016;AN=62;BaseQRankSum=         |
| 5833 | chrY | 9933172 | . | A | G   | 87.46    | my_snp_filter | AC=1;AF=0.016;AN=62;BaseQRankSum=         |
| 5834 | chrY | 9933173 | . | T | C   | 979.93   | PASS          | AC=5;AF=0.083;AN=60;BaseQRankSum=0.096;Cl |
| 5835 | chrY | 9933181 | . | G | C   | 3624.81  | PASS          | AC=9;AF=0.141;AN=64;BaseQRankSum=-6.730e- |
| 5836 | chrY | 9933182 | . | A | G   | 900.78   | PASS          | AC=6;AF=0.094;AN=64;BaseQRankSum=1.06;Cli |
| 5837 | chrY | 9933192 | . | G | T,* | 5655.97  | PASS          | AC=9,2;AF=0.145,0.032;AN=62;BaseQRankSum= |
| 5838 | chrY | 9933194 | . | T | C   | 366.55   | my_snp_filter | AC=5;AF=0.078;AN=64;BaseQRankSum=         |
| 5839 | chrY | 9933199 | . | G | A   | 1427.20  | PASS          | AC=5;AF=0.078;AN=64;BaseQRankSum=-1.215e+ |
| 5840 | chrY | 9933205 | . | A | C   | 304.54   | my_snp_filter | AC=5;AF=0.074;AN=68;BaseQRankSum=         |
| 5841 | chrY | 9933227 | . | A | T   | 1757.06  | PASS          | AC=7;AF=0.100;AN=70;BaseQRankSum=0.452;Cl |
| 5842 | chrY | 9933234 | . | G | C   | 1065.52  | PASS          | AC=7;AF=0.100;AN=70;BaseQRankSum=-2.311e+ |
| 5843 | chrY | 9933284 | . | T | A   | 1548.56  | PASS          | AC=17;AF=0.243;AN=70;BaseQRankSum=-8.700e |
| 5844 | chrY | 9933305 | . | T | A   | 318.62   | PASS          | AC=7;AF=0.100;AN=70;BaseQRankSum=0.151;Cl |
| 5845 | chrY | 9933313 | . | C | A   | 1529.57  | PASS          | AC=16;AF=0.235;AN=68;BaseQRankSum=0.496;C |
| 5846 | chrY | 9933342 | . | C | T   | 1536.30  | my_snp_filter | AC=10;AF=0.143;AN=70;BaseQRankSum         |
| 5847 | chrY | 9933345 | . | C | T   | 1535.99  | my_snp_filter | AC=10;AF=0.143;AN=70;BaseQRankSum         |
| 5848 | chrY | 9933348 | . | C | T   | 175.04   | PASS          | AC=4;AF=0.057;AN=70;BaseQRankSum=1.20;Cli |
| 5849 | chrY | 9933349 | . | C | T   | 244.08   | PASS          | AC=5;AF=0.071;AN=70;BaseQRankSum=0.320;Cl |
| 5850 | chrY | 9933359 | . | T | C   | 326.46   | PASS          | AC=5;AF=0.071;AN=70;BaseQRankSum=-1.736e+ |
| 5851 | chrY | 9933365 | . | T | A   | 1592.46  | PASS          | AC=8;AF=0.114;AN=70;BaseQRankSum=-9.610e- |
| 5852 | chrY | 9933372 | . | T | G   | 418.43   | PASS          | AC=4;AF=0.057;AN=70;BaseQRankSum=1.73;Cli |

|      |      |         |   |   |      |          |               |                                             |
|------|------|---------|---|---|------|----------|---------------|---------------------------------------------|
| 5853 | chrY | 9933388 | . | T | C    | 547.35   | PASS          | AC=4;AF=0.057;AN=70;BaseQRankSum=-3.730e-   |
| 5854 | chrY | 9933389 | . | A | T    | 43.13    | my_snp_filter | AC=2;AF=0.029;AN=70;BaseQRankSum=           |
| 5855 | chrY | 9933393 | . | C | G    | 2562.79  | PASS          | AC=12;AF=0.171;AN=70;BaseQRankSum=-5.820e   |
| 5856 | chrY | 9933400 | . | G | A    | 39.92    | my_snp_filter | AC=2;AF=0.029;AN=70;BaseQRankSum=           |
| 5857 | chrY | 9933407 | . | T | C    | 172.73   | my_snp_filter | AC=3;AF=0.043;AN=70;BaseQRankSum=           |
| 5858 | chrY | 9933419 | . | T | G    | 197.90   | my_snp_filter | AC=4;AF=0.057;AN=70;BaseQRankSum=           |
| 5859 | chrY | 9933423 | . | G | A    | 837.36   | PASS          | AC=8;AF=0.114;AN=70;BaseQRankSum=0.147;Cl   |
| 5860 | chrY | 9933431 | . | T | G    | 4033.23  | PASS          | AC=14;AF=0.206;AN=68;BaseQRankSum=-1.679e   |
| 5861 | chrY | 9933432 | . | T | G    | 150.25   | my_snp_filter | AC=3;AF=0.043;AN=70;BaseQRankSum=           |
| 5862 | chrY | 9933440 | . | C | T    | 74.71    | PASS          | AC=2;AF=0.029;AN=68;BaseQRankSum=0.00;Cli   |
| 5863 | chrY | 9933441 | . | A | G    | 234.83   | PASS          | AC=6;AF=0.088;AN=68;BaseQRankSum=-4.170e    |
| 5864 | chrY | 9933448 | . | A | G    | 4170.26  | PASS          | AC=11;AF=0.167;AN=66;BaseQRankSum=-2.005e   |
| 5865 | chrY | 9933478 | . | A | C    | 111.04   | my_snp_filter | AC=3;AF=0.047;AN=64;BaseQRankSum=           |
| 5866 | chrY | 9933484 | . | G | T    | 672.89   | PASS          | AC=6;AF=0.094;AN=64;BaseQRankSum=0.433;Cl   |
| 5867 | chrY | 9933489 | . | G | A    | 313.70   | PASS          | AC=7;AF=0.109;AN=64;BaseQRankSum=-7.270e-   |
| 5868 | chrY | 9933496 | . | T | G    | 55.86    | my_snp_filter | AC=1;AF=0.016;AN=62;BaseQRankSum=           |
| 5869 | chrY | 9933499 | . | G | A    | 731.20   | PASS          | AC=9;AF=0.155;AN=58;BaseQRankSum=0.867;Cl   |
| 5870 | chrY | 9933501 | . | T | G    | 110.77   | PASS          | AC=1;AF=0.016;AN=62;BaseQRankSum=-2.619e+   |
| 5871 | chrY | 9933514 | . | T | C    | 1183.29  | PASS          | AC=7;AF=0.113;AN=62;BaseQRankSum=0.239;Cl   |
| 5872 | chrY | 9933517 | . | A | G    | 924.51   | PASS          | AC=10;AF=0.161;AN=62;BaseQRankSum=0.097;C   |
| 5873 | chrY | 9933525 | . | T | C    | 1969.88  | PASS          | AC=14;AF=0.212;AN=66;BaseQRankSum=-4.440e   |
| 5874 | chrY | 9933527 | . | A | G    | 1541.43  | PASS          | AC=9;AF=0.132;AN=68;BaseQRankSum=0.045;Cl   |
| 5875 | chrY | 9933547 | . | T | C    | 5100.02  | PASS          | AC=22;AF=0.333;AN=66;BaseQRankSum=-7.290e   |
| 5876 | chrY | 9933548 | . | G | A    | 5020.93  | PASS          | AC=22;AF=0.333;AN=66;BaseQRankSum=0.402;C   |
| 5877 | chrY | 9933553 | . | G | T    | 3015.44  | PASS          | AC=21;AF=0.309;AN=68;BaseQRankSum=0.296;C   |
| 5878 | chrY | 9933562 | . | T | C    | 2328.85  | PASS          | AC=18;AF=0.265;AN=68;BaseQRankSum=-7.310e   |
| 5879 | chrY | 9933564 | . | G | C    | 195.63   | my_snp_filter | AC=4;AF=0.057;AN=70;BaseQRankSum=           |
| 5880 | chrY | 9933566 | . | A | G    | 204.70   | PASS          | AC=4;AF=0.057;AN=70;BaseQRankSum=0.441;Cl   |
| 5881 | chrY | 9933586 | . | G | A, T | 2027     | PASS          | AC=17, 3;AF=0.250, 0.044;AN=68;BaseQRankSum |
| 5882 | chrY | 9933599 | . | T | G    | 260.09   | PASS          | AC=4;AF=0.057;AN=70;BaseQRankSum=-1.276e+   |
| 5883 | chrY | 9933606 | . | G | T    | 2246.34  | PASS          | AC=20;AF=0.286;AN=70;BaseQRankSum=-8.680e   |
| 5884 | chrY | 9933624 | . | G | C    | 1633.11  | PASS          | AC=18;AF=0.257;AN=70;BaseQRankSum=-1.990e   |
| 5885 | chrY | 9933651 | . | A | G    | 687.72   | PASS          | AC=14;AF=0.200;AN=70;BaseQRankSum=-1.580e   |
| 5886 | chrY | 9933655 | . | G | A    | 691.70   | PASS          | AC=13;AF=0.186;AN=70;BaseQRankSum=0.751;C   |
| 5887 | chrY | 9933673 | . | C | T    | 55.92    | my_snp_filter | AC=3;AF=0.043;AN=70;BaseQRankSum=           |
| 5888 | chrY | 9933715 | . | A | T    | 671.06   | PASS          | AC=7;AF=0.100;AN=70;BaseQRankSum=1.06;Cli   |
| 5889 | chrY | 9933720 | . | T | G    | 734.70   | PASS          | AC=7;AF=0.100;AN=70;BaseQRankSum=-1.340e-   |
| 5890 | chrY | 9933760 | . | T | A    | 552.49   | PASS          | AC=7;AF=0.100;AN=70;BaseQRankSum=0.322;Cl   |
| 5891 | chrY | 9933790 | . | T | C    | 77.41    | PASS          | AC=1;AF=0.014;AN=70;BaseQRankSum=1.75;Cli   |
| 5892 | chrY | 9933797 | . | C | T    | 77.59    | PASS          | AC=1;AF=0.014;AN=70;BaseQRankSum=-5.500e-   |
| 5893 | chrY | 9933804 | . | C | T    | 35.49    | PASS          | AC=1;AF=0.014;AN=70;BaseQRankSum=0.00;Cli   |
| 5894 | chrY | 9933831 | . | G | A    | 2298.76  | my_snp_filter | AC=15;AF=0.221;AN=68;BaseQRankSum           |
| 5895 | chrY | 9933839 | . | T | C    | 3247.46  | my_snp_filter | AC=15;AF=0.221;AN=68;BaseQRankSum           |
| 5896 | chrY | 9933854 | . | C | T    | 42.33    | my_snp_filter | AC=2;AF=0.029;AN=70;BaseQRankSum=           |
| 5897 | chrY | 9933856 | . | G | T    | 174.71   | my_snp_filter | AC=8;AF=0.114;AN=70;BaseQRankSum=           |
| 5898 | chrY | 9933867 | . | A | G    | 18672.79 | PASS          | AC=30;AF=0.429;AN=70;BaseQRankSum           |
| 5899 | chrY | 9933874 | . | T | A    | 3779.89  | PASS          | AC=19;AF=0.271;AN=70;BaseQRankSum=-1.900e   |
| 5900 | chrY | 9933891 | . | T | C    | 88.77    | my_snp_filter | AC=4;AF=0.057;AN=70;BaseQRankSum=           |
| 5901 | chrY | 9933910 | . | G | A    | 360.17   | my_snp_filter | AC=9;AF=0.129;AN=70;BaseQRankSum=           |
| 5902 | chrY | 9933920 | . | G | A    | 34346.41 | PASS          | AC=34;AF=0.486;AN=70;BaseQRankSum           |
| 5903 | chrY | 9933939 | . | A | C    | 2398.04  | PASS          | AC=21;AF=0.300;AN=70;BaseQRankSum=-8.500e   |
| 5904 | chrY | 9933969 | . | T | G    | 69.18    | my_snp_filter | AC=2;AF=0.029;AN=68;BaseQRankSum=           |
| 5905 | chrY | 9933972 | . | G | A    | 8040.44  | PASS          | AC=31;AF=0.456;AN=68;BaseQRankSum=0.675;C   |
| 5906 | chrY | 9933981 | . | T | C    | 2153.02  | PASS          | AC=19;AF=0.288;AN=66;BaseQRankSum=0.198;C   |
| 5907 | chrY | 9933998 | . | T | A    | 5929.83  | PASS          | AC=32;AF=0.485;AN=66;BaseQRankSum=0.241;C   |
| 5908 | chrY | 9933999 | . | G | A    | 721.09   | PASS          | AC=7;AF=0.103;AN=68;BaseQRankSum=-8.980e-   |
| 5909 | chrY | 9934012 | . | A | G    | 1566.46  | PASS          | AC=17;AF=0.250;AN=68;BaseQRankSum=-7.420e   |
| 5910 | chrY | 9934038 | . | C | G    | 5235.90  | PASS          | AC=33;AF=0.500;AN=66;BaseQRankSum=0.727;C   |
| 5911 | chrY | 9934052 | . | G | A    | 736.94   | PASS          | AC=10;AF=0.152;AN=66;BaseQRankSum=0.762;C   |
| 5912 | chrY | 9934057 | . | C | A    | 77.81    | PASS          | AC=3;AF=0.044;AN=68;BaseQRankSum=-7.620e-   |
| 5913 | chrY | 9934069 | . | C | T    | 273.06   | PASS          | AC=5;AF=0.076;AN=66;BaseQRankSum=1.67;Cli   |
| 5914 | chrY | 9934093 | . | C | G    | 3830.72  | PASS          | AC=30;AF=0.517;AN=58;BaseQRankSum=0.736;C   |
| 5915 | chrY | 9934119 | . | G | T    | 36.82    | PASS          | AC=1;AF=0.015;AN=66;BaseQRankSum=0.720;Cl   |
| 5916 | chrY | 9934126 | . | G | A    | 273.74   | PASS          | AC=5;AF=0.081;AN=62;BaseQRankSum=1.20;Cli   |
| 5917 | chrY | 9934137 | . | G | A    | 297.55   | PASS          | AC=5;AF=0.076;AN=66;BaseQRankSum=0.451;Cl   |
| 5918 | chrY | 9934140 | . | G | A    | 69.35    | PASS          | AC=1;AF=0.015;AN=66;BaseQRankSum=0.036;Cl   |
| 5919 | chrY | 9934141 | . | C | T    | 69.29    | PASS          | AC=1;AF=0.015;AN=66;BaseQRankSum=-9.410e-   |
| 5920 | chrY | 9934157 | . | A | G    | 684.30   | PASS          | AC=7;AF=0.109;AN=64;BaseQRankSum=-1.603e+   |
| 5921 | chrY | 9934158 | . | T | C    | 65.70    | my_snp_filter | AC=2;AF=0.030;AN=66;BaseQRankSum=           |
| 5922 | chrY | 9934203 | . | T | C    | 982.74   | PASS          | AC=8;AF=0.114;AN=70;BaseQRankSum=1.16;Cli   |
| 5923 | chrY | 9934207 | . | G | A    | 70.85    | PASS          | AC=2;AF=0.029;AN=70;BaseQRankSum=3.15;Cli   |
| 5924 | chrY | 9934226 | . | T | C    | 2642.65  | my_snp_filter | AC=9;AF=0.129;AN=70;BaseQRankSum=           |
| 5925 | chrY | 9934230 | . | T | C    | 57.61    | PASS          | AC=1;AF=0.014;AN=70;BaseQRankSum=1.07;Cli   |
| 5926 | chrY | 9934233 | . | G | C    | 523.38   | PASS          | AC=4;AF=0.057;AN=70;BaseQRankSum=1.21;Cli   |
| 5927 | chrY | 9934234 | . | C | A    | 56.07    | PASS          | AC=1;AF=0.014;AN=70;BaseQRankSum=0.193;Cl   |
| 5928 | chrY | 9934235 | . | A | T    | 242.71   | PASS          | AC=4;AF=0.057;AN=70;BaseQRankSum=0.365;Cl   |

|      |      |         |   |   |     |           |               |                                           |
|------|------|---------|---|---|-----|-----------|---------------|-------------------------------------------|
| 5929 | chrY | 9934238 | . | C | T   | 3150.30   | my_snp_filter | AC=13;AF=0.191;AN=68;BaseQRankSum         |
| 5930 | chrY | 9934239 | . | G | A   | 707.65    | PASS          | AC=4;AF=0.059;AN=68;BaseQRankSum=2.58;Cli |
| 5931 | chrY | 9934253 | . | G | A   | 43.23     | my_snp_filter | AC=2;AF=0.029;AN=70;BaseQRankSum=         |
| 5932 | chrY | 9934255 | . | G | T   | 913.25    | PASS          | AC=13;AF=0.186;AN=70;BaseQRankSum=0.389;C |
| 5933 | chrY | 9934273 | . | T | A   | 305.17    | my_snp_filter | AC=11;AF=0.157;AN=70;BaseQRankSum         |
| 5934 | chrY | 9934274 | . | A | C   | 394.65    | PASS          | AC=4;AF=0.057;AN=70;BaseQRankSum=-1.167e+ |
| 5935 | chrY | 9934284 | . | T | C   | 1344.04   | PASS          | AC=15;AF=0.214;AN=70;BaseQRankSum=-1.678e |
| 5936 | chrY | 9934285 | . | G | A   | 48.38     | my_snp_filter | AC=3;AF=0.043;AN=70;BaseQRankSum=         |
| 5937 | chrY | 9934286 | . | A | T   | 33.49     | PASS          | AC=1;AF=0.014;AN=70;BaseQRankSum=-1.380e+ |
| 5938 | chrY | 9934291 | . | C | T   | 2693.82   | PASS          | AC=24;AF=0.343;AN=70;BaseQRankSum=-7.200e |
| 5939 | chrY | 9934293 | . | T | A   | 2678.96   | PASS          | AC=24;AF=0.343;AN=70;BaseQRankSum=-6.000e |
| 5940 | chrY | 9934307 | . | T | C   | 2251.99   | PASS          | AC=14;AF=0.200;AN=70;BaseQRankSum=-5.990e |
| 5941 | chrY | 9934312 | . | G | A   | 5607.68   | PASS          | AC=28;AF=0.400;AN=70;BaseQRankSum=-7.470e |
| 5942 | chrY | 9934364 | . | G | T   | 118.23    | my_snp_filter | AC=3;AF=0.043;AN=70;BaseQRankSum=         |
| 5943 | chrY | 9934374 | . | A | G   | 404       | PASS          | AC=6;AF=0.086;AN=70;BaseQRankSum=-1.886e+ |
| 5944 | chrY | 9934555 | . | A | T   | 309.71    | PASS          | AC=4;AF=0.057;AN=70;BaseQRankSum=-8.100e+ |
| 5945 | chrY | 9934557 | . | C | T   | 345.69    | PASS          | AC=4;AF=0.057;AN=70;BaseQRankSum=-1.031e+ |
| 5946 | chrY | 9934567 | . | G | A   | 533.34    | PASS          | AC=4;AF=0.057;AN=70;BaseQRankSum=-2.105e+ |
| 5947 | chrY | 9934570 | . | T | A   | 733.55    | my_snp_filter | AC=4;AF=0.059;AN=68;BaseQRankSum=         |
| 5948 | chrY | 9934571 | . | C | G   | 558.55    | PASS          | AC=4;AF=0.059;AN=68;BaseQRankSum=-2.065e+ |
| 5949 | chrY | 9934579 | . | C | T   | 950.59    | my_snp_filter | AC=4;AF=0.059;AN=68;BaseQRankSum=         |
| 5950 | chrY | 9934611 | . | C | T   | 703.26    | PASS          | AC=6;AF=0.088;AN=68;BaseQRankSum=0.731;Cl |
| 5951 | chrY | 9934623 | . | C | T   | 386.65    | PASS          | AC=2;AF=0.029;AN=70;BaseQRankSum=-1.810e- |
| 5952 | chrY | 9934629 | . | C | T   | 467.35    | PASS          | AC=2;AF=0.029;AN=68;BaseQRankSum=0.434;Cl |
| 5953 | chrY | 9934631 | . | G | A   | 411.38    | PASS          | AC=2;AF=0.029;AN=70;BaseQRankSum=-3.420e- |
| 5954 | chrY | 9934639 | . | G | A   | 590.92    | PASS          | AC=2;AF=0.029;AN=70;BaseQRankSum=0.00;Cli |
| 5955 | chrY | 9934654 | . | C | T   | 1610.83   | my_snp_filter | AC=7;AF=0.113;AN=62;BaseQRankSum=         |
| 5956 | chrY | 9934655 | . | A | G   | 1340.83   | my_snp_filter | AC=6;AF=0.097;AN=62;BaseQRankSum=         |
| 5957 | chrY | 9934681 | . | G | T   | 909.03    | my_snp_filter | AC=5;AF=0.071;AN=70;BaseQRankSum=         |
| 5958 | chrY | 9934685 | . | T | C   | 36.26     | PASS          | AC=1;AF=0.014;AN=70;BaseQRankSum=-1.380e+ |
| 5959 | chrY | 9934686 | . | A | G   | 3318.51   | my_snp_filter | AC=8;AF=0.114;AN=70;BaseQRankSum=         |
| 5960 | chrY | 9934687 | . | T | C   | 1189.89   | my_snp_filter | AC=7;AF=0.100;AN=70;BaseQRankSum=         |
| 5961 | chrY | 9934691 | . | G | C   | 212.68    | PASS          | AC=1;AF=0.014;AN=70;BaseQRankSum=1.17;Cli |
| 5962 | chrY | 9934697 | . | G | A   | 1215.82   | my_snp_filter | AC=7;AF=0.100;AN=70;BaseQRankSum=         |
| 5963 | chrY | 9934711 | . | T | C   | 633.27    | PASS          | AC=3;AF=0.044;AN=68;BaseQRankSum=-1.217e+ |
| 5964 | chrY | 9934716 | . | T | C   | 52.74     | my_snp_filter | AC=2;AF=0.029;AN=68;BaseQRankSum=         |
| 5965 | chrY | 9934720 | . | G | A   | 619.40    | PASS          | AC=3;AF=0.044;AN=68;BaseQRankSum=-9.710e- |
| 5966 | chrY | 9934727 | . | A | G   | 745.87    | PASS          | AC=4;AF=0.057;AN=70;BaseQRankSum=1.63;Cli |
| 5967 | chrY | 9934735 | . | C | T   | 6321.15   | PASS          | AC=26;AF=0.371;AN=70;BaseQRankSum=0.343;C |
| 5968 | chrY | 9934736 | . | C | T   | 35.25     | my_snp_filter | AC=4;AF=0.057;AN=70;BaseQRankSum=         |
| 5969 | chrY | 9934748 | . | A | G,* | 7102.67   | PASS          | AC=4,20;AF=0.057,0.286;AN=70;BaseQRankSum |
| 5970 | chrY | 9934749 | . | A | G   | 263.17    | my_snp_filter | AC=3;AF=0.043;AN=70;BaseQRankSum=         |
| 5971 | chrY | 9934756 | . | C | G   | 76.42     | my_snp_filter | AC=1;AF=0.014;AN=70;BaseQRankSum=         |
| 5972 | chrY | 9934758 | . | A | G   | 916.29    | PASS          | AC=4;AF=0.057;AN=70;BaseQRankSum=1.91;Cli |
| 5973 | chrY | 9934760 | . | G | T   | 7352.32   | PASS          | AC=24;AF=0.343;AN=70;BaseQRankSum=-1.638e |
| 5974 | chrY | 9934761 | . | G | A   | 269.13    | my_snp_filter | AC=8;AF=0.114;AN=70;BaseQRankSum=         |
| 5975 | chrY | 9934768 | . | G | C   | 60.06     | my_snp_filter | AC=2;AF=0.029;AN=70;BaseQRankSum=         |
| 5976 | chrY | 9934772 | . | G | T   | 995.87    | my_snp_filter | AC=10;AF=0.143;AN=70;BaseQRankSum         |
| 5977 | chrY | 9934778 | . | A | G   | 2512.06   | PASS          | AC=7;AF=0.100;AN=70;BaseQRankSum=1.50;Cli |
| 5978 | chrY | 9934787 | . | C | T   | 1545.31   | PASS          | AC=6;AF=0.086;AN=70;BaseQRankSum=3.07;Cli |
| 5979 | chrY | 9934789 | . | C | T   | 5135.66   | PASS          | AC=22;AF=0.314;AN=70;BaseQRankSum=-1.970e |
| 5980 | chrY | 9934790 | . | G | A   | 51096.53  | PASS          | AC=34;AF=0.486;AN=70;BaseQRankSum         |
| 5981 | chrY | 9934803 | . | G | A   | 13345.50  | PASS          | AC=32;AF=0.457;AN=70;BaseQRankSum         |
| 5982 | chrY | 9934819 | . | C | A   | 14730.10  | PASS          | AC=33;AF=0.471;AN=70;BaseQRankSum         |
| 5983 | chrY | 9934820 | . | C | T   | 127663.94 | PASS          | AC=57;AF=0.814;AN=70;BaseQRankSum         |
| 5984 | chrY | 9934825 | . | G | A   | 14286.40  | PASS          | AC=32;AF=0.457;AN=70;BaseQRankSum         |
| 5985 | chrY | 9934842 | . | C | T   | 19035.84  | PASS          | AC=34;AF=0.486;AN=70;BaseQRankSum         |
| 5986 | chrY | 9934843 | . | C | A   | 82.42     | my_snp_filter | AC=1;AF=0.014;AN=70;BaseQRankSum=         |
| 5987 | chrY | 9934845 | . | T | A   | 495.76    | my_snp_filter | AC=7;AF=0.100;AN=70;BaseQRankSum=         |
| 5988 | chrY | 9934847 | . | A | C   | 2251.68   | PASS          | AC=8;AF=0.114;AN=70;BaseQRankSum=0.626;Cl |
| 5989 | chrY | 9934877 | . | C | T   | 228.41    | my_snp_filter | AC=3;AF=0.043;AN=70;BaseQRankSum=         |
| 5990 | chrY | 9934897 | . | G | A   | 51330.72  | PASS          | AC=35;AF=0.500;AN=70;BaseQRankSum         |
| 5991 | chrY | 9934902 | . | G | T   | 5848.74   | PASS          | AC=18;AF=0.257;AN=70;BaseQRankSum=0.370;C |
| 5992 | chrY | 9934917 | . | A | G   | 5044.68   | PASS          | AC=16;AF=0.229;AN=70;BaseQRankSum=-2.850e |
| 5993 | chrY | 9934926 | . | A | T   | 1333.96   | PASS          | AC=8;AF=0.114;AN=70;BaseQRankSum=-3.280e- |
| 5994 | chrY | 9934934 | . | A | C   | 2575      | PASS          | AC=17;AF=0.243;AN=70;BaseQRankSum=0.050;C |
| 5995 | chrY | 9934935 | . | A | T   | 1456.80   | PASS          | AC=9;AF=0.129;AN=70;BaseQRankSum=-4.260e- |
| 5996 | chrY | 9934940 | . | C | T   | 64.31     | my_snp_filter | AC=2;AF=0.029;AN=70;BaseQRankSum=         |
| 5997 | chrY | 9934955 | . | C | T   | 25132.74  | PASS          | AC=35;AF=0.500;AN=70;BaseQRankSum         |
| 5998 | chrY | 9934956 | . | T | G   | 25097.74  | PASS          | AC=35;AF=0.500;AN=70;BaseQRankSum         |
| 5999 | chrY | 9934957 | . | C | T   | 69153.33  | PASS          | AC=36;AF=0.514;AN=70;BaseQRankSum         |
| 6000 | chrY | 9934961 | . | A | T   | 17293.31  | PASS          | AC=28;AF=0.400;AN=70;BaseQRankSum         |
| 6001 | chrY | 9934964 | . | A | T   | 1623.40   | PASS          | AC=4;AF=0.057;AN=70;BaseQRankSum=1.14;Cli |
| 6002 | chrY | 9934965 | . | G | T   | 1608.85   | PASS          | AC=4;AF=0.057;AN=70;BaseQRankSum=2.40;Cli |
| 6003 | chrY | 9934972 | . | A | T   | 1706.54   | PASS          | AC=11;AF=0.157;AN=70;BaseQRankSum=0.142;C |
| 6004 | chrY | 9934980 | . | A | C   | 726.80    | my_snp_filter | AC=10;AF=0.143;AN=70;BaseQRankSum         |



|      |      |         |   |   |     |          |               |                                            |
|------|------|---------|---|---|-----|----------|---------------|--------------------------------------------|
| 6005 | chrY | 9934985 | . | T | C   | 21600.46 | PASS          | AC=32;AF=0.457;AN=70;BaseQRankSum          |
| 6006 | chrY | 9934990 | . | A | G   | 3594.96  | PASS          | AC=20;AF=0.286;AN=70;BaseQRankSum=-7.820e  |
| 6007 | chrY | 9935001 | . | G | A   | 45251.90 | PASS          | AC=35;AF=0.500;AN=70;BaseQRankSum          |
| 6008 | chrY | 9935004 | . | T | G   | 1239.61  | PASS          | AC=14;AF=0.200;AN=70;BaseQRankSum=-8.200e  |
| 6009 | chrY | 9935005 | . | T | C   | 1220.96  | PASS          | AC=13;AF=0.186;AN=70;BaseQRankSum=0.670;C  |
| 6010 | chrY | 9935035 | . | G | A   | 50.13    | my_snp_filter | AC=2;AF=0.029;AN=70;BaseQRankSum=          |
| 6011 | chrY | 9935051 | . | T | C   | 37107.27 | my_snp_filter | AC=25;AF=0.403;AN=62;Base                  |
| 6012 | chrY | 9935056 | . | C | T   | 96.21    | my_snp_filter | AC=2;AF=0.029;AN=70;BaseQRankSum=          |
| 6013 | chrY | 9935071 | . | G | A   | 9688.12  | PASS          | AC=16;AF=0.229;AN=70;BaseQRankSum=4.07;Cl  |
| 6014 | chrY | 9935074 | . | G | A   | 34906.74 | my_snp_filter | AC=25;AF=0.368;AN=68;Base                  |
| 6015 | chrY | 9935076 | . | G | A   | 2667.91  | PASS          | AC=9;AF=0.129;AN=70;BaseQRankSum=4.81;Cli  |
| 6016 | chrY | 9935083 | . | T | G   | 12682.09 | PASS          | AC=22;AF=0.324;AN=68;BaseQRankSum          |
| 6017 | chrY | 9935097 | . | A | C   | 176.24   | my_snp_filter | AC=3;AF=0.043;AN=70;BaseQRankSum=          |
| 6018 | chrY | 9935105 | . | T | C   | 162.15   | my_snp_filter | AC=3;AF=0.043;AN=70;BaseQRankSum=          |
| 6019 | chrY | 9935110 | . | T | C   | 346.35   | PASS          | AC=9;AF=0.129;AN=70;BaseQRankSum=-1.432e+  |
| 6020 | chrY | 9935117 | . | G | A   | 5420.70  | PASS          | AC=15;AF=0.214;AN=70;BaseQRankSum=-1.354e+ |
| 6021 | chrY | 9935119 | . | C | T   | 649.35   | PASS          | AC=8;AF=0.114;AN=70;BaseQRankSum=-8.730e-  |
| 6022 | chrY | 9935136 | . | C | T   | 23447.23 | my_snp_filter | AC=30;AF=0.429;AN=70;Base                  |
| 6023 | chrY | 9935153 | . | T | C   | 2932.17  | PASS          | AC=6;AF=0.086;AN=70;BaseQRankSum=-2.414e+  |
| 6024 | chrY | 9935166 | . | A | C   | 637.88   | PASS          | AC=7;AF=0.100;AN=70;BaseQRankSum=-1.444e+  |
| 6025 | chrY | 9935176 | . | C | T   | 9847.49  | my_snp_filter | AC=14;AF=0.219;AN=64;BaseQRankSum          |
| 6026 | chrY | 9935190 | . | G | C   | 8710.40  | my_snp_filter | AC=13;AF=0.191;AN=68;BaseQRankSum          |
| 6027 | chrY | 9935192 | . | A | G   | 1265.07  | PASS          | AC=8;AF=0.114;AN=70;BaseQRankSum=-5.700e-  |
| 6028 | chrY | 9935198 | . | C | T   | 265.02   | my_snp_filter | AC=3;AF=0.044;AN=68;BaseQRankSum=          |
| 6029 | chrY | 9935215 | . | T | G   | 5766.31  | my_snp_filter | AC=9;AF=0.132;AN=68;BaseQRankSum=          |
| 6030 | chrY | 9935219 | . | T | C   | 5382.57  | my_snp_filter | AC=9;AF=0.132;AN=68;BaseQRankSum=          |
| 6031 | chrY | 9935226 | . | G | A   | 1635.44  | my_snp_filter | AC=6;AF=0.091;AN=66;BaseQRankSum=          |
| 6032 | chrY | 9935245 | . | G | A   | 2204.91  | my_snp_filter | AC=8;AF=0.114;AN=70;BaseQRankSum=          |
| 6033 | chrY | 9935299 | . | C | A   | 2355.82  | my_snp_filter | AC=13;AF=0.186;AN=70;BaseQRankSum          |
| 6034 | chrY | 9935332 | . | A | G   | 4062.78  | my_snp_filter | AC=11;AF=0.157;AN=70;BaseQRankSum          |
| 6035 | chrY | 9935336 | . | A | G   | 4022.76  | my_snp_filter | AC=11;AF=0.157;AN=70;BaseQRankSum          |
| 6036 | chrY | 9935344 | . | G | A   | 370.33   | PASS          | AC=5;AF=0.071;AN=70;BaseQRankSum=-6.510e-  |
| 6037 | chrY | 9935347 | . | T | A   | 2167.85  | my_snp_filter | AC=11;AF=0.157;AN=70;BaseQRankSum          |
| 6038 | chrY | 9935349 | . | A | G   | 2171.02  | my_snp_filter | AC=11;AF=0.157;AN=70;BaseQRankSum          |
| 6039 | chrY | 9935360 | . | C | A   | 745.25   | PASS          | AC=9;AF=0.129;AN=70;BaseQRankSum=0.715;Cl  |
| 6040 | chrY | 9935363 | . | T | C   | 93.89    | PASS          | AC=2;AF=0.029;AN=70;BaseQRankSum=-1.026e+  |
| 6041 | chrY | 9935369 | . | T | C   | 97.58    | PASS          | AC=2;AF=0.029;AN=70;BaseQRankSum=-1.026e+  |
| 6042 | chrY | 9935419 | . | A | G   | 151.75   | PASS          | AC=4;AF=0.059;AN=68;BaseQRankSum=0.415;Cl  |
| 6043 | chrY | 9935422 | . | A | G   | 154.66   | PASS          | AC=4;AF=0.059;AN=68;BaseQRankSum=-1.616e+  |
| 6044 | chrY | 9935434 | . | G | A   | 322.80   | PASS          | AC=7;AF=0.109;AN=64;BaseQRankSum=-7.360e-  |
| 6045 | chrY | 9935630 | . | A | C   | 71.30    | PASS          | AC=4;AF=0.063;AN=64;BaseQRankSum=-1.495e+  |
| 6046 | chrY | 9935641 | . | A | T   | 67.09    | PASS          | AC=4;AF=0.061;AN=66;BaseQRankSum=1.04;Cli  |
| 6047 | chrY | 9935882 | . | G | T   | 149.16   | PASS          | AC=2;AF=0.029;AN=70;BaseQRankSum=-4.680e-  |
| 6048 | chrY | 9935902 | . | C | T   | 97.71    | PASS          | AC=1;AF=0.015;AN=68;BaseQRankSum=0.722;Cl  |
| 6049 | chrY | 9935903 | . | A | G   | 194.15   | PASS          | AC=2;AF=0.029;AN=68;BaseQRankSum=-2.208e+  |
| 6050 | chrY | 9935908 | . | G | C   | 194.92   | PASS          | AC=2;AF=0.029;AN=70;BaseQRankSum=-2.798e+  |
| 6051 | chrY | 9935929 | . | T | A   | 123.09   | PASS          | AC=4;AF=0.057;AN=70;BaseQRankSum=-3.510e-  |
| 6052 | chrY | 9935934 | . | G | A   | 823.13   | PASS          | AC=10;AF=0.143;AN=70;BaseQRankSum=-3.570e- |
| 6053 | chrY | 9935953 | . | A | G   | 478.52   | PASS          | AC=9;AF=0.129;AN=70;BaseQRankSum=-7.620e-  |
| 6054 | chrY | 9935960 | . | G | A   | 1014.16  | PASS          | AC=12;AF=0.171;AN=70;BaseQRankSum=-1.352e+ |
| 6055 | chrY | 9935972 | . | T | C   | 1046.54  | PASS          | AC=11;AF=0.157;AN=70;BaseQRankSum=-1.733e+ |
| 6056 | chrY | 9935974 | . | T | A   | 111.41   | my_snp_filter | AC=5;AF=0.071;AN=70;BaseQRankSum=          |
| 6057 | chrY | 9935982 | . | A | T   | 456.35   | PASS          | AC=10;AF=0.143;AN=70;BaseQRankSum=-9.340e- |
| 6058 | chrY | 9935992 | . | A | G   | 1312.59  | PASS          | AC=15;AF=0.227;AN=66;BaseQRankSum=-7.360e- |
| 6059 | chrY | 9936011 | . | G | A   | 368.62   | PASS          | AC=4;AF=0.059;AN=68;BaseQRankSum=-1.387e+  |
| 6060 | chrY | 9936014 | . | T | A   | 1856.64  | PASS          | AC=14;AF=0.219;AN=64;BaseQRankSum=0.426;C  |
| 6061 | chrY | 9936015 | . | T | C   | 235.66   | PASS          | AC=3;AF=0.043;AN=70;BaseQRankSum=-1.231e+  |
| 6062 | chrY | 9936034 | . | T | C   | 1334.76  | PASS          | AC=9;AF=0.141;AN=64;BaseQRankSum=-5.770e-  |
| 6063 | chrY | 9936042 | . | T | C,G | 1012.02  | PASS          | AC=6,3;AF=0.086,0.043;AN=70;BaseQRankSum=  |
| 6064 | chrY | 9936052 | . | T | C   | 1242.46  | PASS          | AC=8;AF=0.118;AN=68;BaseQRankSum=-1.853e+  |
| 6065 | chrY | 9936063 | . | C | G   | 289.89   | PASS          | AC=4;AF=0.057;AN=70;BaseQRankSum=0.038;Cl  |
| 6066 | chrY | 9936067 | . | G | A   | 292.46   | PASS          | AC=3;AF=0.043;AN=70;BaseQRankSum=-1.240e+  |
| 6067 | chrY | 9936083 | . | T | G   | 448.24   | PASS          | AC=5;AF=0.074;AN=68;BaseQRankSum=0.218;Cl  |
| 6068 | chrY | 9936095 | . | T | A   | 245.69   | my_snp_filter | AC=5;AF=0.074;AN=68;BaseQRankSum=0.493;Cl  |
| 6069 | chrY | 9936118 | . | T | G   | 380.45   | PASS          | AC=5;AF=0.074;AN=68;BaseQRankSum=0.00;Cli  |
| 6070 | chrY | 9936142 | . | G | A   | 853.32   | PASS          | AC=5;AF=0.074;AN=68;BaseQRankSum=0.00;Cli  |
| 6071 | chrY | 9936143 | . | C | T   | 1983.63  | my_snp_filter | AC=10;AF=0.152;AN=66;BaseQRankSum          |
| 6072 | chrY | 9936150 | . | A | G   | 30.98    | PASS          | AC=1;AF=0.015;AN=68;BaseQRankSum=-1.495e+  |
| 6073 | chrY | 9936159 | . | A | G   | 1114.44  | my_snp_filter | AC=5;AF=0.071;AN=70;BaseQRankSum           |
| 6074 | chrY | 9936163 | . | C | T   | 33.80    | PASS          | AC=1;AF=0.015;AN=68;BaseQRankSum=-1.380e+  |
| 6075 | chrY | 9936165 | . | G | A   | 33.69    | PASS          | AC=1;AF=0.015;AN=68;BaseQRankSum=-1.380e+  |
| 6076 | chrY | 9936177 | . | C | T   | 32.63    | my_snp_filter | AC=1;AF=0.015;AN=68;BaseQRankSum=          |
| 6077 | chrY | 9936182 | . | C | A   | 44.97    | my_snp_filter | AC=2;AF=0.029;AN=70;BaseQRankSum=          |
| 6078 | chrY | 9936201 | . | T | A   | 6599.86  | my_snp_filter | AC=12;AF=0.171;AN=70;BaseQRankSum          |
| 6079 | chrY | 9936212 | . | T | C   | 5675.87  | my_snp_filter | AC=17;AF=0.243;AN=70;BaseQRankSum          |
| 6080 | chrY | 9936228 | . | A | T   | 9924.55  | my_snp_filter | AC=23;AF=0.329;AN=70;BaseQRankSum          |



|      |      |         |   |   |     |          |               |                                           |
|------|------|---------|---|---|-----|----------|---------------|-------------------------------------------|
| 6081 | chrY | 9936236 | . | C | T   | 140.84   | my_snp_filter | AC=7;AF=0.100;AN=70;BaseQRankSum=         |
| 6082 | chrY | 9936239 | . | C | T   | 1972.79  | PASS          | AC=13;AF=0.186;AN=70;BaseQRankSum=-8.300e |
| 6083 | chrY | 9936281 | . | T | C   | 4294.23  | my_snp_filter | AC=25;AF=0.357;AN=70;BaseQRankSum         |
| 6084 | chrY | 9936297 | . | C | G   | 29293.72 | my_snp_filter | AC=35;AF=0.500;AN=70;Base                 |
| 6085 | chrY | 9936300 | . | G | A   | 29482.72 | my_snp_filter | AC=35;AF=0.500;AN=70;Base                 |
| 6086 | chrY | 9936329 | . | C | A   | 12496.73 | PASS          | AC=31;AF=0.443;AN=70;BaseQRankSum         |
| 6087 | chrY | 9936335 | . | C | T   | 60.43    | my_snp_filter | AC=3;AF=0.043;AN=70;BaseQRankSum=         |
| 6088 | chrY | 9936338 | . | T | A   | 14106.02 | PASS          | AC=33;AF=0.471;AN=70;BaseQRankSum         |
| 6089 | chrY | 9936357 | . | T | A   | 15011.97 | PASS          | AC=30;AF=0.429;AN=70;BaseQRankSum         |
| 6090 | chrY | 9936369 | . | T | G   | 1674.77  | PASS          | AC=9;AF=0.129;AN=70;BaseQRankSum=0.248;Cl |
| 6091 | chrY | 9936370 | . | T | A   | 1673.91  | PASS          | AC=9;AF=0.129;AN=70;BaseQRankSum=-6.900e  |
| 6092 | chrY | 9936379 | . | T | C   | 1723.86  | PASS          | AC=8;AF=0.114;AN=70;BaseQRankSum=0.735;Cl |
| 6093 | chrY | 9936398 | . | T | C,* | 13795.99 | PASS          | AC=26,5;AF=0.371,0.071;AN=70;Base         |
| 6094 | chrY | 9936411 | . | A | G   | 1429.51  | PASS          | AC=3;AF=0.043;AN=70;BaseQRankSum=-1.298e+ |
| 6095 | chrY | 9936412 | . | C | A   | 134.78   | my_snp_filter | AC=4;AF=0.057;AN=70;BaseQRankSum=         |
| 6096 | chrY | 9936420 | . | T | G   | 5870.97  | PASS          | AC=26;AF=0.371;AN=70;BaseQRankSum=-1.336e |
| 6097 | chrY | 9936432 | . | G | A   | 12662.42 | PASS          | AC=33;AF=0.471;AN=70;BaseQRankSum         |
| 6098 | chrY | 9936433 | . | G | A   | 479.61   | my_snp_filter | AC=6;AF=0.086;AN=70;BaseQRankSum=         |
| 6099 | chrY | 9936436 | . | T | A   | 24532.84 | PASS          | AC=34;AF=0.486;AN=70;BaseQRankSum         |
| 6100 | chrY | 9936443 | . | T | C   | 18458.73 | PASS          | AC=35;AF=0.500;AN=70;BaseQRankSum         |
| 6101 | chrY | 9936449 | . | T | C,G | 19418.73 | PASS          | AC=33,2;AF=0.471,0.029;AN=70;Base         |
| 6102 | chrY | 9936450 | . | G | A   | 11660.92 | PASS          | AC=34;AF=0.486;AN=70;BaseQRankSum         |
| 6103 | chrY | 9936488 | . | A | C,T | 20509.46 | PASS          | AC=26,2;AF=0.464,0.036;AN=56;Base         |
| 6104 | chrY | 9936490 | . | A | G   | 426.90   | PASS          | AC=1;AF=0.014;AN=70;BaseQRankSum=-3.175e+ |
| 6105 | chrY | 9936493 | . | C | A   | 1370.78  | PASS          | AC=6;AF=0.086;AN=70;BaseQRankSum=1.24;Cli |
| 6106 | chrY | 9936495 | . | C | T   | 1451.49  | PASS          | AC=6;AF=0.086;AN=70;BaseQRankSum=-1.398e+ |
| 6107 | chrY | 9936498 | . | T | C   | 2174.80  | PASS          | AC=4;AF=0.057;AN=70;BaseQRankSum=0.091;Cl |
| 6108 | chrY | 9936501 | . | G | A   | 12084.63 | PASS          | AC=22;AF=0.324;AN=68;BaseQRankSum         |
| 6109 | chrY | 9936504 | . | T | G   | 174.79   | PASS          | AC=2;AF=0.029;AN=70;BaseQRankSum=-1.775e+ |
| 6110 | chrY | 9936508 | . | T | C   | 11314.04 | PASS          | AC=22;AF=0.324;AN=68;BaseQRankSum         |
| 6111 | chrY | 9936510 | . | T | A   | 2411.21  | PASS          | AC=4;AF=0.057;AN=70;BaseQRankSum=-1.800e- |
| 6112 | chrY | 9936512 | . | C | T   | 1305.87  | PASS          | AC=5;AF=0.071;AN=70;BaseQRankSum=0.633;Cl |
| 6113 | chrY | 9936519 | . | T | C   | 5696.05  | PASS          | AC=20;AF=0.313;AN=64;BaseQRankSum=-1.991e |
| 6114 | chrY | 9936520 | . | G | C   | 613.03   | my_snp_filter | AC=11;AF=0.172;AN=64;BaseQRankSum         |
| 6115 | chrY | 9936521 | . | T | C   | 4464.65  | PASS          | AC=23;AF=0.338;AN=68;BaseQRankSum=0.727;C |
| 6116 | chrY | 9936522 | . | G | A,C | 6292.15  | PASS          | AC=15,4;AF=0.221,0.059;AN=68;BaseQRankSum |
| 6117 | chrY | 9936524 | . | G | A   | 7690.60  | PASS          | AC=19;AF=0.306;AN=62;BaseQRankSum=0.358;C |
| 6118 | chrY | 9936525 | . | A | G   | 10306.62 | PASS          | AC=23;AF=0.371;AN=62;BaseQRankSum         |
| 6119 | chrY | 9936527 | . | C | T   | 2169.01  | PASS          | AC=4;AF=0.057;AN=70;BaseQRankSum=-9.920e- |
| 6120 | chrY | 9936539 | . | T | C   | 10355.66 | PASS          | AC=17;AF=0.266;AN=64;BaseQRankSum         |
| 6121 | chrY | 9936546 | . | G | A   | 6581.44  | PASS          | AC=11;AF=0.167;AN=66;BaseQRankSum=2.51;Cl |
| 6122 | chrY | 9936547 | . | A | T   | 9977.21  | PASS          | AC=16;AF=0.250;AN=64;BaseQRankSum=0.382;C |
| 6123 | chrY | 9936556 | . | T | C   | 888.45   | PASS          | AC=7;AF=0.100;AN=70;BaseQRankSum=-3.325e+ |
| 6124 | chrY | 9936563 | . | C | T   | 4468.53  | my_snp_filter | AC=9;AF=0.129;AN=70;BaseQRankSum=         |
| 6125 | chrY | 9936566 | . | A | G   | 4513.84  | my_snp_filter | AC=10;AF=0.143;AN=70;BaseQRankSum         |
| 6126 | chrY | 9936569 | . | A | G   | 295.14   | PASS          | AC=2;AF=0.029;AN=70;BaseQRankSum=0.323;Cl |
| 6127 | chrY | 9936573 | . | A | G   | 1040.52  | my_snp_filter | AC=7;AF=0.100;AN=70;BaseQRankSum=         |
| 6128 | chrY | 9936586 | . | A | G   | 407.79   | PASS          | AC=10;AF=0.143;AN=70;BaseQRankSum=-1.179e |
| 6129 | chrY | 9936615 | . | A | T   | 200.13   | PASS          | AC=6;AF=0.086;AN=70;BaseQRankSum=0.00;Cli |
| 6130 | chrY | 9936639 | . | G | A   | 14284.38 | PASS          | AC=30;AF=0.429;AN=70;BaseQRankSum         |
| 6131 | chrY | 9936647 | . | A | G   | 15673.38 | PASS          | AC=31;AF=0.443;AN=70;BaseQRankSum=        |
| 6132 | chrY | 9936655 | . | G | T   | 30.72    | my_snp_filter | AC=1;AF=0.014;AN=70;BaseQRankSum=         |
| 6133 | chrY | 9936664 | . | T | A   | 5028.48  | PASS          | AC=10;AF=0.143;AN=70;BaseQRankSum=0.985;C |
| 6134 | chrY | 9936665 | . | C | G   | 70.49    | PASS          | AC=1;AF=0.014;AN=70;BaseQRankSum=1.09;Cli |
| 6135 | chrY | 9936670 | . | C | A   | 20066.23 | PASS          | AC=30;AF=0.429;AN=70;BaseQRankSum         |
| 6136 | chrY | 9936682 | . | G | C   | 449.35   | PASS          | AC=2;AF=0.029;AN=70;BaseQRankSum=2.24;Cli |
| 6137 | chrY | 9936683 | . | T | C   | 3389.74  | PASS          | AC=10;AF=0.143;AN=70;BaseQRankSum=1.29;Cl |
| 6138 | chrY | 9936695 | . | T | C   | 1667.22  | PASS          | AC=9;AF=0.129;AN=70;BaseQRankSum=1.43;Cli |
| 6139 | chrY | 9936698 | . | A | G   | 3491.30  | PASS          | AC=14;AF=0.200;AN=70;BaseQRankSum=-2.290e |
| 6140 | chrY | 9936706 | . | G | A   | 19201.97 | PASS          | AC=36;AF=0.514;AN=70;BaseQRankSum         |
| 6141 | chrY | 9936708 | . | C | G   | 5232.24  | PASS          | AC=17;AF=0.243;AN=70;BaseQRankSum=0.533;C |
| 6142 | chrY | 9936734 | . | G | A   | 529.91   | my_snp_filter | AC=6;AF=0.086;AN=70;BaseQRankSum=         |
| 6143 | chrY | 9936735 | . | T | A   | 6367.33  | PASS          | AC=29;AF=0.414;AN=70;BaseQRankSum=-4.740e |
| 6144 | chrY | 9936740 | . | G | C   | 1126.12  | PASS          | AC=8;AF=0.114;AN=70;BaseQRankSum=-3.300e- |
| 6145 | chrY | 9936749 | . | T | A   | 38.97    | my_snp_filter | AC=3;AF=0.043;AN=70;BaseQRankSum=         |
| 6146 | chrY | 9936754 | . | G | A   | 6308.77  | PASS          | AC=33;AF=0.471;AN=70;BaseQRankSum=0.067;C |
| 6147 | chrY | 9936760 | . | C | A   | 1187.21  | PASS          | AC=12;AF=0.171;AN=70;BaseQRankSum=-1.271e |
| 6148 | chrY | 9936761 | . | C | A   | 1200.88  | PASS          | AC=12;AF=0.171;AN=70;BaseQRankSum=-3.470e |
| 6149 | chrY | 9936797 | . | C | T   | 2130.86  | PASS          | AC=23;AF=0.329;AN=70;BaseQRankSum=-3.580e |
| 6150 | chrY | 9936816 | . | C | A   | 2297.08  | PASS          | AC=18;AF=0.257;AN=70;BaseQRankSum=0.480;C |
| 6151 | chrY | 9936818 | . | A | T,C | 3571.44  | PASS          | AC=19,5;AF=0.317,0.083;AN=60;BaseQRankSum |
| 6152 | chrY | 9936819 | . | G | A   | 73.10    | PASS          | AC=1;AF=0.015;AN=66;BaseQRankSum=0.956;Cl |
| 6153 | chrY | 9936825 | . | T | C   | 231.16   | PASS          | AC=2;AF=0.029;AN=68;BaseQRankSum=-1.884e+ |
| 6154 | chrY | 9936830 | . | A | C   | 1045.37  | PASS          | AC=6;AF=0.088;AN=68;BaseQRankSum=0.804;Cl |
| 6155 | chrY | 9936831 | . | A | G   | 610.29   | PASS          | AC=8;AF=0.118;AN=68;BaseQRankSum=-7.200e- |
| 6156 | chrY | 9936850 | . | T | G   | 156.32   | PASS          | AC=3;AF=0.044;AN=68;BaseQRankSum=0.779;Cl |

|      |      |         |   |   |     |          |               |                                           |
|------|------|---------|---|---|-----|----------|---------------|-------------------------------------------|
| 6157 | chrY | 9936852 | . | A | C   | 154.01   | PASS          | AC=3;AF=0.044;AN=68;BaseQRankSum=1.11;Cli |
| 6158 | chrY | 9936969 | . | G | A   | 214.45   | PASS          | AC=3;AF=0.045;AN=66;BaseQRankSum=1.92;Cli |
| 6159 | chrY | 9936976 | . | G | A   | 208.52   | PASS          | AC=3;AF=0.045;AN=66;BaseQRankSum=0.934;Cl |
| 6160 | chrY | 9936977 | . | G | C   | 180.57   | PASS          | AC=2;AF=0.030;AN=66;BaseQRankSum=2.95;Cli |
| 6161 | chrY | 9936978 | . | T | C   | 182.93   | PASS          | AC=2;AF=0.030;AN=66;BaseQRankSum=2.45;Cli |
| 6162 | chrY | 9936979 | . | G | T   | 470.28   | my_snp_filter | AC=5;AF=0.076;AN=66;BaseQRankSum=         |
| 6163 | chrY | 9936984 | . | C | T   | 292.09   | PASS          | AC=3;AF=0.044;AN=68;BaseQRankSum=-4.820e- |
| 6164 | chrY | 9937003 | . | T | C   | 327.58   | PASS          | AC=3;AF=0.044;AN=68;BaseQRankSum=-5.640e- |
| 6165 | chrY | 9937018 | . | C | G   | 428.67   | PASS          | AC=3;AF=0.044;AN=68;BaseQRankSum=-7.360e- |
| 6166 | chrY | 9937022 | . | G | A   | 428.93   | PASS          | AC=3;AF=0.044;AN=68;BaseQRankSum=-1.618e+ |
| 6167 | chrY | 9937028 | . | A | C   | 416.38   | PASS          | AC=3;AF=0.044;AN=68;BaseQRankSum=-2.377e+ |
| 6168 | chrY | 9937029 | . | G | C   | 1040.65  | PASS          | AC=11;AF=0.162;AN=68;BaseQRankSum=0.783;C |
| 6169 | chrY | 9937032 | . | T | C   | 2259.23  | PASS          | AC=19;AF=0.279;AN=68;BaseQRankSum=-6.350e |
| 6170 | chrY | 9937036 | . | C | G,A | 2384.16  | PASS          | AC=7,13;AF=0.103,0.191;AN=68;BaseQRankSum |
| 6171 | chrY | 9937044 | . | T | C   | 752.88   | PASS          | AC=12;AF=0.176;AN=68;BaseQRankSum=-5.510e |
| 6172 | chrY | 9937051 | . | A | G   | 403.84   | PASS          | AC=9;AF=0.132;AN=68;BaseQRankSum=-1.175e+ |
| 6173 | chrY | 9937060 | . | A | C   | 302.19   | PASS          | AC=3;AF=0.044;AN=68;BaseQRankSum=-2.478e+ |
| 6174 | chrY | 9937066 | . | T | C   | 1491.46  | PASS          | AC=16;AF=0.242;AN=66;BaseQRankSum=-1.159e |
| 6175 | chrY | 9937069 | . | T | C   | 1481.03  | PASS          | AC=14;AF=0.212;AN=66;BaseQRankSum=-1.324e |
| 6176 | chrY | 9937070 | . | G | T   | 970.88   | PASS          | AC=11;AF=0.167;AN=66;BaseQRankSum=0.045;C |
| 6177 | chrY | 9937075 | . | A | G   | 902.45   | PASS          | AC=10;AF=0.152;AN=66;BaseQRankSum=-1.599e |
| 6178 | chrY | 9937081 | . | C | T   | 891.21   | PASS          | AC=10;AF=0.143;AN=70;BaseQRankSum=-8.250e |
| 6179 | chrY | 9937093 | . | A | G   | 3292.70  | PASS          | AC=18;AF=0.265;AN=68;BaseQRankSum=-1.109e |
| 6180 | chrY | 9937095 | . | G | A   | 381.96   | PASS          | AC=6;AF=0.086;AN=70;BaseQRankSum=-7.940e- |
| 6181 | chrY | 9937097 | . | A | C   | 3171.03  | PASS          | AC=18;AF=0.265;AN=68;BaseQRankSum=0.351;C |
| 6182 | chrY | 9937130 | . | A | G   | 554.53   | PASS          | AC=11;AF=0.157;AN=70;BaseQRankSum=-9.250e |
| 6183 | chrY | 9937280 | . | C | A   | 38.49    | my_snp_filter | AC=1;AF=0.014;AN=70;BaseQRankSum=         |
| 6184 | chrY | 9937284 | . | T | C   | 885.57   | PASS          | AC=13;AF=0.186;AN=70;BaseQRankSum=0.517;C |
| 6185 | chrY | 9937296 | . | A | G   | 900.09   | PASS          | AC=12;AF=0.171;AN=70;BaseQRankSum=-4.800e |
| 6186 | chrY | 9937341 | . | A | C   | 5711.38  | PASS          | AC=31;AF=0.443;AN=70;BaseQRankSum=-1.571e |
| 6187 | chrY | 9937343 | . | A | G   | 696.73   | PASS          | AC=9;AF=0.129;AN=70;BaseQRankSum=-1.203e+ |
| 6188 | chrY | 9937352 | . | T | G   | 6252.64  | PASS          | AC=29;AF=0.414;AN=70;BaseQRankSum=-1.306e |
| 6189 | chrY | 9937359 | . | A | G   | 555.64   | PASS          | AC=11;AF=0.157;AN=70;BaseQRankSum=-1.532e |
| 6190 | chrY | 9937387 | . | T | G   | 2840.65  | PASS          | AC=27;AF=0.386;AN=70;BaseQRankSum=-7.680e |
| 6191 | chrY | 9937409 | . | T | G   | 1843.70  | PASS          | AC=15;AF=0.214;AN=70;BaseQRankSum=-7.900e |
| 6192 | chrY | 9937415 | . | G | C   | 57.02    | PASS          | AC=1;AF=0.014;AN=70;BaseQRankSum=-5.720e- |
| 6193 | chrY | 9937419 | . | G | T   | 2075.48  | PASS          | AC=11;AF=0.157;AN=70;BaseQRankSum=0.408;C |
| 6194 | chrY | 9937433 | . | G | T   | 3432.34  | my_snp_filter | AC=10;AF=0.143;AN=70;BaseQRankSum=        |
| 6195 | chrY | 9937435 | . | A | G   | 116.51   | PASS          | AC=1;AF=0.014;AN=70;BaseQRankSum=0.959;Cl |
| 6196 | chrY | 9937436 | . | T | A   | 259.24   | my_snp_filter | AC=4;AF=0.057;AN=70;BaseQRankSum=         |
| 6197 | chrY | 9937485 | . | C | A,G | 3532.94  | my_snp_filter | AC=10,13;AF=0.143,0.186;AN=70;Bas         |
| 6198 | chrY | 9937503 | . | C | T   | 48.52    | my_snp_filter | AC=2;AF=0.029;AN=70;BaseQRankSum=         |
| 6199 | chrY | 9937510 | . | C | T   | 769.09   | PASS          | AC=6;AF=0.086;AN=70;BaseQRankSum=-3.660e- |
| 6200 | chrY | 9937511 | . | A | G   | 2142.35  | PASS          | AC=18;AF=0.257;AN=70;BaseQRankSum=-1.267e |
| 6201 | chrY | 9937555 | . | C | T   | 73.30    | PASS          | AC=2;AF=0.029;AN=68;BaseQRankSum=1.53;Cli |
| 6202 | chrY | 9937557 | . | C | T   | 125.64   | PASS          | AC=3;AF=0.044;AN=68;BaseQRankSum=0.888;Cl |
| 6203 | chrY | 9937568 | . | C | T   | 444.73   | PASS          | AC=7;AF=0.100;AN=70;BaseQRankSum=0.847;Cl |
| 6204 | chrY | 9937576 | . | C | G,T | 529.69   | my_snp_filter | AC=1,6;AF=0.014,0.086;AN=70;BaseQ         |
| 6205 | chrY | 9937754 | . | G | A   | 3970.24  | my_snp_filter | AC=15;AF=0.227;AN=66;BaseQRankSum         |
| 6206 | chrY | 9937765 | . | T | G   | 31.74    | PASS          | AC=1;AF=0.015;AN=66;BaseQRankSum=0.00;Cli |
| 6207 | chrY | 9937781 | . | C | T   | 480.48   | PASS          | AC=8;AF=0.121;AN=66;BaseQRankSum=0.922;Cl |
| 6208 | chrY | 9937791 | . | C | T   | 545.14   | PASS          | AC=10;AF=0.147;AN=68;BaseQRankSum=-7.420e |
| 6209 | chrY | 9937796 | . | A | G   | 3389.94  | PASS          | AC=21;AF=0.300;AN=70;BaseQRankSum=-1.086e |
| 6210 | chrY | 9937809 | . | G | A   | 40.48    | PASS          | AC=3;AF=0.043;AN=70;BaseQRankSum=-7.420e- |
| 6211 | chrY | 9937844 | . | A | T   | 57.38    | PASS          | AC=2;AF=0.029;AN=70;BaseQRankSum=-1.380e+ |
| 6212 | chrY | 9937851 | . | G | G   | 19216.07 | PASS          | AC=25;AF=0.357;AN=70;BaseQRankSum         |
| 6213 | chrY | 9937864 | . | C | T   | 9232.35  | PASS          | AC=10;AF=0.143;AN=70;BaseQRankSum=4.78;Cl |
| 6214 | chrY | 9937866 | . | C | A   | 8908.26  | PASS          | AC=10;AF=0.143;AN=70;BaseQRankSum=4.67;Cl |
| 6215 | chrY | 9937867 | . | A | G   | 7337.41  | PASS          | AC=21;AF=0.300;AN=70;BaseQRankSum=-7.940e |
| 6216 | chrY | 9937872 | . | T | C   | 18787.18 | PASS          | AC=22;AF=0.314;AN=70;BaseQRankSum         |
| 6217 | chrY | 9937879 | . | C | A   | 5524.27  | PASS          | AC=9;AF=0.129;AN=70;BaseQRankSum=0.872;Cl |
| 6218 | chrY | 9937889 | . | G | A,C | 10090.82 | PASS          | AC=15,7;AF=0.227,0.106;AN=66;Base         |
| 6219 | chrY | 9937898 | . | C | T   | 5496.48  | PASS          | AC=10;AF=0.143;AN=70;BaseQRankSum=1.99;Cl |
| 6220 | chrY | 9937911 | . | T | A   | 5278.59  | PASS          | AC=14;AF=0.200;AN=70;BaseQRankSum=0.053;C |
| 6221 | chrY | 9937922 | . | T | C   | 6657.08  | PASS          | AC=22;AF=0.324;AN=68;BaseQRankSum=-1.164e |
| 6222 | chrY | 9937929 | . | A | G   | 50.43    | my_snp_filter | AC=1;AF=0.014;AN=70;BaseQRankSum=         |
| 6223 | chrY | 9937951 | . | A | G   | 268.49   | my_snp_filter | AC=7;AF=0.100;AN=70;BaseQRankSum=         |
| 6224 | chrY | 9937953 | . | G | A,T | 16232.14 | PASS          | AC=25,24;AF=0.357,0.343;AN=70;Bas         |
| 6225 | chrY | 9937955 | . | A | G   | 69.83    | my_snp_filter | AC=5;AF=0.071;AN=70;BaseQRankSum=         |
| 6226 | chrY | 9937967 | . | G | C   | 99.45    | my_snp_filter | AC=4;AF=0.057;AN=70;BaseQRankSum=         |
| 6227 | chrY | 9937977 | . | C | A   | 16640.84 | PASS          | AC=34;AF=0.486;AN=70;BaseQRankSum         |
| 6228 | chrY | 9937985 | . | A | G   | 17442.92 | PASS          | AC=34;AF=0.486;AN=70;BaseQRankSum         |
| 6229 | chrY | 9937995 | . | A | T   | 44850.12 | PASS          | AC=35;AF=0.500;AN=70;BaseQRankSum         |
| 6230 | chrY | 9938017 | . | C | T   | 572.27   | my_snp_filter | AC=13;AF=0.186;AN=70;BaseQRankSum         |
| 6231 | chrY | 9938018 | . | C | G   | 8127.20  | PASS          | AC=33;AF=0.471;AN=70;BaseQRankSum=0.100;C |
| 6232 | chrY | 9938027 | . | G | A   | 2203.86  | my_snp_filter | AC=23;AF=0.329;AN=70;BaseQRankSum         |

|      |      |         |   |   |     |          |               |                                           |
|------|------|---------|---|---|-----|----------|---------------|-------------------------------------------|
| 6233 | chrY | 9938079 | . | C | A   | 639.20   | PASS          | AC=6;AF=0.086;AN=70;BaseQRankSum=-1.044e+ |
| 6234 | chrY | 9938080 | . | A | G   | 646.51   | PASS          | AC=6;AF=0.086;AN=70;BaseQRankSum=-1.594e+ |
| 6235 | chrY | 9938083 | . | T | C   | 311.59   | PASS          | AC=4;AF=0.057;AN=70;BaseQRankSum=0.155;Cl |
| 6236 | chrY | 9938089 | . | C | A   | 611.23   | PASS          | AC=6;AF=0.086;AN=70;BaseQRankSum=-1.866e+ |
| 6237 | chrY | 9938097 | . | A | G   | 841.80   | PASS          | AC=6;AF=0.086;AN=70;BaseQRankSum=-1.626e+ |
| 6238 | chrY | 9938099 | . | A | T   | 290.66   | PASS          | AC=3;AF=0.043;AN=70;BaseQRankSum=0.076;Cl |
| 6239 | chrY | 9938100 | . | T | C   | 9532.13  | PASS          | AC=26;AF=0.371;AN=70;BaseQRankSum=-1.880e |
| 6240 | chrY | 9938101 | . | G | C   | 7701.31  | PASS          | AC=23;AF=0.338;AN=68;BaseQRankSum=1.77;Cl |
| 6241 | chrY | 9938113 | . | G | C   | 267.43   | PASS          | AC=2;AF=0.029;AN=70;BaseQRankSum=1.60;Cli |
| 6242 | chrY | 9938115 | . | C | T   | 13071.53 | PASS          | AC=34;AF=0.486;AN=70;BaseQRankSum=        |
| 6243 | chrY | 9938118 | . | C | T   | 1706.60  | PASS          | AC=13;AF=0.186;AN=70;BaseQRankSum=-8.670e |
| 6244 | chrY | 9938121 | . | T | C   | 2054.64  | PASS          | AC=11;AF=0.157;AN=70;BaseQRankSum=-2.637e |
| 6245 | chrY | 9938122 | . | G | A   | 165.52   | PASS          | AC=2;AF=0.029;AN=70;BaseQRankSum=1.26;Cli |
| 6246 | chrY | 9938134 | . | C | T   | 12620.81 | my_snp_filter | AC=32;AF=0.457;AN=70;Base                 |
| 6247 | chrY | 9938155 | . | C | A   | 4525.33  | my_snp_filter | AC=24;AF=0.343;AN=70;BaseQRankSum         |
| 6248 | chrY | 9938166 | . | G | A   | 1488.68  | my_snp_filter | AC=17;AF=0.243;AN=70;BaseQRankSum         |
| 6249 | chrY | 9938250 | . | T | C   | 64.19    | my_snp_filter | AC=2;AF=0.029;AN=70;BaseQRankSum=         |
| 6250 | chrY | 9938254 | . | T | C   | 67.16    | my_snp_filter | AC=2;AF=0.029;AN=70;BaseQRankSum=         |
| 6251 | chrY | 9938273 | . | C | A   | 103.21   | PASS          | AC=2;AF=0.029;AN=68;BaseQRankSum=1.15;Cli |
| 6252 | chrY | 9938274 | . | T | G   | 104.47   | PASS          | AC=2;AF=0.029;AN=68;BaseQRankSum=-9.450e- |
| 6253 | chrY | 9938304 | . | G | C   | 589.34   | my_snp_filter | AC=6;AF=0.086;AN=70;BaseQRankSum=         |
| 6254 | chrY | 9938337 | . | G | A   | 285.37   | PASS          | AC=4;AF=0.059;AN=68;BaseQRankSum=0.538;Cl |
| 6255 | chrY | 9938349 | . | C | G   | 78.12    | my_snp_filter | AC=3;AF=0.043;AN=70;BaseQRankSum=         |
| 6256 | chrY | 9938367 | . | C | T   | 122.17   | PASS          | AC=3;AF=0.043;AN=70;BaseQRankSum=1.83;Cli |
| 6257 | chrY | 9938381 | . | G | A   | 127.04   | PASS          | AC=3;AF=0.044;AN=68;BaseQRankSum=1.19;Cli |
| 6258 | chrY | 9938390 | . | A | G   | 84.99    | PASS          | AC=2;AF=0.029;AN=70;BaseQRankSum=-1.734e+ |
| 6259 | chrY | 9938506 | . | T | C   | 37.34    | my_snp_filter | AC=1;AF=0.014;AN=70;BaseQRankSum=         |
| 6260 | chrY | 9938509 | . | A | G   | 37.70    | my_snp_filter | AC=1;AF=0.014;AN=70;BaseQRankSum=         |
| 6261 | chrY | 9938517 | . | T | C   | 45.03    | PASS          | AC=1;AF=0.014;AN=70;BaseQRankSum=-1.890e- |
| 6262 | chrY | 9938522 | . | T | A   | 35.54    | my_snp_filter | AC=1;AF=0.014;AN=70;BaseQRankSum=         |
| 6263 | chrY | 9938527 | . | T | A   | 95.81    | PASS          | AC=1;AF=0.014;AN=70;BaseQRankSum=-2.000e+ |
| 6264 | chrY | 9938531 | . | C | A   | 111.30   | PASS          | AC=1;AF=0.014;AN=70;BaseQRankSum=-2.230e- |
| 6265 | chrY | 9938545 | . | C | T   | 1731.29  | PASS          | AC=5;AF=0.074;AN=68;BaseQRankSum=-1.542e+ |
| 6266 | chrY | 9938551 | . | C | T   | 534.09   | PASS          | AC=3;AF=0.043;AN=70;BaseQRankSum=1.66;Cli |
| 6267 | chrY | 9938552 | . | A | G   | 2098.69  | PASS          | AC=5;AF=0.071;AN=70;BaseQRankSum=-1.519e+ |
| 6268 | chrY | 9938556 | . | A | G   | 410.69   | PASS          | AC=3;AF=0.043;AN=70;BaseQRankSum=2.27;Cli |
| 6269 | chrY | 9938562 | . | C | A   | 82.34    | my_snp_filter | AC=3;AF=0.043;AN=70;BaseQRankSum=         |
| 6270 | chrY | 9938564 | . | A | G   | 3451.29  | PASS          | AC=8;AF=0.114;AN=70;BaseQRankSum=1.07;Cli |
| 6271 | chrY | 9938567 | . | C | G   | 138.96   | my_snp_filter | AC=2;AF=0.029;AN=68;BaseQRankSum=         |
| 6272 | chrY | 9938572 | . | T | C   | 1612.48  | PASS          | AC=5;AF=0.074;AN=68;BaseQRankSum=2.33;Cli |
| 6273 | chrY | 9938574 | . | T | C   | 2780.51  | PASS          | AC=8;AF=0.114;AN=70;BaseQRankSum=2.58;Cli |
| 6274 | chrY | 9938579 | . | T | C   | 1463.95  | PASS          | AC=4;AF=0.057;AN=70;BaseQRankSum=1.63;Cli |
| 6275 | chrY | 9938581 | . | G | C   | 204.08   | my_snp_filter | AC=2;AF=0.029;AN=70;BaseQRankSum=         |
| 6276 | chrY | 9938590 | . | C | A   | 10114.63 | PASS          | AC=16;AF=0.229;AN=70;BaseQRankSum         |
| 6277 | chrY | 9938591 | . | G | A   | 2821.21  | PASS          | AC=11;AF=0.157;AN=70;BaseQRankSum=2.20;Cl |
| 6278 | chrY | 9938594 | . | C | T   | 1579.74  | PASS          | AC=6;AF=0.086;AN=70;BaseQRankSum=0.123;Cl |
| 6279 | chrY | 9938596 | . | A | G   | 15372.98 | PASS          | AC=20;AF=0.286;AN=70;BaseQRankSum         |
| 6280 | chrY | 9938602 | . | T | A   | 823.07   | PASS          | AC=5;AF=0.071;AN=70;BaseQRankSum=0.733;Cl |
| 6281 | chrY | 9938606 | . | C | T   | 7656.28  | PASS          | AC=15;AF=0.214;AN=70;BaseQRankSum=1.92;Cl |
| 6282 | chrY | 9938613 | . | C | T   | 6094.22  | PASS          | AC=17;AF=0.243;AN=70;BaseQRankSum=-1.311e |
| 6283 | chrY | 9938622 | . | G | C   | 8688.81  | PASS          | AC=19;AF=0.271;AN=70;BaseQRankSum=-1.952e |
| 6284 | chrY | 9938632 | . | T | G   | 162      | my_snp_filter | AC=5;AF=0.071;AN=70;BaseQRankSum=         |
| 6285 | chrY | 9938638 | . | C | T   | 9228.78  | PASS          | AC=21;AF=0.300;AN=70;BaseQRankSum=0.751;C |
| 6286 | chrY | 9938640 | . | G | A   | 168.78   | my_snp_filter | AC=4;AF=0.057;AN=70;BaseQRankSum=         |
| 6287 | chrY | 9938644 | . | C | A   | 1041.55  | PASS          | AC=12;AF=0.171;AN=70;BaseQRankSum=0.369;C |
| 6288 | chrY | 9938652 | . | A | G   | 10223.90 | PASS          | AC=24;AF=0.343;AN=70;BaseQRankSum         |
| 6289 | chrY | 9938664 | . | A | G,* | 1060.41  | PASS          | AC=4,8;AF=0.057,0.114;AN=70;BaseQRankSum  |
| 6290 | chrY | 9938665 | . | C | G,* | 1059.74  | PASS          | AC=4,8;AF=0.057,0.114;AN=70;BaseQRankSum  |
| 6291 | chrY | 9938671 | . | G | A   | 1232.12  | PASS          | AC=14;AF=0.200;AN=70;BaseQRankSum=-1.133e |
| 6292 | chrY | 9938672 | . | A | T   | 1232.19  | PASS          | AC=14;AF=0.200;AN=70;BaseQRankSum=-1.509e |
| 6293 | chrY | 9938682 | . | G | T   | 1136.32  | PASS          | AC=8;AF=0.114;AN=70;BaseQRankSum=0.222;Cl |
| 6294 | chrY | 9938686 | . | C | T   | 321.44   | my_snp_filter | AC=5;AF=0.071;AN=70;BaseQRankSum=         |
| 6295 | chrY | 9938707 | . | A | G   | 8130.65  | my_snp_filter | AC=18;AF=0.265;AN=68;BaseQRankSum         |
| 6296 | chrY | 9938712 | . | C | T   | 1129.77  | my_snp_filter | AC=8;AF=0.114;AN=70;BaseQRankSum=         |
| 6297 | chrY | 9938713 | . | G | A   | 2016.92  | PASS          | AC=5;AF=0.074;AN=68;BaseQRankSum=2.85;Cli |
| 6298 | chrY | 9938714 | . | T | C   | 8052.43  | my_snp_filter | AC=16;AF=0.235;AN=68;BaseQRankSum         |
| 6299 | chrY | 9938715 | . | G | A   | 5013.81  | PASS          | AC=11;AF=0.162;AN=68;BaseQRankSum=1.92;Cl |
| 6300 | chrY | 9938718 | . | T | C   | 8205.11  | my_snp_filter | AC=15;AF=0.227;AN=66;BaseQRankSum         |
| 6301 | chrY | 9938719 | . | G | A   | 3382.90  | PASS          | AC=8;AF=0.121;AN=66;BaseQRankSum=1.93;Cli |
| 6302 | chrY | 9938725 | . | T | A   | 1707.86  | my_snp_filter | AC=8;AF=0.114;AN=70;BaseQRankSum=         |
| 6303 | chrY | 9938726 | . | G | A   | 2918.96  | PASS          | AC=7;AF=0.103;AN=68;BaseQRankSum=0.410;Cl |
| 6304 | chrY | 9938727 | . | T | G   | 546.87   | PASS          | AC=6;AF=0.088;AN=68;BaseQRankSum=-9.330e- |
| 6305 | chrY | 9938730 | . | C | G   | 129.29   | my_snp_filter | AC=4;AF=0.061;AN=66;BaseQRankSum=         |
| 6306 | chrY | 9938731 | . | C | A   | 6033.19  | my_snp_filter | AC=9;AF=0.141;AN=64;BaseQRankSum=         |
| 6307 | chrY | 9938734 | . | A | T   | 47.95    | PASS          | AC=1;AF=0.014;AN=70;BaseQRankSum=1.07;Cli |
| 6308 | chrY | 9938741 | . | T | C   | 269.57   | PASS          | AC=3;AF=0.043;AN=70;BaseQRankSum=2.55;Cli |

|      |      |         |   |   |     |          |               |                                           |
|------|------|---------|---|---|-----|----------|---------------|-------------------------------------------|
| 6309 | chrY | 9938743 | . | C | T   | 325.25   | PASS          | AC=4;AF=0.057;AN=70;BaseQRankSum=0.294;C  |
| 6310 | chrY | 9938746 | . | T | G   | 5857.54  | PASS          | AC=12;AF=0.176;AN=68;BaseQRankSum=-3.650e |
| 6311 | chrY | 9938748 | . | C | T   | 447.66   | my_snp_filter | AC=7;AF=0.100;AN=70;BaseQRankSum=         |
| 6312 | chrY | 9938752 | . | C | T   | 4654.55  | PASS          | AC=12;AF=0.171;AN=70;BaseQRankSum=-6.000e |
| 6313 | chrY | 9938769 | . | T | C   | 15182.31 | PASS          | AC=24;AF=0.343;AN=70;BaseQRankSum         |
| 6314 | chrY | 9938776 | . | A | G   | 3934.37  | PASS          | AC=18;AF=0.257;AN=70;BaseQRankSum=-1.271e |
| 6315 | chrY | 9938784 | . | C | T   | 183.77   | PASS          | AC=5;AF=0.071;AN=70;BaseQRankSum=-3.480e- |
| 6316 | chrY | 9938785 | . | T | G   | 182.52   | PASS          | AC=5;AF=0.071;AN=70;BaseQRankSum=-2.550e- |
| 6317 | chrY | 9938790 | . | C | A   | 26771.08 | PASS          | AC=31;AF=0.456;AN=68;BaseQRankSum         |
| 6318 | chrY | 9938797 | . | G | T   | 28413.36 | PASS          | AC=31;AF=0.470;AN=66;BaseQRankSum         |
| 6319 | chrY | 9938811 | . | G | A   | 89.52    | my_snp_filter | AC=3;AF=0.043;AN=70;BaseQRankSum=         |
| 6320 | chrY | 9938826 | . | T | C   | 8942.72  | PASS          | AC=30;AF=0.429;AN=70;BaseQRankSum=0.111;C |
| 6321 | chrY | 9938837 | . | G | A   | 38.15    | my_snp_filter | AC=1;AF=0.014;AN=70;BaseQRankSum=         |
| 6322 | chrY | 9938851 | . | A | T,C | 53557.90 | PASS          | AC=34,11;AF=0.486,0.157;AN=70;Bas         |
| 6323 | chrY | 9938855 | . | A | T   | 103.91   | PASS          | AC=1;AF=0.014;AN=70;BaseQRankSum=-1.940e+ |
| 6324 | chrY | 9938868 | . | T | A,* | 10651.09 | PASS          | AC=27,1;AF=0.386,0.014;AN=70;Base         |
| 6325 | chrY | 9938875 | . | C | T   | 33484.53 | PASS          | AC=34;AF=0.486;AN=70;BaseQRankSum         |
| 6326 | chrY | 9938876 | . | C | T   | 24989.86 | PASS          | AC=32;AF=0.457;AN=70;BaseQRankSum         |
| 6327 | chrY | 9938878 | . | C | T   | 3943.13  | PASS          | AC=22;AF=0.314;AN=70;BaseQRankSum=-2.120e |
| 6328 | chrY | 9938879 | . | C | T   | 21563.04 | PASS          | AC=34;AF=0.486;AN=70;BaseQRankSum         |
| 6329 | chrY | 9938883 | . | C | A   | 15312.03 | PASS          | AC=26;AF=0.371;AN=70;BaseQRankSum         |
| 6330 | chrY | 9938884 | . | C | A   | 15305.91 | PASS          | AC=26;AF=0.371;AN=70;BaseQRankSum         |
| 6331 | chrY | 9938894 | . | C | G   | 4161.62  | PASS          | AC=21;AF=0.300;AN=70;BaseQRankSum=0.00;C  |
| 6332 | chrY | 9938895 | . | C | T   | 4123.82  | PASS          | AC=21;AF=0.300;AN=70;BaseQRankSum=-5.220e |
| 6333 | chrY | 9938896 | . | A | G   | 4046.96  | PASS          | AC=21;AF=0.300;AN=70;BaseQRankSum=-3.200e |
| 6334 | chrY | 9938898 | . | G | A   | 29105.77 | PASS          | AC=32;AF=0.457;AN=70;BaseQRankSum         |
| 6335 | chrY | 9938913 | . | T | C,A | 35053.76 | PASS          | AC=34,1;AF=0.486,0.014;AN=70;Base         |
| 6336 | chrY | 9938917 | . | C | T   | 15747.79 | PASS          | AC=22;AF=0.314;AN=70;BaseQRankSum         |
| 6337 | chrY | 9938927 | . | G | A   | 25397.28 | PASS          | AC=31;AF=0.443;AN=70;BaseQRankSum         |
| 6338 | chrY | 9938933 | . | A | C   | 417.94   | my_snp_filter | AC=7;AF=0.100;AN=70;BaseQRankSum=         |
| 6339 | chrY | 9938935 | . | G | A   | 14894.69 | PASS          | AC=21;AF=0.300;AN=70;BaseQRankSum         |
| 6340 | chrY | 9938944 | . | C | G   | 54416.21 | PASS          | AC=37;AF=0.529;AN=70;BaseQRankSum         |
| 6341 | chrY | 9938947 | . | C | T   | 20207.06 | PASS          | AC=33;AF=0.471;AN=70;BaseQRankSum         |
| 6342 | chrY | 9938948 | . | G | T   | 78.52    | PASS          | AC=2;AF=0.029;AN=70;BaseQRankSum=-3.320e- |
| 6343 | chrY | 9938960 | . | T | A   | 17064.67 | PASS          | AC=26;AF=0.371;AN=70;BaseQRankSum         |
| 6344 | chrY | 9938962 | . | C | A,G | 52157.69 | PASS          | AC=9,33;AF=0.129,0.471;AN=70;Base         |
| 6345 | chrY | 9938963 | . | G | A   | 127.80   | my_snp_filter | AC=1;AF=0.014;AN=70;BaseQRankSum=         |
| 6346 | chrY | 9938966 | . | G | T   | 13537.26 | PASS          | AC=29;AF=0.414;AN=70;BaseQRankSum         |
| 6347 | chrY | 9938968 | . | T | C   | 20186.24 | PASS          | AC=30;AF=0.429;AN=70;BaseQRankSum         |
| 6348 | chrY | 9938969 | . | G | A   | 2735.51  | PASS          | AC=9;AF=0.129;AN=70;BaseQRankSum=1.07;C   |
| 6349 | chrY | 9938978 | . | A | G   | 47.81    | my_snp_filter | AC=2;AF=0.029;AN=70;BaseQRankSum=         |
| 6350 | chrY | 9938979 | . | G | A   | 2668.42  | PASS          | AC=9;AF=0.129;AN=70;BaseQRankSum=0.286;C  |
| 6351 | chrY | 9938980 | . | G | A   | 113.42   | PASS          | AC=2;AF=0.029;AN=70;BaseQRankSum=-1.730e- |
| 6352 | chrY | 9938982 | . | T | C   | 50953.76 | PASS          | AC=38;AF=0.543;AN=70;BaseQRankSum         |
| 6353 | chrY | 9938987 | . | T | C   | 723.18   | PASS          | AC=10;AF=0.143;AN=70;BaseQRankSum=0.117;C |
| 6354 | chrY | 9938993 | . | G | T   | 12441.28 | PASS          | AC=28;AF=0.400;AN=70;BaseQRankSum         |
| 6355 | chrY | 9939001 | . | G | A   | 5102.55  | PASS          | AC=17;AF=0.243;AN=70;BaseQRankSum=-1.100e |
| 6356 | chrY | 9939002 | . | T | A,G | 21413.92 | PASS          | AC=10,25;AF=0.143,0.357;AN=70;Bas         |
| 6357 | chrY | 9939006 | . | G | C   | 122.28   | PASS          | AC=2;AF=0.029;AN=70;BaseQRankSum=0.919;C  |
| 6358 | chrY | 9939007 | . | C | T   | 99.53    | my_snp_filter | AC=2;AF=0.029;AN=70;BaseQRankSum=         |
| 6359 | chrY | 9939008 | . | G | T,A | 4750.12  | PASS          | AC=22,1;AF=0.314,0.014;AN=70;BaseQRankSum |
| 6360 | chrY | 9939012 | . | C | G   | 794.02   | my_snp_filter | AC=10;AF=0.143;AN=70;BaseQRankSum         |
| 6361 | chrY | 9939020 | . | C | T   | 99.03    | my_snp_filter | AC=2;AF=0.029;AN=70;BaseQRankSum=         |
| 6362 | chrY | 9939027 | . | G | A   | 283.09   | my_snp_filter | AC=5;AF=0.071;AN=70;BaseQRankSum=         |
| 6363 | chrY | 9939050 | . | C | T   | 489.24   | my_snp_filter | AC=6;AF=0.086;AN=70;BaseQRankSum=         |
| 6364 | chrY | 9939054 | . | A | G   | 34.50    | my_snp_filter | AC=2;AF=0.029;AN=70;BaseQRankSum=         |
| 6365 | chrY | 9939055 | . | G | T   | 86.75    | PASS          | AC=1;AF=0.014;AN=70;BaseQRankSum=-2.480e- |
| 6366 | chrY | 9939057 | . | T | C   | 728.74   | my_snp_filter | AC=9;AF=0.129;AN=70;BaseQRankSum=         |
| 6367 | chrY | 9939063 | . | G | A   | 10846.56 | PASS          | AC=30;AF=0.429;AN=70;BaseQRankSum         |
| 6368 | chrY | 9939064 | . | C | G   | 660.25   | my_snp_filter | AC=9;AF=0.129;AN=70;BaseQRankSum=         |
| 6369 | chrY | 9939065 | . | C | G   | 8673.34  | PASS          | AC=30;AF=0.429;AN=70;BaseQRankSum=-6.920e |
| 6370 | chrY | 9939078 | . | A | G   | 1083.03  | PASS          | AC=10;AF=0.143;AN=70;BaseQRankSum=-2.217e |
| 6371 | chrY | 9939085 | . | A | G   | 974.84   | PASS          | AC=10;AF=0.147;AN=68;BaseQRankSum=-6.150e |
| 6372 | chrY | 9939086 | . | T | G   | 67402.01 | PASS          | AC=33;AF=0.500;AN=66;BaseQRankSum         |
| 6373 | chrY | 9939087 | . | C | G   | 67273.24 | PASS          | AC=33;AF=0.500;AN=66;BaseQRankSum         |
| 6374 | chrY | 9939101 | . | A | G   | 7575.61  | PASS          | AC=23;AF=0.329;AN=70;BaseQRankSum=0.136;C |
| 6375 | chrY | 9939106 | . | C | T,A | 2456.80  | PASS          | AC=16,3;AF=0.229,0.043;AN=70;BaseQRankSum |
| 6376 | chrY | 9939111 | . | T | C   | 3273.90  | PASS          | AC=15;AF=0.214;AN=70;BaseQRankSum=-5.920e |
| 6377 | chrY | 9939116 | . | G | A   | 48.56    | PASS          | AC=1;AF=0.014;AN=70;BaseQRankSum=-1.670e- |
| 6378 | chrY | 9939117 | . | T | A   | 9848.86  | PASS          | AC=27;AF=0.386;AN=70;BaseQRankSum=0.352;C |
| 6379 | chrY | 9939118 | . | G | A   | 2870.16  | PASS          | AC=20;AF=0.286;AN=70;BaseQRankSum=-7.520e |
| 6380 | chrY | 9939119 | . | G | A   | 53.32    | my_snp_filter | AC=3;AF=0.043;AN=70;BaseQRankSum=         |
| 6381 | chrY | 9939127 | . | A | T   | 4998.94  | PASS          | AC=20;AF=0.286;AN=70;BaseQRankSum=-2.590e |
| 6382 | chrY | 9939128 | . | G | A   | 3102.35  | PASS          | AC=20;AF=0.286;AN=70;BaseQRankSum=-2.080e |
| 6383 | chrY | 9939130 | . | A | G   | 64883.50 | PASS          | AC=31;AF=0.500;AN=62;BaseQRankSum         |
| 6384 | chrY | 9939136 | . | A | C   | 72194.63 | PASS          | AC=33;AF=0.516;AN=64;BaseQRankSum         |

|      |      |         |   |   |       |          |               |                                           |
|------|------|---------|---|---|-------|----------|---------------|-------------------------------------------|
| 6385 | chrY | 9939159 | . | G | A     | 3228.29  | PASS          | AC=17;AF=0.243;AN=70;BaseQRankSum=0.602;C |
| 6386 | chrY | 9939169 | . | C | A,T   | 1417.36  | my_snp_filter | AC=11,7;AF=0.157,0.100;AN=70;Base         |
| 6387 | chrY | 9939182 | . | G | T     | 398.99   | my_snp_filter | AC=8;AF=0.114;AN=70;BaseQRankSum=         |
| 6388 | chrY | 9939183 | . | A | G     | 408.50   | PASS          | AC=5;AF=0.071;AN=70;BaseQRankSum=-1.500e- |
| 6389 | chrY | 9939191 | . | G | A     | 159.58   | my_snp_filter | AC=3;AF=0.043;AN=70;BaseQRankSum=         |
| 6390 | chrY | 9939200 | . | C | T     | 151.41   | my_snp_filter | AC=4;AF=0.057;AN=70;BaseQRankSum=         |
| 6391 | chrY | 9939202 | . | A | G     | 153.59   | my_snp_filter | AC=4;AF=0.057;AN=70;BaseQRankSum=         |
| 6392 | chrY | 9939204 | . | A | C     | 159.80   | my_snp_filter | AC=4;AF=0.057;AN=70;BaseQRankSum=         |
| 6393 | chrY | 9939206 | . | T | C     | 26398.10 | PASS          | AC=28;AF=0.467;AN=60;BaseQRankSum         |
| 6394 | chrY | 9939207 | . | G | A     | 3708.78  | PASS          | AC=12;AF=0.176;AN=68;BaseQRankSum=-9.070e |
| 6395 | chrY | 9939208 | . | G | A     | 264.48   | my_snp_filter | AC=5;AF=0.071;AN=70;BaseQRankSum=         |
| 6396 | chrY | 9939214 | . | G | A     | 2457.64  | PASS          | AC=17;AF=0.243;AN=70;BaseQRankSum=0.484;C |
| 6397 | chrY | 9939215 | . | C | G     | 148.32   | PASS          | AC=2;AF=0.029;AN=70;BaseQRankSum=-1.377e+ |
| 6398 | chrY | 9939217 | . | G | A     | 145.41   | my_snp_filter | AC=4;AF=0.057;AN=70;BaseQRankSum=         |
| 6399 | chrY | 9939222 | . | C | T     | 309.20   | PASS          | AC=1;AF=0.014;AN=70;BaseQRankSum=-1.930e- |
| 6400 | chrY | 9939223 | . | C | T     | 3741.40  | PASS          | AC=12;AF=0.171;AN=70;BaseQRankSum=-1.476e |
| 6401 | chrY | 9939225 | . | G | C     | 3260.87  | PASS          | AC=12;AF=0.171;AN=70;BaseQRankSum=-5.187e |
| 6402 | chrY | 9939227 | . | G | C     | 145.08   | my_snp_filter | AC=3;AF=0.043;AN=70;BaseQRankSum=         |
| 6403 | chrY | 9939232 | . | T | C     | 21108.39 | PASS          | AC=27;AF=0.422;AN=64;BaseQRankSum         |
| 6404 | chrY | 9939242 | . | T | C     | 1666.21  | PASS          | AC=10;AF=0.143;AN=70;BaseQRankSum=-2.561e |
| 6405 | chrY | 9939260 | . | G | A     | 8296.18  | my_snp_filter | AC=14;AF=0.206;AN=68;BaseQRankSum=        |
| 6406 | chrY | 9939265 | . | G | C     | 926.70   | PASS          | AC=8;AF=0.114;AN=70;BaseQRankSum=1.32;Cli |
| 6407 | chrY | 9939268 | . | T | C,A   | 905.09   | PASS          | AC=6,1;AF=0.088,0.015;AN=68;BaseQRankSum= |
| 6408 | chrY | 9939271 | . | C | T     | 5283.53  | my_snp_filter | AC=10;AF=0.152;AN=66;BaseQRankSum         |
| 6409 | chrY | 9939272 | . | A | G     | 7897.20  | my_snp_filter | AC=11;AF=0.172;AN=64;BaseQRankSum         |
| 6410 | chrY | 9939278 | . | G | A     | 56.93    | my_snp_filter | AC=1;AF=0.015;AN=68;BaseQRankSum=         |
| 6411 | chrY | 9939282 | . | G | C     | 7479.38  | my_snp_filter | AC=10;AF=0.152;AN=66;BaseQRankSum         |
| 6412 | chrY | 9939315 | . | A | G     | 3582.89  | PASS          | AC=10;AF=0.143;AN=70;BaseQRankSum=-2.680e |
| 6413 | chrY | 9939318 | . | C | T     | 213.32   | PASS          | AC=2;AF=0.029;AN=70;BaseQRankSum=-8.290e- |
| 6414 | chrY | 9939336 | . | A | G     | 5458.97  | my_snp_filter | AC=17;AF=0.243;AN=70;BaseQRankSum         |
| 6415 | chrY | 9939365 | . | G | A     | 85.53    | PASS          | AC=1;AF=0.014;AN=70;BaseQRankSum=0.383;Cl |
| 6416 | chrY | 9939366 | . | C | A     | 7077.81  | my_snp_filter | AC=14;AF=0.200;AN=70;BaseQRankSum         |
| 6417 | chrY | 9939378 | . | A | G     | 11077.11 | my_snp_filter | AC=60;AF=0.857;AN=70;Base                 |
| 6418 | chrY | 9939388 | . | A | G     | 8651.50  | PASS          | AC=12;AF=0.171;AN=70;BaseQRankSum=-5.400e |
| 6419 | chrY | 9939398 | . | C | T     | 5668.95  | my_snp_filter | AC=9;AF=0.129;AN=70;BaseQRankSum=         |
| 6420 | chrY | 9939408 | . | G | A     | 3366.11  | PASS          | AC=13;AF=0.186;AN=70;BaseQRankSum=-1.640e |
| 6421 | chrY | 9939414 | . | C | T     | 3441.59  | PASS          | AC=12;AF=0.171;AN=70;BaseQRankSum=-8.690e |
| 6422 | chrY | 9939425 | . | T | C     | 8055.95  | PASS          | AC=13;AF=0.186;AN=70;BaseQRankSum=-2.100e |
| 6423 | chrY | 9939432 | . | A | G     | 72.48    | my_snp_filter | AC=2;AF=0.029;AN=70;BaseQRankSum=         |
| 6424 | chrY | 9939436 | . | T | C     | 8178.33  | PASS          | AC=23;AF=0.329;AN=70;BaseQRankSum=0.727;C |
| 6425 | chrY | 9939438 | . | T | C     | 12086.47 | PASS          | AC=23;AF=0.338;AN=68;BaseQRankSum         |
| 6426 | chrY | 9939445 | . | C | G     | 1333.78  | my_snp_filter | AC=6;AF=0.086;AN=70;BaseQRankSum=         |
| 6427 | chrY | 9939447 | . | C | T     | 12022.27 | PASS          | AC=23;AF=0.371;AN=62;BaseQRankSum         |
| 6428 | chrY | 9939453 | . | C | T     | 977.94   | my_snp_filter | AC=5;AF=0.071;AN=70;BaseQRankSum=         |
| 6429 | chrY | 9939454 | . | T | C     | 1771.01  | PASS          | AC=9;AF=0.145;AN=62;BaseQRankSum=-1.980e- |
| 6430 | chrY | 9939455 | . | G | T     | 13112    | PASS          | AC=23;AF=0.371;AN=62;BaseQRankSum=0.595;C |
| 6431 | chrY | 9939470 | . | T | C     | 16998.38 | PASS          | AC=30;AF=0.455;AN=66;BaseQRankSum         |
| 6432 | chrY | 9939471 | . | C | G     | 2151.57  | PASS          | AC=13;AF=0.191;AN=68;BaseQRankSum=-1.257e |
| 6433 | chrY | 9939475 | . | C | G     | 577.43   | my_snp_filter | AC=10;AF=0.143;AN=70;BaseQRankSum         |
| 6434 | chrY | 9939476 | . | G | A     | 911.61   | PASS          | AC=11;AF=0.157;AN=70;BaseQRankSum=-8.770e |
| 6435 | chrY | 9939499 | . | A | G     | 47.58    | my_snp_filter | AC=1;AF=0.014;AN=70;BaseQRankSum=         |
| 6436 | chrY | 9939506 | . | G | A     | 29856.72 | PASS          | AC=35;AF=0.500;AN=70;BaseQRankSum         |
| 6437 | chrY | 9939507 | . | C | T     | 700.63   | my_snp_filter | AC=9;AF=0.129;AN=70;BaseQRankSum=         |
| 6438 | chrY | 9939511 | . | A | T     | 712.21   | my_snp_filter | AC=11;AF=0.157;AN=70;BaseQRankSum         |
| 6439 | chrY | 9939530 | . | T | G     | 32614.72 | PASS          | AC=35;AF=0.500;AN=70;BaseQRankSum         |
| 6440 | chrY | 9939538 | . | T | A     | 284.02   | PASS          | AC=3;AF=0.043;AN=70;BaseQRankSum=0.661;Cl |
| 6441 | chrY | 9939542 | . | C | T     | 92.94    | my_snp_filter | AC=2;AF=0.029;AN=70;BaseQRankSum=         |
| 6442 | chrY | 9939584 | . | C | G     | 1323.64  | PASS          | AC=5;AF=0.071;AN=70;BaseQRankSum=1.94;Cli |
| 6443 | chrY | 9939585 | . | T | G     | 1932.43  | PASS          | AC=5;AF=0.071;AN=70;BaseQRankSum=0.238;Cl |
| 6444 | chrY | 9939598 | . | T | C     | 3571.62  | PASS          | AC=34;AF=0.486;AN=70;BaseQRankSum=0.322;C |
| 6445 | chrY | 9939619 | . | T | C     | 21390.05 | PASS          | AC=36;AF=0.529;AN=68;BaseQRankSum         |
| 6446 | chrY | 9939620 | . | T | C     | 2602.74  | PASS          | AC=8;AF=0.114;AN=70;BaseQRankSum=1.07;Cli |
| 6447 | chrY | 9939623 | . | G | C     | 2592.83  | PASS          | AC=8;AF=0.114;AN=70;BaseQRankSum=-2.377e+ |
| 6448 | chrY | 9939631 | . | A | T     | 2630.76  | PASS          | AC=8;AF=0.114;AN=70;BaseQRankSum=-2.190e- |
| 6449 | chrY | 9939634 | . | C | G     | 2669.89  | my_snp_filter | AC=8;AF=0.114;AN=70;BaseQRankSum=         |
| 6450 | chrY | 9939647 | . | A | G     | 2308.61  | PASS          | AC=7;AF=0.109;AN=64;BaseQRankSum=0.224;Cl |
| 6451 | chrY | 9939652 | . | T | C     | 12952.67 | PASS          | AC=34;AF=0.486;AN=70;BaseQRankSum         |
| 6452 | chrY | 9939699 | . | A | T     | 264.02   | PASS          | AC=5;AF=0.074;AN=68;BaseQRankSum=0.550;Cl |
| 6453 | chrY | 9939706 | . | A | G     | 270.25   | PASS          | AC=4;AF=0.059;AN=68;BaseQRankSum=1.38;Cli |
| 6454 | chrY | 9939711 | . | C | T     | 5150.58  | PASS          | AC=24;AF=0.353;AN=68;BaseQRankSum=1.16;Cl |
| 6455 | chrY | 9939713 | . | T | C     | 16787.76 | PASS          | AC=38;AF=0.559;AN=68;BaseQRankSum         |
| 6456 | chrY | 9939715 | . | T | C,G,A | 6680.71  | PASS          | AC=23,7,2;AF=0.338,0.103,0.029;AN=68;Base |
| 6457 | chrY | 9939719 | . | T | C     | 1888.95  | PASS          | AC=23;AF=0.329;AN=70;BaseQRankSum=-6.600e |
| 6458 | chrY | 9939732 | . | A | G     | 21955.67 | PASS          | AC=38;AF=0.543;AN=70;BaseQRankSum         |
| 6459 | chrY | 9939743 | . | A | T     | 182.31   | my_snp_filter | AC=5;AF=0.071;AN=70;BaseQRankSum=         |
| 6460 | chrY | 9939758 | . | C | G,T   | 761.73   | PASS          | AC=2,8;AF=0.029,0.114;AN=70;BaseQRankSum= |

|      |      |         |   |   |     |          |               |                                            |
|------|------|---------|---|---|-----|----------|---------------|--------------------------------------------|
| 6461 | chrY | 9939780 | . | C | T   | 326.88   | my_snp_filter | AC=7;AF=0.100;AN=70;BaseQRankSum=          |
| 6462 | chrY | 9939789 | . | C | A   | 24924.72 | PASS          | AC=35;AF=0.500;AN=70;BaseQRankSum=         |
| 6463 | chrY | 9939798 | . | T | A,* | 9430.29  | PASS          | AC=30,2;AF=0.429,0.029;AN=70;BaseQRankSum= |
| 6464 | chrY | 9939802 | . | T | C   | 310.10   | my_snp_filter | AC=5;AF=0.071;AN=70;BaseQRankSum=          |
| 6465 | chrY | 9939816 | . | C | G   | 59839.16 | PASS          | AC=41;AF=0.586;AN=70;BaseQRankSum=         |
| 6466 | chrY | 9939838 | . | C | T   | 93.83    | my_snp_filter | AC=4;AF=0.057;AN=70;BaseQRankSum=          |
| 6467 | chrY | 9939855 | . | T | C   | 16260.63 | PASS          | AC=34;AF=0.486;AN=70;BaseQRankSum=         |
| 6468 | chrY | 9939859 | . | T | A   | 24529.28 | PASS          | AC=33;AF=0.471;AN=70;BaseQRankSum=         |
| 6469 | chrY | 9939866 | . | G | T   | 2772.21  | PASS          | AC=20;AF=0.286;AN=70;BaseQRankSum=-8.300e  |
| 6470 | chrY | 9939869 | . | G | A   | 44972.67 | PASS          | AC=35;AF=0.500;AN=70;BaseQRankSum=         |
| 6471 | chrY | 9939878 | . | G | A   | 20433.84 | PASS          | AC=29;AF=0.414;AN=70;BaseQRankSum=         |
| 6472 | chrY | 9939879 | . | G | A   | 56.79    | PASS          | AC=2;AF=0.029;AN=70;BaseQRankSum=1.48;Cli  |
| 6473 | chrY | 9939884 | . | A | C   | 11369.15 | PASS          | AC=22;AF=0.314;AN=70;BaseQRankSum=         |
| 6474 | chrY | 9939897 | . | T | C   | 32.86    | PASS          | AC=1;AF=0.015;AN=66;BaseQRankSum=0.358;Cl  |
| 6475 | chrY | 9939898 | . | T | G   | 275.09   | my_snp_filter | AC=5;AF=0.076;AN=66;BaseQRankSum=          |
| 6476 | chrY | 9939905 | . | C | A   | 23082.21 | PASS          | AC=22;AF=0.324;AN=68;BaseQRankSum=         |
| 6477 | chrY | 9939910 | . | T | C   | 10163.04 | PASS          | AC=15;AF=0.221;AN=68;BaseQRankSum=         |
| 6478 | chrY | 9939916 | . | G | A   | 545.22   | PASS          | AC=3;AF=0.045;AN=66;BaseQRankSum=1.46;Cli  |
| 6479 | chrY | 9939934 | . | T | C   | 7806.39  | PASS          | AC=13;AF=0.203;AN=64;BaseQRankSum=-8.120e  |
| 6480 | chrY | 9939942 | . | A | G   | 354.93   | PASS          | AC=5;AF=0.078;AN=64;BaseQRankSum=0.900;Cl  |
| 6481 | chrY | 9939947 | . | A | C   | 412.15   | my_snp_filter | AC=8;AF=0.121;AN=66;BaseQRankSum=          |
| 6482 | chrY | 9939949 | . | G | T   | 6507.15  | PASS          | AC=10;AF=0.156;AN=64;BaseQRankSum=1.89;Cl  |
| 6483 | chrY | 9939960 | . | T | A   | 5808.08  | PASS          | AC=12;AF=0.188;AN=64;BaseQRankSum=2.03;Cl  |
| 6484 | chrY | 9939964 | . | G | A   | 5244.85  | PASS          | AC=12;AF=0.188;AN=64;BaseQRankSum=0.804;C  |
| 6485 | chrY | 9939979 | . | A | G   | 2911.63  | my_snp_filter | AC=9;AF=0.136;AN=66;BaseQRankSum=          |
| 6486 | chrY | 9939981 | . | T | C   | 2961.13  | my_snp_filter | AC=9;AF=0.136;AN=66;BaseQRankSum=          |
| 6487 | chrY | 9940003 | . | A | G   | 317.44   | PASS          | AC=3;AF=0.047;AN=64;BaseQRankSum=1.25;Cli  |
| 6488 | chrY | 9940004 | . | A | G   | 3069.81  | PASS          | AC=11;AF=0.172;AN=64;BaseQRankSum=-1.197e  |
| 6489 | chrY | 9940028 | . | C | T   | 250.25   | PASS          | AC=3;AF=0.048;AN=62;BaseQRankSum=0.529;Cl  |
| 6490 | chrY | 9940033 | . | T | C   | 1488.98  | PASS          | AC=6;AF=0.097;AN=62;BaseQRankSum=1.16;Cli  |
| 6491 | chrY | 9940038 | . | T | C   | 4967.68  | my_snp_filter | AC=9;AF=0.145;AN=62;BaseQRankSum=          |
| 6492 | chrY | 9940045 | . | T | C   | 1661.28  | PASS          | AC=6;AF=0.088;AN=68;BaseQRankSum=1.57;Cli  |
| 6493 | chrY | 9940052 | . | C | A   | 6152     | my_snp_filter | AC=11;AF=0.157;AN=70;BaseQRankSum=         |
| 6494 | chrY | 9940071 | . | C | T   | 8526.07  | PASS          | AC=21;AF=0.309;AN=68;BaseQRankSum=0.550;C  |
| 6495 | chrY | 9940086 | . | A | T   | 730.34   | PASS          | AC=14;AF=0.200;AN=70;BaseQRankSum=-1.290e  |
| 6496 | chrY | 9940094 | . | A | T   | 4660     | PASS          | AC=10;AF=0.143;AN=70;BaseQRankSum=1.16;Cl  |
| 6497 | chrY | 9940106 | . | T | C   | 5308.25  | PASS          | AC=12;AF=0.171;AN=70;BaseQRankSum=-4.723e  |
| 6498 | chrY | 9940107 | . | T | G   | 5476.06  | PASS          | AC=12;AF=0.171;AN=70;BaseQRankSum=-3.510e  |
| 6499 | chrY | 9940123 | . | G | A   | 5468.49  | PASS          | AC=12;AF=0.171;AN=70;BaseQRankSum=-1.200e  |
| 6500 | chrY | 9940130 | . | T | A   | 5381.19  | PASS          | AC=12;AF=0.171;AN=70;BaseQRankSum=0.311;C  |
| 6501 | chrY | 9940133 | . | C | A   | 772.99   | my_snp_filter | AC=9;AF=0.129;AN=70;BaseQRankSum=          |
| 6502 | chrY | 9940159 | . | G | A   | 10087.17 | PASS          | AC=17;AF=0.243;AN=70;BaseQRankSum=         |
| 6503 | chrY | 9940167 | . | T | C   | 27132.08 | PASS          | AC=33;AF=0.471;AN=70;BaseQRankSum=         |
| 6504 | chrY | 9940177 | . | C | T   | 26842.29 | PASS          | AC=31;AF=0.456;AN=68;BaseQRankSum=         |
| 6505 | chrY | 9940183 | . | G | T   | 5414.79  | PASS          | AC=13;AF=0.186;AN=70;BaseQRankSum=1.02;Cl  |
| 6506 | chrY | 9940186 | . | A | G   | 421.44   | PASS          | AC=6;AF=0.086;AN=70;BaseQRankSum=0.067;Cl  |
| 6507 | chrY | 9940197 | . | C | G   | 880.37   | my_snp_filter | AC=7;AF=0.100;AN=70;BaseQRankSum=          |
| 6508 | chrY | 9940215 | . | T | C   | 2638.62  | PASS          | AC=23;AF=0.329;AN=70;BaseQRankSum=-1.107e  |
| 6509 | chrY | 9940258 | . | G | C   | 963.14   | PASS          | AC=16;AF=0.235;AN=68;BaseQRankSum=0.155;C  |
| 6510 | chrY | 9940262 | . | C | T   | 668.21   | PASS          | AC=8;AF=0.114;AN=70;BaseQRankSum=1.07;Cli  |
| 6511 | chrY | 9940263 | . | C | G   | 6333.38  | PASS          | AC=13;AF=0.191;AN=68;BaseQRankSum=-3.220e  |
| 6512 | chrY | 9940267 | . | T | C   | 37.31    | PASS          | AC=1;AF=0.014;AN=70;BaseQRankSum=0.358;Cl  |
| 6513 | chrY | 9940270 | . | T | C   | 247.85   | PASS          | AC=4;AF=0.057;AN=70;BaseQRankSum=0.573;Cl  |
| 6514 | chrY | 9940272 | . | G | A   | 154.04   | my_snp_filter | AC=2;AF=0.029;AN=70;BaseQRankSum=          |
| 6515 | chrY | 9940275 | . | T | C   | 1026.64  | my_snp_filter | AC=6;AF=0.086;AN=70;BaseQRankSum=          |
| 6516 | chrY | 9940278 | . | C | T   | 6256.36  | my_snp_filter | AC=11;AF=0.157;AN=70;BaseQRankSum=         |
| 6517 | chrY | 9940279 | . | T | G   | 3801.05  | PASS          | AC=10;AF=0.143;AN=70;BaseQRankSum=-3.580e  |
| 6518 | chrY | 9940281 | . | G | T   | 253.62   | PASS          | AC=2;AF=0.029;AN=70;BaseQRankSum=2.06;Cli  |
| 6519 | chrY | 9940284 | . | C | T,G | 4024.18  | PASS          | AC=10,3;AF=0.143,0.043;AN=70;BaseQRankSum= |
| 6520 | chrY | 9940287 | . | A | T   | 632.32   | PASS          | AC=8;AF=0.125;AN=64;BaseQRankSum=0.550;Cl  |
| 6521 | chrY | 9940294 | . | G | A   | 515.58   | PASS          | AC=7;AF=0.106;AN=66;BaseQRankSum=-9.220e-  |
| 6522 | chrY | 9940302 | . | T | A   | 3820.30  | PASS          | AC=11;AF=0.190;AN=58;BaseQRankSum=0.791;C  |
| 6523 | chrY | 9940305 | . | G | C   | 192.62   | PASS          | AC=2;AF=0.031;AN=64;BaseQRankSum=0.296;Cl  |
| 6524 | chrY | 9940307 | . | A | G   | 192.71   | PASS          | AC=2;AF=0.030;AN=66;BaseQRankSum=0.358;Cl  |
| 6525 | chrY | 9940324 | . | A | T   | 1213.07  | PASS          | AC=4;AF=0.063;AN=64;BaseQRankSum=1.81;Cli  |
| 6526 | chrY | 9940332 | . | T | A   | 823.17   | PASS          | AC=4;AF=0.067;AN=60;BaseQRankSum=1.78;Cli  |
| 6527 | chrY | 9940406 | . | C | T   | 154.81   | PASS          | AC=6;AF=0.150;AN=40;BaseQRankSum=0.572;Cl  |
| 6528 | chrY | 9940442 | . | C | A   | 838.50   | my_snp_filter | AC=13;AF=0.186;AN=70;BaseQRankSum=         |
| 6529 | chrY | 9940443 | . | A | T   | 981.87   | PASS          | AC=10;AF=0.143;AN=70;BaseQRankSum=0.036;C  |
| 6530 | chrY | 9940460 | . | G | T   | 595.98   | PASS          | AC=3;AF=0.043;AN=70;BaseQRankSum=0.851;Cl  |
| 6531 | chrY | 9940472 | . | A | G   | 7207.06  | PASS          | AC=30;AF=0.429;AN=70;BaseQRankSum=0.493;C  |
| 6532 | chrY | 9940483 | . | A | G   | 13442.72 | PASS          | AC=35;AF=0.500;AN=70;BaseQRankSum=         |
| 6533 | chrY | 9940484 | . | G | A   | 357.55   | my_snp_filter | AC=6;AF=0.086;AN=70;BaseQRankSum=          |
| 6534 | chrY | 9940489 | . | C | T,A | 35442.96 | PASS          | AC=27,33;AF=0.386,0.471;AN=70;Bas          |
| 6535 | chrY | 9940505 | . | C | T   | 425.04   | PASS          | AC=4;AF=0.057;AN=70;BaseQRankSum=-1.026e+  |
| 6536 | chrY | 9940521 | . | C | T   | 20087.39 | PASS          | AC=19;AF=0.271;AN=70;BaseQRankSum=         |

|      |      |         |   |   |     |          |               |                                           |
|------|------|---------|---|---|-----|----------|---------------|-------------------------------------------|
| 6537 | chrY | 9940541 | . | T | A   | 22057.67 | PASS          | AC=20;AF=0.286;AN=70;BaseQRankSum         |
| 6538 | chrY | 9940543 | . | T | G   | 40180.38 | PASS          | AC=35;AF=0.500;AN=70;BaseQRankSum         |
| 6539 | chrY | 9940551 | . | G | A   | 22521.70 | PASS          | AC=19;AF=0.271;AN=70;BaseQRankSum         |
| 6540 | chrY | 9940553 | . | A | G   | 285.57   | my_snp_filter | AC=6;AF=0.086;AN=70;BaseQRankSum          |
| 6541 | chrY | 9940558 | . | C | T   | 22711.97 | PASS          | AC=20;AF=0.286;AN=70;BaseQRankSum         |
| 6542 | chrY | 9940587 | . | A | T   | 30093.61 | PASS          | AC=41;AF=0.586;AN=70;BaseQRankSum         |
| 6543 | chrY | 9940592 | . | T | A   | 37.98    | PASS          | AC=1;AF=0.014;AN=70;BaseQRankSum=0.361;C  |
| 6544 | chrY | 9940597 | . | A | T   | 1333.40  | PASS          | AC=6;AF=0.088;AN=68;BaseQRankSum=-1.691e+ |
| 6545 | chrY | 9940599 | . | A | T   | 53333.52 | PASS          | AC=39;AF=0.574;AN=68;BaseQRankSum         |
| 6546 | chrY | 9940600 | . | A | G   | 1230.95  | PASS          | AC=6;AF=0.086;AN=70;BaseQRankSum=-2.890e  |
| 6547 | chrY | 9940602 | . | A | T   | 549      | my_snp_filter | AC=5;AF=0.071;AN=70;BaseQRankSum          |
| 6548 | chrY | 9940613 | . | T | G   | 1371.57  | PASS          | AC=8;AF=0.114;AN=70;BaseQRankSum=-7.960e- |
| 6549 | chrY | 9940615 | . | T | C   | 61517.18 | PASS          | AC=54;AF=0.794;AN=68;BaseQRankSum         |
| 6550 | chrY | 9940616 | . | C | A   | 59032.51 | PASS          | AC=39;AF=0.629;AN=62;BaseQRankSum         |
| 6551 | chrY | 9940627 | . | A | G   | 4533.68  | PASS          | AC=18;AF=0.257;AN=70;BaseQRankSum=1.04;C  |
| 6552 | chrY | 9940641 | . | C | T   | 44433.20 | PASS          | AC=32;AF=0.485;AN=66;BaseQRankSum         |
| 6553 | chrY | 9940647 | . | A | G   | 22864.36 | PASS          | AC=33;AF=0.471;AN=70;BaseQRankSum         |
| 6554 | chrY | 9940651 | . | T | C   | 4193.39  | PASS          | AC=16;AF=0.229;AN=70;BaseQRankSum=-3.410e |
| 6555 | chrY | 9940657 | . | A | G   | 96587.98 | PASS          | AC=45;AF=0.643;AN=70;BaseQRankSum         |
| 6556 | chrY | 9940668 | . | C | A   | 2263.60  | PASS          | AC=10;AF=0.143;AN=70;BaseQRankSum=0.725;C |
| 6557 | chrY | 9940671 | . | C | A   | 158.24   | my_snp_filter | AC=3;AF=0.043;AN=70;BaseQRankSum          |
| 6558 | chrY | 9940674 | . | C | A   | 248.52   | my_snp_filter | AC=4;AF=0.057;AN=70;BaseQRankSum          |
| 6559 | chrY | 9940681 | . | G | A   | 10770.11 | PASS          | AC=29;AF=0.414;AN=70;BaseQRankSum         |
| 6560 | chrY | 9940684 | . | C | T   | 346.75   | my_snp_filter | AC=5;AF=0.071;AN=70;BaseQRankSum          |
| 6561 | chrY | 9940687 | . | T | C   | 185.18   | my_snp_filter | AC=2;AF=0.029;AN=70;BaseQRankSum          |
| 6562 | chrY | 9940691 | . | A | G   | 731.71   | my_snp_filter | AC=6;AF=0.086;AN=70;BaseQRankSum          |
| 6563 | chrY | 9940698 | . | C | A   | 670.60   | my_snp_filter | AC=5;AF=0.071;AN=70;BaseQRankSum          |
| 6564 | chrY | 9940701 | . | A | G   | 215.04   | my_snp_filter | AC=4;AF=0.057;AN=70;BaseQRankSum          |
| 6565 | chrY | 9940724 | . | G | A   | 669.54   | my_snp_filter | AC=7;AF=0.100;AN=70;BaseQRankSum          |
| 6566 | chrY | 9940731 | . | G | C   | 31799.76 | PASS          | AC=35;AF=0.500;AN=70;BaseQRankSum         |
| 6567 | chrY | 9940742 | . | T | C   | 43068.72 | PASS          | AC=35;AF=0.500;AN=70;BaseQRankSum         |
| 6568 | chrY | 9940743 | . | A | G   | 11944.97 | PASS          | AC=31;AF=0.443;AN=70;BaseQRankSum         |
| 6569 | chrY | 9940744 | . | G | A   | 43293.72 | PASS          | AC=35;AF=0.500;AN=70;BaseQRankSum         |
| 6570 | chrY | 9940765 | . | C | T   | 108.54   | my_snp_filter | AC=3;AF=0.043;AN=70;BaseQRankSum          |
| 6571 | chrY | 9940790 | . | T | C   | 9210.92  | PASS          | AC=27;AF=0.386;AN=70;BaseQRankSum=-2.400e |
| 6572 | chrY | 9940801 | . | T | C   | 219.13   | my_snp_filter | AC=4;AF=0.057;AN=70;BaseQRankSum          |
| 6573 | chrY | 9940821 | . | C | G   | 90125.26 | PASS          | AC=47;AF=0.671;AN=70;BaseQRankSum         |
| 6574 | chrY | 9940827 | . | T | G   | 54.42    | my_snp_filter | AC=1;AF=0.014;AN=70;BaseQRankSum          |
| 6575 | chrY | 9940833 | . | A | G   | 834.60   | my_snp_filter | AC=13;AF=0.186;AN=70;BaseQRankSum         |
| 6576 | chrY | 9940850 | . | A | G   | 3798.49  | PASS          | AC=10;AF=0.143;AN=70;BaseQRankSum=-3.156e |
| 6577 | chrY | 9940859 | . | T | A   | 5354.64  | PASS          | AC=15;AF=0.214;AN=70;BaseQRankSum=-2.240e |
| 6578 | chrY | 9940872 | . | C | A   | 42151.54 | PASS          | AC=20;AF=0.286;AN=70;BaseQRankSum         |
| 6579 | chrY | 9940888 | . | T | C   | 7494.59  | PASS          | AC=18;AF=0.257;AN=70;BaseQRankSum=0.727;C |
| 6580 | chrY | 9940896 | . | T | A   | 5772.91  | PASS          | AC=9;AF=0.129;AN=70;BaseQRankSum=-5.350e- |
| 6581 | chrY | 9940906 | . | C | T   | 37991.11 | PASS          | AC=27;AF=0.386;AN=70;BaseQRankSum         |
| 6582 | chrY | 9940908 | . | G | A   | 38164.04 | PASS          | AC=27;AF=0.386;AN=70;BaseQRankSum         |
| 6583 | chrY | 9940915 | . | G | A   | 34746.76 | PASS          | AC=27;AF=0.386;AN=70;BaseQRankSum         |
| 6584 | chrY | 9940951 | . | C | T   | 3560.56  | PASS          | AC=17;AF=0.243;AN=70;BaseQRankSum=0.771;C |
| 6585 | chrY | 9940961 | . | C | G   | 4269.39  | PASS          | AC=12;AF=0.171;AN=70;BaseQRankSum=-1.835e |
| 6586 | chrY | 9940967 | . | T | C   | 3835.55  | PASS          | AC=15;AF=0.214;AN=70;BaseQRankSum=-1.034e |
| 6587 | chrY | 9940970 | . | G | A   | 39655.06 | PASS          | AC=29;AF=0.483;AN=60;BaseQRankSum         |
| 6588 | chrY | 9940971 | . | G | T   | 118.34   | PASS          | AC=2;AF=0.031;AN=64;BaseQRankSum=1.78;Cli |
| 6589 | chrY | 9940975 | . | C | T   | 868.44   | my_snp_filter | AC=7;AF=0.100;AN=70;BaseQRankSum          |
| 6590 | chrY | 9940976 | . | A | T,G | 33311.97 | PASS          | AC=25,10;AF=0.431,0.172;AN=58;Bas         |
| 6591 | chrY | 9940997 | . | C | G   | 2584.27  | PASS          | AC=11;AF=0.157;AN=70;BaseQRankSum=0.519;C |
| 6592 | chrY | 9941007 | . | A | G   | 3911.56  | PASS          | AC=22;AF=0.314;AN=70;BaseQRankSum=0.331;C |
| 6593 | chrY | 9941008 | . | G | A   | 3351.09  | PASS          | AC=11;AF=0.157;AN=70;BaseQRankSum=0.893;C |
| 6594 | chrY | 9941012 | . | A | C   | 27951.64 | PASS          | AC=32;AF=0.457;AN=70;BaseQRankSum         |
| 6595 | chrY | 9941014 | . | C | G   | 1124.24  | PASS          | AC=8;AF=0.114;AN=70;BaseQRankSum=0.028;C  |
| 6596 | chrY | 9941018 | . | G | A   | 29506.64 | PASS          | AC=32;AF=0.457;AN=70;BaseQRankSum         |
| 6597 | chrY | 9941033 | . | C | T   | 3998.13  | PASS          | AC=11;AF=0.157;AN=70;BaseQRankSum=2.40;C  |
| 6598 | chrY | 9941034 | . | A | G   | 43655.79 | PASS          | AC=36;AF=0.514;AN=70;BaseQRankSum         |
| 6599 | chrY | 9941042 | . | C | T   | 890.32   | PASS          | AC=8;AF=0.114;AN=70;BaseQRankSum=0.818;C  |
| 6600 | chrY | 9941043 | . | A | G,T | 2694.42  | PASS          | AC=6,5;AF=0.086,0.071;AN=70;BaseQRankSum  |
| 6601 | chrY | 9941044 | . | T | C   | 7082.52  | PASS          | AC=22;AF=0.314;AN=70;BaseQRankSum=0.403;C |
| 6602 | chrY | 9941057 | . | G | T   | 303.06   | PASS          | AC=2;AF=0.029;AN=70;BaseQRankSum=1.56;Cli |
| 6603 | chrY | 9941061 | . | A | G   | 9556.51  | PASS          | AC=16;AF=0.229;AN=70;BaseQRankSum=-1.150e |
| 6604 | chrY | 9941072 | . | A | G,T | 7083.03  | PASS          | AC=16,9;AF=0.229,0.129;AN=70;BaseQRankSum |
| 6605 | chrY | 9941073 | . | G | C   | 3775.01  | PASS          | AC=14;AF=0.200;AN=70;BaseQRankSum=-3.040e |
| 6606 | chrY | 9941077 | . | G | T   | 3701.12  | PASS          | AC=14;AF=0.200;AN=70;BaseQRankSum=0.350;C |
| 6607 | chrY | 9941082 | . | C | G   | 14466.11 | PASS          | AC=16;AF=0.235;AN=68;BaseQRankSum         |
| 6608 | chrY | 9941083 | . | T | C   | 3808.45  | PASS          | AC=13;AF=0.186;AN=70;BaseQRankSum=0.530;C |
| 6609 | chrY | 9941089 | . | A | G   | 16376.51 | PASS          | AC=16;AF=0.229;AN=70;BaseQRankSum         |
| 6610 | chrY | 9941096 | . | T | C   | 78927.79 | PASS          | AC=36;AF=0.514;AN=70;BaseQRankSum         |
| 6611 | chrY | 9941100 | . | T | C   | 33310.53 | PASS          | AC=34;AF=0.486;AN=70;BaseQRankSum         |
| 6612 | chrY | 9941103 | . | T | C   | 1718.05  | PASS          | AC=5;AF=0.071;AN=70;BaseQRankSum=1.04;Cli |



|      |      |         |   |   |     |           |               |                                           |
|------|------|---------|---|---|-----|-----------|---------------|-------------------------------------------|
| 6613 | chrY | 9941115 | . | A | G   | 25546.53  | PASS          | AC=34;AF=0.486;AN=70;BaseQRankSum         |
| 6614 | chrY | 9941120 | . | G | T   | 63249.72  | PASS          | AC=35;AF=0.500;AN=70;BaseQRankSum         |
| 6615 | chrY | 9941122 | . | G | C   | 2929.94   | PASS          | AC=9;AF=0.129;AN=70;BaseQRankSum=-2.552e+ |
| 6616 | chrY | 9941137 | . | G | A   | 8611.43   | PASS          | AC=22;AF=0.314;AN=70;BaseQRankSum=-5.710e |
| 6617 | chrY | 9941138 | . | A | G   | 13359.80  | PASS          | AC=27;AF=0.386;AN=70;BaseQRankSum         |
| 6618 | chrY | 9941139 | . | C | G   | 33252.94  | PASS          | AC=34;AF=0.486;AN=70;BaseQRankSum         |
| 6619 | chrY | 9941140 | . | A | G   | 1153.28   | my_snp_filter | AC=7;AF=0.100;AN=70;BaseQRankSum=         |
| 6620 | chrY | 9941154 | . | T | C   | 20239.80  | PASS          | AC=32;AF=0.457;AN=70;BaseQRankSum         |
| 6621 | chrY | 9941168 | . | G | A   | 22440.84  | PASS          | AC=34;AF=0.486;AN=70;BaseQRankSum         |
| 6622 | chrY | 9941183 | . | G | A   | 1925.16   | my_snp_filter | AC=12;AF=0.171;AN=70;BaseQRankSum         |
| 6623 | chrY | 9941190 | . | G | A   | 1956.07   | my_snp_filter | AC=12;AF=0.171;AN=70;BaseQRankSum         |
| 6624 | chrY | 9941204 | . | C | A   | 175.41    | my_snp_filter | AC=2;AF=0.029;AN=70;BaseQRankSum=         |
| 6625 | chrY | 9941213 | . | A | G   | 9408.65   | PASS          | AC=26;AF=0.371;AN=70;BaseQRankSum=-4.020e |
| 6626 | chrY | 9941217 | . | A | G   | 102456.39 | PASS          | AC=36;AF=0.514;AN=70;BaseQRankSum         |
| 6627 | chrY | 9941230 | . | G | T   | 86532.73  | PASS          | AC=35;AF=0.500;AN=70;BaseQRankSum         |
| 6628 | chrY | 9941236 | . | C | T   | 15491.47  | PASS          | AC=33;AF=0.471;AN=70;BaseQRankSum         |
| 6629 | chrY | 9941247 | . | T | G   | 1382.87   | my_snp_filter | AC=13;AF=0.186;AN=70;BaseQRankSum         |
| 6630 | chrY | 9941248 | . | C | G   | 1389.84   | my_snp_filter | AC=14;AF=0.200;AN=70;BaseQRankSum         |
| 6631 | chrY | 9941256 | . | G | T   | 13561.75  | PASS          | AC=32;AF=0.457;AN=70;BaseQRankSum         |
| 6632 | chrY | 9941264 | . | T | C   | 29807.67  | my_snp_filter | AC=34;AF=0.500;AN=68;Base                 |
| 6633 | chrY | 9941265 | . | G | A   | 54.89     | PASS          | AC=1;AF=0.014;AN=70;BaseQRankSum=-2.540e- |
| 6634 | chrY | 9941271 | . | G | C   | 2037.76   | PASS          | AC=15;AF=0.221;AN=68;BaseQRankSum=0.987;C |
| 6635 | chrY | 9941272 | . | T | A   | 77.63     | PASS          | AC=1;AF=0.015;AN=68;BaseQRankSum=-7.200e- |
| 6636 | chrY | 9941274 | . | A | C   | 1667.55   | PASS          | AC=15;AF=0.214;AN=70;BaseQRankSum=1.04;Cl |
| 6637 | chrY | 9941293 | . | G | T   | 211.79    | my_snp_filter | AC=4;AF=0.057;AN=70;BaseQRankSum=         |
| 6638 | chrY | 9941298 | . | T | C   | 7391.77   | my_snp_filter | AC=11;AF=0.157;AN=70;BaseQRankSum         |
| 6639 | chrY | 9941300 | . | A | G   | 7363.98   | my_snp_filter | AC=11;AF=0.157;AN=70;BaseQRankSum         |
| 6640 | chrY | 9941304 | . | G | A   | 1000.53   | PASS          | AC=6;AF=0.086;AN=70;BaseQRankSum=-1.910e+ |
| 6641 | chrY | 9941332 | . | G | A   | 630.94    | PASS          | AC=6;AF=0.086;AN=70;BaseQRankSum=0.564;Cl |
| 6642 | chrY | 9941333 | . | G | A   | 634       | PASS          | AC=6;AF=0.086;AN=70;BaseQRankSum=0.591;Cl |
| 6643 | chrY | 9941347 | . | C | T   | 78.92     | my_snp_filter | AC=2;AF=0.029;AN=70;BaseQRankSum=         |
| 6644 | chrY | 9941348 | . | C | T   | 78.95     | my_snp_filter | AC=2;AF=0.029;AN=70;BaseQRankSum=         |
| 6645 | chrY | 9941367 | . | A | C   | 31.05     | my_snp_filter | AC=1;AF=0.014;AN=70;BaseQRankSum=         |
| 6646 | chrY | 9941429 | . | C | T   | 2727.01   | PASS          | AC=9;AF=0.129;AN=70;BaseQRankSum=3.39;Cli |
| 6647 | chrY | 9941433 | . | T | C,A | 2320.66   | PASS          | AC=8,1;AF=0.114,0.014;AN=70;BaseQRankSum= |
| 6648 | chrY | 9941463 | . | C | A   | 5677.44   | PASS          | AC=17;AF=0.250;AN=68;BaseQRankSum=1.19;Cl |
| 6649 | chrY | 9941479 | . | A | C   | 8104.85   | PASS          | AC=24;AF=0.343;AN=70;BaseQRankSum=0.037;C |
| 6650 | chrY | 9941536 | . | T | C   | 355.50    | my_snp_filter | AC=5;AF=0.071;AN=70;BaseQRankSum=         |
| 6651 | chrY | 9941538 | . | T | G   | 25734.82  | PASS          | AC=30;AF=0.429;AN=70;BaseQRankSum         |
| 6652 | chrY | 9941551 | . | T | A   | 3710.23   | PASS          | AC=18;AF=0.257;AN=70;BaseQRankSum=-7.650e |
| 6653 | chrY | 9941559 | . | A | C   | 26792.54  | PASS          | AC=32;AF=0.457;AN=70;BaseQRankSum         |
| 6654 | chrY | 9941576 | . | A | T   | 53        | my_snp_filter | AC=4;AF=0.057;AN=70;BaseQRankSum=         |
| 6655 | chrY | 9941579 | . | G | A   | 42.69     | my_snp_filter | AC=4;AF=0.057;AN=70;BaseQRankSum=         |
| 6656 | chrY | 9941580 | . | T | C   | 5661.02   | PASS          | AC=16;AF=0.229;AN=70;BaseQRankSum=-6.780e |
| 6657 | chrY | 9941581 | . | C | T,A | 607.41    | my_snp_filter | AC=3,4;AF=0.043,0.057;AN=70;BaseQ         |
| 6658 | chrY | 9941589 | . | C | T   | 28721.28  | PASS          | AC=37;AF=0.529;AN=70;BaseQRankSum=        |
| 6659 | chrY | 9941591 | . | T | C   | 4402.98   | PASS          | AC=17;AF=0.243;AN=70;BaseQRankSum=-1.752e |
| 6660 | chrY | 9941592 | . | T | C   | 258.32    | my_snp_filter | AC=4;AF=0.057;AN=70;BaseQRankSum=         |
| 6661 | chrY | 9941598 | . | A | G   | 3874.14   | PASS          | AC=9;AF=0.129;AN=70;BaseQRankSum=1.92;Cli |
| 6662 | chrY | 9941600 | . | G | A   | 155.79    | my_snp_filter | AC=1;AF=0.014;AN=70;BaseQRankSum=         |
| 6663 | chrY | 9941617 | . | C | T   | 171.26    | my_snp_filter | AC=1;AF=0.014;AN=70;BaseQRankSum=         |
| 6664 | chrY | 9941621 | . | A | G   | 3431.29   | PASS          | AC=9;AF=0.129;AN=70;BaseQRankSum=3.18;Cli |
| 6665 | chrY | 9941634 | . | G | A   | 1003.88   | my_snp_filter | AC=8;AF=0.114;AN=70;BaseQRankSum=         |
| 6666 | chrY | 9941635 | . | T | C   | 1013.02   | my_snp_filter | AC=8;AF=0.114;AN=70;BaseQRankSum=         |
| 6667 | chrY | 9941642 | . | C | T   | 36598.55  | PASS          | AC=39;AF=0.557;AN=70;BaseQRankSum         |
| 6668 | chrY | 9941645 | . | A | G   | 1083.49   | my_snp_filter | AC=8;AF=0.114;AN=70;BaseQRankSum=         |
| 6669 | chrY | 9941646 | . | A | G   | 405.94    | PASS          | AC=8;AF=0.114;AN=70;BaseQRankSum=-1.442e+ |
| 6670 | chrY | 9941652 | . | T | G   | 95.27     | my_snp_filter | AC=5;AF=0.071;AN=70;BaseQRankSum=         |
| 6671 | chrY | 9941667 | . | C | T   | 4260.96   | PASS          | AC=27;AF=0.386;AN=70;BaseQRankSum=0.070;C |
| 6672 | chrY | 9941682 | . | T | C   | 353.63    | my_snp_filter | AC=10;AF=0.143;AN=70;BaseQRankSum         |
| 6673 | chrY | 9941684 | . | T | A   | 61.05     | my_snp_filter | AC=2;AF=0.029;AN=70;BaseQRankSum=         |
| 6674 | chrY | 9941694 | . | G | T   | 12829.03  | PASS          | AC=32;AF=0.457;AN=70;BaseQRankSum         |
| 6675 | chrY | 9941699 | . | C | A   | 71.87     | my_snp_filter | AC=1;AF=0.014;AN=70;BaseQRankSum=         |
| 6676 | chrY | 9941711 | . | A | G   | 3154.37   | PASS          | AC=20;AF=0.286;AN=70;BaseQRankSum=-3.540e |
| 6677 | chrY | 9941715 | . | A | G   | 3144.54   | PASS          | AC=20;AF=0.286;AN=70;BaseQRankSum=-1.276e |
| 6678 | chrY | 9941716 | . | T | C   | 394.18    | PASS          | AC=2;AF=0.029;AN=70;BaseQRankSum=-7.760e- |
| 6679 | chrY | 9941718 | . | G | A   | 18225.37  | PASS          | AC=32;AF=0.457;AN=70;BaseQRankSum         |
| 6680 | chrY | 9941724 | . | G | A   | 3095.42   | PASS          | AC=18;AF=0.257;AN=70;BaseQRankSum=-3.210e |
| 6681 | chrY | 9941725 | . | G | A   | 426.13    | PASS          | AC=5;AF=0.071;AN=70;BaseQRankSum=0.322;Cl |
| 6682 | chrY | 9941728 | . | C | A   | 384.94    | PASS          | AC=5;AF=0.071;AN=70;BaseQRankSum=1.04;Cli |
| 6683 | chrY | 9941730 | . | G | C   | 269.23    | PASS          | AC=3;AF=0.043;AN=70;BaseQRankSum=0.566;Cl |
| 6684 | chrY | 9941736 | . | T | C   | 13562.73  | PASS          | AC=27;AF=0.386;AN=70;BaseQRankSum         |
| 6685 | chrY | 9941750 | . | A | G   | 7201.43   | PASS          | AC=15;AF=0.214;AN=70;BaseQRankSum=0.322;C |
| 6686 | chrY | 9941753 | . | T | C   | 678.53    | PASS          | AC=11;AF=0.157;AN=70;BaseQRankSum=-2.550e |
| 6687 | chrY | 9941755 | . | C | G   | 11020.50  | PASS          | AC=24;AF=0.343;AN=70;BaseQRankSum         |
| 6688 | chrY | 9941758 | . | A | G   | 10616.20  | PASS          | AC=23;AF=0.329;AN=70;BaseQRankSum         |



|      |      |         |   |   |       |          |               |                                           |
|------|------|---------|---|---|-------|----------|---------------|-------------------------------------------|
| 6689 | chrY | 9941770 | . | T | C     | 8729.01  | PASS          | AC=19;AF=0.271;AN=70;BaseQRankSum=-1.107e |
| 6690 | chrY | 9941771 | . | G | T     | 908.47   | PASS          | AC=7;AF=0.100;AN=70;BaseQRankSum=1.38;Cli |
| 6691 | chrY | 9941783 | . | A | G     | 6714.97  | PASS          | AC=15;AF=0.221;AN=68;BaseQRankSum=0.801;C |
| 6692 | chrY | 9941788 | . | A | T     | 1723.22  | PASS          | AC=10;AF=0.143;AN=70;BaseQRankSum=-2.480e |
| 6693 | chrY | 9941802 | . | G | T,*   | 6947.56  | PASS          | AC=23,3;AF=0.338,0.044;AN=68;BaseQRankSum |
| 6694 | chrY | 9941822 | . | G | C,A   | 31681.28 | PASS          | AC=31,10;AF=0.443,0.143;AN=70;Bas         |
| 6695 | chrY | 9941827 | . | T | C     | 419.61   | PASS          | AC=4;AF=0.057;AN=70;BaseQRankSum=-7.100e- |
| 6696 | chrY | 9941829 | . | A | G     | 30737.11 | PASS          | AC=25;AF=0.500;AN=50;BaseQRankSum         |
| 6697 | chrY | 9941832 | . | C | T     | 48.42    | my_snp_filter | AC=1;AF=0.014;AN=70;BaseQRankSum=         |
| 6698 | chrY | 9941837 | . | C | G     | 3759.04  | PASS          | AC=16;AF=0.229;AN=70;BaseQRankSum=-3.010e |
| 6699 | chrY | 9941838 | . | C | T     | 111.42   | PASS          | AC=1;AF=0.014;AN=70;BaseQRankSum=-1.460e- |
| 6700 | chrY | 9941848 | . | A | G     | 8138.57  | PASS          | AC=13;AF=0.186;AN=70;BaseQRankSum=-2.107e |
| 6701 | chrY | 9941853 | . | T | G     | 5110.53  | PASS          | AC=14;AF=0.200;AN=70;BaseQRankSum=-1.009e |
| 6702 | chrY | 9941854 | . | T | C     | 8168.27  | PASS          | AC=13;AF=0.186;AN=70;BaseQRankSum=1.32;Cl |
| 6703 | chrY | 9941860 | . | T | A     | 8308.35  | PASS          | AC=13;AF=0.186;AN=70;BaseQRankSum=-4.750e |
| 6704 | chrY | 9941865 | . | A | G     | 4082.89  | PASS          | AC=20;AF=0.286;AN=70;BaseQRankSum=-7.420e |
| 6705 | chrY | 9941869 | . | C | T     | 8393.61  | PASS          | AC=13;AF=0.186;AN=70;BaseQRankSum=1.98;Cl |
| 6706 | chrY | 9941879 | . | T | C     | 37.49    | my_snp_filter | AC=1;AF=0.014;AN=70;BaseQRankSum=         |
| 6707 | chrY | 9941884 | . | T | G     | 1009.32  | PASS          | AC=6;AF=0.086;AN=70;BaseQRankSum=-5.490e- |
| 6708 | chrY | 9941885 | . | C | G,A   | 10800.26 | PASS          | AC=10,7;AF=0.147,0.103;AN=68;Base         |
| 6709 | chrY | 9941887 | . | T | C     | 927.94   | my_snp_filter | AC=11;AF=0.157;AN=70;BaseQRankSum         |
| 6710 | chrY | 9941888 | . | A | G     | 857.30   | my_snp_filter | AC=8;AF=0.114;AN=70;BaseQRankSum=         |
| 6711 | chrY | 9941907 | . | A | G     | 1022.49  | PASS          | AC=11;AF=0.157;AN=70;BaseQRankSum=-1.240e |
| 6712 | chrY | 9941915 | . | G | A     | 5372.16  | PASS          | AC=12;AF=0.171;AN=70;BaseQRankSum=-9.620e |
| 6713 | chrY | 9941917 | . | A | G     | 7641.60  | PASS          | AC=15;AF=0.214;AN=70;BaseQRankSum=-4.280e |
| 6714 | chrY | 9941920 | . | A | G     | 22911.79 | PASS          | AC=20;AF=0.526;AN=38;BaseQRankSum         |
| 6715 | chrY | 9941928 | . | A | C     | 97.16    | PASS          | AC=2;AF=0.029;AN=70;BaseQRankSum=0.630;Cl |
| 6716 | chrY | 9941939 | . | C | G     | 164.13   | my_snp_filter | AC=4;AF=0.057;AN=70;BaseQRankSum=         |
| 6717 | chrY | 9941944 | . | T | A     | 107.90   | PASS          | AC=1;AF=0.014;AN=70;BaseQRankSum=1.43;Cli |
| 6718 | chrY | 9941951 | . | C | T     | 150.09   | PASS          | AC=1;AF=0.014;AN=70;BaseQRankSum=-1.021e+ |
| 6719 | chrY | 9941952 | . | C | A     | 131.64   | PASS          | AC=1;AF=0.014;AN=70;BaseQRankSum=0.153;Cl |
| 6720 | chrY | 9941954 | . | T | A     | 156.01   | PASS          | AC=1;AF=0.017;AN=58;BaseQRankSum=0.882;Cl |
| 6721 | chrY | 9941955 | . | T | A     | 2890.30  | PASS          | AC=4;AF=0.400;AN=10;BaseQRankSum=-5.020e- |
| 6722 | chrY | 9941963 | . | A | G     | 157.04   | PASS          | AC=2;AF=0.029;AN=70;BaseQRankSum=0.992;Cl |
| 6723 | chrY | 9941973 | . | C | T     | 874.81   | PASS          | AC=4;AF=0.065;AN=62;BaseQRankSum=-3.720e- |
| 6724 | chrY | 9941974 | . | A | G     | 976.73   | PASS          | AC=4;AF=0.067;AN=60;BaseQRankSum=-5.720e- |
| 6725 | chrY | 9941986 | . | C | T     | 744.76   | PASS          | AC=4;AF=0.167;AN=24;BaseQRankSum=2.05;Cli |
| 6726 | chrY | 9942005 | . | T | G     | 34.18    | PASS          | AC=1;AF=0.022;AN=46;BaseQRankSum=-4.800e- |
| 6727 | chrY | 9942216 | . | C | T     | 308.19   | PASS          | AC=2;AF=0.111;AN=18;DP=131;FS=0.000;MLEAC |
| 6728 | chrY | 9942300 | . | G | T     | 30.34    | my_snp_filter | AC=1;AF=0.056;AN=18;BaseQRankSum=         |
| 6729 | chrY | 9942320 | . | T | G     | 190.90   | PASS          | AC=3;AF=0.167;AN=18;BaseQRankSum=0.00;Cli |
| 6730 | chrY | 9942332 | . | T | C     | 319      | PASS          | AC=5;AF=0.278;AN=18;BaseQRankSum=-3.500e- |
| 6731 | chrY | 9942333 | . | G | A     | 316      | PASS          | AC=5;AF=0.278;AN=18;BaseQRankSum=-1.550e+ |
| 6732 | chrY | 9942352 | . | T | C     | 1026.26  | PASS          | AC=6;AF=0.333;AN=18;BaseQRankSum=-1.510e- |
| 6733 | chrY | 9942353 | . | G | C     | 311.83   | PASS          | AC=5;AF=0.278;AN=18;BaseQRankSum=-9.100e- |
| 6734 | chrY | 9942357 | . | C | T     | 407.26   | PASS          | AC=3;AF=0.167;AN=18;BaseQRankSum=-7.140e- |
| 6735 | chrY | 9942358 | . | G | A     | 706.65   | PASS          | AC=5;AF=0.278;AN=18;BaseQRankSum=2.48;Cli |
| 6736 | chrY | 9942360 | . | C | T     | 294.89   | PASS          | AC=4;AF=0.222;AN=18;BaseQRankSum=0.505;Cl |
| 6737 | chrY | 9942368 | . | G | A     | 32.01    | my_snp_filter | AC=2;AF=0.111;AN=18;BaseQRankSum=         |
| 6738 | chrY | 9942373 | . | A | C,T,G | 1541.97  | PASS          | AC=1,3,2;AF=0.071,0.214,0.143;AN=14;BaseQ |
| 6739 | chrY | 9942379 | . | C | G     | 2176.51  | PASS          | AC=6;AF=0.500;AN=12;BaseQRankSum=-2.388e+ |
| 6740 | chrY | 9942383 | . | A | T     | 337.59   | PASS          | AC=4;AF=0.182;AN=22;BaseQRankSum=0.203;Cl |
| 6741 | chrY | 9942385 | . | G | A     | 40.51    | my_snp_filter | AC=2;AF=0.091;AN=22;BaseQRankSum=         |
| 6742 | chrY | 9942391 | . | T | C     | 306.22   | PASS          | AC=3;AF=0.125;AN=24;BaseQRankSum=-1.552e+ |
| 6743 | chrY | 9942396 | . | A | G     | 292.05   | PASS          | AC=3;AF=0.125;AN=24;BaseQRankSum=-1.246e+ |
| 6744 | chrY | 9942408 | . | G | A     | 778.24   | PASS          | AC=5;AF=0.250;AN=20;BaseQRankSum=-8.240e- |
| 6745 | chrY | 9942417 | . | C | T     | 44.68    | my_snp_filter | AC=3;AF=0.125;AN=24;BaseQRankSum=         |
| 6746 | chrY | 9942423 | . | G | A     | 732.68   | PASS          | AC=5;AF=0.208;AN=24;BaseQRankSum=-9.460e- |
| 6747 | chrY | 9942428 | . | A | C     | 38.57    | my_snp_filter | AC=3;AF=0.125;AN=24;BaseQRankSum=         |
| 6748 | chrY | 9942430 | . | A | T     | 827.02   | PASS          | AC=6;AF=0.300;AN=20;BaseQRankSum=-3.570e- |
| 6749 | chrY | 9942433 | . | A | G     | 741.20   | PASS          | AC=6;AF=0.250;AN=24;BaseQRankSum=-2.364e+ |
| 6750 | chrY | 9942445 | . | A | G     | 827.52   | PASS          | AC=7;AF=0.292;AN=24;BaseQRankSum=0.158;Cl |
| 6751 | chrY | 9942446 | . | G | T     | 523.52   | PASS          | AC=7;AF=0.318;AN=22;BaseQRankSum=0.023;Cl |
| 6752 | chrY | 9942452 | . | C | T     | 47.59    | PASS          | AC=1;AF=0.038;AN=26;BaseQRankSum=0.749;Cl |
| 6753 | chrY | 9942475 | . | G | C     | 2506.03  | PASS          | AC=10;AF=0.455;AN=22;BaseQRankSum=1.22;Cl |
| 6754 | chrY | 9942477 | . | T | C     | 400.63   | PASS          | AC=4;AF=0.182;AN=22;BaseQRankSum=-8.530e- |
| 6755 | chrY | 9942500 | . | A | G     | 248.05   | PASS          | AC=2;AF=0.091;AN=22;BaseQRankSum=0.805;Cl |
| 6756 | chrY | 9942515 | . | G | A     | 442.74   | PASS          | AC=1;AF=0.036;AN=28;BaseQRankSum=0.869;Cl |
| 6757 | chrY | 9942524 | . | T | G     | 181.68   | PASS          | AC=1;AF=0.029;AN=34;BaseQRankSum=-1.246e+ |
| 6758 | chrY | 9942599 | . | A | T     | 85.67    | PASS          | AC=2;AF=0.048;AN=42;BaseQRankSum=1.26;Cli |
| 6759 | chrY | 9942602 | . | C | T     | 2169.21  | PASS          | AC=9;AF=0.225;AN=40;BaseQRankSum=1.64;Cli |
| 6760 | chrY | 9942603 | . | T | G     | 296.99   | PASS          | AC=5;AF=0.114;AN=44;BaseQRankSum=-7.440e- |
| 6761 | chrY | 9942637 | . | C | T     | 1391.43  | my_snp_filter | AC=8;AF=0.133;AN=60;BaseQRankSum=         |
| 6762 | chrY | 9942658 | . | A | G     | 1383.60  | my_snp_filter | AC=8;AF=0.121;AN=66;BaseQRankSum=         |
| 6763 | chrY | 9942665 | . | A | G     | 357.81   | my_snp_filter | AC=6;AF=0.088;AN=68;BaseQRankSum=         |
| 6764 | chrY | 9942668 | . | T | C     | 859.44   | my_snp_filter | AC=7;AF=0.100;AN=70;BaseQRankSum=         |

|      |      |         |   |   |     |          |               |                                           |
|------|------|---------|---|---|-----|----------|---------------|-------------------------------------------|
| 6765 | chrY | 9942669 | . | A | G   | 197.19   | PASS          | AC=3;AF=0.043;AN=70;BaseQRankSum=-1.471e+ |
| 6766 | chrY | 9942671 | . | C | G   | 173.21   | PASS          | AC=1;AF=0.014;AN=70;BaseQRankSum=-5.100e- |
| 6767 | chrY | 9942673 | . | A | G   | 542.65   | my_snp_filter | AC=6;AF=0.086;AN=70;BaseQRankSum=         |
| 6768 | chrY | 9942677 | . | G | T   | 196.51   | PASS          | AC=3;AF=0.043;AN=70;BaseQRankSum=-1.040e+ |
| 6769 | chrY | 9942684 | . | T | A   | 3380.63  | PASS          | AC=9;AF=0.129;AN=70;BaseQRankSum=-1.800e- |
| 6770 | chrY | 9942698 | . | A | G   | 809.41   | my_snp_filter | AC=6;AF=0.086;AN=70;BaseQRankSum=         |
| 6771 | chrY | 9942704 | . | C | T   | 297.12   | PASS          | AC=3;AF=0.043;AN=70;BaseQRankSum=-8.500e- |
| 6772 | chrY | 9942712 | . | C | G   | 2043.22  | PASS          | AC=10;AF=0.147;AN=68;BaseQRankSum=-3.110e |
| 6773 | chrY | 9942726 | . | A | G   | 795.82   | PASS          | AC=8;AF=0.114;AN=70;BaseQRankSum=-2.336e+ |
| 6774 | chrY | 9942731 | . | T | A   | 963.71   | PASS          | AC=9;AF=0.132;AN=68;BaseQRankSum=1.12;Cli |
| 6775 | chrY | 9942758 | . | G | C   | 37.85    | PASS          | AC=1;AF=0.014;AN=70;BaseQRankSum=0.736;Cl |
| 6776 | chrY | 9942770 | . | C | A,G | 401.31   | PASS          | AC=2,3;AF=0.029,0.043;AN=70;BaseQRankSum= |
| 6777 | chrY | 9942774 | . | G | T   | 183.16   | PASS          | AC=3;AF=0.043;AN=70;BaseQRankSum=-2.420e- |
| 6778 | chrY | 9942789 | . | T | A   | 446.64   | PASS          | AC=5;AF=0.074;AN=68;BaseQRankSum=1.08;Cli |
| 6779 | chrY | 9942802 | . | T | C   | 645.60   | PASS          | AC=6;AF=0.086;AN=70;BaseQRankSum=-5.780e- |
| 6780 | chrY | 9942822 | . | T | A   | 1325.92  | PASS          | AC=7;AF=0.106;AN=66;BaseQRankSum=-1.240e+ |
| 6781 | chrY | 9942850 | . | T | C   | 6362.88  | PASS          | AC=9;AF=0.141;AN=64;BaseQRankSum=0.755;Cl |
| 6782 | chrY | 9942851 | . | G | A   | 6376.88  | PASS          | AC=9;AF=0.141;AN=64;BaseQRankSum=0.108;Cl |
| 6783 | chrY | 9942876 | . | T | G   | 784.31   | my_snp_filter | AC=8;AF=0.125;AN=64;BaseQRankSum=         |
| 6784 | chrY | 9942899 | . | A | C   | 1799.99  | my_snp_filter | AC=8;AF=0.121;AN=66;BaseQRankSum=         |
| 6785 | chrY | 9942922 | . | C | A   | 1688.75  | my_snp_filter | AC=9;AF=0.132;AN=68;BaseQRankSum=         |
| 6786 | chrY | 9942949 | . | T | A   | 1121.58  | my_snp_filter | AC=14;AF=0.200;AN=70;BaseQRankSum=        |
| 6787 | chrY | 9942955 | . | C | T   | 516.65   | PASS          | AC=7;AF=0.100;AN=70;BaseQRankSum=0.777;Cl |
| 6788 | chrY | 9942979 | . | C | T   | 815.14   | PASS          | AC=6;AF=0.086;AN=70;BaseQRankSum=1.20;Cli |
| 6789 | chrY | 9942985 | . | C | T   | 475.88   | PASS          | AC=4;AF=0.057;AN=70;BaseQRankSum=2.00;Cli |
| 6790 | chrY | 9942986 | . | A | G   | 473.37   | PASS          | AC=4;AF=0.057;AN=70;BaseQRankSum=1.95;Cli |
| 6791 | chrY | 9942987 | . | C | A   | 409.80   | PASS          | AC=4;AF=0.057;AN=70;BaseQRankSum=1.75;Cli |
| 6792 | chrY | 9942990 | . | A | G   | 279.87   | PASS          | AC=4;AF=0.057;AN=70;BaseQRankSum=0.778;Cl |
| 6793 | chrY | 9943004 | . | A | G   | 363.48   | PASS          | AC=5;AF=0.071;AN=70;BaseQRankSum=0.441;Cl |
| 6794 | chrY | 9943009 | . | G | A   | 368.03   | PASS          | AC=5;AF=0.071;AN=70;BaseQRankSum=0.140;Cl |
| 6795 | chrY | 9943020 | . | A | G   | 671.13   | PASS          | AC=10;AF=0.143;AN=70;BaseQRankSum=0.529;C |
| 6796 | chrY | 9943046 | . | G | T   | 160.38   | my_snp_filter | AC=7;AF=0.100;AN=70;BaseQRankSum=         |
| 6797 | chrY | 9943059 | . | T | C   | 5866.96  | PASS          | AC=26;AF=0.371;AN=70;BaseQRankSum=-1.099e |
| 6798 | chrY | 9943072 | . | G | C   | 6299.88  | PASS          | AC=26;AF=0.371;AN=70;BaseQRankSum=0.168;C |
| 6799 | chrY | 9943104 | . | C | T   | 6288.16  | PASS          | AC=26;AF=0.371;AN=70;BaseQRankSum=-5.300e |
| 6800 | chrY | 9943132 | . | C | T   | 5079.37  | PASS          | AC=22;AF=0.314;AN=70;BaseQRankSum=0.181;C |
| 6801 | chrY | 9943135 | . | A | G   | 3552.68  | PASS          | AC=20;AF=0.286;AN=70;BaseQRankSum=-7.200e |
| 6802 | chrY | 9943144 | . | T | A   | 2886.13  | PASS          | AC=17;AF=0.250;AN=68;BaseQRankSum=0.204;C |
| 6803 | chrY | 9943151 | . | C | G   | 79.08    | PASS          | AC=3;AF=0.045;AN=66;BaseQRankSum=-9.100e- |
| 6804 | chrY | 9943152 | . | C | G   | 78.93    | PASS          | AC=3;AF=0.044;AN=68;BaseQRankSum=0.691;Cl |
| 6805 | chrY | 9943166 | . | T | A   | 804.78   | PASS          | AC=10;AF=0.147;AN=68;BaseQRankSum=-2.500e |
| 6806 | chrY | 9943201 | . | G | A   | 2158.34  | my_snp_filter | AC=18;AF=0.265;AN=68;BaseQRankSum=        |
| 6807 | chrY | 9943212 | . | C | T   | 2119.83  | my_snp_filter | AC=18;AF=0.265;AN=68;BaseQRankSum=        |
| 6808 | chrY | 9943259 | . | C | A   | 425.38   | PASS          | AC=7;AF=0.106;AN=66;BaseQRankSum=1.64;Cli |
| 6809 | chrY | 9943263 | . | T | G   | 284.57   | PASS          | AC=7;AF=0.103;AN=68;BaseQRankSum=-2.117e+ |
| 6810 | chrY | 9943266 | . | A | C   | 216.04   | my_snp_filter | AC=7;AF=0.103;AN=68;BaseQRankSum=         |
| 6811 | chrY | 9943288 | . | G | A   | 36.81    | my_snp_filter | AC=4;AF=0.061;AN=66;BaseQRankSum=         |
| 6812 | chrY | 9943294 | . | C | T   | 49.29    | PASS          | AC=1;AF=0.015;AN=66;BaseQRankSum=-4.670e- |
| 6813 | chrY | 9943299 | . | C | A   | 103.20   | PASS          | AC=3;AF=0.045;AN=66;BaseQRankSum=-1.345e+ |
| 6814 | chrY | 9943359 | . | G | A   | 70.97    | PASS          | AC=2;AF=0.030;AN=66;BaseQRankSum=-1.495e+ |
| 6815 | chrY | 9943364 | . | A | C   | 72.46    | PASS          | AC=1;AF=0.014;AN=70;BaseQRankSum=-1.495e+ |
| 6816 | chrY | 9943456 | . | C | T   | 618.05   | my_snp_filter | AC=5;AF=0.071;AN=70;BaseQRankSum=         |
| 6817 | chrY | 9943471 | . | A | T   | 3978.60  | my_snp_filter | AC=7;AF=0.103;AN=68;BaseQRankSum=         |
| 6818 | chrY | 9943475 | . | T | C   | 4466.62  | my_snp_filter | AC=7;AF=0.106;AN=66;BaseQRankSum=         |
| 6819 | chrY | 9943488 | . | C | T   | 10731.16 | my_snp_filter | AC=15;AF=0.227;AN=66;BaseQRankSum=        |
| 6820 | chrY | 9943489 | . | C | G   | 10789.45 | my_snp_filter | AC=15;AF=0.227;AN=66;BaseQRankSum=        |
| 6821 | chrY | 9943512 | . | G | A   | 19496.99 | my_snp_filter | AC=30;AF=0.469;AN=64;BaseQRankSum=        |
| 6822 | chrY | 9943530 | . | T | C   | 28425.76 | my_snp_filter | AC=32;AF=0.516;AN=62;BaseQRankSum=        |
| 6823 | chrY | 9943532 | . | G | C   | 6054.03  | PASS          | AC=13;AF=0.197;AN=66;BaseQRankSum=-1.045e |
| 6824 | chrY | 9943538 | . | G | T   | 185.59   | my_snp_filter | AC=2;AF=0.029;AN=70;BaseQRankSum=         |
| 6825 | chrY | 9943539 | . | G | C   | 37.56    | my_snp_filter | AC=1;AF=0.014;AN=70;BaseQRankSum=         |
| 6826 | chrY | 9943540 | . | T | G   | 31367.71 | my_snp_filter | AC=32;AF=0.516;AN=62;BaseQRankSum=        |
| 6827 | chrY | 9943545 | . | G | A   | 153.29   | PASS          | AC=1;AF=0.014;AN=70;BaseQRankSum=-7.620e- |
| 6828 | chrY | 9943551 | . | G | A   | 109.82   | my_snp_filter | AC=2;AF=0.029;AN=70;BaseQRankSum=         |
| 6829 | chrY | 9943563 | . | G | C   | 3864.71  | my_snp_filter | AC=6;AF=0.097;AN=62;BaseQRankSum=         |
| 6830 | chrY | 9943573 | . | A | T   | 3487.53  | my_snp_filter | AC=5;AF=0.071;AN=70;BaseQRankSum=         |
| 6831 | chrY | 9943574 | . | A | C   | 403.48   | PASS          | AC=5;AF=0.071;AN=70;BaseQRankSum=-5.340e- |
| 6832 | chrY | 9943584 | . | C | T   | 9309.70  | PASS          | AC=31;AF=0.443;AN=70;BaseQRankSum=-1.458e |
| 6833 | chrY | 9943585 | . | T | C   | 7787.40  | PASS          | AC=13;AF=0.217;AN=60;BaseQRankSum=-2.430e |
| 6834 | chrY | 9943589 | . | G | A   | 7953.78  | PASS          | AC=12;AF=0.200;AN=60;BaseQRankSum=-1.004e |
| 6835 | chrY | 9943600 | . | G | C   | 4179.28  | my_snp_filter | AC=10;AF=0.167;AN=60;BaseQRankSum=        |
| 6836 | chrY | 9943607 | . | T | C   | 1019.46  | PASS          | AC=13;AF=0.186;AN=70;BaseQRankSum=-3.640e |
| 6837 | chrY | 9943608 | . | A | G   | 1055.48  | PASS          | AC=9;AF=0.129;AN=70;BaseQRankSum=-2.700e- |
| 6838 | chrY | 9943620 | . | A | G   | 9251.24  | PASS          | AC=15;AF=0.214;AN=70;BaseQRankSum=-2.282e |
| 6839 | chrY | 9943622 | . | C | G   | 6904.23  | PASS          | AC=7;AF=0.100;AN=70;BaseQRankSum=-2.740e- |
| 6840 | chrY | 9943626 | . | A | T   | 7177.60  | my_snp_filter | AC=8;AF=0.114;AN=70;BaseQRankSum=         |

|      |      |         |   |   |       |          |               |                                            |
|------|------|---------|---|---|-------|----------|---------------|--------------------------------------------|
| 6841 | chrY | 9943632 | . | A | C     | 29219.72 | PASS          | AC=35;AF=0.500;AN=70;BaseQRankSum          |
| 6842 | chrY | 9943633 | . | G | A     | 11236.64 | PASS          | AC=32;AF=0.457;AN=70;BaseQRankSum          |
| 6843 | chrY | 9943642 | . | G | T     | 1021.86  | PASS          | AC=12;AF=0.171;AN=70;BaseQRankSum=-5.200e  |
| 6844 | chrY | 9943649 | . | G | A     | 33105.74 | PASS          | AC=35;AF=0.500;AN=70;BaseQRankSum          |
| 6845 | chrY | 9943650 | . | G | A     | 1973.79  | PASS          | AC=13;AF=0.186;AN=70;BaseQRankSum=0.196;C  |
| 6846 | chrY | 9943655 | . | C | A     | 66.23    | my_snp_filter | AC=2;AF=0.029;AN=70;BaseQRankSum=          |
| 6847 | chrY | 9943657 | . | T | G     | 66.21    | my_snp_filter | AC=2;AF=0.029;AN=70;BaseQRankSum=          |
| 6848 | chrY | 9943664 | . | C | A     | 4496.09  | PASS          | AC=22;AF=0.314;AN=70;BaseQRankSum=0.852;C  |
| 6849 | chrY | 9943666 | . | G | T     | 1532.11  | PASS          | AC=16;AF=0.229;AN=70;BaseQRankSum=0.401;C  |
| 6850 | chrY | 9943670 | . | A | G     | 1916.64  | PASS          | AC=12;AF=0.171;AN=70;BaseQRankSum=1.46;C1  |
| 6851 | chrY | 9943671 | . | G | A     | 4747.26  | PASS          | AC=22;AF=0.314;AN=70;BaseQRankSum=-2.050e  |
| 6852 | chrY | 9943692 | . | T | C     | 270.47   | my_snp_filter | AC=6;AF=0.086;AN=70;BaseQRankSum=          |
| 6853 | chrY | 9943699 | . | G | T     | 11082.01 | PASS          | AC=26;AF=0.371;AN=70;BaseQRankSum          |
| 6854 | chrY | 9943700 | . | T | A     | 324.25   | PASS          | AC=6;AF=0.086;AN=70;BaseQRankSum=0.318;C1  |
| 6855 | chrY | 9943708 | . | C | T     | 13794.74 | PASS          | AC=27;AF=0.386;AN=70;BaseQRankSum          |
| 6856 | chrY | 9943716 | . | G | A     | 13131.77 | PASS          | AC=26;AF=0.371;AN=70;BaseQRankSum          |
| 6857 | chrY | 9943723 | . | G | A     | 9790.05  | PASS          | AC=23;AF=0.329;AN=70;BaseQRankSum=0.934;C  |
| 6858 | chrY | 9943724 | . | C | A     | 1293.37  | PASS          | AC=7;AF=0.100;AN=70;BaseQRankSum=-2.150e-  |
| 6859 | chrY | 9943729 | . | G | T     | 31085.74 | PASS          | AC=34;AF=0.486;AN=70;BaseQRankSum          |
| 6860 | chrY | 9943740 | . | G | C     | 10227.48 | PASS          | AC=23;AF=0.329;AN=70;BaseQRankSum          |
| 6861 | chrY | 9943748 | . | A | G     | 80976.94 | PASS          | AC=36;AF=0.514;AN=70;BaseQRankSum          |
| 6862 | chrY | 9943751 | . | T | A     | 1418.71  | PASS          | AC=6;AF=0.086;AN=70;BaseQRankSum=0.236;C1  |
| 6863 | chrY | 9943753 | . | G | A     | 32512.72 | PASS          | AC=33;AF=0.471;AN=70;BaseQRankSum          |
| 6864 | chrY | 9943754 | . | G | A     | 18050.77 | PASS          | AC=32;AF=0.457;AN=70;BaseQRankSum          |
| 6865 | chrY | 9943768 | . | G | A     | 538.35   | PASS          | AC=5;AF=0.071;AN=70;BaseQRankSum=-7.170e-  |
| 6866 | chrY | 9943771 | . | G | A     | 32992.53 | PASS          | AC=34;AF=0.486;AN=70;BaseQRankSum          |
| 6867 | chrY | 9943779 | . | T | A     | 13018.70 | PASS          | AC=27;AF=0.386;AN=70;BaseQRankSum          |
| 6868 | chrY | 9943796 | . | C | T     | 12554.74 | PASS          | AC=24;AF=0.343;AN=70;BaseQRankSum          |
| 6869 | chrY | 9943801 | . | A | C     | 41372.84 | PASS          | AC=34;AF=0.486;AN=70;BaseQRankSum          |
| 6870 | chrY | 9943804 | . | C | G     | 109.30   | PASS          | AC=3;AF=0.047;AN=64;BaseQRankSum=0.00;Cli  |
| 6871 | chrY | 9943829 | . | C | A     | 580.65   | my_snp_filter | AC=6;AF=0.086;AN=70;BaseQRankSum=          |
| 6872 | chrY | 9943830 | . | A | T     | 576.02   | my_snp_filter | AC=6;AF=0.086;AN=70;BaseQRankSum=          |
| 6873 | chrY | 9943831 | . | C | A     | 2020.78  | PASS          | AC=9;AF=0.129;AN=70;BaseQRankSum=0.747;C1  |
| 6874 | chrY | 9943838 | . | G | A     | 594.67   | my_snp_filter | AC=7;AF=0.100;AN=70;BaseQRankSum=          |
| 6875 | chrY | 9943846 | . | A | T     | 74832.13 | PASS          | AC=35;AF=0.530;AN=66;BaseQRankSum          |
| 6876 | chrY | 9943853 | . | T | G     | 386.16   | my_snp_filter | AC=3;AF=0.043;AN=70;BaseQRankSum=          |
| 6877 | chrY | 9943866 | . | G | A,C   | 68639.76 | PASS          | AC=27,11;AF=0.409,0.167;AN=66;Bas          |
| 6878 | chrY | 9943876 | . | C | T     | 25505.06 | PASS          | AC=18;AF=0.257;AN=70;BaseQRankSum          |
| 6879 | chrY | 9943878 | . | G | A     | 22690.34 | PASS          | AC=18;AF=0.265;AN=68;BaseQRankSum          |
| 6880 | chrY | 9943880 | . | A | G     | 333.51   | my_snp_filter | AC=4;AF=0.057;AN=70;BaseQRankSum=          |
| 6881 | chrY | 9943888 | . | A | G,T,* | 41333.62 | PASS          | AC=25,12,1;AF=0.379,0.182,0.015;A          |
| 6882 | chrY | 9943890 | . | A | G,*   | 7736.30  | PASS          | AC=4,5;AF=0.061,0.076;AN=66;BaseQRankSum=  |
| 6883 | chrY | 9943910 | . | G | A,*   | 4828.82  | PASS          | AC=4,6;AF=0.057,0.086;AN=70;BaseQRankSum=  |
| 6884 | chrY | 9943921 | . | C | T     | 22448.13 | PASS          | AC=32;AF=0.457;AN=70;BaseQRankSum          |
| 6885 | chrY | 9943925 | . | G | A,*   | 8911.59  | PASS          | AC=3,5;AF=0.043,0.071;AN=70;BaseQRankSum=  |
| 6886 | chrY | 9943946 | . | C | A,*   | 6736.57  | PASS          | AC=18,3;AF=0.257,0.043;AN=70;BaseQRankSum= |
| 6887 | chrY | 9943958 | . | T | C,*   | 19986.68 | PASS          | AC=17,12;AF=0.243,0.171;AN=70;Bas          |
| 6888 | chrY | 9943965 | . | A | G     | 397.06   | my_snp_filter | AC=2;AF=0.029;AN=70;BaseQRankSum=          |
| 6889 | chrY | 9943966 | . | G | C     | 3800.93  | my_snp_filter | AC=17;AF=0.243;AN=70;BaseQRankSum          |
| 6890 | chrY | 9943975 | . | A | T     | 3122.08  | my_snp_filter | AC=11;AF=0.157;AN=70;BaseQRankSum          |
| 6891 | chrY | 9943978 | . | G | A     | 660.51   | my_snp_filter | AC=3;AF=0.043;AN=70;BaseQRankSum=          |
| 6892 | chrY | 9943997 | . | C | A     | 3875.80  | my_snp_filter | AC=20;AF=0.286;AN=70;BaseQRankSum          |
| 6893 | chrY | 9943999 | . | A | T     | 345.53   | my_snp_filter | AC=3;AF=0.043;AN=70;BaseQRankSum=          |
| 6894 | chrY | 9944010 | . | G | A     | 42807.72 | PASS          | AC=35;AF=0.500;AN=70;BaseQRankSum          |
| 6895 | chrY | 9944021 | . | C | T     | 265.51   | my_snp_filter | AC=3;AF=0.043;AN=70;BaseQRankSum=          |
| 6896 | chrY | 9944024 | . | T | C     | 51556.53 | PASS          | AC=35;AF=0.500;AN=70;BaseQRankSum          |
| 6897 | chrY | 9944027 | . | C | T     | 167.42   | my_snp_filter | AC=2;AF=0.029;AN=70;BaseQRankSum=          |
| 6898 | chrY | 9944032 | . | G | A     | 18530.54 | PASS          | AC=28;AF=0.400;AN=70;BaseQRankSum          |
| 6899 | chrY | 9944034 | . | T | G     | 58241.72 | PASS          | AC=35;AF=0.500;AN=70;BaseQRankSum          |
| 6900 | chrY | 9944043 | . | G | A     | 10395.63 | PASS          | AC=25;AF=0.357;AN=70;BaseQRankSum          |
| 6901 | chrY | 9944052 | . | C | T     | 44390.72 | PASS          | AC=35;AF=0.500;AN=70;BaseQRankSum          |
| 6902 | chrY | 9944061 | . | T | G     | 42530.17 | PASS          | AC=32;AF=0.457;AN=70;BaseQRankSum          |
| 6903 | chrY | 9944063 | . | G | T     | 13295.68 | PASS          | AC=25;AF=0.357;AN=70;BaseQRankSum          |
| 6904 | chrY | 9944066 | . | A | G     | 51736.72 | PASS          | AC=35;AF=0.500;AN=70;BaseQRankSum          |
| 6905 | chrY | 9944077 | . | C | T     | 3942.59  | my_snp_filter | AC=18;AF=0.257;AN=70;BaseQRankSum          |
| 6906 | chrY | 9944086 | . | G | C     | 3064.02  | my_snp_filter | AC=13;AF=0.186;AN=70;BaseQRankSum          |
| 6907 | chrY | 9944098 | . | G | T     | 2495.03  | my_snp_filter | AC=10;AF=0.143;AN=70;BaseQRankSum          |
| 6908 | chrY | 9944102 | . | A | G     | 8523.98  | PASS          | AC=26;AF=0.371;AN=70;BaseQRankSum=-9.100e  |
| 6909 | chrY | 9944104 | . | A | T     | 226.53   | my_snp_filter | AC=5;AF=0.071;AN=70;BaseQRankSum=          |
| 6910 | chrY | 9944112 | . | G | A     | 1487.54  | my_snp_filter | AC=11;AF=0.157;AN=70;BaseQRankSum          |
| 6911 | chrY | 9944113 | . | A | T     | 13842.11 | PASS          | AC=31;AF=0.443;AN=70;BaseQRankSum          |
| 6912 | chrY | 9944114 | . | C | A     | 2671.63  | PASS          | AC=12;AF=0.171;AN=70;BaseQRankSum=0.271;C  |
| 6913 | chrY | 9944116 | . | T | A     | 13327.18 | PASS          | AC=31;AF=0.443;AN=70;BaseQRankSum          |
| 6914 | chrY | 9944120 | . | C | T     | 17603.14 | PASS          | AC=30;AF=0.429;AN=70;BaseQRankSum          |
| 6915 | chrY | 9944121 | . | A | G     | 52594.72 | PASS          | AC=35;AF=0.500;AN=70;BaseQRankSum          |
| 6916 | chrY | 9944126 | . | A | G     | 42.07    | my_snp_filter | AC=2;AF=0.029;AN=70;BaseQRankSum=          |

|      |      |         |   |   |     |          |               |                                           |
|------|------|---------|---|---|-----|----------|---------------|-------------------------------------------|
| 6917 | chrY | 9944127 | . | C | A   | 4365.61  | PASS          | AC=22;AF=0.314;AN=70;BaseQRankSum=-1.900e |
| 6918 | chrY | 9944128 | . | A | C   | 36012.72 | PASS          | AC=35;AF=0.500;AN=70;BaseQRankSum         |
| 6919 | chrY | 9944132 | . | T | G   | 1070.19  | my_snp_filter | AC=11;AF=0.157;AN=70;BaseQRankSum         |
| 6920 | chrY | 9944134 | . | T | G   | 2900     | my_snp_filter | AC=21;AF=0.300;AN=70;BaseQRankSum         |
| 6921 | chrY | 9944135 | . | G | A   | 6144.54  | PASS          | AC=26;AF=0.371;AN=70;BaseQRankSum=-4.110e |
| 6922 | chrY | 9944145 | . | C | G   | 3035.10  | my_snp_filter | AC=20;AF=0.286;AN=70;BaseQRankSum         |
| 6923 | chrY | 9944146 | . | C | A   | 3007.27  | PASS          | AC=12;AF=0.171;AN=70;BaseQRankSum=1.12;Cl |
| 6924 | chrY | 9944147 | . | A | G   | 37022.72 | PASS          | AC=35;AF=0.500;AN=70;BaseQRankSum         |
| 6925 | chrY | 9944161 | . | C | A   | 119.19   | my_snp_filter | AC=3;AF=0.043;AN=70;BaseQRankSum          |
| 6926 | chrY | 9944162 | . | A | G   | 1029.51  | my_snp_filter | AC=14;AF=0.200;AN=70;BaseQRankSum         |
| 6927 | chrY | 9944168 | . | C | T   | 1554.86  | PASS          | AC=15;AF=0.214;AN=70;BaseQRankSum=1.56;Cl |
| 6928 | chrY | 9944169 | . | A | G   | 49846.56 | PASS          | AC=36;AF=0.514;AN=70;BaseQRankSum         |
| 6929 | chrY | 9944186 | . | G | A   | 619.87   | my_snp_filter | AC=8;AF=0.114;AN=70;BaseQRankSum=         |
| 6930 | chrY | 9944199 | . | G | A   | 4785.99  | PASS          | AC=19;AF=0.279;AN=68;BaseQRankSum=0.100;C |
| 6931 | chrY | 9944200 | . | G | A   | 1855.96  | PASS          | AC=13;AF=0.191;AN=68;BaseQRankSum=-1.027e |
| 6932 | chrY | 9944214 | . | A | G   | 22091.52 | my_snp_filter | AC=26;AF=0.406;AN=64;Base                 |
| 6933 | chrY | 9944218 | . | C | T   | 21329.28 | my_snp_filter | AC=26;AF=0.382;AN=68;Base                 |
| 6934 | chrY | 9944224 | . | C | G,A | 14811.52 | my_snp_filter | AC=3,16;AF=0.045,0.242;AN                 |
| 6935 | chrY | 9944225 | . | C | T   | 288.75   | my_snp_filter | AC=4;AF=0.059;AN=68;BaseQRankSum=         |
| 6936 | chrY | 9944232 | . | T | G   | 630.02   | PASS          | AC=3;AF=0.043;AN=70;BaseQRankSum=0.284;Cl |
| 6937 | chrY | 9944235 | . | G | A   | 648.33   | PASS          | AC=6;AF=0.086;AN=70;BaseQRankSum=0.931;Cl |
| 6938 | chrY | 9944244 | . | T | C   | 10669.76 | my_snp_filter | AC=10;AF=0.143;AN=70;Base                 |
| 6939 | chrY | 9944250 | . | T | C   | 9738.66  | my_snp_filter | AC=10;AF=0.143;AN=70;BaseQRankSum         |
| 6940 | chrY | 9944254 | . | G | A   | 2510.78  | PASS          | AC=8;AF=0.114;AN=70;BaseQRankSum=-3.560e- |
| 6941 | chrY | 9944271 | . | A | T   | 3812.10  | PASS          | AC=9;AF=0.129;AN=70;BaseQRankSum=0.641;Cl |
| 6942 | chrY | 9944276 | . | C | A   | 7253.91  | PASS          | AC=9;AF=0.129;AN=70;BaseQRankSum=2.78;Cl  |
| 6943 | chrY | 9944289 | . | C | G   | 2641.25  | PASS          | AC=7;AF=0.100;AN=70;BaseQRankSum=-1.828e+ |
| 6944 | chrY | 9944290 | . | C | G   | 665.17   | PASS          | AC=4;AF=0.057;AN=70;BaseQRankSum=-3.218e+ |
| 6945 | chrY | 9944294 | . | T | G   | 13908.49 | PASS          | AC=9;AF=0.129;AN=70;BaseQRankSum=         |
| 6946 | chrY | 9944302 | . | T | G   | 13229.89 | PASS          | AC=9;AF=0.129;AN=70;BaseQRankSum=         |
| 6947 | chrY | 9944310 | . | G | A   | 621.78   | my_snp_filter | AC=5;AF=0.071;AN=70;BaseQRankSum=         |
| 6948 | chrY | 9944331 | . | T | C   | 16926.31 | PASS          | AC=9;AF=0.129;AN=70;BaseQRankSum=         |
| 6949 | chrY | 9944334 | . | C | A   | 892.56   | my_snp_filter | AC=7;AF=0.100;AN=70;BaseQRankSum=         |
| 6950 | chrY | 9944339 | . | G | T   | 102.54   | my_snp_filter | AC=4;AF=0.057;AN=70;BaseQRankSum=         |
| 6951 | chrY | 9944340 | . | A | G   | 16925.38 | PASS          | AC=9;AF=0.129;AN=70;BaseQRankSum=         |
| 6952 | chrY | 9944342 | . | C | T   | 895.72   | my_snp_filter | AC=7;AF=0.100;AN=70;BaseQRankSum=         |
| 6953 | chrY | 9944346 | . | T | G   | 102.41   | my_snp_filter | AC=4;AF=0.057;AN=70;BaseQRankSum=         |
| 6954 | chrY | 9944349 | . | T | C   | 889.82   | my_snp_filter | AC=7;AF=0.100;AN=70;BaseQRankSum=         |
| 6955 | chrY | 9944363 | . | A | G   | 15117.51 | PASS          | AC=9;AF=0.132;AN=68;BaseQRankSum=         |
| 6956 | chrY | 9944382 | . | C | A   | 2502.69  | PASS          | AC=9;AF=0.132;AN=68;BaseQRankSum=-3.980e- |
| 6957 | chrY | 9944387 | . | C | A   | 16998.67 | PASS          | AC=9;AF=0.129;AN=70;BaseQRankSum=         |
| 6958 | chrY | 9944391 | . | G | C   | 1713.07  | PASS          | AC=6;AF=0.086;AN=70;BaseQRankSum=-1.713e+ |
| 6959 | chrY | 9944395 | . | A | G   | 16888.18 | PASS          | AC=9;AF=0.129;AN=70;BaseQRankSum=         |
| 6960 | chrY | 9944396 | . | A | G   | 521.87   | my_snp_filter | AC=4;AF=0.057;AN=70;BaseQRankSum=         |
| 6961 | chrY | 9944410 | . | C | T   | 41.63    | my_snp_filter | AC=2;AF=0.029;AN=68;BaseQRankSum=         |
| 6962 | chrY | 9944425 | . | A | T   | 75.83    | my_snp_filter | AC=3;AF=0.045;AN=66;BaseQRankSum=         |
| 6963 | chrY | 9944438 | . | T | A   | 136.18   | PASS          | AC=3;AF=0.044;AN=68;BaseQRankSum=0.00;Cli |
| 6964 | chrY | 9944445 | . | G | A   | 102.16   | PASS          | AC=1;AF=0.014;AN=70;BaseQRankSum=2.26;Cli |
| 6965 | chrY | 9944459 | . | A | C   | 1316.76  | my_snp_filter | AC=7;AF=0.125;AN=56;BaseQRankSum=         |
| 6966 | chrY | 9944477 | . | T | C   | 977.38   | PASS          | AC=3;AF=0.044;AN=68;BaseQRankSum=-4.360e- |
| 6967 | chrY | 9944492 | . | C | G   | 857.47   | PASS          | AC=5;AF=0.071;AN=70;BaseQRankSum=-2.411e+ |
| 6968 | chrY | 9944496 | . | C | T   | 686.73   | PASS          | AC=2;AF=0.029;AN=70;BaseQRankSum=1.00;Cli |
| 6969 | chrY | 9944502 | . | A | G   | 12965.90 | my_snp_filter | AC=16;AF=0.258;AN=62;Base                 |
| 6970 | chrY | 9944517 | . | C | A   | 157.66   | PASS          | AC=2;AF=0.029;AN=70;BaseQRankSum=0.091;Cl |
| 6971 | chrY | 9944521 | . | A | C,T | 19110.69 | my_snp_filter | AC=21,2;AF=0.389,0.037;AN                 |
| 6972 | chrY | 9944527 | . | G | T   | 191.93   | PASS          | AC=2;AF=0.029;AN=70;BaseQRankSum=-8.300e- |
| 6973 | chrY | 9944533 | . | T | G   | 23226.25 | my_snp_filter | AC=25;AF=0.481;AN=52;Base                 |
| 6974 | chrY | 9944537 | . | A | C,T | 22667.15 | my_snp_filter | AC=23,2;AF=0.442,0.038;AN                 |
| 6975 | chrY | 9944541 | . | C | T   | 344.98   | PASS          | AC=2;AF=0.029;AN=70;BaseQRankSum=0.459;Cl |
| 6976 | chrY | 9944559 | . | C | T,A | 6385.33  | PASS          | AC=9,4;AF=0.129,0.057;AN=70;BaseQRankSum= |
| 6977 | chrY | 9944561 | . | C | A   | 4235.27  | PASS          | AC=10;AF=0.143;AN=70;BaseQRankSum=3.88;Cl |
| 6978 | chrY | 9944564 | . | A | T   | 14555.39 | PASS          | AC=33;AF=0.471;AN=70;BaseQRankSum         |
| 6979 | chrY | 9944566 | . | C | A   | 1352.22  | PASS          | AC=5;AF=0.071;AN=70;BaseQRankSum=-2.720e- |
| 6980 | chrY | 9944567 | . | T | C   | 1365.49  | PASS          | AC=5;AF=0.071;AN=70;BaseQRankSum=-3.070e+ |
| 6981 | chrY | 9944573 | . | G | T,A | 18248.54 | PASS          | AC=5,30;AF=0.071,0.429;AN=70;Base         |
| 6982 | chrY | 9944582 | . | C | T   | 17623.24 | PASS          | AC=33;AF=0.471;AN=70;BaseQRankSum         |
| 6983 | chrY | 9944583 | . | C | A   | 10989.56 | PASS          | AC=20;AF=0.286;AN=70;BaseQRankSum         |
| 6984 | chrY | 9944586 | . | T | A   | 221.27   | my_snp_filter | AC=4;AF=0.057;AN=70;BaseQRankSum=         |
| 6985 | chrY | 9944596 | . | A | T   | 772.26   | PASS          | AC=10;AF=0.143;AN=70;BaseQRankSum=-3.040e |
| 6986 | chrY | 9944603 | . | G | C   | 3849.10  | PASS          | AC=9;AF=0.129;AN=70;BaseQRankSum=-1.445e+ |
| 6987 | chrY | 9944613 | . | T | G   | 421.65   | PASS          | AC=7;AF=0.100;AN=70;BaseQRankSum=-1.790e- |
| 6988 | chrY | 9944628 | . | G | A   | 1369.08  | PASS          | AC=14;AF=0.200;AN=70;BaseQRankSum=-1.580e |
| 6989 | chrY | 9944639 | . | G | C   | 9207.20  | PASS          | AC=29;AF=0.439;AN=66;BaseQRankSum=-1.050e |
| 6990 | chrY | 9944650 | . | C | T   | 855.66   | my_snp_filter | AC=12;AF=0.171;AN=70;BaseQRankSum         |
| 6991 | chrY | 9944654 | . | G | T   | 892.12   | my_snp_filter | AC=13;AF=0.186;AN=70;BaseQRankSum         |
| 6992 | chrY | 9944655 | . | C | A   | 813.73   | my_snp_filter | AC=12;AF=0.171;AN=70;BaseQRankSum         |

|      |      |         |   |   |     |           |               |                                           |
|------|------|---------|---|---|-----|-----------|---------------|-------------------------------------------|
| 6993 | chrY | 9944656 | . | A | G   | 89068.83  | PASS          | AC=56;AF=0.800;AN=70;BaseQRankSum         |
| 6994 | chrY | 9944669 | . | C | A   | 3354.23   | my_snp_filter | AC=24;AF=0.343;AN=70;BaseQRankSum         |
| 6995 | chrY | 9944685 | . | T | A   | 74.94     | my_snp_filter | AC=3;AF=0.043;AN=70;BaseQRankSum          |
| 6996 | chrY | 9944691 | . | C | T   | 571.65    | my_snp_filter | AC=9;AF=0.129;AN=70;BaseQRankSum          |
| 6997 | chrY | 9944722 | . | A | C   | 2293.33   | my_snp_filter | AC=16;AF=0.229;AN=70;BaseQRankSum         |
| 6998 | chrY | 9944736 | . | C | T   | 147.60    | my_snp_filter | AC=4;AF=0.057;AN=70;BaseQRankSum          |
| 6999 | chrY | 9944738 | . | C | A   | 21842.89  | PASS          | AC=29;AF=0.414;AN=70;BaseQRankSum         |
| 7000 | chrY | 9944740 | . | G | A   | 123968.31 | PASS          | AC=47;AF=0.671;AN=70;BaseQRankSum         |
| 7001 | chrY | 9944749 | . | T | C   | 21468.21  | PASS          | AC=30;AF=0.429;AN=70;BaseQRankSum         |
| 7002 | chrY | 9944766 | . | G | C   | 29348.13  | PASS          | AC=32;AF=0.457;AN=70;BaseQRankSum         |
| 7003 | chrY | 9944768 | . | A | C   | 224.14    | my_snp_filter | AC=4;AF=0.057;AN=70;BaseQRankSum          |
| 7004 | chrY | 9944773 | . | A | T   | 29017.03  | PASS          | AC=32;AF=0.457;AN=70;BaseQRankSum         |
| 7005 | chrY | 9944779 | . | A | C   | 83634.73  | PASS          | AC=35;AF=0.500;AN=70;BaseQRankSum         |
| 7006 | chrY | 9944789 | . | A | G   | 13826.12  | PASS          | AC=25;AF=0.357;AN=70;BaseQRankSum         |
| 7007 | chrY | 9944790 | . | G | T   | 13742.55  | PASS          | AC=15;AF=0.214;AN=70;BaseQRankSum         |
| 7008 | chrY | 9944792 | . | C | A   | 87274.68  | PASS          | AC=34;AF=0.500;AN=68;BaseQRankSum         |
| 7009 | chrY | 9944793 | . | A | T   | 24627.18  | PASS          | AC=31;AF=0.456;AN=68;BaseQRankSum         |
| 7010 | chrY | 9944795 | . | T | G   | 14262.51  | PASS          | AC=24;AF=0.343;AN=70;BaseQRankSum         |
| 7011 | chrY | 9944800 | . | G | T,A | 21032.24  | PASS          | AC=23,4;AF=0.329,0.057;AN=70;Base         |
| 7012 | chrY | 9944810 | . | A | T   | 14671.80  | PASS          | AC=13;AF=0.186;AN=70;BaseQRankSum         |
| 7013 | chrY | 9944813 | . | G | T   | 105.21    | PASS          | AC=2;AF=0.029;AN=70;BaseQRankSum=-1.131e+ |
| 7014 | chrY | 9944815 | . | C | T   | 12659.86  | PASS          | AC=18;AF=0.257;AN=70;BaseQRankSum         |
| 7015 | chrY | 9944817 | . | C | T   | 26241.68  | PASS          | AC=30;AF=0.429;AN=70;BaseQRankSum         |
| 7016 | chrY | 9944820 | . | C | T   | 12450.68  | PASS          | AC=17;AF=0.243;AN=70;BaseQRankSum         |
| 7017 | chrY | 9944830 | . | C | T   | 15245.53  | PASS          | AC=18;AF=0.257;AN=70;BaseQRankSum         |
| 7018 | chrY | 9944832 | . | A | C   | 5296.70   | PASS          | AC=22;AF=0.314;AN=70;BaseQRankSum=-9.410e |
| 7019 | chrY | 9944833 | . | G | C   | 1459.38   | PASS          | AC=9;AF=0.129;AN=70;BaseQRankSum=0.00;Cli |
| 7020 | chrY | 9944843 | . | C | T   | 1356.20   | PASS          | AC=4;AF=0.057;AN=70;BaseQRankSum=0.445;Cl |
| 7021 | chrY | 9944849 | . | G | A   | 9295.46   | PASS          | AC=9;AF=0.129;AN=70;BaseQRankSum=2.34;Cli |
| 7022 | chrY | 9944855 | . | C | T   | 14976.20  | PASS          | AC=23;AF=0.329;AN=70;BaseQRankSum         |
| 7023 | chrY | 9944862 | . | T | C,A | 63136.09  | PASS          | AC=28,13;AF=0.400,0.186;AN=70;Bas         |
| 7024 | chrY | 9944881 | . | T | C   | 16034.48  | PASS          | AC=12;AF=0.171;AN=70;BaseQRankSum         |
| 7025 | chrY | 9944883 | . | T | G   | 3958.76   | PASS          | AC=20;AF=0.286;AN=70;BaseQRankSum=-1.230e |
| 7026 | chrY | 9944896 | . | T | A   | 22733.49  | PASS          | AC=27;AF=0.386;AN=70;BaseQRankSum         |
| 7027 | chrY | 9944899 | . | C | T,A | 81870.85  | PASS          | AC=34,8;AF=0.486,0.114;AN=70;Base         |
| 7028 | chrY | 9944900 | . | G | T   | 22388.55  | PASS          | AC=27;AF=0.386;AN=70;BaseQRankSum         |
| 7029 | chrY | 9944904 | . | T | C   | 14408.80  | PASS          | AC=26;AF=0.371;AN=70;BaseQRankSum         |
| 7030 | chrY | 9944912 | . | T | A,C | 13865.83  | PASS          | AC=20,5;AF=0.286,0.071;AN=70;Base         |
| 7031 | chrY | 9944916 | . | G | A   | 2396.45   | PASS          | AC=19;AF=0.271;AN=70;BaseQRankSum=-1.660e |
| 7032 | chrY | 9944917 | . | A | G   | 1836.58   | my_snp_filter | AC=11;AF=0.157;AN=70;BaseQRankSum         |
| 7033 | chrY | 9944926 | . | T | G   | 4476.42   | my_snp_filter | AC=9;AF=0.129;AN=70;BaseQRankSum          |
| 7034 | chrY | 9944951 | . | C | T   | 351.70    | PASS          | AC=6;AF=0.086;AN=70;BaseQRankSum=-1.080e- |
| 7035 | chrY | 9944955 | . | G | A   | 5812.92   | my_snp_filter | AC=17;AF=0.243;AN=70;BaseQRankSum         |
| 7036 | chrY | 9944956 | . | A | T   | 25288.12  | PASS          | AC=24;AF=0.343;AN=70;BaseQRankSum         |
| 7037 | chrY | 9944963 | . | G | A   | 2378.17   | my_snp_filter | AC=11;AF=0.157;AN=70;BaseQRankSum         |
| 7038 | chrY | 9944973 | . | A | G   | 136575.09 | PASS          | AC=42;AF=0.600;AN=70;BaseQRankSum         |
| 7039 | chrY | 9944979 | . | G | A   | 140146.45 | PASS          | AC=42;AF=0.600;AN=70;BaseQRankSum         |
| 7040 | chrY | 9944987 | . | A | G   | 141186.82 | PASS          | AC=43;AF=0.614;AN=70;BaseQRankSum         |
| 7041 | chrY | 9944991 | . | A | T   | 316.58    | my_snp_filter | AC=6;AF=0.086;AN=70;BaseQRankSum          |
| 7042 | chrY | 9944994 | . | A | G   | 36776.36  | PASS          | AC=33;AF=0.471;AN=70;BaseQRankSum         |
| 7043 | chrY | 9945008 | . | C | A,G | 9215.42   | PASS          | AC=4,23;AF=0.057,0.329;AN=70;BaseQRankSum |
| 7044 | chrY | 9945016 | . | C | T   | 2928.43   | my_snp_filter | AC=11;AF=0.157;AN=70;BaseQRankSum         |
| 7045 | chrY | 9945017 | . | C | G   | 2973.39   | my_snp_filter | AC=11;AF=0.157;AN=70;BaseQRankSum         |
| 7046 | chrY | 9945018 | . | C | T   | 3029.29   | my_snp_filter | AC=11;AF=0.157;AN=70;BaseQRankSum         |
| 7047 | chrY | 9945022 | . | T | C   | 1281.47   | my_snp_filter | AC=12;AF=0.171;AN=70;BaseQRankSum         |
| 7048 | chrY | 9945024 | . | C | T   | 124.04    | my_snp_filter | AC=2;AF=0.029;AN=70;BaseQRankSum          |
| 7049 | chrY | 9945028 | . | T | C   | 64.27     | my_snp_filter | AC=2;AF=0.029;AN=70;BaseQRankSum          |
| 7050 | chrY | 9945040 | . | A | T   | 76466.86  | PASS          | AC=35;AF=0.500;AN=70;BaseQRankSum         |
| 7051 | chrY | 9945049 | . | G | A   | 114.43    | my_snp_filter | AC=2;AF=0.029;AN=70;BaseQRankSum          |
| 7052 | chrY | 9945050 | . | C | A   | 101.64    | my_snp_filter | AC=2;AF=0.029;AN=70;BaseQRankSum          |
| 7053 | chrY | 9945054 | . | C | G   | 150.11    | PASS          | AC=2;AF=0.029;AN=70;BaseQRankSum=0.314;Cl |
| 7054 | chrY | 9945065 | . | T | C   | 1816.11   | my_snp_filter | AC=12;AF=0.171;AN=70;BaseQRankSum         |
| 7055 | chrY | 9945066 | . | G | T   | 17288.74  | PASS          | AC=26;AF=0.371;AN=70;BaseQRankSum         |
| 7056 | chrY | 9945073 | . | C | A   | 119.38    | my_snp_filter | AC=3;AF=0.043;AN=70;BaseQRankSum          |
| 7057 | chrY | 9945078 | . | C | G   | 5339.33   | PASS          | AC=11;AF=0.157;AN=70;BaseQRankSum=0.941;C |
| 7058 | chrY | 9945083 | . | T | C   | 42362.93  | PASS          | AC=34;AF=0.500;AN=70;BaseQRankSum         |
| 7059 | chrY | 9945086 | . | A | G   | 28036.91  | PASS          | AC=33;AF=0.471;AN=70;BaseQRankSum         |
| 7060 | chrY | 9945094 | . | T | C   | 78544.72  | PASS          | AC=35;AF=0.500;AN=70;BaseQRankSum         |
| 7061 | chrY | 9945095 | . | C | T   | 6316.01   | PASS          | AC=13;AF=0.186;AN=70;BaseQRankSum=-6.710e |
| 7062 | chrY | 9945101 | . | C | A   | 58389.72  | PASS          | AC=35;AF=0.500;AN=70;BaseQRankSum         |
| 7063 | chrY | 9945123 | . | A | G   | 7584.96   | PASS          | AC=14;AF=0.200;AN=70;BaseQRankSum=-1.141e |
| 7064 | chrY | 9945130 | . | T | C,A | 49944.88  | PASS          | AC=32,1;AF=0.457,0.014;AN=70;Base         |
| 7065 | chrY | 9945138 | . | C | T   | 6066.74   | PASS          | AC=15;AF=0.214;AN=70;BaseQRankSum=0.873;C |
| 7066 | chrY | 9945156 | . | T | A   | 43714.72  | PASS          | AC=35;AF=0.500;AN=70;BaseQRankSum         |
| 7067 | chrY | 9945157 | . | G | C   | 6311.38   | PASS          | AC=15;AF=0.214;AN=70;BaseQRankSum=-2.592e |
| 7068 | chrY | 9945162 | . | A | T   | 25020.18  | PASS          | AC=31;AF=0.443;AN=70;BaseQRankSum         |

|      |      |         |   |   |     |          |               |                                            |
|------|------|---------|---|---|-----|----------|---------------|--------------------------------------------|
| 7069 | chrY | 9945172 | . | A | G   | 20457.93 | PASS          | AC=33;AF=0.471;AN=70;BaseQRankSum          |
| 7070 | chrY | 9945185 | . | T | A   | 3441.79  | my_snp_filter | AC=10;AF=0.143;AN=70;BaseQRankSum          |
| 7071 | chrY | 9945190 | . | C | G   | 22369.53 | PASS          | AC=34;AF=0.486;AN=70;BaseQRankSum          |
| 7072 | chrY | 9945199 | . | G | A   | 3770.77  | my_snp_filter | AC=11;AF=0.157;AN=70;BaseQRankSum          |
| 7073 | chrY | 9945212 | . | C | A   | 21806.17 | PASS          | AC=31;AF=0.443;AN=70;BaseQRankSum          |
| 7074 | chrY | 9945244 | . | A | C,* | 14812.56 | PASS          | AC=10,15;AF=0.143,0.214;AN=70;Bas          |
| 7075 | chrY | 9945261 | . | A | T   | 12197.80 | PASS          | AC=21;AF=0.300;AN=70;BaseQRankSum          |
| 7076 | chrY | 9945265 | . | C | A   | 888.15   | PASS          | AC=13;AF=0.186;AN=70;BaseQRankSum=0.199;C  |
| 7077 | chrY | 9945276 | . | A | T   | 11627.98 | PASS          | AC=21;AF=0.300;AN=70;BaseQRankSum          |
| 7078 | chrY | 9945280 | . | T | C   | 839.85   | my_snp_filter | AC=15;AF=0.214;AN=70;BaseQRankSum          |
| 7079 | chrY | 9945281 | . | A | G   | 11133.19 | PASS          | AC=21;AF=0.300;AN=70;BaseQRankSum          |
| 7080 | chrY | 9945287 | . | A | G   | 56.20    | my_snp_filter | AC=1;AF=0.014;AN=70;BaseQRankSum=          |
| 7081 | chrY | 9945299 | . | G | A   | 3838.16  | my_snp_filter | AC=18;AF=0.257;AN=70;BaseQRankSum          |
| 7082 | chrY | 9945311 | . | C | T   | 99.22    | my_snp_filter | AC=5;AF=0.071;AN=70;BaseQRankSum=          |
| 7083 | chrY | 9945325 | . | A | C   | 82524.28 | PASS          | AC=42;AF=0.600;AN=70;BaseQRankSum          |
| 7084 | chrY | 9945330 | . | G | A   | 12263.59 | PASS          | AC=27;AF=0.386;AN=70;BaseQRankSum          |
| 7085 | chrY | 9945336 | . | A | G   | 410.52   | PASS          | AC=4;AF=0.057;AN=70;BaseQRankSum=0.452;Cl  |
| 7086 | chrY | 9945337 | . | T | C   | 33999.73 | PASS          | AC=33;AF=0.471;AN=70;BaseQRankSum          |
| 7087 | chrY | 9945339 | . | G | C   | 2481.73  | my_snp_filter | AC=16;AF=0.229;AN=70;BaseQRankSum          |
| 7088 | chrY | 9945343 | . | T | C   | 224.06   | PASS          | AC=3;AF=0.043;AN=70;BaseQRankSum=0.546;Cl  |
| 7089 | chrY | 9945346 | . | T | C   | 6992.50  | PASS          | AC=24;AF=0.343;AN=70;BaseQRankSum=-1.645e  |
| 7090 | chrY | 9945356 | . | G | T   | 33194.36 | PASS          | AC=33;AF=0.471;AN=70;BaseQRankSum          |
| 7091 | chrY | 9945357 | . | T | C   | 1161.09  | PASS          | AC=15;AF=0.214;AN=70;BaseQRankSum=0.00;Cl  |
| 7092 | chrY | 9945360 | . | G | A   | 2784.14  | PASS          | AC=16;AF=0.229;AN=70;BaseQRankSum=0.103;C  |
| 7093 | chrY | 9945364 | . | A | G   | 3801.09  | PASS          | AC=21;AF=0.300;AN=70;BaseQRankSum=-3.470e  |
| 7094 | chrY | 9945373 | . | T | C   | 132.07   | my_snp_filter | AC=5;AF=0.071;AN=70;BaseQRankSum=          |
| 7095 | chrY | 9945385 | . | G | T   | 325.01   | PASS          | AC=6;AF=0.088;AN=68;BaseQRankSum=1.18;Cli  |
| 7096 | chrY | 9945390 | . | C | T   | 5637.23  | PASS          | AC=16;AF=0.235;AN=68;BaseQRankSum=-1.980e  |
| 7097 | chrY | 9945396 | . | A | G   | 41.13    | PASS          | AC=1;AF=0.015;AN=66;BaseQRankSum=0.358;Cl  |
| 7098 | chrY | 9945398 | . | A | C   | 3615.49  | PASS          | AC=7;AF=0.121;AN=58;BaseQRankSum=0.035;Cl  |
| 7099 | chrY | 9945402 | . | A | C   | 35.39    | PASS          | AC=1;AF=0.019;AN=54;BaseQRankSum=-7.200e-  |
| 7100 | chrY | 9945412 | . | C | A   | 16490.03 | PASS          | AC=11;AF=0.275;AN=40;BaseQRankSum          |
| 7101 | chrY | 9945414 | . | C | T   | 21573.97 | my_snp_filter | AC=11;AF=0.306;AN=36;Base                  |
| 7102 | chrY | 9945416 | . | T | C   | 9196.46  | my_snp_filter | AC=9;AF=0.237;AN=38;BaseQRankSum=          |
| 7103 | chrY | 9945419 | . | G | A   | 20357.95 | my_snp_filter | AC=11;AF=0.306;AN=36;Base                  |
| 7104 | chrY | 9945422 | . | G | A   | 1989.70  | PASS          | AC=6;AF=0.125;AN=48;BaseQRankSum=-2.220e-  |
| 7105 | chrY | 9945443 | . | A | C   | 10816.66 | PASS          | AC=9;AF=0.205;AN=44;BaseQRankSum=          |
| 7106 | chrY | 9945445 | . | T | C   | 1274.16  | PASS          | AC=6;AF=0.130;AN=46;BaseQRankSum=2.24;Cli  |
| 7107 | chrY | 9945452 | . | T | C   | 79.90    | my_snp_filter | AC=1;AF=0.022;AN=46;BaseQRankSum=          |
| 7108 | chrY | 9945458 | . | A | G,T | 237.39   | my_snp_filter | AC=1,3;AF=0.022,0.065;AN=46;BaseQ          |
| 7109 | chrY | 9945464 | . | T | G   | 1075.95  | PASS          | AC=6;AF=0.120;AN=50;BaseQRankSum=0.796;Cl  |
| 7110 | chrY | 9945467 | . | C | T   | 1347.85  | PASS          | AC=8;AF=0.167;AN=48;BaseQRankSum=-6.330e-  |
| 7111 | chrY | 9945474 | . | G | T   | 5694.67  | PASS          | AC=9;AF=0.205;AN=44;BaseQRankSum=-4.209e+  |
| 7112 | chrY | 9945482 | . | A | T   | 150.22   | my_snp_filter | AC=3;AF=0.068;AN=44;BaseQRankSum=          |
| 7113 | chrY | 9945494 | . | G | T   | 188.60   | my_snp_filter | AC=3;AF=0.068;AN=44;BaseQRankSum=          |
| 7114 | chrY | 9945502 | . | C | T   | 1011.43  | PASS          | AC=4;AF=0.087;AN=46;BaseQRankSum=-5.510e-  |
| 7115 | chrY | 9945521 | . | T | A   | 376.97   | PASS          | AC=3;AF=0.048;AN=62;BaseQRankSum=0.396;Cl  |
| 7116 | chrY | 9945528 | . | C | T   | 329.95   | PASS          | AC=3;AF=0.047;AN=64;BaseQRankSum=0.867;Cl  |
| 7117 | chrY | 9945565 | . | G | A   | 1702.26  | my_snp_filter | AC=9;AF=0.136;AN=66;BaseQRankSum=          |
| 7118 | chrY | 9945596 | . | T | C   | 287.03   | PASS          | AC=6;AF=0.088;AN=68;BaseQRankSum=1.87;Cli  |
| 7119 | chrY | 9945604 | . | C | G   | 49.05    | PASS          | AC=2;AF=0.029;AN=70;BaseQRankSum=-8.190e-  |
| 7120 | chrY | 9945636 | . | A | G   | 2216.29  | PASS          | AC=4;AF=0.059;AN=68;BaseQRankSum=-6.750e-  |
| 7121 | chrY | 9945645 | . | T | A   | 2774.59  | PASS          | AC=4;AF=0.063;AN=64;BaseQRankSum=-5.440e-  |
| 7122 | chrY | 9945681 | . | G | C   | 5489.42  | my_snp_filter | AC=16;AF=0.229;AN=70;BaseQRankSum          |
| 7123 | chrY | 9945683 | . | A | G   | 37.16    | PASS          | AC=1;AF=0.014;AN=70;BaseQRankSum=-1.231e+  |
| 7124 | chrY | 9945689 | . | A | T   | 543.77   | PASS          | AC=7;AF=0.100;AN=70;BaseQRankSum=-9.220e-  |
| 7125 | chrY | 9945707 | . | A | T   | 1022.20  | PASS          | AC=7;AF=0.100;AN=70;BaseQRankSum=0.411;Cl  |
| 7126 | chrY | 9945722 | . | C | A   | 7043.69  | PASS          | AC=16;AF=0.229;AN=70;BaseQRankSum=1.60;Cl  |
| 7127 | chrY | 9945727 | . | C | T   | 1140.02  | PASS          | AC=7;AF=0.100;AN=70;BaseQRankSum=-8.750e-  |
| 7128 | chrY | 9945732 | . | G | A   | 7273.03  | PASS          | AC=16;AF=0.229;AN=70;BaseQRankSum=-1.076e  |
| 7129 | chrY | 9945739 | . | T | G   | 1151.05  | PASS          | AC=8;AF=0.118;AN=68;BaseQRankSum=1.09;Cli  |
| 7130 | chrY | 9945743 | . | G | T   | 1141.05  | PASS          | AC=7;AF=0.103;AN=68;BaseQRankSum=0.725;Cl  |
| 7131 | chrY | 9945744 | . | G | T   | 1142.63  | PASS          | AC=7;AF=0.103;AN=68;BaseQRankSum=-1.109e+  |
| 7132 | chrY | 9945756 | . | G | T   | 1163.57  | PASS          | AC=7;AF=0.106;AN=66;BaseQRankSum=-2.810e-  |
| 7133 | chrY | 9945759 | . | T | A   | 1809.51  | PASS          | AC=10;AF=0.152;AN=66;BaseQRankSum=-5.920e- |
| 7134 | chrY | 9945763 | . | G | A   | 12548.38 | my_snp_filter | AC=19;AF=0.288;AN=66;Base                  |
| 7135 | chrY | 9945768 | . | A | T   | 7068.78  | PASS          | AC=14;AF=0.212;AN=66;BaseQRankSum=0.736;C  |
| 7136 | chrY | 9945777 | . | A | G   | 6226.17  | PASS          | AC=18;AF=0.273;AN=66;BaseQRankSum=0.269;C  |
| 7137 | chrY | 9945810 | . | A | C   | 290.04   | PASS          | AC=2;AF=0.032;AN=62;BaseQRankSum=0.245;Cl  |
| 7138 | chrY | 9945813 | . | T | A   | 302.87   | PASS          | AC=2;AF=0.032;AN=62;BaseQRankSum=2.07;Cli  |
| 7139 | chrY | 9945815 | . | A | G   | 5486.43  | my_snp_filter | AC=13;AF=0.217;AN=60;BaseQRankSum          |
| 7140 | chrY | 9945822 | . | C | A,G | 1130.45  | PASS          | AC=5,1;AF=0.086,0.017;AN=58;BaseQRankSum=  |
| 7141 | chrY | 9945824 | . | T | G   | 270.62   | PASS          | AC=2;AF=0.036;AN=56;BaseQRankSum=3.09;Cli  |
| 7142 | chrY | 9945826 | . | C | T   | 2054.12  | PASS          | AC=6;AF=0.107;AN=56;BaseQRankSum=0.804;Cl  |
| 7143 | chrY | 9945832 | . | T | C   | 5258.69  | my_snp_filter | AC=9;AF=0.180;AN=50;BaseQRankSum=          |
| 7144 | chrY | 9945837 | . | C | T   | 675.26   | PASS          | AC=4;AF=0.083;AN=48;BaseQRankSum=2.25;Cli  |

|      |      |         |   |   |   |          |               |                                           |
|------|------|---------|---|---|---|----------|---------------|-------------------------------------------|
| 7145 | chrY | 9945838 | . | G | A | 4413.30  | my_snp_filter | AC=10;AF=0.200;AN=50;BaseQRankSum         |
| 7146 | chrY | 9945840 | . | A | G | 122.14   | PASS          | AC=2;AF=0.038;AN=52;BaseQRankSum=1.78;Cli |
| 7147 | chrY | 9945856 | . | C | T | 8505.28  | my_snp_filter | AC=10;AF=0.217;AN=46;BaseQRankSum         |
| 7148 | chrY | 9945874 | . | A | G | 10740.16 | my_snp_filter | AC=9;AF=0.188;AN=48;BaseQ                 |
| 7149 | chrY | 9945904 | . | T | C | 210.60   | my_snp_filter | AC=4;AF=0.083;AN=48;BaseQRankSum=         |
| 7150 | chrY | 9945983 | . | A | G | 21532.35 | PASS          | AC=9;AF=0.265;AN=34;BaseQRankSum=         |
| 7151 | chrY | 9946003 | . | T | A | 19831.29 | PASS          | AC=9;AF=0.281;AN=32;BaseQRankSum=         |
| 7152 | chrY | 9946014 | . | T | A | 25138.06 | PASS          | AC=9;AF=0.250;AN=36;BaseQRankSum=         |
| 7153 | chrY | 9946026 | . | C | T | 25663.34 | PASS          | AC=11;AF=0.550;AN=20;BaseQRankSum         |
| 7154 | chrY | 9946031 | . | T | C | 23705.29 | PASS          | AC=9;AF=0.281;AN=32;BaseQRankSum=         |
| 7155 | chrY | 9946053 | . | C | G | 4221.29  | PASS          | AC=9;AF=0.281;AN=32;BaseQRankSum=0.430;Cl |
| 7156 | chrY | 9946059 | . | G | C | 14475.82 | PASS          | AC=9;AF=0.321;AN=28;BaseQRankSum=         |
| 7157 | chrY | 9946062 | . | A | G | 922.84   | PASS          | AC=5;AF=0.179;AN=28;BaseQRankSum=-2.595e+ |
| 7158 | chrY | 9946088 | . | C | G | 20123    | PASS          | AC=13;AF=0.591;AN=22;BaseQRankSum=1.76;Cl |
| 7159 | chrY | 9946089 | . | T | A | 15883.68 | PASS          | AC=9;AF=0.321;AN=28;BaseQRankSum=         |
| 7160 | chrY | 9946094 | . | T | C | 16079.71 | PASS          | AC=9;AF=0.346;AN=26;BaseQRankSum=         |
| 7161 | chrY | 9946096 | . | C | A | 128.12   | my_snp_filter | AC=2;AF=0.067;AN=30;BaseQRankSum=         |
| 7162 | chrY | 9946102 | . | T | C | 1452.32  | PASS          | AC=5;AF=0.208;AN=24;BaseQRankSum=1.15;Cli |
| 7163 | chrY | 9946103 | . | G | A | 16442.09 | PASS          | AC=9;AF=0.500;AN=18;BaseQRankSum=         |
| 7164 | chrY | 9946113 | . | A | T | 13773.08 | PASS          | AC=9;AF=0.450;AN=20;BaseQRankSum=         |
| 7165 | chrY | 9946118 | . | T | G | 18247.09 | PASS          | AC=9;AF=0.500;AN=18;BaseQRankSum=         |
| 7166 | chrY | 9946128 | . | T | G | 112.04   | my_snp_filter | AC=2;AF=0.111;AN=18;BaseQRankSum=         |
| 7167 | chrY | 9946132 | . | G | A | 11748.09 | PASS          | AC=9;AF=0.500;AN=18;BaseQRankSum=         |
| 7168 | chrY | 9946145 | . | C | G | 263.70   | my_snp_filter | AC=2;AF=0.111;AN=18;BaseQRankSum=         |
| 7169 | chrY | 9946147 | . | A | G | 1719.23  | PASS          | AC=7;AF=0.389;AN=18;BaseQRankSum=-1.814e+ |
| 7170 | chrY | 9946167 | . | T | G | 423.29   | my_snp_filter | AC=4;AF=0.222;AN=18;BaseQRankSum=         |
| 7171 | chrY | 9946170 | . | C | T | 6366.09  | PASS          | AC=9;AF=0.500;AN=18;BaseQRankSum=-8.990e- |
| 7172 | chrY | 9946179 | . | C | A | 524.17   | my_snp_filter | AC=4;AF=0.222;AN=18;BaseQRankSum=         |
| 7173 | chrY | 9946198 | . | C | T | 144.33   | my_snp_filter | AC=1;AF=0.056;AN=18;BaseQRankSum=         |
| 7174 | chrY | 9946206 | . | A | T | 433.78   | my_snp_filter | AC=3;AF=0.167;AN=18;BaseQRankSum=         |
| 7175 | chrY | 9946217 | . | T | C | 843.50   | my_snp_filter | AC=5;AF=0.250;AN=20;BaseQRankSum=         |
| 7176 | chrY | 9946220 | . | C | T | 837.52   | my_snp_filter | AC=5;AF=0.250;AN=20;BaseQRankSum=         |
| 7177 | chrY | 9946225 | . | G | C | 1078.73  | my_snp_filter | AC=7;AF=0.350;AN=20;BaseQRankSum=         |
| 7178 | chrY | 9946228 | . | T | C | 975.65   | PASS          | AC=5;AF=0.250;AN=20;BaseQRankSum=-6.454e+ |
| 7179 | chrY | 9946232 | . | T | A | 2745.38  | PASS          | AC=8;AF=0.400;AN=20;BaseQRankSum=-2.157e+ |
| 7180 | chrY | 9946241 | . | A | C | 120.32   | my_snp_filter | AC=1;AF=0.056;AN=18;BaseQRankSum=         |
| 7181 | chrY | 9946246 | . | A | C | 14548.09 | my_snp_filter | AC=9;AF=0.500;AN=18;BaseQ                 |
| 7182 | chrY | 9946251 | . | G | A | 595.78   | my_snp_filter | AC=4;AF=0.200;AN=20;BaseQRankSum=         |
| 7183 | chrY | 9946252 | . | C | T | 985.13   | my_snp_filter | AC=7;AF=0.350;AN=20;BaseQRankSum=         |
| 7184 | chrY | 9946254 | . | G | A | 2227.43  | PASS          | AC=8;AF=0.400;AN=20;BaseQRankSum=4.00;Cli |
| 7185 | chrY | 9946261 | . | G | C | 8608.52  | PASS          | AC=9;AF=0.450;AN=20;BaseQRankSum=4.22;Cli |
| 7186 | chrY | 9946262 | . | T | C | 615.31   | my_snp_filter | AC=4;AF=0.200;AN=20;BaseQRankSum=         |
| 7187 | chrY | 9946264 | . | A | G | 26486.09 | my_snp_filter | AC=9;AF=0.500;AN=18;BaseQ                 |
| 7188 | chrY | 9946266 | . | T | C | 3961.52  | PASS          | AC=9;AF=0.450;AN=20;BaseQRankSum=2.97;Cli |
| 7189 | chrY | 9946280 | . | T | A | 3819.09  | PASS          | AC=9;AF=0.500;AN=18;BaseQRankSum=-4.026e+ |
| 7190 | chrY | 9946297 | . | A | T | 117.72   | my_snp_filter | AC=3;AF=0.167;AN=18;BaseQRankSum=         |
| 7191 | chrY | 9946313 | . | C | T | 14307.52 | my_snp_filter | AC=9;AF=0.450;AN=20;BaseQ                 |
| 7192 | chrY | 9946318 | . | G | T | 13231.52 | my_snp_filter | AC=9;AF=0.450;AN=20;BaseQ                 |
| 7193 | chrY | 9946336 | . | C | T | 8444.52  | my_snp_filter | AC=9;AF=0.450;AN=20;BaseQRankSum=         |
| 7194 | chrY | 9946341 | . | A | G | 476.67   | PASS          | AC=5;AF=0.250;AN=20;BaseQRankSum=-2.445e+ |
| 7195 | chrY | 9946346 | . | A | G | 519.21   | PASS          | AC=5;AF=0.250;AN=20;BaseQRankSum=-2.910e- |
| 7196 | chrY | 9946347 | . | A | G | 115.43   | my_snp_filter | AC=3;AF=0.150;AN=20;BaseQRankSum=         |
| 7197 | chrY | 9946352 | . | C | T | 544.81   | PASS          | AC=6;AF=0.300;AN=20;BaseQRankSum=1.19;Cli |
| 7198 | chrY | 9946362 | . | G | A | 144.01   | my_snp_filter | AC=3;AF=0.150;AN=20;BaseQRankSum=         |
| 7199 | chrY | 9946384 | . | G | T | 211.66   | PASS          | AC=1;AF=0.056;AN=18;BaseQRankSum=-2.853e+ |
| 7200 | chrY | 9946389 | . | A | T | 211.66   | PASS          | AC=1;AF=0.056;AN=18;BaseQRankSum=-1.529e+ |
| 7201 | chrY | 9946401 | . | C | A | 152.66   | PASS          | AC=1;AF=0.056;AN=18;BaseQRankSum=0.227;Cl |
| 7202 | chrY | 9946405 | . | C | T | 107.66   | PASS          | AC=1;AF=0.056;AN=18;BaseQRankSum=1.75;Cli |
| 7203 | chrY | 9946408 | . | T | C | 62.87    | PASS          | AC=1;AF=0.050;AN=20;BaseQRankSum=0.269;Cl |
| 7204 | chrY | 9946536 | . | A | C | 1674.18  | PASS          | AC=6;AF=0.333;AN=18;DP=164;FS=0.000;MLEAC |
| 7205 | chrY | 9946738 | . | A | T | 140.88   | my_snp_filter | AC=4;AF=0.222;AN=18;BaseQRankSum=         |
| 7206 | chrY | 9946766 | . | G | C | 513.17   | PASS          | AC=5;AF=0.278;AN=18;BaseQRankSum=-2.344e+ |
| 7207 | chrY | 9946769 | . | T | C | 514.69   | PASS          | AC=5;AF=0.278;AN=18;BaseQRankSum=-1.714e+ |
| 7208 | chrY | 9946785 | . | T | C | 221.04   | PASS          | AC=4;AF=0.200;AN=20;BaseQRankSum=-3.400e- |
| 7209 | chrY | 9946831 | . | C | T | 145.53   | my_snp_filter | AC=5;AF=0.208;AN=24;BaseQRankSum=         |
| 7210 | chrY | 9947100 | . | G | A | 46.09    | my_snp_filter | AC=2;AF=0.100;AN=20;BaseQRankSum=         |
| 7211 | chrY | 9947114 | . | T | C | 42.78    | my_snp_filter | AC=2;AF=0.091;AN=22;BaseQRankSum=         |
| 7212 | chrY | 9947139 | . | G | C | 162.04   | PASS          | AC=2;AF=0.083;AN=24;BaseQRankSum=-6.450e- |
| 7213 | chrY | 9947140 | . | G | A | 43.70    | my_snp_filter | AC=2;AF=0.083;AN=24;BaseQRankSum=         |
| 7214 | chrY | 9947148 | . | A | C | 1916.41  | PASS          | AC=9;AF=0.375;AN=24;BaseQRankSum=-1.528e+ |
| 7215 | chrY | 9947151 | . | A | G | 1794     | PASS          | AC=9;AF=0.346;AN=26;BaseQRankSum=-7.300e- |
| 7216 | chrY | 9947167 | . | C | T | 118.20   | my_snp_filter | AC=4;AF=0.154;AN=26;BaseQRankSum=         |
| 7217 | chrY | 9947179 | . | G | C | 33.92    | my_snp_filter | AC=2;AF=0.063;AN=32;BaseQRankSum=         |
| 7218 | chrY | 9947208 | . | T | A | 337.68   | my_snp_filter | AC=7;AF=0.159;AN=44;BaseQRankSum=         |
| 7219 | chrY | 9947215 | . | C | G | 2110.42  | PASS          | AC=8;AF=0.167;AN=48;BaseQRankSum=1.93;Cli |
| 7220 | chrY | 9947234 | . | T | C | 1632.40  | PASS          | AC=8;AF=0.143;AN=56;BaseQRankSum=0.415;Cl |



|      |      |         |   |   |     |         |               |                                            |
|------|------|---------|---|---|-----|---------|---------------|--------------------------------------------|
| 7221 | chrY | 9947236 | . | T | C   | 562.63  | PASS          | AC=7;AF=0.121;AN=58;BaseQRankSum=0.071;Cl  |
| 7222 | chrY | 9947237 | . | T | C   | 1231.92 | PASS          | AC=8;AF=0.138;AN=58;BaseQRankSum=0.028;Cl  |
| 7223 | chrY | 9947250 | . | C | T   | 938.17  | PASS          | AC=8;AF=0.129;AN=62;BaseQRankSum=0.942;Cl  |
| 7224 | chrY | 9947258 | . | G | T   | 96.06   | my_snp_filter | AC=3;AF=0.045;AN=66;BaseQRankSum=          |
| 7225 | chrY | 9947259 | . | T | C   | 296.21  | PASS          | AC=5;AF=0.076;AN=66;BaseQRankSum=1.21;Cl   |
| 7226 | chrY | 9947675 | . | G | A   | 1778.95 | PASS          | AC=6;AF=0.300;AN=20;DP=194;FS=0.000;Inbre  |
| 7227 | chrY | 9948348 | . | C | T   | 79.50   | PASS          | AC=1;AF=0.056;AN=18;BaseQRankSum=-2.068e+  |
| 7228 | chrY | 9948349 | . | A | G   | 79.41   | PASS          | AC=1;AF=0.056;AN=18;BaseQRankSum=-6.890e-  |
| 7229 | chrY | 9948397 | . | T | A   | 72.93   | my_snp_filter | AC=2;AF=0.100;AN=20;BaseQRankSum=          |
| 7230 | chrY | 9948400 | . | C | T   | 123.25  | PASS          | AC=3;AF=0.150;AN=20;BaseQRankSum=-1.256e+  |
| 7231 | chrY | 9948457 | . | G | A   | 43.73   | PASS          | AC=1;AF=0.042;AN=24;BaseQRankSum=-7.200e-  |
| 7232 | chrY | 9949426 | . | A | G   | 132.64  | PASS          | AC=4;AF=0.133;AN=30;BaseQRankSum=0.00;Cli  |
| 7233 | chrY | 9949436 | . | A | T   | 52.34   | PASS          | AC=2;AF=0.067;AN=30;DP=252;FS=0.000;Inbre  |
| 7234 | chrY | 9949438 | . | T | G   | 184.11  | PASS          | AC=2;AF=0.071;AN=28;BaseQRankSum=-7.760e-  |
| 7235 | chrY | 9949440 | . | G | T   | 52.34   | PASS          | AC=2;AF=0.071;AN=28;DP=249;FS=0.000;Inbre  |
| 7236 | chrY | 9949477 | . | G | A   | 58.69   | my_snp_filter | AC=2;AF=0.077;AN=26;BaseQRankSum=          |
| 7237 | chrY | 9949478 | . | C | G   | 113.71  | my_snp_filter | AC=5;AF=0.250;AN=20;BaseQRankSum=          |
| 7238 | chrY | 9949507 | . | G | C   | 177.13  | PASS          | AC=4;AF=0.182;AN=22;BaseQRankSum=0.819;Cl  |
| 7239 | chrY | 9949521 | . | T | A   | 96.85   | PASS          | AC=2;AF=0.100;AN=20;BaseQRankSum=0.819;Cl  |
| 7240 | chrY | 9949524 | . | A | G   | 129.46  | PASS          | AC=2;AF=0.100;AN=20;BaseQRankSum=1.98;Cli  |
| 7241 | chrY | 9949526 | . | G | A   | 47.53   | my_snp_filter | AC=2;AF=0.100;AN=20;BaseQRankSum=          |
| 7242 | chrY | 9949528 | . | C | A   | 48.71   | my_snp_filter | AC=2;AF=0.100;AN=20;BaseQRankSum=          |
| 7243 | chrY | 9949529 | . | A | G   | 50.39   | my_snp_filter | AC=2;AF=0.100;AN=20;BaseQRankSum=          |
| 7244 | chrY | 9949761 | . | C | A   | 687.59  | PASS          | AC=2;AF=0.042;AN=48;BaseQRankSum=-1.612e+  |
| 7245 | chrY | 9949766 | . | T | C   | 656.99  | PASS          | AC=2;AF=0.038;AN=52;BaseQRankSum=-2.838e+  |
| 7246 | chrY | 9949779 | . | A | G   | 1019.25 | PASS          | AC=2;AF=0.036;AN=56;BaseQRankSum=-4.069e+  |
| 7247 | chrY | 9949782 | . | C | G   | 1061.75 | PASS          | AC=2;AF=0.036;AN=56;BaseQRankSum=-1.826e+  |
| 7248 | chrY | 9949791 | . | C | T   | 1085.45 | PASS          | AC=3;AF=0.050;AN=60;BaseQRankSum=-1.699e+  |
| 7249 | chrY | 9949798 | . | A | T   | 1918.63 | PASS          | AC=9;AF=0.150;AN=60;BaseQRankSum=-1.484e+  |
| 7250 | chrY | 9949800 | . | G | A   | 738.77  | PASS          | AC=6;AF=0.100;AN=60;BaseQRankSum=0.680;Cl  |
| 7251 | chrY | 9949818 | . | A | G   | 3526.46 | my_snp_filter | AC=9;AF=0.141;AN=64;BaseQRankSum=          |
| 7252 | chrY | 9949823 | . | C | A   | 688.24  | PASS          | AC=3;AF=0.047;AN=64;BaseQRankSum=-1.114e+  |
| 7253 | chrY | 9949827 | . | T | A   | 733.39  | PASS          | AC=3;AF=0.044;AN=68;BaseQRankSum=-6.440e-  |
| 7254 | chrY | 9949828 | . | C | G   | 798.67  | PASS          | AC=5;AF=0.074;AN=68;BaseQRankSum=-1.733e+  |
| 7255 | chrY | 9949831 | . | C | G   | 3913.76 | my_snp_filter | AC=9;AF=0.129;AN=70;BaseQRankSum=          |
| 7256 | chrY | 9949845 | . | G | T   | 67.33   | my_snp_filter | AC=2;AF=0.029;AN=70;BaseQRankSum=          |
| 7257 | chrY | 9949846 | . | G | A   | 284.81  | PASS          | AC=3;AF=0.043;AN=70;BaseQRankSum=-1.985e+  |
| 7258 | chrY | 9949858 | . | A | G   | 2232.73 | my_snp_filter | AC=8;AF=0.114;AN=70;BaseQRankSum=          |
| 7259 | chrY | 9949865 | . | G | A   | 238.41  | PASS          | AC=2;AF=0.029;AN=70;BaseQRankSum=-1.400e-  |
| 7260 | chrY | 9949866 | . | C | A   | 630.86  | PASS          | AC=5;AF=0.071;AN=70;BaseQRankSum=0.635;Cl  |
| 7261 | chrY | 9949873 | . | G | A   | 2455.16 | my_snp_filter | AC=8;AF=0.118;AN=68;BaseQRankSum=          |
| 7262 | chrY | 9949883 | . | G | C   | 646.26  | PASS          | AC=6;AF=0.086;AN=70;BaseQRankSum=-3.830e-  |
| 7263 | chrY | 9949890 | . | A | T,G | 812.96  | PASS          | AC=5,1;AF=0.071,0.014;AN=70;BaseQRankSum=  |
| 7264 | chrY | 9949891 | . | C | G   | 654.11  | PASS          | AC=6;AF=0.086;AN=70;BaseQRankSum=0.897;Cl  |
| 7265 | chrY | 9949910 | . | A | G   | 3084.94 | PASS          | AC=8;AF=0.114;AN=70;BaseQRankSum=-3.641e+  |
| 7266 | chrY | 9949917 | . | T | A   | 2305.61 | my_snp_filter | AC=9;AF=0.129;AN=70;BaseQRankSum=          |
| 7267 | chrY | 9949927 | . | G | A   | 2172.29 | my_snp_filter | AC=9;AF=0.129;AN=70;BaseQRankSum=          |
| 7268 | chrY | 9949933 | . | C | T   | 846.67  | PASS          | AC=4;AF=0.057;AN=70;BaseQRankSum=0.749;Cl  |
| 7269 | chrY | 9949938 | . | G | T   | 3495.92 | PASS          | AC=10;AF=0.143;AN=70;BaseQRankSum=2.77;Cl  |
| 7270 | chrY | 9949943 | . | C | T   | 266.47  | PASS          | AC=1;AF=0.014;AN=70;BaseQRankSum=-1.667e+  |
| 7271 | chrY | 9949944 | . | A | G   | 3338.09 | PASS          | AC=10;AF=0.143;AN=70;BaseQRankSum=-1.635e+ |
| 7272 | chrY | 9949957 | . | T | G   | 2809.56 | PASS          | AC=9;AF=0.129;AN=70;BaseQRankSum=0.222;Cl  |
| 7273 | chrY | 9949962 | . | T | C   | 1142.02 | PASS          | AC=4;AF=0.057;AN=70;BaseQRankSum=0.700;Cl  |
| 7274 | chrY | 9949969 | . | T | C   | 2874.83 | PASS          | AC=9;AF=0.129;AN=70;BaseQRankSum=1.68;Cli  |
| 7275 | chrY | 9949975 | . | G | T   | 1218.34 | PASS          | AC=7;AF=0.100;AN=70;BaseQRankSum=0.303;Cl  |
| 7276 | chrY | 9949977 | . | T | G   | 3421.17 | PASS          | AC=9;AF=0.129;AN=70;BaseQRankSum=2.33;Cl   |
| 7277 | chrY | 9949988 | . | A | G   | 4203.89 | PASS          | AC=9;AF=0.129;AN=70;BaseQRankSum=-9.210e-  |
| 7278 | chrY | 9949991 | . | G | A   | 4186.85 | PASS          | AC=9;AF=0.129;AN=70;BaseQRankSum=-7.830e-  |
| 7279 | chrY | 9949992 | . | G | T   | 264.47  | PASS          | AC=1;AF=0.014;AN=70;BaseQRankSum=-5.860e-  |
| 7280 | chrY | 9949996 | . | A | C   | 264.47  | PASS          | AC=1;AF=0.014;AN=70;BaseQRankSum=1.96;Cli  |
| 7281 | chrY | 9949999 | . | C | A   | 45.41   | my_snp_filter | AC=1;AF=0.014;AN=70;BaseQRankSum=          |
| 7282 | chrY | 9950000 | . | G | A   | 1698.37 | PASS          | AC=7;AF=0.100;AN=70;BaseQRankSum=0.924;Cl  |
| 7283 | chrY | 9950014 | . | C | A   | 1217.66 | PASS          | AC=7;AF=0.100;AN=70;BaseQRankSum=-1.300e-  |
| 7284 | chrY | 9950018 | . | T | G   | 1211.68 | PASS          | AC=7;AF=0.100;AN=70;BaseQRankSum=0.918;Cl  |
| 7285 | chrY | 9950026 | . | C | T   | 1134.84 | PASS          | AC=7;AF=0.103;AN=68;BaseQRankSum=-1.540e-  |
| 7286 | chrY | 9950031 | . | T | C   | 709.04  | PASS          | AC=6;AF=0.088;AN=68;BaseQRankSum=0.627;Cl  |
| 7287 | chrY | 9950032 | . | G | T   | 712.76  | PASS          | AC=6;AF=0.088;AN=68;BaseQRankSum=0.306;Cl  |
| 7288 | chrY | 9950035 | . | C | T   | 1011.94 | PASS          | AC=7;AF=0.103;AN=68;BaseQRankSum=0.322;Cl  |
| 7289 | chrY | 9950036 | . | G | A,C | 2734.68 | PASS          | AC=1,7;AF=0.015,0.103;AN=68;BaseQRankSum=  |
| 7290 | chrY | 9950070 | . | C | G   | 333.82  | PASS          | AC=2;AF=0.029;AN=68;BaseQRankSum=-6.280e-  |
| 7291 | chrY | 9950095 | . | A | G   | 1672.78 | PASS          | AC=7;AF=0.100;AN=70;BaseQRankSum=0.538;Cl  |
| 7292 | chrY | 9950099 | . | C | T   | 798.03  | PASS          | AC=8;AF=0.114;AN=70;BaseQRankSum=0.00;Cli  |
| 7293 | chrY | 9950103 | . | T | A   | 1538.43 | PASS          | AC=7;AF=0.100;AN=70;BaseQRankSum=0.094;Cl  |
| 7294 | chrY | 9950106 | . | G | A   | 1522.19 | PASS          | AC=7;AF=0.100;AN=70;BaseQRankSum=1.24;Cli  |
| 7295 | chrY | 9950132 | . | G | A   | 55.74   | my_snp_filter | AC=1;AF=0.014;AN=70;BaseQRankSum=          |
| 7296 | chrY | 9950143 | . | T | A   | 3741.32 | PASS          | AC=9;AF=0.129;AN=70;BaseQRankSum=-4.370e-  |



|      |      |         |   |   |     |          |               |                                            |
|------|------|---------|---|---|-----|----------|---------------|--------------------------------------------|
| 7297 | chrY | 9950148 | . | C | A   | 3524.26  | PASS          | AC=9;AF=0.129;AN=70;BaseQRankSum=0.171;Cli |
| 7298 | chrY | 9950152 | . | C | T   | 3169.55  | PASS          | AC=9;AF=0.129;AN=70;BaseQRankSum=-1.449e+  |
| 7299 | chrY | 9950159 | . | A | G,T | 2323.07  | PASS          | AC=8,1;AF=0.114,0.014;AN=70;BaseQRankSum=  |
| 7300 | chrY | 9950176 | . | G | A   | 211.65   | PASS          | AC=1;AF=0.014;AN=70;BaseQRankSum=-1.285e+  |
| 7301 | chrY | 9950179 | . | G | A   | 1189.54  | PASS          | AC=5;AF=0.074;AN=68;BaseQRankSum=1.36;Cli  |
| 7302 | chrY | 9950180 | . | C | G   | 1552.71  | PASS          | AC=6;AF=0.086;AN=70;BaseQRankSum=0.396;Cli |
| 7303 | chrY | 9950187 | . | T | A   | 1128.78  | PASS          | AC=5;AF=0.071;AN=70;BaseQRankSum=-1.586e+  |
| 7304 | chrY | 9950190 | . | C | G   | 1448.79  | PASS          | AC=6;AF=0.086;AN=70;BaseQRankSum=-4.560e-  |
| 7305 | chrY | 9950196 | . | T | G   | 1321.46  | PASS          | AC=6;AF=0.086;AN=70;BaseQRankSum=-1.485e+  |
| 7306 | chrY | 9950208 | . | G | C   | 1943.34  | PASS          | AC=6;AF=0.088;AN=68;BaseQRankSum=2.11;Cli  |
| 7307 | chrY | 9950211 | . | T | C   | 286.94   | PASS          | AC=1;AF=0.014;AN=70;BaseQRankSum=1.26;Cli  |
| 7308 | chrY | 9950214 | . | G | A   | 1531.93  | PASS          | AC=6;AF=0.088;AN=68;BaseQRankSum=1.61;Cli  |
| 7309 | chrY | 9950222 | . | C | T,A | 1286.13  | PASS          | AC=3,3;AF=0.047,0.047;AN=64;BaseQRankSum=  |
| 7310 | chrY | 9950223 | . | A | G   | 2691.86  | PASS          | AC=6;AF=0.094;AN=64;BaseQRankSum=1.37;Cli  |
| 7311 | chrY | 9950225 | . | A | C   | 3395.90  | PASS          | AC=6;AF=0.094;AN=64;BaseQRankSum=-7.520e-  |
| 7312 | chrY | 9950247 | . | A | G   | 1373.18  | PASS          | AC=4;AF=0.057;AN=70;BaseQRankSum=-1.706e+  |
| 7313 | chrY | 9950256 | . | A | T   | 1196.25  | PASS          | AC=7;AF=0.100;AN=70;BaseQRankSum=1.25;Cli  |
| 7314 | chrY | 9950258 | . | G | A   | 1083.79  | PASS          | AC=4;AF=0.057;AN=70;BaseQRankSum=-9.230e-  |
| 7315 | chrY | 9950266 | . | T | C   | 9921.47  | PASS          | AC=9;AF=0.129;AN=70;BaseQRankSum=0.193;Cli |
| 7316 | chrY | 9950267 | . | C | T   | 602.64   | PASS          | AC=3;AF=0.043;AN=70;BaseQRankSum=-2.385e+  |
| 7317 | chrY | 9950270 | . | C | A   | 3785.62  | PASS          | AC=9;AF=0.129;AN=70;BaseQRankSum=-2.708e+  |
| 7318 | chrY | 9950276 | . | T | C   | 10053.92 | PASS          | AC=9;AF=0.129;AN=70;BaseQRankSum=          |
| 7319 | chrY | 9950277 | . | G | A   | 6975.86  | PASS          | AC=9;AF=0.129;AN=70;BaseQRankSum=1.33;Cli  |
| 7320 | chrY | 9950285 | . | G | C   | 7713.54  | PASS          | AC=9;AF=0.129;AN=70;BaseQRankSum=4.63;Cli  |
| 7321 | chrY | 9950302 | . | G | T   | 130.85   | PASS          | AC=1;AF=0.015;AN=68;BaseQRankSum=0.259;Cli |
| 7322 | chrY | 9950328 | . | T | C   | 13555.90 | PASS          | AC=9;AF=0.129;AN=70;BaseQRankSum=          |
| 7323 | chrY | 9950330 | . | C | T   | 40.84    | my_snp_filter | AC=1;AF=0.014;AN=70;BaseQRankSum=          |
| 7324 | chrY | 9950332 | . | G | T   | 270.33   | my_snp_filter | AC=2;AF=0.029;AN=70;BaseQRankSum=          |
| 7325 | chrY | 9950335 | . | G | T   | 273.04   | my_snp_filter | AC=2;AF=0.029;AN=68;BaseQRankSum=          |
| 7326 | chrY | 9950337 | . | C | T   | 1349.28  | PASS          | AC=7;AF=0.103;AN=68;BaseQRankSum=0.883;Cli |
| 7327 | chrY | 9950338 | . | C | G   | 8761.80  | PASS          | AC=9;AF=0.132;AN=68;BaseQRankSum=-2.371e+  |
| 7328 | chrY | 9950344 | . | C | A   | 302.19   | my_snp_filter | AC=4;AF=0.059;AN=68;BaseQRankSum=          |
| 7329 | chrY | 9950345 | . | C | T   | 1944.73  | PASS          | AC=7;AF=0.103;AN=68;BaseQRankSum=-1.345e+  |
| 7330 | chrY | 9950350 | . | A | C   | 1959.67  | PASS          | AC=7;AF=0.103;AN=68;BaseQRankSum=1.02;Cli  |
| 7331 | chrY | 9950352 | . | T | G   | 11340.27 | PASS          | AC=9;AF=0.132;AN=68;BaseQRankSum=          |
| 7332 | chrY | 9950356 | . | G | T   | 82.89    | my_snp_filter | AC=2;AF=0.029;AN=68;BaseQRankSum=          |
| 7333 | chrY | 9950358 | . | C | T   | 4152.67  | PASS          | AC=7;AF=0.106;AN=66;BaseQRankSum=1.27;Cli  |
| 7334 | chrY | 9950359 | . | A | G   | 5745.70  | PASS          | AC=7;AF=0.106;AN=66;BaseQRankSum=0.530;Cli |
| 7335 | chrY | 9950378 | . | A | T   | 3400.97  | PASS          | AC=9;AF=0.132;AN=68;BaseQRankSum=1.46;Cli  |
| 7336 | chrY | 9950382 | . | A | C   | 1017.72  | PASS          | AC=6;AF=0.086;AN=70;BaseQRankSum=0.796;Cli |
| 7337 | chrY | 9950384 | . | T | A   | 2344.33  | PASS          | AC=9;AF=0.129;AN=70;BaseQRankSum=1.75;Cli  |
| 7338 | chrY | 9950396 | . | A | C   | 1587.20  | my_snp_filter | AC=8;AF=0.114;AN=70;BaseQRankSum=          |
| 7339 | chrY | 9950406 | . | G | A   | 770.31   | PASS          | AC=6;AF=0.086;AN=70;BaseQRankSum=0.321;Cli |
| 7340 | chrY | 9950409 | . | T | C   | 1437.02  | my_snp_filter | AC=6;AF=0.088;AN=68;BaseQRankSum=          |
| 7341 | chrY | 9950416 | . | A | G   | 382.43   | PASS          | AC=1;AF=0.015;AN=68;BaseQRankSum=1.36;Cli  |
| 7342 | chrY | 9950419 | . | A | G   | 2118.02  | my_snp_filter | AC=6;AF=0.097;AN=62;BaseQRankSum=          |
| 7343 | chrY | 9950425 | . | A | G   | 2647.40  | PASS          | AC=6;AF=0.097;AN=62;BaseQRankSum=-3.120e-  |
| 7344 | chrY | 9950432 | . | A | G   | 54.45    | PASS          | AC=1;AF=0.015;AN=68;BaseQRankSum=-2.890e+  |
| 7345 | chrY | 9950457 | . | A | C   | 10933.21 | PASS          | AC=10;AF=0.152;AN=66;BaseQRankSum=         |
| 7346 | chrY | 9950470 | . | G | A   | 13916.85 | my_snp_filter | AC=17;AF=0.250;AN=68;BaseQRankSum=         |
| 7347 | chrY | 9950472 | . | G | C   | 4745.54  | PASS          | AC=10;AF=0.147;AN=68;BaseQRankSum=-3.465e+ |
| 7348 | chrY | 9950474 | . | A | G   | 4551.73  | PASS          | AC=8;AF=0.114;AN=70;BaseQRankSum=-2.212e+  |
| 7349 | chrY | 9950476 | . | A | G   | 14593.43 | PASS          | AC=18;AF=0.281;AN=64;BaseQRankSum=         |
| 7350 | chrY | 9950483 | . | C | G   | 32.65    | PASS          | AC=1;AF=0.014;AN=70;BaseQRankSum=1.50;Cli  |
| 7351 | chrY | 9950484 | . | C | T   | 2079.03  | PASS          | AC=7;AF=0.100;AN=70;BaseQRankSum=-3.343e+  |
| 7352 | chrY | 9950503 | . | C | T   | 13353.55 | PASS          | AC=28;AF=0.424;AN=66;BaseQRankSum=         |
| 7353 | chrY | 9950504 | . | A | G   | 17786.37 | PASS          | AC=29;AF=0.439;AN=66;BaseQRankSum=         |
| 7354 | chrY | 9950506 | . | G | A   | 67.78    | PASS          | AC=2;AF=0.029;AN=70;BaseQRankSum=-7.510e-  |
| 7355 | chrY | 9950510 | . | G | A   | 70.79    | PASS          | AC=2;AF=0.029;AN=70;BaseQRankSum=0.898;Cli |
| 7356 | chrY | 9950511 | . | G | T   | 6007.65  | PASS          | AC=15;AF=0.214;AN=70;BaseQRankSum=-1.537e+ |
| 7357 | chrY | 9950520 | . | C | A,T | 17496.57 | PASS          | AC=28,5;AF=0.400,0.071;AN=70;BaseQRankSum= |
| 7358 | chrY | 9950524 | . | C | T   | 17235.36 | PASS          | AC=28;AF=0.400;AN=70;BaseQRankSum=         |
| 7359 | chrY | 9950526 | . | G | T   | 6343.84  | PASS          | AC=14;AF=0.200;AN=70;BaseQRankSum=-1.088e+ |
| 7360 | chrY | 9950542 | . | G | A   | 41648.51 | PASS          | AC=37;AF=0.529;AN=70;BaseQRankSum=         |
| 7361 | chrY | 9950550 | . | G | A   | 11941.46 | PASS          | AC=21;AF=0.300;AN=70;BaseQRankSum=         |
| 7362 | chrY | 9950551 | . | C | T   | 16095.59 | PASS          | AC=22;AF=0.314;AN=70;BaseQRankSum=         |
| 7363 | chrY | 9950561 | . | G | A   | 977.71   | PASS          | AC=6;AF=0.086;AN=70;BaseQRankSum=-8.520e-  |
| 7364 | chrY | 9950568 | . | C | A   | 15136.72 | PASS          | AC=28;AF=0.400;AN=70;BaseQRankSum=         |
| 7365 | chrY | 9950572 | . | G | T,A | 45808.74 | PASS          | AC=34,5;AF=0.486,0.071;AN=70;BaseQRankSum= |
| 7366 | chrY | 9950573 | . | G | A   | 204.64   | PASS          | AC=4;AF=0.057;AN=70;BaseQRankSum=0.736;Cli |
| 7367 | chrY | 9950583 | . | C | T   | 1259.65  | PASS          | AC=14;AF=0.200;AN=70;BaseQRankSum=-9.060e- |
| 7368 | chrY | 9950584 | . | T | C   | 53674.85 | PASS          | AC=35;AF=0.500;AN=70;BaseQRankSum=         |
| 7369 | chrY | 9950585 | . | C | A   | 777.07   | PASS          | AC=3;AF=0.043;AN=70;BaseQRankSum=-9.970e-  |
| 7370 | chrY | 9950600 | . | C | T   | 23256.81 | PASS          | AC=22;AF=0.314;AN=70;BaseQRankSum=         |
| 7371 | chrY | 9950601 | . | G | A   | 496.44   | my_snp_filter | AC=8;AF=0.114;AN=70;BaseQRankSum=          |
| 7372 | chrY | 9950607 | . | T | A   | 8219.20  | PASS          | AC=21;AF=0.300;AN=70;BaseQRankSum=-4.850e- |

|      |      |         |   |   |       |           |               |                                           |
|------|------|---------|---|---|-------|-----------|---------------|-------------------------------------------|
| 7373 | chrY | 9950612 | . | G | T     | 57057.88  | PASS          | AC=30;AF=0.455;AN=66;BaseQRankSum=        |
| 7374 | chrY | 9950614 | . | G | C     | 194.47    | my_snp_filter | AC=3;AF=0.043;AN=70;BaseQRankSum=         |
| 7375 | chrY | 9950625 | . | A | C     | 14170.83  | PASS          | AC=21;AF=0.318;AN=66;BaseQRankSum=        |
| 7376 | chrY | 9950638 | . | T | A     | 158.35    | PASS          | AC=4;AF=0.059;AN=68;BaseQRankSum=-4.450e- |
| 7377 | chrY | 9950641 | . | G | T     | 156.64    | PASS          | AC=2;AF=0.029;AN=70;BaseQRankSum=-5.290e- |
| 7378 | chrY | 9950643 | . | T | C     | 53135.68  | PASS          | AC=33;AF=0.500;AN=66;BaseQRankSum=        |
| 7379 | chrY | 9950644 | . | G | A     | 25623.30  | PASS          | AC=25;AF=0.391;AN=64;BaseQRankSum=        |
| 7380 | chrY | 9950651 | . | C | T     | 14444.68  | PASS          | AC=19;AF=0.271;AN=70;BaseQRankSum=        |
| 7381 | chrY | 9950665 | . | C | T     | 20949.80  | PASS          | AC=24;AF=0.343;AN=70;BaseQRankSum=        |
| 7382 | chrY | 9950667 | . | G | T     | 2703.58   | PASS          | AC=10;AF=0.143;AN=70;BaseQRankSum=0.053;C |
| 7383 | chrY | 9950671 | . | T | C     | 57253.52  | PASS          | AC=35;AF=0.515;AN=68;BaseQRankSum=        |
| 7384 | chrY | 9950672 | . | T | C     | 2145.82   | PASS          | AC=12;AF=0.176;AN=68;BaseQRankSum=0.566;C |
| 7385 | chrY | 9950673 | . | G | C     | 254.77    | PASS          | AC=6;AF=0.086;AN=70;BaseQRankSum=0.550;Cl |
| 7386 | chrY | 9950674 | . | C | T     | 59466.68  | PASS          | AC=34;AF=0.500;AN=68;BaseQRankSum=        |
| 7387 | chrY | 9950677 | . | C | T     | 2272.26   | PASS          | AC=12;AF=0.182;AN=66;BaseQRankSum=0.658;C |
| 7388 | chrY | 9950681 | . | C | T,*   | 23676.45  | PASS          | AC=1,23;AF=0.015,0.348;AN=66;Base         |
| 7389 | chrY | 9950699 | . | C | A     | 30155.68  | PASS          | AC=28;AF=0.412;AN=68;BaseQRankSum=        |
| 7390 | chrY | 9950703 | . | C | T     | 74057     | PASS          | AC=35;AF=0.515;AN=68;BaseQRankSum=0.260;C |
| 7391 | chrY | 9950731 | . | T | C     | 30174.75  | PASS          | AC=30;AF=0.429;AN=70;BaseQRankSum=        |
| 7392 | chrY | 9950734 | . | A | G     | 83666.87  | PASS          | AC=34;AF=0.486;AN=70;BaseQRankSum=        |
| 7393 | chrY | 9950736 | . | G | T     | 1457.59   | PASS          | AC=7;AF=0.100;AN=70;BaseQRankSum=1.54;Cli |
| 7394 | chrY | 9950752 | . | T | C     | 21237.73  | PASS          | AC=26;AF=0.371;AN=70;BaseQRankSum=        |
| 7395 | chrY | 9950760 | . | A | C     | 84900.94  | PASS          | AC=34;AF=0.486;AN=70;BaseQRankSum=        |
| 7396 | chrY | 9950770 | . | G | A     | 52698.19  | PASS          | AC=27;AF=0.386;AN=70;BaseQRankSum=        |
| 7397 | chrY | 9950778 | . | C | T     | 2211.13   | PASS          | AC=3;AF=0.043;AN=70;BaseQRankSum=-1.532e+ |
| 7398 | chrY | 9950781 | . | G | A     | 2905.66   | my_snp_filter | AC=9;AF=0.129;AN=70;BaseQRankSum=         |
| 7399 | chrY | 9950783 | . | C | T     | 2344.55   | PASS          | AC=3;AF=0.043;AN=70;BaseQRankSum=0.049;Cl |
| 7400 | chrY | 9950789 | . | A | G     | 74453.44  | PASS          | AC=27;AF=0.386;AN=70;BaseQRankSum=        |
| 7401 | chrY | 9950790 | . | T | G     | 2845.16   | my_snp_filter | AC=10;AF=0.143;AN=70;BaseQRankSum=        |
| 7402 | chrY | 9950799 | . | A | G     | 30433.40  | PASS          | AC=26;AF=0.371;AN=70;BaseQRankSum=        |
| 7403 | chrY | 9950805 | . | G | A     | 96477.22  | PASS          | AC=31;AF=0.443;AN=70;BaseQRankSum=        |
| 7404 | chrY | 9950806 | . | A | G     | 34723.74  | PASS          | AC=29;AF=0.414;AN=70;BaseQRankSum=        |
| 7405 | chrY | 9950815 | . | C | A,T   | 43425.94  | PASS          | AC=24,13;AF=0.343,0.186;AN=70;Bas         |
| 7406 | chrY | 9950820 | . | G | A     | 13400.17  | PASS          | AC=8;AF=0.114;AN=70;BaseQRankSum=         |
| 7407 | chrY | 9950859 | . | A | G     | 4796.11   | PASS          | AC=21;AF=0.300;AN=70;BaseQRankSum=0.453;C |
| 7408 | chrY | 9950862 | . | T | G     | 94980.95  | PASS          | AC=38;AF=0.543;AN=70;BaseQRankSum=        |
| 7409 | chrY | 9950889 | . | G | T     | 236.31    | my_snp_filter | AC=7;AF=0.100;AN=70;BaseQRankSum=         |
| 7410 | chrY | 9950890 | . | G | A     | 13120.27  | PASS          | AC=13;AF=0.186;AN=70;BaseQRankSum=        |
| 7411 | chrY | 9950897 | . | G | T     | 4068.67   | PASS          | AC=9;AF=0.129;AN=70;BaseQRankSum=-3.900e- |
| 7412 | chrY | 9950899 | . | G | A     | 95132.04  | PASS          | AC=36;AF=0.514;AN=70;BaseQRankSum=        |
| 7413 | chrY | 9950902 | . | G | A     | 398.20    | my_snp_filter | AC=6;AF=0.086;AN=70;BaseQRankSum=         |
| 7414 | chrY | 9950905 | . | G | A     | 734.04    | PASS          | AC=9;AF=0.129;AN=70;BaseQRankSum=0.685;Cl |
| 7415 | chrY | 9950915 | . | A | G     | 34294.88  | PASS          | AC=31;AF=0.456;AN=68;BaseQRankSum=        |
| 7416 | chrY | 9950916 | . | C | A     | 25360.77  | PASS          | AC=17;AF=0.250;AN=68;BaseQRankSum=        |
| 7417 | chrY | 9950927 | . | G | C     | 97361.90  | PASS          | AC=39;AF=0.574;AN=68;BaseQRankSum=        |
| 7418 | chrY | 9950938 | . | A | C,T,* | 27753.55  | PASS          | AC=19,5,7;AF=0.297,0.078,0.109;AN         |
| 7419 | chrY | 9950939 | . | A | G     | 17925.73  | PASS          | AC=27;AF=0.422;AN=64;BaseQRankSum=        |
| 7420 | chrY | 9950946 | . | G | A,T   | 26981.76  | PASS          | AC=20,1;AF=0.286,0.014;AN=70;Base         |
| 7421 | chrY | 9950951 | . | G | A     | 26608.71  | PASS          | AC=19;AF=0.271;AN=70;BaseQRankSum=        |
| 7422 | chrY | 9950953 | . | G | A     | 120.42    | PASS          | AC=1;AF=0.014;AN=70;BaseQRankSum=-6.190e- |
| 7423 | chrY | 9950959 | . | T | G     | 111232.48 | PASS          | AC=38;AF=0.559;AN=68;BaseQRankSum=        |
| 7424 | chrY | 9950965 | . | C | G     | 25397.44  | PASS          | AC=16;AF=0.229;AN=70;BaseQRankSum=        |
| 7425 | chrY | 9950974 | . | C | T     | 6900.77   | PASS          | AC=10;AF=0.143;AN=70;BaseQRankSum=1.96;Cl |
| 7426 | chrY | 9950993 | . | A | G     | 210.70    | my_snp_filter | AC=4;AF=0.057;AN=70;BaseQRankSum=         |
| 7427 | chrY | 9950994 | . | A | T     | 6142.81   | PASS          | AC=22;AF=0.314;AN=70;BaseQRankSum=-6.310e |
| 7428 | chrY | 9950995 | . | A | G     | 19328.84  | PASS          | AC=33;AF=0.471;AN=70;BaseQRankSum=        |
| 7429 | chrY | 9950999 | . | A | T     | 109723.20 | PASS          | AC=40;AF=0.571;AN=70;BaseQRankSum=        |
| 7430 | chrY | 9951000 | . | C | T     | 243.67    | my_snp_filter | AC=1;AF=0.014;AN=70;BaseQRankSum=         |
| 7431 | chrY | 9951026 | . | A | G     | 15593.16  | PASS          | AC=20;AF=0.286;AN=70;BaseQRankSum=        |
| 7432 | chrY | 9951028 | . | A | G     | 103346.91 | PASS          | AC=40;AF=0.571;AN=70;BaseQRankSum=        |
| 7433 | chrY | 9951038 | . | G | A     | 610.44    | my_snp_filter | AC=9;AF=0.129;AN=70;BaseQRankSum=         |
| 7434 | chrY | 9951042 | . | G | A     | 32419.04  | PASS          | AC=25;AF=0.357;AN=70;BaseQRankSum=        |
| 7435 | chrY | 9951044 | . | C | T     | 19097.87  | PASS          | AC=17;AF=0.243;AN=70;BaseQRankSum=        |
| 7436 | chrY | 9951051 | . | C | G     | 6004.10   | PASS          | AC=13;AF=0.186;AN=70;BaseQRankSum=-7.290e |
| 7437 | chrY | 9951059 | . | T | C,A   | 1747.84   | PASS          | AC=2,6;AF=0.029,0.088;AN=68;BaseQRankSum= |
| 7438 | chrY | 9951074 | . | C | T     | 510.68    | my_snp_filter | AC=6;AF=0.086;AN=70;BaseQRankSum=         |
| 7439 | chrY | 9951075 | . | A | G     | 15789.73  | PASS          | AC=16;AF=0.229;AN=70;BaseQRankSum=        |
| 7440 | chrY | 9951076 | . | C | T     | 6848.67   | PASS          | AC=13;AF=0.186;AN=70;BaseQRankSum=3.75;Cl |
| 7441 | chrY | 9951081 | . | T | C     | 89359.06  | PASS          | AC=36;AF=0.529;AN=68;BaseQRankSum=        |
| 7442 | chrY | 9951085 | . | T | C     | 20702.65  | PASS          | AC=31;AF=0.456;AN=68;BaseQRankSum=        |
| 7443 | chrY | 9951108 | . | T | C     | 16323.61  | PASS          | AC=27;AF=0.397;AN=68;BaseQRankSum=        |
| 7444 | chrY | 9951110 | . | G | A     | 79226.59  | PASS          | AC=36;AF=0.529;AN=68;BaseQRankSum=        |
| 7445 | chrY | 9951118 | . | A | G     | 77195.03  | PASS          | AC=34;AF=0.500;AN=68;BaseQRankSum=        |
| 7446 | chrY | 9951129 | . | T | C     | 16305.97  | PASS          | AC=26;AF=0.382;AN=68;BaseQRankSum=        |
| 7447 | chrY | 9951135 | . | C | A     | 465.73    | PASS          | AC=6;AF=0.086;AN=70;BaseQRankSum=-2.240e- |
| 7448 | chrY | 9951138 | . | A | G     | 13743.24  | PASS          | AC=16;AF=0.229;AN=70;BaseQRankSum=        |

|      |      |         |   |   |     |          |               |                                            |
|------|------|---------|---|---|-----|----------|---------------|--------------------------------------------|
| 7449 | chrY | 9951143 | . | G | T   | 13852.68 | PASS          | AC=16;AF=0.229;AN=70;BaseQRankSum          |
| 7450 | chrY | 9951145 | . | C | A   | 26860.77 | PASS          | AC=22;AF=0.314;AN=70;BaseQRankSum          |
| 7451 | chrY | 9951146 | . | C | T   | 10919.16 | PASS          | AC=17;AF=0.243;AN=70;BaseQRankSum          |
| 7452 | chrY | 9951149 | . | A | C   | 2049.96  | my_snp_filter | AC=13;AF=0.186;AN=70;BaseQRankSum          |
| 7453 | chrY | 9951152 | . | G | A   | 77136.40 | PASS          | AC=38;AF=0.576;AN=66;BaseQRankSum          |
| 7454 | chrY | 9951155 | . | C | T   | 25567.27 | PASS          | AC=22;AF=0.324;AN=68;BaseQRankSum          |
| 7455 | chrY | 9951160 | . | C | A   | 77948.05 | PASS          | AC=40;AF=0.588;AN=68;BaseQRankSum          |
| 7456 | chrY | 9951164 | . | C | T   | 245.93   | PASS          | AC=6;AF=0.088;AN=68;BaseQRankSum=0.217;Cl  |
| 7457 | chrY | 9951173 | . | T | C   | 691.65   | PASS          | AC=6;AF=0.091;AN=66;BaseQRankSum=-5.320e-  |
| 7458 | chrY | 9951180 | . | C | G   | 16968.41 | PASS          | AC=8;AF=0.121;AN=66;BaseQRankSum           |
| 7459 | chrY | 9951194 | . | A | C   | 9067.18  | PASS          | AC=19;AF=0.297;AN=64;BaseQRankSum=0.452;C  |
| 7460 | chrY | 9951196 | . | C | G   | 228.73   | PASS          | AC=4;AF=0.065;AN=62;BaseQRankSum=-4.060e-  |
| 7461 | chrY | 9951197 | . | A | T   | 149.96   | PASS          | AC=1;AF=0.017;AN=60;BaseQRankSum=0.978;Cl  |
| 7462 | chrY | 9951205 | . | G | A   | 27580.54 | PASS          | AC=14;AF=0.241;AN=58;BaseQRankSum          |
| 7463 | chrY | 9951211 | . | A | C   | 463.03   | my_snp_filter | AC=1;AF=0.017;AN=58;BaseQRankSum           |
| 7464 | chrY | 9951221 | . | A | G   | 7572.03  | PASS          | AC=9;AF=0.167;AN=54;BaseQRankSum=-3.550e-  |
| 7465 | chrY | 9951226 | . | A | G   | 9251.05  | PASS          | AC=16;AF=0.286;AN=56;BaseQRankSum=-9.220e- |
| 7466 | chrY | 9951233 | . | A | G   | 13603.47 | PASS          | AC=12;AF=0.214;AN=56;BaseQRankSum          |
| 7467 | chrY | 9951247 | . | C | T   | 1858.23  | my_snp_filter | AC=4;AF=0.074;AN=54;BaseQRankSum           |
| 7468 | chrY | 9951303 | . | C | T   | 13748.94 | PASS          | AC=14;AF=0.219;AN=64;BaseQRankSum          |
| 7469 | chrY | 9951304 | . | T | C   | 78951.92 | PASS          | AC=24;AF=0.387;AN=62;BaseQRankSum          |
| 7470 | chrY | 9951321 | . | A | G   | 24071.56 | PASS          | AC=17;AF=0.243;AN=70;BaseQRankSum          |
| 7471 | chrY | 9951342 | . | G | A   | 1444.19  | my_snp_filter | AC=5;AF=0.071;AN=70;BaseQRankSum           |
| 7472 | chrY | 9951346 | . | C | T   | 1378.47  | my_snp_filter | AC=5;AF=0.071;AN=70;BaseQRankSum           |
| 7473 | chrY | 9951359 | . | T | A   | 77022.80 | PASS          | AC=17;AF=0.243;AN=70;BaseQRankSum          |
| 7474 | chrY | 9951364 | . | A | T   | 76967.34 | PASS          | AC=16;AF=0.229;AN=70;BaseQRankSum          |
| 7475 | chrY | 9951370 | . | A | C   | 67956.45 | PASS          | AC=15;AF=0.221;AN=68;BaseQRankSum          |
| 7476 | chrY | 9951383 | . | C | G   | 1306.97  | my_snp_filter | AC=7;AF=0.100;AN=70;BaseQRankSum           |
| 7477 | chrY | 9951394 | . | G | A   | 21074.09 | PASS          | AC=10;AF=0.143;AN=70;BaseQRankSum          |
| 7478 | chrY | 9951396 | . | A | G   | 28825.01 | PASS          | AC=10;AF=0.147;AN=68;BaseQRankSum          |
| 7479 | chrY | 9951397 | . | C | T   | 81854.69 | PASS          | AC=18;AF=0.265;AN=68;BaseQRankSum          |
| 7480 | chrY | 9951401 | . | C | T   | 18836    | PASS          | AC=13;AF=0.191;AN=68;BaseQRankSum=2.02;Cl  |
| 7481 | chrY | 9951402 | . | T | C   | 81538.28 | PASS          | AC=17;AF=0.250;AN=68;BaseQRankSum          |
| 7482 | chrY | 9951406 | . | C | A   | 2424.91  | my_snp_filter | AC=6;AF=0.086;AN=70;BaseQRankSum           |
| 7483 | chrY | 9951417 | . | T | C   | 1916.71  | my_snp_filter | AC=8;AF=0.114;AN=70;BaseQRankSum           |
| 7484 | chrY | 9951421 | . | C | T   | 21025.22 | PASS          | AC=14;AF=0.200;AN=70;BaseQRankSum          |
| 7485 | chrY | 9951424 | . | A | G   | 2749.74  | my_snp_filter | AC=6;AF=0.086;AN=70;BaseQRankSum           |
| 7486 | chrY | 9951425 | . | G | T   | 2130.99  | my_snp_filter | AC=8;AF=0.114;AN=70;BaseQRankSum           |
| 7487 | chrY | 9951429 | . | C | T   | 2750.47  | my_snp_filter | AC=6;AF=0.086;AN=70;BaseQRankSum           |
| 7488 | chrY | 9951430 | . | A | G   | 33.06    | PASS          | AC=1;AF=0.015;AN=68;BaseQRankSum=0.922;Cl  |
| 7489 | chrY | 9951436 | . | C | G   | 553.08   | PASS          | AC=3;AF=0.044;AN=68;BaseQRankSum=-2.640e-  |
| 7490 | chrY | 9951437 | . | T | C   | 6892.37  | PASS          | AC=11;AF=0.162;AN=68;BaseQRankSum=0.747;C  |
| 7491 | chrY | 9951438 | . | T | C   | 2344.65  | my_snp_filter | AC=8;AF=0.118;AN=68;BaseQRankSum           |
| 7492 | chrY | 9951463 | . | C | A,G | 15553.53 | PASS          | AC=15,5;AF=0.221,0.074;AN=68;Base          |
| 7493 | chrY | 9951471 | . | A | G   | 33.96    | PASS          | AC=1;AF=0.015;AN=68;BaseQRankSum=-1.380e+  |
| 7494 | chrY | 9951480 | . | G | A   | 9417.90  | PASS          | AC=12;AF=0.176;AN=68;BaseQRankSum=1.19;Cl  |
| 7495 | chrY | 9951485 | . | T | A   | 9321.02  | PASS          | AC=11;AF=0.162;AN=68;BaseQRankSum=0.351;C  |
| 7496 | chrY | 9951489 | . | A | T   | 15593.77 | PASS          | AC=15;AF=0.221;AN=68;BaseQRankSum          |
| 7497 | chrY | 9951493 | . | A | T   | 735.97   | PASS          | AC=3;AF=0.043;AN=70;BaseQRankSum=0.731;Cl  |
| 7498 | chrY | 9951494 | . | A | G   | 742.19   | PASS          | AC=3;AF=0.043;AN=70;BaseQRankSum=0.509;Cl  |
| 7499 | chrY | 9951503 | . | T | G   | 49385.26 | PASS          | AC=22;AF=0.324;AN=68;BaseQRankSum          |
| 7500 | chrY | 9951505 | . | A | C   | 9166.95  | PASS          | AC=10;AF=0.143;AN=70;BaseQRankSum=-5.062e  |
| 7501 | chrY | 9951514 | . | C | T   | 288.41   | my_snp_filter | AC=2;AF=0.029;AN=70;BaseQRankSum           |
| 7502 | chrY | 9951515 | . | T | G   | 8728.98  | PASS          | AC=11;AF=0.157;AN=70;BaseQRankSum=-7.070e  |
| 7503 | chrY | 9951521 | . | T | C   | 270.81   | my_snp_filter | AC=2;AF=0.029;AN=70;BaseQRankSum           |
| 7504 | chrY | 9951523 | . | T | A   | 57751.56 | PASS          | AC=20;AF=0.323;AN=62;BaseQRankSum          |
| 7505 | chrY | 9951531 | . | G | C   | 18008.71 | PASS          | AC=10;AF=0.152;AN=66;BaseQRankSum          |
| 7506 | chrY | 9951532 | . | G | A   | 18113.64 | PASS          | AC=10;AF=0.147;AN=68;BaseQRankSum          |
| 7507 | chrY | 9951537 | . | T | A   | 7403.32  | PASS          | AC=10;AF=0.147;AN=68;BaseQRankSum=-8.330e  |
| 7508 | chrY | 9951545 | . | A | G   | 7269.72  | PASS          | AC=11;AF=0.162;AN=68;BaseQRankSum=-2.685e  |
| 7509 | chrY | 9951547 | . | A | T   | 110.95   | my_snp_filter | AC=2;AF=0.029;AN=68;BaseQRankSum           |
| 7510 | chrY | 9951552 | . | A | G   | 7037.60  | PASS          | AC=11;AF=0.157;AN=70;BaseQRankSum=-6.437e  |
| 7511 | chrY | 9951555 | . | T | C   | 12266.12 | PASS          | AC=11;AF=0.157;AN=70;BaseQRankSum          |
| 7512 | chrY | 9951560 | . | T | A   | 47145.21 | PASS          | AC=18;AF=0.290;AN=62;BaseQRankSum          |
| 7513 | chrY | 9951562 | . | T | G   | 14534.21 | PASS          | AC=13;AF=0.191;AN=68;BaseQRankSum          |
| 7514 | chrY | 9951570 | . | A | C   | 44007.99 | PASS          | AC=18;AF=0.281;AN=64;BaseQRankSum          |
| 7515 | chrY | 9951576 | . | A | G   | 6272.38  | PASS          | AC=8;AF=0.118;AN=68;BaseQRankSum=-2.682e+  |
| 7516 | chrY | 9951577 | . | C | T   | 203.64   | my_snp_filter | AC=1;AF=0.014;AN=70;BaseQRankSum           |
| 7517 | chrY | 9951601 | . | G | C   | 51296.72 | PASS          | AC=23;AF=0.338;AN=68;BaseQRankSum          |
| 7518 | chrY | 9951610 | . | T | C   | 6014.50  | PASS          | AC=9;AF=0.132;AN=68;BaseQRankSum=0.424;Cl  |
| 7519 | chrY | 9951613 | . | T | C   | 57399.52 | PASS          | AC=23;AF=0.348;AN=66;BaseQRankSum          |
| 7520 | chrY | 9951614 | . | T | A   | 49.85    | PASS          | AC=2;AF=0.029;AN=68;BaseQRankSum=0.198;Cl  |
| 7521 | chrY | 9951622 | . | G | T   | 6284.72  | PASS          | AC=9;AF=0.132;AN=68;BaseQRankSum=-7.380e-  |
| 7522 | chrY | 9951637 | . | A | T   | 6814.96  | PASS          | AC=13;AF=0.191;AN=68;BaseQRankSum=-1.377e  |
| 7523 | chrY | 9951640 | . | A | C   | 10514.80 | PASS          | AC=25;AF=0.391;AN=64;BaseQRankSum          |
| 7524 | chrY | 9951642 | . | T | A   | 10589.98 | PASS          | AC=25;AF=0.368;AN=68;BaseQRankSum          |

|      |      |         |   |   |     |          |               |                                           |
|------|------|---------|---|---|-----|----------|---------------|-------------------------------------------|
| 7525 | chrY | 9951644 | . | T | A   | 30587.36 | PASS          | AC=18;AF=0.273;AN=66;BaseQRankSum         |
| 7526 | chrY | 9951652 | . | A | C   | 6594.63  | PASS          | AC=10;AF=0.152;AN=66;BaseQRankSum=-2.154e |
| 7527 | chrY | 9951667 | . | A | G   | 1376.15  | my_snp_filter | AC=9;AF=0.145;AN=62;BaseQRankSum=         |
| 7528 | chrY | 9951668 | . | C | T   | 17408.88 | PASS          | AC=11;AF=0.177;AN=62;BaseQRankSum         |
| 7529 | chrY | 9951677 | . | A | G,C | 73348.52 | PASS          | AC=27,3;AF=0.482,0.054;AN=56;Base         |
| 7530 | chrY | 9951686 | . | A | G   | 40108.20 | PASS          | AC=16;AF=0.286;AN=56;BaseQRankSum         |
| 7531 | chrY | 9951689 | . | A | G   | 13970.63 | PASS          | AC=10;AF=0.161;AN=62;BaseQRankSum         |
| 7532 | chrY | 9951690 | . | T | C   | 1745.21  | my_snp_filter | AC=9;AF=0.145;AN=62;BaseQRankSum=         |
| 7533 | chrY | 9951713 | . | C | T   | 74567.97 | PASS          | AC=18;AF=0.474;AN=38;BaseQRankSum         |
| 7534 | chrY | 9951714 | . | C | T   | 25125.68 | PASS          | AC=14;AF=0.304;AN=46;BaseQRankSum         |
| 7535 | chrY | 9951715 | . | G | A   | 26873.32 | PASS          | AC=10;AF=0.227;AN=44;BaseQRankSum         |
| 7536 | chrY | 9951723 | . | A | T   | 24011.37 | PASS          | AC=11;AF=0.239;AN=46;BaseQRankSum         |
| 7537 | chrY | 9951729 | . | A | G,T | 65474.76 | PASS          | AC=17,1;AF=0.425,0.025;AN=40;Base         |
| 7538 | chrY | 9951731 | . | A | G   | 456.36   | my_snp_filter | AC=3;AF=0.068;AN=44;BaseQRankSum=         |
| 7539 | chrY | 9951733 | . | A | T   | 2980.86  | PASS          | AC=7;AF=0.152;AN=46;BaseQRankSum=-5.752e+ |
| 7540 | chrY | 9951752 | . | A | G   | 1825.77  | my_snp_filter | AC=6;AF=0.120;AN=50;BaseQRankSum=         |
| 7541 | chrY | 9951765 | . | T | A   | 1669.90  | my_snp_filter | AC=3;AF=0.058;AN=52;BaseQRankSum=         |
| 7542 | chrY | 9951775 | . | G | A   | 132.94   | my_snp_filter | AC=1;AF=0.019;AN=52;BaseQRankSum=         |
| 7543 | chrY | 9951785 | . | A | T   | 10275.54 | PASS          | AC=9;AF=0.180;AN=50;BaseQRankSum=         |
| 7544 | chrY | 9951786 | . | G | C   | 26690.28 | PASS          | AC=17;AF=0.425;AN=40;BaseQRankSum         |
| 7545 | chrY | 9951787 | . | C | T   | 217.25   | my_snp_filter | AC=2;AF=0.040;AN=50;BaseQRankSum=         |
| 7546 | chrY | 9951792 | . | G | C   | 1178.59  | PASS          | AC=4;AF=0.074;AN=54;BaseQRankSum=-1.641e+ |
| 7547 | chrY | 9951794 | . | A | G   | 9927.01  | PASS          | AC=9;AF=0.173;AN=52;BaseQRankSum=-2.502e+ |
| 7548 | chrY | 9951798 | . | A | C   | 6087.80  | PASS          | AC=9;AF=0.180;AN=50;BaseQRankSum=-7.660e- |
| 7549 | chrY | 9951801 | . | A | T   | 1269.45  | PASS          | AC=6;AF=0.115;AN=52;BaseQRankSum=0.619;Cl |
| 7550 | chrY | 9951804 | . | A | G   | 988.36   | my_snp_filter | AC=3;AF=0.056;AN=54;BaseQRankSum=         |
| 7551 | chrY | 9951805 | . | G | T   | 154.33   | my_snp_filter | AC=2;AF=0.037;AN=54;BaseQRankSum=         |
| 7552 | chrY | 9951807 | . | G | T   | 300.30   | my_snp_filter | AC=3;AF=0.063;AN=48;BaseQRankSum=         |
| 7553 | chrY | 9951808 | . | G | A   | 259.80   | my_snp_filter | AC=3;AF=0.060;AN=50;BaseQRankSum=         |
| 7554 | chrY | 9951811 | . | C | T   | 186.31   | my_snp_filter | AC=3;AF=0.063;AN=48;BaseQRankSum=         |
| 7555 | chrY | 9951813 | . | A | G   | 7709.41  | PASS          | AC=9;AF=0.196;AN=46;BaseQRankSum=-1.520e- |
| 7556 | chrY | 9951819 | . | A | C   | 175.27   | PASS          | AC=1;AF=0.022;AN=46;BaseQRankSum=-2.189e+ |
| 7557 | chrY | 9951833 | . | A | G   | 34.20    | my_snp_filter | AC=1;AF=0.028;AN=36;BaseQRankSum=         |
| 7558 | chrY | 9951834 | . | A | T   | 34.02    | my_snp_filter | AC=1;AF=0.028;AN=36;BaseQRankSum=         |
| 7559 | chrY | 9951859 | . | A | G   | 10419.94 | PASS          | AC=9;AF=0.167;AN=54;BaseQRankSum=         |
| 7560 | chrY | 9951860 | . | T | A   | 10486.81 | PASS          | AC=9;AF=0.205;AN=44;BaseQRankSum=         |
| 7561 | chrY | 9951870 | . | C | A   | 12523.27 | PASS          | AC=12;AF=0.300;AN=40;BaseQRankSum=        |
| 7562 | chrY | 9951880 | . | C | G,A | 13446.81 | PASS          | AC=3,9;AF=0.058,0.173;AN=52;BaseQ         |
| 7563 | chrY | 9951884 | . | A | G   | 48.42    | PASS          | AC=2;AF=0.040;AN=50;DP=1768;FS=0.000;Inbr |
| 7564 | chrY | 9951888 | . | T | C   | 16494.16 | PASS          | AC=16;AF=0.421;AN=38;BaseQRankSum         |
| 7565 | chrY | 9951896 | . | A | G   | 33.38    | PASS          | AC=1;AF=0.019;AN=52;BaseQRankSum=0.922;Cl |
| 7566 | chrY | 9951897 | . | C | T   | 15264.82 | PASS          | AC=9;AF=0.188;AN=48;BaseQRankSum=         |
| 7567 | chrY | 9951910 | . | A | G   | 44.11    | PASS          | AC=1;AF=0.016;AN=64;BaseQRankSum=-7.360e- |
| 7568 | chrY | 9951912 | . | C | G   | 6492.76  | PASS          | AC=8;AF=0.125;AN=64;BaseQRankSum=-1.787e+ |
| 7569 | chrY | 9951918 | . | T | A   | 43.96    | PASS          | AC=1;AF=0.016;AN=64;BaseQRankSum=-7.360e- |
| 7570 | chrY | 9951921 | . | C | T   | 43.91    | PASS          | AC=1;AF=0.016;AN=64;BaseQRankSum=-7.360e- |
| 7571 | chrY | 9951939 | . | G | T   | 2125.58  | PASS          | AC=4;AF=0.067;AN=60;BaseQRankSum=0.555;Cl |
| 7572 | chrY | 9951945 | . | A | G   | 10248.26 | PASS          | AC=15;AF=0.234;AN=64;BaseQRankSum         |
| 7573 | chrY | 9951956 | . | A | G   | 136.54   | my_snp_filter | AC=1;AF=0.015;AN=68;BaseQRankSum=         |
| 7574 | chrY | 9951960 | . | G | T   | 26984.76 | PASS          | AC=15;AF=0.221;AN=68;BaseQRankSum         |
| 7575 | chrY | 9951972 | . | T | G   | 96604.81 | PASS          | AC=50;AF=0.781;AN=64;BaseQRankSum         |
| 7576 | chrY | 9951980 | . | G | A   | 13445.90 | PASS          | AC=13;AF=0.217;AN=60;BaseQRankSum         |
| 7577 | chrY | 9951982 | . | C | T   | 22424.04 | PASS          | AC=17;AF=0.283;AN=60;BaseQRankSum         |
| 7578 | chrY | 9951983 | . | G | A   | 255.72   | my_snp_filter | AC=3;AF=0.048;AN=62;BaseQRankSum=         |
| 7579 | chrY | 9952011 | . | A | C   | 5652.55  | PASS          | AC=17;AF=0.266;AN=64;BaseQRankSum=-1.231e |
| 7580 | chrY | 9952014 | . | A | T   | 22251.46 | PASS          | AC=29;AF=0.453;AN=64;BaseQRankSum         |
| 7581 | chrY | 9952026 | . | G | C   | 630.59   | my_snp_filter | AC=6;AF=0.091;AN=66;BaseQRankSum=         |
| 7582 | chrY | 9952038 | . | A | T   | 23052.33 | PASS          | AC=25;AF=0.368;AN=68;BaseQRankSum         |
| 7583 | chrY | 9952050 | . | T | G   | 527.67   | my_snp_filter | AC=9;AF=0.132;AN=68;BaseQRankSum=         |
| 7584 | chrY | 9952060 | . | C | G   | 26443.38 | PASS          | AC=25;AF=0.368;AN=68;BaseQRankSum         |
| 7585 | chrY | 9952066 | . | G | A   | 57402.72 | PASS          | AC=30;AF=0.441;AN=68;BaseQRankSum         |
| 7586 | chrY | 9952074 | . | A | G   | 93412.49 | PASS          | AC=33;AF=0.500;AN=66;BaseQRankSum         |
| 7587 | chrY | 9952082 | . | A | G   | 538.02   | my_snp_filter | AC=3;AF=0.048;AN=62;BaseQRankSum=         |
| 7588 | chrY | 9952085 | . | G | A   | 89238.89 | PASS          | AC=32;AF=0.485;AN=66;BaseQRankSum         |
| 7589 | chrY | 9952119 | . | C | A   | 2471.78  | PASS          | AC=5;AF=0.071;AN=70;BaseQRankSum=3.12;Cli |
| 7590 | chrY | 9952122 | . | G | A   | 1024.89  | PASS          | AC=5;AF=0.071;AN=70;BaseQRankSum=2.81;Cli |
| 7591 | chrY | 9952126 | . | C | T   | 3847.07  | PASS          | AC=6;AF=0.086;AN=70;BaseQRankSum=5.10;Cli |
| 7592 | chrY | 9952138 | . | G | A   | 173.32   | my_snp_filter | AC=2;AF=0.029;AN=70;BaseQRankSum=         |
| 7593 | chrY | 9952144 | . | T | G   | 38636.32 | PASS          | AC=33;AF=0.471;AN=70;BaseQRankSum         |
| 7594 | chrY | 9952145 | . | T | A   | 41730.08 | PASS          | AC=33;AF=0.471;AN=70;BaseQRankSum         |
| 7595 | chrY | 9952152 | . | A | G   | 48169.04 | PASS          | AC=33;AF=0.471;AN=70;BaseQRankSum         |
| 7596 | chrY | 9952154 | . | G | A   | 1085.87  | PASS          | AC=4;AF=0.057;AN=70;BaseQRankSum=0.785;Cl |
| 7597 | chrY | 9952157 | . | T | A   | 154.10   | my_snp_filter | AC=1;AF=0.014;AN=70;BaseQRankSum=         |
| 7598 | chrY | 9952159 | . | C | A   | 1071.70  | PASS          | AC=4;AF=0.057;AN=70;BaseQRankSum=3.69;Cli |
| 7599 | chrY | 9952161 | . | C | A   | 47247.66 | PASS          | AC=34;AF=0.500;AN=68;BaseQRankSum         |
| 7600 | chrY | 9952162 | . | T | C   | 3032.39  | PASS          | AC=8;AF=0.114;AN=70;BaseQRankSum=-6.500e- |

|      |      |         |   |   |     |           |               |                                           |
|------|------|---------|---|---|-----|-----------|---------------|-------------------------------------------|
| 7601 | chrY | 9952164 | . | A | T   | 30704.64  | PASS          | AC=33;AF=0.471;AN=70;BaseQRankSum         |
| 7602 | chrY | 9952171 | . | T | G   | 11143.43  | PASS          | AC=11;AF=0.162;AN=68;BaseQRankSum         |
| 7603 | chrY | 9952198 | . | G | C   | 22928.31  | PASS          | AC=26;AF=0.382;AN=68;BaseQRankSum         |
| 7604 | chrY | 9952215 | . | C | T   | 51        | my_snp_filter | AC=1;AF=0.015;AN=68;BaseQRankSum          |
| 7605 | chrY | 9952217 | . | A | C   | 53180.43  | PASS          | AC=28;AF=0.424;AN=66;BaseQRankSum         |
| 7606 | chrY | 9952221 | . | C | A   | 53.48     | my_snp_filter | AC=1;AF=0.014;AN=70;BaseQRankSum          |
| 7607 | chrY | 9952233 | . | A | T   | 7093.72   | PASS          | AC=10;AF=0.143;AN=70;BaseQRankSum=-7.290e |
| 7608 | chrY | 9952236 | . | G | T   | 9861.15   | PASS          | AC=16;AF=0.235;AN=68;BaseQRankSum=-7.470e |
| 7609 | chrY | 9952246 | . | A | T   | 13666.70  | PASS          | AC=19;AF=0.271;AN=70;BaseQRankSum         |
| 7610 | chrY | 9952250 | . | T | C   | 154.86    | PASS          | AC=4;AF=0.059;AN=68;BaseQRankSum=-4.800e  |
| 7611 | chrY | 9952251 | . | C | T   | 33        | PASS          | AC=1;AF=0.014;AN=70;BaseQRankSum=-2.166e+ |
| 7612 | chrY | 9952260 | . | G | T   | 78.15     | my_snp_filter | AC=1;AF=0.014;AN=70;BaseQRankSum          |
| 7613 | chrY | 9952267 | . | T | C   | 32825.07  | PASS          | AC=16;AF=0.229;AN=70;BaseQRankSum         |
| 7614 | chrY | 9952268 | . | C | A   | 11940.19  | PASS          | AC=10;AF=0.143;AN=70;BaseQRankSum         |
| 7615 | chrY | 9952275 | . | A | T,G | 17286.34  | PASS          | AC=13,4;AF=0.191,0.059;AN=68;Base         |
| 7616 | chrY | 9952290 | . | T | A   | 58343.09  | PASS          | AC=24;AF=0.343;AN=70;BaseQRankSum         |
| 7617 | chrY | 9952291 | . | G | A   | 4491.21   | PASS          | AC=7;AF=0.103;AN=68;BaseQRankSum=0.837;Cl |
| 7618 | chrY | 9952303 | . | G | A   | 61434.87  | PASS          | AC=27;AF=0.386;AN=70;BaseQRankSum         |
| 7619 | chrY | 9952345 | . | C | T   | 78332.86  | PASS          | AC=34;AF=0.486;AN=70;BaseQRankSum         |
| 7620 | chrY | 9952350 | . | A | G   | 2146.87   | PASS          | AC=21;AF=0.300;AN=70;BaseQRankSum=-1.066e |
| 7621 | chrY | 9952353 | . | C | G   | 92.09     | PASS          | AC=2;AF=0.029;AN=70;BaseQRankSum=0.935;Cl |
| 7622 | chrY | 9952363 | . | G | A   | 86.64     | my_snp_filter | AC=4;AF=0.057;AN=70;BaseQRankSum          |
| 7623 | chrY | 9952399 | . | G | A   | 6263.81   | PASS          | AC=14;AF=0.200;AN=70;BaseQRankSum=0.222;C |
| 7624 | chrY | 9952403 | . | T | C   | 33714.17  | PASS          | AC=24;AF=0.343;AN=70;BaseQRankSum         |
| 7625 | chrY | 9952407 | . | T | A   | 136518.13 | PASS          | AC=41;AF=0.586;AN=70;BaseQRankSum         |
| 7626 | chrY | 9952415 | . | C | G   | 35723.90  | PASS          | AC=25;AF=0.357;AN=70;BaseQRankSum         |
| 7627 | chrY | 9952416 | . | G | A   | 91562.84  | PASS          | AC=36;AF=0.514;AN=70;BaseQRankSum         |
| 7628 | chrY | 9952417 | . | A | C   | 151.06    | my_snp_filter | AC=2;AF=0.029;AN=70;BaseQRankSum          |
| 7629 | chrY | 9952420 | . | T | G   | 18986.55  | PASS          | AC=20;AF=0.286;AN=70;BaseQRankSum         |
| 7630 | chrY | 9952422 | . | C | A   | 7749.67   | PASS          | AC=13;AF=0.186;AN=70;BaseQRankSum=2.05;Cl |
| 7631 | chrY | 9952426 | . | C | T   | 8983.39   | PASS          | AC=24;AF=0.343;AN=70;BaseQRankSum=0.199;C |
| 7632 | chrY | 9952436 | . | A | T   | 201.06    | my_snp_filter | AC=2;AF=0.029;AN=70;BaseQRankSum          |
| 7633 | chrY | 9952446 | . | T | C   | 7034.92   | PASS          | AC=11;AF=0.157;AN=70;BaseQRankSum=-2.460e |
| 7634 | chrY | 9952447 | . | G | A   | 7237.40   | PASS          | AC=11;AF=0.157;AN=70;BaseQRankSum=0.977;C |
| 7635 | chrY | 9952448 | . | C | G   | 33219.64  | PASS          | AC=24;AF=0.343;AN=70;BaseQRankSum         |
| 7636 | chrY | 9952453 | . | A | T   | 7113.72   | PASS          | AC=11;AF=0.157;AN=70;BaseQRankSum=0.161;C |
| 7637 | chrY | 9952469 | . | G | A   | 35602.48  | PASS          | AC=24;AF=0.343;AN=70;BaseQRankSum         |
| 7638 | chrY | 9952470 | . | C | T,A | 8216.10   | PASS          | AC=11,12;AF=0.157,0.171;AN=70;BaseQRankSu |
| 7639 | chrY | 9952474 | . | C | G,T | 19428.74  | PASS          | AC=32,3;AF=0.457,0.043;AN=70;Base         |
| 7640 | chrY | 9952481 | . | A | C   | 1196.84   | PASS          | AC=11;AF=0.157;AN=70;BaseQRankSum=-4.230e |
| 7641 | chrY | 9952483 | . | A | G   | 34522.93  | PASS          | AC=24;AF=0.343;AN=70;BaseQRankSum         |
| 7642 | chrY | 9952492 | . | A | G   | 5169.23   | my_snp_filter | AC=20;AF=0.286;AN=70;BaseQRankSum         |
| 7643 | chrY | 9952494 | . | A | G   | 5166.29   | my_snp_filter | AC=20;AF=0.286;AN=70;BaseQRankSum         |
| 7644 | chrY | 9952497 | . | A | G,T | 101099.71 | PASS          | AC=41,3;AF=0.603,0.044;AN=68;Base         |
| 7645 | chrY | 9952498 | . | G | A   | 14352.20  | PASS          | AC=25;AF=0.368;AN=68;BaseQRankSum         |
| 7646 | chrY | 9952504 | . | C | A   | 28794.32  | PASS          | AC=28;AF=0.412;AN=68;BaseQRankSum         |
| 7647 | chrY | 9952510 | . | G | T   | 4621.29   | my_snp_filter | AC=17;AF=0.243;AN=70;BaseQRankSum         |
| 7648 | chrY | 9952514 | . | A | T   | 703.28    | my_snp_filter | AC=3;AF=0.043;AN=70;BaseQRankSum          |
| 7649 | chrY | 9952528 | . | C | T   | 5798.89   | PASS          | AC=11;AF=0.157;AN=70;BaseQRankSum=-1.952e |
| 7650 | chrY | 9952535 | . | T | C   | 14279.93  | PASS          | AC=14;AF=0.212;AN=66;BaseQRankSum         |
| 7651 | chrY | 9952537 | . | C | T   | 14365.16  | PASS          | AC=14;AF=0.206;AN=68;BaseQRankSum         |
| 7652 | chrY | 9952543 | . | T | C   | 334.21    | my_snp_filter | AC=2;AF=0.030;AN=66;BaseQRankSum          |
| 7653 | chrY | 9952544 | . | G | A   | 11568.64  | PASS          | AC=14;AF=0.219;AN=64;BaseQRankSum         |
| 7654 | chrY | 9952545 | . | G | T   | 2661.08   | my_snp_filter | AC=5;AF=0.074;AN=68;BaseQRankSum          |
| 7655 | chrY | 9952546 | . | T | G   | 16438.08  | PASS          | AC=14;AF=0.212;AN=66;BaseQRankSum         |
| 7656 | chrY | 9952551 | . | C | T   | 558.98    | PASS          | AC=7;AF=0.106;AN=66;BaseQRankSum=0.406;Cl |
| 7657 | chrY | 9952552 | . | A | G   | 561.44    | PASS          | AC=7;AF=0.106;AN=66;BaseQRankSum=-7.360e- |
| 7658 | chrY | 9952558 | . | C | A   | 92578.48  | PASS          | AC=37;AF=0.638;AN=58;BaseQRankSum         |
| 7659 | chrY | 9952565 | . | A | G   | 57269.38  | PASS          | AC=30;AF=0.500;AN=60;BaseQRankSum         |
| 7660 | chrY | 9952574 | . | G | C   | 9724.37   | PASS          | AC=11;AF=0.183;AN=60;BaseQRankSum=-1.493e |
| 7661 | chrY | 9952597 | . | G | A   | 9875.45   | PASS          | AC=8;AF=0.167;AN=48;BaseQRankSum=0.297;Cl |
| 7662 | chrY | 9952611 | . | C | A   | 6781.44   | PASS          | AC=13;AF=0.342;AN=38;BaseQRankSum=2.74;Cl |
| 7663 | chrY | 9952613 | . | C | T   | 8304.23   | PASS          | AC=8;AF=0.190;AN=42;BaseQRankSum=-1.455e+ |
| 7664 | chrY | 9952617 | . | T | C   | 66598.37  | PASS          | AC=27;AF=0.750;AN=36;BaseQRankSum         |
| 7665 | chrY | 9952621 | . | T | A   | 29475.37  | PASS          | AC=13;AF=0.295;AN=44;BaseQRankSum         |
| 7666 | chrY | 9952624 | . | T | C   | 931.25    | PASS          | AC=4;AF=0.087;AN=46;BaseQRankSum=-1.322e+ |
| 7667 | chrY | 9952636 | . | G | A   | 28604.69  | PASS          | AC=11;AF=0.289;AN=38;BaseQRankSum         |
| 7668 | chrY | 9952638 | . | G | T   | 5676.40   | PASS          | AC=9;AF=0.205;AN=44;BaseQRankSum=-2.612e+ |
| 7669 | chrY | 9952642 | . | T | C   | 54912.69  | PASS          | AC=17;AF=0.654;AN=26;BaseQRankSum         |
| 7670 | chrY | 9952643 | . | C | T   | 16574.62  | PASS          | AC=13;AF=0.342;AN=38;BaseQRankSum         |
| 7671 | chrY | 9952644 | . | G | A   | 5245.45   | PASS          | AC=7;AF=0.184;AN=38;BaseQRankSum=2.22;Cli |
| 7672 | chrY | 9952647 | . | G | C   | 6611.21   | PASS          | AC=7;AF=0.175;AN=40;BaseQRankSum=0.581;Cl |
| 7673 | chrY | 9952652 | . | T | C   | 34252.74  | PASS          | AC=11;AF=0.306;AN=36;BaseQRankSum         |
| 7674 | chrY | 9952653 | . | G | A   | 12168.83  | PASS          | AC=9;AF=0.237;AN=38;BaseQRankSum          |
| 7675 | chrY | 9952654 | . | G | A   | 4192.88   | PASS          | AC=8;AF=0.200;AN=40;BaseQRankSum=-8.260e- |
| 7676 | chrY | 9952663 | . | A | C   | 8827.40   | PASS          | AC=9;AF=0.250;AN=36;BaseQRankSum=-1.900e- |

|      |      |         |   |   |     |          |               |                                           |
|------|------|---------|---|---|-----|----------|---------------|-------------------------------------------|
| 7677 | chrY | 9952664 | . | G | A   | 8603.11  | PASS          | AC=9;AF=0.250;AN=36;BaseQRankSum=-2.541e+ |
| 7678 | chrY | 9952667 | . | C | T   | 2716.26  | PASS          | AC=9;AF=0.250;AN=36;BaseQRankSum=-1.175e+ |
| 7679 | chrY | 9952674 | . | T | A,G | 5566.54  | PASS          | AC=5,4;AF=0.179,0.143;AN=28;BaseQRankSum= |
| 7680 | chrY | 9952676 | . | G | A   | 30951.71 | PASS          | AC=9;AF=0.321;AN=28;BaseQRankSum=         |
| 7681 | chrY | 9952688 | . | T | G   | 34063.07 | PASS          | AC=11;AF=0.500;AN=22;BaseQRankSum=        |
| 7682 | chrY | 9952689 | . | C | T   | 5699.68  | PASS          | AC=9;AF=0.321;AN=28;BaseQRankSum=-6.890e- |
| 7683 | chrY | 9952695 | . | T | G   | 13732.11 | PASS          | AC=9;AF=0.409;AN=22;BaseQRankSum=         |
| 7684 | chrY | 9952698 | . | T | C   | 41259.11 | PASS          | AC=9;AF=0.409;AN=22;BaseQRankSum=         |
| 7685 | chrY | 9952699 | . | G | A   | 8380.23  | PASS          | AC=9;AF=0.409;AN=22;BaseQRankSum=1.92;Cli |
| 7686 | chrY | 9952707 | . | G | A   | 2887.70  | PASS          | AC=5;AF=0.250;AN=20;BaseQRankSum=6.33;Cli |
| 7687 | chrY | 9952711 | . | C | G   | 1697.84  | PASS          | AC=4;AF=0.200;AN=20;BaseQRankSum=-3.040e+ |
| 7688 | chrY | 9952720 | . | A | T   | 31643.52 | PASS          | AC=9;AF=0.450;AN=20;BaseQRankSum=         |
| 7689 | chrY | 9952723 | . | C | T   | 1663     | PASS          | AC=5;AF=0.227;AN=22;BaseQRankSum=0.590;Cl |
| 7690 | chrY | 9952729 | . | A | T   | 38088.99 | PASS          | AC=9;AF=0.409;AN=22;BaseQRankSum=         |
| 7691 | chrY | 9952731 | . | A | T   | 399.13   | my_snp_filter | AC=3;AF=0.125;AN=24;BaseQRankSum=         |
| 7692 | chrY | 9952735 | . | A | G,* | 2759.37  | PASS          | AC=5,3;AF=0.192,0.115;AN=26;BaseQRankSum= |
| 7693 | chrY | 9952737 | . | T | G   | 34927.99 | PASS          | AC=9;AF=0.409;AN=22;BaseQRankSum=         |
| 7694 | chrY | 9952739 | . | A | G   | 32491.99 | PASS          | AC=9;AF=0.409;AN=22;BaseQRankSum=         |
| 7695 | chrY | 9952748 | . | G | A   | 4881.24  | PASS          | AC=8;AF=0.308;AN=26;BaseQRankSum=-9.840e- |
| 7696 | chrY | 9952752 | . | C | T   | 748.05   | my_snp_filter | AC=5;AF=0.167;AN=30;BaseQRankSum=         |
| 7697 | chrY | 9952756 | . | T | C   | 1901.66  | PASS          | AC=8;AF=0.235;AN=34;BaseQRankSum=-4.679e+ |
| 7698 | chrY | 9952757 | . | A | G   | 31250.71 | PASS          | AC=9;AF=0.321;AN=28;BaseQRankSum=         |
| 7699 | chrY | 9952759 | . | T | C   | 1484.58  | PASS          | AC=6;AF=0.167;AN=36;BaseQRankSum=2.29;Cli |
| 7700 | chrY | 9952760 | . | C | A   | 1882.57  | my_snp_filter | AC=8;AF=0.222;AN=36;BaseQRankSum=         |
| 7701 | chrY | 9952765 | . | G | C   | 40550.06 | PASS          | AC=9;AF=0.300;AN=30;BaseQRankSum=         |
| 7702 | chrY | 9952770 | . | T | C   | 41396.71 | PASS          | AC=9;AF=0.321;AN=28;BaseQRankSum=         |
| 7703 | chrY | 9952771 | . | G | A   | 32857.07 | PASS          | AC=9;AF=0.281;AN=32;BaseQRankSum=         |
| 7704 | chrY | 9952785 | . | G | A   | 1166.49  | my_snp_filter | AC=6;AF=0.115;AN=52;BaseQRankSum=         |
| 7705 | chrY | 9952786 | . | G | A   | 33343.64 | PASS          | AC=9;AF=0.214;AN=42;BaseQRankSum=         |
| 7706 | chrY | 9952790 | . | A | G   | 1685.23  | my_snp_filter | AC=6;AF=0.130;AN=46;BaseQRankSum=         |
| 7707 | chrY | 9952800 | . | C | T   | 5731.90  | PASS          | AC=8;AF=0.167;AN=48;BaseQRankSum=0.295;Cl |
| 7708 | chrY | 9952802 | . | T | A   | 1775.98  | my_snp_filter | AC=8;AF=0.182;AN=44;BaseQRankSum=         |
| 7709 | chrY | 9952814 | . | G | T   | 39706.08 | PASS          | AC=15;AF=0.395;AN=38;BaseQRankSum=        |
| 7710 | chrY | 9952817 | . | G | C   | 1380.85  | my_snp_filter | AC=7;AF=0.125;AN=56;BaseQRankSum=         |
| 7711 | chrY | 9952843 | . | A | C   | 20964.10 | PASS          | AC=15;AF=0.268;AN=56;BaseQRankSum=        |
| 7712 | chrY | 9952849 | . | A | G   | 41126.03 | PASS          | AC=15;AF=0.313;AN=48;BaseQRankSum=        |
| 7713 | chrY | 9952886 | . | C | T   | 15673.08 | PASS          | AC=14;AF=0.250;AN=56;BaseQRankSum=        |
| 7714 | chrY | 9952930 | . | C | A   | 32.25    | PASS          | AC=1;AF=0.015;AN=68;BaseQRankSum=0.572;Cl |
| 7715 | chrY | 9952940 | . | A | T   | 1873.27  | PASS          | AC=7;AF=0.106;AN=66;BaseQRankSum=-6.440e- |
| 7716 | chrY | 9952947 | . | C | A   | 15884.35 | PASS          | AC=15;AF=0.250;AN=60;BaseQRankSum=        |
| 7717 | chrY | 9952951 | . | T | A   | 1831.47  | PASS          | AC=7;AF=0.106;AN=66;BaseQRankSum=-2.590e- |
| 7718 | chrY | 9952969 | . | T | G   | 11355.40 | PASS          | AC=10;AF=0.152;AN=66;BaseQRankSum=        |
| 7719 | chrY | 9952980 | . | C | T,A | 9850     | my_snp_filter | AC=1,9;AF=0.016,0.141;AN=64;BaseQ         |
| 7720 | chrY | 9952985 | . | C | A   | 682.62   | PASS          | AC=2;AF=0.031;AN=64;BaseQRankSum=1.14;Cli |
| 7721 | chrY | 9952986 | . | A | C   | 8018.34  | my_snp_filter | AC=9;AF=0.141;AN=64;BaseQRankSum=         |
| 7722 | chrY | 9952991 | . | G | A   | 7720.80  | my_snp_filter | AC=9;AF=0.150;AN=60;BaseQRankSum=         |
| 7723 | chrY | 9953037 | . | T | C   | 11549.53 | PASS          | AC=9;AF=0.136;AN=66;BaseQRankSum=         |
| 7724 | chrY | 9953039 | . | T | C   | 81.27    | my_snp_filter | AC=2;AF=0.030;AN=66;BaseQRankSum=         |
| 7725 | chrY | 9953040 | . | A | T   | 11988.04 | PASS          | AC=9;AF=0.132;AN=68;BaseQRankSum=         |
| 7726 | chrY | 9953056 | . | T | C   | 642.54   | PASS          | AC=4;AF=0.059;AN=68;BaseQRankSum=2.12;Cli |
| 7727 | chrY | 9953059 | . | C | T   | 19011.48 | PASS          | AC=17;AF=0.258;AN=66;BaseQRankSum=        |
| 7728 | chrY | 9953080 | . | A | T   | 541.41   | my_snp_filter | AC=3;AF=0.043;AN=70;BaseQRankSum=         |
| 7729 | chrY | 9953088 | . | C | T   | 523.78   | my_snp_filter | AC=3;AF=0.043;AN=70;BaseQRankSum=         |
| 7730 | chrY | 9953093 | . | A | C   | 24473.93 | PASS          | AC=27;AF=0.409;AN=66;BaseQRankSum=        |
| 7731 | chrY | 9953114 | . | C | G   | 63.28    | PASS          | AC=2;AF=0.029;AN=70;BaseQRankSum=1.78;Cli |
| 7732 | chrY | 9953162 | . | C | T   | 39.32    | PASS          | AC=1;AF=0.014;AN=70;BaseQRankSum=-3.750e- |
| 7733 | chrY | 9953177 | . | A | G   | 200.87   | my_snp_filter | AC=4;AF=0.059;AN=68;BaseQRankSum=         |
| 7734 | chrY | 9953201 | . | A | C   | 171.98   | my_snp_filter | AC=6;AF=0.086;AN=70;BaseQRankSum=         |
| 7735 | chrY | 9953202 | . | T | C   | 17967.71 | PASS          | AC=24;AF=0.343;AN=70;BaseQRankSum=        |
| 7736 | chrY | 9953211 | . | G | A   | 28169.58 | PASS          | AC=29;AF=0.426;AN=68;BaseQRankSum=        |
| 7737 | chrY | 9953212 | . | T | C   | 4379.21  | PASS          | AC=11;AF=0.162;AN=68;BaseQRankSum=-1.606e |
| 7738 | chrY | 9953220 | . | G | T   | 2699.58  | PASS          | AC=14;AF=0.200;AN=70;BaseQRankSum=0.091;C |
| 7739 | chrY | 9953230 | . | T | C   | 75.39    | my_snp_filter | AC=2;AF=0.029;AN=70;BaseQRankSum=         |
| 7740 | chrY | 9953249 | . | A | G   | 98.68    | my_snp_filter | AC=3;AF=0.043;AN=70;BaseQRankSum=         |
| 7741 | chrY | 9953250 | . | T | C   | 721.43   | PASS          | AC=7;AF=0.100;AN=70;BaseQRankSum=-2.355e+ |
| 7742 | chrY | 9953251 | . | G | T   | 4763.83  | PASS          | AC=19;AF=0.271;AN=70;BaseQRankSum=0.694;C |
| 7743 | chrY | 9953252 | . | A | T   | 6554.44  | PASS          | AC=21;AF=0.309;AN=68;BaseQRankSum=0.071;C |
| 7744 | chrY | 9953255 | . | A | T   | 19781.78 | PASS          | AC=28;AF=0.438;AN=64;BaseQRankSum=        |
| 7745 | chrY | 9953259 | . | C | G   | 5832.05  | PASS          | AC=21;AF=0.309;AN=68;BaseQRankSum=0.736;C |
| 7746 | chrY | 9953281 | . | T | G   | 18884.11 | PASS          | AC=31;AF=0.443;AN=70;BaseQRankSum=        |
| 7747 | chrY | 9953298 | . | T | A   | 2852.65  | PASS          | AC=10;AF=0.143;AN=70;BaseQRankSum=-5.540e |
| 7748 | chrY | 9953320 | . | A | G   | 5097.71  | PASS          | AC=8;AF=0.114;AN=70;BaseQRankSum=0.032;Cl |
| 7749 | chrY | 9953323 | . | C | T   | 3687.03  | PASS          | AC=11;AF=0.157;AN=70;BaseQRankSum=0.118;C |
| 7750 | chrY | 9953327 | . | T | A   | 5368.21  | PASS          | AC=8;AF=0.114;AN=70;BaseQRankSum=0.751;Cl |
| 7751 | chrY | 9953336 | . | G | A   | 12981.18 | PASS          | AC=11;AF=0.162;AN=68;BaseQRankSum=        |
| 7752 | chrY | 9953344 | . | G | C   | 39058.53 | PASS          | AC=13;AF=0.232;AN=56;BaseQRankSum=        |

|      |      |         |   |   |     |           |               |                                           |
|------|------|---------|---|---|-----|-----------|---------------|-------------------------------------------|
| 7753 | chrY | 9953347 | . | T | C   | 1891.25   | PASS          | AC=4;AF=0.057;AN=70;BaseQRankSum=-4.503e+ |
| 7754 | chrY | 9953349 | . | A | T   | 39127.56  | PASS          | AC=13;AF=0.271;AN=48;BaseQRankSum         |
| 7755 | chrY | 9953359 | . | G | A   | 22223.07  | PASS          | AC=9;AF=0.129;AN=70;BaseQRankSum          |
| 7756 | chrY | 9953367 | . | G | A   | 39113.46  | PASS          | AC=13;AF=0.361;AN=36;BaseQRankSum         |
| 7757 | chrY | 9953368 | . | A | G   | 5659.33   | PASS          | AC=7;AF=0.194;AN=36;BaseQRankSum=-1.461e+ |
| 7758 | chrY | 9953381 | . | C | T   | 25075.69  | PASS          | AC=9;AF=0.129;AN=70;BaseQRankSum          |
| 7759 | chrY | 9953388 | . | A | G   | 41219     | PASS          | AC=13;AF=0.406;AN=32;BaseQRankSum=0.740;C |
| 7760 | chrY | 9953398 | . | C | G   | 26755.38  | PASS          | AC=9;AF=0.132;AN=68;BaseQRankSum          |
| 7761 | chrY | 9953401 | . | A | C   | 1477.63   | PASS          | AC=2;AF=0.029;AN=70;BaseQRankSum=1.45;Cli |
| 7762 | chrY | 9953418 | . | C | G   | 5769.02   | PASS          | AC=24;AF=0.343;AN=70;BaseQRankSum=0.00;Cl |
| 7763 | chrY | 9953423 | . | T | A   | 456.08    | PASS          | AC=1;AF=0.014;AN=70;BaseQRankSum=-2.530e+ |
| 7764 | chrY | 9953426 | . | G | T   | 2408.33   | PASS          | AC=17;AF=0.243;AN=70;BaseQRankSum=0.259;C |
| 7765 | chrY | 9953428 | . | G | A   | 1616.24   | PASS          | AC=9;AF=0.129;AN=70;BaseQRankSum=-4.790e- |
| 7766 | chrY | 9953429 | . | C | T   | 494.24    | PASS          | AC=7;AF=0.100;AN=70;BaseQRankSum=-9.900e- |
| 7767 | chrY | 9953433 | . | C | T   | 1695.63   | PASS          | AC=9;AF=0.129;AN=70;BaseQRankSum=-3.700e- |
| 7768 | chrY | 9953437 | . | A | C   | 21928.88  | PASS          | AC=22;AF=0.314;AN=70;BaseQRankSum         |
| 7769 | chrY | 9953463 | . | A | T   | 73347.96  | PASS          | AC=37;AF=0.529;AN=70;BaseQRankSum         |
| 7770 | chrY | 9953467 | . | C | G   | 64486.01  | PASS          | AC=37;AF=0.529;AN=70;BaseQRankSum         |
| 7771 | chrY | 9953471 | . | G | T   | 66124.62  | PASS          | AC=37;AF=0.529;AN=70;BaseQRankSum         |
| 7772 | chrY | 9953478 | . | C | G   | 723.02    | my_snp_filter | AC=3;AF=0.043;AN=70;BaseQRankSum          |
| 7773 | chrY | 9953492 | . | T | G   | 57841.09  | PASS          | AC=30;AF=0.429;AN=70;BaseQRankSum         |
| 7774 | chrY | 9953493 | . | C | T   | 981.46    | PASS          | AC=8;AF=0.114;AN=70;BaseQRankSum=0.783;Cl |
| 7775 | chrY | 9953494 | . | C | T   | 901.52    | my_snp_filter | AC=3;AF=0.043;AN=70;BaseQRankSum          |
| 7776 | chrY | 9953495 | . | C | G   | 143.60    | my_snp_filter | AC=3;AF=0.043;AN=70;BaseQRankSum          |
| 7777 | chrY | 9953496 | . | C | T   | 34139.25  | PASS          | AC=28;AF=0.400;AN=70;BaseQRankSum         |
| 7778 | chrY | 9953503 | . | T | C   | 107.64    | my_snp_filter | AC=3;AF=0.043;AN=70;BaseQRankSum          |
| 7779 | chrY | 9953504 | . | T | C   | 17410.61  | PASS          | AC=30;AF=0.429;AN=70;BaseQRankSum         |
| 7780 | chrY | 9953513 | . | G | T   | 32370.76  | PASS          | AC=28;AF=0.400;AN=70;BaseQRankSum         |
| 7781 | chrY | 9953527 | . | G | A   | 2551.26   | my_snp_filter | AC=7;AF=0.100;AN=70;BaseQRankSum          |
| 7782 | chrY | 9953536 | . | G | C   | 109.15    | my_snp_filter | AC=3;AF=0.043;AN=70;BaseQRankSum          |
| 7783 | chrY | 9953538 | . | T | C   | 1383.03   | PASS          | AC=7;AF=0.100;AN=70;BaseQRankSum=-3.530e- |
| 7784 | chrY | 9953543 | . | C | T   | 3683.40   | my_snp_filter | AC=13;AF=0.186;AN=70;BaseQRankSum         |
| 7785 | chrY | 9953564 | . | C | T   | 139486.66 | PASS          | AC=37;AF=0.529;AN=70;BaseQRankSum         |
| 7786 | chrY | 9953568 | . | A | C   | 140696.91 | PASS          | AC=36;AF=0.514;AN=70;BaseQRankSum         |
| 7787 | chrY | 9953579 | . | T | C   | 143738.79 | PASS          | AC=38;AF=0.543;AN=70;BaseQRankSum         |
| 7788 | chrY | 9953582 | . | C | T   | 2049.16   | my_snp_filter | AC=6;AF=0.086;AN=70;BaseQRankSum          |
| 7789 | chrY | 9953587 | . | A | G   | 7033.23   | PASS          | AC=24;AF=0.343;AN=70;BaseQRankSum=0.548;C |
| 7790 | chrY | 9953589 | . | A | G,C | 136709.41 | PASS          | AC=34,6;AF=0.486,0.086;AN=70;Base         |
| 7791 | chrY | 9953601 | . | A | G   | 86786.72  | PASS          | AC=33;AF=0.471;AN=70;BaseQRankSum         |
| 7792 | chrY | 9953602 | . | C | G   | 2231.42   | my_snp_filter | AC=6;AF=0.086;AN=70;BaseQRankSum          |
| 7793 | chrY | 9953607 | . | T | A   | 18542.04  | PASS          | AC=31;AF=0.443;AN=70;BaseQRankSum         |
| 7794 | chrY | 9953614 | . | C | T   | 122952.56 | PASS          | AC=34;AF=0.486;AN=70;BaseQRankSum         |
| 7795 | chrY | 9953616 | . | C | A   | 19820.48  | PASS          | AC=30;AF=0.429;AN=70;BaseQRankSum         |
| 7796 | chrY | 9953622 | . | G | A   | 11562.47  | PASS          | AC=24;AF=0.343;AN=70;BaseQRankSum         |
| 7797 | chrY | 9953637 | . | A | T   | 465.70    | my_snp_filter | AC=7;AF=0.100;AN=70;BaseQRankSum          |
| 7798 | chrY | 9953647 | . | A | G   | 18458.86  | PASS          | AC=30;AF=0.429;AN=70;BaseQRankSum         |
| 7799 | chrY | 9953650 | . | A | T   | 152797.39 | PASS          | AC=41;AF=0.586;AN=70;BaseQRankSum         |
| 7800 | chrY | 9953658 | . | A | G   | 12104.96  | PASS          | AC=26;AF=0.371;AN=70;BaseQRankSum         |
| 7801 | chrY | 9953668 | . | C | A   | 10761.02  | PASS          | AC=21;AF=0.300;AN=70;BaseQRankSum         |
| 7802 | chrY | 9953669 | . | T | C   | 156068.01 | PASS          | AC=38;AF=0.543;AN=70;BaseQRankSum         |
| 7803 | chrY | 9953674 | . | C | T   | 12493.76  | PASS          | AC=26;AF=0.371;AN=70;BaseQRankSum         |
| 7804 | chrY | 9953681 | . | C | A   | 11191.08  | PASS          | AC=22;AF=0.314;AN=70;BaseQRankSum         |
| 7805 | chrY | 9953691 | . | G | C   | 154690.10 | PASS          | AC=43;AF=0.614;AN=70;BaseQRankSum         |
| 7806 | chrY | 9953705 | . | T | G   | 17746.93  | PASS          | AC=29;AF=0.414;AN=70;BaseQRankSum         |
| 7807 | chrY | 9953749 | . | A | C   | 151847.41 | PASS          | AC=42;AF=0.656;AN=64;BaseQRankSum         |
| 7808 | chrY | 9953771 | . | C | T   | 149484.12 | PASS          | AC=39;AF=0.609;AN=64;BaseQRankSum         |
| 7809 | chrY | 9953780 | . | G | A   | 30524.85  | PASS          | AC=31;AF=0.456;AN=68;BaseQRankSum         |
| 7810 | chrY | 9953788 | . | A | G   | 136588.16 | PASS          | AC=36;AF=0.563;AN=64;BaseQRankSum         |
| 7811 | chrY | 9953789 | . | T | C   | 128562.73 | PASS          | AC=36;AF=0.563;AN=64;BaseQRankSum         |
| 7812 | chrY | 9953801 | . | G | C   | 4618.26   | PASS          | AC=20;AF=0.286;AN=70;BaseQRankSum=-3.770e |
| 7813 | chrY | 9953803 | . | G | A   | 22485.05  | PASS          | AC=27;AF=0.397;AN=68;BaseQRankSum         |
| 7814 | chrY | 9953805 | . | T | C   | 384.70    | my_snp_filter | AC=14;AF=0.200;AN=70;BaseQRankSum         |
| 7815 | chrY | 9953816 | . | A | T   | 7900.24   | PASS          | AC=16;AF=0.229;AN=70;BaseQRankSum=0.461;C |
| 7816 | chrY | 9953829 | . | A | G   | 8641.32   | PASS          | AC=15;AF=0.214;AN=70;BaseQRankSum=-2.154e |
| 7817 | chrY | 9953833 | . | T | G   | 81087.53  | PASS          | AC=42;AF=0.600;AN=70;BaseQRankSum         |
| 7818 | chrY | 9953844 | . | G | T   | 8569.24   | PASS          | AC=11;AF=0.157;AN=70;BaseQRankSum=0.158;C |
| 7819 | chrY | 9953855 | . | A | G   | 8187.72   | PASS          | AC=10;AF=0.143;AN=70;BaseQRankSum=2.22;Cl |
| 7820 | chrY | 9953868 | . | G | A   | 11295.04  | PASS          | AC=18;AF=0.257;AN=70;BaseQRankSum         |
| 7821 | chrY | 9953869 | . | T | C   | 347.28    | my_snp_filter | AC=3;AF=0.043;AN=70;BaseQRankSum          |
| 7822 | chrY | 9953874 | . | G | T,A | 8640.10   | PASS          | AC=9,2;AF=0.129,0.029;AN=70;BaseQRankSum  |
| 7823 | chrY | 9953884 | . | T | C   | 55338.80  | PASS          | AC=17;AF=0.293;AN=58;BaseQRankSum         |
| 7824 | chrY | 9953885 | . | G | T   | 55371.81  | PASS          | AC=17;AF=0.293;AN=58;BaseQRankSum         |
| 7825 | chrY | 9953893 | . | G | A   | 53678.92  | PASS          | AC=14;AF=0.226;AN=62;BaseQRankSum         |
| 7826 | chrY | 9953898 | . | G | T   | 9874.21   | PASS          | AC=10;AF=0.152;AN=66;BaseQRankSum=-3.745e |
| 7827 | chrY | 9953903 | . | T | G   | 693.22    | my_snp_filter | AC=3;AF=0.045;AN=66;BaseQRankSum          |
| 7828 | chrY | 9953907 | . | T | G   | 51145.84  | PASS          | AC=13;AF=0.191;AN=68;BaseQRankSum         |



|      |      |         |   |   |     |          |               |                                           |
|------|------|---------|---|---|-----|----------|---------------|-------------------------------------------|
| 7829 | chrY | 9953908 | . | G | C   | 17575.69 | PASS          | AC=11;AF=0.162;AN=68;BaseQRankSum         |
| 7830 | chrY | 9953910 | . | C | T   | 12205.68 | PASS          | AC=10;AF=0.156;AN=64;BaseQRankSum         |
| 7831 | chrY | 9953911 | . | G | A   | 9199.15  | PASS          | AC=9;AF=0.145;AN=62;BaseQRankSum=1.18;Cli |
| 7832 | chrY | 9953951 | . | A | T   | 66982.98 | PASS          | AC=33;AF=0.485;AN=68;BaseQRankSum         |
| 7833 | chrY | 9953956 | . | C | G   | 3073.96  | PASS          | AC=17;AF=0.243;AN=70;BaseQRankSum=0.198;C |
| 7834 | chrY | 9953960 | . | A | G   | 66004.39 | PASS          | AC=33;AF=0.485;AN=68;BaseQRankSum         |
| 7835 | chrY | 9953962 | . | T | A,C | 4634.98  | PASS          | AC=11,10;AF=0.157,0.143;AN=70;BaseQRankSu |
| 7836 | chrY | 9953969 | . | T | C   | 8873.13  | PASS          | AC=19;AF=0.271;AN=70;BaseQRankSum=-1.102e |
| 7837 | chrY | 9953986 | . | G | T   | 26894.35 | PASS          | AC=29;AF=0.414;AN=70;BaseQRankSum         |
| 7838 | chrY | 9953993 | . | C | T   | 55957.59 | PASS          | AC=31;AF=0.470;AN=66;BaseQRankSum         |
| 7839 | chrY | 9954009 | . | C | T   | 16128.13 | PASS          | AC=19;AF=0.271;AN=70;BaseQRankSum         |
| 7840 | chrY | 9954013 | . | G | C,T | 504.71   | my_snp_filter | AC=7,3;AF=0.100,0.043;AN=70;BaseQ         |
| 7841 | chrY | 9954021 | . | G | T   | 53312.69 | PASS          | AC=21;AF=0.328;AN=64;BaseQRankSum         |
| 7842 | chrY | 9954028 | . | G | T   | 44083.66 | PASS          | AC=20;AF=0.323;AN=62;BaseQRankSum         |
| 7843 | chrY | 9954043 | . | A | G   | 11342.08 | PASS          | AC=13;AF=0.191;AN=68;BaseQRankSum         |
| 7844 | chrY | 9954048 | . | C | T   | 53503.76 | PASS          | AC=20;AF=0.345;AN=58;BaseQRankSum         |
| 7845 | chrY | 9954051 | . | G | A   | 4698.41  | PASS          | AC=12;AF=0.176;AN=68;BaseQRankSum=1.29;Cl |
| 7846 | chrY | 9954052 | . | G | T   | 11227.43 | PASS          | AC=13;AF=0.191;AN=68;BaseQRankSum         |
| 7847 | chrY | 9954053 | . | G | T   | 4005.01  | PASS          | AC=12;AF=0.176;AN=68;BaseQRankSum=0.490;C |
| 7848 | chrY | 9954070 | . | A | G,* | 16788.63 | PASS          | AC=14,1;AF=0.212,0.015;AN=66;Base         |
| 7849 | chrY | 9954087 | . | T | G   | 12970.05 | PASS          | AC=14;AF=0.206;AN=68;BaseQRankSum         |
| 7850 | chrY | 9954095 | . | G | A   | 2529.17  | PASS          | AC=13;AF=0.191;AN=68;BaseQRankSum=0.751;C |
| 7851 | chrY | 9954099 | . | C | A   | 16940.02 | PASS          | AC=18;AF=0.257;AN=70;BaseQRankSum         |
| 7852 | chrY | 9954102 | . | G | T   | 8529.80  | PASS          | AC=12;AF=0.176;AN=68;BaseQRankSum=0.158;C |
| 7853 | chrY | 9954107 | . | C | T   | 42.51    | my_snp_filter | AC=1;AF=0.014;AN=70;BaseQRankSum=         |
| 7854 | chrY | 9954123 | . | T | C   | 54170.61 | PASS          | AC=26;AF=0.481;AN=54;BaseQRankSum         |
| 7855 | chrY | 9954130 | . | G | A   | 45.57    | PASS          | AC=1;AF=0.017;AN=60;BaseQRankSum=1.32;Cli |
| 7856 | chrY | 9954131 | . | T | A   | 882.60   | my_snp_filter | AC=6;AF=0.097;AN=62;BaseQRankSum=         |
| 7857 | chrY | 9954134 | . | C | T   | 56838.05 | PASS          | AC=27;AF=0.519;AN=52;BaseQRankSum         |
| 7858 | chrY | 9954143 | . | A | C   | 56.43    | PASS          | AC=1;AF=0.014;AN=70;BaseQRankSum=-9.290e- |
| 7859 | chrY | 9954179 | . | A | C   | 5144.50  | PASS          | AC=24;AF=0.343;AN=70;BaseQRankSum=-6.230e |
| 7860 | chrY | 9954197 | . | T | A   | 53796.72 | PASS          | AC=41;AF=0.586;AN=70;BaseQRankSum         |
| 7861 | chrY | 9954198 | . | G | C   | 5805.63  | PASS          | AC=14;AF=0.200;AN=70;BaseQRankSum=-3.320e |
| 7862 | chrY | 9954208 | . | T | C   | 2222.51  | PASS          | AC=14;AF=0.206;AN=68;BaseQRankSum=0.116;C |
| 7863 | chrY | 9954210 | . | T | A   | 5634.68  | PASS          | AC=10;AF=0.143;AN=70;BaseQRankSum=-1.869e |
| 7864 | chrY | 9954222 | . | A | G   | 5257.20  | PASS          | AC=10;AF=0.143;AN=70;BaseQRankSum=-5.163e |
| 7865 | chrY | 9954228 | . | C | T   | 3611.56  | PASS          | AC=12;AF=0.171;AN=70;BaseQRankSum=-9.590e |
| 7866 | chrY | 9954233 | . | C | A   | 37647.91 | PASS          | AC=26;AF=0.406;AN=64;BaseQRankSum         |
| 7867 | chrY | 9954235 | . | C | A   | 37244.95 | PASS          | AC=26;AF=0.394;AN=66;BaseQRankSum         |
| 7868 | chrY | 9954236 | . | G | T   | 36643.95 | PASS          | AC=26;AF=0.394;AN=66;BaseQRankSum         |
| 7869 | chrY | 9954238 | . | A | C   | 5285.32  | PASS          | AC=10;AF=0.143;AN=70;BaseQRankSum=-2.757e |
| 7870 | chrY | 9954243 | . | C | G   | 197.08   | PASS          | AC=1;AF=0.014;AN=70;BaseQRankSum=2.00;Cli |
| 7871 | chrY | 9954247 | . | T | C   | 5009.84  | PASS          | AC=12;AF=0.171;AN=70;BaseQRankSum=0.382;C |
| 7872 | chrY | 9954258 | . | C | A   | 2045.12  | PASS          | AC=6;AF=0.086;AN=70;BaseQRankSum=1.08;Cli |
| 7873 | chrY | 9954265 | . | A | T   | 4511.61  | PASS          | AC=13;AF=0.186;AN=70;BaseQRankSum=-4.110e |
| 7874 | chrY | 9954269 | . | C | T   | 31011.94 | PASS          | AC=27;AF=0.422;AN=64;BaseQRankSum         |
| 7875 | chrY | 9954273 | . | G | T   | 631.54   | PASS          | AC=5;AF=0.071;AN=70;BaseQRankSum=0.067;Cl |
| 7876 | chrY | 9954279 | . | T | C   | 30381.15 | PASS          | AC=26;AF=0.394;AN=66;BaseQRankSum         |
| 7877 | chrY | 9954280 | . | C | A,T | 4677.13  | PASS          | AC=10,5;AF=0.156,0.078;AN=64;BaseQRankSum |
| 7878 | chrY | 9954289 | . | G | A   | 1241.72  | PASS          | AC=10;AF=0.143;AN=70;BaseQRankSum=0.731;C |
| 7879 | chrY | 9954304 | . | C | T   | 60.31    | my_snp_filter | AC=1;AF=0.015;AN=68;BaseQRankSum=         |
| 7880 | chrY | 9954322 | . | C | G,A | 28124.61 | PASS          | AC=29,3;AF=0.414,0.043;AN=70;Base         |
| 7881 | chrY | 9954335 | . | A | G   | 2552.37  | PASS          | AC=22;AF=0.314;AN=70;BaseQRankSum=0.092;C |
| 7882 | chrY | 9954364 | . | T | A   | 211.24   | my_snp_filter | AC=5;AF=0.071;AN=70;BaseQRankSum=         |
| 7883 | chrY | 9954366 | . | G | A   | 3985.18  | PASS          | AC=26;AF=0.371;AN=70;BaseQRankSum=0.00;Cl |
| 7884 | chrY | 9954377 | . | A | G   | 32492.59 | PASS          | AC=38;AF=0.559;AN=68;BaseQRankSum         |
| 7885 | chrY | 9954383 | . | C | T   | 107.21   | my_snp_filter | AC=2;AF=0.029;AN=70;BaseQRankSum=         |
| 7886 | chrY | 9954386 | . | C | A   | 191.35   | my_snp_filter | AC=4;AF=0.057;AN=70;BaseQRankSum=         |
| 7887 | chrY | 9954392 | . | C | T   | 5123.63  | PASS          | AC=27;AF=0.386;AN=70;BaseQRankSum=-1.900e |
| 7888 | chrY | 9954407 | . | G | A   | 36389.73 | PASS          | AC=36;AF=0.529;AN=68;BaseQRankSum         |
| 7889 | chrY | 9954416 | . | G | C   | 533.33   | my_snp_filter | AC=9;AF=0.129;AN=70;BaseQRankSum=         |
| 7890 | chrY | 9954418 | . | A | G   | 369.89   | my_snp_filter | AC=7;AF=0.100;AN=70;BaseQRankSum=         |
| 7891 | chrY | 9954435 | . | G | A   | 3651.20  | PASS          | AC=28;AF=0.400;AN=70;BaseQRankSum=-5.620e |
| 7892 | chrY | 9954436 | . | C | A   | 606.53   | PASS          | AC=10;AF=0.143;AN=70;BaseQRankSum=-9.540e |
| 7893 | chrY | 9954438 | . | T | C   | 2820.43  | PASS          | AC=10;AF=0.143;AN=70;BaseQRankSum=2.11;Cl |
| 7894 | chrY | 9954443 | . | C | A,T | 787.63   | my_snp_filter | AC=5,2;AF=0.071,0.029;AN=70;BaseQ         |
| 7895 | chrY | 9954472 | . | G | A   | 1000.02  | PASS          | AC=7;AF=0.100;AN=70;BaseQRankSum=-9.130e- |
| 7896 | chrY | 9954479 | . | A | G   | 5983.30  | my_snp_filter | AC=10;AF=0.500;AN=20;BaseQRankSum         |
| 7897 | chrY | 9954481 | . | A | T   | 896.06   | PASS          | AC=7;AF=0.100;AN=70;BaseQRankSum=-7.960e- |
| 7898 | chrY | 9954491 | . | C | T   | 139.54   | my_snp_filter | AC=3;AF=0.043;AN=70;BaseQRankSum=         |
| 7899 | chrY | 9954500 | . | G | C   | 3518.50  | my_snp_filter | AC=9;AF=0.300;AN=30;BaseQRankSum=         |
| 7900 | chrY | 9954513 | . | C | T   | 1764.41  | my_snp_filter | AC=6;AF=0.150;AN=40;BaseQRankSum=         |
| 7901 | chrY | 9954517 | . | A | G   | 954.93   | PASS          | AC=2;AF=0.029;AN=70;BaseQRankSum=3.66;Cli |
| 7902 | chrY | 9954526 | . | T | G   | 743.99   | PASS          | AC=4;AF=0.071;AN=56;BaseQRankSum=0.020;Cl |
| 7903 | chrY | 9954692 | . | T | G   | 318.59   | PASS          | AC=2;AF=0.029;AN=70;BaseQRankSum=0.648;Cl |
| 7904 | chrY | 9954696 | . | A | G   | 440.11   | PASS          | AC=2;AF=0.029;AN=70;BaseQRankSum=2.45;Cli |



|      |      |         |   |   |     |          |               |                                            |
|------|------|---------|---|---|-----|----------|---------------|--------------------------------------------|
| 7905 | chrY | 9954700 | . | G | A   | 482.37   | PASS          | AC=2;AF=0.029;AN=70;BaseQRankSum=1.01;Cli  |
| 7906 | chrY | 9954701 | . | G | A   | 482.63   | PASS          | AC=2;AF=0.029;AN=70;BaseQRankSum=0.990;Cl  |
| 7907 | chrY | 9954750 | . | T | G   | 5638.95  | PASS          | AC=10;AF=0.147;AN=68;BaseQRankSum=0.857;C  |
| 7908 | chrY | 9954751 | . | G | A   | 5663.81  | PASS          | AC=10;AF=0.147;AN=68;BaseQRankSum=1.26;Cl  |
| 7909 | chrY | 9954759 | . | C | T   | 4063.28  | PASS          | AC=10;AF=0.143;AN=70;BaseQRankSum=-1.760e  |
| 7910 | chrY | 9954766 | . | G | C   | 7645.77  | PASS          | AC=10;AF=0.143;AN=70;BaseQRankSum=-2.935e  |
| 7911 | chrY | 9954775 | . | A | C   | 7538.80  | PASS          | AC=10;AF=0.152;AN=66;BaseQRankSum=8.000e-  |
| 7912 | chrY | 9954778 | . | T | A   | 7871.05  | PASS          | AC=10;AF=0.152;AN=66;BaseQRankSum=0.945;C  |
| 7913 | chrY | 9954828 | . | T | C   | 44.05    | my_snp_filter | AC=2;AF=0.029;AN=70;BaseQRankSum=          |
| 7914 | chrY | 9954831 | . | A | G   | 33.12    | PASS          | AC=1;AF=0.014;AN=70;BaseQRankSum=0.198;Cl  |
| 7915 | chrY | 9954840 | . | G | A   | 34.12    | PASS          | AC=1;AF=0.014;AN=70;BaseQRankSum=0.922;Cl  |
| 7916 | chrY | 9954841 | . | A | C   | 3769.85  | PASS          | AC=16;AF=0.229;AN=70;BaseQRankSum=-1.666e- |
| 7917 | chrY | 9954843 | . | C | T   | 31.33    | PASS          | AC=1;AF=0.014;AN=70;BaseQRankSum=0.198;Cl  |
| 7918 | chrY | 9954849 | . | A | G   | 41.91    | PASS          | AC=1;AF=0.015;AN=68;BaseQRankSum=0.720;Cl  |
| 7919 | chrY | 9954859 | . | T | C   | 7089.95  | my_snp_filter | AC=18;AF=0.265;AN=68;BaseQRankSum=         |
| 7920 | chrY | 9954862 | . | T | G   | 361.68   | PASS          | AC=3;AF=0.043;AN=70;BaseQRankSum=-2.700e-  |
| 7921 | chrY | 9954866 | . | G | C   | 7209.57  | my_snp_filter | AC=19;AF=0.271;AN=70;BaseQRankSum=         |
| 7922 | chrY | 9954880 | . | A | G   | 294.75   | PASS          | AC=4;AF=0.057;AN=70;BaseQRankSum=1.23;Cli  |
| 7923 | chrY | 9954899 | . | A | T   | 32.78    | PASS          | AC=1;AF=0.015;AN=68;BaseQRankSum=-3.580e-  |
| 7924 | chrY | 9954914 | . | A | G,C | 2230.06  | my_snp_filter | AC=8,12;AF=0.118,0.176;AN=68;Base          |
| 7925 | chrY | 9954946 | . | T | C   | 7982.53  | PASS          | AC=19;AF=0.271;AN=70;BaseQRankSum=-3.700e- |
| 7926 | chrY | 9954955 | . | G | A   | 2074.89  | PASS          | AC=12;AF=0.171;AN=70;BaseQRankSum=0.711;C  |
| 7927 | chrY | 9954956 | . | G | A   | 100.97   | PASS          | AC=1;AF=0.014;AN=70;BaseQRankSum=0.741;Cl  |
| 7928 | chrY | 9954960 | . | T | C   | 130.59   | PASS          | AC=2;AF=0.029;AN=70;BaseQRankSum=0.754;Cl  |
| 7929 | chrY | 9954963 | . | T | C   | 130.66   | PASS          | AC=2;AF=0.029;AN=70;BaseQRankSum=-7.470e-  |
| 7930 | chrY | 9954966 | . | T | G   | 10805.41 | PASS          | AC=17;AF=0.250;AN=68;BaseQRankSum=         |
| 7931 | chrY | 9954979 | . | G | A   | 72.75    | PASS          | AC=1;AF=0.014;AN=70;BaseQRankSum=-9.080e-  |
| 7932 | chrY | 9954983 | . | G | C   | 12877.95 | PASS          | AC=25;AF=0.357;AN=70;BaseQRankSum=         |
| 7933 | chrY | 9954998 | . | G | T   | 19730.87 | PASS          | AC=31;AF=0.443;AN=70;BaseQRankSum=         |
| 7934 | chrY | 9955005 | . | G | T   | 262.38   | PASS          | AC=5;AF=0.071;AN=70;BaseQRankSum=0.227;Cl  |
| 7935 | chrY | 9955014 | . | C | T   | 3040.85  | PASS          | AC=13;AF=0.186;AN=70;BaseQRankSum=1.40;Cl  |
| 7936 | chrY | 9955035 | . | G | C   | 2091.59  | PASS          | AC=17;AF=0.243;AN=70;BaseQRankSum=0.230;C  |
| 7937 | chrY | 9955045 | . | C | A   | 3268.61  | PASS          | AC=16;AF=0.229;AN=70;BaseQRankSum=1.44;Cl  |
| 7938 | chrY | 9955051 | . | T | G   | 2366.03  | PASS          | AC=19;AF=0.271;AN=70;BaseQRankSum=-5.560e  |
| 7939 | chrY | 9955053 | . | G | C   | 229.60   | PASS          | AC=4;AF=0.057;AN=70;BaseQRankSum=0.102;Cl  |
| 7940 | chrY | 9955054 | . | G | A   | 8125.24  | PASS          | AC=29;AF=0.414;AN=70;BaseQRankSum=0.648;C  |
| 7941 | chrY | 9955079 | . | C | G   | 14559.84 | PASS          | AC=28;AF=0.412;AN=68;BaseQRankSum=         |
| 7942 | chrY | 9955088 | . | C | A   | 9048.70  | PASS          | AC=21;AF=0.300;AN=70;BaseQRankSum=-1.910e  |
| 7943 | chrY | 9955104 | . | G | A   | 11095.61 | PASS          | AC=25;AF=0.357;AN=70;BaseQRankSum=         |
| 7944 | chrY | 9955116 | . | C | T   | 956.67   | PASS          | AC=9;AF=0.129;AN=70;BaseQRankSum=-7.510e-  |
| 7945 | chrY | 9955122 | . | T | C   | 11146.25 | PASS          | AC=23;AF=0.329;AN=70;BaseQRankSum=         |
| 7946 | chrY | 9955145 | . | T | C   | 5925.19  | PASS          | AC=13;AF=0.186;AN=70;BaseQRankSum=-5.200e  |
| 7947 | chrY | 9955147 | . | A | C,G | 7212.67  | PASS          | AC=11,6;AF=0.157,0.086;AN=70;BaseQRankSum  |
| 7948 | chrY | 9955148 | . | A | G   | 2101.03  | PASS          | AC=11;AF=0.157;AN=70;BaseQRankSum=0.361;C  |
| 7949 | chrY | 9955149 | . | C | T   | 2207.44  | PASS          | AC=11;AF=0.157;AN=70;BaseQRankSum=1.71;Cl  |
| 7950 | chrY | 9955161 | . | T | C   | 1597.70  | PASS          | AC=10;AF=0.143;AN=70;BaseQRankSum=0.057;C  |
| 7951 | chrY | 9955177 | . | G | A   | 5031.56  | PASS          | AC=26;AF=0.371;AN=70;BaseQRankSum=0.296;C  |
| 7952 | chrY | 9955186 | . | A | G   | 1743.79  | PASS          | AC=14;AF=0.200;AN=70;BaseQRankSum=-1.655e  |
| 7953 | chrY | 9955192 | . | T | C   | 2947.65  | PASS          | AC=25;AF=0.357;AN=70;BaseQRankSum=-1.790e  |
| 7954 | chrY | 9955193 | . | T | G   | 1662.03  | PASS          | AC=12;AF=0.171;AN=70;BaseQRankSum=-2.035e  |
| 7955 | chrY | 9955227 | . | C | G   | 23207.46 | PASS          | AC=34;AF=0.486;AN=70;BaseQRankSum=         |
| 7956 | chrY | 9955236 | . | T | C   | 12533.13 | PASS          | AC=32;AF=0.457;AN=70;BaseQRankSum=         |
| 7957 | chrY | 9955246 | . | A | T   | 24774.04 | PASS          | AC=34;AF=0.486;AN=70;BaseQRankSum=         |
| 7958 | chrY | 9955258 | . | T | A   | 5072.43  | PASS          | AC=14;AF=0.200;AN=70;BaseQRankSum=-1.036e  |
| 7959 | chrY | 9955274 | . | T | C   | 7731.81  | PASS          | AC=31;AF=0.443;AN=70;BaseQRankSum=-3.700e  |
| 7960 | chrY | 9955277 | . | T | A   | 1449.58  | PASS          | AC=9;AF=0.129;AN=70;BaseQRankSum=0.297;Cl  |
| 7961 | chrY | 9955278 | . | T | C   | 49.01    | my_snp_filter | AC=3;AF=0.043;AN=70;BaseQRankSum=          |
| 7962 | chrY | 9955300 | . | G | A   | 13119.20 | PASS          | AC=33;AF=0.471;AN=70;BaseQRankSum=         |
| 7963 | chrY | 9955310 | . | G | C   | 94.18    | my_snp_filter | AC=5;AF=0.071;AN=70;BaseQRankSum=          |
| 7964 | chrY | 9955314 | . | A | G   | 262.83   | my_snp_filter | AC=8;AF=0.114;AN=70;BaseQRankSum=          |
| 7965 | chrY | 9955317 | . | G | A   | 12904.67 | PASS          | AC=33;AF=0.471;AN=70;BaseQRankSum=         |
| 7966 | chrY | 9955341 | . | G | A   | 38.43    | my_snp_filter | AC=1;AF=0.014;AN=70;BaseQRankSum=          |
| 7967 | chrY | 9955342 | . | T | C   | 48.42    | PASS          | AC=1;AF=0.014;AN=70;BaseQRankSum=0.578;Cl  |
| 7968 | chrY | 9955347 | . | C | T   | 235.67   | my_snp_filter | AC=7;AF=0.100;AN=70;BaseQRankSum=          |
| 7969 | chrY | 9955350 | . | C | A   | 383.44   | my_snp_filter | AC=11;AF=0.157;AN=70;BaseQRankSum=         |
| 7970 | chrY | 9955375 | . | C | T   | 3950.59  | my_snp_filter | AC=27;AF=0.386;AN=70;BaseQRankSum=         |
| 7971 | chrY | 9955388 | . | A | T   | 120.38   | PASS          | AC=4;AF=0.057;AN=70;BaseQRankSum=0.397;Cl  |
| 7972 | chrY | 9955401 | . | T | G   | 1447.47  | my_snp_filter | AC=9;AF=0.132;AN=68;BaseQRankSum=          |
| 7973 | chrY | 9955411 | . | C | T   | 961.05   | my_snp_filter | AC=8;AF=0.114;AN=70;BaseQRankSum=          |
| 7974 | chrY | 9955432 | . | A | C   | 310.09   | my_snp_filter | AC=7;AF=0.100;AN=70;BaseQRankSum=          |
| 7975 | chrY | 9955722 | . | C | T   | 826.14   | my_snp_filter | AC=5;AF=0.076;AN=66;BaseQRankSum=          |
| 7976 | chrY | 9955748 | . | A | G   | 33.76    | my_snp_filter | AC=3;AF=0.047;AN=64;BaseQRankSum=          |
| 7977 | chrY | 9955791 | . | C | T   | 1317.52  | my_snp_filter | AC=5;AF=0.086;AN=58;BaseQRankSum=          |
| 7978 | chrY | 9955816 | . | T | C   | 1068.98  | my_snp_filter | AC=5;AF=0.089;AN=56;BaseQRankSum=          |
| 7979 | chrY | 9955820 | . | T | C   | 861.50   | my_snp_filter | AC=5;AF=0.086;AN=58;BaseQRankSum=          |
| 7980 | chrY | 9955822 | . | C | G   | 875.46   | my_snp_filter | AC=5;AF=0.086;AN=58;BaseQRankSum=          |

|      |      |         |   |   |     |          |               |                                            |
|------|------|---------|---|---|-----|----------|---------------|--------------------------------------------|
| 7981 | chrY | 9955851 | . | A | G   | 38.68    | PASS          | AC=2;AF=0.033;AN=60;BaseQRankSum=0.651;C   |
| 7982 | chrY | 9955863 | . | A | G   | 144.88   | PASS          | AC=3;AF=0.052;AN=58;BaseQRankSum=-2.740e-  |
| 7983 | chrY | 9955906 | . | T | A   | 38.16    | my_snp_filter | AC=1;AF=0.017;AN=58;BaseQRankSum=          |
| 7984 | chrY | 9955921 | . | A | G   | 870.56   | PASS          | AC=6;AF=0.100;AN=60;BaseQRankSum=-2.155e+  |
| 7985 | chrY | 9955949 | . | A | C   | 3517.31  | PASS          | AC=13;AF=0.203;AN=64;BaseQRankSum=-1.304e- |
| 7986 | chrY | 9955962 | . | C | T   | 261.14   | PASS          | AC=6;AF=0.088;AN=68;BaseQRankSum=-5.960e-  |
| 7987 | chrY | 9955964 | . | A | C   | 3439.22  | PASS          | AC=15;AF=0.227;AN=66;BaseQRankSum=0.736;C  |
| 7988 | chrY | 9955981 | . | T | G   | 3933.55  | PASS          | AC=20;AF=0.286;AN=70;BaseQRankSum=0.198;C  |
| 7989 | chrY | 9956007 | . | A | T   | 131.34   | my_snp_filter | AC=5;AF=0.071;AN=70;BaseQRankSum=          |
| 7990 | chrY | 9956010 | . | A | G   | 73.18    | my_snp_filter | AC=5;AF=0.071;AN=70;BaseQRankSum=          |
| 7991 | chrY | 9956020 | . | C | A,* | 5839.05  | PASS          | AC=12,12;AF=0.171,0.171;AN=70;BaseQRankSu  |
| 7992 | chrY | 9956022 | . | C | T,* | 6055.68  | PASS          | AC=12,12;AF=0.171,0.171;AN=70;BaseQRankSu  |
| 7993 | chrY | 9956039 | . | G | A,T | 1160.41  | PASS          | AC=4,5;AF=0.057,0.071;AN=70;BaseQRankSum=  |
| 7994 | chrY | 9956049 | . | T | C   | 7944.49  | PASS          | AC=21;AF=0.300;AN=70;BaseQRankSum=0.00;C   |
| 7995 | chrY | 9956050 | . | A | C   | 76.34    | my_snp_filter | AC=3;AF=0.043;AN=70;BaseQRankSum=          |
| 7996 | chrY | 9956055 | . | A | C   | 63.73    | PASS          | AC=1;AF=0.015;AN=68;BaseQRankSum=-3.200e-  |
| 7997 | chrY | 9956079 | . | T | G   | 4966.67  | PASS          | AC=16;AF=0.250;AN=64;BaseQRankSum=-2.200e- |
| 7998 | chrY | 9956081 | . | C | T   | 365.07   | PASS          | AC=3;AF=0.044;AN=68;BaseQRankSum=-9.320e-  |
| 7999 | chrY | 9956086 | . | A | G   | 5319.69  | PASS          | AC=17;AF=0.274;AN=62;BaseQRankSum=0.178;C  |
| 8000 | chrY | 9956087 | . | C | A   | 1123.75  | PASS          | AC=8;AF=0.125;AN=64;BaseQRankSum=0.371;C   |
| 8001 | chrY | 9956089 | . | G | A   | 3649.19  | PASS          | AC=16;AF=0.250;AN=64;BaseQRankSum=1.57;C   |
| 8002 | chrY | 9956097 | . | T | C   | 221.06   | PASS          | AC=3;AF=0.043;AN=70;BaseQRankSum=-2.417e+  |
| 8003 | chrY | 9956099 | . | C | T   | 221.45   | PASS          | AC=3;AF=0.043;AN=70;BaseQRankSum=0.116;C   |
| 8004 | chrY | 9956109 | . | C | A   | 1370.85  | PASS          | AC=8;AF=0.121;AN=66;BaseQRankSum=0.477;C   |
| 8005 | chrY | 9956125 | . | C | T   | 435.14   | PASS          | AC=6;AF=0.086;AN=70;BaseQRankSum=-5.130e-  |
| 8006 | chrY | 9956126 | . | A | G   | 571.18   | PASS          | AC=6;AF=0.086;AN=70;BaseQRankSum=-5.250e-  |
| 8007 | chrY | 9956129 | . | T | G   | 6184.17  | PASS          | AC=19;AF=0.380;AN=50;BaseQRankSum=-7.200e- |
| 8008 | chrY | 9956141 | . | T | C   | 129.94   | PASS          | AC=2;AF=0.029;AN=68;BaseQRankSum=-1.746e+  |
| 8009 | chrY | 9956149 | . | G | A   | 4897.74  | PASS          | AC=15;AF=0.341;AN=44;BaseQRankSum=-7.370e- |
| 8010 | chrY | 9956151 | . | A | G   | 136.75   | PASS          | AC=2;AF=0.029;AN=68;BaseQRankSum=1.05;C    |
| 8011 | chrY | 9956153 | . | T | C   | 4754.29  | PASS          | AC=14;AF=0.304;AN=46;BaseQRankSum=-3.260e- |
| 8012 | chrY | 9956160 | . | C | T   | 4559.27  | PASS          | AC=14;AF=0.318;AN=44;BaseQRankSum=0.00;C   |
| 8013 | chrY | 9956165 | . | T | C   | 5087.11  | PASS          | AC=15;AF=0.326;AN=46;BaseQRankSum=0.566;C  |
| 8014 | chrY | 9956173 | . | C | T   | 152.93   | PASS          | AC=2;AF=0.033;AN=60;BaseQRankSum=0.893;C   |
| 8015 | chrY | 9956176 | . | G | C   | 155.37   | PASS          | AC=2;AF=0.033;AN=60;BaseQRankSum=-1.733e+  |
| 8016 | chrY | 9956186 | . | A | C   | 2866.46  | PASS          | AC=10;AF=0.278;AN=36;BaseQRankSum=-1.286e- |
| 8017 | chrY | 9956188 | . | C | T   | 271.51   | PASS          | AC=3;AF=0.100;AN=30;BaseQRankSum=0.037;C   |
| 8018 | chrY | 9956199 | . | A | G   | 2128.46  | PASS          | AC=8;AF=0.222;AN=36;BaseQRankSum=-2.760e+  |
| 8019 | chrY | 9956202 | . | G | C,* | 1897.14  | PASS          | AC=4,4;AF=0.118,0.118;AN=34;BaseQRankSum=  |
| 8020 | chrY | 9956203 | . | A | C   | 1924.77  | PASS          | AC=8;AF=0.235;AN=34;BaseQRankSum=-1.495e+  |
| 8021 | chrY | 9956214 | . | T | C   | 2813.91  | PASS          | AC=9;AF=0.300;AN=30;BaseQRankSum=0.876;C   |
| 8022 | chrY | 9956228 | . | G | A   | 2582.38  | PASS          | AC=9;AF=0.265;AN=34;BaseQRankSum=-1.095e+  |
| 8023 | chrY | 9956232 | . | A | G   | 2882.22  | PASS          | AC=9;AF=0.300;AN=30;BaseQRankSum=-8.390e-  |
| 8024 | chrY | 9956233 | . | C | A   | 107.11   | PASS          | AC=2;AF=0.067;AN=30;BaseQRankSum=-8.830e-  |
| 8025 | chrY | 9956236 | . | G | C   | 105.39   | PASS          | AC=2;AF=0.063;AN=32;BaseQRankSum=2.37;C    |
| 8026 | chrY | 9956263 | . | G | A   | 368.74   | PASS          | AC=4;AF=0.167;AN=24;BaseQRankSum=-1.086e+  |
| 8027 | chrY | 9956269 | . | C | A   | 568.21   | PASS          | AC=4;AF=0.182;AN=22;BaseQRankSum=-5.790e-  |
| 8028 | chrY | 9956272 | . | C | T   | 567.98   | PASS          | AC=4;AF=0.200;AN=20;BaseQRankSum=1.22;C    |
| 8029 | chrY | 9956306 | . | C | A   | 104.78   | PASS          | AC=2;AF=0.100;AN=20;BaseQRankSum=1.22;C    |
| 8030 | chrY | 9956308 | . | A | G   | 104.12   | PASS          | AC=2;AF=0.111;AN=18;BaseQRankSum=0.731;C   |
| 8031 | chrY | 9956329 | . | C | G   | 112.17   | PASS          | AC=2;AF=0.077;AN=26;BaseQRankSum=-7.310e-  |
| 8032 | chrY | 9956339 | . | C | A   | 161.32   | PASS          | AC=3;AF=0.083;AN=36;BaseQRankSum=0.747;C   |
| 8033 | chrY | 9956357 | . | C | T   | 401.35   | PASS          | AC=4;AF=0.154;AN=26;BaseQRankSum=0.937;C   |
| 8034 | chrY | 9956360 | . | C | A   | 405.62   | PASS          | AC=4;AF=0.143;AN=28;BaseQRankSum=1.37;C    |
| 8035 | chrY | 9956395 | . | A | G   | 163.57   | PASS          | AC=3;AF=0.044;AN=68;BaseQRankSum=-1.750e-  |
| 8036 | chrY | 9956402 | . | G | T,C | 378.82   | PASS          | AC=4,6;AF=0.063,0.094;AN=64;BaseQRankSum=  |
| 8037 | chrY | 9956442 | . | T | A   | 16130.30 | PASS          | AC=28;AF=0.424;AN=66;BaseQRankSum=         |
| 8038 | chrY | 9956445 | . | C | T   | 16245.16 | PASS          | AC=28;AF=0.424;AN=66;BaseQRankSum=         |
| 8039 | chrY | 9956463 | . | C | G   | 5449.40  | PASS          | AC=26;AF=0.371;AN=70;BaseQRankSum=-6.700e- |
| 8040 | chrY | 9956471 | . | G | A   | 2910.73  | PASS          | AC=22;AF=0.314;AN=70;BaseQRankSum=-1.120e+ |
| 8041 | chrY | 9956472 | . | T | C   | 2965.63  | PASS          | AC=9;AF=0.129;AN=70;BaseQRankSum=-1.445e+  |
| 8042 | chrY | 9956481 | . | T | G   | 2853.04  | PASS          | AC=21;AF=0.300;AN=70;BaseQRankSum=-1.231e- |
| 8043 | chrY | 9956489 | . | A | G   | 73.61    | my_snp_filter | AC=5;AF=0.071;AN=70;BaseQRankSum=          |
| 8044 | chrY | 9956520 | . | T | C   | 77.11    | PASS          | AC=1;AF=0.014;AN=70;BaseQRankSum=-1.034e+  |
| 8045 | chrY | 9956521 | . | G | T   | 76.75    | PASS          | AC=1;AF=0.014;AN=70;BaseQRankSum=0.248;C   |
| 8046 | chrY | 9956522 | . | G | T   | 41.05    | PASS          | AC=1;AF=0.014;AN=70;BaseQRankSum=1.03;C    |
| 8047 | chrY | 9956533 | . | C | T   | 11859.20 | my_snp_filter | AC=10;AF=0.147;AN=68;Base                  |
| 8048 | chrY | 9956548 | . | G | A   | 228.21   | my_snp_filter | AC=4;AF=0.057;AN=70;BaseQRankSum=          |
| 8049 | chrY | 9956573 | . | A | C   | 4249.98  | PASS          | AC=9;AF=0.129;AN=70;BaseQRankSum=-6.600e-  |
| 8050 | chrY | 9956575 | . | T | A   | 14563.12 | my_snp_filter | AC=9;AF=0.129;AN=70;BaseQ                  |
| 8051 | chrY | 9956584 | . | T | C   | 15781.43 | my_snp_filter | AC=9;AF=0.132;AN=68;BaseQ                  |
| 8052 | chrY | 9956585 | . | G | A   | 16143.52 | my_snp_filter | AC=9;AF=0.132;AN=68;BaseQ                  |
| 8053 | chrY | 9956592 | . | C | G   | 794.74   | my_snp_filter | AC=6;AF=0.088;AN=68;BaseQRankSum=          |
| 8054 | chrY | 9956601 | . | T | C   | 7044     | my_snp_filter | AC=9;AF=0.136;AN=66;BaseQRankSum=          |
| 8055 | chrY | 9956605 | . | G | A   | 20896.67 | my_snp_filter | AC=9;AF=0.136;AN=66;BaseQ                  |
| 8056 | chrY | 9956608 | . | C | G   | 21330.87 | my_snp_filter | AC=9;AF=0.141;AN=64;BaseQ                  |

|      |      |         |   |   |     |          |               |                                           |
|------|------|---------|---|---|-----|----------|---------------|-------------------------------------------|
| 8057 | chrY | 9956610 | . | G | C   | 2769.04  | PASS          | AC=9;AF=0.129;AN=70;BaseQRankSum=-3.458e+ |
| 8058 | chrY | 9956612 | . | C | T   | 966.45   | my_snp_filter | AC=9;AF=0.129;AN=70;BaseQRankSum=         |
| 8059 | chrY | 9956613 | . | C | T   | 879.94   | my_snp_filter | AC=6;AF=0.086;AN=70;BaseQRankSum=         |
| 8060 | chrY | 9956632 | . | A | T   | 5069.11  | PASS          | AC=7;AF=0.106;AN=66;BaseQRankSum=-1.777e+ |
| 8061 | chrY | 9956636 | . | A | G   | 879.59   | my_snp_filter | AC=5;AF=0.074;AN=68;BaseQRankSum=         |
| 8062 | chrY | 9956640 | . | T | C   | 5954.99  | PASS          | AC=7;AF=0.109;AN=64;BaseQRankSum=0.070;Cl |
| 8063 | chrY | 9956658 | . | C | T   | 1386.33  | PASS          | AC=5;AF=0.086;AN=58;BaseQRankSum=1.49;Cli |
| 8064 | chrY | 9956665 | . | C | T   | 30602.09 | PASS          | AC=19;AF=0.279;AN=68;BaseQRankSum         |
| 8065 | chrY | 9956678 | . | A | G   | 6077.63  | PASS          | AC=10;AF=0.143;AN=70;BaseQRankSum=-2.851e |
| 8066 | chrY | 9956692 | . | G | A   | 25160.90 | PASS          | AC=12;AF=0.171;AN=70;BaseQRankSum         |
| 8067 | chrY | 9956705 | . | G | C   | 61304.68 | PASS          | AC=27;AF=0.482;AN=56;BaseQRankSum         |
| 8068 | chrY | 9956706 | . | A | T   | 61507.68 | PASS          | AC=27;AF=0.482;AN=56;BaseQRankSum         |
| 8069 | chrY | 9956709 | . | G | T   | 8056.46  | PASS          | AC=12;AF=0.171;AN=70;BaseQRankSum=-2.781e |
| 8070 | chrY | 9956720 | . | T | C   | 4061.50  | PASS          | AC=9;AF=0.129;AN=70;BaseQRankSum=-4.483e+ |
| 8071 | chrY | 9956726 | . | G | A   | 19996.45 | PASS          | AC=22;AF=0.333;AN=66;BaseQRankSum         |
| 8072 | chrY | 9956746 | . | C | T   | 19569.80 | PASS          | AC=21;AF=0.318;AN=66;BaseQRankSum         |
| 8073 | chrY | 9956752 | . | T | C   | 19414.18 | PASS          | AC=21;AF=0.318;AN=66;BaseQRankSum         |
| 8074 | chrY | 9956761 | . | T | A   | 18631.95 | PASS          | AC=21;AF=0.318;AN=66;BaseQRankSum         |
| 8075 | chrY | 9956763 | . | T | A   | 17652.20 | PASS          | AC=16;AF=0.242;AN=66;BaseQRankSum         |
| 8076 | chrY | 9956771 | . | T | C   | 3966.56  | PASS          | AC=11;AF=0.157;AN=70;BaseQRankSum=2.76;Cl |
| 8077 | chrY | 9956780 | . | G | A   | 51.53    | PASS          | AC=1;AF=0.014;AN=70;BaseQRankSum=1.44;Cl  |
| 8078 | chrY | 9956787 | . | A | C   | 298.13   | PASS          | AC=5;AF=0.074;AN=68;BaseQRankSum=0.173;Cl |
| 8079 | chrY | 9956790 | . | T | C   | 55116.22 | PASS          | AC=25;AF=0.521;AN=48;BaseQRankSum         |
| 8080 | chrY | 9956791 | . | G | A   | 54984.22 | PASS          | AC=25;AF=0.521;AN=48;BaseQRankSum         |
| 8081 | chrY | 9956795 | . | C | A   | 28454.70 | PASS          | AC=14;AF=0.226;AN=62;BaseQRankSum         |
| 8082 | chrY | 9956805 | . | G | C   | 2189.76  | my_snp_filter | AC=6;AF=0.091;AN=66;BaseQRankSum=         |
| 8083 | chrY | 9956819 | . | C | T   | 298.14   | my_snp_filter | AC=2;AF=0.030;AN=66;BaseQRankSum=         |
| 8084 | chrY | 9956830 | . | T | C   | 20258.58 | PASS          | AC=20;AF=0.625;AN=32;BaseQRankSum         |
| 8085 | chrY | 9956842 | . | C | A   | 104.40   | my_snp_filter | AC=1;AF=0.015;AN=68;BaseQRankSum=         |
| 8086 | chrY | 9956846 | . | C | T,G | 3763.68  | PASS          | AC=1,4;AF=0.017,0.069;AN=58;BaseQRankSum= |
| 8087 | chrY | 9956862 | . | A | C   | 3322.12  | PASS          | AC=4;AF=0.071;AN=56;BaseQRankSum=-1.264e+ |
| 8088 | chrY | 9956868 | . | A | C   | 3281.85  | PASS          | AC=4;AF=0.080;AN=50;BaseQRankSum=-8.940e- |
| 8089 | chrY | 9956869 | . | T | C   | 325.83   | my_snp_filter | AC=2;AF=0.037;AN=54;BaseQRankSum=         |
| 8090 | chrY | 9956872 | . | C | G   | 25867.56 | PASS          | AC=15;AF=0.536;AN=28;BaseQRankSum         |
| 8091 | chrY | 9956874 | . | C | T   | 2655.07  | PASS          | AC=4;AF=0.077;AN=52;BaseQRankSum=1.03;Cli |
| 8092 | chrY | 9956879 | . | A | G   | 3525.04  | PASS          | AC=4;AF=0.077;AN=52;BaseQRankSum=-4.085e+ |
| 8093 | chrY | 9956897 | . | G | A,* | 4557.55  | PASS          | AC=3,5;AF=0.094,0.156;AN=32;BaseQRankSum= |
| 8094 | chrY | 9956911 | . | T | G   | 642.01   | PASS          | AC=2;AF=0.042;AN=48;BaseQRankSum=0.704;Cl |
| 8095 | chrY | 9956915 | . | C | T,* | 3789.89  | PASS          | AC=2,2;AF=0.059,0.059;AN=34;BaseQRankSum= |
| 8096 | chrY | 9956934 | . | A | C   | 20610.22 | PASS          | AC=7;AF=0.292;AN=24;BaseQRankSum=         |
| 8097 | chrY | 9956935 | . | C | T   | 12260.43 | PASS          | AC=6;AF=0.176;AN=34;BaseQRankSum=         |
| 8098 | chrY | 9956939 | . | G | A,T | 3815.31  | PASS          | AC=4,1;AF=0.100,0.025;AN=40;BaseQRankSum= |
| 8099 | chrY | 9956940 | . | T | C   | 652.73   | PASS          | AC=1;AF=0.021;AN=48;BaseQRankSum=-1.325e+ |
| 8100 | chrY | 9956968 | . | G | A   | 17571.28 | PASS          | AC=8;AF=0.200;AN=40;BaseQRankSum=         |
| 8101 | chrY | 9956972 | . | C | G   | 26675.34 | PASS          | AC=9;AF=0.225;AN=40;BaseQRankSum=         |
| 8102 | chrY | 9956973 | . | C | T   | 1093.22  | my_snp_filter | AC=4;AF=0.074;AN=54;BaseQRankSum=         |
| 8103 | chrY | 9956974 | . | T | C   | 2097.03  | PASS          | AC=3;AF=0.058;AN=52;BaseQRankSum=1.30;Cli |
| 8104 | chrY | 9956991 | . | A | G   | 16613.82 | PASS          | AC=10;AF=0.200;AN=50;BaseQRankSum         |
| 8105 | chrY | 9956996 | . | G | A   | 16112.13 | PASS          | AC=10;AF=0.200;AN=50;BaseQRankSum         |
| 8106 | chrY | 9956997 | . | C | T   | 976.54   | PASS          | AC=2;AF=0.033;AN=60;BaseQRankSum=1.76;Cli |
| 8107 | chrY | 9957006 | . | T | C   | 9368     | PASS          | AC=7;AF=0.121;AN=58;BaseQRankSum=0.663;Cl |
| 8108 | chrY | 9957026 | . | T | C   | 704.76   | PASS          | AC=3;AF=0.047;AN=64;BaseQRankSum=-2.362e+ |
| 8109 | chrY | 9957036 | . | A | G   | 1082.78  | PASS          | AC=3;AF=0.045;AN=66;BaseQRankSum=0.918;Cl |
| 8110 | chrY | 9957037 | . | A | G   | 618.50   | PASS          | AC=3;AF=0.045;AN=66;BaseQRankSum=1.08;Cli |
| 8111 | chrY | 9957060 | . | A | G   | 32818.08 | PASS          | AC=18;AF=0.273;AN=66;BaseQRankSum         |
| 8112 | chrY | 9957065 | . | A | T   | 8028.37  | PASS          | AC=13;AF=0.191;AN=68;BaseQRankSum=2.00;Cl |
| 8113 | chrY | 9957078 | . | A | C   | 966.26   | my_snp_filter | AC=7;AF=0.100;AN=70;BaseQRankSum=         |
| 8114 | chrY | 9957089 | . | T | C   | 32378.74 | my_snp_filter | AC=17;AF=0.243;AN=70;Base                 |
| 8115 | chrY | 9957118 | . | G | T   | 33952.78 | my_snp_filter | AC=26;AF=0.406;AN=64;Base                 |
| 8116 | chrY | 9957123 | . | G | T   | 35993.51 | PASS          | AC=26;AF=0.448;AN=58;BaseQRankSum         |
| 8117 | chrY | 9957133 | . | A | G   | 134.68   | PASS          | AC=1;AF=0.014;AN=70;BaseQRankSum=-7.940e- |
| 8118 | chrY | 9957145 | . | C | T   | 9170.87  | PASS          | AC=21;AF=0.309;AN=68;BaseQRankSum=1.94;Cl |
| 8119 | chrY | 9957171 | . | G | C   | 10108.30 | PASS          | AC=30;AF=0.429;AN=70;BaseQRankSum         |
| 8120 | chrY | 9957175 | . | A | G   | 18591.65 | PASS          | AC=28;AF=0.400;AN=70;BaseQRankSum         |
| 8121 | chrY | 9957178 | . | T | A   | 73.01    | my_snp_filter | AC=2;AF=0.029;AN=70;BaseQRankSum=         |
| 8122 | chrY | 9957183 | . | A | G   | 56308.25 | PASS          | AC=37;AF=0.529;AN=70;BaseQRankSum         |
| 8123 | chrY | 9957195 | . | G | A   | 2772.57  | PASS          | AC=24;AF=0.343;AN=70;BaseQRankSum=-1.042e |
| 8124 | chrY | 9957209 | . | C | T   | 6454.47  | PASS          | AC=27;AF=0.386;AN=70;BaseQRankSum=-7.780e |
| 8125 | chrY | 9957215 | . | C | T   | 51550.84 | PASS          | AC=36;AF=0.514;AN=70;BaseQRankSum         |
| 8126 | chrY | 9957226 | . | A | G   | 138.86   | my_snp_filter | AC=6;AF=0.086;AN=70;BaseQRankSum=         |
| 8127 | chrY | 9957230 | . | C | T   | 66.42    | my_snp_filter | AC=1;AF=0.014;AN=70;BaseQRankSum=         |
| 8128 | chrY | 9957231 | . | C | G   | 452.31   | my_snp_filter | AC=9;AF=0.129;AN=70;BaseQRankSum=         |
| 8129 | chrY | 9957232 | . | C | T   | 7425.20  | PASS          | AC=31;AF=0.443;AN=70;BaseQRankSum=-1.327e |
| 8130 | chrY | 9957238 | . | G | C,A | 34021.73 | PASS          | AC=34,3;AF=0.486,0.043;AN=70;Base         |
| 8131 | chrY | 9957249 | . | A | C   | 8812.27  | PASS          | AC=30;AF=0.429;AN=70;BaseQRankSum=0.053;C |
| 8132 | chrY | 9957278 | . | G | A   | 22366.68 | my_snp_filter | AC=31;AF=0.470;AN=66;Base                 |

|      |      |         |   |   |     |          |               |                                            |
|------|------|---------|---|---|-----|----------|---------------|--------------------------------------------|
| 8133 | chrY | 9957297 | . | A | G   | 1276.04  | PASS          | AC=13;AF=0.186;AN=70;BaseQRankSum=0.919;C  |
| 8134 | chrY | 9957299 | . | T | A   | 15044.79 | my_snp_filter | AC=30;AF=0.455;AN=66;Base                  |
| 8135 | chrY | 9957303 | . | A | T   | 65.73    | my_snp_filter | AC=4;AF=0.057;AN=70;BaseQRankSum=          |
| 8136 | chrY | 9957310 | . | C | G   | 204.13   | PASS          | AC=5;AF=0.071;AN=70;BaseQRankSum=0.407;Cl  |
| 8137 | chrY | 9957319 | . | A | T   | 568.56   | PASS          | AC=8;AF=0.118;AN=68;BaseQRankSum=-4.670e-  |
| 8138 | chrY | 9957339 | . | G | C   | 1126.46  | PASS          | AC=10;AF=0.156;AN=64;BaseQRankSum=-2.800e- |
| 8139 | chrY | 9957351 | . | G | A   | 1023.43  | my_snp_filter | AC=7;AF=0.109;AN=64;BaseQRankSum=          |
| 8140 | chrY | 9957358 | . | C | T   | 1056.32  | my_snp_filter | AC=7;AF=0.109;AN=64;BaseQRankSum=          |
| 8141 | chrY | 9957390 | . | A | G   | 733.11   | PASS          | AC=7;AF=0.130;AN=54;BaseQRankSum=-6.510e-  |
| 8142 | chrY | 9957435 | . | C | A   | 575.20   | PASS          | AC=7;AF=0.117;AN=60;BaseQRankSum=1.12;Cli  |
| 8143 | chrY | 9957439 | . | T | G   | 641.70   | PASS          | AC=7;AF=0.117;AN=60;BaseQRankSum=-1.734e+  |
| 8144 | chrY | 9957449 | . | T | G   | 771.92   | PASS          | AC=8;AF=0.133;AN=60;BaseQRankSum=0.619;Cl  |
| 8145 | chrY | 9957535 | . | T | C   | 756.65   | PASS          | AC=7;AF=0.103;AN=68;BaseQRankSum=0.522;Cl  |
| 8146 | chrY | 9957543 | . | C | A   | 151.95   | PASS          | AC=4;AF=0.059;AN=68;BaseQRankSum=-1.070e-  |
| 8147 | chrY | 9957545 | . | G | C   | 154.97   | PASS          | AC=4;AF=0.059;AN=68;BaseQRankSum=1.19;Cli  |
| 8148 | chrY | 9957564 | . | T | C   | 330.55   | PASS          | AC=5;AF=0.074;AN=68;BaseQRankSum=-5.220e-  |
| 8149 | chrY | 9957587 | . | T | G   | 93.49    | my_snp_filter | AC=2;AF=0.029;AN=70;BaseQRankSum=          |
| 8150 | chrY | 9957595 | . | G | C   | 194.97   | PASS          | AC=2;AF=0.029;AN=70;BaseQRankSum=-3.000e-  |
| 8151 | chrY | 9957676 | . | A | C   | 1156.25  | my_snp_filter | AC=7;AF=0.100;AN=70;BaseQRankSum=          |
| 8152 | chrY | 9957685 | . | G | A   | 1316.28  | my_snp_filter | AC=7;AF=0.100;AN=70;BaseQRankSum=          |
| 8153 | chrY | 9957708 | . | A | G   | 1173.17  | PASS          | AC=8;AF=0.121;AN=66;BaseQRankSum=-1.377e+  |
| 8154 | chrY | 9957730 | . | C | G   | 5397.25  | my_snp_filter | AC=9;AF=0.150;AN=60;BaseQRankSum=          |
| 8155 | chrY | 9957754 | . | A | C   | 6600.75  | my_snp_filter | AC=9;AF=0.167;AN=54;BaseQRankSum=          |
| 8156 | chrY | 9957760 | . | T | A   | 6656.03  | my_snp_filter | AC=9;AF=0.173;AN=52;BaseQRankSum=          |
| 8157 | chrY | 9957766 | . | C | T   | 57.51    | PASS          | AC=1;AF=0.020;AN=50;BaseQRankSum=-6.890e-  |
| 8158 | chrY | 9957773 | . | A | G   | 7932.94  | PASS          | AC=9;AF=0.188;AN=48;BaseQRankSum=-3.987e+  |
| 8159 | chrY | 9957782 | . | T | A   | 8831.88  | my_snp_filter | AC=9;AF=0.196;AN=46;BaseQRankSum=          |
| 8160 | chrY | 9957792 | . | G | A   | 610.88   | PASS          | AC=5;AF=0.125;AN=40;BaseQRankSum=-2.200e-  |
| 8161 | chrY | 9957795 | . | T | C   | 715.82   | PASS          | AC=6;AF=0.158;AN=38;BaseQRankSum=0.00;Cli  |
| 8162 | chrY | 9957802 | . | T | C   | 8320.12  | PASS          | AC=9;AF=0.281;AN=32;BaseQRankSum=-2.345e+  |
| 8163 | chrY | 9957810 | . | G | A   | 585      | PASS          | AC=4;AF=0.111;AN=36;BaseQRankSum=-2.300e-  |
| 8164 | chrY | 9957811 | . | C | T   | 223.78   | PASS          | AC=1;AF=0.031;AN=32;BaseQRankSum=-8.000e-  |
| 8165 | chrY | 9957834 | . | T | C   | 264.54   | my_snp_filter | AC=5;AF=0.119;AN=42;BaseQRankSum=          |
| 8166 | chrY | 9957848 | . | T | A   | 17531.07 | PASS          | AC=11;AF=0.229;AN=48;BaseQRankSum          |
| 8167 | chrY | 9957865 | . | T | C   | 395.42   | PASS          | AC=2;AF=0.032;AN=62;BaseQRankSum=-2.822e+  |
| 8168 | chrY | 9957867 | . | G | T   | 4243.15  | PASS          | AC=9;AF=0.145;AN=62;BaseQRankSum=-3.512e+  |
| 8169 | chrY | 9957871 | . | G | A   | 589.01   | PASS          | AC=2;AF=0.033;AN=60;BaseQRankSum=0.013;Cl  |
| 8170 | chrY | 9957883 | . | C | T   | 7597.62  | PASS          | AC=11;AF=0.167;AN=66;BaseQRankSum=-3.765e  |
| 8171 | chrY | 9957933 | . | C | G   | 9228.64  | PASS          | AC=13;AF=0.203;AN=64;BaseQRankSum=4.17;Cl  |
| 8172 | chrY | 9957975 | . | G | A   | 52.90    | PASS          | AC=1;AF=0.015;AN=66;BaseQRankSum=-1.371e+  |
| 8173 | chrY | 9957976 | . | T | C   | 51.82    | PASS          | AC=1;AF=0.018;AN=56;BaseQRankSum=-1.020e-  |
| 8174 | chrY | 9957979 | . | A | C   | 57.95    | PASS          | AC=1;AF=0.017;AN=58;BaseQRankSum=-1.660e+  |
| 8175 | chrY | 9958019 | . | A | G   | 33.74    | PASS          | AC=1;AF=0.014;AN=70;BaseQRankSum=-1.667e+  |
| 8176 | chrY | 9958035 | . | T | A   | 30.62    | PASS          | AC=1;AF=0.014;AN=70;BaseQRankSum=1.18;Cli  |
| 8177 | chrY | 9958039 | . | G | A   | 30.58    | PASS          | AC=1;AF=0.019;AN=52;BaseQRankSum=1.59;Cli  |
| 8178 | chrY | 9958040 | . | G | C   | 386.45   | PASS          | AC=3;AF=0.058;AN=52;BaseQRankSum=0.00;Cli  |
| 8179 | chrY | 9958044 | . | G | A   | 31.59    | PASS          | AC=1;AF=0.014;AN=70;BaseQRankSum=1.07;Cli  |
| 8180 | chrY | 9958051 | . | C | A   | 35.21    | PASS          | AC=1;AF=0.014;AN=70;BaseQRankSum=0.572;Cl  |
| 8181 | chrY | 9958069 | . | T | A   | 545.01   | my_snp_filter | AC=6;AF=0.088;AN=68;BaseQRankSum=          |
| 8182 | chrY | 9958083 | . | A | G   | 10842.95 | PASS          | AC=10;AF=0.147;AN=68;BaseQRankSum          |
| 8183 | chrY | 9958090 | . | C | T   | 21054.08 | PASS          | AC=19;AF=0.288;AN=66;BaseQRankSum          |
| 8184 | chrY | 9958094 | . | G | C,* | 225.84   | my_snp_filter | AC=2,1;AF=0.029,0.015;AN=68;BaseQ          |
| 8185 | chrY | 9958095 | . | A | C   | 117.56   | my_snp_filter | AC=1;AF=0.015;AN=68;BaseQRankSum=          |
| 8186 | chrY | 9958104 | . | A | G   | 3449.31  | PASS          | AC=10;AF=0.147;AN=68;BaseQRankSum=-3.692e  |
| 8187 | chrY | 9958116 | . | A | C   | 670.10   | my_snp_filter | AC=4;AF=0.061;AN=66;BaseQRankSum=          |
| 8188 | chrY | 9958119 | . | T | A   | 31834.38 | PASS          | AC=21;AF=0.328;AN=64;BaseQRankSum          |
| 8189 | chrY | 9958123 | . | G | A   | 660.04   | my_snp_filter | AC=4;AF=0.059;AN=68;BaseQRankSum=          |
| 8190 | chrY | 9958152 | . | A | G   | 84.41    | my_snp_filter | AC=4;AF=0.059;AN=68;BaseQRankSum=          |
| 8191 | chrY | 9958163 | . | C | T   | 10296.52 | PASS          | AC=23;AF=0.329;AN=70;BaseQRankSum          |
| 8192 | chrY | 9958177 | . | G | A   | 9575.07  | PASS          | AC=21;AF=0.309;AN=68;BaseQRankSum=1.11;Cl  |
| 8193 | chrY | 9958186 | . | A | T   | 20833.37 | PASS          | AC=29;AF=0.426;AN=68;BaseQRankSum          |
| 8194 | chrY | 9958189 | . | G | A   | 11345.87 | PASS          | AC=28;AF=0.400;AN=70;BaseQRankSum          |
| 8195 | chrY | 9958199 | . | T | C   | 11716.32 | PASS          | AC=27;AF=0.386;AN=70;BaseQRankSum          |
| 8196 | chrY | 9958222 | . | G | A   | 30581.29 | PASS          | AC=31;AF=0.443;AN=70;BaseQRankSum          |
| 8197 | chrY | 9958230 | . | C | A   | 1111.60  | my_snp_filter | AC=17;AF=0.243;AN=70;BaseQRankSum          |
| 8198 | chrY | 9958256 | . | G | A   | 6281     | PASS          | AC=8;AF=0.114;AN=70;BaseQRankSum=2.87;Cli  |
| 8199 | chrY | 9958262 | . | G | A   | 4054.78  | PASS          | AC=21;AF=0.300;AN=70;BaseQRankSum=0.960;C  |
| 8200 | chrY | 9958276 | . | C | G   | 45869.85 | PASS          | AC=34;AF=0.486;AN=70;BaseQRankSum          |
| 8201 | chrY | 9958280 | . | T | A   | 5056.97  | PASS          | AC=8;AF=0.114;AN=70;BaseQRankSum=1.04;Cli  |
| 8202 | chrY | 9958282 | . | T | C,A | 36145.66 | PASS          | AC=13,26;AF=0.186,0.371;AN=70;Bas          |
| 8203 | chrY | 9958291 | . | C | A   | 4540.34  | PASS          | AC=8;AF=0.114;AN=70;BaseQRankSum=2.13;Cli  |
| 8204 | chrY | 9958303 | . | A | G   | 3854.87  | PASS          | AC=8;AF=0.114;AN=70;BaseQRankSum=1.84;Cli  |
| 8205 | chrY | 9958308 | . | G | A   | 18079.09 | PASS          | AC=32;AF=0.457;AN=70;BaseQRankSum          |
| 8206 | chrY | 9958318 | . | G | C   | 18102.02 | PASS          | AC=30;AF=0.429;AN=70;BaseQRankSum          |
| 8207 | chrY | 9958320 | . | G | A   | 18249.02 | PASS          | AC=30;AF=0.429;AN=70;BaseQRankSum          |
| 8208 | chrY | 9958323 | . | T | C   | 38023.52 | PASS          | AC=33;AF=0.471;AN=70;BaseQRankSum          |

|      |      |         |   |   |     |          |               |                                            |
|------|------|---------|---|---|-----|----------|---------------|--------------------------------------------|
| 8209 | chrY | 9958340 | . | A | T   | 18192.93 | PASS          | AC=28;AF=0.400;AN=70;BaseQRankSum          |
| 8210 | chrY | 9958345 | . | G | T   | 17318.81 | PASS          | AC=30;AF=0.429;AN=70;BaseQRankSum          |
| 8211 | chrY | 9958349 | . | A | G   | 5768.69  | PASS          | AC=23;AF=0.329;AN=70;BaseQRankSum=-1.278e  |
| 8212 | chrY | 9958358 | . | C | G   | 449.12   | PASS          | AC=7;AF=0.100;AN=70;BaseQRankSum=0.817;Cl  |
| 8213 | chrY | 9958359 | . | A | T   | 3741.50  | PASS          | AC=18;AF=0.257;AN=70;BaseQRankSum=0.324;C  |
| 8214 | chrY | 9958364 | . | G | A   | 19410.88 | PASS          | AC=30;AF=0.429;AN=70;BaseQRankSum          |
| 8215 | chrY | 9958371 | . | A | C   | 31297.72 | PASS          | AC=35;AF=0.500;AN=70;BaseQRankSum          |
| 8216 | chrY | 9958373 | . | C | T   | 34019.73 | PASS          | AC=35;AF=0.500;AN=70;BaseQRankSum          |
| 8217 | chrY | 9958396 | . | G | C   | 70079.84 | PASS          | AC=36;AF=0.514;AN=70;BaseQRankSum          |
| 8218 | chrY | 9958400 | . | A | G   | 27968.72 | PASS          | AC=35;AF=0.500;AN=70;BaseQRankSum          |
| 8219 | chrY | 9958403 | . | G | T   | 10340.58 | PASS          | AC=26;AF=0.371;AN=70;BaseQRankSum          |
| 8220 | chrY | 9958408 | . | G | A   | 20206.32 | PASS          | AC=33;AF=0.471;AN=70;BaseQRankSum          |
| 8221 | chrY | 9958413 | . | C | T   | 8545.65  | PASS          | AC=23;AF=0.329;AN=70;BaseQRankSum=-8.890e  |
| 8222 | chrY | 9958421 | . | T | A   | 19855.34 | PASS          | AC=33;AF=0.471;AN=70;BaseQRankSum          |
| 8223 | chrY | 9958452 | . | A | T   | 4927.69  | PASS          | AC=24;AF=0.343;AN=70;BaseQRankSum=-8.670e  |
| 8224 | chrY | 9958476 | . | T | C   | 18175.73 | PASS          | AC=35;AF=0.500;AN=70;BaseQRankSum          |
| 8225 | chrY | 9958526 | . | C | A   | 12181.59 | my_snp_filter | AC=32;AF=0.471;AN=68;Base                  |
| 8226 | chrY | 9958538 | . | C | T   | 303.71   | PASS          | AC=4;AF=0.057;AN=70;BaseQRankSum=0.023;Cl  |
| 8227 | chrY | 9958548 | . | A | G   | 360.62   | my_snp_filter | AC=7;AF=0.103;AN=68;BaseQRankSum=          |
| 8228 | chrY | 9958558 | . | G | A   | 2590.67  | my_snp_filter | AC=18;AF=0.257;AN=70;BaseQRankSum          |
| 8229 | chrY | 9958571 | . | G | A   | 1122.18  | my_snp_filter | AC=15;AF=0.214;AN=70;BaseQRankSum          |
| 8230 | chrY | 9958594 | . | C | G   | 346.41   | my_snp_filter | AC=9;AF=0.129;AN=70;BaseQRankSum=          |
| 8231 | chrY | 9958668 | . | G | A   | 1494.71  | PASS          | AC=7;AF=0.100;AN=70;BaseQRankSum=1.80;Cli  |
| 8232 | chrY | 9958669 | . | G | C   | 1494.37  | PASS          | AC=7;AF=0.100;AN=70;BaseQRankSum=0.288;Cl  |
| 8233 | chrY | 9958688 | . | A | T   | 1285.17  | PASS          | AC=7;AF=0.100;AN=70;BaseQRankSum=1.14;Cli  |
| 8234 | chrY | 9958705 | . | A | G   | 1280.79  | PASS          | AC=7;AF=0.100;AN=70;BaseQRankSum=1.22;Cli  |
| 8235 | chrY | 9958747 | . | T | G   | 2847.81  | PASS          | AC=9;AF=0.129;AN=70;BaseQRankSum=-2.204e+  |
| 8236 | chrY | 9958755 | . | A | T   | 3143.90  | PASS          | AC=9;AF=0.129;AN=70;BaseQRankSum=-2.072e+  |
| 8237 | chrY | 9958807 | . | C | T   | 269.65   | PASS          | AC=3;AF=0.044;AN=68;BaseQRankSum=0.026;Cl  |
| 8238 | chrY | 9958823 | . | C | A   | 534.51   | PASS          | AC=3;AF=0.047;AN=64;BaseQRankSum=2.20;Cli  |
| 8239 | chrY | 9958824 | . | A | T   | 346.58   | PASS          | AC=2;AF=0.030;AN=66;BaseQRankSum=0.457;Cl  |
| 8240 | chrY | 9958828 | . | G | A   | 1995.10  | PASS          | AC=8;AF=0.121;AN=66;BaseQRankSum=-6.380e-  |
| 8241 | chrY | 9958839 | . | A | T   | 4518.14  | my_snp_filter | AC=9;AF=0.141;AN=64;BaseQRankSum=          |
| 8242 | chrY | 9958858 | . | T | A   | 1305.74  | PASS          | AC=5;AF=0.076;AN=66;BaseQRankSum=0.736;Cl  |
| 8243 | chrY | 9958871 | . | T | G   | 1141.06  | PASS          | AC=5;AF=0.078;AN=64;BaseQRankSum=2.02;Cli  |
| 8244 | chrY | 9958903 | . | T | G   | 12127.61 | PASS          | AC=19;AF=0.317;AN=60;BaseQRankSum          |
| 8245 | chrY | 9958905 | . | A | T   | 671.83   | PASS          | AC=4;AF=0.061;AN=66;BaseQRankSum=1.70;Cli  |
| 8246 | chrY | 9958912 | . | C | T   | 989.01   | PASS          | AC=8;AF=0.118;AN=68;BaseQRankSum=1.80;Cli  |
| 8247 | chrY | 9958913 | . | T | G   | 998.99   | PASS          | AC=7;AF=0.103;AN=68;BaseQRankSum=1.29;Cli  |
| 8248 | chrY | 9958914 | . | A | G   | 96.20    | my_snp_filter | AC=3;AF=0.043;AN=70;BaseQRankSum=          |
| 8249 | chrY | 9958947 | . | C | A,G | 982.07   | my_snp_filter | AC=3,7;AF=0.043,0.100;AN=70;BaseQ          |
| 8250 | chrY | 9958952 | . | A | T   | 89.99    | PASS          | AC=3;AF=0.043;AN=70;BaseQRankSum=0.358;Cl  |
| 8251 | chrY | 9958953 | . | A | C   | 538.06   | my_snp_filter | AC=11;AF=0.157;AN=70;BaseQRankSum          |
| 8252 | chrY | 9958956 | . | C | T   | 184.90   | PASS          | AC=4;AF=0.057;AN=70;BaseQRankSum=-5.660e-  |
| 8253 | chrY | 9958960 | . | A | T   | 10253.89 | PASS          | AC=15;AF=0.214;AN=70;BaseQRankSum          |
| 8254 | chrY | 9958964 | . | A | G   | 25285.94 | PASS          | AC=26;AF=0.406;AN=64;BaseQRankSum          |
| 8255 | chrY | 9958966 | . | C | G   | 11136.73 | PASS          | AC=15;AF=0.214;AN=70;BaseQRankSum          |
| 8256 | chrY | 9958973 | . | C | T   | 10909.19 | PASS          | AC=15;AF=0.214;AN=70;BaseQRankSum          |
| 8257 | chrY | 9958976 | . | G | A   | 10119.45 | PASS          | AC=23;AF=0.338;AN=68;BaseQRankSum          |
| 8258 | chrY | 9958987 | . | T | C   | 977.71   | PASS          | AC=5;AF=0.071;AN=70;BaseQRankSum=-3.264e+  |
| 8259 | chrY | 9959008 | . | G | A   | 8062.16  | PASS          | AC=11;AF=0.157;AN=70;BaseQRankSum=-1.850e+ |
| 8260 | chrY | 9959012 | . | C | T   | 2859.68  | PASS          | AC=9;AF=0.129;AN=70;BaseQRankSum=-7.640e-  |
| 8261 | chrY | 9959020 | . | A | G   | 17849.73 | PASS          | AC=12;AF=0.194;AN=62;BaseQRankSum          |
| 8262 | chrY | 9959022 | . | C | T   | 3020.75  | PASS          | AC=10;AF=0.152;AN=66;BaseQRankSum=1.72;Cl  |
| 8263 | chrY | 9959024 | . | T | C   | 2765.10  | PASS          | AC=9;AF=0.132;AN=68;BaseQRankSum=-2.936e+  |
| 8264 | chrY | 9959031 | . | G | C   | 16955.56 | PASS          | AC=9;AF=0.141;AN=64;BaseQRankSum=          |
| 8265 | chrY | 9959038 | . | C | T   | 16916.02 | PASS          | AC=9;AF=0.136;AN=66;BaseQRankSum=          |
| 8266 | chrY | 9959041 | . | A | G   | 2995.44  | PASS          | AC=9;AF=0.141;AN=64;BaseQRankSum=-1.240e-  |
| 8267 | chrY | 9959046 | . | C | A   | 848.19   | PASS          | AC=4;AF=0.057;AN=70;BaseQRankSum=2.32;Cli  |
| 8268 | chrY | 9959054 | . | G | A   | 3659.53  | PASS          | AC=9;AF=0.150;AN=60;BaseQRankSum=0.205;Cl  |
| 8269 | chrY | 9959055 | . | T | C   | 7415.37  | PASS          | AC=9;AF=0.132;AN=68;BaseQRankSum=-1.562e+  |
| 8270 | chrY | 9959056 | . | A | C   | 3624.07  | PASS          | AC=9;AF=0.155;AN=58;BaseQRankSum=0.080;Cl  |
| 8271 | chrY | 9959065 | . | G | A   | 23056.85 | PASS          | AC=13;AF=0.232;AN=56;BaseQRankSum          |
| 8272 | chrY | 9959086 | . | G | T   | 3290.53  | PASS          | AC=5;AF=0.071;AN=70;BaseQRankSum=0.933;Cl  |
| 8273 | chrY | 9959107 | . | G | A   | 2040.99  | PASS          | AC=4;AF=0.057;AN=70;BaseQRankSum=0.634;Cl  |
| 8274 | chrY | 9959108 | . | G | T   | 269.20   | my_snp_filter | AC=3;AF=0.043;AN=70;BaseQRankSum=          |
| 8275 | chrY | 9959116 | . | G | A   | 230.73   | my_snp_filter | AC=1;AF=0.014;AN=70;BaseQRankSum=          |
| 8276 | chrY | 9959148 | . | A | G   | 897.04   | my_snp_filter | AC=10;AF=0.147;AN=68;BaseQRankSum          |
| 8277 | chrY | 9959166 | . | T | C   | 92550.45 | PASS          | AC=42;AF=0.600;AN=70;BaseQRankSum          |
| 8278 | chrY | 9959175 | . | G | A,T | 17691.80 | PASS          | AC=28,3;AF=0.400,0.043;AN=70;Base          |
| 8279 | chrY | 9959177 | . | C | G   | 3223.52  | my_snp_filter | AC=14;AF=0.200;AN=70;BaseQRankSum          |
| 8280 | chrY | 9959178 | . | C | T   | 16906.17 | PASS          | AC=29;AF=0.414;AN=70;BaseQRankSum          |
| 8281 | chrY | 9959179 | . | C | T   | 70712.73 | PASS          | AC=35;AF=0.500;AN=70;BaseQRankSum          |
| 8282 | chrY | 9959197 | . | C | G   | 1618.43  | my_snp_filter | AC=16;AF=0.229;AN=70;BaseQRankSum          |
| 8283 | chrY | 9959222 | . | A | T   | 123.50   | my_snp_filter | AC=2;AF=0.029;AN=70;BaseQRankSum=          |
| 8284 | chrY | 9959226 | . | A | T   | 125.74   | my_snp_filter | AC=2;AF=0.029;AN=70;BaseQRankSum=          |

|      |      |         |   |   |     |          |               |                                           |
|------|------|---------|---|---|-----|----------|---------------|-------------------------------------------|
| 8285 | chrY | 9959233 | . | G | T   | 60.73    | my_snp_filter | AC=2;AF=0.029;AN=70;BaseQRankSum=         |
| 8286 | chrY | 9959234 | . | T | C   | 3049.38  | PASS          | AC=17;AF=0.243;AN=70;BaseQRankSum=-2.650e |
| 8287 | chrY | 9959235 | . | T | C   | 5561.55  | PASS          | AC=24;AF=0.343;AN=70;BaseQRankSum=-1.110e |
| 8288 | chrY | 9959240 | . | A | T   | 13514.13 | PASS          | AC=30;AF=0.429;AN=70;BaseQRankSum         |
| 8289 | chrY | 9959244 | . | G | A   | 2112.36  | PASS          | AC=15;AF=0.214;AN=70;BaseQRankSum=-1.052e |
| 8290 | chrY | 9959261 | . | T | C   | 9192.14  | PASS          | AC=26;AF=0.371;AN=70;BaseQRankSum=0.392;C |
| 8291 | chrY | 9959265 | . | A | C   | 22375.88 | my_snp_filter | AC=32;AF=0.457;AN=70;Base                 |
| 8292 | chrY | 9959267 | . | C | T,G | 18725.77 | my_snp_filter | AC=28,3;AF=0.400,0.043;AN                 |
| 8293 | chrY | 9959271 | . | T | C   | 19431.10 | my_snp_filter | AC=31;AF=0.443;AN=70;Base                 |
| 8294 | chrY | 9959276 | . | G | T   | 7194.40  | PASS          | AC=23;AF=0.329;AN=70;BaseQRankSum=1.36;Cl |
| 8295 | chrY | 9959300 | . | G | A   | 747.45   | PASS          | AC=9;AF=0.129;AN=70;BaseQRankSum=0.358;Cl |
| 8296 | chrY | 9959301 | . | G | A   | 747.71   | PASS          | AC=9;AF=0.129;AN=70;BaseQRankSum=0.358;Cl |
| 8297 | chrY | 9959306 | . | C | A   | 52.94    | PASS          | AC=1;AF=0.014;AN=70;BaseQRankSum=-1.109e+ |
| 8298 | chrY | 9959321 | . | G | T   | 368.78   | PASS          | AC=5;AF=0.071;AN=70;BaseQRankSum=0.736;Cl |
| 8299 | chrY | 9959326 | . | T | A   | 49.06    | my_snp_filter | AC=1;AF=0.014;AN=70;BaseQRankSum=         |
| 8300 | chrY | 9959332 | . | C | T   | 440.07   | PASS          | AC=5;AF=0.071;AN=70;BaseQRankSum=1.20;Cli |
| 8301 | chrY | 9959334 | . | C | A   | 7118.31  | my_snp_filter | AC=17;AF=0.250;AN=68;BaseQRankSum         |
| 8302 | chrY | 9959346 | . | C | T   | 4147.73  | my_snp_filter | AC=10;AF=0.143;AN=70;BaseQRankSum         |
| 8303 | chrY | 9959350 | . | A | G   | 7561.60  | my_snp_filter | AC=15;AF=0.221;AN=68;BaseQRankSum         |
| 8304 | chrY | 9959358 | . | C | T   | 378.19   | PASS          | AC=4;AF=0.057;AN=70;BaseQRankSum=0.287;Cl |
| 8305 | chrY | 9959374 | . | A | G   | 10429.68 | PASS          | AC=12;AF=0.171;AN=70;BaseQRankSum         |
| 8306 | chrY | 9959382 | . | G | A   | 11711.90 | PASS          | AC=11;AF=0.157;AN=70;BaseQRankSum         |
| 8307 | chrY | 9959388 | . | A | C   | 7528.81  | PASS          | AC=10;AF=0.143;AN=70;BaseQRankSum=-9.230e |
| 8308 | chrY | 9959391 | . | C | T   | 7662.97  | PASS          | AC=10;AF=0.143;AN=70;BaseQRankSum=1.18;Cl |
| 8309 | chrY | 9959396 | . | A | T   | 7794.82  | PASS          | AC=10;AF=0.143;AN=70;BaseQRankSum=0.521;C |
| 8310 | chrY | 9959397 | . | G | A   | 630.35   | PASS          | AC=4;AF=0.057;AN=70;BaseQRankSum=-2.720e- |
| 8311 | chrY | 9959401 | . | C | G   | 2815.57  | PASS          | AC=9;AF=0.129;AN=70;BaseQRankSum=1.61;Cli |
| 8312 | chrY | 9959411 | . | A | C   | 3088.97  | PASS          | AC=9;AF=0.129;AN=70;BaseQRankSum=2.63;Cli |
| 8313 | chrY | 9959423 | . | G | A   | 275.44   | my_snp_filter | AC=2;AF=0.029;AN=70;BaseQRankSum=         |
| 8314 | chrY | 9959425 | . | G | T   | 12945.14 | PASS          | AC=9;AF=0.129;AN=70;BaseQRankSum=         |
| 8315 | chrY | 9959459 | . | T | G   | 14109.78 | PASS          | AC=11;AF=0.157;AN=70;BaseQRankSum         |
| 8316 | chrY | 9959486 | . | T | C   | 93.22    | my_snp_filter | AC=1;AF=0.014;AN=70;BaseQRankSum=         |
| 8317 | chrY | 9959490 | . | C | T   | 3577.70  | PASS          | AC=7;AF=0.100;AN=70;BaseQRankSum=-6.750e- |
| 8318 | chrY | 9959496 | . | A | G   | 2292.79  | PASS          | AC=7;AF=0.100;AN=70;BaseQRankSum=-1.174e+ |
| 8319 | chrY | 9959503 | . | A | G   | 22838.51 | PASS          | AC=24;AF=0.353;AN=68;BaseQRankSum         |
| 8320 | chrY | 9959506 | . | T | C   | 2689.95  | PASS          | AC=16;AF=0.229;AN=70;BaseQRankSum=-1.853e |
| 8321 | chrY | 9959527 | . | C | G   | 1333.55  | PASS          | AC=9;AF=0.129;AN=70;BaseQRankSum=0.186;Cl |
| 8322 | chrY | 9959544 | . | T | C   | 10577.92 | PASS          | AC=25;AF=0.357;AN=70;BaseQRankSum         |
| 8323 | chrY | 9959548 | . | T | G   | 182.58   | my_snp_filter | AC=5;AF=0.071;AN=70;BaseQRankSum=         |
| 8324 | chrY | 9959553 | . | A | T   | 11691.47 | PASS          | AC=27;AF=0.386;AN=70;BaseQRankSum         |
| 8325 | chrY | 9959555 | . | C | A   | 10665.42 | PASS          | AC=25;AF=0.357;AN=70;BaseQRankSum         |
| 8326 | chrY | 9959567 | . | A | G   | 18097.66 | PASS          | AC=29;AF=0.426;AN=68;BaseQRankSum         |
| 8327 | chrY | 9959572 | . | T | G   | 940.88   | PASS          | AC=4;AF=0.057;AN=70;BaseQRankSum=2.88;Cli |
| 8328 | chrY | 9959574 | . | G | A   | 8687.85  | PASS          | AC=24;AF=0.353;AN=68;BaseQRankSum=0.751;C |
| 8329 | chrY | 9959584 | . | C | T   | 445.21   | PASS          | AC=8;AF=0.118;AN=68;BaseQRankSum=0.387;Cl |
| 8330 | chrY | 9959594 | . | C | T   | 3296.75  | PASS          | AC=12;AF=0.176;AN=68;BaseQRankSum=-9.220e |
| 8331 | chrY | 9959618 | . | A | G   | 6843.50  | my_snp_filter | AC=9;AF=0.161;AN=56;BaseQRankSum=         |
| 8332 | chrY | 9959619 | . | C | T   | 601.17   | PASS          | AC=1;AF=0.018;AN=56;BaseQRankSum=-1.174e+ |
| 8333 | chrY | 9959621 | . | A | G   | 6506.54  | my_snp_filter | AC=9;AF=0.161;AN=56;BaseQRankSum=         |
| 8334 | chrY | 9959625 | . | G | A   | 2529.48  | PASS          | AC=7;AF=0.130;AN=54;BaseQRankSum=2.08;Cli |
| 8335 | chrY | 9959656 | . | C | T   | 421.84   | PASS          | AC=3;AF=0.071;AN=42;BaseQRankSum=-1.244e+ |
| 8336 | chrY | 9959658 | . | A | G   | 1345.07  | PASS          | AC=5;AF=0.125;AN=40;BaseQRankSum=-1.722e+ |
| 8337 | chrY | 9959669 | . | T | A   | 3706.45  | my_snp_filter | AC=9;AF=0.250;AN=36;BaseQRankSum=         |
| 8338 | chrY | 9959671 | . | C | A   | 1398.56  | PASS          | AC=5;AF=0.147;AN=34;BaseQRankSum=-1.590e- |
| 8339 | chrY | 9959673 | . | C | T   | 499.69   | PASS          | AC=3;AF=0.088;AN=34;BaseQRankSum=-1.550e- |
| 8340 | chrY | 9959685 | . | G | A   | 5365.39  | PASS          | AC=9;AF=0.300;AN=30;BaseQRankSum=0.795;Cl |
| 8341 | chrY | 9959686 | . | G | T   | 186.27   | PASS          | AC=2;AF=0.067;AN=30;BaseQRankSum=1.48;Cli |
| 8342 | chrY | 9959702 | . | G | A,T | 2124.06  | PASS          | AC=5,2;AF=0.167,0.067;AN=30;BaseQRankSum= |
| 8343 | chrY | 9959706 | . | G | A   | 783.66   | PASS          | AC=2;AF=0.067;AN=30;BaseQRankSum=1.96;Cli |
| 8344 | chrY | 9959717 | . | T | C   | 8423.05  | PASS          | AC=11;AF=0.423;AN=26;BaseQRankSum=-4.917e |
| 8345 | chrY | 9959719 | . | T | C   | 16879.05 | PASS          | AC=11;AF=0.423;AN=26;BaseQRankSum         |
| 8346 | chrY | 9959721 | . | T | G   | 1072.15  | PASS          | AC=2;AF=0.071;AN=28;BaseQRankSum=-1.990e- |
| 8347 | chrY | 9959730 | . | A | G   | 8632.74  | PASS          | AC=11;AF=0.458;AN=24;BaseQRankSum=0.819;C |
| 8348 | chrY | 9959740 | . | G | A   | 4028.10  | PASS          | AC=7;AF=0.233;AN=30;BaseQRankSum=0.167;Cl |
| 8349 | chrY | 9959741 | . | A | G   | 65.47    | my_snp_filter | AC=1;AF=0.031;AN=32;BaseQRankSum          |
| 8350 | chrY | 9959743 | . | A | G   | 8555.36  | PASS          | AC=8;AF=0.308;AN=26;BaseQRankSum=0.438;Cl |
| 8351 | chrY | 9959750 | . | C | A   | 4055.10  | PASS          | AC=7;AF=0.233;AN=30;BaseQRankSum=0.384;Cl |
| 8352 | chrY | 9959776 | . | T | C,G | 20140.36 | PASS          | AC=13,11;AF=0.464,0.393;AN=28;Bas         |
| 8353 | chrY | 9959791 | . | A | G   | 23975.23 | PASS          | AC=15;AF=0.577;AN=26;BaseQRankSum         |
| 8354 | chrY | 9959798 | . | T | G   | 4990.13  | PASS          | AC=10;AF=0.313;AN=32;BaseQRankSum=1.32;Cl |
| 8355 | chrY | 9959800 | . | G | C   | 3058.49  | PASS          | AC=11;AF=0.306;AN=36;BaseQRankSum=2.33;Cl |
| 8356 | chrY | 9959801 | . | T | C   | 97.62    | my_snp_filter | AC=1;AF=0.028;AN=36;BaseQRankSum=         |
| 8357 | chrY | 9959808 | . | C | A   | 5112.03  | PASS          | AC=9;AF=0.281;AN=32;BaseQRankSum=-2.630e- |
| 8358 | chrY | 9959820 | . | G | T   | 4817.92  | PASS          | AC=9;AF=0.281;AN=32;BaseQRankSum=-8.510e- |
| 8359 | chrY | 9959821 | . | G | A,T | 7683.10  | PASS          | AC=8,3;AF=0.308,0.115;AN=26;BaseQRankSum= |
| 8360 | chrY | 9959829 | . | G | A   | 6061.03  | PASS          | AC=9;AF=0.281;AN=32;BaseQRankSum=2.08;Cli |

|      |      |         |   |   |      |          |               |                                             |
|------|------|---------|---|---|------|----------|---------------|---------------------------------------------|
| 8361 | chrY | 9959849 | . | A | G    | 2572.39  | PASS          | AC=8;AF=0.400;AN=20;BaseQRankSum=0.704;C    |
| 8362 | chrY | 9959853 | . | A | G    | 3122.85  | PASS          | AC=9;AF=0.375;AN=24;BaseQRankSum=-3.142e+   |
| 8363 | chrY | 9959860 | . | T | C    | 5300.22  | PASS          | AC=11;AF=0.393;AN=28;BaseQRankSum=-3.700e   |
| 8364 | chrY | 9959898 | . | A | G    | 707.14   | PASS          | AC=3;AF=0.044;AN=68;BaseQRankSum=1.24;Cli   |
| 8365 | chrY | 9959910 | . | G | T    | 604.77   | PASS          | AC=4;AF=0.059;AN=68;BaseQRankSum=-6.400e-   |
| 8366 | chrY | 9959921 | . | C | A    | 8884.58  | PASS          | AC=18;AF=0.281;AN=64;BaseQRankSum=-2.620e-  |
| 8367 | chrY | 9959933 | . | C | G    | 178.48   | PASS          | AC=3;AF=0.043;AN=70;BaseQRankSum=-6.470e-   |
| 8368 | chrY | 9959938 | . | C | T    | 8440.21  | PASS          | AC=18;AF=0.265;AN=68;BaseQRankSum=1.23;Cl   |
| 8369 | chrY | 9959955 | . | C | T    | 7547.42  | PASS          | AC=18;AF=0.265;AN=68;BaseQRankSum=0.358;C   |
| 8370 | chrY | 9959966 | . | C | T    | 7584.11  | PASS          | AC=19;AF=0.279;AN=68;BaseQRankSum=0.736;C   |
| 8371 | chrY | 9959996 | . | T | G    | 80.76    | my_snp_filter | AC=2;AF=0.029;AN=70;BaseQRankSum=           |
| 8372 | chrY | 9960011 | . | G | T    | 3115.74  | PASS          | AC=17;AF=0.243;AN=70;BaseQRankSum=-7.620e   |
| 8373 | chrY | 9960040 | . | C | G    | 7851.82  | PASS          | AC=14;AF=0.206;AN=68;BaseQRankSum=0.742;C   |
| 8374 | chrY | 9960046 | . | G | A    | 380.76   | PASS          | AC=3;AF=0.043;AN=70;BaseQRankSum=2.19;Cli   |
| 8375 | chrY | 9960050 | . | C | T    | 7287.93  | PASS          | AC=14;AF=0.206;AN=68;BaseQRankSum=-1.026e   |
| 8376 | chrY | 9960069 | . | C | T    | 8223.26  | PASS          | AC=12;AF=0.171;AN=70;BaseQRankSum=2.77;Cl   |
| 8377 | chrY | 9960074 | . | A | C    | 7045.63  | PASS          | AC=11;AF=0.157;AN=70;BaseQRankSum=0.540;C   |
| 8378 | chrY | 9960082 | . | T | C    | 295.68   | PASS          | AC=2;AF=0.029;AN=70;BaseQRankSum=0.923;Cl   |
| 8379 | chrY | 9960083 | . | G | T    | 296.03   | PASS          | AC=2;AF=0.029;AN=70;BaseQRankSum=-9.080e-   |
| 8380 | chrY | 9960101 | . | C | T    | 8846.15  | PASS          | AC=18;AF=0.257;AN=70;BaseQRankSum=0.496;C   |
| 8381 | chrY | 9960117 | . | C | T    | 318.72   | PASS          | AC=4;AF=0.057;AN=70;BaseQRankSum=1.19;Cli   |
| 8382 | chrY | 9960119 | . | G | C    | 214.10   | my_snp_filter | AC=5;AF=0.071;AN=70;BaseQRankSum=           |
| 8383 | chrY | 9960121 | . | G | A    | 7189.94  | PASS          | AC=17;AF=0.243;AN=70;BaseQRankSum=-3.200e   |
| 8384 | chrY | 9960137 | . | G | A    | 6730.44  | PASS          | AC=18;AF=0.257;AN=70;BaseQRankSum=0.372;C   |
| 8385 | chrY | 9960142 | . | T | C    | 1148.78  | PASS          | AC=14;AF=0.200;AN=70;BaseQRankSum=-6.660e   |
| 8386 | chrY | 9960177 | . | C | A    | 2038.59  | PASS          | AC=15;AF=0.214;AN=70;BaseQRankSum=0.242;C   |
| 8387 | chrY | 9960202 | . | C | T    | 132.95   | PASS          | AC=3;AF=0.043;AN=70;BaseQRankSum=-5.980e-   |
| 8388 | chrY | 9960206 | . | T | C    | 7370.19  | PASS          | AC=26;AF=0.371;AN=70;BaseQRankSum=0.633;C   |
| 8389 | chrY | 9960210 | . | A | G    | 8032.64  | PASS          | AC=26;AF=0.371;AN=70;BaseQRankSum=0.558;C   |
| 8390 | chrY | 9960215 | . | C | T    | 8522.37  | PASS          | AC=26;AF=0.382;AN=68;BaseQRankSum=-3.860e   |
| 8391 | chrY | 9960225 | . | A | G    | 74.70    | my_snp_filter | AC=3;AF=0.043;AN=70;BaseQRankSum=           |
| 8392 | chrY | 9960231 | . | A | G    | 64.99    | my_snp_filter | AC=2;AF=0.029;AN=70;BaseQRankSum=           |
| 8393 | chrY | 9960237 | . | T | C    | 288.71   | PASS          | AC=4;AF=0.057;AN=70;BaseQRankSum=-4.740e-   |
| 8394 | chrY | 9960245 | . | G | A    | 2785.30  | PASS          | AC=17;AF=0.243;AN=70;BaseQRankSum=0.727;C   |
| 8395 | chrY | 9960251 | . | A | T    | 30322.13 | PASS          | AC=36;AF=0.514;AN=70;BaseQRankSum=          |
| 8396 | chrY | 9960254 | . | G | T    | 32040.13 | PASS          | AC=36;AF=0.514;AN=70;BaseQRankSum=          |
| 8397 | chrY | 9960257 | . | A | C    | 8711.20  | PASS          | AC=30;AF=0.429;AN=70;BaseQRankSum=0.372;C   |
| 8398 | chrY | 9960258 | . | A | C    | 10149.89 | PASS          | AC=33;AF=0.471;AN=70;BaseQRankSum=          |
| 8399 | chrY | 9960259 | . | C | A, T | 6808.03  | PASS          | AC=21, 6;AF=0.300, 0.086;AN=70;BaseQRankSum |
| 8400 | chrY | 9960267 | . | A | C    | 281.26   | my_snp_filter | AC=7;AF=0.100;AN=70;BaseQRankSum=           |
| 8401 | chrY | 9960313 | . | C | A    | 21789.72 | PASS          | AC=35;AF=0.500;AN=70;BaseQRankSum=          |
| 8402 | chrY | 9960341 | . | G | A    | 12041.53 | PASS          | AC=30;AF=0.429;AN=70;BaseQRankSum=          |
| 8403 | chrY | 9960350 | . | C | A    | 16543.89 | PASS          | AC=34;AF=0.486;AN=70;BaseQRankSum=          |
| 8404 | chrY | 9960353 | . | T | A    | 3307.19  | PASS          | AC=18;AF=0.257;AN=70;BaseQRankSum=-7.330e   |
| 8405 | chrY | 9960369 | . | T | A    | 2950.66  | PASS          | AC=19;AF=0.271;AN=70;BaseQRankSum=-3.980e   |
| 8406 | chrY | 9960373 | . | A | G    | 385.29   | my_snp_filter | AC=6;AF=0.086;AN=70;BaseQRankSum=           |
| 8407 | chrY | 9960378 | . | G | A    | 14060.57 | PASS          | AC=34;AF=0.486;AN=70;BaseQRankSum=          |
| 8408 | chrY | 9960379 | . | C | G    | 3978.95  | PASS          | AC=24;AF=0.343;AN=70;BaseQRankSum=-4.650e   |
| 8409 | chrY | 9960394 | . | G | A    | 2837.52  | PASS          | AC=22;AF=0.314;AN=70;BaseQRankSum=0.061;C   |
| 8410 | chrY | 9960397 | . | T | C    | 8720.08  | PASS          | AC=29;AF=0.414;AN=70;BaseQRankSum=-9.450e-  |
| 8411 | chrY | 9960408 | . | T | A    | 82.78    | PASS          | AC=1;AF=0.014;AN=70;BaseQRankSum=-5.560e-   |
| 8412 | chrY | 9960419 | . | C | A, G | 15092.08 | PASS          | AC=18, 21;AF=0.257, 0.300;AN=70;Bas         |
| 8413 | chrY | 9960423 | . | T | C    | 22873.79 | PASS          | AC=35;AF=0.500;AN=70;BaseQRankSum=          |
| 8414 | chrY | 9960426 | . | A | C    | 20963.86 | PASS          | AC=35;AF=0.500;AN=70;BaseQRankSum=          |
| 8415 | chrY | 9960427 | . | G | A    | 972.88   | PASS          | AC=12;AF=0.171;AN=70;BaseQRankSum=0.215;C   |
| 8416 | chrY | 9960430 | . | T | G    | 6339.10  | PASS          | AC=29;AF=0.414;AN=70;BaseQRankSum=-6.270e-  |
| 8417 | chrY | 9960462 | . | A | T    | 881.75   | PASS          | AC=7;AF=0.100;AN=70;BaseQRankSum=0.252;Cl   |
| 8418 | chrY | 9960463 | . | T | C    | 2213.90  | PASS          | AC=16;AF=0.229;AN=70;BaseQRankSum=0.740;C   |
| 8419 | chrY | 9960466 | . | T | A    | 4375.56  | PASS          | AC=24;AF=0.343;AN=70;BaseQRankSum=0.790;C   |
| 8420 | chrY | 9960468 | . | A | G    | 4369.56  | PASS          | AC=24;AF=0.343;AN=70;BaseQRankSum=0.212;C   |
| 8421 | chrY | 9960470 | . | T | A    | 9150.16  | PASS          | AC=21;AF=0.300;AN=70;BaseQRankSum=0.144;C   |
| 8422 | chrY | 9960477 | . | G | C    | 16851.68 | PASS          | AC=30;AF=0.429;AN=70;BaseQRankSum=          |
| 8423 | chrY | 9960488 | . | C | T    | 568.27   | PASS          | AC=6;AF=0.086;AN=70;BaseQRankSum=0.496;Cl   |
| 8424 | chrY | 9960500 | . | G | C    | 8816.97  | PASS          | AC=19;AF=0.271;AN=70;BaseQRankSum=-1.840e   |
| 8425 | chrY | 9960519 | . | G | A    | 2104.87  | PASS          | AC=12;AF=0.171;AN=70;BaseQRankSum=0.366;C   |
| 8426 | chrY | 9960520 | . | C | A    | 2102.25  | PASS          | AC=12;AF=0.171;AN=70;BaseQRankSum=0.412;C   |
| 8427 | chrY | 9960521 | . | G | A    | 14536.94 | PASS          | AC=18;AF=0.257;AN=70;BaseQRankSum=          |
| 8428 | chrY | 9960527 | . | G | C    | 44.94    | my_snp_filter | AC=1;AF=0.015;AN=68;BaseQRankSum=           |
| 8429 | chrY | 9960545 | . | A | T    | 12461.05 | PASS          | AC=16;AF=0.235;AN=68;BaseQRankSum=          |
| 8430 | chrY | 9960579 | . | T | C    | 7325.51  | PASS          | AC=12;AF=0.176;AN=68;BaseQRankSum=-2.750e   |
| 8431 | chrY | 9960608 | . | A | C    | 121.68   | PASS          | AC=1;AF=0.015;AN=68;BaseQRankSum=1.97;Cli   |
| 8432 | chrY | 9960617 | . | T | C    | 153.16   | my_snp_filter | AC=3;AF=0.044;AN=68;BaseQRankSum=           |
| 8433 | chrY | 9960621 | . | T | G    | 3296.02  | PASS          | AC=9;AF=0.132;AN=68;BaseQRankSum=-1.938e+   |
| 8434 | chrY | 9960631 | . | G | A    | 2981.59  | PASS          | AC=9;AF=0.132;AN=68;BaseQRankSum=0.226;Cl   |
| 8435 | chrY | 9960633 | . | C | T    | 3524.27  | PASS          | AC=9;AF=0.132;AN=68;BaseQRankSum=0.966;Cl   |
| 8436 | chrY | 9960642 | . | A | C    | 1994.47  | PASS          | AC=8;AF=0.118;AN=68;BaseQRankSum=1.37;Cli   |



|      |      |         |   |   |     |           |               |                                           |
|------|------|---------|---|---|-----|-----------|---------------|-------------------------------------------|
| 8437 | chrY | 9960720 | . | G | A   | 1560.19   | my_snp_filter | AC=8;AF=0.118;AN=68;BaseQRankSum=         |
| 8438 | chrY | 9960733 | . | T | C   | 366.64    | PASS          | AC=6;AF=0.088;AN=68;BaseQRankSum=0.938;C1 |
| 8439 | chrY | 9960734 | . | G | A   | 367       | PASS          | AC=6;AF=0.088;AN=68;BaseQRankSum=1.08;Cli |
| 8440 | chrY | 9960750 | . | T | G   | 14047.21  | my_snp_filter | AC=29;AF=0.414;AN=70;Base                 |
| 8441 | chrY | 9960753 | . | G | C   | 1498.63   | PASS          | AC=16;AF=0.229;AN=70;BaseQRankSum=0.804;C |
| 8442 | chrY | 9960755 | . | T | C   | 16914.98  | my_snp_filter | AC=30;AF=0.429;AN=70;Base                 |
| 8443 | chrY | 9960763 | . | G | T   | 8724.19   | PASS          | AC=24;AF=0.343;AN=70;BaseQRankSum=1.03;C1 |
| 8444 | chrY | 9960765 | . | T | C   | 20517.85  | my_snp_filter | AC=32;AF=0.457;AN=70;Base                 |
| 8445 | chrY | 9960835 | . | A | C   | 62.71     | PASS          | AC=1;AF=0.015;AN=68;BaseQRankSum=-2.739e+ |
| 8446 | chrY | 9960836 | . | G | A   | 9893.78   | PASS          | AC=26;AF=0.382;AN=68;BaseQRankSum=0.085;C |
| 8447 | chrY | 9960837 | . | G | A   | 20923.43  | PASS          | AC=32;AF=0.471;AN=68;BaseQRankSum         |
| 8448 | chrY | 9960838 | . | G | A   | 687.45    | my_snp_filter | AC=14;AF=0.206;AN=68;BaseQRankSum         |
| 8449 | chrY | 9960843 | . | A | T   | 822.39    | my_snp_filter | AC=14;AF=0.206;AN=68;BaseQRankSum         |
| 8450 | chrY | 9960846 | . | C | A   | 912.05    | my_snp_filter | AC=14;AF=0.206;AN=68;BaseQRankSum         |
| 8451 | chrY | 9960854 | . | A | T   | 76.76     | my_snp_filter | AC=4;AF=0.057;AN=70;BaseQRankSum=         |
| 8452 | chrY | 9960858 | . | T | C   | 5119.15   | PASS          | AC=21;AF=0.300;AN=70;BaseQRankSum=-7.170e |
| 8453 | chrY | 9960861 | . | A | G   | 8360.69   | PASS          | AC=24;AF=0.343;AN=70;BaseQRankSum=0.255;C |
| 8454 | chrY | 9960888 | . | G | A   | 4410.05   | PASS          | AC=27;AF=0.386;AN=70;BaseQRankSum=-5.870e |
| 8455 | chrY | 9960910 | . | A | G   | 498.58    | my_snp_filter | AC=11;AF=0.157;AN=70;BaseQRankSum         |
| 8456 | chrY | 9960913 | . | G | T   | 7839.07   | PASS          | AC=24;AF=0.343;AN=70;BaseQRankSum=-2.040e |
| 8457 | chrY | 9960918 | . | C | G,T | 9102.51   | PASS          | AC=22,9;AF=0.314,0.129;AN=70;BaseQRankSum |
| 8458 | chrY | 9960955 | . | C | A   | 11419.36  | PASS          | AC=33;AF=0.471;AN=70;BaseQRankSum         |
| 8459 | chrY | 9960964 | . | T | C   | 3582.71   | PASS          | AC=15;AF=0.214;AN=70;BaseQRankSum=0.097;C |
| 8460 | chrY | 9960976 | . | G | A   | 15918.04  | PASS          | AC=33;AF=0.471;AN=70;BaseQRankSum         |
| 8461 | chrY | 9960978 | . | C | T   | 5598.59   | PASS          | AC=24;AF=0.343;AN=70;BaseQRankSum=0.516;C |
| 8462 | chrY | 9960981 | . | T | G   | 913.49    | PASS          | AC=5;AF=0.071;AN=70;BaseQRankSum=-4.000e  |
| 8463 | chrY | 9960983 | . | C | T   | 67886.77  | PASS          | AC=39;AF=0.557;AN=70;BaseQRankSum         |
| 8464 | chrY | 9960993 | . | G | C   | 7071.84   | PASS          | AC=25;AF=0.357;AN=70;BaseQRankSum=-1.022e |
| 8465 | chrY | 9960994 | . | C | A   | 7107.57   | PASS          | AC=24;AF=0.343;AN=70;BaseQRankSum=0.148;C |
| 8466 | chrY | 9961005 | . | C | T   | 7918.94   | PASS          | AC=24;AF=0.343;AN=70;BaseQRankSum=0.079;C |
| 8467 | chrY | 9961008 | . | C | A   | 3199.51   | PASS          | AC=16;AF=0.229;AN=70;BaseQRankSum=0.020;C |
| 8468 | chrY | 9961017 | . | G | C   | 5089.67   | PASS          | AC=9;AF=0.129;AN=70;BaseQRankSum=-3.711e+ |
| 8469 | chrY | 9961021 | . | C | A   | 4179.45   | PASS          | AC=15;AF=0.214;AN=70;BaseQRankSum=-1.241e |
| 8470 | chrY | 9961025 | . | A | G   | 63553.72  | PASS          | AC=35;AF=0.500;AN=70;BaseQRankSum         |
| 8471 | chrY | 9961026 | . | T | C,G | 87858.54  | PASS          | AC=35,8;AF=0.500,0.114;AN=70;Base         |
| 8472 | chrY | 9961029 | . | T | C   | 8244.33   | PASS          | AC=23;AF=0.329;AN=70;BaseQRankSum=-1.099e |
| 8473 | chrY | 9961047 | . | C | T   | 283.67    | my_snp_filter | AC=1;AF=0.014;AN=70;BaseQRankSum=         |
| 8474 | chrY | 9961048 | . | A | T   | 1522.58   | PASS          | AC=8;AF=0.114;AN=70;BaseQRankSum=-6.020e- |
| 8475 | chrY | 9961049 | . | G | T,C | 11895.66  | PASS          | AC=11,19;AF=0.157,0.271;AN=70;Bas         |
| 8476 | chrY | 9961050 | . | C | G   | 6951.58   | PASS          | AC=10;AF=0.143;AN=70;BaseQRankSum=1.82;C1 |
| 8477 | chrY | 9961051 | . | T | G   | 114438.88 | PASS          | AC=35;AF=0.500;AN=70;BaseQRankSum         |
| 8478 | chrY | 9961054 | . | C | A   | 780.56    | my_snp_filter | AC=10;AF=0.143;AN=70;BaseQRankSum         |
| 8479 | chrY | 9961067 | . | A | T   | 2089.01   | PASS          | AC=10;AF=0.143;AN=70;BaseQRankSum=-1.910e |
| 8480 | chrY | 9961072 | . | C | A   | 94480.72  | PASS          | AC=35;AF=0.500;AN=70;BaseQRankSum         |
| 8481 | chrY | 9961075 | . | C | T   | 986.09    | my_snp_filter | AC=7;AF=0.100;AN=70;BaseQRankSum=         |
| 8482 | chrY | 9961076 | . | T | C   | 93484.72  | PASS          | AC=35;AF=0.500;AN=70;BaseQRankSum         |
| 8483 | chrY | 9961077 | . | A | T   | 139171.90 | PASS          | AC=38;AF=0.543;AN=70;BaseQRankSum         |
| 8484 | chrY | 9961079 | . | T | G   | 847.73    | PASS          | AC=4;AF=0.057;AN=70;BaseQRankSum=-1.069e+ |
| 8485 | chrY | 9961126 | . | G | C   | 8256.65   | PASS          | AC=17;AF=0.243;AN=70;BaseQRankSum=-1.780e |
| 8486 | chrY | 9961127 | . | G | T   | 8151.90   | PASS          | AC=17;AF=0.243;AN=70;BaseQRankSum=-1.120e |
| 8487 | chrY | 9961132 | . | C | T   | 128457.87 | PASS          | AC=36;AF=0.514;AN=70;BaseQRankSum         |
| 8488 | chrY | 9961142 | . | G | T   | 11274.47  | PASS          | AC=16;AF=0.229;AN=70;BaseQRankSum         |
| 8489 | chrY | 9961147 | . | T | G   | 1500.82   | my_snp_filter | AC=6;AF=0.086;AN=70;BaseQRankSum=         |
| 8490 | chrY | 9961151 | . | T | C   | 683       | my_snp_filter | AC=4;AF=0.057;AN=70;BaseQRankSum=         |
| 8491 | chrY | 9961152 | . | T | A   | 678.28    | my_snp_filter | AC=4;AF=0.057;AN=70;BaseQRankSum=         |
| 8492 | chrY | 9961155 | . | T | C   | 11247.83  | PASS          | AC=13;AF=0.186;AN=70;BaseQRankSum         |
| 8493 | chrY | 9961156 | . | C | A   | 11573.67  | PASS          | AC=13;AF=0.186;AN=70;BaseQRankSum         |
| 8494 | chrY | 9961157 | . | G | A   | 2979.85   | my_snp_filter | AC=17;AF=0.243;AN=70;BaseQRankSum         |
| 8495 | chrY | 9961158 | . | A | G   | 501.40    | my_snp_filter | AC=4;AF=0.057;AN=70;BaseQRankSum=         |
| 8496 | chrY | 9961165 | . | C | A   | 2434.15   | PASS          | AC=10;AF=0.143;AN=70;BaseQRankSum=-3.500e |
| 8497 | chrY | 9961177 | . | C | T   | 13417.57  | PASS          | AC=15;AF=0.214;AN=70;BaseQRankSum         |
| 8498 | chrY | 9961178 | . | A | G   | 141574.72 | PASS          | AC=35;AF=0.500;AN=70;BaseQRankSum         |
| 8499 | chrY | 9961197 | . | A | G   | 156755.06 | PASS          | AC=35;AF=0.500;AN=70;BaseQRankSum         |
| 8500 | chrY | 9961199 | . | T | G   | 69725.72  | PASS          | AC=35;AF=0.500;AN=70;BaseQRankSum         |
| 8501 | chrY | 9961205 | . | A | G   | 153812.85 | PASS          | AC=36;AF=0.514;AN=70;BaseQRankSum         |
| 8502 | chrY | 9961239 | . | T | C   | 48382.72  | PASS          | AC=35;AF=0.500;AN=70;BaseQRankSum         |
| 8503 | chrY | 9961254 | . | A | G   | 200.60    | my_snp_filter | AC=6;AF=0.086;AN=70;BaseQRankSum=         |
| 8504 | chrY | 9961264 | . | A | T,C | 109190.84 | PASS          | AC=35,26;AF=0.500,0.371;AN=70;Bas         |
| 8505 | chrY | 9961269 | . | A | G   | 838.03    | my_snp_filter | AC=6;AF=0.086;AN=70;BaseQRankSum=         |
| 8506 | chrY | 9961275 | . | C | T   | 14473.11  | PASS          | AC=29;AF=0.414;AN=70;BaseQRankSum         |
| 8507 | chrY | 9961277 | . | C | T   | 8755.61   | PASS          | AC=29;AF=0.414;AN=70;BaseQRankSum=-4.360e |
| 8508 | chrY | 9961284 | . | C | T   | 788.17    | my_snp_filter | AC=7;AF=0.100;AN=70;BaseQRankSum=         |
| 8509 | chrY | 9961289 | . | A | G   | 14427.38  | PASS          | AC=31;AF=0.443;AN=70;BaseQRankSum         |
| 8510 | chrY | 9961295 | . | T | A   | 95931.76  | PASS          | AC=35;AF=0.500;AN=70;BaseQRankSum         |
| 8511 | chrY | 9961300 | . | G | T   | 39639.72  | PASS          | AC=35;AF=0.500;AN=70;BaseQRankSum         |
| 8512 | chrY | 9961301 | . | G | A   | 13363.52  | PASS          | AC=32;AF=0.457;AN=70;BaseQRankSum         |

|      |      |         |   |   |     |          |               |                                           |
|------|------|---------|---|---|-----|----------|---------------|-------------------------------------------|
| 8513 | chrY | 9961306 | . | C | T   | 774.59   | my_snp_filter | AC=9;AF=0.129;AN=70;BaseQRankSum=         |
| 8514 | chrY | 9961312 | . | A | G   | 7674.88  | PASS          | AC=25;AF=0.357;AN=70;BaseQRankSum=0.559;C |
| 8515 | chrY | 9961313 | . | C | G   | 7600.03  | PASS          | AC=25;AF=0.357;AN=70;BaseQRankSum=-9.710e |
| 8516 | chrY | 9961325 | . | A | G   | 9135.80  | PASS          | AC=32;AF=0.457;AN=70;BaseQRankSum=-5.490e |
| 8517 | chrY | 9961340 | . | C | G   | 313.06   | my_snp_filter | AC=3;AF=0.043;AN=70;BaseQRankSum=         |
| 8518 | chrY | 9961344 | . | G | A   | 712.66   | PASS          | AC=6;AF=0.086;AN=70;BaseQRankSum=-1.670e- |
| 8519 | chrY | 9961351 | . | T | C   | 15284.49 | PASS          | AC=18;AF=0.375;AN=48;BaseQRankSum         |
| 8520 | chrY | 9961357 | . | C | A   | 323.71   | PASS          | AC=3;AF=0.043;AN=70;BaseQRankSum=0.596;Cl |
| 8521 | chrY | 9961364 | . | G | A   | 4733.43  | PASS          | AC=8;AF=0.118;AN=68;BaseQRankSum=-1.569e+ |
| 8522 | chrY | 9961372 | . | T | A   | 10790.56 | PASS          | AC=13;AF=0.217;AN=60;BaseQRankSum         |
| 8523 | chrY | 9961381 | . | C | T   | 647.27   | PASS          | AC=1;AF=0.014;AN=70;BaseQRankSum=1.67;Cli |
| 8524 | chrY | 9961384 | . | G | C   | 2042.39  | PASS          | AC=6;AF=0.086;AN=70;BaseQRankSum=0.058;Cl |
| 8525 | chrY | 9961387 | . | C | T   | 3206.91  | PASS          | AC=5;AF=0.076;AN=66;BaseQRankSum=-1.649e+ |
| 8526 | chrY | 9961392 | . | T | G   | 1656.75  | PASS          | AC=5;AF=0.074;AN=68;BaseQRankSum=-4.526e+ |
| 8527 | chrY | 9961408 | . | A | G   | 3101.25  | PASS          | AC=5;AF=0.076;AN=66;BaseQRankSum=-1.951e+ |
| 8528 | chrY | 9961460 | . | G | C   | 14264.43 | PASS          | AC=12;AF=0.207;AN=58;BaseQRankSum         |
| 8529 | chrY | 9961481 | . | A | G   | 22924.24 | PASS          | AC=16;AF=0.500;AN=32;BaseQRankSum         |
| 8530 | chrY | 9961482 | . | T | C   | 7180.27  | PASS          | AC=12;AF=0.353;AN=34;BaseQRankSum=-1.044e |
| 8531 | chrY | 9961487 | . | G | T   | 6785.97  | PASS          | AC=14;AF=0.200;AN=70;BaseQRankSum=3.21;Cl |
| 8532 | chrY | 9961488 | . | C | A   | 4575.20  | PASS          | AC=11;AF=0.157;AN=70;BaseQRankSum=-8.600e |
| 8533 | chrY | 9961491 | . | T | C   | 158.99   | PASS          | AC=4;AF=0.057;AN=70;BaseQRankSum=0.456;Cl |
| 8534 | chrY | 9961494 | . | C | T   | 1745.69  | PASS          | AC=10;AF=0.143;AN=70;BaseQRankSum=-2.215e |
| 8535 | chrY | 9961515 | . | C | T   | 412.68   | my_snp_filter | AC=10;AF=0.143;AN=70;BaseQRankSum         |
| 8536 | chrY | 9961541 | . | T | C   | 2827.21  | PASS          | AC=17;AF=0.243;AN=70;BaseQRankSum=-9.390e |
| 8537 | chrY | 9961552 | . | A | G   | 173.62   | PASS          | AC=2;AF=0.029;AN=70;BaseQRankSum=-3.260e- |
| 8538 | chrY | 9961559 | . | A | T   | 1030.10  | PASS          | AC=8;AF=0.114;AN=70;BaseQRankSum=-6.610e- |
| 8539 | chrY | 9961565 | . | G | A   | 10018.54 | PASS          | AC=31;AF=0.443;AN=70;BaseQRankSum         |
| 8540 | chrY | 9961570 | . | A | G   | 12145.49 | PASS          | AC=33;AF=0.471;AN=70;BaseQRankSum         |
| 8541 | chrY | 9961584 | . | C | T   | 9683.97  | PASS          | AC=27;AF=0.386;AN=70;BaseQRankSum=-7.000e |
| 8542 | chrY | 9961585 | . | T | A   | 9699.48  | PASS          | AC=27;AF=0.386;AN=70;BaseQRankSum=-1.170e |
| 8543 | chrY | 9961595 | . | C | T   | 151.19   | my_snp_filter | AC=3;AF=0.043;AN=70;BaseQRankSum=         |
| 8544 | chrY | 9961601 | . | C | T   | 158.15   | my_snp_filter | AC=5;AF=0.071;AN=70;BaseQRankSum=         |
| 8545 | chrY | 9961602 | . | A | T   | 167.47   | my_snp_filter | AC=5;AF=0.071;AN=70;BaseQRankSum=         |
| 8546 | chrY | 9961622 | . | G | A   | 1677.98  | PASS          | AC=21;AF=0.300;AN=70;BaseQRankSum=0.072;C |
| 8547 | chrY | 9961627 | . | T | C   | 1344.62  | PASS          | AC=12;AF=0.171;AN=70;BaseQRankSum=1.86;Cl |
| 8548 | chrY | 9961640 | . | G | A   | 5356.97  | PASS          | AC=16;AF=0.229;AN=70;BaseQRankSum=-2.480e |
| 8549 | chrY | 9961650 | . | T | C   | 12314.24 | PASS          | AC=23;AF=0.397;AN=58;BaseQRankSum         |
| 8550 | chrY | 9961659 | . | G | A   | 3274.54  | PASS          | AC=13;AF=0.191;AN=68;BaseQRankSum=0.498;C |
| 8551 | chrY | 9961660 | . | A | T   | 94.46    | PASS          | AC=2;AF=0.029;AN=68;BaseQRankSum=0.736;Cl |
| 8552 | chrY | 9961661 | . | T | C   | 3524.41  | PASS          | AC=13;AF=0.191;AN=68;BaseQRankSum=0.089;C |
| 8553 | chrY | 9961662 | . | G | A   | 3230.05  | PASS          | AC=12;AF=0.176;AN=68;BaseQRankSum=-1.400e |
| 8554 | chrY | 9961666 | . | C | T   | 6635.33  | PASS          | AC=11;AF=0.157;AN=70;BaseQRankSum=4.60;Cl |
| 8555 | chrY | 9961669 | . | T | A   | 9911.08  | PASS          | AC=13;AF=0.191;AN=68;BaseQRankSum=0.550;C |
| 8556 | chrY | 9961673 | . | G | T   | 1013.95  | PASS          | AC=8;AF=0.114;AN=70;BaseQRankSum=0.553;Cl |
| 8557 | chrY | 9961680 | . | G | C   | 9765.56  | PASS          | AC=12;AF=0.182;AN=66;BaseQRankSum=4.23;Cl |
| 8558 | chrY | 9961684 | . | C | T   | 9753.03  | PASS          | AC=12;AF=0.176;AN=68;BaseQRankSum=-2.950e |
| 8559 | chrY | 9961687 | . | A | T   | 3112.92  | PASS          | AC=9;AF=0.129;AN=70;BaseQRankSum=2.02;Cli |
| 8560 | chrY | 9961694 | . | G | A   | 3176.02  | PASS          | AC=9;AF=0.129;AN=70;BaseQRankSum=0.390;Cl |
| 8561 | chrY | 9961707 | . | G | A   | 10990.86 | PASS          | AC=20;AF=0.303;AN=66;BaseQRankSum         |
| 8562 | chrY | 9961767 | . | G | A   | 116.52   | my_snp_filter | AC=4;AF=0.057;AN=70;BaseQRankSum=         |
| 8563 | chrY | 9961769 | . | C | G   | 117.05   | my_snp_filter | AC=4;AF=0.057;AN=70;BaseQRankSum=         |
| 8564 | chrY | 9961773 | . | T | C   | 10698.15 | PASS          | AC=29;AF=0.414;AN=70;BaseQRankSum         |
| 8565 | chrY | 9961787 | . | A | G   | 1467.50  | PASS          | AC=10;AF=0.147;AN=68;BaseQRankSum=1.24;Cl |
| 8566 | chrY | 9961809 | . | A | T   | 7985.91  | PASS          | AC=18;AF=0.273;AN=66;BaseQRankSum=-1.750e |
| 8567 | chrY | 9961828 | . | T | A   | 5220.41  | my_snp_filter | AC=11;AF=0.167;AN=66;BaseQRankSum         |
| 8568 | chrY | 9961832 | . | T | C   | 109.82   | my_snp_filter | AC=1;AF=0.014;AN=70;BaseQRankSum=         |
| 8569 | chrY | 9961841 | . | T | G   | 4297.38  | PASS          | AC=8;AF=0.125;AN=64;BaseQRankSum=-5.420e- |
| 8570 | chrY | 9961844 | . | T | C   | 4044.47  | PASS          | AC=7;AF=0.106;AN=66;BaseQRankSum=0.170;Cl |
| 8571 | chrY | 9961845 | . | G | A   | 867.05   | PASS          | AC=6;AF=0.091;AN=66;BaseQRankSum=-5.170e- |
| 8572 | chrY | 9961852 | . | T | G,A | 2079.19  | PASS          | AC=3,3;AF=0.043,0.043;AN=70;BaseQRankSum= |
| 8573 | chrY | 9961856 | . | T | C   | 136.37   | PASS          | AC=1;AF=0.014;AN=70;BaseQRankSum=0.423;Cl |
| 8574 | chrY | 9961869 | . | T | C   | 574.36   | PASS          | AC=3;AF=0.043;AN=70;BaseQRankSum=-1.610e- |
| 8575 | chrY | 9961884 | . | A | G   | 407.32   | PASS          | AC=6;AF=0.086;AN=70;BaseQRankSum=-1.735e+ |
| 8576 | chrY | 9961889 | . | T | C   | 202.74   | PASS          | AC=3;AF=0.043;AN=70;BaseQRankSum=-7.810e- |
| 8577 | chrY | 9961938 | . | A | G   | 1580.72  | PASS          | AC=8;AF=0.114;AN=70;BaseQRankSum=0.840;Cl |
| 8578 | chrY | 9961941 | . | C | T   | 1854.86  | PASS          | AC=8;AF=0.114;AN=70;BaseQRankSum=-2.960e- |
| 8579 | chrY | 9961951 | . | T | C   | 1167.91  | PASS          | AC=6;AF=0.086;AN=70;BaseQRankSum=-1.129e+ |
| 8580 | chrY | 9961953 | . | A | G   | 2695.58  | PASS          | AC=10;AF=0.143;AN=70;BaseQRankSum=0.607;C |
| 8581 | chrY | 9961958 | . | G | T   | 2569.24  | PASS          | AC=10;AF=0.143;AN=70;BaseQRankSum=1.81;Cl |
| 8582 | chrY | 9961969 | . | G | A   | 2943.60  | PASS          | AC=9;AF=0.129;AN=70;BaseQRankSum=-9.210e- |
| 8583 | chrY | 9961984 | . | A | T   | 7726.85  | PASS          | AC=10;AF=0.143;AN=70;BaseQRankSum=-6.030e |
| 8584 | chrY | 9961987 | . | G | C   | 7858.43  | PASS          | AC=11;AF=0.157;AN=70;BaseQRankSum=-9.250e |
| 8585 | chrY | 9962001 | . | G | A   | 449.82   | my_snp_filter | AC=6;AF=0.086;AN=70;BaseQRankSum=         |
| 8586 | chrY | 9962022 | . | C | A   | 8299.48  | PASS          | AC=22;AF=0.314;AN=70;BaseQRankSum=-7.310e |
| 8587 | chrY | 9962027 | . | C | T   | 389.81   | PASS          | AC=6;AF=0.086;AN=70;BaseQRankSum=-2.970e- |
| 8588 | chrY | 9962028 | . | T | C   | 1662.54  | PASS          | AC=11;AF=0.157;AN=70;BaseQRankSum=0.777;C |

|      |      |         |   |   |     |          |               |                                           |
|------|------|---------|---|---|-----|----------|---------------|-------------------------------------------|
| 8589 | chrY | 9962031 | . | C | A   | 216.73   | PASS          | AC=3;AF=0.043;AN=70;BaseQRankSum=-1.536e+ |
| 8590 | chrY | 9962039 | . | G | T   | 241.91   | my_snp_filter | AC=4;AF=0.057;AN=70;BaseQRankSum=         |
| 8591 | chrY | 9962044 | . | C | A   | 8090.16  | PASS          | AC=19;AF=0.279;AN=68;BaseQRankSum=-5.600e |
| 8592 | chrY | 9962045 | . | A | G   | 11288.59 | PASS          | AC=23;AF=0.338;AN=68;BaseQRankSum         |
| 8593 | chrY | 9962052 | . | A | G   | 8551.60  | PASS          | AC=19;AF=0.271;AN=70;BaseQRankSum=-2.239e |
| 8594 | chrY | 9962063 | . | T | C   | 10996.46 | PASS          | AC=19;AF=0.288;AN=66;BaseQRankSum         |
| 8595 | chrY | 9962064 | . | G | A   | 2466.69  | PASS          | AC=10;AF=0.147;AN=68;BaseQRankSum=1.11;Cl |
| 8596 | chrY | 9962083 | . | A | T   | 2648.07  | PASS          | AC=8;AF=0.125;AN=64;BaseQRankSum=-1.712e+ |
| 8597 | chrY | 9962084 | . | C | G   | 5055.58  | PASS          | AC=13;AF=0.197;AN=66;BaseQRankSum=2.23;Cl |
| 8598 | chrY | 9962085 | . | G | T   | 2598.94  | PASS          | AC=8;AF=0.125;AN=64;BaseQRankSum=1.49;Cli |
| 8599 | chrY | 9962099 | . | T | A   | 1696     | PASS          | AC=10;AF=0.156;AN=64;BaseQRankSum=-1.632e |
| 8600 | chrY | 9962120 | . | A | G   | 9936.02  | PASS          | AC=9;AF=0.155;AN=58;BaseQRankSum=0.379;Cl |
| 8601 | chrY | 9962121 | . | T | G   | 10482.28 | PASS          | AC=9;AF=0.155;AN=58;BaseQRankSum=         |
| 8602 | chrY | 9962123 | . | C | G   | 937.17   | PASS          | AC=8;AF=0.133;AN=60;BaseQRankSum=1.79;Cli |
| 8603 | chrY | 9962129 | . | C | T   | 44.59    | my_snp_filter | AC=1;AF=0.016;AN=64;BaseQRankSum=         |
| 8604 | chrY | 9962131 | . | C | T   | 189.48   | PASS          | AC=1;AF=0.016;AN=62;BaseQRankSum=-7.400e- |
| 8605 | chrY | 9962133 | . | G | C   | 186.40   | PASS          | AC=1;AF=0.017;AN=60;BaseQRankSum=0.430;Cl |
| 8606 | chrY | 9962138 | . | C | T,G | 8026.31  | PASS          | AC=6,7;AF=0.107,0.125;AN=56;BaseQRankSum= |
| 8607 | chrY | 9962143 | . | G | A   | 3662.31  | PASS          | AC=9;AF=0.150;AN=60;BaseQRankSum=-6.730e- |
| 8608 | chrY | 9962147 | . | T | A,C | 7359.71  | PASS          | AC=7,3;AF=0.117,0.050;AN=60;BaseQRankSum= |
| 8609 | chrY | 9962150 | . | G | A   | 2004.82  | PASS          | AC=7;AF=0.113;AN=62;BaseQRankSum=3.39;Cli |
| 8610 | chrY | 9962152 | . | T | C   | 16793.90 | PASS          | AC=9;AF=0.150;AN=60;BaseQRankSum=         |
| 8611 | chrY | 9962160 | . | G | C   | 6847.04  | PASS          | AC=9;AF=0.145;AN=62;BaseQRankSum=-2.723e+ |
| 8612 | chrY | 9962169 | . | T | G   | 4451.36  | PASS          | AC=9;AF=0.136;AN=66;BaseQRankSum=2.18;Cli |
| 8613 | chrY | 9962175 | . | T | G   | 4850.36  | PASS          | AC=9;AF=0.132;AN=68;BaseQRankSum=1.96;Cli |
| 8614 | chrY | 9962180 | . | T | C   | 226.04   | PASS          | AC=1;AF=0.015;AN=68;BaseQRankSum=0.546;Cl |
| 8615 | chrY | 9962189 | . | C | G,A | 7906.89  | PASS          | AC=6,6;AF=0.088,0.088;AN=68;BaseQRankSum= |
| 8616 | chrY | 9962195 | . | C | G   | 219.40   | PASS          | AC=1;AF=0.015;AN=68;BaseQRankSum=2.08;Cli |
| 8617 | chrY | 9962207 | . | A | T,G | 1103.79  | PASS          | AC=4,5;AF=0.061,0.076;AN=66;BaseQRankSum= |
| 8618 | chrY | 9962214 | . | G | T   | 3984.54  | PASS          | AC=10;AF=0.143;AN=70;BaseQRankSum=-5.720e |
| 8619 | chrY | 9962215 | . | T | G   | 11252.30 | PASS          | AC=13;AF=0.197;AN=66;BaseQRankSum=        |
| 8620 | chrY | 9962218 | . | T | C   | 1772.32  | PASS          | AC=9;AF=0.132;AN=68;BaseQRankSum=-3.425e+ |
| 8621 | chrY | 9962229 | . | A | T   | 1243.06  | PASS          | AC=7;AF=0.100;AN=70;BaseQRankSum=-2.100e- |
| 8622 | chrY | 9962232 | . | A | G   | 1250.06  | PASS          | AC=7;AF=0.100;AN=70;BaseQRankSum=2.06;Cli |
| 8623 | chrY | 9962239 | . | T | C   | 4401.50  | PASS          | AC=10;AF=0.143;AN=70;BaseQRankSum=-1.027e |
| 8624 | chrY | 9962251 | . | G | T   | 109.85   | my_snp_filter | AC=1;AF=0.014;AN=70;BaseQRankSum=         |
| 8625 | chrY | 9962260 | . | G | A   | 86.81    | my_snp_filter | AC=1;AF=0.014;AN=70;BaseQRankSum=         |
| 8626 | chrY | 9962270 | . | G | A   | 7659.57  | PASS          | AC=9;AF=0.132;AN=68;BaseQRankSum=1.49;Cli |
| 8627 | chrY | 9962274 | . | A | G   | 44.83    | my_snp_filter | AC=1;AF=0.015;AN=68;BaseQRankSum=         |
| 8628 | chrY | 9962277 | . | C | T   | 3266.21  | PASS          | AC=7;AF=0.103;AN=68;BaseQRankSum=0.756;Cl |
| 8629 | chrY | 9962287 | . | A | G   | 389.45   | PASS          | AC=2;AF=0.030;AN=66;BaseQRankSum=-2.502e+ |
| 8630 | chrY | 9962289 | . | G | A   | 2323.76  | PASS          | AC=6;AF=0.091;AN=66;BaseQRankSum=-6.300e- |
| 8631 | chrY | 9962292 | . | C | A   | 127.08   | my_snp_filter | AC=2;AF=0.030;AN=66;BaseQRankSum=         |
| 8632 | chrY | 9962295 | . | G | A   | 7076.40  | PASS          | AC=9;AF=0.136;AN=66;BaseQRankSum=0.256;Cl |
| 8633 | chrY | 9962310 | . | A | G   | 8249.42  | PASS          | AC=9;AF=0.136;AN=66;BaseQRankSum=0.409;Cl |
| 8634 | chrY | 9962320 | . | T | C   | 349.76   | PASS          | AC=3;AF=0.043;AN=70;BaseQRankSum=-1.690e+ |
| 8635 | chrY | 9962327 | . | T | C   | 8922.79  | PASS          | AC=12;AF=0.171;AN=70;BaseQRankSum=0.736;C |
| 8636 | chrY | 9962341 | . | A | T   | 9002.60  | PASS          | AC=17;AF=0.250;AN=68;BaseQRankSum=1.05;Cl |
| 8637 | chrY | 9962356 | . | C | G   | 1510.87  | PASS          | AC=7;AF=0.100;AN=70;BaseQRankSum=1.27;Cli |
| 8638 | chrY | 9962358 | . | G | A   | 6102.43  | PASS          | AC=16;AF=0.229;AN=70;BaseQRankSum=0.804;C |
| 8639 | chrY | 9962394 | . | A | G   | 1139.11  | my_snp_filter | AC=12;AF=0.171;AN=70;BaseQRankSum         |
| 8640 | chrY | 9962395 | . | A | T   | 11507.85 | PASS          | AC=26;AF=0.371;AN=70;BaseQRankSum         |
| 8641 | chrY | 9962397 | . | A | G   | 24747.59 | PASS          | AC=34;AF=0.486;AN=70;BaseQRankSum         |
| 8642 | chrY | 9962406 | . | C | T   | 14029.89 | PASS          | AC=26;AF=0.371;AN=70;BaseQRankSum         |
| 8643 | chrY | 9962420 | . | A | G   | 18126.95 | PASS          | AC=28;AF=0.412;AN=68;BaseQRankSum         |
| 8644 | chrY | 9962434 | . | C | T   | 18425.22 | PASS          | AC=32;AF=0.457;AN=70;BaseQRankSum         |
| 8645 | chrY | 9962442 | . | A | G   | 18716.22 | PASS          | AC=32;AF=0.457;AN=70;BaseQRankSum         |
| 8646 | chrY | 9962445 | . | C | A   | 22672.07 | PASS          | AC=31;AF=0.443;AN=70;BaseQRankSum         |
| 8647 | chrY | 9962446 | . | T | G   | 7380.86  | PASS          | AC=27;AF=0.386;AN=70;BaseQRankSum=-4.250e |
| 8648 | chrY | 9962451 | . | T | C   | 49026    | PASS          | AC=36;AF=0.514;AN=70;BaseQRankSum=-6.510e |
| 8649 | chrY | 9962498 | . | C | A   | 2325.77  | PASS          | AC=12;AF=0.171;AN=70;BaseQRankSum=-9.040e |
| 8650 | chrY | 9962506 | . | T | C   | 50608.72 | PASS          | AC=35;AF=0.500;AN=70;BaseQRankSum         |
| 8651 | chrY | 9962513 | . | G | A   | 16714.15 | PASS          | AC=33;AF=0.471;AN=70;BaseQRankSum         |
| 8652 | chrY | 9962518 | . | C | T   | 41.09    | my_snp_filter | AC=2;AF=0.029;AN=70;BaseQRankSum=         |
| 8653 | chrY | 9962521 | . | C | T   | 150.30   | my_snp_filter | AC=5;AF=0.071;AN=70;BaseQRankSum=         |
| 8654 | chrY | 9962524 | . | T | G   | 17233.73 | PASS          | AC=33;AF=0.471;AN=70;BaseQRankSum         |
| 8655 | chrY | 9962531 | . | A | T   | 43060.78 | PASS          | AC=34;AF=0.486;AN=70;BaseQRankSum         |
| 8656 | chrY | 9962532 | . | A | C   | 42457.78 | PASS          | AC=34;AF=0.486;AN=70;BaseQRankSum         |
| 8657 | chrY | 9962542 | . | A | G   | 1285.68  | my_snp_filter | AC=9;AF=0.129;AN=70;BaseQRankSum=         |
| 8658 | chrY | 9962556 | . | G | A   | 5880.04  | PASS          | AC=30;AF=0.429;AN=70;BaseQRankSum=-4.210e |
| 8659 | chrY | 9962562 | . | A | G   | 5360.27  | PASS          | AC=13;AF=0.186;AN=70;BaseQRankSum=-8.130e |
| 8660 | chrY | 9962569 | . | C | T   | 5616.15  | PASS          | AC=16;AF=0.229;AN=70;BaseQRankSum=2.48;Cl |
| 8661 | chrY | 9962570 | . | A | G   | 28836.65 | PASS          | AC=32;AF=0.457;AN=70;BaseQRankSum         |
| 8662 | chrY | 9962580 | . | T | G   | 26949.65 | PASS          | AC=32;AF=0.457;AN=70;BaseQRankSum         |
| 8663 | chrY | 9962584 | . | T | G   | 268.64   | my_snp_filter | AC=4;AF=0.057;AN=70;BaseQRankSum=         |
| 8664 | chrY | 9962589 | . | T | C   | 4015.43  | PASS          | AC=11;AF=0.157;AN=70;BaseQRankSum=1.09;Cl |

|      |      |         |   |   |     |          |               |                                           |
|------|------|---------|---|---|-----|----------|---------------|-------------------------------------------|
| 8665 | chrY | 9962595 | . | T | C   | 325.62   | my_snp_filter | AC=5;AF=0.071;AN=70;BaseQRankSum=         |
| 8666 | chrY | 9962602 | . | A | G   | 339.34   | my_snp_filter | AC=5;AF=0.071;AN=70;BaseQRankSum=         |
| 8667 | chrY | 9962612 | . | C | A   | 58.69    | my_snp_filter | AC=2;AF=0.029;AN=70;BaseQRankSum=         |
| 8668 | chrY | 9962628 | . | A | T   | 4698.34  | PASS          | AC=10;AF=0.143;AN=70;BaseQRankSum=-1.270e |
| 8669 | chrY | 9962643 | . | C | T   | 5664.95  | PASS          | AC=10;AF=0.147;AN=68;BaseQRankSum=1.78;Cl |
| 8670 | chrY | 9962644 | . | C | T   | 16748.85 | PASS          | AC=20;AF=0.303;AN=66;BaseQRankSum=        |
| 8671 | chrY | 9962646 | . | G | A   | 5572.01  | PASS          | AC=10;AF=0.143;AN=70;BaseQRankSum=2.05;Cl |
| 8672 | chrY | 9962654 | . | A | T   | 7895.69  | PASS          | AC=20;AF=0.294;AN=68;BaseQRankSum=0.842;C |
| 8673 | chrY | 9962655 | . | G | A   | 390.74   | my_snp_filter | AC=5;AF=0.071;AN=70;BaseQRankSum=         |
| 8674 | chrY | 9962665 | . | T | C   | 7177.38  | PASS          | AC=9;AF=0.136;AN=66;BaseQRankSum=2.79;Cli |
| 8675 | chrY | 9962669 | . | T | C   | 8385.12  | PASS          | AC=18;AF=0.273;AN=66;BaseQRankSum=-2.589e |
| 8676 | chrY | 9962672 | . | C | T   | 8265.98  | PASS          | AC=18;AF=0.265;AN=68;BaseQRankSum=0.00;Cl |
| 8677 | chrY | 9962676 | . | C | T   | 7911.78  | PASS          | AC=18;AF=0.265;AN=68;BaseQRankSum=-2.800e |
| 8678 | chrY | 9962677 | . | C | A   | 5784.30  | PASS          | AC=9;AF=0.132;AN=68;BaseQRankSum=-3.040e- |
| 8679 | chrY | 9962678 | . | G | A   | 7761.01  | PASS          | AC=16;AF=0.235;AN=68;BaseQRankSum=1.39;Cl |
| 8680 | chrY | 9962681 | . | G | C   | 147.53   | my_snp_filter | AC=2;AF=0.029;AN=68;BaseQRankSum=         |
| 8681 | chrY | 9962693 | . | C | G   | 5728.29  | PASS          | AC=9;AF=0.129;AN=70;BaseQRankSum=-4.743e+ |
| 8682 | chrY | 9962697 | . | T | G   | 14101.62 | my_snp_filter | AC=14;AF=0.200;AN=70;Base                 |
| 8683 | chrY | 9962700 | . | A | C   | 5622.22  | PASS          | AC=9;AF=0.129;AN=70;BaseQRankSum=2.66;Cli |
| 8684 | chrY | 9962711 | . | G | A   | 92.38    | my_snp_filter | AC=4;AF=0.057;AN=70;BaseQRankSum=         |
| 8685 | chrY | 9962714 | . | G | A   | 12595.98 | PASS          | AC=11;AF=0.157;AN=70;BaseQRankSum=        |
| 8686 | chrY | 9962735 | . | G | T   | 278.66   | my_snp_filter | AC=4;AF=0.057;AN=70;BaseQRankSum=         |
| 8687 | chrY | 9962740 | . | C | A   | 2777.63  | my_snp_filter | AC=9;AF=0.129;AN=70;BaseQRankSum=         |
| 8688 | chrY | 9962743 | . | C | T   | 298.84   | my_snp_filter | AC=4;AF=0.057;AN=70;BaseQRankSum=         |
| 8689 | chrY | 9962749 | . | A | G   | 1892.97  | PASS          | AC=9;AF=0.132;AN=68;BaseQRankSum=1.64;Cli |
| 8690 | chrY | 9962761 | . | G | A   | 6173.57  | PASS          | AC=9;AF=0.136;AN=66;BaseQRankSum=1.11;Cl  |
| 8691 | chrY | 9962780 | . | G | T   | 4485.90  | PASS          | AC=9;AF=0.129;AN=70;BaseQRankSum=0.554;Cl |
| 8692 | chrY | 9962790 | . | C | T   | 794.32   | PASS          | AC=7;AF=0.100;AN=70;BaseQRankSum=-1.346e+ |
| 8693 | chrY | 9962810 | . | T | C   | 578.29   | PASS          | AC=5;AF=0.071;AN=70;BaseQRankSum=-1.070e- |
| 8694 | chrY | 9962817 | . | T | G   | 305.63   | PASS          | AC=3;AF=0.043;AN=70;BaseQRankSum=-3.060e- |
| 8695 | chrY | 9962821 | . | G | T   | 239.47   | PASS          | AC=3;AF=0.043;AN=70;BaseQRankSum=0.224;Cl |
| 8696 | chrY | 9962826 | . | G | C   | 72.89    | PASS          | AC=1;AF=0.014;AN=70;BaseQRankSum=0.980;Cl |
| 8697 | chrY | 9962875 | . | C | A   | 297.98   | PASS          | AC=4;AF=0.059;AN=68;BaseQRankSum=1.77;Cli |
| 8698 | chrY | 9962877 | . | C | A   | 300.05   | PASS          | AC=4;AF=0.059;AN=68;BaseQRankSum=1.45;Cli |
| 8699 | chrY | 9962919 | . | T | G   | 5130.20  | my_snp_filter | AC=22;AF=0.333;AN=66;BaseQRankSum=        |
| 8700 | chrY | 9962924 | . | A | G   | 117.96   | PASS          | AC=1;AF=0.014;AN=70;BaseQRankSum=0.615;Cl |
| 8701 | chrY | 9962930 | . | A | C   | 1445.43  | PASS          | AC=15;AF=0.214;AN=70;BaseQRankSum=-3.650e |
| 8702 | chrY | 9962936 | . | C | T   | 109.38   | PASS          | AC=1;AF=0.014;AN=70;BaseQRankSum=-1.628e+ |
| 8703 | chrY | 9962939 | . | C | T   | 5693.17  | my_snp_filter | AC=10;AF=0.143;AN=70;BaseQRankSum=        |
| 8704 | chrY | 9962940 | . | A | G   | 1279.48  | PASS          | AC=14;AF=0.200;AN=70;BaseQRankSum=-7.360e |
| 8705 | chrY | 9962941 | . | T | C   | 5798.21  | my_snp_filter | AC=10;AF=0.143;AN=70;BaseQRankSum=        |
| 8706 | chrY | 9962943 | . | T | C   | 2196.59  | PASS          | AC=10;AF=0.143;AN=70;BaseQRankSum=0.053;C |
| 8707 | chrY | 9962958 | . | C | T   | 170.12   | PASS          | AC=1;AF=0.014;AN=70;BaseQRankSum=0.135;Cl |
| 8708 | chrY | 9962968 | . | C | A   | 188.42   | PASS          | AC=1;AF=0.014;AN=70;BaseQRankSum=-2.329e+ |
| 8709 | chrY | 9962970 | . | A | T   | 75.04    | my_snp_filter | AC=1;AF=0.014;AN=70;BaseQRankSum=         |
| 8710 | chrY | 9962974 | . | C | G   | 10034.79 | PASS          | AC=17;AF=0.243;AN=70;BaseQRankSum=        |
| 8711 | chrY | 9962986 | . | A | G   | 14378.80 | PASS          | AC=27;AF=0.386;AN=70;BaseQRankSum=        |
| 8712 | chrY | 9962991 | . | A | G   | 809.79   | PASS          | AC=10;AF=0.143;AN=70;BaseQRankSum=-6.700e |
| 8713 | chrY | 9962993 | . | G | A   | 13560.44 | PASS          | AC=23;AF=0.329;AN=70;BaseQRankSum=        |
| 8714 | chrY | 9963002 | . | C | T   | 16119.44 | PASS          | AC=27;AF=0.397;AN=68;BaseQRankSum=        |
| 8715 | chrY | 9963015 | . | A | G   | 432.89   | my_snp_filter | AC=9;AF=0.129;AN=70;BaseQRankSum=         |
| 8716 | chrY | 9963018 | . | G | A   | 12862.54 | PASS          | AC=24;AF=0.343;AN=70;BaseQRankSum=        |
| 8717 | chrY | 9963029 | . | T | C,A | 12540.32 | PASS          | AC=4,22;AF=0.057,0.314;AN=70;Base         |
| 8718 | chrY | 9963082 | . | A | G   | 18121.79 | PASS          | AC=30;AF=0.429;AN=70;BaseQRankSum=        |
| 8719 | chrY | 9963088 | . | G | A   | 18372.04 | PASS          | AC=29;AF=0.414;AN=70;BaseQRankSum=        |
| 8720 | chrY | 9963096 | . | C | T   | 3804.68  | PASS          | AC=9;AF=0.129;AN=70;BaseQRankSum=-8.200e- |
| 8721 | chrY | 9963099 | . | T | G   | 4267.25  | PASS          | AC=9;AF=0.129;AN=70;BaseQRankSum=-7.730e- |
| 8722 | chrY | 9963106 | . | G | T   | 4250.71  | PASS          | AC=9;AF=0.129;AN=70;BaseQRankSum=1.71;Cli |
| 8723 | chrY | 9963115 | . | G | T   | 2785.06  | PASS          | AC=11;AF=0.157;AN=70;BaseQRankSum=0.998;C |
| 8724 | chrY | 9963129 | . | G | A   | 12350.21 | PASS          | AC=21;AF=0.300;AN=70;BaseQRankSum=        |
| 8725 | chrY | 9963130 | . | G | T   | 6424.44  | PASS          | AC=19;AF=0.271;AN=70;BaseQRankSum=0.967;C |
| 8726 | chrY | 9963136 | . | G | T   | 13302.33 | PASS          | AC=22;AF=0.314;AN=70;BaseQRankSum=        |
| 8727 | chrY | 9963148 | . | A | G   | 23468.42 | PASS          | AC=26;AF=0.382;AN=68;BaseQRankSum=        |
| 8728 | chrY | 9963155 | . | G | A   | 23858.46 | PASS          | AC=26;AF=0.382;AN=68;BaseQRankSum=        |
| 8729 | chrY | 9963156 | . | C | G   | 7756.90  | PASS          | AC=15;AF=0.221;AN=68;BaseQRankSum=0.709;C |
| 8730 | chrY | 9963161 | . | A | C   | 13823.40 | PASS          | AC=25;AF=0.357;AN=70;BaseQRankSum=        |
| 8731 | chrY | 9963163 | . | C | T   | 13330.99 | PASS          | AC=23;AF=0.329;AN=70;BaseQRankSum=        |
| 8732 | chrY | 9963175 | . | T | A   | 22058.10 | PASS          | AC=29;AF=0.414;AN=70;BaseQRankSum=        |
| 8733 | chrY | 9963199 | . | A | G   | 540.06   | my_snp_filter | AC=7;AF=0.103;AN=68;BaseQRankSum=         |
| 8734 | chrY | 9963207 | . | C | T   | 51.52    | my_snp_filter | AC=1;AF=0.015;AN=68;BaseQRankSum=         |
| 8735 | chrY | 9963226 | . | A | G   | 55.29    | my_snp_filter | AC=1;AF=0.014;AN=70;BaseQRankSum=         |
| 8736 | chrY | 9963238 | . | G | A   | 713.33   | PASS          | AC=7;AF=0.100;AN=70;BaseQRankSum=2.36;Cli |
| 8737 | chrY | 9963240 | . | G | A   | 133.33   | my_snp_filter | AC=2;AF=0.029;AN=70;BaseQRankSum=         |
| 8738 | chrY | 9963248 | . | T | G   | 447.94   | my_snp_filter | AC=2;AF=0.030;AN=66;BaseQRankSum=         |
| 8739 | chrY | 9963260 | . | A | T   | 51.76    | my_snp_filter | AC=1;AF=0.015;AN=68;BaseQRankSum=         |
| 8740 | chrY | 9963266 | . | G | A   | 60.68    | my_snp_filter | AC=1;AF=0.014;AN=70;BaseQRankSum=         |

|      |      |         |   |   |     |          |               |                                            |
|------|------|---------|---|---|-----|----------|---------------|--------------------------------------------|
| 8741 | chrY | 9963276 | . | G | A   | 14720.81 | PASS          | AC=25;AF=0.357;AN=70;BaseQRankSum          |
| 8742 | chrY | 9963279 | . | A | T   | 60.88    | my_snp_filter | AC=1;AF=0.014;AN=70;BaseQRankSum=          |
| 8743 | chrY | 9963286 | . | T | A   | 2262.69  | PASS          | AC=18;AF=0.273;AN=66;BaseQRankSum=0.358;C  |
| 8744 | chrY | 9963287 | . | T | A   | 2255.10  | PASS          | AC=18;AF=0.273;AN=66;BaseQRankSum=0.720;C  |
| 8745 | chrY | 9963303 | . | C | A   | 10307.26 | PASS          | AC=22;AF=0.314;AN=70;BaseQRankSum          |
| 8746 | chrY | 9963318 | . | T | A   | 2014.08  | PASS          | AC=19;AF=0.271;AN=70;BaseQRankSum=-3.220e  |
| 8747 | chrY | 9963343 | . | A | G   | 21080.91 | PASS          | AC=37;AF=0.529;AN=70;BaseQRankSum          |
| 8748 | chrY | 9963345 | . | A | C   | 6143.03  | PASS          | AC=24;AF=0.343;AN=70;BaseQRankSum=-4.700e  |
| 8749 | chrY | 9963346 | . | A | T   | 129.63   | my_snp_filter | AC=2;AF=0.029;AN=70;BaseQRankSum=          |
| 8750 | chrY | 9963356 | . | C | T   | 112.64   | my_snp_filter | AC=2;AF=0.029;AN=70;BaseQRankSum=          |
| 8751 | chrY | 9963389 | . | C | A,T | 4855.37  | PASS          | AC=27,2;AF=0.386,0.029;AN=70;BaseQRankSum  |
| 8752 | chrY | 9963409 | . | C | T   | 8493.01  | PASS          | AC=32;AF=0.457;AN=70;BaseQRankSum=-1.390e  |
| 8753 | chrY | 9963448 | . | C | T   | 15129.46 | my_snp_filter | AC=32;AF=0.457;AN=70;Base                  |
| 8754 | chrY | 9963468 | . | C | T   | 44.65    | PASS          | AC=1;AF=0.016;AN=62;BaseQRankSum=0.720;Cl  |
| 8755 | chrY | 9963472 | . | G | T   | 42.73    | PASS          | AC=1;AF=0.015;AN=68;BaseQRankSum=-1.026e+  |
| 8756 | chrY | 9963473 | . | A | C   | 48.73    | PASS          | AC=1;AF=0.015;AN=68;BaseQRankSum=-1.026e+  |
| 8757 | chrY | 9963477 | . | A | C   | 8568.30  | my_snp_filter | AC=25;AF=0.368;AN=68;BaseQRankSum          |
| 8758 | chrY | 9963500 | . | T | C   | 4782.45  | my_snp_filter | AC=16;AF=0.242;AN=66;BaseQRankSum          |
| 8759 | chrY | 9963515 | . | T | C   | 2543.43  | my_snp_filter | AC=12;AF=0.176;AN=68;BaseQRankSum          |
| 8760 | chrY | 9963517 | . | C | G   | 1118.10  | PASS          | AC=8;AF=0.114;AN=70;BaseQRankSum=-3.203e+  |
| 8761 | chrY | 9963526 | . | C | A   | 1247.63  | PASS          | AC=10;AF=0.147;AN=68;BaseQRankSum=-2.050e+ |
| 8762 | chrY | 9963527 | . | A | G   | 1279.37  | PASS          | AC=10;AF=0.147;AN=68;BaseQRankSum=0.128;C  |
| 8763 | chrY | 9963530 | . | C | T   | 2700.90  | my_snp_filter | AC=13;AF=0.191;AN=68;BaseQRankSum          |
| 8764 | chrY | 9963707 | . | T | C   | 37.89    | my_snp_filter | AC=2;AF=0.029;AN=70;BaseQRankSum=          |
| 8765 | chrY | 9963724 | . | C | T   | 285.53   | PASS          | AC=7;AF=0.100;AN=70;BaseQRankSum=0.248;Cl  |
| 8766 | chrY | 9963727 | . | A | G   | 332.09   | PASS          | AC=7;AF=0.100;AN=70;BaseQRankSum=-1.059e+  |
| 8767 | chrY | 9963732 | . | G | T   | 582.97   | PASS          | AC=7;AF=0.100;AN=70;BaseQRankSum=-9.350e-  |
| 8768 | chrY | 9963736 | . | G | A   | 629.66   | PASS          | AC=7;AF=0.103;AN=68;BaseQRankSum=0.134;Cl  |
| 8769 | chrY | 9963746 | . | G | T   | 723.01   | PASS          | AC=6;AF=0.086;AN=70;BaseQRankSum=1.08;Cli  |
| 8770 | chrY | 9963776 | . | A | G   | 559      | PASS          | AC=9;AF=0.129;AN=70;BaseQRankSum=-1.357e+  |
| 8771 | chrY | 9963786 | . | C | T   | 184.28   | PASS          | AC=5;AF=0.071;AN=70;BaseQRankSum=-5.370e-  |
| 8772 | chrY | 9963818 | . | C | T   | 181.45   | my_snp_filter | AC=8;AF=0.118;AN=68;BaseQRankSum=          |
| 8773 | chrY | 9963826 | . | C | T   | 45.63    | my_snp_filter | AC=3;AF=0.044;AN=68;BaseQRankSum=          |
| 8774 | chrY | 9963847 | . | C | T   | 1315.61  | PASS          | AC=19;AF=0.288;AN=66;BaseQRankSum=-4.210e  |
| 8775 | chrY | 9963863 | . | T | C   | 1918.73  | PASS          | AC=16;AF=0.250;AN=64;BaseQRankSum=0.231;C  |
| 8776 | chrY | 9963864 | . | C | T   | 1916.32  | PASS          | AC=16;AF=0.250;AN=64;BaseQRankSum=-7.390e+ |
| 8777 | chrY | 9963883 | . | C | T   | 724.99   | PASS          | AC=7;AF=0.103;AN=68;BaseQRankSum=2.05;Cli  |
| 8778 | chrY | 9963884 | . | G | C   | 720.30   | PASS          | AC=7;AF=0.103;AN=68;BaseQRankSum=0.595;Cl  |
| 8779 | chrY | 9963889 | . | A | G   | 517.78   | PASS          | AC=6;AF=0.088;AN=68;BaseQRankSum=0.851;Cl  |
| 8780 | chrY | 9963895 | . | G | A   | 386.36   | PASS          | AC=3;AF=0.044;AN=68;BaseQRankSum=1.04;Cli  |
| 8781 | chrY | 9963921 | . | A | C   | 1217.02  | PASS          | AC=6;AF=0.088;AN=68;BaseQRankSum=-9.490e-  |
| 8782 | chrY | 9963929 | . | A | G   | 1422.73  | my_snp_filter | AC=6;AF=0.086;AN=70;BaseQRankSum=          |
| 8783 | chrY | 9963939 | . | G | T   | 2668.28  | my_snp_filter | AC=6;AF=0.088;AN=68;BaseQRankSum=          |
| 8784 | chrY | 9963941 | . | T | A   | 2508.54  | my_snp_filter | AC=6;AF=0.088;AN=68;BaseQRankSum=          |
| 8785 | chrY | 9963946 | . | A | G   | 1666.89  | my_snp_filter | AC=6;AF=0.088;AN=68;BaseQRankSum=          |
| 8786 | chrY | 9963959 | . | T | G   | 3604.61  | my_snp_filter | AC=6;AF=0.088;AN=68;BaseQRankSum=          |
| 8787 | chrY | 9963962 | . | T | G   | 3401.42  | my_snp_filter | AC=6;AF=0.088;AN=68;BaseQRankSum=          |
| 8788 | chrY | 9963987 | . | G | A   | 3753.92  | my_snp_filter | AC=10;AF=0.143;AN=70;BaseQRankSum          |
| 8789 | chrY | 9963991 | . | A | C   | 4797.33  | my_snp_filter | AC=12;AF=0.171;AN=70;BaseQRankSum          |
| 8790 | chrY | 9963993 | . | T | A   | 707.35   | my_snp_filter | AC=6;AF=0.086;AN=70;BaseQRankSum=          |
| 8791 | chrY | 9964000 | . | T | A   | 5171.96  | my_snp_filter | AC=11;AF=0.157;AN=70;BaseQRankSum          |
| 8792 | chrY | 9964001 | . | C | A   | 5217.81  | my_snp_filter | AC=11;AF=0.157;AN=70;BaseQRankSum          |
| 8793 | chrY | 9964011 | . | A | T   | 5411.10  | my_snp_filter | AC=12;AF=0.171;AN=70;BaseQRankSum          |
| 8794 | chrY | 9964017 | . | C | A   | 102.95   | my_snp_filter | AC=2;AF=0.029;AN=70;BaseQRankSum=          |
| 8795 | chrY | 9964021 | . | A | T   | 205.60   | PASS          | AC=2;AF=0.029;AN=70;BaseQRankSum=-3.540e-  |
| 8796 | chrY | 9964026 | . | A | G   | 194.01   | PASS          | AC=2;AF=0.029;AN=70;BaseQRankSum=-1.468e+  |
| 8797 | chrY | 9964027 | . | C | A   | 1528.60  | PASS          | AC=13;AF=0.186;AN=70;BaseQRankSum=-1.206e  |
| 8798 | chrY | 9964032 | . | T | C   | 197.65   | PASS          | AC=2;AF=0.029;AN=70;BaseQRankSum=-9.870e-  |
| 8799 | chrY | 9964033 | . | G | C   | 195.19   | PASS          | AC=2;AF=0.029;AN=70;BaseQRankSum=0.615;Cl  |
| 8800 | chrY | 9964034 | . | T | C   | 1617.78  | PASS          | AC=13;AF=0.186;AN=70;BaseQRankSum=-2.558e+ |
| 8801 | chrY | 9964038 | . | T | C   | 1079.91  | PASS          | AC=10;AF=0.143;AN=70;BaseQRankSum=1.19;Cl  |
| 8802 | chrY | 9964061 | . | C | G   | 1822.93  | PASS          | AC=11;AF=0.157;AN=70;BaseQRankSum=-3.860e  |
| 8803 | chrY | 9964072 | . | A | G   | 12592.40 | my_snp_filter | AC=30;AF=0.429;AN=70;Base                  |
| 8804 | chrY | 9964078 | . | C | T   | 33.35    | my_snp_filter | AC=2;AF=0.029;AN=70;BaseQRankSum=          |
| 8805 | chrY | 9964081 | . | T | A   | 1997.12  | PASS          | AC=12;AF=0.171;AN=70;BaseQRankSum=-1.743e  |
| 8806 | chrY | 9964089 | . | T | C   | 9990.38  | my_snp_filter | AC=19;AF=0.271;AN=70;BaseQRankSum          |
| 8807 | chrY | 9964094 | . | C | T   | 13110.74 | my_snp_filter | AC=32;AF=0.457;AN=70;Base                  |
| 8808 | chrY | 9964105 | . | C | T   | 2409.88  | PASS          | AC=14;AF=0.200;AN=70;BaseQRankSum=1.96;Cl  |
| 8809 | chrY | 9964117 | . | G | T   | 6440.16  | PASS          | AC=17;AF=0.243;AN=70;BaseQRankSum=-3.010e  |
| 8810 | chrY | 9964126 | . | A | G   | 2905.99  | PASS          | AC=26;AF=0.371;AN=70;BaseQRankSum=0.264;C  |
| 8811 | chrY | 9964135 | . | G | A   | 1206.11  | PASS          | AC=7;AF=0.100;AN=70;BaseQRankSum=0.851;Cl  |
| 8812 | chrY | 9964141 | . | A | C   | 11805.14 | my_snp_filter | AC=28;AF=0.400;AN=70;Base                  |
| 8813 | chrY | 9964142 | . | A | G   | 5755.63  | PASS          | AC=20;AF=0.286;AN=70;BaseQRankSum=-1.006e  |
| 8814 | chrY | 9964165 | . | C | T,* | 3750.84  | PASS          | AC=13,10;AF=0.186,0.143;AN=70;BaseQRankSu  |
| 8815 | chrY | 9964171 | . | G | C   | 900.10   | PASS          | AC=5;AF=0.071;AN=70;BaseQRankSum=-1.358e+  |
| 8816 | chrY | 9964180 | . | G | C   | 950.05   | PASS          | AC=15;AF=0.214;AN=70;BaseQRankSum=0.651;C  |

|      |      |         |   |   |     |          |               |                                           |
|------|------|---------|---|---|-----|----------|---------------|-------------------------------------------|
| 8817 | chrY | 9964207 | . | G | A   | 21079.19 | PASS          | AC=28;AF=0.400;AN=70;BaseQRankSum         |
| 8818 | chrY | 9964214 | . | A | T   | 2352.25  | PASS          | AC=13;AF=0.186;AN=70;BaseQRankSum=-9.730e |
| 8819 | chrY | 9964215 | . | A | T,G | 22714.24 | PASS          | AC=28,3;AF=0.400,0.043;AN=70;Base         |
| 8820 | chrY | 9964218 | . | A | T   | 1328.77  | PASS          | AC=11;AF=0.157;AN=70;BaseQRankSum=0.231;C |
| 8821 | chrY | 9964228 | . | G | C   | 19659.48 | PASS          | AC=29;AF=0.414;AN=70;BaseQRankSum         |
| 8822 | chrY | 9964231 | . | C | T   | 923.27   | my_snp_filter | AC=11;AF=0.157;AN=70;BaseQRankSum         |
| 8823 | chrY | 9964234 | . | T | C   | 422.69   | PASS          | AC=3;AF=0.043;AN=70;BaseQRankSum=-6.320e- |
| 8824 | chrY | 9964239 | . | T | A   | 2897.80  | PASS          | AC=14;AF=0.200;AN=70;BaseQRankSum=-1.182e |
| 8825 | chrY | 9964242 | . | A | G   | 426.70   | PASS          | AC=3;AF=0.043;AN=70;BaseQRankSum=0.037;Cl |
| 8826 | chrY | 9964243 | . | C | T   | 3819.31  | PASS          | AC=23;AF=0.329;AN=70;BaseQRankSum=0.00;Cl |
| 8827 | chrY | 9964246 | . | C | G   | 92.01    | my_snp_filter | AC=5;AF=0.071;AN=70;BaseQRankSum          |
| 8828 | chrY | 9964252 | . | G | A   | 138.92   | PASS          | AC=3;AF=0.043;AN=70;BaseQRankSum=-9.530e- |
| 8829 | chrY | 9964281 | . | G | A   | 1408.68  | my_snp_filter | AC=12;AF=0.171;AN=70;BaseQRankSum         |
| 8830 | chrY | 9964284 | . | C | A   | 1211.28  | my_snp_filter | AC=15;AF=0.214;AN=70;BaseQRankSum         |
| 8831 | chrY | 9964297 | . | G | A   | 114.60   | PASS          | AC=5;AF=0.071;AN=70;BaseQRankSum=-4.740e- |
| 8832 | chrY | 9964302 | . | C | T   | 8915.63  | PASS          | AC=24;AF=0.343;AN=70;BaseQRankSum=1.38;Cl |
| 8833 | chrY | 9964303 | . | G | A   | 819.90   | my_snp_filter | AC=13;AF=0.186;AN=70;BaseQRankSum         |
| 8834 | chrY | 9964316 | . | C | T   | 484.44   | my_snp_filter | AC=5;AF=0.071;AN=70;BaseQRankSum=         |
| 8835 | chrY | 9964319 | . | C | T   | 4753.78  | PASS          | AC=15;AF=0.227;AN=66;BaseQRankSum=-1.473e |
| 8836 | chrY | 9964325 | . | A | G   | 16248.24 | PASS          | AC=25;AF=0.379;AN=66;BaseQRankSum         |
| 8837 | chrY | 9964352 | . | G | A   | 16464.81 | PASS          | AC=18;AF=0.300;AN=60;BaseQRankSum         |
| 8838 | chrY | 9964353 | . | A | C   | 124.55   | my_snp_filter | AC=4;AF=0.067;AN=60;BaseQRankSum=         |
| 8839 | chrY | 9964371 | . | C | T   | 204.87   | my_snp_filter | AC=3;AF=0.056;AN=54;BaseQRankSum=         |
| 8840 | chrY | 9964373 | . | G | T   | 16297.43 | PASS          | AC=12;AF=0.240;AN=50;BaseQRankSum         |
| 8841 | chrY | 9964409 | . | T | C   | 525.22   | PASS          | AC=5;AF=0.086;AN=58;BaseQRankSum=1.49;Cli |
| 8842 | chrY | 9964416 | . | A | T   | 5414.62  | my_snp_filter | AC=9;AF=0.155;AN=58;BaseQRankSum=         |
| 8843 | chrY | 9964424 | . | G | T   | 652.35   | PASS          | AC=4;AF=0.067;AN=60;BaseQRankSum=1.38;Cli |
| 8844 | chrY | 9964438 | . | T | G   | 59.96    | PASS          | AC=1;AF=0.016;AN=64;BaseQRankSum=1.95;Cli |
| 8845 | chrY | 9964439 | . | A | G   | 59.53    | PASS          | AC=1;AF=0.016;AN=64;BaseQRankSum=1.74;Cli |
| 8846 | chrY | 9964443 | . | C | T   | 72.92    | PASS          | AC=1;AF=0.016;AN=64;BaseQRankSum=0.582;Cl |
| 8847 | chrY | 9964448 | . | T | A   | 7080.68  | my_snp_filter | AC=11;AF=0.172;AN=64;BaseQRankSum         |
| 8848 | chrY | 9964456 | . | C | G   | 2874.62  | my_snp_filter | AC=7;AF=0.109;AN=64;BaseQRankSum=         |
| 8849 | chrY | 9964469 | . | C | T   | 571.49   | PASS          | AC=3;AF=0.043;AN=70;BaseQRankSum=-9.100e- |
| 8850 | chrY | 9964480 | . | A | C   | 79.27    | PASS          | AC=1;AF=0.014;AN=70;BaseQRankSum=-9.690e- |
| 8851 | chrY | 9964488 | . | C | G   | 63.75    | my_snp_filter | AC=1;AF=0.014;AN=70;BaseQRankSum=         |
| 8852 | chrY | 9964498 | . | C | A   | 13318.82 | my_snp_filter | AC=20;AF=0.294;AN=68;Base                 |
| 8853 | chrY | 9964499 | . | G | A   | 368.58   | PASS          | AC=2;AF=0.029;AN=70;BaseQRankSum=2.75;Cli |
| 8854 | chrY | 9964504 | . | G | C   | 136.31   | PASS          | AC=1;AF=0.014;AN=70;BaseQRankSum=-2.450e- |
| 8855 | chrY | 9964509 | . | G | T   | 42.80    | my_snp_filter | AC=1;AF=0.014;AN=70;BaseQRankSum=         |
| 8856 | chrY | 9964513 | . | G | A   | 125.20   | my_snp_filter | AC=4;AF=0.057;AN=70;BaseQRankSum=         |
| 8857 | chrY | 9964517 | . | C | G   | 12573.91 | PASS          | AC=19;AF=0.271;AN=70;BaseQRankSum         |
| 8858 | chrY | 9964518 | . | C | T   | 905.23   | PASS          | AC=6;AF=0.086;AN=70;BaseQRankSum=-5.700e- |
| 8859 | chrY | 9964519 | . | T | G   | 256.01   | PASS          | AC=4;AF=0.057;AN=70;BaseQRankSum=-1.123e+ |
| 8860 | chrY | 9964523 | . | A | G   | 243.65   | PASS          | AC=3;AF=0.043;AN=70;BaseQRankSum=1.39;Cli |
| 8861 | chrY | 9964524 | . | G | A   | 35.45    | my_snp_filter | AC=1;AF=0.014;AN=70;BaseQRankSum=         |
| 8862 | chrY | 9964551 | . | C | A,G | 8765.22  | PASS          | AC=6,16;AF=0.086,0.229;AN=70;BaseQRankSum |
| 8863 | chrY | 9964553 | . | C | A   | 1287.16  | PASS          | AC=8;AF=0.114;AN=70;BaseQRankSum=-2.020e- |
| 8864 | chrY | 9964564 | . | G | C   | 19647.97 | PASS          | AC=28;AF=0.400;AN=70;BaseQRankSum         |
| 8865 | chrY | 9964566 | . | A | C   | 2684.88  | PASS          | AC=14;AF=0.200;AN=70;BaseQRankSum=0.824;C |
| 8866 | chrY | 9964582 | . | C | A   | 2547.79  | PASS          | AC=14;AF=0.200;AN=70;BaseQRankSum=0.631;C |
| 8867 | chrY | 9964584 | . | G | A   | 2001.60  | PASS          | AC=15;AF=0.221;AN=68;BaseQRankSum=0.762;C |
| 8868 | chrY | 9964586 | . | T | G   | 17298.64 | PASS          | AC=27;AF=0.409;AN=66;BaseQRankSum         |
| 8869 | chrY | 9964587 | . | G | A   | 1290.71  | PASS          | AC=15;AF=0.227;AN=66;BaseQRankSum=0.382;C |
| 8870 | chrY | 9964591 | . | C | T   | 1320.86  | PASS          | AC=14;AF=0.200;AN=70;BaseQRankSum=0.517;C |
| 8871 | chrY | 9964597 | . | A | G   | 18357.24 | PASS          | AC=27;AF=0.397;AN=68;BaseQRankSum         |
| 8872 | chrY | 9964608 | . | T | C   | 6065.71  | PASS          | AC=27;AF=0.397;AN=68;BaseQRankSum=0.00;Cl |
| 8873 | chrY | 9964611 | . | A | T   | 3863.21  | PASS          | AC=14;AF=0.200;AN=70;BaseQRankSum=-7.300e |
| 8874 | chrY | 9964625 | . | A | G   | 58.62    | my_snp_filter | AC=2;AF=0.029;AN=70;BaseQRankSum=         |
| 8875 | chrY | 9964633 | . | G | A   | 2667.97  | PASS          | AC=20;AF=0.286;AN=70;BaseQRankSum=-5.880e |
| 8876 | chrY | 9964662 | . | G | A   | 4320.47  | PASS          | AC=28;AF=0.400;AN=70;BaseQRankSum=-8.000e |
| 8877 | chrY | 9964672 | . | G | T   | 4633.91  | PASS          | AC=28;AF=0.400;AN=70;BaseQRankSum=-7.910e |
| 8878 | chrY | 9964683 | . | T | C   | 4497.93  | PASS          | AC=29;AF=0.414;AN=70;BaseQRankSum=-1.050e |
| 8879 | chrY | 9964692 | . | T | C,G | 29868.26 | PASS          | AC=27,29;AF=0.386,0.414;AN=70;Bas         |
| 8880 | chrY | 9964698 | . | A | T   | 8128.94  | PASS          | AC=27;AF=0.386;AN=70;BaseQRankSum=-8.340e |
| 8881 | chrY | 9964722 | . | C | T   | 5398.43  | PASS          | AC=27;AF=0.386;AN=70;BaseQRankSum=-1.263e |
| 8882 | chrY | 9964758 | . | G | T   | 15417.62 | PASS          | AC=29;AF=0.468;AN=62;BaseQRankSum         |
| 8883 | chrY | 9964760 | . | G | A   | 15392.62 | PASS          | AC=29;AF=0.468;AN=62;BaseQRankSum         |
| 8884 | chrY | 9964767 | . | T | C   | 2140.55  | PASS          | AC=13;AF=0.191;AN=68;BaseQRankSum=0.855;C |
| 8885 | chrY | 9964772 | . | T | C   | 4757.28  | PASS          | AC=16;AF=0.235;AN=68;BaseQRankSum=0.752;C |
| 8886 | chrY | 9964774 | . | A | G   | 1090.06  | PASS          | AC=10;AF=0.147;AN=68;BaseQRankSum=0.377;C |
| 8887 | chrY | 9964776 | . | G | C   | 1349.18  | PASS          | AC=11;AF=0.162;AN=68;BaseQRankSum=-1.793e |
| 8888 | chrY | 9964784 | . | G | C   | 3838.39  | PASS          | AC=11;AF=0.162;AN=68;BaseQRankSum=0.079;C |
| 8889 | chrY | 9964791 | . | G | A   | 2961.17  | PASS          | AC=9;AF=0.129;AN=70;BaseQRankSum=0.981;Cl |
| 8890 | chrY | 9964802 | . | A | G   | 998.02   | PASS          | AC=6;AF=0.086;AN=70;BaseQRankSum=1.48;Cli |
| 8891 | chrY | 9964808 | . | A | C   | 751.28   | PASS          | AC=5;AF=0.071;AN=70;BaseQRankSum=-6.150e- |
| 8892 | chrY | 9964884 | . | G | T   | 243.45   | PASS          | AC=4;AF=0.065;AN=62;BaseQRankSum=0.804;Cl |

|      |      |         |   |   |     |          |               |                                           |
|------|------|---------|---|---|-----|----------|---------------|-------------------------------------------|
| 8893 | chrY | 9964911 | . | T | G   | 3640.16  | PASS          | AC=11;AF=0.167;AN=66;BaseQRankSum=-2.260e |
| 8894 | chrY | 9964912 | . | T | G   | 3791.16  | PASS          | AC=11;AF=0.167;AN=66;BaseQRankSum=0.537;C |
| 8895 | chrY | 9964922 | . | T | C   | 1210.31  | PASS          | AC=7;AF=0.103;AN=68;BaseQRankSum=0.083;Cl |
| 8896 | chrY | 9964928 | . | G | A   | 1030.04  | PASS          | AC=6;AF=0.086;AN=70;BaseQRankSum=-1.980e- |
| 8897 | chrY | 9964941 | . | C | T   | 1287.53  | PASS          | AC=9;AF=0.141;AN=64;BaseQRankSum=1.23;Cli |
| 8898 | chrY | 9964942 | . | C | T   | 8528.59  | PASS          | AC=27;AF=0.409;AN=66;BaseQRankSum=0.742;C |
| 8899 | chrY | 9964956 | . | A | G   | 1703.93  | PASS          | AC=18;AF=0.257;AN=70;BaseQRankSum=0.731;C |
| 8900 | chrY | 9964967 | . | G | A,C | 1415.58  | PASS          | AC=12,12;AF=0.171,0.171;AN=70;BaseQRankSu |
| 8901 | chrY | 9964985 | . | G | T   | 31.67    | my_snp_filter | AC=1;AF=0.014;AN=70;BaseQRankSum=         |
| 8902 | chrY | 9964994 | . | C | A   | 4605.49  | PASS          | AC=27;AF=0.386;AN=70;BaseQRankSum=-2.890e |
| 8903 | chrY | 9965004 | . | T | C   | 564.94   | PASS          | AC=10;AF=0.143;AN=70;BaseQRankSum=-4.530e |
| 8904 | chrY | 9965009 | . | A | C   | 4745.02  | PASS          | AC=26;AF=0.371;AN=70;BaseQRankSum=-7.110e |
| 8905 | chrY | 9965029 | . | G | T   | 373.34   | my_snp_filter | AC=10;AF=0.143;AN=70;BaseQRankSum         |
| 8906 | chrY | 9965044 | . | A | T   | 340.36   | my_snp_filter | AC=8;AF=0.114;AN=70;BaseQRankSum=         |
| 8907 | chrY | 9965046 | . | A | T   | 12227.27 | PASS          | AC=30;AF=0.429;AN=70;BaseQRankSum         |
| 8908 | chrY | 9965055 | . | G | T   | 6633.65  | PASS          | AC=22;AF=0.314;AN=70;BaseQRankSum=-3.600e |
| 8909 | chrY | 9965062 | . | T | A   | 568.26   | PASS          | AC=6;AF=0.086;AN=70;BaseQRankSum=-4.330e- |
| 8910 | chrY | 9965072 | . | G | A   | 675.51   | PASS          | AC=8;AF=0.114;AN=70;BaseQRankSum=-4.700e- |
| 8911 | chrY | 9965080 | . | T | C,A | 11568.70 | PASS          | AC=25,10;AF=0.357,0.143;AN=70;Bas         |
| 8912 | chrY | 9965095 | . | C | G   | 1918.48  | PASS          | AC=17;AF=0.243;AN=70;BaseQRankSum=-9.510e |
| 8913 | chrY | 9965098 | . | A | G   | 6538.47  | PASS          | AC=21;AF=0.300;AN=70;BaseQRankSum=0.529;C |
| 8914 | chrY | 9965108 | . | A | G   | 12231.69 | PASS          | AC=25;AF=0.368;AN=68;BaseQRankSum         |
| 8915 | chrY | 9965114 | . | A | C   | 1253.93  | PASS          | AC=14;AF=0.200;AN=70;BaseQRankSum=0.642;C |
| 8916 | chrY | 9965116 | . | G | T   | 1320.43  | PASS          | AC=14;AF=0.200;AN=70;BaseQRankSum=0.898;C |
| 8917 | chrY | 9965131 | . | A | T,G | 5570.42  | PASS          | AC=25,4;AF=0.368,0.059;AN=68;BaseQRankSum |
| 8918 | chrY | 9965169 | . | C | G   | 11769.05 | PASS          | AC=32;AF=0.457;AN=70;BaseQRankSum         |
| 8919 | chrY | 9965172 | . | C | T   | 1807.66  | PASS          | AC=13;AF=0.186;AN=70;BaseQRankSum=1.50;Cl |
| 8920 | chrY | 9965173 | . | T | G   | 1807.36  | PASS          | AC=13;AF=0.186;AN=70;BaseQRankSum=1.21;Cl |
| 8921 | chrY | 9965212 | . | T | C   | 59.86    | my_snp_filter | AC=3;AF=0.043;AN=70;BaseQRankSum=         |
| 8922 | chrY | 9965224 | . | G | A   | 4080.80  | PASS          | AC=10;AF=0.147;AN=68;BaseQRankSum=5.43;Cl |
| 8923 | chrY | 9965245 | . | G | A   | 13227.26 | PASS          | AC=30;AF=0.429;AN=70;BaseQRankSum         |
| 8924 | chrY | 9965249 | . | T | C,* | 7162.13  | PASS          | AC=9,19;AF=0.129,0.271;AN=70;BaseQRankSum |
| 8925 | chrY | 9965251 | . | T | A   | 12926.87 | PASS          | AC=29;AF=0.414;AN=70;BaseQRankSum         |
| 8926 | chrY | 9965260 | . | T | C   | 1066.58  | PASS          | AC=7;AF=0.103;AN=68;BaseQRankSum=1.40;Cli |
| 8927 | chrY | 9965278 | . | A | G   | 11755.14 | my_snp_filter | AC=25;AF=0.357;AN=70;Base                 |
| 8928 | chrY | 9965282 | . | C | T   | 11325.01 | my_snp_filter | AC=24;AF=0.343;AN=70;Base                 |
| 8929 | chrY | 9965284 | . | G | A   | 822.73   | PASS          | AC=7;AF=0.100;AN=70;BaseQRankSum=-2.231e+ |
| 8930 | chrY | 9965286 | . | C | A   | 825.69   | PASS          | AC=7;AF=0.100;AN=70;BaseQRankSum=-1.252e+ |
| 8931 | chrY | 9965291 | . | G | T   | 548.69   | my_snp_filter | AC=7;AF=0.100;AN=70;BaseQRankSum=         |
| 8932 | chrY | 9965315 | . | G | C,T | 2866.52  | my_snp_filter | AC=8,8;AF=0.114,0.114;AN=70;BaseQ         |
| 8933 | chrY | 9965316 | . | A | G   | 3431.11  | my_snp_filter | AC=16;AF=0.229;AN=70;BaseQRankSum         |
| 8934 | chrY | 9965342 | . | T | C   | 39.80    | my_snp_filter | AC=1;AF=0.014;AN=70;BaseQRankSum=         |
| 8935 | chrY | 9965351 | . | G | A   | 650.16   | my_snp_filter | AC=5;AF=0.071;AN=70;BaseQRankSum=         |
| 8936 | chrY | 9965352 | . | C | T   | 649.75   | my_snp_filter | AC=5;AF=0.071;AN=70;BaseQRankSum=         |
| 8937 | chrY | 9965391 | . | A | C   | 46.32    | PASS          | AC=2;AF=0.029;AN=70;BaseQRankSum=-5.940e- |
| 8938 | chrY | 9965468 | . | A | T   | 52.14    | PASS          | AC=1;AF=0.014;AN=70;BaseQRankSum=-7.200e- |
| 8939 | chrY | 9965471 | . | T | C   | 91.27    | PASS          | AC=2;AF=0.029;AN=70;BaseQRankSum=-1.531e+ |
| 8940 | chrY | 9965483 | . | A | G   | 145.32   | PASS          | AC=3;AF=0.043;AN=70;BaseQRankSum=0.822;Cl |
| 8941 | chrY | 9965484 | . | A | G   | 142.35   | PASS          | AC=3;AF=0.043;AN=70;BaseQRankSum=-2.650e- |
| 8942 | chrY | 9965500 | . | A | G   | 583.29   | PASS          | AC=3;AF=0.043;AN=70;BaseQRankSum=2.06;Cli |
| 8943 | chrY | 9965507 | . | A | G   | 762.32   | PASS          | AC=3;AF=0.043;AN=70;BaseQRankSum=-2.048e+ |
| 8944 | chrY | 9965515 | . | T | C   | 534.79   | my_snp_filter | AC=3;AF=0.043;AN=70;BaseQRankSum=         |
| 8945 | chrY | 9965521 | . | A | G   | 87.49    | PASS          | AC=2;AF=0.029;AN=70;BaseQRankSum=0.550;Cl |
| 8946 | chrY | 9965538 | . | C | A   | 103.27   | my_snp_filter | AC=6;AF=0.086;AN=70;BaseQRankSum=         |
| 8947 | chrY | 9965541 | . | G | T   | 2002.39  | my_snp_filter | AC=9;AF=0.129;AN=70;BaseQRankSum=         |
| 8948 | chrY | 9965543 | . | T | C   | 3163     | PASS          | AC=17;AF=0.243;AN=70;BaseQRankSum=-4.210e |
| 8949 | chrY | 9965556 | . | A | C   | 1984.92  | PASS          | AC=15;AF=0.214;AN=70;BaseQRankSum=-9.600e |
| 8950 | chrY | 9965562 | . | G | C   | 66.47    | PASS          | AC=1;AF=0.014;AN=70;BaseQRankSum=-1.238e+ |
| 8951 | chrY | 9965570 | . | C | A   | 3071.02  | my_snp_filter | AC=12;AF=0.171;AN=70;BaseQRankSum         |
| 8952 | chrY | 9965571 | . | C | T   | 237.67   | PASS          | AC=5;AF=0.071;AN=70;BaseQRankSum=-1.386e+ |
| 8953 | chrY | 9965578 | . | G | C,T | 3590.33  | PASS          | AC=5,11;AF=0.071,0.157;AN=70;BaseQRankSum |
| 8954 | chrY | 9965581 | . | G | A   | 410.89   | my_snp_filter | AC=7;AF=0.100;AN=70;BaseQRankSum=         |
| 8955 | chrY | 9965600 | . | T | A   | 440.97   | PASS          | AC=7;AF=0.100;AN=70;BaseQRankSum=-6.850e- |
| 8956 | chrY | 9965607 | . | C | G   | 357.49   | my_snp_filter | AC=8;AF=0.114;AN=70;BaseQRankSum=         |
| 8957 | chrY | 9965608 | . | T | G   | 1014.82  | PASS          | AC=12;AF=0.171;AN=70;BaseQRankSum=-1.197e |
| 8958 | chrY | 9965614 | . | T | A   | 6030.67  | PASS          | AC=23;AF=0.329;AN=70;BaseQRankSum=-1.980e |
| 8959 | chrY | 9965618 | . | C | T   | 254.73   | my_snp_filter | AC=7;AF=0.100;AN=70;BaseQRankSum=         |
| 8960 | chrY | 9965619 | . | T | A,C | 452.56   | my_snp_filter | AC=5,6;AF=0.071,0.086;AN=70;BaseQ         |
| 8961 | chrY | 9965624 | . | A | T   | 4996.07  | my_snp_filter | AC=23;AF=0.329;AN=70;BaseQRankSum         |
| 8962 | chrY | 9965634 | . | C | G,T | 4262.70  | my_snp_filter | AC=11,4;AF=0.157,0.057;AN=70;Base         |
| 8963 | chrY | 9965641 | . | A | G   | 4828.73  | my_snp_filter | AC=19;AF=0.271;AN=70;BaseQRankSum         |
| 8964 | chrY | 9965673 | . | A | G   | 4844.67  | my_snp_filter | AC=11;AF=0.157;AN=70;BaseQRankSum         |
| 8965 | chrY | 9965677 | . | A | T   | 4241.66  | my_snp_filter | AC=10;AF=0.143;AN=70;BaseQRankSum         |
| 8966 | chrY | 9965685 | . | A | T,C | 3985.24  | my_snp_filter | AC=7,3;AF=0.100,0.043;AN=70;BaseQ         |
| 8967 | chrY | 9965693 | . | A | G   | 6311.67  | my_snp_filter | AC=10;AF=0.143;AN=70;BaseQRankSum         |
| 8968 | chrY | 9965699 | . | G | A   | 104.44   | my_snp_filter | AC=3;AF=0.043;AN=70;BaseQRankSum=         |



|      |      |         |   |   |     |          |               |                                            |
|------|------|---------|---|---|-----|----------|---------------|--------------------------------------------|
| 8969 | chrY | 9965707 | . | T | C   | 146      | my_snp_filter | AC=3;AF=0.043;AN=70;BaseQRankSum=          |
| 8970 | chrY | 9965723 | . | A | C   | 94.45    | my_snp_filter | AC=2;AF=0.033;AN=60;BaseQRankSum=          |
| 8971 | chrY | 9965734 | . | A | T   | 5098.85  | PASS          | AC=12;AF=0.214;AN=56;BaseQRankSum=0.075;C  |
| 8972 | chrY | 9965745 | . | T | G   | 15787.15 | PASS          | AC=13;AF=0.260;AN=50;BaseQRankSum=         |
| 8973 | chrY | 9965753 | . | A | G   | 13863.48 | PASS          | AC=13;AF=0.271;AN=48;BaseQRankSum=         |
| 8974 | chrY | 9965755 | . | G | C   | 15991.38 | PASS          | AC=13;AF=0.271;AN=48;BaseQRankSum=         |
| 8975 | chrY | 9965780 | . | T | A   | 3503.22  | PASS          | AC=9;AF=0.161;AN=56;BaseQRankSum=-2.740e-  |
| 8976 | chrY | 9965781 | . | G | A   | 3501.87  | PASS          | AC=9;AF=0.161;AN=56;BaseQRankSum=-2.420e-  |
| 8977 | chrY | 9965784 | . | G | C   | 6399.76  | PASS          | AC=16;AF=0.333;AN=48;BaseQRankSum=-2.133e- |
| 8978 | chrY | 9965787 | . | C | T   | 36.23    | PASS          | AC=2;AF=0.036;AN=56;BaseQRankSum=0.034;Cl  |
| 8979 | chrY | 9965794 | . | T | A   | 3965.38  | PASS          | AC=12;AF=0.250;AN=48;BaseQRankSum=2.06;Cl  |
| 8980 | chrY | 9965799 | . | T | G   | 3281.57  | PASS          | AC=9;AF=0.167;AN=54;BaseQRankSum=-5.284e+  |
| 8981 | chrY | 9965844 | . | A | T   | 16591.45 | PASS          | AC=11;AF=0.500;AN=22;BaseQRankSum=         |
| 8982 | chrY | 9965852 | . | A | G   | 10451.34 | PASS          | AC=9;AF=0.450;AN=20;BaseQRankSum=          |
| 8983 | chrY | 9965864 | . | C | A   | 14715.34 | PASS          | AC=9;AF=0.450;AN=20;BaseQRankSum=          |
| 8984 | chrY | 9965869 | . | T | C   | 1321.48  | PASS          | AC=7;AF=0.219;AN=32;BaseQRankSum=1.62;Cli  |
| 8985 | chrY | 9965880 | . | G | A   | 11152.54 | PASS          | AC=11;AF=0.458;AN=24;BaseQRankSum=         |
| 8986 | chrY | 9965900 | . | C | G   | 10136.64 | PASS          | AC=13;AF=0.500;AN=26;BaseQRankSum=         |
| 8987 | chrY | 9965905 | . | G | A   | 10051.64 | PASS          | AC=13;AF=0.500;AN=26;BaseQRankSum=         |
| 8988 | chrY | 9965929 | . | A | G   | 11324.16 | PASS          | AC=13;AF=0.500;AN=26;BaseQRankSum=         |
| 8989 | chrY | 9965943 | . | A | T   | 1436     | PASS          | AC=5;AF=0.132;AN=38;BaseQRankSum=0.817;Cl  |
| 8990 | chrY | 9965947 | . | C | A   | 4303.30  | PASS          | AC=10;AF=0.357;AN=28;BaseQRankSum=2.70;Cl  |
| 8991 | chrY | 9965951 | . | T | C,* | 560.62   | PASS          | AC=2,1;AF=0.050,0.025;AN=40;BaseQRankSum=  |
| 8992 | chrY | 9965953 | . | T | C   | 1733.30  | PASS          | AC=5;AF=0.125;AN=40;BaseQRankSum=0.487;Cl  |
| 8993 | chrY | 9965955 | . | G | T,C | 2412.58  | PASS          | AC=5,2;AF=0.132,0.053;AN=38;BaseQRankSum=  |
| 8994 | chrY | 9965960 | . | A | G   | 8758.47  | PASS          | AC=11;AF=0.367;AN=30;BaseQRankSum=0.768;C  |
| 8995 | chrY | 9965992 | . | A | G   | 2123.61  | PASS          | AC=4;AF=0.100;AN=40;BaseQRankSum=0.722;Cl  |
| 8996 | chrY | 9965994 | . | C | T   | 11836.32 | PASS          | AC=13;AF=0.342;AN=38;BaseQRankSum=         |
| 8997 | chrY | 9966015 | . | G | A   | 20840.54 | PASS          | AC=10;AF=0.294;AN=34;BaseQRankSum=         |
| 8998 | chrY | 9966016 | . | G | A   | 11941.76 | PASS          | AC=10;AF=0.263;AN=38;BaseQRankSum=         |
| 8999 | chrY | 9966024 | . | G | C,T | 14677.56 | PASS          | AC=2,9;AF=0.042,0.188;AN=48;BaseQ          |
| 9000 | chrY | 9966025 | . | A | G   | 12021.03 | PASS          | AC=9;AF=0.161;AN=56;BaseQRankSum=          |
| 9001 | chrY | 9966033 | . | A | C   | 20599.25 | PASS          | AC=9;AF=0.167;AN=54;BaseQRankSum=          |
| 9002 | chrY | 9966034 | . | G | A   | 14932.59 | PASS          | AC=9;AF=0.161;AN=56;BaseQRankSum=          |
| 9003 | chrY | 9966048 | . | G | T   | 1650.23  | PASS          | AC=7;AF=0.113;AN=62;BaseQRankSum=2.94;Cli  |
| 9004 | chrY | 9966054 | . | G | A   | 61.10    | my_snp_filter | AC=1;AF=0.017;AN=60;BaseQRankSum=          |
| 9005 | chrY | 9966073 | . | C | A   | 1894.70  | PASS          | AC=8;AF=0.125;AN=64;BaseQRankSum=-1.830e+  |
| 9006 | chrY | 9966074 | . | A | C   | 177.70   | my_snp_filter | AC=2;AF=0.031;AN=64;BaseQRankSum=          |
| 9007 | chrY | 9966092 | . | C | T   | 162.38   | my_snp_filter | AC=2;AF=0.031;AN=64;BaseQRankSum=          |
| 9008 | chrY | 9966104 | . | A | G   | 12825.37 | PASS          | AC=10;AF=0.152;AN=66;BaseQRankSum=         |
| 9009 | chrY | 9966108 | . | G | A   | 5782.76  | PASS          | AC=9;AF=0.129;AN=70;BaseQRankSum=-1.880e-  |
| 9010 | chrY | 9966153 | . | G | T   | 2466.43  | my_snp_filter | AC=9;AF=0.129;AN=70;BaseQRankSum=          |
| 9011 | chrY | 9966157 | . | G | A   | 4582.90  | my_snp_filter | AC=12;AF=0.171;AN=70;BaseQRankSum=         |
| 9012 | chrY | 9966166 | . | T | C   | 4281.68  | my_snp_filter | AC=12;AF=0.171;AN=70;BaseQRankSum=         |
| 9013 | chrY | 9966176 | . | T | G   | 3765.03  | my_snp_filter | AC=12;AF=0.171;AN=70;BaseQRankSum=         |
| 9014 | chrY | 9966202 | . | A | C   | 1325.01  | my_snp_filter | AC=6;AF=0.086;AN=70;BaseQRankSum=          |
| 9015 | chrY | 9966219 | . | T | A,G | 3027.03  | my_snp_filter | AC=13,1;AF=0.186,0.014;AN=70;Base          |
| 9016 | chrY | 9966221 | . | C | T   | 227.84   | PASS          | AC=1;AF=0.014;AN=70;BaseQRankSum=-1.595e+  |
| 9017 | chrY | 9966229 | . | T | C   | 3696.48  | my_snp_filter | AC=14;AF=0.200;AN=70;BaseQRankSum=         |
| 9018 | chrY | 9966235 | . | A | G   | 459.22   | PASS          | AC=6;AF=0.086;AN=70;BaseQRankSum=-6.040e-  |
| 9019 | chrY | 9966236 | . | C | T   | 3751.53  | my_snp_filter | AC=14;AF=0.200;AN=70;BaseQRankSum=         |
| 9020 | chrY | 9966247 | . | G | A   | 710.29   | PASS          | AC=8;AF=0.114;AN=70;BaseQRankSum=-1.686e+  |
| 9021 | chrY | 9966250 | . | G | A   | 607.32   | PASS          | AC=8;AF=0.114;AN=70;BaseQRankSum=1.77;Cli  |
| 9022 | chrY | 9966293 | . | A | G   | 516.56   | PASS          | AC=8;AF=0.114;AN=70;BaseQRankSum=-9.780e-  |
| 9023 | chrY | 9966309 | . | G | A   | 5854.29  | my_snp_filter | AC=14;AF=0.212;AN=66;BaseQRankSum=         |
| 9024 | chrY | 9966311 | . | C | T   | 758.81   | my_snp_filter | AC=8;AF=0.114;AN=70;BaseQRankSum=          |
| 9025 | chrY | 9966313 | . | A | C   | 235.76   | my_snp_filter | AC=6;AF=0.086;AN=70;BaseQRankSum=          |
| 9026 | chrY | 9966315 | . | T | C   | 774.06   | PASS          | AC=8;AF=0.114;AN=70;BaseQRankSum=-1.708e+  |
| 9027 | chrY | 9966317 | . | T | G   | 770.10   | my_snp_filter | AC=8;AF=0.114;AN=70;BaseQRankSum=          |
| 9028 | chrY | 9966325 | . | C | G   | 435.38   | PASS          | AC=6;AF=0.086;AN=70;BaseQRankSum=0.501;Cl  |
| 9029 | chrY | 9966326 | . | A | G   | 1088.04  | PASS          | AC=13;AF=0.186;AN=70;BaseQRankSum=-3.060e- |
| 9030 | chrY | 9966328 | . | G | A   | 2161.48  | PASS          | AC=10;AF=0.143;AN=70;BaseQRankSum=-8.300e- |
| 9031 | chrY | 9966341 | . | G | A   | 1769.74  | PASS          | AC=10;AF=0.143;AN=70;BaseQRankSum=-1.275e- |
| 9032 | chrY | 9966342 | . | A | G   | 1799.33  | PASS          | AC=10;AF=0.143;AN=70;BaseQRankSum=-3.620e- |
| 9033 | chrY | 9966349 | . | C | A   | 1526.02  | PASS          | AC=9;AF=0.129;AN=70;BaseQRankSum=-9.850e-  |
| 9034 | chrY | 9966352 | . | T | C   | 1912.32  | PASS          | AC=14;AF=0.200;AN=70;BaseQRankSum=-6.340e- |
| 9035 | chrY | 9966363 | . | T | C   | 2557.20  | PASS          | AC=14;AF=0.200;AN=70;BaseQRankSum=-1.800e- |
| 9036 | chrY | 9966388 | . | A | T   | 1320.67  | PASS          | AC=16;AF=0.229;AN=70;BaseQRankSum=-6.940e- |
| 9037 | chrY | 9966389 | . | A | G   | 2119.88  | PASS          | AC=18;AF=0.257;AN=70;BaseQRankSum=-9.560e- |
| 9038 | chrY | 9966399 | . | G | A   | 283.71   | PASS          | AC=5;AF=0.071;AN=70;BaseQRankSum=-5.720e-  |
| 9039 | chrY | 9966412 | . | G | A   | 1058.33  | PASS          | AC=16;AF=0.229;AN=70;BaseQRankSum=0.332;C  |
| 9040 | chrY | 9966417 | . | G | T   | 681.60   | PASS          | AC=14;AF=0.206;AN=68;BaseQRankSum=-7.150e- |
| 9041 | chrY | 9966419 | . | G | C   | 147.44   | PASS          | AC=3;AF=0.043;AN=70;BaseQRankSum=-1.395e+  |
| 9042 | chrY | 9966443 | . | T | A   | 439.61   | PASS          | AC=9;AF=0.132;AN=68;BaseQRankSum=-7.200e-  |
| 9043 | chrY | 9966449 | . | G | A   | 156.80   | PASS          | AC=3;AF=0.043;AN=70;BaseQRankSum=0.198;Cl  |
| 9044 | chrY | 9966488 | . | G | A   | 1279.37  | PASS          | AC=6;AF=0.086;AN=70;BaseQRankSum=0.102;Cl  |

|      |      |         |   |   |     |          |               |                                           |
|------|------|---------|---|---|-----|----------|---------------|-------------------------------------------|
| 9045 | chrY | 9966508 | . | A | C   | 77.08    | PASS          | AC=2;AF=0.029;AN=70;BaseQRankSum=-1.180e- |
| 9046 | chrY | 9966511 | . | A | G   | 77.38    | PASS          | AC=2;AF=0.029;AN=70;BaseQRankSum=0.829;C1 |
| 9047 | chrY | 9966523 | . | T | C   | 164.76   | PASS          | AC=4;AF=0.057;AN=70;BaseQRankSum=0.296;C1 |
| 9048 | chrY | 9966525 | . | T | G   | 205.56   | PASS          | AC=4;AF=0.057;AN=70;BaseQRankSum=0.589;C1 |
| 9049 | chrY | 9966570 | . | G | T   | 2261.58  | my_snp_filter | AC=23;AF=0.329;AN=70;BaseQRankSum         |
| 9050 | chrY | 9966572 | . | C | G   | 2257.99  | my_snp_filter | AC=23;AF=0.329;AN=70;BaseQRankSum         |
| 9051 | chrY | 9966589 | . | A | C   | 3689.24  | PASS          | AC=31;AF=0.443;AN=70;BaseQRankSum=-9.900e |
| 9052 | chrY | 9966609 | . | G | T   | 6282.92  | PASS          | AC=29;AF=0.414;AN=70;BaseQRankSum=-4.770e |
| 9053 | chrY | 9966617 | . | G | A   | 9667.25  | PASS          | AC=33;AF=0.471;AN=70;BaseQRankSum=-4.060e |
| 9054 | chrY | 9966625 | . | C | T   | 1380.75  | PASS          | AC=9;AF=0.129;AN=70;BaseQRankSum=0.934;C1 |
| 9055 | chrY | 9966634 | . | G | A   | 1401.82  | PASS          | AC=9;AF=0.129;AN=70;BaseQRankSum=-1.960e  |
| 9056 | chrY | 9966642 | . | C | A   | 2158.34  | PASS          | AC=10;AF=0.143;AN=70;BaseQRankSum=0.476;C |
| 9057 | chrY | 9966655 | . | C | G   | 827.86   | PASS          | AC=7;AF=0.100;AN=70;BaseQRankSum=-5.910e- |
| 9058 | chrY | 9966699 | . | A | T   | 2213.83  | PASS          | AC=19;AF=0.271;AN=70;BaseQRankSum=-6.760e |
| 9059 | chrY | 9966703 | . | T | A,C | 4470.58  | PASS          | AC=8,21;AF=0.118,0.309;AN=68;BaseQRankSum |
| 9060 | chrY | 9966742 | . | A | G   | 301.84   | PASS          | AC=6;AF=0.091;AN=66;BaseQRankSum=-3.580e- |
| 9061 | chrY | 9966747 | . | A | T   | 228.39   | PASS          | AC=5;AF=0.074;AN=68;BaseQRankSum=-1.026e+ |
| 9062 | chrY | 9966768 | . | A | C   | 59.60    | my_snp_filter | AC=3;AF=0.044;AN=68;BaseQRankSum=         |
| 9063 | chrY | 9966779 | . | C | T   | 49.63    | PASS          | AC=1;AF=0.015;AN=68;BaseQRankSum=1.75;Cli |
| 9064 | chrY | 9966932 | . | A | T   | 36.02    | PASS          | AC=1;AF=0.015;AN=68;BaseQRankSum=-7.640e- |
| 9065 | chrY | 9966936 | . | T | G   | 78.49    | PASS          | AC=1;AF=0.014;AN=70;BaseQRankSum=0.208;C1 |
| 9066 | chrY | 9966949 | . | T | C   | 948.78   | PASS          | AC=6;AF=0.088;AN=68;BaseQRankSum=-1.300e- |
| 9067 | chrY | 9966950 | . | G | A   | 943.70   | PASS          | AC=6;AF=0.088;AN=68;BaseQRankSum=0.736;C1 |
| 9068 | chrY | 9966996 | . | G | T   | 6735.51  | my_snp_filter | AC=24;AF=0.343;AN=70;BaseQRankSum         |
| 9069 | chrY | 9967001 | . | C | A   | 239.56   | my_snp_filter | AC=4;AF=0.057;AN=70;BaseQRankSum=         |
| 9070 | chrY | 9967011 | . | G | C   | 105.80   | my_snp_filter | AC=1;AF=0.014;AN=70;BaseQRankSum=         |
| 9071 | chrY | 9967013 | . | C | T   | 15291.18 | my_snp_filter | AC=29;AF=0.414;AN=70;Base                 |
| 9072 | chrY | 9967017 | . | A | G,T | 11902.50 | my_snp_filter | AC=19,10;AF=0.271,0.143;A                 |
| 9073 | chrY | 9967023 | . | T | C   | 33.50    | PASS          | AC=1;AF=0.014;AN=70;BaseQRankSum=-1.380e+ |
| 9074 | chrY | 9967050 | . | G | A   | 13334.97 | PASS          | AC=32;AF=0.457;AN=70;BaseQRankSum         |
| 9075 | chrY | 9967055 | . | C | A   | 1851.36  | PASS          | AC=19;AF=0.271;AN=70;BaseQRankSum=0.284;C |
| 9076 | chrY | 9967072 | . | C | G   | 3678.52  | PASS          | AC=27;AF=0.386;AN=70;BaseQRankSum=0.807;C |
| 9077 | chrY | 9967076 | . | G | C   | 3751.02  | PASS          | AC=27;AF=0.386;AN=70;BaseQRankSum=0.411;C |
| 9078 | chrY | 9967088 | . | C | T   | 8091.90  | PASS          | AC=30;AF=0.429;AN=70;BaseQRankSum=0.334;C |
| 9079 | chrY | 9967100 | . | C | A,G | 3634.99  | PASS          | AC=5,24;AF=0.071,0.343;AN=70;BaseQRankSum |
| 9080 | chrY | 9967104 | . | T | C   | 47.49    | my_snp_filter | AC=2;AF=0.029;AN=70;BaseQRankSum=         |
| 9081 | chrY | 9967146 | . | T | C   | 704.91   | my_snp_filter | AC=11;AF=0.157;AN=70;BaseQRankSum         |
| 9082 | chrY | 9967151 | . | A | G   | 27456.84 | PASS          | AC=36;AF=0.514;AN=70;BaseQRankSum         |
| 9083 | chrY | 9967154 | . | C | A   | 42.60    | my_snp_filter | AC=2;AF=0.029;AN=70;BaseQRankSum=         |
| 9084 | chrY | 9967155 | . | C | T   | 1962.10  | PASS          | AC=21;AF=0.300;AN=70;BaseQRankSum=-1.210e |
| 9085 | chrY | 9967159 | . | C | A   | 68.44    | my_snp_filter | AC=1;AF=0.014;AN=70;BaseQRankSum=         |
| 9086 | chrY | 9967195 | . | C | T   | 15203.58 | PASS          | AC=32;AF=0.457;AN=70;BaseQRankSum         |
| 9087 | chrY | 9967226 | . | C | T   | 9773.39  | PASS          | AC=27;AF=0.386;AN=70;BaseQRankSum=2.64;C1 |
| 9088 | chrY | 9967238 | . | A | C,T | 10012.69 | PASS          | AC=12,6;AF=0.182,0.091;AN=66;Base         |
| 9089 | chrY | 9967240 | . | T | C   | 8933.86  | PASS          | AC=12;AF=0.171;AN=70;BaseQRankSum=1.69;C1 |
| 9090 | chrY | 9967243 | . | A | G   | 1288.87  | PASS          | AC=9;AF=0.129;AN=70;BaseQRankSum=0.736;C1 |
| 9091 | chrY | 9967258 | . | A | G   | 10349.27 | PASS          | AC=12;AF=0.182;AN=66;BaseQRankSum         |
| 9092 | chrY | 9967264 | . | C | A   | 1022.06  | PASS          | AC=4;AF=0.061;AN=66;BaseQRankSum=-1.820e- |
| 9093 | chrY | 9967280 | . | A | C   | 155.47   | PASS          | AC=3;AF=0.044;AN=68;BaseQRankSum=-1.980e- |
| 9094 | chrY | 9967284 | . | T | C   | 254.39   | my_snp_filter | AC=3;AF=0.044;AN=68;BaseQRankSum=         |
| 9095 | chrY | 9967303 | . | C | T   | 97.01    | PASS          | AC=1;AF=0.015;AN=68;BaseQRankSum=-9.380e- |
| 9096 | chrY | 9967304 | . | C | A   | 190.65   | PASS          | AC=4;AF=0.059;AN=68;BaseQRankSum=-4.800e- |
| 9097 | chrY | 9967306 | . | C | T   | 8030.80  | my_snp_filter | AC=10;AF=0.147;AN=68;BaseQRankSum         |
| 9098 | chrY | 9967343 | . | G | A   | 481.51   | my_snp_filter | AC=6;AF=0.091;AN=66;BaseQRankSum=         |
| 9099 | chrY | 9967347 | . | A | G   | 7181.69  | my_snp_filter | AC=9;AF=0.136;AN=66;BaseQRankSum=         |
| 9100 | chrY | 9967359 | . | T | A   | 9061.55  | my_snp_filter | AC=13;AF=0.197;AN=66;BaseQRankSum         |
| 9101 | chrY | 9967364 | . | T | C   | 281.51   | my_snp_filter | AC=6;AF=0.091;AN=66;BaseQRankSum=         |
| 9102 | chrY | 9967368 | . | C | T   | 327.96   | my_snp_filter | AC=6;AF=0.091;AN=66;BaseQRankSum=         |
| 9103 | chrY | 9967385 | . | C | A   | 7456.80  | my_snp_filter | AC=10;AF=0.152;AN=66;BaseQRankSum         |
| 9104 | chrY | 9967392 | . | A | G   | 165.25   | my_snp_filter | AC=2;AF=0.030;AN=66;BaseQRankSum=         |
| 9105 | chrY | 9967408 | . | T | C   | 7034.40  | my_snp_filter | AC=9;AF=0.129;AN=70;BaseQRankSum=         |
| 9106 | chrY | 9967424 | . | T | C   | 1178.56  | PASS          | AC=10;AF=0.143;AN=70;BaseQRankSum=-7.160e |
| 9107 | chrY | 9967425 | . | G | A   | 142.92   | my_snp_filter | AC=3;AF=0.043;AN=70;BaseQRankSum=         |
| 9108 | chrY | 9967433 | . | C | A   | 1472.75  | PASS          | AC=10;AF=0.143;AN=70;BaseQRankSum=1.04;C1 |
| 9109 | chrY | 9967440 | . | G | A   | 1816     | PASS          | AC=10;AF=0.143;AN=70;BaseQRankSum=0.485;C |
| 9110 | chrY | 9967444 | . | A | G   | 1953.82  | PASS          | AC=10;AF=0.143;AN=70;BaseQRankSum=0.657;C |
| 9111 | chrY | 9967460 | . | T | C   | 2273.50  | PASS          | AC=13;AF=0.186;AN=70;BaseQRankSum=-1.180e |
| 9112 | chrY | 9967474 | . | T | C   | 4624.07  | PASS          | AC=12;AF=0.171;AN=70;BaseQRankSum=0.907;C |
| 9113 | chrY | 9967475 | . | A | G   | 2098.83  | PASS          | AC=17;AF=0.243;AN=70;BaseQRankSum=0.953;C |
| 9114 | chrY | 9967485 | . | G | T   | 45.10    | my_snp_filter | AC=2;AF=0.029;AN=70;BaseQRankSum=         |
| 9115 | chrY | 9967487 | . | T | C   | 10586.38 | PASS          | AC=28;AF=0.400;AN=70;BaseQRankSum         |
| 9116 | chrY | 9967488 | . | G | A   | 4923.97  | PASS          | AC=23;AF=0.329;AN=70;BaseQRankSum=0.355;C |
| 9117 | chrY | 9967496 | . | A | G   | 37.12    | PASS          | AC=1;AF=0.014;AN=70;BaseQRankSum=-3.580e- |
| 9118 | chrY | 9967506 | . | C | A   | 4337.13  | PASS          | AC=25;AF=0.357;AN=70;BaseQRankSum=-8.950e |
| 9119 | chrY | 9967520 | . | T | C   | 819.25   | PASS          | AC=13;AF=0.186;AN=70;BaseQRankSum=-3.809e |
| 9120 | chrY | 9967572 | . | C | A   | 2726.88  | PASS          | AC=20;AF=0.286;AN=70;BaseQRankSum=0.283;C |

|      |      |         |   |   |       |         |               |                                            |
|------|------|---------|---|---|-------|---------|---------------|--------------------------------------------|
| 9121 | chrY | 9967576 | . | T | C     | 2990.92 | PASS          | AC=21;AF=0.300;AN=70;BaseQRankSum=-1.030e  |
| 9122 | chrY | 9967593 | . | G | C     | 86.43   | PASS          | AC=2;AF=0.029;AN=70;BaseQRankSum=1.03;Cli  |
| 9123 | chrY | 9967599 | . | G | A     | 760.64  | PASS          | AC=11;AF=0.157;AN=70;BaseQRankSum=1.07;Cl  |
| 9124 | chrY | 9967600 | . | T | A     | 59.86   | PASS          | AC=1;AF=0.014;AN=70;BaseQRankSum=-7.360e-  |
| 9125 | chrY | 9967624 | . | A | T     | 412.44  | PASS          | AC=11;AF=0.157;AN=70;BaseQRankSum=0.698;C  |
| 9126 | chrY | 9967671 | . | T | C     | 1472.56 | my_snp_filter | AC=19;AF=0.271;AN=70;BaseQRankSum          |
| 9127 | chrY | 9967676 | . | A | T     | 1071.27 | my_snp_filter | AC=16;AF=0.229;AN=70;BaseQRankSum          |
| 9128 | chrY | 9967701 | . | A | C     | 1048.26 | PASS          | AC=16;AF=0.235;AN=68;BaseQRankSum=0.804;C  |
| 9129 | chrY | 9967728 | . | G | C     | 241.22  | my_snp_filter | AC=7;AF=0.100;AN=70;BaseQRankSum=          |
| 9130 | chrY | 9967747 | . | C | T     | 168.43  | my_snp_filter | AC=4;AF=0.057;AN=70;BaseQRankSum=          |
| 9131 | chrY | 9967769 | . | G | T     | 75.35   | my_snp_filter | AC=2;AF=0.029;AN=70;BaseQRankSum=          |
| 9132 | chrY | 9967772 | . | T | C     | 60.45   | my_snp_filter | AC=1;AF=0.014;AN=70;BaseQRankSum=          |
| 9133 | chrY | 9967821 | . | T | C     | 97.92   | PASS          | AC=2;AF=0.029;AN=70;BaseQRankSum=1.23;Cli  |
| 9134 | chrY | 9967822 | . | C | A     | 100.78  | PASS          | AC=2;AF=0.029;AN=70;BaseQRankSum=0.720;Cl  |
| 9135 | chrY | 9967858 | . | A | C     | 121.13  | PASS          | AC=2;AF=0.029;AN=68;BaseQRankSum=-3.580e-  |
| 9136 | chrY | 9967862 | . | A | G     | 118.85  | PASS          | AC=2;AF=0.029;AN=70;BaseQRankSum=0.358;Cl  |
| 9137 | chrY | 9967863 | . | A | G     | 118.92  | PASS          | AC=2;AF=0.029;AN=70;BaseQRankSum=0.358;Cl  |
| 9138 | chrY | 9967870 | . | C | T     | 106.58  | PASS          | AC=2;AF=0.029;AN=70;BaseQRankSum=-3.580e-  |
| 9139 | chrY | 9967872 | . | C | T     | 43.46   | PASS          | AC=1;AF=0.014;AN=70;BaseQRankSum=-2.083e+  |
| 9140 | chrY | 9967880 | . | G | A     | 58.37   | PASS          | AC=2;AF=0.029;AN=68;BaseQRankSum=0.727;Cl  |
| 9141 | chrY | 9967909 | . | C | A     | 828.52  | PASS          | AC=15;AF=0.214;AN=70;BaseQRankSum=0.736;C  |
| 9142 | chrY | 9967915 | . | T | C     | 916.31  | PASS          | AC=18;AF=0.257;AN=70;BaseQRankSum=-3.580e- |
| 9143 | chrY | 9967924 | . | C | G     | 4264.16 | PASS          | AC=31;AF=0.470;AN=66;BaseQRankSum=0.937;C  |
| 9144 | chrY | 9967925 | . | G | T     | 48.86   | PASS          | AC=3;AF=0.043;AN=70;BaseQRankSum=0.046;Cl  |
| 9145 | chrY | 9967926 | . | G | C     | 1133.13 | PASS          | AC=15;AF=0.214;AN=70;BaseQRankSum=0.00;Cl  |
| 9146 | chrY | 9967928 | . | T | G     | 4453.76 | PASS          | AC=31;AF=0.470;AN=66;BaseQRankSum=-9.370e- |
| 9147 | chrY | 9967934 | . | T | C     | 4769.13 | PASS          | AC=30;AF=0.455;AN=66;BaseQRankSum=-9.220e- |
| 9148 | chrY | 9967935 | . | G | A     | 2290.15 | PASS          | AC=20;AF=0.294;AN=68;BaseQRankSum=-3.260e- |
| 9149 | chrY | 9967937 | . | G | C     | 1393.50 | PASS          | AC=14;AF=0.200;AN=70;BaseQRankSum=-7.270e- |
| 9150 | chrY | 9967951 | . | G | A     | 233.59  | PASS          | AC=5;AF=0.071;AN=70;BaseQRankSum=1.61;Cli  |
| 9151 | chrY | 9967962 | . | G | A     | 2044.08 | PASS          | AC=21;AF=0.300;AN=70;BaseQRankSum=-4.150e- |
| 9152 | chrY | 9967978 | . | C | T,*   | 3196.31 | PASS          | AC=20,6;AF=0.303,0.091;AN=66;BaseQRankSum  |
| 9153 | chrY | 9967979 | . | C | A,G,* | 2828.54 | PASS          | AC=5,18,2;AF=0.076,0.273,0.030;AN=66;Base  |
| 9154 | chrY | 9967988 | . | C | G,*   | 2366.22 | PASS          | AC=13,2;AF=0.210,0.032;AN=62;BaseQRankSum  |
| 9155 | chrY | 9967998 | . | A | G     | 4826.57 | PASS          | AC=27;AF=0.422;AN=64;BaseQRankSum=-1.275e- |
| 9156 | chrY | 9968000 | . | G | A     | 360.97  | PASS          | AC=6;AF=0.086;AN=70;BaseQRankSum=1.36;Cli  |
| 9157 | chrY | 9968012 | . | G | T,A   | 2651.61 | PASS          | AC=14,11;AF=0.200,0.157;AN=70;BaseQRankSu  |
| 9158 | chrY | 9968015 | . | C | G     | 1551.72 | PASS          | AC=16;AF=0.235;AN=68;BaseQRankSum=-1.246e- |
| 9159 | chrY | 9968021 | . | C | T     | 159.97  | PASS          | AC=2;AF=0.029;AN=70;BaseQRankSum=-1.453e+  |
| 9160 | chrY | 9968023 | . | G | A     | 1390.45 | PASS          | AC=15;AF=0.214;AN=70;BaseQRankSum=-6.230e- |
| 9161 | chrY | 9968027 | . | T | C     | 820.66  | PASS          | AC=10;AF=0.143;AN=70;BaseQRankSum=-1.733e- |
| 9162 | chrY | 9968028 | . | G | A     | 1343.62 | PASS          | AC=15;AF=0.214;AN=70;BaseQRankSum=-1.239e- |
| 9163 | chrY | 9968029 | . | G | A     | 690.37  | PASS          | AC=9;AF=0.129;AN=70;BaseQRankSum=-1.930e-  |
| 9164 | chrY | 9968036 | . | A | G     | 3046.40 | PASS          | AC=27;AF=0.386;AN=70;BaseQRankSum=-1.020e- |
| 9165 | chrY | 9968043 | . | C | A     | 484.32  | PASS          | AC=8;AF=0.114;AN=70;BaseQRankSum=0.922;Cl  |
| 9166 | chrY | 9968044 | . | G | A     | 622.45  | PASS          | AC=9;AF=0.129;AN=70;BaseQRankSum=1.45;Cli  |
| 9167 | chrY | 9968051 | . | C | T     | 558.82  | PASS          | AC=9;AF=0.129;AN=70;BaseQRankSum=1.38;Cli  |
| 9168 | chrY | 9968059 | . | G | A     | 412.47  | PASS          | AC=8;AF=0.118;AN=68;BaseQRankSum=0.937;Cl  |
| 9169 | chrY | 9968066 | . | G | A     | 417.11  | PASS          | AC=8;AF=0.121;AN=66;BaseQRankSum=0.096;Cl  |
| 9170 | chrY | 9968067 | . | C | T     | 609.65  | PASS          | AC=8;AF=0.121;AN=66;BaseQRankSum=1.57;Cli  |
| 9171 | chrY | 9968079 | . | T | C     | 1424.27 | PASS          | AC=19;AF=0.297;AN=64;BaseQRankSum=-6.960e- |
| 9172 | chrY | 9968080 | . | G | A     | 435.02  | PASS          | AC=7;AF=0.106;AN=66;BaseQRankSum=-6.700e-  |
| 9173 | chrY | 9968082 | . | C | A     | 33.79   | PASS          | AC=1;AF=0.015;AN=68;BaseQRankSum=1.38;Cli  |
| 9174 | chrY | 9968092 | . | G | A     | 374.65  | PASS          | AC=5;AF=0.074;AN=68;BaseQRankSum=1.57;Cli  |
| 9175 | chrY | 9968104 | . | C | A     | 801.52  | PASS          | AC=12;AF=0.182;AN=66;BaseQRankSum=1.23;Cl  |
| 9176 | chrY | 9968110 | . | T | A     | 651.90  | PASS          | AC=10;AF=0.147;AN=68;BaseQRankSum=1.18;Cl  |
| 9177 | chrY | 9968136 | . | A | G     | 753.21  | PASS          | AC=9;AF=0.132;AN=68;BaseQRankSum=0.135;Cl  |
| 9178 | chrY | 9968138 | . | C | T     | 366.74  | PASS          | AC=6;AF=0.088;AN=68;BaseQRankSum=1.45;Cli  |
| 9179 | chrY | 9968160 | . | C | T     | 398.62  | PASS          | AC=6;AF=0.091;AN=66;BaseQRankSum=1.06;Cli  |
| 9180 | chrY | 9971430 | . | G | A     | 1292.96 | PASS          | AC=6;AF=0.300;AN=20;DP=164;FS=0.000;Inbre  |
| 9181 | chrY | 9971930 | . | A | G     | 149.37  | PASS          | AC=2;AF=0.029;AN=70;DP=485;FS=0.000;Inbre  |
| 9182 | chrY | 9971959 | . | C | A     | 107.21  | PASS          | AC=2;AF=0.029;AN=70;BaseQRankSum=-1.177e+  |
| 9183 | chrY | 9971991 | . | C | A     | 223.09  | PASS          | AC=2;AF=0.029;AN=70;BaseQRankSum=-3.240e-  |
| 9184 | chrY | 9971997 | . | C | T     | 238.09  | PASS          | AC=2;AF=0.029;AN=70;BaseQRankSum=1.08;Cli  |
| 9185 | chrY | 9972000 | . | G | A     | 224.13  | PASS          | AC=2;AF=0.029;AN=70;BaseQRankSum=-3.690e-  |
| 9186 | chrY | 9972161 | . | A | T     | 131.59  | PASS          | AC=4;AF=0.059;AN=68;BaseQRankSum=0.847;Cl  |
| 9187 | chrY | 9972222 | . | C | T     | 660.37  | PASS          | AC=6;AF=0.091;AN=66;BaseQRankSum=1.52;Cli  |
| 9188 | chrY | 9972236 | . | G | C     | 886.75  | PASS          | AC=6;AF=0.091;AN=66;BaseQRankSum=-3.300e-  |
| 9189 | chrY | 9972255 | . | C | A     | 1125.72 | PASS          | AC=6;AF=0.091;AN=66;BaseQRankSum=-1.350e+  |
| 9190 | chrY | 9972279 | . | G | T     | 1193.16 | PASS          | AC=6;AF=0.091;AN=66;BaseQRankSum=2.28;Cli  |
| 9191 | chrY | 9972291 | . | T | A     | 1095.45 | PASS          | AC=6;AF=0.088;AN=68;BaseQRankSum=-9.150e-  |
| 9192 | chrY | 9972343 | . | A | C     | 905.38  | my_snp_filter | AC=8;AF=0.114;AN=70;BaseQRankSum=          |
| 9193 | chrY | 9972382 | . | C | G     | 1764.05 | my_snp_filter | AC=9;AF=0.129;AN=70;BaseQRankSum=          |
| 9194 | chrY | 9972393 | . | C | A     | 1625.86 | my_snp_filter | AC=9;AF=0.129;AN=70;BaseQRankSum=          |
| 9195 | chrY | 9972413 | . | T | C     | 1410.68 | my_snp_filter | AC=9;AF=0.129;AN=70;BaseQRankSum=          |
| 9196 | chrY | 9972434 | . | C | T     | 1280.76 | my_snp_filter | AC=9;AF=0.129;AN=70;BaseQRankSum=          |

|      |      |         |   |   |     |          |               |                                            |
|------|------|---------|---|---|-----|----------|---------------|--------------------------------------------|
| 9197 | chrY | 9972594 | . | T | G   | 2000.48  | PASS          | AC=25;AF=0.379;AN=66;BaseQRankSum=-6.560e  |
| 9198 | chrY | 9972632 | . | C | G   | 2996.22  | PASS          | AC=27;AF=0.422;AN=64;BaseQRankSum=-1.250e  |
| 9199 | chrY | 9972636 | . | G | A   | 210.54   | PASS          | AC=7;AF=0.109;AN=64;BaseQRankSum=-7.440e-  |
| 9200 | chrY | 9972686 | . | T | A   | 3323.01  | PASS          | AC=18;AF=0.300;AN=60;BaseQRankSum=0.307;C  |
| 9201 | chrY | 9972689 | . | C | T   | 3502.21  | PASS          | AC=20;AF=0.357;AN=56;BaseQRankSum=0.00;Cl  |
| 9202 | chrY | 9972713 | . | C | T   | 2121.75  | PASS          | AC=11;AF=0.196;AN=56;BaseQRankSum=0.122;Cl |
| 9203 | chrY | 9972722 | . | G | T   | 1311.02  | PASS          | AC=8;AF=0.143;AN=56;BaseQRankSum=1.37;Cli  |
| 9204 | chrY | 9972724 | . | A | T   | 1230.42  | PASS          | AC=8;AF=0.143;AN=56;BaseQRankSum=-7.180e-  |
| 9205 | chrY | 9972748 | . | C | T   | 185.23   | PASS          | AC=3;AF=0.044;AN=68;BaseQRankSum=0.930;Cl  |
| 9206 | chrY | 9972759 | . | T | C   | 145.78   | PASS          | AC=3;AF=0.043;AN=70;BaseQRankSum=0.085;Cl  |
| 9207 | chrY | 9972850 | . | C | T   | 272.83   | PASS          | AC=2;AF=0.029;AN=70;BaseQRankSum=3.42;Cli  |
| 9208 | chrY | 9972858 | . | C | T   | 269.88   | PASS          | AC=2;AF=0.029;AN=70;BaseQRankSum=2.39;Cli  |
| 9209 | chrY | 9972859 | . | A | G   | 272.88   | PASS          | AC=2;AF=0.029;AN=70;BaseQRankSum=0.206;Cl  |
| 9210 | chrY | 9972873 | . | A | G   | 281.03   | PASS          | AC=2;AF=0.029;AN=70;BaseQRankSum=-2.350e+  |
| 9211 | chrY | 9972882 | . | T | G   | 310.04   | PASS          | AC=2;AF=0.029;AN=70;BaseQRankSum=0.805;Cl  |
| 9212 | chrY | 9972929 | . | G | T   | 788.13   | my_snp_filter | AC=7;AF=0.100;AN=70;BaseQRankSum=          |
| 9213 | chrY | 9972939 | . | C | A   | 169.02   | PASS          | AC=3;AF=0.043;AN=70;BaseQRankSum=1.19;Cli  |
| 9214 | chrY | 9973349 | . | T | G   | 432.25   | my_snp_filter | AC=10;AF=0.147;AN=68;BaseQRankSum          |
| 9215 | chrY | 9973389 | . | G | T   | 298.46   | PASS          | AC=7;AF=0.109;AN=64;BaseQRankSum=1.87;Cli  |
| 9216 | chrY | 9973394 | . | A | G   | 905.65   | my_snp_filter | AC=9;AF=0.141;AN=64;BaseQRankSum=          |
| 9217 | chrY | 9973420 | . | A | T   | 221.37   | PASS          | AC=5;AF=0.071;AN=70;BaseQRankSum=1.36;Cl   |
| 9218 | chrY | 9973448 | . | C | T   | 219.07   | PASS          | AC=4;AF=0.057;AN=70;BaseQRankSum=0.474;Cl  |
| 9219 | chrY | 9973470 | . | C | G   | 721.04   | my_snp_filter | AC=7;AF=0.100;AN=70;BaseQRankSum=          |
| 9220 | chrY | 9973478 | . | A | C   | 758.85   | my_snp_filter | AC=7;AF=0.100;AN=70;BaseQRankSum=          |
| 9221 | chrY | 9973491 | . | C | G   | 143.82   | PASS          | AC=3;AF=0.044;AN=68;BaseQRankSum=1.88;Cli  |
| 9222 | chrY | 9973519 | . | G | T   | 152.39   | PASS          | AC=4;AF=0.059;AN=68;BaseQRankSum=0.250;Cl  |
| 9223 | chrY | 9973593 | . | G | T   | 163.24   | PASS          | AC=3;AF=0.045;AN=66;BaseQRankSum=1.40;Cl   |
| 9224 | chrY | 9973620 | . | T | C   | 227.96   | my_snp_filter | AC=5;AF=0.074;AN=68;BaseQRankSum=          |
| 9225 | chrY | 9973658 | . | T | C   | 2849.66  | PASS          | AC=20;AF=0.313;AN=64;BaseQRankSum=-1.124e  |
| 9226 | chrY | 9973659 | . | G | A   | 768.73   | PASS          | AC=13;AF=0.197;AN=66;BaseQRankSum=-3.940e- |
| 9227 | chrY | 9973664 | . | C | A   | 350.30   | PASS          | AC=7;AF=0.103;AN=68;BaseQRankSum=-6.270e-  |
| 9228 | chrY | 9973678 | . | T | C   | 261.92   | PASS          | AC=5;AF=0.076;AN=66;BaseQRankSum=-1.026e+  |
| 9229 | chrY | 9973681 | . | T | C   | 84.23    | my_snp_filter | AC=4;AF=0.061;AN=66;BaseQRankSum=          |
| 9230 | chrY | 9973699 | . | T | A   | 83.30    | my_snp_filter | AC=4;AF=0.059;AN=68;BaseQRankSum=          |
| 9231 | chrY | 9973705 | . | A | G   | 162.57   | my_snp_filter | AC=4;AF=0.059;AN=68;BaseQRankSum=          |
| 9232 | chrY | 9973712 | . | C | T   | 85.76    | my_snp_filter | AC=4;AF=0.059;AN=68;BaseQRankSum=          |
| 9233 | chrY | 9973713 | . | G | T   | 170.36   | my_snp_filter | AC=4;AF=0.059;AN=68;BaseQRankSum=          |
| 9234 | chrY | 9973719 | . | G | T   | 88.05    | my_snp_filter | AC=4;AF=0.059;AN=68;BaseQRankSum=          |
| 9235 | chrY | 9973729 | . | C | T   | 2132.26  | PASS          | AC=12;AF=0.182;AN=66;BaseQRankSum=0.898;C  |
| 9236 | chrY | 9973739 | . | G | A   | 108.91   | my_snp_filter | AC=3;AF=0.044;AN=68;BaseQRankSum=          |
| 9237 | chrY | 9973867 | . | T | A   | 192.84   | PASS          | AC=3;AF=0.050;AN=60;BaseQRankSum=1.15;Cli  |
| 9238 | chrY | 9973880 | . | G | A   | 117.99   | PASS          | AC=2;AF=0.030;AN=66;BaseQRankSum=1.01;Cli  |
| 9239 | chrY | 9973905 | . | A | G   | 298.11   | PASS          | AC=4;AF=0.065;AN=62;BaseQRankSum=-1.445e+  |
| 9240 | chrY | 9973908 | . | T | C   | 70.45    | my_snp_filter | AC=3;AF=0.044;AN=68;BaseQRankSum=          |
| 9241 | chrY | 9973924 | . | A | G   | 202.71   | PASS          | AC=1;AF=0.015;AN=66;BaseQRankSum=0.810;Cl  |
| 9242 | chrY | 9973926 | . | G | A   | 199.72   | PASS          | AC=1;AF=0.015;AN=66;BaseQRankSum=1.04;Cl   |
| 9243 | chrY | 9973935 | . | A | T   | 89.91    | PASS          | AC=3;AF=0.044;AN=68;BaseQRankSum=0.752;Cl  |
| 9244 | chrY | 9973942 | . | A | C,T | 937.87   | PASS          | AC=5,5;AF=0.081,0.081;AN=62;BaseQRankSum=  |
| 9245 | chrY | 9973969 | . | A | T   | 377.20   | PASS          | AC=8;AF=0.114;AN=70;BaseQRankSum=0.211;Cl  |
| 9246 | chrY | 9973982 | . | T | C   | 699.86   | PASS          | AC=14;AF=0.226;AN=62;BaseQRankSum=-1.026e  |
| 9247 | chrY | 9974007 | . | A | G   | 658.67   | PASS          | AC=7;AF=0.106;AN=66;BaseQRankSum=0.00;Cli  |
| 9248 | chrY | 9974014 | . | A | G   | 633.13   | PASS          | AC=7;AF=0.106;AN=66;BaseQRankSum=0.347;Cl  |
| 9249 | chrY | 9974036 | . | G | A   | 67.03    | my_snp_filter | AC=2;AF=0.030;AN=66;BaseQRankSum=          |
| 9250 | chrY | 9974049 | . | C | T   | 67.70    | my_snp_filter | AC=2;AF=0.029;AN=68;BaseQRankSum=          |
| 9251 | chrY | 9974070 | . | A | C   | 162.28   | PASS          | AC=3;AF=0.044;AN=68;BaseQRankSum=1.66;Cl   |
| 9252 | chrY | 9974074 | . | C | G   | 168.95   | PASS          | AC=3;AF=0.045;AN=66;BaseQRankSum=2.03;Cl   |
| 9253 | chrY | 9974102 | . | T | A   | 259.43   | PASS          | AC=6;AF=0.086;AN=70;BaseQRankSum=-1.212e+  |
| 9254 | chrY | 9974155 | . | G | A   | 440.86   | PASS          | AC=7;AF=0.113;AN=62;BaseQRankSum=1.65;Cli  |
| 9255 | chrY | 9974158 | . | G | C   | 84.16    | my_snp_filter | AC=3;AF=0.048;AN=62;BaseQRankSum=          |
| 9256 | chrY | 9974160 | . | C | T   | 2543.18  | PASS          | AC=10;AF=0.167;AN=60;BaseQRankSum=-6.390e  |
| 9257 | chrY | 9974180 | . | G | A   | 3343.54  | PASS          | AC=10;AF=0.179;AN=56;BaseQRankSum=1.16;Cl  |
| 9258 | chrY | 9974196 | . | A | G   | 4035.82  | PASS          | AC=9;AF=0.180;AN=50;BaseQRankSum=-8.100e-  |
| 9259 | chrY | 9974205 | . | G | C   | 4511.89  | PASS          | AC=9;AF=0.173;AN=52;BaseQRankSum=-1.982e+  |
| 9260 | chrY | 9974216 | . | T | G   | 2332.04  | PASS          | AC=9;AF=0.173;AN=52;BaseQRankSum=0.751;Cl  |
| 9261 | chrY | 9974235 | . | A | C   | 5993.46  | PASS          | AC=9;AF=0.225;AN=40;BaseQRankSum=-1.647e+  |
| 9262 | chrY | 9974237 | . | A | C   | 5963.15  | PASS          | AC=9;AF=0.250;AN=36;BaseQRankSum=-1.500e-  |
| 9263 | chrY | 9974275 | . | C | G   | 864.09   | PASS          | AC=9;AF=0.132;AN=68;BaseQRankSum=0.929;Cl  |
| 9264 | chrY | 9974306 | . | C | A   | 30.31    | my_snp_filter | AC=2;AF=0.030;AN=66;BaseQRankSum=          |
| 9265 | chrY | 9974321 | . | C | A   | 10326.98 | PASS          | AC=33;AF=0.500;AN=66;BaseQRankSum          |
| 9266 | chrY | 9974330 | . | C | G   | 9962.77  | PASS          | AC=32;AF=0.485;AN=66;BaseQRankSum=-8.390e  |
| 9267 | chrY | 9974331 | . | C | T   | 1133.01  | PASS          | AC=12;AF=0.182;AN=66;BaseQRankSum=-7.500e  |
| 9268 | chrY | 9974353 | . | A | T   | 7496.86  | PASS          | AC=28;AF=0.438;AN=64;BaseQRankSum=0.548;C  |
| 9269 | chrY | 9974397 | . | A | C   | 1923.78  | PASS          | AC=15;AF=0.227;AN=66;BaseQRankSum=-7.240e  |
| 9270 | chrY | 9974422 | . | G | A   | 1463.48  | my_snp_filter | AC=11;AF=0.167;AN=66;BaseQRankSum          |
| 9271 | chrY | 9974429 | . | C | T   | 1211.40  | my_snp_filter | AC=10;AF=0.147;AN=68;BaseQRankSum          |
| 9272 | chrY | 9974464 | . | T | A   | 725.03   | my_snp_filter | AC=7;AF=0.100;AN=70;BaseQRankSum=          |

|      |      |         |   |   |   |         |               |                                            |
|------|------|---------|---|---|---|---------|---------------|--------------------------------------------|
| 9273 | chrY | 9974468 | . | C | T | 689.24  | my_snp_filter | AC=6;AF=0.086;AN=70;BaseQRankSum=          |
| 9274 | chrY | 9974487 | . | T | A | 685.87  | my_snp_filter | AC=6;AF=0.086;AN=70;BaseQRankSum=          |
| 9275 | chrY | 9974488 | . | G | A | 89.74   | PASS          | AC=2;AF=0.029;AN=70;BaseQRankSum=-7.620e-  |
| 9276 | chrY | 9974493 | . | G | A | 89.73   | PASS          | AC=2;AF=0.029;AN=70;BaseQRankSum=-7.620e-  |
| 9277 | chrY | 9974506 | . | C | T | 206.89  | PASS          | AC=3;AF=0.043;AN=70;BaseQRankSum=0.980;Cl  |
| 9278 | chrY | 9974510 | . | G | C | 789.09  | my_snp_filter | AC=6;AF=0.086;AN=70;BaseQRankSum=          |
| 9279 | chrY | 9974521 | . | A | C | 1166.35 | my_snp_filter | AC=11;AF=0.157;AN=70;BaseQRankSum=         |
| 9280 | chrY | 9974567 | . | G | C | 673.65  | my_snp_filter | AC=8;AF=0.114;AN=70;BaseQRankSum=          |
| 9281 | chrY | 9974569 | . | G | A | 641.52  | my_snp_filter | AC=7;AF=0.100;AN=70;BaseQRankSum=          |
| 9282 | chrY | 9974579 | . | G | A | 696.46  | my_snp_filter | AC=9;AF=0.129;AN=70;BaseQRankSum=          |
| 9283 | chrY | 9974610 | . | C | T | 256.81  | PASS          | AC=4;AF=0.057;AN=70;BaseQRankSum=-9.370e-  |
| 9284 | chrY | 9974616 | . | C | G | 231.90  | PASS          | AC=4;AF=0.057;AN=70;BaseQRankSum=-2.023e+  |
| 9285 | chrY | 9974644 | . | T | C | 114.38  | PASS          | AC=3;AF=0.043;AN=70;BaseQRankSum=-1.741e+  |
| 9286 | chrY | 9975009 | . | G | C | 40.37   | PASS          | AC=1;AF=0.014;AN=70;BaseQRankSum=-1.638e+  |
| 9287 | chrY | 9975150 | . | C | T | 348.42  | PASS          | AC=4;AF=0.057;AN=70;BaseQRankSum=1.25;Cli  |
| 9288 | chrY | 9975156 | . | T | C | 617.71  | PASS          | AC=4;AF=0.057;AN=70;BaseQRankSum=-1.493e+  |
| 9289 | chrY | 9975158 | . | G | A | 883.51  | PASS          | AC=5;AF=0.071;AN=70;BaseQRankSum=2.19;Cli  |
| 9290 | chrY | 9975163 | . | G | A | 213.76  | PASS          | AC=4;AF=0.059;AN=68;BaseQRankSum=-1.736e+  |
| 9291 | chrY | 9975169 | . | C | A | 53.18   | PASS          | AC=1;AF=0.015;AN=68;BaseQRankSum=0.311;Cl  |
| 9292 | chrY | 9975184 | . | C | T | 59.69   | PASS          | AC=1;AF=0.017;AN=60;BaseQRankSum=-8.500e-  |
| 9293 | chrY | 9975197 | . | T | G | 1278.48 | PASS          | AC=7;AF=0.125;AN=56;BaseQRankSum=-1.488e+  |
| 9294 | chrY | 9975213 | . | C | T | 191.04  | PASS          | AC=3;AF=0.056;AN=54;BaseQRankSum=1.26;Cli  |
| 9295 | chrY | 9975236 | . | C | A | 1223.24 | PASS          | AC=11;AF=0.220;AN=50;BaseQRankSum=-3.300e- |
| 9296 | chrY | 9975237 | . | C | A | 1265.74 | PASS          | AC=11;AF=0.229;AN=48;BaseQRankSum=0.099;C  |
| 9297 | chrY | 9975245 | . | G | A | 212.79  | PASS          | AC=5;AF=0.109;AN=46;BaseQRankSum=1.10;Cli  |
| 9298 | chrY | 9975250 | . | C | T | 206.48  | PASS          | AC=5;AF=0.104;AN=48;BaseQRankSum=-1.246e+  |
| 9299 | chrY | 9975253 | . | T | G | 206.80  | PASS          | AC=5;AF=0.109;AN=46;BaseQRankSum=0.505;Cl  |
| 9300 | chrY | 9975258 | . | G | T | 113.99  | PASS          | AC=2;AF=0.043;AN=46;BaseQRankSum=-5.670e-  |
| 9301 | chrY | 9975310 | . | C | A | 1512.39 | PASS          | AC=8;AF=0.333;AN=24;BaseQRankSum=2.06;Cli  |
| 9302 | chrY | 9975324 | . | G | A | 1193.20 | PASS          | AC=8;AF=0.308;AN=26;BaseQRankSum=1.58;Cli  |
| 9303 | chrY | 9975325 | . | T | A | 31.17   | my_snp_filter | AC=1;AF=0.038;AN=26;BaseQRankSum=          |
| 9304 | chrY | 9975341 | . | C | G | 1364.57 | PASS          | AC=8;AF=0.444;AN=18;BaseQRankSum=-1.700e-  |
| 9305 | chrY | 9975365 | . | C | A | 1761.28 | PASS          | AC=8;AF=0.333;AN=24;BaseQRankSum=-4.560e-  |
| 9306 | chrY | 9975375 | . | A | T | 96.91   | PASS          | AC=1;AF=0.038;AN=26;BaseQRankSum=0.182;Cl  |
| 9307 | chrY | 9975376 | . | C | A | 96.61   | PASS          | AC=1;AF=0.036;AN=28;BaseQRankSum=1.49;Cli  |
| 9308 | chrY | 9975384 | . | C | T | 96.24   | PASS          | AC=1;AF=0.036;AN=28;BaseQRankSum=-2.890e-  |
| 9309 | chrY | 9975391 | . | G | T | 90.81   | PASS          | AC=1;AF=0.036;AN=28;BaseQRankSum=1.39;Cli  |
| 9310 | chrY | 9975398 | . | A | T | 1330.92 | PASS          | AC=8;AF=0.286;AN=28;BaseQRankSum=-4.330e-  |
| 9311 | chrY | 9975399 | . | G | A | 1333.34 | PASS          | AC=8;AF=0.286;AN=28;BaseQRankSum=-1.157e+  |
| 9312 | chrY | 9975404 | . | A | G | 1370.95 | PASS          | AC=8;AF=0.286;AN=28;BaseQRankSum=0.731;Cl  |
| 9313 | chrY | 9975413 | . | G | C | 1122.49 | PASS          | AC=7;AF=0.269;AN=26;BaseQRankSum=-9.550e-  |
| 9314 | chrY | 9975414 | . | C | G | 1664.10 | PASS          | AC=10;AF=0.417;AN=24;BaseQRankSum=-2.099e- |
| 9315 | chrY | 9975415 | . | T | C | 116.23  | PASS          | AC=2;AF=0.083;AN=24;BaseQRankSum=-2.840e+  |
| 9316 | chrY | 9975424 | . | G | A | 1467.65 | PASS          | AC=8;AF=0.333;AN=24;BaseQRankSum=0.981;Cl  |
| 9317 | chrY | 9975430 | . | C | A | 985.40  | PASS          | AC=7;AF=0.318;AN=22;BaseQRankSum=0.031;Cl  |
| 9318 | chrY | 9975432 | . | A | G | 949.40  | PASS          | AC=7;AF=0.318;AN=22;BaseQRankSum=-2.184e+  |
| 9319 | chrY | 9975437 | . | C | T | 121.04  | PASS          | AC=3;AF=0.136;AN=22;BaseQRankSum=-2.451e+  |
| 9320 | chrY | 9975458 | . | G | A | 540.80  | PASS          | AC=6;AF=0.231;AN=26;BaseQRankSum=1.92;Cli  |
| 9321 | chrY | 9975474 | . | C | A | 32.26   | my_snp_filter | AC=1;AF=0.038;AN=26;BaseQRankSum=          |
| 9322 | chrY | 9975481 | . | A | G | 378.41  | PASS          | AC=3;AF=0.107;AN=28;BaseQRankSum=1.09;Cli  |
| 9323 | chrY | 9975485 | . | A | G | 492.81  | PASS          | AC=5;AF=0.227;AN=22;BaseQRankSum=-7.460e-  |
| 9324 | chrY | 9975488 | . | A | G | 296.46  | PASS          | AC=3;AF=0.107;AN=28;BaseQRankSum=1.75;Cli  |
| 9325 | chrY | 9975513 | . | T | C | 50.53   | my_snp_filter | AC=2;AF=0.100;AN=20;BaseQRankSum=          |
| 9326 | chrY | 9975597 | . | T | C | 224.19  | my_snp_filter | AC=6;AF=0.333;AN=18;BaseQRankSum=          |
| 9327 | chrY | 9975640 | . | A | G | 53.90   | my_snp_filter | AC=4;AF=0.222;AN=18;BaseQRankSum=          |
| 9328 | chrY | 9975705 | . | A | G | 56.44   | my_snp_filter | AC=2;AF=0.111;AN=18;BaseQRankSum=          |
| 9329 | chrY | 9976058 | . | A | T | 75.28   | PASS          | AC=2;AF=0.111;AN=18;BaseQRankSum=-1.393e+  |
| 9330 | chrY | 9976070 | . | A | G | 153.43  | PASS          | AC=2;AF=0.111;AN=18;BaseQRankSum=-1.737e+  |
| 9331 | chrY | 9976093 | . | A | G | 214.48  | PASS          | AC=2;AF=0.111;AN=18;BaseQRankSum=-2.950e-  |
| 9332 | chrY | 9976131 | . | C | T | 93.45   | PASS          | AC=1;AF=0.056;AN=18;BaseQRankSum=0.826;Cl  |
| 9333 | chrY | 9976132 | . | T | C | 1342.15 | my_snp_filter | AC=9;AF=0.500;AN=18;BaseQRankSum=          |
| 9334 | chrY | 9976168 | . | C | T | 2613.09 | PASS          | AC=9;AF=0.500;AN=18;BaseQRankSum=-2.445e+  |
| 9335 | chrY | 9976169 | . | A | G | 5046.09 | my_snp_filter | AC=9;AF=0.500;AN=18;BaseQRankSum=          |
| 9336 | chrY | 9976171 | . | A | G | 1396.01 | my_snp_filter | AC=8;AF=0.444;AN=18;BaseQRankSum=          |
| 9337 | chrY | 9976189 | . | G | T | 2660.09 | PASS          | AC=9;AF=0.500;AN=18;BaseQRankSum=2.03;Cli  |
| 9338 | chrY | 9976206 | . | T | C | 9385.09 | my_snp_filter | AC=9;AF=0.500;AN=18;BaseQRankSum=          |
| 9339 | chrY | 9976213 | . | C | A | 3780.09 | PASS          | AC=9;AF=0.500;AN=18;BaseQRankSum=-9.740e-  |
| 9340 | chrY | 9976214 | . | C | T | 637.75  | my_snp_filter | AC=6;AF=0.333;AN=18;BaseQRankSum=          |
| 9341 | chrY | 9976216 | . | C | A | 87.86   | my_snp_filter | AC=3;AF=0.167;AN=18;BaseQRankSum=          |
| 9342 | chrY | 9976223 | . | A | G | 105.45  | my_snp_filter | AC=4;AF=0.222;AN=18;BaseQRankSum=          |
| 9343 | chrY | 9976226 | . | G | C | 105.57  | my_snp_filter | AC=4;AF=0.222;AN=18;BaseQRankSum=          |
| 9344 | chrY | 9976228 | . | C | G | 9170.09 | my_snp_filter | AC=9;AF=0.500;AN=18;BaseQRankSum=          |
| 9345 | chrY | 9976244 | . | A | T | 2991.62 | PASS          | AC=8;AF=0.444;AN=18;BaseQRankSum=1.89;Cli  |
| 9346 | chrY | 9976256 | . | G | A | 111.46  | my_snp_filter | AC=3;AF=0.167;AN=18;BaseQRankSum=          |
| 9347 | chrY | 9976300 | . | A | G | 1807.56 | PASS          | AC=8;AF=0.444;AN=18;BaseQRankSum=0.746;Cl  |
| 9348 | chrY | 9976309 | . | T | A | 9864.09 | my_snp_filter | AC=9;AF=0.500;AN=18;BaseQRankSum=          |

|      |      |         |   |   |     |          |               |                                            |
|------|------|---------|---|---|-----|----------|---------------|--------------------------------------------|
| 9349 | chrY | 9976310 | . | A | T   | 9837.09  | my_snp_filter | AC=9;AF=0.500;AN=18;BaseQRankSum=          |
| 9350 | chrY | 9976314 | . | C | A   | 882.91   | PASS          | AC=7;AF=0.389;AN=18;BaseQRankSum=-1.225e+  |
| 9351 | chrY | 9976319 | . | A | G   | 1544.19  | my_snp_filter | AC=8;AF=0.400;AN=20;BaseQRankSum=          |
| 9352 | chrY | 9976327 | . | G | A   | 1157.84  | my_snp_filter | AC=8;AF=0.400;AN=20;BaseQRankSum=          |
| 9353 | chrY | 9976342 | . | C | T   | 63.53    | my_snp_filter | AC=2;AF=0.091;AN=22;BaseQRankSum=          |
| 9354 | chrY | 9976343 | . | A | T   | 5437.52  | my_snp_filter | AC=9;AF=0.450;AN=20;BaseQRankSum=          |
| 9355 | chrY | 9976379 | . | G | C   | 11058.84 | PASS          | AC=9;AF=0.375;AN=24;BaseQRankSum=          |
| 9356 | chrY | 9976391 | . | A | C   | 12717.52 | PASS          | AC=9;AF=0.450;AN=20;BaseQRankSum=          |
| 9357 | chrY | 9976392 | . | C | T   | 196.01   | PASS          | AC=1;AF=0.045;AN=22;BaseQRankSum=0.666;Cl  |
| 9358 | chrY | 9976410 | . | T | A   | 637.55   | PASS          | AC=2;AF=0.091;AN=22;BaseQRankSum=2.35;Cli  |
| 9359 | chrY | 9976419 | . | C | T   | 1071.88  | PASS          | AC=3;AF=0.107;AN=28;BaseQRankSum=-1.666e+  |
| 9360 | chrY | 9976420 | . | A | G   | 1065.88  | PASS          | AC=3;AF=0.107;AN=28;BaseQRankSum=-2.077e+  |
| 9361 | chrY | 9976429 | . | G | T   | 616.95   | PASS          | AC=2;AF=0.100;AN=20;BaseQRankSum=-3.720e-  |
| 9362 | chrY | 9976441 | . | A | G   | 1131.41  | PASS          | AC=3;AF=0.125;AN=24;BaseQRankSum=-4.529e+  |
| 9363 | chrY | 9976446 | . | G | T   | 9760.11  | PASS          | AC=9;AF=0.409;AN=22;BaseQRankSum=3.57;Cli  |
| 9364 | chrY | 9976455 | . | C | A   | 10236.11 | PASS          | AC=9;AF=0.409;AN=22;BaseQRankSum=          |
| 9365 | chrY | 9976459 | . | C | T   | 10200.11 | PASS          | AC=9;AF=0.409;AN=22;BaseQRankSum=          |
| 9366 | chrY | 9976460 | . | T | C   | 16616.09 | PASS          | AC=9;AF=0.500;AN=18;BaseQRankSum=          |
| 9367 | chrY | 9976472 | . | T | C   | 10259.84 | PASS          | AC=9;AF=0.375;AN=24;BaseQRankSum=          |
| 9368 | chrY | 9976473 | . | G | T   | 10349.84 | PASS          | AC=9;AF=0.375;AN=24;BaseQRankSum=          |
| 9369 | chrY | 9976517 | . | C | T   | 18443.09 | PASS          | AC=9;AF=0.500;AN=18;BaseQRankSum=          |
| 9370 | chrY | 9976519 | . | A | T   | 8442.11  | PASS          | AC=9;AF=0.409;AN=22;BaseQRankSum=1.37;Cli  |
| 9371 | chrY | 9976528 | . | T | A   | 8231.11  | PASS          | AC=9;AF=0.409;AN=22;BaseQRankSum=-5.800e-  |
| 9372 | chrY | 9976537 | . | C | T   | 3298     | PASS          | AC=7;AF=0.318;AN=22;BaseQRankSum=-2.239e+  |
| 9373 | chrY | 9976539 | . | T | C   | 3379.27  | PASS          | AC=7;AF=0.350;AN=20;BaseQRankSum=-2.515e+  |
| 9374 | chrY | 9976541 | . | T | G   | 3481.38  | PASS          | AC=8;AF=0.400;AN=20;BaseQRankSum=-4.555e+  |
| 9375 | chrY | 9976555 | . | G | C   | 7400.09  | PASS          | AC=9;AF=0.500;AN=18;BaseQRankSum=2.52;Cli  |
| 9376 | chrY | 9976557 | . | G | A   | 16064.09 | PASS          | AC=9;AF=0.500;AN=18;BaseQRankSum=          |
| 9377 | chrY | 9976561 | . | G | C   | 7541.31  | PASS          | AC=9;AF=0.500;AN=18;BaseQRankSum=-5.199e+  |
| 9378 | chrY | 9976575 | . | G | A   | 6763.52  | PASS          | AC=9;AF=0.450;AN=20;BaseQRankSum=1.82;Cli  |
| 9379 | chrY | 9976578 | . | C | T   | 6545.52  | PASS          | AC=9;AF=0.450;AN=20;BaseQRankSum=-1.693e+  |
| 9380 | chrY | 9976590 | . | T | C   | 13676.52 | PASS          | AC=9;AF=0.450;AN=20;BaseQRankSum=          |
| 9381 | chrY | 9976634 | . | G | A   | 11458.52 | PASS          | AC=9;AF=0.450;AN=20;BaseQRankSum=          |
| 9382 | chrY | 9976666 | . | A | G   | 8016.09  | PASS          | AC=9;AF=0.500;AN=18;BaseQRankSum=-2.783e+  |
| 9383 | chrY | 9976670 | . | T | G   | 7692.09  | my_snp_filter | AC=9;AF=0.500;AN=18;BaseQRankSum=          |
| 9384 | chrY | 9976684 | . | G | T   | 706.31   | PASS          | AC=6;AF=0.333;AN=18;BaseQRankSum=-1.071e+  |
| 9385 | chrY | 9976688 | . | T | G   | 5766.09  | PASS          | AC=9;AF=0.500;AN=18;BaseQRankSum=-2.514e+  |
| 9386 | chrY | 9976690 | . | G | A   | 5633.09  | PASS          | AC=9;AF=0.500;AN=18;BaseQRankSum=1.05;Cli  |
| 9387 | chrY | 9976712 | . | G | C   | 49.24    | my_snp_filter | AC=1;AF=0.056;AN=18;BaseQRankSum=          |
| 9388 | chrY | 9976717 | . | C | G   | 547.05   | PASS          | AC=4;AF=0.222;AN=18;BaseQRankSum=0.532;Cl  |
| 9389 | chrY | 9976747 | . | C | A   | 3559.53  | my_snp_filter | AC=8;AF=0.444;AN=18;BaseQRankSum=          |
| 9390 | chrY | 9976758 | . | C | G   | 2878.53  | my_snp_filter | AC=8;AF=0.444;AN=18;BaseQRankSum=          |
| 9391 | chrY | 9976778 | . | G | A   | 2354.53  | my_snp_filter | AC=8;AF=0.444;AN=18;BaseQRankSum=          |
| 9392 | chrY | 9976781 | . | T | A   | 2357.53  | my_snp_filter | AC=8;AF=0.444;AN=18;BaseQRankSum=          |
| 9393 | chrY | 9976795 | . | A | T   | 2694.38  | my_snp_filter | AC=8;AF=0.400;AN=20;BaseQRankSum=          |
| 9394 | chrY | 9976801 | . | T | G   | 2898.38  | my_snp_filter | AC=8;AF=0.400;AN=20;BaseQRankSum=          |
| 9395 | chrY | 9976805 | . | G | C   | 2950.38  | my_snp_filter | AC=8;AF=0.400;AN=20;BaseQRankSum=          |
| 9396 | chrY | 9976808 | . | G | A   | 2950.38  | my_snp_filter | AC=8;AF=0.400;AN=20;BaseQRankSum=          |
| 9397 | chrY | 9976830 | . | C | A   | 81.94    | my_snp_filter | AC=2;AF=0.083;AN=24;BaseQRankSum=          |
| 9398 | chrY | 9976836 | . | A | G   | 3286.90  | my_snp_filter | AC=8;AF=0.333;AN=24;BaseQRankSum=          |
| 9399 | chrY | 9976855 | . | A | T,C | 3921.35  | my_snp_filter | AC=8,1;AF=0.333,0.042;AN=24;BaseQ          |
| 9400 | chrY | 9976858 | . | T | A   | 3983.71  | PASS          | AC=9;AF=0.375;AN=24;BaseQRankSum=0.395;Cl  |
| 9401 | chrY | 9976896 | . | G | A   | 3726.54  | PASS          | AC=11;AF=0.458;AN=24;BaseQRankSum=2.54;Cl  |
| 9402 | chrY | 9976930 | . | A | C   | 984.21   | PASS          | AC=9;AF=0.300;AN=30;BaseQRankSum=-1.309e+  |
| 9403 | chrY | 9976935 | . | C | T   | 1845.16  | PASS          | AC=9;AF=0.265;AN=34;BaseQRankSum=-2.000e+  |
| 9404 | chrY | 9977021 | . | T | C   | 2558.61  | PASS          | AC=10;AF=0.172;AN=58;BaseQRankSum=-3.040e+ |
| 9405 | chrY | 9977035 | . | C | T   | 732.51   | PASS          | AC=8;AF=0.133;AN=60;BaseQRankSum=-1.588e+  |
| 9406 | chrY | 9977044 | . | T | C   | 732.10   | PASS          | AC=8;AF=0.129;AN=62;BaseQRankSum=-1.380e+  |
| 9407 | chrY | 9977058 | . | G | A   | 509.86   | PASS          | AC=8;AF=0.121;AN=66;BaseQRankSum=-1.903e+  |
| 9408 | chrY | 9977069 | . | C | T   | 330.81   | PASS          | AC=5;AF=0.076;AN=66;BaseQRankSum=-7.510e-  |
| 9409 | chrY | 9977074 | . | T | C   | 74.76    | my_snp_filter | AC=2;AF=0.029;AN=70;BaseQRankSum=          |
| 9410 | chrY | 9977087 | . | C | A   | 40.78    | my_snp_filter | AC=1;AF=0.015;AN=68;BaseQRankSum=          |
| 9411 | chrY | 9977098 | . | C | T   | 311.56   | PASS          | AC=6;AF=0.088;AN=68;BaseQRankSum=0.361;Cl  |
| 9412 | chrY | 9977101 | . | A | G   | 272.56   | PASS          | AC=6;AF=0.088;AN=68;BaseQRankSum=-9.270e-  |
| 9413 | chrY | 9977367 | . | T | A   | 84.68    | PASS          | AC=2;AF=0.059;AN=34;BaseQRankSum=-3.470e-  |
| 9414 | chrY | 9977370 | . | A | C   | 261.98   | PASS          | AC=4;AF=0.154;AN=26;BaseQRankSum=0.00;Cli  |
| 9415 | chrY | 9977372 | . | A | C   | 306.90   | PASS          | AC=4;AF=0.154;AN=26;BaseQRankSum=1.41;Cli  |
| 9416 | chrY | 9977377 | . | C | A   | 384.04   | PASS          | AC=4;AF=0.182;AN=22;BaseQRankSum=-7.180e-  |
| 9417 | chrY | 9977384 | . | C | T   | 554.53   | PASS          | AC=4;AF=0.200;AN=20;BaseQRankSum=-3.700e-  |
| 9418 | chrY | 9977387 | . | C | T   | 581.56   | PASS          | AC=5;AF=0.278;AN=18;BaseQRankSum=0.550;Cl  |
| 9419 | chrY | 9977396 | . | A | G   | 735.18   | PASS          | AC=4;AF=0.222;AN=18;BaseQRankSum=-1.115e+  |
| 9420 | chrY | 9977402 | . | G | A   | 815.18   | PASS          | AC=4;AF=0.222;AN=18;BaseQRankSum=2.52;Cli  |
| 9421 | chrY | 9977427 | . | G | A   | 1203.73  | my_snp_filter | AC=5;AF=0.227;AN=22;BaseQRankSum=          |
| 9422 | chrY | 9977434 | . | G | C   | 3426.11  | my_snp_filter | AC=9;AF=0.409;AN=22;BaseQRankSum=          |
| 9423 | chrY | 9977437 | . | G | C   | 3606.11  | my_snp_filter | AC=9;AF=0.409;AN=22;BaseQRankSum=          |
| 9424 | chrY | 9977444 | . | T | C   | 1588.73  | my_snp_filter | AC=5;AF=0.227;AN=22;BaseQRankSum=          |

|      |      |         |   |   |     |          |               |                                            |
|------|------|---------|---|---|-----|----------|---------------|--------------------------------------------|
| 9425 | chrY | 9977452 | . | G | A   | 1737.12  | my_snp_filter | AC=9;AF=0.409;AN=22;BaseQRankSum=          |
| 9426 | chrY | 9977458 | . | A | T   | 2113.45  | my_snp_filter | AC=5;AF=0.208;AN=24;BaseQRankSum=          |
| 9427 | chrY | 9977463 | . | C | G   | 5898.85  | my_snp_filter | AC=9;AF=0.375;AN=24;BaseQRankSum=          |
| 9428 | chrY | 9977481 | . | G | C   | 7158.57  | my_snp_filter | AC=11;AF=0.423;AN=26;BaseQRankSum=         |
| 9429 | chrY | 9977485 | . | T | C   | 105.91   | my_snp_filter | AC=2;AF=0.063;AN=32;BaseQRankSum=          |
| 9430 | chrY | 9977506 | . | G | A   | 1971.42  | PASS          | AC=9;AF=0.265;AN=34;BaseQRankSum=-8.330e-  |
| 9431 | chrY | 9977511 | . | G | A   | 1131.61  | PASS          | AC=10;AF=0.278;AN=36;BaseQRankSum=-1.397e- |
| 9432 | chrY | 9977562 | . | A | G   | 5317.52  | PASS          | AC=14;AF=0.250;AN=56;BaseQRankSum=1.61;Cli |
| 9433 | chrY | 9977573 | . | T | C   | 5462.83  | PASS          | AC=15;AF=0.242;AN=62;BaseQRankSum=0.777;C  |
| 9434 | chrY | 9977606 | . | C | A   | 480.82   | PASS          | AC=3;AF=0.043;AN=70;BaseQRankSum=1.75;Cli  |
| 9435 | chrY | 9977631 | . | C | A   | 4299.80  | PASS          | AC=11;AF=0.157;AN=70;BaseQRankSum=1.41;Cli |
| 9436 | chrY | 9977635 | . | T | C   | 8996.31  | PASS          | AC=20;AF=0.286;AN=70;BaseQRankSum=-3.650e- |
| 9437 | chrY | 9977643 | . | G | A   | 2164.43  | PASS          | AC=10;AF=0.143;AN=70;BaseQRankSum=-3.110e- |
| 9438 | chrY | 9977650 | . | G | A   | 2997.49  | PASS          | AC=6;AF=0.086;AN=70;BaseQRankSum=2.71;Cli  |
| 9439 | chrY | 9977658 | . | T | C   | 11015.88 | PASS          | AC=21;AF=0.300;AN=70;BaseQRankSum=         |
| 9440 | chrY | 9977659 | . | A | T   | 3250.55  | PASS          | AC=6;AF=0.086;AN=70;BaseQRankSum=1.65;Cli  |
| 9441 | chrY | 9977660 | . | T | G   | 2197.31  | PASS          | AC=19;AF=0.271;AN=70;BaseQRankSum=0.167;C  |
| 9442 | chrY | 9977663 | . | G | T   | 11347.84 | PASS          | AC=21;AF=0.300;AN=70;BaseQRankSum=         |
| 9443 | chrY | 9977669 | . | T | C   | 3224.61  | PASS          | AC=6;AF=0.086;AN=70;BaseQRankSum=-2.499e+  |
| 9444 | chrY | 9977679 | . | A | T   | 11740.76 | PASS          | AC=19;AF=0.271;AN=70;BaseQRankSum=         |
| 9445 | chrY | 9977685 | . | G | C   | 614.48   | PASS          | AC=3;AF=0.043;AN=70;BaseQRankSum=1.32;Cli  |
| 9446 | chrY | 9977690 | . | T | C   | 4507.17  | PASS          | AC=21;AF=0.300;AN=70;BaseQRankSum=-7.360e- |
| 9447 | chrY | 9977697 | . | C | T   | 4854.31  | PASS          | AC=21;AF=0.300;AN=70;BaseQRankSum=1.28;Cli |
| 9448 | chrY | 9977706 | . | T | A   | 5052.09  | PASS          | AC=19;AF=0.271;AN=70;BaseQRankSum=0.742;C  |
| 9449 | chrY | 9977707 | . | A | T   | 5043.13  | PASS          | AC=19;AF=0.271;AN=70;BaseQRankSum=0.783;C  |
| 9450 | chrY | 9977716 | . | A | C   | 4847.37  | PASS          | AC=19;AF=0.271;AN=70;BaseQRankSum=-1.179e- |
| 9451 | chrY | 9977724 | . | A | G   | 96.66    | my_snp_filter | AC=3;AF=0.043;AN=70;BaseQRankSum=          |
| 9452 | chrY | 9977732 | . | T | C   | 29045    | PASS          | AC=26;AF=0.382;AN=68;BaseQRankSum=0.355;C  |
| 9453 | chrY | 9977733 | . | G | A   | 9404.95  | PASS          | AC=18;AF=0.257;AN=70;BaseQRankSum=2.36;Cl  |
| 9454 | chrY | 9977735 | . | G | A   | 3253.24  | PASS          | AC=6;AF=0.086;AN=70;BaseQRankSum=-3.055e+  |
| 9455 | chrY | 9977741 | . | T | C   | 21092.22 | PASS          | AC=22;AF=0.324;AN=68;BaseQRankSum=         |
| 9456 | chrY | 9977749 | . | G | A,C | 19790.20 | PASS          | AC=9,18;AF=0.132,0.265;AN=68;Base          |
| 9457 | chrY | 9977776 | . | T | G   | 208.37   | my_snp_filter | AC=3;AF=0.043;AN=70;BaseQRankSum=          |
| 9458 | chrY | 9977780 | . | A | G   | 1095.01  | PASS          | AC=8;AF=0.114;AN=70;BaseQRankSum=-1.222e+  |
| 9459 | chrY | 9977790 | . | A | T   | 2851.95  | PASS          | AC=9;AF=0.129;AN=70;BaseQRankSum=1.06;Cli  |
| 9460 | chrY | 9977794 | . | C | T   | 2560.89  | PASS          | AC=10;AF=0.143;AN=70;BaseQRankSum=-1.680e- |
| 9461 | chrY | 9977808 | . | T | A   | 78.94    | my_snp_filter | AC=2;AF=0.029;AN=70;BaseQRankSum=          |
| 9462 | chrY | 9977809 | . | T | G   | 21482.45 | PASS          | AC=33;AF=0.471;AN=70;BaseQRankSum=         |
| 9463 | chrY | 9977848 | . | C | T   | 16792.72 | PASS          | AC=35;AF=0.500;AN=70;BaseQRankSum=         |
| 9464 | chrY | 9977853 | . | T | C   | 54109.72 | PASS          | AC=35;AF=0.500;AN=70;BaseQRankSum=         |
| 9465 | chrY | 9977864 | . | C | T   | 11346.25 | PASS          | AC=30;AF=0.429;AN=70;BaseQRankSum=         |
| 9466 | chrY | 9977866 | . | T | G   | 63504.58 | PASS          | AC=35;AF=0.500;AN=70;BaseQRankSum=         |
| 9467 | chrY | 9977868 | . | T | C   | 11379.30 | PASS          | AC=30;AF=0.429;AN=70;BaseQRankSum=         |
| 9468 | chrY | 9977871 | . | T | C   | 806.92   | PASS          | AC=4;AF=0.057;AN=70;BaseQRankSum=-7.250e-  |
| 9469 | chrY | 9977905 | . | C | T   | 60.42    | my_snp_filter | AC=1;AF=0.014;AN=70;BaseQRankSum=          |
| 9470 | chrY | 9977927 | . | G | A   | 3031.63  | PASS          | AC=8;AF=0.114;AN=70;BaseQRankSum=-1.495e+  |
| 9471 | chrY | 9977932 | . | C | A,T | 14292.31 | PASS          | AC=27,6;AF=0.386,0.086;AN=70;Base          |
| 9472 | chrY | 9977933 | . | G | C   | 3146.50  | PASS          | AC=8;AF=0.114;AN=70;BaseQRankSum=3.70;Cli  |
| 9473 | chrY | 9977937 | . | T | G   | 5872.57  | PASS          | AC=19;AF=0.271;AN=70;BaseQRankSum=-8.380e- |
| 9474 | chrY | 9977942 | . | T | A   | 341.42   | PASS          | AC=1;AF=0.014;AN=70;BaseQRankSum=-3.630e-  |
| 9475 | chrY | 9977946 | . | C | G   | 10557.43 | PASS          | AC=25;AF=0.357;AN=70;BaseQRankSum=         |
| 9476 | chrY | 9977949 | . | T | A,G | 59645.11 | PASS          | AC=29,32;AF=0.414,0.457;AN=70;Bas          |
| 9477 | chrY | 9977954 | . | G | T   | 3840.64  | PASS          | AC=18;AF=0.257;AN=70;BaseQRankSum=0.466;C  |
| 9478 | chrY | 9977963 | . | C | A   | 15839.27 | PASS          | AC=31;AF=0.443;AN=70;BaseQRankSum=         |
| 9479 | chrY | 9977966 | . | T | C   | 66775.72 | PASS          | AC=35;AF=0.500;AN=70;BaseQRankSum=         |
| 9480 | chrY | 9977970 | . | A | G   | 46.90    | my_snp_filter | AC=1;AF=0.014;AN=70;BaseQRankSum=          |
| 9481 | chrY | 9977980 | . | C | T,* | 6420.01  | PASS          | AC=24,3;AF=0.343,0.043;AN=70;BaseQRankSum= |
| 9482 | chrY | 9977985 | . | C | T   | 156.43   | PASS          | AC=1;AF=0.014;AN=70;BaseQRankSum=0.059;Cl  |
| 9483 | chrY | 9977990 | . | C | T   | 2194.84  | PASS          | AC=16;AF=0.229;AN=70;BaseQRankSum=1.58;Cl  |
| 9484 | chrY | 9977991 | . | T | G   | 19975.22 | PASS          | AC=32;AF=0.457;AN=70;BaseQRankSum=         |
| 9485 | chrY | 9978009 | . | A | G   | 32127.73 | PASS          | AC=35;AF=0.500;AN=70;BaseQRankSum=         |
| 9486 | chrY | 9978034 | . | A | G   | 30695.74 | PASS          | AC=35;AF=0.500;AN=70;BaseQRankSum=         |
| 9487 | chrY | 9978035 | . | C | A   | 15206.99 | PASS          | AC=29;AF=0.414;AN=70;BaseQRankSum=         |
| 9488 | chrY | 9978055 | . | C | T,A | 16907.47 | PASS          | AC=29,1;AF=0.414,0.014;AN=70;Base          |
| 9489 | chrY | 9978056 | . | G | A   | 3681.65  | PASS          | AC=15;AF=0.214;AN=70;BaseQRankSum=0.967;C  |
| 9490 | chrY | 9978106 | . | C | G   | 1701.58  | PASS          | AC=11;AF=0.157;AN=70;BaseQRankSum=-9.330e- |
| 9491 | chrY | 9978133 | . | T | C   | 11250.48 | PASS          | AC=23;AF=0.329;AN=70;BaseQRankSum=         |
| 9492 | chrY | 9978135 | . | G | A   | 4812.52  | PASS          | AC=14;AF=0.200;AN=70;BaseQRankSum=-1.280e- |
| 9493 | chrY | 9978136 | . | T | G,A | 19195.42 | PASS          | AC=30,4;AF=0.429,0.057;AN=70;Base          |
| 9494 | chrY | 9978139 | . | A | T   | 4606.55  | PASS          | AC=14;AF=0.200;AN=70;BaseQRankSum=0.922;C  |
| 9495 | chrY | 9978147 | . | A | G   | 23020.78 | PASS          | AC=33;AF=0.471;AN=70;BaseQRankSum=         |
| 9496 | chrY | 9978165 | . | T | G   | 658.23   | my_snp_filter | AC=9;AF=0.129;AN=70;BaseQRankSum=          |
| 9497 | chrY | 9978191 | . | A | T   | 3241.90  | PASS          | AC=17;AF=0.243;AN=70;BaseQRankSum=0.310;C  |
| 9498 | chrY | 9978212 | . | A | T   | 2633.46  | PASS          | AC=16;AF=0.229;AN=70;BaseQRankSum=0.720;C  |
| 9499 | chrY | 9978216 | . | C | T   | 11239.26 | PASS          | AC=23;AF=0.329;AN=70;BaseQRankSum=         |
| 9500 | chrY | 9978228 | . | T | C   | 280.46   | PASS          | AC=2;AF=0.029;AN=70;BaseQRankSum=-3.983e+  |



|      |      |         |   |   |   |          |               |                                           |
|------|------|---------|---|---|---|----------|---------------|-------------------------------------------|
| 9501 | chrY | 9978270 | . | C | T | 6151.96  | PASS          | AC=22;AF=0.314;AN=70;BaseQRankSum=1.19;C  |
| 9502 | chrY | 9978275 | . | C | T | 1067.78  | PASS          | AC=11;AF=0.157;AN=70;BaseQRankSum=0.972;C |
| 9503 | chrY | 9978280 | . | C | T | 1010.87  | my_snp_filter | AC=11;AF=0.157;AN=70;BaseQRankSum         |
| 9504 | chrY | 9978282 | . | A | T | 21667.67 | PASS          | AC=24;AF=0.343;AN=70;BaseQRankSum         |
| 9505 | chrY | 9978287 | . | C | T | 7402.32  | PASS          | AC=13;AF=0.186;AN=70;BaseQRankSum=3.17;C  |
| 9506 | chrY | 9978288 | . | G | A | 9112.21  | PASS          | AC=23;AF=0.329;AN=70;BaseQRankSum=-6.230e |
| 9507 | chrY | 9978292 | . | C | T | 21762.11 | PASS          | AC=24;AF=0.343;AN=70;BaseQRankSum         |
| 9508 | chrY | 9978297 | . | G | A | 889.60   | PASS          | AC=9;AF=0.129;AN=70;BaseQRankSum=0.846;C  |
| 9509 | chrY | 9978298 | . | T | C | 9382.81  | PASS          | AC=24;AF=0.343;AN=70;BaseQRankSum=-1.957e |
| 9510 | chrY | 9978300 | . | G | C | 7499.19  | PASS          | AC=13;AF=0.186;AN=70;BaseQRankSum=-5.175e |
| 9511 | chrY | 9978325 | . | G | T | 7549.84  | PASS          | AC=12;AF=0.171;AN=70;BaseQRankSum=0.714;C |
| 9512 | chrY | 9978326 | . | C | A | 7513.88  | PASS          | AC=12;AF=0.171;AN=70;BaseQRankSum=0.721;C |
| 9513 | chrY | 9978340 | . | T | C | 6757.92  | PASS          | AC=10;AF=0.143;AN=70;BaseQRankSum=-9.650e |
| 9514 | chrY | 9978346 | . | G | C | 5302.13  | PASS          | AC=13;AF=0.186;AN=70;BaseQRankSum=-3.690e |
| 9515 | chrY | 9978350 | . | T | G | 14392.24 | PASS          | AC=13;AF=0.186;AN=70;BaseQRankSum         |
| 9516 | chrY | 9978352 | . | A | C | 13944.24 | PASS          | AC=13;AF=0.191;AN=68;BaseQRankSum         |
| 9517 | chrY | 9978354 | . | T | A | 13698.20 | PASS          | AC=13;AF=0.191;AN=68;BaseQRankSum         |
| 9518 | chrY | 9978361 | . | T | C | 12683.66 | PASS          | AC=12;AF=0.176;AN=68;BaseQRankSum         |
| 9519 | chrY | 9978364 | . | G | A | 12561.24 | PASS          | AC=12;AF=0.176;AN=68;BaseQRankSum         |
| 9520 | chrY | 9978373 | . | A | G | 11212.31 | PASS          | AC=10;AF=0.147;AN=68;BaseQRankSum         |
| 9521 | chrY | 9978388 | . | G | T | 751.54   | PASS          | AC=7;AF=0.103;AN=68;BaseQRankSum=1.13;C   |
| 9522 | chrY | 9978390 | . | A | G | 9612.41  | PASS          | AC=10;AF=0.147;AN=68;BaseQRankSum=2.75;C  |
| 9523 | chrY | 9978394 | . | G | C | 9125.93  | PASS          | AC=10;AF=0.147;AN=68;BaseQRankSum=2.21;C  |
| 9524 | chrY | 9978402 | . | A | G | 8729.01  | PASS          | AC=10;AF=0.143;AN=70;BaseQRankSum=1.86;C  |
| 9525 | chrY | 9978410 | . | C | T | 7728.73  | PASS          | AC=10;AF=0.143;AN=70;BaseQRankSum=1.49;C  |
| 9526 | chrY | 9978414 | . | G | C | 7714.52  | PASS          | AC=10;AF=0.143;AN=70;BaseQRankSum=4.79;C  |
| 9527 | chrY | 9978424 | . | C | A | 3113.66  | PASS          | AC=10;AF=0.143;AN=70;BaseQRankSum=-1.644e |
| 9528 | chrY | 9978444 | . | A | C | 832.53   | PASS          | AC=10;AF=0.143;AN=70;BaseQRankSum=0.880;C |
| 9529 | chrY | 9978452 | . | G | C | 750.78   | PASS          | AC=9;AF=0.129;AN=70;BaseQRankSum=0.025;C  |
| 9530 | chrY | 9978457 | . | G | A | 1412.94  | PASS          | AC=11;AF=0.157;AN=70;BaseQRankSum=1.74;C  |
| 9531 | chrY | 9978463 | . | G | T | 1074.01  | PASS          | AC=9;AF=0.129;AN=70;BaseQRankSum=2.03;C   |
| 9532 | chrY | 9978464 | . | C | T | 1083.37  | PASS          | AC=9;AF=0.129;AN=70;BaseQRankSum=0.561;C  |
| 9533 | chrY | 9978499 | . | A | C | 9907.91  | PASS          | AC=13;AF=0.186;AN=70;BaseQRankSum=0.727;C |
| 9534 | chrY | 9978501 | . | G | A | 53.40    | my_snp_filter | AC=1;AF=0.014;AN=70;BaseQRankSum=         |
| 9535 | chrY | 9978506 | . | G | A | 10040.27 | PASS          | AC=12;AF=0.182;AN=66;BaseQRankSum         |
| 9536 | chrY | 9978509 | . | G | T | 2415.91  | PASS          | AC=9;AF=0.132;AN=68;BaseQRankSum=-7.590e- |
| 9537 | chrY | 9978525 | . | C | T | 3062.41  | PASS          | AC=9;AF=0.136;AN=66;BaseQRankSum=-7.900e- |
| 9538 | chrY | 9978528 | . | G | T | 3002.73  | PASS          | AC=9;AF=0.132;AN=68;BaseQRankSum=1.99;C   |
| 9539 | chrY | 9978534 | . | G | A | 9542.07  | PASS          | AC=12;AF=0.200;AN=60;BaseQRankSum=1.16;C  |
| 9540 | chrY | 9978535 | . | C | A | 3157.09  | PASS          | AC=9;AF=0.141;AN=64;BaseQRankSum=1.31;C   |
| 9541 | chrY | 9978536 | . | G | A | 4545.53  | PASS          | AC=12;AF=0.188;AN=64;BaseQRankSum=1.03;C  |
| 9542 | chrY | 9978545 | . | A | G | 10121.10 | my_snp_filter | AC=12;AF=0.200;AN=60;BaseQ                |
| 9543 | chrY | 9978547 | . | A | G | 3318.88  | PASS          | AC=9;AF=0.132;AN=68;BaseQRankSum=2.02;C   |
| 9544 | chrY | 9978555 | . | G | T | 3421.28  | PASS          | AC=9;AF=0.129;AN=70;BaseQRankSum=0.119;C  |
| 9545 | chrY | 9978559 | . | A | T | 3241.01  | PASS          | AC=9;AF=0.132;AN=68;BaseQRankSum=0.812;C  |
| 9546 | chrY | 9978561 | . | C | T | 3113.08  | PASS          | AC=9;AF=0.132;AN=68;BaseQRankSum=-1.110e+ |
| 9547 | chrY | 9978563 | . | C | T | 5244.69  | PASS          | AC=13;AF=0.191;AN=68;BaseQRankSum=0.557;C |
| 9548 | chrY | 9978574 | . | T | C | 5235.78  | PASS          | AC=12;AF=0.188;AN=64;BaseQRankSum=1.28;C  |
| 9549 | chrY | 9978594 | . | C | T | 5251.21  | PASS          | AC=19;AF=0.306;AN=62;BaseQRankSum=-7.270e |
| 9550 | chrY | 9978618 | . | G | A | 2007.26  | PASS          | AC=17;AF=0.243;AN=70;BaseQRankSum=0.248;C |
| 9551 | chrY | 9978620 | . | A | T | 354.21   | PASS          | AC=5;AF=0.071;AN=70;BaseQRankSum=-4.200e- |
| 9552 | chrY | 9978640 | . | T | G | 10492.94 | PASS          | AC=28;AF=0.424;AN=66;BaseQRankSum         |
| 9553 | chrY | 9978653 | . | G | T | 59.36    | my_snp_filter | AC=1;AF=0.015;AN=68;BaseQRankSum=         |
| 9554 | chrY | 9978669 | . | G | T | 10476.23 | PASS          | AC=25;AF=0.403;AN=62;BaseQRankSum         |
| 9555 | chrY | 9978679 | . | C | A | 2662.38  | PASS          | AC=16;AF=0.229;AN=70;BaseQRankSum=-1.421e |
| 9556 | chrY | 9978684 | . | A | C | 2548.17  | PASS          | AC=16;AF=0.229;AN=70;BaseQRankSum=0.477;C |
| 9557 | chrY | 9978690 | . | A | G | 9241.36  | my_snp_filter | AC=22;AF=0.333;AN=66;BaseQRankSum         |
| 9558 | chrY | 9978710 | . | C | A | 3242.83  | my_snp_filter | AC=18;AF=0.281;AN=64;BaseQRankSum         |
| 9559 | chrY | 9978731 | . | A | C | 2593.44  | my_snp_filter | AC=13;AF=0.203;AN=64;BaseQRankSum         |
| 9560 | chrY | 9978733 | . | C | A | 1871.51  | PASS          | AC=11;AF=0.162;AN=68;BaseQRankSum=0.242;C |
| 9561 | chrY | 9978744 | . | C | T | 1097.03  | PASS          | AC=9;AF=0.132;AN=68;BaseQRankSum=1.22;C   |
| 9562 | chrY | 9978764 | . | C | A | 158.41   | PASS          | AC=3;AF=0.044;AN=68;BaseQRankSum=0.878;C  |
| 9563 | chrY | 9978771 | . | C | T | 67.84    | my_snp_filter | AC=2;AF=0.029;AN=68;BaseQRankSum=         |
| 9564 | chrY | 9978772 | . | A | G | 70.15    | my_snp_filter | AC=2;AF=0.029;AN=68;BaseQRankSum=         |
| 9565 | chrY | 9978992 | . | A | G | 30.72    | my_snp_filter | AC=3;AF=0.045;AN=66;BaseQRankSum=         |
| 9566 | chrY | 9979021 | . | T | G | 4303.49  | my_snp_filter | AC=14;AF=0.206;AN=68;BaseQRankSum         |
| 9567 | chrY | 9979038 | . | A | G | 2735.35  | PASS          | AC=15;AF=0.221;AN=68;BaseQRankSum=-2.080e |
| 9568 | chrY | 9979047 | . | T | C | 5610.60  | PASS          | AC=18;AF=0.273;AN=66;BaseQRankSum=0.742;C |
| 9569 | chrY | 9979089 | . | G | A | 1474.77  | my_snp_filter | AC=8;AF=0.118;AN=68;BaseQRankSum=         |
| 9570 | chrY | 9979101 | . | C | A | 1371.40  | my_snp_filter | AC=9;AF=0.129;AN=70;BaseQRankSum=         |
| 9571 | chrY | 9979103 | . | C | T | 1325.98  | my_snp_filter | AC=9;AF=0.129;AN=70;BaseQRankSum=         |
| 9572 | chrY | 9979116 | . | C | A | 3527.83  | PASS          | AC=15;AF=0.221;AN=68;BaseQRankSum=-8.520e |
| 9573 | chrY | 9979125 | . | T | A | 5482.27  | my_snp_filter | AC=14;AF=0.212;AN=66;BaseQRankSum         |
| 9574 | chrY | 9979136 | . | C | T | 189.89   | PASS          | AC=2;AF=0.029;AN=70;BaseQRankSum=1.65;C   |
| 9575 | chrY | 9979150 | . | A | G | 4363.20  | my_snp_filter | AC=13;AF=0.197;AN=66;BaseQRankSum         |
| 9576 | chrY | 9979164 | . | C | T | 1884.61  | my_snp_filter | AC=10;AF=0.147;AN=68;BaseQRankSum         |

|      |      |         |   |   |     |          |               |                                           |
|------|------|---------|---|---|-----|----------|---------------|-------------------------------------------|
| 9577 | chrY | 9979167 | . | T | C,G | 2306.09  | my_snp_filter | AC=7,4;AF=0.100,0.057;AN=70;BaseQ         |
| 9578 | chrY | 9979168 | . | G | A   | 1831.89  | PASS          | AC=9;AF=0.129;AN=70;BaseQRankSum=0.579;Cl |
| 9579 | chrY | 9979173 | . | G | A   | 542.13   | PASS          | AC=5;AF=0.071;AN=70;BaseQRankSum=0.324;Cl |
| 9580 | chrY | 9979187 | . | C | G,* | 697.23   | PASS          | AC=5,1;AF=0.071,0.014;AN=70;BaseQRankSum= |
| 9581 | chrY | 9979203 | . | C | T   | 1816.77  | PASS          | AC=9;AF=0.132;AN=68;BaseQRankSum=2.36;Cli |
| 9582 | chrY | 9979204 | . | A | G   | 1899.84  | PASS          | AC=9;AF=0.136;AN=66;BaseQRankSum=2.02;Cli |
| 9583 | chrY | 9979214 | . | A | G   | 1860.86  | PASS          | AC=9;AF=0.129;AN=70;BaseQRankSum=1.35;Cli |
| 9584 | chrY | 9979219 | . | G | C,T | 1777.87  | PASS          | AC=4,5;AF=0.059,0.074;AN=68;BaseQRankSum= |
| 9585 | chrY | 9979221 | . | A | G   | 1051.77  | PASS          | AC=6;AF=0.088;AN=68;BaseQRankSum=2.23;Cli |
| 9586 | chrY | 9979228 | . | C | T   | 2873.86  | PASS          | AC=8;AF=0.118;AN=68;BaseQRankSum=1.55;Cli |
| 9587 | chrY | 9979239 | . | A | C   | 4128.09  | PASS          | AC=9;AF=0.132;AN=68;BaseQRankSum=1.55;Cli |
| 9588 | chrY | 9979248 | . | C | G   | 1625.58  | PASS          | AC=7;AF=0.100;AN=70;BaseQRankSum=-9.650e- |
| 9589 | chrY | 9979251 | . | T | A   | 1892.59  | PASS          | AC=8;AF=0.114;AN=70;BaseQRankSum=0.387;Cl |
| 9590 | chrY | 9979258 | . | A | G   | 5086.69  | PASS          | AC=10;AF=0.143;AN=70;BaseQRankSum=0.324;C |
| 9591 | chrY | 9979266 | . | G | T   | 2479.96  | PASS          | AC=8;AF=0.114;AN=70;BaseQRankSum=-1.640e- |
| 9592 | chrY | 9979269 | . | G | A   | 2487.07  | PASS          | AC=8;AF=0.114;AN=70;BaseQRankSum=3.56;Cli |
| 9593 | chrY | 9979289 | . | A | G   | 9596.26  | PASS          | AC=25;AF=0.403;AN=62;BaseQRankSum=0.059;C |
| 9594 | chrY | 9979299 | . | G | C   | 3379.41  | PASS          | AC=22;AF=0.324;AN=68;BaseQRankSum=0.047;C |
| 9595 | chrY | 9979341 | . | C | T   | 7387.32  | PASS          | AC=29;AF=0.426;AN=68;BaseQRankSum=0.751;C |
| 9596 | chrY | 9979352 | . | A | G   | 1529.37  | PASS          | AC=16;AF=0.235;AN=68;BaseQRankSum=-1.569e |
| 9597 | chrY | 9979383 | . | T | A   | 12350.75 | PASS          | AC=29;AF=0.426;AN=68;BaseQRankSum         |
| 9598 | chrY | 9979393 | . | T | C   | 17098.61 | PASS          | AC=29;AF=0.426;AN=68;BaseQRankSum         |
| 9599 | chrY | 9979404 | . | T | G   | 16154.38 | PASS          | AC=31;AF=0.443;AN=70;BaseQRankSum         |
| 9600 | chrY | 9979410 | . | C | T   | 8479.56  | PASS          | AC=29;AF=0.426;AN=68;BaseQRankSum=-2.150e |
| 9601 | chrY | 9979416 | . | T | G   | 14839.54 | PASS          | AC=29;AF=0.414;AN=70;BaseQRankSum         |
| 9602 | chrY | 9979435 | . | G | T   | 8799.55  | PASS          | AC=29;AF=0.426;AN=68;BaseQRankSum=-2.990e |
| 9603 | chrY | 9979459 | . | C | G   | 180.98   | my_snp_filter | AC=6;AF=0.086;AN=70;BaseQRankSum=         |
| 9604 | chrY | 9979473 | . | T | A   | 5904.22  | PASS          | AC=26;AF=0.371;AN=70;BaseQRankSum=-6.100e |
| 9605 | chrY | 9979474 | . | G | T   | 197.12   | my_snp_filter | AC=5;AF=0.071;AN=70;BaseQRankSum=         |
| 9606 | chrY | 9979475 | . | T | A   | 5026.62  | PASS          | AC=24;AF=0.343;AN=70;BaseQRankSum=-4.120e |
| 9607 | chrY | 9979480 | . | T | C   | 254.66   | my_snp_filter | AC=5;AF=0.071;AN=70;BaseQRankSum=         |
| 9608 | chrY | 9979481 | . | C | T   | 254.82   | my_snp_filter | AC=5;AF=0.071;AN=70;BaseQRankSum=         |
| 9609 | chrY | 9979493 | . | T | A,C | 4431.70  | PASS          | AC=23,2;AF=0.338,0.029;AN=68;BaseQRankSum |
| 9610 | chrY | 9979502 | . | C | T   | 2024.70  | PASS          | AC=15;AF=0.221;AN=68;BaseQRankSum=0.264;C |
| 9611 | chrY | 9979503 | . | T | A   | 64.16    | my_snp_filter | AC=2;AF=0.029;AN=68;BaseQRankSum=         |
| 9612 | chrY | 9979516 | . | A | C   | 3961.38  | PASS          | AC=14;AF=0.206;AN=68;BaseQRankSum=0.254;C |
| 9613 | chrY | 9979528 | . | A | G   | 431.40   | PASS          | AC=3;AF=0.044;AN=68;BaseQRankSum=0.090;Cl |
| 9614 | chrY | 9979534 | . | T | C   | 589.21   | PASS          | AC=5;AF=0.071;AN=70;BaseQRankSum=-7.770e- |
| 9615 | chrY | 9979543 | . | G | C   | 3964.74  | PASS          | AC=10;AF=0.143;AN=70;BaseQRankSum=1.60;Cl |
| 9616 | chrY | 9979552 | . | A | C   | 288.22   | PASS          | AC=4;AF=0.057;AN=70;BaseQRankSum=-2.472e+ |
| 9617 | chrY | 9979557 | . | T | C   | 1269.38  | PASS          | AC=6;AF=0.086;AN=70;BaseQRankSum=-4.040e+ |
| 9618 | chrY | 9979559 | . | G | A   | 778      | PASS          | AC=5;AF=0.071;AN=70;BaseQRankSum=-1.847e+ |
| 9619 | chrY | 9979561 | . | A | C   | 1264.52  | PASS          | AC=6;AF=0.086;AN=70;BaseQRankSum=0.118;Cl |
| 9620 | chrY | 9979567 | . | C | T   | 784.70   | PASS          | AC=5;AF=0.071;AN=70;BaseQRankSum=-1.620e- |
| 9621 | chrY | 9979570 | . | T | C   | 6260.72  | PASS          | AC=10;AF=0.143;AN=70;BaseQRankSum=-1.185e |
| 9622 | chrY | 9979578 | . | C | T   | 2501.62  | PASS          | AC=10;AF=0.143;AN=70;BaseQRankSum=1.92;Cl |
| 9623 | chrY | 9979594 | . | A | G   | 65.01    | PASS          | AC=1;AF=0.014;AN=70;BaseQRankSum=-1.535e+ |
| 9624 | chrY | 9979595 | . | A | T   | 6306.68  | PASS          | AC=12;AF=0.176;AN=68;BaseQRankSum=0.546;C |
| 9625 | chrY | 9979618 | . | T | A   | 5865.67  | PASS          | AC=14;AF=0.226;AN=62;BaseQRankSum=0.328;C |
| 9626 | chrY | 9979636 | . | A | G   | 2953.48  | PASS          | AC=10;AF=0.152;AN=66;BaseQRankSum=-3.940e |
| 9627 | chrY | 9979655 | . | T | C   | 1663.46  | PASS          | AC=8;AF=0.125;AN=64;BaseQRankSum=0.572;Cl |
| 9628 | chrY | 9979687 | . | T | A   | 1047.22  | PASS          | AC=8;AF=0.125;AN=64;BaseQRankSum=0.906;Cl |
| 9629 | chrY | 9979690 | . | A | T   | 995.47   | PASS          | AC=8;AF=0.125;AN=64;BaseQRankSum=-4.210e- |
| 9630 | chrY | 9979697 | . | A | T   | 630.20   | PASS          | AC=6;AF=0.094;AN=64;BaseQRankSum=-1.070e- |
| 9631 | chrY | 9979700 | . | G | A   | 424.64   | PASS          | AC=6;AF=0.094;AN=64;BaseQRankSum=1.18;Cl  |
| 9632 | chrY | 9979726 | . | A | G   | 43.47    | PASS          | AC=2;AF=0.032;AN=62;BaseQRankSum=0.727;Cl |
| 9633 | chrY | 9979728 | . | A | T   | 43.79    | PASS          | AC=2;AF=0.031;AN=64;BaseQRankSum=0.727;Cl |
| 9634 | chrY | 9979772 | . | T | C   | 81.75    | PASS          | AC=2;AF=0.031;AN=64;BaseQRankSum=-9.560e- |
| 9635 | chrY | 9979789 | . | G | T   | 807.68   | PASS          | AC=9;AF=0.132;AN=68;BaseQRankSum=0.00;Cli |
| 9636 | chrY | 9979797 | . | G | A   | 61.26    | PASS          | AC=1;AF=0.015;AN=68;BaseQRankSum=-3.700e- |
| 9637 | chrY | 9979801 | . | T | G   | 2568.30  | PASS          | AC=15;AF=0.242;AN=62;BaseQRankSum=0.206;C |
| 9638 | chrY | 9979802 | . | C | T   | 901.83   | PASS          | AC=10;AF=0.161;AN=62;BaseQRankSum=-4.740e |
| 9639 | chrY | 9979815 | . | G | C   | 1074.48  | PASS          | AC=11;AF=0.162;AN=68;BaseQRankSum=-3.340e |
| 9640 | chrY | 9979820 | . | C | G   | 1170.62  | PASS          | AC=9;AF=0.129;AN=70;BaseQRankSum=0.948;Cl |
| 9641 | chrY | 9979824 | . | C | T   | 1140.35  | PASS          | AC=11;AF=0.162;AN=68;BaseQRankSum=-6.680e |
| 9642 | chrY | 9979850 | . | A | G   | 37.04    | PASS          | AC=1;AF=0.015;AN=68;BaseQRankSum=0.358;Cl |
| 9643 | chrY | 9979852 | . | A | G   | 3541.91  | PASS          | AC=17;AF=0.250;AN=68;BaseQRankSum=-1.350e |
| 9644 | chrY | 9979860 | . | C | T   | 907.44   | PASS          | AC=7;AF=0.106;AN=66;BaseQRankSum=-1.286e+ |
| 9645 | chrY | 9979876 | . | A | T   | 1490.65  | PASS          | AC=19;AF=0.271;AN=70;BaseQRankSum=-1.271e |
| 9646 | chrY | 9979890 | . | C | G   | 86.68    | PASS          | AC=3;AF=0.043;AN=70;BaseQRankSum=-2.890e- |
| 9647 | chrY | 9979924 | . | C | T   | 358.94   | PASS          | AC=6;AF=0.091;AN=66;BaseQRankSum=-1.764e+ |
| 9648 | chrY | 9979944 | . | G | C   | 2348.09  | PASS          | AC=25;AF=0.391;AN=64;BaseQRankSum=0.572;C |
| 9649 | chrY | 9979978 | . | G | A   | 2537.51  | PASS          | AC=9;AF=0.132;AN=68;BaseQRankSum=-8.190e- |
| 9650 | chrY | 9979981 | . | A | C   | 2701.72  | PASS          | AC=9;AF=0.132;AN=68;BaseQRankSum=-7.060e- |
| 9651 | chrY | 9979991 | . | A | C   | 373.50   | PASS          | AC=3;AF=0.045;AN=66;BaseQRankSum=1.30;Cli |
| 9652 | chrY | 9979992 | . | C | G   | 590.17   | PASS          | AC=6;AF=0.091;AN=66;BaseQRankSum=0.158;Cl |

|      |      |         |   |   |     |          |               |                                           |
|------|------|---------|---|---|-----|----------|---------------|-------------------------------------------|
| 9653 | chrY | 9979994 | . | T | C   | 2876.72  | my_snp_filter | AC=9;AF=0.136;AN=66;BaseQRankSum=         |
| 9654 | chrY | 9979999 | . | T | A   | 114.26   | my_snp_filter | AC=4;AF=0.061;AN=66;BaseQRankSum=         |
| 9655 | chrY | 9980003 | . | T | A   | 42.39    | my_snp_filter | AC=2;AF=0.031;AN=64;BaseQRankSum=         |
| 9656 | chrY | 9980012 | . | G | T   | 651.68   | PASS          | AC=7;AF=0.113;AN=62;BaseQRankSum=0.149;Cl |
| 9657 | chrY | 9980022 | . | G | C   | 719.14   | PASS          | AC=7;AF=0.109;AN=64;BaseQRankSum=-2.878e+ |
| 9658 | chrY | 9980028 | . | G | A   | 253.65   | PASS          | AC=3;AF=0.044;AN=68;BaseQRankSum=1.20;Cli |
| 9659 | chrY | 9980039 | . | C | G   | 859.73   | PASS          | AC=7;AF=0.106;AN=66;BaseQRankSum=0.134;Cl |
| 9660 | chrY | 9980050 | . | A | G   | 992.15   | PASS          | AC=8;AF=0.121;AN=66;BaseQRankSum=0.717;Cl |
| 9661 | chrY | 9980059 | . | C | A   | 2139.75  | my_snp_filter | AC=8;AF=0.125;AN=64;BaseQRankSum=         |
| 9662 | chrY | 9980080 | . | A | G   | 189.37   | my_snp_filter | AC=6;AF=0.094;AN=64;BaseQRankSum=         |
| 9663 | chrY | 9980082 | . | G | C   | 4945.02  | my_snp_filter | AC=9;AF=0.145;AN=62;BaseQRankSum=         |
| 9664 | chrY | 9980083 | . | A | G   | 71.37    | my_snp_filter | AC=3;AF=0.047;AN=64;BaseQRankSum=         |
| 9665 | chrY | 9980102 | . | A | T   | 421.36   | PASS          | AC=3;AF=0.048;AN=62;BaseQRankSum=-2.950e- |
| 9666 | chrY | 9980103 | . | T | C,A | 3464.38  | my_snp_filter | AC=7,2;AF=0.117,0.033;AN=60;BaseQ         |
| 9667 | chrY | 9980117 | . | A | T   | 2351.67  | my_snp_filter | AC=9;AF=0.150;AN=60;BaseQRankSum=         |
| 9668 | chrY | 9980125 | . | G | A   | 1594.19  | PASS          | AC=8;AF=0.129;AN=62;BaseQRankSum=0.829;Cl |
| 9669 | chrY | 9980142 | . | C | A   | 2017.26  | PASS          | AC=8;AF=0.129;AN=62;BaseQRankSum=2.70;Cli |
| 9670 | chrY | 9980148 | . | T | G   | 2126.06  | PASS          | AC=8;AF=0.138;AN=58;BaseQRankSum=-1.480e+ |
| 9671 | chrY | 9980165 | . | A | T   | 2655.72  | my_snp_filter | AC=11;AF=0.190;AN=58;BaseQRankSum=        |
| 9672 | chrY | 9980177 | . | G | A   | 6404.10  | my_snp_filter | AC=15;AF=0.268;AN=56;BaseQRankSum=        |
| 9673 | chrY | 9980231 | . | G | C   | 5740.99  | PASS          | AC=21;AF=0.350;AN=60;BaseQRankSum=-7.170e |
| 9674 | chrY | 9980235 | . | G | A   | 411.67   | PASS          | AC=4;AF=0.065;AN=62;BaseQRankSum=0.793;Cl |
| 9675 | chrY | 9980236 | . | C | T   | 5054.58  | PASS          | AC=19;AF=0.328;AN=58;BaseQRankSum=0.515;C |
| 9676 | chrY | 9980238 | . | A | G   | 4634.85  | PASS          | AC=19;AF=0.317;AN=60;BaseQRankSum=-7.420e |
| 9677 | chrY | 9980239 | . | C | T   | 13374.39 | PASS          | AC=29;AF=0.500;AN=58;BaseQRankSum=        |
| 9678 | chrY | 9980240 | . | A | G   | 13500.39 | PASS          | AC=29;AF=0.500;AN=58;BaseQRankSum=        |
| 9679 | chrY | 9980244 | . | C | G   | 37.96    | PASS          | AC=1;AF=0.015;AN=68;BaseQRankSum=1.07;Cli |
| 9680 | chrY | 9980251 | . | G | A   | 3753.82  | PASS          | AC=16;AF=0.229;AN=70;BaseQRankSum=0.00;Cl |
| 9681 | chrY | 9980252 | . | C | T   | 3736.53  | PASS          | AC=16;AF=0.229;AN=70;BaseQRankSum=1.60;Cl |
| 9682 | chrY | 9980256 | . | T | C   | 17951.22 | PASS          | AC=29;AF=0.500;AN=58;BaseQRankSum=        |
| 9683 | chrY | 9980270 | . | C | T   | 283.28   | PASS          | AC=3;AF=0.043;AN=70;BaseQRankSum=0.400;Cl |
| 9684 | chrY | 9980278 | . | A | G   | 3361.44  | PASS          | AC=21;AF=0.300;AN=70;BaseQRankSum=0.107;C |
| 9685 | chrY | 9980291 | . | G | C   | 21490.72 | PASS          | AC=35;AF=0.500;AN=70;BaseQRankSum=        |
| 9686 | chrY | 9980314 | . | T | A   | 69.06    | my_snp_filter | AC=3;AF=0.043;AN=70;BaseQRankSum=         |
| 9687 | chrY | 9980315 | . | G | C   | 12995.73 | PASS          | AC=35;AF=0.500;AN=70;BaseQRankSum=        |
| 9688 | chrY | 9980343 | . | A | T   | 401.99   | my_snp_filter | AC=3;AF=0.043;AN=70;BaseQRankSum=         |
| 9689 | chrY | 9980344 | . | G | C   | 231.69   | my_snp_filter | AC=5;AF=0.071;AN=70;BaseQRankSum=         |
| 9690 | chrY | 9980345 | . | G | A   | 234.48   | my_snp_filter | AC=5;AF=0.071;AN=70;BaseQRankSum=         |
| 9691 | chrY | 9980347 | . | C | G   | 252.93   | my_snp_filter | AC=5;AF=0.071;AN=70;BaseQRankSum=         |
| 9692 | chrY | 9980359 | . | A | C   | 372.25   | PASS          | AC=5;AF=0.071;AN=70;BaseQRankSum=-7.280e- |
| 9693 | chrY | 9980362 | . | C | T   | 1508.26  | my_snp_filter | AC=15;AF=0.214;AN=70;BaseQRankSum=        |
| 9694 | chrY | 9980370 | . | C | T   | 17360.73 | PASS          | AC=35;AF=0.500;AN=70;BaseQRankSum=        |
| 9695 | chrY | 9980391 | . | G | A   | 12427.36 | PASS          | AC=31;AF=0.443;AN=70;BaseQRankSum=        |
| 9696 | chrY | 9980395 | . | A | T   | 12440.41 | PASS          | AC=30;AF=0.429;AN=70;BaseQRankSum=        |
| 9697 | chrY | 9980400 | . | C | T   | 12611.06 | PASS          | AC=29;AF=0.414;AN=70;BaseQRankSum=        |
| 9698 | chrY | 9980403 | . | C | A   | 603.97   | my_snp_filter | AC=9;AF=0.129;AN=70;BaseQRankSum=         |
| 9699 | chrY | 9980407 | . | T | G   | 260.61   | my_snp_filter | AC=5;AF=0.071;AN=70;BaseQRankSum=         |
| 9700 | chrY | 9980408 | . | G | A   | 266.57   | my_snp_filter | AC=5;AF=0.071;AN=70;BaseQRankSum=         |
| 9701 | chrY | 9980409 | . | C | T   | 12985.78 | PASS          | AC=26;AF=0.371;AN=70;BaseQRankSum=        |
| 9702 | chrY | 9980420 | . | T | C   | 20441.85 | PASS          | AC=34;AF=0.486;AN=70;BaseQRankSum=        |
| 9703 | chrY | 9980421 | . | T | C   | 20447.85 | PASS          | AC=34;AF=0.486;AN=70;BaseQRankSum=        |
| 9704 | chrY | 9980422 | . | G | C,A | 22533.72 | PASS          | AC=28,7;AF=0.400,0.100;AN=70;Base         |
| 9705 | chrY | 9980431 | . | G | C   | 10351.63 | PASS          | AC=27;AF=0.386;AN=70;BaseQRankSum=        |
| 9706 | chrY | 9980446 | . | A | G   | 14593.36 | PASS          | AC=33;AF=0.471;AN=70;BaseQRankSum=        |
| 9707 | chrY | 9980447 | . | G | T   | 8591.02  | PASS          | AC=25;AF=0.357;AN=70;BaseQRankSum=0.522;C |
| 9708 | chrY | 9980450 | . | C | T   | 13859.36 | PASS          | AC=33;AF=0.471;AN=70;BaseQRankSum=        |
| 9709 | chrY | 9980460 | . | C | G   | 623.38   | PASS          | AC=8;AF=0.114;AN=70;BaseQRankSum=0.312;Cl |
| 9710 | chrY | 9980463 | . | T | G   | 42293.87 | PASS          | AC=35;AF=0.500;AN=70;BaseQRankSum=        |
| 9711 | chrY | 9980465 | . | A | G   | 12803.85 | PASS          | AC=34;AF=0.486;AN=70;BaseQRankSum=        |
| 9712 | chrY | 9980474 | . | C | T   | 9047.22  | PASS          | AC=30;AF=0.429;AN=70;BaseQRankSum=0.673;C |
| 9713 | chrY | 9980481 | . | A | C   | 5994.96  | PASS          | AC=23;AF=0.329;AN=70;BaseQRankSum=0.898;C |
| 9714 | chrY | 9980520 | . | A | G   | 418.79   | my_snp_filter | AC=8;AF=0.114;AN=70;BaseQRankSum=         |
| 9715 | chrY | 9980525 | . | C | G   | 261.73   | my_snp_filter | AC=6;AF=0.086;AN=70;BaseQRankSum=         |
| 9716 | chrY | 9980539 | . | T | C   | 7788.21  | PASS          | AC=15;AF=0.234;AN=64;BaseQRankSum=1.40;Cl |
| 9717 | chrY | 9980555 | . | A | C   | 6175.06  | my_snp_filter | AC=10;AF=0.147;AN=68;BaseQRankSum=        |
| 9718 | chrY | 9980558 | . | G | T   | 1480.08  | PASS          | AC=7;AF=0.100;AN=70;BaseQRankSum=2.27;Cli |
| 9719 | chrY | 9980561 | . | C | T   | 3198.46  | my_snp_filter | AC=9;AF=0.129;AN=70;BaseQRankSum=         |
| 9720 | chrY | 9980575 | . | G | T   | 3314.21  | my_snp_filter | AC=9;AF=0.129;AN=70;BaseQRankSum=         |
| 9721 | chrY | 9980581 | . | A | G   | 1536.62  | PASS          | AC=6;AF=0.086;AN=70;BaseQRankSum=-2.669e+ |
| 9722 | chrY | 9980602 | . | C | T   | 7716.49  | my_snp_filter | AC=9;AF=0.132;AN=68;BaseQRankSum=         |
| 9723 | chrY | 9980608 | . | A | T   | 8059.82  | my_snp_filter | AC=14;AF=0.206;AN=68;BaseQRankSum=        |
| 9724 | chrY | 9980622 | . | T | C   | 132.92   | my_snp_filter | AC=3;AF=0.043;AN=70;BaseQRankSum=         |
| 9725 | chrY | 9980623 | . | T | C   | 612.94   | PASS          | AC=4;AF=0.057;AN=70;BaseQRankSum=2.36;Cli |
| 9726 | chrY | 9980625 | . | G | A,* | 828.43   | PASS          | AC=3,4;AF=0.043,0.057;AN=70;BaseQRankSum= |
| 9727 | chrY | 9980641 | . | T | C   | 1256.91  | PASS          | AC=7;AF=0.100;AN=70;BaseQRankSum=0.567;Cl |
| 9728 | chrY | 9980652 | . | G | A   | 142.62   | my_snp_filter | AC=5;AF=0.071;AN=70;BaseQRankSum=         |

|      |      |         |   |   |     |          |               |                                            |
|------|------|---------|---|---|-----|----------|---------------|--------------------------------------------|
| 9729 | chrY | 9980654 | . | C | T   | 2315.23  | PASS          | AC=16;AF=0.229;AN=70;BaseQRankSum=-6.810e  |
| 9730 | chrY | 9980686 | . | T | G   | 11627.63 | PASS          | AC=25;AF=0.357;AN=70;BaseQRankSum          |
| 9731 | chrY | 9980687 | . | C | T   | 32.18    | my_snp_filter | AC=2;AF=0.029;AN=70;BaseQRankSum           |
| 9732 | chrY | 9980691 | . | T | G   | 11400.11 | PASS          | AC=25;AF=0.357;AN=70;BaseQRankSum          |
| 9733 | chrY | 9980702 | . | C | A   | 827.45   | PASS          | AC=8;AF=0.114;AN=70;BaseQRankSum=0.284;C   |
| 9734 | chrY | 9980743 | . | G | A   | 1195.13  | PASS          | AC=7;AF=0.106;AN=66;BaseQRankSum=-2.248e+  |
| 9735 | chrY | 9980755 | . | G | A   | 1049.31  | PASS          | AC=7;AF=0.106;AN=66;BaseQRankSum=-7.510e-  |
| 9736 | chrY | 9981158 | . | A | G   | 619.93   | PASS          | AC=9;AF=0.129;AN=70;BaseQRankSum=-6.500e-  |
| 9737 | chrY | 9981169 | . | G | T   | 207.62   | my_snp_filter | AC=6;AF=0.086;AN=70;BaseQRankSum=          |
| 9738 | chrY | 9981176 | . | C | T   | 139.90   | my_snp_filter | AC=4;AF=0.057;AN=70;BaseQRankSum=          |
| 9739 | chrY | 9981200 | . | C | G   | 76.65    | PASS          | AC=1;AF=0.014;AN=70;BaseQRankSum=-2.350e+  |
| 9740 | chrY | 9981201 | . | C | A   | 76.64    | PASS          | AC=1;AF=0.014;AN=70;BaseQRankSum=-4.700e-  |
| 9741 | chrY | 9981229 | . | T | G   | 566.10   | PASS          | AC=8;AF=0.114;AN=70;BaseQRankSum=-9.420e-  |
| 9742 | chrY | 9981231 | . | A | G   | 91.07    | my_snp_filter | AC=3;AF=0.043;AN=70;BaseQRankSum=          |
| 9743 | chrY | 9981243 | . | C | G   | 116.69   | PASS          | AC=2;AF=0.029;AN=70;BaseQRankSum=-2.381e+  |
| 9744 | chrY | 9981250 | . | T | C   | 675.25   | PASS          | AC=10;AF=0.143;AN=70;BaseQRankSum=0.818;C  |
| 9745 | chrY | 9981252 | . | A | T   | 48.96    | my_snp_filter | AC=2;AF=0.029;AN=70;BaseQRankSum=          |
| 9746 | chrY | 9981253 | . | C | T   | 1587.23  | my_snp_filter | AC=13;AF=0.186;AN=70;BaseQRankSum          |
| 9747 | chrY | 9981258 | . | A | C   | 1443.10  | my_snp_filter | AC=12;AF=0.171;AN=70;BaseQRankSum          |
| 9748 | chrY | 9981262 | . | C | A   | 489.17   | PASS          | AC=10;AF=0.143;AN=70;BaseQRankSum=0.273;C  |
| 9749 | chrY | 9981265 | . | G | A   | 76.48    | PASS          | AC=1;AF=0.014;AN=70;BaseQRankSum=1.03;Cli  |
| 9750 | chrY | 9981269 | . | G | A   | 384      | my_snp_filter | AC=9;AF=0.129;AN=70;BaseQRankSum=          |
| 9751 | chrY | 9981274 | . | T | G   | 655.66   | my_snp_filter | AC=9;AF=0.129;AN=70;BaseQRankSum=          |
| 9752 | chrY | 9981284 | . | C | G   | 76.01    | PASS          | AC=1;AF=0.014;AN=70;BaseQRankSum=-2.297e+  |
| 9753 | chrY | 9981287 | . | A | G   | 538.52   | my_snp_filter | AC=6;AF=0.086;AN=70;BaseQRankSum=          |
| 9754 | chrY | 9981317 | . | A | G   | 1372.96  | PASS          | AC=7;AF=0.100;AN=70;BaseQRankSum=1.50;Cli  |
| 9755 | chrY | 9981367 | . | T | C   | 58.28    | my_snp_filter | AC=1;AF=0.014;AN=70;BaseQRankSum=          |
| 9756 | chrY | 9981376 | . | A | C   | 3613.38  | PASS          | AC=22;AF=0.314;AN=70;BaseQRankSum=0.592;C  |
| 9757 | chrY | 9981390 | . | T | C   | 301.55   | PASS          | AC=2;AF=0.029;AN=70;BaseQRankSum=-1.609e+  |
| 9758 | chrY | 9981393 | . | T | C   | 6023.82  | PASS          | AC=22;AF=0.355;AN=62;BaseQRankSum=0.546;C  |
| 9759 | chrY | 9981395 | . | G | C   | 6459.88  | PASS          | AC=23;AF=0.371;AN=62;BaseQRankSum=-6.350e+ |
| 9760 | chrY | 9981402 | . | A | G   | 1104.95  | PASS          | AC=12;AF=0.171;AN=70;BaseQRankSum=-1.626e  |
| 9761 | chrY | 9981403 | . | G | A   | 1262.65  | PASS          | AC=12;AF=0.171;AN=70;BaseQRankSum=-3.030e  |
| 9762 | chrY | 9981407 | . | G | A,T | 5796.82  | PASS          | AC=14,9;AF=0.241,0.155;AN=58;BaseQRankSum  |
| 9763 | chrY | 9981410 | . | G | T,C | 4920.79  | PASS          | AC=19,3;AF=0.279,0.044;AN=68;BaseQRankSum  |
| 9764 | chrY | 9981421 | . | G | T   | 5600.18  | PASS          | AC=23;AF=0.329;AN=70;BaseQRankSum=-1.124e+ |
| 9765 | chrY | 9981426 | . | G | T   | 1791.94  | PASS          | AC=12;AF=0.171;AN=70;BaseQRankSum=-3.240e  |
| 9766 | chrY | 9981449 | . | C | T,G | 3255.85  | PASS          | AC=19,8;AF=0.271,0.114;AN=70;BaseQRankSum  |
| 9767 | chrY | 9981475 | . | C | G,T | 7113.29  | PASS          | AC=26,9;AF=0.371,0.129;AN=70;BaseQRankSum  |
| 9768 | chrY | 9981481 | . | G | A   | 1290.15  | PASS          | AC=16;AF=0.229;AN=70;BaseQRankSum=-2.620e  |
| 9769 | chrY | 9981488 | . | T | C   | 1874.73  | PASS          | AC=17;AF=0.243;AN=70;BaseQRankSum=-3.140e  |
| 9770 | chrY | 9981496 | . | C | G   | 5452.43  | PASS          | AC=24;AF=0.343;AN=70;BaseQRankSum=-2.310e  |
| 9771 | chrY | 9981505 | . | G | A   | 6996.40  | PASS          | AC=27;AF=0.397;AN=68;BaseQRankSum=-9.430e  |
| 9772 | chrY | 9981508 | . | T | C   | 16426.03 | PASS          | AC=33;AF=0.485;AN=68;BaseQRankSum          |
| 9773 | chrY | 9981514 | . | C | A   | 1189.48  | PASS          | AC=15;AF=0.214;AN=70;BaseQRankSum=0.101;C  |
| 9774 | chrY | 9981543 | . | G | A   | 258.31   | PASS          | AC=5;AF=0.071;AN=70;BaseQRankSum=0.796;C   |
| 9775 | chrY | 9981545 | . | C | A   | 1896.99  | PASS          | AC=21;AF=0.309;AN=68;BaseQRankSum=0.577;C  |
| 9776 | chrY | 9981546 | . | C | T   | 31.66    | my_snp_filter | AC=2;AF=0.029;AN=70;BaseQRankSum=          |
| 9777 | chrY | 9981547 | . | T | C   | 2876.35  | PASS          | AC=26;AF=0.382;AN=68;BaseQRankSum=0.731;C  |
| 9778 | chrY | 9981558 | . | C | T   | 109.23   | PASS          | AC=3;AF=0.043;AN=70;BaseQRankSum=1.34;Cli  |
| 9779 | chrY | 9981563 | . | G | A,* | 667.72   | PASS          | AC=8,2;AF=0.118,0.029;AN=68;BaseQRankSum=  |
| 9780 | chrY | 9981566 | . | C | T   | 46.05    | my_snp_filter | AC=2;AF=0.029;AN=70;BaseQRankSum=          |
| 9781 | chrY | 9981568 | . | C | A   | 288.33   | PASS          | AC=5;AF=0.071;AN=70;BaseQRankSum=0.742;C   |
| 9782 | chrY | 9981584 | . | C | A   | 67.75    | my_snp_filter | AC=2;AF=0.029;AN=68;BaseQRankSum=          |
| 9783 | chrY | 9981585 | . | A | G   | 67.74    | my_snp_filter | AC=2;AF=0.029;AN=68;BaseQRankSum=          |
| 9784 | chrY | 9981725 | . | G | C   | 554.43   | PASS          | AC=7;AF=0.100;AN=70;BaseQRankSum=-2.120e-  |
| 9785 | chrY | 9981731 | . | G | A   | 2288.14  | PASS          | AC=25;AF=0.357;AN=70;BaseQRankSum=0.00;C   |
| 9786 | chrY | 9981753 | . | T | C   | 10364.33 | PASS          | AC=34;AF=0.486;AN=70;BaseQRankSum          |
| 9787 | chrY | 9981754 | . | G | A   | 3833.17  | PASS          | AC=27;AF=0.386;AN=70;BaseQRankSum=-2.130e  |
| 9788 | chrY | 9981785 | . | C | G   | 29774.73 | PASS          | AC=35;AF=0.500;AN=70;BaseQRankSum          |
| 9789 | chrY | 9981816 | . | A | G   | 11587.16 | PASS          | AC=34;AF=0.486;AN=70;BaseQRankSum          |
| 9790 | chrY | 9981819 | . | G | T   | 10782.84 | PASS          | AC=32;AF=0.457;AN=70;BaseQRankSum          |
| 9791 | chrY | 9981826 | . | T | C   | 11111.30 | PASS          | AC=32;AF=0.457;AN=70;BaseQRankSum          |
| 9792 | chrY | 9981839 | . | G | T   | 7670.89  | PASS          | AC=30;AF=0.429;AN=70;BaseQRankSum=-4.570e  |
| 9793 | chrY | 9981858 | . | T | C   | 6176.80  | PASS          | AC=27;AF=0.386;AN=70;BaseQRankSum=-2.480e  |
| 9794 | chrY | 9981897 | . | C | T   | 5352.22  | PASS          | AC=29;AF=0.414;AN=70;BaseQRankSum=0.927;C  |
| 9795 | chrY | 9981898 | . | A | G   | 30825.72 | PASS          | AC=35;AF=0.500;AN=70;BaseQRankSum          |
| 9796 | chrY | 9981913 | . | A | T   | 199.06   | PASS          | AC=2;AF=0.029;AN=70;BaseQRankSum=1.22;Cli  |
| 9797 | chrY | 9981918 | . | T | C   | 3136.90  | PASS          | AC=22;AF=0.314;AN=70;BaseQRankSum=-4.000e  |
| 9798 | chrY | 9981962 | . | A | T   | 31.72    | PASS          | AC=1;AF=0.014;AN=70;BaseQRankSum=1.26;Cli  |
| 9799 | chrY | 9981968 | . | T | G   | 3298.79  | PASS          | AC=20;AF=0.333;AN=60;BaseQRankSum=-4.830e  |
| 9800 | chrY | 9981977 | . | A | C   | 2418.77  | PASS          | AC=16;AF=0.250;AN=64;BaseQRankSum=0.589;C  |
| 9801 | chrY | 9981982 | . | G | C   | 71.01    | my_snp_filter | AC=4;AF=0.057;AN=70;BaseQRankSum=          |
| 9802 | chrY | 9982000 | . | C | T   | 522.33   | PASS          | AC=9;AF=0.145;AN=62;BaseQRankSum=1.67;Cli  |
| 9803 | chrY | 9982001 | . | G | A   | 310.38   | PASS          | AC=5;AF=0.081;AN=62;BaseQRankSum=1.26;Cli  |
| 9804 | chrY | 9982009 | . | T | G   | 143.83   | my_snp_filter | AC=4;AF=0.061;AN=66;BaseQRankSum=          |

|      |      |         |   |   |     |          |               |                                           |
|------|------|---------|---|---|-----|----------|---------------|-------------------------------------------|
| 9805 | chrY | 9982010 | . | C | T   | 93.83    | PASS          | AC=2;AF=0.030;AN=66;BaseQRankSum=-9.220e- |
| 9806 | chrY | 9982014 | . | A | C   | 94.96    | PASS          | AC=3;AF=0.044;AN=68;BaseQRankSum=-6.000e- |
| 9807 | chrY | 9982117 | . | G | A   | 107.83   | PASS          | AC=7;AF=0.103;AN=68;BaseQRankSum=0.742;Cl |
| 9808 | chrY | 9982139 | . | A | C   | 355.23   | PASS          | AC=11;AF=0.162;AN=68;BaseQRankSum=0.762;C |
| 9809 | chrY | 9982184 | . | A | T   | 1231.19  | my_snp_filter | AC=8;AF=0.114;AN=70;BaseQRankSum=         |
| 9810 | chrY | 9982205 | . | T | C   | 1366.81  | my_snp_filter | AC=8;AF=0.114;AN=70;BaseQRankSum=         |
| 9811 | chrY | 9982210 | . | G | C   | 1311.25  | my_snp_filter | AC=8;AF=0.114;AN=70;BaseQRankSum=         |
| 9812 | chrY | 9982211 | . | G | A   | 1270.82  | my_snp_filter | AC=8;AF=0.114;AN=70;BaseQRankSum=         |
| 9813 | chrY | 9982217 | . | C | T   | 1221.11  | my_snp_filter | AC=8;AF=0.114;AN=70;BaseQRankSum=         |
| 9814 | chrY | 9982227 | . | C | T   | 297.96   | PASS          | AC=3;AF=0.043;AN=70;BaseQRankSum=-1.350e+ |
| 9815 | chrY | 9982273 | . | G | A   | 1636.46  | PASS          | AC=14;AF=0.200;AN=70;BaseQRankSum=-1.444e |
| 9816 | chrY | 9982281 | . | A | G   | 1359.84  | PASS          | AC=11;AF=0.157;AN=70;BaseQRankSum=-1.648e |
| 9817 | chrY | 9982299 | . | G | C   | 1122.64  | PASS          | AC=10;AF=0.143;AN=70;BaseQRankSum=-6.730e |
| 9818 | chrY | 9982303 | . | C | T   | 1016.62  | PASS          | AC=10;AF=0.143;AN=70;BaseQRankSum=-1.457e |
| 9819 | chrY | 9982342 | . | T | C,* | 284.40   | PASS          | AC=3,2;AF=0.043,0.029;AN=70;BaseQRankSum= |
| 9820 | chrY | 9982343 | . | T | G,* | 279.89   | PASS          | AC=3,2;AF=0.043,0.029;AN=70;BaseQRankSum= |
| 9821 | chrY | 9982356 | . | C | A   | 660.85   | PASS          | AC=7;AF=0.100;AN=70;BaseQRankSum=1.24;Cli |
| 9822 | chrY | 9982365 | . | A | T   | 110.03   | PASS          | AC=2;AF=0.029;AN=70;BaseQRankSum=-7.580e- |
| 9823 | chrY | 9982377 | . | C | G   | 798.44   | PASS          | AC=7;AF=0.100;AN=70;BaseQRankSum=1.05;Cli |
| 9824 | chrY | 9982383 | . | G | C   | 860.45   | PASS          | AC=7;AF=0.100;AN=70;BaseQRankSum=-8.050e- |
| 9825 | chrY | 9982393 | . | A | G   | 982.03   | PASS          | AC=7;AF=0.100;AN=70;BaseQRankSum=0.297;Cl |
| 9826 | chrY | 9982408 | . | C | T   | 1025.58  | PASS          | AC=7;AF=0.109;AN=64;BaseQRankSum=-2.700e- |
| 9827 | chrY | 9982423 | . | T | A   | 1037.63  | PASS          | AC=7;AF=0.109;AN=64;BaseQRankSum=-7.050e- |
| 9828 | chrY | 9982452 | . | T | G   | 878.68   | PASS          | AC=7;AF=0.130;AN=54;BaseQRankSum=-2.059e+ |
| 9829 | chrY | 9982455 | . | T | A   | 879.98   | PASS          | AC=7;AF=0.135;AN=52;BaseQRankSum=-9.550e- |
| 9830 | chrY | 9982494 | . | T | C   | 224.82   | PASS          | AC=3;AF=0.083;AN=36;BaseQRankSum=-1.270e- |
| 9831 | chrY | 9982528 | . | G | A   | 487.16   | PASS          | AC=4;AF=0.167;AN=24;BaseQRankSum=0.510;Cl |
| 9832 | chrY | 9982529 | . | T | C   | 2317.64  | PASS          | AC=10;AF=0.500;AN=20;BaseQRankSum=1.21;Cl |
| 9833 | chrY | 9982530 | . | T | C   | 489.42   | PASS          | AC=4;AF=0.182;AN=22;BaseQRankSum=1.04;Cli |
| 9834 | chrY | 9982536 | . | T | G   | 408.26   | PASS          | AC=4;AF=0.182;AN=22;BaseQRankSum=-2.560e+ |
| 9835 | chrY | 9982540 | . | T | A   | 35.97    | my_snp_filter | AC=1;AF=0.038;AN=26;BaseQRankSum=         |
| 9836 | chrY | 9982546 | . | A | G   | 504.29   | PASS          | AC=4;AF=0.167;AN=24;BaseQRankSum=0.296;Cl |
| 9837 | chrY | 9982556 | . | C | T   | 509.67   | PASS          | AC=4;AF=0.167;AN=24;BaseQRankSum=1.20;Cli |
| 9838 | chrY | 9982561 | . | A | G   | 438.67   | PASS          | AC=4;AF=0.143;AN=28;BaseQRankSum=-1.529e+ |
| 9839 | chrY | 9982562 | . | A | T   | 495.59   | PASS          | AC=4;AF=0.143;AN=28;BaseQRankSum=-9.400e- |
| 9840 | chrY | 9982576 | . | C | T   | 614.61   | PASS          | AC=4;AF=0.143;AN=28;BaseQRankSum=1.27;Cl  |
| 9841 | chrY | 9982578 | . | A | G   | 614.34   | PASS          | AC=4;AF=0.143;AN=28;BaseQRankSum=0.887;Cl |
| 9842 | chrY | 9982588 | . | T | C   | 774.46   | PASS          | AC=4;AF=0.133;AN=30;BaseQRankSum=1.21;Cli |
| 9843 | chrY | 9982589 | . | A | T   | 776.46   | PASS          | AC=4;AF=0.133;AN=30;BaseQRankSum=0.258;Cl |
| 9844 | chrY | 9982605 | . | T | C   | 1019.46  | PASS          | AC=5;AF=0.109;AN=46;BaseQRankSum=-7.100e- |
| 9845 | chrY | 9982606 | . | G | C   | 1018.26  | PASS          | AC=5;AF=0.109;AN=46;BaseQRankSum=-2.096e+ |
| 9846 | chrY | 9982616 | . | C | T   | 117.71   | PASS          | AC=2;AF=0.042;AN=48;BaseQRankSum=1.47;Cli |
| 9847 | chrY | 9982636 | . | T | C   | 381.10   | PASS          | AC=6;AF=0.100;AN=60;BaseQRankSum=-1.233e+ |
| 9848 | chrY | 9982662 | . | A | G   | 304.57   | PASS          | AC=7;AF=0.113;AN=62;BaseQRankSum=-1.239e+ |
| 9849 | chrY | 9982669 | . | C | A   | 47.74    | PASS          | AC=2;AF=0.031;AN=64;BaseQRankSum=0.731;Cl |
| 9850 | chrY | 9982675 | . | A | T   | 44.65    | my_snp_filter | AC=2;AF=0.031;AN=64;BaseQRankSum=         |
| 9851 | chrY | 9982684 | . | G | A   | 127.84   | PASS          | AC=3;AF=0.045;AN=66;BaseQRankSum=0.854;Cl |
| 9852 | chrY | 9982705 | . | A | G   | 1090.82  | PASS          | AC=9;AF=0.132;AN=68;BaseQRankSum=-2.573e+ |
| 9853 | chrY | 9982711 | . | A | T   | 1054.73  | PASS          | AC=8;AF=0.118;AN=68;BaseQRankSum=-2.310e- |
| 9854 | chrY | 9982724 | . | G | C   | 631.85   | PASS          | AC=7;AF=0.103;AN=68;BaseQRankSum=0.761;Cl |
| 9855 | chrY | 9982743 | . | C | T   | 431.47   | PASS          | AC=8;AF=0.114;AN=70;BaseQRankSum=0.269;Cl |
| 9856 | chrY | 9982750 | . | G | C   | 391.48   | PASS          | AC=7;AF=0.100;AN=70;BaseQRankSum=0.736;Cl |
| 9857 | chrY | 9982759 | . | T | G   | 116.02   | my_snp_filter | AC=4;AF=0.057;AN=70;BaseQRankSum=         |
| 9858 | chrY | 9982785 | . | C | A   | 275.18   | PASS          | AC=6;AF=0.086;AN=70;BaseQRankSum=0.375;Cl |
| 9859 | chrY | 9982817 | . | G | C   | 120.20   | my_snp_filter | AC=5;AF=0.071;AN=70;BaseQRankSum=         |
| 9860 | chrY | 9982845 | . | T | G   | 13016.84 | PASS          | AC=34;AF=0.486;AN=70;BaseQRankSum         |
| 9861 | chrY | 9982851 | . | G | A   | 14161.72 | PASS          | AC=35;AF=0.500;AN=70;BaseQRankSum         |
| 9862 | chrY | 9982852 | . | T | C   | 98.79    | my_snp_filter | AC=5;AF=0.071;AN=70;BaseQRankSum=         |
| 9863 | chrY | 9982856 | . | C | T   | 73.72    | my_snp_filter | AC=6;AF=0.086;AN=70;BaseQRankSum=         |
| 9864 | chrY | 9982869 | . | C | G   | 300.72   | my_snp_filter | AC=7;AF=0.100;AN=70;BaseQRankSum=         |
| 9865 | chrY | 9982892 | . | G | A   | 8391.72  | PASS          | AC=33;AF=0.471;AN=70;BaseQRankSum=-1.281e |
| 9866 | chrY | 9982897 | . | G | A   | 5601.82  | PASS          | AC=32;AF=0.457;AN=70;BaseQRankSum=-7.480e |
| 9867 | chrY | 9982900 | . | C | A   | 964.68   | my_snp_filter | AC=15;AF=0.214;AN=70;BaseQRankSum         |
| 9868 | chrY | 9982917 | . | C | A   | 7719.72  | PASS          | AC=33;AF=0.471;AN=70;BaseQRankSum=-6.100e |
| 9869 | chrY | 9982927 | . | A | G   | 857.42   | my_snp_filter | AC=14;AF=0.200;AN=70;BaseQRankSum         |
| 9870 | chrY | 9982940 | . | T | G   | 19978.72 | PASS          | AC=35;AF=0.500;AN=70;BaseQRankSum         |
| 9871 | chrY | 9982945 | . | C | G   | 19151.73 | PASS          | AC=35;AF=0.500;AN=70;BaseQRankSum         |
| 9872 | chrY | 9982946 | . | G | A   | 37.53    | my_snp_filter | AC=2;AF=0.029;AN=70;BaseQRankSum=         |
| 9873 | chrY | 9982992 | . | C | T   | 433      | PASS          | AC=8;AF=0.114;AN=70;BaseQRankSum=0.541;Cl |
| 9874 | chrY | 9982993 | . | A | G   | 3467.97  | PASS          | AC=24;AF=0.343;AN=70;BaseQRankSum=-2.340e |
| 9875 | chrY | 9983005 | . | T | C   | 1998.31  | PASS          | AC=17;AF=0.243;AN=70;BaseQRankSum=0.852;C |
| 9876 | chrY | 9983006 | . | G | A   | 1999.88  | PASS          | AC=17;AF=0.250;AN=68;BaseQRankSum=0.572;C |
| 9877 | chrY | 9983009 | . | G | A   | 203.39   | PASS          | AC=4;AF=0.059;AN=68;BaseQRankSum=1.23;Cli |
| 9878 | chrY | 9983012 | . | A | T   | 2116.09  | PASS          | AC=17;AF=0.250;AN=68;BaseQRankSum=0.731;C |
| 9879 | chrY | 9983014 | . | G | A   | 57.47    | my_snp_filter | AC=2;AF=0.030;AN=66;BaseQRankSum=         |
| 9880 | chrY | 9983020 | . | C | A   | 2281.99  | PASS          | AC=20;AF=0.303;AN=66;BaseQRankSum=-6.100e |

|      |      |         |   |   |     |         |               |                                           |
|------|------|---------|---|---|-----|---------|---------------|-------------------------------------------|
| 9881 | chrY | 9983060 | . | C | A   | 1197.17 | PASS          | AC=8;AF=0.182;AN=44;BaseQRankSum=-1.398e+ |
| 9882 | chrY | 9983063 | . | A | T   | 62.91   | my_snp_filter | AC=2;AF=0.042;AN=48;BaseQRankSum=         |
| 9883 | chrY | 9983067 | . | T | C   | 2043.80 | PASS          | AC=9;AF=0.225;AN=40;BaseQRankSum=-3.592e+ |
| 9884 | chrY | 9983076 | . | G | T   | 354.41  | PASS          | AC=3;AF=0.071;AN=42;BaseQRankSum=0.298;Cl |
| 9885 | chrY | 9983090 | . | C | A   | 245.07  | PASS          | AC=5;AF=0.104;AN=48;BaseQRankSum=1.69;Cli |
| 9886 | chrY | 9983091 | . | G | A   | 1767.07 | PASS          | AC=7;AF=0.184;AN=38;BaseQRankSum=1.26;Cli |
| 9887 | chrY | 9983098 | . | T | C   | 1768.13 | PASS          | AC=7;AF=0.152;AN=46;BaseQRankSum=-2.986e+ |
| 9888 | chrY | 9983113 | . | G | C   | 2178.86 | PASS          | AC=8;AF=0.174;AN=46;BaseQRankSum=1.33;Cli |
| 9889 | chrY | 9983145 | . | T | C   | 541.64  | PASS          | AC=4;AF=0.069;AN=58;BaseQRankSum=0.572;Cl |
| 9890 | chrY | 9983147 | . | C | T   | 104.05  | PASS          | AC=2;AF=0.033;AN=60;BaseQRankSum=-9.220e  |
| 9891 | chrY | 9983148 | . | A | G   | 537.60  | PASS          | AC=4;AF=0.067;AN=60;BaseQRankSum=0.063;Cl |
| 9892 | chrY | 9983154 | . | T | C   | 400.11  | PASS          | AC=2;AF=0.032;AN=62;BaseQRankSum=0.220;Cl |
| 9893 | chrY | 9983155 | . | G | A   | 400.53  | PASS          | AC=2;AF=0.032;AN=62;BaseQRankSum=-1.457e+ |
| 9894 | chrY | 9983170 | . | T | C   | 359.86  | PASS          | AC=2;AF=0.031;AN=64;BaseQRankSum=1.94;Cli |
| 9895 | chrY | 9983171 | . | T | A,C | 490.13  | PASS          | AC=2,2;AF=0.030,0.030;AN=66;BaseQRankSum= |
| 9896 | chrY | 9983176 | . | A | T,C | 481.46  | PASS          | AC=2,2;AF=0.029,0.029;AN=68;BaseQRankSum= |
| 9897 | chrY | 9983177 | . | C | A   | 80.73   | PASS          | AC=2;AF=0.029;AN=68;BaseQRankSum=0.741;Cl |
| 9898 | chrY | 9983179 | . | G | A   | 277.17  | PASS          | AC=2;AF=0.029;AN=68;BaseQRankSum=-1.067e+ |
| 9899 | chrY | 9983181 | . | C | T   | 78.14   | PASS          | AC=2;AF=0.029;AN=68;BaseQRankSum=-3.540e- |
| 9900 | chrY | 9983189 | . | T | C   | 133.66  | PASS          | AC=1;AF=0.015;AN=68;BaseQRankSum=-1.577e+ |
| 9901 | chrY | 9983195 | . | T | C   | 134.06  | PASS          | AC=1;AF=0.015;AN=68;BaseQRankSum=1.77;Cli |
| 9902 | chrY | 9983204 | . | A | C   | 150.50  | PASS          | AC=2;AF=0.029;AN=70;BaseQRankSum=-9.640e+ |
| 9903 | chrY | 9983214 | . | C | A   | 127.81  | PASS          | AC=1;AF=0.014;AN=70;BaseQRankSum=2.01;Cli |
| 9904 | chrY | 9983345 | . | G | C   | 237.57  | PASS          | AC=6;AF=0.088;AN=68;BaseQRankSum=0.945;Cl |
| 9905 | chrY | 9983367 | . | A | G   | 193.47  | PASS          | AC=5;AF=0.074;AN=68;BaseQRankSum=-1.296e+ |
| 9906 | chrY | 9983373 | . | A | G   | 1383.66 | PASS          | AC=5;AF=0.071;AN=70;BaseQRankSum=1.29;Cli |
| 9907 | chrY | 9983383 | . | A | G   | 293.04  | PASS          | AC=7;AF=0.103;AN=68;BaseQRankSum=-1.423e+ |
| 9908 | chrY | 9983416 | . | A | C   | 371.58  | PASS          | AC=9;AF=0.132;AN=68;BaseQRankSum=-5.890e- |
| 9909 | chrY | 9983427 | . | G | T   | 195.70  | PASS          | AC=5;AF=0.071;AN=70;BaseQRankSum=0.514;Cl |
| 9910 | chrY | 9983428 | . | T | C   | 475.53  | PASS          | AC=8;AF=0.114;AN=70;BaseQRankSum=0.567;Cl |
| 9911 | chrY | 9983440 | . | T | C   | 459.80  | PASS          | AC=6;AF=0.086;AN=70;BaseQRankSum=-1.495e+ |
| 9912 | chrY | 9983480 | . | T | C   | 520.72  | PASS          | AC=8;AF=0.114;AN=70;BaseQRankSum=0.350;Cl |
| 9913 | chrY | 9983490 | . | A | G   | 1306.23 | PASS          | AC=14;AF=0.206;AN=68;BaseQRankSum=0.425;C |
| 9914 | chrY | 9983512 | . | T | C   | 182.98  | my_snp_filter | AC=6;AF=0.088;AN=68;BaseQRankSum=         |
| 9915 | chrY | 9983529 | . | C | G   | 142.12  | PASS          | AC=4;AF=0.059;AN=68;BaseQRankSum=0.354;Cl |
| 9916 | chrY | 9983572 | . | T | G   | 30.99   | my_snp_filter | AC=2;AF=0.029;AN=70;BaseQRankSum=         |
| 9917 | chrY | 9983581 | . | T | A   | 64.78   | PASS          | AC=2;AF=0.029;AN=70;BaseQRankSum=0.347;Cl |
| 9918 | chrY | 9983612 | . | A | G   | 1008.31 | PASS          | AC=14;AF=0.206;AN=68;BaseQRankSum=0.579;C |
| 9919 | chrY | 9983635 | . | T | G   | 2278.19 | PASS          | AC=20;AF=0.286;AN=70;BaseQRankSum=-1.868e |
| 9920 | chrY | 9983676 | . | G | A   | 3327.17 | PASS          | AC=27;AF=0.386;AN=70;BaseQRankSum=-1.577e |
| 9921 | chrY | 9983698 | . | A | C   | 3039.09 | PASS          | AC=27;AF=0.386;AN=70;BaseQRankSum=-9.620e |
| 9922 | chrY | 9983719 | . | C | T   | 300.85  | my_snp_filter | AC=9;AF=0.129;AN=70;BaseQRankSum=         |
| 9923 | chrY | 9983724 | . | C | T   | 2638.60 | PASS          | AC=26;AF=0.371;AN=70;BaseQRankSum=0.401;C |
| 9924 | chrY | 9983731 | . | G | A   | 1904.09 | PASS          | AC=24;AF=0.343;AN=70;BaseQRankSum=0.935;C |
| 9925 | chrY | 9983737 | . | T | C   | 1394.22 | PASS          | AC=20;AF=0.286;AN=70;BaseQRankSum=0.822;C |
| 9926 | chrY | 9983755 | . | G | A   | 83.55   | my_snp_filter | AC=5;AF=0.071;AN=70;BaseQRankSum=         |
| 9927 | chrY | 9983764 | . | G | T   | 54.39   | my_snp_filter | AC=3;AF=0.043;AN=70;BaseQRankSum=         |
| 9928 | chrY | 9983910 | . | C | A   | 334.56  | PASS          | AC=7;AF=0.109;AN=64;BaseQRankSum=0.070;Cl |
| 9929 | chrY | 9983924 | . | T | G,C | 1159.94 | PASS          | AC=6,4;AF=0.100,0.067;AN=60;BaseQRankSum= |
| 9930 | chrY | 9983925 | . | G | T   | 666.49  | PASS          | AC=6;AF=0.100;AN=60;BaseQRankSum=-1.187e+ |
| 9931 | chrY | 9983930 | . | T | A   | 677.98  | PASS          | AC=6;AF=0.100;AN=60;BaseQRankSum=-6.390e- |
| 9932 | chrY | 9983931 | . | T | C   | 1127.93 | PASS          | AC=9;AF=0.155;AN=58;BaseQRankSum=-7.510e- |
| 9933 | chrY | 9983938 | . | C | A   | 792.82  | PASS          | AC=5;AF=0.076;AN=66;BaseQRankSum=0.727;Cl |
| 9934 | chrY | 9983965 | . | C | T   | 297.46  | PASS          | AC=3;AF=0.047;AN=64;BaseQRankSum=1.42;Cli |
| 9935 | chrY | 9983966 | . | G | A   | 738.24  | PASS          | AC=5;AF=0.089;AN=56;BaseQRankSum=1.23;Cli |
| 9936 | chrY | 9983976 | . | C | A   | 741.60  | PASS          | AC=5;AF=0.074;AN=68;BaseQRankSum=1.52;Cli |
| 9937 | chrY | 9983987 | . | A | T,* | 531.99  | PASS          | AC=1,3;AF=0.016,0.047;AN=64;BaseQRankSum= |
| 9938 | chrY | 9983992 | . | T | C,* | 478.87  | PASS          | AC=1,3;AF=0.016,0.047;AN=64;BaseQRankSum= |
| 9939 | chrY | 9983993 | . | G | A,* | 471.12  | PASS          | AC=1,3;AF=0.016,0.047;AN=64;BaseQRankSum= |
| 9940 | chrY | 9984003 | . | T | C,* | 406.49  | PASS          | AC=1,2;AF=0.018,0.036;AN=56;BaseQRankSum= |
| 9941 | chrY | 9984004 | . | C | G,* | 569.87  | PASS          | AC=2,2;AF=0.036,0.036;AN=56;BaseQRankSum= |
| 9942 | chrY | 9984005 | . | A | G,* | 594.89  | PASS          | AC=2,2;AF=0.034,0.034;AN=58;BaseQRankSum= |
| 9943 | chrY | 9984069 | . | A | G   | 631.25  | PASS          | AC=4;AF=0.080;AN=50;BaseQRankSum=1.62;Cli |
| 9944 | chrY | 9984071 | . | C | T   | 581.14  | PASS          | AC=4;AF=0.061;AN=66;BaseQRankSum=1.56;Cli |
| 9945 | chrY | 9984072 | . | A | G   | 601.59  | PASS          | AC=4;AF=0.080;AN=50;BaseQRankSum=1.38;Cli |
| 9946 | chrY | 9984088 | . | C | A   | 747.20  | PASS          | AC=4;AF=0.059;AN=68;BaseQRankSum=0.404;Cl |
| 9947 | chrY | 9984103 | . | C | T   | 3050.07 | PASS          | AC=12;AF=0.375;AN=32;BaseQRankSum=-6.780e |
| 9948 | chrY | 9984110 | . | T | G   | 3029.89 | PASS          | AC=10;AF=0.143;AN=70;BaseQRankSum=-9.030e |
| 9949 | chrY | 9984117 | . | A | C   | 47.82   | my_snp_filter | AC=2;AF=0.029;AN=70;BaseQRankSum=         |
| 9950 | chrY | 9984141 | . | C | G   | 5361.52 | PASS          | AC=16;AF=0.229;AN=70;BaseQRankSum=-5.210e |
| 9951 | chrY | 9984147 | . | T | C   | 7575.34 | PASS          | AC=25;AF=0.357;AN=70;BaseQRankSum=-8.310e |
| 9952 | chrY | 9984152 | . | A | G   | 391.76  | my_snp_filter | AC=6;AF=0.086;AN=70;BaseQRankSum=         |
| 9953 | chrY | 9984155 | . | C | T   | 5362.98 | PASS          | AC=16;AF=0.235;AN=68;BaseQRankSum=0.900;C |
| 9954 | chrY | 9984159 | . | T | C   | 5228.11 | PASS          | AC=16;AF=0.235;AN=68;BaseQRankSum=-3.280e |
| 9955 | chrY | 9984172 | . | T | C   | 1624.97 | PASS          | AC=16;AF=0.229;AN=70;BaseQRankSum=-5.800e |
| 9956 | chrY | 9984183 | . | T | C   | 4752.72 | PASS          | AC=17;AF=0.250;AN=68;BaseQRankSum=-1.880e |

|       |      |         |   |   |     |          |               |                                            |
|-------|------|---------|---|---|-----|----------|---------------|--------------------------------------------|
| 9957  | chrY | 9984184 | . | T | G   | 4689.21  | PASS          | AC=17;AF=0.250;AN=68;BaseQRankSum=-1.531e  |
| 9958  | chrY | 9984187 | . | T | C   | 2237.69  | PASS          | AC=16;AF=0.229;AN=70;BaseQRankSum=-1.102e  |
| 9959  | chrY | 9984188 | . | G | A   | 640.50   | my_snp_filter | AC=12;AF=0.171;AN=70;BaseQRankSum          |
| 9960  | chrY | 9984190 | . | C | T   | 607.29   | my_snp_filter | AC=12;AF=0.171;AN=70;BaseQRankSum          |
| 9961  | chrY | 9984194 | . | T | A   | 3842.44  | PASS          | AC=15;AF=0.221;AN=68;BaseQRankSum=0.630;C  |
| 9962  | chrY | 9984199 | . | A | T   | 3245.95  | PASS          | AC=14;AF=0.206;AN=68;BaseQRankSum=1.29;C   |
| 9963  | chrY | 9984200 | . | C | T   | 3165.91  | PASS          | AC=14;AF=0.206;AN=68;BaseQRankSum=0.682;C  |
| 9964  | chrY | 9984201 | . | C | T   | 3051.93  | PASS          | AC=14;AF=0.206;AN=68;BaseQRankSum=0.634;C  |
| 9965  | chrY | 9984228 | . | C | T   | 629.12   | PASS          | AC=7;AF=0.100;AN=70;BaseQRankSum=0.729;C   |
| 9966  | chrY | 9984231 | . | T | C   | 4833.78  | PASS          | AC=22;AF=0.324;AN=68;BaseQRankSum=1.20;C   |
| 9967  | chrY | 9984236 | . | C | G,* | 5720.11  | PASS          | AC=18,5;AF=0.257,0.071;AN=70;BaseQRankSum  |
| 9968  | chrY | 9984239 | . | A | C   | 8072.58  | PASS          | AC=24;AF=0.343;AN=70;BaseQRankSum=0.781;C  |
| 9969  | chrY | 9984265 | . | T | A   | 871.73   | PASS          | AC=8;AF=0.114;AN=70;BaseQRankSum=0.460;C   |
| 9970  | chrY | 9984270 | . | T | C   | 1511.68  | PASS          | AC=11;AF=0.157;AN=70;BaseQRankSum=0.992;C  |
| 9971  | chrY | 9984276 | . | G | C   | 1583.17  | PASS          | AC=16;AF=0.229;AN=70;BaseQRankSum=0.320;C  |
| 9972  | chrY | 9984306 | . | A | C   | 2876.13  | PASS          | AC=17;AF=0.243;AN=70;BaseQRankSum=1.40;C   |
| 9973  | chrY | 9984318 | . | C | T   | 5938.59  | PASS          | AC=28;AF=0.400;AN=70;BaseQRankSum=-2.130e  |
| 9974  | chrY | 9984319 | . | G | A   | 2559.52  | PASS          | AC=12;AF=0.171;AN=70;BaseQRankSum=1.62;C   |
| 9975  | chrY | 9984323 | . | G | A   | 145.52   | my_snp_filter | AC=5;AF=0.071;AN=70;BaseQRankSum=          |
| 9976  | chrY | 9984331 | . | A | G   | 4776.70  | PASS          | AC=22;AF=0.314;AN=70;BaseQRankSum=0.322;C  |
| 9977  | chrY | 9984344 | . | C | T   | 576.86   | PASS          | AC=10;AF=0.143;AN=70;BaseQRankSum=-5.370e  |
| 9978  | chrY | 9984346 | . | C | T   | 749.75   | PASS          | AC=8;AF=0.118;AN=68;BaseQRankSum=1.20;C    |
| 9979  | chrY | 9984372 | . | A | C   | 3112.34  | PASS          | AC=13;AF=0.191;AN=68;BaseQRankSum=-5.710e  |
| 9980  | chrY | 9984382 | . | T | A   | 102.43   | my_snp_filter | AC=2;AF=0.029;AN=70;BaseQRankSum=          |
| 9981  | chrY | 9984384 | . | A | C   | 3076.46  | PASS          | AC=9;AF=0.129;AN=70;BaseQRankSum=0.321;C   |
| 9982  | chrY | 9984385 | . | A | G   | 105.75   | PASS          | AC=2;AF=0.029;AN=70;BaseQRankSum=1.84;C    |
| 9983  | chrY | 9984394 | . | T | G   | 117.38   | PASS          | AC=2;AF=0.029;AN=70;BaseQRankSum=-2.489e+  |
| 9984  | chrY | 9984401 | . | A | G   | 2623.42  | PASS          | AC=10;AF=0.143;AN=70;BaseQRankSum=-9.800e  |
| 9985  | chrY | 9984412 | . | T | C   | 1041.24  | PASS          | AC=7;AF=0.100;AN=70;BaseQRankSum=-9.600e-  |
| 9986  | chrY | 9984424 | . | C | G   | 133.31   | PASS          | AC=3;AF=0.043;AN=70;BaseQRankSum=0.482;C   |
| 9987  | chrY | 9984433 | . | T | C   | 874.93   | PASS          | AC=5;AF=0.071;AN=70;BaseQRankSum=0.168;C   |
| 9988  | chrY | 9984448 | . | T | C   | 1188.73  | PASS          | AC=5;AF=0.071;AN=70;BaseQRankSum=0.346;C   |
| 9989  | chrY | 9984449 | . | T | C   | 268.28   | PASS          | AC=1;AF=0.014;AN=70;BaseQRankSum=-2.790e-  |
| 9990  | chrY | 9984452 | . | G | C   | 1168.02  | PASS          | AC=5;AF=0.071;AN=70;BaseQRankSum=-4.260e-  |
| 9991  | chrY | 9984463 | . | C | T   | 433.07   | PASS          | AC=4;AF=0.057;AN=70;BaseQRankSum=-5.100e-  |
| 9992  | chrY | 9984477 | . | C | T   | 2089.48  | PASS          | AC=19;AF=0.271;AN=70;BaseQRankSum=0.717;C  |
| 9993  | chrY | 9984482 | . | C | T,A | 5922.89  | PASS          | AC=18,13;AF=0.257,0.186;AN=70;BaseQRankSum |
| 9994  | chrY | 9984484 | . | T | C   | 12238.36 | PASS          | AC=33;AF=0.471;AN=70;BaseQRankSum=         |
| 9995  | chrY | 9984488 | . | C | T   | 1850.27  | PASS          | AC=16;AF=0.229;AN=70;BaseQRankSum=0.298;C  |
| 9996  | chrY | 9984493 | . | T | C   | 42.54    | my_snp_filter | AC=3;AF=0.043;AN=70;BaseQRankSum=          |
| 9997  | chrY | 9984494 | . | G | A   | 42.53    | my_snp_filter | AC=2;AF=0.029;AN=70;BaseQRankSum=          |
| 9998  | chrY | 9984520 | . | C | A   | 3341.96  | PASS          | AC=20;AF=0.286;AN=70;BaseQRankSum=-4.520e  |
| 9999  | chrY | 9984534 | . | C | T   | 920.57   | my_snp_filter | AC=12;AF=0.171;AN=70;BaseQRankSum          |
| 10000 | chrY | 9984536 | . | G | C   | 433.23   | my_snp_filter | AC=5;AF=0.071;AN=70;BaseQRankSum=          |
| 10001 | chrY | 9984544 | . | A | T   | 2576.31  | my_snp_filter | AC=21;AF=0.300;AN=70;BaseQRankSum          |
| 10002 | chrY | 9984565 | . | C | T   | 11825.36 | PASS          | AC=25;AF=0.357;AN=70;BaseQRankSum=         |
| 10003 | chrY | 9984567 | . | G | A   | 156.37   | my_snp_filter | AC=3;AF=0.043;AN=70;BaseQRankSum=          |
| 10004 | chrY | 9984572 | . | G | A   | 12244.32 | PASS          | AC=26;AF=0.371;AN=70;BaseQRankSum          |
| 10005 | chrY | 9984585 | . | G | A   | 10616.43 | PASS          | AC=22;AF=0.314;AN=70;BaseQRankSum          |
| 10006 | chrY | 9984599 | . | C | T   | 1463     | my_snp_filter | AC=11;AF=0.157;AN=70;BaseQRankSum          |
| 10007 | chrY | 9984601 | . | C | G   | 5018.31  | PASS          | AC=30;AF=0.429;AN=70;BaseQRankSum=-2.670e  |
| 10008 | chrY | 9984602 | . | C | T   | 9054.14  | PASS          | AC=20;AF=0.286;AN=70;BaseQRankSum=0.147;C  |
| 10009 | chrY | 9984607 | . | G | C   | 1401.34  | my_snp_filter | AC=11;AF=0.157;AN=70;BaseQRankSum          |
| 10010 | chrY | 9984619 | . | G | C   | 157.93   | my_snp_filter | AC=4;AF=0.057;AN=70;BaseQRankSum=          |
| 10011 | chrY | 9984621 | . | G | T   | 7216.48  | PASS          | AC=17;AF=0.243;AN=70;BaseQRankSum=1.63;C   |
| 10012 | chrY | 9984623 | . | T | A   | 10355.76 | PASS          | AC=22;AF=0.314;AN=70;BaseQRankSum          |
| 10013 | chrY | 9984635 | . | T | C   | 6114.59  | PASS          | AC=15;AF=0.214;AN=70;BaseQRankSum=0.327;C  |
| 10014 | chrY | 9984658 | . | G | A   | 155.07   | my_snp_filter | AC=4;AF=0.057;AN=70;BaseQRankSum=          |
| 10015 | chrY | 9984663 | . | A | T   | 4056.47  | PASS          | AC=28;AF=0.400;AN=70;BaseQRankSum=0.372;C  |
| 10016 | chrY | 9984669 | . | C | G   | 793.10   | PASS          | AC=5;AF=0.071;AN=70;BaseQRankSum=2.67;C    |
| 10017 | chrY | 9984674 | . | A | T,G | 1516.34  | PASS          | AC=10,4;AF=0.143,0.057;AN=70;BaseQRankSum  |
| 10018 | chrY | 9984679 | . | T | A   | 1479.65  | PASS          | AC=24;AF=0.343;AN=70;BaseQRankSum=-1.060e  |
| 10019 | chrY | 9984689 | . | C | A   | 3317.67  | PASS          | AC=22;AF=0.314;AN=70;BaseQRankSum=0.073;C  |
| 10020 | chrY | 9984690 | . | A | C   | 607.17   | PASS          | AC=4;AF=0.057;AN=70;BaseQRankSum=2.22;C    |
| 10021 | chrY | 9984699 | . | T | G   | 6018.92  | PASS          | AC=24;AF=0.343;AN=70;BaseQRankSum=1.04;C   |
| 10022 | chrY | 9984710 | . | G | A   | 3763.98  | PASS          | AC=13;AF=0.186;AN=70;BaseQRankSum=1.23;C   |
| 10023 | chrY | 9984721 | . | T | G   | 3406.61  | PASS          | AC=9;AF=0.129;AN=70;BaseQRankSum=1.23;C    |
| 10024 | chrY | 9984725 | . | T | C   | 883.64   | PASS          | AC=3;AF=0.043;AN=70;BaseQRankSum=2.06;C    |
| 10025 | chrY | 9984726 | . | A | T   | 1819.71  | PASS          | AC=7;AF=0.100;AN=70;BaseQRankSum=2.09;C    |
| 10026 | chrY | 9984734 | . | T | C   | 3587.62  | PASS          | AC=9;AF=0.129;AN=70;BaseQRankSum=1.52;C    |
| 10027 | chrY | 9984735 | . | G | A   | 1988.39  | PASS          | AC=8;AF=0.114;AN=70;BaseQRankSum=1.62;C    |
| 10028 | chrY | 9984743 | . | G | A   | 1072.59  | PASS          | AC=3;AF=0.043;AN=70;BaseQRankSum=0.133;C   |
| 10029 | chrY | 9984752 | . | A | C   | 4337.29  | PASS          | AC=10;AF=0.156;AN=64;BaseQRankSum=1.42;C   |
| 10030 | chrY | 9984753 | . | T | C   | 1866.14  | PASS          | AC=6;AF=0.091;AN=66;BaseQRankSum=1.58;C    |
| 10031 | chrY | 9984755 | . | T | G   | 1958.76  | PASS          | AC=5;AF=0.074;AN=68;BaseQRankSum=-1.210e-  |
| 10032 | chrY | 9984757 | . | T | C   | 4516.34  | PASS          | AC=9;AF=0.141;AN=64;BaseQRankSum=0.293;C   |



|       |      |         |   |   |     |          |               |                                            |
|-------|------|---------|---|---|-----|----------|---------------|--------------------------------------------|
| 10033 | chrY | 9984766 | . | C | T   | 2625.15  | PASS          | AC=4;AF=0.061;AN=66;BaseQRankSum=3.89;Cli  |
| 10034 | chrY | 9984771 | . | T | C   | 2828.19  | PASS          | AC=4;AF=0.061;AN=66;BaseQRankSum=2.42;Cli  |
| 10035 | chrY | 9984772 | . | G | A   | 2825.13  | PASS          | AC=4;AF=0.061;AN=66;BaseQRankSum=1.30;Cli  |
| 10036 | chrY | 9984786 | . | C | T   | 6362.79  | PASS          | AC=15;AF=0.214;AN=70;BaseQRankSum=1.67;Cl  |
| 10037 | chrY | 9984793 | . | T | C   | 18581.75 | PASS          | AC=29;AF=0.426;AN=68;BaseQRankSum=         |
| 10038 | chrY | 9984795 | . | C | T   | 725.01   | PASS          | AC=8;AF=0.114;AN=70;BaseQRankSum=-7.310e-  |
| 10039 | chrY | 9984796 | . | C | T   | 189.79   | PASS          | AC=2;AF=0.029;AN=70;BaseQRankSum=-2.311e+  |
| 10040 | chrY | 9984808 | . | G | A,T | 11893.52 | PASS          | AC=28,2;AF=0.412,0.029;AN=68;Base          |
| 10041 | chrY | 9984813 | . | C | A   | 5842.58  | PASS          | AC=23;AF=0.329;AN=70;BaseQRankSum=-1.020e  |
| 10042 | chrY | 9984818 | . | G | C,T | 4179.12  | PASS          | AC=18,2;AF=0.257,0.029;AN=70;BaseQRankSum  |
| 10043 | chrY | 9984828 | . | G | T   | 1637.25  | PASS          | AC=9;AF=0.129;AN=70;BaseQRankSum=-1.990e   |
| 10044 | chrY | 9984833 | . | G | C   | 1671.26  | PASS          | AC=9;AF=0.129;AN=70;BaseQRankSum=-2.203e+  |
| 10045 | chrY | 9984835 | . | G | C   | 4729.32  | PASS          | AC=22;AF=0.314;AN=70;BaseQRankSum=-4.220e  |
| 10046 | chrY | 9984840 | . | G | A   | 4880.23  | PASS          | AC=22;AF=0.314;AN=70;BaseQRankSum=-8.620e  |
| 10047 | chrY | 9984842 | . | C | T   | 8057.14  | PASS          | AC=22;AF=0.314;AN=70;BaseQRankSum=1.49;Cl  |
| 10048 | chrY | 9984843 | . | G | A   | 11619.44 | PASS          | AC=29;AF=0.414;AN=70;BaseQRankSum=         |
| 10049 | chrY | 9984845 | . | G | A   | 11721.39 | PASS          | AC=29;AF=0.414;AN=70;BaseQRankSum=         |
| 10050 | chrY | 9984856 | . | T | C   | 1508.33  | PASS          | AC=9;AF=0.129;AN=70;BaseQRankSum=-2.156e+  |
| 10051 | chrY | 9984864 | . | G | A   | 20486.89 | PASS          | AC=31;AF=0.470;AN=66;BaseQRankSum=         |
| 10052 | chrY | 9984875 | . | C | T   | 455.18   | my_snp_filter | AC=4;AF=0.057;AN=70;BaseQRankSum=          |
| 10053 | chrY | 9984878 | . | C | T   | 10436.18 | PASS          | AC=22;AF=0.314;AN=70;BaseQRankSum=         |
| 10054 | chrY | 9984886 | . | A | T   | 1059.85  | PASS          | AC=9;AF=0.129;AN=70;BaseQRankSum=-6.190e-  |
| 10055 | chrY | 9984888 | . | T | G   | 35606.55 | PASS          | AC=36;AF=0.514;AN=70;BaseQRankSum=         |
| 10056 | chrY | 9984898 | . | C | A,T | 8197.15  | PASS          | AC=9,21;AF=0.129,0.300;AN=70;BaseQRankSum  |
| 10057 | chrY | 9984913 | . | G | A   | 3822.35  | PASS          | AC=23;AF=0.329;AN=70;BaseQRankSum=0.967;C  |
| 10058 | chrY | 9984915 | . | G | A   | 3859.29  | PASS          | AC=23;AF=0.329;AN=70;BaseQRankSum=-5.390e- |
| 10059 | chrY | 9984927 | . | C | A   | 6256.69  | PASS          | AC=20;AF=0.286;AN=70;BaseQRankSum=1.40;Cl  |
| 10060 | chrY | 9984928 | . | G | A   | 8603.89  | PASS          | AC=21;AF=0.300;AN=70;BaseQRankSum=0.736;C  |
| 10061 | chrY | 9984931 | . | G | A   | 86.69    | PASS          | AC=2;AF=0.029;AN=70;BaseQRankSum=1.09;Cli  |
| 10062 | chrY | 9984932 | . | C | A   | 6498.97  | PASS          | AC=21;AF=0.300;AN=70;BaseQRankSum=0.296;C  |
| 10063 | chrY | 9984939 | . | C | T,* | 2719.90  | PASS          | AC=14,2;AF=0.200,0.029;AN=70;BaseQRankSum  |
| 10064 | chrY | 9984940 | . | T | C   | 2572.69  | PASS          | AC=14;AF=0.200;AN=70;BaseQRankSum=-8.900e- |
| 10065 | chrY | 9984946 | . | G | A   | 2185.61  | PASS          | AC=8;AF=0.114;AN=70;BaseQRankSum=0.421;Cl  |
| 10066 | chrY | 9984949 | . | G | A,T | 8163.71  | PASS          | AC=14,8;AF=0.200,0.114;AN=70;BaseQRankSum  |
| 10067 | chrY | 9984955 | . | G | T   | 9639.65  | PASS          | AC=30;AF=0.429;AN=70;BaseQRankSum=0.679;C  |
| 10068 | chrY | 9984959 | . | A | G   | 18488.54 | PASS          | AC=30;AF=0.455;AN=66;BaseQRankSum=         |
| 10069 | chrY | 9984961 | . | G | A   | 18307.37 | PASS          | AC=30;AF=0.469;AN=64;BaseQRankSum=         |
| 10070 | chrY | 9984965 | . | C | T   | 4818.73  | PASS          | AC=19;AF=0.271;AN=70;BaseQRankSum=0.00;Cl  |
| 10071 | chrY | 9984971 | . | C | T   | 6219.20  | PASS          | AC=14;AF=0.200;AN=70;BaseQRankSum=-3.550e- |
| 10072 | chrY | 9984976 | . | T | G   | 3824.25  | PASS          | AC=17;AF=0.250;AN=68;BaseQRankSum=-3.230e- |
| 10073 | chrY | 9984978 | . | A | G   | 1574.91  | PASS          | AC=8;AF=0.114;AN=70;BaseQRankSum=0.747;Cl  |
| 10074 | chrY | 9984982 | . | G | T   | 453.19   | PASS          | AC=4;AF=0.057;AN=70;BaseQRankSum=-7.170e-  |
| 10075 | chrY | 9984983 | . | G | C   | 5905.14  | PASS          | AC=14;AF=0.200;AN=70;BaseQRankSum=-2.010e- |
| 10076 | chrY | 9984985 | . | G | A   | 370.47   | PASS          | AC=5;AF=0.071;AN=70;BaseQRankSum=-8.700e-  |
| 10077 | chrY | 9984989 | . | A | G   | 23068.16 | PASS          | AC=33;AF=0.485;AN=68;BaseQRankSum=         |
| 10078 | chrY | 9984991 | . | A | T   | 3867.92  | PASS          | AC=21;AF=0.300;AN=70;BaseQRankSum=0.00;Cl  |
| 10079 | chrY | 9984992 | . | G | T   | 189.98   | my_snp_filter | AC=4;AF=0.057;AN=70;BaseQRankSum=          |
| 10080 | chrY | 9985004 | . | C | A   | 2523.59  | PASS          | AC=16;AF=0.229;AN=70;BaseQRankSum=-6.340e- |
| 10081 | chrY | 9985006 | . | G | C   | 28777.03 | PASS          | AC=36;AF=0.514;AN=70;BaseQRankSum=         |
| 10082 | chrY | 9985011 | . | T | A   | 1874.52  | PASS          | AC=11;AF=0.157;AN=70;BaseQRankSum=0.058;C  |
| 10083 | chrY | 9985013 | . | G | A   | 1855.63  | PASS          | AC=11;AF=0.157;AN=70;BaseQRankSum=0.289;C  |
| 10084 | chrY | 9985030 | . | G | C   | 1711.59  | PASS          | AC=9;AF=0.129;AN=70;BaseQRankSum=1.73;Cli  |
| 10085 | chrY | 9985033 | . | G | A   | 10010.08 | PASS          | AC=24;AF=0.343;AN=70;BaseQRankSum=         |
| 10086 | chrY | 9985040 | . | T | G   | 12348.52 | PASS          | AC=27;AF=0.386;AN=70;BaseQRankSum=         |
| 10087 | chrY | 9985041 | . | G | A   | 210.14   | my_snp_filter | AC=5;AF=0.071;AN=70;BaseQRankSum=          |
| 10088 | chrY | 9985046 | . | G | A   | 1607.15  | PASS          | AC=9;AF=0.129;AN=70;BaseQRankSum=0.419;Cl  |
| 10089 | chrY | 9985048 | . | T | A   | 2243.13  | PASS          | AC=19;AF=0.271;AN=70;BaseQRankSum=-1.670e- |
| 10090 | chrY | 9985050 | . | G | A   | 1548.13  | PASS          | AC=9;AF=0.129;AN=70;BaseQRankSum=0.707;Cl  |
| 10091 | chrY | 9985055 | . | T | C   | 9649.12  | PASS          | AC=25;AF=0.357;AN=70;BaseQRankSum=-1.481e- |
| 10092 | chrY | 9985056 | . | G | A   | 391.43   | my_snp_filter | AC=6;AF=0.086;AN=70;BaseQRankSum=          |
| 10093 | chrY | 9985077 | . | G | A   | 8115.15  | PASS          | AC=22;AF=0.314;AN=70;BaseQRankSum=0.200;C  |
| 10094 | chrY | 9985090 | . | T | C   | 36.77    | my_snp_filter | AC=2;AF=0.029;AN=70;BaseQRankSum=          |
| 10095 | chrY | 9985106 | . | T | C   | 3760.22  | PASS          | AC=22;AF=0.314;AN=70;BaseQRankSum=-7.500e- |
| 10096 | chrY | 9985108 | . | C | A   | 516.53   | PASS          | AC=3;AF=0.043;AN=70;BaseQRankSum=1.77;Cli  |
| 10097 | chrY | 9985112 | . | C | T   | 2054.11  | my_snp_filter | AC=20;AF=0.286;AN=70;BaseQRankSum=         |
| 10098 | chrY | 9985116 | . | C | A   | 14609    | PASS          | AC=33;AF=0.471;AN=70;BaseQRankSum=-7.540e- |
| 10099 | chrY | 9985117 | . | T | C   | 825.20   | my_snp_filter | AC=11;AF=0.157;AN=70;BaseQRankSum=         |
| 10100 | chrY | 9985123 | . | A | G   | 7537.32  | PASS          | AC=20;AF=0.286;AN=70;BaseQRankSum=-3.580e- |
| 10101 | chrY | 9985124 | . | T | A   | 440.27   | my_snp_filter | AC=9;AF=0.129;AN=70;BaseQRankSum=          |
| 10102 | chrY | 9985132 | . | T | C,G | 14781.29 | PASS          | AC=21,15;AF=0.300,0.214;AN=70;Bas          |
| 10103 | chrY | 9985135 | . | G | A   | 307.80   | PASS          | AC=4;AF=0.057;AN=70;BaseQRankSum=0.839;Cl  |
| 10104 | chrY | 9985140 | . | G | A   | 913.04   | PASS          | AC=6;AF=0.086;AN=70;BaseQRankSum=-1.982e+  |
| 10105 | chrY | 9985151 | . | G | A   | 5058.96  | PASS          | AC=28;AF=0.400;AN=70;BaseQRankSum=0.831;C  |
| 10106 | chrY | 9985153 | . | T | C   | 2721.04  | PASS          | AC=14;AF=0.200;AN=70;BaseQRankSum=-7.360e- |
| 10107 | chrY | 9985162 | . | G | T,C | 4707.11  | my_snp_filter | AC=16,3;AF=0.235,0.044;AN=68;Base          |
| 10108 | chrY | 9985163 | . | C | T   | 2273.84  | PASS          | AC=12;AF=0.176;AN=68;BaseQRankSum=0.441;C  |

|       |      |         |   |   |     |         |               |                                            |
|-------|------|---------|---|---|-----|---------|---------------|--------------------------------------------|
| 10109 | chrY | 9985166 | . | C | G   | 9399.96 | my_snp_filter | AC=31;AF=0.470;AN=66;BaseQRankSum          |
| 10110 | chrY | 9985170 | . | G | T   | 1758.35 | PASS          | AC=11;AF=0.162;AN=68;BaseQRankSum=-1.730e  |
| 10111 | chrY | 9985171 | . | G | T   | 1731.45 | PASS          | AC=12;AF=0.176;AN=68;BaseQRankSum=0.625;C  |
| 10112 | chrY | 9985193 | . | G | T   | 802.44  | my_snp_filter | AC=7;AF=0.103;AN=68;BaseQRankSum=          |
| 10113 | chrY | 9985211 | . | C | A   | 258.10  | PASS          | AC=4;AF=0.059;AN=68;BaseQRankSum=0.796;C   |
| 10114 | chrY | 9985212 | . | G | C   | 256.78  | PASS          | AC=4;AF=0.059;AN=68;BaseQRankSum=-6.500e-  |
| 10115 | chrY | 9985336 | . | G | C   | 41.04   | PASS          | AC=1;AF=0.014;AN=70;BaseQRankSum=0.580;C   |
| 10116 | chrY | 9985371 | . | T | C   | 91.26   | my_snp_filter | AC=3;AF=0.044;AN=68;BaseQRankSum=          |
| 10117 | chrY | 9985415 | . | A | G   | 203.75  | PASS          | AC=4;AF=0.059;AN=68;BaseQRankSum=0.731;C   |
| 10118 | chrY | 9985420 | . | G | C   | 257.56  | PASS          | AC=4;AF=0.059;AN=68;BaseQRankSum=1.48;C    |
| 10119 | chrY | 9985446 | . | T | G   | 143.67  | PASS          | AC=3;AF=0.045;AN=66;BaseQRankSum=0.756;C   |
| 10120 | chrY | 9985474 | . | T | C   | 136.52  | PASS          | AC=3;AF=0.043;AN=70;BaseQRankSum=0.714;C   |
| 10121 | chrY | 9985475 | . | T | A   | 136.52  | PASS          | AC=3;AF=0.043;AN=70;BaseQRankSum=0.067;C   |
| 10122 | chrY | 9985602 | . | T | C   | 78.29   | PASS          | AC=2;AF=0.029;AN=68;BaseQRankSum=0.00;C    |
| 10123 | chrY | 9985612 | . | G | A   | 2159.53 | my_snp_filter | AC=24;AF=0.353;AN=68;BaseQRankSum          |
| 10124 | chrY | 9985624 | . | G | A,* | 3369.54 | my_snp_filter | AC=25,1;AF=0.368,0.015;AN=68;Base          |
| 10125 | chrY | 9985631 | . | A | G   | 808.53  | PASS          | AC=15;AF=0.214;AN=70;BaseQRankSum=-1.194e  |
| 10126 | chrY | 9985662 | . | G | T   | 2488.18 | PASS          | AC=24;AF=0.353;AN=68;BaseQRankSum=-1.580e  |
| 10127 | chrY | 9985667 | . | C | G   | 2454.38 | PASS          | AC=23;AF=0.329;AN=70;BaseQRankSum=-5.970e  |
| 10128 | chrY | 9985676 | . | G | T   | 194.18  | my_snp_filter | AC=7;AF=0.100;AN=70;BaseQRankSum=          |
| 10129 | chrY | 9985699 | . | A | G   | 91.14   | my_snp_filter | AC=6;AF=0.094;AN=64;BaseQRankSum=          |
| 10130 | chrY | 9985745 | . | C | T   | 458.51  | PASS          | AC=7;AF=0.117;AN=60;BaseQRankSum=0.861;C   |
| 10131 | chrY | 9985752 | . | C | T   | 310.34  | PASS          | AC=5;AF=0.083;AN=60;BaseQRankSum=0.867;C   |
| 10132 | chrY | 9985757 | . | A | G   | 60.61   | PASS          | AC=1;AF=0.017;AN=60;BaseQRankSum=1.53;C    |
| 10133 | chrY | 9985761 | . | C | T   | 61.99   | PASS          | AC=1;AF=0.016;AN=62;BaseQRankSum=1.53;C    |
| 10134 | chrY | 9985787 | . | C | A   | 31.03   | my_snp_filter | AC=1;AF=0.015;AN=66;BaseQRankSum=          |
| 10135 | chrY | 9985799 | . | A | T   | 1162.50 | PASS          | AC=7;AF=0.121;AN=58;BaseQRankSum=1.51;C    |
| 10136 | chrY | 9985805 | . | G | T   | 893.85  | PASS          | AC=7;AF=0.113;AN=62;BaseQRankSum=-6.300e-  |
| 10137 | chrY | 9985810 | . | C | T   | 91.05   | my_snp_filter | AC=2;AF=0.033;AN=60;BaseQRankSum=          |
| 10138 | chrY | 9985811 | . | A | G   | 1560.19 | PASS          | AC=7;AF=0.117;AN=60;BaseQRankSum=-2.436e+  |
| 10139 | chrY | 9985815 | . | C | A   | 131.02  | my_snp_filter | AC=3;AF=0.048;AN=62;BaseQRankSum=          |
| 10140 | chrY | 9985817 | . | C | T   | 258.81  | PASS          | AC=3;AF=0.048;AN=62;BaseQRankSum=-6.270e-  |
| 10141 | chrY | 9985825 | . | A | G   | 133.53  | my_snp_filter | AC=3;AF=0.048;AN=62;BaseQRankSum=          |
| 10142 | chrY | 9985833 | . | T | C   | 44.32   | my_snp_filter | AC=2;AF=0.033;AN=60;BaseQRankSum=          |
| 10143 | chrY | 9985849 | . | T | A   | 313.73  | PASS          | AC=3;AF=0.048;AN=62;BaseQRankSum=-2.060e-  |
| 10144 | chrY | 9985850 | . | A | C   | 571.17  | PASS          | AC=8;AF=0.129;AN=62;BaseQRankSum=0.525;C   |
| 10145 | chrY | 9985855 | . | T | C   | 135.47  | PASS          | AC=2;AF=0.032;AN=62;BaseQRankSum=2.10;C    |
| 10146 | chrY | 9985857 | . | C | A   | 364.87  | PASS          | AC=4;AF=0.067;AN=60;BaseQRankSum=-7.270e-  |
| 10147 | chrY | 9985863 | . | T | C   | 577.93  | PASS          | AC=8;AF=0.129;AN=62;BaseQRankSum=-9.890e-  |
| 10148 | chrY | 9985868 | . | G | C   | 514.08  | PASS          | AC=5;AF=0.083;AN=60;BaseQRankSum=-4.680e-  |
| 10149 | chrY | 9985869 | . | T | A   | 1877.88 | PASS          | AC=10;AF=0.161;AN=62;BaseQRankSum=-1.540e- |
| 10150 | chrY | 9985879 | . | T | C   | 948.19  | PASS          | AC=6;AF=0.097;AN=62;BaseQRankSum=-2.688e+  |
| 10151 | chrY | 9985882 | . | G | T   | 2247.29 | PASS          | AC=10;AF=0.156;AN=64;BaseQRankSum=-1.733e- |
| 10152 | chrY | 9985886 | . | C | T   | 5604.27 | PASS          | AC=12;AF=0.188;AN=64;BaseQRankSum=1.03;C   |
| 10153 | chrY | 9985891 | . | G | A,T | 1434.26 | PASS          | AC=5,4;AF=0.081,0.065;AN=62;BaseQRankSum=  |
| 10154 | chrY | 9985905 | . | A | G   | 4419.02 | PASS          | AC=12;AF=0.188;AN=64;BaseQRankSum=-1.759e- |
| 10155 | chrY | 9985906 | . | G | C   | 1659.32 | PASS          | AC=9;AF=0.132;AN=68;BaseQRankSum=0.133;C   |
| 10156 | chrY | 9985921 | . | T | C   | 530.71  | PASS          | AC=10;AF=0.143;AN=70;BaseQRankSum=0.256;C  |
| 10157 | chrY | 9985945 | . | C | T   | 4539.44 | PASS          | AC=26;AF=0.382;AN=68;BaseQRankSum=0.406;C  |
| 10158 | chrY | 9985949 | . | T | A   | 7150.53 | PASS          | AC=28;AF=0.412;AN=68;BaseQRankSum=-2.450e- |
| 10159 | chrY | 9985956 | . | G | A   | 44.99   | my_snp_filter | AC=4;AF=0.059;AN=68;BaseQRankSum=          |
| 10160 | chrY | 9985961 | . | T | C   | 830.25  | PASS          | AC=14;AF=0.206;AN=68;BaseQRankSum=-7.470e- |
| 10161 | chrY | 9985970 | . | A | G   | 5762.95 | PASS          | AC=28;AF=0.412;AN=68;BaseQRankSum=-8.250e- |
| 10162 | chrY | 9985979 | . | T | G   | 473.27  | PASS          | AC=4;AF=0.057;AN=70;BaseQRankSum=-2.360e-  |
| 10163 | chrY | 9985986 | . | G | T   | 330.52  | PASS          | AC=3;AF=0.043;AN=70;BaseQRankSum=2.36;C    |
| 10164 | chrY | 9985994 | . | T | A   | 172.89  | PASS          | AC=3;AF=0.043;AN=70;BaseQRankSum=-3.900e-  |
| 10165 | chrY | 9986015 | . | A | T   | 1855.36 | PASS          | AC=17;AF=0.250;AN=68;BaseQRankSum=-5.460e- |
| 10166 | chrY | 9986031 | . | A | C   | 1567.04 | PASS          | AC=14;AF=0.200;AN=70;BaseQRankSum=0.118;C  |
| 10167 | chrY | 9986032 | . | C | A   | 1519.77 | PASS          | AC=14;AF=0.200;AN=70;BaseQRankSum=0.354;C  |
| 10168 | chrY | 9986041 | . | T | C   | 46.02   | PASS          | AC=1;AF=0.014;AN=70;BaseQRankSum=-5.560e-  |
| 10169 | chrY | 9986043 | . | T | A   | 717.49  | PASS          | AC=10;AF=0.143;AN=70;BaseQRankSum=0.321;C  |
| 10170 | chrY | 9986056 | . | T | C   | 311.16  | PASS          | AC=3;AF=0.043;AN=70;BaseQRankSum=0.744;C   |
| 10171 | chrY | 9986057 | . | T | C   | 269.03  | PASS          | AC=3;AF=0.043;AN=70;BaseQRankSum=0.678;C   |
| 10172 | chrY | 9986059 | . | A | T   | 64.04   | PASS          | AC=1;AF=0.014;AN=70;BaseQRankSum=-7.860e-  |
| 10173 | chrY | 9986061 | . | T | C   | 172.99  | PASS          | AC=2;AF=0.029;AN=70;BaseQRankSum=1.69;C    |
| 10174 | chrY | 9986064 | . | C | T   | 183.47  | PASS          | AC=3;AF=0.043;AN=70;BaseQRankSum=1.27;C    |
| 10175 | chrY | 9986077 | . | G | A   | 320.15  | PASS          | AC=3;AF=0.043;AN=70;BaseQRankSum=2.41;C    |
| 10176 | chrY | 9986087 | . | A | G   | 366.50  | PASS          | AC=3;AF=0.043;AN=70;BaseQRankSum=0.186;C   |
| 10177 | chrY | 9986111 | . | A | G,T | 1302.84 | my_snp_filter | AC=2,8;AF=0.029,0.114;AN=70;BaseQ          |
| 10178 | chrY | 9986124 | . | G | A   | 676.08  | my_snp_filter | AC=3;AF=0.043;AN=70;BaseQRankSum=          |
| 10179 | chrY | 9986147 | . | G | C   | 2738.37 | my_snp_filter | AC=11;AF=0.157;AN=70;BaseQRankSum          |
| 10180 | chrY | 9986155 | . | C | A   | 668.13  | PASS          | AC=5;AF=0.071;AN=70;BaseQRankSum=1.17;C    |
| 10181 | chrY | 9986157 | . | G | A   | 2159.47 | my_snp_filter | AC=10;AF=0.143;AN=70;BaseQRankSum          |
| 10182 | chrY | 9986176 | . | A | G   | 841.28  | PASS          | AC=5;AF=0.071;AN=70;BaseQRankSum=0.877;C   |
| 10183 | chrY | 9986197 | . | C | A   | 2209.03 | my_snp_filter | AC=13;AF=0.186;AN=70;BaseQRankSum          |
| 10184 | chrY | 9986199 | . | T | C   | 427.39  | PASS          | AC=6;AF=0.086;AN=70;BaseQRankSum=-2.325e+  |

|       |      |         |   |   |     |         |               |                                                 |
|-------|------|---------|---|---|-----|---------|---------------|-------------------------------------------------|
| 10185 | chrY | 9986211 | . | C | T   | 1121.04 | PASS          | AC=7;AF=0.100;AN=70;BaseQRankSum=-7.880e-       |
| 10186 | chrY | 9986233 | . | A | T   | 70.88   | PASS          | AC=2;AF=0.029;AN=70;BaseQRankSum=-2.170e-       |
| 10187 | chrY | 9986238 | . | G | T   | 93.31   | PASS          | AC=3;AF=0.043;AN=70;BaseQRankSum=-7.200e-       |
| 10188 | chrY | 9986254 | . | A | T   | 107.01  | my_snp_filter | AC=3;AF=0.043;AN=70;BaseQRankSum=-              |
| 10189 | chrY | 9986255 | . | T | C   | 1887.54 | PASS          | AC=9;AF=0.129;AN=70;BaseQRankSum=-7.160e-       |
| 10190 | chrY | 9986257 | . | C | T   | 1887.57 | PASS          | AC=9;AF=0.129;AN=70;BaseQRankSum=-1.848e+       |
| 10191 | chrY | 9986272 | . | G | C   | 1540.08 | PASS          | AC=9;AF=0.132;AN=68;BaseQRankSum=-3.440e-       |
| 10192 | chrY | 9986273 | . | A | C   | 1858.73 | PASS          | AC=9;AF=0.132;AN=68;BaseQRankSum=-1.681e+       |
| 10193 | chrY | 9986278 | . | A | G   | 1802.71 | PASS          | AC=9;AF=0.132;AN=68;BaseQRankSum=-2.140e+       |
| 10194 | chrY | 9986279 | . | T | C   | 1486.43 | PASS          | AC=9;AF=0.132;AN=68;BaseQRankSum=-2.976e+       |
| 10195 | chrY | 9986300 | . | G | A   | 86.23   | my_snp_filter | AC=2;AF=0.031;AN=64;BaseQRankSum=0.480;Cl       |
| 10196 | chrY | 9986322 | . | A | T   | 75.76   | PASS          | AC=2;AF=0.043;AN=46;DP=220;FS=0.000;Inbre       |
| 10197 | chrY | 9986362 | . | G | T   | 51.39   | PASS          | AC=2;AF=0.056;AN=36;DP=207;FS=0.000;Inbre       |
| 10198 | chrY | 9986368 | . | A | C   | 57.82   | PASS          | AC=2;AF=0.053;AN=38;DP=207;FS=0.000;Inbre       |
| 10199 | chrY | 9986369 | . | G | T   | 56.82   | PASS          | AC=1;AF=0.042;AN=24;BaseQRankSum=0.128;Cl       |
| 10200 | chrY | 9986413 | . | C | T   | 82.03   | PASS          | AC=1;AF=0.038;AN=26;BaseQRankSum=-8.090e-       |
| 10201 | chrY | 9986414 | . | A | G   | 81.35   | PASS          | AC=1;AF=0.033;AN=30;BaseQRankSum=-3.022e+       |
| 10202 | chrY | 9986423 | . | A | G   | 83.69   | PASS          | AC=1;AF=0.036;AN=28;BaseQRankSum=-8.510e-       |
| 10203 | chrY | 9986439 | . | T | C   | 84.83   | PASS          | AC=1;AF=0.036;AN=28;BaseQRankSum=-2.105e+       |
| 10204 | chrY | 9986441 | . | G | A   | 80.92   | PASS          | AC=1;AF=0.031;AN=32;BaseQRankSum=0.261;Cl       |
| 10205 | chrY | 9986448 | . | C | T   | 119.78  | PASS          | AC=1;AF=0.031;AN=32;BaseQRankSum=0.071;Cl       |
| 10206 | chrY | 9986449 | . | A | G   | 124.64  | PASS          | AC=2;AF=0.056;AN=36;BaseQRankSum=-7.440e-       |
| 10207 | chrY | 9986472 | . | A | C   | 121.48  | PASS          | AC=2;AF=0.053;AN=38;BaseQRankSum=-5.500e-       |
| 10208 | chrY | 9986489 | . | T | C   | 207.32  | PASS          | AC=1;AF=0.025;AN=40;BaseQRankSum=0.434;Cl       |
| 10209 | chrY | 9986492 | . | G | A   | 159.06  | PASS          | AC=1;AF=0.020;AN=50;BaseQRankSum=-1.519e+       |
| 10210 | chrY | 9986504 | . | A | G   | 156.30  | PASS          | AC=2;AF=0.037;AN=54;BaseQRankSum=-              |
| 10211 | chrY | 9986517 | . | T | A   | 41.28   | my_snp_filter | AC=2;AF=0.036;AN=56;BaseQRankSum=-1.519e+       |
| 10212 | chrY | 9986518 | . | A | C   | 212.86  | PASS          | AC=6;AF=0.103;AN=58;BaseQRankSum=-1.345e+       |
| 10213 | chrY | 9986521 | . | T | G   | 560.19  | PASS          | AC=12;AF=0.171;AN=70;BaseQRankSum=-1.271e       |
| 10214 | chrY | 9986570 | . | A | C   | 487.87  | PASS          | my_snp_filter AC=6;AF=0.086;AN=70;BaseQRankSum= |
| 10215 | chrY | 9986604 | . | G | A   | 37.98   | my_snp_filter | AC=6;AF=0.094;AN=64;BaseQRankSum=0.350;Cl       |
| 10216 | chrY | 9986635 | . | C | A   | 642.60  | PASS          | AC=5;AF=0.076;AN=66;BaseQRankSum=1.36;Cli       |
| 10217 | chrY | 9986636 | . | C | T   | 287.96  | PASS          | AC=6;AF=0.091;AN=66;BaseQRankSum=0.651;Cl       |
| 10218 | chrY | 9986641 | . | G | A   | 607.53  | PASS          | AC=4;AF=0.061;AN=66;BaseQRankSum=               |
| 10219 | chrY | 9986649 | . | G | T   | 45.10   | my_snp_filter | AC=5;AF=0.076;AN=66;BaseQRankSum=               |
| 10220 | chrY | 9986666 | . | G | A   | 188.22  | my_snp_filter | AC=5;AF=0.076;AN=66;BaseQRankSum=1.90;Cli       |
| 10221 | chrY | 9986667 | . | C | A   | 226.81  | PASS          | AC=5;AF=0.076;AN=66;BaseQRankSum=0.280;Cl       |
| 10222 | chrY | 9986673 | . | A | C   | 205.68  | PASS          | my_snp_filter AC=2;AF=0.029;AN=68;BaseQRankSum= |
| 10223 | chrY | 9986699 | . | C | T   | 52.67   | my_snp_filter | AC=4;AF=0.059;AN=68;BaseQRankSum=0.404;Cl       |
| 10224 | chrY | 9986700 | . | A | G   | 206.50  | PASS          | AC=4;AF=0.061;AN=66;BaseQRankSum=-8.630e-       |
| 10225 | chrY | 9986705 | . | A | T   | 250.20  | PASS          | AC=2;AF=0.029;AN=70;BaseQRankSum=               |
| 10226 | chrY | 9986728 | . | A | T   | 38.14   | my_snp_filter | AC=8,16;AF=0.118,0.235;AN=68;BaseQRankSum       |
| 10227 | chrY | 9986769 | . | A | T,C | 3544.14 | PASS          | AC=21;AF=0.309;AN=68;BaseQRankSum=-5.530e       |
| 10228 | chrY | 9986770 | . | G | A   | 2821.89 | PASS          | AC=25;AF=0.368;AN=68;BaseQRankSum=-5.810e       |
| 10229 | chrY | 9986779 | . | T | G   | 5933.38 | PASS          | my_snp_filter AC=2;AF=0.029;AN=70;BaseQRankSum= |
| 10230 | chrY | 9986788 | . | C | T   | 75.11   | my_snp_filter | AC=2;AF=0.029;AN=70;BaseQRankSum=-3.180e        |
| 10231 | chrY | 9986789 | . | A | G   | 71.98   | my_snp_filter | AC=17;AF=0.243;AN=70;BaseQRankSum=0.427;C       |
| 10232 | chrY | 9986790 | . | A | G   | 5658.98 | PASS          | AC=25,4;AF=0.368,0.059;AN=68;BaseQRankSum       |
| 10233 | chrY | 9986795 | . | G | T   | 2274.66 | PASS          | AC=20;AF=0.294;AN=68;BaseQRankSum=-7.360e       |
| 10234 | chrY | 9986812 | . | T | C,* | 4187.04 | PASS          | AC=24;AF=0.353;AN=68;BaseQRankSum=-7.360e       |
| 10235 | chrY | 9986817 | . | C | G   | 3413.24 | PASS          | AC=20,11;AF=0.294,0.162;AN=68;BaseQRankSu       |
| 10236 | chrY | 9986819 | . | G | A   | 3491.94 | PASS          | my_snp_filter AC=3;AF=0.044;AN=68;BaseQRankSum= |
| 10237 | chrY | 9986824 | . | T | C,A | 6293.28 | PASS          | my_snp_filter AC=6;AF=0.086;AN=70;BaseQRankSum= |
| 10238 | chrY | 9986828 | . | C | T   | 62.56   | my_snp_filter | AC=20;AF=0.286;AN=70;BaseQRankSum=-4.520e       |
| 10239 | chrY | 9986844 | . | A | G   | 177.82  | my_snp_filter | AC=8;AF=0.114;AN=70;BaseQRankSum=-1.300e+       |
| 10240 | chrY | 9986849 | . | A | G   | 1757.24 | PASS          | AC=8;AF=0.121;AN=66;BaseQRankSum=-1.191e+       |
| 10241 | chrY | 9986861 | . | G | T   | 580.44  | PASS          | AC=8;AF=0.121;AN=66;BaseQRankSum=0.460;Cl       |
| 10242 | chrY | 9986865 | . | G | A   | 590.71  | PASS          | AC=4,3;AF=0.061,0.045;AN=66;BaseQRankSum=       |
| 10243 | chrY | 9986869 | . | G | T   | 587.62  | PASS          | AC=3;AF=0.045;AN=66;BaseQRankSum=-1.617e+       |
| 10244 | chrY | 9986873 | . | C | G,* | 420.22  | PASS          | AC=4;AF=0.059;AN=68;BaseQRankSum=-1.213e+       |
| 10245 | chrY | 9986876 | . | G | A   | 239.62  | PASS          | AC=14,3;AF=0.206,0.044;AN=68;BaseQRankSum       |
| 10246 | chrY | 9986880 | . | G | T   | 209.44  | PASS          | AC=20,3;AF=0.294,0.044;AN=68;BaseQRankSum       |
| 10247 | chrY | 9986884 | . | G | A,* | 1509.03 | PASS          | AC=18;AF=0.257;AN=70;BaseQRankSum=-2.130e       |
| 10248 | chrY | 9986886 | . | C | G,A | 3825.32 | PASS          | AC=20;AF=0.286;AN=70;BaseQRankSum=-6.700e       |
| 10249 | chrY | 9986891 | . | C | T   | 1532.25 | PASS          | AC=29;AF=0.414;AN=70;BaseQRankSum=-5.360e       |
| 10250 | chrY | 9986893 | . | C | T   | 3520.28 | PASS          | AC=4;AF=0.057;AN=70;BaseQRankSum=-7.270e-       |
| 10251 | chrY | 9986896 | . | G | C   | 6872.14 | PASS          | AC=3;AF=0.043;AN=70;BaseQRankSum=-2.435e+       |
| 10252 | chrY | 9986899 | . | A | G   | 280.22  | PASS          | my_snp_filter AC=4;AF=0.059;AN=68;BaseQRankSum= |
| 10253 | chrY | 9986907 | . | T | C   | 288.57  | PASS          | AC=8;AF=0.121;AN=66;BaseQRankSum=0.867;Cl       |
| 10254 | chrY | 9986938 | . | G | T   | 91.79   | my_snp_filter | AC=5;AF=0.074;AN=68;BaseQRankSum=0.00;Cli       |
| 10255 | chrY | 9986943 | . | A | G   | 532.28  | PASS          | AC=2;AF=0.029;AN=70;BaseQRankSum=-7.200e-       |
| 10256 | chrY | 9986969 | . | A | T   | 347.73  | PASS          | AC=3;AF=0.043;AN=70;BaseQRankSum=0.124;Cl       |
| 10257 | chrY | 9986970 | . | G | A   | 81.45   | PASS          | AC=4;AF=0.059;AN=68;BaseQRankSum=1.25;Cli       |
| 10258 | chrY | 9986978 | . | A | T   | 200.70  | PASS          | AC=4;AF=0.059;AN=68;BaseQRankSum=0.480;Cl       |
| 10259 | chrY | 9987002 | . | C | A   | 142.62  | PASS          |                                                 |
| 10260 | chrY | 9987006 | . | G | A   | 187.72  | PASS          |                                                 |

|       |      |         |   |   |     |          |               |                                            |
|-------|------|---------|---|---|-----|----------|---------------|--------------------------------------------|
| 10261 | chrY | 9987084 | . | C | G   | 52.79    | my_snp_filter | AC=3;AF=0.043;AN=70;BaseQRankSum=          |
| 10262 | chrY | 9987132 | . | T | C   | 46.47    | PASS          | AC=1;AF=0.014;AN=70;BaseQRankSum=-2.709e+  |
| 10263 | chrY | 9987134 | . | C | T   | 46.53    | PASS          | AC=1;AF=0.014;AN=70;BaseQRankSum=-1.071e+  |
| 10264 | chrY | 9987144 | . | G | C   | 49.59    | PASS          | AC=1;AF=0.014;AN=70;BaseQRankSum=-2.526e+  |
| 10265 | chrY | 9987152 | . | C | T   | 52.31    | PASS          | AC=1;AF=0.014;AN=70;BaseQRankSum=0.217;Cl  |
| 10266 | chrY | 9987246 | . | T | G   | 524.36   | PASS          | AC=10;AF=0.143;AN=70;BaseQRankSum=-1.271e  |
| 10267 | chrY | 9987268 | . | A | G   | 34.42    | my_snp_filter | AC=4;AF=0.057;AN=70;BaseQRankSum=          |
| 10268 | chrY | 9987295 | . | G | C   | 800.30   | PASS          | AC=16;AF=0.229;AN=70;BaseQRankSum=-1.061e  |
| 10269 | chrY | 9987332 | . | G | A   | 128.63   | my_snp_filter | AC=3;AF=0.043;AN=70;BaseQRankSum=          |
| 10270 | chrY | 9987343 | . | C | T   | 3217.88  | my_snp_filter | AC=22;AF=0.314;AN=70;BaseQRankSum=         |
| 10271 | chrY | 9987350 | . | A | G   | 1805.13  | my_snp_filter | AC=16;AF=0.229;AN=70;BaseQRankSum=         |
| 10272 | chrY | 9987366 | . | T | A   | 1513.81  | my_snp_filter | AC=19;AF=0.271;AN=70;BaseQRankSum=         |
| 10273 | chrY | 9987384 | . | C | T   | 90.55    | my_snp_filter | AC=2;AF=0.029;AN=70;BaseQRankSum=          |
| 10274 | chrY | 9987406 | . | A | G   | 286.11   | PASS          | AC=7;AF=0.100;AN=70;BaseQRankSum=0.888;Cl  |
| 10275 | chrY | 9987414 | . | A | G   | 647.66   | PASS          | AC=5;AF=0.071;AN=70;BaseQRankSum=2.35;Cli  |
| 10276 | chrY | 9987421 | . | C | G   | 90.18    | my_snp_filter | AC=4;AF=0.057;AN=70;BaseQRankSum=          |
| 10277 | chrY | 9987429 | . | C | T   | 2360.50  | PASS          | AC=19;AF=0.271;AN=70;BaseQRankSum=0.473;C  |
| 10278 | chrY | 9987431 | . | G | A   | 49.66    | my_snp_filter | AC=3;AF=0.043;AN=70;BaseQRankSum=          |
| 10279 | chrY | 9987449 | . | G | A   | 2554.43  | PASS          | AC=16;AF=0.229;AN=70;BaseQRankSum=-8.040e  |
| 10280 | chrY | 9987457 | . | G | A   | 73.13    | PASS          | AC=2;AF=0.029;AN=70;BaseQRankSum=-1.416e+  |
| 10281 | chrY | 9987464 | . | C | T   | 2632.66  | PASS          | AC=15;AF=0.214;AN=70;BaseQRankSum=-3.540e  |
| 10282 | chrY | 9987479 | . | C | G   | 2514.16  | PASS          | AC=19;AF=0.271;AN=70;BaseQRankSum=-1.927e  |
| 10283 | chrY | 9987515 | . | T | G,C | 29337.18 | PASS          | AC=33,3;AF=0.471,0.043;AN=70;Base          |
| 10284 | chrY | 9987518 | . | T | C   | 1188.02  | my_snp_filter | AC=13;AF=0.186;AN=70;BaseQRankSum=         |
| 10285 | chrY | 9987521 | . | G | A   | 2235.71  | PASS          | AC=18;AF=0.257;AN=70;BaseQRankSum=-8.000e  |
| 10286 | chrY | 9987528 | . | A | G   | 23384.72 | PASS          | AC=35;AF=0.500;AN=70;BaseQRankSum=         |
| 10287 | chrY | 9987529 | . | G | T   | 10100.95 | PASS          | AC=33;AF=0.471;AN=70;BaseQRankSum=         |
| 10288 | chrY | 9987531 | . | G | A   | 660.87   | my_snp_filter | AC=9;AF=0.129;AN=70;BaseQRankSum=          |
| 10289 | chrY | 9987533 | . | G | A   | 15598.36 | PASS          | AC=33;AF=0.471;AN=70;BaseQRankSum=         |
| 10290 | chrY | 9987536 | . | T | A   | 1465.94  | PASS          | AC=15;AF=0.214;AN=70;BaseQRankSum=-9.230e  |
| 10291 | chrY | 9987578 | . | T | C   | 4306.53  | PASS          | AC=23;AF=0.329;AN=70;BaseQRankSum=0.839;C  |
| 10292 | chrY | 9987586 | . | C | T   | 2141.38  | PASS          | AC=20;AF=0.286;AN=70;BaseQRankSum=0.729;C  |
| 10293 | chrY | 9987616 | . | C | G   | 6350.73  | PASS          | AC=20;AF=0.303;AN=66;BaseQRankSum=0.358;C  |
| 10294 | chrY | 9987619 | . | T | C   | 1643.35  | PASS          | AC=11;AF=0.157;AN=70;BaseQRankSum=-2.175e  |
| 10295 | chrY | 9987623 | . | G | A   | 1140.39  | PASS          | AC=9;AF=0.129;AN=70;BaseQRankSum=0.791;Cl  |
| 10296 | chrY | 9987629 | . | C | T   | 6179.88  | PASS          | AC=12;AF=0.176;AN=68;BaseQRankSum=0.598;C  |
| 10297 | chrY | 9987630 | . | A | G   | 2193.23  | PASS          | AC=10;AF=0.143;AN=70;BaseQRankSum=0.639;C  |
| 10298 | chrY | 9987636 | . | T | C   | 2858.13  | PASS          | AC=10;AF=0.147;AN=68;BaseQRankSum=-1.763e  |
| 10299 | chrY | 9987639 | . | C | A   | 2993.23  | PASS          | AC=10;AF=0.147;AN=68;BaseQRankSum=-1.171e  |
| 10300 | chrY | 9987647 | . | A | C   | 5623.25  | PASS          | AC=16;AF=0.235;AN=68;BaseQRankSum=-1.444e  |
| 10301 | chrY | 9987656 | . | G | A   | 2313.86  | PASS          | AC=11;AF=0.162;AN=68;BaseQRankSum=0.315;C  |
| 10302 | chrY | 9987657 | . | G | A   | 171.23   | my_snp_filter | AC=8;AF=0.118;AN=68;BaseQRankSum=          |
| 10303 | chrY | 9987697 | . | C | T   | 37.24    | PASS          | AC=1;AF=0.015;AN=68;BaseQRankSum=1.23;Cli  |
| 10304 | chrY | 9987721 | . | C | T   | 1239.49  | PASS          | AC=12;AF=0.176;AN=68;BaseQRankSum=0.821;C  |
| 10305 | chrY | 9987733 | . | T | G   | 386.36   | my_snp_filter | AC=8;AF=0.118;AN=68;BaseQRankSum=          |
| 10306 | chrY | 9987748 | . | A | G   | 103.65   | my_snp_filter | AC=3;AF=0.044;AN=68;BaseQRankSum=          |
| 10307 | chrY | 9987775 | . | A | C   | 401.59   | PASS          | AC=7;AF=0.109;AN=64;BaseQRankSum=0.322;Cl  |
| 10308 | chrY | 9987776 | . | T | C   | 96.90    | PASS          | AC=1;AF=0.015;AN=66;BaseQRankSum=0.322;Cl  |
| 10309 | chrY | 9987783 | . | G | T   | 107.88   | PASS          | AC=1;AF=0.014;AN=70;BaseQRankSum=-1.307e+  |
| 10310 | chrY | 9987794 | . | G | A   | 649.06   | PASS          | AC=5;AF=0.071;AN=70;BaseQRankSum=0.736;Cl  |
| 10311 | chrY | 9987802 | . | G | A   | 4212.53  | PASS          | AC=23;AF=0.329;AN=70;BaseQRankSum=1.16;Cl  |
| 10312 | chrY | 9987810 | . | A | G   | 7959.19  | PASS          | AC=31;AF=0.484;AN=64;BaseQRankSum=0.115;C  |
| 10313 | chrY | 9987811 | . | T | C   | 8350.19  | PASS          | AC=31;AF=0.484;AN=64;BaseQRankSum=-1.123e  |
| 10314 | chrY | 9987817 | . | A | C,G | 8123.99  | PASS          | AC=25,6;AF=0.379,0.091;AN=66;BaseQRankSum= |
| 10315 | chrY | 9987829 | . | A | T   | 163.53   | my_snp_filter | AC=4;AF=0.057;AN=70;BaseQRankSum=          |
| 10316 | chrY | 9987834 | . | T | A,C | 9818.54  | PASS          | AC=29,7;AF=0.426,0.103;AN=68;BaseQRankSum= |
| 10317 | chrY | 9987835 | . | G | T   | 1568.09  | PASS          | AC=12;AF=0.176;AN=68;BaseQRankSum=-7.360e  |
| 10318 | chrY | 9987845 | . | G | T   | 2288.04  | PASS          | AC=21;AF=0.300;AN=70;BaseQRankSum=-1.087e  |
| 10319 | chrY | 9987855 | . | T | C   | 1255.93  | PASS          | AC=11;AF=0.157;AN=70;BaseQRankSum=-2.094e  |
| 10320 | chrY | 9987856 | . | C | A   | 285.60   | PASS          | AC=3;AF=0.043;AN=70;BaseQRankSum=-8.760e-  |
| 10321 | chrY | 9987896 | . | T | C   | 2302.25  | PASS          | AC=25;AF=0.357;AN=70;BaseQRankSum=-2.580e  |
| 10322 | chrY | 9987897 | . | C | T   | 28070.16 | PASS          | AC=34;AF=0.486;AN=70;BaseQRankSum=         |
| 10323 | chrY | 9987901 | . | G | C   | 8172.87  | PASS          | AC=28;AF=0.400;AN=70;BaseQRankSum=-4.510e  |
| 10324 | chrY | 9987928 | . | G | A   | 2206.66  | PASS          | AC=21;AF=0.300;AN=70;BaseQRankSum=-9.640e  |
| 10325 | chrY | 9987932 | . | T | C   | 18110.62 | PASS          | AC=35;AF=0.500;AN=70;BaseQRankSum=         |
| 10326 | chrY | 9987944 | . | A | G   | 140.53   | PASS          | AC=2;AF=0.029;AN=68;BaseQRankSum=1.27;Cli  |
| 10327 | chrY | 9987951 | . | T | C   | 10395.97 | PASS          | AC=26;AF=0.382;AN=68;BaseQRankSum=         |
| 10328 | chrY | 9987958 | . | G | A   | 256.12   | my_snp_filter | AC=8;AF=0.121;AN=66;BaseQRankSum=          |
| 10329 | chrY | 9987960 | . | T | G   | 43.44    | PASS          | AC=1;AF=0.015;AN=66;BaseQRankSum=-1.701e+  |
| 10330 | chrY | 9987983 | . | G | A   | 806.38   | PASS          | AC=6;AF=0.088;AN=68;BaseQRankSum=0.990;Cl  |
| 10331 | chrY | 9988003 | . | G | A   | 968.07   | PASS          | AC=5;AF=0.071;AN=70;BaseQRankSum=-1.750e-  |
| 10332 | chrY | 9988014 | . | A | G   | 641.04   | PASS          | AC=5;AF=0.071;AN=70;BaseQRankSum=0.383;Cl  |
| 10333 | chrY | 9988025 | . | A | G   | 1034.54  | PASS          | AC=14;AF=0.206;AN=68;BaseQRankSum=0.675;C  |
| 10334 | chrY | 9988037 | . | G | A   | 438.94   | PASS          | AC=5;AF=0.071;AN=70;BaseQRankSum=0.762;Cl  |
| 10335 | chrY | 9988059 | . | G | C   | 266.69   | PASS          | AC=6;AF=0.088;AN=68;BaseQRankSum=-1.470e+  |
| 10336 | chrY | 9988060 | . | A | T   | 1678.61  | PASS          | AC=16;AF=0.242;AN=66;BaseQRankSum=-2.870e  |

|       |      |         |   |   |   |          |               |                                           |
|-------|------|---------|---|---|---|----------|---------------|-------------------------------------------|
| 10337 | chrY | 9988064 | . | T | C | 1710.15  | PASS          | AC=16;AF=0.229;AN=70;BaseQRankSum=0.00;C  |
| 10338 | chrY | 9988065 | . | C | G | 106.29   | PASS          | AC=2;AF=0.029;AN=70;BaseQRankSum=0.485;C  |
| 10339 | chrY | 9988067 | . | C | A | 290.71   | PASS          | AC=6;AF=0.086;AN=70;BaseQRankSum=-1.054e+ |
| 10340 | chrY | 9988071 | . | C | G | 2375.79  | PASS          | AC=20;AF=0.286;AN=70;BaseQRankSum=-6.940e |
| 10341 | chrY | 9988072 | . | C | T | 324.33   | PASS          | AC=6;AF=0.086;AN=70;BaseQRankSum=-1.335e+ |
| 10342 | chrY | 9988085 | . | C | T | 62.41    | my_snp_filter | AC=2;AF=0.029;AN=70;BaseQRankSum=         |
| 10343 | chrY | 9988093 | . | G | A | 65.64    | my_snp_filter | AC=2;AF=0.029;AN=70;BaseQRankSum=         |
| 10344 | chrY | 9988100 | . | G | A | 1308.85  | PASS          | AC=14;AF=0.200;AN=70;BaseQRankSum=-5.740e |
| 10345 | chrY | 9988101 | . | A | T | 2502.25  | PASS          | AC=20;AF=0.286;AN=70;BaseQRankSum=-7.170e |
| 10346 | chrY | 9988125 | . | T | C | 2207.69  | PASS          | AC=19;AF=0.279;AN=68;BaseQRankSum=0.00;C  |
| 10347 | chrY | 9988133 | . | C | A | 106.30   | PASS          | AC=3;AF=0.043;AN=70;BaseQRankSum=-7.810e  |
| 10348 | chrY | 9988137 | . | A | T | 2387.69  | PASS          | AC=17;AF=0.243;AN=70;BaseQRankSum=-1.240e |
| 10349 | chrY | 9988140 | . | G | T | 2298.14  | PASS          | AC=17;AF=0.243;AN=70;BaseQRankSum=1.40;C  |
| 10350 | chrY | 9988149 | . | C | T | 4197.62  | PASS          | AC=22;AF=0.324;AN=68;BaseQRankSum=0.856;C |
| 10351 | chrY | 9988162 | . | C | T | 91.17    | my_snp_filter | AC=6;AF=0.088;AN=68;BaseQRankSum=         |
| 10352 | chrY | 9988169 | . | A | G | 990.42   | my_snp_filter | AC=9;AF=0.132;AN=68;BaseQRankSum=         |
| 10353 | chrY | 9988170 | . | G | A | 89.21    | my_snp_filter | AC=2;AF=0.029;AN=68;BaseQRankSum=         |
| 10354 | chrY | 9988198 | . | A | G | 392.75   | my_snp_filter | AC=7;AF=0.103;AN=68;BaseQRankSum=         |
| 10355 | chrY | 9988202 | . | A | G | 844.91   | my_snp_filter | AC=9;AF=0.132;AN=68;BaseQRankSum=         |
| 10356 | chrY | 9988239 | . | C | A | 40.57    | my_snp_filter | AC=4;AF=0.059;AN=68;BaseQRankSum=         |
| 10357 | chrY | 9988265 | . | T | C | 188.70   | PASS          | AC=2;AF=0.031;AN=64;BaseQRankSum=0.787;C  |
| 10358 | chrY | 9988271 | . | A | G | 157.34   | PASS          | AC=2;AF=0.031;AN=64;BaseQRankSum=-2.250e+ |
| 10359 | chrY | 9988276 | . | C | T | 157.51   | PASS          | AC=2;AF=0.032;AN=62;BaseQRankSum=1.20;C   |
| 10360 | chrY | 9988277 | . | A | G | 160.22   | PASS          | AC=2;AF=0.032;AN=62;BaseQRankSum=1.70;C   |
| 10361 | chrY | 9988286 | . | T | C | 167.47   | PASS          | AC=2;AF=0.031;AN=64;BaseQRankSum=1.22;C   |
| 10362 | chrY | 9988305 | . | G | A | 89.84    | PASS          | AC=1;AF=0.015;AN=66;BaseQRankSum=-1.590e- |
| 10363 | chrY | 9988309 | . | G | A | 95.14    | PASS          | AC=1;AF=0.016;AN=64;BaseQRankSum=-9.100e- |
| 10364 | chrY | 9988313 | . | C | T | 119.35   | PASS          | AC=1;AF=0.015;AN=66;BaseQRankSum=2.24;C   |
| 10365 | chrY | 9988314 | . | T | G | 120.09   | PASS          | AC=1;AF=0.016;AN=62;BaseQRankSum=-1.212e+ |
| 10366 | chrY | 9988387 | . | A | G | 830.16   | PASS          | AC=9;AF=0.129;AN=70;BaseQRankSum=-1.380e+ |
| 10367 | chrY | 9988392 | . | A | G | 817.44   | PASS          | AC=9;AF=0.129;AN=70;BaseQRankSum=-1.733e+ |
| 10368 | chrY | 9988430 | . | A | G | 81.05    | my_snp_filter | AC=3;AF=0.043;AN=70;BaseQRankSum=         |
| 10369 | chrY | 9989179 | . | G | A | 212.41   | PASS          | AC=8;AF=0.114;AN=70;BaseQRankSum=-9.670e- |
| 10370 | chrY | 9989220 | . | C | A | 608.45   | PASS          | AC=8;AF=0.114;AN=70;BaseQRankSum=0.067;C  |
| 10371 | chrY | 9989221 | . | A | G | 608.25   | PASS          | AC=8;AF=0.114;AN=70;BaseQRankSum=-7.500e- |
| 10372 | chrY | 9989222 | . | C | G | 253.20   | PASS          | AC=5;AF=0.071;AN=70;BaseQRankSum=-9.220e- |
| 10373 | chrY | 9989230 | . | G | A | 236.84   | PASS          | AC=4;AF=0.057;AN=70;BaseQRankSum=-1.180e- |
| 10374 | chrY | 9989242 | . | A | G | 264.24   | PASS          | AC=5;AF=0.071;AN=70;BaseQRankSum=-5.460e- |
| 10375 | chrY | 9989244 | . | T | A | 290.44   | PASS          | AC=5;AF=0.071;AN=70;BaseQRankSum=-1.588e+ |
| 10376 | chrY | 9989254 | . | A | C | 222.33   | PASS          | AC=5;AF=0.071;AN=70;BaseQRankSum=1.18;C   |
| 10377 | chrY | 9989257 | . | G | T | 147.85   | PASS          | AC=5;AF=0.071;AN=70;BaseQRankSum=0.632;C  |
| 10378 | chrY | 9989261 | . | A | G | 312.37   | PASS          | AC=7;AF=0.100;AN=70;BaseQRankSum=0.751;C  |
| 10379 | chrY | 9989400 | . | G | A | 45.50    | my_snp_filter | AC=3;AF=0.045;AN=66;BaseQRankSum=         |
| 10380 | chrY | 9989435 | . | T | C | 57.62    | my_snp_filter | AC=5;AF=0.076;AN=66;BaseQRankSum=         |
| 10381 | chrY | 9989446 | . | G | A | 400.56   | PASS          | AC=9;AF=0.136;AN=66;BaseQRankSum=-7.360e- |
| 10382 | chrY | 9989474 | . | G | C | 136.22   | PASS          | AC=6;AF=0.088;AN=68;BaseQRankSum=0.742;C  |
| 10383 | chrY | 9989504 | . | A | C | 94.28    | PASS          | AC=3;AF=0.043;AN=70;BaseQRankSum=-1.203e+ |
| 10384 | chrY | 9989530 | . | T | C | 85.87    | PASS          | AC=3;AF=0.043;AN=70;BaseQRankSum=-8.690e- |
| 10385 | chrY | 9989615 | . | G | A | 13804.96 | PASS          | AC=70;AF=1.00;AN=70;DP=448;FS=0.0         |
| 10386 | chrY | 9989842 | . | G | A | 707.72   | PASS          | AC=12;AF=0.171;AN=70;BaseQRankSum=0.313;C |
| 10387 | chrY | 9989853 | . | C | T | 739.54   | PASS          | AC=13;AF=0.186;AN=70;BaseQRankSum=0.245;C |
| 10388 | chrY | 9989873 | . | C | A | 2111.37  | PASS          | AC=18;AF=0.257;AN=70;BaseQRankSum=0.034;C |
| 10389 | chrY | 9989878 | . | C | A | 2067.55  | PASS          | AC=18;AF=0.257;AN=70;BaseQRankSum=-5.260e |
| 10390 | chrY | 9989903 | . | T | C | 1482.56  | PASS          | AC=19;AF=0.271;AN=70;BaseQRankSum=0.00;C  |
| 10391 | chrY | 9989940 | . | A | G | 36.46    | PASS          | AC=1;AF=0.014;AN=70;BaseQRankSum=-1.231e+ |
| 10392 | chrY | 9989941 | . | G | T | 1146.03  | PASS          | AC=12;AF=0.171;AN=70;BaseQRankSum=-6.100e |
| 10393 | chrY | 9989945 | . | A | G | 1083.66  | PASS          | AC=12;AF=0.171;AN=70;BaseQRankSum=0.538;C |
| 10394 | chrY | 9989995 | . | G | A | 40.11    | my_snp_filter | AC=2;AF=0.029;AN=70;BaseQRankSum=         |
| 10395 | chrY | 9990000 | . | T | A | 36.85    | my_snp_filter | AC=2;AF=0.029;AN=70;BaseQRankSum=         |
| 10396 | chrY | 9990058 | . | T | C | 905.14   | PASS          | AC=13;AF=0.186;AN=70;BaseQRankSum=0.296;C |
| 10397 | chrY | 9990103 | . | C | T | 2470.87  | PASS          | AC=27;AF=0.386;AN=70;BaseQRankSum=-2.740e |
| 10398 | chrY | 9990135 | . | A | C | 5536.45  | PASS          | AC=25;AF=0.357;AN=70;BaseQRankSum=-6.350e |
| 10399 | chrY | 9990161 | . | T | C | 1565.05  | PASS          | AC=20;AF=0.286;AN=70;BaseQRankSum=-1.768e |
| 10400 | chrY | 9990200 | . | G | A | 620.38   | PASS          | AC=12;AF=0.194;AN=62;BaseQRankSum=0.406;C |
| 10401 | chrY | 9990286 | . | T | C | 60.47    | PASS          | AC=1;AF=0.033;AN=30;BaseQRankSum=-2.647e+ |
| 10402 | chrY | 9990306 | . | T | C | 183.92   | PASS          | AC=1;AF=0.045;AN=22;BaseQRankSum=1.23;C   |
| 10403 | chrY | 9990311 | . | C | T | 61.26    | PASS          | AC=1;AF=0.042;AN=24;BaseQRankSum=-2.170e- |
| 10404 | chrY | 9990314 | . | C | T | 57.35    | PASS          | AC=1;AF=0.042;AN=24;BaseQRankSum=-9.380e- |
| 10405 | chrY | 9990337 | . | T | C | 128.19   | PASS          | AC=2;AF=0.100;AN=20;BaseQRankSum=0.953;C  |
| 10406 | chrY | 9990348 | . | T | C | 133.36   | PASS          | AC=3;AF=0.150;AN=20;BaseQRankSum=1.25;C   |
| 10407 | chrY | 9990349 | . | G | A | 81.86    | PASS          | AC=2;AF=0.091;AN=22;BaseQRankSum=0.693;C  |
| 10408 | chrY | 9990357 | . | A | T | 152.33   | PASS          | AC=2;AF=0.111;AN=18;BaseQRankSum=0.914;C  |
| 10409 | chrY | 9990366 | . | A | C | 140.14   | PASS          | AC=3;AF=0.167;AN=18;BaseQRankSum=-8.390e- |
| 10410 | chrY | 9990373 | . | C | T | 93.71    | PASS          | AC=3;AF=0.150;AN=20;BaseQRankSum=-2.900e- |
| 10411 | chrY | 9990383 | . | A | C | 178.65   | PASS          | AC=4;AF=0.222;AN=18;BaseQRankSum=0.869;C  |
| 10412 | chrY | 9990432 | . | T | A | 201.30   | PASS          | AC=3;AF=0.167;AN=18;BaseQRankSum=0.150;C  |

|       |      |         |   |   |     |          |               |                                           |
|-------|------|---------|---|---|-----|----------|---------------|-------------------------------------------|
| 10413 | chrY | 9990444 | . | A | T   | 63.58    | my_snp_filter | AC=2;AF=0.100;AN=20;BaseQRankSum=         |
| 10414 | chrY | 9990447 | . | A | G   | 242.17   | PASS          | AC=3;AF=0.167;AN=18;BaseQRankSum=-1.975e+ |
| 10415 | chrY | 9990454 | . | T | A   | 39.31    | my_snp_filter | AC=1;AF=0.050;AN=20;BaseQRankSum=         |
| 10416 | chrY | 9990458 | . | T | C   | 67.54    | my_snp_filter | AC=2;AF=0.111;AN=18;BaseQRankSum=         |
| 10417 | chrY | 9990475 | . | C | G   | 38.75    | my_snp_filter | AC=2;AF=0.111;AN=18;BaseQRankSum=         |
| 10418 | chrY | 9990509 | . | C | A   | 284.01   | PASS          | AC=6;AF=0.333;AN=18;BaseQRankSum=2.18;Cli |
| 10419 | chrY | 9990518 | . | C | G   | 294.81   | PASS          | AC=6;AF=0.333;AN=18;BaseQRankSum=0.290;Cl |
| 10420 | chrY | 9990561 | . | T | C   | 276.32   | PASS          | AC=6;AF=0.333;AN=18;BaseQRankSum=0.747;Cl |
| 10421 | chrY | 9990579 | . | A | T   | 295.99   | PASS          | AC=6;AF=0.333;AN=18;BaseQRankSum=0.423;Cl |
| 10422 | chrY | 9990582 | . | T | G   | 292.57   | PASS          | AC=6;AF=0.333;AN=18;BaseQRankSum=-2.166e+ |
| 10423 | chrY | 9990589 | . | T | A   | 193.27   | PASS          | AC=5;AF=0.278;AN=18;BaseQRankSum=0.00;Cli |
| 10424 | chrY | 9990593 | . | T | A   | 190.74   | PASS          | AC=5;AF=0.278;AN=18;BaseQRankSum=-7.360e- |
| 10425 | chrY | 9990595 | . | G | A   | 161.49   | PASS          | AC=4;AF=0.222;AN=18;BaseQRankSum=-3.820e- |
| 10426 | chrY | 9990597 | . | C | T   | 161.49   | PASS          | AC=4;AF=0.222;AN=18;BaseQRankSum=-1.107e+ |
| 10427 | chrY | 9991313 | . | C | T   | 86.34    | my_snp_filter | AC=3;AF=0.071;AN=42;BaseQRankSum=         |
| 10428 | chrY | 9991361 | . | A | G   | 766.03   | my_snp_filter | AC=7;AF=0.117;AN=60;BaseQRankSum=         |
| 10429 | chrY | 9991369 | . | T | C   | 891.34   | my_snp_filter | AC=7;AF=0.109;AN=64;BaseQRankSum=         |
| 10430 | chrY | 9991373 | . | T | G   | 935.02   | my_snp_filter | AC=7;AF=0.103;AN=68;BaseQRankSum=         |
| 10431 | chrY | 9991375 | . | G | T   | 930.04   | my_snp_filter | AC=7;AF=0.103;AN=68;BaseQRankSum=         |
| 10432 | chrY | 9991378 | . | C | G   | 972.20   | my_snp_filter | AC=7;AF=0.103;AN=68;BaseQRankSum=         |
| 10433 | chrY | 9991385 | . | C | T   | 941.25   | my_snp_filter | AC=7;AF=0.109;AN=64;BaseQRankSum=         |
| 10434 | chrY | 9991444 | . | G | T   | 995.68   | my_snp_filter | AC=17;AF=0.243;AN=70;BaseQRankSum=        |
| 10435 | chrY | 9991482 | . | A | C,T | 3967.14  | my_snp_filter | AC=8,14;AF=0.114,0.200;AN=70;Base         |
| 10436 | chrY | 9991490 | . | C | A   | 4717.19  | my_snp_filter | AC=23;AF=0.329;AN=70;BaseQRankSum=        |
| 10437 | chrY | 9991499 | . | T | C   | 5116.61  | my_snp_filter | AC=23;AF=0.329;AN=70;BaseQRankSum=        |
| 10438 | chrY | 9991511 | . | G | A   | 5618.71  | PASS          | AC=26;AF=0.382;AN=68;BaseQRankSum=0.320;C |
| 10439 | chrY | 9991545 | . | T | G   | 10045.72 | PASS          | AC=33;AF=0.471;AN=70;BaseQRankSum=        |
| 10440 | chrY | 9991555 | . | C | T   | 10594.84 | PASS          | AC=34;AF=0.486;AN=70;BaseQRankSum=        |
| 10441 | chrY | 9991598 | . | T | C   | 9988.26  | PASS          | AC=33;AF=0.485;AN=68;BaseQRankSum=-1.884e |
| 10442 | chrY | 9991623 | . | C | A   | 9198.53  | PASS          | AC=35;AF=0.515;AN=68;BaseQRankSum=-5.730e |
| 10443 | chrY | 9991636 | . | C | T   | 2939.50  | my_snp_filter | AC=18;AF=0.346;AN=52;BaseQRankSum=        |
| 10444 | chrY | 9991637 | . | C | A   | 4759.05  | PASS          | AC=17;AF=0.283;AN=60;BaseQRankSum=0.00;Cl |
| 10445 | chrY | 9991638 | . | T | A   | 2764.28  | PASS          | AC=18;AF=0.273;AN=66;BaseQRankSum=0.537;C |
| 10446 | chrY | 9991643 | . | T | C   | 4224.58  | PASS          | AC=18;AF=0.391;AN=46;BaseQRankSum=-7.270e |
| 10447 | chrY | 9991644 | . | T | C   | 1681.78  | PASS          | AC=15;AF=0.227;AN=66;BaseQRankSum=0.358;C |
| 10448 | chrY | 9991654 | . | T | C   | 3392.02  | PASS          | AC=22;AF=0.500;AN=44;BaseQRankSum=-5.720e |
| 10449 | chrY | 9991655 | . | T | C   | 280.77   | PASS          | AC=5;AF=0.086;AN=58;BaseQRankSum=-7.360e- |
| 10450 | chrY | 9991686 | . | C | G   | 693.21   | PASS          | AC=8;AF=0.308;AN=26;BaseQRankSum=1.59;Cli |
| 10451 | chrY | 9991700 | . | A | C   | 588.33   | PASS          | AC=6;AF=0.200;AN=30;BaseQRankSum=-1.202e+ |
| 10452 | chrY | 9991717 | . | A | G   | 609.07   | PASS          | AC=6;AF=0.188;AN=32;BaseQRankSum=0.311;Cl |
| 10453 | chrY | 9991722 | . | T | C   | 640.49   | PASS          | AC=6;AF=0.188;AN=32;BaseQRankSum=0.930;Cl |
| 10454 | chrY | 9991726 | . | A | G   | 722.85   | PASS          | AC=6;AF=0.200;AN=30;BaseQRankSum=-1.416e+ |
| 10455 | chrY | 9991742 | . | T | C   | 976.60   | PASS          | AC=6;AF=0.167;AN=36;BaseQRankSum=-2.890e- |
| 10456 | chrY | 9991743 | . | G | A   | 973.19   | PASS          | AC=5;AF=0.139;AN=36;BaseQRankSum=-3.960e- |
| 10457 | chrY | 9991749 | . | T | C   | 1051.39  | PASS          | AC=6;AF=0.158;AN=38;BaseQRankSum=-2.530e- |
| 10458 | chrY | 9991759 | . | C | T   | 55.83    | my_snp_filter | AC=2;AF=0.050;AN=40;BaseQRankSum=         |
| 10459 | chrY | 9991768 | . | T | C   | 1049.69  | PASS          | AC=6;AF=0.158;AN=38;BaseQRankSum=-5.370e- |
| 10460 | chrY | 9991774 | . | G | A   | 133.79   | my_snp_filter | AC=3;AF=0.079;AN=38;BaseQRankSum=         |
| 10461 | chrY | 9991780 | . | C | T   | 1327.12  | PASS          | AC=6;AF=0.150;AN=40;BaseQRankSum=1.86;Cli |
| 10462 | chrY | 9991785 | . | A | G   | 3453.70  | PASS          | AC=9;AF=0.214;AN=42;BaseQRankSum=0.849;Cl |
| 10463 | chrY | 9991786 | . | C | G,T | 581.19   | PASS          | AC=4,1;AF=0.087,0.022;AN=46;BaseQRankSum= |
| 10464 | chrY | 9991796 | . | A | T   | 5978.50  | PASS          | AC=9;AF=0.155;AN=58;BaseQRankSum=1.11;Cli |
| 10465 | chrY | 9991808 | . | T | A   | 1968.26  | my_snp_filter | AC=9;AF=0.145;AN=62;BaseQRankSum=         |
| 10466 | chrY | 9991810 | . | T | A   | 168.92   | my_snp_filter | AC=3;AF=0.047;AN=64;BaseQRankSum=         |
| 10467 | chrY | 9991828 | . | T | C   | 2967.07  | my_snp_filter | AC=9;AF=0.132;AN=68;BaseQRankSum=         |
| 10468 | chrY | 9991838 | . | C | T   | 2872.09  | PASS          | AC=8;AF=0.114;AN=70;BaseQRankSum=0.415;Cl |
| 10469 | chrY | 9991839 | . | C | T   | 4804.60  | PASS          | AC=41;AF=0.661;AN=62;BaseQRankSum=1.16;Cl |
| 10470 | chrY | 9991845 | . | G | T   | 43.08    | my_snp_filter | AC=1;AF=0.014;AN=70;BaseQRankSum=         |
| 10471 | chrY | 9991855 | . | G | C   | 609.31   | PASS          | AC=2;AF=0.029;AN=70;BaseQRankSum=-6.380e- |
| 10472 | chrY | 9991870 | . | G | T   | 1282.94  | my_snp_filter | AC=7;AF=0.103;AN=68;BaseQRankSum=         |
| 10473 | chrY | 9991871 | . | C | T   | 411.42   | PASS          | AC=5;AF=0.074;AN=68;BaseQRankSum=0.297;Cl |
| 10474 | chrY | 9991882 | . | C | G,A | 3560.55  | PASS          | AC=3,7;AF=0.043,0.100;AN=70;BaseQRankSum= |
| 10475 | chrY | 9991883 | . | T | C   | 1193     | my_snp_filter | AC=7;AF=0.100;AN=70;BaseQRankSum=         |
| 10476 | chrY | 9991889 | . | C | T   | 2414.03  | PASS          | AC=9;AF=0.129;AN=70;BaseQRankSum=-1.040e+ |
| 10477 | chrY | 9991890 | . | T | C   | 2413.65  | PASS          | AC=9;AF=0.129;AN=70;BaseQRankSum=1.02;Cli |
| 10478 | chrY | 9991895 | . | A | C   | 5211.61  | PASS          | AC=10;AF=0.143;AN=70;BaseQRankSum=1.90;Cl |
| 10479 | chrY | 9991909 | . | G | A   | 998.23   | PASS          | AC=5;AF=0.071;AN=70;BaseQRankSum=-1.348e+ |
| 10480 | chrY | 9991927 | . | G | A   | 2153.13  | PASS          | AC=8;AF=0.114;AN=70;BaseQRankSum=3.04;Cli |
| 10481 | chrY | 9991931 | . | C | A   | 371.96   | PASS          | AC=5;AF=0.071;AN=70;BaseQRankSum=1.71;Cli |
| 10482 | chrY | 9991932 | . | G | A   | 1470.32  | PASS          | AC=5;AF=0.071;AN=70;BaseQRankSum=3.44;Cli |
| 10483 | chrY | 9991935 | . | T | C   | 2005.21  | PASS          | AC=8;AF=0.114;AN=70;BaseQRankSum=1.36;Cli |
| 10484 | chrY | 9991951 | . | C | T   | 1763.04  | PASS          | AC=7;AF=0.100;AN=70;BaseQRankSum=1.36;Cli |
| 10485 | chrY | 9991952 | . | G | T   | 1807.74  | PASS          | AC=7;AF=0.100;AN=70;BaseQRankSum=2.57;Cli |
| 10486 | chrY | 9991956 | . | T | C   | 1134.87  | PASS          | AC=6;AF=0.086;AN=70;BaseQRankSum=0.781;Cl |
| 10487 | chrY | 9991959 | . | T | C   | 1958.89  | PASS          | AC=7;AF=0.100;AN=70;BaseQRankSum=0.498;Cl |
| 10488 | chrY | 9991965 | . | A | G   | 659.20   | PASS          | AC=4;AF=0.057;AN=70;BaseQRankSum=-6.370e- |

|       |      |         |   |   |     |          |               |                                           |
|-------|------|---------|---|---|-----|----------|---------------|-------------------------------------------|
| 10489 | chrY | 9991990 | . | A | C,T | 5166.40  | PASS          | AC=16,2;AF=0.229,0.029;AN=70;BaseQRankSum |
| 10490 | chrY | 9991995 | . | C | A   | 9040.28  | my_snp_filter | AC=25;AF=0.368;AN=68;BaseQRankSum         |
| 10491 | chrY | 9991996 | . | G | T   | 440.06   | my_snp_filter | AC=7;AF=0.103;AN=68;BaseQRankSum          |
| 10492 | chrY | 9992002 | . | C | A   | 2470.59  | PASS          | AC=10;AF=0.143;AN=70;BaseQRankSum=-4.860e |
| 10493 | chrY | 9992004 | . | C | T   | 515.76   | my_snp_filter | AC=6;AF=0.088;AN=68;BaseQRankSum          |
| 10494 | chrY | 9992005 | . | T | G   | 515.54   | my_snp_filter | AC=6;AF=0.088;AN=68;BaseQRankSum          |
| 10495 | chrY | 9992007 | . | T | C   | 1155.03  | PASS          | AC=9;AF=0.129;AN=70;BaseQRankSum=-3.600e- |
| 10496 | chrY | 9992019 | . | G | C   | 528.79   | PASS          | AC=4;AF=0.057;AN=70;BaseQRankSum=-1.890e- |
| 10497 | chrY | 9992037 | . | T | C   | 195.99   | my_snp_filter | AC=4;AF=0.057;AN=70;BaseQRankSum          |
| 10498 | chrY | 9992038 | . | G | A   | 8598.91  | PASS          | AC=30;AF=0.429;AN=70;BaseQRankSum=0.428;  |
| 10499 | chrY | 9992040 | . | G | A   | 1707.44  | PASS          | AC=16;AF=0.229;AN=70;BaseQRankSum=-1.480e |
| 10500 | chrY | 9992042 | . | T | A   | 1324.57  | PASS          | AC=14;AF=0.200;AN=70;BaseQRankSum=-9.400e |
| 10501 | chrY | 9992063 | . | C | A   | 994.38   | my_snp_filter | AC=15;AF=0.214;AN=70;BaseQRankSum         |
| 10502 | chrY | 9992065 | . | C | G   | 2099.46  | PASS          | AC=12;AF=0.171;AN=70;BaseQRankSum=-5.200e |
| 10503 | chrY | 9992071 | . | A | C   | 34803.11 | PASS          | AC=37;AF=0.529;AN=70;BaseQRankSum         |
| 10504 | chrY | 9992075 | . | G | A   | 657.97   | my_snp_filter | AC=12;AF=0.171;AN=70;BaseQRankSum         |
| 10505 | chrY | 9992081 | . | A | G   | 4855.48  | PASS          | AC=28;AF=0.400;AN=70;BaseQRankSum=-1.678e |
| 10506 | chrY | 9992082 | . | T | C   | 2531.42  | PASS          | AC=14;AF=0.200;AN=70;BaseQRankSum=-1.083e |
| 10507 | chrY | 9992106 | . | C | T   | 3203.90  | PASS          | AC=18;AF=0.257;AN=70;BaseQRankSum=1.57;Cl |
| 10508 | chrY | 9992107 | . | A | G   | 3163.27  | PASS          | AC=17;AF=0.243;AN=70;BaseQRankSum=0.373;C |
| 10509 | chrY | 9992114 | . | C | A   | 2977.60  | PASS          | AC=15;AF=0.214;AN=70;BaseQRankSum=-9.500e |
| 10510 | chrY | 9992127 | . | T | A   | 2833.53  | PASS          | AC=15;AF=0.214;AN=70;BaseQRankSum=-3.910e |
| 10511 | chrY | 9992130 | . | T | C   | 3159.57  | PASS          | AC=27;AF=0.386;AN=70;BaseQRankSum=-7.420e |
| 10512 | chrY | 9992131 | . | T | G   | 3133.58  | PASS          | AC=16;AF=0.229;AN=70;BaseQRankSum=-3.230e |
| 10513 | chrY | 9992138 | . | C | G   | 57.22    | my_snp_filter | AC=4;AF=0.057;AN=70;BaseQRankSum          |
| 10514 | chrY | 9992141 | . | T | C   | 119.23   | my_snp_filter | AC=5;AF=0.071;AN=70;BaseQRankSum          |
| 10515 | chrY | 9992153 | . | T | C   | 193.18   | my_snp_filter | AC=4;AF=0.057;AN=70;BaseQRankSum          |
| 10516 | chrY | 9992167 | . | C | A,* | 7264.91  | PASS          | AC=16,18;AF=0.229,0.257;AN=70;BaseQRankSu |
| 10517 | chrY | 9992188 | . | C | T   | 6730.87  | PASS          | AC=22;AF=0.314;AN=70;BaseQRankSum=1.65;Cl |
| 10518 | chrY | 9992193 | . | A | G   | 61.02    | my_snp_filter | AC=4;AF=0.057;AN=70;BaseQRankSum          |
| 10519 | chrY | 9992196 | . | A | C   | 14350.60 | PASS          | AC=31;AF=0.443;AN=70;BaseQRankSum         |
| 10520 | chrY | 9992208 | . | G | T   | 6439.05  | PASS          | AC=21;AF=0.300;AN=70;BaseQRankSum=0.778;C |
| 10521 | chrY | 9992213 | . | G | A   | 6311.90  | PASS          | AC=21;AF=0.300;AN=70;BaseQRankSum=0.066;C |
| 10522 | chrY | 9992214 | . | T | C   | 6270.95  | PASS          | AC=21;AF=0.300;AN=70;BaseQRankSum=-8.360e |
| 10523 | chrY | 9992232 | . | T | A   | 209.98   | my_snp_filter | AC=4;AF=0.057;AN=70;BaseQRankSum          |
| 10524 | chrY | 9992233 | . | A | C   | 43115.82 | PASS          | AC=35;AF=0.515;AN=68;BaseQRankSum         |
| 10525 | chrY | 9992235 | . | A | G   | 26363.74 | PASS          | AC=35;AF=0.500;AN=70;BaseQRankSum         |
| 10526 | chrY | 9992247 | . | A | T   | 4651.48  | PASS          | AC=11;AF=0.162;AN=68;BaseQRankSum=0.357;C |
| 10527 | chrY | 9992257 | . | T | C   | 2573.23  | PASS          | AC=8;AF=0.114;AN=70;BaseQRankSum=-4.702e+ |
| 10528 | chrY | 9992268 | . | C | T   | 30565.38 | PASS          | AC=14;AF=0.368;AN=38;BaseQRankSum         |
| 10529 | chrY | 9992283 | . | C | A   | 244.03   | my_snp_filter | AC=3;AF=0.044;AN=68;BaseQRankSum          |
| 10530 | chrY | 9992288 | . | A | T   | 27825.02 | PASS          | AC=13;AF=0.295;AN=44;BaseQRankSum         |
| 10531 | chrY | 9992301 | . | T | C   | 7820.86  | PASS          | AC=10;AF=0.143;AN=70;BaseQRankSum=1.00;Cl |
| 10532 | chrY | 9992309 | . | T | C   | 2113.49  | PASS          | AC=9;AF=0.132;AN=68;BaseQRankSum=-4.670e- |
| 10533 | chrY | 9992313 | . | G | A   | 7245.05  | PASS          | AC=10;AF=0.143;AN=70;BaseQRankSum=1.39;Cl |
| 10534 | chrY | 9992316 | . | C | T   | 16679.91 | PASS          | AC=12;AF=0.200;AN=60;BaseQRankSum         |
| 10535 | chrY | 9992317 | . | A | C   | 1831.45  | PASS          | AC=9;AF=0.145;AN=62;BaseQRankSum=0.755;Cl |
| 10536 | chrY | 9992333 | . | T | C   | 573.25   | PASS          | AC=5;AF=0.071;AN=70;BaseQRankSum=0.809;Cl |
| 10537 | chrY | 9992336 | . | A | T   | 380.88   | PASS          | AC=4;AF=0.057;AN=70;BaseQRankSum=0.494;Cl |
| 10538 | chrY | 9992337 | . | C | T   | 10059.81 | PASS          | AC=9;AF=0.129;AN=70;BaseQRankSum          |
| 10539 | chrY | 9992338 | . | A | G   | 9813.15  | PASS          | AC=9;AF=0.129;AN=70;BaseQRankSum=-1.068e+ |
| 10540 | chrY | 9992369 | . | T | G   | 3355.28  | PASS          | AC=8;AF=0.114;AN=70;BaseQRankSum=-3.610e- |
| 10541 | chrY | 9992392 | . | C | A   | 3157.88  | PASS          | AC=8;AF=0.114;AN=70;BaseQRankSum=0.117;Cl |
| 10542 | chrY | 9992399 | . | G | A   | 1368.56  | PASS          | AC=5;AF=0.071;AN=70;BaseQRankSum=1.48;Cli |
| 10543 | chrY | 9992401 | . | A | C   | 3817.59  | PASS          | AC=8;AF=0.118;AN=68;BaseQRankSum=1.11;Cli |
| 10544 | chrY | 9992413 | . | C | T   | 5620.03  | PASS          | AC=8;AF=0.121;AN=66;BaseQRankSum=-3.800e- |
| 10545 | chrY | 9992428 | . | C | G   | 8938.71  | PASS          | AC=8;AF=0.148;AN=54;BaseQRankSum=-9.000e- |
| 10546 | chrY | 9992432 | . | A | C   | 9235.29  | PASS          | AC=10;AF=0.185;AN=54;BaseQRankSum=3.10;Cl |
| 10547 | chrY | 9992434 | . | C | G   | 1223.26  | PASS          | AC=4;AF=0.057;AN=70;BaseQRankSum=-3.421e+ |
| 10548 | chrY | 9992442 | . | T | A   | 1063.28  | PASS          | AC=2;AF=0.029;AN=70;BaseQRankSum=-1.479e+ |
| 10549 | chrY | 9992446 | . | C | G   | 1548.11  | PASS          | AC=5;AF=0.071;AN=70;BaseQRankSum=0.00;Cli |
| 10550 | chrY | 9992456 | . | G | A   | 1114.02  | PASS          | AC=2;AF=0.029;AN=70;BaseQRankSum=2.19;Cli |
| 10551 | chrY | 9992466 | . | C | T   | 1867.86  | PASS          | AC=6;AF=0.086;AN=70;BaseQRankSum=0.900;Cl |
| 10552 | chrY | 9992473 | . | T | A   | 7529.47  | PASS          | AC=32;AF=0.457;AN=70;BaseQRankSum=-4.000e |
| 10553 | chrY | 9992475 | . | T | C   | 7544.39  | PASS          | AC=32;AF=0.457;AN=70;BaseQRankSum=-5.480e |
| 10554 | chrY | 9992484 | . | C | T   | 15842.75 | PASS          | AC=35;AF=0.500;AN=70;BaseQRankSum         |
| 10555 | chrY | 9992485 | . | A | G   | 16055.75 | PASS          | AC=35;AF=0.500;AN=70;BaseQRankSum         |
| 10556 | chrY | 9992499 | . | C | T   | 3589.88  | PASS          | AC=14;AF=0.200;AN=70;BaseQRankSum=-9.400e |
| 10557 | chrY | 9992508 | . | T | G   | 3832.90  | PASS          | AC=14;AF=0.200;AN=70;BaseQRankSum=-1.417e |
| 10558 | chrY | 9992511 | . | C | T   | 3985.21  | PASS          | AC=22;AF=0.314;AN=70;BaseQRankSum=0.028;C |
| 10559 | chrY | 9992513 | . | A | G   | 514.46   | my_snp_filter | AC=11;AF=0.157;AN=70;BaseQRankSum         |
| 10560 | chrY | 9992534 | . | G | A   | 3497.53  | PASS          | AC=14;AF=0.200;AN=70;BaseQRankSum=1.35;Cl |
| 10561 | chrY | 9992543 | . | T | C   | 10954.17 | PASS          | AC=31;AF=0.443;AN=70;BaseQRankSum         |
| 10562 | chrY | 9992548 | . | A | T   | 3695.59  | PASS          | AC=12;AF=0.171;AN=70;BaseQRankSum=0.853;C |
| 10563 | chrY | 9992553 | . | G | A   | 3471.44  | PASS          | AC=22;AF=0.314;AN=70;BaseQRankSum=0.092;C |
| 10564 | chrY | 9992560 | . | C | T   | 11950.37 | PASS          | AC=32;AF=0.457;AN=70;BaseQRankSum         |



|       |      |         |   |   |     |          |               |                                           |
|-------|------|---------|---|---|-----|----------|---------------|-------------------------------------------|
| 10565 | chrY | 9992565 | . | T | C   | 3156.99  | PASS          | AC=12;AF=0.171;AN=70;BaseQRankSum=-7.790e |
| 10566 | chrY | 9992567 | . | C | T   | 2999.78  | PASS          | AC=11;AF=0.157;AN=70;BaseQRankSum=1.10;Cl |
| 10567 | chrY | 9992572 | . | C | T   | 9217.60  | PASS          | AC=29;AF=0.414;AN=70;BaseQRankSum=0.585;C |
| 10568 | chrY | 9992576 | . | C | T,A | 19780.50 | PASS          | AC=29,8;AF=0.414,0.114;AN=70;Base         |
| 10569 | chrY | 9992592 | . | C | T   | 11226.32 | PASS          | AC=25;AF=0.357;AN=70;BaseQRankSum         |
| 10570 | chrY | 9992593 | . | A | G   | 17167.15 | PASS          | AC=33;AF=0.471;AN=70;BaseQRankSum         |
| 10571 | chrY | 9992594 | . | G | A   | 2957.49  | PASS          | AC=17;AF=0.243;AN=70;BaseQRankSum=0.526;C |
| 10572 | chrY | 9992601 | . | G | T   | 171.68   | PASS          | AC=1;AF=0.014;AN=70;BaseQRankSum=0.597;Cl |
| 10573 | chrY | 9992606 | . | C | A,T | 1598.13  | PASS          | AC=10,2;AF=0.143,0.029;AN=70;BaseQRankSum |
| 10574 | chrY | 9992607 | . | A | G   | 4241.17  | PASS          | AC=14;AF=0.200;AN=70;BaseQRankSum=-1.746e |
| 10575 | chrY | 9992626 | . | G | A   | 292.70   | my_snp_filter | AC=4;AF=0.057;AN=70;BaseQRankSum=         |
| 10576 | chrY | 9992627 | . | T | C   | 2566.47  | PASS          | AC=11;AF=0.157;AN=70;BaseQRankSum=1.20;Cl |
| 10577 | chrY | 9992628 | . | G | A   | 2545     | PASS          | AC=11;AF=0.157;AN=70;BaseQRankSum=1.63;Cl |
| 10578 | chrY | 9992638 | . | G | T   | 1241.05  | PASS          | AC=7;AF=0.100;AN=70;BaseQRankSum=1.77;Cli |
| 10579 | chrY | 9992647 | . | C | T   | 565.58   | PASS          | AC=11;AF=0.157;AN=70;BaseQRankSum=0.666;C |
| 10580 | chrY | 9992649 | . | A | G   | 733.63   | PASS          | AC=2;AF=0.029;AN=70;BaseQRankSum=-1.064e+ |
| 10581 | chrY | 9992655 | . | A | G   | 690.90   | PASS          | AC=2;AF=0.029;AN=70;BaseQRankSum=-2.980e- |
| 10582 | chrY | 9992661 | . | G | T   | 13224.72 | PASS          | AC=35;AF=0.500;AN=70;BaseQRankSum         |
| 10583 | chrY | 9992667 | . | T | C   | 12830.10 | PASS          | AC=34;AF=0.486;AN=70;BaseQRankSum         |
| 10584 | chrY | 9992674 | . | A | G   | 4419.59  | PASS          | AC=28;AF=0.400;AN=70;BaseQRankSum=1.28;Cl |
| 10585 | chrY | 9992679 | . | C | T   | 639.83   | my_snp_filter | AC=9;AF=0.129;AN=70;BaseQRankSum=         |
| 10586 | chrY | 9992694 | . | G | A   | 844.02   | my_snp_filter | AC=4;AF=0.057;AN=70;BaseQRankSum=         |
| 10587 | chrY | 9992700 | . | T | C   | 173.71   | my_snp_filter | AC=5;AF=0.071;AN=70;BaseQRankSum=         |
| 10588 | chrY | 9992712 | . | G | C   | 916.79   | my_snp_filter | AC=4;AF=0.057;AN=70;BaseQRankSum=         |
| 10589 | chrY | 9992714 | . | G | T   | 5991.13  | PASS          | AC=27;AF=0.386;AN=70;BaseQRankSum=-1.370e |
| 10590 | chrY | 9992719 | . | T | A   | 392.49   | my_snp_filter | AC=8;AF=0.114;AN=70;BaseQRankSum=         |
| 10591 | chrY | 9992725 | . | G | A   | 423.61   | my_snp_filter | AC=10;AF=0.143;AN=70;BaseQRankSum=        |
| 10592 | chrY | 9992756 | . | C | T   | 32.19    | my_snp_filter | AC=1;AF=0.014;AN=70;BaseQRankSum=         |
| 10593 | chrY | 9992757 | . | G | A   | 4597.36  | PASS          | AC=30;AF=0.429;AN=70;BaseQRankSum=-1.217e |
| 10594 | chrY | 9992791 | . | T | C   | 3327.14  | PASS          | AC=15;AF=0.214;AN=70;BaseQRankSum=-1.590e |
| 10595 | chrY | 9992793 | . | C | A   | 11291.53 | PASS          | AC=34;AF=0.486;AN=70;BaseQRankSum=        |
| 10596 | chrY | 9992812 | . | C | A   | 2505.12  | PASS          | AC=13;AF=0.186;AN=70;BaseQRankSum=-4.210e |
| 10597 | chrY | 9992814 | . | A | G   | 573.23   | my_snp_filter | AC=10;AF=0.143;AN=70;BaseQRankSum=        |
| 10598 | chrY | 9992820 | . | T | C   | 3014.06  | PASS          | AC=20;AF=0.286;AN=70;BaseQRankSum=-8.490e |
| 10599 | chrY | 9992821 | . | G | C,A | 3721.06  | PASS          | AC=19,1;AF=0.271,0.014;AN=70;BaseQRankSum |
| 10600 | chrY | 9992833 | . | G | A   | 7308.31  | PASS          | AC=19;AF=0.271;AN=70;BaseQRankSum=1.18;Cl |
| 10601 | chrY | 9992845 | . | A | T   | 5363.07  | PASS          | AC=9;AF=0.129;AN=70;BaseQRankSum=-4.260e- |
| 10602 | chrY | 9992853 | . | C | G   | 4666.84  | PASS          | AC=9;AF=0.129;AN=70;BaseQRankSum=2.75;Cli |
| 10603 | chrY | 9992860 | . | C | A   | 4141.25  | PASS          | AC=9;AF=0.129;AN=70;BaseQRankSum=0.094;Cl |
| 10604 | chrY | 9992914 | . | A | C   | 1277.85  | PASS          | AC=8;AF=0.118;AN=68;BaseQRankSum=-5.890e- |
| 10605 | chrY | 9992923 | . | C | T   | 1393.39  | PASS          | AC=8;AF=0.118;AN=68;BaseQRankSum=-9.900e- |
| 10606 | chrY | 9992944 | . | T | A   | 1718.66  | PASS          | AC=8;AF=0.118;AN=68;BaseQRankSum=-1.007e+ |
| 10607 | chrY | 9992953 | . | T | C   | 1982.59  | PASS          | AC=9;AF=0.129;AN=70;BaseQRankSum=-3.450e- |
| 10608 | chrY | 9992961 | . | A | G   | 2376.91  | PASS          | AC=12;AF=0.176;AN=68;BaseQRankSum=1.55;Cl |
| 10609 | chrY | 9992989 | . | G | C   | 2659.63  | PASS          | AC=22;AF=0.314;AN=70;BaseQRankSum=0.184;C |
| 10610 | chrY | 9993003 | . | A | T   | 318.58   | my_snp_filter | AC=5;AF=0.074;AN=68;BaseQRankSum=         |
| 10611 | chrY | 9993019 | . | G | T   | 357.20   | my_snp_filter | AC=6;AF=0.088;AN=68;BaseQRankSum=         |
| 10612 | chrY | 9993023 | . | T | G   | 333.61   | my_snp_filter | AC=6;AF=0.088;AN=68;BaseQRankSum=         |
| 10613 | chrY | 9993024 | . | G | A   | 72.70    | my_snp_filter | AC=3;AF=0.044;AN=68;BaseQRankSum=         |
| 10614 | chrY | 9993048 | . | T | C   | 179.32   | my_snp_filter | AC=4;AF=0.057;AN=70;BaseQRankSum=         |
| 10615 | chrY | 9993061 | . | A | G   | 141.87   | my_snp_filter | AC=2;AF=0.029;AN=70;BaseQRankSum=         |
| 10616 | chrY | 9993080 | . | C | T   | 181.32   | PASS          | AC=2;AF=0.029;AN=70;BaseQRankSum=1.31;Cli |
| 10617 | chrY | 9993088 | . | C | G   | 12746.45 | PASS          | AC=34;AF=0.500;AN=68;BaseQRankSum         |
| 10618 | chrY | 9993094 | . | T | C   | 15725.46 | PASS          | AC=34;AF=0.500;AN=68;BaseQRankSum         |
| 10619 | chrY | 9993099 | . | G | A   | 106.33   | my_snp_filter | AC=3;AF=0.043;AN=70;BaseQRankSum=         |
| 10620 | chrY | 9993104 | . | T | A   | 109.97   | my_snp_filter | AC=3;AF=0.043;AN=70;BaseQRankSum=         |
| 10621 | chrY | 9993107 | . | C | A   | 177.29   | PASS          | AC=2;AF=0.029;AN=70;BaseQRankSum=2.65;Cli |
| 10622 | chrY | 9993111 | . | G | A   | 180.29   | PASS          | AC=2;AF=0.029;AN=70;BaseQRankSum=1.50;Cli |
| 10623 | chrY | 9993117 | . | T | C   | 813.40   | PASS          | AC=14;AF=0.200;AN=70;BaseQRankSum=0.817;C |
| 10624 | chrY | 9993118 | . | C | T   | 16135.37 | PASS          | AC=36;AF=0.514;AN=70;BaseQRankSum         |
| 10625 | chrY | 9993125 | . | G | C   | 892.03   | PASS          | AC=12;AF=0.171;AN=70;BaseQRankSum=0.740;C |
| 10626 | chrY | 9993126 | . | G | T   | 19042.10 | PASS          | AC=37;AF=0.529;AN=70;BaseQRankSum         |
| 10627 | chrY | 9993159 | . | A | C   | 16499.77 | PASS          | AC=36;AF=0.529;AN=68;BaseQRankSum         |
| 10628 | chrY | 9993172 | . | G | A   | 3991.94  | PASS          | AC=25;AF=0.368;AN=68;BaseQRankSum=-3.900e |
| 10629 | chrY | 9993176 | . | C | G   | 47.49    | my_snp_filter | AC=3;AF=0.043;AN=70;BaseQRankSum=         |
| 10630 | chrY | 9993202 | . | C | T   | 4708.27  | PASS          | AC=26;AF=0.382;AN=68;BaseQRankSum=-1.649e |
| 10631 | chrY | 9993227 | . | C | T   | 5210.47  | PASS          | AC=32;AF=0.457;AN=70;BaseQRankSum=0.781;C |
| 10632 | chrY | 9993273 | . | T | G   | 5806.73  | my_snp_filter | AC=21;AF=0.300;AN=70;BaseQRankSum         |
| 10633 | chrY | 9993274 | . | T | C   | 5799.80  | my_snp_filter | AC=21;AF=0.300;AN=70;BaseQRankSum         |
| 10634 | chrY | 9993280 | . | C | G   | 89.40    | my_snp_filter | AC=3;AF=0.044;AN=68;BaseQRankSum=         |
| 10635 | chrY | 9993285 | . | T | C   | 196.98   | PASS          | AC=3;AF=0.044;AN=68;BaseQRankSum=1.66;Cli |
| 10636 | chrY | 9993288 | . | C | A   | 32.65    | my_snp_filter | AC=2;AF=0.029;AN=68;BaseQRankSum=         |
| 10637 | chrY | 9993302 | . | C | T   | 1748.53  | my_snp_filter | AC=13;AF=0.191;AN=68;BaseQRankSum         |
| 10638 | chrY | 9993313 | . | T | C   | 2944.61  | my_snp_filter | AC=13;AF=0.191;AN=68;BaseQRankSum         |
| 10639 | chrY | 9993318 | . | C | A   | 2973.56  | my_snp_filter | AC=13;AF=0.191;AN=68;BaseQRankSum         |
| 10640 | chrY | 9993354 | . | G | C   | 1513.06  | my_snp_filter | AC=13;AF=0.186;AN=70;BaseQRankSum         |

|       |      |         |   |   |     |          |               |                                           |
|-------|------|---------|---|---|-----|----------|---------------|-------------------------------------------|
| 10641 | chrY | 9993355 | . | A | G   | 1509.49  | my_snp_filter | AC=13;AF=0.186;AN=70;BaseQRankSum         |
| 10642 | chrY | 9993389 | . | A | C   | 1402.82  | my_snp_filter | AC=10;AF=0.147;AN=68;BaseQRankSum         |
| 10643 | chrY | 9993397 | . | G | C   | 1184.37  | my_snp_filter | AC=10;AF=0.147;AN=68;BaseQRankSum         |
| 10644 | chrY | 9993419 | . | T | G   | 394.91   | PASS          | AC=4;AF=0.057;AN=70;DP=454;FS=0.000;Inbre |
| 10645 | chrY | 9993431 | . | A | G   | 238.12   | PASS          | AC=3;AF=0.043;AN=70;BaseQRankSum=-9.270e- |
| 10646 | chrY | 9993472 | . | A | G   | 30.16    | my_snp_filter | AC=1;AF=0.015;AN=68;BaseQRankSum=         |
| 10647 | chrY | 9993477 | . | G | A   | 33.09    | my_snp_filter | AC=1;AF=0.015;AN=68;BaseQRankSum=         |
| 10648 | chrY | 9993501 | . | T | G   | 203.27   | PASS          | AC=6;AF=0.088;AN=68;BaseQRankSum=1.21;Cli |
| 10649 | chrY | 9993505 | . | G | A   | 229.98   | PASS          | AC=6;AF=0.088;AN=68;BaseQRankSum=0.731;Cl |
| 10650 | chrY | 9993506 | . | C | G   | 232.71   | PASS          | AC=6;AF=0.088;AN=68;BaseQRankSum=0.514;Cl |
| 10651 | chrY | 9993533 | . | A | C   | 65.12    | my_snp_filter | AC=3;AF=0.045;AN=66;BaseQRankSum=         |
| 10652 | chrY | 9993545 | . | C | T   | 60.06    | my_snp_filter | AC=3;AF=0.045;AN=66;BaseQRankSum=         |
| 10653 | chrY | 9993668 | . | C | T   | 8827.30  | PASS          | AC=42;AF=0.636;AN=66;DP=479;FS=0.000;Inbr |
| 10654 | chrY | 9993828 | . | A | G   | 63.69    | my_snp_filter | AC=3;AF=0.044;AN=68;BaseQRankSum=         |
| 10655 | chrY | 9993850 | . | G | C   | 44.97    | my_snp_filter | AC=2;AF=0.029;AN=70;BaseQRankSum=         |
| 10656 | chrY | 9993880 | . | C | A   | 116.96   | PASS          | AC=2;AF=0.029;AN=70;BaseQRankSum=1.10;Cli |
| 10657 | chrY | 9994457 | . | T | C   | 53.72    | my_snp_filter | AC=3;AF=0.045;AN=66;BaseQRankSum=         |
| 10658 | chrY | 9994480 | . | C | A   | 137.69   | PASS          | AC=2;AF=0.030;AN=66;BaseQRankSum=-1.495e+ |
| 10659 | chrY | 9994486 | . | C | T   | 135.12   | PASS          | AC=2;AF=0.030;AN=66;BaseQRankSum=-9.220e- |
| 10660 | chrY | 9994581 | . | T | C   | 92.27    | PASS          | AC=2;AF=0.031;AN=64;BaseQRankSum=-2.462e+ |
| 10661 | chrY | 9994582 | . | G | C   | 145.01   | PASS          | AC=3;AF=0.047;AN=64;BaseQRankSum=0.634;Cl |
| 10662 | chrY | 9994585 | . | A | C   | 155.79   | PASS          | AC=3;AF=0.047;AN=64;BaseQRankSum=-2.357e+ |
| 10663 | chrY | 9994587 | . | C | G   | 41.57    | PASS          | AC=2;AF=0.029;AN=68;BaseQRankSum=-1.026e+ |
| 10664 | chrY | 9994617 | . | G | T   | 509.12   | PASS          | AC=10;AF=0.152;AN=66;BaseQRankSum=0.609;C |
| 10665 | chrY | 9994631 | . | G | T   | 2315.66  | my_snp_filter | AC=17;AF=0.258;AN=66;BaseQRankSum         |
| 10666 | chrY | 9994633 | . | T | A   | 3512.35  | my_snp_filter | AC=18;AF=0.273;AN=66;BaseQRankSum         |
| 10667 | chrY | 9994638 | . | T | C   | 544.30   | PASS          | AC=9;AF=0.132;AN=68;BaseQRankSum=-1.975e+ |
| 10668 | chrY | 9994643 | . | A | T   | 88.83    | my_snp_filter | AC=5;AF=0.074;AN=68;BaseQRankSum=         |
| 10669 | chrY | 9994645 | . | C | T,A | 4808.11  | PASS          | AC=21,3;AF=0.318,0.045;AN=66;BaseQRankSum |
| 10670 | chrY | 9994650 | . | C | A   | 10260.34 | my_snp_filter | AC=29;AF=0.426;AN=68;Base                 |
| 10671 | chrY | 9994651 | . | A | T   | 4574.19  | PASS          | AC=21;AF=0.309;AN=68;BaseQRankSum=0.065;C |
| 10672 | chrY | 9994688 | . | A | T   | 3756.59  | PASS          | AC=30;AF=0.429;AN=70;BaseQRankSum=-4.570e |
| 10673 | chrY | 9994703 | . | T | C   | 518.24   | PASS          | AC=3;AF=0.043;AN=70;BaseQRankSum=-2.240e- |
| 10674 | chrY | 9994709 | . | G | C   | 149.43   | PASS          | AC=1;AF=0.014;AN=70;BaseQRankSum=0.487;Cl |
| 10675 | chrY | 9994716 | . | T | A   | 777.33   | PASS          | AC=5;AF=0.071;AN=70;BaseQRankSum=0.00;Cli |
| 10676 | chrY | 9994717 | . | C | G   | 22576.91 | PASS          | AC=39;AF=0.557;AN=70;BaseQRankSum         |
| 10677 | chrY | 9994738 | . | C | T   | 326.52   | my_snp_filter | AC=3;AF=0.043;AN=70;BaseQRankSum=         |
| 10678 | chrY | 9994739 | . | C | G   | 1150.42  | PASS          | AC=14;AF=0.200;AN=70;BaseQRankSum=-7.180e |
| 10679 | chrY | 9994745 | . | T | C   | 1119.85  | PASS          | AC=15;AF=0.214;AN=70;BaseQRankSum=-1.368e |
| 10680 | chrY | 9994748 | . | T | G   | 97.40    | my_snp_filter | AC=2;AF=0.029;AN=70;BaseQRankSum=         |
| 10681 | chrY | 9994755 | . | T | C   | 285.64   | my_snp_filter | AC=3;AF=0.043;AN=70;BaseQRankSum=         |
| 10682 | chrY | 9994759 | . | T | C   | 24692.30 | PASS          | AC=40;AF=0.571;AN=70;BaseQRankSum         |
| 10683 | chrY | 9994774 | . | A | G   | 390.78   | my_snp_filter | AC=9;AF=0.129;AN=70;BaseQRankSum=         |
| 10684 | chrY | 9994781 | . | T | G   | 113.13   | my_snp_filter | AC=1;AF=0.014;AN=70;BaseQRankSum=         |
| 10685 | chrY | 9994788 | . | G | A,C | 6593     | PASS          | AC=20,13;AF=0.294,0.191;AN=68;BaseQRankSu |
| 10686 | chrY | 9994794 | . | C | A   | 1483.83  | PASS          | AC=9;AF=0.129;AN=70;BaseQRankSum=-7.510e- |
| 10687 | chrY | 9994828 | . | G | A   | 6360.38  | PASS          | AC=16;AF=0.258;AN=62;BaseQRankSum=0.742;C |
| 10688 | chrY | 9994837 | . | G | C,* | 4117.86  | PASS          | AC=17,3;AF=0.274,0.048;AN=62;BaseQRankSum |
| 10689 | chrY | 9994839 | . | A | G   | 2250.44  | PASS          | AC=12;AF=0.200;AN=60;BaseQRankSum=-1.026e |
| 10690 | chrY | 9994843 | . | G | A   | 136.63   | my_snp_filter | AC=2;AF=0.030;AN=66;BaseQRankSum=         |
| 10691 | chrY | 9994856 | . | A | G,* | 2908.11  | PASS          | AC=6,3;AF=0.111,0.056;AN=54;BaseQRankSum= |
| 10692 | chrY | 9994862 | . | T | C   | 45.02    | PASS          | AC=1;AF=0.019;AN=52;BaseQRankSum=-1.026e+ |
| 10693 | chrY | 9994869 | . | A | G   | 3962.92  | my_snp_filter | AC=14;AF=0.269;AN=52;BaseQRankSum         |
| 10694 | chrY | 9994873 | . | G | A   | 3324.31  | PASS          | AC=8;AF=0.167;AN=48;BaseQRankSum=2.18;Cli |
| 10695 | chrY | 9994875 | . | G | A   | 379.14   | my_snp_filter | AC=4;AF=0.095;AN=42;BaseQRankSum=         |
| 10696 | chrY | 9994879 | . | T | C   | 3337.28  | PASS          | AC=8;AF=0.182;AN=44;BaseQRankSum=-2.825e+ |
| 10697 | chrY | 9994884 | . | T | G   | 3475.62  | PASS          | AC=10;AF=0.250;AN=40;BaseQRankSum=-1.957e |
| 10698 | chrY | 9994885 | . | C | T   | 3417.30  | PASS          | AC=10;AF=0.250;AN=40;BaseQRankSum=-8.610e |
| 10699 | chrY | 9994902 | . | G | A   | 4040.46  | PASS          | AC=9;AF=0.214;AN=42;BaseQRankSum=2.12;Cli |
| 10700 | chrY | 9994904 | . | G | A   | 12282.65 | PASS          | AC=10;AF=0.333;AN=30;BaseQRankSum         |
| 10701 | chrY | 9994905 | . | T | A   | 4164.61  | PASS          | AC=9;AF=0.237;AN=38;BaseQRankSum=0.582;Cl |
| 10702 | chrY | 9994906 | . | T | C   | 1676.28  | PASS          | AC=4;AF=0.105;AN=38;BaseQRankSum=0.457;Cl |
| 10703 | chrY | 9994912 | . | C | T   | 4037.63  | PASS          | AC=9;AF=0.225;AN=40;BaseQRankSum=0.671;Cl |
| 10704 | chrY | 9994920 | . | G | T   | 2732.12  | PASS          | AC=7;AF=0.184;AN=38;BaseQRankSum=0.952;Cl |
| 10705 | chrY | 9994930 | . | G | A   | 3310.32  | PASS          | AC=8;AF=0.250;AN=32;BaseQRankSum=1.30;Cli |
| 10706 | chrY | 9994934 | . | T | C   | 101.54   | PASS          | AC=1;AF=0.029;AN=34;BaseQRankSum=1.78;Cli |
| 10707 | chrY | 9994935 | . | G | A   | 12304.82 | PASS          | AC=9;AF=0.300;AN=30;BaseQRankSum=         |
| 10708 | chrY | 9994937 | . | A | T   | 2767.04  | PASS          | AC=7;AF=0.219;AN=32;BaseQRankSum=-5.780e- |
| 10709 | chrY | 9994958 | . | A | G   | 81.26    | my_snp_filter | AC=1;AF=0.022;AN=46;BaseQRankSum=         |
| 10710 | chrY | 9994966 | . | T | C   | 4437.72  | PASS          | AC=9;AF=0.205;AN=44;BaseQRankSum=-3.074e+ |
| 10711 | chrY | 9994967 | . | A | G   | 4539.95  | PASS          | AC=9;AF=0.214;AN=42;BaseQRankSum=-3.723e+ |
| 10712 | chrY | 9994975 | . | C | T   | 18917.62 | PASS          | AC=14;AF=0.438;AN=32;BaseQRankSum         |
| 10713 | chrY | 9994978 | . | T | C   | 4985.22  | PASS          | AC=9;AF=0.173;AN=52;BaseQRankSum=-1.182e+ |
| 10714 | chrY | 9994992 | . | A | T   | 21552.14 | PASS          | AC=13;AF=0.433;AN=30;BaseQRankSum         |
| 10715 | chrY | 9994998 | . | A | G   | 5955.15  | PASS          | AC=9;AF=0.155;AN=58;BaseQRankSum=0.174;Cl |
| 10716 | chrY | 9995000 | . | A | C   | 10303.64 | PASS          | AC=12;AF=0.300;AN=40;BaseQRankSum         |

|       |      |         |   |   |     |          |               |                                            |
|-------|------|---------|---|---|-----|----------|---------------|--------------------------------------------|
| 10717 | chrY | 9995002 | . | A | G   | 10114.58 | PASS          | AC=12;AF=0.300;AN=40;BaseQRankSum          |
| 10718 | chrY | 9995005 | . | G | A   | 6049.02  | PASS          | AC=9;AF=0.150;AN=60;BaseQRankSum=-2.217e+  |
| 10719 | chrY | 9995007 | . | G | T   | 6072.88  | PASS          | AC=9;AF=0.150;AN=60;BaseQRankSum=-2.227e+  |
| 10720 | chrY | 9995030 | . | G | A   | 6149.77  | PASS          | AC=9;AF=0.167;AN=54;BaseQRankSum=-2.182e+  |
| 10721 | chrY | 9995036 | . | G | A   | 13587.24 | PASS          | AC=21;AF=0.362;AN=58;BaseQRankSum          |
| 10722 | chrY | 9995038 | . | T | C   | 6107.01  | PASS          | AC=9;AF=0.167;AN=54;BaseQRankSum=-2.823e+  |
| 10723 | chrY | 9995047 | . | G | A   | 5439.74  | PASS          | AC=9;AF=0.145;AN=62;BaseQRankSum=3.78;Cli  |
| 10724 | chrY | 9995052 | . | C | T   | 23345.76 | PASS          | AC=30;AF=0.536;AN=56;BaseQRankSum          |
| 10725 | chrY | 9995053 | . | G | C   | 5257.54  | PASS          | AC=9;AF=0.150;AN=60;BaseQRankSum=-3.470e-  |
| 10726 | chrY | 9995079 | . | T | C   | 37.78    | PASS          | AC=1;AF=0.015;AN=68;BaseQRankSum=-3.580e-  |
| 10727 | chrY | 9995082 | . | A | T   | 2107.67  | PASS          | AC=8;AF=0.118;AN=68;BaseQRankSum=0.197;Cl  |
| 10728 | chrY | 9995103 | . | A | C,G | 16904.92 | PASS          | AC=5,16;AF=0.086,0.276;AN=58;Base          |
| 10729 | chrY | 9995106 | . | T | A,C | 16075.49 | PASS          | AC=20,6;AF=0.313,0.094;AN=64;Base          |
| 10730 | chrY | 9995116 | . | C | T   | 18043.08 | PASS          | AC=23;AF=0.329;AN=70;BaseQRankSum          |
| 10731 | chrY | 9995127 | . | C | T   | 912.27   | PASS          | AC=9;AF=0.129;AN=70;BaseQRankSum=0.667;Cl  |
| 10732 | chrY | 9995134 | . | G | A   | 914.30   | PASS          | AC=9;AF=0.129;AN=70;BaseQRankSum=0.663;Cl  |
| 10733 | chrY | 9995137 | . | G | A   | 14702.65 | my_snp_filter | AC=24;AF=0.364;AN=66;Base                  |
| 10734 | chrY | 9995149 | . | T | G   | 1153.38  | PASS          | AC=7;AF=0.100;AN=70;BaseQRankSum=-1.495e+  |
| 10735 | chrY | 9995153 | . | A | T   | 841.34   | PASS          | AC=9;AF=0.129;AN=70;BaseQRankSum=0.674;Cl  |
| 10736 | chrY | 9995156 | . | C | G   | 40.34    | my_snp_filter | AC=3;AF=0.043;AN=70;BaseQRankSum=          |
| 10737 | chrY | 9995169 | . | C | A   | 837.61   | PASS          | AC=7;AF=0.100;AN=70;BaseQRankSum=0.069;Cl  |
| 10738 | chrY | 9995170 | . | T | C   | 406.67   | my_snp_filter | AC=10;AF=0.143;AN=70;BaseQRankSum          |
| 10739 | chrY | 9995174 | . | C | T   | 50.45    | PASS          | AC=1;AF=0.014;AN=70;BaseQRankSum=-1.106e+  |
| 10740 | chrY | 9995180 | . | G | T   | 409.10   | PASS          | AC=5;AF=0.071;AN=70;BaseQRankSum=0.877;Cl  |
| 10741 | chrY | 9995229 | . | A | C   | 2914.69  | my_snp_filter | AC=12;AF=0.171;AN=70;BaseQRankSum          |
| 10742 | chrY | 9995230 | . | C | T   | 7945.78  | my_snp_filter | AC=13;AF=0.186;AN=70;BaseQRankSum          |
| 10743 | chrY | 9995231 | . | A | G   | 312.92   | my_snp_filter | AC=7;AF=0.100;AN=70;BaseQRankSum=          |
| 10744 | chrY | 9995240 | . | G | A   | 7154.17  | my_snp_filter | AC=10;AF=0.143;AN=70;BaseQRankSum          |
| 10745 | chrY | 9995241 | . | T | C   | 382.20   | PASS          | AC=3;AF=0.043;AN=70;BaseQRankSum=-1.084e+  |
| 10746 | chrY | 9995242 | . | G | T   | 423.61   | PASS          | AC=4;AF=0.057;AN=70;BaseQRankSum=1.32;Cli  |
| 10747 | chrY | 9995256 | . | T | A   | 6136.16  | my_snp_filter | AC=11;AF=0.157;AN=70;BaseQRankSum          |
| 10748 | chrY | 9995266 | . | G | A   | 1839.94  | my_snp_filter | AC=9;AF=0.129;AN=70;BaseQRankSum=          |
| 10749 | chrY | 9995267 | . | G | A   | 370.15   | PASS          | AC=5;AF=0.071;AN=70;BaseQRankSum=1.63;Cli  |
| 10750 | chrY | 9995282 | . | G | T   | 3131.52  | my_snp_filter | AC=11;AF=0.157;AN=70;BaseQRankSum          |
| 10751 | chrY | 9995294 | . | G | T,A | 233.01   | my_snp_filter | AC=1,4;AF=0.014,0.057;AN=70;BaseQ          |
| 10752 | chrY | 9995300 | . | C | T   | 1900.90  | my_snp_filter | AC=11;AF=0.157;AN=70;BaseQRankSum          |
| 10753 | chrY | 9995302 | . | C | A   | 63.91    | PASS          | AC=1;AF=0.014;AN=70;BaseQRankSum=1.16;Cli  |
| 10754 | chrY | 9995308 | . | C | G   | 277.72   | PASS          | AC=5;AF=0.071;AN=70;BaseQRankSum=1.33;Cli  |
| 10755 | chrY | 9995312 | . | A | C   | 287.82   | PASS          | AC=5;AF=0.071;AN=70;BaseQRankSum=1.70;Cli  |
| 10756 | chrY | 9995324 | . | T | G   | 1458.93  | my_snp_filter | AC=10;AF=0.143;AN=70;BaseQRankSum          |
| 10757 | chrY | 9995353 | . | A | G   | 1485.08  | PASS          | AC=11;AF=0.157;AN=70;BaseQRankSum=-4.010e- |
| 10758 | chrY | 9995357 | . | T | G,* | 1187.82  | PASS          | AC=11,2;AF=0.157,0.029;AN=70;BaseQRankSum  |
| 10759 | chrY | 9995365 | . | A | C   | 2094.05  | PASS          | AC=14;AF=0.200;AN=70;BaseQRankSum=-3.320e- |
| 10760 | chrY | 9995373 | . | C | T   | 1603.44  | PASS          | AC=14;AF=0.206;AN=68;BaseQRankSum=-6.680e- |
| 10761 | chrY | 9995378 | . | T | C   | 172.78   | PASS          | AC=2;AF=0.029;AN=70;BaseQRankSum=-7.610e-  |
| 10762 | chrY | 9995409 | . | G | A   | 826.44   | PASS          | AC=10;AF=0.147;AN=68;BaseQRankSum=0.293;C  |
| 10763 | chrY | 9995423 | . | C | G   | 780.61   | PASS          | AC=8;AF=0.114;AN=70;BaseQRankSum=-1.338e+  |
| 10764 | chrY | 9995442 | . | C | T   | 474.55   | PASS          | AC=7;AF=0.100;AN=70;BaseQRankSum=0.255;Cl  |
| 10765 | chrY | 9995456 | . | G | T   | 388.64   | PASS          | AC=4;AF=0.059;AN=68;BaseQRankSum=-1.518e+  |
| 10766 | chrY | 9995470 | . | C | G   | 381.20   | PASS          | AC=3;AF=0.044;AN=68;BaseQRankSum=0.891;Cl  |
| 10767 | chrY | 9995501 | . | A | G   | 184.27   | PASS          | AC=5;AF=0.071;AN=70;BaseQRankSum=-7.360e-  |
| 10768 | chrY | 9995503 | . | T | C   | 180.65   | PASS          | AC=5;AF=0.071;AN=70;BaseQRankSum=0.193;Cl  |
| 10769 | chrY | 9995508 | . | G | A   | 74.31    | PASS          | AC=3;AF=0.043;AN=70;BaseQRankSum=-4.960e-  |
| 10770 | chrY | 9995652 | . | A | G   | 926.52   | PASS          | AC=6;AF=0.086;AN=70;BaseQRankSum=-1.085e+  |
| 10771 | chrY | 9995751 | . | G | T   | 62.38    | PASS          | AC=2;AF=0.029;AN=70;BaseQRankSum=0.358;Cl  |
| 10772 | chrY | 9995757 | . | C | A   | 56.06    | PASS          | AC=2;AF=0.029;AN=70;BaseQRankSum=0.358;Cl  |
| 10773 | chrY | 9995862 | . | G | A   | 1942.29  | PASS          | AC=15;AF=0.250;AN=60;BaseQRankSum=0.023;C  |
| 10774 | chrY | 9995876 | . | G | A   | 4448.98  | PASS          | AC=20;AF=0.313;AN=64;BaseQRankSum=0.107;C  |
| 10775 | chrY | 9995878 | . | C | A   | 140.49   | PASS          | AC=2;AF=0.029;AN=70;BaseQRankSum=0.667;Cl  |
| 10776 | chrY | 9995880 | . | C | A,G | 5769.37  | PASS          | AC=9,15;AF=0.150,0.250;AN=60;BaseQRankSum  |
| 10777 | chrY | 9995885 | . | C | A   | 329.99   | PASS          | AC=4;AF=0.057;AN=70;BaseQRankSum=0.457;Cl  |
| 10778 | chrY | 9995902 | . | C | T   | 9402.64  | PASS          | AC=19;AF=0.279;AN=68;BaseQRankSum=-1.170e- |
| 10779 | chrY | 9995909 | . | T | A   | 341.43   | PASS          | AC=4;AF=0.057;AN=70;BaseQRankSum=-4.800e-  |
| 10780 | chrY | 9995910 | . | G | T   | 9028.96  | PASS          | AC=19;AF=0.271;AN=70;BaseQRankSum=-1.316e- |
| 10781 | chrY | 9995929 | . | C | T   | 13708.35 | PASS          | AC=24;AF=0.353;AN=68;BaseQRankSum          |
| 10782 | chrY | 9995930 | . | T | G   | 229.38   | PASS          | AC=3;AF=0.043;AN=70;BaseQRankSum=-1.735e+  |
| 10783 | chrY | 9995939 | . | A | C   | 3837.60  | PASS          | AC=25;AF=0.357;AN=70;BaseQRankSum=-4.950e- |
| 10784 | chrY | 9995947 | . | T | C   | 3099.19  | PASS          | AC=21;AF=0.300;AN=70;BaseQRankSum=-1.860e- |
| 10785 | chrY | 9995951 | . | A | T   | 3276.59  | PASS          | AC=21;AF=0.300;AN=70;BaseQRankSum=-8.640e- |
| 10786 | chrY | 9995959 | . | G | A   | 398.99   | my_snp_filter | AC=7;AF=0.100;AN=70;BaseQRankSum           |
| 10787 | chrY | 9995964 | . | C | A   | 7562.96  | PASS          | AC=30;AF=0.429;AN=70;BaseQRankSum=0.060;C  |
| 10788 | chrY | 9995967 | . | G | C   | 20085.98 | PASS          | AC=29;AF=0.414;AN=70;BaseQRankSum          |
| 10789 | chrY | 9995971 | . | T | C   | 47078.84 | PASS          | AC=34;AF=0.486;AN=70;BaseQRankSum          |
| 10790 | chrY | 9995972 | . | G | C,A | 10471.84 | PASS          | AC=13,21;AF=0.186,0.300;AN=70;Bas          |
| 10791 | chrY | 9995978 | . | A | G   | 4299.84  | PASS          | AC=26;AF=0.371;AN=70;BaseQRankSum=-2.240e- |
| 10792 | chrY | 9995980 | . | A | G   | 7613.41  | PASS          | AC=29;AF=0.414;AN=70;BaseQRankSum=-4.130e- |

|       |      |         |   |   |     |          |               |                                            |
|-------|------|---------|---|---|-----|----------|---------------|--------------------------------------------|
| 10793 | chrY | 9996011 | . | T | G   | 15009.13 | PASS          | AC=29;AF=0.414;AN=70;BaseQRankSum          |
| 10794 | chrY | 9996014 | . | T | G   | 6303.81  | PASS          | AC=26;AF=0.371;AN=70;BaseQRankSum=-1.890e  |
| 10795 | chrY | 9996021 | . | T | C   | 12990.12 | PASS          | AC=29;AF=0.414;AN=70;BaseQRankSum          |
| 10796 | chrY | 9996031 | . | C | T   | 1351.96  | PASS          | AC=16;AF=0.229;AN=70;BaseQRankSum=-4.400e  |
| 10797 | chrY | 9996036 | . | G | T   | 1289.71  | PASS          | AC=15;AF=0.214;AN=70;BaseQRankSum=0.00;Cl  |
| 10798 | chrY | 9996046 | . | A | G   | 680.81   | PASS          | AC=11;AF=0.157;AN=70;BaseQRankSum=0.934;Cl |
| 10799 | chrY | 9996057 | . | T | C   | 600.31   | PASS          | AC=6;AF=0.086;AN=70;BaseQRankSum=1.68;Cli  |
| 10800 | chrY | 9996058 | . | G | C   | 5091.35  | PASS          | AC=32;AF=0.457;AN=70;BaseQRankSum=-4.890e  |
| 10801 | chrY | 9996074 | . | A | G   | 924.01   | PASS          | AC=9;AF=0.129;AN=70;BaseQRankSum=-1.713e+  |
| 10802 | chrY | 9996075 | . | C | A   | 152.80   | PASS          | AC=3;AF=0.043;AN=70;BaseQRankSum=0.551;C   |
| 10803 | chrY | 9996083 | . | G | T   | 64.24    | my_snp_filter | AC=3;AF=0.043;AN=70;BaseQRankSum=          |
| 10804 | chrY | 9996092 | . | G | A   | 3177.43  | PASS          | AC=27;AF=0.450;AN=60;BaseQRankSum=0.720;C  |
| 10805 | chrY | 9996093 | . | A | G   | 3408.43  | PASS          | AC=27;AF=0.450;AN=60;BaseQRankSum=0.00;Cl  |
| 10806 | chrY | 9996117 | . | A | C   | 1304.16  | PASS          | AC=16;AF=0.242;AN=66;BaseQRankSum=0.804;C  |
| 10807 | chrY | 9996144 | . | G | A   | 262.57   | PASS          | AC=3;AF=0.056;AN=54;BaseQRankSum=-1.126e+  |
| 10808 | chrY | 9996148 | . | A | G   | 220.74   | PASS          | AC=3;AF=0.056;AN=54;BaseQRankSum=-8.910e-  |
| 10809 | chrY | 9996490 | . | A | G   | 34.29    | PASS          | AC=1;AF=0.015;AN=68;BaseQRankSum=-1.495e+  |
| 10810 | chrY | 9996496 | . | T | C   | 34.18    | my_snp_filter | AC=2;AF=0.029;AN=68;BaseQRankSum=          |
| 10811 | chrY | 9996635 | . | C | G   | 82.64    | PASS          | AC=1;AF=0.021;AN=48;BaseQRankSum=-2.240e-  |
| 10812 | chrY | 9996637 | . | T | A   | 82.30    | PASS          | AC=1;AF=0.021;AN=48;BaseQRankSum=-1.937e+  |
| 10813 | chrY | 9996806 | . | G | T   | 3471.02  | my_snp_filter | AC=11;AF=0.262;AN=42;BaseQRankSum=         |
| 10814 | chrY | 9996807 | . | A | C   | 366.42   | PASS          | AC=6;AF=0.103;AN=58;BaseQRankSum=0.465;Cl  |
| 10815 | chrY | 9996818 | . | T | C   | 418.41   | PASS          | AC=5;AF=0.086;AN=58;BaseQRankSum=-1.684e+  |
| 10816 | chrY | 9996826 | . | C | T   | 249.31   | my_snp_filter | AC=4;AF=0.069;AN=58;BaseQRankSum=          |
| 10817 | chrY | 9996832 | . | G | A   | 7266.53  | my_snp_filter | AC=22;AF=0.458;AN=48;BaseQRankSum=         |
| 10818 | chrY | 9996846 | . | T | G   | 373.11   | PASS          | AC=4;AF=0.077;AN=52;BaseQRankSum=-1.373e+  |
| 10819 | chrY | 9996848 | . | T | C   | 444.05   | PASS          | AC=5;AF=0.096;AN=52;BaseQRankSum=-2.321e+  |
| 10820 | chrY | 9996872 | . | A | C   | 823.84   | PASS          | AC=8;AF=0.121;AN=66;BaseQRankSum=-2.928e+  |
| 10821 | chrY | 9996875 | . | C | T   | 567.34   | PASS          | AC=11;AF=0.162;AN=68;BaseQRankSum=1.03;Cl  |
| 10822 | chrY | 9996876 | . | A | T   | 128.36   | my_snp_filter | AC=6;AF=0.086;AN=70;BaseQRankSum=          |
| 10823 | chrY | 9996901 | . | T | C   | 230.99   | PASS          | AC=4;AF=0.057;AN=70;BaseQRankSum=-5.050e-  |
| 10824 | chrY | 9996902 | . | T | C   | 230.96   | PASS          | AC=4;AF=0.057;AN=70;BaseQRankSum=-1.227e+  |
| 10825 | chrY | 9996908 | . | T | A   | 73.08    | PASS          | AC=1;AF=0.014;AN=70;BaseQRankSum=-6.840e-  |
| 10826 | chrY | 9996920 | . | T | G   | 1089.78  | PASS          | AC=14;AF=0.200;AN=70;BaseQRankSum=0.742;C  |
| 10827 | chrY | 9996922 | . | T | C   | 479.68   | my_snp_filter | AC=11;AF=0.157;AN=70;BaseQRankSum=         |
| 10828 | chrY | 9996939 | . | C | T   | 540.52   | my_snp_filter | AC=7;AF=0.100;AN=70;BaseQRankSum=          |
| 10829 | chrY | 9996952 | . | T | G   | 326.74   | my_snp_filter | AC=7;AF=0.100;AN=70;BaseQRankSum=          |
| 10830 | chrY | 9996962 | . | T | C   | 10010.29 | PASS          | AC=21;AF=0.328;AN=64;BaseQRankSum=         |
| 10831 | chrY | 9996963 | . | G | A   | 10019.76 | PASS          | AC=21;AF=0.328;AN=64;BaseQRankSum=         |
| 10832 | chrY | 9996986 | . | T | C   | 10145.54 | PASS          | AC=9;AF=0.141;AN=64;BaseQRankSum=          |
| 10833 | chrY | 9996987 | . | T | C   | 10067.14 | PASS          | AC=9;AF=0.141;AN=64;BaseQRankSum=          |
| 10834 | chrY | 9997003 | . | A | G   | 43.34    | PASS          | AC=3;AF=0.043;AN=70;BaseQRankSum=0.751;Cl  |
| 10835 | chrY | 9997017 | . | G | A   | 1463.35  | PASS          | AC=7;AF=0.100;AN=70;BaseQRankSum=0.483;Cl  |
| 10836 | chrY | 9997020 | . | A | G   | 334.63   | PASS          | AC=4;AF=0.057;AN=70;BaseQRankSum=0.720;Cl  |
| 10837 | chrY | 9997022 | . | G | A   | 1484.39  | PASS          | AC=7;AF=0.100;AN=70;BaseQRankSum=0.715;Cl  |
| 10838 | chrY | 9997027 | . | G | T   | 17211.53 | PASS          | AC=28;AF=0.412;AN=68;BaseQRankSum=         |
| 10839 | chrY | 9997051 | . | G | T   | 52.05    | my_snp_filter | AC=3;AF=0.043;AN=70;BaseQRankSum=          |
| 10840 | chrY | 9997052 | . | C | T   | 629.90   | my_snp_filter | AC=4;AF=0.057;AN=70;BaseQRankSum=          |
| 10841 | chrY | 9997057 | . | G | C   | 567.31   | PASS          | AC=2;AF=0.029;AN=68;BaseQRankSum=-1.231e+  |
| 10842 | chrY | 9997059 | . | A | T   | 105.99   | PASS          | AC=4;AF=0.059;AN=68;BaseQRankSum=0.503;Cl  |
| 10843 | chrY | 9997063 | . | A | C   | 1858.22  | PASS          | AC=17;AF=0.250;AN=68;BaseQRankSum=0.091;C  |
| 10844 | chrY | 9997067 | . | G | A   | 62.55    | my_snp_filter | AC=3;AF=0.044;AN=68;BaseQRankSum=          |
| 10845 | chrY | 9997077 | . | G | A   | 24105.01 | PASS          | AC=32;AF=0.485;AN=66;BaseQRankSum=         |
| 10846 | chrY | 9997082 | . | C | A   | 386.80   | PASS          | AC=5;AF=0.074;AN=68;BaseQRankSum=-1.009e+  |
| 10847 | chrY | 9997096 | . | C | T   | 593.40   | PASS          | AC=2;AF=0.030;AN=66;BaseQRankSum=3.21;Cli  |
| 10848 | chrY | 9997100 | . | A | G   | 3072.53  | PASS          | AC=13;AF=0.197;AN=66;BaseQRankSum=-1.179e+ |
| 10849 | chrY | 9997111 | . | C | T   | 561.03   | PASS          | AC=2;AF=0.029;AN=68;BaseQRankSum=3.12;Cli  |
| 10850 | chrY | 9997113 | . | A | G   | 31918.45 | PASS          | AC=33;AF=0.485;AN=68;BaseQRankSum=         |
| 10851 | chrY | 9997145 | . | A | G   | 35711.69 | PASS          | AC=38;AF=0.543;AN=70;BaseQRankSum=         |
| 10852 | chrY | 9997147 | . | A | T   | 1938.78  | PASS          | AC=8;AF=0.114;AN=70;BaseQRankSum=-6.350e-  |
| 10853 | chrY | 9997152 | . | T | C   | 1978.49  | PASS          | AC=6;AF=0.086;AN=70;BaseQRankSum=0.696;Cl  |
| 10854 | chrY | 9997157 | . | G | A,* | 3103.40  | PASS          | AC=24,1;AF=0.343,0.014;AN=70;BaseQRankSum  |
| 10855 | chrY | 9997162 | . | C | A   | 2386.35  | PASS          | AC=12;AF=0.171;AN=70;BaseQRankSum=0.139;C  |
| 10856 | chrY | 9997194 | . | C | T   | 577.64   | PASS          | AC=3;AF=0.043;AN=70;BaseQRankSum=-3.740e-  |
| 10857 | chrY | 9997203 | . | A | C   | 156.73   | PASS          | AC=6;AF=0.086;AN=70;BaseQRankSum=-3.550e-  |
| 10858 | chrY | 9997218 | . | G | A   | 23588.03 | PASS          | AC=37;AF=0.529;AN=70;BaseQRankSum=         |
| 10859 | chrY | 9997249 | . | C | T   | 11431.85 | PASS          | AC=30;AF=0.455;AN=66;BaseQRankSum=         |
| 10860 | chrY | 9997261 | . | A | T   | 14905.30 | PASS          | AC=28;AF=0.438;AN=64;BaseQRankSum=         |
| 10861 | chrY | 9997279 | . | G | C   | 24212.81 | PASS          | AC=28;AF=0.467;AN=60;BaseQRankSum=         |
| 10862 | chrY | 9997286 | . | A | C   | 24903.65 | PASS          | AC=28;AF=0.483;AN=58;BaseQRankSum=         |
| 10863 | chrY | 9997296 | . | T | G   | 1532.20  | PASS          | AC=15;AF=0.214;AN=70;BaseQRankSum=-8.980e  |
| 10864 | chrY | 9997302 | . | C | G   | 24214.74 | PASS          | AC=28;AF=0.452;AN=62;BaseQRankSum=         |
| 10865 | chrY | 9997318 | . | T | A   | 23264.76 | PASS          | AC=27;AF=0.450;AN=60;BaseQRankSum=         |
| 10866 | chrY | 9997342 | . | T | C   | 24751.66 | PASS          | AC=20;AF=0.345;AN=58;BaseQRankSum=         |
| 10867 | chrY | 9997343 | . | A | C   | 24961.28 | PASS          | AC=20;AF=0.345;AN=58;BaseQRankSum=         |
| 10868 | chrY | 9997359 | . | T | C   | 25484.29 | PASS          | AC=18;AF=0.321;AN=56;BaseQRankSum=         |

|       |      |          |   |   |     |          |               |                                           |                                   |
|-------|------|----------|---|---|-----|----------|---------------|-------------------------------------------|-----------------------------------|
| 10869 | chrY | 9997360  | . | G | T   | 25392.88 | PASS          | AC=18;AF=0.321;AN=56;BaseQRankSum=        |                                   |
| 10870 | chrY | 9997376  | . | A | C   | 483.22   | my_snp_filter | AC=4;AF=0.067;AN=60;BaseQRankSum=         |                                   |
| 10871 | chrY | 9997387  | . | T | C   | 215.24   | my_snp_filter | AC=4;AF=0.059;AN=68;BaseQRankSum=         |                                   |
| 10872 | chrY | 9997393  | . | C | T   | 612.99   | my_snp_filter | AC=5;AF=0.086;AN=58;BaseQRankSum=         |                                   |
| 10873 | chrY | 9997426  | . | A | T   | 182.50   | my_snp_filter | AC=2;AF=0.029;AN=70;BaseQRankSum=         |                                   |
| 10874 | chrY | 9997431  | . | T | C   | 188.53   | my_snp_filter | AC=2;AF=0.029;AN=70;BaseQRankSum=         |                                   |
| 10875 | chrY | 9997442  | . | G | A   | 1120.86  | PASS          | AC=5;AF=0.074;AN=68;BaseQRankSum=0.462;Cl |                                   |
| 10876 | chrY | 9997451  | . | G | A   | 17898.36 | PASS          | AC=13;AF=0.203;AN=64;BaseQRankSum=        |                                   |
| 10877 | chrY | 9997453  | . | G | T   | 1316.91  | PASS          | AC=6;AF=0.088;AN=68;BaseQRankSum=2.30;Cli |                                   |
| 10878 | chrY | 9997472  | . | C | A   | 17077.38 | PASS          | AC=11;AF=0.162;AN=68;BaseQRankSum=        |                                   |
| 10879 | chrY | 9997476  | . | G | A   | 15611.54 | PASS          | AC=10;AF=0.147;AN=68;BaseQRankSum=        |                                   |
| 10880 | chrY | 9997490  | . | C | G   | 13384.60 | PASS          | AC=10;AF=0.147;AN=68;BaseQRankSum=        |                                   |
| 10881 | chrY | 9997491  | . | C | G   | 13100.76 | PASS          | AC=10;AF=0.152;AN=66;BaseQRankSum=        |                                   |
| 10882 | chrY | 9997494  | . | A | G   | 68.02    | my_snp_filter | AC=2;AF=0.029;AN=70;BaseQRankSum=         |                                   |
| 10883 | chrY | 9997497  | . | C | T   | 11745.80 | PASS          | AC=11;AF=0.157;AN=70;BaseQRankSum=        |                                   |
| 10884 | chrY | 9997501  | . | G | C   | 1180.43  | PASS          | AC=7;AF=0.103;AN=68;BaseQRankSum=-2.450e- |                                   |
| 10885 | chrY | 9997502  | . | A | T   | 11066.36 | PASS          | AC=11;AF=0.162;AN=68;BaseQRankSum=        |                                   |
| 10886 | chrY | 9997510  | . | T | C   | 5930.88  | PASS          | AC=10;AF=0.147;AN=68;BaseQRankSum=0.469;C |                                   |
| 10887 | chrY | 9997517  | . | C | G   | 7684.31  | PASS          | AC=9;AF=0.132;AN=68;BaseQRankSum=-7.910e- |                                   |
| 10888 | chrY | 9997524  | . | G | A   | 1231.92  | PASS          | AC=8;AF=0.118;AN=68;BaseQRankSum=0.959;Cl |                                   |
| 10889 | chrY | 9997555  | . | G | A   | 107.24   | PASS          | AC=3;AF=0.043;AN=70;BaseQRankSum=0.324;Cl |                                   |
| 10890 | chrY | 9997559  | . | A | T   | 71.57    | PASS          | AC=2;AF=0.029;AN=70;BaseQRankSum=1.00;Cli |                                   |
| 10891 | chrY | 9997562  | . | C | T   | 551.01   | PASS          | AC=6;AF=0.086;AN=70;BaseQRankSum=0.839;Cl |                                   |
| 10892 | chrY | 9997564  | . | C | T   | 381.61   | PASS          | AC=6;AF=0.086;AN=70;BaseQRankSum=1.83;Cli |                                   |
| 10893 | chrY | 9997619  | . | A | C   | 1509.02  | PASS          | AC=9;AF=0.155;AN=58;BaseQRankSum=-1.570e- |                                   |
| 10894 | chrY | 9997664  | . | G | A   | 7417.59  | PASS          | AC=11;AF=0.212;AN=52;BaseQRankSum=2.42;Cl |                                   |
| 10895 | chrY | 9997665  | . | T | C   | 698.58   | PASS          | AC=8;AF=0.148;AN=54;BaseQRankSum=0.336;Cl |                                   |
| 10896 | chrY | 9997667  | . | G | A   | 6039.30  | my_snp_filter | AC=10;AF=0.192;AN=52;BaseQRankSum=        |                                   |
| 10897 | chrY | 9997686  | . | C | T   | 6348.70  | PASS          | AC=10;AF=0.227;AN=44;BaseQRankSum=-2.890e |                                   |
| 10898 | chrY | 9997730  | . | G | A   | 196.44   | PASS          | AC=3;AF=0.100;AN=30;BaseQRankSum=2.47;Cli |                                   |
| 10899 | chrY | 9997739  | . | T | A   | 160.43   | PASS          | AC=3;AF=0.100;AN=30;BaseQRankSum=-1.644e+ |                                   |
| 10900 | chrY | 9997740  | . | C | G   | 2490.74  | my_snp_filter | AC=9;AF=0.346;AN=26;BaseQRankSum=         |                                   |
| 10901 | chrY | 9997768  | . | G | C   | 1579.96  | my_snp_filter | AC=6;AF=0.231;AN=26;BaseQRankSum=         |                                   |
| 10902 | chrY | 9997788  | . | C | T   | 1242.69  | PASS          | AC=6;AF=0.231;AN=26;BaseQRankSum=1.36;Cli |                                   |
| 10903 | chrY | 9997798  | . | C | T   | 876.64   | PASS          | AC=6;AF=0.231;AN=26;BaseQRankSum=-1.164e+ |                                   |
| 10904 | chrY | 9997807  | . | T | C   | 887.74   | PASS          | AC=7;AF=0.292;AN=24;BaseQRankSum=0.482;Cl |                                   |
| 10905 | chrY | 9997813  | . | T | C   | 1719.21  | PASS          | AC=8;AF=0.333;AN=24;BaseQRankSum=-8.250e- |                                   |
| 10906 | chrY | 9997818  | . | G | A   | 817.78   | PASS          | AC=7;AF=0.292;AN=24;BaseQRankSum=0.690;Cl |                                   |
| 10907 | chrY | 9997819  | . | C | T   | 817.69   | PASS          | AC=7;AF=0.292;AN=24;BaseQRankSum=0.789;Cl |                                   |
| 10908 | chrY | 9997825  | . | T | C   | 396.13   | PASS          | AC=5;AF=0.192;AN=26;BaseQRankSum=-1.931e+ |                                   |
| 10909 | chrY | 9997844  | . | A | G   | 719.93   | PASS          | AC=6;AF=0.214;AN=28;BaseQRankSum=-9.350e- |                                   |
| 10910 | chrY | 9997853  | . | A | C   | 777.21   | PASS          | AC=6;AF=0.250;AN=24;BaseQRankSum=1.13;Cli |                                   |
| 10911 | chrY | 9997861  | . | G | C   | 55.79    | PASS          | AC=2;AF=0.071;AN=28;BaseQRankSum=1.03;Cli |                                   |
| 10912 | chrY | 9997872  | . | T | C   | 45.03    | PASS          | AC=1;AF=0.036;AN=28;BaseQRankSum=1.03;Cli |                                   |
| 10913 | chrY | 9997879  | . | C | T   | 454.53   | PASS          | AC=5;AF=0.192;AN=26;BaseQRankSum=1.73;Cli |                                   |
| 10914 | chrY | 9997882  | . | C | T   | 45.22    | PASS          | AC=1;AF=0.038;AN=26;BaseQRankSum=0.00;Cli |                                   |
| 10915 | chrY | 9997905  | . | T | C   | 162.42   | PASS          | AC=2;AF=0.083;AN=24;BaseQRankSum=1.09;Cli |                                   |
| 10916 | chrY | 9997912  | . | G | A   | 134.01   | PASS          | AC=2;AF=0.077;AN=26;BaseQRankSum=1.37;Cli |                                   |
| 10917 | chrY | 9997920  | . | G | A   | 46.78    | PASS          | AC=1;AF=0.042;AN=24;BaseQRankSum=-1.957e+ |                                   |
| 10918 | chrY | 9997933  | . | T | C   | 42.40    | PASS          | AC=1;AF=0.045;AN=22;BaseQRankSum=-8.630e- |                                   |
| 10919 | chrY | 9999370  | . | G | A   | 1287.15  | my_snp_filter | AC=9;AF=0.500;AN=18;BaseQRankSum=         |                                   |
| 10920 | chrY | 9999373  | . | G | T   | 1282.01  | my_snp_filter | AC=8;AF=0.444;AN=18;BaseQRankSum=         |                                   |
| 10921 | chrY | 9999388  | . | G | T   | 1463.65  | my_snp_filter | AC=9;AF=0.500;AN=18;BaseQRankSum=         |                                   |
| 10922 | chrY | 9999399  | . | C | G   | 1467.15  | my_snp_filter | AC=9;AF=0.500;AN=18;BaseQRankSum=         |                                   |
| 10923 | chrY | 9999421  | . | G | A   | 1458.68  | my_snp_filter | AC=9;AF=0.450;AN=20;BaseQRankSum=         |                                   |
| 10924 | chrY | 9999457  | . | C | T   | 419.24   | my_snp_filter | AC=7;AF=0.350;AN=20;BaseQRankSum=         |                                   |
| 10925 | chrY | 9999563  | . | G | A   | 265.75   | my_snp_filter | AC=7;AF=0.318;AN=22;BaseQRankSum=         |                                   |
| 10926 | chrY | 9999583  | . | C | G   | 628.68   | PASS          | AC=8;AF=0.400;AN=20;BaseQRankSum=0.313;Cl |                                   |
| 10927 | chrY | 9999613  | . | T | A   | 796.60   | PASS          | AC=8;AF=0.400;AN=20;BaseQRankSum=1.67;Cli |                                   |
| 10928 | chrY | 9999653  | . | C | T   | 1314.52  | PASS          | AC=9;AF=0.450;AN=20;BaseQRankSum=0.994;Cl |                                   |
| 10929 | chrY | 9999687  | . | C | G   | 2495.11  | PASS          | AC=9;AF=0.409;AN=22;BaseQRankSum=-8.980e- |                                   |
| 10930 | chrY | 9999690  | . | T | A   | 2490.99  | PASS          | AC=9;AF=0.409;AN=22;BaseQRankSum=-1.366e+ |                                   |
| 10931 | chrY | 9999718  | . | T | C   | 1356.76  | PASS          | AC=9;AF=0.375;AN=24;BaseQRankSum=-7.930e- |                                   |
| 10932 | chrY | 9999739  | . | A | C   | 1661.39  | PASS          | AC=9;AF=0.375;AN=24;BaseQRankSum=-3.277e+ |                                   |
| 10933 | chrY | 9999747  | . | C | A   | 1561.35  | PASS          | AC=9;AF=0.346;AN=26;BaseQRankSum=-2.450e- |                                   |
| 10934 | chrY | 9999793  | . | C | T   | 459.44   | PASS          | AC=5;AF=0.227;AN=22;BaseQRankSum=1.25;Cli |                                   |
| 10935 | chrY | 9999808  | . | G | T   | 395.99   | PASS          | AC=4;AF=0.200;AN=20;BaseQRankSum=0.312;Cl |                                   |
| 10936 | chrY | 9999818  | . | T | A   | 332.76   | PASS          | AC=4;AF=0.200;AN=20;BaseQRankSum=-5.800e- |                                   |
| 10937 | chrY | 9999836  | . | G | T   | 100.76   | PASS          | AC=2;AF=0.100;AN=20;BaseQRankSum=1.16;Cli |                                   |
| 10938 | chrY | 9999869  | . | G | A   | 551.78   | PASS          | AC=7;AF=0.350;AN=20;BaseQRankSum=-1.733e+ |                                   |
| 10939 | chrY | 9999975  | . | C | T   | 475.17   | PASS          | AC=4;AF=0.182;AN=22;BaseQRankSum=0.651;Cl |                                   |
| 10940 | chrY | 9999976  | . | T | A,G | 5382.82  | PASS          | AC=14,4;AF=0.778,0.222;AN=18;DP=198;FS=0. |                                   |
| 10941 | chrY | 9999983  | . | A | G   | 753.20   | PASS          | AC=7;AF=0.318;AN=22;BaseQRankSum=-2.410e- |                                   |
| 10942 | chrY | 9999989  | . | T | C   | 693.36   | PASS          | AC=4;AF=0.167;AN=24;BaseQRankSum=-7.950e- |                                   |
| 10943 | chrY | 10000028 | . | . | C   | T        | 305.82        | PASS                                      | AC=5;AF=0.179;AN=28;BaseQRankSum= |
| 10944 | chrY | 10000029 | . | . | T   | A        | 389.97        | PASS                                      | AC=7;AF=0.250;AN=28;BaseQRankSum= |

|       |      |          |   |   |   |          |               |                                    |
|-------|------|----------|---|---|---|----------|---------------|------------------------------------|
| 10945 | chrY | 10000049 | . | C | T | 865.29   | PASS          | AC=10;AF=0.385;AN=26;BaseQRankSum= |
| 10946 | chrY | 10000070 | . | T | G | 362.94   | my_snp_filter | AC=5;AF=0.208;AN=24;BaseQ          |
| 10947 | chrY | 10000072 | . | A | G | 77.25    | my_snp_filter | AC=2;AF=0.083;AN=24;BaseQ          |
| 10948 | chrY | 10000088 | . | A | G | 293.59   | PASS          | AC=5;AF=0.227;AN=22;BaseQRankSum=  |
| 10949 | chrY | 10000107 | . | C | A | 3417.09  | PASS          | AC=9;AF=0.500;AN=18;BaseQRankSum=  |
| 10950 | chrY | 10000118 | . | G | C | 1702.65  | PASS          | AC=9;AF=0.500;AN=18;BaseQRankSum=  |
| 10951 | chrY | 10000150 | . | T | C | 1466.15  | PASS          | AC=9;AF=0.500;AN=18;BaseQRankSum=  |
| 10952 | chrY | 10000182 | . | C | G | 1335.09  | PASS          | AC=9;AF=0.500;AN=18;BaseQRankSum=  |
| 10953 | chrY | 10000186 | . | C | T | 1309.10  | PASS          | AC=9;AF=0.500;AN=18;BaseQRankSum=  |
| 10954 | chrY | 10000187 | . | C | T | 171.25   | PASS          | AC=2;AF=0.111;AN=18;BaseQRankSum=  |
| 10955 | chrY | 10000189 | . | T | C | 1736.09  | PASS          | AC=9;AF=0.500;AN=18;BaseQRankSum=  |
| 10956 | chrY | 10000203 | . | G | A | 106.57   | my_snp_filter | AC=2;AF=0.111;AN=18;BaseQ          |
| 10957 | chrY | 10000212 | . | C | T | 84.65    | PASS          | AC=1;AF=0.056;AN=18;BaseQRankSum=  |
| 10958 | chrY | 10000217 | . | T | C | 84.30    | PASS          | AC=1;AF=0.050;AN=20;BaseQRankSum=  |
| 10959 | chrY | 10000223 | . | T | C | 372.72   | my_snp_filter | AC=7;AF=0.389;AN=18;BaseQ          |
| 10960 | chrY | 10000226 | . | T | A | 78.30    | PASS          | AC=1;AF=0.050;AN=20;BaseQRankSum=  |
| 10961 | chrY | 10000235 | . | T | G | 81.30    | PASS          | AC=1;AF=0.050;AN=20;BaseQRankSum=  |
| 10962 | chrY | 10000250 | . | T | G | 78.30    | PASS          | AC=1;AF=0.050;AN=20;BaseQRankSum=  |
| 10963 | chrY | 10000256 | . | T | C | 1341.31  | PASS          | AC=9;AF=0.500;AN=18;BaseQRankSum=  |
| 10964 | chrY | 10000259 | . | C | A | 1212.09  | PASS          | AC=9;AF=0.500;AN=18;BaseQRankSum=  |
| 10965 | chrY | 10000296 | . | A | C | 1402.09  | my_snp_filter | AC=9;AF=0.500;AN=18;BaseQ          |
| 10966 | chrY | 10000315 | . | T | C | 1478.09  | my_snp_filter | AC=9;AF=0.500;AN=18;BaseQ          |
| 10967 | chrY | 10000322 | . | T | G | 1526.09  | my_snp_filter | AC=9;AF=0.500;AN=18;BaseQ          |
| 10968 | chrY | 10000342 | . | T | A | 1469.09  | my_snp_filter | AC=9;AF=0.500;AN=18;BaseQ          |
| 10969 | chrY | 10000344 | . | C | T | 1427.09  | my_snp_filter | AC=9;AF=0.500;AN=18;BaseQ          |
| 10970 | chrY | 10000351 | . | G | A | 1255.09  | my_snp_filter | AC=9;AF=0.500;AN=18;BaseQ          |
| 10971 | chrY | 10000393 | . | C | G | 249.67   | my_snp_filter | AC=5;AF=0.278;AN=18;BaseQ          |
| 10972 | chrY | 10000430 | . | T | C | 593.54   | my_snp_filter | AC=5;AF=0.278;AN=18;BaseQ          |
| 10973 | chrY | 10000434 | . | T | C | 499.51   | PASS          | AC=4;AF=0.222;AN=18;BaseQRankSum=  |
| 10974 | chrY | 10000437 | . | C | T | 502.48   | PASS          | AC=4;AF=0.222;AN=18;BaseQRankSum=  |
| 10975 | chrY | 10000453 | . | T | G | 290.85   | PASS          | AC=3;AF=0.167;AN=18;BaseQRankSum=  |
| 10976 | chrY | 10000461 | . | C | T | 264.01   | PASS          | AC=3;AF=0.167;AN=18;BaseQRankSum=  |
| 10977 | chrY | 10000462 | . | A | G | 266.84   | PASS          | AC=3;AF=0.167;AN=18;BaseQRankSum=  |
| 10978 | chrY | 10000488 | . | T | C | 32.27    | PASS          | AC=1;AF=0.056;AN=18;BaseQRankSum=  |
| 10979 | chrY | 10000489 | . | G | A | 32.28    | PASS          | AC=1;AF=0.056;AN=18;BaseQRankSum=  |
| 10980 | chrY | 10000770 | . | T | A | 168.62   | PASS          | AC=2;AF=0.111;AN=18;BaseQRankSum=  |
| 10981 | chrY | 10000787 | . | T | C | 172.42   | PASS          | AC=2;AF=0.111;AN=18;BaseQRankSum=  |
| 10982 | chrY | 10000808 | . | G | A | 127.47   | PASS          | AC=2;AF=0.111;AN=18;BaseQRankSum=  |
| 10983 | chrY | 10000815 | . | A | G | 135.07   | PASS          | AC=2;AF=0.111;AN=18;BaseQRankSum=  |
| 10984 | chrY | 10001077 | . | A | G | 68.16    | PASS          | AC=2;AF=0.111;AN=18;BaseQRankSum=  |
| 10985 | chrY | 10001108 | . | C | G | 146.31   | PASS          | AC=3;AF=0.167;AN=18;BaseQRankSum=  |
| 10986 | chrY | 10001116 | . | C | T | 140.02   | PASS          | AC=3;AF=0.167;AN=18;BaseQRankSum=  |
| 10987 | chrY | 10001127 | . | G | A | 137.88   | PASS          | AC=3;AF=0.167;AN=18;BaseQRankSum=  |
| 10988 | chrY | 10001359 | . | T | C | 477.10   | PASS          | AC=2;AF=0.111;AN=18;BaseQRankSum=  |
| 10989 | chrY | 10001380 | . | C | A | 531.98   | PASS          | AC=3;AF=0.167;AN=18;BaseQRankSum=  |
| 10990 | chrY | 10001384 | . | C | T | 529.89   | PASS          | AC=3;AF=0.167;AN=18;BaseQRankSum=  |
| 10991 | chrY | 10001411 | . | T | C | 69.05    | my_snp_filter | AC=2;AF=0.111;AN=18;BaseQ          |
| 10992 | chrY | 10001987 | . | T | G | 1688.63  | PASS          | AC=6;AF=0.273;AN=22;DP=186;FS=0.0  |
| 10993 | chrY | 10002645 | . | T | C | 163.72   | PASS          | AC=2;AF=0.091;AN=22;BaseQRankSum=  |
| 10994 | chrY | 10002652 | . | G | A | 156.31   | PASS          | AC=2;AF=0.091;AN=22;BaseQRankSum=  |
| 10995 | chrY | 10002800 | . | G | C | 415.86   | PASS          | AC=4;AF=0.222;AN=18;BaseQRankSum=  |
| 10996 | chrY | 10002807 | . | G | A | 528.64   | PASS          | AC=5;AF=0.250;AN=20;BaseQRankSum=  |
| 10997 | chrY | 10002865 | . | G | A | 734.62   | PASS          | AC=5;AF=0.227;AN=22;BaseQRankSum=  |
| 10998 | chrY | 10002870 | . | T | G | 1568.12  | PASS          | AC=8;AF=0.400;AN=20;BaseQRankSum=  |
| 10999 | chrY | 10002889 | . | A | T | 1153.24  | PASS          | AC=9;AF=0.450;AN=20;BaseQRankSum=  |
| 11000 | chrY | 10002931 | . | T | C | 823.66   | PASS          | AC=8;AF=0.364;AN=22;BaseQRankSum=  |
| 11001 | chrY | 10002949 | . | C | A | 1177.74  | PASS          | AC=9;AF=0.346;AN=26;BaseQRankSum=  |
| 11002 | chrY | 10002958 | . | C | T | 1014.03  | PASS          | AC=8;AF=0.286;AN=28;BaseQRankSum=  |
| 11003 | chrY | 10003014 | . | C | T | 44.94    | my_snp_filter | AC=2;AF=0.045;AN=44;BaseQ          |
| 11004 | chrY | 10003150 | . | C | G | 56.39    | PASS          | AC=4;AF=0.059;AN=68;BaseQRankSum=  |
| 11005 | chrY | 10003155 | . | T | C | 281.55   | PASS          | AC=3;AF=0.043;AN=70;BaseQRankSum=  |
| 11006 | chrY | 10003168 | . | A | T | 2018.47  | PASS          | AC=13;AF=0.186;AN=70;BaseQRankSum= |
| 11007 | chrY | 10003184 | . | G | A | 3623.09  | PASS          | AC=18;AF=0.257;AN=70;BaseQRankSum= |
| 11008 | chrY | 10003195 | . | G | C | 5105.12  | PASS          | AC=23;AF=0.329;AN=70;BaseQRankSum= |
| 11009 | chrY | 10003201 | . | T | A | 174.72   | PASS          | AC=3;AF=0.043;AN=70;BaseQRankSum=  |
| 11010 | chrY | 10003207 | . | A | C | 5693.24  | PASS          | AC=24;AF=0.343;AN=70;BaseQRankSum= |
| 11011 | chrY | 10003211 | . | T | G | 398.28   | PASS          | AC=4;AF=0.057;AN=70;BaseQRankSum=  |
| 11012 | chrY | 10003226 | . | C | G | 10823.13 | PASS          | AC=19;AF=0.271;AN=70;BaseQ         |
| 11013 | chrY | 10003228 | . | T | A | 10772.13 | PASS          | AC=19;AF=0.271;AN=70;BaseQ         |
| 11014 | chrY | 10003258 | . | T | A | 472.21   | PASS          | AC=2;AF=0.029;AN=70;BaseQRankSum=  |
| 11015 | chrY | 10003270 | . | C | T | 410.84   | PASS          | AC=3;AF=0.043;AN=70;BaseQRankSum=  |
| 11016 | chrY | 10003274 | . | A | G | 3780.03  | my_snp_filter | AC=20;AF=0.294;AN=68;BaseQ         |
| 11017 | chrY | 10003281 | . | G | T | 118.23   | PASS          | AC=2;AF=0.029;AN=70;BaseQRankSum=  |
| 11018 | chrY | 10003299 | . | G | A | 1091.13  | my_snp_filter | AC=11;AF=0.162;AN=68;BaseQ         |
| 11019 | chrY | 10003531 | . | C | T | 79.12    | PASS          | AC=2;AF=0.037;AN=54;BaseQRankSum=  |
| 11020 | chrY | 10003552 | . | G | A | 97.67    | PASS          | AC=3;AF=0.048;AN=62;BaseQRankSum=  |

|       |      |          |   |   |     |          |               |                                    |
|-------|------|----------|---|---|-----|----------|---------------|------------------------------------|
| 11021 | chrY | 10003559 | . | T | C   | 94.16    | PASS          | AC=3;AF=0.045;AN=66;BaseQRankSum=  |
| 11022 | chrY | 10003560 | . | G | C   | 94.67    | PASS          | AC=3;AF=0.045;AN=66;BaseQRankSum=  |
| 11023 | chrY | 10003921 | . | T | A   | 10862.96 | PASS          | AC=68;AF=1.00;AN=68;DP=35          |
| 11024 | chrY | 10003956 | . | C | T   | 30.88    | PASS          | AC=1;AF=0.014;AN=70;BaseQRankSum=  |
| 11025 | chrY | 10003957 | . | G | T   | 153.89   | PASS          | AC=6;AF=0.086;AN=70;BaseQRankSum=  |
| 11026 | chrY | 10003991 | . | T | C   | 211.90   | PASS          | AC=7;AF=0.103;AN=68;BaseQRankSum=  |
| 11027 | chrY | 10004006 | . | C | A   | 240.45   | PASS          | AC=6;AF=0.088;AN=68;BaseQRankSum=  |
| 11028 | chrY | 10004051 | . | G | A   | 129.10   | PASS          | AC=3;AF=0.047;AN=64;BaseQRankSum=  |
| 11029 | chrY | 10004064 | . | T | A   | 150.26   | PASS          | AC=3;AF=0.044;AN=68;BaseQRankSum=  |
| 11030 | chrY | 10004070 | . | G | T   | 135.93   | PASS          | AC=4;AF=0.059;AN=68;BaseQRankSum=  |
| 11031 | chrY | 10004340 | . | G | A   | 145.61   | PASS          | AC=7;AF=0.106;AN=66;BaseQRankSum=  |
| 11032 | chrY | 10004341 | . | T | A   | 169.43   | PASS          | AC=7;AF=0.106;AN=66;BaseQRankSum=  |
| 11033 | chrY | 10004354 | . | A | G   | 220.88   | PASS          | AC=11;AF=0.162;AN=68;BaseQRankSum= |
| 11034 | chrY | 10004369 | . | A | G   | 799.32   | PASS          | AC=13;AF=0.186;AN=70;BaseQRankSum= |
| 11035 | chrY | 10004373 | . | T | C   | 896.12   | PASS          | AC=13;AF=0.186;AN=70;BaseQRankSum= |
| 11036 | chrY | 10004377 | . | A | G   | 78.87    | PASS          | AC=1;AF=0.014;AN=70;BaseQRankSum=  |
| 11037 | chrY | 10004382 | . | C | T   | 78.85    | PASS          | AC=1;AF=0.014;AN=70;BaseQRankSum=  |
| 11038 | chrY | 10004383 | . | T | G   | 78.85    | PASS          | AC=1;AF=0.014;AN=70;BaseQRankSum=  |
| 11039 | chrY | 10004407 | . | T | G   | 1374.12  | PASS          | AC=18;AF=0.257;AN=70;BaseQRankSum= |
| 11040 | chrY | 10004408 | . | C | G   | 1154.22  | PASS          | AC=16;AF=0.229;AN=70;BaseQRankSum= |
| 11041 | chrY | 10004416 | . | C | T   | 97.89    | PASS          | AC=1;AF=0.014;AN=70;BaseQRankSum=  |
| 11042 | chrY | 10004419 | . | G | A   | 119.04   | PASS          | AC=1;AF=0.014;AN=70;BaseQRankSum=  |
| 11043 | chrY | 10004446 | . | A | C   | 503.62   | PASS          | AC=7;AF=0.100;AN=70;BaseQRankSum=  |
| 11044 | chrY | 10004450 | . | C | T   | 193.53   | PASS          | AC=4;AF=0.057;AN=70;BaseQRankSum=  |
| 11045 | chrY | 10004471 | . | A | G   | 30.74    | PASS          | AC=1;AF=0.014;AN=70;BaseQRankSum=  |
| 11046 | chrY | 10004500 | . | C | T   | 33.35    | my_snp_filter | AC=2;AF=0.029;AN=70;BaseQ          |
| 11047 | chrY | 10004520 | . | T | G   | 32.14    | my_snp_filter | AC=2;AF=0.029;AN=70;BaseQ          |
| 11048 | chrY | 10004540 | . | G | A   | 37.13    | my_snp_filter | AC=1;AF=0.015;AN=68;BaseQ          |
| 11049 | chrY | 10004583 | . | T | A   | 68.19    | my_snp_filter | AC=2;AF=0.030;AN=66;BaseQ          |
| 11050 | chrY | 10004587 | . | T | G   | 67.83    | my_snp_filter | AC=2;AF=0.030;AN=66;BaseQ          |
| 11051 | chrY | 10004701 | . | A | G   | 55.47    | PASS          | AC=2;AF=0.034;AN=58;BaseQRankSum=  |
| 11052 | chrY | 10004726 | . | C | T   | 132.70   | PASS          | AC=3;AF=0.058;AN=52;BaseQRankSum=  |
| 11053 | chrY | 10004757 | . | G | A   | 52.07    | PASS          | AC=2;AF=0.042;AN=48;BaseQRankSum=  |
| 11054 | chrY | 10004773 | . | T | A   | 58.61    | PASS          | AC=3;AF=0.065;AN=46;BaseQRankSum=  |
| 11055 | chrY | 10004775 | . | A | C   | 148.55   | PASS          | AC=4;AF=0.095;AN=42;BaseQRankSum=  |
| 11056 | chrY | 10004776 | . | C | T   | 377.12   | PASS          | AC=6;AF=0.143;AN=42;BaseQRankSum=  |
| 11057 | chrY | 10004786 | . | T | C   | 143.55   | PASS          | AC=4;AF=0.087;AN=46;BaseQRankSum=  |
| 11058 | chrY | 10004792 | . | C | G   | 336.95   | PASS          | AC=6;AF=0.136;AN=44;BaseQRankSum=  |
| 11059 | chrY | 10004796 | . | G | T   | 560.74   | PASS          | AC=10;AF=0.238;AN=42;BaseQRankSum= |
| 11060 | chrY | 10004842 | . | T | A   | 76.20    | PASS          | AC=1;AF=0.036;AN=28;BaseQRankSum=  |
| 11061 | chrY | 10004846 | . | C | A   | 100.20   | PASS          | AC=1;AF=0.033;AN=30;BaseQRankSum=  |
| 11062 | chrY | 10004861 | . | G | A,* | 258.33   | PASS          | AC=1,1;AF=0.031,0.031;AN=32;BaseQ  |
| 11063 | chrY | 10005430 | . | A | C   | 64.08    | PASS          | AC=2;AF=0.029;AN=70;BaseQRankSum=  |
| 11064 | chrY | 10005433 | . | T | C   | 63.74    | PASS          | AC=2;AF=0.029;AN=70;BaseQRankSum=  |
| 11065 | chrY | 10005436 | . | G | T   | 67.07    | PASS          | AC=2;AF=0.029;AN=70;BaseQRankSum=  |
| 11066 | chrY | 10005468 | . | A | G   | 9127.89  | PASS          | AC=58;AF=0.829;AN=70;DP=424;FS=0.  |
| 11067 | chrY | 10005568 | . | A | G   | 171.46   | PASS          | AC=5;AF=0.071;AN=70;BaseQRankSum=  |
| 11068 | chrY | 10005759 | . | C | A   | 1356.95  | PASS          | AC=10;AF=0.143;AN=70;BaseQRankSum= |
| 11069 | chrY | 10005764 | . | A | T   | 1437.95  | PASS          | AC=10;AF=0.143;AN=70;BaseQRankSum= |
| 11070 | chrY | 10005769 | . | A | G   | 421.96   | PASS          | AC=3;AF=0.043;AN=70;BaseQRankSum=  |
| 11071 | chrY | 10005770 | . | C | T   | 2792.75  | my_snp_filter | AC=18;AF=0.257;AN=70;BaseQ         |
| 11072 | chrY | 10005771 | . | G | A   | 31.77    | my_snp_filter | AC=1;AF=0.014;AN=70;BaseQ          |
| 11073 | chrY | 10005795 | . | G | A   | 2238.70  | my_snp_filter | AC=13;AF=0.186;AN=70;BaseQ         |
| 11074 | chrY | 10005798 | . | C | G   | 72.66    | my_snp_filter | AC=2;AF=0.029;AN=70;BaseQ          |
| 11075 | chrY | 10005806 | . | G | T   | 89.30    | PASS          | AC=3;AF=0.043;AN=70;BaseQRankSum=  |
| 11076 | chrY | 10005814 | . | G | A   | 5382.96  | my_snp_filter | AC=28;AF=0.400;AN=70;BaseQ         |
| 11077 | chrY | 10005818 | . | G | A   | 53.35    | my_snp_filter | AC=2;AF=0.029;AN=70;BaseQ          |
| 11078 | chrY | 10005824 | . | G | T   | 57.53    | my_snp_filter | AC=2;AF=0.029;AN=70;BaseQ          |
| 11079 | chrY | 10005836 | . | A | C   | 4308.25  | PASS          | AC=21;AF=0.300;AN=70;BaseQRankSum= |
| 11080 | chrY | 10005848 | . | T | A   | 6327.55  | PASS          | AC=24;AF=0.343;AN=70;BaseQRankSum= |
| 11081 | chrY | 10005856 | . | A | T,C | 7439.05  | PASS          | AC=22,9;AF=0.314,0.129;AN=70;BaseQ |
| 11082 | chrY | 10005863 | . | G | C   | 4428.12  | PASS          | AC=29;AF=0.414;AN=70;BaseQRankSum= |
| 11083 | chrY | 10005866 | . | C | T   | 815.76   | PASS          | AC=10;AF=0.143;AN=70;BaseQRankSum= |
| 11084 | chrY | 10005868 | . | G | C   | 791.99   | PASS          | AC=10;AF=0.143;AN=70;BaseQRankSum= |
| 11085 | chrY | 10005870 | . | G | A   | 137.89   | my_snp_filter | AC=6;AF=0.086;AN=70;BaseQ          |
| 11086 | chrY | 10005874 | . | A | G   | 659.25   | PASS          | AC=10;AF=0.143;AN=70;BaseQRankSum= |
| 11087 | chrY | 10005877 | . | G | A   | 87.33    | my_snp_filter | AC=1;AF=0.014;AN=70;BaseQ          |
| 11088 | chrY | 10005883 | . | A | T   | 7155.49  | PASS          | AC=19;AF=0.271;AN=70;BaseQRankSum= |
| 11089 | chrY | 10005885 | . | A | C   | 123.66   | my_snp_filter | AC=4;AF=0.057;AN=70;BaseQ          |
| 11090 | chrY | 10005893 | . | T | G   | 7003.60  | PASS          | AC=17;AF=0.250;AN=68;BaseQRankSum= |
| 11091 | chrY | 10005896 | . | T | C   | 134.01   | my_snp_filter | AC=3;AF=0.045;AN=66;BaseQ          |
| 11092 | chrY | 10005900 | . | A | G   | 6824.09  | PASS          | AC=15;AF=0.221;AN=68;BaseQRankSum= |
| 11093 | chrY | 10005901 | . | T | G   | 9725.18  | PASS          | AC=16;AF=0.235;AN=68;BaseQRankSum= |
| 11094 | chrY | 10005913 | . | G | T   | 7129.60  | PASS          | AC=9;AF=0.132;AN=68;BaseQRankSum=  |
| 11095 | chrY | 10005919 | . | T | C   | 11610.91 | PASS          | AC=15;AF=0.259;AN=58;BaseQ         |
| 11096 | chrY | 10005920 | . | C | A   | 7498.40  | PASS          | AC=9;AF=0.150;AN=60;BaseQRankSum=  |



|       |      |          |   |   |       |          |               |                                    |
|-------|------|----------|---|---|-------|----------|---------------|------------------------------------|
| 11097 | chrY | 10005928 | . | A | G     | 7251.22  | PASS          | AC=9;AF=0.132;AN=68;BaseQRankSum=  |
| 11098 | chrY | 10005933 | . | C | T     | 7084.31  | PASS          | AC=10;AF=0.147;AN=68;BaseQRankSum= |
| 11099 | chrY | 10005934 | . | T | A     | 839.79   | my_snp_filter | AC=12;AF=0.182;AN=66;BaseQ         |
| 11100 | chrY | 10005937 | . | C | G     | 7052.47  | PASS          | AC=10;AF=0.147;AN=68;BaseQRankSum= |
| 11101 | chrY | 10005939 | . | G | C     | 56.99    | my_snp_filter | AC=1;AF=0.014;AN=70;BaseQ          |
| 11102 | chrY | 10005978 | . | G | A     | 3764.10  | PASS          | AC=17;AF=0.243;AN=70;BaseQRankSum= |
| 11103 | chrY | 10005981 | . | C | T     | 111.52   | PASS          | AC=1;AF=0.014;AN=70;BaseQRankSum=  |
| 11104 | chrY | 10005992 | . | G | A     | 13916.55 | PASS          | AC=34;AF=0.486;AN=70;BaseQ         |
| 11105 | chrY | 10005997 | . | A | T     | 4861.83  | PASS          | AC=17;AF=0.243;AN=70;BaseQRankSum= |
| 11106 | chrY | 10005998 | . | G | A     | 51.66    | PASS          | AC=1;AF=0.014;AN=70;BaseQRankSum=  |
| 11107 | chrY | 10006003 | . | G | A     | 3346.12  | PASS          | AC=16;AF=0.229;AN=70;BaseQRankSum= |
| 11108 | chrY | 10006006 | . | G | T     | 4864.05  | PASS          | AC=17;AF=0.243;AN=70;BaseQRankSum= |
| 11109 | chrY | 10006018 | . | G | C     | 2728.50  | PASS          | AC=18;AF=0.273;AN=66;BaseQRankSum= |
| 11110 | chrY | 10006023 | . | T | G     | 37.27    | PASS          | AC=1;AF=0.015;AN=68;BaseQRankSum=  |
| 11111 | chrY | 10006029 | . | G | C     | 116.69   | PASS          | AC=3;AF=0.044;AN=68;BaseQRankSum=  |
| 11112 | chrY | 10006033 | . | T | G     | 13016.77 | PASS          | AC=22;AF=0.379;AN=58;BaseQ         |
| 11113 | chrY | 10006034 | . | G | T     | 5072.47  | PASS          | AC=18;AF=0.290;AN=62;BaseQRankSum= |
| 11114 | chrY | 10006036 | . | A | C     | 162.05   | PASS          | AC=3;AF=0.044;AN=68;BaseQRankSum=  |
| 11115 | chrY | 10006038 | . | G | T     | 4189.88  | PASS          | AC=13;AF=0.191;AN=68;BaseQRankSum= |
| 11116 | chrY | 10006042 | . | A | G     | 4127.43  | PASS          | AC=12;AF=0.176;AN=68;BaseQRankSum= |
| 11117 | chrY | 10006044 | . | T | C     | 184.27   | my_snp_filter | AC=4;AF=0.059;AN=68;BaseQ          |
| 11118 | chrY | 10006049 | . | C | G     | 2674.71  | PASS          | AC=13;AF=0.203;AN=64;BaseQRankSum= |
| 11119 | chrY | 10006050 | . | C | G,A   | 4928.14  | PASS          | AC=7,7;AF=0.109,0.109;AN=64;BaseQ  |
| 11120 | chrY | 10006051 | . | G | T     | 3952.96  | PASS          | AC=10;AF=0.152;AN=66;BaseQRankSum= |
| 11121 | chrY | 10006053 | . | T | C     | 3011.59  | PASS          | AC=17;AF=0.258;AN=66;BaseQRankSum= |
| 11122 | chrY | 10006054 | . | G | T     | 251.08   | PASS          | AC=4;AF=0.061;AN=66;BaseQRankSum=  |
| 11123 | chrY | 10006058 | . | A | C     | 3697.89  | PASS          | AC=10;AF=0.147;AN=68;BaseQRankSum= |
| 11124 | chrY | 10006067 | . | T | G     | 266.06   | PASS          | AC=5;AF=0.074;AN=68;BaseQRankSum=  |
| 11125 | chrY | 10006069 | . | G | A     | 10540.08 | PASS          | AC=17;AF=0.327;AN=52;BaseQ         |
| 11126 | chrY | 10006072 | . | G | A     | 130.01   | my_snp_filter | AC=3;AF=0.044;AN=68;BaseQ          |
| 11127 | chrY | 10006089 | . | C | A     | 2720.07  | PASS          | AC=12;AF=0.188;AN=64;BaseQRankSum= |
| 11128 | chrY | 10006098 | . | C | G     | 1121.70  | PASS          | AC=9;AF=0.129;AN=70;BaseQRankSum=  |
| 11129 | chrY | 10006108 | . | G | T     | 341.98   | PASS          | AC=5;AF=0.071;AN=70;BaseQRankSum=  |
| 11130 | chrY | 10006119 | . | G | T     | 216.34   | my_snp_filter | AC=5;AF=0.074;AN=68;BaseQ          |
| 11131 | chrY | 10006122 | . | C | A     | 1775.49  | PASS          | AC=9;AF=0.129;AN=70;BaseQRankSum=  |
| 11132 | chrY | 10006127 | . | T | C     | 2352.53  | PASS          | AC=16;AF=0.250;AN=64;BaseQRankSum= |
| 11133 | chrY | 10006128 | . | G | C     | 1405.34  | PASS          | AC=9;AF=0.141;AN=64;BaseQRankSum=  |
| 11134 | chrY | 10006130 | . | T | C     | 4840.41  | PASS          | AC=20;AF=0.313;AN=64;BaseQRankSum= |
| 11135 | chrY | 10006131 | . | G | A     | 2992.81  | PASS          | AC=19;AF=0.288;AN=66;BaseQRankSum= |
| 11136 | chrY | 10006139 | . | G | A     | 3392.28  | PASS          | AC=19;AF=0.279;AN=68;BaseQRankSum= |
| 11137 | chrY | 10006145 | . | T | G     | 2097.90  | PASS          | AC=9;AF=0.346;AN=26;BaseQRankSum=  |
| 11138 | chrY | 10006148 | . | C | T,A,* | 3584.52  | PASS          | AC=9,6,4;AF=0.196,0.130,0.087;AN=  |
| 11139 | chrY | 10006165 | . | G | C     | 1174.58  | PASS          | AC=8;AF=0.114;AN=70;BaseQRankSum=  |
| 11140 | chrY | 10006173 | . | T | G     | 17807.82 | PASS          | AC=21;AF=0.477;AN=44;BaseQ         |
| 11141 | chrY | 10006198 | . | C | T     | 11980    | PASS          | AC=21;AF=0.300;AN=70;BaseQRankSum= |
| 11142 | chrY | 10006207 | . | G | A     | 12134.21 | PASS          | AC=21;AF=0.300;AN=70;BaseQ         |
| 11143 | chrY | 10006250 | . | C | T     | 5513.78  | PASS          | AC=25;AF=0.357;AN=70;BaseQRankSum= |
| 11144 | chrY | 10006253 | . | C | T     | 2495.35  | PASS          | AC=16;AF=0.229;AN=70;BaseQRankSum= |
| 11145 | chrY | 10006267 | . | A | G     | 2492.63  | my_snp_filter | AC=21;AF=0.300;AN=70;BaseQ         |
| 11146 | chrY | 10006280 | . | G | C     | 1321.87  | PASS          | AC=9;AF=0.129;AN=70;BaseQRankSum=  |
| 11147 | chrY | 10006290 | . | G | T     | 32.45    | my_snp_filter | AC=1;AF=0.014;AN=70;BaseQ          |
| 11148 | chrY | 10006295 | . | A | C     | 585.67   | PASS          | AC=6;AF=0.086;AN=70;BaseQRankSum=  |
| 11149 | chrY | 10006296 | . | G | C     | 842.55   | PASS          | AC=8;AF=0.114;AN=70;BaseQRankSum=  |
| 11150 | chrY | 10006298 | . | T | C     | 3388.85  | PASS          | AC=14;AF=0.200;AN=70;BaseQRankSum= |
| 11151 | chrY | 10006300 | . | A | T     | 13082.26 | PASS          | AC=31;AF=0.534;AN=58;BaseQ         |
| 11152 | chrY | 10006311 | . | A | G     | 7048.59  | my_snp_filter | AC=23;AF=0.397;AN=58;BaseQ         |
| 11153 | chrY | 10006316 | . | T | C,*   | 2215.92  | my_snp_filter | AC=9,1;AF=0.161,0.018;AN=          |
| 11154 | chrY | 10006321 | . | T | C     | 1113.02  | my_snp_filter | AC=7;AF=0.152;AN=46;BaseQ          |
| 11155 | chrY | 10006325 | . | G | A     | 330.57   | PASS          | AC=3;AF=0.048;AN=62;BaseQRankSum=  |
| 11156 | chrY | 10006331 | . | C | T     | 334.87   | PASS          | AC=5;AF=0.086;AN=58;BaseQRankSum=  |
| 11157 | chrY | 10006337 | . | T | G     | 112.87   | PASS          | AC=2;AF=0.032;AN=62;BaseQRankSum=  |
| 11158 | chrY | 10006346 | . | A | G     | 53.42    | PASS          | AC=1;AF=0.017;AN=60;BaseQRankSum=  |
| 11159 | chrY | 10006351 | . | G | A     | 50.39    | PASS          | AC=1;AF=0.016;AN=64;BaseQRankSum=  |
| 11160 | chrY | 10006352 | . | C | T     | 50.48    | PASS          | AC=1;AF=0.016;AN=64;BaseQRankSum=  |
| 11161 | chrY | 10006795 | . | T | C     | 1148.30  | my_snp_filter | AC=12;AF=0.200;AN=60;BaseQ         |
| 11162 | chrY | 10006796 | . | C | G     | 205.50   | my_snp_filter | AC=8;AF=0.121;AN=66;BaseQ          |
| 11163 | chrY | 10006836 | . | C | A     | 1234.15  | PASS          | AC=11;AF=0.196;AN=56;BaseQRankSum= |
| 11164 | chrY | 10006838 | . | A | C     | 297.25   | PASS          | AC=4;AF=0.061;AN=66;BaseQRankSum=  |
| 11165 | chrY | 10006844 | . | T | C     | 1254     | PASS          | AC=10;AF=0.161;AN=62;BaseQRankSum= |
| 11166 | chrY | 10006848 | . | C | G     | 207.69   | PASS          | AC=2;AF=0.029;AN=68;BaseQRankSum=  |
| 11167 | chrY | 10006851 | . | C | G     | 783.01   | PASS          | AC=10;AF=0.156;AN=64;BaseQRankSum= |
| 11168 | chrY | 10006869 | . | C | T     | 540.71   | PASS          | AC=5;AF=0.083;AN=60;BaseQRankSum=  |
| 11169 | chrY | 10006920 | . | C | T     | 4688.28  | PASS          | AC=34;AF=0.548;AN=62;BaseQRankSum= |
| 11170 | chrY | 10007053 | . | C | T     | 1076.41  | PASS          | AC=6;AF=0.086;AN=70;DP=692;FS=0.0  |
| 11171 | chrY | 10007275 | . | C | T     | 1125.95  | PASS          | AC=6;AF=0.094;AN=64;DP=377;FS=0.0  |
| 11172 | chrY | 10007464 | . | T | C     | 152.59   | PASS          | AC=4;AF=0.059;AN=68;BaseQRankSum=  |

|       |      |          |   |   |     |          |               |                                    |
|-------|------|----------|---|---|-----|----------|---------------|------------------------------------|
| 11173 | chrY | 10007465 | . | G | A   | 152.99   | PASS          | AC=4;AF=0.059;AN=68;BaseQRankSum=  |
| 11174 | chrY | 10007473 | . | A | G   | 520.88   | PASS          | AC=5;AF=0.074;AN=68;BaseQRankSum=  |
| 11175 | chrY | 10007476 | . | A | G   | 559.62   | PASS          | AC=5;AF=0.074;AN=68;BaseQRankSum=  |
| 11176 | chrY | 10007480 | . | G | C   | 602.17   | PASS          | AC=5;AF=0.076;AN=66;BaseQRankSum=  |
| 11177 | chrY | 10007487 | . | T | C   | 1017.63  | my_snp_filter | AC=6;AF=0.091;AN=66;BaseQ          |
| 11178 | chrY | 10007498 | . | G | A   | 1407.33  | my_snp_filter | AC=7;AF=0.113;AN=62;BaseQ          |
| 11179 | chrY | 10007500 | . | A | C   | 1453.22  | my_snp_filter | AC=7;AF=0.113;AN=62;BaseQ          |
| 11180 | chrY | 10007514 | . | A | G   | 2001.11  | my_snp_filter | AC=6;AF=0.097;AN=62;BaseQ          |
| 11181 | chrY | 10007521 | . | G | A   | 2009.24  | my_snp_filter | AC=7;AF=0.109;AN=64;BaseQ          |
| 11182 | chrY | 10007524 | . | G | C   | 1865.79  | my_snp_filter | AC=7;AF=0.103;AN=68;BaseQ          |
| 11183 | chrY | 10007539 | . | T | C   | 2140.91  | my_snp_filter | AC=7;AF=0.113;AN=62;BaseQ          |
| 11184 | chrY | 10007546 | . | A | G   | 2157.87  | my_snp_filter | AC=7;AF=0.113;AN=62;BaseQ          |
| 11185 | chrY | 10007557 | . | G | A   | 2277.52  | my_snp_filter | AC=8;AF=0.133;AN=60;BaseQ          |
| 11186 | chrY | 10007576 | . | G | C   | 785.19   | PASS          | AC=3;AF=0.056;AN=54;BaseQRankSum=  |
| 11187 | chrY | 10007605 | . | G | A   | 38.32    | my_snp_filter | AC=3;AF=0.044;AN=68;BaseQ          |
| 11188 | chrY | 10007612 | . | C | T   | 2132.21  | PASS          | AC=11;AF=0.172;AN=64;BaseQRankSum= |
| 11189 | chrY | 10007637 | . | C | T   | 381.47   | PASS          | AC=7;AF=0.103;AN=68;BaseQRankSum=  |
| 11190 | chrY | 10007641 | . | G | A   | 4134.42  | PASS          | AC=14;AF=0.219;AN=64;BaseQRankSum= |
| 11191 | chrY | 10007660 | . | T | G   | 5382.95  | PASS          | AC=15;AF=0.242;AN=62;BaseQRankSum= |
| 11192 | chrY | 10007669 | . | C | T   | 1004.14  | PASS          | AC=9;AF=0.136;AN=66;BaseQRankSum=  |
| 11193 | chrY | 10007674 | . | C | G   | 1715.42  | PASS          | AC=9;AF=0.161;AN=56;BaseQRankSum=  |
| 11194 | chrY | 10007682 | . | T | C   | 7515.88  | PASS          | AC=18;AF=0.290;AN=62;BaseQRankSum= |
| 11195 | chrY | 10007688 | . | C | T   | 157.81   | my_snp_filter | AC=2;AF=0.029;AN=68;BaseQ          |
| 11196 | chrY | 10007697 | . | C | T   | 76.62    | my_snp_filter | AC=1;AF=0.015;AN=68;BaseQ          |
| 11197 | chrY | 10007709 | . | C | A   | 14632.71 | PASS          | AC=28;AF=0.412;AN=68;BaseQ         |
| 11198 | chrY | 10007710 | . | G | A   | 37.90    | my_snp_filter | AC=3;AF=0.044;AN=68;BaseQ          |
| 11199 | chrY | 10007727 | . | G | A   | 16430.06 | PASS          | AC=31;AF=0.456;AN=68;BaseQ         |
| 11200 | chrY | 10007740 | . | C | T   | 282.94   | PASS          | AC=3;AF=0.044;AN=68;BaseQRankSum=  |
| 11201 | chrY | 10007741 | . | G | A   | 14167.28 | PASS          | AC=27;AF=0.397;AN=68;BaseQ         |
| 11202 | chrY | 10007745 | . | T | C   | 6365.72  | PASS          | AC=27;AF=0.397;AN=68;BaseQRankSum= |
| 11203 | chrY | 10007778 | . | A | G   | 11860.26 | PASS          | AC=28;AF=0.412;AN=68;BaseQ         |
| 11204 | chrY | 10007794 | . | G | T   | 15754.76 | my_snp_filter | AC=29;AF=0.439;AN=66;BaseQ         |
| 11205 | chrY | 10007797 | . | C | G   | 15560    | my_snp_filter | AC=29;AF=0.439;AN=66;BaseQ         |
| 11206 | chrY | 10007803 | . | G | T   | 109.50   | PASS          | AC=1;AF=0.015;AN=68;BaseQRankSum=  |
| 11207 | chrY | 10007822 | . | T | C   | 11382.32 | PASS          | AC=28;AF=0.412;AN=68;BaseQ         |
| 11208 | chrY | 10007824 | . | T | G   | 11282.65 | PASS          | AC=28;AF=0.412;AN=68;BaseQ         |
| 11209 | chrY | 10007830 | . | T | C   | 2369.65  | PASS          | AC=17;AF=0.250;AN=68;BaseQRankSum= |
| 11210 | chrY | 10007833 | . | C | A   | 9135.38  | PASS          | AC=26;AF=0.371;AN=70;BaseQRankSum= |
| 11211 | chrY | 10007870 | . | A | G   | 76.57    | my_snp_filter | AC=5;AF=0.071;AN=70;BaseQ          |
| 11212 | chrY | 10007877 | . | G | A   | 114.60   | PASS          | AC=1;AF=0.014;AN=70;BaseQRankSum=  |
| 11213 | chrY | 10007881 | . | T | G   | 102.51   | PASS          | AC=1;AF=0.014;AN=70;BaseQRankSum=  |
| 11214 | chrY | 10008013 | . | A | G   | 113.31   | PASS          | AC=3;AF=0.045;AN=66;BaseQRankSum=  |
| 11215 | chrY | 10008030 | . | T | G   | 351.31   | PASS          | AC=4;AF=0.061;AN=66;BaseQRankSum=  |
| 11216 | chrY | 10008082 | . | G | A   | 1155.12  | PASS          | AC=7;AF=0.106;AN=66;BaseQRankSum=  |
| 11217 | chrY | 10008083 | . | A | C   | 1732.57  | PASS          | AC=8;AF=0.125;AN=64;BaseQRankSum=  |
| 11218 | chrY | 10008113 | . | C | T   | 129.75   | my_snp_filter | AC=5;AF=0.078;AN=64;BaseQ          |
| 11219 | chrY | 10008152 | . | G | A   | 249.27   | PASS          | AC=1;AF=0.015;AN=68;BaseQRankSum=  |
| 11220 | chrY | 10008158 | . | T | C   | 3912.77  | PASS          | AC=13;AF=0.197;AN=66;BaseQRankSum= |
| 11221 | chrY | 10008159 | . | G | T   | 244.66   | PASS          | AC=1;AF=0.015;AN=68;BaseQRankSum=  |
| 11222 | chrY | 10008166 | . | C | T   | 4354.58  | PASS          | AC=13;AF=0.197;AN=66;BaseQRankSum= |
| 11223 | chrY | 10008190 | . | T | C   | 280.73   | PASS          | AC=3;AF=0.043;AN=70;BaseQRankSum=  |
| 11224 | chrY | 10008198 | . | T | C   | 980.30   | PASS          | AC=10;AF=0.143;AN=70;BaseQRankSum= |
| 11225 | chrY | 10008203 | . | T | A   | 281.04   | PASS          | AC=4;AF=0.057;AN=70;BaseQRankSum=  |
| 11226 | chrY | 10008206 | . | A | C   | 3914.48  | PASS          | AC=17;AF=0.243;AN=70;BaseQRankSum= |
| 11227 | chrY | 10008215 | . | G | T   | 54.42    | my_snp_filter | AC=2;AF=0.029;AN=70;BaseQ          |
| 11228 | chrY | 10008221 | . | T | G   | 3690.97  | PASS          | AC=19;AF=0.279;AN=68;BaseQRankSum= |
| 11229 | chrY | 10008234 | . | T | C   | 4555.77  | PASS          | AC=20;AF=0.294;AN=68;BaseQRankSum= |
| 11230 | chrY | 10008254 | . | C | T   | 3784.48  | PASS          | AC=18;AF=0.265;AN=68;BaseQRankSum= |
| 11231 | chrY | 10008259 | . | A | G   | 3739.52  | PASS          | AC=18;AF=0.265;AN=68;BaseQRankSum= |
| 11232 | chrY | 10008262 | . | C | T   | 1711.55  | PASS          | AC=11;AF=0.157;AN=70;BaseQRankSum= |
| 11233 | chrY | 10008278 | . | A | G,* | 2117.86  | PASS          | AC=8,7;AF=0.118,0.103;AN=68;BaseQ  |
| 11234 | chrY | 10008279 | . | C | A   | 976.75   | PASS          | AC=8;AF=0.118;AN=68;BaseQRankSum=  |
| 11235 | chrY | 10008290 | . | C | T,* | 1493.07  | PASS          | AC=8,8;AF=0.121,0.121;AN=66;BaseQ  |
| 11236 | chrY | 10008291 | . | C | G,* | 1418.59  | PASS          | AC=8,8;AF=0.121,0.121;AN=66;BaseQ  |
| 11237 | chrY | 10008329 | . | G | C   | 892.73   | PASS          | AC=10;AF=0.143;AN=70;BaseQRankSum= |
| 11238 | chrY | 10008331 | . | T | G   | 2085.66  | PASS          | AC=16;AF=0.229;AN=70;BaseQRankSum= |
| 11239 | chrY | 10008337 | . | G | A   | 2115.62  | PASS          | AC=17;AF=0.243;AN=70;BaseQRankSum= |
| 11240 | chrY | 10008365 | . | C | T   | 2693.45  | PASS          | AC=18;AF=0.257;AN=70;BaseQRankSum= |
| 11241 | chrY | 10008366 | . | A | G   | 2692.40  | PASS          | AC=18;AF=0.257;AN=70;BaseQRankSum= |
| 11242 | chrY | 10008367 | . | C | T   | 811.07   | PASS          | AC=10;AF=0.143;AN=70;BaseQRankSum= |
| 11243 | chrY | 10008398 | . | T | C   | 111.90   | PASS          | AC=3;AF=0.043;AN=70;BaseQRankSum=  |
| 11244 | chrY | 10008403 | . | C | T   | 2795.62  | PASS          | AC=16;AF=0.235;AN=68;BaseQRankSum= |
| 11245 | chrY | 10008412 | . | T | C   | 3042.80  | PASS          | AC=15;AF=0.214;AN=70;BaseQRankSum= |
| 11246 | chrY | 10008420 | . | C | A   | 3159.99  | my_snp_filter | AC=14;AF=0.200;AN=70;BaseQ         |
| 11247 | chrY | 10008444 | . | T | C   | 3555.11  | my_snp_filter | AC=12;AF=0.171;AN=70;BaseQ         |
| 11248 | chrY | 10008450 | . | C | G   | 1636.70  | PASS          | AC=10;AF=0.143;AN=70;BaseQRankSum= |

|       |      |          |   |   |     |          |               |                                    |
|-------|------|----------|---|---|-----|----------|---------------|------------------------------------|
| 11249 | chrY | 10008500 | . | C | T   | 318.73   | PASS          | AC=6;AF=0.086;AN=70;BaseQRankSum=  |
| 11250 | chrY | 10008505 | . | T | A   | 473.17   | PASS          | AC=10;AF=0.143;AN=70;BaseQRankSum= |
| 11251 | chrY | 10008510 | . | C | G   | 198.21   | PASS          | AC=5;AF=0.071;AN=70;BaseQRankSum=  |
| 11252 | chrY | 10008538 | . | C | T   | 101.73   | PASS          | AC=2;AF=0.029;AN=70;BaseQRankSum=  |
| 11253 | chrY | 10008791 | . | T | C   | 4693.12  | PASS          | AC=54;AF=1.00;AN=54;DP=215;FS=0.0  |
| 11254 | chrY | 10009025 | . | A | G   | 176.13   | my_snp_filter | AC=4;AF=0.059;AN=68;BaseQ          |
| 11255 | chrY | 10009033 | . | C | G   | 949.72   | my_snp_filter | AC=5;AF=0.074;AN=68;BaseQ          |
| 11256 | chrY | 10009046 | . | A | C   | 1097.12  | my_snp_filter | AC=6;AF=0.091;AN=66;BaseQ          |
| 11257 | chrY | 10009074 | . | A | G   | 102.71   | my_snp_filter | AC=3;AF=0.045;AN=66;BaseQ          |
| 11258 | chrY | 10009098 | . | A | G   | 1207.68  | my_snp_filter | AC=6;AF=0.094;AN=64;BaseQ          |
| 11259 | chrY | 10009124 | . | T | C   | 479.70   | PASS          | AC=3;AF=0.052;AN=58;BaseQRankSum=  |
| 11260 | chrY | 10009132 | . | C | A   | 209.05   | PASS          | AC=1;AF=0.017;AN=60;BaseQRankSum=  |
| 11261 | chrY | 10009149 | . | G | A   | 416.43   | PASS          | AC=3;AF=0.050;AN=60;BaseQRankSum=  |
| 11262 | chrY | 10009181 | . | A | C   | 274.31   | PASS          | AC=1;AF=0.016;AN=62;BaseQRankSum=  |
| 11263 | chrY | 10009194 | . | G | C   | 183.50   | PASS          | AC=1;AF=0.017;AN=58;BaseQRankSum=  |
| 11264 | chrY | 10009220 | . | T | C   | 83.82    | my_snp_filter | AC=3;AF=0.048;AN=62;BaseQ          |
| 11265 | chrY | 10009232 | . | T | C   | 284.38   | PASS          | AC=3;AF=0.045;AN=66;BaseQRankSum=  |
| 11266 | chrY | 10009233 | . | A | T   | 285.03   | PASS          | AC=3;AF=0.045;AN=66;BaseQRankSum=  |
| 11267 | chrY | 10009264 | . | T | C   | 3195.95  | PASS          | AC=17;AF=0.258;AN=66;BaseQRankSum= |
| 11268 | chrY | 10009289 | . | T | C   | 6187.99  | PASS          | AC=21;AF=0.309;AN=68;BaseQRankSum= |
| 11269 | chrY | 10009290 | . | A | G   | 6255.20  | PASS          | AC=21;AF=0.309;AN=68;BaseQRankSum= |
| 11270 | chrY | 10009291 | . | G | A   | 902.10   | PASS          | AC=7;AF=0.103;AN=68;BaseQRankSum=  |
| 11271 | chrY | 10009296 | . | G | A   | 6645.93  | PASS          | AC=23;AF=0.338;AN=68;BaseQRankSum= |
| 11272 | chrY | 10009312 | . | G | A   | 2040.79  | PASS          | AC=21;AF=0.300;AN=70;BaseQRankSum= |
| 11273 | chrY | 10009343 | . | A | G   | 11347.33 | PASS          | AC=29;AF=0.414;AN=70;BaseQ         |
| 11274 | chrY | 10009345 | . | G | A   | 1205.16  | PASS          | AC=8;AF=0.114;AN=70;BaseQRankSum=  |
| 11275 | chrY | 10009351 | . | C | A   | 11475.97 | PASS          | AC=28;AF=0.400;AN=70;BaseQ         |
| 11276 | chrY | 10009362 | . | T | G   | 11508.15 | PASS          | AC=30;AF=0.429;AN=70;BaseQ         |
| 11277 | chrY | 10009366 | . | C | T   | 5128.18  | PASS          | AC=20;AF=0.286;AN=70;BaseQRankSum= |
| 11278 | chrY | 10009372 | . | C | T   | 5392.18  | PASS          | AC=19;AF=0.271;AN=70;BaseQRankSum= |
| 11279 | chrY | 10009387 | . | G | T   | 3277.45  | PASS          | AC=18;AF=0.257;AN=70;BaseQRankSum= |
| 11280 | chrY | 10009398 | . | T | C,G | 7419.72  | PASS          | AC=28,4;AF=0.400,0.057;AN=70;BaseQ |
| 11281 | chrY | 10009403 | . | G | A   | 140.31   | my_snp_filter | AC=4;AF=0.057;AN=70;BaseQ          |
| 11282 | chrY | 10009432 | . | C | T   | 7364.65  | PASS          | AC=26;AF=0.371;AN=70;BaseQRankSum= |
| 11283 | chrY | 10009440 | . | G | A   | 6397.11  | PASS          | AC=21;AF=0.309;AN=68;BaseQRankSum= |
| 11284 | chrY | 10009441 | . | C | T   | 136.93   | my_snp_filter | AC=4;AF=0.057;AN=70;BaseQ          |
| 11285 | chrY | 10009455 | . | G | A   | 896.02   | PASS          | AC=11;AF=0.162;AN=68;BaseQRankSum= |
| 11286 | chrY | 10009458 | . | G | A   | 403.37   | PASS          | AC=5;AF=0.074;AN=68;BaseQRankSum=  |
| 11287 | chrY | 10009474 | . | G | C   | 1327.28  | PASS          | AC=10;AF=0.152;AN=66;BaseQRankSum= |
| 11288 | chrY | 10009484 | . | G | C   | 374.63   | PASS          | AC=5;AF=0.076;AN=66;BaseQRankSum=  |
| 11289 | chrY | 10009486 | . | A | C   | 2059.57  | PASS          | AC=8;AF=0.125;AN=64;BaseQRankSum=  |
| 11290 | chrY | 10009490 | . | A | G   | 1271.30  | PASS          | AC=7;AF=0.106;AN=66;BaseQRankSum=  |
| 11291 | chrY | 10009491 | . | T | C   | 1240.29  | PASS          | AC=7;AF=0.106;AN=66;BaseQRankSum=  |
| 11292 | chrY | 10009501 | . | T | C   | 158.30   | PASS          | AC=4;AF=0.059;AN=68;BaseQRankSum=  |
| 11293 | chrY | 10009509 | . | T | C   | 564.71   | PASS          | AC=7;AF=0.103;AN=68;BaseQRankSum=  |
| 11294 | chrY | 10009528 | . | G | C   | 305.78   | PASS          | AC=6;AF=0.091;AN=66;BaseQRankSum=  |
| 11295 | chrY | 10009532 | . | A | C   | 364.25   | PASS          | AC=6;AF=0.088;AN=68;BaseQRankSum=  |
| 11296 | chrY | 10009537 | . | G | A   | 352.77   | PASS          | AC=6;AF=0.088;AN=68;BaseQRankSum=  |
| 11297 | chrY | 10009556 | . | A | G   | 50.63    | PASS          | AC=1;AF=0.015;AN=66;BaseQRankSum=  |
| 11298 | chrY | 10009603 | . | T | C   | 279.93   | PASS          | AC=2;AF=0.032;AN=62;BaseQRankSum=  |
| 11299 | chrY | 10009608 | . | T | C   | 273.43   | PASS          | AC=2;AF=0.032;AN=62;BaseQRankSum=  |
| 11300 | chrY | 10009610 | . | G | A   | 273.48   | PASS          | AC=2;AF=0.032;AN=62;BaseQRankSum=  |
| 11301 | chrY | 10009616 | . | C | T   | 43.44    | my_snp_filter | AC=2;AF=0.031;AN=64;BaseQ          |
| 11302 | chrY | 10009699 | . | G | A   | 253.24   | PASS          | AC=2;AF=0.029;AN=68;BaseQRankSum=  |
| 11303 | chrY | 10009711 | . | A | T   | 334.66   | PASS          | AC=3;AF=0.045;AN=66;BaseQRankSum=  |
| 11304 | chrY | 10009713 | . | C | G   | 528.74   | PASS          | AC=6;AF=0.091;AN=66;BaseQRankSum=  |
| 11305 | chrY | 10009735 | . | A | G   | 269.92   | PASS          | AC=4;AF=0.059;AN=68;BaseQRankSum=  |
| 11306 | chrY | 10009744 | . | G | A   | 252.19   | PASS          | AC=3;AF=0.043;AN=70;BaseQRankSum=  |
| 11307 | chrY | 10009746 | . | A | T   | 1163.80  | PASS          | AC=8;AF=0.118;AN=68;BaseQRankSum=  |
| 11308 | chrY | 10009770 | . | G | A   | 208.24   | PASS          | AC=3;AF=0.047;AN=64;BaseQRankSum=  |
| 11309 | chrY | 10009786 | . | A | T   | 1551.17  | PASS          | AC=10;AF=0.156;AN=64;BaseQRankSum= |
| 11310 | chrY | 10009795 | . | A | G   | 1465.93  | PASS          | AC=10;AF=0.156;AN=64;BaseQRankSum= |
| 11311 | chrY | 10009802 | . | T | C   | 1474.69  | PASS          | AC=10;AF=0.147;AN=68;BaseQRankSum= |
| 11312 | chrY | 10009815 | . | G | A   | 426.90   | PASS          | AC=8;AF=0.121;AN=66;BaseQRankSum=  |
| 11313 | chrY | 10009844 | . | A | G   | 2003.31  | PASS          | AC=16;AF=0.242;AN=66;BaseQRankSum= |
| 11314 | chrY | 10009851 | . | G | A   | 692.68   | PASS          | AC=12;AF=0.182;AN=66;BaseQRankSum= |
| 11315 | chrY | 10009853 | . | G | A   | 225.28   | PASS          | AC=4;AF=0.063;AN=64;DP=483;FS=0.0  |
| 11316 | chrY | 10009854 | . | G | T   | 659.65   | PASS          | AC=8;AF=0.125;AN=64;BaseQRankSum=  |
| 11317 | chrY | 10009857 | . | A | G   | 1813.75  | PASS          | AC=16;AF=0.276;AN=58;BaseQRankSum= |
| 11318 | chrY | 10009877 | . | C | T   | 1315.77  | PASS          | AC=15;AF=0.242;AN=62;BaseQRankSum= |
| 11319 | chrY | 10009881 | . | A | G   | 1090.33  | PASS          | AC=15;AF=0.242;AN=62;BaseQRankSum= |
| 11320 | chrY | 10009909 | . | T | C   | 103      | PASS          | AC=2;AF=0.031;AN=64;BaseQRankSum=  |
| 11321 | chrY | 10009914 | . | T | C   | 99.23    | PASS          | AC=2;AF=0.031;AN=64;BaseQRankSum=  |
| 11322 | chrY | 10010279 | . | T | C   | 200.55   | PASS          | AC=2;AF=0.030;AN=66;BaseQRankSum=  |
| 11323 | chrY | 10010285 | . | A | T   | 218.12   | PASS          | AC=3;AF=0.045;AN=66;BaseQRankSum=  |
| 11324 | chrY | 10010308 | . | C | A   | 222.67   | PASS          | AC=2;AF=0.033;AN=60;BaseQRankSum=  |

|       |      |          |   |   |     |          |               |                                    |
|-------|------|----------|---|---|-----|----------|---------------|------------------------------------|
| 11325 | chrY | 10010428 | . | A | G   | 2285.15  | PASS          | AC=12;AF=0.182;AN=66;BaseQRankSum= |
| 11326 | chrY | 10010458 | . | T | C   | 387.31   | PASS          | AC=5;AF=0.071;AN=70;BaseQRankSum=  |
| 11327 | chrY | 10010465 | . | T | C   | 640.88   | PASS          | AC=8;AF=0.118;AN=68;BaseQRankSum=  |
| 11328 | chrY | 10010487 | . | C | T   | 66.05    | my_snp_filter | AC=4;AF=0.057;AN=70;BaseQ          |
| 11329 | chrY | 10010511 | . | G | A   | 31.38    | my_snp_filter | AC=4;AF=0.059;AN=68;BaseQ          |
| 11330 | chrY | 10010520 | . | T | G   | 4304.75  | PASS          | AC=25;AF=0.391;AN=64;BaseQRankSum= |
| 11331 | chrY | 10010531 | . | A | G   | 4657.47  | PASS          | AC=25;AF=0.391;AN=64;BaseQRankSum= |
| 11332 | chrY | 10010573 | . | G | A   | 6870.63  | PASS          | AC=25;AF=0.391;AN=64;BaseQRankSum= |
| 11333 | chrY | 10010592 | . | G | C   | 8137.84  | PASS          | AC=25;AF=0.431;AN=58;BaseQRankSum= |
| 11334 | chrY | 10010594 | . | G | A   | 31.47    | my_snp_filter | AC=1;AF=0.014;AN=70;BaseQ          |
| 11335 | chrY | 10010597 | . | C | T   | 8225.11  | PASS          | AC=25;AF=0.431;AN=58;BaseQRankSum= |
| 11336 | chrY | 10010636 | . | G | A   | 654.49   | PASS          | AC=13;AF=0.191;AN=68;BaseQRankSum= |
| 11337 | chrY | 10010637 | . | T | G   | 6272.75  | PASS          | AC=29;AF=0.426;AN=68;BaseQRankSum= |
| 11338 | chrY | 10010679 | . | G | T   | 1304.01  | PASS          | AC=11;AF=0.167;AN=66;BaseQRankSum= |
| 11339 | chrY | 10010688 | . | G | C   | 1166.04  | PASS          | AC=11;AF=0.162;AN=68;BaseQRankSum= |
| 11340 | chrY | 10010694 | . | G | C   | 4168.46  | PASS          | AC=20;AF=0.303;AN=66;BaseQRankSum= |
| 11341 | chrY | 10010715 | . | G | A,T | 952.70   | PASS          | AC=9,3;AF=0.136,0.045;AN=66;BaseQ  |
| 11342 | chrY | 10010717 | . | T | C   | 1749.88  | my_snp_filter | AC=16;AF=0.250;AN=64;BaseQ         |
| 11343 | chrY | 10010718 | . | G | A   | 732.66   | PASS          | AC=12;AF=0.182;AN=66;BaseQRankSum= |
| 11344 | chrY | 10010780 | . | A | C   | 59.84    | PASS          | AC=2;AF=0.032;AN=62;BaseQRankSum=  |
| 11345 | chrY | 10010782 | . | C | T   | 60.29    | PASS          | AC=2;AF=0.032;AN=62;BaseQRankSum=  |
| 11346 | chrY | 10010978 | . | A | T   | 1321.86  | my_snp_filter | AC=16;AF=0.267;AN=60;BaseQ         |
| 11347 | chrY | 10011009 | . | T | G   | 34.29    | PASS          | AC=1;AF=0.014;AN=70;BaseQRankSum=  |
| 11348 | chrY | 10011019 | . | C | T   | 416.24   | PASS          | AC=9;AF=0.129;AN=70;BaseQRankSum=  |
| 11349 | chrY | 10011033 | . | G | T   | 465.77   | PASS          | AC=9;AF=0.129;AN=70;BaseQRankSum=  |
| 11350 | chrY | 10011052 | . | A | G   | 106.18   | PASS          | AC=3;AF=0.043;AN=70;BaseQRankSum=  |
| 11351 | chrY | 10011060 | . | C | T   | 1228.90  | PASS          | AC=13;AF=0.186;AN=70;BaseQRankSum= |
| 11352 | chrY | 10011064 | . | C | T   | 1194.97  | PASS          | AC=12;AF=0.171;AN=70;BaseQRankSum= |
| 11353 | chrY | 10011091 | . | T | C   | 468.56   | PASS          | AC=7;AF=0.100;AN=70;BaseQRankSum=  |
| 11354 | chrY | 10011092 | . | G | C   | 669.18   | my_snp_filter | AC=12;AF=0.171;AN=70;BaseQ         |
| 11355 | chrY | 10011093 | . | T | C   | 7238.97  | PASS          | AC=28;AF=0.400;AN=70;BaseQRankSum= |
| 11356 | chrY | 10011107 | . | A | C   | 273.38   | PASS          | AC=5;AF=0.071;AN=70;BaseQRankSum=  |
| 11357 | chrY | 10011128 | . | T | C   | 5447.33  | my_snp_filter | AC=20;AF=0.303;AN=66;BaseQ         |
| 11358 | chrY | 10011131 | . | A | G   | 878.71   | my_snp_filter | AC=8;AF=0.118;AN=68;BaseQ          |
| 11359 | chrY | 10011135 | . | C | A   | 256.47   | PASS          | AC=5;AF=0.074;AN=68;BaseQRankSum=  |
| 11360 | chrY | 10011166 | . | A | C   | 3402.80  | my_snp_filter | AC=19;AF=0.306;AN=62;BaseQ         |
| 11361 | chrY | 10011202 | . | T | A   | 192.26   | PASS          | AC=4;AF=0.061;AN=66;BaseQRankSum=  |
| 11362 | chrY | 10011209 | . | T | C   | 97.40    | PASS          | AC=2;AF=0.030;AN=66;BaseQRankSum=  |
| 11363 | chrY | 10011216 | . | T | C   | 118.19   | my_snp_filter | AC=4;AF=0.059;AN=68;BaseQ          |
| 11364 | chrY | 10011231 | . | G | T   | 79.44    | PASS          | AC=1;AF=0.015;AN=68;BaseQRankSum=  |
| 11365 | chrY | 10011237 | . | C | T   | 81.49    | PASS          | AC=1;AF=0.015;AN=68;BaseQRankSum=  |
| 11366 | chrY | 10011238 | . | A | G   | 84.26    | PASS          | AC=1;AF=0.015;AN=68;BaseQRankSum=  |
| 11367 | chrY | 10011277 | . | A | G   | 1513.70  | my_snp_filter | AC=14;AF=0.280;AN=50;BaseQ         |
| 11368 | chrY | 10011303 | . | A | G   | 13310.15 | PASS          | AC=35;AF=0.500;AN=70;BaseQ         |
| 11369 | chrY | 10011321 | . | C | T   | 87.90    | my_snp_filter | AC=5;AF=0.071;AN=70;BaseQ          |
| 11370 | chrY | 10011344 | . | A | G   | 27454.93 | PASS          | AC=39;AF=0.557;AN=70;BaseQ         |
| 11371 | chrY | 10011413 | . | T | C   | 101.41   | my_snp_filter | AC=4;AF=0.057;AN=70;BaseQ          |
| 11372 | chrY | 10011435 | . | A | C   | 7372.52  | PASS          | AC=32;AF=0.457;AN=70;BaseQRankSum= |
| 11373 | chrY | 10011438 | . | A | C   | 99.63    | my_snp_filter | AC=3;AF=0.043;AN=70;BaseQ          |
| 11374 | chrY | 10011444 | . | A | G   | 116.50   | my_snp_filter | AC=3;AF=0.043;AN=70;BaseQ          |
| 11375 | chrY | 10011487 | . | A | G   | 6288.27  | PASS          | AC=23;AF=0.329;AN=70;BaseQRankSum= |
| 11376 | chrY | 10011498 | . | G | C,T | 37099.80 | PASS          | AC=35,16;AF=0.500,0.229;AN=70      |
| 11377 | chrY | 10011501 | . | C | T   | 9452.45  | PASS          | AC=24;AF=0.343;AN=70;BaseQRankSum= |
| 11378 | chrY | 10011502 | . | A | G   | 21714.75 | PASS          | AC=35;AF=0.500;AN=70;BaseQ         |
| 11379 | chrY | 10011533 | . | G | T   | 314.52   | PASS          | AC=3;AF=0.043;AN=70;BaseQRankSum=  |
| 11380 | chrY | 10011542 | . | G | T   | 149.45   | my_snp_filter | AC=1;AF=0.014;AN=70;BaseQ          |
| 11381 | chrY | 10011545 | . | T | G   | 41269.21 | PASS          | AC=38;AF=0.543;AN=70;BaseQ         |
| 11382 | chrY | 10011565 | . | C | G   | 46.12    | my_snp_filter | AC=2;AF=0.029;AN=70;BaseQ          |
| 11383 | chrY | 10011581 | . | G | A,C | 735.35   | my_snp_filter | AC=10,2;AF=0.143,0.029;AN=70       |
| 11384 | chrY | 10011585 | . | G | A   | 197.05   | my_snp_filter | AC=6;AF=0.086;AN=70;BaseQ          |
| 11385 | chrY | 10011606 | . | C | T   | 597.41   | my_snp_filter | AC=2;AF=0.033;AN=60;BaseQ          |
| 11386 | chrY | 10011617 | . | G | A   | 133.91   | my_snp_filter | AC=3;AF=0.043;AN=70;BaseQ          |
| 11387 | chrY | 10011625 | . | C | T   | 518.06   | my_snp_filter | AC=2;AF=0.029;AN=70;BaseQ          |
| 11388 | chrY | 10011648 | . | T | G   | 34689.06 | PASS          | AC=32;AF=0.471;AN=68;BaseQ         |
| 11389 | chrY | 10011673 | . | G | A   | 77287.94 | PASS          | AC=35;AF=0.515;AN=68;BaseQ         |
| 11390 | chrY | 10011677 | . | G | A   | 87547.36 | PASS          | AC=35;AF=0.515;AN=68;BaseQ         |
| 11391 | chrY | 10011678 | . | T | C   | 3332.94  | PASS          | AC=12;AF=0.171;AN=70;BaseQRankSum= |
| 11392 | chrY | 10011697 | . | G | T   | 1529.18  | my_snp_filter | AC=17;AF=0.243;AN=70;BaseQ         |
| 11393 | chrY | 10011698 | . | A | G   | 20771.53 | PASS          | AC=34;AF=0.486;AN=70;BaseQ         |
| 11394 | chrY | 10011723 | . | G | A   | 4370.62  | PASS          | AC=12;AF=0.171;AN=70;BaseQRankSum= |
| 11395 | chrY | 10011724 | . | G | A   | 58378.60 | PASS          | AC=36;AF=0.514;AN=70;BaseQ         |
| 11396 | chrY | 10011746 | . | G | C   | 4978.63  | PASS          | AC=14;AF=0.200;AN=70;BaseQRankSum= |
| 11397 | chrY | 10011762 | . | A | G   | 51054.92 | PASS          | AC=34;AF=0.486;AN=70;BaseQ         |
| 11398 | chrY | 10011766 | . | C | T,A | 5260.96  | PASS          | AC=7,12;AF=0.100,0.171;AN=70;BaseQ |
| 11399 | chrY | 10011768 | . | C | T   | 4740.12  | PASS          | AC=12;AF=0.171;AN=70;BaseQRankSum= |
| 11400 | chrY | 10011769 | . | C | T   | 4913.05  | PASS          | AC=9;AF=0.129;AN=70;BaseQRankSum=  |

|       |      |          |   |   |       |          |               |                                                   |
|-------|------|----------|---|---|-------|----------|---------------|---------------------------------------------------|
| 11401 | chrY | 10011839 | . | A | C     | 74894.34 | PASS          | AC=47;AF=0.671;AN=70;BaseQRankSum=                |
| 11402 | chrY | 10011857 | . | A | G     | 15028.10 | PASS          | AC=34;AF=0.486;AN=70;BaseQRankSum=                |
| 11403 | chrY | 10011878 | . | G | A     | 6379.92  | PASS          | AC=22;AF=0.314;AN=70;BaseQRankSum=                |
| 11404 | chrY | 10011923 | . | T | G     | 591.72   | my_snp_filter | AC=13;AF=0.186;AN=70;BaseQRankSum=                |
| 11405 | chrY | 10011931 | . | C | A     | 91475.74 | PASS          | AC=56;AF=0.800;AN=70;BaseQRankSum=                |
| 11406 | chrY | 10011960 | . | T | C     | 2352.80  | PASS          | AC=24;AF=0.343;AN=70;BaseQRankSum=                |
| 11407 | chrY | 10011992 | . | A | G     | 201.52   | PASS          | AC=5;AF=0.071;AN=70;BaseQRankSum=                 |
| 11408 | chrY | 10011999 | . | C | A     | 221.52   | my_snp_filter | AC=2;AF=0.029;AN=70;BaseQRankSum=                 |
| 11409 | chrY | 10012012 | . | T | A     | 43572.67 | PASS          | AC=42;AF=0.600;AN=70;BaseQRankSum=                |
| 11410 | chrY | 10012034 | . | A | G     | 2596.53  | PASS          | AC=19;AF=0.271;AN=70;BaseQRankSum=                |
| 11411 | chrY | 10012062 | . | A | G     | 7137.84  | PASS          | AC=30;AF=0.429;AN=70;BaseQRankSum=                |
| 11412 | chrY | 10012068 | . | A | T     | 7053.48  | PASS          | AC=30;AF=0.429;AN=70;BaseQRankSum=                |
| 11413 | chrY | 10012071 | . | G | C     | 51425.19 | PASS          | AC=39;AF=0.557;AN=70;BaseQRankSum=                |
| 11414 | chrY | 10012098 | . | G | C     | 48927.55 | PASS          | AC=36;AF=0.514;AN=70;BaseQRankSum=                |
| 11415 | chrY | 10012104 | . | C | T     | 463.82   | my_snp_filter | AC=9;AF=0.129;AN=70;BaseQRankSum=                 |
| 11416 | chrY | 10012109 | . | T | C     | 36655.86 | PASS          | AC=35;AF=0.500;AN=70;BaseQRankSum=                |
| 11417 | chrY | 10012110 | . | G | A     | 77.43    | PASS          | AC=1;AF=0.014;AN=70;BaseQRankSum=                 |
| 11418 | chrY | 10012116 | . | C | T     | 141.54   | PASS          | AC=2;AF=0.029;AN=70;BaseQRankSum=                 |
| 11419 | chrY | 10012117 | . | G | A     | 1767.97  | PASS          | AC=17;AF=0.243;AN=70;BaseQRankSum=                |
| 11420 | chrY | 10012138 | . | A | G     | 33275.86 | my_snp_filter | AC=35;AF=0.500;AN=70;BaseQRankSum=                |
| 11421 | chrY | 10012140 | . | A | G     | 33078.86 | my_snp_filter | AC=35;AF=0.500;AN=70;BaseQRankSum=                |
| 11422 | chrY | 10012141 | . | G | A     | 32319.86 | my_snp_filter | AC=35;AF=0.500;AN=70;BaseQRankSum=                |
| 11423 | chrY | 10012164 | . | C | G     | 7572.50  | my_snp_filter | AC=23;AF=0.371;AN=62;BaseQRankSum=                |
| 11424 | chrY | 10012165 | . | G | A     | 133.58   | my_snp_filter | AC=6;AF=0.086;AN=70;BaseQRankSum=                 |
| 11425 | chrY | 10012168 | . | T | C     | 10049.01 | my_snp_filter | AC=25;AF=0.368;AN=70;BaseQRankSum=                |
| 11426 | chrY | 10012169 | . | G | A     | 1654.85  | PASS          | AC=14;AF=0.200;AN=70;BaseQRankSum=                |
| 11427 | chrY | 10012176 | . | C | T     | 613.85   | PASS          | AC=8;AF=0.114;AN=70;BaseQRankSum=                 |
| 11428 | chrY | 10012178 | . | C | G     | 4216.67  | my_snp_filter | AC=16;AF=0.235;AN=68;BaseQRankSum=                |
| 11429 | chrY | 10012186 | . | C | A     | 4986.96  | my_snp_filter | AC=19;AF=0.288;AN=66;BaseQRankSum=                |
| 11430 | chrY | 10012189 | . | T | G     | 4638.50  | my_snp_filter | AC=20;AF=0.294;AN=68;BaseQRankSum=                |
| 11431 | chrY | 10012207 | . | A | G     | 40.12    | my_snp_filter | AC=2;AF=0.029;AN=70;BaseQRankSum=                 |
| 11432 | chrY | 10012209 | . | T | C     | 703.30   | my_snp_filter | AC=9;AF=0.129;AN=70;BaseQRankSum=                 |
| 11433 | chrY | 10012314 | . | A | T     | 134.17   | PASS          | AC=3;AF=0.043;AN=70;BaseQRankSum=                 |
| 11434 | chrY | 10012349 | . | G | C     | 456.67   | PASS          | AC=5;AF=0.076;AN=66;BaseQRankSum=                 |
| 11435 | chrY | 10012354 | . | G | A     | 160      | PASS          | AC=4;AF=0.059;AN=68;BaseQRankSum=                 |
| 11436 | chrY | 10012395 | . | G | A     | 188.03   | PASS          | AC=3;AF=0.044;AN=68;BaseQRankSum=                 |
| 11437 | chrY | 10012404 | . | T | C     | 135.18   | PASS          | AC=2;AF=0.029;AN=68;BaseQRankSum=                 |
| 11438 | chrY | 10012414 | . | A | G     | 112.56   | PASS          | AC=2;AF=0.029;AN=68;BaseQRankSum=                 |
| 11439 | chrY | 10012449 | . | A | G     | 597.88   | PASS          | AC=6;AF=0.091;AN=66;BaseQRankSum=                 |
| 11440 | chrY | 10012458 | . | G | A     | 740.94   | PASS          | AC=6;AF=0.091;AN=66;BaseQRankSum=                 |
| 11441 | chrY | 10012471 | . | C | A     | 1873.26  | my_snp_filter | AC=9;AF=0.136;AN=66;BaseQRankSum=                 |
| 11442 | chrY | 10012475 | . | A | C     | 2491.56  | my_snp_filter | AC=10;AF=0.152;AN=66;BaseQRankSum=                |
| 11443 | chrY | 10012544 | . | G | A     | 540.03   | PASS          | AC=6;AF=0.088;AN=68;BaseQRankSum=                 |
| 11444 | chrY | 10012545 | . | A | T     | 538.37   | PASS          | AC=6;AF=0.088;AN=68;BaseQRankSum=                 |
| 11445 | chrY | 10012568 | . | G | A     | 135.16   | my_snp_filter | AC=3;AF=0.044;AN=68;BaseQRankSum=                 |
| 11446 | chrY | 10012575 | . | C | G     | 3218.59  | PASS          | AC=21;AF=0.300;AN=70;BaseQRankSum=                |
| 11447 | chrY | 10012587 | . | G | A     | 969.32   | PASS          | AC=11;AF=0.157;AN=70;BaseQRankSum=                |
| 11448 | chrY | 10012592 | . | G | C     | 29914.08 | PASS          | AC=33;AF=0.485;AN=68;BaseQRankSum=                |
| 11449 | chrY | 10012600 | . | T | G     | 39882.17 | PASS          | AC=34;AF=0.500;AN=68;BaseQRankSum=                |
| 11450 | chrY | 10012601 | . | T | G     | 31566.75 | PASS          | AC=32;AF=0.471;AN=68;BaseQRankSum=                |
| 11451 | chrY | 10012612 | . | C | T     | 1002.14  | my_snp_filter | AC=10;AF=0.143;AN=70;BaseQRankSum=                |
| 11452 | chrY | 10012613 | . | C | T     | 31832.65 | PASS          | AC=32;AF=0.457;AN=70;BaseQRankSum=                |
| 11453 | chrY | 10012614 | . | C | T     | 8854.47  | PASS          | AC=28;AF=0.400;AN=70;BaseQRankSum=                |
| 11454 | chrY | 10012615 | . | G | A     | 1759.67  | PASS          | AC=14;AF=0.200;AN=70;BaseQRankSum=                |
| 11455 | chrY | 10012630 | . | G | T     | 1820.53  | PASS          | AC=13;AF=0.186;AN=70;BaseQRankSum=                |
| 11456 | chrY | 10012633 | . | T | C     | 1287.33  | PASS          | AC=11;AF=0.157;AN=70;BaseQRankSum=                |
| 11457 | chrY | 10012644 | . | A | T     | 180.26   | my_snp_filter | AC=6;AF=0.086;AN=70;BaseQRankSum=                 |
| 11458 | chrY | 10012649 | . | C | A,G,T | 522.52   | PASS          | AC=6,1,1;AF=0.086,0.014,0.014;AN=70;BaseQRankSum= |
| 11459 | chrY | 10012650 | . | A | G     | 31471.01 | PASS          | AC=38;AF=0.559;AN=68;BaseQRankSum=                |
| 11460 | chrY | 10012662 | . | A | G     | 33916.09 | PASS          | AC=37;AF=0.544;AN=68;BaseQRankSum=                |
| 11461 | chrY | 10012669 | . | G | A     | 2802.67  | PASS          | AC=19;AF=0.271;AN=70;BaseQRankSum=                |
| 11462 | chrY | 10012671 | . | C | A,G   | 864.65   | PASS          | AC=5,4;AF=0.071,0.057;AN=70;BaseQRankSum=         |
| 11463 | chrY | 10012674 | . | G | A     | 1745.62  | PASS          | AC=17;AF=0.243;AN=70;BaseQRankSum=                |
| 11464 | chrY | 10012680 | . | G | A     | 4606.54  | PASS          | AC=23;AF=0.329;AN=70;BaseQRankSum=                |
| 11465 | chrY | 10012684 | . | C | G     | 848.76   | PASS          | AC=7;AF=0.100;AN=70;BaseQRankSum=                 |
| 11466 | chrY | 10012701 | . | C | T     | 1602.43  | PASS          | AC=7;AF=0.100;AN=70;BaseQRankSum=                 |
| 11467 | chrY | 10012704 | . | G | T     | 18227.03 | PASS          | AC=33;AF=0.471;AN=70;BaseQRankSum=                |
| 11468 | chrY | 10012712 | . | A | G     | 2555.51  | PASS          | AC=17;AF=0.250;AN=68;BaseQRankSum=                |
| 11469 | chrY | 10012727 | . | C | A     | 426.46   | my_snp_filter | AC=9;AF=0.129;AN=70;BaseQRankSum=                 |
| 11470 | chrY | 10012728 | . | G | A     | 25813.61 | PASS          | AC=32;AF=0.471;AN=68;BaseQRankSum=                |
| 11471 | chrY | 10012731 | . | A | G     | 69.24    | PASS          | AC=1;AF=0.014;AN=70;BaseQRankSum=                 |
| 11472 | chrY | 10012737 | . | C | G     | 26545.93 | PASS          | AC=32;AF=0.471;AN=68;BaseQRankSum=                |
| 11473 | chrY | 10012749 | . | G | T     | 87.57    | my_snp_filter | AC=3;AF=0.043;AN=70;BaseQRankSum=                 |
| 11474 | chrY | 10012758 | . | T | C     | 145.72   | my_snp_filter | AC=3;AF=0.043;AN=70;BaseQRankSum=                 |
| 11475 | chrY | 10012765 | . | C | T     | 369.40   | my_snp_filter | AC=6;AF=0.086;AN=70;BaseQRankSum=                 |
| 11476 | chrY | 10012777 | . | C | T     | 99.44    | PASS          | AC=1;AF=0.014;AN=70;BaseQRankSum=                 |

|       |      |          |   |   |       |          |               |                                    |
|-------|------|----------|---|---|-------|----------|---------------|------------------------------------|
| 11477 | chrY | 10012779 | . | C | T     | 273.30   | PASS          | AC=2;AF=0.029;AN=70;BaseQRankSum=  |
| 11478 | chrY | 10012787 | . | T | C     | 315.78   | PASS          | AC=2;AF=0.029;AN=70;BaseQRankSum=  |
| 11479 | chrY | 10012788 | . | T | C     | 315.69   | PASS          | AC=2;AF=0.029;AN=70;BaseQRankSum=  |
| 11480 | chrY | 10012789 | . | C | A     | 983.62   | my_snp_filter | AC=10;AF=0.143;AN=70;BaseQ         |
| 11481 | chrY | 10012792 | . | G | T     | 148.85   | my_snp_filter | AC=6;AF=0.086;AN=70;BaseQ          |
| 11482 | chrY | 10012801 | . | C | T     | 456.23   | PASS          | AC=9;AF=0.129;AN=70;BaseQRankSum=  |
| 11483 | chrY | 10012807 | . | C | T     | 1542.71  | PASS          | AC=18;AF=0.257;AN=70;BaseQRankSum= |
| 11484 | chrY | 10012810 | . | T | A     | 941.10   | PASS          | AC=11;AF=0.157;AN=70;BaseQRankSum= |
| 11485 | chrY | 10012814 | . | T | C     | 13884.02 | PASS          | AC=27;AF=0.397;AN=68;BaseQ         |
| 11486 | chrY | 10012815 | . | C | T     | 1800.46  | PASS          | AC=14;AF=0.206;AN=68;BaseQRankSum= |
| 11487 | chrY | 10012816 | . | C | T     | 2754.58  | PASS          | AC=17;AF=0.250;AN=68;BaseQRankSum= |
| 11488 | chrY | 10012817 | . | G | T     | 630.81   | PASS          | AC=9;AF=0.129;AN=70;BaseQRankSum=  |
| 11489 | chrY | 10012824 | . | C | T     | 87.15    | my_snp_filter | AC=4;AF=0.057;AN=70;BaseQ          |
| 11490 | chrY | 10012825 | . | C | T     | 67.50    | PASS          | AC=1;AF=0.014;AN=70;BaseQRankSum=  |
| 11491 | chrY | 10012826 | . | T | G     | 29687.13 | PASS          | AC=30;AF=0.455;AN=66;BaseQ         |
| 11492 | chrY | 10012828 | . | A | G     | 69.09    | PASS          | AC=1;AF=0.014;AN=70;BaseQRankSum=  |
| 11493 | chrY | 10012838 | . | T | C,*   | 7996.90  | PASS          | AC=21,6;AF=0.328,0.094;AN=64;BaseQ |
| 11494 | chrY | 10012839 | . | T | C,G,* | 6912.69  | PASS          | AC=22,4,4;AF=0.344,0.063,0.063;AN= |
| 11495 | chrY | 10012847 | . | T | C     | 8823.28  | PASS          | AC=21;AF=0.318;AN=66;BaseQRankSum= |
| 11496 | chrY | 10012861 | . | G | T     | 35587.51 | PASS          | AC=31;AF=0.500;AN=62;BaseQ         |
| 11497 | chrY | 10012867 | . | G | C     | 35954.51 | PASS          | AC=31;AF=0.500;AN=62;BaseQ         |
| 11498 | chrY | 10012925 | . | C | T     | 1847.64  | PASS          | AC=13;AF=0.186;AN=70;BaseQRankSum= |
| 11499 | chrY | 10012931 | . | C | T     | 1843.55  | PASS          | AC=12;AF=0.171;AN=70;BaseQRankSum= |
| 11500 | chrY | 10012937 | . | C | T     | 1295.58  | PASS          | AC=14;AF=0.200;AN=70;BaseQRankSum= |
| 11501 | chrY | 10012944 | . | T | C     | 15956.64 | PASS          | AC=20;AF=0.400;AN=50;BaseQ         |
| 11502 | chrY | 10012961 | . | A | C     | 11517.27 | PASS          | AC=14;AF=0.269;AN=52;BaseQ         |
| 11503 | chrY | 10012966 | . | T | C     | 9639.39  | PASS          | AC=12;AF=0.207;AN=58;BaseQRankSum= |
| 11504 | chrY | 10012977 | . | G | C     | 7839.93  | PASS          | AC=11;AF=0.162;AN=68;BaseQRankSum= |
| 11505 | chrY | 10012981 | . | A | G     | 7429.13  | PASS          | AC=9;AF=0.132;AN=68;BaseQRankSum=  |
| 11506 | chrY | 10012985 | . | T | C     | 7389.08  | PASS          | AC=9;AF=0.129;AN=70;BaseQRankSum=  |
| 11507 | chrY | 10012993 | . | A | G     | 3487.88  | PASS          | AC=9;AF=0.129;AN=70;BaseQRankSum=  |
| 11508 | chrY | 10013011 | . | C | G     | 1615.08  | PASS          | AC=10;AF=0.143;AN=70;BaseQRankSum= |
| 11509 | chrY | 10013014 | . | C | T     | 7741.74  | PASS          | AC=13;AF=0.217;AN=60;BaseQRankSum= |
| 11510 | chrY | 10013018 | . | G | C     | 7256.44  | PASS          | AC=13;AF=0.217;AN=60;BaseQRankSum= |
| 11511 | chrY | 10013029 | . | T | G     | 5576.86  | PASS          | AC=16;AF=0.276;AN=58;BaseQRankSum= |
| 11512 | chrY | 10013058 | . | C | T     | 339.38   | my_snp_filter | AC=8;AF=0.114;AN=70;BaseQ          |
| 11513 | chrY | 10013077 | . | A | G     | 4764.20  | PASS          | AC=27;AF=0.422;AN=64;BaseQRankSum= |
| 11514 | chrY | 10013079 | . | C | T     | 981.87   | PASS          | AC=15;AF=0.214;AN=70;BaseQRankSum= |
| 11515 | chrY | 10013083 | . | G | A     | 161.94   | my_snp_filter | AC=6;AF=0.086;AN=70;BaseQ          |
| 11516 | chrY | 10013095 | . | T | C,G   | 2885.02  | PASS          | AC=7,14;AF=0.113,0.226;AN=62;BaseQ |
| 11517 | chrY | 10013106 | . | G | T     | 2879.78  | PASS          | AC=16;AF=0.242;AN=66;BaseQRankSum= |
| 11518 | chrY | 10013109 | . | A | C     | 3040.08  | PASS          | AC=16;AF=0.250;AN=64;BaseQRankSum= |
| 11519 | chrY | 10013110 | . | G | C     | 124.15   | PASS          | AC=1;AF=0.016;AN=64;BaseQRankSum=  |
| 11520 | chrY | 10013115 | . | G | T     | 1486.64  | PASS          | AC=7;AF=0.103;AN=68;BaseQRankSum=  |
| 11521 | chrY | 10013132 | . | A | G     | 3634.12  | PASS          | AC=10;AF=0.167;AN=60;BaseQRankSum= |
| 11522 | chrY | 10013138 | . | G | A     | 3566.15  | PASS          | AC=10;AF=0.185;AN=54;BaseQRankSum= |
| 11523 | chrY | 10013144 | . | G | A     | 2561.33  | PASS          | AC=9;AF=0.150;AN=60;BaseQRankSum=  |
| 11524 | chrY | 10013148 | . | G | A     | 3451.88  | PASS          | AC=10;AF=0.200;AN=50;BaseQRankSum= |
| 11525 | chrY | 10013155 | . | G | A     | 3769.39  | PASS          | AC=10;AF=0.217;AN=46;BaseQRankSum= |
| 11526 | chrY | 10013156 | . | T | C     | 4952.66  | PASS          | AC=13;AF=0.283;AN=46;BaseQRankSum= |
| 11527 | chrY | 10013164 | . | T | G     | 5563.57  | PASS          | AC=13;AF=0.342;AN=38;BaseQRankSum= |
| 11528 | chrY | 10013175 | . | C | G     | 574      | PASS          | AC=5;AF=0.071;AN=70;BaseQRankSum=  |
| 11529 | chrY | 10013187 | . | G | T     | 861.32   | PASS          | AC=9;AF=0.129;AN=70;BaseQRankSum=  |
| 11530 | chrY | 10013193 | . | G | T     | 818.35   | PASS          | AC=7;AF=0.100;AN=70;BaseQRankSum=  |
| 11531 | chrY | 10013196 | . | C | T     | 335.75   | PASS          | AC=4;AF=0.057;AN=70;BaseQRankSum=  |
| 11532 | chrY | 10013197 | . | G | A,T   | 2965.47  | PASS          | AC=16,8;AF=0.229,0.114;AN=70;BaseQ |
| 11533 | chrY | 10013198 | . | C | T     | 1091.74  | PASS          | AC=14;AF=0.200;AN=70;BaseQRankSum= |
| 11534 | chrY | 10013211 | . | C | G     | 1269.01  | PASS          | AC=18;AF=0.257;AN=70;BaseQRankSum= |
| 11535 | chrY | 10013213 | . | A | C     | 21825.47 | PASS          | AC=36;AF=0.514;AN=70;BaseQ         |
| 11536 | chrY | 10013214 | . | G | A     | 2673     | PASS          | AC=20;AF=0.286;AN=70;BaseQRankSum= |
| 11537 | chrY | 10013234 | . | G | T     | 21077.88 | PASS          | AC=36;AF=0.514;AN=70;BaseQ         |
| 11538 | chrY | 10013242 | . | G | A     | 13799.68 | PASS          | AC=34;AF=0.486;AN=70;BaseQ         |
| 11539 | chrY | 10013246 | . | T | C     | 20263.89 | PASS          | AC=36;AF=0.514;AN=70;BaseQ         |
| 11540 | chrY | 10013265 | . | A | T     | 217.79   | my_snp_filter | AC=6;AF=0.086;AN=70;BaseQ          |
| 11541 | chrY | 10013267 | . | C | A     | 1633.04  | PASS          | AC=7;AF=0.100;AN=70;BaseQRankSum=  |
| 11542 | chrY | 10013274 | . | G | A     | 23000.63 | PASS          | AC=36;AF=0.529;AN=68;BaseQ         |
| 11543 | chrY | 10013279 | . | C | T     | 1330.77  | PASS          | AC=16;AF=0.229;AN=70;BaseQRankSum= |
| 11544 | chrY | 10013285 | . | A | G     | 2301.68  | PASS          | AC=17;AF=0.243;AN=70;BaseQRankSum= |
| 11545 | chrY | 10013286 | . | C | T     | 1614.90  | PASS          | AC=19;AF=0.279;AN=68;BaseQRankSum= |
| 11546 | chrY | 10013287 | . | C | T     | 7243.38  | PASS          | AC=32;AF=0.457;AN=70;BaseQRankSum= |
| 11547 | chrY | 10013310 | . | C | T     | 1259.73  | PASS          | AC=17;AF=0.243;AN=70;BaseQRankSum= |
| 11548 | chrY | 10013318 | . | A | G     | 13657.32 | PASS          | AC=32;AF=0.471;AN=68;BaseQ         |
| 11549 | chrY | 10013328 | . | C | G     | 7371.64  | PASS          | AC=28;AF=0.424;AN=66;BaseQRankSum= |
| 11550 | chrY | 10013329 | . | A | G     | 11903.02 | my_snp_filter | AC=30;AF=0.455;AN=                 |
| 11551 | chrY | 10013342 | . | C | T     | 786.78   | PASS          | AC=13;AF=0.191;AN=68;BaseQRankSum= |
| 11552 | chrY | 10013371 | . | T | C     | 5705.22  | my_snp_filter | AC=29;AF=0.426;AN=68;BaseQ         |

|       |      |          |   |   |     |          |               |                                    |
|-------|------|----------|---|---|-----|----------|---------------|------------------------------------|
| 11553 | chrY | 10013372 | . | G | T   | 5699.22  | my_snp_filter | AC=29;AF=0.426;AN=68;BaseQ         |
| 11554 | chrY | 10013388 | . | C | T   | 2112.41  | my_snp_filter | AC=17;AF=0.266;AN=64;BaseQ         |
| 11555 | chrY | 10013393 | . | T | C   | 1744.03  | my_snp_filter | AC=13;AF=0.197;AN=66;BaseQ         |
| 11556 | chrY | 10013413 | . | C | T   | 955.26   | my_snp_filter | AC=10;AF=0.147;AN=68;BaseQ         |
| 11557 | chrY | 10013455 | . | T | C   | 89.91    | my_snp_filter | AC=3;AF=0.045;AN=66;BaseQ          |
| 11558 | chrY | 10013544 | . | A | C   | 100.60   | PASS          | AC=3;AF=0.043;AN=70;BaseQRankSum=  |
| 11559 | chrY | 10013545 | . | A | G   | 101.71   | PASS          | AC=3;AF=0.043;AN=70;BaseQRankSum=  |
| 11560 | chrY | 10013546 | . | G | C   | 103.05   | PASS          | AC=3;AF=0.043;AN=70;BaseQRankSum=  |
| 11561 | chrY | 10013566 | . | A | G   | 82.89    | PASS          | AC=3;AF=0.043;AN=70;BaseQRankSum=  |
| 11562 | chrY | 10013569 | . | G | C   | 47.28    | my_snp_filter | AC=2;AF=0.029;AN=70;BaseQ          |
| 11563 | chrY | 10013573 | . | T | C   | 80.34    | PASS          | AC=3;AF=0.043;AN=70;BaseQRankSum=  |
| 11564 | chrY | 10013581 | . | T | C   | 41.76    | my_snp_filter | AC=2;AF=0.029;AN=70;BaseQ          |
| 11565 | chrY | 10013596 | . | C | T   | 15436.64 | PASS          | AC=44;AF=0.647;AN=68;DP=7          |
| 11566 | chrY | 10013732 | . | A | G   | 90.10    | my_snp_filter | AC=2;AF=0.032;AN=62;BaseQ          |
| 11567 | chrY | 10013763 | . | G | A   | 101.87   | my_snp_filter | AC=4;AF=0.087;AN=46;BaseQ          |
| 11568 | chrY | 10013781 | . | T | C   | 257.16   | PASS          | AC=4;AF=0.091;AN=44;BaseQRankSum=  |
| 11569 | chrY | 10013800 | . | C | T   | 317.51   | PASS          | AC=4;AF=0.095;AN=42;BaseQRankSum=  |
| 11570 | chrY | 10013804 | . | C | T   | 66.14    | my_snp_filter | AC=3;AF=0.071;AN=42;BaseQ          |
| 11571 | chrY | 10013807 | . | G | A   | 69.53    | my_snp_filter | AC=3;AF=0.071;AN=42;BaseQ          |
| 11572 | chrY | 10013856 | . | A | G   | 69.25    | my_snp_filter | AC=2;AF=0.056;AN=36;BaseQ          |
| 11573 | chrY | 10013867 | . | T | C   | 135.44   | PASS          | AC=2;AF=0.059;AN=34;BaseQRankSum=  |
| 11574 | chrY | 10013870 | . | G | A   | 86.48    | PASS          | AC=1;AF=0.029;AN=34;BaseQRankSum=  |
| 11575 | chrY | 10013871 | . | T | G   | 169.54   | PASS          | AC=2;AF=0.059;AN=34;BaseQRankSum=  |
| 11576 | chrY | 10013883 | . | G | A   | 108.51   | PASS          | AC=1;AF=0.028;AN=36;BaseQRankSum=  |
| 11577 | chrY | 10013934 | . | C | T   | 181.44   | PASS          | AC=4;AF=0.083;AN=48;BaseQRankSum=  |
| 11578 | chrY | 10013949 | . | A | T   | 554.98   | PASS          | AC=6;AF=0.103;AN=58;BaseQRankSum=  |
| 11579 | chrY | 10013987 | . | G | T   | 94.99    | my_snp_filter | AC=3;AF=0.047;AN=64;BaseQ          |
| 11580 | chrY | 10014024 | . | T | C   | 528.26   | PASS          | AC=4;AF=0.061;AN=66;BaseQRankSum=  |
| 11581 | chrY | 10014026 | . | C | G   | 506.33   | PASS          | AC=4;AF=0.059;AN=68;BaseQRankSum=  |
| 11582 | chrY | 10014143 | . | G | C   | 49.48    | my_snp_filter | AC=4;AF=0.057;AN=70;BaseQ          |
| 11583 | chrY | 10014158 | . | T | C   | 137.93   | my_snp_filter | AC=6;AF=0.086;AN=70;BaseQ          |
| 11584 | chrY | 10014181 | . | A | G   | 938.68   | PASS          | AC=10;AF=0.143;AN=70;BaseQRankSum= |
| 11585 | chrY | 10014203 | . | A | G   | 173.78   | PASS          | AC=1;AF=0.016;AN=64;BaseQRankSum=  |
| 11586 | chrY | 10014214 | . | G | C   | 131.87   | my_snp_filter | AC=6;AF=0.100;AN=60;BaseQ          |
| 11587 | chrY | 10014247 | . | A | G   | 49.36    | PASS          | AC=2;AF=0.042;AN=48;DP=268;FS=0.0  |
| 11588 | chrY | 10014254 | . | T | C   | 641.54   | PASS          | AC=16;AF=0.444;AN=36;DP=256;FS=0.0 |
| 11589 | chrY | 10014260 | . | C | A   | 50.37    | PASS          | AC=2;AF=0.048;AN=42;DP=250;FS=0.0  |
| 11590 | chrY | 10014263 | . | C | A   | 1531.19  | PASS          | AC=22;AF=0.688;AN=32;BaseQRankSum= |
| 11591 | chrY | 10014264 | . | T | C   | 1531.19  | PASS          | AC=22;AF=0.688;AN=32;BaseQRankSum= |
| 11592 | chrY | 10014265 | . | G | A   | 1531.19  | PASS          | AC=22;AF=0.688;AN=32;BaseQRankSum= |
| 11593 | chrY | 10014274 | . | G | A   | 204.41   | PASS          | AC=2;AF=0.045;AN=44;BaseQRankSum=  |
| 11594 | chrY | 10014281 | . | T | A   | 197.76   | PASS          | AC=2;AF=0.043;AN=46;BaseQRankSum=  |
| 11595 | chrY | 10014300 | . | G | A   | 124.48   | my_snp_filter | AC=3;AF=0.058;AN=52;BaseQ          |
| 11596 | chrY | 10014303 | . | C | G   | 113.95   | PASS          | AC=2;AF=0.038;AN=52;BaseQRankSum=  |
| 11597 | chrY | 10014310 | . | T | C   | 103.48   | PASS          | AC=1;AF=0.019;AN=54;BaseQRankSum=  |
| 11598 | chrY | 10014318 | . | C | T   | 261.50   | PASS          | AC=2;AF=0.036;AN=56;BaseQRankSum=  |
| 11599 | chrY | 10014410 | . | A | G   | 39.90    | PASS          | AC=1;AF=0.016;AN=62;BaseQRankSum=  |
| 11600 | chrY | 10014443 | . | T | A   | 660.51   | PASS          | AC=11;AF=0.157;AN=70;BaseQRankSum= |
| 11601 | chrY | 10014445 | . | T | G   | 12388    | my_snp_filter | AC=30;AF=0.469;AN=64;BaseQ         |
| 11602 | chrY | 10014459 | . | A | C   | 18638.34 | my_snp_filter | AC=29;AF=0.453;AN=68               |
| 11603 | chrY | 10014477 | . | C | T   | 21363.25 | PASS          | AC=29;AF=0.483;AN=60;BaseQ         |
| 11604 | chrY | 10014478 | . | A | G   | 25370.25 | PASS          | AC=29;AF=0.483;AN=60;BaseQ         |
| 11605 | chrY | 10014494 | . | A | G   | 2217.84  | PASS          | AC=17;AF=0.243;AN=70;BaseQRankSum= |
| 11606 | chrY | 10014500 | . | C | T   | 2904.68  | PASS          | AC=21;AF=0.300;AN=70;BaseQRankSum= |
| 11607 | chrY | 10014508 | . | G | T   | 37579.79 | PASS          | AC=35;AF=0.500;AN=70;BaseQ         |
| 11608 | chrY | 10014509 | . | G | T   | 2119.58  | PASS          | AC=17;AF=0.243;AN=70;BaseQRankSum= |
| 11609 | chrY | 10014511 | . | A | G   | 2113.32  | PASS          | AC=17;AF=0.243;AN=70;BaseQRankSum= |
| 11610 | chrY | 10014512 | . | A | G   | 38889.72 | PASS          | AC=35;AF=0.500;AN=70;BaseQ         |
| 11611 | chrY | 10014514 | . | G | A   | 129.72   | my_snp_filter | AC=3;AF=0.043;AN=70;BaseQ          |
| 11612 | chrY | 10014517 | . | A | G   | 38578.72 | PASS          | AC=35;AF=0.500;AN=70;BaseQ         |
| 11613 | chrY | 10014518 | . | G | A   | 1711.50  | PASS          | AC=17;AF=0.243;AN=70;BaseQRankSum= |
| 11614 | chrY | 10014525 | . | C | A   | 2580.67  | PASS          | AC=21;AF=0.300;AN=70;BaseQRankSum= |
| 11615 | chrY | 10014546 | . | A | T   | 2982.85  | PASS          | AC=23;AF=0.329;AN=70;BaseQRankSum= |
| 11616 | chrY | 10014561 | . | A | G   | 38314.19 | PASS          | AC=37;AF=0.529;AN=70;BaseQ         |
| 11617 | chrY | 10014577 | . | A | G   | 791.43   | PASS          | AC=10;AF=0.143;AN=70;BaseQRankSum= |
| 11618 | chrY | 10014593 | . | A | G,T | 20414.47 | PASS          | AC=31,7;AF=0.456,0.103;AN=68       |
| 11619 | chrY | 10014606 | . | T | A   | 37.83    | my_snp_filter | AC=2;AF=0.029;AN=70;BaseQ          |
| 11620 | chrY | 10014610 | . | G | T   | 4399.16  | PASS          | AC=18;AF=0.257;AN=70;BaseQRankSum= |
| 11621 | chrY | 10014613 | . | A | G   | 41.33    | PASS          | AC=2;AF=0.029;AN=70;BaseQRankSum=  |
| 11622 | chrY | 10014627 | . | T | C   | 19975.80 | PASS          | AC=30;AF=0.441;AN=68;BaseQ         |
| 11623 | chrY | 10014639 | . | T | G   | 19472.30 | PASS          | AC=28;AF=0.412;AN=68;BaseQ         |
| 11624 | chrY | 10014640 | . | G | A   | 112.67   | my_snp_filter | AC=2;AF=0.031;AN=64;BaseQ          |
| 11625 | chrY | 10014701 | . | A | G   | 76.48    | my_snp_filter | AC=3;AF=0.043;AN=70;BaseQ          |
| 11626 | chrY | 10014714 | . | A | G   | 17921.96 | PASS          | AC=27;AF=0.422;AN=64;BaseQ         |
| 11627 | chrY | 10014729 | . | A | G   | 14689.93 | PASS          | AC=21;AF=0.318;AN=66;BaseQ         |
| 11628 | chrY | 10014734 | . | A | T   | 17262.19 | PASS          | AC=24;AF=0.387;AN=62;BaseQ         |



|       |      |          |   |   |     |           |               |                                           |
|-------|------|----------|---|---|-----|-----------|---------------|-------------------------------------------|
| 11629 | chrY | 10014738 | . | T | C   | 16029.85  | PASS          | AC=21;AF=0.318;AN=66;BaseQRankSum=        |
| 11630 | chrY | 10014741 | . | C | T   | 6072.54   | PASS          | AC=18;AF=0.265;AN=68;BaseQRankSum=        |
| 11631 | chrY | 10014744 | . | A | G   | 156.36    | PASS          | AC=3;AF=0.045;AN=66;BaseQRankSum=         |
| 11632 | chrY | 10014749 | . | A | T   | 13345.84  | PASS          | AC=18;AF=0.265;AN=68;BaseQRankSum=        |
| 11633 | chrY | 10014761 | . | G | A   | 13110.46  | PASS          | AC=18;AF=0.257;AN=70;BaseQRankSum=        |
| 11634 | chrY | 10014766 | . | A | C   | 4985.35   | PASS          | AC=12;AF=0.171;AN=70;BaseQRankSum=        |
| 11635 | chrY | 10014768 | . | T | C   | 587.90    | my_snp_filter | AC=9;AF=0.129;AN=70;BaseQRankSum=         |
| 11636 | chrY | 10014779 | . | G | A   | 460.47    | my_snp_filter | AC=9;AF=0.129;AN=70;BaseQRankSum=         |
| 11637 | chrY | 10014784 | . | G | C   | 13827.50  | PASS          | AC=23;AF=0.338;AN=68;BaseQRankSum=        |
| 11638 | chrY | 10014805 | . | T | A   | 2731.08   | PASS          | AC=15;AF=0.214;AN=70;BaseQRankSum=        |
| 11639 | chrY | 10014819 | . | T | A   | 782.31    | PASS          | AC=8;AF=0.114;AN=70;BaseQRankSum=         |
| 11640 | chrY | 10014826 | . | G | T   | 205.76    | PASS          | AC=3;AF=0.043;AN=70;BaseQRankSum=         |
| 11641 | chrY | 10014843 | . | G | A   | 2628.55   | PASS          | AC=6;AF=0.120;AN=50;BaseQRankSum=         |
| 11642 | chrY | 10014844 | . | G | T   | 254.17    | PASS          | AC=3;AF=0.043;AN=70;BaseQRankSum=         |
| 11643 | chrY | 10014845 | . | G | A   | 444.66    | PASS          | AC=3;AF=0.043;AN=70;BaseQRankSum=         |
| 11644 | chrY | 10014846 | . | G | A   | 61.08     | my_snp_filter | AC=1;AF=0.014;AN=70;BaseQRankSum=         |
| 11645 | chrY | 10014850 | . | C | T   | 90.42     | PASS          | AC=3;AF=0.044;AN=68;BaseQRankSum=         |
| 11646 | chrY | 10014851 | . | A | G   | 397.03    | PASS          | AC=8;AF=0.125;AN=64;BaseQRankSum=         |
| 11647 | chrY | 10014859 | . | A | G   | 341.46    | PASS          | AC=5;AF=0.071;AN=70;BaseQRankSum=         |
| 11648 | chrY | 10014860 | . | C | T   | 211.96    | PASS          | AC=3;AF=0.043;AN=70;BaseQRankSum=         |
| 11649 | chrY | 10014865 | . | G | T   | 2590.81   | PASS          | AC=5;AF=0.104;AN=48;BaseQRankSum=         |
| 11650 | chrY | 10014876 | . | G | A   | 224.38    | PASS          | AC=3;AF=0.047;AN=64;BaseQRankSum=         |
| 11651 | chrY | 10014879 | . | G | A   | 430.69    | PASS          | AC=2;AF=0.032;AN=62;BaseQRankSum=         |
| 11652 | chrY | 10014880 | . | C | A,T | 537.72    | PASS          | AC=3,3;AF=0.048,0.048;AN=62;BaseQRankSum= |
| 11653 | chrY | 10014886 | . | C | T   | 2067.32   | PASS          | AC=4;AF=0.080;AN=50;BaseQRankSum=         |
| 11654 | chrY | 10014887 | . | A | T   | 52.76     | PASS          | AC=1;AF=0.019;AN=54;BaseQRankSum=         |
| 11655 | chrY | 10014909 | . | A | T   | 1448.70   | PASS          | AC=5;AF=0.096;AN=52;BaseQRankSum=         |
| 11656 | chrY | 10014924 | . | C | T   | 1336.55   | PASS          | AC=4;AF=0.077;AN=52;BaseQRankSum=         |
| 11657 | chrY | 10014944 | . | G | T   | 1116.34   | PASS          | AC=2;AF=0.043;AN=46;BaseQRankSum=         |
| 11658 | chrY | 10014984 | . | A | T   | 295.49    | PASS          | AC=1;AF=0.045;AN=22;BaseQRankSum=         |
| 11659 | chrY | 10015136 | . | T | C   | 2915.83   | my_snp_filter | AC=9;AF=0.300;AN=30;BaseQRankSum=         |
| 11660 | chrY | 10015143 | . | A | G   | 2768.51   | my_snp_filter | AC=9;AF=0.281;AN=32;BaseQRankSum=         |
| 11661 | chrY | 10015151 | . | C | T   | 2992.81   | my_snp_filter | AC=9;AF=0.265;AN=34;BaseQRankSum=         |
| 11662 | chrY | 10015181 | . | C | G   | 4091.21   | my_snp_filter | AC=11;AF=0.229;AN=48;BaseQRankSum=        |
| 11663 | chrY | 10015192 | . | A | G   | 1952.75   | PASS          | AC=6;AF=0.136;AN=44;BaseQRankSum=         |
| 11664 | chrY | 10015203 | . | G | T   | 2231.92   | PASS          | AC=9;AF=0.141;AN=64;BaseQRankSum=         |
| 11665 | chrY | 10015215 | . | C | T   | 56.71     | my_snp_filter | AC=1;AF=0.014;AN=70;BaseQRankSum=         |
| 11666 | chrY | 10015217 | . | G | C   | 9447.30   | PASS          | AC=10;AF=0.500;AN=20;BaseQRankSum=        |
| 11667 | chrY | 10015221 | . | A | T   | 1842.86   | PASS          | AC=7;AF=0.100;AN=70;BaseQRankSum=         |
| 11668 | chrY | 10015232 | . | T | C   | 10073.30  | PASS          | AC=10;AF=0.500;AN=20;BaseQRankSum=        |
| 11669 | chrY | 10015233 | . | G | A   | 1595.36   | PASS          | AC=5;AF=0.132;AN=38;BaseQRankSum=         |
| 11670 | chrY | 10015248 | . | C | T   | 6690.90   | PASS          | AC=10;AF=0.208;AN=48;BaseQRankSum=        |
| 11671 | chrY | 10015251 | . | A | C   | 395.49    | my_snp_filter | AC=6;AF=0.086;AN=70;BaseQRankSum=         |
| 11672 | chrY | 10015274 | . | G | A   | 3547.98   | PASS          | AC=20;AF=0.286;AN=70;BaseQRankSum=        |
| 11673 | chrY | 10015275 | . | T | C   | 60400.29  | PASS          | AC=38;AF=0.543;AN=70;BaseQRankSum=        |
| 11674 | chrY | 10015280 | . | G | T   | 63550.23  | PASS          | AC=37;AF=0.529;AN=70;BaseQRankSum=        |
| 11675 | chrY | 10015282 | . | A | G   | 3155.21   | PASS          | AC=23;AF=0.329;AN=70;BaseQRankSum=        |
| 11676 | chrY | 10015284 | . | C | T   | 6987.10   | PASS          | AC=29;AF=0.414;AN=70;BaseQRankSum=        |
| 11677 | chrY | 10015285 | . | T | C   | 66277.91  | PASS          | AC=36;AF=0.514;AN=70;BaseQRankSum=        |
| 11678 | chrY | 10015305 | . | G | A   | 3010.25   | my_snp_filter | AC=23;AF=0.329;AN=70;BaseQRankSum=        |
| 11679 | chrY | 10015319 | . | A | G   | 6813.43   | PASS          | AC=17;AF=0.243;AN=70;BaseQRankSum=        |
| 11680 | chrY | 10015332 | . | C | T   | 8087.02   | PASS          | AC=18;AF=0.257;AN=70;BaseQRankSum=        |
| 11681 | chrY | 10015336 | . | C | T   | 122965.10 | PASS          | AC=37;AF=0.529;AN=70;BaseQRankSum=        |
| 11682 | chrY | 10015342 | . | T | C   | 125240.95 | PASS          | AC=35;AF=0.500;AN=70;BaseQRankSum=        |
| 11683 | chrY | 10015344 | . | G | A   | 9820.23   | PASS          | AC=21;AF=0.300;AN=70;BaseQRankSum=        |
| 11684 | chrY | 10015365 | . | A | C   | 11339.51  | PASS          | AC=22;AF=0.314;AN=70;BaseQRankSum=        |
| 11685 | chrY | 10015372 | . | G | C   | 11179.85  | PASS          | AC=22;AF=0.314;AN=70;BaseQRankSum=        |
| 11686 | chrY | 10015377 | . | T | C   | 113554.03 | PASS          | AC=38;AF=0.543;AN=70;BaseQRankSum=        |
| 11687 | chrY | 10015399 | . | T | C   | 1990.23   | my_snp_filter | AC=15;AF=0.214;AN=70;BaseQRankSum=        |
| 11688 | chrY | 10015409 | . | C | T   | 794.39    | PASS          | AC=4;AF=0.057;AN=70;BaseQRankSum=         |
| 11689 | chrY | 10015413 | . | A | C   | 124519.19 | PASS          | AC=37;AF=0.529;AN=70;BaseQRankSum=        |
| 11690 | chrY | 10015416 | . | T | C   | 94588.72  | PASS          | AC=35;AF=0.500;AN=70;BaseQRankSum=        |
| 11691 | chrY | 10015434 | . | G | C   | 5620.14   | my_snp_filter | AC=29;AF=0.414;AN=70;BaseQRankSum=        |
| 11692 | chrY | 10015452 | . | C | T   | 311.71    | my_snp_filter | AC=5;AF=0.071;AN=70;BaseQRankSum=         |
| 11693 | chrY | 10015456 | . | C | T   | 3500.37   | my_snp_filter | AC=23;AF=0.329;AN=70;BaseQRankSum=        |
| 11694 | chrY | 10015461 | . | C | T   | 3419.75   | my_snp_filter | AC=24;AF=0.343;AN=70;BaseQRankSum=        |
| 11695 | chrY | 10015474 | . | A | C   | 17988.72  | PASS          | AC=35;AF=0.500;AN=70;BaseQRankSum=        |
| 11696 | chrY | 10015487 | . | G | T   | 53567.76  | PASS          | AC=40;AF=0.571;AN=70;BaseQRankSum=        |
| 11697 | chrY | 10015495 | . | C | T   | 401.92    | my_snp_filter | AC=8;AF=0.114;AN=70;BaseQRankSum=         |
| 11698 | chrY | 10015518 | . | T | A   | 142.25    | my_snp_filter | AC=2;AF=0.029;AN=70;BaseQRankSum=         |
| 11699 | chrY | 10015536 | . | T | C   | 40352.65  | PASS          | AC=27;AF=0.397;AN=68;BaseQRankSum=        |
| 11700 | chrY | 10015537 | . | G | C   | 724.23    | PASS          | AC=2;AF=0.029;AN=70;BaseQRankSum=         |
| 11701 | chrY | 10015546 | . | C | G   | 39903.86  | PASS          | AC=20;AF=0.294;AN=68;BaseQRankSum=        |
| 11702 | chrY | 10015547 | . | A | G   | 887.95    | my_snp_filter | AC=8;AF=0.118;AN=68;BaseQRankSum=         |
| 11703 | chrY | 10015550 | . | T | C   | 39903.19  | PASS          | AC=18;AF=0.273;AN=66;BaseQRankSum=        |
| 11704 | chrY | 10015556 | . | G | A   | 668.63    | PASS          | AC=2;AF=0.029;AN=70;BaseQRankSum=         |

|       |      |          |   |   |     |           |               |                                   |
|-------|------|----------|---|---|-----|-----------|---------------|-----------------------------------|
| 11705 | chrY | 10015560 | . | C | T   | 3779.16   | PASS          | AC=10;AF=0.143;AN=70;BaseQRankSum |
| 11706 | chrY | 10015565 | . | A | G   | 40814.30  | PASS          | AC=19;AF=0.396;AN=48;BaseQ        |
| 11707 | chrY | 10015566 | . | T | C   | 40583.94  | PASS          | AC=19;AF=0.396;AN=48;BaseQ        |
| 11708 | chrY | 10015636 | . | T | C   | 21647.92  | PASS          | AC=31;AF=0.443;AN=70;BaseQ        |
| 11709 | chrY | 10015668 | . | C | G   | 71679.58  | PASS          | AC=34;AF=0.486;AN=70;BaseQ        |
| 11710 | chrY | 10015674 | . | A | G   | 72900.61  | PASS          | AC=35;AF=0.500;AN=70;BaseQ        |
| 11711 | chrY | 10015690 | . | T | C   | 7404.18   | PASS          | AC=22;AF=0.314;AN=70;BaseQRankSum |
| 11712 | chrY | 10015704 | . | A | G,T | 82290.47  | PASS          | AC=33,8;AF=0.485,0.118;AN=        |
| 11713 | chrY | 10015706 | . | G | A   | 1186.58   | PASS          | AC=2;AF=0.029;AN=70;BaseQRankSum  |
| 11714 | chrY | 10015711 | . | C | T   | 6513.19   | PASS          | AC=21;AF=0.300;AN=70;BaseQRankSum |
| 11715 | chrY | 10015712 | . | G | A   | 1069.52   | PASS          | AC=3;AF=0.043;AN=70;BaseQRankSum  |
| 11716 | chrY | 10015728 | . | T | A   | 86703.53  | PASS          | AC=34;AF=0.486;AN=70;BaseQ        |
| 11717 | chrY | 10015729 | . | C | A   | 73021.72  | PASS          | AC=34;AF=0.486;AN=70;BaseQ        |
| 11718 | chrY | 10015733 | . | A | C   | 105009.72 | PASS          | AC=35;AF=0.500;AN=70;BaseQ        |
| 11719 | chrY | 10015738 | . | A | G   | 105177.72 | PASS          | AC=35;AF=0.500;AN=70;BaseQ        |
| 11720 | chrY | 10015745 | . | C | T   | 387.88    | my_snp_filter | AC=6;AF=0.086;AN=70;BaseQ         |
| 11721 | chrY | 10015746 | . | C | T   | 19321.88  | PASS          | AC=27;AF=0.386;AN=70;BaseQ        |
| 11722 | chrY | 10015747 | . | A | G   | 23363.70  | PASS          | AC=28;AF=0.400;AN=70;BaseQ        |
| 11723 | chrY | 10015749 | . | T | A   | 387.83    | my_snp_filter | AC=6;AF=0.086;AN=70;BaseQ         |
| 11724 | chrY | 10015762 | . | C | T   | 18219.66  | PASS          | AC=27;AF=0.386;AN=70;BaseQ        |
| 11725 | chrY | 10015767 | . | A | T   | 543.28    | my_snp_filter | AC=7;AF=0.100;AN=70;BaseQ         |
| 11726 | chrY | 10015776 | . | A | G   | 114424.72 | PASS          | AC=35;AF=0.500;AN=70;BaseQ        |
| 11727 | chrY | 10015782 | . | C | T   | 882.41    | my_snp_filter | AC=7;AF=0.100;AN=70;BaseQ         |
| 11728 | chrY | 10015784 | . | C | T,A | 14190.54  | PASS          | AC=20,10;AF=0.286,0.143;AN=       |
| 11729 | chrY | 10015789 | . | T | C   | 89630.53  | PASS          | AC=34;AF=0.486;AN=70;BaseQ        |
| 11730 | chrY | 10015793 | . | C | T   | 9332.79   | PASS          | AC=22;AF=0.314;AN=70;BaseQRankSum |
| 11731 | chrY | 10015794 | . | G | A   | 94521.53  | PASS          | AC=34;AF=0.486;AN=70;BaseQ        |
| 11732 | chrY | 10015802 | . | C | T   | 11056.58  | PASS          | AC=23;AF=0.329;AN=70;BaseQ        |
| 11733 | chrY | 10015806 | . | G | A   | 15640.45  | PASS          | AC=25;AF=0.368;AN=68;BaseQ        |
| 11734 | chrY | 10015809 | . | T | C   | 81489.53  | PASS          | AC=34;AF=0.486;AN=70;BaseQ        |
| 11735 | chrY | 10015816 | . | T | G   | 1051.42   | PASS          | AC=2;AF=0.029;AN=70;BaseQRankSum  |
| 11736 | chrY | 10015821 | . | T | C   | 110285.72 | PASS          | AC=35;AF=0.500;AN=70;BaseQ        |
| 11737 | chrY | 10015823 | . | C | T   | 4354.27   | PASS          | AC=16;AF=0.229;AN=70;BaseQRankSum |
| 11738 | chrY | 10015825 | . | C | T   | 15615.10  | PASS          | AC=26;AF=0.371;AN=70;BaseQ        |
| 11739 | chrY | 10015826 | . | G | A   | 521.65    | my_snp_filter | AC=6;AF=0.086;AN=70;BaseQ         |
| 11740 | chrY | 10015832 | . | T | C   | 119903.72 | PASS          | AC=35;AF=0.500;AN=70;BaseQ        |
| 11741 | chrY | 10015835 | . | C | T   | 120723.72 | PASS          | AC=35;AF=0.500;AN=70;BaseQ        |
| 11742 | chrY | 10015845 | . | C | G   | 218.39    | my_snp_filter | AC=6;AF=0.086;AN=70;BaseQ         |
| 11743 | chrY | 10015850 | . | C | T   | 1177.89   | PASS          | AC=4;AF=0.057;AN=70;BaseQRankSum  |
| 11744 | chrY | 10015851 | . | T | C   | 5617.70   | PASS          | AC=17;AF=0.243;AN=70;BaseQRankSum |
| 11745 | chrY | 10015864 | . | G | T   | 6524.69   | PASS          | AC=20;AF=0.286;AN=70;BaseQRankSum |
| 11746 | chrY | 10015865 | . | T | C   | 149143.72 | PASS          | AC=35;AF=0.500;AN=70;BaseQ        |
| 11747 | chrY | 10015876 | . | T | A   | 9168.88   | PASS          | AC=21;AF=0.300;AN=70;BaseQRankSum |
| 11748 | chrY | 10015885 | . | A | G   | 206974.84 | PASS          | AC=36;AF=0.514;AN=70;BaseQ        |
| 11749 | chrY | 10015886 | . | T | G   | 1800.14   | my_snp_filter | AC=7;AF=0.100;AN=70;BaseQ         |
| 11750 | chrY | 10015890 | . | C | A   | 8915.21   | PASS          | AC=21;AF=0.300;AN=70;BaseQRankSum |
| 11751 | chrY | 10015891 | . | G | T,A | 1905.94   | my_snp_filter | AC=5,3;AF=0.071,0.043;AN=         |
| 11752 | chrY | 10015903 | . | T | A   | 4055.52   | my_snp_filter | AC=17;AF=0.243;AN=70;BaseQ        |
| 11753 | chrY | 10015905 | . | C | T   | 20096.04  | PASS          | AC=29;AF=0.414;AN=70;BaseQ        |
| 11754 | chrY | 10015917 | . | A | T   | 20909.03  | PASS          | AC=29;AF=0.414;AN=70;BaseQ        |
| 11755 | chrY | 10015920 | . | C | T   | 19997.03  | PASS          | AC=29;AF=0.414;AN=70;BaseQ        |
| 11756 | chrY | 10015926 | . | G | A   | 99622.72  | PASS          | AC=35;AF=0.500;AN=70;BaseQ        |
| 11757 | chrY | 10015941 | . | C | T   | 6341.76   | my_snp_filter | AC=21;AF=0.300;AN=70;BaseQ        |
| 11758 | chrY | 10015943 | . | T | C   | 16916.59  | PASS          | AC=29;AF=0.414;AN=70;BaseQ        |
| 11759 | chrY | 10015966 | . | G | A   | 163859.72 | PASS          | AC=35;AF=0.500;AN=70;BaseQ        |
| 11760 | chrY | 10015980 | . | C | G   | 45980.72  | PASS          | AC=35;AF=0.500;AN=70;BaseQ        |
| 11761 | chrY | 10015988 | . | T | C   | 213360.29 | PASS          | AC=37;AF=0.529;AN=70;BaseQ        |
| 11762 | chrY | 10015989 | . | G | A   | 4318.67   | my_snp_filter | AC=22;AF=0.314;AN=70;BaseQ        |
| 11763 | chrY | 10016006 | . | T | A,C | 192293.42 | PASS          | AC=33,35;AF=0.471,0.500;AN=       |
| 11764 | chrY | 10016013 | . | G | A   | 29275.53  | PASS          | AC=34;AF=0.486;AN=70;BaseQ        |
| 11765 | chrY | 10016035 | . | G | T   | 431.42    | PASS          | AC=1;AF=0.014;AN=70;BaseQRankSum  |
| 11766 | chrY | 10016036 | . | G | C   | 2106.88   | PASS          | AC=12;AF=0.171;AN=70;BaseQRankSum |
| 11767 | chrY | 10016044 | . | T | C   | 36937.67  | PASS          | AC=12;AF=0.500;AN=24;BaseQ        |
| 11768 | chrY | 10016051 | . | T | C   | 29729.10  | PASS          | AC=12;AF=0.261;AN=46;BaseQ        |
| 11769 | chrY | 10016061 | . | T | C   | 1150.26   | PASS          | AC=4;AF=0.057;AN=70;BaseQRankSum  |
| 11770 | chrY | 10016066 | . | T | C   | 729.52    | PASS          | AC=5;AF=0.104;AN=48;BaseQRankSum  |
| 11771 | chrY | 10016067 | . | C | T   | 326.07    | PASS          | AC=2;AF=0.059;AN=34;BaseQRankSum  |
| 11772 | chrY | 10016077 | . | C | A,* | 4670.74   | PASS          | AC=1,3;AF=0.045,0.136;AN=22;BaseQ |
| 11773 | chrY | 10016100 | . | G | C   | 10195.33  | PASS          | AC=11;AF=0.344;AN=32;BaseQ        |
| 11774 | chrY | 10016114 | . | T | C   | 794.10    | PASS          | AC=2;AF=0.033;AN=60;BaseQRankSum  |
| 11775 | chrY | 10016126 | . | T | G   | 8777.72   | PASS          | AC=10;AF=0.179;AN=56;BaseQRankSum |
| 11776 | chrY | 10016127 | . | T | C   | 1272.36   | PASS          | AC=8;AF=0.129;AN=62;BaseQRankSum  |
| 11777 | chrY | 10016150 | . | T | G   | 12485.64  | PASS          | AC=11;AF=0.196;AN=56;BaseQ        |
| 11778 | chrY | 10016167 | . | A | G   | 14580.30  | PASS          | AC=11;AF=0.212;AN=52;BaseQ        |
| 11779 | chrY | 10016172 | . | G | T   | 11702.78  | PASS          | AC=10;AF=0.172;AN=58;BaseQ        |
| 11780 | chrY | 10016173 | . | T | G   | 15343.36  | PASS          | AC=11;AF=0.204;AN=54;BaseQ        |

|       |      |          |   |   |       |          |               |                                    |
|-------|------|----------|---|---|-------|----------|---------------|------------------------------------|
| 11781 | chrY | 10016177 | . | C | G     | 246.39   | PASS          | AC=1;AF=0.015;AN=66;BaseQRankSum=  |
| 11782 | chrY | 10016194 | . | A | C     | 18405.49 | PASS          | AC=11;AF=0.204;AN=54;Base          |
| 11783 | chrY | 10016200 | . | C | T     | 19167.70 | PASS          | AC=11;AF=0.212;AN=52;Base          |
| 11784 | chrY | 10016204 | . | G | A     | 56.85    | my_snp_filter | AC=1;AF=0.015;AN=66;BaseQ          |
| 11785 | chrY | 10016205 | . | T | A     | 76.78    | my_snp_filter | AC=2;AF=0.030;AN=66;BaseQ          |
| 11786 | chrY | 10016216 | . | A | G     | 21540.38 | PASS          | AC=11;AF=0.183;AN=60;Base          |
| 11787 | chrY | 10016220 | . | A | G     | 110.36   | my_snp_filter | AC=2;AF=0.030;AN=66;BaseQ          |
| 11788 | chrY | 10016234 | . | A | G     | 25255.83 | PASS          | AC=15;AF=0.242;AN=62;Base          |
| 11789 | chrY | 10016243 | . | G | T     | 10856.96 | PASS          | AC=13;AF=0.197;AN=66;Base          |
| 11790 | chrY | 10016288 | . | A | C,T   | 22550.09 | PASS          | AC=17,6;AF=0.250,0.088;AN          |
| 11791 | chrY | 10016298 | . | G | C     | 1927.97  | PASS          | AC=12;AF=0.176;AN=68;BaseQRankSum  |
| 11792 | chrY | 10016309 | . | C | T     | 7177.98  | PASS          | AC=9;AF=0.129;AN=70;BaseQRankSum=  |
| 11793 | chrY | 10016310 | . | A | G     | 16617.95 | PASS          | AC=9;AF=0.129;AN=70;BaseQ          |
| 11794 | chrY | 10016313 | . | T | A     | 1073.17  | my_snp_filter | AC=12;AF=0.176;AN=68;Base          |
| 11795 | chrY | 10016319 | . | G | C     | 6349.16  | PASS          | AC=9;AF=0.132;AN=68;BaseQRankSum=  |
| 11796 | chrY | 10016335 | . | G | C     | 22689.98 | PASS          | AC=14;AF=0.212;AN=66;Base          |
| 11797 | chrY | 10016338 | . | A | G     | 30.65    | PASS          | AC=1;AF=0.015;AN=68;BaseQRankSum=  |
| 11798 | chrY | 10016355 | . | G | A     | 1058.92  | PASS          | AC=4;AF=0.057;AN=70;BaseQRankSum=  |
| 11799 | chrY | 10016359 | . | G | A     | 636.66   | PASS          | AC=8;AF=0.114;AN=70;BaseQRankSum=  |
| 11800 | chrY | 10016369 | . | T | C     | 10883.27 | PASS          | AC=11;AF=0.157;AN=70;Base          |
| 11801 | chrY | 10016371 | . | T | G     | 16184.51 | PASS          | AC=11;AF=0.162;AN=68;Base          |
| 11802 | chrY | 10016386 | . | T | G     | 14120.96 | PASS          | AC=12;AF=0.171;AN=70;Base          |
| 11803 | chrY | 10016404 | . | C | T     | 904.94   | PASS          | AC=2;AF=0.029;AN=70;BaseQRankSum=  |
| 11804 | chrY | 10016416 | . | C | T     | 967.87   | PASS          | AC=2;AF=0.029;AN=68;BaseQRankSum=  |
| 11805 | chrY | 10016417 | . | A | G,T   | 7721.01  | PASS          | AC=9,3;AF=0.136,0.045;AN=66;BaseQ  |
| 11806 | chrY | 10016424 | . | C | T     | 4472.71  | my_snp_filter | AC=9;AF=0.129;AN=70;BaseQ          |
| 11807 | chrY | 10016435 | . | G | T     | 2620.65  | PASS          | AC=9;AF=0.129;AN=70;BaseQRankSum=  |
| 11808 | chrY | 10016443 | . | C | T     | 2157.42  | PASS          | AC=9;AF=0.129;AN=70;BaseQRankSum=  |
| 11809 | chrY | 10016444 | . | G | A     | 1429.16  | PASS          | AC=6;AF=0.086;AN=70;BaseQRankSum=  |
| 11810 | chrY | 10016446 | . | C | G     | 2059.46  | PASS          | AC=9;AF=0.129;AN=70;BaseQRankSum=  |
| 11811 | chrY | 10016449 | . | C | G     | 11245.82 | my_snp_filter | AC=14;AF=0.206;AN                  |
| 11812 | chrY | 10016459 | . | T | C     | 1341.33  | PASS          | AC=8;AF=0.114;AN=70;BaseQRankSum=  |
| 11813 | chrY | 10016471 | . | A | G     | 17134.34 | my_snp_filter | AC=20;AF=0.294;AN                  |
| 11814 | chrY | 10016476 | . | C | G     | 18357.44 | PASS          | AC=19;AF=0.288;AN=66;Base          |
| 11815 | chrY | 10016479 | . | G | A     | 749.82   | PASS          | AC=6;AF=0.086;AN=70;BaseQRankSum=  |
| 11816 | chrY | 10016480 | . | A | T     | 59.44    | PASS          | AC=1;AF=0.014;AN=70;BaseQRankSum=  |
| 11817 | chrY | 10016485 | . | A | T     | 11819.29 | PASS          | AC=16;AF=0.229;AN=70;Base          |
| 11818 | chrY | 10016488 | . | T | C     | 18635.64 | PASS          | AC=20;AF=0.303;AN=66;Base          |
| 11819 | chrY | 10016490 | . | C | T     | 13904.36 | PASS          | AC=18;AF=0.281;AN=64;Base          |
| 11820 | chrY | 10016500 | . | A | G     | 478.45   | my_snp_filter | AC=4;AF=0.057;AN=70;BaseQ          |
| 11821 | chrY | 10016503 | . | T | C     | 455.27   | my_snp_filter | AC=3;AF=0.043;AN=70;BaseQ          |
| 11822 | chrY | 10016518 | . | G | A     | 13619.07 | PASS          | AC=22;AF=0.314;AN=70;Base          |
| 11823 | chrY | 10016531 | . | A | C     | 42206.56 | PASS          | AC=31;AF=0.470;AN=66;Base          |
| 11824 | chrY | 10016532 | . | A | G     | 1317.62  | my_snp_filter | AC=13;AF=0.197;AN=66;Base          |
| 11825 | chrY | 10016550 | . | A | G     | 49348.60 | PASS          | AC=33;AF=0.485;AN=68;Base          |
| 11826 | chrY | 10016562 | . | A | G     | 51961.12 | PASS          | AC=33;AF=0.485;AN=68;Base          |
| 11827 | chrY | 10016570 | . | G | A     | 326.37   | my_snp_filter | AC=3;AF=0.043;AN=70;BaseQ          |
| 11828 | chrY | 10016573 | . | G | A     | 316.39   | my_snp_filter | AC=3;AF=0.043;AN=70;BaseQ          |
| 11829 | chrY | 10016574 | . | C | T     | 310.30   | PASS          | AC=2;AF=0.029;AN=70;BaseQRankSum=  |
| 11830 | chrY | 10016575 | . | C | T     | 525.67   | PASS          | AC=4;AF=0.057;AN=70;BaseQRankSum=  |
| 11831 | chrY | 10016584 | . | G | T     | 31845.86 | PASS          | AC=30;AF=0.429;AN=70;Base          |
| 11832 | chrY | 10016589 | . | C | G     | 6590.05  | PASS          | AC=24;AF=0.353;AN=68;BaseQRankSum= |
| 11833 | chrY | 10016596 | . | A | G     | 527.25   | my_snp_filter | AC=3;AF=0.043;AN=70;BaseQ          |
| 11834 | chrY | 10016601 | . | G | A     | 560.61   | my_snp_filter | AC=3;AF=0.043;AN=70;BaseQ          |
| 11835 | chrY | 10016604 | . | A | G     | 935.49   | PASS          | AC=8;AF=0.114;AN=70;BaseQRankSum=  |
| 11836 | chrY | 10016611 | . | T | C     | 69.46    | PASS          | AC=2;AF=0.029;AN=70;BaseQRankSum=  |
| 11837 | chrY | 10016613 | . | T | C     | 53901.87 | PASS          | AC=33;AF=0.471;AN=70;Base          |
| 11838 | chrY | 10016614 | . | G | A     | 52670.58 | PASS          | AC=33;AF=0.471;AN=70;Base          |
| 11839 | chrY | 10016629 | . | A | G     | 54998.60 | PASS          | AC=33;AF=0.471;AN=70;Base          |
| 11840 | chrY | 10016646 | . | C | G,T,* | 16740.27 | PASS          | AC=30,2,2;AF=0.429,0.029,          |
| 11841 | chrY | 10016649 | . | G | A     | 1932.10  | PASS          | AC=10;AF=0.143;AN=70;BaseQRankSum= |
| 11842 | chrY | 10016650 | . | T | C     | 21623.94 | PASS          | AC=27;AF=0.386;AN=70;Base          |
| 11843 | chrY | 10016652 | . | G | A     | 14971.56 | PASS          | AC=31;AF=0.443;AN=70;Base          |
| 11844 | chrY | 10016654 | . | C | T     | 52681.48 | PASS          | AC=34;AF=0.500;AN=68;Base          |
| 11845 | chrY | 10016655 | . | A | G     | 55507.54 | PASS          | AC=34;AF=0.500;AN=68;Base          |
| 11846 | chrY | 10016658 | . | C | G     | 54735.73 | PASS          | AC=34;AF=0.515;AN=66;Base          |
| 11847 | chrY | 10016663 | . | C | G,T   | 27685.31 | PASS          | AC=29,2;AF=0.414,0.029;AN          |
| 11848 | chrY | 10016664 | . | G | A     | 703.43   | PASS          | AC=9;AF=0.129;AN=70;BaseQRankSum=  |
| 11849 | chrY | 10016671 | . | C | G     | 25752.42 | PASS          | AC=28;AF=0.400;AN=70;Base          |
| 11850 | chrY | 10016674 | . | G | A     | 1460.71  | PASS          | AC=11;AF=0.157;AN=70;BaseQRankSum= |
| 11851 | chrY | 10016680 | . | A | C     | 2410.41  | PASS          | AC=9;AF=0.129;AN=70;BaseQRankSum=  |
| 11852 | chrY | 10016696 | . | C | T     | 539.94   | my_snp_filter | AC=6;AF=0.086;AN=70;BaseQ          |
| 11853 | chrY | 10016700 | . | G | A     | 2291.41  | PASS          | AC=8;AF=0.114;AN=70;BaseQRankSum=  |
| 11854 | chrY | 10016703 | . | G | A     | 2213.65  | PASS          | AC=9;AF=0.129;AN=70;BaseQRankSum=  |
| 11855 | chrY | 10016707 | . | G | A     | 8234.75  | PASS          | AC=24;AF=0.343;AN=70;BaseQRankSum= |
| 11856 | chrY | 10016724 | . | T | C     | 465.26   | PASS          | AC=8;AF=0.114;AN=70;BaseQRankSum=  |

|       |      |          |   |   |     |          |               |                                    |
|-------|------|----------|---|---|-----|----------|---------------|------------------------------------|
| 11857 | chrY | 10016727 | . | C | T   | 1524.12  | PASS          | AC=8;AF=0.114;AN=70;BaseQRankSum=  |
| 11858 | chrY | 10016736 | . | G | A   | 8715.89  | PASS          | AC=30;AF=0.429;AN=70;BaseQRankSum= |
| 11859 | chrY | 10016737 | . | T | A   | 1090.41  | PASS          | AC=4;AF=0.057;AN=70;BaseQRankSum=  |
| 11860 | chrY | 10016750 | . | G | C   | 271.75   | my_snp_filter | AC=5;AF=0.071;AN=70;BaseQ          |
| 11861 | chrY | 10016751 | . | G | A   | 10765.86 | PASS          | AC=25;AF=0.357;AN=70;Base          |
| 11862 | chrY | 10016753 | . | T | G   | 42022.74 | PASS          | AC=35;AF=0.530;AN=66;Base          |
| 11863 | chrY | 10016765 | . | A | T   | 346.04   | my_snp_filter | AC=2;AF=0.029;AN=68;BaseQ          |
| 11864 | chrY | 10016766 | . | T | G,A | 40698.66 | PASS          | AC=36,3;AF=0.529,0.044;AN          |
| 11865 | chrY | 10016768 | . | G | A   | 329.05   | my_snp_filter | AC=5;AF=0.071;AN=70;BaseQ          |
| 11866 | chrY | 10016774 | . | T | C   | 312.06   | my_snp_filter | AC=2;AF=0.029;AN=70;BaseQ          |
| 11867 | chrY | 10016785 | . | G | T   | 66.34    | my_snp_filter | AC=2;AF=0.029;AN=70;BaseQ          |
| 11868 | chrY | 10016799 | . | G | A   | 57.33    | my_snp_filter | AC=3;AF=0.043;AN=70;BaseQ          |
| 11869 | chrY | 10016800 | . | C | T   | 434.44   | my_snp_filter | AC=9;AF=0.129;AN=70;BaseQ          |
| 11870 | chrY | 10016801 | . | C | A,G | 14835.85 | PASS          | AC=13,23;AF=0.191,0.338;A          |
| 11871 | chrY | 10016832 | . | C | T   | 150.90   | my_snp_filter | AC=1;AF=0.014;AN=70;BaseQ          |
| 11872 | chrY | 10016836 | . | T | C   | 2618.72  | PASS          | AC=9;AF=0.129;AN=70;BaseQRankSum=  |
| 11873 | chrY | 10016839 | . | G | C   | 20616.62 | PASS          | AC=36;AF=0.514;AN=70;Base          |
| 11874 | chrY | 10016847 | . | G | A   | 79.70    | my_snp_filter | AC=1;AF=0.014;AN=70;BaseQ          |
| 11875 | chrY | 10016889 | . | C | G   | 656.79   | my_snp_filter | AC=10;AF=0.143;AN=70;Base          |
| 11876 | chrY | 10016916 | . | G | C   | 6293.08  | my_snp_filter | AC=15;AF=0.221;AN=68;Base          |
| 11877 | chrY | 10016920 | . | T | C   | 93.52    | PASS          | AC=2;AF=0.029;AN=68;BaseQRankSum=  |
| 11878 | chrY | 10016925 | . | T | C   | 118.41   | PASS          | AC=2;AF=0.040;AN=50;BaseQRankSum=  |
| 11879 | chrY | 10017103 | . | G | C   | 221.39   | PASS          | AC=2;AF=0.029;AN=70;BaseQRankSum=  |
| 11880 | chrY | 10017104 | . | G | A   | 229.08   | PASS          | AC=2;AF=0.029;AN=70;BaseQRankSum=  |
| 11881 | chrY | 10017339 | . | A | G   | 1522.37  | my_snp_filter | AC=6;AF=0.115;AN=52;BaseQ          |
| 11882 | chrY | 10017341 | . | C | T   | 51.95    | my_snp_filter | AC=1;AF=0.019;AN=52;BaseQ          |
| 11883 | chrY | 10017342 | . | A | G   | 1466.89  | my_snp_filter | AC=6;AF=0.115;AN=52;BaseQ          |
| 11884 | chrY | 10017354 | . | T | C   | 1473.26  | my_snp_filter | AC=6;AF=0.125;AN=48;BaseQ          |
| 11885 | chrY | 10017355 | . | G | T   | 1432.81  | my_snp_filter | AC=6;AF=0.125;AN=48;BaseQ          |
| 11886 | chrY | 10017362 | . | T | A   | 2345.63  | my_snp_filter | AC=6;AF=0.136;AN=44;BaseQ          |
| 11887 | chrY | 10017375 | . | G | T   | 2712.10  | my_snp_filter | AC=5;AF=0.147;AN=34;BaseQ          |
| 11888 | chrY | 10017381 | . | C | A   | 1735.12  | PASS          | AC=5;AF=0.156;AN=32;BaseQRankSum=  |
| 11889 | chrY | 10017393 | . | A | G   | 6839.77  | my_snp_filter | AC=6;AF=0.250;AN=24;BaseQ          |
| 11890 | chrY | 10017395 | . | C | T   | 8246.39  | my_snp_filter | AC=6;AF=0.231;AN=26;BaseQ          |
| 11891 | chrY | 10017416 | . | G | A   | 10997.43 | my_snp_filter | AC=6;AF=0.231;AN=                  |
| 11892 | chrY | 10017421 | . | T | A   | 11658.48 | my_snp_filter | AC=6;AF=0.231;AN=                  |
| 11893 | chrY | 10017427 | . | A | G   | 12709.13 | my_snp_filter | AC=8;AF=0.250;AN=                  |
| 11894 | chrY | 10017431 | . | G | A   | 312.37   | PASS          | AC=2;AF=0.053;AN=38;BaseQRankSum=  |
| 11895 | chrY | 10017446 | . | G | T   | 112.31   | my_snp_filter | AC=1;AF=0.022;AN=46;BaseQ          |
| 11896 | chrY | 10017449 | . | G | A   | 16841.58 | PASS          | AC=8;AF=0.250;AN=32;BaseQ          |
| 11897 | chrY | 10017453 | . | C | T   | 5187.59  | PASS          | AC=7;AF=0.233;AN=30;BaseQRankSum=  |
| 11898 | chrY | 10017454 | . | A | G   | 17779.13 | PASS          | AC=8;AF=0.286;AN=28;BaseQ          |
| 11899 | chrY | 10017457 | . | A | G   | 17782.71 | PASS          | AC=8;AF=0.286;AN=28;BaseQ          |
| 11900 | chrY | 10017465 | . | G | C   | 5249.94  | PASS          | AC=7;AF=0.140;AN=50;BaseQRankSum=  |
| 11901 | chrY | 10017480 | . | C | T   | 172.67   | my_snp_filter | AC=2;AF=0.030;AN=66;BaseQ          |
| 11902 | chrY | 10017497 | . | C | T   | 30039.28 | PASS          | AC=19;AF=0.328;AN=58;Base          |
| 11903 | chrY | 10017502 | . | C | T   | 29828.24 | PASS          | AC=19;AF=0.339;AN=56;Base          |
| 11904 | chrY | 10017527 | . | C | T   | 33819.25 | PASS          | AC=19;AF=0.365;AN=52;Base          |
| 11905 | chrY | 10017545 | . | A | G,T | 15581.63 | PASS          | AC=4,15;AF=0.071,0.268;AN          |
| 11906 | chrY | 10017552 | . | T | C   | 25119.24 | PASS          | AC=18;AF=0.290;AN=62;Base          |
| 11907 | chrY | 10017564 | . | C | G   | 479.02   | my_snp_filter | AC=2;AF=0.029;AN=70;BaseQ          |
| 11908 | chrY | 10017565 | . | A | G   | 17139.70 | PASS          | AC=12;AF=0.171;AN=70;Base          |
| 11909 | chrY | 10017566 | . | C | A   | 1107.37  | my_snp_filter | AC=8;AF=0.114;AN=70;BaseQ          |
| 11910 | chrY | 10017568 | . | A | T   | 35664.05 | PASS          | AC=18;AF=0.346;AN=52;Base          |
| 11911 | chrY | 10017575 | . | G | A   | 16118.29 | PASS          | AC=16;AF=0.250;AN=64;Base          |
| 11912 | chrY | 10017585 | . | A | G   | 15770.32 | PASS          | AC=12;AF=0.171;AN=70;Base          |
| 11913 | chrY | 10017596 | . | T | A   | 41885.51 | PASS          | AC=27;AF=0.397;AN=68;Base          |
| 11914 | chrY | 10017597 | . | T | C   | 38396.51 | PASS          | AC=27;AF=0.397;AN=68;Base          |
| 11915 | chrY | 10017628 | . | T | C   | 31844.80 | PASS          | AC=30;AF=0.455;AN=66;Base          |
| 11916 | chrY | 10017633 | . | C | T   | 10054.94 | PASS          | AC=25;AF=0.357;AN=70;Base          |
| 11917 | chrY | 10017659 | . | T | C   | 39283.47 | PASS          | AC=29;AF=0.468;AN=62;Base          |
| 11918 | chrY | 10017662 | . | C | T   | 39467.43 | PASS          | AC=29;AF=0.468;AN=62;Base          |
| 11919 | chrY | 10017664 | . | A | G   | 39393.36 | PASS          | AC=29;AF=0.468;AN=62;Base          |
| 11920 | chrY | 10017669 | . | G | A   | 37933.30 | PASS          | AC=29;AF=0.468;AN=62;Base          |
| 11921 | chrY | 10017687 | . | A | G   | 31732.13 | PASS          | AC=29;AF=0.453;AN=64;Base          |
| 11922 | chrY | 10017697 | . | A | C   | 26798.40 | PASS          | AC=28;AF=0.438;AN=64;Base          |
| 11923 | chrY | 10017711 | . | C | T   | 193.50   | PASS          | AC=3;AF=0.043;AN=70;BaseQRankSum=  |
| 11924 | chrY | 10017734 | . | T | C   | 273.09   | PASS          | AC=6;AF=0.125;AN=48;BaseQRankSum=  |
| 11925 | chrY | 10017738 | . | T | C   | 259.43   | PASS          | AC=5;AF=0.100;AN=50;BaseQRankSum=  |
| 11926 | chrY | 10017791 | . | C | T   | 26112.04 | PASS          | AC=32;AF=0.485;AN=66;Base          |
| 11927 | chrY | 10017801 | . | C | T   | 34523.43 | PASS          | AC=32;AF=0.485;AN=66;Base          |
| 11928 | chrY | 10017805 | . | C | A   | 36812.42 | PASS          | AC=32;AF=0.485;AN=66;Base          |
| 11929 | chrY | 10017814 | . | C | T   | 1373.97  | PASS          | AC=8;AF=0.114;AN=70;BaseQRankSum=  |
| 11930 | chrY | 10017818 | . | C | A   | 20216.31 | PASS          | AC=32;AF=0.471;AN=68;Base          |
| 11931 | chrY | 10017821 | . | C | T   | 45529.42 | PASS          | AC=32;AF=0.485;AN=66;Base          |
| 11932 | chrY | 10017822 | . | C | A   | 105.90   | my_snp_filter | AC=1;AF=0.014;AN=70;BaseQ          |

|       |      |          |   |   |       |           |               |                                    |
|-------|------|----------|---|---|-------|-----------|---------------|------------------------------------|
| 11933 | chrY | 10017847 | . | A | G     | 77649.98  | PASS          | AC=36;AF=0.514;AN=70;BaseQ         |
| 11934 | chrY | 10017852 | . | G | A     | 234.39    | PASS          | AC=2;AF=0.029;AN=70;BaseQRankSum=  |
| 11935 | chrY | 10017867 | . | T | C     | 956.99    | PASS          | AC=4;AF=0.057;AN=70;BaseQRankSum=  |
| 11936 | chrY | 10017868 | . | A | G     | 113444.52 | PASS          | AC=37;AF=0.529;AN=70;BaseQ         |
| 11937 | chrY | 10017879 | . | T | C     | 123617.86 | PASS          | AC=35;AF=0.500;AN=70;BaseQ         |
| 11938 | chrY | 10017880 | . | G | C     | 7504.89   | PASS          | AC=23;AF=0.329;AN=70;BaseQRankSum= |
| 11939 | chrY | 10017891 | . | T | C     | 12253.80  | PASS          | AC=32;AF=0.457;AN=70;BaseQ         |
| 11940 | chrY | 10017892 | . | G | A     | 591.09    | my_snp_filter | AC=5;AF=0.071;AN=70;BaseQ          |
| 11941 | chrY | 10017893 | . | C | A     | 413.20    | my_snp_filter | AC=7;AF=0.100;AN=70;BaseQ          |
| 11942 | chrY | 10017912 | . | C | G     | 139377.27 | PASS          | AC=37;AF=0.529;AN=70;BaseQ         |
| 11943 | chrY | 10017921 | . | A | G     | 26801.65  | PASS          | AC=26;AF=0.371;AN=70;BaseQ         |
| 11944 | chrY | 10017934 | . | G | T     | 19390.85  | PASS          | AC=32;AF=0.457;AN=70;BaseQ         |
| 11945 | chrY | 10017939 | . | C | T     | 27298.14  | PASS          | AC=26;AF=0.371;AN=70;BaseQ         |
| 11946 | chrY | 10017946 | . | C | T     | 118179.72 | PASS          | AC=35;AF=0.500;AN=70;BaseQ         |
| 11947 | chrY | 10017963 | . | G | C     | 1800.74   | my_snp_filter | AC=12;AF=0.171;AN=70;BaseQ         |
| 11948 | chrY | 10017979 | . | G | A     | 32567.22  | PASS          | AC=32;AF=0.457;AN=70;BaseQ         |
| 11949 | chrY | 10017981 | . | C | T     | 2915.51   | PASS          | AC=12;AF=0.171;AN=70;BaseQRankSum= |
| 11950 | chrY | 10017984 | . | C | T     | 31353.22  | PASS          | AC=32;AF=0.457;AN=70;BaseQ         |
| 11951 | chrY | 10017989 | . | T | C     | 102068.87 | PASS          | AC=36;AF=0.514;AN=70;BaseQ         |
| 11952 | chrY | 10017990 | . | G | A     | 51.31     | my_snp_filter | AC=2;AF=0.029;AN=70;BaseQ          |
| 11953 | chrY | 10017998 | . | T | A     | 88649.87  | PASS          | AC=36;AF=0.514;AN=70;BaseQ         |
| 11954 | chrY | 10018005 | . | G | C     | 78780.87  | PASS          | AC=36;AF=0.514;AN=70;BaseQ         |
| 11955 | chrY | 10018009 | . | T | G     | 72806.82  | PASS          | AC=35;AF=0.515;AN=68;BaseQ         |
| 11956 | chrY | 10018017 | . | C | G     | 2537.49   | my_snp_filter | AC=23;AF=0.329;AN=70;BaseQ         |
| 11957 | chrY | 10018036 | . | C | T     | 20494.59  | PASS          | AC=31;AF=0.443;AN=70;BaseQ         |
| 11958 | chrY | 10018042 | . | T | A,C   | 65169.47  | PASS          | AC=37,5;AF=0.529,0.071;AN=         |
| 11959 | chrY | 10018052 | . | C | T     | 34471.59  | PASS          | AC=35;AF=0.500;AN=70;BaseQ         |
| 11960 | chrY | 10018058 | . | T | C     | 921.08    | PASS          | AC=10;AF=0.143;AN=70;BaseQRankSum= |
| 11961 | chrY | 10018063 | . | C | A     | 591.32    | PASS          | AC=8;AF=0.114;AN=70;BaseQRankSum=  |
| 11962 | chrY | 10018066 | . | C | T     | 242.69    | PASS          | AC=3;AF=0.043;AN=70;BaseQRankSum=  |
| 11963 | chrY | 10018076 | . | C | T     | 196.67    | my_snp_filter | AC=4;AF=0.057;AN=70;BaseQ          |
| 11964 | chrY | 10018083 | . | T | G     | 45018.07  | PASS          | AC=40;AF=0.588;AN=68;BaseQ         |
| 11965 | chrY | 10018101 | . | C | G     | 210.05    | PASS          | AC=3;AF=0.043;AN=70;BaseQRankSum=  |
| 11966 | chrY | 10018107 | . | G | T,C   | 44382.25  | PASS          | AC=37,2;AF=0.561,0.030;AN=         |
| 11967 | chrY | 10018109 | . | T | C     | 34838.68  | PASS          | AC=39;AF=0.591;AN=66;BaseQ         |
| 11968 | chrY | 10018135 | . | T | G     | 7890.45   | PASS          | AC=17;AF=0.425;AN=40;BaseQRankSum= |
| 11969 | chrY | 10018170 | . | A | G     | 26319.45  | PASS          | AC=11;AF=0.500;AN=22;BaseQ         |
| 11970 | chrY | 10018171 | . | C | T     | 26086.45  | PASS          | AC=11;AF=0.500;AN=22;BaseQ         |
| 11971 | chrY | 10018173 | . | T | C     | 25668.45  | PASS          | AC=11;AF=0.500;AN=22;BaseQ         |
| 11972 | chrY | 10018190 | . | A | C     | 640.54    | PASS          | AC=3;AF=0.125;AN=24;BaseQRankSum=  |
| 11973 | chrY | 10018194 | . | C | T     | 109.30    | my_snp_filter | AC=1;AF=0.050;AN=20;BaseQ          |
| 11974 | chrY | 10018200 | . | C | T     | 8795.06   | PASS          | AC=11;AF=0.458;AN=24;BaseQRankSum= |
| 11975 | chrY | 10018202 | . | C | T     | 396.40    | PASS          | AC=3;AF=0.136;AN=22;BaseQRankSum=  |
| 11976 | chrY | 10018211 | . | C | T,*   | 5314.74   | PASS          | AC=3,7;AF=0.115,0.269;AN=26;BaseQ  |
| 11977 | chrY | 10018220 | . | A | G     | 17704.57  | PASS          | AC=11;AF=0.423;AN=26;BaseQ         |
| 11978 | chrY | 10018232 | . | C | T     | 7342.70   | PASS          | AC=9;AF=0.346;AN=26;BaseQRankSum=  |
| 11979 | chrY | 10018233 | . | A | G     | 16398.78  | PASS          | AC=9;AF=0.375;AN=24;BaseQ          |
| 11980 | chrY | 10018241 | . | A | G     | 15319.69  | PASS          | AC=9;AF=0.346;AN=26;BaseQ          |
| 11981 | chrY | 10018258 | . | A | G     | 11671.69  | my_snp_filter | AC=9;AF=0.346;AN=                  |
| 11982 | chrY | 10018265 | . | G | T     | 255.67    | PASS          | AC=2;AF=0.077;AN=26;BaseQRankSum=  |
| 11983 | chrY | 10018276 | . | A | T     | 3684.48   | my_snp_filter | AC=9;AF=0.281;AN=32;BaseQ          |
| 11984 | chrY | 10018287 | . | A | G     | 5855.31   | my_snp_filter | AC=9;AF=0.265;AN=34;BaseQ          |
| 11985 | chrY | 10018288 | . | T | C     | 5767.31   | my_snp_filter | AC=9;AF=0.265;AN=34;BaseQ          |
| 11986 | chrY | 10018293 | . | C | A     | 1291.94   | PASS          | AC=6;AF=0.158;AN=38;BaseQRankSum=  |
| 11987 | chrY | 10018297 | . | G | A     | 2610.84   | my_snp_filter | AC=9;AF=0.225;AN=40;BaseQ          |
| 11988 | chrY | 10018302 | . | C | G     | 3798.02   | PASS          | AC=9;AF=0.205;AN=44;BaseQRankSum=  |
| 11989 | chrY | 10018309 | . | A | T     | 3406.69   | PASS          | AC=9;AF=0.196;AN=46;BaseQRankSum=  |
| 11990 | chrY | 10018326 | . | G | A     | 2944.22   | PASS          | AC=9;AF=0.188;AN=48;BaseQRankSum=  |
| 11991 | chrY | 10018339 | . | A | G     | 98.07     | my_snp_filter | AC=2;AF=0.037;AN=54;BaseQ          |
| 11992 | chrY | 10018359 | . | G | A     | 4221.21   | PASS          | AC=9;AF=0.145;AN=62;BaseQRankSum=  |
| 11993 | chrY | 10018367 | . | A | G     | 8364.82   | PASS          | AC=9;AF=0.136;AN=66;BaseQRankSum=  |
| 11994 | chrY | 10018370 | . | A | C     | 8755.78   | PASS          | AC=9;AF=0.136;AN=66;BaseQRankSum=  |
| 11995 | chrY | 10018372 | . | T | C     | 8929.01   | PASS          | AC=9;AF=0.136;AN=66;BaseQRankSum=  |
| 11996 | chrY | 10018381 | . | C | T     | 9132.39   | PASS          | AC=9;AF=0.136;AN=66;BaseQRankSum=  |
| 11997 | chrY | 10018406 | . | T | C     | 10921.24  | PASS          | AC=9;AF=0.145;AN=62;BaseQ          |
| 11998 | chrY | 10018413 | . | G | A     | 58.18     | PASS          | AC=2;AF=0.029;AN=68;BaseQRankSum=  |
| 11999 | chrY | 10018417 | . | G | A     | 11061.71  | PASS          | AC=9;AF=0.150;AN=60;BaseQ          |
| 12000 | chrY | 10018418 | . | C | T     | 217.80    | my_snp_filter | AC=5;AF=0.083;AN=60;BaseQ          |
| 12001 | chrY | 10018424 | . | C | T     | 290.91    | PASS          | AC=5;AF=0.074;AN=68;BaseQRankSum=  |
| 12002 | chrY | 10018431 | . | A | G,C,T | 11626.64  | PASS          | AC=3,2,9;AF=0.050,0.033,0          |
| 12003 | chrY | 10018449 | . | T | A     | 2700.32   | PASS          | AC=15;AF=0.214;AN=70;BaseQRankSum= |
| 12004 | chrY | 10018498 | . | A | C     | 7437.14   | PASS          | AC=14;AF=0.200;AN=70;BaseQRankSum= |
| 12005 | chrY | 10018501 | . | A | G     | 2230.83   | PASS          | AC=11;AF=0.157;AN=70;BaseQRankSum= |
| 12006 | chrY | 10018504 | . | G | A     | 232.42    | my_snp_filter | AC=4;AF=0.057;AN=70;BaseQ          |
| 12007 | chrY | 10018514 | . | A | G     | 6955.53   | my_snp_filter | AC=12;AF=0.171;AN=70;BaseQ         |
| 12008 | chrY | 10018523 | . | G | A,*   | 1256.51   | PASS          | AC=6,2;AF=0.086,0.029;AN=70;BaseQ  |

|       |      |          |   |   |     |          |               |                                    |
|-------|------|----------|---|---|-----|----------|---------------|------------------------------------|
| 12009 | chrY | 10018524 | . | T | C,* | 1252.08  | PASS          | AC=6,2;AF=0.086,0.029;AN=70;BaseQ  |
| 12010 | chrY | 10018529 | . | A | G   | 6446.93  | my_snp_filter | AC=12;AF=0.176;AN=68;Base          |
| 12011 | chrY | 10018530 | . | T | C   | 350.06   | PASS          | AC=5;AF=0.074;AN=68;BaseQRankSum=  |
| 12012 | chrY | 10018534 | . | C | A   | 3732.48  | PASS          | AC=9;AF=0.132;AN=68;BaseQRankSum=  |
| 12013 | chrY | 10018540 | . | C | T   | 938.73   | PASS          | AC=5;AF=0.071;AN=70;BaseQRankSum=  |
| 12014 | chrY | 10018541 | . | A | G   | 5674.64  | PASS          | AC=9;AF=0.129;AN=70;BaseQRankSum=  |
| 12015 | chrY | 10018547 | . | A | T   | 3503.20  | PASS          | AC=8;AF=0.114;AN=70;BaseQRankSum=  |
| 12016 | chrY | 10018549 | . | T | A   | 396.53   | PASS          | AC=5;AF=0.071;AN=70;BaseQRankSum=  |
| 12017 | chrY | 10018551 | . | T | C   | 5171.61  | PASS          | AC=9;AF=0.136;AN=66;BaseQRankSum=  |
| 12018 | chrY | 10018565 | . | A | C   | 6002.95  | PASS          | AC=11;AF=0.183;AN=60;BaseQRankSum= |
| 12019 | chrY | 10018571 | . | T | C   | 178.96   | my_snp_filter | AC=4;AF=0.059;AN=68;BaseQ          |
| 12020 | chrY | 10018574 | . | C | T   | 239.38   | my_snp_filter | AC=3;AF=0.045;AN=66;BaseQ          |
| 12021 | chrY | 10018603 | . | C | T   | 11858.73 | PASS          | AC=15;AF=0.242;AN=62;Base          |
| 12022 | chrY | 10018625 | . | C | T   | 12747.75 | PASS          | AC=14;AF=0.241;AN=58;Base          |
| 12023 | chrY | 10018658 | . | G | A   | 9893.68  | PASS          | AC=16;AF=0.242;AN=66;BaseQRankSum= |
| 12024 | chrY | 10018686 | . | A | G   | 1664.22  | PASS          | AC=14;AF=0.206;AN=68;BaseQRankSum= |
| 12025 | chrY | 10018690 | . | A | G   | 20283.25 | PASS          | AC=21;AF=0.328;AN=64;Base          |
| 12026 | chrY | 10018694 | . | G | T,C | 19095.77 | PASS          | AC=17,2;AF=0.258,0.030;AN          |
| 12027 | chrY | 10018700 | . | A | G   | 15368.88 | PASS          | AC=13;AF=0.203;AN=64;Base          |
| 12028 | chrY | 10018701 | . | A | C   | 20327.34 | PASS          | AC=20;AF=0.313;AN=64;Base          |
| 12029 | chrY | 10018710 | . | C | A   | 15276.34 | PASS          | AC=14;AF=0.219;AN=64;Base          |
| 12030 | chrY | 10018712 | . | G | A   | 12280.10 | PASS          | AC=12;AF=0.194;AN=62;Base          |
| 12031 | chrY | 10018719 | . | C | G   | 325.54   | PASS          | AC=2;AF=0.029;AN=70;BaseQRankSum=  |
| 12032 | chrY | 10018746 | . | G | C   | 17310.88 | PASS          | AC=30;AF=0.441;AN=68;Base          |
| 12033 | chrY | 10018753 | . | T | C   | 14037.52 | PASS          | AC=27;AF=0.386;AN=70;Base          |
| 12034 | chrY | 10018758 | . | T | C   | 802.83   | my_snp_filter | AC=11;AF=0.157;AN=70;Base          |
| 12035 | chrY | 10018783 | . | C | T   | 71.14    | my_snp_filter | AC=2;AF=0.029;AN=70;BaseQ          |
| 12036 | chrY | 10018796 | . | G | C   | 6043.92  | PASS          | AC=17;AF=0.258;AN=66;BaseQRankSum= |
| 12037 | chrY | 10018808 | . | T | A   | 6486.33  | PASS          | AC=14;AF=0.212;AN=66;BaseQRankSum= |
| 12038 | chrY | 10018819 | . | G | T   | 5497.79  | PASS          | AC=13;AF=0.197;AN=66;BaseQRankSum= |
| 12039 | chrY | 10018822 | . | G | A   | 5774.67  | PASS          | AC=13;AF=0.197;AN=66;BaseQRankSum= |
| 12040 | chrY | 10018828 | . | A | G   | 5765.10  | PASS          | AC=12;AF=0.182;AN=66;BaseQRankSum= |
| 12041 | chrY | 10018832 | . | C | T   | 5503.01  | PASS          | AC=9;AF=0.132;AN=68;BaseQRankSum=  |
| 12042 | chrY | 10018836 | . | T | A   | 5940.30  | PASS          | AC=10;AF=0.156;AN=64;BaseQRankSum= |
| 12043 | chrY | 10018852 | . | C | T   | 5373.40  | PASS          | AC=9;AF=0.136;AN=66;BaseQRankSum=  |
| 12044 | chrY | 10018867 | . | G | A   | 183.73   | my_snp_filter | AC=7;AF=0.103;AN=68;BaseQ          |
| 12045 | chrY | 10018869 | . | G | A   | 1962.93  | PASS          | AC=6;AF=0.088;AN=68;BaseQRankSum=  |
| 12046 | chrY | 10018870 | . | T | A   | 1483.60  | PASS          | AC=17;AF=0.250;AN=68;BaseQRankSum= |
| 12047 | chrY | 10018894 | . | T | C,G | 25391.35 | PASS          | AC=18,10;AF=0.321,0.179;A          |
| 12048 | chrY | 10018900 | . | T | G   | 13073.91 | PASS          | AC=20;AF=0.323;AN=62;Base          |
| 12049 | chrY | 10018905 | . | C | A   | 8902.39  | PASS          | AC=15;AF=0.214;AN=70;BaseQRankSum= |
| 12050 | chrY | 10018925 | . | C | A   | 1929.32  | PASS          | AC=13;AF=0.186;AN=70;BaseQRankSum= |
| 12051 | chrY | 10018928 | . | G | A   | 1805.06  | PASS          | AC=13;AF=0.186;AN=70;BaseQRankSum= |
| 12052 | chrY | 10018930 | . | C | T   | 1293.45  | PASS          | AC=13;AF=0.191;AN=68;BaseQRankSum= |
| 12053 | chrY | 10018931 | . | G | T,C | 43428.90 | PASS          | AC=4,32;AF=0.061,0.485;AN          |
| 12054 | chrY | 10018938 | . | C | G   | 50105.81 | PASS          | AC=34;AF=0.515;AN=66;Base          |
| 12055 | chrY | 10018943 | . | C | A   | 653.01   | my_snp_filter | AC=9;AF=0.129;AN=70;BaseQ          |
| 12056 | chrY | 10018970 | . | C | T   | 990.08   | my_snp_filter | AC=12;AF=0.171;AN=70;Base          |
| 12057 | chrY | 10018976 | . | T | C   | 801.03   | PASS          | AC=9;AF=0.129;AN=70;BaseQRankSum=  |
| 12058 | chrY | 10018984 | . | T | G   | 57149.13 | PASS          | AC=43;AF=0.614;AN=70;Base          |
| 12059 | chrY | 10019021 | . | A | G   | 41058.19 | PASS          | AC=35;AF=0.530;AN=66;Base          |
| 12060 | chrY | 10019027 | . | G | A   | 1690.23  | PASS          | AC=14;AF=0.200;AN=70;BaseQRankSum= |
| 12061 | chrY | 10019031 | . | G | A   | 7929.50  | PASS          | AC=24;AF=0.343;AN=70;BaseQRankSum= |
| 12062 | chrY | 10019034 | . | G | A   | 26749.57 | PASS          | AC=22;AF=0.355;AN=62;Base          |
| 12063 | chrY | 10019054 | . | G | A,* | 16556.59 | PASS          | AC=16,2;AF=0.267,0.033;AN          |
| 12064 | chrY | 10019055 | . | T | C,* | 2794.48  | PASS          | AC=9,2;AF=0.132,0.029;AN=68;BaseQ  |
| 12065 | chrY | 10019059 | . | A | G   | 31436.22 | PASS          | AC=21;AF=0.404;AN=52;Base          |
| 12066 | chrY | 10019060 | . | A | T   | 4500.22  | PASS          | AC=15;AF=0.259;AN=58;BaseQRankSum= |
| 12067 | chrY | 10019063 | . | G | T   | 21608.14 | PASS          | AC=15;AF=0.234;AN=64;Base          |
| 12068 | chrY | 10019067 | . | A | G   | 29672.26 | PASS          | AC=17;AF=0.386;AN=44;Base          |
| 12069 | chrY | 10019072 | . | G | T   | 422.49   | my_snp_filter | AC=4;AF=0.065;AN=62;BaseQ          |
| 12070 | chrY | 10019075 | . | G | A   | 439.68   | PASS          | AC=3;AF=0.047;AN=64;BaseQRankSum=  |
| 12071 | chrY | 10019077 | . | A | G   | 27580.65 | PASS          | AC=16;AF=0.320;AN=50;Base          |
| 12072 | chrY | 10019079 | . | T | C   | 18887.37 | PASS          | AC=12;AF=0.200;AN=60;Base          |
| 12073 | chrY | 10019089 | . | A | C   | 24127.56 | PASS          | AC=13;AF=0.232;AN=56;Base          |
| 12074 | chrY | 10019090 | . | G | A   | 289.04   | PASS          | AC=1;AF=0.015;AN=68;BaseQRankSum=  |
| 12075 | chrY | 10019100 | . | T | C   | 6922.17  | PASS          | AC=11;AF=0.183;AN=60;BaseQRankSum= |
| 12076 | chrY | 10019102 | . | T | G   | 24113.86 | PASS          | AC=19;AF=0.380;AN=50;Base          |
| 12077 | chrY | 10019126 | . | C | T   | 693.20   | my_snp_filter | AC=6;AF=0.088;AN=68;BaseQ          |
| 12078 | chrY | 10019128 | . | C | T   | 5785.10  | PASS          | AC=16;AF=0.235;AN=68;BaseQRankSum= |
| 12079 | chrY | 10019133 | . | A | G   | 16906.13 | PASS          | AC=28;AF=0.424;AN=66;Base          |
| 12080 | chrY | 10019136 | . | G | A   | 47.02    | my_snp_filter | AC=2;AF=0.029;AN=70;BaseQ          |
| 12081 | chrY | 10019144 | . | A | C   | 5337.36  | PASS          | AC=17;AF=0.250;AN=68;BaseQRankSum= |
| 12082 | chrY | 10019154 | . | T | C   | 39281.51 | PASS          | AC=34;AF=0.531;AN=64;Base          |
| 12083 | chrY | 10019166 | . | A | G   | 27858.22 | PASS          | AC=30;AF=0.469;AN=64;Base          |
| 12084 | chrY | 10019167 | . | C | T   | 297.46   | PASS          | AC=2;AF=0.029;AN=68;BaseQRankSum=  |

|       |      |          |   |   |     |          |               |                                    |
|-------|------|----------|---|---|-----|----------|---------------|------------------------------------|
| 12085 | chrY | 10019188 | . | G | T   | 115.20   | my_snp_filter | AC=2;AF=0.029;AN=70;BaseQ          |
| 12086 | chrY | 10019202 | . | G | C   | 15362.67 | PASS          | AC=18;AF=0.257;AN=70;Base          |
| 12087 | chrY | 10019210 | . | C | T   | 1216.14  | PASS          | AC=14;AF=0.206;AN=68;BaseQRankSum  |
| 12088 | chrY | 10019211 | . | A | G   | 20986.50 | PASS          | AC=35;AF=0.547;AN=64;Base          |
| 12089 | chrY | 10019226 | . | G | A   | 34475.88 | PASS          | AC=22;AF=0.379;AN=58;Base          |
| 12090 | chrY | 10019237 | . | C | A   | 33753.16 | PASS          | AC=21;AF=0.375;AN=56;Base          |
| 12091 | chrY | 10019251 | . | T | C   | 1828.25  | my_snp_filter | AC=18;AF=0.265;AN=68;Base          |
| 12092 | chrY | 10019261 | . | A | G   | 37183.57 | PASS          | AC=27;AF=0.519;AN=52;Base          |
| 12093 | chrY | 10019273 | . | G | A   | 27610.99 | PASS          | AC=20;AF=0.357;AN=56;Base          |
| 12094 | chrY | 10019299 | . | A | C,* | 2956.48  | PASS          | AC=9,4;AF=0.250,0.111;AN=36;BaseQ  |
| 12095 | chrY | 10019311 | . | T | A   | 14769.02 | PASS          | AC=9;AF=0.145;AN=62;BaseQ          |
| 12096 | chrY | 10019321 | . | T | C   | 35871.12 | PASS          | AC=23;AF=0.523;AN=44;Base          |
| 12097 | chrY | 10019322 | . | G | A   | 15243.85 | PASS          | AC=9;AF=0.150;AN=60;BaseQ          |
| 12098 | chrY | 10019328 | . | T | A   | 1747.19  | PASS          | AC=5;AF=0.074;AN=68;BaseQRankSum=  |
| 12099 | chrY | 10019330 | . | C | T   | 14745.63 | PASS          | AC=9;AF=0.136;AN=66;BaseQ          |
| 12100 | chrY | 10019341 | . | C | T   | 19381.66 | PASS          | AC=11;AF=0.172;AN=64;Base          |
| 12101 | chrY | 10019349 | . | G | A   | 2765.06  | PASS          | AC=11;AF=0.167;AN=66;BaseQRankSum  |
| 12102 | chrY | 10019352 | . | T | A   | 34620.82 | PASS          | AC=25;AF=0.543;AN=46;Base          |
| 12103 | chrY | 10019362 | . | C | G   | 272.89   | my_snp_filter | AC=3;AF=0.044;AN=68;BaseQ          |
| 12104 | chrY | 10019380 | . | G | T   | 2668.54  | PASS          | AC=13;AF=0.186;AN=70;BaseQRankSum  |
| 12105 | chrY | 10019404 | . | G | A   | 56.14    | PASS          | AC=2;AF=0.029;AN=68;BaseQRankSum=  |
| 12106 | chrY | 10019410 | . | G | T   | 146.56   | PASS          | AC=4;AF=0.059;AN=68;BaseQRankSum=  |
| 12107 | chrY | 10019420 | . | A | G   | 3029.23  | PASS          | AC=16;AF=0.229;AN=70;BaseQRankSum  |
| 12108 | chrY | 10019437 | . | G | C   | 5688.23  | PASS          | AC=26;AF=0.394;AN=66;BaseQRankSum  |
| 12109 | chrY | 10019439 | . | G | A   | 5886.29  | PASS          | AC=26;AF=0.406;AN=64;BaseQRankSum  |
| 12110 | chrY | 10019454 | . | A | G,* | 6148.39  | PASS          | AC=1,28;AF=0.019,0.538;AN=52;Base  |
| 12111 | chrY | 10019460 | . | G | A   | 131.76   | my_snp_filter | AC=2;AF=0.031;AN=64;BaseQ          |
| 12112 | chrY | 10019465 | . | G | T   | 4413.80  | PASS          | AC=21;AF=0.328;AN=64;BaseQRankSum  |
| 12113 | chrY | 10019467 | . | G | A   | 1591.36  | PASS          | AC=10;AF=0.161;AN=62;BaseQRankSum  |
| 12114 | chrY | 10019486 | . | G | T   | 8640.55  | PASS          | AC=25;AF=0.357;AN=70;BaseQRankSum  |
| 12115 | chrY | 10019489 | . | A | G   | 4464.75  | PASS          | AC=21;AF=0.300;AN=70;BaseQRankSum  |
| 12116 | chrY | 10019490 | . | C | T   | 72.82    | my_snp_filter | AC=2;AF=0.029;AN=70;BaseQ          |
| 12117 | chrY | 10019497 | . | C | G   | 28476.42 | PASS          | AC=39;AF=0.609;AN=64;Base          |
| 12118 | chrY | 10019507 | . | G | T   | 12954.31 | PASS          | AC=30;AF=0.441;AN=68;Base          |
| 12119 | chrY | 10019551 | . | G | T   | 207.13   | PASS          | AC=3;AF=0.043;AN=70;BaseQRankSum=  |
| 12120 | chrY | 10019569 | . | A | C   | 1871.61  | PASS          | AC=11;AF=0.688;AN=16;BaseQRankSum  |
| 12121 | chrY | 10019572 | . | C | G   | 1847.61  | PASS          | AC=11;AF=0.688;AN=16;BaseQRankSum  |
| 12122 | chrY | 10019581 | . | T | C   | 475.70   | PASS          | AC=2;AF=0.125;AN=16;BaseQRankSum=  |
| 12123 | chrY | 10019691 | . | G | A   | 30.28    | my_snp_filter | AC=2;AF=0.071;AN=28;BaseQ          |
| 12124 | chrY | 10019692 | . | A | G   | 99.55    | my_snp_filter | AC=3;AF=0.107;AN=28;BaseQ          |
| 12125 | chrY | 10019705 | . | T | G   | 305.88   | PASS          | AC=3;AF=0.100;AN=30;BaseQRankSum=  |
| 12126 | chrY | 10019723 | . | T | C   | 353.13   | PASS          | AC=3;AF=0.083;AN=36;BaseQRankSum=  |
| 12127 | chrY | 10019725 | . | C | T   | 38.73    | my_snp_filter | AC=1;AF=0.028;AN=36;BaseQ          |
| 12128 | chrY | 10019732 | . | T | C   | 427.14   | PASS          | AC=3;AF=0.075;AN=40;BaseQRankSum=  |
| 12129 | chrY | 10019733 | . | G | A   | 137.01   | PASS          | AC=2;AF=0.048;AN=42;BaseQRankSum=  |
| 12130 | chrY | 10019768 | . | T | C   | 634.32   | PASS          | AC=5;AF=0.109;AN=46;BaseQRankSum=  |
| 12131 | chrY | 10019775 | . | T | G   | 366.07   | PASS          | AC=5;AF=0.100;AN=50;BaseQRankSum=  |
| 12132 | chrY | 10019778 | . | T | C   | 453.05   | PASS          | AC=5;AF=0.119;AN=42;BaseQRankSum=  |
| 12133 | chrY | 10019808 | . | G | C   | 674.93   | PASS          | AC=7;AF=0.113;AN=62;BaseQRankSum=  |
| 12134 | chrY | 10019817 | . | C | T   | 7612.05  | PASS          | AC=15;AF=0.278;AN=54;BaseQRankSum  |
| 12135 | chrY | 10019818 | . | A | G   | 13125.20 | PASS          | AC=47;AF=0.870;AN=54;Base          |
| 12136 | chrY | 10019826 | . | C | T   | 8774.64  | PASS          | AC=15;AF=0.268;AN=56;BaseQRankSum  |
| 12137 | chrY | 10019828 | . | C | T   | 2377.29  | PASS          | AC=11;AF=0.183;AN=60;BaseQRankSum  |
| 12138 | chrY | 10019832 | . | G | T   | 1952.82  | PASS          | AC=8;AF=0.118;AN=68;BaseQRankSum=  |
| 12139 | chrY | 10019845 | . | G | T   | 4400.91  | PASS          | AC=9;AF=0.136;AN=66;BaseQRankSum=  |
| 12140 | chrY | 10019852 | . | T | C   | 8613.63  | PASS          | AC=9;AF=0.180;AN=50;BaseQRankSum=  |
| 12141 | chrY | 10019854 | . | G | A   | 11407.54 | PASS          | AC=14;AF=0.280;AN=50;Base          |
| 12142 | chrY | 10019866 | . | T | C   | 11851.35 | PASS          | AC=16;AF=0.348;AN=46;Base          |
| 12143 | chrY | 10019880 | . | C | T   | 1294.04  | PASS          | AC=9;AF=0.129;AN=70;BaseQRankSum=  |
| 12144 | chrY | 10019889 | . | G | A   | 4259.74  | PASS          | AC=12;AF=0.171;AN=70;BaseQRankSum= |
| 12145 | chrY | 10019890 | . | C | T   | 40.74    | my_snp_filter | AC=1;AF=0.014;AN=70;BaseQ          |
| 12146 | chrY | 10019892 | . | T | C,G | 17030.17 | PASS          | AC=31,10;AF=0.443,0.143;A          |
| 12147 | chrY | 10019893 | . | G | A   | 8152.36  | PASS          | AC=29;AF=0.414;AN=70;BaseQRankSum  |
| 12148 | chrY | 10019894 | . | G | A   | 12275.53 | PASS          | AC=19;AF=0.271;AN=70;Base          |
| 12149 | chrY | 10019898 | . | C | A   | 12109.40 | PASS          | AC=19;AF=0.279;AN=68;Base          |
| 12150 | chrY | 10019899 | . | T | A   | 4342.83  | PASS          | AC=23;AF=0.329;AN=70;BaseQRankSum  |
| 12151 | chrY | 10019910 | . | G | A   | 2725.22  | PASS          | AC=14;AF=0.200;AN=70;BaseQRankSum  |
| 12152 | chrY | 10019914 | . | T | C   | 11059.16 | PASS          | AC=19;AF=0.279;AN=68;Base          |
| 12153 | chrY | 10019915 | . | G | A   | 438.87   | PASS          | AC=7;AF=0.100;AN=70;BaseQRankSum=  |
| 12154 | chrY | 10019924 | . | A | C   | 2447.74  | PASS          | AC=14;AF=0.200;AN=70;BaseQRankSum= |
| 12155 | chrY | 10019935 | . | C | T   | 671.74   | PASS          | AC=12;AF=0.176;AN=68;BaseQRankSum  |
| 12156 | chrY | 10019941 | . | C | G,T | 12623.44 | PASS          | AC=17,18;AF=0.274,0.290;A          |
| 12157 | chrY | 10019950 | . | T | A   | 16390.73 | PASS          | AC=31;AF=0.500;AN=62;Base          |
| 12158 | chrY | 10019953 | . | G | T   | 797.10   | PASS          | AC=7;AF=0.100;AN=70;BaseQRankSum=  |
| 12159 | chrY | 10019954 | . | G | A   | 1807.76  | PASS          | AC=7;AF=0.103;AN=68;BaseQRankSum=  |
| 12160 | chrY | 10019957 | . | G | A   | 15562.96 | PASS          | AC=31;AF=0.517;AN=60;Base          |



|       |      |          |   |   |     |         |               |                                   |
|-------|------|----------|---|---|-----|---------|---------------|-----------------------------------|
| 12161 | chrY | 10019966 | . | A | G   | 44.45   | my_snp_filter | AC=2;AF=0.029;AN=70;BaseQ         |
| 12162 | chrY | 10019967 | . | G | A   | 5305.31 | PASS          | AC=25;AF=0.368;AN=68;BaseQRankSum |
| 12163 | chrY | 10019975 | . | T | C   | 1660.79 | PASS          | AC=6;AF=0.086;AN=70;BaseQRankSum= |
| 12164 | chrY | 10019983 | . | C | T   | 2115.66 | PASS          | AC=11;AF=0.183;AN=60;BaseQRankSum |
| 12165 | chrY | 10019999 | . | G | A   | 1754.38 | PASS          | AC=7;AF=0.106;AN=66;BaseQRankSum= |
| 12166 | chrY | 10020000 | . | C | G   | 3927.32 | PASS          | AC=19;AF=0.297;AN=64;BaseQRankSum |
| 12167 | chrY | 10020005 | . | C | G   | 6107.86 | PASS          | AC=21;AF=0.375;AN=56;BaseQRankSum |
| 12168 | chrY | 10020007 | . | G | A   | 1720.99 | PASS          | AC=7;AF=0.113;AN=62;BaseQRankSum= |
| 12169 | chrY | 10020014 | . | T | C   | 1336.51 | PASS          | AC=5;AF=0.081;AN=62;BaseQRankSum= |
| 12170 | chrY | 10020015 | . | G | A   | 1553    | PASS          | AC=7;AF=0.113;AN=62;BaseQRankSum= |
| 12171 | chrY | 10020022 | . | C | A   | 1476.49 | PASS          | AC=6;AF=0.100;AN=60;BaseQRankSum= |
| 12172 | chrY | 10020029 | . | T | C   | 3504.32 | PASS          | AC=10;AF=0.208;AN=48;BaseQRankSum |
| 12173 | chrY | 10020030 | . | G | C   | 3501.35 | PASS          | AC=10;AF=0.208;AN=48;BaseQRankSum |
| 12174 | chrY | 10020039 | . | A | G   | 130.82  | PASS          | AC=2;AF=0.053;AN=38;BaseQRankSum= |
| 12175 | chrY | 10020054 | . | T | A   | 79.88   | PASS          | AC=1;AF=0.033;AN=30;BaseQRankSum= |
| 12176 | chrY | 10020062 | . | T | C   | 713.85  | PASS          | AC=3;AF=0.088;AN=34;BaseQRankSum= |
| 12177 | chrY | 10020093 | . | A | C   | 4700.65 | PASS          | AC=10;AF=0.179;AN=56;BaseQRankSum |
| 12178 | chrY | 10020095 | . | A | G   | 43.73   | my_snp_filter | AC=1;AF=0.016;AN=62;BaseQ         |
| 12179 | chrY | 10020096 | . | T | C   | 874.71  | PASS          | AC=6;AF=0.097;AN=62;BaseQRankSum= |
| 12180 | chrY | 10020104 | . | T | C   | 3018.33 | PASS          | AC=10;AF=0.172;AN=58;BaseQRankSum |
| 12181 | chrY | 10020105 | . | G | A   | 4986.63 | PASS          | AC=10;AF=0.172;AN=58;BaseQRankSum |
| 12182 | chrY | 10020113 | . | A | G   | 5111.10 | PASS          | AC=10;AF=0.172;AN=58;BaseQRankSum |
| 12183 | chrY | 10020132 | . | G | A   | 915.03  | PASS          | AC=5;AF=0.081;AN=62;BaseQRankSum= |
| 12184 | chrY | 10020148 | . | A | G   | 2895.93 | PASS          | AC=8;AF=0.133;AN=60;BaseQRankSum= |
| 12185 | chrY | 10020152 | . | T | A   | 349.71  | PASS          | AC=4;AF=0.067;AN=60;BaseQRankSum= |
| 12186 | chrY | 10020153 | . | G | A   | 350.01  | PASS          | AC=4;AF=0.067;AN=60;BaseQRankSum= |
| 12187 | chrY | 10020160 | . | G | T   | 329.61  | PASS          | AC=3;AF=0.050;AN=60;BaseQRankSum= |
| 12188 | chrY | 10020162 | . | C | T   | 204.68  | my_snp_filter | AC=3;AF=0.050;AN=60;BaseQ         |
| 12189 | chrY | 10020169 | . | C | T   | 111.30  | my_snp_filter | AC=2;AF=0.034;AN=58;BaseQ         |
| 12190 | chrY | 10020171 | . | C | A   | 344.56  | PASS          | AC=3;AF=0.052;AN=58;BaseQRankSum= |
| 12191 | chrY | 10020187 | . | C | T   | 37.22   | my_snp_filter | AC=2;AF=0.045;AN=44;BaseQ         |
| 12192 | chrY | 10020188 | . | G | A   | 1017.38 | PASS          | AC=9;AF=0.205;AN=44;BaseQRankSum= |
| 12193 | chrY | 10020198 | . | T | G   | 2605.11 | PASS          | AC=9;AF=0.375;AN=24;BaseQRankSum= |
| 12194 | chrY | 10020205 | . | G | A   | 69.57   | my_snp_filter | AC=1;AF=0.018;AN=56;BaseQ         |
| 12195 | chrY | 10020213 | . | G | A   | 230.02  | PASS          | AC=4;AF=0.069;AN=58;BaseQRankSum= |
| 12196 | chrY | 10020216 | . | C | T   | 184.07  | PASS          | AC=1;AF=0.017;AN=58;BaseQRankSum= |
| 12197 | chrY | 10020217 | . | A | G   | 188.33  | PASS          | AC=1;AF=0.017;AN=58;BaseQRankSum= |
| 12198 | chrY | 10020224 | . | A | G   | 570.63  | PASS          | AC=3;AF=0.058;AN=52;BaseQRankSum= |
| 12199 | chrY | 10020230 | . | A | C   | 803.73  | PASS          | AC=3;AF=0.071;AN=42;BaseQRankSum= |
| 12200 | chrY | 10020237 | . | A | G   | 809.43  | PASS          | AC=3;AF=0.071;AN=42;BaseQRankSum= |
| 12201 | chrY | 10020239 | . | G | T   | 773.83  | PASS          | AC=3;AF=0.075;AN=40;BaseQRankSum= |
| 12202 | chrY | 10020244 | . | T | C   | 604.11  | PASS          | AC=3;AF=0.079;AN=38;BaseQRankSum= |
| 12203 | chrY | 10020247 | . | T | C   | 524.25  | PASS          | AC=3;AF=0.083;AN=36;BaseQRankSum= |
| 12204 | chrY | 10020248 | . | G | T   | 86.91   | my_snp_filter | AC=3;AF=0.079;AN=38;BaseQ         |
| 12205 | chrY | 10020264 | . | A | C   | 388.78  | PASS          | AC=1;AF=0.036;AN=28;BaseQRankSum= |
| 12206 | chrY | 10020274 | . | C | T   | 308.01  | PASS          | AC=1;AF=0.033;AN=30;BaseQRankSum= |
| 12207 | chrY | 10020280 | . | A | G   | 230.77  | PASS          | AC=1;AF=0.031;AN=32;BaseQRankSum= |
| 12208 | chrY | 10020281 | . | C | T   | 752.51  | PASS          | AC=5;AF=0.147;AN=34;BaseQRankSum= |
| 12209 | chrY | 10020282 | . | G | A   | 230.77  | PASS          | AC=1;AF=0.031;AN=32;BaseQRankSum= |
| 12210 | chrY | 10020286 | . | A | G   | 192.09  | PASS          | AC=1;AF=0.029;AN=34;BaseQRankSum= |
| 12211 | chrY | 10020289 | . | T | C   | 192.07  | PASS          | AC=1;AF=0.036;AN=28;BaseQRankSum= |
| 12212 | chrY | 10020292 | . | A | G   | 234.23  | PASS          | AC=1;AF=0.033;AN=30;BaseQRankSum= |
| 12213 | chrY | 10020295 | . | G | T   | 189.08  | PASS          | AC=1;AF=0.036;AN=28;BaseQRankSum= |
| 12214 | chrY | 10020296 | . | C | G   | 186.08  | PASS          | AC=1;AF=0.036;AN=28;BaseQRankSum= |
| 12215 | chrY | 10020318 | . | G | C   | 269.47  | PASS          | AC=5;AF=0.192;AN=26;BaseQRankSum= |
| 12216 | chrY | 10020701 | . | T | C   | 219.50  | PASS          | AC=3;AF=0.044;AN=68;BaseQRankSum= |
| 12217 | chrY | 10020702 | . | C | T   | 224.93  | PASS          | AC=3;AF=0.044;AN=68;BaseQRankSum= |
| 12218 | chrY | 10020710 | . | C | A   | 72.12   | PASS          | AC=1;AF=0.015;AN=68;BaseQRankSum= |
| 12219 | chrY | 10020716 | . | A | G   | 412.34  | PASS          | AC=9;AF=0.155;AN=58;BaseQRankSum= |
| 12220 | chrY | 10020733 | . | C | T   | 1351.51 | PASS          | AC=2;AF=0.036;AN=56;BaseQRankSum= |
| 12221 | chrY | 10020742 | . | C | G   | 121.09  | PASS          | AC=3;AF=0.048;AN=62;BaseQRankSum= |
| 12222 | chrY | 10020743 | . | G | A   | 1436.36 | PASS          | AC=5;AF=0.083;AN=60;BaseQRankSum= |
| 12223 | chrY | 10020785 | . | A | C   | 665.90  | PASS          | AC=1;AF=0.023;AN=44;BaseQRankSum= |
| 12224 | chrY | 10020792 | . | C | T,* | 1757.51 | PASS          | AC=1,2;AF=0.022,0.043;AN=46;BaseQ |
| 12225 | chrY | 10020801 | . | G | C,T | 1889.04 | PASS          | AC=3,1;AF=0.068,0.023;AN=44;BaseQ |
| 12226 | chrY | 10020819 | . | C | G   | 659.55  | PASS          | AC=1;AF=0.021;AN=48;BaseQRankSum= |
| 12227 | chrY | 10020829 | . | C | A   | 76.48   | PASS          | AC=1;AF=0.018;AN=56;BaseQRankSum= |
| 12228 | chrY | 10020836 | . | A | T   | 2375.88 | PASS          | AC=3;AF=0.094;AN=32;BaseQRankSum= |
| 12229 | chrY | 10020867 | . | G | C   | 1382.98 | PASS          | AC=3;AF=0.047;AN=64;BaseQRankSum= |
| 12230 | chrY | 10020877 | . | C | G   | 640.15  | PASS          | AC=1;AF=0.019;AN=52;BaseQRankSum= |
| 12231 | chrY | 10020899 | . | T | A,G | 4814.85 | PASS          | AC=3,2;AF=0.167,0.111;AN=18;BaseQ |
| 12232 | chrY | 10020917 | . | G | C   | 585.13  | PASS          | AC=7;AF=0.103;AN=68;DP=1322;FS=5. |
| 12233 | chrY | 10020919 | . | T | C   | 4863.42 | PASS          | AC=4;AF=0.182;AN=22;BaseQRankSum= |
| 12234 | chrY | 10020927 | . | C | G   | 2790.18 | PASS          | AC=2;AF=0.059;AN=34;BaseQRankSum= |
| 12235 | chrY | 10020951 | . | G | C   | 967.82  | PASS          | AC=4;AF=0.057;AN=70;BaseQRankSum= |
| 12236 | chrY | 10020953 | . | C | T   | 56.76   | my_snp_filter | AC=1;AF=0.014;AN=70;BaseQ         |

|       |      |          |   |   |     |          |               |                                    |
|-------|------|----------|---|---|-----|----------|---------------|------------------------------------|
| 12237 | chrY | 10020955 | . | G | T   | 1065.03  | PASS          | AC=4;AF=0.057;AN=70;BaseQRankSum=  |
| 12238 | chrY | 10020961 | . | A | C   | 5100.71  | my_snp_filter | AC=6;AF=0.188;AN=32;BaseQ          |
| 12239 | chrY | 10020964 | . | A | T   | 142.48   | my_snp_filter | AC=2;AF=0.030;AN=66;BaseQ          |
| 12240 | chrY | 10020990 | . | G | C   | 361.70   | PASS          | AC=2;AF=0.029;AN=70;BaseQRankSum=  |
| 12241 | chrY | 10020993 | . | T | C   | 321.99   | PASS          | AC=2;AF=0.029;AN=70;BaseQRankSum=  |
| 12242 | chrY | 10020994 | . | T | A   | 271.97   | PASS          | AC=2;AF=0.029;AN=70;BaseQRankSum=  |
| 12243 | chrY | 10020996 | . | C | T   | 6709.59  | my_snp_filter | AC=7;AF=0.159;AN=44;BaseQ          |
| 12244 | chrY | 10021012 | . | T | A   | 4277.62  | PASS          | AC=6;AF=0.200;AN=30;BaseQRankSum=  |
| 12245 | chrY | 10021026 | . | T | C   | 4513.79  | PASS          | AC=6;AF=0.200;AN=30;BaseQRankSum=  |
| 12246 | chrY | 10021032 | . | G | C   | 1745.71  | PASS          | AC=5;AF=0.089;AN=56;BaseQRankSum=  |
| 12247 | chrY | 10021039 | . | T | C   | 569.27   | PASS          | AC=5;AF=0.071;AN=70;BaseQRankSum=  |
| 12248 | chrY | 10021066 | . | C | T   | 5847.69  | PASS          | AC=13;AF=0.203;AN=64;BaseQRankSum= |
| 12249 | chrY | 10021083 | . | A | T   | 10357.73 | my_snp_filter | AC=15;AF=0.313;AN=                 |
| 12250 | chrY | 10021092 | . | G | A   | 6500.53  | PASS          | AC=14;AF=0.206;AN=68;BaseQRankSum= |
| 12251 | chrY | 10021104 | . | T | A   | 6038.03  | PASS          | AC=14;AF=0.269;AN=52;BaseQRankSum= |
| 12252 | chrY | 10021122 | . | C | G   | 7559.51  | my_snp_filter | AC=15;AF=0.288;AN=52;BaseQ         |
| 12253 | chrY | 10021132 | . | C | G   | 66.78    | my_snp_filter | AC=2;AF=0.029;AN=70;BaseQ          |
| 12254 | chrY | 10021155 | . | C | T   | 4103.39  | my_snp_filter | AC=10;AF=0.179;AN=56;BaseQ         |
| 12255 | chrY | 10021190 | . | T | C   | 339.16   | PASS          | AC=1;AF=0.018;AN=56;BaseQRankSum=  |
| 12256 | chrY | 10021195 | . | C | T   | 341.86   | PASS          | AC=1;AF=0.022;AN=46;BaseQRankSum=  |
| 12257 | chrY | 10021200 | . | C | T   | 331.12   | PASS          | AC=1;AF=0.021;AN=48;BaseQRankSum=  |
| 12258 | chrY | 10021202 | . | T | C   | 176.10   | PASS          | AC=1;AF=0.023;AN=44;BaseQRankSum=  |
| 12259 | chrY | 10021208 | . | T | C   | 173.97   | PASS          | AC=1;AF=0.025;AN=40;BaseQRankSum=  |
| 12260 | chrY | 10021217 | . | A | C   | 853.41   | PASS          | AC=2;AF=0.100;AN=20;BaseQRankSum=  |
| 12261 | chrY | 10021218 | . | T | C   | 255.07   | PASS          | AC=2;AF=0.083;AN=24;BaseQRankSum=  |
| 12262 | chrY | 10021222 | . | C | T   | 184.18   | PASS          | AC=1;AF=0.028;AN=36;BaseQRankSum=  |
| 12263 | chrY | 10021227 | . | C | G   | 167.99   | PASS          | AC=1;AF=0.028;AN=36;BaseQRankSum=  |
| 12264 | chrY | 10021246 | . | T | C   | 330.68   | PASS          | AC=2;AF=0.063;AN=32;BaseQRankSum=  |
| 12265 | chrY | 10021250 | . | A | T   | 375.19   | PASS          | AC=2;AF=0.067;AN=30;BaseQRankSum=  |
| 12266 | chrY | 10021258 | . | C | T   | 531.30   | PASS          | AC=3;AF=0.188;AN=16;BaseQRankSum=  |
| 12267 | chrY | 10021259 | . | G | A   | 1457.74  | PASS          | AC=2;AF=0.167;AN=12;BaseQRankSum=  |
| 12268 | chrY | 10021264 | . | T | G   | 120.66   | my_snp_filter | AC=2;AF=0.071;AN=28;BaseQ          |
| 12269 | chrY | 10021272 | . | T | G,* | 789.25   | PASS          | AC=3,1;AF=0.167,0.056;AN=18;BaseQ  |
| 12270 | chrY | 10021283 | . | C | T   | 355.35   | PASS          | AC=2;AF=0.077;AN=26;BaseQRankSum=  |
| 12271 | chrY | 10021285 | . | C | T   | 667.46   | PASS          | AC=2;AF=0.077;AN=26;BaseQRankSum=  |
| 12272 | chrY | 10021291 | . | G | A   | 624.77   | PASS          | AC=2;AF=0.077;AN=26;BaseQRankSum=  |
| 12273 | chrY | 10021301 | . | C | T   | 476.36   | PASS          | AC=2;AF=0.100;AN=20;BaseQRankSum=  |
| 12274 | chrY | 10021321 | . | C | G   | 476.97   | PASS          | AC=2;AF=0.063;AN=32;BaseQRankSum=  |
| 12275 | chrY | 10021386 | . | C | T   | 723.08   | PASS          | AC=1;AF=0.250;AN=4;BaseQRankSum=0  |
| 12276 | chrY | 10021449 | . | C | T   | 1055.17  | PASS          | AC=6;AF=0.231;AN=26;BaseQRankSum=  |
| 12277 | chrY | 10021456 | . | G | A   | 4853     | PASS          | AC=7;AF=0.438;AN=16;BaseQRankSum=  |
| 12278 | chrY | 10021465 | . | G | A   | 1152.12  | PASS          | AC=5;AF=0.227;AN=22;BaseQRankSum=  |
| 12279 | chrY | 10021498 | . | T | C   | 6581.27  | PASS          | AC=5;AF=0.357;AN=14;BaseQRankSum=  |
| 12280 | chrY | 10021503 | . | T | C   | 1464.55  | PASS          | AC=5;AF=0.313;AN=16;BaseQRankSum=  |
| 12281 | chrY | 10021504 | . | A | G   | 6690.55  | PASS          | AC=5;AF=0.313;AN=16;BaseQRankSum=  |
| 12282 | chrY | 10021514 | . | C | T   | 1523.74  | PASS          | AC=5;AF=0.208;AN=24;BaseQRankSum=  |
| 12283 | chrY | 10021521 | . | C | T   | 1640.52  | PASS          | AC=5;AF=0.208;AN=24;BaseQRankSum=  |
| 12284 | chrY | 10021528 | . | C | T   | 36.01    | my_snp_filter | AC=1;AF=0.033;AN=30;BaseQ          |
| 12285 | chrY | 10021536 | . | G | A   | 2965.45  | PASS          | AC=5;AF=0.250;AN=20;BaseQRankSum=  |
| 12286 | chrY | 10021560 | . | C | G   | 1137.24  | PASS          | AC=5;AF=0.192;AN=26;BaseQRankSum=  |
| 12287 | chrY | 10021602 | . | C | T   | 305.32   | my_snp_filter | AC=4;AF=0.118;AN=34;BaseQ          |
| 12288 | chrY | 10021604 | . | C | G   | 416.89   | my_snp_filter | AC=5;AF=0.139;AN=36;BaseQ          |
| 12289 | chrY | 10021610 | . | C | G   | 365.45   | my_snp_filter | AC=4;AF=0.111;AN=36;BaseQ          |
| 12290 | chrY | 10021612 | . | G | C   | 6501.95  | PASS          | AC=9;AF=0.321;AN=28;BaseQRankSum=  |
| 12291 | chrY | 10021614 | . | T | G   | 431.31   | my_snp_filter | AC=4;AF=0.111;AN=36;BaseQ          |
| 12292 | chrY | 10021622 | . | A | G   | 6763.50  | PASS          | AC=9;AF=0.321;AN=28;BaseQRankSum=  |
| 12293 | chrY | 10021628 | . | C | A   | 2162.69  | PASS          | AC=9;AF=0.250;AN=36;BaseQRankSum=  |
| 12294 | chrY | 10021636 | . | G | C   | 2367.60  | PASS          | AC=9;AF=0.250;AN=36;BaseQRankSum=  |
| 12295 | chrY | 10021667 | . | A | T,* | 1547.89  | PASS          | AC=5,1;AF=0.125,0.025;AN=40;BaseQ  |
| 12296 | chrY | 10021696 | . | G | C,* | 2301.52  | PASS          | AC=6,1;AF=0.115,0.019;AN=52;BaseQ  |
| 12297 | chrY | 10021701 | . | T | C   | 1350.30  | PASS          | AC=7;AF=0.135;AN=52;BaseQRankSum=  |
| 12298 | chrY | 10021704 | . | T | C   | 1947.54  | PASS          | AC=7;AF=0.130;AN=54;BaseQRankSum=  |
| 12299 | chrY | 10021710 | . | C | T   | 32.09    | my_snp_filter | AC=3;AF=0.045;AN=66;BaseQ          |
| 12300 | chrY | 10021770 | . | C | T   | 1445.81  | PASS          | AC=9;AF=0.129;AN=70;BaseQRankSum=  |
| 12301 | chrY | 10021786 | . | C | T   | 1140.36  | PASS          | AC=8;AF=0.118;AN=68;BaseQRankSum=  |
| 12302 | chrY | 10021787 | . | C | T   | 15264.95 | PASS          | AC=11;AF=0.162;AN=68;BaseQ         |
| 12303 | chrY | 10021788 | . | G | T   | 5900.60  | PASS          | AC=10;AF=0.147;AN=68;BaseQRankSum= |
| 12304 | chrY | 10021792 | . | T | C   | 13744.77 | PASS          | AC=11;AF=0.162;AN=68;BaseQ         |
| 12305 | chrY | 10021793 | . | G | A   | 773.87   | my_snp_filter | AC=7;AF=0.100;AN=70;BaseQ          |
| 12306 | chrY | 10021796 | . | C | G   | 12872.47 | PASS          | AC=10;AF=0.143;AN=70;BaseQ         |
| 12307 | chrY | 10021806 | . | C | A   | 893.98   | PASS          | AC=7;AF=0.100;AN=70;BaseQRankSum=  |
| 12308 | chrY | 10021808 | . | T | C   | 11286.01 | PASS          | AC=9;AF=0.132;AN=68;BaseQ          |
| 12309 | chrY | 10021809 | . | C | A   | 423.05   | my_snp_filter | AC=8;AF=0.114;AN=70;BaseQ          |
| 12310 | chrY | 10021815 | . | A | C   | 10812.14 | PASS          | AC=9;AF=0.141;AN=64;BaseQ          |
| 12311 | chrY | 10021829 | . | A | G   | 10116.44 | PASS          | AC=9;AF=0.145;AN=62;BaseQ          |
| 12312 | chrY | 10021845 | . | C | A   | 1269.56  | PASS          | AC=3;AF=0.047;AN=64;BaseQRankSum=  |

|       |      |          |   |   |     |          |               |                                    |
|-------|------|----------|---|---|-----|----------|---------------|------------------------------------|
| 12313 | chrY | 10021864 | . | C | T   | 113.45   | PASS          | AC=1;AF=0.014;AN=70;BaseQRankSum=  |
| 12314 | chrY | 10021867 | . | G | T   | 6852.22  | PASS          | AC=7;AF=0.125;AN=56;BaseQRankSum=  |
| 12315 | chrY | 10021877 | . | A | G   | 9726.52  | PASS          | AC=9;AF=0.180;AN=50;BaseQRankSum=  |
| 12316 | chrY | 10021893 | . | C | T   | 9601.83  | PASS          | AC=9;AF=0.161;AN=56;BaseQRankSum=  |
| 12317 | chrY | 10021901 | . | C | T   | 4011.87  | PASS          | AC=9;AF=0.136;AN=66;BaseQRankSum=  |
| 12318 | chrY | 10021903 | . | G | A   | 36.32    | my_snp_filter | AC=3;AF=0.043;AN=70;BaseQ          |
| 12319 | chrY | 10021905 | . | A | G   | 428.27   | PASS          | AC=5;AF=0.071;AN=70;BaseQRankSum=  |
| 12320 | chrY | 10021910 | . | G | A   | 30.51    | my_snp_filter | AC=2;AF=0.030;AN=66;BaseQ          |
| 12321 | chrY | 10021918 | . | A | G   | 8169.96  | PASS          | AC=9;AF=0.155;AN=58;BaseQRankSum=  |
| 12322 | chrY | 10021920 | . | C | G   | 548.63   | my_snp_filter | AC=6;AF=0.088;AN=68;BaseQ          |
| 12323 | chrY | 10021922 | . | T | C   | 10025.89 | PASS          | AC=9;AF=0.167;AN=54;BaseQ          |
| 12324 | chrY | 10021938 | . | G | T   | 786.53   | PASS          | AC=6;AF=0.086;AN=70;BaseQRankSum=  |
| 12325 | chrY | 10021947 | . | C | A   | 13689    | PASS          | AC=9;AF=0.180;AN=50;BaseQRankSum=  |
| 12326 | chrY | 10021951 | . | T | G   | 11655.50 | PASS          | AC=9;AF=0.161;AN=56;BaseQ          |
| 12327 | chrY | 10021958 | . | T | C   | 12625.59 | PASS          | AC=9;AF=0.155;AN=58;BaseQ          |
| 12328 | chrY | 10021965 | . | T | C   | 1972.26  | PASS          | AC=6;AF=0.086;AN=70;BaseQRankSum=  |
| 12329 | chrY | 10021973 | . | A | G   | 18756.64 | PASS          | AC=9;AF=0.237;AN=38;BaseQ          |
| 12330 | chrY | 10021975 | . | G | C   | 19462.02 | PASS          | AC=9;AF=0.237;AN=38;BaseQ          |
| 12331 | chrY | 10021985 | . | T | C   | 19881.29 | PASS          | AC=9;AF=0.265;AN=34;BaseQ          |
| 12332 | chrY | 10021987 | . | T | C   | 688.01   | PASS          | AC=2;AF=0.029;AN=70;BaseQRankSum=  |
| 12333 | chrY | 10022008 | . | G | A   | 47.53    | my_snp_filter | AC=1;AF=0.014;AN=70;BaseQ          |
| 12334 | chrY | 10022014 | . | G | A   | 48791.01 | PASS          | AC=31;AF=0.443;AN=70;BaseQ         |
| 12335 | chrY | 10022027 | . | A | G   | 824.30   | my_snp_filter | AC=11;AF=0.157;AN=70;BaseQ         |
| 12336 | chrY | 10022033 | . | A | G   | 45531.48 | PASS          | AC=30;AF=0.441;AN=68;BaseQ         |
| 12337 | chrY | 10022039 | . | A | G   | 36652.38 | PASS          | AC=30;AF=0.441;AN=68;BaseQ         |
| 12338 | chrY | 10022051 | . | C | T   | 109.94   | my_snp_filter | AC=3;AF=0.043;AN=70;BaseQ          |
| 12339 | chrY | 10022057 | . | T | G   | 16858.93 | PASS          | AC=26;AF=0.371;AN=70;BaseQ         |
| 12340 | chrY | 10022059 | . | A | C   | 45034.73 | PASS          | AC=32;AF=0.471;AN=68;BaseQ         |
| 12341 | chrY | 10022071 | . | G | A   | 869      | my_snp_filter | AC=6;AF=0.086;AN=70;BaseQ          |
| 12342 | chrY | 10022076 | . | C | A   | 430.54   | my_snp_filter | AC=10;AF=0.147;AN=68;BaseQ         |
| 12343 | chrY | 10022080 | . | G | A   | 25938.25 | PASS          | AC=27;AF=0.409;AN=66;BaseQ         |
| 12344 | chrY | 10022098 | . | G | T   | 737.84   | PASS          | AC=4;AF=0.057;AN=70;BaseQRankSum=  |
| 12345 | chrY | 10022101 | . | G | C   | 756.09   | PASS          | AC=4;AF=0.057;AN=70;BaseQRankSum=  |
| 12346 | chrY | 10022108 | . | C | T   | 6946.01  | PASS          | AC=13;AF=0.186;AN=70;BaseQRankSum= |
| 12347 | chrY | 10022128 | . | C | G   | 11066.66 | PASS          | AC=14;AF=0.292;AN=48;BaseQ         |
| 12348 | chrY | 10022129 | . | A | G,T | 18808.89 | PASS          | AC=14,3;AF=0.292,0.063;AN          |
| 12349 | chrY | 10022132 | . | A | G   | 22495.61 | PASS          | AC=15;AF=0.300;AN=50;BaseQ         |
| 12350 | chrY | 10022136 | . | C | A   | 2237.27  | PASS          | AC=9;AF=0.155;AN=58;BaseQRankSum=  |
| 12351 | chrY | 10022138 | . | C | G   | 2470.94  | PASS          | AC=9;AF=0.155;AN=58;BaseQRankSum=  |
| 12352 | chrY | 10022140 | . | A | G   | 8847.06  | PASS          | AC=13;AF=0.241;AN=54;BaseQRankSum= |
| 12353 | chrY | 10022156 | . | T | C   | 18431.97 | PASS          | AC=9;AF=0.250;AN=36;BaseQ          |
| 12354 | chrY | 10022163 | . | G | A   | 1714.49  | PASS          | AC=5;AF=0.125;AN=40;BaseQRankSum=  |
| 12355 | chrY | 10022168 | . | G | A   | 10528.31 | PASS          | AC=9;AF=0.225;AN=40;BaseQ          |
| 12356 | chrY | 10022171 | . | C | T   | 10386.57 | PASS          | AC=9;AF=0.214;AN=42;BaseQ          |
| 12357 | chrY | 10022185 | . | C | T   | 1609.94  | PASS          | AC=4;AF=0.087;AN=46;BaseQRankSum=  |
| 12358 | chrY | 10022188 | . | C | A   | 9213.56  | PASS          | AC=9;AF=0.214;AN=42;BaseQRankSum=  |
| 12359 | chrY | 10022203 | . | C | A   | 10931.49 | PASS          | AC=9;AF=0.265;AN=34;BaseQ          |
| 12360 | chrY | 10022206 | . | G | T   | 2652.11  | PASS          | AC=5;AF=0.132;AN=38;BaseQRankSum=  |
| 12361 | chrY | 10022219 | . | A | G   | 1794.72  | PASS          | AC=3;AF=0.083;AN=36;BaseQRankSum=  |
| 12362 | chrY | 10022228 | . | A | G,T | 20511.79 | PASS          | AC=9,1;AF=0.346,0.038;AN=          |
| 12363 | chrY | 10022241 | . | A | T   | 147.12   | my_snp_filter | AC=2;AF=0.059;AN=34;BaseQ          |
| 12364 | chrY | 10022245 | . | A | G   | 17348.17 | PASS          | AC=11;AF=0.344;AN=32;BaseQ         |
| 12365 | chrY | 10022249 | . | G | C   | 17355.33 | PASS          | AC=9;AF=0.300;AN=30;BaseQ          |
| 12366 | chrY | 10022250 | . | C | A   | 23440.20 | PASS          | AC=9;AF=0.300;AN=30;BaseQ          |
| 12367 | chrY | 10022256 | . | T | G   | 23330.19 | PASS          | AC=9;AF=0.321;AN=28;BaseQ          |
| 12368 | chrY | 10022267 | . | C | T   | 2651.97  | PASS          | AC=6;AF=0.143;AN=42;BaseQRankSum=  |
| 12369 | chrY | 10022276 | . | G | A   | 1741.28  | PASS          | AC=3;AF=0.060;AN=50;BaseQRankSum=  |
| 12370 | chrY | 10022287 | . | C | T   | 1417.62  | PASS          | AC=3;AF=0.060;AN=50;BaseQRankSum=  |
| 12371 | chrY | 10022294 | . | T | A   | 3671.89  | PASS          | AC=9;AF=0.167;AN=54;BaseQRankSum=  |
| 12372 | chrY | 10022298 | . | G | T   | 15149.44 | PASS          | AC=9;AF=0.205;AN=44;BaseQ          |
| 12373 | chrY | 10022309 | . | T | C   | 3572.32  | PASS          | AC=10;AF=0.167;AN=60;BaseQRankSum= |
| 12374 | chrY | 10022310 | . | C | G   | 4189.68  | PASS          | AC=7;AF=0.130;AN=54;BaseQRankSum=  |
| 12375 | chrY | 10022340 | . | A | G   | 345.99   | my_snp_filter | AC=7;AF=0.103;AN=68;BaseQ          |
| 12376 | chrY | 10022348 | . | C | A   | 42.99    | PASS          | AC=1;AF=0.015;AN=68;BaseQRankSum=  |
| 12377 | chrY | 10022350 | . | G | C   | 821.04   | PASS          | AC=7;AF=0.106;AN=66;BaseQRankSum=  |
| 12378 | chrY | 10022375 | . | G | A   | 3764.91  | PASS          | AC=10;AF=0.143;AN=70;BaseQRankSum= |
| 12379 | chrY | 10022384 | . | C | T   | 4791.85  | my_snp_filter | AC=9;AF=0.132;AN=68;BaseQ          |
| 12380 | chrY | 10022385 | . | A | G   | 4781.81  | my_snp_filter | AC=9;AF=0.132;AN=68;BaseQ          |
| 12381 | chrY | 10022394 | . | T | C   | 8867.19  | my_snp_filter | AC=9;AF=0.132;AN=68;BaseQ          |
| 12382 | chrY | 10022398 | . | T | C   | 8613.03  | my_snp_filter | AC=9;AF=0.136;AN=66;BaseQ          |
| 12383 | chrY | 10022407 | . | T | C   | 3379.31  | PASS          | AC=9;AF=0.132;AN=68;BaseQRankSum=  |
| 12384 | chrY | 10022421 | . | T | G   | 4735.45  | my_snp_filter | AC=9;AF=0.132;AN=68;BaseQ          |
| 12385 | chrY | 10022422 | . | G | C   | 2879.87  | PASS          | AC=9;AF=0.129;AN=70;BaseQRankSum=  |
| 12386 | chrY | 10022428 | . | C | T   | 724.60   | PASS          | AC=5;AF=0.076;AN=66;BaseQRankSum=  |
| 12387 | chrY | 10022429 | . | A | G   | 5427.45  | my_snp_filter | AC=9;AF=0.136;AN=66;BaseQ          |
| 12388 | chrY | 10022433 | . | G | A   | 786.34   | PASS          | AC=5;AF=0.074;AN=68;BaseQRankSum=  |

|       |      |          |   |   |     |          |               |                                    |
|-------|------|----------|---|---|-----|----------|---------------|------------------------------------|
| 12389 | chrY | 10022452 | . | C | T   | 2064.91  | PASS          | AC=9;AF=0.141;AN=64;BaseQRankSum=  |
| 12390 | chrY | 10022468 | . | G | C   | 1244.05  | my_snp_filter | AC=5;AF=0.076;AN=66;BaseQ          |
| 12391 | chrY | 10022493 | . | G | A   | 698.28   | PASS          | AC=6;AF=0.091;AN=66;BaseQRankSum=  |
| 12392 | chrY | 10022506 | . | T | A   | 112.36   | PASS          | AC=1;AF=0.014;AN=70;BaseQRankSum=  |
| 12393 | chrY | 10022507 | . | A | C,T | 2955.22  | PASS          | AC=13,3;AF=0.197,0.045;AN=66;Base  |
| 12394 | chrY | 10022511 | . | G | C   | 3400.88  | PASS          | AC=16;AF=0.235;AN=68;BaseQRankSum= |
| 12395 | chrY | 10022522 | . | G | C   | 1083.73  | PASS          | AC=10;AF=0.147;AN=68;BaseQRankSum= |
| 12396 | chrY | 10022538 | . | G | A   | 37.56    | PASS          | AC=1;AF=0.015;AN=66;BaseQRankSum=  |
| 12397 | chrY | 10022550 | . | G | A   | 1035.35  | PASS          | AC=10;AF=0.143;AN=70;BaseQRankSum= |
| 12398 | chrY | 10022560 | . | T | C   | 5076.78  | PASS          | AC=12;AF=0.176;AN=68;BaseQRankSum= |
| 12399 | chrY | 10022578 | . | T | C   | 155.53   | PASS          | AC=4;AF=0.057;AN=70;BaseQRankSum=  |
| 12400 | chrY | 10022579 | . | G | C   | 456.83   | PASS          | AC=2;AF=0.029;AN=70;BaseQRankSum=  |
| 12401 | chrY | 10022583 | . | G | T   | 987.67   | my_snp_filter | AC=2;AF=0.029;AN=70;BaseQ          |
| 12402 | chrY | 10022604 | . | T | A   | 523.78   | PASS          | AC=5;AF=0.071;AN=70;BaseQRankSum=  |
| 12403 | chrY | 10022608 | . | T | C   | 59.24    | my_snp_filter | AC=3;AF=0.043;AN=70;BaseQ          |
| 12404 | chrY | 10022613 | . | T | C   | 923.39   | PASS          | AC=9;AF=0.132;AN=68;BaseQRankSum=  |
| 12405 | chrY | 10022630 | . | G | A   | 353.39   | PASS          | AC=7;AF=0.103;AN=68;BaseQRankSum=  |
| 12406 | chrY | 10022636 | . | A | G   | 209.08   | my_snp_filter | AC=7;AF=0.106;AN=66;BaseQ          |
| 12407 | chrY | 10022677 | . | T | G   | 515.89   | PASS          | AC=4;AF=0.063;AN=64;BaseQRankSum=  |
| 12408 | chrY | 10022680 | . | C | T   | 516.02   | PASS          | AC=4;AF=0.059;AN=68;BaseQRankSum=  |
| 12409 | chrY | 10022705 | . | C | G   | 796      | PASS          | AC=8;AF=0.129;AN=62;BaseQRankSum=  |
| 12410 | chrY | 10022726 | . | A | C   | 947.54   | PASS          | AC=10;AF=0.167;AN=60;BaseQRankSum= |
| 12411 | chrY | 10022747 | . | A | T   | 1062.25  | PASS          | AC=10;AF=0.152;AN=66;BaseQRankSum= |
| 12412 | chrY | 10022759 | . | G | T   | 1110.94  | PASS          | AC=8;AF=0.118;AN=68;BaseQRankSum=  |
| 12413 | chrY | 10022769 | . | A | G   | 1416.07  | PASS          | AC=8;AF=0.118;AN=68;BaseQRankSum=  |
| 12414 | chrY | 10022779 | . | A | C   | 1545.82  | PASS          | AC=9;AF=0.129;AN=70;BaseQRankSum=  |
| 12415 | chrY | 10022808 | . | C | A   | 2855.09  | PASS          | AC=16;AF=0.250;AN=64;BaseQRankSum= |
| 12416 | chrY | 10022809 | . | C | A   | 2845.91  | PASS          | AC=16;AF=0.250;AN=64;BaseQRankSum= |
| 12417 | chrY | 10022821 | . | A | G   | 2838.43  | PASS          | AC=14;AF=0.212;AN=66;BaseQRankSum= |
| 12418 | chrY | 10022823 | . | A | T   | 2626.41  | PASS          | AC=13;AF=0.203;AN=64;BaseQRankSum= |
| 12419 | chrY | 10022857 | . | T | G   | 1657.95  | PASS          | AC=11;AF=0.167;AN=66;BaseQRankSum= |
| 12420 | chrY | 10022862 | . | C | T   | 485.27   | PASS          | AC=3;AF=0.045;AN=66;BaseQRankSum=  |
| 12421 | chrY | 10022885 | . | T | C   | 3735.89  | PASS          | AC=9;AF=0.136;AN=66;BaseQRankSum=  |
| 12422 | chrY | 10022886 | . | G | C   | 3732.23  | PASS          | AC=9;AF=0.132;AN=68;BaseQRankSum=  |
| 12423 | chrY | 10022900 | . | G | A   | 658.75   | PASS          | AC=3;AF=0.045;AN=66;BaseQRankSum=  |
| 12424 | chrY | 10022909 | . | C | T   | 1831.65  | PASS          | AC=8;AF=0.121;AN=66;BaseQRankSum=  |
| 12425 | chrY | 10022917 | . | C | A   | 1338.45  | PASS          | AC=10;AF=0.152;AN=66;BaseQRankSum= |
| 12426 | chrY | 10022937 | . | G | A   | 3961.09  | PASS          | AC=14;AF=0.212;AN=66;BaseQRankSum= |
| 12427 | chrY | 10022945 | . | C | A   | 4685.14  | PASS          | AC=15;AF=0.234;AN=64;BaseQRankSum= |
| 12428 | chrY | 10022959 | . | C | T   | 5202.99  | PASS          | AC=19;AF=0.288;AN=66;BaseQRankSum= |
| 12429 | chrY | 10022961 | . | T | C   | 12548.97 | PASS          | AC=25;AF=0.379;AN=66;BaseQ         |
| 12430 | chrY | 10022971 | . | C | A   | 6115.87  | PASS          | AC=18;AF=0.265;AN=68;BaseQRankSum= |
| 12431 | chrY | 10022976 | . | A | G   | 15652.14 | PASS          | AC=26;AF=0.394;AN=66;BaseQ         |
| 12432 | chrY | 10022983 | . | C | A   | 16406.31 | PASS          | AC=27;AF=0.409;AN=66;BaseQ         |
| 12433 | chrY | 10022988 | . | T | G,C | 11546.73 | PASS          | AC=15,16;AF=0.227,0.242;AN=66      |
| 12434 | chrY | 10023012 | . | T | C   | 18323.46 | PASS          | AC=30;AF=0.455;AN=66;BaseQ         |
| 12435 | chrY | 10023017 | . | G | T   | 4368.88  | PASS          | AC=21;AF=0.300;AN=70;BaseQRankSum= |
| 12436 | chrY | 10023062 | . | T | A   | 9361.02  | PASS          | AC=27;AF=0.397;AN=68;BaseQRankSum= |
| 12437 | chrY | 10023088 | . | G | A   | 2701.77  | PASS          | AC=15;AF=0.221;AN=68;BaseQRankSum= |
| 12438 | chrY | 10023120 | . | T | C   | 10457.38 | PASS          | AC=15;AF=0.242;AN=62;BaseQ         |
| 12439 | chrY | 10023123 | . | G | C,T | 8162.83  | PASS          | AC=4,10;AF=0.065,0.161;AN=62;Base  |
| 12440 | chrY | 10023142 | . | A | G   | 8645.41  | PASS          | AC=14;AF=0.219;AN=64;BaseQRankSum= |
| 12441 | chrY | 10023166 | . | T | A   | 6777.17  | PASS          | AC=15;AF=0.242;AN=62;BaseQRankSum= |
| 12442 | chrY | 10023181 | . | A | C,G | 5084.17  | PASS          | AC=13,2;AF=0.197,0.030;AN=66;Base  |
| 12443 | chrY | 10023227 | . | T | C   | 6005.77  | PASS          | AC=15;AF=0.234;AN=64;BaseQRankSum= |
| 12444 | chrY | 10023238 | . | T | G   | 2831.79  | PASS          | AC=13;AF=0.197;AN=66;BaseQRankSum= |
| 12445 | chrY | 10023252 | . | T | C   | 1031.64  | PASS          | AC=10;AF=0.156;AN=64;BaseQRankSum= |
| 12446 | chrY | 10023262 | . | C | G   | 1147.44  | PASS          | AC=10;AF=0.147;AN=68;BaseQRankSum= |
| 12447 | chrY | 10023268 | . | C | A   | 4465.44  | PASS          | AC=13;AF=0.191;AN=68;BaseQRankSum= |
| 12448 | chrY | 10023269 | . | G | A   | 377.76   | PASS          | AC=4;AF=0.059;AN=68;BaseQRankSum=  |
| 12449 | chrY | 10023287 | . | A | G   | 12051.46 | PASS          | AC=17;AF=0.283;AN=60;BaseQ         |
| 12450 | chrY | 10023305 | . | G | A   | 8331.14  | PASS          | AC=15;AF=0.278;AN=54;BaseQRankSum= |
| 12451 | chrY | 10023315 | . | G | A   | 17632.21 | PASS          | AC=19;AF=0.380;AN=50;BaseQ         |
| 12452 | chrY | 10023319 | . | A | G   | 18190.20 | PASS          | AC=19;AF=0.380;AN=50;BaseQ         |
| 12453 | chrY | 10023338 | . | T | A   | 2172.56  | PASS          | AC=13;AF=0.186;AN=70;BaseQRankSum= |
| 12454 | chrY | 10023344 | . | C | T   | 1144.19  | PASS          | AC=7;AF=0.103;AN=68;BaseQRankSum=  |
| 12455 | chrY | 10023396 | . | G | A   | 455.48   | PASS          | AC=4;AF=0.133;AN=30;BaseQRankSum=  |
| 12456 | chrY | 10023410 | . | G | A   | 344.89   | PASS          | AC=3;AF=0.065;AN=46;BaseQRankSum=  |
| 12457 | chrY | 10023418 | . | C | T   | 242.55   | PASS          | AC=2;AF=0.029;AN=70;BaseQRankSum=  |
| 12458 | chrY | 10023430 | . | G | A   | 126.63   | PASS          | AC=2;AF=0.045;AN=44;BaseQRankSum=  |
| 12459 | chrY | 10023444 | . | G | A   | 31.68    | PASS          | AC=1;AF=0.017;AN=58;BaseQRankSum=  |
| 12460 | chrY | 10023585 | . | T | G   | 398.29   | PASS          | AC=3;AF=0.047;AN=64;BaseQRankSum=  |
| 12461 | chrY | 10023622 | . | G | C   | 296.08   | PASS          | AC=1;AF=0.020;AN=50;BaseQRankSum=  |
| 12462 | chrY | 10023634 | . | C | A   | 35.71    | my_snp_filter | AC=1;AF=0.020;AN=50;BaseQ          |
| 12463 | chrY | 10023638 | . | T | C   | 515.78   | PASS          | AC=1;AF=0.022;AN=46;BaseQRankSum=  |
| 12464 | chrY | 10023652 | . | C | A   | 312.19   | PASS          | AC=1;AF=0.028;AN=36;BaseQRankSum=  |

|       |      |          |   |   |     |          |               |                                    |
|-------|------|----------|---|---|-----|----------|---------------|------------------------------------|
| 12465 | chrY | 10023664 | . | A | G   | 189.07   | PASS          | AC=1;AF=0.029;AN=34;BaseQRankSum=  |
| 12466 | chrY | 10023695 | . | A | T   | 819.35   | PASS          | AC=6;AF=0.150;AN=40;BaseQRankSum=  |
| 12467 | chrY | 10023701 | . | C | T   | 1776.41  | PASS          | AC=9;AF=0.265;AN=34;BaseQRankSum=  |
| 12468 | chrY | 10023749 | . | G | C   | 63.71    | PASS          | AC=2;AF=0.250;AN=8;DP=493;FS=0.00  |
| 12469 | chrY | 10023753 | . | T | C   | 63.01    | PASS          | AC=2;AF=0.167;AN=12;DP=463;FS=0.0  |
| 12470 | chrY | 10023755 | . | G | A   | 63.05    | PASS          | AC=2;AF=0.125;AN=16;DP=460;FS=0.0  |
| 12471 | chrY | 10023926 | . | A | G   | 935.09   | PASS          | AC=7;AF=0.438;AN=16;BaseQRankSum=  |
| 12472 | chrY | 10023949 | . | C | T   | 293.12   | PASS          | AC=3;AF=0.136;AN=22;BaseQRankSum=  |
| 12473 | chrY | 10023952 | . | G | C   | 265.53   | PASS          | AC=3;AF=0.125;AN=24;BaseQRankSum=  |
| 12474 | chrY | 10023980 | . | C | A   | 2460.13  | PASS          | AC=7;AF=0.269;AN=26;BaseQRankSum=  |
| 12475 | chrY | 10023990 | . | A | G   | 2870.13  | PASS          | AC=7;AF=0.269;AN=26;BaseQRankSum=  |
| 12476 | chrY | 10023995 | . | T | C   | 309.29   | PASS          | AC=2;AF=0.077;AN=26;BaseQRankSum=  |
| 12477 | chrY | 10023996 | . | G | A   | 309.29   | PASS          | AC=2;AF=0.077;AN=26;BaseQRankSum=  |
| 12478 | chrY | 10024003 | . | T | C   | 331.55   | PASS          | AC=2;AF=0.091;AN=22;BaseQRankSum=  |
| 12479 | chrY | 10024046 | . | C | T   | 569.25   | PASS          | AC=2;AF=0.071;AN=28;BaseQRankSum=  |
| 12480 | chrY | 10024047 | . | G | A   | 4391.45  | PASS          | AC=9;AF=0.375;AN=24;BaseQRankSum=  |
| 12481 | chrY | 10024135 | . | T | C   | 2814.36  | PASS          | AC=8;AF=0.364;AN=22;BaseQRankSum=  |
| 12482 | chrY | 10024136 | . | G | T   | 221.03   | PASS          | AC=2;AF=0.083;AN=24;BaseQRankSum=  |
| 12483 | chrY | 10024143 | . | C | T   | 387.58   | PASS          | AC=3;AF=0.125;AN=24;BaseQRankSum=  |
| 12484 | chrY | 10024145 | . | C | G   | 3036.98  | PASS          | AC=8;AF=0.400;AN=20;BaseQRankSum=  |
| 12485 | chrY | 10024149 | . | T | C   | 3970.98  | PASS          | AC=8;AF=0.400;AN=20;BaseQRankSum=  |
| 12486 | chrY | 10024150 | . | G | A   | 3967.98  | PASS          | AC=8;AF=0.400;AN=20;BaseQRankSum=  |
| 12487 | chrY | 10024162 | . | T | A   | 3856.33  | PASS          | AC=8;AF=0.364;AN=22;BaseQRankSum=  |
| 12488 | chrY | 10024164 | . | T | A   | 365.63   | PASS          | AC=1;AF=0.042;AN=24;BaseQRankSum=  |
| 12489 | chrY | 10024173 | . | T | C   | 379.69   | PASS          | AC=1;AF=0.050;AN=20;BaseQRankSum=  |
| 12490 | chrY | 10024188 | . | C | T   | 1221.16  | PASS          | AC=7;AF=0.350;AN=20;BaseQRankSum=  |
| 12491 | chrY | 10024193 | . | T | C,* | 1116.97  | PASS          | AC=4,2;AF=0.182,0.091;AN=22;BaseQ  |
| 12492 | chrY | 10024195 | . | T | C,* | 1075.97  | PASS          | AC=4,2;AF=0.182,0.091;AN=22;BaseQ  |
| 12493 | chrY | 10024197 | . | T | C,* | 1098.82  | PASS          | AC=4,2;AF=0.182,0.091;AN=22;BaseQ  |
| 12494 | chrY | 10024201 | . | C | G   | 2778.33  | PASS          | AC=8;AF=0.364;AN=22;BaseQRankSum=  |
| 12495 | chrY | 10024205 | . | T | G   | 1251.13  | PASS          | AC=6;AF=0.300;AN=20;BaseQRankSum=  |
| 12496 | chrY | 10024262 | . | C | G   | 131.26   | PASS          | AC=1;AF=0.050;AN=20;BaseQRankSum=  |
| 12497 | chrY | 10024278 | . | C | G   | 41.06    | PASS          | AC=1;AF=0.045;AN=22;BaseQRankSum=  |
| 12498 | chrY | 10024333 | . | T | C   | 1736.10  | PASS          | AC=2;AF=0.500;AN=4;BaseQRankSum=0  |
| 12499 | chrY | 10024353 | . | C | T   | 1824.71  | PASS          | AC=2;AF=0.167;AN=12;BaseQRankSum=  |
| 12500 | chrY | 10024398 | . | G | T   | 2478.27  | PASS          | AC=2;AF=0.200;AN=10;BaseQRankSum=  |
| 12501 | chrY | 10024412 | . | T | C   | 1328.37  | PASS          | AC=6;AF=0.250;AN=24;DP=518;FS=0.0  |
| 12502 | chrY | 10024443 | . | T | C   | 1607.71  | PASS          | AC=2;AF=0.100;AN=20;BaseQRankSum=  |
| 12503 | chrY | 10024452 | . | T | A   | 3054.26  | PASS          | AC=2;AF=0.200;AN=10;BaseQRankSum=  |
| 12504 | chrY | 10024473 | . | G | T   | 3200.90  | PASS          | AC=3;AF=0.250;AN=12;BaseQRankSum=  |
| 12505 | chrY | 10024481 | . | C | T   | 3340.91  | PASS          | AC=3;AF=0.214;AN=14;BaseQRankSum=  |
| 12506 | chrY | 10024489 | . | G | T   | 1228.42  | PASS          | AC=3;AF=0.107;AN=28;BaseQRankSum=  |
| 12507 | chrY | 10024500 | . | C | T   | 1148.42  | PASS          | AC=3;AF=0.107;AN=28;BaseQRankSum=  |
| 12508 | chrY | 10024519 | . | T | A   | 1111.07  | PASS          | AC=3;AF=0.107;AN=28;BaseQRankSum=  |
| 12509 | chrY | 10024533 | . | T | C   | 1161.43  | PASS          | AC=3;AF=0.125;AN=24;BaseQRankSum=  |
| 12510 | chrY | 10024562 | . | C | G   | 567.66   | PASS          | AC=1;AF=0.029;AN=34;BaseQRankSum=  |
| 12511 | chrY | 10024564 | . | C | G   | 5816.99  | PASS          | AC=11;AF=0.324;AN=34;BaseQRankSum= |
| 12512 | chrY | 10024566 | . | C | G   | 109.76   | PASS          | AC=1;AF=0.028;AN=36;BaseQRankSum=  |
| 12513 | chrY | 10024568 | . | C | G   | 5856.38  | PASS          | AC=11;AF=0.289;AN=38;BaseQRankSum= |
| 12514 | chrY | 10024570 | . | C | G   | 110.72   | PASS          | AC=1;AF=0.031;AN=32;BaseQRankSum=  |
| 12515 | chrY | 10024574 | . | G | C,* | 4270.49  | PASS          | AC=1,9;AF=0.025,0.225;AN=40;BaseQ  |
| 12516 | chrY | 10024582 | . | C | T   | 6620.42  | PASS          | AC=11;AF=0.262;AN=42;BaseQRankSum= |
| 12517 | chrY | 10024596 | . | C | T   | 8180.12  | PASS          | AC=12;AF=0.286;AN=42;BaseQRankSum= |
| 12518 | chrY | 10024668 | . | C | T   | 17692.37 | PASS          | AC=13;AF=0.197;AN=66;BaseQ         |
| 12519 | chrY | 10024674 | . | T | C   | 17480.10 | PASS          | AC=13;AF=0.203;AN=64;BaseQ         |
| 12520 | chrY | 10024678 | . | T | C   | 17660.75 | PASS          | AC=13;AF=0.197;AN=66;BaseQ         |
| 12521 | chrY | 10024698 | . | A | G   | 16887.34 | PASS          | AC=22;AF=0.324;AN=68;BaseQ         |
| 12522 | chrY | 10024718 | . | C | G   | 5103.16  | PASS          | AC=9;AF=0.132;AN=68;BaseQRankSum=  |
| 12523 | chrY | 10024732 | . | C | G   | 5485.26  | PASS          | AC=9;AF=0.129;AN=70;BaseQRankSum=  |
| 12524 | chrY | 10024736 | . | T | C,* | 8813.72  | PASS          | AC=9,22;AF=0.129,0.314;AN=70;Base  |
| 12525 | chrY | 10024740 | . | T | C,* | 8540.69  | PASS          | AC=9,22;AF=0.129,0.314;AN=70;Base  |
| 12526 | chrY | 10024744 | . | C | T   | 4992.10  | PASS          | AC=9;AF=0.129;AN=70;BaseQRankSum=  |
| 12527 | chrY | 10024745 | . | A | G   | 4932.59  | PASS          | AC=9;AF=0.129;AN=70;BaseQRankSum=  |
| 12528 | chrY | 10024752 | . | C | G   | 19140.96 | PASS          | AC=32;AF=0.457;AN=70;BaseQ         |
| 12529 | chrY | 10024758 | . | T | C   | 20334.66 | PASS          | AC=32;AF=0.457;AN=70;BaseQ         |
| 12530 | chrY | 10024764 | . | C | T   | 69.43    | PASS          | AC=1;AF=0.014;AN=70;BaseQRankSum=  |
| 12531 | chrY | 10024769 | . | G | A   | 21139.09 | PASS          | AC=33;AF=0.471;AN=70;BaseQ         |
| 12532 | chrY | 10024824 | . | T | C   | 9081.36  | PASS          | AC=32;AF=0.457;AN=70;BaseQRankSum= |
| 12533 | chrY | 10024826 | . | G | A   | 88.54    | my_snp_filter | AC=3;AF=0.043;AN=70;BaseQ          |
| 12534 | chrY | 10024841 | . | T | A   | 54.90    | my_snp_filter | AC=2;AF=0.029;AN=70;BaseQ          |
| 12535 | chrY | 10024851 | . | C | T   | 1808.99  | my_snp_filter | AC=18;AF=0.257;AN=70;BaseQ         |
| 12536 | chrY | 10024857 | . | A | T   | 7864.41  | PASS          | AC=31;AF=0.443;AN=70;BaseQRankSum= |
| 12537 | chrY | 10024870 | . | A | C   | 4330.01  | PASS          | AC=19;AF=0.271;AN=70;BaseQRankSum= |
| 12538 | chrY | 10024878 | . | G | A   | 1098.92  | PASS          | AC=11;AF=0.157;AN=70;BaseQRankSum= |
| 12539 | chrY | 10024881 | . | C | A   | 7182.68  | PASS          | AC=26;AF=0.371;AN=70;BaseQRankSum= |
| 12540 | chrY | 10024882 | . | A | G   | 4051.20  | PASS          | AC=21;AF=0.300;AN=70;BaseQRankSum= |

|       |      |          |   |   |     |          |               |                                             |
|-------|------|----------|---|---|-----|----------|---------------|---------------------------------------------|
| 12541 | chrY | 10024890 | . | T | C   | 4785.82  | PASS          | AC=23;AF=0.329;AN=70;BaseQRankSum=          |
| 12542 | chrY | 10024912 | . | A | T   | 17188.42 | PASS          | AC=33;AF=0.471;AN=70;BaseQRankSum=          |
| 12543 | chrY | 10024965 | . | C | T   | 12284.10 | PASS          | AC=14;AF=0.219;AN=64;BaseQRankSum=          |
| 12544 | chrY | 10024966 | . | C | G,A | 8494.97  | PASS          | AC=9,5;AF=0.141,0.078;AN=64;BaseQRankSum=   |
| 12545 | chrY | 10024974 | . | C | T   | 1882.26  | PASS          | AC=9;AF=0.132;AN=68;BaseQRankSum=           |
| 12546 | chrY | 10024975 | . | A | G   | 13227.91 | PASS          | AC=14;AF=0.206;AN=68;BaseQRankSum=          |
| 12547 | chrY | 10024995 | . | T | C   | 12538.84 | PASS          | AC=14;AF=0.219;AN=64;BaseQRankSum=          |
| 12548 | chrY | 10024996 | . | A | C   | 12540.12 | PASS          | AC=14;AF=0.219;AN=64;BaseQRankSum=          |
| 12549 | chrY | 10025029 | . | C | T   | 89.02    | my_snp_filter | AC=2;AF=0.029;AN=68;BaseQRankSum=           |
| 12550 | chrY | 10025037 | . | A | C,T | 6037.67  | PASS          | AC=13,16;AF=0.197,0.242;AN=66;BaseQRankSum= |
| 12551 | chrY | 10025052 | . | A | T   | 300.28   | my_snp_filter | AC=2;AF=0.029;AN=68;BaseQRankSum=           |
| 12552 | chrY | 10025058 | . | C | T   | 288.52   | my_snp_filter | AC=2;AF=0.029;AN=68;BaseQRankSum=           |
| 12553 | chrY | 10025067 | . | A | G   | 19929.79 | PASS          | AC=30;AF=0.441;AN=68;BaseQRankSum=          |
| 12554 | chrY | 10025072 | . | C | G   | 452.02   | PASS          | AC=2;AF=0.029;AN=68;BaseQRankSum=           |
| 12555 | chrY | 10025078 | . | G | C   | 18699.35 | PASS          | AC=30;AF=0.441;AN=68;BaseQRankSum=          |
| 12556 | chrY | 10025081 | . | C | T   | 481.79   | PASS          | AC=3;AF=0.044;AN=68;BaseQRankSum=           |
| 12557 | chrY | 10025083 | . | G | A   | 494.69   | PASS          | AC=3;AF=0.044;AN=68;BaseQRankSum=           |
| 12558 | chrY | 10025112 | . | C | T   | 10881.12 | PASS          | AC=25;AF=0.368;AN=68;BaseQRankSum=          |
| 12559 | chrY | 10025135 | . | G | A   | 1950.05  | PASS          | AC=9;AF=0.136;AN=66;BaseQRankSum=           |
| 12560 | chrY | 10025140 | . | C | T   | 14736.55 | PASS          | AC=22;AF=0.355;AN=62;BaseQRankSum=          |
| 12561 | chrY | 10025156 | . | C | T   | 11034.17 | PASS          | AC=18;AF=0.290;AN=62;BaseQRankSum=          |
| 12562 | chrY | 10025161 | . | G | C   | 2386.96  | PASS          | AC=10;AF=0.152;AN=66;BaseQRankSum=          |
| 12563 | chrY | 10025176 | . | G | A   | 14080.18 | PASS          | AC=20;AF=0.357;AN=56;BaseQRankSum=          |
| 12564 | chrY | 10025187 | . | C | G   | 2830.11  | PASS          | AC=12;AF=0.200;AN=60;BaseQRankSum=          |
| 12565 | chrY | 10025203 | . | C | T   | 3140.93  | PASS          | AC=14;AF=0.250;AN=56;BaseQRankSum=          |
| 12566 | chrY | 10025212 | . | G | T   | 111.68   | PASS          | AC=1;AF=0.017;AN=60;BaseQRankSum=           |
| 12567 | chrY | 10025216 | . | A | T   | 68.59    | PASS          | AC=1;AF=0.016;AN=62;BaseQRankSum=           |
| 12568 | chrY | 10025236 | . | C | T   | 3085.54  | PASS          | AC=14;AF=0.241;AN=58;BaseQRankSum=          |
| 12569 | chrY | 10025246 | . | C | A   | 1638.82  | PASS          | AC=6;AF=0.103;AN=58;BaseQRankSum=           |
| 12570 | chrY | 10025263 | . | G | A   | 3100.98  | PASS          | AC=12;AF=0.214;AN=56;BaseQRankSum=          |
| 12571 | chrY | 10025277 | . | T | C   | 2925.17  | PASS          | AC=12;AF=0.200;AN=60;BaseQRankSum=          |
| 12572 | chrY | 10025295 | . | T | A   | 2720.09  | PASS          | AC=10;AF=0.167;AN=60;BaseQRankSum=          |
| 12573 | chrY | 10025322 | . | T | A   | 2674.71  | PASS          | AC=9;AF=0.150;AN=60;BaseQRankSum=           |
| 12574 | chrY | 10025327 | . | C | G   | 2521.45  | PASS          | AC=9;AF=0.150;AN=60;BaseQRankSum=           |
| 12575 | chrY | 10025342 | . | T | C   | 2156.01  | PASS          | AC=8;AF=0.129;AN=62;BaseQRankSum=           |
| 12576 | chrY | 10025344 | . | C | G   | 2163.05  | PASS          | AC=8;AF=0.129;AN=62;BaseQRankSum=           |
| 12577 | chrY | 10025351 | . | T | C   | 1874.77  | PASS          | AC=8;AF=0.121;AN=66;BaseQRankSum=           |
| 12578 | chrY | 10025381 | . | C | T   | 1231.83  | PASS          | AC=7;AF=0.103;AN=68;BaseQRankSum=           |
| 12579 | chrY | 10025382 | . | A | G   | 1272.03  | PASS          | AC=7;AF=0.100;AN=70;BaseQRankSum=           |
| 12580 | chrY | 10025385 | . | G | T   | 785.06   | PASS          | AC=4;AF=0.057;AN=70;BaseQRankSum=           |
| 12581 | chrY | 10025388 | . | T | G   | 1515.14  | PASS          | AC=7;AF=0.100;AN=70;BaseQRankSum=           |
| 12582 | chrY | 10025393 | . | C | A   | 1106.08  | PASS          | AC=5;AF=0.071;AN=70;BaseQRankSum=           |
| 12583 | chrY | 10025403 | . | C | T   | 1136.96  | PASS          | AC=5;AF=0.071;AN=70;BaseQRankSum=           |
| 12584 | chrY | 10025408 | . | T | C   | 1128.37  | PASS          | AC=5;AF=0.076;AN=66;BaseQRankSum=           |
| 12585 | chrY | 10025415 | . | T | C   | 782.98   | PASS          | AC=4;AF=0.061;AN=66;BaseQRankSum=           |
| 12586 | chrY | 10025443 | . | G | T   | 1426.13  | PASS          | AC=7;AF=0.117;AN=60;BaseQRankSum=           |
| 12587 | chrY | 10025444 | . | G | C   | 1469.69  | PASS          | AC=7;AF=0.117;AN=60;BaseQRankSum=           |
| 12588 | chrY | 10025447 | . | C | T   | 1544.80  | PASS          | AC=7;AF=0.121;AN=58;BaseQRankSum=           |
| 12589 | chrY | 10025454 | . | A | C   | 1405.60  | PASS          | AC=7;AF=0.117;AN=60;BaseQRankSum=           |
| 12590 | chrY | 10025470 | . | G | A   | 1767.29  | PASS          | AC=11;AF=0.196;AN=56;BaseQRankSum=          |
| 12591 | chrY | 10025473 | . | C | T   | 844.96   | PASS          | AC=6;AF=0.107;AN=56;BaseQRankSum=           |
| 12592 | chrY | 10025474 | . | T | G   | 1810.21  | PASS          | AC=10;AF=0.179;AN=56;BaseQRankSum=          |
| 12593 | chrY | 10025478 | . | G | T   | 2004.47  | PASS          | AC=10;AF=0.172;AN=58;BaseQRankSum=          |
| 12594 | chrY | 10025499 | . | G | A   | 2304.67  | PASS          | AC=10;AF=0.167;AN=60;BaseQRankSum=          |
| 12595 | chrY | 10025515 | . | T | C   | 2664.39  | PASS          | AC=12;AF=0.194;AN=62;BaseQRankSum=          |
| 12596 | chrY | 10025525 | . | C | T   | 2740.12  | PASS          | AC=12;AF=0.200;AN=60;BaseQRankSum=          |
| 12597 | chrY | 10025538 | . | A | G   | 2875.58  | PASS          | AC=14;AF=0.226;AN=62;BaseQRankSum=          |
| 12598 | chrY | 10025546 | . | G | A   | 2816.34  | PASS          | AC=14;AF=0.226;AN=62;BaseQRankSum=          |
| 12599 | chrY | 10025566 | . | G | C   | 2895.55  | PASS          | AC=13;AF=0.224;AN=58;BaseQRankSum=          |
| 12600 | chrY | 10025572 | . | G | A   | 2843.44  | PASS          | AC=13;AF=0.224;AN=58;BaseQRankSum=          |
| 12601 | chrY | 10025577 | . | A | G   | 2613.86  | PASS          | AC=12;AF=0.207;AN=58;BaseQRankSum=          |
| 12602 | chrY | 10025580 | . | G | A   | 2695.85  | PASS          | AC=13;AF=0.224;AN=58;BaseQRankSum=          |
| 12603 | chrY | 10025620 | . | C | A   | 938.20   | PASS          | AC=17;AF=0.274;AN=62;BaseQRankSum=          |
| 12604 | chrY | 10025645 | . | C | T   | 34.40    | PASS          | AC=1;AF=0.015;AN=66;BaseQRankSum=           |
| 12605 | chrY | 10025648 | . | G | A   | 850.37   | PASS          | AC=12;AF=0.200;AN=60;BaseQRankSum=          |
| 12606 | chrY | 10025649 | . | T | C   | 34.55    | PASS          | AC=1;AF=0.016;AN=64;BaseQRankSum=           |
| 12607 | chrY | 10025650 | . | G | A   | 34.49    | PASS          | AC=1;AF=0.016;AN=64;BaseQRankSum=           |
| 12608 | chrY | 10025652 | . | G | T   | 817.38   | PASS          | AC=12;AF=0.200;AN=60;BaseQRankSum=          |
| 12609 | chrY | 10025660 | . | C | T   | 557.59   | PASS          | AC=8;AF=0.125;AN=64;BaseQRankSum=           |
| 12610 | chrY | 10025669 | . | A | C   | 141.42   | PASS          | AC=5;AF=0.078;AN=64;BaseQRankSum=           |
| 12611 | chrY | 10025670 | . | C | G   | 141.16   | PASS          | AC=5;AF=0.081;AN=62;BaseQRankSum=           |
| 12612 | chrY | 10025676 | . | T | C   | 150.81   | PASS          | AC=4;AF=0.065;AN=62;BaseQRankSum=           |
| 12613 | chrY | 10025831 | . | A | G   | 441.17   | PASS          | AC=4;AF=0.059;AN=68;BaseQRankSum=           |
| 12614 | chrY | 10025836 | . | T | C   | 436.33   | PASS          | AC=4;AF=0.061;AN=66;BaseQRankSum=           |
| 12615 | chrY | 10025848 | . | G | C   | 89.19    | my_snp_filter | AC=3;AF=0.044;AN=68;BaseQRankSum=           |
| 12616 | chrY | 10025860 | . | A | T   | 83.38    | my_snp_filter | AC=3;AF=0.045;AN=66;BaseQRankSum=           |

|       |      |          |   |   |     |         |               |                                    |
|-------|------|----------|---|---|-----|---------|---------------|------------------------------------|
| 12617 | chrY | 10025862 | . | G | T   | 83.81   | my_snp_filter | AC=3;AF=0.045;AN=66;BaseQ          |
| 12618 | chrY | 10025864 | . | T | C   | 534.42  | PASS          | AC=8;AF=0.129;AN=62;BaseQRankSum=  |
| 12619 | chrY | 10025865 | . | G | A   | 823.12  | PASS          | AC=9;AF=0.145;AN=62;BaseQRankSum=  |
| 12620 | chrY | 10025908 | . | A | G   | 887.15  | PASS          | AC=13;AF=0.197;AN=66;BaseQRankSum= |
| 12621 | chrY | 10025912 | . | C | T   | 5434.14 | PASS          | AC=41;AF=0.603;AN=68;BaseQRankSum= |
| 12622 | chrY | 10025922 | . | G | A   | 913.93  | my_snp_filter | AC=13;AF=0.191;AN=68;BaseQ         |
| 12623 | chrY | 10025953 | . | G | A   | 156.71  | PASS          | AC=5;AF=0.071;AN=70;BaseQRankSum=  |
| 12624 | chrY | 10025967 | . | A | C   | 83.10   | my_snp_filter | AC=3;AF=0.043;AN=70;BaseQ          |
| 12625 | chrY | 10025979 | . | C | G   | 70.65   | my_snp_filter | AC=2;AF=0.029;AN=70;BaseQ          |
| 12626 | chrY | 10025986 | . | C | T   | 73.22   | my_snp_filter | AC=2;AF=0.029;AN=68;BaseQ          |
| 12627 | chrY | 10025987 | . | A | G   | 80.77   | my_snp_filter | AC=2;AF=0.029;AN=68;BaseQ          |
| 12628 | chrY | 10026020 | . | C | T   | 658.20  | PASS          | AC=14;AF=0.206;AN=68;BaseQRankSum= |
| 12629 | chrY | 10026027 | . | C | G   | 113.42  | my_snp_filter | AC=3;AF=0.043;AN=70;BaseQ          |
| 12630 | chrY | 10026028 | . | A | G,T | 242.49  | my_snp_filter | AC=4,3;AF=0.057,0.043;AN=          |
| 12631 | chrY | 10026035 | . | T | G   | 1903.82 | PASS          | AC=21;AF=0.318;AN=66;BaseQRankSum= |
| 12632 | chrY | 10026039 | . | C | T   | 109.45  | my_snp_filter | AC=5;AF=0.071;AN=70;BaseQ          |
| 12633 | chrY | 10026049 | . | G | T   | 53.68   | my_snp_filter | AC=3;AF=0.043;AN=70;BaseQ          |
| 12634 | chrY | 10026050 | . | T | A,G | 1770.42 | PASS          | AC=6,16;AF=0.091,0.242;AN=66;BaseQ |
| 12635 | chrY | 10026051 | . | C | T   | 97.96   | my_snp_filter | AC=3;AF=0.043;AN=70;BaseQ          |
| 12636 | chrY | 10026087 | . | T | C   | 1288.29 | PASS          | AC=15;AF=0.234;AN=64;BaseQRankSum= |
| 12637 | chrY | 10026093 | . | A | T,C | 1102.91 | PASS          | AC=4,8;AF=0.065,0.129;AN=62;BaseQ  |
| 12638 | chrY | 10026098 | . | C | A   | 1169.22 | PASS          | AC=14;AF=0.219;AN=64;BaseQRankSum= |
| 12639 | chrY | 10026109 | . | G | A   | 896.58  | PASS          | AC=12;AF=0.182;AN=66;BaseQRankSum= |
| 12640 | chrY | 10026117 | . | G | A   | 230.05  | PASS          | AC=7;AF=0.109;AN=64;BaseQRankSum=  |
| 12641 | chrY | 10026122 | . | G | C   | 861.76  | PASS          | AC=8;AF=0.133;AN=60;BaseQRankSum=  |
| 12642 | chrY | 10026126 | . | G | A   | 820.60  | PASS          | AC=7;AF=0.125;AN=56;BaseQRankSum=  |
| 12643 | chrY | 10026155 | . | C | G   | 109.34  | PASS          | AC=3;AF=0.071;AN=42;BaseQRankSum=  |
| 12644 | chrY | 10026158 | . | C | T   | 117.37  | PASS          | AC=2;AF=0.048;AN=42;BaseQRankSum=  |
| 12645 | chrY | 10026165 | . | T | C   | 95.76   | PASS          | AC=3;AF=0.065;AN=46;BaseQRankSum=  |
| 12646 | chrY | 10026177 | . | A | C   | 43.24   | PASS          | AC=1;AF=0.019;AN=52;BaseQRankSum=  |
| 12647 | chrY | 10026183 | . | T | A   | 43.07   | PASS          | AC=1;AF=0.019;AN=54;BaseQRankSum=  |
| 12648 | chrY | 10026187 | . | C | A   | 42.39   | PASS          | AC=1;AF=0.019;AN=52;BaseQRankSum=  |
| 12649 | chrY | 10026340 | . | T | A   | 36.13   | PASS          | AC=1;AF=0.019;AN=54;BaseQRankSum=  |
| 12650 | chrY | 10026344 | . | G | A   | 36.67   | PASS          | AC=1;AF=0.019;AN=54;BaseQRankSum=  |
| 12651 | chrY | 10026349 | . | A | T   | 62.12   | PASS          | AC=2;AF=0.034;AN=58;BaseQRankSum=  |
| 12652 | chrY | 10026376 | . | A | T   | 299.73  | PASS          | AC=4;AF=0.059;AN=68;BaseQRankSum=  |
| 12653 | chrY | 10026393 | . | A | C   | 488.77  | PASS          | AC=5;AF=0.076;AN=66;BaseQRankSum=  |
| 12654 | chrY | 10026402 | . | A | G   | 578.41  | PASS          | AC=5;AF=0.076;AN=66;BaseQRankSum=  |
| 12655 | chrY | 10026425 | . | T | A   | 614.59  | PASS          | AC=5;AF=0.076;AN=66;BaseQRankSum=  |
| 12656 | chrY | 10026454 | . | G | A   | 561.81  | PASS          | AC=5;AF=0.076;AN=66;BaseQRankSum=  |
| 12657 | chrY | 10026480 | . | A | G   | 424.12  | PASS          | AC=5;AF=0.083;AN=60;BaseQRankSum=  |
| 12658 | chrY | 10026496 | . | T | C   | 269.58  | PASS          | AC=4;AF=0.071;AN=56;BaseQRankSum=  |
| 12659 | chrY | 10026512 | . | T | G   | 126.76  | PASS          | AC=3;AF=0.054;AN=56;BaseQRankSum=  |
| 12660 | chrY | 10026516 | . | G | A   | 98.97   | PASS          | AC=3;AF=0.056;AN=54;BaseQRankSum=  |
| 12661 | chrY | 10026605 | . | C | T   | 43.06   | my_snp_filter | AC=2;AF=0.042;AN=48;BaseQ          |
| 12662 | chrY | 10026637 | . | C | A   | 440.18  | PASS          | AC=5;AF=0.100;AN=50;BaseQRankSum=  |
| 12663 | chrY | 10026645 | . | A | G   | 440.21  | PASS          | AC=5;AF=0.100;AN=50;BaseQRankSum=  |
| 12664 | chrY | 10026654 | . | C | A   | 469.36  | PASS          | AC=6;AF=0.115;AN=52;BaseQRankSum=  |
| 12665 | chrY | 10026685 | . | G | A   | 405.64  | PASS          | AC=8;AF=0.125;AN=64;BaseQRankSum=  |
| 12666 | chrY | 10026730 | . | G | A   | 630.26  | PASS          | AC=8;AF=0.118;AN=68;BaseQRankSum=  |
| 12667 | chrY | 10026737 | . | C | T   | 31.49   | my_snp_filter | AC=1;AF=0.014;AN=70;BaseQ          |
| 12668 | chrY | 10026747 | . | G | A   | 511.01  | PASS          | AC=8;AF=0.121;AN=66;BaseQRankSum=  |
| 12669 | chrY | 10026755 | . | G | T   | 263.25  | PASS          | AC=4;AF=0.061;AN=66;BaseQRankSum=  |
| 12670 | chrY | 10026758 | . | T | C   | 228.52  | PASS          | AC=3;AF=0.047;AN=64;BaseQRankSum=  |
| 12671 | chrY | 10026763 | . | A | G   | 230.63  | PASS          | AC=4;AF=0.061;AN=66;BaseQRankSum=  |
| 12672 | chrY | 10026766 | . | G | A   | 186.19  | PASS          | AC=4;AF=0.065;AN=62;BaseQRankSum=  |
| 12673 | chrY | 10027021 | . | G | C,* | 303.98  | PASS          | AC=2,2;AF=0.100,0.100;AN=20;BaseQ  |
| 12674 | chrY | 10027040 | . | C | T   | 58.91   | PASS          | AC=2;AF=0.100;AN=20;BaseQRankSum=  |
| 12675 | chrY | 10027041 | . | A | G   | 63.22   | PASS          | AC=2;AF=0.100;AN=20;BaseQRankSum=  |
| 12676 | chrY | 10027046 | . | C | T   | 451     | PASS          | AC=5;AF=0.250;AN=20;BaseQRankSum=  |
| 12677 | chrY | 10027048 | . | C | T   | 456.96  | PASS          | AC=2;AF=0.100;AN=20;BaseQRankSum=  |
| 12678 | chrY | 10027049 | . | A | G   | 63.26   | PASS          | AC=2;AF=0.100;AN=20;BaseQRankSum=  |
| 12679 | chrY | 10027056 | . | G | C   | 440.76  | PASS          | AC=5;AF=0.250;AN=20;BaseQRankSum=  |
| 12680 | chrY | 10027057 | . | G | A   | 440.76  | PASS          | AC=5;AF=0.250;AN=20;BaseQRankSum=  |
| 12681 | chrY | 10027100 | . | A | C   | 899.34  | PASS          | AC=7;AF=0.350;AN=20;BaseQRankSum=  |
| 12682 | chrY | 10027110 | . | T | C   | 931.81  | PASS          | AC=7;AF=0.350;AN=20;BaseQRankSum=  |
| 12683 | chrY | 10027111 | . | G | A   | 931.81  | PASS          | AC=7;AF=0.350;AN=20;BaseQRankSum=  |
| 12684 | chrY | 10027136 | . | G | T   | 170.78  | PASS          | AC=3;AF=0.150;AN=20;BaseQRankSum=  |
| 12685 | chrY | 10027152 | . | A | G   | 774.19  | PASS          | AC=5;AF=0.278;AN=18;BaseQRankSum=  |
| 12686 | chrY | 10027166 | . | T | C   | 728.89  | PASS          | AC=5;AF=0.250;AN=20;BaseQRankSum=  |
| 12687 | chrY | 10027167 | . | A | G   | 232.09  | PASS          | AC=1;AF=0.045;AN=22;BaseQRankSum=  |
| 12688 | chrY | 10027188 | . | T | G   | 588.77  | PASS          | AC=6;AF=0.188;AN=32;BaseQRankSum=  |
| 12689 | chrY | 10027206 | . | T | C   | 686.09  | PASS          | AC=7;AF=0.159;AN=44;BaseQRankSum=  |
| 12690 | chrY | 10027256 | . | G | T   | 1132.46 | PASS          | AC=7;AF=0.121;AN=58;BaseQRankSum=  |
| 12691 | chrY | 10027261 | . | C | T   | 1281.21 | PASS          | AC=7;AF=0.113;AN=62;BaseQRankSum=  |
| 12692 | chrY | 10027262 | . | C | T   | 1278.25 | PASS          | AC=7;AF=0.117;AN=60;BaseQRankSum=  |

|       |      |          |   |   |     |         |               |                                    |
|-------|------|----------|---|---|-----|---------|---------------|------------------------------------|
| 12693 | chrY | 10027271 | . | C | T   | 1236.47 | PASS          | AC=7;AF=0.109;AN=64;BaseQRankSum=  |
| 12694 | chrY | 10027303 | . | A | C   | 1113.90 | PASS          | AC=7;AF=0.100;AN=70;BaseQRankSum=  |
| 12695 | chrY | 10027315 | . | A | C   | 1184.31 | PASS          | AC=7;AF=0.100;AN=70;BaseQRankSum=  |
| 12696 | chrY | 10027332 | . | G | A   | 1086.39 | PASS          | AC=7;AF=0.100;AN=70;BaseQRankSum=  |
| 12697 | chrY | 10027395 | . | A | T   | 508.70  | PASS          | AC=7;AF=0.103;AN=68;BaseQRankSum=  |
| 12698 | chrY | 10027399 | . | G | A   | 90.97   | PASS          | AC=2;AF=0.029;AN=68;BaseQRankSum=  |
| 12699 | chrY | 10027402 | . | T | C   | 366.11  | PASS          | AC=5;AF=0.074;AN=68;BaseQRankSum=  |
| 12700 | chrY | 10027407 | . | A | C   | 338.92  | PASS          | AC=5;AF=0.074;AN=68;BaseQRankSum=  |
| 12701 | chrY | 10027473 | . | C | A   | 842.25  | PASS          | AC=10;AF=0.147;AN=68;BaseQRankSum= |
| 12702 | chrY | 10027474 | . | C | G   | 172.91  | PASS          | AC=5;AF=0.074;AN=68;BaseQRankSum=  |
| 12703 | chrY | 10027481 | . | A | C   | 257.97  | PASS          | AC=3;AF=0.047;AN=64;BaseQRankSum=  |
| 12704 | chrY | 10027483 | . | A | G   | 31.14   | PASS          | AC=1;AF=0.015;AN=68;BaseQRankSum=  |
| 12705 | chrY | 10027488 | . | T | G   | 528.06  | PASS          | AC=10;AF=0.147;AN=68;BaseQRankSum= |
| 12706 | chrY | 10027490 | . | A | T   | 244.68  | PASS          | AC=3;AF=0.043;AN=70;BaseQRankSum=  |
| 12707 | chrY | 10027493 | . | T | C   | 1103.49 | PASS          | AC=12;AF=0.176;AN=68;BaseQRankSum= |
| 12708 | chrY | 10027519 | . | C | T   | 1713.44 | PASS          | AC=16;AF=0.229;AN=70;BaseQRankSum= |
| 12709 | chrY | 10027547 | . | A | C   | 739.30  | PASS          | AC=14;AF=0.200;AN=70;BaseQRankSum= |
| 12710 | chrY | 10027558 | . | G | T   | 52.22   | my_snp_filter | AC=2;AF=0.029;AN=70;BaseQ          |
| 12711 | chrY | 10027569 | . | G | A   | 893.43  | PASS          | AC=14;AF=0.200;AN=70;BaseQRankSum= |
| 12712 | chrY | 10027571 | . | A | T   | 448.72  | PASS          | AC=6;AF=0.086;AN=70;BaseQRankSum=  |
| 12713 | chrY | 10027580 | . | T | A   | 1911.69 | PASS          | AC=23;AF=0.338;AN=68;BaseQRankSum= |
| 12714 | chrY | 10027581 | . | T | C   | 30.80   | PASS          | AC=1;AF=0.014;AN=70;BaseQRankSum=  |
| 12715 | chrY | 10027605 | . | C | T   | 264.40  | PASS          | AC=4;AF=0.063;AN=64;BaseQRankSum=  |
| 12716 | chrY | 10027609 | . | G | A   | 305.18  | PASS          | AC=5;AF=0.078;AN=64;BaseQRankSum=  |
| 12717 | chrY | 10028000 | . | A | G   | 317.47  | PASS          | AC=5;AF=0.076;AN=66;BaseQRankSum=  |
| 12718 | chrY | 10028002 | . | A | G   | 347.11  | PASS          | AC=6;AF=0.091;AN=66;BaseQRankSum=  |
| 12719 | chrY | 10028003 | . | T | C   | 357.89  | PASS          | AC=5;AF=0.078;AN=64;BaseQRankSum=  |
| 12720 | chrY | 10028008 | . | T | C   | 361.40  | PASS          | AC=6;AF=0.094;AN=64;BaseQRankSum=  |
| 12721 | chrY | 10028033 | . | T | C   | 397.02  | PASS          | AC=7;AF=0.117;AN=60;BaseQRankSum=  |
| 12722 | chrY | 10028053 | . | G | A   | 36.31   | my_snp_filter | AC=4;AF=0.063;AN=64;BaseQ          |
| 12723 | chrY | 10028084 | . | A | T   | 894     | PASS          | AC=7;AF=0.106;AN=66;BaseQRankSum=  |
| 12724 | chrY | 10028085 | . | T | C   | 892.35  | PASS          | AC=7;AF=0.106;AN=66;BaseQRankSum=  |
| 12725 | chrY | 10028103 | . | G | A   | 1540.15 | PASS          | AC=23;AF=0.329;AN=70;BaseQRankSum= |
| 12726 | chrY | 10028126 | . | T | C   | 36.74   | my_snp_filter | AC=4;AF=0.057;AN=70;BaseQ          |
| 12727 | chrY | 10028141 | . | G | A   | 578.87  | PASS          | AC=14;AF=0.200;AN=70;BaseQRankSum= |
| 12728 | chrY | 10028169 | . | T | C   | 5601.37 | PASS          | AC=29;AF=0.426;AN=68;BaseQRankSum= |
| 12729 | chrY | 10028170 | . | G | A   | 1102.22 | PASS          | AC=16;AF=0.235;AN=68;BaseQRankSum= |
| 12730 | chrY | 10028171 | . | T | A   | 121.91  | PASS          | AC=2;AF=0.029;AN=68;BaseQRankSum=  |
| 12731 | chrY | 10028173 | . | G | A   | 124.81  | PASS          | AC=2;AF=0.029;AN=70;BaseQRankSum=  |
| 12732 | chrY | 10028176 | . | G | A   | 2207.92 | PASS          | AC=23;AF=0.329;AN=70;BaseQRankSum= |
| 12733 | chrY | 10028178 | . | C | G   | 859.26  | PASS          | AC=15;AF=0.214;AN=70;BaseQRankSum= |
| 12734 | chrY | 10028180 | . | A | G   | 5445.81 | PASS          | AC=29;AF=0.414;AN=70;BaseQRankSum= |
| 12735 | chrY | 10028188 | . | T | C   | 679.64  | PASS          | AC=14;AF=0.200;AN=70;BaseQRankSum= |
| 12736 | chrY | 10028194 | . | C | A   | 1814.40 | PASS          | AC=20;AF=0.286;AN=70;BaseQRankSum= |
| 12737 | chrY | 10028195 | . | A | G   | 47.27   | my_snp_filter | AC=3;AF=0.043;AN=70;BaseQ          |
| 12738 | chrY | 10028201 | . | C | T   | 1857.36 | PASS          | AC=20;AF=0.286;AN=70;BaseQRankSum= |
| 12739 | chrY | 10028205 | . | G | A   | 286.69  | my_snp_filter | AC=10;AF=0.143;AN=70;BaseQ         |
| 12740 | chrY | 10028206 | . | C | G   | 542.83  | PASS          | AC=11;AF=0.157;AN=70;BaseQRankSum= |
| 12741 | chrY | 10028213 | . | T | A,C | 1087.15 | PASS          | AC=8,10;AF=0.114,0.143;AN=70;BaseQ |
| 12742 | chrY | 10028215 | . | A | G   | 533.10  | PASS          | AC=11;AF=0.157;AN=70;BaseQRankSum= |
| 12743 | chrY | 10028217 | . | T | A   | 211.43  | my_snp_filter | AC=7;AF=0.100;AN=70;BaseQ          |
| 12744 | chrY | 10028227 | . | T | C   | 1463.55 | PASS          | AC=19;AF=0.271;AN=70;BaseQRankSum= |
| 12745 | chrY | 10028228 | . | G | A   | 1458.39 | PASS          | AC=19;AF=0.271;AN=70;BaseQRankSum= |
| 12746 | chrY | 10028248 | . | G | T   | 371.26  | PASS          | AC=11;AF=0.157;AN=70;BaseQRankSum= |
| 12747 | chrY | 10028259 | . | G | A   | 289.77  | PASS          | AC=5;AF=0.074;AN=68;BaseQRankSum=  |
| 12748 | chrY | 10028262 | . | A | C   | 78.11   | PASS          | AC=2;AF=0.029;AN=68;BaseQRankSum=  |
| 12749 | chrY | 10028266 | . | G | C   | 496.76  | PASS          | AC=7;AF=0.109;AN=64;BaseQRankSum=  |
| 12750 | chrY | 10028284 | . | G | A   | 107.71  | PASS          | AC=3;AF=0.043;AN=70;BaseQRankSum=  |
| 12751 | chrY | 10028363 | . | C | T   | 123     | PASS          | AC=1;AF=0.015;AN=68;BaseQRankSum=  |
| 12752 | chrY | 10028370 | . | A | T   | 119.64  | PASS          | AC=1;AF=0.015;AN=68;BaseQRankSum=  |
| 12753 | chrY | 10028411 | . | G | C   | 173.69  | PASS          | AC=2;AF=0.029;AN=70;BaseQRankSum=  |
| 12754 | chrY | 10028419 | . | A | T   | 173.65  | PASS          | AC=2;AF=0.029;AN=70;BaseQRankSum=  |
| 12755 | chrY | 10028705 | . | A | G   | 155.15  | PASS          | AC=4;AF=0.057;AN=70;BaseQRankSum=  |
| 12756 | chrY | 10028717 | . | A | T   | 130.79  | PASS          | AC=3;AF=0.043;AN=70;BaseQRankSum=  |
| 12757 | chrY | 10028739 | . | T | C   | 121.70  | PASS          | AC=3;AF=0.043;AN=70;BaseQRankSum=  |
| 12758 | chrY | 10028743 | . | G | T   | 121.32  | PASS          | AC=3;AF=0.043;AN=70;BaseQRankSum=  |
| 12759 | chrY | 10028764 | . | A | C   | 662.87  | PASS          | AC=10;AF=0.143;AN=70;BaseQRankSum= |
| 12760 | chrY | 10028769 | . | G | C   | 418.13  | PASS          | AC=5;AF=0.071;AN=70;BaseQRankSum=  |
| 12761 | chrY | 10028771 | . | T | A,C | 796.69  | PASS          | AC=9,3;AF=0.129,0.043;AN=70;BaseQ  |
| 12762 | chrY | 10028772 | . | G | A   | 134.32  | PASS          | AC=3;AF=0.043;AN=70;BaseQRankSum=  |
| 12763 | chrY | 10028777 | . | C | T   | 127.89  | PASS          | AC=3;AF=0.043;AN=70;BaseQRankSum=  |
| 12764 | chrY | 10028780 | . | T | C   | 889.74  | PASS          | AC=12;AF=0.171;AN=70;BaseQRankSum= |
| 12765 | chrY | 10028783 | . | T | C   | 883.72  | PASS          | AC=12;AF=0.171;AN=70;BaseQRankSum= |
| 12766 | chrY | 10028786 | . | T | G   | 115.79  | my_snp_filter | AC=3;AF=0.043;AN=70;BaseQ          |
| 12767 | chrY | 10028798 | . | G | A   | 127.61  | PASS          | AC=3;AF=0.043;AN=70;BaseQRankSum=  |
| 12768 | chrY | 10028843 | . | G | A   | 121.81  | my_snp_filter | AC=3;AF=0.043;AN=70;BaseQ          |



|       |      |          |   |   |     |          |               |                                    |
|-------|------|----------|---|---|-----|----------|---------------|------------------------------------|
| 12769 | chrY | 10028848 | . | G | T   | 103.62   | PASS          | AC=2;AF=0.029;AN=70;BaseQRankSum=  |
| 12770 | chrY | 10028856 | . | G | A   | 95.18    | PASS          | AC=1;AF=0.014;AN=70;BaseQRankSum=  |
| 12771 | chrY | 10028871 | . | A | C   | 49.25    | my_snp_filter | AC=2;AF=0.029;AN=70;BaseQ          |
| 12772 | chrY | 10028892 | . | G | T   | 50.38    | my_snp_filter | AC=1;AF=0.014;AN=70;BaseQ          |
| 12773 | chrY | 10028893 | . | G | T   | 52.82    | my_snp_filter | AC=1;AF=0.014;AN=70;BaseQ          |
| 12774 | chrY | 10029015 | . | G | T   | 36.49    | my_snp_filter | AC=1;AF=0.015;AN=66;BaseQ          |
| 12775 | chrY | 10029032 | . | A | C   | 157.28   | PASS          | AC=1;AF=0.016;AN=62;BaseQRankSum=  |
| 12776 | chrY | 10029064 | . | G | A   | 7288.06  | my_snp_filter | AC=10;AF=0.147;AN=68;Base          |
| 12777 | chrY | 10029066 | . | A | G   | 1450.70  | PASS          | AC=9;AF=0.136;AN=66;BaseQRankSum=  |
| 12778 | chrY | 10029075 | . | T | G   | 1610.39  | PASS          | AC=8;AF=0.121;AN=66;BaseQRankSum=  |
| 12779 | chrY | 10029091 | . | G | C   | 5541.21  | PASS          | AC=12;AF=0.176;AN=68;BaseQRankSum= |
| 12780 | chrY | 10029101 | . | T | C   | 12167.27 | my_snp_filter | AC=15;AF=0.242;AN                  |
| 12781 | chrY | 10029138 | . | C | T   | 3395.97  | PASS          | AC=15;AF=0.214;AN=70;BaseQRankSum= |
| 12782 | chrY | 10029155 | . | A | T   | 3478.25  | PASS          | AC=14;AF=0.200;AN=70;BaseQRankSum= |
| 12783 | chrY | 10029163 | . | A | G   | 13729.76 | PASS          | AC=35;AF=0.500;AN=70;Base          |
| 12784 | chrY | 10029174 | . | G | T   | 2658.16  | PASS          | AC=14;AF=0.200;AN=70;BaseQRankSum= |
| 12785 | chrY | 10029185 | . | G | A   | 224.88   | PASS          | AC=4;AF=0.057;AN=70;BaseQRankSum=  |
| 12786 | chrY | 10029199 | . | G | T   | 72.29    | PASS          | AC=1;AF=0.014;AN=70;BaseQRankSum=  |
| 12787 | chrY | 10029205 | . | A | G   | 13126.73 | PASS          | AC=31;AF=0.443;AN=70;Base          |
| 12788 | chrY | 10029207 | . | A | T   | 1331.03  | PASS          | AC=10;AF=0.143;AN=70;BaseQRankSum= |
| 12789 | chrY | 10029218 | . | G | A   | 15211.52 | PASS          | AC=31;AF=0.443;AN=70;Base          |
| 12790 | chrY | 10029220 | . | G | T   | 339.09   | my_snp_filter | AC=8;AF=0.114;AN=70;BaseQ          |
| 12791 | chrY | 10029228 | . | G | A   | 20807.61 | PASS          | AC=33;AF=0.500;AN=66;Base          |
| 12792 | chrY | 10029237 | . | A | G   | 220.66   | PASS          | AC=4;AF=0.057;AN=70;BaseQRankSum=  |
| 12793 | chrY | 10029240 | . | C | T   | 1601.24  | PASS          | AC=9;AF=0.129;AN=70;BaseQRankSum=  |
| 12794 | chrY | 10029249 | . | G | T   | 5351.48  | PASS          | AC=18;AF=0.257;AN=70;BaseQRankSum= |
| 12795 | chrY | 10029272 | . | T | C   | 2736.71  | PASS          | AC=14;AF=0.200;AN=70;BaseQRankSum= |
| 12796 | chrY | 10029287 | . | C | T,* | 28093.48 | PASS          | AC=2,27;AF=0.029,0.386;AN          |
| 12797 | chrY | 10029300 | . | C | T   | 262.21   | PASS          | AC=3;AF=0.043;AN=70;BaseQRankSum=  |
| 12798 | chrY | 10029301 | . | G | A   | 3575.72  | PASS          | AC=24;AF=0.343;AN=70;BaseQRankSum= |
| 12799 | chrY | 10029308 | . | A | C,T | 5751.90  | PASS          | AC=15,18;AF=0.214,0.257;AN=70;Bas  |
| 12800 | chrY | 10029322 | . | T | C   | 53988.99 | PASS          | AC=37;AF=0.529;AN=70;Base          |
| 12801 | chrY | 10029333 | . | A | G   | 4741.33  | PASS          | AC=28;AF=0.400;AN=70;BaseQRankSum= |
| 12802 | chrY | 10029334 | . | C | G   | 125.50   | my_snp_filter | AC=2;AF=0.029;AN=70;BaseQ          |
| 12803 | chrY | 10029340 | . | T | C   | 31497.72 | PASS          | AC=35;AF=0.500;AN=70;Base          |
| 12804 | chrY | 10029347 | . | C | T   | 4561.21  | PASS          | AC=25;AF=0.357;AN=70;BaseQRankSum= |
| 12805 | chrY | 10029390 | . | T | A   | 20522.72 | PASS          | AC=35;AF=0.500;AN=70;Base          |
| 12806 | chrY | 10029393 | . | A | C   | 11987.72 | PASS          | AC=35;AF=0.500;AN=70;Base          |
| 12807 | chrY | 10029396 | . | T | C   | 2765.20  | PASS          | AC=25;AF=0.357;AN=70;BaseQRankSum= |
| 12808 | chrY | 10029408 | . | T | C   | 333.05   | my_snp_filter | AC=8;AF=0.114;AN=70;BaseQ          |
| 12809 | chrY | 10029410 | . | T | A   | 322.23   | my_snp_filter | AC=11;AF=0.157;AN=70;Base          |
| 12810 | chrY | 10029422 | . | A | C   | 9012.39  | PASS          | AC=30;AF=0.455;AN=66;BaseQRankSum= |
| 12811 | chrY | 10029426 | . | A | C   | 7096.43  | PASS          | AC=29;AF=0.426;AN=68;BaseQRankSum= |
| 12812 | chrY | 10029433 | . | T | C   | 5509.53  | PASS          | AC=25;AF=0.368;AN=68;BaseQRankSum= |
| 12813 | chrY | 10029443 | . | A | G   | 163.57   | PASS          | AC=4;AF=0.057;AN=70;BaseQRankSum=  |
| 12814 | chrY | 10029466 | . | T | G   | 64.35    | my_snp_filter | AC=3;AF=0.043;AN=70;BaseQ          |
| 12815 | chrY | 10029541 | . | G | C   | 256.31   | PASS          | AC=6;AF=0.086;AN=70;BaseQRankSum=  |
| 12816 | chrY | 10029571 | . | A | T   | 126.41   | my_snp_filter | AC=3;AF=0.043;AN=70;BaseQ          |
| 12817 | chrY | 10029581 | . | C | A   | 136.30   | my_snp_filter | AC=4;AF=0.057;AN=70;BaseQ          |
| 12818 | chrY | 10029583 | . | T | C   | 6582.40  | my_snp_filter | AC=12;AF=0.171;AN=70;Base          |
| 12819 | chrY | 10029584 | . | G | A   | 6567.99  | my_snp_filter | AC=11;AF=0.157;AN=70;Base          |
| 12820 | chrY | 10029602 | . | G | A   | 126.82   | my_snp_filter | AC=4;AF=0.057;AN=70;BaseQ          |
| 12821 | chrY | 10029610 | . | G | A   | 7330.50  | my_snp_filter | AC=17;AF=0.243;AN=70;Base          |
| 12822 | chrY | 10029616 | . | G | T   | 8109.10  | my_snp_filter | AC=21;AF=0.309;AN=68;Base          |
| 12823 | chrY | 10029623 | . | C | T   | 8426.89  | my_snp_filter | AC=21;AF=0.309;AN=68;Base          |
| 12824 | chrY | 10029629 | . | A | G   | 4004.44  | PASS          | AC=17;AF=0.250;AN=68;BaseQRankSum= |
| 12825 | chrY | 10029649 | . | C | G   | 1408.19  | PASS          | AC=15;AF=0.214;AN=70;BaseQRankSum= |
| 12826 | chrY | 10029655 | . | G | A   | 1008.75  | PASS          | AC=17;AF=0.243;AN=70;BaseQRankSum= |
| 12827 | chrY | 10029695 | . | G | T   | 104.08   | my_snp_filter | AC=3;AF=0.043;AN=70;BaseQ          |
| 12828 | chrY | 10029702 | . | G | A   | 768.27   | PASS          | AC=11;AF=0.157;AN=70;BaseQRankSum= |
| 12829 | chrY | 10029711 | . | A | C   | 1265.01  | PASS          | AC=11;AF=0.157;AN=70;BaseQRankSum= |
| 12830 | chrY | 10029720 | . | A | C   | 830      | PASS          | AC=10;AF=0.143;AN=70;BaseQRankSum= |
| 12831 | chrY | 10029725 | . | G | C   | 505.90   | PASS          | AC=5;AF=0.071;AN=70;BaseQRankSum=  |
| 12832 | chrY | 10029731 | . | A | T   | 385.07   | PASS          | AC=6;AF=0.086;AN=70;BaseQRankSum=  |
| 12833 | chrY | 10029740 | . | G | T   | 318.80   | PASS          | AC=4;AF=0.057;AN=70;BaseQRankSum=  |
| 12834 | chrY | 10029743 | . | A | G   | 33.02    | my_snp_filter | AC=3;AF=0.043;AN=70;BaseQ          |
| 12835 | chrY | 10029760 | . | A | G   | 112.22   | PASS          | AC=2;AF=0.029;AN=70;BaseQRankSum=  |
| 12836 | chrY | 10029770 | . | G | A   | 35.95    | my_snp_filter | AC=1;AF=0.014;AN=70;BaseQ          |
| 12837 | chrY | 10029772 | . | T | A   | 35.97    | my_snp_filter | AC=1;AF=0.014;AN=70;BaseQ          |
| 12838 | chrY | 10029820 | . | A | G   | 92.90    | PASS          | AC=1;AF=0.015;AN=68;BaseQRankSum=  |
| 12839 | chrY | 10029824 | . | T | G   | 94.20    | PASS          | AC=1;AF=0.014;AN=70;BaseQRankSum=  |
| 12840 | chrY | 10029827 | . | G | A   | 94.81    | PASS          | AC=1;AF=0.014;AN=70;BaseQRankSum=  |
| 12841 | chrY | 10029828 | . | G | A   | 95.42    | PASS          | AC=1;AF=0.014;AN=70;BaseQRankSum=  |
| 12842 | chrY | 10029843 | . | A | C   | 65.93    | my_snp_filter | AC=4;AF=0.057;AN=70;BaseQ          |
| 12843 | chrY | 10029864 | . | G | A   | 195.55   | PASS          | AC=5;AF=0.071;AN=70;BaseQRankSum=  |
| 12844 | chrY | 10029868 | . | C | G   | 192.96   | PASS          | AC=5;AF=0.071;AN=70;BaseQRankSum=  |

|       |      |          |   |   |     |          |               |                                    |
|-------|------|----------|---|---|-----|----------|---------------|------------------------------------|
| 12845 | chrY | 10029880 | . | G | C   | 206.56   | PASS          | AC=5;AF=0.071;AN=70;BaseQRankSum=  |
| 12846 | chrY | 10029886 | . | C | T   | 208.72   | PASS          | AC=5;AF=0.071;AN=70;BaseQRankSum=  |
| 12847 | chrY | 10029889 | . | G | T   | 215.06   | PASS          | AC=5;AF=0.071;AN=70;BaseQRankSum=  |
| 12848 | chrY | 10030031 | . | G | A   | 256.21   | PASS          | AC=6;AF=0.094;AN=64;BaseQRankSum=  |
| 12849 | chrY | 10030070 | . | A | G   | 313.64   | PASS          | AC=6;AF=0.120;AN=50;BaseQRankSum=  |
| 12850 | chrY | 10030298 | . | A | G   | 1162.78  | PASS          | AC=5;AF=0.250;AN=20;BaseQRankSum=  |
| 12851 | chrY | 10030323 | . | G | C   | 224.14   | PASS          | AC=2;AF=0.100;AN=20;BaseQRankSum=  |
| 12852 | chrY | 10030326 | . | C | G   | 225.13   | PASS          | AC=2;AF=0.100;AN=20;BaseQRankSum=  |
| 12853 | chrY | 10030400 | . | T | A   | 90.99    | PASS          | AC=1;AF=0.050;AN=20;BaseQRankSum=  |
| 12854 | chrY | 10030407 | . | A | G   | 95.67    | PASS          | AC=1;AF=0.050;AN=20;BaseQRankSum=  |
| 12855 | chrY | 10030446 | . | T | A   | 91.19    | PASS          | AC=2;AF=0.083;AN=24;BaseQRankSum=  |
| 12856 | chrY | 10030460 | . | A | C   | 93.79    | PASS          | AC=1;AF=0.042;AN=24;BaseQRankSum=  |
| 12857 | chrY | 10030629 | . | T | C   | 634.01   | PASS          | AC=8;AF=0.444;AN=18;BaseQRankSum=  |
| 12858 | chrY | 10030641 | . | T | G   | 1911.09  | PASS          | AC=9;AF=0.500;AN=18;BaseQRankSum=  |
| 12859 | chrY | 10030648 | . | G | A   | 767.78   | PASS          | AC=3;AF=0.167;AN=18;BaseQRankSum=  |
| 12860 | chrY | 10030681 | . | A | G   | 886.13   | PASS          | AC=9;AF=0.500;AN=18;BaseQRankSum=  |
| 12861 | chrY | 10030692 | . | G | C   | 3659.68  | PASS          | AC=9;AF=0.500;AN=18;BaseQRankSum=  |
| 12862 | chrY | 10030706 | . | A | G   | 2554.78  | PASS          | AC=9;AF=0.500;AN=18;BaseQRankSum=  |
| 12863 | chrY | 10030711 | . | C | T   | 515.80   | PASS          | AC=6;AF=0.333;AN=18;BaseQRankSum=  |
| 12864 | chrY | 10030720 | . | A | C   | 508.14   | PASS          | AC=6;AF=0.333;AN=18;BaseQRankSum=  |
| 12865 | chrY | 10030747 | . | A | G   | 515.09   | PASS          | AC=9;AF=0.500;AN=18;BaseQRankSum=  |
| 12866 | chrY | 10030841 | . | A | G   | 39.33    | my_snp_filter | AC=1;AF=0.056;AN=18;BaseQ          |
| 12867 | chrY | 10030854 | . | G | A   | 79.68    | PASS          | AC=1;AF=0.050;AN=20;BaseQRankSum=  |
| 12868 | chrY | 10030895 | . | C | G   | 506.30   | PASS          | AC=3;AF=0.136;AN=22;BaseQRankSum=  |
| 12869 | chrY | 10030904 | . | G | C   | 499.93   | PASS          | AC=3;AF=0.150;AN=20;BaseQRankSum=  |
| 12870 | chrY | 10030952 | . | A | T   | 1980.89  | PASS          | AC=9;AF=0.409;AN=22;BaseQRankSum=  |
| 12871 | chrY | 10030953 | . | C | T   | 1980.89  | PASS          | AC=9;AF=0.409;AN=22;BaseQRankSum=  |
| 12872 | chrY | 10030973 | . | G | A   | 2037.46  | PASS          | AC=9;AF=0.409;AN=22;BaseQRankSum=  |
| 12873 | chrY | 10030992 | . | T | A   | 1752.29  | PASS          | AC=9;AF=0.409;AN=22;BaseQRankSum=  |
| 12874 | chrY | 10030994 | . | T | A   | 1716.29  | PASS          | AC=9;AF=0.409;AN=22;BaseQRankSum=  |
| 12875 | chrY | 10031027 | . | G | A   | 210.86   | PASS          | AC=2;AF=0.167;AN=12;BaseQRankSum=  |
| 12876 | chrY | 10031044 | . | A | C   | 219.59   | PASS          | AC=2;AF=0.111;AN=18;BaseQRankSum=  |
| 12877 | chrY | 10031055 | . | G | A   | 119.29   | PASS          | AC=1;AF=0.056;AN=18;BaseQRankSum=  |
| 12878 | chrY | 10031176 | . | G | A   | 774.95   | PASS          | AC=3;AF=0.107;AN=28;BaseQRankSum=  |
| 12879 | chrY | 10031178 | . | A | C   | 819.06   | PASS          | AC=3;AF=0.107;AN=28;BaseQRankSum=  |
| 12880 | chrY | 10031191 | . | T | C   | 1189.23  | PASS          | AC=3;AF=0.115;AN=26;BaseQRankSum=  |
| 12881 | chrY | 10031203 | . | T | A   | 870.93   | PASS          | AC=3;AF=0.188;AN=16;BaseQRankSum=  |
| 12882 | chrY | 10031212 | . | T | A   | 991.06   | PASS          | AC=3;AF=0.107;AN=28;BaseQRankSum=  |
| 12883 | chrY | 10031215 | . | T | A   | 1116.55  | PASS          | AC=3;AF=0.063;AN=48;BaseQRankSum=  |
| 12884 | chrY | 10031218 | . | T | A   | 1111.19  | PASS          | AC=4;AF=0.111;AN=36;BaseQRankSum=  |
| 12885 | chrY | 10031222 | . | T | A   | 1149.38  | PASS          | AC=3;AF=0.052;AN=58;BaseQRankSum=  |
| 12886 | chrY | 10031238 | . | C | A   | 3904.30  | PASS          | AC=4;AF=0.105;AN=38;BaseQRankSum=  |
| 12887 | chrY | 10031256 | . | A | G   | 4056.62  | PASS          | AC=4;AF=0.105;AN=38;BaseQRankSum=  |
| 12888 | chrY | 10031267 | . | A | T   | 1897.94  | PASS          | AC=4;AF=0.069;AN=58;BaseQRankSum=  |
| 12889 | chrY | 10031271 | . | C | A   | 1691.10  | PASS          | AC=3;AF=0.044;AN=68;BaseQRankSum=  |
| 12890 | chrY | 10031283 | . | A | G   | 4035.56  | PASS          | AC=4;AF=0.100;AN=40;BaseQRankSum=  |
| 12891 | chrY | 10031304 | . | T | A   | 2429.56  | PASS          | AC=3;AF=0.075;AN=40;BaseQRankSum=  |
| 12892 | chrY | 10031327 | . | G | A   | 1940.36  | PASS          | AC=3;AF=0.063;AN=48;BaseQRankSum=  |
| 12893 | chrY | 10031334 | . | C | A   | 115.93   | my_snp_filter | AC=2;AF=0.029;AN=70;BaseQ          |
| 12894 | chrY | 10031347 | . | C | T   | 293.54   | PASS          | AC=2;AF=0.029;AN=68;BaseQRankSum=  |
| 12895 | chrY | 10031349 | . | A | G   | 1632.67  | PASS          | AC=3;AF=0.058;AN=52;BaseQRankSum=  |
| 12896 | chrY | 10031352 | . | G | C   | 1627.08  | PASS          | AC=3;AF=0.056;AN=54;BaseQRankSum=  |
| 12897 | chrY | 10031354 | . | A | G   | 1629.06  | PASS          | AC=3;AF=0.056;AN=54;BaseQRankSum=  |
| 12898 | chrY | 10031390 | . | T | C   | 12340.60 | PASS          | AC=16;AF=0.242;AN=66;BaseQ         |
| 12899 | chrY | 10031391 | . | G | A   | 12506.43 | PASS          | AC=16;AF=0.242;AN=66;BaseQ         |
| 12900 | chrY | 10031408 | . | C | A   | 5524.22  | PASS          | AC=13;AF=0.186;AN=70;BaseQRankSum= |
| 12901 | chrY | 10031409 | . | T | G   | 125.20   | PASS          | AC=2;AF=0.029;AN=70;BaseQRankSum=  |
| 12902 | chrY | 10031411 | . | A | G   | 5589.27  | PASS          | AC=12;AF=0.171;AN=70;BaseQRankSum= |
| 12903 | chrY | 10031414 | . | T | G,C | 13710.79 | PASS          | AC=15,5;AF=0.227,0.076;AN          |
| 12904 | chrY | 10031423 | . | T | C   | 14413.93 | PASS          | AC=20;AF=0.303;AN=66;BaseQ         |
| 12905 | chrY | 10031433 | . | T | A   | 388.74   | my_snp_filter | AC=8;AF=0.114;AN=70;BaseQ          |
| 12906 | chrY | 10031434 | . | A | G   | 5979.41  | PASS          | AC=12;AF=0.171;AN=70;BaseQRankSum= |
| 12907 | chrY | 10031435 | . | G | A   | 81.42    | PASS          | AC=2;AF=0.029;AN=70;BaseQRankSum=  |
| 12908 | chrY | 10031442 | . | A | G   | 5063.57  | PASS          | AC=11;AF=0.162;AN=68;BaseQRankSum= |
| 12909 | chrY | 10031451 | . | T | C   | 428.69   | PASS          | AC=6;AF=0.086;AN=70;BaseQRankSum=  |
| 12910 | chrY | 10031452 | . | G | T   | 477.14   | PASS          | AC=6;AF=0.086;AN=70;BaseQRankSum=  |
| 12911 | chrY | 10031456 | . | G | A   | 13432.01 | PASS          | AC=13;AF=0.186;AN=70;BaseQ         |
| 12912 | chrY | 10031460 | . | T | C   | 5481.76  | PASS          | AC=16;AF=0.229;AN=70;BaseQRankSum= |
| 12913 | chrY | 10031463 | . | T | C   | 394.94   | PASS          | AC=4;AF=0.057;AN=70;BaseQRankSum=  |
| 12914 | chrY | 10031466 | . | C | T   | 6651.35  | PASS          | AC=11;AF=0.162;AN=68;BaseQRankSum= |
| 12915 | chrY | 10031488 | . | T | C   | 14929.69 | PASS          | AC=15;AF=0.250;AN=60;BaseQ         |
| 12916 | chrY | 10031489 | . | G | A   | 14169.44 | PASS          | AC=13;AF=0.217;AN=60;BaseQ         |
| 12917 | chrY | 10031490 | . | G | A   | 132.28   | PASS          | AC=3;AF=0.045;AN=66;BaseQRankSum=  |
| 12918 | chrY | 10031496 | . | G | C   | 15354.68 | PASS          | AC=15;AF=0.250;AN=60;BaseQ         |
| 12919 | chrY | 10031506 | . | T | C   | 5898.75  | PASS          | AC=10;AF=0.147;AN=68;BaseQRankSum= |
| 12920 | chrY | 10031509 | . | G | A   | 5584.96  | PASS          | AC=10;AF=0.147;AN=68;BaseQRankSum= |

|       |      |          |   |   |     |          |               |                                    |
|-------|------|----------|---|---|-----|----------|---------------|------------------------------------|
| 12921 | chrY | 10031515 | . | G | A   | 13966.60 | PASS          | AC=17;AF=0.258;AN=66;BaseQ         |
| 12922 | chrY | 10031526 | . | C | A   | 58.81    | PASS          | AC=2;AF=0.029;AN=68;BaseQRankSum=  |
| 12923 | chrY | 10031534 | . | G | A   | 225.07   | PASS          | AC=3;AF=0.044;AN=68;BaseQRankSum=  |
| 12924 | chrY | 10031542 | . | C | A   | 20339.30 | PASS          | AC=30;AF=0.441;AN=68;BaseQ         |
| 12925 | chrY | 10031544 | . | T | C   | 260.49   | PASS          | AC=2;AF=0.029;AN=68;BaseQRankSum=  |
| 12926 | chrY | 10031546 | . | G | A   | 258.28   | PASS          | AC=2;AF=0.029;AN=70;BaseQRankSum=  |
| 12927 | chrY | 10031548 | . | T | C   | 9407.37  | PASS          | AC=26;AF=0.371;AN=70;BaseQRankSum= |
| 12928 | chrY | 10031549 | . | G | A,C | 9666.04  | PASS          | AC=25,2;AF=0.357,0.029;AN=70;BaseQ |
| 12929 | chrY | 10031565 | . | T | C   | 26493.35 | PASS          | AC=31;AF=0.456;AN=68;BaseQ         |
| 12930 | chrY | 10031572 | . | G | A   | 26780.19 | PASS          | AC=31;AF=0.456;AN=68;BaseQ         |
| 12931 | chrY | 10031582 | . | G | A   | 29327.14 | PASS          | AC=31;AF=0.456;AN=68;BaseQ         |
| 12932 | chrY | 10031595 | . | G | A   | 31708.17 | PASS          | AC=32;AF=0.471;AN=68;BaseQ         |
| 12933 | chrY | 10031596 | . | T | C   | 29935.83 | PASS          | AC=32;AF=0.471;AN=68;BaseQ         |
| 12934 | chrY | 10031597 | . | G | A   | 30102.59 | PASS          | AC=32;AF=0.471;AN=68;BaseQ         |
| 12935 | chrY | 10031599 | . | C | A   | 194.25   | my_snp_filter | AC=2;AF=0.029;AN=70;BaseQ          |
| 12936 | chrY | 10031601 | . | T | C   | 32142.71 | PASS          | AC=32;AF=0.471;AN=68;BaseQ         |
| 12937 | chrY | 10031602 | . | T | A   | 1799.59  | PASS          | AC=13;AF=0.191;AN=68;BaseQRankSum= |
| 12938 | chrY | 10031612 | . | C | T   | 634.35   | PASS          | AC=5;AF=0.071;AN=70;BaseQRankSum=  |
| 12939 | chrY | 10031630 | . | T | C   | 23322.78 | PASS          | AC=35;AF=0.500;AN=70;BaseQ         |
| 12940 | chrY | 10031640 | . | C | A   | 7518.96  | PASS          | AC=27;AF=0.386;AN=70;BaseQRankSum= |
| 12941 | chrY | 10031659 | . | A | G   | 37171.07 | PASS          | AC=37;AF=0.529;AN=70;BaseQ         |
| 12942 | chrY | 10031666 | . | A | C   | 7333.49  | PASS          | AC=30;AF=0.429;AN=70;BaseQRankSum= |
| 12943 | chrY | 10031667 | . | G | C   | 35951.76 | PASS          | AC=36;AF=0.514;AN=70;BaseQ         |
| 12944 | chrY | 10031671 | . | C | T   | 3721.01  | PASS          | AC=29;AF=0.414;AN=70;BaseQRankSum= |
| 12945 | chrY | 10031673 | . | C | T   | 3696.30  | PASS          | AC=28;AF=0.400;AN=70;BaseQRankSum= |
| 12946 | chrY | 10031687 | . | G | T   | 3199.93  | PASS          | AC=29;AF=0.414;AN=70;BaseQRankSum= |
| 12947 | chrY | 10031693 | . | A | G   | 32008.76 | PASS          | AC=35;AF=0.500;AN=70;BaseQ         |
| 12948 | chrY | 10031695 | . | A | G   | 35371.76 | PASS          | AC=35;AF=0.500;AN=70;BaseQ         |
| 12949 | chrY | 10031714 | . | C | T   | 100.77   | my_snp_filter | AC=5;AF=0.071;AN=70;BaseQ          |
| 12950 | chrY | 10031719 | . | A | C   | 31266.73 | PASS          | AC=35;AF=0.500;AN=70;BaseQ         |
| 12951 | chrY | 10031720 | . | G | A   | 22734.72 | PASS          | AC=35;AF=0.500;AN=70;BaseQ         |
| 12952 | chrY | 10031735 | . | T | A   | 3184.56  | PASS          | AC=19;AF=0.271;AN=70;BaseQRankSum= |
| 12953 | chrY | 10031741 | . | C | A   | 16342.68 | PASS          | AC=30;AF=0.429;AN=70;BaseQ         |
| 12954 | chrY | 10031761 | . | G | C   | 57.61    | PASS          | AC=3;AF=0.043;AN=70;BaseQRankSum=  |
| 12955 | chrY | 10031763 | . | T | C   | 717.96   | PASS          | AC=12;AF=0.171;AN=70;BaseQRankSum= |
| 12956 | chrY | 10031768 | . | T | A   | 13814.50 | PASS          | AC=23;AF=0.397;AN=58;BaseQ         |
| 12957 | chrY | 10031770 | . | A | G   | 13817.36 | PASS          | AC=23;AF=0.397;AN=58;BaseQ         |
| 12958 | chrY | 10031786 | . | C | T   | 49.82    | PASS          | AC=1;AF=0.015;AN=68;BaseQRankSum=  |
| 12959 | chrY | 10031793 | . | G | C   | 15376    | PASS          | AC=25;AF=0.431;AN=58;BaseQRankSum= |
| 12960 | chrY | 10031818 | . | C | A   | 11665.35 | PASS          | AC=13;AF=0.217;AN=60;BaseQ         |
| 12961 | chrY | 10031823 | . | A | G   | 11231.59 | PASS          | AC=13;AF=0.210;AN=62;BaseQ         |
| 12962 | chrY | 10031827 | . | T | A,C | 7913     | PASS          | AC=9,4;AF=0.145,0.065;AN=62;BaseQ  |
| 12963 | chrY | 10031838 | . | T | C   | 9785.31  | PASS          | AC=13;AF=0.203;AN=64;BaseQRankSum= |
| 12964 | chrY | 10031842 | . | G | A   | 9323.34  | PASS          | AC=13;AF=0.224;AN=58;BaseQRankSum= |
| 12965 | chrY | 10031844 | . | T | C   | 9273.06  | PASS          | AC=13;AF=0.217;AN=60;BaseQRankSum= |
| 12966 | chrY | 10031859 | . | G | A   | 2406.43  | PASS          | AC=11;AF=0.190;AN=58;BaseQRankSum= |
| 12967 | chrY | 10031864 | . | T | C   | 4539.29  | PASS          | AC=10;AF=0.200;AN=50;BaseQRankSum= |
| 12968 | chrY | 10031865 | . | G | A   | 872.69   | PASS          | AC=4;AF=0.071;AN=56;BaseQRankSum=  |
| 12969 | chrY | 10031876 | . | A | G   | 7965.22  | my_snp_filter | AC=10;AF=0.185;AN=54;BaseQ         |
| 12970 | chrY | 10031880 | . | C | G   | 7861.94  | my_snp_filter | AC=10;AF=0.192;AN=52;BaseQ         |
| 12971 | chrY | 10031909 | . | G | T   | 2126.69  | PASS          | AC=9;AF=0.145;AN=62;BaseQRankSum=  |
| 12972 | chrY | 10031912 | . | G | T   | 10319.50 | my_snp_filter | AC=17;AF=0.304;AN=                 |
| 12973 | chrY | 10031917 | . | T | C   | 10649.72 | my_snp_filter | AC=17;AF=0.304;AN=                 |
| 12974 | chrY | 10031918 | . | G | T   | 5610.75  | PASS          | AC=17;AF=0.293;AN=58;BaseQRankSum= |
| 12975 | chrY | 10031930 | . | C | G   | 10860.49 | my_snp_filter | AC=18;AF=0.321;AN=                 |
| 12976 | chrY | 10031933 | . | C | A   | 2511.91  | my_snp_filter | AC=9;AF=0.150;AN=60;BaseQ          |
| 12977 | chrY | 10031934 | . | A | G   | 10773.75 | my_snp_filter | AC=18;AF=0.310;AN=                 |
| 12978 | chrY | 10031970 | . | C | T   | 13075.60 | PASS          | AC=33;AF=0.500;AN=66;BaseQ         |
| 12979 | chrY | 10031982 | . | A | C   | 12802.40 | PASS          | AC=32;AF=0.471;AN=68;BaseQ         |
| 12980 | chrY | 10032028 | . | T | A   | 4532.44  | my_snp_filter | AC=18;AF=0.290;AN=62;BaseQ         |
| 12981 | chrY | 10032040 | . | C | T   | 1364.80  | PASS          | AC=6;AF=0.100;AN=60;BaseQRankSum=  |
| 12982 | chrY | 10032041 | . | A | G   | 3161.11  | my_snp_filter | AC=9;AF=0.150;AN=60;BaseQ          |
| 12983 | chrY | 10032050 | . | A | T   | 2026.84  | PASS          | AC=7;AF=0.117;AN=60;BaseQRankSum=  |
| 12984 | chrY | 10032096 | . | G | C   | 509.79   | PASS          | AC=5;AF=0.093;AN=54;BaseQRankSum=  |
| 12985 | chrY | 10032097 | . | G | A   | 112.84   | PASS          | AC=2;AF=0.034;AN=58;BaseQRankSum=  |
| 12986 | chrY | 10032103 | . | G | A   | 687.71   | PASS          | AC=6;AF=0.107;AN=56;BaseQRankSum=  |
| 12987 | chrY | 10032107 | . | T | C   | 736.43   | PASS          | AC=6;AF=0.111;AN=54;BaseQRankSum=  |
| 12988 | chrY | 10032108 | . | G | A   | 736.43   | PASS          | AC=6;AF=0.111;AN=54;BaseQRankSum=  |
| 12989 | chrY | 10032115 | . | C | T   | 545.82   | PASS          | AC=4;AF=0.067;AN=60;BaseQRankSum=  |
| 12990 | chrY | 10032116 | . | G | A   | 160.02   | PASS          | AC=4;AF=0.065;AN=62;BaseQRankSum=  |
| 12991 | chrY | 10032125 | . | T | A   | 852.38   | PASS          | AC=6;AF=0.115;AN=52;BaseQRankSum=  |
| 12992 | chrY | 10032129 | . | G | C   | 867.11   | PASS          | AC=6;AF=0.115;AN=52;BaseQRankSum=  |
| 12993 | chrY | 10032141 | . | C | A   | 112.18   | PASS          | AC=2;AF=0.042;AN=48;BaseQRankSum=  |
| 12994 | chrY | 10032142 | . | A | G   | 113.03   | PASS          | AC=2;AF=0.042;AN=48;BaseQRankSum=  |
| 12995 | chrY | 10032153 | . | T | C   | 532.05   | PASS          | AC=5;AF=0.119;AN=42;BaseQRankSum=  |
| 12996 | chrY | 10032180 | . | C | A   | 1555.21  | PASS          | AC=8;AF=0.308;AN=26;BaseQRankSum=  |

|       |      |          |   |   |   |         |               |                                    |
|-------|------|----------|---|---|---|---------|---------------|------------------------------------|
| 12997 | chrY | 10032184 | . | G | A | 1630.21 | PASS          | AC=8;AF=0.308;AN=26;BaseQRankSum=  |
| 12998 | chrY | 10032185 | . | T | C | 1094.66 | PASS          | AC=6;AF=0.231;AN=26;BaseQRankSum=  |
| 12999 | chrY | 10032199 | . | C | T | 1796.59 | my_snp_filter | AC=8;AF=0.400;AN=20;BaseQ          |
| 13000 | chrY | 10032213 | . | T | C | 273.73  | PASS          | AC=3;AF=0.136;AN=22;BaseQRankSum=  |
| 13001 | chrY | 10032221 | . | A | G | 1535.33 | PASS          | AC=8;AF=0.364;AN=22;BaseQRankSum=  |
| 13002 | chrY | 10032228 | . | A | G | 2003.59 | my_snp_filter | AC=8;AF=0.400;AN=20;BaseQ          |
| 13003 | chrY | 10032248 | . | T | G | 2265.59 | PASS          | AC=8;AF=0.400;AN=20;BaseQRankSum=  |
| 13004 | chrY | 10032266 | . | A | C | 1829.44 | PASS          | AC=7;AF=0.389;AN=18;BaseQRankSum=  |
| 13005 | chrY | 10032271 | . | C | T | 482.18  | PASS          | AC=6;AF=0.300;AN=20;BaseQRankSum=  |
| 13006 | chrY | 10032289 | . | T | C | 1126.58 | PASS          | AC=7;AF=0.500;AN=14;BaseQRankSum=  |
| 13007 | chrY | 10032290 | . | G | A | 529.32  | PASS          | AC=4;AF=0.286;AN=14;BaseQRankSum=  |
| 13008 | chrY | 10032295 | . | C | T | 577.34  | PASS          | AC=4;AF=0.222;AN=18;BaseQRankSum=  |
| 13009 | chrY | 10032311 | . | G | T | 133.37  | PASS          | AC=3;AF=0.167;AN=18;BaseQRankSum=  |
| 13010 | chrY | 10032317 | . | A | C | 1687.28 | PASS          | AC=7;AF=0.389;AN=18;BaseQRankSum=  |
| 13011 | chrY | 10032322 | . | A | G | 1576.81 | PASS          | AC=7;AF=0.438;AN=16;BaseQRankSum=  |
| 13012 | chrY | 10032329 | . | C | T | 658.02  | PASS          | AC=4;AF=0.222;AN=18;BaseQRankSum=  |
| 13013 | chrY | 10032333 | . | C | T | 697.66  | PASS          | AC=4;AF=0.222;AN=18;BaseQRankSum=  |
| 13014 | chrY | 10032334 | . | G | A | 911.63  | PASS          | AC=4;AF=0.222;AN=18;BaseQRankSum=  |
| 13015 | chrY | 10032338 | . | G | A | 1752.24 | PASS          | AC=7;AF=0.389;AN=18;BaseQRankSum=  |
| 13016 | chrY | 10032343 | . | T | C | 1758.63 | PASS          | AC=7;AF=0.389;AN=18;BaseQRankSum=  |
| 13017 | chrY | 10032356 | . | T | A | 773.41  | PASS          | AC=4;AF=0.222;AN=18;BaseQRankSum=  |
| 13018 | chrY | 10032380 | . | A | T | 2770.09 | PASS          | AC=9;AF=0.500;AN=18;BaseQRankSum=  |
| 13019 | chrY | 10032382 | . | C | A | 3038.34 | PASS          | AC=9;AF=0.500;AN=18;BaseQRankSum=  |
| 13020 | chrY | 10032385 | . | C | A | 3094.09 | PASS          | AC=9;AF=0.500;AN=18;BaseQRankSum=  |
| 13021 | chrY | 10032391 | . | A | T | 33.19   | my_snp_filter | AC=2;AF=0.111;AN=18;BaseQ          |
| 13022 | chrY | 10032402 | . | T | C | 4112.09 | PASS          | AC=9;AF=0.500;AN=18;BaseQRankSum=  |
| 13023 | chrY | 10032416 | . | C | G | 4379.09 | PASS          | AC=9;AF=0.500;AN=18;BaseQRankSum=  |
| 13024 | chrY | 10032440 | . | C | A | 1674.99 | PASS          | AC=6;AF=0.300;AN=20;BaseQRankSum=  |
| 13025 | chrY | 10032441 | . | A | G | 3688.52 | PASS          | AC=9;AF=0.450;AN=20;BaseQRankSum=  |
| 13026 | chrY | 10032448 | . | C | T | 1797.65 | PASS          | AC=6;AF=0.273;AN=22;BaseQRankSum=  |
| 13027 | chrY | 10032472 | . | C | T | 2077.04 | PASS          | AC=6;AF=0.200;AN=30;BaseQRankSum=  |
| 13028 | chrY | 10032480 | . | T | A | 5600.83 | PASS          | AC=9;AF=0.300;AN=30;BaseQRankSum=  |
| 13029 | chrY | 10032496 | . | C | G | 3116.97 | PASS          | AC=8;AF=0.250;AN=32;BaseQRankSum=  |
| 13030 | chrY | 10032519 | . | A | T | 2786.39 | PASS          | AC=8;AF=0.235;AN=34;BaseQRankSum=  |
| 13031 | chrY | 10032524 | . | C | T | 2841.40 | PASS          | AC=8;AF=0.235;AN=34;BaseQRankSum=  |
| 13032 | chrY | 10032525 | . | G | A | 3145.64 | PASS          | AC=8;AF=0.267;AN=30;BaseQRankSum=  |
| 13033 | chrY | 10032526 | . | C | A | 3140.64 | PASS          | AC=8;AF=0.267;AN=30;BaseQRankSum=  |
| 13034 | chrY | 10032535 | . | A | G | 2976.31 | PASS          | AC=7;AF=0.194;AN=36;BaseQRankSum=  |
| 13035 | chrY | 10032547 | . | C | T | 6446.29 | PASS          | AC=8;AF=0.286;AN=28;BaseQRankSum=  |
| 13036 | chrY | 10032577 | . | T | A | 8038.77 | PASS          | AC=9;AF=0.196;AN=46;BaseQRankSum=  |
| 13037 | chrY | 10032578 | . | T | A | 8035.66 | PASS          | AC=9;AF=0.196;AN=46;BaseQRankSum=  |
| 13038 | chrY | 10032598 | . | C | T | 3526.42 | PASS          | AC=7;AF=0.121;AN=58;BaseQRankSum=  |
| 13039 | chrY | 10032599 | . | T | G | 7826.16 | PASS          | AC=9;AF=0.155;AN=58;BaseQRankSum=  |
| 13040 | chrY | 10032611 | . | T | C | 7244.73 | PASS          | AC=9;AF=0.150;AN=60;BaseQRankSum=  |
| 13041 | chrY | 10032614 | . | G | A | 3501.47 | PASS          | AC=8;AF=0.129;AN=62;BaseQRankSum=  |
| 13042 | chrY | 10032621 | . | A | G | 2708.39 | PASS          | AC=9;AF=0.141;AN=64;BaseQRankSum=  |
| 13043 | chrY | 10032624 | . | C | T | 3244.42 | PASS          | AC=7;AF=0.113;AN=62;BaseQRankSum=  |
| 13044 | chrY | 10032630 | . | G | A | 3209.92 | PASS          | AC=8;AF=0.125;AN=64;BaseQRankSum=  |
| 13045 | chrY | 10032656 | . | G | T | 2662.64 | my_snp_filter | AC=11;AF=0.172;AN=64;Base          |
| 13046 | chrY | 10032658 | . | G | T | 1903.04 | PASS          | AC=9;AF=0.136;AN=66;BaseQRankSum=  |
| 13047 | chrY | 10032669 | . | C | T | 5022.01 | PASS          | AC=13;AF=0.197;AN=66;BaseQRankSum= |
| 13048 | chrY | 10032671 | . | C | T | 673.32  | PASS          | AC=8;AF=0.121;AN=66;BaseQRankSum=  |
| 13049 | chrY | 10032673 | . | C | T | 2530.75 | my_snp_filter | AC=11;AF=0.167;AN=66;Base          |
| 13050 | chrY | 10032674 | . | G | A | 317.59  | PASS          | AC=3;AF=0.044;AN=68;BaseQRankSum=  |
| 13051 | chrY | 10032701 | . | T | A | 282.38  | PASS          | AC=4;AF=0.057;AN=70;BaseQRankSum=  |
| 13052 | chrY | 10032712 | . | G | T | 1549.11 | my_snp_filter | AC=6;AF=0.086;AN=70;BaseQ          |
| 13053 | chrY | 10032716 | . | A | G | 1419.58 | my_snp_filter | AC=5;AF=0.071;AN=70;BaseQ          |
| 13054 | chrY | 10032720 | . | C | G | 1348.34 | my_snp_filter | AC=5;AF=0.071;AN=70;BaseQ          |
| 13055 | chrY | 10032721 | . | G | T | 1308.75 | my_snp_filter | AC=5;AF=0.074;AN=68;BaseQ          |
| 13056 | chrY | 10032724 | . | G | C | 1218.94 | my_snp_filter | AC=5;AF=0.074;AN=68;BaseQ          |
| 13057 | chrY | 10032749 | . | A | G | 733.48  | my_snp_filter | AC=5;AF=0.078;AN=64;BaseQ          |
| 13058 | chrY | 10032807 | . | G | T | 689.78  | my_snp_filter | AC=5;AF=0.081;AN=62;BaseQ          |
| 13059 | chrY | 10032810 | . | A | G | 706.75  | my_snp_filter | AC=5;AF=0.081;AN=62;BaseQ          |
| 13060 | chrY | 10032823 | . | G | A | 756.74  | my_snp_filter | AC=5;AF=0.083;AN=60;BaseQ          |
| 13061 | chrY | 10032840 | . | G | A | 806.43  | my_snp_filter | AC=5;AF=0.081;AN=62;BaseQ          |
| 13062 | chrY | 10032873 | . | G | A | 677.10  | PASS          | AC=6;AF=0.094;AN=64;BaseQRankSum=  |
| 13063 | chrY | 10032878 | . | C | T | 552.33  | PASS          | AC=6;AF=0.094;AN=64;BaseQRankSum=  |
| 13064 | chrY | 10032879 | . | T | C | 549.97  | PASS          | AC=6;AF=0.094;AN=64;BaseQRankSum=  |
| 13065 | chrY | 10032886 | . | C | G | 504.19  | PASS          | AC=6;AF=0.097;AN=62;BaseQRankSum=  |
| 13066 | chrY | 10032890 | . | A | G | 413.75  | PASS          | AC=5;AF=0.081;AN=62;BaseQRankSum=  |
| 13067 | chrY | 10032894 | . | C | G | 422.48  | PASS          | AC=6;AF=0.094;AN=64;BaseQRankSum=  |
| 13068 | chrY | 10032904 | . | C | T | 375.35  | PASS          | AC=6;AF=0.097;AN=62;BaseQRankSum=  |
| 13069 | chrY | 10032932 | . | A | G | 109.16  | PASS          | AC=5;AF=0.078;AN=64;BaseQRankSum=  |
| 13070 | chrY | 10033070 | . | T | C | 58.41   | PASS          | AC=4;AF=0.069;AN=58;BaseQRankSum=  |
| 13071 | chrY | 10033072 | . | G | T | 57.01   | PASS          | AC=4;AF=0.067;AN=60;BaseQRankSum=  |
| 13072 | chrY | 10033080 | . | C | T | 51.66   | PASS          | AC=3;AF=0.050;AN=60;BaseQRankSum=  |

|       |      |          |   |   |     |         |               |                                            |
|-------|------|----------|---|---|-----|---------|---------------|--------------------------------------------|
| 13073 | chrY | 10033081 | . | T | G   | 60.76   | PASS          | AC=4;AF=0.069;AN=58;BaseQRankSum=          |
| 13074 | chrY | 10033085 | . | T | C   | 65.94   | PASS          | AC=4;AF=0.071;AN=56;BaseQRankSum=          |
| 13075 | chrY | 10033096 | . | T | G   | 139.22  | PASS          | AC=5;AF=0.089;AN=56;BaseQRankSum=          |
| 13076 | chrY | 10033106 | . | C | T   | 35.04   | PASS          | AC=2;AF=0.036;AN=56;BaseQRankSum=          |
| 13077 | chrY | 10033116 | . | C | T   | 172.38  | PASS          | AC=6;AF=0.103;AN=58;BaseQRankSum=          |
| 13078 | chrY | 10033122 | . | G | A   | 213.48  | PASS          | AC=6;AF=0.103;AN=58;BaseQRankSum=          |
| 13079 | chrY | 10033128 | . | C | T   | 113.08  | PASS          | AC=3;AF=0.052;AN=58;BaseQRankSum=          |
| 13080 | chrY | 10033134 | . | G | A   | 45.61   | PASS          | AC=2;AF=0.036;AN=56;BaseQRankSum=          |
| 13081 | chrY | 10033137 | . | G | A   | 302.34  | PASS          | AC=5;AF=0.100;AN=50;BaseQRankSum=          |
| 13082 | chrY | 10033163 | . | G | A   | 109.52  | PASS          | AC=4;AF=0.063;AN=64;BaseQRankSum=          |
| 13083 | chrY | 10033171 | . | G | T   | 64.44   | PASS          | AC=3;AF=0.048;AN=62;BaseQRankSum=          |
| 13084 | chrY | 10033180 | . | T | A   | 60.91   | my_snp_filter | AC=3;AF=0.048;AN=62;BaseQRankSum=          |
| 13085 | chrY | 10033192 | . | T | C   | 176.36  | PASS          | AC=6;AF=0.088;AN=68;BaseQRankSum=          |
| 13086 | chrY | 10033211 | . | G | C   | 303.71  | PASS          | AC=8;AF=0.129;AN=62;BaseQRankSum=          |
| 13087 | chrY | 10033216 | . | G | A   | 55.58   | PASS          | AC=2;AF=0.033;AN=60;BaseQRankSum=          |
| 13088 | chrY | 10033222 | . | A | G   | 45.84   | PASS          | AC=1;AF=0.017;AN=60;BaseQRankSum=          |
| 13089 | chrY | 10033229 | . | G | A   | 189.27  | PASS          | AC=3;AF=0.060;AN=50;BaseQRankSum=          |
| 13090 | chrY | 10033235 | . | C | A   | 301.64  | PASS          | AC=6;AF=0.130;AN=46;BaseQRankSum=          |
| 13091 | chrY | 10033240 | . | C | G   | 265.52  | PASS          | AC=6;AF=0.115;AN=52;BaseQRankSum=          |
| 13092 | chrY | 10033248 | . | C | A   | 145.42  | PASS          | AC=3;AF=0.052;AN=58;BaseQRankSum=          |
| 13093 | chrY | 10033249 | . | G | A   | 256.08  | PASS          | AC=6;AF=0.115;AN=52;BaseQRankSum=          |
| 13094 | chrY | 10033251 | . | G | C   | 257.41  | PASS          | AC=6;AF=0.115;AN=52;BaseQRankSum=          |
| 13095 | chrY | 10033256 | . | C | T   | 92.40   | PASS          | AC=2;AF=0.038;AN=52;BaseQRankSum=          |
| 13096 | chrY | 10033257 | . | G | A   | 257.05  | PASS          | AC=5;AF=0.083;AN=60;BaseQRankSum=          |
| 13097 | chrY | 10033261 | . | T | C   | 139.25  | PASS          | AC=2;AF=0.037;AN=54;BaseQRankSum=          |
| 13098 | chrY | 10033264 | . | T | C   | 201.53  | PASS          | AC=4;AF=0.071;AN=56;BaseQRankSum=          |
| 13099 | chrY | 10033269 | . | A | C   | 137.28  | PASS          | AC=3;AF=0.054;AN=56;BaseQRankSum=          |
| 13100 | chrY | 10033272 | . | C | T   | 135.74  | PASS          | AC=2;AF=0.034;AN=58;BaseQRankSum=          |
| 13101 | chrY | 10033283 | . | T | C   | 113.50  | PASS          | AC=1;AF=0.017;AN=58;BaseQRankSum=          |
| 13102 | chrY | 10033286 | . | G | A   | 107.54  | PASS          | AC=1;AF=0.017;AN=60;BaseQRankSum=          |
| 13103 | chrY | 10033288 | . | C | A   | 109.31  | PASS          | AC=1;AF=0.016;AN=62;BaseQRankSum=          |
| 13104 | chrY | 10033296 | . | G | A   | 108.59  | PASS          | AC=1;AF=0.016;AN=64;BaseQRankSum=          |
| 13105 | chrY | 10033300 | . | C | G   | 65.75   | PASS          | AC=1;AF=0.016;AN=64;BaseQRankSum=          |
| 13106 | chrY | 10033413 | . | A | G   | 112.09  | PASS          | AC=4;AF=0.057;AN=70;BaseQRankSum=          |
| 13107 | chrY | 10033429 | . | G | C   | 588.65  | PASS          | AC=5;AF=0.081;AN=62;BaseQRankSum=          |
| 13108 | chrY | 10033439 | . | A | G   | 718.70  | PASS          | AC=6;AF=0.100;AN=60;BaseQRankSum=          |
| 13109 | chrY | 10033441 | . | G | C   | 664.96  | PASS          | AC=5;AF=0.074;AN=68;BaseQRankSum=          |
| 13110 | chrY | 10033450 | . | A | C   | 865.91  | PASS          | AC=7;AF=0.117;AN=60;BaseQRankSum=          |
| 13111 | chrY | 10033461 | . | G | C   | 996.87  | PASS          | AC=12;AF=0.194;AN=62;BaseQRankSum=         |
| 13112 | chrY | 10033462 | . | G | A   | 484.68  | PASS          | AC=8;AF=0.125;AN=64;BaseQRankSum=          |
| 13113 | chrY | 10033466 | . | C | T   | 899.09  | PASS          | AC=8;AF=0.118;AN=68;BaseQRankSum=          |
| 13114 | chrY | 10033471 | . | G | T   | 1035.01 | PASS          | AC=8;AF=0.114;AN=70;BaseQRankSum=          |
| 13115 | chrY | 10033502 | . | G | A   | 462.14  | PASS          | AC=10;AF=0.143;AN=70;BaseQRankSum=         |
| 13116 | chrY | 10033508 | . | A | G   | 119.91  | my_snp_filter | AC=2;AF=0.029;AN=68;BaseQRankSum=          |
| 13117 | chrY | 10033512 | . | C | T   | 3149.82 | PASS          | AC=19;AF=0.279;AN=68;BaseQRankSum=         |
| 13118 | chrY | 10033513 | . | G | A,C | 1198.32 | PASS          | AC=11,2;AF=0.162,0.029;AN=68;BaseQRankSum= |
| 13119 | chrY | 10033519 | . | C | T   | 974.04  | PASS          | AC=11;AF=0.157;AN=70;BaseQRankSum=         |
| 13120 | chrY | 10033523 | . | C | G   | 1087.61 | PASS          | AC=11;AF=0.167;AN=66;BaseQRankSum=         |
| 13121 | chrY | 10033526 | . | A | G   | 1689.17 | PASS          | AC=13;AF=0.197;AN=66;BaseQRankSum=         |
| 13122 | chrY | 10033539 | . | G | A   | 703.18  | PASS          | AC=12;AF=0.194;AN=62;BaseQRankSum=         |
| 13123 | chrY | 10033561 | . | G | T   | 891.40  | PASS          | AC=11;AF=0.177;AN=62;BaseQRankSum=         |
| 13124 | chrY | 10033562 | . | G | T   | 986.65  | PASS          | AC=12;AF=0.207;AN=58;BaseQRankSum=         |
| 13125 | chrY | 10033570 | . | T | G   | 1973.61 | PASS          | AC=19;AF=0.339;AN=56;BaseQRankSum=         |
| 13126 | chrY | 10033571 | . | G | C   | 1930.56 | PASS          | AC=19;AF=0.339;AN=56;BaseQRankSum=         |
| 13127 | chrY | 10033581 | . | A | C   | 645.72  | PASS          | AC=8;AF=0.129;AN=62;BaseQRankSum=          |
| 13128 | chrY | 10033583 | . | A | T,C | 1161.50 | PASS          | AC=6,5;AF=0.111,0.093;AN=54;BaseQRankSum=  |
| 13129 | chrY | 10033589 | . | C | T   | 424.71  | PASS          | AC=4;AF=0.065;AN=62;BaseQRankSum=          |
| 13130 | chrY | 10033590 | . | C | A   | 372.38  | PASS          | AC=8;AF=0.125;AN=64;BaseQRankSum=          |
| 13131 | chrY | 10033602 | . | T | C   | 233.64  | PASS          | AC=2;AF=0.043;AN=46;BaseQRankSum=          |
| 13132 | chrY | 10033604 | . | G | A   | 291.83  | PASS          | AC=2;AF=0.037;AN=54;BaseQRankSum=          |
| 13133 | chrY | 10033608 | . | C | T   | 158.52  | PASS          | AC=2;AF=0.034;AN=58;BaseQRankSum=          |
| 13134 | chrY | 10033625 | . | A | T   | 65.67   | PASS          | AC=1;AF=0.018;AN=56;BaseQRankSum=          |
| 13135 | chrY | 10033626 | . | T | C   | 65.02   | PASS          | AC=1;AF=0.017;AN=58;BaseQRankSum=          |
| 13136 | chrY | 10033752 | . | G | C   | 140.04  | PASS          | AC=3;AF=0.068;AN=44;BaseQRankSum=          |
| 13137 | chrY | 10033761 | . | G | C   | 164.68  | PASS          | AC=4;AF=0.087;AN=46;BaseQRankSum=          |
| 13138 | chrY | 10033769 | . | T | C   | 164.70  | PASS          | AC=4;AF=0.100;AN=40;BaseQRankSum=          |
| 13139 | chrY | 10033774 | . | C | G   | 172.68  | PASS          | AC=5;AF=0.119;AN=42;BaseQRankSum=          |
| 13140 | chrY | 10033778 | . | T | C   | 258.40  | PASS          | AC=5;AF=0.132;AN=38;BaseQRankSum=          |
| 13141 | chrY | 10033784 | . | T | C   | 305.27  | PASS          | AC=5;AF=0.156;AN=32;BaseQRankSum=          |
| 13142 | chrY | 10033791 | . | G | A   | 79.75   | PASS          | AC=2;AF=0.034;AN=58;BaseQRankSum=          |
| 13143 | chrY | 10033795 | . | C | A   | 68.78   | PASS          | AC=2;AF=0.032;AN=62;BaseQRankSum=          |
| 13144 | chrY | 10033801 | . | G | T   | 391.67  | PASS          | AC=4;AF=0.118;AN=34;BaseQRankSum=          |
| 13145 | chrY | 10033832 | . | A | G   | 143.25  | PASS          | AC=1;AF=0.015;AN=66;BaseQRankSum=          |
| 13146 | chrY | 10033835 | . | G | A   | 902.16  | PASS          | AC=9;AF=0.136;AN=66;BaseQRankSum=          |
| 13147 | chrY | 10033840 | . | C | G,* | 4008.47 | PASS          | AC=19,3;AF=0.317,0.050;AN=60;BaseQRankSum= |
| 13148 | chrY | 10033841 | . | C | T,* | 3976.19 | PASS          | AC=19,3;AF=0.317,0.050;AN=60;BaseQRankSum= |

|       |      |          |   |   |     |         |               |                                   |
|-------|------|----------|---|---|-----|---------|---------------|-----------------------------------|
| 13149 | chrY | 10033855 | . | G | A,* | 368.23  | PASS          | AC=1,6;AF=0.017,0.100;AN=60;BaseQ |
| 13150 | chrY | 10033862 | . | A | G   | 4719.31 | PASS          | AC=21;AF=0.350;AN=60;BaseQRankSum |
| 13151 | chrY | 10033864 | . | C | A   | 158.92  | PASS          | AC=1;AF=0.015;AN=66;BaseQRankSum= |
| 13152 | chrY | 10033866 | . | G | A   | 4482.36 | PASS          | AC=21;AF=0.318;AN=66;BaseQRankSum |
| 13153 | chrY | 10033870 | . | G | T   | 4396.16 | PASS          | AC=21;AF=0.318;AN=66;BaseQRankSum |
| 13154 | chrY | 10033882 | . | G | A   | 4494.92 | PASS          | AC=24;AF=0.343;AN=70;BaseQRankSum |
| 13155 | chrY | 10033888 | . | T | C   | 4674.70 | PASS          | AC=24;AF=0.364;AN=66;BaseQRankSum |
| 13156 | chrY | 10033890 | . | A | C   | 351.24  | PASS          | AC=5;AF=0.076;AN=66;BaseQRankSum= |
| 13157 | chrY | 10033896 | . | G | T   | 2063.24 | PASS          | AC=9;AF=0.129;AN=70;BaseQRankSum= |
| 13158 | chrY | 10033899 | . | G | A   | 1391.96 | PASS          | AC=9;AF=0.129;AN=70;BaseQRankSum= |
| 13159 | chrY | 10033906 | . | C | T   | 3847.32 | PASS          | AC=17;AF=0.258;AN=66;BaseQRankSum |
| 13160 | chrY | 10033907 | . | G | A   | 850.78  | PASS          | AC=13;AF=0.197;AN=66;BaseQRankSum |
| 13161 | chrY | 10033923 | . | A | C   | 568.94  | PASS          | AC=7;AF=0.100;AN=70;BaseQRankSum= |
| 13162 | chrY | 10033924 | . | G | A   | 564.60  | PASS          | AC=7;AF=0.100;AN=70;BaseQRankSum= |
| 13163 | chrY | 10033932 | . | T | C   | 4396.54 | PASS          | AC=22;AF=0.407;AN=54;BaseQRankSum |
| 13164 | chrY | 10033933 | . | G | T   | 607.01  | PASS          | AC=6;AF=0.111;AN=54;BaseQRankSum= |
| 13165 | chrY | 10033943 | . | T | A   | 663.61  | PASS          | AC=8;AF=0.114;AN=70;BaseQRankSum= |
| 13166 | chrY | 10033947 | . | G | A   | 697.03  | PASS          | AC=6;AF=0.086;AN=70;BaseQRankSum= |
| 13167 | chrY | 10033953 | . | C | T   | 1690.56 | PASS          | AC=10;AF=0.143;AN=70;BaseQRankSum |
| 13168 | chrY | 10033954 | . | A | C   | 743.81  | PASS          | AC=6;AF=0.091;AN=66;BaseQRankSum= |
| 13169 | chrY | 10033962 | . | T | A   | 6452.12 | PASS          | AC=22;AF=0.344;AN=64;BaseQRankSum |
| 13170 | chrY | 10033970 | . | G | A   | 544.87  | PASS          | AC=6;AF=0.091;AN=66;BaseQRankSum= |
| 13171 | chrY | 10033974 | . | C | T   | 3531.29 | PASS          | AC=19;AF=0.279;AN=68;BaseQRankSum |
| 13172 | chrY | 10033975 | . | G | C   | 1459.97 | my_snp_filter | AC=7;AF=0.106;AN=66;BaseQ         |
| 13173 | chrY | 10033976 | . | G | T   | 3562.55 | PASS          | AC=19;AF=0.279;AN=68;BaseQRankSum |
| 13174 | chrY | 10033985 | . | G | A   | 3678.84 | PASS          | AC=18;AF=0.265;AN=68;BaseQRankSum |
| 13175 | chrY | 10033992 | . | A | G   | 3112.83 | PASS          | AC=9;AF=0.132;AN=68;BaseQRankSum= |
| 13176 | chrY | 10033995 | . | T | C   | 5468.62 | PASS          | AC=15;AF=0.227;AN=66;BaseQRankSum |
| 13177 | chrY | 10033999 | . | G | A   | 5589.64 | PASS          | AC=19;AF=0.339;AN=56;BaseQRankSum |
| 13178 | chrY | 10034003 | . | T | C   | 5404.85 | PASS          | AC=14;AF=0.226;AN=62;BaseQRankSum |
| 13179 | chrY | 10034006 | . | G | C   | 4082.01 | PASS          | AC=14;AF=0.212;AN=66;BaseQRankSum |
| 13180 | chrY | 10034011 | . | C | G   | 5306.93 | PASS          | AC=16;AF=0.308;AN=52;BaseQRankSum |
| 13181 | chrY | 10034012 | . | T | C   | 4985.73 | PASS          | AC=16;AF=0.308;AN=52;BaseQRankSum |
| 13182 | chrY | 10034016 | . | G | A   | 307.07  | PASS          | AC=6;AF=0.103;AN=58;BaseQRankSum= |
| 13183 | chrY | 10034017 | . | A | C   | 5732.82 | PASS          | AC=17;AF=0.293;AN=58;BaseQRankSum |
| 13184 | chrY | 10034018 | . | G | A   | 40.01   | PASS          | AC=1;AF=0.015;AN=68;BaseQRankSum= |
| 13185 | chrY | 10034025 | . | C | T   | 266.57  | PASS          | AC=4;AF=0.067;AN=60;BaseQRankSum= |
| 13186 | chrY | 10034029 | . | C | A   | 3941.07 | PASS          | AC=15;AF=0.288;AN=52;BaseQRankSum |
| 13187 | chrY | 10034045 | . | G | A   | 51.03   | my_snp_filter | AC=2;AF=0.030;AN=66;BaseQ         |
| 13188 | chrY | 10034056 | . | T | C   | 5366.25 | PASS          | AC=17;AF=0.315;AN=54;BaseQRankSum |
| 13189 | chrY | 10034059 | . | C | T   | 5388.75 | PASS          | AC=17;AF=0.315;AN=54;BaseQRankSum |
| 13190 | chrY | 10034076 | . | G | A   | 5106.25 | my_snp_filter | AC=16;AF=0.276;AN=58;BaseQ        |
| 13191 | chrY | 10034104 | . | G | A   | 3061.39 | my_snp_filter | AC=11;AF=0.212;AN=52;BaseQ        |
| 13192 | chrY | 10034127 | . | A | C   | 2754.09 | my_snp_filter | AC=9;AF=0.167;AN=54;BaseQ         |
| 13193 | chrY | 10034134 | . | C | G   | 2715.12 | my_snp_filter | AC=8;AF=0.143;AN=56;BaseQ         |
| 13194 | chrY | 10034139 | . | C | T   | 2648.26 | my_snp_filter | AC=8;AF=0.143;AN=56;BaseQ         |
| 13195 | chrY | 10034149 | . | T | C   | 2369.14 | my_snp_filter | AC=8;AF=0.143;AN=56;BaseQ         |
| 13196 | chrY | 10034150 | . | G | C   | 2241.99 | my_snp_filter | AC=8;AF=0.143;AN=56;BaseQ         |
| 13197 | chrY | 10034153 | . | T | G   | 2202.72 | my_snp_filter | AC=8;AF=0.138;AN=58;BaseQ         |
| 13198 | chrY | 10034164 | . | A | C   | 1669.17 | my_snp_filter | AC=6;AF=0.115;AN=52;BaseQ         |
| 13199 | chrY | 10034166 | . | C | A,G | 1607.53 | my_snp_filter | AC=3,3;AF=0.054,0.054;AN=         |
| 13200 | chrY | 10034181 | . | G | A   | 1237.39 | my_snp_filter | AC=5;AF=0.089;AN=56;BaseQ         |
| 13201 | chrY | 10034195 | . | T | C   | 1104.69 | PASS          | AC=5;AF=0.086;AN=58;BaseQRankSum= |
| 13202 | chrY | 10034197 | . | A | C   | 978.77  | PASS          | AC=5;AF=0.083;AN=60;BaseQRankSum= |
| 13203 | chrY | 10034199 | . | C | T   | 931.10  | PASS          | AC=5;AF=0.089;AN=56;BaseQRankSum= |
| 13204 | chrY | 10034208 | . | C | G   | 803.25  | PASS          | AC=5;AF=0.083;AN=60;BaseQRankSum= |
| 13205 | chrY | 10034228 | . | C | T   | 479.35  | PASS          | AC=5;AF=0.086;AN=58;BaseQRankSum= |
| 13206 | chrY | 10034229 | . | C | G   | 480.48  | PASS          | AC=5;AF=0.086;AN=58;BaseQRankSum= |
| 13207 | chrY | 10034244 | . | C | A   | 403.96  | PASS          | AC=4;AF=0.067;AN=60;BaseQRankSum= |
| 13208 | chrY | 10034245 | . | A | G   | 403.23  | PASS          | AC=4;AF=0.067;AN=60;BaseQRankSum= |
| 13209 | chrY | 10034262 | . | C | T   | 253.12  | PASS          | AC=3;AF=0.052;AN=58;BaseQRankSum= |
| 13210 | chrY | 10034263 | . | G | T   | 250.34  | PASS          | AC=3;AF=0.052;AN=58;BaseQRankSum= |
| 13211 | chrY | 10034270 | . | G | C   | 245.58  | PASS          | AC=3;AF=0.054;AN=56;BaseQRankSum= |
| 13212 | chrY | 10034271 | . | G | C   | 248.57  | PASS          | AC=3;AF=0.054;AN=56;BaseQRankSum= |
| 13213 | chrY | 10034287 | . | C | A   | 167.97  | PASS          | AC=3;AF=0.052;AN=58;BaseQRankSum= |
| 13214 | chrY | 10034288 | . | T | G   | 123.84  | PASS          | AC=3;AF=0.052;AN=58;BaseQRankSum= |
| 13215 | chrY | 10034293 | . | T | C   | 131.10  | PASS          | AC=3;AF=0.052;AN=58;BaseQRankSum= |
| 13216 | chrY | 10034295 | . | G | C   | 131.32  | PASS          | AC=3;AF=0.056;AN=54;BaseQRankSum= |
| 13217 | chrY | 10034767 | . | C | T   | 48.58   | PASS          | AC=1;AF=0.016;AN=62;BaseQRankSum= |
| 13218 | chrY | 10034781 | . | A | T   | 117.87  | PASS          | AC=2;AF=0.033;AN=60;BaseQRankSum= |
| 13219 | chrY | 10034782 | . | C | A   | 142.03  | PASS          | AC=2;AF=0.032;AN=62;BaseQRankSum= |
| 13220 | chrY | 10034788 | . | T | C   | 126.91  | PASS          | AC=2;AF=0.031;AN=64;BaseQRankSum= |
| 13221 | chrY | 10034789 | . | G | A   | 216.66  | PASS          | AC=2;AF=0.031;AN=64;BaseQRankSum= |
| 13222 | chrY | 10034792 | . | T | C   | 263.29  | PASS          | AC=2;AF=0.032;AN=62;BaseQRankSum= |
| 13223 | chrY | 10034793 | . | T | G   | 281.69  | PASS          | AC=2;AF=0.032;AN=62;BaseQRankSum= |
| 13224 | chrY | 10034814 | . | C | A   | 563.10  | PASS          | AC=9;AF=0.141;AN=64;BaseQRankSum= |

|       |      |          |   |   |     |          |               |                                    |
|-------|------|----------|---|---|-----|----------|---------------|------------------------------------|
| 13225 | chrY | 10034819 | . | T | G   | 957.51   | PASS          | AC=14;AF=0.233;AN=60;BaseQRankSum= |
| 13226 | chrY | 10034823 | . | C | T   | 694.17   | PASS          | AC=10;AF=0.152;AN=66;BaseQRankSum= |
| 13227 | chrY | 10034824 | . | T | G   | 1067.60  | PASS          | AC=15;AF=0.234;AN=64;BaseQRankSum= |
| 13228 | chrY | 10034827 | . | T | G   | 1433.80  | PASS          | AC=15;AF=0.234;AN=64;BaseQRankSum= |
| 13229 | chrY | 10034836 | . | C | A   | 1688.56  | PASS          | AC=16;AF=0.267;AN=60;BaseQRankSum= |
| 13230 | chrY | 10034848 | . | G | A   | 286.55   | PASS          | AC=6;AF=0.086;AN=70;BaseQRankSum=  |
| 13231 | chrY | 10034855 | . | G | A   | 1530.12  | PASS          | AC=15;AF=0.221;AN=68;BaseQRankSum= |
| 13232 | chrY | 10034864 | . | C | T   | 40.21    | PASS          | AC=1;AF=0.014;AN=70;BaseQRankSum=  |
| 13233 | chrY | 10034868 | . | A | G   | 40.22    | PASS          | AC=1;AF=0.014;AN=70;BaseQRankSum=  |
| 13234 | chrY | 10034887 | . | C | T   | 1760.40  | PASS          | AC=22;AF=0.314;AN=70;BaseQRankSum= |
| 13235 | chrY | 10034888 | . | C | G   | 6598.61  | PASS          | AC=33;AF=0.471;AN=70;BaseQRankSum= |
| 13236 | chrY | 10034941 | . | C | A   | 6862.16  | PASS          | AC=31;AF=0.456;AN=68;BaseQRankSum= |
| 13237 | chrY | 10034953 | . | C | T   | 625.87   | PASS          | AC=9;AF=0.129;AN=70;BaseQRankSum=  |
| 13238 | chrY | 10034954 | . | A | G   | 5881.93  | PASS          | AC=29;AF=0.414;AN=70;BaseQRankSum= |
| 13239 | chrY | 10034987 | . | G | T,* | 2897.52  | PASS          | AC=14,3;AF=0.226,0.048;AN=62;BaseQ |
| 13240 | chrY | 10034989 | . | C | T   | 2557.72  | PASS          | AC=14;AF=0.241;AN=58;BaseQRankSum= |
| 13241 | chrY | 10035006 | . | A | C   | 4560.63  | PASS          | AC=16;AF=0.235;AN=68;BaseQRankSum= |
| 13242 | chrY | 10035029 | . | A | G   | 5390.62  | PASS          | AC=21;AF=0.318;AN=66;BaseQRankSum= |
| 13243 | chrY | 10035031 | . | T | G   | 5348.62  | PASS          | AC=21;AF=0.318;AN=66;BaseQRankSum= |
| 13244 | chrY | 10035086 | . | T | G   | 4364.60  | my_snp_filter | AC=25;AF=0.368;AN=68;BaseQ         |
| 13245 | chrY | 10035119 | . | A | G   | 3082.48  | my_snp_filter | AC=16;AF=0.235;AN=68;BaseQ         |
| 13246 | chrY | 10035125 | . | G | T   | 3018.79  | my_snp_filter | AC=14;AF=0.206;AN=68;BaseQ         |
| 13247 | chrY | 10035128 | . | C | T,G | 3562.31  | my_snp_filter | AC=9,12;AF=0.136,0.182;AN=         |
| 13248 | chrY | 10035146 | . | C | T   | 6581.96  | my_snp_filter | AC=18;AF=0.265;AN=68;BaseQ         |
| 13249 | chrY | 10035147 | . | A | G   | 6575.21  | my_snp_filter | AC=18;AF=0.265;AN=68;BaseQ         |
| 13250 | chrY | 10035153 | . | T | G   | 6279.80  | my_snp_filter | AC=18;AF=0.265;AN=68;BaseQ         |
| 13251 | chrY | 10035159 | . | A | T   | 6150.80  | my_snp_filter | AC=18;AF=0.257;AN=70;BaseQ         |
| 13252 | chrY | 10035180 | . | G | T,C | 2023.63  | my_snp_filter | AC=8,3;AF=0.114,0.043;AN=          |
| 13253 | chrY | 10035184 | . | T | C,A | 2163.82  | my_snp_filter | AC=8,3;AF=0.114,0.043;AN=          |
| 13254 | chrY | 10035191 | . | A | C   | 1099.97  | PASS          | AC=5;AF=0.071;AN=70;BaseQRankSum=  |
| 13255 | chrY | 10035202 | . | C | T   | 2894.17  | my_snp_filter | AC=9;AF=0.129;AN=70;BaseQ          |
| 13256 | chrY | 10035211 | . | C | G   | 2713.62  | my_snp_filter | AC=9;AF=0.129;AN=70;BaseQ          |
| 13257 | chrY | 10035212 | . | A | T   | 2660.70  | my_snp_filter | AC=9;AF=0.129;AN=70;BaseQ          |
| 13258 | chrY | 10035216 | . | A | G   | 2454.17  | my_snp_filter | AC=9;AF=0.129;AN=70;BaseQ          |
| 13259 | chrY | 10035223 | . | T | C   | 2162.22  | my_snp_filter | AC=9;AF=0.129;AN=70;BaseQ          |
| 13260 | chrY | 10035244 | . | T | C   | 369.22   | PASS          | AC=3;AF=0.043;AN=70;BaseQRankSum=  |
| 13261 | chrY | 10035258 | . | C | T   | 564.18   | PASS          | AC=4;AF=0.057;AN=70;BaseQRankSum=  |
| 13262 | chrY | 10035267 | . | T | C   | 304.99   | PASS          | AC=2;AF=0.029;AN=70;BaseQRankSum=  |
| 13263 | chrY | 10035274 | . | T | C   | 99.85    | PASS          | AC=1;AF=0.014;AN=70;BaseQRankSum=  |
| 13264 | chrY | 10035275 | . | G | A   | 99.90    | PASS          | AC=1;AF=0.015;AN=68;BaseQRankSum=  |
| 13265 | chrY | 10035276 | . | G | A   | 99.90    | PASS          | AC=1;AF=0.015;AN=68;BaseQRankSum=  |
| 13266 | chrY | 10035289 | . | C | G   | 131.73   | PASS          | AC=2;AF=0.029;AN=70;BaseQRankSum=  |
| 13267 | chrY | 10035290 | . | C | G   | 96.75    | PASS          | AC=2;AF=0.029;AN=70;BaseQRankSum=  |
| 13268 | chrY | 10035292 | . | C | T   | 97.23    | PASS          | AC=2;AF=0.029;AN=68;BaseQRankSum=  |
| 13269 | chrY | 10035297 | . | A | G   | 54.95    | my_snp_filter | AC=2;AF=0.029;AN=68;BaseQ          |
| 13270 | chrY | 10035553 | . | T | C   | 74.04    | PASS          | AC=1;AF=0.014;AN=70;BaseQRankSum=  |
| 13271 | chrY | 10035560 | . | G | A   | 73.52    | PASS          | AC=1;AF=0.014;AN=70;BaseQRankSum=  |
| 13272 | chrY | 10035562 | . | A | G   | 74       | PASS          | AC=1;AF=0.014;AN=70;BaseQRankSum=  |
| 13273 | chrY | 10035566 | . | T | G   | 74.18    | PASS          | AC=1;AF=0.014;AN=70;BaseQRankSum=  |
| 13274 | chrY | 10035575 | . | A | C   | 71.63    | PASS          | AC=1;AF=0.015;AN=68;BaseQRankSum=  |
| 13275 | chrY | 10035578 | . | G | A   | 71.49    | PASS          | AC=1;AF=0.014;AN=70;BaseQRankSum=  |
| 13276 | chrY | 10035584 | . | G | A   | 71.57    | PASS          | AC=1;AF=0.015;AN=68;BaseQRankSum=  |
| 13277 | chrY | 10035601 | . | A | G   | 192.47   | PASS          | AC=6;AF=0.088;AN=68;BaseQRankSum=  |
| 13278 | chrY | 10035609 | . | G | A   | 167.61   | PASS          | AC=4;AF=0.059;AN=68;BaseQRankSum=  |
| 13279 | chrY | 10035610 | . | A | G   | 167.60   | PASS          | AC=4;AF=0.059;AN=68;BaseQRankSum=  |
| 13280 | chrY | 10035630 | . | C | T   | 288.18   | PASS          | AC=4;AF=0.059;AN=68;BaseQRankSum=  |
| 13281 | chrY | 10035635 | . | C | A   | 284.99   | PASS          | AC=4;AF=0.057;AN=70;BaseQRankSum=  |
| 13282 | chrY | 10035638 | . | A | T   | 490.34   | PASS          | AC=5;AF=0.074;AN=68;BaseQRankSum=  |
| 13283 | chrY | 10035643 | . | G | A   | 368.44   | PASS          | AC=4;AF=0.059;AN=68;BaseQRankSum=  |
| 13284 | chrY | 10035651 | . | T | A   | 268.47   | PASS          | AC=4;AF=0.057;AN=70;BaseQRankSum=  |
| 13285 | chrY | 10035664 | . | C | G   | 11617.96 | PASS          | AC=64;AF=1.00;AN=64;DP=39          |
| 13286 | chrY | 10035680 | . | T | C   | 467.14   | PASS          | AC=8;AF=0.121;AN=66;BaseQRankSum=  |
| 13287 | chrY | 10035682 | . | A | G   | 148.04   | PASS          | AC=3;AF=0.045;AN=66;BaseQRankSum=  |
| 13288 | chrY | 10035686 | . | A | G   | 140.10   | PASS          | AC=2;AF=0.030;AN=66;BaseQRankSum=  |
| 13289 | chrY | 10035695 | . | T | C   | 486.56   | PASS          | AC=6;AF=0.088;AN=68;BaseQRankSum=  |
| 13290 | chrY | 10035697 | . | T | A   | 409.66   | PASS          | AC=6;AF=0.088;AN=68;BaseQRankSum=  |
| 13291 | chrY | 10035725 | . | C | A   | 199.06   | my_snp_filter | AC=7;AF=0.103;AN=68;BaseQ          |
| 13292 | chrY | 10035726 | . | A | G   | 196.77   | PASS          | AC=6;AF=0.088;AN=68;BaseQRankSum=  |
| 13293 | chrY | 10035731 | . | T | A   | 159.18   | my_snp_filter | AC=6;AF=0.091;AN=66;BaseQ          |
| 13294 | chrY | 10035746 | . | A | G   | 453.22   | PASS          | AC=8;AF=0.114;AN=70;BaseQRankSum=  |
| 13295 | chrY | 10035748 | . | G | A   | 532.26   | PASS          | AC=8;AF=0.114;AN=70;BaseQRankSum=  |
| 13296 | chrY | 10035752 | . | G | A   | 613.33   | PASS          | AC=7;AF=0.100;AN=70;BaseQRankSum=  |
| 13297 | chrY | 10035768 | . | G | A   | 1223.22  | PASS          | AC=8;AF=0.114;AN=70;BaseQRankSum=  |
| 13298 | chrY | 10035772 | . | T | C   | 1198.15  | PASS          | AC=8;AF=0.118;AN=68;BaseQRankSum=  |
| 13299 | chrY | 10035793 | . | T | C   | 1128.63  | PASS          | AC=9;AF=0.132;AN=68;BaseQRankSum=  |
| 13300 | chrY | 10035801 | . | G | C   | 181.35   | my_snp_filter | AC=5;AF=0.071;AN=70;BaseQ          |

|       |      |          |   |   |     |          |               |                                    |
|-------|------|----------|---|---|-----|----------|---------------|------------------------------------|
| 13301 | chrY | 10035819 | . | T | C   | 2086.42  | PASS          | AC=11;AF=0.167;AN=66;BaseQRankSum= |
| 13302 | chrY | 10035822 | . | T | C,A | 1612.05  | PASS          | AC=4,7;AF=0.059,0.103;AN=68;BaseQ  |
| 13303 | chrY | 10035826 | . | G | T   | 1345.69  | PASS          | AC=7;AF=0.103;AN=68;BaseQRankSum=  |
| 13304 | chrY | 10035839 | . | C | T   | 1254.26  | PASS          | AC=7;AF=0.103;AN=68;BaseQRankSum=  |
| 13305 | chrY | 10035840 | . | T | G   | 1988.25  | PASS          | AC=10;AF=0.147;AN=68;BaseQRankSum= |
| 13306 | chrY | 10035889 | . | T | G   | 3522.07  | PASS          | AC=12;AF=0.182;AN=66;BaseQRankSum= |
| 13307 | chrY | 10035910 | . | G | A   | 3598.03  | PASS          | AC=13;AF=0.191;AN=68;BaseQRankSum= |
| 13308 | chrY | 10035915 | . | T | A   | 3578.08  | PASS          | AC=13;AF=0.191;AN=68;BaseQRankSum= |
| 13309 | chrY | 10035919 | . | C | T   | 1173.75  | PASS          | AC=8;AF=0.118;AN=68;BaseQRankSum=  |
| 13310 | chrY | 10035930 | . | C | A   | 3937.78  | PASS          | AC=11;AF=0.162;AN=68;BaseQRankSum= |
| 13311 | chrY | 10035937 | . | A | G   | 4101.73  | PASS          | AC=11;AF=0.162;AN=68;BaseQRankSum= |
| 13312 | chrY | 10035943 | . | T | C   | 4471.59  | PASS          | AC=11;AF=0.162;AN=68;BaseQRankSum= |
| 13313 | chrY | 10035944 | . | G | A   | 1656.34  | PASS          | AC=8;AF=0.118;AN=68;BaseQRankSum=  |
| 13314 | chrY | 10035949 | . | A | T,G | 2614.87  | PASS          | AC=8,3;AF=0.118,0.044;AN=68;BaseQ  |
| 13315 | chrY | 10035962 | . | C | T   | 2536.40  | PASS          | AC=11;AF=0.157;AN=70;BaseQRankSum= |
| 13316 | chrY | 10035968 | . | C | A   | 1685.67  | PASS          | AC=8;AF=0.118;AN=68;BaseQRankSum=  |
| 13317 | chrY | 10035971 | . | G | A   | 5066.11  | PASS          | AC=10;AF=0.147;AN=68;BaseQRankSum= |
| 13318 | chrY | 10035985 | . | C | A   | 4716.93  | PASS          | AC=10;AF=0.147;AN=68;BaseQRankSum= |
| 13319 | chrY | 10035991 | . | C | T   | 1635.32  | PASS          | AC=8;AF=0.118;AN=68;BaseQRankSum=  |
| 13320 | chrY | 10036016 | . | C | T   | 1263.37  | PASS          | AC=8;AF=0.121;AN=66;BaseQRankSum=  |
| 13321 | chrY | 10036018 | . | A | G   | 4473.55  | PASS          | AC=10;AF=0.152;AN=66;BaseQRankSum= |
| 13322 | chrY | 10036021 | . | C | G   | 4374.26  | PASS          | AC=10;AF=0.152;AN=66;BaseQRankSum= |
| 13323 | chrY | 10036069 | . | C | G   | 159.54   | my_snp_filter | AC=4;AF=0.063;AN=64;BaseQ          |
| 13324 | chrY | 10036087 | . | C | T   | 1715.86  | PASS          | AC=9;AF=0.136;AN=66;BaseQRankSum=  |
| 13325 | chrY | 10036088 | . | A | G   | 3172.87  | my_snp_filter | AC=9;AF=0.141;AN=64;BaseQ          |
| 13326 | chrY | 10036105 | . | T | C   | 3274.88  | my_snp_filter | AC=9;AF=0.136;AN=66;BaseQ          |
| 13327 | chrY | 10036107 | . | T | C   | 3434.75  | my_snp_filter | AC=9;AF=0.136;AN=66;BaseQ          |
| 13328 | chrY | 10036111 | . | A | G   | 125.20   | PASS          | AC=2;AF=0.030;AN=66;BaseQRankSum=  |
| 13329 | chrY | 10036117 | . | C | T   | 737.31   | PASS          | AC=6;AF=0.091;AN=66;BaseQRankSum=  |
| 13330 | chrY | 10036122 | . | G | A   | 756.27   | PASS          | AC=4;AF=0.063;AN=64;BaseQRankSum=  |
| 13331 | chrY | 10036126 | . | C | G   | 1107.61  | PASS          | AC=6;AF=0.094;AN=64;BaseQRankSum=  |
| 13332 | chrY | 10036127 | . | G | A   | 3043.77  | PASS          | AC=9;AF=0.141;AN=64;BaseQRankSum=  |
| 13333 | chrY | 10036132 | . | T | C   | 5135.86  | my_snp_filter | AC=9;AF=0.136;AN=66;BaseQ          |
| 13334 | chrY | 10036133 | . | G | A   | 5092.48  | my_snp_filter | AC=9;AF=0.136;AN=66;BaseQ          |
| 13335 | chrY | 10036149 | . | T | C   | 2677.84  | PASS          | AC=9;AF=0.136;AN=66;BaseQRankSum=  |
| 13336 | chrY | 10036156 | . | G | C   | 6468.57  | my_snp_filter | AC=10;AF=0.152;AN=66;BaseQ         |
| 13337 | chrY | 10036159 | . | T | C   | 6880.74  | my_snp_filter | AC=10;AF=0.152;AN=66;BaseQ         |
| 13338 | chrY | 10036164 | . | T | C   | 7309.47  | my_snp_filter | AC=11;AF=0.172;AN=64;BaseQ         |
| 13339 | chrY | 10036165 | . | G | A   | 4215.04  | PASS          | AC=9;AF=0.136;AN=66;BaseQRankSum=  |
| 13340 | chrY | 10036175 | . | G | A   | 2498.98  | PASS          | AC=9;AF=0.136;AN=66;BaseQRankSum=  |
| 13341 | chrY | 10036189 | . | C | T   | 2843.65  | PASS          | AC=10;AF=0.161;AN=62;BaseQRankSum= |
| 13342 | chrY | 10036195 | . | T | C   | 4836.78  | PASS          | AC=9;AF=0.145;AN=62;BaseQRankSum=  |
| 13343 | chrY | 10036205 | . | G | T   | 4895.11  | PASS          | AC=9;AF=0.145;AN=62;BaseQRankSum=  |
| 13344 | chrY | 10036229 | . | T | C   | 9555.03  | PASS          | AC=10;AF=0.179;AN=56;BaseQRankSum= |
| 13345 | chrY | 10036233 | . | G | C   | 9611.91  | PASS          | AC=10;AF=0.185;AN=54;BaseQRankSum= |
| 13346 | chrY | 10036255 | . | G | A   | 3633.91  | PASS          | AC=10;AF=0.185;AN=54;BaseQRankSum= |
| 13347 | chrY | 10036259 | . | C | T   | 6595.84  | PASS          | AC=11;AF=0.204;AN=54;BaseQRankSum= |
| 13348 | chrY | 10036261 | . | C | T   | 3576     | PASS          | AC=10;AF=0.185;AN=54;BaseQRankSum= |
| 13349 | chrY | 10036262 | . | G | A   | 6587.39  | PASS          | AC=11;AF=0.212;AN=52;BaseQRankSum= |
| 13350 | chrY | 10036267 | . | C | A   | 11548.93 | PASS          | AC=12;AF=0.222;AN=54;BaseQ         |
| 13351 | chrY | 10036272 | . | C | T   | 6321.90  | PASS          | AC=11;AF=0.177;AN=62;BaseQRankSum= |
| 13352 | chrY | 10036277 | . | A | G   | 3318.08  | PASS          | AC=10;AF=0.172;AN=58;BaseQRankSum= |
| 13353 | chrY | 10036279 | . | C | T   | 10917.24 | PASS          | AC=12;AF=0.222;AN=54;BaseQ         |
| 13354 | chrY | 10036280 | . | A | G   | 10878.38 | PASS          | AC=12;AF=0.222;AN=54;BaseQ         |
| 13355 | chrY | 10036298 | . | G | T   | 3213.57  | PASS          | AC=13;AF=0.203;AN=64;BaseQRankSum= |
| 13356 | chrY | 10036313 | . | T | C   | 12694.97 | PASS          | AC=17;AF=0.293;AN=58;BaseQ         |
| 13357 | chrY | 10036316 | . | C | T   | 7399.89  | PASS          | AC=15;AF=0.234;AN=64;BaseQRankSum= |
| 13358 | chrY | 10036323 | . | A | G   | 7165.32  | PASS          | AC=16;AF=0.250;AN=64;BaseQRankSum= |
| 13359 | chrY | 10036331 | . | A | T   | 13136.61 | PASS          | AC=17;AF=0.293;AN=58;BaseQ         |
| 13360 | chrY | 10036339 | . | C | A,G | 8987.48  | PASS          | AC=12,7;AF=0.214,0.125;AN=56;BaseQ |
| 13361 | chrY | 10036362 | . | T | C   | 15769.80 | PASS          | AC=26;AF=0.419;AN=62;BaseQ         |
| 13362 | chrY | 10036374 | . | C | T   | 20539.55 | PASS          | AC=28;AF=0.438;AN=64;BaseQ         |
| 13363 | chrY | 10036375 | . | A | G   | 20644.55 | PASS          | AC=28;AF=0.438;AN=64;BaseQ         |
| 13364 | chrY | 10036383 | . | G | C   | 21231.42 | PASS          | AC=29;AF=0.468;AN=62;BaseQ         |
| 13365 | chrY | 10036396 | . | C | T   | 11015.34 | PASS          | AC=26;AF=0.394;AN=66;BaseQ         |
| 13366 | chrY | 10036406 | . | C | A   | 11873.57 | PASS          | AC=26;AF=0.394;AN=66;BaseQ         |
| 13367 | chrY | 10036408 | . | C | A   | 25878.17 | PASS          | AC=31;AF=0.500;AN=62;BaseQ         |
| 13368 | chrY | 10036412 | . | G | A   | 12045.29 | PASS          | AC=26;AF=0.406;AN=64;BaseQ         |
| 13369 | chrY | 10036422 | . | C | T   | 28501.77 | PASS          | AC=34;AF=0.515;AN=66;BaseQ         |
| 13370 | chrY | 10036438 | . | C | T   | 7045.82  | PASS          | AC=25;AF=0.357;AN=70;BaseQRankSum= |
| 13371 | chrY | 10036457 | . | C | T   | 74.83    | PASS          | AC=1;AF=0.014;AN=70;BaseQRankSum=  |
| 13372 | chrY | 10036472 | . | T | C   | 245.95   | PASS          | AC=3;AF=0.043;AN=70;BaseQRankSum=  |
| 13373 | chrY | 10036483 | . | T | C   | 29046.78 | PASS          | AC=35;AF=0.515;AN=68;BaseQ         |
| 13374 | chrY | 10036486 | . | C | G   | 29028.81 | PASS          | AC=35;AF=0.515;AN=68;BaseQ         |
| 13375 | chrY | 10036503 | . | T | C   | 9033.78  | PASS          | AC=29;AF=0.414;AN=70;BaseQRankSum= |
| 13376 | chrY | 10036518 | . | C | T   | 6565.33  | PASS          | AC=32;AF=0.457;AN=70;BaseQRankSum= |



|       |      |          |   |   |     |          |      |                                           |
|-------|------|----------|---|---|-----|----------|------|-------------------------------------------|
| 13377 | chrY | 10036519 | . | G | A   | 11383.18 | PASS | AC=26;AF=0.382;AN=68;BaseQRankSum=        |
| 13378 | chrY | 10036530 | . | A | G   | 12152.86 | PASS | AC=26;AF=0.371;AN=70;BaseQRankSum=        |
| 13379 | chrY | 10036533 | . | C | A   | 12190.38 | PASS | AC=26;AF=0.371;AN=70;BaseQRankSum=        |
| 13380 | chrY | 10036544 | . | C | T   | 11732.57 | PASS | AC=26;AF=0.371;AN=70;BaseQRankSum=        |
| 13381 | chrY | 10036545 | . | T | C   | 25070.51 | PASS | AC=34;AF=0.500;AN=68;BaseQRankSum=        |
| 13382 | chrY | 10036552 | . | C | T   | 10333.90 | PASS | AC=32;AF=0.457;AN=70;BaseQRankSum=        |
| 13383 | chrY | 10036553 | . | G | A   | 11226.04 | PASS | AC=26;AF=0.371;AN=70;BaseQRankSum=        |
| 13384 | chrY | 10036586 | . | T | C   | 16896.01 | PASS | AC=35;AF=0.515;AN=68;BaseQRankSum=        |
| 13385 | chrY | 10036587 | . | G | A   | 10697.44 | PASS | AC=32;AF=0.471;AN=68;BaseQRankSum=        |
| 13386 | chrY | 10036590 | . | T | G   | 10587.03 | PASS | AC=32;AF=0.485;AN=66;BaseQRankSum=        |
| 13387 | chrY | 10036592 | . | G | A   | 2385.13  | PASS | AC=10;AF=0.147;AN=68;BaseQRankSum=        |
| 13388 | chrY | 10036601 | . | G | A   | 87.19    | PASS | AC=4;AF=0.059;AN=68;BaseQRankSum=         |
| 13389 | chrY | 10036617 | . | C | G   | 8265.69  | PASS | AC=28;AF=0.438;AN=64;BaseQRankSum=        |
| 13390 | chrY | 10036621 | . | T | C   | 17836.26 | PASS | AC=29;AF=0.468;AN=62;BaseQRankSum=        |
| 13391 | chrY | 10036622 | . | G | C   | 8143.21  | PASS | AC=28;AF=0.452;AN=62;BaseQRankSum=        |
| 13392 | chrY | 10036640 | . | T | G   | 115.11   | PASS | AC=2;AF=0.030;AN=66;BaseQRankSum=         |
| 13393 | chrY | 10036642 | . | G | A   | 6619.25  | PASS | AC=20;AF=0.313;AN=64;BaseQRankSum=        |
| 13394 | chrY | 10036671 | . | C | T   | 175.93   | PASS | AC=4;AF=0.087;AN=46;BaseQRankSum=         |
| 13395 | chrY | 10036672 | . | A | G,C | 612.41   | PASS | AC=7,1;AF=0.146,0.021;AN=48;BaseQRankSum= |
| 13396 | chrY | 10036680 | . | A | G   | 460.30   | PASS | AC=6;AF=0.130;AN=46;BaseQRankSum=         |
| 13397 | chrY | 10036685 | . | A | T,G | 361.65   | PASS | AC=4,1;AF=0.087,0.022;AN=46;BaseQRankSum= |
| 13398 | chrY | 10036686 | . | A | G   | 323.27   | PASS | AC=5;AF=0.109;AN=46;BaseQRankSum=         |
| 13399 | chrY | 10036690 | . | T | G   | 176.98   | PASS | AC=3;AF=0.063;AN=48;BaseQRankSum=         |
| 13400 | chrY | 10036700 | . | C | G   | 243.09   | PASS | AC=2;AF=0.045;AN=44;BaseQRankSum=         |
| 13401 | chrY | 10036719 | . | A | C   | 118.83   | PASS | AC=1;AF=0.015;AN=68;BaseQRankSum=         |
| 13402 | chrY | 10036724 | . | A | T,* | 359.35   | PASS | AC=3,1;AF=0.071,0.024;AN=42;BaseQRankSum= |
| 13403 | chrY | 10036730 | . | T | C   | 327.12   | PASS | AC=4;AF=0.100;AN=40;BaseQRankSum=         |
| 13404 | chrY | 10036731 | . | G | A   | 365.12   | PASS | AC=4;AF=0.100;AN=40;BaseQRankSum=         |
| 13405 | chrY | 10036738 | . | C | T   | 302.23   | PASS | AC=3;AF=0.054;AN=56;BaseQRankSum=         |
| 13406 | chrY | 10036741 | . | T | C   | 302.92   | PASS | AC=3;AF=0.071;AN=42;BaseQRankSum=         |
| 13407 | chrY | 10036747 | . | G | A   | 319.01   | PASS | AC=4;AF=0.074;AN=54;BaseQRankSum=         |
| 13408 | chrY | 10036756 | . | T | C   | 317.86   | PASS | AC=4;AF=0.091;AN=44;BaseQRankSum=         |
| 13409 | chrY | 10036777 | . | A | G   | 490.02   | PASS | AC=7;AF=0.152;AN=46;BaseQRankSum=         |
| 13410 | chrY | 10036781 | . | G | A   | 490.10   | PASS | AC=7;AF=0.167;AN=42;BaseQRankSum=         |
| 13411 | chrY | 10036786 | . | G | T   | 306.98   | PASS | AC=6;AF=0.107;AN=56;BaseQRankSum=         |
| 13412 | chrY | 10036807 | . | A | C   | 260.57   | PASS | AC=7;AF=0.184;AN=38;BaseQRankSum=         |
| 13413 | chrY | 10036821 | . | T | C   | 210.93   | PASS | AC=4;AF=0.111;AN=36;BaseQRankSum=         |
| 13414 | chrY | 10036827 | . | C | T   | 42.86    | PASS | AC=1;AF=0.019;AN=54;BaseQRankSum=         |
| 13415 | chrY | 10036843 | . | C | A   | 424.53   | PASS | AC=5;AF=0.114;AN=44;BaseQRankSum=         |
| 13416 | chrY | 10036844 | . | A | G   | 573.79   | PASS | AC=6;AF=0.143;AN=42;BaseQRankSum=         |
| 13417 | chrY | 10036848 | . | A | T   | 53.11    | PASS | AC=2;AF=0.032;AN=62;BaseQRankSum=         |
| 13418 | chrY | 10036866 | . | A | G   | 347.91   | PASS | AC=5;AF=0.104;AN=48;BaseQRankSum=         |
| 13419 | chrY | 10036883 | . | A | G   | 3675.74  | PASS | AC=7;AF=0.130;AN=54;BaseQRankSum=         |
| 13420 | chrY | 10036894 | . | T | C   | 3988.75  | PASS | AC=7;AF=0.125;AN=56;BaseQRankSum=         |
| 13421 | chrY | 10036909 | . | G | A   | 2772.58  | PASS | AC=5;AF=0.104;AN=48;BaseQRankSum=         |
| 13422 | chrY | 10036910 | . | A | T   | 3900.92  | PASS | AC=6;AF=0.130;AN=46;BaseQRankSum=         |
| 13423 | chrY | 10036912 | . | T | C   | 2702.75  | PASS | AC=5;AF=0.089;AN=56;BaseQRankSum=         |
| 13424 | chrY | 10036915 | . | G | T   | 3722.16  | PASS | AC=6;AF=0.130;AN=46;BaseQRankSum=         |
| 13425 | chrY | 10036920 | . | C | T   | 3566.39  | PASS | AC=6;AF=0.111;AN=54;BaseQRankSum=         |
| 13426 | chrY | 10036924 | . | C | T   | 2183.91  | PASS | AC=5;AF=0.081;AN=62;BaseQRankSum=         |
| 13427 | chrY | 10036935 | . | A | G   | 2243.99  | PASS | AC=8;AF=0.174;AN=46;BaseQRankSum=         |
| 13428 | chrY | 10036958 | . | A | G   | 2219.49  | PASS | AC=8;AF=0.154;AN=52;BaseQRankSum=         |
| 13429 | chrY | 10036960 | . | T | G   | 2278.43  | PASS | AC=7;AF=0.135;AN=52;BaseQRankSum=         |
| 13430 | chrY | 10036970 | . | C | T   | 1931.76  | PASS | AC=6;AF=0.103;AN=58;BaseQRankSum=         |
| 13431 | chrY | 10036971 | . | G | A   | 1999.86  | PASS | AC=6;AF=0.103;AN=58;BaseQRankSum=         |
| 13432 | chrY | 10036982 | . | A | G   | 730.71   | PASS | AC=3;AF=0.048;AN=62;BaseQRankSum=         |
| 13433 | chrY | 10036990 | . | C | T   | 1752.19  | PASS | AC=6;AF=0.100;AN=60;BaseQRankSum=         |
| 13434 | chrY | 10036994 | . | G | A   | 1718.38  | PASS | AC=5;AF=0.083;AN=60;BaseQRankSum=         |
| 13435 | chrY | 10036999 | . | T | C   | 1498.70  | PASS | AC=5;AF=0.086;AN=58;BaseQRankSum=         |
| 13436 | chrY | 10037012 | . | T | C   | 1543.97  | PASS | AC=4;AF=0.071;AN=56;BaseQRankSum=         |
| 13437 | chrY | 10037013 | . | G | A   | 1543.69  | PASS | AC=4;AF=0.071;AN=56;BaseQRankSum=         |
| 13438 | chrY | 10037016 | . | A | G   | 1634.05  | PASS | AC=4;AF=0.071;AN=56;BaseQRankSum=         |
| 13439 | chrY | 10037079 | . | C | T   | 1062.23  | PASS | AC=6;AF=0.094;AN=64;BaseQRankSum=         |
| 13440 | chrY | 10037094 | . | C | T   | 1171.37  | PASS | AC=11;AF=0.172;AN=64;BaseQRankSum=        |
| 13441 | chrY | 10037095 | . | C | T   | 1251.56  | PASS | AC=11;AF=0.172;AN=64;BaseQRankSum=        |
| 13442 | chrY | 10037096 | . | A | G   | 1719     | PASS | AC=11;AF=0.177;AN=62;BaseQRankSum=        |
| 13443 | chrY | 10037105 | . | C | T   | 2118     | PASS | AC=12;AF=0.182;AN=66;BaseQRankSum=        |
| 13444 | chrY | 10037106 | . | A | G   | 2116.46  | PASS | AC=12;AF=0.182;AN=66;BaseQRankSum=        |
| 13445 | chrY | 10037108 | . | T | C   | 2261.97  | PASS | AC=12;AF=0.182;AN=66;BaseQRankSum=        |
| 13446 | chrY | 10037114 | . | C | T   | 2611.43  | PASS | AC=12;AF=0.182;AN=66;BaseQRankSum=        |
| 13447 | chrY | 10037119 | . | A | G   | 2807.13  | PASS | AC=12;AF=0.188;AN=64;BaseQRankSum=        |
| 13448 | chrY | 10037125 | . | G | C   | 2944.07  | PASS | AC=12;AF=0.194;AN=62;BaseQRankSum=        |
| 13449 | chrY | 10037140 | . | C | G   | 3091.98  | PASS | AC=12;AF=0.182;AN=66;BaseQRankSum=        |
| 13450 | chrY | 10037153 | . | A | C   | 3585.98  | PASS | AC=11;AF=0.167;AN=66;BaseQRankSum=        |
| 13451 | chrY | 10037167 | . | T | G   | 3167.75  | PASS | AC=11;AF=0.177;AN=62;BaseQRankSum=        |
| 13452 | chrY | 10037172 | . | C | T   | 3749.33  | PASS | AC=11;AF=0.183;AN=60;BaseQRankSum=        |

|       |      |          |   |   |       |          |               |                                   |
|-------|------|----------|---|---|-------|----------|---------------|-----------------------------------|
| 13453 | chrY | 10037173 | . | T | G     | 3752.37  | PASS          | AC=11;AF=0.183;AN=60;BaseQRankSum |
| 13454 | chrY | 10037177 | . | C | T     | 3561.47  | PASS          | AC=11;AF=0.162;AN=68;BaseQRankSum |
| 13455 | chrY | 10037183 | . | T | C     | 3658.95  | PASS          | AC=11;AF=0.162;AN=68;BaseQRankSum |
| 13456 | chrY | 10037189 | . | A | G     | 4515.92  | PASS          | AC=13;AF=0.203;AN=64;BaseQRankSum |
| 13457 | chrY | 10037224 | . | G | C     | 103.13   | PASS          | AC=3;AF=0.052;AN=58;BaseQRankSum= |
| 13458 | chrY | 10037237 | . | T | C     | 34.30    | PASS          | AC=2;AF=0.030;AN=66;BaseQRankSum= |
| 13459 | chrY | 10037247 | . | C | T     | 196.18   | PASS          | AC=1;AF=0.023;AN=44;BaseQRankSum= |
| 13460 | chrY | 10037251 | . | C | T     | 70.15    | PASS          | AC=1;AF=0.015;AN=68;BaseQRankSum= |
| 13461 | chrY | 10037252 | . | A | G     | 134.46   | PASS          | AC=3;AF=0.063;AN=48;BaseQRankSum= |
| 13462 | chrY | 10037258 | . | T | C     | 78.82    | PASS          | AC=2;AF=0.029;AN=68;BaseQRankSum= |
| 13463 | chrY | 10037270 | . | C | A     | 116.55   | PASS          | AC=1;AF=0.020;AN=50;BaseQRankSum= |
| 13464 | chrY | 10037283 | . | C | T     | 33.61    | PASS          | AC=1;AF=0.019;AN=52;BaseQRankSum= |
| 13465 | chrY | 10037286 | . | C | T     | 33.28    | PASS          | AC=1;AF=0.021;AN=48;BaseQRankSum= |
| 13466 | chrY | 10037287 | . | T | G     | 32.82    | PASS          | AC=1;AF=0.021;AN=48;BaseQRankSum= |
| 13467 | chrY | 10037289 | . | G | A     | 31.31    | PASS          | AC=1;AF=0.020;AN=50;BaseQRankSum= |
| 13468 | chrY | 10037500 | . | G | A     | 314.56   | PASS          | AC=1;AF=0.020;AN=50;BaseQRankSum= |
| 13469 | chrY | 10037513 | . | C | T     | 356.56   | PASS          | AC=1;AF=0.019;AN=54;BaseQRankSum= |
| 13470 | chrY | 10037524 | . | C | T     | 418.85   | PASS          | AC=2;AF=0.036;AN=56;BaseQRankSum= |
| 13471 | chrY | 10037525 | . | G | T     | 353.04   | PASS          | AC=2;AF=0.036;AN=56;BaseQRankSum= |
| 13472 | chrY | 10037527 | . | A | G     | 894.16   | PASS          | AC=5;AF=0.086;AN=58;BaseQRankSum= |
| 13473 | chrY | 10037533 | . | T | C     | 974.85   | PASS          | AC=5;AF=0.093;AN=54;BaseQRankSum= |
| 13474 | chrY | 10037534 | . | G | A     | 971.33   | PASS          | AC=5;AF=0.093;AN=54;BaseQRankSum= |
| 13475 | chrY | 10037535 | . | T | C     | 999.41   | PASS          | AC=5;AF=0.093;AN=54;BaseQRankSum= |
| 13476 | chrY | 10037557 | . | G | T,*   | 1732.97  | PASS          | AC=6,1;AF=0.103,0.017;AN=58;BaseQ |
| 13477 | chrY | 10037560 | . | A | T     | 1805.02  | PASS          | AC=7;AF=0.117;AN=60;BaseQRankSum= |
| 13478 | chrY | 10037567 | . | G | A     | 1226.12  | PASS          | AC=6;AF=0.088;AN=68;BaseQRankSum= |
| 13479 | chrY | 10037584 | . | T | C     | 2153.39  | PASS          | AC=7;AF=0.113;AN=62;BaseQRankSum= |
| 13480 | chrY | 10037586 | . | T | C     | 2149.44  | PASS          | AC=7;AF=0.113;AN=62;BaseQRankSum= |
| 13481 | chrY | 10037590 | . | T | C     | 2366.25  | PASS          | AC=7;AF=0.113;AN=62;BaseQRankSum= |
| 13482 | chrY | 10037597 | . | C | T     | 167.88   | PASS          | AC=2;AF=0.029;AN=70;BaseQRankSum= |
| 13483 | chrY | 10037600 | . | A | G     | 1988.38  | PASS          | AC=7;AF=0.103;AN=68;BaseQRankSum= |
| 13484 | chrY | 10037604 | . | A | T     | 2728.46  | PASS          | AC=9;AF=0.150;AN=60;BaseQRankSum= |
| 13485 | chrY | 10037605 | . | C | T     | 2239.28  | PASS          | AC=9;AF=0.150;AN=60;BaseQRankSum= |
| 13486 | chrY | 10037606 | . | G | A     | 391.42   | PASS          | AC=1;AF=0.016;AN=64;BaseQRankSum= |
| 13487 | chrY | 10037611 | . | C | T     | 154.99   | PASS          | AC=2;AF=0.029;AN=68;BaseQRankSum= |
| 13488 | chrY | 10037612 | . | A | G     | 159.80   | PASS          | AC=2;AF=0.029;AN=68;BaseQRankSum= |
| 13489 | chrY | 10037619 | . | C | T,*   | 3320.62  | PASS          | AC=11,1;AF=0.177,0.016;AN=62;Base |
| 13490 | chrY | 10037620 | . | A | G,*   | 3323.18  | PASS          | AC=11,1;AF=0.177,0.016;AN=62;Base |
| 13491 | chrY | 10037625 | . | G | C     | 470.41   | PASS          | AC=2;AF=0.029;AN=70;BaseQRankSum= |
| 13492 | chrY | 10037636 | . | C | T     | 4288.73  | PASS          | AC=15;AF=0.234;AN=64;BaseQRankSum |
| 13493 | chrY | 10037637 | . | A | G     | 4388.94  | PASS          | AC=17;AF=0.266;AN=64;BaseQRankSum |
| 13494 | chrY | 10037644 | . | C | T     | 4886.36  | PASS          | AC=17;AF=0.266;AN=64;BaseQRankSum |
| 13495 | chrY | 10037652 | . | T | G     | 4139     | PASS          | AC=12;AF=0.171;AN=70;BaseQRankSum |
| 13496 | chrY | 10037655 | . | C | G     | 634.47   | PASS          | AC=12;AF=0.171;AN=70;BaseQRankSum |
| 13497 | chrY | 10037656 | . | G | A     | 4306.48  | PASS          | AC=11;AF=0.162;AN=68;BaseQRankSum |
| 13498 | chrY | 10037661 | . | A | G,C,T | 5591.32  | PASS          | AC=11,9,1;AF=0.172,0.141,0.016;AN |
| 13499 | chrY | 10037676 | . | G | A     | 1345.50  | PASS          | AC=10;AF=0.143;AN=70;BaseQRankSum |
| 13500 | chrY | 10037681 | . | C | T     | 3362.33  | PASS          | AC=8;AF=0.114;AN=70;BaseQRankSum= |
| 13501 | chrY | 10037691 | . | C | T     | 394.42   | my_snp_filter | AC=11;AF=0.157;AN=70;Base         |
| 13502 | chrY | 10037700 | . | G | A     | 3386.54  | PASS          | AC=10;AF=0.143;AN=70;BaseQRankSum |
| 13503 | chrY | 10037704 | . | C | T     | 1601.65  | PASS          | AC=10;AF=0.143;AN=70;BaseQRankSum |
| 13504 | chrY | 10037718 | . | A | T     | 19044.22 | PASS          | AC=33;AF=0.471;AN=70;Base         |
| 13505 | chrY | 10037726 | . | C | A     | 20968.80 | PASS          | AC=33;AF=0.485;AN=68;Base         |
| 13506 | chrY | 10037727 | . | C | T     | 7983.39  | PASS          | AC=31;AF=0.443;AN=70;BaseQRankSum |
| 13507 | chrY | 10037728 | . | A | G     | 59.43    | my_snp_filter | AC=2;AF=0.029;AN=70;BaseQ         |
| 13508 | chrY | 10037731 | . | G | C     | 50.59    | my_snp_filter | AC=2;AF=0.029;AN=70;BaseQ         |
| 13509 | chrY | 10037739 | . | C | T     | 38.82    | my_snp_filter | AC=2;AF=0.029;AN=70;BaseQ         |
| 13510 | chrY | 10037740 | . | G | A     | 12361.95 | PASS          | AC=31;AF=0.456;AN=68;Base         |
| 13511 | chrY | 10037745 | . | T | A     | 23678.04 | PASS          | AC=34;AF=0.500;AN=68;Base         |
| 13512 | chrY | 10037753 | . | T | C     | 7077.96  | PASS          | AC=31;AF=0.443;AN=70;BaseQRankSum |
| 13513 | chrY | 10037785 | . | C | G     | 367.29   | my_snp_filter | AC=5;AF=0.071;AN=70;BaseQ         |
| 13514 | chrY | 10037786 | . | G | A     | 24586.69 | PASS          | AC=37;AF=0.529;AN=70;Base         |
| 13515 | chrY | 10037787 | . | G | C     | 361.24   | my_snp_filter | AC=5;AF=0.071;AN=70;BaseQ         |
| 13516 | chrY | 10037790 | . | C | T     | 11518.01 | PASS          | AC=30;AF=0.429;AN=70;Base         |
| 13517 | chrY | 10037795 | . | G | A     | 3252.12  | PASS          | AC=10;AF=0.143;AN=70;BaseQRankSum |
| 13518 | chrY | 10037807 | . | T | C     | 393.92   | my_snp_filter | AC=8;AF=0.114;AN=70;BaseQ         |
| 13519 | chrY | 10037825 | . | T | C     | 543.03   | my_snp_filter | AC=10;AF=0.143;AN=70;Base         |
| 13520 | chrY | 10037842 | . | A | G     | 12384.84 | PASS          | AC=28;AF=0.483;AN=58;Base         |
| 13521 | chrY | 10037855 | . | C | T     | 6918.12  | PASS          | AC=23;AF=0.348;AN=66;BaseQRankSum |
| 13522 | chrY | 10037863 | . | C | T     | 12046.04 | PASS          | AC=26;AF=0.419;AN=62;Base         |
| 13523 | chrY | 10037867 | . | C | T     | 6943.91  | PASS          | AC=25;AF=0.368;AN=68;BaseQRankSum |
| 13524 | chrY | 10037868 | . | G | A     | 3762.97  | PASS          | AC=18;AF=0.265;AN=68;BaseQRankSum |
| 13525 | chrY | 10037869 | . | C | G     | 6632.13  | PASS          | AC=21;AF=0.309;AN=68;BaseQRankSum |
| 13526 | chrY | 10037875 | . | C | T,A   | 9880.32  | PASS          | AC=20,14;AF=0.333,0.233;AN=60;Bas |
| 13527 | chrY | 10037880 | . | C | T     | 3564.82  | PASS          | AC=20;AF=0.323;AN=62;BaseQRankSum |
| 13528 | chrY | 10037896 | . | C | T     | 1639.72  | PASS          | AC=7;AF=0.103;AN=68;BaseQRankSum= |

|       |      |          |   |   |     |         |               |                                    |
|-------|------|----------|---|---|-----|---------|---------------|------------------------------------|
| 13529 | chrY | 10037905 | . | T | C   | 2195.43 | PASS          | AC=11;AF=0.167;AN=66;BaseQRankSum= |
| 13530 | chrY | 10037908 | . | G | A   | 102.80  | PASS          | AC=5;AF=0.076;AN=66;BaseQRankSum=  |
| 13531 | chrY | 10037912 | . | T | G,* | 3064.41 | PASS          | AC=4,10;AF=0.095,0.238;AN=42;BaseQ |
| 13532 | chrY | 10037914 | . | T | C   | 69.63   | PASS          | AC=4;AF=0.154;AN=26;BaseQRankSum=  |
| 13533 | chrY | 10037921 | . | C | T   | 70.17   | PASS          | AC=3;AF=0.048;AN=62;BaseQRankSum=  |
| 13534 | chrY | 10037922 | . | A | G   | 58.16   | PASS          | AC=4;AF=0.065;AN=62;BaseQRankSum=  |
| 13535 | chrY | 10037927 | . | T | A   | 3307.11 | PASS          | AC=8;AF=0.200;AN=40;BaseQRankSum=  |
| 13536 | chrY | 10037931 | . | C | T   | 40.27   | my_snp_filter | AC=2;AF=0.033;AN=60;BaseQ          |
| 13537 | chrY | 10037933 | . | C | A   | 41.79   | my_snp_filter | AC=2;AF=0.034;AN=58;BaseQ          |
| 13538 | chrY | 10037935 | . | T | C   | 40.52   | my_snp_filter | AC=2;AF=0.034;AN=58;BaseQ          |
| 13539 | chrY | 10037937 | . | A | G   | 3033.72 | PASS          | AC=7;AF=0.175;AN=40;BaseQRankSum=  |
| 13540 | chrY | 10037938 | . | G | T   | 612.26  | PASS          | AC=5;AF=0.114;AN=44;BaseQRankSum=  |
| 13541 | chrY | 10037945 | . | C | T   | 2661.22 | PASS          | AC=6;AF=0.143;AN=42;BaseQRankSum=  |
| 13542 | chrY | 10037948 | . | A | G   | 2656.92 | PASS          | AC=6;AF=0.143;AN=42;BaseQRankSum=  |
| 13543 | chrY | 10037951 | . | C | A   | 2604.59 | PASS          | AC=5;AF=0.119;AN=42;BaseQRankSum=  |
| 13544 | chrY | 10037955 | . | C | T   | 2541.27 | PASS          | AC=4;AF=0.095;AN=42;BaseQRankSum=  |
| 13545 | chrY | 10037956 | . | T | C   | 2498.75 | PASS          | AC=4;AF=0.095;AN=42;BaseQRankSum=  |
| 13546 | chrY | 10037957 | . | G | A   | 2496.73 | PASS          | AC=4;AF=0.087;AN=46;BaseQRankSum=  |
| 13547 | chrY | 10037968 | . | C | T   | 2301.02 | PASS          | AC=4;AF=0.091;AN=44;BaseQRankSum=  |
| 13548 | chrY | 10037971 | . | G | C   | 2256.98 | PASS          | AC=4;AF=0.074;AN=54;BaseQRankSum=  |
| 13549 | chrY | 10037979 | . | A | G   | 735.88  | PASS          | AC=3;AF=0.054;AN=56;BaseQRankSum=  |
| 13550 | chrY | 10037996 | . | G | T   | 973.91  | PASS          | AC=3;AF=0.060;AN=50;BaseQRankSum=  |
| 13551 | chrY | 10037998 | . | A | C   | 2033.57 | PASS          | AC=3;AF=0.071;AN=42;BaseQRankSum=  |
| 13552 | chrY | 10038004 | . | A | G   | 865.36  | PASS          | AC=3;AF=0.052;AN=58;BaseQRankSum=  |
| 13553 | chrY | 10038008 | . | C | T   | 1905.30 | PASS          | AC=3;AF=0.052;AN=58;BaseQRankSum=  |
| 13554 | chrY | 10038026 | . | C | T   | 636.57  | PASS          | AC=3;AF=0.063;AN=48;BaseQRankSum=  |
| 13555 | chrY | 10038029 | . | C | T   | 1232.85 | PASS          | AC=3;AF=0.065;AN=46;BaseQRankSum=  |
| 13556 | chrY | 10038030 | . | A | G   | 1229.85 | PASS          | AC=3;AF=0.065;AN=46;BaseQRankSum=  |
| 13557 | chrY | 10038033 | . | C | T   | 645.40  | PASS          | AC=3;AF=0.060;AN=50;BaseQRankSum=  |
| 13558 | chrY | 10038049 | . | C | T   | 616.04  | PASS          | AC=3;AF=0.065;AN=46;BaseQRankSum=  |
| 13559 | chrY | 10038050 | . | A | G   | 886.76  | PASS          | AC=3;AF=0.065;AN=46;BaseQRankSum=  |
| 13560 | chrY | 10038055 | . | T | C   | 108.08  | PASS          | AC=2;AF=0.042;AN=48;BaseQRankSum=  |
| 13561 | chrY | 10038068 | . | C | T   | 639.15  | PASS          | AC=3;AF=0.060;AN=50;BaseQRankSum=  |
| 13562 | chrY | 10038077 | . | C | T   | 456.13  | PASS          | AC=3;AF=0.058;AN=52;BaseQRankSum=  |
| 13563 | chrY | 10038084 | . | T | C   | 541.17  | PASS          | AC=3;AF=0.054;AN=56;BaseQRankSum=  |
| 13564 | chrY | 10038087 | . | T | G   | 456.57  | PASS          | AC=3;AF=0.054;AN=56;BaseQRankSum=  |
| 13565 | chrY | 10038099 | . | G | C   | 370.34  | PASS          | AC=3;AF=0.052;AN=58;BaseQRankSum=  |
| 13566 | chrY | 10038109 | . | T | C   | 245.55  | PASS          | AC=3;AF=0.052;AN=58;BaseQRankSum=  |
| 13567 | chrY | 10038119 | . | A | G   | 242.50  | PASS          | AC=3;AF=0.052;AN=58;BaseQRankSum=  |
| 13568 | chrY | 10038192 | . | A | G   | 9045.97 | PASS          | AC=66;AF=1.00;AN=66;DP=347;FS=0.0  |
| 13569 | chrY | 10038253 | . | C | G   | 140.66  | PASS          | AC=2;AF=0.029;AN=68;BaseQRankSum=  |
| 13570 | chrY | 10038265 | . | G | A   | 331.12  | PASS          | AC=3;AF=0.044;AN=68;BaseQRankSum=  |
| 13571 | chrY | 10038271 | . | A | T,G | 830.67  | PASS          | AC=1,2;AF=0.016,0.032;AN=62;BaseQ  |
| 13572 | chrY | 10038275 | . | C | T   | 710.44  | PASS          | AC=2;AF=0.029;AN=68;BaseQRankSum=  |
| 13573 | chrY | 10038276 | . | A | G   | 710.46  | PASS          | AC=2;AF=0.029;AN=68;BaseQRankSum=  |
| 13574 | chrY | 10038287 | . | G | A   | 1421.70 | PASS          | AC=3;AF=0.048;AN=62;BaseQRankSum=  |
| 13575 | chrY | 10038288 | . | T | C   | 1421.70 | PASS          | AC=3;AF=0.048;AN=62;BaseQRankSum=  |
| 13576 | chrY | 10038289 | . | G | C   | 1421.87 | PASS          | AC=3;AF=0.048;AN=62;BaseQRankSum=  |
| 13577 | chrY | 10038294 | . | T | C   | 814.67  | PASS          | AC=3;AF=0.043;AN=70;BaseQRankSum=  |
| 13578 | chrY | 10038301 | . | G | A   | 1569.40 | PASS          | AC=4;AF=0.065;AN=62;BaseQRankSum=  |
| 13579 | chrY | 10038303 | . | T | A   | 1600.74 | PASS          | AC=4;AF=0.065;AN=62;BaseQRankSum=  |
| 13580 | chrY | 10038309 | . | T | C   | 1770.94 | PASS          | AC=5;AF=0.078;AN=64;BaseQRankSum=  |
| 13581 | chrY | 10038310 | . | G | A   | 610.48  | PASS          | AC=4;AF=0.063;AN=64;BaseQRankSum=  |
| 13582 | chrY | 10038320 | . | T | C   | 2226.56 | my_snp_filter | AC=5;AF=0.081;AN=62;BaseQ          |
| 13583 | chrY | 10038328 | . | C | T,* | 1588.86 | PASS          | AC=4,1;AF=0.067,0.017;AN=60;BaseQ  |
| 13584 | chrY | 10038334 | . | A | T   | 1549.51 | PASS          | AC=4;AF=0.061;AN=66;BaseQRankSum=  |
| 13585 | chrY | 10038337 | . | G | A   | 2596.41 | my_snp_filter | AC=5;AF=0.083;AN=60;BaseQ          |
| 13586 | chrY | 10038366 | . | T | A   | 1994.24 | PASS          | AC=7;AF=0.117;AN=60;BaseQRankSum=  |
| 13587 | chrY | 10038387 | . | T | C   | 320.11  | PASS          | AC=1;AF=0.016;AN=64;BaseQRankSum=  |
| 13588 | chrY | 10038389 | . | G | C   | 3414.66 | PASS          | AC=7;AF=0.109;AN=64;BaseQRankSum=  |
| 13589 | chrY | 10038407 | . | G | A   | 4399.38 | PASS          | AC=8;AF=0.154;AN=52;BaseQRankSum=  |
| 13590 | chrY | 10038414 | . | A | C   | 4449.84 | PASS          | AC=8;AF=0.148;AN=54;BaseQRankSum=  |
| 13591 | chrY | 10038417 | . | T | C   | 4548.84 | PASS          | AC=8;AF=0.148;AN=54;BaseQRankSum=  |
| 13592 | chrY | 10038418 | . | G | A   | 4621.56 | PASS          | AC=8;AF=0.148;AN=54;BaseQRankSum=  |
| 13593 | chrY | 10038424 | . | A | G   | 4628.73 | PASS          | AC=8;AF=0.148;AN=54;BaseQRankSum=  |
| 13594 | chrY | 10038427 | . | T | C   | 4752.94 | PASS          | AC=8;AF=0.148;AN=54;BaseQRankSum=  |
| 13595 | chrY | 10038435 | . | A | G   | 4711.42 | PASS          | AC=8;AF=0.148;AN=54;BaseQRankSum=  |
| 13596 | chrY | 10038442 | . | G | A   | 4633.67 | PASS          | AC=8;AF=0.148;AN=54;BaseQRankSum=  |
| 13597 | chrY | 10038447 | . | A | G   | 4805.20 | PASS          | AC=8;AF=0.148;AN=54;BaseQRankSum=  |
| 13598 | chrY | 10038454 | . | C | T   | 4906.49 | PASS          | AC=8;AF=0.148;AN=54;BaseQRankSum=  |
| 13599 | chrY | 10038458 | . | T | C   | 4685.02 | PASS          | AC=8;AF=0.143;AN=56;BaseQRankSum=  |
| 13600 | chrY | 10038462 | . | C | T   | 4756.97 | PASS          | AC=8;AF=0.143;AN=56;BaseQRankSum=  |
| 13601 | chrY | 10038467 | . | G | A   | 4631.94 | PASS          | AC=8;AF=0.148;AN=54;BaseQRankSum=  |
| 13602 | chrY | 10038477 | . | T | C   | 4805.52 | PASS          | AC=8;AF=0.148;AN=54;BaseQRankSum=  |
| 13603 | chrY | 10038478 | . | G | A   | 153.77  | my_snp_filter | AC=4;AF=0.071;AN=56;BaseQ          |
| 13604 | chrY | 10038492 | . | T | A   | 2410.07 | PASS          | AC=5;AF=0.100;AN=50;BaseQRankSum=  |

|       |      |          |   |   |     |          |               |                                           |
|-------|------|----------|---|---|-----|----------|---------------|-------------------------------------------|
| 13605 | chrY | 10038501 | . | C | A   | 2007.11  | PASS          | AC=5;AF=0.104;AN=48;BaseQRankSum=         |
| 13606 | chrY | 10038502 | . | C | G   | 2571.12  | PASS          | AC=5;AF=0.104;AN=48;BaseQRankSum=         |
| 13607 | chrY | 10038506 | . | C | T   | 2098.07  | PASS          | AC=5;AF=0.086;AN=58;BaseQRankSum=         |
| 13608 | chrY | 10038509 | . | C | A   | 502.60   | PASS          | AC=3;AF=0.052;AN=58;BaseQRankSum=         |
| 13609 | chrY | 10038516 | . | T | C   | 3187.40  | PASS          | AC=5;AF=0.096;AN=52;BaseQRankSum=         |
| 13610 | chrY | 10038519 | . | T | G   | 574.55   | PASS          | AC=3;AF=0.050;AN=60;BaseQRankSum=         |
| 13611 | chrY | 10038522 | . | T | A   | 3327.06  | PASS          | AC=5;AF=0.100;AN=50;BaseQRankSum=         |
| 13612 | chrY | 10038532 | . | C | T   | 931.69   | PASS          | AC=3;AF=0.050;AN=60;BaseQRankSum=         |
| 13613 | chrY | 10038534 | . | A | G   | 931.13   | PASS          | AC=3;AF=0.048;AN=62;BaseQRankSum=         |
| 13614 | chrY | 10038537 | . | T | C   | 2428.90  | PASS          | AC=5;AF=0.081;AN=62;BaseQRankSum=         |
| 13615 | chrY | 10038541 | . | T | C   | 4243.02  | PASS          | AC=5;AF=0.093;AN=54;BaseQRankSum=         |
| 13616 | chrY | 10038545 | . | T | A   | 4493.52  | PASS          | AC=5;AF=0.093;AN=54;BaseQRankSum=         |
| 13617 | chrY | 10038568 | . | C | T   | 1399.25  | PASS          | AC=5;AF=0.093;AN=54;BaseQRankSum=         |
| 13618 | chrY | 10038569 | . | A | G   | 1389.23  | PASS          | AC=5;AF=0.093;AN=54;BaseQRankSum=         |
| 13619 | chrY | 10038581 | . | A | C   | 3307.96  | PASS          | AC=7;AF=0.125;AN=56;BaseQRankSum=         |
| 13620 | chrY | 10038589 | . | A | C   | 3732.48  | PASS          | AC=7;AF=0.121;AN=58;BaseQRankSum=         |
| 13621 | chrY | 10038594 | . | G | A   | 1323.35  | PASS          | AC=5;AF=0.074;AN=68;BaseQRankSum=         |
| 13622 | chrY | 10038598 | . | C | G   | 3699.88  | PASS          | AC=7;AF=0.117;AN=60;BaseQRankSum=         |
| 13623 | chrY | 10038599 | . | G | A   | 1318.58  | PASS          | AC=5;AF=0.081;AN=62;BaseQRankSum=         |
| 13624 | chrY | 10038600 | . | T | C   | 3772.36  | PASS          | AC=7;AF=0.117;AN=60;BaseQRankSum=         |
| 13625 | chrY | 10038603 | . | A | G   | 4168.90  | PASS          | AC=7;AF=0.121;AN=58;BaseQRankSum=         |
| 13626 | chrY | 10038609 | . | A | G   | 5986.94  | PASS          | AC=7;AF=0.125;AN=56;BaseQRankSum=         |
| 13627 | chrY | 10038617 | . | G | A   | 6270.64  | PASS          | AC=6;AF=0.107;AN=56;BaseQRankSum=         |
| 13628 | chrY | 10038638 | . | A | G   | 2945.41  | PASS          | AC=5;AF=0.096;AN=52;BaseQRankSum=         |
| 13629 | chrY | 10038641 | . | G | A   | 2962.49  | PASS          | AC=5;AF=0.096;AN=52;BaseQRankSum=         |
| 13630 | chrY | 10038642 | . | T | C   | 3087.97  | PASS          | AC=5;AF=0.096;AN=52;BaseQRankSum=         |
| 13631 | chrY | 10038650 | . | A | G   | 2902.28  | PASS          | AC=5;AF=0.089;AN=56;BaseQRankSum=         |
| 13632 | chrY | 10038655 | . | A | G   | 3037.43  | PASS          | AC=5;AF=0.089;AN=56;BaseQRankSum=         |
| 13633 | chrY | 10038665 | . | A | T   | 3290.70  | PASS          | AC=5;AF=0.089;AN=56;BaseQRankSum=         |
| 13634 | chrY | 10038666 | . | T | C   | 3289.73  | PASS          | AC=5;AF=0.089;AN=56;BaseQRankSum=         |
| 13635 | chrY | 10038674 | . | G | T   | 3145.21  | PASS          | AC=5;AF=0.089;AN=56;BaseQRankSum=         |
| 13636 | chrY | 10038676 | . | T | C   | 3145.73  | PASS          | AC=5;AF=0.089;AN=56;BaseQRankSum=         |
| 13637 | chrY | 10038681 | . | A | G   | 3143.79  | PASS          | AC=5;AF=0.089;AN=56;BaseQRankSum=         |
| 13638 | chrY | 10038686 | . | C | T   | 3200.38  | PASS          | AC=5;AF=0.089;AN=56;BaseQRankSum=         |
| 13639 | chrY | 10038687 | . | T | G   | 3263.93  | PASS          | AC=5;AF=0.089;AN=56;BaseQRankSum=         |
| 13640 | chrY | 10038697 | . | T | C   | 3036.41  | PASS          | AC=6;AF=0.115;AN=52;BaseQRankSum=         |
| 13641 | chrY | 10038717 | . | G | A   | 35.12    | PASS          | AC=1;AF=0.015;AN=68;BaseQRankSum=         |
| 13642 | chrY | 10038728 | . | T | C   | 10666.87 | PASS          | AC=19;AF=0.271;AN=70;BaseQRankSum=        |
| 13643 | chrY | 10038731 | . | T | C   | 9606.31  | PASS          | AC=17;AF=0.258;AN=66;BaseQRankSum=        |
| 13644 | chrY | 10038734 | . | C | T   | 9859.09  | PASS          | AC=18;AF=0.281;AN=64;BaseQRankSum=        |
| 13645 | chrY | 10038735 | . | A | G   | 10576.56 | PASS          | AC=18;AF=0.281;AN=64;BaseQRankSum=        |
| 13646 | chrY | 10038744 | . | T | G,* | 2954.80  | PASS          | AC=6,7;AF=0.091,0.106;AN=66;BaseQRankSum= |
| 13647 | chrY | 10038754 | . | A | G   | 490.70   | PASS          | AC=7;AF=0.100;AN=70;BaseQRankSum=         |
| 13648 | chrY | 10038761 | . | T | C   | 13220.04 | PASS          | AC=21;AF=0.309;AN=68;BaseQRankSum=        |
| 13649 | chrY | 10038762 | . | G | A   | 13288.48 | PASS          | AC=21;AF=0.309;AN=68;BaseQRankSum=        |
| 13650 | chrY | 10038767 | . | C | A   | 13309.64 | PASS          | AC=21;AF=0.309;AN=68;BaseQRankSum=        |
| 13651 | chrY | 10038774 | . | C | T   | 9038.30  | PASS          | AC=19;AF=0.271;AN=70;BaseQRankSum=        |
| 13652 | chrY | 10038808 | . | C | T   | 10075.28 | PASS          | AC=24;AF=0.353;AN=68;BaseQRankSum=        |
| 13653 | chrY | 10038812 | . | T | G   | 21680.53 | PASS          | AC=33;AF=0.485;AN=68;BaseQRankSum=        |
| 13654 | chrY | 10038824 | . | A | T   | 78.90    | my_snp_filter | AC=2;AF=0.029;AN=70;BaseQRankSum=         |
| 13655 | chrY | 10038827 | . | C | A   | 23952.17 | PASS          | AC=31;AF=0.456;AN=68;BaseQRankSum=        |
| 13656 | chrY | 10038829 | . | C | A   | 7064.80  | PASS          | AC=28;AF=0.400;AN=70;BaseQRankSum=        |
| 13657 | chrY | 10038839 | . | T | C   | 21205.38 | PASS          | AC=31;AF=0.456;AN=68;BaseQRankSum=        |
| 13658 | chrY | 10038840 | . | G | A   | 1969.87  | PASS          | AC=11;AF=0.162;AN=68;BaseQRankSum=        |
| 13659 | chrY | 10038855 | . | G | A   | 11379.48 | PASS          | AC=28;AF=0.400;AN=70;BaseQRankSum=        |
| 13660 | chrY | 10038865 | . | A | G   | 8411.67  | PASS          | AC=25;AF=0.357;AN=70;BaseQRankSum=        |
| 13661 | chrY | 10038874 | . | A | G   | 26208.55 | PASS          | AC=34;AF=0.486;AN=70;BaseQRankSum=        |
| 13662 | chrY | 10038879 | . | C | T   | 502.35   | PASS          | AC=4;AF=0.057;AN=70;BaseQRankSum=         |
| 13663 | chrY | 10038881 | . | T | C   | 13474.28 | PASS          | AC=30;AF=0.429;AN=70;BaseQRankSum=        |
| 13664 | chrY | 10038887 | . | G | A   | 9741.81  | PASS          | AC=29;AF=0.414;AN=70;BaseQRankSum=        |
| 13665 | chrY | 10038894 | . | G | T   | 9707.74  | PASS          | AC=29;AF=0.414;AN=70;BaseQRankSum=        |
| 13666 | chrY | 10038898 | . | G | A   | 157.20   | PASS          | AC=3;AF=0.043;AN=70;BaseQRankSum=         |
| 13667 | chrY | 10038904 | . | A | G   | 163.59   | PASS          | AC=3;AF=0.043;AN=70;BaseQRankSum=         |
| 13668 | chrY | 10038927 | . | T | C   | 686.01   | PASS          | AC=8;AF=0.114;AN=70;BaseQRankSum=         |
| 13669 | chrY | 10038934 | . | T | C   | 461.38   | PASS          | AC=5;AF=0.071;AN=70;BaseQRankSum=         |
| 13670 | chrY | 10038940 | . | T | A   | 275.70   | PASS          | AC=3;AF=0.043;AN=70;BaseQRankSum=         |
| 13671 | chrY | 10038951 | . | A | C   | 2928.29  | PASS          | AC=23;AF=0.329;AN=70;BaseQRankSum=        |
| 13672 | chrY | 10038978 | . | G | T   | 31.06    | PASS          | AC=1;AF=0.014;AN=70;BaseQRankSum=         |
| 13673 | chrY | 10038983 | . | T | C   | 2293.92  | PASS          | AC=16;AF=0.229;AN=70;BaseQRankSum=        |
| 13674 | chrY | 10038985 | . | A | T   | 10981.26 | PASS          | AC=23;AF=0.329;AN=70;BaseQRankSum=        |
| 13675 | chrY | 10039007 | . | G | C   | 1406.55  | PASS          | AC=8;AF=0.118;AN=68;BaseQRankSum=         |
| 13676 | chrY | 10039016 | . | T | G   | 12194.28 | PASS          | AC=15;AF=0.227;AN=66;BaseQRankSum=        |
| 13677 | chrY | 10039030 | . | A | C   | 1394.96  | PASS          | AC=7;AF=0.100;AN=70;BaseQRankSum=         |
| 13678 | chrY | 10039031 | . | C | G   | 11950.83 | PASS          | AC=17;AF=0.250;AN=68;BaseQRankSum=        |
| 13679 | chrY | 10039113 | . | T | G   | 8798.06  | PASS          | AC=32;AF=0.471;AN=68;BaseQRankSum=        |
| 13680 | chrY | 10039151 | . | G | C   | 8165.66  | PASS          | AC=31;AF=0.443;AN=70;BaseQRankSum=        |

|       |      |          |   |   |     |          |               |                                    |
|-------|------|----------|---|---|-----|----------|---------------|------------------------------------|
| 13681 | chrY | 10039189 | . | C | G   | 7767.26  | PASS          | AC=32;AF=0.457;AN=70;BaseQRankSum= |
| 13682 | chrY | 10039229 | . | A | G   | 1011.53  | PASS          | AC=8;AF=0.114;AN=70;BaseQRankSum=  |
| 13683 | chrY | 10039242 | . | T | A   | 9295.02  | PASS          | AC=27;AF=0.409;AN=66;BaseQRankSum= |
| 13684 | chrY | 10039265 | . | C | T   | 7822.51  | PASS          | AC=20;AF=0.323;AN=62;BaseQRankSum= |
| 13685 | chrY | 10039278 | . | A | G   | 6924.24  | PASS          | AC=20;AF=0.323;AN=62;BaseQRankSum= |
| 13686 | chrY | 10039290 | . | A | G   | 6267.25  | PASS          | AC=18;AF=0.265;AN=68;BaseQRankSum= |
| 13687 | chrY | 10039306 | . | T | G   | 7552.37  | PASS          | AC=15;AF=0.227;AN=66;BaseQRankSum= |
| 13688 | chrY | 10039313 | . | T | A   | 7020.62  | PASS          | AC=15;AF=0.234;AN=64;BaseQRankSum= |
| 13689 | chrY | 10039314 | . | C | G   | 5221.28  | PASS          | AC=15;AF=0.234;AN=64;BaseQRankSum= |
| 13690 | chrY | 10039362 | . | C | G   | 1226.08  | PASS          | AC=9;AF=0.136;AN=66;BaseQRankSum=  |
| 13691 | chrY | 10039394 | . | C | T   | 3706.30  | PASS          | AC=9;AF=0.132;AN=68;BaseQRankSum=  |
| 13692 | chrY | 10039395 | . | A | G   | 3698.82  | PASS          | AC=9;AF=0.129;AN=70;BaseQRankSum=  |
| 13693 | chrY | 10039437 | . | A | T   | 203.20   | my_snp_filter | AC=4;AF=0.065;AN=62;BaseQ          |
| 13694 | chrY | 10039442 | . | G | A   | 8193.16  | PASS          | AC=10;AF=0.152;AN=66;BaseQRankSum= |
| 13695 | chrY | 10039455 | . | A | C   | 9029.14  | PASS          | AC=12;AF=0.194;AN=62;BaseQRankSum= |
| 13696 | chrY | 10039468 | . | T | C   | 2566.91  | PASS          | AC=11;AF=0.183;AN=60;BaseQRankSum= |
| 13697 | chrY | 10039469 | . | G | A   | 2588.51  | PASS          | AC=11;AF=0.183;AN=60;BaseQRankSum= |
| 13698 | chrY | 10039472 | . | A | T   | 2600.37  | PASS          | AC=11;AF=0.183;AN=60;BaseQRankSum= |
| 13699 | chrY | 10039483 | . | C | T   | 829.90   | PASS          | AC=6;AF=0.097;AN=62;BaseQRankSum=  |
| 13700 | chrY | 10039501 | . | C | A   | 1603.93  | PASS          | AC=8;AF=0.118;AN=68;BaseQRankSum=  |
| 13701 | chrY | 10039508 | . | A | T,G | 7622.52  | PASS          | AC=12,12;AF=0.176,0.176;AN=68;Bas  |
| 13702 | chrY | 10039511 | . | T | A   | 1609.75  | PASS          | AC=8;AF=0.118;AN=68;BaseQRankSum=  |
| 13703 | chrY | 10039512 | . | C | T   | 37.90    | PASS          | AC=1;AF=0.015;AN=68;BaseQRankSum=  |
| 13704 | chrY | 10039520 | . | C | T   | 15401.81 | PASS          | AC=26;AF=0.394;AN=66;BaseQ         |
| 13705 | chrY | 10039551 | . | A | T   | 212.15   | PASS          | AC=1;AF=0.015;AN=68;BaseQRankSum=  |
| 13706 | chrY | 10039568 | . | A | G   | 2597.71  | PASS          | AC=8;AF=0.114;AN=70;BaseQRankSum=  |
| 13707 | chrY | 10039572 | . | G | T   | 120.55   | PASS          | AC=2;AF=0.029;AN=70;BaseQRankSum=  |
| 13708 | chrY | 10039573 | . | A | G   | 1671.89  | PASS          | AC=12;AF=0.171;AN=70;BaseQRankSum= |
| 13709 | chrY | 10039590 | . | C | G   | 10044.54 | PASS          | AC=22;AF=0.333;AN=66;BaseQ         |
| 13710 | chrY | 10039591 | . | G | A   | 841.21   | PASS          | AC=3;AF=0.044;AN=68;BaseQRankSum=  |
| 13711 | chrY | 10039596 | . | G | A   | 104.06   | my_snp_filter | AC=2;AF=0.029;AN=68;BaseQ          |
| 13712 | chrY | 10039597 | . | G | T   | 2488.34  | PASS          | AC=16;AF=0.235;AN=68;BaseQRankSum= |
| 13713 | chrY | 10039598 | . | G | A   | 202.56   | PASS          | AC=4;AF=0.059;AN=68;BaseQRankSum=  |
| 13714 | chrY | 10039609 | . | C | T,A | 3697.47  | PASS          | AC=5,11;AF=0.071,0.157;AN=70;Base  |
| 13715 | chrY | 10039619 | . | T | A   | 101.03   | PASS          | AC=1;AF=0.014;AN=70;BaseQRankSum=  |
| 13716 | chrY | 10039620 | . | G | T   | 292.04   | PASS          | AC=4;AF=0.057;AN=70;BaseQRankSum=  |
| 13717 | chrY | 10039632 | . | T | C   | 13323.08 | PASS          | AC=30;AF=0.484;AN=62;BaseQ         |
| 13718 | chrY | 10039633 | . | G | A   | 10036.42 | PASS          | AC=25;AF=0.403;AN=62;BaseQ         |
| 13719 | chrY | 10039643 | . | A | G   | 16739.61 | PASS          | AC=30;AF=0.484;AN=62;BaseQ         |
| 13720 | chrY | 10039646 | . | T | G   | 5714.27  | PASS          | AC=23;AF=0.338;AN=68;BaseQRankSum= |
| 13721 | chrY | 10039651 | . | G | A   | 769.56   | PASS          | AC=8;AF=0.114;AN=70;BaseQRankSum=  |
| 13722 | chrY | 10039655 | . | G | T   | 6794.02  | PASS          | AC=22;AF=0.324;AN=68;BaseQRankSum= |
| 13723 | chrY | 10039657 | . | C | T   | 2860.39  | PASS          | AC=15;AF=0.214;AN=70;BaseQRankSum= |
| 13724 | chrY | 10039661 | . | G | A   | 22737.58 | PASS          | AC=31;AF=0.500;AN=62;BaseQ         |
| 13725 | chrY | 10039671 | . | C | G   | 3356.84  | PASS          | AC=15;AF=0.214;AN=70;BaseQRankSum= |
| 13726 | chrY | 10039693 | . | A | G   | 198.51   | my_snp_filter | AC=3;AF=0.043;AN=70;BaseQ          |
| 13727 | chrY | 10039706 | . | C | T   | 153.64   | my_snp_filter | AC=4;AF=0.057;AN=70;BaseQ          |
| 13728 | chrY | 10039709 | . | C | A   | 241      | PASS          | AC=3;AF=0.043;AN=70;BaseQRankSum=  |
| 13729 | chrY | 10039718 | . | G | T   | 6548.31  | PASS          | AC=25;AF=0.357;AN=70;BaseQRankSum= |
| 13730 | chrY | 10039721 | . | C | G   | 2501.12  | PASS          | AC=7;AF=0.100;AN=70;BaseQRankSum=  |
| 13731 | chrY | 10039730 | . | C | T   | 14920.21 | PASS          | AC=35;AF=0.500;AN=70;BaseQ         |
| 13732 | chrY | 10039731 | . | T | G   | 56434.62 | PASS          | AC=36;AF=0.514;AN=70;BaseQ         |
| 13733 | chrY | 10039737 | . | A | G   | 30614.24 | PASS          | AC=34;AF=0.486;AN=70;BaseQ         |
| 13734 | chrY | 10039744 | . | C | T   | 2223.31  | PASS          | AC=12;AF=0.171;AN=70;BaseQRankSum= |
| 13735 | chrY | 10039762 | . | C | T   | 6855.72  | PASS          | AC=22;AF=0.314;AN=70;BaseQRankSum= |
| 13736 | chrY | 10039771 | . | C | T   | 14948.80 | PASS          | AC=33;AF=0.471;AN=70;BaseQ         |
| 13737 | chrY | 10039778 | . | G | A   | 9624.83  | PASS          | AC=31;AF=0.443;AN=70;BaseQRankSum= |
| 13738 | chrY | 10039782 | . | T | C   | 1424.13  | PASS          | AC=13;AF=0.186;AN=70;BaseQRankSum= |
| 13739 | chrY | 10039789 | . | G | A   | 5789.08  | PASS          | AC=21;AF=0.300;AN=70;BaseQRankSum= |
| 13740 | chrY | 10039790 | . | C | T   | 8315.83  | PASS          | AC=27;AF=0.386;AN=70;BaseQRankSum= |
| 13741 | chrY | 10039805 | . | C | G   | 4893.33  | PASS          | AC=19;AF=0.271;AN=70;BaseQRankSum= |
| 13742 | chrY | 10039823 | . | T | A   | 256.86   | my_snp_filter | AC=7;AF=0.100;AN=70;BaseQ          |
| 13743 | chrY | 10039839 | . | G | A,T | 2360.34  | PASS          | AC=16,3;AF=0.229,0.043;AN=70;Base  |
| 13744 | chrY | 10039846 | . | G | T,C | 8292.81  | my_snp_filter | AC=12,19;AF=0.171,0.271;AN=70;Base |
| 13745 | chrY | 10039847 | . | G | A   | 221.88   | PASS          | AC=2;AF=0.029;AN=70;BaseQRankSum=  |
| 13746 | chrY | 10039853 | . | C | T   | 8605.98  | my_snp_filter | AC=27;AF=0.386;AN=70;BaseQ         |
| 13747 | chrY | 10039872 | . | A | G   | 37.90    | my_snp_filter | AC=4;AF=0.057;AN=70;BaseQ          |
| 13748 | chrY | 10039873 | . | G | T   | 37.90    | my_snp_filter | AC=4;AF=0.057;AN=70;BaseQ          |
| 13749 | chrY | 10039896 | . | A | C   | 69.66    | my_snp_filter | AC=2;AF=0.029;AN=70;BaseQ          |
| 13750 | chrY | 10039920 | . | T | C   | 645.50   | PASS          | AC=3;AF=0.044;AN=68;BaseQRankSum=  |
| 13751 | chrY | 10039922 | . | G | A   | 2646.21  | my_snp_filter | AC=18;AF=0.265;AN=68;BaseQ         |
| 13752 | chrY | 10039938 | . | C | T   | 61.26    | my_snp_filter | AC=6;AF=0.088;AN=68;BaseQ          |
| 13753 | chrY | 10039993 | . | G | A   | 729.59   | my_snp_filter | AC=6;AF=0.086;AN=70;BaseQ          |
| 13754 | chrY | 10040016 | . | T | C   | 457.36   | my_snp_filter | AC=4;AF=0.057;AN=70;BaseQ          |
| 13755 | chrY | 10040017 | . | G | T   | 501.84   | my_snp_filter | AC=4;AF=0.057;AN=70;BaseQ          |
| 13756 | chrY | 10040034 | . | A | C   | 129.03   | my_snp_filter | AC=4;AF=0.057;AN=70;BaseQ          |

|       |      |          |   |   |     |          |               |                                    |
|-------|------|----------|---|---|-----|----------|---------------|------------------------------------|
| 13757 | chrY | 10040042 | . | T | G   | 92.61    | my_snp_filter | AC=4;AF=0.057;AN=70;BaseQ          |
| 13758 | chrY | 10040050 | . | T | C   | 198.33   | PASS          | AC=3;AF=0.043;AN=70;BaseQRankSum=  |
| 13759 | chrY | 10040052 | . | C | A   | 140.16   | PASS          | AC=3;AF=0.044;AN=68;BaseQRankSum=  |
| 13760 | chrY | 10040053 | . | A | G   | 140.85   | PASS          | AC=3;AF=0.044;AN=68;BaseQRankSum=  |
| 13761 | chrY | 10040059 | . | C | A   | 142.41   | PASS          | AC=2;AF=0.029;AN=68;BaseQRankSum=  |
| 13762 | chrY | 10040079 | . | C | T   | 167.56   | PASS          | AC=2;AF=0.029;AN=70;BaseQRankSum=  |
| 13763 | chrY | 10040094 | . | A | G   | 124.43   | PASS          | AC=2;AF=0.029;AN=70;BaseQRankSum=  |
| 13764 | chrY | 10040095 | . | G | A   | 169.85   | PASS          | AC=2;AF=0.029;AN=70;BaseQRankSum=  |
| 13765 | chrY | 10040109 | . | C | T   | 46.48    | my_snp_filter | AC=2;AF=0.029;AN=68;BaseQ          |
| 13766 | chrY | 10040118 | . | T | C   | 107.50   | PASS          | AC=3;AF=0.045;AN=66;BaseQRankSum=  |
| 13767 | chrY | 10040148 | . | A | C   | 61.85    | my_snp_filter | AC=3;AF=0.045;AN=66;BaseQ          |
| 13768 | chrY | 10040424 | . | G | A   | 43.06    | PASS          | AC=1;AF=0.015;AN=68;BaseQRankSum=  |
| 13769 | chrY | 10040432 | . | A | G   | 74.28    | my_snp_filter | AC=2;AF=0.029;AN=68;BaseQ          |
| 13770 | chrY | 10040449 | . | A | C   | 258.85   | PASS          | AC=8;AF=0.118;AN=68;BaseQRankSum=  |
| 13771 | chrY | 10040463 | . | G | A   | 1264.71  | PASS          | AC=11;AF=0.162;AN=68;BaseQRankSum= |
| 13772 | chrY | 10040464 | . | C | A   | 1031.07  | PASS          | AC=10;AF=0.147;AN=68;BaseQRankSum= |
| 13773 | chrY | 10040474 | . | T | C   | 639.79   | PASS          | AC=6;AF=0.086;AN=70;BaseQRankSum=  |
| 13774 | chrY | 10040490 | . | C | T   | 109.76   | my_snp_filter | AC=6;AF=0.086;AN=70;BaseQ          |
| 13775 | chrY | 10040498 | . | C | T   | 142.44   | my_snp_filter | AC=6;AF=0.086;AN=70;BaseQ          |
| 13776 | chrY | 10040518 | . | C | G   | 2912.96  | PASS          | AC=19;AF=0.271;AN=70;BaseQRankSum= |
| 13777 | chrY | 10040581 | . | C | G   | 128.21   | my_snp_filter | AC=2;AF=0.029;AN=70;BaseQ          |
| 13778 | chrY | 10040589 | . | A | G   | 8022.58  | my_snp_filter | AC=9;AF=0.129;AN=70;BaseQ          |
| 13779 | chrY | 10040598 | . | C | T   | 8311.99  | my_snp_filter | AC=9;AF=0.129;AN=70;BaseQ          |
| 13780 | chrY | 10040599 | . | T | G   | 8314.99  | my_snp_filter | AC=9;AF=0.129;AN=70;BaseQ          |
| 13781 | chrY | 10040611 | . | C | G   | 3019.98  | PASS          | AC=9;AF=0.129;AN=70;BaseQRankSum=  |
| 13782 | chrY | 10040619 | . | C | T   | 2808.77  | PASS          | AC=9;AF=0.129;AN=70;BaseQRankSum=  |
| 13783 | chrY | 10040629 | . | A | G   | 8812.34  | my_snp_filter | AC=15;AF=0.214;AN=70;BaseQ         |
| 13784 | chrY | 10040644 | . | T | C   | 1784.13  | PASS          | AC=11;AF=0.157;AN=70;BaseQRankSum= |
| 13785 | chrY | 10040649 | . | T | G   | 1160.16  | PASS          | AC=12;AF=0.171;AN=70;BaseQRankSum= |
| 13786 | chrY | 10040659 | . | A | T   | 11061.43 | my_snp_filter | AC=18;AF=0.257;AN=                 |
| 13787 | chrY | 10040670 | . | A | G   | 1098.31  | my_snp_filter | AC=13;AF=0.191;AN=68;BaseQ         |
| 13788 | chrY | 10040679 | . | C | T   | 12688.43 | my_snp_filter | AC=23;AF=0.329;AN=                 |
| 13789 | chrY | 10040725 | . | C | A   | 19057.10 | my_snp_filter | AC=26;AF=0.371;AN=                 |
| 13790 | chrY | 10040738 | . | G | C   | 23204.89 | my_snp_filter | AC=26;AF=0.419;AN=                 |
| 13791 | chrY | 10040739 | . | G | T   | 23300.89 | my_snp_filter | AC=26;AF=0.419;AN=                 |
| 13792 | chrY | 10040751 | . | T | C   | 6663.96  | my_snp_filter | AC=16;AF=0.229;AN=70;BaseQ         |
| 13793 | chrY | 10040760 | . | C | G   | 7208.13  | my_snp_filter | AC=16;AF=0.229;AN=70;BaseQ         |
| 13794 | chrY | 10040775 | . | A | C,T | 5943.28  | my_snp_filter | AC=5,11;AF=0.071,0.157;AN=         |
| 13795 | chrY | 10040795 | . | T | C   | 187.32   | PASS          | AC=3;AF=0.043;AN=70;BaseQRankSum=  |
| 13796 | chrY | 10040798 | . | G | A   | 15128.02 | PASS          | AC=34;AF=0.486;AN=70;BaseQ         |
| 13797 | chrY | 10040800 | . | T | C   | 174.89   | my_snp_filter | AC=3;AF=0.043;AN=70;BaseQ          |
| 13798 | chrY | 10040801 | . | A | C   | 47301.79 | PASS          | AC=35;AF=0.500;AN=70;BaseQ         |
| 13799 | chrY | 10040815 | . | A | T   | 4356.54  | PASS          | AC=12;AF=0.171;AN=70;BaseQRankSum= |
| 13800 | chrY | 10040819 | . | C | T   | 7523.27  | PASS          | AC=27;AF=0.386;AN=70;BaseQRankSum= |
| 13801 | chrY | 10040824 | . | A | G   | 30565.87 | PASS          | AC=36;AF=0.514;AN=70;BaseQ         |
| 13802 | chrY | 10040834 | . | A | T   | 6803.90  | PASS          | AC=27;AF=0.386;AN=70;BaseQRankSum= |
| 13803 | chrY | 10040836 | . | G | A   | 16326.76 | PASS          | AC=23;AF=0.329;AN=70;BaseQ         |
| 13804 | chrY | 10040839 | . | A | G   | 16325.76 | PASS          | AC=23;AF=0.329;AN=70;BaseQ         |
| 13805 | chrY | 10040850 | . | T | C,* | 7468.94  | PASS          | AC=29,1;AF=0.414,0.014;AN=70;BaseQ |
| 13806 | chrY | 10040851 | . | G | A   | 596.52   | my_snp_filter | AC=9;AF=0.129;AN=70;BaseQ          |
| 13807 | chrY | 10040858 | . | G | T   | 825.64   | PASS          | AC=10;AF=0.143;AN=70;BaseQRankSum= |
| 13808 | chrY | 10040860 | . | T | C   | 17661.57 | PASS          | AC=23;AF=0.338;AN=68;BaseQ         |
| 13809 | chrY | 10040869 | . | A | G   | 2838.94  | PASS          | AC=14;AF=0.200;AN=70;BaseQRankSum= |
| 13810 | chrY | 10040877 | . | A | G   | 1228.34  | PASS          | AC=4;AF=0.057;AN=70;BaseQRankSum=  |
| 13811 | chrY | 10040881 | . | T | G   | 1279.65  | my_snp_filter | AC=9;AF=0.129;AN=70;BaseQ          |
| 13812 | chrY | 10040904 | . | A | C   | 18764.27 | PASS          | AC=21;AF=0.339;AN=62;BaseQ         |
| 13813 | chrY | 10040914 | . | A | G   | 40822.71 | PASS          | AC=31;AF=0.517;AN=60;BaseQ         |
| 13814 | chrY | 10040928 | . | A | G   | 328.78   | my_snp_filter | AC=4;AF=0.057;AN=70;BaseQ          |
| 13815 | chrY | 10040930 | . | A | G   | 19765.07 | PASS          | AC=30;AF=0.441;AN=68;BaseQ         |
| 13816 | chrY | 10040957 | . | C | A   | 759.38   | PASS          | AC=4;AF=0.057;AN=70;BaseQRankSum=  |
| 13817 | chrY | 10040974 | . | A | T   | 2902.54  | PASS          | AC=8;AF=0.118;AN=68;BaseQRankSum=  |
| 13818 | chrY | 10040984 | . | T | C   | 1702.24  | PASS          | AC=8;AF=0.114;AN=70;BaseQRankSum=  |
| 13819 | chrY | 10040991 | . | C | T   | 2934.04  | PASS          | AC=8;AF=0.114;AN=70;BaseQRankSum=  |
| 13820 | chrY | 10040992 | . | T | G   | 80.14    | my_snp_filter | AC=3;AF=0.043;AN=70;BaseQ          |
| 13821 | chrY | 10040995 | . | C | T   | 4854.01  | PASS          | AC=14;AF=0.438;AN=32;BaseQRankSum= |
| 13822 | chrY | 10041017 | . | G | C   | 122.22   | PASS          | AC=1;AF=0.014;AN=70;BaseQRankSum=  |
| 13823 | chrY | 10041022 | . | T | C,A | 3262.30  | PASS          | AC=6,4;AF=0.143,0.095;AN=42;BaseQ  |
| 13824 | chrY | 10041026 | . | T | A   | 745.91   | PASS          | AC=5;AF=0.071;AN=70;BaseQRankSum=  |
| 13825 | chrY | 10041030 | . | G | A   | 640.71   | PASS          | AC=7;AF=0.106;AN=66;BaseQRankSum=  |
| 13826 | chrY | 10041044 | . | A | T   | 32.93    | PASS          | AC=2;AF=0.029;AN=70;BaseQRankSum=  |
| 13827 | chrY | 10041053 | . | T | G   | 109.99   | PASS          | AC=1;AF=0.015;AN=68;BaseQRankSum=  |
| 13828 | chrY | 10041067 | . | C | T   | 406.74   | PASS          | AC=3;AF=0.044;AN=68;BaseQRankSum=  |
| 13829 | chrY | 10041079 | . | A | T   | 2649.48  | PASS          | AC=4;AF=0.100;AN=40;BaseQRankSum=  |
| 13830 | chrY | 10041089 | . | A | T   | 1286.74  | PASS          | AC=4;AF=0.061;AN=66;BaseQRankSum=  |
| 13831 | chrY | 10041107 | . | C | G   | 1036.07  | PASS          | AC=3;AF=0.043;AN=70;BaseQRankSum=  |
| 13832 | chrY | 10041108 | . | A | G   | 1039.95  | PASS          | AC=3;AF=0.043;AN=70;BaseQRankSum=  |

|       |      |          |   |   |     |          |               |                                    |
|-------|------|----------|---|---|-----|----------|---------------|------------------------------------|
| 13833 | chrY | 10041125 | . | A | T   | 1338.85  | PASS          | AC=3;AF=0.044;AN=68;BaseQRankSum=  |
| 13834 | chrY | 10041128 | . | G | T,C | 2753.25  | PASS          | AC=3,1;AF=0.052,0.017;AN=58;BaseQ  |
| 13835 | chrY | 10041130 | . | C | T   | 2927.73  | PASS          | AC=5;AF=0.083;AN=60;BaseQRankSum=  |
| 13836 | chrY | 10041133 | . | C | A   | 255.42   | PASS          | AC=1;AF=0.014;AN=70;BaseQRankSum=  |
| 13837 | chrY | 10041147 | . | G | A   | 780.84   | PASS          | AC=1;AF=0.015;AN=68;BaseQRankSum=  |
| 13838 | chrY | 10041150 | . | T | G   | 660.78   | PASS          | AC=1;AF=0.015;AN=68;BaseQRankSum=  |
| 13839 | chrY | 10041151 | . | G | A   | 660.49   | PASS          | AC=1;AF=0.015;AN=68;BaseQRankSum=  |
| 13840 | chrY | 10041152 | . | G | T   | 57.79    | PASS          | AC=1;AF=0.015;AN=68;BaseQRankSum=  |
| 13841 | chrY | 10041154 | . | A | C   | 60.76    | PASS          | AC=1;AF=0.015;AN=68;BaseQRankSum=  |
| 13842 | chrY | 10041160 | . | G | T   | 450.22   | PASS          | AC=1;AF=0.015;AN=68;BaseQRankSum=  |
| 13843 | chrY | 10041165 | . | T | G   | 873.45   | PASS          | AC=2;AF=0.029;AN=68;BaseQRankSum=  |
| 13844 | chrY | 10041166 | . | G | A   | 879.45   | PASS          | AC=2;AF=0.029;AN=68;BaseQRankSum=  |
| 13845 | chrY | 10041170 | . | G | A   | 1247.52  | PASS          | AC=2;AF=0.036;AN=56;BaseQRankSum=  |
| 13846 | chrY | 10041174 | . | C | T   | 194.77   | PASS          | AC=1;AF=0.015;AN=68;BaseQRankSum=  |
| 13847 | chrY | 10041175 | . | A | G   | 1116.17  | PASS          | AC=2;AF=0.029;AN=68;BaseQRankSum=  |
| 13848 | chrY | 10041183 | . | G | A   | 1031.67  | PASS          | AC=2;AF=0.033;AN=60;BaseQRankSum=  |
| 13849 | chrY | 10041209 | . | C | G   | 1166.25  | PASS          | AC=3;AF=0.047;AN=64;BaseQRankSum=  |
| 13850 | chrY | 10041210 | . | G | T   | 1157.48  | PASS          | AC=3;AF=0.047;AN=64;BaseQRankSum=  |
| 13851 | chrY | 10041230 | . | C | G   | 1019.88  | PASS          | AC=3;AF=0.045;AN=66;BaseQRankSum=  |
| 13852 | chrY | 10041242 | . | G | C   | 693.78   | PASS          | AC=3;AF=0.045;AN=66;BaseQRankSum=  |
| 13853 | chrY | 10041268 | . | T | G   | 246.84   | PASS          | AC=3;AF=0.047;AN=64;BaseQRankSum=  |
| 13854 | chrY | 10041271 | . | G | A   | 225.64   | PASS          | AC=3;AF=0.045;AN=66;BaseQRankSum=  |
| 13855 | chrY | 10041324 | . | T | G   | 142.70   | PASS          | AC=1;AF=0.036;AN=28;BaseQRankSum=  |
| 13856 | chrY | 10041500 | . | G | A   | 7130.43  | PASS          | AC=9;AF=0.265;AN=34;BaseQRankSum=  |
| 13857 | chrY | 10041513 | . | T | C   | 7078.29  | PASS          | AC=9;AF=0.300;AN=30;BaseQRankSum=  |
| 13858 | chrY | 10041522 | . | G | T   | 4618.47  | PASS          | AC=11;AF=0.367;AN=30;BaseQRankSum= |
| 13859 | chrY | 10041535 | . | A | G   | 7219.55  | PASS          | AC=9;AF=0.300;AN=30;BaseQRankSum=  |
| 13860 | chrY | 10041545 | . | C | T   | 7315.84  | PASS          | AC=9;AF=0.375;AN=24;BaseQRankSum=  |
| 13861 | chrY | 10041565 | . | G | A   | 16314.09 | PASS          | AC=9;AF=0.500;AN=18;BaseQ          |
| 13862 | chrY | 10041567 | . | A | C   | 5818.09  | PASS          | AC=9;AF=0.500;AN=18;BaseQRankSum=  |
| 13863 | chrY | 10041574 | . | T | C   | 16632.09 | PASS          | AC=9;AF=0.500;AN=18;BaseQ          |
| 13864 | chrY | 10041584 | . | A | C   | 16716.09 | PASS          | AC=9;AF=0.500;AN=18;BaseQ          |
| 13865 | chrY | 10041603 | . | A | C   | 17268.33 | PASS          | AC=8;AF=0.444;AN=18;BaseQ          |
| 13866 | chrY | 10041614 | . | G | C   | 3255.33  | PASS          | AC=8;AF=0.400;AN=20;BaseQRankSum=  |
| 13867 | chrY | 10041656 | . | T | C   | 14149.19 | PASS          | AC=13;AF=0.406;AN=32;Base          |
| 13868 | chrY | 10041697 | . | C | T   | 3441.99  | PASS          | AC=9;AF=0.409;AN=22;BaseQRankSum=  |
| 13869 | chrY | 10041711 | . | T | G   | 15488.31 | PASS          | AC=9;AF=0.500;AN=18;BaseQ          |
| 13870 | chrY | 10041743 | . | T | A   | 6425.68  | PASS          | AC=7;AF=0.184;AN=38;BaseQRankSum=  |
| 13871 | chrY | 10041752 | . | C | A   | 6309.34  | PASS          | AC=7;AF=0.194;AN=36;BaseQRankSum=  |
| 13872 | chrY | 10041755 | . | A | T   | 6238.96  | PASS          | AC=11;AF=0.458;AN=24;BaseQRankSum= |
| 13873 | chrY | 10041759 | . | G | T   | 5866.76  | PASS          | AC=7;AF=0.194;AN=36;BaseQRankSum=  |
| 13874 | chrY | 10041793 | . | C | A   | 15045.09 | PASS          | AC=9;AF=0.500;AN=18;BaseQ          |
| 13875 | chrY | 10041812 | . | C | G   | 15009.09 | PASS          | AC=9;AF=0.500;AN=18;BaseQ          |
| 13876 | chrY | 10041813 | . | C | A   | 14886.09 | PASS          | AC=9;AF=0.500;AN=18;BaseQ          |
| 13877 | chrY | 10041839 | . | G | A   | 15093.52 | PASS          | AC=9;AF=0.450;AN=20;BaseQ          |
| 13878 | chrY | 10041854 | . | T | C   | 13794.11 | PASS          | AC=9;AF=0.409;AN=22;BaseQ          |
| 13879 | chrY | 10041855 | . | G | A   | 13996.11 | PASS          | AC=9;AF=0.409;AN=22;BaseQ          |
| 13880 | chrY | 10041863 | . | G | A   | 6813.99  | PASS          | AC=9;AF=0.409;AN=22;BaseQRankSum=  |
| 13881 | chrY | 10041867 | . | A | G   | 12982.99 | PASS          | AC=9;AF=0.409;AN=22;BaseQ          |
| 13882 | chrY | 10041879 | . | A | G   | 12787.34 | PASS          | AC=9;AF=0.450;AN=20;BaseQ          |
| 13883 | chrY | 10041886 | . | C | A   | 6454.99  | PASS          | AC=9;AF=0.409;AN=22;BaseQRankSum=  |
| 13884 | chrY | 10041900 | . | T | G   | 6472.84  | PASS          | AC=9;AF=0.375;AN=24;BaseQRankSum=  |
| 13885 | chrY | 10041903 | . | A | T   | 6231.11  | PASS          | AC=9;AF=0.409;AN=22;BaseQRankSum=  |
| 13886 | chrY | 10041927 | . | C | T   | 84.80    | my_snp_filter | AC=1;AF=0.033;AN=30;BaseQ          |
| 13887 | chrY | 10041930 | . | C | T   | 82.24    | my_snp_filter | AC=1;AF=0.036;AN=28;BaseQ          |
| 13888 | chrY | 10041949 | . | A | C   | 73.89    | my_snp_filter | AC=1;AF=0.036;AN=28;BaseQ          |
| 13889 | chrY | 10041953 | . | A | C   | 385.18   | my_snp_filter | AC=3;AF=0.107;AN=28;BaseQ          |
| 13890 | chrY | 10041961 | . | G | A   | 158.70   | my_snp_filter | AC=2;AF=0.059;AN=34;BaseQ          |
| 13891 | chrY | 10041973 | . | G | T   | 18169.02 | PASS          | AC=13;AF=0.464;AN=28;Base          |
| 13892 | chrY | 10041974 | . | T | G   | 738.45   | PASS          | AC=3;AF=0.107;AN=28;BaseQRankSum=  |
| 13893 | chrY | 10041987 | . | G | A   | 16868.30 | PASS          | AC=11;AF=0.423;AN=26;Base          |
| 13894 | chrY | 10042001 | . | G | A   | 19935.04 | PASS          | AC=12;AF=0.353;AN=34;Base          |
| 13895 | chrY | 10042017 | . | A | T   | 9230.10  | PASS          | AC=9;AF=0.237;AN=38;BaseQRankSum=  |
| 13896 | chrY | 10042023 | . | G | A   | 9585.10  | PASS          | AC=9;AF=0.237;AN=38;BaseQRankSum=  |
| 13897 | chrY | 10042036 | . | C | T   | 9935.76  | PASS          | AC=11;AF=0.344;AN=32;BaseQRankSum= |
| 13898 | chrY | 10042071 | . | C | G   | 9063.15  | PASS          | AC=9;AF=0.300;AN=30;BaseQRankSum=  |
| 13899 | chrY | 10042089 | . | G | A   | 2798.79  | PASS          | AC=5;AF=0.114;AN=44;BaseQRankSum=  |
| 13900 | chrY | 10042099 | . | A | G   | 10419.53 | PASS          | AC=9;AF=0.237;AN=38;BaseQ          |
| 13901 | chrY | 10042111 | . | A | G   | 11525.48 | PASS          | AC=9;AF=0.205;AN=44;BaseQ          |
| 13902 | chrY | 10042115 | . | A | G   | 11376.38 | PASS          | AC=9;AF=0.205;AN=44;BaseQ          |
| 13903 | chrY | 10042131 | . | T | C   | 20848.38 | PASS          | AC=11;AF=0.275;AN=40;Base          |
| 13904 | chrY | 10042140 | . | T | C   | 12442.55 | PASS          | AC=9;AF=0.205;AN=44;BaseQ          |
| 13905 | chrY | 10042141 | . | G | A   | 12478.47 | PASS          | AC=9;AF=0.196;AN=46;BaseQ          |
| 13906 | chrY | 10042145 | . | A | G   | 21896.06 | PASS          | AC=11;AF=0.306;AN=36;Base          |
| 13907 | chrY | 10042176 | . | C | T   | 6195.39  | PASS          | AC=9;AF=0.145;AN=62;BaseQRankSum=  |
| 13908 | chrY | 10042177 | . | A | G   | 6322.42  | PASS          | AC=9;AF=0.145;AN=62;BaseQRankSum=  |

|       |      |          |   |   |     |          |               |                                    |
|-------|------|----------|---|---|-----|----------|---------------|------------------------------------|
| 13909 | chrY | 10042184 | . | G | A   | 13610.18 | PASS          | AC=21;AF=0.328;AN=64;BaseQ         |
| 13910 | chrY | 10042192 | . | T | G   | 23270.40 | PASS          | AC=21;AF=0.362;AN=58;BaseQ         |
| 13911 | chrY | 10042206 | . | C | G   | 22944.19 | PASS          | AC=22;AF=0.393;AN=56;BaseQ         |
| 13912 | chrY | 10042211 | . | T | C   | 5779.36  | PASS          | AC=11;AF=0.177;AN=62;BaseQRankSum  |
| 13913 | chrY | 10042212 | . | G | A   | 5784.46  | PASS          | AC=11;AF=0.177;AN=62;BaseQRankSum  |
| 13914 | chrY | 10042251 | . | G | A   | 7187.28  | PASS          | AC=24;AF=0.353;AN=68;BaseQRankSum  |
| 13915 | chrY | 10042282 | . | T | C   | 848.47   | my_snp_filter | AC=8;AF=0.114;AN=70;BaseQ          |
| 13916 | chrY | 10042286 | . | A | T   | 96.69    | PASS          | AC=2;AF=0.029;AN=70;BaseQRankSum   |
| 13917 | chrY | 10042288 | . | A | T   | 27403.78 | PASS          | AC=29;AF=0.426;AN=68;BaseQ         |
| 13918 | chrY | 10042291 | . | G | C   | 25556.85 | PASS          | AC=28;AF=0.400;AN=70;BaseQ         |
| 13919 | chrY | 10042297 | . | T | A   | 1286.24  | my_snp_filter | AC=6;AF=0.086;AN=70;BaseQ          |
| 13920 | chrY | 10042306 | . | C | A   | 25170.58 | PASS          | AC=26;AF=0.371;AN=70;BaseQ         |
| 13921 | chrY | 10042333 | . | A | G   | 37026    | PASS          | AC=24;AF=0.364;AN=66;BaseQRankSum  |
| 13922 | chrY | 10042338 | . | T | C   | 9630.54  | PASS          | AC=13;AF=0.186;AN=70;BaseQRankSum  |
| 13923 | chrY | 10042352 | . | T | A   | 43785.81 | PASS          | AC=25;AF=0.379;AN=66;BaseQ         |
| 13924 | chrY | 10042357 | . | T | C   | 2663.85  | PASS          | AC=11;AF=0.157;AN=70;BaseQRankSum  |
| 13925 | chrY | 10042363 | . | T | G   | 169.10   | PASS          | AC=2;AF=0.029;AN=70;BaseQRankSum   |
| 13926 | chrY | 10042367 | . | A | T,C | 40368.12 | PASS          | AC=16,14;AF=0.242,0.212;AN=68      |
| 13927 | chrY | 10042368 | . | A | G   | 24198.67 | my_snp_filter | AC=22;AF=0.355;AN=68               |
| 13928 | chrY | 10042373 | . | G | T   | 258.75   | my_snp_filter | AC=2;AF=0.029;AN=70;BaseQ          |
| 13929 | chrY | 10042377 | . | C | A   | 21135.46 | PASS          | AC=17;AF=0.243;AN=70;BaseQ         |
| 13930 | chrY | 10042381 | . | T | C   | 4546.50  | PASS          | AC=6;AF=0.086;AN=70;BaseQRankSum   |
| 13931 | chrY | 10042385 | . | G | A   | 11797.09 | PASS          | AC=12;AF=0.171;AN=70;BaseQ         |
| 13932 | chrY | 10042391 | . | G | A   | 21351.23 | PASS          | AC=17;AF=0.243;AN=70;BaseQ         |
| 13933 | chrY | 10042397 | . | A | G   | 12681.05 | PASS          | AC=12;AF=0.171;AN=70;BaseQ         |
| 13934 | chrY | 10042398 | . | T | C   | 144.26   | my_snp_filter | AC=1;AF=0.014;AN=70;BaseQ          |
| 13935 | chrY | 10042410 | . | A | T   | 5550.61  | PASS          | AC=14;AF=0.200;AN=70;BaseQRankSum  |
| 13936 | chrY | 10042415 | . | G | C   | 28311.29 | PASS          | AC=26;AF=0.406;AN=64;BaseQ         |
| 13937 | chrY | 10042423 | . | A | G   | 1609.35  | my_snp_filter | AC=10;AF=0.143;AN=70;BaseQ         |
| 13938 | chrY | 10042424 | . | T | C   | 336.49   | my_snp_filter | AC=3;AF=0.043;AN=70;BaseQ          |
| 13939 | chrY | 10042435 | . | C | G   | 531.16   | PASS          | AC=4;AF=0.057;AN=70;BaseQRankSum   |
| 13940 | chrY | 10042447 | . | A | G   | 49.18    | my_snp_filter | AC=2;AF=0.029;AN=70;BaseQ          |
| 13941 | chrY | 10042449 | . | G | A   | 694.89   | PASS          | AC=8;AF=0.118;AN=68;BaseQRankSum   |
| 13942 | chrY | 10042453 | . | A | T   | 2178.60  | PASS          | AC=8;AF=0.114;AN=70;BaseQRankSum   |
| 13943 | chrY | 10042458 | . | T | C   | 2320.20  | PASS          | AC=8;AF=0.114;AN=70;BaseQRankSum   |
| 13944 | chrY | 10042463 | . | A | C   | 43505.67 | PASS          | AC=38;AF=0.559;AN=68;BaseQ         |
| 13945 | chrY | 10042474 | . | C | T   | 61.42    | my_snp_filter | AC=1;AF=0.014;AN=70;BaseQ          |
| 13946 | chrY | 10042476 | . | T | C   | 1317.06  | PASS          | AC=9;AF=0.129;AN=70;BaseQRankSum   |
| 13947 | chrY | 10042485 | . | A | T   | 6081.63  | PASS          | AC=22;AF=0.407;AN=54;BaseQRankSum  |
| 13948 | chrY | 10042486 | . | T | A,* | 385.99   | PASS          | AC=2,1;AF=0.032,0.016;AN=62;BaseQ  |
| 13949 | chrY | 10042496 | . | G | C   | 688.31   | PASS          | AC=4;AF=0.057;AN=70;BaseQRankSum   |
| 13950 | chrY | 10042501 | . | C | T   | 5948.51  | PASS          | AC=8;AF=0.114;AN=70;BaseQRankSum   |
| 13951 | chrY | 10042510 | . | C | T   | 406.42   | my_snp_filter | AC=1;AF=0.014;AN=70;BaseQ          |
| 13952 | chrY | 10042518 | . | C | T   | 663.11   | PASS          | AC=5;AF=0.071;AN=70;BaseQRankSum   |
| 13953 | chrY | 10042519 | . | T | C   | 6445.31  | PASS          | AC=8;AF=0.114;AN=70;BaseQRankSum   |
| 13954 | chrY | 10042524 | . | A | G   | 1836.52  | PASS          | AC=5;AF=0.071;AN=70;BaseQRankSum   |
| 13955 | chrY | 10042527 | . | C | G   | 46676.58 | PASS          | AC=34;AF=0.500;AN=68;BaseQ         |
| 13956 | chrY | 10042528 | . | A | C   | 34887.22 | PASS          | AC=32;AF=0.457;AN=70;BaseQ         |
| 13957 | chrY | 10042534 | . | T | G   | 6833.70  | PASS          | AC=8;AF=0.114;AN=70;BaseQRankSum   |
| 13958 | chrY | 10042538 | . | C | A,* | 7426.34  | PASS          | AC=8,5;AF=0.118,0.074;AN=68;BaseQ  |
| 13959 | chrY | 10042539 | . | G | A   | 110.91   | my_snp_filter | AC=2;AF=0.029;AN=68;BaseQ          |
| 13960 | chrY | 10042540 | . | T | C   | 40783.69 | PASS          | AC=34;AF=0.500;AN=68;BaseQ         |
| 13961 | chrY | 10042545 | . | A | G   | 203.12   | PASS          | AC=2;AF=0.029;AN=70;BaseQRankSum   |
| 13962 | chrY | 10042567 | . | T | C   | 23909.22 | PASS          | AC=32;AF=0.457;AN=70;BaseQ         |
| 13963 | chrY | 10042569 | . | T | C   | 150.26   | PASS          | AC=2;AF=0.029;AN=70;BaseQRankSum   |
| 13964 | chrY | 10042575 | . | C | A,T | 951.63   | PASS          | AC=6,2;AF=0.086,0.029;AN=70;BaseQ  |
| 13965 | chrY | 10042577 | . | A | T   | 43958.52 | PASS          | AC=34;AF=0.500;AN=68;BaseQ         |
| 13966 | chrY | 10042583 | . | C | G   | 3962.25  | PASS          | AC=8;AF=0.174;AN=46;BaseQRankSum   |
| 13967 | chrY | 10042584 | . | T | A   | 282.42   | my_snp_filter | AC=3;AF=0.045;AN=66;BaseQ          |
| 13968 | chrY | 10042598 | . | C | T   | 2196.90  | PASS          | AC=3;AF=0.058;AN=52;BaseQRankSum   |
| 13969 | chrY | 10042599 | . | T | G,A | 2706.89  | PASS          | AC=3,2;AF=0.058,0.038;AN=52;BaseQ  |
| 13970 | chrY | 10042608 | . | T | A   | 276.11   | my_snp_filter | AC=2;AF=0.029;AN=70;BaseQ          |
| 13971 | chrY | 10042609 | . | A | C   | 26860.04 | PASS          | AC=32;AF=0.485;AN=66;BaseQ         |
| 13972 | chrY | 10042614 | . | T | C   | 369.55   | PASS          | AC=2;AF=0.029;AN=70;BaseQRankSum   |
| 13973 | chrY | 10042616 | . | A | G   | 6233.83  | PASS          | AC=22;AF=0.314;AN=70;BaseQRankSum  |
| 13974 | chrY | 10042621 | . | T | C   | 99.18    | my_snp_filter | AC=1;AF=0.014;AN=70;BaseQ          |
| 13975 | chrY | 10042622 | . | G | C   | 239.28   | my_snp_filter | AC=2;AF=0.029;AN=70;BaseQ          |
| 13976 | chrY | 10042630 | . | T | C,* | 3097.10  | PASS          | AC=4,3;AF=0.111,0.083;AN=36;BaseQ  |
| 13977 | chrY | 10042638 | . | G | T   | 92.67    | my_snp_filter | AC=2;AF=0.029;AN=70;BaseQ          |
| 13978 | chrY | 10042645 | . | C | T   | 460.05   | PASS          | AC=3;AF=0.043;AN=70;BaseQRankSum   |
| 13979 | chrY | 10042654 | . | G | T   | 424.13   | PASS          | AC=3;AF=0.043;AN=70;BaseQRankSum   |
| 13980 | chrY | 10042658 | . | G | T   | 411.92   | PASS          | AC=3;AF=0.043;AN=70;BaseQRankSum   |
| 13981 | chrY | 10042659 | . | A | G   | 457.89   | PASS          | AC=4;AF=0.057;AN=70;BaseQRankSum   |
| 13982 | chrY | 10042668 | . | G | A   | 212.19   | PASS          | AC=1;AF=0.015;AN=68;BaseQRankSum   |
| 13983 | chrY | 10042685 | . | T | G,* | 8351.29  | PASS          | AC=11,1;AF=0.393,0.036;AN=28;BaseQ |
| 13984 | chrY | 10042713 | . | A | T,G | 10438.79 | PASS          | AC=8,2;AF=0.308,0.077;AN=28        |



|       |      |          |   |   |     |           |               |                                   |
|-------|------|----------|---|---|-----|-----------|---------------|-----------------------------------|
| 13985 | chrY | 10042724 | . | T | A   | 3058.79   | PASS          | AC=5;AF=0.071;AN=70;BaseQRankSum= |
| 13986 | chrY | 10042731 | . | C | T   | 236.71    | PASS          | AC=1;AF=0.014;AN=70;BaseQRankSum= |
| 13987 | chrY | 10042735 | . | G | A   | 2519.62   | PASS          | AC=4;AF=0.065;AN=62;BaseQRankSum= |
| 13988 | chrY | 10042736 | . | T | G   | 5445.37   | PASS          | AC=9;AF=0.375;AN=24;BaseQRankSum= |
| 13989 | chrY | 10042752 | . | A | C,* | 786.92    | PASS          | AC=3,3;AF=0.075,0.075;AN=40;BaseQ |
| 13990 | chrY | 10042757 | . | C | T,* | 539.88    | PASS          | AC=2,4;AF=0.029,0.057;AN=70;BaseQ |
| 13991 | chrY | 10042761 | . | G | A,* | 1658.30   | PASS          | AC=8,3;AF=0.250,0.094;AN=32;BaseQ |
| 13992 | chrY | 10042763 | . | A | G,* | 797.55    | PASS          | AC=2,3;AF=0.029,0.043;AN=70;BaseQ |
| 13993 | chrY | 10042790 | . | G | T,* | 1153.26   | PASS          | AC=4,4;AF=0.133,0.133;AN=30;BaseQ |
| 13994 | chrY | 10042797 | . | G | C,* | 519.05    | PASS          | AC=1,4;AF=0.014,0.057;AN=70;BaseQ |
| 13995 | chrY | 10042924 | . | C | T,* | 436.36    | PASS          | AC=2,1;AF=0.143,0.071;AN=14;BaseQ |
| 13996 | chrY | 10042975 | . | A | G   | 11479.05  | PASS          | AC=8;AF=0.667;AN=12;BaseQ         |
| 13997 | chrY | 10042978 | . | T | C   | 69.27     | PASS          | AC=3;AF=0.054;AN=56;BaseQRankSum= |
| 13998 | chrY | 10042981 | . | A | G   | 308.87    | my_snp_filter | AC=3;AF=0.060;AN=50;BaseQ         |
| 13999 | chrY | 10042994 | . | G | T   | 4674.35   | PASS          | AC=4;AF=0.077;AN=52;BaseQRankSum= |
| 14000 | chrY | 10042997 | . | C | A   | 1949.43   | PASS          | AC=3;AF=0.052;AN=58;BaseQRankSum= |
| 14001 | chrY | 10043007 | . | G | C   | 304.30    | my_snp_filter | AC=4;AF=0.071;AN=56;BaseQ         |
| 14002 | chrY | 10043014 | . | G | C,T | 11572.52  | PASS          | AC=11,3;AF=0.423,0.115;AN         |
| 14003 | chrY | 10043015 | . | A | T   | 768.32    | PASS          | AC=1;AF=0.021;AN=48;BaseQRankSum= |
| 14004 | chrY | 10043017 | . | T | C   | 490.02    | my_snp_filter | AC=1;AF=0.018;AN=56;BaseQ         |
| 14005 | chrY | 10043025 | . | C | G   | 120.58    | PASS          | AC=4;AF=0.071;AN=56;BaseQRankSum= |
| 14006 | chrY | 10043026 | . | A | G   | 92.13     | my_snp_filter | AC=1;AF=0.018;AN=56;BaseQ         |
| 14007 | chrY | 10043028 | . | T | A   | 1149.60   | PASS          | AC=5;AF=0.086;AN=58;BaseQRankSum= |
| 14008 | chrY | 10043030 | . | C | A   | 619.74    | my_snp_filter | AC=5;AF=0.096;AN=52;BaseQ         |
| 14009 | chrY | 10043037 | . | A | G   | 395.58    | my_snp_filter | AC=2;AF=0.033;AN=60;BaseQ         |
| 14010 | chrY | 10043040 | . | A | T   | 1446.82   | PASS          | AC=3;AF=0.050;AN=60;BaseQRankSum= |
| 14011 | chrY | 10043047 | . | A | G   | 44.09     | PASS          | AC=1;AF=0.016;AN=62;BaseQRankSum= |
| 14012 | chrY | 10043058 | . | G | T   | 39.38     | my_snp_filter | AC=1;AF=0.016;AN=62;BaseQ         |
| 14013 | chrY | 10043060 | . | G | T   | 118.02    | my_snp_filter | AC=4;AF=0.065;AN=62;BaseQ         |
| 14014 | chrY | 10043064 | . | C | T   | 879.57    | PASS          | AC=2;AF=0.033;AN=60;BaseQRankSum= |
| 14015 | chrY | 10043066 | . | A | T   | 3566.23   | PASS          | AC=9;AF=0.161;AN=56;BaseQRankSum= |
| 14016 | chrY | 10043071 | . | G | A   | 6311.23   | PASS          | AC=7;AF=0.117;AN=60;BaseQRankSum= |
| 14017 | chrY | 10043077 | . | C | T   | 65011.43  | PASS          | AC=29;AF=0.659;AN=44;BaseQ        |
| 14018 | chrY | 10043081 | . | G | A   | 90.89     | PASS          | AC=2;AF=0.033;AN=60;DP=8497;FS=0. |
| 14019 | chrY | 10043084 | . | A | T   | 6241.61   | PASS          | AC=8;AF=0.138;AN=58;BaseQRankSum= |
| 14020 | chrY | 10043091 | . | A | C   | 79.20     | my_snp_filter | AC=1;AF=0.016;AN=62;BaseQ         |
| 14021 | chrY | 10043094 | . | T | G   | 10283.20  | PASS          | AC=9;AF=0.150;AN=60;BaseQ         |
| 14022 | chrY | 10043100 | . | C | T   | 10298.41  | PASS          | AC=7;AF=0.130;AN=54;BaseQ         |
| 14023 | chrY | 10043110 | . | A | T   | 14171.38  | PASS          | AC=8;AF=0.138;AN=58;BaseQ         |
| 14024 | chrY | 10043119 | . | A | T   | 587.17    | my_snp_filter | AC=5;AF=0.093;AN=54;BaseQ         |
| 14025 | chrY | 10043122 | . | T | C   | 4717.80   | PASS          | AC=6;AF=0.103;AN=58;BaseQRankSum= |
| 14026 | chrY | 10043124 | . | T | G   | 2305.53   | my_snp_filter | AC=9;AF=0.167;AN=54;BaseQ         |
| 14027 | chrY | 10043130 | . | A | G   | 48.94     | PASS          | AC=2;AF=0.036;AN=56;DP=8157;FS=0. |
| 14028 | chrY | 10043134 | . | C | A   | 42802.96  | PASS          | AC=8;AF=0.182;AN=44;BaseQ         |
| 14029 | chrY | 10043147 | . | G | A   | 9859.12   | PASS          | AC=7;AF=0.140;AN=50;BaseQRankSum= |
| 14030 | chrY | 10043148 | . | T | C   | 105929.52 | PASS          | AC=15;AF=0.750;AN=20;BaseQ        |
| 14031 | chrY | 10043151 | . | T | C   | 2199.07   | my_snp_filter | AC=5;AF=0.093;AN=54;BaseQ         |
| 14032 | chrY | 10043154 | . | T | C   | 9833.15   | PASS          | AC=7;AF=0.135;AN=52;BaseQRankSum= |
| 14033 | chrY | 10043156 | . | C | T   | 115455.88 | PASS          | AC=19;AF=0.950;AN=20;BaseQ        |
| 14034 | chrY | 10043163 | . | G | A   | 4944.45   | PASS          | AC=6;AF=0.115;AN=52;BaseQRankSum= |
| 14035 | chrY | 10043165 | . | T | A   | 32153.46  | PASS          | AC=9;AF=0.180;AN=50;BaseQ         |
| 14036 | chrY | 10043170 | . | C | G   | 14937.72  | PASS          | AC=7;AF=0.152;AN=46;BaseQ         |
| 14037 | chrY | 10043182 | . | T | G   | 3215.99   | PASS          | AC=4;AF=0.083;AN=48;BaseQRankSum= |
| 14038 | chrY | 10043193 | . | G | A   | 19782.56  | PASS          | AC=10;AF=0.263;AN=38;BaseQ        |
| 14039 | chrY | 10043207 | . | G | A,C | 5813.33   | PASS          | AC=6,2;AF=0.130,0.043;AN=46;BaseQ |
| 14040 | chrY | 10043210 | . | A | G   | 95350.52  | PASS          | AC=20;AF=1.00;AN=20;BaseQ         |
| 14041 | chrY | 10043220 | . | A | G   | 7708.73   | PASS          | AC=5;AF=0.104;AN=48;BaseQRankSum= |
| 14042 | chrY | 10043223 | . | G | T   | 7779.80   | PASS          | AC=6;AF=0.125;AN=48;BaseQRankSum= |
| 14043 | chrY | 10043230 | . | G | A   | 3834.80   | my_snp_filter | AC=7;AF=0.159;AN=44;BaseQ         |
| 14044 | chrY | 10043231 | . | A | G   | 89913.78  | PASS          | AC=20;AF=0.909;AN=22;BaseQ        |
| 14045 | chrY | 10043236 | . | C | G   | 4582.25   | PASS          | AC=5;AF=0.109;AN=46;BaseQRankSum= |
| 14046 | chrY | 10043238 | . | T | A   | 7613.71   | PASS          | AC=6;AF=0.130;AN=46;BaseQRankSum= |
| 14047 | chrY | 10043243 | . | G | T   | 4594.85   | PASS          | AC=5;AF=0.109;AN=46;BaseQRankSum= |
| 14048 | chrY | 10043269 | . | C | T   | 1400.57   | my_snp_filter | AC=4;AF=0.080;AN=50;BaseQ         |
| 14049 | chrY | 10043272 | . | A | T   | 22663.05  | PASS          | AC=12;AF=0.273;AN=44;BaseQ        |
| 14050 | chrY | 10043279 | . | C | T   | 7036.68   | PASS          | AC=9;AF=0.188;AN=48;BaseQRankSum= |
| 14051 | chrY | 10043289 | . | A | G   | 5111.76   | my_snp_filter | AC=8;AF=0.190;AN=42;BaseQ         |
| 14052 | chrY | 10043294 | . | C | T   | 44908.95  | PASS          | AC=14;AF=0.389;AN=36;BaseQ        |
| 14053 | chrY | 10043295 | . | T | C   | 2587.24   | my_snp_filter | AC=5;AF=0.119;AN=42;BaseQ         |
| 14054 | chrY | 10043301 | . | A | T   | 13399.08  | PASS          | AC=8;AF=0.190;AN=42;BaseQ         |
| 14055 | chrY | 10043304 | . | T | A   | 13235.18  | PASS          | AC=8;AF=0.190;AN=42;BaseQ         |
| 14056 | chrY | 10043305 | . | C | A   | 261.99    | PASS          | AC=1;AF=0.024;AN=42;BaseQRankSum= |
| 14057 | chrY | 10043311 | . | G | T   | 614.13    | my_snp_filter | AC=3;AF=0.071;AN=42;BaseQ         |
| 14058 | chrY | 10043313 | . | T | C   | 635.37    | my_snp_filter | AC=3;AF=0.079;AN=38;BaseQ         |
| 14059 | chrY | 10043315 | . | T | C   | 2304.37   | PASS          | AC=3;AF=0.083;AN=36;BaseQRankSum= |
| 14060 | chrY | 10043318 | . | T | G   | 60209.39  | PASS          | AC=9;AF=0.346;AN=26;BaseQ         |

|       |      |          |   |   |     |          |               |                                    |
|-------|------|----------|---|---|-----|----------|---------------|------------------------------------|
| 14061 | chrY | 10043332 | . | G | T   | 40917.48 | PASS          | AC=9;AF=0.300;AN=30;BaseQ          |
| 14062 | chrY | 10043356 | . | G | A   | 412.52   | my_snp_filter | AC=2;AF=0.056;AN=36;BaseQ          |
| 14063 | chrY | 10043357 | . | G | T,C | 38358.37 | PASS          | AC=8,3;AF=0.222,0.083;AN=          |
| 14064 | chrY | 10043360 | . | A | T   | 70800.01 | PASS          | AC=11;AF=0.344;AN=32;Base          |
| 14065 | chrY | 10043362 | . | C | T   | 70194.45 | PASS          | AC=11;AF=0.344;AN=32;Base          |
| 14066 | chrY | 10043363 | . | A | G   | 57149.04 | PASS          | AC=9;AF=0.265;AN=34;BaseQ          |
| 14067 | chrY | 10043368 | . | C | T   | 3947     | PASS          | AC=7;AF=0.152;AN=46;BaseQRankSum=  |
| 14068 | chrY | 10043369 | . | C | G   | 4058.12  | PASS          | AC=8;AF=0.167;AN=48;BaseQRankSum=  |
| 14069 | chrY | 10043382 | . | A | C   | 5249.96  | PASS          | AC=9;AF=0.180;AN=50;BaseQRankSum=  |
| 14070 | chrY | 10043385 | . | C | A   | 133.52   | my_snp_filter | AC=3;AF=0.068;AN=44;BaseQ          |
| 14071 | chrY | 10043390 | . | T | A   | 77791.41 | PASS          | AC=11;AF=0.289;AN=38;BaseQ         |
| 14072 | chrY | 10043396 | . | T | C   | 640.53   | my_snp_filter | AC=4;AF=0.071;AN=56;BaseQ          |
| 14073 | chrY | 10043397 | . | A | G   | 104.54   | my_snp_filter | AC=1;AF=0.019;AN=54;BaseQ          |
| 14074 | chrY | 10043398 | . | T | A   | 9674.06  | PASS          | AC=8;AF=0.148;AN=54;BaseQRankSum=  |
| 14075 | chrY | 10043405 | . | C | T   | 64007.20 | PASS          | AC=9;AF=0.167;AN=54;BaseQ          |
| 14076 | chrY | 10043406 | . | A | G   | 85187.50 | PASS          | AC=12;AF=0.222;AN=54;BaseQ         |
| 14077 | chrY | 10043413 | . | A | G   | 84100.07 | PASS          | AC=9;AF=0.161;AN=56;BaseQ          |
| 14078 | chrY | 10043415 | . | A | C,T | 78174.53 | PASS          | AC=10,4;AF=0.227,0.091;AN=         |
| 14079 | chrY | 10043419 | . | G | T,C | 52990.73 | PASS          | AC=1,8;AF=0.016,0.129;AN=          |
| 14080 | chrY | 10043420 | . | C | G,A | 72255.44 | PASS          | AC=9,7;AF=0.150,0.117;AN=          |
| 14081 | chrY | 10043437 | . | T | C   | 546      | my_snp_filter | AC=2;AF=0.029;AN=70;BaseQ          |
| 14082 | chrY | 10043444 | . | A | T   | 75.87    | my_snp_filter | AC=1;AF=0.017;AN=58;BaseQ          |
| 14083 | chrY | 10043483 | . | C | T   | 2106.61  | PASS          | AC=5;AF=0.071;AN=70;BaseQRankSum=  |
| 14084 | chrY | 10043484 | . | A | G   | 43230.90 | PASS          | AC=15;AF=0.214;AN=70;BaseQ         |
| 14085 | chrY | 10043489 | . | C | A   | 5733.34  | PASS          | AC=9;AF=0.129;AN=70;BaseQRankSum=  |
| 14086 | chrY | 10043495 | . | C | T   | 38414.93 | PASS          | AC=11;AF=0.157;AN=70;BaseQ         |
| 14087 | chrY | 10043496 | . | C | A   | 15545.25 | PASS          | AC=6;AF=0.086;AN=70;BaseQ          |
| 14088 | chrY | 10043498 | . | C | T   | 4490.79  | PASS          | AC=7;AF=0.100;AN=70;BaseQRankSum=  |
| 14089 | chrY | 10043505 | . | T | C   | 7271.43  | PASS          | AC=9;AF=0.161;AN=56;BaseQRankSum=  |
| 14090 | chrY | 10043509 | . | A | T   | 13471.02 | PASS          | AC=5;AF=0.071;AN=70;BaseQ          |
| 14091 | chrY | 10043512 | . | T | C   | 41276.53 | PASS          | AC=10;AF=0.143;AN=70;BaseQ         |
| 14092 | chrY | 10043517 | . | T | G   | 22888.42 | PASS          | AC=5;AF=0.071;AN=70;BaseQ          |
| 14093 | chrY | 10043519 | . | T | A   | 1969.30  | PASS          | AC=5;AF=0.071;AN=70;BaseQRankSum=  |
| 14094 | chrY | 10043520 | . | G | T   | 13672.91 | PASS          | AC=10;AF=0.185;AN=54;BaseQ         |
| 14095 | chrY | 10043524 | . | G | A   | 15810.18 | PASS          | AC=9;AF=0.129;AN=70;BaseQ          |
| 14096 | chrY | 10043528 | . | A | G   | 201.66   | PASS          | AC=1;AF=0.014;AN=70;BaseQRankSum=  |
| 14097 | chrY | 10043530 | . | C | T   | 58160.05 | PASS          | AC=12;AF=0.222;AN=54;BaseQ         |
| 14098 | chrY | 10043535 | . | A | T   | 28327.66 | PASS          | AC=5;AF=0.071;AN=70;BaseQ          |
| 14099 | chrY | 10043538 | . | C | T   | 135.57   | my_snp_filter | AC=1;AF=0.014;AN=70;BaseQ          |
| 14100 | chrY | 10043539 | . | A | T   | 2715.90  | PASS          | AC=6;AF=0.086;AN=70;BaseQRankSum=  |
| 14101 | chrY | 10043540 | . | A | G   | 51474.02 | PASS          | AC=11;AF=0.196;AN=56;BaseQ         |
| 14102 | chrY | 10043542 | . | C | G   | 7313.53  | PASS          | AC=7;AF=0.135;AN=52;BaseQRankSum=  |
| 14103 | chrY | 10043546 | . | A | T   | 48894.12 | PASS          | AC=12;AF=0.231;AN=52;BaseQ         |
| 14104 | chrY | 10043548 | . | A | G   | 47804.60 | PASS          | AC=12;AF=0.222;AN=54;BaseQ         |
| 14105 | chrY | 10043551 | . | G | A   | 1493     | PASS          | AC=6;AF=0.097;AN=62;BaseQRankSum=  |
| 14106 | chrY | 10043557 | . | C | G   | 23912.90 | PASS          | AC=9;AF=0.129;AN=70;BaseQ          |
| 14107 | chrY | 10043558 | . | C | T   | 23648.91 | PASS          | AC=9;AF=0.129;AN=70;BaseQ          |
| 14108 | chrY | 10043559 | . | A | T   | 6336.99  | PASS          | AC=9;AF=0.129;AN=70;BaseQRankSum=  |
| 14109 | chrY | 10043560 | . | G | A   | 6255.93  | PASS          | AC=9;AF=0.129;AN=70;BaseQRankSum=  |
| 14110 | chrY | 10043562 | . | G | A   | 3111.09  | PASS          | AC=6;AF=0.086;AN=70;BaseQRankSum=  |
| 14111 | chrY | 10043572 | . | A | T,C | 24528.16 | PASS          | AC=4,8;AF=0.077,0.154;AN=          |
| 14112 | chrY | 10043573 | . | G | A   | 7482.37  | PASS          | AC=9;AF=0.129;AN=70;BaseQRankSum=  |
| 14113 | chrY | 10043576 | . | T | C,* | 8712.43  | PASS          | AC=6,3;AF=0.086,0.043;AN=70;BaseQ  |
| 14114 | chrY | 10043577 | . | G | A,* | 8475.16  | PASS          | AC=6,3;AF=0.086,0.043;AN=70;BaseQ  |
| 14115 | chrY | 10043578 | . | G | A   | 2664.01  | PASS          | AC=7;AF=0.100;AN=70;BaseQRankSum=  |
| 14116 | chrY | 10043585 | . | G | A   | 254.12   | my_snp_filter | AC=2;AF=0.029;AN=70;BaseQ          |
| 14117 | chrY | 10043587 | . | T | C   | 27939.26 | PASS          | AC=9;AF=0.129;AN=70;BaseQ          |
| 14118 | chrY | 10043592 | . | G | T   | 6675.82  | PASS          | AC=9;AF=0.129;AN=70;BaseQRankSum=  |
| 14119 | chrY | 10043596 | . | A | G   | 3426.62  | PASS          | AC=2;AF=0.029;AN=70;BaseQRankSum=  |
| 14120 | chrY | 10043597 | . | A | C   | 20213.35 | PASS          | AC=9;AF=0.129;AN=70;BaseQ          |
| 14121 | chrY | 10043600 | . | G | A   | 1583.91  | PASS          | AC=2;AF=0.029;AN=70;BaseQRankSum=  |
| 14122 | chrY | 10043608 | . | A | C   | 35404.62 | PASS          | AC=20;AF=0.323;AN=62;BaseQ         |
| 14123 | chrY | 10043613 | . | C | T   | 334.47   | PASS          | AC=1;AF=0.014;AN=70;BaseQRankSum=  |
| 14124 | chrY | 10043625 | . | A | T   | 621.76   | PASS          | AC=1;AF=0.014;AN=70;BaseQRankSum=  |
| 14125 | chrY | 10043626 | . | C | G   | 210.13   | my_snp_filter | AC=1;AF=0.014;AN=70;BaseQ          |
| 14126 | chrY | 10043632 | . | C | A   | 180.23   | my_snp_filter | AC=1;AF=0.014;AN=70;BaseQ          |
| 14127 | chrY | 10043634 | . | T | C   | 112.36   | PASS          | AC=5;AF=0.071;AN=70;BaseQRankSum=  |
| 14128 | chrY | 10043644 | . | C | T   | 1142.40  | my_snp_filter | AC=4;AF=0.057;AN=70;BaseQ          |
| 14129 | chrY | 10043658 | . | A | G   | 79794.98 | PASS          | AC=27;AF=0.435;AN=62;BaseQ         |
| 14130 | chrY | 10043665 | . | C | A   | 23705.59 | PASS          | AC=15;AF=0.214;AN=70;BaseQ         |
| 14131 | chrY | 10043670 | . | C | G   | 4518.66  | PASS          | AC=8;AF=0.114;AN=70;BaseQRankSum=  |
| 14132 | chrY | 10043672 | . | C | G   | 21948.54 | PASS          | AC=15;AF=0.214;AN=70;BaseQ         |
| 14133 | chrY | 10043682 | . | T | C   | 79535.88 | PASS          | AC=24;AF=0.429;AN=56;BaseQ         |
| 14134 | chrY | 10043684 | . | T | C   | 1869.60  | PASS          | AC=6;AF=0.091;AN=66;BaseQRankSum=  |
| 14135 | chrY | 10043685 | . | T | G   | 9524.65  | PASS          | AC=13;AF=0.191;AN=68;BaseQRankSum= |
| 14136 | chrY | 10043688 | . | A | T   | 83442.59 | PASS          | AC=19;AF=0.317;AN=60;BaseQ         |

|       |      |          |   |   |     |           |               |                                    |
|-------|------|----------|---|---|-----|-----------|---------------|------------------------------------|
| 14137 | chrY | 10043694 | . | T | C   | 1722.47   | my_snp_filter | AC=5;AF=0.076;AN=66;BaseQ          |
| 14138 | chrY | 10043695 | . | T | G   | 3233.06   | PASS          | AC=9;AF=0.136;AN=66;BaseQRankSum=  |
| 14139 | chrY | 10043705 | . | G | T   | 40.26     | PASS          | AC=1;AF=0.015;AN=66;BaseQRankSum=  |
| 14140 | chrY | 10043706 | . | G | T   | 26791.10  | PASS          | AC=15;AF=0.250;AN=60;BaseQ         |
| 14141 | chrY | 10043712 | . | A | G   | 8878.88   | PASS          | AC=9;AF=0.132;AN=68;BaseQRankSum=  |
| 14142 | chrY | 10043715 | . | C | T,A | 474.85    | PASS          | AC=2,3;AF=0.029,0.044;AN=68;BaseQ  |
| 14143 | chrY | 10043721 | . | T | A   | 118.44    | PASS          | AC=3;AF=0.045;AN=66;BaseQRankSum=  |
| 14144 | chrY | 10043729 | . | G | T   | 1595.70   | my_snp_filter | AC=6;AF=0.091;AN=66;BaseQ          |
| 14145 | chrY | 10043741 | . | T | C   | 1823.48   | my_snp_filter | AC=3;AF=0.045;AN=66;BaseQ          |
| 14146 | chrY | 10043748 | . | C | A   | 564.25    | my_snp_filter | AC=1;AF=0.015;AN=66;BaseQ          |
| 14147 | chrY | 10043757 | . | G | A   | 47.77     | PASS          | AC=2;AF=0.030;AN=66;DP=6984;FS=0.  |
| 14148 | chrY | 10043758 | . | T | C   | 99210.01  | PASS          | AC=23;AF=0.500;AN=46;BaseQ         |
| 14149 | chrY | 10043762 | . | T | C   | 539.93    | my_snp_filter | AC=1;AF=0.016;AN=62;BaseQ          |
| 14150 | chrY | 10043766 | . | G | A   | 511.06    | my_snp_filter | AC=1;AF=0.016;AN=62;BaseQ          |
| 14151 | chrY | 10043772 | . | T | C   | 9977.96   | PASS          | AC=11;AF=0.183;AN=60;BaseQRankSum= |
| 14152 | chrY | 10043775 | . | A | T   | 12346.47  | PASS          | AC=14;AF=0.233;AN=60;BaseQ         |
| 14153 | chrY | 10043780 | . | C | T   | 47.27     | PASS          | AC=2;AF=0.030;AN=66;DP=6306;FS=0.  |
| 14154 | chrY | 10043794 | . | T | A   | 86.71     | PASS          | AC=3;AF=0.052;AN=58;BaseQRankSum=  |
| 14155 | chrY | 10043799 | . | T | A,C | 125111.25 | PASS          | AC=29,5;AF=0.763,0.132;AN=         |
| 14156 | chrY | 10043804 | . | G | A   | 101.62    | PASS          | AC=2;AF=0.032;AN=62;BaseQRankSum=  |
| 14157 | chrY | 10043819 | . | C | A   | 201.57    | my_snp_filter | AC=1;AF=0.017;AN=58;BaseQ          |
| 14158 | chrY | 10043828 | . | C | G   | 134115.37 | PASS          | AC=22;AF=0.647;AN=34;BaseQ         |
| 14159 | chrY | 10043838 | . | A | G   | 2370.62   | my_snp_filter | AC=8;AF=0.154;AN=52;BaseQ          |
| 14160 | chrY | 10043849 | . | T | C   | 532.28    | my_snp_filter | AC=3;AF=0.058;AN=52;BaseQ          |
| 14161 | chrY | 10043855 | . | C | T   | 15247.87  | PASS          | AC=10;AF=0.217;AN=46;BaseQ         |
| 14162 | chrY | 10043857 | . | C | T   | 81450.65  | PASS          | AC=14;AF=0.368;AN=38;BaseQ         |
| 14163 | chrY | 10043863 | . | T | G   | 159.72    | PASS          | AC=2;AF=0.042;AN=48;BaseQRankSum=  |
| 14164 | chrY | 10043867 | . | T | G   | 43.94     | my_snp_filter | AC=1;AF=0.021;AN=48;BaseQ          |
| 14165 | chrY | 10043869 | . | A | G   | 1329.65   | my_snp_filter | AC=5;AF=0.104;AN=48;BaseQ          |
| 14166 | chrY | 10043870 | . | G | A,T | 8427.09   | PASS          | AC=9,1;AF=0.205,0.023;AN=44;BaseQ  |
| 14167 | chrY | 10043871 | . | C | A   | 1984.03   | my_snp_filter | AC=5;AF=0.104;AN=48;BaseQ          |
| 14168 | chrY | 10043878 | . | G | T   | 6321.12   | PASS          | AC=11;AF=0.229;AN=48;BaseQRankSum= |
| 14169 | chrY | 10043882 | . | T | C   | 87841.03  | PASS          | AC=16;AF=0.444;AN=36;BaseQ         |
| 14170 | chrY | 10043896 | . | A | G   | 21556.30  | PASS          | AC=11;AF=0.220;AN=50;BaseQ         |
| 14171 | chrY | 10043909 | . | A | G   | 8340.83   | PASS          | AC=8;AF=0.138;AN=58;BaseQRankSum=  |
| 14172 | chrY | 10043915 | . | G | A   | 110.13    | PASS          | AC=1;AF=0.018;AN=56;BaseQRankSum=  |
| 14173 | chrY | 10043919 | . | C | T   | 22470.72  | PASS          | AC=9;AF=0.173;AN=52;BaseQ          |
| 14174 | chrY | 10043920 | . | A | G   | 22391.64  | PASS          | AC=10;AF=0.208;AN=48;BaseQ         |
| 14175 | chrY | 10043928 | . | G | T   | 7575.22   | PASS          | AC=7;AF=0.125;AN=56;BaseQRankSum=  |
| 14176 | chrY | 10043948 | . | T | G   | 38.11     | PASS          | AC=1;AF=0.016;AN=64;BaseQRankSum=  |
| 14177 | chrY | 10043960 | . | A | G   | 2785.92   | PASS          | AC=6;AF=0.094;AN=64;BaseQRankSum=  |
| 14178 | chrY | 10043962 | . | A | C   | 6593.78   | PASS          | AC=6;AF=0.103;AN=58;BaseQRankSum=  |
| 14179 | chrY | 10043966 | . | A | T   | 6692.23   | PASS          | AC=6;AF=0.094;AN=64;BaseQRankSum=  |
| 14180 | chrY | 10043983 | . | G | T   | 2288.01   | PASS          | AC=5;AF=0.071;AN=70;BaseQRankSum=  |
| 14181 | chrY | 10043984 | . | A | C   | 2266.03   | PASS          | AC=5;AF=0.071;AN=70;BaseQRankSum=  |
| 14182 | chrY | 10043994 | . | G | A   | 6731.92   | PASS          | AC=8;AF=0.114;AN=70;BaseQRankSum=  |
| 14183 | chrY | 10044000 | . | T | C   | 1392.89   | PASS          | AC=4;AF=0.057;AN=70;BaseQRankSum=  |
| 14184 | chrY | 10044001 | . | G | A   | 1392.91   | PASS          | AC=4;AF=0.057;AN=70;BaseQRankSum=  |
| 14185 | chrY | 10044006 | . | T | C   | 1184.78   | PASS          | AC=3;AF=0.043;AN=70;BaseQRankSum=  |
| 14186 | chrY | 10044014 | . | A | C   | 5869.71   | PASS          | AC=8;AF=0.114;AN=70;BaseQRankSum=  |
| 14187 | chrY | 10044026 | . | A | C,T | 22139.98  | PASS          | AC=8,1;AF=0.121,0.015;AN=          |
| 14188 | chrY | 10044027 | . | G | A   | 21851.86  | PASS          | AC=8;AF=0.121;AN=66;BaseQ          |
| 14189 | chrY | 10044036 | . | A | T   | 6245.57   | PASS          | AC=9;AF=0.129;AN=70;BaseQRankSum=  |
| 14190 | chrY | 10044046 | . | T | C   | 5603.55   | PASS          | AC=9;AF=0.129;AN=70;BaseQRankSum=  |
| 14191 | chrY | 10044047 | . | A | G   | 36230.04  | PASS          | AC=10;AF=0.147;AN=68;BaseQ         |
| 14192 | chrY | 10044052 | . | T | C   | 36107.25  | PASS          | AC=10;AF=0.147;AN=68;BaseQ         |
| 14193 | chrY | 10044053 | . | A | T   | 21969.48  | PASS          | AC=10;AF=0.147;AN=68;BaseQ         |
| 14194 | chrY | 10044055 | . | A | T   | 36226.90  | PASS          | AC=10;AF=0.143;AN=70;BaseQ         |
| 14195 | chrY | 10044061 | . | C | T   | 10705.46  | PASS          | AC=9;AF=0.129;AN=70;BaseQ          |
| 14196 | chrY | 10044062 | . | A | G   | 10711.44  | PASS          | AC=9;AF=0.129;AN=70;BaseQ          |
| 14197 | chrY | 10044069 | . | C | A   | 22811.08  | PASS          | AC=10;AF=0.147;AN=68;BaseQ         |
| 14198 | chrY | 10044070 | . | C | A   | 22748.87  | PASS          | AC=10;AF=0.147;AN=68;BaseQ         |
| 14199 | chrY | 10044071 | . | A | G   | 11218.19  | PASS          | AC=9;AF=0.129;AN=70;BaseQ          |
| 14200 | chrY | 10044078 | . | T | G   | 11208.19  | PASS          | AC=9;AF=0.129;AN=70;BaseQ          |
| 14201 | chrY | 10044079 | . | A | G   | 11214.59  | PASS          | AC=9;AF=0.129;AN=70;BaseQ          |
| 14202 | chrY | 10044086 | . | A | G   | 36495.66  | PASS          | AC=10;AF=0.143;AN=70;BaseQ         |
| 14203 | chrY | 10044088 | . | G | A   | 6550.38   | PASS          | AC=9;AF=0.129;AN=70;BaseQRankSum=  |
| 14204 | chrY | 10044090 | . | A | G   | 11339.16  | PASS          | AC=9;AF=0.129;AN=70;BaseQ          |
| 14205 | chrY | 10044095 | . | T | G   | 10982.12  | PASS          | AC=9;AF=0.129;AN=70;BaseQ          |
| 14206 | chrY | 10044099 | . | T | C   | 36028.25  | PASS          | AC=10;AF=0.143;AN=70;BaseQ         |
| 14207 | chrY | 10044118 | . | C | G   | 3408.04   | PASS          | AC=7;AF=0.100;AN=70;BaseQRankSum=  |
| 14208 | chrY | 10044122 | . | T | C   | 4648.79   | PASS          | AC=9;AF=0.132;AN=68;BaseQRankSum=  |
| 14209 | chrY | 10044134 | . | T | G   | 12305.68  | PASS          | AC=9;AF=0.129;AN=70;BaseQ          |
| 14210 | chrY | 10044173 | . | C | A   | 25413.59  | PASS          | AC=15;AF=0.227;AN=66;BaseQ         |
| 14211 | chrY | 10044180 | . | C | T   | 18141.05  | PASS          | AC=10;AF=0.147;AN=68;BaseQ         |
| 14212 | chrY | 10044194 | . | C | G,A | 4659.25   | PASS          | AC=5,8;AF=0.074,0.118;AN=68;BaseQ  |

|       |      |          |   |   |     |          |               |                                    |
|-------|------|----------|---|---|-----|----------|---------------|------------------------------------|
| 14213 | chrY | 10044207 | . | G | T   | 6784.32  | PASS          | AC=13;AF=0.232;AN=56;BaseQRankSum= |
| 14214 | chrY | 10044216 | . | T | C   | 185.40   | PASS          | AC=2;AF=0.029;AN=70;BaseQRankSum=  |
| 14215 | chrY | 10044224 | . | G | A   | 169.84   | PASS          | AC=2;AF=0.029;AN=70;BaseQRankSum=  |
| 14216 | chrY | 10044232 | . | G | C,* | 6612.40  | PASS          | AC=1,6;AF=0.014,0.086;AN=70;BaseQ  |
| 14217 | chrY | 10044235 | . | G | C,* | 6612.55  | PASS          | AC=1,6;AF=0.014,0.086;AN=70;BaseQ  |
| 14218 | chrY | 10044243 | . | A | T,* | 7066.23  | PASS          | AC=12,5;AF=0.171,0.071;AN=70;BaseQ |
| 14219 | chrY | 10044256 | . | G | C,* | 5376.09  | PASS          | AC=1,5;AF=0.014,0.071;AN=70;BaseQ  |
| 14220 | chrY | 10044262 | . | C | T,* | 4933.51  | PASS          | AC=1,5;AF=0.014,0.071;AN=70;BaseQ  |
| 14221 | chrY | 10044263 | . | G | A,* | 5720.87  | PASS          | AC=1,5;AF=0.014,0.071;AN=70;BaseQ  |
| 14222 | chrY | 10044272 | . | A | C,* | 4978.28  | PASS          | AC=1,5;AF=0.014,0.071;AN=70;BaseQ  |
| 14223 | chrY | 10044274 | . | G | A,* | 4973.76  | PASS          | AC=1,5;AF=0.014,0.071;AN=70;BaseQ  |
| 14224 | chrY | 10044280 | . | A | T,* | 4897.93  | PASS          | AC=1,5;AF=0.014,0.071;AN=70;BaseQ  |
| 14225 | chrY | 10044286 | . | T | G,* | 7701.36  | PASS          | AC=7,5;AF=0.117,0.083;AN=60;BaseQ  |
| 14226 | chrY | 10044291 | . | G | A,* | 7469     | PASS          | AC=6,5;AF=0.091,0.076;AN=66;BaseQ  |
| 14227 | chrY | 10044311 | . | T | C,* | 8359.53  | PASS          | AC=8,5;AF=0.129,0.081;AN=62;BaseQ  |
| 14228 | chrY | 10044315 | . | T | A,* | 8365.52  | PASS          | AC=6,5;AF=0.097,0.081;AN=62;BaseQ  |
| 14229 | chrY | 10044317 | . | T | C,* | 5884.22  | PASS          | AC=3,5;AF=0.048,0.081;AN=62;BaseQ  |
| 14230 | chrY | 10044338 | . | C | T,* | 7466.26  | PASS          | AC=2,5;AF=0.031,0.078;AN=64;BaseQ  |
| 14231 | chrY | 10044352 | . | T | C,* | 5185.61  | PASS          | AC=3,5;AF=0.044,0.074;AN=68;BaseQ  |
| 14232 | chrY | 10044353 | . | C | G,* | 5413.38  | PASS          | AC=1,5;AF=0.015,0.074;AN=68;BaseQ  |
| 14233 | chrY | 10044358 | . | G | A,* | 8551.95  | PASS          | AC=4,5;AF=0.067,0.083;AN=60;BaseQ  |
| 14234 | chrY | 10044375 | . | C | G,* | 7749.86  | PASS          | AC=2,5;AF=0.031,0.078;AN=64;BaseQ  |
| 14235 | chrY | 10044381 | . | A | G,* | 6675.56  | PASS          | AC=3,5;AF=0.048,0.081;AN=62;BaseQ  |
| 14236 | chrY | 10044386 | . | T | G,* | 5674.45  | PASS          | AC=3,5;AF=0.044,0.074;AN=68;BaseQ  |
| 14237 | chrY | 10044388 | . | G | A,* | 5688.30  | PASS          | AC=3,5;AF=0.044,0.074;AN=68;BaseQ  |
| 14238 | chrY | 10044391 | . | A | G,* | 7924.59  | PASS          | AC=4,5;AF=0.061,0.076;AN=66;BaseQ  |
| 14239 | chrY | 10044408 | . | A | G   | 1086.71  | PASS          | AC=3;AF=0.044;AN=68;BaseQRankSum=  |
| 14240 | chrY | 10044428 | . | G | T   | 31.41    | PASS          | AC=1;AF=0.015;AN=68;BaseQRankSum=  |
| 14241 | chrY | 10044430 | . | G | A   | 1391.92  | PASS          | AC=3;AF=0.044;AN=68;BaseQRankSum=  |
| 14242 | chrY | 10044433 | . | A | G   | 13386.72 | PASS          | AC=22;AF=0.379;AN=58;BaseQ         |
| 14243 | chrY | 10044438 | . | A | G   | 1556.23  | PASS          | AC=3;AF=0.043;AN=70;BaseQRankSum=  |
| 14244 | chrY | 10044442 | . | T | C   | 14274.69 | PASS          | AC=23;AF=0.383;AN=60;BaseQ         |
| 14245 | chrY | 10044447 | . | G | A   | 5644.24  | PASS          | AC=13;AF=0.210;AN=62;BaseQRankSum= |
| 14246 | chrY | 10044454 | . | A | C   | 158.93   | PASS          | AC=4;AF=0.063;AN=64;BaseQRankSum=  |
| 14247 | chrY | 10044459 | . | T | C   | 1667.29  | PASS          | AC=3;AF=0.043;AN=70;BaseQRankSum=  |
| 14248 | chrY | 10044466 | . | C | T,A | 1942.96  | PASS          | AC=3,3;AF=0.088,0.088;AN=34;BaseQ  |
| 14249 | chrY | 10044467 | . | C | A   | 1683.86  | PASS          | AC=8;AF=0.143;AN=56;BaseQRankSum=  |
| 14250 | chrY | 10044469 | . | C | A,T | 4044.93  | PASS          | AC=8,6;AF=0.174,0.130;AN=46;BaseQ  |
| 14251 | chrY | 10044476 | . | T | C   | 39.44    | PASS          | AC=1;AF=0.014;AN=70;BaseQRankSum=  |
| 14252 | chrY | 10044477 | . | A | T   | 39.73    | PASS          | AC=1;AF=0.014;AN=70;BaseQRankSum=  |
| 14253 | chrY | 10044501 | . | C | T   | 49.42    | my_snp_filter | AC=1;AF=0.014;AN=70;BaseQ          |
| 14254 | chrY | 10044511 | . | T | C   | 55.99    | my_snp_filter | AC=2;AF=0.029;AN=70;BaseQ          |
| 14255 | chrY | 10044525 | . | A | G   | 103.34   | PASS          | AC=1;AF=0.015;AN=66;BaseQRankSum=  |
| 14256 | chrY | 10044526 | . | C | T   | 6471.22  | PASS          | AC=13;AF=0.310;AN=42;BaseQRankSum= |
| 14257 | chrY | 10044527 | . | G | A   | 11797.87 | PASS          | AC=14;AF=0.333;AN=42;BaseQ         |
| 14258 | chrY | 10044537 | . | C | T   | 1272.50  | PASS          | AC=7;AF=0.100;AN=70;BaseQRankSum=  |
| 14259 | chrY | 10044548 | . | T | C   | 1018.45  | PASS          | AC=2;AF=0.029;AN=70;BaseQRankSum=  |
| 14260 | chrY | 10044550 | . | G | A   | 2467.39  | PASS          | AC=6;AF=0.086;AN=70;BaseQRankSum=  |
| 14261 | chrY | 10044555 | . | G | A   | 3993.57  | PASS          | AC=11;AF=0.157;AN=70;BaseQRankSum= |
| 14262 | chrY | 10044567 | . | C | T   | 63685.35 | PASS          | AC=25;AF=0.595;AN=42;BaseQ         |
| 14263 | chrY | 10044580 | . | T | A   | 4601.51  | PASS          | AC=16;AF=0.229;AN=70;BaseQRankSum= |
| 14264 | chrY | 10044581 | . | C | A   | 1698.14  | PASS          | AC=4;AF=0.057;AN=70;BaseQRankSum=  |
| 14265 | chrY | 10044588 | . | G | T   | 9094.43  | PASS          | AC=16;AF=0.229;AN=70;BaseQRankSum= |
| 14266 | chrY | 10044594 | . | T | A   | 32020.83 | PASS          | AC=21;AF=0.300;AN=70;BaseQ         |
| 14267 | chrY | 10044601 | . | G | T   | 38360.39 | PASS          | AC=23;AF=0.338;AN=68;BaseQ         |
| 14268 | chrY | 10044602 | . | C | T   | 24426.38 | PASS          | AC=21;AF=0.309;AN=68;BaseQ         |
| 14269 | chrY | 10044610 | . | G | T   | 7211.23  | PASS          | AC=18;AF=0.257;AN=70;BaseQRankSum= |
| 14270 | chrY | 10044612 | . | C | T   | 583.95   | my_snp_filter | AC=8;AF=0.114;AN=70;BaseQ          |
| 14271 | chrY | 10044613 | . | C | T   | 55.07    | my_snp_filter | AC=2;AF=0.029;AN=70;BaseQ          |
| 14272 | chrY | 10044614 | . | T | A   | 17888.66 | PASS          | AC=23;AF=0.329;AN=70;BaseQ         |
| 14273 | chrY | 10044616 | . | G | T   | 74781.56 | PASS          | AC=25;AF=0.500;AN=50;BaseQ         |
| 14274 | chrY | 10044617 | . | G | A   | 49.07    | my_snp_filter | AC=2;AF=0.029;AN=70;BaseQ          |
| 14275 | chrY | 10044618 | . | G | T   | 1070.39  | PASS          | AC=3;AF=0.043;AN=70;BaseQRankSum=  |
| 14276 | chrY | 10044620 | . | G | T   | 32722.78 | PASS          | AC=23;AF=0.338;AN=68;BaseQ         |
| 14277 | chrY | 10044627 | . | G | T   | 1359.05  | PASS          | AC=11;AF=0.157;AN=70;BaseQRankSum= |
| 14278 | chrY | 10044635 | . | T | C   | 1027.21  | PASS          | AC=3;AF=0.043;AN=70;BaseQRankSum=  |
| 14279 | chrY | 10044637 | . | C | T   | 63.33    | PASS          | AC=2;AF=0.029;AN=70;BaseQRankSum=  |
| 14280 | chrY | 10044639 | . | T | C   | 55041.90 | PASS          | AC=27;AF=0.540;AN=50;BaseQ         |
| 14281 | chrY | 10044648 | . | T | G   | 8363.48  | PASS          | AC=16;AF=0.229;AN=70;BaseQRankSum= |
| 14282 | chrY | 10044649 | . | A | G   | 5204.56  | PASS          | AC=11;AF=0.157;AN=70;BaseQRankSum= |
| 14283 | chrY | 10044650 | . | A | G   | 5671.48  | PASS          | AC=14;AF=0.200;AN=70;BaseQRankSum= |
| 14284 | chrY | 10044662 | . | C | T,G | 10159.36 | PASS          | AC=10,11;AF=0.143,0.157;AN=        |
| 14285 | chrY | 10044669 | . | A | G   | 1171.16  | PASS          | AC=5;AF=0.071;AN=70;BaseQRankSum=  |
| 14286 | chrY | 10044680 | . | A | G   | 25760.69 | PASS          | AC=27;AF=0.386;AN=70;BaseQ         |
| 14287 | chrY | 10044682 | . | T | G,A | 62190.20 | PASS          | AC=30,2;AF=0.500,0.033;AN=         |
| 14288 | chrY | 10044684 | . | A | G   | 63048.78 | PASS          | AC=31;AF=0.517;AN=60;BaseQ         |

|       |      |          |   |   |     |          |               |                                    |
|-------|------|----------|---|---|-----|----------|---------------|------------------------------------|
| 14289 | chrY | 10044686 | . | G | A   | 1612.96  | PASS          | AC=4;AF=0.057;AN=70;BaseQRankSum=  |
| 14290 | chrY | 10044687 | . | C | A   | 29242.61 | PASS          | AC=27;AF=0.409;AN=66;BaseQ         |
| 14291 | chrY | 10044702 | . | G | T   | 1672.84  | PASS          | AC=7;AF=0.100;AN=70;BaseQRankSum=  |
| 14292 | chrY | 10044708 | . | C | A   | 1285.59  | my_snp_filter | AC=6;AF=0.088;AN=68;BaseQ          |
| 14293 | chrY | 10044710 | . | T | A   | 27131.39 | PASS          | AC=27;AF=0.397;AN=68;BaseQ         |
| 14294 | chrY | 10044711 | . | T | G   | 293.53   | my_snp_filter | AC=3;AF=0.044;AN=68;BaseQ          |
| 14295 | chrY | 10044714 | . | C | T   | 265.79   | my_snp_filter | AC=3;AF=0.044;AN=68;BaseQ          |
| 14296 | chrY | 10044718 | . | G | A   | 38347.47 | PASS          | AC=27;AF=0.450;AN=60;BaseQ         |
| 14297 | chrY | 10044722 | . | A | G   | 51854.21 | PASS          | AC=29;AF=0.483;AN=60;BaseQ         |
| 14298 | chrY | 10044723 | . | A | T   | 382.83   | my_snp_filter | AC=4;AF=0.063;AN=64;BaseQ          |
| 14299 | chrY | 10044725 | . | C | A   | 27660.15 | PASS          | AC=27;AF=0.422;AN=64;BaseQ         |
| 14300 | chrY | 10044728 | . | G | A   | 19336.10 | PASS          | AC=19;AF=0.328;AN=58;BaseQ         |
| 14301 | chrY | 10044735 | . | G | A   | 31556.72 | PASS          | AC=23;AF=0.371;AN=62;BaseQ         |
| 14302 | chrY | 10044736 | . | C | T   | 27468.34 | PASS          | AC=21;AF=0.339;AN=62;BaseQ         |
| 14303 | chrY | 10044740 | . | G | T   | 51112.58 | PASS          | AC=22;AF=0.367;AN=60;BaseQ         |
| 14304 | chrY | 10044748 | . | C | G   | 52.54    | my_snp_filter | AC=2;AF=0.029;AN=68;BaseQ          |
| 14305 | chrY | 10044751 | . | T | C   | 47864.76 | PASS          | AC=22;AF=0.367;AN=60;BaseQ         |
| 14306 | chrY | 10044755 | . | C | A   | 2802.14  | PASS          | AC=12;AF=0.171;AN=70;BaseQRankSum= |
| 14307 | chrY | 10044769 | . | G | C   | 28373.80 | PASS          | AC=21;AF=0.328;AN=64;BaseQ         |
| 14308 | chrY | 10044770 | . | A | T   | 30631.87 | PASS          | AC=21;AF=0.328;AN=64;BaseQ         |
| 14309 | chrY | 10044771 | . | G | T   | 964      | my_snp_filter | AC=6;AF=0.088;AN=68;BaseQ          |
| 14310 | chrY | 10044772 | . | C | T   | 3429.17  | PASS          | AC=10;AF=0.147;AN=68;BaseQRankSum= |
| 14311 | chrY | 10044773 | . | C | G,T | 38299.12 | PASS          | AC=9,20;AF=0.150,0.333;AN=         |
| 14312 | chrY | 10044783 | . | C | T   | 10140.80 | PASS          | AC=13;AF=0.186;AN=70;BaseQ         |
| 14313 | chrY | 10044784 | . | T | A   | 28537.34 | PASS          | AC=21;AF=0.300;AN=70;BaseQ         |
| 14314 | chrY | 10044796 | . | G | T   | 623.96   | my_snp_filter | AC=5;AF=0.071;AN=70;BaseQ          |
| 14315 | chrY | 10044818 | . | T | C   | 3449.90  | PASS          | AC=11;AF=0.157;AN=70;BaseQRankSum= |
| 14316 | chrY | 10044822 | . | T | C   | 15711.34 | PASS          | AC=21;AF=0.300;AN=70;BaseQ         |
| 14317 | chrY | 10044823 | . | G | A   | 8476.18  | PASS          | AC=14;AF=0.200;AN=70;BaseQRankSum= |
| 14318 | chrY | 10044824 | . | G | A   | 448.84   | my_snp_filter | AC=8;AF=0.114;AN=70;BaseQ          |
| 14319 | chrY | 10044836 | . | G | A   | 44556.46 | PASS          | AC=28;AF=0.400;AN=70;BaseQ         |
| 14320 | chrY | 10044843 | . | T | C   | 63204.11 | PASS          | AC=31;AF=0.443;AN=70;BaseQ         |
| 14321 | chrY | 10044846 | . | G | T   | 65128.18 | PASS          | AC=31;AF=0.443;AN=70;BaseQ         |
| 14322 | chrY | 10044847 | . | G | C   | 6809.34  | PASS          | AC=22;AF=0.314;AN=70;BaseQRankSum= |
| 14323 | chrY | 10044850 | . | A | T   | 539.97   | my_snp_filter | AC=8;AF=0.114;AN=70;BaseQ          |
| 14324 | chrY | 10044851 | . | C | A   | 729.61   | my_snp_filter | AC=10;AF=0.143;AN=70;BaseQ         |
| 14325 | chrY | 10044852 | . | G | A   | 7088.85  | PASS          | AC=22;AF=0.314;AN=70;BaseQRankSum= |
| 14326 | chrY | 10044857 | . | T | C   | 68565.68 | PASS          | AC=31;AF=0.443;AN=70;BaseQ         |
| 14327 | chrY | 10044871 | . | A | T   | 8119.25  | PASS          | AC=22;AF=0.314;AN=70;BaseQRankSum= |
| 14328 | chrY | 10044874 | . | C | T   | 73687.06 | PASS          | AC=31;AF=0.443;AN=70;BaseQ         |
| 14329 | chrY | 10044882 | . | T | G   | 246.54   | my_snp_filter | AC=3;AF=0.043;AN=70;BaseQ          |
| 14330 | chrY | 10044883 | . | C | A   | 149.90   | PASS          | AC=3;AF=0.043;AN=70;BaseQRankSum=  |
| 14331 | chrY | 10044890 | . | T | C   | 9825.71  | PASS          | AC=18;AF=0.257;AN=70;BaseQRankSum= |
| 14332 | chrY | 10044892 | . | A | G   | 35152.70 | PASS          | AC=27;AF=0.386;AN=70;BaseQ         |
| 14333 | chrY | 10044912 | . | T | A   | 1379.83  | my_snp_filter | AC=10;AF=0.143;AN=70;BaseQ         |
| 14334 | chrY | 10044919 | . | A | G,C | 9441.32  | PASS          | AC=8,13;AF=0.114,0.186;AN=70;BaseQ |
| 14335 | chrY | 10044930 | . | G | T   | 1820.65  | my_snp_filter | AC=12;AF=0.171;AN=70;BaseQ         |
| 14336 | chrY | 10044939 | . | G | T   | 580.88   | PASS          | AC=4;AF=0.057;AN=70;BaseQRankSum=  |
| 14337 | chrY | 10044942 | . | G | C   | 50417.15 | PASS          | AC=30;AF=0.441;AN=68;BaseQ         |
| 14338 | chrY | 10044948 | . | G | T   | 16984.77 | PASS          | AC=20;AF=0.286;AN=70;BaseQ         |
| 14339 | chrY | 10044957 | . | G | T   | 1616.92  | my_snp_filter | AC=13;AF=0.191;AN=68;BaseQ         |
| 14340 | chrY | 10044963 | . | G | A   | 1205.36  | PASS          | AC=4;AF=0.061;AN=66;BaseQRankSum=  |
| 14341 | chrY | 10044982 | . | A | T   | 597.23   | PASS          | AC=3;AF=0.047;AN=64;BaseQRankSum=  |
| 14342 | chrY | 10044987 | . | C | T   | 52.22    | my_snp_filter | AC=2;AF=0.031;AN=64;BaseQ          |
| 14343 | chrY | 10044990 | . | C | A   | 576.26   | PASS          | AC=3;AF=0.050;AN=60;BaseQRankSum=  |
| 14344 | chrY | 10044992 | . | C | T   | 595.05   | PASS          | AC=3;AF=0.052;AN=58;BaseQRankSum=  |
| 14345 | chrY | 10045006 | . | G | A   | 76.15    | my_snp_filter | AC=2;AF=0.037;AN=54;BaseQ          |
| 14346 | chrY | 10045010 | . | C | G   | 133.82   | PASS          | AC=4;AF=0.083;AN=48;BaseQRankSum=  |
| 14347 | chrY | 10045011 | . | T | C   | 271.91   | PASS          | AC=3;AF=0.060;AN=50;BaseQRankSum=  |
| 14348 | chrY | 10045023 | . | G | T   | 141.23   | my_snp_filter | AC=3;AF=0.065;AN=46;BaseQ          |
| 14349 | chrY | 10045029 | . | A | G   | 35.29    | my_snp_filter | AC=2;AF=0.071;AN=28;BaseQ          |
| 14350 | chrY | 10045062 | . | C | A   | 4555.68  | PASS          | AC=10;AF=0.278;AN=36;BaseQRankSum= |
| 14351 | chrY | 10045064 | . | C | G   | 139.80   | PASS          | AC=1;AF=0.026;AN=38;BaseQRankSum=  |
| 14352 | chrY | 10045068 | . | C | A   | 138.02   | PASS          | AC=1;AF=0.025;AN=40;BaseQRankSum=  |
| 14353 | chrY | 10045077 | . | T | C   | 230.69   | my_snp_filter | AC=3;AF=0.079;AN=38;BaseQ          |
| 14354 | chrY | 10045105 | . | G | A   | 9981.70  | PASS          | AC=9;AF=0.346;AN=26;BaseQRankSum=  |
| 14355 | chrY | 10045107 | . | A | G   | 86.93    | PASS          | AC=1;AF=0.042;AN=24;BaseQRankSum=  |
| 14356 | chrY | 10045109 | . | T | C   | 287.65   | PASS          | AC=3;AF=0.100;AN=30;BaseQRankSum=  |
| 14357 | chrY | 10045114 | . | C | G,* | 882.02   | PASS          | AC=3,4;AF=0.125,0.167;AN=24;BaseQ  |
| 14358 | chrY | 10045115 | . | A | G,* | 890.63   | PASS          | AC=3,4;AF=0.136,0.182;AN=22;BaseQ  |
| 14359 | chrY | 10045116 | . | C | T   | 9957.82  | PASS          | AC=9;AF=0.450;AN=20;BaseQRankSum=  |
| 14360 | chrY | 10045119 | . | C | A,T | 2634.61  | PASS          | AC=7,2;AF=0.269,0.077;AN=26;BaseQ  |
| 14361 | chrY | 10045126 | . | C | T   | 1004.88  | PASS          | AC=7;AF=0.292;AN=24;BaseQRankSum=  |
| 14362 | chrY | 10045131 | . | C | A   | 5006.85  | PASS          | AC=9;AF=0.321;AN=28;BaseQRankSum=  |
| 14363 | chrY | 10045134 | . | T | A   | 182.85   | my_snp_filter | AC=2;AF=0.067;AN=30;BaseQ          |
| 14364 | chrY | 10045165 | . | A | G   | 263.97   | PASS          | AC=3;AF=0.094;AN=32;BaseQRankSum=  |

|       |      |          |   |   |     |          |               |                                    |
|-------|------|----------|---|---|-----|----------|---------------|------------------------------------|
| 14365 | chrY | 10045176 | . | A | G   | 7118.81  | PASS          | AC=10;AF=0.357;AN=28;BaseQRankSum= |
| 14366 | chrY | 10045179 | . | C | T   | 244.28   | my_snp_filter | AC=4;AF=0.154;AN=26;BaseQ          |
| 14367 | chrY | 10045180 | . | G | T,A | 3111.06  | PASS          | AC=5,7;AF=0.192,0.269;AN=26;BaseQ  |
| 14368 | chrY | 10045181 | . | C | T   | 45.50    | PASS          | AC=1;AF=0.038;AN=26;BaseQRankSum=  |
| 14369 | chrY | 10045182 | . | T | A   | 5586.40  | PASS          | AC=9;AF=0.321;AN=28;BaseQRankSum=  |
| 14370 | chrY | 10045188 | . | G | A   | 677.59   | PASS          | AC=8;AF=0.333;AN=24;BaseQRankSum=  |
| 14371 | chrY | 10045194 | . | G | A   | 2172.81  | PASS          | AC=8;AF=0.308;AN=26;BaseQRankSum=  |
| 14372 | chrY | 10045204 | . | G | C   | 3557.76  | PASS          | AC=9;AF=0.346;AN=26;BaseQRankSum=  |
| 14373 | chrY | 10045206 | . | A | C   | 44.71    | my_snp_filter | AC=1;AF=0.038;AN=26;BaseQ          |
| 14374 | chrY | 10045220 | . | A | C   | 283.30   | my_snp_filter | AC=4;AF=0.154;AN=26;BaseQ          |
| 14375 | chrY | 10045238 | . | T | A   | 379.68   | PASS          | AC=3;AF=0.115;AN=26;BaseQRankSum=  |
| 14376 | chrY | 10045243 | . | T | G   | 858.34   | PASS          | AC=5;AF=0.250;AN=20;BaseQRankSum=  |
| 14377 | chrY | 10045598 | . | G | A   | 103.75   | PASS          | AC=2;AF=0.029;AN=68;BaseQRankSum=  |
| 14378 | chrY | 10045601 | . | T | C   | 112.09   | PASS          | AC=3;AF=0.044;AN=68;BaseQRankSum=  |
| 14379 | chrY | 10045603 | . | T | G   | 110.68   | PASS          | AC=3;AF=0.044;AN=68;BaseQRankSum=  |
| 14380 | chrY | 10045625 | . | A | G   | 77.61    | my_snp_filter | AC=2;AF=0.029;AN=68;BaseQ          |
| 14381 | chrY | 10045629 | . | T | A   | 82.70    | my_snp_filter | AC=2;AF=0.029;AN=70;BaseQ          |
| 14382 | chrY | 10045644 | . | C | T   | 72.70    | PASS          | AC=1;AF=0.014;AN=70;BaseQRankSum=  |
| 14383 | chrY | 10045655 | . | C | A   | 7812.46  | PASS          | AC=50;AF=0.735;AN=68;BaseQRankSum= |
| 14384 | chrY | 10047184 | . | T | C   | 673.31   | PASS          | AC=6;AF=0.300;AN=20;BaseQRankSum=  |
| 14385 | chrY | 10047782 | . | T | C   | 112.86   | PASS          | AC=2;AF=0.037;AN=54;BaseQRankSum=  |
| 14386 | chrY | 10047804 | . | A | C   | 482.48   | PASS          | AC=3;AF=0.056;AN=54;BaseQRankSum=  |
| 14387 | chrY | 10047828 | . | A | C   | 886.81   | PASS          | AC=6;AF=0.094;AN=64;BaseQRankSum=  |
| 14388 | chrY | 10047855 | . | A | C   | 5953.35  | PASS          | AC=24;AF=0.343;AN=70;BaseQRankSum= |
| 14389 | chrY | 10047859 | . | C | A   | 5905.20  | PASS          | AC=24;AF=0.343;AN=70;BaseQRankSum= |
| 14390 | chrY | 10047865 | . | T | C   | 194.35   | my_snp_filter | AC=4;AF=0.057;AN=70;BaseQ          |
| 14391 | chrY | 10047900 | . | T | C   | 3293.41  | PASS          | AC=22;AF=0.333;AN=66;BaseQRankSum= |
| 14392 | chrY | 10047902 | . | T | C   | 1499.02  | PASS          | AC=6;AF=0.091;AN=66;BaseQRankSum=  |
| 14393 | chrY | 10047935 | . | C | A   | 3513.32  | my_snp_filter | AC=12;AF=0.171;AN=70;Base          |
| 14394 | chrY | 10047939 | . | C | T   | 1376.61  | PASS          | AC=11;AF=0.157;AN=70;BaseQRankSum= |
| 14395 | chrY | 10047940 | . | G | A   | 1302.71  | PASS          | AC=6;AF=0.086;AN=70;BaseQRankSum=  |
| 14396 | chrY | 10047948 | . | G | A   | 2861.80  | my_snp_filter | AC=8;AF=0.121;AN=66;BaseQ          |
| 14397 | chrY | 10047953 | . | T | A   | 2571.06  | my_snp_filter | AC=8;AF=0.114;AN=70;BaseQ          |
| 14398 | chrY | 10047968 | . | T | C   | 1020.15  | PASS          | AC=5;AF=0.071;AN=70;BaseQRankSum=  |
| 14399 | chrY | 10047990 | . | T | C   | 609.68   | PASS          | AC=3;AF=0.043;AN=70;BaseQRankSum=  |
| 14400 | chrY | 10048013 | . | A | C   | 253.07   | PASS          | AC=4;AF=0.057;AN=70;BaseQRankSum=  |
| 14401 | chrY | 10048027 | . | A | G   | 380.23   | PASS          | AC=3;AF=0.043;AN=70;BaseQRankSum=  |
| 14402 | chrY | 10048037 | . | A | C   | 433.46   | PASS          | AC=4;AF=0.057;AN=70;BaseQRankSum=  |
| 14403 | chrY | 10048073 | . | G | A   | 3473.36  | my_snp_filter | AC=13;AF=0.191;AN=68;Base          |
| 14404 | chrY | 10048079 | . | T | C   | 3959.13  | my_snp_filter | AC=12;AF=0.176;AN=68;Base          |
| 14405 | chrY | 10048088 | . | C | T   | 119.89   | PASS          | AC=1;AF=0.014;AN=70;BaseQRankSum=  |
| 14406 | chrY | 10048099 | . | T | A   | 258.77   | PASS          | AC=2;AF=0.029;AN=70;BaseQRankSum=  |
| 14407 | chrY | 10048101 | . | G | A,C | 499.88   | PASS          | AC=2,1;AF=0.029,0.014;AN=70;BaseQ  |
| 14408 | chrY | 10048110 | . | C | T   | 256.01   | PASS          | AC=2;AF=0.029;AN=70;BaseQRankSum=  |
| 14409 | chrY | 10048111 | . | C | T   | 6591.59  | PASS          | AC=13;AF=0.191;AN=68;BaseQRankSum= |
| 14410 | chrY | 10048115 | . | G | A   | 237.63   | PASS          | AC=1;AF=0.014;AN=70;BaseQRankSum=  |
| 14411 | chrY | 10048119 | . | C | T   | 7050.32  | PASS          | AC=12;AF=0.176;AN=68;BaseQRankSum= |
| 14412 | chrY | 10048125 | . | A | G,* | 425.92   | PASS          | AC=1,2;AF=0.014,0.029;AN=70;BaseQ  |
| 14413 | chrY | 10048130 | . | T | G   | 9001.47  | PASS          | AC=12;AF=0.182;AN=66;BaseQRankSum= |
| 14414 | chrY | 10048145 | . | A | C   | 105.98   | PASS          | AC=2;AF=0.029;AN=70;BaseQRankSum=  |
| 14415 | chrY | 10048146 | . | G | T   | 384.86   | PASS          | AC=1;AF=0.014;AN=70;BaseQRankSum=  |
| 14416 | chrY | 10048149 | . | G | T,A | 10260.94 | PASS          | AC=2,10;AF=0.030,0.152;AN=         |
| 14417 | chrY | 10048154 | . | C | T   | 49.29    | PASS          | AC=1;AF=0.014;AN=70;BaseQRankSum=  |
| 14418 | chrY | 10048163 | . | T | C   | 10881.79 | PASS          | AC=10;AF=0.147;AN=68;Base          |
| 14419 | chrY | 10048164 | . | G | C   | 10882.95 | PASS          | AC=10;AF=0.147;AN=68;Base          |
| 14420 | chrY | 10048177 | . | G | T   | 719.49   | PASS          | AC=1;AF=0.014;AN=70;BaseQRankSum=  |
| 14421 | chrY | 10048183 | . | A | G   | 724.46   | PASS          | AC=1;AF=0.014;AN=70;BaseQRankSum=  |
| 14422 | chrY | 10048192 | . | G | A   | 9612.15  | PASS          | AC=12;AF=0.182;AN=66;BaseQRankSum= |
| 14423 | chrY | 10048207 | . | C | T   | 803.22   | PASS          | AC=1;AF=0.015;AN=68;BaseQRankSum=  |
| 14424 | chrY | 10048208 | . | A | G   | 803.23   | PASS          | AC=1;AF=0.015;AN=68;BaseQRankSum=  |
| 14425 | chrY | 10048212 | . | A | G   | 800.59   | PASS          | AC=1;AF=0.015;AN=68;BaseQRankSum=  |
| 14426 | chrY | 10048239 | . | G | T   | 88.50    | PASS          | AC=3;AF=0.045;AN=66;BaseQRankSum=  |
| 14427 | chrY | 10048257 | . | C | T   | 9107.78  | PASS          | AC=17;AF=0.266;AN=64;BaseQRankSum= |
| 14428 | chrY | 10048266 | . | C | T   | 279.74   | PASS          | AC=3;AF=0.047;AN=64;BaseQRankSum=  |
| 14429 | chrY | 10048267 | . | G | A   | 10069.72 | PASS          | AC=15;AF=0.234;AN=64;Base          |
| 14430 | chrY | 10048269 | . | T | C   | 10128.90 | PASS          | AC=14;AF=0.200;AN=70;Base          |
| 14431 | chrY | 10048270 | . | G | T   | 10379.67 | PASS          | AC=16;AF=0.229;AN=70;Base          |
| 14432 | chrY | 10048283 | . | T | C   | 11881.84 | PASS          | AC=18;AF=0.273;AN=66;Base          |
| 14433 | chrY | 10048284 | . | G | A   | 12043.84 | PASS          | AC=18;AF=0.273;AN=66;Base          |
| 14434 | chrY | 10048304 | . | C | A   | 14741.91 | PASS          | AC=18;AF=0.273;AN=66;Base          |
| 14435 | chrY | 10048318 | . | C | T   | 8924.48  | PASS          | AC=10;AF=0.143;AN=70;BaseQRankSum= |
| 14436 | chrY | 10048329 | . | T | C   | 9628.81  | PASS          | AC=10;AF=0.143;AN=70;BaseQRankSum= |
| 14437 | chrY | 10048331 | . | G | A   | 9724.84  | PASS          | AC=10;AF=0.143;AN=70;BaseQRankSum= |
| 14438 | chrY | 10048340 | . | A | G   | 10079.10 | PASS          | AC=10;AF=0.143;AN=70;Base          |
| 14439 | chrY | 10048351 | . | C | G   | 14189.43 | PASS          | AC=34;AF=0.486;AN=70;Base          |
| 14440 | chrY | 10048362 | . | G | A   | 9882.74  | PASS          | AC=9;AF=0.129;AN=70;BaseQRankSum=  |

|       |      |          |   |   |     |          |               |                                    |
|-------|------|----------|---|---|-----|----------|---------------|------------------------------------|
| 14441 | chrY | 10048369 | . | G | A   | 10293.40 | PASS          | AC=9;AF=0.129;AN=70;BaseQ          |
| 14442 | chrY | 10048379 | . | A | C   | 28561.89 | PASS          | AC=32;AF=0.457;AN=70;Base          |
| 14443 | chrY | 10048389 | . | T | G   | 10938.76 | PASS          | AC=9;AF=0.129;AN=70;BaseQ          |
| 14444 | chrY | 10048399 | . | C | T,A | 14720.11 | PASS          | AC=19,9;AF=0.271,0.129;AN          |
| 14445 | chrY | 10048426 | . | A | T   | 26735.36 | PASS          | AC=23;AF=0.348;AN=66;Base          |
| 14446 | chrY | 10048445 | . | C | T   | 15714.16 | PASS          | AC=17;AF=0.283;AN=60;Base          |
| 14447 | chrY | 10048453 | . | T | C   | 7517.63  | PASS          | AC=9;AF=0.145;AN=62;BaseQRankSum=  |
| 14448 | chrY | 10048484 | . | A | G   | 7279.34  | PASS          | AC=9;AF=0.214;AN=42;BaseQRankSum=  |
| 14449 | chrY | 10048496 | . | C | T   | 1919.53  | PASS          | AC=5;AF=0.114;AN=44;BaseQRankSum=  |
| 14450 | chrY | 10048497 | . | C | T   | 1916.53  | PASS          | AC=5;AF=0.114;AN=44;BaseQRankSum=  |
| 14451 | chrY | 10048498 | . | A | G   | 1898.53  | PASS          | AC=5;AF=0.114;AN=44;BaseQRankSum=  |
| 14452 | chrY | 10048500 | . | A | G   | 1826.54  | PASS          | AC=5;AF=0.114;AN=44;BaseQRankSum=  |
| 14453 | chrY | 10048503 | . | A | G   | 27022.19 | PASS          | AC=9;AF=0.265;AN=34;BaseQ          |
| 14454 | chrY | 10048504 | . | C | A,T | 2108.38  | PASS          | AC=4,3;AF=0.105,0.079;AN=38;BaseQ  |
| 14455 | chrY | 10048506 | . | C | G   | 1545.92  | PASS          | AC=5;AF=0.114;AN=44;BaseQRankSum=  |
| 14456 | chrY | 10048514 | . | A | G   | 24754.83 | PASS          | AC=9;AF=0.281;AN=32;BaseQ          |
| 14457 | chrY | 10048519 | . | G | T   | 1348.36  | PASS          | AC=5;AF=0.119;AN=42;BaseQRankSum=  |
| 14458 | chrY | 10048520 | . | G | A,T | 19823.41 | PASS          | AC=9,5;AF=0.300,0.167;AN=          |
| 14459 | chrY | 10048523 | . | A | T,C | 25553.90 | PASS          | AC=9,1;AF=0.300,0.033;AN=          |
| 14460 | chrY | 10048528 | . | C | A   | 1021.38  | PASS          | AC=5;AF=0.132;AN=38;BaseQRankSum=  |
| 14461 | chrY | 10048536 | . | C | T   | 26513.70 | PASS          | AC=9;AF=0.321;AN=28;BaseQ          |
| 14462 | chrY | 10048537 | . | C | G   | 26508.61 | PASS          | AC=9;AF=0.321;AN=28;BaseQ          |
| 14463 | chrY | 10048540 | . | T | G   | 11061.48 | PASS          | AC=9;AF=0.375;AN=24;BaseQ          |
| 14464 | chrY | 10048544 | . | C | T   | 646.80   | my_snp_filter | AC=5;AF=0.167;AN=30;BaseQ          |
| 14465 | chrY | 10048550 | . | T | C   | 415.45   | my_snp_filter | AC=4;AF=0.133;AN=30;BaseQ          |
| 14466 | chrY | 10048551 | . | C | T   | 414.01   | my_snp_filter | AC=4;AF=0.133;AN=30;BaseQ          |
| 14467 | chrY | 10048553 | . | G | A   | 403.95   | my_snp_filter | AC=3;AF=0.100;AN=30;BaseQ          |
| 14468 | chrY | 10048555 | . | G | C   | 400.36   | my_snp_filter | AC=3;AF=0.107;AN=28;BaseQ          |
| 14469 | chrY | 10048556 | . | A | T   | 364.80   | my_snp_filter | AC=3;AF=0.115;AN=26;BaseQ          |
| 14470 | chrY | 10048571 | . | T | C   | 26044.23 | PASS          | AC=9;AF=0.450;AN=20;BaseQ          |
| 14471 | chrY | 10048587 | . | A | T   | 23836.34 | PASS          | AC=9;AF=0.450;AN=20;BaseQ          |
| 14472 | chrY | 10048601 | . | G | C   | 23384.34 | PASS          | AC=9;AF=0.450;AN=20;BaseQ          |
| 14473 | chrY | 10048604 | . | T | A   | 23335.46 | PASS          | AC=11;AF=0.500;AN=22;Base          |
| 14474 | chrY | 10048615 | . | G | T   | 5669.73  | PASS          | AC=9;AF=0.375;AN=24;BaseQRankSum=  |
| 14475 | chrY | 10048662 | . | C | T   | 9687.57  | PASS          | AC=11;AF=0.423;AN=26;BaseQRankSum= |
| 14476 | chrY | 10048672 | . | A | G   | 1445.68  | PASS          | AC=5;AF=0.208;AN=24;BaseQRankSum=  |
| 14477 | chrY | 10048676 | . | G | A   | 1615.09  | PASS          | AC=5;AF=0.192;AN=26;BaseQRankSum=  |
| 14478 | chrY | 10048682 | . | A | C   | 27344.70 | PASS          | AC=11;AF=0.500;AN=22;Base          |
| 14479 | chrY | 10048687 | . | C | T   | 9054.76  | PASS          | AC=9;AF=0.321;AN=28;BaseQRankSum=  |
| 14480 | chrY | 10048692 | . | G | A   | 2081.29  | PASS          | AC=5;AF=0.179;AN=28;BaseQRankSum=  |
| 14481 | chrY | 10048700 | . | C | A   | 2550     | PASS          | AC=6;AF=0.231;AN=26;BaseQRankSum=  |
| 14482 | chrY | 10048724 | . | T | A   | 30843.24 | PASS          | AC=10;AF=0.417;AN=24;Base          |
| 14483 | chrY | 10048727 | . | G | C   | 3941.82  | PASS          | AC=5;AF=0.139;AN=36;BaseQRankSum=  |
| 14484 | chrY | 10048728 | . | A | T   | 3945.82  | PASS          | AC=5;AF=0.139;AN=36;BaseQRankSum=  |
| 14485 | chrY | 10048748 | . | T | C   | 4337.27  | PASS          | AC=5;AF=0.139;AN=36;BaseQRankSum=  |
| 14486 | chrY | 10048759 | . | A | G   | 34470.82 | PASS          | AC=14;AF=0.500;AN=28;Base          |
| 14487 | chrY | 10048777 | . | C | T   | 36278.14 | PASS          | AC=13;AF=0.464;AN=28;Base          |
| 14488 | chrY | 10048788 | . | A | C   | 37222.87 | PASS          | AC=13;AF=0.500;AN=26;Base          |
| 14489 | chrY | 10048793 | . | A | G   | 5121.21  | PASS          | AC=12;AF=0.222;AN=54;BaseQRankSum= |
| 14490 | chrY | 10048795 | . | G | C   | 4896.27  | PASS          | AC=11;AF=0.190;AN=58;BaseQRankSum= |
| 14491 | chrY | 10048797 | . | T | A,G | 29196.43 | PASS          | AC=13,5;AF=0.464,0.179;AN          |
| 14492 | chrY | 10048834 | . | T | G   | 14523.81 | PASS          | AC=18;AF=0.333;AN=54;Base          |
| 14493 | chrY | 10048846 | . | A | G   | 10711.24 | PASS          | AC=22;AF=0.324;AN=68;Base          |
| 14494 | chrY | 10048858 | . | C | T   | 24799.93 | PASS          | AC=24;AF=0.387;AN=62;Base          |
| 14495 | chrY | 10048872 | . | C | T   | 40470.90 | PASS          | AC=24;AF=0.500;AN=48;Base          |
| 14496 | chrY | 10048873 | . | A | G   | 40219.90 | PASS          | AC=24;AF=0.500;AN=48;Base          |
| 14497 | chrY | 10048877 | . | G | A   | 11457.18 | PASS          | AC=17;AF=0.283;AN=60;Base          |
| 14498 | chrY | 10048893 | . | A | C   | 787.25   | PASS          | AC=2;AF=0.029;AN=70;BaseQRankSum=  |
| 14499 | chrY | 10048900 | . | A | G   | 10479.29 | PASS          | AC=16;AF=0.267;AN=60;Base          |
| 14500 | chrY | 10048901 | . | G | C   | 746.10   | PASS          | AC=2;AF=0.029;AN=70;BaseQRankSum=  |
| 14501 | chrY | 10048924 | . | T | G   | 10158.45 | PASS          | AC=23;AF=0.329;AN=70;Base          |
| 14502 | chrY | 10048931 | . | T | C   | 10191.74 | PASS          | AC=22;AF=0.314;AN=70;Base          |
| 14503 | chrY | 10048933 | . | A | T   | 48696.29 | PASS          | AC=30;AF=0.500;AN=60;Base          |
| 14504 | chrY | 10048936 | . | A | G   | 49444.29 | PASS          | AC=30;AF=0.500;AN=60;Base          |
| 14505 | chrY | 10048945 | . | T | C   | 51915.29 | PASS          | AC=30;AF=0.500;AN=60;Base          |
| 14506 | chrY | 10048955 | . | A | T   | 8251.42  | PASS          | AC=25;AF=0.357;AN=70;BaseQRankSum= |
| 14507 | chrY | 10048961 | . | T | C   | 9991.51  | PASS          | AC=22;AF=0.314;AN=70;BaseQRankSum= |
| 14508 | chrY | 10048969 | . | A | G   | 37926.31 | PASS          | AC=28;AF=0.438;AN=64;Base          |
| 14509 | chrY | 10049009 | . | T | C   | 7695.78  | PASS          | AC=25;AF=0.357;AN=70;BaseQRankSum= |
| 14510 | chrY | 10049012 | . | C | A   | 7784.13  | PASS          | AC=25;AF=0.357;AN=70;BaseQRankSum= |
| 14511 | chrY | 10049023 | . | G | C   | 44074.32 | PASS          | AC=36;AF=0.514;AN=70;Base          |
| 14512 | chrY | 10049030 | . | G | A   | 6573.14  | PASS          | AC=22;AF=0.314;AN=70;BaseQRankSum= |
| 14513 | chrY | 10049047 | . | G | C   | 11816.85 | PASS          | AC=33;AF=0.471;AN=70;Base          |
| 14514 | chrY | 10049048 | . | A | G   | 5669.03  | PASS          | AC=19;AF=0.271;AN=70;BaseQRankSum= |
| 14515 | chrY | 10049069 | . | T | A   | 34502.81 | PASS          | AC=35;AF=0.500;AN=70;Base          |
| 14516 | chrY | 10049073 | . | C | T   | 33723.76 | PASS          | AC=35;AF=0.500;AN=70;Base          |

|       |      |          |   |   |     |          |               |                                   |
|-------|------|----------|---|---|-----|----------|---------------|-----------------------------------|
| 14517 | chrY | 10049083 | . | G | C   | 6754.11  | PASS          | AC=31;AF=0.443;AN=70;BaseQRankSum |
| 14518 | chrY | 10049109 | . | T | C   | 4406.83  | PASS          | AC=22;AF=0.314;AN=70;BaseQRankSum |
| 14519 | chrY | 10049120 | . | T | A   | 2694.66  | PASS          | AC=11;AF=0.157;AN=70;BaseQRankSum |
| 14520 | chrY | 10049124 | . | G | C   | 8338.27  | PASS          | AC=18;AF=0.474;AN=38;BaseQRankSum |
| 14521 | chrY | 10049126 | . | C | T   | 8277.01  | my_snp_filter | AC=18;AF=0.409;AN=44;BaseQ        |
| 14522 | chrY | 10049131 | . | T | C,* | 8185.98  | my_snp_filter | AC=15,7;AF=0.300,0.140;AN         |
| 14523 | chrY | 10049142 | . | T | C   | 6202.69  | my_snp_filter | AC=15;AF=0.268;AN=56;BaseQ        |
| 14524 | chrY | 10049144 | . | C | A   | 2597.40  | my_snp_filter | AC=15;AF=0.278;AN=54;BaseQ        |
| 14525 | chrY | 10049147 | . | C | A   | 9249.67  | my_snp_filter | AC=17;AF=0.370;AN=46;BaseQ        |
| 14526 | chrY | 10049178 | . | T | C   | 1291.53  | my_snp_filter | AC=6;AF=0.158;AN=38;BaseQ         |
| 14527 | chrY | 10049188 | . | G | T   | 89.85    | my_snp_filter | AC=2;AF=0.056;AN=36;BaseQ         |
| 14528 | chrY | 10049193 | . | A | G   | 111.72   | my_snp_filter | AC=2;AF=0.059;AN=34;BaseQ         |
| 14529 | chrY | 10049199 | . | G | A   | 965.86   | my_snp_filter | AC=4;AF=0.143;AN=28;BaseQ         |
| 14530 | chrY | 10049200 | . | C | G   | 960.94   | my_snp_filter | AC=4;AF=0.154;AN=26;BaseQ         |
| 14531 | chrY | 10049205 | . | T | A   | 966.80   | my_snp_filter | AC=5;AF=0.192;AN=26;BaseQ         |
| 14532 | chrY | 10049211 | . | G | A   | 7215.64  | my_snp_filter | AC=9;AF=0.409;AN=22;BaseQ         |
| 14533 | chrY | 10049213 | . | C | T   | 441.30   | my_snp_filter | AC=4;AF=0.167;AN=24;BaseQ         |
| 14534 | chrY | 10049218 | . | A | C   | 308.78   | my_snp_filter | AC=3;AF=0.125;AN=24;BaseQ         |
| 14535 | chrY | 10049219 | . | G | A   | 305.78   | my_snp_filter | AC=3;AF=0.125;AN=24;BaseQ         |
| 14536 | chrY | 10049220 | . | A | T   | 302.14   | my_snp_filter | AC=3;AF=0.125;AN=24;BaseQ         |
| 14537 | chrY | 10049222 | . | T | G   | 8054.99  | my_snp_filter | AC=9;AF=0.409;AN=22;BaseQ         |
| 14538 | chrY | 10049226 | . | A | G   | 8660.99  | my_snp_filter | AC=9;AF=0.409;AN=22;BaseQ         |
| 14539 | chrY | 10049227 | . | C | A   | 111.39   | my_snp_filter | AC=2;AF=0.083;AN=24;BaseQ         |
| 14540 | chrY | 10049254 | . | C | T   | 9789.75  | my_snp_filter | AC=9;AF=0.346;AN=26;BaseQ         |
| 14541 | chrY | 10049255 | . | T | G   | 9828.69  | my_snp_filter | AC=9;AF=0.346;AN=26;BaseQ         |
| 14542 | chrY | 10049258 | . | A | T   | 10075.71 | my_snp_filter | AC=9;AF=0.321;AN=                 |
| 14543 | chrY | 10049261 | . | A | G   | 10324.83 | my_snp_filter | AC=9;AF=0.300;AN=                 |
| 14544 | chrY | 10049281 | . | T | A   | 11317.71 | my_snp_filter | AC=10;AF=0.357;AN=                |
| 14545 | chrY | 10049308 | . | G | A   | 11954.17 | PASS          | AC=12;AF=0.333;AN=36;BaseQ        |
| 14546 | chrY | 10049311 | . | A | G   | 2487.65  | PASS          | AC=4;AF=0.091;AN=44;BaseQRankSum= |
| 14547 | chrY | 10049332 | . | A | G   | 3048.18  | PASS          | AC=4;AF=0.074;AN=54;BaseQRankSum= |
| 14548 | chrY | 10049354 | . | A | T   | 3349.65  | PASS          | AC=4;AF=0.071;AN=56;BaseQRankSum= |
| 14549 | chrY | 10049370 | . | G | A   | 19477.74 | PASS          | AC=18;AF=0.333;AN=54;BaseQ        |
| 14550 | chrY | 10049371 | . | G | T   | 4940.50  | PASS          | AC=14;AF=0.233;AN=60;BaseQRankSum |
| 14551 | chrY | 10049384 | . | C | T   | 21679.82 | PASS          | AC=19;AF=0.365;AN=52;BaseQ        |
| 14552 | chrY | 10049411 | . | G | C   | 23766.81 | PASS          | AC=23;AF=0.383;AN=60;BaseQ        |
| 14553 | chrY | 10049436 | . | A | G   | 10609.41 | PASS          | AC=22;AF=0.333;AN=66;BaseQ        |
| 14554 | chrY | 10049438 | . | T | C   | 3305.24  | PASS          | AC=7;AF=0.100;AN=70;BaseQRankSum= |
| 14555 | chrY | 10049469 | . | C | T   | 40880.13 | PASS          | AC=30;AF=0.455;AN=66;BaseQ        |
| 14556 | chrY | 10049482 | . | G | A   | 42389.13 | PASS          | AC=30;AF=0.455;AN=66;BaseQ        |
| 14557 | chrY | 10049487 | . | C | A   | 9169.87  | PASS          | AC=27;AF=0.386;AN=70;BaseQRankSum |
| 14558 | chrY | 10049524 | . | C | T   | 15945.03 | PASS          | AC=28;AF=0.400;AN=70;BaseQ        |
| 14559 | chrY | 10049544 | . | A | G   | 16403.23 | PASS          | AC=28;AF=0.400;AN=70;BaseQ        |
| 14560 | chrY | 10049560 | . | A | G   | 36240.68 | PASS          | AC=34;AF=0.500;AN=68;BaseQ        |
| 14561 | chrY | 10049563 | . | A | G   | 15056.02 | PASS          | AC=28;AF=0.412;AN=68;BaseQ        |
| 14562 | chrY | 10049572 | . | T | C   | 34241.04 | PASS          | AC=34;AF=0.500;AN=68;BaseQ        |
| 14563 | chrY | 10049583 | . | G | T   | 14232.19 | PASS          | AC=27;AF=0.397;AN=68;BaseQ        |
| 14564 | chrY | 10049640 | . | A | G,T | 14936.99 | PASS          | AC=5,16;AF=0.089,0.286;AN         |
| 14565 | chrY | 10049653 | . | C | T   | 14051.25 | PASS          | AC=18;AF=0.300;AN=60;BaseQ        |
| 14566 | chrY | 10049675 | . | G | T   | 12695.42 | PASS          | AC=10;AF=0.179;AN=56;BaseQ        |
| 14567 | chrY | 10049682 | . | A | C   | 28467.38 | PASS          | AC=11;AF=0.190;AN=58;BaseQ        |
| 14568 | chrY | 10049684 | . | T | A   | 28549.69 | PASS          | AC=11;AF=0.204;AN=54;BaseQ        |
| 14569 | chrY | 10049696 | . | C | T   | 11967.08 | PASS          | AC=10;AF=0.172;AN=58;BaseQ        |
| 14570 | chrY | 10049715 | . | G | A   | 28340.31 | PASS          | AC=10;AF=0.185;AN=54;BaseQ        |
| 14571 | chrY | 10049720 | . | T | G   | 28346.59 | PASS          | AC=10;AF=0.185;AN=54;BaseQ        |
| 14572 | chrY | 10049741 | . | G | T   | 11538.89 | PASS          | AC=9;AF=0.141;AN=64;BaseQ         |
| 14573 | chrY | 10049744 | . | C | T   | 4053.93  | PASS          | AC=7;AF=0.103;AN=68;BaseQRankSum= |
| 14574 | chrY | 10049745 | . | A | G   | 10756.79 | PASS          | AC=9;AF=0.136;AN=66;BaseQ         |
| 14575 | chrY | 10049793 | . | C | G   | 12022.44 | PASS          | AC=20;AF=0.313;AN=64;BaseQ        |
| 14576 | chrY | 10049808 | . | G | T   | 7420.75  | PASS          | AC=12;AF=0.171;AN=70;BaseQRankSum |
| 14577 | chrY | 10049815 | . | G | C   | 18185.39 | PASS          | AC=20;AF=0.313;AN=64;BaseQ        |
| 14578 | chrY | 10049827 | . | C | G   | 8482.71  | PASS          | AC=20;AF=0.286;AN=70;BaseQRankSum |
| 14579 | chrY | 10049843 | . | T | C   | 23379.50 | PASS          | AC=20;AF=0.323;AN=62;BaseQ        |
| 14580 | chrY | 10049844 | . | G | A   | 10913.97 | PASS          | AC=13;AF=0.210;AN=62;BaseQ        |
| 14581 | chrY | 10049858 | . | A | T   | 24986.31 | PASS          | AC=19;AF=0.306;AN=62;BaseQ        |
| 14582 | chrY | 10049863 | . | T | C   | 25813.73 | PASS          | AC=19;AF=0.297;AN=64;BaseQ        |
| 14583 | chrY | 10049920 | . | A | G   | 12991.88 | PASS          | AC=26;AF=0.371;AN=70;BaseQ        |
| 14584 | chrY | 10049964 | . | G | A   | 32966.60 | PASS          | AC=34;AF=0.486;AN=70;BaseQ        |
| 14585 | chrY | 10049992 | . | T | C   | 37433.74 | PASS          | AC=35;AF=0.515;AN=68;BaseQ        |
| 14586 | chrY | 10049997 | . | C | T   | 9521.33  | PASS          | AC=30;AF=0.441;AN=68;BaseQRankSum |
| 14587 | chrY | 10050060 | . | G | A,T | 24236.49 | PASS          | AC=26,20;AF=0.406,0.313;A         |
| 14588 | chrY | 10050066 | . | C | T   | 14984.92 | PASS          | AC=26;AF=0.382;AN=68;BaseQ        |
| 14589 | chrY | 10050069 | . | T | C   | 30.50    | PASS          | AC=1;AF=0.014;AN=70;BaseQRankSum= |
| 14590 | chrY | 10050074 | . | C | G   | 30.65    | PASS          | AC=1;AF=0.014;AN=70;BaseQRankSum= |
| 14591 | chrY | 10050076 | . | C | T   | 32991.13 | PASS          | AC=30;AF=0.484;AN=62;BaseQ        |
| 14592 | chrY | 10050091 | . | A | C   | 30701.95 | PASS          | AC=29;AF=0.483;AN=60;BaseQ        |



|       |      |          |   |   |   |          |               |                                    |
|-------|------|----------|---|---|---|----------|---------------|------------------------------------|
| 14593 | chrY | 10050110 | . | G | C | 29180.17 | PASS          | AC=25;AF=0.463;AN=54;BaseQ         |
| 14594 | chrY | 10050118 | . | T | C | 28437.83 | PASS          | AC=22;AF=0.500;AN=44;BaseQ         |
| 14595 | chrY | 10050130 | . | T | G | 10145.42 | PASS          | AC=12;AF=0.214;AN=56;BaseQ         |
| 14596 | chrY | 10050151 | . | C | G | 27227.19 | PASS          | AC=10;AF=0.357;AN=28;BaseQ         |
| 14597 | chrY | 10050166 | . | A | G | 27921.23 | PASS          | AC=10;AF=0.417;AN=24;BaseQ         |
| 14598 | chrY | 10050167 | . | C | A | 5947     | PASS          | AC=9;AF=0.300;AN=30;BaseQRankSum=  |
| 14599 | chrY | 10050177 | . | T | C | 28516.30 | PASS          | AC=10;AF=0.455;AN=22;BaseQ         |
| 14600 | chrY | 10050178 | . | T | C | 28414.30 | PASS          | AC=10;AF=0.455;AN=22;BaseQ         |
| 14601 | chrY | 10050190 | . | G | C | 27960.47 | PASS          | AC=9;AF=0.375;AN=24;BaseQ          |
| 14602 | chrY | 10050227 | . | G | A | 28694.52 | PASS          | AC=9;AF=0.450;AN=20;BaseQ          |
| 14603 | chrY | 10050231 | . | T | G | 29110.52 | PASS          | AC=9;AF=0.409;AN=22;BaseQ          |
| 14604 | chrY | 10050237 | . | C | T | 12507.78 | PASS          | AC=9;AF=0.375;AN=24;BaseQ          |
| 14605 | chrY | 10050262 | . | C | G | 29875.14 | PASS          | AC=9;AF=0.321;AN=28;BaseQ          |
| 14606 | chrY | 10050267 | . | G | A | 12095.17 | PASS          | AC=9;AF=0.300;AN=30;BaseQ          |
| 14607 | chrY | 10050273 | . | A | G | 29541.16 | PASS          | AC=9;AF=0.300;AN=30;BaseQ          |
| 14608 | chrY | 10050278 | . | G | A | 28929.76 | PASS          | AC=9;AF=0.300;AN=30;BaseQ          |
| 14609 | chrY | 10050283 | . | C | T | 13263.10 | PASS          | AC=9;AF=0.237;AN=38;BaseQ          |
| 14610 | chrY | 10050355 | . | C | T | 5641.72  | PASS          | AC=10;AF=0.185;AN=54;BaseQRankSum= |
| 14611 | chrY | 10050367 | . | G | A | 26751.13 | PASS          | AC=10;AF=0.167;AN=60;BaseQ         |
| 14612 | chrY | 10050388 | . | T | C | 27233.84 | PASS          | AC=9;AF=0.136;AN=66;BaseQ          |
| 14613 | chrY | 10050404 | . | G | T | 11848.66 | PASS          | AC=9;AF=0.136;AN=66;BaseQ          |
| 14614 | chrY | 10050417 | . | A | T | 10171.69 | PASS          | AC=9;AF=0.129;AN=70;BaseQ          |
| 14615 | chrY | 10050418 | . | A | G | 24598.07 | PASS          | AC=9;AF=0.129;AN=70;BaseQ          |
| 14616 | chrY | 10050428 | . | C | T | 23677.95 | PASS          | AC=9;AF=0.132;AN=68;BaseQ          |
| 14617 | chrY | 10050431 | . | A | T | 11262.39 | PASS          | AC=9;AF=0.129;AN=70;BaseQ          |
| 14618 | chrY | 10050445 | . | C | T | 22366.62 | PASS          | AC=9;AF=0.132;AN=68;BaseQ          |
| 14619 | chrY | 10050458 | . | C | T | 9250.36  | PASS          | AC=9;AF=0.129;AN=70;BaseQRankSum=  |
| 14620 | chrY | 10050460 | . | A | G | 22312.56 | PASS          | AC=9;AF=0.132;AN=68;BaseQ          |
| 14621 | chrY | 10050466 | . | T | C | 10481.24 | PASS          | AC=9;AF=0.129;AN=70;BaseQ          |
| 14622 | chrY | 10050481 | . | A | T | 20980.93 | PASS          | AC=9;AF=0.132;AN=68;BaseQ          |
| 14623 | chrY | 10050483 | . | C | G | 10144.39 | PASS          | AC=9;AF=0.129;AN=70;BaseQ          |
| 14624 | chrY | 10050489 | . | C | T | 21040.35 | PASS          | AC=9;AF=0.129;AN=70;BaseQ          |
| 14625 | chrY | 10050492 | . | C | T | 10451.93 | PASS          | AC=9;AF=0.129;AN=70;BaseQ          |
| 14626 | chrY | 10050493 | . | A | C | 20914.34 | PASS          | AC=9;AF=0.129;AN=70;BaseQ          |
| 14627 | chrY | 10050498 | . | G | C | 20863.50 | PASS          | AC=9;AF=0.129;AN=70;BaseQ          |
| 14628 | chrY | 10050507 | . | C | T | 7877.30  | PASS          | AC=9;AF=0.129;AN=70;BaseQRankSum=  |
| 14629 | chrY | 10050510 | . | A | T | 20806.40 | PASS          | AC=9;AF=0.129;AN=70;BaseQ          |
| 14630 | chrY | 10050513 | . | C | T | 10898.09 | PASS          | AC=9;AF=0.129;AN=70;BaseQ          |
| 14631 | chrY | 10050526 | . | A | G | 7333.51  | PASS          | AC=9;AF=0.132;AN=68;BaseQRankSum=  |
| 14632 | chrY | 10050529 | . | G | A | 11367.57 | PASS          | AC=9;AF=0.129;AN=70;BaseQ          |
| 14633 | chrY | 10050546 | . | T | G | 20099.14 | PASS          | AC=9;AF=0.150;AN=60;BaseQ          |
| 14634 | chrY | 10050547 | . | T | C | 11364.23 | PASS          | AC=9;AF=0.136;AN=66;BaseQ          |
| 14635 | chrY | 10050555 | . | C | A | 6282.80  | PASS          | AC=9;AF=0.145;AN=62;BaseQRankSum=  |
| 14636 | chrY | 10050557 | . | A | G | 11327.61 | PASS          | AC=9;AF=0.129;AN=70;BaseQ          |
| 14637 | chrY | 10050565 | . | C | A | 20003.09 | PASS          | AC=9;AF=0.145;AN=62;BaseQ          |
| 14638 | chrY | 10050580 | . | A | C | 18666.30 | PASS          | AC=9;AF=0.155;AN=58;BaseQ          |
| 14639 | chrY | 10050628 | . | T | C | 12973.65 | PASS          | AC=20;AF=0.313;AN=64;BaseQ         |
| 14640 | chrY | 10050631 | . | T | C | 5380.31  | PASS          | AC=13;AF=0.203;AN=64;BaseQRankSum= |
| 14641 | chrY | 10050658 | . | T | A | 1368.50  | my_snp_filter | AC=6;AF=0.097;AN=62;BaseQ          |
| 14642 | chrY | 10050659 | . | G | T | 1353.30  | my_snp_filter | AC=6;AF=0.097;AN=62;BaseQ          |
| 14643 | chrY | 10050667 | . | T | A | 1126.09  | my_snp_filter | AC=6;AF=0.100;AN=60;BaseQ          |
| 14644 | chrY | 10050670 | . | G | T | 1092.64  | my_snp_filter | AC=6;AF=0.115;AN=52;BaseQ          |
| 14645 | chrY | 10050671 | . | C | T | 1104.22  | my_snp_filter | AC=6;AF=0.115;AN=52;BaseQ          |
| 14646 | chrY | 10050679 | . | T | C | 4576.96  | my_snp_filter | AC=9;AF=0.167;AN=54;BaseQ          |
| 14647 | chrY | 10050684 | . | C | A | 764.62   | PASS          | AC=6;AF=0.115;AN=52;BaseQRankSum=  |
| 14648 | chrY | 10050693 | . | A | C | 523.46   | PASS          | AC=6;AF=0.136;AN=44;BaseQRankSum=  |
| 14649 | chrY | 10050694 | . | A | T | 523.27   | PASS          | AC=6;AF=0.136;AN=44;BaseQRankSum=  |
| 14650 | chrY | 10050705 | . | T | C | 481.30   | PASS          | AC=6;AF=0.150;AN=40;BaseQRankSum=  |
| 14651 | chrY | 10050706 | . | G | A | 5803.64  | my_snp_filter | AC=8;AF=0.200;AN=40;BaseQ          |
| 14652 | chrY | 10050708 | . | T | A | 328.61   | my_snp_filter | AC=5;AF=0.125;AN=40;BaseQ          |
| 14653 | chrY | 10050712 | . | C | A | 5673.50  | my_snp_filter | AC=8;AF=0.200;AN=40;BaseQ          |
| 14654 | chrY | 10050715 | . | T | C | 5605.29  | my_snp_filter | AC=7;AF=0.167;AN=42;BaseQ          |
| 14655 | chrY | 10050716 | . | T | C | 268.55   | PASS          | AC=3;AF=0.071;AN=42;BaseQRankSum=  |
| 14656 | chrY | 10050717 | . | T | A | 271      | PASS          | AC=3;AF=0.075;AN=40;BaseQRankSum=  |
| 14657 | chrY | 10050728 | . | G | A | 132.20   | PASS          | AC=2;AF=0.059;AN=34;BaseQRankSum=  |
| 14658 | chrY | 10050742 | . | A | G | 4430.55  | my_snp_filter | AC=7;AF=0.219;AN=32;BaseQ          |
| 14659 | chrY | 10050755 | . | A | G | 4610.76  | my_snp_filter | AC=7;AF=0.292;AN=24;BaseQ          |
| 14660 | chrY | 10050776 | . | C | T | 4142.73  | my_snp_filter | AC=7;AF=0.350;AN=20;BaseQ          |
| 14661 | chrY | 10050798 | . | T | C | 3340.70  | my_snp_filter | AC=7;AF=0.318;AN=22;BaseQ          |
| 14662 | chrY | 10050799 | . | G | T | 3337.70  | my_snp_filter | AC=7;AF=0.318;AN=22;BaseQ          |
| 14663 | chrY | 10050822 | . | T | G | 2338.69  | my_snp_filter | AC=7;AF=0.318;AN=22;BaseQ          |
| 14664 | chrY | 10050833 | . | T | A | 2060.72  | my_snp_filter | AC=7;AF=0.292;AN=24;BaseQ          |
| 14665 | chrY | 10050848 | . | T | G | 1664.07  | my_snp_filter | AC=5;AF=0.208;AN=24;BaseQ          |
| 14666 | chrY | 10050849 | . | T | G | 1662.69  | my_snp_filter | AC=5;AF=0.192;AN=26;BaseQ          |
| 14667 | chrY | 10050855 | . | A | C | 1498.91  | my_snp_filter | AC=5;AF=0.192;AN=26;BaseQ          |
| 14668 | chrY | 10050858 | . | C | G | 1450.86  | my_snp_filter | AC=5;AF=0.208;AN=24;BaseQ          |

|       |      |          |   |   |   |          |               |                                    |
|-------|------|----------|---|---|---|----------|---------------|------------------------------------|
| 14669 | chrY | 10050859 | . | T | C | 1447.86  | my_snp_filter | AC=5;AF=0.208;AN=24;BaseQ          |
| 14670 | chrY | 10050863 | . | T | C | 1360.10  | my_snp_filter | AC=5;AF=0.208;AN=24;BaseQ          |
| 14671 | chrY | 10050864 | . | A | C | 1354.10  | my_snp_filter | AC=5;AF=0.208;AN=24;BaseQ          |
| 14672 | chrY | 10050875 | . | C | A | 952.23   | my_snp_filter | AC=5;AF=0.192;AN=26;BaseQ          |
| 14673 | chrY | 10050886 | . | T | C | 709.64   | my_snp_filter | AC=5;AF=0.147;AN=34;BaseQ          |
| 14674 | chrY | 10050888 | . | G | T | 485.02   | PASS          | AC=5;AF=0.147;AN=34;BaseQRankSum=  |
| 14675 | chrY | 10050899 | . | G | C | 95.44    | my_snp_filter | AC=3;AF=0.094;AN=32;BaseQ          |
| 14676 | chrY | 10050928 | . | A | G | 3851.09  | my_snp_filter | AC=11;AF=0.262;AN=42;BaseQ         |
| 14677 | chrY | 10050966 | . | A | G | 3722.40  | my_snp_filter | AC=9;AF=0.173;AN=52;BaseQ          |
| 14678 | chrY | 10051017 | . | A | G | 5768.49  | my_snp_filter | AC=6;AF=0.097;AN=62;BaseQ          |
| 14679 | chrY | 10051018 | . | T | A | 5768.41  | my_snp_filter | AC=6;AF=0.097;AN=62;BaseQ          |
| 14680 | chrY | 10051033 | . | C | T | 5863.25  | PASS          | AC=6;AF=0.097;AN=62;BaseQRankSum=  |
| 14681 | chrY | 10051068 | . | T | G | 6683.39  | PASS          | AC=7;AF=0.113;AN=62;BaseQRankSum=  |
| 14682 | chrY | 10051070 | . | T | C | 7054.27  | PASS          | AC=7;AF=0.113;AN=62;BaseQRankSum=  |
| 14683 | chrY | 10051081 | . | G | C | 7449.97  | PASS          | AC=7;AF=0.109;AN=64;BaseQRankSum=  |
| 14684 | chrY | 10051095 | . | C | T | 7761.54  | PASS          | AC=7;AF=0.109;AN=64;BaseQRankSum=  |
| 14685 | chrY | 10051096 | . | G | A | 1003.26  | PASS          | AC=6;AF=0.086;AN=70;DP=856;FS=0.0  |
| 14686 | chrY | 10051098 | . | G | C | 3462.90  | PASS          | AC=6;AF=0.086;AN=70;BaseQRankSum=  |
| 14687 | chrY | 10051103 | . | A | G | 7846.85  | PASS          | AC=7;AF=0.109;AN=64;BaseQRankSum=  |
| 14688 | chrY | 10051111 | . | T | C | 7841.31  | PASS          | AC=7;AF=0.109;AN=64;BaseQRankSum=  |
| 14689 | chrY | 10051120 | . | G | C | 8021.61  | PASS          | AC=7;AF=0.109;AN=64;BaseQRankSum=  |
| 14690 | chrY | 10051124 | . | A | C | 8090.51  | PASS          | AC=7;AF=0.109;AN=64;BaseQRankSum=  |
| 14691 | chrY | 10051126 | . | A | T | 8222.63  | PASS          | AC=7;AF=0.109;AN=64;BaseQRankSum=  |
| 14692 | chrY | 10051131 | . | C | T | 8339.87  | PASS          | AC=7;AF=0.109;AN=64;BaseQRankSum=  |
| 14693 | chrY | 10051141 | . | C | A | 8585.34  | PASS          | AC=7;AF=0.109;AN=64;BaseQRankSum=  |
| 14694 | chrY | 10051161 | . | T | G | 7598.93  | PASS          | AC=7;AF=0.109;AN=64;BaseQRankSum=  |
| 14695 | chrY | 10051165 | . | C | T | 7256.40  | PASS          | AC=7;AF=0.109;AN=64;BaseQRankSum=  |
| 14696 | chrY | 10051441 | . | T | G | 12327.70 | PASS          | AC=9;AF=0.346;AN=26;BaseQ          |
| 14697 | chrY | 10051453 | . | C | A | 12920.22 | PASS          | AC=9;AF=0.300;AN=30;BaseQ          |
| 14698 | chrY | 10051459 | . | G | T | 12882.22 | PASS          | AC=9;AF=0.300;AN=30;BaseQ          |
| 14699 | chrY | 10051494 | . | G | A | 11335.95 | PASS          | AC=10;AF=0.227;AN=44;BaseQ         |
| 14700 | chrY | 10051541 | . | C | T | 1128.46  | PASS          | AC=4;AF=0.083;AN=48;BaseQRankSum=  |
| 14701 | chrY | 10051550 | . | T | G | 1207.80  | PASS          | AC=4;AF=0.083;AN=48;BaseQRankSum=  |
| 14702 | chrY | 10051554 | . | T | G | 1290.95  | PASS          | AC=4;AF=0.083;AN=48;BaseQRankSum=  |
| 14703 | chrY | 10051576 | . | T | A | 1214.94  | PASS          | AC=3;AF=0.054;AN=56;BaseQRankSum=  |
| 14704 | chrY | 10051584 | . | T | C | 1247.71  | PASS          | AC=2;AF=0.045;AN=44;BaseQRankSum=  |
| 14705 | chrY | 10051585 | . | T | A | 1288.75  | PASS          | AC=2;AF=0.045;AN=44;BaseQRankSum=  |
| 14706 | chrY | 10051595 | . | C | T | 1324.72  | PASS          | AC=2;AF=0.042;AN=48;BaseQRankSum=  |
| 14707 | chrY | 10051617 | . | A | G | 1234.54  | PASS          | AC=1;AF=0.019;AN=54;BaseQRankSum=  |
| 14708 | chrY | 10051626 | . | T | C | 1228.30  | PASS          | AC=1;AF=0.022;AN=46;BaseQRankSum=  |
| 14709 | chrY | 10051633 | . | T | C | 1183.16  | PASS          | AC=1;AF=0.023;AN=44;BaseQRankSum=  |
| 14710 | chrY | 10051644 | . | C | A | 1259.87  | PASS          | AC=1;AF=0.025;AN=40;BaseQRankSum=  |
| 14711 | chrY | 10051647 | . | A | T | 1299.21  | PASS          | AC=1;AF=0.023;AN=44;BaseQRankSum=  |
| 14712 | chrY | 10051668 | . | A | C | 1340.58  | PASS          | AC=1;AF=0.029;AN=34;BaseQRankSum=  |
| 14713 | chrY | 10051670 | . | A | G | 1343.53  | PASS          | AC=1;AF=0.026;AN=38;BaseQRankSum=  |
| 14714 | chrY | 10051700 | . | G | T | 2018.06  | PASS          | AC=1;AF=0.033;AN=30;BaseQRankSum=  |
| 14715 | chrY | 10051705 | . | T | G | 1972.04  | PASS          | AC=1;AF=0.031;AN=32;BaseQRankSum=  |
| 14716 | chrY | 10051728 | . | C | A | 2045.07  | PASS          | AC=1;AF=0.028;AN=36;BaseQRankSum=  |
| 14717 | chrY | 10051729 | . | C | T | 2045.07  | PASS          | AC=1;AF=0.028;AN=36;BaseQRankSum=  |
| 14718 | chrY | 10051736 | . | C | A | 1961.38  | PASS          | AC=1;AF=0.021;AN=48;BaseQRankSum=  |
| 14719 | chrY | 10051760 | . | A | T | 1662.53  | PASS          | AC=1;AF=0.023;AN=44;BaseQRankSum=  |
| 14720 | chrY | 10052094 | . | G | T | 12764.32 | PASS          | AC=17;AF=0.243;AN=70;BaseQ         |
| 14721 | chrY | 10052103 | . | A | T | 13402.73 | PASS          | AC=17;AF=0.243;AN=70;BaseQ         |
| 14722 | chrY | 10052124 | . | C | T | 12513.73 | PASS          | AC=15;AF=0.214;AN=70;BaseQ         |
| 14723 | chrY | 10052132 | . | C | T | 12606.56 | PASS          | AC=15;AF=0.214;AN=70;BaseQ         |
| 14724 | chrY | 10052153 | . | A | G | 3968.32  | PASS          | AC=11;AF=0.157;AN=70;BaseQRankSum= |
| 14725 | chrY | 10052157 | . | A | C | 12360.79 | PASS          | AC=16;AF=0.229;AN=70;BaseQ         |
| 14726 | chrY | 10052167 | . | T | C | 12281.89 | PASS          | AC=16;AF=0.229;AN=70;BaseQ         |
| 14727 | chrY | 10052189 | . | C | T | 12392.55 | PASS          | AC=16;AF=0.229;AN=70;BaseQ         |
| 14728 | chrY | 10052197 | . | T | A | 12318.28 | PASS          | AC=16;AF=0.229;AN=70;BaseQ         |
| 14729 | chrY | 10052199 | . | T | A | 12233.28 | PASS          | AC=16;AF=0.229;AN=70;BaseQ         |
| 14730 | chrY | 10052219 | . | A | G | 11393.47 | PASS          | AC=17;AF=0.243;AN=70;BaseQ         |
| 14731 | chrY | 10052245 | . | C | T | 11685.16 | PASS          | AC=19;AF=0.279;AN=68;BaseQ         |
| 14732 | chrY | 10052250 | . | C | T | 11635.18 | PASS          | AC=20;AF=0.294;AN=68;BaseQ         |
| 14733 | chrY | 10052291 | . | C | G | 11941.19 | PASS          | AC=14;AF=0.206;AN=68;BaseQ         |
| 14734 | chrY | 10052308 | . | T | C | 12110.80 | PASS          | AC=13;AF=0.210;AN=62;BaseQ         |
| 14735 | chrY | 10052310 | . | C | T | 12095.85 | PASS          | AC=13;AF=0.217;AN=60;BaseQ         |
| 14736 | chrY | 10052314 | . | C | A | 11931    | PASS          | AC=13;AF=0.217;AN=60;BaseQRankSum= |
| 14737 | chrY | 10052329 | . | A | C | 10956.59 | PASS          | AC=11;AF=0.190;AN=58;BaseQ         |
| 14738 | chrY | 10052330 | . | C | T | 10998.59 | PASS          | AC=11;AF=0.190;AN=58;BaseQ         |
| 14739 | chrY | 10052339 | . | A | T | 10306.35 | PASS          | AC=10;AF=0.161;AN=62;BaseQ         |
| 14740 | chrY | 10052353 | . | C | T | 9509.67  | PASS          | AC=9;AF=0.150;AN=60;BaseQRankSum=  |
| 14741 | chrY | 10052354 | . | T | G | 9471.04  | PASS          | AC=9;AF=0.150;AN=60;BaseQRankSum=  |
| 14742 | chrY | 10052412 | . | T | G | 7909.74  | my_snp_filter | AC=11;AF=0.289;AN=38;BaseQ         |
| 14743 | chrY | 10052414 | . | T | A | 7980.01  | my_snp_filter | AC=11;AF=0.275;AN=40;BaseQ         |
| 14744 | chrY | 10052417 | . | C | T | 2750.76  | PASS          | AC=6;AF=0.136;AN=44;BaseQRankSum=  |

|       |      |          |   |   |     |          |               |                                    |
|-------|------|----------|---|---|-----|----------|---------------|------------------------------------|
| 14745 | chrY | 10052443 | . | C | T   | 3819.47  | my_snp_filter | AC=9;AF=0.265;AN=34;BaseQ          |
| 14746 | chrY | 10052487 | . | G | A   | 7403.71  | my_snp_filter | AC=9;AF=0.321;AN=28;BaseQ          |
| 14747 | chrY | 10052488 | . | A | C   | 7400.71  | my_snp_filter | AC=9;AF=0.321;AN=28;BaseQ          |
| 14748 | chrY | 10052503 | . | T | A   | 7322.52  | my_snp_filter | AC=9;AF=0.450;AN=20;BaseQ          |
| 14749 | chrY | 10052505 | . | A | G   | 7268.09  | my_snp_filter | AC=9;AF=0.500;AN=18;BaseQ          |
| 14750 | chrY | 10052542 | . | G | T   | 6059.69  | my_snp_filter | AC=9;AF=0.346;AN=26;BaseQ          |
| 14751 | chrY | 10052550 | . | G | C   | 5906.69  | my_snp_filter | AC=9;AF=0.346;AN=26;BaseQ          |
| 14752 | chrY | 10052551 | . | G | A   | 5889.69  | my_snp_filter | AC=9;AF=0.346;AN=26;BaseQ          |
| 14753 | chrY | 10052566 | . | C | T   | 3933.69  | my_snp_filter | AC=9;AF=0.346;AN=26;BaseQ          |
| 14754 | chrY | 10052600 | . | G | T   | 1234.38  | my_snp_filter | AC=9;AF=0.346;AN=26;BaseQ          |
| 14755 | chrY | 10052627 | . | T | A   | 652.92   | my_snp_filter | AC=5;AF=0.227;AN=22;BaseQ          |
| 14756 | chrY | 10052639 | . | C | A   | 761.28   | PASS          | AC=5;AF=0.250;AN=20;BaseQRankSum=  |
| 14757 | chrY | 10052645 | . | G | C   | 627.39   | PASS          | AC=3;AF=0.150;AN=20;BaseQRankSum=  |
| 14758 | chrY | 10053144 | . | C | G   | 766.20   | PASS          | AC=6;AF=0.333;AN=18;DP=136;FS=0.0  |
| 14759 | chrY | 10054039 | . | T | C   | 520.10   | PASS          | AC=6;AF=0.086;AN=70;BaseQRankSum=  |
| 14760 | chrY | 10054041 | . | C | T   | 425.71   | PASS          | AC=4;AF=0.057;AN=70;BaseQRankSum=  |
| 14761 | chrY | 10054049 | . | C | T   | 47.48    | my_snp_filter | AC=2;AF=0.029;AN=70;BaseQ          |
| 14762 | chrY | 10054052 | . | C | A   | 106.62   | PASS          | AC=3;AF=0.043;AN=70;BaseQRankSum=  |
| 14763 | chrY | 10054058 | . | T | A   | 715.76   | PASS          | AC=8;AF=0.114;AN=70;BaseQRankSum=  |
| 14764 | chrY | 10054078 | . | T | A   | 1027.22  | PASS          | AC=9;AF=0.141;AN=64;BaseQRankSum=  |
| 14765 | chrY | 10054082 | . | A | G   | 37.74    | PASS          | AC=1;AF=0.015;AN=66;BaseQRankSum=  |
| 14766 | chrY | 10054091 | . | A | G   | 37.46    | PASS          | AC=1;AF=0.015;AN=66;BaseQRankSum=  |
| 14767 | chrY | 10054109 | . | C | T   | 1025.81  | my_snp_filter | AC=6;AF=0.094;AN=64;BaseQ          |
| 14768 | chrY | 10054115 | . | A | G   | 40.61    | my_snp_filter | AC=3;AF=0.047;AN=64;BaseQ          |
| 14769 | chrY | 10054131 | . | A | T   | 89.34    | my_snp_filter | AC=5;AF=0.078;AN=64;BaseQ          |
| 14770 | chrY | 10054143 | . | G | A   | 1217.40  | my_snp_filter | AC=6;AF=0.100;AN=60;BaseQ          |
| 14771 | chrY | 10054149 | . | G | T   | 1155.54  | my_snp_filter | AC=4;AF=0.067;AN=60;BaseQ          |
| 14772 | chrY | 10054156 | . | G | T   | 1173.35  | my_snp_filter | AC=6;AF=0.100;AN=60;BaseQ          |
| 14773 | chrY | 10054157 | . | T | G   | 1173.34  | my_snp_filter | AC=6;AF=0.100;AN=60;BaseQ          |
| 14774 | chrY | 10054162 | . | G | A   | 1140.51  | my_snp_filter | AC=4;AF=0.067;AN=60;BaseQ          |
| 14775 | chrY | 10054185 | . | T | A   | 1043.74  | PASS          | AC=5;AF=0.109;AN=46;BaseQRankSum=  |
| 14776 | chrY | 10054208 | . | T | C   | 1306.41  | PASS          | AC=5;AF=0.147;AN=34;BaseQRankSum=  |
| 14777 | chrY | 10054214 | . | C | G   | 1148.17  | PASS          | AC=5;AF=0.114;AN=44;BaseQRankSum=  |
| 14778 | chrY | 10054221 | . | A | G   | 68.81    | PASS          | AC=1;AF=0.019;AN=52;BaseQRankSum=  |
| 14779 | chrY | 10054247 | . | A | T   | 2349.72  | PASS          | AC=16;AF=0.571;AN=28;BaseQRankSum= |
| 14780 | chrY | 10054258 | . | C | T   | 1958.11  | PASS          | AC=7;AF=0.159;AN=44;BaseQRankSum=  |
| 14781 | chrY | 10054279 | . | C | T   | 2071.65  | PASS          | AC=7;AF=0.146;AN=48;BaseQRankSum=  |
| 14782 | chrY | 10054290 | . | G | C,A | 1307.93  | PASS          | AC=4,3;AF=0.095,0.071;AN=42;BaseQ  |
| 14783 | chrY | 10054303 | . | A | G   | 67.47    | PASS          | AC=1;AF=0.025;AN=40;BaseQRankSum=  |
| 14784 | chrY | 10054307 | . | A | G   | 1407.88  | PASS          | AC=5;AF=0.167;AN=30;BaseQRankSum=  |
| 14785 | chrY | 10054312 | . | A | G   | 161.15   | PASS          | AC=3;AF=0.088;AN=34;BaseQRankSum=  |
| 14786 | chrY | 10054330 | . | G | A   | 348.42   | PASS          | AC=4;AF=0.095;AN=42;BaseQRankSum=  |
| 14787 | chrY | 10054340 | . | A | G   | 1919.15  | PASS          | AC=4;AF=0.095;AN=42;BaseQRankSum=  |
| 14788 | chrY | 10054344 | . | A | G   | 87.99    | PASS          | AC=1;AF=0.025;AN=40;BaseQRankSum=  |
| 14789 | chrY | 10054351 | . | C | T   | 2645.86  | PASS          | AC=7;AF=0.219;AN=32;BaseQRankSum=  |
| 14790 | chrY | 10054359 | . | C | T   | 472.16   | PASS          | AC=4;AF=0.105;AN=38;BaseQRankSum=  |
| 14791 | chrY | 10054381 | . | G | A   | 420.19   | PASS          | AC=3;AF=0.065;AN=46;BaseQRankSum=  |
| 14792 | chrY | 10054386 | . | C | G   | 2074.64  | PASS          | AC=6;AF=0.130;AN=46;BaseQRankSum=  |
| 14793 | chrY | 10054388 | . | G | A   | 1625.90  | my_snp_filter | AC=6;AF=0.111;AN=54;BaseQ          |
| 14794 | chrY | 10054393 | . | A | G   | 427.37   | PASS          | AC=3;AF=0.056;AN=54;BaseQRankSum=  |
| 14795 | chrY | 10054403 | . | T | C   | 419      | PASS          | AC=4;AF=0.091;AN=44;BaseQRankSum=  |
| 14796 | chrY | 10054406 | . | A | T   | 304.09   | PASS          | AC=3;AF=0.048;AN=62;BaseQRankSum=  |
| 14797 | chrY | 10054425 | . | C | T   | 1394.35  | my_snp_filter | AC=7;AF=0.100;AN=70;BaseQ          |
| 14798 | chrY | 10054430 | . | A | C   | 1811.30  | my_snp_filter | AC=7;AF=0.184;AN=38;BaseQ          |
| 14799 | chrY | 10054435 | . | G | A   | 52.72    | PASS          | AC=2;AF=0.063;AN=32;DP=538;FS=0.0  |
| 14800 | chrY | 10054436 | . | C | T   | 82.14    | PASS          | AC=1;AF=0.016;AN=64;BaseQRankSum=  |
| 14801 | chrY | 10054438 | . | C | T   | 1656.98  | my_snp_filter | AC=7;AF=0.233;AN=30;BaseQ          |
| 14802 | chrY | 10054483 | . | G | C   | 31.52    | my_snp_filter | AC=1;AF=0.014;AN=70;BaseQ          |
| 14803 | chrY | 10054486 | . | A | G   | 265.64   | my_snp_filter | AC=5;AF=0.227;AN=22;BaseQ          |
| 14804 | chrY | 10054519 | . | C | G   | 8529.38  | PASS          | AC=27;AF=0.386;AN=70;BaseQRankSum= |
| 14805 | chrY | 10054528 | . | G | A   | 8490.11  | PASS          | AC=27;AF=0.397;AN=68;BaseQRankSum= |
| 14806 | chrY | 10054531 | . | T | C   | 8522.75  | PASS          | AC=27;AF=0.397;AN=68;BaseQRankSum= |
| 14807 | chrY | 10054534 | . | T | C   | 8611.97  | PASS          | AC=27;AF=0.386;AN=70;BaseQRankSum= |
| 14808 | chrY | 10054542 | . | T | C   | 8260.98  | PASS          | AC=26;AF=0.382;AN=68;BaseQRankSum= |
| 14809 | chrY | 10054591 | . | T | C   | 11845.52 | PASS          | AC=35;AF=0.500;AN=70;BaseQ         |
| 14810 | chrY | 10054598 | . | T | C   | 10921.52 | PASS          | AC=35;AF=0.500;AN=70;BaseQ         |
| 14811 | chrY | 10054686 | . | G | C   | 9417.36  | PASS          | AC=33;AF=0.471;AN=70;BaseQRankSum= |
| 14812 | chrY | 10054761 | . | T | C   | 2514.28  | PASS          | AC=25;AF=0.368;AN=68;BaseQRankSum= |
| 14813 | chrY | 10054859 | . | T | A   | 57.66    | PASS          | AC=1;AF=0.015;AN=66;BaseQRankSum=  |
| 14814 | chrY | 10054867 | . | A | T   | 55.87    | PASS          | AC=1;AF=0.016;AN=64;BaseQRankSum=  |
| 14815 | chrY | 10054898 | . | T | G   | 78.69    | my_snp_filter | AC=3;AF=0.043;AN=70;BaseQ          |
| 14816 | chrY | 10054901 | . | G | A   | 417.27   | PASS          | AC=6;AF=0.088;AN=68;BaseQRankSum=  |
| 14817 | chrY | 10054909 | . | C | T   | 1079.82  | PASS          | AC=12;AF=0.176;AN=68;BaseQRankSum= |
| 14818 | chrY | 10054919 | . | A | G   | 1724.45  | my_snp_filter | AC=12;AF=0.176;AN=68;BaseQ         |
| 14819 | chrY | 10054920 | . | G | A   | 432.50   | PASS          | AC=6;AF=0.086;AN=70;BaseQRankSum=  |
| 14820 | chrY | 10054933 | . | T | A   | 1451.55  | my_snp_filter | AC=7;AF=0.103;AN=68;BaseQ          |

|       |      |          |   |   |     |          |               |                                    |
|-------|------|----------|---|---|-----|----------|---------------|------------------------------------|
| 14821 | chrY | 10054951 | . | C | T   | 562.60   | my_snp_filter | AC=7;AF=0.103;AN=68;BaseQ          |
| 14822 | chrY | 10054963 | . | T | A   | 243.60   | PASS          | AC=2;AF=0.031;AN=64;BaseQRankSum=  |
| 14823 | chrY | 10054984 | . | C | T   | 264.14   | PASS          | AC=3;AF=0.044;AN=68;BaseQRankSum=  |
| 14824 | chrY | 10054993 | . | A | G   | 213.39   | PASS          | AC=3;AF=0.044;AN=68;BaseQRankSum=  |
| 14825 | chrY | 10055011 | . | C | A   | 145.71   | PASS          | AC=1;AF=0.016;AN=64;BaseQRankSum=  |
| 14826 | chrY | 10055012 | . | A | G   | 145.68   | PASS          | AC=1;AF=0.016;AN=64;BaseQRankSum=  |
| 14827 | chrY | 10055029 | . | C | A   | 60.50    | PASS          | AC=1;AF=0.016;AN=62;BaseQRankSum=  |
| 14828 | chrY | 10055062 | . | A | G   | 59.54    | my_snp_filter | AC=1;AF=0.019;AN=52;BaseQ          |
| 14829 | chrY | 10055102 | . | T | C   | 38.37    | PASS          | AC=1;AF=0.028;AN=36;BaseQRankSum=  |
| 14830 | chrY | 10055135 | . | C | T   | 466.92   | PASS          | AC=6;AF=0.100;AN=60;BaseQRankSum=  |
| 14831 | chrY | 10055153 | . | A | G   | 49.39    | PASS          | AC=1;AF=0.014;AN=70;BaseQRankSum=  |
| 14832 | chrY | 10055167 | . | G | T   | 2483.06  | PASS          | AC=4;AF=0.059;AN=68;BaseQRankSum=  |
| 14833 | chrY | 10055169 | . | T | A   | 33.72    | my_snp_filter | AC=1;AF=0.015;AN=68;BaseQ          |
| 14834 | chrY | 10055170 | . | A | G   | 6232.92  | PASS          | AC=21;AF=0.339;AN=62;BaseQRankSum= |
| 14835 | chrY | 10055173 | . | C | G   | 39.51    | my_snp_filter | AC=1;AF=0.014;AN=70;BaseQ          |
| 14836 | chrY | 10055201 | . | C | T   | 92.49    | PASS          | AC=1;AF=0.014;AN=70;BaseQRankSum=  |
| 14837 | chrY | 10055207 | . | C | T   | 11152.85 | PASS          | AC=18;AF=0.333;AN=54;BaseQ         |
| 14838 | chrY | 10055211 | . | G | T   | 36.94    | my_snp_filter | AC=1;AF=0.014;AN=70;BaseQ          |
| 14839 | chrY | 10055218 | . | A | C   | 1473.96  | PASS          | AC=6;AF=0.086;AN=70;BaseQRankSum=  |
| 14840 | chrY | 10055220 | . | G | T   | 538.55   | my_snp_filter | AC=5;AF=0.071;AN=70;BaseQ          |
| 14841 | chrY | 10055226 | . | G | A   | 502.57   | PASS          | AC=4;AF=0.057;AN=70;BaseQRankSum=  |
| 14842 | chrY | 10055233 | . | T | C   | 398.40   | my_snp_filter | AC=4;AF=0.057;AN=70;BaseQ          |
| 14843 | chrY | 10055236 | . | T | G   | 11518.42 | PASS          | AC=18;AF=0.333;AN=54;BaseQ         |
| 14844 | chrY | 10055239 | . | C | T   | 100.21   | my_snp_filter | AC=1;AF=0.014;AN=70;BaseQ          |
| 14845 | chrY | 10055245 | . | G | C   | 59.71    | my_snp_filter | AC=2;AF=0.029;AN=70;BaseQ          |
| 14846 | chrY | 10055248 | . | G | A   | 3023.13  | PASS          | AC=7;AF=0.100;AN=70;BaseQRankSum=  |
| 14847 | chrY | 10055250 | . | C | T   | 3023.58  | PASS          | AC=7;AF=0.100;AN=70;BaseQRankSum=  |
| 14848 | chrY | 10055252 | . | G | A   | 11122.20 | PASS          | AC=15;AF=0.259;AN=58;BaseQ         |
| 14849 | chrY | 10055255 | . | G | A   | 3021.94  | PASS          | AC=8;AF=0.114;AN=70;BaseQRankSum=  |
| 14850 | chrY | 10055264 | . | G | T   | 2600.77  | PASS          | AC=6;AF=0.086;AN=70;BaseQRankSum=  |
| 14851 | chrY | 10055267 | . | G | A   | 2432.56  | PASS          | AC=6;AF=0.088;AN=68;BaseQRankSum=  |
| 14852 | chrY | 10055271 | . | T | C   | 11958.98 | PASS          | AC=9;AF=0.150;AN=60;BaseQ          |
| 14853 | chrY | 10055272 | . | A | G   | 65.39    | PASS          | AC=3;AF=0.047;AN=64;BaseQRankSum=  |
| 14854 | chrY | 10055281 | . | A | G   | 74.54    | PASS          | AC=3;AF=0.045;AN=66;BaseQRankSum=  |
| 14855 | chrY | 10055297 | . | T | C   | 623.21   | PASS          | AC=4;AF=0.061;AN=66;BaseQRankSum=  |
| 14856 | chrY | 10055328 | . | C | T   | 9447.44  | PASS          | AC=6;AF=0.111;AN=54;BaseQRankSum=  |
| 14857 | chrY | 10055341 | . | C | A   | 3400.86  | PASS          | AC=6;AF=0.091;AN=66;BaseQRankSum=  |
| 14858 | chrY | 10055345 | . | C | G   | 2219.59  | PASS          | AC=10;AF=0.152;AN=66;BaseQRankSum= |
| 14859 | chrY | 10055353 | . | C | A   | 1469.12  | PASS          | AC=4;AF=0.071;AN=56;BaseQRankSum=  |
| 14860 | chrY | 10055354 | . | A | T   | 10546.90 | PASS          | AC=7;AF=0.130;AN=54;BaseQ          |
| 14861 | chrY | 10055361 | . | A | G   | 411.18   | PASS          | AC=1;AF=0.014;AN=70;BaseQRankSum=  |
| 14862 | chrY | 10055367 | . | C | A   | 1177.42  | PASS          | AC=4;AF=0.057;AN=70;BaseQRankSum=  |
| 14863 | chrY | 10055373 | . | G | A   | 3927.86  | PASS          | AC=7;AF=0.100;AN=70;BaseQRankSum=  |
| 14864 | chrY | 10055401 | . | T | C   | 7306.30  | PASS          | AC=24;AF=0.353;AN=68;BaseQRankSum= |
| 14865 | chrY | 10055416 | . | G | A   | 206.44   | PASS          | AC=7;AF=0.100;AN=70;BaseQRankSum=  |
| 14866 | chrY | 10055417 | . | G | T   | 10308.07 | PASS          | AC=23;AF=0.329;AN=70;BaseQ         |
| 14867 | chrY | 10055424 | . | C | T   | 13892.77 | PASS          | AC=28;AF=0.412;AN=68;BaseQ         |
| 14868 | chrY | 10055448 | . | A | G   | 4600.59  | PASS          | AC=17;AF=0.243;AN=70;BaseQRankSum= |
| 14869 | chrY | 10055461 | . | G | T   | 721.44   | PASS          | AC=6;AF=0.086;AN=70;BaseQRankSum=  |
| 14870 | chrY | 10055473 | . | T | A   | 13411.63 | PASS          | AC=27;AF=0.386;AN=70;BaseQ         |
| 14871 | chrY | 10055491 | . | T | C   | 3894.40  | PASS          | AC=18;AF=0.257;AN=70;BaseQRankSum= |
| 14872 | chrY | 10055492 | . | G | A   | 3895.57  | PASS          | AC=18;AF=0.257;AN=70;BaseQRankSum= |
| 14873 | chrY | 10055507 | . | G | A   | 5676.80  | PASS          | AC=16;AF=0.229;AN=70;BaseQRankSum= |
| 14874 | chrY | 10055508 | . | T | C   | 5669.63  | PASS          | AC=17;AF=0.243;AN=70;BaseQRankSum= |
| 14875 | chrY | 10055539 | . | C | T   | 3180.04  | my_snp_filter | AC=12;AF=0.171;AN=70;BaseQ         |
| 14876 | chrY | 10055559 | . | A | C   | 2727.20  | my_snp_filter | AC=9;AF=0.129;AN=70;BaseQ          |
| 14877 | chrY | 10055572 | . | T | C   | 586.69   | PASS          | AC=5;AF=0.071;AN=70;BaseQRankSum=  |
| 14878 | chrY | 10055573 | . | G | A   | 583.74   | PASS          | AC=5;AF=0.071;AN=70;BaseQRankSum=  |
| 14879 | chrY | 10055574 | . | C | T   | 3064.74  | my_snp_filter | AC=9;AF=0.132;AN=68;BaseQ          |
| 14880 | chrY | 10055575 | . | G | A,T | 706.98   | PASS          | AC=5,2;AF=0.071,0.029;AN=70;BaseQ  |
| 14881 | chrY | 10055585 | . | A | T   | 433.04   | PASS          | AC=4;AF=0.061;AN=66;BaseQRankSum=  |
| 14882 | chrY | 10055638 | . | A | G   | 64.16    | my_snp_filter | AC=4;AF=0.059;AN=68;BaseQ          |
| 14883 | chrY | 10055640 | . | G | A   | 1200.31  | my_snp_filter | AC=6;AF=0.088;AN=68;BaseQ          |
| 14884 | chrY | 10055645 | . | C | A   | 1912.82  | my_snp_filter | AC=6;AF=0.091;AN=66;BaseQ          |
| 14885 | chrY | 10055658 | . | C | G   | 1350.39  | my_snp_filter | AC=6;AF=0.091;AN=66;BaseQ          |
| 14886 | chrY | 10055670 | . | T | C   | 1162.45  | my_snp_filter | AC=6;AF=0.088;AN=68;BaseQ          |
| 14887 | chrY | 10055703 | . | T | C   | 40.40    | my_snp_filter | AC=3;AF=0.044;AN=68;BaseQ          |
| 14888 | chrY | 10055708 | . | A | T   | 45.57    | my_snp_filter | AC=2;AF=0.029;AN=68;BaseQ          |
| 14889 | chrY | 10055767 | . | G | T   | 40.48    | PASS          | AC=1;AF=0.016;AN=64;BaseQRankSum=  |
| 14890 | chrY | 10055769 | . | A | T   | 32.52    | PASS          | AC=1;AF=0.016;AN=62;BaseQRankSum=  |
| 14891 | chrY | 10055778 | . | A | G   | 89.98    | PASS          | AC=2;AF=0.031;AN=64;DP=288;FS=0.0  |
| 14892 | chrY | 10055780 | . | A | G   | 89.78    | PASS          | AC=2;AF=0.029;AN=68;DP=295;FS=0.0  |
| 14893 | chrY | 10055988 | . | G | A   | 131.63   | PASS          | AC=3;AF=0.043;AN=70;BaseQRankSum=  |
| 14894 | chrY | 10055993 | . | T | C   | 249.40   | PASS          | AC=4;AF=0.057;AN=70;BaseQRankSum=  |
| 14895 | chrY | 10056016 | . | G | T   | 290.47   | PASS          | AC=3;AF=0.043;AN=70;BaseQRankSum=  |
| 14896 | chrY | 10056042 | . | C | G   | 251.51   | PASS          | AC=3;AF=0.044;AN=68;BaseQRankSum=  |

|       |      |          |   |   |   |          |               |                                    |
|-------|------|----------|---|---|---|----------|---------------|------------------------------------|
| 14897 | chrY | 10056072 | . | T | G | 474.15   | PASS          | AC=3;AF=0.056;AN=54;BaseQRankSum=  |
| 14898 | chrY | 10056083 | . | A | G | 387.89   | PASS          | AC=3;AF=0.058;AN=52;BaseQRankSum=  |
| 14899 | chrY | 10056088 | . | C | T | 385.41   | PASS          | AC=3;AF=0.060;AN=50;BaseQRankSum=  |
| 14900 | chrY | 10056093 | . | T | C | 427.76   | PASS          | AC=3;AF=0.060;AN=50;BaseQRankSum=  |
| 14901 | chrY | 10056117 | . | C | T | 585.25   | PASS          | AC=3;AF=0.100;AN=30;BaseQRankSum=  |
| 14902 | chrY | 10056132 | . | G | A | 580.23   | PASS          | AC=3;AF=0.088;AN=34;BaseQRankSum=  |
| 14903 | chrY | 10056141 | . | G | A | 620.18   | my_snp_filter | AC=3;AF=0.088;AN=34;BaseQ          |
| 14904 | chrY | 10056149 | . | C | T | 674.21   | PASS          | AC=3;AF=0.083;AN=36;BaseQRankSum=  |
| 14905 | chrY | 10056158 | . | T | C | 674.39   | PASS          | AC=3;AF=0.075;AN=40;BaseQRankSum=  |
| 14906 | chrY | 10056186 | . | C | T | 564.67   | PASS          | AC=3;AF=0.065;AN=46;BaseQRankSum=  |
| 14907 | chrY | 10056187 | . | A | G | 561.67   | PASS          | AC=3;AF=0.065;AN=46;BaseQRankSum=  |
| 14908 | chrY | 10056204 | . | A | G | 433.70   | PASS          | AC=3;AF=0.063;AN=48;BaseQRankSum=  |
| 14909 | chrY | 10056213 | . | C | G | 385.25   | PASS          | AC=3;AF=0.065;AN=46;BaseQRankSum=  |
| 14910 | chrY | 10056221 | . | A | T | 353.51   | PASS          | AC=3;AF=0.058;AN=52;BaseQRankSum=  |
| 14911 | chrY | 10056246 | . | T | C | 207.91   | PASS          | AC=1;AF=0.016;AN=62;BaseQRankSum=  |
| 14912 | chrY | 10056256 | . | T | C | 286.53   | PASS          | AC=1;AF=0.015;AN=66;BaseQRankSum=  |
| 14913 | chrY | 10056259 | . | C | T | 328.16   | PASS          | AC=1;AF=0.015;AN=66;BaseQRankSum=  |
| 14914 | chrY | 10056260 | . | A | G | 327.78   | PASS          | AC=1;AF=0.015;AN=66;BaseQRankSum=  |
| 14915 | chrY | 10056268 | . | T | G | 234.55   | PASS          | AC=1;AF=0.015;AN=66;BaseQRankSum=  |
| 14916 | chrY | 10056270 | . | A | C | 235.12   | PASS          | AC=1;AF=0.015;AN=66;BaseQRankSum=  |
| 14917 | chrY | 10056291 | . | T | G | 282.11   | PASS          | AC=1;AF=0.015;AN=68;BaseQRankSum=  |
| 14918 | chrY | 10056303 | . | A | C | 447.76   | PASS          | AC=1;AF=0.015;AN=68;BaseQRankSum=  |
| 14919 | chrY | 10056304 | . | T | G | 444.71   | PASS          | AC=1;AF=0.015;AN=68;BaseQRankSum=  |
| 14920 | chrY | 10056308 | . | G | C | 447.77   | PASS          | AC=1;AF=0.015;AN=68;BaseQRankSum=  |
| 14921 | chrY | 10056319 | . | A | G | 616.39   | PASS          | AC=1;AF=0.015;AN=66;BaseQRankSum=  |
| 14922 | chrY | 10056327 | . | A | T | 655.16   | PASS          | AC=1;AF=0.015;AN=68;BaseQRankSum=  |
| 14923 | chrY | 10056330 | . | A | G | 687.22   | PASS          | AC=1;AF=0.015;AN=68;BaseQRankSum=  |
| 14924 | chrY | 10056331 | . | G | C | 687.18   | PASS          | AC=1;AF=0.015;AN=68;BaseQRankSum=  |
| 14925 | chrY | 10056372 | . | G | A | 5299.13  | PASS          | AC=10;AF=0.147;AN=68;BaseQRankSum= |
| 14926 | chrY | 10056383 | . | A | G | 250      | PASS          | AC=3;AF=0.044;AN=68;BaseQRankSum=  |
| 14927 | chrY | 10056385 | . | T | A | 250.10   | PASS          | AC=3;AF=0.044;AN=68;BaseQRankSum=  |
| 14928 | chrY | 10056402 | . | T | C | 8843.41  | PASS          | AC=11;AF=0.162;AN=68;BaseQRankSum= |
| 14929 | chrY | 10056404 | . | T | A | 8913.61  | PASS          | AC=11;AF=0.162;AN=68;BaseQRankSum= |
| 14930 | chrY | 10056412 | . | T | G | 8916.31  | PASS          | AC=11;AF=0.162;AN=68;BaseQRankSum= |
| 14931 | chrY | 10056466 | . | C | G | 4217.70  | PASS          | AC=15;AF=0.221;AN=68;BaseQRankSum= |
| 14932 | chrY | 10056467 | . | G | T | 4510.39  | PASS          | AC=15;AF=0.221;AN=68;BaseQRankSum= |
| 14933 | chrY | 10056487 | . | A | C | 244.06   | PASS          | AC=4;AF=0.057;AN=70;BaseQRankSum=  |
| 14934 | chrY | 10056492 | . | C | T | 6367.12  | PASS          | AC=14;AF=0.200;AN=70;BaseQRankSum= |
| 14935 | chrY | 10056511 | . | T | A | 7225.99  | PASS          | AC=14;AF=0.206;AN=68;BaseQRankSum= |
| 14936 | chrY | 10056562 | . | G | T | 10047.26 | PASS          | AC=10;AF=0.152;AN=66;BaseQRankSum= |
| 14937 | chrY | 10056572 | . | T | C | 10418.05 | PASS          | AC=9;AF=0.141;AN=64;BaseQRankSum=  |
| 14938 | chrY | 10056581 | . | T | A | 10137.35 | PASS          | AC=9;AF=0.136;AN=66;BaseQRankSum=  |
| 14939 | chrY | 10056586 | . | T | C | 10169.03 | PASS          | AC=9;AF=0.136;AN=66;BaseQRankSum=  |
| 14940 | chrY | 10056611 | . | T | A | 10678.24 | PASS          | AC=9;AF=0.141;AN=64;BaseQRankSum=  |
| 14941 | chrY | 10056630 | . | G | A | 11152.97 | PASS          | AC=9;AF=0.173;AN=52;BaseQRankSum=  |
| 14942 | chrY | 10056636 | . | T | C | 10990.97 | PASS          | AC=9;AF=0.214;AN=42;BaseQRankSum=  |
| 14943 | chrY | 10056648 | . | C | A | 10876.49 | PASS          | AC=9;AF=0.225;AN=40;BaseQRankSum=  |
| 14944 | chrY | 10056658 | . | T | A | 11252.18 | PASS          | AC=9;AF=0.237;AN=38;BaseQRankSum=  |
| 14945 | chrY | 10056664 | . | A | C | 11131.29 | PASS          | AC=9;AF=0.281;AN=32;BaseQRankSum=  |
| 14946 | chrY | 10056670 | . | G | A | 11161.01 | PASS          | AC=9;AF=0.281;AN=32;BaseQRankSum=  |
| 14947 | chrY | 10056677 | . | T | G | 11071.40 | PASS          | AC=10;AF=0.385;AN=26;BaseQRankSum= |
| 14948 | chrY | 10056746 | . | T | A | 19039.62 | my_snp_filter | AC=34;AF=0.486;AN=                 |
| 14949 | chrY | 10056762 | . | T | G | 23826.64 | my_snp_filter | AC=34;AF=0.500;AN=                 |
| 14950 | chrY | 10056809 | . | C | A | 2171.50  | PASS          | AC=14;AF=0.200;AN=70;BaseQRankSum= |
| 14951 | chrY | 10056812 | . | T | C | 55977.13 | PASS          | AC=35;AF=0.530;AN=66;BaseQRankSum= |
| 14952 | chrY | 10056815 | . | G | A | 4011.24  | PASS          | AC=11;AF=0.157;AN=70;BaseQRankSum= |
| 14953 | chrY | 10056818 | . | G | C | 39908.18 | PASS          | AC=26;AF=0.500;AN=52;BaseQRankSum= |
| 14954 | chrY | 10056823 | . | T | A | 40451.07 | PASS          | AC=26;AF=0.500;AN=52;BaseQRankSum= |
| 14955 | chrY | 10056826 | . | C | A | 507.43   | PASS          | AC=2;AF=0.029;AN=70;BaseQRankSum=  |
| 14956 | chrY | 10056828 | . | A | T | 4667.88  | PASS          | AC=11;AF=0.157;AN=70;BaseQRankSum= |
| 14957 | chrY | 10056850 | . | G | C | 14797.21 | PASS          | AC=25;AF=0.357;AN=70;BaseQRankSum= |
| 14958 | chrY | 10056854 | . | A | G | 14342.09 | PASS          | AC=25;AF=0.357;AN=70;BaseQRankSum= |
| 14959 | chrY | 10056858 | . | C | T | 13815.42 | PASS          | AC=25;AF=0.357;AN=70;BaseQRankSum= |
| 14960 | chrY | 10056860 | . | G | T | 4872.57  | PASS          | AC=12;AF=0.171;AN=70;BaseQRankSum= |
| 14961 | chrY | 10056869 | . | A | G | 24981.82 | PASS          | AC=20;AF=0.357;AN=56;BaseQRankSum= |
| 14962 | chrY | 10056876 | . | C | T | 4770.79  | PASS          | AC=12;AF=0.171;AN=70;BaseQRankSum= |
| 14963 | chrY | 10056879 | . | C | G | 23348.96 | PASS          | AC=20;AF=0.357;AN=56;BaseQRankSum= |
| 14964 | chrY | 10056891 | . | T | G | 9785.49  | PASS          | AC=20;AF=0.323;AN=62;BaseQRankSum= |
| 14965 | chrY | 10056899 | . | A | C | 17889.96 | PASS          | AC=20;AF=0.357;AN=56;BaseQRankSum= |
| 14966 | chrY | 10056912 | . | C | A | 18824.65 | PASS          | AC=20;AF=0.455;AN=44;BaseQRankSum= |
| 14967 | chrY | 10056921 | . | G | A | 3114.50  | PASS          | AC=7;AF=0.100;AN=70;BaseQRankSum=  |
| 14968 | chrY | 10056926 | . | C | T | 16062.24 | PASS          | AC=17;AF=0.370;AN=46;BaseQRankSum= |
| 14969 | chrY | 10056946 | . | G | A | 587.14   | my_snp_filter | AC=4;AF=0.061;AN=66;BaseQRankSum=  |
| 14970 | chrY | 10056955 | . | C | T | 3647.08  | PASS          | AC=6;AF=0.094;AN=64;BaseQRankSum=  |
| 14971 | chrY | 10056956 | . | G | A | 5303.74  | PASS          | AC=11;AF=0.172;AN=64;BaseQRankSum= |
| 14972 | chrY | 10056968 | . | C | G | 4921.24  | PASS          | AC=11;AF=0.190;AN=58;BaseQRankSum= |

|       |      |          |   |   |     |          |               |                                    |
|-------|------|----------|---|---|-----|----------|---------------|------------------------------------|
| 14973 | chrY | 10056978 | . | T | A   | 12444.15 | PASS          | AC=11;AF=0.275;AN=40;BaseQ         |
| 14974 | chrY | 10056993 | . | C | G   | 6570.64  | PASS          | AC=9;AF=0.196;AN=46;BaseQRankSum=  |
| 14975 | chrY | 10056994 | . | A | G   | 11952.38 | PASS          | AC=13;AF=0.325;AN=40;BaseQ         |
| 14976 | chrY | 10056997 | . | T | A   | 4067.57  | PASS          | AC=9;AF=0.150;AN=60;BaseQRankSum=  |
| 14977 | chrY | 10057045 | . | C | T   | 54.53    | my_snp_filter | AC=2;AF=0.029;AN=68;BaseQ          |
| 14978 | chrY | 10057046 | . | C | T   | 5495.25  | PASS          | AC=10;AF=0.147;AN=68;BaseQRankSum= |
| 14979 | chrY | 10057053 | . | C | A   | 47.27    | my_snp_filter | AC=1;AF=0.015;AN=66;BaseQ          |
| 14980 | chrY | 10057079 | . | A | T   | 7026.19  | PASS          | AC=9;AF=0.136;AN=66;BaseQRankSum=  |
| 14981 | chrY | 10057086 | . | T | A   | 167.26   | my_snp_filter | AC=3;AF=0.044;AN=68;BaseQ          |
| 14982 | chrY | 10057097 | . | C | A   | 12539.25 | my_snp_filter | AC=22;AF=0.344;AN=                 |
| 14983 | chrY | 10057109 | . | T | C   | 361.64   | my_snp_filter | AC=9;AF=0.132;AN=68;BaseQ          |
| 14984 | chrY | 10057128 | . | A | G   | 545.99   | PASS          | AC=8;AF=0.114;AN=70;BaseQRankSum=  |
| 14985 | chrY | 10057151 | . | C | T   | 113.86   | my_snp_filter | AC=2;AF=0.029;AN=70;BaseQ          |
| 14986 | chrY | 10057155 | . | A | T   | 778.94   | PASS          | AC=8;AF=0.114;AN=70;BaseQRankSum=  |
| 14987 | chrY | 10057156 | . | C | T   | 98.48    | PASS          | AC=1;AF=0.014;AN=70;BaseQRankSum=  |
| 14988 | chrY | 10057157 | . | A | G   | 1221.16  | my_snp_filter | AC=11;AF=0.162;AN=68;BaseQ         |
| 14989 | chrY | 10057159 | . | G | A   | 97.36    | my_snp_filter | AC=2;AF=0.029;AN=70;BaseQ          |
| 14990 | chrY | 10057160 | . | A | G   | 586.42   | PASS          | AC=9;AF=0.129;AN=70;BaseQRankSum=  |
| 14991 | chrY | 10057161 | . | A | G   | 759.98   | PASS          | AC=9;AF=0.129;AN=70;BaseQRankSum=  |
| 14992 | chrY | 10057165 | . | T | A   | 69.70    | PASS          | AC=1;AF=0.014;AN=70;BaseQRankSum=  |
| 14993 | chrY | 10057167 | . | T | G   | 1091.86  | my_snp_filter | AC=10;AF=0.143;AN=70;BaseQ         |
| 14994 | chrY | 10057170 | . | A | T   | 75.47    | PASS          | AC=1;AF=0.014;AN=70;BaseQRankSum=  |
| 14995 | chrY | 10057171 | . | G | T   | 402.51   | my_snp_filter | AC=9;AF=0.129;AN=70;BaseQ          |
| 14996 | chrY | 10057177 | . | C | T   | 87.50    | PASS          | AC=1;AF=0.014;AN=70;BaseQRankSum=  |
| 14997 | chrY | 10057180 | . | G | C   | 571.69   | PASS          | AC=7;AF=0.100;AN=70;BaseQRankSum=  |
| 14998 | chrY | 10057192 | . | C | A   | 1357.66  | my_snp_filter | AC=13;AF=0.191;AN=68;BaseQ         |
| 14999 | chrY | 10057201 | . | A | T   | 704.60   | PASS          | AC=9;AF=0.141;AN=64;BaseQRankSum=  |
| 15000 | chrY | 10057208 | . | T | C   | 432.81   | PASS          | AC=4;AF=0.059;AN=68;BaseQRankSum=  |
| 15001 | chrY | 10057213 | . | A | G   | 414.96   | PASS          | AC=3;AF=0.043;AN=70;BaseQRankSum=  |
| 15002 | chrY | 10057219 | . | G | A   | 289.68   | PASS          | AC=3;AF=0.047;AN=64;BaseQRankSum=  |
| 15003 | chrY | 10057334 | . | C | T   | 123.34   | PASS          | AC=1;AF=0.015;AN=68;BaseQRankSum=  |
| 15004 | chrY | 10057335 | . | G | C   | 123.16   | PASS          | AC=1;AF=0.015;AN=66;BaseQRankSum=  |
| 15005 | chrY | 10057344 | . | G | C   | 240.25   | PASS          | AC=1;AF=0.016;AN=62;BaseQRankSum=  |
| 15006 | chrY | 10057408 | . | G | A   | 2569.56  | PASS          | AC=9;AF=0.141;AN=64;BaseQRankSum=  |
| 15007 | chrY | 10057421 | . | C | T   | 35.89    | PASS          | AC=3;AF=0.050;AN=60;BaseQRankSum=  |
| 15008 | chrY | 10057430 | . | A | T   | 71.75    | PASS          | AC=1;AF=0.020;AN=50;BaseQRankSum=  |
| 15009 | chrY | 10057434 | . | A | G   | 4347.84  | PASS          | AC=12;AF=0.261;AN=46;BaseQRankSum= |
| 15010 | chrY | 10057450 | . | T | A   | 2160.20  | PASS          | AC=9;AF=0.196;AN=46;BaseQRankSum=  |
| 15011 | chrY | 10057458 | . | G | A   | 1782.66  | PASS          | AC=9;AF=0.196;AN=46;BaseQRankSum=  |
| 15012 | chrY | 10057468 | . | C | G,T | 3172.24  | PASS          | AC=7,2;AF=0.140,0.040;AN=50;BaseQ  |
| 15013 | chrY | 10057486 | . | C | T   | 6571.64  | PASS          | AC=9;AF=0.173;AN=52;BaseQRankSum=  |
| 15014 | chrY | 10057488 | . | C | T   | 830.22   | PASS          | AC=16;AF=0.421;AN=38;DP=419;FS=0.  |
| 15015 | chrY | 10057518 | . | T | G   | 5883.20  | PASS          | AC=9;AF=0.145;AN=62;BaseQRankSum=  |
| 15016 | chrY | 10057526 | . | C | T   | 34.93    | my_snp_filter | AC=1;AF=0.015;AN=68;BaseQ          |
| 15017 | chrY | 10057528 | . | T | A   | 5819.22  | PASS          | AC=9;AF=0.141;AN=64;BaseQRankSum=  |
| 15018 | chrY | 10057545 | . | G | A   | 1886.94  | PASS          | AC=9;AF=0.129;AN=70;BaseQRankSum=  |
| 15019 | chrY | 10057602 | . | T | A   | 855.40   | PASS          | AC=3;AF=0.044;AN=68;BaseQRankSum=  |
| 15020 | chrY | 10057615 | . | G | T   | 729.54   | PASS          | AC=3;AF=0.044;AN=68;BaseQRankSum=  |
| 15021 | chrY | 10057623 | . | T | C   | 589.53   | PASS          | AC=3;AF=0.044;AN=68;BaseQRankSum=  |
| 15022 | chrY | 10057632 | . | C | G   | 479.68   | PASS          | AC=3;AF=0.043;AN=70;BaseQRankSum=  |
| 15023 | chrY | 10057633 | . | T | G   | 479.71   | PASS          | AC=3;AF=0.043;AN=70;BaseQRankSum=  |
| 15024 | chrY | 10057647 | . | C | A   | 323.89   | PASS          | AC=3;AF=0.043;AN=70;BaseQRankSum=  |
| 15025 | chrY | 10057648 | . | G | A   | 282.09   | PASS          | AC=3;AF=0.044;AN=68;BaseQRankSum=  |
| 15026 | chrY | 10057676 | . | C | T   | 210.27   | PASS          | AC=2;AF=0.031;AN=64;BaseQRankSum=  |
| 15027 | chrY | 10058653 | . | T | A   | 680.78   | PASS          | AC=3;AF=0.167;AN=18;BaseQRankSum=  |
| 15028 | chrY | 10058913 | . | C | T   | 3732.87  | PASS          | AC=18;AF=1.00;AN=18;BaseQRankSum=  |
| 15029 | chrY | 10059440 | . | A | G   | 159.13   | PASS          | AC=2;AF=0.059;AN=34;BaseQRankSum=  |
| 15030 | chrY | 10059472 | . | T | A,C | 5874.12  | PASS          | AC=8,15;AF=0.125,0.234;AN=64;BaseQ |
| 15031 | chrY | 10059494 | . | C | T   | 6589.64  | PASS          | AC=20;AF=0.286;AN=70;BaseQRankSum= |
| 15032 | chrY | 10059499 | . | T | C   | 3414.60  | PASS          | AC=15;AF=0.227;AN=66;BaseQRankSum= |
| 15033 | chrY | 10059507 | . | A | T   | 3462.71  | PASS          | AC=15;AF=0.227;AN=66;BaseQRankSum= |
| 15034 | chrY | 10059515 | . | C | A   | 11861.79 | PASS          | AC=22;AF=0.344;AN=64;BaseQ         |
| 15035 | chrY | 10059533 | . | T | G   | 1932.83  | PASS          | AC=5;AF=0.071;AN=70;BaseQRankSum=  |
| 15036 | chrY | 10059544 | . | A | G   | 4454.37  | PASS          | AC=12;AF=0.171;AN=70;BaseQRankSum= |
| 15037 | chrY | 10059556 | . | C | A   | 3530.81  | PASS          | AC=10;AF=0.143;AN=70;BaseQRankSum= |
| 15038 | chrY | 10059561 | . | A | C   | 9285.84  | PASS          | AC=12;AF=0.176;AN=68;BaseQRankSum= |
| 15039 | chrY | 10059567 | . | G | A   | 8833.62  | PASS          | AC=12;AF=0.182;AN=66;BaseQRankSum= |
| 15040 | chrY | 10059574 | . | C | T   | 8209.51  | PASS          | AC=11;AF=0.167;AN=66;BaseQRankSum= |
| 15041 | chrY | 10059581 | . | T | C   | 8134.61  | PASS          | AC=11;AF=0.167;AN=66;BaseQRankSum= |
| 15042 | chrY | 10059595 | . | G | A   | 7793.53  | PASS          | AC=11;AF=0.162;AN=68;BaseQRankSum= |
| 15043 | chrY | 10059610 | . | A | G   | 7032.90  | PASS          | AC=10;AF=0.152;AN=66;BaseQRankSum= |
| 15044 | chrY | 10059617 | . | A | C   | 6817.91  | PASS          | AC=10;AF=0.147;AN=68;BaseQRankSum= |
| 15045 | chrY | 10059636 | . | G | A   | 2909.80  | PASS          | AC=10;AF=0.143;AN=70;BaseQRankSum= |
| 15046 | chrY | 10059645 | . | T | C   | 7327.52  | PASS          | AC=12;AF=0.176;AN=68;BaseQRankSum= |
| 15047 | chrY | 10059649 | . | G | T   | 2766.26  | PASS          | AC=11;AF=0.157;AN=70;BaseQRankSum= |
| 15048 | chrY | 10059679 | . | G | A   | 1560.38  | PASS          | AC=12;AF=0.182;AN=66;BaseQRankSum= |

|       |      |          |   |   |      |          |               |                                             |
|-------|------|----------|---|---|------|----------|---------------|---------------------------------------------|
| 15049 | chrY | 10059681 | . | G | A    | 9975.60  | PASS          | AC=18;AF=0.281;AN=64;BaseQRankSum=          |
| 15050 | chrY | 10059692 | . | G | T    | 10807.34 | PASS          | AC=18;AF=0.273;AN=66;BaseQRankSum=          |
| 15051 | chrY | 10059698 | . | C | A    | 11365.99 | PASS          | AC=19;AF=0.297;AN=64;BaseQRankSum=          |
| 15052 | chrY | 10059717 | . | C | T    | 12578.73 | PASS          | AC=19;AF=0.297;AN=64;BaseQRankSum=          |
| 15053 | chrY | 10059791 | . | C | T    | 3413.87  | PASS          | AC=15;AF=0.214;AN=70;BaseQRankSum=          |
| 15054 | chrY | 10059794 | . | C | T    | 3597.26  | PASS          | AC=13;AF=0.186;AN=70;BaseQRankSum=          |
| 15055 | chrY | 10059798 | . | A | C    | 7890.17  | my_snp_filter | AC=19;AF=0.306;AN=62;BaseQRankSum=          |
| 15056 | chrY | 10059822 | . | C | T    | 2280.05  | PASS          | AC=11;AF=0.167;AN=66;BaseQRankSum=          |
| 15057 | chrY | 10059823 | . | C | T    | 5182.37  | PASS          | AC=11;AF=0.177;AN=62;BaseQRankSum=          |
| 15058 | chrY | 10059836 | . | G | T    | 3846.85  | PASS          | AC=10;AF=0.167;AN=60;BaseQRankSum=          |
| 15059 | chrY | 10059837 | . | C | A    | 1403.42  | PASS          | AC=6;AF=0.094;AN=64;BaseQRankSum=           |
| 15060 | chrY | 10059840 | . | C | T    | 1701.13  | PASS          | AC=10;AF=0.143;AN=70;BaseQRankSum=          |
| 15061 | chrY | 10059846 | . | G | T    | 80.14    | PASS          | AC=1;AF=0.014;AN=70;BaseQRankSum=           |
| 15062 | chrY | 10059850 | . | A | G    | 137.54   | PASS          | AC=1;AF=0.015;AN=68;BaseQRankSum=           |
| 15063 | chrY | 10059851 | . | A | G    | 44.43    | PASS          | AC=1;AF=0.014;AN=70;BaseQRankSum=           |
| 15064 | chrY | 10059864 | . | G | A    | 51.18    | PASS          | AC=1;AF=0.016;AN=64;BaseQRankSum=           |
| 15065 | chrY | 10059873 | . | A | T    | 287.18   | PASS          | AC=2;AF=0.045;AN=44;BaseQRankSum=           |
| 15066 | chrY | 10059881 | . | A | G    | 248.34   | PASS          | AC=2;AF=0.038;AN=52;BaseQRankSum=           |
| 15067 | chrY | 10059897 | . | T | C    | 156.32   | PASS          | AC=2;AF=0.040;AN=50;BaseQRankSum=           |
| 15068 | chrY | 10059899 | . | G | T    | 108.90   | PASS          | AC=1;AF=0.017;AN=58;BaseQRankSum=           |
| 15069 | chrY | 10059912 | . | G | T    | 161.16   | PASS          | AC=2;AF=0.042;AN=48;BaseQRankSum=           |
| 15070 | chrY | 10059918 | . | C | A    | 112.83   | PASS          | AC=1;AF=0.017;AN=58;BaseQRankSum=           |
| 15071 | chrY | 10059928 | . | C | T    | 112.71   | PASS          | AC=1;AF=0.023;AN=44;BaseQRankSum=           |
| 15072 | chrY | 10059943 | . | A | C    | 63.01    | PASS          | AC=1;AF=0.017;AN=60;BaseQRankSum=           |
| 15073 | chrY | 10059953 | . | T | G    | 59.35    | PASS          | AC=1;AF=0.015;AN=66;BaseQRankSum=           |
| 15074 | chrY | 10059954 | . | C | T    | 59.47    | PASS          | AC=1;AF=0.015;AN=66;BaseQRankSum=           |
| 15075 | chrY | 10060186 | . | C | A    | 523.91   | PASS          | AC=4;AF=0.067;AN=60;BaseQRankSum=           |
| 15076 | chrY | 10060199 | . | C | T    | 286.16   | my_snp_filter | AC=4;AF=0.067;AN=60;BaseQRankSum=           |
| 15077 | chrY | 10060221 | . | T | C    | 5145.30  | PASS          | AC=14;AF=0.212;AN=66;BaseQRankSum=          |
| 15078 | chrY | 10060227 | . | T | C    | 618.24   | PASS          | AC=5;AF=0.076;AN=66;BaseQRankSum=           |
| 15079 | chrY | 10060236 | . | C | T    | 605.96   | PASS          | AC=4;AF=0.061;AN=66;BaseQRankSum=           |
| 15080 | chrY | 10060245 | . | T | G    | 7144.49  | my_snp_filter | AC=14;AF=0.219;AN=64;BaseQRankSum=          |
| 15081 | chrY | 10060255 | . | G | A    | 7561.57  | PASS          | AC=14;AF=0.219;AN=64;BaseQRankSum=          |
| 15082 | chrY | 10060268 | . | A | C    | 2262.50  | PASS          | AC=12;AF=0.171;AN=70;BaseQRankSum=          |
| 15083 | chrY | 10060274 | . | C | T    | 2216.52  | PASS          | AC=9;AF=0.129;AN=70;BaseQRankSum=           |
| 15084 | chrY | 10060285 | . | G | A    | 5698.55  | PASS          | AC=15;AF=0.214;AN=70;BaseQRankSum=          |
| 15085 | chrY | 10060306 | . | A | G    | 4820.70  | my_snp_filter | AC=14;AF=0.200;AN=70;BaseQRankSum=          |
| 15086 | chrY | 10060320 | . | C | T    | 17050.93 | PASS          | AC=68;AF=1.00;AN=68;BaseQRankSum=           |
| 15087 | chrY | 10060342 | . | A | T    | 357.27   | PASS          | AC=4;AF=0.057;AN=70;BaseQRankSum=           |
| 15088 | chrY | 10060354 | . | A | G    | 1656.10  | PASS          | AC=8;AF=0.118;AN=68;BaseQRankSum=           |
| 15089 | chrY | 10060361 | . | T | C    | 1749.51  | PASS          | AC=8;AF=0.114;AN=70;BaseQRankSum=           |
| 15090 | chrY | 10060366 | . | G | A    | 1664.23  | PASS          | AC=8;AF=0.114;AN=70;BaseQRankSum=           |
| 15091 | chrY | 10060379 | . | A | T    | 1192.73  | PASS          | AC=8;AF=0.114;AN=70;BaseQRankSum=           |
| 15092 | chrY | 10060385 | . | T | A    | 1075.86  | PASS          | AC=7;AF=0.100;AN=70;BaseQRankSum=           |
| 15093 | chrY | 10060417 | . | T | G    | 1946.33  | PASS          | AC=9;AF=0.129;AN=70;BaseQRankSum=           |
| 15094 | chrY | 10060418 | . | C | A    | 1946.27  | PASS          | AC=9;AF=0.129;AN=70;BaseQRankSum=           |
| 15095 | chrY | 10060434 | . | A | G    | 3510.33  | PASS          | AC=9;AF=0.129;AN=70;BaseQRankSum=           |
| 15096 | chrY | 10060441 | . | G | A    | 3994.60  | PASS          | AC=9;AF=0.129;AN=70;BaseQRankSum=           |
| 15097 | chrY | 10060442 | . | A | T    | 3118.69  | PASS          | AC=9;AF=0.129;AN=70;BaseQRankSum=           |
| 15098 | chrY | 10060445 | . | A | T    | 522.29   | PASS          | AC=4;AF=0.057;AN=70;BaseQRankSum=           |
| 15099 | chrY | 10060466 | . | G | C    | 5237.37  | PASS          | AC=9;AF=0.132;AN=68;BaseQRankSum=           |
| 15100 | chrY | 10060492 | . | A | G    | 6679.87  | PASS          | AC=9;AF=0.141;AN=64;BaseQRankSum=           |
| 15101 | chrY | 10060499 | . | C | T    | 3517.59  | PASS          | AC=9;AF=0.129;AN=70;BaseQRankSum=           |
| 15102 | chrY | 10060510 | . | A | G    | 7368.96  | PASS          | AC=9;AF=0.136;AN=66;BaseQRankSum=           |
| 15103 | chrY | 10060513 | . | T | C    | 1900.86  | PASS          | AC=9;AF=0.132;AN=68;BaseQRankSum=           |
| 15104 | chrY | 10060543 | . | T | G    | 4508.14  | PASS          | AC=9;AF=0.145;AN=62;BaseQRankSum=           |
| 15105 | chrY | 10060558 | . | T | A    | 8405.66  | PASS          | AC=10;AF=0.156;AN=64;BaseQRankSum=          |
| 15106 | chrY | 10060561 | . | A | G    | 4999.12  | PASS          | AC=9;AF=0.136;AN=66;BaseQRankSum=           |
| 15107 | chrY | 10060582 | . | T | G    | 5171.42  | PASS          | AC=9;AF=0.136;AN=66;BaseQRankSum=           |
| 15108 | chrY | 10060592 | . | T | G    | 5214.82  | PASS          | AC=9;AF=0.141;AN=64;BaseQRankSum=           |
| 15109 | chrY | 10060597 | . | C | A, T | 6361.63  | PASS          | AC=6, 4;AF=0.100, 0.067;AN=60;BaseQRankSum= |
| 15110 | chrY | 10060599 | . | A | C    | 10489.81 | PASS          | AC=9;AF=0.150;AN=60;BaseQRankSum=           |
| 15111 | chrY | 10060603 | . | C | G    | 10385.78 | PASS          | AC=9;AF=0.150;AN=60;BaseQRankSum=           |
| 15112 | chrY | 10060614 | . | A | C    | 3778.40  | PASS          | AC=10;AF=0.156;AN=64;BaseQRankSum=          |
| 15113 | chrY | 10060631 | . | A | G    | 33.79    | PASS          | AC=1;AF=0.014;AN=70;BaseQRankSum=           |
| 15114 | chrY | 10060641 | . | A | C    | 41.19    | PASS          | AC=1;AF=0.014;AN=70;BaseQRankSum=           |
| 15115 | chrY | 10060645 | . | A | C    | 14390.48 | PASS          | AC=22;AF=0.344;AN=64;BaseQRankSum=          |
| 15116 | chrY | 10060646 | . | T | C    | 4810.80  | PASS          | AC=17;AF=0.266;AN=64;BaseQRankSum=          |
| 15117 | chrY | 10060650 | . | C | T    | 88.02    | PASS          | AC=2;AF=0.029;AN=70;BaseQRankSum=           |
| 15118 | chrY | 10060658 | . | A | T    | 7905.97  | PASS          | AC=18;AF=0.257;AN=70;BaseQRankSum=          |
| 15119 | chrY | 10060686 | . | A | G    | 18727.93 | PASS          | AC=30;AF=0.429;AN=70;BaseQRankSum=          |
| 15120 | chrY | 10060688 | . | C | T    | 2993.32  | PASS          | AC=21;AF=0.300;AN=70;BaseQRankSum=          |
| 15121 | chrY | 10060700 | . | G | C    | 24419.19 | PASS          | AC=34;AF=0.486;AN=70;BaseQRankSum=          |
| 15122 | chrY | 10060708 | . | A | C    | 25741.77 | PASS          | AC=33;AF=0.471;AN=70;BaseQRankSum=          |
| 15123 | chrY | 10060709 | . | C | T    | 5201.64  | PASS          | AC=23;AF=0.329;AN=70;BaseQRankSum=          |
| 15124 | chrY | 10060711 | . | C | T    | 544.25   | PASS          | AC=9;AF=0.129;AN=70;BaseQRankSum=           |

|       |      |          |   |   |     |          |               |                                    |
|-------|------|----------|---|---|-----|----------|---------------|------------------------------------|
| 15125 | chrY | 10060739 | . | C | A   | 530.30   | PASS          | AC=9;AF=0.129;AN=70;BaseQRankSum=  |
| 15126 | chrY | 10060748 | . | A | T   | 25725.68 | PASS          | AC=27;AF=0.409;AN=66;BaseQ         |
| 15127 | chrY | 10060758 | . | T | G   | 23945.83 | PASS          | AC=20;AF=0.313;AN=64;BaseQ         |
| 15128 | chrY | 10060761 | . | A | C   | 8373.13  | PASS          | AC=15;AF=0.214;AN=70;BaseQRankSum= |
| 15129 | chrY | 10060762 | . | T | C   | 6801.75  | PASS          | AC=16;AF=0.229;AN=70;BaseQRankSum= |
| 15130 | chrY | 10060774 | . | T | C   | 1304.72  | PASS          | AC=7;AF=0.103;AN=68;BaseQRankSum=  |
| 15131 | chrY | 10060782 | . | A | C,G | 8147.41  | PASS          | AC=15,1;AF=0.221,0.015;AN=68;BaseQ |
| 15132 | chrY | 10060784 | . | A | G   | 21788.04 | PASS          | AC=19;AF=0.317;AN=60;BaseQ         |
| 15133 | chrY | 10060791 | . | C | T   | 21081.79 | PASS          | AC=19;AF=0.306;AN=62;BaseQ         |
| 15134 | chrY | 10060817 | . | C | T   | 8475.64  | PASS          | AC=13;AF=0.186;AN=70;BaseQRankSum= |
| 15135 | chrY | 10060820 | . | T | C   | 708.81   | PASS          | AC=4;AF=0.057;AN=70;BaseQRankSum=  |
| 15136 | chrY | 10060838 | . | A | T,G | 9963.50  | PASS          | AC=12,3;AF=0.182,0.045;AN=66;BaseQ |
| 15137 | chrY | 10060845 | . | C | T   | 832.03   | PASS          | AC=5;AF=0.081;AN=62;BaseQRankSum=  |
| 15138 | chrY | 10060851 | . | C | T   | 9375.36  | PASS          | AC=12;AF=0.171;AN=70;BaseQRankSum= |
| 15139 | chrY | 10060859 | . | G | A   | 10626.83 | PASS          | AC=18;AF=0.257;AN=70;BaseQ         |
| 15140 | chrY | 10060870 | . | T | C   | 22932.71 | PASS          | AC=19;AF=0.271;AN=70;BaseQ         |
| 15141 | chrY | 10060877 | . | C | T   | 23560.30 | PASS          | AC=22;AF=0.324;AN=68;BaseQ         |
| 15142 | chrY | 10060885 | . | T | A   | 22840.59 | PASS          | AC=22;AF=0.324;AN=68;BaseQ         |
| 15143 | chrY | 10060887 | . | T | C   | 22550.39 | PASS          | AC=22;AF=0.324;AN=68;BaseQ         |
| 15144 | chrY | 10060893 | . | C | T   | 299.80   | PASS          | AC=5;AF=0.071;AN=70;BaseQRankSum=  |
| 15145 | chrY | 10060909 | . | T | G   | 20785.75 | PASS          | AC=15;AF=0.242;AN=62;BaseQ         |
| 15146 | chrY | 10060929 | . | A | G   | 21080.43 | PASS          | AC=13;AF=0.217;AN=60;BaseQ         |
| 15147 | chrY | 10060934 | . | G | C   | 21060.69 | PASS          | AC=13;AF=0.217;AN=60;BaseQ         |
| 15148 | chrY | 10060940 | . | A | C   | 9045.06  | PASS          | AC=13;AF=0.210;AN=62;BaseQRankSum= |
| 15149 | chrY | 10060945 | . | T | A   | 21206.11 | PASS          | AC=13;AF=0.232;AN=56;BaseQ         |
| 15150 | chrY | 10060948 | . | G | A   | 8799.02  | PASS          | AC=12;AF=0.200;AN=60;BaseQRankSum= |
| 15151 | chrY | 10060954 | . | T | G   | 3111.08  | PASS          | AC=6;AF=0.097;AN=62;BaseQRankSum=  |
| 15152 | chrY | 10060955 | . | T | G   | 20516.57 | PASS          | AC=13;AF=0.241;AN=54;BaseQ         |
| 15153 | chrY | 10061030 | . | G | C   | 12010.89 | PASS          | AC=16;AF=0.308;AN=52;BaseQ         |
| 15154 | chrY | 10061058 | . | T | C   | 11224.55 | PASS          | AC=13;AF=0.250;AN=52;BaseQ         |
| 15155 | chrY | 10061067 | . | A | T   | 11662    | PASS          | AC=13;AF=0.250;AN=52;BaseQRankSum= |
| 15156 | chrY | 10061103 | . | T | A   | 14334.16 | PASS          | AC=25;AF=0.379;AN=66;BaseQ         |
| 15157 | chrY | 10061117 | . | A | G   | 3233.06  | PASS          | AC=11;AF=0.157;AN=70;BaseQRankSum= |
| 15158 | chrY | 10061125 | . | C | A   | 61.52    | my_snp_filter | AC=2;AF=0.029;AN=70;BaseQ          |
| 15159 | chrY | 10061133 | . | G | C   | 43.50    | my_snp_filter | AC=2;AF=0.029;AN=70;BaseQ          |
| 15160 | chrY | 10061142 | . | A | G   | 27477.80 | PASS          | AC=25;AF=0.391;AN=64;BaseQ         |
| 15161 | chrY | 10061162 | . | T | C   | 6884.99  | PASS          | AC=17;AF=0.243;AN=70;BaseQRankSum= |
| 15162 | chrY | 10061174 | . | A | T   | 33475.03 | PASS          | AC=26;AF=0.394;AN=66;BaseQ         |
| 15163 | chrY | 10061197 | . | G | A   | 33086.95 | PASS          | AC=26;AF=0.419;AN=62;BaseQ         |
| 15164 | chrY | 10061201 | . | C | T   | 12450    | PASS          | AC=20;AF=0.323;AN=62;BaseQRankSum= |
| 15165 | chrY | 10061202 | . | A | G   | 32854.96 | PASS          | AC=26;AF=0.419;AN=62;BaseQ         |
| 15166 | chrY | 10061211 | . | A | T   | 32604.22 | PASS          | AC=26;AF=0.406;AN=64;BaseQ         |
| 15167 | chrY | 10061225 | . | T | A   | 12538.80 | PASS          | AC=19;AF=0.271;AN=70;BaseQ         |
| 15168 | chrY | 10061232 | . | A | G   | 30028.98 | PASS          | AC=26;AF=0.394;AN=66;BaseQ         |
| 15169 | chrY | 10061247 | . | A | G   | 10831.52 | PASS          | AC=18;AF=0.257;AN=70;BaseQ         |
| 15170 | chrY | 10061251 | . | G | A   | 13392.94 | PASS          | AC=21;AF=0.300;AN=70;BaseQ         |
| 15171 | chrY | 10061276 | . | G | A   | 22159.48 | PASS          | AC=24;AF=0.353;AN=68;BaseQ         |
| 15172 | chrY | 10061291 | . | C | G   | 279.39   | PASS          | AC=3;AF=0.043;AN=70;BaseQRankSum=  |
| 15173 | chrY | 10061318 | . | C | T   | 512.53   | PASS          | AC=7;AF=0.103;AN=68;BaseQRankSum=  |
| 15174 | chrY | 10061321 | . | C | A   | 514.07   | PASS          | AC=7;AF=0.103;AN=68;BaseQRankSum=  |
| 15175 | chrY | 10061323 | . | G | A   | 169.89   | PASS          | AC=4;AF=0.057;AN=70;BaseQRankSum=  |
| 15176 | chrY | 10061329 | . | A | T   | 619.40   | PASS          | AC=11;AF=0.204;AN=54;BaseQRankSum= |
| 15177 | chrY | 10061334 | . | A | G   | 119.19   | PASS          | AC=3;AF=0.043;AN=70;BaseQRankSum=  |
| 15178 | chrY | 10061337 | . | T | G   | 78.56    | PASS          | AC=3;AF=0.043;AN=70;BaseQRankSum=  |
| 15179 | chrY | 10061348 | . | A | C   | 367.63   | PASS          | AC=8;AF=0.148;AN=54;BaseQRankSum=  |
| 15180 | chrY | 10061355 | . | C | A   | 123.46   | PASS          | AC=5;AF=0.071;AN=70;BaseQRankSum=  |
| 15181 | chrY | 10061358 | . | T | C   | 85.60    | PASS          | AC=5;AF=0.071;AN=70;BaseQRankSum=  |
| 15182 | chrY | 10061366 | . | A | G   | 54.51    | PASS          | AC=4;AF=0.080;AN=50;BaseQRankSum=  |
| 15183 | chrY | 10061428 | . | G | C   | 4268.91  | PASS          | AC=4;AF=0.074;AN=54;BaseQRankSum=  |
| 15184 | chrY | 10061438 | . | G | T   | 4919.56  | PASS          | AC=4;AF=0.071;AN=56;BaseQRankSum=  |
| 15185 | chrY | 10061446 | . | T | C   | 5499.06  | PASS          | AC=4;AF=0.074;AN=54;BaseQRankSum=  |
| 15186 | chrY | 10061454 | . | T | G   | 2472.76  | PASS          | AC=4;AF=0.063;AN=64;BaseQRankSum=  |
| 15187 | chrY | 10061455 | . | G | T   | 1339.60  | PASS          | AC=3;AF=0.047;AN=64;BaseQRankSum=  |
| 15188 | chrY | 10061475 | . | C | A   | 7173.70  | PASS          | AC=4;AF=0.074;AN=54;BaseQRankSum=  |
| 15189 | chrY | 10061479 | . | T | A   | 2787.52  | PASS          | AC=4;AF=0.069;AN=58;BaseQRankSum=  |
| 15190 | chrY | 10061483 | . | A | T   | 3626.97  | PASS          | AC=4;AF=0.067;AN=60;BaseQRankSum=  |
| 15191 | chrY | 10061547 | . | C | A   | 10606.94 | PASS          | AC=9;AF=0.237;AN=38;BaseQ          |
| 15192 | chrY | 10061586 | . | C | A   | 13643.70 | PASS          | AC=9;AF=0.346;AN=26;BaseQ          |
| 15193 | chrY | 10061590 | . | C | T   | 8091.75  | PASS          | AC=9;AF=0.300;AN=30;BaseQRankSum=  |
| 15194 | chrY | 10061591 | . | T | A   | 13654.68 | PASS          | AC=9;AF=0.321;AN=28;BaseQ          |
| 15195 | chrY | 10061602 | . | A | G   | 2743.87  | PASS          | AC=7;AF=0.269;AN=26;BaseQRankSum=  |
| 15196 | chrY | 10061612 | . | C | G   | 7853.85  | PASS          | AC=9;AF=0.375;AN=24;BaseQRankSum=  |
| 15197 | chrY | 10061618 | . | G | T   | 10980.11 | PASS          | AC=9;AF=0.409;AN=22;BaseQ          |
| 15198 | chrY | 10061624 | . | G | T   | 7000.23  | PASS          | AC=9;AF=0.409;AN=22;BaseQRankSum=  |
| 15199 | chrY | 10061632 | . | C | A   | 9766.11  | PASS          | AC=9;AF=0.409;AN=22;BaseQRankSum=  |
| 15200 | chrY | 10061648 | . | T | C,* | 3095.41  | PASS          | AC=6,2;AF=0.333,0.111;AN=18;BaseQ  |



|       |      |          |   |   |     |          |               |                                    |
|-------|------|----------|---|---|-----|----------|---------------|------------------------------------|
| 15201 | chrY | 10061650 | . | C | T   | 1188.67  | PASS          | AC=7;AF=0.500;AN=14;BaseQRankSum=  |
| 15202 | chrY | 10061651 | . | C | T   | 5997.31  | PASS          | AC=9;AF=0.500;AN=18;BaseQRankSum=  |
| 15203 | chrY | 10061668 | . | T | A   | 5785.09  | PASS          | AC=9;AF=0.500;AN=18;BaseQRankSum=  |
| 15204 | chrY | 10061669 | . | A | T   | 6131.78  | PASS          | AC=9;AF=0.500;AN=18;BaseQRankSum=  |
| 15205 | chrY | 10061670 | . | C | G   | 6676.09  | PASS          | AC=9;AF=0.500;AN=18;BaseQRankSum=  |
| 15206 | chrY | 10061674 | . | C | T   | 7024.78  | PASS          | AC=9;AF=0.500;AN=18;BaseQRankSum=  |
| 15207 | chrY | 10061677 | . | T | A   | 58.33    | PASS          | AC=1;AF=0.056;AN=18;BaseQRankSum=  |
| 15208 | chrY | 10061685 | . | T | C   | 6201.09  | PASS          | AC=9;AF=0.500;AN=18;BaseQRankSum=  |
| 15209 | chrY | 10061690 | . | T | C   | 6145.09  | PASS          | AC=9;AF=0.500;AN=18;BaseQRankSum=  |
| 15210 | chrY | 10061716 | . | C | A   | 7701.34  | PASS          | AC=9;AF=0.450;AN=20;BaseQRankSum=  |
| 15211 | chrY | 10061766 | . | C | T   | 4679.68  | PASS          | AC=13;AF=0.464;AN=28;BaseQRankSum= |
| 15212 | chrY | 10061810 | . | C | A,* | 3049.85  | PASS          | AC=5,4;AF=0.278,0.222;AN=18;BaseQ  |
| 15213 | chrY | 10061852 | . | T | C,* | 2801.85  | PASS          | AC=5,4;AF=0.208,0.167;AN=24;BaseQ  |
| 15214 | chrY | 10061854 | . | C | T,* | 2760.45  | PASS          | AC=5,4;AF=0.227,0.182;AN=22;BaseQ  |
| 15215 | chrY | 10061872 | . | G | A,* | 2232.40  | PASS          | AC=3,4;AF=0.188,0.250;AN=16;BaseQ  |
| 15216 | chrY | 10061881 | . | T | T,* | 1929.62  | PASS          | AC=3,3;AF=0.167,0.167;AN=18;BaseQ  |
| 15217 | chrY | 10061889 | . | A | G,* | 1651.27  | PASS          | AC=3,3;AF=0.188,0.188;AN=16;BaseQ  |
| 15218 | chrY | 10061894 | . | G | A,* | 1450.81  | PASS          | AC=3,3;AF=0.214,0.214;AN=14;BaseQ  |
| 15219 | chrY | 10061899 | . | A | G,* | 1419.95  | PASS          | AC=3,3;AF=0.214,0.214;AN=14;BaseQ  |
| 15220 | chrY | 10061902 | . | G | T,* | 1333.39  | PASS          | AC=3,3;AF=0.188,0.188;AN=16;BaseQ  |
| 15221 | chrY | 10062129 | . | A | T   | 1100.38  | PASS          | AC=4;AF=0.067;AN=60;BaseQRankSum=  |
| 15222 | chrY | 10062130 | . | C | G   | 1100.62  | PASS          | AC=4;AF=0.067;AN=60;BaseQRankSum=  |
| 15223 | chrY | 10062133 | . | T | A   | 1067.22  | PASS          | AC=4;AF=0.067;AN=60;BaseQRankSum=  |
| 15224 | chrY | 10062135 | . | C | G   | 1063.58  | PASS          | AC=4;AF=0.069;AN=58;BaseQRankSum=  |
| 15225 | chrY | 10062140 | . | C | A   | 979.10   | PASS          | AC=4;AF=0.063;AN=64;BaseQRankSum=  |
| 15226 | chrY | 10062142 | . | C | G   | 982.29   | PASS          | AC=4;AF=0.063;AN=64;BaseQRankSum=  |
| 15227 | chrY | 10062174 | . | C | G   | 389.88   | PASS          | AC=2;AF=0.029;AN=68;BaseQRankSum=  |
| 15228 | chrY | 10062176 | . | G | C   | 388.69   | PASS          | AC=2;AF=0.029;AN=68;BaseQRankSum=  |
| 15229 | chrY | 10062179 | . | G | A   | 386.89   | PASS          | AC=2;AF=0.029;AN=68;BaseQRankSum=  |
| 15230 | chrY | 10062186 | . | G | T   | 103.32   | PASS          | AC=1;AF=0.015;AN=68;BaseQRankSum=  |
| 15231 | chrY | 10062189 | . | G | T   | 102.04   | PASS          | AC=1;AF=0.015;AN=68;BaseQRankSum=  |
| 15232 | chrY | 10062412 | . | A | C   | 271.24   | PASS          | AC=1;AF=0.017;AN=58;BaseQRankSum=  |
| 15233 | chrY | 10062414 | . | G | C   | 78.51    | PASS          | AC=1;AF=0.016;AN=62;BaseQRankSum=  |
| 15234 | chrY | 10062483 | . | T | C,* | 606.81   | PASS          | AC=7,1;AF=0.103,0.015;AN=68;BaseQ  |
| 15235 | chrY | 10062484 | . | G | A   | 759.18   | PASS          | AC=8;AF=0.118;AN=68;BaseQRankSum=  |
| 15236 | chrY | 10062501 | . | C | T   | 740.85   | PASS          | AC=7;AF=0.100;AN=70;BaseQRankSum=  |
| 15237 | chrY | 10062502 | . | T | C   | 736.97   | PASS          | AC=7;AF=0.100;AN=70;BaseQRankSum=  |
| 15238 | chrY | 10062504 | . | A | C   | 687.54   | PASS          | AC=7;AF=0.100;AN=70;BaseQRankSum=  |
| 15239 | chrY | 10062512 | . | T | A   | 722.11   | PASS          | AC=7;AF=0.100;AN=70;BaseQRankSum=  |
| 15240 | chrY | 10062539 | . | A | T   | 479.22   | PASS          | AC=5;AF=0.071;AN=70;BaseQRankSum=  |
| 15241 | chrY | 10062556 | . | C | A   | 377.61   | PASS          | AC=4;AF=0.057;AN=70;BaseQRankSum=  |
| 15242 | chrY | 10062563 | . | G | C   | 370.88   | PASS          | AC=4;AF=0.057;AN=70;BaseQRankSum=  |
| 15243 | chrY | 10062586 | . | G | A   | 133.40   | my_snp_filter | AC=3;AF=0.043;AN=70;BaseQ          |
| 15244 | chrY | 10062593 | . | G | A   | 66.54    | my_snp_filter | AC=2;AF=0.029;AN=70;BaseQ          |
| 15245 | chrY | 10062719 | . | G | C   | 8734.09  | PASS          | AC=66;AF=1.00;AN=66;DP=328;FS=0.0  |
| 15246 | chrY | 10062894 | . | T | A   | 80.24    | PASS          | AC=2;AF=0.029;AN=68;BaseQRankSum=  |
| 15247 | chrY | 10062896 | . | G | A   | 74.23    | PASS          | AC=2;AF=0.029;AN=68;BaseQRankSum=  |
| 15248 | chrY | 10062901 | . | T | A   | 73.87    | PASS          | AC=2;AF=0.029;AN=68;BaseQRankSum=  |
| 15249 | chrY | 10063130 | . | G | A   | 137.80   | PASS          | AC=2;AF=0.056;AN=36;BaseQRankSum=  |
| 15250 | chrY | 10063132 | . | G | C   | 137.82   | PASS          | AC=2;AF=0.056;AN=36;BaseQRankSum=  |
| 15251 | chrY | 10063400 | . | T | C   | 250.56   | PASS          | AC=6;AF=0.091;AN=66;BaseQRankSum=  |
| 15252 | chrY | 10063401 | . | G | A   | 245.82   | PASS          | AC=6;AF=0.091;AN=66;BaseQRankSum=  |
| 15253 | chrY | 10063409 | . | G | A   | 232.76   | PASS          | AC=5;AF=0.076;AN=66;BaseQRankSum=  |
| 15254 | chrY | 10063414 | . | C | G   | 1423.27  | my_snp_filter | AC=8;AF=0.118;AN=68;BaseQ          |
| 15255 | chrY | 10063421 | . | T | C   | 145.78   | PASS          | AC=4;AF=0.074;AN=54;BaseQRankSum=  |
| 15256 | chrY | 10063424 | . | A | T   | 3104.53  | my_snp_filter | AC=10;AF=0.143;AN=70;BaseQ         |
| 15257 | chrY | 10063432 | . | C | T   | 121.57   | PASS          | AC=4;AF=0.057;AN=70;BaseQRankSum=  |
| 15258 | chrY | 10063436 | . | T | C   | 1463.42  | my_snp_filter | AC=8;AF=0.114;AN=70;BaseQ          |
| 15259 | chrY | 10063448 | . | C | A   | 32.14    | my_snp_filter | AC=1;AF=0.014;AN=70;BaseQ          |
| 15260 | chrY | 10063453 | . | C | T   | 3152.71  | my_snp_filter | AC=10;AF=0.147;AN=68;BaseQ         |
| 15261 | chrY | 10063455 | . | A | T   | 1409.21  | my_snp_filter | AC=8;AF=0.118;AN=68;BaseQ          |
| 15262 | chrY | 10063458 | . | G | T   | 3157.58  | my_snp_filter | AC=10;AF=0.147;AN=68;BaseQ         |
| 15263 | chrY | 10063473 | . | T | C   | 3253.34  | my_snp_filter | AC=11;AF=0.162;AN=68;BaseQ         |
| 15264 | chrY | 10063478 | . | G | A   | 3794.71  | my_snp_filter | AC=12;AF=0.176;AN=68;BaseQ         |
| 15265 | chrY | 10063533 | . | G | T   | 16320.91 | PASS          | AC=14;AF=0.200;AN=70;BaseQ         |
| 15266 | chrY | 10063547 | . | A | G   | 7127.48  | PASS          | AC=10;AF=0.143;AN=70;BaseQRankSum= |
| 15267 | chrY | 10063560 | . | G | A   | 17478.25 | PASS          | AC=11;AF=0.157;AN=70;BaseQ         |
| 15268 | chrY | 10063564 | . | G | A   | 17667.36 | PASS          | AC=9;AF=0.129;AN=70;BaseQ          |
| 15269 | chrY | 10063567 | . | T | A   | 6990.11  | PASS          | AC=9;AF=0.129;AN=70;BaseQRankSum=  |
| 15270 | chrY | 10063585 | . | T | C   | 19165.45 | PASS          | AC=9;AF=0.129;AN=70;BaseQ          |
| 15271 | chrY | 10063586 | . | G | A   | 19159.22 | PASS          | AC=9;AF=0.129;AN=70;BaseQ          |
| 15272 | chrY | 10063593 | . | A | G   | 19324.16 | PASS          | AC=9;AF=0.129;AN=70;BaseQ          |
| 15273 | chrY | 10063597 | . | G | C   | 19426.44 | PASS          | AC=9;AF=0.129;AN=70;BaseQ          |
| 15274 | chrY | 10063611 | . | T | C   | 19996.66 | PASS          | AC=9;AF=0.129;AN=70;BaseQ          |
| 15275 | chrY | 10063612 | . | G | A   | 20206.62 | PASS          | AC=9;AF=0.129;AN=70;BaseQ          |
| 15276 | chrY | 10063622 | . | G | A   | 20605.89 | PASS          | AC=9;AF=0.129;AN=70;BaseQ          |

|       |      |          |   |   |     |          |               |                                    |
|-------|------|----------|---|---|-----|----------|---------------|------------------------------------|
| 15277 | chrY | 10063623 | . | A | G   | 20641.45 | PASS          | AC=9;AF=0.129;AN=70;BaseQ          |
| 15278 | chrY | 10063628 | . | C | T   | 7847.97  | PASS          | AC=9;AF=0.129;AN=70;BaseQRankSum=  |
| 15279 | chrY | 10063629 | . | T | A,G | 11800.86 | PASS          | AC=7,2;AF=0.100,0.029;AN=          |
| 15280 | chrY | 10063641 | . | T | G   | 20859.97 | PASS          | AC=9;AF=0.129;AN=70;BaseQ          |
| 15281 | chrY | 10063644 | . | C | T   | 1974.66  | PASS          | AC=5;AF=0.071;AN=70;BaseQRankSum=  |
| 15282 | chrY | 10063681 | . | G | A   | 9249.27  | PASS          | AC=5;AF=0.081;AN=62;BaseQRankSum=  |
| 15283 | chrY | 10063685 | . | A | G   | 9623.22  | PASS          | AC=5;AF=0.081;AN=62;BaseQRankSum=  |
| 15284 | chrY | 10063689 | . | C | G   | 4840.85  | PASS          | AC=5;AF=0.071;AN=70;BaseQRankSum=  |
| 15285 | chrY | 10063701 | . | A | C   | 9845.99  | PASS          | AC=5;AF=0.081;AN=62;BaseQRankSum=  |
| 15286 | chrY | 10063719 | . | T | C   | 5515.14  | PASS          | AC=5;AF=0.071;AN=70;BaseQRankSum=  |
| 15287 | chrY | 10063723 | . | A | T   | 10048.48 | PASS          | AC=5;AF=0.083;AN=60;BaseQ          |
| 15288 | chrY | 10063734 | . | A | T   | 19972.48 | PASS          | AC=9;AF=0.132;AN=68;BaseQ          |
| 15289 | chrY | 10063752 | . | G | C   | 10589.31 | PASS          | AC=9;AF=0.129;AN=70;BaseQ          |
| 15290 | chrY | 10063761 | . | T | G   | 22486.82 | PASS          | AC=10;AF=0.143;AN=70;Base          |
| 15291 | chrY | 10063762 | . | G | C   | 22735.88 | PASS          | AC=10;AF=0.143;AN=70;Base          |
| 15292 | chrY | 10063776 | . | A | C   | 24174.78 | PASS          | AC=9;AF=0.132;AN=68;BaseQ          |
| 15293 | chrY | 10063778 | . | G | A   | 24351.87 | PASS          | AC=9;AF=0.129;AN=70;BaseQ          |
| 15294 | chrY | 10063784 | . | A | G   | 733.40   | PASS          | AC=3;AF=0.043;AN=70;BaseQRankSum=  |
| 15295 | chrY | 10063788 | . | C | T   | 10116.65 | PASS          | AC=9;AF=0.136;AN=66;BaseQ          |
| 15296 | chrY | 10063821 | . | A | G   | 480.32   | my_snp_filter | AC=3;AF=0.043;AN=70;BaseQ          |
| 15297 | chrY | 10063823 | . | G | A   | 25183.68 | PASS          | AC=13;AF=0.191;AN=68;Base          |
| 15298 | chrY | 10063827 | . | T | G   | 24767.37 | PASS          | AC=13;AF=0.191;AN=68;Base          |
| 15299 | chrY | 10063884 | . | T | G   | 23488.23 | PASS          | AC=13;AF=0.224;AN=58;Base          |
| 15300 | chrY | 10063894 | . | T | C   | 10751.36 | PASS          | AC=12;AF=0.273;AN=44;Base          |
| 15301 | chrY | 10063897 | . | G | C   | 11032.40 | PASS          | AC=12;AF=0.273;AN=44;Base          |
| 15302 | chrY | 10063901 | . | A | C   | 11419.75 | PASS          | AC=9;AF=0.196;AN=46;BaseQ          |
| 15303 | chrY | 10063921 | . | C | T   | 25517.16 | PASS          | AC=9;AF=0.265;AN=34;BaseQ          |
| 15304 | chrY | 10063925 | . | T | C   | 17371.95 | PASS          | AC=9;AF=0.265;AN=34;BaseQ          |
| 15305 | chrY | 10063934 | . | A | G   | 6589.68  | PASS          | AC=9;AF=0.300;AN=30;BaseQRankSum=  |
| 15306 | chrY | 10063935 | . | G | C   | 6667.73  | PASS          | AC=9;AF=0.300;AN=30;BaseQRankSum=  |
| 15307 | chrY | 10063969 | . | G | A   | 6581.69  | PASS          | AC=9;AF=0.346;AN=26;BaseQRankSum=  |
| 15308 | chrY | 10063995 | . | G | A   | 19176.86 | PASS          | AC=12;AF=0.462;AN=26;Base          |
| 15309 | chrY | 10063999 | . | G | T   | 151.52   | PASS          | AC=1;AF=0.038;AN=26;BaseQRankSum=  |
| 15310 | chrY | 10064055 | . | G | A   | 10834.25 | PASS          | AC=9;AF=0.321;AN=28;BaseQ          |
| 15311 | chrY | 10064070 | . | G | T   | 10906.80 | PASS          | AC=9;AF=0.321;AN=28;BaseQ          |
| 15312 | chrY | 10064091 | . | A | G   | 19843.24 | PASS          | AC=10;AF=0.417;AN=24;Base          |
| 15313 | chrY | 10064115 | . | T | A   | 10124    | PASS          | AC=9;AF=0.196;AN=46;BaseQRankSum=  |
| 15314 | chrY | 10064126 | . | A | T   | 11241.47 | my_snp_filter | AC=4;AF=0.077;AN=                  |
| 15315 | chrY | 10064129 | . | T | G,C | 35577.75 | PASS          | AC=9,3;AF=0.265,0.088;AN=          |
| 15316 | chrY | 10064131 | . | A | G   | 262.02   | my_snp_filter | AC=1;AF=0.018;AN=56;BaseQ          |
| 15317 | chrY | 10064138 | . | G | C   | 3065     | PASS          | AC=4;AF=0.069;AN=58;BaseQRankSum=  |
| 15318 | chrY | 10064142 | . | C | G   | 42278.28 | PASS          | AC=11;AF=0.306;AN=36;Base          |
| 15319 | chrY | 10064146 | . | C | T   | 4914.69  | PASS          | AC=4;AF=0.067;AN=60;BaseQRankSum=  |
| 15320 | chrY | 10064169 | . | T | G,A | 33352.22 | PASS          | AC=12,6;AF=0.316,0.158;AN=         |
| 15321 | chrY | 10064170 | . | G | A   | 38.18    | my_snp_filter | AC=1;AF=0.015;AN=66;BaseQ          |
| 15322 | chrY | 10064180 | . | G | A   | 10473.93 | PASS          | AC=12;AF=0.176;AN=68;Base          |
| 15323 | chrY | 10064184 | . | G | A   | 20334.81 | my_snp_filter | AC=8;AF=0.148;AN=                  |
| 15324 | chrY | 10064198 | . | T | C   | 3951.06  | PASS          | AC=4;AF=0.059;AN=68;BaseQRankSum=  |
| 15325 | chrY | 10064206 | . | A | G   | 1035.69  | my_snp_filter | AC=4;AF=0.059;AN=68;BaseQ          |
| 15326 | chrY | 10064221 | . | T | C   | 29350.31 | PASS          | AC=23;AF=0.329;AN=70;Base          |
| 15327 | chrY | 10064230 | . | A | G   | 3544.35  | PASS          | AC=3;AF=0.043;AN=70;BaseQRankSum=  |
| 15328 | chrY | 10064231 | . | G | T   | 4892.97  | PASS          | AC=24;AF=0.343;AN=70;BaseQRankSum= |
| 15329 | chrY | 10064250 | . | T | C   | 22177.70 | PASS          | AC=11;AF=0.157;AN=70;Base          |
| 15330 | chrY | 10064251 | . | C | T   | 3327.52  | PASS          | AC=3;AF=0.043;AN=70;BaseQRankSum=  |
| 15331 | chrY | 10064259 | . | T | C   | 40563.36 | PASS          | AC=15;AF=0.242;AN=62;Base          |
| 15332 | chrY | 10064260 | . | C | T   | 13162.16 | PASS          | AC=24;AF=0.353;AN=68;Base          |
| 15333 | chrY | 10064272 | . | A | G   | 77858.64 | PASS          | AC=35;AF=0.500;AN=70;Base          |
| 15334 | chrY | 10064274 | . | G | T,A | 33351.15 | PASS          | AC=15,10;AF=0.221,0.147;A          |
| 15335 | chrY | 10064276 | . | T | G   | 44820.24 | PASS          | AC=14;AF=0.226;AN=62;Base          |
| 15336 | chrY | 10064277 | . | G | C,A | 74677.60 | PASS          | AC=34,3;AF=0.486,0.043;AN=         |
| 15337 | chrY | 10064280 | . | A | G   | 14896.24 | PASS          | AC=26;AF=0.371;AN=70;Base          |
| 15338 | chrY | 10064281 | . | C | A   | 76288.35 | PASS          | AC=34;AF=0.486;AN=70;Base          |
| 15339 | chrY | 10064289 | . | C | T   | 1026.70  | my_snp_filter | AC=10;AF=0.143;AN=70;Base          |
| 15340 | chrY | 10064292 | . | C | A   | 2448.81  | PASS          | AC=9;AF=0.129;AN=70;BaseQRankSum=  |
| 15341 | chrY | 10064299 | . | G | T   | 50081.75 | PASS          | AC=14;AF=0.206;AN=68;Base          |
| 15342 | chrY | 10064309 | . | C | T   | 8884.46  | PASS          | AC=26;AF=0.371;AN=70;BaseQRankSum= |
| 15343 | chrY | 10064310 | . | G | T   | 43266.09 | PASS          | AC=12;AF=0.171;AN=70;Base          |
| 15344 | chrY | 10064312 | . | C | T   | 14861.88 | PASS          | AC=25;AF=0.357;AN=70;Base          |
| 15345 | chrY | 10064313 | . | T | C   | 5628.54  | PASS          | AC=8;AF=0.114;AN=70;BaseQRankSum=  |
| 15346 | chrY | 10064315 | . | T | C   | 628.63   | my_snp_filter | AC=4;AF=0.057;AN=70;BaseQ          |
| 15347 | chrY | 10064316 | . | T | C   | 616.64   | my_snp_filter | AC=4;AF=0.057;AN=70;BaseQ          |
| 15348 | chrY | 10064317 | . | T | G   | 14657.81 | PASS          | AC=26;AF=0.371;AN=70;Base          |
| 15349 | chrY | 10064326 | . | C | T   | 464.18   | my_snp_filter | AC=4;AF=0.057;AN=70;BaseQ          |
| 15350 | chrY | 10064327 | . | C | G,T | 79266.71 | PASS          | AC=34,10;AF=0.486,0.143;A          |
| 15351 | chrY | 10064335 | . | T | C   | 30764.93 | PASS          | AC=35;AF=0.500;AN=70;Base          |
| 15352 | chrY | 10064345 | . | C | A   | 6720.28  | PASS          | AC=9;AF=0.129;AN=70;BaseQRankSum=  |

|       |      |          |   |   |       |          |               |                                    |
|-------|------|----------|---|---|-------|----------|---------------|------------------------------------|
| 15353 | chrY | 10064348 | . | G | C     | 6358.22  | PASS          | AC=9;AF=0.129;AN=70;BaseQRankSum=  |
| 15354 | chrY | 10064352 | . | G | C     | 180.14   | my_snp_filter | AC=1;AF=0.014;AN=70;BaseQ          |
| 15355 | chrY | 10064353 | . | T | C     | 31709.33 | PASS          | AC=9;AF=0.129;AN=70;BaseQ          |
| 15356 | chrY | 10064356 | . | A | T     | 2074.26  | my_snp_filter | AC=7;AF=0.100;AN=70;BaseQ          |
| 15357 | chrY | 10064359 | . | G | T     | 42466.04 | PASS          | AC=10;AF=0.143;AN=70;Base          |
| 15358 | chrY | 10064362 | . | G | T     | 47280.71 | PASS          | AC=12;AF=0.176;AN=68;Base          |
| 15359 | chrY | 10064364 | . | C | G     | 6565.33  | PASS          | AC=9;AF=0.129;AN=70;BaseQRankSum=  |
| 15360 | chrY | 10064365 | . | A | G     | 3704.62  | PASS          | AC=9;AF=0.129;AN=70;BaseQRankSum=  |
| 15361 | chrY | 10064366 | . | C | T     | 13691.09 | PASS          | AC=29;AF=0.414;AN=70;Base          |
| 15362 | chrY | 10064370 | . | T | A     | 35586.48 | PASS          | AC=10;AF=0.143;AN=70;Base          |
| 15363 | chrY | 10064371 | . | A | G     | 79890.72 | PASS          | AC=37;AF=0.529;AN=70;Base          |
| 15364 | chrY | 10064376 | . | G | A     | 78460.89 | PASS          | AC=38;AF=0.543;AN=70;Base          |
| 15365 | chrY | 10064384 | . | C | T     | 49.71    | PASS          | AC=1;AF=0.014;AN=70;BaseQRankSum=  |
| 15366 | chrY | 10064388 | . | G | A     | 7079.54  | PASS          | AC=22;AF=0.314;AN=70;BaseQRankSum= |
| 15367 | chrY | 10064390 | . | T | A     | 46590.94 | PASS          | AC=12;AF=0.182;AN=66;Base          |
| 15368 | chrY | 10064391 | . | T | C     | 4320.27  | PASS          | AC=9;AF=0.129;AN=70;BaseQRankSum=  |
| 15369 | chrY | 10064398 | . | G | T,*   | 1529.14  | my_snp_filter | AC=1,6;AF=0.015,0.088;AN=          |
| 15370 | chrY | 10064400 | . | C | A     | 35765.06 | PASS          | AC=10;AF=0.156;AN=64;Base          |
| 15371 | chrY | 10064404 | . | T | G     | 6760.64  | PASS          | AC=21;AF=0.300;AN=70;BaseQRankSum= |
| 15372 | chrY | 10064408 | . | T | A     | 29965.30 | PASS          | AC=8;AF=0.114;AN=70;BaseQ          |
| 15373 | chrY | 10064409 | . | A | G     | 621.32   | PASS          | AC=1;AF=0.014;AN=70;BaseQRankSum=  |
| 15374 | chrY | 10064421 | . | T | A     | 5795.08  | PASS          | AC=17;AF=0.243;AN=70;BaseQRankSum= |
| 15375 | chrY | 10064431 | . | C | A     | 5266.29  | PASS          | AC=14;AF=0.226;AN=62;BaseQRankSum= |
| 15376 | chrY | 10064432 | . | T | C     | 56715.94 | PASS          | AC=27;AF=0.450;AN=60;Base          |
| 15377 | chrY | 10064433 | . | G | A     | 56789.21 | PASS          | AC=27;AF=0.450;AN=60;Base          |
| 15378 | chrY | 10064440 | . | T | G,C   | 9124.03  | PASS          | AC=11,7;AF=0.162,0.103;AN=68;Base  |
| 15379 | chrY | 10064447 | . | A | G,C,T | 37747.89 | PASS          | AC=21,8,1;AF=0.375,0.143,          |
| 15380 | chrY | 10064448 | . | C | T     | 1430.50  | my_snp_filter | AC=7;AF=0.106;AN=66;BaseQ          |
| 15381 | chrY | 10064451 | . | C | T     | 359.39   | PASS          | AC=1;AF=0.015;AN=68;BaseQRankSum=  |
| 15382 | chrY | 10064459 | . | C | A     | 537.21   | my_snp_filter | AC=3;AF=0.044;AN=68;BaseQ          |
| 15383 | chrY | 10064462 | . | T | C     | 10285.84 | PASS          | AC=12;AF=0.176;AN=68;Base          |
| 15384 | chrY | 10064480 | . | G | C     | 14629.76 | PASS          | AC=14;AF=0.226;AN=62;Base          |
| 15385 | chrY | 10064483 | . | T | G     | 195.62   | PASS          | AC=2;AF=0.032;AN=62;BaseQRankSum=  |
| 15386 | chrY | 10064495 | . | G | A     | 1123.34  | PASS          | AC=2;AF=0.033;AN=60;BaseQRankSum=  |
| 15387 | chrY | 10064496 | . | C | T     | 13210.14 | PASS          | AC=9;AF=0.145;AN=62;BaseQ          |
| 15388 | chrY | 10064498 | . | C | T     | 14488.11 | PASS          | AC=10;AF=0.172;AN=58;Base          |
| 15389 | chrY | 10064507 | . | G | C     | 203.09   | PASS          | AC=2;AF=0.036;AN=56;BaseQRankSum=  |
| 15390 | chrY | 10064511 | . | G | A     | 204.63   | PASS          | AC=2;AF=0.036;AN=56;BaseQRankSum=  |
| 15391 | chrY | 10064520 | . | C | T     | 13029.16 | PASS          | AC=9;AF=0.167;AN=54;BaseQ          |
| 15392 | chrY | 10064529 | . | A | G     | 14393.57 | PASS          | AC=9;AF=0.346;AN=26;BaseQ          |
| 15393 | chrY | 10064541 | . | C | A     | 772.65   | PASS          | AC=3;AF=0.083;AN=36;BaseQRankSum=  |
| 15394 | chrY | 10064543 | . | A | T     | 12903.31 | PASS          | AC=9;AF=0.346;AN=26;BaseQ          |
| 15395 | chrY | 10064562 | . | A | G     | 14429.96 | PASS          | AC=9;AF=0.265;AN=34;BaseQ          |
| 15396 | chrY | 10064584 | . | A | G     | 13495.69 | PASS          | AC=9;AF=0.180;AN=50;BaseQ          |
| 15397 | chrY | 10064600 | . | T | C,*   | 6248.74  | PASS          | AC=5,4;AF=0.096,0.077;AN=52;BaseQ  |
| 15398 | chrY | 10064605 | . | C | T     | 13795.28 | PASS          | AC=9;AF=0.150;AN=60;BaseQ          |
| 15399 | chrY | 10064616 | . | G | T     | 4000.29  | PASS          | AC=7;AF=0.103;AN=68;BaseQRankSum=  |
| 15400 | chrY | 10064639 | . | G | C     | 2451.18  | PASS          | AC=5;AF=0.076;AN=66;BaseQRankSum=  |
| 15401 | chrY | 10064642 | . | A | T     | 14365.45 | PASS          | AC=17;AF=0.274;AN=62;Base          |
| 15402 | chrY | 10064660 | . | C | A     | 2455.63  | PASS          | AC=5;AF=0.071;AN=70;BaseQRankSum=  |
| 15403 | chrY | 10064699 | . | T | A     | 55.14    | PASS          | AC=2;AF=0.029;AN=70;BaseQRankSum=  |
| 15404 | chrY | 10064708 | . | C | G     | 105.76   | PASS          | AC=2;AF=0.029;AN=68;BaseQRankSum=  |
| 15405 | chrY | 10064714 | . | A | G     | 9430.02  | PASS          | AC=15;AF=0.214;AN=70;BaseQRankSum= |
| 15406 | chrY | 10064743 | . | G | T     | 12388.35 | PASS          | AC=15;AF=0.250;AN=60;Base          |
| 15407 | chrY | 10064747 | . | G | T     | 12980.49 | PASS          | AC=15;AF=0.250;AN=60;Base          |
| 15408 | chrY | 10064756 | . | G | T     | 478.66   | PASS          | AC=6;AF=0.088;AN=68;BaseQRankSum=  |
| 15409 | chrY | 10064777 | . | A | T     | 13361.14 | PASS          | AC=15;AF=0.250;AN=60;Base          |
| 15410 | chrY | 10064788 | . | G | A     | 13778.35 | PASS          | AC=15;AF=0.250;AN=60;Base          |
| 15411 | chrY | 10064802 | . | A | T     | 13619.93 | PASS          | AC=15;AF=0.288;AN=52;Base          |
| 15412 | chrY | 10064805 | . | G | T     | 7633.78  | PASS          | AC=15;AF=0.214;AN=70;BaseQRankSum= |
| 15413 | chrY | 10064806 | . | A | T     | 7707.10  | PASS          | AC=15;AF=0.214;AN=70;BaseQRankSum= |
| 15414 | chrY | 10064808 | . | G | C,A   | 8973.65  | PASS          | AC=8,10;AF=0.143,0.179;AN=56;Base  |
| 15415 | chrY | 10064812 | . | C | T     | 7653.83  | PASS          | AC=15;AF=0.214;AN=70;BaseQRankSum= |
| 15416 | chrY | 10064839 | . | A | C     | 12708.78 | PASS          | AC=13;AF=0.217;AN=60;Base          |
| 15417 | chrY | 10064841 | . | A | T     | 6315.44  | PASS          | AC=11;AF=0.157;AN=70;BaseQRankSum= |
| 15418 | chrY | 10064847 | . | G | A     | 12880.14 | PASS          | AC=13;AF=0.217;AN=60;Base          |
| 15419 | chrY | 10064848 | . | G | C     | 12886.16 | PASS          | AC=13;AF=0.217;AN=60;Base          |
| 15420 | chrY | 10064852 | . | G | A     | 5377.85  | PASS          | AC=11;AF=0.167;AN=66;BaseQRankSum= |
| 15421 | chrY | 10064875 | . | C | G,*   | 4866.94  | PASS          | AC=5,3;AF=0.074,0.044;AN=68;BaseQ  |
| 15422 | chrY | 10064877 | . | G | C     | 8597.54  | PASS          | AC=10;AF=0.172;AN=58;BaseQRankSum= |
| 15423 | chrY | 10064890 | . | C | A     | 12797.94 | PASS          | AC=10;AF=0.172;AN=58;Base          |
| 15424 | chrY | 10064891 | . | G | A     | 5471.58  | PASS          | AC=7;AF=0.121;AN=58;BaseQRankSum=  |
| 15425 | chrY | 10064893 | . | A | T     | 12552.46 | PASS          | AC=9;AF=0.161;AN=56;BaseQ          |
| 15426 | chrY | 10064910 | . | T | C     | 1559.96  | PASS          | AC=4;AF=0.069;AN=58;BaseQRankSum=  |
| 15427 | chrY | 10064911 | . | A | G     | 12090.63 | PASS          | AC=9;AF=0.205;AN=44;BaseQ          |
| 15428 | chrY | 10064960 | . | T | C     | 14548.92 | PASS          | AC=13;AF=0.433;AN=30;Base          |

|       |      |          |   |   |     |          |               |                                           |
|-------|------|----------|---|---|-----|----------|---------------|-------------------------------------------|
| 15429 | chrY | 10064973 | . | C | G   | 7597.06  | PASS          | AC=13;AF=0.406;AN=32;BaseQRankSum=        |
| 15430 | chrY | 10065007 | . | T | G   | 20519.11 | PASS          | AC=10;AF=0.278;AN=36;BaseQRankSum=        |
| 15431 | chrY | 10065008 | . | C | A   | 9418.78  | PASS          | AC=10;AF=0.263;AN=38;BaseQRankSum=        |
| 15432 | chrY | 10065023 | . | C | T   | 21400.99 | PASS          | AC=9;AF=0.205;AN=44;BaseQRankSum=         |
| 15433 | chrY | 10065024 | . | G | A   | 9628.64  | PASS          | AC=9;AF=0.196;AN=46;BaseQRankSum=         |
| 15434 | chrY | 10065044 | . | T | C,A | 14726.48 | PASS          | AC=9;AF=0.167;AN=48;BaseQRankSum=         |
| 15435 | chrY | 10065079 | . | A | G   | 10390.16 | PASS          | AC=9;AF=0.150;AN=60;BaseQRankSum=         |
| 15436 | chrY | 10065090 | . | T | C   | 2034     | PASS          | AC=5;AF=0.081;AN=62;BaseQRankSum=         |
| 15437 | chrY | 10065092 | . | T | C   | 10049.68 | PASS          | AC=9;AF=0.145;AN=62;BaseQRankSum=         |
| 15438 | chrY | 10065094 | . | A | T   | 17534.92 | PASS          | AC=9;AF=0.150;AN=60;BaseQRankSum=         |
| 15439 | chrY | 10065129 | . | T | C   | 7926.69  | PASS          | AC=9;AF=0.145;AN=62;BaseQRankSum=         |
| 15440 | chrY | 10065165 | . | G | C   | 7564.63  | PASS          | AC=9;AF=0.136;AN=66;BaseQRankSum=         |
| 15441 | chrY | 10065179 | . | C | T   | 17342.68 | PASS          | AC=9;AF=0.132;AN=68;BaseQRankSum=         |
| 15442 | chrY | 10065184 | . | T | C   | 46.68    | PASS          | AC=2;AF=0.029;AN=68;DP=952;FS=0.0         |
| 15443 | chrY | 10065188 | . | T | A   | 46.88    | PASS          | AC=2;AF=0.029;AN=68;DP=960;FS=0.0         |
| 15444 | chrY | 10065195 | . | G | C   | 6917.68  | PASS          | AC=9;AF=0.136;AN=66;BaseQRankSum=         |
| 15445 | chrY | 10065204 | . | C | T   | 16869.89 | PASS          | AC=9;AF=0.136;AN=66;BaseQRankSum=         |
| 15446 | chrY | 10065215 | . | C | T   | 16245.19 | PASS          | AC=9;AF=0.132;AN=68;BaseQRankSum=         |
| 15447 | chrY | 10065222 | . | T | A   | 16078.29 | PASS          | AC=9;AF=0.132;AN=68;BaseQRankSum=         |
| 15448 | chrY | 10065224 | . | C | T   | 6317.80  | PASS          | AC=9;AF=0.132;AN=68;BaseQRankSum=         |
| 15449 | chrY | 10065242 | . | G | A   | 15958.62 | PASS          | AC=9;AF=0.132;AN=68;BaseQRankSum=         |
| 15450 | chrY | 10065246 | . | C | G   | 8033.66  | PASS          | AC=9;AF=0.132;AN=68;BaseQRankSum=         |
| 15451 | chrY | 10065266 | . | G | A   | 15650.15 | PASS          | AC=9;AF=0.132;AN=68;BaseQRankSum=         |
| 15452 | chrY | 10065277 | . | C | G   | 7669.23  | PASS          | AC=9;AF=0.132;AN=68;BaseQRankSum=         |
| 15453 | chrY | 10065288 | . | T | C   | 4652.70  | PASS          | AC=9;AF=0.141;AN=64;BaseQRankSum=         |
| 15454 | chrY | 10065589 | . | C | T   | 6716.46  | PASS          | AC=8;AF=0.400;AN=20;BaseQRankSum=         |
| 15455 | chrY | 10065597 | . | T | G   | 17059.16 | PASS          | AC=8;AF=0.444;AN=18;BaseQRankSum=         |
| 15456 | chrY | 10065599 | . | G | A   | 6919.46  | PASS          | AC=8;AF=0.400;AN=20;BaseQRankSum=         |
| 15457 | chrY | 10065607 | . | G | A   | 16837.16 | PASS          | AC=8;AF=0.444;AN=18;BaseQRankSum=         |
| 15458 | chrY | 10066145 | . | A | G   | 121.59   | PASS          | AC=2;AF=0.111;AN=18;BaseQRankSum=         |
| 15459 | chrY | 10066159 | . | A | T   | 118.59   | PASS          | AC=2;AF=0.111;AN=18;BaseQRankSum=         |
| 15460 | chrY | 10066165 | . | A | G   | 124.59   | PASS          | AC=2;AF=0.111;AN=18;BaseQRankSum=         |
| 15461 | chrY | 10066182 | . | T | A   | 214.86   | PASS          | AC=2;AF=0.111;AN=18;BaseQRankSum=         |
| 15462 | chrY | 10066187 | . | G | A   | 256.88   | PASS          | AC=2;AF=0.167;AN=12;BaseQRankSum=         |
| 15463 | chrY | 10066194 | . | G | C   | 336.51   | PASS          | AC=2;AF=0.125;AN=16;BaseQRankSum=         |
| 15464 | chrY | 10066212 | . | C | G   | 330.54   | PASS          | AC=2;AF=0.143;AN=14;BaseQRankSum=         |
| 15465 | chrY | 10066216 | . | A | T   | 414.54   | PASS          | AC=2;AF=0.143;AN=14;BaseQRankSum=         |
| 15466 | chrY | 10066246 | . | T | G   | 924.46   | PASS          | AC=2;AF=0.111;AN=18;BaseQRankSum=         |
| 15467 | chrY | 10066251 | . | A | G   | 1006.50  | PASS          | AC=2;AF=0.125;AN=16;BaseQRankSum=         |
| 15468 | chrY | 10066268 | . | A | C   | 51.70    | my_snp_filter | AC=1;AF=0.045;AN=22;BaseQRankSum=         |
| 15469 | chrY | 10066275 | . | T | C   | 1143.22  | PASS          | AC=2;AF=0.143;AN=14;BaseQRankSum=         |
| 15470 | chrY | 10066276 | . | G | A   | 1252.06  | PASS          | AC=2;AF=0.143;AN=14;BaseQRankSum=         |
| 15471 | chrY | 10066300 | . | G | T   | 530.71   | PASS          | AC=1;AF=0.063;AN=16;BaseQRankSum=         |
| 15472 | chrY | 10066308 | . | G | T   | 541.10   | PASS          | AC=1;AF=0.071;AN=14;BaseQRankSum=         |
| 15473 | chrY | 10066320 | . | A | G   | 543.11   | PASS          | AC=1;AF=0.083;AN=12;BaseQRankSum=         |
| 15474 | chrY | 10066339 | . | A | G   | 453.38   | PASS          | AC=1;AF=0.042;AN=24;BaseQRankSum=         |
| 15475 | chrY | 10066398 | . | G | C   | 392.54   | PASS          | AC=2;AF=0.083;AN=24;BaseQRankSum=         |
| 15476 | chrY | 10066410 | . | C | T   | 326.81   | PASS          | AC=2;AF=0.063;AN=32;BaseQRankSum=         |
| 15477 | chrY | 10066414 | . | C | T   | 324.80   | PASS          | AC=2;AF=0.059;AN=34;BaseQRankSum=         |
| 15478 | chrY | 10066416 | . | T | C   | 320.68   | PASS          | AC=2;AF=0.053;AN=38;BaseQRankSum=         |
| 15479 | chrY | 10066419 | . | T | G   | 314.15   | PASS          | AC=2;AF=0.053;AN=38;BaseQRankSum=         |
| 15480 | chrY | 10066562 | . | A | C   | 361.15   | PASS          | AC=5;AF=0.074;AN=68;BaseQRankSum=         |
| 15481 | chrY | 10066568 | . | T | C   | 350.46   | PASS          | AC=5;AF=0.074;AN=68;BaseQRankSum=         |
| 15482 | chrY | 10066569 | . | G | A   | 350.50   | PASS          | AC=5;AF=0.074;AN=68;BaseQRankSum=         |
| 15483 | chrY | 10066591 | . | C | G   | 48.62    | my_snp_filter | AC=2;AF=0.029;AN=68;BaseQRankSum=         |
| 15484 | chrY | 10066668 | . | A | C   | 880.80   | PASS          | AC=6;AF=0.094;AN=64;BaseQRankSum=         |
| 15485 | chrY | 10066689 | . | G | T   | 33.03    | PASS          | AC=1;AF=0.015;AN=66;BaseQRankSum=         |
| 15486 | chrY | 10066697 | . | C | G   | 46.91    | PASS          | AC=1;AF=0.016;AN=64;BaseQRankSum=         |
| 15487 | chrY | 10066712 | . | A | G   | 44.77    | PASS          | AC=1;AF=0.018;AN=56;BaseQRankSum=         |
| 15488 | chrY | 10066714 | . | A | T   | 45.90    | PASS          | AC=1;AF=0.018;AN=56;BaseQRankSum=         |
| 15489 | chrY | 10066731 | . | T | A   | 42.21    | PASS          | AC=1;AF=0.022;AN=46;BaseQRankSum=         |
| 15490 | chrY | 10066738 | . | A | T   | 121.49   | PASS          | AC=3;AF=0.063;AN=48;BaseQRankSum=         |
| 15491 | chrY | 10066739 | . | C | A   | 116.70   | PASS          | AC=2;AF=0.038;AN=52;BaseQRankSum=         |
| 15492 | chrY | 10066741 | . | A | T   | 82.96    | PASS          | AC=3;AF=0.058;AN=52;BaseQRankSum=         |
| 15493 | chrY | 10066744 | . | T | G,C | 504.58   | PASS          | AC=4;AF=0.083;AN=48;BaseQRankSum=         |
| 15494 | chrY | 10066745 | . | G | A   | 109.34   | PASS          | AC=1;AF=0.021;AN=48;BaseQRankSum=         |
| 15495 | chrY | 10066747 | . | T | C   | 48.23    | PASS          | AC=2;AF=0.038;AN=52;BaseQRankSum=         |
| 15496 | chrY | 10066756 | . | C | T   | 46.47    | PASS          | AC=1;AF=0.019;AN=54;BaseQRankSum=         |
| 15497 | chrY | 10066757 | . | C | T   | 264.30   | PASS          | AC=4;AF=0.071;AN=56;BaseQRankSum=         |
| 15498 | chrY | 10066758 | . | A | G   | 261.58   | PASS          | AC=4;AF=0.071;AN=56;BaseQRankSum=         |
| 15499 | chrY | 10066759 | . | C | A   | 67.04    | PASS          | AC=2;AF=0.037;AN=54;BaseQRankSum=         |
| 15500 | chrY | 10066763 | . | C | T   | 86.72    | PASS          | AC=2;AF=0.036;AN=56;BaseQRankSum=         |
| 15501 | chrY | 10066770 | . | C | T   | 537.80   | PASS          | AC=6;AF=0.136;AN=44;BaseQRankSum=         |
| 15502 | chrY | 10066779 | . | T | A,* | 394.63   | PASS          | AC=2,3;AF=0.045,0.068;AN=44;BaseQRankSum= |
| 15503 | chrY | 10066780 | . | G | A   | 246.79   | PASS          | AC=3;AF=0.054;AN=56;BaseQRankSum=         |
| 15504 | chrY | 10066800 | . | A | C   | 203.19   | PASS          | AC=2;AF=0.050;AN=40;BaseQRankSum=         |

|       |      |          |   |   |     |         |               |                                    |
|-------|------|----------|---|---|-----|---------|---------------|------------------------------------|
| 15505 | chrY | 10066830 | . | T | G   | 162.53  | PASS          | AC=2;AF=0.029;AN=70;BaseQRankSum=  |
| 15506 | chrY | 10066840 | . | A | T   | 156.49  | PASS          | AC=2;AF=0.029;AN=70;BaseQRankSum=  |
| 15507 | chrY | 10066843 | . | G | A   | 168.06  | PASS          | AC=2;AF=0.029;AN=70;BaseQRankSum=  |
| 15508 | chrY | 10066929 | . | C | A   | 3919.15 | PASS          | AC=1;AF=0.038;AN=26;BaseQRankSum=  |
| 15509 | chrY | 10066933 | . | T | C   | 3874.87 | PASS          | AC=1;AF=0.029;AN=34;BaseQRankSum=  |
| 15510 | chrY | 10066950 | . | A | C   | 3474.73 | PASS          | AC=1;AF=0.033;AN=30;BaseQRankSum=  |
| 15511 | chrY | 10066965 | . | C | T   | 2740.15 | PASS          | AC=1;AF=0.036;AN=28;BaseQRankSum=  |
| 15512 | chrY | 10066969 | . | C | T   | 2446.19 | PASS          | AC=1;AF=0.036;AN=28;BaseQRankSum=  |
| 15513 | chrY | 10067006 | . | C | A   | 133.12  | PASS          | AC=4;AF=0.061;AN=66;BaseQRankSum=  |
| 15514 | chrY | 10067037 | . | A | G   | 3721.92 | PASS          | AC=8;AF=0.250;AN=32;BaseQRankSum=  |
| 15515 | chrY | 10067069 | . | C | T   | 1172.69 | PASS          | AC=5;AF=0.250;AN=20;BaseQRankSum=  |
| 15516 | chrY | 10067099 | . | C | G   | 2547.33 | PASS          | AC=5;AF=0.250;AN=20;BaseQRankSum=  |
| 15517 | chrY | 10067100 | . | C | T   | 130.52  | my_snp_filter | AC=2;AF=0.033;AN=60;BaseQ          |
| 15518 | chrY | 10067113 | . | T | C,* | 534.32  | PASS          | AC=2,3;AF=0.100,0.150;AN=20;BaseQ  |
| 15519 | chrY | 10067115 | . | C | G   | 2795.34 | PASS          | AC=5;AF=0.250;AN=20;BaseQRankSum=  |
| 15520 | chrY | 10067118 | . | T | G   | 2840.33 | PASS          | AC=5;AF=0.250;AN=20;BaseQRankSum=  |
| 15521 | chrY | 10067125 | . | G | A   | 2936.33 | PASS          | AC=5;AF=0.250;AN=20;BaseQRankSum=  |
| 15522 | chrY | 10067136 | . | T | G   | 2222.33 | PASS          | AC=5;AF=0.250;AN=20;BaseQRankSum=  |
| 15523 | chrY | 10067169 | . | C | G   | 1315.94 | PASS          | AC=4;AF=0.154;AN=26;BaseQRankSum=  |
| 15524 | chrY | 10067174 | . | A | C   | 2458.88 | PASS          | AC=7;AF=0.250;AN=28;BaseQRankSum=  |
| 15525 | chrY | 10067187 | . | T | C   | 1814.68 | PASS          | AC=4;AF=0.154;AN=26;BaseQRankSum=  |
| 15526 | chrY | 10067196 | . | A | T   | 1375.07 | PASS          | AC=4;AF=0.133;AN=30;BaseQRankSum=  |
| 15527 | chrY | 10067207 | . | A | T   | 850.45  | PASS          | AC=3;AF=0.083;AN=36;BaseQRankSum=  |
| 15528 | chrY | 10067227 | . | T | G   | 249.50  | PASS          | AC=3;AF=0.063;AN=48;BaseQRankSum=  |
| 15529 | chrY | 10067264 | . | C | T   | 1508.23 | PASS          | AC=6;AF=0.086;AN=70;BaseQRankSum=  |
| 15530 | chrY | 10067329 | . | A | G   | 156.96  | PASS          | AC=3;AF=0.063;AN=48;BaseQRankSum=  |
| 15531 | chrY | 10067364 | . | C | A   | 886.91  | PASS          | AC=10;AF=0.208;AN=48;BaseQRankSum= |
| 15532 | chrY | 10067389 | . | C | T   | 2569.45 | PASS          | AC=10;AF=0.208;AN=48;BaseQRankSum= |
| 15533 | chrY | 10067406 | . | A | T,* | 2108.61 | PASS          | AC=1,6;AF=0.020,0.120;AN=50;BaseQ  |
| 15534 | chrY | 10067416 | . | G | A   | 429.21  | PASS          | AC=3;AF=0.065;AN=46;BaseQRankSum=  |
| 15535 | chrY | 10067426 | . | C | T   | 676.29  | PASS          | AC=1;AF=0.015;AN=66;BaseQRankSum=  |
| 15536 | chrY | 10067427 | . | A | C   | 341.29  | PASS          | AC=3;AF=0.063;AN=48;BaseQRankSum=  |
| 15537 | chrY | 10067428 | . | C | A   | 341.08  | PASS          | AC=3;AF=0.063;AN=48;BaseQRankSum=  |
| 15538 | chrY | 10067434 | . | A | G   | 833.52  | PASS          | AC=4;AF=0.077;AN=52;BaseQRankSum=  |
| 15539 | chrY | 10067436 | . | C | T   | 501.95  | PASS          | AC=1;AF=0.015;AN=66;BaseQRankSum=  |
| 15540 | chrY | 10067437 | . | A | G   | 839.49  | PASS          | AC=4;AF=0.077;AN=52;BaseQRankSum=  |
| 15541 | chrY | 10067444 | . | A | G   | 838.98  | PASS          | AC=4;AF=0.074;AN=54;BaseQRankSum=  |
| 15542 | chrY | 10067468 | . | T | C   | 482.05  | PASS          | AC=4;AF=0.077;AN=52;BaseQRankSum=  |
| 15543 | chrY | 10067469 | . | C | T   | 484.78  | PASS          | AC=4;AF=0.077;AN=52;BaseQRankSum=  |
| 15544 | chrY | 10067473 | . | A | C   | 128.84  | PASS          | AC=1;AF=0.019;AN=52;BaseQRankSum=  |
| 15545 | chrY | 10067489 | . | G | C   | 95.55   | PASS          | AC=2;AF=0.038;AN=52;BaseQRankSum=  |
| 15546 | chrY | 10068056 | . | A | T   | 351.49  | PASS          | AC=3;AF=0.068;AN=44;BaseQRankSum=  |
| 15547 | chrY | 10068075 | . | T | C   | 396.56  | PASS          | AC=3;AF=0.068;AN=44;BaseQRankSum=  |
| 15548 | chrY | 10068079 | . | G | T   | 486.42  | PASS          | AC=3;AF=0.071;AN=42;BaseQRankSum=  |
| 15549 | chrY | 10068098 | . | T | C   | 525.26  | PASS          | AC=3;AF=0.071;AN=42;BaseQRankSum=  |
| 15550 | chrY | 10068103 | . | T | C   | 570.23  | PASS          | AC=3;AF=0.071;AN=42;BaseQRankSum=  |
| 15551 | chrY | 10068114 | . | G | A   | 576     | PASS          | AC=3;AF=0.068;AN=44;BaseQRankSum=  |
| 15552 | chrY | 10068121 | . | A | G   | 490.37  | PASS          | AC=3;AF=0.063;AN=48;BaseQRankSum=  |
| 15553 | chrY | 10068130 | . | G | A   | 455.20  | PASS          | AC=3;AF=0.063;AN=48;BaseQRankSum=  |
| 15554 | chrY | 10068142 | . | A | T   | 463.90  | PASS          | AC=3;AF=0.065;AN=46;BaseQRankSum=  |
| 15555 | chrY | 10068156 | . | G | C   | 456.37  | PASS          | AC=3;AF=0.068;AN=44;BaseQRankSum=  |
| 15556 | chrY | 10068168 | . | T | G   | 34.17   | PASS          | AC=1;AF=0.014;AN=70;BaseQRankSum=  |
| 15557 | chrY | 10068172 | . | C | A   | 34.97   | PASS          | AC=1;AF=0.014;AN=70;BaseQRankSum=  |
| 15558 | chrY | 10068178 | . | A | T   | 34.90   | PASS          | AC=1;AF=0.014;AN=70;BaseQRankSum=  |
| 15559 | chrY | 10068183 | . | A | T   | 35.27   | PASS          | AC=1;AF=0.014;AN=70;BaseQRankSum=  |
| 15560 | chrY | 10068185 | . | G | C   | 36.53   | PASS          | AC=1;AF=0.014;AN=70;BaseQRankSum=  |
| 15561 | chrY | 10068187 | . | T | C   | 510.24  | PASS          | AC=6;AF=0.103;AN=58;BaseQRankSum=  |
| 15562 | chrY | 10068192 | . | C | T   | 34.47   | PASS          | AC=1;AF=0.015;AN=68;BaseQRankSum=  |
| 15563 | chrY | 10068204 | . | A | C   | 301.03  | PASS          | AC=3;AF=0.054;AN=56;BaseQRankSum=  |
| 15564 | chrY | 10068222 | . | A | T   | 185.32  | PASS          | AC=3;AF=0.054;AN=56;BaseQRankSum=  |
| 15565 | chrY | 10068230 | . | G | C   | 247.92  | PASS          | AC=5;AF=0.100;AN=50;BaseQRankSum=  |
| 15566 | chrY | 10068232 | . | T | G   | 294.88  | PASS          | AC=6;AF=0.125;AN=48;BaseQRankSum=  |
| 15567 | chrY | 10068234 | . | A | G   | 117.09  | PASS          | AC=3;AF=0.054;AN=56;BaseQRankSum=  |
| 15568 | chrY | 10068295 | . | C | A   | 492.50  | PASS          | AC=1;AF=0.015;AN=66;BaseQRankSum=  |
| 15569 | chrY | 10068296 | . | C | A   | 531.44  | PASS          | AC=1;AF=0.015;AN=66;BaseQRankSum=  |
| 15570 | chrY | 10068303 | . | C | A   | 554.84  | PASS          | AC=1;AF=0.016;AN=64;BaseQRankSum=  |
| 15571 | chrY | 10068309 | . | A | G   | 526.88  | PASS          | AC=3;AF=0.065;AN=46;BaseQRankSum=  |
| 15572 | chrY | 10068310 | . | C | A   | 488.09  | PASS          | AC=1;AF=0.015;AN=68;BaseQRankSum=  |
| 15573 | chrY | 10068328 | . | T | A   | 386.90  | PASS          | AC=3;AF=0.044;AN=68;BaseQRankSum=  |
| 15574 | chrY | 10068330 | . | T | C   | 56.01   | my_snp_filter | AC=1;AF=0.015;AN=68;BaseQ          |
| 15575 | chrY | 10068333 | . | C | T   | 56.14   | PASS          | AC=1;AF=0.014;AN=70;BaseQRankSum=  |
| 15576 | chrY | 10068334 | . | C | A   | 752.60  | PASS          | AC=4;AF=0.067;AN=60;BaseQRankSum=  |
| 15577 | chrY | 10068346 | . | T | C   | 67.46   | PASS          | AC=1;AF=0.015;AN=68;BaseQRankSum=  |
| 15578 | chrY | 10068347 | . | A | C   | 178.15  | PASS          | AC=3;AF=0.045;AN=66;BaseQRankSum=  |
| 15579 | chrY | 10068367 | . | G | T   | 94.45   | PASS          | AC=1;AF=0.015;AN=68;BaseQRankSum=  |
| 15580 | chrY | 10068386 | . | G | C   | 62.83   | PASS          | AC=1;AF=0.019;AN=52;BaseQRankSum=  |

|       |      |          |   |   |     |          |               |                                   |
|-------|------|----------|---|---|-----|----------|---------------|-----------------------------------|
| 15581 | chrY | 10068393 | . | A | T   | 58.05    | PASS          | AC=1;AF=0.015;AN=68;BaseQRankSum= |
| 15582 | chrY | 10068395 | . | G | A   | 57.80    | PASS          | AC=1;AF=0.015;AN=68;BaseQRankSum= |
| 15583 | chrY | 10068624 | . | G | T   | 16135.66 | PASS          | AC=3;AF=0.150;AN=20;BaseQ         |
| 15584 | chrY | 10068632 | . | C | A   | 25872.12 | PASS          | AC=5;AF=0.208;AN=24;BaseQ         |
| 15585 | chrY | 10068633 | . | C | A   | 17992.03 | PASS          | AC=4;AF=0.167;AN=24;BaseQ         |
| 15586 | chrY | 10068637 | . | C | T   | 27453.49 | PASS          | AC=5;AF=0.227;AN=22;BaseQ         |
| 15587 | chrY | 10068654 | . | G | C   | 30792.67 | PASS          | AC=5;AF=0.167;AN=30;BaseQ         |
| 15588 | chrY | 10068686 | . | A | G   | 15091.03 | PASS          | AC=4;AF=0.111;AN=36;BaseQ         |
| 15589 | chrY | 10068695 | . | A | T   | 81589.80 | PASS          | AC=13;AF=0.260;AN=50;Base         |
| 15590 | chrY | 10068698 | . | T | G   | 76676.83 | PASS          | AC=14;AF=0.292;AN=48;Base         |
| 15591 | chrY | 10068701 | . | C | A   | 84442.79 | PASS          | AC=14;AF=0.280;AN=50;Base         |
| 15592 | chrY | 10068706 | . | C | T   | 37.77    | PASS          | AC=1;AF=0.017;AN=60;BaseQRankSum= |
| 15593 | chrY | 10068711 | . | A | G   | 374.65   | my_snp_filter | AC=2;AF=0.032;AN=62;BaseQ         |
| 15594 | chrY | 10068713 | . | A | G   | 34.79    | PASS          | AC=1;AF=0.016;AN=64;BaseQRankSum= |
| 15595 | chrY | 10068734 | . | A | G   | 64682.58 | PASS          | AC=12;AF=0.231;AN=52;Base         |
| 15596 | chrY | 10068818 | . | C | A   | 46.88    | PASS          | AC=1;AF=0.019;AN=52;BaseQRankSum= |
| 15597 | chrY | 10068826 | . | C | A   | 1375.06  | PASS          | AC=6;AF=0.086;AN=70;BaseQRankSum= |
| 15598 | chrY | 10068829 | . | C | T   | 39.57    | PASS          | AC=1;AF=0.019;AN=52;BaseQRankSum= |
| 15599 | chrY | 10068919 | . | C | G   | 6400.38  | my_snp_filter | AC=2;AF=0.036;AN=56;BaseQ         |
| 15600 | chrY | 10068929 | . | A | G   | 5668.81  | my_snp_filter | AC=2;AF=0.036;AN=56;BaseQ         |
| 15601 | chrY | 10068938 | . | T | G   | 4541.88  | my_snp_filter | AC=2;AF=0.036;AN=56;BaseQ         |
| 15602 | chrY | 10068939 | . | T | G   | 4182.42  | my_snp_filter | AC=2;AF=0.036;AN=56;BaseQ         |
| 15603 | chrY | 10068945 | . | C | T   | 2553.48  | my_snp_filter | AC=2;AF=0.036;AN=56;BaseQ         |
| 15604 | chrY | 10068949 | . | T | G   | 2221.55  | my_snp_filter | AC=2;AF=0.036;AN=56;BaseQ         |
| 15605 | chrY | 10068951 | . | A | C   | 2050.36  | my_snp_filter | AC=2;AF=0.036;AN=56;BaseQ         |
| 15606 | chrY | 10068958 | . | G | A   | 1475.32  | PASS          | AC=2;AF=0.036;AN=56;BaseQRankSum= |
| 15607 | chrY | 10068961 | . | A | G   | 967.32   | PASS          | AC=2;AF=0.031;AN=64;BaseQRankSum= |
| 15608 | chrY | 10068962 | . | C | T   | 926.32   | PASS          | AC=2;AF=0.036;AN=56;BaseQRankSum= |
| 15609 | chrY | 10068965 | . | G | A   | 923.26   | PASS          | AC=2;AF=0.036;AN=56;BaseQRankSum= |
| 15610 | chrY | 10068975 | . | T | G   | 940.58   | PASS          | AC=1;AF=0.018;AN=56;BaseQRankSum= |
| 15611 | chrY | 10068977 | . | G | T   | 856.58   | PASS          | AC=1;AF=0.018;AN=56;BaseQRankSum= |
| 15612 | chrY | 10068982 | . | G | A   | 814.65   | PASS          | AC=1;AF=0.018;AN=56;BaseQRankSum= |
| 15613 | chrY | 10068986 | . | A | C   | 811.69   | PASS          | AC=1;AF=0.018;AN=56;BaseQRankSum= |
| 15614 | chrY | 10068988 | . | A | T   | 853.69   | PASS          | AC=1;AF=0.018;AN=56;BaseQRankSum= |
| 15615 | chrY | 10068996 | . | A | G   | 849.95   | PASS          | AC=1;AF=0.017;AN=58;BaseQRankSum= |
| 15616 | chrY | 10069006 | . | A | G   | 872.94   | PASS          | AC=2;AF=0.034;AN=58;BaseQRankSum= |
| 15617 | chrY | 10069027 | . | A | C   | 854.97   | PASS          | AC=1;AF=0.019;AN=54;BaseQRankSum= |
| 15618 | chrY | 10069039 | . | C | T   | 893.80   | PASS          | AC=1;AF=0.021;AN=48;BaseQRankSum= |
| 15619 | chrY | 10069042 | . | T | A   | 861.06   | PASS          | AC=1;AF=0.021;AN=48;BaseQRankSum= |
| 15620 | chrY | 10069304 | . | T | C   | 293.59   | PASS          | AC=1;AF=0.016;AN=62;BaseQRankSum= |
| 15621 | chrY | 10069307 | . | G | A   | 51.27    | PASS          | AC=2;AF=0.032;AN=62;DP=1958;FS=0. |
| 15622 | chrY | 10069316 | . | G | T   | 51.53    | PASS          | AC=2;AF=0.036;AN=56;DP=2308;FS=0. |
| 15623 | chrY | 10069317 | . | G | T   | 48.32    | PASS          | AC=2;AF=0.034;AN=58;DP=2224;FS=0. |
| 15624 | chrY | 10069321 | . | C | T   | 47.22    | PASS          | AC=2;AF=0.032;AN=62;DP=2240;FS=0. |
| 15625 | chrY | 10069329 | . | C | A   | 80.60    | PASS          | AC=1;AF=0.016;AN=62;BaseQRankSum= |
| 15626 | chrY | 10069334 | . | G | A   | 81.76    | PASS          | AC=1;AF=0.016;AN=62;BaseQRankSum= |
| 15627 | chrY | 10069338 | . | A | T   | 80.62    | PASS          | AC=1;AF=0.016;AN=62;BaseQRankSum= |
| 15628 | chrY | 10069354 | . | G | C   | 46.79    | my_snp_filter | AC=1;AF=0.015;AN=66;BaseQ         |
| 15629 | chrY | 10069359 | . | C | A   | 114.36   | PASS          | AC=1;AF=0.023;AN=44;BaseQRankSum= |
| 15630 | chrY | 10069812 | . | C | T   | 118.08   | PASS          | AC=2;AF=0.048;AN=42;BaseQRankSum= |
| 15631 | chrY | 10069815 | . | C | A   | 116.49   | PASS          | AC=2;AF=0.050;AN=40;BaseQRankSum= |
| 15632 | chrY | 10069824 | . | G | T   | 104.30   | my_snp_filter | AC=2;AF=0.053;AN=38;BaseQ         |
| 15633 | chrY | 10069830 | . | G | C   | 109.26   | PASS          | AC=2;AF=0.056;AN=36;BaseQRankSum= |
| 15634 | chrY | 10069831 | . | G | C   | 105.36   | my_snp_filter | AC=2;AF=0.056;AN=36;BaseQ         |
| 15635 | chrY | 10069999 | . | T | A   | 107.42   | PASS          | AC=1;AF=0.050;AN=20;BaseQRankSum= |
| 15636 | chrY | 10070011 | . | C | A   | 225.08   | PASS          | AC=1;AF=0.250;AN=4;BaseQRankSum=  |
| 15637 | chrY | 10070017 | . | A | T   | 55.37    | my_snp_filter | AC=2;AF=0.100;AN=20;BaseQ         |
| 15638 | chrY | 10070018 | . | G | C,T | 640.56   | PASS          | AC=1,1;AF=0.125,0.125;AN=8;BaseQR |
| 15639 | chrY | 10070026 | . | A | G   | 524.11   | PASS          | AC=1;AF=0.250;AN=4;BaseQRankSum=  |
| 15640 | chrY | 10070040 | . | A | C   | 1240.11  | PASS          | AC=1;AF=0.250;AN=4;BaseQRankSum=0 |
| 15641 | chrY | 10070046 | . | G | T   | 1575.53  | PASS          | AC=1;AF=0.167;AN=6;BaseQRankSum=0 |
| 15642 | chrY | 10070049 | . | A | G   | 1376.53  | PASS          | AC=1;AF=0.167;AN=6;BaseQRankSum=0 |
| 15643 | chrY | 10070058 | . | G | A   | 237.92   | PASS          | AC=1;AF=0.042;AN=24;BaseQRankSum= |
| 15644 | chrY | 10070069 | . | T | C   | 1550.35  | PASS          | AC=1;AF=0.125;AN=8;BaseQRankSum=  |
| 15645 | chrY | 10070070 | . | T | A   | 1550.35  | PASS          | AC=1;AF=0.125;AN=8;BaseQRankSum=  |
| 15646 | chrY | 10070073 | . | A | G   | 2426.35  | PASS          | AC=1;AF=0.125;AN=8;BaseQRankSum=  |
| 15647 | chrY | 10070080 | . | G | C   | 2588.35  | PASS          | AC=1;AF=0.125;AN=8;BaseQRankSum=0 |
| 15648 | chrY | 10070083 | . | T | A   | 2672.35  | PASS          | AC=1;AF=0.125;AN=8;BaseQRankSum=  |
| 15649 | chrY | 10070091 | . | T | A   | 3008.35  | PASS          | AC=1;AF=0.125;AN=8;BaseQRankSum=0 |
| 15650 | chrY | 10070094 | . | C | G   | 3050.35  | PASS          | AC=1;AF=0.125;AN=8;BaseQRankSum=2 |
| 15651 | chrY | 10070108 | . | A | T   | 3521.99  | PASS          | AC=1;AF=0.125;AN=8;BaseQRankSum=3 |
| 15652 | chrY | 10070114 | . | T | C   | 3647.99  | PASS          | AC=1;AF=0.125;AN=8;BaseQRankSum=  |
| 15653 | chrY | 10070119 | . | G | C   | 3757.99  | PASS          | AC=1;AF=0.125;AN=8;BaseQRankSum=4 |
| 15654 | chrY | 10070130 | . | G | A   | 3815.32  | PASS          | AC=1;AF=0.167;AN=6;BaseQRankSum=4 |
| 15655 | chrY | 10070679 | . | T | G   | 139.83   | PASS          | AC=2;AF=0.029;AN=70;BaseQRankSum= |
| 15656 | chrY | 10070680 | . | T | A   | 139.96   | PASS          | AC=2;AF=0.029;AN=70;BaseQRankSum= |

|       |      |          |   |   |     |          |               |                                            |
|-------|------|----------|---|---|-----|----------|---------------|--------------------------------------------|
| 15657 | chrY | 10070683 | . | C | T   | 142.99   | PASS          | AC=2;AF=0.029;AN=70;BaseQRankSum=          |
| 15658 | chrY | 10070689 | . | G | A   | 133.53   | PASS          | AC=2;AF=0.029;AN=70;BaseQRankSum=          |
| 15659 | chrY | 10070690 | . | C | A   | 127.64   | PASS          | AC=2;AF=0.029;AN=68;BaseQRankSum=          |
| 15660 | chrY | 10070700 | . | C | T   | 128.33   | PASS          | AC=2;AF=0.029;AN=68;BaseQRankSum=          |
| 15661 | chrY | 10070712 | . | C | T   | 125.60   | PASS          | AC=3;AF=0.056;AN=54;BaseQRankSum=          |
| 15662 | chrY | 10070722 | . | G | C   | 262.52   | PASS          | AC=1;AF=0.016;AN=64;BaseQRankSum=          |
| 15663 | chrY | 10070728 | . | C | T   | 145.74   | PASS          | AC=2;AF=0.042;AN=48;BaseQRankSum=          |
| 15664 | chrY | 10070777 | . | A | C   | 7877.62  | PASS          | AC=10;AF=0.227;AN=44;BaseQRankSum=         |
| 15665 | chrY | 10070789 | . | G | C   | 8578.86  | PASS          | AC=11;AF=0.289;AN=38;BaseQRankSum=         |
| 15666 | chrY | 10070820 | . | A | G   | 81.06    | PASS          | AC=2;AF=0.067;AN=30;BaseQRankSum=          |
| 15667 | chrY | 10070843 | . | C | A   | 956.46   | PASS          | AC=3;AF=0.115;AN=26;BaseQRankSum=          |
| 15668 | chrY | 10070844 | . | C | A   | 958.78   | PASS          | AC=3;AF=0.115;AN=26;BaseQRankSum=          |
| 15669 | chrY | 10070846 | . | T | A   | 955.20   | PASS          | AC=3;AF=0.115;AN=26;BaseQRankSum=          |
| 15670 | chrY | 10070857 | . | G | C   | 856.13   | PASS          | AC=3;AF=0.107;AN=28;BaseQRankSum=          |
| 15671 | chrY | 10070858 | . | G | T   | 856.09   | PASS          | AC=3;AF=0.107;AN=28;BaseQRankSum=          |
| 15672 | chrY | 10070859 | . | A | G   | 10021.02 | PASS          | AC=11;AF=0.367;AN=30;BaseQRankSum=         |
| 15673 | chrY | 10070864 | . | A | C   | 634.85   | PASS          | AC=3;AF=0.115;AN=26;BaseQRankSum=          |
| 15674 | chrY | 10070876 | . | G | C   | 247.59   | my_snp_filter | AC=3;AF=0.125;AN=24;BaseQRankSum=          |
| 15675 | chrY | 10070879 | . | G | C   | 10849.57 | PASS          | AC=11;AF=0.423;AN=26;BaseQRankSum=         |
| 15676 | chrY | 10070880 | . | A | T   | 11042.15 | PASS          | AC=11;AF=0.458;AN=24;BaseQRankSum=         |
| 15677 | chrY | 10070888 | . | G | A   | 11067.11 | PASS          | AC=9;AF=0.409;AN=22;BaseQRankSum=          |
| 15678 | chrY | 10070889 | . | G | A   | 11238.11 | PASS          | AC=9;AF=0.409;AN=22;BaseQRankSum=          |
| 15679 | chrY | 10070904 | . | G | A   | 10989.52 | PASS          | AC=9;AF=0.450;AN=20;BaseQRankSum=          |
| 15680 | chrY | 10070927 | . | A | C   | 10445.52 | PASS          | AC=9;AF=0.450;AN=20;BaseQRankSum=          |
| 15681 | chrY | 10070956 | . | C | A   | 4131.45  | PASS          | AC=4;AF=0.500;AN=8;BaseQRankSum=           |
| 15682 | chrY | 10070963 | . | G | T   | 3929.94  | PASS          | AC=4;AF=0.400;AN=10;BaseQRankSum=          |
| 15683 | chrY | 10070982 | . | T | C   | 4092.94  | PASS          | AC=4;AF=0.400;AN=10;BaseQRankSum=          |
| 15684 | chrY | 10070983 | . | A | T   | 4053.94  | PASS          | AC=4;AF=0.400;AN=10;BaseQRankSum=          |
| 15685 | chrY | 10071018 | . | G | A   | 2636.23  | PASS          | AC=4;AF=0.167;AN=24;BaseQRankSum=          |
| 15686 | chrY | 10071019 | . | C | T   | 7806.72  | PASS          | AC=8;AF=0.333;AN=24;BaseQRankSum=          |
| 15687 | chrY | 10071025 | . | G | A   | 8123.33  | PASS          | AC=8;AF=0.444;AN=18;BaseQRankSum=          |
| 15688 | chrY | 10071028 | . | A | G   | 8046.33  | PASS          | AC=8;AF=0.444;AN=18;BaseQRankSum=          |
| 15689 | chrY | 10071046 | . | A | C   | 8073.97  | PASS          | AC=8;AF=0.400;AN=20;BaseQRankSum=          |
| 15690 | chrY | 10071048 | . | G | C   | 8220.40  | PASS          | AC=8;AF=0.333;AN=24;BaseQRankSum=          |
| 15691 | chrY | 10071052 | . | C | G   | 8334.79  | PASS          | AC=8;AF=0.333;AN=24;BaseQRankSum=          |
| 15692 | chrY | 10071057 | . | A | T   | 8279.79  | PASS          | AC=8;AF=0.333;AN=24;BaseQRankSum=          |
| 15693 | chrY | 10071064 | . | A | T   | 8001.70  | PASS          | AC=9;AF=0.346;AN=26;BaseQRankSum=          |
| 15694 | chrY | 10071073 | . | C | A   | 8540.10  | PASS          | AC=9;AF=0.450;AN=20;BaseQRankSum=          |
| 15695 | chrY | 10071114 | . | G | A   | 2598.27  | PASS          | AC=8;AF=0.400;AN=20;BaseQRankSum=          |
| 15696 | chrY | 10071117 | . | G | A,C | 7475.43  | PASS          | AC=1,9;AF=0.050,0.450;AN=20;BaseQRankSum=  |
| 15697 | chrY | 10071145 | . | T | A   | 11357.63 | PASS          | AC=9;AF=0.450;AN=20;BaseQRankSum=          |
| 15698 | chrY | 10071152 | . | T | C   | 888.03   | PASS          | AC=4;AF=0.154;AN=26;BaseQRankSum=          |
| 15699 | chrY | 10071193 | . | C | A   | 17242.18 | PASS          | AC=11;AF=0.393;AN=28;BaseQRankSum=         |
| 15700 | chrY | 10071223 | . | T | C   | 20926.18 | PASS          | AC=11;AF=0.500;AN=22;BaseQRankSum=         |
| 15701 | chrY | 10071252 | . | G | A   | 22163.74 | PASS          | AC=11;AF=0.458;AN=24;BaseQRankSum=         |
| 15702 | chrY | 10071258 | . | A | G   | 22135.74 | PASS          | AC=11;AF=0.458;AN=24;BaseQRankSum=         |
| 15703 | chrY | 10071263 | . | G | A   | 11178.39 | PASS          | AC=9;AF=0.346;AN=26;BaseQRankSum=          |
| 15704 | chrY | 10071278 | . | T | C   | 21980.22 | PASS          | AC=9;AF=0.409;AN=22;BaseQRankSum=          |
| 15705 | chrY | 10071294 | . | A | G   | 209.16   | my_snp_filter | AC=2;AF=0.063;AN=32;BaseQRankSum=          |
| 15706 | chrY | 10071295 | . | A | C   | 21012.11 | PASS          | AC=9;AF=0.409;AN=22;BaseQRankSum=          |
| 15707 | chrY | 10071300 | . | T | C   | 2861.12  | PASS          | AC=7;AF=0.250;AN=28;BaseQRankSum=          |
| 15708 | chrY | 10071354 | . | C | G   | 20339.55 | PASS          | AC=9;AF=0.346;AN=26;BaseQRankSum=          |
| 15709 | chrY | 10071355 | . | C | T   | 7774.59  | PASS          | AC=9;AF=0.321;AN=28;BaseQRankSum=          |
| 15710 | chrY | 10071356 | . | G | A   | 10507.83 | PASS          | AC=9;AF=0.250;AN=36;BaseQRankSum=          |
| 15711 | chrY | 10071360 | . | T | G   | 20475.96 | PASS          | AC=9;AF=0.281;AN=32;BaseQRankSum=          |
| 15712 | chrY | 10071365 | . | T | A   | 20199.59 | PASS          | AC=9;AF=0.225;AN=40;BaseQRankSum=          |
| 15713 | chrY | 10071367 | . | A | T   | 7922.29  | PASS          | AC=9;AF=0.237;AN=38;BaseQRankSum=          |
| 15714 | chrY | 10071370 | . | A | G,T | 11393.46 | PASS          | AC=8,3;AF=0.211,0.079;AN=38;BaseQRankSum=  |
| 15715 | chrY | 10071371 | . | T | C   | 19842.98 | PASS          | AC=9;AF=0.237;AN=38;BaseQRankSum=          |
| 15716 | chrY | 10071388 | . | C | A   | 9825.26  | PASS          | AC=9;AF=0.188;AN=48;BaseQRankSum=          |
| 15717 | chrY | 10071390 | . | G | T   | 9516.26  | PASS          | AC=9;AF=0.188;AN=48;BaseQRankSum=          |
| 15718 | chrY | 10071402 | . | A | G   | 1938.89  | PASS          | AC=5;AF=0.096;AN=52;BaseQRankSum=          |
| 15719 | chrY | 10071422 | . | A | C   | 17800.52 | PASS          | AC=10;AF=0.179;AN=56;BaseQRankSum=         |
| 15720 | chrY | 10071430 | . | C | G   | 17796.11 | PASS          | AC=10;AF=0.156;AN=64;BaseQRankSum=         |
| 15721 | chrY | 10071450 | . | A | G   | 9022.73  | PASS          | AC=9;AF=0.136;AN=66;BaseQRankSum=          |
| 15722 | chrY | 10071455 | . | G | T   | 15794.05 | PASS          | AC=9;AF=0.141;AN=64;BaseQRankSum=          |
| 15723 | chrY | 10071481 | . | A | G   | 3034.51  | PASS          | AC=4;AF=0.057;AN=70;BaseQRankSum=          |
| 15724 | chrY | 10071485 | . | G | T   | 3092.03  | PASS          | AC=4;AF=0.057;AN=70;BaseQRankSum=          |
| 15725 | chrY | 10071509 | . | G | A   | 17438.28 | PASS          | AC=14;AF=0.212;AN=66;BaseQRankSum=         |
| 15726 | chrY | 10071517 | . | T | G,C | 11126.14 | PASS          | AC=11,6;AF=0.167,0.091;AN=66;BaseQRankSum= |
| 15727 | chrY | 10071536 | . | G | A   | 15826.52 | PASS          | AC=14;AF=0.212;AN=66;BaseQRankSum=         |
| 15728 | chrY | 10071538 | . | A | T   | 15801.53 | PASS          | AC=14;AF=0.212;AN=66;BaseQRankSum=         |
| 15729 | chrY | 10071544 | . | A | T   | 2356.72  | PASS          | AC=4;AF=0.059;AN=68;BaseQRankSum=          |
| 15730 | chrY | 10071552 | . | T | C   | 14463.75 | PASS          | AC=11;AF=0.162;AN=68;BaseQRankSum=         |
| 15731 | chrY | 10071576 | . | G | C   | 12321.03 | PASS          | AC=9;AF=0.132;AN=68;BaseQRankSum=          |
| 15732 | chrY | 10071585 | . | A | G   | 11259.82 | PASS          | AC=9;AF=0.132;AN=68;BaseQRankSum=          |

|       |      |          |   |   |     |          |               |                                    |
|-------|------|----------|---|---|-----|----------|---------------|------------------------------------|
| 15733 | chrY | 10071589 | . | T | C   | 10801.76 | PASS          | AC=9;AF=0.132;AN=68;BaseQ          |
| 15734 | chrY | 10071604 | . | A | T   | 8984.66  | PASS          | AC=9;AF=0.129;AN=70;BaseQRankSum=  |
| 15735 | chrY | 10071605 | . | T | G   | 8735.12  | PASS          | AC=9;AF=0.129;AN=70;BaseQRankSum=  |
| 15736 | chrY | 10071631 | . | C | A   | 1536.39  | PASS          | AC=3;AF=0.043;AN=70;BaseQRankSum=  |
| 15737 | chrY | 10071635 | . | A | T   | 1130.10  | PASS          | AC=2;AF=0.029;AN=70;BaseQRankSum=  |
| 15738 | chrY | 10071640 | . | G | A   | 1513.76  | PASS          | AC=3;AF=0.043;AN=70;BaseQRankSum=  |
| 15739 | chrY | 10071653 | . | C | A   | 2872.19  | PASS          | AC=6;AF=0.100;AN=60;BaseQRankSum=  |
| 15740 | chrY | 10071658 | . | T | A   | 1390.23  | PASS          | AC=5;AF=0.074;AN=68;BaseQRankSum=  |
| 15741 | chrY | 10071663 | . | G | T   | 1262.95  | PASS          | AC=5;AF=0.074;AN=68;BaseQRankSum=  |
| 15742 | chrY | 10071674 | . | G | T   | 1842.65  | PASS          | AC=4;AF=0.069;AN=58;BaseQRankSum=  |
| 15743 | chrY | 10071677 | . | A | G   | 730.68   | PASS          | AC=3;AF=0.044;AN=68;BaseQRankSum=  |
| 15744 | chrY | 10071680 | . | G | A   | 1425.30  | PASS          | AC=4;AF=0.071;AN=56;BaseQRankSum=  |
| 15745 | chrY | 10071695 | . | T | C   | 799.07   | PASS          | AC=3;AF=0.058;AN=52;BaseQRankSum=  |
| 15746 | chrY | 10071696 | . | G | A   | 714.87   | PASS          | AC=3;AF=0.056;AN=54;BaseQRankSum=  |
| 15747 | chrY | 10071700 | . | G | C   | 124.47   | PASS          | AC=2;AF=0.034;AN=58;BaseQRankSum=  |
| 15748 | chrY | 10071707 | . | A | G   | 80.73    | PASS          | AC=1;AF=0.017;AN=60;BaseQRankSum=  |
| 15749 | chrY | 10071708 | . | G | A   | 176.03   | PASS          | AC=2;AF=0.034;AN=58;BaseQRankSum=  |
| 15750 | chrY | 10071709 | . | G | C   | 40.99    | my_snp_filter | AC=1;AF=0.017;AN=58;BaseQ          |
| 15751 | chrY | 10071760 | . | A | G   | 34.27    | my_snp_filter | AC=2;AF=0.029;AN=68;BaseQ          |
| 15752 | chrY | 10071777 | . | G | A   | 30.08    | my_snp_filter | AC=2;AF=0.040;AN=50;BaseQ          |
| 15753 | chrY | 10071785 | . | T | C   | 75.43    | PASS          | AC=2;AF=0.040;AN=50;BaseQRankSum=  |
| 15754 | chrY | 10071791 | . | A | T   | 66.40    | my_snp_filter | AC=2;AF=0.042;AN=48;BaseQ          |
| 15755 | chrY | 10071792 | . | C | A   | 66.22    | my_snp_filter | AC=2;AF=0.042;AN=48;BaseQ          |
| 15756 | chrY | 10071796 | . | A | G   | 61.37    | my_snp_filter | AC=2;AF=0.030;AN=66;BaseQ          |
| 15757 | chrY | 10071800 | . | C | A   | 146.54   | PASS          | AC=2;AF=0.040;AN=50;BaseQRankSum=  |
| 15758 | chrY | 10071801 | . | A | G   | 147.09   | PASS          | AC=2;AF=0.040;AN=50;BaseQRankSum=  |
| 15759 | chrY | 10071808 | . | A | T   | 97.32    | PASS          | AC=2;AF=0.029;AN=70;BaseQRankSum=  |
| 15760 | chrY | 10071811 | . | A | T   | 185.81   | PASS          | AC=2;AF=0.038;AN=52;BaseQRankSum=  |
| 15761 | chrY | 10071834 | . | T | G   | 126.47   | PASS          | AC=1;AF=0.019;AN=52;BaseQRankSum=  |
| 15762 | chrY | 10071840 | . | G | A   | 90.33    | PASS          | AC=1;AF=0.019;AN=52;BaseQRankSum=  |
| 15763 | chrY | 10071849 | . | C | T   | 181.58   | PASS          | AC=1;AF=0.019;AN=52;BaseQRankSum=  |
| 15764 | chrY | 10071858 | . | A | G   | 180.96   | PASS          | AC=1;AF=0.019;AN=52;BaseQRankSum=  |
| 15765 | chrY | 10071860 | . | C | T   | 49.97    | PASS          | AC=1;AF=0.015;AN=68;BaseQRankSum=  |
| 15766 | chrY | 10071874 | . | T | A   | 95.84    | PASS          | AC=1;AF=0.019;AN=52;BaseQRankSum=  |
| 15767 | chrY | 10071914 | . | A | G   | 1283.93  | PASS          | AC=5;AF=0.071;AN=70;BaseQRankSum=  |
| 15768 | chrY | 10071938 | . | C | T   | 6728.61  | PASS          | AC=23;AF=0.338;AN=68;BaseQRankSum= |
| 15769 | chrY | 10071940 | . | C | A   | 2114.06  | PASS          | AC=7;AF=0.103;AN=68;BaseQRankSum=  |
| 15770 | chrY | 10071941 | . | T | C   | 2159.97  | PASS          | AC=7;AF=0.103;AN=68;BaseQRankSum=  |
| 15771 | chrY | 10071951 | . | A | T   | 2534.39  | PASS          | AC=7;AF=0.100;AN=70;BaseQRankSum=  |
| 15772 | chrY | 10071958 | . | C | T   | 1951.11  | PASS          | AC=5;AF=0.071;AN=70;BaseQRankSum=  |
| 15773 | chrY | 10071992 | . | A | G   | 24341.78 | PASS          | AC=32;AF=0.457;AN=70;BaseQ         |
| 15774 | chrY | 10072012 | . | G | C   | 27092.74 | PASS          | AC=32;AF=0.457;AN=70;BaseQ         |
| 15775 | chrY | 10072036 | . | T | C   | 526.13   | PASS          | AC=8;AF=0.114;AN=70;BaseQRankSum=  |
| 15776 | chrY | 10072047 | . | C | T   | 23674.39 | PASS          | AC=32;AF=0.457;AN=70;BaseQ         |
| 15777 | chrY | 10072100 | . | A | G   | 2256.68  | PASS          | AC=15;AF=0.341;AN=44;BaseQRankSum= |
| 15778 | chrY | 10072107 | . | T | A   | 2134.56  | PASS          | AC=15;AF=0.357;AN=42;BaseQRankSum= |
| 15779 | chrY | 10072116 | . | G | T   | 1739.89  | PASS          | AC=14;AF=0.318;AN=44;BaseQRankSum= |
| 15780 | chrY | 10072123 | . | A | G   | 1591.74  | PASS          | AC=12;AF=0.286;AN=42;BaseQRankSum= |
| 15781 | chrY | 10072125 | . | G | A   | 1552.90  | PASS          | AC=12;AF=0.300;AN=40;BaseQRankSum= |
| 15782 | chrY | 10072140 | . | A | T   | 661.87   | PASS          | AC=7;AF=0.206;AN=34;BaseQRankSum=  |
| 15783 | chrY | 10072163 | . | C | T   | 14834.30 | PASS          | AC=12;AF=0.261;AN=46;BaseQ         |
| 15784 | chrY | 10072180 | . | C | T   | 13556.05 | PASS          | AC=9;AF=0.214;AN=42;BaseQ          |
| 15785 | chrY | 10072187 | . | C | T   | 12815.09 | PASS          | AC=8;AF=0.190;AN=42;BaseQ          |
| 15786 | chrY | 10072193 | . | C | A   | 11758.72 | PASS          | AC=8;AF=0.211;AN=38;BaseQ          |
| 15787 | chrY | 10072194 | . | T | G   | 2503.24  | PASS          | AC=8;AF=0.200;AN=40;BaseQRankSum=  |
| 15788 | chrY | 10072225 | . | G | T,C | 5381.30  | PASS          | AC=5,4;AF=0.147,0.118;AN=34;BaseQ  |
| 15789 | chrY | 10072239 | . | A | G   | 3472.64  | PASS          | AC=6;AF=0.158;AN=38;BaseQRankSum=  |
| 15790 | chrY | 10072244 | . | G | T   | 3469.44  | PASS          | AC=6;AF=0.167;AN=36;BaseQRankSum=  |
| 15791 | chrY | 10072259 | . | G | A   | 5770.22  | PASS          | AC=7;AF=0.269;AN=26;BaseQRankSum=  |
| 15792 | chrY | 10072262 | . | A | C   | 5400.94  | PASS          | AC=7;AF=0.269;AN=26;BaseQRankSum=  |
| 15793 | chrY | 10072265 | . | G | A   | 4997.10  | PASS          | AC=7;AF=0.269;AN=26;BaseQRankSum=  |
| 15794 | chrY | 10072266 | . | A | G   | 2316.12  | PASS          | AC=6;AF=0.176;AN=34;BaseQRankSum=  |
| 15795 | chrY | 10072278 | . | C | T   | 1521.30  | PASS          | AC=7;AF=0.219;AN=32;BaseQRankSum=  |
| 15796 | chrY | 10072285 | . | A | G   | 1540.77  | PASS          | AC=6;AF=0.176;AN=34;BaseQRankSum=  |
| 15797 | chrY | 10072300 | . | G | T   | 1070.15  | PASS          | AC=6;AF=0.158;AN=38;BaseQRankSum=  |
| 15798 | chrY | 10072302 | . | G | A   | 905.71   | PASS          | AC=5;AF=0.125;AN=40;BaseQRankSum=  |
| 15799 | chrY | 10072308 | . | T | A   | 1691.90  | PASS          | AC=6;AF=0.143;AN=42;BaseQRankSum=  |
| 15800 | chrY | 10072311 | . | T | A   | 538.29   | PASS          | AC=4;AF=0.095;AN=42;BaseQRankSum=  |
| 15801 | chrY | 10072323 | . | T | C   | 628.18   | PASS          | AC=2;AF=0.048;AN=42;BaseQRankSum=  |
| 15802 | chrY | 10072353 | . | G | C   | 1359.34  | PASS          | AC=2;AF=0.083;AN=24;BaseQRankSum=  |
| 15803 | chrY | 10072369 | . | T | C   | 1922.88  | PASS          | AC=2;AF=0.167;AN=12;BaseQRankSum=  |
| 15804 | chrY | 10072377 | . | A | G   | 2098.82  | PASS          | AC=2;AF=0.125;AN=16;BaseQRankSum=  |
| 15805 | chrY | 10072427 | . | T | G   | 1816.02  | PASS          | AC=9;AF=0.450;AN=20;BaseQRankSum=  |
| 15806 | chrY | 10072443 | . | T | G   | 30.27    | my_snp_filter | AC=3;AF=0.043;AN=70;BaseQ          |
| 15807 | chrY | 10072464 | . | T | C   | 47.55    | PASS          | AC=1;AF=0.017;AN=58;BaseQRankSum=  |
| 15808 | chrY | 10072475 | . | A | G   | 45.38    | PASS          | AC=1;AF=0.036;AN=28;BaseQRankSum=  |



|       |      |          |   |   |     |         |               |                                    |
|-------|------|----------|---|---|-----|---------|---------------|------------------------------------|
| 15809 | chrY | 10072483 | . | T | G   | 2180.66 | PASS          | AC=15;AF=0.278;AN=54;BaseQRankSum= |
| 15810 | chrY | 10072492 | . | C | T   | 1968.80 | PASS          | AC=18;AF=0.500;AN=36;BaseQRankSum= |
| 15811 | chrY | 10072501 | . | G | C   | 1603.37 | PASS          | AC=18;AF=0.529;AN=34;BaseQRankSum= |
| 15812 | chrY | 10072502 | . | T | A   | 1603.37 | PASS          | AC=18;AF=0.529;AN=34;BaseQRankSum= |
| 15813 | chrY | 10072526 | . | T | A   | 597.61  | PASS          | AC=8;AF=0.235;AN=34;BaseQRankSum=  |
| 15814 | chrY | 10072531 | . | T | C   | 355.88  | PASS          | AC=4;AF=0.182;AN=22;BaseQRankSum=  |
| 15815 | chrY | 10072534 | . | A | C   | 50.07   | PASS          | AC=1;AF=0.020;AN=50;BaseQRankSum=  |
| 15816 | chrY | 10072541 | . | T | C   | 223.52  | PASS          | AC=4;AF=0.133;AN=30;BaseQRankSum=  |
| 15817 | chrY | 10072546 | . | A | G   | 93.42   | PASS          | AC=3;AF=0.094;AN=32;BaseQRankSum=  |
| 15818 | chrY | 10072548 | . | T | C   | 93.16   | PASS          | AC=3;AF=0.083;AN=36;BaseQRankSum=  |
| 15819 | chrY | 10072551 | . | T | A   | 55.40   | my_snp_filter | AC=2;AF=0.053;AN=38;DP=29          |
| 15820 | chrY | 10072875 | . | C | A   | 114.42  | PASS          | AC=1;AF=0.014;AN=70;BaseQRankSum=  |
| 15821 | chrY | 10072879 | . | G | C   | 113.45  | PASS          | AC=1;AF=0.014;AN=70;BaseQRankSum=  |
| 15822 | chrY | 10072887 | . | A | T   | 107.78  | PASS          | AC=1;AF=0.014;AN=70;BaseQRankSum=  |
| 15823 | chrY | 10072889 | . | A | T   | 110.95  | PASS          | AC=1;AF=0.014;AN=70;BaseQRankSum=  |
| 15824 | chrY | 10072891 | . | T | C   | 114.28  | PASS          | AC=1;AF=0.014;AN=70;BaseQRankSum=  |
| 15825 | chrY | 10072900 | . | C | T   | 117.12  | PASS          | AC=1;AF=0.014;AN=70;BaseQRankSum=  |
| 15826 | chrY | 10072903 | . | A | G   | 115.22  | PASS          | AC=2;AF=0.029;AN=70;BaseQRankSum=  |
| 15827 | chrY | 10072912 | . | T | G   | 118.37  | PASS          | AC=2;AF=0.029;AN=70;BaseQRankSum=  |
| 15828 | chrY | 10072914 | . | T | A   | 124.51  | PASS          | AC=2;AF=0.029;AN=70;BaseQRankSum=  |
| 15829 | chrY | 10072922 | . | A | G   | 120.47  | PASS          | AC=2;AF=0.029;AN=70;BaseQRankSum=  |
| 15830 | chrY | 10072957 | . | C | A   | 399.27  | PASS          | AC=2;AF=0.029;AN=68;BaseQRankSum=  |
| 15831 | chrY | 10072958 | . | G | T   | 429.31  | PASS          | AC=2;AF=0.029;AN=68;BaseQRankSum=  |
| 15832 | chrY | 10072973 | . | T | C   | 390.41  | PASS          | AC=2;AF=0.029;AN=70;BaseQRankSum=  |
| 15833 | chrY | 10072982 | . | G | C   | 393.46  | PASS          | AC=2;AF=0.029;AN=70;BaseQRankSum=  |
| 15834 | chrY | 10072993 | . | A | C   | 222.11  | PASS          | AC=1;AF=0.014;AN=70;BaseQRankSum=  |
| 15835 | chrY | 10072997 | . | G | C   | 177.39  | PASS          | AC=1;AF=0.014;AN=70;BaseQRankSum=  |
| 15836 | chrY | 10073105 | . | A | C   | 34.18   | PASS          | AC=2;AF=0.034;AN=58;DP=371;FS=0.0  |
| 15837 | chrY | 10073204 | . | C | T   | 51.23   | PASS          | AC=2;AF=0.071;AN=28;BaseQRankSum=  |
| 15838 | chrY | 10073221 | . | G | A   | 745.14  | PASS          | AC=10;AF=0.385;AN=26;BaseQRankSum= |
| 15839 | chrY | 10073262 | . | T | G   | 2312.09 | PASS          | AC=9;AF=0.500;AN=18;BaseQRankSum=  |
| 15840 | chrY | 10073266 | . | C | A   | 2306.09 | PASS          | AC=9;AF=0.500;AN=18;BaseQRankSum=  |
| 15841 | chrY | 10073267 | . | T | A   | 2309.09 | PASS          | AC=9;AF=0.500;AN=18;BaseQRankSum=  |
| 15842 | chrY | 10073273 | . | A | C   | 2300.09 | PASS          | AC=9;AF=0.500;AN=18;BaseQRankSum=  |
| 15843 | chrY | 10073282 | . | T | A   | 2303.09 | PASS          | AC=9;AF=0.500;AN=18;BaseQRankSum=  |
| 15844 | chrY | 10073285 | . | T | G   | 2300.09 | PASS          | AC=9;AF=0.500;AN=18;BaseQRankSum=  |
| 15845 | chrY | 10073306 | . | C | T   | 2340.09 | PASS          | AC=9;AF=0.500;AN=18;BaseQRankSum=  |
| 15846 | chrY | 10073612 | . | C | A   | 572.44  | PASS          | AC=3;AF=0.115;AN=26;BaseQRankSum=  |
| 15847 | chrY | 10073616 | . | A | T   | 2190.48 | PASS          | AC=3;AF=0.300;AN=10;BaseQRankSum=  |
| 15848 | chrY | 10073622 | . | C | T   | 3176.77 | PASS          | AC=5;AF=0.625;AN=8;BaseQRankSum=2  |
| 15849 | chrY | 10073624 | . | T | A   | 3035.97 | PASS          | AC=5;AF=0.625;AN=8;BaseQRankSum=0  |
| 15850 | chrY | 10073648 | . | A | T   | 3716.68 | PASS          | AC=4;AF=0.400;AN=10;BaseQRankSum=  |
| 15851 | chrY | 10073671 | . | G | T   | 1097.89 | PASS          | AC=1;AF=0.167;AN=6;BaseQRankSum=3  |
| 15852 | chrY | 10073677 | . | T | C   | 615.56  | PASS          | AC=5;AF=0.278;AN=18;BaseQRankSum=  |
| 15853 | chrY | 10073679 | . | C | G   | 726.17  | PASS          | AC=3;AF=0.500;AN=6;BaseQRankSum=-  |
| 15854 | chrY | 10073680 | . | A | T,C | 1463.17 | PASS          | AC=1,2;AF=0.167,0.333;AN=6;BaseQR  |
| 15855 | chrY | 10073681 | . | A | T   | 1735.88 | PASS          | AC=3;AF=0.500;AN=6;BaseQRankSum=-  |
| 15856 | chrY | 10073695 | . | T | A   | 548.88  | PASS          | AC=3;AF=0.500;AN=6;BaseQRankSum=-  |
| 15857 | chrY | 10073718 | . | T | A   | 938.04  | PASS          | AC=3;AF=0.250;AN=12;BaseQRankSum=  |
| 15858 | chrY | 10073738 | . | C | T   | 215.94  | PASS          | AC=3;AF=0.167;AN=18;BaseQRankSum=  |
| 15859 | chrY | 10073762 | . | T | C   | 178.57  | PASS          | AC=3;AF=0.150;AN=20;BaseQRankSum=  |
| 15860 | chrY | 10073782 | . | A | T   | 32.15   | my_snp_filter | AC=1;AF=0.050;AN=20;BaseQ          |
| 15861 | chrY | 10073783 | . | T | G   | 33.27   | my_snp_filter | AC=1;AF=0.050;AN=20;BaseQ          |
| 15862 | chrY | 10073787 | . | T | C   | 31.19   | my_snp_filter | AC=1;AF=0.050;AN=20;BaseQ          |
| 15863 | chrY | 10074935 | . | G | A   | 469.32  | PASS          | AC=14;AF=0.350;AN=40;DP=198;FS=0.  |
| 15864 | chrY | 10074996 | . | T | G   | 118.10  | my_snp_filter | AC=3;AF=0.047;AN=64;BaseQ          |
| 15865 | chrY | 10075004 | . | C | T   | 518.09  | my_snp_filter | AC=5;AF=0.076;AN=66;BaseQ          |
| 15866 | chrY | 10075006 | . | G | A   | 1987.52 | PASS          | AC=6;AF=0.091;AN=66;BaseQRankSum=  |
| 15867 | chrY | 10075015 | . | C | T   | 252.93  | PASS          | AC=3;AF=0.045;AN=66;BaseQRankSum=  |
| 15868 | chrY | 10075016 | . | G | A   | 337.20  | PASS          | AC=3;AF=0.047;AN=64;BaseQRankSum=  |
| 15869 | chrY | 10075019 | . | A | G   | 396.66  | PASS          | AC=4;AF=0.061;AN=66;BaseQRankSum=  |
| 15870 | chrY | 10075050 | . | C | G   | 1082.09 | my_snp_filter | AC=12;AF=0.194;AN=62;Base          |
| 15871 | chrY | 10075054 | . | A | T   | 90.86   | PASS          | AC=2;AF=0.029;AN=68;BaseQRankSum=  |
| 15872 | chrY | 10075068 | . | G | C   | 2214.81 | my_snp_filter | AC=13;AF=0.186;AN=70;Base          |
| 15873 | chrY | 10075070 | . | T | C   | 2358.39 | my_snp_filter | AC=13;AF=0.186;AN=70;Base          |
| 15874 | chrY | 10075072 | . | C | T   | 203.30  | PASS          | AC=2;AF=0.030;AN=66;BaseQRankSum=  |
| 15875 | chrY | 10075073 | . | T | C   | 3037.63 | my_snp_filter | AC=13;AF=0.197;AN=66;Base          |
| 15876 | chrY | 10075075 | . | G | A   | 2417.98 | my_snp_filter | AC=13;AF=0.186;AN=70;Base          |
| 15877 | chrY | 10075077 | . | G | A   | 3187.14 | my_snp_filter | AC=13;AF=0.197;AN=66;Base          |
| 15878 | chrY | 10075099 | . | C | A   | 3768.14 | my_snp_filter | AC=11;AF=0.167;AN=66;Base          |
| 15879 | chrY | 10075104 | . | A | G   | 2048.12 | my_snp_filter | AC=11;AF=0.167;AN=66;Base          |
| 15880 | chrY | 10075105 | . | G | A   | 4095.14 | my_snp_filter | AC=11;AF=0.167;AN=66;Base          |
| 15881 | chrY | 10075130 | . | C | T   | 3109.39 | my_snp_filter | AC=9;AF=0.141;AN=64;BaseQ          |
| 15882 | chrY | 10075131 | . | A | G   | 3132.74 | my_snp_filter | AC=9;AF=0.141;AN=64;BaseQ          |
| 15883 | chrY | 10075132 | . | C | T   | 2839.72 | my_snp_filter | AC=9;AF=0.141;AN=64;BaseQ          |
| 15884 | chrY | 10075137 | . | G | A   | 980.19  | PASS          | AC=4;AF=0.059;AN=68;BaseQRankSum=  |

|       |      |          |   |   |     |          |               |                                    |
|-------|------|----------|---|---|-----|----------|---------------|------------------------------------|
| 15885 | chrY | 10075142 | . | T | C   | 3305.09  | my_snp_filter | AC=10;AF=0.156;AN=64;BaseQ         |
| 15886 | chrY | 10075156 | . | G | C   | 1082.60  | PASS          | AC=5;AF=0.076;AN=66;BaseQRankSum=  |
| 15887 | chrY | 10075159 | . | G | C   | 1018.26  | PASS          | AC=4;AF=0.059;AN=68;BaseQRankSum=  |
| 15888 | chrY | 10075163 | . | C | T,* | 1276.04  | PASS          | AC=8,1;AF=0.118,0.015;AN=68;BaseQ  |
| 15889 | chrY | 10075170 | . | G | A   | 3708.83  | my_snp_filter | AC=9;AF=0.141;AN=64;BaseQ          |
| 15890 | chrY | 10075176 | . | G | C   | 3633.99  | my_snp_filter | AC=9;AF=0.136;AN=66;BaseQ          |
| 15891 | chrY | 10075220 | . | T | A   | 5732.60  | my_snp_filter | AC=16;AF=0.229;AN=70;BaseQ         |
| 15892 | chrY | 10075228 | . | A | C   | 5669.93  | my_snp_filter | AC=15;AF=0.221;AN=68;BaseQ         |
| 15893 | chrY | 10075245 | . | C | T   | 4833.83  | PASS          | AC=11;AF=0.183;AN=60;BaseQRankSum= |
| 15894 | chrY | 10075246 | . | C | T   | 4828.15  | PASS          | AC=11;AF=0.177;AN=62;BaseQRankSum= |
| 15895 | chrY | 10075264 | . | A | G   | 3873.71  | PASS          | AC=9;AF=0.136;AN=66;BaseQRankSum=  |
| 15896 | chrY | 10075278 | . | G | A   | 3404.65  | PASS          | AC=7;AF=0.130;AN=54;BaseQRankSum=  |
| 15897 | chrY | 10075286 | . | C | G   | 2968.55  | PASS          | AC=6;AF=0.115;AN=52;BaseQRankSum=  |
| 15898 | chrY | 10075290 | . | C | T   | 2830.62  | PASS          | AC=6;AF=0.130;AN=46;BaseQRankSum=  |
| 15899 | chrY | 10075299 | . | G | A   | 2320.69  | PASS          | AC=6;AF=0.136;AN=44;BaseQRankSum=  |
| 15900 | chrY | 10075302 | . | T | C   | 2189.20  | PASS          | AC=6;AF=0.150;AN=40;BaseQRankSum=  |
| 15901 | chrY | 10075307 | . | T | A   | 1976.46  | PASS          | AC=6;AF=0.143;AN=42;BaseQRankSum=  |
| 15902 | chrY | 10075309 | . | T | C   | 1936.35  | PASS          | AC=6;AF=0.158;AN=38;BaseQRankSum=  |
| 15903 | chrY | 10075326 | . | C | T   | 1154.71  | PASS          | AC=6;AF=0.200;AN=30;BaseQRankSum=  |
| 15904 | chrY | 10075343 | . | G | C   | 429.74   | PASS          | AC=4;AF=0.133;AN=30;BaseQRankSum=  |
| 15905 | chrY | 10075352 | . | C | A   | 198.58   | PASS          | AC=3;AF=0.107;AN=28;BaseQRankSum=  |
| 15906 | chrY | 10075356 | . | C | T   | 143.19   | PASS          | AC=2;AF=0.067;AN=30;BaseQRankSum=  |
| 15907 | chrY | 10075384 | . | T | A   | 96.92    | PASS          | AC=1;AF=0.036;AN=28;BaseQRankSum=  |
| 15908 | chrY | 10075401 | . | A | C   | 121.41   | my_snp_filter | AC=3;AF=0.125;AN=24;BaseQ          |
| 15909 | chrY | 10075409 | . | T | A   | 155.74   | PASS          | AC=4;AF=0.167;AN=24;BaseQRankSum=  |
| 15910 | chrY | 10075413 | . | G | C   | 206.72   | PASS          | AC=4;AF=0.167;AN=24;BaseQRankSum=  |
| 15911 | chrY | 10075421 | . | C | G   | 213.74   | PASS          | AC=4;AF=0.167;AN=24;BaseQRankSum=  |
| 15912 | chrY | 10075425 | . | G | T   | 287.90   | PASS          | AC=5;AF=0.208;AN=24;BaseQRankSum=  |
| 15913 | chrY | 10075438 | . | T | G   | 354.74   | PASS          | AC=5;AF=0.227;AN=22;BaseQRankSum=  |
| 15914 | chrY | 10075444 | . | C | G   | 373.24   | PASS          | AC=6;AF=0.273;AN=22;BaseQRankSum=  |
| 15915 | chrY | 10075446 | . | A | G   | 496.24   | PASS          | AC=6;AF=0.273;AN=22;BaseQRankSum=  |
| 15916 | chrY | 10075460 | . | T | A   | 790.91   | my_snp_filter | AC=6;AF=0.300;AN=20;BaseQ          |
| 15917 | chrY | 10075465 | . | C | T   | 880.28   | my_snp_filter | AC=6;AF=0.375;AN=16;BaseQ          |
| 15918 | chrY | 10075466 | . | G | A   | 883.37   | my_snp_filter | AC=6;AF=0.375;AN=16;BaseQ          |
| 15919 | chrY | 10075474 | . | G | T   | 964.21   | my_snp_filter | AC=6;AF=0.333;AN=18;BaseQ          |
| 15920 | chrY | 10075481 | . | A | G   | 1053.71  | my_snp_filter | AC=6;AF=0.333;AN=18;BaseQ          |
| 15921 | chrY | 10075500 | . | A | G   | 1338.32  | my_snp_filter | AC=6;AF=0.300;AN=20;BaseQ          |
| 15922 | chrY | 10075501 | . | A | G   | 1261.27  | my_snp_filter | AC=6;AF=0.375;AN=16;BaseQ          |
| 15923 | chrY | 10075503 | . | T | C   | 1300.91  | my_snp_filter | AC=6;AF=0.300;AN=20;BaseQ          |
| 15924 | chrY | 10075520 | . | T | C   | 437.50   | PASS          | AC=2;AF=0.091;AN=22;BaseQRankSum=  |
| 15925 | chrY | 10075524 | . | T | A   | 1591.88  | PASS          | AC=6;AF=0.429;AN=14;BaseQRankSum=  |
| 15926 | chrY | 10075530 | . | C | T   | 231.88   | PASS          | AC=1;AF=0.045;AN=22;BaseQRankSum=  |
| 15927 | chrY | 10075546 | . | G | A   | 2825.73  | PASS          | AC=6;AF=0.429;AN=14;BaseQRankSum=  |
| 15928 | chrY | 10075552 | . | T | A   | 3081.73  | PASS          | AC=6;AF=0.429;AN=14;BaseQRankSum=  |
| 15929 | chrY | 10075577 | . | T | C   | 795.08   | PASS          | AC=1;AF=0.250;AN=4;BaseQRankSum=-  |
| 15930 | chrY | 10075597 | . | C | T   | 381.92   | PASS          | AC=1;AF=0.042;AN=24;BaseQRankSum=  |
| 15931 | chrY | 10075600 | . | T | C   | 924.08   | PASS          | AC=1;AF=0.250;AN=4;BaseQRankSum=0  |
| 15932 | chrY | 10075604 | . | A | G   | 1008.08  | PASS          | AC=1;AF=0.250;AN=4;BaseQRankSum=-  |
| 15933 | chrY | 10075605 | . | T | A   | 430.24   | PASS          | AC=1;AF=0.125;AN=8;BaseQRankSum=-  |
| 15934 | chrY | 10075623 | . | G | A   | 1041.08  | PASS          | AC=1;AF=0.250;AN=4;BaseQRankSum=1  |
| 15935 | chrY | 10075634 | . | T | C   | 1143.08  | PASS          | AC=1;AF=0.250;AN=4;BaseQRankSum=1  |
| 15936 | chrY | 10075644 | . | C | T   | 637.63   | PASS          | AC=1;AF=0.063;AN=16;BaseQRankSum=  |
| 15937 | chrY | 10075650 | . | G | A   | 637.49   | PASS          | AC=1;AF=0.045;AN=22;BaseQRankSum=  |
| 15938 | chrY | 10075685 | . | G | C   | 4079.09  | my_snp_filter | AC=8;AF=0.286;AN=28;BaseQ          |
| 15939 | chrY | 10075700 | . | G | A   | 104.93   | PASS          | AC=1;AF=0.038;AN=26;BaseQRankSum=  |
| 15940 | chrY | 10075701 | . | C | G   | 4063.78  | my_snp_filter | AC=8;AF=0.267;AN=30;BaseQ          |
| 15941 | chrY | 10075704 | . | T | C   | 1800.34  | PASS          | AC=11;AF=0.367;AN=30;BaseQRankSum= |
| 15942 | chrY | 10075709 | . | A | G   | 1793.44  | PASS          | AC=11;AF=0.367;AN=30;BaseQRankSum= |
| 15943 | chrY | 10075712 | . | G | T   | 6448.08  | my_snp_filter | AC=13;AF=0.433;AN=30;BaseQ         |
| 15944 | chrY | 10075713 | . | G | A   | 110.18   | PASS          | AC=1;AF=0.036;AN=28;BaseQRankSum=  |
| 15945 | chrY | 10075716 | . | G | T   | 6333.68  | my_snp_filter | AC=13;AF=0.464;AN=28;BaseQ         |
| 15946 | chrY | 10075721 | . | A | G   | 58.69    | my_snp_filter | AC=1;AF=0.038;AN=26;BaseQ          |
| 15947 | chrY | 10075722 | . | A | C   | 106.37   | PASS          | AC=1;AF=0.042;AN=24;BaseQRankSum=  |
| 15948 | chrY | 10075724 | . | A | T   | 146.61   | PASS          | AC=1;AF=0.042;AN=24;BaseQRankSum=  |
| 15949 | chrY | 10075730 | . | A | T   | 1483.58  | PASS          | AC=11;AF=0.393;AN=28;BaseQRankSum= |
| 15950 | chrY | 10075740 | . | A | G   | 151.06   | PASS          | AC=1;AF=0.045;AN=22;BaseQRankSum=  |
| 15951 | chrY | 10075752 | . | G | A   | 2959.73  | my_snp_filter | AC=9;AF=0.375;AN=24;BaseQ          |
| 15952 | chrY | 10075763 | . | G | C   | 408.73   | PASS          | AC=3;AF=0.136;AN=22;BaseQRankSum=  |
| 15953 | chrY | 10075782 | . | C | T   | 298.26   | PASS          | AC=3;AF=0.300;AN=10;BaseQRankSum=  |
| 15954 | chrY | 10075802 | . | T | A   | 110.46   | PASS          | AC=2;AF=0.111;AN=18;BaseQRankSum=  |
| 15955 | chrY | 10075805 | . | G | A   | 118.91   | PASS          | AC=2;AF=0.111;AN=18;BaseQRankSum=  |
| 15956 | chrY | 10075806 | . | C | A   | 112.76   | PASS          | AC=2;AF=0.111;AN=18;BaseQRankSum=  |
| 15957 | chrY | 10075811 | . | T | A   | 76.92    | PASS          | AC=2;AF=0.111;AN=18;BaseQRankSum=  |
| 15958 | chrY | 10076800 | . | A | C   | 1280.22  | PASS          | AC=6;AF=0.300;AN=20;BaseQRankSum=  |
| 15959 | chrY | 10077460 | . | G | A   | 26907.96 | PASS          | AC=70;AF=1.00;AN=70;BaseQ          |
| 15960 | chrY | 10081624 | . | A | C   | 148.47   | PASS          | AC=1;AF=0.014;AN=70;BaseQRankSum=  |

|       |      |          |   |   |     |          |               |                                    |
|-------|------|----------|---|---|-----|----------|---------------|------------------------------------|
| 15961 | chrY | 10081627 | . | T | A   | 146.06   | PASS          | AC=1;AF=0.014;AN=70;BaseQRankSum=  |
| 15962 | chrY | 10081631 | . | G | A   | 113.16   | PASS          | AC=1;AF=0.014;AN=70;BaseQRankSum=  |
| 15963 | chrY | 10081633 | . | C | G   | 111.88   | PASS          | AC=1;AF=0.014;AN=70;BaseQRankSum=  |
| 15964 | chrY | 10081635 | . | A | G   | 111.09   | PASS          | AC=1;AF=0.014;AN=70;BaseQRankSum=  |
| 15965 | chrY | 10081655 | . | G | T   | 81.38    | PASS          | AC=1;AF=0.014;AN=70;BaseQRankSum=  |
| 15966 | chrY | 10081656 | . | A | G   | 81.59    | PASS          | AC=1;AF=0.014;AN=70;BaseQRankSum=  |
| 15967 | chrY | 10081689 | . | T | G   | 660.11   | PASS          | AC=6;AF=0.086;AN=70;BaseQRankSum=  |
| 15968 | chrY | 10081895 | . | G | T   | 92.78    | PASS          | AC=1;AF=0.050;AN=20;BaseQRankSum=  |
| 15969 | chrY | 10081955 | . | T | C   | 113.51   | my_snp_filter | AC=1;AF=0.021;AN=48;BaseQ          |
| 15970 | chrY | 10081956 | . | C | A   | 359.32   | PASS          | AC=4;AF=0.083;AN=48;BaseQRankSum=  |
| 15971 | chrY | 10081958 | . | T | G   | 125.43   | my_snp_filter | AC=1;AF=0.020;AN=50;BaseQ          |
| 15972 | chrY | 10081961 | . | T | A   | 90.42    | PASS          | AC=1;AF=0.020;AN=50;BaseQRankSum=  |
| 15973 | chrY | 10081962 | . | C | A,T | 504.47   | PASS          | AC=5,1;AF=0.100,0.020;AN=50;BaseQ  |
| 15974 | chrY | 10081966 | . | C | T   | 79.87    | my_snp_filter | AC=2;AF=0.045;AN=44;BaseQ          |
| 15975 | chrY | 10081968 | . | C | T   | 1236.54  | PASS          | AC=9;AF=0.300;AN=30;BaseQRankSum=  |
| 15976 | chrY | 10081970 | . | G | A   | 487.90   | PASS          | AC=6;AF=0.120;AN=50;BaseQRankSum=  |
| 15977 | chrY | 10081973 | . | C | T   | 323.68   | PASS          | AC=4;AF=0.080;AN=50;BaseQRankSum=  |
| 15978 | chrY | 10081976 | . | A | C   | 96.40    | my_snp_filter | AC=3;AF=0.060;AN=50;BaseQ          |
| 15979 | chrY | 10081979 | . | G | A   | 308.93   | PASS          | AC=4;AF=0.080;AN=50;BaseQRankSum=  |
| 15980 | chrY | 10081980 | . | C | A,T | 333.51   | PASS          | AC=1,1;AF=0.024,0.024;AN=42;BaseQ  |
| 15981 | chrY | 10081981 | . | C | C,T | 667.99   | PASS          | AC=4,4;AF=0.080,0.080;AN=50;BaseQ  |
| 15982 | chrY | 10081984 | . | C | G   | 161.53   | PASS          | AC=1;AF=0.019;AN=54;BaseQRankSum=  |
| 15983 | chrY | 10081985 | . | C | T   | 111.59   | PASS          | AC=3;AF=0.056;AN=54;BaseQRankSum=  |
| 15984 | chrY | 10081995 | . | C | T   | 249.49   | PASS          | AC=5;AF=0.096;AN=52;BaseQRankSum=  |
| 15985 | chrY | 10081996 | . | T | C   | 132.73   | PASS          | AC=3;AF=0.065;AN=46;BaseQRankSum=  |
| 15986 | chrY | 10081998 | . | G | A   | 89.65    | PASS          | AC=1;AF=0.021;AN=48;BaseQRankSum=  |
| 15987 | chrY | 10082000 | . | A | T   | 77.05    | my_snp_filter | AC=3;AF=0.058;AN=52;BaseQ          |
| 15988 | chrY | 10082004 | . | T | A   | 119.44   | PASS          | AC=2;AF=0.042;AN=48;BaseQRankSum=  |
| 15989 | chrY | 10082007 | . | A | G   | 39.24    | my_snp_filter | AC=1;AF=0.020;AN=50;BaseQ          |
| 15990 | chrY | 10082014 | . | G | C   | 124.23   | PASS          | AC=4;AF=0.091;AN=44;BaseQRankSum=  |
| 15991 | chrY | 10082019 | . | C | A,T | 755.19   | PASS          | AC=5,4;AF=0.192,0.154;AN=26;BaseQ  |
| 15992 | chrY | 10082021 | . | T | C   | 386.85   | PASS          | AC=5;AF=0.125;AN=40;BaseQRankSum=  |
| 15993 | chrY | 10082023 | . | C | A   | 347.47   | PASS          | AC=4;AF=0.111;AN=36;BaseQRankSum=  |
| 15994 | chrY | 10082027 | . | C | T   | 358.82   | PASS          | AC=3;AF=0.079;AN=38;BaseQRankSum=  |
| 15995 | chrY | 10082028 | . | T | G   | 340.22   | PASS          | AC=4;AF=0.100;AN=40;BaseQRankSum=  |
| 15996 | chrY | 10082035 | . | T | A   | 346.08   | PASS          | AC=3;AF=0.071;AN=42;BaseQRankSum=  |
| 15997 | chrY | 10082037 | . | A | G   | 32.25    | my_snp_filter | AC=1;AF=0.024;AN=42;BaseQ          |
| 15998 | chrY | 10082039 | . | A | C   | 31.89    | my_snp_filter | AC=1;AF=0.024;AN=42;BaseQ          |
| 15999 | chrY | 10082045 | . | T | C   | 310.98   | PASS          | AC=2;AF=0.071;AN=28;BaseQRankSum=  |
| 16000 | chrY | 10082056 | . | G | C   | 177.64   | PASS          | AC=3;AF=0.088;AN=34;BaseQRankSum=  |
| 16001 | chrY | 10082058 | . | G | C   | 259.10   | PASS          | AC=2;AF=0.059;AN=34;BaseQRankSum=  |
| 16002 | chrY | 10082062 | . | G | T   | 301.44   | PASS          | AC=6;AF=0.300;AN=20;BaseQRankSum=  |
| 16003 | chrY | 10082070 | . | C | T   | 48.82    | PASS          | AC=1;AF=0.038;AN=26;BaseQRankSum=  |
| 16004 | chrY | 10082078 | . | C | A   | 91.06    | PASS          | AC=2;AF=0.200;AN=10;BaseQRankSum=  |
| 16005 | chrY | 10082082 | . | T | A   | 88.37    | PASS          | AC=2;AF=0.167;AN=12;BaseQRankSum=  |
| 16006 | chrY | 10082251 | . | A | G   | 500.42   | PASS          | AC=7;AF=0.100;AN=70;BaseQRankSum=  |
| 16007 | chrY | 10082253 | . | G | A   | 526.13   | PASS          | AC=7;AF=0.103;AN=68;BaseQRankSum=  |
| 16008 | chrY | 10082262 | . | A | G   | 329.83   | PASS          | AC=6;AF=0.088;AN=68;BaseQRankSum=  |
| 16009 | chrY | 10082286 | . | G | T   | 236.56   | PASS          | AC=5;AF=0.071;AN=70;BaseQRankSum=  |
| 16010 | chrY | 10082290 | . | A | G   | 238.79   | PASS          | AC=5;AF=0.071;AN=70;BaseQRankSum=  |
| 16011 | chrY | 10082295 | . | T | G   | 236.76   | PASS          | AC=5;AF=0.071;AN=70;BaseQRankSum=  |
| 16012 | chrY | 10082297 | . | C | T   | 248.59   | PASS          | AC=5;AF=0.071;AN=70;BaseQRankSum=  |
| 16013 | chrY | 10082310 | . | T | C   | 185.60   | PASS          | AC=4;AF=0.057;AN=70;BaseQRankSum=  |
| 16014 | chrY | 10082312 | . | T | G   | 186.75   | PASS          | AC=4;AF=0.057;AN=70;BaseQRankSum=  |
| 16015 | chrY | 10082313 | . | G | A   | 185.85   | PASS          | AC=4;AF=0.057;AN=70;BaseQRankSum=  |
| 16016 | chrY | 10082324 | . | T | C   | 172.29   | PASS          | AC=4;AF=0.057;AN=70;BaseQRankSum=  |
| 16017 | chrY | 10082330 | . | C | A   | 171.55   | PASS          | AC=4;AF=0.057;AN=70;BaseQRankSum=  |
| 16018 | chrY | 10082343 | . | A | G   | 174.20   | PASS          | AC=3;AF=0.043;AN=70;BaseQRankSum=  |
| 16019 | chrY | 10082346 | . | T | G   | 169.87   | PASS          | AC=2;AF=0.029;AN=70;BaseQRankSum=  |
| 16020 | chrY | 10082347 | . | C | T   | 170.36   | PASS          | AC=2;AF=0.029;AN=70;BaseQRankSum=  |
| 16021 | chrY | 10082350 | . | A | C   | 179.13   | PASS          | AC=3;AF=0.043;AN=70;BaseQRankSum=  |
| 16022 | chrY | 10082355 | . | A | G   | 9576.55  | PASS          | AC=51;AF=0.729;AN=70;BaseQRankSum= |
| 16023 | chrY | 10083346 | . | T | A   | 39.15    | my_snp_filter | AC=3;AF=0.136;AN=22;BaseQ          |
| 16024 | chrY | 10083407 | . | T | A   | 46.66    | my_snp_filter | AC=2;AF=0.111;AN=18;BaseQ          |
| 16025 | chrY | 10083621 | . | C | A   | 43.21    | my_snp_filter | AC=2;AF=0.032;AN=62;BaseQ          |
| 16026 | chrY | 10083777 | . | G | A   | 1158.81  | PASS          | AC=4;AF=0.057;AN=70;BaseQRankSum=  |
| 16027 | chrY | 10084166 | . | G | A   | 172.41   | PASS          | AC=4;AF=0.250;AN=16;DP=33;FS=0.00  |
| 16028 | chrY | 10090099 | . | A | G   | 3187.23  | my_snp_filter | AC=3;AF=0.045;AN=66;BaseQ          |
| 16029 | chrY | 10091418 | . | A | C   | 642.87   | my_snp_filter | AC=7;AF=0.350;AN=20;BaseQ          |
| 16030 | chrY | 10091489 | . | C | G   | 12557.50 | PASS          | AC=14;AF=0.467;AN=30;BaseQ         |
| 16031 | chrY | 10091528 | . | A | T   | 896.39   | PASS          | AC=3;AF=0.083;AN=36;BaseQRankSum=  |
| 16032 | chrY | 10091529 | . | T | G   | 852.96   | PASS          | AC=3;AF=0.083;AN=36;BaseQRankSum=  |
| 16033 | chrY | 10091637 | . | T | A   | 404.62   | my_snp_filter | AC=2;AF=0.050;AN=40;BaseQ          |
| 16034 | chrY | 10091653 | . | G | A   | 3360.60  | PASS          | AC=3;AF=0.094;AN=32;BaseQRankSum=  |
| 16035 | chrY | 10091675 | . | A | G   | 186.34   | my_snp_filter | AC=3;AF=0.125;AN=24;BaseQ          |
| 16036 | chrY | 10091698 | . | A | G   | 29113.26 | PASS          | AC=14;AF=0.538;AN=26;BaseQ         |

|       |      |          |   |   |     |          |               |                                    |
|-------|------|----------|---|---|-----|----------|---------------|------------------------------------|
| 16037 | chrY | 10091742 | . | A | T   | 290.11   | PASS          | AC=1;AF=0.022;AN=46;BaseQRankSum=  |
| 16038 | chrY | 10091769 | . | A | T   | 24288.57 | PASS          | AC=19;AF=0.633;AN=30;BaseQ         |
| 16039 | chrY | 10091798 | . | T | C   | 11420.01 | PASS          | AC=12;AF=0.353;AN=34;BaseQ         |
| 16040 | chrY | 10091867 | . | G | A   | 9400.87  | PASS          | AC=9;AF=0.321;AN=28;BaseQRankSum=  |
| 16041 | chrY | 10091895 | . | A | C   | 1982.18  | PASS          | AC=10;AF=0.385;AN=26;BaseQRankSum= |
| 16042 | chrY | 10091930 | . | A | G,* | 1356.07  | PASS          | AC=2,5;AF=0.111,0.278;AN=18;BaseQ  |
| 16043 | chrY | 10091967 | . | A | T   | 7487.09  | my_snp_filter | AC=9;AF=0.500;AN=18;BaseQ          |
| 16044 | chrY | 10092545 | . | G | A   | 54.39    | my_snp_filter | AC=1;AF=0.050;AN=20;BaseQ          |
| 16045 | chrY | 10092551 | . | T | A   | 54.40    | my_snp_filter | AC=1;AF=0.050;AN=20;BaseQ          |
| 16046 | chrY | 10092567 | . | A | C   | 52.81    | my_snp_filter | AC=1;AF=0.050;AN=20;BaseQ          |
| 16047 | chrY | 10092575 | . | G | T   | 49.17    | my_snp_filter | AC=1;AF=0.050;AN=20;BaseQ          |
| 16048 | chrY | 10092581 | . | G | C   | 49.17    | my_snp_filter | AC=1;AF=0.050;AN=20;BaseQ          |
| 16049 | chrY | 10092923 | . | T | C   | 1931.70  | PASS          | AC=4;AF=0.061;AN=66;BaseQRankSum=  |
| 16050 | chrY | 10092924 | . | G | A   | 1929.14  | PASS          | AC=4;AF=0.061;AN=66;BaseQRankSum=  |
| 16051 | chrY | 10093143 | . | G | T   | 2324.15  | PASS          | AC=4;AF=0.065;AN=62;BaseQRankSum=  |
| 16052 | chrY | 10093159 | . | C | G   | 2603.46  | PASS          | AC=4;AF=0.071;AN=56;BaseQRankSum=  |
| 16053 | chrY | 10093160 | . | G | T   | 2645.75  | PASS          | AC=4;AF=0.071;AN=56;BaseQRankSum=  |
| 16054 | chrY | 10093163 | . | C | A   | 2790.23  | PASS          | AC=4;AF=0.069;AN=58;BaseQRankSum=  |
| 16055 | chrY | 10093206 | . | T | G   | 2797.41  | PASS          | AC=4;AF=0.065;AN=62;BaseQRankSum=  |
| 16056 | chrY | 10093207 | . | T | A   | 2845.41  | PASS          | AC=4;AF=0.065;AN=62;BaseQRankSum=  |
| 16057 | chrY | 10093211 | . | G | C   | 2929.38  | PASS          | AC=4;AF=0.065;AN=62;BaseQRankSum=  |
| 16058 | chrY | 10093217 | . | G | T   | 2800.12  | PASS          | AC=4;AF=0.063;AN=64;BaseQRankSum=  |
| 16059 | chrY | 10093259 | . | G | A   | 4535.23  | PASS          | AC=8;AF=0.118;AN=68;BaseQRankSum=  |
| 16060 | chrY | 10093273 | . | G | A   | 4227.31  | PASS          | AC=8;AF=0.118;AN=68;BaseQRankSum=  |
| 16061 | chrY | 10093305 | . | C | T   | 2694.86  | PASS          | AC=7;AF=0.103;AN=68;BaseQRankSum=  |
| 16062 | chrY | 10093312 | . | C | G   | 2467.90  | PASS          | AC=7;AF=0.103;AN=68;BaseQRankSum=  |
| 16063 | chrY | 10093314 | . | T | C   | 2341.88  | PASS          | AC=7;AF=0.103;AN=68;BaseQRankSum=  |
| 16064 | chrY | 10093329 | . | G | T   | 1798.76  | PASS          | AC=7;AF=0.103;AN=68;BaseQRankSum=  |
| 16065 | chrY | 10093332 | . | G | C   | 1679.17  | PASS          | AC=7;AF=0.103;AN=68;BaseQRankSum=  |
| 16066 | chrY | 10093336 | . | T | A   | 1468.74  | PASS          | AC=7;AF=0.103;AN=68;BaseQRankSum=  |
| 16067 | chrY | 10093338 | . | C | T   | 1426.74  | PASS          | AC=7;AF=0.103;AN=68;BaseQRankSum=  |
| 16068 | chrY | 10093346 | . | T | G   | 1019.24  | PASS          | AC=6;AF=0.088;AN=68;BaseQRankSum=  |
| 16069 | chrY | 10093351 | . | C | T   | 890.13   | PASS          | AC=6;AF=0.088;AN=68;BaseQRankSum=  |
| 16070 | chrY | 10093353 | . | T | C   | 893.13   | PASS          | AC=6;AF=0.088;AN=68;BaseQRankSum=  |
| 16071 | chrY | 10093363 | . | C | T   | 474.97   | PASS          | AC=5;AF=0.074;AN=68;BaseQRankSum=  |
| 16072 | chrY | 10093377 | . | G | A   | 91.17    | PASS          | AC=2;AF=0.029;AN=68;BaseQRankSum=  |
| 16073 | chrY | 10093378 | . | G | T   | 90.76    | PASS          | AC=2;AF=0.029;AN=68;BaseQRankSum=  |
| 16074 | chrY | 10093561 | . | T | G   | 289.87   | my_snp_filter | AC=4;AF=0.182;AN=22;BaseQ          |
| 16075 | chrY | 10093577 | . | A | G   | 550.92   | my_snp_filter | AC=4;AF=0.182;AN=22;BaseQ          |
| 16076 | chrY | 10093581 | . | T | C   | 553.84   | my_snp_filter | AC=4;AF=0.167;AN=24;BaseQ          |
| 16077 | chrY | 10093592 | . | A | G   | 960.90   | my_snp_filter | AC=4;AF=0.125;AN=32;BaseQ          |
| 16078 | chrY | 10093598 | . | T | C   | 1180.76  | my_snp_filter | AC=4;AF=0.118;AN=34;BaseQ          |
| 16079 | chrY | 10093599 | . | G | A   | 1183.76  | my_snp_filter | AC=4;AF=0.118;AN=34;BaseQ          |
| 16080 | chrY | 10093603 | . | A | T   | 1196.40  | my_snp_filter | AC=4;AF=0.105;AN=38;BaseQ          |
| 16081 | chrY | 10093624 | . | C | G   | 1795     | my_snp_filter | AC=4;AF=0.095;AN=42;BaseQ          |
| 16082 | chrY | 10093643 | . | T | G   | 1978.22  | my_snp_filter | AC=4;AF=0.074;AN=54;BaseQ          |
| 16083 | chrY | 10093645 | . | T | A   | 2013.19  | my_snp_filter | AC=4;AF=0.074;AN=54;BaseQ          |
| 16084 | chrY | 10093647 | . | C | T   | 1998.21  | my_snp_filter | AC=4;AF=0.074;AN=54;BaseQ          |
| 16085 | chrY | 10093652 | . | C | T   | 2074.69  | my_snp_filter | AC=4;AF=0.071;AN=56;BaseQ          |
| 16086 | chrY | 10093656 | . | T | C   | 2070.66  | my_snp_filter | AC=4;AF=0.067;AN=60;BaseQ          |
| 16087 | chrY | 10093662 | . | A | T   | 2099.99  | my_snp_filter | AC=4;AF=0.063;AN=64;BaseQ          |
| 16088 | chrY | 10093671 | . | G | T   | 2241.19  | my_snp_filter | AC=4;AF=0.067;AN=60;BaseQ          |
| 16089 | chrY | 10093672 | . | C | T   | 2246.95  | my_snp_filter | AC=4;AF=0.067;AN=60;BaseQ          |
| 16090 | chrY | 10093693 | . | C | T   | 1910.15  | my_snp_filter | AC=4;AF=0.063;AN=64;BaseQ          |
| 16091 | chrY | 10093711 | . | T | G   | 1668.41  | my_snp_filter | AC=4;AF=0.059;AN=68;BaseQ          |
| 16092 | chrY | 10093716 | . | C | A   | 1578.85  | my_snp_filter | AC=4;AF=0.059;AN=68;BaseQ          |
| 16093 | chrY | 10093717 | . | A | G   | 1536.67  | my_snp_filter | AC=4;AF=0.059;AN=68;BaseQ          |
| 16094 | chrY | 10093745 | . | G | T   | 605.89   | my_snp_filter | AC=5;AF=0.071;AN=70;BaseQ          |
| 16095 | chrY | 10093749 | . | C | T   | 572.16   | my_snp_filter | AC=4;AF=0.057;AN=70;BaseQ          |
| 16096 | chrY | 10093767 | . | G | A   | 159.98   | my_snp_filter | AC=4;AF=0.057;AN=70;BaseQ          |
| 16097 | chrY | 10093768 | . | T | C   | 128.69   | my_snp_filter | AC=4;AF=0.057;AN=70;BaseQ          |
| 16098 | chrY | 10093772 | . | G | A   | 104.47   | my_snp_filter | AC=3;AF=0.043;AN=70;BaseQ          |
| 16099 | chrY | 10093782 | . | A | G   | 70.46    | my_snp_filter | AC=2;AF=0.029;AN=70;BaseQ          |
| 16100 | chrY | 10093795 | . | T | C   | 55.22    | my_snp_filter | AC=1;AF=0.014;AN=70;BaseQ          |
| 16101 | chrY | 10093796 | . | G | A   | 54.97    | my_snp_filter | AC=1;AF=0.014;AN=70;BaseQ          |
| 16102 | chrY | 10093803 | . | A | G   | 111.96   | my_snp_filter | AC=1;AF=0.014;AN=70;BaseQ          |
| 16103 | chrY | 10093806 | . | A | G   | 112.06   | my_snp_filter | AC=1;AF=0.014;AN=70;BaseQ          |
| 16104 | chrY | 10093814 | . | G | C   | 114.78   | my_snp_filter | AC=1;AF=0.014;AN=70;BaseQ          |
| 16105 | chrY | 10093826 | . | C | T   | 157.40   | my_snp_filter | AC=1;AF=0.014;AN=70;BaseQ          |
| 16106 | chrY | 10093834 | . | A | G   | 198.12   | my_snp_filter | AC=1;AF=0.014;AN=70;BaseQ          |
| 16107 | chrY | 10093836 | . | T | A   | 198.47   | my_snp_filter | AC=1;AF=0.014;AN=70;BaseQ          |
| 16108 | chrY | 10093838 | . | G | A   | 198.28   | my_snp_filter | AC=1;AF=0.014;AN=70;BaseQ          |
| 16109 | chrY | 10093842 | . | C | G   | 202.23   | my_snp_filter | AC=1;AF=0.014;AN=70;BaseQ          |
| 16110 | chrY | 10093846 | . | A | C   | 198.56   | my_snp_filter | AC=1;AF=0.015;AN=68;BaseQ          |
| 16111 | chrY | 10093852 | . | A | G   | 288.75   | my_snp_filter | AC=1;AF=0.015;AN=68;BaseQ          |
| 16112 | chrY | 10093853 | . | A | C   | 292.21   | my_snp_filter | AC=1;AF=0.015;AN=68;BaseQ          |

|       |      |          |   |   |   |        |               |                                   |
|-------|------|----------|---|---|---|--------|---------------|-----------------------------------|
| 16113 | chrY | 10093862 | . | T | C | 333.32 | my_snp_filter | AC=1;AF=0.015;AN=68;BaseQ         |
| 16114 | chrY | 10093863 | . | A | G | 334.14 | my_snp_filter | AC=1;AF=0.015;AN=66;BaseQ         |
| 16115 | chrY | 10093869 | . | C | A | 373.89 | my_snp_filter | AC=1;AF=0.015;AN=66;BaseQ         |
| 16116 | chrY | 10093877 | . | G | T | 415.24 | my_snp_filter | AC=1;AF=0.015;AN=66;BaseQ         |
| 16117 | chrY | 10093880 | . | G | C | 415.25 | my_snp_filter | AC=1;AF=0.015;AN=68;BaseQ         |
| 16118 | chrY | 10093883 | . | T | C | 415.51 | my_snp_filter | AC=1;AF=0.015;AN=68;BaseQ         |
| 16119 | chrY | 10093909 | . | T | C | 33.98  | my_snp_filter | AC=1;AF=0.014;AN=70;BaseQ         |
| 16120 | chrY | 10093910 | . | G | C | 381.64 | my_snp_filter | AC=1;AF=0.014;AN=70;BaseQ         |
| 16121 | chrY | 10093913 | . | G | A | 34.37  | my_snp_filter | AC=1;AF=0.014;AN=70;BaseQ         |
| 16122 | chrY | 10093916 | . | G | A | 375.67 | my_snp_filter | AC=1;AF=0.014;AN=70;BaseQ         |
| 16123 | chrY | 10093917 | . | G | T | 40.89  | PASS          | AC=1;AF=0.014;AN=70;BaseQRankSum= |
| 16124 | chrY | 10093918 | . | C | A | 378.04 | my_snp_filter | AC=1;AF=0.014;AN=70;BaseQ         |
| 16125 | chrY | 10093920 | . | T | A | 372.75 | my_snp_filter | AC=1;AF=0.014;AN=70;BaseQ         |
| 16126 | chrY | 10093928 | . | T | C | 36.83  | PASS          | AC=1;AF=0.014;AN=70;BaseQRankSum= |
| 16127 | chrY | 10093939 | . | T | C | 416.91 | my_snp_filter | AC=1;AF=0.014;AN=70;BaseQ         |
| 16128 | chrY | 10093959 | . | C | G | 319.43 | my_snp_filter | AC=1;AF=0.015;AN=66;BaseQ         |
| 16129 | chrY | 10093964 | . | T | A | 271.15 | my_snp_filter | AC=1;AF=0.015;AN=66;BaseQ         |
| 16130 | chrY | 10093968 | . | G | T | 266.93 | my_snp_filter | AC=1;AF=0.015;AN=66;BaseQ         |
| 16131 | chrY | 10093977 | . | C | A | 181.73 | my_snp_filter | AC=1;AF=0.016;AN=62;BaseQ         |
| 16132 | chrY | 10094025 | . | G | A | 135.16 | my_snp_filter | AC=2;AF=0.031;AN=64;DP=32         |
| 16133 | chrY | 10094118 | . | C | G | 41.55  | my_snp_filter | AC=1;AF=0.033;AN=30;BaseQ         |
| 16134 | chrY | 10094119 | . | A | G | 40.75  | my_snp_filter | AC=1;AF=0.033;AN=30;BaseQ         |
| 16135 | chrY | 10094131 | . | C | T | 35.33  | my_snp_filter | AC=1;AF=0.028;AN=36;BaseQ         |
| 16136 | chrY | 10094132 | . | A | G | 35.26  | my_snp_filter | AC=1;AF=0.026;AN=38;BaseQ         |
| 16137 | chrY | 10094141 | . | A | T | 44.33  | my_snp_filter | AC=1;AF=0.033;AN=30;BaseQ         |
| 16138 | chrY | 10094142 | . | A | C | 43.02  | my_snp_filter | AC=1;AF=0.033;AN=30;BaseQ         |
| 16139 | chrY | 10094154 | . | G | T | 36.65  | my_snp_filter | AC=1;AF=0.028;AN=36;BaseQ         |
| 16140 | chrY | 10094156 | . | C | G | 39.72  | my_snp_filter | AC=1;AF=0.028;AN=36;BaseQ         |
| 16141 | chrY | 10094173 | . | G | T | 37.77  | my_snp_filter | AC=1;AF=0.022;AN=46;BaseQ         |
| 16142 | chrY | 10094183 | . | A | T | 36.66  | my_snp_filter | AC=1;AF=0.019;AN=54;BaseQ         |
| 16143 | chrY | 10094662 | . | G | C | 343.35 | PASS          | AC=1;AF=0.050;AN=20;BaseQRankSum= |
| 16144 | chrY | 10094665 | . | A | T | 343.47 | PASS          | AC=1;AF=0.100;AN=10;BaseQRankSum= |
| 16145 | chrY | 10094666 | . | T | A | 340.47 | PASS          | AC=1;AF=0.100;AN=10;BaseQRankSum= |
| 16146 | chrY | 10094689 | . | G | T | 351.04 | my_snp_filter | AC=1;AF=0.056;AN=18;BaseQ         |
| 16147 | chrY | 10094694 | . | G | T | 357.04 | my_snp_filter | AC=1;AF=0.056;AN=18;BaseQ         |
| 16148 | chrY | 10094729 | . | C | G | 122.74 | my_snp_filter | AC=1;AF=0.063;AN=16;BaseQ         |
| 16149 | chrY | 10104062 | . | G | T | 59.02  | my_snp_filter | AC=2;AF=0.250;AN=8;DP=14;         |
| 16150 | chrY | 10104087 | . | G | A | 64.54  | my_snp_filter | AC=2;AF=0.333;AN=6;DP=9;F         |
| 16151 | chrY | 10104089 | . | C | T | 62.11  | my_snp_filter | AC=2;AF=0.500;AN=4;DP=11;         |
| 16152 | chrY | 10104090 | . | T | A | 60.95  | my_snp_filter | AC=2;AF=0.333;AN=6;DP=11;         |
| 16153 | chrY | 10104096 | . | G | T | 64.85  | my_snp_filter | AC=2;AF=0.500;AN=4;DP=6;F         |
| 16154 | chrY | 10104114 | . | C | G | 67.84  | my_snp_filter | AC=2;AF=1.00;AN=2;DP=4;FS         |
| 16155 | chrY | 10104115 | . | C | A | 67.84  | my_snp_filter | AC=2;AF=1.00;AN=2;DP=4;FS         |
| 16156 | chrY | 10104122 | . | T | C | 64.83  | my_snp_filter | AC=2;AF=0.500;AN=4;DP=4;F         |
| 16157 | chrY | 10104132 | . | A | G | 67.84  | my_snp_filter | AC=2;AF=1.00;AN=2;DP=4;FS         |
| 16158 | chrY | 10104134 | . | A | G | 67.84  | my_snp_filter | AC=2;AF=1.00;AN=2;DP=4;FS         |
| 16159 | chrY | 10104336 | . | A | T | 47.86  | my_snp_filter | AC=2;AF=0.250;AN=8;DP=10;         |
| 16160 | chrY | 10104354 | . | G | T | 56.84  | my_snp_filter | AC=2;AF=1.00;AN=2;DP=11;F         |
| 16161 | chrY | 13105832 | . | C | A | 30.09  | my_snp_filter | AC=1;AF=0.083;AN=12;BaseQ         |
| 16162 | chrY | 13107615 | . | G | C | 56.82  | PASS          | AC=2;AF=0.125;AN=16;DP=23;FS=0.00 |
| 16163 | chrY | 13107631 | . | T | C | 51.11  | PASS          | AC=1;AF=0.063;AN=16;BaseQRankSum= |
| 16164 | chrY | 13107636 | . | G | T | 50.42  | PASS          | AC=1;AF=0.056;AN=18;BaseQRankSum= |
| 16165 | chrY | 13107644 | . | T | A | 50.42  | PASS          | AC=1;AF=0.056;AN=18;BaseQRankSum= |
| 16166 | chrY | 13107646 | . | C | T | 51.58  | PASS          | AC=1;AF=0.056;AN=18;BaseQRankSum= |
| 16167 | chrY | 13107656 | . | A | T | 57.86  | PASS          | AC=1;AF=0.500;AN=2;BaseQRankSum=  |
| 16168 | chrY | 13107662 | . | C | T | 54.90  | my_snp_filter | AC=2;AF=0.125;AN=16;DP=23         |
| 16169 | chrY | 13107664 | . | T | A | 51.53  | PASS          | AC=1;AF=0.056;AN=18;BaseQRankSum= |
| 16170 | chrY | 13107670 | . | G | T | 58.94  | my_snp_filter | AC=2;AF=0.167;AN=12;DP=24         |
| 16171 | chrY | 13107686 | . | T | A | 56.14  | my_snp_filter | AC=2;AF=0.111;AN=18;DP=24         |
| 16172 | chrY | 13107688 | . | C | G | 200.79 | my_snp_filter | AC=5;AF=0.833;AN=6;BaseQR         |
| 16173 | chrY | 13107691 | . | G | T | 55.89  | my_snp_filter | AC=2;AF=0.125;AN=16;DP=22         |
| 16174 | chrY | 13107706 | . | A | G | 57.86  | PASS          | AC=1;AF=0.500;AN=2;BaseQRankSum=  |
| 16175 | chrY | 13107708 | . | A | G | 55.53  | PASS          | AC=1;AF=0.250;AN=4;BaseQRankSum=  |
| 16176 | chrY | 13107713 | . | C | A | 58.53  | PASS          | AC=1;AF=0.250;AN=4;BaseQRankSum=  |
| 16177 | chrY | 13107718 | . | T | C | 54.02  | PASS          | AC=1;AF=0.125;AN=8;BaseQRankSum=  |
| 16178 | chrY | 13107911 | . | A | G | 67.84  | my_snp_filter | AC=2;AF=1.00;AN=2;DP=11;F         |
| 16179 | chrY | 13107928 | . | G | A | 67.84  | my_snp_filter | AC=2;AF=1.00;AN=2;DP=10;F         |
| 16180 | chrY | 13107940 | . | A | G | 66.17  | my_snp_filter | AC=2;AF=0.333;AN=6;DP=10;         |
| 16181 | chrY | 13107946 | . | T | G | 61.52  | my_snp_filter | AC=2;AF=0.250;AN=8;DP=10;         |
| 16182 | chrY | 13107969 | . | A | T | 64.81  | my_snp_filter | AC=2;AF=0.333;AN=6;DP=11;         |
| 16183 | chrY | 13107976 | . | T | G | 64.85  | my_snp_filter | AC=2;AF=0.500;AN=4;DP=11;         |
| 16184 | chrY | 13108001 | . | A | G | 63     | my_snp_filter | AC=2;AF=0.333;AN=6;DP=5;F         |
| 16185 | chrY | 13108004 | . | G | T | 63.27  | my_snp_filter | AC=2;AF=0.333;AN=6;DP=4;F         |
| 16186 | chrY | 13108006 | . | C | A | 63     | my_snp_filter | AC=2;AF=0.333;AN=6;DP=4;F         |
| 16187 | chrY | 13108008 | . | G | A | 63     | my_snp_filter | AC=2;AF=0.333;AN=6;DP=4;F         |
| 16188 | chrY | 13108010 | . | G | T | 63     | my_snp_filter | AC=2;AF=0.333;AN=6;DP=4;F         |

|       |      |          |   |   |     |          |               |                                   |
|-------|------|----------|---|---|-----|----------|---------------|-----------------------------------|
| 16189 | chrY | 13108013 | . | C | T   | 63       | my_snp_filter | AC=2;AF=0.333;AN=6;DP=4;F         |
| 16190 | chrY | 13108014 | . | A | G   | 63       | my_snp_filter | AC=2;AF=0.333;AN=6;DP=4;F         |
| 16191 | chrY | 13108940 | . | G | A   | 243.61   | my_snp_filter | AC=2;AF=0.200;AN=10;BaseQ         |
| 16192 | chrY | 13109264 | . | G | A   | 104.04   | PASS          | AC=3;AF=0.115;AN=26;BaseQRankSum= |
| 16193 | chrY | 13109267 | . | G | C   | 312.11   | my_snp_filter | AC=4;AF=0.167;AN=24;BaseQ         |
| 16194 | chrY | 13109269 | . | A | T   | 306.28   | PASS          | AC=4;AF=0.154;AN=26;DP=348;FS=0.0 |
| 16195 | chrY | 13109596 | . | C | G   | 790.98   | my_snp_filter | AC=4;AF=0.400;AN=10;BaseQ         |
| 16196 | chrY | 13109928 | . | G | T,C | 306.49   | PASS          | AC=1,2;AF=0.250,0.500;AN=4;BaseQR |
| 16197 | chrY | 13109933 | . | C | G   | 65.85    | PASS          | AC=2;AF=0.250;AN=8;DP=279;FS=0.00 |
| 16198 | chrY | 13109934 | . | T | A   | 54.29    | my_snp_filter | AC=1;AF=0.100;AN=10;BaseQ         |
| 16199 | chrY | 13109961 | . | T | C   | 67.84    | PASS          | AC=2;AF=1.00;AN=2;DP=254;FS=0.000 |
| 16200 | chrY | 13109962 | . | A | T   | 57.86    | PASS          | AC=1;AF=0.500;AN=2;DP=254;FS=0.00 |
| 16201 | chrY | 13109968 | . | G | A   | 51.77    | my_snp_filter | AC=1;AF=0.056;AN=18;BaseQ         |
| 16202 | chrY | 13109971 | . | C | A   | 50.60    | my_snp_filter | AC=1;AF=0.056;AN=18;BaseQ         |
| 16203 | chrY | 13109976 | . | C | A   | 50.62    | my_snp_filter | AC=1;AF=0.056;AN=18;BaseQ         |
| 16204 | chrY | 13109983 | . | T | A   | 57.86    | my_snp_filter | AC=1;AF=0.500;AN=2;BaseQR         |
| 16205 | chrY | 13110324 | . | C | T   | 279.59   | my_snp_filter | AC=3;AF=0.250;AN=12;BaseQ         |
| 16206 | chrY | 13110531 | . | G | A   | 196.57   | my_snp_filter | AC=1;AF=0.050;AN=20;BaseQ         |
| 16207 | chrY | 13110553 | . | C | T   | 725.23   | my_snp_filter | AC=1;AF=0.056;AN=18;BaseQ         |
| 16208 | chrY | 13110566 | . | G | A,C | 752.84   | my_snp_filter | AC=1,1;AF=0.071,0.071;AN=         |
| 16209 | chrY | 13110569 | . | G | C   | 587.96   | my_snp_filter | AC=1;AF=0.083;AN=12;BaseQ         |
| 16210 | chrY | 13110662 | . | C | G   | 125.86   | my_snp_filter | AC=2;AF=0.167;AN=12;BaseQ         |
| 16211 | chrY | 13112222 | . | G | T   | 508.04   | my_snp_filter | AC=6;AF=0.375;AN=16;BaseQ         |
| 16212 | chrY | 13112766 | . | G | A   | 456.28   | my_snp_filter | AC=2;AF=0.167;AN=12;DP=88         |
| 16213 | chrY | 13114783 | . | A | G   | 62.03    | PASS          | AC=2;AF=0.333;AN=6;DP=15;FS=0.000 |
| 16214 | chrY | 13114800 | . | C | T   | 64.84    | PASS          | AC=2;AF=0.500;AN=4;DP=16;FS=0.000 |
| 16215 | chrY | 13114805 | . | C | A   | 62.53    | PASS          | AC=2;AF=0.250;AN=8;DP=16;FS=0.000 |
| 16216 | chrY | 13114809 | . | G | A   | 64.83    | PASS          | AC=2;AF=0.500;AN=4;DP=18;FS=0.000 |
| 16217 | chrY | 13114811 | . | C | A   | 60.85    | PASS          | AC=2;AF=0.250;AN=8;DP=16;FS=0.000 |
| 16218 | chrY | 13114813 | . | A | C   | 61.86    | PASS          | AC=2;AF=0.200;AN=10;DP=17;FS=0.00 |
| 16219 | chrY | 13121682 | . | C | G   | 80.41    | my_snp_filter | AC=1;AF=0.071;AN=14;BaseQ         |
| 16220 | chrY | 13122191 | . | A | C   | 114.68   | my_snp_filter | AC=1;AF=0.071;AN=14;BaseQ         |
| 16221 | chrY | 13122814 | . | T | C   | 2957.45  | my_snp_filter | AC=11;AF=0.786;AN=14;Base         |
| 16222 | chrY | 13122912 | . | C | G   | 179.81   | my_snp_filter | AC=2;AF=0.143;AN=14;BaseQ         |
| 16223 | chrY | 13124650 | . | T | G   | 123.83   | my_snp_filter | AC=1;AF=0.063;AN=16;BaseQ         |
| 16224 | chrY | 13127119 | . | A | G   | 157.42   | my_snp_filter | AC=11;AF=0.611;AN=18;Base         |
| 16225 | chrY | 13127471 | . | G | T   | 933.91   | PASS          | AC=6;AF=0.088;AN=68;DP=666;FS=0.0 |
| 16226 | chrY | 13127517 | . | C | G   | 1178.42  | PASS          | AC=6;AF=0.086;AN=70;DP=656;FS=0.0 |
| 16227 | chrY | 13128274 | . | A | T   | 51.36    | my_snp_filter | AC=4;AF=0.250;AN=16;DP=11         |
| 16228 | chrY | 13128577 | . | C | T   | 938.46   | my_snp_filter | AC=6;AF=0.150;AN=40;DP=15         |
| 16229 | chrY | 13128689 | . | A | C   | 1870.48  | PASS          | AC=6;AF=0.107;AN=56;DP=253;FS=0.0 |
| 16230 | chrY | 13128978 | . | G | T   | 1626.31  | PASS          | AC=6;AF=0.200;AN=30;DP=192;FS=0.0 |
| 16231 | chrY | 13129361 | . | C | G   | 95.74    | my_snp_filter | AC=1;AF=0.036;AN=28;BaseQ         |
| 16232 | chrY | 13129449 | . | A | G   | 1163.73  | my_snp_filter | AC=6;AF=0.158;AN=38;BaseQ         |
| 16233 | chrY | 13130901 | . | G | A   | 2894.87  | my_snp_filter | AC=18;AF=1.00;AN=18;DP=11         |
| 16234 | chrY | 13131003 | . | G | A   | 3007.87  | my_snp_filter | AC=18;AF=1.00;AN=18;DP=12         |
| 16235 | chrY | 13132137 | . | A | T   | 33.01    | PASS          | AC=1;AF=0.015;AN=68;BaseQRankSum= |
| 16236 | chrY | 13132141 | . | C | T   | 40.70    | PASS          | AC=1;AF=0.023;AN=44;BaseQRankSum= |
| 16237 | chrY | 13132153 | . | C | G   | 39.22    | PASS          | AC=1;AF=0.015;AN=66;BaseQRankSum= |
| 16238 | chrY | 13132154 | . | A | T   | 44.22    | PASS          | AC=1;AF=0.016;AN=64;BaseQRankSum= |
| 16239 | chrY | 13132287 | . | T | A   | 11941.85 | PASS          | AC=56;AF=0.933;AN=60;DP=5         |
| 16240 | chrY | 13132704 | . | C | T   | 752.85   | PASS          | AC=6;AF=0.333;AN=18;DP=102;FS=0.0 |
| 16241 | chrY | 13132710 | . | C | A   | 840.22   | PASS          | AC=6;AF=0.333;AN=18;DP=98;FS=0.00 |
| 16242 | chrY | 13133254 | . | A | T   | 51.24    | PASS          | AC=2;AF=0.071;AN=28;DP=233;FS=0.0 |
| 16243 | chrY | 13133259 | . | T | A   | 51.44    | PASS          | AC=2;AF=0.083;AN=24;DP=234;FS=0.0 |
| 16244 | chrY | 13133263 | . | G | C   | 97.43    | PASS          | AC=4;AF=0.167;AN=24;DP=232;FS=0.0 |
| 16245 | chrY | 13133273 | . | A | T   | 51.23    | PASS          | AC=2;AF=0.071;AN=28;DP=244;FS=0.0 |
| 16246 | chrY | 13133291 | . | C | T   | 51.64    | PASS          | AC=2;AF=0.091;AN=22;DP=238;FS=0.0 |
| 16247 | chrY | 13133300 | . | G | T   | 311.39   | PASS          | AC=1;AF=0.045;AN=22;BaseQRankSum= |
| 16248 | chrY | 13133305 | . | T | C   | 232.87   | PASS          | AC=1;AF=0.050;AN=20;BaseQRankSum= |
| 16249 | chrY | 13133720 | . | T | G   | 84.47    | PASS          | AC=2;AF=0.071;AN=28;BaseQRankSum= |
| 16250 | chrY | 13133726 | . | C | G   | 35.55    | my_snp_filter | AC=2;AF=0.071;AN=28;BaseQ         |
| 16251 | chrY | 13133745 | . | G | A   | 42.01    | my_snp_filter | AC=2;AF=0.071;AN=28;BaseQ         |
| 16252 | chrY | 13133748 | . | C | A   | 46.86    | my_snp_filter | AC=2;AF=0.071;AN=28;BaseQ         |
| 16253 | chrY | 13133750 | . | A | T   | 88.84    | PASS          | AC=2;AF=0.071;AN=28;BaseQRankSum= |
| 16254 | chrY | 13133756 | . | C | T   | 171.47   | PASS          | AC=3;AF=0.107;AN=28;BaseQRankSum= |
| 16255 | chrY | 13133760 | . | T | A   | 43.95    | my_snp_filter | AC=2;AF=0.071;AN=28;BaseQ         |
| 16256 | chrY | 13133764 | . | A | G   | 36.65    | PASS          | AC=3;AF=0.107;AN=28;BaseQRankSum= |
| 16257 | chrY | 13133765 | . | T | A   | 45.11    | my_snp_filter | AC=3;AF=0.107;AN=28;BaseQ         |
| 16258 | chrY | 13133766 | . | A | G   | 44.60    | PASS          | AC=3;AF=0.115;AN=26;BaseQRankSum= |
| 16259 | chrY | 13133776 | . | C | T   | 121.21   | my_snp_filter | AC=3;AF=0.107;AN=28;BaseQ         |
| 16260 | chrY | 13133781 | . | T | A   | 67.23    | my_snp_filter | AC=4;AF=0.143;AN=28;BaseQ         |
| 16261 | chrY | 13133791 | . | A | T   | 108.52   | my_snp_filter | AC=3;AF=0.107;AN=28;BaseQ         |
| 16262 | chrY | 13133811 | . | C | T   | 31.48    | my_snp_filter | AC=2;AF=0.077;AN=26;BaseQ         |
| 16263 | chrY | 13134208 | . | C | G   | 1030.49  | PASS          | AC=6;AF=0.086;AN=70;DP=628;FS=0.0 |
| 16264 | chrY | 13134952 | . | G | C   | 48.60    | PASS          | AC=1;AF=0.026;AN=38;BaseQRankSum= |

|       |      |          |   |   |     |          |               |                                    |
|-------|------|----------|---|---|-----|----------|---------------|------------------------------------|
| 16265 | chrY | 13134953 | . | A | C   | 206.95   | PASS          | AC=2;AF=0.067;AN=30;BaseQRankSum=  |
| 16266 | chrY | 13134955 | . | G | A   | 67.30    | PASS          | AC=1;AF=0.026;AN=38;BaseQRankSum=  |
| 16267 | chrY | 13134961 | . | A | T   | 67.30    | PASS          | AC=1;AF=0.026;AN=38;BaseQRankSum=  |
| 16268 | chrY | 13134964 | . | C | T   | 114.79   | my_snp_filter | AC=2;AF=0.056;AN=36;BaseQ          |
| 16269 | chrY | 13134967 | . | C | T   | 82.13    | PASS          | AC=1;AF=0.026;AN=38;BaseQRankSum=  |
| 16270 | chrY | 13134968 | . | A | G   | 67.30    | PASS          | AC=1;AF=0.026;AN=38;BaseQRankSum=  |
| 16271 | chrY | 13135045 | . | C | T   | 238.54   | PASS          | AC=1;AF=0.024;AN=42;BaseQRankSum=  |
| 16272 | chrY | 13135099 | . | C | G   | 4622.14  | PASS          | AC=10;AF=0.152;AN=66;BaseQRankSum= |
| 16273 | chrY | 13135113 | . | A | T   | 4496.35  | PASS          | AC=10;AF=0.143;AN=70;BaseQRankSum= |
| 16274 | chrY | 13135132 | . | C | T   | 4432.08  | PASS          | AC=9;AF=0.129;AN=70;BaseQRankSum=  |
| 16275 | chrY | 13135133 | . | A | G   | 4474.31  | PASS          | AC=9;AF=0.129;AN=70;BaseQRankSum=  |
| 16276 | chrY | 13135139 | . | C | T   | 48.91    | my_snp_filter | AC=1;AF=0.014;AN=70;BaseQ          |
| 16277 | chrY | 13135140 | . | A | G   | 4457.77  | PASS          | AC=9;AF=0.129;AN=70;BaseQRankSum=  |
| 16278 | chrY | 13135143 | . | G | T   | 4401.39  | PASS          | AC=9;AF=0.129;AN=70;BaseQRankSum=  |
| 16279 | chrY | 13135146 | . | G | T   | 4551.24  | PASS          | AC=9;AF=0.129;AN=70;BaseQRankSum=  |
| 16280 | chrY | 13135194 | . | C | T   | 8188.44  | PASS          | AC=8;AF=0.118;AN=68;BaseQRankSum=  |
| 16281 | chrY | 13135209 | . | T | A   | 8581.15  | PASS          | AC=9;AF=0.136;AN=66;BaseQRankSum=  |
| 16282 | chrY | 13135213 | . | T | C   | 8722.39  | PASS          | AC=9;AF=0.136;AN=66;BaseQRankSum=  |
| 16283 | chrY | 13135214 | . | G | A   | 8683.02  | PASS          | AC=9;AF=0.136;AN=66;BaseQRankSum=  |
| 16284 | chrY | 13135241 | . | T | C   | 10449.79 | PASS          | AC=10;AF=0.143;AN=70;BaseQ         |
| 16285 | chrY | 13135246 | . | A | G   | 10729.67 | PASS          | AC=10;AF=0.143;AN=70;BaseQ         |
| 16286 | chrY | 13135256 | . | C | A   | 10831.70 | PASS          | AC=10;AF=0.143;AN=70;BaseQ         |
| 16287 | chrY | 13135257 | . | A | G   | 1331.84  | PASS          | AC=3;AF=0.043;AN=70;BaseQRankSum=  |
| 16288 | chrY | 13135260 | . | T | C   | 10815.68 | PASS          | AC=10;AF=0.143;AN=70;BaseQ         |
| 16289 | chrY | 13135261 | . | G | T   | 10895.48 | PASS          | AC=10;AF=0.143;AN=70;BaseQ         |
| 16290 | chrY | 13135270 | . | T | A   | 11159.91 | PASS          | AC=10;AF=0.143;AN=70;BaseQ         |
| 16291 | chrY | 13135284 | . | A | T   | 11410.41 | PASS          | AC=9;AF=0.132;AN=68;BaseQ          |
| 16292 | chrY | 13135287 | . | C | T   | 11655.82 | PASS          | AC=9;AF=0.132;AN=68;BaseQ          |
| 16293 | chrY | 13135289 | . | C | G   | 11826.58 | PASS          | AC=9;AF=0.132;AN=68;BaseQ          |
| 16294 | chrY | 13135300 | . | G | A   | 1697.09  | PASS          | AC=5;AF=0.074;AN=68;BaseQRankSum=  |
| 16295 | chrY | 13135305 | . | T | C   | 11715.65 | PASS          | AC=9;AF=0.132;AN=68;BaseQ          |
| 16296 | chrY | 13135315 | . | G | T   | 11212.78 | PASS          | AC=9;AF=0.132;AN=68;BaseQ          |
| 16297 | chrY | 13135323 | . | T | C   | 11269.53 | PASS          | AC=9;AF=0.132;AN=68;BaseQ          |
| 16298 | chrY | 13135324 | . | G | A   | 11275.48 | PASS          | AC=9;AF=0.132;AN=68;BaseQ          |
| 16299 | chrY | 13135327 | . | A | G   | 11357.15 | PASS          | AC=9;AF=0.132;AN=68;BaseQ          |
| 16300 | chrY | 13135347 | . | A | T   | 11188.56 | PASS          | AC=8;AF=0.129;AN=62;BaseQ          |
| 16301 | chrY | 13135371 | . | G | A   | 11038.26 | PASS          | AC=8;AF=0.190;AN=42;BaseQ          |
| 16302 | chrY | 13135375 | . | G | T   | 10988.73 | PASS          | AC=8;AF=0.182;AN=44;BaseQ          |
| 16303 | chrY | 13135389 | . | T | C   | 11268.81 | PASS          | AC=8;AF=0.200;AN=40;BaseQ          |
| 16304 | chrY | 13135408 | . | T | C   | 11240.18 | PASS          | AC=8;AF=0.200;AN=40;BaseQ          |
| 16305 | chrY | 13135416 | . | T | A   | 11598.98 | PASS          | AC=8;AF=0.267;AN=30;BaseQ          |
| 16306 | chrY | 13135417 | . | A | G   | 11542.74 | PASS          | AC=8;AF=0.222;AN=36;BaseQ          |
| 16307 | chrY | 13135422 | . | G | A   | 11662.51 | PASS          | AC=8;AF=0.211;AN=38;BaseQ          |
| 16308 | chrY | 13135435 | . | T | C   | 193.47   | PASS          | AC=1;AF=0.026;AN=38;BaseQRankSum=  |
| 16309 | chrY | 13135440 | . | C | G   | 10785.64 | PASS          | AC=8;AF=0.222;AN=36;BaseQ          |
| 16310 | chrY | 13135444 | . | A | C   | 88.83    | PASS          | AC=3;AF=0.079;AN=38;BaseQRankSum=  |
| 16311 | chrY | 13135461 | . | A | T   | 50.75    | my_snp_filter | AC=2;AF=0.056;AN=36;DP=11          |
| 16312 | chrY | 13135463 | . | G | A   | 50.75    | my_snp_filter | AC=2;AF=0.056;AN=36;DP=11          |
| 16313 | chrY | 13135469 | . | A | G   | 3040.26  | PASS          | AC=7;AF=0.219;AN=32;BaseQRankSum=  |
| 16314 | chrY | 13135470 | . | T | C   | 3606.55  | PASS          | AC=8;AF=0.250;AN=32;BaseQRankSum=  |
| 16315 | chrY | 13135488 | . | G | T   | 3322.34  | PASS          | AC=5;AF=0.156;AN=32;BaseQRankSum=  |
| 16316 | chrY | 13135500 | . | A | G,T | 15984.36 | PASS          | AC=11,5;AF=0.344,0.156;AN          |
| 16317 | chrY | 13135536 | . | T | A   | 6910.63  | PASS          | AC=8;AF=0.174;AN=46;BaseQRankSum=  |
| 16318 | chrY | 13135556 | . | C | G   | 15091.31 | PASS          | AC=16;AF=0.276;AN=58;BaseQ         |
| 16319 | chrY | 13135557 | . | C | T   | 5115.15  | PASS          | AC=8;AF=0.129;AN=62;BaseQRankSum=  |
| 16320 | chrY | 13135558 | . | T | G   | 2717.24  | PASS          | AC=8;AF=0.133;AN=60;BaseQRankSum=  |
| 16321 | chrY | 13135569 | . | G | A,T | 16856.18 | PASS          | AC=14,3;AF=0.259,0.056;AN          |
| 16322 | chrY | 13135573 | . | G | C   | 2782.36  | PASS          | AC=8;AF=0.118;AN=68;BaseQRankSum=  |
| 16323 | chrY | 13135578 | . | T | A   | 9633.60  | PASS          | AC=14;AF=0.250;AN=56;BaseQRankSum= |
| 16324 | chrY | 13135584 | . | A | C   | 1351.94  | PASS          | AC=8;AF=0.118;AN=68;BaseQRankSum=  |
| 16325 | chrY | 13135587 | . | A | T   | 1016.08  | my_snp_filter | AC=8;AF=0.118;AN=68;BaseQ          |
| 16326 | chrY | 13135593 | . | G | C   | 340.34   | my_snp_filter | AC=6;AF=0.088;AN=68;BaseQ          |
| 16327 | chrY | 13135597 | . | C | T   | 165.25   | my_snp_filter | AC=2;AF=0.029;AN=68;BaseQ          |
| 16328 | chrY | 13135604 | . | A | G   | 16326.17 | PASS          | AC=26;AF=0.394;AN=66;BaseQ         |
| 16329 | chrY | 13135620 | . | G | A   | 2531.37  | PASS          | AC=9;AF=0.132;AN=68;BaseQRankSum=  |
| 16330 | chrY | 13135656 | . | T | G   | 13286.54 | PASS          | AC=30;AF=0.429;AN=70;BaseQ         |
| 16331 | chrY | 13135676 | . | C | T   | 5658.44  | PASS          | AC=7;AF=0.100;AN=70;BaseQRankSum=  |
| 16332 | chrY | 13135684 | . | T | G   | 5580.40  | PASS          | AC=7;AF=0.100;AN=70;BaseQRankSum=  |
| 16333 | chrY | 13135694 | . | C | A   | 15503.69 | PASS          | AC=30;AF=0.441;AN=68;BaseQ         |
| 16334 | chrY | 13135695 | . | G | A   | 5161.32  | PASS          | AC=7;AF=0.103;AN=68;BaseQRankSum=  |
| 16335 | chrY | 13135708 | . | C | G   | 4767.27  | PASS          | AC=7;AF=0.100;AN=70;BaseQRankSum=  |
| 16336 | chrY | 13135710 | . | G | A   | 10404.59 | PASS          | AC=25;AF=0.403;AN=62;BaseQ         |
| 16337 | chrY | 13135714 | . | A | T   | 4422.25  | PASS          | AC=7;AF=0.100;AN=70;BaseQRankSum=  |
| 16338 | chrY | 13135715 | . | A | G   | 4474.44  | PASS          | AC=8;AF=0.114;AN=70;BaseQRankSum=  |
| 16339 | chrY | 13135719 | . | T | C   | 4282.52  | PASS          | AC=8;AF=0.114;AN=70;BaseQRankSum=  |
| 16340 | chrY | 13135727 | . | G | C   | 4030.52  | PASS          | AC=8;AF=0.114;AN=70;BaseQRankSum=  |

|       |      |          |   |   |     |          |               |                                    |
|-------|------|----------|---|---|-----|----------|---------------|------------------------------------|
| 16341 | chrY | 13135730 | . | C | T   | 14914.32 | PASS          | AC=31;AF=0.443;AN=70;Base          |
| 16342 | chrY | 13135735 | . | C | T   | 13948.53 | PASS          | AC=29;AF=0.414;AN=70;Base          |
| 16343 | chrY | 13135740 | . | C | T   | 13326.90 | PASS          | AC=30;AF=0.429;AN=70;Base          |
| 16344 | chrY | 13135751 | . | T | C   | 11958.03 | PASS          | AC=25;AF=0.357;AN=70;Base          |
| 16345 | chrY | 13135757 | . | A | G   | 2585.46  | PASS          | AC=7;AF=0.100;AN=70;BaseQRankSum=  |
| 16346 | chrY | 13135767 | . | G | T   | 9814.46  | PASS          | AC=22;AF=0.314;AN=70;BaseQRankSum= |
| 16347 | chrY | 13135774 | . | T | A   | 1584.64  | PASS          | AC=7;AF=0.100;AN=70;BaseQRankSum=  |
| 16348 | chrY | 13135778 | . | G | C   | 8367.02  | PASS          | AC=20;AF=0.286;AN=70;BaseQRankSum= |
| 16349 | chrY | 13135787 | . | T | G   | 1025.24  | PASS          | AC=7;AF=0.100;AN=70;BaseQRankSum=  |
| 16350 | chrY | 13135788 | . | A | G   | 733.32   | PASS          | AC=6;AF=0.086;AN=70;BaseQRankSum=  |
| 16351 | chrY | 13135789 | . | A | C   | 266.79   | PASS          | AC=1;AF=0.014;AN=70;BaseQRankSum=  |
| 16352 | chrY | 13135792 | . | G | T   | 6701.96  | PASS          | AC=17;AF=0.243;AN=70;BaseQRankSum= |
| 16353 | chrY | 13135799 | . | G | C,T | 5767.13  | PASS          | AC=10,2;AF=0.152,0.030;AN=66;Base  |
| 16354 | chrY | 13135801 | . | T | G   | 5382.58  | PASS          | AC=10;AF=0.147;AN=68;BaseQRankSum= |
| 16355 | chrY | 13135804 | . | A | G   | 6268.84  | PASS          | AC=12;AF=0.188;AN=64;BaseQRankSum= |
| 16356 | chrY | 13135820 | . | A | T   | 415.95   | PASS          | AC=1;AF=0.014;AN=70;BaseQRankSum=  |
| 16357 | chrY | 13135825 | . | T | A   | 5889.50  | PASS          | AC=7;AF=0.117;AN=60;BaseQRankSum=  |
| 16358 | chrY | 13135831 | . | C | T   | 5806.33  | PASS          | AC=7;AF=0.117;AN=60;BaseQRankSum=  |
| 16359 | chrY | 13135844 | . | C | T   | 5656.59  | PASS          | AC=6;AF=0.103;AN=58;BaseQRankSum=  |
| 16360 | chrY | 13135848 | . | A | G   | 4334.89  | PASS          | AC=5;AF=0.076;AN=66;BaseQRankSum=  |
| 16361 | chrY | 13135852 | . | G | A   | 5498.60  | PASS          | AC=5;AF=0.093;AN=54;BaseQRankSum=  |
| 16362 | chrY | 13135853 | . | G | A   | 4306.59  | PASS          | AC=5;AF=0.093;AN=54;BaseQRankSum=  |
| 16363 | chrY | 13135866 | . | G | A   | 3917.26  | PASS          | AC=5;AF=0.074;AN=68;BaseQRankSum=  |
| 16364 | chrY | 13135867 | . | A | G   | 969.60   | PASS          | AC=1;AF=0.014;AN=70;BaseQRankSum=  |
| 16365 | chrY | 13135888 | . | A | T   | 12424.42 | PASS          | AC=15;AF=0.214;AN=70;Base          |
| 16366 | chrY | 13135897 | . | T | C   | 17683.26 | PASS          | AC=21;AF=0.300;AN=70;Base          |
| 16367 | chrY | 13135898 | . | G | C   | 2917.07  | PASS          | AC=12;AF=0.171;AN=70;BaseQRankSum= |
| 16368 | chrY | 13135902 | . | T | C   | 14013.96 | PASS          | AC=15;AF=0.214;AN=70;Base          |
| 16369 | chrY | 13135914 | . | T | G   | 14176.60 | PASS          | AC=15;AF=0.214;AN=70;Base          |
| 16370 | chrY | 13135919 | . | G | A   | 19218.06 | PASS          | AC=21;AF=0.300;AN=70;Base          |
| 16371 | chrY | 13135924 | . | G | A   | 19602.06 | PASS          | AC=21;AF=0.300;AN=70;Base          |
| 16372 | chrY | 13135929 | . | A | C   | 14206.70 | PASS          | AC=15;AF=0.214;AN=70;Base          |
| 16373 | chrY | 13135932 | . | G | A   | 3875.36  | PASS          | AC=12;AF=0.171;AN=70;BaseQRankSum= |
| 16374 | chrY | 13135939 | . | C | A   | 4299.50  | PASS          | AC=10;AF=0.152;AN=66;BaseQRankSum= |
| 16375 | chrY | 13135941 | . | G | A   | 20791.62 | PASS          | AC=17;AF=0.266;AN=64;Base          |
| 16376 | chrY | 13135947 | . | T | C   | 21234.54 | PASS          | AC=17;AF=0.243;AN=70;Base          |
| 16377 | chrY | 13135951 | . | A | G   | 7200.50  | my_snp_filter | AC=14;AF=0.200;AN=70;Base          |
| 16378 | chrY | 13135955 | . | A | G   | 4712.15  | PASS          | AC=11;AF=0.157;AN=70;BaseQRankSum= |
| 16379 | chrY | 13135972 | . | G | C   | 5383.83  | PASS          | AC=13;AF=0.186;AN=70;BaseQRankSum= |
| 16380 | chrY | 13135977 | . | A | G   | 5520.27  | PASS          | AC=13;AF=0.191;AN=68;BaseQRankSum= |
| 16381 | chrY | 13135978 | . | C | T   | 21718.87 | PASS          | AC=18;AF=0.265;AN=68;Base          |
| 16382 | chrY | 13135979 | . | C | G   | 21663.87 | PASS          | AC=18;AF=0.265;AN=68;Base          |
| 16383 | chrY | 13135994 | . | G | A   | 20948.64 | PASS          | AC=18;AF=0.281;AN=64;Base          |
| 16384 | chrY | 13136020 | . | G | C   | 8266.96  | PASS          | AC=22;AF=0.314;AN=70;BaseQRankSum= |
| 16385 | chrY | 13136022 | . | C | A   | 9032.89  | PASS          | AC=16;AF=0.235;AN=68;BaseQRankSum= |
| 16386 | chrY | 13136023 | . | C | G   | 19869.40 | PASS          | AC=24;AF=0.353;AN=68;Base          |
| 16387 | chrY | 13136025 | . | G | T,A | 13297.28 | PASS          | AC=16,13;AF=0.235,0.191;A          |
| 16388 | chrY | 13136029 | . | G | A   | 8248.66  | PASS          | AC=16;AF=0.229;AN=70;BaseQRankSum= |
| 16389 | chrY | 13136038 | . | T | C   | 7067.27  | PASS          | AC=13;AF=0.191;AN=68;BaseQRankSum= |
| 16390 | chrY | 13136045 | . | C | T   | 5938.58  | PASS          | AC=11;AF=0.157;AN=70;BaseQRankSum= |
| 16391 | chrY | 13136049 | . | C | A   | 5557.54  | PASS          | AC=10;AF=0.143;AN=70;BaseQRankSum= |
| 16392 | chrY | 13136053 | . | C | T   | 12076.15 | PASS          | AC=21;AF=0.318;AN=66;Base          |
| 16393 | chrY | 13136054 | . | A | G   | 14966.56 | PASS          | AC=21;AF=0.318;AN=66;Base          |
| 16394 | chrY | 13136060 | . | A | C   | 4295.61  | PASS          | AC=10;AF=0.143;AN=70;BaseQRankSum= |
| 16395 | chrY | 13136061 | . | T | C   | 4129.31  | PASS          | AC=10;AF=0.143;AN=70;BaseQRankSum= |
| 16396 | chrY | 13136077 | . | G | A   | 725.22   | PASS          | AC=5;AF=0.071;AN=70;BaseQRankSum=  |
| 16397 | chrY | 13136083 | . | T | C   | 665.99   | PASS          | AC=5;AF=0.071;AN=70;BaseQRankSum=  |
| 16398 | chrY | 13136091 | . | T | G   | 5850.08  | PASS          | AC=13;AF=0.191;AN=68;BaseQRankSum= |
| 16399 | chrY | 13136094 | . | A | G   | 120.77   | my_snp_filter | AC=2;AF=0.029;AN=70;BaseQ          |
| 16400 | chrY | 13136095 | . | C | T   | 119.85   | my_snp_filter | AC=2;AF=0.029;AN=70;BaseQ          |
| 16401 | chrY | 13136098 | . | A | G   | 35.58    | my_snp_filter | AC=2;AF=0.029;AN=70;BaseQ          |
| 16402 | chrY | 13136101 | . | C | G   | 34.42    | my_snp_filter | AC=1;AF=0.014;AN=70;BaseQ          |
| 16403 | chrY | 13136102 | . | T | A   | 34.68    | my_snp_filter | AC=1;AF=0.014;AN=70;BaseQ          |
| 16404 | chrY | 13136114 | . | A | C   | 3827.13  | PASS          | AC=10;AF=0.179;AN=56;BaseQRankSum= |
| 16405 | chrY | 13136119 | . | C | A   | 3600.13  | PASS          | AC=8;AF=0.138;AN=58;BaseQRankSum=  |
| 16406 | chrY | 13136139 | . | T | C   | 3278.71  | PASS          | AC=8;AF=0.148;AN=54;BaseQRankSum=  |
| 16407 | chrY | 13136145 | . | G | A   | 2899.53  | PASS          | AC=6;AF=0.111;AN=54;BaseQRankSum=  |
| 16408 | chrY | 13136182 | . | A | C   | 2275.24  | PASS          | AC=7;AF=0.125;AN=56;BaseQRankSum=  |
| 16409 | chrY | 13136187 | . | T | G   | 2231.30  | PASS          | AC=7;AF=0.121;AN=58;BaseQRankSum=  |
| 16410 | chrY | 13136218 | . | T | C   | 1204.24  | PASS          | AC=4;AF=0.080;AN=50;BaseQRankSum=  |
| 16411 | chrY | 13136237 | . | A | G   | 1087.88  | PASS          | AC=3;AF=0.058;AN=52;BaseQRankSum=  |
| 16412 | chrY | 13136238 | . | A | C   | 1087.88  | PASS          | AC=3;AF=0.058;AN=52;BaseQRankSum=  |
| 16413 | chrY | 13136250 | . | T | A   | 1003.89  | PASS          | AC=3;AF=0.056;AN=54;BaseQRankSum=  |
| 16414 | chrY | 13136261 | . | C | A   | 958.83   | PASS          | AC=3;AF=0.058;AN=52;BaseQRankSum=  |
| 16415 | chrY | 13136265 | . | A | C   | 912.42   | PASS          | AC=2;AF=0.036;AN=56;BaseQRankSum=  |
| 16416 | chrY | 13136270 | . | C | T   | 867.45   | PASS          | AC=2;AF=0.036;AN=56;BaseQRankSum=  |



|       |      |          |   |   |   |          |               |                                   |
|-------|------|----------|---|---|---|----------|---------------|-----------------------------------|
| 16417 | chrY | 13136286 | . | T | C | 790.05   | PASS          | AC=1;AF=0.018;AN=56;BaseQRankSum= |
| 16418 | chrY | 13136454 | . | C | T | 86.61    | PASS          | AC=1;AF=0.014;AN=70;BaseQRankSum= |
| 16419 | chrY | 13136457 | . | T | C | 78.92    | PASS          | AC=2;AF=0.037;AN=54;BaseQRankSum= |
| 16420 | chrY | 13136464 | . | G | A | 69.06    | PASS          | AC=1;AF=0.014;AN=70;BaseQRankSum= |
| 16421 | chrY | 13136468 | . | T | G | 70.68    | my_snp_filter | AC=2;AF=0.029;AN=68;BaseQ         |
| 16422 | chrY | 13136499 | . | C | T | 77.57    | PASS          | AC=2;AF=0.029;AN=68;BaseQRankSum= |
| 16423 | chrY | 13136512 | . | T | C | 124.08   | PASS          | AC=2;AF=0.030;AN=66;BaseQRankSum= |
| 16424 | chrY | 13136544 | . | G | A | 63.67    | PASS          | AC=2;AF=0.033;AN=60;BaseQRankSum= |
| 16425 | chrY | 13136551 | . | C | T | 130.78   | PASS          | AC=2;AF=0.071;AN=28;BaseQRankSum= |
| 16426 | chrY | 13136565 | . | T | C | 125.76   | PASS          | AC=2;AF=0.071;AN=28;BaseQRankSum= |
| 16427 | chrY | 13136576 | . | A | G | 61.57    | PASS          | AC=1;AF=0.014;AN=70;BaseQRankSum= |
| 16428 | chrY | 13136578 | . | G | A | 226.52   | PASS          | AC=2;AF=0.083;AN=24;BaseQRankSum= |
| 16429 | chrY | 13136586 | . | A | C | 141.63   | PASS          | AC=2;AF=0.029;AN=70;BaseQRankSum= |
| 16430 | chrY | 13136589 | . | A | T | 152.25   | PASS          | AC=2;AF=0.083;AN=24;BaseQRankSum= |
| 16431 | chrY | 13136590 | . | G | T | 151.74   | PASS          | AC=2;AF=0.083;AN=24;BaseQRankSum= |
| 16432 | chrY | 13136620 | . | C | A | 176.92   | PASS          | AC=2;AF=0.091;AN=22;BaseQRankSum= |
| 16433 | chrY | 13136621 | . | G | A | 221.47   | PASS          | AC=2;AF=0.091;AN=22;BaseQRankSum= |
| 16434 | chrY | 13136623 | . | C | A | 245.01   | PASS          | AC=1;AF=0.014;AN=70;BaseQRankSum= |
| 16435 | chrY | 13136628 | . | T | C | 259.14   | PASS          | AC=2;AF=0.045;AN=44;BaseQRankSum= |
| 16436 | chrY | 13136638 | . | A | G | 182.18   | PASS          | AC=1;AF=0.014;AN=70;BaseQRankSum= |
| 16437 | chrY | 13136642 | . | T | G | 265.43   | PASS          | AC=1;AF=0.042;AN=24;BaseQRankSum= |
| 16438 | chrY | 13136648 | . | C | A | 296      | PASS          | AC=2;AF=0.045;AN=44;BaseQRankSum= |
| 16439 | chrY | 13136665 | . | A | C | 270.69   | PASS          | AC=1;AF=0.015;AN=68;BaseQRankSum= |
| 16440 | chrY | 13136681 | . | A | T | 195.60   | PASS          | AC=1;AF=0.028;AN=36;BaseQRankSum= |
| 16441 | chrY | 13136684 | . | A | G | 190.07   | PASS          | AC=1;AF=0.024;AN=42;BaseQRankSum= |
| 16442 | chrY | 13136691 | . | T | C | 140.46   | PASS          | AC=1;AF=0.014;AN=70;BaseQRankSum= |
| 16443 | chrY | 13136991 | . | G | C | 554.29   | PASS          | AC=1;AF=0.014;AN=70;BaseQRankSum= |
| 16444 | chrY | 13136992 | . | T | G | 305.37   | PASS          | AC=1;AF=0.014;AN=70;BaseQRankSum= |
| 16445 | chrY | 13136998 | . | G | A | 43.42    | my_snp_filter | AC=1;AF=0.014;AN=70;BaseQ         |
| 16446 | chrY | 13137000 | . | A | C | 798.20   | PASS          | AC=3;AF=0.050;AN=60;BaseQRankSum= |
| 16447 | chrY | 13137001 | . | T | C | 786.97   | PASS          | AC=3;AF=0.050;AN=60;BaseQRankSum= |
| 16448 | chrY | 13137003 | . | A | C | 1463.71  | PASS          | AC=3;AF=0.052;AN=58;BaseQRankSum= |
| 16449 | chrY | 13137007 | . | A | C | 1085.10  | PASS          | AC=3;AF=0.054;AN=56;BaseQRankSum= |
| 16450 | chrY | 13137014 | . | C | A | 628.23   | PASS          | AC=3;AF=0.056;AN=54;BaseQRankSum= |
| 16451 | chrY | 13137145 | . | C | G | 104.68   | PASS          | AC=1;AF=0.014;AN=70;BaseQRankSum= |
| 16452 | chrY | 13137153 | . | A | T | 114      | my_snp_filter | AC=2;AF=0.037;AN=54;BaseQ         |
| 16453 | chrY | 13137158 | . | C | T | 142.59   | PASS          | AC=2;AF=0.029;AN=70;BaseQRankSum= |
| 16454 | chrY | 13137161 | . | C | T | 145.20   | PASS          | AC=2;AF=0.029;AN=70;BaseQRankSum= |
| 16455 | chrY | 13137530 | . | C | A | 387.39   | PASS          | AC=1;AF=0.015;AN=66;BaseQRankSum= |
| 16456 | chrY | 13137538 | . | A | C | 383.91   | PASS          | AC=1;AF=0.019;AN=54;BaseQRankSum= |
| 16457 | chrY | 13137539 | . | A | C | 381.12   | PASS          | AC=1;AF=0.019;AN=54;BaseQRankSum= |
| 16458 | chrY | 13137542 | . | T | C | 342.54   | PASS          | AC=1;AF=0.019;AN=52;BaseQRankSum= |
| 16459 | chrY | 13137549 | . | T | G | 344.85   | PASS          | AC=1;AF=0.017;AN=58;BaseQRankSum= |
| 16460 | chrY | 13137550 | . | G | A | 346.21   | PASS          | AC=1;AF=0.017;AN=58;BaseQRankSum= |
| 16461 | chrY | 13137556 | . | T | G | 348.45   | PASS          | AC=1;AF=0.019;AN=54;BaseQRankSum= |
| 16462 | chrY | 13137557 | . | C | A | 348      | PASS          | AC=1;AF=0.019;AN=54;BaseQRankSum= |
| 16463 | chrY | 13137600 | . | G | A | 557.45   | PASS          | AC=4;AF=0.071;AN=56;BaseQRankSum= |
| 16464 | chrY | 13137607 | . | T | C | 488.39   | PASS          | AC=4;AF=0.057;AN=70;BaseQRankSum= |
| 16465 | chrY | 13137632 | . | C | T | 46.32    | my_snp_filter | AC=1;AF=0.014;AN=70;BaseQ         |
| 16466 | chrY | 13138179 | . | A | T | 210.83   | PASS          | AC=1;AF=0.019;AN=52;BaseQRankSum= |
| 16467 | chrY | 13138181 | . | C | A | 133.02   | PASS          | AC=1;AF=0.015;AN=68;BaseQRankSum= |
| 16468 | chrY | 13138622 | . | A | C | 47.87    | my_snp_filter | AC=1;AF=0.017;AN=60;BaseQ         |
| 16469 | chrY | 13138782 | . | A | C | 49.13    | my_snp_filter | AC=1;AF=0.015;AN=68;BaseQ         |
| 16470 | chrY | 13138799 | . | T | C | 43.29    | PASS          | AC=1;AF=0.014;AN=70;BaseQRankSum= |
| 16471 | chrY | 13138801 | . | T | C | 63.58    | PASS          | AC=1;AF=0.017;AN=60;BaseQRankSum= |
| 16472 | chrY | 13138802 | . | A | T | 40.50    | PASS          | AC=1;AF=0.017;AN=60;BaseQRankSum= |
| 16473 | chrY | 13138811 | . | C | A | 43.17    | PASS          | AC=1;AF=0.015;AN=66;BaseQRankSum= |
| 16474 | chrY | 13138813 | . | T | C | 94.08    | PASS          | AC=1;AF=0.017;AN=58;BaseQRankSum= |
| 16475 | chrY | 13138814 | . | C | T | 50.17    | PASS          | AC=1;AF=0.018;AN=56;BaseQRankSum= |
| 16476 | chrY | 13139028 | . | C | T | 1510.57  | PASS          | AC=6;AF=0.115;AN=52;BaseQRankSum= |
| 16477 | chrY | 13139036 | . | A | C | 1141.91  | PASS          | AC=6;AF=0.107;AN=56;BaseQRankSum= |
| 16478 | chrY | 13139038 | . | T | A | 1012.91  | PASS          | AC=6;AF=0.107;AN=56;BaseQRankSum= |
| 16479 | chrY | 13139043 | . | C | A | 788.92   | PASS          | AC=6;AF=0.125;AN=48;BaseQRankSum= |
| 16480 | chrY | 13139046 | . | A | C | 580.67   | PASS          | AC=4;AF=0.083;AN=48;BaseQRankSum= |
| 16481 | chrY | 13139051 | . | A | C | 405.19   | PASS          | AC=3;AF=0.065;AN=46;BaseQRankSum= |
| 16482 | chrY | 13139055 | . | C | A | 324.65   | PASS          | AC=2;AF=0.045;AN=44;BaseQRankSum= |
| 16483 | chrY | 13139058 | . | A | C | 91.38    | PASS          | AC=2;AF=0.040;AN=50;BaseQRankSum= |
| 16484 | chrY | 13139062 | . | A | G | 88.68    | PASS          | AC=1;AF=0.020;AN=50;BaseQRankSum= |
| 16485 | chrY | 13139063 | . | C | T | 44.19    | PASS          | AC=1;AF=0.021;AN=48;BaseQRankSum= |
| 16486 | chrY | 13139740 | . | A | T | 61.31    | PASS          | AC=1;AF=0.018;AN=56;BaseQRankSum= |
| 16487 | chrY | 13139741 | . | T | C | 60.95    | PASS          | AC=1;AF=0.018;AN=56;BaseQRankSum= |
| 16488 | chrY | 13139814 | . | G | T | 442.07   | PASS          | AC=3;AF=0.050;AN=60;BaseQRankSum= |
| 16489 | chrY | 13139867 | . | A | C | 132.38   | PASS          | AC=2;AF=0.036;AN=56;BaseQRankSum= |
| 16490 | chrY | 13139869 | . | C | T | 146.58   | PASS          | AC=3;AF=0.044;AN=68;BaseQRankSum= |
| 16491 | chrY | 13139876 | . | G | C | 12960.28 | PASS          | AC=48;AF=0.960;AN=50;DP=8         |
| 16492 | chrY | 13139882 | . | A | C | 50.71    | PASS          | AC=2;AF=0.037;AN=54;DP=975;FS=0.0 |

|       |      |          |   |   |     |          |               |                                   |
|-------|------|----------|---|---|-----|----------|---------------|-----------------------------------|
| 16493 | chrY | 13139885 | . | G | T   | 11832.88 | PASS          | AC=48;AF=1.00;AN=48;DP=73         |
| 16494 | chrY | 13139887 | . | G | T   | 11541.65 | PASS          | AC=46;AF=1.00;AN=46;DP=72         |
| 16495 | chrY | 13139888 | . | T | A   | 93.27    | PASS          | AC=2;AF=0.037;AN=54;DP=820;FS=0.0 |
| 16496 | chrY | 13139893 | . | G | T   | 10248.89 | PASS          | AC=48;AF=1.00;AN=48;DP=60         |
| 16497 | chrY | 13139896 | . | G | A   | 9756.97  | PASS          | AC=46;AF=1.00;AN=46;DP=608;FS=0.0 |
| 16498 | chrY | 13139902 | . | G | A   | 8527.11  | PASS          | AC=46;AF=1.00;AN=46;DP=644;FS=0.0 |
| 16499 | chrY | 13139919 | . | G | A   | 6097.19  | PASS          | AC=42;AF=1.00;AN=42;DP=275;FS=0.0 |
| 16500 | chrY | 13139931 | . | G | A   | 4387.36  | PASS          | AC=40;AF=1.00;AN=40;DP=230;FS=0.0 |
| 16501 | chrY | 13139937 | . | G | A   | 3892.45  | PASS          | AC=40;AF=1.00;AN=40;DP=215;FS=0.0 |
| 16502 | chrY | 13139945 | . | G | A   | 3262.52  | PASS          | AC=38;AF=1.00;AN=38;DP=183;FS=0.0 |
| 16503 | chrY | 13139947 | . | G | C   | 3037.57  | PASS          | AC=38;AF=1.00;AN=38;DP=178;FS=0.0 |
| 16504 | chrY | 13139954 | . | G | T   | 2002.57  | PASS          | AC=26;AF=1.00;AN=26;DP=138;FS=0.0 |
| 16505 | chrY | 13139973 | . | G | A   | 383.44   | PASS          | AC=10;AF=1.00;AN=10;DP=40;FS=0.00 |
| 16506 | chrY | 13139980 | . | G | C   | 202.69   | PASS          | AC=4;AF=1.00;AN=4;DP=35;FS=0.000  |
| 16507 | chrY | 13139982 | . | G | T   | 202.69   | PASS          | AC=4;AF=1.00;AN=4;DP=35;FS=0.000  |
| 16508 | chrY | 13139983 | . | G | T   | 202.69   | PASS          | AC=4;AF=1.00;AN=4;DP=35;FS=0.000  |
| 16509 | chrY | 13139985 | . | G | C   | 202.69   | PASS          | AC=4;AF=1.00;AN=4;DP=34;FS=0.000  |
| 16510 | chrY | 13140468 | . | C | T   | 187.10   | PASS          | AC=1;AF=0.014;AN=70;BaseQRankSum= |
| 16511 | chrY | 13140486 | . | C | T   | 209.97   | my_snp_filter | AC=5;AF=0.086;AN=58;BaseQ         |
| 16512 | chrY | 13140491 | . | T | C   | 263.44   | PASS          | AC=6;AF=0.088;AN=68;BaseQRankSum= |
| 16513 | chrY | 13140492 | . | C | A   | 380.76   | PASS          | AC=7;AF=0.103;AN=68;BaseQRankSum= |
| 16514 | chrY | 13140547 | . | T | A   | 306.70   | PASS          | AC=1;AF=0.018;AN=56;BaseQRankSum= |
| 16515 | chrY | 13140716 | . | T | A   | 120.27   | my_snp_filter | AC=1;AF=0.014;AN=70;BaseQ         |
| 16516 | chrY | 13141183 | . | T | C   | 98.86    | PASS          | AC=1;AF=0.038;AN=26;BaseQRankSum= |
| 16517 | chrY | 13141195 | . | T | A   | 92.89    | PASS          | AC=1;AF=0.019;AN=54;BaseQRankSum= |
| 16518 | chrY | 13141199 | . | A | T   | 88.44    | PASS          | AC=1;AF=0.017;AN=58;BaseQRankSum= |
| 16519 | chrY | 13141200 | . | C | T   | 95.92    | PASS          | AC=1;AF=0.019;AN=54;BaseQRankSum= |
| 16520 | chrY | 13141205 | . | A | T   | 96       | PASS          | AC=1;AF=0.038;AN=26;BaseQRankSum= |
| 16521 | chrY | 13141225 | . | A | T   | 114.99   | my_snp_filter | AC=1;AF=0.042;AN=24;BaseQ         |
| 16522 | chrY | 13141387 | . | A | C   | 141.38   | PASS          | AC=2;AF=0.037;AN=54;BaseQRankSum= |
| 16523 | chrY | 13141396 | . | T | A   | 126.06   | PASS          | AC=2;AF=0.038;AN=52;BaseQRankSum= |
| 16524 | chrY | 13141403 | . | C | T   | 114.77   | PASS          | AC=2;AF=0.032;AN=62;BaseQRankSum= |
| 16525 | chrY | 13141414 | . | C | T   | 35.53    | my_snp_filter | AC=1;AF=0.014;AN=70;BaseQ         |
| 16526 | chrY | 13141424 | . | A | C   | 32.59    | my_snp_filter | AC=1;AF=0.018;AN=56;BaseQ         |
| 16527 | chrY | 13141737 | . | G | T   | 116.35   | PASS          | AC=1;AF=0.021;AN=48;BaseQRankSum= |
| 16528 | chrY | 13141812 | . | T | G   | 169.67   | PASS          | AC=2;AF=0.042;AN=48;BaseQRankSum= |
| 16529 | chrY | 13141821 | . | C | T   | 187.15   | PASS          | AC=2;AF=0.042;AN=48;BaseQRankSum= |
| 16530 | chrY | 13141834 | . | T | C   | 119.53   | PASS          | AC=2;AF=0.143;AN=14;BaseQRankSum= |
| 16531 | chrY | 13142156 | . | G | C   | 141.49   | PASS          | AC=1;AF=0.014;AN=70;BaseQRankSum= |
| 16532 | chrY | 13142159 | . | G | C   | 137.97   | PASS          | AC=1;AF=0.014;AN=70;BaseQRankSum= |
| 16533 | chrY | 13142164 | . | C | A   | 239.22   | PASS          | AC=1;AF=0.014;AN=70;BaseQRankSum= |
| 16534 | chrY | 13142169 | . | G | A   | 150.73   | PASS          | AC=1;AF=0.014;AN=70;BaseQRankSum= |
| 16535 | chrY | 13142172 | . | C | T   | 76.74    | my_snp_filter | AC=4;AF=0.057;AN=70;BaseQ         |
| 16536 | chrY | 13142181 | . | C | T   | 30.47    | PASS          | AC=1;AF=0.014;AN=70;BaseQRankSum= |
| 16537 | chrY | 13142195 | . | C | A   | 764.08   | PASS          | AC=7;AF=0.103;AN=68;BaseQRankSum= |
| 16538 | chrY | 13142197 | . | A | C   | 62.91    | my_snp_filter | AC=5;AF=0.074;AN=68;BaseQ         |
| 16539 | chrY | 13142198 | . | C | T   | 977.67   | PASS          | AC=8;AF=0.118;AN=68;BaseQRankSum= |
| 16540 | chrY | 13142199 | . | A | T   | 37.79    | PASS          | AC=1;AF=0.015;AN=68;BaseQRankSum= |
| 16541 | chrY | 13142204 | . | A | T   | 67.38    | PASS          | AC=1;AF=0.015;AN=68;BaseQRankSum= |
| 16542 | chrY | 13142205 | . | T | C   | 33.05    | PASS          | AC=1;AF=0.015;AN=66;BaseQRankSum= |
| 16543 | chrY | 13142206 | . | T | C   | 776.66   | PASS          | AC=6;AF=0.091;AN=66;BaseQRankSum= |
| 16544 | chrY | 13142211 | . | T | A   | 33.45    | PASS          | AC=1;AF=0.015;AN=68;BaseQRankSum= |
| 16545 | chrY | 13142212 | . | C | G   | 42.33    | PASS          | AC=1;AF=0.015;AN=68;BaseQRankSum= |
| 16546 | chrY | 13142214 | . | T | A   | 996.55   | PASS          | AC=9;AF=0.136;AN=66;BaseQRankSum= |
| 16547 | chrY | 13142597 | . | G | T   | 27637.88 | PASS          | AC=66;AF=1.00;AN=66;DP=92         |
| 16548 | chrY | 13142801 | . | C | T   | 1073.71  | PASS          | AC=9;AF=0.132;AN=68;BaseQRankSum= |
| 16549 | chrY | 13142802 | . | C | A   | 1074.19  | PASS          | AC=9;AF=0.132;AN=68;BaseQRankSum= |
| 16550 | chrY | 13143006 | . | C | T   | 132.88   | PASS          | AC=1;AF=0.014;AN=70;BaseQRankSum= |
| 16551 | chrY | 13143009 | . | T | C   | 108.42   | PASS          | AC=1;AF=0.014;AN=70;BaseQRankSum= |
| 16552 | chrY | 13143016 | . | C | T   | 103.20   | PASS          | AC=1;AF=0.014;AN=70;BaseQRankSum= |
| 16553 | chrY | 13143231 | . | G | C,* | 4469.99  | PASS          | AC=16,7;AF=0.471,0.206;AN=34;DP=5 |
| 16554 | chrY | 13143346 | . | C | G   | 124.38   | PASS          | AC=2;AF=0.029;AN=70;BaseQRankSum= |
| 16555 | chrY | 13143350 | . | T | C   | 113.87   | PASS          | AC=1;AF=0.014;AN=70;BaseQRankSum= |
| 16556 | chrY | 13143351 | . | C | T   | 84.74    | PASS          | AC=1;AF=0.014;AN=70;BaseQRankSum= |
| 16557 | chrY | 13143357 | . | C | A   | 188.27   | PASS          | AC=3;AF=0.043;AN=70;BaseQRankSum= |
| 16558 | chrY | 13143360 | . | G | A   | 212.70   | PASS          | AC=3;AF=0.043;AN=70;BaseQRankSum= |
| 16559 | chrY | 13143361 | . | A | G   | 259.11   | PASS          | AC=3;AF=0.043;AN=70;BaseQRankSum= |
| 16560 | chrY | 13143363 | . | C | G   | 186.06   | PASS          | AC=3;AF=0.043;AN=70;BaseQRankSum= |
| 16561 | chrY | 13143366 | . | G | A   | 219.57   | PASS          | AC=3;AF=0.063;AN=48;BaseQRankSum= |
| 16562 | chrY | 13143376 | . | T | A   | 122.78   | PASS          | AC=1;AF=0.014;AN=70;BaseQRankSum= |
| 16563 | chrY | 13143377 | . | C | G   | 207.40   | PASS          | AC=3;AF=0.043;AN=70;BaseQRankSum= |
| 16564 | chrY | 13143379 | . | G | A   | 37.27    | my_snp_filter | AC=1;AF=0.014;AN=70;BaseQ         |
| 16565 | chrY | 13143380 | . | G | T   | 46.11    | PASS          | AC=1;AF=0.014;AN=70;BaseQRankSum= |
| 16566 | chrY | 13143401 | . | C | A   | 43.41    | PASS          | AC=1;AF=0.014;AN=70;BaseQRankSum= |
| 16567 | chrY | 13143406 | . | C | A   | 37.42    | PASS          | AC=2;AF=0.029;AN=68;BaseQRankSum= |
| 16568 | chrY | 13143417 | . | T | C   | 116.63   | PASS          | AC=1;AF=0.014;AN=70;BaseQRankSum= |

|       |      |          |   |   |     |          |               |                                    |
|-------|------|----------|---|---|-----|----------|---------------|------------------------------------|
| 16569 | chrY | 13143421 | . | A | C   | 50.27    | my_snp_filter | AC=2;AF=0.029;AN=68;BaseQ          |
| 16570 | chrY | 13143423 | . | C | T   | 117.37   | PASS          | AC=1;AF=0.014;AN=70;BaseQRankSum=  |
| 16571 | chrY | 13143427 | . | C | G   | 44.01    | PASS          | AC=1;AF=0.014;AN=70;BaseQRankSum=  |
| 16572 | chrY | 13143432 | . | T | C   | 128.68   | PASS          | AC=1;AF=0.016;AN=62;BaseQRankSum=  |
| 16573 | chrY | 13143433 | . | T | C   | 332.20   | PASS          | AC=5;AF=0.078;AN=64;BaseQRankSum=  |
| 16574 | chrY | 13143451 | . | A | T   | 136.09   | PASS          | AC=2;AF=0.033;AN=60;BaseQRankSum=  |
| 16575 | chrY | 13143573 | . | G | A   | 33792.91 | PASS          | AC=70;AF=1.00;AN=70;BaseQ          |
| 16576 | chrY | 13143581 | . | T | C   | 45.83    | PASS          | AC=2;AF=0.029;AN=70;DP=1082;FS=0.  |
| 16577 | chrY | 13143777 | . | C | T   | 65.92    | PASS          | AC=2;AF=0.037;AN=54;DP=2133;FS=0   |
| 16578 | chrY | 13143782 | . | C | T   | 39.15    | PASS          | AC=1;AF=0.025;AN=40;BaseQRankSum=  |
| 16579 | chrY | 13143784 | . | G | C   | 53.35    | my_snp_filter | AC=2;AF=0.083;AN=24;BaseQ          |
| 16580 | chrY | 13194673 | . | T | C   | 36311.88 | PASS          | AC=70;AF=1.00;AN=70;DP=11          |
| 16581 | chrY | 13194828 | . | C | T   | 157.28   | PASS          | AC=3;AF=0.048;AN=62;BaseQRankSum=  |
| 16582 | chrY | 13194834 | . | C | T   | 131.93   | PASS          | AC=3;AF=0.043;AN=70;BaseQRankSum=  |
| 16583 | chrY | 13194855 | . | A | C   | 209.89   | my_snp_filter | AC=2;AF=0.029;AN=68;BaseQ          |
| 16584 | chrY | 13194880 | . | C | T   | 68.04    | my_snp_filter | AC=2;AF=0.029;AN=68;BaseQ          |
| 16585 | chrY | 13194884 | . | T | C   | 809.63   | PASS          | AC=5;AF=0.086;AN=58;BaseQRankSum=  |
| 16586 | chrY | 13194913 | . | G | C   | 1153.01  | PASS          | AC=6;AF=0.091;AN=66;BaseQRankSum=  |
| 16587 | chrY | 13194914 | . | G | C   | 1207.63  | PASS          | AC=6;AF=0.091;AN=66;BaseQRankSum=  |
| 16588 | chrY | 13194925 | . | T | G   | 1607.89  | PASS          | AC=7;AF=0.125;AN=56;BaseQRankSum=  |
| 16589 | chrY | 13194935 | . | A | C   | 1740.01  | PASS          | AC=7;AF=0.121;AN=58;BaseQRankSum=  |
| 16590 | chrY | 13194938 | . | G | A   | 1730.84  | PASS          | AC=7;AF=0.125;AN=56;BaseQRankSum=  |
| 16591 | chrY | 13194948 | . | A | G   | 1896.57  | PASS          | AC=7;AF=0.125;AN=56;BaseQRankSum=  |
| 16592 | chrY | 13194964 | . | C | A   | 2301.81  | PASS          | AC=7;AF=0.117;AN=60;BaseQRankSum=  |
| 16593 | chrY | 13194970 | . | T | A   | 2493.45  | PASS          | AC=7;AF=0.125;AN=56;BaseQRankSum=  |
| 16594 | chrY | 13194989 | . | C | T   | 3098.53  | PASS          | AC=7;AF=0.109;AN=64;BaseQRankSum=  |
| 16595 | chrY | 13194996 | . | G | C   | 31.88    | my_snp_filter | AC=2;AF=0.029;AN=68;BaseQ          |
| 16596 | chrY | 13195001 | . | C | G   | 3172.02  | PASS          | AC=7;AF=0.100;AN=70;BaseQRankSum=  |
| 16597 | chrY | 13195018 | . | A | C   | 325.83   | PASS          | AC=3;AF=0.043;AN=70;BaseQRankSum=  |
| 16598 | chrY | 13195019 | . | C | A   | 1556.32  | PASS          | AC=3;AF=0.043;AN=70;BaseQRankSum=  |
| 16599 | chrY | 13195033 | . | A | T   | 1505.81  | PASS          | AC=3;AF=0.054;AN=56;BaseQRankSum=  |
| 16600 | chrY | 13195034 | . | C | T   | 887.75   | PASS          | AC=7;AF=0.152;AN=46;BaseQRankSum=  |
| 16601 | chrY | 13195035 | . | A | G   | 2709.48  | PASS          | AC=9;AF=0.214;AN=42;BaseQRankSum=  |
| 16602 | chrY | 13195039 | . | C | T   | 1088.95  | PASS          | AC=7;AF=0.100;AN=70;BaseQRankSum=  |
| 16603 | chrY | 13195057 | . | T | C   | 1865.26  | PASS          | AC=7;AF=0.135;AN=52;BaseQRankSum=  |
| 16604 | chrY | 13195061 | . | C | T   | 1790.99  | PASS          | AC=6;AF=0.086;AN=70;BaseQRankSum=  |
| 16605 | chrY | 13195066 | . | C | A   | 197.90   | my_snp_filter | AC=4;AF=0.059;AN=68;BaseQ          |
| 16606 | chrY | 13195071 | . | T | C   | 6809.88  | PASS          | AC=29;AF=0.426;AN=68;BaseQRankSum= |
| 16607 | chrY | 13195073 | . | T | A   | 1411.12  | PASS          | AC=4;AF=0.077;AN=52;BaseQRankSum=  |
| 16608 | chrY | 13195103 | . | A | C   | 641.97   | PASS          | AC=6;AF=0.097;AN=62;BaseQRankSum=  |
| 16609 | chrY | 13195107 | . | A | C   | 1947.80  | PASS          | AC=14;AF=0.350;AN=40;BaseQRankSum= |
| 16610 | chrY | 13195115 | . | C | T   | 779.29   | PASS          | AC=7;AF=0.135;AN=52;BaseQRankSum=  |
| 16611 | chrY | 13195116 | . | G | A   | 864.85   | PASS          | AC=6;AF=0.115;AN=52;BaseQRankSum=  |
| 16612 | chrY | 13195121 | . | G | A   | 861.10   | PASS          | AC=6;AF=0.115;AN=52;BaseQRankSum=  |
| 16613 | chrY | 13195132 | . | G | C   | 417.01   | PASS          | AC=4;AF=0.074;AN=54;BaseQRankSum=  |
| 16614 | chrY | 13195138 | . | C | T   | 1274.23  | PASS          | AC=7;AF=0.135;AN=52;BaseQRankSum=  |
| 16615 | chrY | 13195139 | . | G | A   | 323.71   | PASS          | AC=2;AF=0.038;AN=52;BaseQRankSum=  |
| 16616 | chrY | 13195145 | . | T | C   | 276.83   | PASS          | AC=2;AF=0.038;AN=52;BaseQRankSum=  |
| 16617 | chrY | 13195148 | . | C | T   | 280.80   | PASS          | AC=2;AF=0.038;AN=52;BaseQRankSum=  |
| 16618 | chrY | 13195156 | . | T | C   | 197.94   | PASS          | AC=2;AF=0.036;AN=56;BaseQRankSum=  |
| 16619 | chrY | 13195161 | . | A | T   | 1233.60  | PASS          | AC=7;AF=0.146;AN=48;BaseQRankSum=  |
| 16620 | chrY | 13195174 | . | T | C   | 856.10   | PASS          | AC=5;AF=0.104;AN=48;BaseQRankSum=  |
| 16621 | chrY | 13195175 | . | C | T   | 864.92   | PASS          | AC=6;AF=0.120;AN=50;BaseQRankSum=  |
| 16622 | chrY | 13195183 | . | A | C   | 661.10   | PASS          | AC=5;AF=0.104;AN=48;BaseQRankSum=  |
| 16623 | chrY | 13195198 | . | C | G,* | 2123.03  | PASS          | AC=4,3;AF=0.067,0.050;AN=60;BaseQ  |
| 16624 | chrY | 13195199 | . | C | T,* | 2114.66  | PASS          | AC=4,3;AF=0.063,0.047;AN=64;BaseQ  |
| 16625 | chrY | 13195200 | . | T | G,* | 2153.93  | PASS          | AC=4,3;AF=0.071,0.054;AN=56;BaseQ  |
| 16626 | chrY | 13195214 | . | C | T,* | 462.32   | PASS          | AC=1,3;AF=0.015,0.045;AN=66;BaseQ  |
| 16627 | chrY | 13195215 | . | A | G   | 293.42   | PASS          | AC=3;AF=0.045;AN=66;BaseQRankSum=  |
| 16628 | chrY | 13195219 | . | C | T   | 277.20   | PASS          | AC=3;AF=0.045;AN=66;BaseQRankSum=  |
| 16629 | chrY | 13195220 | . | A | G   | 118.47   | PASS          | AC=1;AF=0.015;AN=66;BaseQRankSum=  |
| 16630 | chrY | 13195230 | . | A | G   | 101.72   | PASS          | AC=1;AF=0.015;AN=68;BaseQRankSum=  |
| 16631 | chrY | 13195234 | . | C | T   | 58.96    | PASS          | AC=1;AF=0.014;AN=70;BaseQRankSum=  |
| 16632 | chrY | 13195235 | . | A | G   | 59.75    | PASS          | AC=1;AF=0.015;AN=66;BaseQRankSum=  |
| 16633 | chrY | 13195248 | . | A | T   | 147.20   | PASS          | AC=1;AF=0.017;AN=58;BaseQRankSum=  |
| 16634 | chrY | 13195252 | . | G | T   | 610.17   | PASS          | AC=7;AF=0.106;AN=66;BaseQRankSum=  |
| 16635 | chrY | 13195271 | . | T | C   | 188.80   | my_snp_filter | AC=4;AF=0.057;AN=70;BaseQ          |
| 16636 | chrY | 13195493 | . | G | C   | 248.69   | PASS          | AC=2;AF=0.034;AN=58;BaseQRankSum=  |
| 16637 | chrY | 13195697 | . | A | T   | 115.98   | PASS          | AC=2;AF=0.029;AN=70;BaseQRankSum=  |
| 16638 | chrY | 13195712 | . | T | C   | 1714.81  | PASS          | AC=7;AF=0.109;AN=64;BaseQRankSum=  |
| 16639 | chrY | 13195722 | . | A | T   | 2715.10  | PASS          | AC=7;AF=0.106;AN=66;BaseQRankSum=  |
| 16640 | chrY | 13195724 | . | T | C   | 997.16   | PASS          | AC=7;AF=0.106;AN=66;BaseQRankSum=  |
| 16641 | chrY | 13195727 | . | A | C   | 2647.58  | PASS          | AC=8;AF=0.121;AN=66;BaseQRankSum=  |
| 16642 | chrY | 13195735 | . | C | G   | 90.26    | my_snp_filter | AC=2;AF=0.034;AN=58;BaseQ          |
| 16643 | chrY | 13195741 | . | A | T,* | 2399.31  | PASS          | AC=6,2;AF=0.107,0.036;AN=56;BaseQ  |
| 16644 | chrY | 13195751 | . | C | A,* | 843.78   | PASS          | AC=2,3;AF=0.030,0.045;AN=66;BaseQ  |

|       |      |          |   |   |     |         |               |                                    |
|-------|------|----------|---|---|-----|---------|---------------|------------------------------------|
| 16645 | chrY | 13195756 | . | A | C   | 2735.61 | PASS          | AC=7;AF=0.146;AN=48;BaseQRankSum=  |
| 16646 | chrY | 13195770 | . | C | T,* | 2429.66 | PASS          | AC=7,1;AF=0.117,0.017;AN=60;BaseQ  |
| 16647 | chrY | 13195773 | . | C | T,* | 2370.77 | PASS          | AC=7,1;AF=0.117,0.017;AN=60;BaseQ  |
| 16648 | chrY | 13195781 | . | C | T   | 684.73  | PASS          | AC=5;AF=0.089;AN=56;BaseQRankSum=  |
| 16649 | chrY | 13195791 | . | A | C,* | 2025.36 | PASS          | AC=7,1;AF=0.159,0.023;AN=44;BaseQ  |
| 16650 | chrY | 13195802 | . | T | A,* | 1511.41 | PASS          | AC=7,1;AF=0.184,0.026;AN=38;BaseQ  |
| 16651 | chrY | 13195803 | . | A | C   | 1492.96 | PASS          | AC=7;AF=0.194;AN=36;BaseQRankSum=  |
| 16652 | chrY | 13195821 | . | C | T   | 1162.77 | PASS          | AC=6;AF=0.115;AN=52;BaseQRankSum=  |
| 16653 | chrY | 13195823 | . | T | C   | 277.10  | my_snp_filter | AC=5;AF=0.100;AN=50;BaseQ          |
| 16654 | chrY | 13195826 | . | T | A   | 372.04  | PASS          | AC=5;AF=0.119;AN=42;BaseQRankSum=  |
| 16655 | chrY | 13195835 | . | A | C   | 1417.96 | PASS          | AC=7;AF=0.175;AN=40;BaseQRankSum=  |
| 16656 | chrY | 13195842 | . | A | T   | 1069.23 | PASS          | AC=6;AF=0.130;AN=46;BaseQRankSum=  |
| 16657 | chrY | 13195843 | . | T | C   | 1036.41 | PASS          | AC=6;AF=0.150;AN=40;BaseQRankSum=  |
| 16658 | chrY | 13195860 | . | C | A   | 435.21  | PASS          | AC=4;AF=0.080;AN=50;BaseQRankSum=  |
| 16659 | chrY | 13195870 | . | A | G   | 540.46  | PASS          | AC=4;AF=0.091;AN=44;BaseQRankSum=  |
| 16660 | chrY | 13195872 | . | C | T   | 533.57  | PASS          | AC=4;AF=0.077;AN=52;BaseQRankSum=  |
| 16661 | chrY | 13195874 | . | G | A   | 357.62  | PASS          | AC=2;AF=0.038;AN=52;BaseQRankSum=  |
| 16662 | chrY | 13195876 | . | G | A   | 1111.62 | PASS          | AC=6;AF=0.158;AN=38;BaseQRankSum=  |
| 16663 | chrY | 13195878 | . | G | A,T | 1034    | PASS          | AC=2,4;AF=0.050,0.100;AN=40;BaseQ  |
| 16664 | chrY | 13195880 | . | C | G   | 527.94  | PASS          | AC=4;AF=0.077;AN=52;BaseQRankSum=  |
| 16665 | chrY | 13195890 | . | T | C   | 1113.52 | PASS          | AC=6;AF=0.143;AN=42;BaseQRankSum=  |
| 16666 | chrY | 13195891 | . | C | A   | 540.49  | PASS          | AC=4;AF=0.091;AN=44;BaseQRankSum=  |
| 16667 | chrY | 13195893 | . | A | C   | 441.52  | PASS          | AC=2;AF=0.036;AN=56;BaseQRankSum=  |
| 16668 | chrY | 13195894 | . | G | A   | 444.30  | PASS          | AC=2;AF=0.034;AN=58;BaseQRankSum=  |
| 16669 | chrY | 13195904 | . | C | T   | 455.50  | PASS          | AC=4;AF=0.065;AN=62;BaseQRankSum=  |
| 16670 | chrY | 13195931 | . | A | C   | 308.80  | PASS          | AC=2;AF=0.033;AN=60;BaseQRankSum=  |
| 16671 | chrY | 13195935 | . | C | T   | 303.10  | PASS          | AC=2;AF=0.033;AN=60;BaseQRankSum=  |
| 16672 | chrY | 13195939 | . | T | A   | 302.20  | PASS          | AC=2;AF=0.034;AN=58;BaseQRankSum=  |
| 16673 | chrY | 13195947 | . | T | A   | 302.70  | PASS          | AC=2;AF=0.031;AN=64;BaseQRankSum=  |
| 16674 | chrY | 13195949 | . | A | T   | 64      | PASS          | AC=1;AF=0.016;AN=64;BaseQRankSum=  |
| 16675 | chrY | 13195952 | . | A | G,T | 399.84  | PASS          | AC=2,1;AF=0.032,0.016;AN=62;BaseQ  |
| 16676 | chrY | 13195954 | . | A | C   | 297.25  | PASS          | AC=2;AF=0.030;AN=66;BaseQRankSum=  |
| 16677 | chrY | 13195962 | . | C | T   | 294.96  | PASS          | AC=2;AF=0.031;AN=64;BaseQRankSum=  |
| 16678 | chrY | 13195965 | . | C | T   | 385.34  | PASS          | AC=3;AF=0.047;AN=64;BaseQRankSum=  |
| 16679 | chrY | 13195969 | . | G | A   | 304.84  | PASS          | AC=3;AF=0.050;AN=60;BaseQRankSum=  |
| 16680 | chrY | 13195979 | . | A | T   | 56.76   | PASS          | AC=1;AF=0.014;AN=70;BaseQRankSum=  |
| 16681 | chrY | 13195988 | . | C | T   | 231.40  | PASS          | AC=3;AF=0.043;AN=70;BaseQRankSum=  |
| 16682 | chrY | 13195998 | . | T | C   | 231.42  | PASS          | AC=2;AF=0.029;AN=68;BaseQRankSum=  |
| 16683 | chrY | 13195999 | . | G | A   | 138.45  | my_snp_filter | AC=2;AF=0.029;AN=68;BaseQ          |
| 16684 | chrY | 13196009 | . | G | A   | 1484.53 | PASS          | AC=4;AF=0.069;AN=58;BaseQRankSum=  |
| 16685 | chrY | 13196015 | . | G | T   | 1515.57 | PASS          | AC=4;AF=0.069;AN=58;BaseQRankSum=  |
| 16686 | chrY | 13196018 | . | G | A   | 1525.48 | PASS          | AC=4;AF=0.071;AN=56;BaseQRankSum=  |
| 16687 | chrY | 13196044 | . | C | A   | 4384.57 | PASS          | AC=18;AF=0.265;AN=68;BaseQRankSum= |
| 16688 | chrY | 13196059 | . | G | A   | 4002.67 | PASS          | AC=18;AF=0.290;AN=62;BaseQRankSum= |
| 16689 | chrY | 13196089 | . | G | A   | 3777.19 | PASS          | AC=15;AF=0.259;AN=58;BaseQRankSum= |
| 16690 | chrY | 13196092 | . | A | C   | 3805.94 | PASS          | AC=15;AF=0.259;AN=58;BaseQRankSum= |
| 16691 | chrY | 13196103 | . | C | T   | 3251.28 | PASS          | AC=14;AF=0.200;AN=70;BaseQRankSum= |
| 16692 | chrY | 13196105 | . | C | A   | 3298.27 | PASS          | AC=14;AF=0.200;AN=70;BaseQRankSum= |
| 16693 | chrY | 13196122 | . | C | A   | 1813.66 | PASS          | AC=3;AF=0.043;AN=70;BaseQRankSum=  |
| 16694 | chrY | 13196123 | . | C | A   | 1813.55 | PASS          | AC=3;AF=0.043;AN=70;BaseQRankSum=  |
| 16695 | chrY | 13196127 | . | C | A   | 255.34  | my_snp_filter | AC=3;AF=0.043;AN=70;BaseQ          |
| 16696 | chrY | 13196129 | . | A | C   | 257.40  | my_snp_filter | AC=3;AF=0.043;AN=70;BaseQ          |
| 16697 | chrY | 13196132 | . | G | C   | 5446.57 | PASS          | AC=17;AF=0.304;AN=56;BaseQRankSum= |
| 16698 | chrY | 13196140 | . | T | C   | 2440.63 | PASS          | AC=14;AF=0.200;AN=70;BaseQRankSum= |
| 16699 | chrY | 13196142 | . | A | C   | 6287.50 | PASS          | AC=17;AF=0.315;AN=54;BaseQRankSum= |
| 16700 | chrY | 13196144 | . | A | G   | 275.77  | PASS          | AC=3;AF=0.043;AN=70;BaseQRankSum=  |
| 16701 | chrY | 13196148 | . | G | A   | 173.74  | PASS          | AC=2;AF=0.029;AN=70;BaseQRankSum=  |
| 16702 | chrY | 13196150 | . | C | T   | 564.10  | PASS          | AC=5;AF=0.071;AN=70;BaseQRankSum=  |
| 16703 | chrY | 13196159 | . | A | T   | 50.29   | my_snp_filter | AC=1;AF=0.014;AN=70;BaseQ          |
| 16704 | chrY | 13196168 | . | T | C   | 4023.94 | PASS          | AC=16;AF=0.333;AN=48;BaseQRankSum= |
| 16705 | chrY | 13196169 | . | A | C,T | 2810.52 | PASS          | AC=13,3;AF=0.271,0.063;AN=48;Base  |
| 16706 | chrY | 13196173 | . | C | A   | 479.41  | PASS          | AC=7;AF=0.100;AN=70;BaseQRankSum=  |
| 16707 | chrY | 13196174 | . | A | T   | 62.89   | my_snp_filter | AC=2;AF=0.029;AN=70;BaseQ          |
| 16708 | chrY | 13196176 | . | C | T   | 657.37  | PASS          | AC=7;AF=0.100;AN=70;BaseQRankSum=  |
| 16709 | chrY | 13196182 | . | C | T   | 80.07   | my_snp_filter | AC=2;AF=0.029;AN=70;BaseQ          |
| 16710 | chrY | 13196193 | . | A | C   | 1240.72 | PASS          | AC=9;AF=0.173;AN=52;BaseQRankSum=  |
| 16711 | chrY | 13196194 | . | A | T   | 170.96  | my_snp_filter | AC=3;AF=0.058;AN=52;BaseQ          |
| 16712 | chrY | 13196196 | . | T | A,* | 2089.20 | PASS          | AC=8,11;AF=0.121,0.167;AN=66;Base  |
| 16713 | chrY | 13196200 | . | T | C,* | 2046.21 | PASS          | AC=8,11;AF=0.118,0.162;AN=68;Base  |
| 16714 | chrY | 13196203 | . | C | T   | 30.98   | my_snp_filter | AC=2;AF=0.029;AN=70;BaseQ          |
| 16715 | chrY | 13196204 | . | A | G   | 37.43   | my_snp_filter | AC=2;AF=0.029;AN=70;BaseQ          |
| 16716 | chrY | 13196207 | . | C | A   | 218.17  | PASS          | AC=3;AF=0.043;AN=70;BaseQRankSum=  |
| 16717 | chrY | 13196218 | . | C | A   | 48.94   | my_snp_filter | AC=2;AF=0.029;AN=70;BaseQ          |
| 16718 | chrY | 13196224 | . | T | G   | 491.60  | PASS          | AC=3;AF=0.043;AN=70;BaseQRankSum=  |
| 16719 | chrY | 13196227 | . | C | A   | 37.47   | my_snp_filter | AC=1;AF=0.014;AN=70;BaseQ          |
| 16720 | chrY | 13196228 | . | C | G   | 1405.18 | PASS          | AC=14;AF=0.200;AN=70;BaseQRankSum= |

|       |      |          |   |   |     |          |               |                                      |
|-------|------|----------|---|---|-----|----------|---------------|--------------------------------------|
| 16721 | chrY | 13196234 | . | A | T   | 159.99   | PASS          | AC=3;AF=0.043;AN=70;BaseQRankSum=    |
| 16722 | chrY | 13196237 | . | C | T   | 502.77   | PASS          | AC=3;AF=0.043;AN=70;BaseQRankSum=    |
| 16723 | chrY | 13196239 | . | A | G   | 48.92    | PASS          | AC=1;AF=0.014;AN=70;BaseQRankSum=    |
| 16724 | chrY | 13196249 | . | A | T,* | 989.49   | PASS          | AC=1,4;AF=0.014,0.057;AN=70;BaseQ    |
| 16725 | chrY | 13196254 | . | A | T   | 124.39   | PASS          | AC=2;AF=0.029;AN=70;BaseQRankSum=    |
| 16726 | chrY | 13196258 | . | C | A   | 135.50   | PASS          | AC=2;AF=0.029;AN=70;BaseQRankSum=    |
| 16727 | chrY | 13196261 | . | T | A,* | 501.47   | PASS          | AC=1,1;AF=0.014,0.014;AN=70;BaseQ    |
| 16728 | chrY | 13196262 | . | C | G,* | 266.78   | PASS          | AC=1,1;AF=0.014,0.014;AN=70;BaseQ    |
| 16729 | chrY | 13196265 | . | C | A,* | 399.33   | PASS          | AC=2,1;AF=0.029,0.015;AN=68;BaseQ    |
| 16730 | chrY | 13196270 | . | C | G   | 284.77   | PASS          | AC=2;AF=0.032;AN=62;BaseQRankSum=    |
| 16731 | chrY | 13196275 | . | G | C,T | 410.69   | PASS          | AC=3,1;AF=0.083,0.028;AN=36;BaseQ    |
| 16732 | chrY | 13196283 | . | T | C   | 376.44   | PASS          | AC=1;AF=0.033;AN=30;BaseQRankSum=    |
| 16733 | chrY | 13196323 | . | C | T   | 196.68   | PASS          | AC=1;AF=0.019;AN=54;BaseQRankSum=    |
| 16734 | chrY | 13196342 | . | G | A   | 143.44   | PASS          | AC=1;AF=0.015;AN=66;BaseQRankSum=    |
| 16735 | chrY | 13196375 | . | A | T   | 173.66   | PASS          | AC=2;AF=0.037;AN=54;BaseQRankSum=    |
| 16736 | chrY | 13196379 | . | T | C   | 79.50    | PASS          | AC=2;AF=0.034;AN=58;BaseQRankSum=    |
| 16737 | chrY | 13196396 | . | A | G   | 203.53   | PASS          | AC=4;AF=0.061;AN=66;BaseQRankSum=    |
| 16738 | chrY | 13196403 | . | G | A   | 319.06   | PASS          | AC=8;AF=0.125;AN=64;BaseQRankSum=    |
| 16739 | chrY | 13196416 | . | A | T   | 148.18   | my_snp_filter | AC=3;AF=0.043;AN=70;BaseQ            |
| 16740 | chrY | 13196420 | . | C | T   | 46.42    | my_snp_filter | AC=2;AF=0.029;AN=70;BaseQ            |
| 16741 | chrY | 13196421 | . | A | G   | 44.69    | my_snp_filter | AC=2;AF=0.029;AN=70;BaseQ            |
| 16742 | chrY | 13196422 | . | T | C   | 98.50    | PASS          | AC=3;AF=0.043;AN=70;BaseQRankSum=    |
| 16743 | chrY | 13196424 | . | C | G   | 100.23   | PASS          | AC=2;AF=0.029;AN=70;BaseQRankSum=    |
| 16744 | chrY | 13196432 | . | T | A   | 104.85   | PASS          | AC=2;AF=0.029;AN=70;BaseQRankSum=    |
| 16745 | chrY | 13196436 | . | C | G   | 157.66   | PASS          | AC=2;AF=0.029;AN=70;BaseQRankSum=    |
| 16746 | chrY | 13196437 | . | C | T   | 150.16   | PASS          | AC=3;AF=0.043;AN=70;BaseQRankSum=    |
| 16747 | chrY | 13197085 | . | C | T   | 1058.24  | PASS          | AC=6;AF=0.086;AN=70;DP=470;FS=0.0    |
| 16748 | chrY | 13198176 | . | T | A   | 236.56   | PASS          | AC=2;AF=0.029;AN=70;DP=294;FS=0.0    |
| 16749 | chrY | 13198580 | . | C | T   | 876.48   | PASS          | AC=6;AF=0.086;AN=70;BaseQRankSum=    |
| 16750 | chrY | 13200604 | . | G | T   | 1065.90  | PASS          | AC=6;AF=0.086;AN=70;DP=395;FS=0.0    |
| 16751 | chrY | 13203831 | . | C | G   | 18557.58 | PASS          | AC=52;AF=1.00;AN=52;DP=57            |
| 16752 | chrY | 13203837 | . | C | G   | 17879.97 | PASS          | AC=54;AF=1.00;AN=54;DP=53            |
| 16753 | chrY | 13203843 | . | A | G   | 16583.67 | PASS          | AC=52;AF=1.00;AN=52;DP=47            |
| 16754 | chrY | 13203844 | . | C | T   | 16131.92 | PASS          | AC=52;AF=1.00;AN=52;DP=46            |
| 16755 | chrY | 13203845 | . | C | G   | 15681.92 | PASS          | AC=52;AF=1.00;AN=52;DP=46            |
| 16756 | chrY | 13203849 | . | A | G   | 14648.67 | PASS          | AC=52;AF=1.00;AN=52;DP=43            |
| 16757 | chrY | 13203872 | . | C | T   | 9286.08  | PASS          | AC=50;AF=1.00;AN=50;DP=288;FS=0.0    |
| 16758 | chrY | 13203875 | . | C | G   | 8484.03  | PASS          | AC=48;AF=1.00;AN=48;DP=254;FS=0.0    |
| 16759 | chrY | 13203877 | . | T | G   | 7635.05  | PASS          | AC=48;AF=1.00;AN=48;DP=243;FS=0.0    |
| 16760 | chrY | 13203900 | . | A | G   | 1828.34  | PASS          | AC=18;AF=1.00;AN=18;DP=55;FS=0.00    |
| 16761 | chrY | 13203901 | . | C | T   | 1693.54  | PASS          | AC=18;AF=1.00;AN=18;DP=53;FS=0.00    |
| 16762 | chrY | 13203908 | . | C | A   | 652.06   | PASS          | AC=6;AF=1.00;AN=6;DP=36;FS=0.000;    |
| 16763 | chrY | 13203910 | . | C | T   | 652.06   | my_snp_filter | AC=6;AF=1.00;AN=6;DP=29;FS=0.000;    |
| 16764 | chrY | 13203913 | . | C | T   | 517.19   | my_snp_filter | AC=6;AF=1.00;AN=6;DP=25;FS=0.000;    |
| 16765 | chrY | 13203917 | . | G | A   | 247.54   | my_snp_filter | AC=4;AF=1.00;AN=4;DP=20;FS=0.000;    |
| 16766 | chrY | 13203922 | . | C | T   | 158.18   | my_snp_filter | AC=4;AF=1.00;AN=4;DP=18;FS=0.000;    |
| 16767 | chrY | 13203925 | . | C | T   | 246.93   | PASS          | AC=2;AF=1.00;AN=2;DP=24;FS=0.000;    |
| 16768 | chrY | 13203929 | . | G | A   | 336.88   | PASS          | AC=2;AF=1.00;AN=2;DP=28;FS=0.000;    |
| 16769 | chrY | 13203936 | . | A | T   | 561.86   | PASS          | AC=2;AF=1.00;AN=2;DP=32;FS=0.000;    |
| 16770 | chrY | 13203943 | . | T | G   | 718.62   | PASS          | AC=2;AF=0.067;AN=30;DP=72;FS=0.000;  |
| 16771 | chrY | 13203945 | . | A | T   | 741.86   | PASS          | AC=2;AF=1.00;AN=2;DP=77;FS=0.000;    |
| 16772 | chrY | 13203955 | . | C | G   | 921.86   | PASS          | AC=2;AF=1.00;AN=2;DP=113;FS=0.000;   |
| 16773 | chrY | 13203958 | . | C | G   | 1101.86  | PASS          | AC=2;AF=1.00;AN=2;DP=113;FS=0.000;   |
| 16774 | chrY | 13203961 | . | T | A   | 1123.07  | PASS          | AC=2;AF=0.067;AN=30;DP=139;FS=0.000; |
| 16775 | chrY | 13203971 | . | C | T   | 1641.86  | PASS          | AC=2;AF=1.00;AN=2;DP=223;FS=0.000;   |
| 16776 | chrY | 13204163 | . | A | T   | 234.24   | PASS          | AC=1;AF=0.021;AN=48;BaseQRankSum=    |
| 16777 | chrY | 13204181 | . | C | T   | 283.70   | PASS          | AC=1;AF=0.021;AN=48;BaseQRankSum=    |
| 16778 | chrY | 13204196 | . | C | A,T | 39406.82 | PASS          | AC=68,1;AF=0.971,0.014;AN=68         |
| 16779 | chrY | 13204205 | . | G | A   | 38720.64 | PASS          | AC=69;AF=0.986;AN=70;BaseQRankSum=   |
| 16780 | chrY | 13204215 | . | A | G   | 216.95   | PASS          | AC=1;AF=0.014;AN=70;BaseQRankSum=    |
| 16781 | chrY | 13204260 | . | T | G   | 27573.18 | PASS          | AC=69;AF=0.986;AN=70;BaseQRankSum=   |
| 16782 | chrY | 13204293 | . | T | G   | 20830.11 | PASS          | AC=64;AF=0.914;AN=70;BaseQRankSum=   |
| 16783 | chrY | 13204300 | . | G | A   | 21019.66 | PASS          | AC=66;AF=0.971;AN=68;BaseQRankSum=   |
| 16784 | chrY | 13204307 | . | G | A   | 21460.47 | PASS          | AC=66;AF=0.971;AN=68;BaseQRankSum=   |
| 16785 | chrY | 13204326 | . | T | G   | 23107.65 | PASS          | AC=67;AF=0.985;AN=68;BaseQRankSum=   |
| 16786 | chrY | 13204349 | . | G | T   | 4390.73  | PASS          | AC=17;AF=0.258;AN=66;BaseQRankSum=   |
| 16787 | chrY | 13204353 | . | T | C   | 1083.10  | PASS          | AC=6;AF=0.086;AN=70;BaseQRankSum=    |
| 16788 | chrY | 13204363 | . | G | A   | 20696.17 | PASS          | AC=64;AF=0.914;AN=70;BaseQRankSum=   |
| 16789 | chrY | 13204366 | . | G | A   | 5099.59  | PASS          | AC=17;AF=0.258;AN=66;BaseQRankSum=   |
| 16790 | chrY | 13204380 | . | T | G   | 21699.17 | PASS          | AC=64;AF=0.914;AN=70;BaseQRankSum=   |
| 16791 | chrY | 13204426 | . | A | G   | 4530.35  | PASS          | AC=25;AF=0.368;AN=68;BaseQRankSum=   |
| 16792 | chrY | 13204430 | . | T | A   | 27276.69 | PASS          | AC=67;AF=0.957;AN=70;BaseQRankSum=   |
| 16793 | chrY | 13204463 | . | T | C   | 9253.11  | PASS          | AC=29;AF=0.414;AN=70;BaseQRankSum=   |
| 16794 | chrY | 13204477 | . | G | A   | 8348.29  | PASS          | AC=28;AF=0.400;AN=70;BaseQRankSum=   |
| 16795 | chrY | 13204519 | . | T | A   | 1122     | my_snp_filter | AC=11;AF=0.157;AN=70;BaseQRankSum=   |
| 16796 | chrY | 13204529 | . | G | A   | 240.57   | my_snp_filter | AC=7;AF=0.100;AN=70;BaseQRankSum=    |

|       |      |          |   |   |     |          |               |                                    |
|-------|------|----------|---|---|-----|----------|---------------|------------------------------------|
| 16797 | chrY | 13204616 | . | A | G   | 525.26   | PASS          | AC=5;AF=0.071;AN=70;BaseQRankSum=  |
| 16798 | chrY | 13204644 | . | A | G   | 159.58   | PASS          | AC=1;AF=0.014;AN=70;BaseQRankSum=  |
| 16799 | chrY | 13209765 | . | C | A   | 413.24   | PASS          | AC=2;AF=0.029;AN=70;DP=640;FS=0.0  |
| 16800 | chrY | 13210264 | . | T | C   | 11239.11 | PASS          | AC=54;AF=0.818;AN=66;Base          |
| 16801 | chrY | 13211940 | . | G | A   | 1277.18  | PASS          | AC=6;AF=0.086;AN=70;DP=514;FS=0.0  |
| 16802 | chrY | 13213581 | . | G | A   | 1241.54  | PASS          | AC=6;AF=0.086;AN=70;DP=580;FS=0.0  |
| 16803 | chrY | 13213680 | . | A | G   | 10141.97 | PASS          | AC=54;AF=0.818;AN=66;DP=4          |
| 16804 | chrY | 13215759 | . | C | T   | 30.98    | PASS          | AC=1;AF=0.015;AN=66;BaseQRankSum=  |
| 16805 | chrY | 13215782 | . | A | G   | 34.87    | PASS          | AC=1;AF=0.015;AN=66;BaseQRankSum=  |
| 16806 | chrY | 13217107 | . | G | A   | 1465.52  | PASS          | AC=6;AF=0.088;AN=68;DP=472;FS=0.0  |
| 16807 | chrY | 13219524 | . | G | C   | 211.24   | PASS          | AC=2;AF=0.042;AN=48;DP=144;FS=0.0  |
| 16808 | chrY | 13221316 | . | C | T   | 120.36   | PASS          | AC=2;AF=0.029;AN=70;DP=430;FS=0.0  |
| 16809 | chrY | 13222067 | . | G | A   | 111.88   | PASS          | AC=4;AF=0.167;AN=24;DP=110;FS=0.0  |
| 16810 | chrY | 13222265 | . | G | A   | 77.02    | PASS          | AC=2;AF=0.200;AN=10;DP=42;FS=0.00  |
| 16811 | chrY | 13222384 | . | A | G   | 226.71   | PASS          | AC=2;AF=0.167;AN=12;DP=72;FS=0.00  |
| 16812 | chrY | 13222391 | . | G | A   | 183.75   | PASS          | AC=2;AF=0.100;AN=20;DP=77;FS=0.00  |
| 16813 | chrY | 13222398 | . | A | T   | 187.07   | PASS          | AC=2;AF=0.100;AN=20;DP=73;FS=0.00  |
| 16814 | chrY | 13222399 | . | G | A   | 182.07   | PASS          | AC=2;AF=0.100;AN=20;DP=73;FS=0.00  |
| 16815 | chrY | 13222879 | . | G | T   | 454.97   | PASS          | AC=4;AF=1.00;AN=4;DP=69;FS=0.000;  |
| 16816 | chrY | 13222880 | . | G | T   | 454.97   | PASS          | AC=4;AF=1.00;AN=4;DP=69;FS=0.000;  |
| 16817 | chrY | 13223248 | . | G | C   | 44.23    | PASS          | AC=1;AF=0.015;AN=66;BaseQRankSum=  |
| 16818 | chrY | 13223260 | . | G | T   | 45.59    | PASS          | AC=1;AF=0.016;AN=64;BaseQRankSum=  |
| 16819 | chrY | 13223340 | . | G | A   | 343.54   | PASS          | AC=5;AF=0.076;AN=66;BaseQRankSum=  |
| 16820 | chrY | 13223417 | . | A | G   | 159.33   | PASS          | AC=2;AF=0.034;AN=58;BaseQRankSum=  |
| 16821 | chrY | 13224272 | . | C | T   | 363.05   | PASS          | AC=2;AF=0.029;AN=68;DP=452;FS=0.0  |
| 16822 | chrY | 13228027 | . | G | T   | 9690.51  | PASS          | AC=48;AF=0.727;AN=66;BaseQRankSum= |
| 16823 | chrY | 13228634 | . | C | A   | 291.93   | PASS          | AC=6;AF=0.091;AN=66;DP=330;FS=0.0  |
| 16824 | chrY | 13228644 | . | C | T   | 777.95   | PASS          | AC=6;AF=0.091;AN=66;DP=338;FS=0.0  |
| 16825 | chrY | 13229033 | . | C | T   | 53.80    | PASS          | AC=2;AF=0.029;AN=68;DP=443;FS=0.0  |
| 16826 | chrY | 13230354 | . | G | A   | 506.26   | PASS          | AC=6;AF=0.091;AN=66;DP=313;FS=0.0  |
| 16827 | chrY | 13238659 | . | C | T   | 11223.94 | PASS          | AC=66;AF=1.00;AN=66;DP=38          |
| 16828 | chrY | 13238850 | . | C | A   | 1788.87  | PASS          | AC=6;AF=0.088;AN=68;DP=630;FS=0.0  |
| 16829 | chrY | 13238871 | . | G | A   | 1758.85  | PASS          | AC=6;AF=0.088;AN=68;DP=596;FS=0.0  |
| 16830 | chrY | 13239356 | . | T | A   | 767.32   | my_snp_filter | AC=7;AF=0.167;AN=42;BaseQ          |
| 16831 | chrY | 13239462 | . | G | A   | 50.79    | my_snp_filter | AC=2;AF=0.100;AN=20;BaseQ          |
| 16832 | chrY | 13239531 | . | G | A   | 2062.03  | PASS          | AC=7;AF=0.350;AN=20;BaseQRankSum=  |
| 16833 | chrY | 13239620 | . | C | T   | 2595.08  | PASS          | AC=10;AF=0.455;AN=22;BaseQRankSum= |
| 16834 | chrY | 13239656 | . | A | G   | 3167.48  | PASS          | AC=12;AF=0.462;AN=26;BaseQRankSum= |
| 16835 | chrY | 13239760 | . | G | T   | 2881.83  | my_snp_filter | AC=9;AF=0.250;AN=36;BaseQ          |
| 16836 | chrY | 13239843 | . | A | C   | 607.62   | my_snp_filter | AC=7;AF=0.109;AN=64;BaseQ          |
| 16837 | chrY | 13239873 | . | T | A   | 8666.49  | PASS          | AC=61;AF=0.984;AN=62;BaseQRankSum= |
| 16838 | chrY | 13239912 | . | T | A,C | 626.25   | my_snp_filter | AC=3,5;AF=0.043,0.071;AN=          |
| 16839 | chrY | 13239914 | . | G | A   | 488.55   | my_snp_filter | AC=6;AF=0.086;AN=70;BaseQ          |
| 16840 | chrY | 13240048 | . | C | T   | 104.51   | my_snp_filter | AC=3;AF=0.044;AN=68;BaseQ          |
| 16841 | chrY | 13240146 | . | A | T   | 44.81    | my_snp_filter | AC=2;AF=0.029;AN=70;BaseQ          |
| 16842 | chrY | 13240190 | . | A | G   | 45.03    | my_snp_filter | AC=2;AF=0.029;AN=70;BaseQ          |
| 16843 | chrY | 13240192 | . | A | C   | 51.56    | my_snp_filter | AC=3;AF=0.043;AN=70;BaseQ          |
| 16844 | chrY | 13240296 | . | C | T   | 206.54   | PASS          | AC=4;AF=0.057;AN=70;BaseQRankSum=  |
| 16845 | chrY | 13240309 | . | A | G   | 55.64    | PASS          | AC=1;AF=0.014;AN=70;BaseQRankSum=  |
| 16846 | chrY | 13240346 | . | C | T   | 1150.78  | PASS          | AC=14;AF=0.200;AN=70;BaseQRankSum= |
| 16847 | chrY | 13241057 | . | A | C   | 207.23   | PASS          | AC=2;AF=0.031;AN=64;BaseQRankSum=  |
| 16848 | chrY | 13241090 | . | C | T   | 109.70   | PASS          | AC=2;AF=0.031;AN=64;BaseQRankSum=  |
| 16849 | chrY | 13241099 | . | C | T   | 49.49    | PASS          | AC=1;AF=0.015;AN=68;BaseQRankSum=  |
| 16850 | chrY | 13241296 | . | T | C   | 127.22   | PASS          | AC=3;AF=0.047;AN=64;BaseQRankSum=  |
| 16851 | chrY | 13241341 | . | C | A   | 288.18   | PASS          | AC=3;AF=0.068;AN=44;BaseQRankSum=  |
| 16852 | chrY | 13241355 | . | A | G   | 283.64   | PASS          | AC=3;AF=0.075;AN=40;BaseQRankSum=  |
| 16853 | chrY | 13241544 | . | T | G   | 139.25   | PASS          | AC=2;AF=0.031;AN=64;BaseQRankSum=  |
| 16854 | chrY | 13241566 | . | G | T   | 362.48   | PASS          | AC=2;AF=0.031;AN=64;BaseQRankSum=  |
| 16855 | chrY | 13241584 | . | T | C   | 779.96   | PASS          | AC=6;AF=0.100;AN=60;BaseQRankSum=  |
| 16856 | chrY | 13241590 | . | C | T   | 330.42   | PASS          | AC=4;AF=0.061;AN=66;BaseQRankSum=  |
| 16857 | chrY | 13241593 | . | T | C   | 516.78   | PASS          | AC=2;AF=0.030;AN=66;BaseQRankSum=  |
| 16858 | chrY | 13241598 | . | G | C   | 539.43   | PASS          | AC=2;AF=0.030;AN=66;BaseQRankSum=  |
| 16859 | chrY | 13241603 | . | A | G   | 258.13   | PASS          | AC=3;AF=0.047;AN=64;BaseQRankSum=  |
| 16860 | chrY | 13241604 | . | T | C   | 258.72   | PASS          | AC=3;AF=0.047;AN=64;BaseQRankSum=  |
| 16861 | chrY | 13241609 | . | G | A   | 449.76   | PASS          | AC=6;AF=0.091;AN=66;BaseQRankSum=  |
| 16862 | chrY | 13241635 | . | C | T   | 1942.91  | PASS          | AC=14;AF=0.212;AN=66;BaseQRankSum= |
| 16863 | chrY | 13241636 | . | C | G   | 1942.56  | PASS          | AC=14;AF=0.212;AN=66;BaseQRankSum= |
| 16864 | chrY | 13241656 | . | G | A   | 1127.74  | PASS          | AC=12;AF=0.182;AN=66;BaseQRankSum= |
| 16865 | chrY | 13241659 | . | T | C   | 2191.80  | PASS          | AC=15;AF=0.227;AN=66;BaseQRankSum= |
| 16866 | chrY | 13241730 | . | A | G   | 208.90   | my_snp_filter | AC=9;AF=0.132;AN=68;BaseQ          |
| 16867 | chrY | 13241756 | . | A | G   | 486.14   | PASS          | AC=7;AF=0.103;AN=68;BaseQRankSum=  |
| 16868 | chrY | 13241786 | . | C | A   | 1111.29  | PASS          | AC=6;AF=0.086;AN=70;BaseQRankSum=  |
| 16869 | chrY | 13241794 | . | G | A   | 1043.07  | PASS          | AC=6;AF=0.086;AN=70;BaseQRankSum=  |
| 16870 | chrY | 13241802 | . | T | A   | 740.17   | PASS          | AC=6;AF=0.086;AN=70;BaseQRankSum=  |
| 16871 | chrY | 13241877 | . | T | C   | 619.07   | PASS          | AC=6;AF=0.088;AN=68;BaseQRankSum=  |
| 16872 | chrY | 13241925 | . | G | A   | 182.04   | my_snp_filter | AC=4;AF=0.059;AN=68;BaseQ          |

|       |      |          |   |   |   |          |               |                                    |
|-------|------|----------|---|---|---|----------|---------------|------------------------------------|
| 16873 | chrY | 13241934 | . | A | G | 3155.51  | PASS          | AC=14;AF=0.206;AN=68;BaseQRankSum= |
| 16874 | chrY | 13241943 | . | G | A | 272.42   | PASS          | AC=4;AF=0.059;AN=68;BaseQRankSum=  |
| 16875 | chrY | 13241986 | . | G | A | 130.07   | my_snp_filter | AC=3;AF=0.043;AN=70;BaseQ          |
| 16876 | chrY | 13242006 | . | T | C | 8319.68  | PASS          | AC=22;AF=0.314;AN=70;BaseQRankSum= |
| 16877 | chrY | 13242019 | . | C | T | 38.57    | my_snp_filter | AC=3;AF=0.043;AN=70;BaseQ          |
| 16878 | chrY | 13242026 | . | C | T | 347.26   | PASS          | AC=4;AF=0.057;AN=70;BaseQRankSum=  |
| 16879 | chrY | 13242027 | . | A | G | 347.60   | PASS          | AC=4;AF=0.057;AN=70;BaseQRankSum=  |
| 16880 | chrY | 13242044 | . | C | T | 10732.91 | PASS          | AC=23;AF=0.329;AN=70;BaseQ         |
| 16881 | chrY | 13242055 | . | G | A | 10527.27 | PASS          | AC=23;AF=0.329;AN=70;BaseQ         |
| 16882 | chrY | 13242063 | . | G | A | 149.72   | my_snp_filter | AC=5;AF=0.071;AN=70;BaseQ          |
| 16883 | chrY | 13242082 | . | T | C | 190.41   | my_snp_filter | AC=3;AF=0.043;AN=70;BaseQ          |
| 16884 | chrY | 13242083 | . | T | C | 290.41   | my_snp_filter | AC=6;AF=0.086;AN=70;BaseQ          |
| 16885 | chrY | 13242098 | . | A | G | 149.02   | my_snp_filter | AC=6;AF=0.086;AN=70;BaseQ          |
| 16886 | chrY | 13242165 | . | C | T | 256.90   | PASS          | AC=1;AF=0.014;AN=70;BaseQRankSum=  |
| 16887 | chrY | 13242178 | . | C | T | 62.20    | my_snp_filter | AC=3;AF=0.044;AN=68;BaseQ          |
| 16888 | chrY | 13242182 | . | C | T | 62.49    | my_snp_filter | AC=3;AF=0.044;AN=68;BaseQ          |
| 16889 | chrY | 13242196 | . | T | G | 2367.78  | PASS          | AC=19;AF=0.288;AN=66;BaseQRankSum= |
| 16890 | chrY | 13242225 | . | C | T | 73.04    | PASS          | AC=2;AF=0.030;AN=66;BaseQRankSum=  |
| 16891 | chrY | 13242500 | . | C | T | 223.58   | PASS          | AC=3;AF=0.167;AN=18;BaseQRankSum=  |
| 16892 | chrY | 13242501 | . | G | T | 106.42   | PASS          | AC=2;AF=0.111;AN=18;BaseQRankSum=  |
| 16893 | chrY | 13242515 | . | T | G | 231.25   | PASS          | AC=3;AF=0.167;AN=18;BaseQRankSum=  |
| 16894 | chrY | 13242523 | . | C | T | 218.35   | PASS          | AC=3;AF=0.167;AN=18;BaseQRankSum=  |
| 16895 | chrY | 13242525 | . | T | C | 213.66   | PASS          | AC=3;AF=0.167;AN=18;BaseQRankSum=  |
| 16896 | chrY | 13242547 | . | T | C | 204.38   | PASS          | AC=3;AF=0.167;AN=18;BaseQRankSum=  |
| 16897 | chrY | 13242560 | . | A | C | 102.50   | PASS          | AC=2;AF=0.111;AN=18;BaseQRankSum=  |
| 16898 | chrY | 13242562 | . | A | T | 100.65   | PASS          | AC=2;AF=0.111;AN=18;BaseQRankSum=  |
| 16899 | chrY | 13242598 | . | T | C | 104.70   | PASS          | AC=2;AF=0.100;AN=20;BaseQRankSum=  |
| 16900 | chrY | 13242697 | . | C | T | 317.33   | PASS          | AC=4;AF=0.083;AN=48;BaseQRankSum=  |
| 16901 | chrY | 13242699 | . | C | T | 1431.51  | PASS          | AC=8;AF=0.182;AN=44;BaseQRankSum=  |
| 16902 | chrY | 13242802 | . | T | C | 2626.92  | PASS          | AC=13;AF=0.191;AN=68;BaseQRankSum= |
| 16903 | chrY | 13242807 | . | C | T | 783.72   | PASS          | AC=11;AF=0.162;AN=68;BaseQRankSum= |
| 16904 | chrY | 13242810 | . | G | C | 49.99    | my_snp_filter | AC=4;AF=0.059;AN=68;BaseQ          |
| 16905 | chrY | 13242831 | . | T | C | 277.86   | PASS          | AC=4;AF=0.057;AN=70;BaseQRankSum=  |
| 16906 | chrY | 13242834 | . | T | G | 273.21   | PASS          | AC=3;AF=0.043;AN=70;BaseQRankSum=  |
| 16907 | chrY | 13242874 | . | C | T | 209.89   | PASS          | AC=2;AF=0.029;AN=68;BaseQRankSum=  |
| 16908 | chrY | 13242877 | . | T | C | 185.30   | PASS          | AC=2;AF=0.029;AN=68;BaseQRankSum=  |
| 16909 | chrY | 13242878 | . | G | A | 185.32   | PASS          | AC=2;AF=0.029;AN=68;BaseQRankSum=  |
| 16910 | chrY | 13243011 | . | C | T | 45.42    | my_snp_filter | AC=2;AF=0.029;AN=70;BaseQ          |
| 16911 | chrY | 13243012 | . | T | C | 180.92   | my_snp_filter | AC=3;AF=0.043;AN=70;BaseQ          |
| 16912 | chrY | 13243027 | . | G | A | 36.63    | my_snp_filter | AC=2;AF=0.029;AN=70;BaseQ          |
| 16913 | chrY | 13243050 | . | C | G | 3926.24  | PASS          | AC=18;AF=0.265;AN=68;BaseQRankSum= |
| 16914 | chrY | 13243093 | . | C | T | 124.74   | PASS          | AC=1;AF=0.015;AN=68;BaseQRankSum=  |
| 16915 | chrY | 13243097 | . | G | T | 131.25   | PASS          | AC=1;AF=0.015;AN=68;BaseQRankSum=  |
| 16916 | chrY | 13243158 | . | T | C | 54.54    | my_snp_filter | AC=2;AF=0.029;AN=68;BaseQ          |
| 16917 | chrY | 13243265 | . | T | A | 514.68   | PASS          | AC=4;AF=0.061;AN=66;BaseQRankSum=  |
| 16918 | chrY | 13243269 | . | G | A | 694.21   | PASS          | AC=4;AF=0.063;AN=64;BaseQRankSum=  |
| 16919 | chrY | 13243290 | . | T | A | 862.21   | PASS          | AC=4;AF=0.063;AN=64;BaseQRankSum=  |
| 16920 | chrY | 13243326 | . | T | C | 1258.52  | PASS          | AC=10;AF=0.156;AN=64;BaseQRankSum= |
| 16921 | chrY | 13243352 | . | G | A | 2616.03  | PASS          | AC=15;AF=0.227;AN=66;BaseQRankSum= |
| 16922 | chrY | 13243393 | . | G | T | 2307.47  | PASS          | AC=16;AF=0.235;AN=68;BaseQRankSum= |
| 16923 | chrY | 13243429 | . | C | T | 45.10    | my_snp_filter | AC=3;AF=0.043;AN=70;BaseQ          |
| 16924 | chrY | 13243437 | . | G | T | 339.10   | my_snp_filter | AC=6;AF=0.086;AN=70;BaseQ          |
| 16925 | chrY | 13243454 | . | T | C | 345.61   | my_snp_filter | AC=6;AF=0.086;AN=70;BaseQ          |
| 16926 | chrY | 13243458 | . | C | T | 5854.11  | PASS          | AC=20;AF=0.286;AN=70;BaseQRankSum= |
| 16927 | chrY | 13243477 | . | C | T | 235.31   | PASS          | AC=2;AF=0.029;AN=70;BaseQRankSum=  |
| 16928 | chrY | 13243496 | . | T | C | 6037.79  | PASS          | AC=20;AF=0.286;AN=70;BaseQRankSum= |
| 16929 | chrY | 13243508 | . | G | A | 5913.19  | PASS          | AC=18;AF=0.257;AN=70;BaseQRankSum= |
| 16930 | chrY | 13243519 | . | T | G | 5050.57  | PASS          | AC=18;AF=0.265;AN=68;BaseQRankSum= |
| 16931 | chrY | 13243576 | . | G | A | 93.70    | my_snp_filter | AC=3;AF=0.043;AN=70;BaseQ          |
| 16932 | chrY | 13243618 | . | C | T | 3046.27  | PASS          | AC=19;AF=0.271;AN=70;BaseQRankSum= |
| 16933 | chrY | 13243633 | . | C | T | 727.47   | PASS          | AC=8;AF=0.114;AN=70;BaseQRankSum=  |
| 16934 | chrY | 13243650 | . | C | A | 686.30   | PASS          | AC=8;AF=0.114;AN=70;BaseQRankSum=  |
| 16935 | chrY | 13243652 | . | A | G | 654.36   | PASS          | AC=8;AF=0.114;AN=70;BaseQRankSum=  |
| 16936 | chrY | 13243653 | . | T | A | 316.06   | PASS          | AC=2;AF=0.029;AN=70;BaseQRankSum=  |
| 16937 | chrY | 13243655 | . | C | A | 664.23   | PASS          | AC=8;AF=0.118;AN=68;BaseQRankSum=  |
| 16938 | chrY | 13243683 | . | G | A | 248.27   | my_snp_filter | AC=5;AF=0.081;AN=62;BaseQ          |
| 16939 | chrY | 13243693 | . | G | A | 2552.02  | PASS          | AC=9;AF=0.161;AN=56;BaseQRankSum=  |
| 16940 | chrY | 13243716 | . | C | G | 270.76   | PASS          | AC=3;AF=0.071;AN=42;BaseQRankSum=  |
| 16941 | chrY | 13243763 | . | C | A | 160.93   | my_snp_filter | AC=4;AF=0.125;AN=32;BaseQ          |
| 16942 | chrY | 13243793 | . | T | C | 1607.11  | PASS          | AC=8;AF=0.267;AN=30;BaseQRankSum=  |
| 16943 | chrY | 13243806 | . | A | G | 1013.69  | PASS          | AC=7;AF=0.350;AN=20;BaseQRankSum=  |
| 16944 | chrY | 13243848 | . | T | C | 482.39   | PASS          | AC=4;AF=0.167;AN=24;BaseQRankSum=  |
| 16945 | chrY | 13243879 | . | A | G | 254.81   | PASS          | AC=4;AF=0.182;AN=22;BaseQRankSum=  |
| 16946 | chrY | 13243880 | . | C | G | 262.81   | PASS          | AC=4;AF=0.182;AN=22;BaseQRankSum=  |
| 16947 | chrY | 13243953 | . | A | G | 1032.10  | PASS          | AC=6;AF=0.250;AN=24;BaseQRankSum=  |
| 16948 | chrY | 13243955 | . | A | T | 49.26    | PASS          | AC=1;AF=0.042;AN=24;BaseQRankSum=  |

|       |      |          |   |   |   |          |               |                                    |
|-------|------|----------|---|---|---|----------|---------------|------------------------------------|
| 16949 | chrY | 13243978 | . | T | G | 1064.37  | PASS          | AC=5;AF=0.208;AN=24;BaseQRankSum=  |
| 16950 | chrY | 13244066 | . | A | G | 484.31   | PASS          | AC=5;AF=0.156;AN=32;BaseQRankSum=  |
| 16951 | chrY | 13244084 | . | G | T | 815.32   | PASS          | AC=4;AF=0.133;AN=30;BaseQRankSum=  |
| 16952 | chrY | 13244085 | . | T | G | 819.29   | PASS          | AC=4;AF=0.143;AN=28;BaseQRankSum=  |
| 16953 | chrY | 13244116 | . | G | C | 2607.51  | PASS          | AC=9;AF=0.265;AN=34;BaseQRankSum=  |
| 16954 | chrY | 13244117 | . | C | T | 2606.97  | PASS          | AC=9;AF=0.265;AN=34;BaseQRankSum=  |
| 16955 | chrY | 13244129 | . | G | A | 196.56   | PASS          | AC=5;AF=0.139;AN=36;BaseQRankSum=  |
| 16956 | chrY | 13244139 | . | G | T | 184.65   | PASS          | AC=5;AF=0.132;AN=38;BaseQRankSum=  |
| 16957 | chrY | 13244160 | . | C | T | 2459.98  | PASS          | AC=10;AF=0.238;AN=42;BaseQRankSum= |
| 16958 | chrY | 13244184 | . | C | T | 491.88   | PASS          | AC=9;AF=0.167;AN=54;BaseQRankSum=  |
| 16959 | chrY | 13244201 | . | G | A | 468.50   | PASS          | AC=8;AF=0.138;AN=58;BaseQRankSum=  |
| 16960 | chrY | 13244236 | . | A | T | 143.28   | PASS          | AC=3;AF=0.045;AN=66;BaseQRankSum=  |
| 16961 | chrY | 13244237 | . | A | G | 4303.55  | PASS          | AC=16;AF=0.267;AN=60;BaseQRankSum= |
| 16962 | chrY | 13244251 | . | C | T | 30.20    | my_snp_filter | AC=1;AF=0.015;AN=68;BaseQ          |
| 16963 | chrY | 13244263 | . | C | T | 52.57    | PASS          | AC=2;AF=0.029;AN=70;BaseQRankSum=  |
| 16964 | chrY | 13244264 | . | A | G | 2225.38  | PASS          | AC=13;AF=0.186;AN=70;BaseQRankSum= |
| 16965 | chrY | 13244288 | . | G | T | 3412.24  | PASS          | AC=14;AF=0.200;AN=70;BaseQRankSum= |
| 16966 | chrY | 13244370 | . | A | C | 15823.20 | PASS          | AC=57;AF=0.891;AN=64;BaseQ         |
| 16967 | chrY | 13244385 | . | C | T | 4018.25  | PASS          | AC=12;AF=0.176;AN=68;BaseQRankSum= |
| 16968 | chrY | 13244403 | . | T | G | 1556.01  | PASS          | AC=12;AF=0.171;AN=70;BaseQRankSum= |
| 16969 | chrY | 13244485 | . | T | C | 240.23   | my_snp_filter | AC=5;AF=0.071;AN=70;BaseQ          |
| 16970 | chrY | 13244554 | . | C | T | 136.06   | my_snp_filter | AC=3;AF=0.043;AN=70;BaseQ          |
| 16971 | chrY | 13244558 | . | C | T | 3734.65  | PASS          | AC=10;AF=0.143;AN=70;BaseQRankSum= |
| 16972 | chrY | 13244559 | . | A | G | 679.04   | my_snp_filter | AC=8;AF=0.114;AN=70;BaseQ          |
| 16973 | chrY | 13244565 | . | T | C | 4123.84  | PASS          | AC=13;AF=0.186;AN=70;BaseQRankSum= |
| 16974 | chrY | 13244566 | . | T | G | 777.67   | PASS          | AC=6;AF=0.086;AN=70;BaseQRankSum=  |
| 16975 | chrY | 13244586 | . | G | T | 141.37   | my_snp_filter | AC=2;AF=0.029;AN=70;BaseQ          |
| 16976 | chrY | 13244644 | . | T | C | 611.01   | PASS          | AC=7;AF=0.103;AN=68;BaseQRankSum=  |
| 16977 | chrY | 13244655 | . | T | C | 13812.61 | PASS          | AC=25;AF=0.379;AN=66;BaseQ         |
| 16978 | chrY | 13244660 | . | T | G | 2086.91  | PASS          | AC=10;AF=0.147;AN=68;BaseQRankSum= |
| 16979 | chrY | 13244666 | . | C | T | 435.57   | PASS          | AC=7;AF=0.103;AN=68;BaseQRankSum=  |
| 16980 | chrY | 13244675 | . | C | T | 4800.57  | PASS          | AC=15;AF=0.227;AN=66;BaseQRankSum= |
| 16981 | chrY | 13244688 | . | G | A | 2447.58  | PASS          | AC=7;AF=0.103;AN=68;BaseQRankSum=  |
| 16982 | chrY | 13244690 | . | A | G | 1847.05  | PASS          | AC=15;AF=0.221;AN=68;BaseQRankSum= |
| 16983 | chrY | 13244693 | . | C | A | 2491.17  | PASS          | AC=7;AF=0.103;AN=68;BaseQRankSum=  |
| 16984 | chrY | 13244726 | . | G | T | 2601.20  | PASS          | AC=15;AF=0.234;AN=64;BaseQRankSum= |
| 16985 | chrY | 13244782 | . | T | C | 3951.78  | PASS          | AC=11;AF=0.239;AN=46;BaseQRankSum= |
| 16986 | chrY | 13244783 | . | G | A | 3938.78  | PASS          | AC=11;AF=0.239;AN=46;BaseQRankSum= |
| 16987 | chrY | 13244806 | . | C | A | 4706.62  | PASS          | AC=10;AF=0.278;AN=36;BaseQRankSum= |
| 16988 | chrY | 13244808 | . | T | C | 8986.82  | PASS          | AC=13;AF=0.382;AN=34;BaseQRankSum= |
| 16989 | chrY | 13244809 | . | G | A | 2859.35  | PASS          | AC=11;AF=0.275;AN=40;BaseQRankSum= |
| 16990 | chrY | 13244812 | . | G | A | 1014.45  | PASS          | AC=6;AF=0.136;AN=44;BaseQRankSum=  |
| 16991 | chrY | 13244819 | . | T | G | 2425.25  | PASS          | AC=11;AF=0.229;AN=48;BaseQRankSum= |
| 16992 | chrY | 13244834 | . | C | T | 2017.10  | PASS          | AC=10;AF=0.217;AN=46;BaseQRankSum= |
| 16993 | chrY | 13244864 | . | G | A | 1027.32  | PASS          | AC=6;AF=0.158;AN=38;BaseQRankSum=  |
| 16994 | chrY | 13244866 | . | A | G | 1028.66  | PASS          | AC=6;AF=0.167;AN=36;BaseQRankSum=  |
| 16995 | chrY | 13244885 | . | T | C | 519.75   | PASS          | AC=4;AF=0.095;AN=42;BaseQRankSum=  |
| 16996 | chrY | 13244908 | . | T | A | 72.79    | PASS          | AC=1;AF=0.024;AN=42;BaseQRankSum=  |
| 16997 | chrY | 13244964 | . | T | G | 342.26   | PASS          | AC=5;AF=0.093;AN=54;BaseQRankSum=  |
| 16998 | chrY | 13244981 | . | G | A | 636.02   | PASS          | AC=7;AF=0.121;AN=58;BaseQRankSum=  |
| 16999 | chrY | 13245000 | . | A | G | 3467.35  | my_snp_filter | AC=10;AF=0.156;AN=64;BaseQ         |
| 17000 | chrY | 13245033 | . | C | T | 2389.99  | PASS          | AC=14;AF=0.206;AN=68;BaseQRankSum= |
| 17001 | chrY | 13245050 | . | A | C | 1694.23  | PASS          | AC=11;AF=0.162;AN=68;BaseQRankSum= |
| 17002 | chrY | 13245120 | . | C | A | 1403.68  | my_snp_filter | AC=13;AF=0.186;AN=70;BaseQ         |
| 17003 | chrY | 13245130 | . | G | T | 401.25   | PASS          | AC=5;AF=0.071;AN=70;BaseQRankSum=  |
| 17004 | chrY | 13245147 | . | T | G | 271.36   | PASS          | AC=4;AF=0.057;AN=70;BaseQRankSum=  |
| 17005 | chrY | 13245158 | . | G | C | 82.94    | my_snp_filter | AC=2;AF=0.029;AN=70;BaseQ          |
| 17006 | chrY | 13245161 | . | C | T | 42.88    | PASS          | AC=2;AF=0.029;AN=70;BaseQRankSum=  |
| 17007 | chrY | 13245308 | . | C | T | 12266.45 | PASS          | AC=40;AF=0.571;AN=70;DP=6          |
| 17008 | chrY | 13245441 | . | G | A | 4660.94  | PASS          | AC=25;AF=0.368;AN=68;BaseQRankSum= |
| 17009 | chrY | 13245451 | . | C | T | 4590.77  | PASS          | AC=24;AF=0.353;AN=68;BaseQRankSum= |
| 17010 | chrY | 13245469 | . | C | T | 3685.83  | PASS          | AC=24;AF=0.364;AN=66;BaseQRankSum= |
| 17011 | chrY | 13245619 | . | G | A | 75.10    | my_snp_filter | AC=4;AF=0.067;AN=60;BaseQ          |
| 17012 | chrY | 13245647 | . | C | A | 326.43   | PASS          | AC=4;AF=0.080;AN=50;BaseQRankSum=  |
| 17013 | chrY | 13245661 | . | A | C | 226.06   | PASS          | AC=3;AF=0.071;AN=42;BaseQRankSum=  |
| 17014 | chrY | 13245673 | . | G | A | 226.92   | PASS          | AC=3;AF=0.071;AN=42;BaseQRankSum=  |
| 17015 | chrY | 13245675 | . | C | T | 232.92   | PASS          | AC=3;AF=0.071;AN=42;BaseQRankSum=  |
| 17016 | chrY | 13245693 | . | G | A | 158.89   | PASS          | AC=2;AF=0.040;AN=50;BaseQRankSum=  |
| 17017 | chrY | 13245741 | . | G | C | 33.02    | my_snp_filter | AC=1;AF=0.015;AN=66;BaseQ          |
| 17018 | chrY | 13245748 | . | A | G | 35.57    | my_snp_filter | AC=1;AF=0.016;AN=64;BaseQ          |
| 17019 | chrY | 13245751 | . | A | C | 35.13    | my_snp_filter | AC=1;AF=0.016;AN=64;BaseQ          |
| 17020 | chrY | 13245854 | . | G | A | 298.73   | my_snp_filter | AC=6;AF=0.088;AN=68;BaseQ          |
| 17021 | chrY | 13245884 | . | T | C | 387.18   | my_snp_filter | AC=7;AF=0.100;AN=70;BaseQ          |
| 17022 | chrY | 13246031 | . | A | G | 955.55   | PASS          | AC=3;AF=0.063;AN=48;BaseQRankSum=  |
| 17023 | chrY | 13246036 | . | G | C | 929.63   | PASS          | AC=3;AF=0.065;AN=46;BaseQRankSum=  |
| 17024 | chrY | 13246052 | . | T | C | 539.87   | PASS          | AC=2;AF=0.029;AN=68;BaseQRankSum=  |



|       |      |          |   |   |     |          |               |                                    |
|-------|------|----------|---|---|-----|----------|---------------|------------------------------------|
| 17025 | chrY | 13246152 | . | T | C   | 962.17   | PASS          | AC=10;AF=0.143;AN=70;BaseQRankSum= |
| 17026 | chrY | 13246159 | . | A | G   | 46.26    | my_snp_filter | AC=2;AF=0.029;AN=70;BaseQ          |
| 17027 | chrY | 13246191 | . | A | G   | 183.38   | PASS          | AC=2;AF=0.029;AN=68;BaseQRankSum=  |
| 17028 | chrY | 13246195 | . | T | A   | 188.43   | PASS          | AC=2;AF=0.029;AN=70;BaseQRankSum=  |
| 17029 | chrY | 13246402 | . | G | C   | 932.39   | my_snp_filter | AC=11;AF=0.157;AN=70;Base          |
| 17030 | chrY | 13246431 | . | C | T   | 743.71   | PASS          | AC=12;AF=0.176;AN=68;BaseQRankSum= |
| 17031 | chrY | 13246481 | . | A | G,* | 2425.06  | PASS          | AC=11,10;AF=0.167,0.152;AN=66;Bas  |
| 17032 | chrY | 13246486 | . | T | A   | 3750.04  | PASS          | AC=22;AF=0.333;AN=66;BaseQRankSum= |
| 17033 | chrY | 13246495 | . | C | T   | 3539.55  | PASS          | AC=22;AF=0.324;AN=68;BaseQRankSum= |
| 17034 | chrY | 13246497 | . | G | T   | 1703.76  | PASS          | AC=15;AF=0.221;AN=68;BaseQRankSum= |
| 17035 | chrY | 13246500 | . | A | T   | 3315.79  | PASS          | AC=22;AF=0.324;AN=68;BaseQRankSum= |
| 17036 | chrY | 13246559 | . | T | C   | 203.39   | PASS          | AC=6;AF=0.088;AN=68;BaseQRankSum=  |
| 17037 | chrY | 13246591 | . | A | G   | 8073.05  | PASS          | AC=58;AF=1.00;AN=58;BaseQRankSum=  |
| 17038 | chrY | 13246814 | . | G | A   | 89.87    | my_snp_filter | AC=2;AF=0.029;AN=70;BaseQ          |
| 17039 | chrY | 13246958 | . | T | C   | 373.83   | PASS          | AC=4;AF=0.061;AN=66;BaseQRankSum=  |
| 17040 | chrY | 13246977 | . | A | G   | 329.63   | PASS          | AC=3;AF=0.044;AN=68;BaseQRankSum=  |
| 17041 | chrY | 13246987 | . | C | T   | 423      | PASS          | AC=4;AF=0.061;AN=66;BaseQRankSum=  |
| 17042 | chrY | 13247181 | . | T | C   | 81.92    | PASS          | AC=1;AF=0.015;AN=66;BaseQRankSum=  |
| 17043 | chrY | 13247208 | . | C | T   | 48.36    | my_snp_filter | AC=1;AF=0.015;AN=66;BaseQ          |
| 17044 | chrY | 13247231 | . | A | C   | 50.32    | PASS          | AC=1;AF=0.016;AN=64;BaseQRankSum=  |
| 17045 | chrY | 13247379 | . | C | T   | 468.25   | PASS          | AC=7;AF=0.106;AN=66;BaseQRankSum=  |
| 17046 | chrY | 13247486 | . | C | T   | 346.51   | PASS          | AC=6;AF=0.091;AN=66;BaseQRankSum=  |
| 17047 | chrY | 13247522 | . | C | T   | 268.57   | PASS          | AC=4;AF=0.059;AN=68;BaseQRankSum=  |
| 17048 | chrY | 13247525 | . | A | G   | 241.15   | PASS          | AC=3;AF=0.044;AN=68;BaseQRankSum=  |
| 17049 | chrY | 13247677 | . | C | A   | 800.13   | PASS          | AC=16;AF=0.229;AN=70;BaseQRankSum= |
| 17050 | chrY | 13247723 | . | C | T   | 498.76   | PASS          | AC=5;AF=0.076;AN=66;BaseQRankSum=  |
| 17051 | chrY | 13247730 | . | T | C   | 1305.94  | my_snp_filter | AC=10;AF=0.156;AN=64;Base          |
| 17052 | chrY | 13247752 | . | C | T   | 1138.22  | my_snp_filter | AC=9;AF=0.136;AN=66;BaseQ          |
| 17053 | chrY | 13247753 | . | T | C   | 1132.67  | my_snp_filter | AC=9;AF=0.136;AN=66;BaseQ          |
| 17054 | chrY | 13247759 | . | T | C   | 1056.46  | my_snp_filter | AC=9;AF=0.136;AN=66;BaseQ          |
| 17055 | chrY | 13248839 | . | G | A   | 51.56    | my_snp_filter | AC=1;AF=0.028;AN=36;BaseQ          |
| 17056 | chrY | 13248847 | . | T | C   | 53.27    | my_snp_filter | AC=1;AF=0.029;AN=34;BaseQ          |
| 17057 | chrY | 13248878 | . | T | C   | 66.53    | PASS          | AC=1;AF=0.036;AN=28;BaseQRankSum=  |
| 17058 | chrY | 13248898 | . | C | T   | 59.38    | PASS          | AC=1;AF=0.031;AN=32;BaseQRankSum=  |
| 17059 | chrY | 13248923 | . | G | A   | 65.21    | PASS          | AC=1;AF=0.025;AN=40;BaseQRankSum=  |
| 17060 | chrY | 13249128 | . | A | C   | 226.48   | PASS          | AC=5;AF=0.071;AN=70;BaseQRankSum=  |
| 17061 | chrY | 13249129 | . | C | T   | 226.51   | PASS          | AC=5;AF=0.071;AN=70;BaseQRankSum=  |
| 17062 | chrY | 13249157 | . | T | G   | 1213.88  | my_snp_filter | AC=7;AF=0.100;AN=70;BaseQ          |
| 17063 | chrY | 13249177 | . | T | C   | 2090.60  | my_snp_filter | AC=9;AF=0.129;AN=70;BaseQ          |
| 17064 | chrY | 13249180 | . | T | A   | 2088.74  | my_snp_filter | AC=9;AF=0.129;AN=70;BaseQ          |
| 17065 | chrY | 13249183 | . | T | C   | 2294.95  | my_snp_filter | AC=9;AF=0.129;AN=70;BaseQ          |
| 17066 | chrY | 13249190 | . | C | T   | 2453.10  | my_snp_filter | AC=9;AF=0.129;AN=70;BaseQ          |
| 17067 | chrY | 13249208 | . | C | A   | 2695.26  | my_snp_filter | AC=9;AF=0.129;AN=70;BaseQ          |
| 17068 | chrY | 13249261 | . | C | T   | 4574.79  | my_snp_filter | AC=27;AF=0.386;AN=70;Base          |
| 17069 | chrY | 13249275 | . | G | A   | 99.71    | PASS          | AC=1;AF=0.015;AN=68;BaseQRankSum=  |
| 17070 | chrY | 13249314 | . | A | G   | 4982.05  | PASS          | AC=28;AF=0.412;AN=68;BaseQRankSum= |
| 17071 | chrY | 13249403 | . | C | T   | 4813.37  | PASS          | AC=29;AF=0.414;AN=70;BaseQRankSum= |
| 17072 | chrY | 13249418 | . | G | A   | 4079.64  | my_snp_filter | AC=30;AF=0.441;AN=68;Base          |
| 17073 | chrY | 13249482 | . | C | G   | 2020.64  | my_snp_filter | AC=10;AF=0.147;AN=68;Base          |
| 17074 | chrY | 13249484 | . | C | A   | 2015.50  | my_snp_filter | AC=10;AF=0.147;AN=68;Base          |
| 17075 | chrY | 13249505 | . | A | G   | 1999.84  | my_snp_filter | AC=9;AF=0.129;AN=70;BaseQ          |
| 17076 | chrY | 13249506 | . | T | G   | 114.55   | PASS          | AC=1;AF=0.014;AN=70;BaseQRankSum=  |
| 17077 | chrY | 13249527 | . | A | G   | 1792.89  | my_snp_filter | AC=9;AF=0.129;AN=70;BaseQ          |
| 17078 | chrY | 13249574 | . | A | G   | 1689.46  | my_snp_filter | AC=13;AF=0.186;AN=70;Base          |
| 17079 | chrY | 13249584 | . | T | C   | 1550.81  | my_snp_filter | AC=12;AF=0.171;AN=70;Base          |
| 17080 | chrY | 13249613 | . | C | T   | 34.56    | PASS          | AC=1;AF=0.015;AN=68;BaseQRankSum=  |
| 17081 | chrY | 13249617 | . | G | T   | 34.88    | PASS          | AC=1;AF=0.015;AN=68;BaseQRankSum=  |
| 17082 | chrY | 13249643 | . | T | C   | 676      | PASS          | AC=5;AF=0.078;AN=64;BaseQRankSum=  |
| 17083 | chrY | 13249655 | . | T | G   | 589.55   | PASS          | AC=5;AF=0.078;AN=64;BaseQRankSum=  |
| 17084 | chrY | 13249680 | . | T | C   | 237.75   | PASS          | AC=4;AF=0.063;AN=64;BaseQRankSum=  |
| 17085 | chrY | 13250417 | . | C | A   | 132.24   | PASS          | AC=1;AF=0.050;AN=20;BaseQRankSum=  |
| 17086 | chrY | 13250425 | . | G | T   | 174.09   | PASS          | AC=1;AF=0.045;AN=22;BaseQRankSum=  |
| 17087 | chrY | 13250436 | . | C | T   | 206.82   | PASS          | AC=1;AF=0.042;AN=24;BaseQRankSum=  |
| 17088 | chrY | 13250569 | . | T | G   | 328.99   | PASS          | AC=8;AF=0.267;AN=30;BaseQRankSum=  |
| 17089 | chrY | 13251031 | . | C | T   | 41.33    | PASS          | AC=1;AF=0.015;AN=66;BaseQRankSum=  |
| 17090 | chrY | 13251032 | . | A | G   | 41.37    | PASS          | AC=1;AF=0.015;AN=66;BaseQRankSum=  |
| 17091 | chrY | 13251168 | . | C | T   | 270.26   | my_snp_filter | AC=9;AF=0.129;AN=70;BaseQ          |
| 17092 | chrY | 13251187 | . | A | G   | 5769.61  | my_snp_filter | AC=18;AF=0.265;AN=68;Base          |
| 17093 | chrY | 13251213 | . | A | G   | 5992.51  | my_snp_filter | AC=19;AF=0.271;AN=70;Base          |
| 17094 | chrY | 13251349 | . | T | G   | 9052.38  | my_snp_filter | AC=10;AF=0.143;AN=70;Base          |
| 17095 | chrY | 13251357 | . | A | T   | 8801.05  | my_snp_filter | AC=9;AF=0.132;AN=68;BaseQ          |
| 17096 | chrY | 13251368 | . | A | T   | 850.53   | PASS          | AC=11;AF=0.157;AN=70;BaseQRankSum= |
| 17097 | chrY | 13251387 | . | C | A   | 8015.24  | PASS          | AC=18;AF=0.265;AN=68;BaseQRankSum= |
| 17098 | chrY | 13251426 | . | A | C   | 165.03   | my_snp_filter | AC=4;AF=0.057;AN=70;BaseQ          |
| 17099 | chrY | 13251431 | . | T | C   | 193.26   | my_snp_filter | AC=4;AF=0.057;AN=70;BaseQ          |
| 17100 | chrY | 13251461 | . | C | A   | 10272.70 | PASS          | AC=15;AF=0.250;AN=60;Base          |

|       |      |          |   |   |   |          |               |                                    |
|-------|------|----------|---|---|---|----------|---------------|------------------------------------|
| 17101 | chrY | 13251463 | . | T | C | 13040.88 | PASS          | AC=15;AF=0.250;AN=60;BaseQRankSum= |
| 17102 | chrY | 13251464 | . | G | A | 921.88   | PASS          | AC=5;AF=0.081;AN=62;BaseQRankSum=  |
| 17103 | chrY | 13251513 | . | C | G | 18179.96 | PASS          | AC=24;AF=0.387;AN=62;BaseQRankSum= |
| 17104 | chrY | 13251528 | . | C | G | 14310.13 | PASS          | AC=30;AF=0.484;AN=62;BaseQRankSum= |
| 17105 | chrY | 13251608 | . | T | C | 25275.62 | PASS          | AC=33;AF=0.500;AN=66;BaseQRankSum= |
| 17106 | chrY | 13251630 | . | T | C | 23662.22 | PASS          | AC=32;AF=0.457;AN=70;BaseQRankSum= |
| 17107 | chrY | 13251673 | . | T | C | 401.01   | PASS          | AC=4;AF=0.057;AN=70;BaseQRankSum=  |
| 17108 | chrY | 13251678 | . | C | T | 74.52    | my_snp_filter | AC=2;AF=0.029;AN=70;BaseQRankSum=  |
| 17109 | chrY | 13251719 | . | A | G | 5974.40  | my_snp_filter | AC=14;AF=0.200;AN=70;BaseQRankSum= |
| 17110 | chrY | 13251733 | . | C | A | 427.82   | PASS          | AC=3;AF=0.043;AN=70;BaseQRankSum=  |
| 17111 | chrY | 13251742 | . | A | G | 5546.05  | my_snp_filter | AC=10;AF=0.143;AN=70;BaseQRankSum= |
| 17112 | chrY | 13251753 | . | C | T | 985.39   | PASS          | AC=7;AF=0.100;AN=70;BaseQRankSum=  |
| 17113 | chrY | 13251754 | . | T | C | 5172.53  | my_snp_filter | AC=9;AF=0.129;AN=70;BaseQRankSum=  |
| 17114 | chrY | 13251769 | . | G | T | 928.97   | PASS          | AC=7;AF=0.103;AN=68;BaseQRankSum=  |
| 17115 | chrY | 13251808 | . | C | T | 1673.23  | my_snp_filter | AC=10;AF=0.143;AN=70;BaseQRankSum= |
| 17116 | chrY | 13251821 | . | A | G | 2795.63  | my_snp_filter | AC=17;AF=0.266;AN=64;BaseQRankSum= |
| 17117 | chrY | 13251843 | . | C | G | 1095.54  | my_snp_filter | AC=8;AF=0.114;AN=70;BaseQRankSum=  |
| 17118 | chrY | 13251844 | . | C | T | 1098.54  | my_snp_filter | AC=8;AF=0.114;AN=70;BaseQRankSum=  |
| 17119 | chrY | 13251880 | . | T | C | 216.45   | PASS          | AC=4;AF=0.057;AN=70;BaseQRankSum=  |
| 17120 | chrY | 13251896 | . | A | C | 52.44    | PASS          | AC=1;AF=0.014;AN=70;BaseQRankSum=  |
| 17121 | chrY | 13252001 | . | T | A | 106.11   | PASS          | AC=2;AF=0.029;AN=70;BaseQRankSum=  |
| 17122 | chrY | 13252012 | . | G | A | 124.56   | PASS          | AC=3;AF=0.044;AN=68;BaseQRankSum=  |
| 17123 | chrY | 13252044 | . | C | T | 131.97   | my_snp_filter | AC=4;AF=0.061;AN=66;BaseQRankSum=  |
| 17124 | chrY | 13252070 | . | A | G | 412.39   | PASS          | AC=4;AF=0.061;AN=66;BaseQRankSum=  |
| 17125 | chrY | 13252077 | . | A | C | 423.08   | PASS          | AC=4;AF=0.059;AN=68;BaseQRankSum=  |
| 17126 | chrY | 13252256 | . | G | A | 116.24   | PASS          | AC=2;AF=0.030;AN=66;BaseQRankSum=  |
| 17127 | chrY | 13252257 | . | A | C | 117.10   | PASS          | AC=2;AF=0.030;AN=66;BaseQRankSum=  |
| 17128 | chrY | 13252380 | . | C | A | 2194.03  | my_snp_filter | AC=11;AF=0.183;AN=60;BaseQRankSum= |
| 17129 | chrY | 13252388 | . | C | T | 2507.82  | my_snp_filter | AC=11;AF=0.196;AN=56;BaseQRankSum= |
| 17130 | chrY | 13252395 | . | T | G | 2723.09  | PASS          | AC=11;AF=0.196;AN=56;BaseQRankSum= |
| 17131 | chrY | 13252413 | . | C | A | 3877.09  | PASS          | AC=11;AF=0.204;AN=54;BaseQRankSum= |
| 17132 | chrY | 13252415 | . | A | C | 389.80   | PASS          | AC=7;AF=0.125;AN=56;BaseQRankSum=  |
| 17133 | chrY | 13252419 | . | G | A | 3860.08  | PASS          | AC=12;AF=0.222;AN=54;BaseQRankSum= |
| 17134 | chrY | 13252448 | . | C | A | 1932.82  | PASS          | AC=11;AF=0.239;AN=46;BaseQRankSum= |
| 17135 | chrY | 13252511 | . | C | A | 906.08   | PASS          | AC=6;AF=0.200;AN=30;BaseQRankSum=  |
| 17136 | chrY | 13252520 | . | G | C | 144.27   | PASS          | AC=2;AF=0.056;AN=36;BaseQRankSum=  |
| 17137 | chrY | 13252524 | . | C | T | 67.86    | PASS          | AC=1;AF=0.028;AN=36;BaseQRankSum=  |
| 17138 | chrY | 13252528 | . | A | G | 71.96    | PASS          | AC=1;AF=0.026;AN=38;BaseQRankSum=  |
| 17139 | chrY | 13252538 | . | G | A | 129.70   | PASS          | AC=1;AF=0.025;AN=40;BaseQRankSum=  |
| 17140 | chrY | 13252540 | . | G | A | 147.35   | PASS          | AC=1;AF=0.024;AN=42;BaseQRankSum=  |
| 17141 | chrY | 13252543 | . | A | G | 140.18   | PASS          | AC=1;AF=0.023;AN=44;BaseQRankSum=  |
| 17142 | chrY | 13252546 | . | C | T | 128.12   | PASS          | AC=1;AF=0.023;AN=44;BaseQRankSum=  |
| 17143 | chrY | 13252551 | . | T | G | 194.63   | PASS          | AC=2;AF=0.048;AN=42;BaseQRankSum=  |
| 17144 | chrY | 13252561 | . | G | T | 160.29   | PASS          | AC=2;AF=0.048;AN=42;BaseQRankSum=  |
| 17145 | chrY | 13252572 | . | C | T | 144.42   | PASS          | AC=2;AF=0.050;AN=40;BaseQRankSum=  |
| 17146 | chrY | 13252573 | . | T | G | 293.32   | PASS          | AC=6;AF=0.167;AN=36;BaseQRankSum=  |
| 17147 | chrY | 13252666 | . | T | C | 284.13   | PASS          | AC=2;AF=0.034;AN=58;BaseQRankSum=  |
| 17148 | chrY | 13252668 | . | G | C | 1622.59  | PASS          | AC=8;AF=0.148;AN=54;BaseQRankSum=  |
| 17149 | chrY | 13252676 | . | A | C | 338.03   | PASS          | AC=2;AF=0.034;AN=58;BaseQRankSum=  |
| 17150 | chrY | 13252677 | . | G | A | 350.98   | PASS          | AC=2;AF=0.034;AN=58;BaseQRankSum=  |
| 17151 | chrY | 13252701 | . | G | A | 292.02   | PASS          | AC=5;AF=0.086;AN=58;BaseQRankSum=  |
| 17152 | chrY | 13252703 | . | G | T | 322.72   | PASS          | AC=2;AF=0.033;AN=60;BaseQRankSum=  |
| 17153 | chrY | 13252722 | . | A | G | 125.57   | PASS          | AC=1;AF=0.017;AN=58;BaseQRankSum=  |
| 17154 | chrY | 13252724 | . | G | C | 255.65   | PASS          | AC=10;AF=0.185;AN=54;BaseQRankSum= |
| 17155 | chrY | 13252726 | . | T | C | 39.53    | PASS          | AC=1;AF=0.017;AN=58;BaseQRankSum=  |
| 17156 | chrY | 13252732 | . | G | A | 49.53    | PASS          | AC=1;AF=0.017;AN=58;BaseQRankSum=  |
| 17157 | chrY | 13252735 | . | C | A | 267.94   | PASS          | AC=2;AF=0.034;AN=58;BaseQRankSum=  |
| 17158 | chrY | 13252739 | . | A | G | 231.21   | PASS          | AC=2;AF=0.034;AN=58;BaseQRankSum=  |
| 17159 | chrY | 13252749 | . | A | G | 213.95   | PASS          | AC=2;AF=0.036;AN=56;BaseQRankSum=  |
| 17160 | chrY | 13252766 | . | C | T | 72.88    | PASS          | AC=2;AF=0.045;AN=44;BaseQRankSum=  |
| 17161 | chrY | 13252774 | . | C | T | 58.56    | PASS          | AC=1;AF=0.020;AN=50;BaseQRankSum=  |
| 17162 | chrY | 13252777 | . | A | G | 74.62    | PASS          | AC=1;AF=0.020;AN=50;BaseQRankSum=  |
| 17163 | chrY | 13252779 | . | C | T | 256.16   | PASS          | AC=1;AF=0.022;AN=46;BaseQRankSum=  |
| 17164 | chrY | 13252780 | . | G | A | 57.43    | PASS          | AC=1;AF=0.022;AN=46;BaseQRankSum=  |
| 17165 | chrY | 13252784 | . | T | G | 108.28   | PASS          | AC=1;AF=0.029;AN=34;BaseQRankSum=  |
| 17166 | chrY | 13252795 | . | A | G | 299.88   | PASS          | AC=1;AF=0.021;AN=48;BaseQRankSum=  |
| 17167 | chrY | 13252803 | . | C | T | 224.67   | PASS          | AC=1;AF=0.016;AN=62;BaseQRankSum=  |
| 17168 | chrY | 13252842 | . | A | T | 1571.90  | PASS          | AC=16;AF=0.296;AN=54;BaseQRankSum= |
| 17169 | chrY | 13252869 | . | G | A | 2542.46  | PASS          | AC=21;AF=0.328;AN=64;BaseQRankSum= |
| 17170 | chrY | 13252901 | . | C | T | 90.48    | PASS          | AC=2;AF=0.030;AN=66;BaseQRankSum=  |
| 17171 | chrY | 13252913 | . | G | A | 1613.78  | PASS          | AC=19;AF=0.279;AN=68;BaseQRankSum= |
| 17172 | chrY | 13252936 | . | C | T | 331.15   | my_snp_filter | AC=6;AF=0.088;AN=68;BaseQRankSum=  |
| 17173 | chrY | 13252941 | . | G | T | 2181.07  | PASS          | AC=21;AF=0.309;AN=68;BaseQRankSum= |
| 17174 | chrY | 13252956 | . | A | T | 205.68   | my_snp_filter | AC=4;AF=0.059;AN=68;BaseQRankSum=  |
| 17175 | chrY | 13252978 | . | G | A | 631.44   | PASS          | AC=7;AF=0.106;AN=66;BaseQRankSum=  |
| 17176 | chrY | 13253002 | . | T | A | 845.69   | PASS          | AC=9;AF=0.150;AN=60;BaseQRankSum=  |

|       |      |          |   |   |   |          |               |                                    |
|-------|------|----------|---|---|---|----------|---------------|------------------------------------|
| 17177 | chrY | 13253035 | . | G | C | 2951.34  | PASS          | AC=15;AF=0.313;AN=48;BaseQRankSum= |
| 17178 | chrY | 13253040 | . | C | A | 1072.06  | PASS          | AC=7;AF=0.159;AN=44;BaseQRankSum=  |
| 17179 | chrY | 13253057 | . | C | T | 1039.64  | PASS          | AC=7;AF=0.159;AN=44;BaseQRankSum=  |
| 17180 | chrY | 13253096 | . | T | G | 1007.74  | PASS          | AC=6;AF=0.136;AN=44;BaseQRankSum=  |
| 17181 | chrY | 13253111 | . | G | A | 1216.98  | PASS          | AC=7;AF=0.152;AN=46;BaseQRankSum=  |
| 17182 | chrY | 13253161 | . | G | A | 151.48   | PASS          | AC=4;AF=0.095;AN=42;BaseQRankSum=  |
| 17183 | chrY | 13253173 | . | A | C | 171.02   | PASS          | AC=4;AF=0.091;AN=44;BaseQRankSum=  |
| 17184 | chrY | 13253192 | . | C | T | 61.33    | PASS          | AC=2;AF=0.071;AN=28;BaseQRankSum=  |
| 17185 | chrY | 13253212 | . | T | C | 59.31    | PASS          | AC=2;AF=0.050;AN=40;BaseQRankSum=  |
| 17186 | chrY | 13253262 | . | G | T | 4423.29  | PASS          | AC=22;AF=0.440;AN=50;BaseQRankSum= |
| 17187 | chrY | 13253267 | . | A | C | 4766.86  | PASS          | AC=23;AF=0.442;AN=52;BaseQRankSum= |
| 17188 | chrY | 13253274 | . | T | C | 5240.35  | PASS          | AC=22;AF=0.393;AN=56;BaseQRankSum= |
| 17189 | chrY | 13253314 | . | G | T | 6726.81  | PASS          | AC=36;AF=0.563;AN=64;BaseQRankSum= |
| 17190 | chrY | 13253361 | . | C | T | 106.59   | PASS          | AC=2;AF=0.029;AN=70;BaseQRankSum=  |
| 17191 | chrY | 13253376 | . | C | G | 107.93   | PASS          | AC=1;AF=0.014;AN=70;BaseQRankSum=  |
| 17192 | chrY | 13253383 | . | A | T | 115.09   | PASS          | AC=1;AF=0.015;AN=68;BaseQRankSum=  |
| 17193 | chrY | 13253393 | . | T | C | 7244.81  | PASS          | AC=32;AF=0.593;AN=54;BaseQRankSum= |
| 17194 | chrY | 13253395 | . | G | A | 7492.56  | PASS          | AC=32;AF=0.593;AN=54;BaseQRankSum= |
| 17195 | chrY | 13253409 | . | C | T | 553.85   | PASS          | AC=4;AF=0.065;AN=62;BaseQRankSum=  |
| 17196 | chrY | 13253410 | . | C | T | 504.92   | PASS          | AC=4;AF=0.065;AN=62;BaseQRankSum=  |
| 17197 | chrY | 13253412 | . | C | T | 132.09   | PASS          | AC=1;AF=0.016;AN=62;BaseQRankSum=  |
| 17198 | chrY | 13253427 | . | C | T | 2560.16  | my_snp_filter | AC=27;AF=0.435;AN=62;BaseQRankSum= |
| 17199 | chrY | 13253488 | . | C | T | 5817.12  | my_snp_filter | AC=28;AF=0.452;AN=62;BaseQRankSum= |
| 17200 | chrY | 13253498 | . | C | T | 1358.35  | PASS          | AC=13;AF=0.197;AN=66;BaseQRankSum= |
| 17201 | chrY | 13253503 | . | G | A | 4863.23  | my_snp_filter | AC=21;AF=0.375;AN=56;BaseQRankSum= |
| 17202 | chrY | 13253523 | . | G | A | 1873.21  | PASS          | AC=14;AF=0.219;AN=64;BaseQRankSum= |
| 17203 | chrY | 13253526 | . | T | C | 4086.48  | PASS          | AC=17;AF=0.274;AN=62;BaseQRankSum= |
| 17204 | chrY | 13253531 | . | G | C | 3659.33  | PASS          | AC=17;AF=0.274;AN=62;BaseQRankSum= |
| 17205 | chrY | 13253535 | . | C | T | 3368     | PASS          | AC=17;AF=0.283;AN=60;BaseQRankSum= |
| 17206 | chrY | 13253558 | . | G | C | 40.45    | PASS          | AC=1;AF=0.015;AN=66;BaseQRankSum=  |
| 17207 | chrY | 13253561 | . | G | C | 42.57    | PASS          | AC=1;AF=0.015;AN=66;BaseQRankSum=  |
| 17208 | chrY | 13253567 | . | A | G | 44.15    | PASS          | AC=1;AF=0.015;AN=68;BaseQRankSum=  |
| 17209 | chrY | 13253575 | . | G | T | 49.25    | PASS          | AC=1;AF=0.015;AN=68;BaseQRankSum=  |
| 17210 | chrY | 13253578 | . | T | C | 416.63   | PASS          | AC=6;AF=0.086;AN=70;BaseQRankSum=  |
| 17211 | chrY | 13253639 | . | T | C | 794.02   | PASS          | AC=8;AF=0.125;AN=64;BaseQRankSum=  |
| 17212 | chrY | 13253694 | . | T | C | 617.94   | PASS          | AC=3;AF=0.056;AN=54;BaseQRankSum=  |
| 17213 | chrY | 13253705 | . | T | C | 587.10   | PASS          | AC=3;AF=0.058;AN=52;BaseQRankSum=  |
| 17214 | chrY | 13253708 | . | A | T | 654.69   | PASS          | AC=4;AF=0.077;AN=52;BaseQRankSum=  |
| 17215 | chrY | 13253718 | . | C | T | 123.36   | PASS          | AC=3;AF=0.058;AN=52;BaseQRankSum=  |
| 17216 | chrY | 13253724 | . | T | G | 663.21   | PASS          | AC=4;AF=0.080;AN=50;BaseQRankSum=  |
| 17217 | chrY | 13253729 | . | C | A | 623.26   | PASS          | AC=4;AF=0.083;AN=48;BaseQRankSum=  |
| 17218 | chrY | 13253740 | . | C | G | 295.84   | PASS          | AC=3;AF=0.065;AN=46;BaseQRankSum=  |
| 17219 | chrY | 13253741 | . | G | T | 522.73   | PASS          | AC=4;AF=0.087;AN=46;BaseQRankSum=  |
| 17220 | chrY | 13253750 | . | C | G | 263.07   | PASS          | AC=3;AF=0.065;AN=46;BaseQRankSum=  |
| 17221 | chrY | 13253753 | . | C | G | 236.76   | PASS          | AC=3;AF=0.065;AN=46;BaseQRankSum=  |
| 17222 | chrY | 13253759 | . | G | A | 289.04   | PASS          | AC=2;AF=0.042;AN=48;BaseQRankSum=  |
| 17223 | chrY | 13253782 | . | A | G | 609.12   | PASS          | AC=6;AF=0.130;AN=46;BaseQRankSum=  |
| 17224 | chrY | 13253829 | . | A | T | 215.86   | my_snp_filter | AC=7;AF=0.109;AN=64;BaseQRankSum=  |
| 17225 | chrY | 13253917 | . | A | G | 109.53   | PASS          | AC=3;AF=0.047;AN=64;BaseQRankSum=  |
| 17226 | chrY | 13253923 | . | T | G | 179.81   | PASS          | AC=3;AF=0.047;AN=64;BaseQRankSum=  |
| 17227 | chrY | 13253947 | . | T | G | 922.32   | PASS          | AC=3;AF=0.048;AN=62;BaseQRankSum=  |
| 17228 | chrY | 13253951 | . | C | G | 922.74   | PASS          | AC=3;AF=0.052;AN=58;BaseQRankSum=  |
| 17229 | chrY | 13253993 | . | T | C | 7606.41  | my_snp_filter | AC=27;AF=0.409;AN=66;BaseQRankSum= |
| 17230 | chrY | 13254012 | . | T | A | 10295.91 | PASS          | AC=30;AF=0.455;AN=66;BaseQRankSum= |
| 17231 | chrY | 13254034 | . | C | G | 12474.74 | PASS          | AC=32;AF=0.485;AN=66;BaseQRankSum= |
| 17232 | chrY | 13254062 | . | C | T | 17636.25 | PASS          | AC=33;AF=0.471;AN=70;BaseQRankSum= |
| 17233 | chrY | 13254082 | . | C | T | 17576.62 | PASS          | AC=30;AF=0.441;AN=68;BaseQRankSum= |
| 17234 | chrY | 13254088 | . | C | T | 17319.31 | PASS          | AC=30;AF=0.455;AN=66;BaseQRankSum= |
| 17235 | chrY | 13254106 | . | C | G | 82.46    | my_snp_filter | AC=4;AF=0.059;AN=68;BaseQRankSum=  |
| 17236 | chrY | 13254123 | . | T | G | 11667.43 | PASS          | AC=25;AF=0.379;AN=66;BaseQRankSum= |
| 17237 | chrY | 13254128 | . | C | T | 11328.97 | PASS          | AC=24;AF=0.353;AN=68;BaseQRankSum= |
| 17238 | chrY | 13254144 | . | T | C | 9138.88  | PASS          | AC=25;AF=0.379;AN=66;BaseQRankSum= |
| 17239 | chrY | 13254160 | . | C | T | 5003.89  | PASS          | AC=14;AF=0.219;AN=64;BaseQRankSum= |
| 17240 | chrY | 13254163 | . | T | C | 4923.16  | PASS          | AC=14;AF=0.219;AN=64;BaseQRankSum= |
| 17241 | chrY | 13254175 | . | A | G | 3377.14  | PASS          | AC=11;AF=0.167;AN=66;BaseQRankSum= |
| 17242 | chrY | 13254187 | . | A | G | 2595.17  | PASS          | AC=9;AF=0.136;AN=66;BaseQRankSum=  |
| 17243 | chrY | 13254228 | . | C | T | 4188.95  | PASS          | AC=20;AF=0.294;AN=68;BaseQRankSum= |
| 17244 | chrY | 13254267 | . | G | A | 6312.54  | PASS          | AC=29;AF=0.414;AN=70;BaseQRankSum= |
| 17245 | chrY | 13254302 | . | G | A | 7210.23  | PASS          | AC=27;AF=0.386;AN=70;BaseQRankSum= |
| 17246 | chrY | 13254331 | . | G | T | 6194.94  | PASS          | AC=21;AF=0.309;AN=68;BaseQRankSum= |
| 17247 | chrY | 13254337 | . | G | A | 5757.71  | PASS          | AC=22;AF=0.333;AN=66;BaseQRankSum= |
| 17248 | chrY | 13254379 | . | G | T | 6452.54  | PASS          | AC=23;AF=0.329;AN=70;BaseQRankSum= |
| 17249 | chrY | 13254388 | . | A | G | 10304.82 | PASS          | AC=29;AF=0.426;AN=68;BaseQRankSum= |
| 17250 | chrY | 13254415 | . | C | T | 6667.79  | PASS          | AC=29;AF=0.439;AN=66;BaseQRankSum= |
| 17251 | chrY | 13254434 | . | G | T | 609.09   | PASS          | AC=10;AF=0.143;AN=70;BaseQRankSum= |
| 17252 | chrY | 13254477 | . | G | T | 7537.51  | PASS          | AC=20;AF=0.323;AN=62;BaseQRankSum= |

|       |      |          |   |   |   |          |               |                                   |
|-------|------|----------|---|---|---|----------|---------------|-----------------------------------|
| 17253 | chrY | 13254482 | . | C | T | 7437.56  | PASS          | AC=18;AF=0.290;AN=62;BaseQRankSum |
| 17254 | chrY | 13254488 | . | G | A | 7265.23  | PASS          | AC=17;AF=0.304;AN=56;BaseQRankSum |
| 17255 | chrY | 13254491 | . | C | T | 32       | my_snp_filter | AC=1;AF=0.015;AN=66;BaseQ         |
| 17256 | chrY | 13254498 | . | C | T | 143.76   | PASS          | AC=4;AF=0.061;AN=66;BaseQRankSum= |
| 17257 | chrY | 13254507 | . | C | G | 5944.92  | PASS          | AC=13;AF=0.217;AN=60;BaseQRankSum |
| 17258 | chrY | 13254529 | . | C | A | 557.64   | PASS          | AC=9;AF=0.155;AN=58;BaseQRankSum= |
| 17259 | chrY | 13254539 | . | C | G | 642.27   | PASS          | AC=9;AF=0.136;AN=66;BaseQRankSum= |
| 17260 | chrY | 13254586 | . | C | T | 8260.35  | PASS          | AC=25;AF=0.368;AN=68;BaseQRankSum |
| 17261 | chrY | 13254597 | . | C | T | 8245.43  | my_snp_filter | AC=23;AF=0.348;AN=66;Base         |
| 17262 | chrY | 13254602 | . | C | T | 7851.53  | my_snp_filter | AC=23;AF=0.371;AN=62;Base         |
| 17263 | chrY | 13254613 | . | T | G | 6821.32  | my_snp_filter | AC=22;AF=0.367;AN=60;Base         |
| 17264 | chrY | 13254615 | . | C | G | 6593.21  | my_snp_filter | AC=22;AF=0.379;AN=58;Base         |
| 17265 | chrY | 13254626 | . | G | A | 1434.94  | PASS          | AC=19;AF=0.297;AN=64;BaseQRankSum |
| 17266 | chrY | 13254634 | . | T | A | 43.93    | PASS          | AC=1;AF=0.015;AN=66;BaseQRankSum= |
| 17267 | chrY | 13254657 | . | A | G | 189.28   | PASS          | AC=5;AF=0.081;AN=62;BaseQRankSum= |
| 17268 | chrY | 13254675 | . | A | C | 2594.73  | my_snp_filter | AC=10;AF=0.172;AN=58;Base         |
| 17269 | chrY | 13254678 | . | T | C | 2662.91  | my_snp_filter | AC=11;AF=0.196;AN=56;Base         |
| 17270 | chrY | 13254680 | . | C | T | 77.64    | PASS          | AC=2;AF=0.032;AN=62;BaseQRankSum= |
| 17271 | chrY | 13254693 | . | G | C | 1292.62  | PASS          | AC=7;AF=0.113;AN=62;BaseQRankSum= |
| 17272 | chrY | 13254695 | . | G | T | 1264.04  | PASS          | AC=7;AF=0.113;AN=62;BaseQRankSum= |
| 17273 | chrY | 13254702 | . | C | T | 647.72   | PASS          | AC=6;AF=0.094;AN=64;BaseQRankSum= |
| 17274 | chrY | 13254709 | . | A | T | 484.37   | PASS          | AC=5;AF=0.078;AN=64;BaseQRankSum= |
| 17275 | chrY | 13254809 | . | C | T | 199.65   | PASS          | AC=2;AF=0.036;AN=56;BaseQRankSum= |
| 17276 | chrY | 13254860 | . | G | A | 489.65   | PASS          | AC=11;AF=0.162;AN=68;BaseQRankSum |
| 17277 | chrY | 13254876 | . | C | T | 5277.18  | PASS          | AC=28;AF=0.424;AN=66;BaseQRankSum |
| 17278 | chrY | 13254894 | . | C | T | 317.38   | my_snp_filter | AC=9;AF=0.132;AN=68;BaseQ         |
| 17279 | chrY | 13254897 | . | A | G | 364.87   | PASS          | AC=5;AF=0.074;AN=68;BaseQRankSum= |
| 17280 | chrY | 13254948 | . | G | A | 4009.82  | PASS          | AC=22;AF=0.344;AN=64;BaseQRankSum |
| 17281 | chrY | 13254965 | . | T | A | 2371.64  | PASS          | AC=12;AF=0.240;AN=50;BaseQRankSum |
| 17282 | chrY | 13254978 | . | C | T | 1338.83  | PASS          | AC=7;AF=0.113;AN=62;BaseQRankSum= |
| 17283 | chrY | 13255082 | . | G | A | 44.80    | PASS          | AC=1;AF=0.016;AN=64;BaseQRankSum= |
| 17284 | chrY | 13255098 | . | G | A | 44.32    | PASS          | AC=1;AF=0.015;AN=68;BaseQRankSum= |
| 17285 | chrY | 13255104 | . | A | C | 67.81    | PASS          | AC=2;AF=0.029;AN=68;BaseQRankSum= |
| 17286 | chrY | 13255294 | . | C | T | 1617.39  | PASS          | AC=16;AF=0.258;AN=62;BaseQRankSum |
| 17287 | chrY | 13255515 | . | A | G | 212.96   | PASS          | AC=2;AF=0.032;AN=62;BaseQRankSum= |
| 17288 | chrY | 13255665 | . | C | T | 668.18   | PASS          | AC=4;AF=0.091;AN=44;BaseQRankSum= |
| 17289 | chrY | 13255676 | . | C | T | 710.43   | PASS          | AC=4;AF=0.077;AN=52;BaseQRankSum= |
| 17290 | chrY | 13255687 | . | C | T | 713.59   | PASS          | AC=4;AF=0.077;AN=52;BaseQRankSum= |
| 17291 | chrY | 13255692 | . | C | G | 738.84   | PASS          | AC=4;AF=0.077;AN=52;BaseQRankSum= |
| 17292 | chrY | 13255715 | . | A | T | 216.99   | PASS          | AC=4;AF=0.077;AN=52;DP=234;FS=0.0 |
| 17293 | chrY | 13255722 | . | A | G | 84.23    | my_snp_filter | AC=4;AF=0.074;AN=54;BaseQ         |
| 17294 | chrY | 13255769 | . | G | A | 642.57   | PASS          | AC=3;AF=0.052;AN=58;BaseQRankSum= |
| 17295 | chrY | 13255774 | . | T | C | 612.05   | PASS          | AC=3;AF=0.050;AN=60;BaseQRankSum= |
| 17296 | chrY | 13255777 | . | C | G | 613.55   | PASS          | AC=3;AF=0.050;AN=60;BaseQRankSum= |
| 17297 | chrY | 13255784 | . | G | C | 574.12   | PASS          | AC=3;AF=0.047;AN=64;BaseQRankSum= |
| 17298 | chrY | 13256015 | . | C | T | 74.06    | PASS          | AC=2;AF=0.033;AN=60;BaseQRankSum= |
| 17299 | chrY | 13256041 | . | G | A | 730.24   | PASS          | AC=12;AF=0.214;AN=56;BaseQRankSum |
| 17300 | chrY | 13256049 | . | T | G | 633.09   | PASS          | AC=3;AF=0.052;AN=58;BaseQRankSum= |
| 17301 | chrY | 13256061 | . | T | C | 1998.14  | PASS          | AC=14;AF=0.269;AN=52;BaseQRankSum |
| 17302 | chrY | 13256071 | . | C | A | 2064.09  | PASS          | AC=13;AF=0.250;AN=52;BaseQRankSum |
| 17303 | chrY | 13256107 | . | A | C | 3941.41  | PASS          | AC=17;AF=0.315;AN=54;BaseQRankSum |
| 17304 | chrY | 13256115 | . | C | A | 4317.04  | PASS          | AC=17;AF=0.370;AN=46;BaseQRankSum |
| 17305 | chrY | 13256126 | . | G | A | 41.11    | PASS          | AC=1;AF=0.016;AN=62;BaseQRankSum= |
| 17306 | chrY | 13256139 | . | C | G | 5167.82  | PASS          | AC=16;AF=0.308;AN=52;BaseQRankSum |
| 17307 | chrY | 13256143 | . | C | T | 5082.39  | PASS          | AC=16;AF=0.320;AN=50;BaseQRankSum |
| 17308 | chrY | 13256147 | . | C | T | 147.04   | PASS          | AC=1;AF=0.016;AN=64;BaseQRankSum= |
| 17309 | chrY | 13256151 | . | A | G | 5172.92  | PASS          | AC=17;AF=0.327;AN=52;BaseQRankSum |
| 17310 | chrY | 13256154 | . | T | C | 144      | PASS          | AC=1;AF=0.016;AN=64;BaseQRankSum= |
| 17311 | chrY | 13256166 | . | C | T | 146.63   | PASS          | AC=2;AF=0.032;AN=62;BaseQRankSum= |
| 17312 | chrY | 13256206 | . | G | A | 2743.15  | PASS          | AC=18;AF=0.321;AN=56;BaseQRankSum |
| 17313 | chrY | 13256236 | . | C | T | 1337.47  | PASS          | AC=11;AF=0.177;AN=62;BaseQRankSum |
| 17314 | chrY | 13256242 | . | A | T | 2253.39  | PASS          | AC=10;AF=0.167;AN=60;BaseQRankSum |
| 17315 | chrY | 13256249 | . | T | C | 35.26    | PASS          | AC=1;AF=0.015;AN=66;BaseQRankSum= |
| 17316 | chrY | 13256263 | . | C | T | 772.76   | PASS          | AC=14;AF=0.206;AN=68;BaseQRankSum |
| 17317 | chrY | 13256287 | . | G | T | 863.01   | PASS          | AC=13;AF=0.191;AN=68;BaseQRankSum |
| 17318 | chrY | 13256309 | . | C | A | 6992.87  | PASS          | AC=29;AF=0.426;AN=68;BaseQRankSum |
| 17319 | chrY | 13256323 | . | C | T | 15773.57 | PASS          | AC=30;AF=0.441;AN=68;Base         |
| 17320 | chrY | 13256336 | . | C | T | 82.29    | PASS          | AC=1;AF=0.014;AN=70;BaseQRankSum= |
| 17321 | chrY | 13256337 | . | C | G | 82.40    | PASS          | AC=1;AF=0.014;AN=70;BaseQRankSum= |
| 17322 | chrY | 13256360 | . | A | G | 73.59    | PASS          | AC=1;AF=0.014;AN=70;BaseQRankSum= |
| 17323 | chrY | 13256374 | . | G | A | 4615.65  | PASS          | AC=32;AF=0.457;AN=70;BaseQRankSum |
| 17324 | chrY | 13256376 | . | G | A | 73.01    | PASS          | AC=1;AF=0.014;AN=70;BaseQRankSum= |
| 17325 | chrY | 13256392 | . | C | T | 77.11    | my_snp_filter | AC=2;AF=0.029;AN=70;BaseQ         |
| 17326 | chrY | 13256416 | . | C | T | 54.23    | my_snp_filter | AC=2;AF=0.029;AN=68;BaseQ         |
| 17327 | chrY | 13256417 | . | C | A | 192.09   | PASS          | AC=3;AF=0.043;AN=70;BaseQRankSum= |
| 17328 | chrY | 13256418 | . | A | G | 6177.47  | my_snp_filter | AC=27;AF=0.397;AN=68;Base         |

|       |      |          |   |     |     |         |               |                                    |
|-------|------|----------|---|-----|-----|---------|---------------|------------------------------------|
| 17329 | chrY | 13256422 | . | A   | C   | 78.72   | PASS          | AC=2;AF=0.029;AN=70;BaseQRankSum=  |
| 17330 | chrY | 13256426 | . | G   | T   | 77.50   | PASS          | AC=2;AF=0.029;AN=70;BaseQRankSum=  |
| 17331 | chrY | 13256427 | . | C   | A   | 77.32   | PASS          | AC=2;AF=0.029;AN=70;BaseQRankSum=  |
| 17332 | chrY | 13256545 | . | C   | G   | 1082.83 | PASS          | AC=14;AF=0.241;AN=58;BaseQRankSum= |
| 17333 | chrY | 13257138 | . | G   | A   | 183.38  | PASS          | AC=4;AF=0.059;AN=68;BaseQRankSum=  |
| 17334 | chrY | 13257142 | . | A   | C   | 180.87  | PASS          | AC=4;AF=0.057;AN=70;BaseQRankSum=  |
| 17335 | chrY | 13257150 | . | G   | A   | 147.22  | PASS          | AC=3;AF=0.044;AN=68;BaseQRankSum=  |
| 17336 | chrY | 13257156 | . | G   | A   | 41.32   | PASS          | AC=1;AF=0.014;AN=70;BaseQRankSum=  |
| 17337 | chrY | 13257161 | . | A   | G   | 41.47   | PASS          | AC=1;AF=0.014;AN=70;BaseQRankSum=  |
| 17338 | chrY | 13257166 | . | T   | C   | 216.33  | PASS          | AC=4;AF=0.065;AN=62;BaseQRankSum=  |
| 17339 | chrY | 13257174 | . | G   | C   | 127.94  | PASS          | AC=2;AF=0.034;AN=58;BaseQRankSum=  |
| 17340 | chrY | 13257193 | . | C   | G   | 136.97  | PASS          | AC=2;AF=0.031;AN=64;BaseQRankSum=  |
| 17341 | chrY | 13257201 | . | T   | C   | 142.99  | PASS          | AC=2;AF=0.031;AN=64;BaseQRankSum=  |
| 17342 | chrY | 13257217 | . | A   | G   | 43.33   | PASS          | AC=1;AF=0.016;AN=64;BaseQRankSum=  |
| 17343 | chrY | 13257337 | . | C   | T   | 3240.22 | PASS          | AC=22;AF=0.355;AN=62;BaseQRankSum= |
| 17344 | chrY | 13257339 | . | A   | C   | 109.01  | PASS          | AC=1;AF=0.015;AN=68;BaseQRankSum=  |
| 17345 | chrY | 13257341 | . | T   | G   | 109     | PASS          | AC=1;AF=0.015;AN=68;BaseQRankSum=  |
| 17346 | chrY | 13257342 | . | C   | T   | 2553.19 | PASS          | AC=16;AF=0.235;AN=68;BaseQRankSum= |
| 17347 | chrY | 13257353 | . | C   | T   | 2737.88 | PASS          | AC=16;AF=0.229;AN=70;BaseQRankSum= |
| 17348 | chrY | 13257375 | . | T   | C   | 188.08  | PASS          | AC=3;AF=0.043;AN=70;BaseQRankSum=  |
| 17349 | chrY | 13257388 | . | C   | A   | 5637.23 | PASS          | AC=33;AF=0.471;AN=70;BaseQRankSum= |
| 17350 | chrY | 13257389 | . | G   | A   | 227.76  | PASS          | AC=3;AF=0.043;AN=70;BaseQRankSum=  |
| 17351 | chrY | 13257407 | . | G   | A   | 30.23   | my_snp_filter | AC=2;AF=0.029;AN=70;BaseQ          |
| 17352 | chrY | 13257428 | . | G   | T   | 8438.63 | PASS          | AC=28;AF=0.412;AN=68;BaseQRankSum= |
| 17353 | chrY | 13257440 | . | C   | T,* | 237.10  | PASS          | AC=5,1;AF=0.071,0.014;AN=70;BaseQ  |
| 17354 | chrY | 13257472 | . | A,* | A,* | 2528.68 | PASS          | AC=11,1;AF=0.177,0.016;AN=62;Base  |
| 17355 | chrY | 13257475 | . | T   | C,* | 2226.25 | PASS          | AC=11,1;AF=0.177,0.016;AN=62;Base  |
| 17356 | chrY | 13257494 | . | A   | G   | 672.88  | PASS          | AC=4;AF=0.063;AN=64;BaseQRankSum=  |
| 17357 | chrY | 13257496 | . | T   | C,* | 269.35  | PASS          | AC=2,1;AF=0.030,0.015;AN=66;BaseQ  |
| 17358 | chrY | 13257502 | . | T   | A   | 103.38  | PASS          | AC=2;AF=0.030;AN=66;BaseQRankSum=  |
| 17359 | chrY | 13257510 | . | T   | G   | 332.41  | PASS          | AC=2;AF=0.030;AN=66;BaseQRankSum=  |
| 17360 | chrY | 13257515 | . | A   | T,* | 381.88  | PASS          | AC=2,1;AF=0.032,0.016;AN=62;BaseQ  |
| 17361 | chrY | 13257526 | . | G   | A   | 238.43  | PASS          | AC=2;AF=0.038;AN=52;BaseQRankSum=  |
| 17362 | chrY | 13257534 | . | A   | C,* | 387.69  | PASS          | AC=3,1;AF=0.047,0.016;AN=64;BaseQ  |
| 17363 | chrY | 13257583 | . | T   | C   | 1555.97 | PASS          | AC=13;AF=0.197;AN=66;BaseQRankSum= |
| 17364 | chrY | 13257585 | . | C   | T   | 48.34   | PASS          | AC=1;AF=0.015;AN=68;BaseQRankSum=  |
| 17365 | chrY | 13257603 | . | G   | A   | 1566.68 | PASS          | AC=10;AF=0.167;AN=60;BaseQRankSum= |
| 17366 | chrY | 13257606 | . | C   | T   | 49.54   | PASS          | AC=1;AF=0.016;AN=62;BaseQRankSum=  |
| 17367 | chrY | 13257643 | . | G   | A   | 2319.98 | PASS          | AC=10;AF=0.156;AN=64;BaseQRankSum= |
| 17368 | chrY | 13257664 | . | G   | A   | 2034.87 | PASS          | AC=9;AF=0.145;AN=62;BaseQRankSum=  |
| 17369 | chrY | 13257668 | . | G   | T   | 1881.61 | PASS          | AC=10;AF=0.167;AN=60;BaseQRankSum= |
| 17370 | chrY | 13257685 | . | T   | C   | 31.66   | PASS          | AC=1;AF=0.015;AN=66;BaseQRankSum=  |
| 17371 | chrY | 13257709 | . | G   | A   | 254.44  | PASS          | AC=4;AF=0.067;AN=60;BaseQRankSum=  |
| 17372 | chrY | 13257723 | . | T   | C   | 113.84  | PASS          | AC=3;AF=0.044;AN=68;BaseQRankSum=  |
| 17373 | chrY | 13257771 | . | C   | A   | 56.17   | PASS          | AC=2;AF=0.029;AN=68;BaseQRankSum=  |
| 17374 | chrY | 13257773 | . | G   | A   | 53.47   | PASS          | AC=2;AF=0.029;AN=68;BaseQRankSum=  |
| 17375 | chrY | 13258031 | . | A   | C   | 416.67  | PASS          | AC=8;AF=0.138;AN=58;BaseQRankSum=  |
| 17376 | chrY | 13258092 | . | T   | C   | 83.33   | PASS          | AC=2;AF=0.032;AN=62;BaseQRankSum=  |
| 17377 | chrY | 13258099 | . | C   | T   | 59.27   | PASS          | AC=1;AF=0.016;AN=62;BaseQRankSum=  |
| 17378 | chrY | 13258115 | . | G   | A   | 2759.72 | PASS          | AC=18;AF=0.290;AN=62;BaseQRankSum= |
| 17379 | chrY | 13258227 | . | G   | C   | 1719.78 | my_snp_filter | AC=13;AF=0.232;AN=56;Base          |
| 17380 | chrY | 13258251 | . | G   | T   | 2190.55 | my_snp_filter | AC=15;AF=0.288;AN=52;Base          |
| 17381 | chrY | 13258279 | . | C   | T   | 1244.76 | my_snp_filter | AC=17;AF=0.266;AN=64;Base          |
| 17382 | chrY | 13258333 | . | A   | C   | 142.48  | PASS          | AC=2;AF=0.032;AN=62;BaseQRankSum=  |
| 17383 | chrY | 13258354 | . | G   | A   | 4229.72 | PASS          | AC=23;AF=0.397;AN=58;BaseQRankSum= |
| 17384 | chrY | 13258365 | . | T   | G   | 1619.09 | PASS          | AC=10;AF=0.156;AN=64;BaseQRankSum= |
| 17385 | chrY | 13258437 | . | C   | T   | 1069.73 | PASS          | AC=9;AF=0.180;AN=50;BaseQRankSum=  |
| 17386 | chrY | 13258454 | . | T   | G   | 168.30  | PASS          | AC=3;AF=0.052;AN=58;BaseQRankSum=  |
| 17387 | chrY | 13258455 | . | C   | T   | 84.14   | PASS          | AC=1;AF=0.017;AN=58;BaseQRankSum=  |
| 17388 | chrY | 13258465 | . | T   | A   | 106.83  | PASS          | AC=2;AF=0.037;AN=54;BaseQRankSum=  |
| 17389 | chrY | 13258466 | . | C   | T   | 99.66   | PASS          | AC=2;AF=0.037;AN=54;BaseQRankSum=  |
| 17390 | chrY | 13258475 | . | A   | C   | 848.47  | PASS          | AC=8;AF=0.154;AN=52;BaseQRankSum=  |
| 17391 | chrY | 13258504 | . | G   | A   | 254.93  | PASS          | AC=6;AF=0.107;AN=56;BaseQRankSum=  |
| 17392 | chrY | 13258549 | . | T   | C   | 65.75   | PASS          | AC=1;AF=0.022;AN=46;BaseQRankSum=  |
| 17393 | chrY | 13258629 | . | G   | A   | 354.02  | PASS          | AC=5;AF=0.086;AN=58;BaseQRankSum=  |
| 17394 | chrY | 13258631 | . | G   | A   | 114.02  | PASS          | AC=1;AF=0.017;AN=58;BaseQRankSum=  |
| 17395 | chrY | 13258632 | . | G   | A   | 121.61  | PASS          | AC=1;AF=0.017;AN=58;BaseQRankSum=  |
| 17396 | chrY | 13258662 | . | G   | T   | 537.14  | PASS          | AC=6;AF=0.111;AN=54;BaseQRankSum=  |
| 17397 | chrY | 13258666 | . | G   | A   | 107.19  | PASS          | AC=1;AF=0.018;AN=56;BaseQRankSum=  |
| 17398 | chrY | 13258671 | . | G   | A   | 110.51  | PASS          | AC=1;AF=0.018;AN=56;BaseQRankSum=  |
| 17399 | chrY | 13258684 | . | T   | G   | 517.23  | PASS          | AC=6;AF=0.111;AN=54;BaseQRankSum=  |
| 17400 | chrY | 13258690 | . | G   | C   | 483.26  | PASS          | AC=6;AF=0.111;AN=54;BaseQRankSum=  |
| 17401 | chrY | 13258696 | . | T   | C   | 450.38  | PASS          | AC=5;AF=0.096;AN=52;BaseQRankSum=  |
| 17402 | chrY | 13258700 | . | A   | G   | 450.96  | PASS          | AC=5;AF=0.096;AN=52;BaseQRankSum=  |
| 17403 | chrY | 13258746 | . | G   | T   | 305.57  | PASS          | AC=6;AF=0.125;AN=48;BaseQRankSum=  |
| 17404 | chrY | 13258756 | . | T   | C   | 374.16  | PASS          | AC=7;AF=0.146;AN=48;BaseQRankSum=  |

|       |      |          |   |   |   |          |               |                                    |
|-------|------|----------|---|---|---|----------|---------------|------------------------------------|
| 17405 | chrY | 13258771 | . | C | T | 579.94   | PASS          | AC=5;AF=0.100;AN=50;BaseQRankSum=  |
| 17406 | chrY | 13258793 | . | G | A | 1533     | PASS          | AC=14;AF=0.269;AN=52;BaseQRankSum= |
| 17407 | chrY | 13258840 | . | C | T | 41.72    | PASS          | AC=1;AF=0.016;AN=62;BaseQRankSum=  |
| 17408 | chrY | 13258861 | . | C | T | 5708.61  | PASS          | AC=24;AF=0.429;AN=56;BaseQRankSum= |
| 17409 | chrY | 13258894 | . | C | T | 9904.47  | PASS          | AC=23;AF=0.371;AN=62;BaseQRankSum= |
| 17410 | chrY | 13258909 | . | A | G | 10196.95 | PASS          | AC=25;AF=0.414;AN=58;BaseQRankSum= |
| 17411 | chrY | 13258924 | . | C | G | 8967.93  | PASS          | AC=24;AF=0.414;AN=58;BaseQRankSum= |
| 17412 | chrY | 13259011 | . | G | A | 297.80   | PASS          | AC=5;AF=0.078;AN=64;BaseQRankSum=  |
| 17413 | chrY | 13259029 | . | T | C | 255.01   | PASS          | AC=4;AF=0.063;AN=64;BaseQRankSum=  |
| 17414 | chrY | 13259068 | . | T | C | 1862.35  | PASS          | AC=8;AF=0.125;AN=64;BaseQRankSum=  |
| 17415 | chrY | 13259082 | . | G | A | 2010.26  | PASS          | AC=8;AF=0.125;AN=64;BaseQRankSum=  |
| 17416 | chrY | 13259132 | . | A | C | 3684.75  | my_snp_filter | AC=19;AF=0.297;AN=64;BaseQRankSum= |
| 17417 | chrY | 13259210 | . | G | A | 18352.30 | PASS          | AC=31;AF=0.456;AN=68;BaseQRankSum= |
| 17418 | chrY | 13259220 | . | T | A | 18962.58 | PASS          | AC=30;AF=0.441;AN=68;BaseQRankSum= |
| 17419 | chrY | 13259230 | . | C | T | 65.54    | my_snp_filter | AC=3;AF=0.043;AN=70;BaseQRankSum=  |
| 17420 | chrY | 13259306 | . | C | T | 3968.91  | PASS          | AC=12;AF=0.207;AN=58;BaseQRankSum= |
| 17421 | chrY | 13259326 | . | G | A | 4716.37  | PASS          | AC=12;AF=0.222;AN=54;BaseQRankSum= |
| 17422 | chrY | 13259362 | . | G | C | 1455.52  | PASS          | AC=11;AF=0.229;AN=48;BaseQRankSum= |
| 17423 | chrY | 13259378 | . | T | C | 232.81   | PASS          | AC=1;AF=0.017;AN=58;BaseQRankSum=  |
| 17424 | chrY | 13259400 | . | T | G | 550.19   | PASS          | AC=4;AF=0.083;AN=48;BaseQRankSum=  |
| 17425 | chrY | 13259447 | . | A | T | 38.26    | my_snp_filter | AC=1;AF=0.045;AN=22;BaseQRankSum=  |
| 17426 | chrY | 13259457 | . | C | T | 4806.68  | PASS          | AC=9;AF=0.321;AN=28;BaseQRankSum=  |
| 17427 | chrY | 13259542 | . | C | A | 58.79    | my_snp_filter | AC=1;AF=0.023;AN=44;BaseQRankSum=  |
| 17428 | chrY | 13259555 | . | C | T | 6031.35  | PASS          | AC=9;AF=0.167;AN=54;BaseQRankSum=  |
| 17429 | chrY | 13259570 | . | A | G | 4700.60  | PASS          | AC=9;AF=0.150;AN=60;BaseQRankSum=  |
| 17430 | chrY | 13259580 | . | G | A | 1391.38  | PASS          | AC=6;AF=0.100;AN=60;BaseQRankSum=  |
| 17431 | chrY | 13259598 | . | A | G | 1979.47  | PASS          | AC=9;AF=0.136;AN=66;BaseQRankSum=  |
| 17432 | chrY | 13259611 | . | G | T | 1929.71  | PASS          | AC=9;AF=0.132;AN=68;BaseQRankSum=  |
| 17433 | chrY | 13259643 | . | T | C | 1176.16  | PASS          | AC=9;AF=0.129;AN=70;BaseQRankSum=  |
| 17434 | chrY | 13259717 | . | A | G | 8201.54  | PASS          | AC=15;AF=0.214;AN=70;BaseQRankSum= |
| 17435 | chrY | 13259718 | . | G | T | 2913.38  | PASS          | AC=10;AF=0.143;AN=70;BaseQRankSum= |
| 17436 | chrY | 13259728 | . | G | A | 2807.94  | PASS          | AC=10;AF=0.143;AN=70;BaseQRankSum= |
| 17437 | chrY | 13259744 | . | G | T | 2054.03  | PASS          | AC=12;AF=0.171;AN=70;BaseQRankSum= |
| 17438 | chrY | 13259749 | . | A | G | 43.78    | my_snp_filter | AC=2;AF=0.029;AN=70;BaseQRankSum=  |
| 17439 | chrY | 13259750 | . | G | C | 2718.98  | PASS          | AC=9;AF=0.129;AN=70;BaseQRankSum=  |
| 17440 | chrY | 13259764 | . | G | A | 106.99   | PASS          | AC=2;AF=0.029;AN=70;BaseQRankSum=  |
| 17441 | chrY | 13259771 | . | T | A | 2532.40  | PASS          | AC=9;AF=0.136;AN=66;BaseQRankSum=  |
| 17442 | chrY | 13259796 | . | G | A | 1299.77  | PASS          | AC=6;AF=0.100;AN=60;BaseQRankSum=  |
| 17443 | chrY | 13259827 | . | G | C | 1835.92  | PASS          | AC=8;AF=0.154;AN=52;BaseQRankSum=  |
| 17444 | chrY | 13259828 | . | G | A | 6134.64  | PASS          | AC=9;AF=0.173;AN=52;BaseQRankSum=  |
| 17445 | chrY | 13259839 | . | T | A | 7812.62  | PASS          | AC=9;AF=0.180;AN=50;BaseQRankSum=  |
| 17446 | chrY | 13259842 | . | T | A | 2794.53  | PASS          | AC=9;AF=0.167;AN=54;BaseQRankSum=  |
| 17447 | chrY | 13259851 | . | T | C | 7411.17  | PASS          | AC=11;AF=0.229;AN=48;BaseQRankSum= |
| 17448 | chrY | 13259899 | . | T | C | 336.99   | my_snp_filter | AC=5;AF=0.100;AN=50;BaseQRankSum=  |
| 17449 | chrY | 13259914 | . | G | C | 319.95   | my_snp_filter | AC=5;AF=0.114;AN=44;BaseQRankSum=  |
| 17450 | chrY | 13259927 | . | C | T | 5495.29  | PASS          | AC=14;AF=0.467;AN=30;BaseQRankSum= |
| 17451 | chrY | 13259941 | . | T | G | 123.18   | my_snp_filter | AC=2;AF=0.071;AN=28;BaseQRankSum=  |
| 17452 | chrY | 13259958 | . | A | G | 4053.09  | PASS          | AC=9;AF=0.500;AN=18;BaseQRankSum=  |
| 17453 | chrY | 13259964 | . | G | C | 128.88   | my_snp_filter | AC=3;AF=0.125;AN=24;BaseQRankSum=  |
| 17454 | chrY | 13260009 | . | T | G | 1300.26  | PASS          | AC=7;AF=0.350;AN=20;BaseQRankSum=  |
| 17455 | chrY | 13260016 | . | G | C | 1075.25  | PASS          | AC=5;AF=0.250;AN=20;BaseQRankSum=  |
| 17456 | chrY | 13260018 | . | T | G | 969.57   | PASS          | AC=5;AF=0.250;AN=20;BaseQRankSum=  |
| 17457 | chrY | 13260024 | . | C | T | 705.15   | PASS          | AC=4;AF=0.200;AN=20;BaseQRankSum=  |
| 17458 | chrY | 13260051 | . | T | A | 123.40   | PASS          | AC=1;AF=0.056;AN=18;BaseQRankSum=  |
| 17459 | chrY | 13260073 | . | T | A | 1520.42  | PASS          | AC=7;AF=0.389;AN=18;BaseQRankSum=  |
| 17460 | chrY | 13260092 | . | T | C | 1930.05  | PASS          | AC=7;AF=0.389;AN=18;BaseQRankSum=  |
| 17461 | chrY | 13260145 | . | A | T | 62.42    | my_snp_filter | AC=1;AF=0.042;AN=24;BaseQRankSum=  |
| 17462 | chrY | 13260207 | . | C | T | 131.02   | my_snp_filter | AC=1;AF=0.042;AN=24;BaseQRankSum=  |
| 17463 | chrY | 13260233 | . | G | T | 2073.52  | PASS          | AC=9;AF=0.450;AN=20;BaseQRankSum=  |
| 17464 | chrY | 13260262 | . | T | C | 2809.52  | PASS          | AC=9;AF=0.450;AN=20;BaseQRankSum=  |
| 17465 | chrY | 13260296 | . | T | G | 520.51   | PASS          | AC=7;AF=0.389;AN=18;BaseQRankSum=  |
| 17466 | chrY | 13260314 | . | G | A | 696.98   | my_snp_filter | AC=8;AF=0.444;AN=18;BaseQRankSum=  |
| 17467 | chrY | 13260372 | . | T | A | 1374.01  | my_snp_filter | AC=8;AF=0.444;AN=18;BaseQRankSum=  |
| 17468 | chrY | 13260501 | . | T | G | 995.78   | PASS          | AC=4;AF=0.222;AN=18;BaseQRankSum=  |
| 17469 | chrY | 13260505 | . | G | T | 558.59   | PASS          | AC=3;AF=0.167;AN=18;BaseQRankSum=  |
| 17470 | chrY | 13260506 | . | G | A | 556.77   | PASS          | AC=3;AF=0.167;AN=18;BaseQRankSum=  |
| 17471 | chrY | 13260518 | . | G | A | 783.59   | PASS          | AC=4;AF=0.222;AN=18;BaseQRankSum=  |
| 17472 | chrY | 13260695 | . | C | T | 91.19    | PASS          | AC=1;AF=0.050;AN=20;BaseQRankSum=  |
| 17473 | chrY | 13260703 | . | G | C | 230.37   | PASS          | AC=3;AF=0.150;AN=20;BaseQRankSum=  |
| 17474 | chrY | 13260727 | . | A | G | 337.11   | PASS          | AC=3;AF=0.150;AN=20;BaseQRankSum=  |
| 17475 | chrY | 13260736 | . | G | A | 81.10    | my_snp_filter | AC=3;AF=0.150;AN=20;BaseQRankSum=  |
| 17476 | chrY | 13260843 | . | G | T | 5071.99  | my_snp_filter | AC=9;AF=0.409;AN=22;BaseQRankSum=  |
| 17477 | chrY | 13260848 | . | T | G | 4623.99  | my_snp_filter | AC=9;AF=0.409;AN=22;BaseQRankSum=  |
| 17478 | chrY | 13260851 | . | G | T | 30.88    | my_snp_filter | AC=2;AF=0.091;AN=22;BaseQRankSum=  |
| 17479 | chrY | 13260863 | . | T | G | 3465.34  | PASS          | AC=9;AF=0.450;AN=20;BaseQRankSum=  |
| 17480 | chrY | 13260866 | . | T | C | 55       | my_snp_filter | AC=2;AF=0.091;AN=22;BaseQRankSum=  |

|       |      |          |   |   |   |          |               |                                    |
|-------|------|----------|---|---|---|----------|---------------|------------------------------------|
| 17481 | chrY | 13260885 | . | G | A | 38.34    | my_snp_filter | AC=2;AF=0.091;AN=22;BaseQ          |
| 17482 | chrY | 13260894 | . | T | C | 82.45    | my_snp_filter | AC=2;AF=0.100;AN=20;BaseQ          |
| 17483 | chrY | 13260905 | . | C | A | 1761.08  | PASS          | AC=9;AF=0.409;AN=22;BaseQRankSum=  |
| 17484 | chrY | 13260984 | . | T | A | 488.17   | my_snp_filter | AC=5;AF=0.208;AN=24;BaseQ          |
| 17485 | chrY | 13261084 | . | C | T | 98.28    | my_snp_filter | AC=1;AF=0.045;AN=22;BaseQ          |
| 17486 | chrY | 13261085 | . | G | A | 510.79   | my_snp_filter | AC=5;AF=0.208;AN=24;BaseQ          |
| 17487 | chrY | 13261092 | . | G | A | 10471.34 | PASS          | AC=9;AF=0.450;AN=20;BaseQ          |
| 17488 | chrY | 13261134 | . | A | G | 3527.78  | PASS          | AC=9;AF=0.375;AN=24;BaseQRankSum=  |
| 17489 | chrY | 13261238 | . | G | A | 83.67    | my_snp_filter | AC=2;AF=0.083;AN=24;BaseQ          |
| 17490 | chrY | 13261243 | . | G | C | 2496.62  | PASS          | AC=8;AF=0.308;AN=26;BaseQRankSum=  |
| 17491 | chrY | 13261247 | . | T | C | 2423.74  | PASS          | AC=8;AF=0.308;AN=26;BaseQRankSum=  |
| 17492 | chrY | 13261255 | . | G | C | 1791.80  | PASS          | AC=9;AF=0.375;AN=24;BaseQRankSum=  |
| 17493 | chrY | 13261275 | . | G | A | 2124.48  | PASS          | AC=8;AF=0.333;AN=24;BaseQRankSum=  |
| 17494 | chrY | 13261276 | . | T | G | 871.87   | PASS          | AC=9;AF=0.375;AN=24;BaseQRankSum=  |
| 17495 | chrY | 13261289 | . | T | A | 2683.84  | my_snp_filter | AC=9;AF=0.375;AN=24;BaseQ          |
| 17496 | chrY | 13261301 | . | C | A | 179.93   | PASS          | AC=2;AF=0.083;AN=24;BaseQRankSum=  |
| 17497 | chrY | 13261324 | . | A | G | 172.94   | my_snp_filter | AC=2;AF=0.083;AN=24;BaseQ          |
| 17498 | chrY | 13261352 | . | G | A | 746.79   | PASS          | AC=5;AF=0.208;AN=24;BaseQRankSum=  |
| 17499 | chrY | 13261372 | . | G | A | 5388.52  | PASS          | AC=9;AF=0.450;AN=20;BaseQRankSum=  |
| 17500 | chrY | 13261454 | . | G | A | 328.91   | PASS          | AC=2;AF=0.111;AN=18;BaseQRankSum=  |
| 17501 | chrY | 13261551 | . | A | T | 752.44   | my_snp_filter | AC=7;AF=0.318;AN=22;BaseQ          |
| 17502 | chrY | 13261558 | . | T | C | 2960.65  | PASS          | AC=8;AF=0.444;AN=18;BaseQRankSum=  |
| 17503 | chrY | 13261570 | . | T | C | 47.55    | my_snp_filter | AC=2;AF=0.100;AN=20;BaseQ          |
| 17504 | chrY | 13261588 | . | T | C | 1556.10  | PASS          | AC=9;AF=0.500;AN=18;BaseQRankSum=  |
| 17505 | chrY | 13261638 | . | G | A | 1384.85  | PASS          | AC=7;AF=0.389;AN=18;BaseQRankSum=  |
| 17506 | chrY | 13261680 | . | G | T | 3931.09  | my_snp_filter | AC=9;AF=0.500;AN=18;BaseQ          |
| 17507 | chrY | 13261739 | . | C | T | 457.94   | PASS          | AC=5;AF=0.278;AN=18;BaseQRankSum=  |
| 17508 | chrY | 13261840 | . | A | C | 201.91   | PASS          | AC=4;AF=0.200;AN=20;BaseQRankSum=  |
| 17509 | chrY | 13261874 | . | C | T | 142.50   | PASS          | AC=2;AF=0.100;AN=20;BaseQRankSum=  |
| 17510 | chrY | 13261875 | . | A | G | 142.50   | PASS          | AC=2;AF=0.100;AN=20;BaseQRankSum=  |
| 17511 | chrY | 13261898 | . | G | C | 291.68   | PASS          | AC=3;AF=0.150;AN=20;BaseQRankSum=  |
| 17512 | chrY | 13261906 | . | G | A | 297.54   | PASS          | AC=3;AF=0.150;AN=20;BaseQRankSum=  |
| 17513 | chrY | 13261921 | . | G | T | 241.42   | my_snp_filter | AC=6;AF=0.333;AN=18;BaseQ          |
| 17514 | chrY | 13262017 | . | C | T | 4185.09  | PASS          | AC=9;AF=0.500;AN=18;BaseQRankSum=  |
| 17515 | chrY | 13262030 | . | G | T | 4761.38  | PASS          | AC=9;AF=0.500;AN=18;BaseQRankSum=  |
| 17516 | chrY | 13262052 | . | T | G | 2951.01  | PASS          | AC=8;AF=0.444;AN=18;BaseQRankSum=  |
| 17517 | chrY | 13262170 | . | T | C | 82.94    | my_snp_filter | AC=1;AF=0.050;AN=20;BaseQ          |
| 17518 | chrY | 13262214 | . | T | A | 1914.40  | PASS          | AC=8;AF=0.400;AN=20;BaseQRankSum=  |
| 17519 | chrY | 13262232 | . | G | A | 9675.52  | PASS          | AC=9;AF=0.450;AN=20;BaseQRankSum=  |
| 17520 | chrY | 13262256 | . | A | T | 4304.09  | PASS          | AC=9;AF=0.500;AN=18;BaseQRankSum=  |
| 17521 | chrY | 13262258 | . | G | A | 250.04   | my_snp_filter | AC=2;AF=0.111;AN=18;BaseQ          |
| 17522 | chrY | 13262312 | . | G | A | 5926.74  | PASS          | AC=11;AF=0.458;AN=24;BaseQRankSum= |
| 17523 | chrY | 13262313 | . | A | T | 3022.99  | PASS          | AC=9;AF=0.409;AN=22;BaseQRankSum=  |
| 17524 | chrY | 13262314 | . | G | A | 560.67   | PASS          | AC=2;AF=0.077;AN=26;BaseQRankSum=  |
| 17525 | chrY | 13262357 | . | A | G | 685.90   | my_snp_filter | AC=5;AF=0.208;AN=24;BaseQ          |
| 17526 | chrY | 13262413 | . | T | C | 1803.74  | PASS          | AC=5;AF=0.208;AN=24;BaseQRankSum=  |
| 17527 | chrY | 13262431 | . | G | A | 1622.92  | PASS          | AC=5;AF=0.208;AN=24;BaseQRankSum=  |
| 17528 | chrY | 13262477 | . | C | T | 398.47   | PASS          | AC=1;AF=0.028;AN=36;BaseQRankSum=  |
| 17529 | chrY | 13262482 | . | C | A | 4389.50  | PASS          | AC=14;AF=0.389;AN=36;BaseQRankSum= |
| 17530 | chrY | 13262546 | . | G | A | 544.40   | my_snp_filter | AC=3;AF=0.071;AN=42;BaseQ          |
| 17531 | chrY | 13262589 | . | G | A | 681.17   | PASS          | AC=2;AF=0.040;AN=50;BaseQRankSum=  |
| 17532 | chrY | 13262594 | . | C | G | 1350.52  | my_snp_filter | AC=10;AF=0.200;AN=50;BaseQ         |
| 17533 | chrY | 13262630 | . | C | T | 12598.21 | PASS          | AC=9;AF=0.155;AN=58;BaseQ          |
| 17534 | chrY | 13262651 | . | G | T | 2306.77  | PASS          | AC=9;AF=0.150;AN=60;BaseQRankSum=  |
| 17535 | chrY | 13262678 | . | G | A | 6282.61  | my_snp_filter | AC=10;AF=0.152;AN=66;BaseQ         |
| 17536 | chrY | 13262692 | . | A | G | 5024.21  | my_snp_filter | AC=10;AF=0.152;AN=66;BaseQ         |
| 17537 | chrY | 13262713 | . | G | C | 1319.25  | PASS          | AC=7;AF=0.117;AN=60;BaseQRankSum=  |
| 17538 | chrY | 13262747 | . | A | G | 5481.18  | my_snp_filter | AC=9;AF=0.150;AN=60;BaseQ          |
| 17539 | chrY | 13262752 | . | C | A | 5949.41  | my_snp_filter | AC=9;AF=0.161;AN=56;BaseQ          |
| 17540 | chrY | 13262769 | . | T | C | 3857.59  | PASS          | AC=9;AF=0.161;AN=56;BaseQRankSum=  |
| 17541 | chrY | 13262770 | . | G | A | 3209.92  | PASS          | AC=8;AF=0.129;AN=62;BaseQRankSum=  |
| 17542 | chrY | 13262792 | . | C | T | 1987.95  | PASS          | AC=6;AF=0.111;AN=54;BaseQRankSum=  |
| 17543 | chrY | 13262795 | . | C | T | 2474.33  | PASS          | AC=7;AF=0.125;AN=56;BaseQRankSum=  |
| 17544 | chrY | 13262826 | . | C | A | 61.94    | PASS          | AC=2;AF=0.031;AN=64;BaseQRankSum=  |
| 17545 | chrY | 13262831 | . | G | A | 247.04   | PASS          | AC=4;AF=0.063;AN=64;BaseQRankSum=  |
| 17546 | chrY | 13262836 | . | C | A | 1642.50  | PASS          | AC=2;AF=0.031;AN=64;BaseQRankSum=  |
| 17547 | chrY | 13262837 | . | A | G | 12549.52 | PASS          | AC=29;AF=0.500;AN=58;BaseQ         |
| 17548 | chrY | 13262840 | . | C | T | 151.37   | PASS          | AC=1;AF=0.016;AN=64;BaseQRankSum=  |
| 17549 | chrY | 13262843 | . | G | A | 3085.31  | PASS          | AC=20;AF=0.333;AN=60;BaseQRankSum= |
| 17550 | chrY | 13262844 | . | C | T | 1621.88  | PASS          | AC=2;AF=0.031;AN=64;BaseQRankSum=  |
| 17551 | chrY | 13262846 | . | C | G | 46.54    | PASS          | AC=2;AF=0.030;AN=66;BaseQRankSum=  |
| 17552 | chrY | 13262850 | . | C | G | 43.32    | PASS          | AC=2;AF=0.030;AN=66;BaseQRankSum=  |
| 17553 | chrY | 13262870 | . | G | C | 109.62   | my_snp_filter | AC=3;AF=0.045;AN=66;BaseQ          |
| 17554 | chrY | 13262908 | . | C | G | 20015.75 | PASS          | AC=44;AF=0.647;AN=68;BaseQ         |
| 17555 | chrY | 13262918 | . | A | T | 841.63   | PASS          | AC=6;AF=0.086;AN=70;BaseQRankSum=  |
| 17556 | chrY | 13262950 | . | G | A | 987.05   | PASS          | AC=6;AF=0.086;AN=70;BaseQRankSum=  |

|       |      |          |   |   |     |          |               |                                            |
|-------|------|----------|---|---|-----|----------|---------------|--------------------------------------------|
| 17557 | chrY | 13262958 | . | C | A   | 1141.01  | PASS          | AC=8;AF=0.114;AN=70;BaseQRankSum=          |
| 17558 | chrY | 13262996 | . | C | G   | 2308.65  | PASS          | AC=6;AF=0.086;AN=70;BaseQRankSum=          |
| 17559 | chrY | 13263010 | . | G | A   | 2231.66  | PASS          | AC=6;AF=0.086;AN=70;BaseQRankSum=          |
| 17560 | chrY | 13263091 | . | G | A   | 29743.19 | PASS          | AC=41;AF=0.641;AN=64;BaseQRankSum=         |
| 17561 | chrY | 13263103 | . | C | A   | 2113.48  | PASS          | AC=3;AF=0.044;AN=68;BaseQRankSum=          |
| 17562 | chrY | 13263115 | . | C | T   | 2254.40  | PASS          | AC=3;AF=0.044;AN=68;BaseQRankSum=          |
| 17563 | chrY | 13263118 | . | G | A   | 2155.57  | PASS          | AC=3;AF=0.045;AN=66;BaseQRankSum=          |
| 17564 | chrY | 13263170 | . | A | C,T | 23341.92 | PASS          | AC=24,2;AF=0.444,0.037;AN=64;BaseQRankSum= |
| 17565 | chrY | 13263175 | . | A | G   | 25140.46 | PASS          | AC=25;AF=0.481;AN=52;BaseQRankSum=         |
| 17566 | chrY | 13263194 | . | T | A   | 24523.70 | PASS          | AC=25;AF=0.463;AN=54;BaseQRankSum=         |
| 17567 | chrY | 13263262 | . | C | A   | 249.03   | PASS          | AC=2;AF=0.029;AN=68;BaseQRankSum=          |
| 17568 | chrY | 13263265 | . | T | G   | 18637.28 | PASS          | AC=40;AF=0.645;AN=62;BaseQRankSum=         |
| 17569 | chrY | 13263289 | . | G | A   | 961.07   | PASS          | AC=5;AF=0.076;AN=66;BaseQRankSum=          |
| 17570 | chrY | 13263304 | . | C | T   | 18770.68 | PASS          | AC=41;AF=0.641;AN=64;BaseQRankSum=         |
| 17571 | chrY | 13263345 | . | G | T   | 409.36   | PASS          | AC=4;AF=0.057;AN=70;BaseQRankSum=          |
| 17572 | chrY | 13263364 | . | A | G   | 33877.16 | PASS          | AC=32;AF=0.516;AN=62;BaseQRankSum=         |
| 17573 | chrY | 13263369 | . | C | G   | 1090.29  | PASS          | AC=6;AF=0.086;AN=70;BaseQRankSum=          |
| 17574 | chrY | 13263371 | . | C | T   | 7392.06  | PASS          | AC=18;AF=0.257;AN=70;BaseQRankSum=         |
| 17575 | chrY | 13263374 | . | C | G   | 36035.98 | PASS          | AC=32;AF=0.516;AN=62;BaseQRankSum=         |
| 17576 | chrY | 13263400 | . | C | T   | 7546.08  | PASS          | AC=16;AF=0.235;AN=68;BaseQRankSum=         |
| 17577 | chrY | 13263409 | . | T | C   | 36312.33 | PASS          | AC=31;AF=0.534;AN=58;BaseQRankSum=         |
| 17578 | chrY | 13263439 | . | G | T   | 34110.64 | PASS          | AC=29;AF=0.518;AN=56;BaseQRankSum=         |
| 17579 | chrY | 13263454 | . | T | C   | 32660.14 | PASS          | AC=29;AF=0.483;AN=60;BaseQRankSum=         |
| 17580 | chrY | 13263468 | . | G | A   | 6035.70  | PASS          | AC=21;AF=0.350;AN=60;BaseQRankSum=         |
| 17581 | chrY | 13263469 | . | G | C   | 29881.55 | PASS          | AC=26;AF=0.433;AN=60;BaseQRankSum=         |
| 17582 | chrY | 13263470 | . | T | A   | 29501.37 | PASS          | AC=26;AF=0.433;AN=60;BaseQRankSum=         |
| 17583 | chrY | 13263511 | . | C | T   | 15587.92 | PASS          | AC=30;AF=0.556;AN=54;BaseQRankSum=         |
| 17584 | chrY | 13263525 | . | G | A   | 129.72   | PASS          | AC=1;AF=0.016;AN=64;BaseQRankSum=          |
| 17585 | chrY | 13263555 | . | G | T   | 148.38   | my_snp_filter | AC=3;AF=0.045;AN=66;BaseQRankSum=          |
| 17586 | chrY | 13263562 | . | A | G   | 32.73    | my_snp_filter | AC=1;AF=0.015;AN=66;BaseQRankSum=          |
| 17587 | chrY | 13263571 | . | C | T   | 3088.15  | PASS          | AC=14;AF=0.226;AN=62;BaseQRankSum=         |
| 17588 | chrY | 13263602 | . | G | A   | 220.99   | my_snp_filter | AC=3;AF=0.047;AN=64;BaseQRankSum=          |
| 17589 | chrY | 13263604 | . | T | C   | 17803.24 | PASS          | AC=34;AF=0.586;AN=58;BaseQRankSum=         |
| 17590 | chrY | 13263606 | . | G | T   | 174.57   | my_snp_filter | AC=2;AF=0.031;AN=64;BaseQRankSum=          |
| 17591 | chrY | 13263608 | . | C | A   | 1034.86  | PASS          | AC=1;AF=0.015;AN=66;BaseQRankSum=          |
| 17592 | chrY | 13263609 | . | C | T   | 855.20   | PASS          | AC=6;AF=0.094;AN=64;BaseQRankSum=          |
| 17593 | chrY | 13263625 | . | G | A   | 1029.81  | PASS          | AC=1;AF=0.015;AN=68;BaseQRankSum=          |
| 17594 | chrY | 13263647 | . | G | A   | 7337.54  | PASS          | AC=18;AF=0.310;AN=58;BaseQRankSum=         |
| 17595 | chrY | 13263654 | . | C | A   | 239.11   | my_snp_filter | AC=4;AF=0.059;AN=68;BaseQRankSum=          |
| 17596 | chrY | 13263659 | . | C | G   | 204.05   | my_snp_filter | AC=4;AF=0.061;AN=66;BaseQRankSum=          |
| 17597 | chrY | 13263664 | . | G | T   | 328.02   | my_snp_filter | AC=5;AF=0.078;AN=64;BaseQRankSum=          |
| 17598 | chrY | 13263674 | . | G | A   | 1197.33  | PASS          | AC=5;AF=0.076;AN=66;BaseQRankSum=          |
| 17599 | chrY | 13263676 | . | T | A   | 15132.87 | PASS          | AC=18;AF=0.310;AN=58;BaseQRankSum=         |
| 17600 | chrY | 13263678 | . | C | T   | 9114.03  | PASS          | AC=17;AF=0.274;AN=62;BaseQRankSum=         |
| 17601 | chrY | 13263679 | . | G | T   | 15060.83 | PASS          | AC=18;AF=0.310;AN=58;BaseQRankSum=         |
| 17602 | chrY | 13263686 | . | C | G   | 568.37   | PASS          | AC=2;AF=0.030;AN=66;BaseQRankSum=          |
| 17603 | chrY | 13263692 | . | C | T   | 458.22   | my_snp_filter | AC=4;AF=0.065;AN=62;BaseQRankSum=          |
| 17604 | chrY | 13263694 | . | G | C   | 466.53   | my_snp_filter | AC=5;AF=0.081;AN=62;BaseQRankSum=          |
| 17605 | chrY | 13263697 | . | C | T   | 9984.71  | PASS          | AC=15;AF=0.242;AN=62;BaseQRankSum=         |
| 17606 | chrY | 13263700 | . | C | T   | 9854.75  | PASS          | AC=15;AF=0.234;AN=64;BaseQRankSum=         |
| 17607 | chrY | 13263702 | . | C | A   | 399.64   | my_snp_filter | AC=5;AF=0.081;AN=62;BaseQRankSum=          |
| 17608 | chrY | 13263735 | . | C | G   | 6394.29  | PASS          | AC=14;AF=0.206;AN=68;BaseQRankSum=         |
| 17609 | chrY | 13263758 | . | T | G   | 347.49   | my_snp_filter | AC=3;AF=0.044;AN=68;BaseQRankSum=          |
| 17610 | chrY | 13263760 | . | G | C   | 5288.76  | PASS          | AC=12;AF=0.176;AN=68;BaseQRankSum=         |
| 17611 | chrY | 13263766 | . | C | A   | 360.73   | my_snp_filter | AC=2;AF=0.030;AN=66;BaseQRankSum=          |
| 17612 | chrY | 13263770 | . | T | C   | 333.41   | my_snp_filter | AC=3;AF=0.047;AN=64;BaseQRankSum=          |
| 17613 | chrY | 13263773 | . | A | T   | 293.48   | my_snp_filter | AC=2;AF=0.031;AN=64;BaseQRankSum=          |
| 17614 | chrY | 13263777 | . | A | T   | 21793.24 | PASS          | AC=24;AF=0.444;AN=54;BaseQRankSum=         |
| 17615 | chrY | 13263785 | . | A | G   | 319.15   | my_snp_filter | AC=2;AF=0.033;AN=60;BaseQRankSum=          |
| 17616 | chrY | 13263787 | . | C | T   | 336.29   | my_snp_filter | AC=2;AF=0.034;AN=58;BaseQRankSum=          |
| 17617 | chrY | 13263792 | . | G | C   | 319.36   | my_snp_filter | AC=2;AF=0.034;AN=58;BaseQRankSum=          |
| 17618 | chrY | 13263818 | . | G | A   | 960.75   | PASS          | AC=3;AF=0.052;AN=58;BaseQRankSum=          |
| 17619 | chrY | 13263826 | . | G | T   | 413.21   | PASS          | AC=2;AF=0.042;AN=48;BaseQRankSum=          |
| 17620 | chrY | 13263828 | . | G | C   | 413.10   | PASS          | AC=2;AF=0.042;AN=48;BaseQRankSum=          |
| 17621 | chrY | 13263834 | . | G | A   | 365.70   | PASS          | AC=1;AF=0.021;AN=48;BaseQRankSum=          |
| 17622 | chrY | 13263859 | . | G | T   | 74.35    | my_snp_filter | AC=2;AF=0.048;AN=42;BaseQRankSum=          |
| 17623 | chrY | 13263872 | . | G | A   | 3817.44  | PASS          | AC=9;AF=0.214;AN=42;BaseQRankSum=          |
| 17624 | chrY | 13263879 | . | C | T   | 24568.51 | PASS          | AC=17;AF=0.607;AN=28;BaseQRankSum=         |
| 17625 | chrY | 13263883 | . | A | G   | 3476.26  | PASS          | AC=9;AF=0.265;AN=34;BaseQRankSum=          |
| 17626 | chrY | 13263903 | . | A | C   | 2960.66  | PASS          | AC=7;AF=0.233;AN=30;BaseQRankSum=          |
| 17627 | chrY | 13263909 | . | A | T   | 67.25    | my_snp_filter | AC=1;AF=0.028;AN=36;BaseQRankSum=          |
| 17628 | chrY | 13263970 | . | G | T   | 1753.99  | PASS          | AC=4;AF=0.167;AN=24;BaseQRankSum=          |
| 17629 | chrY | 13263999 | . | T | C   | 954.52   | my_snp_filter | AC=9;AF=0.450;AN=20;BaseQRankSum=          |
| 17630 | chrY | 13264002 | . | T | A   | 16703.09 | PASS          | AC=9;AF=0.500;AN=18;BaseQRankSum=          |
| 17631 | chrY | 13264012 | . | A | G   | 3922.52  | PASS          | AC=9;AF=0.450;AN=20;BaseQRankSum=          |
| 17632 | chrY | 13264031 | . | T | G   | 4090.52  | PASS          | AC=9;AF=0.450;AN=20;BaseQRankSum=          |



|       |      |          |   |   |   |          |               |                                    |
|-------|------|----------|---|---|---|----------|---------------|------------------------------------|
| 17633 | chrY | 13264045 | . | C | G | 3862.52  | PASS          | AC=9;AF=0.450;AN=20;BaseQRankSum=  |
| 17634 | chrY | 13264057 | . | G | T | 3800.52  | PASS          | AC=9;AF=0.450;AN=20;BaseQRankSum=  |
| 17635 | chrY | 13264058 | . | T | A | 3788.52  | PASS          | AC=9;AF=0.450;AN=20;BaseQRankSum=  |
| 17636 | chrY | 13264068 | . | G | A | 11700.52 | PASS          | AC=9;AF=0.450;AN=20;BaseQRankSum=  |
| 17637 | chrY | 13264073 | . | A | T | 3155.52  | PASS          | AC=9;AF=0.450;AN=20;BaseQRankSum=  |
| 17638 | chrY | 13264089 | . | A | G | 1765.75  | PASS          | AC=7;AF=0.350;AN=20;BaseQRankSum=  |
| 17639 | chrY | 13264093 | . | T | A | 17564.34 | PASS          | AC=9;AF=0.450;AN=20;BaseQRankSum=  |
| 17640 | chrY | 13264116 | . | C | G | 1296.36  | PASS          | AC=7;AF=0.350;AN=20;BaseQRankSum=  |
| 17641 | chrY | 13264121 | . | A | T | 11870.52 | PASS          | AC=9;AF=0.450;AN=20;BaseQRankSum=  |
| 17642 | chrY | 13264132 | . | T | C | 1331.99  | PASS          | AC=7;AF=0.318;AN=22;BaseQRankSum=  |
| 17643 | chrY | 13264180 | . | G | C | 171.51   | my_snp_filter | AC=2;AF=0.111;AN=18;BaseQRankSum=  |
| 17644 | chrY | 13264268 | . | G | C | 4523.64  | my_snp_filter | AC=9;AF=0.281;AN=32;BaseQRankSum=  |
| 17645 | chrY | 13264281 | . | G | A | 1358.91  | my_snp_filter | AC=9;AF=0.237;AN=38;BaseQRankSum=  |
| 17646 | chrY | 13264289 | . | G | A | 1326.32  | my_snp_filter | AC=9;AF=0.225;AN=40;BaseQRankSum=  |
| 17647 | chrY | 13264294 | . | C | T | 3606.99  | my_snp_filter | AC=9;AF=0.214;AN=42;BaseQRankSum=  |
| 17648 | chrY | 13264337 | . | C | A | 162.93   | my_snp_filter | AC=4;AF=0.077;AN=52;BaseQRankSum=  |
| 17649 | chrY | 13264440 | . | C | T | 89.95    | PASS          | AC=1;AF=0.014;AN=70;BaseQRankSum=  |
| 17650 | chrY | 13264470 | . | A | C | 289.22   | PASS          | AC=2;AF=0.029;AN=70;BaseQRankSum=  |
| 17651 | chrY | 13264650 | . | G | C | 730.15   | my_snp_filter | AC=7;AF=0.152;AN=46;BaseQRankSum=  |
| 17652 | chrY | 13264669 | . | T | G | 420.79   | PASS          | AC=5;AF=0.132;AN=38;BaseQRankSum=  |
| 17653 | chrY | 13264717 | . | G | T | 727.01   | PASS          | AC=6;AF=0.250;AN=24;BaseQRankSum=  |
| 17654 | chrY | 13264729 | . | T | A | 916.32   | PASS          | AC=7;AF=0.292;AN=24;BaseQRankSum=  |
| 17655 | chrY | 13264790 | . | C | A | 1726.01  | PASS          | AC=8;AF=0.444;AN=18;BaseQRankSum=  |
| 17656 | chrY | 13264889 | . | G | T | 255.09   | PASS          | AC=1;AF=0.050;AN=20;BaseQRankSum=  |
| 17657 | chrY | 13264955 | . | G | A | 952.99   | PASS          | AC=7;AF=0.389;AN=18;BaseQRankSum=  |
| 17658 | chrY | 13265038 | . | G | A | 900.54   | PASS          | AC=8;AF=0.444;AN=18;BaseQRankSum=  |
| 17659 | chrY | 13265088 | . | C | T | 3244.09  | my_snp_filter | AC=9;AF=0.500;AN=18;BaseQRankSum=  |
| 17660 | chrY | 13265152 | . | G | A | 1309.16  | PASS          | AC=8;AF=0.444;AN=18;BaseQRankSum=  |
| 17661 | chrY | 13265171 | . | T | C | 11605.09 | my_snp_filter | AC=9;AF=0.500;AN=18;BaseQRankSum=  |
| 17662 | chrY | 13265176 | . | T | C | 11818.09 | my_snp_filter | AC=9;AF=0.500;AN=18;BaseQRankSum=  |
| 17663 | chrY | 13265199 | . | A | G | 7404.09  | my_snp_filter | AC=9;AF=0.500;AN=18;BaseQRankSum=  |
| 17664 | chrY | 13265203 | . | A | G | 205.04   | my_snp_filter | AC=2;AF=0.111;AN=18;BaseQRankSum=  |
| 17665 | chrY | 13265266 | . | T | C | 2366.99  | PASS          | AC=9;AF=0.409;AN=22;BaseQRankSum=  |
| 17666 | chrY | 13265305 | . | G | T | 11321.66 | PASS          | AC=9;AF=0.450;AN=20;BaseQRankSum=  |
| 17667 | chrY | 13265370 | . | C | A | 4738.34  | PASS          | AC=9;AF=0.450;AN=20;BaseQRankSum=  |
| 17668 | chrY | 13265372 | . | T | A | 17289.34 | PASS          | AC=12;AF=0.600;AN=20;BaseQRankSum= |
| 17669 | chrY | 13265490 | . | G | A | 536.71   | my_snp_filter | AC=6;AF=0.273;AN=22;BaseQRankSum=  |
| 17670 | chrY | 13265530 | . | G | T | 177.02   | my_snp_filter | AC=4;AF=0.182;AN=22;BaseQRankSum=  |
| 17671 | chrY | 13265535 | . | G | T | 349.95   | PASS          | AC=3;AF=0.136;AN=22;BaseQRankSum=  |
| 17672 | chrY | 13265635 | . | A | G | 658.80   | my_snp_filter | AC=7;AF=0.350;AN=20;BaseQRankSum=  |
| 17673 | chrY | 13265665 | . | G | A | 32.16    | my_snp_filter | AC=1;AF=0.050;AN=20;BaseQRankSum=  |
| 17674 | chrY | 13265694 | . | A | C | 439.36   | my_snp_filter | AC=6;AF=0.300;AN=20;BaseQRankSum=  |
| 17675 | chrY | 13265718 | . | A | C | 329.13   | PASS          | AC=4;AF=0.200;AN=20;BaseQRankSum=  |
| 17676 | chrY | 13265722 | . | C | G | 1132.20  | my_snp_filter | AC=7;AF=0.350;AN=20;BaseQRankSum=  |
| 17677 | chrY | 13265732 | . | C | T | 290.80   | PASS          | AC=4;AF=0.200;AN=20;BaseQRankSum=  |
| 17678 | chrY | 13265738 | . | G | T | 553.53   | PASS          | AC=5;AF=0.250;AN=20;BaseQRankSum=  |
| 17679 | chrY | 13265743 | . | C | T | 1297.38  | PASS          | AC=8;AF=0.400;AN=20;BaseQRankSum=  |
| 17680 | chrY | 13265768 | . | C | T | 1650.58  | PASS          | AC=8;AF=0.444;AN=18;BaseQRankSum=  |
| 17681 | chrY | 13265855 | . | C | T | 2132.51  | PASS          | AC=9;AF=0.450;AN=20;BaseQRankSum=  |
| 17682 | chrY | 13265881 | . | T | C | 2783.99  | PASS          | AC=9;AF=0.409;AN=22;BaseQRankSum=  |
| 17683 | chrY | 13265888 | . | G | T | 179.96   | PASS          | AC=1;AF=0.038;AN=26;BaseQRankSum=  |
| 17684 | chrY | 13265896 | . | A | G | 182.96   | PASS          | AC=1;AF=0.038;AN=26;BaseQRankSum=  |
| 17685 | chrY | 13265930 | . | G | T | 46.01    | my_snp_filter | AC=1;AF=0.033;AN=30;BaseQRankSum=  |
| 17686 | chrY | 13265949 | . | T | A | 3797.91  | my_snp_filter | AC=9;AF=0.300;AN=30;BaseQRankSum=  |
| 17687 | chrY | 13266022 | . | G | C | 3057.54  | my_snp_filter | AC=10;AF=0.172;AN=58;BaseQRankSum= |
| 17688 | chrY | 13266042 | . | C | T | 11133.73 | my_snp_filter | AC=14;AF=0.241;AN=20;BaseQRankSum= |
| 17689 | chrY | 13266045 | . | A | G | 10027.41 | my_snp_filter | AC=16;AF=0.258;AN=20;BaseQRankSum= |
| 17690 | chrY | 13266070 | . | T | C | 11316.31 | my_snp_filter | AC=22;AF=0.379;AN=20;BaseQRankSum= |
| 17691 | chrY | 13266103 | . | T | C | 22412.72 | my_snp_filter | AC=34;AF=0.486;AN=20;BaseQRankSum= |
| 17692 | chrY | 13266116 | . | C | G | 13075.72 | PASS          | AC=33;AF=0.471;AN=70;BaseQRankSum= |
| 17693 | chrY | 13266154 | . | A | G | 420.54   | my_snp_filter | AC=4;AF=0.057;AN=70;BaseQRankSum=  |
| 17694 | chrY | 13266160 | . | T | G | 20628.73 | PASS          | AC=35;AF=0.500;AN=70;BaseQRankSum= |
| 17695 | chrY | 13266168 | . | G | A | 42.42    | my_snp_filter | AC=1;AF=0.014;AN=70;BaseQRankSum=  |
| 17696 | chrY | 13266177 | . | T | A | 60166.84 | PASS          | AC=36;AF=0.514;AN=70;BaseQRankSum= |
| 17697 | chrY | 13266216 | . | A | G | 360.01   | my_snp_filter | AC=3;AF=0.043;AN=70;BaseQRankSum=  |
| 17698 | chrY | 13266218 | . | A | G | 5137.55  | PASS          | AC=11;AF=0.157;AN=70;BaseQRankSum= |
| 17699 | chrY | 13266221 | . | G | T | 1682.68  | PASS          | AC=8;AF=0.114;AN=70;BaseQRankSum=  |
| 17700 | chrY | 13266227 | . | C | T | 5469.39  | PASS          | AC=11;AF=0.157;AN=70;BaseQRankSum= |
| 17701 | chrY | 13266243 | . | T | C | 56.42    | my_snp_filter | AC=1;AF=0.014;AN=70;BaseQRankSum=  |
| 17702 | chrY | 13266266 | . | G | A | 75773.72 | PASS          | AC=35;AF=0.500;AN=70;BaseQRankSum= |
| 17703 | chrY | 13266286 | . | C | T | 67623.72 | PASS          | AC=35;AF=0.500;AN=70;BaseQRankSum= |
| 17704 | chrY | 13266301 | . | A | G | 58089.73 | PASS          | AC=35;AF=0.500;AN=70;BaseQRankSum= |
| 17705 | chrY | 13266346 | . | C | G | 722.86   | PASS          | AC=9;AF=0.129;AN=70;BaseQRankSum=  |
| 17706 | chrY | 13266368 | . | T | G | 867.37   | my_snp_filter | AC=12;AF=0.171;AN=70;BaseQRankSum= |
| 17707 | chrY | 13266369 | . | T | A | 2722.74  | PASS          | AC=18;AF=0.257;AN=70;BaseQRankSum= |
| 17708 | chrY | 13266377 | . | G | C | 39207.50 | PASS          | AC=42;AF=0.600;AN=70;BaseQRankSum= |

|       |      |          |   |   |     |           |               |                                   |
|-------|------|----------|---|---|-----|-----------|---------------|-----------------------------------|
| 17709 | chrY | 13266414 | . | C | T   | 788.63    | my_snp_filter | AC=12;AF=0.171;AN=70;Base         |
| 17710 | chrY | 13266418 | . | C | T,A | 4407.39   | PASS          | AC=18,3;AF=0.257,0.043;AN=70;Base |
| 17711 | chrY | 13266424 | . | C | A,* | 8659.19   | PASS          | AC=7,17;AF=0.100,0.243;AN=70;Base |
| 17712 | chrY | 13266433 | . | T | C,* | 6699.46   | PASS          | AC=6,15;AF=0.086,0.214;AN=70;Base |
| 17713 | chrY | 13266437 | . | G | A,* | 8146.43   | PASS          | AC=26,5;AF=0.371,0.071;AN=70;Base |
| 17714 | chrY | 13266499 | . | A | G   | 56855.72  | PASS          | AC=35;AF=0.500;AN=70;Base         |
| 17715 | chrY | 13266520 | . | G | T   | 5158.33   | PASS          | AC=17;AF=0.243;AN=70;BaseQRankSum |
| 17716 | chrY | 13266533 | . | A | C   | 17790.56  | PASS          | AC=28;AF=0.400;AN=70;Base         |
| 17717 | chrY | 13266534 | . | T | C   | 154.42    | PASS          | AC=1;AF=0.014;AN=70;BaseQRankSum  |
| 17718 | chrY | 13266544 | . | G | A   | 392.57    | my_snp_filter | AC=3;AF=0.043;AN=70;BaseQ         |
| 17719 | chrY | 13266556 | . | T | G   | 119266.72 | PASS          | AC=35;AF=0.500;AN=70;Base         |
| 17720 | chrY | 13266557 | . | G | T   | 222.43    | my_snp_filter | AC=1;AF=0.014;AN=70;BaseQ         |
| 17721 | chrY | 13266560 | . | C | T   | 120732.72 | PASS          | AC=35;AF=0.500;AN=70;Base         |
| 17722 | chrY | 13266572 | . | A | G   | 301.71    | my_snp_filter | AC=3;AF=0.043;AN=70;BaseQ         |
| 17723 | chrY | 13266587 | . | C | G   | 11342.45  | my_snp_filter | AC=21;AF=0.300;AN                 |
| 17724 | chrY | 13266605 | . | T | C   | 33.45     | my_snp_filter | AC=1;AF=0.014;AN=70;BaseQ         |
| 17725 | chrY | 13266634 | . | A | T   | 30.43     | my_snp_filter | AC=1;AF=0.014;AN=70;BaseQ         |
| 17726 | chrY | 13266656 | . | T | C   | 388.80    | my_snp_filter | AC=7;AF=0.100;AN=70;BaseQ         |
| 17727 | chrY | 13266670 | . | G | A   | 2809.61   | my_snp_filter | AC=9;AF=0.129;AN=70;BaseQ         |
| 17728 | chrY | 13266695 | . | C | A   | 78006.72  | PASS          | AC=35;AF=0.500;AN=70;Base         |
| 17729 | chrY | 13266696 | . | A | C   | 90952.84  | PASS          | AC=36;AF=0.514;AN=70;Base         |
| 17730 | chrY | 13266717 | . | C | T   | 133.09    | my_snp_filter | AC=2;AF=0.029;AN=70;BaseQ         |
| 17731 | chrY | 13266791 | . | A | C   | 25771.45  | PASS          | AC=40;AF=0.571;AN=70;Base         |
| 17732 | chrY | 13266803 | . | G | A   | 41.99     | PASS          | AC=1;AF=0.015;AN=68;BaseQRankSum  |
| 17733 | chrY | 13266852 | . | G | A   | 11500.27  | PASS          | AC=13;AF=0.361;AN=36;Base         |
| 17734 | chrY | 13266937 | . | C | T   | 301.43    | my_snp_filter | AC=3;AF=0.100;AN=30;BaseQ         |
| 17735 | chrY | 13266949 | . | C | T   | 13126.70  | PASS          | AC=13;AF=0.542;AN=24;Base         |
| 17736 | chrY | 13266959 | . | A | T   | 4773.70   | PASS          | AC=13;AF=0.542;AN=24;BaseQRankSum |
| 17737 | chrY | 13266972 | . | A | C   | 751.34    | my_snp_filter | AC=6;AF=0.250;AN=24;BaseQ         |
| 17738 | chrY | 13266990 | . | T | C   | 4065.34   | PASS          | AC=11;AF=0.550;AN=20;BaseQRankSum |
| 17739 | chrY | 13267083 | . | G | A   | 8507.84   | PASS          | AC=9;AF=0.450;AN=20;BaseQRankSum  |
| 17740 | chrY | 13267099 | . | C | T   | 915.66    | PASS          | AC=6;AF=0.273;AN=22;BaseQRankSum  |
| 17741 | chrY | 13267131 | . | G | A   | 596.91    | my_snp_filter | AC=7;AF=0.318;AN=22;BaseQ         |
| 17742 | chrY | 13267168 | . | G | T   | 4211.09   | my_snp_filter | AC=9;AF=0.500;AN=18;BaseQ         |
| 17743 | chrY | 13267189 | . | G | C   | 3533.09   | my_snp_filter | AC=9;AF=0.500;AN=18;BaseQ         |
| 17744 | chrY | 13267197 | . | G | A   | 3329.09   | my_snp_filter | AC=9;AF=0.500;AN=18;BaseQ         |
| 17745 | chrY | 13267224 | . | A | T   | 2535.09   | PASS          | AC=9;AF=0.500;AN=18;BaseQRankSum  |
| 17746 | chrY | 13267251 | . | G | A   | 4881.09   | PASS          | AC=9;AF=0.500;AN=18;BaseQRankSum  |
| 17747 | chrY | 13267260 | . | C | T   | 41.25     | my_snp_filter | AC=1;AF=0.056;AN=18;BaseQ         |
| 17748 | chrY | 13267261 | . | G | T   | 97.45     | my_snp_filter | AC=2;AF=0.111;AN=18;BaseQ         |
| 17749 | chrY | 13267282 | . | T | C   | 5453.52   | PASS          | AC=9;AF=0.450;AN=20;BaseQRankSum  |
| 17750 | chrY | 13267301 | . | G | A   | 5571.99   | PASS          | AC=9;AF=0.409;AN=22;BaseQRankSum  |
| 17751 | chrY | 13267326 | . | G | A   | 6536.54   | PASS          | AC=11;AF=0.458;AN=24;BaseQRankSum |
| 17752 | chrY | 13267327 | . | G | T   | 254.46    | PASS          | AC=2;AF=0.091;AN=22;BaseQRankSum  |
| 17753 | chrY | 13267330 | . | C | T   | 1124.18   | PASS          | AC=3;AF=0.125;AN=24;BaseQRankSum  |
| 17754 | chrY | 13267360 | . | T | G   | 163.99    | PASS          | AC=1;AF=0.042;AN=24;BaseQRankSum  |
| 17755 | chrY | 13267365 | . | C | A   | 2323.71   | PASS          | AC=5;AF=0.227;AN=22;BaseQRankSum  |
| 17756 | chrY | 13267371 | . | G | A   | 1758.40   | PASS          | AC=5;AF=0.227;AN=22;BaseQRankSum  |
| 17757 | chrY | 13267412 | . | A | G   | 3087.92   | PASS          | AC=10;AF=0.556;AN=18;BaseQRankSum |
| 17758 | chrY | 13267454 | . | G | A   | 140.32    | PASS          | AC=1;AF=0.056;AN=18;BaseQRankSum  |
| 17759 | chrY | 13267465 | . | T | G,* | 460.82    | PASS          | AC=3,3;AF=0.188,0.188;AN=16;BaseQ |
| 17760 | chrY | 13267473 | . | T | A   | 56.83     | PASS          | AC=1;AF=0.056;AN=18;BaseQRankSum  |
| 17761 | chrY | 13267493 | . | G | A   | 145.70    | PASS          | AC=4;AF=0.222;AN=18;BaseQRankSum  |
| 17762 | chrY | 13267524 | . | A | G   | 284.05    | PASS          | AC=3;AF=0.167;AN=18;BaseQRankSum  |
| 17763 | chrY | 13267530 | . | T | C   | 458.62    | PASS          | AC=4;AF=0.222;AN=18;BaseQRankSum  |
| 17764 | chrY | 13267546 | . | T | A,C | 876.98    | PASS          | AC=4,3;AF=0.222,0.167;AN=18;BaseQ |
| 17765 | chrY | 13267570 | . | T | C,A | 975.08    | PASS          | AC=3,4;AF=0.167,0.222;AN=18;BaseQ |
| 17766 | chrY | 13267641 | . | C | T   | 3241.09   | PASS          | AC=9;AF=0.500;AN=18;BaseQRankSum  |
| 17767 | chrY | 13267672 | . | C | G   | 4666.09   | PASS          | AC=9;AF=0.500;AN=18;BaseQRankSum  |
| 17768 | chrY | 13267711 | . | C | G   | 288.87    | PASS          | AC=1;AF=0.045;AN=22;BaseQRankSum  |
| 17769 | chrY | 13267780 | . | T | C   | 1498.95   | PASS          | AC=5;AF=0.192;AN=26;BaseQRankSum  |
| 17770 | chrY | 13267803 | . | G | C,A | 9399.55   | PASS          | AC=14,4;AF=0.583,0.167;AN=24;Base |
| 17771 | chrY | 13267843 | . | C | A   | 12456.34  | PASS          | AC=11;AF=0.550;AN=20;Base         |
| 17772 | chrY | 13267844 | . | C | T   | 8137.34   | PASS          | AC=9;AF=0.450;AN=20;BaseQRankSum  |
| 17773 | chrY | 13267850 | . | G | C   | 12282.34  | PASS          | AC=11;AF=0.550;AN=20;Base         |
| 17774 | chrY | 13267854 | . | A | T   | 7925.34   | PASS          | AC=9;AF=0.450;AN=20;BaseQRankSum  |
| 17775 | chrY | 13267855 | . | G | T   | 219.95    | PASS          | AC=3;AF=0.136;AN=22;BaseQRankSum  |
| 17776 | chrY | 13267864 | . | T | G   | 10741.34  | PASS          | AC=11;AF=0.550;AN=20;Base         |
| 17777 | chrY | 13267885 | . | C | G   | 979.72    | PASS          | AC=3;AF=0.167;AN=18;BaseQRankSum  |
| 17778 | chrY | 13267937 | . | A | T   | 6049.09   | PASS          | AC=9;AF=0.500;AN=18;BaseQRankSum  |
| 17779 | chrY | 13267978 | . | G | C   | 7695.09   | PASS          | AC=9;AF=0.500;AN=18;BaseQRankSum  |
| 17780 | chrY | 13267992 | . | G | A   | 13435.09  | PASS          | AC=9;AF=0.500;AN=18;BaseQ         |
| 17781 | chrY | 13268004 | . | A | T   | 1061.45   | PASS          | AC=7;AF=0.318;AN=22;BaseQRankSum  |
| 17782 | chrY | 13268061 | . | A | C   | 17327.66  | PASS          | AC=11;AF=0.500;AN=22;Base         |
| 17783 | chrY | 13268062 | . | G | A   | 1889.77   | PASS          | AC=8;AF=0.364;AN=22;BaseQRankSum  |
| 17784 | chrY | 13268077 | . | C | A   | 18172.66  | PASS          | AC=11;AF=0.500;AN=22;Base         |

|       |      |          |   |   |     |           |               |                                    |
|-------|------|----------|---|---|-----|-----------|---------------|------------------------------------|
| 17785 | chrY | 13268112 | . | A | G   | 167.77    | my_snp_filter | AC=2;AF=0.100;AN=20;BaseQ          |
| 17786 | chrY | 13268165 | . | G | A   | 9323.08   | PASS          | AC=9;AF=0.375;AN=24;BaseQRankSum=  |
| 17787 | chrY | 13268187 | . | T | C   | 10907.58  | PASS          | AC=11;AF=0.367;AN=30;Base          |
| 17788 | chrY | 13268212 | . | C | T   | 6165.05   | PASS          | AC=9;AF=0.250;AN=36;BaseQRankSum=  |
| 17789 | chrY | 13268222 | . | G | T   | 6820.79   | PASS          | AC=11;AF=0.324;AN=34;BaseQRankSum= |
| 17790 | chrY | 13268231 | . | T | A   | 1081.20   | PASS          | AC=2;AF=0.059;AN=34;BaseQRankSum=  |
| 17791 | chrY | 13268242 | . | C | T   | 443.57    | my_snp_filter | AC=4;AF=0.095;AN=42;BaseQ          |
| 17792 | chrY | 13268286 | . | C | G   | 886.75    | PASS          | AC=2;AF=0.042;AN=48;BaseQRankSum=  |
| 17793 | chrY | 13268352 | . | G | T   | 432.88    | PASS          | AC=1;AF=0.016;AN=64;BaseQRankSum=  |
| 17794 | chrY | 13268361 | . | T | C   | 30920.27  | PASS          | AC=36;AF=0.643;AN=56;Base          |
| 17795 | chrY | 13268366 | . | G | A   | 710.38    | PASS          | AC=1;AF=0.015;AN=68;BaseQRankSum=  |
| 17796 | chrY | 13268376 | . | C | T   | 404.55    | PASS          | AC=1;AF=0.015;AN=68;BaseQRankSum=  |
| 17797 | chrY | 13268377 | . | A | G   | 30906.34  | PASS          | AC=38;AF=0.633;AN=60;Base          |
| 17798 | chrY | 13268468 | . | G | A   | 1029.02   | PASS          | AC=5;AF=0.071;AN=70;BaseQRankSum=  |
| 17799 | chrY | 13268494 | . | A | C   | 85.06     | my_snp_filter | AC=2;AF=0.029;AN=70;BaseQ          |
| 17800 | chrY | 13268521 | . | C | T   | 43635.70  | PASS          | AC=44;AF=0.629;AN=70;Base          |
| 17801 | chrY | 13268577 | . | G | T   | 71641.19  | PASS          | AC=40;AF=0.571;AN=70;Base          |
| 17802 | chrY | 13268593 | . | G | T   | 80819.81  | PASS          | AC=38;AF=0.543;AN=70;Base          |
| 17803 | chrY | 13268618 | . | G | A   | 103036.15 | PASS          | AC=35;AF=0.500;AN=70;Base          |
| 17804 | chrY | 13268619 | . | T | C   | 102988.15 | PASS          | AC=35;AF=0.500;AN=70;Base          |
| 17805 | chrY | 13268644 | . | T | C   | 23375.72  | PASS          | AC=35;AF=0.500;AN=70;Base          |
| 17806 | chrY | 13268659 | . | C | A   | 1545.09   | PASS          | AC=6;AF=0.086;AN=70;BaseQRankSum=  |
| 17807 | chrY | 13268698 | . | C | G   | 62016.72  | PASS          | AC=35;AF=0.500;AN=70;Base          |
| 17808 | chrY | 13268715 | . | G | A   | 1151.15   | my_snp_filter | AC=11;AF=0.157;AN=70;Base          |
| 17809 | chrY | 13268723 | . | G | A   | 66754.53  | PASS          | AC=35;AF=0.500;AN=70;Base          |
| 17810 | chrY | 13268729 | . | C | G   | 64422.84  | PASS          | AC=36;AF=0.514;AN=70;Base          |
| 17811 | chrY | 13268767 | . | A | C   | 33665.74  | PASS          | AC=35;AF=0.500;AN=70;Base          |
| 17812 | chrY | 13268815 | . | C | G   | 29558.16  | my_snp_filter | AC=38;AF=0.543;AN                  |
| 17813 | chrY | 13268870 | . | A | C   | 16393.22  | my_snp_filter | AC=27;AF=0.386;AN                  |
| 17814 | chrY | 13268872 | . | T | C   | 16378.94  | my_snp_filter | AC=27;AF=0.386;AN                  |
| 17815 | chrY | 13268914 | . | A | G   | 3147.04   | my_snp_filter | AC=7;AF=0.113;AN=62;BaseQ          |
| 17816 | chrY | 13268937 | . | G | T   | 40.08     | my_snp_filter | AC=3;AF=0.054;AN=56;BaseQ          |
| 17817 | chrY | 13269016 | . | G | T   | 215.67    | PASS          | AC=4;AF=0.118;AN=34;BaseQRankSum=  |
| 17818 | chrY | 13269042 | . | T | C   | 857.65    | PASS          | AC=6;AF=0.273;AN=22;BaseQRankSum=  |
| 17819 | chrY | 13269043 | . | G | A   | 857.65    | PASS          | AC=6;AF=0.273;AN=22;BaseQRankSum=  |
| 17820 | chrY | 13269069 | . | T | C   | 2676.46   | PASS          | AC=8;AF=0.400;AN=20;BaseQRankSum=  |
| 17821 | chrY | 13269070 | . | G | A   | 906.54    | PASS          | AC=6;AF=0.300;AN=20;BaseQRankSum=  |
| 17822 | chrY | 13269100 | . | G | A   | 3107.09   | my_snp_filter | AC=9;AF=0.500;AN=18;BaseQ          |
| 17823 | chrY | 13269151 | . | T | A   | 5672.09   | my_snp_filter | AC=9;AF=0.500;AN=18;BaseQ          |
| 17824 | chrY | 13269165 | . | A | G   | 6423.09   | my_snp_filter | AC=9;AF=0.500;AN=18;BaseQ          |
| 17825 | chrY | 13269202 | . | T | G   | 2540.98   | PASS          | AC=6;AF=0.300;AN=20;BaseQRankSum=  |
| 17826 | chrY | 13269230 | . | C | T   | 2422.78   | PASS          | AC=6;AF=0.273;AN=22;BaseQRankSum=  |
| 17827 | chrY | 13269269 | . | A | G   | 7612.75   | PASS          | AC=17;AF=0.654;AN=26;BaseQRankSum= |
| 17828 | chrY | 13269304 | . | C | T   | 2587.69   | PASS          | AC=14;AF=0.438;AN=32;BaseQRankSum= |
| 17829 | chrY | 13269319 | . | C | T   | 2546.42   | PASS          | AC=14;AF=0.467;AN=30;BaseQRankSum= |
| 17830 | chrY | 13269369 | . | C | G   | 6827.52   | PASS          | AC=9;AF=0.450;AN=20;BaseQRankSum=  |
| 17831 | chrY | 13269424 | . | C | T   | 2453.90   | PASS          | AC=10;AF=0.208;AN=48;BaseQRankSum= |
| 17832 | chrY | 13269449 | . | G | A   | 13185.13  | PASS          | AC=15;AF=0.250;AN=60;Base          |
| 17833 | chrY | 13269484 | . | A | G   | 3666.26   | PASS          | AC=13;AF=0.197;AN=66;BaseQRankSum= |
| 17834 | chrY | 13269513 | . | A | G   | 1124.16   | PASS          | AC=7;AF=0.100;AN=70;BaseQRankSum=  |
| 17835 | chrY | 13269520 | . | G | T   | 869.49    | PASS          | AC=6;AF=0.086;AN=70;BaseQRankSum=  |
| 17836 | chrY | 13269524 | . | C | T   | 351.20    | PASS          | AC=4;AF=0.057;AN=70;BaseQRankSum=  |
| 17837 | chrY | 13269531 | . | G | A   | 8961.23   | PASS          | AC=28;AF=0.400;AN=70;BaseQRankSum= |
| 17838 | chrY | 13269566 | . | A | T   | 258.88    | my_snp_filter | AC=7;AF=0.100;AN=70;BaseQ          |
| 17839 | chrY | 13269567 | . | C | T   | 1821.05   | PASS          | AC=14;AF=0.200;AN=70;BaseQRankSum= |
| 17840 | chrY | 13269582 | . | C | A,* | 2018.28   | PASS          | AC=10,1;AF=0.156,0.016;AN=64;Base  |
| 17841 | chrY | 13269599 | . | A | C,* | 1148.78   | PASS          | AC=2,4;AF=0.029,0.059;AN=68;BaseQ  |
| 17842 | chrY | 13269601 | . | C | A   | 547.63    | PASS          | AC=5;AF=0.074;AN=68;BaseQRankSum=  |
| 17843 | chrY | 13269607 | . | G | C   | 1127.96   | PASS          | AC=8;AF=0.114;AN=70;BaseQRankSum=  |
| 17844 | chrY | 13269620 | . | T | C   | 18588.16  | PASS          | AC=29;AF=0.426;AN=68;Base          |
| 17845 | chrY | 13269622 | . | A | G   | 601.06    | PASS          | AC=4;AF=0.057;AN=70;BaseQRankSum=  |
| 17846 | chrY | 13269636 | . | C | T   | 1469.24   | PASS          | AC=8;AF=0.114;AN=70;BaseQRankSum=  |
| 17847 | chrY | 13269640 | . | C | A   | 39969.72  | PASS          | AC=35;AF=0.500;AN=70;Base          |
| 17848 | chrY | 13269644 | . | T | C   | 43974.72  | PASS          | AC=35;AF=0.500;AN=70;Base          |
| 17849 | chrY | 13269725 | . | C | T   | 2728.09   | PASS          | AC=12;AF=0.171;AN=70;BaseQRankSum= |
| 17850 | chrY | 13269754 | . | G | T   | 1003.05   | PASS          | AC=5;AF=0.071;AN=70;BaseQRankSum=  |
| 17851 | chrY | 13269771 | . | A | G   | 405.62    | my_snp_filter | AC=6;AF=0.086;AN=70;BaseQ          |
| 17852 | chrY | 13269772 | . | C | T   | 16124.07  | PASS          | AC=31;AF=0.443;AN=70;Base          |
| 17853 | chrY | 13269779 | . | T | C   | 13993.84  | PASS          | AC=34;AF=0.486;AN=70;Base          |
| 17854 | chrY | 13269786 | . | G | A   | 10637.25  | PASS          | AC=30;AF=0.429;AN=70;Base          |
| 17855 | chrY | 13269787 | . | T | C   | 969.30    | my_snp_filter | AC=8;AF=0.114;AN=70;BaseQ          |
| 17856 | chrY | 13269803 | . | A | C   | 2633.94   | my_snp_filter | AC=20;AF=0.286;AN=70;Base          |
| 17857 | chrY | 13269822 | . | T | G   | 333.78    | my_snp_filter | AC=6;AF=0.086;AN=70;BaseQ          |
| 17858 | chrY | 13269830 | . | G | T   | 1153.65   | PASS          | AC=7;AF=0.100;AN=70;BaseQRankSum=  |
| 17859 | chrY | 13269845 | . | C | T   | 12632.75  | PASS          | AC=30;AF=0.429;AN=70;Base          |
| 17860 | chrY | 13269866 | . | C | A   | 1023.82   | PASS          | AC=6;AF=0.086;AN=70;BaseQRankSum=  |

|       |      |          |   |   |     |          |               |                                    |
|-------|------|----------|---|---|-----|----------|---------------|------------------------------------|
| 17861 | chrY | 13269877 | . | T | A   | 80150.35 | PASS          | AC=37;AF=0.529;AN=70;BaseQ         |
| 17862 | chrY | 13269880 | . | C | T   | 70.42    | my_snp_filter | AC=1;AF=0.014;AN=70;BaseQ          |
| 17863 | chrY | 13269925 | . | A | C   | 24789.17 | PASS          | AC=32;AF=0.457;AN=70;BaseQ         |
| 17864 | chrY | 13269957 | . | A | T   | 50579.72 | PASS          | AC=35;AF=0.500;AN=70;BaseQ         |
| 17865 | chrY | 13269964 | . | T | C   | 38224.72 | PASS          | AC=35;AF=0.500;AN=70;BaseQ         |
| 17866 | chrY | 13269990 | . | T | C   | 94144.84 | PASS          | AC=36;AF=0.514;AN=70;BaseQ         |
| 17867 | chrY | 13270001 | . | C | G   | 89675.84 | PASS          | AC=36;AF=0.514;AN=70;BaseQ         |
| 17868 | chrY | 13270036 | . | A | G   | 43580.73 | PASS          | AC=35;AF=0.500;AN=70;BaseQ         |
| 17869 | chrY | 13270050 | . | C | T   | 14942.57 | PASS          | AC=33;AF=0.471;AN=70;BaseQ         |
| 17870 | chrY | 13270101 | . | A | T   | 573.88   | PASS          | AC=8;AF=0.114;AN=70;BaseQRankSum=  |
| 17871 | chrY | 13270157 | . | A | G   | 884.41   | PASS          | AC=3;AF=0.048;AN=62;BaseQRankSum=  |
| 17872 | chrY | 13270195 | . | T | C   | 43651.67 | PASS          | AC=27;AF=0.643;AN=42;BaseQ         |
| 17873 | chrY | 13270201 | . | C | T   | 22356.32 | PASS          | AC=21;AF=0.457;AN=46;BaseQ         |
| 17874 | chrY | 13270211 | . | C | T   | 98.26    | PASS          | AC=3;AF=0.065;AN=46;BaseQRankSum=  |
| 17875 | chrY | 13270225 | . | A | G   | 107.17   | my_snp_filter | AC=1;AF=0.022;AN=46;BaseQ          |
| 17876 | chrY | 13270227 | . | C | A   | 10749.75 | PASS          | AC=13;AF=0.325;AN=40;BaseQ         |
| 17877 | chrY | 13270281 | . | T | G   | 15007.60 | PASS          | AC=11;AF=0.550;AN=20;BaseQ         |
| 17878 | chrY | 13270296 | . | T | G   | 18102.45 | PASS          | AC=11;AF=0.500;AN=22;BaseQ         |
| 17879 | chrY | 13270307 | . | G | A   | 743.55   | my_snp_filter | AC=6;AF=0.300;AN=20;BaseQ          |
| 17880 | chrY | 13270311 | . | G | T   | 29273.52 | PASS          | AC=11;AF=0.550;AN=20;BaseQ         |
| 17881 | chrY | 13270313 | . | T | G   | 2162.52  | PASS          | AC=9;AF=0.450;AN=20;BaseQRankSum=  |
| 17882 | chrY | 13270330 | . | C | T   | 893.30   | PASS          | AC=1;AF=0.050;AN=20;BaseQRankSum=  |
| 17883 | chrY | 13270406 | . | C | A   | 721.11   | my_snp_filter | AC=5;AF=0.179;AN=28;BaseQ          |
| 17884 | chrY | 13270455 | . | G | T   | 9696.54  | PASS          | AC=15;AF=0.469;AN=32;BaseQRankSum= |
| 17885 | chrY | 13270461 | . | A | G   | 167.17   | my_snp_filter | AC=3;AF=0.079;AN=38;BaseQ          |
| 17886 | chrY | 13270502 | . | A | G   | 9648.04  | PASS          | AC=16;AF=0.500;AN=32;BaseQRankSum= |
| 17887 | chrY | 13270603 | . | G | A   | 17287.09 | PASS          | AC=17;AF=0.258;AN=66;BaseQ         |
| 17888 | chrY | 13270609 | . | G | C   | 17145.05 | PASS          | AC=19;AF=0.279;AN=68;BaseQ         |
| 17889 | chrY | 13270614 | . | G | A   | 24584.14 | PASS          | AC=36;AF=0.563;AN=64;BaseQ         |
| 17890 | chrY | 13270657 | . | G | T   | 724.24   | PASS          | AC=10;AF=0.143;AN=70;BaseQRankSum= |
| 17891 | chrY | 13270670 | . | G | A   | 4123.86  | PASS          | AC=18;AF=0.257;AN=70;BaseQRankSum= |
| 17892 | chrY | 13270696 | . | G | A   | 2234.71  | PASS          | AC=15;AF=0.214;AN=70;BaseQRankSum= |
| 17893 | chrY | 13270702 | . | G | A   | 6912.38  | PASS          | AC=21;AF=0.300;AN=70;BaseQRankSum= |
| 17894 | chrY | 13270703 | . | G | A   | 996.84   | PASS          | AC=6;AF=0.086;AN=70;BaseQRankSum=  |
| 17895 | chrY | 13270723 | . | G | A   | 474.71   | my_snp_filter | AC=4;AF=0.057;AN=70;BaseQ          |
| 17896 | chrY | 13270742 | . | A | G   | 47.42    | my_snp_filter | AC=1;AF=0.014;AN=70;BaseQ          |
| 17897 | chrY | 13270745 | . | A | G   | 64794.23 | PASS          | AC=37;AF=0.529;AN=70;BaseQ         |
| 17898 | chrY | 13270757 | . | C | T   | 908.70   | my_snp_filter | AC=9;AF=0.129;AN=70;BaseQ          |
| 17899 | chrY | 13270763 | . | C | T   | 2102.46  | PASS          | AC=9;AF=0.129;AN=70;BaseQRankSum=  |
| 17900 | chrY | 13270797 | . | A | G   | 5366.88  | PASS          | AC=26;AF=0.371;AN=70;BaseQRankSum= |
| 17901 | chrY | 13270800 | . | C | A   | 117.52   | my_snp_filter | AC=5;AF=0.071;AN=70;BaseQ          |
| 17902 | chrY | 13270807 | . | T | G   | 180.97   | my_snp_filter | AC=5;AF=0.071;AN=70;BaseQ          |
| 17903 | chrY | 13270880 | . | C | G   | 478.32   | PASS          | AC=3;AF=0.043;AN=70;BaseQRankSum=  |
| 17904 | chrY | 13270885 | . | A | C   | 19453.34 | PASS          | AC=29;AF=0.414;AN=70;BaseQ         |
| 17905 | chrY | 13270902 | . | C | T   | 17358.41 | PASS          | AC=27;AF=0.386;AN=70;BaseQ         |
| 17906 | chrY | 13270946 | . | C | T   | 4130.45  | PASS          | AC=17;AF=0.243;AN=70;BaseQRankSum= |
| 17907 | chrY | 13270952 | . | C | T   | 1785.22  | PASS          | AC=8;AF=0.114;AN=70;BaseQRankSum=  |
| 17908 | chrY | 13270993 | . | A | C   | 9454.38  | PASS          | AC=20;AF=0.286;AN=70;BaseQRankSum= |
| 17909 | chrY | 13271015 | . | A | G   | 5721.49  | PASS          | AC=16;AF=0.229;AN=70;BaseQRankSum= |
| 17910 | chrY | 13271055 | . | G | A   | 18144.58 | PASS          | AC=27;AF=0.386;AN=70;BaseQ         |
| 17911 | chrY | 13271065 | . | C | G,* | 19794.89 | PASS          | AC=25,1;AF=0.357,0.014;AN          |
| 17912 | chrY | 13271074 | . | T | C   | 20713.53 | PASS          | AC=27;AF=0.386;AN=70;BaseQ         |
| 17913 | chrY | 13271159 | . | C | T   | 11674.95 | PASS          | AC=24;AF=0.353;AN=68;BaseQ         |
| 17914 | chrY | 13271160 | . | A | G   | 20630.03 | PASS          | AC=38;AF=0.559;AN=68;BaseQ         |
| 17915 | chrY | 13271184 | . | G | A   | 11885.09 | PASS          | AC=22;AF=0.344;AN=64;BaseQ         |
| 17916 | chrY | 13271202 | . | C | A   | 9937.44  | PASS          | AC=16;AF=0.381;AN=42;BaseQRankSum= |
| 17917 | chrY | 13271282 | . | G | T   | 11979.37 | PASS          | AC=13;AF=0.591;AN=22;BaseQ         |
| 17918 | chrY | 13271355 | . | G | A   | 29932.51 | PASS          | AC=27;AF=0.643;AN=42;BaseQ         |
| 17919 | chrY | 13271361 | . | G | T   | 23241    | PASS          | AC=26;AF=0.619;AN=42;BaseQRankSum= |
| 17920 | chrY | 13271367 | . | A | C   | 8696.70  | PASS          | AC=25;AF=0.568;AN=44;BaseQRankSum= |
| 17921 | chrY | 13271388 | . | C | T   | 9173.14  | PASS          | AC=21;AF=0.362;AN=58;BaseQRankSum= |
| 17922 | chrY | 13271486 | . | T | C   | 12125.74 | PASS          | AC=33;AF=0.471;AN=70;BaseQ         |
| 17923 | chrY | 13271549 | . | G | T   | 118.42   | my_snp_filter | AC=1;AF=0.014;AN=70;BaseQ          |
| 17924 | chrY | 13271567 | . | G | A   | 229.42   | my_snp_filter | AC=1;AF=0.014;AN=70;BaseQ          |
| 17925 | chrY | 13271585 | . | G | A   | 1867.62  | PASS          | AC=11;AF=0.157;AN=70;BaseQRankSum= |
| 17926 | chrY | 13271634 | . | G | T   | 534.42   | PASS          | AC=1;AF=0.014;AN=70;BaseQRankSum=  |
| 17927 | chrY | 13271683 | . | A | G   | 62841.94 | PASS          | AC=38;AF=0.543;AN=70;BaseQ         |
| 17928 | chrY | 13271758 | . | C | T   | 64024.58 | PASS          | AC=38;AF=0.543;AN=70;BaseQ         |
| 17929 | chrY | 13271765 | . | A | G   | 67697.01 | PASS          | AC=40;AF=0.571;AN=70;BaseQ         |
| 17930 | chrY | 13271793 | . | C | G   | 1628.30  | PASS          | AC=10;AF=0.143;AN=70;BaseQRankSum= |
| 17931 | chrY | 13271797 | . | G | A   | 2485.67  | PASS          | AC=8;AF=0.114;AN=70;BaseQRankSum=  |
| 17932 | chrY | 13271808 | . | G | A   | 77863.01 | PASS          | AC=41;AF=0.586;AN=70;BaseQ         |
| 17933 | chrY | 13271860 | . | A | T   | 30154.72 | PASS          | AC=35;AF=0.500;AN=70;BaseQ         |
| 17934 | chrY | 13271885 | . | T | A   | 78371.04 | PASS          | AC=36;AF=0.514;AN=70;BaseQ         |
| 17935 | chrY | 13271904 | . | A | G   | 73002.85 | PASS          | AC=36;AF=0.514;AN=70;BaseQ         |
| 17936 | chrY | 13271906 | . | A | T   | 2242.73  | PASS          | AC=12;AF=0.171;AN=70;BaseQRankSum= |

|       |      |          |   |   |     |          |               |                                           |
|-------|------|----------|---|---|-----|----------|---------------|-------------------------------------------|
| 17937 | chrY | 13271912 | . | G | A   | 15475.93 | PASS          | AC=33;AF=0.471;AN=70;BaseQRankSum=        |
| 17938 | chrY | 13271933 | . | T | A   | 50785.14 | PASS          | AC=40;AF=0.571;AN=70;BaseQRankSum=        |
| 17939 | chrY | 13271938 | . | C | A   | 9004.73  | PASS          | AC=33;AF=0.471;AN=70;BaseQRankSum=        |
| 17940 | chrY | 13272046 | . | A | G   | 51658.95 | PASS          | AC=35;AF=0.500;AN=70;BaseQRankSum=        |
| 17941 | chrY | 13272065 | . | A | G   | 46924.84 | PASS          | AC=36;AF=0.514;AN=70;BaseQRankSum=        |
| 17942 | chrY | 13272067 | . | A | C   | 45906.84 | PASS          | AC=36;AF=0.514;AN=70;BaseQRankSum=        |
| 17943 | chrY | 13272147 | . | T | A   | 11392.83 | my_snp_filter | AC=11;AF=0.289;AN=70;BaseQRankSum=        |
| 17944 | chrY | 13272168 | . | A | G   | 11139.94 | PASS          | AC=9;AF=0.281;AN=32;BaseQRankSum=         |
| 17945 | chrY | 13272202 | . | C | T,A | 2139.59  | PASS          | AC=7,1;AF=0.219,0.031;AN=32;BaseQRankSum= |
| 17946 | chrY | 13272212 | . | T | C   | 18393.48 | PASS          | AC=9;AF=0.321;AN=28;BaseQRankSum=         |
| 17947 | chrY | 13272244 | . | G | C   | 20879.69 | PASS          | AC=9;AF=0.346;AN=26;BaseQRankSum=         |
| 17948 | chrY | 13272252 | . | G | T   | 8762.29  | PASS          | AC=9;AF=0.281;AN=32;BaseQRankSum=         |
| 17949 | chrY | 13272253 | . | C | G   | 6523.58  | PASS          | AC=7;AF=0.184;AN=38;BaseQRankSum=         |
| 17950 | chrY | 13272281 | . | A | T   | 9293.13  | PASS          | AC=13;AF=0.325;AN=40;BaseQRankSum=        |
| 17951 | chrY | 13272291 | . | G | A   | 8996.05  | PASS          | AC=13;AF=0.325;AN=40;BaseQRankSum=        |
| 17952 | chrY | 13272378 | . | C | T   | 1437.43  | PASS          | AC=7;AF=0.146;AN=48;BaseQRankSum=         |
| 17953 | chrY | 13272385 | . | A | G   | 11144.11 | PASS          | AC=11;AF=0.239;AN=46;BaseQRankSum=        |
| 17954 | chrY | 13272412 | . | T | C   | 6388.54  | PASS          | AC=9;AF=0.173;AN=52;BaseQRankSum=         |
| 17955 | chrY | 13272416 | . | C | T   | 262.20   | PASS          | AC=2;AF=0.038;AN=52;BaseQRankSum=         |
| 17956 | chrY | 13272438 | . | A | G   | 86.17    | my_snp_filter | AC=2;AF=0.032;AN=62;BaseQRankSum=         |
| 17957 | chrY | 13272455 | . | T | C   | 7537.59  | PASS          | AC=11;AF=0.183;AN=60;BaseQRankSum=        |
| 17958 | chrY | 13272471 | . | A | G   | 127.82   | PASS          | AC=1;AF=0.014;AN=70;BaseQRankSum=         |
| 17959 | chrY | 13272490 | . | T | C   | 11328.23 | PASS          | AC=15;AF=0.221;AN=68;BaseQRankSum=        |
| 17960 | chrY | 13272657 | . | C | G   | 53.42    | my_snp_filter | AC=1;AF=0.014;AN=70;BaseQRankSum=         |
| 17961 | chrY | 13272677 | . | T | C   | 26913.72 | PASS          | AC=35;AF=0.500;AN=70;BaseQRankSum=        |
| 17962 | chrY | 13272678 | . | A | G   | 26889.72 | PASS          | AC=35;AF=0.500;AN=70;BaseQRankSum=        |
| 17963 | chrY | 13272689 | . | C | G   | 25223.88 | PASS          | AC=32;AF=0.457;AN=70;BaseQRankSum=        |
| 17964 | chrY | 13272692 | . | A | G   | 31178.53 | PASS          | AC=34;AF=0.486;AN=70;BaseQRankSum=        |
| 17965 | chrY | 13272696 | . | A | G   | 240.37   | my_snp_filter | AC=3;AF=0.043;AN=70;BaseQRankSum=         |
| 17966 | chrY | 13272705 | . | T | C   | 66941.81 | PASS          | AC=39;AF=0.557;AN=70;BaseQRankSum=        |
| 17967 | chrY | 13272732 | . | G | A   | 213.45   | my_snp_filter | AC=5;AF=0.071;AN=70;BaseQRankSum=         |
| 17968 | chrY | 13272738 | . | T | C   | 56862.36 | PASS          | AC=39;AF=0.557;AN=70;BaseQRankSum=        |
| 17969 | chrY | 13272739 | . | T | C   | 16972.72 | PASS          | AC=35;AF=0.500;AN=70;BaseQRankSum=        |
| 17970 | chrY | 13272750 | . | T | G   | 112.42   | PASS          | AC=1;AF=0.014;AN=70;BaseQRankSum=         |
| 17971 | chrY | 13272793 | . | G | A   | 167.61   | PASS          | AC=1;AF=0.014;AN=70;BaseQRankSum=         |
| 17972 | chrY | 13272849 | . | A | G   | 5665.26  | PASS          | AC=26;AF=0.371;AN=70;BaseQRankSum=        |
| 17973 | chrY | 13272875 | . | T | C   | 7674.02  | PASS          | AC=24;AF=0.375;AN=64;BaseQRankSum=        |
| 17974 | chrY | 13272878 | . | C | G   | 98.32    | my_snp_filter | AC=2;AF=0.030;AN=66;BaseQRankSum=         |
| 17975 | chrY | 13272881 | . | G | C   | 750.40   | PASS          | AC=3;AF=0.045;AN=66;BaseQRankSum=         |
| 17976 | chrY | 13272915 | . | C | T   | 866.74   | my_snp_filter | AC=7;AF=0.113;AN=62;BaseQRankSum=         |
| 17977 | chrY | 13272929 | . | C | T   | 14219.26 | PASS          | AC=16;AF=0.444;AN=36;BaseQRankSum=        |
| 17978 | chrY | 13272930 | . | G | A   | 748.18   | PASS          | AC=8;AF=0.143;AN=56;BaseQRankSum=         |
| 17979 | chrY | 13272956 | . | G | A   | 17548.24 | PASS          | AC=10;AF=0.417;AN=24;BaseQRankSum=        |
| 17980 | chrY | 13272957 | . | T | C   | 17524.24 | PASS          | AC=10;AF=0.417;AN=24;BaseQRankSum=        |
| 17981 | chrY | 13272967 | . | G | T   | 128.71   | my_snp_filter | AC=2;AF=0.063;AN=32;BaseQRankSum=         |
| 17982 | chrY | 13272976 | . | C | A   | 68.43    | my_snp_filter | AC=2;AF=0.056;AN=36;BaseQRankSum=         |
| 17983 | chrY | 13273005 | . | G | A   | 11960.04 | PASS          | AC=10;AF=0.313;AN=32;BaseQRankSum=        |
| 17984 | chrY | 13273033 | . | C | T   | 95.48    | my_snp_filter | AC=1;AF=0.021;AN=48;BaseQRankSum=         |
| 17985 | chrY | 13273036 | . | G | T   | 2613.97  | PASS          | AC=9;AF=0.205;AN=44;BaseQRankSum=         |
| 17986 | chrY | 13273047 | . | G | A   | 875.58   | PASS          | AC=3;AF=0.060;AN=50;BaseQRankSum=         |
| 17987 | chrY | 13273058 | . | C | G   | 79.11    | my_snp_filter | AC=1;AF=0.019;AN=52;BaseQRankSum=         |
| 17988 | chrY | 13273065 | . | A | C   | 13064.50 | PASS          | AC=17;AF=0.304;AN=56;BaseQRankSum=        |
| 17989 | chrY | 13273100 | . | A | G   | 1787.16  | PASS          | AC=11;AF=0.162;AN=68;BaseQRankSum=        |
| 17990 | chrY | 13273127 | . | G | C   | 6528.88  | my_snp_filter | AC=11;AF=0.162;AN=68;BaseQRankSum=        |
| 17991 | chrY | 13273189 | . | G | T   | 3195.15  | my_snp_filter | AC=15;AF=0.214;AN=70;BaseQRankSum=        |
| 17992 | chrY | 13273197 | . | A | C   | 183.45   | my_snp_filter | AC=4;AF=0.057;AN=70;BaseQRankSum=         |
| 17993 | chrY | 13273223 | . | C | G   | 3751.51  | my_snp_filter | AC=10;AF=0.143;AN=70;BaseQRankSum=        |
| 17994 | chrY | 13273227 | . | C | T   | 3975.71  | my_snp_filter | AC=11;AF=0.157;AN=70;BaseQRankSum=        |
| 17995 | chrY | 13273282 | . | G | A   | 3291.46  | my_snp_filter | AC=10;AF=0.143;AN=70;BaseQRankSum=        |
| 17996 | chrY | 13273297 | . | G | C   | 3825.88  | my_snp_filter | AC=11;AF=0.157;AN=70;BaseQRankSum=        |
| 17997 | chrY | 13273402 | . | A | G   | 80       | my_snp_filter | AC=3;AF=0.048;AN=62;BaseQRankSum=         |
| 17998 | chrY | 13273416 | . | G | A   | 319.25   | PASS          | AC=3;AF=0.052;AN=58;BaseQRankSum=         |
| 17999 | chrY | 13273424 | . | A | G   | 382.24   | PASS          | AC=3;AF=0.048;AN=62;BaseQRankSum=         |
| 18000 | chrY | 13273425 | . | C | T   | 424.08   | PASS          | AC=3;AF=0.048;AN=62;BaseQRankSum=         |
| 18001 | chrY | 13273430 | . | G | A   | 417.89   | PASS          | AC=3;AF=0.048;AN=62;BaseQRankSum=         |
| 18002 | chrY | 13273432 | . | G | A   | 422.09   | PASS          | AC=3;AF=0.048;AN=62;BaseQRankSum=         |
| 18003 | chrY | 13273545 | . | C | T   | 539.08   | my_snp_filter | AC=12;AF=0.171;AN=70;BaseQRankSum=        |
| 18004 | chrY | 13273579 | . | T | C   | 1714.92  | PASS          | AC=18;AF=0.257;AN=70;BaseQRankSum=        |
| 18005 | chrY | 13273603 | . | C | T   | 253.92   | PASS          | AC=3;AF=0.043;AN=70;BaseQRankSum=         |
| 18006 | chrY | 13273630 | . | T | C   | 2997.40  | my_snp_filter | AC=20;AF=0.286;AN=70;BaseQRankSum=        |
| 18007 | chrY | 13273664 | . | A | C   | 3827.35  | PASS          | AC=22;AF=0.314;AN=70;BaseQRankSum=        |
| 18008 | chrY | 13273704 | . | T | C   | 375.78   | PASS          | AC=4;AF=0.063;AN=64;BaseQRankSum=         |
| 18009 | chrY | 13273710 | . | T | C   | 785.59   | PASS          | AC=7;AF=0.109;AN=64;BaseQRankSum=         |
| 18010 | chrY | 13273718 | . | C | T   | 875.47   | PASS          | AC=8;AF=0.138;AN=58;BaseQRankSum=         |
| 18011 | chrY | 13273719 | . | T | G   | 904.14   | PASS          | AC=8;AF=0.138;AN=58;BaseQRankSum=         |
| 18012 | chrY | 13273729 | . | G | A   | 959.82   | PASS          | AC=9;AF=0.161;AN=56;BaseQRankSum=         |

|       |      |          |   |   |   |          |               |                                    |
|-------|------|----------|---|---|---|----------|---------------|------------------------------------|
| 18013 | chrY | 13273750 | . | T | G | 3696.95  | PASS          | AC=10;AF=0.227;AN=44;BaseQRankSum= |
| 18014 | chrY | 13273753 | . | T | A | 3629.47  | PASS          | AC=10;AF=0.227;AN=44;BaseQRankSum= |
| 18015 | chrY | 13273812 | . | C | T | 91.10    | my_snp_filter | AC=3;AF=0.125;AN=24;BaseQ          |
| 18016 | chrY | 13273813 | . | A | G | 91.82    | my_snp_filter | AC=3;AF=0.125;AN=24;BaseQ          |
| 18017 | chrY | 13273814 | . | A | G | 339.47   | PASS          | AC=5;AF=0.208;AN=24;BaseQRankSum=  |
| 18018 | chrY | 13273818 | . | A | G | 670.55   | PASS          | AC=8;AF=0.333;AN=24;BaseQRankSum=  |
| 18019 | chrY | 13273832 | . | C | A | 40.63    | my_snp_filter | AC=2;AF=0.091;AN=22;BaseQ          |
| 18020 | chrY | 13273833 | . | A | C | 683.82   | PASS          | AC=5;AF=0.227;AN=22;BaseQRankSum=  |
| 18021 | chrY | 13273844 | . | G | C | 1226.33  | PASS          | AC=8;AF=0.444;AN=18;BaseQRankSum=  |
| 18022 | chrY | 13273873 | . | A | G | 217.32   | PASS          | AC=1;AF=0.056;AN=18;BaseQRankSum=  |
| 18023 | chrY | 13273905 | . | A | G | 98.32    | my_snp_filter | AC=3;AF=0.150;AN=20;BaseQ          |
| 18024 | chrY | 13273917 | . | T | C | 47.10    | my_snp_filter | AC=2;AF=0.111;AN=18;BaseQ          |
| 18025 | chrY | 13273981 | . | C | T | 377.79   | my_snp_filter | AC=6;AF=0.333;AN=18;BaseQ          |
| 18026 | chrY | 13273986 | . | T | C | 363.35   | my_snp_filter | AC=6;AF=0.333;AN=18;BaseQ          |
| 18027 | chrY | 13273993 | . | C | A | 2990.12  | my_snp_filter | AC=8;AF=0.444;AN=18;BaseQ          |
| 18028 | chrY | 13273994 | . | C | T | 2989.84  | my_snp_filter | AC=8;AF=0.444;AN=18;BaseQ          |
| 18029 | chrY | 13274001 | . | A | T | 234.14   | my_snp_filter | AC=4;AF=0.222;AN=18;BaseQ          |
| 18030 | chrY | 13274032 | . | G | A | 107.41   | my_snp_filter | AC=4;AF=0.222;AN=18;BaseQ          |
| 18031 | chrY | 13274061 | . | C | A | 544.69   | PASS          | AC=6;AF=0.333;AN=18;BaseQRankSum=  |
| 18032 | chrY | 13274072 | . | A | G | 45.33    | PASS          | AC=1;AF=0.056;AN=18;BaseQRankSum=  |
| 18033 | chrY | 13274075 | . | T | C | 45.81    | PASS          | AC=1;AF=0.056;AN=18;BaseQRankSum=  |
| 18034 | chrY | 13274076 | . | G | A | 48.34    | PASS          | AC=1;AF=0.056;AN=18;BaseQRankSum=  |
| 18035 | chrY | 13274086 | . | G | A | 44.58    | my_snp_filter | AC=2;AF=0.111;AN=18;BaseQ          |
| 18036 | chrY | 13274230 | . | G | T | 104.72   | my_snp_filter | AC=4;AF=0.182;AN=22;BaseQ          |
| 18037 | chrY | 13274236 | . | G | A | 1029.78  | PASS          | AC=9;AF=0.375;AN=24;BaseQRankSum=  |
| 18038 | chrY | 13274272 | . | A | C | 1141.87  | PASS          | AC=8;AF=0.286;AN=28;BaseQRankSum=  |
| 18039 | chrY | 13274282 | . | A | G | 384.07   | my_snp_filter | AC=7;AF=0.219;AN=32;BaseQ          |
| 18040 | chrY | 13274297 | . | A | G | 275.41   | PASS          | AC=4;AF=0.133;AN=30;BaseQRankSum=  |
| 18041 | chrY | 13274339 | . | T | G | 1141.18  | PASS          | AC=8;AF=0.160;AN=50;BaseQRankSum=  |
| 18042 | chrY | 13274346 | . | T | C | 183.89   | PASS          | AC=3;AF=0.050;AN=60;BaseQRankSum=  |
| 18043 | chrY | 13274349 | . | T | C | 594.09   | my_snp_filter | AC=6;AF=0.103;AN=58;BaseQ          |
| 18044 | chrY | 13274362 | . | G | T | 173.62   | my_snp_filter | AC=3;AF=0.044;AN=68;BaseQ          |
| 18045 | chrY | 13274416 | . | A | G | 3439.94  | PASS          | AC=19;AF=0.271;AN=70;BaseQRankSum= |
| 18046 | chrY | 13274418 | . | C | T | 344.37   | PASS          | AC=7;AF=0.100;AN=70;BaseQRankSum=  |
| 18047 | chrY | 13274425 | . | C | T | 8029.37  | PASS          | AC=29;AF=0.414;AN=70;BaseQRankSum= |
| 18048 | chrY | 13274456 | . | A | G | 395.69   | PASS          | AC=6;AF=0.086;AN=70;BaseQRankSum=  |
| 18049 | chrY | 13274458 | . | G | A | 389.38   | PASS          | AC=5;AF=0.071;AN=70;BaseQRankSum=  |
| 18050 | chrY | 13274468 | . | T | C | 13266.53 | PASS          | AC=34;AF=0.486;AN=70;BaseQ         |
| 18051 | chrY | 13274511 | . | A | G | 13336.08 | PASS          | AC=34;AF=0.486;AN=70;BaseQ         |
| 18052 | chrY | 13274513 | . | C | A | 2071.77  | PASS          | AC=11;AF=0.157;AN=70;BaseQRankSum= |
| 18053 | chrY | 13274517 | . | C | T | 2075     | PASS          | AC=11;AF=0.157;AN=70;BaseQRankSum= |
| 18054 | chrY | 13274568 | . | A | G | 7207.96  | PASS          | AC=31;AF=0.443;AN=70;BaseQRankSum= |
| 18055 | chrY | 13274598 | . | T | C | 2307.05  | PASS          | AC=22;AF=0.314;AN=70;BaseQRankSum= |
| 18056 | chrY | 13274615 | . | T | C | 2086.05  | PASS          | AC=7;AF=0.100;AN=70;BaseQRankSum=  |
| 18057 | chrY | 13274621 | . | C | G | 1042.15  | PASS          | AC=17;AF=0.258;AN=66;BaseQRankSum= |
| 18058 | chrY | 13274650 | . | C | T | 37.04    | my_snp_filter | AC=2;AF=0.029;AN=70;BaseQ          |
| 18059 | chrY | 13274833 | . | C | T | 33.82    | PASS          | AC=1;AF=0.014;AN=70;BaseQRankSum=  |
| 18060 | chrY | 13274848 | . | A | G | 36.97    | PASS          | AC=1;AF=0.014;AN=70;BaseQRankSum=  |
| 18061 | chrY | 13274869 | . | T | C | 83.39    | my_snp_filter | AC=3;AF=0.043;AN=70;BaseQ          |
| 18062 | chrY | 13274877 | . | T | C | 343      | my_snp_filter | AC=7;AF=0.100;AN=70;BaseQ          |
| 18063 | chrY | 13274907 | . | G | A | 30.85    | my_snp_filter | AC=2;AF=0.032;AN=62;BaseQ          |
| 18064 | chrY | 13275001 | . | T | C | 93.40    | my_snp_filter | AC=3;AF=0.125;AN=24;BaseQ          |
| 18065 | chrY | 13275002 | . | C | T | 1194.84  | my_snp_filter | AC=7;AF=0.292;AN=24;BaseQ          |
| 18066 | chrY | 13275010 | . | A | C | 1678.72  | my_snp_filter | AC=9;AF=0.346;AN=26;BaseQ          |
| 18067 | chrY | 13275119 | . | A | G | 182.15   | PASS          | AC=5;AF=0.227;AN=22;BaseQRankSum=  |
| 18068 | chrY | 13275144 | . | T | C | 72.29    | PASS          | AC=2;AF=0.083;AN=24;BaseQRankSum=  |
| 18069 | chrY | 13275211 | . | A | G | 2595.18  | PASS          | AC=12;AF=0.400;AN=30;BaseQRankSum= |
| 18070 | chrY | 13275223 | . | G | T | 1638.75  | PASS          | AC=8;AF=0.250;AN=32;BaseQRankSum=  |
| 18071 | chrY | 13275309 | . | G | A | 1404.19  | PASS          | AC=9;AF=0.150;AN=60;BaseQRankSum=  |
| 18072 | chrY | 13275341 | . | T | C | 1285.27  | PASS          | AC=8;AF=0.129;AN=62;BaseQRankSum=  |
| 18073 | chrY | 13275343 | . | C | T | 3281.03  | my_snp_filter | AC=9;AF=0.145;AN=62;BaseQ          |
| 18074 | chrY | 13275347 | . | C | G | 1027.27  | PASS          | AC=8;AF=0.133;AN=60;BaseQRankSum=  |
| 18075 | chrY | 13275372 | . | C | T | 1100.76  | my_snp_filter | AC=9;AF=0.136;AN=66;BaseQ          |
| 18076 | chrY | 13275524 | . | G | T | 1534.33  | PASS          | AC=9;AF=0.129;AN=70;BaseQRankSum=  |
| 18077 | chrY | 13275576 | . | T | A | 540.18   | PASS          | AC=3;AF=0.052;AN=58;BaseQRankSum=  |
| 18078 | chrY | 13275577 | . | A | G | 1663.06  | PASS          | AC=7;AF=0.130;AN=54;BaseQRankSum=  |
| 18079 | chrY | 13275588 | . | T | C | 1978.09  | PASS          | AC=8;AF=0.167;AN=48;BaseQRankSum=  |
| 18080 | chrY | 13275589 | . | G | A | 1773.74  | PASS          | AC=7;AF=0.146;AN=48;BaseQRankSum=  |
| 18081 | chrY | 13275640 | . | C | T | 1433.19  | PASS          | AC=8;AF=0.333;AN=24;BaseQRankSum=  |
| 18082 | chrY | 13275657 | . | A | T | 956      | PASS          | AC=7;AF=0.318;AN=22;BaseQRankSum=  |
| 18083 | chrY | 13275688 | . | C | T | 1144.75  | PASS          | AC=8;AF=0.444;AN=18;BaseQRankSum=  |
| 18084 | chrY | 13275764 | . | T | G | 1440.54  | my_snp_filter | AC=8;AF=0.444;AN=18;BaseQ          |
| 18085 | chrY | 13275767 | . | C | G | 3668.24  | my_snp_filter | AC=9;AF=0.500;AN=18;BaseQ          |
| 18086 | chrY | 13275788 | . | G | A | 1732.01  | my_snp_filter | AC=8;AF=0.444;AN=18;BaseQ          |
| 18087 | chrY | 13275812 | . | C | T | 192.42   | PASS          | AC=2;AF=0.111;AN=18;BaseQRankSum=  |
| 18088 | chrY | 13275853 | . | T | A | 1695.55  | my_snp_filter | AC=8;AF=0.444;AN=18;BaseQ          |

|       |      |          |   |   |     |         |               |                                    |
|-------|------|----------|---|---|-----|---------|---------------|------------------------------------|
| 18089 | chrY | 13275907 | . | C | G   | 158.34  | PASS          | AC=2;AF=0.111;AN=18;BaseQRankSum=  |
| 18090 | chrY | 13275918 | . | C | T   | 1873.09 | PASS          | AC=9;AF=0.500;AN=18;BaseQRankSum=  |
| 18091 | chrY | 13275934 | . | A | G   | 1723.09 | PASS          | AC=9;AF=0.500;AN=18;BaseQRankSum=  |
| 18092 | chrY | 13275983 | . | C | T   | 357.82  | my_snp_filter | AC=6;AF=0.333;AN=18;BaseQ          |
| 18093 | chrY | 13276016 | . | T | C   | 6187.53 | PASS          | AC=9;AF=0.450;AN=20;BaseQRankSum=  |
| 18094 | chrY | 13276017 | . | A | G   | 280.24  | PASS          | AC=3;AF=0.150;AN=20;BaseQRankSum=  |
| 18095 | chrY | 13276057 | . | C | G   | 799.21  | PASS          | AC=7;AF=0.350;AN=20;BaseQRankSum=  |
| 18096 | chrY | 13276064 | . | C | G   | 404.24  | PASS          | AC=5;AF=0.250;AN=20;BaseQRankSum=  |
| 18097 | chrY | 13276075 | . | G | T   | 862.48  | PASS          | AC=7;AF=0.350;AN=20;BaseQRankSum=  |
| 18098 | chrY | 13276077 | . | T | C   | 33.30   | my_snp_filter | AC=1;AF=0.050;AN=20;BaseQ          |
| 18099 | chrY | 13276101 | . | T | G   | 31.32   | my_snp_filter | AC=1;AF=0.050;AN=20;BaseQ          |
| 18100 | chrY | 13276128 | . | A | T   | 3642.09 | PASS          | AC=9;AF=0.500;AN=18;BaseQRankSum=  |
| 18101 | chrY | 13276278 | . | C | G   | 3065.89 | PASS          | AC=13;AF=0.591;AN=22;BaseQRankSum= |
| 18102 | chrY | 13276363 | . | T | C   | 2040.09 | PASS          | AC=9;AF=0.500;AN=18;BaseQRankSum=  |
| 18103 | chrY | 13276382 | . | G | T   | 1754.09 | PASS          | AC=9;AF=0.500;AN=18;BaseQRankSum=  |
| 18104 | chrY | 13276411 | . | C | T   | 1100.60 | my_snp_filter | AC=6;AF=0.333;AN=18;BaseQ          |
| 18105 | chrY | 13276416 | . | C | A   | 1128.54 | PASS          | AC=5;AF=0.278;AN=18;BaseQRankSum=  |
| 18106 | chrY | 13276504 | . | G | A   | 124.79  | PASS          | AC=2;AF=0.100;AN=20;BaseQRankSum=  |
| 18107 | chrY | 13276576 | . | T | G   | 603.54  | PASS          | AC=5;AF=0.179;AN=28;BaseQRankSum=  |
| 18108 | chrY | 13276709 | . | G | C   | 31.08   | my_snp_filter | AC=1;AF=0.014;AN=70;BaseQ          |
| 18109 | chrY | 13276713 | . | C | T   | 206.33  | PASS          | AC=4;AF=0.057;AN=70;BaseQRankSum=  |
| 18110 | chrY | 13277037 | . | G | T   | 66.82   | my_snp_filter | AC=2;AF=0.029;AN=70;BaseQ          |
| 18111 | chrY | 13277165 | . | G | A   | 3681.98 | PASS          | AC=22;AF=0.314;AN=70;BaseQRankSum= |
| 18112 | chrY | 13277195 | . | G | C   | 356.15  | my_snp_filter | AC=8;AF=0.114;AN=70;BaseQ          |
| 18113 | chrY | 13277231 | . | C | T   | 963.12  | PASS          | AC=10;AF=0.143;AN=70;BaseQRankSum= |
| 18114 | chrY | 13277239 | . | C | T   | 978.86  | PASS          | AC=10;AF=0.143;AN=70;BaseQRankSum= |
| 18115 | chrY | 13277296 | . | C | A   | 122.11  | my_snp_filter | AC=4;AF=0.057;AN=70;BaseQ          |
| 18116 | chrY | 13277303 | . | G | A   | 987.17  | my_snp_filter | AC=8;AF=0.114;AN=70;BaseQ          |
| 18117 | chrY | 13277375 | . | C | T   | 2026.36 | PASS          | AC=12;AF=0.176;AN=68;BaseQRankSum= |
| 18118 | chrY | 13277384 | . | G | A   | 2232.48 | PASS          | AC=12;AF=0.176;AN=68;BaseQRankSum= |
| 18119 | chrY | 13277464 | . | G | A   | 4096.87 | PASS          | AC=15;AF=0.234;AN=64;BaseQRankSum= |
| 18120 | chrY | 13277499 | . | G | A   | 8018.78 | PASS          | AC=15;AF=0.268;AN=56;BaseQRankSum= |
| 18121 | chrY | 13277512 | . | A | G   | 3155.60 | PASS          | AC=9;AF=0.145;AN=62;BaseQRankSum=  |
| 18122 | chrY | 13277522 | . | C | A   | 3135.15 | PASS          | AC=10;AF=0.156;AN=64;BaseQRankSum= |
| 18123 | chrY | 13277608 | . | A | T   | 2838.09 | PASS          | AC=9;AF=0.129;AN=70;BaseQRankSum=  |
| 18124 | chrY | 13277616 | . | C | T   | 3228.29 | PASS          | AC=10;AF=0.143;AN=70;BaseQRankSum= |
| 18125 | chrY | 13277647 | . | A | G   | 1021.40 | PASS          | AC=11;AF=0.157;AN=70;BaseQRankSum= |
| 18126 | chrY | 13277676 | . | G | A   | 2887.47 | PASS          | AC=15;AF=0.221;AN=68;BaseQRankSum= |
| 18127 | chrY | 13277678 | . | C | A   | 7268.99 | PASS          | AC=21;AF=0.300;AN=70;BaseQRankSum= |
| 18128 | chrY | 13277719 | . | A | G   | 1842.76 | PASS          | AC=10;AF=0.208;AN=48;BaseQRankSum= |
| 18129 | chrY | 13277752 | . | A | G   | 1559.20 | PASS          | AC=11;AF=0.423;AN=26;BaseQRankSum= |
| 18130 | chrY | 13277762 | . | G | T   | 791.43  | PASS          | AC=6;AF=0.250;AN=24;BaseQRankSum=  |
| 18131 | chrY | 13277778 | . | T | A   | 454.07  | PASS          | AC=7;AF=0.318;AN=22;BaseQRankSum=  |
| 18132 | chrY | 13277796 | . | C | A   | 2979.52 | PASS          | AC=9;AF=0.450;AN=20;BaseQRankSum=  |
| 18133 | chrY | 13277809 | . | C | T   | 2831.52 | PASS          | AC=9;AF=0.450;AN=20;BaseQRankSum=  |
| 18134 | chrY | 13277811 | . | A | C   | 715.09  | PASS          | AC=4;AF=0.200;AN=20;BaseQRankSum=  |
| 18135 | chrY | 13277815 | . | G | A   | 2582.66 | PASS          | AC=9;AF=0.450;AN=20;BaseQRankSum=  |
| 18136 | chrY | 13277822 | . | T | C   | 2474.09 | PASS          | AC=9;AF=0.500;AN=18;BaseQRankSum=  |
| 18137 | chrY | 13277830 | . | A | G   | 2045.09 | PASS          | AC=9;AF=0.500;AN=18;BaseQRankSum=  |
| 18138 | chrY | 13277841 | . | C | T   | 1865.78 | PASS          | AC=8;AF=0.444;AN=18;BaseQRankSum=  |
| 18139 | chrY | 13277874 | . | T | C   | 414.44  | PASS          | AC=5;AF=0.250;AN=20;BaseQRankSum=  |
| 18140 | chrY | 13277880 | . | C | G   | 230.89  | PASS          | AC=2;AF=0.100;AN=20;BaseQRankSum=  |
| 18141 | chrY | 13277901 | . | A | G   | 551.51  | PASS          | AC=6;AF=0.167;AN=36;BaseQRankSum=  |
| 18142 | chrY | 13277920 | . | T | C   | 828.02  | PASS          | AC=6;AF=0.125;AN=48;BaseQRankSum=  |
| 18143 | chrY | 13277969 | . | T | C   | 1442.81 | PASS          | AC=13;AF=0.260;AN=50;BaseQRankSum= |
| 18144 | chrY | 13277992 | . | G | A   | 2252.10 | PASS          | AC=15;AF=0.288;AN=52;BaseQRankSum= |
| 18145 | chrY | 13278053 | . | G | A,* | 1087.32 | PASS          | AC=9,4;AF=0.145,0.065;AN=62;BaseQ  |
| 18146 | chrY | 13278057 | . | T | A   | 1309.38 | PASS          | AC=14;AF=0.212;AN=66;BaseQRankSum= |
| 18147 | chrY | 13278209 | . | T | G   | 299.98  | PASS          | AC=5;AF=0.089;AN=56;BaseQRankSum=  |
| 18148 | chrY | 13278249 | . | A | G   | 60.65   | my_snp_filter | AC=3;AF=0.075;AN=40;BaseQ          |
| 18149 | chrY | 13278251 | . | T | A   | 602.08  | my_snp_filter | AC=7;AF=0.175;AN=40;BaseQ          |
| 18150 | chrY | 13278376 | . | C | T   | 270.38  | PASS          | AC=5;AF=0.167;AN=30;BaseQRankSum=  |
| 18151 | chrY | 13278458 | . | T | G   | 163.60  | PASS          | AC=4;AF=0.067;AN=60;BaseQRankSum=  |
| 18152 | chrY | 13278488 | . | G | C   | 404.29  | PASS          | AC=6;AF=0.088;AN=68;BaseQRankSum=  |
| 18153 | chrY | 13278499 | . | A | T   | 664.73  | PASS          | AC=8;AF=0.114;AN=70;BaseQRankSum=  |
| 18154 | chrY | 13278602 | . | G | A   | 1541.93 | PASS          | AC=12;AF=0.176;AN=68;BaseQRankSum= |
| 18155 | chrY | 13278706 | . | A | T   | 1082.89 | PASS          | AC=8;AF=0.200;AN=40;BaseQRankSum=  |
| 18156 | chrY | 13278784 | . | C | A   | 4053.09 | my_snp_filter | AC=9;AF=0.500;AN=18;BaseQ          |
| 18157 | chrY | 13278795 | . | G | T   | 2599.42 | PASS          | AC=8;AF=0.444;AN=18;BaseQRankSum=  |
| 18158 | chrY | 13278845 | . | C | A   | 3259.09 | PASS          | AC=9;AF=0.500;AN=18;BaseQRankSum=  |
| 18159 | chrY | 13278865 | . | G | A   | 69.80   | my_snp_filter | AC=1;AF=0.056;AN=18;BaseQ          |
| 18160 | chrY | 13278875 | . | A | T   | 3629.09 | PASS          | AC=9;AF=0.500;AN=18;BaseQRankSum=  |
| 18161 | chrY | 13278941 | . | T | C   | 1048.91 | PASS          | AC=5;AF=0.278;AN=18;BaseQRankSum=  |
| 18162 | chrY | 13278957 | . | G | C   | 1280.51 | PASS          | AC=6;AF=0.333;AN=18;BaseQRankSum=  |
| 18163 | chrY | 13278976 | . | C | G   | 578.78  | PASS          | AC=3;AF=0.167;AN=18;BaseQRankSum=  |
| 18164 | chrY | 13278986 | . | G | C   | 7385.09 | PASS          | AC=9;AF=0.500;AN=18;BaseQRankSum=  |

|       |      |          |   |   |   |         |               |                                    |
|-------|------|----------|---|---|---|---------|---------------|------------------------------------|
| 18165 | chrY | 13279001 | . | T | A | 1900.58 | PASS          | AC=8;AF=0.444;AN=18;BaseQRankSum=  |
| 18166 | chrY | 13279006 | . | T | A | 1914.54 | PASS          | AC=8;AF=0.444;AN=18;BaseQRankSum=  |
| 18167 | chrY | 13279035 | . | T | C | 2291.52 | PASS          | AC=9;AF=0.450;AN=20;BaseQRankSum=  |
| 18168 | chrY | 13279059 | . | A | T | 2410.71 | PASS          | AC=8;AF=0.308;AN=26;BaseQRankSum=  |
| 18169 | chrY | 13279067 | . | T | C | 2464.18 | PASS          | AC=8;AF=0.286;AN=28;BaseQRankSum=  |
| 18170 | chrY | 13279130 | . | T | C | 743.37  | PASS          | AC=4;AF=0.111;AN=36;BaseQRankSum=  |
| 18171 | chrY | 13279152 | . | T | A | 599.47  | PASS          | AC=6;AF=0.130;AN=46;BaseQRankSum=  |
| 18172 | chrY | 13279189 | . | T | A | 6853.25 | PASS          | AC=10;AF=0.217;AN=46;BaseQRankSum= |
| 18173 | chrY | 13279279 | . | T | G | 3972.82 | my_snp_filter | AC=10;AF=0.152;AN=66;BaseQ         |
| 18174 | chrY | 13279343 | . | C | T | 1211.04 | PASS          | AC=8;AF=0.125;AN=64;BaseQRankSum=  |
| 18175 | chrY | 13279374 | . | T | A | 266.30  | PASS          | AC=2;AF=0.031;AN=64;BaseQRankSum=  |
| 18176 | chrY | 13279495 | . | C | G | 395.19  | PASS          | AC=7;AF=0.292;AN=24;BaseQRankSum=  |
| 18177 | chrY | 13279551 | . | C | A | 352.96  | PASS          | AC=5;AF=0.227;AN=22;BaseQRankSum=  |
| 18178 | chrY | 13279552 | . | G | T | 554.61  | PASS          | AC=7;AF=0.318;AN=22;BaseQRankSum=  |
| 18179 | chrY | 13279556 | . | T | C | 1350.67 | PASS          | AC=7;AF=0.318;AN=22;BaseQRankSum=  |
| 18180 | chrY | 13279633 | . | A | G | 160.93  | my_snp_filter | AC=5;AF=0.278;AN=18;BaseQ          |
| 18181 | chrY | 13279675 | . | A | G | 157.06  | my_snp_filter | AC=2;AF=0.111;AN=18;BaseQ          |
| 18182 | chrY | 13279683 | . | T | C | 1390.21 | PASS          | AC=9;AF=0.500;AN=18;BaseQRankSum=  |
| 18183 | chrY | 13279688 | . | A | G | 4614.09 | my_snp_filter | AC=9;AF=0.500;AN=18;BaseQ          |
| 18184 | chrY | 13279719 | . | T | C | 84.63   | my_snp_filter | AC=3;AF=0.150;AN=20;BaseQ          |
| 18185 | chrY | 13279768 | . | C | T | 1785.38 | my_snp_filter | AC=8;AF=0.400;AN=20;BaseQ          |
| 18186 | chrY | 13279808 | . | G | A | 699.34  | PASS          | AC=8;AF=0.333;AN=24;BaseQRankSum=  |
| 18187 | chrY | 13279857 | . | G | T | 636.54  | PASS          | AC=2;AF=0.053;AN=38;BaseQRankSum=  |
| 18188 | chrY | 13279866 | . | C | T | 5614.10 | PASS          | AC=12;AF=0.353;AN=34;BaseQRankSum= |
| 18189 | chrY | 13279891 | . | G | A | 894.12  | PASS          | AC=3;AF=0.071;AN=42;BaseQRankSum=  |
| 18190 | chrY | 13279893 | . | A | G | 1698.66 | PASS          | AC=8;AF=0.167;AN=48;BaseQRankSum=  |
| 18191 | chrY | 13279896 | . | C | A | 1634.50 | PASS          | AC=8;AF=0.167;AN=48;BaseQRankSum=  |
| 18192 | chrY | 13279902 | . | G | T | 4670.28 | PASS          | AC=10;AF=0.208;AN=48;BaseQRankSum= |
| 18193 | chrY | 13279906 | . | G | A | 265.80  | PASS          | AC=1;AF=0.019;AN=52;BaseQRankSum=  |
| 18194 | chrY | 13279932 | . | A | T | 4182.41 | PASS          | AC=9;AF=0.225;AN=40;BaseQRankSum=  |
| 18195 | chrY | 13279938 | . | T | C | 6422.89 | PASS          | AC=9;AF=0.214;AN=42;BaseQRankSum=  |
| 18196 | chrY | 13279940 | . | G | A | 3310.13 | PASS          | AC=9;AF=0.225;AN=40;BaseQRankSum=  |
| 18197 | chrY | 13279942 | . | G | T | 306.37  | PASS          | AC=2;AF=0.042;AN=48;BaseQRankSum=  |
| 18198 | chrY | 13279954 | . | T | C | 1441.64 | PASS          | AC=8;AF=0.148;AN=54;BaseQRankSum=  |
| 18199 | chrY | 13279955 | . | G | A | 1446.42 | PASS          | AC=8;AF=0.148;AN=54;BaseQRankSum=  |
| 18200 | chrY | 13279994 | . | G | A | 1014.70 | PASS          | AC=8;AF=0.160;AN=50;BaseQRankSum=  |
| 18201 | chrY | 13280004 | . | A | T | 973.14  | PASS          | AC=7;AF=0.219;AN=32;BaseQRankSum=  |
| 18202 | chrY | 13280010 | . | A | T | 890.90  | PASS          | AC=7;AF=0.125;AN=56;BaseQRankSum=  |
| 18203 | chrY | 13280016 | . | A | T | 678.86  | PASS          | AC=6;AF=0.097;AN=62;BaseQRankSum=  |
| 18204 | chrY | 13280021 | . | A | G | 651.08  | PASS          | AC=6;AF=0.091;AN=66;BaseQRankSum=  |
| 18205 | chrY | 13280029 | . | C | T | 518.60  | PASS          | AC=6;AF=0.088;AN=68;BaseQRankSum=  |
| 18206 | chrY | 13280086 | . | G | A | 60      | PASS          | AC=3;AF=0.043;AN=70;BaseQRankSum=  |
| 18207 | chrY | 13280097 | . | T | A | 554.52  | PASS          | AC=7;AF=0.100;AN=70;BaseQRankSum=  |
| 18208 | chrY | 13280102 | . | T | A | 474.73  | PASS          | AC=4;AF=0.057;AN=70;BaseQRankSum=  |
| 18209 | chrY | 13280112 | . | T | C | 58.22   | PASS          | AC=2;AF=0.029;AN=70;BaseQRankSum=  |
| 18210 | chrY | 13280119 | . | C | T | 416.38  | PASS          | AC=3;AF=0.045;AN=66;BaseQRankSum=  |
| 18211 | chrY | 13280230 | . | T | G | 1401.83 | my_snp_filter | AC=8;AF=0.167;AN=48;BaseQ          |
| 18212 | chrY | 13280278 | . | A | T | 1097.50 | my_snp_filter | AC=8;AF=0.286;AN=28;BaseQ          |
| 18213 | chrY | 13280649 | . | C | T | 446.27  | PASS          | AC=2;AF=0.029;AN=70;DP=664;FS=0.0  |
| 18214 | chrY | 13280899 | . | T | G | 252.08  | my_snp_filter | AC=4;AF=0.061;AN=66;BaseQ          |
| 18215 | chrY | 13280948 | . | T | C | 409.98  | my_snp_filter | AC=7;AF=0.100;AN=70;BaseQ          |
| 18216 | chrY | 13281196 | . | G | T | 250.37  | PASS          | AC=1;AF=0.031;AN=32;BaseQRankSum=  |
| 18217 | chrY | 13281306 | . | T | C | 65.32   | my_snp_filter | AC=1;AF=0.056;AN=18;BaseQ          |
| 18218 | chrY | 13281317 | . | T | C | 2899.09 | PASS          | AC=9;AF=0.500;AN=18;BaseQRankSum=  |
| 18219 | chrY | 13281348 | . | G | A | 4084.91 | PASS          | AC=10;AF=0.556;AN=18;BaseQRankSum= |
| 18220 | chrY | 13281450 | . | C | G | 3915.34 | PASS          | AC=11;AF=0.550;AN=20;BaseQRankSum= |
| 18221 | chrY | 13281648 | . | A | G | 106.41  | PASS          | AC=1;AF=0.056;AN=18;BaseQRankSum=  |
| 18222 | chrY | 13281656 | . | T | C | 112.49  | PASS          | AC=1;AF=0.056;AN=18;BaseQRankSum=  |
| 18223 | chrY | 13281770 | . | G | A | 165.98  | PASS          | AC=4;AF=0.222;AN=18;BaseQRankSum=  |
| 18224 | chrY | 13281885 | . | C | T | 594.06  | PASS          | AC=7;AF=0.389;AN=18;BaseQRankSum=  |
| 18225 | chrY | 13281889 | . | T | A | 314.78  | PASS          | AC=3;AF=0.167;AN=18;BaseQRankSum=  |
| 18226 | chrY | 13281897 | . | C | G | 621.27  | PASS          | AC=7;AF=0.389;AN=18;BaseQRankSum=  |
| 18227 | chrY | 13281913 | . | A | G | 662.55  | PASS          | AC=7;AF=0.389;AN=18;BaseQRankSum=  |
| 18228 | chrY | 13281928 | . | A | G | 367.92  | PASS          | AC=6;AF=0.333;AN=18;BaseQRankSum=  |
| 18229 | chrY | 13281963 | . | G | A | 394.58  | PASS          | AC=6;AF=0.333;AN=18;BaseQRankSum=  |
| 18230 | chrY | 13281996 | . | T | G | 435.27  | PASS          | AC=5;AF=0.250;AN=20;BaseQRankSum=  |
| 18231 | chrY | 13282001 | . | T | C | 391.52  | PASS          | AC=4;AF=0.200;AN=20;BaseQRankSum=  |
| 18232 | chrY | 13282108 | . | A | T | 671.94  | PASS          | AC=5;AF=0.278;AN=18;BaseQRankSum=  |
| 18233 | chrY | 13282118 | . | T | C | 638.91  | PASS          | AC=5;AF=0.278;AN=18;BaseQRankSum=  |
| 18234 | chrY | 13282186 | . | T | G | 2166.09 | my_snp_filter | AC=9;AF=0.500;AN=18;BaseQ          |
| 18235 | chrY | 13282244 | . | T | G | 125.42  | my_snp_filter | AC=2;AF=0.091;AN=22;BaseQ          |
| 18236 | chrY | 13282266 | . | T | C | 228.77  | PASS          | AC=2;AF=0.100;AN=20;BaseQRankSum=  |
| 18237 | chrY | 13282302 | . | C | T | 2581.52 | PASS          | AC=9;AF=0.450;AN=20;BaseQRankSum=  |
| 18238 | chrY | 13282377 | . | C | T | 4136.09 | PASS          | AC=9;AF=0.500;AN=18;BaseQRankSum=  |
| 18239 | chrY | 13282382 | . | G | A | 34.06   | my_snp_filter | AC=1;AF=0.045;AN=22;BaseQ          |
| 18240 | chrY | 13282388 | . | A | G | 37.06   | my_snp_filter | AC=1;AF=0.045;AN=22;BaseQ          |



|       |      |          |   |   |   |         |               |                                    |
|-------|------|----------|---|---|---|---------|---------------|------------------------------------|
| 18241 | chrY | 13282397 | . | T | A | 558.19  | PASS          | AC=2;AF=0.091;AN=22;BaseQRankSum=  |
| 18242 | chrY | 13282461 | . | C | A | 119.77  | my_snp_filter | AC=2;AF=0.100;AN=20;BaseQ          |
| 18243 | chrY | 13282490 | . | G | C | 632.87  | PASS          | AC=7;AF=0.389;AN=18;BaseQRankSum=  |
| 18244 | chrY | 13282545 | . | T | C | 810.81  | my_snp_filter | AC=6;AF=0.333;AN=18;BaseQ          |
| 18245 | chrY | 13282568 | . | T | C | 515.87  | my_snp_filter | AC=6;AF=0.333;AN=18;BaseQ          |
| 18246 | chrY | 13282580 | . | A | G | 1068.37 | my_snp_filter | AC=5;AF=0.278;AN=18;BaseQ          |
| 18247 | chrY | 13282587 | . | A | G | 1210.92 | PASS          | AC=7;AF=0.350;AN=20;BaseQRankSum=  |
| 18248 | chrY | 13282620 | . | A | C | 932.81  | PASS          | AC=9;AF=0.409;AN=22;BaseQRankSum=  |
| 18249 | chrY | 13282709 | . | G | A | 934.77  | PASS          | AC=7;AF=0.292;AN=24;BaseQRankSum=  |
| 18250 | chrY | 13282718 | . | A | G | 952.68  | PASS          | AC=7;AF=0.318;AN=22;BaseQRankSum=  |
| 18251 | chrY | 13282773 | . | G | A | 134.67  | my_snp_filter | AC=3;AF=0.167;AN=18;BaseQ          |
| 18252 | chrY | 13283206 | . | A | G | 183.80  | PASS          | AC=1;AF=0.014;AN=70;BaseQRankSum=  |
| 18253 | chrY | 13283302 | . | A | G | 84.49   | PASS          | AC=1;AF=0.021;AN=48;BaseQRankSum=  |
| 18254 | chrY | 13283394 | . | G | T | 89.19   | my_snp_filter | AC=2;AF=0.100;AN=20;BaseQ          |
| 18255 | chrY | 13283652 | . | G | A | 82.15   | my_snp_filter | AC=2;AF=0.100;AN=20;BaseQ          |
| 18256 | chrY | 13283696 | . | C | T | 611.07  | PASS          | AC=6;AF=0.300;AN=20;BaseQRankSum=  |
| 18257 | chrY | 13283717 | . | G | A | 787.26  | PASS          | AC=6;AF=0.333;AN=18;BaseQRankSum=  |
| 18258 | chrY | 13283757 | . | A | G | 391.15  | PASS          | AC=3;AF=0.136;AN=22;BaseQRankSum=  |
| 18259 | chrY | 13283758 | . | T | C | 773.47  | PASS          | AC=6;AF=0.273;AN=22;BaseQRankSum=  |
| 18260 | chrY | 13283804 | . | A | T | 255.09  | PASS          | AC=4;AF=0.143;AN=28;BaseQRankSum=  |
| 18261 | chrY | 13283860 | . | T | C | 894.85  | PASS          | AC=6;AF=0.231;AN=26;BaseQRankSum=  |
| 18262 | chrY | 13283930 | . | G | T | 1696.68 | my_snp_filter | AC=10;AF=0.179;AN=56;BaseQ         |
| 18263 | chrY | 13283966 | . | C | T | 1199.58 | PASS          | AC=7;AF=0.100;AN=70;BaseQRankSum=  |
| 18264 | chrY | 13283983 | . | A | G | 930.82  | PASS          | AC=7;AF=0.100;AN=70;BaseQRankSum=  |
| 18265 | chrY | 13283986 | . | T | C | 835.90  | PASS          | AC=7;AF=0.100;AN=70;BaseQRankSum=  |
| 18266 | chrY | 13283995 | . | C | T | 451.55  | PASS          | AC=7;AF=0.100;AN=70;BaseQRankSum=  |
| 18267 | chrY | 13283999 | . | G | A | 317.51  | PASS          | AC=5;AF=0.071;AN=70;BaseQRankSum=  |
| 18268 | chrY | 13284034 | . | C | T | 928.41  | PASS          | AC=5;AF=0.071;AN=70;BaseQRankSum=  |
| 18269 | chrY | 13284038 | . | C | G | 636.06  | PASS          | AC=3;AF=0.043;AN=70;BaseQRankSum=  |
| 18270 | chrY | 13284043 | . | C | G | 181.42  | my_snp_filter | AC=4;AF=0.057;AN=70;BaseQ          |
| 18271 | chrY | 13284047 | . | T | G | 2904.86 | PASS          | AC=21;AF=0.309;AN=68;BaseQRankSum= |
| 18272 | chrY | 13284153 | . | A | G | 506.29  | PASS          | AC=9;AF=0.129;AN=70;BaseQRankSum=  |
| 18273 | chrY | 13284161 | . | C | T | 879.17  | PASS          | AC=11;AF=0.157;AN=70;BaseQRankSum= |
| 18274 | chrY | 13284170 | . | A | G | 5383.37 | PASS          | AC=20;AF=0.286;AN=70;BaseQRankSum= |
| 18275 | chrY | 13284205 | . | G | C | 103.02  | my_snp_filter | AC=3;AF=0.043;AN=70;BaseQ          |
| 18276 | chrY | 13284222 | . | C | T | 170.29  | my_snp_filter | AC=4;AF=0.057;AN=70;BaseQ          |
| 18277 | chrY | 13284249 | . | A | G | 111.18  | PASS          | AC=4;AF=0.061;AN=66;BaseQRankSum=  |
| 18278 | chrY | 13284293 | . | G | A | 213.98  | PASS          | AC=4;AF=0.071;AN=56;BaseQRankSum=  |
| 18279 | chrY | 13284314 | . | T | A | 165.99  | PASS          | AC=4;AF=0.074;AN=54;BaseQRankSum=  |
| 18280 | chrY | 13284557 | . | T | C | 41.39   | my_snp_filter | AC=5;AF=0.074;AN=68;BaseQ          |
| 18281 | chrY | 13284569 | . | C | T | 7156.22 | PASS          | AC=56;AF=0.824;AN=68;DP=301;FS=0.  |
| 18282 | chrY | 13284727 | . | C | T | 185.34  | PASS          | AC=3;AF=0.043;AN=70;BaseQRankSum=  |
| 18283 | chrY | 13284731 | . | T | C | 176.70  | PASS          | AC=3;AF=0.043;AN=70;BaseQRankSum=  |
| 18284 | chrY | 13284746 | . | G | A | 197.06  | PASS          | AC=3;AF=0.043;AN=70;BaseQRankSum=  |
| 18285 | chrY | 13284814 | . | C | T | 178.52  | PASS          | AC=3;AF=0.044;AN=68;BaseQRankSum=  |
| 18286 | chrY | 13284816 | . | G | A | 126.95  | PASS          | AC=1;AF=0.015;AN=68;BaseQRankSum=  |
| 18287 | chrY | 13285136 | . | T | C | 531.60  | PASS          | AC=7;AF=0.106;AN=66;BaseQRankSum=  |
| 18288 | chrY | 13285142 | . | G | T | 515.03  | PASS          | AC=6;AF=0.088;AN=68;BaseQRankSum=  |
| 18289 | chrY | 13285180 | . | C | T | 52.10   | my_snp_filter | AC=4;AF=0.059;AN=68;BaseQ          |
| 18290 | chrY | 13285211 | . | A | G | 31.91   | my_snp_filter | AC=2;AF=0.029;AN=70;BaseQ          |
| 18291 | chrY | 13285306 | . | C | T | 565.08  | PASS          | AC=7;AF=0.109;AN=64;BaseQRankSum=  |
| 18292 | chrY | 13285335 | . | C | T | 803.40  | PASS          | AC=6;AF=0.086;AN=70;BaseQRankSum=  |
| 18293 | chrY | 13285358 | . | C | T | 39.81   | my_snp_filter | AC=3;AF=0.043;AN=70;BaseQ          |
| 18294 | chrY | 13285359 | . | G | A | 807.60  | PASS          | AC=6;AF=0.086;AN=70;BaseQRankSum=  |
| 18295 | chrY | 13285380 | . | A | G | 485.44  | PASS          | AC=5;AF=0.071;AN=70;BaseQRankSum=  |
| 18296 | chrY | 13285439 | . | A | G | 52.34   | PASS          | AC=1;AF=0.014;AN=70;BaseQRankSum=  |
| 18297 | chrY | 13285453 | . | T | A | 70.10   | PASS          | AC=1;AF=0.014;AN=70;BaseQRankSum=  |
| 18298 | chrY | 13285455 | . | A | G | 69.48   | PASS          | AC=1;AF=0.014;AN=70;BaseQRankSum=  |
| 18299 | chrY | 13285469 | . | A | C | 90.24   | PASS          | AC=1;AF=0.014;AN=70;BaseQRankSum=  |
| 18300 | chrY | 13285501 | . | T | C | 409.27  | PASS          | AC=7;AF=0.100;AN=70;BaseQRankSum=  |
| 18301 | chrY | 13285514 | . | G | A | 418.49  | PASS          | AC=6;AF=0.086;AN=70;BaseQRankSum=  |
| 18302 | chrY | 13285561 | . | G | A | 427.50  | PASS          | AC=7;AF=0.121;AN=58;BaseQRankSum=  |
| 18303 | chrY | 13285593 | . | A | C | 2815.72 | my_snp_filter | AC=9;AF=0.205;AN=44;BaseQ          |
| 18304 | chrY | 13285600 | . | C | T | 489.03  | PASS          | AC=7;AF=0.175;AN=40;BaseQRankSum=  |
| 18305 | chrY | 13285631 | . | C | T | 30.93   | my_snp_filter | AC=1;AF=0.024;AN=42;BaseQ          |
| 18306 | chrY | 13285658 | . | G | A | 2997.29 | PASS          | AC=13;AF=0.325;AN=40;BaseQRankSum= |
| 18307 | chrY | 13285674 | . | T | C | 341.39  | PASS          | AC=1;AF=0.024;AN=42;BaseQRankSum=  |
| 18308 | chrY | 13285720 | . | A | G | 2554.11 | PASS          | AC=10;AF=0.333;AN=30;BaseQRankSum= |
| 18309 | chrY | 13285737 | . | G | T | 2981.24 | PASS          | AC=10;AF=0.357;AN=28;BaseQRankSum= |
| 18310 | chrY | 13285749 | . | C | T | 2941.10 | PASS          | AC=10;AF=0.417;AN=24;BaseQRankSum= |
| 18311 | chrY | 13285755 | . | T | G | 920.44  | PASS          | AC=3;AF=0.125;AN=24;BaseQRankSum=  |
| 18312 | chrY | 13285779 | . | C | T | 7288.75 | PASS          | AC=9;AF=0.346;AN=26;BaseQRankSum=  |
| 18313 | chrY | 13285803 | . | C | T | 112.48  | my_snp_filter | AC=2;AF=0.071;AN=28;BaseQ          |
| 18314 | chrY | 13285820 | . | C | T | 3226.07 | PASS          | AC=10;AF=0.357;AN=28;BaseQRankSum= |
| 18315 | chrY | 13285827 | . | T | C | 2077.58 | PASS          | AC=9;AF=0.346;AN=26;BaseQRankSum=  |
| 18316 | chrY | 13285885 | . | G | A | 2787.20 | PASS          | AC=9;AF=0.250;AN=36;BaseQRankSum=  |

|       |      |          |   |   |   |          |               |                                    |
|-------|------|----------|---|---|---|----------|---------------|------------------------------------|
| 18317 | chrY | 13285890 | . | G | A | 2724.20  | PASS          | AC=9;AF=0.250;AN=36;BaseQRankSum=  |
| 18318 | chrY | 13285921 | . | G | C | 6868.27  | PASS          | AC=9;AF=0.214;AN=42;BaseQRankSum=  |
| 18319 | chrY | 13285938 | . | G | T | 391.77   | PASS          | AC=4;AF=0.067;AN=60;BaseQRankSum=  |
| 18320 | chrY | 13285953 | . | A | G | 1094.22  | PASS          | AC=5;AF=0.078;AN=64;BaseQRankSum=  |
| 18321 | chrY | 13285963 | . | G | T | 79.54    | my_snp_filter | AC=1;AF=0.015;AN=68;BaseQ          |
| 18322 | chrY | 13285977 | . | A | T | 857.39   | PASS          | AC=5;AF=0.071;AN=70;BaseQRankSum=  |
| 18323 | chrY | 13286013 | . | G | A | 133.58   | my_snp_filter | AC=4;AF=0.057;AN=70;BaseQ          |
| 18324 | chrY | 13286036 | . | G | A | 1024.79  | PASS          | AC=9;AF=0.129;AN=70;BaseQRankSum=  |
| 18325 | chrY | 13286045 | . | A | T | 1025.37  | PASS          | AC=9;AF=0.132;AN=68;BaseQRankSum=  |
| 18326 | chrY | 13286091 | . | G | A | 1014.41  | PASS          | AC=9;AF=0.129;AN=70;BaseQRankSum=  |
| 18327 | chrY | 13286117 | . | A | C | 2715.39  | PASS          | AC=18;AF=0.257;AN=70;BaseQRankSum= |
| 18328 | chrY | 13286124 | . | T | G | 109.45   | PASS          | AC=1;AF=0.014;AN=70;BaseQRankSum=  |
| 18329 | chrY | 13286155 | . | C | T | 795.53   | PASS          | AC=3;AF=0.043;AN=70;BaseQRankSum=  |
| 18330 | chrY | 13286165 | . | C | T | 30.65    | my_snp_filter | AC=2;AF=0.029;AN=70;BaseQ          |
| 18331 | chrY | 13286202 | . | C | G | 15419.73 | PASS          | AC=35;AF=0.500;AN=70;Base          |
| 18332 | chrY | 13286235 | . | G | A | 74.62    | my_snp_filter | AC=2;AF=0.029;AN=70;BaseQ          |
| 18333 | chrY | 13286242 | . | A | G | 101.74   | PASS          | AC=1;AF=0.014;AN=70;BaseQRankSum=  |
| 18334 | chrY | 13286244 | . | G | A | 102.19   | PASS          | AC=1;AF=0.014;AN=70;BaseQRankSum=  |
| 18335 | chrY | 13286289 | . | A | G | 6332.12  | my_snp_filter | AC=23;AF=0.329;AN=70;Base          |
| 18336 | chrY | 13286306 | . | C | A | 3732.44  | my_snp_filter | AC=24;AF=0.343;AN=70;Base          |
| 18337 | chrY | 13286336 | . | C | T | 115.11   | PASS          | AC=3;AF=0.043;AN=70;BaseQRankSum=  |
| 18338 | chrY | 13286346 | . | G | A | 86.19    | PASS          | AC=2;AF=0.029;AN=70;BaseQRankSum=  |
| 18339 | chrY | 13286454 | . | A | C | 124.81   | PASS          | AC=2;AF=0.029;AN=70;BaseQRankSum=  |
| 18340 | chrY | 13286469 | . | A | T | 496.89   | PASS          | AC=5;AF=0.071;AN=70;BaseQRankSum=  |
| 18341 | chrY | 13286494 | . | A | G | 1083.94  | my_snp_filter | AC=8;AF=0.118;AN=68;BaseQ          |
| 18342 | chrY | 13286507 | . | A | G | 1277.17  | my_snp_filter | AC=11;AF=0.162;AN=68;Base          |
| 18343 | chrY | 13286625 | . | C | G | 4373.99  | PASS          | AC=20;AF=0.286;AN=70;BaseQRankSum= |
| 18344 | chrY | 13286631 | . | C | T | 221.26   | my_snp_filter | AC=6;AF=0.086;AN=70;BaseQ          |
| 18345 | chrY | 13286655 | . | C | G | 8194.74  | PASS          | AC=34;AF=0.486;AN=70;BaseQRankSum= |
| 18346 | chrY | 13286680 | . | T | G | 910.65   | my_snp_filter | AC=16;AF=0.235;AN=68;Base          |
| 18347 | chrY | 13286686 | . | G | A | 602.41   | PASS          | AC=10;AF=0.143;AN=70;BaseQRankSum= |
| 18348 | chrY | 13286727 | . | G | C | 169.50   | my_snp_filter | AC=6;AF=0.086;AN=70;BaseQ          |
| 18349 | chrY | 13286773 | . | A | T | 4265.27  | PASS          | AC=29;AF=0.426;AN=68;BaseQRankSum= |
| 18350 | chrY | 13286832 | . | T | C | 6095.68  | PASS          | AC=11;AF=0.229;AN=48;BaseQRankSum= |
| 18351 | chrY | 13286840 | . | T | G | 6034.32  | PASS          | AC=10;AF=0.238;AN=42;BaseQRankSum= |
| 18352 | chrY | 13286864 | . | C | T | 3841     | PASS          | AC=9;AF=0.375;AN=24;BaseQRankSum=  |
| 18353 | chrY | 13286869 | . | T | C | 4666.76  | PASS          | AC=9;AF=0.321;AN=28;BaseQRankSum=  |
| 18354 | chrY | 13286874 | . | G | A | 4034.73  | PASS          | AC=9;AF=0.375;AN=24;BaseQRankSum=  |
| 18355 | chrY | 13286888 | . | C | T | 5011.84  | PASS          | AC=9;AF=0.375;AN=24;BaseQRankSum=  |
| 18356 | chrY | 13286895 | . | T | C | 3465.78  | PASS          | AC=9;AF=0.375;AN=24;BaseQRankSum=  |
| 18357 | chrY | 13286942 | . | A | G | 997.57   | PASS          | AC=5;AF=0.179;AN=28;BaseQRankSum=  |
| 18358 | chrY | 13286948 | . | A | G | 2351.70  | PASS          | AC=11;AF=0.393;AN=28;BaseQRankSum= |
| 18359 | chrY | 13286953 | . | T | C | 798.29   | my_snp_filter | AC=7;AF=0.250;AN=28;BaseQ          |
| 18360 | chrY | 13286974 | . | G | T | 1078.97  | PASS          | AC=4;AF=0.154;AN=26;BaseQRankSum=  |
| 18361 | chrY | 13286988 | . | G | A | 2601.11  | PASS          | AC=9;AF=0.409;AN=22;BaseQRankSum=  |
| 18362 | chrY | 13287015 | . | A | G | 2071.84  | PASS          | AC=9;AF=0.375;AN=24;BaseQRankSum=  |
| 18363 | chrY | 13287066 | . | A | C | 5680.66  | PASS          | AC=11;AF=0.250;AN=44;BaseQRankSum= |
| 18364 | chrY | 13287080 | . | T | C | 496.08   | my_snp_filter | AC=5;AF=0.100;AN=50;BaseQ          |
| 18365 | chrY | 13287081 | . | G | A | 496.08   | my_snp_filter | AC=5;AF=0.100;AN=50;BaseQ          |
| 18366 | chrY | 13287107 | . | A | G | 1309.06  | PASS          | AC=9;AF=0.150;AN=60;BaseQRankSum=  |
| 18367 | chrY | 13287142 | . | G | T | 1820.06  | PASS          | AC=9;AF=0.132;AN=68;BaseQRankSum=  |
| 18368 | chrY | 13287177 | . | A | G | 1392.78  | PASS          | AC=9;AF=0.129;AN=70;BaseQRankSum=  |
| 18369 | chrY | 13287202 | . | A | G | 1287.17  | PASS          | AC=9;AF=0.129;AN=70;BaseQRankSum=  |
| 18370 | chrY | 13287203 | . | G | T | 1221.17  | PASS          | AC=9;AF=0.129;AN=70;BaseQRankSum=  |
| 18371 | chrY | 13287332 | . | C | T | 349.49   | PASS          | AC=5;AF=0.071;AN=70;BaseQRankSum=  |
| 18372 | chrY | 13287377 | . | T | C | 1575.95  | PASS          | AC=7;AF=0.100;AN=70;BaseQRankSum=  |
| 18373 | chrY | 13287378 | . | T | G | 1686.98  | PASS          | AC=8;AF=0.114;AN=70;BaseQRankSum=  |
| 18374 | chrY | 13287385 | . | G | C | 1214.36  | PASS          | AC=7;AF=0.103;AN=68;BaseQRankSum=  |
| 18375 | chrY | 13287397 | . | C | A | 254.92   | PASS          | AC=4;AF=0.059;AN=68;BaseQRankSum=  |
| 18376 | chrY | 13287415 | . | C | G | 309.28   | PASS          | AC=4;AF=0.059;AN=68;BaseQRankSum=  |
| 18377 | chrY | 13287471 | . | T | C | 121.20   | my_snp_filter | AC=6;AF=0.088;AN=68;BaseQ          |
| 18378 | chrY | 13287496 | . | G | A | 692.32   | PASS          | AC=3;AF=0.044;AN=68;BaseQRankSum=  |
| 18379 | chrY | 13287525 | . | C | T | 1233.55  | PASS          | AC=9;AF=0.132;AN=68;BaseQRankSum=  |
| 18380 | chrY | 13287533 | . | T | G | 1225.14  | PASS          | AC=9;AF=0.132;AN=68;BaseQRankSum=  |
| 18381 | chrY | 13287651 | . | G | C | 166.09   | PASS          | AC=5;AF=0.076;AN=66;BaseQRankSum=  |
| 18382 | chrY | 13287654 | . | T | G | 52.99    | PASS          | AC=1;AF=0.015;AN=66;BaseQRankSum=  |
| 18383 | chrY | 13287658 | . | A | G | 53.21    | PASS          | AC=1;AF=0.015;AN=66;BaseQRankSum=  |
| 18384 | chrY | 13287664 | . | C | T | 161.19   | PASS          | AC=5;AF=0.076;AN=66;BaseQRankSum=  |
| 18385 | chrY | 13287673 | . | G | A | 1804.74  | PASS          | AC=19;AF=0.297;AN=64;BaseQRankSum= |
| 18386 | chrY | 13287677 | . | G | A | 158.90   | PASS          | AC=5;AF=0.076;AN=66;BaseQRankSum=  |
| 18387 | chrY | 13287691 | . | A | C | 31.81    | PASS          | AC=1;AF=0.015;AN=66;BaseQRankSum=  |
| 18388 | chrY | 13287706 | . | A | G | 4096.30  | PASS          | AC=25;AF=0.391;AN=64;BaseQRankSum= |
| 18389 | chrY | 13287711 | . | A | G | 4238.20  | PASS          | AC=25;AF=0.391;AN=64;BaseQRankSum= |
| 18390 | chrY | 13287724 | . | A | T | 4990.86  | PASS          | AC=28;AF=0.519;AN=54;BaseQRankSum= |
| 18391 | chrY | 13287733 | . | A | G | 200.60   | PASS          | AC=1;AF=0.014;AN=70;BaseQRankSum=  |
| 18392 | chrY | 13287734 | . | T | C | 4296.49  | PASS          | AC=28;AF=0.500;AN=56;BaseQRankSum= |

|       |      |          |   |   |     |          |               |                                    |
|-------|------|----------|---|---|-----|----------|---------------|------------------------------------|
| 18393 | chrY | 13287753 | . | G | A   | 199.48   | PASS          | AC=1;AF=0.019;AN=54;BaseQRankSum=  |
| 18394 | chrY | 13287797 | . | G | T   | 104.32   | PASS          | AC=1;AF=0.038;AN=26;BaseQRankSum=  |
| 18395 | chrY | 13287798 | . | G | A   | 315.99   | PASS          | AC=5;AF=0.192;AN=26;BaseQRankSum=  |
| 18396 | chrY | 13287811 | . | G | A   | 82.32    | PASS          | AC=2;AF=0.077;AN=26;BaseQRankSum=  |
| 18397 | chrY | 13287869 | . | A | G   | 250.39   | PASS          | AC=3;AF=0.167;AN=18;BaseQRankSum=  |
| 18398 | chrY | 13287883 | . | A | G   | 381.75   | PASS          | AC=4;AF=0.222;AN=18;BaseQRankSum=  |
| 18399 | chrY | 13287957 | . | A | T,* | 829.15   | PASS          | AC=3,2;AF=0.167,0.111;AN=18;BaseQ  |
| 18400 | chrY | 13287959 | . | T | A   | 281.46   | PASS          | AC=5;AF=0.313;AN=16;BaseQRankSum=  |
| 18401 | chrY | 13287963 | . | T | C,G | 2129.92  | PASS          | AC=7,1;AF=0.389,0.056;AN=18;BaseQ  |
| 18402 | chrY | 13287973 | . | A | C   | 1873.30  | PASS          | AC=10;AF=0.556;AN=18;BaseQRankSum= |
| 18403 | chrY | 13287975 | . | A | C   | 113.32   | PASS          | AC=1;AF=0.056;AN=18;BaseQRankSum=  |
| 18404 | chrY | 13287984 | . | T | C   | 514.21   | PASS          | AC=2;AF=0.111;AN=18;BaseQRankSum=  |
| 18405 | chrY | 13287995 | . | G | T   | 674.61   | PASS          | AC=2;AF=0.111;AN=18;BaseQRankSum=  |
| 18406 | chrY | 13288012 | . | T | C   | 3419.15  | PASS          | AC=9;AF=0.500;AN=18;BaseQRankSum=  |
| 18407 | chrY | 13288030 | . | A | T   | 3634.19  | PASS          | AC=8;AF=0.400;AN=20;BaseQRankSum=  |
| 18408 | chrY | 13288034 | . | G | T,A | 523.46   | PASS          | AC=1,1;AF=0.050,0.050;AN=20;BaseQ  |
| 18409 | chrY | 13288035 | . | G | A   | 1054.64  | PASS          | AC=8;AF=0.400;AN=20;BaseQRankSum=  |
| 18410 | chrY | 13288049 | . | G | A   | 1058.61  | PASS          | AC=8;AF=0.400;AN=20;BaseQRankSum=  |
| 18411 | chrY | 13288077 | . | C | A   | 2424.44  | PASS          | AC=8;AF=0.400;AN=20;BaseQRankSum=  |
| 18412 | chrY | 13288105 | . | G | A   | 137.30   | PASS          | AC=1;AF=0.050;AN=20;BaseQRankSum=  |
| 18413 | chrY | 13288187 | . | C | T   | 109.26   | PASS          | AC=1;AF=0.045;AN=22;BaseQRankSum=  |
| 18414 | chrY | 13288294 | . | G | T   | 5343.99  | PASS          | AC=9;AF=0.409;AN=22;BaseQRankSum=  |
| 18415 | chrY | 13288325 | . | T | A   | 74.97    | my_snp_filter | AC=3;AF=0.100;AN=30;BaseQ          |
| 18416 | chrY | 13288397 | . | G | A   | 2657.44  | PASS          | AC=9;AF=0.196;AN=46;BaseQRankSum=  |
| 18417 | chrY | 13288444 | . | C | G   | 1410.55  | PASS          | AC=9;AF=0.141;AN=64;BaseQRankSum=  |
| 18418 | chrY | 13288520 | . | G | A   | 10902.86 | PASS          | AC=29;AF=0.414;AN=70;BaseQ         |
| 18419 | chrY | 13288525 | . | C | A   | 11755.59 | PASS          | AC=30;AF=0.429;AN=70;BaseQ         |
| 18420 | chrY | 13288557 | . | G | A   | 13105.53 | PASS          | AC=34;AF=0.486;AN=70;BaseQ         |
| 18421 | chrY | 13288591 | . | C | T   | 1616.89  | PASS          | AC=9;AF=0.129;AN=70;BaseQRankSum=  |
| 18422 | chrY | 13288614 | . | C | T   | 17111.79 | PASS          | AC=36;AF=0.514;AN=70;BaseQ         |
| 18423 | chrY | 13288628 | . | G | A   | 75.74    | PASS          | AC=1;AF=0.014;AN=70;BaseQRankSum=  |
| 18424 | chrY | 13288637 | . | T | A   | 55.18    | my_snp_filter | AC=3;AF=0.043;AN=70;BaseQ          |
| 18425 | chrY | 13288657 | . | G | A   | 95.20    | my_snp_filter | AC=2;AF=0.029;AN=70;BaseQ          |
| 18426 | chrY | 13288658 | . | G | T   | 88.06    | my_snp_filter | AC=2;AF=0.029;AN=70;BaseQ          |
| 18427 | chrY | 13288691 | . | C | T   | 63.75    | my_snp_filter | AC=3;AF=0.043;AN=70;BaseQ          |
| 18428 | chrY | 13288698 | . | T | C   | 58.42    | PASS          | AC=1;AF=0.014;AN=70;BaseQRankSum=  |
| 18429 | chrY | 13288699 | . | G | A   | 831.50   | my_snp_filter | AC=6;AF=0.086;AN=70;BaseQ          |
| 18430 | chrY | 13288759 | . | A | T   | 829.50   | my_snp_filter | AC=6;AF=0.086;AN=70;BaseQ          |
| 18431 | chrY | 13288781 | . | T | C   | 27242.72 | PASS          | AC=35;AF=0.500;AN=70;BaseQ         |
| 18432 | chrY | 13288823 | . | G | A   | 3891.09  | my_snp_filter | AC=25;AF=0.357;AN=70;BaseQ         |
| 18433 | chrY | 13288844 | . | G | A   | 441.32   | my_snp_filter | AC=8;AF=0.114;AN=70;BaseQ          |
| 18434 | chrY | 13288854 | . | A | T   | 4982.86  | PASS          | AC=19;AF=0.271;AN=70;BaseQRankSum= |
| 18435 | chrY | 13288865 | . | C | T   | 999.97   | PASS          | AC=8;AF=0.114;AN=70;BaseQRankSum=  |
| 18436 | chrY | 13288875 | . | T | A   | 5024.03  | PASS          | AC=23;AF=0.329;AN=70;BaseQRankSum= |
| 18437 | chrY | 13289001 | . | T | C   | 258.74   | PASS          | AC=4;AF=0.057;AN=70;BaseQRankSum=  |
| 18438 | chrY | 13289035 | . | G | A   | 97.32    | my_snp_filter | AC=3;AF=0.043;AN=70;BaseQ          |
| 18439 | chrY | 13289048 | . | C | T   | 137.10   | PASS          | AC=3;AF=0.043;AN=70;BaseQRankSum=  |
| 18440 | chrY | 13289246 | . | A | C   | 236.33   | PASS          | AC=6;AF=0.136;AN=44;BaseQRankSum=  |
| 18441 | chrY | 13289255 | . | C | T   | 73.18    | my_snp_filter | AC=2;AF=0.050;AN=40;BaseQ          |
| 18442 | chrY | 13289267 | . | C | T   | 996.07   | PASS          | AC=8;AF=0.222;AN=36;BaseQRankSum=  |
| 18443 | chrY | 13289274 | . | A | C   | 220.44   | PASS          | AC=3;AF=0.094;AN=32;BaseQRankSum=  |
| 18444 | chrY | 13289310 | . | G | T   | 180.21   | my_snp_filter | AC=4;AF=0.154;AN=26;BaseQ          |
| 18445 | chrY | 13289321 | . | C | A   | 41.37    | my_snp_filter | AC=1;AF=0.042;AN=24;BaseQ          |
| 18446 | chrY | 13289342 | . | G | A   | 51.31    | my_snp_filter | AC=2;AF=0.083;AN=24;BaseQ          |
| 18447 | chrY | 13289343 | . | C | T   | 91.94    | my_snp_filter | AC=2;AF=0.083;AN=24;BaseQ          |
| 18448 | chrY | 13289362 | . | C | T   | 85.10    | my_snp_filter | AC=2;AF=0.083;AN=24;BaseQ          |
| 18449 | chrY | 13289417 | . | T | G   | 915.80   | PASS          | AC=9;AF=0.409;AN=22;BaseQRankSum=  |
| 18450 | chrY | 13289421 | . | G | A   | 204.96   | PASS          | AC=3;AF=0.136;AN=22;BaseQRankSum=  |
| 18451 | chrY | 13289456 | . | T | G   | 106.51   | my_snp_filter | AC=3;AF=0.107;AN=28;BaseQ          |
| 18452 | chrY | 13289460 | . | C | T   | 31.30    | PASS          | AC=2;AF=0.063;AN=32;DP=207;FS=0.0  |
| 18453 | chrY | 13289476 | . | C | T   | 208.13   | PASS          | AC=4;AF=0.095;AN=42;BaseQRankSum=  |
| 18454 | chrY | 13289640 | . | T | A   | 327.13   | PASS          | AC=3;AF=0.043;AN=70;BaseQRankSum=  |
| 18455 | chrY | 13289646 | . | A | T   | 323.95   | PASS          | AC=3;AF=0.043;AN=70;BaseQRankSum=  |
| 18456 | chrY | 13289657 | . | G | T   | 240.54   | PASS          | AC=4;AF=0.057;AN=70;BaseQRankSum=  |
| 18457 | chrY | 13289774 | . | A | G   | 221.44   | PASS          | AC=4;AF=0.057;AN=70;BaseQRankSum=  |
| 18458 | chrY | 13289791 | . | G | A   | 163.22   | PASS          | AC=4;AF=0.057;AN=70;BaseQRankSum=  |
| 18459 | chrY | 13289803 | . | C | A   | 771.98   | PASS          | AC=4;AF=0.057;AN=70;BaseQRankSum=  |
| 18460 | chrY | 13289813 | . | T | A   | 627.78   | PASS          | AC=3;AF=0.043;AN=70;BaseQRankSum=  |
| 18461 | chrY | 13289820 | . | T | C   | 600.53   | PASS          | AC=3;AF=0.043;AN=70;BaseQRankSum=  |
| 18462 | chrY | 13289855 | . | G | A   | 2820.15  | my_snp_filter | AC=20;AF=0.286;AN=70;BaseQ         |
| 18463 | chrY | 13289888 | . | T | C   | 758.54   | PASS          | AC=8;AF=0.114;AN=70;BaseQRankSum=  |
| 18464 | chrY | 13289904 | . | C | T   | 9692.63  | my_snp_filter | AC=35;AF=0.500;AN=70;BaseQ         |
| 18465 | chrY | 13289947 | . | C | G,* | 984.57   | my_snp_filter | AC=1,9;AF=0.014,0.129;AN=          |
| 18466 | chrY | 13289948 | . | C | G,* | 979.62   | my_snp_filter | AC=1,9;AF=0.014,0.129;AN=          |
| 18467 | chrY | 13289950 | . | A | G,* | 1267.91  | PASS          | AC=4,7;AF=0.057,0.100;AN=70;BaseQ  |
| 18468 | chrY | 13289953 | . | A | G   | 19022.07 | PASS          | AC=46;AF=0.657;AN=70;BaseQ         |

|       |      |          |   |   |     |          |               |                                    |
|-------|------|----------|---|---|-----|----------|---------------|------------------------------------|
| 18469 | chrY | 13289956 | . | G | A,* | 1161.52  | PASS          | AC=5,5;AF=0.071,0.071;AN=70;BaseQ  |
| 18470 | chrY | 13289985 | . | C | T   | 34029.93 | PASS          | AC=47;AF=0.671;AN=70;BaseQ         |
| 18471 | chrY | 13290007 | . | G | A   | 37200.48 | PASS          | AC=49;AF=0.700;AN=70;BaseQ         |
| 18472 | chrY | 13290008 | . | T | G   | 1898.79  | PASS          | AC=6;AF=0.086;AN=70;BaseQRankSum=  |
| 18473 | chrY | 13290059 | . | G | C   | 783.39   | PASS          | AC=6;AF=0.086;AN=70;BaseQRankSum=  |
| 18474 | chrY | 13290075 | . | T | C   | 30.51    | my_snp_filter | AC=1;AF=0.014;AN=70;BaseQ          |
| 18475 | chrY | 13290109 | . | A | G   | 593.54   | PASS          | AC=7;AF=0.100;AN=70;BaseQRankSum=  |
| 18476 | chrY | 13290136 | . | A | T   | 5550.62  | my_snp_filter | AC=33;AF=0.550;AN=60;BaseQ         |
| 18477 | chrY | 13290187 | . | A | G   | 2205.35  | my_snp_filter | AC=16;AF=0.267;AN=60;BaseQ         |
| 18478 | chrY | 13290228 | . | T | C   | 2833.30  | my_snp_filter | AC=9;AF=0.136;AN=66;BaseQ          |
| 18479 | chrY | 13290235 | . | A | T   | 2794.44  | my_snp_filter | AC=9;AF=0.132;AN=68;BaseQ          |
| 18480 | chrY | 13290292 | . | G | T   | 389.22   | my_snp_filter | AC=6;AF=0.086;AN=70;BaseQ          |
| 18481 | chrY | 13290333 | . | T | G   | 116.32   | PASS          | AC=1;AF=0.014;AN=70;BaseQRankSum=  |
| 18482 | chrY | 13290336 | . | G | A   | 145.26   | PASS          | AC=2;AF=0.029;AN=70;BaseQRankSum=  |
| 18483 | chrY | 13290461 | . | T | G   | 174.48   | PASS          | AC=3;AF=0.045;AN=66;BaseQRankSum=  |
| 18484 | chrY | 13290490 | . | G | A   | 867.73   | PASS          | AC=8;AF=0.118;AN=68;BaseQRankSum=  |
| 18485 | chrY | 13290509 | . | T | C   | 2727.68  | my_snp_filter | AC=10;AF=0.147;AN=68;BaseQ         |
| 18486 | chrY | 13290517 | . | A | G   | 597.05   | PASS          | AC=6;AF=0.088;AN=68;BaseQRankSum=  |
| 18487 | chrY | 13290577 | . | A | G   | 94.06    | PASS          | AC=2;AF=0.032;AN=62;BaseQRankSum=  |
| 18488 | chrY | 13290578 | . | G | T   | 94.40    | PASS          | AC=2;AF=0.032;AN=62;BaseQRankSum=  |
| 18489 | chrY | 13290616 | . | T | A   | 1539.54  | PASS          | AC=6;AF=0.125;AN=48;BaseQRankSum=  |
| 18490 | chrY | 13290621 | . | A | G   | 523.87   | PASS          | AC=4;AF=0.095;AN=42;BaseQRankSum=  |
| 18491 | chrY | 13290630 | . | A | C   | 1708     | PASS          | AC=6;AF=0.158;AN=38;BaseQRankSum=  |
| 18492 | chrY | 13290645 | . | G | T   | 1676.98  | PASS          | AC=6;AF=0.188;AN=32;BaseQRankSum=  |
| 18493 | chrY | 13290680 | . | A | G   | 406.64   | PASS          | AC=4;AF=0.167;AN=24;BaseQRankSum=  |
| 18494 | chrY | 13290689 | . | T | C   | 366.96   | PASS          | AC=4;AF=0.154;AN=26;BaseQRankSum=  |
| 18495 | chrY | 13290692 | . | G | C   | 3269.85  | PASS          | AC=9;AF=0.375;AN=24;BaseQRankSum=  |
| 18496 | chrY | 13290707 | . | G | A   | 3139.11  | PASS          | AC=9;AF=0.409;AN=22;BaseQRankSum=  |
| 18497 | chrY | 13290736 | . | T | G   | 484.21   | PASS          | AC=4;AF=0.200;AN=20;BaseQRankSum=  |
| 18498 | chrY | 13290759 | . | G | C   | 2602.09  | PASS          | AC=9;AF=0.500;AN=18;BaseQRankSum=  |
| 18499 | chrY | 13290769 | . | G | C   | 102.24   | PASS          | AC=1;AF=0.056;AN=18;BaseQRankSum=  |
| 18500 | chrY | 13290772 | . | G | A   | 687.88   | PASS          | AC=3;AF=0.150;AN=20;BaseQRankSum=  |
| 18501 | chrY | 13290803 | . | G | C   | 525.10   | PASS          | AC=2;AF=0.100;AN=20;BaseQRankSum=  |
| 18502 | chrY | 13290887 | . | C | A   | 1180.45  | PASS          | AC=4;AF=0.167;AN=24;BaseQRankSum=  |
| 18503 | chrY | 13290888 | . | G | A   | 1180.45  | PASS          | AC=4;AF=0.167;AN=24;BaseQRankSum=  |
| 18504 | chrY | 13290890 | . | G | A   | 1158.11  | PASS          | AC=4;AF=0.167;AN=24;BaseQRankSum=  |
| 18505 | chrY | 13290894 | . | A | G   | 2010.77  | PASS          | AC=7;AF=0.292;AN=24;BaseQRankSum=  |
| 18506 | chrY | 13290896 | . | T | C   | 1138.64  | PASS          | AC=4;AF=0.154;AN=26;BaseQRankSum=  |
| 18507 | chrY | 13290912 | . | T | A   | 661.02   | PASS          | AC=6;AF=0.167;AN=36;BaseQRankSum=  |
| 18508 | chrY | 13290933 | . | C | T   | 328.35   | PASS          | AC=2;AF=0.043;AN=46;BaseQRankSum=  |
| 18509 | chrY | 13290949 | . | G | A   | 173.31   | PASS          | AC=1;AF=0.019;AN=52;BaseQRankSum=  |
| 18510 | chrY | 13290954 | . | A | G   | 525.35   | PASS          | AC=3;AF=0.058;AN=52;BaseQRankSum=  |
| 18511 | chrY | 13290955 | . | A | G   | 283.17   | PASS          | AC=2;AF=0.038;AN=52;BaseQRankSum=  |
| 18512 | chrY | 13290978 | . | C | A   | 156.19   | PASS          | AC=2;AF=0.036;AN=56;BaseQRankSum=  |
| 18513 | chrY | 13290979 | . | A | G   | 155.81   | PASS          | AC=2;AF=0.034;AN=58;BaseQRankSum=  |
| 18514 | chrY | 13290984 | . | A | G   | 154.38   | PASS          | AC=3;AF=0.054;AN=56;BaseQRankSum=  |
| 18515 | chrY | 13291023 | . | C | T   | 360.71   | PASS          | AC=9;AF=0.141;AN=64;BaseQRankSum=  |
| 18516 | chrY | 13291052 | . | C | T   | 702.58   | PASS          | AC=7;AF=0.113;AN=62;BaseQRankSum=  |
| 18517 | chrY | 13291077 | . | T | C   | 1637     | PASS          | AC=13;AF=0.186;AN=70;BaseQRankSum= |
| 18518 | chrY | 13291082 | . | G | A   | 82.94    | PASS          | AC=1;AF=0.014;AN=70;BaseQRankSum=  |
| 18519 | chrY | 13291125 | . | C | T   | 84.40    | PASS          | AC=2;AF=0.029;AN=70;BaseQRankSum=  |
| 18520 | chrY | 13291136 | . | T | C   | 690.47   | PASS          | AC=12;AF=0.171;AN=70;BaseQRankSum= |
| 18521 | chrY | 13291164 | . | T | C   | 1113.38  | PASS          | AC=16;AF=0.229;AN=70;BaseQRankSum= |
| 18522 | chrY | 13291290 | . | G | T   | 6180.82  | PASS          | AC=48;AF=0.727;AN=66;DP=336;FS=0   |
| 18523 | chrY | 13291351 | . | C | A   | 40.55    | PASS          | AC=1;AF=0.015;AN=68;BaseQRankSum=  |
| 18524 | chrY | 13291559 | . | A | G   | 469.91   | PASS          | AC=6;AF=0.088;AN=68;BaseQRankSum=  |
| 18525 | chrY | 13291567 | . | T | C   | 604.64   | PASS          | AC=6;AF=0.086;AN=70;BaseQRankSum=  |
| 18526 | chrY | 13291573 | . | C | T   | 85.07    | PASS          | AC=3;AF=0.043;AN=70;BaseQRankSum=  |
| 18527 | chrY | 13291596 | . | A | G   | 170.60   | PASS          | AC=3;AF=0.043;AN=70;BaseQRankSum=  |
| 18528 | chrY | 13291624 | . | A | G   | 708.41   | PASS          | AC=5;AF=0.071;AN=70;BaseQRankSum=  |
| 18529 | chrY | 13291640 | . | C | T   | 896.67   | PASS          | AC=5;AF=0.071;AN=70;BaseQRankSum=  |
| 18530 | chrY | 13291654 | . | C | T,G | 877.51   | PASS          | AC=3,2;AF=0.043,0.029;AN=70;BaseQ  |
| 18531 | chrY | 13291728 | . | C | T   | 38.38    | PASS          | AC=1;AF=0.014;AN=70;BaseQRankSum=  |
| 18532 | chrY | 13291741 | . | T | C   | 200.40   | PASS          | AC=5;AF=0.071;AN=70;BaseQRankSum=  |
| 18533 | chrY | 13291789 | . | A | C   | 71.98    | PASS          | AC=2;AF=0.029;AN=70;BaseQRankSum=  |
| 18534 | chrY | 13291824 | . | T | C   | 162.45   | my_snp_filter | AC=2;AF=0.029;AN=70;BaseQ          |
| 18535 | chrY | 13291839 | . | A | G   | 117.76   | PASS          | AC=3;AF=0.043;AN=70;BaseQRankSum=  |
| 18536 | chrY | 13291851 | . | C | A   | 242.38   | PASS          | AC=4;AF=0.057;AN=70;BaseQRankSum=  |
| 18537 | chrY | 13291899 | . | C | T   | 69.51    | PASS          | AC=1;AF=0.014;AN=70;BaseQRankSum=  |
| 18538 | chrY | 13291905 | . | C | T   | 10354.91 | PASS          | AC=31;AF=0.443;AN=70;BaseQ         |
| 18539 | chrY | 13291910 | . | T | C   | 7893.73  | PASS          | AC=26;AF=0.371;AN=70;BaseQRankSum= |
| 18540 | chrY | 13291923 | . | G | A   | 655.94   | PASS          | AC=5;AF=0.071;AN=70;BaseQRankSum=  |
| 18541 | chrY | 13291928 | . | C | A   | 646.93   | PASS          | AC=5;AF=0.071;AN=70;BaseQRankSum=  |
| 18542 | chrY | 13291948 | . | T | A   | 5474.68  | PASS          | AC=30;AF=0.429;AN=70;BaseQRankSum= |
| 18543 | chrY | 13291965 | . | G | T   | 948.48   | PASS          | AC=6;AF=0.086;AN=70;BaseQRankSum=  |
| 18544 | chrY | 13291979 | . | C | T   | 1015.75  | PASS          | AC=6;AF=0.086;AN=70;BaseQRankSum=  |

|       |      |          |   |   |     |          |               |                                    |
|-------|------|----------|---|---|-----|----------|---------------|------------------------------------|
| 18545 | chrY | 13292051 | . | C | A   | 9705.02  | PASS          | AC=24;AF=0.343;AN=70;BaseQRankSum= |
| 18546 | chrY | 13292058 | . | T | C,* | 7962.69  | PASS          | AC=23,1;AF=0.329,0.014;AN=70;BaseQ |
| 18547 | chrY | 13292090 | . | C | A   | 251.69   | my_snp_filter | AC=3;AF=0.043;AN=70;BaseQ          |
| 18548 | chrY | 13292120 | . | G | A   | 12566.40 | PASS          | AC=34;AF=0.486;AN=70;BaseQ         |
| 18549 | chrY | 13292158 | . | C | T,* | 4180.95  | PASS          | AC=19,12;AF=0.271,0.171;AN=70;Bas  |
| 18550 | chrY | 13292165 | . | A | G   | 8178.01  | PASS          | AC=31;AF=0.443;AN=70;BaseQRankSum= |
| 18551 | chrY | 13292238 | . | C | T   | 36.29    | my_snp_filter | AC=2;AF=0.031;AN=64;BaseQ          |
| 18552 | chrY | 13292240 | . | G | A   | 45.73    | my_snp_filter | AC=2;AF=0.029;AN=68;BaseQ          |
| 18553 | chrY | 13292264 | . | G | T   | 168.31   | PASS          | AC=2;AF=0.029;AN=68;BaseQRankSum=  |
| 18554 | chrY | 13292265 | . | G | C   | 2478.94  | PASS          | AC=22;AF=0.393;AN=56;BaseQRankSum= |
| 18555 | chrY | 13292275 | . | C | T   | 152.42   | PASS          | AC=2;AF=0.029;AN=68;BaseQRankSum=  |
| 18556 | chrY | 13292302 | . | C | G   | 212.27   | PASS          | AC=3;AF=0.043;AN=70;BaseQRankSum=  |
| 18557 | chrY | 13292322 | . | T | A   | 206.46   | PASS          | AC=3;AF=0.043;AN=70;BaseQRankSum=  |
| 18558 | chrY | 13292328 | . | T | C   | 150.78   | my_snp_filter | AC=3;AF=0.043;AN=70;BaseQ          |
| 18559 | chrY | 13292335 | . | G | A   | 51.93    | PASS          | AC=1;AF=0.014;AN=70;BaseQRankSum=  |
| 18560 | chrY | 13292340 | . | G | T   | 20129.39 | PASS          | AC=34;AF=0.500;AN=68;BaseQ         |
| 18561 | chrY | 13292346 | . | C | T   | 3632.69  | PASS          | AC=11;AF=0.157;AN=70;BaseQRankSum= |
| 18562 | chrY | 13292382 | . | C | A   | 368.51   | PASS          | AC=4;AF=0.057;AN=70;BaseQRankSum=  |
| 18563 | chrY | 13292433 | . | T | C   | 114.41   | my_snp_filter | AC=3;AF=0.043;AN=70;BaseQ          |
| 18564 | chrY | 13292469 | . | T | G   | 17775.73 | PASS          | AC=35;AF=0.500;AN=70;BaseQ         |
| 18565 | chrY | 13292569 | . | A | G   | 2436.61  | my_snp_filter | AC=18;AF=0.290;AN=62;BaseQ         |
| 18566 | chrY | 13292580 | . | G | A   | 51.68    | my_snp_filter | AC=1;AF=0.016;AN=62;BaseQ          |
| 18567 | chrY | 13292600 | . | C | T   | 1464.18  | my_snp_filter | AC=13;AF=0.271;AN=48;BaseQ         |
| 18568 | chrY | 13292617 | . | A | C   | 199.78   | PASS          | AC=4;AF=0.095;AN=42;BaseQRankSum=  |
| 18569 | chrY | 13292640 | . | G | A   | 491.22   | PASS          | AC=7;AF=0.219;AN=32;BaseQRankSum=  |
| 18570 | chrY | 13292656 | . | T | C   | 1160.12  | PASS          | AC=10;AF=0.357;AN=28;BaseQRankSum= |
| 18571 | chrY | 13292685 | . | C | A   | 1803.24  | PASS          | AC=8;AF=0.308;AN=26;BaseQRankSum=  |
| 18572 | chrY | 13292702 | . | C | T   | 1786.84  | PASS          | AC=8;AF=0.333;AN=24;BaseQRankSum=  |
| 18573 | chrY | 13292712 | . | G | A   | 1846.75  | PASS          | AC=8;AF=0.333;AN=24;BaseQRankSum=  |
| 18574 | chrY | 13292727 | . | C | T   | 738.73   | PASS          | AC=9;AF=0.346;AN=26;BaseQRankSum=  |
| 18575 | chrY | 13292752 | . | G | T   | 391.71   | PASS          | AC=5;AF=0.250;AN=20;BaseQRankSum=  |
| 18576 | chrY | 13292847 | . | C | T   | 4428.52  | my_snp_filter | AC=9;AF=0.450;AN=20;BaseQ          |
| 18577 | chrY | 13292895 | . | C | T   | 207.19   | my_snp_filter | AC=4;AF=0.167;AN=24;BaseQ          |
| 18578 | chrY | 13292900 | . | G | C   | 198.06   | my_snp_filter | AC=4;AF=0.167;AN=24;BaseQ          |
| 18579 | chrY | 13292909 | . | G | A   | 209.63   | my_snp_filter | AC=4;AF=0.154;AN=26;BaseQ          |
| 18580 | chrY | 13292933 | . | G | T   | 837.93   | my_snp_filter | AC=8;AF=0.286;AN=28;BaseQ          |
| 18581 | chrY | 13292953 | . | G | A   | 36.84    | my_snp_filter | AC=1;AF=0.033;AN=30;BaseQ          |
| 18582 | chrY | 13292966 | . | T | A   | 439.57   | my_snp_filter | AC=6;AF=0.188;AN=32;BaseQ          |
| 18583 | chrY | 13292996 | . | C | G   | 53.48    | my_snp_filter | AC=3;AF=0.100;AN=30;BaseQ          |
| 18584 | chrY | 13293053 | . | G | A   | 4985.46  | PASS          | AC=12;AF=0.375;AN=32;BaseQRankSum= |
| 18585 | chrY | 13293086 | . | T | G   | 1992.66  | PASS          | AC=8;AF=0.286;AN=28;BaseQRankSum=  |
| 18586 | chrY | 13293104 | . | G | C   | 1619.45  | PASS          | AC=12;AF=0.462;AN=26;BaseQRankSum= |
| 18587 | chrY | 13293139 | . | T | C   | 4249.09  | PASS          | AC=9;AF=0.500;AN=18;BaseQRankSum=  |
| 18588 | chrY | 13293176 | . | C | A   | 4459.34  | PASS          | AC=9;AF=0.450;AN=20;BaseQRankSum=  |
| 18589 | chrY | 13293243 | . | A | G   | 13406.97 | PASS          | AC=29;AF=0.580;AN=50;BaseQ         |
| 18590 | chrY | 13293265 | . | C | T   | 11802.90 | PASS          | AC=30;AF=0.484;AN=62;BaseQ         |
| 18591 | chrY | 13293266 | . | G | C   | 4539.36  | PASS          | AC=13;AF=0.197;AN=66;BaseQRankSum= |
| 18592 | chrY | 13293275 | . | G | C   | 601.98   | my_snp_filter | AC=9;AF=0.132;AN=68;BaseQ          |
| 18593 | chrY | 13293289 | . | T | C   | 353.72   | my_snp_filter | AC=6;AF=0.086;AN=70;BaseQ          |
| 18594 | chrY | 13293360 | . | T | G   | 100.61   | my_snp_filter | AC=3;AF=0.043;AN=70;BaseQ          |
| 18595 | chrY | 13293363 | . | C | A   | 128.42   | my_snp_filter | AC=1;AF=0.014;AN=70;BaseQ          |
| 18596 | chrY | 13293386 | . | C | A   | 99.67    | my_snp_filter | AC=1;AF=0.014;AN=70;BaseQ          |
| 18597 | chrY | 13293471 | . | A | G   | 90357.72 | PASS          | AC=35;AF=0.500;AN=70;BaseQ         |
| 18598 | chrY | 13293473 | . | G | A   | 3125.20  | PASS          | AC=8;AF=0.114;AN=70;BaseQRankSum=  |
| 18599 | chrY | 13293525 | . | A | T   | 4397.17  | PASS          | AC=7;AF=0.100;AN=70;BaseQRankSum=  |
| 18600 | chrY | 13293529 | . | T | A   | 4375.17  | PASS          | AC=7;AF=0.100;AN=70;BaseQRankSum=  |
| 18601 | chrY | 13293592 | . | A | G   | 13556.04 | PASS          | AC=33;AF=0.485;AN=68;BaseQ         |
| 18602 | chrY | 13293637 | . | G | A   | 160.38   | my_snp_filter | AC=2;AF=0.032;AN=62;BaseQ          |
| 18603 | chrY | 13293658 | . | T | G   | 48.33    | PASS          | AC=2;AF=0.033;AN=60;BaseQRankSum=  |
| 18604 | chrY | 13293666 | . | T | A   | 1387.58  | PASS          | AC=8;AF=0.167;AN=48;BaseQRankSum=  |
| 18605 | chrY | 13293687 | . | C | T   | 65.17    | PASS          | AC=1;AF=0.023;AN=44;BaseQRankSum=  |
| 18606 | chrY | 13293688 | . | A | G   | 65.17    | PASS          | AC=1;AF=0.023;AN=44;BaseQRankSum=  |
| 18607 | chrY | 13293707 | . | C | T   | 1728.30  | PASS          | AC=8;AF=0.211;AN=38;BaseQRankSum=  |
| 18608 | chrY | 13293746 | . | G | C   | 1774.36  | PASS          | AC=9;AF=0.375;AN=24;BaseQRankSum=  |
| 18609 | chrY | 13293815 | . | C | T   | 1424.92  | PASS          | AC=7;AF=0.389;AN=18;BaseQRankSum=  |
| 18610 | chrY | 13293833 | . | A | G   | 2332.16  | PASS          | AC=9;AF=0.500;AN=18;BaseQRankSum=  |
| 18611 | chrY | 13293886 | . | A | T   | 3663.68  | my_snp_filter | AC=9;AF=0.321;AN=28;BaseQ          |
| 18612 | chrY | 13294023 | . | C | A   | 3695.76  | PASS          | AC=12;AF=0.214;AN=56;BaseQRankSum= |
| 18613 | chrY | 13294025 | . | T | C   | 18781.14 | PASS          | AC=25;AF=0.543;AN=46;BaseQ         |
| 18614 | chrY | 13294106 | . | T | C   | 7369.70  | PASS          | AC=17;AF=0.258;AN=66;BaseQRankSum= |
| 18615 | chrY | 13294119 | . | T | C   | 6514.86  | PASS          | AC=16;AF=0.258;AN=62;BaseQRankSum= |
| 18616 | chrY | 13294189 | . | T | C,* | 2633.80  | PASS          | AC=7,3;AF=0.106,0.045;AN=66;BaseQ  |
| 18617 | chrY | 13294204 | . | C | T   | 35.52    | PASS          | AC=1;AF=0.016;AN=64;BaseQRankSum=  |
| 18618 | chrY | 13294211 | . | C | T   | 987.77   | PASS          | AC=7;AF=0.106;AN=66;BaseQRankSum=  |
| 18619 | chrY | 13294228 | . | C | T   | 39.73    | PASS          | AC=1;AF=0.016;AN=64;BaseQRankSum=  |
| 18620 | chrY | 13294271 | . | A | G   | 38.57    | PASS          | AC=1;AF=0.016;AN=64;BaseQRankSum=  |

|       |      |          |   |   |   |          |               |                                    |
|-------|------|----------|---|---|---|----------|---------------|------------------------------------|
| 18621 | chrY | 13294290 | . | T | C | 7478.62  | PASS          | AC=20;AF=0.345;AN=58;BaseQRankSum= |
| 18622 | chrY | 13294304 | . | G | A | 174.93   | my_snp_filter | AC=4;AF=0.057;AN=70;BaseQ          |
| 18623 | chrY | 13294311 | . | T | A | 378.76   | PASS          | AC=5;AF=0.074;AN=68;BaseQRankSum=  |
| 18624 | chrY | 13294354 | . | G | T | 2875.01  | PASS          | AC=23;AF=0.329;AN=70;BaseQRankSum= |
| 18625 | chrY | 13294388 | . | G | T | 16399.73 | PASS          | AC=35;AF=0.500;AN=70;BaseQ         |
| 18626 | chrY | 13294389 | . | C | T | 583.95   | PASS          | AC=7;AF=0.100;AN=70;BaseQRankSum=  |
| 18627 | chrY | 13294485 | . | C | T | 20442.89 | PASS          | AC=26;AF=0.419;AN=62;BaseQ         |
| 18628 | chrY | 13294486 | . | A | G | 2701.62  | PASS          | AC=16;AF=0.250;AN=64;BaseQRankSum= |
| 18629 | chrY | 13294497 | . | T | A | 22436.18 | PASS          | AC=26;AF=0.500;AN=52;BaseQ         |
| 18630 | chrY | 13294565 | . | A | C | 103.88   | PASS          | AC=2;AF=0.029;AN=70;BaseQRankSum=  |
| 18631 | chrY | 13294572 | . | G | T | 80.51    | my_snp_filter | AC=3;AF=0.043;AN=70;BaseQ          |
| 18632 | chrY | 13294597 | . | G | T | 201.68   | PASS          | AC=1;AF=0.014;AN=70;BaseQRankSum=  |
| 18633 | chrY | 13294651 | . | C | T | 4201.38  | PASS          | AC=21;AF=0.300;AN=70;BaseQRankSum= |
| 18634 | chrY | 13294668 | . | T | G | 3525.64  | PASS          | AC=14;AF=0.200;AN=70;BaseQRankSum= |
| 18635 | chrY | 13294675 | . | G | A | 3679.63  | my_snp_filter | AC=13;AF=0.191;AN=68;BaseQ         |
| 18636 | chrY | 13294692 | . | G | T | 1258.08  | my_snp_filter | AC=12;AF=0.176;AN=68;BaseQ         |
| 18637 | chrY | 13294719 | . | C | T | 57.47    | PASS          | AC=1;AF=0.014;AN=70;BaseQRankSum=  |
| 18638 | chrY | 13294739 | . | G | A | 119.32   | my_snp_filter | AC=4;AF=0.057;AN=70;BaseQ          |
| 18639 | chrY | 13294747 | . | G | T | 3863.32  | PASS          | AC=21;AF=0.300;AN=70;BaseQRankSum= |
| 18640 | chrY | 13294757 | . | A | T | 3666.52  | PASS          | AC=21;AF=0.300;AN=70;BaseQRankSum= |
| 18641 | chrY | 13294770 | . | G | T | 44       | PASS          | AC=1;AF=0.014;AN=70;BaseQRankSum=  |
| 18642 | chrY | 13294780 | . | C | T | 55.02    | PASS          | AC=1;AF=0.014;AN=70;BaseQRankSum=  |
| 18643 | chrY | 13294822 | . | T | G | 2222.64  | PASS          | AC=9;AF=0.225;AN=40;BaseQRankSum=  |
| 18644 | chrY | 13294960 | . | T | C | 291.98   | PASS          | AC=4;AF=0.057;AN=70;BaseQRankSum=  |
| 18645 | chrY | 13294961 | . | G | A | 62.19    | PASS          | AC=1;AF=0.014;AN=70;BaseQRankSum=  |
| 18646 | chrY | 13294965 | . | A | G | 266.53   | PASS          | AC=3;AF=0.043;AN=70;BaseQRankSum=  |
| 18647 | chrY | 13295024 | . | T | C | 813.23   | PASS          | AC=4;AF=0.057;AN=70;BaseQRankSum=  |
| 18648 | chrY | 13295056 | . | T | C | 301.15   | PASS          | AC=5;AF=0.074;AN=68;BaseQRankSum=  |
| 18649 | chrY | 13295284 | . | G | A | 231.31   | PASS          | AC=5;AF=0.074;AN=68;BaseQRankSum=  |
| 18650 | chrY | 13295325 | . | C | T | 139.61   | PASS          | AC=3;AF=0.043;AN=70;BaseQRankSum=  |
| 18651 | chrY | 13295438 | . | G | A | 899.85   | PASS          | AC=11;AF=0.190;AN=58;BaseQRankSum= |
| 18652 | chrY | 13295451 | . | C | T | 329.29   | PASS          | AC=5;AF=0.083;AN=60;BaseQRankSum=  |
| 18653 | chrY | 13295467 | . | G | C | 394.55   | PASS          | AC=3;AF=0.048;AN=62;BaseQRankSum=  |
| 18654 | chrY | 13295471 | . | T | C | 360.53   | PASS          | AC=3;AF=0.050;AN=60;BaseQRankSum=  |
| 18655 | chrY | 13295642 | . | T | G | 158.59   | my_snp_filter | AC=3;AF=0.044;AN=68;BaseQ          |
| 18656 | chrY | 13295768 | . | T | G | 760.77   | PASS          | AC=9;AF=0.129;AN=70;BaseQRankSum=  |
| 18657 | chrY | 13295813 | . | G | T | 992.73   | PASS          | AC=8;AF=0.114;AN=70;BaseQRankSum=  |
| 18658 | chrY | 13295858 | . | C | T | 1310.81  | PASS          | AC=13;AF=0.186;AN=70;BaseQRankSum= |
| 18659 | chrY | 13295860 | . | C | T | 581.08   | PASS          | AC=7;AF=0.100;AN=70;BaseQRankSum=  |
| 18660 | chrY | 13295870 | . | G | C | 6226.60  | PASS          | AC=27;AF=0.386;AN=70;BaseQRankSum= |
| 18661 | chrY | 13295933 | . | T | A | 4462.47  | my_snp_filter | AC=24;AF=0.343;AN=70;BaseQ         |
| 18662 | chrY | 13295949 | . | T | A | 3794.41  | my_snp_filter | AC=21;AF=0.300;AN=70;BaseQ         |
| 18663 | chrY | 13295995 | . | G | A | 727.24   | my_snp_filter | AC=8;AF=0.118;AN=68;BaseQ          |
| 18664 | chrY | 13296370 | . | C | G | 52.37    | my_snp_filter | AC=5;AF=0.074;AN=68;BaseQ          |
| 18665 | chrY | 13296390 | . | A | G | 138.50   | PASS          | AC=4;AF=0.057;AN=70;BaseQRankSum=  |
| 18666 | chrY | 13296447 | . | A | C | 127.29   | PASS          | AC=3;AF=0.043;AN=70;BaseQRankSum=  |
| 18667 | chrY | 13296452 | . | C | A | 134.53   | PASS          | AC=3;AF=0.043;AN=70;BaseQRankSum=  |
| 18668 | chrY | 13296600 | . | G | T | 1158.94  | PASS          | AC=15;AF=0.221;AN=68;BaseQRankSum= |
| 18669 | chrY | 13296628 | . | G | A | 680.79   | my_snp_filter | AC=9;AF=0.132;AN=68;BaseQ          |
| 18670 | chrY | 13296715 | . | A | G | 404.66   | PASS          | AC=6;AF=0.086;AN=70;BaseQRankSum=  |
| 18671 | chrY | 13296793 | . | T | C | 3718.98  | my_snp_filter | AC=25;AF=0.357;AN=70;BaseQ         |
| 18672 | chrY | 13296797 | . | C | A | 81.80    | my_snp_filter | AC=3;AF=0.043;AN=70;BaseQ          |
| 18673 | chrY | 13296814 | . | T | C | 32.39    | my_snp_filter | AC=2;AF=0.029;AN=70;BaseQ          |
| 18674 | chrY | 13296851 | . | C | T | 5097.52  | PASS          | AC=21;AF=0.328;AN=64;BaseQRankSum= |
| 18675 | chrY | 13296871 | . | T | G | 2787.58  | PASS          | AC=15;AF=0.227;AN=66;BaseQRankSum= |
| 18676 | chrY | 13296890 | . | G | A | 19356.40 | PASS          | AC=29;AF=0.453;AN=64;BaseQ         |
| 18677 | chrY | 13296891 | . | C | T | 76.28    | PASS          | AC=1;AF=0.015;AN=68;BaseQRankSum=  |
| 18678 | chrY | 13296908 | . | G | A | 102.18   | PASS          | AC=2;AF=0.029;AN=68;BaseQRankSum=  |
| 18679 | chrY | 13296909 | . | C | T | 8309.29  | PASS          | AC=27;AF=0.397;AN=68;BaseQRankSum= |
| 18680 | chrY | 13296979 | . | G | T | 12733.12 | PASS          | AC=29;AF=0.453;AN=64;BaseQ         |
| 18681 | chrY | 13297028 | . | G | C | 5779.21  | PASS          | AC=27;AF=0.386;AN=70;BaseQRankSum= |
| 18682 | chrY | 13297066 | . | T | G | 9372.57  | PASS          | AC=27;AF=0.386;AN=70;BaseQRankSum= |
| 18683 | chrY | 13297111 | . | G | C | 156.44   | my_snp_filter | AC=1;AF=0.014;AN=70;BaseQ          |
| 18684 | chrY | 13297132 | . | C | T | 14692.84 | PASS          | AC=34;AF=0.486;AN=70;BaseQ         |
| 18685 | chrY | 13297182 | . | A | G | 19082.34 | PASS          | AC=34;AF=0.486;AN=70;BaseQ         |
| 18686 | chrY | 13297284 | . | G | T | 68.04    | my_snp_filter | AC=2;AF=0.029;AN=70;BaseQ          |
| 18687 | chrY | 13297367 | . | A | G | 842.33   | my_snp_filter | AC=7;AF=0.100;AN=70;BaseQ          |
| 18688 | chrY | 13297382 | . | A | G | 830.27   | my_snp_filter | AC=7;AF=0.100;AN=70;BaseQ          |
| 18689 | chrY | 13297403 | . | T | A | 392.12   | PASS          | AC=3;AF=0.043;AN=70;BaseQRankSum=  |
| 18690 | chrY | 13297468 | . | A | T | 670.65   | PASS          | AC=5;AF=0.074;AN=68;BaseQRankSum=  |
| 18691 | chrY | 13297541 | . | C | T | 1949.03  | my_snp_filter | AC=14;AF=0.206;AN=68;BaseQ         |
| 18692 | chrY | 13297598 | . | A | G | 3406.11  | PASS          | AC=13;AF=0.191;AN=68;BaseQRankSum= |
| 18693 | chrY | 13297622 | . | G | A | 5694.94  | PASS          | AC=21;AF=0.309;AN=68;BaseQRankSum= |
| 18694 | chrY | 13297657 | . | T | C | 9811.56  | PASS          | AC=25;AF=0.357;AN=70;BaseQRankSum= |
| 18695 | chrY | 13297747 | . | C | T | 12609.62 | PASS          | AC=25;AF=0.357;AN=70;BaseQ         |
| 18696 | chrY | 13297772 | . | C | A | 11095.50 | PASS          | AC=24;AF=0.343;AN=70;BaseQ         |

|       |      |          |   |   |     |          |               |                                    |
|-------|------|----------|---|---|-----|----------|---------------|------------------------------------|
| 18697 | chrY | 13297817 | . | C | A   | 9336.85  | PASS          | AC=23;AF=0.329;AN=70;BaseQRankSum= |
| 18698 | chrY | 13297840 | . | A | T   | 36.46    | my_snp_filter | AC=1;AF=0.014;AN=70;BaseQ          |
| 18699 | chrY | 13297841 | . | A | T   | 36.46    | my_snp_filter | AC=1;AF=0.014;AN=70;BaseQ          |
| 18700 | chrY | 13297852 | . | A | C   | 986.50   | PASS          | AC=10;AF=0.143;AN=70;BaseQRankSum= |
| 18701 | chrY | 13297889 | . | G | C   | 118.20   | my_snp_filter | AC=6;AF=0.086;AN=70;BaseQ          |
| 18702 | chrY | 13297909 | . | T | G   | 7058.58  | PASS          | AC=22;AF=0.324;AN=68;BaseQRankSum= |
| 18703 | chrY | 13297914 | . | A | C   | 233.45   | my_snp_filter | AC=6;AF=0.086;AN=70;BaseQ          |
| 18704 | chrY | 13297969 | . | T | C   | 3867.72  | PASS          | AC=19;AF=0.271;AN=70;BaseQRankSum= |
| 18705 | chrY | 13297997 | . | A | C   | 3293.28  | PASS          | AC=14;AF=0.200;AN=70;BaseQRankSum= |
| 18706 | chrY | 13298068 | . | C | T   | 149.64   | PASS          | AC=1;AF=0.014;AN=70;BaseQRankSum=  |
| 18707 | chrY | 13298073 | . | T | A   | 3629.83  | PASS          | AC=15;AF=0.214;AN=70;BaseQRankSum= |
| 18708 | chrY | 13298087 | . | G | A   | 118.02   | PASS          | AC=1;AF=0.014;AN=70;BaseQRankSum=  |
| 18709 | chrY | 13298108 | . | C | T   | 5249.88  | PASS          | AC=16;AF=0.229;AN=70;BaseQRankSum= |
| 18710 | chrY | 13298125 | . | G | T   | 4349.18  | PASS          | AC=14;AF=0.200;AN=70;BaseQRankSum= |
| 18711 | chrY | 13298174 | . | C | T   | 8043.73  | PASS          | AC=33;AF=0.471;AN=70;BaseQRankSum= |
| 18712 | chrY | 13298272 | . | G | A   | 3818.86  | PASS          | AC=17;AF=0.243;AN=70;BaseQRankSum= |
| 18713 | chrY | 13298286 | . | T | C   | 1625.95  | PASS          | AC=19;AF=0.279;AN=68;BaseQRankSum= |
| 18714 | chrY | 13298297 | . | C | T   | 649.32   | PASS          | AC=10;AF=0.147;AN=68;BaseQRankSum= |
| 18715 | chrY | 13298306 | . | G | A   | 1517.18  | PASS          | AC=9;AF=0.132;AN=68;BaseQRankSum=  |
| 18716 | chrY | 13298340 | . | G | A   | 276.29   | PASS          | AC=2;AF=0.029;AN=70;BaseQRankSum=  |
| 18717 | chrY | 13298423 | . | A | C   | 4781.37  | PASS          | AC=17;AF=0.243;AN=70;BaseQRankSum= |
| 18718 | chrY | 13298427 | . | G | A   | 2912.14  | PASS          | AC=17;AF=0.243;AN=70;BaseQRankSum= |
| 18719 | chrY | 13298430 | . | A | G   | 1478.33  | PASS          | AC=3;AF=0.043;AN=70;BaseQRankSum=  |
| 18720 | chrY | 13298442 | . | A | T   | 1630.16  | PASS          | AC=4;AF=0.057;AN=70;BaseQRankSum=  |
| 18721 | chrY | 13298444 | . | T | C   | 5580.17  | PASS          | AC=17;AF=0.243;AN=70;BaseQRankSum= |
| 18722 | chrY | 13298471 | . | A | T   | 2572.88  | PASS          | AC=7;AF=0.100;AN=70;BaseQRankSum=  |
| 18723 | chrY | 13298491 | . | G | T   | 2947.12  | PASS          | AC=7;AF=0.100;AN=70;BaseQRankSum=  |
| 18724 | chrY | 13298513 | . | C | A   | 3041.73  | PASS          | AC=10;AF=0.143;AN=70;BaseQRankSum= |
| 18725 | chrY | 13298521 | . | C | T   | 3109.39  | PASS          | AC=10;AF=0.143;AN=70;BaseQRankSum= |
| 18726 | chrY | 13298541 | . | T | A   | 2840.58  | PASS          | AC=10;AF=0.147;AN=68;BaseQRankSum= |
| 18727 | chrY | 13298592 | . | C | T   | 159.78   | my_snp_filter | AC=4;AF=0.057;AN=70;BaseQ          |
| 18728 | chrY | 13298598 | . | T | C   | 89.48    | my_snp_filter | AC=3;AF=0.043;AN=70;BaseQ          |
| 18729 | chrY | 13298607 | . | T | C   | 2530.67  | PASS          | AC=14;AF=0.200;AN=70;BaseQRankSum= |
| 18730 | chrY | 13298630 | . | T | A   | 3634.39  | PASS          | AC=17;AF=0.243;AN=70;BaseQRankSum= |
| 18731 | chrY | 13298635 | . | T | C   | 3057.75  | PASS          | AC=14;AF=0.200;AN=70;BaseQRankSum= |
| 18732 | chrY | 13298698 | . | C | T   | 1134.49  | PASS          | AC=7;AF=0.100;AN=70;BaseQRankSum=  |
| 18733 | chrY | 13298701 | . | G | C   | 2077.71  | PASS          | AC=14;AF=0.200;AN=70;BaseQRankSum= |
| 18734 | chrY | 13298711 | . | C | T   | 1121.61  | PASS          | AC=7;AF=0.100;AN=70;BaseQRankSum=  |
| 18735 | chrY | 13298744 | . | A | T   | 1061.56  | PASS          | AC=7;AF=0.100;AN=70;BaseQRankSum=  |
| 18736 | chrY | 13298756 | . | G | A   | 837.70   | PASS          | AC=6;AF=0.086;AN=70;BaseQRankSum=  |
| 18737 | chrY | 13298772 | . | C | G   | 324.88   | PASS          | AC=4;AF=0.057;AN=70;BaseQRankSum=  |
| 18738 | chrY | 13298781 | . | A | G   | 155.35   | my_snp_filter | AC=4;AF=0.057;AN=70;BaseQ          |
| 18739 | chrY | 13298876 | . | C | T   | 32       | my_snp_filter | AC=1;AF=0.014;AN=70;BaseQ          |
| 18740 | chrY | 13298892 | . | C | T   | 40.36    | PASS          | AC=1;AF=0.014;AN=70;BaseQRankSum=  |
| 18741 | chrY | 13299069 | . | G | A   | 1389.68  | PASS          | AC=6;AF=0.088;AN=68;DP=357;FS=0.0  |
| 18742 | chrY | 13299429 | . | G | A   | 1855.15  | my_snp_filter | AC=9;AF=0.265;AN=34;BaseQ          |
| 18743 | chrY | 13299471 | . | G | A   | 1113.77  | my_snp_filter | AC=7;AF=0.135;AN=52;BaseQ          |
| 18744 | chrY | 13299483 | . | G | A   | 417.66   | PASS          | AC=6;AF=0.120;AN=50;BaseQRankSum=  |
| 18745 | chrY | 13299490 | . | C | T   | 96.76    | PASS          | AC=2;AF=0.038;AN=52;BaseQRankSum=  |
| 18746 | chrY | 13299491 | . | G | C   | 2372.16  | PASS          | AC=15;AF=0.313;AN=48;BaseQRankSum= |
| 18747 | chrY | 13299492 | . | C | T   | 1112.85  | my_snp_filter | AC=8;AF=0.154;AN=52;BaseQ          |
| 18748 | chrY | 13299500 | . | T | C   | 487.83   | PASS          | AC=7;AF=0.146;AN=48;BaseQRankSum=  |
| 18749 | chrY | 13299543 | . | G | A   | 338.62   | PASS          | AC=5;AF=0.119;AN=42;BaseQRankSum=  |
| 18750 | chrY | 13299638 | . | T | A   | 169.98   | my_snp_filter | AC=3;AF=0.115;AN=26;BaseQ          |
| 18751 | chrY | 13299707 | . | T | C   | 253.10   | my_snp_filter | AC=7;AF=0.121;AN=58;BaseQ          |
| 18752 | chrY | 13299800 | . | C | A   | 1269.44  | PASS          | AC=16;AF=0.229;AN=70;BaseQRankSum= |
| 18753 | chrY | 13299865 | . | C | T   | 5756.34  | PASS          | AC=6;AF=0.086;AN=70;BaseQRankSum=  |
| 18754 | chrY | 13299867 | . | G | A   | 5755.83  | PASS          | AC=6;AF=0.086;AN=70;BaseQRankSum=  |
| 18755 | chrY | 13299901 | . | T | C   | 3922.10  | PASS          | AC=6;AF=0.088;AN=68;BaseQRankSum=  |
| 18756 | chrY | 13299909 | . | T | G   | 3918.79  | PASS          | AC=6;AF=0.086;AN=70;BaseQRankSum=  |
| 18757 | chrY | 13299934 | . | G | A   | 130.75   | PASS          | AC=1;AF=0.014;AN=70;BaseQRankSum=  |
| 18758 | chrY | 13299939 | . | A | G   | 4000.30  | PASS          | AC=6;AF=0.086;AN=70;BaseQRankSum=  |
| 18759 | chrY | 13299940 | . | G | T   | 4000.58  | PASS          | AC=6;AF=0.086;AN=70;BaseQRankSum=  |
| 18760 | chrY | 13299976 | . | A | C,G | 2204.06  | PASS          | AC=10,2;AF=0.147,0.029;AN=68;Base  |
| 18761 | chrY | 13300027 | . | G | A   | 13475.40 | PASS          | AC=24;AF=0.343;AN=70;Base          |
| 18762 | chrY | 13300034 | . | G | A   | 14056.48 | PASS          | AC=24;AF=0.343;AN=70;Base          |
| 18763 | chrY | 13300045 | . | A | G   | 136.44   | PASS          | AC=1;AF=0.014;AN=70;BaseQRankSum=  |
| 18764 | chrY | 13300100 | . | G | A   | 12792.15 | PASS          | AC=26;AF=0.371;AN=70;Base          |
| 18765 | chrY | 13300109 | . | C | G   | 101.87   | my_snp_filter | AC=4;AF=0.057;AN=70;BaseQ          |
| 18766 | chrY | 13300210 | . | G | A   | 7388.80  | PASS          | AC=21;AF=0.309;AN=68;BaseQRankSum= |
| 18767 | chrY | 13300253 | . | C | T   | 4577.08  | PASS          | AC=16;AF=0.242;AN=66;BaseQRankSum= |
| 18768 | chrY | 13300312 | . | A | G   | 3469.82  | PASS          | AC=12;AF=0.176;AN=68;BaseQRankSum= |
| 18769 | chrY | 13300382 | . | T | G   | 103.22   | my_snp_filter | AC=2;AF=0.029;AN=70;BaseQ          |
| 18770 | chrY | 13300420 | . | G | A   | 259.55   | my_snp_filter | AC=4;AF=0.057;AN=70;BaseQ          |
| 18771 | chrY | 13300490 | . | G | A   | 1783.24  | my_snp_filter | AC=19;AF=0.271;AN=70;Base          |
| 18772 | chrY | 13300511 | . | C | T   | 158.43   | my_snp_filter | AC=1;AF=0.014;AN=70;BaseQ          |

|       |      |          |   |   |   |          |               |                                    |
|-------|------|----------|---|---|---|----------|---------------|------------------------------------|
| 18773 | chrY | 13300628 | . | A | G | 171.81   | PASS          | AC=3;AF=0.043;AN=70;BaseQRankSum=  |
| 18774 | chrY | 13300629 | . | A | G | 999.25   | PASS          | AC=9;AF=0.129;AN=70;BaseQRankSum=  |
| 18775 | chrY | 13300668 | . | A | C | 2762.94  | my_snp_filter | AC=13;AF=0.197;AN=66;BaseQ         |
| 18776 | chrY | 13300689 | . | G | C | 3428.10  | my_snp_filter | AC=15;AF=0.341;AN=44;BaseQ         |
| 18777 | chrY | 13300749 | . | C | G | 54.02    | my_snp_filter | AC=2;AF=0.033;AN=60;BaseQ          |
| 18778 | chrY | 13300762 | . | G | C | 48.27    | PASS          | AC=1;AF=0.016;AN=64;BaseQRankSum=  |
| 18779 | chrY | 13300771 | . | T | G | 50.72    | PASS          | AC=1;AF=0.016;AN=64;BaseQRankSum=  |
| 18780 | chrY | 13301149 | . | G | A | 1000.24  | PASS          | AC=7;AF=0.100;AN=70;BaseQRankSum=  |
| 18781 | chrY | 13301159 | . | T | G | 4775.87  | my_snp_filter | AC=15;AF=0.214;AN=70;BaseQ         |
| 18782 | chrY | 13301165 | . | G | A | 4041.33  | my_snp_filter | AC=17;AF=0.243;AN=70;BaseQ         |
| 18783 | chrY | 13301185 | . | A | T | 5327.91  | PASS          | AC=17;AF=0.243;AN=70;BaseQRankSum= |
| 18784 | chrY | 13301196 | . | T | C | 303.87   | PASS          | AC=3;AF=0.043;AN=70;BaseQRankSum=  |
| 18785 | chrY | 13301231 | . | T | C | 7850.64  | PASS          | AC=20;AF=0.286;AN=70;BaseQRankSum= |
| 18786 | chrY | 13301233 | . | A | G | 7858.88  | PASS          | AC=20;AF=0.286;AN=70;BaseQRankSum= |
| 18787 | chrY | 13301252 | . | G | C | 6605.06  | PASS          | AC=20;AF=0.286;AN=70;BaseQRankSum= |
| 18788 | chrY | 13301284 | . | C | T | 5986.06  | PASS          | AC=14;AF=0.200;AN=70;BaseQRankSum= |
| 18789 | chrY | 13301285 | . | A | G | 6049.83  | PASS          | AC=14;AF=0.200;AN=70;BaseQRankSum= |
| 18790 | chrY | 13301351 | . | A | T | 4149.80  | PASS          | AC=8;AF=0.190;AN=42;BaseQRankSum=  |
| 18791 | chrY | 13301358 | . | C | T | 108.65   | PASS          | AC=1;AF=0.024;AN=42;BaseQRankSum=  |
| 18792 | chrY | 13301361 | . | G | T | 4697.94  | PASS          | AC=8;AF=0.211;AN=38;BaseQRankSum=  |
| 18793 | chrY | 13301369 | . | T | C | 4480.05  | PASS          | AC=8;AF=0.222;AN=36;BaseQRankSum=  |
| 18794 | chrY | 13301430 | . | T | C | 3532.88  | PASS          | AC=6;AF=0.188;AN=32;BaseQRankSum=  |
| 18795 | chrY | 13301528 | . | G | A | 3366.84  | PASS          | AC=9;AF=0.173;AN=52;BaseQRankSum=  |
| 18796 | chrY | 13301535 | . | T | G | 142.53   | PASS          | AC=2;AF=0.036;AN=56;BaseQRankSum=  |
| 18797 | chrY | 13301586 | . | T | C | 2949.24  | PASS          | AC=12;AF=0.188;AN=64;BaseQRankSum= |
| 18798 | chrY | 13301630 | . | G | A | 358.71   | PASS          | AC=4;AF=0.059;AN=68;BaseQRankSum=  |
| 18799 | chrY | 13301674 | . | C | A | 1436.95  | PASS          | AC=9;AF=0.129;AN=70;BaseQRankSum=  |
| 18800 | chrY | 13301691 | . | C | T | 1983.36  | my_snp_filter | AC=8;AF=0.114;AN=70;BaseQ          |
| 18801 | chrY | 13301700 | . | T | C | 2025.95  | my_snp_filter | AC=8;AF=0.114;AN=70;BaseQ          |
| 18802 | chrY | 13301704 | . | C | T | 26941.55 | PASS          | AC=27;AF=0.386;AN=70;BaseQ         |
| 18803 | chrY | 13301705 | . | A | G | 28455.55 | PASS          | AC=27;AF=0.386;AN=70;BaseQ         |
| 18804 | chrY | 13301737 | . | T | C | 54.02    | my_snp_filter | AC=5;AF=0.071;AN=70;BaseQ          |
| 18805 | chrY | 13301772 | . | A | G | 10993.09 | PASS          | AC=24;AF=0.343;AN=70;BaseQ         |
| 18806 | chrY | 13301792 | . | T | C | 457.23   | my_snp_filter | AC=6;AF=0.086;AN=70;BaseQ          |
| 18807 | chrY | 13301811 | . | A | G | 230.61   | PASS          | AC=1;AF=0.014;AN=70;BaseQRankSum=  |
| 18808 | chrY | 13301813 | . | T | G | 5116.80  | PASS          | AC=21;AF=0.300;AN=70;BaseQRankSum= |
| 18809 | chrY | 13301847 | . | T | C | 5349.94  | PASS          | AC=22;AF=0.314;AN=70;BaseQRankSum= |
| 18810 | chrY | 13301857 | . | G | C | 58.11    | my_snp_filter | AC=2;AF=0.029;AN=70;BaseQ          |
| 18811 | chrY | 13301873 | . | T | C | 33.61    | PASS          | AC=1;AF=0.014;AN=70;BaseQRankSum=  |
| 18812 | chrY | 13301953 | . | A | G | 1796.76  | PASS          | AC=7;AF=0.103;AN=68;BaseQRankSum=  |
| 18813 | chrY | 13301986 | . | A | T | 573.33   | PASS          | AC=4;AF=0.057;AN=70;BaseQRankSum=  |
| 18814 | chrY | 13302072 | . | C | T | 2025.42  | PASS          | AC=10;AF=0.152;AN=66;BaseQRankSum= |
| 18815 | chrY | 13302139 | . | A | C | 1603.41  | my_snp_filter | AC=10;AF=0.143;AN=70;BaseQ         |
| 18816 | chrY | 13302175 | . | A | C | 2681.73  | PASS          | AC=22;AF=0.324;AN=68;BaseQRankSum= |
| 18817 | chrY | 13302271 | . | G | A | 2905.96  | my_snp_filter | AC=10;AF=0.156;AN=64;BaseQ         |
| 18818 | chrY | 13302314 | . | G | A | 194.67   | my_snp_filter | AC=4;AF=0.065;AN=62;BaseQ          |
| 18819 | chrY | 13302316 | . | A | G | 3933.71  | PASS          | AC=11;AF=0.183;AN=60;BaseQRankSum= |
| 18820 | chrY | 13302366 | . | C | T | 268.96   | my_snp_filter | AC=3;AF=0.048;AN=62;BaseQ          |
| 18821 | chrY | 13302441 | . | G | A | 220.83   | my_snp_filter | AC=3;AF=0.043;AN=70;BaseQ          |
| 18822 | chrY | 13302444 | . | G | C | 7656.52  | PASS          | AC=20;AF=0.286;AN=70;BaseQRankSum= |
| 18823 | chrY | 13302479 | . | C | T | 6729.18  | PASS          | AC=25;AF=0.357;AN=70;BaseQRankSum= |
| 18824 | chrY | 13302532 | . | A | G | 11088.09 | PASS          | AC=30;AF=0.429;AN=70;BaseQ         |
| 18825 | chrY | 13302551 | . | A | C | 16367.45 | PASS          | AC=29;AF=0.414;AN=70;BaseQ         |
| 18826 | chrY | 13302554 | . | G | A | 16409.46 | PASS          | AC=29;AF=0.414;AN=70;BaseQ         |
| 18827 | chrY | 13302634 | . | G | A | 301.44   | my_snp_filter | AC=2;AF=0.029;AN=70;BaseQ          |
| 18828 | chrY | 13302657 | . | A | C | 448.71   | my_snp_filter | AC=9;AF=0.129;AN=70;BaseQ          |
| 18829 | chrY | 13302687 | . | A | G | 14408.24 | PASS          | AC=38;AF=0.543;AN=70;BaseQ         |
| 18830 | chrY | 13302779 | . | G | A | 9846.75  | PASS          | AC=35;AF=0.500;AN=70;BaseQRankSum= |
| 18831 | chrY | 13302791 | . | A | G | 672.57   | PASS          | AC=6;AF=0.086;AN=70;BaseQRankSum=  |
| 18832 | chrY | 13302826 | . | G | A | 777.95   | PASS          | AC=9;AF=0.129;AN=70;BaseQRankSum=  |
| 18833 | chrY | 13302856 | . | T | C | 56.01    | my_snp_filter | AC=2;AF=0.029;AN=70;BaseQ          |
| 18834 | chrY | 13302919 | . | C | G | 15762.53 | PASS          | AC=37;AF=0.529;AN=70;BaseQ         |
| 18835 | chrY | 13302939 | . | A | T | 525.06   | PASS          | AC=5;AF=0.074;AN=68;BaseQRankSum=  |
| 18836 | chrY | 13302984 | . | T | C | 3882.67  | PASS          | AC=19;AF=0.279;AN=68;BaseQRankSum= |
| 18837 | chrY | 13303074 | . | A | G | 59.58    | PASS          | AC=1;AF=0.015;AN=68;BaseQRankSum=  |
| 18838 | chrY | 13303086 | . | A | G | 919.41   | my_snp_filter | AC=8;AF=0.118;AN=68;BaseQ          |
| 18839 | chrY | 13303107 | . | G | C | 1152.15  | my_snp_filter | AC=8;AF=0.118;AN=68;BaseQ          |
| 18840 | chrY | 13303126 | . | A | T | 1213.73  | my_snp_filter | AC=8;AF=0.121;AN=66;BaseQ          |
| 18841 | chrY | 13303136 | . | C | T | 1295.37  | my_snp_filter | AC=8;AF=0.125;AN=64;BaseQ          |
| 18842 | chrY | 13303186 | . | G | A | 285.66   | my_snp_filter | AC=6;AF=0.091;AN=66;BaseQ          |
| 18843 | chrY | 13303227 | . | T | C | 89.28    | PASS          | AC=4;AF=0.057;AN=70;BaseQRankSum=  |
| 18844 | chrY | 13303253 | . | A | G | 336.15   | PASS          | AC=6;AF=0.091;AN=66;BaseQRankSum=  |
| 18845 | chrY | 13303306 | . | G | C | 49.94    | PASS          | AC=2;AF=0.043;AN=46;DP=171;FS=0.0  |
| 18846 | chrY | 13303307 | . | G | A | 49.94    | PASS          | AC=2;AF=0.043;AN=46;DP=173;FS=0.0  |
| 18847 | chrY | 13303576 | . | G | A | 521.83   | PASS          | AC=7;AF=0.100;AN=70;BaseQRankSum=  |
| 18848 | chrY | 13303600 | . | G | A | 92.88    | my_snp_filter | AC=5;AF=0.071;AN=70;BaseQ          |



|       |      |          |   |   |     |          |               |                                    |
|-------|------|----------|---|---|-----|----------|---------------|------------------------------------|
| 18849 | chrY | 13303693 | . | A | G   | 139.33   | PASS          | AC=3;AF=0.043;AN=70;BaseQRankSum=  |
| 18850 | chrY | 13303700 | . | T | C   | 997.68   | PASS          | AC=9;AF=0.129;AN=70;BaseQRankSum=  |
| 18851 | chrY | 13303773 | . | C | T   | 399.62   | PASS          | AC=6;AF=0.086;AN=70;BaseQRankSum=  |
| 18852 | chrY | 13303776 | . | A | G   | 392.52   | PASS          | AC=6;AF=0.086;AN=70;BaseQRankSum=  |
| 18853 | chrY | 13303824 | . | G | A   | 68.79    | my_snp_filter | AC=2;AF=0.029;AN=70;BaseQ          |
| 18854 | chrY | 13303890 | . | T | A   | 80.04    | PASS          | AC=1;AF=0.014;AN=70;BaseQRankSum=  |
| 18855 | chrY | 13303894 | . | T | G   | 394.87   | PASS          | AC=5;AF=0.071;AN=70;BaseQRankSum=  |
| 18856 | chrY | 13304004 | . | G | A   | 940.07   | PASS          | AC=3;AF=0.044;AN=68;BaseQRankSum=  |
| 18857 | chrY | 13304028 | . | A | G   | 799.62   | PASS          | AC=6;AF=0.088;AN=68;BaseQRankSum=  |
| 18858 | chrY | 13304052 | . | A | C   | 618.47   | PASS          | AC=4;AF=0.059;AN=68;BaseQRankSum=  |
| 18859 | chrY | 13304066 | . | T | C   | 423.96   | PASS          | AC=3;AF=0.044;AN=68;BaseQRankSum=  |
| 18860 | chrY | 13304100 | . | T | C   | 805.93   | my_snp_filter | AC=8;AF=0.121;AN=66;BaseQ          |
| 18861 | chrY | 13304168 | . | A | C   | 976.60   | PASS          | AC=9;AF=0.136;AN=66;BaseQRankSum=  |
| 18862 | chrY | 13304210 | . | A | T   | 30.96    | my_snp_filter | AC=1;AF=0.017;AN=60;BaseQ          |
| 18863 | chrY | 13304394 | . | T | C   | 269.37   | PASS          | AC=4;AF=0.061;AN=66;BaseQRankSum=  |
| 18864 | chrY | 13304489 | . | T | C   | 232.44   | PASS          | AC=10;AF=1.00;AN=10;DP=108;FS=0.0  |
| 18865 | chrY | 13304679 | . | T | A   | 2776.25  | my_snp_filter | AC=13;AF=0.191;AN=68;Base          |
| 18866 | chrY | 13304700 | . | G | A   | 84.08    | my_snp_filter | AC=2;AF=0.029;AN=68;BaseQ          |
| 18867 | chrY | 13304793 | . | C | A   | 9857.15  | PASS          | AC=34;AF=0.500;AN=68;BaseQRankSum= |
| 18868 | chrY | 13304853 | . | G | A   | 3340.06  | PASS          | AC=17;AF=0.243;AN=70;BaseQRankSum= |
| 18869 | chrY | 13304873 | . | C | T   | 286.29   | my_snp_filter | AC=4;AF=0.057;AN=70;BaseQ          |
| 18870 | chrY | 13304893 | . | G | A   | 343.54   | my_snp_filter | AC=4;AF=0.057;AN=70;BaseQ          |
| 18871 | chrY | 13304943 | . | C | T   | 18357.56 | PASS          | AC=34;AF=0.486;AN=70;Base          |
| 18872 | chrY | 13304982 | . | T | A   | 6563.79  | my_snp_filter | AC=29;AF=0.414;AN=70;Base          |
| 18873 | chrY | 13304993 | . | G | T   | 69.86    | PASS          | AC=2;AF=0.029;AN=70;BaseQRankSum=  |
| 18874 | chrY | 13305014 | . | T | C   | 1050.06  | my_snp_filter | AC=11;AF=0.162;AN=68;Base          |
| 18875 | chrY | 13305017 | . | C | T   | 1014.49  | my_snp_filter | AC=11;AF=0.167;AN=66;Base          |
| 18876 | chrY | 13305033 | . | C | A   | 92.12    | PASS          | AC=2;AF=0.029;AN=68;BaseQRankSum=  |
| 18877 | chrY | 13305052 | . | G | A   | 161.14   | PASS          | AC=2;AF=0.029;AN=68;BaseQRankSum=  |
| 18878 | chrY | 13305060 | . | C | G   | 236.35   | PASS          | AC=3;AF=0.044;AN=68;BaseQRankSum=  |
| 18879 | chrY | 13305124 | . | A | T   | 177      | PASS          | AC=2;AF=0.029;AN=68;BaseQRankSum=  |
| 18880 | chrY | 13305145 | . | C | A   | 103.47   | PASS          | AC=2;AF=0.030;AN=66;BaseQRankSum=  |
| 18881 | chrY | 13305685 | . | G | A   | 151.79   | PASS          | AC=6;AF=0.088;AN=68;BaseQRankSum=  |
| 18882 | chrY | 13306011 | . | G | C   | 714.60   | my_snp_filter | AC=12;AF=0.188;AN=64;Base          |
| 18883 | chrY | 13306139 | . | T | C   | 258.30   | PASS          | AC=3;AF=0.047;AN=64;BaseQRankSum=  |
| 18884 | chrY | 13306144 | . | G | T   | 206.87   | PASS          | AC=3;AF=0.047;AN=64;BaseQRankSum=  |
| 18885 | chrY | 13306156 | . | T | G   | 89.10    | PASS          | AC=1;AF=0.016;AN=64;BaseQRankSum=  |
| 18886 | chrY | 13306191 | . | C | T   | 1123.34  | PASS          | AC=6;AF=0.103;AN=58;BaseQRankSum=  |
| 18887 | chrY | 13306192 | . | G | T   | 1202.11  | PASS          | AC=6;AF=0.103;AN=58;BaseQRankSum=  |
| 18888 | chrY | 13306194 | . | T | C   | 1261.08  | PASS          | AC=6;AF=0.103;AN=58;BaseQRankSum=  |
| 18889 | chrY | 13306195 | . | G | A   | 1340.26  | PASS          | AC=6;AF=0.103;AN=58;BaseQRankSum=  |
| 18890 | chrY | 13306201 | . | G | C   | 1494.20  | PASS          | AC=6;AF=0.097;AN=62;BaseQRankSum=  |
| 18891 | chrY | 13306247 | . | C | T   | 4367.60  | PASS          | AC=34;AF=0.500;AN=68;BaseQRankSum= |
| 18892 | chrY | 13306252 | . | G | T   | 153.82   | PASS          | AC=1;AF=0.015;AN=68;BaseQRankSum=  |
| 18893 | chrY | 13306256 | . | G | A   | 1202.26  | PASS          | AC=11;AF=0.162;AN=68;BaseQRankSum= |
| 18894 | chrY | 13306266 | . | G | A   | 423.82   | PASS          | AC=5;AF=0.074;AN=68;BaseQRankSum=  |
| 18895 | chrY | 13306286 | . | C | G,T | 8038.69  | PASS          | AC=32,2;AF=0.500,0.031;AN=64;Base  |
| 18896 | chrY | 13306292 | . | C | T   | 7884.96  | PASS          | AC=32;AF=0.485;AN=66;BaseQRankSum= |
| 18897 | chrY | 13306346 | . | T | G   | 2612.70  | my_snp_filter | AC=20;AF=0.303;AN=66;Base          |
| 18898 | chrY | 13306386 | . | A | G   | 159.87   | PASS          | AC=3;AF=0.047;AN=64;BaseQRankSum=  |
| 18899 | chrY | 13306462 | . | G | A   | 1820.54  | PASS          | AC=9;AF=0.150;AN=60;BaseQRankSum=  |
| 18900 | chrY | 13306465 | . | C | T   | 2705.91  | PASS          | AC=9;AF=0.145;AN=62;BaseQRankSum=  |
| 18901 | chrY | 13306490 | . | A | G   | 4314.46  | PASS          | AC=9;AF=0.180;AN=50;BaseQRankSum=  |
| 18902 | chrY | 13306514 | . | T | C   | 4715.08  | PASS          | AC=9;AF=0.155;AN=58;BaseQRankSum=  |
| 18903 | chrY | 13306533 | . | C | A   | 5221.90  | PASS          | AC=10;AF=0.185;AN=54;BaseQRankSum= |
| 18904 | chrY | 13306540 | . | T | C   | 181.57   | PASS          | AC=1;AF=0.018;AN=56;BaseQRankSum=  |
| 18905 | chrY | 13306541 | . | G | A   | 181.70   | PASS          | AC=1;AF=0.017;AN=58;BaseQRankSum=  |
| 18906 | chrY | 13306648 | . | G | C   | 6072.45  | my_snp_filter | AC=28;AF=0.424;AN=66;Base          |
| 18907 | chrY | 13306660 | . | G | A   | 392.51   | PASS          | AC=6;AF=0.091;AN=66;BaseQRankSum=  |
| 18908 | chrY | 13306702 | . | C | T   | 3209.92  | PASS          | AC=16;AF=0.235;AN=68;BaseQRankSum= |
| 18909 | chrY | 13306703 | . | G | T   | 12651.49 | PASS          | AC=35;AF=0.515;AN=68;Base          |
| 18910 | chrY | 13306754 | . | C | T   | 18935.48 | PASS          | AC=33;AF=0.485;AN=68;Base          |
| 18911 | chrY | 13306805 | . | A | C   | 26739.33 | PASS          | AC=35;AF=0.500;AN=70;Base          |
| 18912 | chrY | 13306980 | . | A | C   | 451.03   | PASS          | AC=6;AF=0.094;AN=64;BaseQRankSum=  |
| 18913 | chrY | 13306982 | . | G | T   | 521.87   | PASS          | AC=6;AF=0.094;AN=64;BaseQRankSum=  |
| 18914 | chrY | 13307007 | . | T | C   | 641.89   | PASS          | AC=9;AF=0.141;AN=64;BaseQRankSum=  |
| 18915 | chrY | 13307059 | . | C | G   | 4665.90  | PASS          | AC=25;AF=0.357;AN=70;BaseQRankSum= |
| 18916 | chrY | 13307063 | . | C | A   | 417.38   | PASS          | AC=5;AF=0.071;AN=70;BaseQRankSum=  |
| 18917 | chrY | 13307141 | . | G | A   | 728.81   | PASS          | AC=4;AF=0.057;AN=70;BaseQRankSum=  |
| 18918 | chrY | 13307185 | . | T | G   | 1438.74  | PASS          | AC=9;AF=0.129;AN=70;BaseQRankSum=  |
| 18919 | chrY | 13307210 | . | G | A   | 1163.64  | PASS          | AC=6;AF=0.091;AN=66;BaseQRankSum=  |
| 18920 | chrY | 13307222 | . | T | G   | 3212.93  | PASS          | AC=20;AF=0.323;AN=62;BaseQRankSum= |
| 18921 | chrY | 13307247 | . | T | C   | 1899.91  | PASS          | AC=15;AF=0.242;AN=62;BaseQRankSum= |
| 18922 | chrY | 13307286 | . | C | T   | 96.32    | PASS          | AC=2;AF=0.032;AN=62;BaseQRankSum=  |
| 18923 | chrY | 13307318 | . | C | A   | 5326.99  | my_snp_filter | AC=18;AF=0.290;AN=62;Base          |
| 18924 | chrY | 13307320 | . | G | A   | 4407.93  | my_snp_filter | AC=15;AF=0.250;AN=60;Base          |

|       |      |          |   |   |   |          |               |                                    |
|-------|------|----------|---|---|---|----------|---------------|------------------------------------|
| 18925 | chrY | 13307343 | . | C | T | 371.28   | PASS          | AC=5;AF=0.074;AN=68;BaseQRankSum=  |
| 18926 | chrY | 13307344 | . | G | A | 370.59   | PASS          | AC=6;AF=0.091;AN=66;BaseQRankSum=  |
| 18927 | chrY | 13307348 | . | C | G | 6933.85  | PASS          | AC=30;AF=0.469;AN=64;BaseQRankSum= |
| 18928 | chrY | 13307361 | . | G | A | 439.63   | PASS          | AC=3;AF=0.044;AN=68;BaseQRankSum=  |
| 18929 | chrY | 13307372 | . | C | T | 443.78   | PASS          | AC=3;AF=0.044;AN=68;BaseQRankSum=  |
| 18930 | chrY | 13307425 | . | G | T | 12486.97 | PASS          | AC=35;AF=0.515;AN=68;BaseQRankSum= |
| 18931 | chrY | 13307481 | . | A | G | 343.34   | PASS          | AC=4;AF=0.057;AN=70;BaseQRankSum=  |
| 18932 | chrY | 13307492 | . | A | G | 918.45   | PASS          | AC=9;AF=0.129;AN=70;BaseQRankSum=  |
| 18933 | chrY | 13307562 | . | G | A | 14094.95 | PASS          | AC=32;AF=0.500;AN=64;BaseQRankSum= |
| 18934 | chrY | 13307669 | . | C | T | 367.09   | my_snp_filter | AC=6;AF=0.088;AN=68;BaseQRankSum=  |
| 18935 | chrY | 13307685 | . | A | C | 9023.04  | PASS          | AC=27;AF=0.466;AN=58;BaseQRankSum= |
| 18936 | chrY | 13307700 | . | C | T | 6267.86  | PASS          | AC=25;AF=0.403;AN=62;BaseQRankSum= |
| 18937 | chrY | 13307731 | . | T | C | 3682.72  | my_snp_filter | AC=21;AF=0.318;AN=66;BaseQRankSum= |
| 18938 | chrY | 13307749 | . | C | G | 2665.53  | my_snp_filter | AC=17;AF=0.274;AN=62;BaseQRankSum= |
| 18939 | chrY | 13307764 | . | T | C | 2762.99  | my_snp_filter | AC=17;AF=0.274;AN=62;BaseQRankSum= |
| 18940 | chrY | 13307818 | . | T | G | 49.28    | my_snp_filter | AC=1;AF=0.016;AN=64;BaseQRankSum=  |
| 18941 | chrY | 13307822 | . | A | G | 2126.37  | my_snp_filter | AC=10;AF=0.156;AN=64;BaseQRankSum= |
| 18942 | chrY | 13307849 | . | A | G | 2250.41  | my_snp_filter | AC=14;AF=0.226;AN=62;BaseQRankSum= |
| 18943 | chrY | 13307886 | . | G | A | 51.18    | PASS          | AC=1;AF=0.016;AN=64;BaseQRankSum=  |
| 18944 | chrY | 13307916 | . | C | T | 8027.79  | PASS          | AC=28;AF=0.424;AN=66;BaseQRankSum= |
| 18945 | chrY | 13307923 | . | T | C | 1380.74  | PASS          | AC=19;AF=0.288;AN=66;BaseQRankSum= |
| 18946 | chrY | 13307956 | . | T | C | 3622.86  | PASS          | AC=24;AF=0.387;AN=62;BaseQRankSum= |
| 18947 | chrY | 13307982 | . | A | G | 50.95    | my_snp_filter | AC=2;AF=0.030;AN=66;BaseQRankSum=  |
| 18948 | chrY | 13308009 | . | T | C | 2934.11  | PASS          | AC=10;AF=0.161;AN=62;BaseQRankSum= |
| 18949 | chrY | 13308010 | . | G | A | 2903.72  | PASS          | AC=10;AF=0.161;AN=62;BaseQRankSum= |
| 18950 | chrY | 13308034 | . | C | T | 954.70   | PASS          | AC=9;AF=0.132;AN=68;BaseQRankSum=  |
| 18951 | chrY | 13308277 | . | A | C | 1825.95  | my_snp_filter | AC=13;AF=0.191;AN=68;BaseQRankSum= |
| 18952 | chrY | 13308282 | . | C | T | 2033.22  | PASS          | AC=13;AF=0.191;AN=68;BaseQRankSum= |
| 18953 | chrY | 13308365 | . | G | T | 9461.25  | PASS          | AC=34;AF=0.500;AN=68;BaseQRankSum= |
| 18954 | chrY | 13308382 | . | C | A | 10606.31 | PASS          | AC=35;AF=0.500;AN=70;BaseQRankSum= |
| 18955 | chrY | 13308449 | . | T | C | 10947.72 | PASS          | AC=33;AF=0.471;AN=70;BaseQRankSum= |
| 18956 | chrY | 13308567 | . | C | T | 6299.64  | PASS          | AC=24;AF=0.364;AN=66;BaseQRankSum= |
| 18957 | chrY | 13308570 | . | G | A | 6365.62  | PASS          | AC=24;AF=0.364;AN=66;BaseQRankSum= |
| 18958 | chrY | 13308595 | . | G | A | 362.22   | PASS          | AC=5;AF=0.071;AN=70;BaseQRankSum=  |
| 18959 | chrY | 13308626 | . | A | C | 157.68   | PASS          | AC=1;AF=0.014;AN=70;BaseQRankSum=  |
| 18960 | chrY | 13308641 | . | A | C | 3742.58  | PASS          | AC=27;AF=0.409;AN=66;BaseQRankSum= |
| 18961 | chrY | 13308661 | . | C | G | 105.26   | my_snp_filter | AC=3;AF=0.044;AN=68;BaseQRankSum=  |
| 18962 | chrY | 13308703 | . | C | T | 2420.57  | my_snp_filter | AC=11;AF=0.172;AN=64;BaseQRankSum= |
| 18963 | chrY | 13308710 | . | G | T | 2539.21  | PASS          | AC=11;AF=0.172;AN=64;BaseQRankSum= |
| 18964 | chrY | 13308716 | . | G | T | 2392.32  | PASS          | AC=11;AF=0.167;AN=66;BaseQRankSum= |
| 18965 | chrY | 13308717 | . | C | T | 2340.31  | PASS          | AC=11;AF=0.167;AN=66;BaseQRankSum= |
| 18966 | chrY | 13308779 | . | G | A | 926.10   | PASS          | AC=14;AF=0.219;AN=64;BaseQRankSum= |
| 18967 | chrY | 13308813 | . | T | C | 188.62   | my_snp_filter | AC=7;AF=0.109;AN=64;BaseQRankSum=  |
| 18968 | chrY | 13309070 | . | T | C | 480.34   | PASS          | AC=7;AF=0.113;AN=62;BaseQRankSum=  |
| 18969 | chrY | 13309130 | . | T | C | 290.14   | PASS          | AC=7;AF=0.106;AN=66;BaseQRankSum=  |
| 18970 | chrY | 13309152 | . | A | G | 94.14    | my_snp_filter | AC=3;AF=0.045;AN=66;BaseQRankSum=  |
| 18971 | chrY | 13309174 | . | A | T | 5383.73  | PASS          | AC=32;AF=0.485;AN=66;BaseQRankSum= |
| 18972 | chrY | 13309226 | . | A | C | 6659.20  | PASS          | AC=29;AF=0.453;AN=64;BaseQRankSum= |
| 18973 | chrY | 13309239 | . | G | C | 6584.24  | PASS          | AC=30;AF=0.469;AN=64;BaseQRankSum= |
| 18974 | chrY | 13309255 | . | C | G | 82.12    | my_snp_filter | AC=2;AF=0.031;AN=64;BaseQRankSum=  |
| 18975 | chrY | 13309262 | . | T | C | 7458.31  | PASS          | AC=29;AF=0.453;AN=64;BaseQRankSum= |
| 18976 | chrY | 13309306 | . | G | A | 815.17   | PASS          | AC=10;AF=0.143;AN=70;BaseQRankSum= |
| 18977 | chrY | 13309310 | . | G | A | 81.59    | my_snp_filter | AC=4;AF=0.057;AN=70;BaseQRankSum=  |
| 18978 | chrY | 13309340 | . | A | G | 510.94   | PASS          | AC=10;AF=0.143;AN=70;BaseQRankSum= |
| 18979 | chrY | 13309348 | . | C | T | 5657.42  | PASS          | AC=32;AF=0.457;AN=70;BaseQRankSum= |
| 18980 | chrY | 13309371 | . | C | T | 4096.52  | PASS          | AC=26;AF=0.382;AN=68;BaseQRankSum= |
| 18981 | chrY | 13309398 | . | C | T | 1475.76  | my_snp_filter | AC=13;AF=0.203;AN=64;BaseQRankSum= |
| 18982 | chrY | 13309506 | . | T | C | 97.55    | PASS          | AC=2;AF=0.029;AN=70;BaseQRankSum=  |
| 18983 | chrY | 13309574 | . | T | C | 233.02   | PASS          | AC=1;AF=0.015;AN=68;BaseQRankSum=  |
| 18984 | chrY | 13309588 | . | A | C | 257.74   | PASS          | AC=2;AF=0.029;AN=68;BaseQRankSum=  |
| 18985 | chrY | 13309602 | . | G | T | 284.49   | PASS          | AC=4;AF=0.059;AN=68;BaseQRankSum=  |
| 18986 | chrY | 13309629 | . | C | T | 317.25   | PASS          | AC=6;AF=0.086;AN=70;BaseQRankSum=  |
| 18987 | chrY | 13309667 | . | T | C | 622.48   | PASS          | AC=5;AF=0.071;AN=70;BaseQRankSum=  |
| 18988 | chrY | 13309668 | . | G | A | 621.67   | PASS          | AC=5;AF=0.071;AN=70;BaseQRankSum=  |
| 18989 | chrY | 13309681 | . | C | T | 380.14   | PASS          | AC=3;AF=0.044;AN=68;BaseQRankSum=  |
| 18990 | chrY | 13309932 | . | G | A | 188.05   | PASS          | AC=3;AF=0.047;AN=64;BaseQRankSum=  |
| 18991 | chrY | 13309936 | . | G | T | 185.80   | PASS          | AC=3;AF=0.048;AN=62;BaseQRankSum=  |
| 18992 | chrY | 13309958 | . | C | T | 203.57   | PASS          | AC=3;AF=0.047;AN=64;BaseQRankSum=  |
| 18993 | chrY | 13309982 | . | G | A | 135.29   | PASS          | AC=4;AF=0.065;AN=62;BaseQRankSum=  |
| 18994 | chrY | 13310000 | . | C | T | 192.96   | PASS          | AC=3;AF=0.044;AN=68;BaseQRankSum=  |
| 18995 | chrY | 13310004 | . | C | A | 201.68   | PASS          | AC=5;AF=0.074;AN=68;BaseQRankSum=  |
| 18996 | chrY | 13310078 | . | G | A | 145.35   | PASS          | AC=4;AF=0.057;AN=70;BaseQRankSum=  |
| 18997 | chrY | 13310114 | . | T | C | 216.50   | PASS          | AC=5;AF=0.071;AN=70;BaseQRankSum=  |
| 18998 | chrY | 13310145 | . | T | C | 118.63   | my_snp_filter | AC=7;AF=0.106;AN=66;BaseQRankSum=  |
| 18999 | chrY | 13310161 | . | G | A | 856.59   | PASS          | AC=8;AF=0.121;AN=66;BaseQRankSum=  |
| 19000 | chrY | 13310289 | . | C | T | 980.63   | PASS          | AC=5;AF=0.074;AN=68;BaseQRankSum=  |

|       |      |          |   |   |   |          |               |                                    |
|-------|------|----------|---|---|---|----------|---------------|------------------------------------|
| 19001 | chrY | 13310293 | . | T | C | 923.55   | PASS          | AC=5;AF=0.076;AN=66;BaseQRankSum=  |
| 19002 | chrY | 13310301 | . | T | C | 870.13   | PASS          | AC=5;AF=0.074;AN=68;BaseQRankSum=  |
| 19003 | chrY | 13310311 | . | G | C | 670.90   | PASS          | AC=5;AF=0.074;AN=68;BaseQRankSum=  |
| 19004 | chrY | 13310353 | . | G | A | 1949.34  | PASS          | AC=11;AF=0.157;AN=70;BaseQRankSum= |
| 19005 | chrY | 13310359 | . | C | A | 1937.34  | PASS          | AC=11;AF=0.157;AN=70;BaseQRankSum= |
| 19006 | chrY | 13310409 | . | C | T | 1279.16  | PASS          | AC=9;AF=0.129;AN=70;BaseQRankSum=  |
| 19007 | chrY | 13310418 | . | G | A | 1257.96  | PASS          | AC=9;AF=0.129;AN=70;BaseQRankSum=  |
| 19008 | chrY | 13310444 | . | T | C | 673.52   | PASS          | AC=6;AF=0.086;AN=70;BaseQRankSum=  |
| 19009 | chrY | 13310449 | . | A | C | 653.26   | PASS          | AC=6;AF=0.086;AN=70;BaseQRankSum=  |
| 19010 | chrY | 13310462 | . | T | C | 588.20   | PASS          | AC=4;AF=0.057;AN=70;BaseQRankSum=  |
| 19011 | chrY | 13310495 | . | T | C | 309.11   | PASS          | AC=3;AF=0.043;AN=70;BaseQRankSum=  |
| 19012 | chrY | 13310500 | . | G | A | 314.10   | PASS          | AC=3;AF=0.043;AN=70;BaseQRankSum=  |
| 19013 | chrY | 13310502 | . | A | G | 287.45   | PASS          | AC=3;AF=0.043;AN=70;BaseQRankSum=  |
| 19014 | chrY | 13310507 | . | G | A | 282.03   | PASS          | AC=3;AF=0.043;AN=70;BaseQRankSum=  |
| 19015 | chrY | 13310525 | . | A | G | 1396.97  | PASS          | AC=6;AF=0.088;AN=68;BaseQRankSum=  |
| 19016 | chrY | 13310531 | . | C | A | 1564.76  | PASS          | AC=6;AF=0.091;AN=66;BaseQRankSum=  |
| 19017 | chrY | 13310532 | . | C | G | 1570.78  | PASS          | AC=6;AF=0.091;AN=66;BaseQRankSum=  |
| 19018 | chrY | 13310559 | . | T | C | 2749.33  | PASS          | AC=9;AF=0.136;AN=66;BaseQRankSum=  |
| 19019 | chrY | 13310567 | . | T | C | 2867.59  | PASS          | AC=9;AF=0.136;AN=66;BaseQRankSum=  |
| 19020 | chrY | 13310578 | . | C | T | 4167.84  | PASS          | AC=9;AF=0.136;AN=66;BaseQRankSum=  |
| 19021 | chrY | 13310581 | . | G | C | 4175.08  | PASS          | AC=9;AF=0.136;AN=66;BaseQRankSum=  |
| 19022 | chrY | 13310582 | . | G | A | 4179.65  | PASS          | AC=9;AF=0.136;AN=66;BaseQRankSum=  |
| 19023 | chrY | 13310602 | . | G | A | 5342.25  | PASS          | AC=13;AF=0.197;AN=66;BaseQRankSum= |
| 19024 | chrY | 13310606 | . | T | C | 5447.27  | PASS          | AC=13;AF=0.197;AN=66;BaseQRankSum= |
| 19025 | chrY | 13310607 | . | G | A | 5464.69  | PASS          | AC=13;AF=0.197;AN=66;BaseQRankSum= |
| 19026 | chrY | 13310610 | . | A | C | 5429.34  | PASS          | AC=13;AF=0.197;AN=66;BaseQRankSum= |
| 19027 | chrY | 13310621 | . | C | A | 5806.70  | PASS          | AC=13;AF=0.197;AN=66;BaseQRankSum= |
| 19028 | chrY | 13310622 | . | C | A | 5808.69  | PASS          | AC=13;AF=0.197;AN=66;BaseQRankSum= |
| 19029 | chrY | 13310679 | . | A | G | 4701.57  | PASS          | AC=15;AF=0.227;AN=66;BaseQRankSum= |
| 19030 | chrY | 13310683 | . | T | C | 4802.26  | PASS          | AC=15;AF=0.234;AN=64;BaseQRankSum= |
| 19031 | chrY | 13310719 | . | G | A | 4185.15  | my_snp_filter | AC=16;AF=0.242;AN=66;BaseQ         |
| 19032 | chrY | 13310721 | . | C | A | 4189.36  | my_snp_filter | AC=16;AF=0.250;AN=64;BaseQ         |
| 19033 | chrY | 13310740 | . | G | A | 3593.63  | PASS          | AC=19;AF=0.297;AN=64;BaseQRankSum= |
| 19034 | chrY | 13310768 | . | G | C | 10092.70 | PASS          | AC=25;AF=0.379;AN=66;BaseQ         |
| 19035 | chrY | 13310775 | . | A | G | 10562.57 | PASS          | AC=25;AF=0.368;AN=68;BaseQ         |
| 19036 | chrY | 13310784 | . | T | G | 11146.92 | PASS          | AC=25;AF=0.368;AN=68;BaseQ         |
| 19037 | chrY | 13310870 | . | G | A | 1111.68  | PASS          | AC=4;AF=0.057;AN=70;BaseQRankSum=  |
| 19038 | chrY | 13310913 | . | G | T | 11181.29 | PASS          | AC=23;AF=0.348;AN=66;BaseQ         |
| 19039 | chrY | 13310915 | . | C | A | 11181.31 | PASS          | AC=23;AF=0.348;AN=66;BaseQ         |
| 19040 | chrY | 13311038 | . | T | C | 1125.40  | my_snp_filter | AC=4;AF=0.061;AN=66;BaseQ          |
| 19041 | chrY | 13311041 | . | C | G | 1122.63  | my_snp_filter | AC=4;AF=0.061;AN=66;BaseQ          |
| 19042 | chrY | 13311065 | . | A | G | 1092     | my_snp_filter | AC=4;AF=0.065;AN=62;BaseQ          |
| 19043 | chrY | 13311067 | . | G | T | 1137.97  | my_snp_filter | AC=4;AF=0.065;AN=62;BaseQ          |
| 19044 | chrY | 13311069 | . | A | G | 1134.92  | my_snp_filter | AC=4;AF=0.065;AN=62;BaseQ          |
| 19045 | chrY | 13311082 | . | C | G | 1171.09  | my_snp_filter | AC=4;AF=0.063;AN=64;BaseQ          |
| 19046 | chrY | 13311089 | . | G | C | 1164.78  | my_snp_filter | AC=4;AF=0.065;AN=62;BaseQ          |
| 19047 | chrY | 13311121 | . | T | A | 1373.06  | my_snp_filter | AC=5;AF=0.076;AN=66;BaseQ          |
| 19048 | chrY | 13311144 | . | G | A | 1311.27  | my_snp_filter | AC=5;AF=0.076;AN=66;BaseQ          |
| 19049 | chrY | 13311146 | . | A | C | 1314     | my_snp_filter | AC=5;AF=0.076;AN=66;BaseQ          |
| 19050 | chrY | 13311150 | . | C | T | 1272.17  | my_snp_filter | AC=5;AF=0.076;AN=66;BaseQ          |
| 19051 | chrY | 13311217 | . | C | T | 92.22    | my_snp_filter | AC=3;AF=0.045;AN=66;BaseQ          |
| 19052 | chrY | 13311223 | . | T | A | 9200.04  | PASS          | AC=64;AF=1.00;AN=64;DP=314;FS=0.0  |
| 19053 | chrY | 13311920 | . | T | C | 294.19   | PASS          | AC=4;AF=0.063;AN=64;BaseQRankSum=  |
| 19054 | chrY | 13311941 | . | T | C | 290.50   | PASS          | AC=5;AF=0.076;AN=66;BaseQRankSum=  |
| 19055 | chrY | 13311991 | . | G | C | 1213.48  | PASS          | AC=11;AF=0.177;AN=62;BaseQRankSum= |
| 19056 | chrY | 13311998 | . | G | C | 1221.11  | PASS          | AC=11;AF=0.177;AN=62;BaseQRankSum= |
| 19057 | chrY | 13312020 | . | A | C | 710.33   | PASS          | AC=10;AF=0.167;AN=60;BaseQRankSum= |
| 19058 | chrY | 13312021 | . | G | A | 622.95   | PASS          | AC=8;AF=0.133;AN=60;BaseQRankSum=  |
| 19059 | chrY | 13312066 | . | A | T | 79.69    | PASS          | AC=2;AF=0.033;AN=60;BaseQRankSum=  |
| 19060 | chrY | 13312067 | . | T | C | 101.87   | PASS          | AC=2;AF=0.033;AN=60;BaseQRankSum=  |
| 19061 | chrY | 13312072 | . | T | A | 129.49   | PASS          | AC=2;AF=0.032;AN=62;BaseQRankSum=  |
| 19062 | chrY | 13312106 | . | T | C | 304.98   | PASS          | AC=2;AF=0.036;AN=56;BaseQRankSum=  |
| 19063 | chrY | 13312124 | . | T | C | 651.68   | PASS          | AC=3;AF=0.056;AN=54;BaseQRankSum=  |
| 19064 | chrY | 13312128 | . | C | T | 651.29   | PASS          | AC=3;AF=0.056;AN=54;BaseQRankSum=  |
| 19065 | chrY | 13312157 | . | A | C | 656.39   | PASS          | AC=7;AF=0.140;AN=50;BaseQRankSum=  |
| 19066 | chrY | 13312176 | . | A | G | 834.77   | PASS          | AC=9;AF=0.161;AN=56;BaseQRankSum=  |
| 19067 | chrY | 13312196 | . | C | T | 2041.76  | PASS          | AC=5;AF=0.083;AN=60;BaseQRankSum=  |
| 19068 | chrY | 13312197 | . | A | G | 2041.70  | PASS          | AC=5;AF=0.083;AN=60;BaseQRankSum=  |
| 19069 | chrY | 13312198 | . | C | T | 2041.75  | PASS          | AC=5;AF=0.083;AN=60;BaseQRankSum=  |
| 19070 | chrY | 13312275 | . | C | T | 1761.50  | PASS          | AC=7;AF=0.113;AN=62;BaseQRankSum=  |
| 19071 | chrY | 13312289 | . | A | G | 1706.67  | PASS          | AC=4;AF=0.065;AN=62;BaseQRankSum=  |
| 19072 | chrY | 13312307 | . | A | G | 1669.80  | PASS          | AC=6;AF=0.094;AN=64;BaseQRankSum=  |
| 19073 | chrY | 13312347 | . | A | G | 1022.86  | PASS          | AC=7;AF=0.117;AN=60;BaseQRankSum=  |
| 19074 | chrY | 13312355 | . | T | C | 1046.36  | PASS          | AC=7;AF=0.109;AN=64;BaseQRankSum=  |
| 19075 | chrY | 13312386 | . | T | C | 844.53   | PASS          | AC=7;AF=0.113;AN=62;BaseQRankSum=  |
| 19076 | chrY | 13312401 | . | A | G | 1123.93  | PASS          | AC=7;AF=0.113;AN=62;BaseQRankSum=  |

|       |      |          |   |   |   |          |               |                                    |
|-------|------|----------|---|---|---|----------|---------------|------------------------------------|
| 19077 | chrY | 13312410 | . | C | A | 1517.40  | PASS          | AC=7;AF=0.113;AN=62;BaseQRankSum=  |
| 19078 | chrY | 13312421 | . | C | T | 1925.11  | PASS          | AC=7;AF=0.113;AN=62;BaseQRankSum=  |
| 19079 | chrY | 13312446 | . | T | C | 3593.06  | PASS          | AC=13;AF=0.217;AN=60;BaseQRankSum= |
| 19080 | chrY | 13312452 | . | C | T | 3585.65  | PASS          | AC=13;AF=0.224;AN=58;BaseQRankSum= |
| 19081 | chrY | 13312469 | . | C | G | 4038.98  | PASS          | AC=16;AF=0.267;AN=60;BaseQRankSum= |
| 19082 | chrY | 13312538 | . | T | A | 7711.38  | PASS          | AC=18;AF=0.290;AN=62;BaseQRankSum= |
| 19083 | chrY | 13312540 | . | G | A | 7751.29  | PASS          | AC=18;AF=0.290;AN=62;BaseQRankSum= |
| 19084 | chrY | 13312557 | . | C | T | 4566.56  | PASS          | AC=18;AF=0.290;AN=62;BaseQRankSum= |
| 19085 | chrY | 13312579 | . | G | A | 5742.73  | PASS          | AC=20;AF=0.313;AN=64;BaseQRankSum= |
| 19086 | chrY | 13312583 | . | A | C | 5598.79  | PASS          | AC=19;AF=0.297;AN=64;BaseQRankSum= |
| 19087 | chrY | 13312622 | . | A | G | 1102.64  | PASS          | AC=7;AF=0.103;AN=68;BaseQRankSum=  |
| 19088 | chrY | 13312633 | . | C | T | 63.58    | PASS          | AC=1;AF=0.015;AN=66;BaseQRankSum=  |
| 19089 | chrY | 13312651 | . | C | T | 521.93   | PASS          | AC=6;AF=0.091;AN=66;BaseQRankSum=  |
| 19090 | chrY | 13312666 | . | G | C | 2039.60  | PASS          | AC=16;AF=0.235;AN=68;BaseQRankSum= |
| 19091 | chrY | 13312729 | . | C | T | 1922.93  | PASS          | AC=15;AF=0.214;AN=70;BaseQRankSum= |
| 19092 | chrY | 13312737 | . | G | A | 31.72    | my_snp_filter | AC=1;AF=0.014;AN=70;BaseQRankSum=  |
| 19093 | chrY | 13312756 | . | A | G | 10134.38 | PASS          | AC=32;AF=0.457;AN=70;BaseQRankSum= |
| 19094 | chrY | 13312789 | . | A | G | 767.75   | PASS          | AC=6;AF=0.088;AN=68;BaseQRankSum=  |
| 19095 | chrY | 13312809 | . | G | A | 2996.44  | PASS          | AC=12;AF=0.171;AN=70;BaseQRankSum= |
| 19096 | chrY | 13312825 | . | C | T | 3774.86  | PASS          | AC=10;AF=0.147;AN=68;BaseQRankSum= |
| 19097 | chrY | 13312834 | . | C | T | 3579.44  | PASS          | AC=10;AF=0.152;AN=66;BaseQRankSum= |
| 19098 | chrY | 13312840 | . | G | A | 848.10   | PASS          | AC=5;AF=0.076;AN=66;BaseQRankSum=  |
| 19099 | chrY | 13312842 | . | G | A | 3115.17  | PASS          | AC=7;AF=0.106;AN=66;BaseQRankSum=  |
| 19100 | chrY | 13312880 | . | A | T | 1679.80  | PASS          | AC=9;AF=0.129;AN=70;BaseQRankSum=  |
| 19101 | chrY | 13312887 | . | G | T | 173.85   | PASS          | AC=4;AF=0.057;AN=70;BaseQRankSum=  |
| 19102 | chrY | 13312899 | . | A | G | 2556.06  | PASS          | AC=9;AF=0.129;AN=70;BaseQRankSum=  |
| 19103 | chrY | 13312900 | . | T | G | 2557.39  | PASS          | AC=9;AF=0.129;AN=70;BaseQRankSum=  |
| 19104 | chrY | 13312927 | . | C | T | 305.41   | PASS          | AC=6;AF=0.086;AN=70;BaseQRankSum=  |
| 19105 | chrY | 13312960 | . | C | T | 4338.91  | PASS          | AC=19;AF=0.271;AN=70;BaseQRankSum= |
| 19106 | chrY | 13312971 | . | G | T | 5206.48  | PASS          | AC=19;AF=0.271;AN=70;BaseQRankSum= |
| 19107 | chrY | 13312987 | . | T | C | 7146.34  | PASS          | AC=22;AF=0.314;AN=70;BaseQRankSum= |
| 19108 | chrY | 13312988 | . | G | A | 337.90   | my_snp_filter | AC=6;AF=0.086;AN=70;BaseQRankSum=  |
| 19109 | chrY | 13313000 | . | G | T | 576.85   | PASS          | AC=7;AF=0.100;AN=70;BaseQRankSum=  |
| 19110 | chrY | 13313049 | . | G | T | 10289.13 | PASS          | AC=24;AF=0.343;AN=70;BaseQRankSum= |
| 19111 | chrY | 13313060 | . | G | A | 17238.13 | PASS          | AC=24;AF=0.343;AN=70;BaseQRankSum= |
| 19112 | chrY | 13313069 | . | C | T | 17108.16 | PASS          | AC=24;AF=0.343;AN=70;BaseQRankSum= |
| 19113 | chrY | 13313142 | . | T | C | 207.19   | PASS          | AC=4;AF=0.059;AN=68;BaseQRankSum=  |
| 19114 | chrY | 13313165 | . | C | A | 3320.03  | my_snp_filter | AC=12;AF=0.176;AN=68;BaseQRankSum= |
| 19115 | chrY | 13313174 | . | A | G | 2576.59  | PASS          | AC=10;AF=0.143;AN=70;BaseQRankSum= |
| 19116 | chrY | 13313177 | . | T | C | 2342.18  | PASS          | AC=10;AF=0.143;AN=70;BaseQRankSum= |
| 19117 | chrY | 13313201 | . | T | A | 408.58   | PASS          | AC=1;AF=0.014;AN=70;BaseQRankSum=  |
| 19118 | chrY | 13313210 | . | A | G | 694.42   | my_snp_filter | AC=6;AF=0.086;AN=70;BaseQRankSum=  |
| 19119 | chrY | 13313242 | . | A | C | 819.79   | PASS          | AC=5;AF=0.074;AN=68;BaseQRankSum=  |
| 19120 | chrY | 13313302 | . | C | T | 2788.63  | PASS          | AC=9;AF=0.132;AN=68;BaseQRankSum=  |
| 19121 | chrY | 13313305 | . | C | A | 2929.11  | PASS          | AC=9;AF=0.132;AN=68;BaseQRankSum=  |
| 19122 | chrY | 13313311 | . | C | T | 3048.74  | PASS          | AC=11;AF=0.162;AN=68;BaseQRankSum= |
| 19123 | chrY | 13313326 | . | G | T | 3215.58  | PASS          | AC=13;AF=0.191;AN=68;BaseQRankSum= |
| 19124 | chrY | 13313342 | . | C | T | 2991.02  | PASS          | AC=15;AF=0.221;AN=68;BaseQRankSum= |
| 19125 | chrY | 13313373 | . | C | T | 1680.12  | PASS          | AC=14;AF=0.200;AN=70;BaseQRankSum= |
| 19126 | chrY | 13313423 | . | C | G | 979.83   | PASS          | AC=5;AF=0.071;AN=70;BaseQRankSum=  |
| 19127 | chrY | 13313428 | . | A | G | 991.19   | PASS          | AC=5;AF=0.071;AN=70;BaseQRankSum=  |
| 19128 | chrY | 13313429 | . | C | G | 968      | PASS          | AC=5;AF=0.071;AN=70;BaseQRankSum=  |
| 19129 | chrY | 13313430 | . | A | G | 960.50   | PASS          | AC=5;AF=0.071;AN=70;BaseQRankSum=  |
| 19130 | chrY | 13313441 | . | T | G | 895.09   | PASS          | AC=5;AF=0.071;AN=70;BaseQRankSum=  |
| 19131 | chrY | 13313457 | . | G | A | 676.87   | PASS          | AC=5;AF=0.071;AN=70;BaseQRankSum=  |
| 19132 | chrY | 13313460 | . | A | G | 629.91   | PASS          | AC=5;AF=0.071;AN=70;BaseQRankSum=  |
| 19133 | chrY | 13313464 | . | C | A | 658.16   | PASS          | AC=5;AF=0.071;AN=70;BaseQRankSum=  |
| 19134 | chrY | 13313472 | . | C | A | 577.51   | PASS          | AC=5;AF=0.076;AN=66;BaseQRankSum=  |
| 19135 | chrY | 13313501 | . | A | G | 809.04   | PASS          | AC=6;AF=0.094;AN=64;BaseQRankSum=  |
| 19136 | chrY | 13313513 | . | G | A | 207.15   | PASS          | AC=3;AF=0.045;AN=66;BaseQRankSum=  |
| 19137 | chrY | 13313553 | . | G | A | 1984.93  | PASS          | AC=6;AF=0.111;AN=54;BaseQRankSum=  |
| 19138 | chrY | 13313565 | . | C | A | 2166.92  | PASS          | AC=6;AF=0.120;AN=50;BaseQRankSum=  |
| 19139 | chrY | 13313575 | . | T | C | 2130.14  | PASS          | AC=6;AF=0.125;AN=48;BaseQRankSum=  |
| 19140 | chrY | 13313604 | . | T | C | 1089.98  | PASS          | AC=7;AF=0.121;AN=58;BaseQRankSum=  |
| 19141 | chrY | 13313652 | . | T | C | 1093.78  | PASS          | AC=6;AF=0.094;AN=64;BaseQRankSum=  |
| 19142 | chrY | 13313658 | . | C | T | 1079.49  | PASS          | AC=6;AF=0.094;AN=64;BaseQRankSum=  |
| 19143 | chrY | 13313695 | . | A | T | 860.18   | PASS          | AC=9;AF=0.132;AN=68;BaseQRankSum=  |
| 19144 | chrY | 13313734 | . | G | T | 719.97   | PASS          | AC=4;AF=0.059;AN=68;BaseQRankSum=  |
| 19145 | chrY | 13313740 | . | A | C | 699.28   | PASS          | AC=4;AF=0.059;AN=68;BaseQRankSum=  |
| 19146 | chrY | 13313758 | . | T | C | 1349.65  | PASS          | AC=7;AF=0.103;AN=68;BaseQRankSum=  |
| 19147 | chrY | 13313822 | . | G | A | 4653.43  | PASS          | AC=23;AF=0.329;AN=70;BaseQRankSum= |
| 19148 | chrY | 13313841 | . | A | G | 3849.07  | PASS          | AC=22;AF=0.314;AN=70;BaseQRankSum= |
| 19149 | chrY | 13313855 | . | C | T | 4731.04  | PASS          | AC=20;AF=0.294;AN=68;BaseQRankSum= |
| 19150 | chrY | 13313861 | . | T | C | 4520.44  | PASS          | AC=18;AF=0.265;AN=68;BaseQRankSum= |
| 19151 | chrY | 13313863 | . | T | C | 4418.76  | PASS          | AC=18;AF=0.265;AN=68;BaseQRankSum= |
| 19152 | chrY | 13313905 | . | G | A | 1206.98  | PASS          | AC=9;AF=0.132;AN=68;BaseQRankSum=  |

|       |      |          |   |   |     |          |               |                                    |
|-------|------|----------|---|---|-----|----------|---------------|------------------------------------|
| 19153 | chrY | 13313918 | . | G | A   | 922.26   | PASS          | AC=6;AF=0.088;AN=68;BaseQRankSum=  |
| 19154 | chrY | 13313957 | . | A | C   | 47.13    | my_snp_filter | AC=1;AF=0.015;AN=68;BaseQ          |
| 19155 | chrY | 13313991 | . | T | G   | 95.94    | PASS          | AC=1;AF=0.015;AN=68;BaseQRankSum=  |
| 19156 | chrY | 13314006 | . | G | T   | 159.88   | PASS          | AC=3;AF=0.044;AN=68;BaseQRankSum=  |
| 19157 | chrY | 13314016 | . | C | G   | 108.46   | my_snp_filter | AC=3;AF=0.044;AN=68;BaseQ          |
| 19158 | chrY | 13314022 | . | G | A   | 108.37   | my_snp_filter | AC=3;AF=0.043;AN=70;BaseQ          |
| 19159 | chrY | 13314034 | . | A | C   | 61.31    | my_snp_filter | AC=3;AF=0.043;AN=70;BaseQ          |
| 19160 | chrY | 13314070 | . | A | C   | 227.05   | PASS          | AC=3;AF=0.044;AN=68;BaseQRankSum=  |
| 19161 | chrY | 13314079 | . | G | A   | 150.90   | PASS          | AC=3;AF=0.045;AN=66;BaseQRankSum=  |
| 19162 | chrY | 13314089 | . | G | T   | 156.42   | PASS          | AC=3;AF=0.044;AN=68;BaseQRankSum=  |
| 19163 | chrY | 13314236 | . | G | A   | 1177.68  | PASS          | AC=12;AF=0.200;AN=60;BaseQRankSum= |
| 19164 | chrY | 13314240 | . | A | G   | 742.53   | PASS          | AC=7;AF=0.121;AN=58;BaseQRankSum=  |
| 19165 | chrY | 13314245 | . | C | T   | 719.75   | PASS          | AC=7;AF=0.117;AN=60;BaseQRankSum=  |
| 19166 | chrY | 13314246 | . | A | G   | 724.16   | PASS          | AC=7;AF=0.117;AN=60;BaseQRankSum=  |
| 19167 | chrY | 13314252 | . | G | A   | 727.98   | PASS          | AC=7;AF=0.113;AN=62;BaseQRankSum=  |
| 19168 | chrY | 13314257 | . | G | T   | 211.60   | PASS          | AC=5;AF=0.083;AN=60;BaseQRankSum=  |
| 19169 | chrY | 13314266 | . | G | C   | 667.64   | PASS          | AC=6;AF=0.097;AN=62;BaseQRankSum=  |
| 19170 | chrY | 13314271 | . | T | C   | 2144.91  | PASS          | AC=14;AF=0.233;AN=60;BaseQRankSum= |
| 19171 | chrY | 13314281 | . | T | G   | 762.86   | PASS          | AC=6;AF=0.097;AN=62;BaseQRankSum=  |
| 19172 | chrY | 13314307 | . | A | G   | 971.36   | PASS          | AC=9;AF=0.145;AN=62;BaseQRankSum=  |
| 19173 | chrY | 13314313 | . | A | G   | 986.25   | PASS          | AC=9;AF=0.145;AN=62;BaseQRankSum=  |
| 19174 | chrY | 13314327 | . | G | A   | 370.83   | PASS          | AC=3;AF=0.048;AN=62;BaseQRankSum=  |
| 19175 | chrY | 13314328 | . | T | C   | 370.82   | PASS          | AC=3;AF=0.048;AN=62;BaseQRankSum=  |
| 19176 | chrY | 13314336 | . | C | G   | 833.92   | PASS          | AC=8;AF=0.129;AN=62;BaseQRankSum=  |
| 19177 | chrY | 13314363 | . | A | G   | 58.27    | PASS          | AC=2;AF=0.034;AN=58;BaseQRankSum=  |
| 19178 | chrY | 13314592 | . | A | T   | 1409.43  | PASS          | AC=8;AF=0.121;AN=66;BaseQRankSum=  |
| 19179 | chrY | 13314598 | . | T | C   | 1506.29  | PASS          | AC=8;AF=0.121;AN=66;BaseQRankSum=  |
| 19180 | chrY | 13314621 | . | G | A   | 2179.17  | my_snp_filter | AC=11;AF=0.172;AN=64;BaseQ         |
| 19181 | chrY | 13314628 | . | C | T   | 1066.97  | PASS          | AC=8;AF=0.125;AN=64;BaseQRankSum=  |
| 19182 | chrY | 13314642 | . | A | G   | 4006.41  | my_snp_filter | AC=12;AF=0.176;AN=68;BaseQ         |
| 19183 | chrY | 13314646 | . | C | T   | 806.31   | PASS          | AC=4;AF=0.059;AN=68;BaseQRankSum=  |
| 19184 | chrY | 13314647 | . | G | A   | 4180.05  | my_snp_filter | AC=14;AF=0.212;AN=66;BaseQ         |
| 19185 | chrY | 13314682 | . | C | T   | 7643.55  | PASS          | AC=23;AF=0.338;AN=68;BaseQRankSum= |
| 19186 | chrY | 13314689 | . | C | T   | 7643.98  | PASS          | AC=23;AF=0.329;AN=70;BaseQRankSum= |
| 19187 | chrY | 13314693 | . | G | A   | 7671.62  | PASS          | AC=23;AF=0.329;AN=70;BaseQRankSum= |
| 19188 | chrY | 13314735 | . | G | T   | 5285.21  | PASS          | AC=22;AF=0.324;AN=68;BaseQRankSum= |
| 19189 | chrY | 13314738 | . | A | G   | 5217.11  | PASS          | AC=21;AF=0.309;AN=68;BaseQRankSum= |
| 19190 | chrY | 13314806 | . | C | T   | 2956.96  | PASS          | AC=15;AF=0.221;AN=68;BaseQRankSum= |
| 19191 | chrY | 13314825 | . | T | A   | 3512.16  | PASS          | AC=14;AF=0.200;AN=70;BaseQRankSum= |
| 19192 | chrY | 13314829 | . | G | C   | 3748.94  | PASS          | AC=14;AF=0.212;AN=66;BaseQRankSum= |
| 19193 | chrY | 13314842 | . | T | C   | 4720.60  | PASS          | AC=16;AF=0.235;AN=68;BaseQRankSum= |
| 19194 | chrY | 13314865 | . | A | C,G | 6207.20  | PASS          | AC=17,3;AF=0.250,0.044;AN=68;BaseQ |
| 19195 | chrY | 13314928 | . | G | A   | 147.77   | my_snp_filter | AC=5;AF=0.071;AN=70;BaseQ          |
| 19196 | chrY | 13314944 | . | G | A   | 10414.46 | PASS          | AC=27;AF=0.397;AN=68;BaseQ         |
| 19197 | chrY | 13314946 | . | G | A   | 79.79    | my_snp_filter | AC=3;AF=0.043;AN=70;BaseQ          |
| 19198 | chrY | 13314976 | . | C | A   | 3577.50  | PASS          | AC=25;AF=0.357;AN=70;BaseQRankSum= |
| 19199 | chrY | 13315000 | . | C | T   | 6600.23  | my_snp_filter | AC=19;AF=0.279;AN=68;BaseQ         |
| 19200 | chrY | 13315001 | . | A | G   | 6595.23  | my_snp_filter | AC=19;AF=0.279;AN=68;BaseQ         |
| 19201 | chrY | 13315006 | . | G | A   | 6306.19  | PASS          | AC=19;AF=0.271;AN=70;BaseQRankSum= |
| 19202 | chrY | 13315022 | . | G | A   | 218.24   | PASS          | AC=4;AF=0.057;AN=70;BaseQRankSum=  |
| 19203 | chrY | 13315083 | . | A | G   | 1449.41  | PASS          | AC=15;AF=0.221;AN=68;BaseQRankSum= |
| 19204 | chrY | 13315125 | . | T | C   | 6693.32  | PASS          | AC=21;AF=0.309;AN=68;BaseQRankSum= |
| 19205 | chrY | 13315127 | . | C | T   | 70.85    | my_snp_filter | AC=3;AF=0.044;AN=68;BaseQ          |
| 19206 | chrY | 13315132 | . | G | A   | 2763.35  | PASS          | AC=19;AF=0.279;AN=68;BaseQRankSum= |
| 19207 | chrY | 13315181 | . | G | A   | 196.76   | PASS          | AC=3;AF=0.043;AN=70;BaseQRankSum=  |
| 19208 | chrY | 13315241 | . | C | T   | 2882.22  | PASS          | AC=22;AF=0.314;AN=70;BaseQRankSum= |
| 19209 | chrY | 13315264 | . | A | G   | 4016.90  | my_snp_filter | AC=14;AF=0.200;AN=70;BaseQ         |
| 19210 | chrY | 13315287 | . | G | C   | 273.34   | PASS          | AC=4;AF=0.059;AN=68;BaseQRankSum=  |
| 19211 | chrY | 13315301 | . | C | T   | 336.28   | PASS          | AC=4;AF=0.059;AN=68;BaseQRankSum=  |
| 19212 | chrY | 13315320 | . | C | T   | 307.18   | PASS          | AC=7;AF=0.103;AN=68;BaseQRankSum=  |
| 19213 | chrY | 13315369 | . | G | A   | 68.10    | PASS          | AC=2;AF=0.030;AN=66;BaseQRankSum=  |
| 19214 | chrY | 13315396 | . | A | G   | 181.99   | PASS          | AC=2;AF=0.031;AN=64;BaseQRankSum=  |
| 19215 | chrY | 13315490 | . | T | C   | 66.17    | PASS          | AC=2;AF=0.031;AN=64;BaseQRankSum=  |
| 19216 | chrY | 13316252 | . | T | A   | 6323.16  | PASS          | AC=44;AF=0.786;AN=56;DP=323;FS=0.  |
| 19217 | chrY | 13316381 | . | T | C   | 208.36   | PASS          | AC=4;AF=0.061;AN=66;BaseQRankSum=  |
| 19218 | chrY | 13316423 | . | C | T   | 598.36   | PASS          | AC=8;AF=0.121;AN=66;BaseQRankSum=  |
| 19219 | chrY | 13316467 | . | C | T   | 540.64   | PASS          | AC=8;AF=0.118;AN=68;BaseQRankSum=  |
| 19220 | chrY | 13316750 | . | A | C   | 517.60   | my_snp_filter | AC=7;AF=0.109;AN=64;BaseQ          |
| 19221 | chrY | 13316767 | . | C | A   | 842.01   | my_snp_filter | AC=6;AF=0.100;AN=60;BaseQ          |
| 19222 | chrY | 13316928 | . | A | G   | 1123.76  | PASS          | AC=10;AF=0.200;AN=50;BaseQRankSum= |
| 19223 | chrY | 13316932 | . | A | T   | 1042.09  | PASS          | AC=7;AF=0.140;AN=50;BaseQRankSum=  |
| 19224 | chrY | 13317135 | . | C | A   | 6979.98  | my_snp_filter | AC=30;AF=0.441;AN=68;BaseQ         |
| 19225 | chrY | 13317176 | . | A | C   | 2245.97  | my_snp_filter | AC=18;AF=0.257;AN=70;BaseQ         |
| 19226 | chrY | 13317200 | . | C | G   | 900.71   | my_snp_filter | AC=12;AF=0.171;AN=70;BaseQ         |
| 19227 | chrY | 13317207 | . | A | G   | 686.30   | my_snp_filter | AC=11;AF=0.157;AN=70;BaseQ         |
| 19228 | chrY | 13317375 | . | A | T   | 495.81   | PASS          | AC=8;AF=0.125;AN=64;BaseQRankSum=  |

|       |      |          |   |   |   |          |               |                                    |
|-------|------|----------|---|---|---|----------|---------------|------------------------------------|
| 19229 | chrY | 13317488 | . | T | A | 384.52   | PASS          | AC=4;AF=0.087;AN=46;BaseQRankSum=  |
| 19230 | chrY | 13317529 | . | A | G | 106.16   | PASS          | AC=2;AF=0.048;AN=42;BaseQRankSum=  |
| 19231 | chrY | 13317833 | . | G | A | 2645.22  | PASS          | AC=12;AF=0.171;AN=70;BaseQRankSum= |
| 19232 | chrY | 13318166 | . | T | C | 368.13   | PASS          | AC=6;AF=0.086;AN=70;BaseQRankSum=  |
| 19233 | chrY | 13318186 | . | C | T | 858.44   | my_snp_filter | AC=11;AF=0.157;AN=70;BaseQ         |
| 19234 | chrY | 13318213 | . | T | A | 816.49   | PASS          | AC=8;AF=0.118;AN=68;BaseQRankSum=  |
| 19235 | chrY | 13318238 | . | G | T | 970.03   | PASS          | AC=9;AF=0.129;AN=70;BaseQRankSum=  |
| 19236 | chrY | 13318253 | . | A | G | 922.75   | PASS          | AC=8;AF=0.114;AN=70;BaseQRankSum=  |
| 19237 | chrY | 13318264 | . | A | C | 874.69   | PASS          | AC=8;AF=0.114;AN=70;BaseQRankSum=  |
| 19238 | chrY | 13318348 | . | C | T | 86.03    | PASS          | AC=5;AF=0.071;AN=70;BaseQRankSum=  |
| 19239 | chrY | 13318373 | . | T | C | 321.24   | PASS          | AC=7;AF=0.100;AN=70;BaseQRankSum=  |
| 19240 | chrY | 13318432 | . | A | G | 1941.73  | PASS          | AC=15;AF=0.221;AN=68;BaseQRankSum= |
| 19241 | chrY | 13318442 | . | G | A | 1925.50  | PASS          | AC=13;AF=0.186;AN=70;BaseQRankSum= |
| 19242 | chrY | 13318500 | . | T | C | 810.97   | PASS          | AC=3;AF=0.043;AN=70;BaseQRankSum=  |
| 19243 | chrY | 13318501 | . | C | T | 811.57   | PASS          | AC=3;AF=0.043;AN=70;BaseQRankSum=  |
| 19244 | chrY | 13318768 | . | C | T | 77.71    | PASS          | AC=2;AF=0.029;AN=70;BaseQRankSum=  |
| 19245 | chrY | 13318827 | . | C | T | 291.47   | PASS          | AC=2;AF=0.029;AN=70;BaseQRankSum=  |
| 19246 | chrY | 13318843 | . | G | T | 208.61   | PASS          | AC=1;AF=0.015;AN=68;BaseQRankSum=  |
| 19247 | chrY | 13318845 | . | C | G | 210.92   | PASS          | AC=1;AF=0.015;AN=68;BaseQRankSum=  |
| 19248 | chrY | 13318891 | . | C | G | 150.46   | PASS          | AC=1;AF=0.014;AN=70;BaseQRankSum=  |
| 19249 | chrY | 13318933 | . | A | G | 208.74   | PASS          | AC=2;AF=0.029;AN=70;BaseQRankSum=  |
| 19250 | chrY | 13318939 | . | G | A | 208.88   | PASS          | AC=2;AF=0.029;AN=70;BaseQRankSum=  |
| 19251 | chrY | 13319087 | . | C | T | 392.28   | PASS          | AC=5;AF=0.114;AN=44;BaseQRankSum=  |
| 19252 | chrY | 13319154 | . | C | T | 1932.86  | PASS          | AC=8;AF=0.364;AN=22;BaseQRankSum=  |
| 19253 | chrY | 13319162 | . | T | C | 2244.68  | PASS          | AC=6;AF=0.273;AN=22;BaseQRankSum=  |
| 19254 | chrY | 13319163 | . | G | A | 2084.46  | PASS          | AC=6;AF=0.273;AN=22;BaseQRankSum=  |
| 19255 | chrY | 13319196 | . | G | T | 93.87    | my_snp_filter | AC=3;AF=0.125;AN=24;BaseQ          |
| 19256 | chrY | 13319282 | . | G | A | 852.28   | PASS          | AC=5;AF=0.227;AN=22;BaseQRankSum=  |
| 19257 | chrY | 13319335 | . | C | T | 624.78   | PASS          | AC=2;AF=0.030;AN=66;BaseQRankSum=  |
| 19258 | chrY | 13319340 | . | T | A | 623.41   | PASS          | AC=2;AF=0.029;AN=68;BaseQRankSum=  |
| 19259 | chrY | 13319375 | . | C | G | 275.87   | PASS          | AC=2;AF=0.029;AN=68;BaseQRankSum=  |
| 19260 | chrY | 13319384 | . | T | C | 190.52   | PASS          | AC=2;AF=0.029;AN=70;BaseQRankSum=  |
| 19261 | chrY | 13319386 | . | A | C | 190.20   | PASS          | AC=2;AF=0.029;AN=70;BaseQRankSum=  |
| 19262 | chrY | 13319510 | . | G | A | 305.64   | PASS          | AC=1;AF=0.015;AN=66;BaseQRankSum=  |
| 19263 | chrY | 13319518 | . | G | T | 326.72   | PASS          | AC=1;AF=0.016;AN=64;BaseQRankSum=  |
| 19264 | chrY | 13319527 | . | T | A | 405.57   | PASS          | AC=3;AF=0.048;AN=62;BaseQRankSum=  |
| 19265 | chrY | 13319551 | . | C | A | 1636.19  | PASS          | AC=15;AF=0.214;AN=70;BaseQRankSum= |
| 19266 | chrY | 13319596 | . | C | A | 3685.22  | PASS          | AC=22;AF=0.314;AN=70;BaseQRankSum= |
| 19267 | chrY | 13319615 | . | T | C | 1670.14  | PASS          | AC=14;AF=0.200;AN=70;BaseQRankSum= |
| 19268 | chrY | 13319631 | . | C | A | 62.43    | PASS          | AC=1;AF=0.014;AN=70;BaseQRankSum=  |
| 19269 | chrY | 13319654 | . | G | A | 87.33    | my_snp_filter | AC=3;AF=0.043;AN=70;BaseQ          |
| 19270 | chrY | 13319692 | . | C | T | 243.38   | my_snp_filter | AC=8;AF=0.118;AN=68;BaseQ          |
| 19271 | chrY | 13319696 | . | T | A | 37.52    | my_snp_filter | AC=1;AF=0.015;AN=68;BaseQ          |
| 19272 | chrY | 13319698 | . | T | C | 7328.67  | PASS          | AC=23;AF=0.348;AN=66;BaseQRankSum= |
| 19273 | chrY | 13319707 | . | C | T | 6843.50  | PASS          | AC=23;AF=0.371;AN=62;BaseQRankSum= |
| 19274 | chrY | 13319725 | . | A | G | 4266.39  | PASS          | AC=21;AF=0.389;AN=54;BaseQRankSum= |
| 19275 | chrY | 13319747 | . | C | T | 4693.03  | PASS          | AC=8;AF=0.286;AN=28;BaseQRankSum=  |
| 19276 | chrY | 13319748 | . | A | G | 4690.02  | PASS          | AC=8;AF=0.286;AN=28;BaseQRankSum=  |
| 19277 | chrY | 13319762 | . | A | G | 3419.41  | PASS          | AC=5;AF=0.227;AN=22;BaseQRankSum=  |
| 19278 | chrY | 13319782 | . | A | T | 3339.48  | PASS          | AC=5;AF=0.250;AN=20;BaseQRankSum=  |
| 19279 | chrY | 13319801 | . | A | T | 3388.85  | PASS          | AC=9;AF=0.375;AN=24;BaseQRankSum=  |
| 19280 | chrY | 13319845 | . | C | A | 147.16   | my_snp_filter | AC=3;AF=0.079;AN=38;BaseQ          |
| 19281 | chrY | 13319855 | . | T | C | 4498.07  | PASS          | AC=9;AF=0.237;AN=38;BaseQRankSum=  |
| 19282 | chrY | 13319909 | . | A | C | 9828.58  | PASS          | AC=25;AF=0.379;AN=66;BaseQRankSum= |
| 19283 | chrY | 13319934 | . | A | C | 11823.04 | PASS          | AC=26;AF=0.382;AN=68;BaseQ         |
| 19284 | chrY | 13319936 | . | A | G | 1370.64  | my_snp_filter | AC=7;AF=0.103;AN=68;BaseQ          |
| 19285 | chrY | 13319979 | . | C | T | 8981.56  | PASS          | AC=26;AF=0.382;AN=68;BaseQRankSum= |
| 19286 | chrY | 13319994 | . | C | G | 8362.61  | PASS          | AC=26;AF=0.382;AN=68;BaseQRankSum= |
| 19287 | chrY | 13320070 | . | A | T | 4847.95  | PASS          | AC=19;AF=0.288;AN=66;BaseQRankSum= |
| 19288 | chrY | 13320112 | . | A | G | 5891.92  | PASS          | AC=11;AF=0.177;AN=62;BaseQRankSum= |
| 19289 | chrY | 13320121 | . | C | A | 5901.89  | my_snp_filter | AC=11;AF=0.167;AN=66;BaseQ         |
| 19290 | chrY | 13320158 | . | C | A | 2710.01  | PASS          | AC=11;AF=0.172;AN=64;BaseQRankSum= |
| 19291 | chrY | 13320226 | . | C | T | 262.31   | PASS          | AC=4;AF=0.057;AN=70;BaseQRankSum=  |
| 19292 | chrY | 13320227 | . | A | G | 1256.02  | PASS          | AC=6;AF=0.086;AN=70;BaseQRankSum=  |
| 19293 | chrY | 13320239 | . | T | G | 1111.95  | PASS          | AC=6;AF=0.086;AN=70;BaseQRankSum=  |
| 19294 | chrY | 13320241 | . | A | G | 1111.79  | PASS          | AC=6;AF=0.086;AN=70;BaseQRankSum=  |
| 19295 | chrY | 13320303 | . | T | G | 2885.45  | PASS          | AC=6;AF=0.088;AN=68;BaseQRankSum=  |
| 19296 | chrY | 13320307 | . | A | G | 2877.25  | PASS          | AC=6;AF=0.088;AN=68;BaseQRankSum=  |
| 19297 | chrY | 13320385 | . | C | G | 4670.34  | PASS          | AC=6;AF=0.176;AN=34;BaseQRankSum=  |
| 19298 | chrY | 13320387 | . | T | A | 4670.34  | PASS          | AC=6;AF=0.176;AN=34;BaseQRankSum=  |
| 19299 | chrY | 13320463 | . | T | G | 1602.55  | PASS          | AC=7;AF=0.206;AN=34;BaseQRankSum=  |
| 19300 | chrY | 13320507 | . | G | C | 529.94   | PASS          | AC=5;AF=0.078;AN=64;BaseQRankSum=  |
| 19301 | chrY | 13320533 | . | A | G | 202.03   | my_snp_filter | AC=4;AF=0.057;AN=70;BaseQ          |
| 19302 | chrY | 13320545 | . | G | A | 2578.32  | PASS          | AC=12;AF=0.171;AN=70;BaseQRankSum= |
| 19303 | chrY | 13320566 | . | A | G | 383.33   | PASS          | AC=4;AF=0.057;AN=70;BaseQRankSum=  |
| 19304 | chrY | 13320579 | . | A | T | 3315.75  | PASS          | AC=12;AF=0.171;AN=70;BaseQRankSum= |

|       |      |          |   |   |   |          |               |                                    |
|-------|------|----------|---|---|---|----------|---------------|------------------------------------|
| 19305 | chrY | 13320582 | . | T | C | 501.21   | PASS          | AC=4;AF=0.057;AN=70;BaseQRankSum=  |
| 19306 | chrY | 13320658 | . | C | T | 4250.09  | PASS          | AC=7;AF=0.106;AN=66;BaseQRankSum=  |
| 19307 | chrY | 13320665 | . | G | T | 4159.47  | PASS          | AC=7;AF=0.109;AN=64;BaseQRankSum=  |
| 19308 | chrY | 13320673 | . | G | A | 3920.26  | PASS          | AC=7;AF=0.109;AN=64;BaseQRankSum=  |
| 19309 | chrY | 13320696 | . | C | T | 3690.67  | PASS          | AC=7;AF=0.117;AN=60;BaseQRankSum=  |
| 19310 | chrY | 13320705 | . | A | G | 2781.76  | PASS          | AC=9;AF=0.155;AN=58;BaseQRankSum=  |
| 19311 | chrY | 13320727 | . | C | A | 2713.54  | PASS          | AC=9;AF=0.155;AN=58;BaseQRankSum=  |
| 19312 | chrY | 13320744 | . | C | G | 2528.58  | PASS          | AC=7;AF=0.130;AN=54;BaseQRankSum=  |
| 19313 | chrY | 13320745 | . | C | T | 2532.34  | PASS          | AC=7;AF=0.135;AN=52;BaseQRankSum=  |
| 19314 | chrY | 13320797 | . | C | T | 876.58   | PASS          | AC=5;AF=0.083;AN=60;BaseQRankSum=  |
| 19315 | chrY | 13320806 | . | C | T | 787.74   | PASS          | AC=4;AF=0.069;AN=58;BaseQRankSum=  |
| 19316 | chrY | 13320831 | . | C | T | 827.61   | PASS          | AC=5;AF=0.089;AN=56;BaseQRankSum=  |
| 19317 | chrY | 13320879 | . | A | T | 3977.28  | PASS          | AC=16;AF=0.235;AN=68;BaseQRankSum= |
| 19318 | chrY | 13320890 | . | G | A | 4761.30  | PASS          | AC=16;AF=0.235;AN=68;BaseQRankSum= |
| 19319 | chrY | 13320895 | . | T | C | 4996.44  | PASS          | AC=16;AF=0.242;AN=66;BaseQRankSum= |
| 19320 | chrY | 13320927 | . | A | G | 5829.32  | PASS          | AC=22;AF=0.314;AN=70;BaseQRankSum= |
| 19321 | chrY | 13320932 | . | T | C | 6105.80  | PASS          | AC=22;AF=0.314;AN=70;BaseQRankSum= |
| 19322 | chrY | 13320995 | . | T | G | 1446.87  | PASS          | AC=12;AF=0.171;AN=70;BaseQRankSum= |
| 19323 | chrY | 13321024 | . | A | G | 7486.16  | PASS          | AC=26;AF=0.371;AN=70;BaseQRankSum= |
| 19324 | chrY | 13321069 | . | A | T | 5049.39  | PASS          | AC=20;AF=0.294;AN=68;BaseQRankSum= |
| 19325 | chrY | 13321092 | . | T | C | 3655.25  | PASS          | AC=18;AF=0.265;AN=68;BaseQRankSum= |
| 19326 | chrY | 13321117 | . | G | A | 2469.76  | PASS          | AC=14;AF=0.219;AN=64;BaseQRankSum= |
| 19327 | chrY | 13321158 | . | G | A | 727.02   | PASS          | AC=7;AF=0.117;AN=60;BaseQRankSum=  |
| 19328 | chrY | 13321185 | . | G | C | 1826.57  | PASS          | AC=6;AF=0.115;AN=52;BaseQRankSum=  |
| 19329 | chrY | 13321195 | . | G | T | 2102.11  | PASS          | AC=6;AF=0.125;AN=48;BaseQRankSum=  |
| 19330 | chrY | 13321217 | . | G | T | 1911.63  | PASS          | AC=6;AF=0.150;AN=40;BaseQRankSum=  |
| 19331 | chrY | 13321285 | . | C | G | 2033.76  | PASS          | AC=16;AF=0.381;AN=42;BaseQRankSum= |
| 19332 | chrY | 13321324 | . | C | T | 1088.10  | my_snp_filter | AC=9;AF=0.136;AN=66;BaseQ          |
| 19333 | chrY | 13321335 | . | A | C | 716.76   | my_snp_filter | AC=7;AF=0.103;AN=68;BaseQ          |
| 19334 | chrY | 13321386 | . | C | T | 6664.32  | PASS          | AC=21;AF=0.300;AN=70;BaseQRankSum= |
| 19335 | chrY | 13321410 | . | G | A | 7287.21  | PASS          | AC=21;AF=0.300;AN=70;BaseQRankSum= |
| 19336 | chrY | 13321499 | . | T | C | 85.91    | PASS          | AC=1;AF=0.014;AN=70;BaseQRankSum=  |
| 19337 | chrY | 13321514 | . | T | A | 40.74    | my_snp_filter | AC=1;AF=0.014;AN=70;BaseQ          |
| 19338 | chrY | 13321657 | . | A | G | 642.27   | PASS          | AC=3;AF=0.043;AN=70;BaseQRankSum=  |
| 19339 | chrY | 13321662 | . | T | A | 642.64   | PASS          | AC=3;AF=0.043;AN=70;BaseQRankSum=  |
| 19340 | chrY | 13321939 | . | T | A | 786.53   | PASS          | AC=7;AF=0.130;AN=54;BaseQRankSum=  |
| 19341 | chrY | 13321996 | . | C | T | 1104.39  | PASS          | AC=9;AF=0.205;AN=44;BaseQRankSum=  |
| 19342 | chrY | 13322036 | . | A | G | 1547.33  | PASS          | AC=9;AF=0.196;AN=46;BaseQRankSum=  |
| 19343 | chrY | 13322046 | . | A | G | 1460.75  | PASS          | AC=8;AF=0.154;AN=52;BaseQRankSum=  |
| 19344 | chrY | 13322121 | . | A | G | 329.29   | PASS          | AC=3;AF=0.044;AN=68;BaseQRankSum=  |
| 19345 | chrY | 13322125 | . | T | C | 334.34   | PASS          | AC=3;AF=0.044;AN=68;BaseQRankSum=  |
| 19346 | chrY | 13322130 | . | A | G | 295.16   | PASS          | AC=3;AF=0.043;AN=70;BaseQRankSum=  |
| 19347 | chrY | 13322203 | . | A | G | 55.22    | PASS          | AC=1;AF=0.014;AN=70;BaseQRankSum=  |
| 19348 | chrY | 13322244 | . | C | G | 132.82   | PASS          | AC=1;AF=0.014;AN=70;BaseQRankSum=  |
| 19349 | chrY | 13322249 | . | C | A | 175.29   | PASS          | AC=1;AF=0.014;AN=70;BaseQRankSum=  |
| 19350 | chrY | 13322251 | . | G | A | 175.09   | PASS          | AC=1;AF=0.014;AN=70;BaseQRankSum=  |
| 19351 | chrY | 13322270 | . | T | C | 171.91   | PASS          | AC=1;AF=0.014;AN=70;BaseQRankSum=  |
| 19352 | chrY | 13322287 | . | T | A | 259.10   | PASS          | AC=1;AF=0.014;AN=70;BaseQRankSum=  |
| 19353 | chrY | 13322302 | . | T | A | 250.34   | PASS          | AC=1;AF=0.014;AN=70;BaseQRankSum=  |
| 19354 | chrY | 13322322 | . | A | G | 281.66   | PASS          | AC=1;AF=0.015;AN=68;BaseQRankSum=  |
| 19355 | chrY | 13322362 | . | C | T | 80.03    | PASS          | AC=1;AF=0.014;AN=70;BaseQRankSum=  |
| 19356 | chrY | 13322383 | . | A | G | 75.62    | my_snp_filter | AC=6;AF=0.086;AN=70;BaseQ          |
| 19357 | chrY | 13322474 | . | G | A | 1912.30  | PASS          | AC=15;AF=0.214;AN=70;BaseQRankSum= |
| 19358 | chrY | 13322480 | . | A | T | 1210.48  | PASS          | AC=13;AF=0.186;AN=70;BaseQRankSum= |
| 19359 | chrY | 13322740 | . | C | A | 531.27   | my_snp_filter | AC=4;AF=0.133;AN=30;BaseQ          |
| 19360 | chrY | 13322787 | . | C | T | 546.74   | PASS          | AC=4;AF=0.083;AN=48;BaseQRankSum=  |
| 19361 | chrY | 13322788 | . | T | G | 546.29   | PASS          | AC=4;AF=0.080;AN=50;BaseQRankSum=  |
| 19362 | chrY | 13322822 | . | A | G | 185.49   | PASS          | AC=1;AF=0.015;AN=68;BaseQRankSum=  |
| 19363 | chrY | 13322824 | . | T | G | 4385.76  | my_snp_filter | AC=11;AF=0.167;AN=66;Base          |
| 19364 | chrY | 13322828 | . | C | T | 465.67   | PASS          | AC=3;AF=0.044;AN=68;BaseQRankSum=  |
| 19365 | chrY | 13322834 | . | T | C | 568.01   | PASS          | AC=4;AF=0.059;AN=68;BaseQRankSum=  |
| 19366 | chrY | 13322842 | . | G | A | 646.22   | PASS          | AC=4;AF=0.061;AN=66;BaseQRankSum=  |
| 19367 | chrY | 13322858 | . | C | T | 1231.89  | PASS          | AC=11;AF=0.162;AN=68;BaseQRankSum= |
| 19368 | chrY | 13322875 | . | A | G | 1523.89  | PASS          | AC=16;AF=0.235;AN=68;BaseQRankSum= |
| 19369 | chrY | 13322915 | . | G | A | 81.43    | my_snp_filter | AC=1;AF=0.014;AN=70;BaseQ          |
| 19370 | chrY | 13322927 | . | G | A | 8315.73  | PASS          | AC=29;AF=0.414;AN=70;BaseQRankSum= |
| 19371 | chrY | 13322933 | . | A | G | 8443.87  | PASS          | AC=30;AF=0.429;AN=70;BaseQRankSum= |
| 19372 | chrY | 13322972 | . | C | A | 6604.70  | PASS          | AC=21;AF=0.300;AN=70;BaseQRankSum= |
| 19373 | chrY | 13323007 | . | C | T | 18475.73 | PASS          | AC=35;AF=0.500;AN=70;Base          |
| 19374 | chrY | 13323022 | . | G | A | 5343.41  | PASS          | AC=14;AF=0.200;AN=70;BaseQRankSum= |
| 19375 | chrY | 13323027 | . | T | A | 5102.60  | PASS          | AC=14;AF=0.200;AN=70;BaseQRankSum= |
| 19376 | chrY | 13323035 | . | T | C | 4518.37  | PASS          | AC=14;AF=0.200;AN=70;BaseQRankSum= |
| 19377 | chrY | 13323059 | . | C | T | 2348.02  | PASS          | AC=11;AF=0.157;AN=70;BaseQRankSum= |
| 19378 | chrY | 13323094 | . | C | T | 16461.53 | PASS          | AC=34;AF=0.486;AN=70;Base          |
| 19379 | chrY | 13323119 | . | T | C | 17108.87 | PASS          | AC=34;AF=0.486;AN=70;Base          |
| 19380 | chrY | 13323133 | . | T | C | 982.80   | PASS          | AC=7;AF=0.100;AN=70;BaseQRankSum=  |

|       |      |          |   |   |   |         |               |                                    |
|-------|------|----------|---|---|---|---------|---------------|------------------------------------|
| 19381 | chrY | 13323145 | . | C | T | 993.26  | PASS          | AC=8;AF=0.114;AN=70;BaseQRankSum=  |
| 19382 | chrY | 13323150 | . | G | A | 732.13  | PASS          | AC=3;AF=0.043;AN=70;BaseQRankSum=  |
| 19383 | chrY | 13323172 | . | G | A | 761.80  | PASS          | AC=4;AF=0.059;AN=68;BaseQRankSum=  |
| 19384 | chrY | 13323184 | . | T | C | 229.38  | PASS          | AC=2;AF=0.029;AN=68;BaseQRankSum=  |
| 19385 | chrY | 13323188 | . | T | C | 610.65  | PASS          | AC=3;AF=0.044;AN=68;BaseQRankSum=  |
| 19386 | chrY | 13323197 | . | A | T | 348.24  | PASS          | AC=2;AF=0.030;AN=66;BaseQRankSum=  |
| 19387 | chrY | 13323205 | . | C | T | 230.37  | PASS          | AC=2;AF=0.029;AN=68;BaseQRankSum=  |
| 19388 | chrY | 13323206 | . | G | A | 4650.90 | PASS          | AC=11;AF=0.167;AN=66;BaseQRankSum= |
| 19389 | chrY | 13323213 | . | T | C | 4779.75 | PASS          | AC=9;AF=0.132;AN=68;BaseQRankSum=  |
| 19390 | chrY | 13323214 | . | G | T | 176.76  | PASS          | AC=2;AF=0.029;AN=68;BaseQRankSum=  |
| 19391 | chrY | 13323226 | . | G | A | 4438.20 | PASS          | AC=10;AF=0.147;AN=68;BaseQRankSum= |
| 19392 | chrY | 13323227 | . | T | C | 5003.87 | PASS          | AC=10;AF=0.147;AN=68;BaseQRankSum= |
| 19393 | chrY | 13323252 | . | C | T | 829.09  | my_snp_filter | AC=4;AF=0.061;AN=66;BaseQ          |
| 19394 | chrY | 13323253 | . | A | C | 829.09  | my_snp_filter | AC=4;AF=0.061;AN=66;BaseQ          |
| 19395 | chrY | 13323258 | . | C | T | 968.40  | my_snp_filter | AC=4;AF=0.063;AN=64;BaseQ          |
| 19396 | chrY | 13323282 | . | C | A | 1186.80 | my_snp_filter | AC=5;AF=0.093;AN=54;BaseQ          |
| 19397 | chrY | 13323309 | . | A | G | 2414.20 | my_snp_filter | AC=5;AF=0.156;AN=32;BaseQ          |
| 19398 | chrY | 13323311 | . | C | A | 3478.83 | my_snp_filter | AC=9;AF=0.300;AN=30;BaseQ          |
| 19399 | chrY | 13323318 | . | T | C | 6717.07 | PASS          | AC=9;AF=0.375;AN=24;BaseQRankSum=  |
| 19400 | chrY | 13323338 | . | T | A | 3479.39 | my_snp_filter | AC=5;AF=0.208;AN=24;BaseQ          |
| 19401 | chrY | 13323359 | . | C | A | 990.05  | my_snp_filter | AC=7;AF=0.292;AN=24;BaseQ          |
| 19402 | chrY | 13323360 | . | G | A | 3972.85 | my_snp_filter | AC=5;AF=0.208;AN=24;BaseQ          |
| 19403 | chrY | 13323393 | . | C | G | 3520.43 | PASS          | AC=10;AF=0.385;AN=26;BaseQRankSum= |
| 19404 | chrY | 13323478 | . | T | A | 49.02   | my_snp_filter | AC=2;AF=0.045;AN=44;BaseQ          |
| 19405 | chrY | 13323493 | . | A | C | 5806.31 | PASS          | AC=11;AF=0.367;AN=30;BaseQRankSum= |
| 19406 | chrY | 13323510 | . | A | T | 5600.16 | PASS          | AC=8;AF=0.167;AN=48;BaseQRankSum=  |
| 19407 | chrY | 13323515 | . | A | T | 5489.83 | PASS          | AC=8;AF=0.138;AN=58;BaseQRankSum=  |
| 19408 | chrY | 13323523 | . | G | A | 5484.77 | PASS          | AC=8;AF=0.114;AN=70;BaseQRankSum=  |
| 19409 | chrY | 13323548 | . | A | G | 4895.60 | PASS          | AC=11;AF=0.167;AN=66;BaseQRankSum= |
| 19410 | chrY | 13323736 | . | A | C | 2093.75 | PASS          | AC=8;AF=0.114;AN=70;BaseQRankSum=  |
| 19411 | chrY | 13323745 | . | G | A | 79.43   | my_snp_filter | AC=3;AF=0.044;AN=68;BaseQ          |
| 19412 | chrY | 13323747 | . | A | C | 2596.88 | PASS          | AC=10;AF=0.143;AN=70;BaseQRankSum= |
| 19413 | chrY | 13323793 | . | G | A | 2548.98 | PASS          | AC=12;AF=0.171;AN=70;BaseQRankSum= |
| 19414 | chrY | 13323798 | . | C | T | 70.94   | my_snp_filter | AC=3;AF=0.043;AN=70;BaseQ          |
| 19415 | chrY | 13323880 | . | G | A | 2388.29 | PASS          | AC=12;AF=0.171;AN=70;BaseQRankSum= |
| 19416 | chrY | 13323884 | . | T | C | 4406.59 | PASS          | AC=20;AF=0.286;AN=70;BaseQRankSum= |
| 19417 | chrY | 13323912 | . | G | C | 1796.50 | PASS          | AC=13;AF=0.186;AN=70;BaseQRankSum= |
| 19418 | chrY | 13323935 | . | G | C | 595.18  | PASS          | AC=7;AF=0.100;AN=70;BaseQRankSum=  |
| 19419 | chrY | 13324002 | . | G | A | 4097.63 | PASS          | AC=16;AF=0.229;AN=70;BaseQRankSum= |
| 19420 | chrY | 13324007 | . | G | C | 3989.50 | PASS          | AC=16;AF=0.229;AN=70;BaseQRankSum= |
| 19421 | chrY | 13324015 | . | G | A | 8072.69 | PASS          | AC=28;AF=0.412;AN=68;BaseQRankSum= |
| 19422 | chrY | 13324056 | . | A | T | 3657.97 | PASS          | AC=12;AF=0.171;AN=70;BaseQRankSum= |
| 19423 | chrY | 13324071 | . | G | A | 159.58  | my_snp_filter | AC=3;AF=0.043;AN=70;BaseQ          |
| 19424 | chrY | 13324079 | . | T | C | 4250.30 | PASS          | AC=10;AF=0.143;AN=70;BaseQRankSum= |
| 19425 | chrY | 13324089 | . | A | G | 4102.12 | PASS          | AC=11;AF=0.157;AN=70;BaseQRankSum= |
| 19426 | chrY | 13324118 | . | G | A | 2328.10 | my_snp_filter | AC=10;AF=0.143;AN=70;BaseQ         |
| 19427 | chrY | 13324143 | . | G | T | 2180.98 | PASS          | AC=17;AF=0.250;AN=68;BaseQRankSum= |
| 19428 | chrY | 13324155 | . | C | A | 1032.47 | my_snp_filter | AC=11;AF=0.172;AN=64;BaseQ         |
| 19429 | chrY | 13324168 | . | C | T | 4070.40 | PASS          | AC=13;AF=0.210;AN=62;BaseQRankSum= |
| 19430 | chrY | 13324170 | . | T | G | 2950.16 | PASS          | AC=6;AF=0.094;AN=64;BaseQRankSum=  |
| 19431 | chrY | 13324216 | . | G | C | 35.44   | my_snp_filter | AC=1;AF=0.015;AN=68;BaseQ          |
| 19432 | chrY | 13324224 | . | T | C | 865.09  | PASS          | AC=4;AF=0.063;AN=64;BaseQRankSum=  |
| 19433 | chrY | 13324233 | . | T | C | 955.84  | PASS          | AC=4;AF=0.061;AN=66;BaseQRankSum=  |
| 19434 | chrY | 13324244 | . | T | A | 806.62  | PASS          | AC=5;AF=0.076;AN=66;BaseQRankSum=  |
| 19435 | chrY | 13324266 | . | A | G | 1011.04 | PASS          | AC=9;AF=0.141;AN=64;BaseQRankSum=  |
| 19436 | chrY | 13324307 | . | A | G | 4985.64 | PASS          | AC=12;AF=0.207;AN=58;BaseQRankSum= |
| 19437 | chrY | 13324316 | . | T | C | 5210.80 | PASS          | AC=12;AF=0.207;AN=58;BaseQRankSum= |
| 19438 | chrY | 13324322 | . | C | A | 5252.47 | PASS          | AC=12;AF=0.207;AN=58;BaseQRankSum= |
| 19439 | chrY | 13324362 | . | C | A | 3209.92 | PASS          | AC=13;AF=0.217;AN=60;BaseQRankSum= |
| 19440 | chrY | 13324401 | . | T | C | 3893.64 | PASS          | AC=7;AF=0.109;AN=64;BaseQRankSum=  |
| 19441 | chrY | 13324404 | . | C | T | 3893.79 | PASS          | AC=7;AF=0.109;AN=64;BaseQRankSum=  |
| 19442 | chrY | 13324409 | . | T | C | 3707.19 | PASS          | AC=6;AF=0.097;AN=62;BaseQRankSum=  |
| 19443 | chrY | 13324416 | . | C | T | 3483.55 | PASS          | AC=6;AF=0.097;AN=62;BaseQRankSum=  |
| 19444 | chrY | 13324422 | . | C | A | 3265.57 | PASS          | AC=6;AF=0.094;AN=64;BaseQRankSum=  |
| 19445 | chrY | 13324460 | . | A | G | 365.12  | PASS          | AC=4;AF=0.063;AN=64;BaseQRankSum=  |
| 19446 | chrY | 13324478 | . | T | C | 68.17   | my_snp_filter | AC=2;AF=0.031;AN=64;BaseQ          |
| 19447 | chrY | 13324536 | . | G | A | 138.79  | PASS          | AC=4;AF=0.061;AN=66;BaseQRankSum=  |
| 19448 | chrY | 13324571 | . | T | C | 1231.15 | PASS          | AC=5;AF=0.074;AN=68;BaseQRankSum=  |
| 19449 | chrY | 13324578 | . | A | G | 1441.62 | PASS          | AC=5;AF=0.074;AN=68;BaseQRankSum=  |
| 19450 | chrY | 13324583 | . | A | G | 1574.42 | PASS          | AC=5;AF=0.074;AN=68;BaseQRankSum=  |
| 19451 | chrY | 13324588 | . | A | G | 1674.36 | PASS          | AC=5;AF=0.074;AN=68;BaseQRankSum=  |
| 19452 | chrY | 13324593 | . | A | C | 1797.51 | PASS          | AC=6;AF=0.088;AN=68;BaseQRankSum=  |
| 19453 | chrY | 13324605 | . | C | G | 1561.27 | PASS          | AC=6;AF=0.091;AN=66;BaseQRankSum=  |
| 19454 | chrY | 13324642 | . | C | T | 1365.64 | PASS          | AC=8;AF=0.125;AN=64;BaseQRankSum=  |
| 19455 | chrY | 13324699 | . | A | C | 2193.74 | PASS          | AC=12;AF=0.200;AN=60;BaseQRankSum= |
| 19456 | chrY | 13324709 | . | T | C | 2125.55 | PASS          | AC=13;AF=0.224;AN=58;BaseQRankSum= |



|       |      |          |   |   |   |         |               |                                    |
|-------|------|----------|---|---|---|---------|---------------|------------------------------------|
| 19457 | chrY | 13324710 | . | G | C | 2116.15 | PASS          | AC=13;AF=0.224;AN=58;BaseQRankSum= |
| 19458 | chrY | 13324714 | . | C | T | 1967.55 | PASS          | AC=11;AF=0.204;AN=54;BaseQRankSum= |
| 19459 | chrY | 13324720 | . | A | G | 1976.99 | PASS          | AC=11;AF=0.212;AN=52;BaseQRankSum= |
| 19460 | chrY | 13324741 | . | A | T | 1332.69 | PASS          | AC=6;AF=0.115;AN=52;BaseQRankSum=  |
| 19461 | chrY | 13324751 | . | G | C | 1033.64 | PASS          | AC=5;AF=0.083;AN=60;BaseQRankSum=  |
| 19462 | chrY | 13324760 | . | C | T | 891.35  | PASS          | AC=5;AF=0.083;AN=60;BaseQRankSum=  |
| 19463 | chrY | 13324791 | . | G | A | 184.04  | PASS          | AC=3;AF=0.048;AN=62;BaseQRankSum=  |
| 19464 | chrY | 13324806 | . | T | C | 152.44  | PASS          | AC=2;AF=0.032;AN=62;BaseQRankSum=  |
| 19465 | chrY | 13324974 | . | A | T | 90.51   | PASS          | AC=1;AF=0.018;AN=56;BaseQRankSum=  |
| 19466 | chrY | 13324984 | . | C | T | 90.62   | PASS          | AC=1;AF=0.017;AN=60;BaseQRankSum=  |
| 19467 | chrY | 13324985 | . | C | G | 90.37   | PASS          | AC=1;AF=0.016;AN=62;BaseQRankSum=  |
| 19468 | chrY | 13325106 | . | T | G | 190.86  | PASS          | AC=2;AF=0.036;AN=56;BaseQRankSum=  |
| 19469 | chrY | 13325169 | . | C | A | 38.27   | PASS          | AC=1;AF=0.015;AN=68;BaseQRankSum=  |
| 19470 | chrY | 13325171 | . | A | T | 152.56  | PASS          | AC=2;AF=0.029;AN=68;BaseQRankSum=  |
| 19471 | chrY | 13325177 | . | G | T | 40.75   | PASS          | AC=1;AF=0.015;AN=68;BaseQRankSum=  |
| 19472 | chrY | 13325275 | . | A | G | 124.52  | PASS          | AC=3;AF=0.044;AN=68;BaseQRankSum=  |
| 19473 | chrY | 13325292 | . | C | G | 87.40   | PASS          | AC=2;AF=0.030;AN=66;BaseQRankSum=  |
| 19474 | chrY | 13325299 | . | G | A | 88.05   | PASS          | AC=2;AF=0.030;AN=66;BaseQRankSum=  |
| 19475 | chrY | 13325346 | . | G | A | 231.14  | PASS          | AC=5;AF=0.076;AN=66;BaseQRankSum=  |
| 19476 | chrY | 13325402 | . | T | C | 3479.51 | PASS          | AC=45;AF=0.682;AN=66;BaseQRankSum= |
| 19477 | chrY | 13325487 | . | C | G | 198.03  | PASS          | AC=5;AF=0.071;AN=70;BaseQRankSum=  |
| 19478 | chrY | 13325495 | . | A | T | 280.57  | my_snp_filter | AC=7;AF=0.100;AN=70;BaseQ          |
| 19479 | chrY | 13325496 | . | C | T | 1734.54 | PASS          | AC=12;AF=0.171;AN=70;BaseQRankSum= |
| 19480 | chrY | 13325501 | . | G | T | 151.62  | PASS          | AC=3;AF=0.043;AN=70;BaseQRankSum=  |
| 19481 | chrY | 13325536 | . | C | A | 324.96  | PASS          | AC=2;AF=0.029;AN=70;BaseQRankSum=  |
| 19482 | chrY | 13325562 | . | A | G | 319.54  | PASS          | AC=4;AF=0.057;AN=70;BaseQRankSum=  |
| 19483 | chrY | 13325571 | . | T | A | 196.32  | PASS          | AC=2;AF=0.029;AN=70;BaseQRankSum=  |
| 19484 | chrY | 13325605 | . | T | G | 51.42   | my_snp_filter | AC=2;AF=0.029;AN=70;BaseQ          |
| 19485 | chrY | 13325730 | . | T | C | 405.17  | PASS          | AC=4;AF=0.059;AN=68;BaseQRankSum=  |
| 19486 | chrY | 13325752 | . | C | T | 515.16  | PASS          | AC=4;AF=0.059;AN=68;BaseQRankSum=  |
| 19487 | chrY | 13325778 | . | T | A | 927.03  | PASS          | AC=4;AF=0.065;AN=62;BaseQRankSum=  |
| 19488 | chrY | 13325816 | . | G | A | 1194.24 | PASS          | AC=5;AF=0.156;AN=32;BaseQRankSum=  |
| 19489 | chrY | 13325846 | . | C | T | 1949.66 | my_snp_filter | AC=8;AF=0.250;AN=32;BaseQ          |
| 19490 | chrY | 13325865 | . | G | C | 1387.62 | PASS          | AC=5;AF=0.179;AN=28;BaseQRankSum=  |
| 19491 | chrY | 13325872 | . | C | T | 1404.55 | PASS          | AC=5;AF=0.208;AN=24;BaseQRankSum=  |
| 19492 | chrY | 13325881 | . | A | G | 1375.48 | PASS          | AC=5;AF=0.208;AN=24;BaseQRankSum=  |
| 19493 | chrY | 13325891 | . | C | T | 1286.19 | PASS          | AC=4;AF=0.167;AN=24;BaseQRankSum=  |
| 19494 | chrY | 13325959 | . | A | G | 825.95  | PASS          | AC=9;AF=0.409;AN=22;BaseQRankSum=  |
| 19495 | chrY | 13325964 | . | A | G | 1023.48 | PASS          | AC=5;AF=0.250;AN=20;BaseQRankSum=  |
| 19496 | chrY | 13325975 | . | A | G | 62.47   | my_snp_filter | AC=2;AF=0.100;AN=20;BaseQ          |
| 19497 | chrY | 13325977 | . | T | G | 104.47  | my_snp_filter | AC=2;AF=0.100;AN=20;BaseQ          |
| 19498 | chrY | 13325978 | . | G | T | 1368.81 | PASS          | AC=5;AF=0.250;AN=20;BaseQRankSum=  |
| 19499 | chrY | 13325983 | . | A | T | 152.45  | PASS          | AC=2;AF=0.100;AN=20;BaseQRankSum=  |
| 19500 | chrY | 13325984 | . | A | G | 1415.81 | PASS          | AC=5;AF=0.250;AN=20;BaseQRankSum=  |
| 19501 | chrY | 13325987 | . | C | T | 155.45  | PASS          | AC=2;AF=0.100;AN=20;BaseQRankSum=  |
| 19502 | chrY | 13325999 | . | T | G | 2116.10 | PASS          | AC=6;AF=0.300;AN=20;BaseQRankSum=  |
| 19503 | chrY | 13326019 | . | A | G | 1581.12 | PASS          | AC=6;AF=0.300;AN=20;BaseQRankSum=  |
| 19504 | chrY | 13326039 | . | G | A | 562.54  | PASS          | AC=4;AF=0.200;AN=20;BaseQRankSum=  |
| 19505 | chrY | 13326170 | . | A | T | 30.37   | PASS          | AC=1;AF=0.056;AN=18;BaseQRankSum=  |
| 19506 | chrY | 13326172 | . | T | G | 117.51  | PASS          | AC=4;AF=0.222;AN=18;BaseQRankSum=  |
| 19507 | chrY | 13326180 | . | C | G | 50.46   | PASS          | AC=3;AF=0.150;AN=20;BaseQRankSum=  |
| 19508 | chrY | 13326220 | . | T | C | 59.95   | PASS          | AC=3;AF=0.150;AN=20;BaseQRankSum=  |
| 19509 | chrY | 13326230 | . | A | C | 72.34   | PASS          | AC=3;AF=0.136;AN=22;BaseQRankSum=  |
| 19510 | chrY | 13326305 | . | A | T | 149.12  | my_snp_filter | AC=4;AF=0.118;AN=34;BaseQ          |
| 19511 | chrY | 13326341 | . | C | T | 48.61   | my_snp_filter | AC=3;AF=0.065;AN=46;BaseQ          |
| 19512 | chrY | 13326635 | . | A | G | 142.37  | PASS          | AC=3;AF=0.045;AN=66;BaseQRankSum=  |
| 19513 | chrY | 13326644 | . | C | A | 348.52  | PASS          | AC=5;AF=0.074;AN=68;BaseQRankSum=  |
| 19514 | chrY | 13326677 | . | A | C | 243.07  | PASS          | AC=3;AF=0.050;AN=60;BaseQRankSum=  |
| 19515 | chrY | 13326741 | . | T | G | 77.99   | PASS          | AC=1;AF=0.026;AN=38;BaseQRankSum=  |
| 19516 | chrY | 13326775 | . | C | T | 116.72  | PASS          | AC=2;AF=0.077;AN=26;BaseQRankSum=  |
| 19517 | chrY | 13326780 | . | C | G | 128.76  | PASS          | AC=2;AF=0.077;AN=26;BaseQRankSum=  |
| 19518 | chrY | 13326824 | . | A | G | 198.26  | PASS          | AC=2;AF=0.071;AN=28;BaseQRankSum=  |
| 19519 | chrY | 13326840 | . | C | G | 252.22  | PASS          | AC=2;AF=0.077;AN=26;BaseQRankSum=  |
| 19520 | chrY | 13326898 | . | T | C | 384.49  | PASS          | AC=3;AF=0.100;AN=30;BaseQRankSum=  |
| 19521 | chrY | 13326972 | . | T | A | 979.97  | PASS          | AC=3;AF=0.052;AN=58;BaseQRankSum=  |
| 19522 | chrY | 13326973 | . | A | T | 980.12  | PASS          | AC=3;AF=0.052;AN=58;BaseQRankSum=  |
| 19523 | chrY | 13326997 | . | T | C | 1287.53 | PASS          | AC=12;AF=0.182;AN=66;BaseQRankSum= |
| 19524 | chrY | 13327013 | . | T | G | 2198.47 | PASS          | AC=15;AF=0.214;AN=70;BaseQRankSum= |
| 19525 | chrY | 13327048 | . | A | C | 4913.53 | PASS          | AC=21;AF=0.300;AN=70;BaseQRankSum= |
| 19526 | chrY | 13327177 | . | A | C | 202.29  | PASS          | AC=3;AF=0.045;AN=66;BaseQRankSum=  |
| 19527 | chrY | 13327190 | . | G | A | 230.80  | PASS          | AC=4;AF=0.063;AN=64;BaseQRankSum=  |
| 19528 | chrY | 13327259 | . | A | C | 55.12   | PASS          | AC=1;AF=0.014;AN=70;BaseQRankSum=  |
| 19529 | chrY | 13327291 | . | C | A | 1843.01 | PASS          | AC=4;AF=0.057;AN=70;BaseQRankSum=  |
| 19530 | chrY | 13327292 | . | A | T | 1843.03 | PASS          | AC=4;AF=0.057;AN=70;BaseQRankSum=  |
| 19531 | chrY | 13327307 | . | G | T | 1259.37 | PASS          | AC=6;AF=0.086;AN=70;BaseQRankSum=  |
| 19532 | chrY | 13327317 | . | G | C | 1098.93 | PASS          | AC=5;AF=0.071;AN=70;BaseQRankSum=  |

|       |      |          |   |   |      |         |               |                                     |
|-------|------|----------|---|---|------|---------|---------------|-------------------------------------|
| 19533 | chrY | 13327319 | . | A | C    | 1508.77 | PASS          | AC=6;AF=0.086;AN=70;BaseQRankSum=   |
| 19534 | chrY | 13327383 | . | C | G    | 647.28  | PASS          | AC=5;AF=0.076;AN=66;BaseQRankSum=   |
| 19535 | chrY | 13327429 | . | C | G    | 65.10   | my_snp_filter | AC=2;AF=0.029;AN=68;BaseQ           |
| 19536 | chrY | 13327463 | . | G | T    | 253.19  | PASS          | AC=2;AF=0.030;AN=66;BaseQRankSum=   |
| 19537 | chrY | 13327469 | . | A | G    | 303.70  | PASS          | AC=3;AF=0.045;AN=66;BaseQRankSum=   |
| 19538 | chrY | 13327473 | . | T | G    | 231.44  | PASS          | AC=3;AF=0.045;AN=66;BaseQRankSum=   |
| 19539 | chrY | 13327523 | . | G | A    | 1368.24 | PASS          | AC=13;AF=0.191;AN=68;BaseQRankSum=  |
| 19540 | chrY | 13327674 | . | T | C    | 1384.55 | PASS          | AC=15;AF=0.221;AN=68;BaseQRankSum=  |
| 19541 | chrY | 13327744 | . | T | C    | 3574.31 | PASS          | AC=13;AF=0.210;AN=62;BaseQRankSum=  |
| 19542 | chrY | 13327746 | . | G | A    | 3562.18 | PASS          | AC=13;AF=0.210;AN=62;BaseQRankSum=  |
| 19543 | chrY | 13327754 | . | T | G    | 3157.65 | PASS          | AC=13;AF=0.210;AN=62;BaseQRankSum=  |
| 19544 | chrY | 13327768 | . | G | A    | 2418.94 | PASS          | AC=11;AF=0.167;AN=66;BaseQRankSum=  |
| 19545 | chrY | 13327801 | . | C | T    | 2308.58 | PASS          | AC=9;AF=0.145;AN=62;BaseQRankSum=   |
| 19546 | chrY | 13327806 | . | A | C    | 2275.67 | PASS          | AC=8;AF=0.129;AN=62;BaseQRankSum=   |
| 19547 | chrY | 13327829 | . | A | G    | 1586.87 | PASS          | AC=6;AF=0.094;AN=64;BaseQRankSum=   |
| 19548 | chrY | 13327831 | . | G | A    | 1582.40 | PASS          | AC=6;AF=0.094;AN=64;BaseQRankSum=   |
| 19549 | chrY | 13327857 | . | G | T    | 969.48  | PASS          | AC=6;AF=0.103;AN=58;BaseQRankSum=   |
| 19550 | chrY | 13327874 | . | T | G    | 664.64  | PASS          | AC=4;AF=0.067;AN=60;BaseQRankSum=   |
| 19551 | chrY | 13327875 | . | C | T    | 698.20  | PASS          | AC=4;AF=0.067;AN=60;BaseQRankSum=   |
| 19552 | chrY | 13327892 | . | G | A    | 596.25  | PASS          | AC=4;AF=0.067;AN=60;BaseQRankSum=   |
| 19553 | chrY | 13327900 | . | A | G    | 608.18  | PASS          | AC=4;AF=0.069;AN=58;BaseQRankSum=   |
| 19554 | chrY | 13327927 | . | A | G    | 338.69  | PASS          | AC=3;AF=0.054;AN=56;BaseQRankSum=   |
| 19555 | chrY | 13328020 | . | C | T    | 670.35  | PASS          | AC=4;AF=0.059;AN=68;BaseQRankSum=   |
| 19556 | chrY | 13328024 | . | C | T    | 408.60  | PASS          | AC=5;AF=0.076;AN=66;BaseQRankSum=   |
| 19557 | chrY | 13328034 | . | A | G    | 1319.98 | PASS          | AC=6;AF=0.094;AN=64;BaseQRankSum=   |
| 19558 | chrY | 13328213 | . | T | G    | 88.79   | PASS          | AC=1;AF=0.016;AN=64;BaseQRankSum=   |
| 19559 | chrY | 13328235 | . | G | C    | 190.07  | PASS          | AC=2;AF=0.034;AN=58;BaseQRankSum=   |
| 19560 | chrY | 13328237 | . | C | G    | 189.78  | PASS          | AC=2;AF=0.036;AN=56;BaseQRankSum=   |
| 19561 | chrY | 13328252 | . | C | T    | 192.16  | PASS          | AC=2;AF=0.033;AN=60;BaseQRankSum=   |
| 19562 | chrY | 13328269 | . | C | T    | 150.70  | PASS          | AC=2;AF=0.031;AN=64;BaseQRankSum=   |
| 19563 | chrY | 13328279 | . | T | C    | 150.91  | PASS          | AC=2;AF=0.031;AN=64;BaseQRankSum=   |
| 19564 | chrY | 13328285 | . | T | C    | 153.53  | PASS          | AC=2;AF=0.031;AN=64;BaseQRankSum=   |
| 19565 | chrY | 13328788 | . | C | T    | 131.35  | my_snp_filter | AC=6;AF=0.100;AN=60;BaseQ           |
| 19566 | chrY | 13328810 | . | C | T    | 391.82  | PASS          | AC=9;AF=0.155;AN=58;BaseQRankSum=   |
| 19567 | chrY | 13328821 | . | T | A    | 307.37  | PASS          | AC=9;AF=0.161;AN=56;BaseQRankSum=   |
| 19568 | chrY | 13328826 | . | C | T    | 38.37   | PASS          | AC=1;AF=0.019;AN=54;BaseQRankSum=   |
| 19569 | chrY | 13328832 | . | A | C    | 1180.97 | PASS          | AC=15;AF=0.278;AN=54;BaseQRankSum=  |
| 19570 | chrY | 13328868 | . | C | T    | 984.72  | PASS          | AC=11;AF=0.220;AN=50;BaseQRankSum=  |
| 19571 | chrY | 13328869 | . | G | T    | 984.72  | PASS          | AC=11;AF=0.220;AN=50;BaseQRankSum=  |
| 19572 | chrY | 13328895 | . | C | G    | 324.51  | PASS          | AC=6;AF=0.125;AN=48;BaseQRankSum=   |
| 19573 | chrY | 13328908 | . | G | A    | 399.91  | PASS          | AC=7;AF=0.140;AN=50;BaseQRankSum=   |
| 19574 | chrY | 13328911 | . | A | G, T | 870.76  | PASS          | AC=6, 5;AF=0.125, 0.104;AN=48;BaseQ |
| 19575 | chrY | 13328919 | . | A | G    | 605.54  | PASS          | AC=9;AF=0.173;AN=52;BaseQRankSum=   |
| 19576 | chrY | 13328920 | . | G | C    | 602.21  | PASS          | AC=9;AF=0.173;AN=52;BaseQRankSum=   |
| 19577 | chrY | 13328927 | . | A | C    | 338.75  | PASS          | AC=7;AF=0.130;AN=54;BaseQRankSum=   |
| 19578 | chrY | 13328948 | . | A | C    | 344.59  | PASS          | AC=3;AF=0.056;AN=54;BaseQRankSum=   |
| 19579 | chrY | 13328958 | . | G | C    | 384.24  | PASS          | AC=3;AF=0.063;AN=48;BaseQRankSum=   |
| 19580 | chrY | 13328974 | . | G | T    | 551.38  | PASS          | AC=3;AF=0.056;AN=54;BaseQRankSum=   |
| 19581 | chrY | 13328976 | . | G | A    | 589.25  | PASS          | AC=3;AF=0.056;AN=54;BaseQRankSum=   |
| 19582 | chrY | 13328979 | . | G | T    | 614.48  | PASS          | AC=3;AF=0.056;AN=54;BaseQRankSum=   |
| 19583 | chrY | 13328986 | . | T | C    | 612.20  | PASS          | AC=7;AF=0.125;AN=56;BaseQRankSum=   |
| 19584 | chrY | 13329025 | . | A | G    | 1814.85 | PASS          | AC=21;AF=0.339;AN=62;BaseQRankSum=  |
| 19585 | chrY | 13329054 | . | C | T    | 4426.57 | PASS          | AC=24;AF=0.414;AN=58;BaseQRankSum=  |
| 19586 | chrY | 13329069 | . | C | T    | 5092.90 | PASS          | AC=24;AF=0.387;AN=62;BaseQRankSum=  |
| 19587 | chrY | 13329135 | . | A | G    | 1048.77 | PASS          | AC=14;AF=0.206;AN=68;BaseQRankSum=  |
| 19588 | chrY | 13329265 | . | A | G    | 62.65   | PASS          | AC=1;AF=0.016;AN=62;BaseQRankSum=   |
| 19589 | chrY | 13329307 | . | G | C    | 1119.97 | PASS          | AC=7;AF=0.117;AN=60;BaseQRankSum=   |
| 19590 | chrY | 13329318 | . | T | C    | 1047.18 | PASS          | AC=6;AF=0.094;AN=64;BaseQRankSum=   |
| 19591 | chrY | 13329331 | . | G | C    | 1083.69 | PASS          | AC=6;AF=0.094;AN=64;BaseQRankSum=   |
| 19592 | chrY | 13329338 | . | C | G    | 1087.18 | PASS          | AC=6;AF=0.097;AN=62;BaseQRankSum=   |
| 19593 | chrY | 13329344 | . | C | T    | 1036.72 | PASS          | AC=6;AF=0.100;AN=60;BaseQRankSum=   |
| 19594 | chrY | 13329361 | . | T | C    | 994.08  | PASS          | AC=6;AF=0.100;AN=60;BaseQRankSum=   |
| 19595 | chrY | 13329469 | . | G | A    | 416.53  | my_snp_filter | AC=6;AF=0.143;AN=42;BaseQ           |
| 19596 | chrY | 13329476 | . | T | C    | 391.42  | my_snp_filter | AC=6;AF=0.130;AN=46;BaseQ           |
| 19597 | chrY | 13329506 | . | A | G    | 259.86  | PASS          | AC=4;AF=0.074;AN=54;BaseQRankSum=   |
| 19598 | chrY | 13329516 | . | G | T    | 239.39  | PASS          | AC=3;AF=0.052;AN=58;BaseQRankSum=   |
| 19599 | chrY | 13329518 | . | G | A    | 217.35  | PASS          | AC=2;AF=0.034;AN=58;BaseQRankSum=   |
| 19600 | chrY | 13329524 | . | G | T    | 229.37  | PASS          | AC=2;AF=0.033;AN=60;BaseQRankSum=   |
| 19601 | chrY | 13330931 | . | C | T    | 675.08  | PASS          | AC=6;AF=0.086;AN=70;DP=393;FS=0.0   |
| 19602 | chrY | 13331076 | . | A | G    | 709.78  | PASS          | AC=4;AF=0.133;AN=30;BaseQRankSum=   |
| 19603 | chrY | 13331100 | . | C | G    | 693.29  | PASS          | AC=4;AF=0.143;AN=28;BaseQRankSum=   |
| 19604 | chrY | 13331101 | . | A | G    | 698.58  | PASS          | AC=4;AF=0.143;AN=28;BaseQRankSum=   |
| 19605 | chrY | 13331256 | . | C | T    | 49.42   | PASS          | AC=1;AF=0.023;AN=44;BaseQRankSum=   |
| 19606 | chrY | 13331264 | . | T | C    | 47.23   | PASS          | AC=1;AF=0.020;AN=50;BaseQRankSum=   |
| 19607 | chrY | 13331385 | . | T | G    | 198.06  | my_snp_filter | AC=7;AF=0.125;AN=56;BaseQ           |
| 19608 | chrY | 13331402 | . | A | G    | 32.72   | my_snp_filter | AC=1;AF=0.017;AN=58;BaseQ           |

|       |      |          |   |   |     |         |               |                                    |
|-------|------|----------|---|---|-----|---------|---------------|------------------------------------|
| 19609 | chrY | 13331412 | . | C | A   | 196.26  | PASS          | AC=3;AF=0.054;AN=56;BaseQRankSum=  |
| 19610 | chrY | 13331444 | . | C | T   | 38.56   | my_snp_filter | AC=2;AF=0.031;AN=64;BaseQ          |
| 19611 | chrY | 13331501 | . | C | A   | 1246.82 | PASS          | AC=7;AF=0.100;AN=70;BaseQRankSum=  |
| 19612 | chrY | 13331509 | . | A | G   | 496.17  | PASS          | AC=3;AF=0.043;AN=70;BaseQRankSum=  |
| 19613 | chrY | 13331524 | . | A | G   | 187.03  | my_snp_filter | AC=5;AF=0.074;AN=68;BaseQ          |
| 19614 | chrY | 13331545 | . | A | G   | 193.76  | PASS          | AC=1;AF=0.014;AN=70;BaseQRankSum=  |
| 19615 | chrY | 13331552 | . | G | A   | 187.92  | PASS          | AC=1;AF=0.014;AN=70;BaseQRankSum=  |
| 19616 | chrY | 13331707 | . | G | T   | 249.05  | PASS          | AC=3;AF=0.050;AN=60;BaseQRankSum=  |
| 19617 | chrY | 13331712 | . | T | A   | 279.31  | my_snp_filter | AC=4;AF=0.069;AN=58;BaseQ          |
| 19618 | chrY | 13331713 | . | G | A   | 254.93  | my_snp_filter | AC=4;AF=0.069;AN=58;BaseQ          |
| 19619 | chrY | 13331722 | . | G | C   | 880.37  | my_snp_filter | AC=8;AF=0.143;AN=56;BaseQ          |
| 19620 | chrY | 13331827 | . | T | G   | 163.19  | PASS          | AC=1;AF=0.016;AN=64;BaseQRankSum=  |
| 19621 | chrY | 13331833 | . | G | A   | 243.49  | PASS          | AC=1;AF=0.016;AN=64;BaseQRankSum=  |
| 19622 | chrY | 13331840 | . | G | T   | 85.95   | my_snp_filter | AC=1;AF=0.016;AN=64;BaseQ          |
| 19623 | chrY | 13331889 | . | A | G   | 4274.33 | PASS          | AC=11;AF=0.162;AN=68;BaseQRankSum= |
| 19624 | chrY | 13331902 | . | A | G   | 4304.67 | PASS          | AC=11;AF=0.162;AN=68;BaseQRankSum= |
| 19625 | chrY | 13331935 | . | G | A   | 89.07   | my_snp_filter | AC=3;AF=0.043;AN=70;BaseQ          |
| 19626 | chrY | 13331979 | . | A | G   | 798.14  | PASS          | AC=11;AF=0.157;AN=70;BaseQRankSum= |
| 19627 | chrY | 13332016 | . | A | C   | 1689.62 | my_snp_filter | AC=9;AF=0.129;AN=70;BaseQ          |
| 19628 | chrY | 13332020 | . | A | C   | 831.48  | my_snp_filter | AC=9;AF=0.129;AN=70;BaseQ          |
| 19629 | chrY | 13332029 | . | G | T   | 954.42  | PASS          | AC=11;AF=0.157;AN=70;BaseQRankSum= |
| 19630 | chrY | 13332041 | . | T | C   | 1818.93 | my_snp_filter | AC=14;AF=0.200;AN=70;BaseQ         |
| 19631 | chrY | 13332042 | . | G | C   | 45.71   | my_snp_filter | AC=1;AF=0.014;AN=70;BaseQ          |
| 19632 | chrY | 13332044 | . | G | T   | 360.36  | PASS          | AC=5;AF=0.071;AN=70;BaseQRankSum=  |
| 19633 | chrY | 13332069 | . | T | C   | 226.22  | my_snp_filter | AC=5;AF=0.071;AN=70;BaseQ          |
| 19634 | chrY | 13332081 | . | T | C   | 134.39  | my_snp_filter | AC=5;AF=0.071;AN=70;BaseQ          |
| 19635 | chrY | 13332083 | . | C | T   | 200.98  | my_snp_filter | AC=5;AF=0.071;AN=70;BaseQ          |
| 19636 | chrY | 13332090 | . | C | T   | 256.11  | my_snp_filter | AC=5;AF=0.071;AN=70;BaseQ          |
| 19637 | chrY | 13332095 | . | T | C   | 264.93  | PASS          | AC=7;AF=0.100;AN=70;BaseQRankSum=  |
| 19638 | chrY | 13332101 | . | A | G   | 281.14  | PASS          | AC=7;AF=0.103;AN=68;BaseQRankSum=  |
| 19639 | chrY | 13332106 | . | G | A   | 208.99  | PASS          | AC=6;AF=0.091;AN=66;BaseQRankSum=  |
| 19640 | chrY | 13332116 | . | C | T   | 124.24  | my_snp_filter | AC=5;AF=0.076;AN=66;BaseQ          |
| 19641 | chrY | 13332142 | . | C | A   | 222.73  | my_snp_filter | AC=6;AF=0.088;AN=68;BaseQ          |
| 19642 | chrY | 13332153 | . | C | G   | 386.89  | PASS          | AC=7;AF=0.103;AN=68;BaseQRankSum=  |
| 19643 | chrY | 13332156 | . | G | A   | 5059.53 | PASS          | AC=27;AF=0.386;AN=70;BaseQRankSum= |
| 19644 | chrY | 13332160 | . | C | A   | 226.63  | my_snp_filter | AC=5;AF=0.071;AN=70;BaseQ          |
| 19645 | chrY | 13332167 | . | C | T   | 440.91  | PASS          | AC=6;AF=0.086;AN=70;BaseQRankSum=  |
| 19646 | chrY | 13332170 | . | G | T   | 204.31  | PASS          | AC=4;AF=0.057;AN=70;BaseQRankSum=  |
| 19647 | chrY | 13332172 | . | T | C   | 498.31  | PASS          | AC=6;AF=0.086;AN=70;BaseQRankSum=  |
| 19648 | chrY | 13332180 | . | G | C   | 640.31  | PASS          | AC=7;AF=0.100;AN=70;BaseQRankSum=  |
| 19649 | chrY | 13332198 | . | G | T   | 146.14  | PASS          | AC=4;AF=0.063;AN=64;BaseQRankSum=  |
| 19650 | chrY | 13332210 | . | C | G   | 184.48  | PASS          | AC=5;AF=0.078;AN=64;BaseQRankSum=  |
| 19651 | chrY | 13332218 | . | G | C   | 35.93   | PASS          | AC=2;AF=0.030;AN=66;BaseQRankSum=  |
| 19652 | chrY | 13332224 | . | G | C   | 238.80  | PASS          | AC=3;AF=0.045;AN=66;BaseQRankSum=  |
| 19653 | chrY | 13332225 | . | C | T   | 740.24  | my_snp_filter | AC=12;AF=0.188;AN=64;BaseQ         |
| 19654 | chrY | 13332246 | . | G | C   | 1973.82 | my_snp_filter | AC=14;AF=0.206;AN=68;BaseQ         |
| 19655 | chrY | 13332268 | . | C | T   | 157.57  | my_snp_filter | AC=4;AF=0.061;AN=66;BaseQ          |
| 19656 | chrY | 13332277 | . | C | T   | 1038.29 | my_snp_filter | AC=7;AF=0.106;AN=66;BaseQ          |
| 19657 | chrY | 13332303 | . | C | A   | 1272.77 | my_snp_filter | AC=8;AF=0.118;AN=68;BaseQ          |
| 19658 | chrY | 13332322 | . | C | T   | 1712.23 | my_snp_filter | AC=9;AF=0.129;AN=70;BaseQ          |
| 19659 | chrY | 13332330 | . | A | T   | 1517.99 | my_snp_filter | AC=8;AF=0.114;AN=70;BaseQ          |
| 19660 | chrY | 13332833 | . | C | A   | 60.85   | my_snp_filter | AC=3;AF=0.047;AN=64;BaseQ          |
| 19661 | chrY | 13332835 | . | C | T   | 60.77   | my_snp_filter | AC=3;AF=0.047;AN=64;BaseQ          |
| 19662 | chrY | 13332857 | . | T | A   | 559.18  | PASS          | AC=9;AF=0.145;AN=62;BaseQRankSum=  |
| 19663 | chrY | 13333712 | . | A | G   | 91.60   | my_snp_filter | AC=2;AF=0.033;AN=60;BaseQ          |
| 19664 | chrY | 13333971 | . | T | G   | 33.46   | my_snp_filter | AC=2;AF=0.029;AN=70;BaseQ          |
| 19665 | chrY | 13334368 | . | C | T   | 1481.93 | PASS          | AC=6;AF=0.091;AN=66;BaseQRankSum=  |
| 19666 | chrY | 13334385 | . | A | G   | 57.50   | PASS          | AC=1;AF=0.014;AN=70;BaseQRankSum=  |
| 19667 | chrY | 13334400 | . | G | C   | 72.32   | my_snp_filter | AC=2;AF=0.029;AN=70;BaseQ          |
| 19668 | chrY | 13334652 | . | A | C   | 247.73  | PASS          | AC=4;AF=0.059;AN=68;BaseQRankSum=  |
| 19669 | chrY | 13334665 | . | C | G   | 520.47  | PASS          | AC=5;AF=0.076;AN=66;BaseQRankSum=  |
| 19670 | chrY | 13334741 | . | T | G   | 1022.02 | PASS          | AC=6;AF=0.167;AN=36;BaseQRankSum=  |
| 19671 | chrY | 13334763 | . | A | G,* | 431.45  | PASS          | AC=1,2;AF=0.036,0.071;AN=28;BaseQ  |
| 19672 | chrY | 13334764 | . | C | T,* | 424.20  | PASS          | AC=1,2;AF=0.036,0.071;AN=28;BaseQ  |
| 19673 | chrY | 13334819 | . | G | A   | 169.51  | my_snp_filter | AC=4;AF=0.222;AN=18;BaseQ          |
| 19674 | chrY | 13334873 | . | C | T   | 1002.61 | PASS          | AC=6;AF=0.333;AN=18;BaseQRankSum=  |
| 19675 | chrY | 13334883 | . | A | T   | 42.86   | my_snp_filter | AC=2;AF=0.111;AN=18;BaseQ          |
| 19676 | chrY | 13334889 | . | T | C   | 209.23  | my_snp_filter | AC=4;AF=0.222;AN=18;BaseQ          |
| 19677 | chrY | 13334891 | . | A | C   | 493.83  | PASS          | AC=6;AF=0.333;AN=18;BaseQRankSum=  |
| 19678 | chrY | 13334990 | . | T | C   | 395.69  | PASS          | AC=2;AF=0.111;AN=18;BaseQRankSum=  |
| 19679 | chrY | 13335007 | . | T | C   | 924.44  | my_snp_filter | AC=5;AF=0.278;AN=18;BaseQ          |
| 19680 | chrY | 13335016 | . | T | A   | 790.97  | my_snp_filter | AC=5;AF=0.278;AN=18;BaseQ          |
| 19681 | chrY | 13335026 | . | G | A   | 818.18  | my_snp_filter | AC=5;AF=0.250;AN=20;BaseQ          |
| 19682 | chrY | 13335598 | . | G | A   | 850.13  | PASS          | AC=6;AF=0.333;AN=18;BaseQRankSum=  |
| 19683 | chrY | 13335602 | . | G | A   | 1048.59 | PASS          | AC=8;AF=0.400;AN=20;BaseQRankSum=  |
| 19684 | chrY | 13335612 | . | T | C   | 865.18  | PASS          | AC=6;AF=0.300;AN=20;BaseQRankSum=  |

|       |      |          |   |   |   |         |               |                                   |
|-------|------|----------|---|---|---|---------|---------------|-----------------------------------|
| 19685 | chrY | 13335619 | . | A | G | 114.78  | my_snp_filter | AC=2;AF=0.091;AN=22;BaseQ         |
| 19686 | chrY | 13335644 | . | C | T | 114.46  | my_snp_filter | AC=2;AF=0.091;AN=22;BaseQ         |
| 19687 | chrY | 13335687 | . | G | A | 498.14  | PASS          | AC=5;AF=0.227;AN=22;BaseQRankSum= |
| 19688 | chrY | 13335735 | . | C | T | 90.89   | my_snp_filter | AC=2;AF=0.091;AN=22;BaseQ         |
| 19689 | chrY | 13335741 | . | C | G | 408.68  | PASS          | AC=4;AF=0.200;AN=20;BaseQRankSum= |
| 19690 | chrY | 13335758 | . | C | A | 127.34  | my_snp_filter | AC=3;AF=0.125;AN=24;BaseQ         |
| 19691 | chrY | 13335775 | . | T | C | 67.68   | my_snp_filter | AC=2;AF=0.083;AN=24;BaseQ         |
| 19692 | chrY | 13335777 | . | G | T | 185.78  | my_snp_filter | AC=4;AF=0.167;AN=24;BaseQ         |
| 19693 | chrY | 13335781 | . | C | T | 179.76  | my_snp_filter | AC=4;AF=0.167;AN=24;BaseQ         |
| 19694 | chrY | 13335801 | . | T | C | 1352.52 | PASS          | AC=8;AF=0.286;AN=28;BaseQRankSum= |
| 19695 | chrY | 13335824 | . | C | A | 96.82   | my_snp_filter | AC=3;AF=0.083;AN=36;BaseQ         |
| 19696 | chrY | 13335831 | . | G | A | 661.84  | PASS          | AC=5;AF=0.132;AN=38;BaseQRankSum= |
| 19697 | chrY | 13335861 | . | G | T | 142.59  | my_snp_filter | AC=3;AF=0.052;AN=58;BaseQ         |
| 19698 | chrY | 13335900 | . | C | A | 521.33  | PASS          | AC=4;AF=0.065;AN=62;BaseQRankSum= |
| 19699 | chrY | 13336023 | . | C | T | 483.20  | PASS          | AC=4;AF=0.057;AN=70;BaseQRankSum= |
| 19700 | chrY | 13336042 | . | G | A | 57.71   | my_snp_filter | AC=1;AF=0.014;AN=70;BaseQ         |
| 19701 | chrY | 13336088 | . | G | A | 199.58  | PASS          | AC=2;AF=0.029;AN=70;BaseQRankSum= |
| 19702 | chrY | 13336105 | . | C | T | 184.99  | PASS          | AC=1;AF=0.014;AN=70;BaseQRankSum= |
| 19703 | chrY | 13336117 | . | C | A | 190     | PASS          | AC=1;AF=0.014;AN=70;BaseQRankSum= |
| 19704 | chrY | 13336370 | . | C | G | 185.01  | PASS          | AC=4;AF=0.059;AN=68;BaseQRankSum= |
| 19705 | chrY | 13336447 | . | G | T | 112.86  | PASS          | AC=2;AF=0.048;AN=42;BaseQRankSum= |
| 19706 | chrY | 13336459 | . | G | T | 88.11   | PASS          | AC=2;AF=0.050;AN=40;BaseQRankSum= |
| 19707 | chrY | 13336471 | . | C | T | 40.14   | my_snp_filter | AC=2;AF=0.053;AN=38;BaseQ         |
| 19708 | chrY | 13336537 | . | A | G | 174.74  | PASS          | AC=2;AF=0.100;AN=20;BaseQRankSum= |
| 19709 | chrY | 13336573 | . | T | C | 122.82  | PASS          | AC=1;AF=0.056;AN=18;BaseQRankSum= |
| 19710 | chrY | 13336584 | . | C | G | 136.90  | PASS          | AC=1;AF=0.056;AN=18;BaseQRankSum= |
| 19711 | chrY | 13336621 | . | A | G | 120.35  | PASS          | AC=1;AF=0.056;AN=18;BaseQRankSum= |
| 19712 | chrY | 13336627 | . | G | T | 113.35  | PASS          | AC=1;AF=0.056;AN=18;BaseQRankSum= |
| 19713 | chrY | 13336630 | . | C | T | 129.32  | PASS          | AC=1;AF=0.056;AN=18;BaseQRankSum= |
| 19714 | chrY | 13336652 | . | C | T | 430.83  | PASS          | AC=5;AF=0.250;AN=20;BaseQRankSum= |
| 19715 | chrY | 13336653 | . | G | A | 100.12  | my_snp_filter | AC=3;AF=0.150;AN=20;BaseQ         |
| 19716 | chrY | 13336656 | . | A | G | 387.30  | PASS          | AC=1;AF=0.050;AN=20;BaseQRankSum= |
| 19717 | chrY | 13336664 | . | T | A | 79.36   | my_snp_filter | AC=3;AF=0.150;AN=20;BaseQ         |
| 19718 | chrY | 13336668 | . | G | T | 44.18   | my_snp_filter | AC=1;AF=0.050;AN=20;BaseQ         |
| 19719 | chrY | 13336669 | . | T | G | 186.10  | PASS          | AC=3;AF=0.150;AN=20;BaseQRankSum= |
| 19720 | chrY | 13336689 | . | C | T | 835.78  | my_snp_filter | AC=6;AF=0.273;AN=22;BaseQ         |
| 19721 | chrY | 13336694 | . | A | C | 117.19  | PASS          | AC=4;AF=0.182;AN=22;BaseQRankSum= |
| 19722 | chrY | 13336710 | . | G | A | 31.06   | my_snp_filter | AC=1;AF=0.045;AN=22;BaseQ         |
| 19723 | chrY | 13336716 | . | G | A | 52.69   | my_snp_filter | AC=4;AF=0.182;AN=22;BaseQ         |
| 19724 | chrY | 13336889 | . | G | A | 72.80   | PASS          | AC=1;AF=0.042;AN=24;BaseQRankSum= |
| 19725 | chrY | 13336907 | . | G | C | 66.21   | PASS          | AC=1;AF=0.042;AN=24;BaseQRankSum= |
| 19726 | chrY | 13336947 | . | C | T | 39.86   | my_snp_filter | AC=2;AF=0.100;AN=20;BaseQ         |
| 19727 | chrY | 13337906 | . | T | C | 191.82  | PASS          | AC=5;AF=0.250;AN=20;BaseQRankSum= |
| 19728 | chrY | 13338057 | . | C | A | 89.47   | my_snp_filter | AC=2;AF=0.100;AN=20;BaseQ         |
| 19729 | chrY | 13338064 | . | C | A | 70.52   | my_snp_filter | AC=2;AF=0.100;AN=20;BaseQ         |
| 19730 | chrY | 13338067 | . | A | T | 159.19  | PASS          | AC=2;AF=0.111;AN=18;BaseQRankSum= |
| 19731 | chrY | 13338075 | . | C | T | 139.18  | PASS          | AC=1;AF=0.050;AN=20;BaseQRankSum= |
| 19732 | chrY | 13338106 | . | C | T | 171.09  | PASS          | AC=2;AF=0.100;AN=20;BaseQRankSum= |
| 19733 | chrY | 13338293 | . | G | A | 276.18  | PASS          | AC=2;AF=0.111;AN=18;BaseQRankSum= |
| 19734 | chrY | 13338382 | . | T | C | 211.40  | PASS          | AC=4;AF=0.200;AN=20;BaseQRankSum= |
| 19735 | chrY | 13338480 | . | A | G | 100.65  | my_snp_filter | AC=2;AF=0.091;AN=22;BaseQ         |
| 19736 | chrY | 13338579 | . | A | G | 227.49  | PASS          | AC=3;AF=0.167;AN=18;BaseQRankSum= |
| 19737 | chrY | 13338675 | . | G | C | 211.19  | PASS          | AC=3;AF=0.150;AN=20;BaseQRankSum= |
| 19738 | chrY | 13338678 | . | T | G | 227.49  | PASS          | AC=3;AF=0.150;AN=20;BaseQRankSum= |
| 19739 | chrY | 13338694 | . | C | T | 278.92  | PASS          | AC=3;AF=0.150;AN=20;BaseQRankSum= |
| 19740 | chrY | 13338704 | . | G | A | 288.61  | PASS          | AC=4;AF=0.200;AN=20;BaseQRankSum= |
| 19741 | chrY | 13338803 | . | T | C | 441.21  | PASS          | AC=3;AF=0.167;AN=18;BaseQRankSum= |
| 19742 | chrY | 13338806 | . | C | G | 594.65  | PASS          | AC=6;AF=0.333;AN=18;BaseQRankSum= |
| 19743 | chrY | 13338813 | . | G | A | 370.42  | PASS          | AC=2;AF=0.111;AN=18;BaseQRankSum= |
| 19744 | chrY | 13338816 | . | A | G | 457.42  | PASS          | AC=2;AF=0.111;AN=18;BaseQRankSum= |
| 19745 | chrY | 13338818 | . | G | A | 37.78   | my_snp_filter | AC=2;AF=0.111;AN=18;BaseQ         |
| 19746 | chrY | 13338821 | . | G | A | 513.42  | PASS          | AC=2;AF=0.111;AN=18;BaseQRankSum= |
| 19747 | chrY | 13338836 | . | A | C | 884.70  | PASS          | AC=4;AF=0.222;AN=18;BaseQRankSum= |
| 19748 | chrY | 13339001 | . | A | T | 114.03  | PASS          | AC=1;AF=0.045;AN=22;BaseQRankSum= |
| 19749 | chrY | 13339027 | . | T | A | 121.99  | PASS          | AC=1;AF=0.045;AN=22;BaseQRankSum= |
| 19750 | chrY | 13339029 | . | A | C | 115.09  | PASS          | AC=1;AF=0.045;AN=22;BaseQRankSum= |
| 19751 | chrY | 13339030 | . | T | G | 109.17  | PASS          | AC=1;AF=0.045;AN=22;BaseQRankSum= |
| 19752 | chrY | 13339171 | . | T | C | 174.40  | PASS          | AC=1;AF=0.056;AN=18;BaseQRankSum= |
| 19753 | chrY | 13339195 | . | A | G | 320.97  | PASS          | AC=1;AF=0.050;AN=20;BaseQRankSum= |
| 19754 | chrY | 13339203 | . | A | G | 323.39  | PASS          | AC=2;AF=0.100;AN=20;BaseQRankSum= |
| 19755 | chrY | 13339205 | . | A | G | 365.39  | PASS          | AC=2;AF=0.100;AN=20;BaseQRankSum= |
| 19756 | chrY | 13339231 | . | C | T | 431.40  | PASS          | AC=2;AF=0.091;AN=22;BaseQRankSum= |
| 19757 | chrY | 13339256 | . | A | T | 480.53  | my_snp_filter | AC=3;AF=0.125;AN=24;BaseQ         |
| 19758 | chrY | 13339268 | . | A | T | 78      | PASS          | AC=1;AF=0.042;AN=24;BaseQRankSum= |
| 19759 | chrY | 13339304 | . | A | T | 310.13  | PASS          | AC=3;AF=0.115;AN=26;BaseQRankSum= |
| 19760 | chrY | 13339333 | . | A | T | 452.47  | PASS          | AC=3;AF=0.115;AN=26;BaseQRankSum= |

|       |      |          |   |   |     |         |               |                                    |
|-------|------|----------|---|---|-----|---------|---------------|------------------------------------|
| 19761 | chrY | 13339336 | . | G | C   | 329.98  | PASS          | AC=3;AF=0.115;AN=26;BaseQRankSum=  |
| 19762 | chrY | 13339347 | . | T | C   | 246.63  | PASS          | AC=4;AF=0.154;AN=26;BaseQRankSum=  |
| 19763 | chrY | 13339352 | . | A | T   | 226.11  | PASS          | AC=3;AF=0.125;AN=24;BaseQRankSum=  |
| 19764 | chrY | 13339357 | . | T | G   | 279.77  | PASS          | AC=3;AF=0.136;AN=22;BaseQRankSum=  |
| 19765 | chrY | 13339369 | . | G | A   | 308.62  | PASS          | AC=3;AF=0.150;AN=20;BaseQRankSum=  |
| 19766 | chrY | 13339393 | . | T | G   | 99.45   | PASS          | AC=2;AF=0.100;AN=20;BaseQRankSum=  |
| 19767 | chrY | 13339572 | . | C | T   | 424.79  | PASS          | AC=2;AF=0.125;AN=16;BaseQRankSum=  |
| 19768 | chrY | 13339574 | . | C | T   | 420.75  | PASS          | AC=2;AF=0.111;AN=18;BaseQRankSum=  |
| 19769 | chrY | 13339577 | . | C | A   | 313.05  | PASS          | AC=2;AF=0.111;AN=18;BaseQRankSum=  |
| 19770 | chrY | 13339592 | . | T | A   | 288.33  | PASS          | AC=2;AF=0.111;AN=18;BaseQRankSum=  |
| 19771 | chrY | 13339594 | . | T | G   | 33.05   | my_snp_filter | AC=2;AF=0.111;AN=18;BaseQ          |
| 19772 | chrY | 13339600 | . | T | C   | 33.06   | my_snp_filter | AC=2;AF=0.111;AN=18;BaseQ          |
| 19773 | chrY | 13339601 | . | G | C   | 33.16   | my_snp_filter | AC=2;AF=0.111;AN=18;BaseQ          |
| 19774 | chrY | 13339609 | . | G | A   | 1210.44 | PASS          | AC=4;AF=0.222;AN=18;BaseQRankSum=  |
| 19775 | chrY | 13339625 | . | C | T   | 329.14  | PASS          | AC=3;AF=0.167;AN=18;BaseQRankSum=  |
| 19776 | chrY | 13339626 | . | C | G   | 567.55  | PASS          | AC=5;AF=0.278;AN=18;BaseQRankSum=  |
| 19777 | chrY | 13339632 | . | G | T   | 291.28  | PASS          | AC=2;AF=0.111;AN=18;BaseQRankSum=  |
| 19778 | chrY | 13339641 | . | G | A   | 106.31  | PASS          | AC=2;AF=0.111;AN=18;BaseQRankSum=  |
| 19779 | chrY | 13339669 | . | T | C   | 265.97  | PASS          | AC=2;AF=0.111;AN=18;BaseQRankSum=  |
| 19780 | chrY | 13339684 | . | T | A,* | 543.82  | PASS          | AC=1,3;AF=0.050,0.150;AN=20;BaseQ  |
| 19781 | chrY | 13339686 | . | G | T   | 468.96  | PASS          | AC=1;AF=0.050;AN=20;BaseQRankSum=  |
| 19782 | chrY | 13339693 | . | T | G,* | 557.14  | PASS          | AC=1,3;AF=0.050,0.150;AN=20;BaseQ  |
| 19783 | chrY | 13339702 | . | C | G,* | 575.68  | PASS          | AC=1,3;AF=0.050,0.150;AN=20;BaseQ  |
| 19784 | chrY | 13339725 | . | A | G   | 553.14  | PASS          | AC=2;AF=0.100;AN=20;BaseQRankSum=  |
| 19785 | chrY | 13339788 | . | C | T   | 2003.61 | my_snp_filter | AC=8;AF=0.400;AN=20;BaseQ          |
| 19786 | chrY | 13339812 | . | G | A   | 639.55  | PASS          | AC=5;AF=0.227;AN=22;BaseQRankSum=  |
| 19787 | chrY | 13339813 | . | C | T   | 137.52  | PASS          | AC=2;AF=0.091;AN=22;BaseQRankSum=  |
| 19788 | chrY | 13339885 | . | C | T   | 448.09  | PASS          | AC=5;AF=0.250;AN=20;BaseQRankSum=  |
| 19789 | chrY | 13339891 | . | A | T   | 574.77  | PASS          | AC=5;AF=0.250;AN=20;BaseQRankSum=  |
| 19790 | chrY | 13340328 | . | C | G   | 111.04  | PASS          | AC=1;AF=0.056;AN=18;BaseQRankSum=  |
| 19791 | chrY | 13340503 | . | T | C   | 126.44  | PASS          | AC=2;AF=0.083;AN=24;BaseQRankSum=  |
| 19792 | chrY | 13340506 | . | T | C   | 154.72  | PASS          | AC=3;AF=0.136;AN=22;BaseQRankSum=  |
| 19793 | chrY | 13340514 | . | A | G   | 148.36  | PASS          | AC=2;AF=0.100;AN=20;BaseQRankSum=  |
| 19794 | chrY | 13340581 | . | G | A   | 33.43   | my_snp_filter | AC=1;AF=0.050;AN=20;BaseQ          |
| 19795 | chrY | 13340600 | . | C | A   | 39.06   | my_snp_filter | AC=1;AF=0.045;AN=22;BaseQ          |
| 19796 | chrY | 13340609 | . | A | G   | 616.63  | PASS          | AC=6;AF=0.300;AN=20;BaseQRankSum=  |
| 19797 | chrY | 13340615 | . | C | T   | 33.09   | my_snp_filter | AC=1;AF=0.050;AN=20;BaseQ          |
| 19798 | chrY | 13340628 | . | A | G   | 558.56  | PASS          | AC=6;AF=0.300;AN=20;BaseQRankSum=  |
| 19799 | chrY | 13340638 | . | G | A   | 364.87  | PASS          | AC=3;AF=0.167;AN=18;BaseQRankSum=  |
| 19800 | chrY | 13340644 | . | T | C   | 367.82  | PASS          | AC=3;AF=0.167;AN=18;BaseQRankSum=  |
| 19801 | chrY | 13340650 | . | T | C   | 298.48  | PASS          | AC=3;AF=0.250;AN=12;BaseQRankSum=  |
| 19802 | chrY | 13340652 | . | T | C   | 304.58  | PASS          | AC=3;AF=0.250;AN=12;BaseQRankSum=  |
| 19803 | chrY | 13340658 | . | G | A   | 60.05   | my_snp_filter | AC=2;AF=0.111;AN=18;BaseQ          |
| 19804 | chrY | 13340917 | . | C | T   | 797.60  | PASS          | AC=6;AF=0.333;AN=18;BaseQRankSum=  |
| 19805 | chrY | 13340921 | . | G | A   | 775.98  | PASS          | AC=6;AF=0.333;AN=18;BaseQRankSum=  |
| 19806 | chrY | 13340924 | . | C | T   | 748.87  | PASS          | AC=6;AF=0.333;AN=18;BaseQRankSum=  |
| 19807 | chrY | 13340942 | . | T | C   | 367.82  | PASS          | AC=6;AF=0.333;AN=18;BaseQRankSum=  |
| 19808 | chrY | 13340967 | . | T | G   | 88.84   | my_snp_filter | AC=2;AF=0.111;AN=18;BaseQ          |
| 19809 | chrY | 13341206 | . | G | A   | 1354.55 | PASS          | AC=6;AF=0.333;AN=18;BaseQRankSum=  |
| 19810 | chrY | 13341417 | . | T | C   | 226.63  | PASS          | AC=2;AF=0.100;AN=20;BaseQRankSum=  |
| 19811 | chrY | 13341459 | . | G | A   | 38.61   | my_snp_filter | AC=2;AF=0.100;AN=20;BaseQ          |
| 19812 | chrY | 13341462 | . | T | C   | 111.30  | PASS          | AC=1;AF=0.050;AN=20;BaseQRankSum=  |
| 19813 | chrY | 13341464 | . | T | C   | 111.30  | PASS          | AC=1;AF=0.050;AN=20;BaseQRankSum=  |
| 19814 | chrY | 13341519 | . | C | T   | 128.98  | PASS          | AC=1;AF=0.045;AN=22;BaseQRankSum=  |
| 19815 | chrY | 13341546 | . | G | A   | 916.44  | PASS          | AC=3;AF=0.150;AN=20;BaseQRankSum=  |
| 19816 | chrY | 13341611 | . | C | T   | 55.17   | my_snp_filter | AC=1;AF=0.050;AN=20;BaseQ          |
| 19817 | chrY | 13341674 | . | C | G   | 751.27  | PASS          | AC=4;AF=0.200;AN=20;BaseQRankSum=  |
| 19818 | chrY | 13341678 | . | G | T   | 829.51  | PASS          | AC=4;AF=0.200;AN=20;BaseQRankSum=  |
| 19819 | chrY | 13341843 | . | T | C   | 47.57   | PASS          | AC=1;AF=0.050;AN=20;BaseQRankSum=  |
| 19820 | chrY | 13341844 | . | G | A   | 48.26   | PASS          | AC=1;AF=0.050;AN=20;BaseQRankSum=  |
| 19821 | chrY | 13341845 | . | G | C   | 107.29  | PASS          | AC=1;AF=0.050;AN=20;BaseQRankSum=  |
| 19822 | chrY | 13341895 | . | C | T   | 106.76  | PASS          | AC=2;AF=0.100;AN=20;BaseQRankSum=  |
| 19823 | chrY | 13342181 | . | A | T   | 2108.09 | my_snp_filter | AC=9;AF=0.500;AN=18;BaseQ          |
| 19824 | chrY | 13342225 | . | T | C   | 52.67   | my_snp_filter | AC=1;AF=0.056;AN=18;BaseQ          |
| 19825 | chrY | 13342235 | . | G | A   | 1126.91 | PASS          | AC=7;AF=0.389;AN=18;BaseQRankSum=  |
| 19826 | chrY | 13342377 | . | C | A   | 2567.09 | PASS          | AC=9;AF=0.500;AN=18;BaseQRankSum=  |
| 19827 | chrY | 13342392 | . | C | G   | 257.36  | my_snp_filter | AC=3;AF=0.150;AN=20;BaseQ          |
| 19828 | chrY | 13342410 | . | C | A   | 3893.34 | PASS          | AC=11;AF=0.550;AN=20;BaseQRankSum= |
| 19829 | chrY | 13342434 | . | A | G   | 2127.91 | PASS          | AC=9;AF=0.450;AN=20;BaseQRankSum=  |
| 19830 | chrY | 13342487 | . | T | C   | 3069.09 | my_snp_filter | AC=9;AF=0.500;AN=18;BaseQ          |
| 19831 | chrY | 13342523 | . | A | T   | 1286.69 | my_snp_filter | AC=8;AF=0.444;AN=18;BaseQ          |
| 19832 | chrY | 13342542 | . | T | C   | 153.03  | my_snp_filter | AC=3;AF=0.167;AN=18;BaseQ          |
| 19833 | chrY | 13342638 | . | G | A   | 142.97  | my_snp_filter | AC=4;AF=0.222;AN=18;BaseQ          |
| 19834 | chrY | 13342648 | . | C | T   | 126.74  | PASS          | AC=3;AF=0.167;AN=18;BaseQRankSum=  |
| 19835 | chrY | 13343141 | . | C | A   | 235.25  | PASS          | AC=3;AF=0.167;AN=18;BaseQRankSum=  |
| 19836 | chrY | 13343146 | . | T | G   | 777.03  | my_snp_filter | AC=4;AF=0.222;AN=18;BaseQ          |

|       |      |          |   |   |     |          |               |                                   |
|-------|------|----------|---|---|-----|----------|---------------|-----------------------------------|
| 19837 | chrY | 13343198 | . | T | A   | 248.68   | PASS          | AC=2;AF=0.111;AN=18;BaseQRankSum= |
| 19838 | chrY | 13343283 | . | A | G   | 161.25   | PASS          | AC=1;AF=0.056;AN=18;BaseQRankSum= |
| 19839 | chrY | 13343293 | . | A | T   | 194.26   | PASS          | AC=1;AF=0.056;AN=18;BaseQRankSum= |
| 19840 | chrY | 13343298 | . | C | T   | 36.45    | my_snp_filter | AC=1;AF=0.056;AN=18;BaseQ         |
| 19841 | chrY | 13343299 | . | A | T   | 60.47    | PASS          | AC=1;AF=0.056;AN=18;BaseQRankSum= |
| 19842 | chrY | 13343304 | . | C | A   | 733.79   | PASS          | AC=5;AF=0.278;AN=18;BaseQRankSum= |
| 19843 | chrY | 13343320 | . | T | C   | 441.51   | PASS          | AC=1;AF=0.056;AN=18;BaseQRankSum= |
| 19844 | chrY | 13343334 | . | T | A   | 157.42   | PASS          | AC=2;AF=0.111;AN=18;BaseQRankSum= |
| 19845 | chrY | 13343356 | . | C | T   | 98.46    | my_snp_filter | AC=3;AF=0.167;AN=18;BaseQ         |
| 19846 | chrY | 13343359 | . | G | A   | 101.46   | my_snp_filter | AC=3;AF=0.167;AN=18;BaseQ         |
| 19847 | chrY | 13343408 | . | T | G   | 355.23   | PASS          | AC=2;AF=0.111;AN=18;BaseQRankSum= |
| 19848 | chrY | 13343458 | . | T | A   | 164.48   | PASS          | AC=2;AF=0.111;AN=18;BaseQRankSum= |
| 19849 | chrY | 13343479 | . | T | C   | 84.41    | PASS          | AC=1;AF=0.056;AN=18;BaseQRankSum= |
| 19850 | chrY | 13343482 | . | T | C   | 83.37    | PASS          | AC=1;AF=0.056;AN=18;BaseQRankSum= |
| 19851 | chrY | 13343597 | . | G | T   | 32.74    | my_snp_filter | AC=2;AF=0.111;AN=18;BaseQ         |
| 19852 | chrY | 13343662 | . | C | G   | 31.32    | my_snp_filter | AC=1;AF=0.056;AN=18;BaseQ         |
| 19853 | chrY | 13344084 | . | A | G   | 11165.26 | PASS          | AC=58;AF=0.829;AN=70;DP=5         |
| 19854 | chrY | 13345115 | . | G | T,* | 1099.77  | PASS          | AC=6,1;AF=0.333,0.056;AN=18;BaseQ |
| 19855 | chrY | 13345123 | . | T | C   | 65.33    | my_snp_filter | AC=1;AF=0.056;AN=18;BaseQ         |
| 19856 | chrY | 13345128 | . | A | G   | 627.25   | PASS          | AC=6;AF=0.333;AN=18;BaseQRankSum= |
| 19857 | chrY | 13345159 | . | T | A   | 1982.38  | PASS          | AC=8;AF=0.400;AN=20;BaseQRankSum= |
| 19858 | chrY | 13345169 | . | T | A,G | 990.62   | PASS          | AC=4,3;AF=0.200,0.150;AN=20;BaseQ |
| 19859 | chrY | 13345179 | . | T | C   | 471.25   | PASS          | AC=4;AF=0.200;AN=20;BaseQRankSum= |
| 19860 | chrY | 13345191 | . | T | A   | 43.98    | my_snp_filter | AC=2;AF=0.100;AN=20;BaseQ         |
| 19861 | chrY | 13345216 | . | G | T   | 391.12   | PASS          | AC=3;AF=0.136;AN=22;BaseQRankSum= |
| 19862 | chrY | 13345234 | . | A | G   | 477.49   | PASS          | AC=5;AF=0.227;AN=22;BaseQRankSum= |
| 19863 | chrY | 13345261 | . | G | A   | 602.88   | PASS          | AC=5;AF=0.227;AN=22;BaseQRankSum= |
| 19864 | chrY | 13345271 | . | A | G   | 1586.20  | my_snp_filter | AC=8;AF=0.308;AN=26;BaseQ         |
| 19865 | chrY | 13345286 | . | T | A   | 491.54   | PASS          | AC=5;AF=0.192;AN=26;BaseQRankSum= |
| 19866 | chrY | 13345325 | . | G | T   | 147.71   | my_snp_filter | AC=3;AF=0.068;AN=44;BaseQ         |
| 19867 | chrY | 13345360 | . | G | A   | 144.01   | my_snp_filter | AC=4;AF=0.067;AN=60;BaseQ         |
| 19868 | chrY | 13345391 | . | T | A   | 730.47   | my_snp_filter | AC=7;AF=0.109;AN=64;BaseQ         |
| 19869 | chrY | 13345445 | . | C | T   | 60.58    | my_snp_filter | AC=4;AF=0.057;AN=70;BaseQ         |
| 19870 | chrY | 13345697 | . | G | A   | 150.92   | PASS          | AC=3;AF=0.100;AN=30;BaseQRankSum= |
| 19871 | chrY | 13345777 | . | A | G   | 125.81   | PASS          | AC=1;AF=0.042;AN=24;BaseQRankSum= |
| 19872 | chrY | 13345801 | . | A | G   | 210.62   | PASS          | AC=2;AF=0.091;AN=22;BaseQRankSum= |
| 19873 | chrY | 13345820 | . | C | T   | 668      | PASS          | AC=4;AF=0.182;AN=22;BaseQRankSum= |
| 19874 | chrY | 13345821 | . | G | T   | 447.17   | PASS          | AC=4;AF=0.167;AN=24;BaseQRankSum= |
| 19875 | chrY | 13345944 | . | G | C   | 38.93    | my_snp_filter | AC=2;AF=0.100;AN=20;BaseQ         |
| 19876 | chrY | 13345946 | . | C | A   | 119.81   | PASS          | AC=2;AF=0.100;AN=20;BaseQRankSum= |
| 19877 | chrY | 13345990 | . | A | G   | 164.43   | PASS          | AC=3;AF=0.150;AN=20;BaseQRankSum= |
| 19878 | chrY | 13346004 | . | C | T   | 89.53    | PASS          | AC=2;AF=0.100;AN=20;BaseQRankSum= |
| 19879 | chrY | 13346251 | . | C | T   | 239.96   | PASS          | AC=5;AF=0.089;AN=56;BaseQRankSum= |
| 19880 | chrY | 13346267 | . | G | T   | 277.32   | PASS          | AC=5;AF=0.083;AN=60;BaseQRankSum= |
| 19881 | chrY | 13346339 | . | A | G   | 30.96    | my_snp_filter | AC=4;AF=0.059;AN=68;BaseQ         |
| 19882 | chrY | 13346633 | . | C | T   | 256.98   | PASS          | AC=2;AF=0.083;AN=24;BaseQRankSum= |
| 19883 | chrY | 13346634 | . | A | G   | 369.66   | PASS          | AC=3;AF=0.136;AN=22;BaseQRankSum= |
| 19884 | chrY | 13346722 | . | G | T   | 422.12   | PASS          | AC=5;AF=0.278;AN=18;BaseQRankSum= |
| 19885 | chrY | 13346744 | . | C | A   | 187.13   | PASS          | AC=2;AF=0.100;AN=20;BaseQRankSum= |
| 19886 | chrY | 13346771 | . | A | C   | 196.10   | PASS          | AC=6;AF=0.333;AN=18;BaseQRankSum= |
| 19887 | chrY | 13346982 | . | A | C   | 93.14    | PASS          | AC=2;AF=0.111;AN=18;BaseQRankSum= |
| 19888 | chrY | 13347012 | . | T | C   | 33.24    | my_snp_filter | AC=1;AF=0.056;AN=18;BaseQ         |
| 19889 | chrY | 13347028 | . | G | A   | 56.10    | my_snp_filter | AC=2;AF=0.111;AN=18;BaseQ         |
| 19890 | chrY | 13347087 | . | C | A   | 193.28   | PASS          | AC=4;AF=0.222;AN=18;BaseQRankSum= |
| 19891 | chrY | 13347116 | . | G | T   | 75.17    | my_snp_filter | AC=2;AF=0.111;AN=18;BaseQ         |
| 19892 | chrY | 13347463 | . | C | T   | 393.11   | PASS          | AC=3;AF=0.167;AN=18;BaseQRankSum= |
| 19893 | chrY | 13347464 | . | A | G   | 567.75   | PASS          | AC=4;AF=0.222;AN=18;BaseQRankSum= |
| 19894 | chrY | 13347567 | . | G | A   | 334.97   | PASS          | AC=4;AF=0.222;AN=18;BaseQRankSum= |
| 19895 | chrY | 13347573 | . | G | T   | 234.72   | PASS          | AC=3;AF=0.167;AN=18;BaseQRankSum= |
| 19896 | chrY | 13347576 | . | C | G   | 66.35    | PASS          | AC=1;AF=0.056;AN=18;BaseQRankSum= |
| 19897 | chrY | 13347687 | . | G | A   | 608.19   | PASS          | AC=4;AF=0.200;AN=20;BaseQRankSum= |
| 19898 | chrY | 13347690 | . | C | T   | 605.72   | PASS          | AC=4;AF=0.200;AN=20;BaseQRankSum= |
| 19899 | chrY | 13347695 | . | C | T   | 671.72   | PASS          | AC=4;AF=0.200;AN=20;BaseQRankSum= |
| 19900 | chrY | 13347699 | . | T | G   | 179.51   | PASS          | AC=1;AF=0.050;AN=20;BaseQRankSum= |
| 19901 | chrY | 13347704 | . | C | G   | 102.16   | PASS          | AC=2;AF=0.100;AN=20;BaseQRankSum= |
| 19902 | chrY | 13347718 | . | C | A   | 857.27   | PASS          | AC=4;AF=0.200;AN=20;BaseQRankSum= |
| 19903 | chrY | 13347750 | . | A | C   | 1205.01  | PASS          | AC=7;AF=0.350;AN=20;BaseQRankSum= |
| 19904 | chrY | 13347773 | . | A | G   | 883.24   | PASS          | AC=4;AF=0.200;AN=20;BaseQRankSum= |
| 19905 | chrY | 13347777 | . | A | T   | 855.12   | PASS          | AC=4;AF=0.200;AN=20;BaseQRankSum= |
| 19906 | chrY | 13347800 | . | A | G   | 627.49   | PASS          | AC=3;AF=0.150;AN=20;BaseQRankSum= |
| 19907 | chrY | 13347851 | . | T | C   | 185.23   | PASS          | AC=1;AF=0.056;AN=18;BaseQRankSum= |
| 19908 | chrY | 13347854 | . | G | T   | 184.80   | PASS          | AC=1;AF=0.056;AN=18;BaseQRankSum= |
| 19909 | chrY | 13347859 | . | G | A   | 185.75   | PASS          | AC=1;AF=0.056;AN=18;BaseQRankSum= |
| 19910 | chrY | 13347998 | . | A | C   | 63.32    | PASS          | AC=1;AF=0.056;AN=18;BaseQRankSum= |
| 19911 | chrY | 13348021 | . | T | C   | 54.32    | PASS          | AC=1;AF=0.056;AN=18;BaseQRankSum= |
| 19912 | chrY | 13348228 | . | A | C   | 122.05   | PASS          | AC=2;AF=0.111;AN=18;BaseQRankSum= |

|       |      |          |   |   |   |         |               |                                   |
|-------|------|----------|---|---|---|---------|---------------|-----------------------------------|
| 19913 | chrY | 13348249 | . | G | A | 35.37   | my_snp_filter | AC=2;AF=0.100;AN=20;BaseQ         |
| 19914 | chrY | 13348286 | . | A | G | 89.89   | my_snp_filter | AC=3;AF=0.150;AN=20;BaseQ         |
| 19915 | chrY | 13348314 | . | G | A | 42.30   | PASS          | AC=1;AF=0.050;AN=20;BaseQRankSum= |
| 19916 | chrY | 13348315 | . | T | C | 44.16   | PASS          | AC=1;AF=0.050;AN=20;BaseQRankSum= |
| 19917 | chrY | 13348316 | . | G | A | 43.18   | PASS          | AC=1;AF=0.050;AN=20;BaseQRankSum= |
| 19918 | chrY | 13348319 | . | C | A | 66.33   | PASS          | AC=1;AF=0.056;AN=18;BaseQRankSum= |
| 19919 | chrY | 13348348 | . | C | T | 176.90  | PASS          | AC=3;AF=0.167;AN=18;BaseQRankSum= |
| 19920 | chrY | 13348358 | . | A | T | 131.16  | PASS          | AC=3;AF=0.167;AN=18;BaseQRankSum= |
| 19921 | chrY | 13348369 | . | G | A | 53.13   | my_snp_filter | AC=2;AF=0.111;AN=18;BaseQ         |
| 19922 | chrY | 13348435 | . | G | C | 3730.86 | PASS          | AC=18;AF=1.00;AN=18;DP=147;FS=0.0 |
| 19923 | chrY | 13348577 | . | C | T | 160.28  | PASS          | AC=3;AF=0.167;AN=18;BaseQRankSum= |
| 19924 | chrY | 13348598 | . | G | C | 37.50   | my_snp_filter | AC=2;AF=0.111;AN=18;BaseQ         |
| 19925 | chrY | 13348717 | . | A | T | 627.30  | PASS          | AC=5;AF=0.250;AN=20;BaseQRankSum= |
| 19926 | chrY | 13348739 | . | G | A | 48.94   | PASS          | AC=1;AF=0.050;AN=20;BaseQRankSum= |
| 19927 | chrY | 13348741 | . | T | C | 49.22   | PASS          | AC=1;AF=0.050;AN=20;BaseQRankSum= |
| 19928 | chrY | 13348744 | . | T | C | 85.86   | PASS          | AC=2;AF=0.100;AN=20;BaseQRankSum= |
| 19929 | chrY | 13348749 | . | T | C | 80.83   | my_snp_filter | AC=3;AF=0.150;AN=20;BaseQ         |
| 19930 | chrY | 13348767 | . | T | C | 616.09  | PASS          | AC=5;AF=0.250;AN=20;BaseQRankSum= |
| 19931 | chrY | 13348778 | . | G | A | 603.66  | PASS          | AC=5;AF=0.278;AN=18;BaseQRankSum= |
| 19932 | chrY | 13348858 | . | C | G | 279.76  | PASS          | AC=4;AF=0.222;AN=18;BaseQRankSum= |
| 19933 | chrY | 13348896 | . | C | T | 198.46  | PASS          | AC=3;AF=0.167;AN=18;BaseQRankSum= |
| 19934 | chrY | 13348897 | . | C | T | 41.32   | PASS          | AC=1;AF=0.056;AN=18;BaseQRankSum= |
| 19935 | chrY | 13348900 | . | C | T | 375.47  | PASS          | AC=5;AF=0.278;AN=18;BaseQRankSum= |
| 19936 | chrY | 13348902 | . | C | T | 1484.06 | PASS          | AC=7;AF=0.389;AN=18;BaseQRankSum= |
| 19937 | chrY | 13348940 | . | T | C | 326.62  | PASS          | AC=5;AF=0.278;AN=18;BaseQRankSum= |
| 19938 | chrY | 13349042 | . | T | C | 502.25  | PASS          | AC=3;AF=0.150;AN=20;BaseQRankSum= |
| 19939 | chrY | 13349045 | . | T | G | 522.31  | PASS          | AC=3;AF=0.150;AN=20;BaseQRankSum= |
| 19940 | chrY | 13349048 | . | C | T | 527.49  | PASS          | AC=3;AF=0.150;AN=20;BaseQRankSum= |
| 19941 | chrY | 13349054 | . | G | A | 564.11  | PASS          | AC=3;AF=0.150;AN=20;BaseQRankSum= |
| 19942 | chrY | 13349064 | . | A | T | 559.43  | PASS          | AC=3;AF=0.150;AN=20;BaseQRankSum= |
| 19943 | chrY | 13349080 | . | A | G | 860.27  | PASS          | AC=4;AF=0.200;AN=20;BaseQRankSum= |
| 19944 | chrY | 13349184 | . | T | C | 501.10  | PASS          | AC=3;AF=0.167;AN=18;BaseQRankSum= |
| 19945 | chrY | 13349230 | . | G | C | 124.37  | PASS          | AC=1;AF=0.056;AN=18;BaseQRankSum= |
| 19946 | chrY | 13349231 | . | A | C | 122.82  | PASS          | AC=1;AF=0.056;AN=18;BaseQRankSum= |
| 19947 | chrY | 13349387 | . | T | C | 289.96  | PASS          | AC=2;AF=0.111;AN=18;BaseQRankSum= |
| 19948 | chrY | 13349399 | . | T | A | 343.56  | PASS          | AC=2;AF=0.111;AN=18;BaseQRankSum= |
| 19949 | chrY | 13349425 | . | T | A | 348.28  | PASS          | AC=2;AF=0.111;AN=18;BaseQRankSum= |
| 19950 | chrY | 13349475 | . | G | T | 88.71   | my_snp_filter | AC=2;AF=0.111;AN=18;BaseQ         |
| 19951 | chrY | 13349496 | . | C | T | 91.94   | PASS          | AC=3;AF=0.167;AN=18;BaseQRankSum= |
| 19952 | chrY | 13349644 | . | G | A | 287.36  | PASS          | AC=6;AF=0.333;AN=18;BaseQRankSum= |
| 19953 | chrY | 13349694 | . | A | G | 486.52  | PASS          | AC=5;AF=0.278;AN=18;BaseQRankSum= |
| 19954 | chrY | 13349739 | . | A | C | 557.14  | PASS          | AC=3;AF=0.167;AN=18;BaseQRankSum= |
| 19955 | chrY | 13349747 | . | T | G | 347.82  | PASS          | AC=3;AF=0.167;AN=18;BaseQRankSum= |
| 19956 | chrY | 13349771 | . | G | A | 184.90  | PASS          | AC=3;AF=0.167;AN=18;BaseQRankSum= |
| 19957 | chrY | 13349806 | . | C | T | 69.15   | my_snp_filter | AC=3;AF=0.167;AN=18;BaseQ         |
| 19958 | chrY | 13349839 | . | T | A | 35.52   | my_snp_filter | AC=2;AF=0.111;AN=18;BaseQ         |
| 19959 | chrY | 13350013 | . | G | C | 163.13  | PASS          | AC=1;AF=0.042;AN=24;BaseQRankSum= |
| 19960 | chrY | 13350014 | . | T | C | 162.30  | PASS          | AC=1;AF=0.042;AN=24;BaseQRankSum= |
| 19961 | chrY | 13350029 | . | G | A | 41.35   | my_snp_filter | AC=1;AF=0.042;AN=24;BaseQ         |
| 19962 | chrY | 13350565 | . | G | T | 212.58  | my_snp_filter | AC=5;AF=0.278;AN=18;BaseQ         |
| 19963 | chrY | 13350607 | . | C | T | 161.22  | PASS          | AC=2;AF=0.111;AN=18;BaseQRankSum= |
| 19964 | chrY | 13350611 | . | A | C | 254.66  | PASS          | AC=4;AF=0.222;AN=18;BaseQRankSum= |
| 19965 | chrY | 13350623 | . | A | T | 126.81  | my_snp_filter | AC=4;AF=0.222;AN=18;BaseQ         |
| 19966 | chrY | 13350673 | . | G | A | 789.40  | PASS          | AC=5;AF=0.250;AN=20;BaseQRankSum= |
| 19967 | chrY | 13350677 | . | C | T | 731.95  | PASS          | AC=5;AF=0.250;AN=20;BaseQRankSum= |
| 19968 | chrY | 13350776 | . | C | T | 212.47  | PASS          | AC=3;AF=0.167;AN=18;BaseQRankSum= |
| 19969 | chrY | 13350804 | . | G | A | 161     | my_snp_filter | AC=5;AF=0.278;AN=18;BaseQ         |
| 19970 | chrY | 13350835 | . | G | A | 692.10  | PASS          | AC=9;AF=0.500;AN=18;BaseQRankSum= |
| 19971 | chrY | 13350887 | . | A | G | 124.67  | PASS          | AC=2;AF=0.111;AN=18;BaseQRankSum= |
| 19972 | chrY | 13350907 | . | A | G | 43.77   | my_snp_filter | AC=3;AF=0.167;AN=18;BaseQ         |
| 19973 | chrY | 13350922 | . | C | T | 46.91   | PASS          | AC=2;AF=0.125;AN=16;BaseQRankSum= |
| 19974 | chrY | 13350927 | . | T | G | 39      | PASS          | AC=2;AF=0.111;AN=18;BaseQRankSum= |
| 19975 | chrY | 13351019 | . | T | A | 35.03   | PASS          | AC=1;AF=0.056;AN=18;BaseQRankSum= |
| 19976 | chrY | 13351115 | . | T | A | 49.66   | PASS          | AC=1;AF=0.056;AN=18;BaseQRankSum= |
| 19977 | chrY | 13351208 | . | T | A | 158.85  | PASS          | AC=2;AF=0.111;AN=18;BaseQRankSum= |
| 19978 | chrY | 13351229 | . | A | T | 37.77   | PASS          | AC=2;AF=0.111;AN=18;BaseQRankSum= |
| 19979 | chrY | 13351239 | . | A | T | 195.99  | PASS          | AC=4;AF=0.222;AN=18;BaseQRankSum= |
| 19980 | chrY | 13351256 | . | A | G | 123.81  | my_snp_filter | AC=5;AF=0.278;AN=18;BaseQ         |
| 19981 | chrY | 13351341 | . | G | T | 908.08  | PASS          | AC=5;AF=0.278;AN=18;BaseQRankSum= |
| 19982 | chrY | 13351353 | . | A | G | 820.87  | PASS          | AC=5;AF=0.278;AN=18;BaseQRankSum= |
| 19983 | chrY | 13351421 | . | C | T | 35.38   | my_snp_filter | AC=1;AF=0.056;AN=18;BaseQ         |
| 19984 | chrY | 13351422 | . | C | T | 35.26   | my_snp_filter | AC=1;AF=0.056;AN=18;BaseQ         |
| 19985 | chrY | 13351474 | . | G | T | 1252.04 | PASS          | AC=9;AF=0.450;AN=20;BaseQRankSum= |
| 19986 | chrY | 13351499 | . | A | G | 134.82  | my_snp_filter | AC=4;AF=0.200;AN=20;BaseQ         |
| 19987 | chrY | 13351508 | . | G | A | 132.56  | my_snp_filter | AC=3;AF=0.150;AN=20;BaseQ         |
| 19988 | chrY | 13351681 | . | T | C | 1695.20 | my_snp_filter | AC=8;AF=0.333;AN=24;BaseQ         |

|       |      |          |   |   |     |         |               |                                   |
|-------|------|----------|---|---|-----|---------|---------------|-----------------------------------|
| 19989 | chrY | 13351687 | . | C | T   | 1125.33 | PASS          | AC=8;AF=0.364;AN=22;BaseQRankSum= |
| 19990 | chrY | 13351728 | . | A | G   | 35.09   | my_snp_filter | AC=1;AF=0.050;AN=20;BaseQ         |
| 19991 | chrY | 13351764 | . | C | T   | 316.20  | my_snp_filter | AC=6;AF=0.300;AN=20;BaseQ         |
| 19992 | chrY | 13351776 | . | T | C   | 110.35  | PASS          | AC=1;AF=0.050;AN=20;BaseQRankSum= |
| 19993 | chrY | 13351819 | . | G | C   | 501.01  | my_snp_filter | AC=8;AF=0.444;AN=18;BaseQ         |
| 19994 | chrY | 13351930 | . | T | G   | 83.34   | my_snp_filter | AC=2;AF=0.111;AN=18;BaseQ         |
| 19995 | chrY | 13351944 | . | A | G,T | 558.09  | PASS          | AC=2,5;AF=0.111,0.278;AN=18;BaseQ |
| 19996 | chrY | 13351955 | . | A | T   | 2471.09 | my_snp_filter | AC=9;AF=0.500;AN=18;BaseQ         |
| 19997 | chrY | 13351971 | . | A | G   | 238.90  | PASS          | AC=3;AF=0.167;AN=18;BaseQRankSum= |
| 19998 | chrY | 13351975 | . | G | A   | 320.75  | PASS          | AC=2;AF=0.111;AN=18;BaseQRankSum= |
| 19999 | chrY | 13351989 | . | T | A   | 168.34  | PASS          | AC=1;AF=0.056;AN=18;BaseQRankSum= |
| 20000 | chrY | 13351993 | . | G | C   | 168.33  | PASS          | AC=1;AF=0.050;AN=20;BaseQRankSum= |
| 20001 | chrY | 13352045 | . | A | G   | 950.08  | my_snp_filter | AC=8;AF=0.400;AN=20;BaseQ         |
| 20002 | chrY | 13352069 | . | T | C   | 87.80   | my_snp_filter | AC=2;AF=0.100;AN=20;BaseQ         |
| 20003 | chrY | 13352149 | . | T | A   | 31.98   | my_snp_filter | AC=1;AF=0.050;AN=20;BaseQ         |
| 20004 | chrY | 13352184 | . | C | G   | 144.50  | PASS          | AC=3;AF=0.150;AN=20;BaseQRankSum= |
| 20005 | chrY | 13352309 | . | C | G   | 30.27   | my_snp_filter | AC=1;AF=0.045;AN=22;BaseQ         |
| 20006 | chrY | 13352312 | . | A | G   | 30.27   | my_snp_filter | AC=1;AF=0.045;AN=22;BaseQ         |
| 20007 | chrY | 13352626 | . | A | T   | 103.51  | my_snp_filter | AC=3;AF=0.136;AN=22;BaseQ         |
| 20008 | chrY | 13352838 | . | C | G   | 106.93  | my_snp_filter | AC=2;AF=0.083;AN=24;BaseQ         |
| 20009 | chrY | 13352839 | . | A | G   | 106.93  | my_snp_filter | AC=2;AF=0.083;AN=24;BaseQ         |
| 20010 | chrY | 13352909 | . | C | A   | 305.18  | PASS          | AC=2;AF=0.091;AN=22;DP=189;FS=0.0 |
| 20011 | chrY | 13353036 | . | G | C   | 83.06   | PASS          | AC=2;AF=0.100;AN=20;BaseQRankSum= |
| 20012 | chrY | 13353066 | . | C | T   | 384.40  | PASS          | AC=3;AF=0.150;AN=20;BaseQRankSum= |
| 20013 | chrY | 13353074 | . | A | C   | 404.67  | PASS          | AC=3;AF=0.150;AN=20;BaseQRankSum= |
| 20014 | chrY | 13353108 | . | G | T   | 156.16  | PASS          | AC=3;AF=0.167;AN=18;BaseQRankSum= |
| 20015 | chrY | 13353489 | . | C | T   | 287.09  | PASS          | AC=3;AF=0.136;AN=22;BaseQRankSum= |
| 20016 | chrY | 13353499 | . | C | T   | 344.52  | PASS          | AC=4;AF=0.200;AN=20;BaseQRankSum= |
| 20017 | chrY | 13353528 | . | T | C   | 470.40  | PASS          | AC=7;AF=0.350;AN=20;BaseQRankSum= |
| 20018 | chrY | 13353658 | . | A | T   | 104.61  | PASS          | AC=3;AF=0.136;AN=22;BaseQRankSum= |
| 20019 | chrY | 13353667 | . | C | G   | 118.23  | PASS          | AC=3;AF=0.136;AN=22;BaseQRankSum= |
| 20020 | chrY | 13353693 | . | A | G   | 93.31   | PASS          | AC=3;AF=0.136;AN=22;BaseQRankSum= |
| 20021 | chrY | 13353833 | . | T | G   | 274.26  | PASS          | AC=4;AF=0.250;AN=16;BaseQRankSum= |
| 20022 | chrY | 13353839 | . | G | T   | 560.52  | PASS          | AC=5;AF=0.313;AN=16;BaseQRankSum= |
| 20023 | chrY | 13353856 | . | A | G   | 628.60  | PASS          | AC=5;AF=0.278;AN=18;BaseQRankSum= |
| 20024 | chrY | 13353859 | . | C | T   | 32.21   | PASS          | AC=2;AF=0.111;AN=18;DP=80;FS=0.00 |
| 20025 | chrY | 13354036 | . | A | G   | 682.59  | PASS          | AC=8;AF=0.400;AN=20;BaseQRankSum= |
| 20026 | chrY | 13354107 | . | T | C   | 418.60  | my_snp_filter | AC=4;AF=0.222;AN=18;BaseQ         |
| 20027 | chrY | 13354110 | . | C | T   | 94.19   | my_snp_filter | AC=3;AF=0.167;AN=18;BaseQ         |
| 20028 | chrY | 13354145 | . | C | T   | 250.23  | my_snp_filter | AC=4;AF=0.222;AN=18;BaseQ         |
| 20029 | chrY | 13354164 | . | C | A   | 218.74  | PASS          | AC=4;AF=0.200;AN=20;BaseQRankSum= |
| 20030 | chrY | 13354289 | . | C | T   | 82.31   | my_snp_filter | AC=3;AF=0.136;AN=22;BaseQ         |
| 20031 | chrY | 13354309 | . | G | T   | 663.72  | PASS          | AC=6;AF=0.300;AN=20;BaseQRankSum= |
| 20032 | chrY | 13354549 | . | A | G   | 1547.32 | my_snp_filter | AC=9;AF=0.500;AN=18;BaseQ         |
| 20033 | chrY | 13354558 | . | G | T   | 358.51  | my_snp_filter | AC=5;AF=0.227;AN=22;BaseQ         |
| 20034 | chrY | 13354586 | . | C | T   | 61.06   | my_snp_filter | AC=2;AF=0.077;AN=26;BaseQ         |
| 20035 | chrY | 13354609 | . | C | A   | 657.85  | PASS          | AC=6;AF=0.231;AN=26;BaseQRankSum= |
| 20036 | chrY | 13354716 | . | T | C   | 907.94  | PASS          | AC=5;AF=0.278;AN=18;BaseQRankSum= |
| 20037 | chrY | 13354729 | . | T | C   | 787.27  | PASS          | AC=4;AF=0.222;AN=18;BaseQRankSum= |
| 20038 | chrY | 13354760 | . | C | T   | 188.84  | PASS          | AC=3;AF=0.167;AN=18;BaseQRankSum= |
| 20039 | chrY | 13354763 | . | A | C   | 846.26  | PASS          | AC=6;AF=0.333;AN=18;BaseQRankSum= |
| 20040 | chrY | 13354773 | . | T | A   | 266.87  | PASS          | AC=4;AF=0.222;AN=18;BaseQRankSum= |
| 20041 | chrY | 13354795 | . | G | T   | 67.38   | PASS          | AC=1;AF=0.056;AN=18;BaseQRankSum= |
| 20042 | chrY | 13354820 | . | T | C   | 304.69  | PASS          | AC=6;AF=0.333;AN=18;BaseQRankSum= |
| 20043 | chrY | 13355885 | . | C | A   | 1538.38 | PASS          | AC=6;AF=0.273;AN=22;DP=160;FS=0.0 |
| 20044 | chrY | 13355918 | . | G | C   | 1544.26 | PASS          | AC=8;AF=0.400;AN=20;DP=157;FS=0.0 |
| 20045 | chrY | 13355984 | . | C | A   | 401.25  | PASS          | AC=3;AF=0.150;AN=20;BaseQRankSum= |
| 20046 | chrY | 13356003 | . | A | T   | 398.86  | PASS          | AC=3;AF=0.167;AN=18;BaseQRankSum= |
| 20047 | chrY | 13356015 | . | T | A   | 424.52  | PASS          | AC=3;AF=0.167;AN=18;BaseQRankSum= |
| 20048 | chrY | 13356135 | . | G | A   | 264.47  | PASS          | AC=5;AF=0.278;AN=18;BaseQRankSum= |
| 20049 | chrY | 13356309 | . | G | A   | 97.09   | my_snp_filter | AC=2;AF=0.100;AN=20;BaseQ         |
| 20050 | chrY | 13356343 | . | G | T   | 353.09  | PASS          | AC=5;AF=0.250;AN=20;BaseQRankSum= |
| 20051 | chrY | 13356414 | . | T | C   | 37.49   | my_snp_filter | AC=2;AF=0.111;AN=18;BaseQ         |
| 20052 | chrY | 13356628 | . | G | C   | 398.08  | PASS          | AC=6;AF=0.333;AN=18;DP=139;FS=0.0 |
| 20053 | chrY | 13356656 | . | C | A   | 32.34   | PASS          | AC=1;AF=0.045;AN=22;BaseQRankSum= |
| 20054 | chrY | 13356899 | . | G | T   | 260.70  | PASS          | AC=3;AF=0.047;AN=64;BaseQRankSum= |
| 20055 | chrY | 13356918 | . | C | A   | 234.32  | PASS          | AC=3;AF=0.044;AN=68;BaseQRankSum= |
| 20056 | chrY | 13356927 | . | C | T   | 234.10  | PASS          | AC=3;AF=0.044;AN=68;BaseQRankSum= |
| 20057 | chrY | 13356938 | . | A | C   | 182.28  | PASS          | AC=3;AF=0.044;AN=68;BaseQRankSum= |
| 20058 | chrY | 13356939 | . | G | C   | 187.81  | PASS          | AC=3;AF=0.044;AN=68;BaseQRankSum= |
| 20059 | chrY | 13356948 | . | C | G   | 133.45  | PASS          | AC=4;AF=0.059;AN=68;BaseQRankSum= |
| 20060 | chrY | 13358504 | . | G | C   | 78.24   | PASS          | AC=1;AF=0.015;AN=66;BaseQRankSum= |
| 20061 | chrY | 13358527 | . | C | T   | 87.85   | PASS          | AC=2;AF=0.032;AN=62;BaseQRankSum= |
| 20062 | chrY | 13358568 | . | C | T   | 186.47  | PASS          | AC=5;AF=0.096;AN=52;BaseQRankSum= |
| 20063 | chrY | 13358595 | . | C | T   | 458.43  | PASS          | AC=4;AF=0.095;AN=42;BaseQRankSum= |
| 20064 | chrY | 13358612 | . | G | A   | 342.85  | PASS          | AC=3;AF=0.083;AN=36;BaseQRankSum= |



|       |      |          |   |   |     |         |               |                                   |
|-------|------|----------|---|---|-----|---------|---------------|-----------------------------------|
| 20065 | chrY | 13358701 | . | A | G   | 58.61   | PASS          | AC=1;AF=0.056;AN=18;BaseQRankSum= |
| 20066 | chrY | 13358706 | . | G | A   | 53.57   | PASS          | AC=1;AF=0.056;AN=18;BaseQRankSum= |
| 20067 | chrY | 13358716 | . | T | A   | 54.97   | PASS          | AC=1;AF=0.056;AN=18;BaseQRankSum= |
| 20068 | chrY | 13359115 | . | A | G   | 36.81   | my_snp_filter | AC=2;AF=0.111;AN=18;BaseQ         |
| 20069 | chrY | 13359238 | . | C | T   | 103.84  | my_snp_filter | AC=4;AF=0.222;AN=18;BaseQ         |
| 20070 | chrY | 13359240 | . | G | A   | 229.56  | PASS          | AC=2;AF=0.111;AN=18;BaseQRankSum= |
| 20071 | chrY | 13360230 | . | A | G   | 31.36   | my_snp_filter | AC=2;AF=0.031;AN=64;BaseQ         |
| 20072 | chrY | 13360266 | . | T | C   | 108.23  | my_snp_filter | AC=4;AF=0.063;AN=64;BaseQ         |
| 20073 | chrY | 13360445 | . | C | T   | 50.11   | my_snp_filter | AC=3;AF=0.044;AN=68;BaseQ         |
| 20074 | chrY | 13360479 | . | C | A   | 686.28  | PASS          | AC=6;AF=0.091;AN=66;BaseQRankSum= |
| 20075 | chrY | 13360502 | . | C | T   | 862.39  | PASS          | AC=6;AF=0.086;AN=70;BaseQRankSum= |
| 20076 | chrY | 13360618 | . | A | C   | 884.57  | PASS          | AC=4;AF=0.061;AN=66;DP=294;FS=0.0 |
| 20077 | chrY | 13361662 | . | C | T   | 382.27  | PASS          | AC=2;AF=0.091;AN=22;BaseQRankSum= |
| 20078 | chrY | 13362309 | . | G | A   | 159.62  | PASS          | AC=4;AF=0.222;AN=18;BaseQRankSum= |
| 20079 | chrY | 13362380 | . | G | A   | 45.35   | PASS          | AC=1;AF=0.056;AN=18;BaseQRankSum= |
| 20080 | chrY | 13362384 | . | G | A   | 43.11   | PASS          | AC=1;AF=0.056;AN=18;BaseQRankSum= |
| 20081 | chrY | 13362387 | . | T | A   | 40.94   | PASS          | AC=1;AF=0.056;AN=18;BaseQRankSum= |
| 20082 | chrY | 13362497 | . | T | G   | 42.35   | PASS          | AC=1;AF=0.056;AN=18;BaseQRankSum= |
| 20083 | chrY | 13362514 | . | C | A   | 322.91  | PASS          | AC=3;AF=0.167;AN=18;BaseQRankSum= |
| 20084 | chrY | 13362533 | . | C | T   | 143.66  | PASS          | AC=1;AF=0.056;AN=18;BaseQRankSum= |
| 20085 | chrY | 13362551 | . | T | G   | 40.52   | PASS          | AC=1;AF=0.056;AN=18;BaseQRankSum= |
| 20086 | chrY | 13362576 | . | T | C   | 41.15   | PASS          | AC=1;AF=0.056;AN=18;BaseQRankSum= |
| 20087 | chrY | 13362800 | . | A | G   | 49.81   | PASS          | AC=1;AF=0.056;AN=18;BaseQRankSum= |
| 20088 | chrY | 13362949 | . | C | T   | 740.74  | PASS          | AC=6;AF=0.333;AN=18;BaseQRankSum= |
| 20089 | chrY | 13362969 | . | C | A   | 283.79  | PASS          | AC=6;AF=0.333;AN=18;BaseQRankSum= |
| 20090 | chrY | 13362987 | . | C | T   | 217.97  | PASS          | AC=2;AF=0.100;AN=20;BaseQRankSum= |
| 20091 | chrY | 13362988 | . | A | G   | 215.54  | PASS          | AC=2;AF=0.100;AN=20;BaseQRankSum= |
| 20092 | chrY | 13362996 | . | G | A   | 205.71  | PASS          | AC=2;AF=0.100;AN=20;BaseQRankSum= |
| 20093 | chrY | 13363005 | . | C | T   | 207.87  | PASS          | AC=2;AF=0.091;AN=22;BaseQRankSum= |
| 20094 | chrY | 13363019 | . | T | C   | 152.19  | PASS          | AC=2;AF=0.091;AN=22;BaseQRankSum= |
| 20095 | chrY | 13363041 | . | T | C   | 696.78  | my_snp_filter | AC=5;AF=0.227;AN=22;BaseQ         |
| 20096 | chrY | 13363073 | . | T | C   | 1170.28 | my_snp_filter | AC=5;AF=0.227;AN=22;BaseQ         |
| 20097 | chrY | 13363075 | . | C | A   | 247.78  | PASS          | AC=2;AF=0.091;AN=22;BaseQRankSum= |
| 20098 | chrY | 13363088 | . | A | G   | 1015    | my_snp_filter | AC=5;AF=0.227;AN=22;BaseQ         |
| 20099 | chrY | 13363111 | . | G | A   | 927.73  | PASS          | AC=5;AF=0.227;AN=22;BaseQRankSum= |
| 20100 | chrY | 13363126 | . | C | T   | 1005.62 | PASS          | AC=6;AF=0.300;AN=20;BaseQRankSum= |
| 20101 | chrY | 13363142 | . | T | G   | 844.73  | PASS          | AC=5;AF=0.227;AN=22;BaseQRankSum= |
| 20102 | chrY | 13363175 | . | C | T   | 643.86  | PASS          | AC=7;AF=0.350;AN=20;BaseQRankSum= |
| 20103 | chrY | 13363193 | . | G | T   | 361.94  | PASS          | AC=3;AF=0.150;AN=20;BaseQRankSum= |
| 20104 | chrY | 13363219 | . | C | T   | 1837.22 | PASS          | AC=6;AF=0.300;AN=20;BaseQRankSum= |
| 20105 | chrY | 13363246 | . | G | T   | 1923.81 | PASS          | AC=7;AF=0.350;AN=20;BaseQRankSum= |
| 20106 | chrY | 13363271 | . | C | A   | 1794.05 | PASS          | AC=7;AF=0.389;AN=18;BaseQRankSum= |
| 20107 | chrY | 13363277 | . | T | A   | 201.21  | my_snp_filter | AC=5;AF=0.278;AN=18;BaseQ         |
| 20108 | chrY | 13363283 | . | C | T   | 3006.01 | my_snp_filter | AC=8;AF=0.444;AN=18;BaseQ         |
| 20109 | chrY | 13363302 | . | T | A   | 411.17  | PASS          | AC=4;AF=0.222;AN=18;BaseQRankSum= |
| 20110 | chrY | 13363343 | . | C | G   | 40.30   | my_snp_filter | AC=1;AF=0.050;AN=20;BaseQ         |
| 20111 | chrY | 13363357 | . | C | T   | 415.87  | PASS          | AC=4;AF=0.200;AN=20;BaseQRankSum= |
| 20112 | chrY | 13363373 | . | A | G   | 1005.84 | my_snp_filter | AC=6;AF=0.300;AN=20;BaseQ         |
| 20113 | chrY | 13363374 | . | T | A   | 1447.51 | PASS          | AC=8;AF=0.400;AN=20;BaseQRankSum= |
| 20114 | chrY | 13363400 | . | G | C   | 136.61  | my_snp_filter | AC=4;AF=0.222;AN=18;BaseQ         |
| 20115 | chrY | 13363416 | . | A | T   | 840.66  | PASS          | AC=6;AF=0.300;AN=20;BaseQRankSum= |
| 20116 | chrY | 13363428 | . | T | C   | 1001.58 | PASS          | AC=6;AF=0.300;AN=20;BaseQRankSum= |
| 20117 | chrY | 13363430 | . | C | T,G | 685.81  | PASS          | AC=2,3;AF=0.100,0.150;AN=20;BaseQ |
| 20118 | chrY | 13363431 | . | A | G   | 1504.59 | my_snp_filter | AC=8;AF=0.400;AN=20;BaseQ         |
| 20119 | chrY | 13363447 | . | T | G   | 120.57  | PASS          | AC=3;AF=0.150;AN=20;BaseQRankSum= |
| 20120 | chrY | 13363461 | . | G | A   | 148.97  | PASS          | AC=3;AF=0.150;AN=20;BaseQRankSum= |
| 20121 | chrY | 13363463 | . | A | T   | 84.84   | my_snp_filter | AC=3;AF=0.150;AN=20;BaseQ         |
| 20122 | chrY | 13363464 | . | T | A   | 115.03  | PASS          | AC=3;AF=0.150;AN=20;BaseQRankSum= |
| 20123 | chrY | 13363518 | . | A | C   | 711.88  | PASS          | AC=5;AF=0.278;AN=18;BaseQRankSum= |
| 20124 | chrY | 13363525 | . | C | T   | 750.62  | PASS          | AC=5;AF=0.278;AN=18;BaseQRankSum= |
| 20125 | chrY | 13363528 | . | T | C   | 795.53  | PASS          | AC=5;AF=0.278;AN=18;BaseQRankSum= |
| 20126 | chrY | 13363548 | . | T | G   | 702.54  | PASS          | AC=5;AF=0.278;AN=18;BaseQRankSum= |
| 20127 | chrY | 13363549 | . | A | C   | 702.96  | PASS          | AC=5;AF=0.278;AN=18;BaseQRankSum= |
| 20128 | chrY | 13363604 | . | A | C   | 224.75  | PASS          | AC=3;AF=0.150;AN=20;BaseQRankSum= |
| 20129 | chrY | 13363621 | . | A | G   | 107.89  | my_snp_filter | AC=3;AF=0.150;AN=20;BaseQ         |
| 20130 | chrY | 13363835 | . | T | G   | 80.51   | PASS          | AC=2;AF=0.111;AN=18;BaseQRankSum= |
| 20131 | chrY | 13363857 | . | A | C   | 168.71  | PASS          | AC=2;AF=0.111;AN=18;BaseQRankSum= |
| 20132 | chrY | 13364241 | . | A | G   | 80      | PASS          | AC=1;AF=0.056;AN=18;BaseQRankSum= |
| 20133 | chrY | 13364379 | . | A | G   | 32.81   | my_snp_filter | AC=1;AF=0.038;AN=26;BaseQ         |
| 20134 | chrY | 13364406 | . | T | A   | 121.37  | PASS          | AC=2;AF=0.077;AN=26;BaseQRankSum= |
| 20135 | chrY | 13364407 | . | A | G   | 121.42  | PASS          | AC=2;AF=0.077;AN=26;BaseQRankSum= |
| 20136 | chrY | 13364428 | . | T | C   | 3236.47 | PASS          | AC=8;AF=0.364;AN=22;BaseQRankSum= |
| 20137 | chrY | 13364436 | . | T | G   | 87.60   | PASS          | AC=1;AF=0.036;AN=28;BaseQRankSum= |
| 20138 | chrY | 13364441 | . | G | A   | 3330.87 | PASS          | AC=9;AF=0.321;AN=28;BaseQRankSum= |
| 20139 | chrY | 13364575 | . | G | T   | 2294.55 | PASS          | AC=8;AF=0.400;AN=20;BaseQRankSum= |
| 20140 | chrY | 13364588 | . | T | C   | 1847.51 | PASS          | AC=8;AF=0.400;AN=20;BaseQRankSum= |

|       |      |          |   |   |   |          |               |                                    |
|-------|------|----------|---|---|---|----------|---------------|------------------------------------|
| 20141 | chrY | 13364701 | . | A | C | 812.22   | my_snp_filter | AC=7;AF=0.350;AN=20;BaseQ          |
| 20142 | chrY | 13364785 | . | T | G | 237.93   | PASS          | AC=4;AF=0.167;AN=24;BaseQRankSum=  |
| 20143 | chrY | 13365382 | . | C | T | 44.84    | PASS          | AC=1;AF=0.033;AN=30;BaseQRankSum=  |
| 20144 | chrY | 13365389 | . | C | A | 44.96    | PASS          | AC=1;AF=0.038;AN=26;BaseQRankSum=  |
| 20145 | chrY | 13365407 | . | T | A | 41.67    | PASS          | AC=1;AF=0.031;AN=32;BaseQRankSum=  |
| 20146 | chrY | 13365434 | . | C | G | 81.46    | PASS          | AC=1;AF=0.026;AN=38;BaseQRankSum=  |
| 20147 | chrY | 13365624 | . | G | T | 107.44   | my_snp_filter | AC=5;AF=0.071;AN=70;BaseQ          |
| 20148 | chrY | 13365702 | . | T | C | 563.27   | PASS          | AC=5;AF=0.074;AN=68;BaseQRankSum=  |
| 20149 | chrY | 13365709 | . | G | C | 566.03   | PASS          | AC=5;AF=0.074;AN=68;BaseQRankSum=  |
| 20150 | chrY | 13365945 | . | G | A | 153.75   | PASS          | AC=2;AF=0.091;AN=22;BaseQRankSum=  |
| 20151 | chrY | 13366220 | . | T | C | 263.72   | PASS          | AC=5;AF=0.278;AN=18;BaseQRankSum=  |
| 20152 | chrY | 13366808 | . | T | G | 263.59   | PASS          | AC=6;AF=0.250;AN=24;BaseQRankSum=  |
| 20153 | chrY | 13366845 | . | C | T | 520.19   | PASS          | AC=5;AF=0.227;AN=22;BaseQRankSum=  |
| 20154 | chrY | 13366857 | . | T | G | 484.66   | PASS          | AC=3;AF=0.136;AN=22;BaseQRankSum=  |
| 20155 | chrY | 13366877 | . | G | A | 463.09   | PASS          | AC=3;AF=0.107;AN=28;BaseQRankSum=  |
| 20156 | chrY | 13367020 | . | G | A | 161      | PASS          | AC=2;AF=0.034;AN=58;BaseQRankSum=  |
| 20157 | chrY | 13367038 | . | T | C | 198.50   | PASS          | AC=2;AF=0.032;AN=62;BaseQRankSum=  |
| 20158 | chrY | 13367057 | . | A | T | 61.40    | my_snp_filter | AC=2;AF=0.032;AN=62;BaseQ          |
| 20159 | chrY | 13367127 | . | T | C | 50.85    | my_snp_filter | AC=2;AF=0.029;AN=70;BaseQ          |
| 20160 | chrY | 13367144 | . | T | C | 123.36   | PASS          | AC=2;AF=0.029;AN=70;BaseQRankSum=  |
| 20161 | chrY | 13367148 | . | A | G | 135.02   | PASS          | AC=2;AF=0.029;AN=70;BaseQRankSum=  |
| 20162 | chrY | 13367152 | . | G | C | 93.18    | PASS          | AC=2;AF=0.029;AN=70;BaseQRankSum=  |
| 20163 | chrY | 13367734 | . | A | G | 247.23   | PASS          | AC=3;AF=0.043;AN=70;BaseQRankSum=  |
| 20164 | chrY | 13367763 | . | C | T | 823.68   | PASS          | AC=5;AF=0.071;AN=70;BaseQRankSum=  |
| 20165 | chrY | 13367768 | . | C | T | 821.39   | PASS          | AC=5;AF=0.071;AN=70;BaseQRankSum=  |
| 20166 | chrY | 13367769 | . | A | G | 824.39   | PASS          | AC=5;AF=0.071;AN=70;BaseQRankSum=  |
| 20167 | chrY | 13367774 | . | A | G | 702.40   | PASS          | AC=5;AF=0.071;AN=70;BaseQRankSum=  |
| 20168 | chrY | 13367918 | . | A | G | 2408.24  | PASS          | AC=11;AF=0.157;AN=70;BaseQRankSum= |
| 20169 | chrY | 13367942 | . | C | T | 3857.77  | PASS          | AC=13;AF=0.191;AN=68;BaseQRankSum= |
| 20170 | chrY | 13367946 | . | G | C | 1931.05  | PASS          | AC=8;AF=0.114;AN=70;BaseQRankSum=  |
| 20171 | chrY | 13367966 | . | C | A | 2269.61  | PASS          | AC=8;AF=0.114;AN=70;BaseQRankSum=  |
| 20172 | chrY | 13367986 | . | A | C | 6391.59  | PASS          | AC=24;AF=0.343;AN=70;BaseQRankSum= |
| 20173 | chrY | 13368049 | . | A | G | 1157.87  | PASS          | AC=14;AF=0.200;AN=70;BaseQRankSum= |
| 20174 | chrY | 13368087 | . | G | A | 140.86   | PASS          | AC=2;AF=0.029;AN=68;BaseQRankSum=  |
| 20175 | chrY | 13368146 | . | A | G | 120.06   | PASS          | AC=3;AF=0.043;AN=70;BaseQRankSum=  |
| 20176 | chrY | 13368177 | . | G | A | 104.29   | PASS          | AC=3;AF=0.048;AN=62;BaseQRankSum=  |
| 20177 | chrY | 13368271 | . | C | T | 144.19   | my_snp_filter | AC=4;AF=0.167;AN=24;BaseQ          |
| 20178 | chrY | 13368433 | . | G | A | 1474.18  | PASS          | AC=6;AF=0.333;AN=18;DP=201;FS=0.0  |
| 20179 | chrY | 13368645 | . | G | A | 41.86    | PASS          | AC=1;AF=0.045;AN=22;BaseQRankSum=  |
| 20180 | chrY | 13368646 | . | C | G | 41.86    | PASS          | AC=1;AF=0.045;AN=22;BaseQRankSum=  |
| 20181 | chrY | 13368751 | . | T | C | 54.52    | PASS          | AC=1;AF=0.036;AN=28;BaseQRankSum=  |
| 20182 | chrY | 13368768 | . | G | T | 67.53    | PASS          | AC=1;AF=0.033;AN=30;BaseQRankSum=  |
| 20183 | chrY | 13369447 | . | G | A | 56.76    | my_snp_filter | AC=4;AF=0.057;AN=70;BaseQ          |
| 20184 | chrY | 13369493 | . | T | A | 103.95   | PASS          | AC=2;AF=0.029;AN=70;BaseQRankSum=  |
| 20185 | chrY | 13369622 | . | C | G | 782.68   | PASS          | AC=7;AF=0.100;AN=70;BaseQRankSum=  |
| 20186 | chrY | 13369633 | . | T | G | 1558.63  | PASS          | AC=7;AF=0.100;AN=70;BaseQRankSum=  |
| 20187 | chrY | 13369638 | . | G | A | 1434.59  | PASS          | AC=7;AF=0.100;AN=70;BaseQRankSum=  |
| 20188 | chrY | 13369641 | . | A | T | 1364.55  | PASS          | AC=7;AF=0.100;AN=70;BaseQRankSum=  |
| 20189 | chrY | 13369745 | . | C | G | 92.46    | PASS          | AC=2;AF=0.029;AN=68;BaseQRankSum=  |
| 20190 | chrY | 13369909 | . | C | T | 1249.82  | PASS          | AC=4;AF=0.059;AN=68;BaseQRankSum=  |
| 20191 | chrY | 13369920 | . | T | C | 1219.66  | PASS          | AC=13;AF=0.191;AN=68;BaseQRankSum= |
| 20192 | chrY | 13369958 | . | T | C | 128.19   | my_snp_filter | AC=5;AF=0.071;AN=70;BaseQ          |
| 20193 | chrY | 13369989 | . | G | A | 746.35   | PASS          | AC=6;AF=0.088;AN=68;BaseQRankSum=  |
| 20194 | chrY | 13370136 | . | G | T | 124.99   | PASS          | AC=3;AF=0.043;AN=70;BaseQRankSum=  |
| 20195 | chrY | 13370192 | . | G | A | 187.52   | PASS          | AC=5;AF=0.071;AN=70;BaseQRankSum=  |
| 20196 | chrY | 13370232 | . | C | T | 449.90   | PASS          | AC=7;AF=0.103;AN=68;BaseQRankSum=  |
| 20197 | chrY | 13370269 | . | C | A | 562.04   | PASS          | AC=8;AF=0.121;AN=66;BaseQRankSum=  |
| 20198 | chrY | 13370306 | . | G | A | 841.55   | PASS          | AC=3;AF=0.056;AN=54;BaseQRankSum=  |
| 20199 | chrY | 13370343 | . | T | C | 396.23   | PASS          | AC=5;AF=0.096;AN=52;BaseQRankSum=  |
| 20200 | chrY | 13370349 | . | C | T | 336      | PASS          | AC=4;AF=0.080;AN=50;BaseQRankSum=  |
| 20201 | chrY | 13370396 | . | C | G | 42.94    | PASS          | AC=2;AF=0.048;AN=42;BaseQRankSum=  |
| 20202 | chrY | 13370417 | . | G | C | 89.79    | PASS          | AC=2;AF=0.040;AN=50;BaseQRankSum=  |
| 20203 | chrY | 13370465 | . | C | A | 95.73    | PASS          | AC=3;AF=0.047;AN=64;BaseQRankSum=  |
| 20204 | chrY | 13370755 | . | A | G | 79.15    | PASS          | AC=2;AF=0.029;AN=70;BaseQRankSum=  |
| 20205 | chrY | 13370785 | . | T | C | 89.89    | PASS          | AC=2;AF=0.029;AN=70;BaseQRankSum=  |
| 20206 | chrY | 13370790 | . | G | A | 86.56    | PASS          | AC=2;AF=0.029;AN=70;BaseQRankSum=  |
| 20207 | chrY | 13370792 | . | C | G | 88.96    | PASS          | AC=2;AF=0.029;AN=70;BaseQRankSum=  |
| 20208 | chrY | 13370815 | . | G | A | 40.40    | my_snp_filter | AC=2;AF=0.029;AN=68;BaseQ          |
| 20209 | chrY | 13370823 | . | G | C | 52.58    | my_snp_filter | AC=3;AF=0.044;AN=68;BaseQ          |
| 20210 | chrY | 13370840 | . | A | G | 112.90   | PASS          | AC=3;AF=0.043;AN=70;BaseQRankSum=  |
| 20211 | chrY | 13370842 | . | C | T | 94.89    | PASS          | AC=2;AF=0.029;AN=70;BaseQRankSum=  |
| 20212 | chrY | 13371027 | . | C | T | 1588.32  | PASS          | AC=20;AF=0.286;AN=70;BaseQRankSum= |
| 20213 | chrY | 13371572 | . | C | T | 13972.91 | PASS          | AC=68;AF=1.00;AN=68;DP=47          |
| 20214 | chrY | 13371924 | . | A | G | 728.88   | my_snp_filter | AC=11;AF=0.157;AN=70;Base          |
| 20215 | chrY | 13371945 | . | T | C | 1999.97  | PASS          | AC=16;AF=0.235;AN=68;BaseQRankSum= |
| 20216 | chrY | 13371958 | . | T | C | 2208.71  | PASS          | AC=18;AF=0.257;AN=70;BaseQRankSum= |

|       |      |          |   |   |     |          |               |                                    |
|-------|------|----------|---|---|-----|----------|---------------|------------------------------------|
| 20217 | chrY | 13372033 | . | C | T   | 806.38   | PASS          | AC=8;AF=0.121;AN=66;BaseQRankSum=  |
| 20218 | chrY | 13372045 | . | A | G   | 659.68   | PASS          | AC=7;AF=0.109;AN=64;BaseQRankSum=  |
| 20219 | chrY | 13372077 | . | T | C   | 1500.30  | PASS          | AC=7;AF=0.146;AN=48;BaseQRankSum=  |
| 20220 | chrY | 13372096 | . | A | G   | 1671.10  | PASS          | AC=8;AF=0.200;AN=40;BaseQRankSum=  |
| 20221 | chrY | 13372121 | . | C | A   | 1173.44  | PASS          | AC=10;AF=0.313;AN=32;BaseQRankSum= |
| 20222 | chrY | 13372132 | . | G | T   | 75.66    | my_snp_filter | AC=2;AF=0.059;AN=34;BaseQ          |
| 20223 | chrY | 13372133 | . | G | A   | 645.33   | PASS          | AC=3;AF=0.088;AN=34;BaseQRankSum=  |
| 20224 | chrY | 13372160 | . | C | A   | 223.89   | PASS          | AC=3;AF=0.100;AN=30;BaseQRankSum=  |
| 20225 | chrY | 13372165 | . | A | C   | 868.90   | PASS          | AC=8;AF=0.286;AN=28;BaseQRankSum=  |
| 20226 | chrY | 13372170 | . | C | G   | 853.89   | PASS          | AC=8;AF=0.286;AN=28;BaseQRankSum=  |
| 20227 | chrY | 13372190 | . | C | T   | 1146.42  | PASS          | AC=10;AF=0.417;AN=24;BaseQRankSum= |
| 20228 | chrY | 13372216 | . | A | C   | 520.71   | PASS          | AC=7;AF=0.250;AN=28;BaseQRankSum=  |
| 20229 | chrY | 13372243 | . | C | T   | 1514.64  | PASS          | AC=8;AF=0.267;AN=30;BaseQRankSum=  |
| 20230 | chrY | 13372245 | . | T | A   | 1505.46  | PASS          | AC=9;AF=0.300;AN=30;BaseQRankSum=  |
| 20231 | chrY | 13372254 | . | G | A   | 1233.61  | PASS          | AC=9;AF=0.281;AN=32;BaseQRankSum=  |
| 20232 | chrY | 13372265 | . | C | A   | 1329.63  | PASS          | AC=9;AF=0.281;AN=32;BaseQRankSum=  |
| 20233 | chrY | 13372270 | . | C | A   | 1113.35  | PASS          | AC=8;AF=0.250;AN=32;BaseQRankSum=  |
| 20234 | chrY | 13372279 | . | G | A   | 1855.62  | PASS          | AC=9;AF=0.281;AN=32;BaseQRankSum=  |
| 20235 | chrY | 13372286 | . | T | A   | 1729.56  | PASS          | AC=9;AF=0.250;AN=36;BaseQRankSum=  |
| 20236 | chrY | 13372336 | . | G | C   | 691.01   | PASS          | AC=5;AF=0.086;AN=58;BaseQRankSum=  |
| 20237 | chrY | 13372390 | . | C | A   | 139.97   | PASS          | AC=2;AF=0.029;AN=68;BaseQRankSum=  |
| 20238 | chrY | 13372413 | . | A | T   | 887.86   | my_snp_filter | AC=11;AF=0.157;AN=70;Base          |
| 20239 | chrY | 13372426 | . | A | C   | 2499.45  | PASS          | AC=15;AF=0.221;AN=68;BaseQRankSum= |
| 20240 | chrY | 13372435 | . | T | C   | 2668.84  | PASS          | AC=14;AF=0.206;AN=68;BaseQRankSum= |
| 20241 | chrY | 13372460 | . | T | C   | 30.56    | my_snp_filter | AC=2;AF=0.029;AN=70;BaseQ          |
| 20242 | chrY | 13372471 | . | A | G   | 119.16   | my_snp_filter | AC=2;AF=0.029;AN=70;BaseQ          |
| 20243 | chrY | 13372520 | . | A | G   | 10671.27 | PASS          | AC=28;AF=0.400;AN=70;Base          |
| 20244 | chrY | 13372539 | . | T | C   | 6354.23  | PASS          | AC=22;AF=0.314;AN=70;BaseQRankSum= |
| 20245 | chrY | 13372540 | . | G | A   | 7217.52  | PASS          | AC=23;AF=0.329;AN=70;BaseQRankSum= |
| 20246 | chrY | 13372542 | . | T | C,A | 6221.31  | PASS          | AC=21,1;AF=0.300,0.014;AN=70;Base  |
| 20247 | chrY | 13372558 | . | A | G   | 4938.99  | PASS          | AC=23;AF=0.329;AN=70;BaseQRankSum= |
| 20248 | chrY | 13372564 | . | A | T   | 1863.35  | PASS          | AC=14;AF=0.200;AN=70;BaseQRankSum= |
| 20249 | chrY | 13372572 | . | C | T   | 681.80   | PASS          | AC=9;AF=0.129;AN=70;BaseQRankSum=  |
| 20250 | chrY | 13372602 | . | T | G   | 4017.79  | PASS          | AC=25;AF=0.357;AN=70;BaseQRankSum= |
| 20251 | chrY | 13372625 | . | C | T,G | 1918.81  | PASS          | AC=13,3;AF=0.186,0.043;AN=70;Base  |
| 20252 | chrY | 13372626 | . | C | A   | 62.06    | my_snp_filter | AC=2;AF=0.029;AN=70;BaseQ          |
| 20253 | chrY | 13372633 | . | C | T   | 2101.01  | PASS          | AC=16;AF=0.229;AN=70;BaseQRankSum= |
| 20254 | chrY | 13372652 | . | T | C   | 348.82   | PASS          | AC=4;AF=0.057;AN=70;BaseQRankSum=  |
| 20255 | chrY | 13372668 | . | A | G   | 362.74   | PASS          | AC=9;AF=0.129;AN=70;BaseQRankSum=  |
| 20256 | chrY | 13372671 | . | T | A   | 311.98   | PASS          | AC=4;AF=0.057;AN=70;BaseQRankSum=  |
| 20257 | chrY | 13372688 | . | G | T   | 518.56   | PASS          | AC=6;AF=0.086;AN=70;BaseQRankSum=  |
| 20258 | chrY | 13372696 | . | C | T   | 459.92   | PASS          | AC=7;AF=0.100;AN=70;BaseQRankSum=  |
| 20259 | chrY | 13372712 | . | G | T   | 209.18   | PASS          | AC=4;AF=0.057;AN=70;BaseQRankSum=  |
| 20260 | chrY | 13372713 | . | C | T   | 111.16   | PASS          | AC=3;AF=0.043;AN=70;BaseQRankSum=  |
| 20261 | chrY | 13372716 | . | A | G   | 130.79   | PASS          | AC=3;AF=0.043;AN=70;BaseQRankSum=  |
| 20262 | chrY | 13372722 | . | T | C   | 61.45    | my_snp_filter | AC=3;AF=0.043;AN=70;BaseQ          |
| 20263 | chrY | 13372725 | . | A | C   | 52.96    | PASS          | AC=1;AF=0.014;AN=70;BaseQRankSum=  |
| 20264 | chrY | 13372815 | . | C | T   | 950.39   | PASS          | AC=14;AF=0.200;AN=70;BaseQRankSum= |
| 20265 | chrY | 13372858 | . | G | T   | 1725.31  | PASS          | AC=13;AF=0.191;AN=68;BaseQRankSum= |
| 20266 | chrY | 13372863 | . | C | G   | 30.88    | my_snp_filter | AC=2;AF=0.029;AN=68;BaseQ          |
| 20267 | chrY | 13372868 | . | C | T   | 1827.86  | PASS          | AC=11;AF=0.162;AN=68;BaseQRankSum= |
| 20268 | chrY | 13372881 | . | A | G   | 3197.14  | PASS          | AC=9;AF=0.145;AN=62;BaseQRankSum=  |
| 20269 | chrY | 13372888 | . | G | T   | 337.56   | PASS          | AC=4;AF=0.065;AN=62;BaseQRankSum=  |
| 20270 | chrY | 13372895 | . | T | G   | 1004.54  | PASS          | AC=6;AF=0.111;AN=54;BaseQRankSum=  |
| 20271 | chrY | 13372900 | . | T | A   | 1023.94  | PASS          | AC=6;AF=0.111;AN=54;BaseQRankSum=  |
| 20272 | chrY | 13372918 | . | C | A   | 636.21   | PASS          | AC=5;AF=0.083;AN=60;BaseQRankSum=  |
| 20273 | chrY | 13372919 | . | T | A   | 2521.57  | PASS          | AC=8;AF=0.148;AN=54;BaseQRankSum=  |
| 20274 | chrY | 13372920 | . | T | A   | 2479.57  | PASS          | AC=8;AF=0.148;AN=54;BaseQRankSum=  |
| 20275 | chrY | 13372939 | . | T | G   | 628.86   | PASS          | AC=5;AF=0.093;AN=54;BaseQRankSum=  |
| 20276 | chrY | 13372952 | . | G | C   | 2709.13  | PASS          | AC=12;AF=0.250;AN=48;BaseQRankSum= |
| 20277 | chrY | 13372964 | . | T | C   | 574.89   | PASS          | AC=5;AF=0.096;AN=52;BaseQRankSum=  |
| 20278 | chrY | 13372972 | . | G | A   | 2888.92  | PASS          | AC=12;AF=0.240;AN=50;BaseQRankSum= |
| 20279 | chrY | 13373000 | . | C | T   | 95.31    | my_snp_filter | AC=2;AF=0.037;AN=54;BaseQ          |
| 20280 | chrY | 13373004 | . | C | T   | 1246.86  | PASS          | AC=8;AF=0.167;AN=48;BaseQRankSum=  |
| 20281 | chrY | 13373021 | . | C | A   | 126.44   | my_snp_filter | AC=3;AF=0.050;AN=60;BaseQ          |
| 20282 | chrY | 13373047 | . | T | C   | 208.56   | my_snp_filter | AC=4;AF=0.065;AN=62;BaseQ          |
| 20283 | chrY | 13373054 | . | T | C   | 393.50   | PASS          | AC=6;AF=0.097;AN=62;BaseQRankSum=  |
| 20284 | chrY | 13373099 | . | G | A   | 83.71    | my_snp_filter | AC=2;AF=0.029;AN=68;BaseQ          |
| 20285 | chrY | 13373101 | . | T | G   | 241.73   | PASS          | AC=2;AF=0.029;AN=68;BaseQRankSum=  |
| 20286 | chrY | 13373252 | . | C | T   | 58.19    | PASS          | AC=1;AF=0.014;AN=70;BaseQRankSum=  |
| 20287 | chrY | 13373253 | . | A | G   | 59.27    | PASS          | AC=1;AF=0.014;AN=70;BaseQRankSum=  |
| 20288 | chrY | 13373257 | . | G | A   | 61.71    | PASS          | AC=1;AF=0.014;AN=70;BaseQRankSum=  |
| 20289 | chrY | 13373263 | . | G | A   | 61.42    | PASS          | AC=1;AF=0.014;AN=70;BaseQRankSum=  |
| 20290 | chrY | 13373295 | . | C | A   | 64.63    | PASS          | AC=1;AF=0.015;AN=68;BaseQRankSum=  |
| 20291 | chrY | 13373296 | . | C | T   | 180.29   | PASS          | AC=2;AF=0.029;AN=68;BaseQRankSum=  |
| 20292 | chrY | 13373300 | . | T | A   | 135.96   | PASS          | AC=2;AF=0.029;AN=68;BaseQRankSum=  |

|       |      |          |   |   |     |         |               |                                    |
|-------|------|----------|---|---|-----|---------|---------------|------------------------------------|
| 20293 | chrY | 13373302 | . | A | G   | 270.07  | PASS          | AC=3;AF=0.044;AN=68;BaseQRankSum=  |
| 20294 | chrY | 13373305 | . | T | C   | 279.60  | PASS          | AC=3;AF=0.044;AN=68;BaseQRankSum=  |
| 20295 | chrY | 13373306 | . | G | A   | 183.60  | PASS          | AC=2;AF=0.030;AN=66;BaseQRankSum=  |
| 20296 | chrY | 13373367 | . | A | T   | 121.89  | my_snp_filter | AC=4;AF=0.118;AN=34;BaseQ          |
| 20297 | chrY | 13373395 | . | A | G   | 271.86  | PASS          | AC=4;AF=0.154;AN=26;BaseQRankSum=  |
| 20298 | chrY | 13373396 | . | T | C   | 210.66  | PASS          | AC=4;AF=0.154;AN=26;BaseQRankSum=  |
| 20299 | chrY | 13373527 | . | A | G   | 1579.75 | PASS          | AC=6;AF=0.333;AN=18;DP=143;FS=0.0  |
| 20300 | chrY | 13373537 | . | A | T   | 1607.91 | PASS          | AC=6;AF=0.300;AN=20;DP=147;FS=0.0  |
| 20301 | chrY | 13373588 | . | T | C   | 67.87   | PASS          | AC=1;AF=0.050;AN=20;BaseQRankSum=  |
| 20302 | chrY | 13373590 | . | C | T   | 67.89   | PASS          | AC=1;AF=0.050;AN=20;BaseQRankSum=  |
| 20303 | chrY | 13373822 | . | C | T   | 50.60   | PASS          | AC=2;AF=0.030;AN=66;BaseQRankSum=  |
| 20304 | chrY | 13373834 | . | A | T   | 46.23   | PASS          | AC=2;AF=0.030;AN=66;BaseQRankSum=  |
| 20305 | chrY | 13373900 | . | C | A   | 62.64   | PASS          | AC=2;AF=0.029;AN=70;BaseQRankSum=  |
| 20306 | chrY | 13373903 | . | A | C   | 305.07  | my_snp_filter | AC=6;AF=0.086;AN=70;BaseQ          |
| 20307 | chrY | 13373913 | . | A | G   | 72.46   | my_snp_filter | AC=2;AF=0.029;AN=70;BaseQ          |
| 20308 | chrY | 13373923 | . | G | A   | 137.87  | PASS          | AC=2;AF=0.029;AN=70;BaseQRankSum=  |
| 20309 | chrY | 13373924 | . | T | G   | 137.89  | PASS          | AC=2;AF=0.029;AN=70;BaseQRankSum=  |
| 20310 | chrY | 13373932 | . | G | A   | 1287.71 | my_snp_filter | AC=9;AF=0.129;AN=70;BaseQ          |
| 20311 | chrY | 13373969 | . | A | T   | 785.19  | PASS          | AC=6;AF=0.086;AN=70;BaseQRankSum=  |
| 20312 | chrY | 13373980 | . | G | A   | 817.86  | PASS          | AC=6;AF=0.086;AN=70;BaseQRankSum=  |
| 20313 | chrY | 13373986 | . | G | A   | 2378.93 | PASS          | AC=7;AF=0.100;AN=70;BaseQRankSum=  |
| 20314 | chrY | 13373992 | . | C | A   | 591.78  | PASS          | AC=1;AF=0.014;AN=70;BaseQRankSum=  |
| 20315 | chrY | 13373996 | . | G | A   | 848.12  | PASS          | AC=6;AF=0.086;AN=70;BaseQRankSum=  |
| 20316 | chrY | 13374029 | . | A | G   | 809.05  | PASS          | AC=8;AF=0.138;AN=58;BaseQRankSum=  |
| 20317 | chrY | 13374037 | . | C | T   | 795.95  | PASS          | AC=8;AF=0.133;AN=60;BaseQRankSum=  |
| 20318 | chrY | 13374043 | . | A | G   | 72.32   | my_snp_filter | AC=3;AF=0.052;AN=58;BaseQ          |
| 20319 | chrY | 13374053 | . | A | G   | 718.32  | PASS          | AC=8;AF=0.138;AN=58;BaseQRankSum=  |
| 20320 | chrY | 13374066 | . | G | A   | 45.63   | my_snp_filter | AC=2;AF=0.043;AN=46;BaseQ          |
| 20321 | chrY | 13374072 | . | A | T,G | 852.34  | PASS          | AC=3,5;AF=0.063,0.104;AN=48;BaseQ  |
| 20322 | chrY | 13374073 | . | A | C   | 1411.98 | PASS          | AC=8;AF=0.167;AN=48;BaseQRankSum=  |
| 20323 | chrY | 13374083 | . | T | A   | 377.48  | PASS          | AC=5;AF=0.109;AN=46;BaseQRankSum=  |
| 20324 | chrY | 13374084 | . | C | G   | 961.04  | PASS          | AC=6;AF=0.130;AN=46;BaseQRankSum=  |
| 20325 | chrY | 13374116 | . | A | G   | 703.25  | PASS          | AC=10;AF=0.357;AN=28;BaseQRankSum= |
| 20326 | chrY | 13374125 | . | G | C   | 197.99  | PASS          | AC=4;AF=0.143;AN=28;BaseQRankSum=  |
| 20327 | chrY | 13374134 | . | C | T   | 1550.61 | PASS          | AC=9;AF=0.346;AN=26;BaseQRankSum=  |
| 20328 | chrY | 13374144 | . | T | C   | 230.59  | PASS          | AC=3;AF=0.107;AN=28;BaseQRankSum=  |
| 20329 | chrY | 13374158 | . | C | A   | 212.17  | PASS          | AC=4;AF=0.143;AN=28;BaseQRankSum=  |
| 20330 | chrY | 13374181 | . | G | A   | 978.87  | PASS          | AC=8;AF=0.364;AN=22;BaseQRankSum=  |
| 20331 | chrY | 13374182 | . | C | T   | 525.84  | PASS          | AC=3;AF=0.125;AN=24;BaseQRankSum=  |
| 20332 | chrY | 13374217 | . | G | C   | 337.68  | PASS          | AC=2;AF=0.083;AN=24;BaseQRankSum=  |
| 20333 | chrY | 13374234 | . | T | G   | 283.59  | PASS          | AC=2;AF=0.111;AN=18;BaseQRankSum=  |
| 20334 | chrY | 13374247 | . | A | T   | 292.91  | PASS          | AC=2;AF=0.111;AN=18;BaseQRankSum=  |
| 20335 | chrY | 13374256 | . | C | A   | 63.08   | PASS          | AC=2;AF=0.111;AN=18;BaseQRankSum=  |
| 20336 | chrY | 13374265 | . | A | G   | 612.49  | PASS          | AC=4;AF=0.200;AN=20;BaseQRankSum=  |
| 20337 | chrY | 13374269 | . | A | C   | 136.23  | PASS          | AC=2;AF=0.100;AN=20;BaseQRankSum=  |
| 20338 | chrY | 13374271 | . | G | A,C | 315.05  | PASS          | AC=2,3;AF=0.100,0.150;AN=20;BaseQ  |
| 20339 | chrY | 13374273 | . | A | C   | 185.73  | PASS          | AC=2;AF=0.091;AN=22;BaseQRankSum=  |
| 20340 | chrY | 13374275 | . | A | C   | 78.14   | PASS          | AC=1;AF=0.045;AN=22;BaseQRankSum=  |
| 20341 | chrY | 13374279 | . | A | C   | 31.34   | PASS          | AC=1;AF=0.045;AN=22;BaseQRankSum=  |
| 20342 | chrY | 13374281 | . | A | C   | 42.36   | PASS          | AC=1;AF=0.042;AN=24;BaseQRankSum=  |
| 20343 | chrY | 13374367 | . | C | A   | 163.04  | PASS          | AC=4;AF=0.061;AN=66;BaseQRankSum=  |
| 20344 | chrY | 13374406 | . | C | T   | 1110.74 | PASS          | AC=12;AF=0.176;AN=68;BaseQRankSum= |
| 20345 | chrY | 13374445 | . | T | G   | 4877.72 | PASS          | AC=21;AF=0.300;AN=70;BaseQRankSum= |
| 20346 | chrY | 13374446 | . | C | T   | 4977.79 | PASS          | AC=21;AF=0.300;AN=70;BaseQRankSum= |
| 20347 | chrY | 13374451 | . | A | C   | 5828.48 | PASS          | AC=21;AF=0.300;AN=70;BaseQRankSum= |
| 20348 | chrY | 13374462 | . | T | G   | 105.28  | PASS          | AC=2;AF=0.029;AN=70;BaseQRankSum=  |
| 20349 | chrY | 13374468 | . | A | G   | 6815.91 | PASS          | AC=21;AF=0.300;AN=70;BaseQRankSum= |
| 20350 | chrY | 13374485 | . | C | T   | 7294.74 | PASS          | AC=20;AF=0.286;AN=70;BaseQRankSum= |
| 20351 | chrY | 13374494 | . | A | G   | 212.08  | PASS          | AC=2;AF=0.029;AN=70;BaseQRankSum=  |
| 20352 | chrY | 13374496 | . | A | G   | 7067.99 | PASS          | AC=24;AF=0.343;AN=70;BaseQRankSum= |
| 20353 | chrY | 13374501 | . | T | C   | 6792.43 | PASS          | AC=22;AF=0.314;AN=70;BaseQRankSum= |
| 20354 | chrY | 13374539 | . | C | A   | 3424.28 | PASS          | AC=19;AF=0.271;AN=70;BaseQRankSum= |
| 20355 | chrY | 13374572 | . | C | G   | 2300.39 | PASS          | AC=20;AF=0.286;AN=70;BaseQRankSum= |
| 20356 | chrY | 13374622 | . | C | G   | 4032.65 | PASS          | AC=24;AF=0.387;AN=62;BaseQRankSum= |
| 20357 | chrY | 13374681 | . | A | T   | 1675.71 | my_snp_filter | AC=12;AF=0.171;AN=70;BaseQ         |
| 20358 | chrY | 13374774 | . | T | G   | 610.39  | my_snp_filter | AC=8;AF=0.114;AN=70;BaseQ          |
| 20359 | chrY | 13374833 | . | G | C   | 70.92   | my_snp_filter | AC=3;AF=0.043;AN=70;BaseQ          |
| 20360 | chrY | 13374943 | . | A | G   | 88.98   | my_snp_filter | AC=4;AF=0.074;AN=54;BaseQ          |
| 20361 | chrY | 13374968 | . | A | G   | 143.58  | PASS          | AC=3;AF=0.052;AN=58;BaseQRankSum=  |
| 20362 | chrY | 13374973 | . | C | A   | 45      | PASS          | AC=1;AF=0.017;AN=60;BaseQRankSum=  |
| 20363 | chrY | 13374987 | . | C | T   | 573.05  | PASS          | AC=5;AF=0.093;AN=54;BaseQRankSum=  |
| 20364 | chrY | 13374988 | . | C | A   | 572.50  | PASS          | AC=5;AF=0.093;AN=54;BaseQRankSum=  |
| 20365 | chrY | 13375031 | . | A | C   | 962.52  | PASS          | AC=5;AF=0.081;AN=62;BaseQRankSum=  |
| 20366 | chrY | 13375046 | . | A | G   | 943.91  | PASS          | AC=5;AF=0.081;AN=62;BaseQRankSum=  |
| 20367 | chrY | 13375047 | . | C | T   | 946.95  | PASS          | AC=5;AF=0.081;AN=62;BaseQRankSum=  |
| 20368 | chrY | 13375065 | . | C | A   | 655.41  | PASS          | AC=4;AF=0.063;AN=64;BaseQRankSum=  |

|       |      |          |   |   |     |         |               |                                   |
|-------|------|----------|---|---|-----|---------|---------------|-----------------------------------|
| 20369 | chrY | 13375070 | . | G | C   | 573.59  | PASS          | AC=4;AF=0.063;AN=64;BaseQRankSum= |
| 20370 | chrY | 13375095 | . | G | A   | 113.45  | PASS          | AC=1;AF=0.016;AN=62;BaseQRankSum= |
| 20371 | chrY | 13375119 | . | A | C   | 618.90  | PASS          | AC=4;AF=0.077;AN=52;BaseQRankSum= |
| 20372 | chrY | 13375145 | . | T | C   | 545.37  | PASS          | AC=3;AF=0.060;AN=50;BaseQRankSum= |
| 20373 | chrY | 13375167 | . | C | A   | 197.54  | PASS          | AC=2;AF=0.050;AN=40;BaseQRankSum= |
| 20374 | chrY | 13375172 | . | C | T   | 570.71  | PASS          | AC=5;AF=0.119;AN=42;BaseQRankSum= |
| 20375 | chrY | 13375173 | . | G | C   | 566.90  | my_snp_filter | AC=5;AF=0.125;AN=40;BaseQ         |
| 20376 | chrY | 13375186 | . | G | A   | 598.14  | my_snp_filter | AC=4;AF=0.111;AN=36;BaseQ         |
| 20377 | chrY | 13375210 | . | T | G   | 1012.33 | PASS          | AC=5;AF=0.179;AN=28;BaseQRankSum= |
| 20378 | chrY | 13375310 | . | C | T   | 46.50   | PASS          | AC=1;AF=0.050;AN=20;BaseQRankSum= |
| 20379 | chrY | 13375402 | . | C | T   | 134.32  | PASS          | AC=1;AF=0.056;AN=18;BaseQRankSum= |
| 20380 | chrY | 13375403 | . | C | G   | 255.10  | PASS          | AC=2;AF=0.111;AN=18;BaseQRankSum= |
| 20381 | chrY | 13375404 | . | C | A   | 87.95   | my_snp_filter | AC=3;AF=0.167;AN=18;BaseQ         |
| 20382 | chrY | 13375409 | . | C | T   | 79.78   | my_snp_filter | AC=3;AF=0.167;AN=18;BaseQ         |
| 20383 | chrY | 13375415 | . | G | T   | 823.73  | my_snp_filter | AC=7;AF=0.389;AN=18;BaseQ         |
| 20384 | chrY | 13375465 | . | T | C   | 937.05  | PASS          | AC=4;AF=0.222;AN=18;BaseQRankSum= |
| 20385 | chrY | 13375468 | . | T | A   | 943.05  | PASS          | AC=4;AF=0.222;AN=18;BaseQRankSum= |
| 20386 | chrY | 13375484 | . | G | A   | 4887.09 | my_snp_filter | AC=9;AF=0.500;AN=18;BaseQ         |
| 20387 | chrY | 13375486 | . | T | A   | 4917.09 | my_snp_filter | AC=9;AF=0.500;AN=18;BaseQ         |
| 20388 | chrY | 13375494 | . | A | T   | 2673.53 | PASS          | AC=8;AF=0.444;AN=18;BaseQRankSum= |
| 20389 | chrY | 13375511 | . | C | G   | 163.32  | PASS          | AC=1;AF=0.056;AN=18;BaseQRankSum= |
| 20390 | chrY | 13375515 | . | C | G   | 1778.53 | PASS          | AC=8;AF=0.444;AN=18;BaseQRankSum= |
| 20391 | chrY | 13375609 | . | G | A   | 1007.53 | PASS          | AC=6;AF=0.333;AN=18;BaseQRankSum= |
| 20392 | chrY | 13375617 | . | G | A   | 2071.78 | PASS          | AC=8;AF=0.444;AN=18;BaseQRankSum= |
| 20393 | chrY | 13375625 | . | C | T   | 1015.26 | PASS          | AC=6;AF=0.333;AN=18;BaseQRankSum= |
| 20394 | chrY | 13375630 | . | C | A   | 2836.09 | PASS          | AC=9;AF=0.500;AN=18;BaseQRankSum= |
| 20395 | chrY | 13375637 | . | G | A   | 463.80  | PASS          | AC=7;AF=0.389;AN=18;BaseQRankSum= |
| 20396 | chrY | 13375639 | . | G | T   | 487.45  | PASS          | AC=7;AF=0.389;AN=18;BaseQRankSum= |
| 20397 | chrY | 13375652 | . | G | A   | 852.46  | PASS          | AC=7;AF=0.389;AN=18;BaseQRankSum= |
| 20398 | chrY | 13375659 | . | A | C   | 880.55  | PASS          | AC=5;AF=0.278;AN=18;BaseQRankSum= |
| 20399 | chrY | 13375664 | . | C | T   | 249.99  | my_snp_filter | AC=6;AF=0.333;AN=18;BaseQ         |
| 20400 | chrY | 13375706 | . | A | T   | 51.17   | my_snp_filter | AC=1;AF=0.050;AN=20;BaseQ         |
| 20401 | chrY | 13375709 | . | C | T   | 719.02  | PASS          | AC=6;AF=0.300;AN=20;BaseQRankSum= |
| 20402 | chrY | 13375712 | . | C | G   | 773.84  | PASS          | AC=6;AF=0.300;AN=20;BaseQRankSum= |
| 20403 | chrY | 13375723 | . | T | C   | 1865.52 | my_snp_filter | AC=9;AF=0.450;AN=20;BaseQ         |
| 20404 | chrY | 13375725 | . | C | T   | 1236.55 | PASS          | AC=9;AF=0.450;AN=20;BaseQRankSum= |
| 20405 | chrY | 13375726 | . | G | T   | 424.07  | PASS          | AC=4;AF=0.222;AN=18;BaseQRankSum= |
| 20406 | chrY | 13375727 | . | A | G   | 463.84  | PASS          | AC=5;AF=0.250;AN=20;BaseQRankSum= |
| 20407 | chrY | 13375755 | . | C | G,T | 619.40  | PASS          | AC=2,1;AF=0.100,0.050;AN=20;BaseQ |
| 20408 | chrY | 13375756 | . | G | A   | 352.46  | PASS          | AC=2;AF=0.100;AN=20;BaseQRankSum= |
| 20409 | chrY | 13375779 | . | A | G   | 413.65  | PASS          | AC=1;AF=0.050;AN=20;BaseQRankSum= |
| 20410 | chrY | 13375804 | . | A | G   | 345.86  | PASS          | AC=1;AF=0.071;AN=14;BaseQRankSum= |
| 20411 | chrY | 13375817 | . | C | T   | 221.68  | PASS          | AC=1;AF=0.056;AN=18;BaseQRankSum= |
| 20412 | chrY | 13375848 | . | T | G   | 359.08  | PASS          | AC=5;AF=0.278;AN=18;BaseQRankSum= |
| 20413 | chrY | 13375994 | . | A | G   | 767.07  | my_snp_filter | AC=7;AF=0.389;AN=18;BaseQ         |
| 20414 | chrY | 13376007 | . | A | G   | 264.77  | PASS          | AC=3;AF=0.167;AN=18;BaseQRankSum= |
| 20415 | chrY | 13376009 | . | C | T   | 329.76  | PASS          | AC=5;AF=0.278;AN=18;BaseQRankSum= |
| 20416 | chrY | 13376017 | . | A | C   | 301.56  | PASS          | AC=4;AF=0.222;AN=18;BaseQRankSum= |
| 20417 | chrY | 13376801 | . | A | G   | 89.69   | PASS          | AC=1;AF=0.050;AN=20;BaseQRankSum= |
| 20418 | chrY | 13376803 | . | G | A   | 91.22   | PASS          | AC=1;AF=0.050;AN=20;BaseQRankSum= |
| 20419 | chrY | 13376815 | . | C | A   | 33.74   | my_snp_filter | AC=2;AF=0.100;AN=20;BaseQ         |
| 20420 | chrY | 13377033 | . | A | G   | 31.44   | my_snp_filter | AC=2;AF=0.111;AN=18;BaseQ         |
| 20421 | chrY | 13377050 | . | A | G   | 386.34  | PASS          | AC=6;AF=0.333;AN=18;BaseQRankSum= |
| 20422 | chrY | 13377076 | . | G | A   | 58.34   | PASS          | AC=1;AF=0.056;AN=18;BaseQRankSum= |
| 20423 | chrY | 13377077 | . | T | C   | 57.33   | PASS          | AC=1;AF=0.056;AN=18;BaseQRankSum= |
| 20424 | chrY | 13377091 | . | C | A   | 512.88  | PASS          | AC=4;AF=0.222;AN=18;BaseQRankSum= |
| 20425 | chrY | 13377096 | . | T | C   | 516.27  | PASS          | AC=4;AF=0.222;AN=18;BaseQRankSum= |
| 20426 | chrY | 13377178 | . | G | T   | 141.29  | PASS          | AC=2;AF=0.111;AN=18;BaseQRankSum= |
| 20427 | chrY | 13377179 | . | A | G   | 140.72  | PASS          | AC=2;AF=0.111;AN=18;BaseQRankSum= |
| 20428 | chrY | 13377376 | . | C | A   | 106.32  | PASS          | AC=1;AF=0.056;AN=18;BaseQRankSum= |
| 20429 | chrY | 13377381 | . | C | T   | 281.86  | PASS          | AC=4;AF=0.222;AN=18;BaseQRankSum= |
| 20430 | chrY | 13377552 | . | T | C   | 96.08   | my_snp_filter | AC=3;AF=0.167;AN=18;BaseQ         |
| 20431 | chrY | 13377588 | . | C | T   | 47.06   | PASS          | AC=1;AF=0.056;AN=18;BaseQRankSum= |
| 20432 | chrY | 13377609 | . | G | A   | 47.31   | my_snp_filter | AC=2;AF=0.100;AN=20;BaseQ         |
| 20433 | chrY | 13377611 | . | A | T   | 543.44  | my_snp_filter | AC=5;AF=0.250;AN=20;BaseQ         |
| 20434 | chrY | 13377648 | . | T | G   | 80.09   | PASS          | AC=1;AF=0.050;AN=20;BaseQRankSum= |
| 20435 | chrY | 13377667 | . | G | A   | 2106.46 | my_snp_filter | AC=8;AF=0.400;AN=20;BaseQ         |
| 20436 | chrY | 13377708 | . | C | A   | 563.16  | PASS          | AC=5;AF=0.278;AN=18;BaseQRankSum= |
| 20437 | chrY | 13377729 | . | G | A   | 274.91  | my_snp_filter | AC=4;AF=0.222;AN=18;BaseQ         |
| 20438 | chrY | 13377753 | . | C | G   | 421.95  | my_snp_filter | AC=5;AF=0.278;AN=18;BaseQ         |
| 20439 | chrY | 13377758 | . | C | T   | 715.75  | PASS          | AC=3;AF=0.167;AN=18;BaseQRankSum= |
| 20440 | chrY | 13377774 | . | T | C   | 8319.09 | my_snp_filter | AC=9;AF=0.500;AN=18;BaseQ         |
| 20441 | chrY | 13377964 | . | G | A   | 1403.70 | PASS          | AC=5;AF=0.278;AN=18;BaseQRankSum= |
| 20442 | chrY | 13378005 | . | A | C   | 184.88  | my_snp_filter | AC=3;AF=0.136;AN=22;BaseQ         |
| 20443 | chrY | 13378057 | . | T | G   | 39.06   | my_snp_filter | AC=1;AF=0.045;AN=22;BaseQ         |
| 20444 | chrY | 13378091 | . | C | T   | 100.26  | PASS          | AC=1;AF=0.045;AN=22;BaseQRankSum= |

|       |      |          |   |   |     |         |               |                                    |
|-------|------|----------|---|---|-----|---------|---------------|------------------------------------|
| 20445 | chrY | 13378111 | . | C | T   | 47.21   | my_snp_filter | AC=1;AF=0.042;AN=24;BaseQ          |
| 20446 | chrY | 13378119 | . | G | C   | 1799.83 | PASS          | AC=5;AF=0.208;AN=24;BaseQRankSum=  |
| 20447 | chrY | 13378120 | . | C | T   | 1797.79 | PASS          | AC=5;AF=0.208;AN=24;BaseQRankSum=  |
| 20448 | chrY | 13378124 | . | T | C   | 43.21   | my_snp_filter | AC=1;AF=0.042;AN=24;BaseQ          |
| 20449 | chrY | 13378144 | . | C | A   | 68.49   | my_snp_filter | AC=3;AF=0.150;AN=20;BaseQ          |
| 20450 | chrY | 13378145 | . | C | T   | 65.71   | my_snp_filter | AC=3;AF=0.150;AN=20;BaseQ          |
| 20451 | chrY | 13378154 | . | C | T   | 100.78  | my_snp_filter | AC=4;AF=0.200;AN=20;BaseQ          |
| 20452 | chrY | 13378194 | . | G | A   | 88.34   | PASS          | AC=1;AF=0.056;AN=18;BaseQRankSum=  |
| 20453 | chrY | 13378198 | . | T | A   | 110.25  | PASS          | AC=1;AF=0.056;AN=18;BaseQRankSum=  |
| 20454 | chrY | 13378242 | . | T | C   | 489.56  | PASS          | AC=4;AF=0.200;AN=20;BaseQRankSum=  |
| 20455 | chrY | 13378250 | . | G | A   | 323.46  | my_snp_filter | AC=4;AF=0.200;AN=20;BaseQ          |
| 20456 | chrY | 13378255 | . | A | G,T | 335.10  | my_snp_filter | AC=1,2;AF=0.050,0.100;AN=          |
| 20457 | chrY | 13378265 | . | C | A   | 572.47  | PASS          | AC=4;AF=0.200;AN=20;BaseQRankSum=  |
| 20458 | chrY | 13378295 | . | T | C   | 526.29  | PASS          | AC=3;AF=0.150;AN=20;BaseQRankSum=  |
| 20459 | chrY | 13378302 | . | C | T   | 120.25  | my_snp_filter | AC=3;AF=0.150;AN=20;BaseQ          |
| 20460 | chrY | 13378314 | . | C | T   | 123.32  | PASS          | AC=1;AF=0.056;AN=18;BaseQRankSum=  |
| 20461 | chrY | 13378345 | . | G | C   | 249.97  | PASS          | AC=3;AF=0.167;AN=18;BaseQRankSum=  |
| 20462 | chrY | 13378377 | . | A | G   | 446.60  | PASS          | AC=4;AF=0.222;AN=18;BaseQRankSum=  |
| 20463 | chrY | 13378398 | . | A | G   | 237.71  | PASS          | AC=3;AF=0.167;AN=18;BaseQRankSum=  |
| 20464 | chrY | 13378482 | . | C | G   | 207.31  | PASS          | AC=4;AF=0.222;AN=18;BaseQRankSum=  |
| 20465 | chrY | 13378543 | . | T | A   | 1627.06 | PASS          | AC=8;AF=0.364;AN=22;BaseQRankSum=  |
| 20466 | chrY | 13378549 | . | A | G   | 1623.40 | PASS          | AC=8;AF=0.364;AN=22;BaseQRankSum=  |
| 20467 | chrY | 13378555 | . | T | C   | 165.05  | PASS          | AC=2;AF=0.091;AN=22;BaseQRankSum=  |
| 20468 | chrY | 13378605 | . | A | T   | 44.88   | my_snp_filter | AC=1;AF=0.036;AN=28;BaseQ          |
| 20469 | chrY | 13378654 | . | T | A   | 251.74  | PASS          | AC=3;AF=0.079;AN=38;BaseQRankSum=  |
| 20470 | chrY | 13378658 | . | A | G   | 417.87  | PASS          | AC=4;AF=0.100;AN=40;BaseQRankSum=  |
| 20471 | chrY | 13378664 | . | G | T   | 224.80  | PASS          | AC=1;AF=0.026;AN=38;BaseQRankSum=  |
| 20472 | chrY | 13378665 | . | C | A   | 224.80  | PASS          | AC=1;AF=0.025;AN=40;BaseQRankSum=  |
| 20473 | chrY | 13379197 | . | C | T   | 619.75  | PASS          | AC=2;AF=0.100;AN=20;DP=190;FS=0.0  |
| 20474 | chrY | 13379399 | . | A | G   | 277.15  | PASS          | AC=5;AF=0.278;AN=18;BaseQRankSum=  |
| 20475 | chrY | 13379420 | . | G | A   | 502.44  | my_snp_filter | AC=6;AF=0.333;AN=18;BaseQ          |
| 20476 | chrY | 13379450 | . | C | A   | 90.32   | PASS          | AC=1;AF=0.056;AN=18;BaseQRankSum=  |
| 20477 | chrY | 13379460 | . | A | G   | 90.32   | PASS          | AC=1;AF=0.056;AN=18;BaseQRankSum=  |
| 20478 | chrY | 13379472 | . | G | A   | 721.34  | PASS          | AC=6;AF=0.333;AN=18;BaseQRankSum=  |
| 20479 | chrY | 13379486 | . | A | G   | 1953.09 | my_snp_filter | AC=9;AF=0.500;AN=18;BaseQ          |
| 20480 | chrY | 13379491 | . | A | G   | 161.78  | my_snp_filter | AC=3;AF=0.167;AN=18;BaseQ          |
| 20481 | chrY | 13379540 | . | G | T   | 141.17  | my_snp_filter | AC=2;AF=0.111;AN=18;BaseQ          |
| 20482 | chrY | 13379541 | . | C | T   | 815.92  | PASS          | AC=7;AF=0.389;AN=18;BaseQRankSum=  |
| 20483 | chrY | 13379546 | . | C | T   | 3303.09 | my_snp_filter | AC=9;AF=0.500;AN=18;BaseQ          |
| 20484 | chrY | 13379551 | . | T | A   | 1111.87 | my_snp_filter | AC=8;AF=0.444;AN=18;BaseQ          |
| 20485 | chrY | 13379655 | . | T | C   | 1691.29 | PASS          | AC=9;AF=0.450;AN=20;BaseQRankSum=  |
| 20486 | chrY | 13379667 | . | T | C   | 4199.54 | PASS          | AC=9;AF=0.450;AN=20;BaseQRankSum=  |
| 20487 | chrY | 13379729 | . | G | A   | 480.49  | PASS          | AC=4;AF=0.200;AN=20;BaseQRankSum=  |
| 20488 | chrY | 13379762 | . | T | A   | 534.66  | PASS          | AC=3;AF=0.167;AN=18;BaseQRankSum=  |
| 20489 | chrY | 13379763 | . | G | C   | 1695.91 | PASS          | AC=7;AF=0.389;AN=18;BaseQRankSum=  |
| 20490 | chrY | 13379768 | . | G | A   | 9309.09 | PASS          | AC=9;AF=0.500;AN=18;BaseQRankSum=  |
| 20491 | chrY | 13379781 | . | G | A   | 1389.24 | PASS          | AC=6;AF=0.333;AN=18;BaseQRankSum=  |
| 20492 | chrY | 13379832 | . | T | C   | 2373.64 | PASS          | AC=6;AF=0.333;AN=18;BaseQRankSum=  |
| 20493 | chrY | 13379833 | . | T | C   | 1072.78 | PASS          | AC=4;AF=0.222;AN=18;BaseQRankSum=  |
| 20494 | chrY | 13379837 | . | C | T   | 1447.95 | PASS          | AC=4;AF=0.222;AN=18;BaseQRankSum=  |
| 20495 | chrY | 13379846 | . | T | A   | 2887.01 | PASS          | AC=8;AF=0.444;AN=18;BaseQRankSum=  |
| 20496 | chrY | 13379859 | . | A | T   | 1627.86 | PASS          | AC=7;AF=0.389;AN=18;BaseQRankSum=  |
| 20497 | chrY | 13379865 | . | C | T   | 1261.19 | PASS          | AC=6;AF=0.333;AN=18;BaseQRankSum=  |
| 20498 | chrY | 13379904 | . | C | T   | 2812.50 | PASS          | AC=7;AF=0.389;AN=18;BaseQRankSum=  |
| 20499 | chrY | 13379905 | . | C | G   | 2712.75 | PASS          | AC=7;AF=0.389;AN=18;BaseQRankSum=  |
| 20500 | chrY | 13379908 | . | T | C   | 114.80  | my_snp_filter | AC=4;AF=0.222;AN=18;BaseQ          |
| 20501 | chrY | 13379939 | . | G | C   | 3445.15 | PASS          | AC=9;AF=0.500;AN=18;BaseQRankSum=  |
| 20502 | chrY | 13379990 | . | A | G   | 3962.45 | PASS          | AC=9;AF=0.500;AN=18;BaseQRankSum=  |
| 20503 | chrY | 13379991 | . | C | G   | 232.05  | my_snp_filter | AC=4;AF=0.222;AN=18;BaseQ          |
| 20504 | chrY | 13379995 | . | T | C   | 3763.54 | PASS          | AC=8;AF=0.444;AN=18;BaseQRankSum=  |
| 20505 | chrY | 13379998 | . | G | T   | 234.90  | my_snp_filter | AC=5;AF=0.278;AN=18;BaseQ          |
| 20506 | chrY | 13380056 | . | G | A   | 1295.61 | PASS          | AC=8;AF=0.400;AN=20;BaseQRankSum=  |
| 20507 | chrY | 13380078 | . | T | C   | 1388.07 | PASS          | AC=6;AF=0.300;AN=20;BaseQRankSum=  |
| 20508 | chrY | 13380084 | . | T | C   | 623.27  | PASS          | AC=4;AF=0.200;AN=20;BaseQRankSum=  |
| 20509 | chrY | 13380086 | . | C | A   | 621.85  | PASS          | AC=4;AF=0.222;AN=18;BaseQRankSum=  |
| 20510 | chrY | 13380115 | . | T | G   | 428.47  | PASS          | AC=4;AF=0.182;AN=22;BaseQRankSum=  |
| 20511 | chrY | 13380154 | . | C | T   | 1352.98 | PASS          | AC=5;AF=0.227;AN=22;BaseQRankSum=  |
| 20512 | chrY | 13380188 | . | G | A   | 2816.83 | PASS          | AC=6;AF=0.300;AN=20;BaseQRankSum=  |
| 20513 | chrY | 13380191 | . | A | G   | 6930.87 | my_snp_filter | AC=8;AF=0.400;AN=20;BaseQ          |
| 20514 | chrY | 13380205 | . | G | T   | 994.08  | PASS          | AC=2;AF=0.100;AN=20;BaseQRankSum=  |
| 20515 | chrY | 13380274 | . | C | T   | 3440.28 | PASS          | AC=7;AF=0.389;AN=18;BaseQRankSum=  |
| 20516 | chrY | 13380303 | . | T | C   | 1249.23 | PASS          | AC=7;AF=0.350;AN=20;BaseQRankSum=  |
| 20517 | chrY | 13380306 | . | T | C   | 827.10  | PASS          | AC=7;AF=0.292;AN=24;BaseQRankSum=  |
| 20518 | chrY | 13380313 | . | T | A   | 209.96  | PASS          | AC=1;AF=0.038;AN=26;BaseQRankSum=  |
| 20519 | chrY | 13380319 | . | G | T   | 210.07  | PASS          | AC=1;AF=0.042;AN=24;BaseQRankSum=  |
| 20520 | chrY | 13380339 | . | G | T   | 6130.42 | PASS          | AC=12;AF=0.500;AN=24;BaseQRankSum= |

|       |      |          |   |   |     |         |               |                                    |
|-------|------|----------|---|---|-----|---------|---------------|------------------------------------|
| 20521 | chrY | 13380361 | . | A | C   | 7514.25 | PASS          | AC=10;AF=0.455;AN=22;BaseQRankSum= |
| 20522 | chrY | 13380366 | . | T | A   | 228.64  | PASS          | AC=2;AF=0.083;AN=24;BaseQRankSum=  |
| 20523 | chrY | 13380370 | . | C | G   | 8092.41 | PASS          | AC=11;AF=0.500;AN=22;BaseQRankSum= |
| 20524 | chrY | 13380399 | . | G | A   | 233.96  | PASS          | AC=2;AF=0.077;AN=26;BaseQRankSum=  |
| 20525 | chrY | 13380409 | . | G | T   | 7122.83 | PASS          | AC=9;AF=0.409;AN=22;BaseQRankSum=  |
| 20526 | chrY | 13380428 | . | G | A   | 5956.97 | PASS          | AC=8;AF=0.400;AN=20;BaseQRankSum=  |
| 20527 | chrY | 13380476 | . | A | G   | 4212.27 | PASS          | AC=7;AF=0.350;AN=20;BaseQRankSum=  |
| 20528 | chrY | 13380499 | . | T | C   | 3938.60 | PASS          | AC=7;AF=0.350;AN=20;BaseQRankSum=  |
| 20529 | chrY | 13380511 | . | A | G   | 124.53  | PASS          | AC=1;AF=0.050;AN=20;BaseQRankSum=  |
| 20530 | chrY | 13380516 | . | A | G   | 2757.93 | my_snp_filter | AC=7;AF=0.389;AN=18;BaseQ          |
| 20531 | chrY | 13380532 | . | G | A   | 2751.68 | my_snp_filter | AC=8;AF=0.444;AN=18;BaseQ          |
| 20532 | chrY | 13380546 | . | C | T   | 2297    | my_snp_filter | AC=7;AF=0.389;AN=18;BaseQ          |
| 20533 | chrY | 13380548 | . | G | C   | 211.32  | PASS          | AC=1;AF=0.056;AN=18;BaseQRankSum=  |
| 20534 | chrY | 13380561 | . | A | G   | 2206.54 | my_snp_filter | AC=8;AF=0.444;AN=18;BaseQ          |
| 20535 | chrY | 13380595 | . | T | C   | 1457.90 | my_snp_filter | AC=8;AF=0.444;AN=18;BaseQ          |
| 20536 | chrY | 13380598 | . | C | T   | 1440.91 | my_snp_filter | AC=7;AF=0.389;AN=18;BaseQ          |
| 20537 | chrY | 13380604 | . | C | A   | 33.36   | my_snp_filter | AC=1;AF=0.056;AN=18;BaseQ          |
| 20538 | chrY | 13380619 | . | T | C   | 576.56  | PASS          | AC=5;AF=0.250;AN=20;BaseQRankSum=  |
| 20539 | chrY | 13380954 | . | T | C   | 71.64   | my_snp_filter | AC=3;AF=0.167;AN=18;BaseQ          |
| 20540 | chrY | 13381043 | . | A | G   | 441.69  | PASS          | AC=6;AF=0.333;AN=18;BaseQRankSum=  |
| 20541 | chrY | 13381058 | . | T | C   | 175.84  | my_snp_filter | AC=4;AF=0.222;AN=18;BaseQ          |
| 20542 | chrY | 13381121 | . | C | T   | 432.83  | PASS          | AC=5;AF=0.227;AN=22;BaseQRankSum=  |
| 20543 | chrY | 13381125 | . | C | T   | 435.83  | PASS          | AC=5;AF=0.227;AN=22;BaseQRankSum=  |
| 20544 | chrY | 13381137 | . | C | T   | 135.07  | PASS          | AC=1;AF=0.045;AN=22;BaseQRankSum=  |
| 20545 | chrY | 13381152 | . | C | T   | 438.33  | PASS          | AC=5;AF=0.250;AN=20;BaseQRankSum=  |
| 20546 | chrY | 13381206 | . | A | G,T | 1223.42 | my_snp_filter | AC=5,2;AF=0.250,0.100;AN=          |
| 20547 | chrY | 13381209 | . | T | C   | 1218.22 | my_snp_filter | AC=7;AF=0.350;AN=20;BaseQ          |
| 20548 | chrY | 13381225 | . | A | G   | 887.01  | PASS          | AC=3;AF=0.150;AN=20;BaseQRankSum=  |
| 20549 | chrY | 13381258 | . | A | T   | 270.71  | my_snp_filter | AC=7;AF=0.318;AN=22;BaseQ          |
| 20550 | chrY | 13381284 | . | G | A   | 488.47  | PASS          | AC=7;AF=0.318;AN=22;BaseQRankSum=  |
| 20551 | chrY | 13381289 | . | G | A   | 400.73  | PASS          | AC=7;AF=0.318;AN=22;BaseQRankSum=  |
| 20552 | chrY | 13382190 | . | C | T   | 284.48  | PASS          | AC=3;AF=0.150;AN=20;BaseQRankSum=  |
| 20553 | chrY | 13382198 | . | T | C   | 284.06  | PASS          | AC=3;AF=0.150;AN=20;BaseQRankSum=  |
| 20554 | chrY | 13382451 | . | A | G   | 81.28   | my_snp_filter | AC=3;AF=0.125;AN=24;BaseQ          |
| 20555 | chrY | 13382473 | . | T | G   | 119.98  | my_snp_filter | AC=3;AF=0.150;AN=20;BaseQ          |
| 20556 | chrY | 13382478 | . | T | C   | 426.43  | PASS          | AC=2;AF=0.111;AN=18;BaseQRankSum=  |
| 20557 | chrY | 13382487 | . | T | C   | 108.06  | PASS          | AC=2;AF=0.111;AN=18;BaseQRankSum=  |
| 20558 | chrY | 13382488 | . | G | A   | 371.05  | PASS          | AC=2;AF=0.111;AN=18;BaseQRankSum=  |
| 20559 | chrY | 13382511 | . | A | G   | 424.70  | PASS          | AC=5;AF=0.278;AN=18;BaseQRankSum=  |
| 20560 | chrY | 13382570 | . | C | T   | 587.14  | PASS          | AC=6;AF=0.333;AN=18;BaseQRankSum=  |
| 20561 | chrY | 13382596 | . | T | A   | 101.50  | PASS          | AC=2;AF=0.111;AN=18;BaseQRankSum=  |
| 20562 | chrY | 13382622 | . | C | T   | 92.54   | PASS          | AC=2;AF=0.100;AN=20;BaseQRankSum=  |
| 20563 | chrY | 13382674 | . | C | T   | 53.62   | my_snp_filter | AC=2;AF=0.100;AN=20;BaseQ          |
| 20564 | chrY | 13382676 | . | C | G   | 206.55  | PASS          | AC=3;AF=0.150;AN=20;BaseQRankSum=  |
| 20565 | chrY | 13382697 | . | C | T   | 104.42  | my_snp_filter | AC=3;AF=0.150;AN=20;BaseQ          |
| 20566 | chrY | 13382704 | . | C | T   | 68.07   | my_snp_filter | AC=2;AF=0.100;AN=20;BaseQ          |
| 20567 | chrY | 13382706 | . | T | C   | 66.86   | my_snp_filter | AC=2;AF=0.100;AN=20;BaseQ          |
| 20568 | chrY | 13382712 | . | T | C   | 489.42  | PASS          | AC=7;AF=0.350;AN=20;BaseQRankSum=  |
| 20569 | chrY | 13382843 | . | T | G   | 326.98  | PASS          | AC=4;AF=0.222;AN=18;BaseQRankSum=  |
| 20570 | chrY | 13382874 | . | G | A   | 488.53  | PASS          | AC=5;AF=0.278;AN=18;BaseQRankSum=  |
| 20571 | chrY | 13382915 | . | G | A   | 283.01  | PASS          | AC=3;AF=0.167;AN=18;BaseQRankSum=  |
| 20572 | chrY | 13382928 | . | T | C   | 226.04  | PASS          | AC=2;AF=0.111;AN=18;BaseQRankSum=  |
| 20573 | chrY | 13382931 | . | A | G   | 304.08  | PASS          | AC=4;AF=0.222;AN=18;BaseQRankSum=  |
| 20574 | chrY | 13382963 | . | G | A   | 2781.78 | PASS          | AC=8;AF=0.364;AN=22;BaseQRankSum=  |
| 20575 | chrY | 13382969 | . | T | G   | 211.40  | PASS          | AC=7;AF=0.292;AN=24;BaseQRankSum=  |
| 20576 | chrY | 13382973 | . | C | T   | 1004.23 | PASS          | AC=3;AF=0.125;AN=24;BaseQRankSum=  |
| 20577 | chrY | 13382987 | . | C | A,T | 3200.90 | PASS          | AC=4,8;AF=0.182,0.364;AN=22;BaseQ  |
| 20578 | chrY | 13382996 | . | C | T   | 126.26  | my_snp_filter | AC=2;AF=0.083;AN=24;BaseQ          |
| 20579 | chrY | 13383047 | . | C | T   | 1343.35 | PASS          | AC=8;AF=0.333;AN=24;BaseQRankSum=  |
| 20580 | chrY | 13383050 | . | T | C   | 74.95   | my_snp_filter | AC=3;AF=0.115;AN=26;BaseQ          |
| 20581 | chrY | 13383062 | . | A | G   | 41.32   | my_snp_filter | AC=1;AF=0.045;AN=22;BaseQ          |
| 20582 | chrY | 13383095 | . | T | G   | 1690.88 | PASS          | AC=8;AF=0.444;AN=18;BaseQRankSum=  |
| 20583 | chrY | 13383111 | . | A | C   | 1526.54 | PASS          | AC=8;AF=0.444;AN=18;BaseQRankSum=  |
| 20584 | chrY | 13383123 | . | G | A   | 912.79  | PASS          | AC=7;AF=0.389;AN=18;BaseQRankSum=  |
| 20585 | chrY | 13383151 | . | A | C   | 1248.54 | my_snp_filter | AC=8;AF=0.444;AN=18;BaseQ          |
| 20586 | chrY | 13383213 | . | A | C   | 297.91  | my_snp_filter | AC=6;AF=0.273;AN=22;BaseQ          |
| 20587 | chrY | 13383224 | . | A | G   | 855.34  | PASS          | AC=8;AF=0.364;AN=22;BaseQRankSum=  |
| 20588 | chrY | 13383230 | . | A | G   | 4607.34 | PASS          | AC=9;AF=0.450;AN=20;BaseQRankSum=  |
| 20589 | chrY | 13383232 | . | C | T   | 312.28  | my_snp_filter | AC=6;AF=0.300;AN=20;BaseQ          |
| 20590 | chrY | 13383256 | . | C | T   | 307.79  | my_snp_filter | AC=5;AF=0.227;AN=22;BaseQ          |
| 20591 | chrY | 13383279 | . | T | G   | 48.30   | my_snp_filter | AC=1;AF=0.050;AN=20;BaseQ          |
| 20592 | chrY | 13383296 | . | G | C   | 1618.52 | PASS          | AC=9;AF=0.450;AN=20;BaseQRankSum=  |
| 20593 | chrY | 13383329 | . | T | C   | 1017.38 | PASS          | AC=8;AF=0.333;AN=24;BaseQRankSum=  |
| 20594 | chrY | 13383334 | . | T | A   | 33.53   | my_snp_filter | AC=1;AF=0.042;AN=24;BaseQ          |
| 20595 | chrY | 13383339 | . | T | G   | 34.01   | my_snp_filter | AC=1;AF=0.042;AN=24;BaseQ          |
| 20596 | chrY | 13383342 | . | T | C   | 57.01   | PASS          | AC=1;AF=0.042;AN=24;BaseQRankSum=  |

|       |      |          |   |   |     |         |               |                                    |
|-------|------|----------|---|---|-----|---------|---------------|------------------------------------|
| 20597 | chrY | 13383403 | . | G | A   | 1263.92 | PASS          | AC=5;AF=0.156;AN=32;BaseQRankSum=  |
| 20598 | chrY | 13383407 | . | A | G   | 223.18  | my_snp_filter | AC=4;AF=0.125;AN=32;BaseQ          |
| 20599 | chrY | 13383436 | . | A | C   | 734.04  | PASS          | AC=8;AF=0.235;AN=34;BaseQRankSum=  |
| 20600 | chrY | 13383440 | . | G | C   | 92.33   | PASS          | AC=1;AF=0.029;AN=34;BaseQRankSum=  |
| 20601 | chrY | 13383442 | . | A | G   | 92.33   | PASS          | AC=1;AF=0.029;AN=34;BaseQRankSum=  |
| 20602 | chrY | 13383478 | . | T | C   | 135.68  | PASS          | AC=2;AF=0.063;AN=32;BaseQRankSum=  |
| 20603 | chrY | 13383479 | . | G | A   | 132.93  | PASS          | AC=2;AF=0.063;AN=32;BaseQRankSum=  |
| 20604 | chrY | 13383491 | . | T | G   | 944.68  | PASS          | AC=6;AF=0.231;AN=26;BaseQRankSum=  |
| 20605 | chrY | 13383492 | . | G | C,A | 1774.98 | PASS          | AC=3,5;AF=0.125,0.208;AN=24;BaseQ  |
| 20606 | chrY | 13383498 | . | G | T   | 157.74  | my_snp_filter | AC=4;AF=0.167;AN=24;BaseQ          |
| 20607 | chrY | 13383525 | . | C | G   | 1108.85 | PASS          | AC=9;AF=0.375;AN=24;BaseQRankSum=  |
| 20608 | chrY | 13383604 | . | C | A   | 1730.55 | PASS          | AC=8;AF=0.364;AN=22;BaseQRankSum=  |
| 20609 | chrY | 13383638 | . | C | G   | 2164.71 | PASS          | AC=8;AF=0.308;AN=26;BaseQRankSum=  |
| 20610 | chrY | 13383653 | . | A | T   | 3441.72 | PASS          | AC=9;AF=0.321;AN=28;BaseQRankSum=  |
| 20611 | chrY | 13383674 | . | T | C   | 155.77  | my_snp_filter | AC=4;AF=0.133;AN=30;BaseQ          |
| 20612 | chrY | 13383797 | . | C | A   | 797.67  | PASS          | AC=5;AF=0.278;AN=18;BaseQRankSum=  |
| 20613 | chrY | 13383809 | . | C | A   | 31.01   | my_snp_filter | AC=1;AF=0.050;AN=20;BaseQ          |
| 20614 | chrY | 13383811 | . | T | C   | 32.15   | my_snp_filter | AC=1;AF=0.050;AN=20;BaseQ          |
| 20615 | chrY | 13383814 | . | T | G   | 570.59  | PASS          | AC=5;AF=0.250;AN=20;BaseQRankSum=  |
| 20616 | chrY | 13383826 | . | C | T   | 333.50  | PASS          | AC=5;AF=0.227;AN=22;BaseQRankSum=  |
| 20617 | chrY | 13383849 | . | A | G   | 320.19  | PASS          | AC=5;AF=0.208;AN=24;BaseQRankSum=  |
| 20618 | chrY | 13383855 | . | G | A   | 275.81  | PASS          | AC=5;AF=0.208;AN=24;BaseQRankSum=  |
| 20619 | chrY | 13383943 | . | T | C   | 34.05   | my_snp_filter | AC=2;AF=0.083;AN=24;BaseQ          |
| 20620 | chrY | 13383955 | . | T | C   | 43.52   | my_snp_filter | AC=2;AF=0.083;AN=24;BaseQ          |
| 20621 | chrY | 13383967 | . | G | A   | 1871.73 | PASS          | AC=9;AF=0.375;AN=24;BaseQRankSum=  |
| 20622 | chrY | 13383977 | . | G | A   | 58.93   | my_snp_filter | AC=2;AF=0.083;AN=24;BaseQ          |
| 20623 | chrY | 13383987 | . | C | T   | 43.64   | my_snp_filter | AC=2;AF=0.083;AN=24;BaseQ          |
| 20624 | chrY | 13384075 | . | A | C   | 39.37   | my_snp_filter | AC=2;AF=0.100;AN=20;BaseQ          |
| 20625 | chrY | 13384105 | . | C | T   | 677.62  | PASS          | AC=8;AF=0.444;AN=18;BaseQRankSum=  |
| 20626 | chrY | 13384116 | . | C | A   | 375.84  | PASS          | AC=6;AF=0.333;AN=18;BaseQRankSum=  |
| 20627 | chrY | 13384176 | . | G | T   | 811.17  | PASS          | AC=8;AF=0.333;AN=24;BaseQRankSum=  |
| 20628 | chrY | 13384181 | . | C | T   | 564     | PASS          | AC=4;AF=0.133;AN=30;BaseQRankSum=  |
| 20629 | chrY | 13384196 | . | T | A   | 540.81  | PASS          | AC=4;AF=0.143;AN=28;BaseQRankSum=  |
| 20630 | chrY | 13384222 | . | C | A   | 193.24  | my_snp_filter | AC=4;AF=0.143;AN=28;BaseQ          |
| 20631 | chrY | 13384249 | . | G | A   | 1741    | PASS          | AC=6;AF=0.231;AN=26;BaseQRankSum=  |
| 20632 | chrY | 13384255 | . | T | C   | 272.38  | my_snp_filter | AC=4;AF=0.167;AN=24;BaseQ          |
| 20633 | chrY | 13384260 | . | A | G   | 2764.35 | PASS          | AC=8;AF=0.364;AN=22;BaseQRankSum=  |
| 20634 | chrY | 13384261 | . | C | G   | 769.63  | PASS          | AC=4;AF=0.167;AN=24;BaseQRankSum=  |
| 20635 | chrY | 13384263 | . | G | A   | 2601.35 | PASS          | AC=8;AF=0.364;AN=22;BaseQRankSum=  |
| 20636 | chrY | 13384269 | . | G | C   | 1206.56 | PASS          | AC=5;AF=0.208;AN=24;BaseQRankSum=  |
| 20637 | chrY | 13384276 | . | T | C   | 1019.61 | PASS          | AC=5;AF=0.192;AN=26;BaseQRankSum=  |
| 20638 | chrY | 13384292 | . | A | G   | 1748.33 | PASS          | AC=8;AF=0.286;AN=28;BaseQRankSum=  |
| 20639 | chrY | 13384339 | . | G | T   | 55.19   | my_snp_filter | AC=1;AF=0.025;AN=40;BaseQ          |
| 20640 | chrY | 13384351 | . | A | T   | 114.36  | PASS          | AC=1;AF=0.024;AN=42;BaseQRankSum=  |
| 20641 | chrY | 13384364 | . | G | A   | 74.56   | my_snp_filter | AC=3;AF=0.065;AN=46;BaseQ          |
| 20642 | chrY | 13384370 | . | G | A   | 117.96  | PASS          | AC=2;AF=0.043;AN=46;BaseQRankSum=  |
| 20643 | chrY | 13384381 | . | A | T   | 210.78  | my_snp_filter | AC=7;AF=0.130;AN=54;BaseQ          |
| 20644 | chrY | 13384401 | . | C | G   | 1029.08 | PASS          | AC=6;AF=0.091;AN=66;BaseQRankSum=  |
| 20645 | chrY | 13384404 | . | A | G   | 2375.19 | my_snp_filter | AC=9;AF=0.136;AN=66;BaseQ          |
| 20646 | chrY | 13384456 | . | C | A   | 736.83  | PASS          | AC=5;AF=0.071;AN=70;BaseQRankSum=  |
| 20647 | chrY | 13384469 | . | C | T   | 904.60  | PASS          | AC=7;AF=0.100;AN=70;BaseQRankSum=  |
| 20648 | chrY | 13384524 | . | G | A   | 250.56  | PASS          | AC=4;AF=0.057;AN=70;BaseQRankSum=  |
| 20649 | chrY | 13384541 | . | T | G   | 438.04  | PASS          | AC=4;AF=0.057;AN=70;BaseQRankSum=  |
| 20650 | chrY | 13384548 | . | T | C   | 312.58  | PASS          | AC=4;AF=0.057;AN=70;BaseQRankSum=  |
| 20651 | chrY | 13384641 | . | G | C   | 56.85   | PASS          | AC=2;AF=0.029;AN=68;BaseQRankSum=  |
| 20652 | chrY | 13384690 | . | C | T   | 537.49  | PASS          | AC=5;AF=0.071;AN=70;BaseQRankSum=  |
| 20653 | chrY | 13384755 | . | A | C   | 771.12  | PASS          | AC=10;AF=0.147;AN=68;BaseQRankSum= |
| 20654 | chrY | 13384809 | . | G | A   | 1595.41 | my_snp_filter | AC=8;AF=0.133;AN=60;BaseQ          |
| 20655 | chrY | 13384812 | . | G | A   | 1289.99 | my_snp_filter | AC=8;AF=0.133;AN=60;BaseQ          |
| 20656 | chrY | 13384813 | . | G | A   | 606.56  | PASS          | AC=7;AF=0.121;AN=58;BaseQRankSum=  |
| 20657 | chrY | 13384833 | . | C | T   | 1179.48 | PASS          | AC=8;AF=0.148;AN=54;BaseQRankSum=  |
| 20658 | chrY | 13384844 | . | A | G   | 1350.80 | PASS          | AC=8;AF=0.182;AN=44;BaseQRankSum=  |
| 20659 | chrY | 13384851 | . | G | T   | 1372.01 | PASS          | AC=7;AF=0.167;AN=42;BaseQRankSum=  |
| 20660 | chrY | 13384854 | . | C | T   | 70.73   | my_snp_filter | AC=1;AF=0.024;AN=42;BaseQ          |
| 20661 | chrY | 13384855 | . | A | C   | 3352.48 | my_snp_filter | AC=9;AF=0.214;AN=42;BaseQ          |
| 20662 | chrY | 13384865 | . | A | C   | 351.46  | my_snp_filter | AC=4;AF=0.111;AN=36;BaseQ          |
| 20663 | chrY | 13384873 | . | T | C   | 205     | my_snp_filter | AC=3;AF=0.094;AN=32;BaseQ          |
| 20664 | chrY | 13384877 | . | C | T   | 1511.48 | my_snp_filter | AC=7;AF=0.219;AN=32;BaseQ          |
| 20665 | chrY | 13384933 | . | G | A   | 1961.24 | my_snp_filter | AC=6;AF=0.333;AN=18;BaseQ          |
| 20666 | chrY | 13384937 | . | A | G   | 1877.25 | my_snp_filter | AC=6;AF=0.333;AN=18;BaseQ          |
| 20667 | chrY | 13384939 | . | T | C   | 42.30   | my_snp_filter | AC=1;AF=0.050;AN=20;BaseQ          |
| 20668 | chrY | 13384954 | . | T | C   | 265.80  | my_snp_filter | AC=3;AF=0.167;AN=18;BaseQ          |
| 20669 | chrY | 13384980 | . | C | T   | 307.23  | my_snp_filter | AC=4;AF=0.200;AN=20;BaseQ          |
| 20670 | chrY | 13384985 | . | G | A   | 716.24  | PASS          | AC=5;AF=0.250;AN=20;BaseQRankSum=  |
| 20671 | chrY | 13385005 | . | T | A   | 2759.87 | PASS          | AC=8;AF=0.444;AN=18;BaseQRankSum=  |
| 20672 | chrY | 13385021 | . | A | G   | 133.82  | my_snp_filter | AC=3;AF=0.150;AN=20;BaseQ          |



|       |      |          |   |   |     |         |               |                                    |
|-------|------|----------|---|---|-----|---------|---------------|------------------------------------|
| 20673 | chrY | 13385035 | . | T | A   | 266.83  | PASS          | AC=3;AF=0.136;AN=22;BaseQRankSum=  |
| 20674 | chrY | 13385044 | . | T | C   | 161.93  | PASS          | AC=2;AF=0.091;AN=22;BaseQRankSum=  |
| 20675 | chrY | 13385047 | . | A | G   | 231.99  | PASS          | AC=3;AF=0.136;AN=22;BaseQRankSum=  |
| 20676 | chrY | 13385078 | . | G | A   | 182.83  | PASS          | AC=4;AF=0.222;AN=18;BaseQRankSum=  |
| 20677 | chrY | 13385097 | . | A | G   | 899.78  | PASS          | AC=7;AF=0.350;AN=20;BaseQRankSum=  |
| 20678 | chrY | 13385101 | . | G | A   | 206.47  | PASS          | AC=2;AF=0.100;AN=20;BaseQRankSum=  |
| 20679 | chrY | 13385103 | . | C | T   | 1258.90 | PASS          | AC=6;AF=0.300;AN=20;BaseQRankSum=  |
| 20680 | chrY | 13385104 | . | C | T   | 54.65   | my_snp_filter | AC=3;AF=0.150;AN=20;BaseQ          |
| 20681 | chrY | 13385108 | . | T | C   | 1061.45 | PASS          | AC=6;AF=0.300;AN=20;BaseQRankSum=  |
| 20682 | chrY | 13385128 | . | T | G   | 236.79  | PASS          | AC=2;AF=0.100;AN=20;BaseQRankSum=  |
| 20683 | chrY | 13385142 | . | C | A,* | 434.79  | PASS          | AC=1,2;AF=0.056,0.111;AN=18;BaseQ  |
| 20684 | chrY | 13385153 | . | A | G   | 251.31  | PASS          | AC=1;AF=0.056;AN=18;BaseQRankSum=  |
| 20685 | chrY | 13385183 | . | C | T   | 1888.50 | PASS          | AC=8;AF=0.444;AN=18;BaseQRankSum=  |
| 20686 | chrY | 13385207 | . | T | C   | 1991.01 | PASS          | AC=8;AF=0.444;AN=18;BaseQRankSum=  |
| 20687 | chrY | 13385218 | . | G | A   | 1714.59 | PASS          | AC=8;AF=0.400;AN=20;BaseQRankSum=  |
| 20688 | chrY | 13385219 | . | A | G   | 1886.59 | PASS          | AC=8;AF=0.400;AN=20;BaseQRankSum=  |
| 20689 | chrY | 13385226 | . | C | T   | 48.46   | PASS          | AC=1;AF=0.050;AN=20;BaseQRankSum=  |
| 20690 | chrY | 13385246 | . | T | A   | 53.27   | my_snp_filter | AC=4;AF=0.143;AN=28;BaseQ          |
| 20691 | chrY | 13385286 | . | A | C   | 61.68   | my_snp_filter | AC=2;AF=0.045;AN=44;BaseQ          |
| 20692 | chrY | 13385515 | . | G | A   | 238     | PASS          | AC=4;AF=0.059;AN=68;BaseQRankSum=  |
| 20693 | chrY | 13385518 | . | C | T   | 235.62  | PASS          | AC=4;AF=0.059;AN=68;BaseQRankSum=  |
| 20694 | chrY | 13385519 | . | T | G   | 235.71  | PASS          | AC=4;AF=0.059;AN=68;BaseQRankSum=  |
| 20695 | chrY | 13385537 | . | T | C   | 170.47  | PASS          | AC=4;AF=0.067;AN=60;BaseQRankSum=  |
| 20696 | chrY | 13385560 | . | A | T   | 283.32  | PASS          | AC=6;AF=0.107;AN=56;BaseQRankSum=  |
| 20697 | chrY | 13385597 | . | A | T   | 168.64  | PASS          | AC=2;AF=0.042;AN=48;BaseQRankSum=  |
| 20698 | chrY | 13385598 | . | G | A   | 168.33  | PASS          | AC=2;AF=0.042;AN=48;BaseQRankSum=  |
| 20699 | chrY | 13385624 | . | T | C   | 94.62   | PASS          | AC=2;AF=0.063;AN=32;BaseQRankSum=  |
| 20700 | chrY | 13385641 | . | T | A   | 50.21   | PASS          | AC=1;AF=0.045;AN=22;BaseQRankSum=  |
| 20701 | chrY | 13385665 | . | T | C   | 51.45   | PASS          | AC=1;AF=0.056;AN=18;BaseQRankSum=  |
| 20702 | chrY | 13385669 | . | C | A   | 50.40   | PASS          | AC=1;AF=0.056;AN=18;BaseQRankSum=  |
| 20703 | chrY | 13385679 | . | G | A   | 46.65   | PASS          | AC=1;AF=0.056;AN=18;BaseQRankSum=  |
| 20704 | chrY | 13385702 | . | A | G   | 44.47   | PASS          | AC=1;AF=0.056;AN=18;BaseQRankSum=  |
| 20705 | chrY | 13385998 | . | A | G   | 155.87  | PASS          | AC=2;AF=0.038;AN=52;BaseQRankSum=  |
| 20706 | chrY | 13386001 | . | G | A   | 139.62  | PASS          | AC=2;AF=0.037;AN=54;BaseQRankSum=  |
| 20707 | chrY | 13386003 | . | C | T   | 139.56  | PASS          | AC=2;AF=0.036;AN=56;BaseQRankSum=  |
| 20708 | chrY | 13386012 | . | C | T   | 175.96  | PASS          | AC=2;AF=0.037;AN=54;BaseQRankSum=  |
| 20709 | chrY | 13386024 | . | C | A   | 102.31  | PASS          | AC=2;AF=0.034;AN=58;BaseQRankSum=  |
| 20710 | chrY | 13386038 | . | T | A   | 252.62  | PASS          | AC=3;AF=0.048;AN=62;BaseQRankSum=  |
| 20711 | chrY | 13386045 | . | G | T   | 160.93  | PASS          | AC=2;AF=0.032;AN=62;BaseQRankSum=  |
| 20712 | chrY | 13386049 | . | C | T   | 161.39  | PASS          | AC=2;AF=0.033;AN=60;BaseQRankSum=  |
| 20713 | chrY | 13386163 | . | G | A   | 48.35   | my_snp_filter | AC=3;AF=0.043;AN=70;BaseQ          |
| 20714 | chrY | 13386168 | . | T | A   | 68.18   | my_snp_filter | AC=3;AF=0.043;AN=70;BaseQ          |
| 20715 | chrY | 13386176 | . | A | T   | 143.76  | PASS          | AC=3;AF=0.043;AN=70;BaseQRankSum=  |
| 20716 | chrY | 13386199 | . | A | T   | 369.93  | PASS          | AC=4;AF=0.063;AN=64;BaseQRankSum=  |
| 20717 | chrY | 13386200 | . | T | C   | 569.86  | PASS          | AC=3;AF=0.048;AN=62;BaseQRankSum=  |
| 20718 | chrY | 13386214 | . | G | C   | 363.76  | PASS          | AC=3;AF=0.054;AN=56;BaseQRankSum=  |
| 20719 | chrY | 13386219 | . | C | T   | 422.72  | PASS          | AC=5;AF=0.089;AN=56;BaseQRankSum=  |
| 20720 | chrY | 13386238 | . | G | T   | 758.29  | PASS          | AC=5;AF=0.096;AN=52;BaseQRankSum=  |
| 20721 | chrY | 13386286 | . | T | C   | 211.94  | my_snp_filter | AC=6;AF=0.125;AN=48;BaseQ          |
| 20722 | chrY | 13386295 | . | C | T   | 379.35  | PASS          | AC=4;AF=0.091;AN=44;BaseQRankSum=  |
| 20723 | chrY | 13386325 | . | C | T   | 520.12  | PASS          | AC=3;AF=0.079;AN=38;BaseQRankSum=  |
| 20724 | chrY | 13386333 | . | A | T   | 429.81  | PASS          | AC=3;AF=0.083;AN=36;BaseQRankSum=  |
| 20725 | chrY | 13386335 | . | T | G   | 430.13  | PASS          | AC=3;AF=0.079;AN=38;BaseQRankSum=  |
| 20726 | chrY | 13386338 | . | T | C   | 355.78  | PASS          | AC=3;AF=0.075;AN=40;BaseQRankSum=  |
| 20727 | chrY | 13386342 | . | G | C   | 232.09  | PASS          | AC=3;AF=0.079;AN=38;BaseQRankSum=  |
| 20728 | chrY | 13386347 | . | A | C   | 179.54  | PASS          | AC=3;AF=0.088;AN=34;BaseQRankSum=  |
| 20729 | chrY | 13386429 | . | T | C   | 1900.09 | PASS          | AC=9;AF=0.500;AN=18;BaseQRankSum=  |
| 20730 | chrY | 13386445 | . | C | T   | 280.91  | PASS          | AC=3;AF=0.136;AN=22;BaseQRankSum=  |
| 20731 | chrY | 13386466 | . | A | T   | 1378.45 | PASS          | AC=9;AF=0.409;AN=22;BaseQRankSum=  |
| 20732 | chrY | 13386467 | . | C | T   | 1314.99 | PASS          | AC=7;AF=0.318;AN=22;BaseQRankSum=  |
| 20733 | chrY | 13386490 | . | A | G   | 823.56  | PASS          | AC=4;AF=0.182;AN=22;BaseQRankSum=  |
| 20734 | chrY | 13386554 | . | T | C   | 511.43  | my_snp_filter | AC=4;AF=0.200;AN=20;BaseQ          |
| 20735 | chrY | 13386555 | . | G | A   | 351.40  | PASS          | AC=4;AF=0.200;AN=20;BaseQRankSum=  |
| 20736 | chrY | 13386577 | . | T | A   | 197.65  | PASS          | AC=4;AF=0.200;AN=20;BaseQRankSum=  |
| 20737 | chrY | 13386656 | . | T | C   | 667.53  | PASS          | AC=8;AF=0.400;AN=20;DP=138;FS=0.0  |
| 20738 | chrY | 13386761 | . | C | G   | 6298.33 | PASS          | AC=56;AF=1.00;AN=56;DP=217;FS=0.0  |
| 20739 | chrY | 13387448 | . | C | T   | 45.60   | PASS          | AC=1;AF=0.015;AN=68;BaseQRankSum=  |
| 20740 | chrY | 13387481 | . | C | T   | 2668.12 | PASS          | AC=19;AF=0.271;AN=70;BaseQRankSum= |
| 20741 | chrY | 13387519 | . | C | T   | 4513.91 | PASS          | AC=24;AF=0.343;AN=70;BaseQRankSum= |
| 20742 | chrY | 13387604 | . | A | G   | 1368.77 | PASS          | AC=13;AF=0.191;AN=68;BaseQRankSum= |
| 20743 | chrY | 13387967 | . | A | C   | 38.38   | PASS          | AC=1;AF=0.056;AN=18;BaseQRankSum=  |
| 20744 | chrY | 13387972 | . | T | G   | 42.06   | PASS          | AC=1;AF=0.056;AN=18;BaseQRankSum=  |
| 20745 | chrY | 13388002 | . | T | A   | 51.54   | PASS          | AC=1;AF=0.056;AN=18;BaseQRankSum=  |
| 20746 | chrY | 13388081 | . | G | A   | 44.16   | PASS          | AC=2;AF=0.100;AN=20;BaseQRankSum=  |
| 20747 | chrY | 13388083 | . | A | C   | 540.94  | PASS          | AC=7;AF=0.350;AN=20;BaseQRankSum=  |
| 20748 | chrY | 13388103 | . | A | G   | 1173.26 | PASS          | AC=7;AF=0.350;AN=20;BaseQRankSum=  |

|       |      |          |   |   |     |          |               |                                   |
|-------|------|----------|---|---|-----|----------|---------------|-----------------------------------|
| 20749 | chrY | 13388173 | . | T | C   | 1232.92  | PASS          | AC=8;AF=0.444;AN=18;BaseQRankSum= |
| 20750 | chrY | 13388195 | . | A | T   | 1378.27  | PASS          | AC=8;AF=0.364;AN=22;BaseQRankSum= |
| 20751 | chrY | 13388218 | . | A | C   | 2233.08  | PASS          | AC=9;AF=0.346;AN=26;BaseQRankSum= |
| 20752 | chrY | 13388227 | . | A | G   | 339.43   | PASS          | AC=5;AF=0.167;AN=30;BaseQRankSum= |
| 20753 | chrY | 13388232 | . | A | G   | 55.34    | my_snp_filter | AC=2;AF=0.059;AN=34;BaseQ         |
| 20754 | chrY | 13388239 | . | G | C   | 402.17   | PASS          | AC=5;AF=0.147;AN=34;BaseQRankSum= |
| 20755 | chrY | 13388248 | . | G | C   | 112.08   | my_snp_filter | AC=3;AF=0.083;AN=36;BaseQ         |
| 20756 | chrY | 13388268 | . | C | A   | 60.13    | my_snp_filter | AC=2;AF=0.043;AN=46;BaseQ         |
| 20757 | chrY | 13388297 | . | T | C   | 1470.63  | my_snp_filter | AC=8;AF=0.138;AN=58;BaseQ         |
| 20758 | chrY | 13388559 | . | A | T   | 56.42    | PASS          | AC=1;AF=0.016;AN=62;BaseQRankSum= |
| 20759 | chrY | 13388564 | . | A | T   | 50.99    | PASS          | AC=1;AF=0.016;AN=62;BaseQRankSum= |
| 20760 | chrY | 13388574 | . | G | T   | 51.83    | PASS          | AC=1;AF=0.017;AN=60;BaseQRankSum= |
| 20761 | chrY | 13388681 | . | A | G   | 4139.86  | PASS          | AC=18;AF=1.00;AN=18;BaseQRankSum= |
| 20762 | chrY | 13388708 | . | A | G   | 235.14   | PASS          | AC=4;AF=0.182;AN=22;BaseQRankSum= |
| 20763 | chrY | 13388804 | . | C | T   | 92.83    | my_snp_filter | AC=4;AF=0.200;AN=20;BaseQ         |
| 20764 | chrY | 13389378 | . | A | C   | 223.50   | PASS          | AC=2;AF=0.100;AN=20;BaseQRankSum= |
| 20765 | chrY | 13389387 | . | C | G   | 56.08    | my_snp_filter | AC=2;AF=0.100;AN=20;BaseQ         |
| 20766 | chrY | 13389453 | . | A | T   | 101.32   | PASS          | AC=3;AF=0.136;AN=22;BaseQRankSum= |
| 20767 | chrY | 13389465 | . | C | T   | 79.82    | PASS          | AC=2;AF=0.091;AN=22;BaseQRankSum= |
| 20768 | chrY | 13389468 | . | A | G   | 68.19    | PASS          | AC=2;AF=0.091;AN=22;BaseQRankSum= |
| 20769 | chrY | 13389473 | . | A | G   | 62.52    | PASS          | AC=2;AF=0.091;AN=22;BaseQRankSum= |
| 20770 | chrY | 13389479 | . | G | A   | 171.35   | PASS          | AC=3;AF=0.136;AN=22;BaseQRankSum= |
| 20771 | chrY | 13389495 | . | A | G   | 74.56    | PASS          | AC=2;AF=0.091;AN=22;BaseQRankSum= |
| 20772 | chrY | 13389509 | . | G | C   | 71.86    | my_snp_filter | AC=2;AF=0.100;AN=20;BaseQ         |
| 20773 | chrY | 13389529 | . | T | C   | 55.30    | PASS          | AC=1;AF=0.056;AN=18;BaseQRankSum= |
| 20774 | chrY | 13389543 | . | T | C   | 53.39    | PASS          | AC=1;AF=0.056;AN=18;BaseQRankSum= |
| 20775 | chrY | 13389544 | . | A | G   | 189.65   | PASS          | AC=3;AF=0.167;AN=18;BaseQRankSum= |
| 20776 | chrY | 13389561 | . | G | A   | 84.95    | PASS          | AC=1;AF=0.056;AN=18;BaseQRankSum= |
| 20777 | chrY | 13389569 | . | C | T   | 81.80    | PASS          | AC=1;AF=0.056;AN=18;BaseQRankSum= |
| 20778 | chrY | 13389607 | . | C | T   | 185.95   | PASS          | AC=4;AF=0.222;AN=18;BaseQRankSum= |
| 20779 | chrY | 13389610 | . | C | T   | 186.28   | PASS          | AC=4;AF=0.222;AN=18;BaseQRankSum= |
| 20780 | chrY | 13389641 | . | G | A   | 232.97   | PASS          | AC=4;AF=0.222;AN=18;BaseQRankSum= |
| 20781 | chrY | 13389646 | . | A | G   | 235.72   | PASS          | AC=4;AF=0.222;AN=18;BaseQRankSum= |
| 20782 | chrY | 13389666 | . | T | C   | 195.05   | PASS          | AC=4;AF=0.222;AN=18;BaseQRankSum= |
| 20783 | chrY | 13389680 | . | A | G   | 180.33   | PASS          | AC=4;AF=0.222;AN=18;BaseQRankSum= |
| 20784 | chrY | 13389797 | . | A | C   | 159.49   | PASS          | AC=1;AF=0.056;AN=18;BaseQRankSum= |
| 20785 | chrY | 13389799 | . | T | C   | 299.91   | PASS          | AC=2;AF=0.111;AN=18;BaseQRankSum= |
| 20786 | chrY | 13389808 | . | T | C   | 343.65   | PASS          | AC=2;AF=0.111;AN=18;BaseQRankSum= |
| 20787 | chrY | 13389839 | . | G | A   | 412.40   | PASS          | AC=7;AF=0.389;AN=18;BaseQRankSum= |
| 20788 | chrY | 13389920 | . | C | T   | 158.13   | PASS          | AC=3;AF=0.167;AN=18;BaseQRankSum= |
| 20789 | chrY | 13389922 | . | C | T   | 385.06   | PASS          | AC=5;AF=0.278;AN=18;BaseQRankSum= |
| 20790 | chrY | 13389929 | . | A | G   | 1206.05  | my_snp_filter | AC=7;AF=0.389;AN=18;BaseQ         |
| 20791 | chrY | 13389937 | . | C | T   | 90.32    | PASS          | AC=1;AF=0.056;AN=18;BaseQRankSum= |
| 20792 | chrY | 13389941 | . | G | A   | 88.28    | PASS          | AC=1;AF=0.056;AN=18;BaseQRankSum= |
| 20793 | chrY | 13389943 | . | A | G   | 87.30    | PASS          | AC=1;AF=0.050;AN=20;BaseQRankSum= |
| 20794 | chrY | 13389947 | . | T | C   | 1426.59  | PASS          | AC=8;AF=0.400;AN=20;BaseQRankSum= |
| 20795 | chrY | 13389966 | . | G | A   | 56.09    | PASS          | AC=1;AF=0.050;AN=20;BaseQRankSum= |
| 20796 | chrY | 13389968 | . | G | A   | 262.36   | PASS          | AC=1;AF=0.050;AN=20;BaseQRankSum= |
| 20797 | chrY | 13389990 | . | A | G,* | 665.42   | PASS          | AC=2,2;AF=0.091,0.091;AN=22;BaseQ |
| 20798 | chrY | 13390004 | . | A | T   | 105.81   | PASS          | AC=1;AF=0.042;AN=24;BaseQRankSum= |
| 20799 | chrY | 13390022 | . | G | A   | 798.12   | my_snp_filter | AC=5;AF=0.227;AN=22;BaseQ         |
| 20800 | chrY | 13390026 | . | G | A   | 276.98   | PASS          | AC=3;AF=0.115;AN=26;BaseQRankSum= |
| 20801 | chrY | 13390027 | . | C | G   | 128.56   | PASS          | AC=1;AF=0.042;AN=24;BaseQRankSum= |
| 20802 | chrY | 13390070 | . | C | T   | 2944.44  | PASS          | AC=8;AF=0.267;AN=30;BaseQRankSum= |
| 20803 | chrY | 13390071 | . | A | G   | 2930.90  | PASS          | AC=8;AF=0.250;AN=32;BaseQRankSum= |
| 20804 | chrY | 13390078 | . | C | T   | 3493.62  | PASS          | AC=8;AF=0.267;AN=30;BaseQRankSum= |
| 20805 | chrY | 13390080 | . | T | C   | 45.35    | my_snp_filter | AC=1;AF=0.033;AN=30;BaseQ         |
| 20806 | chrY | 13390081 | . | T | C   | 33.97    | my_snp_filter | AC=3;AF=0.100;AN=30;BaseQ         |
| 20807 | chrY | 13390106 | . | G | A   | 10919.87 | PASS          | AC=13;AF=0.542;AN=24;BaseQ        |
| 20808 | chrY | 13390113 | . | C | G   | 466.29   | my_snp_filter | AC=6;AF=0.231;AN=26;BaseQ         |
| 20809 | chrY | 13390120 | . | A | G   | 101.65   | my_snp_filter | AC=2;AF=0.071;AN=28;BaseQ         |
| 20810 | chrY | 13390140 | . | G | T   | 7482.71  | PASS          | AC=8;AF=0.308;AN=26;BaseQRankSum= |
| 20811 | chrY | 13390144 | . | C | T   | 7534.02  | PASS          | AC=8;AF=0.286;AN=28;BaseQRankSum= |
| 20812 | chrY | 13390154 | . | G | A   | 196.24   | my_snp_filter | AC=3;AF=0.107;AN=28;BaseQ         |
| 20813 | chrY | 13390187 | . | G | C   | 3026.52  | PASS          | AC=9;AF=0.450;AN=20;BaseQRankSum= |
| 20814 | chrY | 13390218 | . | G | A   | 118.37   | PASS          | AC=1;AF=0.045;AN=22;BaseQRankSum= |
| 20815 | chrY | 13390244 | . | T | A   | 125.93   | my_snp_filter | AC=2;AF=0.083;AN=24;BaseQ         |
| 20816 | chrY | 13390259 | . | C | A   | 507.80   | PASS          | AC=5;AF=0.208;AN=24;BaseQRankSum= |
| 20817 | chrY | 13390289 | . | T | G   | 337.63   | PASS          | AC=5;AF=0.208;AN=24;BaseQRankSum= |
| 20818 | chrY | 13390291 | . | C | T   | 73.94    | my_snp_filter | AC=2;AF=0.083;AN=24;BaseQ         |
| 20819 | chrY | 13390343 | . | T | G   | 68.08    | my_snp_filter | AC=4;AF=0.200;AN=20;BaseQ         |
| 20820 | chrY | 13390383 | . | T | C   | 2921.19  | my_snp_filter | AC=8;AF=0.333;AN=24;BaseQ         |
| 20821 | chrY | 13390387 | . | T | A   | 1967.21  | my_snp_filter | AC=8;AF=0.333;AN=24;BaseQ         |
| 20822 | chrY | 13390395 | . | C | T   | 232.92   | PASS          | AC=3;AF=0.107;AN=28;BaseQRankSum= |
| 20823 | chrY | 13390397 | . | C | T   | 2364.40  | my_snp_filter | AC=8;AF=0.286;AN=28;BaseQ         |
| 20824 | chrY | 13390446 | . | G | T   | 152.13   | PASS          | AC=2;AF=0.067;AN=30;BaseQRankSum= |

|       |      |          |   |   |     |         |               |                                    |
|-------|------|----------|---|---|-----|---------|---------------|------------------------------------|
| 20825 | chrY | 13390456 | . | C | G   | 151.84  | PASS          | AC=2;AF=0.063;AN=32;BaseQRankSum=  |
| 20826 | chrY | 13390467 | . | G | C   | 72.44   | PASS          | AC=1;AF=0.029;AN=34;BaseQRankSum=  |
| 20827 | chrY | 13390469 | . | G | A   | 1333.68 | my_snp_filter | AC=8;AF=0.235;AN=34;BaseQ          |
| 20828 | chrY | 13390479 | . | G | A   | 129.76  | my_snp_filter | AC=2;AF=0.050;AN=40;BaseQ          |
| 20829 | chrY | 13390483 | . | T | G   | 129.38  | my_snp_filter | AC=2;AF=0.048;AN=42;BaseQ          |
| 20830 | chrY | 13390502 | . | C | G   | 1502.43 | PASS          | AC=8;AF=0.143;AN=56;BaseQRankSum=  |
| 20831 | chrY | 13390510 | . | C | T   | 1445.03 | PASS          | AC=8;AF=0.129;AN=62;BaseQRankSum=  |
| 20832 | chrY | 13390542 | . | T | C   | 1023.19 | PASS          | AC=7;AF=0.109;AN=64;BaseQRankSum=  |
| 20833 | chrY | 13390546 | . | C | T   | 797.56  | PASS          | AC=7;AF=0.109;AN=64;BaseQRankSum=  |
| 20834 | chrY | 13390627 | . | G | T   | 6803.27 | PASS          | AC=46;AF=0.657;AN=70;DP=428;FS=0   |
| 20835 | chrY | 13390795 | . | C | A   | 189.64  | PASS          | AC=3;AF=0.060;AN=50;BaseQRankSum=  |
| 20836 | chrY | 13390796 | . | C | A   | 63.89   | my_snp_filter | AC=2;AF=0.040;AN=50;BaseQ          |
| 20837 | chrY | 13390797 | . | G | A   | 186.33  | PASS          | AC=3;AF=0.058;AN=52;BaseQRankSum=  |
| 20838 | chrY | 13390815 | . | A | G   | 539.52  | PASS          | AC=4;AF=0.077;AN=52;BaseQRankSum=  |
| 20839 | chrY | 13390927 | . | G | T   | 253.50  | PASS          | AC=2;AF=0.034;AN=58;DP=198;FS=0.0  |
| 20840 | chrY | 13391146 | . | G | A   | 53.65   | PASS          | AC=1;AF=0.018;AN=56;BaseQRankSum=  |
| 20841 | chrY | 13391154 | . | G | A   | 47.82   | PASS          | AC=1;AF=0.019;AN=52;BaseQRankSum=  |
| 20842 | chrY | 13391651 | . | C | T   | 46.79   | PASS          | AC=1;AF=0.022;AN=46;BaseQRankSum=  |
| 20843 | chrY | 13391652 | . | A | T   | 135.44  | my_snp_filter | AC=5;AF=0.119;AN=42;BaseQ          |
| 20844 | chrY | 13391697 | . | T | C   | 33.07   | my_snp_filter | AC=1;AF=0.023;AN=44;BaseQ          |
| 20845 | chrY | 13391698 | . | C | T   | 50.75   | PASS          | AC=1;AF=0.024;AN=42;BaseQRankSum=  |
| 20846 | chrY | 13392071 | . | A | T   | 140.18  | PASS          | AC=1;AF=0.031;AN=32;BaseQRankSum=  |
| 20847 | chrY | 13392209 | . | C | A   | 561.93  | my_snp_filter | AC=6;AF=0.176;AN=34;BaseQ          |
| 20848 | chrY | 13392281 | . | A | T   | 343.37  | PASS          | AC=6;AF=0.176;AN=34;BaseQRankSum=  |
| 20849 | chrY | 13392324 | . | C | G   | 519.10  | PASS          | AC=5;AF=0.147;AN=34;BaseQRankSum=  |
| 20850 | chrY | 13392384 | . | T | G   | 1046.95 | PASS          | AC=8;AF=0.222;AN=36;BaseQRankSum=  |
| 20851 | chrY | 13392504 | . | T | A   | 75.67   | my_snp_filter | AC=2;AF=0.077;AN=26;BaseQ          |
| 20852 | chrY | 13392517 | . | T | A   | 2544.75 | PASS          | AC=9;AF=0.300;AN=30;BaseQRankSum=  |
| 20853 | chrY | 13392646 | . | G | T   | 248.01  | PASS          | AC=6;AF=0.188;AN=32;BaseQRankSum=  |
| 20854 | chrY | 13392679 | . | A | G   | 646.03  | PASS          | AC=8;AF=0.250;AN=32;BaseQRankSum=  |
| 20855 | chrY | 13392688 | . | A | G   | 71.01   | my_snp_filter | AC=4;AF=0.143;AN=28;BaseQ          |
| 20856 | chrY | 13392727 | . | G | A   | 290.06  | my_snp_filter | AC=3;AF=0.107;AN=28;BaseQ          |
| 20857 | chrY | 13392747 | . | A | G   | 719.71  | my_snp_filter | AC=6;AF=0.250;AN=24;BaseQ          |
| 20858 | chrY | 13392749 | . | T | C   | 174.97  | PASS          | AC=4;AF=0.167;AN=24;BaseQRankSum=  |
| 20859 | chrY | 13392776 | . | A | G   | 305.81  | PASS          | AC=4;AF=0.143;AN=28;BaseQRankSum=  |
| 20860 | chrY | 13392782 | . | G | A   | 301.13  | PASS          | AC=4;AF=0.143;AN=28;BaseQRankSum=  |
| 20861 | chrY | 13392858 | . | A | C   | 66.89   | PASS          | AC=1;AF=0.029;AN=34;BaseQRankSum=  |
| 20862 | chrY | 13392883 | . | G | A   | 135.75  | PASS          | AC=1;AF=0.025;AN=40;BaseQRankSum=  |
| 20863 | chrY | 13392904 | . | G | A   | 213.28  | my_snp_filter | AC=5;AF=0.132;AN=38;BaseQ          |
| 20864 | chrY | 13392933 | . | C | T   | 124.19  | my_snp_filter | AC=3;AF=0.071;AN=42;BaseQ          |
| 20865 | chrY | 13392940 | . | T | C   | 336.83  | PASS          | AC=5;AF=0.119;AN=42;BaseQRankSum=  |
| 20866 | chrY | 13392943 | . | C | T   | 164.61  | PASS          | AC=2;AF=0.048;AN=42;BaseQRankSum=  |
| 20867 | chrY | 13392947 | . | T | C   | 7055.59 | PASS          | AC=10;AF=0.263;AN=38;BaseQRankSum= |
| 20868 | chrY | 13392965 | . | A | C   | 8280.73 | PASS          | AC=12;AF=0.400;AN=30;BaseQRankSum= |
| 20869 | chrY | 13392966 | . | G | A   | 1448.49 | PASS          | AC=7;AF=0.184;AN=38;BaseQRankSum=  |
| 20870 | chrY | 13392969 | . | C | T   | 578.76  | PASS          | AC=5;AF=0.114;AN=44;BaseQRankSum=  |
| 20871 | chrY | 13392995 | . | G | A   | 117.86  | my_snp_filter | AC=3;AF=0.063;AN=48;BaseQ          |
| 20872 | chrY | 13393021 | . | T | C   | 253.13  | PASS          | AC=3;AF=0.058;AN=52;BaseQRankSum=  |
| 20873 | chrY | 13393035 | . | A | G   | 1637.63 | PASS          | AC=13;AF=0.271;AN=48;BaseQRankSum= |
| 20874 | chrY | 13393100 | . | A | C   | 1085.78 | PASS          | AC=8;AF=0.267;AN=30;BaseQRankSum=  |
| 20875 | chrY | 13393112 | . | G | C   | 255.65  | PASS          | AC=4;AF=0.125;AN=32;BaseQRankSum=  |
| 20876 | chrY | 13393115 | . | C | G   | 226.18  | PASS          | AC=4;AF=0.125;AN=32;BaseQRankSum=  |
| 20877 | chrY | 13393142 | . | G | A   | 484.67  | PASS          | AC=6;AF=0.188;AN=32;BaseQRankSum=  |
| 20878 | chrY | 13393149 | . | G | A   | 113.53  | PASS          | AC=1;AF=0.031;AN=32;BaseQRankSum=  |
| 20879 | chrY | 13393150 | . | C | T   | 113.53  | PASS          | AC=1;AF=0.031;AN=32;BaseQRankSum=  |
| 20880 | chrY | 13393154 | . | G | T   | 122.40  | PASS          | AC=1;AF=0.028;AN=36;BaseQRankSum=  |
| 20881 | chrY | 13393194 | . | G | A   | 2891.28 | PASS          | AC=12;AF=0.400;AN=30;BaseQRankSum= |
| 20882 | chrY | 13393204 | . | A | G   | 3252.80 | PASS          | AC=12;AF=0.400;AN=30;BaseQRankSum= |
| 20883 | chrY | 13393217 | . | G | A   | 3011.81 | my_snp_filter | AC=8;AF=0.235;AN=34;BaseQ          |
| 20884 | chrY | 13393235 | . | C | T   | 4953.11 | PASS          | AC=14;AF=0.467;AN=30;BaseQRankSum= |
| 20885 | chrY | 13393242 | . | G | A   | 70.01   | my_snp_filter | AC=2;AF=0.053;AN=38;BaseQ          |
| 20886 | chrY | 13393248 | . | G | A   | 831.09  | PASS          | AC=4;AF=0.111;AN=36;BaseQRankSum=  |
| 20887 | chrY | 13393250 | . | G | T   | 831.09  | PASS          | AC=4;AF=0.111;AN=36;BaseQRankSum=  |
| 20888 | chrY | 13393262 | . | A | C   | 5819.20 | my_snp_filter | AC=9;AF=0.346;AN=26;BaseQ          |
| 20889 | chrY | 13393275 | . | G | T   | 1041.90 | PASS          | AC=8;AF=0.211;AN=38;BaseQRankSum=  |
| 20890 | chrY | 13393276 | . | G | T   | 278.03  | my_snp_filter | AC=4;AF=0.091;AN=44;BaseQ          |
| 20891 | chrY | 13393281 | . | G | C   | 935.95  | PASS          | AC=4;AF=0.100;AN=40;BaseQRankSum=  |
| 20892 | chrY | 13393299 | . | A | G   | 4864.21 | my_snp_filter | AC=12;AF=0.286;AN=42;BaseQ         |
| 20893 | chrY | 13393303 | . | C | A,T | 2803.83 | my_snp_filter | AC=9,3;AF=0.196,0.065;AN=          |
| 20894 | chrY | 13393318 | . | A | G   | 1102.42 | PASS          | AC=6;AF=0.136;AN=44;BaseQRankSum=  |
| 20895 | chrY | 13393324 | . | G | A,T | 1293.74 | PASS          | AC=6,6;AF=0.150,0.150;AN=40;BaseQ  |
| 20896 | chrY | 13393354 | . | C | A   | 1184.97 | PASS          | AC=7;AF=0.175;AN=40;BaseQRankSum=  |
| 20897 | chrY | 13393360 | . | T | G   | 1172.87 | PASS          | AC=7;AF=0.175;AN=40;BaseQRankSum=  |
| 20898 | chrY | 13393390 | . | G | A   | 77.47   | my_snp_filter | AC=2;AF=0.048;AN=42;BaseQ          |
| 20899 | chrY | 13393395 | . | T | C   | 731.71  | PASS          | AC=7;AF=0.184;AN=38;BaseQRankSum=  |
| 20900 | chrY | 13393416 | . | G | C   | 821.44  | PASS          | AC=9;AF=0.265;AN=34;BaseQRankSum=  |

|       |      |          |   |   |     |         |               |                                   |
|-------|------|----------|---|---|-----|---------|---------------|-----------------------------------|
| 20901 | chrY | 13393436 | . | G | C   | 30.51   | my_snp_filter | AC=2;AF=0.059;AN=34;BaseQ         |
| 20902 | chrY | 13393446 | . | G | C   | 427.09  | PASS          | AC=6;AF=0.231;AN=26;BaseQRankSum= |
| 20903 | chrY | 13393480 | . | C | A   | 192.62  | PASS          | AC=2;AF=0.056;AN=36;BaseQRankSum= |
| 20904 | chrY | 13393485 | . | C | T   | 51.62   | PASS          | AC=1;AF=0.028;AN=36;BaseQRankSum= |
| 20905 | chrY | 13394229 | . | G | T   | 146.23  | PASS          | AC=4;AF=0.143;AN=28;DP=204;FS=0.0 |
| 20906 | chrY | 13395026 | . | A | G   | 1335.66 | my_snp_filter | AC=9;AF=0.225;AN=40;BaseQ         |
| 20907 | chrY | 13395042 | . | C | T   | 489.17  | my_snp_filter | AC=8;AF=0.200;AN=40;BaseQ         |
| 20908 | chrY | 13395084 | . | T | C   | 2428.79 | my_snp_filter | AC=9;AF=0.214;AN=42;BaseQ         |
| 20909 | chrY | 13395102 | . | T | C   | 782.24  | PASS          | AC=9;AF=0.214;AN=42;BaseQRankSum= |
| 20910 | chrY | 13395147 | . | G | A   | 126.21  | my_snp_filter | AC=3;AF=0.088;AN=34;BaseQ         |
| 20911 | chrY | 13395168 | . | T | A   | 181.20  | PASS          | AC=3;AF=0.075;AN=40;BaseQRankSum= |
| 20912 | chrY | 13395173 | . | G | C   | 203.04  | PASS          | AC=3;AF=0.075;AN=40;BaseQRankSum= |
| 20913 | chrY | 13395180 | . | A | G   | 32.25   | my_snp_filter | AC=2;AF=0.050;AN=40;BaseQ         |
| 20914 | chrY | 13395183 | . | A | G   | 3080.30 | PASS          | AC=9;AF=0.250;AN=36;BaseQRankSum= |
| 20915 | chrY | 13395184 | . | G | A   | 2464.99 | PASS          | AC=9;AF=0.237;AN=38;BaseQRankSum= |
| 20916 | chrY | 13395189 | . | G | T   | 2381.81 | PASS          | AC=9;AF=0.250;AN=36;BaseQRankSum= |
| 20917 | chrY | 13395196 | . | A | T   | 252.59  | PASS          | AC=4;AF=0.111;AN=36;BaseQRankSum= |
| 20918 | chrY | 13395199 | . | G | A   | 2491.81 | PASS          | AC=9;AF=0.237;AN=38;BaseQRankSum= |
| 20919 | chrY | 13395217 | . | G | A   | 95.73   | my_snp_filter | AC=3;AF=0.071;AN=42;BaseQ         |
| 20920 | chrY | 13395224 | . | C | G   | 2437.87 | PASS          | AC=9;AF=0.214;AN=42;BaseQRankSum= |
| 20921 | chrY | 13395229 | . | G | C   | 39.58   | my_snp_filter | AC=4;AF=0.091;AN=44;BaseQ         |
| 20922 | chrY | 13395236 | . | C | A   | 2475.33 | PASS          | AC=9;AF=0.196;AN=46;BaseQRankSum= |
| 20923 | chrY | 13395261 | . | T | C   | 40.55   | my_snp_filter | AC=1;AF=0.019;AN=52;BaseQ         |
| 20924 | chrY | 13395279 | . | G | T   | 110.10  | PASS          | AC=1;AF=0.019;AN=52;BaseQRankSum= |
| 20925 | chrY | 13395280 | . | C | T   | 110.12  | PASS          | AC=1;AF=0.020;AN=50;BaseQRankSum= |
| 20926 | chrY | 13395287 | . | G | A   | 117.73  | PASS          | AC=1;AF=0.019;AN=54;BaseQRankSum= |
| 20927 | chrY | 13395303 | . | G | A   | 111.45  | PASS          | AC=1;AF=0.017;AN=60;BaseQRankSum= |
| 20928 | chrY | 13395368 | . | A | G   | 101.85  | PASS          | AC=2;AF=0.031;AN=64;BaseQRankSum= |
| 20929 | chrY | 13395381 | . | A | G   | 798.77  | my_snp_filter | AC=7;AF=0.109;AN=64;BaseQ         |
| 20930 | chrY | 13395384 | . | T | G   | 170.38  | PASS          | AC=2;AF=0.031;AN=64;BaseQRankSum= |
| 20931 | chrY | 13395387 | . | G | C   | 226.06  | PASS          | AC=4;AF=0.063;AN=64;BaseQRankSum= |
| 20932 | chrY | 13395389 | . | C | T   | 128.18  | PASS          | AC=2;AF=0.031;AN=64;BaseQRankSum= |
| 20933 | chrY | 13395810 | . | T | C   | 205.75  | my_snp_filter | AC=4;AF=0.200;AN=20;BaseQ         |
| 20934 | chrY | 13395812 | . | C | T   | 372.77  | my_snp_filter | AC=3;AF=0.150;AN=20;BaseQ         |
| 20935 | chrY | 13395826 | . | G | A   | 371.94  | my_snp_filter | AC=4;AF=0.200;AN=20;BaseQ         |
| 20936 | chrY | 13395933 | . | A | C   | 731.21  | my_snp_filter | AC=7;AF=0.350;AN=20;BaseQ         |
| 20937 | chrY | 13395964 | . | G | A   | 93.72   | my_snp_filter | AC=2;AF=0.091;AN=22;BaseQ         |
| 20938 | chrY | 13395980 | . | G | C   | 2014.75 | PASS          | AC=8;AF=0.333;AN=24;BaseQRankSum= |
| 20939 | chrY | 13396002 | . | C | T   | 500.17  | PASS          | AC=5;AF=0.192;AN=26;BaseQRankSum= |
| 20940 | chrY | 13396005 | . | A | G,T | 759.10  | PASS          | AC=2,5;AF=0.077,0.192;AN=26;BaseQ |
| 20941 | chrY | 13396012 | . | C | A   | 396.51  | PASS          | AC=5;AF=0.192;AN=26;BaseQRankSum= |
| 20942 | chrY | 13396058 | . | C | G   | 1805.01 | my_snp_filter | AC=6;AF=0.250;AN=24;BaseQ         |
| 20943 | chrY | 13396127 | . | A | C   | 713.23  | my_snp_filter | AC=5;AF=0.278;AN=18;BaseQ         |
| 20944 | chrY | 13396128 | . | T | C   | 713.23  | my_snp_filter | AC=5;AF=0.278;AN=18;BaseQ         |
| 20945 | chrY | 13396172 | . | G | T,C | 6522.31 | PASS          | AC=8,1;AF=0.444,0.056;AN=18;BaseQ |
| 20946 | chrY | 13396180 | . | T | C   | 1977.24 | PASS          | AC=6;AF=0.333;AN=18;BaseQRankSum= |
| 20947 | chrY | 13396203 | . | T | G   | 104.08  | my_snp_filter | AC=3;AF=0.167;AN=18;BaseQ         |
| 20948 | chrY | 13396208 | . | T | A   | 8084.09 | PASS          | AC=9;AF=0.500;AN=18;BaseQRankSum= |
| 20949 | chrY | 13396213 | . | A | G   | 4508.09 | PASS          | AC=9;AF=0.500;AN=18;BaseQRankSum= |
| 20950 | chrY | 13396215 | . | A | T   | 419.61  | my_snp_filter | AC=4;AF=0.222;AN=18;BaseQ         |
| 20951 | chrY | 13396229 | . | G | A   | 88.35   | my_snp_filter | AC=1;AF=0.056;AN=18;BaseQ         |
| 20952 | chrY | 13396277 | . | G | A   | 928.55  | PASS          | AC=4;AF=0.200;AN=20;BaseQRankSum= |
| 20953 | chrY | 13396285 | . | C | G   | 738.04  | my_snp_filter | AC=4;AF=0.182;AN=22;BaseQ         |
| 20954 | chrY | 13396438 | . | G | A   | 402.04  | my_snp_filter | AC=6;AF=0.273;AN=22;BaseQ         |
| 20955 | chrY | 13396472 | . | A | G   | 364.37  | my_snp_filter | AC=4;AF=0.200;AN=20;BaseQ         |
| 20956 | chrY | 13396500 | . | A | T   | 891.53  | my_snp_filter | AC=8;AF=0.400;AN=20;BaseQ         |
| 20957 | chrY | 13396521 | . | G | A   | 99.46   | my_snp_filter | AC=1;AF=0.056;AN=18;BaseQ         |
| 20958 | chrY | 13396523 | . | G | A   | 561.03  | my_snp_filter | AC=7;AF=0.389;AN=18;BaseQ         |
| 20959 | chrY | 13396530 | . | A | G   | 53.45   | my_snp_filter | AC=1;AF=0.056;AN=18;BaseQ         |
| 20960 | chrY | 13396668 | . | G | A   | 51.49   | PASS          | AC=2;AF=0.083;AN=24;DP=194;FS=0.0 |
| 20961 | chrY | 13396670 | . | C | T   | 51.48   | PASS          | AC=2;AF=0.083;AN=24;DP=197;FS=0.0 |
| 20962 | chrY | 13396852 | . | T | C   | 107.73  | PASS          | AC=1;AF=0.050;AN=20;BaseQRankSum= |
| 20963 | chrY | 13397005 | . | A | G   | 75.17   | my_snp_filter | AC=3;AF=0.125;AN=24;BaseQ         |
| 20964 | chrY | 13397980 | . | T | A   | 848.32  | my_snp_filter | AC=9;AF=0.500;AN=18;BaseQ         |
| 20965 | chrY | 13398025 | . | T | C   | 8664.86 | PASS          | AC=18;AF=1.00;AN=18;BaseQRankSum= |
| 20966 | chrY | 13398045 | . | C | T   | 162.64  | my_snp_filter | AC=4;AF=0.222;AN=18;BaseQ         |
| 20967 | chrY | 13398064 | . | G | T   | 2087.09 | PASS          | AC=9;AF=0.500;AN=18;BaseQRankSum= |
| 20968 | chrY | 13398261 | . | G | A   | 124.22  | my_snp_filter | AC=2;AF=0.111;AN=18;BaseQ         |
| 20969 | chrY | 13398262 | . | G | T   | 4386.09 | PASS          | AC=9;AF=0.500;AN=18;BaseQRankSum= |
| 20970 | chrY | 13398274 | . | A | G   | 45.32   | my_snp_filter | AC=1;AF=0.056;AN=18;BaseQ         |
| 20971 | chrY | 13398283 | . | C | A   | 4641.09 | PASS          | AC=9;AF=0.500;AN=18;BaseQRankSum= |
| 20972 | chrY | 13398303 | . | A | T   | 426.30  | my_snp_filter | AC=4;AF=0.222;AN=18;BaseQ         |
| 20973 | chrY | 13398311 | . | G | T   | 519.28  | PASS          | AC=4;AF=0.222;AN=18;BaseQRankSum= |
| 20974 | chrY | 13398317 | . | G | A   | 396.49  | my_snp_filter | AC=4;AF=0.222;AN=18;BaseQ         |
| 20975 | chrY | 13398319 | . | C | A   | 98.96   | my_snp_filter | AC=2;AF=0.111;AN=18;BaseQ         |
| 20976 | chrY | 13398320 | . | C | T   | 539.85  | PASS          | AC=3;AF=0.167;AN=18;BaseQRankSum= |

|       |      |          |   |   |     |          |               |                                    |
|-------|------|----------|---|---|-----|----------|---------------|------------------------------------|
| 20977 | chrY | 13398337 | . | C | T   | 3188.31  | PASS          | AC=9;AF=0.500;AN=18;BaseQRankSum=  |
| 20978 | chrY | 13398353 | . | C | A   | 965.28   | PASS          | AC=7;AF=0.389;AN=18;BaseQRankSum=  |
| 20979 | chrY | 13398354 | . | C | A   | 1746.54  | PASS          | AC=8;AF=0.444;AN=18;BaseQRankSum=  |
| 20980 | chrY | 13398373 | . | A | G   | 3129.09  | PASS          | AC=9;AF=0.500;AN=18;BaseQRankSum=  |
| 20981 | chrY | 13398387 | . | T | A   | 4820.09  | PASS          | AC=9;AF=0.500;AN=18;BaseQRankSum=  |
| 20982 | chrY | 13398444 | . | G | A   | 2145.09  | PASS          | AC=9;AF=0.500;AN=18;BaseQRankSum=  |
| 20983 | chrY | 13398457 | . | A | C   | 2553.09  | PASS          | AC=9;AF=0.500;AN=18;BaseQRankSum=  |
| 20984 | chrY | 13398511 | . | C | T   | 366.32   | PASS          | AC=3;AF=0.167;AN=18;BaseQRankSum=  |
| 20985 | chrY | 13398529 | . | T | C   | 248.48   | PASS          | AC=2;AF=0.111;AN=18;BaseQRankSum=  |
| 20986 | chrY | 13398598 | . | C | T   | 267.74   | PASS          | AC=2;AF=0.100;AN=20;BaseQRankSum=  |
| 20987 | chrY | 13398653 | . | G | T   | 533.65   | PASS          | AC=4;AF=0.143;AN=28;BaseQRankSum=  |
| 20988 | chrY | 13398677 | . | C | T   | 367.14   | PASS          | AC=2;AF=0.056;AN=36;BaseQRankSum=  |
| 20989 | chrY | 13398698 | . | T | G   | 273.20   | PASS          | AC=3;AF=0.063;AN=48;BaseQRankSum=  |
| 20990 | chrY | 13399147 | . | T | C   | 118.13   | my_snp_filter | AC=4;AF=0.061;AN=66;BaseQ          |
| 20991 | chrY | 13399149 | . | C | A   | 136.59   | my_snp_filter | AC=3;AF=0.045;AN=66;BaseQ          |
| 20992 | chrY | 13399152 | . | G | C   | 137.18   | my_snp_filter | AC=3;AF=0.045;AN=66;BaseQ          |
| 20993 | chrY | 13399159 | . | G | A   | 563.90   | PASS          | AC=8;AF=0.118;AN=68;BaseQRankSum=  |
| 20994 | chrY | 13399167 | . | A | G   | 2859.40  | my_snp_filter | AC=21;AF=0.328;AN=64;Base          |
| 20995 | chrY | 13399182 | . | C | A   | 1730.35  | my_snp_filter | AC=21;AF=0.318;AN=66;Base          |
| 20996 | chrY | 13399198 | . | C | T   | 2257.46  | my_snp_filter | AC=21;AF=0.300;AN=70;Base          |
| 20997 | chrY | 13399206 | . | G | C,T | 840.94   | PASS          | AC=3,9;AF=0.043,0.129;AN=70;BaseQ  |
| 20998 | chrY | 13399220 | . | A | G   | 598.75   | PASS          | AC=9;AF=0.129;AN=70;BaseQRankSum=  |
| 20999 | chrY | 13399230 | . | G | A   | 169.01   | my_snp_filter | AC=4;AF=0.057;AN=70;BaseQ          |
| 21000 | chrY | 13399244 | . | A | G   | 130.74   | PASS          | AC=2;AF=0.029;AN=70;BaseQRankSum=  |
| 21001 | chrY | 13399245 | . | A | G   | 272.46   | PASS          | AC=5;AF=0.071;AN=70;BaseQRankSum=  |
| 21002 | chrY | 13399269 | . | T | C   | 4201.73  | PASS          | AC=14;AF=0.200;AN=70;BaseQRankSum= |
| 21003 | chrY | 13399280 | . | T | C   | 64.48    | my_snp_filter | AC=2;AF=0.029;AN=70;BaseQ          |
| 21004 | chrY | 13399286 | . | G | A   | 383.53   | PASS          | AC=4;AF=0.057;AN=70;BaseQRankSum=  |
| 21005 | chrY | 13399294 | . | A | C   | 18759.31 | PASS          | AC=29;AF=0.414;AN=70;Base          |
| 21006 | chrY | 13399301 | . | C | G   | 20366.35 | PASS          | AC=32;AF=0.457;AN=70;Base          |
| 21007 | chrY | 13399306 | . | A | G   | 10009.84 | PASS          | AC=22;AF=0.314;AN=70;Base          |
| 21008 | chrY | 13399334 | . | C | T   | 11399.45 | PASS          | AC=28;AF=0.400;AN=70;Base          |
| 21009 | chrY | 13399342 | . | C | T   | 10919.45 | PASS          | AC=28;AF=0.400;AN=70;Base          |
| 21010 | chrY | 13399362 | . | C | T   | 475.25   | PASS          | AC=5;AF=0.071;AN=70;BaseQRankSum=  |
| 21011 | chrY | 13399371 | . | C | A   | 23595.72 | PASS          | AC=35;AF=0.500;AN=70;Base          |
| 21012 | chrY | 13399400 | . | G | A   | 2109.68  | PASS          | AC=17;AF=0.243;AN=70;BaseQRankSum= |
| 21013 | chrY | 13399415 | . | G | C   | 3668.93  | PASS          | AC=27;AF=0.386;AN=70;BaseQRankSum= |
| 21014 | chrY | 13399425 | . | C | T   | 609.62   | my_snp_filter | AC=13;AF=0.186;AN=70;Base          |
| 21015 | chrY | 13399453 | . | T | C   | 102.92   | PASS          | AC=2;AF=0.029;AN=68;BaseQRankSum=  |
| 21016 | chrY | 13399458 | . | C | G   | 2973.50  | my_snp_filter | AC=21;AF=0.309;AN=68;Base          |
| 21017 | chrY | 13399490 | . | C | G   | 419.24   | PASS          | AC=8;AF=0.121;AN=66;BaseQRankSum=  |
| 21018 | chrY | 13399509 | . | G | A   | 137      | PASS          | AC=2;AF=0.031;AN=64;BaseQRankSum=  |
| 21019 | chrY | 13399525 | . | C | G   | 2286.68  | PASS          | AC=9;AF=0.155;AN=58;BaseQRankSum=  |
| 21020 | chrY | 13399540 | . | G | T   | 799.83   | my_snp_filter | AC=6;AF=0.097;AN=62;BaseQ          |
| 21021 | chrY | 13399552 | . | A | G,* | 1025.61  | my_snp_filter | AC=6,1;AF=0.094,0.016;AN=          |
| 21022 | chrY | 13399576 | . | G | C   | 724.24   | my_snp_filter | AC=6;AF=0.094;AN=64;BaseQ          |
| 21023 | chrY | 13399577 | . | C | T   | 2471.39  | PASS          | AC=8;AF=0.129;AN=62;BaseQRankSum=  |
| 21024 | chrY | 13399597 | . | C | A   | 431.26   | PASS          | AC=5;AF=0.071;AN=70;BaseQRankSum=  |
| 21025 | chrY | 13399599 | . | T | A   | 549.01   | my_snp_filter | AC=6;AF=0.086;AN=70;BaseQ          |
| 21026 | chrY | 13399617 | . | G | A   | 426.53   | PASS          | AC=5;AF=0.071;AN=70;BaseQRankSum=  |
| 21027 | chrY | 13399659 | . | T | A   | 1876.46  | my_snp_filter | AC=5;AF=0.071;AN=70;BaseQ          |
| 21028 | chrY | 13399660 | . | G | C   | 1880.02  | my_snp_filter | AC=5;AF=0.071;AN=70;BaseQ          |
| 21029 | chrY | 13399683 | . | T | A   | 1726.57  | my_snp_filter | AC=5;AF=0.071;AN=70;BaseQ          |
| 21030 | chrY | 13399684 | . | T | A   | 1726.61  | my_snp_filter | AC=5;AF=0.071;AN=70;BaseQ          |
| 21031 | chrY | 13399685 | . | C | G   | 336.99   | PASS          | AC=3;AF=0.043;AN=70;BaseQRankSum=  |
| 21032 | chrY | 13399691 | . | C | A   | 191.26   | PASS          | AC=2;AF=0.029;AN=70;BaseQRankSum=  |
| 21033 | chrY | 13399709 | . | G | A   | 85.51    | PASS          | AC=1;AF=0.014;AN=70;BaseQRankSum=  |
| 21034 | chrY | 13399713 | . | G | C   | 536.59   | my_snp_filter | AC=5;AF=0.071;AN=70;BaseQ          |
| 21035 | chrY | 13399757 | . | A | G   | 797.99   | my_snp_filter | AC=10;AF=0.143;AN=70;Base          |
| 21036 | chrY | 13399763 | . | T | C   | 1058.84  | my_snp_filter | AC=10;AF=0.143;AN=70;Base          |
| 21037 | chrY | 13399795 | . | G | A   | 5057.81  | PASS          | AC=19;AF=0.271;AN=70;BaseQRankSum= |
| 21038 | chrY | 13399807 | . | G | A   | 5974.77  | PASS          | AC=20;AF=0.286;AN=70;BaseQRankSum= |
| 21039 | chrY | 13399871 | . | G | C,T | 25457.86 | PASS          | AC=43,26;AF=0.614,0.371;A          |
| 21040 | chrY | 13399890 | . | T | A   | 3326.16  | PASS          | AC=24;AF=0.343;AN=70;BaseQRankSum= |
| 21041 | chrY | 13399921 | . | T | C   | 1678.75  | PASS          | AC=13;AF=0.186;AN=70;BaseQRankSum= |
| 21042 | chrY | 13399953 | . | T | G   | 3416.64  | PASS          | AC=23;AF=0.338;AN=68;BaseQRankSum= |
| 21043 | chrY | 13399966 | . | T | C   | 8475.15  | PASS          | AC=30;AF=0.455;AN=66;BaseQRankSum= |
| 21044 | chrY | 13400059 | . | A | G   | 405.08   | PASS          | AC=5;AF=0.074;AN=68;BaseQRankSum=  |
| 21045 | chrY | 13400069 | . | C | T   | 3375.13  | PASS          | AC=11;AF=0.167;AN=66;BaseQRankSum= |
| 21046 | chrY | 13400099 | . | G | A   | 1153.56  | PASS          | AC=6;AF=0.107;AN=56;BaseQRankSum=  |
| 21047 | chrY | 13400146 | . | A | G   | 1413.56  | my_snp_filter | AC=7;AF=0.194;AN=36;BaseQ          |
| 21048 | chrY | 13400159 | . | C | T   | 6737.39  | PASS          | AC=9;AF=0.346;AN=26;BaseQRankSum=  |
| 21049 | chrY | 13400161 | . | A | T   | 4172.39  | PASS          | AC=9;AF=0.346;AN=26;BaseQRankSum=  |
| 21050 | chrY | 13400168 | . | T | C   | 34.79    | my_snp_filter | AC=1;AF=0.038;AN=26;BaseQ          |
| 21051 | chrY | 13400173 | . | G | T   | 153.92   | my_snp_filter | AC=2;AF=0.067;AN=30;BaseQ          |
| 21052 | chrY | 13400211 | . | G | A   | 439.73   | my_snp_filter | AC=3;AF=0.075;AN=40;BaseQ          |

|       |      |          |   |   |     |          |               |                                    |
|-------|------|----------|---|---|-----|----------|---------------|------------------------------------|
| 21053 | chrY | 13400245 | . | T | C   | 207.53   | my_snp_filter | AC=3;AF=0.063;AN=48;BaseQ          |
| 21054 | chrY | 13400253 | . | T | C   | 73.12    | my_snp_filter | AC=3;AF=0.050;AN=60;BaseQ          |
| 21055 | chrY | 13400336 | . | C | T   | 3665.79  | PASS          | AC=17;AF=0.243;AN=70;BaseQRankSum  |
| 21056 | chrY | 13400351 | . | T | A   | 632.70   | PASS          | AC=8;AF=0.114;AN=70;BaseQRankSum   |
| 21057 | chrY | 13400365 | . | G | A   | 12012.51 | PASS          | AC=25;AF=0.357;AN=70;BaseQ         |
| 21058 | chrY | 13400400 | . | T | A   | 10653.07 | PASS          | AC=27;AF=0.386;AN=70;BaseQ         |
| 21059 | chrY | 13400403 | . | G | T   | 4387.47  | PASS          | AC=19;AF=0.271;AN=70;BaseQRankSum  |
| 21060 | chrY | 13400430 | . | C | A   | 273.02   | my_snp_filter | AC=5;AF=0.071;AN=70;BaseQ          |
| 21061 | chrY | 13400470 | . | G | A   | 10899.86 | PASS          | AC=23;AF=0.329;AN=70;BaseQ         |
| 21062 | chrY | 13400517 | . | T | C   | 1166.22  | PASS          | AC=5;AF=0.074;AN=68;BaseQRankSum   |
| 21063 | chrY | 13400540 | . | C | G   | 12521.77 | PASS          | AC=31;AF=0.470;AN=66;BaseQ         |
| 21064 | chrY | 13400547 | . | C | A   | 1001.49  | PASS          | AC=5;AF=0.076;AN=66;BaseQRankSum   |
| 21065 | chrY | 13400548 | . | A | T   | 1001.48  | PASS          | AC=5;AF=0.076;AN=66;BaseQRankSum   |
| 21066 | chrY | 13400618 | . | C | G   | 9805.66  | PASS          | AC=11;AF=0.162;AN=68;BaseQRankSum  |
| 21067 | chrY | 13400621 | . | T | G   | 4668.72  | PASS          | AC=10;AF=0.143;AN=70;BaseQRankSum  |
| 21068 | chrY | 13400628 | . | T | G   | 4855.65  | PASS          | AC=10;AF=0.143;AN=70;BaseQRankSum  |
| 21069 | chrY | 13400641 | . | C | T   | 4716.09  | PASS          | AC=11;AF=0.157;AN=70;BaseQRankSum  |
| 21070 | chrY | 13400653 | . | T | C   | 66.48    | PASS          | AC=1;AF=0.014;AN=70;BaseQRankSum   |
| 21071 | chrY | 13400654 | . | G | A   | 11598.09 | PASS          | AC=27;AF=0.397;AN=68;BaseQ         |
| 21072 | chrY | 13400703 | . | A | T   | 23803.72 | PASS          | AC=35;AF=0.500;AN=70;BaseQ         |
| 21073 | chrY | 13400715 | . | T | C   | 435.39   | my_snp_filter | AC=7;AF=0.100;AN=70;BaseQ          |
| 21074 | chrY | 13400771 | . | A | T   | 2228.31  | PASS          | AC=17;AF=0.243;AN=70;BaseQRankSum  |
| 21075 | chrY | 13400787 | . | T | A   | 35.36    | my_snp_filter | AC=3;AF=0.043;AN=70;BaseQ          |
| 21076 | chrY | 13400814 | . | C | A   | 2213.64  | PASS          | AC=17;AF=0.243;AN=70;BaseQRankSum  |
| 21077 | chrY | 13400815 | . | T | C   | 11811.50 | my_snp_filter | AC=27;AF=0.386;AN                  |
| 21078 | chrY | 13400826 | . | C | T   | 12142.45 | my_snp_filter | AC=27;AF=0.386;AN                  |
| 21079 | chrY | 13400861 | . | G | A   | 261.46   | my_snp_filter | AC=7;AF=0.100;AN=70;BaseQ          |
| 21080 | chrY | 13400891 | . | A | G   | 39648.10 | PASS          | AC=34;AF=0.486;AN=70;BaseQ         |
| 21081 | chrY | 13400899 | . | C | T   | 42034.34 | PASS          | AC=34;AF=0.486;AN=70;BaseQ         |
| 21082 | chrY | 13400906 | . | T | A   | 1035.11  | my_snp_filter | AC=15;AF=0.214;AN=70;BaseQ         |
| 21083 | chrY | 13400919 | . | T | A   | 863.85   | my_snp_filter | AC=9;AF=0.129;AN=70;BaseQ          |
| 21084 | chrY | 13400928 | . | G | A   | 22704.03 | PASS          | AC=32;AF=0.457;AN=70;BaseQ         |
| 21085 | chrY | 13400956 | . | T | G   | 39559.16 | PASS          | AC=35;AF=0.500;AN=70;BaseQ         |
| 21086 | chrY | 13400974 | . | A | C   | 607.31   | my_snp_filter | AC=6;AF=0.086;AN=70;BaseQ          |
| 21087 | chrY | 13400993 | . | C | G   | 874.35   | PASS          | AC=10;AF=0.143;AN=70;BaseQRankSum  |
| 21088 | chrY | 13400995 | . | G | T   | 783.39   | PASS          | AC=7;AF=0.100;AN=70;BaseQRankSum   |
| 21089 | chrY | 13401048 | . | G | T,C | 8592.33  | PASS          | AC=23,3;AF=0.329,0.043;AN=70;BaseQ |
| 21090 | chrY | 13401059 | . | T | G   | 32460.91 | PASS          | AC=30;AF=0.429;AN=70;BaseQ         |
| 21091 | chrY | 13401066 | . | C | T   | 7333.45  | PASS          | AC=22;AF=0.314;AN=70;BaseQRankSum  |
| 21092 | chrY | 13401069 | . | T | C   | 1114.39  | PASS          | AC=8;AF=0.114;AN=70;BaseQRankSum   |
| 21093 | chrY | 13401072 | . | G | A   | 3606.90  | PASS          | AC=15;AF=0.214;AN=70;BaseQRankSum  |
| 21094 | chrY | 13401091 | . | T | C   | 30287.52 | PASS          | AC=27;AF=0.386;AN=70;BaseQ         |
| 21095 | chrY | 13401110 | . | G | A   | 370.39   | PASS          | AC=4;AF=0.057;AN=70;BaseQRankSum   |
| 21096 | chrY | 13401130 | . | G | A   | 262.48   | PASS          | AC=2;AF=0.029;AN=70;BaseQRankSum   |
| 21097 | chrY | 13401135 | . | T | C   | 381.10   | PASS          | AC=3;AF=0.043;AN=70;BaseQRankSum   |
| 21098 | chrY | 13401146 | . | A | C   | 5948.35  | PASS          | AC=22;AF=0.314;AN=70;BaseQRankSum  |
| 21099 | chrY | 13401166 | . | C | T   | 1263.07  | PASS          | AC=6;AF=0.086;AN=70;BaseQRankSum   |
| 21100 | chrY | 13401188 | . | A | G,T | 14265.82 | PASS          | AC=27,3;AF=0.386,0.043;AN          |
| 21101 | chrY | 13401189 | . | C | T   | 15407.04 | PASS          | AC=30;AF=0.429;AN=70;BaseQ         |
| 21102 | chrY | 13401203 | . | T | C   | 49.41    | my_snp_filter | AC=2;AF=0.029;AN=70;BaseQ          |
| 21103 | chrY | 13401218 | . | G | A   | 528.53   | PASS          | AC=5;AF=0.071;AN=70;BaseQRankSum   |
| 21104 | chrY | 13401230 | . | C | T   | 102.03   | my_snp_filter | AC=6;AF=0.086;AN=70;BaseQ          |
| 21105 | chrY | 13401250 | . | G | A   | 105.85   | PASS          | AC=1;AF=0.014;AN=70;BaseQRankSum   |
| 21106 | chrY | 13401273 | . | C | T   | 159.30   | PASS          | AC=1;AF=0.014;AN=70;BaseQRankSum   |
| 21107 | chrY | 13401283 | . | T | C   | 18396.04 | PASS          | AC=29;AF=0.414;AN=70;BaseQ         |
| 21108 | chrY | 13401296 | . | G | A   | 20655.32 | PASS          | AC=28;AF=0.400;AN=70;BaseQ         |
| 21109 | chrY | 13401307 | . | T | C   | 3309.69  | PASS          | AC=9;AF=0.129;AN=70;BaseQRankSum   |
| 21110 | chrY | 13401309 | . | A | C   | 7036.43  | PASS          | AC=17;AF=0.243;AN=70;BaseQRankSum  |
| 21111 | chrY | 13401321 | . | G | A   | 3811.74  | PASS          | AC=13;AF=0.186;AN=70;BaseQRankSum  |
| 21112 | chrY | 13401333 | . | T | C   | 1406.45  | PASS          | AC=4;AF=0.057;AN=70;BaseQRankSum   |
| 21113 | chrY | 13401384 | . | C | T   | 49.42    | my_snp_filter | AC=1;AF=0.014;AN=70;BaseQ          |
| 21114 | chrY | 13401390 | . | C | T   | 39119.79 | PASS          | AC=36;AF=0.514;AN=70;BaseQ         |
| 21115 | chrY | 13401405 | . | C | T   | 1243.78  | PASS          | AC=5;AF=0.071;AN=70;BaseQRankSum   |
| 21116 | chrY | 13401428 | . | C | T   | 38024.72 | PASS          | AC=35;AF=0.500;AN=70;BaseQ         |
| 21117 | chrY | 13401439 | . | T | C   | 12312.73 | PASS          | AC=33;AF=0.471;AN=70;BaseQ         |
| 21118 | chrY | 13401450 | . | T | G   | 23715.53 | PASS          | AC=34;AF=0.486;AN=70;BaseQ         |
| 21119 | chrY | 13401481 | . | T | C   | 10095.15 | PASS          | AC=31;AF=0.443;AN=70;BaseQ         |
| 21120 | chrY | 13401571 | . | A | C   | 34334.72 | PASS          | AC=35;AF=0.500;AN=70;BaseQ         |
| 21121 | chrY | 13401576 | . | C | T   | 5637.19  | PASS          | AC=24;AF=0.343;AN=70;BaseQRankSum  |
| 21122 | chrY | 13401602 | . | C | G   | 688.67   | PASS          | AC=1;AF=0.014;AN=70;BaseQRankSum   |
| 21123 | chrY | 13401655 | . | G | C   | 12530.73 | PASS          | AC=33;AF=0.471;AN=70;BaseQ         |
| 21124 | chrY | 13401705 | . | C | A   | 9738.26  | PASS          | AC=29;AF=0.414;AN=70;BaseQRankSum  |
| 21125 | chrY | 13401728 | . | G | T   | 384.88   | my_snp_filter | AC=6;AF=0.086;AN=70;BaseQ          |
| 21126 | chrY | 13401783 | . | G | A   | 349.21   | my_snp_filter | AC=3;AF=0.043;AN=70;BaseQ          |
| 21127 | chrY | 13401802 | . | T | C   | 8794.62  | PASS          | AC=30;AF=0.441;AN=68;BaseQRankSum  |
| 21128 | chrY | 13401806 | . | T | C   | 2130.87  | PASS          | AC=22;AF=0.333;AN=66;BaseQRankSum  |

|       |      |          |   |   |      |          |               |                                     |
|-------|------|----------|---|---|------|----------|---------------|-------------------------------------|
| 21129 | chrY | 13401817 | . | A | G    | 6176.79  | PASS          | AC=21;AF=0.339;AN=62;BaseQRankSum=  |
| 21130 | chrY | 13401823 | . | T | C    | 3019.25  | PASS          | AC=19;AF=0.306;AN=62;BaseQRankSum=  |
| 21131 | chrY | 13401870 | . | T | C    | 324.40   | PASS          | AC=4;AF=0.095;AN=42;BaseQRankSum=   |
| 21132 | chrY | 13401878 | . | G | A    | 221.02   | my_snp_filter | AC=4;AF=0.100;AN=40;BaseQ           |
| 21133 | chrY | 13401900 | . | T | C    | 3006.11  | my_snp_filter | AC=9;AF=0.409;AN=22;BaseQ           |
| 21134 | chrY | 13401987 | . | A | T    | 2193.69  | PASS          | AC=9;AF=0.346;AN=26;BaseQRankSum=   |
| 21135 | chrY | 13402002 | . | C | T    | 2469.82  | PASS          | AC=6;AF=0.167;AN=36;BaseQRankSum=   |
| 21136 | chrY | 13402006 | . | C | T    | 16751.84 | PASS          | AC=14;AF=0.538;AN=26;BaseQ          |
| 21137 | chrY | 13402008 | . | G | C    | 2149.79  | PASS          | AC=11;AF=0.262;AN=42;BaseQRankSum=  |
| 21138 | chrY | 13402034 | . | C | T    | 683.93   | PASS          | AC=5;AF=0.114;AN=44;BaseQRankSum=   |
| 21139 | chrY | 13402037 | . | C | G    | 92.49    | my_snp_filter | AC=3;AF=0.060;AN=50;BaseQ           |
| 21140 | chrY | 13402077 | . | C | A    | 5310.22  | PASS          | AC=9;AF=0.205;AN=44;BaseQRankSum=   |
| 21141 | chrY | 13402082 | . | G | A    | 99.12    | my_snp_filter | AC=3;AF=0.058;AN=52;BaseQ           |
| 21142 | chrY | 13402122 | . | C | A    | 53.78    | my_snp_filter | AC=2;AF=0.034;AN=58;BaseQ           |
| 21143 | chrY | 13402143 | . | C | A    | 1923.06  | PASS          | AC=11;AF=0.183;AN=60;BaseQRankSum=  |
| 21144 | chrY | 13402162 | . | C | G    | 150.45   | my_snp_filter | AC=2;AF=0.029;AN=70;BaseQ           |
| 21145 | chrY | 13402178 | . | A | C    | 513.78   | PASS          | AC=7;AF=0.100;AN=70;BaseQRankSum=   |
| 21146 | chrY | 13402186 | . | T | C    | 12823.34 | PASS          | AC=34;AF=0.486;AN=70;BaseQ          |
| 21147 | chrY | 13402246 | . | T | C    | 4532.62  | PASS          | AC=25;AF=0.357;AN=70;BaseQRankSum=  |
| 21148 | chrY | 13402259 | . | A | G    | 48993.23 | PASS          | AC=37;AF=0.529;AN=70;BaseQ          |
| 21149 | chrY | 13402293 | . | A | G    | 4410.81  | PASS          | AC=27;AF=0.386;AN=70;BaseQRankSum=  |
| 21150 | chrY | 13402301 | . | G | C    | 93.42    | my_snp_filter | AC=1;AF=0.014;AN=70;BaseQ           |
| 21151 | chrY | 13402321 | . | T | C    | 4303.44  | PASS          | AC=23;AF=0.329;AN=70;BaseQRankSum=  |
| 21152 | chrY | 13402403 | . | C | T    | 367.24   | PASS          | AC=7;AF=0.125;AN=56;BaseQRankSum=   |
| 21153 | chrY | 13402432 | . | C | T    | 5249.59  | PASS          | AC=9;AF=0.409;AN=22;BaseQRankSum=   |
| 21154 | chrY | 13402516 | . | G | A    | 652.27   | PASS          | AC=5;AF=0.250;AN=20;BaseQRankSum=   |
| 21155 | chrY | 13402530 | . | T | C    | 4379.29  | PASS          | AC=7;AF=0.389;AN=18;BaseQRankSum=   |
| 21156 | chrY | 13402543 | . | G | T    | 4129.29  | PASS          | AC=7;AF=0.389;AN=18;BaseQRankSum=   |
| 21157 | chrY | 13402550 | . | A | G    | 4019.29  | PASS          | AC=7;AF=0.389;AN=18;BaseQRankSum=   |
| 21158 | chrY | 13402561 | . | G | T    | 2206.82  | PASS          | AC=7;AF=0.350;AN=20;BaseQRankSum=   |
| 21159 | chrY | 13402570 | . | A | G    | 380.72   | PASS          | AC=3;AF=0.167;AN=18;BaseQRankSum=   |
| 21160 | chrY | 13402572 | . | A | G, T | 2243.85  | PASS          | AC=2, 5;AF=0.100, 0.250;AN=20;BaseQ |
| 21161 | chrY | 13402613 | . | C | G    | 3475.59  | PASS          | AC=8;AF=0.400;AN=20;BaseQRankSum=   |
| 21162 | chrY | 13402619 | . | G | T, A | 1191.30  | PASS          | AC=4, 2;AF=0.200, 0.100;AN=20;BaseQ |
| 21163 | chrY | 13402623 | . | T | C    | 3807.59  | PASS          | AC=8;AF=0.400;AN=20;BaseQRankSum=   |
| 21164 | chrY | 13402652 | . | T | C    | 5862.09  | PASS          | AC=9;AF=0.500;AN=18;BaseQRankSum=   |
| 21165 | chrY | 13402662 | . | T | A    | 6047.58  | PASS          | AC=8;AF=0.444;AN=18;BaseQRankSum=   |
| 21166 | chrY | 13402755 | . | A | G    | 2853.91  | PASS          | AC=9;AF=0.300;AN=30;BaseQRankSum=   |
| 21167 | chrY | 13402782 | . | G | A    | 9918.68  | PASS          | AC=15;AF=0.357;AN=42;BaseQRankSum=  |
| 21168 | chrY | 13402792 | . | C | T    | 2069.60  | PASS          | AC=13;AF=0.250;AN=52;BaseQRankSum=  |
| 21169 | chrY | 13402794 | . | C | A    | 81.63    | PASS          | AC=2;AF=0.031;AN=64;BaseQRankSum=   |
| 21170 | chrY | 13402876 | . | A | G    | 17838.19 | PASS          | AC=34;AF=0.500;AN=68;BaseQ          |
| 21171 | chrY | 13402900 | . | T | C    | 1736.54  | PASS          | AC=14;AF=0.200;AN=70;BaseQRankSum=  |
| 21172 | chrY | 13402969 | . | T | C    | 1586.70  | PASS          | AC=11;AF=0.157;AN=70;BaseQRankSum=  |
| 21173 | chrY | 13402976 | . | A | T    | 9953     | PASS          | AC=27;AF=0.386;AN=70;BaseQRankSum=  |
| 21174 | chrY | 13402983 | . | T | C    | 1517.95  | PASS          | AC=12;AF=0.171;AN=70;BaseQRankSum=  |
| 21175 | chrY | 13403004 | . | G | A    | 206.05   | PASS          | AC=2;AF=0.029;AN=70;BaseQRankSum=   |
| 21176 | chrY | 13403041 | . | C | T    | 402.66   | PASS          | AC=2;AF=0.029;AN=70;BaseQRankSum=   |
| 21177 | chrY | 13403048 | . | G | T    | 9346.07  | PASS          | AC=28;AF=0.400;AN=70;BaseQRankSum=  |
| 21178 | chrY | 13403049 | . | T | C    | 142.42   | PASS          | AC=1;AF=0.014;AN=70;BaseQRankSum=   |
| 21179 | chrY | 13403066 | . | G | A    | 7739.84  | PASS          | AC=27;AF=0.386;AN=70;BaseQRankSum=  |
| 21180 | chrY | 13403070 | . | C | T    | 2064.47  | PASS          | AC=16;AF=0.229;AN=70;BaseQRankSum=  |
| 21181 | chrY | 13403073 | . | T | A    | 7484.46  | PASS          | AC=27;AF=0.386;AN=70;BaseQRankSum=  |
| 21182 | chrY | 13403145 | . | A | T    | 517.89   | PASS          | AC=6;AF=0.091;AN=66;BaseQRankSum=   |
| 21183 | chrY | 13403153 | . | G | T    | 32.36    | PASS          | AC=1;AF=0.015;AN=66;BaseQRankSum=   |
| 21184 | chrY | 13403184 | . | G | A    | 497.99   | my_snp_filter | AC=5;AF=0.093;AN=54;BaseQ           |
| 21185 | chrY | 13403212 | . | C | G    | 16367.55 | PASS          | AC=23;AF=0.719;AN=32;BaseQ          |
| 21186 | chrY | 13403269 | . | T | A    | 12424.34 | PASS          | AC=11;AF=0.550;AN=20;BaseQ          |
| 21187 | chrY | 13403307 | . | G | A    | 1567.65  | my_snp_filter | AC=8;AF=0.400;AN=20;BaseQ           |
| 21188 | chrY | 13403332 | . | C | T    | 16765.49 | PASS          | AC=12;AF=0.600;AN=20;BaseQ          |
| 21189 | chrY | 13403410 | . | G | A    | 18766.34 | PASS          | AC=9;AF=0.450;AN=20;BaseQ           |
| 21190 | chrY | 13403424 | . | A | C    | 19068.13 | PASS          | AC=9;AF=0.375;AN=24;BaseQ           |
| 21191 | chrY | 13403434 | . | T | G    | 3933.11  | PASS          | AC=9;AF=0.265;AN=34;BaseQRankSum=   |
| 21192 | chrY | 13403436 | . | G | A    | 606.86   | PASS          | AC=4;AF=0.118;AN=34;BaseQRankSum=   |
| 21193 | chrY | 13403445 | . | C | T    | 13486.05 | PASS          | AC=10;AF=0.357;AN=28;BaseQ          |
| 21194 | chrY | 13403451 | . | G | C    | 11723.10 | PASS          | AC=10;AF=0.313;AN=32;BaseQ          |
| 21195 | chrY | 13403455 | . | G | A    | 2055.27  | PASS          | AC=5;AF=0.147;AN=34;BaseQRankSum=   |
| 21196 | chrY | 13403456 | . | T | C    | 4723.79  | PASS          | AC=10;AF=0.294;AN=34;BaseQRankSum=  |
| 21197 | chrY | 13403459 | . | G | A    | 278.12   | PASS          | AC=1;AF=0.025;AN=40;BaseQRankSum=   |
| 21198 | chrY | 13403497 | . | G | A    | 495.62   | my_snp_filter | AC=4;AF=0.077;AN=52;BaseQ           |
| 21199 | chrY | 13403513 | . | C | T    | 122.69   | my_snp_filter | AC=3;AF=0.052;AN=58;BaseQ           |
| 21200 | chrY | 13403524 | . | C | T    | 401.29   | my_snp_filter | AC=2;AF=0.033;AN=60;BaseQ           |
| 21201 | chrY | 13403540 | . | G | A    | 390.20   | PASS          | AC=1;AF=0.016;AN=64;BaseQRankSum=   |
| 21202 | chrY | 13403544 | . | A | G    | 1355.11  | PASS          | AC=11;AF=0.172;AN=64;BaseQRankSum=  |
| 21203 | chrY | 13403552 | . | T | G    | 167.93   | my_snp_filter | AC=3;AF=0.045;AN=66;BaseQ           |
| 21204 | chrY | 13403594 | . | C | T    | 250.62   | PASS          | AC=4;AF=0.057;AN=70;BaseQRankSum=   |

|       |      |          |   |   |     |          |               |                                   |
|-------|------|----------|---|---|-----|----------|---------------|-----------------------------------|
| 21205 | chrY | 13403608 | . | G | A   | 762.80   | my_snp_filter | AC=9;AF=0.129;AN=70;BaseQ         |
| 21206 | chrY | 13403625 | . | T | A   | 5925.26  | PASS          | AC=25;AF=0.357;AN=70;BaseQRankSum |
| 21207 | chrY | 13403697 | . | A | G   | 65894.05 | PASS          | AC=39;AF=0.557;AN=70;BaseQ        |
| 21208 | chrY | 13403722 | . | A | G   | 1355.79  | my_snp_filter | AC=9;AF=0.129;AN=70;BaseQ         |
| 21209 | chrY | 13403723 | . | G | A   | 421.36   | my_snp_filter | AC=6;AF=0.086;AN=70;BaseQ         |
| 21210 | chrY | 13403743 | . | G | A   | 34284.72 | PASS          | AC=35;AF=0.500;AN=70;BaseQ        |
| 21211 | chrY | 13403750 | . | C | T   | 1166.88  | my_snp_filter | AC=13;AF=0.186;AN=70;BaseQ        |
| 21212 | chrY | 13403751 | . | C | G   | 4072.38  | my_snp_filter | AC=15;AF=0.214;AN=70;BaseQ        |
| 21213 | chrY | 13403779 | . | G | A   | 11838    | PASS          | AC=29;AF=0.414;AN=70;BaseQRankSum |
| 21214 | chrY | 13403786 | . | C | T   | 40423.77 | PASS          | AC=35;AF=0.500;AN=70;BaseQ        |
| 21215 | chrY | 13403822 | . | C | A   | 5548.41  | PASS          | AC=19;AF=0.271;AN=70;BaseQRankSum |
| 21216 | chrY | 13403903 | . | C | G   | 9261.61  | PASS          | AC=26;AF=0.371;AN=70;BaseQRankSum |
| 21217 | chrY | 13403916 | . | C | A   | 9288     | PASS          | AC=27;AF=0.386;AN=70;BaseQRankSum |
| 21218 | chrY | 13403919 | . | T | C   | 8782.91  | PASS          | AC=31;AF=0.443;AN=70;BaseQRankSum |
| 21219 | chrY | 13403923 | . | C | T   | 62.42    | my_snp_filter | AC=1;AF=0.014;AN=70;BaseQ         |
| 21220 | chrY | 13403929 | . | T | G   | 68.42    | my_snp_filter | AC=1;AF=0.014;AN=70;BaseQ         |
| 21221 | chrY | 13403942 | . | G | A   | 83.42    | my_snp_filter | AC=1;AF=0.014;AN=70;BaseQ         |
| 21222 | chrY | 13403973 | . | G | A   | 5972.18  | PASS          | AC=32;AF=0.457;AN=70;BaseQRankSum |
| 21223 | chrY | 13403984 | . | C | A   | 152.45   | my_snp_filter | AC=1;AF=0.014;AN=70;BaseQ         |
| 21224 | chrY | 13403991 | . | C | A   | 3009.05  | PASS          | AC=19;AF=0.271;AN=70;BaseQRankSum |
| 21225 | chrY | 13403998 | . | C | T   | 131.60   | my_snp_filter | AC=2;AF=0.029;AN=70;BaseQ         |
| 21226 | chrY | 13403999 | . | T | C   | 193.10   | my_snp_filter | AC=2;AF=0.029;AN=70;BaseQ         |
| 21227 | chrY | 13404000 | . | C | T   | 5325.85  | PASS          | AC=31;AF=0.443;AN=70;BaseQRankSum |
| 21228 | chrY | 13404001 | . | G | T   | 336.06   | my_snp_filter | AC=2;AF=0.029;AN=70;BaseQ         |
| 21229 | chrY | 13404002 | . | G | C   | 35.60    | my_snp_filter | AC=3;AF=0.043;AN=70;BaseQ         |
| 21230 | chrY | 13404019 | . | A | G   | 517.54   | PASS          | AC=3;AF=0.043;AN=70;BaseQRankSum  |
| 21231 | chrY | 13404041 | . | T | G   | 49.89    | my_snp_filter | AC=1;AF=0.014;AN=70;BaseQ         |
| 21232 | chrY | 13404060 | . | T | A   | 1869.11  | PASS          | AC=8;AF=0.121;AN=66;BaseQRankSum  |
| 21233 | chrY | 13404066 | . | T | C   | 24145.32 | PASS          | AC=16;AF=0.250;AN=64;BaseQ        |
| 21234 | chrY | 13404107 | . | C | T   | 4671.19  | PASS          | AC=12;AF=0.182;AN=66;BaseQRankSum |
| 21235 | chrY | 13404127 | . | G | T   | 6660.92  | PASS          | AC=15;AF=0.214;AN=70;BaseQRankSum |
| 21236 | chrY | 13404129 | . | T | C   | 6796.87  | PASS          | AC=15;AF=0.221;AN=68;BaseQRankSum |
| 21237 | chrY | 13404135 | . | G | A   | 1200.16  | my_snp_filter | AC=8;AF=0.118;AN=68;BaseQ         |
| 21238 | chrY | 13404139 | . | G | A   | 6463.87  | PASS          | AC=15;AF=0.214;AN=70;BaseQRankSum |
| 21239 | chrY | 13404175 | . | T | C   | 93.20    | my_snp_filter | AC=1;AF=0.016;AN=64;BaseQ         |
| 21240 | chrY | 13404189 | . | C | G   | 1959.92  | PASS          | AC=7;AF=0.117;AN=60;BaseQRankSum  |
| 21241 | chrY | 13404229 | . | C | G   | 4912.50  | PASS          | AC=16;AF=0.333;AN=48;BaseQRankSum |
| 21242 | chrY | 13404269 | . | T | G   | 259.79   | PASS          | AC=1;AF=0.026;AN=38;BaseQRankSum  |
| 21243 | chrY | 13404294 | . | G | A   | 601.80   | PASS          | AC=5;AF=0.132;AN=38;BaseQRankSum  |
| 21244 | chrY | 13404339 | . | G | C   | 114.56   | my_snp_filter | AC=6;AF=0.150;AN=40;BaseQ         |
| 21245 | chrY | 13404362 | . | C | T,G | 887.21   | my_snp_filter | AC=5,3;AF=0.100,0.060;AN=         |
| 21246 | chrY | 13404381 | . | G | A   | 4498.76  | PASS          | AC=14;AF=0.269;AN=52;BaseQRankSum |
| 21247 | chrY | 13404392 | . | C | A   | 1459.41  | PASS          | AC=8;AF=0.160;AN=50;BaseQRankSum  |
| 21248 | chrY | 13404412 | . | A | G   | 7136.02  | PASS          | AC=18;AF=0.333;AN=54;BaseQRankSum |
| 21249 | chrY | 13404443 | . | A | C   | 550.97   | PASS          | AC=2;AF=0.029;AN=70;BaseQRankSum  |
| 21250 | chrY | 13404453 | . | G | A   | 521.78   | PASS          | AC=1;AF=0.014;AN=70;BaseQRankSum  |
| 21251 | chrY | 13404483 | . | C | T   | 256.41   | my_snp_filter | AC=3;AF=0.043;AN=70;BaseQ         |
| 21252 | chrY | 13404496 | . | G | A   | 2001     | PASS          | AC=10;AF=0.143;AN=70;BaseQRankSum |
| 21253 | chrY | 13404503 | . | T | A   | 230.96   | PASS          | AC=1;AF=0.014;AN=70;BaseQRankSum  |
| 21254 | chrY | 13404527 | . | G | T   | 168.44   | PASS          | AC=1;AF=0.014;AN=70;BaseQRankSum  |
| 21255 | chrY | 13404545 | . | A | C   | 25281.86 | PASS          | AC=31;AF=0.443;AN=70;BaseQ        |
| 21256 | chrY | 13404551 | . | T | G   | 24580.86 | PASS          | AC=31;AF=0.443;AN=70;BaseQ        |
| 21257 | chrY | 13404571 | . | C | T   | 2659.18  | PASS          | AC=15;AF=0.214;AN=70;BaseQRankSum |
| 21258 | chrY | 13404572 | . | A | G   | 18511.42 | PASS          | AC=31;AF=0.443;AN=70;BaseQ        |
| 21259 | chrY | 13404666 | . | C | T   | 153.56   | my_snp_filter | AC=3;AF=0.043;AN=70;BaseQ         |
| 21260 | chrY | 13404667 | . | C | T   | 12192.46 | PASS          | AC=24;AF=0.343;AN=70;BaseQ        |
| 21261 | chrY | 13404679 | . | G | A   | 242.85   | my_snp_filter | AC=3;AF=0.043;AN=70;BaseQ         |
| 21262 | chrY | 13404713 | . | A | C   | 13661.45 | PASS          | AC=19;AF=0.279;AN=68;BaseQ        |
| 21263 | chrY | 13404722 | . | T | C   | 1045.86  | PASS          | AC=7;AF=0.103;AN=68;BaseQRankSum  |
| 21264 | chrY | 13404738 | . | G | A   | 343.82   | my_snp_filter | AC=5;AF=0.071;AN=70;BaseQ         |
| 21265 | chrY | 13404755 | . | T | G   | 8076.53  | PASS          | AC=20;AF=0.286;AN=70;BaseQRankSum |
| 21266 | chrY | 13404794 | . | A | T   | 3328.40  | PASS          | AC=18;AF=0.257;AN=70;BaseQRankSum |
| 21267 | chrY | 13404845 | . | A | G   | 5880.14  | PASS          | AC=24;AF=0.353;AN=68;BaseQRankSum |
| 21268 | chrY | 13404854 | . | A | T   | 1764.38  | PASS          | AC=14;AF=0.200;AN=70;BaseQRankSum |
| 21269 | chrY | 13404855 | . | G | T   | 8940.34  | PASS          | AC=29;AF=0.414;AN=70;BaseQRankSum |
| 21270 | chrY | 13404857 | . | A | G   | 218.93   | my_snp_filter | AC=2;AF=0.029;AN=70;BaseQ         |
| 21271 | chrY | 13404867 | . | T | C   | 9346.37  | PASS          | AC=25;AF=0.357;AN=70;BaseQRankSum |
| 21272 | chrY | 13404869 | . | T | C   | 11483.38 | PASS          | AC=30;AF=0.429;AN=70;BaseQ        |
| 21273 | chrY | 13404870 | . | A | G   | 23772.99 | PASS          | AC=36;AF=0.514;AN=70;BaseQ        |
| 21274 | chrY | 13404873 | . | C | A   | 9708.72  | PASS          | AC=26;AF=0.371;AN=70;BaseQRankSum |
| 21275 | chrY | 13404884 | . | A | C   | 11261.81 | PASS          | AC=30;AF=0.429;AN=70;BaseQ        |
| 21276 | chrY | 13404911 | . | C | A   | 348.52   | my_snp_filter | AC=3;AF=0.043;AN=70;BaseQ         |
| 21277 | chrY | 13404913 | . | G | A   | 30768.72 | PASS          | AC=35;AF=0.500;AN=70;BaseQ        |
| 21278 | chrY | 13404986 | . | T | G   | 68.42    | my_snp_filter | AC=1;AF=0.014;AN=70;BaseQ         |
| 21279 | chrY | 13404996 | . | T | C   | 2129.18  | PASS          | AC=13;AF=0.186;AN=70;BaseQRankSum |
| 21280 | chrY | 13405080 | . | A | G   | 34.69    | my_snp_filter | AC=2;AF=0.029;AN=70;BaseQ         |



|       |      |          |   |   |     |          |               |                                    |
|-------|------|----------|---|---|-----|----------|---------------|------------------------------------|
| 21281 | chrY | 13405085 | . | T | G   | 9081.23  | PASS          | AC=26;AF=0.371;AN=70;BaseQRankSum= |
| 21282 | chrY | 13405106 | . | A | G   | 8157.28  | PASS          | AC=26;AF=0.419;AN=62;BaseQRankSum= |
| 21283 | chrY | 13405121 | . | C | A   | 92.12    | my_snp_filter | AC=1;AF=0.016;AN=62;BaseQ          |
| 21284 | chrY | 13405131 | . | C | T   | 1579.04  | PASS          | AC=7;AF=0.135;AN=52;BaseQRankSum=  |
| 21285 | chrY | 13405134 | . | G | A   | 1581.64  | PASS          | AC=7;AF=0.146;AN=48;BaseQRankSum=  |
| 21286 | chrY | 13405149 | . | T | C   | 9025.05  | PASS          | AC=19;AF=0.413;AN=46;BaseQRankSum= |
| 21287 | chrY | 13405215 | . | G | A   | 12451.19 | PASS          | AC=28;AF=0.519;AN=54;BaseQ         |
| 21288 | chrY | 13405225 | . | A | C   | 2176.48  | PASS          | AC=7;AF=0.109;AN=64;BaseQRankSum=  |
| 21289 | chrY | 13405232 | . | A | T   | 2398.60  | PASS          | AC=8;AF=0.121;AN=66;BaseQRankSum=  |
| 21290 | chrY | 13405246 | . | G | A   | 130.02   | PASS          | AC=5;AF=0.071;AN=70;BaseQRankSum=  |
| 21291 | chrY | 13405302 | . | A | C   | 390.41   | PASS          | AC=2;AF=0.029;AN=70;BaseQRankSum=  |
| 21292 | chrY | 13405321 | . | A | T   | 699.38   | my_snp_filter | AC=7;AF=0.100;AN=70;BaseQ          |
| 21293 | chrY | 13405329 | . | G | C   | 538.27   | my_snp_filter | AC=6;AF=0.086;AN=70;BaseQ          |
| 21294 | chrY | 13405349 | . | G | A   | 27229.73 | PASS          | AC=35;AF=0.500;AN=70;BaseQ         |
| 21295 | chrY | 13405364 | . | A | G   | 436.85   | my_snp_filter | AC=3;AF=0.043;AN=70;BaseQ          |
| 21296 | chrY | 13405370 | . | G | A   | 21209.92 | PASS          | AC=34;AF=0.486;AN=70;BaseQ         |
| 21297 | chrY | 13405401 | . | G | C   | 1886.66  | PASS          | AC=13;AF=0.186;AN=70;BaseQRankSum= |
| 21298 | chrY | 13405408 | . | C | A   | 900.40   | PASS          | AC=3;AF=0.043;AN=70;BaseQRankSum=  |
| 21299 | chrY | 13405423 | . | G | C   | 1754.46  | PASS          | AC=9;AF=0.129;AN=70;BaseQRankSum=  |
| 21300 | chrY | 13405463 | . | T | C   | 4212.92  | PASS          | AC=15;AF=0.214;AN=70;BaseQRankSum= |
| 21301 | chrY | 13405481 | . | T | A   | 1928.56  | PASS          | AC=8;AF=0.118;AN=68;BaseQRankSum=  |
| 21302 | chrY | 13405493 | . | G | A   | 1854.85  | PASS          | AC=8;AF=0.121;AN=66;BaseQRankSum=  |
| 21303 | chrY | 13405572 | . | A | T   | 1377.86  | PASS          | AC=5;AF=0.132;AN=38;BaseQRankSum=  |
| 21304 | chrY | 13405600 | . | C | A   | 742.49   | my_snp_filter | AC=4;AF=0.154;AN=26;BaseQ          |
| 21305 | chrY | 13405604 | . | A | G   | 70.96    | my_snp_filter | AC=1;AF=0.038;AN=26;BaseQ          |
| 21306 | chrY | 13405635 | . | C | G   | 11281.24 | PASS          | AC=12;AF=0.600;AN=20;BaseQ         |
| 21307 | chrY | 13405657 | . | C | G   | 3782.68  | PASS          | AC=8;AF=0.333;AN=24;BaseQRankSum=  |
| 21308 | chrY | 13405719 | . | T | C   | 15188.11 | PASS          | AC=9;AF=0.409;AN=22;BaseQ          |
| 21309 | chrY | 13405728 | . | A | G   | 5270.88  | PASS          | AC=8;AF=0.286;AN=28;BaseQRankSum=  |
| 21310 | chrY | 13405762 | . | G | T   | 1175.67  | PASS          | AC=6;AF=0.158;AN=38;BaseQRankSum=  |
| 21311 | chrY | 13405799 | . | T | G   | 3935.87  | PASS          | AC=12;AF=0.261;AN=46;BaseQRankSum= |
| 21312 | chrY | 13405842 | . | T | A   | 479.11   | my_snp_filter | AC=6;AF=0.120;AN=50;BaseQ          |
| 21313 | chrY | 13405850 | . | C | A   | 417.19   | my_snp_filter | AC=5;AF=0.100;AN=50;BaseQ          |
| 21314 | chrY | 13405866 | . | C | A   | 2165.41  | PASS          | AC=8;AF=0.160;AN=50;BaseQRankSum=  |
| 21315 | chrY | 13405868 | . | C | G   | 157.83   | PASS          | AC=2;AF=0.038;AN=52;BaseQRankSum=  |
| 21316 | chrY | 13405870 | . | T | C   | 84.55    | my_snp_filter | AC=1;AF=0.019;AN=52;BaseQ          |
| 21317 | chrY | 13405879 | . | A | C   | 11522.57 | PASS          | AC=15;AF=0.300;AN=50;BaseQ         |
| 21318 | chrY | 13405911 | . | C | T   | 732.33   | my_snp_filter | AC=6;AF=0.088;AN=68;BaseQ          |
| 21319 | chrY | 13405927 | . | C | T   | 6263.84  | PASS          | AC=16;AF=0.242;AN=66;BaseQRankSum= |
| 21320 | chrY | 13405942 | . | A | G   | 7376.04  | PASS          | AC=17;AF=0.250;AN=68;BaseQRankSum= |
| 21321 | chrY | 13405955 | . | A | G   | 6828.14  | PASS          | AC=17;AF=0.250;AN=68;BaseQRankSum= |
| 21322 | chrY | 13405976 | . | T | C   | 4130.41  | PASS          | AC=15;AF=0.221;AN=68;BaseQRankSum= |
| 21323 | chrY | 13405987 | . | T | C   | 1254.63  | PASS          | AC=10;AF=0.143;AN=70;BaseQRankSum= |
| 21324 | chrY | 13406004 | . | C | G   | 3710.92  | PASS          | AC=11;AF=0.157;AN=70;BaseQRankSum= |
| 21325 | chrY | 13406025 | . | G | T   | 3209.92  | PASS          | AC=9;AF=0.129;AN=70;BaseQRankSum=  |
| 21326 | chrY | 13406053 | . | T | A   | 215.93   | PASS          | AC=2;AF=0.029;AN=70;BaseQRankSum=  |
| 21327 | chrY | 13406062 | . | T | C   | 325.73   | PASS          | AC=3;AF=0.043;AN=70;BaseQRankSum=  |
| 21328 | chrY | 13406174 | . | A | G   | 914.65   | PASS          | AC=6;AF=0.091;AN=66;BaseQRankSum=  |
| 21329 | chrY | 13406185 | . | C | T   | 1006.87  | PASS          | AC=7;AF=0.109;AN=64;BaseQRankSum=  |
| 21330 | chrY | 13406213 | . | T | C   | 186.50   | my_snp_filter | AC=4;AF=0.091;AN=44;BaseQ          |
| 21331 | chrY | 13406251 | . | A | T   | 45.40    | my_snp_filter | AC=1;AF=0.028;AN=36;BaseQ          |
| 21332 | chrY | 13406509 | . | C | G   | 436.32   | PASS          | AC=5;AF=0.278;AN=18;BaseQRankSum=  |
| 21333 | chrY | 13406543 | . | G | A   | 92.08    | my_snp_filter | AC=2;AF=0.111;AN=18;BaseQ          |
| 21334 | chrY | 13406553 | . | A | G   | 1112.62  | my_snp_filter | AC=8;AF=0.444;AN=18;BaseQ          |
| 21335 | chrY | 13406564 | . | T | A   | 661.45   | PASS          | AC=6;AF=0.333;AN=18;BaseQRankSum=  |
| 21336 | chrY | 13406574 | . | G | C   | 261.04   | PASS          | AC=2;AF=0.111;AN=18;BaseQRankSum=  |
| 21337 | chrY | 13406579 | . | G | C   | 1005.65  | PASS          | AC=8;AF=0.444;AN=18;BaseQRankSum=  |
| 21338 | chrY | 13406589 | . | G | C   | 221.77   | PASS          | AC=2;AF=0.100;AN=20;BaseQRankSum=  |
| 21339 | chrY | 13406604 | . | C | A   | 1476.47  | PASS          | AC=8;AF=0.400;AN=20;BaseQRankSum=  |
| 21340 | chrY | 13406620 | . | T | A   | 1364.52  | PASS          | AC=8;AF=0.400;AN=20;BaseQRankSum=  |
| 21341 | chrY | 13406623 | . | A | G   | 1376.88  | PASS          | AC=8;AF=0.400;AN=20;BaseQRankSum=  |
| 21342 | chrY | 13406665 | . | A | G   | 58.90    | my_snp_filter | AC=1;AF=0.056;AN=18;BaseQ          |
| 21343 | chrY | 13406671 | . | C | T   | 174.23   | my_snp_filter | AC=4;AF=0.222;AN=18;BaseQ          |
| 21344 | chrY | 13406688 | . | A | G   | 14834.54 | my_snp_filter | AC=10;AF=0.556;AN=                 |
| 21345 | chrY | 13406752 | . | G | A   | 8417.52  | my_snp_filter | AC=9;AF=0.450;AN=20;BaseQ          |
| 21346 | chrY | 13406753 | . | T | A   | 138.34   | my_snp_filter | AC=1;AF=0.050;AN=20;BaseQ          |
| 21347 | chrY | 13406799 | . | T | C   | 4998.38  | PASS          | AC=8;AF=0.400;AN=20;BaseQRankSum=  |
| 21348 | chrY | 13406816 | . | G | A   | 4983.38  | PASS          | AC=8;AF=0.400;AN=20;BaseQRankSum=  |
| 21349 | chrY | 13406821 | . | C | T   | 7568.52  | PASS          | AC=9;AF=0.450;AN=20;BaseQRankSum=  |
| 21350 | chrY | 13406841 | . | A | G   | 5188.35  | PASS          | AC=8;AF=0.364;AN=22;BaseQRankSum=  |
| 21351 | chrY | 13406851 | . | G | T   | 5262.35  | PASS          | AC=8;AF=0.364;AN=22;BaseQRankSum=  |
| 21352 | chrY | 13406865 | . | A | G   | 7490.84  | PASS          | AC=9;AF=0.375;AN=24;BaseQRankSum=  |
| 21353 | chrY | 13406875 | . | T | A   | 506.70   | my_snp_filter | AC=3;AF=0.107;AN=28;BaseQ          |
| 21354 | chrY | 13406876 | . | A | G,T | 24568.95 | PASS          | AC=10,8;AF=0.455,0.364;AN=         |
| 21355 | chrY | 13406889 | . | T | G   | 2601.90  | PASS          | AC=6;AF=0.188;AN=32;BaseQRankSum=  |
| 21356 | chrY | 13406891 | . | G | A   | 541      | my_snp_filter | AC=3;AF=0.107;AN=28;BaseQ          |

|       |      |          |   |   |     |          |               |                                    |
|-------|------|----------|---|---|-----|----------|---------------|------------------------------------|
| 21357 | chrY | 13406937 | . | G | A   | 4525.61  | PASS          | AC=7;AF=0.106;AN=66;BaseQRankSum=  |
| 21358 | chrY | 13406942 | . | C | T   | 273.72   | my_snp_filter | AC=3;AF=0.048;AN=62;BaseQ          |
| 21359 | chrY | 13406947 | . | G | T   | 4832.91  | PASS          | AC=7;AF=0.106;AN=66;BaseQRankSum=  |
| 21360 | chrY | 13406948 | . | C | A   | 4851.28  | PASS          | AC=7;AF=0.106;AN=66;BaseQRankSum=  |
| 21361 | chrY | 13406958 | . | C | T   | 16985.34 | PASS          | AC=23;AF=0.397;AN=58;Base          |
| 21362 | chrY | 13406991 | . | C | A   | 625.58   | my_snp_filter | AC=7;AF=0.106;AN=66;BaseQ          |
| 21363 | chrY | 13407087 | . | T | A   | 1262.46  | PASS          | AC=6;AF=0.086;AN=70;BaseQRankSum=  |
| 21364 | chrY | 13407103 | . | A | T   | 1098.99  | PASS          | AC=7;AF=0.100;AN=70;BaseQRankSum=  |
| 21365 | chrY | 13407107 | . | T | A   | 929.27   | PASS          | AC=7;AF=0.100;AN=70;BaseQRankSum=  |
| 21366 | chrY | 13407110 | . | C | G   | 5137.13  | my_snp_filter | AC=23;AF=0.329;AN=70;Base          |
| 21367 | chrY | 13407137 | . | C | T,* | 461.18   | PASS          | AC=4,2;AF=0.067,0.033;AN=60;BaseQ  |
| 21368 | chrY | 13407144 | . | T | G   | 152.03   | PASS          | AC=2;AF=0.037;AN=54;BaseQRankSum=  |
| 21369 | chrY | 13407147 | . | T | G   | 103.29   | PASS          | AC=2;AF=0.032;AN=62;BaseQRankSum=  |
| 21370 | chrY | 13407160 | . | G | A   | 75.04    | PASS          | AC=1;AF=0.025;AN=40;BaseQRankSum=  |
| 21371 | chrY | 13407161 | . | G | C   | 75.12    | PASS          | AC=1;AF=0.025;AN=40;BaseQRankSum=  |
| 21372 | chrY | 13407167 | . | C | G   | 76.29    | PASS          | AC=1;AF=0.026;AN=38;BaseQRankSum=  |
| 21373 | chrY | 13407200 | . | G | A   | 938.31   | PASS          | AC=9;AF=0.196;AN=46;BaseQRankSum=  |
| 21374 | chrY | 13407238 | . | A | G   | 716.81   | PASS          | AC=13;AF=0.382;AN=34;BaseQRankSum= |
| 21375 | chrY | 13407243 | . | T | A   | 4059.70  | PASS          | AC=12;AF=0.300;AN=40;BaseQRankSum= |
| 21376 | chrY | 13407260 | . | T | C   | 3769.22  | PASS          | AC=11;AF=0.289;AN=38;BaseQRankSum= |
| 21377 | chrY | 13407276 | . | G | A   | 3373.76  | PASS          | AC=9;AF=0.321;AN=28;BaseQRankSum=  |
| 21378 | chrY | 13407285 | . | T | C   | 2906.69  | PASS          | AC=9;AF=0.346;AN=26;BaseQRankSum=  |
| 21379 | chrY | 13407293 | . | T | C   | 2492.48  | PASS          | AC=9;AF=0.346;AN=26;BaseQRankSum=  |
| 21380 | chrY | 13407297 | . | T | C   | 2387.52  | PASS          | AC=9;AF=0.375;AN=24;BaseQRankSum=  |
| 21381 | chrY | 13407328 | . | G | C   | 68.16    | my_snp_filter | AC=4;AF=0.182;AN=22;BaseQ          |
| 21382 | chrY | 13407382 | . | G | A   | 155.84   | PASS          | AC=2;AF=0.100;AN=20;BaseQRankSum=  |
| 21383 | chrY | 13407389 | . | T | C   | 1610.40  | my_snp_filter | AC=8;AF=0.444;AN=18;BaseQ          |
| 21384 | chrY | 13407410 | . | G | C   | 2272.53  | my_snp_filter | AC=8;AF=0.444;AN=18;BaseQ          |
| 21385 | chrY | 13407423 | . | T | G   | 333.63   | PASS          | AC=5;AF=0.278;AN=18;BaseQRankSum=  |
| 21386 | chrY | 13407425 | . | C | T   | 2703.53  | my_snp_filter | AC=8;AF=0.444;AN=18;BaseQ          |
| 21387 | chrY | 13407429 | . | C | G   | 361.54   | PASS          | AC=5;AF=0.250;AN=20;BaseQRankSum=  |
| 21388 | chrY | 13407450 | . | G | T   | 3741.52  | my_snp_filter | AC=9;AF=0.450;AN=20;BaseQ          |
| 21389 | chrY | 13407516 | . | A | T   | 779.45   | my_snp_filter | AC=7;AF=0.318;AN=22;BaseQ          |
| 21390 | chrY | 13407618 | . | T | C   | 5710.09  | PASS          | AC=9;AF=0.500;AN=18;BaseQRankSum=  |
| 21391 | chrY | 13407619 | . | G | A   | 71.24    | PASS          | AC=1;AF=0.056;AN=18;BaseQRankSum=  |
| 21392 | chrY | 13407640 | . | T | G   | 7346.09  | PASS          | AC=9;AF=0.500;AN=18;BaseQRankSum=  |
| 21393 | chrY | 13407646 | . | G | A   | 1802.38  | PASS          | AC=8;AF=0.400;AN=20;BaseQRankSum=  |
| 21394 | chrY | 13407673 | . | C | T   | 1508.04  | PASS          | AC=7;AF=0.350;AN=20;BaseQRankSum=  |
| 21395 | chrY | 13407674 | . | G | A   | 2556.38  | PASS          | AC=8;AF=0.400;AN=20;BaseQRankSum=  |
| 21396 | chrY | 13407706 | . | G | A   | 1849.45  | PASS          | AC=7;AF=0.318;AN=22;BaseQRankSum=  |
| 21397 | chrY | 13407762 | . | G | T   | 471.68   | PASS          | AC=4;AF=0.118;AN=34;BaseQRankSum=  |
| 21398 | chrY | 13407765 | . | A | G   | 227.42   | my_snp_filter | AC=3;AF=0.088;AN=34;BaseQ          |
| 21399 | chrY | 13407796 | . | A | G   | 1005.16  | PASS          | AC=6;AF=0.111;AN=54;BaseQRankSum=  |
| 21400 | chrY | 13407886 | . | C | T,* | 4930.11  | PASS          | AC=13,3;AF=0.186,0.043;AN=70;Base  |
| 21401 | chrY | 13407906 | . | T | C   | 2062.65  | PASS          | AC=11;AF=0.157;AN=70;BaseQRankSum= |
| 21402 | chrY | 13407940 | . | A | G   | 12237.32 | PASS          | AC=29;AF=0.414;AN=70;Base          |
| 21403 | chrY | 13407945 | . | T | C   | 8219.84  | PASS          | AC=27;AF=0.386;AN=70;BaseQRankSum= |
| 21404 | chrY | 13407950 | . | T | C   | 13031.19 | PASS          | AC=29;AF=0.414;AN=70;Base          |
| 21405 | chrY | 13407988 | . | A | T   | 6582.26  | PASS          | AC=23;AF=0.329;AN=70;BaseQRankSum= |
| 21406 | chrY | 13407994 | . | C | T   | 19326.53 | PASS          | AC=34;AF=0.486;AN=70;Base          |
| 21407 | chrY | 13408002 | . | C | A   | 5101.32  | PASS          | AC=24;AF=0.343;AN=70;BaseQRankSum= |
| 21408 | chrY | 13408017 | . | G | T   | 6385.76  | PASS          | AC=26;AF=0.371;AN=70;BaseQRankSum= |
| 21409 | chrY | 13408021 | . | T | C   | 1096.71  | PASS          | AC=10;AF=0.143;AN=70;BaseQRankSum= |
| 21410 | chrY | 13408048 | . | A | G   | 8189.72  | PASS          | AC=34;AF=0.486;AN=70;BaseQRankSum= |
| 21411 | chrY | 13408069 | . | G | A   | 696.90   | PASS          | AC=6;AF=0.086;AN=70;BaseQRankSum=  |
| 21412 | chrY | 13408081 | . | A | G   | 404.70   | PASS          | AC=2;AF=0.029;AN=68;BaseQRankSum=  |
| 21413 | chrY | 13408095 | . | G | A   | 619.26   | PASS          | AC=9;AF=0.132;AN=68;BaseQRankSum=  |
| 21414 | chrY | 13408108 | . | A | C   | 3420.48  | PASS          | AC=12;AF=0.188;AN=64;BaseQRankSum= |
| 21415 | chrY | 13408130 | . | T | C   | 2050.23  | PASS          | AC=9;AF=0.136;AN=66;BaseQRankSum=  |
| 21416 | chrY | 13408131 | . | C | T   | 114.85   | my_snp_filter | AC=4;AF=0.061;AN=66;BaseQ          |
| 21417 | chrY | 13408231 | . | T | A   | 119.28   | PASS          | AC=1;AF=0.014;AN=70;BaseQRankSum=  |
| 21418 | chrY | 13408238 | . | A | G   | 109.55   | PASS          | AC=1;AF=0.014;AN=70;BaseQRankSum=  |
| 21419 | chrY | 13408247 | . | G | A   | 1410.24  | PASS          | AC=6;AF=0.094;AN=64;BaseQRankSum=  |
| 21420 | chrY | 13408250 | . | G | T   | 105.06   | PASS          | AC=1;AF=0.016;AN=64;BaseQRankSum=  |
| 21421 | chrY | 13408280 | . | G | A   | 162.74   | PASS          | AC=1;AF=0.019;AN=52;BaseQRankSum=  |
| 21422 | chrY | 13408307 | . | T | A   | 1603.93  | PASS          | AC=7;AF=0.152;AN=46;BaseQRankSum=  |
| 21423 | chrY | 13408329 | . | T | G   | 1823.10  | PASS          | AC=8;AF=0.182;AN=44;BaseQRankSum=  |
| 21424 | chrY | 13408364 | . | C | A   | 3089.19  | PASS          | AC=9;AF=0.300;AN=30;BaseQRankSum=  |
| 21425 | chrY | 13408365 | . | C | T   | 3233.06  | PASS          | AC=12;AF=0.375;AN=32;BaseQRankSum= |
| 21426 | chrY | 13408369 | . | T | A   | 2644.39  | PASS          | AC=9;AF=0.300;AN=30;BaseQRankSum=  |
| 21427 | chrY | 13408386 | . | C | T   | 2144.10  | PASS          | AC=8;AF=0.235;AN=34;BaseQRankSum=  |
| 21428 | chrY | 13408387 | . | C | G   | 3062.57  | PASS          | AC=8;AF=0.222;AN=36;BaseQRankSum=  |
| 21429 | chrY | 13408391 | . | G | T   | 7688.54  | PASS          | AC=8;AF=0.235;AN=34;BaseQRankSum=  |
| 21430 | chrY | 13408398 | . | C | A   | 1346.92  | PASS          | AC=5;AF=0.156;AN=32;BaseQRankSum=  |
| 21431 | chrY | 13408399 | . | T | C   | 4849.81  | PASS          | AC=9;AF=0.265;AN=34;BaseQRankSum=  |
| 21432 | chrY | 13408415 | . | T | A   | 3825.98  | PASS          | AC=9;AF=0.237;AN=38;BaseQRankSum=  |

|       |      |          |   |   |     |          |               |                                   |
|-------|------|----------|---|---|-----|----------|---------------|-----------------------------------|
| 21433 | chrY | 13408465 | . | T | A   | 4737.38  | my_snp_filter | AC=9;AF=0.180;AN=50;BaseQ         |
| 21434 | chrY | 13408469 | . | G | T   | 4246.07  | PASS          | AC=12;AF=0.250;AN=48;BaseQRankSum |
| 21435 | chrY | 13408481 | . | C | A   | 4005.14  | my_snp_filter | AC=9;AF=0.180;AN=50;BaseQ         |
| 21436 | chrY | 13408496 | . | A | G   | 8648.10  | PASS          | AC=14;AF=0.259;AN=54;BaseQRankSum |
| 21437 | chrY | 13408497 | . | T | C   | 9012.10  | PASS          | AC=14;AF=0.250;AN=56;BaseQRankSum |
| 21438 | chrY | 13408500 | . | G | T   | 1838.74  | PASS          | AC=5;AF=0.083;AN=60;BaseQRankSum= |
| 21439 | chrY | 13408504 | . | T | C   | 177.39   | PASS          | AC=1;AF=0.017;AN=60;BaseQRankSum= |
| 21440 | chrY | 13408507 | . | A | T   | 22916.99 | PASS          | AC=22;AF=0.407;AN=54;Base         |
| 21441 | chrY | 13408510 | . | C | T   | 168.96   | my_snp_filter | AC=3;AF=0.052;AN=58;BaseQ         |
| 21442 | chrY | 13408547 | . | G | A   | 60       | my_snp_filter | AC=2;AF=0.031;AN=64;BaseQ         |
| 21443 | chrY | 13408552 | . | T | C   | 4319.31  | PASS          | AC=10;AF=0.161;AN=62;BaseQRankSum |
| 21444 | chrY | 13408572 | . | C | G   | 2612.42  | PASS          | AC=9;AF=0.132;AN=68;BaseQRankSum= |
| 21445 | chrY | 13408575 | . | A | T   | 12969.91 | PASS          | AC=9;AF=0.136;AN=66;BaseQ         |
| 21446 | chrY | 13408576 | . | A | G   | 3852.62  | PASS          | AC=8;AF=0.121;AN=66;BaseQRankSum= |
| 21447 | chrY | 13408623 | . | G | A   | 1566.33  | PASS          | AC=4;AF=0.057;AN=70;BaseQRankSum= |
| 21448 | chrY | 13408629 | . | T | G   | 8737.70  | PASS          | AC=14;AF=0.200;AN=70;BaseQRankSum |
| 21449 | chrY | 13408664 | . | T | C   | 3666.10  | my_snp_filter | AC=9;AF=0.129;AN=70;BaseQ         |
| 21450 | chrY | 13408678 | . | C | A   | 4153.16  | my_snp_filter | AC=9;AF=0.129;AN=70;BaseQ         |
| 21451 | chrY | 13408682 | . | C | T   | 4353.69  | my_snp_filter | AC=9;AF=0.129;AN=70;BaseQ         |
| 21452 | chrY | 13408703 | . | T | C   | 333.39   | my_snp_filter | AC=5;AF=0.071;AN=70;BaseQ         |
| 21453 | chrY | 13408713 | . | A | T,G | 7189.69  | PASS          | AC=3,7;AF=0.043,0.100;AN=70;BaseQ |
| 21454 | chrY | 13408720 | . | A | T   | 12901.69 | PASS          | AC=20;AF=0.286;AN=70;Base         |
| 21455 | chrY | 13408730 | . | T | C   | 3914.79  | my_snp_filter | AC=9;AF=0.129;AN=70;BaseQ         |
| 21456 | chrY | 13408780 | . | G | A   | 190.37   | PASS          | AC=2;AF=0.029;AN=70;BaseQRankSum= |
| 21457 | chrY | 13408789 | . | A | T,G | 2696.53  | my_snp_filter | AC=6,3;AF=0.086,0.043;AN=         |
| 21458 | chrY | 13408796 | . | C | T   | 2020.27  | my_snp_filter | AC=8;AF=0.114;AN=70;BaseQ         |
| 21459 | chrY | 13408829 | . | G | A   | 3433.39  | PASS          | AC=10;AF=0.147;AN=68;BaseQRankSum |
| 21460 | chrY | 13408838 | . | T | C   | 365.23   | PASS          | AC=4;AF=0.061;AN=66;BaseQRankSum= |
| 21461 | chrY | 13408859 | . | A | T   | 382.69   | PASS          | AC=3;AF=0.044;AN=68;BaseQRankSum= |
| 21462 | chrY | 13408861 | . | T | C   | 459.49   | my_snp_filter | AC=4;AF=0.061;AN=66;BaseQ         |
| 21463 | chrY | 13408905 | . | A | T   | 2406.75  | my_snp_filter | AC=7;AF=0.121;AN=58;BaseQ         |
| 21464 | chrY | 13408921 | . | T | C   | 2446.63  | my_snp_filter | AC=7;AF=0.135;AN=52;BaseQ         |
| 21465 | chrY | 13408957 | . | C | G   | 1619.44  | my_snp_filter | AC=9;AF=0.205;AN=44;BaseQ         |
| 21466 | chrY | 13409015 | . | T | G   | 595.09   | my_snp_filter | AC=5;AF=0.250;AN=20;BaseQ         |
| 21467 | chrY | 13409053 | . | G | T   | 58.75    | my_snp_filter | AC=2;AF=0.091;AN=22;BaseQ         |
| 21468 | chrY | 13409057 | . | A | T   | 1744.14  | PASS          | AC=9;AF=0.409;AN=22;BaseQRankSum= |
| 21469 | chrY | 13409070 | . | G | A   | 2290.53  | my_snp_filter | AC=9;AF=0.450;AN=20;BaseQ         |
| 21470 | chrY | 13409100 | . | C | T   | 464.62   | my_snp_filter | AC=6;AF=0.250;AN=24;BaseQ         |
| 21471 | chrY | 13409106 | . | G | A   | 35.25    | my_snp_filter | AC=2;AF=0.083;AN=24;BaseQ         |
| 21472 | chrY | 13409112 | . | A | G   | 2256.99  | PASS          | AC=9;AF=0.409;AN=22;BaseQRankSum= |
| 21473 | chrY | 13409126 | . | A | T   | 697.13   | PASS          | AC=7;AF=0.292;AN=24;BaseQRankSum= |
| 21474 | chrY | 13409132 | . | C | T   | 144.64   | my_snp_filter | AC=2;AF=0.083;AN=24;BaseQ         |
| 21475 | chrY | 13409135 | . | G | A   | 67.03    | my_snp_filter | AC=1;AF=0.042;AN=24;BaseQ         |
| 21476 | chrY | 13409151 | . | G | A   | 89.10    | PASS          | AC=1;AF=0.042;AN=24;BaseQRankSum= |
| 21477 | chrY | 13409167 | . | T | C   | 3913.75  | PASS          | AC=11;AF=0.458;AN=24;BaseQRankSum |
| 21478 | chrY | 13409191 | . | G | T,C | 5146.90  | my_snp_filter | AC=8,2;AF=0.364,0.091;AN=         |
| 21479 | chrY | 13409212 | . | G | A,C | 5644.25  | PASS          | AC=9,1;AF=0.450,0.050;AN=20;BaseQ |
| 21480 | chrY | 13409213 | . | T | C   | 151.89   | my_snp_filter | AC=2;AF=0.091;AN=22;BaseQ         |
| 21481 | chrY | 13409215 | . | G | C   | 374.29   | my_snp_filter | AC=4;AF=0.182;AN=22;BaseQ         |
| 21482 | chrY | 13409251 | . | G | A   | 930.18   | my_snp_filter | AC=6;AF=0.300;AN=20;BaseQ         |
| 21483 | chrY | 13409258 | . | G | A   | 976.63   | my_snp_filter | AC=6;AF=0.273;AN=22;BaseQ         |
| 21484 | chrY | 13409351 | . | T | C   | 90.01    | PASS          | AC=2;AF=0.053;AN=38;BaseQRankSum= |
| 21485 | chrY | 13409391 | . | C | T   | 93.12    | PASS          | AC=2;AF=0.038;AN=52;BaseQRankSum= |
| 21486 | chrY | 13409393 | . | A | G   | 89.75    | PASS          | AC=2;AF=0.038;AN=52;BaseQRankSum= |
| 21487 | chrY | 13409394 | . | T | C   | 183.61   | PASS          | AC=2;AF=0.038;AN=52;BaseQRankSum= |
| 21488 | chrY | 13409398 | . | C | T   | 179.99   | PASS          | AC=2;AF=0.036;AN=56;BaseQRankSum= |
| 21489 | chrY | 13409550 | . | C | T   | 41.59    | my_snp_filter | AC=2;AF=0.029;AN=70;BaseQ         |
| 21490 | chrY | 13409571 | . | G | T   | 232.84   | my_snp_filter | AC=6;AF=0.086;AN=70;BaseQ         |
| 21491 | chrY | 13409610 | . | C | A   | 30.79    | my_snp_filter | AC=2;AF=0.029;AN=70;BaseQ         |
| 21492 | chrY | 13409613 | . | T | G   | 129.28   | my_snp_filter | AC=3;AF=0.043;AN=70;BaseQ         |
| 21493 | chrY | 13409623 | . | G | T   | 82.11    | my_snp_filter | AC=3;AF=0.044;AN=68;BaseQ         |
| 21494 | chrY | 13409633 | . | C | A   | 1711.52  | my_snp_filter | AC=9;AF=0.136;AN=66;BaseQ         |
| 21495 | chrY | 13409665 | . | G | A   | 69.88    | my_snp_filter | AC=4;AF=0.065;AN=62;BaseQ         |
| 21496 | chrY | 13409678 | . | G | C   | 47.39    | my_snp_filter | AC=3;AF=0.048;AN=62;BaseQ         |
| 21497 | chrY | 13409686 | . | A | G   | 2162.34  | my_snp_filter | AC=9;AF=0.150;AN=60;BaseQ         |
| 21498 | chrY | 13409706 | . | C | T   | 271.52   | my_snp_filter | AC=5;AF=0.078;AN=64;BaseQ         |
| 21499 | chrY | 13409710 | . | C | T   | 146.82   | my_snp_filter | AC=2;AF=0.031;AN=64;BaseQ         |
| 21500 | chrY | 13409720 | . | G | C   | 59.59    | my_snp_filter | AC=4;AF=0.065;AN=62;BaseQ         |
| 21501 | chrY | 13409727 | . | T | G   | 270.89   | my_snp_filter | AC=4;AF=0.065;AN=62;BaseQ         |
| 21502 | chrY | 13409760 | . | C | A   | 118.64   | my_snp_filter | AC=3;AF=0.043;AN=70;BaseQ         |
| 21503 | chrY | 13409761 | . | T | A   | 71.25    | my_snp_filter | AC=2;AF=0.029;AN=70;BaseQ         |
| 21504 | chrY | 13409772 | . | T | C   | 482.72   | my_snp_filter | AC=7;AF=0.103;AN=68;BaseQ         |
| 21505 | chrY | 13409800 | . | T | G   | 2007.65  | my_snp_filter | AC=12;AF=0.171;AN=70;Base         |
| 21506 | chrY | 13409806 | . | G | C   | 184.39   | PASS          | AC=3;AF=0.043;AN=70;BaseQRankSum= |
| 21507 | chrY | 13409821 | . | C | A   | 1459.06  | my_snp_filter | AC=9;AF=0.129;AN=70;BaseQ         |
| 21508 | chrY | 13409839 | . | T | C   | 1113.64  | PASS          | AC=7;AF=0.100;AN=70;BaseQRankSum= |

|       |      |          |   |   |       |          |               |                                    |
|-------|------|----------|---|---|-------|----------|---------------|------------------------------------|
| 21509 | chrY | 13409871 | . | T | A     | 388.02   | my_snp_filter | AC=5;AF=0.076;AN=66;BaseQ          |
| 21510 | chrY | 13409872 | . | A | G     | 5099.30  | PASS          | AC=10;AF=0.156;AN=64;BaseQRankSum  |
| 21511 | chrY | 13409917 | . | T | G     | 48.50    | my_snp_filter | AC=1;AF=0.015;AN=66;BaseQ          |
| 21512 | chrY | 13409919 | . | G | C     | 411.29   | my_snp_filter | AC=6;AF=0.094;AN=64;BaseQ          |
| 21513 | chrY | 13409924 | . | T | C     | 1142.72  | PASS          | AC=9;AF=0.150;AN=60;BaseQRankSum=  |
| 21514 | chrY | 13409929 | . | G | A     | 1924.33  | PASS          | AC=15;AF=0.234;AN=64;BaseQRankSum= |
| 21515 | chrY | 13409931 | . | C | T     | 772.17   | PASS          | AC=7;AF=0.113;AN=62;BaseQRankSum=  |
| 21516 | chrY | 13409978 | . | T | C     | 1175.31  | PASS          | AC=9;AF=0.129;AN=70;BaseQRankSum=  |
| 21517 | chrY | 13410001 | . | T | C     | 76.83    | my_snp_filter | AC=1;AF=0.015;AN=68;BaseQ          |
| 21518 | chrY | 13410014 | . | C | T     | 172.92   | my_snp_filter | AC=2;AF=0.029;AN=68;BaseQ          |
| 21519 | chrY | 13410025 | . | A | T,*   | 2434.69  | PASS          | AC=5,8;AF=0.074,0.118;AN=68;BaseQ  |
| 21520 | chrY | 13410048 | . | G | A     | 7422.84  | PASS          | AC=21;AF=0.318;AN=66;BaseQRankSum  |
| 21521 | chrY | 13410051 | . | A | G     | 436.46   | PASS          | AC=4;AF=0.059;AN=68;BaseQRankSum=  |
| 21522 | chrY | 13410056 | . | T | C     | 389.49   | my_snp_filter | AC=4;AF=0.059;AN=68;BaseQ          |
| 21523 | chrY | 13410067 | . | G | C     | 382.60   | PASS          | AC=4;AF=0.057;AN=70;BaseQRankSum=  |
| 21524 | chrY | 13410083 | . | T | C     | 1070.79  | PASS          | AC=11;AF=0.157;AN=70;BaseQRankSum= |
| 21525 | chrY | 13410111 | . | T | C     | 210.67   | my_snp_filter | AC=4;AF=0.057;AN=70;BaseQ          |
| 21526 | chrY | 13410124 | . | C | G     | 198.69   | my_snp_filter | AC=3;AF=0.043;AN=70;BaseQ          |
| 21527 | chrY | 13410130 | . | A | G     | 571.48   | PASS          | AC=8;AF=0.114;AN=70;BaseQRankSum=  |
| 21528 | chrY | 13410133 | . | G | A     | 4469.75  | PASS          | AC=16;AF=0.229;AN=70;BaseQRankSum= |
| 21529 | chrY | 13410180 | . | C | A     | 1579.57  | PASS          | AC=8;AF=0.114;AN=70;BaseQRankSum=  |
| 21530 | chrY | 13410193 | . | T | C     | 460.81   | PASS          | AC=5;AF=0.074;AN=68;BaseQRankSum=  |
| 21531 | chrY | 13410209 | . | A | C     | 6605.63  | PASS          | AC=9;AF=0.132;AN=68;BaseQRankSum=  |
| 21532 | chrY | 13410218 | . | C | A     | 7744.70  | PASS          | AC=9;AF=0.132;AN=68;BaseQRankSum=  |
| 21533 | chrY | 13410227 | . | C | T     | 9078.44  | PASS          | AC=9;AF=0.132;AN=68;BaseQRankSum=  |
| 21534 | chrY | 13410282 | . | T | G     | 2792.96  | PASS          | AC=13;AF=0.186;AN=70;BaseQRankSum= |
| 21535 | chrY | 13410284 | . | T | G,A   | 3053.71  | PASS          | AC=6,11;AF=0.086,0.157;AN=70;Base  |
| 21536 | chrY | 13410310 | . | T | A     | 949.33   | PASS          | AC=10;AF=0.143;AN=70;BaseQRankSum= |
| 21537 | chrY | 13410314 | . | G | C     | 174.94   | my_snp_filter | AC=2;AF=0.029;AN=70;BaseQ          |
| 21538 | chrY | 13410339 | . | T | A     | 3790.37  | PASS          | AC=16;AF=0.235;AN=68;BaseQRankSum= |
| 21539 | chrY | 13410345 | . | T | C     | 10559.01 | PASS          | AC=20;AF=0.303;AN=66;Base          |
| 21540 | chrY | 13410385 | . | T | A     | 5538.11  | PASS          | AC=12;AF=0.207;AN=58;BaseQRankSum= |
| 21541 | chrY | 13410391 | . | C | T     | 37.01    | PASS          | AC=1;AF=0.017;AN=60;BaseQRankSum=  |
| 21542 | chrY | 13410409 | . | G | A     | 147.12   | my_snp_filter | AC=3;AF=0.050;AN=60;BaseQ          |
| 21543 | chrY | 13410413 | . | T | C     | 3835.32  | PASS          | AC=11;AF=0.183;AN=60;BaseQRankSum= |
| 21544 | chrY | 13410455 | . | A | G     | 792.50   | PASS          | AC=4;AF=0.057;AN=70;BaseQRankSum=  |
| 21545 | chrY | 13410483 | . | A | G     | 198.97   | my_snp_filter | AC=2;AF=0.029;AN=70;BaseQ          |
| 21546 | chrY | 13410495 | . | T | A     | 175.84   | my_snp_filter | AC=5;AF=0.071;AN=70;BaseQ          |
| 21547 | chrY | 13410502 | . | A | G     | 144.59   | my_snp_filter | AC=3;AF=0.043;AN=70;BaseQ          |
| 21548 | chrY | 13410539 | . | A | C     | 6828.02  | PASS          | AC=26;AF=0.371;AN=70;BaseQRankSum= |
| 21549 | chrY | 13410551 | . | G | T     | 318.16   | my_snp_filter | AC=2;AF=0.029;AN=70;BaseQ          |
| 21550 | chrY | 13410554 | . | T | C     | 3801.87  | PASS          | AC=9;AF=0.129;AN=70;BaseQRankSum=  |
| 21551 | chrY | 13410560 | . | C | A     | 14228.41 | PASS          | AC=26;AF=0.371;AN=70;Base          |
| 21552 | chrY | 13410589 | . | A | G     | 20711.92 | PASS          | AC=30;AF=0.429;AN=70;Base          |
| 21553 | chrY | 13410601 | . | T | C     | 2436.36  | PASS          | AC=8;AF=0.114;AN=70;BaseQRankSum=  |
| 21554 | chrY | 13410651 | . | G | A     | 4879.06  | PASS          | AC=10;AF=0.156;AN=64;BaseQRankSum= |
| 21555 | chrY | 13410664 | . | T | A     | 297.60   | my_snp_filter | AC=3;AF=0.047;AN=64;BaseQ          |
| 21556 | chrY | 13410677 | . | A | T     | 2603.65  | PASS          | AC=6;AF=0.111;AN=54;BaseQRankSum=  |
| 21557 | chrY | 13410709 | . | G | A     | 1154.25  | PASS          | AC=7;AF=0.152;AN=46;BaseQRankSum=  |
| 21558 | chrY | 13410710 | . | A | G     | 13648.95 | PASS          | AC=9;AF=0.225;AN=40;BaseQ          |
| 21559 | chrY | 13410738 | . | G | C     | 8604.86  | PASS          | AC=9;AF=0.237;AN=38;BaseQRankSum=  |
| 21560 | chrY | 13410741 | . | C | T     | 352.05   | my_snp_filter | AC=5;AF=0.119;AN=42;BaseQ          |
| 21561 | chrY | 13410742 | . | G | A     | 3850.56  | PASS          | AC=8;AF=0.200;AN=40;BaseQRankSum=  |
| 21562 | chrY | 13410744 | . | G | A     | 8323.32  | PASS          | AC=9;AF=0.214;AN=42;BaseQRankSum=  |
| 21563 | chrY | 13410758 | . | C | T     | 6390.94  | my_snp_filter | AC=9;AF=0.214;AN=42;BaseQ          |
| 21564 | chrY | 13410771 | . | A | G     | 5178.08  | my_snp_filter | AC=9;AF=0.188;AN=48;BaseQ          |
| 21565 | chrY | 13410787 | . | T | C     | 538.33   | my_snp_filter | AC=6;AF=0.115;AN=52;BaseQ          |
| 21566 | chrY | 13410822 | . | G | A     | 39.24    | my_snp_filter | AC=2;AF=0.031;AN=64;BaseQ          |
| 21567 | chrY | 13410852 | . | G | T     | 689.67   | my_snp_filter | AC=7;AF=0.100;AN=70;BaseQ          |
| 21568 | chrY | 13410856 | . | C | A     | 253.50   | my_snp_filter | AC=4;AF=0.057;AN=70;BaseQ          |
| 21569 | chrY | 13410862 | . | A | C     | 3291.78  | PASS          | AC=17;AF=0.243;AN=70;BaseQRankSum= |
| 21570 | chrY | 13410863 | . | A | G     | 73.41    | my_snp_filter | AC=2;AF=0.029;AN=70;BaseQ          |
| 21571 | chrY | 13410878 | . | G | C     | 208.60   | my_snp_filter | AC=6;AF=0.086;AN=70;BaseQ          |
| 21572 | chrY | 13410881 | . | T | A     | 1266.24  | PASS          | AC=13;AF=0.186;AN=70;BaseQRankSum= |
| 21573 | chrY | 13410891 | . | T | C     | 9490.57  | PASS          | AC=22;AF=0.314;AN=70;BaseQRankSum= |
| 21574 | chrY | 13410916 | . | G | T     | 12049.84 | PASS          | AC=24;AF=0.343;AN=70;Base          |
| 21575 | chrY | 13410923 | . | G | C     | 2418.64  | PASS          | AC=15;AF=0.214;AN=70;BaseQRankSum= |
| 21576 | chrY | 13410926 | . | G | C     | 2788.70  | PASS          | AC=15;AF=0.214;AN=70;BaseQRankSum= |
| 21577 | chrY | 13410940 | . | G | T     | 10553.71 | PASS          | AC=24;AF=0.343;AN=70;Base          |
| 21578 | chrY | 13410999 | . | T | C     | 165.85   | my_snp_filter | AC=2;AF=0.029;AN=70;BaseQ          |
| 21579 | chrY | 13411030 | . | T | C     | 16075.51 | PASS          | AC=30;AF=0.441;AN=68;Base          |
| 21580 | chrY | 13411042 | . | G | T     | 14364.64 | PASS          | AC=30;AF=0.441;AN=68;Base          |
| 21581 | chrY | 13411112 | . | T | C     | 76.92    | my_snp_filter | AC=6;AF=0.094;AN=64;BaseQ          |
| 21582 | chrY | 13411122 | . | A | G     | 11315.07 | PASS          | AC=62;AF=1.00;AN=62;DP=36          |
| 21583 | chrY | 13411152 | . | T | A     | 3771.84  | my_snp_filter | AC=10;AF=0.156;AN=64;Base          |
| 21584 | chrY | 13411157 | . | C | G,T,* | 1307.13  | my_snp_filter | AC=2,5,3;AF=0.032,0.081,0          |

|       |      |          |   |   |     |          |               |                                    |
|-------|------|----------|---|---|-----|----------|---------------|------------------------------------|
| 21585 | chrY | 13411231 | . | G | C   | 256.03   | my_snp_filter | AC=6;AF=0.100;AN=60;BaseQ          |
| 21586 | chrY | 13411253 | . | G | A   | 550.62   | my_snp_filter | AC=6;AF=0.100;AN=60;BaseQ          |
| 21587 | chrY | 13411268 | . | T | A   | 111.86   | my_snp_filter | AC=3;AF=0.056;AN=54;BaseQ          |
| 21588 | chrY | 13411276 | . | G | C   | 1313.08  | PASS          | AC=29;AF=0.537;AN=54;BaseQRankSum  |
| 21589 | chrY | 13411286 | . | G | T   | 48       | PASS          | AC=2;AF=0.033;AN=60;DP=245;FS=0.0  |
| 21590 | chrY | 13411291 | . | G | T   | 472.74   | my_snp_filter | AC=6;AF=0.100;AN=60;BaseQ          |
| 21591 | chrY | 13411321 | . | T | G   | 72.71    | my_snp_filter | AC=2;AF=0.034;AN=58;BaseQ          |
| 21592 | chrY | 13411421 | . | A | G   | 4010.10  | PASS          | AC=28;AF=1.00;AN=28;BaseQRankSum=  |
| 21593 | chrY | 13411449 | . | A | G   | 410.59   | my_snp_filter | AC=7;AF=0.130;AN=54;BaseQ          |
| 21594 | chrY | 13411465 | . | C | A   | 156.79   | PASS          | AC=4;AF=0.059;AN=68;BaseQRankSum=  |
| 21595 | chrY | 13411473 | . | C | T   | 432.91   | PASS          | AC=8;AF=0.114;AN=70;BaseQRankSum=  |
| 21596 | chrY | 13411484 | . | G | A   | 292.19   | PASS          | AC=7;AF=0.100;AN=70;BaseQRankSum=  |
| 21597 | chrY | 13411505 | . | C | T   | 92.10    | PASS          | AC=2;AF=0.029;AN=70;BaseQRankSum=  |
| 21598 | chrY | 13411508 | . | G | A   | 987      | PASS          | AC=14;AF=0.200;AN=70;BaseQRankSum= |
| 21599 | chrY | 13411516 | . | A | G   | 1860.96  | PASS          | AC=19;AF=0.271;AN=70;BaseQRankSum= |
| 21600 | chrY | 13411529 | . | G | A   | 2225.15  | PASS          | AC=21;AF=0.300;AN=70;BaseQRankSum= |
| 21601 | chrY | 13411530 | . | C | T   | 342.01   | my_snp_filter | AC=12;AF=0.171;AN=70;BaseQ         |
| 21602 | chrY | 13411531 | . | A | G   | 1960.11  | PASS          | AC=21;AF=0.300;AN=70;BaseQRankSum= |
| 21603 | chrY | 13411532 | . | C | G   | 314.46   | PASS          | AC=7;AF=0.100;AN=70;BaseQRankSum=  |
| 21604 | chrY | 13411536 | . | G | T   | 6005.98  | PASS          | AC=25;AF=0.357;AN=70;BaseQRankSum= |
| 21605 | chrY | 13411542 | . | A | C   | 1958.94  | PASS          | AC=17;AF=0.243;AN=70;BaseQRankSum= |
| 21606 | chrY | 13411544 | . | A | G   | 2070.31  | PASS          | AC=17;AF=0.243;AN=70;BaseQRankSum= |
| 21607 | chrY | 13411548 | . | C | T   | 3334.47  | PASS          | AC=23;AF=0.329;AN=70;BaseQRankSum= |
| 21608 | chrY | 13411570 | . | A | C   | 794.14   | PASS          | AC=12;AF=0.171;AN=70;BaseQRankSum= |
| 21609 | chrY | 13411573 | . | G | A,* | 4491.82  | PASS          | AC=29,4;AF=0.414,0.057;AN=70;BaseQ |
| 21610 | chrY | 13411575 | . | C | T   | 59.39    | my_snp_filter | AC=3;AF=0.043;AN=70;BaseQ          |
| 21611 | chrY | 13411600 | . | C | T   | 284.88   | my_snp_filter | AC=6;AF=0.086;AN=70;BaseQ          |
| 21612 | chrY | 13411604 | . | T | G   | 20880.72 | PASS          | AC=35;AF=0.500;AN=70;BaseQ         |
| 21613 | chrY | 13411610 | . | C | A   | 71.69    | my_snp_filter | AC=2;AF=0.029;AN=70;BaseQ          |
| 21614 | chrY | 13411614 | . | G | A   | 961.63   | PASS          | AC=14;AF=0.200;AN=70;BaseQRankSum= |
| 21615 | chrY | 13411636 | . | C | T   | 4480.56  | PASS          | AC=29;AF=0.414;AN=70;BaseQRankSum= |
| 21616 | chrY | 13411637 | . | G | A   | 5822.88  | PASS          | AC=28;AF=0.400;AN=70;BaseQRankSum= |
| 21617 | chrY | 13411660 | . | C | A   | 2294.72  | PASS          | AC=19;AF=0.271;AN=70;BaseQRankSum= |
| 21618 | chrY | 13411668 | . | A | G   | 2875.84  | PASS          | AC=22;AF=0.314;AN=70;BaseQRankSum= |
| 21619 | chrY | 13411678 | . | T | A   | 265.18   | my_snp_filter | AC=8;AF=0.114;AN=70;BaseQ          |
| 21620 | chrY | 13411694 | . | G | T   | 2817.09  | PASS          | AC=21;AF=0.300;AN=70;BaseQRankSum= |
| 21621 | chrY | 13411711 | . | T | C   | 2667.68  | PASS          | AC=18;AF=0.257;AN=70;BaseQRankSum= |
| 21622 | chrY | 13411722 | . | T | A   | 2402.99  | PASS          | AC=15;AF=0.242;AN=62;BaseQRankSum= |
| 21623 | chrY | 13411739 | . | C | T,* | 2269.90  | PASS          | AC=10,4;AF=0.200,0.080;AN=50;BaseQ |
| 21624 | chrY | 13411757 | . | G | A   | 661.60   | PASS          | AC=5;AF=0.086;AN=58;BaseQRankSum=  |
| 21625 | chrY | 13411762 | . | A | C   | 1234.60  | my_snp_filter | AC=7;AF=0.109;AN=64;BaseQ          |
| 21626 | chrY | 13411787 | . | G | A   | 1520.57  | PASS          | AC=9;AF=0.136;AN=66;BaseQRankSum=  |
| 21627 | chrY | 13411803 | . | C | T   | 288.96   | PASS          | AC=4;AF=0.057;AN=70;BaseQRankSum=  |
| 21628 | chrY | 13411824 | . | G | A   | 966.67   | PASS          | AC=7;AF=0.100;AN=70;BaseQRankSum=  |
| 21629 | chrY | 13411870 | . | T | C   | 138.48   | my_snp_filter | AC=5;AF=0.071;AN=70;BaseQ          |
| 21630 | chrY | 13411881 | . | T | C   | 157.36   | my_snp_filter | AC=5;AF=0.071;AN=70;BaseQ          |
| 21631 | chrY | 13412040 | . | C | T   | 2691.41  | PASS          | AC=9;AF=0.188;AN=48;BaseQRankSum=  |
| 21632 | chrY | 13412049 | . | A | C   | 599.28   | PASS          | AC=6;AF=0.125;AN=48;BaseQRankSum=  |
| 21633 | chrY | 13412088 | . | T | A   | 207.89   | PASS          | AC=3;AF=0.088;AN=34;BaseQRankSum=  |
| 21634 | chrY | 13412130 | . | A | C   | 1228.95  | PASS          | AC=8;AF=0.250;AN=32;BaseQRankSum=  |
| 21635 | chrY | 13412137 | . | G | C   | 97.81    | PASS          | AC=2;AF=0.059;AN=34;BaseQRankSum=  |
| 21636 | chrY | 13412150 | . | C | G   | 480.25   | PASS          | AC=7;AF=0.175;AN=40;BaseQRankSum=  |
| 21637 | chrY | 13412164 | . | G | A   | 365.44   | PASS          | AC=7;AF=0.146;AN=48;BaseQRankSum=  |
| 21638 | chrY | 13412218 | . | C | T   | 1201.91  | PASS          | AC=6;AF=0.094;AN=64;BaseQRankSum=  |
| 21639 | chrY | 13412221 | . | T | C   | 2004.97  | PASS          | AC=7;AF=0.109;AN=64;BaseQRankSum=  |
| 21640 | chrY | 13412233 | . | A | T   | 97.93    | my_snp_filter | AC=2;AF=0.030;AN=66;BaseQ          |
| 21641 | chrY | 13412234 | . | G | A   | 64.21    | my_snp_filter | AC=2;AF=0.030;AN=66;BaseQ          |
| 21642 | chrY | 13412241 | . | C | T   | 35.02    | my_snp_filter | AC=2;AF=0.029;AN=68;BaseQ          |
| 21643 | chrY | 13412263 | . | T | C   | 45.28    | my_snp_filter | AC=2;AF=0.029;AN=70;BaseQ          |
| 21644 | chrY | 13412320 | . | A | G   | 3109.45  | PASS          | AC=9;AF=0.129;AN=70;BaseQRankSum=  |
| 21645 | chrY | 13412382 | . | T | G   | 1880.40  | PASS          | AC=10;AF=0.143;AN=70;BaseQRankSum= |
| 21646 | chrY | 13412426 | . | G | A   | 604.36   | PASS          | AC=6;AF=0.086;AN=70;BaseQRankSum=  |
| 21647 | chrY | 13412538 | . | A | G   | 526.83   | my_snp_filter | AC=6;AF=0.103;AN=58;BaseQ          |
| 21648 | chrY | 13412552 | . | C | G   | 75.90    | my_snp_filter | AC=2;AF=0.037;AN=54;BaseQ          |
| 21649 | chrY | 13412578 | . | A | C   | 514.77   | my_snp_filter | AC=5;AF=0.119;AN=42;BaseQ          |
| 21650 | chrY | 13412599 | . | T | C   | 337.64   | my_snp_filter | AC=5;AF=0.147;AN=34;BaseQ          |
| 21651 | chrY | 13412624 | . | A | G   | 72.15    | my_snp_filter | AC=1;AF=0.038;AN=26;BaseQ          |
| 21652 | chrY | 13412648 | . | C | T   | 109.43   | my_snp_filter | AC=1;AF=0.042;AN=24;BaseQ          |
| 21653 | chrY | 13412649 | . | T | C   | 108.62   | my_snp_filter | AC=1;AF=0.042;AN=24;BaseQ          |
| 21654 | chrY | 13412662 | . | T | C   | 127.72   | my_snp_filter | AC=2;AF=0.083;AN=24;BaseQ          |
| 21655 | chrY | 13412713 | . | C | A   | 71.19    | my_snp_filter | AC=3;AF=0.125;AN=24;BaseQ          |
| 21656 | chrY | 13412717 | . | G | A   | 107.24   | my_snp_filter | AC=4;AF=0.167;AN=24;BaseQ          |
| 21657 | chrY | 13412744 | . | A | G   | 4008.32  | PASS          | AC=9;AF=0.265;AN=34;BaseQRankSum=  |
| 21658 | chrY | 13412750 | . | T | A   | 709.57   | PASS          | AC=7;AF=0.175;AN=40;BaseQRankSum=  |
| 21659 | chrY | 13412769 | . | G | C   | 299.70   | my_snp_filter | AC=5;AF=0.109;AN=46;BaseQ          |
| 21660 | chrY | 13412780 | . | T | C   | 880.98   | PASS          | AC=6;AF=0.125;AN=48;BaseQRankSum=  |

|       |      |          |   |   |   |         |               |                                    |
|-------|------|----------|---|---|---|---------|---------------|------------------------------------|
| 21661 | chrY | 13412787 | . | G | T | 264.88  | my_snp_filter | AC=3;AF=0.063;AN=48;BaseQ          |
| 21662 | chrY | 13412788 | . | T | G | 2542.97 | PASS          | AC=7;AF=0.146;AN=48;BaseQRankSum=  |
| 21663 | chrY | 13412796 | . | C | G | 2854.03 | PASS          | AC=8;AF=0.138;AN=58;BaseQRankSum=  |
| 21664 | chrY | 13412806 | . | T | A | 405.50  | my_snp_filter | AC=4;AF=0.065;AN=62;BaseQ          |
| 21665 | chrY | 13412811 | . | T | C | 2508.38 | PASS          | AC=8;AF=0.129;AN=62;BaseQRankSum=  |
| 21666 | chrY | 13412822 | . | C | T | 258.10  | my_snp_filter | AC=3;AF=0.050;AN=60;BaseQ          |
| 21667 | chrY | 13412858 | . | C | A | 214.05  | my_snp_filter | AC=3;AF=0.045;AN=66;BaseQ          |
| 21668 | chrY | 13412875 | . | G | C | 1403.91 | PASS          | AC=7;AF=0.103;AN=68;BaseQRankSum=  |
| 21669 | chrY | 13412892 | . | T | C | 1588.37 | PASS          | AC=7;AF=0.100;AN=70;BaseQRankSum=  |
| 21670 | chrY | 13412915 | . | A | G | 817.26  | PASS          | AC=7;AF=0.100;AN=70;BaseQRankSum=  |
| 21671 | chrY | 13412939 | . | C | A | 3582.49 | PASS          | AC=9;AF=0.129;AN=70;BaseQRankSum=  |
| 21672 | chrY | 13412942 | . | C | G | 3315.33 | PASS          | AC=9;AF=0.129;AN=70;BaseQRankSum=  |
| 21673 | chrY | 13413035 | . | C | A | 1245.27 | PASS          | AC=12;AF=0.171;AN=70;BaseQRankSum= |
| 21674 | chrY | 13413050 | . | C | T | 404.25  | my_snp_filter | AC=5;AF=0.071;AN=70;BaseQ          |
| 21675 | chrY | 13413083 | . | A | G | 331.42  | my_snp_filter | AC=4;AF=0.057;AN=70;BaseQ          |
| 21676 | chrY | 13413084 | . | T | C | 160.45  | my_snp_filter | AC=3;AF=0.043;AN=70;BaseQ          |
| 21677 | chrY | 13413108 | . | C | A | 196.05  | my_snp_filter | AC=2;AF=0.029;AN=70;BaseQ          |
| 21678 | chrY | 13413123 | . | A | G | 229.79  | my_snp_filter | AC=2;AF=0.029;AN=70;BaseQ          |
| 21679 | chrY | 13413138 | . | C | T | 89.30   | my_snp_filter | AC=1;AF=0.015;AN=66;BaseQ          |
| 21680 | chrY | 13413179 | . | T | C | 336.69  | my_snp_filter | AC=5;AF=0.100;AN=50;BaseQ          |
| 21681 | chrY | 13413226 | . | G | C | 1992.92 | PASS          | AC=9;AF=0.281;AN=32;BaseQRankSum=  |
| 21682 | chrY | 13413258 | . | A | G | 3786.11 | my_snp_filter | AC=9;AF=0.409;AN=22;BaseQ          |
| 21683 | chrY | 13413262 | . | G | A | 217.85  | my_snp_filter | AC=4;AF=0.182;AN=22;BaseQ          |
| 21684 | chrY | 13413302 | . | G | A | 276.77  | my_snp_filter | AC=5;AF=0.227;AN=22;BaseQ          |
| 21685 | chrY | 13413525 | . | C | A | 186.19  | PASS          | AC=4;AF=0.118;AN=34;BaseQRankSum=  |
| 21686 | chrY | 13413605 | . | T | C | 779.77  | my_snp_filter | AC=8;AF=0.118;AN=68;BaseQ          |
| 21687 | chrY | 13413614 | . | G | C | 232.42  | my_snp_filter | AC=5;AF=0.074;AN=68;BaseQ          |
| 21688 | chrY | 13413717 | . | G | C | 474.73  | PASS          | AC=8;AF=0.114;AN=70;BaseQRankSum=  |
| 21689 | chrY | 13413723 | . | A | T | 555.82  | PASS          | AC=7;AF=0.100;AN=70;BaseQRankSum=  |
| 21690 | chrY | 13413800 | . | T | C | 150.14  | my_snp_filter | AC=3;AF=0.043;AN=70;BaseQ          |
| 21691 | chrY | 13413810 | . | C | G | 3944.05 | PASS          | AC=9;AF=0.132;AN=68;BaseQRankSum=  |
| 21692 | chrY | 13413816 | . | C | T | 351.73  | PASS          | AC=1;AF=0.015;AN=66;BaseQRankSum=  |
| 21693 | chrY | 13413829 | . | C | A | 184.77  | my_snp_filter | AC=4;AF=0.065;AN=62;BaseQ          |
| 21694 | chrY | 13413883 | . | T | G | 161.23  | my_snp_filter | AC=3;AF=0.071;AN=42;BaseQ          |
| 21695 | chrY | 13413903 | . | T | A | 48.71   | my_snp_filter | AC=2;AF=0.053;AN=38;BaseQ          |
| 21696 | chrY | 13413922 | . | G | T | 54.25   | my_snp_filter | AC=1;AF=0.042;AN=24;BaseQ          |
| 21697 | chrY | 13413954 | . | A | G | 1352.59 | PASS          | AC=8;AF=0.400;AN=20;BaseQRankSum=  |
| 21698 | chrY | 13414022 | . | T | C | 967.96  | PASS          | AC=6;AF=0.300;AN=20;BaseQRankSum=  |
| 21699 | chrY | 13414023 | . | C | A | 964.96  | PASS          | AC=6;AF=0.300;AN=20;BaseQRankSum=  |
| 21700 | chrY | 13414027 | . | A | G | 5035.34 | PASS          | AC=9;AF=0.450;AN=20;BaseQRankSum=  |
| 21701 | chrY | 13414049 | . | T | A | 178.58  | my_snp_filter | AC=3;AF=0.125;AN=24;BaseQ          |
| 21702 | chrY | 13414055 | . | C | A | 114.08  | PASS          | AC=1;AF=0.042;AN=24;BaseQRankSum=  |
| 21703 | chrY | 13414069 | . | C | A | 1387.44 | PASS          | AC=5;AF=0.227;AN=22;BaseQRankSum=  |
| 21704 | chrY | 13414070 | . | C | T | 237.45  | PASS          | AC=3;AF=0.125;AN=24;BaseQRankSum=  |
| 21705 | chrY | 13414075 | . | G | A | 829.23  | PASS          | AC=6;AF=0.250;AN=24;BaseQRankSum=  |
| 21706 | chrY | 13414092 | . | G | C | 1279.30 | PASS          | AC=6;AF=0.273;AN=22;BaseQRankSum=  |
| 21707 | chrY | 13414117 | . | A | C | 437.93  | PASS          | AC=4;AF=0.182;AN=22;BaseQRankSum=  |
| 21708 | chrY | 13414152 | . | C | T | 2653.33 | PASS          | AC=8;AF=0.364;AN=22;BaseQRankSum=  |
| 21709 | chrY | 13414169 | . | A | G | 1814.61 | PASS          | AC=8;AF=0.400;AN=20;BaseQRankSum=  |
| 21710 | chrY | 13414177 | . | T | A | 302.82  | PASS          | AC=1;AF=0.050;AN=20;BaseQRankSum=  |
| 21711 | chrY | 13414203 | . | C | T | 837.30  | PASS          | AC=9;AF=0.500;AN=18;BaseQRankSum=  |
| 21712 | chrY | 13414211 | . | A | G | 44.17   | PASS          | AC=1;AF=0.045;AN=22;BaseQRankSum=  |
| 21713 | chrY | 13414213 | . | A | G | 51.57   | PASS          | AC=2;AF=0.083;AN=24;DP=257;FS=0.0  |
| 21714 | chrY | 13414216 | . | C | T | 51.63   | PASS          | AC=2;AF=0.083;AN=24;DP=262;FS=0.0  |
| 21715 | chrY | 13414248 | . | T | C | 176.91  | my_snp_filter | AC=5;AF=0.192;AN=26;BaseQ          |
| 21716 | chrY | 13414259 | . | T | C | 502.86  | PASS          | AC=7;AF=0.269;AN=26;BaseQRankSum=  |
| 21717 | chrY | 13414267 | . | G | T | 396.01  | my_snp_filter | AC=6;AF=0.231;AN=26;BaseQ          |
| 21718 | chrY | 13414280 | . | C | A | 330.26  | PASS          | AC=4;AF=0.182;AN=22;BaseQRankSum=  |
| 21719 | chrY | 13414370 | . | G | T | 114.43  | my_snp_filter | AC=4;AF=0.200;AN=20;BaseQ          |
| 21720 | chrY | 13414378 | . | G | T | 1372.54 | my_snp_filter | AC=9;AF=0.450;AN=20;BaseQ          |
| 21721 | chrY | 13414395 | . | A | G | 249.99  | PASS          | AC=4;AF=0.222;AN=18;BaseQRankSum=  |
| 21722 | chrY | 13414407 | . | C | G | 576.26  | PASS          | AC=6;AF=0.333;AN=18;BaseQRankSum=  |
| 21723 | chrY | 13414800 | . | T | C | 200.51  | PASS          | AC=2;AF=0.125;AN=16;BaseQRankSum=  |
| 21724 | chrY | 13414804 | . | T | G | 56.53   | PASS          | AC=2;AF=0.091;AN=22;BaseQRankSum=  |
| 21725 | chrY | 13414875 | . | C | T | 162.81  | PASS          | AC=4;AF=0.063;AN=64;DP=247;FS=0.0  |
| 21726 | chrY | 13414876 | . | G | A | 173.61  | PASS          | AC=6;AF=0.088;AN=68;BaseQRankSum=  |
| 21727 | chrY | 13414936 | . | A | G | 80.66   | PASS          | AC=2;AF=0.029;AN=68;BaseQRankSum=  |
| 21728 | chrY | 13414937 | . | C | T | 79.78   | PASS          | AC=2;AF=0.029;AN=68;BaseQRankSum=  |
| 21729 | chrY | 13414960 | . | T | C | 309.16  | PASS          | AC=6;AF=0.086;AN=70;BaseQRankSum=  |
| 21730 | chrY | 13414987 | . | C | T | 909.32  | PASS          | AC=6;AF=0.086;AN=70;BaseQRankSum=  |
| 21731 | chrY | 13414995 | . | G | A | 2329.90 | my_snp_filter | AC=8;AF=0.114;AN=70;BaseQ          |
| 21732 | chrY | 13415016 | . | A | T | 4744.95 | my_snp_filter | AC=9;AF=0.129;AN=70;BaseQ          |
| 21733 | chrY | 13415041 | . | T | A | 7379.64 | my_snp_filter | AC=10;AF=0.143;AN=70;BaseQ         |
| 21734 | chrY | 13415121 | . | T | G | 2560.56 | PASS          | AC=9;AF=0.132;AN=68;BaseQRankSum=  |
| 21735 | chrY | 13415167 | . | G | A | 3498.47 | my_snp_filter | AC=9;AF=0.129;AN=70;BaseQ          |
| 21736 | chrY | 13415169 | . | G | A | 3498.64 | my_snp_filter | AC=9;AF=0.129;AN=70;BaseQ          |

|       |      |          |   |   |   |          |               |                                    |
|-------|------|----------|---|---|---|----------|---------------|------------------------------------|
| 21737 | chrY | 13415195 | . | A | G | 1494.65  | my_snp_filter | AC=8;AF=0.114;AN=70;BaseQ          |
| 21738 | chrY | 13415204 | . | C | A | 1591.47  | my_snp_filter | AC=8;AF=0.114;AN=70;BaseQ          |
| 21739 | chrY | 13415224 | . | G | A | 3205.15  | PASS          | AC=8;AF=0.114;AN=70;BaseQRankSum=  |
| 21740 | chrY | 13415242 | . | T | C | 189.85   | my_snp_filter | AC=5;AF=0.074;AN=68;BaseQ          |
| 21741 | chrY | 13415306 | . | C | T | 1199.36  | my_snp_filter | AC=8;AF=0.138;AN=58;BaseQ          |
| 21742 | chrY | 13415356 | . | T | C | 49.56    | PASS          | AC=2;AF=0.040;AN=50;DP=884;FS=0.0  |
| 21743 | chrY | 13415364 | . | G | T | 296.26   | my_snp_filter | AC=5;AF=0.104;AN=48;BaseQ          |
| 21744 | chrY | 13415397 | . | G | A | 10493.17 | PASS          | AC=11;AF=0.367;AN=30;BaseQ         |
| 21745 | chrY | 13415405 | . | A | T | 11199.06 | PASS          | AC=11;AF=0.458;AN=24;BaseQ         |
| 21746 | chrY | 13415560 | . | C | T | 3344.69  | PASS          | AC=7;AF=0.318;AN=22;BaseQRankSum=  |
| 21747 | chrY | 13415561 | . | C | G | 354.01   | PASS          | AC=3;AF=0.136;AN=22;BaseQRankSum=  |
| 21748 | chrY | 13415586 | . | T | C | 1491.25  | PASS          | AC=3;AF=0.300;AN=10;BaseQRankSum=  |
| 21749 | chrY | 13415597 | . | G | T | 912.45   | PASS          | AC=3;AF=0.188;AN=16;BaseQRankSum=  |
| 21750 | chrY | 13415602 | . | T | C | 786.76   | PASS          | AC=3;AF=0.150;AN=20;BaseQRankSum=  |
| 21751 | chrY | 13415617 | . | T | C | 985.54   | PASS          | AC=6;AF=0.250;AN=24;BaseQRankSum=  |
| 21752 | chrY | 13415629 | . | T | C | 426.73   | PASS          | AC=3;AF=0.125;AN=24;BaseQRankSum=  |
| 21753 | chrY | 13415630 | . | C | T | 417.73   | PASS          | AC=3;AF=0.125;AN=24;BaseQRankSum=  |
| 21754 | chrY | 13415653 | . | C | T | 473.96   | PASS          | AC=3;AF=0.107;AN=28;BaseQRankSum=  |
| 21755 | chrY | 13415704 | . | C | G | 250.36   | my_snp_filter | AC=7;AF=0.121;AN=58;BaseQ          |
| 21756 | chrY | 13415712 | . | C | T | 127.28   | my_snp_filter | AC=1;AF=0.016;AN=62;BaseQ          |
| 21757 | chrY | 13415735 | . | T | G | 106.06   | my_snp_filter | AC=1;AF=0.015;AN=66;BaseQ          |
| 21758 | chrY | 13415736 | . | A | C | 4515.70  | PASS          | AC=21;AF=0.318;AN=66;BaseQRankSum= |
| 21759 | chrY | 13415754 | . | A | C | 4662.38  | PASS          | AC=22;AF=0.314;AN=70;BaseQRankSum= |
| 21760 | chrY | 13415772 | . | C | T | 4654.91  | PASS          | AC=22;AF=0.314;AN=70;BaseQRankSum= |
| 21761 | chrY | 13415864 | . | A | T | 2002.42  | PASS          | AC=22;AF=0.314;AN=70;BaseQRankSum= |
| 21762 | chrY | 13415872 | . | A | T | 17532.82 | my_snp_filter | AC=35;AF=0.500;AN                  |
| 21763 | chrY | 13415901 | . | G | T | 1550.03  | PASS          | AC=19;AF=0.271;AN=70;BaseQRankSum= |
| 21764 | chrY | 13415942 | . | A | T | 2192.70  | my_snp_filter | AC=10;AF=0.147;AN=68;BaseQ         |
| 21765 | chrY | 13415993 | . | G | T | 4379.06  | PASS          | AC=22;AF=0.344;AN=64;BaseQRankSum= |
| 21766 | chrY | 13415994 | . | G | T | 4390.42  | PASS          | AC=22;AF=0.355;AN=62;BaseQRankSum= |
| 21767 | chrY | 13416020 | . | T | C | 1460.09  | PASS          | AC=9;AF=0.132;AN=68;BaseQRankSum=  |
| 21768 | chrY | 13416098 | . | G | A | 127.36   | my_snp_filter | AC=4;AF=0.091;AN=44;BaseQ          |
| 21769 | chrY | 13416135 | . | T | G | 3606.99  | PASS          | AC=9;AF=0.150;AN=60;BaseQRankSum=  |
| 21770 | chrY | 13416254 | . | C | G | 777.60   | PASS          | AC=10;AF=0.143;AN=70;BaseQRankSum= |
| 21771 | chrY | 13416266 | . | T | C | 1097.01  | my_snp_filter | AC=11;AF=0.157;AN=70;BaseQ         |
| 21772 | chrY | 13416272 | . | T | C | 1847.54  | PASS          | AC=12;AF=0.171;AN=70;BaseQRankSum= |
| 21773 | chrY | 13416290 | . | A | C | 1483.89  | PASS          | AC=18;AF=0.257;AN=70;BaseQRankSum= |
| 21774 | chrY | 13416348 | . | G | T | 570.02   | PASS          | AC=12;AF=0.176;AN=68;BaseQRankSum= |
| 21775 | chrY | 13416387 | . | T | A | 6495.42  | PASS          | AC=17;AF=0.266;AN=64;BaseQRankSum= |
| 21776 | chrY | 13416388 | . | G | A | 6507.91  | PASS          | AC=17;AF=0.266;AN=64;BaseQRankSum= |
| 21777 | chrY | 13416391 | . | T | A | 6524.78  | PASS          | AC=17;AF=0.266;AN=64;BaseQRankSum= |
| 21778 | chrY | 13416424 | . | G | C | 3294.23  | PASS          | AC=14;AF=0.212;AN=66;BaseQRankSum= |
| 21779 | chrY | 13416426 | . | A | T | 700.33   | PASS          | AC=9;AF=0.141;AN=64;BaseQRankSum=  |
| 21780 | chrY | 13416471 | . | T | C | 3600.43  | PASS          | AC=30;AF=0.429;AN=70;BaseQRankSum= |
| 21781 | chrY | 13416506 | . | G | A | 951.20   | PASS          | AC=9;AF=0.129;AN=70;BaseQRankSum=  |
| 21782 | chrY | 13416516 | . | A | G | 260.17   | PASS          | AC=5;AF=0.071;AN=70;BaseQRankSum=  |
| 21783 | chrY | 13416557 | . | G | A | 4310.62  | PASS          | AC=15;AF=0.250;AN=60;BaseQRankSum= |
| 21784 | chrY | 13416561 | . | C | A | 33.09    | my_snp_filter | AC=2;AF=0.033;AN=60;BaseQ          |
| 21785 | chrY | 13416571 | . | G | T | 1572.57  | PASS          | AC=10;AF=0.179;AN=56;BaseQRankSum= |
| 21786 | chrY | 13416633 | . | C | T | 37.46    | my_snp_filter | AC=1;AF=0.029;AN=34;BaseQ          |
| 21787 | chrY | 13416706 | . | A | T | 47.63    | PASS          | AC=1;AF=0.028;AN=36;BaseQRankSum=  |
| 21788 | chrY | 13416711 | . | T | G | 225.82   | PASS          | AC=4;AF=0.111;AN=36;BaseQRankSum=  |
| 21789 | chrY | 13416747 | . | C | T | 98.07    | my_snp_filter | AC=4;AF=0.071;AN=56;BaseQ          |
| 21790 | chrY | 13416777 | . | T | G | 4026.50  | PASS          | AC=14;AF=0.212;AN=66;BaseQRankSum= |
| 21791 | chrY | 13416791 | . | G | A | 3028.40  | PASS          | AC=16;AF=0.229;AN=70;BaseQRankSum= |
| 21792 | chrY | 13416904 | . | C | T | 3186.25  | PASS          | AC=18;AF=0.257;AN=70;BaseQRankSum= |
| 21793 | chrY | 13416913 | . | G | A | 2377.22  | my_snp_filter | AC=13;AF=0.186;AN=70;BaseQ         |
| 21794 | chrY | 13417006 | . | G | A | 7731.91  | PASS          | AC=12;AF=0.182;AN=66;BaseQRankSum= |
| 21795 | chrY | 13417010 | . | T | G | 7799.56  | PASS          | AC=11;AF=0.167;AN=66;BaseQRankSum= |
| 21796 | chrY | 13417016 | . | C | T | 635.96   | PASS          | AC=7;AF=0.106;AN=66;BaseQRankSum=  |
| 21797 | chrY | 13417079 | . | A | G | 365.94   | PASS          | AC=4;AF=0.061;AN=66;BaseQRankSum=  |
| 21798 | chrY | 13417142 | . | T | A | 487.02   | my_snp_filter | AC=6;AF=0.088;AN=68;BaseQ          |
| 21799 | chrY | 13417144 | . | C | A | 9294.11  | PASS          | AC=17;AF=0.250;AN=68;BaseQRankSum= |
| 21800 | chrY | 13417174 | . | T | C | 4754.56  | PASS          | AC=11;AF=0.157;AN=70;BaseQRankSum= |
| 21801 | chrY | 13417191 | . | G | T | 5198.23  | PASS          | AC=9;AF=0.129;AN=70;BaseQRankSum=  |
| 21802 | chrY | 13417202 | . | T | C | 804.90   | PASS          | AC=6;AF=0.086;AN=70;BaseQRankSum=  |
| 21803 | chrY | 13417207 | . | C | A | 4655.82  | PASS          | AC=9;AF=0.129;AN=70;BaseQRankSum=  |
| 21804 | chrY | 13417233 | . | C | G | 2739.78  | PASS          | AC=15;AF=0.214;AN=70;BaseQRankSum= |
| 21805 | chrY | 13417250 | . | G | C | 2140.61  | PASS          | AC=11;AF=0.157;AN=70;BaseQRankSum= |
| 21806 | chrY | 13417255 | . | T | C | 7877.34  | PASS          | AC=23;AF=0.329;AN=70;BaseQRankSum= |
| 21807 | chrY | 13417259 | . | T | C | 12230.52 | PASS          | AC=24;AF=0.343;AN=70;BaseQ         |
| 21808 | chrY | 13417271 | . | A | G | 11500.88 | PASS          | AC=27;AF=0.386;AN=70;BaseQ         |
| 21809 | chrY | 13417273 | . | T | C | 1841.86  | PASS          | AC=12;AF=0.171;AN=70;BaseQRankSum= |
| 21810 | chrY | 13417282 | . | A | G | 245.06   | PASS          | AC=2;AF=0.029;AN=70;BaseQRankSum=  |
| 21811 | chrY | 13417301 | . | C | T | 14857.15 | PASS          | AC=27;AF=0.386;AN=70;BaseQ         |
| 21812 | chrY | 13417312 | . | C | A | 575.45   | my_snp_filter | AC=9;AF=0.129;AN=70;BaseQ          |

|       |      |          |   |   |     |          |               |                                   |
|-------|------|----------|---|---|-----|----------|---------------|-----------------------------------|
| 21813 | chrY | 13417314 | . | A | C   | 1888.17  | PASS          | AC=15;AF=0.214;AN=70;BaseQRankSum |
| 21814 | chrY | 13417355 | . | G | A   | 3628.87  | my_snp_filter | AC=10;AF=0.147;AN=68;BaseQ        |
| 21815 | chrY | 13417368 | . | C | T   | 161.48   | my_snp_filter | AC=3;AF=0.044;AN=68;BaseQ         |
| 21816 | chrY | 13417376 | . | T | A   | 447.67   | my_snp_filter | AC=4;AF=0.061;AN=66;BaseQ         |
| 21817 | chrY | 13417416 | . | T | C   | 268.67   | my_snp_filter | AC=2;AF=0.031;AN=64;BaseQ         |
| 21818 | chrY | 13417452 | . | T | G   | 96.81    | my_snp_filter | AC=1;AF=0.020;AN=50;BaseQ         |
| 21819 | chrY | 13417495 | . | A | G   | 417.91   | my_snp_filter | AC=5;AF=0.089;AN=56;BaseQ         |
| 21820 | chrY | 13417496 | . | G | C   | 339.82   | my_snp_filter | AC=3;AF=0.052;AN=58;BaseQ         |
| 21821 | chrY | 13417497 | . | C | T   | 5648.90  | PASS          | AC=12;AF=0.222;AN=54;BaseQRankSum |
| 21822 | chrY | 13417505 | . | A | T   | 181.83   | my_snp_filter | AC=3;AF=0.048;AN=62;BaseQ         |
| 21823 | chrY | 13417521 | . | G | C   | 867.60   | my_snp_filter | AC=7;AF=0.121;AN=58;BaseQ         |
| 21824 | chrY | 13417529 | . | G | A   | 842.46   | my_snp_filter | AC=7;AF=0.121;AN=58;BaseQ         |
| 21825 | chrY | 13417550 | . | T | C   | 20587.90 | PASS          | AC=31;AF=0.470;AN=66;BaseQ        |
| 21826 | chrY | 13417564 | . | C | A   | 1239.65  | my_snp_filter | AC=10;AF=0.143;AN=70;BaseQ        |
| 21827 | chrY | 13417565 | . | A | G   | 1227.90  | my_snp_filter | AC=10;AF=0.143;AN=70;BaseQ        |
| 21828 | chrY | 13417617 | . | C | A   | 3182.93  | PASS          | AC=17;AF=0.243;AN=70;BaseQRankSum |
| 21829 | chrY | 13417622 | . | T | C   | 9769.77  | PASS          | AC=30;AF=0.429;AN=70;BaseQRankSum |
| 21830 | chrY | 13417643 | . | C | T   | 3453.07  | my_snp_filter | AC=18;AF=0.257;AN=70;BaseQ        |
| 21831 | chrY | 13417663 | . | C | A   | 9360.19  | PASS          | AC=28;AF=0.400;AN=70;BaseQRankSum |
| 21832 | chrY | 13417698 | . | C | G   | 37691.72 | PASS          | AC=35;AF=0.500;AN=70;BaseQ        |
| 21833 | chrY | 13417711 | . | T | A   | 4579.47  | PASS          | AC=13;AF=0.186;AN=70;BaseQRankSum |
| 21834 | chrY | 13417722 | . | C | T   | 3722.28  | PASS          | AC=11;AF=0.157;AN=70;BaseQRankSum |
| 21835 | chrY | 13417725 | . | T | A   | 3841.08  | PASS          | AC=17;AF=0.243;AN=70;BaseQRankSum |
| 21836 | chrY | 13417766 | . | A | G   | 55       | my_snp_filter | AC=1;AF=0.014;AN=70;BaseQ         |
| 21837 | chrY | 13417768 | . | G | A   | 2253     | PASS          | AC=19;AF=0.271;AN=70;BaseQRankSum |
| 21838 | chrY | 13417770 | . | C | T   | 52.65    | my_snp_filter | AC=1;AF=0.014;AN=70;BaseQ         |
| 21839 | chrY | 13417813 | . | T | C   | 7207.03  | my_snp_filter | AC=16;AF=0.242;AN=66;BaseQ        |
| 21840 | chrY | 13417822 | . | T | A,G | 5835.91  | my_snp_filter | AC=11,5;AF=0.172,0.078;AN=        |
| 21841 | chrY | 13417856 | . | G | A   | 159.40   | PASS          | AC=1;AF=0.016;AN=64;BaseQRankSum= |
| 21842 | chrY | 13417884 | . | C | A   | 1705.87  | PASS          | AC=9;AF=0.150;AN=60;BaseQRankSum= |
| 21843 | chrY | 13417896 | . | C | T   | 897.60   | PASS          | AC=7;AF=0.125;AN=56;BaseQRankSum= |
| 21844 | chrY | 13417903 | . | T | G   | 1061.18  | PASS          | AC=8;AF=0.143;AN=56;BaseQRankSum= |
| 21845 | chrY | 13417931 | . | G | T   | 397.66   | my_snp_filter | AC=4;AF=0.091;AN=44;BaseQ         |
| 21846 | chrY | 13417932 | . | G | T   | 132.17   | my_snp_filter | AC=4;AF=0.095;AN=42;BaseQ         |
| 21847 | chrY | 13417947 | . | T | C   | 9397.47  | PASS          | AC=9;AF=0.265;AN=34;BaseQRankSum= |
| 21848 | chrY | 13418015 | . | A | C   | 1204.49  | PASS          | AC=6;AF=0.300;AN=20;BaseQRankSum= |
| 21849 | chrY | 13418039 | . | C | G,T | 4887.53  | PASS          | AC=8,3;AF=0.444,0.167;AN=18;BaseQ |
| 21850 | chrY | 13418040 | . | T | C   | 905.54   | PASS          | AC=8;AF=0.444;AN=18;BaseQRankSum= |
| 21851 | chrY | 13418088 | . | T | A   | 1481.53  | PASS          | AC=8;AF=0.444;AN=18;BaseQRankSum= |
| 21852 | chrY | 13418099 | . | C | A   | 1801.53  | PASS          | AC=8;AF=0.444;AN=18;BaseQRankSum= |
| 21853 | chrY | 13418112 | . | C | T   | 115.13   | my_snp_filter | AC=3;AF=0.167;AN=18;BaseQ         |
| 21854 | chrY | 13418115 | . | A | T   | 1690.53  | PASS          | AC=8;AF=0.444;AN=18;BaseQRankSum= |
| 21855 | chrY | 13418124 | . | G | A   | 8392.09  | my_snp_filter | AC=9;AF=0.500;AN=18;BaseQ         |
| 21856 | chrY | 13418133 | . | A | G   | 5285.09  | PASS          | AC=9;AF=0.500;AN=18;BaseQRankSum= |
| 21857 | chrY | 13418135 | . | A | G   | 58.85    | my_snp_filter | AC=3;AF=0.167;AN=18;BaseQ         |
| 21858 | chrY | 13418158 | . | C | A   | 38.34    | my_snp_filter | AC=2;AF=0.111;AN=18;BaseQ         |
| 21859 | chrY | 13418176 | . | T | C   | 30.27    | my_snp_filter | AC=2;AF=0.111;AN=18;BaseQ         |
| 21860 | chrY | 13418190 | . | C | T   | 2009.39  | PASS          | AC=7;AF=0.350;AN=20;BaseQRankSum= |
| 21861 | chrY | 13418223 | . | T | C   | 9441.52  | PASS          | AC=9;AF=0.450;AN=20;BaseQRankSum= |
| 21862 | chrY | 13418248 | . | G | T   | 20743.34 | PASS          | AC=9;AF=0.450;AN=20;BaseQ         |
| 21863 | chrY | 13418262 | . | G | A   | 875.40   | my_snp_filter | AC=5;AF=0.250;AN=20;BaseQ         |
| 21864 | chrY | 13418295 | . | T | C   | 13684.52 | PASS          | AC=9;AF=0.450;AN=20;BaseQ         |
| 21865 | chrY | 13418306 | . | T | A   | 2030.55  | PASS          | AC=9;AF=0.500;AN=18;BaseQRankSum= |
| 21866 | chrY | 13418317 | . | C | G   | 1828.52  | PASS          | AC=7;AF=0.350;AN=20;BaseQRankSum= |
| 21867 | chrY | 13418333 | . | G | T   | 305.89   | my_snp_filter | AC=2;AF=0.091;AN=22;BaseQ         |
| 21868 | chrY | 13418344 | . | C | T   | 363.39   | my_snp_filter | AC=2;AF=0.077;AN=26;BaseQ         |
| 21869 | chrY | 13418387 | . | C | T   | 18615.92 | PASS          | AC=11;AF=0.423;AN=26;BaseQ        |
| 21870 | chrY | 13418418 | . | C | A   | 97.68    | my_snp_filter | AC=2;AF=0.077;AN=26;BaseQ         |
| 21871 | chrY | 13418426 | . | G | A   | 5660.61  | my_snp_filter | AC=8;AF=0.308;AN=26;BaseQ         |
| 21872 | chrY | 13418464 | . | G | A   | 3651.71  | my_snp_filter | AC=9;AF=0.346;AN=26;BaseQ         |
| 21873 | chrY | 13418495 | . | C | T,A | 3282.23  | PASS          | AC=9,2;AF=0.321,0.071;AN=28;BaseQ |
| 21874 | chrY | 13418500 | . | T | G   | 3024.54  | PASS          | AC=9;AF=0.300;AN=30;BaseQRankSum= |
| 21875 | chrY | 13418501 | . | A | G   | 1047.45  | PASS          | AC=3;AF=0.100;AN=30;BaseQRankSum= |
| 21876 | chrY | 13418510 | . | A | G   | 3064.50  | PASS          | AC=9;AF=0.300;AN=30;BaseQRankSum= |
| 21877 | chrY | 13418521 | . | G | T   | 178.96   | PASS          | AC=1;AF=0.038;AN=26;BaseQRankSum= |
| 21878 | chrY | 13418530 | . | A | G,C | 26042.47 | PASS          | AC=11,9;AF=0.458,0.375;AN=        |
| 21879 | chrY | 13418537 | . | G | A   | 6181.91  | my_snp_filter | AC=9;AF=0.300;AN=30;BaseQ         |
| 21880 | chrY | 13418572 | . | G | A   | 364.26   | my_snp_filter | AC=3;AF=0.107;AN=28;BaseQ         |
| 21881 | chrY | 13418582 | . | G | A   | 345.56   | my_snp_filter | AC=4;AF=0.133;AN=30;BaseQ         |
| 21882 | chrY | 13418606 | . | G | A   | 4070.20  | PASS          | AC=8;AF=0.333;AN=24;BaseQRankSum= |
| 21883 | chrY | 13418633 | . | A | T   | 10798.99 | PASS          | AC=9;AF=0.409;AN=22;BaseQ         |
| 21884 | chrY | 13418658 | . | T | C   | 11203.88 | PASS          | AC=12;AF=0.429;AN=28;BaseQ        |
| 21885 | chrY | 13418697 | . | T | C   | 8766.68  | PASS          | AC=22;AF=0.478;AN=46;BaseQRankSum |
| 21886 | chrY | 13418709 | . | G | A   | 1583.17  | PASS          | AC=10;AF=0.200;AN=50;BaseQRankSum |
| 21887 | chrY | 13418714 | . | A | T   | 236.97   | PASS          | AC=4;AF=0.067;AN=60;BaseQRankSum= |
| 21888 | chrY | 13418777 | . | G | T   | 3405.77  | PASS          | AC=20;AF=0.286;AN=70;BaseQRankSum |



|       |      |          |   |   |     |          |               |                                   |
|-------|------|----------|---|---|-----|----------|---------------|-----------------------------------|
| 21889 | chrY | 13418778 | . | A | C   | 389.27   | my_snp_filter | AC=4;AF=0.057;AN=70;BaseQ         |
| 21890 | chrY | 13418784 | . | A | G   | 377.27   | my_snp_filter | AC=4;AF=0.057;AN=70;BaseQ         |
| 21891 | chrY | 13418790 | . | G | C   | 2194.40  | PASS          | AC=17;AF=0.243;AN=70;BaseQRankSum |
| 21892 | chrY | 13418819 | . | G | A   | 71.06    | my_snp_filter | AC=2;AF=0.029;AN=70;BaseQ         |
| 21893 | chrY | 13418821 | . | C | A   | 1583.63  | PASS          | AC=12;AF=0.171;AN=70;BaseQRankSum |
| 21894 | chrY | 13418887 | . | C | A   | 68430.79 | PASS          | AC=36;AF=0.514;AN=70;BaseQ        |
| 21895 | chrY | 13418895 | . | C | T   | 67520.53 | PASS          | AC=35;AF=0.500;AN=70;BaseQ        |
| 21896 | chrY | 13418936 | . | A | T   | 7079.48  | PASS          | AC=21;AF=0.300;AN=70;BaseQRankSum |
| 21897 | chrY | 13418938 | . | G | T   | 64.07    | my_snp_filter | AC=2;AF=0.029;AN=70;BaseQ         |
| 21898 | chrY | 13418941 | . | G | A   | 1319.39  | my_snp_filter | AC=13;AF=0.186;AN=70;BaseQ        |
| 21899 | chrY | 13418944 | . | C | T   | 5558.39  | PASS          | AC=28;AF=0.400;AN=70;BaseQRankSum |
| 21900 | chrY | 13418974 | . | G | A   | 14618.61 | PASS          | AC=29;AF=0.414;AN=70;BaseQ        |
| 21901 | chrY | 13419010 | . | T | C   | 69.12    | PASS          | AC=1;AF=0.015;AN=68;BaseQRankSum  |
| 21902 | chrY | 13419030 | . | T | C   | 1088.91  | PASS          | AC=9;AF=0.141;AN=64;BaseQRankSum  |
| 21903 | chrY | 13419046 | . | A | G   | 127.34   | my_snp_filter | AC=2;AF=0.032;AN=62;BaseQ         |
| 21904 | chrY | 13419056 | . | G | A   | 1075.77  | PASS          | AC=8;AF=0.148;AN=54;BaseQRankSum  |
| 21905 | chrY | 13419057 | . | G | T   | 130.28   | my_snp_filter | AC=2;AF=0.037;AN=54;BaseQ         |
| 21906 | chrY | 13419058 | . | T | A   | 1632.84  | PASS          | AC=13;AF=0.241;AN=54;BaseQRankSum |
| 21907 | chrY | 13419087 | . | T | C   | 9904.20  | PASS          | AC=11;AF=0.275;AN=40;BaseQRankSum |
| 21908 | chrY | 13419113 | . | G | A   | 200.40   | my_snp_filter | AC=1;AF=0.028;AN=36;BaseQ         |
| 21909 | chrY | 13419118 | . | T | G   | 188.62   | my_snp_filter | AC=1;AF=0.029;AN=34;BaseQ         |
| 21910 | chrY | 13419131 | . | T | A   | 378.49   | my_snp_filter | AC=3;AF=0.094;AN=32;BaseQ         |
| 21911 | chrY | 13419135 | . | A | G   | 25421.73 | PASS          | AC=10;AF=0.333;AN=30;BaseQ        |
| 21912 | chrY | 13419142 | . | T | C   | 249.82   | my_snp_filter | AC=3;AF=0.094;AN=32;BaseQ         |
| 21913 | chrY | 13419150 | . | C | T   | 264.49   | my_snp_filter | AC=3;AF=0.094;AN=32;BaseQ         |
| 21914 | chrY | 13419154 | . | T | C   | 240.99   | my_snp_filter | AC=3;AF=0.107;AN=28;BaseQ         |
| 21915 | chrY | 13419163 | . | A | G   | 109.46   | my_snp_filter | AC=3;AF=0.094;AN=32;BaseQ         |
| 21916 | chrY | 13419166 | . | A | G,* | 1889.27  | PASS          | AC=3,3;AF=0.100,0.100;AN=30;BaseQ |
| 21917 | chrY | 13419213 | . | C | T   | 404.70   | PASS          | AC=8;AF=0.143;AN=56;BaseQRankSum  |
| 21918 | chrY | 13419223 | . | T | A   | 19867.78 | PASS          | AC=13;AF=0.217;AN=60;BaseQ        |
| 21919 | chrY | 13419242 | . | T | G   | 3928.79  | PASS          | AC=8;AF=0.125;AN=64;BaseQRankSum  |
| 21920 | chrY | 13419247 | . | C | A   | 574.67   | my_snp_filter | AC=5;AF=0.078;AN=64;BaseQ         |
| 21921 | chrY | 13419248 | . | A | G   | 574.64   | my_snp_filter | AC=5;AF=0.078;AN=64;BaseQ         |
| 21922 | chrY | 13419258 | . | C | T   | 4063.81  | PASS          | AC=8;AF=0.125;AN=64;BaseQRankSum  |
| 21923 | chrY | 13419273 | . | T | C   | 430.81   | my_snp_filter | AC=3;AF=0.044;AN=68;BaseQ         |
| 21924 | chrY | 13419289 | . | T | C   | 35997.87 | PASS          | AC=37;AF=0.561;AN=66;BaseQ        |
| 21925 | chrY | 13419314 | . | T | A   | 291.26   | my_snp_filter | AC=5;AF=0.071;AN=70;BaseQ         |
| 21926 | chrY | 13419322 | . | G | C   | 8358.31  | PASS          | AC=24;AF=0.343;AN=70;BaseQRankSum |
| 21927 | chrY | 13419333 | . | G | A   | 15409.65 | PASS          | AC=29;AF=0.414;AN=70;BaseQ        |
| 21928 | chrY | 13419356 | . | G | T   | 432.37   | my_snp_filter | AC=7;AF=0.100;AN=70;BaseQ         |
| 21929 | chrY | 13419366 | . | G | A   | 180.97   | my_snp_filter | AC=4;AF=0.057;AN=70;BaseQ         |
| 21930 | chrY | 13419377 | . | G | T   | 83122    | PASS          | AC=45;AF=0.643;AN=70;BaseQRankSum |
| 21931 | chrY | 13419387 | . | A | G   | 30488.76 | PASS          | AC=35;AF=0.500;AN=70;BaseQ        |
| 21932 | chrY | 13419402 | . | C | G   | 848.04   | PASS          | AC=5;AF=0.071;AN=70;BaseQRankSum  |
| 21933 | chrY | 13419410 | . | G | T   | 277.46   | my_snp_filter | AC=5;AF=0.071;AN=70;BaseQ         |
| 21934 | chrY | 13419456 | . | T | G   | 5867.47  | PASS          | AC=28;AF=0.400;AN=70;BaseQRankSum |
| 21935 | chrY | 13419478 | . | C | T   | 40.83    | my_snp_filter | AC=3;AF=0.043;AN=70;BaseQ         |
| 21936 | chrY | 13419492 | . | C | G   | 36.72    | PASS          | AC=1;AF=0.014;AN=70;BaseQRankSum  |
| 21937 | chrY | 13419495 | . | C | T   | 815.11   | PASS          | AC=3;AF=0.043;AN=70;BaseQRankSum  |
| 21938 | chrY | 13419502 | . | G | A   | 673.51   | PASS          | AC=3;AF=0.043;AN=70;BaseQRankSum  |
| 21939 | chrY | 13419515 | . | G | A   | 767.48   | PASS          | AC=6;AF=0.091;AN=66;BaseQRankSum  |
| 21940 | chrY | 13419521 | . | G | T   | 1371.89  | PASS          | AC=7;AF=0.106;AN=66;BaseQRankSum  |
| 21941 | chrY | 13419534 | . | G | A   | 7202.48  | PASS          | AC=25;AF=0.446;AN=56;BaseQRankSum |
| 21942 | chrY | 13419549 | . | A | T   | 69.16    | my_snp_filter | AC=3;AF=0.054;AN=56;BaseQ         |
| 21943 | chrY | 13419557 | . | G | T   | 2750.43  | PASS          | AC=9;AF=0.167;AN=54;BaseQRankSum  |
| 21944 | chrY | 13419558 | . | A | G   | 2744.43  | PASS          | AC=9;AF=0.167;AN=54;BaseQRankSum  |
| 21945 | chrY | 13419565 | . | A | T   | 255.72   | my_snp_filter | AC=6;AF=0.111;AN=54;BaseQ         |
| 21946 | chrY | 13419566 | . | T | A   | 268.06   | my_snp_filter | AC=2;AF=0.038;AN=52;BaseQ         |
| 21947 | chrY | 13419571 | . | G | T,A | 1269.63  | PASS          | AC=2,5;AF=0.053,0.132;AN=38;BaseQ |
| 21948 | chrY | 13419576 | . | C | T   | 1897.72  | PASS          | AC=7;AF=0.167;AN=42;BaseQRankSum  |
| 21949 | chrY | 13419577 | . | G | A,T | 2919.96  | PASS          | AC=7,1;AF=0.184,0.026;AN=38;BaseQ |
| 21950 | chrY | 13419580 | . | C | T   | 798.41   | PASS          | AC=5;AF=0.139;AN=36;BaseQRankSum  |
| 21951 | chrY | 13419591 | . | G | A   | 238.13   | my_snp_filter | AC=4;AF=0.118;AN=34;BaseQ         |
| 21952 | chrY | 13419596 | . | A | T   | 249.02   | my_snp_filter | AC=5;AF=0.179;AN=28;BaseQ         |
| 21953 | chrY | 13419606 | . | T | C   | 25888.31 | PASS          | AC=9;AF=0.500;AN=18;BaseQ         |
| 21954 | chrY | 13419611 | . | T | G   | 26396.59 | PASS          | AC=9;AF=0.450;AN=20;BaseQ         |
| 21955 | chrY | 13419634 | . | C | T   | 84.08    | my_snp_filter | AC=1;AF=0.036;AN=28;BaseQ         |
| 21956 | chrY | 13419644 | . | C | T   | 85.08    | my_snp_filter | AC=1;AF=0.036;AN=28;BaseQ         |
| 21957 | chrY | 13419658 | . | G | A   | 575.11   | my_snp_filter | AC=4;AF=0.143;AN=28;BaseQ         |
| 21958 | chrY | 13419689 | . | C | G   | 31.21    | my_snp_filter | AC=1;AF=0.042;AN=24;BaseQ         |
| 21959 | chrY | 13419693 | . | G | T   | 34.21    | my_snp_filter | AC=1;AF=0.042;AN=24;BaseQ         |
| 21960 | chrY | 13419725 | . | G | A   | 2079.90  | PASS          | AC=8;AF=0.286;AN=28;BaseQRankSum  |
| 21961 | chrY | 13419756 | . | T | C   | 5103.83  | PASS          | AC=9;AF=0.300;AN=30;BaseQRankSum  |
| 21962 | chrY | 13419763 | . | A | G   | 3914.03  | PASS          | AC=9;AF=0.281;AN=32;BaseQRankSum  |
| 21963 | chrY | 13419764 | . | G | A   | 3640.03  | PASS          | AC=9;AF=0.281;AN=32;BaseQRankSum  |
| 21964 | chrY | 13419792 | . | C | T   | 353.60   | PASS          | AC=4;AF=0.095;AN=42;BaseQRankSum  |

|       |      |          |   |   |     |          |               |                                    |
|-------|------|----------|---|---|-----|----------|---------------|------------------------------------|
| 21965 | chrY | 13419799 | . | G | A   | 363.03   | PASS          | AC=4;AF=0.100;AN=40;BaseQRankSum=  |
| 21966 | chrY | 13419800 | . | A | G   | 1414.72  | PASS          | AC=7;AF=0.175;AN=40;BaseQRankSum=  |
| 21967 | chrY | 13419822 | . | G | A   | 121.71   | PASS          | AC=1;AF=0.021;AN=48;BaseQRankSum=  |
| 21968 | chrY | 13419834 | . | C | T   | 7858.32  | PASS          | AC=11;AF=0.220;AN=50;BaseQRankSum= |
| 21969 | chrY | 13419859 | . | C | T   | 53.18    | my_snp_filter | AC=1;AF=0.016;AN=64;BaseQ          |
| 21970 | chrY | 13419886 | . | C | T   | 4352.58  | PASS          | AC=9;AF=0.132;AN=68;BaseQRankSum=  |
| 21971 | chrY | 13419902 | . | T | C   | 1232.36  | PASS          | AC=12;AF=0.171;AN=70;BaseQRankSum= |
| 21972 | chrY | 13419914 | . | C | G   | 1047.08  | PASS          | AC=8;AF=0.114;AN=70;BaseQRankSum=  |
| 21973 | chrY | 13419925 | . | T | C   | 593.45   | my_snp_filter | AC=2;AF=0.029;AN=70;BaseQ          |
| 21974 | chrY | 13419931 | . | T | C   | 578.44   | my_snp_filter | AC=2;AF=0.029;AN=70;BaseQ          |
| 21975 | chrY | 13419933 | . | A | G   | 54673.35 | PASS          | AC=40;AF=0.571;AN=70;BaseQ         |
| 21976 | chrY | 13419939 | . | A | G   | 117.55   | my_snp_filter | AC=4;AF=0.057;AN=70;BaseQ          |
| 21977 | chrY | 13419940 | . | A | G   | 1508.92  | PASS          | AC=14;AF=0.200;AN=70;BaseQRankSum= |
| 21978 | chrY | 13419968 | . | T | A   | 27378.72 | PASS          | AC=35;AF=0.500;AN=70;BaseQ         |
| 21979 | chrY | 13419993 | . | A | T   | 115.06   | my_snp_filter | AC=2;AF=0.029;AN=70;BaseQ          |
| 21980 | chrY | 13420010 | . | C | T   | 10310.38 | PASS          | AC=21;AF=0.300;AN=70;BaseQ         |
| 21981 | chrY | 13420028 | . | A | G   | 6766.11  | my_snp_filter | AC=9;AF=0.129;AN=70;BaseQ          |
| 21982 | chrY | 13420035 | . | C | A   | 62928.87 | PASS          | AC=36;AF=0.514;AN=70;BaseQ         |
| 21983 | chrY | 13420038 | . | C | T   | 6416.35  | PASS          | AC=11;AF=0.157;AN=70;BaseQRankSum= |
| 21984 | chrY | 13420044 | . | A | G   | 2440.03  | PASS          | AC=8;AF=0.114;AN=70;BaseQRankSum=  |
| 21985 | chrY | 13420047 | . | C | T   | 18496.84 | PASS          | AC=34;AF=0.486;AN=70;BaseQ         |
| 21986 | chrY | 13420067 | . | C | A   | 38.67    | my_snp_filter | AC=2;AF=0.029;AN=70;BaseQ          |
| 21987 | chrY | 13420100 | . | T | G   | 11910.62 | PASS          | AC=25;AF=0.357;AN=70;BaseQ         |
| 21988 | chrY | 13420103 | . | C | G   | 8503.11  | PASS          | AC=23;AF=0.329;AN=70;BaseQRankSum= |
| 21989 | chrY | 13420115 | . | C | T   | 13195.14 | PASS          | AC=26;AF=0.371;AN=70;BaseQ         |
| 21990 | chrY | 13420125 | . | G | T   | 474.87   | my_snp_filter | AC=4;AF=0.057;AN=70;BaseQ          |
| 21991 | chrY | 13420140 | . | T | C   | 96.53    | my_snp_filter | AC=3;AF=0.043;AN=70;BaseQ          |
| 21992 | chrY | 13420180 | . | T | A   | 6026.87  | PASS          | AC=17;AF=0.258;AN=66;BaseQRankSum= |
| 21993 | chrY | 13420188 | . | A | G   | 949.59   | PASS          | AC=10;AF=0.152;AN=66;BaseQRankSum= |
| 21994 | chrY | 13420192 | . | G | A   | 70.12    | my_snp_filter | AC=3;AF=0.045;AN=66;BaseQ          |
| 21995 | chrY | 13420221 | . | A | T   | 833.48   | PASS          | AC=3;AF=0.043;AN=70;BaseQRankSum=  |
| 21996 | chrY | 13420246 | . | C | G   | 2434.27  | PASS          | AC=9;AF=0.129;AN=70;BaseQRankSum=  |
| 21997 | chrY | 13420273 | . | G | T   | 10153.53 | PASS          | AC=18;AF=0.257;AN=70;BaseQ         |
| 21998 | chrY | 13420277 | . | A | C   | 3326.44  | PASS          | AC=13;AF=0.186;AN=70;BaseQRankSum= |
| 21999 | chrY | 13420304 | . | T | G   | 11192.60 | PASS          | AC=10;AF=0.143;AN=70;BaseQ         |
| 22000 | chrY | 13420305 | . | T | G   | 11023.52 | PASS          | AC=11;AF=0.157;AN=70;BaseQ         |
| 22001 | chrY | 13420307 | . | C | T   | 623.42   | PASS          | AC=8;AF=0.114;AN=70;BaseQRankSum=  |
| 22002 | chrY | 13420376 | . | A | G   | 1218.60  | my_snp_filter | AC=7;AF=0.100;AN=70;BaseQ          |
| 22003 | chrY | 13420388 | . | C | G   | 1114.94  | my_snp_filter | AC=8;AF=0.114;AN=70;BaseQ          |
| 22004 | chrY | 13420406 | . | C | T   | 1843.64  | PASS          | AC=8;AF=0.114;AN=70;BaseQRankSum=  |
| 22005 | chrY | 13420413 | . | C | T   | 2229.84  | PASS          | AC=8;AF=0.114;AN=70;BaseQRankSum=  |
| 22006 | chrY | 13420460 | . | T | C   | 75.51    | my_snp_filter | AC=1;AF=0.014;AN=70;BaseQ          |
| 22007 | chrY | 13420490 | . | T | A   | 682.94   | PASS          | AC=3;AF=0.043;AN=70;BaseQRankSum=  |
| 22008 | chrY | 13420523 | . | T | C   | 227.05   | my_snp_filter | AC=5;AF=0.074;AN=68;BaseQ          |
| 22009 | chrY | 13420537 | . | A | G   | 863.38   | my_snp_filter | AC=8;AF=0.125;AN=64;BaseQ          |
| 22010 | chrY | 13420540 | . | C | T   | 671.64   | PASS          | AC=4;AF=0.063;AN=64;BaseQRankSum=  |
| 22011 | chrY | 13420575 | . | A | C,G | 1276.47  | PASS          | AC=8,1;AF=0.118,0.015;AN=68;BaseQ  |
| 22012 | chrY | 13420611 | . | T | C   | 33.69    | my_snp_filter | AC=1;AF=0.014;AN=70;BaseQ          |
| 22013 | chrY | 13420617 | . | A | C   | 7576.05  | PASS          | AC=10;AF=0.143;AN=70;BaseQRankSum= |
| 22014 | chrY | 13420622 | . | T | C   | 30.72    | my_snp_filter | AC=1;AF=0.014;AN=70;BaseQ          |
| 22015 | chrY | 13420627 | . | T | A   | 7381.90  | PASS          | AC=10;AF=0.143;AN=70;BaseQRankSum= |
| 22016 | chrY | 13420641 | . | A | G   | 370.51   | PASS          | AC=3;AF=0.043;AN=70;BaseQRankSum=  |
| 22017 | chrY | 13420646 | . | T | C   | 288.21   | my_snp_filter | AC=6;AF=0.086;AN=70;BaseQ          |
| 22018 | chrY | 13420650 | . | G | A   | 8984.73  | PASS          | AC=9;AF=0.129;AN=70;BaseQRankSum=  |
| 22019 | chrY | 13420662 | . | T | C   | 187.14   | my_snp_filter | AC=3;AF=0.043;AN=70;BaseQ          |
| 22020 | chrY | 13420676 | . | G | T   | 374.25   | my_snp_filter | AC=6;AF=0.086;AN=70;BaseQ          |
| 22021 | chrY | 13420679 | . | A | G   | 146.01   | my_snp_filter | AC=2;AF=0.029;AN=70;BaseQ          |
| 22022 | chrY | 13420747 | . | G | A   | 1000.88  | my_snp_filter | AC=7;AF=0.125;AN=56;BaseQ          |
| 22023 | chrY | 13420748 | . | C | T   | 447.19   | PASS          | AC=1;AF=0.018;AN=56;BaseQRankSum=  |
| 22024 | chrY | 13420767 | . | T | C   | 99.68    | my_snp_filter | AC=2;AF=0.037;AN=54;BaseQ          |
| 22025 | chrY | 13420772 | . | T | A   | 94.30    | my_snp_filter | AC=2;AF=0.038;AN=52;BaseQ          |
| 22026 | chrY | 13420802 | . | T | A   | 10749.17 | PASS          | AC=13;AF=0.271;AN=48;BaseQ         |
| 22027 | chrY | 13420822 | . | C | G   | 1387.51  | my_snp_filter | AC=6;AF=0.125;AN=48;BaseQ          |
| 22028 | chrY | 13420877 | . | T | A   | 31315.64 | PASS          | AC=14;AF=0.438;AN=32;BaseQ         |
| 22029 | chrY | 13420882 | . | G | A   | 3892.42  | PASS          | AC=8;AF=0.250;AN=32;BaseQRankSum=  |
| 22030 | chrY | 13420907 | . | C | T   | 1824.98  | PASS          | AC=6;AF=0.231;AN=26;BaseQRankSum=  |
| 22031 | chrY | 13420970 | . | C | A   | 5479.52  | PASS          | AC=9;AF=0.450;AN=20;BaseQRankSum=  |
| 22032 | chrY | 13420974 | . | G | A   | 90.30    | my_snp_filter | AC=1;AF=0.050;AN=20;BaseQ          |
| 22033 | chrY | 13420985 | . | T | C   | 33500.11 | PASS          | AC=9;AF=0.409;AN=22;BaseQ          |
| 22034 | chrY | 13420987 | . | A | C   | 33661.11 | PASS          | AC=9;AF=0.409;AN=22;BaseQ          |
| 22035 | chrY | 13420992 | . | C | T   | 52.33    | my_snp_filter | AC=1;AF=0.045;AN=22;BaseQ          |
| 22036 | chrY | 13420997 | . | C | T   | 68.06    | my_snp_filter | AC=1;AF=0.045;AN=22;BaseQ          |
| 22037 | chrY | 13421000 | . | G | A   | 536.19   | my_snp_filter | AC=2;AF=0.091;AN=22;BaseQ          |
| 22038 | chrY | 13421065 | . | C | A   | 9416.52  | PASS          | AC=9;AF=0.346;AN=26;BaseQRankSum=  |
| 22039 | chrY | 13421099 | . | A | T   | 38.93    | my_snp_filter | AC=1;AF=0.033;AN=30;BaseQ          |
| 22040 | chrY | 13421101 | . | G | A   | 366.99   | my_snp_filter | AC=3;AF=0.094;AN=32;BaseQ          |

|       |      |          |   |   |   |          |               |                                    |
|-------|------|----------|---|---|---|----------|---------------|------------------------------------|
| 22041 | chrY | 13421207 | . | G | A | 9297.98  | PASS          | AC=10;AF=0.156;AN=64;BaseQRankSum= |
| 22042 | chrY | 13421249 | . | T | C | 3202.93  | PASS          | AC=11;AF=0.162;AN=68;BaseQRankSum= |
| 22043 | chrY | 13421306 | . | C | G | 69.85    | my_snp_filter | AC=2;AF=0.029;AN=70;BaseQ          |
| 22044 | chrY | 13421327 | . | T | A | 5450.20  | PASS          | AC=9;AF=0.129;AN=70;BaseQRankSum=  |
| 22045 | chrY | 13421338 | . | G | A | 5756.17  | PASS          | AC=9;AF=0.129;AN=70;BaseQRankSum=  |
| 22046 | chrY | 13421341 | . | G | A | 1233.07  | PASS          | AC=7;AF=0.100;AN=70;BaseQRankSum=  |
| 22047 | chrY | 13421359 | . | C | T | 1112.85  | PASS          | AC=6;AF=0.086;AN=70;BaseQRankSum=  |
| 22048 | chrY | 13421361 | . | G | A | 3988.16  | PASS          | AC=9;AF=0.129;AN=70;BaseQRankSum=  |
| 22049 | chrY | 13421377 | . | G | A | 1342.99  | PASS          | AC=6;AF=0.086;AN=70;BaseQRankSum=  |
| 22050 | chrY | 13421386 | . | G | A | 1340.25  | PASS          | AC=7;AF=0.100;AN=70;BaseQRankSum=  |
| 22051 | chrY | 13421435 | . | C | T | 863.76   | PASS          | AC=7;AF=0.103;AN=68;BaseQRankSum=  |
| 22052 | chrY | 13421440 | . | A | T | 382.95   | my_snp_filter | AC=4;AF=0.061;AN=66;BaseQ          |
| 22053 | chrY | 13421447 | . | A | C | 32.07    | PASS          | AC=1;AF=0.015;AN=66;BaseQRankSum=  |
| 22054 | chrY | 13421461 | . | G | A | 5053.35  | PASS          | AC=9;AF=0.145;AN=62;BaseQRankSum=  |
| 22055 | chrY | 13421471 | . | C | G | 1305.08  | PASS          | AC=4;AF=0.067;AN=60;BaseQRankSum=  |
| 22056 | chrY | 13421495 | . | C | T | 1887.92  | PASS          | AC=8;AF=0.154;AN=52;BaseQRankSum=  |
| 22057 | chrY | 13421503 | . | A | G | 1318.25  | PASS          | AC=4;AF=0.074;AN=54;BaseQRankSum=  |
| 22058 | chrY | 13421539 | . | A | G | 2881.30  | PASS          | AC=9;AF=0.237;AN=38;BaseQRankSum=  |
| 22059 | chrY | 13421593 | . | T | C | 2543.97  | PASS          | AC=13;AF=0.464;AN=28;BaseQRankSum= |
| 22060 | chrY | 13421683 | . | T | C | 118.64   | PASS          | AC=2;AF=0.111;AN=18;BaseQRankSum=  |
| 22061 | chrY | 13421921 | . | C | G | 806.50   | PASS          | AC=5;AF=0.208;AN=24;BaseQRankSum=  |
| 22062 | chrY | 13421922 | . | C | T | 806.50   | PASS          | AC=5;AF=0.208;AN=24;BaseQRankSum=  |
| 22063 | chrY | 13421951 | . | G | A | 390.28   | PASS          | AC=6;AF=0.250;AN=24;BaseQRankSum=  |
| 22064 | chrY | 13421970 | . | C | T | 332.72   | PASS          | AC=6;AF=0.231;AN=26;BaseQRankSum=  |
| 22065 | chrY | 13421983 | . | T | C | 573.68   | PASS          | AC=6;AF=0.200;AN=30;BaseQRankSum=  |
| 22066 | chrY | 13422008 | . | C | A | 104.11   | my_snp_filter | AC=3;AF=0.107;AN=28;BaseQ          |
| 22067 | chrY | 13422012 | . | A | G | 93.38    | my_snp_filter | AC=3;AF=0.100;AN=30;BaseQ          |
| 22068 | chrY | 13422031 | . | A | C | 233.09   | PASS          | AC=5;AF=0.125;AN=40;BaseQRankSum=  |
| 22069 | chrY | 13422046 | . | A | C | 70.84    | PASS          | AC=1;AF=0.023;AN=44;BaseQRankSum=  |
| 22070 | chrY | 13422054 | . | A | T | 262.13   | PASS          | AC=4;AF=0.087;AN=46;BaseQRankSum=  |
| 22071 | chrY | 13422081 | . | A | G | 615.62   | PASS          | AC=7;AF=0.113;AN=62;BaseQRankSum=  |
| 22072 | chrY | 13422099 | . | A | G | 887.46   | my_snp_filter | AC=7;AF=0.109;AN=64;BaseQ          |
| 22073 | chrY | 13422120 | . | A | C | 406.78   | PASS          | AC=5;AF=0.076;AN=66;BaseQRankSum=  |
| 22074 | chrY | 13422140 | . | T | A | 614.02   | PASS          | AC=5;AF=0.078;AN=64;BaseQRankSum=  |
| 22075 | chrY | 13422142 | . | A | G | 46.12    | my_snp_filter | AC=3;AF=0.045;AN=66;BaseQ          |
| 22076 | chrY | 13422172 | . | A | T | 1754     | my_snp_filter | AC=9;AF=0.132;AN=68;BaseQ          |
| 22077 | chrY | 13422222 | . | T | C | 1557.30  | my_snp_filter | AC=9;AF=0.136;AN=66;BaseQ          |
| 22078 | chrY | 13422277 | . | C | T | 3205.15  | my_snp_filter | AC=9;AF=0.161;AN=56;BaseQ          |
| 22079 | chrY | 13422428 | . | G | C | 1362.54  | PASS          | AC=5;AF=0.227;AN=22;BaseQRankSum=  |
| 22080 | chrY | 13422478 | . | G | C | 1150.16  | PASS          | AC=5;AF=0.250;AN=20;BaseQRankSum=  |
| 22081 | chrY | 13422493 | . | C | T | 1240.45  | PASS          | AC=4;AF=0.182;AN=22;BaseQRankSum=  |
| 22082 | chrY | 13422511 | . | C | T | 10042.08 | PASS          | AC=9;AF=0.450;AN=20;BaseQ          |
| 22083 | chrY | 13422542 | . | G | A | 1324.25  | PASS          | AC=4;AF=0.200;AN=20;BaseQRankSum=  |
| 22084 | chrY | 13422565 | . | T | C | 118.64   | my_snp_filter | AC=2;AF=0.111;AN=18;BaseQ          |
| 22085 | chrY | 13422568 | . | C | A | 189.09   | my_snp_filter | AC=3;AF=0.167;AN=18;BaseQ          |
| 22086 | chrY | 13422610 | . | G | A | 7573.84  | PASS          | AC=9;AF=0.375;AN=24;BaseQRankSum=  |
| 22087 | chrY | 13422644 | . | T | A | 1326.37  | PASS          | AC=7;AF=0.269;AN=26;BaseQRankSum=  |
| 22088 | chrY | 13422687 | . | C | T | 557.43   | PASS          | AC=3;AF=0.125;AN=24;BaseQRankSum=  |
| 22089 | chrY | 13422688 | . | A | G | 7091.78  | PASS          | AC=9;AF=0.375;AN=24;BaseQRankSum=  |
| 22090 | chrY | 13422711 | . | G | A | 731.43   | PASS          | AC=5;AF=0.227;AN=22;BaseQRankSum=  |
| 22091 | chrY | 13422725 | . | C | T | 9086.11  | PASS          | AC=9;AF=0.409;AN=22;BaseQRankSum=  |
| 22092 | chrY | 13422749 | . | G | A | 736.81   | PASS          | AC=5;AF=0.250;AN=20;BaseQRankSum=  |
| 22093 | chrY | 13422750 | . | T | G | 9417.09  | PASS          | AC=9;AF=0.500;AN=18;BaseQRankSum=  |
| 22094 | chrY | 13422766 | . | G | T | 8741.09  | PASS          | AC=9;AF=0.500;AN=18;BaseQRankSum=  |
| 22095 | chrY | 13422800 | . | T | A | 46.30    | my_snp_filter | AC=1;AF=0.050;AN=20;BaseQ          |
| 22096 | chrY | 13422853 | . | C | A | 1068.39  | PASS          | AC=5;AF=0.208;AN=24;BaseQRankSum=  |
| 22097 | chrY | 13422989 | . | T | G | 1997.65  | PASS          | AC=5;AF=0.132;AN=38;BaseQRankSum=  |
| 22098 | chrY | 13422995 | . | A | G | 324.15   | PASS          | AC=1;AF=0.026;AN=38;BaseQRankSum=  |
| 22099 | chrY | 13423011 | . | T | A | 8425.12  | PASS          | AC=11;AF=0.262;AN=42;BaseQRankSum= |
| 22100 | chrY | 13423071 | . | A | G | 1325.93  | PASS          | AC=8;AF=0.143;AN=56;BaseQRankSum=  |
| 22101 | chrY | 13423074 | . | A | T | 2940.45  | PASS          | AC=22;AF=0.379;AN=58;BaseQRankSum= |
| 22102 | chrY | 13423082 | . | G | T | 52.88    | my_snp_filter | AC=2;AF=0.030;AN=66;BaseQ          |
| 22103 | chrY | 13423083 | . | G | A | 2663.08  | PASS          | AC=5;AF=0.076;AN=66;BaseQRankSum=  |
| 22104 | chrY | 13423089 | . | G | T | 2703.52  | PASS          | AC=5;AF=0.076;AN=66;BaseQRankSum=  |
| 22105 | chrY | 13423091 | . | A | T | 21330.42 | PASS          | AC=26;AF=0.448;AN=58;BaseQ         |
| 22106 | chrY | 13423104 | . | G | T | 16226.91 | PASS          | AC=26;AF=0.406;AN=64;BaseQ         |
| 22107 | chrY | 13423122 | . | G | T | 743.03   | PASS          | AC=6;AF=0.088;AN=68;BaseQRankSum=  |
| 22108 | chrY | 13423125 | . | T | C | 10411.70 | PASS          | AC=27;AF=0.422;AN=64;BaseQ         |
| 22109 | chrY | 13423160 | . | A | T | 17695.75 | PASS          | AC=32;AF=0.471;AN=68;BaseQ         |
| 22110 | chrY | 13423165 | . | A | G | 2786.20  | PASS          | AC=17;AF=0.250;AN=68;BaseQRankSum= |
| 22111 | chrY | 13423188 | . | T | A | 18094.15 | PASS          | AC=32;AF=0.471;AN=68;BaseQ         |
| 22112 | chrY | 13423189 | . | T | C | 146.18   | my_snp_filter | AC=3;AF=0.044;AN=68;BaseQ          |
| 22113 | chrY | 13423209 | . | G | A | 268.45   | PASS          | AC=2;AF=0.029;AN=68;BaseQRankSum=  |
| 22114 | chrY | 13423242 | . | C | T | 1104.14  | my_snp_filter | AC=4;AF=0.063;AN=64;BaseQ          |
| 22115 | chrY | 13423244 | . | G | T | 1102.43  | my_snp_filter | AC=4;AF=0.063;AN=64;BaseQ          |
| 22116 | chrY | 13423259 | . | T | C | 1408.06  | PASS          | AC=9;AF=0.150;AN=60;BaseQRankSum=  |

|       |      |          |   |   |     |          |               |                                           |
|-------|------|----------|---|---|-----|----------|---------------|-------------------------------------------|
| 22117 | chrY | 13423292 | . | A | G   | 1203.34  | PASS          | AC=7;AF=0.130;AN=54;BaseQRankSum=         |
| 22118 | chrY | 13423347 | . | A | G   | 674.46   | PASS          | AC=7;AF=0.106;AN=66;BaseQRankSum=         |
| 22119 | chrY | 13423359 | . | A | G   | 307.57   | PASS          | AC=3;AF=0.045;AN=66;BaseQRankSum=         |
| 22120 | chrY | 13423412 | . | G | A   | 2749.17  | PASS          | AC=13;AF=0.186;AN=70;BaseQRankSum=        |
| 22121 | chrY | 13423448 | . | T | C   | 202.05   | PASS          | AC=2;AF=0.029;AN=70;BaseQRankSum=         |
| 22122 | chrY | 13423457 | . | C | T   | 5173.33  | PASS          | AC=26;AF=0.371;AN=70;BaseQRankSum=        |
| 22123 | chrY | 13423471 | . | G | T   | 7065.13  | PASS          | AC=28;AF=0.400;AN=70;BaseQRankSum=        |
| 22124 | chrY | 13423496 | . | C | A   | 5077.96  | PASS          | AC=28;AF=0.400;AN=70;BaseQRankSum=        |
| 22125 | chrY | 13423520 | . | G | T   | 375.91   | PASS          | AC=4;AF=0.057;AN=70;BaseQRankSum=         |
| 22126 | chrY | 13423535 | . | T | C   | 235.13   | PASS          | AC=3;AF=0.043;AN=70;BaseQRankSum=         |
| 22127 | chrY | 13423541 | . | C | G   | 215.01   | PASS          | AC=3;AF=0.043;AN=70;BaseQRankSum=         |
| 22128 | chrY | 13423550 | . | G | C   | 217.30   | PASS          | AC=3;AF=0.043;AN=70;BaseQRankSum=         |
| 22129 | chrY | 13423560 | . | C | T   | 26408.17 | PASS          | AC=36;AF=0.514;AN=70;BaseQRankSum=        |
| 22130 | chrY | 13423569 | . | G | A   | 1314.88  | PASS          | AC=14;AF=0.200;AN=70;BaseQRankSum=        |
| 22131 | chrY | 13423583 | . | A | C   | 907.37   | PASS          | AC=13;AF=0.186;AN=70;BaseQRankSum=        |
| 22132 | chrY | 13423594 | . | T | A   | 3189.84  | PASS          | AC=23;AF=0.329;AN=70;BaseQRankSum=        |
| 22133 | chrY | 13423604 | . | G | T   | 16817.15 | PASS          | AC=34;AF=0.486;AN=70;BaseQRankSum=        |
| 22134 | chrY | 13423623 | . | A | T   | 212.80   | PASS          | AC=2;AF=0.029;AN=68;BaseQRankSum=         |
| 22135 | chrY | 13423630 | . | T | G   | 79.52    | PASS          | AC=1;AF=0.015;AN=66;BaseQRankSum=         |
| 22136 | chrY | 13423638 | . | A | G   | 169.91   | PASS          | AC=3;AF=0.048;AN=62;BaseQRankSum=         |
| 22137 | chrY | 13423671 | . | T | C   | 10068.31 | PASS          | AC=17;AF=0.472;AN=36;BaseQRankSum=        |
| 22138 | chrY | 13423723 | . | A | G   | 152.25   | PASS          | AC=1;AF=0.056;AN=18;BaseQRankSum=         |
| 22139 | chrY | 13423746 | . | A | G   | 1126.21  | PASS          | AC=6;AF=0.333;AN=18;BaseQRankSum=         |
| 22140 | chrY | 13423766 | . | T | G   | 740.04   | PASS          | AC=2;AF=0.111;AN=18;BaseQRankSum=         |
| 22141 | chrY | 13423788 | . | T | C   | 377.97   | my_snp_filter | AC=7;AF=0.389;AN=18;BaseQRankSum=         |
| 22142 | chrY | 13423792 | . | G | A   | 10588.53 | PASS          | AC=10;AF=0.556;AN=18;BaseQRankSum=        |
| 22143 | chrY | 13423793 | . | C | T   | 1325.96  | PASS          | AC=9;AF=0.500;AN=18;BaseQRankSum=         |
| 22144 | chrY | 13423795 | . | T | C,G | 2380.14  | PASS          | AC=5,3;AF=0.278,0.167;AN=18;BaseQRankSum= |
| 22145 | chrY | 13423800 | . | T | G   | 1321.09  | my_snp_filter | AC=9;AF=0.500;AN=18;BaseQRankSum=         |
| 22146 | chrY | 13423813 | . | G | A   | 1022.59  | PASS          | AC=5;AF=0.278;AN=18;BaseQRankSum=         |
| 22147 | chrY | 13423838 | . | G | C   | 10683.40 | PASS          | AC=9;AF=0.500;AN=18;BaseQRankSum=         |
| 22148 | chrY | 13423845 | . | T | A   | 144.45   | PASS          | AC=2;AF=0.077;AN=26;DP=931;FS=0.0         |
| 22149 | chrY | 13423850 | . | C | T   | 6904.34  | PASS          | AC=9;AF=0.450;AN=20;BaseQRankSum=         |
| 22150 | chrY | 13423852 | . | A | G   | 62.29    | PASS          | AC=2;AF=0.077;AN=26;DP=941;FS=0.0         |
| 22151 | chrY | 13423875 | . | T | C   | 517.10   | PASS          | AC=2;AF=0.077;AN=26;BaseQRankSum=         |
| 22152 | chrY | 13423897 | . | A | T   | 277.79   | PASS          | AC=1;AF=0.036;AN=28;BaseQRankSum=         |
| 22153 | chrY | 13423906 | . | C | A   | 56.73    | my_snp_filter | AC=1;AF=0.036;AN=28;BaseQRankSum=         |
| 22154 | chrY | 13423919 | . | C | T   | 270.43   | my_snp_filter | AC=3;AF=0.115;AN=26;BaseQRankSum=         |
| 22155 | chrY | 13423921 | . | T | C   | 1685.58  | PASS          | AC=7;AF=0.269;AN=26;BaseQRankSum=         |
| 22156 | chrY | 13423944 | . | C | T   | 51.15    | PASS          | AC=2;AF=0.067;AN=30;DP=997;FS=0.0         |
| 22157 | chrY | 13423946 | . | A | C   | 11288.69 | PASS          | AC=9;AF=0.346;AN=26;BaseQRankSum=         |
| 22158 | chrY | 13423948 | . | A | G   | 18113.99 | PASS          | AC=9;AF=0.409;AN=22;BaseQRankSum=         |
| 22159 | chrY | 13423949 | . | G | A   | 1366.46  | PASS          | AC=3;AF=0.100;AN=30;BaseQRankSum=         |
| 22160 | chrY | 13423950 | . | T | G   | 4147.54  | PASS          | AC=7;AF=0.269;AN=26;BaseQRankSum=         |
| 22161 | chrY | 13423994 | . | A | T   | 1306.89  | PASS          | AC=7;AF=0.219;AN=32;BaseQRankSum=         |
| 22162 | chrY | 13424025 | . | C | A   | 47443.89 | PASS          | AC=13;AF=0.591;AN=22;BaseQRankSum=        |
| 22163 | chrY | 13424026 | . | C | T   | 47485.89 | PASS          | AC=13;AF=0.591;AN=22;BaseQRankSum=        |
| 22164 | chrY | 13424038 | . | G | C   | 573.39   | my_snp_filter | AC=3;AF=0.075;AN=40;BaseQRankSum=         |
| 22165 | chrY | 13424052 | . | C | T   | 32.24    | my_snp_filter | AC=1;AF=0.026;AN=38;BaseQRankSum=         |
| 22166 | chrY | 13424057 | . | T | C   | 291.12   | my_snp_filter | AC=1;AF=0.026;AN=38;BaseQRankSum=         |
| 22167 | chrY | 13424064 | . | C | A   | 1023.66  | my_snp_filter | AC=7;AF=0.206;AN=34;BaseQRankSum=         |
| 22168 | chrY | 13424090 | . | G | A   | 158      | my_snp_filter | AC=1;AF=0.028;AN=36;BaseQRankSum=         |
| 22169 | chrY | 13424117 | . | C | A   | 33662.57 | PASS          | AC=18;AF=0.818;AN=22;BaseQRankSum=        |
| 22170 | chrY | 13424119 | . | A | G   | 52.29    | PASS          | AC=2;AF=0.063;AN=32;DP=1386;FS=0          |
| 22171 | chrY | 13424122 | . | G | A   | 834.09   | my_snp_filter | AC=3;AF=0.100;AN=30;BaseQRankSum=         |
| 22172 | chrY | 13424124 | . | C | A   | 332.90   | my_snp_filter | AC=2;AF=0.071;AN=28;BaseQRankSum=         |
| 22173 | chrY | 13424139 | . | T | C   | 54.52    | my_snp_filter | AC=3;AF=0.100;AN=30;BaseQRankSum=         |
| 22174 | chrY | 13424175 | . | C | A,G | 1904.99  | PASS          | AC=1,7;AF=0.050,0.350;AN=20;BaseQRankSum= |
| 22175 | chrY | 13424180 | . | A | G   | 15944.29 | PASS          | AC=11;AF=0.550;AN=20;BaseQRankSum=        |
| 22176 | chrY | 13424193 | . | T | C   | 1140.58  | PASS          | AC=5;AF=0.250;AN=20;BaseQRankSum=         |
| 22177 | chrY | 13424198 | . | T | G   | 577.44   | PASS          | AC=5;AF=0.250;AN=20;BaseQRankSum=         |
| 22178 | chrY | 13424215 | . | G | A   | 42.30    | my_snp_filter | AC=1;AF=0.050;AN=20;BaseQRankSum=         |
| 22179 | chrY | 13424238 | . | G | A   | 531.34   | PASS          | AC=5;AF=0.278;AN=18;BaseQRankSum=         |
| 22180 | chrY | 13424240 | . | A | G   | 7859.54  | PASS          | AC=8;AF=0.444;AN=18;BaseQRankSum=         |
| 22181 | chrY | 13424247 | . | T | C   | 7490.54  | PASS          | AC=8;AF=0.444;AN=18;BaseQRankSum=         |
| 22182 | chrY | 13424253 | . | C | T   | 444.05   | PASS          | AC=4;AF=0.222;AN=18;BaseQRankSum=         |
| 22183 | chrY | 13424254 | . | A | G   | 7297.53  | PASS          | AC=8;AF=0.444;AN=18;BaseQRankSum=         |
| 22184 | chrY | 13424275 | . | G | A   | 6947.53  | PASS          | AC=8;AF=0.444;AN=18;BaseQRankSum=         |
| 22185 | chrY | 13424276 | . | G | C   | 779.52   | PASS          | AC=5;AF=0.278;AN=18;BaseQRankSum=         |
| 22186 | chrY | 13424285 | . | C | T   | 7317.53  | PASS          | AC=8;AF=0.444;AN=18;BaseQRankSum=         |
| 22187 | chrY | 13424289 | . | T | C   | 7396.09  | PASS          | AC=9;AF=0.500;AN=18;BaseQRankSum=         |
| 22188 | chrY | 13424305 | . | T | G   | 415.27   | PASS          | AC=3;AF=0.167;AN=18;BaseQRankSum=         |
| 22189 | chrY | 13424387 | . | A | T   | 6696.34  | PASS          | AC=9;AF=0.450;AN=20;BaseQRankSum=         |
| 22190 | chrY | 13424392 | . | G | A   | 23839.09 | PASS          | AC=14;AF=0.700;AN=20;BaseQRankSum=        |
| 22191 | chrY | 13424422 | . | G | A   | 160.26   | my_snp_filter | AC=1;AF=0.045;AN=22;BaseQRankSum=         |
| 22192 | chrY | 13424446 | . | A | C   | 94.23    | my_snp_filter | AC=2;AF=0.083;AN=24;BaseQRankSum=         |

|       |      |          |   |   |     |          |               |                                    |
|-------|------|----------|---|---|-----|----------|---------------|------------------------------------|
| 22193 | chrY | 13424458 | . | G | A   | 2228.85  | PASS          | AC=9;AF=0.375;AN=24;BaseQRankSum=  |
| 22194 | chrY | 13424468 | . | G | A   | 322.66   | my_snp_filter | AC=5;AF=0.250;AN=20;BaseQ          |
| 22195 | chrY | 13424478 | . | G | C   | 270.69   | my_snp_filter | AC=4;AF=0.167;AN=24;BaseQ          |
| 22196 | chrY | 13424514 | . | A | G   | 227.25   | PASS          | AC=1;AF=0.038;AN=26;BaseQRankSum=  |
| 22197 | chrY | 13424536 | . | T | G   | 191.02   | PASS          | AC=1;AF=0.042;AN=24;BaseQRankSum=  |
| 22198 | chrY | 13424544 | . | C | T   | 2373.41  | PASS          | AC=7;AF=0.292;AN=24;BaseQRankSum=  |
| 22199 | chrY | 13424545 | . | A | G,C | 3544.14  | PASS          | AC=9,4;AF=0.375,0.167;AN=24;BaseQ  |
| 22200 | chrY | 13424582 | . | T | G   | 18572.34 | PASS          | AC=11;AF=0.550;AN=20;BaseQ         |
| 22201 | chrY | 13424608 | . | T | A   | 138.56   | my_snp_filter | AC=1;AF=0.036;AN=28;BaseQ          |
| 22202 | chrY | 13424609 | . | A | C   | 11674.71 | PASS          | AC=9;AF=0.375;AN=24;BaseQ          |
| 22203 | chrY | 13424616 | . | A | T   | 4777.39  | my_snp_filter | AC=8;AF=0.286;AN=28;BaseQ          |
| 22204 | chrY | 13424624 | . | A | G   | 1730.05  | PASS          | AC=5;AF=0.167;AN=30;BaseQRankSum=  |
| 22205 | chrY | 13424634 | . | A | C   | 1721.93  | PASS          | AC=5;AF=0.179;AN=28;BaseQRankSum=  |
| 22206 | chrY | 13424647 | . | T | A   | 136.74   | my_snp_filter | AC=1;AF=0.042;AN=24;BaseQ          |
| 22207 | chrY | 13424666 | . | G | C   | 2730.19  | my_snp_filter | AC=8;AF=0.333;AN=24;BaseQ          |
| 22208 | chrY | 13424669 | . | G | C   | 22081.34 | PASS          | AC=11;AF=0.550;AN=20;BaseQ         |
| 22209 | chrY | 13424671 | . | T | A   | 1799.61  | PASS          | AC=7;AF=0.318;AN=22;BaseQRankSum=  |
| 22210 | chrY | 13424702 | . | G | T   | 1765.23  | PASS          | AC=6;AF=0.333;AN=18;BaseQRankSum=  |
| 22211 | chrY | 13424743 | . | C | G   | 240.04   | PASS          | AC=2;AF=0.111;AN=18;BaseQRankSum=  |
| 22212 | chrY | 13424744 | . | T | C   | 332.71   | PASS          | AC=3;AF=0.167;AN=18;BaseQRankSum=  |
| 22213 | chrY | 13424754 | . | T | C   | 7406.09  | PASS          | AC=9;AF=0.500;AN=18;BaseQRankSum=  |
| 22214 | chrY | 13424755 | . | T | C   | 7406.09  | PASS          | AC=9;AF=0.500;AN=18;BaseQRankSum=  |
| 22215 | chrY | 13424763 | . | T | A   | 129.76   | PASS          | AC=1;AF=0.050;AN=20;BaseQRankSum=  |
| 22216 | chrY | 13424796 | . | T | C   | 235.77   | PASS          | AC=2;AF=0.100;AN=20;BaseQRankSum=  |
| 22217 | chrY | 13424806 | . | C | T   | 4608.52  | PASS          | AC=9;AF=0.450;AN=20;BaseQRankSum=  |
| 22218 | chrY | 13424835 | . | C | T   | 1262.43  | PASS          | AC=5;AF=0.278;AN=18;BaseQRankSum=  |
| 22219 | chrY | 13424873 | . | T | C   | 9973.07  | PASS          | AC=9;AF=0.450;AN=20;BaseQRankSum=  |
| 22220 | chrY | 13424893 | . | T | C   | 9009.52  | PASS          | AC=9;AF=0.450;AN=20;BaseQRankSum=  |
| 22221 | chrY | 13424894 | . | G | C   | 297.77   | PASS          | AC=2;AF=0.100;AN=20;BaseQRankSum=  |
| 22222 | chrY | 13424948 | . | C | G   | 266.17   | PASS          | AC=1;AF=0.050;AN=20;BaseQRankSum=  |
| 22223 | chrY | 13424981 | . | C | G   | 5833.52  | PASS          | AC=9;AF=0.450;AN=20;BaseQRankSum=  |
| 22224 | chrY | 13424996 | . | C | T   | 214.30   | PASS          | AC=1;AF=0.050;AN=20;BaseQRankSum=  |
| 22225 | chrY | 13425021 | . | T | C   | 464.18   | PASS          | AC=4;AF=0.222;AN=18;BaseQRankSum=  |
| 22226 | chrY | 13425054 | . | C | T   | 8264.09  | PASS          | AC=9;AF=0.500;AN=18;BaseQRankSum=  |
| 22227 | chrY | 13425075 | . | G | A   | 1135.51  | PASS          | AC=7;AF=0.318;AN=22;BaseQRankSum=  |
| 22228 | chrY | 13425082 | . | T | G   | 4618.11  | PASS          | AC=9;AF=0.409;AN=22;BaseQRankSum=  |
| 22229 | chrY | 13425087 | . | T | A   | 4748.11  | PASS          | AC=9;AF=0.409;AN=22;BaseQRankSum=  |
| 22230 | chrY | 13425092 | . | C | T   | 3326.33  | my_snp_filter | AC=8;AF=0.364;AN=22;BaseQ          |
| 22231 | chrY | 13425128 | . | C | A   | 1098.95  | PASS          | AC=3;AF=0.136;AN=22;BaseQRankSum=  |
| 22232 | chrY | 13425151 | . | G | C   | 20753.07 | PASS          | AC=9;AF=0.450;AN=20;BaseQ          |
| 22233 | chrY | 13425175 | . | G | A   | 7774.09  | PASS          | AC=9;AF=0.500;AN=18;BaseQRankSum=  |
| 22234 | chrY | 13425210 | . | A | G   | 5672.81  | PASS          | AC=7;AF=0.389;AN=18;BaseQRankSum=  |
| 22235 | chrY | 13425245 | . | T | G   | 768.72   | PASS          | AC=4;AF=0.200;AN=20;BaseQRankSum=  |
| 22236 | chrY | 13425265 | . | A | G   | 9611.34  | PASS          | AC=9;AF=0.450;AN=20;BaseQRankSum=  |
| 22237 | chrY | 13425266 | . | G | C   | 9756.34  | PASS          | AC=9;AF=0.450;AN=20;BaseQRankSum=  |
| 22238 | chrY | 13425270 | . | A | G   | 4627.34  | PASS          | AC=9;AF=0.450;AN=20;BaseQRankSum=  |
| 22239 | chrY | 13425273 | . | G | A   | 1399.81  | PASS          | AC=5;AF=0.250;AN=20;BaseQRankSum=  |
| 22240 | chrY | 13425275 | . | G | C   | 9369.34  | PASS          | AC=9;AF=0.450;AN=20;BaseQRankSum=  |
| 22241 | chrY | 13425283 | . | C | A,T | 5695.78  | PASS          | AC=7,2;AF=0.350,0.100;AN=20;BaseQ  |
| 22242 | chrY | 13425298 | . | C | T   | 1553.68  | PASS          | AC=4;AF=0.200;AN=20;BaseQRankSum=  |
| 22243 | chrY | 13425310 | . | A | G   | 1604.68  | PASS          | AC=4;AF=0.200;AN=20;BaseQRankSum=  |
| 22244 | chrY | 13425313 | . | G | T   | 3834.39  | PASS          | AC=6;AF=0.300;AN=20;BaseQRankSum=  |
| 22245 | chrY | 13425314 | . | C | A   | 2120.46  | PASS          | AC=8;AF=0.400;AN=20;BaseQRankSum=  |
| 22246 | chrY | 13425325 | . | A | G   | 5521.99  | PASS          | AC=9;AF=0.409;AN=22;BaseQRankSum=  |
| 22247 | chrY | 13425330 | . | T | G   | 5881.99  | PASS          | AC=9;AF=0.409;AN=22;BaseQRankSum=  |
| 22248 | chrY | 13425337 | . | C | T   | 2067.48  | PASS          | AC=5;AF=0.250;AN=20;BaseQRankSum=  |
| 22249 | chrY | 13425353 | . | G | T   | 6234.52  | PASS          | AC=9;AF=0.450;AN=20;BaseQRankSum=  |
| 22250 | chrY | 13425358 | . | G | A   | 2460.59  | PASS          | AC=5;AF=0.278;AN=18;BaseQRankSum=  |
| 22251 | chrY | 13425405 | . | A | G   | 8122.59  | my_snp_filter | AC=8;AF=0.400;AN=20;BaseQ          |
| 22252 | chrY | 13425480 | . | G | C   | 13712.09 | PASS          | AC=9;AF=0.500;AN=18;BaseQ          |
| 22253 | chrY | 13425514 | . | G | T   | 84.30    | my_snp_filter | AC=1;AF=0.050;AN=20;BaseQ          |
| 22254 | chrY | 13425515 | . | C | A   | 1618.24  | PASS          | AC=6;AF=0.333;AN=18;BaseQRankSum=  |
| 22255 | chrY | 13425536 | . | G | T   | 8342.07  | PASS          | AC=9;AF=0.450;AN=20;BaseQRankSum=  |
| 22256 | chrY | 13425546 | . | A | C   | 566.24   | my_snp_filter | AC=6;AF=0.300;AN=20;BaseQ          |
| 22257 | chrY | 13425574 | . | A | G   | 3593.99  | PASS          | AC=9;AF=0.409;AN=22;BaseQRankSum=  |
| 22258 | chrY | 13425579 | . | A | G   | 15544.99 | PASS          | AC=9;AF=0.409;AN=22;BaseQ          |
| 22259 | chrY | 13425584 | . | G | A   | 2525.07  | my_snp_filter | AC=7;AF=0.318;AN=22;BaseQ          |
| 22260 | chrY | 13425588 | . | G | A   | 1306.90  | PASS          | AC=7;AF=0.318;AN=22;BaseQRankSum=  |
| 22261 | chrY | 13425590 | . | G | A   | 3672.74  | PASS          | AC=9;AF=0.375;AN=24;BaseQRankSum=  |
| 22262 | chrY | 13425603 | . | A | G   | 2376.34  | my_snp_filter | AC=7;AF=0.292;AN=24;BaseQ          |
| 22263 | chrY | 13425619 | . | C | T   | 2091.67  | my_snp_filter | AC=8;AF=0.333;AN=24;BaseQ          |
| 22264 | chrY | 13425683 | . | A | G   | 9092.52  | PASS          | AC=9;AF=0.450;AN=20;BaseQRankSum=  |
| 22265 | chrY | 13425700 | . | A | C   | 454.15   | my_snp_filter | AC=4;AF=0.182;AN=22;BaseQ          |
| 22266 | chrY | 13425713 | . | G | A   | 536.76   | my_snp_filter | AC=5;AF=0.227;AN=22;BaseQ          |
| 22267 | chrY | 13425812 | . | T | A   | 4598.35  | PASS          | AC=13;AF=0.542;AN=24;BaseQRankSum= |
| 22268 | chrY | 13425829 | . | T | C   | 7400.54  | PASS          | AC=11;AF=0.458;AN=24;BaseQRankSum= |

|       |      |          |   |   |     |          |               |                                   |
|-------|------|----------|---|---|-----|----------|---------------|-----------------------------------|
| 22269 | chrY | 13425845 | . | C | A   | 1643.64  | PASS          | AC=7;AF=0.269;AN=26;BaseQRankSum= |
| 22270 | chrY | 13425862 | . | A | G   | 2099.35  | PASS          | AC=8;AF=0.364;AN=22;BaseQRankSum= |
| 22271 | chrY | 13425866 | . | A | G   | 5435.11  | PASS          | AC=9;AF=0.409;AN=22;BaseQRankSum= |
| 22272 | chrY | 13425882 | . | A | G   | 3330.41  | PASS          | AC=8;AF=0.400;AN=20;BaseQRankSum= |
| 22273 | chrY | 13425889 | . | G | T   | 13999.09 | PASS          | AC=9;AF=0.500;AN=18;BaseQ         |
| 22274 | chrY | 13425890 | . | C | T   | 13843.09 | PASS          | AC=9;AF=0.500;AN=18;BaseQ         |
| 22275 | chrY | 13425893 | . | T | C   | 13032.09 | PASS          | AC=9;AF=0.500;AN=18;BaseQ         |
| 22276 | chrY | 13425902 | . | G | A   | 2036.09  | PASS          | AC=9;AF=0.500;AN=18;BaseQRankSum= |
| 22277 | chrY | 13425908 | . | T | G   | 485.72   | my_snp_filter | AC=5;AF=0.278;AN=18;BaseQ         |
| 22278 | chrY | 13425916 | . | C | G   | 310.26   | my_snp_filter | AC=4;AF=0.222;AN=18;BaseQ         |
| 22279 | chrY | 13425925 | . | T | C   | 1023.62  | PASS          | AC=6;AF=0.333;AN=18;BaseQRankSum= |
| 22280 | chrY | 13425950 | . | C | T   | 8978.09  | PASS          | AC=9;AF=0.500;AN=18;BaseQRankSum= |
| 22281 | chrY | 13426003 | . | A | T   | 472.66   | PASS          | AC=4;AF=0.200;AN=20;BaseQRankSum= |
| 22282 | chrY | 13426015 | . | A | C   | 410.53   | PASS          | AC=4;AF=0.167;AN=24;BaseQRankSum= |
| 22283 | chrY | 13426033 | . | G | C   | 746.01   | PASS          | AC=6;AF=0.300;AN=20;BaseQRankSum= |
| 22284 | chrY | 13426057 | . | A | G   | 5659.78  | PASS          | AC=9;AF=0.450;AN=20;BaseQRankSum= |
| 22285 | chrY | 13426070 | . | T | C   | 3189.03  | PASS          | AC=7;AF=0.350;AN=20;BaseQRankSum= |
| 22286 | chrY | 13426079 | . | C | A   | 1975.82  | PASS          | AC=7;AF=0.350;AN=20;BaseQRankSum= |
| 22287 | chrY | 13426093 | . | T | G   | 1116.61  | PASS          | AC=6;AF=0.300;AN=20;BaseQRankSum= |
| 22288 | chrY | 13426152 | . | G | A   | 388.83   | PASS          | AC=4;AF=0.200;AN=20;BaseQRankSum= |
| 22289 | chrY | 13426182 | . | G | A   | 45.06    | my_snp_filter | AC=1;AF=0.045;AN=22;BaseQ         |
| 22290 | chrY | 13426193 | . | G | A   | 2748.89  | PASS          | AC=9;AF=0.409;AN=22;BaseQRankSum= |
| 22291 | chrY | 13426238 | . | A | G   | 1440.72  | PASS          | AC=8;AF=0.308;AN=26;BaseQRankSum= |
| 22292 | chrY | 13426245 | . | A | T   | 550.52   | PASS          | AC=7;AF=0.269;AN=26;BaseQRankSum= |
| 22293 | chrY | 13426259 | . | G | C   | 887.60   | PASS          | AC=7;AF=0.269;AN=26;BaseQRankSum= |
| 22294 | chrY | 13426291 | . | G | A   | 415.43   | PASS          | AC=3;AF=0.125;AN=24;BaseQRankSum= |
| 22295 | chrY | 13426298 | . | T | C   | 2640.26  | PASS          | AC=8;AF=0.364;AN=22;BaseQRankSum= |
| 22296 | chrY | 13426306 | . | C | T   | 357.83   | PASS          | AC=3;AF=0.136;AN=22;BaseQRankSum= |
| 22297 | chrY | 13426310 | . | G | A   | 336.32   | PASS          | AC=3;AF=0.136;AN=22;BaseQRankSum= |
| 22298 | chrY | 13426317 | . | T | G   | 344.19   | PASS          | AC=3;AF=0.125;AN=24;BaseQRankSum= |
| 22299 | chrY | 13426323 | . | C | T   | 2126.20  | PASS          | AC=8;AF=0.333;AN=24;BaseQRankSum= |
| 22300 | chrY | 13426342 | . | G | C,A | 679.40   | PASS          | AC=3,3;AF=0.150,0.150;AN=20;BaseQ |
| 22301 | chrY | 13426357 | . | T | C   | 782.84   | PASS          | AC=7;AF=0.389;AN=18;BaseQRankSum= |
| 22302 | chrY | 13426360 | . | T | G   | 44.22    | my_snp_filter | AC=3;AF=0.167;AN=18;BaseQ         |
| 22303 | chrY | 13426425 | . | A | G   | 30.04    | PASS          | AC=1;AF=0.056;AN=18;BaseQRankSum= |
| 22304 | chrY | 13426475 | . | G | T   | 38.12    | my_snp_filter | AC=2;AF=0.111;AN=18;BaseQ         |
| 22305 | chrY | 13426563 | . | C | G   | 64.56    | my_snp_filter | AC=2;AF=0.111;AN=18;BaseQ         |
| 22306 | chrY | 13426565 | . | G | C   | 1816.79  | PASS          | AC=9;AF=0.500;AN=18;BaseQRankSum= |
| 22307 | chrY | 13426582 | . | G | A   | 55.24    | PASS          | AC=1;AF=0.045;AN=22;BaseQRankSum= |
| 22308 | chrY | 13426758 | . | C | A   | 123.63   | PASS          | AC=2;AF=0.091;AN=22;BaseQRankSum= |
| 22309 | chrY | 13426784 | . | G | A   | 84.92    | my_snp_filter | AC=3;AF=0.125;AN=24;BaseQ         |
| 22310 | chrY | 13426865 | . | T | C   | 123.21   | my_snp_filter | AC=3;AF=0.150;AN=20;BaseQ         |
| 22311 | chrY | 13426904 | . | T | C   | 33.41    | my_snp_filter | AC=2;AF=0.100;AN=20;BaseQ         |
| 22312 | chrY | 13427008 | . | T | A   | 629.80   | PASS          | AC=7;AF=0.350;AN=20;BaseQRankSum= |
| 22313 | chrY | 13427053 | . | A | T   | 627.86   | PASS          | AC=6;AF=0.273;AN=22;BaseQRankSum= |
| 22314 | chrY | 13427162 | . | T | G   | 41.81    | my_snp_filter | AC=2;AF=0.100;AN=20;BaseQ         |
| 22315 | chrY | 13427200 | . | G | T   | 667.84   | PASS          | AC=7;AF=0.350;AN=20;BaseQRankSum= |
| 22316 | chrY | 13427202 | . | C | T   | 958.01   | PASS          | AC=8;AF=0.444;AN=18;BaseQRankSum= |
| 22317 | chrY | 13427225 | . | T | G   | 867.01   | PASS          | AC=8;AF=0.444;AN=18;BaseQRankSum= |
| 22318 | chrY | 13427285 | . | G | A   | 255.96   | my_snp_filter | AC=6;AF=0.300;AN=20;BaseQ         |
| 22319 | chrY | 13427292 | . | A | T   | 37.26    | PASS          | AC=1;AF=0.045;AN=22;BaseQRankSum= |
| 22320 | chrY | 13427527 | . | C | G   | 264.37   | PASS          | AC=4;AF=0.200;AN=20;BaseQRankSum= |
| 22321 | chrY | 13427585 | . | G | C   | 795.38   | my_snp_filter | AC=4;AF=0.167;AN=24;BaseQ         |
| 22322 | chrY | 13427597 | . | G | A   | 1286.29  | my_snp_filter | AC=6;AF=0.273;AN=22;BaseQ         |
| 22323 | chrY | 13427598 | . | C | A   | 1120.20  | my_snp_filter | AC=6;AF=0.273;AN=22;BaseQ         |
| 22324 | chrY | 13427612 | . | T | G   | 1088.19  | my_snp_filter | AC=6;AF=0.300;AN=20;BaseQ         |
| 22325 | chrY | 13427635 | . | C | T   | 869.15   | my_snp_filter | AC=6;AF=0.250;AN=24;BaseQ         |
| 22326 | chrY | 13427637 | . | C | G   | 954.14   | my_snp_filter | AC=6;AF=0.250;AN=24;BaseQ         |
| 22327 | chrY | 13427671 | . | T | C   | 97.64    | PASS          | AC=2;AF=0.083;AN=24;BaseQRankSum= |
| 22328 | chrY | 13427680 | . | T | A,C | 1657.11  | my_snp_filter | AC=3,5;AF=0.125,0.208;AN=         |
| 22329 | chrY | 13427691 | . | T | G   | 2612.73  | my_snp_filter | AC=9;AF=0.375;AN=24;BaseQ         |
| 22330 | chrY | 13427696 | . | A | G   | 2664.73  | my_snp_filter | AC=9;AF=0.375;AN=24;BaseQ         |
| 22331 | chrY | 13427711 | . | T | C   | 349.21   | PASS          | AC=4;AF=0.167;AN=24;BaseQRankSum= |
| 22332 | chrY | 13427739 | . | C | G   | 2158.72  | PASS          | AC=9;AF=0.450;AN=20;BaseQRankSum= |
| 22333 | chrY | 13427742 | . | C | T   | 1283.91  | PASS          | AC=7;AF=0.350;AN=20;BaseQRankSum= |
| 22334 | chrY | 13427753 | . | G | A   | 79.31    | PASS          | AC=1;AF=0.050;AN=20;BaseQRankSum= |
| 22335 | chrY | 13427754 | . | C | A   | 275.68   | my_snp_filter | AC=4;AF=0.200;AN=20;BaseQ         |
| 22336 | chrY | 13427774 | . | T | C   | 1186.92  | PASS          | AC=8;AF=0.364;AN=22;BaseQRankSum= |
| 22337 | chrY | 13427793 | . | T | G   | 581.25   | my_snp_filter | AC=4;AF=0.200;AN=20;BaseQ         |
| 22338 | chrY | 13427800 | . | G | A   | 628.50   | my_snp_filter | AC=5;AF=0.250;AN=20;BaseQ         |
| 22339 | chrY | 13427819 | . | G | C   | 158.05   | my_snp_filter | AC=2;AF=0.100;AN=20;BaseQ         |
| 22340 | chrY | 13427838 | . | A | G   | 18776.54 | PASS          | AC=10;AF=0.556;AN=18;BaseQ        |
| 22341 | chrY | 13427873 | . | T | G   | 18268.31 | PASS          | AC=9;AF=0.500;AN=18;BaseQ         |
| 22342 | chrY | 13427884 | . | C | T   | 7662.09  | PASS          | AC=9;AF=0.500;AN=18;BaseQRankSum= |
| 22343 | chrY | 13427896 | . | G | T   | 85.76    | my_snp_filter | AC=3;AF=0.125;AN=24;BaseQ         |
| 22344 | chrY | 13427940 | . | A | C   | 5864.39  | PASS          | AC=8;AF=0.286;AN=28;BaseQRankSum= |

|       |      |          |   |   |     |          |               |                                   |
|-------|------|----------|---|---|-----|----------|---------------|-----------------------------------|
| 22345 | chrY | 13427941 | . | G | T   | 322.70   | my_snp_filter | AC=1;AF=0.036;AN=28;BaseQ         |
| 22346 | chrY | 13427950 | . | G | T   | 119.90   | my_snp_filter | AC=1;AF=0.036;AN=28;BaseQ         |
| 22347 | chrY | 13427990 | . | G | A   | 4009.19  | PASS          | AC=8;AF=0.333;AN=24;BaseQRankSum= |
| 22348 | chrY | 13428005 | . | C | T   | 1933.91  | PASS          | AC=6;AF=0.231;AN=26;BaseQRankSum= |
| 22349 | chrY | 13428006 | . | C | T   | 20547.45 | PASS          | AC=9;AF=0.346;AN=26;BaseQ         |
| 22350 | chrY | 13428007 | . | A | T   | 65.15    | my_snp_filter | AC=1;AF=0.038;AN=26;BaseQ         |
| 22351 | chrY | 13428018 | . | G | T   | 177.95   | my_snp_filter | AC=2;AF=0.077;AN=26;BaseQ         |
| 22352 | chrY | 13428020 | . | T | A   | 729.66   | my_snp_filter | AC=4;AF=0.167;AN=24;BaseQ         |
| 22353 | chrY | 13428027 | . | G | A   | 2545.45  | PASS          | AC=7;AF=0.318;AN=22;BaseQRankSum= |
| 22354 | chrY | 13428034 | . | A | C   | 2483.93  | PASS          | AC=6;AF=0.231;AN=26;BaseQRankSum= |
| 22355 | chrY | 13428035 | . | G | C   | 2477.91  | PASS          | AC=6;AF=0.231;AN=26;BaseQRankSum= |
| 22356 | chrY | 13428048 | . | T | G   | 36574.09 | PASS          | AC=9;AF=0.500;AN=18;BaseQ         |
| 22357 | chrY | 13428067 | . | C | T   | 36689.52 | PASS          | AC=9;AF=0.450;AN=20;BaseQ         |
| 22358 | chrY | 13428068 | . | T | A   | 2302.41  | PASS          | AC=6;AF=0.214;AN=28;BaseQRankSum= |
| 22359 | chrY | 13428072 | . | A | T   | 35705.71 | PASS          | AC=11;AF=0.500;AN=22;BaseQ        |
| 22360 | chrY | 13428089 | . | C | T   | 21743.21 | PASS          | AC=13;AF=0.464;AN=28;BaseQ        |
| 22361 | chrY | 13428100 | . | C | A   | 211.43   | my_snp_filter | AC=2;AF=0.059;AN=34;BaseQ         |
| 22362 | chrY | 13428113 | . | T | C   | 393.24   | my_snp_filter | AC=4;AF=0.118;AN=34;BaseQ         |
| 22363 | chrY | 13428120 | . | A | G   | 127.58   | my_snp_filter | AC=1;AF=0.029;AN=34;BaseQ         |
| 22364 | chrY | 13428129 | . | T | G   | 153.62   | my_snp_filter | AC=1;AF=0.029;AN=34;BaseQ         |
| 22365 | chrY | 13428138 | . | C | T   | 20133.86 | PASS          | AC=11;AF=0.393;AN=28;BaseQ        |
| 22366 | chrY | 13428139 | . | T | A   | 2228.45  | PASS          | AC=7;AF=0.206;AN=34;BaseQRankSum= |
| 22367 | chrY | 13428149 | . | G | T   | 875.12   | my_snp_filter | AC=5;AF=0.147;AN=34;BaseQ         |
| 22368 | chrY | 13428151 | . | G | T   | 108.62   | my_snp_filter | AC=1;AF=0.029;AN=34;BaseQ         |
| 22369 | chrY | 13428163 | . | C | T   | 1992.54  | PASS          | AC=6;AF=0.188;AN=32;BaseQRankSum= |
| 22370 | chrY | 13428165 | . | C | T   | 13739.65 | PASS          | AC=10;AF=0.333;AN=30;BaseQ        |
| 22371 | chrY | 13428187 | . | G | A   | 108.90   | my_snp_filter | AC=1;AF=0.036;AN=28;BaseQ         |
| 22372 | chrY | 13428202 | . | C | T   | 708.44   | my_snp_filter | AC=4;AF=0.167;AN=24;BaseQ         |
| 22373 | chrY | 13428220 | . | C | T   | 55.84    | my_snp_filter | AC=1;AF=0.033;AN=30;BaseQ         |
| 22374 | chrY | 13428285 | . | C | G   | 525.48   | PASS          | AC=3;AF=0.056;AN=54;BaseQRankSum= |
| 22375 | chrY | 13428295 | . | T | C   | 7243.50  | PASS          | AC=9;AF=0.141;AN=64;BaseQRankSum= |
| 22376 | chrY | 13428296 | . | G | A   | 1776.15  | my_snp_filter | AC=7;AF=0.109;AN=64;BaseQ         |
| 22377 | chrY | 13428304 | . | T | C   | 2398.13  | my_snp_filter | AC=7;AF=0.106;AN=66;BaseQ         |
| 22378 | chrY | 13428307 | . | A | G   | 5366.54  | PASS          | AC=9;AF=0.136;AN=66;BaseQRankSum= |
| 22379 | chrY | 13428334 | . | G | T   | 943.45   | PASS          | AC=9;AF=0.129;AN=70;BaseQRankSum= |
| 22380 | chrY | 13428362 | . | G | A   | 148.27   | PASS          | AC=1;AF=0.014;AN=70;BaseQRankSum= |
| 22381 | chrY | 13428363 | . | T | C   | 627.01   | PASS          | AC=8;AF=0.114;AN=70;BaseQRankSum= |
| 22382 | chrY | 13428419 | . | A | T   | 1415.55  | my_snp_filter | AC=7;AF=0.100;AN=70;BaseQ         |
| 22383 | chrY | 13428427 | . | G | A   | 864.16   | PASS          | AC=5;AF=0.071;AN=70;BaseQRankSum= |
| 22384 | chrY | 13428446 | . | G | C   | 3306.01  | my_snp_filter | AC=8;AF=0.114;AN=70;BaseQ         |
| 22385 | chrY | 13428454 | . | T | C   | 3725.66  | my_snp_filter | AC=8;AF=0.114;AN=70;BaseQ         |
| 22386 | chrY | 13428465 | . | G | A   | 4845.93  | my_snp_filter | AC=8;AF=0.114;AN=70;BaseQ         |
| 22387 | chrY | 13428467 | . | T | C   | 4973.75  | my_snp_filter | AC=8;AF=0.114;AN=70;BaseQ         |
| 22388 | chrY | 13428470 | . | A | G   | 5337.88  | PASS          | AC=8;AF=0.114;AN=70;BaseQRankSum= |
| 22389 | chrY | 13428473 | . | C | A   | 166.92   | PASS          | AC=1;AF=0.014;AN=70;BaseQRankSum= |
| 22390 | chrY | 13428474 | . | C | T   | 5535.91  | PASS          | AC=8;AF=0.114;AN=70;BaseQRankSum= |
| 22391 | chrY | 13428497 | . | A | C   | 7215.85  | PASS          | AC=8;AF=0.114;AN=70;BaseQRankSum= |
| 22392 | chrY | 13428498 | . | G | A   | 295.26   | PASS          | AC=1;AF=0.014;AN=70;BaseQRankSum= |
| 22393 | chrY | 13428501 | . | C | G   | 7330.83  | PASS          | AC=8;AF=0.114;AN=70;BaseQRankSum= |
| 22394 | chrY | 13428507 | . | C | T   | 325.36   | PASS          | AC=1;AF=0.014;AN=70;BaseQRankSum= |
| 22395 | chrY | 13428544 | . | C | T   | 1130.96  | PASS          | AC=6;AF=0.086;AN=70;BaseQRankSum= |
| 22396 | chrY | 13428589 | . | C | T,* | 1102.80  | PASS          | AC=3,3;AF=0.044,0.044;AN=68;BaseQ |
| 22397 | chrY | 13428614 | . | G | T   | 3054.02  | PASS          | AC=9;AF=0.173;AN=52;BaseQRankSum= |
| 22398 | chrY | 13428618 | . | C | T   | 2980.51  | PASS          | AC=8;AF=0.160;AN=50;BaseQRankSum= |
| 22399 | chrY | 13428619 | . | A | G   | 15019.74 | my_snp_filter | AC=9;AF=0.180;AN=                 |
| 22400 | chrY | 13428626 | . | T | C   | 15402.64 | my_snp_filter | AC=9;AF=0.265;AN=                 |
| 22401 | chrY | 13428635 | . | T | C   | 4263.79  | PASS          | AC=8;AF=0.235;AN=34;BaseQRankSum= |
| 22402 | chrY | 13428638 | . | G | A   | 10993.47 | PASS          | AC=9;AF=0.265;AN=34;BaseQ         |
| 22403 | chrY | 13428677 | . | A | G   | 19490.84 | PASS          | AC=10;AF=0.357;AN=28;BaseQ        |
| 22404 | chrY | 13428678 | . | T | C   | 4986.58  | PASS          | AC=7;AF=0.206;AN=34;BaseQRankSum= |
| 22405 | chrY | 13428709 | . | T | C   | 6628.79  | PASS          | AC=7;AF=0.219;AN=32;BaseQRankSum= |
| 22406 | chrY | 13428725 | . | G | A   | 1855.11  | PASS          | AC=4;AF=0.143;AN=28;BaseQRankSum= |
| 22407 | chrY | 13428727 | . | A | C   | 522.96   | my_snp_filter | AC=5;AF=0.167;AN=30;BaseQ         |
| 22408 | chrY | 13428740 | . | A | T   | 660.21   | my_snp_filter | AC=5;AF=0.156;AN=32;BaseQ         |
| 22409 | chrY | 13428747 | . | G | A   | 729.48   | my_snp_filter | AC=5;AF=0.156;AN=32;BaseQ         |
| 22410 | chrY | 13428750 | . | C | G   | 1405.06  | PASS          | AC=1;AF=0.031;AN=32;BaseQRankSum= |
| 22411 | chrY | 13428791 | . | C | T   | 3742.31  | PASS          | AC=9;AF=0.300;AN=30;BaseQRankSum= |
| 22412 | chrY | 13428793 | . | C | T   | 902      | my_snp_filter | AC=4;AF=0.118;AN=34;BaseQ         |
| 22413 | chrY | 13428824 | . | G | T   | 15770.74 | PASS          | AC=11;AF=0.458;AN=24;BaseQ        |
| 22414 | chrY | 13428914 | . | G | T   | 8448.87  | PASS          | AC=9;AF=0.250;AN=36;BaseQRankSum= |
| 22415 | chrY | 13428918 | . | G | C   | 3256.82  | PASS          | AC=9;AF=0.214;AN=42;BaseQRankSum= |
| 22416 | chrY | 13428929 | . | C | A   | 144.52   | my_snp_filter | AC=1;AF=0.023;AN=44;BaseQ         |
| 22417 | chrY | 13428931 | . | G | A   | 2483.02  | PASS          | AC=3;AF=0.079;AN=38;BaseQRankSum= |
| 22418 | chrY | 13428935 | . | G | C,A | 5772.93  | PASS          | AC=5,6;AF=0.147,0.176;AN=34;BaseQ |
| 22419 | chrY | 13428965 | . | C | T   | 7143.78  | PASS          | AC=9;AF=0.225;AN=40;BaseQRankSum= |
| 22420 | chrY | 13428972 | . | G | A   | 10779.92 | PASS          | AC=16;AF=0.400;AN=40;BaseQ        |

|       |      |          |   |   |       |          |               |                                    |
|-------|------|----------|---|---|-------|----------|---------------|------------------------------------|
| 22421 | chrY | 13428987 | . | A | G     | 10782.51 | PASS          | AC=9;AF=0.281;AN=32;BaseQ          |
| 22422 | chrY | 13428989 | . | G | A     | 666.80   | PASS          | AC=1;AF=0.026;AN=38;BaseQRankSum=  |
| 22423 | chrY | 13429045 | . | C | G     | 338.45   | my_snp_filter | AC=3;AF=0.071;AN=42;BaseQ          |
| 22424 | chrY | 13429058 | . | G | A     | 54.63    | my_snp_filter | AC=1;AF=0.025;AN=40;BaseQ          |
| 22425 | chrY | 13429060 | . | C | T     | 142.56   | my_snp_filter | AC=1;AF=0.026;AN=38;BaseQ          |
| 22426 | chrY | 13429069 | . | A | G     | 1274.26  | PASS          | AC=4;AF=0.095;AN=42;BaseQRankSum=  |
| 22427 | chrY | 13429082 | . | C | A     | 55       | my_snp_filter | AC=1;AF=0.025;AN=40;BaseQ          |
| 22428 | chrY | 13429087 | . | T | A     | 8755.09  | my_snp_filter | AC=12;AF=0.375;AN=32;BaseQ         |
| 22429 | chrY | 13429088 | . | G | A     | 1271.97  | PASS          | AC=4;AF=0.105;AN=38;BaseQRankSum=  |
| 22430 | chrY | 13429093 | . | C | G,A,T | 29676.40 | PASS          | AC=16,4,2;AF=0.615,0.154           |
| 22431 | chrY | 13429101 | . | C | A     | 1424     | PASS          | AC=5;AF=0.139;AN=36;BaseQRankSum=  |
| 22432 | chrY | 13429119 | . | G | T     | 367.34   | PASS          | AC=1;AF=0.028;AN=36;BaseQRankSum=  |
| 22433 | chrY | 13429128 | . | C | T     | 10907.62 | my_snp_filter | AC=10;AF=0.333;AN=                 |
| 22434 | chrY | 13429129 | . | C | T     | 1383.19  | PASS          | AC=6;AF=0.158;AN=38;BaseQRankSum=  |
| 22435 | chrY | 13429150 | . | C | T     | 13132.15 | my_snp_filter | AC=9;AF=0.321;AN=                  |
| 22436 | chrY | 13429151 | . | G | A     | 2464.20  | PASS          | AC=6;AF=0.176;AN=34;BaseQRankSum=  |
| 22437 | chrY | 13429169 | . | G | A     | 4661.69  | my_snp_filter | AC=9;AF=0.346;AN=26;BaseQ          |
| 22438 | chrY | 13429183 | . | A | C     | 3864.82  | my_snp_filter | AC=9;AF=0.321;AN=28;BaseQ          |
| 22439 | chrY | 13429198 | . | A | G     | 366.94   | PASS          | AC=1;AF=0.033;AN=30;BaseQRankSum=  |
| 22440 | chrY | 13429218 | . | G | T     | 523.97   | PASS          | AC=4;AF=0.133;AN=30;BaseQRankSum=  |
| 22441 | chrY | 13429233 | . | T | A     | 3452.09  | PASS          | AC=8;AF=0.286;AN=28;BaseQRankSum=  |
| 22442 | chrY | 13429240 | . | T | C     | 3227.04  | PASS          | AC=8;AF=0.267;AN=30;BaseQRankSum=  |
| 22443 | chrY | 13429243 | . | A | C     | 10350.91 | PASS          | AC=9;AF=0.375;AN=24;BaseQ          |
| 22444 | chrY | 13429251 | . | T | G     | 7229.46  | PASS          | AC=8;AF=0.308;AN=26;BaseQRankSum=  |
| 22445 | chrY | 13429264 | . | A | C     | 7179.71  | my_snp_filter | AC=9;AF=0.346;AN=26;BaseQ          |
| 22446 | chrY | 13429273 | . | G | A     | 381.15   | PASS          | AC=1;AF=0.038;AN=26;BaseQRankSum=  |
| 22447 | chrY | 13429301 | . | T | C     | 6514.32  | my_snp_filter | AC=9;AF=0.265;AN=34;BaseQ          |
| 22448 | chrY | 13429311 | . | T | G     | 6415.16  | my_snp_filter | AC=9;AF=0.281;AN=32;BaseQ          |
| 22449 | chrY | 13429329 | . | T | C     | 1263.88  | my_snp_filter | AC=8;AF=0.250;AN=32;BaseQ          |
| 22450 | chrY | 13429367 | . | G | A     | 3817.40  | my_snp_filter | AC=8;AF=0.154;AN=52;BaseQ          |
| 22451 | chrY | 13429381 | . | C | T     | 361.49   | my_snp_filter | AC=5;AF=0.081;AN=62;BaseQ          |
| 22452 | chrY | 13429392 | . | A | G     | 4553.64  | my_snp_filter | AC=8;AF=0.129;AN=62;BaseQ          |
| 22453 | chrY | 13429426 | . | G | T     | 833.01   | PASS          | AC=8;AF=0.121;AN=66;BaseQRankSum=  |
| 22454 | chrY | 13429437 | . | C | A     | 4109.04  | my_snp_filter | AC=9;AF=0.136;AN=66;BaseQ          |
| 22455 | chrY | 13429451 | . | T | C     | 2937.57  | PASS          | AC=9;AF=0.132;AN=68;BaseQRankSum=  |
| 22456 | chrY | 13429473 | . | C | T     | 1846.11  | PASS          | AC=7;AF=0.103;AN=68;BaseQRankSum=  |
| 22457 | chrY | 13429475 | . | A | T     | 1851.42  | PASS          | AC=7;AF=0.100;AN=70;BaseQRankSum=  |
| 22458 | chrY | 13429476 | . | G | T     | 1851.39  | PASS          | AC=7;AF=0.100;AN=70;BaseQRankSum=  |
| 22459 | chrY | 13429479 | . | A | G     | 3094.22  | PASS          | AC=10;AF=0.143;AN=70;BaseQRankSum= |
| 22460 | chrY | 13429485 | . | T | C     | 479.66   | PASS          | AC=4;AF=0.057;AN=70;BaseQRankSum=  |
| 22461 | chrY | 13429527 | . | T | C     | 2911.21  | PASS          | AC=9;AF=0.129;AN=70;BaseQRankSum=  |
| 22462 | chrY | 13429530 | . | C | A     | 2918.32  | PASS          | AC=9;AF=0.129;AN=70;BaseQRankSum=  |
| 22463 | chrY | 13429540 | . | T | C     | 709.11   | PASS          | AC=6;AF=0.086;AN=70;BaseQRankSum=  |
| 22464 | chrY | 13429573 | . | T | C     | 1600.16  | PASS          | AC=9;AF=0.129;AN=70;BaseQRankSum=  |
| 22465 | chrY | 13429577 | . | C | G     | 427.04   | PASS          | AC=4;AF=0.057;AN=70;BaseQRankSum=  |
| 22466 | chrY | 13429625 | . | G | A     | 211.17   | PASS          | AC=3;AF=0.043;AN=70;BaseQRankSum=  |
| 22467 | chrY | 13429635 | . | C | T     | 1089.84  | my_snp_filter | AC=6;AF=0.086;AN=70;BaseQ          |
| 22468 | chrY | 13429642 | . | T | C     | 794.46   | PASS          | AC=5;AF=0.071;AN=70;BaseQRankSum=  |
| 22469 | chrY | 13429662 | . | A | G     | 866.33   | my_snp_filter | AC=5;AF=0.071;AN=70;BaseQ          |
| 22470 | chrY | 13429666 | . | A | C     | 830.07   | PASS          | AC=5;AF=0.071;AN=70;BaseQRankSum=  |
| 22471 | chrY | 13429694 | . | G | T     | 138.97   | my_snp_filter | AC=5;AF=0.071;AN=70;BaseQ          |
| 22472 | chrY | 13429729 | . | A | T     | 2772.18  | PASS          | AC=10;AF=0.147;AN=68;BaseQRankSum= |
| 22473 | chrY | 13429757 | . | G | C     | 4746.93  | PASS          | AC=14;AF=0.219;AN=64;BaseQRankSum= |
| 22474 | chrY | 13429780 | . | T | C     | 340.45   | my_snp_filter | AC=6;AF=0.100;AN=60;BaseQ          |
| 22475 | chrY | 13429828 | . | A | C     | 4695.07  | PASS          | AC=11;AF=0.324;AN=34;BaseQRankSum= |
| 22476 | chrY | 13429829 | . | G | T     | 369.68   | PASS          | AC=4;AF=0.111;AN=36;BaseQRankSum=  |
| 22477 | chrY | 13429848 | . | T | C     | 6014.69  | PASS          | AC=10;AF=0.333;AN=30;BaseQRankSum= |
| 22478 | chrY | 13429871 | . | C | G     | 5442.66  | PASS          | AC=10;AF=0.357;AN=28;BaseQRankSum= |
| 22479 | chrY | 13429893 | . | G | A     | 814.40   | PASS          | AC=7;AF=0.219;AN=32;BaseQRankSum=  |
| 22480 | chrY | 13429931 | . | G | C     | 371.80   | PASS          | AC=6;AF=0.167;AN=36;BaseQRankSum=  |
| 22481 | chrY | 13429955 | . | C | T     | 33.58    | my_snp_filter | AC=1;AF=0.026;AN=38;BaseQ          |
| 22482 | chrY | 13429956 | . | G | A     | 50.80    | my_snp_filter | AC=3;AF=0.079;AN=38;BaseQ          |
| 22483 | chrY | 13430007 | . | G | A     | 136.67   | my_snp_filter | AC=2;AF=0.053;AN=38;BaseQ          |
| 22484 | chrY | 13430055 | . | T | C     | 3867.38  | my_snp_filter | AC=11;AF=0.183;AN=60;BaseQ         |
| 22485 | chrY | 13430061 | . | C | G     | 826.60   | PASS          | AC=5;AF=0.078;AN=64;BaseQRankSum=  |
| 22486 | chrY | 13430062 | . | G | A     | 927.71   | PASS          | AC=6;AF=0.086;AN=70;BaseQRankSum=  |
| 22487 | chrY | 13430072 | . | C | A     | 244.29   | PASS          | AC=3;AF=0.043;AN=70;BaseQRankSum=  |
| 22488 | chrY | 13430081 | . | C | A     | 894.81   | PASS          | AC=6;AF=0.086;AN=70;BaseQRankSum=  |
| 22489 | chrY | 13430122 | . | G | A     | 2716.37  | PASS          | AC=8;AF=0.114;AN=70;BaseQRankSum=  |
| 22490 | chrY | 13430127 | . | A | C     | 3332.51  | PASS          | AC=15;AF=0.214;AN=70;BaseQRankSum= |
| 22491 | chrY | 13430128 | . | A | G     | 2643.40  | PASS          | AC=8;AF=0.114;AN=70;BaseQRankSum=  |
| 22492 | chrY | 13430148 | . | G | T     | 165.07   | PASS          | AC=3;AF=0.043;AN=70;BaseQRankSum=  |
| 22493 | chrY | 13430155 | . | C | T     | 196.56   | PASS          | AC=3;AF=0.043;AN=70;BaseQRankSum=  |
| 22494 | chrY | 13430166 | . | A | G     | 1328.88  | PASS          | AC=8;AF=0.114;AN=70;BaseQRankSum=  |
| 22495 | chrY | 13430173 | . | C | G     | 63.52    | my_snp_filter | AC=2;AF=0.029;AN=70;BaseQ          |
| 22496 | chrY | 13430282 | . | C | T     | 399.36   | PASS          | AC=4;AF=0.057;AN=70;BaseQRankSum=  |



|       |      |          |   |   |     |          |               |                                    |
|-------|------|----------|---|---|-----|----------|---------------|------------------------------------|
| 22497 | chrY | 13430355 | . | C | A   | 3203.90  | PASS          | AC=8;AF=0.129;AN=62;BaseQRankSum=  |
| 22498 | chrY | 13430360 | . | A | T   | 3363.67  | my_snp_filter | AC=8;AF=0.125;AN=64;BaseQ          |
| 22499 | chrY | 13430362 | . | A | G   | 971.25   | my_snp_filter | AC=8;AF=0.125;AN=64;BaseQ          |
| 22500 | chrY | 13430398 | . | A | C   | 525.21   | PASS          | AC=6;AF=0.150;AN=40;BaseQRankSum=  |
| 22501 | chrY | 13430405 | . | G | T   | 416.10   | PASS          | AC=4;AF=0.111;AN=36;BaseQRankSum=  |
| 22502 | chrY | 13430435 | . | C | T   | 69.03    | my_snp_filter | AC=1;AF=0.031;AN=32;BaseQ          |
| 22503 | chrY | 13430440 | . | A | T,C | 295.93   | my_snp_filter | AC=3,1;AF=0.100,0.033;AN=          |
| 22504 | chrY | 13430499 | . | A | C   | 1398.36  | PASS          | AC=8;AF=0.364;AN=22;BaseQRankSum=  |
| 22505 | chrY | 13430500 | . | C | G   | 203.88   | my_snp_filter | AC=4;AF=0.182;AN=22;BaseQ          |
| 22506 | chrY | 13430612 | . | G | A   | 6530.54  | PASS          | AC=11;AF=0.458;AN=24;BaseQRankSum= |
| 22507 | chrY | 13430623 | . | G | A   | 31.04    | my_snp_filter | AC=3;AF=0.125;AN=24;BaseQ          |
| 22508 | chrY | 13430670 | . | G | A   | 4050.14  | PASS          | AC=9;AF=0.250;AN=36;BaseQRankSum=  |
| 22509 | chrY | 13430685 | . | G | T   | 348.43   | my_snp_filter | AC=4;AF=0.080;AN=50;BaseQ          |
| 22510 | chrY | 13430721 | . | A | G   | 215.09   | my_snp_filter | AC=6;AF=0.100;AN=60;BaseQ          |
| 22511 | chrY | 13430736 | . | G | A   | 1002.03  | PASS          | AC=6;AF=0.100;AN=60;BaseQRankSum=  |
| 22512 | chrY | 13430737 | . | C | T   | 1017.25  | PASS          | AC=6;AF=0.100;AN=60;BaseQRankSum=  |
| 22513 | chrY | 13430753 | . | C | A   | 1063.61  | PASS          | AC=6;AF=0.107;AN=56;BaseQRankSum=  |
| 22514 | chrY | 13430781 | . | G | A   | 9002.79  | PASS          | AC=36;AF=0.581;AN=62;BaseQRankSum= |
| 22515 | chrY | 13430807 | . | G | A   | 7750.06  | PASS          | AC=29;AF=0.439;AN=66;BaseQRankSum= |
| 22516 | chrY | 13430819 | . | C | T   | 327.50   | my_snp_filter | AC=7;AF=0.106;AN=66;BaseQ          |
| 22517 | chrY | 13430833 | . | T | C   | 5464.37  | PASS          | AC=33;AF=0.471;AN=70;BaseQRankSum= |
| 22518 | chrY | 13430863 | . | G | T   | 277.55   | my_snp_filter | AC=4;AF=0.057;AN=70;BaseQ          |
| 22519 | chrY | 13430865 | . | C | G   | 102.68   | my_snp_filter | AC=3;AF=0.043;AN=70;BaseQ          |
| 22520 | chrY | 13430874 | . | C | T   | 29375.72 | PASS          | AC=35;AF=0.500;AN=70;BaseQ         |
| 22521 | chrY | 13430882 | . | G | A   | 1346.10  | PASS          | AC=10;AF=0.143;AN=70;BaseQRankSum= |
| 22522 | chrY | 13430916 | . | G | A   | 17698.72 | PASS          | AC=35;AF=0.500;AN=70;BaseQ         |
| 22523 | chrY | 13430933 | . | A | T   | 7441.37  | PASS          | AC=24;AF=0.343;AN=70;BaseQRankSum= |
| 22524 | chrY | 13430952 | . | T | C   | 25604.15 | PASS          | AC=32;AF=0.457;AN=70;BaseQ         |
| 22525 | chrY | 13430973 | . | C | T   | 22402.86 | PASS          | AC=31;AF=0.443;AN=70;BaseQ         |
| 22526 | chrY | 13430985 | . | G | C   | 18602.66 | PASS          | AC=31;AF=0.443;AN=70;BaseQ         |
| 22527 | chrY | 13430993 | . | G | T   | 3689.78  | PASS          | AC=20;AF=0.286;AN=70;BaseQRankSum= |
| 22528 | chrY | 13431018 | . | A | G   | 25208.53 | my_snp_filter | AC=34;AF=0.486;AN=                 |
| 22529 | chrY | 13431019 | . | A | T   | 1000.64  | PASS          | AC=14;AF=0.200;AN=70;BaseQRankSum= |
| 22530 | chrY | 13431028 | . | A | T   | 20141.26 | PASS          | AC=34;AF=0.486;AN=70;BaseQ         |
| 22531 | chrY | 13431035 | . | T | C   | 508.23   | my_snp_filter | AC=8;AF=0.114;AN=70;BaseQ          |
| 22532 | chrY | 13431096 | . | G | A   | 1691.50  | PASS          | AC=14;AF=0.200;AN=70;BaseQRankSum= |
| 22533 | chrY | 13431116 | . | A | G   | 7066.67  | PASS          | AC=13;AF=0.186;AN=70;BaseQRankSum= |
| 22534 | chrY | 13431121 | . | T | G   | 7106.41  | PASS          | AC=13;AF=0.186;AN=70;BaseQRankSum= |
| 22535 | chrY | 13431175 | . | G | T   | 322.54   | PASS          | AC=3;AF=0.044;AN=68;BaseQRankSum=  |
| 22536 | chrY | 13431221 | . | A | T   | 4069.83  | PASS          | AC=9;AF=0.155;AN=58;BaseQRankSum=  |
| 22537 | chrY | 13431270 | . | A | C   | 2729.97  | PASS          | AC=8;AF=0.200;AN=40;BaseQRankSum=  |
| 22538 | chrY | 13431319 | . | A | G   | 1011.33  | PASS          | AC=7;AF=0.292;AN=24;BaseQRankSum=  |
| 22539 | chrY | 13431333 | . | C | T   | 12915.34 | PASS          | AC=11;AF=0.550;AN=20;BaseQ         |
| 22540 | chrY | 13431352 | . | C | A   | 2367.85  | PASS          | AC=7;AF=0.292;AN=24;BaseQRankSum=  |
| 22541 | chrY | 13431439 | . | T | C   | 6334.09  | PASS          | AC=9;AF=0.500;AN=18;BaseQRankSum=  |
| 22542 | chrY | 13431448 | . | G | C   | 1813.91  | PASS          | AC=8;AF=0.444;AN=18;BaseQRankSum=  |
| 22543 | chrY | 13431451 | . | T | G   | 962.04   | PASS          | AC=2;AF=0.111;AN=18;BaseQRankSum=  |
| 22544 | chrY | 13431470 | . | A | T   | 7655.09  | PASS          | AC=9;AF=0.500;AN=18;BaseQRankSum=  |
| 22545 | chrY | 13431476 | . | A | G   | 3527.09  | PASS          | AC=9;AF=0.500;AN=18;BaseQRankSum=  |
| 22546 | chrY | 13431498 | . | C | A   | 3404.09  | PASS          | AC=9;AF=0.500;AN=18;BaseQRankSum=  |
| 22547 | chrY | 13431505 | . | T | C   | 6389.01  | PASS          | AC=10;AF=0.556;AN=18;BaseQRankSum= |
| 22548 | chrY | 13431509 | . | T | A   | 2972.09  | PASS          | AC=9;AF=0.500;AN=18;BaseQRankSum=  |
| 22549 | chrY | 13431548 | . | G | T   | 697.78   | PASS          | AC=3;AF=0.167;AN=18;BaseQRankSum=  |
| 22550 | chrY | 13431579 | . | T | A   | 3502.09  | my_snp_filter | AC=9;AF=0.500;AN=18;BaseQ          |
| 22551 | chrY | 13431607 | . | T | C   | 3300.61  | my_snp_filter | AC=9;AF=0.450;AN=20;BaseQ          |
| 22552 | chrY | 13431648 | . | T | A   | 633.29   | PASS          | AC=4;AF=0.200;AN=20;BaseQRankSum=  |
| 22553 | chrY | 13431666 | . | G | T   | 3595.11  | my_snp_filter | AC=9;AF=0.409;AN=22;BaseQ          |
| 22554 | chrY | 13431677 | . | A | G   | 3029.24  | my_snp_filter | AC=9;AF=0.409;AN=22;BaseQ          |
| 22555 | chrY | 13431742 | . | T | C   | 1141.22  | PASS          | AC=8;AF=0.333;AN=24;BaseQRankSum=  |
| 22556 | chrY | 13431769 | . | A | T   | 51.50    | PASS          | AC=2;AF=0.077;AN=26;BaseQRankSum=  |
| 22557 | chrY | 13431776 | . | C | G   | 51.60    | PASS          | AC=2;AF=0.077;AN=26;DP=261;FS=0.0  |
| 22558 | chrY | 13431778 | . | A | G   | 401.74   | PASS          | AC=7;AF=0.292;AN=24;BaseQRankSum=  |
| 22559 | chrY | 13431838 | . | G | A   | 1422.78  | PASS          | AC=6;AF=0.214;AN=28;BaseQRankSum=  |
| 22560 | chrY | 13431841 | . | G | T   | 2668.41  | PASS          | AC=8;AF=0.286;AN=28;BaseQRankSum=  |
| 22561 | chrY | 13431857 | . | C | T   | 1572.94  | PASS          | AC=6;AF=0.158;AN=38;BaseQRankSum=  |
| 22562 | chrY | 13431879 | . | C | A   | 3453.06  | PASS          | AC=7;AF=0.152;AN=46;BaseQRankSum=  |
| 22563 | chrY | 13431937 | . | G | A   | 1093.88  | PASS          | AC=7;AF=0.109;AN=64;BaseQRankSum=  |
| 22564 | chrY | 13431951 | . | C | A   | 2033.81  | PASS          | AC=12;AF=0.207;AN=58;BaseQRankSum= |
| 22565 | chrY | 13431995 | . | G | C   | 807.83   | PASS          | AC=7;AF=0.100;AN=70;BaseQRankSum=  |
| 22566 | chrY | 13432089 | . | C | A   | 5528.80  | PASS          | AC=15;AF=0.214;AN=70;BaseQRankSum= |
| 22567 | chrY | 13432091 | . | C | T   | 882.28   | PASS          | AC=7;AF=0.100;AN=70;BaseQRankSum=  |
| 22568 | chrY | 13432094 | . | A | C   | 5554.64  | PASS          | AC=16;AF=0.229;AN=70;BaseQRankSum= |
| 22569 | chrY | 13432116 | . | G | A   | 6717.57  | PASS          | AC=19;AF=0.271;AN=70;BaseQRankSum= |
| 22570 | chrY | 13432118 | . | C | G   | 2695.51  | PASS          | AC=17;AF=0.243;AN=70;BaseQRankSum= |
| 22571 | chrY | 13432248 | . | C | G   | 4394.50  | PASS          | AC=8;AF=0.154;AN=52;BaseQRankSum=  |
| 22572 | chrY | 13432315 | . | T | C   | 1961.81  | my_snp_filter | AC=9;AF=0.150;AN=60;BaseQ          |

|       |      |          |   |   |     |           |               |                                    |
|-------|------|----------|---|---|-----|-----------|---------------|------------------------------------|
| 22573 | chrY | 13432328 | . | G | A   | 62.19     | my_snp_filter | AC=3;AF=0.048;AN=62;BaseQ          |
| 22574 | chrY | 13432346 | . | T | C   | 152.90    | my_snp_filter | AC=1;AF=0.016;AN=64;BaseQ          |
| 22575 | chrY | 13432366 | . | C | A   | 30.61     | PASS          | AC=1;AF=0.016;AN=64;BaseQRankSum=  |
| 22576 | chrY | 13432381 | . | T | C   | 571.99    | my_snp_filter | AC=5;AF=0.078;AN=64;BaseQ          |
| 22577 | chrY | 13432411 | . | T | C   | 7605.50   | PASS          | AC=17;AF=0.243;AN=70;BaseQRankSum  |
| 22578 | chrY | 13432431 | . | T | C   | 17211.29  | my_snp_filter | AC=14;AF=0.206;AN=70;BaseQ         |
| 22579 | chrY | 13432467 | . | A | G   | 1143.32   | my_snp_filter | AC=14;AF=0.200;AN=70;BaseQ         |
| 22580 | chrY | 13432473 | . | C | G   | 1493.75   | PASS          | AC=10;AF=0.143;AN=70;BaseQRankSum  |
| 22581 | chrY | 13432482 | . | G | T   | 462.44    | my_snp_filter | AC=7;AF=0.100;AN=70;BaseQ          |
| 22582 | chrY | 13432494 | . | C | T   | 5175.22   | PASS          | AC=16;AF=0.229;AN=70;BaseQRankSum  |
| 22583 | chrY | 13432505 | . | G | A   | 8978.36   | PASS          | AC=19;AF=0.271;AN=70;BaseQRankSum  |
| 22584 | chrY | 13432512 | . | T | C   | 791.56    | my_snp_filter | AC=6;AF=0.086;AN=70;BaseQ          |
| 22585 | chrY | 13432516 | . | T | C   | 7871.96   | PASS          | AC=22;AF=0.314;AN=70;BaseQRankSum  |
| 22586 | chrY | 13432517 | . | C | G   | 49839.78  | PASS          | AC=35;AF=0.500;AN=70;BaseQ         |
| 22587 | chrY | 13432525 | . | C | A   | 799.03    | my_snp_filter | AC=13;AF=0.186;AN=70;BaseQ         |
| 22588 | chrY | 13432529 | . | T | A   | 431.34    | my_snp_filter | AC=4;AF=0.057;AN=70;BaseQ          |
| 22589 | chrY | 13432551 | . | G | T   | 16819.74  | PASS          | AC=35;AF=0.500;AN=70;BaseQ         |
| 22590 | chrY | 13432553 | . | C | T   | 76427.72  | PASS          | AC=42;AF=0.600;AN=70;BaseQ         |
| 22591 | chrY | 13432571 | . | G | T   | 49484.72  | PASS          | AC=35;AF=0.500;AN=70;BaseQ         |
| 22592 | chrY | 13432575 | . | C | T   | 1285.45   | my_snp_filter | AC=11;AF=0.157;AN=70;BaseQ         |
| 22593 | chrY | 13432596 | . | G | A   | 438.65    | my_snp_filter | AC=5;AF=0.071;AN=70;BaseQ          |
| 22594 | chrY | 13432636 | . | A | G   | 312.05    | my_snp_filter | AC=2;AF=0.029;AN=70;BaseQ          |
| 22595 | chrY | 13432652 | . | A | C   | 628.57    | my_snp_filter | AC=3;AF=0.043;AN=70;BaseQ          |
| 22596 | chrY | 13432661 | . | T | G   | 158648.50 | PASS          | AC=52;AF=0.743;AN=70;BaseQ         |
| 22597 | chrY | 13432695 | . | G | C   | 130780.68 | PASS          | AC=34;AF=0.500;AN=68;BaseQ         |
| 22598 | chrY | 13432701 | . | C | T   | 39684.53  | PASS          | AC=34;AF=0.486;AN=70;BaseQ         |
| 22599 | chrY | 13432706 | . | C | T   | 117165.67 | PASS          | AC=34;AF=0.500;AN=68;BaseQ         |
| 22600 | chrY | 13432713 | . | T | C   | 975.85    | my_snp_filter | AC=9;AF=0.129;AN=70;BaseQ          |
| 22601 | chrY | 13432721 | . | C | A   | 3878.37   | PASS          | AC=23;AF=0.329;AN=70;BaseQRankSum  |
| 22602 | chrY | 13432725 | . | G | A   | 79744.69  | PASS          | AC=34;AF=0.500;AN=68;BaseQ         |
| 22603 | chrY | 13432742 | . | A | T   | 42038.36  | PASS          | AC=33;AF=0.471;AN=70;BaseQ         |
| 22604 | chrY | 13432748 | . | T | C   | 230.04    | my_snp_filter | AC=3;AF=0.043;AN=70;BaseQ          |
| 22605 | chrY | 13432756 | . | A | G   | 8545.22   | PASS          | AC=24;AF=0.343;AN=70;BaseQRankSum  |
| 22606 | chrY | 13432763 | . | G | C   | 52941.25  | PASS          | AC=36;AF=0.514;AN=70;BaseQ         |
| 22607 | chrY | 13432768 | . | G | T   | 195.55    | my_snp_filter | AC=1;AF=0.014;AN=70;BaseQ          |
| 22608 | chrY | 13432790 | . | A | G   | 768.04    | my_snp_filter | AC=10;AF=0.143;AN=70;BaseQ         |
| 22609 | chrY | 13432793 | . | G | A   | 101.01    | my_snp_filter | AC=4;AF=0.057;AN=70;BaseQ          |
| 22610 | chrY | 13432801 | . | C | T,A | 8896.55   | PASS          | AC=4,17;AF=0.057,0.243;AN=70;BaseQ |
| 22611 | chrY | 13432802 | . | G | A   | 1476.32   | PASS          | AC=10;AF=0.143;AN=70;BaseQRankSum  |
| 22612 | chrY | 13432808 | . | C | A   | 537.92    | my_snp_filter | AC=5;AF=0.071;AN=70;BaseQ          |
| 22613 | chrY | 13432815 | . | T | A   | 35993.93  | PASS          | AC=26;AF=0.382;AN=68;BaseQ         |
| 22614 | chrY | 13432823 | . | C | T   | 34014.07  | PASS          | AC=27;AF=0.386;AN=70;BaseQ         |
| 22615 | chrY | 13432824 | . | G | A   | 1122.57   | my_snp_filter | AC=13;AF=0.186;AN=70;BaseQ         |
| 22616 | chrY | 13432888 | . | G | C   | 2112.36   | my_snp_filter | AC=15;AF=0.214;AN=70;BaseQ         |
| 22617 | chrY | 13432902 | . | A | G   | 91.43     | PASS          | AC=1;AF=0.014;AN=70;BaseQRankSum=  |
| 22618 | chrY | 13432905 | . | A | G   | 40.12     | my_snp_filter | AC=3;AF=0.043;AN=70;BaseQ          |
| 22619 | chrY | 13432923 | . | C | A   | 4700.71   | PASS          | AC=23;AF=0.329;AN=70;BaseQRankSum  |
| 22620 | chrY | 13432941 | . | G | A   | 71.66     | my_snp_filter | AC=6;AF=0.086;AN=70;BaseQ          |
| 22621 | chrY | 13432946 | . | T | G   | 21824     | PASS          | AC=34;AF=0.486;AN=70;BaseQRankSum  |
| 22622 | chrY | 13432958 | . | T | C   | 694.83    | my_snp_filter | AC=12;AF=0.171;AN=70;BaseQ         |
| 22623 | chrY | 13432969 | . | G | T   | 2114.72   | my_snp_filter | AC=17;AF=0.243;AN=70;BaseQ         |
| 22624 | chrY | 13432987 | . | A | G   | 72647.72  | PASS          | AC=35;AF=0.500;AN=70;BaseQ         |
| 22625 | chrY | 13432989 | . | G | T   | 72776.72  | PASS          | AC=35;AF=0.500;AN=70;BaseQ         |
| 22626 | chrY | 13432990 | . | G | A   | 41730.72  | PASS          | AC=35;AF=0.500;AN=70;BaseQ         |
| 22627 | chrY | 13432996 | . | C | A   | 53.42     | my_snp_filter | AC=1;AF=0.014;AN=70;BaseQ          |
| 22628 | chrY | 13433007 | . | T | C   | 1160.50   | my_snp_filter | AC=12;AF=0.171;AN=70;BaseQ         |
| 22629 | chrY | 13433055 | . | T | G   | 134.47    | PASS          | AC=1;AF=0.014;AN=70;BaseQRankSum=  |
| 22630 | chrY | 13433066 | . | T | C   | 90.09     | my_snp_filter | AC=2;AF=0.029;AN=70;BaseQ          |
| 22631 | chrY | 13433080 | . | T | G   | 207.75    | my_snp_filter | AC=5;AF=0.076;AN=66;BaseQ          |
| 22632 | chrY | 13433103 | . | C | T   | 165.17    | my_snp_filter | AC=5;AF=0.089;AN=56;BaseQ          |
| 22633 | chrY | 13433114 | . | A | T   | 26484.89  | PASS          | AC=19;AF=0.413;AN=46;BaseQ         |
| 22634 | chrY | 13433153 | . | C | A   | 44.34     | my_snp_filter | AC=2;AF=0.043;AN=46;BaseQ          |
| 22635 | chrY | 13433185 | . | C | T   | 98.35     | PASS          | AC=2;AF=0.071;AN=28;BaseQRankSum=  |
| 22636 | chrY | 13433189 | . | T | C   | 63.72     | PASS          | AC=1;AF=0.056;AN=18;BaseQRankSum=  |
| 22637 | chrY | 13433217 | . | A | G   | 111.34    | PASS          | AC=1;AF=0.038;AN=26;BaseQRankSum=  |
| 22638 | chrY | 13433221 | . | C | A   | 60.96     | PASS          | AC=1;AF=0.038;AN=26;BaseQRankSum=  |
| 22639 | chrY | 13433235 | . | G | A   | 99.68     | my_snp_filter | AC=2;AF=0.077;AN=26;BaseQ          |
| 22640 | chrY | 13433240 | . | C | A   | 6739.34   | PASS          | AC=9;AF=0.450;AN=20;BaseQRankSum=  |
| 22641 | chrY | 13433242 | . | G | A   | 806.24    | PASS          | AC=6;AF=0.250;AN=24;BaseQRankSum=  |
| 22642 | chrY | 13433250 | . | C | G   | 274.14    | PASS          | AC=2;AF=0.077;AN=26;BaseQRankSum=  |
| 22643 | chrY | 13433309 | . | T | C   | 2803.15   | PASS          | AC=9;AF=0.409;AN=22;BaseQRankSum=  |
| 22644 | chrY | 13433313 | . | T | C   | 515.50    | my_snp_filter | AC=5;AF=0.227;AN=22;BaseQ          |
| 22645 | chrY | 13433319 | . | G | A   | 8379.23   | PASS          | AC=10;AF=0.417;AN=24;BaseQRankSum  |
| 22646 | chrY | 13433322 | . | G | A   | 509.78    | my_snp_filter | AC=4;AF=0.167;AN=24;BaseQ          |
| 22647 | chrY | 13433350 | . | C | G   | 13586.10  | PASS          | AC=14;AF=0.583;AN=24;BaseQ         |
| 22648 | chrY | 13433352 | . | G | T   | 272.09    | my_snp_filter | AC=2;AF=0.071;AN=28;BaseQ          |

|       |      |          |   |   |     |          |               |                                   |
|-------|------|----------|---|---|-----|----------|---------------|-----------------------------------|
| 22649 | chrY | 13433420 | . | G | A,T | 3579.13  | PASS          | AC=6,2;AF=0.273,0.091;AN=22;BaseQ |
| 22650 | chrY | 13433421 | . | T | C   | 3245.38  | PASS          | AC=8;AF=0.400;AN=20;BaseQRankSum= |
| 22651 | chrY | 13433434 | . | A | G   | 638.92   | PASS          | AC=3;AF=0.167;AN=18;BaseQRankSum= |
| 22652 | chrY | 13433441 | . | A | G   | 1852.11  | PASS          | AC=9;AF=0.409;AN=22;BaseQRankSum= |
| 22653 | chrY | 13433475 | . | A | T   | 2065.52  | PASS          | AC=9;AF=0.450;AN=20;BaseQRankSum= |
| 22654 | chrY | 13433485 | . | A | G   | 224.54   | my_snp_filter | AC=2;AF=0.100;AN=20;BaseQ         |
| 22655 | chrY | 13433489 | . | A | T   | 24857.48 | PASS          | AC=12;AF=0.667;AN=18;BaseQ        |
| 22656 | chrY | 13433497 | . | T | A   | 343.78   | my_snp_filter | AC=2;AF=0.100;AN=20;BaseQ         |
| 22657 | chrY | 13433522 | . | T | A   | 1475.71  | PASS          | AC=5;AF=0.250;AN=20;BaseQRankSum= |
| 22658 | chrY | 13433561 | . | C | A   | 1132.38  | PASS          | AC=5;AF=0.250;AN=20;BaseQRankSum= |
| 22659 | chrY | 13433566 | . | T | C   | 1081.52  | PASS          | AC=5;AF=0.250;AN=20;BaseQRankSum= |
| 22660 | chrY | 13433567 | . | C | T   | 3260.52  | PASS          | AC=9;AF=0.450;AN=20;BaseQRankSum= |
| 22661 | chrY | 13433586 | . | C | A   | 5682.09  | PASS          | AC=9;AF=0.500;AN=18;BaseQRankSum= |
| 22662 | chrY | 13433601 | . | T | A   | 3036.53  | PASS          | AC=8;AF=0.444;AN=18;BaseQRankSum= |
| 22663 | chrY | 13433615 | . | T | C   | 603.43   | my_snp_filter | AC=5;AF=0.278;AN=18;BaseQ         |
| 22664 | chrY | 13433618 | . | T | A,* | 2118.28  | PASS          | AC=4,4;AF=0.222,0.222;AN=18;BaseQ |
| 22665 | chrY | 13433620 | . | T | A,* | 2146.31  | PASS          | AC=7,2;AF=0.389,0.111;AN=18;BaseQ |
| 22666 | chrY | 13433622 | . | T | A   | 9035.31  | PASS          | AC=9;AF=0.500;AN=18;BaseQRankSum= |
| 22667 | chrY | 13433624 | . | T | C   | 334.22   | my_snp_filter | AC=4;AF=0.222;AN=18;BaseQ         |
| 22668 | chrY | 13433632 | . | T | C   | 8028.31  | my_snp_filter | AC=9;AF=0.500;AN=18;BaseQ         |
| 22669 | chrY | 13433641 | . | T | C   | 1935.53  | my_snp_filter | AC=8;AF=0.444;AN=18;BaseQ         |
| 22670 | chrY | 13433643 | . | T | C   | 95.23    | my_snp_filter | AC=3;AF=0.167;AN=18;BaseQ         |
| 22671 | chrY | 13433649 | . | T | C   | 71.32    | my_snp_filter | AC=1;AF=0.056;AN=18;BaseQ         |
| 22672 | chrY | 13433651 | . | C | A   | 1745.61  | PASS          | AC=5;AF=0.278;AN=18;BaseQRankSum= |
| 22673 | chrY | 13433655 | . | T | A   | 2225.29  | PASS          | AC=6;AF=0.333;AN=18;BaseQRankSum= |
| 22674 | chrY | 13433681 | . | G | C   | 1394.05  | PASS          | AC=4;AF=0.222;AN=18;BaseQRankSum= |
| 22675 | chrY | 13433693 | . | G | C   | 319.04   | PASS          | AC=2;AF=0.111;AN=18;BaseQRankSum= |
| 22676 | chrY | 13433704 | . | A | G   | 321.04   | PASS          | AC=2;AF=0.111;AN=18;BaseQRankSum= |
| 22677 | chrY | 13433706 | . | A | G   | 3088.54  | PASS          | AC=8;AF=0.444;AN=18;BaseQRankSum= |
| 22678 | chrY | 13433720 | . | C | T,A | 1553.77  | PASS          | AC=1,6;AF=0.056,0.333;AN=18;BaseQ |
| 22679 | chrY | 13433737 | . | G | A   | 552.80   | PASS          | AC=4;AF=0.222;AN=18;BaseQRankSum= |
| 22680 | chrY | 13433744 | . | C | A   | 1184.55  | PASS          | AC=6;AF=0.333;AN=18;BaseQRankSum= |
| 22681 | chrY | 13433751 | . | C | T   | 1218.64  | PASS          | AC=6;AF=0.333;AN=18;BaseQRankSum= |
| 22682 | chrY | 13433754 | . | T | G   | 14147.54 | PASS          | AC=10;AF=0.556;AN=18;BaseQ        |
| 22683 | chrY | 13433762 | . | C | T   | 990.72   | PASS          | AC=6;AF=0.333;AN=18;BaseQRankSum= |
| 22684 | chrY | 13433866 | . | C | A   | 6962.31  | my_snp_filter | AC=9;AF=0.500;AN=18;BaseQ         |
| 22685 | chrY | 13433889 | . | T | A,G | 6621.31  | my_snp_filter | AC=3,6;AF=0.167,0.333;AN=         |
| 22686 | chrY | 13433950 | . | T | C   | 119.77   | my_snp_filter | AC=2;AF=0.100;AN=20;BaseQ         |
| 22687 | chrY | 13433964 | . | G | A   | 722.10   | PASS          | AC=4;AF=0.222;AN=18;BaseQRankSum= |
| 22688 | chrY | 13434022 | . | T | C   | 1618.13  | PASS          | AC=7;AF=0.318;AN=22;BaseQRankSum= |
| 22689 | chrY | 13434024 | . | C | T   | 181.04   | PASS          | AC=2;AF=0.111;AN=18;BaseQRankSum= |
| 22690 | chrY | 13434070 | . | A | C   | 208.43   | my_snp_filter | AC=4;AF=0.200;AN=20;BaseQ         |
| 22691 | chrY | 13434108 | . | T | G   | 1345.87  | PASS          | AC=8;AF=0.444;AN=18;BaseQRankSum= |
| 22692 | chrY | 13434131 | . | C | T   | 377.07   | PASS          | AC=6;AF=0.300;AN=20;BaseQRankSum= |
| 22693 | chrY | 13434145 | . | C | T   | 169.58   | PASS          | AC=4;AF=0.250;AN=16;BaseQRankSum= |
| 22694 | chrY | 13434179 | . | A | G   | 96.70    | my_snp_filter | AC=4;AF=0.222;AN=18;BaseQ         |
| 22695 | chrY | 13434251 | . | T | C   | 417.69   | PASS          | AC=4;AF=0.200;AN=20;BaseQRankSum= |
| 22696 | chrY | 13434319 | . | C | A   | 1313.70  | PASS          | AC=7;AF=0.318;AN=22;BaseQRankSum= |
| 22697 | chrY | 13434370 | . | C | T   | 5338.99  | PASS          | AC=9;AF=0.409;AN=22;BaseQRankSum= |
| 22698 | chrY | 13434390 | . | A | T   | 840.61   | PASS          | AC=8;AF=0.333;AN=24;BaseQRankSum= |
| 22699 | chrY | 13434423 | . | G | A   | 780.28   | PASS          | AC=7;AF=0.350;AN=20;BaseQRankSum= |
| 22700 | chrY | 13434431 | . | C | G   | 3105.38  | PASS          | AC=8;AF=0.400;AN=20;BaseQRankSum= |
| 22701 | chrY | 13434478 | . | C | T   | 1516.55  | my_snp_filter | AC=8;AF=0.400;AN=20;BaseQ         |
| 22702 | chrY | 13434482 | . | A | G   | 1554.47  | my_snp_filter | AC=8;AF=0.400;AN=20;BaseQ         |
| 22703 | chrY | 13434496 | . | A | G   | 1138.59  | my_snp_filter | AC=8;AF=0.400;AN=20;BaseQ         |
| 22704 | chrY | 13434512 | . | G | A   | 80.50    | my_snp_filter | AC=2;AF=0.100;AN=20;BaseQ         |
| 22705 | chrY | 13434514 | . | T | C   | 2110.59  | PASS          | AC=8;AF=0.400;AN=20;BaseQRankSum= |
| 22706 | chrY | 13434566 | . | A | T   | 193.29   | my_snp_filter | AC=4;AF=0.200;AN=20;BaseQ         |
| 22707 | chrY | 13434589 | . | T | C   | 208.80   | my_snp_filter | AC=4;AF=0.200;AN=20;BaseQ         |
| 22708 | chrY | 13434605 | . | T | C   | 267.05   | my_snp_filter | AC=4;AF=0.222;AN=18;BaseQ         |
| 22709 | chrY | 13434609 | . | C | A   | 90.11    | my_snp_filter | AC=4;AF=0.222;AN=18;BaseQ         |
| 22710 | chrY | 13434613 | . | A | C   | 7394.31  | PASS          | AC=9;AF=0.500;AN=18;BaseQRankSum= |
| 22711 | chrY | 13434622 | . | A | G   | 212.78   | my_snp_filter | AC=3;AF=0.167;AN=18;BaseQ         |
| 22712 | chrY | 13434630 | . | T | C   | 346.95   | my_snp_filter | AC=5;AF=0.278;AN=18;BaseQ         |
| 22713 | chrY | 13434634 | . | A | T   | 206.78   | my_snp_filter | AC=3;AF=0.167;AN=18;BaseQ         |
| 22714 | chrY | 13434638 | . | C | T   | 285.05   | my_snp_filter | AC=4;AF=0.222;AN=18;BaseQ         |
| 22715 | chrY | 13434645 | . | A | G   | 1155.31  | PASS          | AC=6;AF=0.333;AN=18;BaseQRankSum= |
| 22716 | chrY | 13434646 | . | T | A   | 241.72   | my_snp_filter | AC=3;AF=0.167;AN=18;BaseQ         |
| 22717 | chrY | 13434702 | . | T | A   | 11511.79 | PASS          | AC=9;AF=0.500;AN=18;BaseQ         |
| 22718 | chrY | 13434792 | . | A | G   | 461.58   | my_snp_filter | AC=6;AF=0.250;AN=24;BaseQ         |
| 22719 | chrY | 13434839 | . | C | T   | 53.15    | my_snp_filter | AC=1;AF=0.036;AN=28;BaseQ         |
| 22720 | chrY | 13434850 | . | T | C   | 3999.70  | PASS          | AC=9;AF=0.346;AN=26;BaseQRankSum= |
| 22721 | chrY | 13434851 | . | T | G   | 13208.84 | PASS          | AC=9;AF=0.375;AN=24;BaseQ         |
| 22722 | chrY | 13434867 | . | T | C   | 715.56   | my_snp_filter | AC=7;AF=0.233;AN=30;BaseQ         |
| 22723 | chrY | 13434893 | . | C | T   | 4873.43  | my_snp_filter | AC=8;AF=0.333;AN=24;BaseQ         |
| 22724 | chrY | 13434897 | . | T | C,* | 255.91   | PASS          | AC=1,1;AF=0.033,0.033;AN=30;BaseQ |

|       |      |          |   |   |     |           |               |                                    |
|-------|------|----------|---|---|-----|-----------|---------------|------------------------------------|
| 22725 | chrY | 13434900 | . | T | A   | 5929.69   | my_snp_filter | AC=9;AF=0.321;AN=28;BaseQ          |
| 22726 | chrY | 13434927 | . | A | C   | 6333.73   | my_snp_filter | AC=9;AF=0.300;AN=30;BaseQ          |
| 22727 | chrY | 13434946 | . | C | A   | 7095.49   | PASS          | AC=9;AF=0.281;AN=32;BaseQRankSum=  |
| 22728 | chrY | 13434949 | . | C | G   | 91.33     | my_snp_filter | AC=1;AF=0.028;AN=36;BaseQ          |
| 22729 | chrY | 13434969 | . | A | T   | 857.32    | PASS          | AC=4;AF=0.077;AN=52;BaseQRankSum=  |
| 22730 | chrY | 13434970 | . | G | A   | 1064.92   | PASS          | AC=3;AF=0.054;AN=56;BaseQRankSum=  |
| 22731 | chrY | 13434973 | . | T | A   | 43.76     | my_snp_filter | AC=1;AF=0.017;AN=58;BaseQ          |
| 22732 | chrY | 13434981 | . | A | T   | 3449.78   | my_snp_filter | AC=7;AF=0.130;AN=54;BaseQ          |
| 22733 | chrY | 13434989 | . | T | A   | 89.47     | my_snp_filter | AC=1;AF=0.017;AN=60;BaseQ          |
| 22734 | chrY | 13435000 | . | C | A   | 2719.95   | my_snp_filter | AC=8;AF=0.121;AN=66;BaseQ          |
| 22735 | chrY | 13435002 | . | A | G   | 107.64    | my_snp_filter | AC=3;AF=0.044;AN=68;BaseQ          |
| 22736 | chrY | 13435007 | . | C | T   | 425.06    | PASS          | AC=4;AF=0.065;AN=62;BaseQRankSum=  |
| 22737 | chrY | 13435011 | . | C | A   | 2984.22   | PASS          | AC=9;AF=0.132;AN=68;BaseQRankSum=  |
| 22738 | chrY | 13435042 | . | C | T   | 2440.97   | PASS          | AC=14;AF=0.200;AN=70;BaseQRankSum= |
| 22739 | chrY | 13435050 | . | A | T   | 548.52    | my_snp_filter | AC=6;AF=0.086;AN=70;BaseQ          |
| 22740 | chrY | 13435061 | . | G | T   | 464.25    | my_snp_filter | AC=5;AF=0.071;AN=70;BaseQ          |
| 22741 | chrY | 13435064 | . | G | C   | 6331.37   | PASS          | AC=27;AF=0.386;AN=70;BaseQRankSum= |
| 22742 | chrY | 13435066 | . | A | G   | 1944.68   | PASS          | AC=17;AF=0.243;AN=70;BaseQRankSum= |
| 22743 | chrY | 13435078 | . | T | A   | 1849.80   | PASS          | AC=12;AF=0.171;AN=70;BaseQRankSum= |
| 22744 | chrY | 13435079 | . | G | A   | 343.89    | my_snp_filter | AC=5;AF=0.071;AN=70;BaseQ          |
| 22745 | chrY | 13435088 | . | A | C   | 37.56     | PASS          | AC=1;AF=0.014;AN=70;BaseQRankSum=  |
| 22746 | chrY | 13435120 | . | G | A   | 1897.66   | PASS          | AC=8;AF=0.114;AN=70;BaseQRankSum=  |
| 22747 | chrY | 13435129 | . | C | G   | 1342.48   | PASS          | AC=7;AF=0.100;AN=70;BaseQRankSum=  |
| 22748 | chrY | 13435132 | . | G | T   | 1974.24   | PASS          | AC=7;AF=0.100;AN=70;BaseQRankSum=  |
| 22749 | chrY | 13435138 | . | C | G   | 4035.81   | PASS          | AC=21;AF=0.300;AN=70;BaseQRankSum= |
| 22750 | chrY | 13435159 | . | A | T   | 3784.68   | PASS          | AC=14;AF=0.200;AN=70;BaseQRankSum= |
| 22751 | chrY | 13435166 | . | T | C   | 2985.81   | PASS          | AC=13;AF=0.186;AN=70;BaseQRankSum= |
| 22752 | chrY | 13435180 | . | G | A   | 22329.07  | PASS          | AC=28;AF=0.400;AN=70;BaseQ         |
| 22753 | chrY | 13435187 | . | A | C   | 22587.35  | PASS          | AC=32;AF=0.457;AN=70;BaseQ         |
| 22754 | chrY | 13435193 | . | T | C   | 838.19    | PASS          | AC=6;AF=0.086;AN=70;BaseQRankSum=  |
| 22755 | chrY | 13435197 | . | C | T   | 9106.92   | PASS          | AC=26;AF=0.371;AN=70;BaseQRankSum= |
| 22756 | chrY | 13435287 | . | C | T   | 19115.24  | PASS          | AC=36;AF=0.514;AN=70;BaseQ         |
| 22757 | chrY | 13435301 | . | A | C   | 1451.61   | PASS          | AC=10;AF=0.143;AN=70;BaseQRankSum= |
| 22758 | chrY | 13435360 | . | A | G   | 21767.72  | PASS          | AC=33;AF=0.471;AN=70;BaseQ         |
| 22759 | chrY | 13435362 | . | A | C   | 21790.82  | PASS          | AC=33;AF=0.471;AN=70;BaseQ         |
| 22760 | chrY | 13435371 | . | T | C   | 6857.17   | PASS          | AC=26;AF=0.371;AN=70;BaseQRankSum= |
| 22761 | chrY | 13435396 | . | C | T   | 1396.96   | PASS          | AC=9;AF=0.129;AN=70;BaseQRankSum=  |
| 22762 | chrY | 13435429 | . | T | C   | 2630.67   | PASS          | AC=14;AF=0.212;AN=66;BaseQRankSum= |
| 22763 | chrY | 13435442 | . | T | C   | 744.43    | my_snp_filter | AC=10;AF=0.156;AN=64;BaseQ         |
| 22764 | chrY | 13435468 | . | T | A   | 17948.98  | PASS          | AC=25;AF=0.446;AN=56;BaseQ         |
| 22765 | chrY | 13435470 | . | G | A   | 4823.96   | my_snp_filter | AC=19;AF=0.317;AN=60;BaseQ         |
| 22766 | chrY | 13435485 | . | A | G   | 766.37    | PASS          | AC=5;AF=0.078;AN=64;BaseQRankSum=  |
| 22767 | chrY | 13435513 | . | A | T   | 11305.25  | my_snp_filter | AC=33;AF=0.532;AN=70;BaseQ         |
| 22768 | chrY | 13435524 | . | C | T   | 11755.01  | my_snp_filter | AC=31;AF=0.484;AN=70;BaseQ         |
| 22769 | chrY | 13435543 | . | A | G   | 5754.54   | my_snp_filter | AC=13;AF=0.186;AN=70;BaseQ         |
| 22770 | chrY | 13435552 | . | C | A   | 28333.75  | PASS          | AC=39;AF=0.574;AN=68;BaseQ         |
| 22771 | chrY | 13435582 | . | G | T   | 56.07     | my_snp_filter | AC=3;AF=0.043;AN=70;BaseQ          |
| 22772 | chrY | 13435583 | . | G | C   | 59879.32  | PASS          | AC=42;AF=0.600;AN=70;BaseQ         |
| 22773 | chrY | 13435593 | . | G | A   | 193.28    | my_snp_filter | AC=4;AF=0.057;AN=70;BaseQ          |
| 22774 | chrY | 13435604 | . | T | A   | 4384.48   | PASS          | AC=18;AF=0.257;AN=70;BaseQRankSum= |
| 22775 | chrY | 13435606 | . | A | G   | 901.61    | PASS          | AC=5;AF=0.071;AN=70;BaseQRankSum=  |
| 22776 | chrY | 13435607 | . | C | T   | 1641.50   | my_snp_filter | AC=12;AF=0.171;AN=70;BaseQ         |
| 22777 | chrY | 13435627 | . | G | C   | 16009.68  | PASS          | AC=24;AF=0.343;AN=70;BaseQ         |
| 22778 | chrY | 13435668 | . | A | T   | 12126.79  | PASS          | AC=13;AF=0.186;AN=70;BaseQ         |
| 22779 | chrY | 13435669 | . | T | C   | 12101.78  | PASS          | AC=13;AF=0.186;AN=70;BaseQ         |
| 22780 | chrY | 13435672 | . | T | G   | 6653.10   | my_snp_filter | AC=16;AF=0.229;AN=70;BaseQ         |
| 22781 | chrY | 13435679 | . | T | C   | 66333.38  | PASS          | AC=35;AF=0.500;AN=70;BaseQ         |
| 22782 | chrY | 13435680 | . | G | A,T | 7939.76   | my_snp_filter | AC=7,19;AF=0.100,0.271;AN=         |
| 22783 | chrY | 13435690 | . | C | T,A | 2646.20   | my_snp_filter | AC=7,3;AF=0.100,0.043;AN=          |
| 22784 | chrY | 13435704 | . | C | T   | 115347.72 | PASS          | AC=35;AF=0.500;AN=70;BaseQ         |
| 22785 | chrY | 13435705 | . | G | T   | 2066.80   | my_snp_filter | AC=9;AF=0.129;AN=70;BaseQ          |
| 22786 | chrY | 13435713 | . | T | C   | 10625.21  | PASS          | AC=10;AF=0.143;AN=70;BaseQ         |
| 22787 | chrY | 13435717 | . | G | A   | 507       | my_snp_filter | AC=2;AF=0.029;AN=70;BaseQ          |
| 22788 | chrY | 13435719 | . | G | A   | 141492.72 | PASS          | AC=35;AF=0.500;AN=70;BaseQ         |
| 22789 | chrY | 13435721 | . | C | A   | 140407.72 | PASS          | AC=35;AF=0.500;AN=70;BaseQ         |
| 22790 | chrY | 13435724 | . | T | A   | 2147.70   | my_snp_filter | AC=11;AF=0.157;AN=70;BaseQ         |
| 22791 | chrY | 13435729 | . | A | T   | 95.15     | my_snp_filter | AC=2;AF=0.029;AN=70;BaseQ          |
| 22792 | chrY | 13435741 | . | A | G   | 480.50    | my_snp_filter | AC=3;AF=0.043;AN=70;BaseQ          |
| 22793 | chrY | 13435745 | . | G | A   | 1411.93   | my_snp_filter | AC=7;AF=0.100;AN=70;BaseQ          |
| 22794 | chrY | 13435748 | . | C | G   | 1660.23   | my_snp_filter | AC=11;AF=0.157;AN=70;BaseQ         |
| 22795 | chrY | 13435750 | . | C | T   | 59856.72  | PASS          | AC=35;AF=0.500;AN=70;BaseQ         |
| 22796 | chrY | 13435774 | . | G | A   | 783.47    | my_snp_filter | AC=8;AF=0.114;AN=70;BaseQ          |
| 22797 | chrY | 13435775 | . | T | G   | 224.64    | my_snp_filter | AC=3;AF=0.043;AN=70;BaseQ          |
| 22798 | chrY | 13435788 | . | C | A   | 27748.94  | PASS          | AC=35;AF=0.500;AN=70;BaseQ         |
| 22799 | chrY | 13435795 | . | C | T,* | 3812.84   | PASS          | AC=8,1;AF=0.114,0.014;AN=70;BaseQ  |
| 22800 | chrY | 13435796 | . | G | A,* | 610.55    | PASS          | AC=3,1;AF=0.043,0.014;AN=70;BaseQ  |

|       |      |          |   |   |     |          |               |                                    |
|-------|------|----------|---|---|-----|----------|---------------|------------------------------------|
| 22801 | chrY | 13435815 | . | G | C   | 30594.07 | PASS          | AC=38;AF=0.594;AN=64;BaseQ         |
| 22802 | chrY | 13435826 | . | A | C   | 408.10   | PASS          | AC=7;AF=0.103;AN=68;BaseQRankSum=  |
| 22803 | chrY | 13435833 | . | A | G   | 11769.71 | PASS          | AC=29;AF=0.483;AN=60;BaseQ         |
| 22804 | chrY | 13435837 | . | G | A   | 16496.37 | PASS          | AC=31;AF=0.517;AN=60;BaseQ         |
| 22805 | chrY | 13435880 | . | G | A   | 1509.51  | PASS          | AC=3;AF=0.058;AN=52;BaseQRankSum=  |
| 22806 | chrY | 13435893 | . | T | A   | 366.39   | my_snp_filter | AC=4;AF=0.077;AN=52;BaseQ          |
| 22807 | chrY | 13435909 | . | A | G   | 2184.08  | PASS          | AC=9;AF=0.167;AN=54;BaseQRankSum=  |
| 22808 | chrY | 13435916 | . | A | T   | 11848.49 | PASS          | AC=10;AF=0.172;AN=58;BaseQ         |
| 22809 | chrY | 13435961 | . | C | G   | 220.41   | my_snp_filter | AC=4;AF=0.063;AN=64;BaseQ          |
| 22810 | chrY | 13435964 | . | T | C   | 145.89   | my_snp_filter | AC=3;AF=0.047;AN=64;BaseQ          |
| 22811 | chrY | 13435969 | . | A | T   | 931.01   | PASS          | AC=6;AF=0.094;AN=64;BaseQRankSum=  |
| 22812 | chrY | 13435976 | . | A | G   | 992.93   | PASS          | AC=6;AF=0.094;AN=64;BaseQRankSum=  |
| 22813 | chrY | 13435985 | . | G | T   | 98.08    | PASS          | AC=2;AF=0.030;AN=66;BaseQRankSum=  |
| 22814 | chrY | 13436037 | . | A | G   | 65.18    | my_snp_filter | AC=2;AF=0.029;AN=70;BaseQ          |
| 22815 | chrY | 13436038 | . | C | T   | 575.86   | my_snp_filter | AC=10;AF=0.143;AN=70;BaseQ         |
| 22816 | chrY | 13436041 | . | T | C   | 2677.90  | PASS          | AC=21;AF=0.300;AN=70;BaseQRankSum= |
| 22817 | chrY | 13436051 | . | T | C   | 168.62   | my_snp_filter | AC=3;AF=0.043;AN=70;BaseQ          |
| 22818 | chrY | 13436062 | . | G | A   | 12987.40 | PASS          | AC=20;AF=0.286;AN=70;BaseQ         |
| 22819 | chrY | 13436089 | . | C | T   | 43.38    | my_snp_filter | AC=3;AF=0.043;AN=70;BaseQ          |
| 22820 | chrY | 13436098 | . | A | T   | 139.76   | my_snp_filter | AC=2;AF=0.029;AN=70;BaseQ          |
| 22821 | chrY | 13436103 | . | G | A   | 47.42    | my_snp_filter | AC=1;AF=0.014;AN=70;BaseQ          |
| 22822 | chrY | 13436108 | . | C | G   | 818.36   | PASS          | AC=7;AF=0.100;AN=70;BaseQRankSum=  |
| 22823 | chrY | 13436126 | . | T | C   | 4612.73  | PASS          | AC=23;AF=0.329;AN=70;BaseQRankSum= |
| 22824 | chrY | 13436143 | . | T | C   | 17863.35 | PASS          | AC=35;AF=0.500;AN=70;BaseQ         |
| 22825 | chrY | 13436191 | . | T | G   | 1116.47  | PASS          | AC=13;AF=0.186;AN=70;BaseQRankSum= |
| 22826 | chrY | 13436206 | . | G | A   | 1508.23  | my_snp_filter | AC=7;AF=0.100;AN=70;BaseQ          |
| 22827 | chrY | 13436229 | . | A | T   | 6382.80  | PASS          | AC=25;AF=0.357;AN=70;BaseQRankSum= |
| 22828 | chrY | 13436242 | . | G | A   | 2409.50  | PASS          | AC=8;AF=0.114;AN=70;BaseQRankSum=  |
| 22829 | chrY | 13436255 | . | C | T   | 178.89   | my_snp_filter | AC=2;AF=0.029;AN=70;BaseQ          |
| 22830 | chrY | 13436262 | . | G | T   | 3608.82  | PASS          | AC=22;AF=0.314;AN=70;BaseQRankSum= |
| 22831 | chrY | 13436277 | . | C | T   | 139.18   | my_snp_filter | AC=2;AF=0.029;AN=70;BaseQ          |
| 22832 | chrY | 13436283 | . | G | T   | 4060.43  | PASS          | AC=20;AF=0.286;AN=70;BaseQRankSum= |
| 22833 | chrY | 13436306 | . | A | T   | 13288.81 | my_snp_filter | AC=30;AF=0.429;AN=70;BaseQ         |
| 22834 | chrY | 13436328 | . | C | T   | 50.61    | my_snp_filter | AC=3;AF=0.043;AN=70;BaseQ          |
| 22835 | chrY | 13436340 | . | A | G   | 577.39   | PASS          | AC=6;AF=0.086;AN=70;BaseQRankSum=  |
| 22836 | chrY | 13436352 | . | G | A   | 84.55    | my_snp_filter | AC=2;AF=0.029;AN=70;BaseQ          |
| 22837 | chrY | 13436353 | . | C | G   | 6166.46  | PASS          | AC=14;AF=0.200;AN=70;BaseQRankSum= |
| 22838 | chrY | 13436359 | . | G | A   | 44.06    | my_snp_filter | AC=2;AF=0.029;AN=70;BaseQ          |
| 22839 | chrY | 13436369 | . | A | C   | 64.25    | my_snp_filter | AC=2;AF=0.029;AN=70;BaseQ          |
| 22840 | chrY | 13436375 | . | A | C   | 4469.35  | PASS          | AC=10;AF=0.143;AN=70;BaseQRankSum= |
| 22841 | chrY | 13436376 | . | T | A   | 41.08    | my_snp_filter | AC=2;AF=0.029;AN=70;BaseQ          |
| 22842 | chrY | 13436390 | . | A | G   | 340.39   | PASS          | AC=2;AF=0.029;AN=70;BaseQRankSum=  |
| 22843 | chrY | 13436405 | . | T | A   | 6539.83  | PASS          | AC=10;AF=0.143;AN=70;BaseQRankSum= |
| 22844 | chrY | 13436414 | . | G | C   | 6599.07  | PASS          | AC=10;AF=0.143;AN=70;BaseQRankSum= |
| 22845 | chrY | 13436441 | . | C | A   | 2856.21  | PASS          | AC=9;AF=0.132;AN=68;BaseQRankSum=  |
| 22846 | chrY | 13436447 | . | C | T,A | 3436.76  | PASS          | AC=8,2;AF=0.118,0.029;AN=68;BaseQ  |
| 22847 | chrY | 13436463 | . | G | T   | 2661.38  | PASS          | AC=10;AF=0.147;AN=68;BaseQRankSum= |
| 22848 | chrY | 13436543 | . | T | C   | 1342.04  | PASS          | AC=11;AF=0.167;AN=66;BaseQRankSum= |
| 22849 | chrY | 13436551 | . | T | G   | 8923.44  | PASS          | AC=18;AF=0.273;AN=66;BaseQRankSum= |
| 22850 | chrY | 13436568 | . | A | G   | 9098.21  | PASS          | AC=21;AF=0.328;AN=64;BaseQRankSum= |
| 22851 | chrY | 13436610 | . | G | T   | 330.11   | PASS          | AC=9;AF=0.129;AN=70;BaseQRankSum=  |
| 22852 | chrY | 13436662 | . | A | T   | 17630.16 | PASS          | AC=39;AF=0.557;AN=70;BaseQ         |
| 22853 | chrY | 13436701 | . | T | A   | 813.08   | PASS          | AC=15;AF=0.214;AN=70;BaseQRankSum= |
| 22854 | chrY | 13436739 | . | G | C   | 1516.68  | PASS          | AC=12;AF=0.188;AN=64;BaseQRankSum= |
| 22855 | chrY | 13436778 | . | C | T   | 4270.96  | PASS          | AC=13;AF=0.217;AN=60;BaseQRankSum= |
| 22856 | chrY | 13436802 | . | G | A   | 2092.36  | PASS          | AC=8;AF=0.133;AN=60;BaseQRankSum=  |
| 22857 | chrY | 13436805 | . | T | A   | 2334.56  | PASS          | AC=18;AF=0.281;AN=64;BaseQRankSum= |
| 22858 | chrY | 13436813 | . | G | A   | 3668.91  | PASS          | AC=18;AF=0.281;AN=64;BaseQRankSum= |
| 22859 | chrY | 13436814 | . | A | G   | 2067.99  | PASS          | AC=9;AF=0.145;AN=62;BaseQRankSum=  |
| 22860 | chrY | 13436829 | . | C | T   | 2636.57  | PASS          | AC=14;AF=0.219;AN=64;BaseQRankSum= |
| 22861 | chrY | 13436841 | . | A | G   | 2070.18  | PASS          | AC=18;AF=0.273;AN=66;BaseQRankSum= |
| 22862 | chrY | 13436864 | . | A | G   | 18471.29 | PASS          | AC=30;AF=0.469;AN=64;BaseQ         |
| 22863 | chrY | 13436901 | . | T | C   | 1554.58  | PASS          | AC=13;AF=0.191;AN=68;BaseQRankSum= |
| 22864 | chrY | 13436936 | . | C | T   | 2817.97  | PASS          | AC=18;AF=0.265;AN=68;BaseQRankSum= |
| 22865 | chrY | 13436968 | . | G | T   | 485.11   | my_snp_filter | AC=7;AF=0.103;AN=68;BaseQ          |
| 22866 | chrY | 13436992 | . | T | A   | 4000.75  | PASS          | AC=21;AF=0.309;AN=68;BaseQRankSum= |
| 22867 | chrY | 13436996 | . | G | C   | 1707.43  | PASS          | AC=6;AF=0.088;AN=68;BaseQRankSum=  |
| 22868 | chrY | 13437011 | . | T | C   | 195.43   | PASS          | AC=1;AF=0.014;AN=70;BaseQRankSum=  |
| 22869 | chrY | 13437012 | . | A | T,G | 4621.22  | PASS          | AC=3,7;AF=0.043,0.100;AN=70;BaseQ  |
| 22870 | chrY | 13437017 | . | C | A   | 387.82   | my_snp_filter | AC=6;AF=0.086;AN=70;BaseQ          |
| 22871 | chrY | 13437029 | . | G | C,T | 25384.23 | PASS          | AC=36,3;AF=0.514,0.043;AN=70;BaseQ |
| 22872 | chrY | 13437045 | . | C | A   | 512.51   | PASS          | AC=2;AF=0.029;AN=70;BaseQRankSum=  |
| 22873 | chrY | 13437061 | . | C | T   | 69.42    | my_snp_filter | AC=1;AF=0.014;AN=70;BaseQ          |
| 22874 | chrY | 13437065 | . | A | C   | 874.95   | PASS          | AC=5;AF=0.071;AN=70;BaseQRankSum=  |
| 22875 | chrY | 13437075 | . | G | C   | 1153.31  | PASS          | AC=5;AF=0.071;AN=70;BaseQRankSum=  |
| 22876 | chrY | 13437076 | . | G | A   | 35594.62 | PASS          | AC=37;AF=0.529;AN=70;BaseQ         |

|       |      |          |   |   |     |          |               |                                     |
|-------|------|----------|---|---|-----|----------|---------------|-------------------------------------|
| 22877 | chrY | 13437078 | . | A | C   | 399.51   | PASS          | AC=3;AF=0.043;AN=70;BaseQRankSum=   |
| 22878 | chrY | 13437084 | . | G | A   | 1240.55  | PASS          | AC=4;AF=0.057;AN=70;BaseQRankSum=   |
| 22879 | chrY | 13437099 | . | C | T   | 7134.88  | PASS          | AC=27;AF=0.386;AN=70;BaseQRankSum=  |
| 22880 | chrY | 13437109 | . | T | C   | 3372.33  | PASS          | AC=9;AF=0.129;AN=70;BaseQRankSum=   |
| 22881 | chrY | 13437129 | . | G | A   | 5691.99  | PASS          | AC=9;AF=0.129;AN=70;BaseQRankSum=   |
| 22882 | chrY | 13437179 | . | G | A   | 2292.84  | PASS          | AC=6;AF=0.086;AN=70;BaseQRankSum=   |
| 22883 | chrY | 13437185 | . | G | T   | 210.26   | my_snp_filter | AC=5;AF=0.071;AN=70;BaseQ           |
| 22884 | chrY | 13437186 | . | A | G   | 2658.02  | PASS          | AC=25;AF=0.357;AN=70;BaseQRankSum=  |
| 22885 | chrY | 13437192 | . | C | A   | 3442.36  | PASS          | AC=10;AF=0.143;AN=70;BaseQRankSum=  |
| 22886 | chrY | 13437203 | . | G | T   | 40175.27 | PASS          | AC=42;AF=0.600;AN=70;BaseQ          |
| 22887 | chrY | 13437215 | . | A | G   | 2097.29  | PASS          | AC=17;AF=0.243;AN=70;BaseQRankSum=  |
| 22888 | chrY | 13437222 | . | C | A   | 5063.84  | PASS          | AC=8;AF=0.114;AN=70;BaseQRankSum=   |
| 22889 | chrY | 13437240 | . | A | C,G | 47243.24 | PASS          | AC=20,35;AF=0.286,0.500;AN=70;BaseQ |
| 22890 | chrY | 13437247 | . | G | C   | 2909.43  | PASS          | AC=8;AF=0.114;AN=70;BaseQRankSum=   |
| 22891 | chrY | 13437248 | . | G | A   | 5288.87  | PASS          | AC=22;AF=0.324;AN=68;BaseQRankSum=  |
| 22892 | chrY | 13437261 | . | C | G   | 132.06   | my_snp_filter | AC=2;AF=0.029;AN=70;BaseQ           |
| 22893 | chrY | 13437273 | . | G | T   | 6299.49  | PASS          | AC=18;AF=0.265;AN=68;BaseQRankSum=  |
| 22894 | chrY | 13437286 | . | A | T   | 240.45   | my_snp_filter | AC=4;AF=0.059;AN=68;BaseQ           |
| 22895 | chrY | 13437307 | . | A | G   | 1238.37  | PASS          | AC=10;AF=0.143;AN=70;BaseQRankSum=  |
| 22896 | chrY | 13437321 | . | G | A   | 52.45    | PASS          | AC=2;AF=0.029;AN=70;BaseQRankSum=   |
| 22897 | chrY | 13437326 | . | G | C   | 14874.76 | PASS          | AC=25;AF=0.368;AN=68;BaseQ          |
| 22898 | chrY | 13437332 | . | G | A   | 968.12   | my_snp_filter | AC=6;AF=0.086;AN=70;BaseQ           |
| 22899 | chrY | 13437355 | . | T | A   | 152.69   | PASS          | AC=4;AF=0.057;AN=70;BaseQRankSum=   |
| 22900 | chrY | 13437365 | . | T | C   | 174.14   | PASS          | AC=4;AF=0.057;AN=70;BaseQRankSum=   |
| 22901 | chrY | 13437390 | . | G | C   | 1582.12  | my_snp_filter | AC=13;AF=0.186;AN=70;BaseQ          |
| 22902 | chrY | 13437416 | . | A | C   | 65.65    | my_snp_filter | AC=2;AF=0.029;AN=68;BaseQ           |
| 22903 | chrY | 13437443 | . | G | T   | 505.36   | my_snp_filter | AC=6;AF=0.086;AN=70;BaseQ           |
| 22904 | chrY | 13437465 | . | C | A   | 1777.56  | PASS          | AC=10;AF=0.143;AN=70;BaseQRankSum=  |
| 22905 | chrY | 13437467 | . | T | C   | 4434.33  | PASS          | AC=10;AF=0.143;AN=70;BaseQRankSum=  |
| 22906 | chrY | 13437468 | . | A | T   | 9392.46  | PASS          | AC=14;AF=0.200;AN=70;BaseQRankSum=  |
| 22907 | chrY | 13437476 | . | C | G   | 970.84   | PASS          | AC=5;AF=0.071;AN=70;BaseQRankSum=   |
| 22908 | chrY | 13437477 | . | T | C   | 39935.26 | PASS          | AC=35;AF=0.500;AN=70;BaseQ          |
| 22909 | chrY | 13437498 | . | T | G   | 11067.79 | PASS          | AC=29;AF=0.414;AN=70;BaseQ          |
| 22910 | chrY | 13437519 | . | T | C   | 12522.90 | PASS          | AC=26;AF=0.371;AN=70;BaseQ          |
| 22911 | chrY | 13437531 | . | T | C   | 13252.11 | PASS          | AC=26;AF=0.371;AN=70;BaseQ          |
| 22912 | chrY | 13437540 | . | C | A   | 115.21   | my_snp_filter | AC=2;AF=0.029;AN=70;BaseQ           |
| 22913 | chrY | 13437550 | . | G | A   | 491.52   | my_snp_filter | AC=3;AF=0.043;AN=70;BaseQ           |
| 22914 | chrY | 13437555 | . | G | C   | 5133.28  | PASS          | AC=14;AF=0.200;AN=70;BaseQRankSum=  |
| 22915 | chrY | 13437560 | . | C | T   | 921.80   | my_snp_filter | AC=6;AF=0.086;AN=70;BaseQ           |
| 22916 | chrY | 13437563 | . | A | T   | 7394.31  | PASS          | AC=29;AF=0.414;AN=70;BaseQRankSum=  |
| 22917 | chrY | 13437578 | . | A | G   | 9030.63  | PASS          | AC=24;AF=0.343;AN=70;BaseQRankSum=  |
| 22918 | chrY | 13437589 | . | T | C   | 60353.17 | PASS          | AC=36;AF=0.514;AN=70;BaseQ          |
| 22919 | chrY | 13437605 | . | T | C   | 588.17   | PASS          | AC=5;AF=0.071;AN=70;BaseQRankSum=   |
| 22920 | chrY | 13437628 | . | T | G   | 49476.44 | PASS          | AC=37;AF=0.529;AN=70;BaseQ          |
| 22921 | chrY | 13437646 | . | C | A   | 4810.92  | PASS          | AC=21;AF=0.300;AN=70;BaseQRankSum=  |
| 22922 | chrY | 13437662 | . | C | T   | 4070.01  | PASS          | AC=22;AF=0.314;AN=70;BaseQRankSum=  |
| 22923 | chrY | 13437673 | . | A | C   | 1855.92  | my_snp_filter | AC=19;AF=0.271;AN=70;BaseQ          |
| 22924 | chrY | 13437684 | . | T | A   | 5504.61  | PASS          | AC=26;AF=0.371;AN=70;BaseQRankSum=  |
| 22925 | chrY | 13437694 | . | G | T   | 23620.74 | PASS          | AC=33;AF=0.471;AN=70;BaseQ          |
| 22926 | chrY | 13437704 | . | A | T   | 24350.84 | PASS          | AC=34;AF=0.486;AN=70;BaseQ          |
| 22927 | chrY | 13437713 | . | C | T   | 22401.29 | PASS          | AC=32;AF=0.457;AN=70;BaseQ          |
| 22928 | chrY | 13437719 | . | G | A   | 1640.52  | my_snp_filter | AC=20;AF=0.286;AN=70;BaseQ          |
| 22929 | chrY | 13437739 | . | C | G   | 28645.87 | PASS          | AC=34;AF=0.486;AN=70;BaseQ          |
| 22930 | chrY | 13437740 | . | A | C   | 63838.72 | PASS          | AC=35;AF=0.500;AN=70;BaseQ          |
| 22931 | chrY | 13437746 | . | C | T   | 2837.33  | my_snp_filter | AC=15;AF=0.214;AN=70;BaseQ          |
| 22932 | chrY | 13437785 | . | A | T   | 4729.53  | my_snp_filter | AC=17;AF=0.243;AN=70;BaseQ          |
| 22933 | chrY | 13437799 | . | A | G   | 6863.71  | my_snp_filter | AC=15;AF=0.214;AN=70;BaseQ          |
| 22934 | chrY | 13437834 | . | T | A   | 11913.32 | PASS          | AC=20;AF=0.286;AN=70;BaseQ          |
| 22935 | chrY | 13437841 | . | G | T   | 11607.93 | PASS          | AC=21;AF=0.300;AN=70;BaseQ          |
| 22936 | chrY | 13437856 | . | C | T   | 14778.91 | PASS          | AC=24;AF=0.343;AN=70;BaseQ          |
| 22937 | chrY | 13437867 | . | G | A   | 52.44    | my_snp_filter | AC=2;AF=0.029;AN=70;BaseQ           |
| 22938 | chrY | 13437877 | . | T | G   | 3543.53  | my_snp_filter | AC=14;AF=0.200;AN=70;BaseQ          |
| 22939 | chrY | 13437888 | . | G | T   | 4608.57  | my_snp_filter | AC=18;AF=0.257;AN=70;BaseQ          |
| 22940 | chrY | 13437897 | . | T | A   | 57822.72 | PASS          | AC=35;AF=0.500;AN=70;BaseQ          |
| 22941 | chrY | 13437914 | . | A | T   | 39.09    | my_snp_filter | AC=2;AF=0.029;AN=70;BaseQ           |
| 22942 | chrY | 13437920 | . | C | A   | 211.18   | PASS          | AC=1;AF=0.014;AN=70;BaseQRankSum=   |
| 22943 | chrY | 13437928 | . | G | C,T | 11529.73 | PASS          | AC=13,20;AF=0.186,0.286;AN=70;BaseQ |
| 22944 | chrY | 13437934 | . | G | A   | 170.64   | my_snp_filter | AC=3;AF=0.043;AN=70;BaseQ           |
| 22945 | chrY | 13437942 | . | C | T   | 1564.43  | my_snp_filter | AC=13;AF=0.186;AN=70;BaseQ          |
| 22946 | chrY | 13437946 | . | G | T   | 693.15   | my_snp_filter | AC=8;AF=0.114;AN=70;BaseQ           |
| 22947 | chrY | 13437959 | . | G | A   | 62282.64 | PASS          | AC=38;AF=0.543;AN=70;BaseQ          |
| 22948 | chrY | 13437963 | . | C | G   | 5812.45  | PASS          | AC=28;AF=0.400;AN=70;BaseQRankSum=  |
| 22949 | chrY | 13437997 | . | T | C   | 4241.89  | PASS          | AC=22;AF=0.314;AN=70;BaseQRankSum=  |
| 22950 | chrY | 13438008 | . | C | T   | 175.03   | my_snp_filter | AC=5;AF=0.071;AN=70;BaseQ           |
| 22951 | chrY | 13438034 | . | G | T   | 3463.73  | PASS          | AC=23;AF=0.329;AN=70;BaseQRankSum=  |
| 22952 | chrY | 13438045 | . | A | G   | 154.08   | PASS          | AC=2;AF=0.029;AN=70;BaseQRankSum=   |

|       |      |          |   |   |     |          |               |                                    |
|-------|------|----------|---|---|-----|----------|---------------|------------------------------------|
| 22953 | chrY | 13438073 | . | A | C   | 9117.19  | PASS          | AC=14;AF=0.200;AN=70;BaseQRankSum= |
| 22954 | chrY | 13438120 | . | G | A   | 2984     | PASS          | AC=18;AF=0.257;AN=70;BaseQRankSum= |
| 22955 | chrY | 13438180 | . | T | G   | 153.97   | PASS          | AC=2;AF=0.031;AN=64;BaseQRankSum=  |
| 22956 | chrY | 13438181 | . | C | G   | 3321.05  | PASS          | AC=10;AF=0.161;AN=62;BaseQRankSum= |
| 22957 | chrY | 13438212 | . | G | A   | 304.97   | PASS          | AC=2;AF=0.034;AN=58;BaseQRankSum=  |
| 22958 | chrY | 13438225 | . | G | C   | 1324.04  | PASS          | AC=10;AF=0.200;AN=50;BaseQRankSum= |
| 22959 | chrY | 13438229 | . | C | G,T | 5717.17  | PASS          | AC=10,2;AF=0.227,0.045;AN=44;BaseQ |
| 22960 | chrY | 13438241 | . | C | T   | 277.45   | PASS          | AC=2;AF=0.040;AN=50;BaseQRankSum=  |
| 22961 | chrY | 13438263 | . | T | C   | 764.23   | PASS          | AC=4;AF=0.071;AN=56;BaseQRankSum=  |
| 22962 | chrY | 13438288 | . | T | A   | 261.99   | PASS          | AC=2;AF=0.033;AN=60;BaseQRankSum=  |
| 22963 | chrY | 13438298 | . | C | T   | 147.86   | PASS          | AC=3;AF=0.048;AN=62;BaseQRankSum=  |
| 22964 | chrY | 13438321 | . | G | T   | 757.33   | PASS          | AC=8;AF=0.114;AN=70;BaseQRankSum=  |
| 22965 | chrY | 13438325 | . | C | T   | 1146.53  | PASS          | AC=14;AF=0.200;AN=70;BaseQRankSum= |
| 22966 | chrY | 13438361 | . | T | C   | 403.12   | my_snp_filter | AC=11;AF=0.157;AN=70;BaseQ         |
| 22967 | chrY | 13438391 | . | T | C   | 1060.13  | PASS          | AC=14;AF=0.200;AN=70;BaseQRankSum= |
| 22968 | chrY | 13438417 | . | C | A   | 36.43    | my_snp_filter | AC=1;AF=0.014;AN=70;BaseQ          |
| 22969 | chrY | 13438422 | . | C | A   | 1126.09  | PASS          | AC=13;AF=0.186;AN=70;BaseQRankSum= |
| 22970 | chrY | 13438425 | . | T | G   | 15645.72 | PASS          | AC=35;AF=0.500;AN=70;BaseQ         |
| 22971 | chrY | 13438462 | . | A | C   | 484.29   | PASS          | AC=7;AF=0.100;AN=70;BaseQRankSum=  |
| 22972 | chrY | 13438474 | . | C | T   | 34.22    | PASS          | AC=2;AF=0.029;AN=70;BaseQRankSum=  |
| 22973 | chrY | 13438487 | . | T | C   | 273.79   | my_snp_filter | AC=6;AF=0.086;AN=70;BaseQ          |
| 22974 | chrY | 13438489 | . | C | T   | 288.51   | my_snp_filter | AC=6;AF=0.086;AN=70;BaseQ          |
| 22975 | chrY | 13438497 | . | C | G   | 279.75   | PASS          | AC=5;AF=0.071;AN=70;BaseQRankSum=  |
| 22976 | chrY | 13438512 | . | G | A   | 3891.07  | PASS          | AC=18;AF=0.257;AN=70;BaseQRankSum= |
| 22977 | chrY | 13438513 | . | T | C   | 3836.46  | PASS          | AC=17;AF=0.243;AN=70;BaseQRankSum= |
| 22978 | chrY | 13438516 | . | A | G   | 289.31   | PASS          | AC=5;AF=0.071;AN=70;BaseQRankSum=  |
| 22979 | chrY | 13438546 | . | T | C   | 15000.13 | PASS          | AC=62;AF=0.886;AN=70;BaseQ         |
| 22980 | chrY | 13438585 | . | A | T   | 1140.20  | PASS          | AC=7;AF=0.103;AN=68;BaseQRankSum=  |
| 22981 | chrY | 13438589 | . | T | G   | 3971.91  | PASS          | AC=9;AF=0.141;AN=64;BaseQRankSum=  |
| 22982 | chrY | 13438688 | . | G | T   | 2841.24  | PASS          | AC=19;AF=0.271;AN=70;BaseQRankSum= |
| 22983 | chrY | 13438710 | . | G | A   | 13064.39 | PASS          | AC=38;AF=0.543;AN=70;BaseQ         |
| 22984 | chrY | 13438753 | . | C | T   | 5879.02  | PASS          | AC=22;AF=0.324;AN=68;BaseQRankSum= |
| 22985 | chrY | 13438756 | . | T | G   | 23740.71 | PASS          | AC=36;AF=0.514;AN=70;BaseQ         |
| 22986 | chrY | 13438759 | . | T | C   | 9144.36  | PASS          | AC=30;AF=0.429;AN=70;BaseQRankSum= |
| 22987 | chrY | 13438761 | . | G | T   | 14539.16 | PASS          | AC=34;AF=0.486;AN=70;BaseQ         |
| 22988 | chrY | 13438825 | . | T | G   | 8384.57  | PASS          | AC=27;AF=0.386;AN=70;BaseQRankSum= |
| 22989 | chrY | 13438854 | . | A | T   | 10084.17 | PASS          | AC=29;AF=0.414;AN=70;BaseQ         |
| 22990 | chrY | 13438917 | . | T | C   | 5067.76  | PASS          | AC=25;AF=0.357;AN=70;BaseQRankSum= |
| 22991 | chrY | 13438923 | . | C | G   | 19980.13 | PASS          | AC=37;AF=0.529;AN=70;BaseQ         |
| 22992 | chrY | 13438943 | . | A | G   | 5335.38  | PASS          | AC=25;AF=0.357;AN=70;BaseQRankSum= |
| 22993 | chrY | 13438971 | . | A | G   | 4918.78  | my_snp_filter | AC=23;AF=0.348;AN=66;BaseQ         |
| 22994 | chrY | 13438993 | . | C | T   | 3356.35  | my_snp_filter | AC=14;AF=0.200;AN=70;BaseQ         |
| 22995 | chrY | 13439004 | . | C | T   | 303.07   | PASS          | AC=4;AF=0.061;AN=66;BaseQRankSum=  |
| 22996 | chrY | 13439028 | . | C | T   | 1324.01  | my_snp_filter | AC=10;AF=0.156;AN=64;BaseQ         |
| 22997 | chrY | 13439079 | . | G | A   | 654.99   | PASS          | AC=3;AF=0.043;AN=70;BaseQRankSum=  |
| 22998 | chrY | 13439086 | . | G | A   | 630.16   | PASS          | AC=2;AF=0.029;AN=70;BaseQRankSum=  |
| 22999 | chrY | 13439090 | . | G | A   | 3345.56  | my_snp_filter | AC=8;AF=0.114;AN=70;BaseQ          |
| 23000 | chrY | 13439093 | . | C | A   | 4709.83  | PASS          | AC=8;AF=0.118;AN=68;BaseQRankSum=  |
| 23001 | chrY | 13439104 | . | G | A   | 4610.86  | PASS          | AC=8;AF=0.118;AN=68;BaseQRankSum=  |
| 23002 | chrY | 13439118 | . | G | A   | 4563.59  | PASS          | AC=8;AF=0.118;AN=68;BaseQRankSum=  |
| 23003 | chrY | 13439137 | . | A | C   | 466.85   | PASS          | AC=5;AF=0.071;AN=70;BaseQRankSum=  |
| 23004 | chrY | 13439140 | . | G | T   | 1488.76  | PASS          | AC=6;AF=0.086;AN=70;BaseQRankSum=  |
| 23005 | chrY | 13439165 | . | G | A   | 1576.70  | PASS          | AC=8;AF=0.118;AN=68;BaseQRankSum=  |
| 23006 | chrY | 13439195 | . | A | C   | 1548.80  | PASS          | AC=10;AF=0.147;AN=68;BaseQRankSum= |
| 23007 | chrY | 13439235 | . | T | G   | 58.85    | PASS          | AC=1;AF=0.015;AN=68;BaseQRankSum=  |
| 23008 | chrY | 13439247 | . | A | G   | 40.72    | my_snp_filter | AC=1;AF=0.015;AN=66;BaseQ          |
| 23009 | chrY | 13439250 | . | T | G   | 6581.50  | PASS          | AC=14;AF=0.212;AN=66;BaseQRankSum= |
| 23010 | chrY | 13439252 | . | A | G   | 4311.42  | my_snp_filter | AC=11;AF=0.167;AN=66;BaseQ         |
| 23011 | chrY | 13439268 | . | T | C   | 1336.79  | PASS          | AC=7;AF=0.121;AN=58;BaseQRankSum=  |
| 23012 | chrY | 13439319 | . | G | A   | 530.37   | my_snp_filter | AC=5;AF=0.093;AN=54;BaseQ          |
| 23013 | chrY | 13439340 | . | C | T   | 1148.27  | PASS          | AC=8;AF=0.160;AN=50;BaseQRankSum=  |
| 23014 | chrY | 13439417 | . | T | C   | 2692.38  | PASS          | AC=9;AF=0.346;AN=26;BaseQRankSum=  |
| 23015 | chrY | 13439426 | . | A | G   | 423.16   | PASS          | AC=4;AF=0.143;AN=28;BaseQRankSum=  |
| 23016 | chrY | 13439458 | . | G | A   | 152.25   | my_snp_filter | AC=3;AF=0.167;AN=18;BaseQ          |
| 23017 | chrY | 13439462 | . | C | A   | 241.04   | PASS          | AC=2;AF=0.111;AN=18;BaseQRankSum=  |
| 23018 | chrY | 13439463 | . | A | C   | 227.99   | my_snp_filter | AC=5;AF=0.278;AN=18;BaseQ          |
| 23019 | chrY | 13439470 | . | T | C   | 220.04   | PASS          | AC=2;AF=0.111;AN=18;BaseQRankSum=  |
| 23020 | chrY | 13439472 | . | T | C   | 331.27   | my_snp_filter | AC=4;AF=0.222;AN=18;BaseQ          |
| 23021 | chrY | 13439474 | . | T | C   | 367.22   | my_snp_filter | AC=4;AF=0.222;AN=18;BaseQ          |
| 23022 | chrY | 13439479 | . | G | A   | 2485.88  | PASS          | AC=8;AF=0.444;AN=18;BaseQRankSum=  |
| 23023 | chrY | 13439504 | . | T | C   | 346.83   | my_snp_filter | AC=3;AF=0.167;AN=18;BaseQ          |
| 23024 | chrY | 13439515 | . | C | T   | 106.04   | my_snp_filter | AC=2;AF=0.111;AN=18;BaseQ          |
| 23025 | chrY | 13439544 | . | T | G   | 454.89   | my_snp_filter | AC=4;AF=0.200;AN=20;BaseQ          |
| 23026 | chrY | 13439572 | . | G | C   | 1685.25  | PASS          | AC=7;AF=0.350;AN=20;BaseQRankSum=  |
| 23027 | chrY | 13439584 | . | C | G   | 1327.52  | PASS          | AC=9;AF=0.450;AN=20;BaseQRankSum=  |
| 23028 | chrY | 13439585 | . | G | A   | 1737.78  | PASS          | AC=8;AF=0.400;AN=20;BaseQRankSum=  |

|       |      |          |   |   |   |          |               |                                   |
|-------|------|----------|---|---|---|----------|---------------|-----------------------------------|
| 23029 | chrY | 13439595 | . | G | T | 31.32    | my_snp_filter | AC=1;AF=0.056;AN=18;BaseQ         |
| 23030 | chrY | 13439610 | . | A | T | 1250.95  | PASS          | AC=7;AF=0.389;AN=18;BaseQRankSum= |
| 23031 | chrY | 13439611 | . | C | T | 867.78   | PASS          | AC=3;AF=0.167;AN=18;BaseQRankSum= |
| 23032 | chrY | 13439635 | . | C | A | 1156.51  | PASS          | AC=6;AF=0.333;AN=18;BaseQRankSum= |
| 23033 | chrY | 13439640 | . | G | A | 210.41   | my_snp_filter | AC=3;AF=0.167;AN=18;BaseQ         |
| 23034 | chrY | 13439647 | . | C | G | 6685.09  | PASS          | AC=9;AF=0.500;AN=18;BaseQRankSum= |
| 23035 | chrY | 13439650 | . | C | T | 6103.09  | PASS          | AC=9;AF=0.500;AN=18;BaseQRankSum= |
| 23036 | chrY | 13439676 | . | G | C | 2056.12  | PASS          | AC=9;AF=0.409;AN=22;BaseQRankSum= |
| 23037 | chrY | 13439700 | . | G | T | 2826.78  | PASS          | AC=9;AF=0.375;AN=24;BaseQRankSum= |
| 23038 | chrY | 13439719 | . | A | G | 13146.99 | PASS          | AC=9;AF=0.409;AN=22;BaseQ         |
| 23039 | chrY | 13439738 | . | T | C | 15741.99 | PASS          | AC=9;AF=0.409;AN=22;BaseQ         |
| 23040 | chrY | 13439741 | . | G | A | 3678.19  | PASS          | AC=8;AF=0.333;AN=24;BaseQRankSum= |
| 23041 | chrY | 13439742 | . | G | A | 16200.11 | PASS          | AC=9;AF=0.409;AN=22;BaseQ         |
| 23042 | chrY | 13439749 | . | C | A | 5912.73  | PASS          | AC=9;AF=0.375;AN=24;BaseQRankSum= |
| 23043 | chrY | 13439768 | . | G | A | 607.56   | PASS          | AC=4;AF=0.154;AN=26;BaseQRankSum= |
| 23044 | chrY | 13439778 | . | G | T | 570.61   | my_snp_filter | AC=4;AF=0.154;AN=26;BaseQ         |
| 23045 | chrY | 13439803 | . | T | C | 1403.48  | PASS          | AC=8;AF=0.333;AN=24;BaseQRankSum= |
| 23046 | chrY | 13439817 | . | T | C | 1492.35  | my_snp_filter | AC=8;AF=0.364;AN=22;BaseQ         |
| 23047 | chrY | 13439821 | . | A | C | 1553.33  | PASS          | AC=8;AF=0.400;AN=20;BaseQRankSum= |
| 23048 | chrY | 13439828 | . | A | T | 1637.34  | PASS          | AC=9;AF=0.450;AN=20;BaseQRankSum= |
| 23049 | chrY | 13439846 | . | C | T | 1506.81  | PASS          | AC=7;AF=0.389;AN=18;BaseQRankSum= |
| 23050 | chrY | 13439897 | . | T | C | 11441.09 | PASS          | AC=9;AF=0.500;AN=18;BaseQ         |
| 23051 | chrY | 13439904 | . | T | A | 11180.09 | PASS          | AC=9;AF=0.500;AN=18;BaseQ         |
| 23052 | chrY | 13439940 | . | G | T | 76.41    | my_snp_filter | AC=3;AF=0.167;AN=18;BaseQ         |
| 23053 | chrY | 13439990 | . | C | G | 822.63   | PASS          | AC=3;AF=0.167;AN=18;BaseQRankSum= |
| 23054 | chrY | 13440024 | . | C | A | 520.69   | my_snp_filter | AC=4;AF=0.222;AN=18;BaseQ         |
| 23055 | chrY | 13440029 | . | T | C | 815      | my_snp_filter | AC=4;AF=0.222;AN=18;BaseQ         |
| 23056 | chrY | 13440063 | . | A | C | 365.94   | my_snp_filter | AC=2;AF=0.111;AN=18;BaseQ         |
| 23057 | chrY | 13440077 | . | A | G | 858.84   | PASS          | AC=4;AF=0.200;AN=20;BaseQRankSum= |
| 23058 | chrY | 13440098 | . | G | C | 78.30    | PASS          | AC=1;AF=0.050;AN=20;BaseQRankSum= |
| 23059 | chrY | 13440105 | . | T | C | 78.30    | PASS          | AC=1;AF=0.050;AN=20;BaseQRankSum= |
| 23060 | chrY | 13440112 | . | A | T | 6987.52  | PASS          | AC=9;AF=0.450;AN=20;BaseQRankSum= |
| 23061 | chrY | 13440125 | . | C | G | 75.31    | my_snp_filter | AC=1;AF=0.050;AN=20;BaseQ         |
| 23062 | chrY | 13440140 | . | C | A | 83.80    | my_snp_filter | AC=1;AF=0.045;AN=22;BaseQ         |
| 23063 | chrY | 13440146 | . | C | T | 956.73   | PASS          | AC=5;AF=0.250;AN=20;BaseQRankSum= |
| 23064 | chrY | 13440150 | . | A | G | 76.17    | my_snp_filter | AC=1;AF=0.050;AN=20;BaseQ         |
| 23065 | chrY | 13440166 | . | G | T | 497.70   | PASS          | AC=4;AF=0.200;AN=20;BaseQRankSum= |
| 23066 | chrY | 13440172 | . | C | A | 348.96   | my_snp_filter | AC=4;AF=0.200;AN=20;BaseQ         |
| 23067 | chrY | 13440194 | . | T | C | 8715.34  | PASS          | AC=9;AF=0.450;AN=20;BaseQRankSum= |
| 23068 | chrY | 13440197 | . | G | C | 8659.34  | PASS          | AC=9;AF=0.450;AN=20;BaseQRankSum= |
| 23069 | chrY | 13440224 | . | G | A | 286.78   | PASS          | AC=2;AF=0.091;AN=22;BaseQRankSum= |
| 23070 | chrY | 13440225 | . | T | C | 7326.52  | PASS          | AC=9;AF=0.450;AN=20;BaseQRankSum= |
| 23071 | chrY | 13440270 | . | C | A | 3366.81  | PASS          | AC=7;AF=0.350;AN=20;BaseQRankSum= |
| 23072 | chrY | 13440286 | . | C | T | 1350.17  | PASS          | AC=7;AF=0.269;AN=26;BaseQRankSum= |
| 23073 | chrY | 13440310 | . | T | C | 3377.43  | PASS          | AC=8;AF=0.333;AN=24;BaseQRankSum= |
| 23074 | chrY | 13440350 | . | A | C | 13501.52 | PASS          | AC=9;AF=0.450;AN=20;BaseQ         |
| 23075 | chrY | 13440371 | . | A | G | 13771.11 | PASS          | AC=9;AF=0.409;AN=22;BaseQ         |
| 23076 | chrY | 13440430 | . | C | G | 41.30    | my_snp_filter | AC=1;AF=0.050;AN=20;BaseQ         |
| 23077 | chrY | 13440454 | . | A | G | 8854.09  | PASS          | AC=9;AF=0.500;AN=18;BaseQRankSum= |
| 23078 | chrY | 13440520 | . | G | C | 15959.09 | PASS          | AC=9;AF=0.500;AN=18;BaseQ         |
| 23079 | chrY | 13440531 | . | G | A | 15189.09 | PASS          | AC=9;AF=0.500;AN=18;BaseQ         |
| 23080 | chrY | 13440536 | . | C | G | 16160.09 | PASS          | AC=9;AF=0.500;AN=18;BaseQ         |
| 23081 | chrY | 13440555 | . | C | A | 2419.59  | PASS          | AC=5;AF=0.278;AN=18;BaseQRankSum= |
| 23082 | chrY | 13440567 | . | C | A | 2480.59  | PASS          | AC=5;AF=0.278;AN=18;BaseQRankSum= |
| 23083 | chrY | 13440573 | . | A | C | 2346.47  | PASS          | AC=5;AF=0.250;AN=20;BaseQRankSum= |
| 23084 | chrY | 13440575 | . | T | G | 15729.52 | PASS          | AC=9;AF=0.450;AN=20;BaseQ         |
| 23085 | chrY | 13440600 | . | T | C | 15643.52 | PASS          | AC=9;AF=0.450;AN=20;BaseQ         |
| 23086 | chrY | 13440626 | . | G | A | 11866.19 | PASS          | AC=10;AF=0.500;AN=20;BaseQ        |
| 23087 | chrY | 13440658 | . | T | C | 4400.52  | PASS          | AC=9;AF=0.450;AN=20;BaseQRankSum= |
| 23088 | chrY | 13440701 | . | G | A | 3564.49  | PASS          | AC=8;AF=0.444;AN=18;BaseQRankSum= |
| 23089 | chrY | 13440731 | . | A | C | 12854.09 | PASS          | AC=9;AF=0.500;AN=18;BaseQ         |
| 23090 | chrY | 13440734 | . | C | T | 310.30   | PASS          | AC=1;AF=0.050;AN=20;BaseQRankSum= |
| 23091 | chrY | 13440744 | . | A | T | 1782.67  | PASS          | AC=4;AF=0.200;AN=20;BaseQRankSum= |
| 23092 | chrY | 13440774 | . | G | A | 2105.24  | PASS          | AC=6;AF=0.333;AN=18;BaseQRankSum= |
| 23093 | chrY | 13440798 | . | A | C | 16865.09 | PASS          | AC=9;AF=0.500;AN=18;BaseQ         |
| 23094 | chrY | 13440814 | . | A | G | 16566.52 | PASS          | AC=11;AF=0.550;AN=20;BaseQ        |
| 23095 | chrY | 13440850 | . | C | T | 4298.26  | PASS          | AC=8;AF=0.364;AN=22;BaseQRankSum= |
| 23096 | chrY | 13440870 | . | A | T | 4359.38  | PASS          | AC=9;AF=0.450;AN=20;BaseQRankSum= |
| 23097 | chrY | 13440873 | . | A | G | 1018.41  | PASS          | AC=5;AF=0.227;AN=22;BaseQRankSum= |
| 23098 | chrY | 13440887 | . | C | A | 3763.13  | PASS          | AC=7;AF=0.350;AN=20;BaseQRankSum= |
| 23099 | chrY | 13440910 | . | C | A | 12169.34 | PASS          | AC=9;AF=0.450;AN=20;BaseQ         |
| 23100 | chrY | 13440911 | . | A | G | 12085.34 | PASS          | AC=9;AF=0.450;AN=20;BaseQ         |
| 23101 | chrY | 13440945 | . | G | T | 899.73   | PASS          | AC=4;AF=0.200;AN=20;BaseQRankSum= |
| 23102 | chrY | 13440967 | . | C | A | 10733.09 | PASS          | AC=9;AF=0.500;AN=18;BaseQ         |
| 23103 | chrY | 13440983 | . | G | A | 10882.52 | PASS          | AC=9;AF=0.450;AN=20;BaseQ         |
| 23104 | chrY | 13441019 | . | A | G | 4640.11  | my_snp_filter | AC=9;AF=0.409;AN=22;BaseQ         |



|       |      |          |   |   |     |          |               |                                    |
|-------|------|----------|---|---|-----|----------|---------------|------------------------------------|
| 23105 | chrY | 13441095 | . | A | G   | 115.99   | my_snp_filter | AC=4;AF=0.182;AN=22;BaseQ          |
| 23106 | chrY | 13441099 | . | T | A   | 7605.99  | PASS          | AC=9;AF=0.409;AN=22;BaseQRankSum=  |
| 23107 | chrY | 13441111 | . | G | A   | 1817.13  | PASS          | AC=9;AF=0.450;AN=20;BaseQRankSum=  |
| 23108 | chrY | 13441157 | . | A | C   | 6797.52  | my_snp_filter | AC=9;AF=0.450;AN=20;BaseQ          |
| 23109 | chrY | 13441158 | . | T | A   | 6797.52  | my_snp_filter | AC=9;AF=0.450;AN=20;BaseQ          |
| 23110 | chrY | 13441177 | . | A | G   | 2251.11  | PASS          | AC=9;AF=0.409;AN=22;BaseQRankSum=  |
| 23111 | chrY | 13441185 | . | C | A   | 4165.52  | my_snp_filter | AC=9;AF=0.450;AN=20;BaseQ          |
| 23112 | chrY | 13441201 | . | G | T   | 2298.52  | PASS          | AC=9;AF=0.450;AN=20;BaseQRankSum=  |
| 23113 | chrY | 13441262 | . | A | G   | 682.17   | PASS          | AC=6;AF=0.333;AN=18;BaseQRankSum=  |
| 23114 | chrY | 13441273 | . | A | G   | 1610.78  | PASS          | AC=8;AF=0.444;AN=18;BaseQRankSum=  |
| 23115 | chrY | 13441315 | . | C | T   | 381.90   | PASS          | AC=4;AF=0.200;AN=20;BaseQRankSum=  |
| 23116 | chrY | 13441324 | . | A | C,G | 1553.54  | PASS          | AC=6,2;AF=0.300,0.100;AN=20;BaseQ  |
| 23117 | chrY | 13441327 | . | G | T   | 1127.42  | PASS          | AC=6;AF=0.300;AN=20;BaseQRankSum=  |
| 23118 | chrY | 13441331 | . | A | G   | 2122.59  | PASS          | AC=8;AF=0.400;AN=20;BaseQRankSum=  |
| 23119 | chrY | 13441335 | . | G | A   | 211.26   | PASS          | AC=2;AF=0.100;AN=20;BaseQRankSum=  |
| 23120 | chrY | 13441336 | . | A | G   | 211.44   | PASS          | AC=3;AF=0.150;AN=20;BaseQRankSum=  |
| 23121 | chrY | 13441354 | . | G | A   | 1089.50  | PASS          | AC=6;AF=0.300;AN=20;BaseQRankSum=  |
| 23122 | chrY | 13441365 | . | C | T   | 781.17   | PASS          | AC=8;AF=0.444;AN=18;BaseQRankSum=  |
| 23123 | chrY | 13441533 | . | C | T   | 329.35   | PASS          | AC=7;AF=0.350;AN=20;BaseQRankSum=  |
| 23124 | chrY | 13441576 | . | T | C   | 33.34    | PASS          | AC=1;AF=0.045;AN=22;BaseQRankSum=  |
| 23125 | chrY | 13441588 | . | A | T   | 808.13   | PASS          | AC=7;AF=0.269;AN=26;BaseQRankSum=  |
| 23126 | chrY | 13441590 | . | T | A   | 1293.16  | PASS          | AC=8;AF=0.286;AN=28;BaseQRankSum=  |
| 23127 | chrY | 13441641 | . | A | T   | 852.92   | PASS          | AC=7;AF=0.152;AN=46;BaseQRankSum=  |
| 23128 | chrY | 13441690 | . | T | A   | 235.76   | PASS          | AC=3;AF=0.048;AN=62;BaseQRankSum=  |
| 23129 | chrY | 13441827 | . | A | G   | 442.94   | PASS          | AC=6;AF=0.088;AN=68;BaseQRankSum=  |
| 23130 | chrY | 13441838 | . | T | C   | 300.99   | PASS          | AC=6;AF=0.091;AN=66;BaseQRankSum=  |
| 23131 | chrY | 13441873 | . | T | C   | 198.35   | my_snp_filter | AC=4;AF=0.069;AN=58;BaseQ          |
| 23132 | chrY | 13441881 | . | C | T   | 2274.43  | PASS          | AC=9;AF=0.145;AN=62;BaseQRankSum=  |
| 23133 | chrY | 13441915 | . | T | C   | 302.87   | my_snp_filter | AC=5;AF=0.078;AN=64;BaseQ          |
| 23134 | chrY | 13441944 | . | A | G   | 34.91    | PASS          | AC=1;AF=0.015;AN=66;BaseQRankSum=  |
| 23135 | chrY | 13441970 | . | A | T   | 599.44   | PASS          | AC=8;AF=0.118;AN=68;BaseQRankSum=  |
| 23136 | chrY | 13442006 | . | T | C   | 3461.06  | my_snp_filter | AC=13;AF=0.186;AN=70;BaseQ         |
| 23137 | chrY | 13442007 | . | G | A   | 30.88    | my_snp_filter | AC=2;AF=0.029;AN=70;BaseQ          |
| 23138 | chrY | 13442009 | . | C | T   | 30.88    | my_snp_filter | AC=2;AF=0.029;AN=70;BaseQ          |
| 23139 | chrY | 13442026 | . | T | C   | 2731.03  | my_snp_filter | AC=10;AF=0.143;AN=70;BaseQ         |
| 23140 | chrY | 13442038 | . | T | G   | 2384.21  | my_snp_filter | AC=11;AF=0.157;AN=70;BaseQ         |
| 23141 | chrY | 13442069 | . | C | G   | 150.45   | my_snp_filter | AC=4;AF=0.057;AN=70;BaseQ          |
| 23142 | chrY | 13442108 | . | A | T   | 200.92   | PASS          | AC=2;AF=0.029;AN=68;BaseQRankSum=  |
| 23143 | chrY | 13442124 | . | G | A   | 1451.27  | my_snp_filter | AC=10;AF=0.152;AN=66;BaseQ         |
| 23144 | chrY | 13442143 | . | C | T   | 1073.36  | PASS          | AC=8;AF=0.129;AN=62;BaseQRankSum=  |
| 23145 | chrY | 13442158 | . | C | G   | 397.08   | PASS          | AC=4;AF=0.067;AN=60;BaseQRankSum=  |
| 23146 | chrY | 13442160 | . | A | G   | 1287.29  | PASS          | AC=8;AF=0.133;AN=60;BaseQRankSum=  |
| 23147 | chrY | 13442182 | . | G | C   | 7627.80  | PASS          | AC=11;AF=0.250;AN=44;BaseQRankSum= |
| 23148 | chrY | 13442215 | . | C | A   | 827.14   | PASS          | AC=9;AF=0.237;AN=38;BaseQRankSum=  |
| 23149 | chrY | 13442243 | . | T | C   | 2123.50  | PASS          | AC=11;AF=0.262;AN=42;BaseQRankSum= |
| 23150 | chrY | 13442361 | . | T | G   | 8636     | PASS          | AC=33;AF=0.550;AN=60;BaseQRankSum= |
| 23151 | chrY | 13442410 | . | T | C   | 1825.06  | PASS          | AC=15;AF=0.234;AN=64;BaseQRankSum= |
| 23152 | chrY | 13442438 | . | C | G   | 14286.50 | PASS          | AC=29;AF=0.453;AN=64;BaseQ         |
| 23153 | chrY | 13442447 | . | T | C,A | 19944.61 | PASS          | AC=25,4;AF=0.391,0.063;AN=         |
| 23154 | chrY | 13442455 | . | A | T   | 5429.77  | PASS          | AC=13;AF=0.197;AN=66;BaseQRankSum= |
| 23155 | chrY | 13442461 | . | A | T   | 5484.14  | PASS          | AC=13;AF=0.191;AN=68;BaseQRankSum= |
| 23156 | chrY | 13442524 | . | G | A   | 81.62    | PASS          | AC=1;AF=0.014;AN=70;BaseQRankSum=  |
| 23157 | chrY | 13442527 | . | G | A   | 4828.28  | PASS          | AC=25;AF=0.357;AN=70;BaseQRankSum= |
| 23158 | chrY | 13442553 | . | T | C   | 6226.37  | PASS          | AC=24;AF=0.343;AN=70;BaseQRankSum= |
| 23159 | chrY | 13442554 | . | T | C   | 15964.61 | PASS          | AC=34;AF=0.486;AN=70;BaseQ         |
| 23160 | chrY | 13442558 | . | A | G   | 57.43    | PASS          | AC=1;AF=0.014;AN=70;BaseQRankSum=  |
| 23161 | chrY | 13442559 | . | C | T   | 1235.87  | PASS          | AC=9;AF=0.129;AN=70;BaseQRankSum=  |
| 23162 | chrY | 13442571 | . | C | A   | 4812.80  | PASS          | AC=23;AF=0.329;AN=70;BaseQRankSum= |
| 23163 | chrY | 13442604 | . | T | G   | 3557.90  | PASS          | AC=18;AF=0.257;AN=70;BaseQRankSum= |
| 23164 | chrY | 13442607 | . | A | G   | 3561.08  | PASS          | AC=18;AF=0.257;AN=70;BaseQRankSum= |
| 23165 | chrY | 13442637 | . | A | T   | 12726.06 | PASS          | AC=29;AF=0.439;AN=66;BaseQ         |
| 23166 | chrY | 13442638 | . | G | A   | 4695.03  | PASS          | AC=17;AF=0.250;AN=68;BaseQRankSum= |
| 23167 | chrY | 13442649 | . | C | A   | 894.44   | PASS          | AC=4;AF=0.059;AN=68;BaseQRankSum=  |
| 23168 | chrY | 13442657 | . | C | G   | 660.44   | PASS          | AC=6;AF=0.091;AN=66;BaseQRankSum=  |
| 23169 | chrY | 13442662 | . | A | T   | 8658.71  | PASS          | AC=15;AF=0.227;AN=66;BaseQRankSum= |
| 23170 | chrY | 13442671 | . | A | G   | 241.86   | PASS          | AC=3;AF=0.045;AN=66;BaseQRankSum=  |
| 23171 | chrY | 13442672 | . | G | A   | 7660.58  | PASS          | AC=12;AF=0.188;AN=64;BaseQRankSum= |
| 23172 | chrY | 13442675 | . | A | C   | 203.02   | PASS          | AC=1;AF=0.015;AN=66;BaseQRankSum=  |
| 23173 | chrY | 13442676 | . | G | A   | 7350.96  | PASS          | AC=11;AF=0.172;AN=64;BaseQRankSum= |
| 23174 | chrY | 13442696 | . | G | A   | 5490.04  | PASS          | AC=10;AF=0.156;AN=64;BaseQRankSum= |
| 23175 | chrY | 13442738 | . | C | T   | 593.94   | PASS          | AC=4;AF=0.077;AN=52;BaseQRankSum=  |
| 23176 | chrY | 13442741 | . | C | A   | 579.78   | PASS          | AC=4;AF=0.080;AN=50;BaseQRankSum=  |
| 23177 | chrY | 13442747 | . | G | C   | 8872.29  | PASS          | AC=12;AF=0.286;AN=42;BaseQRankSum= |
| 23178 | chrY | 13442753 | . | T | C   | 1435.59  | PASS          | AC=9;AF=0.196;AN=46;BaseQRankSum=  |
| 23179 | chrY | 13442777 | . | G | A   | 2013.89  | PASS          | AC=9;AF=0.250;AN=36;BaseQRankSum=  |
| 23180 | chrY | 13442780 | . | C | T   | 4259.62  | PASS          | AC=9;AF=0.265;AN=34;BaseQRankSum=  |

|       |      |          |   |   |     |          |               |                                    |
|-------|------|----------|---|---|-----|----------|---------------|------------------------------------|
| 23181 | chrY | 13442781 | . | T | G   | 4279.62  | PASS          | AC=9;AF=0.265;AN=34;BaseQRankSum=  |
| 23182 | chrY | 13442782 | . | G | C   | 331.56   | my_snp_filter | AC=3;AF=0.083;AN=36;BaseQ          |
| 23183 | chrY | 13442790 | . | A | T   | 2091.36  | PASS          | AC=9;AF=0.281;AN=32;BaseQRankSum=  |
| 23184 | chrY | 13442791 | . | G | A   | 4423.23  | PASS          | AC=9;AF=0.281;AN=32;BaseQRankSum=  |
| 23185 | chrY | 13442807 | . | G | A   | 51.07    | PASS          | AC=2;AF=0.056;AN=36;BaseQRankSum=  |
| 23186 | chrY | 13442810 | . | A | T   | 1668.10  | PASS          | AC=4;AF=0.105;AN=38;BaseQRankSum=  |
| 23187 | chrY | 13442815 | . | C | G   | 53.29    | my_snp_filter | AC=3;AF=0.083;AN=36;BaseQ          |
| 23188 | chrY | 13442816 | . | C | T   | 49.98    | PASS          | AC=2;AF=0.048;AN=42;BaseQRankSum=  |
| 23189 | chrY | 13442817 | . | A | T   | 2865.68  | PASS          | AC=8;AF=0.182;AN=44;BaseQRankSum=  |
| 23190 | chrY | 13442851 | . | G | C   | 121.35   | PASS          | AC=3;AF=0.065;AN=46;BaseQRankSum=  |
| 23191 | chrY | 13442859 | . | T | C   | 187.65   | PASS          | AC=4;AF=0.083;AN=48;BaseQRankSum=  |
| 23192 | chrY | 13442899 | . | A | C   | 6706.77  | PASS          | AC=15;AF=0.288;AN=52;BaseQRankSum= |
| 23193 | chrY | 13442930 | . | G | C   | 355.58   | my_snp_filter | AC=11;AF=0.162;AN=68;Base          |
| 23194 | chrY | 13442980 | . | A | G   | 13797.69 | PASS          | AC=35;AF=0.500;AN=70;Base          |
| 23195 | chrY | 13443034 | . | A | G   | 23081.72 | PASS          | AC=35;AF=0.500;AN=70;Base          |
| 23196 | chrY | 13443133 | . | T | G   | 17632.73 | PASS          | AC=35;AF=0.500;AN=70;Base          |
| 23197 | chrY | 13443145 | . | G | A   | 1092.47  | PASS          | AC=10;AF=0.143;AN=70;BaseQRankSum= |
| 23198 | chrY | 13443155 | . | T | C   | 16515.72 | PASS          | AC=34;AF=0.486;AN=70;Base          |
| 23199 | chrY | 13443162 | . | G | A   | 2361.66  | PASS          | AC=12;AF=0.171;AN=70;BaseQRankSum= |
| 23200 | chrY | 13443172 | . | C | T   | 2195.32  | PASS          | AC=12;AF=0.171;AN=70;BaseQRankSum= |
| 23201 | chrY | 13443187 | . | C | A   | 3041.39  | PASS          | AC=20;AF=0.286;AN=70;BaseQRankSum= |
| 23202 | chrY | 13443188 | . | C | G   | 20282.22 | PASS          | AC=32;AF=0.457;AN=70;Base          |
| 23203 | chrY | 13443191 | . | G | C   | 20164.22 | PASS          | AC=32;AF=0.457;AN=70;Base          |
| 23204 | chrY | 13443238 | . | G | T   | 11131.74 | PASS          | AC=35;AF=0.500;AN=70;Base          |
| 23205 | chrY | 13443271 | . | A | T   | 333.02   | PASS          | AC=3;AF=0.043;AN=70;BaseQRankSum=  |
| 23206 | chrY | 13443283 | . | C | A   | 288.56   | PASS          | AC=3;AF=0.043;AN=70;BaseQRankSum=  |
| 23207 | chrY | 13443296 | . | C | A   | 939.40   | PASS          | AC=7;AF=0.100;AN=70;BaseQRankSum=  |
| 23208 | chrY | 13443303 | . | G | A   | 6753.70  | PASS          | AC=10;AF=0.143;AN=70;BaseQRankSum= |
| 23209 | chrY | 13443315 | . | A | T   | 5539.92  | PASS          | AC=9;AF=0.129;AN=70;BaseQRankSum=  |
| 23210 | chrY | 13443341 | . | A | G   | 1271.95  | PASS          | AC=9;AF=0.129;AN=70;BaseQRankSum=  |
| 23211 | chrY | 13443381 | . | T | G,A | 1884.06  | PASS          | AC=6,1;AF=0.088,0.015;AN=68;BaseQ  |
| 23212 | chrY | 13443395 | . | T | A   | 3396.36  | PASS          | AC=7;AF=0.106;AN=66;BaseQRankSum=  |
| 23213 | chrY | 13443479 | . | T | A   | 1035.13  | my_snp_filter | AC=8;AF=0.160;AN=50;BaseQ          |
| 23214 | chrY | 13443484 | . | A | G   | 3788.41  | PASS          | AC=9;AF=0.196;AN=46;BaseQRankSum=  |
| 23215 | chrY | 13443530 | . | A | T   | 2808.37  | PASS          | AC=12;AF=0.261;AN=46;BaseQRankSum= |
| 23216 | chrY | 13443531 | . | T | C   | 4255.83  | PASS          | AC=10;AF=0.200;AN=50;BaseQRankSum= |
| 23217 | chrY | 13443535 | . | T | G   | 2219.38  | PASS          | AC=8;AF=0.154;AN=52;BaseQRankSum=  |
| 23218 | chrY | 13443555 | . | C | T   | 1408.53  | PASS          | AC=5;AF=0.093;AN=54;BaseQRankSum=  |
| 23219 | chrY | 13443577 | . | G | A   | 343.96   | PASS          | AC=2;AF=0.036;AN=56;BaseQRankSum=  |
| 23220 | chrY | 13443599 | . | A | T   | 2055.56  | PASS          | AC=11;AF=0.229;AN=48;BaseQRankSum= |
| 23221 | chrY | 13443606 | . | T | C   | 1595.57  | PASS          | AC=10;AF=0.200;AN=50;BaseQRankSum= |
| 23222 | chrY | 13443618 | . | C | A   | 1102.74  | PASS          | AC=13;AF=0.260;AN=50;BaseQRankSum= |
| 23223 | chrY | 13443626 | . | A | G   | 76.19    | my_snp_filter | AC=3;AF=0.060;AN=50;BaseQ          |
| 23224 | chrY | 13443630 | . | G | A   | 1424.83  | PASS          | AC=8;AF=0.160;AN=50;BaseQRankSum=  |
| 23225 | chrY | 13443637 | . | C | T   | 5223.51  | PASS          | AC=11;AF=0.250;AN=44;BaseQRankSum= |
| 23226 | chrY | 13443640 | . | T | C   | 173.54   | my_snp_filter | AC=1;AF=0.020;AN=50;BaseQ          |
| 23227 | chrY | 13443666 | . | G | A   | 687.42   | PASS          | AC=7;AF=0.175;AN=40;BaseQRankSum=  |
| 23228 | chrY | 13443690 | . | G | C   | 2209.37  | PASS          | AC=8;AF=0.154;AN=52;BaseQRankSum=  |
| 23229 | chrY | 13443722 | . | A | G   | 4726.72  | PASS          | AC=8;AF=0.143;AN=56;BaseQRankSum=  |
| 23230 | chrY | 13443738 | . | G | T   | 5373.45  | PASS          | AC=8;AF=0.143;AN=56;BaseQRankSum=  |
| 23231 | chrY | 13443741 | . | G | C   | 890.68   | my_snp_filter | AC=5;AF=0.086;AN=58;BaseQ          |
| 23232 | chrY | 13443743 | . | G | A   | 160.15   | my_snp_filter | AC=2;AF=0.033;AN=60;BaseQ          |
| 23233 | chrY | 13443755 | . | C | G   | 177.22   | my_snp_filter | AC=2;AF=0.032;AN=62;BaseQ          |
| 23234 | chrY | 13443763 | . | T | C   | 79.99    | PASS          | AC=2;AF=0.029;AN=68;BaseQRankSum=  |
| 23235 | chrY | 13443764 | . | G | A   | 2168.20  | PASS          | AC=9;AF=0.132;AN=68;BaseQRankSum=  |
| 23236 | chrY | 13443773 | . | G | A   | 34.53    | PASS          | AC=1;AF=0.015;AN=68;BaseQRankSum=  |
| 23237 | chrY | 13443778 | . | G | T   | 399.54   | PASS          | AC=4;AF=0.061;AN=66;BaseQRankSum=  |
| 23238 | chrY | 13443806 | . | G | A   | 12754.10 | PASS          | AC=24;AF=0.343;AN=70;Base          |
| 23239 | chrY | 13443846 | . | T | A   | 2160.58  | PASS          | AC=9;AF=0.129;AN=70;BaseQRankSum=  |
| 23240 | chrY | 13443853 | . | G | A   | 65.53    | my_snp_filter | AC=1;AF=0.014;AN=70;BaseQ          |
| 23241 | chrY | 13443863 | . | A | G   | 15793.84 | PASS          | AC=31;AF=0.443;AN=70;Base          |
| 23242 | chrY | 13443879 | . | A | G   | 193.97   | PASS          | AC=2;AF=0.029;AN=70;BaseQRankSum=  |
| 23243 | chrY | 13443880 | . | T | C   | 2178.42  | PASS          | AC=9;AF=0.129;AN=70;BaseQRankSum=  |
| 23244 | chrY | 13443886 | . | G | A   | 2269.54  | PASS          | AC=5;AF=0.071;AN=70;BaseQRankSum=  |
| 23245 | chrY | 13443889 | . | G | T   | 2249.58  | PASS          | AC=9;AF=0.129;AN=70;BaseQRankSum=  |
| 23246 | chrY | 13443895 | . | A | G   | 2263.25  | PASS          | AC=11;AF=0.157;AN=70;BaseQRankSum= |
| 23247 | chrY | 13443903 | . | A | C   | 2106.28  | PASS          | AC=7;AF=0.100;AN=70;BaseQRankSum=  |
| 23248 | chrY | 13443916 | . | C | T   | 329.97   | PASS          | AC=2;AF=0.029;AN=70;BaseQRankSum=  |
| 23249 | chrY | 13443917 | . | G | A   | 2262.17  | my_snp_filter | AC=9;AF=0.129;AN=70;BaseQ          |
| 23250 | chrY | 13443938 | . | C | T   | 2345.60  | my_snp_filter | AC=9;AF=0.129;AN=70;BaseQ          |
| 23251 | chrY | 13443947 | . | C | T   | 8867.55  | PASS          | AC=25;AF=0.357;AN=70;BaseQRankSum= |
| 23252 | chrY | 13443955 | . | A | G   | 10929.09 | PASS          | AC=23;AF=0.329;AN=70;Base          |
| 23253 | chrY | 13443966 | . | A | G   | 1399.92  | my_snp_filter | AC=7;AF=0.100;AN=70;BaseQ          |
| 23254 | chrY | 13443968 | . | A | T   | 1477.40  | PASS          | AC=17;AF=0.243;AN=70;BaseQRankSum= |
| 23255 | chrY | 13444006 | . | G | A   | 187.83   | my_snp_filter | AC=4;AF=0.057;AN=70;BaseQ          |
| 23256 | chrY | 13444024 | . | T | C   | 2425.71  | PASS          | AC=10;AF=0.152;AN=66;BaseQRankSum= |

|       |      |          |   |   |     |          |               |                                    |
|-------|------|----------|---|---|-----|----------|---------------|------------------------------------|
| 23257 | chrY | 13444155 | . | A | T   | 6198.92  | PASS          | AC=11;AF=0.423;AN=26;BaseQRankSum= |
| 23258 | chrY | 13444235 | . | C | T   | 5403.52  | PASS          | AC=9;AF=0.450;AN=20;BaseQRankSum=  |
| 23259 | chrY | 13444243 | . | T | C   | 228.93   | PASS          | AC=2;AF=0.083;AN=24;BaseQRankSum=  |
| 23260 | chrY | 13444307 | . | C | A   | 5019.09  | PASS          | AC=9;AF=0.500;AN=18;BaseQRankSum=  |
| 23261 | chrY | 13444325 | . | C | T   | 2799.09  | PASS          | AC=9;AF=0.500;AN=18;BaseQRankSum=  |
| 23262 | chrY | 13444334 | . | G | T   | 1164.41  | PASS          | AC=5;AF=0.227;AN=22;BaseQRankSum=  |
| 23263 | chrY | 13444397 | . | C | G   | 2847.97  | PASS          | AC=9;AF=0.375;AN=24;BaseQRankSum=  |
| 23264 | chrY | 13444404 | . | G | T   | 1024.45  | PASS          | AC=5;AF=0.192;AN=26;BaseQRankSum=  |
| 23265 | chrY | 13444408 | . | A | G   | 3183.87  | PASS          | AC=9;AF=0.346;AN=26;BaseQRankSum=  |
| 23266 | chrY | 13444466 | . | G | C   | 3177.56  | PASS          | AC=9;AF=0.237;AN=38;BaseQRankSum=  |
| 23267 | chrY | 13444485 | . | A | T   | 3799.93  | PASS          | AC=9;AF=0.225;AN=40;BaseQRankSum=  |
| 23268 | chrY | 13444550 | . | T | C   | 1082.99  | my_snp_filter | AC=6;AF=0.100;AN=60;BaseQ          |
| 23269 | chrY | 13444554 | . | C | T   | 473.44   | PASS          | AC=2;AF=0.031;AN=64;BaseQRankSum=  |
| 23270 | chrY | 13444574 | . | A | C   | 3730.23  | my_snp_filter | AC=7;AF=0.109;AN=64;BaseQ          |
| 23271 | chrY | 13444577 | . | C | T   | 922.99   | PASS          | AC=5;AF=0.076;AN=66;BaseQRankSum=  |
| 23272 | chrY | 13444580 | . | C | A   | 13015.47 | my_snp_filter | AC=9;AF=0.155;AN=                  |
| 23273 | chrY | 13444588 | . | T | G   | 5248.45  | my_snp_filter | AC=11;AF=0.172;AN=64;Base          |
| 23274 | chrY | 13444595 | . | C | A   | 574.03   | PASS          | AC=4;AF=0.059;AN=68;BaseQRankSum=  |
| 23275 | chrY | 13444614 | . | T | A   | 1140.26  | PASS          | AC=9;AF=0.129;AN=70;BaseQRankSum=  |
| 23276 | chrY | 13444623 | . | G | A   | 1764.21  | PASS          | AC=10;AF=0.147;AN=68;BaseQRankSum= |
| 23277 | chrY | 13444645 | . | C | T   | 23338.08 | PASS          | AC=38;AF=0.543;AN=70;Base          |
| 23278 | chrY | 13444651 | . | C | A   | 796.52   | PASS          | AC=3;AF=0.043;AN=70;BaseQRankSum=  |
| 23279 | chrY | 13444667 | . | G | T   | 962.98   | PASS          | AC=6;AF=0.086;AN=70;BaseQRankSum=  |
| 23280 | chrY | 13444674 | . | G | A   | 4648.52  | PASS          | AC=16;AF=0.229;AN=70;BaseQRankSum= |
| 23281 | chrY | 13444719 | . | C | T   | 49140.80 | PASS          | AC=41;AF=0.586;AN=70;Base          |
| 23282 | chrY | 13444722 | . | T | C   | 4148.27  | PASS          | AC=14;AF=0.200;AN=70;BaseQRankSum= |
| 23283 | chrY | 13444728 | . | G | A   | 23593.72 | PASS          | AC=35;AF=0.500;AN=70;Base          |
| 23284 | chrY | 13444743 | . | C | A   | 3233.06  | PASS          | AC=9;AF=0.129;AN=70;BaseQRankSum=  |
| 23285 | chrY | 13444761 | . | G | T   | 424.69   | PASS          | AC=10;AF=0.143;AN=70;BaseQRankSum= |
| 23286 | chrY | 13444785 | . | C | G   | 54.94    | my_snp_filter | AC=2;AF=0.029;AN=70;BaseQ          |
| 23287 | chrY | 13444808 | . | T | C   | 81.53    | PASS          | AC=2;AF=0.029;AN=70;BaseQRankSum=  |
| 23288 | chrY | 13444829 | . | T | C,G | 500.81   | PASS          | AC=4,5;AF=0.057,0.071;AN=70;BaseQ  |
| 23289 | chrY | 13444838 | . | C | T   | 12943.84 | PASS          | AC=30;AF=0.441;AN=68;Base          |
| 23290 | chrY | 13444840 | . | A | C   | 189.46   | my_snp_filter | AC=4;AF=0.057;AN=70;BaseQ          |
| 23291 | chrY | 13444843 | . | C | T   | 147.21   | my_snp_filter | AC=2;AF=0.029;AN=70;BaseQ          |
| 23292 | chrY | 13444855 | . | T | C   | 8604.38  | PASS          | AC=14;AF=0.212;AN=66;BaseQRankSum= |
| 23293 | chrY | 13444857 | . | C | T   | 64.22    | my_snp_filter | AC=3;AF=0.045;AN=66;BaseQ          |
| 23294 | chrY | 13444868 | . | T | G   | 94.69    | PASS          | AC=3;AF=0.048;AN=62;BaseQRankSum=  |
| 23295 | chrY | 13444883 | . | T | C   | 6374.70  | PASS          | AC=13;AF=0.217;AN=60;BaseQRankSum= |
| 23296 | chrY | 13444898 | . | T | A   | 1831.09  | PASS          | AC=6;AF=0.107;AN=56;BaseQRankSum=  |
| 23297 | chrY | 13444904 | . | A | T   | 17448.88 | my_snp_filter | AC=13;AF=0.310;AN=                 |
| 23298 | chrY | 13444905 | . | T | A   | 17418.80 | my_snp_filter | AC=13;AF=0.310;AN=                 |
| 23299 | chrY | 13444937 | . | A | G   | 9335.66  | my_snp_filter | AC=11;AF=0.204;AN=54;Base          |
| 23300 | chrY | 13444948 | . | T | C   | 189.09   | my_snp_filter | AC=3;AF=0.044;AN=68;BaseQ          |
| 23301 | chrY | 13444958 | . | T | C   | 193.05   | my_snp_filter | AC=2;AF=0.030;AN=66;BaseQ          |
| 23302 | chrY | 13444976 | . | G | A   | 4447.67  | my_snp_filter | AC=8;AF=0.118;AN=68;BaseQ          |
| 23303 | chrY | 13444978 | . | C | A   | 4399.15  | my_snp_filter | AC=8;AF=0.118;AN=68;BaseQ          |
| 23304 | chrY | 13444981 | . | C | T   | 8009.95  | my_snp_filter | AC=9;AF=0.132;AN=68;BaseQ          |
| 23305 | chrY | 13445003 | . | A | T   | 593.02   | my_snp_filter | AC=3;AF=0.043;AN=70;BaseQ          |
| 23306 | chrY | 13445010 | . | C | A   | 345.67   | PASS          | AC=1;AF=0.014;AN=70;BaseQRankSum=  |
| 23307 | chrY | 13445014 | . | A | G   | 241.69   | PASS          | AC=1;AF=0.014;AN=70;BaseQRankSum=  |
| 23308 | chrY | 13445015 | . | T | A   | 4702.06  | my_snp_filter | AC=10;AF=0.147;AN=68;Base          |
| 23309 | chrY | 13445025 | . | C | T   | 847.79   | PASS          | AC=7;AF=0.100;AN=70;BaseQRankSum=  |
| 23310 | chrY | 13445031 | . | T | G   | 205.97   | PASS          | AC=1;AF=0.014;AN=70;BaseQRankSum=  |
| 23311 | chrY | 13445049 | . | G | A   | 1640.47  | PASS          | AC=10;AF=0.143;AN=70;BaseQRankSum= |
| 23312 | chrY | 13445075 | . | T | G   | 178.88   | PASS          | AC=1;AF=0.014;AN=70;BaseQRankSum=  |
| 23313 | chrY | 13445080 | . | T | C   | 8079.57  | PASS          | AC=28;AF=0.400;AN=70;BaseQRankSum= |
| 23314 | chrY | 13445083 | . | A | G   | 11649.15 | PASS          | AC=29;AF=0.414;AN=70;Base          |
| 23315 | chrY | 13445098 | . | C | G   | 2326.48  | PASS          | AC=12;AF=0.171;AN=70;BaseQRankSum= |
| 23316 | chrY | 13445111 | . | T | A   | 781.67   | my_snp_filter | AC=3;AF=0.043;AN=70;BaseQ          |
| 23317 | chrY | 13445118 | . | C | G   | 73.58    | PASS          | AC=1;AF=0.014;AN=70;BaseQRankSum=  |
| 23318 | chrY | 13445125 | . | T | A   | 34.98    | my_snp_filter | AC=2;AF=0.029;AN=70;BaseQ          |
| 23319 | chrY | 13445142 | . | A | G   | 695.51   | PASS          | AC=6;AF=0.088;AN=68;BaseQRankSum=  |
| 23320 | chrY | 13445143 | . | C | G   | 692.58   | PASS          | AC=6;AF=0.088;AN=68;BaseQRankSum=  |
| 23321 | chrY | 13445157 | . | C | G   | 2424.94  | PASS          | AC=13;AF=0.186;AN=70;BaseQRankSum= |
| 23322 | chrY | 13445160 | . | G | T   | 6896.02  | PASS          | AC=21;AF=0.309;AN=68;BaseQRankSum= |
| 23323 | chrY | 13445249 | . | C | T   | 10173.43 | PASS          | AC=28;AF=0.400;AN=70;Base          |
| 23324 | chrY | 13445252 | . | T | G   | 99.70    | PASS          | AC=1;AF=0.014;AN=70;BaseQRankSum=  |
| 23325 | chrY | 13445261 | . | T | C   | 11167.73 | PASS          | AC=27;AF=0.386;AN=70;Base          |
| 23326 | chrY | 13445262 | . | G | A   | 407.95   | PASS          | AC=5;AF=0.071;AN=70;BaseQRankSum=  |
| 23327 | chrY | 13445266 | . | A | T   | 69.67    | my_snp_filter | AC=1;AF=0.014;AN=70;BaseQ          |
| 23328 | chrY | 13445296 | . | A | G   | 755.88   | my_snp_filter | AC=18;AF=0.265;AN=68;Base          |
| 23329 | chrY | 13445300 | . | C | G   | 3263.80  | PASS          | AC=9;AF=0.136;AN=66;BaseQRankSum=  |
| 23330 | chrY | 13445305 | . | C | T   | 1353.58  | PASS          | AC=6;AF=0.091;AN=66;BaseQRankSum=  |
| 23331 | chrY | 13445309 | . | C | A   | 1215.93  | PASS          | AC=6;AF=0.088;AN=68;BaseQRankSum=  |
| 23332 | chrY | 13445320 | . | T | A   | 1325.78  | PASS          | AC=6;AF=0.091;AN=66;BaseQRankSum=  |

|       |      |          |   |   |     |           |               |                                             |
|-------|------|----------|---|---|-----|-----------|---------------|---------------------------------------------|
| 23333 | chrY | 13445375 | . | A | G   | 716.57    | PASS          | AC=6;AF=0.150;AN=40;BaseQRankSum=           |
| 23334 | chrY | 13445389 | . | A | G   | 1016.76   | PASS          | AC=6;AF=0.143;AN=42;BaseQRankSum=           |
| 23335 | chrY | 13445416 | . | A | T   | 4008.21   | PASS          | AC=8;AF=0.200;AN=40;BaseQRankSum=           |
| 23336 | chrY | 13445419 | . | A | T   | 733.21    | PASS          | AC=3;AF=0.071;AN=42;BaseQRankSum=           |
| 23337 | chrY | 13445421 | . | T | C   | 4314.89   | PASS          | AC=8;AF=0.200;AN=40;BaseQRankSum=           |
| 23338 | chrY | 13445422 | . | C | T   | 725.64    | PASS          | AC=3;AF=0.071;AN=42;BaseQRankSum=           |
| 23339 | chrY | 13445432 | . | A | T   | 4947.39   | PASS          | AC=8;AF=0.211;AN=38;BaseQRankSum=           |
| 23340 | chrY | 13445437 | . | A | G   | 6501.40   | PASS          | AC=8;AF=0.222;AN=36;BaseQRankSum=           |
| 23341 | chrY | 13445465 | . | C | G   | 19818.51  | PASS          | AC=10;AF=0.500;AN=20;BaseQRankSum=          |
| 23342 | chrY | 13445481 | . | G | T   | 8679.69   | PASS          | AC=9;AF=0.346;AN=26;BaseQRankSum=           |
| 23343 | chrY | 13445496 | . | A | G   | 394.62    | PASS          | AC=3;AF=0.100;AN=30;BaseQRankSum=           |
| 23344 | chrY | 13445506 | . | C | A   | 640.60    | my_snp_filter | AC=3;AF=0.107;AN=28;BaseQRankSum=           |
| 23345 | chrY | 13445510 | . | T | C   | 110.91    | my_snp_filter | AC=2;AF=0.063;AN=32;BaseQRankSum=           |
| 23346 | chrY | 13445513 | . | C | G   | 6275.94   | PASS          | AC=9;AF=0.300;AN=30;BaseQRankSum=           |
| 23347 | chrY | 13445528 | . | C | G   | 200.25    | my_snp_filter | AC=3;AF=0.083;AN=36;BaseQRankSum=           |
| 23348 | chrY | 13445531 | . | G | T   | 1814.49   | my_snp_filter | AC=4;AF=0.111;AN=36;BaseQRankSum=           |
| 23349 | chrY | 13445546 | . | A | G   | 6007.84   | PASS          | AC=5;AF=0.179;AN=28;BaseQRankSum=           |
| 23350 | chrY | 13445553 | . | C | T   | 3277.81   | PASS          | AC=7;AF=0.233;AN=30;BaseQRankSum=           |
| 23351 | chrY | 13445555 | . | A | C   | 1545.26   | my_snp_filter | AC=4;AF=0.118;AN=34;BaseQRankSum=           |
| 23352 | chrY | 13445557 | . | T | G   | 346.97    | my_snp_filter | AC=3;AF=0.094;AN=32;BaseQRankSum=           |
| 23353 | chrY | 13445566 | . | A | G   | 3098.17   | my_snp_filter | AC=8;AF=0.235;AN=34;BaseQRankSum=           |
| 23354 | chrY | 13445571 | . | T | C   | 328.08    | my_snp_filter | AC=1;AF=0.033;AN=30;BaseQRankSum=           |
| 23355 | chrY | 13445593 | . | C | A   | 14824.66  | PASS          | AC=10;AF=0.313;AN=32;BaseQRankSum=          |
| 23356 | chrY | 13445618 | . | T | C   | 15765.20  | PASS          | AC=10;AF=0.278;AN=36;BaseQRankSum=          |
| 23357 | chrY | 13445632 | . | T | G   | 57200.13  | PASS          | AC=10;AF=0.263;AN=38;BaseQRankSum=          |
| 23358 | chrY | 13445635 | . | G | A   | 62905.15  | PASS          | AC=11;AF=0.324;AN=34;BaseQRankSum=          |
| 23359 | chrY | 13445641 | . | C | A   | 1070.86   | PASS          | AC=2;AF=0.045;AN=44;BaseQRankSum=           |
| 23360 | chrY | 13445646 | . | T | C   | 3738.01   | PASS          | AC=8;AF=0.190;AN=42;BaseQRankSum=           |
| 23361 | chrY | 13445647 | . | C | T   | 41.15     | PASS          | AC=1;AF=0.023;AN=44;BaseQRankSum=           |
| 23362 | chrY | 13445666 | . | A | G   | 2443.79   | PASS          | AC=9;AF=0.167;AN=54;BaseQRankSum=           |
| 23363 | chrY | 13445705 | . | C | T   | 223.86    | PASS          | AC=4;AF=0.063;AN=64;BaseQRankSum=           |
| 23364 | chrY | 13445720 | . | T | C   | 167.17    | PASS          | AC=4;AF=0.059;AN=68;BaseQRankSum=           |
| 23365 | chrY | 13445731 | . | G | A,* | 22303.02  | PASS          | AC=33,3;AF=0.485,0.044;AN=70;BaseQRankSum=  |
| 23366 | chrY | 13445760 | . | T | G   | 1461.60   | my_snp_filter | AC=14;AF=0.200;AN=70;BaseQRankSum=          |
| 23367 | chrY | 13445764 | . | A | G   | 547.74    | my_snp_filter | AC=5;AF=0.071;AN=70;BaseQRankSum=           |
| 23368 | chrY | 13445768 | . | T | C   | 1570.52   | PASS          | AC=14;AF=0.200;AN=70;BaseQRankSum=          |
| 23369 | chrY | 13445770 | . | C | A   | 73.24     | my_snp_filter | AC=5;AF=0.071;AN=70;BaseQRankSum=           |
| 23370 | chrY | 13445771 | . | T | C   | 1259.93   | PASS          | AC=14;AF=0.200;AN=70;BaseQRankSum=          |
| 23371 | chrY | 13445784 | . | T | C   | 725.21    | my_snp_filter | AC=8;AF=0.114;AN=70;BaseQRankSum=           |
| 23372 | chrY | 13445787 | . | T | A,G | 57954.14  | PASS          | AC=31,5;AF=0.443,0.071;AN=70;BaseQRankSum=  |
| 23373 | chrY | 13445805 | . | T | G   | 96306.54  | PASS          | AC=34;AF=0.486;AN=70;BaseQRankSum=          |
| 23374 | chrY | 13445818 | . | C | G,T | 82758.84  | PASS          | AC=31,5;AF=0.443,0.071;AN=70;BaseQRankSum=  |
| 23375 | chrY | 13445827 | . | T | A   | 224.63    | my_snp_filter | AC=4;AF=0.057;AN=70;BaseQRankSum=           |
| 23376 | chrY | 13445839 | . | C | T   | 12494.48  | PASS          | AC=8;AF=0.114;AN=70;BaseQRankSum=           |
| 23377 | chrY | 13445843 | . | C | T,G | 24982.11  | PASS          | AC=13,6;AF=0.186,0.086;AN=70;BaseQRankSum=  |
| 23378 | chrY | 13445844 | . | T | C   | 23805.88  | PASS          | AC=11;AF=0.157;AN=70;BaseQRankSum=          |
| 23379 | chrY | 13445847 | . | A | C   | 4206.28   | my_snp_filter | AC=18;AF=0.257;AN=70;BaseQRankSum=          |
| 23380 | chrY | 13445858 | . | A | C   | 103497.72 | PASS          | AC=35;AF=0.500;AN=70;BaseQRankSum=          |
| 23381 | chrY | 13445859 | . | T | C   | 95219.72  | PASS          | AC=35;AF=0.500;AN=70;BaseQRankSum=          |
| 23382 | chrY | 13445863 | . | G | C   | 139.42    | my_snp_filter | AC=1;AF=0.014;AN=70;BaseQRankSum=           |
| 23383 | chrY | 13445869 | . | G | C   | 1886.58   | my_snp_filter | AC=8;AF=0.114;AN=70;BaseQRankSum=           |
| 23384 | chrY | 13445872 | . | C | G   | 17973.59  | PASS          | AC=10;AF=0.143;AN=70;BaseQRankSum=          |
| 23385 | chrY | 13445873 | . | A | T   | 886.53    | my_snp_filter | AC=10;AF=0.143;AN=70;BaseQRankSum=          |
| 23386 | chrY | 13445879 | . | C | A,T | 73926.74  | PASS          | AC=18,22;AF=0.257,0.314;AN=70;BaseQRankSum= |
| 23387 | chrY | 13445883 | . | C | T   | 877.44    | my_snp_filter | AC=9;AF=0.129;AN=70;BaseQRankSum=           |
| 23388 | chrY | 13445886 | . | G | T   | 11439.94  | PASS          | AC=17;AF=0.243;AN=70;BaseQRankSum=          |
| 23389 | chrY | 13445897 | . | C | T   | 116.32    | my_snp_filter | AC=4;AF=0.057;AN=70;BaseQRankSum=           |
| 23390 | chrY | 13445898 | . | A | C   | 15510.01  | PASS          | AC=10;AF=0.143;AN=70;BaseQRankSum=          |
| 23391 | chrY | 13445900 | . | C | A,* | 42645.57  | PASS          | AC=25,8;AF=0.357,0.114;AN=70;BaseQRankSum=  |
| 23392 | chrY | 13445903 | . | A | T   | 10486.41  | PASS          | AC=18;AF=0.257;AN=70;BaseQRankSum=          |
| 23393 | chrY | 13445910 | . | A | C   | 57.75     | my_snp_filter | AC=3;AF=0.043;AN=70;BaseQRankSum=           |
| 23394 | chrY | 13445911 | . | G | A   | 24073.06  | PASS          | AC=16;AF=0.229;AN=70;BaseQRankSum=          |
| 23395 | chrY | 13445920 | . | C | A   | 79063.84  | PASS          | AC=34;AF=0.486;AN=70;BaseQRankSum=          |
| 23396 | chrY | 13445929 | . | G | C   | 2617.13   | PASS          | AC=15;AF=0.214;AN=70;BaseQRankSum=          |
| 23397 | chrY | 13445937 | . | C | T   | 787.48    | my_snp_filter | AC=6;AF=0.086;AN=70;BaseQRankSum=           |
| 23398 | chrY | 13445943 | . | G | T   | 1041.69   | PASS          | AC=8;AF=0.114;AN=70;BaseQRankSum=           |
| 23399 | chrY | 13445957 | . | C | G   | 5363.88   | PASS          | AC=21;AF=0.300;AN=70;BaseQRankSum=          |
| 23400 | chrY | 13445969 | . | G | T   | 1687.11   | PASS          | AC=16;AF=0.229;AN=70;BaseQRankSum=          |
| 23401 | chrY | 13445976 | . | G | T   | 1686.81   | PASS          | AC=16;AF=0.229;AN=70;BaseQRankSum=          |
| 23402 | chrY | 13445980 | . | T | A   | 1584.54   | PASS          | AC=16;AF=0.229;AN=70;BaseQRankSum=          |
| 23403 | chrY | 13445999 | . | T | G   | 6771.91   | PASS          | AC=11;AF=0.157;AN=70;BaseQRankSum=          |
| 23404 | chrY | 13446001 | . | G | C,T | 1537.45   | my_snp_filter | AC=4,5;AF=0.057,0.071;AN=70;BaseQRankSum=   |
| 23405 | chrY | 13446009 | . | G | A   | 37162.51  | PASS          | AC=25;AF=0.357;AN=70;BaseQRankSum=          |
| 23406 | chrY | 13446012 | . | G | A   | 1458.18   | my_snp_filter | AC=11;AF=0.157;AN=70;BaseQRankSum=          |
| 23407 | chrY | 13446017 | . | C | T   | 227.04    | my_snp_filter | AC=3;AF=0.043;AN=70;BaseQRankSum=           |
| 23408 | chrY | 13446025 | . | C | T   | 2346.90   | PASS          | AC=5;AF=0.071;AN=70;BaseQRankSum=           |

|       |      |          |   |   |     |          |               |                                            |
|-------|------|----------|---|---|-----|----------|---------------|--------------------------------------------|
| 23409 | chrY | 13446029 | . | T | A   | 3308.92  | PASS          | AC=15;AF=0.214;AN=70;BaseQRankSum=         |
| 23410 | chrY | 13446037 | . | A | T   | 3488.75  | PASS          | AC=15;AF=0.214;AN=70;BaseQRankSum=         |
| 23411 | chrY | 13446042 | . | T | C   | 47592.67 | PASS          | AC=27;AF=0.386;AN=70;BaseQRankSum=         |
| 23412 | chrY | 13446045 | . | A | G   | 19442.71 | PASS          | AC=14;AF=0.200;AN=70;BaseQRankSum=         |
| 23413 | chrY | 13446052 | . | T | G   | 21156.13 | PASS          | AC=13;AF=0.186;AN=70;BaseQRankSum=         |
| 23414 | chrY | 13446056 | . | T | C   | 15355.43 | PASS          | AC=22;AF=0.314;AN=70;BaseQRankSum=         |
| 23415 | chrY | 13446060 | . | G | A   | 3539.45  | PASS          | AC=7;AF=0.100;AN=70;BaseQRankSum=          |
| 23416 | chrY | 13446079 | . | A | G   | 28853.72 | PASS          | AC=22;AF=0.314;AN=70;BaseQRankSum=         |
| 23417 | chrY | 13446092 | . | A | T   | 1043.18  | my_snp_filter | AC=11;AF=0.157;AN=70;BaseQRankSum=         |
| 23418 | chrY | 13446099 | . | A | T   | 1178.53  | PASS          | AC=5;AF=0.071;AN=70;BaseQRankSum=          |
| 23419 | chrY | 13446112 | . | G | A   | 70787.55 | PASS          | AC=43;AF=0.614;AN=70;BaseQRankSum=         |
| 23420 | chrY | 13446117 | . | G | A   | 1486.28  | my_snp_filter | AC=10;AF=0.143;AN=70;BaseQRankSum=         |
| 23421 | chrY | 13446125 | . | G | T   | 19193.43 | PASS          | AC=25;AF=0.357;AN=70;BaseQRankSum=         |
| 23422 | chrY | 13446133 | . | T | A,G | 20331.13 | PASS          | AC=7,22;AF=0.100,0.314;AN=70;BaseQRankSum= |
| 23423 | chrY | 13446147 | . | C | T   | 576.69   | my_snp_filter | AC=8;AF=0.114;AN=70;BaseQRankSum=          |
| 23424 | chrY | 13446157 | . | A | G   | 1029.46  | my_snp_filter | AC=9;AF=0.129;AN=70;BaseQRankSum=          |
| 23425 | chrY | 13446188 | . | C | T   | 2985.14  | PASS          | AC=7;AF=0.100;AN=70;BaseQRankSum=          |
| 23426 | chrY | 13446207 | . | C | A   | 2109.30  | my_snp_filter | AC=17;AF=0.243;AN=70;BaseQRankSum=         |
| 23427 | chrY | 13446218 | . | T | A   | 5527.83  | PASS          | AC=22;AF=0.314;AN=70;BaseQRankSum=         |
| 23428 | chrY | 13446223 | . | G | A   | 3335.35  | PASS          | AC=9;AF=0.129;AN=70;BaseQRankSum=          |
| 23429 | chrY | 13446228 | . | T | A   | 160.97   | my_snp_filter | AC=4;AF=0.057;AN=70;BaseQRankSum=          |
| 23430 | chrY | 13446232 | . | T | A   | 74028.43 | PASS          | AC=36;AF=0.514;AN=70;BaseQRankSum=         |
| 23431 | chrY | 13446241 | . | G | C   | 162.53   | my_snp_filter | AC=5;AF=0.074;AN=68;BaseQRankSum=          |
| 23432 | chrY | 13446248 | . | A | T   | 59781.59 | PASS          | AC=35;AF=0.500;AN=70;BaseQRankSum=         |
| 23433 | chrY | 13446254 | . | C | T   | 67033.88 | PASS          | AC=37;AF=0.529;AN=70;BaseQRankSum=         |
| 23434 | chrY | 13446262 | . | A | G   | 17798.35 | PASS          | AC=23;AF=0.338;AN=68;BaseQRankSum=         |
| 23435 | chrY | 13446271 | . | A | G   | 464.68   | my_snp_filter | AC=3;AF=0.047;AN=64;BaseQRankSum=          |
| 23436 | chrY | 13446279 | . | T | C   | 1463.02  | my_snp_filter | AC=6;AF=0.100;AN=60;BaseQRankSum=          |
| 23437 | chrY | 13446281 | . | A | T   | 37836.37 | PASS          | AC=21;AF=0.362;AN=58;BaseQRankSum=         |
| 23438 | chrY | 13446299 | . | T | C   | 6899.61  | PASS          | AC=14;AF=0.280;AN=50;BaseQRankSum=         |
| 23439 | chrY | 13446304 | . | G | A   | 2000.94  | PASS          | AC=6;AF=0.115;AN=52;BaseQRankSum=          |
| 23440 | chrY | 13446314 | . | T | A   | 911.50   | PASS          | AC=2;AF=0.040;AN=50;BaseQRankSum=          |
| 23441 | chrY | 13446320 | . | A | G   | 35.64    | PASS          | AC=2;AF=0.042;AN=48;BaseQRankSum=          |
| 23442 | chrY | 13446323 | . | G | T   | 514.67   | my_snp_filter | AC=2;AF=0.042;AN=48;BaseQRankSum=          |
| 23443 | chrY | 13446325 | . | G | A   | 1121.79  | PASS          | AC=3;AF=0.065;AN=46;BaseQRankSum=          |
| 23444 | chrY | 13446327 | . | T | A   | 4713.80  | PASS          | AC=9;AF=0.225;AN=40;BaseQRankSum=          |
| 23445 | chrY | 13446330 | . | G | T   | 30007.38 | PASS          | AC=10;AF=0.227;AN=44;BaseQRankSum=         |
| 23446 | chrY | 13446344 | . | G | C   | 2857.79  | PASS          | AC=3;AF=0.071;AN=42;BaseQRankSum=          |
| 23447 | chrY | 13446353 | . | G | A   | 18251.87 | PASS          | AC=8;AF=0.174;AN=46;BaseQRankSum=          |
| 23448 | chrY | 13446362 | . | C | T   | 15932.32 | PASS          | AC=8;AF=0.200;AN=40;BaseQRankSum=          |
| 23449 | chrY | 13446371 | . | T | G   | 196.76   | PASS          | AC=7;AF=0.167;AN=42;BaseQRankSum=          |
| 23450 | chrY | 13446376 | . | A | G   | 21952.48 | PASS          | AC=8;AF=0.174;AN=46;BaseQRankSum=          |
| 23451 | chrY | 13446380 | . | G | A   | 16032.78 | PASS          | AC=8;AF=0.160;AN=50;BaseQRankSum=          |
| 23452 | chrY | 13446389 | . | C | T   | 45766.92 | PASS          | AC=9;AF=0.196;AN=46;BaseQRankSum=          |
| 23453 | chrY | 13446390 | . | A | G   | 50056.54 | PASS          | AC=26;AF=0.565;AN=46;BaseQRankSum=         |
| 23454 | chrY | 13446392 | . | T | G   | 46335.45 | PASS          | AC=8;AF=0.160;AN=50;BaseQRankSum=          |
| 23455 | chrY | 13446403 | . | C | T   | 50258.78 | PASS          | AC=8;AF=0.160;AN=50;BaseQRankSum=          |
| 23456 | chrY | 13446404 | . | A | G   | 50422.08 | PASS          | AC=8;AF=0.160;AN=50;BaseQRankSum=          |
| 23457 | chrY | 13446412 | . | T | A   | 51959.07 | PASS          | AC=9;AF=0.188;AN=48;BaseQRankSum=          |
| 23458 | chrY | 13446415 | . | C | A   | 993.88   | my_snp_filter | AC=5;AF=0.078;AN=64;BaseQRankSum=          |
| 23459 | chrY | 13446418 | . | C | T   | 4281.78  | PASS          | AC=4;AF=0.065;AN=62;BaseQRankSum=          |
| 23460 | chrY | 13446419 | . | C | A   | 945.98   | my_snp_filter | AC=5;AF=0.081;AN=62;BaseQRankSum=          |
| 23461 | chrY | 13446440 | . | C | A   | 5972.86  | PASS          | AC=7;AF=0.106;AN=66;BaseQRankSum=          |
| 23462 | chrY | 13446441 | . | C | G   | 80.62    | my_snp_filter | AC=1;AF=0.015;AN=66;BaseQRankSum=          |
| 23463 | chrY | 13446452 | . | G | T   | 201.94   | my_snp_filter | AC=1;AF=0.015;AN=68;BaseQRankSum=          |
| 23464 | chrY | 13446455 | . | G | A   | 8313.53  | PASS          | AC=3;AF=0.045;AN=66;BaseQRankSum=          |
| 23465 | chrY | 13446484 | . | T | C   | 1004.90  | PASS          | AC=1;AF=0.167;AN=6;BaseQRankSum=           |
| 23466 | chrY | 13446505 | . | G | A   | 996.54   | PASS          | AC=1;AF=0.250;AN=4;BaseQRankSum=           |
| 23467 | chrY | 13446608 | . | C | T   | 717.26   | PASS          | AC=1;AF=0.021;AN=48;BaseQRankSum=          |
| 23468 | chrY | 13446609 | . | T | C   | 721.10   | my_snp_filter | AC=1;AF=0.022;AN=46;BaseQRankSum=          |
| 23469 | chrY | 13446614 | . | T | C   | 336.47   | PASS          | AC=1;AF=0.071;AN=14;BaseQRankSum=          |
| 23470 | chrY | 13446734 | . | G | C   | 134.72   | my_snp_filter | AC=1;AF=0.015;AN=66;BaseQRankSum=          |
| 23471 | chrY | 13446747 | . | T | A   | 141.13   | PASS          | AC=1;AF=0.015;AN=68;BaseQRankSum=          |
| 23472 | chrY | 13446749 | . | T | C   | 135.45   | PASS          | AC=1;AF=0.026;AN=38;BaseQRankSum=          |
| 23473 | chrY | 13446757 | . | G | A   | 742.93   | PASS          | AC=4;AF=0.069;AN=58;BaseQRankSum=          |
| 23474 | chrY | 13446775 | . | C | G   | 21247.08 | PASS          | AC=17;AF=0.293;AN=58;BaseQRankSum=         |
| 23475 | chrY | 13446778 | . | T | G   | 21500.22 | PASS          | AC=17;AF=0.283;AN=60;BaseQRankSum=         |
| 23476 | chrY | 13446796 | . | G | T   | 21568.09 | PASS          | AC=16;AF=0.320;AN=50;BaseQRankSum=         |
| 23477 | chrY | 13446801 | . | C | T,* | 11026.45 | PASS          | AC=14,2;AF=0.269,0.038;AN=60;BaseQRankSum= |
| 23478 | chrY | 13446824 | . | T | G,* | 7620.36  | PASS          | AC=4,12;AF=0.067,0.200;AN=60;BaseQRankSum= |
| 23479 | chrY | 13446829 | . | T | G,* | 6809.39  | PASS          | AC=9,5;AF=0.145,0.081;AN=62;BaseQRankSum=  |
| 23480 | chrY | 13446834 | . | T | G,* | 3728.66  | PASS          | AC=4,4;AF=0.061,0.061;AN=66;BaseQRankSum=  |
| 23481 | chrY | 13446883 | . | T | C   | 37365.46 | PASS          | AC=18;AF=0.409;AN=44;BaseQRankSum=         |
| 23482 | chrY | 13446901 | . | T | C   | 40701.71 | PASS          | AC=19;AF=0.452;AN=42;BaseQRankSum=         |
| 23483 | chrY | 13446936 | . | C | T   | 520.68   | PASS          | AC=1;AF=0.014;AN=70;BaseQRankSum=          |
| 23484 | chrY | 13446967 | . | A | T   | 54000.85 | PASS          | AC=24;AF=0.462;AN=52;BaseQRankSum=         |

|       |      |          |   |   |     |          |               |                                            |
|-------|------|----------|---|---|-----|----------|---------------|--------------------------------------------|
| 23485 | chrY | 13446988 | . | T | A   | 16730.52 | PASS          | AC=20;AF=0.294;AN=68;BaseQRankSum=         |
| 23486 | chrY | 13446998 | . | C | A   | 9526.21  | PASS          | AC=17;AF=0.243;AN=70;BaseQRankSum=         |
| 23487 | chrY | 13447004 | . | T | C   | 48425.80 | PASS          | AC=24;AF=0.414;AN=58;BaseQRankSum=         |
| 23488 | chrY | 13447024 | . | C | T   | 37478.80 | PASS          | AC=24;AF=0.414;AN=58;BaseQRankSum=         |
| 23489 | chrY | 13447040 | . | G | A   | 10830.09 | PASS          | AC=20;AF=0.303;AN=66;BaseQRankSum=         |
| 23490 | chrY | 13447042 | . | A | C   | 29637.85 | PASS          | AC=24;AF=0.462;AN=52;BaseQRankSum=         |
| 23491 | chrY | 13447046 | . | C | A   | 515.78   | PASS          | AC=2;AF=0.029;AN=70;BaseQRankSum=          |
| 23492 | chrY | 13447063 | . | G | A   | 1399.29  | PASS          | AC=8;AF=0.118;AN=68;BaseQRankSum=          |
| 23493 | chrY | 13447101 | . | A | C   | 3752.38  | PASS          | AC=14;AF=0.333;AN=42;BaseQRankSum=         |
| 23494 | chrY | 13447106 | . | C | G,* | 466.75   | PASS          | AC=2,1;AF=0.030,0.015;AN=66;BaseQRankSum=  |
| 23495 | chrY | 13447111 | . | C | A,* | 5577.54  | PASS          | AC=1,36;AF=0.015,0.545;AN=66;BaseQRankSum= |
| 23496 | chrY | 13447139 | . | T | C,* | 1922.41  | PASS          | AC=2,7;AF=0.029,0.103;AN=68;BaseQRankSum=  |
| 23497 | chrY | 13447152 | . | C | T   | 2599.58  | PASS          | AC=9;AF=0.129;AN=70;BaseQRankSum=          |
| 23498 | chrY | 13447164 | . | T | C   | 4800.50  | PASS          | AC=9;AF=0.300;AN=30;BaseQRankSum=          |
| 23499 | chrY | 13447168 | . | T | A   | 50.42    | my_snp_filter | AC=2;AF=0.029;AN=70;BaseQRankSum=          |
| 23500 | chrY | 13447181 | . | G | C   | 4892.23  | PASS          | AC=9;AF=0.250;AN=36;BaseQRankSum=          |
| 23501 | chrY | 13447223 | . | G | A   | 1482.05  | PASS          | AC=3;AF=0.094;AN=32;BaseQRankSum=          |
| 23502 | chrY | 13447226 | . | A | C   | 83.16    | PASS          | AC=1;AF=0.029;AN=34;BaseQRankSum=          |
| 23503 | chrY | 13447257 | . | A | C   | 818.78   | PASS          | AC=2;AF=0.050;AN=40;BaseQRankSum=          |
| 23504 | chrY | 13447311 | . | G | A   | 2848.55  | PASS          | AC=7;AF=0.146;AN=48;BaseQRankSum=          |
| 23505 | chrY | 13447350 | . | T | A   | 477.23   | PASS          | AC=5;AF=0.071;AN=70;BaseQRankSum=          |
| 23506 | chrY | 13447379 | . | T | C   | 494.15   | PASS          | AC=5;AF=0.179;AN=28;BaseQRankSum=          |
| 23507 | chrY | 13447394 | . | T | A   | 668.09   | PASS          | AC=5;AF=0.074;AN=68;BaseQRankSum=          |
| 23508 | chrY | 13447406 | . | G | A   | 658.36   | PASS          | AC=5;AF=0.071;AN=70;BaseQRankSum=          |
| 23509 | chrY | 13447422 | . | G | A   | 551.73   | PASS          | AC=5;AF=0.081;AN=62;BaseQRankSum=          |
| 23510 | chrY | 13447457 | . | C | A   | 43.08    | my_snp_filter | AC=2;AF=0.029;AN=70;BaseQRankSum=          |
| 23511 | chrY | 13447460 | . | T | A   | 1112.59  | PASS          | AC=7;AF=0.100;AN=70;BaseQRankSum=          |
| 23512 | chrY | 13447466 | . | C | A,G | 547.45   | PASS          | AC=5,1;AF=0.076,0.015;AN=66;BaseQRankSum=  |
| 23513 | chrY | 13447473 | . | C | T   | 13722.89 | PASS          | AC=8;AF=0.200;AN=40;BaseQRankSum=          |
| 23514 | chrY | 13447478 | . | A | C,T | 20418.16 | PASS          | AC=24,1;AF=0.632,0.026;AN=66;BaseQRankSum= |
| 23515 | chrY | 13447482 | . | T | A   | 57.87    | PASS          | AC=1;AF=0.017;AN=60;BaseQRankSum=          |
| 23516 | chrY | 13447486 | . | T | C   | 579.95   | my_snp_filter | AC=3;AF=0.050;AN=60;BaseQRankSum=          |
| 23517 | chrY | 13447488 | . | C | G   | 499.69   | my_snp_filter | AC=3;AF=0.050;AN=60;BaseQRankSum=          |
| 23518 | chrY | 13447491 | . | T | C   | 435.98   | my_snp_filter | AC=3;AF=0.054;AN=56;BaseQRankSum=          |
| 23519 | chrY | 13447492 | . | G | T,A | 10480.55 | PASS          | AC=7,2;AF=0.206,0.059;AN=66;BaseQRankSum=  |
| 23520 | chrY | 13447503 | . | C | T   | 3165.09  | PASS          | AC=6;AF=0.100;AN=60;BaseQRankSum=          |
| 23521 | chrY | 13447513 | . | T | C   | 1774.28  | PASS          | AC=11;AF=0.229;AN=48;BaseQRankSum=         |
| 23522 | chrY | 13447555 | . | G | A   | 337.28   | PASS          | AC=3;AF=0.115;AN=26;BaseQRankSum=          |
| 23523 | chrY | 13447568 | . | C | T   | 1424.94  | PASS          | AC=5;AF=0.071;AN=70;BaseQRankSum=          |
| 23524 | chrY | 13447573 | . | G | C   | 1816.26  | PASS          | AC=6;AF=0.086;AN=70;BaseQRankSum=          |
| 23525 | chrY | 13447584 | . | T | C,* | 6286.31  | PASS          | AC=6,2;AF=0.333,0.111;AN=18;BaseQRankSum=  |
| 23526 | chrY | 13447586 | . | T | C   | 101.06   | my_snp_filter | AC=2;AF=0.029;AN=70;BaseQRankSum=          |
| 23527 | chrY | 13447591 | . | T | C   | 267.10   | PASS          | AC=3;AF=0.043;AN=70;BaseQRankSum=          |
| 23528 | chrY | 13447596 | . | T | C   | 178.76   | PASS          | AC=2;AF=0.031;AN=64;BaseQRankSum=          |
| 23529 | chrY | 13447598 | . | G | C   | 269.97   | PASS          | AC=3;AF=0.043;AN=70;BaseQRankSum=          |
| 23530 | chrY | 13447601 | . | A | C   | 225.32   | PASS          | AC=2;AF=0.029;AN=70;BaseQRankSum=          |
| 23531 | chrY | 13447603 | . | G | C   | 192.85   | PASS          | AC=2;AF=0.029;AN=70;BaseQRankSum=          |
| 23532 | chrY | 13447620 | . | A | G   | 19514.22 | PASS          | AC=25;AF=0.357;AN=70;BaseQRankSum=         |
| 23533 | chrY | 13447625 | . | A | T   | 31.17    | my_snp_filter | AC=1;AF=0.014;AN=70;BaseQRankSum=          |
| 23534 | chrY | 13447630 | . | G | A   | 21815.40 | PASS          | AC=26;AF=0.481;AN=54;BaseQRankSum=         |
| 23535 | chrY | 13447634 | . | C | A   | 21358.78 | PASS          | AC=26;AF=0.371;AN=70;BaseQRankSum=         |
| 23536 | chrY | 13447643 | . | G | A   | 111.54   | my_snp_filter | AC=3;AF=0.048;AN=62;BaseQRankSum=          |
| 23537 | chrY | 13447645 | . | G | A   | 21342.38 | PASS          | AC=26;AF=0.448;AN=58;BaseQRankSum=         |
| 23538 | chrY | 13447673 | . | C | T   | 80.87    | PASS          | AC=1;AF=0.014;AN=70;BaseQRankSum=          |
| 23539 | chrY | 13447684 | . | C | T   | 6126.63  | PASS          | AC=21;AF=0.300;AN=70;BaseQRankSum=         |
| 23540 | chrY | 13447692 | . | A | T   | 617.07   | PASS          | AC=1;AF=0.018;AN=56;BaseQRankSum=          |
| 23541 | chrY | 13447698 | . | A | C   | 69884.89 | PASS          | AC=34;AF=0.500;AN=68;BaseQRankSum=         |
| 23542 | chrY | 13447722 | . | A | T   | 82896.60 | PASS          | AC=34;AF=0.486;AN=70;BaseQRankSum=         |
| 23543 | chrY | 13447723 | . | C | A   | 68.05    | my_snp_filter | AC=2;AF=0.029;AN=70;BaseQRankSum=          |
| 23544 | chrY | 13447728 | . | C | T   | 1180.51  | PASS          | AC=3;AF=0.043;AN=70;BaseQRankSum=          |
| 23545 | chrY | 13447729 | . | C | G   | 83444.79 | PASS          | AC=34;AF=0.486;AN=70;BaseQRankSum=         |
| 23546 | chrY | 13447750 | . | A | C   | 11493.59 | PASS          | AC=23;AF=0.329;AN=70;BaseQRankSum=         |
| 23547 | chrY | 13447799 | . | A | G   | 20761.14 | my_snp_filter | AC=23;AF=0.329;AN=70;BaseQRankSum=         |
| 23548 | chrY | 13447805 | . | C | T   | 6481.23  | PASS          | AC=21;AF=0.300;AN=70;BaseQRankSum=         |
| 23549 | chrY | 13447807 | . | G | T   | 93.26    | my_snp_filter | AC=3;AF=0.043;AN=70;BaseQRankSum=          |
| 23550 | chrY | 13447809 | . | G | A   | 34799.15 | PASS          | AC=33;AF=0.471;AN=70;BaseQRankSum=         |
| 23551 | chrY | 13447814 | . | C | T   | 53589.94 | PASS          | AC=34;AF=0.486;AN=70;BaseQRankSum=         |
| 23552 | chrY | 13447815 | . | G | C   | 67.51    | my_snp_filter | AC=3;AF=0.043;AN=70;BaseQRankSum=          |
| 23553 | chrY | 13447852 | . | A | G   | 28984.49 | my_snp_filter | AC=18;AF=0.257;AN=66;BaseQRankSum=         |
| 23554 | chrY | 13447870 | . | G | T   | 32400.76 | my_snp_filter | AC=18;AF=0.257;AN=66;BaseQRankSum=         |
| 23555 | chrY | 13447879 | . | A | T   | 44890.34 | PASS          | AC=20;AF=0.345;AN=58;BaseQRankSum=         |
| 23556 | chrY | 13447880 | . | C | G   | 5950.49  | PASS          | AC=14;AF=0.241;AN=58;BaseQRankSum=         |
| 23557 | chrY | 13447899 | . | T | G,* | 5018.21  | PASS          | AC=5,6;AF=0.071,0.086;AN=70;BaseQRankSum=  |
| 23558 | chrY | 13447901 | . | A | T,* | 20871.18 | PASS          | AC=14,5;AF=0.226,0.081;AN=66;BaseQRankSum= |
| 23559 | chrY | 13447905 | . | C | G   | 3073.08  | PASS          | AC=10;AF=0.143;AN=70;BaseQRankSum=         |
| 23560 | chrY | 13447912 | . | A | G   | 3381.19  | PASS          | AC=10;AF=0.147;AN=68;BaseQRankSum=         |

|       |      |          |   |   |     |           |               |                                    |
|-------|------|----------|---|---|-----|-----------|---------------|------------------------------------|
| 23561 | chrY | 13447915 | . | T | C   | 91701.19  | PASS          | AC=29;AF=0.453;AN=64;BaseQ         |
| 23562 | chrY | 13447916 | . | A | C   | 5711.98   | PASS          | AC=8;AF=0.121;AN=66;BaseQRankSum=  |
| 23563 | chrY | 13447921 | . | A | C   | 3021.09   | PASS          | AC=9;AF=0.129;AN=70;BaseQRankSum=  |
| 23564 | chrY | 13447926 | . | C | A   | 42578.21  | PASS          | AC=14;AF=0.259;AN=54;BaseQ         |
| 23565 | chrY | 13447942 | . | G | A   | 5845.98   | PASS          | AC=13;AF=0.186;AN=70;BaseQRankSum= |
| 23566 | chrY | 13447946 | . | T | C   | 105264.08 | PASS          | AC=31;AF=0.484;AN=64;BaseQ         |
| 23567 | chrY | 13447960 | . | G | A   | 105936.39 | PASS          | AC=30;AF=0.469;AN=64;BaseQ         |
| 23568 | chrY | 13447968 | . | C | T,A | 69543.64  | PASS          | AC=19,7;AF=0.317,0.117;AN=         |
| 23569 | chrY | 13447976 | . | G | A   | 10678.43  | PASS          | AC=16;AF=0.235;AN=68;BaseQ         |
| 23570 | chrY | 13447977 | . | A | T   | 62035.83  | PASS          | AC=20;AF=0.370;AN=54;BaseQ         |
| 23571 | chrY | 13447990 | . | C | G   | 352.90    | my_snp_filter | AC=4;AF=0.057;AN=70;BaseQ          |
| 23572 | chrY | 13447998 | . | C | T   | 4981.97   | PASS          | AC=13;AF=0.186;AN=70;BaseQRankSum= |
| 23573 | chrY | 13448001 | . | C | A   | 2355.28   | my_snp_filter | AC=8;AF=0.114;AN=70;BaseQ          |
| 23574 | chrY | 13448002 | . | T | C   | 549.89    | PASS          | AC=1;AF=0.014;AN=70;BaseQRankSum=  |
| 23575 | chrY | 13448016 | . | C | T   | 2798.57   | PASS          | AC=11;AF=0.157;AN=70;BaseQRankSum= |
| 23576 | chrY | 13448027 | . | A | T   | 49449.93  | PASS          | AC=23;AF=0.383;AN=60;BaseQ         |
| 23577 | chrY | 13448028 | . | T | C   | 49634.93  | PASS          | AC=23;AF=0.383;AN=60;BaseQ         |
| 23578 | chrY | 13448035 | . | C | A,* | 7235.50   | PASS          | AC=16,1;AF=0.229,0.014;AN=70;BaseQ |
| 23579 | chrY | 13448036 | . | C | T,* | 6062.20   | PASS          | AC=17,1;AF=0.243,0.014;AN=70;BaseQ |
| 23580 | chrY | 13448048 | . | C | T   | 76.42     | my_snp_filter | AC=1;AF=0.014;AN=70;BaseQ          |
| 23581 | chrY | 13448050 | . | C | G   | 90.42     | PASS          | AC=1;AF=0.014;AN=70;BaseQRankSum=  |
| 23582 | chrY | 13448060 | . | C | G   | 62.84     | my_snp_filter | AC=3;AF=0.043;AN=70;BaseQ          |
| 23583 | chrY | 13448061 | . | G | A   | 5851.22   | PASS          | AC=16;AF=0.229;AN=70;BaseQRankSum= |
| 23584 | chrY | 13448063 | . | T | A   | 1227.44   | PASS          | AC=6;AF=0.086;AN=70;BaseQRankSum=  |
| 23585 | chrY | 13448065 | . | A | C   | 63207.43  | PASS          | AC=27;AF=0.450;AN=60;BaseQ         |
| 23586 | chrY | 13448074 | . | G | C   | 84.67     | PASS          | AC=1;AF=0.014;AN=70;BaseQRankSum=  |
| 23587 | chrY | 13448076 | . | T | A   | 90997.09  | PASS          | AC=32;AF=0.571;AN=56;BaseQ         |
| 23588 | chrY | 13448080 | . | C | T   | 1539.80   | PASS          | AC=2;AF=0.029;AN=70;BaseQRankSum=  |
| 23589 | chrY | 13448083 | . | T | C   | 8658.90   | PASS          | AC=14;AF=0.200;AN=70;BaseQRankSum= |
| 23590 | chrY | 13448086 | . | A | G   | 25173.33  | PASS          | AC=16;AF=0.235;AN=68;BaseQ         |
| 23591 | chrY | 13448101 | . | A | C   | 40181.15  | PASS          | AC=25;AF=0.368;AN=68;BaseQ         |
| 23592 | chrY | 13448113 | . | T | C   | 3686.43   | PASS          | AC=10;AF=0.143;AN=70;BaseQRankSum= |
| 23593 | chrY | 13448119 | . | C | G   | 60.42     | my_snp_filter | AC=1;AF=0.014;AN=70;BaseQ          |
| 23594 | chrY | 13448124 | . | C | T   | 1591.27   | PASS          | AC=5;AF=0.071;AN=70;BaseQRankSum=  |
| 23595 | chrY | 13448125 | . | C | T   | 614.26    | my_snp_filter | AC=4;AF=0.057;AN=70;BaseQ          |
| 23596 | chrY | 13448131 | . | G | A   | 96677.70  | PASS          | AC=32;AF=0.516;AN=62;BaseQ         |
| 23597 | chrY | 13448145 | . | T | C   | 18503.91  | PASS          | AC=10;AF=0.294;AN=34;BaseQ         |
| 23598 | chrY | 13448147 | . | T | C   | 91971.76  | PASS          | AC=32;AF=0.516;AN=62;BaseQ         |
| 23599 | chrY | 13448162 | . | T | C   | 20878.55  | PASS          | AC=10;AF=0.238;AN=42;BaseQ         |
| 23600 | chrY | 13448165 | . | C | T   | 618.82    | my_snp_filter | AC=4;AF=0.057;AN=70;BaseQ          |
| 23601 | chrY | 13448167 | . | G | C   | 83011.50  | PASS          | AC=31;AF=0.500;AN=62;BaseQ         |
| 23602 | chrY | 13448183 | . | T | A   | 17210.37  | PASS          | AC=12;AF=0.194;AN=62;BaseQ         |
| 23603 | chrY | 13448220 | . | T | C   | 334.17    | PASS          | AC=3;AF=0.058;AN=52;BaseQRankSum=  |
| 23604 | chrY | 13448227 | . | C | T   | 34735     | PASS          | AC=29;AF=0.426;AN=68;BaseQRankSum= |
| 23605 | chrY | 13448238 | . | C | T,* | 4938.29   | PASS          | AC=6,1;AF=0.176,0.029;AN=34;BaseQ  |
| 23606 | chrY | 13448251 | . | A | T   | 3653.40   | PASS          | AC=19;AF=0.271;AN=70;BaseQRankSum= |
| 23607 | chrY | 13448279 | . | C | G   | 1337.58   | PASS          | AC=4;AF=0.057;AN=70;BaseQRankSum=  |
| 23608 | chrY | 13448284 | . | C | T   | 749.12    | PASS          | AC=4;AF=0.057;AN=70;BaseQRankSum=  |
| 23609 | chrY | 13448294 | . | G | C,T | 8049.67   | PASS          | AC=7,3;AF=0.140,0.060;AN=50;BaseQ  |
| 23610 | chrY | 13448297 | . | T | C   | 9490.19   | PASS          | AC=11;AF=0.183;AN=60;BaseQRankSum= |
| 23611 | chrY | 13448298 | . | T | C   | 81.68     | PASS          | AC=1;AF=0.014;AN=70;BaseQRankSum=  |
| 23612 | chrY | 13448301 | . | A | G   | 4647.77   | PASS          | AC=17;AF=0.243;AN=70;BaseQRankSum= |
| 23613 | chrY | 13448304 | . | C | T   | 7072.23   | PASS          | AC=6;AF=0.086;AN=70;BaseQRankSum=  |
| 23614 | chrY | 13448307 | . | C | G   | 1846.31   | PASS          | AC=6;AF=0.086;AN=70;BaseQRankSum=  |
| 23615 | chrY | 13448312 | . | C | T   | 2012.24   | PASS          | AC=6;AF=0.086;AN=70;BaseQRankSum=  |
| 23616 | chrY | 13448315 | . | C | T,A | 4631.09   | PASS          | AC=14,4;AF=0.200,0.057;AN=70;BaseQ |
| 23617 | chrY | 13448319 | . | C | G   | 4027.38   | PASS          | AC=16;AF=0.267;AN=60;BaseQRankSum= |
| 23618 | chrY | 13448341 | . | A | T   | 3486.99   | PASS          | AC=7;AF=0.109;AN=64;BaseQRankSum=  |
| 23619 | chrY | 13448351 | . | A | G   | 8276.11   | PASS          | AC=21;AF=0.318;AN=66;BaseQRankSum= |
| 23620 | chrY | 13448354 | . | C | T   | 53929.01  | PASS          | AC=31;AF=0.443;AN=70;BaseQ         |
| 23621 | chrY | 13448357 | . | C | T   | 117.88    | my_snp_filter | AC=1;AF=0.020;AN=50;BaseQ          |
| 23622 | chrY | 13448358 | . | C | T   | 20683.05  | PASS          | AC=11;AF=0.289;AN=38;BaseQ         |
| 23623 | chrY | 13448372 | . | C | T   | 277.79    | PASS          | AC=2;AF=0.029;AN=70;BaseQRankSum=  |
| 23624 | chrY | 13448375 | . | C | T   | 7199.92   | PASS          | AC=16;AF=0.229;AN=70;BaseQRankSum= |
| 23625 | chrY | 13448377 | . | T | C   | 11527.93  | PASS          | AC=22;AF=0.314;AN=70;BaseQ         |
| 23626 | chrY | 13448386 | . | C | A   | 18829.65  | PASS          | AC=9;AF=0.173;AN=52;BaseQ          |
| 23627 | chrY | 13448388 | . | G | A   | 7968.03   | PASS          | AC=17;AF=0.258;AN=66;BaseQRankSum= |
| 23628 | chrY | 13448400 | . | G | T   | 10519.11  | PASS          | AC=8;AF=0.154;AN=52;BaseQ          |
| 23629 | chrY | 13448404 | . | C | T   | 49806.45  | PASS          | AC=30;AF=0.484;AN=62;BaseQ         |
| 23630 | chrY | 13448405 | . | G | A   | 10654.16  | PASS          | AC=13;AF=0.295;AN=44;BaseQ         |
| 23631 | chrY | 13448410 | . | C | A   | 13256.67  | PASS          | AC=24;AF=0.343;AN=70;BaseQ         |
| 23632 | chrY | 13448442 | . | T | C   | 1594.16   | my_snp_filter | AC=3;AF=0.043;AN=70;BaseQ          |
| 23633 | chrY | 13448457 | . | T | A   | 1804.51   | PASS          | AC=3;AF=0.043;AN=70;BaseQRankSum=  |
| 23634 | chrY | 13448460 | . | A | G   | 2085.85   | PASS          | AC=3;AF=0.058;AN=52;BaseQRankSum=  |
| 23635 | chrY | 13448464 | . | C | T   | 720.42    | my_snp_filter | AC=2;AF=0.029;AN=70;BaseQ          |
| 23636 | chrY | 13448468 | . | C | G   | 4732.51   | PASS          | AC=3;AF=0.043;AN=70;BaseQRankSum=  |

|       |      |          |   |   |     |           |               |                                    |
|-------|------|----------|---|---|-----|-----------|---------------|------------------------------------|
| 23637 | chrY | 13448469 | . | C | T   | 4621.51   | PASS          | AC=3;AF=0.043;AN=70;BaseQRankSum=  |
| 23638 | chrY | 13448470 | . | A | G   | 4348.27   | PASS          | AC=3;AF=0.043;AN=70;BaseQRankSum=  |
| 23639 | chrY | 13448474 | . | C | A   | 289.96    | my_snp_filter | AC=2;AF=0.030;AN=66;BaseQ          |
| 23640 | chrY | 13448475 | . | A | T   | 16344.39  | PASS          | AC=17;AF=0.266;AN=64;Base          |
| 23641 | chrY | 13448476 | . | G | T   | 7899.41   | PASS          | AC=3;AF=0.063;AN=48;BaseQRankSum=  |
| 23642 | chrY | 13448478 | . | T | C   | 2474.50   | PASS          | AC=3;AF=0.043;AN=70;BaseQRankSum=  |
| 23643 | chrY | 13448486 | . | C | T   | 2537.41   | PASS          | AC=3;AF=0.043;AN=70;BaseQRankSum=  |
| 23644 | chrY | 13448488 | . | T | C   | 3764.85   | PASS          | AC=3;AF=0.043;AN=70;BaseQRankSum=  |
| 23645 | chrY | 13448490 | . | A | T   | 1760.66   | PASS          | AC=3;AF=0.043;AN=70;BaseQRankSum=  |
| 23646 | chrY | 13448491 | . | C | A   | 2207.66   | PASS          | AC=3;AF=0.043;AN=70;BaseQRankSum=  |
| 23647 | chrY | 13448496 | . | C | T   | 1267.49   | PASS          | AC=3;AF=0.052;AN=58;BaseQRankSum=  |
| 23648 | chrY | 13448504 | . | T | C   | 2358.12   | PASS          | AC=3;AF=0.050;AN=60;BaseQRankSum=  |
| 23649 | chrY | 13448514 | . | T | C   | 113841.52 | PASS          | AC=30;AF=0.517;AN=58;Base          |
| 23650 | chrY | 13448519 | . | C | T   | 3895.22   | PASS          | AC=4;AF=0.057;AN=70;BaseQRankSum=  |
| 23651 | chrY | 13448520 | . | A | G   | 1650.24   | PASS          | AC=3;AF=0.043;AN=70;BaseQRankSum=  |
| 23652 | chrY | 13448521 | . | T | A   | 2855.43   | my_snp_filter | AC=11;AF=0.157;AN=70;Base          |
| 23653 | chrY | 13448527 | . | T | G   | 12899.36  | PASS          | AC=15;AF=0.214;AN=70;Base          |
| 23654 | chrY | 13448564 | . | A | C   | 63565.47  | PASS          | AC=18;AF=0.500;AN=36;Base          |
| 23655 | chrY | 13448613 | . | T | C,G | 17128.40  | PASS          | AC=9,5;AF=0.409,0.227;AN=          |
| 23656 | chrY | 13448616 | . | C | T   | 19327.50  | PASS          | AC=11;AF=0.324;AN=34;Base          |
| 23657 | chrY | 13448620 | . | A | G   | 4529.65   | PASS          | AC=9;AF=0.136;AN=66;BaseQRankSum=  |
| 23658 | chrY | 13448627 | . | T | A   | 15092.64  | PASS          | AC=8;AF=0.167;AN=48;BaseQ          |
| 23659 | chrY | 13448706 | . | C | T   | 222.62    | PASS          | AC=2;AF=0.029;AN=70;BaseQRankSum=  |
| 23660 | chrY | 13448738 | . | C | T,* | 647.46    | PASS          | AC=1,2;AF=0.014,0.029;AN=70;BaseQ  |
| 23661 | chrY | 13448739 | . | C | G,* | 1038.89   | PASS          | AC=4,2;AF=0.057,0.029;AN=70;BaseQ  |
| 23662 | chrY | 13448746 | . | C | T,* | 971.64    | PASS          | AC=3,2;AF=0.044,0.029;AN=68;BaseQ  |
| 23663 | chrY | 13448756 | . | C | G,* | 1808.26   | PASS          | AC=2,3;AF=0.037,0.056;AN=54;BaseQ  |
| 23664 | chrY | 13448760 | . | T | A,* | 700.56    | PASS          | AC=2,1;AF=0.200,0.100;AN=10;BaseQ  |
| 23665 | chrY | 13448813 | . | C | G,* | 2093.44   | PASS          | AC=1,2;AF=0.017,0.033;AN=60;BaseQ  |
| 23666 | chrY | 13448853 | . | A | C,* | 15580.42  | PASS          | AC=14,6;AF=0.350,0.150;AN          |
| 23667 | chrY | 13448866 | . | G | C,* | 17831.51  | PASS          | AC=16,4;AF=0.421,0.105;AN          |
| 23668 | chrY | 13448871 | . | C | G   | 192.35    | PASS          | AC=1;AF=0.014;AN=70;BaseQRankSum=  |
| 23669 | chrY | 13448873 | . | T | C   | 1871.33   | PASS          | AC=5;AF=0.125;AN=40;BaseQRankSum=  |
| 23670 | chrY | 13448874 | . | C | A   | 3901.78   | PASS          | AC=11;AF=0.204;AN=54;BaseQRankSum= |
| 23671 | chrY | 13448876 | . | T | C   | 600.83    | PASS          | AC=2;AF=0.029;AN=68;BaseQRankSum=  |
| 23672 | chrY | 13448901 | . | C | A   | 178.64    | PASS          | AC=1;AF=0.014;AN=70;BaseQRankSum=  |
| 23673 | chrY | 13448906 | . | C | T   | 216.79    | PASS          | AC=1;AF=0.014;AN=70;BaseQRankSum=  |
| 23674 | chrY | 13448924 | . | C | T   | 5415.25   | PASS          | AC=12;AF=0.171;AN=70;BaseQRankSum= |
| 23675 | chrY | 13448943 | . | G | C   | 62920.75  | PASS          | AC=21;AF=0.477;AN=44;Base          |
| 23676 | chrY | 13448944 | . | C | G   | 3261.97   | PASS          | AC=6;AF=0.130;AN=46;BaseQRankSum=  |
| 23677 | chrY | 13448948 | . | A | C   | 141508.45 | PASS          | AC=33;AF=0.589;AN=56;Base          |
| 23678 | chrY | 13448952 | . | T | A   | 11823.82  | PASS          | AC=9;AF=0.129;AN=70;BaseQ          |
| 23679 | chrY | 13448953 | . | C | T   | 7291.38   | PASS          | AC=16;AF=0.229;AN=70;BaseQRankSum= |
| 23680 | chrY | 13448961 | . | A | T   | 7272.67   | PASS          | AC=17;AF=0.243;AN=70;BaseQRankSum= |
| 23681 | chrY | 13448968 | . | A | G   | 60132.97  | PASS          | AC=22;AF=0.500;AN=44;Base          |
| 23682 | chrY | 13448990 | . | T | C   | 79823.41  | PASS          | AC=18;AF=0.429;AN=42;Base          |
| 23683 | chrY | 13448991 | . | G | A   | 330.49    | my_snp_filter | AC=2;AF=0.036;AN=56;BaseQ          |
| 23684 | chrY | 13448998 | . | C | T   | 87804.96  | PASS          | AC=21;AF=0.362;AN=58;Base          |
| 23685 | chrY | 13449008 | . | G | A   | 1413.48   | my_snp_filter | AC=8;AF=0.114;AN=70;BaseQ          |
| 23686 | chrY | 13449011 | . | C | T   | 135.72    | PASS          | AC=1;AF=0.014;AN=70;BaseQRankSum=  |
| 23687 | chrY | 13449014 | . | G | A   | 2022.65   | my_snp_filter | AC=8;AF=0.114;AN=70;BaseQ          |
| 23688 | chrY | 13449017 | . | A | G   | 2438.68   | PASS          | AC=8;AF=0.118;AN=68;BaseQRankSum=  |
| 23689 | chrY | 13449018 | . | A | C   | 82972.93  | PASS          | AC=29;AF=0.468;AN=62;Base          |
| 23690 | chrY | 13449022 | . | C | G   | 9647.65   | PASS          | AC=26;AF=0.371;AN=70;BaseQRankSum= |
| 23691 | chrY | 13449024 | . | T | G   | 9742.80   | PASS          | AC=26;AF=0.371;AN=70;BaseQRankSum= |
| 23692 | chrY | 13449025 | . | T | G   | 358.62    | my_snp_filter | AC=1;AF=0.014;AN=70;BaseQ          |
| 23693 | chrY | 13449027 | . | T | C   | 45437.45  | PASS          | AC=21;AF=0.328;AN=64;Base          |
| 23694 | chrY | 13449040 | . | C | T,* | 31179.36  | PASS          | AC=12,12;AF=0.200,0.200;A          |
| 23695 | chrY | 13449049 | . | A | G   | 28813.68  | PASS          | AC=20;AF=0.286;AN=70;Base          |
| 23696 | chrY | 13449059 | . | G | A,C | 121250.65 | PASS          | AC=37,2;AF=0.529,0.029;AN          |
| 23697 | chrY | 13449065 | . | C | G,* | 936.74    | my_snp_filter | AC=5,2;AF=0.078,0.031;AN=          |
| 23698 | chrY | 13449069 | . | A | T,* | 45735.69  | PASS          | AC=1,21;AF=0.016,0.339;AN          |
| 23699 | chrY | 13449070 | . | C | T,* | 25109.31  | PASS          | AC=13,8;AF=0.203,0.125;AN          |
| 23700 | chrY | 13449071 | . | T | C,* | 16512.62  | PASS          | AC=11,6;AF=0.157,0.086;AN          |
| 23701 | chrY | 13449072 | . | T | C   | 70089.72  | PASS          | AC=35;AF=0.500;AN=70;Base          |
| 23702 | chrY | 13449080 | . | C | A   | 1032.77   | PASS          | AC=3;AF=0.043;AN=70;BaseQRankSum=  |
| 23703 | chrY | 13449083 | . | C | A,* | 29927.65  | PASS          | AC=4,17;AF=0.057,0.243;AN          |
| 23704 | chrY | 13449085 | . | C | T,* | 22889.60  | PASS          | AC=14,10;AF=0.200,0.143;A          |
| 23705 | chrY | 13449094 | . | A | C,* | 14929.51  | PASS          | AC=18,7;AF=0.257,0.100;AN          |
| 23706 | chrY | 13449102 | . | C | G,* | 3653.35   | PASS          | AC=2,4;AF=0.029,0.057;AN=70;BaseQ  |
| 23707 | chrY | 13449109 | . | A | T   | 2992.20   | PASS          | AC=8;AF=0.114;AN=70;BaseQRankSum=  |
| 23708 | chrY | 13449120 | . | T | A   | 980       | my_snp_filter | AC=3;AF=0.043;AN=70;BaseQ          |
| 23709 | chrY | 13449122 | . | C | T   | 36594.68  | PASS          | AC=20;AF=0.286;AN=70;Base          |
| 23710 | chrY | 13449127 | . | C | G   | 2346.84   | PASS          | AC=7;AF=0.100;AN=70;BaseQRankSum=  |
| 23711 | chrY | 13449130 | . | C | A   | 2304.61   | PASS          | AC=6;AF=0.086;AN=70;BaseQRankSum=  |
| 23712 | chrY | 13449132 | . | C | T   | 101.90    | my_snp_filter | AC=2;AF=0.029;AN=70;BaseQ          |



|       |      |          |   |   |       |           |               |                                   |
|-------|------|----------|---|---|-------|-----------|---------------|-----------------------------------|
| 23713 | chrY | 13449134 | . | A | T     | 72.16     | my_snp_filter | AC=2;AF=0.029;AN=70;BaseQ         |
| 23714 | chrY | 13449139 | . | A | G     | 2247.81   | PASS          | AC=5;AF=0.071;AN=70;BaseQRankSum= |
| 23715 | chrY | 13449140 | . | C | G     | 2292.30   | PASS          | AC=5;AF=0.071;AN=70;BaseQRankSum= |
| 23716 | chrY | 13449144 | . | A | G     | 10555.91  | PASS          | AC=20;AF=0.286;AN=70;BaseQ        |
| 23717 | chrY | 13449157 | . | A | C     | 76.92     | my_snp_filter | AC=1;AF=0.014;AN=70;BaseQ         |
| 23718 | chrY | 13449164 | . | G | T,A   | 153262.50 | PASS          | AC=27,9;AF=0.397,0.132;AN         |
| 23719 | chrY | 13449169 | . | A | C     | 249.89    | my_snp_filter | AC=3;AF=0.043;AN=70;BaseQ         |
| 23720 | chrY | 13449182 | . | C | G     | 13709.36  | PASS          | AC=13;AF=0.186;AN=70;BaseQ        |
| 23721 | chrY | 13449186 | . | T | C     | 9351.07   | PASS          | AC=17;AF=0.243;AN=70;BaseQRankSum |
| 23722 | chrY | 13449189 | . | G | A     | 206946.31 | PASS          | AC=30;AF=0.484;AN=62;BaseQ        |
| 23723 | chrY | 13449192 | . | A | C     | 1755.59   | my_snp_filter | AC=7;AF=0.100;AN=70;BaseQ         |
| 23724 | chrY | 13449198 | . | A | C     | 162274.45 | PASS          | AC=30;AF=0.484;AN=62;BaseQ        |
| 23725 | chrY | 13449199 | . | A | C,*   | 6726.14   | PASS          | AC=4,2;AF=0.063,0.031;AN=64;BaseQ |
| 23726 | chrY | 13449200 | . | A | C,G   | 255103.95 | PASS          | AC=35,10;AF=0.515,0.147;A         |
| 23727 | chrY | 13449205 | . | T | C     | 24662.10  | PASS          | AC=18;AF=0.257;AN=70;BaseQ        |
| 23728 | chrY | 13449207 | . | C | G     | 464.45    | my_snp_filter | AC=2;AF=0.029;AN=70;BaseQ         |
| 23729 | chrY | 13449209 | . | A | G     | 7938.92   | my_snp_filter | AC=14;AF=0.200;AN=70;BaseQ        |
| 23730 | chrY | 13449219 | . | T | A     | 10341.81  | PASS          | AC=10;AF=0.143;AN=70;BaseQ        |
| 23731 | chrY | 13449223 | . | T | G     | 1842.12   | my_snp_filter | AC=4;AF=0.057;AN=70;BaseQ         |
| 23732 | chrY | 13449227 | . | G | A     | 12858.59  | PASS          | AC=11;AF=0.157;AN=70;BaseQ        |
| 23733 | chrY | 13449232 | . | G | A     | 1469.05   | PASS          | AC=2;AF=0.029;AN=70;BaseQRankSum= |
| 23734 | chrY | 13449233 | . | A | G     | 1454.05   | PASS          | AC=2;AF=0.029;AN=70;BaseQRankSum= |
| 23735 | chrY | 13449241 | . | C | T,G   | 16894.89  | PASS          | AC=6,9;AF=0.088,0.132;AN=         |
| 23736 | chrY | 13449242 | . | G | T     | 378939.38 | PASS          | AC=29;AF=0.500;AN=58;BaseQ        |
| 23737 | chrY | 13449249 | . | C | G     | 45155.32  | PASS          | AC=26;AF=0.371;AN=70;BaseQ        |
| 23738 | chrY | 13449271 | . | A | C     | 1484.15   | my_snp_filter | AC=2;AF=0.029;AN=70;BaseQ         |
| 23739 | chrY | 13449278 | . | C | G     | 321.09    | my_snp_filter | AC=1;AF=0.014;AN=70;BaseQ         |
| 23740 | chrY | 13449294 | . | C | T     | 499.42    | PASS          | AC=2;AF=0.029;AN=70;BaseQRankSum= |
| 23741 | chrY | 13449307 | . | T | C     | 159.42    | my_snp_filter | AC=1;AF=0.014;AN=70;BaseQ         |
| 23742 | chrY | 13449314 | . | G | C,T,* | 119028.27 | PASS          | AC=18,1,2;AF=0.429,0.024,         |
| 23743 | chrY | 13449316 | . | A | C     | 1467.49   | PASS          | AC=6;AF=0.125;AN=48;BaseQRankSum= |
| 23744 | chrY | 13449318 | . | T | A     | 1354.23   | PASS          | AC=6;AF=0.086;AN=70;BaseQRankSum= |
| 23745 | chrY | 13449321 | . | C | T     | 479.01    | PASS          | AC=2;AF=0.029;AN=70;BaseQRankSum= |
| 23746 | chrY | 13449323 | . | T | A     | 54096.89  | PASS          | AC=19;AF=0.271;AN=70;BaseQ        |
| 23747 | chrY | 13449326 | . | T | C     | 153572.27 | PASS          | AC=21;AF=0.500;AN=42;BaseQ        |
| 23748 | chrY | 13449328 | . | T | A     | 66709.44  | PASS          | AC=11;AF=0.157;AN=70;BaseQ        |
| 23749 | chrY | 13449336 | . | A | C     | 295       | PASS          | AC=2;AF=0.029;AN=70;BaseQRankSum= |
| 23750 | chrY | 13449341 | . | A | C     | 106.61    | my_snp_filter | AC=2;AF=0.029;AN=70;BaseQ         |
| 23751 | chrY | 13449346 | . | A | G,C   | 323.62    | PASS          | AC=1,1;AF=0.014,0.014;AN=70;BaseQ |
| 23752 | chrY | 13449354 | . | C | A     | 41.50     | my_snp_filter | AC=1;AF=0.014;AN=70;BaseQ         |
| 23753 | chrY | 13449355 | . | C | T     | 1993.64   | PASS          | AC=3;AF=0.043;AN=70;BaseQRankSum= |
| 23754 | chrY | 13449386 | . | T | A     | 47376.68  | PASS          | AC=20;AF=0.500;AN=40;BaseQ        |
| 23755 | chrY | 13449390 | . | C | A     | 2967.34   | PASS          | AC=5;AF=0.071;AN=70;BaseQRankSum= |
| 23756 | chrY | 13449405 | . | C | G     | 452.57    | PASS          | AC=3;AF=0.043;AN=70;BaseQRankSum= |
| 23757 | chrY | 13449409 | . | C | T     | 6984.37   | PASS          | AC=9;AF=0.129;AN=70;BaseQRankSum= |
| 23758 | chrY | 13449414 | . | C | T     | 1276.76   | PASS          | AC=3;AF=0.043;AN=70;BaseQRankSum= |
| 23759 | chrY | 13449417 | . | A | T     | 2520.65   | PASS          | AC=5;AF=0.071;AN=70;BaseQRankSum= |
| 23760 | chrY | 13449429 | . | A | G,T   | 30389.11  | PASS          | AC=12,18;AF=0.300,0.450;A         |
| 23761 | chrY | 13449431 | . | C | T     | 311.69    | PASS          | AC=3;AF=0.052;AN=58;BaseQRankSum= |
| 23762 | chrY | 13449488 | . | T | A     | 2531.28   | my_snp_filter | AC=13;AF=0.260;AN=50;BaseQ        |
| 23763 | chrY | 13449492 | . | G | T     | 189656.64 | PASS          | AC=44;AF=0.880;AN=50;BaseQ        |
| 23764 | chrY | 13449497 | . | C | T     | 121.64    | PASS          | AC=3;AF=0.043;AN=70;BaseQRankSum= |
| 23765 | chrY | 13449520 | . | T | G     | 3006.66   | my_snp_filter | AC=4;AF=0.057;AN=70;BaseQ         |
| 23766 | chrY | 13449528 | . | A | T     | 82.40     | my_snp_filter | AC=2;AF=0.029;AN=70;BaseQ         |
| 23767 | chrY | 13449551 | . | C | T     | 144066.56 | PASS          | AC=13;AF=0.203;AN=64;BaseQ        |
| 23768 | chrY | 13449556 | . | C | G     | 10411.21  | PASS          | AC=7;AF=0.106;AN=66;BaseQ         |
| 23769 | chrY | 13449559 | . | C | T     | 349.31    | my_snp_filter | AC=1;AF=0.036;AN=28;BaseQ         |
| 23770 | chrY | 13449562 | . | C | T     | 10019.44  | PASS          | AC=6;AF=0.088;AN=68;BaseQ         |
| 23771 | chrY | 13449567 | . | C | G     | 9482.75   | PASS          | AC=7;AF=0.109;AN=64;BaseQRankSum= |
| 23772 | chrY | 13449574 | . | C | T     | 27120.49  | PASS          | AC=11;AF=0.393;AN=28;BaseQ        |
| 23773 | chrY | 13449579 | . | C | T     | 320.01    | my_snp_filter | AC=3;AF=0.136;AN=22;BaseQ         |
| 23774 | chrY | 13449586 | . | C | G     | 61665.05  | PASS          | AC=11;AF=0.275;AN=40;BaseQ        |
| 23775 | chrY | 13449590 | . | T | C     | 71061.16  | PASS          | AC=9;AF=0.225;AN=40;BaseQ         |
| 23776 | chrY | 13449592 | . | A | G     | 104.54    | PASS          | AC=2;AF=0.045;AN=44;DP=17810;FS=0 |
| 23777 | chrY | 13449598 | . | T | C     | 62435.80  | PASS          | AC=11;AF=0.177;AN=62;BaseQ        |
| 23778 | chrY | 13449605 | . | A | C     | 171698.36 | PASS          | AC=12;AF=0.545;AN=22;BaseQ        |
| 23779 | chrY | 13449622 | . | T | A     | 61245.66  | PASS          | AC=9;AF=0.129;AN=70;BaseQ         |
| 23780 | chrY | 13449630 | . | A | G,T   | 184849.97 | PASS          | AC=22,3;AF=0.786,0.107;AN         |
| 23781 | chrY | 13449638 | . | T | C     | 699.36    | my_snp_filter | AC=2;AF=0.033;AN=60;BaseQ         |
| 23782 | chrY | 13449642 | . | T | A     | 157073.67 | PASS          | AC=12;AF=0.500;AN=24;BaseQ        |
| 23783 | chrY | 13449643 | . | C | A     | 9979.22   | PASS          | AC=6;AF=0.120;AN=50;BaseQRankSum= |
| 23784 | chrY | 13449649 | . | C | A     | 83038.42  | PASS          | AC=10;AF=0.147;AN=68;BaseQ        |
| 23785 | chrY | 13449651 | . | C | T     | 9790.96   | PASS          | AC=6;AF=0.086;AN=70;BaseQRankSum= |
| 23786 | chrY | 13449654 | . | A | T     | 6661.43   | PASS          | AC=6;AF=0.086;AN=70;BaseQRankSum= |
| 23787 | chrY | 13449663 | . | T | G     | 9276.61   | PASS          | AC=6;AF=0.086;AN=70;BaseQRankSum= |
| 23788 | chrY | 13449666 | . | A | T     | 141.09    | my_snp_filter | AC=3;AF=0.043;AN=70;BaseQ         |

|       |      |          |   |   |       |           |               |                                    |
|-------|------|----------|---|---|-------|-----------|---------------|------------------------------------|
| 23789 | chrY | 13449667 | . | G | T     | 217.42    | my_snp_filter | AC=1;AF=0.014;AN=70;BaseQ          |
| 23790 | chrY | 13449676 | . | T | A     | 15140.77  | PASS          | AC=3;AF=0.043;AN=70;BaseQ          |
| 23791 | chrY | 13449682 | . | C | A     | 14724.25  | PASS          | AC=3;AF=0.043;AN=70;BaseQ          |
| 23792 | chrY | 13449694 | . | T | G     | 13594.60  | PASS          | AC=3;AF=0.043;AN=70;BaseQ          |
| 23793 | chrY | 13449715 | . | A | T,*   | 1758.87   | PASS          | AC=3,3;AF=0.043,0.043;AN=70;BaseQ  |
| 23794 | chrY | 13449748 | . | C | T,*   | 5267.46   | PASS          | AC=6,4;AF=0.100,0.067;AN=60;BaseQ  |
| 23795 | chrY | 13449757 | . | C | T,*   | 6383.84   | PASS          | AC=1,7;AF=0.033,0.233;AN=30;DP=59  |
| 23796 | chrY | 13449761 | . | T | C,*   | 4690.59   | PASS          | AC=1,7;AF=0.033,0.233;AN=30;DP=74  |
| 23797 | chrY | 13449764 | . | T | C,*   | 41400.98  | PASS          | AC=13,1;AF=0.406,0.031;AN          |
| 23798 | chrY | 13449773 | . | C | A,*   | 16868.42  | PASS          | AC=9,2;AF=0.346,0.077;AN=          |
| 23799 | chrY | 13449779 | . | C | A     | 45.30     | PASS          | AC=1;AF=0.014;AN=70;BaseQRankSum   |
| 23800 | chrY | 13449787 | . | C | T     | 1567.18   | PASS          | AC=3;AF=0.043;AN=70;BaseQRankSum   |
| 23801 | chrY | 13449788 | . | C | G     | 62705.07  | PASS          | AC=11;AF=0.157;AN=70;BaseQ         |
| 23802 | chrY | 13449801 | . | T | A     | 17331.71  | PASS          | AC=8;AF=0.114;AN=70;BaseQ          |
| 23803 | chrY | 13449807 | . | T | C     | 95925     | PASS          | AC=11;AF=0.367;AN=30;BaseQRankSum  |
| 23804 | chrY | 13449808 | . | C | A     | 3381.56   | PASS          | AC=4;AF=0.065;AN=62;BaseQRankSum   |
| 23805 | chrY | 13449811 | . | T | C     | 2162.71   | PASS          | AC=4;AF=0.057;AN=70;BaseQRankSum   |
| 23806 | chrY | 13449815 | . | T | C,G   | 125128.80 | PASS          | AC=16,2;AF=0.667,0.083;AN          |
| 23807 | chrY | 13449829 | . | G | T     | 23614.85  | PASS          | AC=8;AF=0.114;AN=70;BaseQ          |
| 23808 | chrY | 13449837 | . | T | A     | 101691.65 | PASS          | AC=11;AF=0.423;AN=26;BaseQ         |
| 23809 | chrY | 13449856 | . | A | C     | 205905.27 | PASS          | AC=34;AF=0.630;AN=54;BaseQ         |
| 23810 | chrY | 13449894 | . | T | C     | 79900     | PASS          | AC=14;AF=0.318;AN=44;BaseQRankSum  |
| 23811 | chrY | 13449905 | . | C | T     | 6253.19   | PASS          | AC=16;AF=0.229;AN=70;BaseQRankSum  |
| 23812 | chrY | 13449906 | . | A | C     | 15847.92  | PASS          | AC=11;AF=0.157;AN=70;BaseQ         |
| 23813 | chrY | 13449913 | . | T | G     | 156.63    | my_snp_filter | AC=2;AF=0.033;AN=60;BaseQ          |
| 23814 | chrY | 13449915 | . | C | T     | 6210.26   | PASS          | AC=15;AF=0.259;AN=58;BaseQRankSum  |
| 23815 | chrY | 13449916 | . | A | G     | 35081.09  | PASS          | AC=13;AF=0.232;AN=56;BaseQ         |
| 23816 | chrY | 13449918 | . | C | G     | 16406.28  | PASS          | AC=12;AF=0.207;AN=58;BaseQ         |
| 23817 | chrY | 13449919 | . | C | A     | 30016.69  | PASS          | AC=12;AF=0.207;AN=58;BaseQ         |
| 23818 | chrY | 13449920 | . | C | G     | 29749.69  | PASS          | AC=12;AF=0.207;AN=58;BaseQ         |
| 23819 | chrY | 13449929 | . | C | A     | 431.47    | PASS          | AC=1;AF=0.014;AN=70;BaseQRankSum   |
| 23820 | chrY | 13449947 | . | C | T     | 18781.71  | PASS          | AC=9;AF=0.188;AN=48;BaseQ          |
| 23821 | chrY | 13449957 | . | C | T     | 7077.94   | PASS          | AC=15;AF=0.214;AN=70;BaseQRankSum  |
| 23822 | chrY | 13450014 | . | C | T,*   | 960.74    | my_snp_filter | AC=8,2;AF=0.138,0.034;AN=          |
| 23823 | chrY | 13450015 | . | G | A,*   | 20362.44  | PASS          | AC=11,1;AF=0.196,0.018;AN          |
| 23824 | chrY | 13450030 | . | C | A     | 4952.75   | PASS          | AC=10;AF=0.179;AN=56;BaseQRankSum  |
| 23825 | chrY | 13450042 | . | C | A     | 36061.20  | PASS          | AC=15;AF=0.214;AN=70;BaseQ         |
| 23826 | chrY | 13450043 | . | C | T     | 14631.85  | PASS          | AC=8;AF=0.114;AN=70;BaseQ          |
| 23827 | chrY | 13450056 | . | C | A     | 11317.77  | PASS          | AC=11;AF=0.157;AN=70;BaseQ         |
| 23828 | chrY | 13450067 | . | C | A     | 930.68    | PASS          | AC=5;AF=0.071;AN=70;BaseQRankSum   |
| 23829 | chrY | 13450069 | . | T | C     | 117442.37 | PASS          | AC=30;AF=0.536;AN=56;BaseQ         |
| 23830 | chrY | 13450074 | . | T | C,*   | 818.37    | PASS          | AC=1,2;AF=0.014,0.029;AN=70;BaseQ  |
| 23831 | chrY | 13450077 | . | T | C,*   | 751.41    | PASS          | AC=1,2;AF=0.014,0.029;AN=70;BaseQ  |
| 23832 | chrY | 13450079 | . | T | C,*   | 652.01    | PASS          | AC=1,2;AF=0.015,0.029;AN=68;BaseQ  |
| 23833 | chrY | 13450081 | . | C | T     | 20899.76  | PASS          | AC=12;AF=0.182;AN=66;BaseQ         |
| 23834 | chrY | 13450084 | . | C | T,A   | 90732.46  | PASS          | AC=27,1;AF=0.540,0.020;AN          |
| 23835 | chrY | 13450089 | . | C | A     | 118.60    | PASS          | AC=2;AF=0.029;AN=70;BaseQRankSum   |
| 23836 | chrY | 13450090 | . | T | C     | 319.63    | my_snp_filter | AC=2;AF=0.029;AN=70;BaseQ          |
| 23837 | chrY | 13450096 | . | C | G     | 36887.55  | PASS          | AC=22;AF=0.314;AN=70;BaseQ         |
| 23838 | chrY | 13450098 | . | A | T     | 343.58    | PASS          | AC=3;AF=0.043;AN=70;BaseQRankSum   |
| 23839 | chrY | 13450099 | . | C | T     | 172.26    | my_snp_filter | AC=3;AF=0.043;AN=70;BaseQ          |
| 23840 | chrY | 13450102 | . | C | T,A   | 2263.02   | PASS          | AC=3,7;AF=0.043,0.100;AN=70;BaseQ  |
| 23841 | chrY | 13450107 | . | C | T,*   | 29498.76  | PASS          | AC=3,20;AF=0.044,0.294;AN          |
| 23842 | chrY | 13450112 | . | C | T,*   | 28694.69  | PASS          | AC=3,18;AF=0.044,0.265;AN          |
| 23843 | chrY | 13450115 | . | C | G,*   | 27391.54  | PASS          | AC=1,21;AF=0.022,0.457;AN          |
| 23844 | chrY | 13450120 | . | C | G,T,* | 26339.26  | PASS          | AC=11,3,10;AF=0.239,0.065          |
| 23845 | chrY | 13450125 | . | C | T,*   | 20948.67  | PASS          | AC=8,15;AF=0.174,0.326;AN          |
| 23846 | chrY | 13450135 | . | T | G,*   | 5812.36   | PASS          | AC=1,5;AF=0.015,0.074;AN=68;BaseQ  |
| 23847 | chrY | 13450141 | . | C | T,*   | 11459.89  | PASS          | AC=3,5;AF=0.044,0.074;AN=          |
| 23848 | chrY | 13450144 | . | T | C,*   | 4631.01   | PASS          | AC=3,2;AF=0.044,0.029;AN=68;BaseQ  |
| 23849 | chrY | 13450146 | . | C | T,*   | 14669.97  | PASS          | AC=10,2;AF=0.147,0.029;AN          |
| 23850 | chrY | 13450151 | . | C | T     | 38316.07  | PASS          | AC=22;AF=0.324;AN=68;BaseQ         |
| 23851 | chrY | 13450166 | . | C | A     | 9773.40   | PASS          | AC=9;AF=0.129;AN=70;BaseQRankSum   |
| 23852 | chrY | 13450169 | . | T | C     | 533.14    | my_snp_filter | AC=4;AF=0.057;AN=70;BaseQ          |
| 23853 | chrY | 13450171 | . | C | T     | 71731.74  | PASS          | AC=25;AF=0.481;AN=52;BaseQ         |
| 23854 | chrY | 13450181 | . | G | C     | 71480.04  | PASS          | AC=26;AF=0.565;AN=46;BaseQ         |
| 23855 | chrY | 13450183 | . | A | G,*   | 4435.59   | PASS          | AC=13,1;AF=0.191,0.015;AN=68;BaseQ |
| 23856 | chrY | 13450197 | . | T | A     | 8327.58   | PASS          | AC=14;AF=0.200;AN=70;BaseQRankSum  |
| 23857 | chrY | 13450200 | . | C | T     | 15788.65  | PASS          | AC=10;AF=0.161;AN=62;BaseQ         |
| 23858 | chrY | 13450215 | . | C | G     | 18035.08  | PASS          | AC=9;AF=0.129;AN=70;BaseQ          |
| 23859 | chrY | 13450222 | . | C | A     | 120.60    | PASS          | AC=2;AF=0.029;AN=70;BaseQRankSum   |
| 23860 | chrY | 13450238 | . | T | A     | 903.41    | PASS          | AC=5;AF=0.071;AN=70;BaseQRankSum   |
| 23861 | chrY | 13450241 | . | C | T     | 40.06     | PASS          | AC=1;AF=0.014;AN=70;BaseQRankSum   |
| 23862 | chrY | 13450250 | . | A | G     | 67.42     | my_snp_filter | AC=3;AF=0.043;AN=70;BaseQ          |
| 23863 | chrY | 13450252 | . | C | A     | 1866.61   | PASS          | AC=7;AF=0.100;AN=70;BaseQRankSum   |
| 23864 | chrY | 13450263 | . | A | T     | 6026.57   | PASS          | AC=20;AF=0.455;AN=44;BaseQRankSum  |

|       |      |          |   |   |     |           |               |                                            |
|-------|------|----------|---|---|-----|-----------|---------------|--------------------------------------------|
| 23865 | chrY | 13450268 | . | C | A,* | 14493.35  | PASS          | AC=22,1;AF=0.324,0.015;AN=70;BaseQRankSum= |
| 23866 | chrY | 13450279 | . | C | G,* | 548.17    | PASS          | AC=3,2;AF=0.043,0.029;AN=70;BaseQRankSum=  |
| 23867 | chrY | 13450283 | . | G | T,* | 1287.88   | PASS          | AC=1,2;AF=0.014,0.029;AN=70;BaseQRankSum=  |
| 23868 | chrY | 13450319 | . | A | C   | 25401.68  | PASS          | AC=23;AF=0.479;AN=48;BaseQRankSum=         |
| 23869 | chrY | 13450347 | . | T | C   | 6178.79   | PASS          | AC=9;AF=0.129;AN=70;BaseQRankSum=          |
| 23870 | chrY | 13450349 | . | C | T   | 5701.28   | PASS          | AC=8;AF=0.114;AN=70;BaseQRankSum=          |
| 23871 | chrY | 13450356 | . | T | A   | 5139.59   | PASS          | AC=11;AF=0.157;AN=70;BaseQRankSum=         |
| 23872 | chrY | 13450367 | . | C | A   | 5633.09   | PASS          | AC=11;AF=0.157;AN=70;BaseQRankSum=         |
| 23873 | chrY | 13450384 | . | C | T   | 5301.92   | PASS          | AC=9;AF=0.129;AN=70;BaseQRankSum=          |
| 23874 | chrY | 13450391 | . | C | G   | 7074.26   | PASS          | AC=8;AF=0.114;AN=70;BaseQRankSum=          |
| 23875 | chrY | 13450413 | . | C | G   | 5736.62   | PASS          | AC=11;AF=0.162;AN=68;BaseQRankSum=         |
| 23876 | chrY | 13450440 | . | A | G,* | 6613.66   | PASS          | AC=12,1;AF=0.171,0.014;AN=70;BaseQRankSum= |
| 23877 | chrY | 13450443 | . | C | G   | 6933.24   | PASS          | AC=7;AF=0.100;AN=70;BaseQRankSum=          |
| 23878 | chrY | 13450445 | . | A | G   | 62.22     | PASS          | AC=2;AF=0.029;AN=70;BaseQRankSum=          |
| 23879 | chrY | 13450450 | . | A | T   | 58.22     | PASS          | AC=2;AF=0.029;AN=70;BaseQRankSum=          |
| 23880 | chrY | 13450455 | . | A | G   | 6890.82   | PASS          | AC=9;AF=0.129;AN=70;BaseQRankSum=          |
| 23881 | chrY | 13450531 | . | C | T   | 1116.07   | PASS          | AC=2;AF=0.034;AN=58;BaseQRankSum=          |
| 23882 | chrY | 13450547 | . | C | T   | 1005.06   | PASS          | AC=2;AF=0.029;AN=70;BaseQRankSum=          |
| 23883 | chrY | 13450551 | . | T | C   | 1046.05   | PASS          | AC=2;AF=0.029;AN=70;BaseQRankSum=          |
| 23884 | chrY | 13450566 | . | T | A   | 4369.99   | PASS          | AC=6;AF=0.086;AN=70;BaseQRankSum=          |
| 23885 | chrY | 13450571 | . | A | C   | 23514.38  | PASS          | AC=10;AF=0.455;AN=22;BaseQRankSum=         |
| 23886 | chrY | 13450578 | . | G | C   | 32112.11  | PASS          | AC=15;AF=0.500;AN=30;BaseQRankSum=         |
| 23887 | chrY | 13450586 | . | C | T   | 32        | PASS          | AC=1;AF=0.014;AN=70;BaseQRankSum=          |
| 23888 | chrY | 13450590 | . | G | A   | 28180.11  | PASS          | AC=15;AF=0.500;AN=30;BaseQRankSum=         |
| 23889 | chrY | 13450614 | . | C | T,* | 14774.16  | PASS          | AC=9,3;AF=0.265,0.088;AN=70;BaseQRankSum=  |
| 23890 | chrY | 13450615 | . | A | T   | 3440.85   | PASS          | AC=9;AF=0.265;AN=34;BaseQRankSum=          |
| 23891 | chrY | 13450619 | . | C | T   | 1945.03   | PASS          | AC=9;AF=0.129;AN=70;BaseQRankSum=          |
| 23892 | chrY | 13450642 | . | T | C   | 139475.58 | PASS          | AC=26;AF=0.565;AN=46;BaseQRankSum=         |
| 23893 | chrY | 13450643 | . | G | T   | 30.92     | my_snp_filter | AC=1;AF=0.014;AN=70;BaseQRankSum=          |
| 23894 | chrY | 13450647 | . | A | G   | 120156.12 | PASS          | AC=24;AF=0.522;AN=46;BaseQRankSum=         |
| 23895 | chrY | 13450654 | . | A | G   | 138.42    | PASS          | AC=1;AF=0.014;AN=70;BaseQRankSum=          |
| 23896 | chrY | 13450655 | . | C | G   | 168.02    | PASS          | AC=1;AF=0.014;AN=70;BaseQRankSum=          |
| 23897 | chrY | 13450656 | . | T | C   | 244.80    | my_snp_filter | AC=2;AF=0.029;AN=70;BaseQRankSum=          |
| 23898 | chrY | 13450661 | . | C | G   | 12330.81  | PASS          | AC=18;AF=0.257;AN=70;BaseQRankSum=         |
| 23899 | chrY | 13450665 | . | C | A   | 12043.15  | PASS          | AC=17;AF=0.243;AN=70;BaseQRankSum=         |
| 23900 | chrY | 13450667 | . | G | A   | 45696.02  | PASS          | AC=26;AF=0.382;AN=68;BaseQRankSum=         |
| 23901 | chrY | 13450674 | . | G | C   | 115.76    | my_snp_filter | AC=2;AF=0.029;AN=70;BaseQRankSum=          |
| 23902 | chrY | 13450677 | . | T | C   | 196774.45 | PASS          | AC=41;AF=0.732;AN=56;BaseQRankSum=         |
| 23903 | chrY | 13450685 | . | C | G   | 188.13    | my_snp_filter | AC=3;AF=0.043;AN=70;BaseQRankSum=          |
| 23904 | chrY | 13450687 | . | A | G   | 232.94    | my_snp_filter | AC=4;AF=0.057;AN=70;BaseQRankSum=          |
| 23905 | chrY | 13450691 | . | C | T   | 142.10    | my_snp_filter | AC=3;AF=0.043;AN=70;BaseQRankSum=          |
| 23906 | chrY | 13450693 | . | A | G   | 160335.74 | PASS          | AC=30;AF=0.517;AN=58;BaseQRankSum=         |
| 23907 | chrY | 13450694 | . | C | T   | 662.63    | my_snp_filter | AC=4;AF=0.059;AN=68;BaseQRankSum=          |
| 23908 | chrY | 13450703 | . | C | G   | 4479.68   | PASS          | AC=14;AF=0.200;AN=70;BaseQRankSum=         |
| 23909 | chrY | 13450708 | . | C | T   | 419.31    | my_snp_filter | AC=4;AF=0.057;AN=70;BaseQRankSum=          |
| 23910 | chrY | 13450716 | . | C | T,A | 38293.42  | PASS          | AC=25,3;AF=0.403,0.048;AN=70;BaseQRankSum= |
| 23911 | chrY | 13450717 | . | A | T   | 9205.23   | PASS          | AC=15;AF=0.242;AN=62;BaseQRankSum=         |
| 23912 | chrY | 13450721 | . | T | A   | 11975.41  | PASS          | AC=18;AF=0.257;AN=70;BaseQRankSum=         |
| 23913 | chrY | 13450722 | . | A | C   | 1319.61   | my_snp_filter | AC=7;AF=0.100;AN=70;BaseQRankSum=          |
| 23914 | chrY | 13450725 | . | C | G   | 12304.23  | PASS          | AC=18;AF=0.257;AN=70;BaseQRankSum=         |
| 23915 | chrY | 13450727 | . | G | A   | 94260.43  | PASS          | AC=27;AF=0.422;AN=64;BaseQRankSum=         |
| 23916 | chrY | 13450733 | . | T | C   | 2220.61   | my_snp_filter | AC=6;AF=0.086;AN=70;BaseQRankSum=          |
| 23917 | chrY | 13450740 | . | C | T   | 1033.10   | PASS          | AC=9;AF=0.129;AN=70;BaseQRankSum=          |
| 23918 | chrY | 13450746 | . | T | C   | 158916.64 | PASS          | AC=37;AF=0.561;AN=66;BaseQRankSum=         |
| 23919 | chrY | 13450751 | . | A | G   | 16487.34  | PASS          | AC=24;AF=0.343;AN=70;BaseQRankSum=         |
| 23920 | chrY | 13450763 | . | C | G   | 1997.66   | my_snp_filter | AC=11;AF=0.157;AN=70;BaseQRankSum=         |
| 23921 | chrY | 13450765 | . | A | G   | 969.66    | my_snp_filter | AC=9;AF=0.129;AN=70;BaseQRankSum=          |
| 23922 | chrY | 13450792 | . | G | A,* | 44874.71  | PASS          | AC=2,21;AF=0.029,0.309;AN=70;BaseQRankSum= |
| 23923 | chrY | 13450800 | . | T | C   | 144451.72 | PASS          | AC=35;AF=0.500;AN=70;BaseQRankSum=         |
| 23924 | chrY | 13450811 | . | C | T   | 379.82    | my_snp_filter | AC=4;AF=0.057;AN=70;BaseQRankSum=          |
| 23925 | chrY | 13450812 | . | A | G   | 172521.72 | PASS          | AC=35;AF=0.500;AN=70;BaseQRankSum=         |
| 23926 | chrY | 13450814 | . | T | G   | 66531.72  | PASS          | AC=35;AF=0.500;AN=70;BaseQRankSum=         |
| 23927 | chrY | 13450817 | . | G | A   | 215229.44 | PASS          | AC=35;AF=0.500;AN=70;BaseQRankSum=         |
| 23928 | chrY | 13450823 | . | C | T   | 1269.58   | my_snp_filter | AC=4;AF=0.057;AN=70;BaseQRankSum=          |
| 23929 | chrY | 13450856 | . | C | T   | 50228.15  | PASS          | AC=21;AF=0.300;AN=70;BaseQRankSum=         |
| 23930 | chrY | 13450861 | . | A | T   | 50561.45  | PASS          | AC=21;AF=0.300;AN=70;BaseQRankSum=         |
| 23931 | chrY | 13450869 | . | C | T   | 3375.99   | my_snp_filter | AC=8;AF=0.114;AN=70;BaseQRankSum=          |
| 23932 | chrY | 13450870 | . | C | T   | 130.05    | my_snp_filter | AC=2;AF=0.029;AN=70;BaseQRankSum=          |
| 23933 | chrY | 13450902 | . | A | T   | 15390.36  | PASS          | AC=19;AF=0.279;AN=68;BaseQRankSum=         |
| 23934 | chrY | 13450907 | . | A | T   | 973.62    | my_snp_filter | AC=8;AF=0.114;AN=70;BaseQRankSum=          |
| 23935 | chrY | 13450910 | . | C | G   | 111661.56 | PASS          | AC=32;AF=0.500;AN=64;BaseQRankSum=         |
| 23936 | chrY | 13450911 | . | G | A   | 913.80    | my_snp_filter | AC=7;AF=0.109;AN=64;BaseQRankSum=          |
| 23937 | chrY | 13450913 | . | T | C   | 354.30    | PASS          | AC=2;AF=0.029;AN=70;BaseQRankSum=          |
| 23938 | chrY | 13450915 | . | C | T   | 22796.37  | PASS          | AC=20;AF=0.286;AN=70;BaseQRankSum=         |
| 23939 | chrY | 13450925 | . | C | A   | 51949.22  | PASS          | AC=32;AF=0.457;AN=70;BaseQRankSum=         |
| 23940 | chrY | 13450930 | . | C | A   | 19399.69  | PASS          | AC=31;AF=0.484;AN=64;BaseQRankSum=         |

|       |      |          |   |   |     |           |               |                                   |
|-------|------|----------|---|---|-----|-----------|---------------|-----------------------------------|
| 23941 | chrY | 13450936 | . | T | C,* | 29292.11  | PASS          | AC=20,6;AF=0.323,0.097;AN=        |
| 23942 | chrY | 13450947 | . | C | T   | 1175.31   | my_snp_filter | AC=8;AF=0.125;AN=64;BaseQ         |
| 23943 | chrY | 13450948 | . | A | G   | 80913.32  | PASS          | AC=32;AF=0.500;AN=64;Base         |
| 23944 | chrY | 13450950 | . | C | T   | 12912.29  | PASS          | AC=28;AF=0.400;AN=70;Base         |
| 23945 | chrY | 13450956 | . | C | T   | 6180.23   | PASS          | AC=17;AF=0.243;AN=70;BaseQRankSum |
| 23946 | chrY | 13450958 | . | A | C   | 71714.08  | PASS          | AC=30;AF=0.469;AN=64;Base         |
| 23947 | chrY | 13450969 | . | T | G   | 46000.59  | PASS          | AC=31;AF=0.443;AN=70;Base         |
| 23948 | chrY | 13450976 | . | C | T   | 1211.42   | PASS          | AC=1;AF=0.014;AN=70;BaseQRankSum= |
| 23949 | chrY | 13450980 | . | C | T   | 112.42    | PASS          | AC=1;AF=0.014;AN=70;BaseQRankSum= |
| 23950 | chrY | 13450986 | . | C | T   | 8358.87   | PASS          | AC=16;AF=0.229;AN=70;BaseQRankSum |
| 23951 | chrY | 13450991 | . | C | T   | 61131.81  | PASS          | AC=30;AF=0.429;AN=70;Base         |
| 23952 | chrY | 13450996 | . | C | T,* | 18790.36  | PASS          | AC=21,4;AF=0.328,0.063;AN         |
| 23953 | chrY | 13450998 | . | T | C   | 82305.44  | PASS          | AC=30;AF=0.500;AN=60;Base         |
| 23954 | chrY | 13451003 | . | C | T   | 8403.66   | PASS          | AC=7;AF=0.117;AN=60;BaseQRankSum= |
| 23955 | chrY | 13451005 | . | T | C   | 17101.72  | PASS          | AC=7;AF=0.159;AN=44;BaseQ         |
| 23956 | chrY | 13451017 | . | A | T   | 121       | my_snp_filter | AC=1;AF=0.014;AN=70;BaseQ         |
| 23957 | chrY | 13451025 | . | A | C   | 732.77    | my_snp_filter | AC=2;AF=0.029;AN=70;BaseQ         |
| 23958 | chrY | 13451028 | . | T | C   | 1736.60   | PASS          | AC=2;AF=0.029;AN=70;BaseQRankSum= |
| 23959 | chrY | 13451031 | . | C | G   | 354.05    | my_snp_filter | AC=2;AF=0.029;AN=70;BaseQ         |
| 23960 | chrY | 13451033 | . | A | T   | 33243.90  | PASS          | AC=15;AF=0.300;AN=50;Base         |
| 23961 | chrY | 13451034 | . | T | A   | 43224.70  | PASS          | AC=27;AF=0.450;AN=60;Base         |
| 23962 | chrY | 13451036 | . | C | A   | 222.18    | my_snp_filter | AC=1;AF=0.014;AN=70;BaseQ         |
| 23963 | chrY | 13451044 | . | T | C   | 335.77    | my_snp_filter | AC=1;AF=0.014;AN=70;BaseQ         |
| 23964 | chrY | 13451048 | . | A | C   | 35349.17  | PASS          | AC=19;AF=0.352;AN=54;Base         |
| 23965 | chrY | 13451050 | . | C | G   | 7809.14   | PASS          | AC=19;AF=0.271;AN=70;BaseQRankSum |
| 23966 | chrY | 13451051 | . | C | A   | 1861.79   | PASS          | AC=2;AF=0.029;AN=70;BaseQRankSum= |
| 23967 | chrY | 13451055 | . | C | T   | 393.67    | my_snp_filter | AC=4;AF=0.057;AN=70;BaseQ         |
| 23968 | chrY | 13451065 | . | C | A   | 30664.37  | PASS          | AC=19;AF=0.271;AN=70;Base         |
| 23969 | chrY | 13451069 | . | C | A   | 132.09    | my_snp_filter | AC=1;AF=0.017;AN=60;BaseQ         |
| 23970 | chrY | 13451070 | . | C | G   | 34672.66  | PASS          | AC=19;AF=0.339;AN=56;Base         |
| 23971 | chrY | 13451071 | . | A | G   | 423.91    | my_snp_filter | AC=2;AF=0.029;AN=70;BaseQ         |
| 23972 | chrY | 13451072 | . | C | A   | 392.94    | my_snp_filter | AC=1;AF=0.014;AN=70;BaseQ         |
| 23973 | chrY | 13451074 | . | C | G   | 99889.50  | PASS          | AC=28;AF=0.519;AN=54;Base         |
| 23974 | chrY | 13451075 | . | T | G   | 100045.46 | PASS          | AC=28;AF=0.519;AN=54;Base         |
| 23975 | chrY | 13451077 | . | T | A   | 10424.88  | PASS          | AC=21;AF=0.300;AN=70;Base         |
| 23976 | chrY | 13451082 | . | C | T   | 347.43    | my_snp_filter | AC=1;AF=0.014;AN=70;BaseQ         |
| 23977 | chrY | 13451088 | . | T | C   | 51821.72  | PASS          | AC=25;AF=0.463;AN=54;Base         |
| 23978 | chrY | 13451091 | . | C | T   | 537.93    | my_snp_filter | AC=5;AF=0.071;AN=70;BaseQ         |
| 23979 | chrY | 13451101 | . | A | G   | 82120.43  | PASS          | AC=28;AF=0.519;AN=54;Base         |
| 23980 | chrY | 13451108 | . | G | A   | 687.73    | my_snp_filter | AC=6;AF=0.086;AN=70;BaseQ         |
| 23981 | chrY | 13451109 | . | G | A   | 9780.26   | PASS          | AC=17;AF=0.243;AN=70;BaseQRankSum |
| 23982 | chrY | 13451112 | . | T | G   | 30634.07  | PASS          | AC=19;AF=0.352;AN=54;Base         |
| 23983 | chrY | 13451119 | . | A | G   | 30387.16  | PASS          | AC=27;AF=0.386;AN=70;Base         |
| 23984 | chrY | 13451136 | . | G | A   | 38.91     | my_snp_filter | AC=1;AF=0.017;AN=60;BaseQ         |
| 23985 | chrY | 13451167 | . | C | A   | 144.05    | PASS          | AC=4;AF=0.074;AN=54;BaseQRankSum= |
| 23986 | chrY | 13451169 | . | A | T   | 58.38     | PASS          | AC=2;AF=0.037;AN=54;DP=7147;FS=0. |
| 23987 | chrY | 13451178 | . | C | T   | 5702.21   | PASS          | AC=1;AF=0.023;AN=44;BaseQRankSum= |
| 23988 | chrY | 13451188 | . | C | A   | 2226.34   | PASS          | AC=1;AF=0.100;AN=10;BaseQRankSum= |
| 23989 | chrY | 13451199 | . | T | C   | 2911.95   | PASS          | AC=2;AF=0.042;AN=48;BaseQRankSum= |
| 23990 | chrY | 13451219 | . | T | C   | 1289.43   | PASS          | AC=1;AF=0.014;AN=70;BaseQRankSum= |
| 23991 | chrY | 13451229 | . | T | C   | 471.94    | my_snp_filter | AC=6;AF=0.088;AN=68;BaseQ         |
| 23992 | chrY | 13451230 | . | G | A   | 60.25     | PASS          | AC=2;AF=0.029;AN=68;BaseQRankSum= |
| 23993 | chrY | 13451239 | . | T | C,A | 22164.72  | PASS          | AC=17,2;AF=0.567,0.067;AN         |
| 23994 | chrY | 13451245 | . | A | T   | 29394.70  | PASS          | AC=22;AF=0.688;AN=32;Base         |
| 23995 | chrY | 13451247 | . | C | T   | 76.90     | PASS          | AC=2;AF=0.029;AN=70;BaseQRankSum= |
| 23996 | chrY | 13451249 | . | C | T   | 7255.93   | PASS          | AC=11;AF=0.167;AN=66;BaseQRankSum |
| 23997 | chrY | 13451262 | . | C | T   | 353.38    | my_snp_filter | AC=4;AF=0.057;AN=70;BaseQ         |
| 23998 | chrY | 13451296 | . | C | A   | 74.65     | PASS          | AC=2;AF=0.029;AN=68;BaseQRankSum= |
| 23999 | chrY | 13451299 | . | C | T   | 4254.12   | my_snp_filter | AC=9;AF=0.132;AN=68;BaseQ         |
| 24000 | chrY | 13451307 | . | C | T   | 11866.76  | PASS          | AC=15;AF=0.250;AN=60;Base         |
| 24001 | chrY | 13451308 | . | A | G   | 151169.46 | PASS          | AC=47;AF=0.783;AN=60;Base         |
| 24002 | chrY | 13451314 | . | C | A   | 185.36    | PASS          | AC=2;AF=0.029;AN=68;BaseQRankSum= |
| 24003 | chrY | 13451319 | . | A | C   | 207699.27 | PASS          | AC=50;AF=0.833;AN=60;Base         |
| 24004 | chrY | 13451343 | . | T | A   | 44668.98  | PASS          | AC=24;AF=0.343;AN=70;Base         |
| 24005 | chrY | 13451345 | . | C | T   | 1463.26   | my_snp_filter | AC=6;AF=0.107;AN=56;BaseQ         |
| 24006 | chrY | 13451346 | . | A | G   | 143466.71 | PASS          | AC=32;AF=0.593;AN=54;Base         |
| 24007 | chrY | 13451381 | . | A | T   | 71588.62  | PASS          | AC=22;AF=0.314;AN=70;Base         |
| 24008 | chrY | 13451395 | . | A | G   | 70439.70  | PASS          | AC=22;AF=0.324;AN=68;Base         |
| 24009 | chrY | 13451397 | . | C | T   | 88.90     | PASS          | AC=1;AF=0.014;AN=70;BaseQRankSum= |
| 24010 | chrY | 13451414 | . | C | T   | 1682.74   | my_snp_filter | AC=7;AF=0.100;AN=70;BaseQ         |
| 24011 | chrY | 13451415 | . | A | T   | 328.35    | my_snp_filter | AC=3;AF=0.043;AN=70;BaseQ         |
| 24012 | chrY | 13451432 | . | T | C   | 636.79    | PASS          | AC=5;AF=0.071;AN=70;BaseQRankSum= |
| 24013 | chrY | 13451433 | . | C | T   | 2948.06   | my_snp_filter | AC=12;AF=0.171;AN=70;Base         |
| 24014 | chrY | 13451434 | . | C | T   | 92.60     | PASS          | AC=1;AF=0.014;AN=70;BaseQRankSum= |
| 24015 | chrY | 13451437 | . | T | G   | 3557.37   | PASS          | AC=5;AF=0.071;AN=70;BaseQRankSum= |
| 24016 | chrY | 13451445 | . | A | G   | 555.19    | PASS          | AC=4;AF=0.057;AN=70;BaseQRankSum= |

|       |      |          |   |   |       |           |               |                                    |
|-------|------|----------|---|---|-------|-----------|---------------|------------------------------------|
| 24017 | chrY | 13451449 | . | C | A     | 4642.06   | PASS          | AC=8;AF=0.114;AN=70;BaseQRankSum=  |
| 24018 | chrY | 13451453 | . | G | A     | 704.56    | PASS          | AC=5;AF=0.071;AN=70;BaseQRankSum=  |
| 24019 | chrY | 13451455 | . | A | C     | 4732.74   | my_snp_filter | AC=9;AF=0.129;AN=70;BaseQ          |
| 24020 | chrY | 13451479 | . | C | T,*   | 2293.57   | my_snp_filter | AC=4,9;AF=0.059,0.132;AN=          |
| 24021 | chrY | 13451483 | . | C | A,*   | 1870.02   | my_snp_filter | AC=3,9;AF=0.044,0.132;AN=          |
| 24022 | chrY | 13451489 | . | T | C     | 123573.36 | PASS          | AC=27;AF=0.500;AN=54;Base          |
| 24023 | chrY | 13451490 | . | G | A     | 132679.62 | PASS          | AC=27;AF=0.500;AN=54;Base          |
| 24024 | chrY | 13451500 | . | A | G     | 271.05    | my_snp_filter | AC=2;AF=0.029;AN=70;BaseQ          |
| 24025 | chrY | 13451509 | . | G | A     | 915.59    | my_snp_filter | AC=2;AF=0.029;AN=70;BaseQ          |
| 24026 | chrY | 13451510 | . | A | T     | 17842.67  | PASS          | AC=24;AF=0.343;AN=70;Base          |
| 24027 | chrY | 13451514 | . | T | C     | 172245.10 | PASS          | AC=31;AF=0.574;AN=54;Base          |
| 24028 | chrY | 13451515 | . | A | G     | 54409.25  | PASS          | AC=27;AF=0.482;AN=56;Base          |
| 24029 | chrY | 13451526 | . | C | T     | 3500.97   | my_snp_filter | AC=12;AF=0.171;AN=70;Base          |
| 24030 | chrY | 13451533 | . | C | G     | 4587.99   | PASS          | AC=8;AF=0.114;AN=70;BaseQRankSum=  |
| 24031 | chrY | 13451554 | . | G | A     | 4328.21   | my_snp_filter | AC=9;AF=0.129;AN=70;BaseQ          |
| 24032 | chrY | 13451577 | . | T | G     | 1840.18   | my_snp_filter | AC=11;AF=0.157;AN=70;Base          |
| 24033 | chrY | 13451579 | . | A | C     | 118819.48 | PASS          | AC=26;AF=0.520;AN=50;Base          |
| 24034 | chrY | 13451583 | . | C | G     | 27322.51  | PASS          | AC=16;AF=0.229;AN=70;Base          |
| 24035 | chrY | 13451588 | . | A | C     | 72765.13  | PASS          | AC=21;AF=0.477;AN=44;Base          |
| 24036 | chrY | 13451591 | . | A | T     | 39620.72  | PASS          | AC=19;AF=0.328;AN=58;Base          |
| 24037 | chrY | 13451596 | . | C | T     | 21336.97  | PASS          | AC=14;AF=0.200;AN=70;Base          |
| 24038 | chrY | 13451601 | . | C | G     | 19259.97  | PASS          | AC=14;AF=0.200;AN=70;Base          |
| 24039 | chrY | 13451605 | . | T | A     | 80689.82  | PASS          | AC=23;AF=0.500;AN=46;Base          |
| 24040 | chrY | 13451608 | . | C | T     | 15911.98  | PASS          | AC=18;AF=0.257;AN=70;Base          |
| 24041 | chrY | 13451614 | . | A | C     | 73915.95  | PASS          | AC=23;AF=0.500;AN=46;Base          |
| 24042 | chrY | 13451620 | . | A | C     | 2016.17   | PASS          | AC=7;AF=0.100;AN=70;BaseQRankSum=  |
| 24043 | chrY | 13451623 | . | A | C     | 66033.42  | PASS          | AC=23;AF=0.500;AN=46;Base          |
| 24044 | chrY | 13451635 | . | A | T     | 10217.67  | PASS          | AC=18;AF=0.273;AN=66;Base          |
| 24045 | chrY | 13451637 | . | T | G     | 15555.78  | PASS          | AC=18;AF=0.281;AN=64;Base          |
| 24046 | chrY | 13451654 | . | C | G     | 12857.10  | PASS          | AC=10;AF=0.143;AN=70;Base          |
| 24047 | chrY | 13451679 | . | T | G,A   | 36757.38  | PASS          | AC=27,9;AF=0.450,0.150;AN          |
| 24048 | chrY | 13451683 | . | T | C     | 13344.38  | PASS          | AC=11;AF=0.275;AN=40;Base          |
| 24049 | chrY | 13451698 | . | A | C     | 14473.24  | PASS          | AC=10;AF=0.238;AN=42;Base          |
| 24050 | chrY | 13451704 | . | C | T     | 7759.08   | PASS          | AC=20;AF=0.286;AN=70;BaseQRankSum= |
| 24051 | chrY | 13451714 | . | C | T     | 12188.16  | PASS          | AC=22;AF=0.324;AN=68;Base          |
| 24052 | chrY | 13451726 | . | G | T,C,* | 21371.39  | PASS          | AC=11,16,2;AF=0.196,0.286          |
| 24053 | chrY | 13451731 | . | T | C,*   | 18778.98  | PASS          | AC=17,5;AF=0.315,0.093;AN          |
| 24054 | chrY | 13451741 | . | C | T     | 485.84    | PASS          | AC=1;AF=0.014;AN=70;BaseQRankSum=  |
| 24055 | chrY | 13451743 | . | C | G     | 11611.93  | PASS          | AC=16;AF=0.242;AN=66;Base          |
| 24056 | chrY | 13451745 | . | A | G     | 17163.98  | PASS          | AC=9;AF=0.167;AN=54;BaseQ          |
| 24057 | chrY | 13451746 | . | C | A,T   | 29024.99  | PASS          | AC=13,9;AF=0.241,0.167;AN          |
| 24058 | chrY | 13451756 | . | C | T     | 64624     | PASS          | AC=29;AF=0.414;AN=70;BaseQRankSum= |
| 24059 | chrY | 13451760 | . | G | A     | 19966.87  | PASS          | AC=9;AF=0.196;AN=46;BaseQ          |
| 24060 | chrY | 13451788 | . | G | C,*   | 19773.67  | PASS          | AC=9,1;AF=0.180,0.020;AN=          |
| 24061 | chrY | 13451794 | . | G | T,*   | 18317.67  | PASS          | AC=9,1;AF=0.180,0.020;AN=          |
| 24062 | chrY | 13451832 | . | C | A     | 84801.50  | PASS          | AC=31;AF=0.500;AN=62;Base          |
| 24063 | chrY | 13451839 | . | T | C     | 678.45    | PASS          | AC=2;AF=0.038;AN=52;BaseQRankSum=  |
| 24064 | chrY | 13451841 | . | T | G     | 58.69     | my_snp_filter | AC=1;AF=0.019;AN=52;BaseQ          |
| 24065 | chrY | 13451843 | . | T | G     | 80352.06  | PASS          | AC=31;AF=0.484;AN=64;Base          |
| 24066 | chrY | 13451844 | . | A | G     | 630.21    | PASS          | AC=2;AF=0.042;AN=48;BaseQRankSum=  |
| 24067 | chrY | 13451849 | . | G | A     | 9253.56   | PASS          | AC=22;AF=0.314;AN=70;BaseQRankSum= |
| 24068 | chrY | 13451875 | . | G | T     | 41403.24  | PASS          | AC=31;AF=0.484;AN=64;Base          |
| 24069 | chrY | 13451903 | . | A | T     | 504.81    | PASS          | AC=1;AF=0.016;AN=64;BaseQRankSum=  |
| 24070 | chrY | 13451904 | . | C | A     | 205.09    | PASS          | AC=1;AF=0.016;AN=64;BaseQRankSum=  |
| 24071 | chrY | 13451908 | . | A | C     | 60978.26  | PASS          | AC=31;AF=0.470;AN=66;Base          |
| 24072 | chrY | 13451909 | . | A | T     | 60274.26  | PASS          | AC=31;AF=0.470;AN=66;Base          |
| 24073 | chrY | 13451910 | . | A | T     | 59725.26  | PASS          | AC=31;AF=0.470;AN=66;Base          |
| 24074 | chrY | 13451912 | . | C | G     | 83.42     | my_snp_filter | AC=1;AF=0.014;AN=70;BaseQ          |
| 24075 | chrY | 13451930 | . | C | G     | 78.37     | my_snp_filter | AC=1;AF=0.014;AN=70;BaseQ          |
| 24076 | chrY | 13451933 | . | C | A     | 80.42     | my_snp_filter | AC=1;AF=0.014;AN=70;BaseQ          |
| 24077 | chrY | 13451934 | . | C | A     | 82.29     | my_snp_filter | AC=1;AF=0.014;AN=70;BaseQ          |
| 24078 | chrY | 13451959 | . | G | A     | 8740.45   | PASS          | AC=26;AF=0.382;AN=68;BaseQRankSum= |
| 24079 | chrY | 13451981 | . | A | T,*   | 11752.42  | PASS          | AC=26,7;AF=0.382,0.103;AN          |
| 24080 | chrY | 13452000 | . | A | C,*   | 11788.01  | PASS          | AC=24,8;AF=0.353,0.118;AN          |
| 24081 | chrY | 13452010 | . | A | G     | 6701.37   | PASS          | AC=22;AF=0.314;AN=70;BaseQRankSum= |
| 24082 | chrY | 13452020 | . | C | T     | 7252.54   | PASS          | AC=21;AF=0.309;AN=68;BaseQRankSum= |
| 24083 | chrY | 13452048 | . | T | C     | 20755.49  | PASS          | AC=32;AF=0.485;AN=66;Base          |
| 24084 | chrY | 13452051 | . | G | T     | 20737.76  | PASS          | AC=32;AF=0.485;AN=66;Base          |
| 24085 | chrY | 13452066 | . | T | C     | 142.66    | PASS          | AC=2;AF=0.029;AN=68;BaseQRankSum=  |
| 24086 | chrY | 13452080 | . | T | C     | 173.02    | PASS          | AC=1;AF=0.015;AN=68;BaseQRankSum=  |
| 24087 | chrY | 13452085 | . | T | A     | 128.99    | PASS          | AC=1;AF=0.015;AN=68;BaseQRankSum=  |
| 24088 | chrY | 13452125 | . | T | C     | 1286.01   | PASS          | AC=1;AF=0.038;AN=26;BaseQRankSum=  |
| 24089 | chrY | 13452149 | . | C | A     | 1326.88   | PASS          | AC=2;AF=0.125;AN=16;BaseQRankSum=  |
| 24090 | chrY | 13452178 | . | A | C     | 9027.93   | PASS          | AC=4;AF=0.200;AN=20;BaseQRankSum=  |
| 24091 | chrY | 13452179 | . | A | C     | 633.53    | PASS          | AC=3;AF=0.100;AN=30;BaseQRankSum=  |
| 24092 | chrY | 13452187 | . | C | A     | 2199.75   | PASS          | AC=4;AF=0.059;AN=68;BaseQRankSum=  |

|       |      |          |   |   |     |          |               |                                           |
|-------|------|----------|---|---|-----|----------|---------------|-------------------------------------------|
| 24093 | chrY | 13452190 | . | T | C   | 9302.30  | PASS          | AC=4;AF=0.167;AN=24;BaseQRankSum=         |
| 24094 | chrY | 13452204 | . | G | A   | 8911.83  | PASS          | AC=4;AF=0.222;AN=18;BaseQRankSum=         |
| 24095 | chrY | 13452232 | . | C | G   | 733.22   | PASS          | AC=3;AF=0.045;AN=66;BaseQRankSum=         |
| 24096 | chrY | 13452248 | . | C | G   | 9426.01  | PASS          | AC=4;AF=0.154;AN=26;BaseQRankSum=         |
| 24097 | chrY | 13452250 | . | C | A   | 511.43   | PASS          | AC=3;AF=0.088;AN=34;BaseQRankSum=         |
| 24098 | chrY | 13452251 | . | T | A   | 9368.01  | PASS          | AC=4;AF=0.154;AN=26;BaseQRankSum=         |
| 24099 | chrY | 13452260 | . | G | T   | 9465.47  | PASS          | AC=4;AF=0.333;AN=12;BaseQRankSum=         |
| 24100 | chrY | 13452327 | . | C | A   | 7751.20  | PASS          | AC=9;AF=0.167;AN=54;BaseQRankSum=         |
| 24101 | chrY | 13452330 | . | C | G   | 15687.24 | PASS          | AC=16;AF=0.500;AN=32;BaseQRankSum=        |
| 24102 | chrY | 13452343 | . | A | G,* | 15629.79 | PASS          | AC=3,19;AF=0.045,0.288;AN=                |
| 24103 | chrY | 13452363 | . | A | G   | 481.13   | PASS          | AC=1;AF=0.014;AN=70;BaseQRankSum=         |
| 24104 | chrY | 13452369 | . | T | G   | 300.74   | PASS          | AC=2;AF=0.029;AN=70;BaseQRankSum=         |
| 24105 | chrY | 13452394 | . | T | G   | 8993.87  | PASS          | AC=9;AF=0.196;AN=46;BaseQRankSum=         |
| 24106 | chrY | 13452401 | . | A | C   | 7702.17  | PASS          | AC=9;AF=0.321;AN=28;BaseQRankSum=         |
| 24107 | chrY | 13452408 | . | T | A   | 6896.88  | PASS          | AC=9;AF=0.281;AN=32;BaseQRankSum=         |
| 24108 | chrY | 13452410 | . | G | T   | 3931.12  | PASS          | AC=6;AF=0.115;AN=52;BaseQRankSum=         |
| 24109 | chrY | 13452411 | . | C | A   | 254.50   | PASS          | AC=1;AF=0.019;AN=52;BaseQRankSum=         |
| 24110 | chrY | 13452432 | . | G | A   | 144.36   | PASS          | AC=1;AF=0.029;AN=34;BaseQRankSum=         |
| 24111 | chrY | 13452433 | . | A | T   | 3014.34  | PASS          | AC=6;AF=0.214;AN=28;BaseQRankSum=         |
| 24112 | chrY | 13452444 | . | A | C   | 1959.64  | PASS          | AC=6;AF=0.214;AN=28;BaseQRankSum=         |
| 24113 | chrY | 13452448 | . | A | T   | 1106.59  | PASS          | AC=5;AF=0.071;AN=70;BaseQRankSum=         |
| 24114 | chrY | 13452451 | . | C | G   | 1028.76  | PASS          | AC=5;AF=0.071;AN=70;BaseQRankSum=         |
| 24115 | chrY | 13452464 | . | C | A   | 160.39   | PASS          | AC=2;AF=0.029;AN=70;BaseQRankSum=         |
| 24116 | chrY | 13452497 | . | C | A   | 7713.36  | PASS          | AC=13;AF=0.232;AN=56;BaseQRankSum=        |
| 24117 | chrY | 13452507 | . | G | C   | 8980.43  | PASS          | AC=13;AF=0.382;AN=34;BaseQRankSum=        |
| 24118 | chrY | 13452509 | . | G | T   | 9085.21  | PASS          | AC=13;AF=0.406;AN=32;BaseQRankSum=        |
| 24119 | chrY | 13452516 | . | C | A   | 3928.20  | PASS          | AC=11;AF=0.196;AN=56;BaseQRankSum=        |
| 24120 | chrY | 13452544 | . | G | A   | 3371.76  | PASS          | AC=12;AF=0.222;AN=54;BaseQRankSum=        |
| 24121 | chrY | 13452556 | . | C | T   | 89.04    | my_snp_filter | AC=2;AF=0.029;AN=70;BaseQRankSum=         |
| 24122 | chrY | 13452564 | . | A | T   | 18190.60 | PASS          | AC=20;AF=0.476;AN=42;BaseQRankSum=        |
| 24123 | chrY | 13452570 | . | G | C   | 19193.06 | PASS          | AC=21;AF=0.438;AN=48;BaseQRankSum=        |
| 24124 | chrY | 13452571 | . | C | T   | 19123.58 | PASS          | AC=20;AF=0.417;AN=48;BaseQRankSum=        |
| 24125 | chrY | 13452577 | . | A | T   | 2834.07  | PASS          | AC=12;AF=0.182;AN=66;BaseQRankSum=        |
| 24126 | chrY | 13452578 | . | C | T   | 22856.82 | PASS          | AC=20;AF=0.303;AN=66;BaseQRankSum=        |
| 24127 | chrY | 13452628 | . | G | C   | 52.29    | my_snp_filter | AC=1;AF=0.019;AN=54;BaseQRankSum=         |
| 24128 | chrY | 13452634 | . | A | T   | 54725.86 | PASS          | AC=22;AF=0.500;AN=44;BaseQRankSum=        |
| 24129 | chrY | 13452640 | . | C | G   | 16931.99 | PASS          | AC=18;AF=0.265;AN=68;BaseQRankSum=        |
| 24130 | chrY | 13452643 | . | C | T   | 17132.99 | PASS          | AC=18;AF=0.265;AN=68;BaseQRankSum=        |
| 24131 | chrY | 13452660 | . | C | T   | 10339.99 | PASS          | AC=15;AF=0.242;AN=62;BaseQRankSum=        |
| 24132 | chrY | 13452664 | . | C | T   | 70328.64 | PASS          | AC=21;AF=0.457;AN=46;BaseQRankSum=        |
| 24133 | chrY | 13452703 | . | C | G   | 14259.29 | PASS          | AC=16;AF=0.348;AN=46;BaseQRankSum=        |
| 24134 | chrY | 13452704 | . | T | G   | 13904.18 | PASS          | AC=14;AF=0.318;AN=44;BaseQRankSum=        |
| 24135 | chrY | 13452781 | . | C | A   | 426.85   | PASS          | AC=2;AF=0.040;AN=50;BaseQRankSum=         |
| 24136 | chrY | 13452790 | . | T | C,A | 3485.48  | PASS          | AC=3,1;AF=0.214,0.071;AN=14;BaseQRankSum= |
| 24137 | chrY | 13452813 | . | C | A   | 58.73    | my_snp_filter | AC=1;AF=0.026;AN=38;BaseQRankSum=         |
| 24138 | chrY | 13452815 | . | A | C   | 788.55   | PASS          | AC=1;AF=0.071;AN=14;BaseQRankSum=         |
| 24139 | chrY | 13452818 | . | T | C   | 791.42   | PASS          | AC=1;AF=0.083;AN=12;BaseQRankSum=         |
| 24140 | chrY | 13452945 | . | G | A   | 51.26    | PASS          | AC=2;AF=0.056;AN=36;BaseQRankSum=         |
| 24141 | chrY | 13452953 | . | T | A   | 35.37    | PASS          | AC=1;AF=0.042;AN=24;BaseQRankSum=         |
| 24142 | chrY | 13452959 | . | A | C   | 47.46    | PASS          | AC=1;AF=0.038;AN=26;BaseQRankSum=         |
| 24143 | chrY | 13453190 | . | A | T   | 140.68   | PASS          | AC=1;AF=0.016;AN=62;BaseQRankSum=         |
| 24144 | chrY | 13453279 | . | A | C   | 908.40   | PASS          | AC=1;AF=0.023;AN=44;BaseQRankSum=         |
| 24145 | chrY | 13453280 | . | G | A   | 896.01   | PASS          | AC=1;AF=0.023;AN=44;BaseQRankSum=         |
| 24146 | chrY | 13453405 | . | T | A   | 3622.33  | my_snp_filter | AC=3;AF=0.065;AN=46;BaseQRankSum=         |
| 24147 | chrY | 13453406 | . | A | T   | 3692.77  | my_snp_filter | AC=3;AF=0.065;AN=46;BaseQRankSum=         |
| 24148 | chrY | 13453543 | . | C | G   | 441.04   | PASS          | AC=2;AF=0.036;AN=56;BaseQRankSum=         |
| 24149 | chrY | 13453600 | . | T | G   | 480.03   | PASS          | AC=2;AF=0.034;AN=58;BaseQRankSum=         |
| 24150 | chrY | 13453688 | . | C | T   | 420.61   | my_snp_filter | AC=1;AF=0.015;AN=68;BaseQRankSum=         |
| 24151 | chrY | 13453709 | . | T | A   | 1249.89  | PASS          | AC=2;AF=0.050;AN=40;BaseQRankSum=         |
| 24152 | chrY | 13453894 | . | A | C   | 58.36    | my_snp_filter | AC=1;AF=0.015;AN=66;BaseQRankSum=         |
| 24153 | chrY | 13453895 | . | A | C   | 79.07    | PASS          | AC=1;AF=0.016;AN=64;BaseQRankSum=         |
| 24154 | chrY | 13453897 | . | C | G   | 57.60    | my_snp_filter | AC=1;AF=0.014;AN=70;BaseQRankSum=         |
| 24155 | chrY | 13454205 | . | T | C   | 283.30   | PASS          | AC=3;AF=0.043;AN=70;BaseQRankSum=         |
| 24156 | chrY | 13454426 | . | C | G   | 649.43   | PASS          | AC=5;AF=0.071;AN=70;BaseQRankSum=         |
| 24157 | chrY | 13454427 | . | A | C   | 650.92   | PASS          | AC=5;AF=0.071;AN=70;BaseQRankSum=         |
| 24158 | chrY | 13454434 | . | C | T   | 654.15   | PASS          | AC=5;AF=0.074;AN=68;BaseQRankSum=         |
| 24159 | chrY | 13454438 | . | A | T   | 621.58   | PASS          | AC=5;AF=0.071;AN=70;BaseQRankSum=         |
| 24160 | chrY | 13454439 | . | T | A   | 624.36   | PASS          | AC=5;AF=0.071;AN=70;BaseQRankSum=         |
| 24161 | chrY | 13454443 | . | A | T   | 627.89   | PASS          | AC=5;AF=0.071;AN=70;BaseQRankSum=         |
| 24162 | chrY | 13454452 | . | C | T   | 638.94   | PASS          | AC=5;AF=0.071;AN=70;BaseQRankSum=         |
| 24163 | chrY | 13454563 | . | T | A   | 593.78   | PASS          | AC=3;AF=0.043;AN=70;BaseQRankSum=         |
| 24164 | chrY | 13454668 | . | T | C   | 2059.77  | my_snp_filter | AC=1;AF=0.018;AN=56;BaseQRankSum=         |
| 24165 | chrY | 13454903 | . | A | T   | 228.61   | PASS          | AC=3;AF=0.043;AN=70;BaseQRankSum=         |
| 24166 | chrY | 13455108 | . | C | T   | 89.31    | PASS          | AC=3;AF=0.050;AN=60;BaseQRankSum=         |
| 24167 | chrY | 13455110 | . | T | A   | 160.01   | PASS          | AC=2;AF=0.036;AN=56;BaseQRankSum=         |
| 24168 | chrY | 13455115 | . | G | T   | 81.82    | PASS          | AC=1;AF=0.018;AN=56;BaseQRankSum=         |

|       |      |          |   |   |     |         |               |                                    |
|-------|------|----------|---|---|-----|---------|---------------|------------------------------------|
| 24169 | chrY | 13455116 | . | T | A   | 120.79  | PASS          | AC=2;AF=0.037;AN=54;BaseQRankSum=  |
| 24170 | chrY | 13455130 | . | C | T   | 46.45   | PASS          | AC=2;AF=0.029;AN=70;BaseQRankSum=  |
| 24171 | chrY | 13455441 | . | C | T   | 103.71  | my_snp_filter | AC=1;AF=0.016;AN=62;BaseQ          |
| 24172 | chrY | 13456008 | . | A | C   | 54.87   | PASS          | AC=1;AF=0.028;AN=36;BaseQRankSum=  |
| 24173 | chrY | 13456079 | . | T | C   | 128.80  | PASS          | AC=1;AF=0.015;AN=68;BaseQRankSum=  |
| 24174 | chrY | 13456110 | . | C | A   | 153.84  | PASS          | AC=2;AF=0.036;AN=56;BaseQRankSum=  |
| 24175 | chrY | 13456553 | . | T | A   | 63.34   | my_snp_filter | AC=2;AF=0.030;AN=66;BaseQ          |
| 24176 | chrY | 13456645 | . | T | G   | 511.32  | PASS          | AC=3;AF=0.047;AN=64;BaseQRankSum=  |
| 24177 | chrY | 13456651 | . | C | A   | 177.11  | PASS          | AC=2;AF=0.031;AN=64;BaseQRankSum=  |
| 24178 | chrY | 13456654 | . | C | A   | 146.66  | PASS          | AC=2;AF=0.031;AN=64;BaseQRankSum=  |
| 24179 | chrY | 13456656 | . | T | C   | 870.31  | PASS          | AC=3;AF=0.047;AN=64;BaseQRankSum=  |
| 24180 | chrY | 13456658 | . | G | A   | 143.71  | PASS          | AC=2;AF=0.031;AN=64;BaseQRankSum=  |
| 24181 | chrY | 13456668 | . | A | T   | 507.77  | PASS          | AC=3;AF=0.054;AN=56;BaseQRankSum=  |
| 24182 | chrY | 13456672 | . | A | C   | 224.96  | PASS          | AC=3;AF=0.056;AN=54;BaseQRankSum=  |
| 24183 | chrY | 13456682 | . | C | T   | 136.77  | PASS          | AC=2;AF=0.037;AN=54;BaseQRankSum=  |
| 24184 | chrY | 13456688 | . | C | A   | 149.80  | PASS          | AC=2;AF=0.053;AN=38;BaseQRankSum=  |
| 24185 | chrY | 13457057 | . | C | G   | 119.72  | PASS          | AC=1;AF=0.014;AN=70;BaseQRankSum=  |
| 24186 | chrY | 13457778 | . | C | A   | 122.84  | my_snp_filter | AC=3;AF=0.043;AN=70;BaseQ          |
| 24187 | chrY | 13457782 | . | G | A   | 78.57   | my_snp_filter | AC=2;AF=0.031;AN=64;BaseQ          |
| 24188 | chrY | 13457783 | . | A | G   | 195.65  | my_snp_filter | AC=5;AF=0.083;AN=60;BaseQ          |
| 24189 | chrY | 13457807 | . | T | A   | 85.61   | PASS          | AC=2;AF=0.167;AN=12;BaseQRankSum=  |
| 24190 | chrY | 13458417 | . | C | A   | 216.32  | PASS          | AC=1;AF=0.028;AN=36;BaseQRankSum=  |
| 24191 | chrY | 13458470 | . | C | G   | 171.23  | PASS          | AC=3;AF=0.047;AN=64;BaseQRankSum=  |
| 24192 | chrY | 13458475 | . | C | A   | 270.88  | PASS          | AC=1;AF=0.016;AN=62;BaseQRankSum=  |
| 24193 | chrY | 13458480 | . | A | C   | 363.32  | PASS          | AC=2;AF=0.083;AN=24;BaseQRankSum=  |
| 24194 | chrY | 13458483 | . | T | A   | 157.89  | PASS          | AC=2;AF=0.043;AN=46;BaseQRankSum=  |
| 24195 | chrY | 13458485 | . | A | C   | 125.36  | PASS          | AC=1;AF=0.071;AN=14;BaseQRankSum=  |
| 24196 | chrY | 13458490 | . | T | C   | 216.09  | PASS          | AC=2;AF=0.200;AN=10;BaseQRankSum=  |
| 24197 | chrY | 13458674 | . | T | G   | 32.43   | PASS          | AC=1;AF=0.014;AN=70;BaseQRankSum=  |
| 24198 | chrY | 13458675 | . | C | G   | 34      | PASS          | AC=1;AF=0.014;AN=70;BaseQRankSum=  |
| 24199 | chrY | 13458678 | . | T | A   | 49.06   | PASS          | AC=1;AF=0.014;AN=70;BaseQRankSum=  |
| 24200 | chrY | 13458682 | . | A | G   | 33.78   | PASS          | AC=1;AF=0.014;AN=70;BaseQRankSum=  |
| 24201 | chrY | 13458683 | . | C | A   | 43.25   | PASS          | AC=1;AF=0.014;AN=70;BaseQRankSum=  |
| 24202 | chrY | 13458696 | . | C | A   | 38.21   | PASS          | AC=1;AF=0.014;AN=70;BaseQRankSum=  |
| 24203 | chrY | 13458723 | . | T | C   | 60.54   | PASS          | AC=1;AF=0.015;AN=68;BaseQRankSum=  |
| 24204 | chrY | 13459063 | . | T | C   | 34.72   | PASS          | AC=1;AF=0.029;AN=34;BaseQRankSum=  |
| 24205 | chrY | 13459070 | . | A | C   | 192.25  | PASS          | AC=2;AF=0.111;AN=18;BaseQRankSum=  |
| 24206 | chrY | 13459165 | . | C | A   | 299.74  | my_snp_filter | AC=3;AF=0.100;AN=30;BaseQ          |
| 24207 | chrY | 13459168 | . | A | T   | 36.84   | my_snp_filter | AC=2;AF=0.083;AN=24;BaseQ          |
| 24208 | chrY | 13459171 | . | C | G   | 96.75   | PASS          | AC=3;AF=0.088;AN=34;BaseQRankSum=  |
| 24209 | chrY | 13459231 | . | T | C   | 299.43  | PASS          | AC=1;AF=0.100;AN=10;BaseQRankSum=  |
| 24210 | chrY | 13459571 | . | A | G   | 319.14  | my_snp_filter | AC=1;AF=0.020;AN=50;BaseQ          |
| 24211 | chrY | 13459574 | . | C | A   | 238.96  | PASS          | AC=1;AF=0.028;AN=36;BaseQRankSum=  |
| 24212 | chrY | 13459575 | . | G | C   | 717.51  | PASS          | AC=2;AF=0.091;AN=22;BaseQRankSum=  |
| 24213 | chrY | 13460258 | . | T | A   | 46.26   | PASS          | AC=1;AF=0.017;AN=58;BaseQRankSum=  |
| 24214 | chrY | 13460261 | . | G | A   | 45.81   | PASS          | AC=1;AF=0.017;AN=58;BaseQRankSum=  |
| 24215 | chrY | 13460262 | . | A | G   | 45.63   | PASS          | AC=1;AF=0.017;AN=58;BaseQRankSum=  |
| 24216 | chrY | 13460264 | . | C | A   | 46.82   | PASS          | AC=1;AF=0.017;AN=58;BaseQRankSum=  |
| 24217 | chrY | 13460272 | . | C | G   | 46.30   | PASS          | AC=1;AF=0.017;AN=58;BaseQRankSum=  |
| 24218 | chrY | 13460289 | . | T | G   | 71.31   | my_snp_filter | AC=2;AF=0.036;AN=56;BaseQ          |
| 24219 | chrY | 13460325 | . | C | A   | 32.27   | my_snp_filter | AC=1;AF=0.016;AN=62;BaseQ          |
| 24220 | chrY | 13460445 | . | G | A   | 165.91  | PASS          | AC=3;AF=0.043;AN=70;BaseQRankSum=  |
| 24221 | chrY | 13460447 | . | C | T   | 166.95  | my_snp_filter | AC=2;AF=0.029;AN=70;BaseQ          |
| 24222 | chrY | 13460448 | . | C | T   | 266.49  | PASS          | AC=4;AF=0.057;AN=70;BaseQRankSum=  |
| 24223 | chrY | 13460449 | . | C | T   | 420.82  | PASS          | AC=2;AF=0.029;AN=70;BaseQRankSum=  |
| 24224 | chrY | 13460453 | . | A | T   | 223.70  | PASS          | AC=5;AF=0.071;AN=70;BaseQRankSum=  |
| 24225 | chrY | 13460461 | . | T | C,A | 5880.69 | PASS          | AC=19,4;AF=0.297,0.063;AN=64;Base  |
| 24226 | chrY | 13460462 | . | G | A   | 679.50  | PASS          | AC=12;AF=0.188;AN=64;BaseQRankSum= |
| 24227 | chrY | 13460465 | . | A | T   | 120.10  | PASS          | AC=3;AF=0.043;AN=70;BaseQRankSum=  |
| 24228 | chrY | 13460466 | . | G | A   | 475.94  | PASS          | AC=5;AF=0.071;AN=70;BaseQRankSum=  |
| 24229 | chrY | 13460475 | . | A | T   | 34.10   | PASS          | AC=2;AF=0.029;AN=70;BaseQRankSum=  |
| 24230 | chrY | 13460482 | . | C | G   | 450.59  | PASS          | AC=5;AF=0.071;AN=70;BaseQRankSum=  |
| 24231 | chrY | 13460484 | . | A | T   | 72.69   | my_snp_filter | AC=3;AF=0.043;AN=70;BaseQ          |
| 24232 | chrY | 13460488 | . | G | C   | 412.78  | PASS          | AC=5;AF=0.071;AN=70;BaseQRankSum=  |
| 24233 | chrY | 13460501 | . | A | T   | 36.89   | PASS          | AC=1;AF=0.014;AN=70;BaseQRankSum=  |
| 24234 | chrY | 13460512 | . | G | A   | 57.23   | my_snp_filter | AC=3;AF=0.043;AN=70;BaseQ          |
| 24235 | chrY | 13460515 | . | C | T   | 107.72  | PASS          | AC=1;AF=0.015;AN=68;BaseQRankSum=  |
| 24236 | chrY | 13460517 | . | C | G   | 53.07   | PASS          | AC=1;AF=0.016;AN=62;BaseQRankSum=  |
| 24237 | chrY | 13460520 | . | A | T   | 201.30  | PASS          | AC=2;AF=0.042;AN=48;BaseQRankSum=  |
| 24238 | chrY | 13460521 | . | T | C   | 169.85  | PASS          | AC=2;AF=0.045;AN=44;BaseQRankSum=  |
| 24239 | chrY | 13460523 | . | C | G   | 671.52  | PASS          | AC=8;AF=0.222;AN=36;BaseQRankSum=  |
| 24240 | chrY | 13460524 | . | G | T   | 153.94  | PASS          | AC=2;AF=0.059;AN=34;BaseQRankSum=  |
| 24241 | chrY | 13460527 | . | G | C   | 293.40  | PASS          | AC=3;AF=0.100;AN=30;BaseQRankSum=  |
| 24242 | chrY | 13460530 | . | T | C,A | 1100.28 | PASS          | AC=7,3;AF=0.269,0.115;AN=26;BaseQ  |
| 24243 | chrY | 13460535 | . | C | G   | 208.11  | PASS          | AC=3;AF=0.056;AN=54;BaseQRankSum=  |
| 24244 | chrY | 13460539 | . | A | T   | 249.78  | PASS          | AC=5;AF=0.081;AN=62;BaseQRankSum=  |

|       |      |          |   |   |     |          |               |                                    |
|-------|------|----------|---|---|-----|----------|---------------|------------------------------------|
| 24245 | chrY | 13460540 | . | G | A   | 196.70   | PASS          | AC=8;AF=0.118;AN=68;BaseQRankSum=  |
| 24246 | chrY | 13460549 | . | C | G   | 37.84    | PASS          | AC=1;AF=0.015;AN=68;BaseQRankSum=  |
| 24247 | chrY | 13460553 | . | A | G   | 71.57    | my_snp_filter | AC=5;AF=0.074;AN=68;BaseQ          |
| 24248 | chrY | 13460568 | . | G | A   | 32.10    | PASS          | AC=1;AF=0.014;AN=70;BaseQRankSum=  |
| 24249 | chrY | 13460581 | . | G | A   | 133.61   | PASS          | AC=2;AF=0.029;AN=68;BaseQRankSum=  |
| 24250 | chrY | 13460582 | . | C | T   | 92.66    | PASS          | AC=2;AF=0.029;AN=68;BaseQRankSum=  |
| 24251 | chrY | 13460586 | . | G | A   | 203.96   | PASS          | AC=3;AF=0.045;AN=66;BaseQRankSum=  |
| 24252 | chrY | 13460590 | . | G | T,A | 246.59   | PASS          | AC=1,2;AF=0.015,0.029;AN=68;BaseQ  |
| 24253 | chrY | 13460597 | . | C | A   | 33.47    | my_snp_filter | AC=1;AF=0.015;AN=68;BaseQ          |
| 24254 | chrY | 13460602 | . | C | A   | 101.41   | PASS          | AC=1;AF=0.014;AN=70;BaseQRankSum=  |
| 24255 | chrY | 13460604 | . | A | C   | 47.73    | my_snp_filter | AC=2;AF=0.029;AN=70;BaseQ          |
| 24256 | chrY | 13460606 | . | C | A   | 130.90   | PASS          | AC=4;AF=0.057;AN=70;BaseQRankSum=  |
| 24257 | chrY | 13460609 | . | T | C   | 166.82   | PASS          | AC=5;AF=0.074;AN=68;BaseQRankSum=  |
| 24258 | chrY | 13460610 | . | A | G   | 142.20   | PASS          | AC=2;AF=0.029;AN=68;BaseQRankSum=  |
| 24259 | chrY | 13460611 | . | C | T   | 41.14    | PASS          | AC=1;AF=0.014;AN=70;BaseQRankSum=  |
| 24260 | chrY | 13460622 | . | T | G   | 44.59    | PASS          | AC=2;AF=0.030;AN=66;BaseQRankSum=  |
| 24261 | chrY | 13460625 | . | T | C   | 221.59   | PASS          | AC=2;AF=0.036;AN=56;BaseQRankSum=  |
| 24262 | chrY | 13460626 | . | T | C   | 1843.17  | PASS          | AC=15;AF=0.500;AN=30;BaseQRankSum= |
| 24263 | chrY | 13460628 | . | C | G   | 1954.09  | PASS          | AC=14;AF=0.467;AN=30;BaseQRankSum= |
| 24264 | chrY | 13460630 | . | G | A   | 46.59    | my_snp_filter | AC=2;AF=0.029;AN=70;DP=10          |
| 24265 | chrY | 13460631 | . | C | T   | 48.63    | my_snp_filter | AC=2;AF=0.029;AN=68;DP=10          |
| 24266 | chrY | 13460632 | . | A | T   | 385.92   | PASS          | AC=4;AF=0.057;AN=70;BaseQRankSum=  |
| 24267 | chrY | 13460633 | . | G | A   | 217.96   | PASS          | AC=2;AF=0.029;AN=70;BaseQRankSum=  |
| 24268 | chrY | 13460636 | . | A | T   | 78.77    | PASS          | AC=3;AF=0.043;AN=70;BaseQRankSum=  |
| 24269 | chrY | 13460640 | . | G | T   | 115.88   | PASS          | AC=4;AF=0.057;AN=70;BaseQRankSum=  |
| 24270 | chrY | 13460648 | . | G | T   | 439.30   | PASS          | AC=5;AF=0.119;AN=42;BaseQRankSum=  |
| 24271 | chrY | 13460649 | . | T | C,A | 1129.87  | PASS          | AC=6,1;AF=0.375,0.063;AN=16;BaseQ  |
| 24272 | chrY | 13460659 | . | C | G   | 166.84   | PASS          | AC=1;AF=0.015;AN=66;BaseQRankSum=  |
| 24273 | chrY | 13460670 | . | C | A   | 464.47   | PASS          | AC=4;AF=0.059;AN=58;BaseQRankSum=  |
| 24274 | chrY | 13460674 | . | A | G   | 194.73   | PASS          | AC=2;AF=0.036;AN=56;BaseQRankSum=  |
| 24275 | chrY | 13460799 | . | C | A   | 157.79   | my_snp_filter | AC=1;AF=0.016;AN=64;BaseQ          |
| 24276 | chrY | 13460802 | . | A | G   | 743.12   | PASS          | AC=7;AF=0.103;AN=68;BaseQRankSum=  |
| 24277 | chrY | 13460805 | . | T | A   | 9766.63  | PASS          | AC=8;AF=0.235;AN=34;BaseQRankSum=  |
| 24278 | chrY | 13460806 | . | A | G   | 49.92    | my_snp_filter | AC=1;AF=0.019;AN=52;BaseQ          |
| 24279 | chrY | 13460811 | . | C | T   | 297.43   | PASS          | AC=1;AF=0.016;AN=64;BaseQRankSum=  |
| 24280 | chrY | 13460812 | . | C | T   | 478.74   | my_snp_filter | AC=4;AF=0.059;AN=68;BaseQ          |
| 24281 | chrY | 13460814 | . | C | T   | 276.37   | PASS          | AC=1;AF=0.015;AN=68;BaseQRankSum=  |
| 24282 | chrY | 13460816 | . | T | A   | 329.96   | PASS          | AC=2;AF=0.029;AN=68;BaseQRankSum=  |
| 24283 | chrY | 13460822 | . | G | T,A | 1550.77  | PASS          | AC=5,2;AF=0.076,0.030;AN=66;BaseQ  |
| 24284 | chrY | 13460831 | . | G | C   | 1040.84  | PASS          | AC=5;AF=0.074;AN=68;BaseQRankSum=  |
| 24285 | chrY | 13460833 | . | G | A   | 12977.22 | PASS          | AC=8;AF=0.125;AN=64;BaseQ          |
| 24286 | chrY | 13460834 | . | C | T,A | 680.77   | PASS          | AC=3,1;AF=0.045,0.015;AN=66;BaseQ  |
| 24287 | chrY | 13460837 | . | A | G   | 12950.73 | PASS          | AC=8;AF=0.125;AN=64;BaseQ          |
| 24288 | chrY | 13460839 | . | T | G   | 39.99    | my_snp_filter | AC=1;AF=0.015;AN=68;BaseQ          |
| 24289 | chrY | 13460842 | . | T | A   | 147.53   | my_snp_filter | AC=1;AF=0.015;AN=66;BaseQ          |
| 24290 | chrY | 13460847 | . | C | A   | 8880.40  | my_snp_filter | AC=4;AF=0.063;AN=64;BaseQ          |
| 24291 | chrY | 13460851 | . | T | G   | 11040.14 | PASS          | AC=8;AF=0.211;AN=38;BaseQ          |
| 24292 | chrY | 13460853 | . | C | T   | 9180.24  | my_snp_filter | AC=6;AF=0.111;AN=54;BaseQ          |
| 24293 | chrY | 13460854 | . | C | A   | 9130.33  | my_snp_filter | AC=6;AF=0.107;AN=56;BaseQ          |
| 24294 | chrY | 13460855 | . | C | A   | 9376.46  | my_snp_filter | AC=6;AF=0.107;AN=56;BaseQ          |
| 24295 | chrY | 13460862 | . | C | G   | 827.42   | PASS          | AC=3;AF=0.047;AN=64;BaseQRankSum=  |
| 24296 | chrY | 13460864 | . | G | C   | 7776.26  | PASS          | AC=4;AF=0.067;AN=60;BaseQRankSum=  |
| 24297 | chrY | 13460869 | . | T | A   | 102.45   | my_snp_filter | AC=1;AF=0.016;AN=62;BaseQ          |
| 24298 | chrY | 13460873 | . | G | C   | 11152.14 | my_snp_filter | AC=9;AF=0.346;AN=                  |
| 24299 | chrY | 13460876 | . | A | G   | 8688.71  | PASS          | AC=8;AF=0.267;AN=30;BaseQRankSum=  |
| 24300 | chrY | 13460877 | . | G | A   | 7748.18  | my_snp_filter | AC=5;AF=0.192;AN=26;BaseQ          |
| 24301 | chrY | 13460880 | . | T | C   | 813.54   | PASS          | AC=2;AF=0.033;AN=60;BaseQRankSum=  |
| 24302 | chrY | 13460881 | . | A | T   | 244.81   | PASS          | AC=1;AF=0.017;AN=60;BaseQRankSum=  |
| 24303 | chrY | 13460891 | . | G | A   | 68.48    | my_snp_filter | AC=1;AF=0.018;AN=56;BaseQ          |
| 24304 | chrY | 13460895 | . | A | T   | 33.31    | my_snp_filter | AC=1;AF=0.018;AN=56;BaseQ          |
| 24305 | chrY | 13460896 | . | T | C   | 684.58   | PASS          | AC=2;AF=0.038;AN=52;BaseQRankSum=  |
| 24306 | chrY | 13460897 | . | C | T   | 3413.07  | PASS          | AC=4;AF=0.080;AN=50;BaseQRankSum=  |
| 24307 | chrY | 13460898 | . | A | G   | 38.45    | my_snp_filter | AC=1;AF=0.018;AN=56;BaseQ          |
| 24308 | chrY | 13460903 | . | A | T   | 54.25    | my_snp_filter | AC=1;AF=0.019;AN=52;BaseQ          |
| 24309 | chrY | 13460906 | . | G | C   | 331.87   | PASS          | AC=2;AF=0.043;AN=46;BaseQRankSum=  |
| 24310 | chrY | 13460916 | . | T | A   | 2677.53  | PASS          | AC=5;AF=0.167;AN=30;BaseQRankSum=  |
| 24311 | chrY | 13460923 | . | C | T   | 383.99   | PASS          | AC=2;AF=0.059;AN=34;BaseQRankSum=  |
| 24312 | chrY | 13460929 | . | G | A   | 342.23   | PASS          | AC=1;AF=0.016;AN=64;BaseQRankSum=  |
| 24313 | chrY | 13460930 | . | C | T   | 1687.24  | PASS          | AC=2;AF=0.031;AN=64;BaseQRankSum=  |
| 24314 | chrY | 13460931 | . | A | T   | 365.07   | PASS          | AC=1;AF=0.015;AN=66;BaseQRankSum=  |
| 24315 | chrY | 13460942 | . | T | A   | 20296.38 | PASS          | AC=7;AF=0.500;AN=14;BaseQ          |
| 24316 | chrY | 13460944 | . | G | A   | 15789.24 | PASS          | AC=2;AF=0.037;AN=54;BaseQ          |
| 24317 | chrY | 13460951 | . | A | G   | 7347.22  | PASS          | AC=2;AF=0.029;AN=70;BaseQRankSum=  |
| 24318 | chrY | 13460958 | . | C | A   | 60466.26 | PASS          | AC=5;AF=0.500;AN=10;BaseQ          |
| 24319 | chrY | 13460978 | . | C | T   | 4497.15  | my_snp_filter | AC=2;AF=0.029;AN=70;BaseQ          |
| 24320 | chrY | 13460982 | . | G | A   | 7847.55  | PASS          | AC=3;AF=0.043;AN=70;BaseQRankSum=  |



|       |      |          |   |   |     |          |               |                                   |
|-------|------|----------|---|---|-----|----------|---------------|-----------------------------------|
| 24321 | chrY | 13460987 | . | G | C   | 94.36    | PASS          | AC=1;AF=0.014;AN=70;BaseQRankSum= |
| 24322 | chrY | 13460989 | . | C | G   | 329.95   | PASS          | AC=1;AF=0.019;AN=54;BaseQRankSum= |
| 24323 | chrY | 13461021 | . | C | T   | 136.98   | PASS          | AC=1;AF=0.014;AN=70;BaseQRankSum= |
| 24324 | chrY | 13461022 | . | A | G   | 82.97    | PASS          | AC=1;AF=0.014;AN=70;BaseQRankSum= |
| 24325 | chrY | 13461026 | . | G | T   | 405.02   | my_snp_filter | AC=6;AF=0.086;AN=70;BaseQ         |
| 24326 | chrY | 13461028 | . | G | C   | 60.46    | my_snp_filter | AC=1;AF=0.014;AN=70;BaseQ         |
| 24327 | chrY | 13461037 | . | G | A   | 100.87   | PASS          | AC=1;AF=0.014;AN=70;BaseQRankSum= |
| 24328 | chrY | 13461041 | . | G | T   | 111.75   | my_snp_filter | AC=2;AF=0.029;AN=70;BaseQ         |
| 24329 | chrY | 13461042 | . | G | T   | 100.91   | PASS          | AC=1;AF=0.014;AN=70;BaseQRankSum= |
| 24330 | chrY | 13461047 | . | G | C   | 187.89   | PASS          | AC=1;AF=0.014;AN=70;BaseQRankSum= |
| 24331 | chrY | 13461048 | . | T | C   | 84.50    | my_snp_filter | AC=2;AF=0.029;AN=70;BaseQ         |
| 24332 | chrY | 13461052 | . | A | C   | 86.34    | my_snp_filter | AC=1;AF=0.014;AN=70;BaseQ         |
| 24333 | chrY | 13461054 | . | A | G   | 386.85   | PASS          | AC=6;AF=0.086;AN=70;BaseQRankSum= |
| 24334 | chrY | 13461055 | . | G | A,T | 225.07   | my_snp_filter | AC=4,1;AF=0.057,0.014;AN=         |
| 24335 | chrY | 13461056 | . | C | T   | 99.44    | my_snp_filter | AC=2;AF=0.029;AN=70;BaseQ         |
| 24336 | chrY | 13461058 | . | C | A   | 62.43    | PASS          | AC=2;AF=0.029;AN=70;BaseQRankSum= |
| 24337 | chrY | 13461062 | . | G | A   | 337.23   | PASS          | AC=1;AF=0.014;AN=70;BaseQRankSum= |
| 24338 | chrY | 13461064 | . | A | T   | 99.46    | PASS          | AC=1;AF=0.014;AN=70;BaseQRankSum= |
| 24339 | chrY | 13461065 | . | G | A   | 87.44    | my_snp_filter | AC=2;AF=0.029;AN=70;BaseQ         |
| 24340 | chrY | 13461067 | . | C | T   | 98.33    | my_snp_filter | AC=4;AF=0.057;AN=70;BaseQ         |
| 24341 | chrY | 13461068 | . | A | G,C | 236.34   | my_snp_filter | AC=3,2;AF=0.043,0.029;AN=         |
| 24342 | chrY | 13461069 | . | G | T   | 361.49   | PASS          | AC=5;AF=0.071;AN=70;BaseQRankSum= |
| 24343 | chrY | 13461072 | . | C | T   | 340.92   | PASS          | AC=6;AF=0.086;AN=70;BaseQRankSum= |
| 24344 | chrY | 13461073 | . | C | G   | 132.34   | my_snp_filter | AC=3;AF=0.043;AN=70;BaseQ         |
| 24345 | chrY | 13461074 | . | T | C,A | 406.24   | my_snp_filter | AC=5,2;AF=0.071,0.029;AN=         |
| 24346 | chrY | 13461076 | . | G | C   | 191.21   | my_snp_filter | AC=2;AF=0.029;AN=68;BaseQ         |
| 24347 | chrY | 13461078 | . | A | T   | 332.05   | PASS          | AC=5;AF=0.071;AN=70;BaseQRankSum= |
| 24348 | chrY | 13461081 | . | G | A   | 222.89   | PASS          | AC=1;AF=0.014;AN=70;BaseQRankSum= |
| 24349 | chrY | 13461085 | . | T | A   | 65.87    | PASS          | AC=1;AF=0.014;AN=70;BaseQRankSum= |
| 24350 | chrY | 13461087 | . | C | T   | 218.36   | my_snp_filter | AC=3;AF=0.043;AN=70;BaseQ         |
| 24351 | chrY | 13461088 | . | A | G   | 175.50   | my_snp_filter | AC=2;AF=0.029;AN=70;BaseQ         |
| 24352 | chrY | 13461089 | . | T | A   | 145.15   | PASS          | AC=1;AF=0.017;AN=60;BaseQRankSum= |
| 24353 | chrY | 13461090 | . | C | G   | 113.01   | PASS          | AC=1;AF=0.017;AN=60;BaseQRankSum= |
| 24354 | chrY | 13461095 | . | G | A   | 958.83   | PASS          | AC=8;AF=0.125;AN=64;BaseQRankSum= |
| 24355 | chrY | 13461096 | . | G | T   | 130.77   | PASS          | AC=3;AF=0.043;AN=70;BaseQRankSum= |
| 24356 | chrY | 13461097 | . | G | T   | 341.05   | PASS          | AC=1;AF=0.014;AN=70;BaseQRankSum= |
| 24357 | chrY | 13461099 | . | G | T   | 377.11   | PASS          | AC=4;AF=0.057;AN=70;BaseQRankSum= |
| 24358 | chrY | 13461101 | . | T | C,A | 936.88   | PASS          | AC=5,1;AF=0.071,0.014;AN=70;BaseQ |
| 24359 | chrY | 13461103 | . | A | C   | 153.60   | PASS          | AC=3;AF=0.043;AN=70;BaseQRankSum= |
| 24360 | chrY | 13461104 | . | G | T   | 166.49   | my_snp_filter | AC=1;AF=0.014;AN=70;BaseQ         |
| 24361 | chrY | 13461105 | . | T | G   | 196.15   | PASS          | AC=1;AF=0.014;AN=70;BaseQRankSum= |
| 24362 | chrY | 13461107 | . | C | T   | 839.21   | PASS          | AC=7;AF=0.100;AN=70;BaseQRankSum= |
| 24363 | chrY | 13461108 | . | A | G   | 232.29   | my_snp_filter | AC=2;AF=0.029;AN=70;BaseQ         |
| 24364 | chrY | 13461110 | . | A | T   | 33.55    | my_snp_filter | AC=1;AF=0.014;AN=70;BaseQ         |
| 24365 | chrY | 13461111 | . | G | T   | 106.60   | my_snp_filter | AC=2;AF=0.029;AN=70;BaseQ         |
| 24366 | chrY | 13461113 | . | T | C   | 68.96    | my_snp_filter | AC=1;AF=0.014;AN=70;BaseQ         |
| 24367 | chrY | 13461114 | . | A | T,G | 319.71   | my_snp_filter | AC=3,1;AF=0.044,0.015;AN=         |
| 24368 | chrY | 13461117 | . | T | A   | 228.96   | PASS          | AC=1;AF=0.014;AN=70;BaseQRankSum= |
| 24369 | chrY | 13461120 | . | C | G   | 304.48   | PASS          | AC=1;AF=0.015;AN=68;BaseQRankSum= |
| 24370 | chrY | 13461122 | . | A | T   | 419.57   | PASS          | AC=2;AF=0.029;AN=70;BaseQRankSum= |
| 24371 | chrY | 13461123 | . | T | G   | 259.06   | PASS          | AC=1;AF=0.015;AN=68;BaseQRankSum= |
| 24372 | chrY | 13461124 | . | G | T   | 157.27   | PASS          | AC=2;AF=0.029;AN=68;BaseQRankSum= |
| 24373 | chrY | 13461128 | . | C | T   | 111.85   | PASS          | AC=1;AF=0.026;AN=38;BaseQRankSum= |
| 24374 | chrY | 13461130 | . | A | G   | 1937.96  | PASS          | AC=8;AF=0.286;AN=28;BaseQRankSum= |
| 24375 | chrY | 13461132 | . | A | T   | 219.62   | PASS          | AC=1;AF=0.024;AN=42;BaseQRankSum= |
| 24376 | chrY | 13461133 | . | G | A   | 194.49   | PASS          | AC=2;AF=0.040;AN=50;BaseQRankSum= |
| 24377 | chrY | 13461135 | . | T | C   | 1147.80  | PASS          | AC=5;AF=0.179;AN=28;BaseQRankSum= |
| 24378 | chrY | 13461140 | . | C | G   | 48.70    | PASS          | AC=1;AF=0.019;AN=52;BaseQRankSum= |
| 24379 | chrY | 13461141 | . | C | T   | 254.18   | PASS          | AC=2;AF=0.037;AN=54;BaseQRankSum= |
| 24380 | chrY | 13461144 | . | G | T   | 292.41   | PASS          | AC=2;AF=0.036;AN=56;BaseQRankSum= |
| 24381 | chrY | 13461145 | . | A | G   | 172.55   | PASS          | AC=3;AF=0.056;AN=54;BaseQRankSum= |
| 24382 | chrY | 13461146 | . | A | C   | 486.68   | PASS          | AC=5;AF=0.114;AN=44;BaseQRankSum= |
| 24383 | chrY | 13461151 | . | T | G   | 406.67   | PASS          | AC=5;AF=0.179;AN=28;BaseQRankSum= |
| 24384 | chrY | 13461156 | . | A | T   | 57.33    | PASS          | AC=1;AF=0.015;AN=66;BaseQRankSum= |
| 24385 | chrY | 13461183 | . | C | T   | 37.87    | my_snp_filter | AC=1;AF=0.015;AN=68;BaseQ         |
| 24386 | chrY | 13461206 | . | G | A   | 317.75   | PASS          | AC=7;AF=0.438;AN=16;BaseQRankSum= |
| 24387 | chrY | 13461240 | . | T | G   | 166.18   | PASS          | AC=1;AF=0.014;AN=70;BaseQRankSum= |
| 24388 | chrY | 13461249 | . | T | A   | 3146.43  | PASS          | AC=1;AF=0.015;AN=68;BaseQRankSum= |
| 24389 | chrY | 13461252 | . | G | A   | 58.84    | my_snp_filter | AC=2;AF=0.029;AN=68;BaseQ         |
| 24390 | chrY | 13461253 | . | T | C   | 3157.74  | PASS          | AC=1;AF=0.015;AN=68;BaseQRankSum= |
| 24391 | chrY | 13461266 | . | A | T   | 31997.36 | PASS          | AC=15;AF=0.375;AN=40;Base         |
| 24392 | chrY | 13461269 | . | A | G   | 52913.66 | PASS          | AC=10;AF=0.217;AN=46;Base         |
| 24393 | chrY | 13461271 | . | G | T   | 44212.35 | PASS          | AC=10;AF=0.227;AN=44;Base         |
| 24394 | chrY | 13461272 | . | C | G   | 47.66    | PASS          | AC=1;AF=0.018;AN=56;BaseQRankSum= |
| 24395 | chrY | 13461284 | . | A | G   | 47.78    | PASS          | AC=1;AF=0.015;AN=66;BaseQRankSum= |
| 24396 | chrY | 13461286 | . | G | C   | 601.31   | my_snp_filter | AC=3;AF=0.048;AN=62;BaseQ         |

|       |      |          |   |   |     |          |               |                                    |
|-------|------|----------|---|---|-----|----------|---------------|------------------------------------|
| 24397 | chrY | 13461292 | . | T | C   | 53.20    | PASS          | AC=2;AF=0.030;AN=66;DP=10401;FS=0  |
| 24398 | chrY | 13461301 | . | G | T   | 532.74   | PASS          | AC=6;AF=0.097;AN=62;BaseQRankSum=  |
| 24399 | chrY | 13461317 | . | A | G   | 313.25   | PASS          | AC=3;AF=0.047;AN=64;BaseQRankSum=  |
| 24400 | chrY | 13461320 | . | T | G   | 291.92   | PASS          | AC=3;AF=0.048;AN=62;BaseQRankSum=  |
| 24401 | chrY | 13461322 | . | T | C   | 176.50   | PASS          | AC=1;AF=0.016;AN=62;BaseQRankSum=  |
| 24402 | chrY | 13461325 | . | C | A   | 177.04   | PASS          | AC=1;AF=0.016;AN=62;BaseQRankSum=  |
| 24403 | chrY | 13461327 | . | A | G   | 378.21   | PASS          | AC=2;AF=0.032;AN=62;BaseQRankSum=  |
| 24404 | chrY | 13461328 | . | G | T   | 116.59   | PASS          | AC=2;AF=0.033;AN=60;BaseQRankSum=  |
| 24405 | chrY | 13461329 | . | C | A   | 1076.75  | PASS          | AC=5;AF=0.086;AN=58;BaseQRankSum=  |
| 24406 | chrY | 13461333 | . | C | T   | 1412.68  | my_snp_filter | AC=8;AF=0.133;AN=60;BaseQ          |
| 24407 | chrY | 13461335 | . | T | G   | 1116.74  | my_snp_filter | AC=5;AF=0.089;AN=56;BaseQ          |
| 24408 | chrY | 13461350 | . | A | G   | 271.52   | PASS          | AC=1;AF=0.016;AN=62;BaseQRankSum=  |
| 24409 | chrY | 13461359 | . | A | G   | 413.18   | PASS          | AC=2;AF=0.036;AN=56;BaseQRankSum=  |
| 24410 | chrY | 13461360 | . | C | T   | 1064.08  | PASS          | AC=4;AF=0.077;AN=52;BaseQRankSum=  |
| 24411 | chrY | 13461363 | . | C | A   | 139.94   | PASS          | AC=2;AF=0.033;AN=60;BaseQRankSum=  |
| 24412 | chrY | 13461364 | . | T | G   | 376.18   | PASS          | AC=2;AF=0.040;AN=50;BaseQRankSum=  |
| 24413 | chrY | 13461366 | . | C | G   | 234.95   | PASS          | AC=1;AF=0.016;AN=62;BaseQRankSum=  |
| 24414 | chrY | 13461367 | . | T | A   | 43.39    | PASS          | AC=1;AF=0.015;AN=66;DP=1698;FS=0.  |
| 24415 | chrY | 13461368 | . | C | G   | 416.61   | PASS          | AC=3;AF=0.056;AN=54;BaseQRankSum=  |
| 24416 | chrY | 13461374 | . | T | A   | 46       | PASS          | AC=1;AF=0.015;AN=66;BaseQRankSum=  |
| 24417 | chrY | 13461375 | . | C | A   | 55.52    | PASS          | AC=1;AF=0.015;AN=66;BaseQRankSum=  |
| 24418 | chrY | 13461377 | . | A | G   | 87.85    | PASS          | AC=2;AF=0.036;AN=56;BaseQRankSum=  |
| 24419 | chrY | 13461552 | . | G | C   | 37.93    | PASS          | AC=1;AF=0.014;AN=70;BaseQRankSum=  |
| 24420 | chrY | 13461554 | . | G | T   | 2335.55  | PASS          | AC=14;AF=0.241;AN=58;BaseQRankSum= |
| 24421 | chrY | 13461561 | . | C | T   | 34.24    | PASS          | AC=1;AF=0.014;AN=70;BaseQRankSum=  |
| 24422 | chrY | 13461580 | . | G | A   | 34.40    | PASS          | AC=1;AF=0.014;AN=70;BaseQRankSum=  |
| 24423 | chrY | 13461584 | . | A | T   | 37.64    | PASS          | AC=1;AF=0.015;AN=68;BaseQRankSum=  |
| 24424 | chrY | 13461586 | . | A | C   | 37.74    | PASS          | AC=1;AF=0.015;AN=66;BaseQRankSum=  |
| 24425 | chrY | 13461596 | . | A | C,* | 720.59   | PASS          | AC=4,7;AF=0.065,0.113;AN=62;BaseQ  |
| 24426 | chrY | 13461685 | . | G | C   | 2714.09  | my_snp_filter | AC=6;AF=0.188;AN=32;BaseQ          |
| 24427 | chrY | 13461686 | . | T | A   | 157.95   | PASS          | AC=1;AF=0.016;AN=62;BaseQRankSum=  |
| 24428 | chrY | 13461690 | . | C | A   | 81.06    | PASS          | AC=1;AF=0.016;AN=62;BaseQRankSum=  |
| 24429 | chrY | 13461693 | . | A | G   | 884.90   | PASS          | AC=4;AF=0.067;AN=60;BaseQRankSum=  |
| 24430 | chrY | 13461694 | . | A | T   | 81.10    | PASS          | AC=1;AF=0.017;AN=60;BaseQRankSum=  |
| 24431 | chrY | 13461695 | . | G | C   | 332.88   | PASS          | AC=4;AF=0.069;AN=58;BaseQRankSum=  |
| 24432 | chrY | 13461700 | . | A | G   | 120.64   | PASS          | AC=1;AF=0.017;AN=58;BaseQRankSum=  |
| 24433 | chrY | 13461705 | . | C | A   | 264.60   | PASS          | AC=2;AF=0.034;AN=58;BaseQRankSum=  |
| 24434 | chrY | 13461709 | . | C | A,G | 3315.99  | my_snp_filter | AC=4,4;AF=0.182,0.182;AN=          |
| 24435 | chrY | 13461711 | . | G | A   | 274.30   | PASS          | AC=3;AF=0.050;AN=60;BaseQRankSum=  |
| 24436 | chrY | 13461712 | . | A | G   | 161.95   | PASS          | AC=1;AF=0.016;AN=64;BaseQRankSum=  |
| 24437 | chrY | 13461716 | . | G | A   | 1625.15  | PASS          | AC=5;AF=0.089;AN=56;BaseQRankSum=  |
| 24438 | chrY | 13461719 | . | C | T   | 200.95   | PASS          | AC=1;AF=0.015;AN=66;BaseQRankSum=  |
| 24439 | chrY | 13461724 | . | T | A   | 4355.16  | PASS          | AC=7;AF=0.250;AN=28;BaseQRankSum=  |
| 24440 | chrY | 13461739 | . | C | A   | 454.70   | PASS          | AC=3;AF=0.043;AN=70;BaseQRankSum=  |
| 24441 | chrY | 13461742 | . | G | C   | 71.28    | my_snp_filter | AC=1;AF=0.014;AN=70;BaseQ          |
| 24442 | chrY | 13461743 | . | T | A   | 206.85   | PASS          | AC=1;AF=0.014;AN=70;BaseQRankSum=  |
| 24443 | chrY | 13461746 | . | G | T   | 841.95   | PASS          | AC=5;AF=0.071;AN=70;BaseQRankSum=  |
| 24444 | chrY | 13461749 | . | G | T   | 1001.96  | PASS          | AC=5;AF=0.074;AN=68;BaseQRankSum=  |
| 24445 | chrY | 13461753 | . | G | A,C | 5648.52  | my_snp_filter | AC=7,9;AF=0.167,0.214;AN=          |
| 24446 | chrY | 13461754 | . | T | A   | 940.46   | PASS          | AC=5;AF=0.074;AN=68;BaseQRankSum=  |
| 24447 | chrY | 13461756 | . | G | T   | 1098.71  | PASS          | AC=5;AF=0.071;AN=70;BaseQRankSum=  |
| 24448 | chrY | 13461758 | . | C | G   | 184.52   | my_snp_filter | AC=2;AF=0.029;AN=70;BaseQ          |
| 24449 | chrY | 13461762 | . | A | T   | 2460.21  | PASS          | AC=12;AF=0.176;AN=68;BaseQRankSum= |
| 24450 | chrY | 13461764 | . | T | C   | 251.69   | PASS          | AC=1;AF=0.014;AN=70;BaseQRankSum=  |
| 24451 | chrY | 13461771 | . | A | T,G | 2446.06  | PASS          | AC=10,6;AF=0.143,0.086;AN=70;Base  |
| 24452 | chrY | 13461773 | . | T | A   | 1616.18  | PASS          | AC=7;AF=0.100;AN=70;BaseQRankSum=  |
| 24453 | chrY | 13461776 | . | G | A   | 458.62   | PASS          | AC=2;AF=0.029;AN=68;BaseQRankSum=  |
| 24454 | chrY | 13461781 | . | T | G   | 1537.20  | PASS          | AC=7;AF=0.100;AN=70;BaseQRankSum=  |
| 24455 | chrY | 13461782 | . | C | G   | 465.84   | PASS          | AC=2;AF=0.029;AN=70;BaseQRankSum=  |
| 24456 | chrY | 13461787 | . | C | T   | 74.44    | my_snp_filter | AC=1;AF=0.014;AN=70;BaseQ          |
| 24457 | chrY | 13461793 | . | T | A   | 35.03    | PASS          | AC=1;AF=0.014;AN=70;BaseQRankSum=  |
| 24458 | chrY | 13461796 | . | G | C   | 1193.50  | PASS          | AC=6;AF=0.086;AN=70;BaseQRankSum=  |
| 24459 | chrY | 13461797 | . | T | C   | 811.10   | PASS          | AC=10;AF=0.143;AN=70;BaseQRankSum= |
| 24460 | chrY | 13461798 | . | C | A   | 5681.16  | PASS          | AC=13;AF=0.197;AN=66;BaseQRankSum= |
| 24461 | chrY | 13461799 | . | C | A   | 15709.61 | PASS          | AC=28;AF=0.452;AN=62;BaseQ         |
| 24462 | chrY | 13461800 | . | T | G   | 5450.60  | PASS          | AC=12;AF=0.182;AN=66;BaseQRankSum= |
| 24463 | chrY | 13461801 | . | G | T   | 507.40   | PASS          | AC=2;AF=0.029;AN=68;BaseQRankSum=  |
| 24464 | chrY | 13461802 | . | C | T   | 322.65   | my_snp_filter | AC=6;AF=0.088;AN=68;BaseQ          |
| 24465 | chrY | 13461803 | . | T | G   | 324.36   | my_snp_filter | AC=6;AF=0.088;AN=68;BaseQ          |
| 24466 | chrY | 13461806 | . | C | T   | 482.47   | PASS          | AC=2;AF=0.029;AN=70;BaseQRankSum=  |
| 24467 | chrY | 13461807 | . | T | C   | 5925.69  | PASS          | AC=12;AF=0.171;AN=70;BaseQRankSum= |
| 24468 | chrY | 13461808 | . | G | T,C | 486.99   | PASS          | AC=5,3;AF=0.071,0.043;AN=70;BaseQ  |
| 24469 | chrY | 13461812 | . | C | G,T | 15935.35 | PASS          | AC=21,5;AF=0.328,0.078;AN=         |
| 24470 | chrY | 13461817 | . | C | T,A | 1404.24  | PASS          | AC=8,2;AF=0.114,0.029;AN=70;BaseQ  |
| 24471 | chrY | 13461818 | . | G | A   | 230.79   | PASS          | AC=2;AF=0.029;AN=70;BaseQRankSum=  |
| 24472 | chrY | 13461819 | . | G | T   | 500.56   | PASS          | AC=2;AF=0.029;AN=68;BaseQRankSum=  |

|       |      |          |   |   |       |          |               |                                    |
|-------|------|----------|---|---|-------|----------|---------------|------------------------------------|
| 24473 | chrY | 13461821 | . | G | T     | 426.01   | PASS          | AC=4;AF=0.057;AN=70;BaseQRankSum=  |
| 24474 | chrY | 13461825 | . | T | A     | 153.80   | my_snp_filter | AC=2;AF=0.029;AN=70;BaseQ          |
| 24475 | chrY | 13461826 | . | G | T     | 1157.08  | PASS          | AC=9;AF=0.132;AN=68;BaseQRankSum=  |
| 24476 | chrY | 13461827 | . | C | T     | 9371.59  | PASS          | AC=16;AF=0.235;AN=68;BaseQRankSum= |
| 24477 | chrY | 13461828 | . | G | A     | 186.60   | PASS          | AC=1;AF=0.014;AN=70;BaseQRankSum=  |
| 24478 | chrY | 13461829 | . | G | T,A   | 762.94   | PASS          | AC=2,6;AF=0.030,0.091;AN=66;BaseQ  |
| 24479 | chrY | 13461830 | . | G | T     | 932.27   | PASS          | AC=6;AF=0.091;AN=66;BaseQRankSum=  |
| 24480 | chrY | 13461832 | . | A | G     | 286.65   | PASS          | AC=4;AF=0.059;AN=68;BaseQRankSum=  |
| 24481 | chrY | 13461833 | . | C | A     | 39.33    | my_snp_filter | AC=1;AF=0.015;AN=68;BaseQ          |
| 24482 | chrY | 13461834 | . | C | T     | 6993.50  | PASS          | AC=15;AF=0.234;AN=64;BaseQRankSum= |
| 24483 | chrY | 13461835 | . | C | G     | 6917.08  | PASS          | AC=14;AF=0.219;AN=64;BaseQRankSum= |
| 24484 | chrY | 13461836 | . | A | G     | 13199.15 | PASS          | AC=17;AF=0.266;AN=64;BaseQ         |
| 24485 | chrY | 13461840 | . | A | T     | 243.64   | PASS          | AC=3;AF=0.043;AN=70;BaseQRankSum=  |
| 24486 | chrY | 13461845 | . | C | T     | 3467.27  | PASS          | AC=9;AF=0.129;AN=70;BaseQRankSum=  |
| 24487 | chrY | 13461848 | . | G | C     | 282.38   | PASS          | AC=5;AF=0.071;AN=70;BaseQRankSum=  |
| 24488 | chrY | 13461853 | . | G | T     | 61.10    | my_snp_filter | AC=1;AF=0.014;AN=70;BaseQ          |
| 24489 | chrY | 13461855 | . | T | A,G   | 853.11   | PASS          | AC=4,2;AF=0.057,0.029;AN=70;BaseQ  |
| 24490 | chrY | 13461861 | . | T | A     | 11086.17 | PASS          | AC=26;AF=0.419;AN=62;BaseQ         |
| 24491 | chrY | 13461863 | . | T | C     | 9314.24  | PASS          | AC=25;AF=0.417;AN=60;BaseQRankSum= |
| 24492 | chrY | 13461864 | . | G | C,A   | 1145.65  | PASS          | AC=11,2;AF=0.172,0.031;AN=64;BaseQ |
| 24493 | chrY | 13461865 | . | G | A     | 1326.25  | PASS          | AC=11;AF=0.162;AN=68;BaseQRankSum= |
| 24494 | chrY | 13461868 | . | T | C     | 180.28   | my_snp_filter | AC=6;AF=0.086;AN=70;BaseQ          |
| 24495 | chrY | 13461870 | . | G | T,A   | 2263.63  | PASS          | AC=8,7;AF=0.114,0.100;AN=70;BaseQ  |
| 24496 | chrY | 13461872 | . | G | C     | 409.14   | PASS          | AC=2;AF=0.029;AN=70;BaseQRankSum=  |
| 24497 | chrY | 13461875 | . | C | T     | 22111.37 | PASS          | AC=31;AF=0.500;AN=62;BaseQ         |
| 24498 | chrY | 13461877 | . | C | A     | 2004.32  | PASS          | AC=12;AF=0.171;AN=70;BaseQRankSum= |
| 24499 | chrY | 13461883 | . | C | A     | 472.50   | my_snp_filter | AC=9;AF=0.129;AN=70;BaseQ          |
| 24500 | chrY | 13461884 | . | C | A     | 1111.47  | PASS          | AC=9;AF=0.129;AN=70;BaseQRankSum=  |
| 24501 | chrY | 13461892 | . | T | G     | 991.18   | PASS          | AC=9;AF=0.129;AN=70;BaseQRankSum=  |
| 24502 | chrY | 13461897 | . | A | C     | 1948.36  | PASS          | AC=7;AF=0.100;AN=70;BaseQRankSum=  |
| 24503 | chrY | 13461901 | . | C | T     | 2625.80  | PASS          | AC=11;AF=0.157;AN=70;BaseQRankSum= |
| 24504 | chrY | 13461902 | . | G | T     | 91.34    | PASS          | AC=1;AF=0.014;AN=70;BaseQRankSum=  |
| 24505 | chrY | 13461903 | . | G | A,C   | 334.12   | my_snp_filter | AC=2,2;AF=0.029,0.029;AN=          |
| 24506 | chrY | 13461907 | . | C | T     | 1872.35  | PASS          | AC=7;AF=0.100;AN=70;BaseQRankSum=  |
| 24507 | chrY | 13461909 | . | C | T     | 85.53    | PASS          | AC=1;AF=0.014;AN=70;BaseQRankSum=  |
| 24508 | chrY | 13461912 | . | C | A     | 883.85   | my_snp_filter | AC=6;AF=0.086;AN=70;BaseQ          |
| 24509 | chrY | 13461918 | . | C | A     | 330.15   | PASS          | AC=3;AF=0.043;AN=70;BaseQRankSum=  |
| 24510 | chrY | 13461919 | . | C | G     | 567.13   | PASS          | AC=2;AF=0.029;AN=70;BaseQRankSum=  |
| 24511 | chrY | 13461921 | . | C | G     | 276.53   | my_snp_filter | AC=3;AF=0.043;AN=70;BaseQ          |
| 24512 | chrY | 13461923 | . | T | C     | 90.68    | PASS          | AC=1;AF=0.014;AN=70;BaseQRankSum=  |
| 24513 | chrY | 13461924 | . | G | A     | 93.59    | PASS          | AC=1;AF=0.014;AN=70;BaseQRankSum=  |
| 24514 | chrY | 13461927 | . | G | T     | 114.31   | PASS          | AC=2;AF=0.029;AN=70;BaseQRankSum=  |
| 24515 | chrY | 13461929 | . | G | C,T   | 15504.82 | PASS          | AC=35,3;AF=0.515,0.044;AN=         |
| 24516 | chrY | 13461935 | . | C | A,T   | 1567.22  | PASS          | AC=4,5;AF=0.057,0.071;AN=70;BaseQ  |
| 24517 | chrY | 13461936 | . | G | A     | 118.89   | PASS          | AC=2;AF=0.029;AN=70;BaseQRankSum=  |
| 24518 | chrY | 13461937 | . | G | T     | 4862.56  | PASS          | AC=19;AF=0.271;AN=70;BaseQRankSum= |
| 24519 | chrY | 13461938 | . | G | A,T   | 559.64   | PASS          | AC=2,1;AF=0.029,0.014;AN=70;BaseQ  |
| 24520 | chrY | 13461943 | . | C | T     | 96.35    | my_snp_filter | AC=1;AF=0.014;AN=70;BaseQ          |
| 24521 | chrY | 13461946 | . | C | T,G   | 315.44   | PASS          | AC=4,1;AF=0.057,0.014;AN=70;BaseQ  |
| 24522 | chrY | 13461947 | . | G | A     | 2607.98  | PASS          | AC=11;AF=0.157;AN=70;BaseQRankSum= |
| 24523 | chrY | 13461950 | . | T | A     | 13118.19 | PASS          | AC=33;AF=0.500;AN=66;BaseQ         |
| 24524 | chrY | 13461953 | . | T | C     | 4226.41  | PASS          | AC=15;AF=0.221;AN=68;BaseQRankSum= |
| 24525 | chrY | 13461959 | . | C | G     | 187.89   | PASS          | AC=2;AF=0.029;AN=70;BaseQRankSum=  |
| 24526 | chrY | 13461961 | . | C | T,*   | 375.22   | PASS          | AC=2,3;AF=0.029,0.043;AN=70;BaseQ  |
| 24527 | chrY | 13461962 | . | C | T     | 519.27   | PASS          | AC=6;AF=0.086;AN=70;BaseQRankSum=  |
| 24528 | chrY | 13461963 | . | G | A,T   | 951.78   | PASS          | AC=3,3;AF=0.044,0.044;AN=68;BaseQ  |
| 24529 | chrY | 13461966 | . | G | A     | 206.38   | PASS          | AC=2;AF=0.029;AN=70;BaseQRankSum=  |
| 24530 | chrY | 13461967 | . | T | A,C   | 1634.36  | PASS          | AC=12,1;AF=0.171,0.014;AN=70;BaseQ |
| 24531 | chrY | 13461968 | . | G | A,T   | 216.24   | PASS          | AC=2,1;AF=0.029,0.014;AN=70;BaseQ  |
| 24532 | chrY | 13461969 | . | G | A     | 161.84   | PASS          | AC=1;AF=0.014;AN=70;BaseQRankSum=  |
| 24533 | chrY | 13461981 | . | T | C,*   | 263.63   | PASS          | AC=1,2;AF=0.014,0.029;AN=70;BaseQ  |
| 24534 | chrY | 13461982 | . | G | A     | 397.08   | PASS          | AC=3;AF=0.043;AN=70;BaseQRankSum=  |
| 24535 | chrY | 13461985 | . | T | A,G   | 2679.95  | PASS          | AC=5,13;AF=0.083,0.217;AN=60;BaseQ |
| 24536 | chrY | 13461989 | . | C | T     | 791.50   | PASS          | AC=3;AF=0.043;AN=70;BaseQRankSum=  |
| 24537 | chrY | 13461990 | . | G | T     | 63.27    | PASS          | AC=1;AF=0.014;AN=70;BaseQRankSum=  |
| 24538 | chrY | 13461991 | . | C | T     | 783.09   | PASS          | AC=3;AF=0.043;AN=70;BaseQRankSum=  |
| 24539 | chrY | 13461995 | . | T | G,C   | 11359.28 | PASS          | AC=27,3;AF=0.450,0.050;AN=         |
| 24540 | chrY | 13461998 | . | C | T     | 220.80   | PASS          | AC=2;AF=0.029;AN=70;BaseQRankSum=  |
| 24541 | chrY | 13462000 | . | C | T,*   | 705.85   | PASS          | AC=3,3;AF=0.043,0.043;AN=70;BaseQ  |
| 24542 | chrY | 13462005 | . | T | G,A,C | 10988.53 | PASS          | AC=24,5,2;AF=0.387,0.081,          |
| 24543 | chrY | 13462007 | . | G | T,A   | 810.07   | PASS          | AC=3,2;AF=0.043,0.029;AN=70;BaseQ  |
| 24544 | chrY | 13462016 | . | C | T,G   | 1065.26  | PASS          | AC=2,3;AF=0.029,0.043;AN=70;BaseQ  |
| 24545 | chrY | 13462017 | . | G | C     | 605.30   | PASS          | AC=3;AF=0.043;AN=70;BaseQRankSum=  |
| 24546 | chrY | 13462019 | . | G | C,A   | 422.81   | PASS          | AC=1,2;AF=0.014,0.029;AN=70;BaseQ  |
| 24547 | chrY | 13462021 | . | G | T     | 275.96   | PASS          | AC=2;AF=0.029;AN=70;BaseQRankSum=  |
| 24548 | chrY | 13462026 | . | A | C     | 318.54   | PASS          | AC=2;AF=0.029;AN=70;BaseQRankSum=  |

|       |      |          |   |   |     |          |               |                                    |
|-------|------|----------|---|---|-----|----------|---------------|------------------------------------|
| 24549 | chrY | 13462027 | . | C | T   | 4349.91  | PASS          | AC=18;AF=0.257;AN=70;BaseQRankSum= |
| 24550 | chrY | 13462028 | . | G | T   | 604.18   | PASS          | AC=3;AF=0.043;AN=70;BaseQRankSum=  |
| 24551 | chrY | 13462029 | . | C | G   | 681.91   | my_snp_filter | AC=4;AF=0.057;AN=70;BaseQ          |
| 24552 | chrY | 13462030 | . | C | T   | 284.05   | PASS          | AC=6;AF=0.086;AN=70;BaseQRankSum=  |
| 24553 | chrY | 13462033 | . | C | G   | 126.37   | PASS          | AC=2;AF=0.029;AN=70;BaseQRankSum=  |
| 24554 | chrY | 13462034 | . | G | A   | 141.28   | PASS          | AC=2;AF=0.029;AN=70;BaseQRankSum=  |
| 24555 | chrY | 13462035 | . | T | C   | 670.33   | my_snp_filter | AC=5;AF=0.071;AN=70;BaseQ          |
| 24556 | chrY | 13462036 | . | G | C   | 251.67   | PASS          | AC=3;AF=0.043;AN=70;BaseQRankSum=  |
| 24557 | chrY | 13462044 | . | C | A   | 654.59   | PASS          | AC=3;AF=0.043;AN=70;BaseQRankSum=  |
| 24558 | chrY | 13462046 | . | G | C   | 570.48   | PASS          | AC=3;AF=0.043;AN=70;BaseQRankSum=  |
| 24559 | chrY | 13462049 | . | C | T   | 354.59   | PASS          | AC=2;AF=0.031;AN=64;BaseQRankSum=  |
| 24560 | chrY | 13462050 | . | T | A,C | 2747.54  | PASS          | AC=9,12;AF=0.141,0.188;AN=64;Base  |
| 24561 | chrY | 13462053 | . | C | T   | 573.13   | PASS          | AC=3;AF=0.043;AN=70;BaseQRankSum=  |
| 24562 | chrY | 13462056 | . | C | T   | 1369.83  | my_snp_filter | AC=7;AF=0.106;AN=66;BaseQ          |
| 24563 | chrY | 13462057 | . | A | G,T | 6276.17  | PASS          | AC=30,4;AF=0.469,0.063;AN=64;Base  |
| 24564 | chrY | 13462058 | . | G | A   | 239.47   | PASS          | AC=2;AF=0.029;AN=68;BaseQRankSum=  |
| 24565 | chrY | 13462059 | . | C | A,T | 1104.52  | PASS          | AC=10,1;AF=0.147,0.015;AN=68;Base  |
| 24566 | chrY | 13462060 | . | G | A   | 271.72   | PASS          | AC=2;AF=0.029;AN=68;BaseQRankSum=  |
| 24567 | chrY | 13462065 | . | C | A   | 996.12   | PASS          | AC=4;AF=0.057;AN=70;BaseQRankSum=  |
| 24568 | chrY | 13462066 | . | C | A   | 814.38   | PASS          | AC=9;AF=0.129;AN=70;BaseQRankSum=  |
| 24569 | chrY | 13462069 | . | A | C   | 280.05   | PASS          | AC=1;AF=0.014;AN=70;BaseQRankSum=  |
| 24570 | chrY | 13462071 | . | G | A,* | 304.42   | PASS          | AC=1,2;AF=0.014,0.029;AN=70;BaseQ  |
| 24571 | chrY | 13462073 | . | A | T,* | 146.21   | my_snp_filter | AC=1,2;AF=0.014,0.029;AN=          |
| 24572 | chrY | 13462074 | . | C | T   | 652.98   | PASS          | AC=5;AF=0.071;AN=70;BaseQRankSum=  |
| 24573 | chrY | 13462075 | . | T | G,A | 1725.69  | PASS          | AC=7,4;AF=0.100,0.057;AN=70;BaseQ  |
| 24574 | chrY | 13462078 | . | C | T   | 41.45    | PASS          | AC=1;AF=0.014;AN=70;BaseQRankSum=  |
| 24575 | chrY | 13462084 | . | C | A   | 287.07   | PASS          | AC=1;AF=0.014;AN=70;BaseQRankSum=  |
| 24576 | chrY | 13462086 | . | C | A   | 428.96   | PASS          | AC=7;AF=0.106;AN=66;BaseQRankSum=  |
| 24577 | chrY | 13462087 | . | T | G   | 7501.56  | PASS          | AC=32;AF=0.516;AN=62;BaseQRankSum= |
| 24578 | chrY | 13462091 | . | A | G   | 488.26   | PASS          | AC=3;AF=0.043;AN=70;BaseQRankSum=  |
| 24579 | chrY | 13462092 | . | G | T,A | 1899.85  | PASS          | AC=5,4;AF=0.071,0.057;AN=70;BaseQ  |
| 24580 | chrY | 13462097 | . | C | A   | 274.61   | PASS          | AC=4;AF=0.059;AN=68;BaseQRankSum=  |
| 24581 | chrY | 13462098 | . | T | C   | 8709.98  | PASS          | AC=27;AF=0.450;AN=60;BaseQRankSum= |
| 24582 | chrY | 13462105 | . | A | C   | 349.31   | PASS          | AC=3;AF=0.043;AN=70;BaseQRankSum=  |
| 24583 | chrY | 13462107 | . | T | A   | 1511.19  | PASS          | AC=6;AF=0.086;AN=70;BaseQRankSum=  |
| 24584 | chrY | 13462108 | . | C | G   | 476.24   | PASS          | AC=2;AF=0.029;AN=70;BaseQRankSum=  |
| 24585 | chrY | 13462109 | . | C | A   | 1248.43  | PASS          | AC=10;AF=0.143;AN=70;BaseQRankSum= |
| 24586 | chrY | 13462113 | . | C | G   | 36.83    | PASS          | AC=1;AF=0.014;AN=70;BaseQRankSum=  |
| 24587 | chrY | 13462114 | . | T | A   | 1946.26  | PASS          | AC=5;AF=0.071;AN=70;BaseQRankSum=  |
| 24588 | chrY | 13462117 | . | A | C,G | 11729.04 | PASS          | AC=25,4;AF=0.417,0.067;AN=         |
| 24589 | chrY | 13462120 | . | G | A   | 253.56   | PASS          | AC=5;AF=0.076;AN=66;BaseQRankSum=  |
| 24590 | chrY | 13462124 | . | G | A   | 666.59   | PASS          | AC=2;AF=0.029;AN=70;BaseQRankSum=  |
| 24591 | chrY | 13462131 | . | T | C   | 670.97   | PASS          | AC=2;AF=0.029;AN=70;BaseQRankSum=  |
| 24592 | chrY | 13462139 | . | C | G   | 61.82    | my_snp_filter | AC=1;AF=0.014;AN=70;BaseQ          |
| 24593 | chrY | 13462141 | . | C | T   | 2148.49  | PASS          | AC=8;AF=0.114;AN=70;BaseQRankSum=  |
| 24594 | chrY | 13462142 | . | C | G   | 2122.65  | PASS          | AC=8;AF=0.114;AN=70;BaseQRankSum=  |
| 24595 | chrY | 13462146 | . | A | T   | 404.55   | my_snp_filter | AC=5;AF=0.071;AN=70;BaseQ          |
| 24596 | chrY | 13462148 | . | C | A   | 153.14   | my_snp_filter | AC=1;AF=0.014;AN=70;BaseQ          |
| 24597 | chrY | 13462149 | . | C | A,G | 330.19   | PASS          | AC=5,1;AF=0.071,0.014;AN=70;BaseQ  |
| 24598 | chrY | 13462153 | . | C | G,T | 531.11   | my_snp_filter | AC=7,2;AF=0.100,0.029;AN=          |
| 24599 | chrY | 13462154 | . | A | T   | 4060.46  | PASS          | AC=12;AF=0.188;AN=64;BaseQRankSum= |
| 24600 | chrY | 13462155 | . | A | G,T | 25374.76 | PASS          | AC=22,8;AF=0.367,0.133;AN=         |
| 24601 | chrY | 13462157 | . | C | G   | 384.68   | my_snp_filter | AC=3;AF=0.045;AN=66;BaseQ          |
| 24602 | chrY | 13462158 | . | C | T   | 612.78   | my_snp_filter | AC=6;AF=0.088;AN=68;BaseQ          |
| 24603 | chrY | 13462160 | . | G | T   | 291.46   | my_snp_filter | AC=5;AF=0.071;AN=70;BaseQ          |
| 24604 | chrY | 13462162 | . | T | A   | 125.53   | my_snp_filter | AC=2;AF=0.029;AN=70;BaseQ          |
| 24605 | chrY | 13462164 | . | C | T   | 117.65   | my_snp_filter | AC=1;AF=0.014;AN=70;BaseQ          |
| 24606 | chrY | 13462168 | . | C | G   | 545.63   | PASS          | AC=6;AF=0.086;AN=70;BaseQRankSum=  |
| 24607 | chrY | 13462169 | . | T | A   | 140.23   | my_snp_filter | AC=2;AF=0.029;AN=70;BaseQ          |
| 24608 | chrY | 13462176 | . | G | T   | 584.09   | PASS          | AC=8;AF=0.114;AN=70;BaseQRankSum=  |
| 24609 | chrY | 13462178 | . | C | T   | 646.81   | PASS          | AC=2;AF=0.029;AN=68;BaseQRankSum=  |
| 24610 | chrY | 13462179 | . | G | A   | 677.98   | PASS          | AC=7;AF=0.106;AN=66;BaseQRankSum=  |
| 24611 | chrY | 13462180 | . | C | T   | 3673.35  | PASS          | AC=15;AF=0.234;AN=64;BaseQRankSum= |
| 24612 | chrY | 13462181 | . | A | G,T | 16205.75 | PASS          | AC=26,4;AF=0.433,0.067;AN=         |
| 24613 | chrY | 13462183 | . | G | A   | 1212.16  | PASS          | AC=7;AF=0.103;AN=68;BaseQRankSum=  |
| 24614 | chrY | 13462184 | . | G | A   | 130.87   | PASS          | AC=2;AF=0.029;AN=70;BaseQRankSum=  |
| 24615 | chrY | 13462185 | . | G | C   | 678.93   | PASS          | AC=7;AF=0.103;AN=68;BaseQRankSum=  |
| 24616 | chrY | 13462187 | . | A | G   | 19099.36 | PASS          | AC=29;AF=0.500;AN=58;Base          |
| 24617 | chrY | 13462189 | . | C | G   | 229.86   | PASS          | AC=2;AF=0.029;AN=70;BaseQRankSum=  |
| 24618 | chrY | 13462191 | . | A | C,T | 918.35   | PASS          | AC=7,1;AF=0.100,0.014;AN=70;BaseQ  |
| 24619 | chrY | 13462192 | . | G | A   | 1087.69  | PASS          | AC=7;AF=0.103;AN=68;BaseQRankSum=  |
| 24620 | chrY | 13462195 | . | A | T   | 161.85   | PASS          | AC=3;AF=0.044;AN=68;BaseQRankSum=  |
| 24621 | chrY | 13462197 | . | C | T   | 658.49   | PASS          | AC=8;AF=0.118;AN=68;BaseQRankSum=  |
| 24622 | chrY | 13462198 | . | A | G   | 5612.11  | PASS          | AC=20;AF=0.303;AN=66;BaseQRankSum= |
| 24623 | chrY | 13462199 | . | G | C   | 371.40   | PASS          | AC=2;AF=0.029;AN=68;BaseQRankSum=  |
| 24624 | chrY | 13462200 | . | C | T   | 69.06    | my_snp_filter | AC=1;AF=0.014;AN=70;BaseQ          |

|       |      |          |   |   |      |          |               |                                    |
|-------|------|----------|---|---|------|----------|---------------|------------------------------------|
| 24625 | chrY | 13462203 | . | C | T    | 346.67   | PASS          | AC=2;AF=0.029;AN=70;BaseQRankSum=  |
| 24626 | chrY | 13462205 | . | A | T    | 183.38   | PASS          | AC=1;AF=0.014;AN=70;BaseQRankSum=  |
| 24627 | chrY | 13462207 | . | T | C    | 591.71   | PASS          | AC=3;AF=0.043;AN=70;BaseQRankSum=  |
| 24628 | chrY | 13462212 | . | G | A    | 290.65   | PASS          | AC=1;AF=0.014;AN=70;BaseQRankSum=  |
| 24629 | chrY | 13462213 | . | C | T    | 1105.76  | PASS          | AC=4;AF=0.057;AN=70;BaseQRankSum=  |
| 24630 | chrY | 13462214 | . | G | C    | 8574.27  | PASS          | AC=10;AF=0.147;AN=68;BaseQRankSum= |
| 24631 | chrY | 13462215 | . | G | T    | 9234.45  | PASS          | AC=11;AF=0.162;AN=68;BaseQRankSum= |
| 24632 | chrY | 13462217 | . | A | G    | 736.16   | my_snp_filter | AC=7;AF=0.100;AN=70;BaseQ          |
| 24633 | chrY | 13462220 | . | C | T    | 42.22    | my_snp_filter | AC=1;AF=0.014;AN=70;BaseQ          |
| 24634 | chrY | 13462221 | . | C | T    | 516.48   | my_snp_filter | AC=6;AF=0.086;AN=70;BaseQ          |
| 24635 | chrY | 13462222 | . | T | C    | 42.14    | my_snp_filter | AC=1;AF=0.014;AN=70;BaseQ          |
| 24636 | chrY | 13462223 | . | G | A    | 599.70   | PASS          | AC=3;AF=0.044;AN=68;BaseQRankSum=  |
| 24637 | chrY | 13462224 | . | G | A    | 812.70   | PASS          | AC=5;AF=0.074;AN=68;BaseQRankSum=  |
| 24638 | chrY | 13462225 | . | A | C    | 250.74   | PASS          | AC=2;AF=0.031;AN=64;BaseQRankSum=  |
| 24639 | chrY | 13462226 | . | G | T    | 435.71   | my_snp_filter | AC=6;AF=0.097;AN=62;BaseQ          |
| 24640 | chrY | 13462227 | . | T | A    | 22872.15 | PASS          | AC=19;AF=0.413;AN=46;BaseQ         |
| 24641 | chrY | 13462228 | . | G | A    | 165.35   | PASS          | AC=1;AF=0.017;AN=60;BaseQRankSum=  |
| 24642 | chrY | 13462232 | . | C | G    | 9081.40  | PASS          | AC=10;AF=0.147;AN=68;BaseQRankSum= |
| 24643 | chrY | 13462233 | . | G | A    | 1005.44  | PASS          | AC=3;AF=0.044;AN=68;BaseQRankSum=  |
| 24644 | chrY | 13462234 | . | G | C    | 8954.29  | PASS          | AC=10;AF=0.147;AN=68;BaseQRankSum= |
| 24645 | chrY | 13462236 | . | G | A    | 585.05   | my_snp_filter | AC=4;AF=0.057;AN=70;BaseQ          |
| 24646 | chrY | 13462239 | . | C | A    | 34.40    | PASS          | AC=1;AF=0.014;AN=70;BaseQRankSum=  |
| 24647 | chrY | 13462241 | . | A | T    | 63.86    | my_snp_filter | AC=1;AF=0.014;AN=70;BaseQ          |
| 24648 | chrY | 13462243 | . | C | A    | 206.05   | my_snp_filter | AC=2;AF=0.029;AN=70;BaseQ          |
| 24649 | chrY | 13462247 | . | C | G    | 8350.85  | PASS          | AC=10;AF=0.147;AN=68;BaseQRankSum= |
| 24650 | chrY | 13462251 | . | T | A    | 17944.51 | PASS          | AC=14;AF=0.389;AN=36;BaseQ         |
| 24651 | chrY | 13462252 | . | C | A, T | 604.28   | PASS          | AC=1,2;AF=0.021,0.042;AN=48;BaseQ  |
| 24652 | chrY | 13462254 | . | T | C    | 13077.98 | PASS          | AC=13;AF=0.325;AN=40;BaseQ         |
| 24653 | chrY | 13462258 | . | C | A    | 98.13    | PASS          | AC=2;AF=0.030;AN=66;BaseQRankSum=  |
| 24654 | chrY | 13462259 | . | C | G    | 74.52    | PASS          | AC=2;AF=0.029;AN=68;BaseQRankSum=  |
| 24655 | chrY | 13462260 | . | C | T    | 7658.21  | PASS          | AC=12;AF=0.182;AN=66;BaseQRankSum= |
| 24656 | chrY | 13462266 | . | C | A    | 45.49    | PASS          | AC=1;AF=0.015;AN=68;BaseQRankSum=  |
| 24657 | chrY | 13462267 | . | C | A    | 8110.67  | PASS          | AC=11;AF=0.167;AN=66;BaseQRankSum= |
| 24658 | chrY | 13462270 | . | A | T    | 13132.11 | PASS          | AC=13;AF=0.464;AN=28;BaseQ         |
| 24659 | chrY | 13462273 | . | C | T    | 198.73   | PASS          | AC=2;AF=0.029;AN=68;BaseQRankSum=  |
| 24660 | chrY | 13462275 | . | C | T    | 170.02   | PASS          | AC=1;AF=0.015;AN=66;BaseQRankSum=  |
| 24661 | chrY | 13462276 | . | T | G    | 45.22    | PASS          | AC=1;AF=0.015;AN=66;BaseQRankSum=  |
| 24662 | chrY | 13462277 | . | C | G    | 128.21   | my_snp_filter | AC=2;AF=0.030;AN=66;BaseQ          |
| 24663 | chrY | 13462278 | . | G | T    | 994.29   | PASS          | AC=5;AF=0.078;AN=64;BaseQRankSum=  |
| 24664 | chrY | 13462279 | . | C | A    | 75.73    | my_snp_filter | AC=1;AF=0.015;AN=68;BaseQ          |
| 24665 | chrY | 13462283 | . | C | A    | 181.06   | PASS          | AC=1;AF=0.015;AN=68;BaseQRankSum=  |
| 24666 | chrY | 13462287 | . | A | C    | 1213.51  | PASS          | AC=7;AF=0.135;AN=52;BaseQRankSum=  |
| 24667 | chrY | 13462290 | . | T | A    | 799.93   | PASS          | AC=5;AF=0.076;AN=66;BaseQRankSum=  |
| 24668 | chrY | 13462292 | . | C | T    | 113.79   | PASS          | AC=1;AF=0.015;AN=68;BaseQRankSum=  |
| 24669 | chrY | 13462293 | . | G | A    | 181      | PASS          | AC=1;AF=0.015;AN=66;BaseQRankSum=  |
| 24670 | chrY | 13462295 | . | G | A, C | 6658.40  | PASS          | AC=9,1;AF=0.167,0.019;AN=54;BaseQ  |
| 24671 | chrY | 13462300 | . | T | C    | 7718.35  | PASS          | AC=10;AF=0.238;AN=42;BaseQRankSum= |
| 24672 | chrY | 13462301 | . | G | A    | 5519.12  | PASS          | AC=10;AF=0.227;AN=44;BaseQRankSum= |
| 24673 | chrY | 13462303 | . | C | T    | 1531.60  | PASS          | AC=5;AF=0.081;AN=62;BaseQRankSum=  |
| 24674 | chrY | 13462304 | . | C | A    | 35.71    | my_snp_filter | AC=1;AF=0.016;AN=62;BaseQ          |
| 24675 | chrY | 13462306 | . | C | A    | 71.49    | my_snp_filter | AC=2;AF=0.030;AN=66;BaseQ          |
| 24676 | chrY | 13462310 | . | A | T    | 30.18    | my_snp_filter | AC=1;AF=0.015;AN=66;BaseQ          |
| 24677 | chrY | 13462313 | . | G | A    | 133.84   | PASS          | AC=3;AF=0.044;AN=68;BaseQRankSum=  |
| 24678 | chrY | 13462324 | . | G | A    | 4457.50  | PASS          | AC=10;AF=0.172;AN=58;BaseQRankSum= |
| 24679 | chrY | 13462328 | . | A | T    | 6357.96  | PASS          | AC=11;AF=0.289;AN=38;BaseQRankSum= |
| 24680 | chrY | 13462333 | . | C | A    | 402.30   | PASS          | AC=1;AF=0.019;AN=54;BaseQRankSum=  |
| 24681 | chrY | 13462335 | . | A | C    | 497.99   | PASS          | AC=4;AF=0.125;AN=32;BaseQRankSum=  |
| 24682 | chrY | 13462339 | . | T | C    | 710.34   | PASS          | AC=3;AF=0.088;AN=34;BaseQRankSum=  |
| 24683 | chrY | 13462341 | . | C | A    | 2090.84  | PASS          | AC=11;AF=0.204;AN=54;BaseQRankSum= |
| 24684 | chrY | 13462342 | . | A | T    | 150.02   | PASS          | AC=1;AF=0.017;AN=60;BaseQRankSum=  |
| 24685 | chrY | 13462346 | . | T | C    | 2821.58  | PASS          | AC=12;AF=0.353;AN=34;BaseQRankSum= |
| 24686 | chrY | 13462348 | . | C | G    | 205.75   | PASS          | AC=1;AF=0.019;AN=52;BaseQRankSum=  |
| 24687 | chrY | 13462350 | . | C | A    | 2215.11  | PASS          | AC=11;AF=0.204;AN=54;BaseQRankSum= |
| 24688 | chrY | 13462352 | . | G | A    | 2122.69  | PASS          | AC=11;AF=0.204;AN=54;BaseQRankSum= |
| 24689 | chrY | 13462355 | . | C | T    | 46.42    | PASS          | AC=1;AF=0.020;AN=50;BaseQRankSum=  |
| 24690 | chrY | 13462356 | . | T | G    | 2582.76  | PASS          | AC=11;AF=0.289;AN=38;BaseQRankSum= |
| 24691 | chrY | 13462393 | . | C | T    | 231.37   | PASS          | AC=1;AF=0.016;AN=62;BaseQRankSum=  |
| 24692 | chrY | 13462394 | . | G | T    | 52.90    | PASS          | AC=1;AF=0.019;AN=52;BaseQRankSum=  |
| 24693 | chrY | 13462395 | . | T | G    | 41.33    | my_snp_filter | AC=1;AF=0.020;AN=50;BaseQ          |
| 24694 | chrY | 13462396 | . | G | A    | 231.67   | PASS          | AC=1;AF=0.017;AN=60;BaseQRankSum=  |
| 24695 | chrY | 13462397 | . | C | A    | 35.57    | my_snp_filter | AC=1;AF=0.016;AN=62;BaseQ          |
| 24696 | chrY | 13462404 | . | A | G    | 164.94   | PASS          | AC=1;AF=0.017;AN=60;BaseQRankSum=  |
| 24697 | chrY | 13462406 | . | G | A    | 160.07   | PASS          | AC=1;AF=0.017;AN=58;BaseQRankSum=  |
| 24698 | chrY | 13462413 | . | G | C, T | 477.53   | PASS          | AC=5,1;AF=0.132,0.026;AN=38;BaseQ  |
| 24699 | chrY | 13462414 | . | G | A    | 92.04    | PASS          | AC=2;AF=0.038;AN=52;BaseQRankSum=  |
| 24700 | chrY | 13462418 | . | T | C    | 163.28   | PASS          | AC=1;AF=0.019;AN=52;BaseQRankSum=  |

|       |      |          |   |   |     |         |               |                                    |
|-------|------|----------|---|---|-----|---------|---------------|------------------------------------|
| 24701 | chrY | 13462420 | . | C | A   | 86.23   | PASS          | AC=2;AF=0.038;AN=52;BaseQRankSum=  |
| 24702 | chrY | 13462426 | . | G | T   | 198.27  | PASS          | AC=1;AF=0.020;AN=50;BaseQRankSum=  |
| 24703 | chrY | 13462427 | . | T | A,G | 328.20  | PASS          | AC=2,1;AF=0.048,0.024;AN=42;BaseQ  |
| 24704 | chrY | 13462429 | . | C | G   | 250.64  | PASS          | AC=3;AF=0.071;AN=42;BaseQRankSum=  |
| 24705 | chrY | 13462433 | . | A | G   | 52.81   | PASS          | AC=1;AF=0.022;AN=46;BaseQRankSum=  |
| 24706 | chrY | 13462434 | . | A | G   | 181.76  | PASS          | AC=3;AF=0.079;AN=38;BaseQRankSum=  |
| 24707 | chrY | 13462442 | . | A | G   | 103.27  | PASS          | AC=2;AF=0.053;AN=38;BaseQRankSum=  |
| 24708 | chrY | 13462447 | . | A | C   | 124.48  | PASS          | AC=2;AF=0.050;AN=40;BaseQRankSum=  |
| 24709 | chrY | 13462475 | . | T | G   | 305.10  | PASS          | AC=5;AF=0.100;AN=50;BaseQRankSum=  |
| 24710 | chrY | 13462481 | . | G | T   | 306.19  | PASS          | AC=5;AF=0.100;AN=50;BaseQRankSum=  |
| 24711 | chrY | 13462485 | . | C | G   | 411.45  | PASS          | AC=6;AF=0.143;AN=42;BaseQRankSum=  |
| 24712 | chrY | 13462487 | . | C | G   | 299.48  | PASS          | AC=5;AF=0.096;AN=52;BaseQRankSum=  |
| 24713 | chrY | 13462496 | . | T | A   | 180.43  | PASS          | AC=3;AF=0.050;AN=60;BaseQRankSum=  |
| 24714 | chrY | 13462511 | . | G | C   | 222.99  | PASS          | AC=4;AF=0.074;AN=54;BaseQRankSum=  |
| 24715 | chrY | 13462518 | . | A | C   | 362.27  | PASS          | AC=5;AF=0.093;AN=54;BaseQRankSum=  |
| 24716 | chrY | 13462519 | . | C | T   | 316.75  | PASS          | AC=5;AF=0.096;AN=52;BaseQRankSum=  |
| 24717 | chrY | 13462597 | . | T | G   | 100.48  | PASS          | AC=3;AF=0.094;AN=32;BaseQRankSum=  |
| 24718 | chrY | 13462601 | . | A | T   | 99.96   | PASS          | AC=3;AF=0.094;AN=32;BaseQRankSum=  |
| 24719 | chrY | 13462607 | . | C | T   | 50.35   | PASS          | AC=1;AF=0.017;AN=60;BaseQRankSum=  |
| 24720 | chrY | 13462610 | . | C | T   | 44.15   | PASS          | AC=1;AF=0.016;AN=62;BaseQRankSum=  |
| 24721 | chrY | 13462612 | . | T | C   | 42.64   | PASS          | AC=1;AF=0.016;AN=62;BaseQRankSum=  |
| 24722 | chrY | 13462618 | . | A | G   | 71.55   | PASS          | AC=3;AF=0.054;AN=56;BaseQRankSum=  |
| 24723 | chrY | 13462629 | . | T | C   | 38.83   | PASS          | AC=2;AF=0.034;AN=58;BaseQRankSum=  |
| 24724 | chrY | 13462632 | . | A | G   | 166.78  | PASS          | AC=3;AF=0.048;AN=62;BaseQRankSum=  |
| 24725 | chrY | 13462634 | . | A | T   | 40.50   | PASS          | AC=1;AF=0.015;AN=66;BaseQRankSum=  |
| 24726 | chrY | 13462635 | . | A | T   | 40.26   | PASS          | AC=1;AF=0.015;AN=66;BaseQRankSum=  |
| 24727 | chrY | 13462637 | . | C | T   | 49.93   | PASS          | AC=2;AF=0.030;AN=66;BaseQRankSum=  |
| 24728 | chrY | 13462639 | . | C | A   | 139.51  | PASS          | AC=4;AF=0.063;AN=64;BaseQRankSum=  |
| 24729 | chrY | 13462640 | . | G | A   | 92.89   | PASS          | AC=3;AF=0.045;AN=66;BaseQRankSum=  |
| 24730 | chrY | 13462645 | . | C | G,T | 304.05  | PASS          | AC=2,4;AF=0.030,0.061;AN=66;BaseQ  |
| 24731 | chrY | 13462647 | . | G | T   | 80.81   | PASS          | AC=2;AF=0.030;AN=66;BaseQRankSum=  |
| 24732 | chrY | 13462648 | . | G | T   | 1155.17 | PASS          | AC=15;AF=0.234;AN=64;BaseQRankSum= |
| 24733 | chrY | 13462651 | . | C | T,A | 201.35  | PASS          | AC=4,3;AF=0.065,0.048;AN=62;BaseQ  |
| 24734 | chrY | 13462653 | . | G | A   | 143.75  | PASS          | AC=2;AF=0.030;AN=66;BaseQRankSum=  |
| 24735 | chrY | 13462655 | . | G | A   | 669.65  | PASS          | AC=8;AF=0.121;AN=66;BaseQRankSum=  |
| 24736 | chrY | 13462665 | . | C | G   | 99.27   | PASS          | AC=3;AF=0.047;AN=64;BaseQRankSum=  |
| 24737 | chrY | 13462670 | . | G | A   | 99.45   | PASS          | AC=2;AF=0.030;AN=66;BaseQRankSum=  |
| 24738 | chrY | 13462673 | . | C | A   | 42.56   | PASS          | AC=1;AF=0.015;AN=66;BaseQRankSum=  |
| 24739 | chrY | 13462675 | . | C | G   | 392.17  | PASS          | AC=3;AF=0.050;AN=60;BaseQRankSum=  |
| 24740 | chrY | 13462676 | . | G | T,C | 1766.55 | PASS          | AC=9,10;AF=0.167,0.185;AN=54;Base  |
| 24741 | chrY | 13462680 | . | C | A   | 101.51  | PASS          | AC=3;AF=0.048;AN=62;BaseQRankSum=  |
| 24742 | chrY | 13462686 | . | T | C   | 752.78  | PASS          | AC=6;AF=0.115;AN=52;BaseQRankSum=  |
| 24743 | chrY | 13462687 | . | G | T   | 66.12   | PASS          | AC=2;AF=0.034;AN=58;BaseQRankSum=  |
| 24744 | chrY | 13462690 | . | G | A   | 223.99  | PASS          | AC=3;AF=0.047;AN=64;BaseQRankSum=  |
| 24745 | chrY | 13462694 | . | T | A   | 668.68  | PASS          | AC=9;AF=0.141;AN=64;BaseQRankSum=  |
| 24746 | chrY | 13462697 | . | G | A   | 921.35  | PASS          | AC=11;AF=0.172;AN=64;BaseQRankSum= |
| 24747 | chrY | 13462701 | . | C | G   | 68.37   | PASS          | AC=2;AF=0.037;AN=54;BaseQRankSum=  |
| 24748 | chrY | 13462702 | . | A | T   | 1374.63 | PASS          | AC=13;AF=0.310;AN=42;BaseQRankSum= |
| 24749 | chrY | 13462712 | . | G | A   | 65.92   | PASS          | AC=2;AF=0.034;AN=58;BaseQRankSum=  |
| 24750 | chrY | 13462731 | . | C | G   | 153.01  | PASS          | AC=4;AF=0.071;AN=56;BaseQRankSum=  |
| 24751 | chrY | 13462741 | . | A | G   | 453.60  | PASS          | AC=6;AF=0.130;AN=46;BaseQRankSum=  |
| 24752 | chrY | 13462985 | . | G | C   | 67.89   | PASS          | AC=1;AF=0.017;AN=58;BaseQRankSum=  |
| 24753 | chrY | 13462988 | . | T | C   | 167.09  | PASS          | AC=1;AF=0.018;AN=56;BaseQRankSum=  |
| 24754 | chrY | 13462991 | . | C | T   | 53.57   | my_snp_filter | AC=1;AF=0.017;AN=58;BaseQ          |
| 24755 | chrY | 13462996 | . | A | G   | 53.90   | my_snp_filter | AC=1;AF=0.017;AN=60;BaseQ          |
| 24756 | chrY | 13463002 | . | G | T   | 47.61   | my_snp_filter | AC=1;AF=0.017;AN=58;BaseQ          |
| 24757 | chrY | 13463011 | . | C | T   | 322.55  | PASS          | AC=3;AF=0.060;AN=50;BaseQRankSum=  |
| 24758 | chrY | 13463048 | . | T | G   | 152.83  | PASS          | AC=1;AF=0.022;AN=46;BaseQRankSum=  |
| 24759 | chrY | 13463067 | . | T | C   | 175.01  | PASS          | AC=2;AF=0.048;AN=42;BaseQRankSum=  |
| 24760 | chrY | 13463072 | . | C | A   | 187.29  | PASS          | AC=3;AF=0.079;AN=38;BaseQRankSum=  |
| 24761 | chrY | 13463082 | . | T | C   | 122.71  | PASS          | AC=1;AF=0.019;AN=54;BaseQRankSum=  |
| 24762 | chrY | 13463088 | . | G | A   | 124.78  | PASS          | AC=1;AF=0.018;AN=56;BaseQRankSum=  |
| 24763 | chrY | 13463089 | . | C | T   | 126.19  | PASS          | AC=1;AF=0.018;AN=56;BaseQRankSum=  |
| 24764 | chrY | 13463103 | . | T | C   | 80.73   | PASS          | AC=1;AF=0.017;AN=60;BaseQRankSum=  |
| 24765 | chrY | 13463120 | . | G | T   | 51.18   | PASS          | AC=2;AF=0.033;AN=60;DP=465;FS=0.0  |
| 24766 | chrY | 13463127 | . | G | A   | 30.33   | my_snp_filter | AC=3;AF=0.052;AN=58;BaseQ          |
| 24767 | chrY | 13463133 | . | G | A   | 294.06  | PASS          | AC=6;AF=0.100;AN=60;BaseQRankSum=  |
| 24768 | chrY | 13463140 | . | C | A   | 95.42   | PASS          | AC=3;AF=0.050;AN=60;BaseQRankSum=  |
| 24769 | chrY | 13463145 | . | A | G   | 468.04  | PASS          | AC=6;AF=0.120;AN=50;BaseQRankSum=  |
| 24770 | chrY | 13463147 | . | G | A   | 83.96   | PASS          | AC=3;AF=0.058;AN=52;BaseQRankSum=  |
| 24771 | chrY | 13463156 | . | A | G   | 773.91  | PASS          | AC=6;AF=0.111;AN=54;BaseQRankSum=  |
| 24772 | chrY | 13463157 | . | G | T   | 257.40  | PASS          | AC=4;AF=0.067;AN=60;BaseQRankSum=  |
| 24773 | chrY | 13463159 | . | G | T   | 269.74  | PASS          | AC=4;AF=0.063;AN=64;BaseQRankSum=  |
| 24774 | chrY | 13463163 | . | C | T   | 237.11  | PASS          | AC=3;AF=0.048;AN=62;BaseQRankSum=  |
| 24775 | chrY | 13463167 | . | C | A   | 371.17  | PASS          | AC=3;AF=0.047;AN=64;BaseQRankSum=  |
| 24776 | chrY | 13463175 | . | G | A   | 180.04  | PASS          | AC=4;AF=0.063;AN=64;BaseQRankSum=  |

|       |      |          |   |   |     |         |               |                                    |
|-------|------|----------|---|---|-----|---------|---------------|------------------------------------|
| 24777 | chrY | 13463183 | . | T | C   | 336.01  | PASS          | AC=2;AF=0.056;AN=36;BaseQRankSum=  |
| 24778 | chrY | 13463184 | . | A | G   | 767.14  | PASS          | AC=5;AF=0.139;AN=36;BaseQRankSum=  |
| 24779 | chrY | 13463193 | . | G | C   | 65.66   | PASS          | AC=1;AF=0.015;AN=66;BaseQRankSum=  |
| 24780 | chrY | 13463194 | . | C | T   | 144.19  | PASS          | AC=2;AF=0.031;AN=64;BaseQRankSum=  |
| 24781 | chrY | 13463201 | . | A | C   | 329.88  | PASS          | AC=5;AF=0.081;AN=62;BaseQRankSum=  |
| 24782 | chrY | 13463203 | . | A | G   | 334.51  | PASS          | AC=5;AF=0.096;AN=52;BaseQRankSum=  |
| 24783 | chrY | 13463204 | . | A | G   | 513.51  | PASS          | AC=3;AF=0.075;AN=40;BaseQRankSum=  |
| 24784 | chrY | 13463211 | . | T | G   | 321.18  | PASS          | AC=5;AF=0.078;AN=64;BaseQRankSum=  |
| 24785 | chrY | 13463214 | . | A | G   | 158.61  | PASS          | AC=2;AF=0.033;AN=60;BaseQRankSum=  |
| 24786 | chrY | 13463220 | . | C | A   | 550.18  | PASS          | AC=11;AF=0.177;AN=62;BaseQRankSum= |
| 24787 | chrY | 13463226 | . | T | G   | 2156.54 | PASS          | AC=14;AF=0.350;AN=40;BaseQRankSum= |
| 24788 | chrY | 13463227 | . | C | T   | 716.21  | PASS          | AC=11;AF=0.229;AN=48;BaseQRankSum= |
| 24789 | chrY | 13463228 | . | G | A,C | 372.98  | PASS          | AC=1,2;AF=0.021,0.042;AN=48;BaseQ  |
| 24790 | chrY | 13463229 | . | A | T   | 683.76  | PASS          | AC=5;AF=0.074;AN=68;BaseQRankSum=  |
| 24791 | chrY | 13463230 | . | G | C   | 112.23  | PASS          | AC=1;AF=0.019;AN=54;BaseQRankSum=  |
| 24792 | chrY | 13463231 | . | A | G,T | 6433.48 | PASS          | AC=33,13;AF=0.688,0.271;AN=48;Bas  |
| 24793 | chrY | 13463234 | . | C | T   | 134.74  | PASS          | AC=1;AF=0.017;AN=60;BaseQRankSum=  |
| 24794 | chrY | 13463235 | . | A | G   | 780.47  | PASS          | AC=6;AF=0.111;AN=54;BaseQRankSum=  |
| 24795 | chrY | 13463237 | . | C | T   | 712.18  | PASS          | AC=5;AF=0.074;AN=68;BaseQRankSum=  |
| 24796 | chrY | 13463238 | . | C | T   | 305.20  | PASS          | AC=1;AF=0.015;AN=68;BaseQRankSum=  |
| 24797 | chrY | 13463239 | . | C | A,T | 465.35  | PASS          | AC=4,1;AF=0.059,0.015;AN=68;BaseQ  |
| 24798 | chrY | 13463240 | . | C | T   | 65.12   | PASS          | AC=1;AF=0.015;AN=68;BaseQRankSum=  |
| 24799 | chrY | 13463241 | . | G | T   | 171.72  | PASS          | AC=2;AF=0.030;AN=66;BaseQRankSum=  |
| 24800 | chrY | 13463244 | . | C | T   | 109.91  | PASS          | AC=1;AF=0.015;AN=68;BaseQRankSum=  |
| 24801 | chrY | 13463246 | . | C | T   | 198.92  | PASS          | AC=1;AF=0.015;AN=68;BaseQRankSum=  |
| 24802 | chrY | 13463252 | . | C | T   | 63.45   | PASS          | AC=1;AF=0.015;AN=68;BaseQRankSum=  |
| 24803 | chrY | 13463255 | . | C | G   | 241.17  | PASS          | AC=3;AF=0.043;AN=70;BaseQRankSum=  |
| 24804 | chrY | 13463256 | . | C | T   | 658.78  | PASS          | AC=10;AF=0.143;AN=70;BaseQRankSum= |
| 24805 | chrY | 13463257 | . | A | T   | 588.81  | PASS          | AC=11;AF=0.162;AN=68;BaseQRankSum= |
| 24806 | chrY | 13463261 | . | C | T   | 153.35  | PASS          | AC=1;AF=0.014;AN=70;BaseQRankSum=  |
| 24807 | chrY | 13463262 | . | G | A   | 251.31  | PASS          | AC=4;AF=0.059;AN=68;BaseQRankSum=  |
| 24808 | chrY | 13463263 | . | C | T   | 239.84  | PASS          | AC=3;AF=0.044;AN=68;BaseQRankSum=  |
| 24809 | chrY | 13463266 | . | C | T   | 749.10  | PASS          | AC=11;AF=0.177;AN=62;BaseQRankSum= |
| 24810 | chrY | 13463267 | . | A | G   | 1789.13 | PASS          | AC=20;AF=0.333;AN=60;BaseQRankSum= |
| 24811 | chrY | 13463268 | . | G | T   | 757.87  | PASS          | AC=5;AF=0.071;AN=70;BaseQRankSum=  |
| 24812 | chrY | 13463269 | . | C | A,T | 510.98  | PASS          | AC=3,1;AF=0.043,0.014;AN=70;BaseQ  |
| 24813 | chrY | 13463271 | . | G | T   | 111.75  | PASS          | AC=2;AF=0.029;AN=70;BaseQRankSum=  |
| 24814 | chrY | 13463274 | . | G | C   | 69.19   | my_snp_filter | AC=2;AF=0.029;AN=70;BaseQ          |
| 24815 | chrY | 13463275 | . | G | A   | 180.08  | PASS          | AC=2;AF=0.029;AN=68;BaseQRankSum=  |
| 24816 | chrY | 13463281 | . | C | A   | 52.03   | PASS          | AC=1;AF=0.014;AN=70;BaseQRankSum=  |
| 24817 | chrY | 13463282 | . | C | G   | 51.87   | PASS          | AC=1;AF=0.014;AN=70;BaseQRankSum=  |
| 24818 | chrY | 13463283 | . | C | G   | 1020.88 | PASS          | AC=5;AF=0.071;AN=70;BaseQRankSum=  |
| 24819 | chrY | 13463285 | . | A | C,T | 1215.24 | PASS          | AC=5,1;AF=0.071,0.014;AN=70;BaseQ  |
| 24820 | chrY | 13463286 | . | C | T   | 180.61  | PASS          | AC=4;AF=0.057;AN=70;BaseQRankSum=  |
| 24821 | chrY | 13463289 | . | G | T   | 362.98  | PASS          | AC=5;AF=0.071;AN=70;BaseQRankSum=  |
| 24822 | chrY | 13463290 | . | C | T   | 121.93  | PASS          | AC=1;AF=0.014;AN=70;BaseQRankSum=  |
| 24823 | chrY | 13463291 | . | C | T   | 243.49  | PASS          | AC=5;AF=0.071;AN=70;BaseQRankSum=  |
| 24824 | chrY | 13463292 | . | C | G   | 247.33  | PASS          | AC=3;AF=0.044;AN=68;BaseQRankSum=  |
| 24825 | chrY | 13463293 | . | C | T   | 337.10  | PASS          | AC=2;AF=0.029;AN=70;BaseQRankSum=  |
| 24826 | chrY | 13463294 | . | G | A   | 443.47  | PASS          | AC=7;AF=0.100;AN=70;BaseQRankSum=  |
| 24827 | chrY | 13463295 | . | G | T   | 124.93  | PASS          | AC=2;AF=0.029;AN=68;BaseQRankSum=  |
| 24828 | chrY | 13463297 | . | A | T   | 114.67  | PASS          | AC=1;AF=0.014;AN=70;BaseQRankSum=  |
| 24829 | chrY | 13463298 | . | T | C,G | 3075.46 | PASS          | AC=7,7;AF=0.106,0.106;AN=66;BaseQ  |
| 24830 | chrY | 13463299 | . | G | T   | 559.47  | PASS          | AC=5;AF=0.076;AN=66;BaseQRankSum=  |
| 24831 | chrY | 13463300 | . | C | T   | 347     | PASS          | AC=7;AF=0.100;AN=70;BaseQRankSum=  |
| 24832 | chrY | 13463301 | . | G | A   | 162.96  | PASS          | AC=2;AF=0.029;AN=68;BaseQRankSum=  |
| 24833 | chrY | 13463304 | . | G | A   | 159.81  | PASS          | AC=2;AF=0.029;AN=70;BaseQRankSum=  |
| 24834 | chrY | 13463305 | . | A | G   | 48.18   | my_snp_filter | AC=1;AF=0.014;AN=70;BaseQ          |
| 24835 | chrY | 13463307 | . | T | C   | 154.08  | PASS          | AC=2;AF=0.029;AN=70;BaseQRankSum=  |
| 24836 | chrY | 13463312 | . | C | T   | 819.57  | PASS          | AC=6;AF=0.086;AN=70;BaseQRankSum=  |
| 24837 | chrY | 13463314 | . | A | T   | 214.37  | PASS          | AC=1;AF=0.014;AN=70;BaseQRankSum=  |
| 24838 | chrY | 13463315 | . | C | T,G | 1230.64 | PASS          | AC=7,3;AF=0.106,0.045;AN=66;BaseQ  |
| 24839 | chrY | 13463316 | . | G | A   | 140.62  | PASS          | AC=4;AF=0.059;AN=68;BaseQRankSum=  |
| 24840 | chrY | 13463318 | . | C | T   | 399.57  | PASS          | AC=7;AF=0.117;AN=60;BaseQRankSum=  |
| 24841 | chrY | 13463319 | . | T | G,A | 3378.32 | PASS          | AC=14,6;AF=0.280,0.120;AN=50;Base  |
| 24842 | chrY | 13463320 | . | C | T   | 934.36  | PASS          | AC=6;AF=0.097;AN=62;BaseQRankSum=  |
| 24843 | chrY | 13463323 | . | C | A   | 134.35  | my_snp_filter | AC=6;AF=0.088;AN=68;BaseQ          |
| 24844 | chrY | 13463324 | . | G | A   | 563.24  | PASS          | AC=4;AF=0.061;AN=66;BaseQRankSum=  |
| 24845 | chrY | 13463325 | . | G | A   | 166.42  | PASS          | AC=3;AF=0.045;AN=66;BaseQRankSum=  |
| 24846 | chrY | 13463326 | . | C | A   | 137.79  | PASS          | AC=3;AF=0.045;AN=66;BaseQRankSum=  |
| 24847 | chrY | 13463328 | . | C | A   | 133.11  | PASS          | AC=2;AF=0.029;AN=68;BaseQRankSum=  |
| 24848 | chrY | 13463329 | . | C | T   | 81.74   | PASS          | AC=2;AF=0.029;AN=68;BaseQRankSum=  |
| 24849 | chrY | 13463330 | . | T | A,C | 768.05  | PASS          | AC=5,2;AF=0.074,0.029;AN=68;BaseQ  |
| 24850 | chrY | 13463332 | . | T | C   | 2503.16 | PASS          | AC=16;AF=0.286;AN=56;BaseQRankSum= |
| 24851 | chrY | 13463333 | . | G | A,T | 267.44  | PASS          | AC=6,2;AF=0.107,0.036;AN=56;BaseQ  |
| 24852 | chrY | 13463337 | . | G | T   | 155.82  | PASS          | AC=3;AF=0.045;AN=66;BaseQRankSum=  |

|       |      |          |   |   |       |         |               |                                    |
|-------|------|----------|---|---|-------|---------|---------------|------------------------------------|
| 24853 | chrY | 13463338 | . | G | T     | 81.66   | my_snp_filter | AC=3;AF=0.045;AN=66;BaseQ          |
| 24854 | chrY | 13463341 | . | C | T     | 156.64  | PASS          | AC=5;AF=0.109;AN=46;BaseQRankSum=  |
| 24855 | chrY | 13463342 | . | T | G,A   | 1319.82 | PASS          | AC=8,2;AF=0.190,0.048;AN=42;BaseQ  |
| 24856 | chrY | 13463343 | . | C | G,T   | 310.30  | PASS          | AC=2,3;AF=0.040,0.060;AN=50;BaseQ  |
| 24857 | chrY | 13463347 | . | C | A     | 217.31  | PASS          | AC=2;AF=0.033;AN=60;BaseQRankSum=  |
| 24858 | chrY | 13463348 | . | T | C     | 2342.32 | PASS          | AC=13;AF=0.325;AN=40;BaseQRankSum= |
| 24859 | chrY | 13463358 | . | G | A     | 294.61  | PASS          | AC=2;AF=0.037;AN=54;BaseQRankSum=  |
| 24860 | chrY | 13463359 | . | C | T     | 406.84  | PASS          | AC=6;AF=0.120;AN=50;BaseQRankSum=  |
| 24861 | chrY | 13463360 | . | G | T     | 1710.09 | PASS          | AC=10;AF=0.263;AN=38;BaseQRankSum= |
| 24862 | chrY | 13463363 | . | T | C     | 471.75  | PASS          | AC=5;AF=0.086;AN=58;BaseQRankSum=  |
| 24863 | chrY | 13463365 | . | G | A     | 248.50  | PASS          | AC=4;AF=0.069;AN=58;BaseQRankSum=  |
| 24864 | chrY | 13463374 | . | C | A     | 336.28  | PASS          | AC=2;AF=0.038;AN=52;BaseQRankSum=  |
| 24865 | chrY | 13463379 | . | C | A     | 121.88  | PASS          | AC=2;AF=0.040;AN=50;BaseQRankSum=  |
| 24866 | chrY | 13463386 | . | A | G     | 34.73   | my_snp_filter | AC=1;AF=0.016;AN=62;BaseQ          |
| 24867 | chrY | 13463391 | . | C | A     | 86.02   | PASS          | AC=3;AF=0.054;AN=56;BaseQRankSum=  |
| 24868 | chrY | 13463398 | . | G | A     | 208.87  | PASS          | AC=3;AF=0.083;AN=36;BaseQRankSum=  |
| 24869 | chrY | 13463400 | . | T | C     | 128.84  | PASS          | AC=3;AF=0.065;AN=46;BaseQRankSum=  |
| 24870 | chrY | 13463402 | . | T | G     | 116.16  | PASS          | AC=3;AF=0.079;AN=38;BaseQRankSum=  |
| 24871 | chrY | 13463425 | . | T | C     | 35.36   | my_snp_filter | AC=3;AF=0.100;AN=30;BaseQ          |
| 24872 | chrY | 13463456 | . | G | T     | 165.26  | PASS          | AC=1;AF=0.056;AN=18;BaseQRankSum=  |
| 24873 | chrY | 13463605 | . | G | T     | 98.76   | PASS          | AC=2;AF=0.063;AN=32;BaseQRankSum=  |
| 24874 | chrY | 13463608 | . | T | G     | 100.10  | PASS          | AC=2;AF=0.083;AN=24;BaseQRankSum=  |
| 24875 | chrY | 13463666 | . | T | G     | 50.01   | PASS          | AC=3;AF=0.150;AN=20;BaseQRankSum=  |
| 24876 | chrY | 13463692 | . | C | T     | 85.12   | PASS          | AC=1;AF=0.018;AN=56;BaseQRankSum=  |
| 24877 | chrY | 13463697 | . | G | T     | 83.10   | PASS          | AC=1;AF=0.017;AN=60;BaseQRankSum=  |
| 24878 | chrY | 13463704 | . | G | A     | 77.71   | PASS          | AC=1;AF=0.015;AN=66;BaseQRankSum=  |
| 24879 | chrY | 13463708 | . | G | A     | 259.58  | PASS          | AC=3;AF=0.044;AN=68;BaseQRankSum=  |
| 24880 | chrY | 13463711 | . | G | T     | 104.25  | my_snp_filter | AC=2;AF=0.030;AN=66;BaseQ          |
| 24881 | chrY | 13463712 | . | A | T     | 103.20  | my_snp_filter | AC=2;AF=0.029;AN=68;BaseQ          |
| 24882 | chrY | 13463713 | . | G | A     | 96.32   | PASS          | AC=2;AF=0.029;AN=68;BaseQRankSum=  |
| 24883 | chrY | 13463717 | . | C | T     | 123.90  | PASS          | AC=2;AF=0.030;AN=66;BaseQRankSum=  |
| 24884 | chrY | 13463720 | . | G | T     | 198.63  | PASS          | AC=4;AF=0.069;AN=58;BaseQRankSum=  |
| 24885 | chrY | 13463721 | . | T | A,C   | 2076.73 | PASS          | AC=4,6;AF=0.071,0.107;AN=56;BaseQ  |
| 24886 | chrY | 13463725 | . | C | A     | 140.96  | PASS          | AC=4;AF=0.061;AN=66;BaseQRankSum=  |
| 24887 | chrY | 13463726 | . | C | A     | 108.93  | PASS          | AC=1;AF=0.015;AN=66;BaseQRankSum=  |
| 24888 | chrY | 13463727 | . | C | A,T   | 1316.80 | PASS          | AC=3,6;AF=0.047,0.094;AN=64;BaseQ  |
| 24889 | chrY | 13463728 | . | G | A,T   | 1680.53 | PASS          | AC=9,3;AF=0.136,0.045;AN=66;BaseQ  |
| 24890 | chrY | 13463730 | . | A | T     | 638.56  | PASS          | AC=7;AF=0.106;AN=66;BaseQRankSum=  |
| 24891 | chrY | 13463731 | . | G | T     | 121.14  | PASS          | AC=2;AF=0.030;AN=66;BaseQRankSum=  |
| 24892 | chrY | 13463732 | . | T | A     | 218.44  | PASS          | AC=3;AF=0.045;AN=66;BaseQRankSum=  |
| 24893 | chrY | 13463735 | . | C | T     | 55.89   | my_snp_filter | AC=1;AF=0.015;AN=68;BaseQ          |
| 24894 | chrY | 13463736 | . | T | A     | 370.05  | PASS          | AC=7;AF=0.103;AN=68;BaseQRankSum=  |
| 24895 | chrY | 13463738 | . | C | A     | 344.03  | PASS          | AC=3;AF=0.044;AN=68;BaseQRankSum=  |
| 24896 | chrY | 13463740 | . | G | A     | 90.94   | my_snp_filter | AC=2;AF=0.029;AN=68;BaseQ          |
| 24897 | chrY | 13463744 | . | G | T     | 50.27   | my_snp_filter | AC=2;AF=0.029;AN=68;BaseQ          |
| 24898 | chrY | 13463745 | . | C | T     | 1035.37 | PASS          | AC=10;AF=0.161;AN=62;BaseQRankSum= |
| 24899 | chrY | 13463746 | . | G | A     | 122.73  | my_snp_filter | AC=4;AF=0.063;AN=64;BaseQ          |
| 24900 | chrY | 13463749 | . | A | T     | 259.66  | PASS          | AC=3;AF=0.043;AN=70;BaseQRankSum=  |
| 24901 | chrY | 13463751 | . | C | A     | 92.62   | my_snp_filter | AC=2;AF=0.029;AN=70;BaseQ          |
| 24902 | chrY | 13463753 | . | T | G     | 52.64   | my_snp_filter | AC=2;AF=0.029;AN=70;BaseQ          |
| 24903 | chrY | 13463767 | . | G | A     | 317.51  | PASS          | AC=6;AF=0.097;AN=62;BaseQRankSum=  |
| 24904 | chrY | 13463772 | . | G | C,*   | 386.56  | PASS          | AC=1,4;AF=0.018,0.071;AN=56;BaseQ  |
| 24905 | chrY | 13463774 | . | G | T,A,* | 453.01  | PASS          | AC=2,1,4;AF=0.029,0.014,0.057;AN=  |
| 24906 | chrY | 13463778 | . | G | T     | 848.82  | PASS          | AC=7;AF=0.135;AN=52;BaseQRankSum=  |
| 24907 | chrY | 13463779 | . | A | C     | 3188.85 | PASS          | AC=17;AF=0.340;AN=50;BaseQRankSum= |
| 24908 | chrY | 13463782 | . | G | C     | 88.72   | PASS          | AC=1;AF=0.014;AN=70;BaseQRankSum=  |
| 24909 | chrY | 13463786 | . | C | A     | 259.39  | PASS          | AC=1;AF=0.015;AN=68;BaseQRankSum=  |
| 24910 | chrY | 13463787 | . | C | A     | 131.87  | PASS          | AC=1;AF=0.015;AN=68;BaseQRankSum=  |
| 24911 | chrY | 13463790 | . | G | T     | 94.11   | my_snp_filter | AC=2;AF=0.029;AN=68;BaseQ          |
| 24912 | chrY | 13463793 | . | A | T     | 91.26   | PASS          | AC=3;AF=0.044;AN=68;BaseQRankSum=  |
| 24913 | chrY | 13463795 | . | A | G     | 97.29   | PASS          | AC=3;AF=0.044;AN=68;BaseQRankSum=  |
| 24914 | chrY | 13463797 | . | G | A     | 91.55   | PASS          | AC=1;AF=0.014;AN=70;BaseQRankSum=  |
| 24915 | chrY | 13463799 | . | C | T     | 616.97  | PASS          | AC=6;AF=0.088;AN=68;BaseQRankSum=  |
| 24916 | chrY | 13463801 | . | C | A     | 296.16  | PASS          | AC=3;AF=0.043;AN=70;BaseQRankSum=  |
| 24917 | chrY | 13463802 | . | C | A     | 300.13  | PASS          | AC=3;AF=0.043;AN=70;BaseQRankSum=  |
| 24918 | chrY | 13463805 | . | A | G     | 611.14  | PASS          | AC=5;AF=0.071;AN=70;BaseQRankSum=  |
| 24919 | chrY | 13463807 | . | T | G     | 88.76   | PASS          | AC=1;AF=0.014;AN=70;BaseQRankSum=  |
| 24920 | chrY | 13463809 | . | G | A     | 187.26  | PASS          | AC=3;AF=0.043;AN=70;BaseQRankSum=  |
| 24921 | chrY | 13463813 | . | C | A     | 345.91  | PASS          | AC=8;AF=0.114;AN=70;BaseQRankSum=  |
| 24922 | chrY | 13463816 | . | C | T     | 70.30   | PASS          | AC=1;AF=0.014;AN=70;BaseQRankSum=  |
| 24923 | chrY | 13463823 | . | C | T     | 3427.71 | PASS          | AC=17;AF=0.258;AN=66;BaseQRankSum= |
| 24924 | chrY | 13463824 | . | G | A     | 379.70  | PASS          | AC=2;AF=0.029;AN=68;BaseQRankSum=  |
| 24925 | chrY | 13463827 | . | G | C     | 2422.13 | PASS          | AC=10;AF=0.147;AN=68;BaseQRankSum= |
| 24926 | chrY | 13463831 | . | T | A     | 4644.58 | PASS          | AC=20;AF=0.313;AN=64;BaseQRankSum= |
| 24927 | chrY | 13463834 | . | A | C,*   | 893.86  | PASS          | AC=6,2;AF=0.088,0.029;AN=68;BaseQ  |
| 24928 | chrY | 13463838 | . | T | G,*   | 825.13  | PASS          | AC=3,5;AF=0.050,0.083;AN=60;BaseQ  |



|       |      |          |   |   |     |         |               |                                    |
|-------|------|----------|---|---|-----|---------|---------------|------------------------------------|
| 24929 | chrY | 13463839 | . | T | C,* | 1470.96 | PASS          | AC=6,4;AF=0.097,0.065;AN=62;BaseQ  |
| 24930 | chrY | 13463848 | . | G | C   | 138.07  | PASS          | AC=1;AF=0.015;AN=66;BaseQRankSum=  |
| 24931 | chrY | 13463860 | . | C | G   | 3658.97 | PASS          | AC=18;AF=0.375;AN=48;BaseQRankSum= |
| 24932 | chrY | 13463861 | . | A | T   | 1558.43 | PASS          | AC=10;AF=0.192;AN=52;BaseQRankSum= |
| 24933 | chrY | 13463863 | . | G | A,T | 647.63  | PASS          | AC=1,1;AF=0.015,0.015;AN=66;BaseQ  |
| 24934 | chrY | 13463864 | . | C | T   | 209.72  | PASS          | AC=1;AF=0.017;AN=58;BaseQRankSum=  |
| 24935 | chrY | 13463865 | . | G | A   | 451.23  | PASS          | AC=1;AF=0.016;AN=64;BaseQRankSum=  |
| 24936 | chrY | 13463866 | . | G | T   | 690.81  | PASS          | AC=3;AF=0.052;AN=58;BaseQRankSum=  |
| 24937 | chrY | 13463868 | . | A | G   | 3576.46 | PASS          | AC=16;AF=0.381;AN=42;BaseQRankSum= |
| 24938 | chrY | 13463869 | . | T | C   | 1617.19 | PASS          | AC=9;AF=0.180;AN=50;BaseQRankSum=  |
| 24939 | chrY | 13463873 | . | G | T   | 213.63  | PASS          | AC=10;AF=0.014;AN=70;BaseQRankSum= |
| 24940 | chrY | 13463875 | . | C | G   | 1481.22 | PASS          | AC=10;AF=0.152;AN=66;BaseQRankSum= |
| 24941 | chrY | 13463876 | . | G | T   | 669.30  | PASS          | AC=1;AF=0.014;AN=70;BaseQRankSum=  |
| 24942 | chrY | 13463877 | . | G | A   | 219.11  | PASS          | AC=1;AF=0.014;AN=70;BaseQRankSum=  |
| 24943 | chrY | 13463878 | . | G | T   | 1992.38 | PASS          | AC=13;AF=0.186;AN=70;BaseQRankSum= |
| 24944 | chrY | 13463881 | . | C | T   | 692.12  | PASS          | AC=4;AF=0.057;AN=70;BaseQRankSum=  |
| 24945 | chrY | 13463888 | . | G | T,A | 547.25  | PASS          | AC=4,1;AF=0.057,0.014;AN=70;BaseQ  |
| 24946 | chrY | 13463891 | . | C | A   | 62.24   | my_snp_filter | AC=1;AF=0.014;AN=70;BaseQ          |
| 24947 | chrY | 13463893 | . | G | A   | 269     | PASS          | AC=3;AF=0.043;AN=70;BaseQRankSum=  |
| 24948 | chrY | 13463894 | . | G | T   | 220.98  | PASS          | AC=3;AF=0.043;AN=70;BaseQRankSum=  |
| 24949 | chrY | 13463901 | . | G | T   | 252.04  | PASS          | AC=2;AF=0.029;AN=70;BaseQRankSum=  |
| 24950 | chrY | 13463903 | . | C | T   | 1772.64 | PASS          | AC=11;AF=0.157;AN=70;BaseQRankSum= |
| 24951 | chrY | 13463905 | . | C | T   | 54.68   | PASS          | AC=1;AF=0.014;AN=70;BaseQRankSum=  |
| 24952 | chrY | 13463906 | . | T | A   | 328.20  | PASS          | AC=1;AF=0.014;AN=70;BaseQRankSum=  |
| 24953 | chrY | 13463907 | . | C | A   | 1459.08 | PASS          | AC=2;AF=0.029;AN=70;BaseQRankSum=  |
| 24954 | chrY | 13463911 | . | C | T   | 1486.49 | PASS          | AC=11;AF=0.157;AN=70;BaseQRankSum= |
| 24955 | chrY | 13463912 | . | G | A   | 1149.92 | PASS          | AC=7;AF=0.100;AN=70;BaseQRankSum=  |
| 24956 | chrY | 13463913 | . | C | T,A | 1993.74 | PASS          | AC=7,3;AF=0.100,0.043;AN=70;BaseQ  |
| 24957 | chrY | 13463914 | . | G | A   | 79.20   | PASS          | AC=1;AF=0.014;AN=70;BaseQRankSum=  |
| 24958 | chrY | 13463919 | . | A | G   | 763.80  | PASS          | AC=6;AF=0.086;AN=70;BaseQRankSum=  |
| 24959 | chrY | 13463920 | . | A | C,T | 4866.30 | PASS          | AC=10,7;AF=0.167,0.117;AN=60;Base  |
| 24960 | chrY | 13463921 | . | A | T   | 764.66  | PASS          | AC=6;AF=0.088;AN=68;BaseQRankSum=  |
| 24961 | chrY | 13463923 | . | C | A   | 69.45   | my_snp_filter | AC=1;AF=0.014;AN=70;BaseQ          |
| 24962 | chrY | 13463925 | . | G | T   | 1676.93 | PASS          | AC=11;AF=0.157;AN=70;BaseQRankSum= |
| 24963 | chrY | 13463927 | . | C | A   | 105.70  | PASS          | AC=1;AF=0.014;AN=70;BaseQRankSum=  |
| 24964 | chrY | 13463936 | . | G | T   | 132.66  | PASS          | AC=5;AF=0.074;AN=68;BaseQRankSum=  |
| 24965 | chrY | 13463937 | . | A | T   | 30.95   | PASS          | AC=1;AF=0.015;AN=68;BaseQRankSum=  |
| 24966 | chrY | 13463941 | . | G | T   | 881.27  | PASS          | AC=7;AF=0.113;AN=62;BaseQRankSum=  |
| 24967 | chrY | 13463942 | . | T | C   | 4221.94 | PASS          | AC=25;AF=0.431;AN=58;BaseQRankSum= |
| 24968 | chrY | 13463943 | . | G | A,T | 1680.94 | PASS          | AC=12,1;AF=0.207,0.017;AN=58;Base  |
| 24969 | chrY | 13463945 | . | G | T   | 804.44  | PASS          | AC=6;AF=0.086;AN=70;BaseQRankSum=  |
| 24970 | chrY | 13463948 | . | T | C   | 2030.47 | PASS          | AC=3;AF=0.048;AN=62;BaseQRankSum=  |
| 24971 | chrY | 13463951 | . | C | A   | 2020.14 | PASS          | AC=3;AF=0.047;AN=64;BaseQRankSum=  |
| 24972 | chrY | 13463963 | . | T | C   | 4538.85 | PASS          | AC=9;AF=0.155;AN=58;BaseQRankSum=  |
| 24973 | chrY | 13463964 | . | G | T   | 46.08   | PASS          | AC=1;AF=0.017;AN=58;BaseQRankSum=  |
| 24974 | chrY | 13463965 | . | G | A   | 2772.91 | PASS          | AC=9;AF=0.150;AN=60;BaseQRankSum=  |
| 24975 | chrY | 13463967 | . | C | A   | 1365.55 | PASS          | AC=7;AF=0.106;AN=66;BaseQRankSum=  |
| 24976 | chrY | 13463972 | . | C | T   | 927.33  | PASS          | AC=7;AF=0.100;AN=70;BaseQRankSum=  |
| 24977 | chrY | 13463973 | . | G | A   | 158.94  | PASS          | AC=2;AF=0.029;AN=70;BaseQRankSum=  |
| 24978 | chrY | 13463974 | . | G | A   | 40.57   | PASS          | AC=1;AF=0.014;AN=70;BaseQRankSum=  |
| 24979 | chrY | 13463976 | . | C | A,G | 2825.42 | PASS          | AC=9,7;AF=0.136,0.106;AN=66;BaseQ  |
| 24980 | chrY | 13463978 | . | G | A   | 1233.68 | PASS          | AC=6;AF=0.088;AN=68;BaseQRankSum=  |
| 24981 | chrY | 13463979 | . | G | A   | 244.38  | PASS          | AC=1;AF=0.015;AN=68;BaseQRankSum=  |
| 24982 | chrY | 13463980 | . | G | T   | 71.19   | PASS          | AC=2;AF=0.029;AN=68;BaseQRankSum=  |
| 24983 | chrY | 13463995 | . | G | A   | 265.83  | PASS          | AC=3;AF=0.045;AN=66;BaseQRankSum=  |
| 24984 | chrY | 13463996 | . | G | A   | 45.98   | my_snp_filter | AC=2;AF=0.031;AN=64;BaseQ          |
| 24985 | chrY | 13463997 | . | T | A   | 1338.50 | PASS          | AC=5;AF=0.076;AN=66;BaseQRankSum=  |
| 24986 | chrY | 13463998 | . | A | C   | 3781.23 | PASS          | AC=13;AF=0.232;AN=56;BaseQRankSum= |
| 24987 | chrY | 13464003 | . | C | A   | 80.66   | PASS          | AC=2;AF=0.029;AN=70;BaseQRankSum=  |
| 24988 | chrY | 13464006 | . | G | A   | 208.65  | PASS          | AC=3;AF=0.044;AN=68;BaseQRankSum=  |
| 24989 | chrY | 13464008 | . | T | C   | 243.48  | PASS          | AC=2;AF=0.029;AN=68;BaseQRankSum=  |
| 24990 | chrY | 13464010 | . | A | G   | 1069.17 | PASS          | AC=5;AF=0.074;AN=68;BaseQRankSum=  |
| 24991 | chrY | 13464013 | . | G | T   | 200.97  | PASS          | AC=3;AF=0.044;AN=68;BaseQRankSum=  |
| 24992 | chrY | 13464017 | . | C | T   | 55.61   | my_snp_filter | AC=2;AF=0.030;AN=66;BaseQ          |
| 24993 | chrY | 13464018 | . | C | T   | 477.42  | PASS          | AC=4;AF=0.061;AN=66;BaseQRankSum=  |
| 24994 | chrY | 13464020 | . | C | T   | 705.23  | PASS          | AC=5;AF=0.076;AN=66;BaseQRankSum=  |
| 24995 | chrY | 13464022 | . | C | G   | 841.95  | PASS          | AC=4;AF=0.061;AN=66;BaseQRankSum=  |
| 24996 | chrY | 13464025 | . | C | T   | 174.60  | PASS          | AC=1;AF=0.016;AN=62;BaseQRankSum=  |
| 24997 | chrY | 13464026 | . | G | A   | 476.68  | PASS          | AC=6;AF=0.094;AN=64;BaseQRankSum=  |
| 24998 | chrY | 13464027 | . | G | T,C | 766.17  | PASS          | AC=4,2;AF=0.065,0.032;AN=62;BaseQ  |
| 24999 | chrY | 13464028 | . | A | G   | 34.96   | my_snp_filter | AC=2;AF=0.031;AN=64;BaseQ          |
| 25000 | chrY | 13464031 | . | T | A   | 3213.67 | my_snp_filter | AC=9;AF=0.237;AN=38;BaseQ          |
| 25001 | chrY | 13464032 | . | C | A   | 594.03  | PASS          | AC=4;AF=0.080;AN=50;BaseQRankSum=  |
| 25002 | chrY | 13464033 | . | T | A   | 61.25   | my_snp_filter | AC=2;AF=0.032;AN=62;BaseQ          |
| 25003 | chrY | 13464034 | . | G | A   | 985.91  | PASS          | AC=2;AF=0.030;AN=66;BaseQRankSum=  |
| 25004 | chrY | 13464036 | . | C | A   | 89.16   | my_snp_filter | AC=2;AF=0.030;AN=66;BaseQ          |

|       |      |          |   |   |     |         |               |                                    |
|-------|------|----------|---|---|-----|---------|---------------|------------------------------------|
| 25005 | chrY | 13464044 | . | C | T   | 42.17   | PASS          | AC=1;AF=0.015;AN=68;BaseQRankSum=  |
| 25006 | chrY | 13464048 | . | G | A   | 635.78  | PASS          | AC=1;AF=0.015;AN=66;BaseQRankSum=  |
| 25007 | chrY | 13464052 | . | T | A   | 41.95   | PASS          | AC=1;AF=0.015;AN=66;BaseQRankSum=  |
| 25008 | chrY | 13464055 | . | C | T   | 138.17  | PASS          | AC=3;AF=0.047;AN=64;BaseQRankSum=  |
| 25009 | chrY | 13464058 | . | G | A   | 147.58  | PASS          | AC=3;AF=0.045;AN=66;BaseQRankSum=  |
| 25010 | chrY | 13464146 | . | G | T   | 32.58   | PASS          | AC=1;AF=0.018;AN=56;BaseQRankSum=  |
| 25011 | chrY | 13464387 | . | G | A   | 37.30   | PASS          | AC=1;AF=0.015;AN=68;BaseQRankSum=  |
| 25012 | chrY | 13464390 | . | G | A   | 112.25  | PASS          | AC=3;AF=0.045;AN=66;BaseQRankSum=  |
| 25013 | chrY | 13464392 | . | A | G,C | 972.09  | PASS          | AC=8,3;AF=0.143,0.054;AN=56;BaseQ  |
| 25014 | chrY | 13464394 | . | T | C,G | 1320.51 | PASS          | AC=9,3;AF=0.188,0.063;AN=48;BaseQ  |
| 25015 | chrY | 13464397 | . | G | T   | 40.71   | PASS          | AC=1;AF=0.015;AN=68;BaseQRankSum=  |
| 25016 | chrY | 13464401 | . | T | C   | 128.71  | PASS          | AC=5;AF=0.083;AN=60;BaseQRankSum=  |
| 25017 | chrY | 13464402 | . | G | A   | 109.27  | PASS          | AC=4;AF=0.063;AN=64;BaseQRankSum=  |
| 25018 | chrY | 13464403 | . | G | A   | 570.40  | PASS          | AC=4;AF=0.063;AN=64;BaseQRankSum=  |
| 25019 | chrY | 13464406 | . | C | A   | 158.70  | PASS          | AC=4;AF=0.063;AN=64;BaseQRankSum=  |
| 25020 | chrY | 13464407 | . | A | G   | 77.62   | PASS          | AC=5;AF=0.089;AN=56;BaseQRankSum=  |
| 25021 | chrY | 13464412 | . | C | T   | 160.48  | PASS          | AC=4;AF=0.057;AN=70;BaseQRankSum=  |
| 25022 | chrY | 13464415 | . | C | G   | 60.30   | my_snp_filter | AC=2;AF=0.029;AN=70;BaseQ          |
| 25023 | chrY | 13464416 | . | T | A   | 303.87  | PASS          | AC=2;AF=0.029;AN=70;BaseQRankSum=  |
| 25024 | chrY | 13464417 | . | A | C   | 363.28  | PASS          | AC=2;AF=0.029;AN=70;BaseQRankSum=  |
| 25025 | chrY | 13464422 | . | T | A   | 39.58   | PASS          | AC=2;AF=0.029;AN=70;BaseQRankSum=  |
| 25026 | chrY | 13464424 | . | C | T   | 2452.84 | PASS          | AC=19;AF=0.380;AN=50;BaseQRankSum= |
| 25027 | chrY | 13464430 | . | G | A   | 126.82  | PASS          | AC=3;AF=0.043;AN=70;BaseQRankSum=  |
| 25028 | chrY | 13464432 | . | C | G   | 552.15  | PASS          | AC=2;AF=0.029;AN=70;BaseQRankSum=  |
| 25029 | chrY | 13464437 | . | T | C   | 523.54  | PASS          | AC=2;AF=0.029;AN=70;BaseQRankSum=  |
| 25030 | chrY | 13464440 | . | C | A   | 315.37  | PASS          | AC=3;AF=0.043;AN=70;BaseQRankSum=  |
| 25031 | chrY | 13464447 | . | T | C   | 529.70  | PASS          | AC=7;AF=0.100;AN=70;BaseQRankSum=  |
| 25032 | chrY | 13464449 | . | C | T   | 533.86  | PASS          | AC=5;AF=0.071;AN=70;BaseQRankSum=  |
| 25033 | chrY | 13464450 | . | G | C   | 81.35   | PASS          | AC=1;AF=0.014;AN=70;BaseQRankSum=  |
| 25034 | chrY | 13464458 | . | C | T   | 618.90  | PASS          | AC=5;AF=0.071;AN=70;BaseQRankSum=  |
| 25035 | chrY | 13464459 | . | G | A   | 734.85  | PASS          | AC=6;AF=0.086;AN=70;BaseQRankSum=  |
| 25036 | chrY | 13464462 | . | C | A   | 571.37  | PASS          | AC=4;AF=0.057;AN=70;BaseQRankSum=  |
| 25037 | chrY | 13464463 | . | T | C   | 4862.01 | PASS          | AC=24;AF=0.387;AN=62;BaseQRankSum= |
| 25038 | chrY | 13464464 | . | C | A   | 1218.03 | PASS          | AC=7;AF=0.109;AN=64;BaseQRankSum=  |
| 25039 | chrY | 13464465 | . | C | T   | 479.24  | PASS          | AC=6;AF=0.091;AN=66;BaseQRankSum=  |
| 25040 | chrY | 13464466 | . | A | G,T | 486.95  | PASS          | AC=5,3;AF=0.076,0.045;AN=66;BaseQ  |
| 25041 | chrY | 13464468 | . | C | G   | 81.53   | my_snp_filter | AC=2;AF=0.029;AN=70;BaseQ          |
| 25042 | chrY | 13464472 | . | C | T   | 74.74   | my_snp_filter | AC=4;AF=0.057;AN=70;BaseQ          |
| 25043 | chrY | 13464473 | . | G | A   | 346.95  | PASS          | AC=3;AF=0.043;AN=70;BaseQRankSum=  |
| 25044 | chrY | 13464478 | . | A | C   | 39.94   | my_snp_filter | AC=1;AF=0.014;AN=70;BaseQ          |
| 25045 | chrY | 13464479 | . | G | C   | 121.90  | my_snp_filter | AC=2;AF=0.029;AN=70;BaseQ          |
| 25046 | chrY | 13464480 | . | G | A   | 102.34  | PASS          | AC=1;AF=0.014;AN=70;BaseQRankSum=  |
| 25047 | chrY | 13464485 | . | C | A   | 128     | PASS          | AC=2;AF=0.029;AN=70;BaseQRankSum=  |
| 25048 | chrY | 13464486 | . | C | G   | 273.01  | PASS          | AC=3;AF=0.043;AN=70;BaseQRankSum=  |
| 25049 | chrY | 13464487 | . | G | A   | 435.74  | PASS          | AC=2;AF=0.029;AN=70;BaseQRankSum=  |
| 25050 | chrY | 13464488 | . | C | A   | 1033.55 | PASS          | AC=6;AF=0.086;AN=70;BaseQRankSum=  |
| 25051 | chrY | 13464497 | . | C | A   | 40.61   | PASS          | AC=1;AF=0.015;AN=68;BaseQRankSum=  |
| 25052 | chrY | 13464499 | . | G | A   | 459.59  | PASS          | AC=2;AF=0.029;AN=68;BaseQRankSum=  |
| 25053 | chrY | 13464502 | . | C | A   | 103.20  | PASS          | AC=4;AF=0.059;AN=68;BaseQRankSum=  |
| 25054 | chrY | 13464504 | . | C | A   | 44.08   | my_snp_filter | AC=1;AF=0.015;AN=68;BaseQ          |
| 25055 | chrY | 13464506 | . | T | A,* | 496.43  | PASS          | AC=5,1;AF=0.076,0.015;AN=66;BaseQ  |
| 25056 | chrY | 13464507 | . | T | G,C | 5364.85 | PASS          | AC=16,1;AF=0.276,0.017;AN=58;Base  |
| 25057 | chrY | 13464510 | . | T | C   | 4577.46 | PASS          | AC=12;AF=0.214;AN=56;BaseQRankSum= |
| 25058 | chrY | 13464513 | . | C | A   | 540.77  | PASS          | AC=2;AF=0.030;AN=66;BaseQRankSum=  |
| 25059 | chrY | 13464515 | . | C | A,G | 4410.61 | PASS          | AC=12,5;AF=0.207,0.086;AN=58;Base  |
| 25060 | chrY | 13464524 | . | C | T,* | 347.25  | PASS          | AC=2,1;AF=0.036,0.018;AN=56;BaseQ  |
| 25061 | chrY | 13464525 | . | T | G,A | 3257.09 | PASS          | AC=13,3;AF=0.241,0.056;AN=54;Base  |
| 25062 | chrY | 13464527 | . | T | C   | 3554.88 | PASS          | AC=14;AF=0.259;AN=54;BaseQRankSum= |
| 25063 | chrY | 13464532 | . | G | A   | 223.74  | PASS          | AC=2;AF=0.029;AN=70;BaseQRankSum=  |
| 25064 | chrY | 13464534 | . | T | A   | 130.29  | my_snp_filter | AC=3;AF=0.043;AN=70;BaseQ          |
| 25065 | chrY | 13464535 | . | C | T,A | 1199.41 | PASS          | AC=3,5;AF=0.043,0.071;AN=70;BaseQ  |
| 25066 | chrY | 13464536 | . | T | C   | 85.72   | my_snp_filter | AC=4;AF=0.057;AN=70;BaseQ          |
| 25067 | chrY | 13464537 | . | C | G   | 498.23  | PASS          | AC=4;AF=0.057;AN=70;BaseQRankSum=  |
| 25068 | chrY | 13464545 | . | C | A   | 500.36  | PASS          | AC=5;AF=0.071;AN=70;BaseQRankSum=  |
| 25069 | chrY | 13464548 | . | C | T   | 1034.54 | PASS          | AC=4;AF=0.057;AN=70;BaseQRankSum=  |
| 25070 | chrY | 13464549 | . | C | T   | 557.79  | PASS          | AC=3;AF=0.043;AN=70;BaseQRankSum=  |
| 25071 | chrY | 13464553 | . | G | A   | 241.96  | my_snp_filter | AC=4;AF=0.057;AN=70;BaseQ          |
| 25072 | chrY | 13464554 | . | C | A   | 239.04  | PASS          | AC=3;AF=0.043;AN=70;BaseQRankSum=  |
| 25073 | chrY | 13464556 | . | C | A   | 31.56   | my_snp_filter | AC=1;AF=0.015;AN=66;BaseQ          |
| 25074 | chrY | 13464557 | . | G | T   | 3067.42 | PASS          | AC=12;AF=0.214;AN=56;BaseQRankSum= |
| 25075 | chrY | 13464563 | . | C | G   | 111.10  | my_snp_filter | AC=2;AF=0.029;AN=70;BaseQ          |
| 25076 | chrY | 13464567 | . | G | C   | 149.03  | my_snp_filter | AC=4;AF=0.057;AN=70;BaseQ          |
| 25077 | chrY | 13464585 | . | T | A   | 107.69  | my_snp_filter | AC=2;AF=0.030;AN=66;BaseQ          |
| 25078 | chrY | 13464586 | . | A | C   | 1430.47 | PASS          | AC=6;AF=0.100;AN=60;BaseQRankSum=  |
| 25079 | chrY | 13464597 | . | G | T   | 2328.66 | PASS          | AC=6;AF=0.107;AN=56;BaseQRankSum=  |
| 25080 | chrY | 13464599 | . | A | C   | 131.23  | PASS          | AC=2;AF=0.032;AN=62;BaseQRankSum=  |

|       |      |          |   |   |     |          |               |                                   |
|-------|------|----------|---|---|-----|----------|---------------|-----------------------------------|
| 25081 | chrY | 13464601 | . | T | C   | 189.25   | PASS          | AC=3;AF=0.044;AN=68;BaseQRankSum= |
| 25082 | chrY | 13464608 | . | A | T   | 157.92   | PASS          | AC=1;AF=0.015;AN=66;BaseQRankSum= |
| 25083 | chrY | 13464613 | . | G | T   | 2024.20  | my_snp_filter | AC=5;AF=0.093;AN=54;BaseQ         |
| 25084 | chrY | 13464621 | . | T | C   | 53.88    | my_snp_filter | AC=2;AF=0.038;AN=52;BaseQ         |
| 25085 | chrY | 13464624 | . | C | T   | 60.03    | my_snp_filter | AC=1;AF=0.016;AN=62;BaseQ         |
| 25086 | chrY | 13464627 | . | C | T   | 689.87   | PASS          | AC=5;AF=0.081;AN=62;BaseQRankSum= |
| 25087 | chrY | 13464628 | . | C | T   | 37.74    | my_snp_filter | AC=1;AF=0.016;AN=64;BaseQ         |
| 25088 | chrY | 13464630 | . | T | G   | 34.55    | my_snp_filter | AC=1;AF=0.016;AN=64;BaseQ         |
| 25089 | chrY | 13464632 | . | T | C   | 1678.33  | my_snp_filter | AC=5;AF=0.089;AN=56;BaseQ         |
| 25090 | chrY | 13464637 | . | C | T   | 756.97   | PASS          | AC=5;AF=0.074;AN=68;BaseQRankSum= |
| 25091 | chrY | 13464642 | . | A | G   | 350.18   | my_snp_filter | AC=4;AF=0.059;AN=68;BaseQ         |
| 25092 | chrY | 13464646 | . | G | A   | 601.05   | PASS          | AC=1;AF=0.015;AN=66;BaseQRankSum= |
| 25093 | chrY | 13464652 | . | C | A   | 30.53    | my_snp_filter | AC=1;AF=0.015;AN=66;BaseQ         |
| 25094 | chrY | 13464655 | . | C | T   | 944.14   | PASS          | AC=2;AF=0.030;AN=66;BaseQRankSum= |
| 25095 | chrY | 13464661 | . | C | G   | 28005.17 | PASS          | AC=11;AF=0.172;AN=64;Base         |
| 25096 | chrY | 13464667 | . | C | A   | 904.34   | PASS          | AC=2;AF=0.031;AN=64;BaseQRankSum= |
| 25097 | chrY | 13464672 | . | C | T   | 175.43   | my_snp_filter | AC=3;AF=0.045;AN=66;BaseQ         |
| 25098 | chrY | 13464679 | . | A | T   | 157.01   | PASS          | AC=1;AF=0.015;AN=66;BaseQRankSum= |
| 25099 | chrY | 13464680 | . | T | C   | 85.40    | my_snp_filter | AC=1;AF=0.014;AN=70;BaseQ         |
| 25100 | chrY | 13464681 | . | A | T   | 71.43    | my_snp_filter | AC=1;AF=0.014;AN=70;BaseQ         |
| 25101 | chrY | 13464691 | . | C | A   | 39.24    | my_snp_filter | AC=2;AF=0.029;AN=70;BaseQ         |
| 25102 | chrY | 13464698 | . | A | T   | 68.15    | my_snp_filter | AC=1;AF=0.014;AN=70;BaseQ         |
| 25103 | chrY | 13464700 | . | A | C   | 171.32   | PASS          | AC=1;AF=0.014;AN=70;BaseQRankSum= |
| 25104 | chrY | 13464702 | . | G | A   | 27121.08 | PASS          | AC=18;AF=0.300;AN=60;Base         |
| 25105 | chrY | 13464718 | . | T | A   | 227.59   | my_snp_filter | AC=3;AF=0.043;AN=70;BaseQ         |
| 25106 | chrY | 13464726 | . | C | A   | 152.30   | my_snp_filter | AC=4;AF=0.057;AN=70;BaseQ         |
| 25107 | chrY | 13464730 | . | G | A   | 1108.22  | PASS          | AC=5;AF=0.071;AN=70;BaseQRankSum= |
| 25108 | chrY | 13464731 | . | G | T   | 133.59   | my_snp_filter | AC=3;AF=0.043;AN=70;BaseQ         |
| 25109 | chrY | 13464735 | . | T | C   | 94.89    | my_snp_filter | AC=2;AF=0.029;AN=70;BaseQ         |
| 25110 | chrY | 13464743 | . | T | G   | 339.79   | my_snp_filter | AC=5;AF=0.071;AN=70;BaseQ         |
| 25111 | chrY | 13464746 | . | G | T   | 224.78   | PASS          | AC=1;AF=0.014;AN=70;BaseQRankSum= |
| 25112 | chrY | 13464752 | . | C | T   | 66.82    | my_snp_filter | AC=1;AF=0.014;AN=70;BaseQ         |
| 25113 | chrY | 13464774 | . | C | T   | 125.15   | my_snp_filter | AC=2;AF=0.029;AN=70;BaseQ         |
| 25114 | chrY | 13464775 | . | T | C,G | 11129.54 | PASS          | AC=10,2;AF=0.156,0.031;AN         |
| 25115 | chrY | 13464778 | . | G | A   | 94.74    | PASS          | AC=2;AF=0.029;AN=70;BaseQRankSum= |
| 25116 | chrY | 13464788 | . | A | C   | 37.04    | PASS          | AC=1;AF=0.014;AN=70;BaseQRankSum= |
| 25117 | chrY | 13464951 | . | A | G   | 186.49   | PASS          | AC=3;AF=0.071;AN=42;BaseQRankSum= |
| 25118 | chrY | 13464966 | . | T | C   | 1097.18  | my_snp_filter | AC=9;AF=0.321;AN=28;BaseQ         |
| 25119 | chrY | 13464967 | . | C | A   | 30.49    | PASS          | AC=1;AF=0.019;AN=54;BaseQRankSum= |
| 25120 | chrY | 13464980 | . | C | A   | 95.61    | PASS          | AC=2;AF=0.029;AN=70;BaseQRankSum= |
| 25121 | chrY | 13464985 | . | A | G   | 31.91    | PASS          | AC=1;AF=0.014;AN=70;BaseQRankSum= |
| 25122 | chrY | 13465019 | . | G | A   | 99.30    | my_snp_filter | AC=3;AF=0.043;AN=70;BaseQ         |
| 25123 | chrY | 13465022 | . | C | A   | 75.49    | my_snp_filter | AC=4;AF=0.057;AN=70;BaseQ         |
| 25124 | chrY | 13465024 | . | G | T   | 90.56    | PASS          | AC=2;AF=0.029;AN=70;BaseQRankSum= |
| 25125 | chrY | 13465025 | . | T | C   | 279.08   | PASS          | AC=3;AF=0.043;AN=70;BaseQRankSum= |
| 25126 | chrY | 13465027 | . | A | T   | 78.57    | PASS          | AC=1;AF=0.014;AN=70;BaseQRankSum= |
| 25127 | chrY | 13465028 | . | C | G   | 108.81   | my_snp_filter | AC=1;AF=0.014;AN=70;BaseQ         |
| 25128 | chrY | 13465033 | . | C | A   | 234.35   | PASS          | AC=5;AF=0.071;AN=70;BaseQRankSum= |
| 25129 | chrY | 13465034 | . | C | T   | 106.52   | PASS          | AC=2;AF=0.029;AN=70;BaseQRankSum= |
| 25130 | chrY | 13465035 | . | C | T   | 1606.82  | PASS          | AC=3;AF=0.043;AN=70;BaseQRankSum= |
| 25131 | chrY | 13465036 | . | C | T   | 82.71    | my_snp_filter | AC=4;AF=0.057;AN=70;BaseQ         |
| 25132 | chrY | 13465038 | . | G | T   | 64.01    | my_snp_filter | AC=1;AF=0.014;AN=70;BaseQ         |
| 25133 | chrY | 13465040 | . | A | C   | 69.68    | PASS          | AC=1;AF=0.014;AN=70;BaseQRankSum= |
| 25134 | chrY | 13465046 | . | A | T   | 512.77   | PASS          | AC=3;AF=0.043;AN=70;BaseQRankSum= |
| 25135 | chrY | 13465047 | . | G | A   | 63.25    | PASS          | AC=2;AF=0.029;AN=70;BaseQRankSum= |
| 25136 | chrY | 13465048 | . | C | A,G | 395.57   | PASS          | AC=5,2;AF=0.071,0.029;AN=70;BaseQ |
| 25137 | chrY | 13465049 | . | T | A   | 77.45    | my_snp_filter | AC=1;AF=0.014;AN=70;BaseQ         |
| 25138 | chrY | 13465052 | . | G | A   | 126.95   | my_snp_filter | AC=4;AF=0.057;AN=70;BaseQ         |
| 25139 | chrY | 13465053 | . | A | T   | 512.02   | PASS          | AC=9;AF=0.129;AN=70;BaseQRankSum= |
| 25140 | chrY | 13465054 | . | C | A   | 1271.46  | PASS          | AC=7;AF=0.100;AN=70;BaseQRankSum= |
| 25141 | chrY | 13465057 | . | G | C   | 76.79    | my_snp_filter | AC=3;AF=0.043;AN=70;BaseQ         |
| 25142 | chrY | 13465059 | . | G | A   | 117.86   | my_snp_filter | AC=5;AF=0.071;AN=70;BaseQ         |
| 25143 | chrY | 13465068 | . | C | A,T | 1123.33  | PASS          | AC=10,3;AF=0.143,0.043;AN=70;Base |
| 25144 | chrY | 13465069 | . | C | T   | 1005.95  | PASS          | AC=8;AF=0.114;AN=70;BaseQRankSum= |
| 25145 | chrY | 13465070 | . | T | A   | 140.57   | my_snp_filter | AC=4;AF=0.057;AN=70;BaseQ         |
| 25146 | chrY | 13465071 | . | G | C   | 243.64   | PASS          | AC=3;AF=0.043;AN=70;BaseQRankSum= |
| 25147 | chrY | 13465072 | . | G | A   | 76.03    | my_snp_filter | AC=4;AF=0.057;AN=70;BaseQ         |
| 25148 | chrY | 13465073 | . | G | T,A | 775.79   | PASS          | AC=7,7;AF=0.100,0.100;AN=70;BaseQ |
| 25149 | chrY | 13465077 | . | T | C   | 147.08   | my_snp_filter | AC=3;AF=0.043;AN=70;BaseQ         |
| 25150 | chrY | 13465080 | . | G | C   | 74.55    | my_snp_filter | AC=1;AF=0.014;AN=70;BaseQ         |
| 25151 | chrY | 13465082 | . | G | T   | 153.20   | PASS          | AC=3;AF=0.043;AN=70;BaseQRankSum= |
| 25152 | chrY | 13465083 | . | C | A   | 75.93    | my_snp_filter | AC=5;AF=0.071;AN=70;BaseQ         |
| 25153 | chrY | 13465087 | . | G | C   | 307.81   | my_snp_filter | AC=6;AF=0.086;AN=70;BaseQ         |
| 25154 | chrY | 13465088 | . | A | T,G | 555.17   | my_snp_filter | AC=5,1;AF=0.071,0.014;AN=         |
| 25155 | chrY | 13465089 | . | T | C   | 214.69   | my_snp_filter | AC=1;AF=0.014;AN=70;BaseQ         |
| 25156 | chrY | 13465094 | . | C | G   | 482.86   | my_snp_filter | AC=8;AF=0.114;AN=70;BaseQ         |

|       |      |          |   |   |     |          |               |                                    |
|-------|------|----------|---|---|-----|----------|---------------|------------------------------------|
| 25157 | chrY | 13465099 | . | C | T   | 457.45   | my_snp_filter | AC=3;AF=0.043;AN=70;BaseQ          |
| 25158 | chrY | 13465100 | . | G | A   | 1452.90  | my_snp_filter | AC=13;AF=0.186;AN=70;BaseQ         |
| 25159 | chrY | 13465101 | . | C | T   | 463.45   | PASS          | AC=4;AF=0.057;AN=70;BaseQRankSum=  |
| 25160 | chrY | 13465104 | . | C | A   | 37.18    | my_snp_filter | AC=2;AF=0.029;AN=70;BaseQ          |
| 25161 | chrY | 13465106 | . | G | A   | 478.01   | my_snp_filter | AC=7;AF=0.100;AN=70;BaseQ          |
| 25162 | chrY | 13465110 | . | G | T   | 848.44   | my_snp_filter | AC=6;AF=0.086;AN=70;BaseQ          |
| 25163 | chrY | 13465113 | . | G | A   | 40.45    | PASS          | AC=1;AF=0.014;AN=70;BaseQRankSum=  |
| 25164 | chrY | 13465115 | . | A | T   | 82.92    | my_snp_filter | AC=1;AF=0.014;AN=70;BaseQ          |
| 25165 | chrY | 13465116 | . | C | A   | 2292.58  | PASS          | AC=7;AF=0.100;AN=70;BaseQRankSum=  |
| 25166 | chrY | 13465117 | . | C | T,G | 577.32   | my_snp_filter | AC=2,3;AF=0.029,0.043;AN=          |
| 25167 | chrY | 13465122 | . | C | G,A | 2285.20  | PASS          | AC=4,3;AF=0.057,0.043;AN=70;BaseQ  |
| 25168 | chrY | 13465123 | . | A | T   | 120.30   | my_snp_filter | AC=1;AF=0.014;AN=70;BaseQ          |
| 25169 | chrY | 13465125 | . | G | A   | 101.81   | my_snp_filter | AC=3;AF=0.043;AN=70;BaseQ          |
| 25170 | chrY | 13465126 | . | A | G   | 600.56   | PASS          | AC=3;AF=0.043;AN=70;BaseQRankSum=  |
| 25171 | chrY | 13465127 | . | G | A   | 1147.17  | PASS          | AC=4;AF=0.057;AN=70;BaseQRankSum=  |
| 25172 | chrY | 13465130 | . | A | C   | 67.19    | my_snp_filter | AC=2;AF=0.029;AN=70;BaseQ          |
| 25173 | chrY | 13465133 | . | T | A   | 179.47   | my_snp_filter | AC=1;AF=0.014;AN=70;BaseQ          |
| 25174 | chrY | 13465134 | . | C | G   | 247.48   | PASS          | AC=2;AF=0.029;AN=70;BaseQRankSum=  |
| 25175 | chrY | 13465136 | . | C | A   | 656.12   | PASS          | AC=4;AF=0.057;AN=70;BaseQRankSum=  |
| 25176 | chrY | 13465139 | . | A | G   | 15737.66 | PASS          | AC=19;AF=0.297;AN=64;BaseQ         |
| 25177 | chrY | 13465141 | . | G | A,C | 285.78   | PASS          | AC=2,2;AF=0.029,0.029;AN=68;BaseQ  |
| 25178 | chrY | 13465143 | . | G | T   | 522.57   | PASS          | AC=6;AF=0.103;AN=58;BaseQRankSum=  |
| 25179 | chrY | 13465144 | . | G | A,T | 15914.56 | PASS          | AC=19,1;AF=0.396,0.021;AN=         |
| 25180 | chrY | 13465148 | . | G | C   | 266.96   | PASS          | AC=2;AF=0.029;AN=70;BaseQRankSum=  |
| 25181 | chrY | 13465149 | . | T | C,A | 397.90   | PASS          | AC=2,1;AF=0.029,0.014;AN=70;BaseQ  |
| 25182 | chrY | 13465150 | . | G | A   | 393.09   | PASS          | AC=2;AF=0.029;AN=70;BaseQRankSum=  |
| 25183 | chrY | 13465153 | . | G | C   | 167.63   | PASS          | AC=1;AF=0.014;AN=70;BaseQRankSum=  |
| 25184 | chrY | 13465157 | . | C | T   | 7045.12  | PASS          | AC=19;AF=0.339;AN=56;BaseQRankSum= |
| 25185 | chrY | 13465158 | . | A | T   | 218.38   | my_snp_filter | AC=2;AF=0.029;AN=70;BaseQ          |
| 25186 | chrY | 13465160 | . | G | C,T | 789.65   | PASS          | AC=3,2;AF=0.043,0.029;AN=70;BaseQ  |
| 25187 | chrY | 13465163 | . | A | C   | 324.52   | PASS          | AC=3;AF=0.043;AN=70;BaseQRankSum=  |
| 25188 | chrY | 13465164 | . | G | A   | 54.17    | my_snp_filter | AC=2;AF=0.029;AN=70;BaseQ          |
| 25189 | chrY | 13465168 | . | T | A   | 193.02   | PASS          | AC=2;AF=0.029;AN=70;BaseQRankSum=  |
| 25190 | chrY | 13465169 | . | C | T   | 122.90   | my_snp_filter | AC=3;AF=0.043;AN=70;BaseQ          |
| 25191 | chrY | 13465171 | . | C | A   | 253.49   | PASS          | AC=2;AF=0.029;AN=68;BaseQRankSum=  |
| 25192 | chrY | 13465172 | . | A | G   | 4588.95  | PASS          | AC=10;AF=0.167;AN=60;BaseQRankSum= |
| 25193 | chrY | 13465175 | . | T | A   | 94.25    | PASS          | AC=1;AF=0.014;AN=70;BaseQRankSum=  |
| 25194 | chrY | 13465177 | . | G | A   | 36.13    | my_snp_filter | AC=1;AF=0.014;AN=70;BaseQ          |
| 25195 | chrY | 13465178 | . | G | A   | 515.68   | PASS          | AC=1;AF=0.014;AN=70;BaseQRankSum=  |
| 25196 | chrY | 13465181 | . | G | C   | 252.10   | PASS          | AC=1;AF=0.014;AN=70;BaseQRankSum=  |
| 25197 | chrY | 13465183 | . | G | C   | 81       | my_snp_filter | AC=2;AF=0.029;AN=68;BaseQ          |
| 25198 | chrY | 13465184 | . | C | T   | 321.61   | PASS          | AC=3;AF=0.044;AN=68;BaseQRankSum=  |
| 25199 | chrY | 13465186 | . | T | C   | 52.72    | PASS          | AC=1;AF=0.015;AN=68;BaseQRankSum=  |
| 25200 | chrY | 13465194 | . | T | A   | 249.27   | PASS          | AC=2;AF=0.029;AN=68;BaseQRankSum=  |
| 25201 | chrY | 13465197 | . | A | T   | 4576.83  | my_snp_filter | AC=8;AF=0.182;AN=44;BaseQ          |
| 25202 | chrY | 13465199 | . | T | C   | 3459.80  | my_snp_filter | AC=6;AF=0.100;AN=60;BaseQ          |
| 25203 | chrY | 13465200 | . | A | G   | 119      | PASS          | AC=1;AF=0.015;AN=68;BaseQRankSum=  |
| 25204 | chrY | 13465204 | . | C | A   | 50.53    | my_snp_filter | AC=2;AF=0.029;AN=68;BaseQ          |
| 25205 | chrY | 13465207 | . | A | G   | 432.24   | PASS          | AC=5;AF=0.071;AN=70;BaseQRankSum=  |
| 25206 | chrY | 13465209 | . | G | A   | 40.91    | PASS          | AC=1;AF=0.014;AN=70;BaseQRankSum=  |
| 25207 | chrY | 13465213 | . | T | C   | 222.01   | PASS          | AC=1;AF=0.014;AN=70;BaseQRankSum=  |
| 25208 | chrY | 13465219 | . | C | A   | 128.76   | my_snp_filter | AC=2;AF=0.029;AN=70;BaseQ          |
| 25209 | chrY | 13465224 | . | A | G   | 40.80    | PASS          | AC=1;AF=0.014;AN=70;BaseQRankSum=  |
| 25210 | chrY | 13465225 | . | T | A   | 569.63   | PASS          | AC=4;AF=0.057;AN=70;BaseQRankSum=  |
| 25211 | chrY | 13465229 | . | T | C   | 104.52   | PASS          | AC=1;AF=0.014;AN=70;BaseQRankSum=  |
| 25212 | chrY | 13465232 | . | T | A   | 391.15   | PASS          | AC=1;AF=0.014;AN=70;BaseQRankSum=  |
| 25213 | chrY | 13465234 | . | C | A,G | 5802.07  | my_snp_filter | AC=9,1;AF=0.250,0.028;AN=          |
| 25214 | chrY | 13465237 | . | C | A   | 345.35   | PASS          | AC=2;AF=0.029;AN=70;BaseQRankSum=  |
| 25215 | chrY | 13465241 | . | C | T   | 220.38   | my_snp_filter | AC=3;AF=0.047;AN=64;BaseQ          |
| 25216 | chrY | 13465252 | . | G | C   | 160.29   | my_snp_filter | AC=1;AF=0.015;AN=66;BaseQ          |
| 25217 | chrY | 13465253 | . | A | C   | 4401.80  | my_snp_filter | AC=5;AF=0.119;AN=42;BaseQ          |
| 25218 | chrY | 13465256 | . | A | G   | 253.85   | my_snp_filter | AC=1;AF=0.015;AN=66;BaseQ          |
| 25219 | chrY | 13465267 | . | C | A   | 92.17    | my_snp_filter | AC=1;AF=0.016;AN=62;BaseQ          |
| 25220 | chrY | 13465277 | . | G | C   | 199.56   | my_snp_filter | AC=1;AF=0.019;AN=54;BaseQ          |
| 25221 | chrY | 13465280 | . | G | T   | 442.65   | my_snp_filter | AC=1;AF=0.019;AN=54;BaseQ          |
| 25222 | chrY | 13465281 | . | A | G   | 118.08   | my_snp_filter | AC=1;AF=0.019;AN=54;BaseQ          |
| 25223 | chrY | 13465282 | . | T | A   | 491.70   | PASS          | AC=2;AF=0.037;AN=54;BaseQRankSum=  |
| 25224 | chrY | 13465286 | . | T | A   | 56.88    | PASS          | AC=2;AF=0.040;AN=50;DP=5485;FS=0.  |
| 25225 | chrY | 13465287 | . | G | A   | 1839.37  | my_snp_filter | AC=8;AF=0.154;AN=52;BaseQ          |
| 25226 | chrY | 13465288 | . | C | A   | 929.97   | my_snp_filter | AC=2;AF=0.040;AN=50;BaseQ          |
| 25227 | chrY | 13465292 | . | G | A   | 111.86   | PASS          | AC=3;AF=0.060;AN=50;BaseQRankSum=  |
| 25228 | chrY | 13465295 | . | G | A   | 90.01    | PASS          | AC=3;AF=0.060;AN=50;BaseQRankSum=  |
| 25229 | chrY | 13465300 | . | A | T,G | 2490.46  | PASS          | AC=6,2;AF=0.120,0.040;AN=50;BaseQ  |
| 25230 | chrY | 13465305 | . | A | G   | 45580.21 | my_snp_filter | AC=12;AF=0.240;AN=                 |
| 25231 | chrY | 13465306 | . | C | G   | 735.09   | my_snp_filter | AC=4;AF=0.077;AN=52;BaseQ          |
| 25232 | chrY | 13465307 | . | C | T   | 66.89    | my_snp_filter | AC=1;AF=0.019;AN=54;BaseQ          |

|       |      |          |   |   |       |          |               |                                    |
|-------|------|----------|---|---|-------|----------|---------------|------------------------------------|
| 25233 | chrY | 13465309 | . | C | A     | 663.09   | my_snp_filter | AC=3;AF=0.063;AN=48;BaseQ          |
| 25234 | chrY | 13465310 | . | T | C     | 1716.18  | my_snp_filter | AC=6;AF=0.136;AN=44;BaseQ          |
| 25235 | chrY | 13465311 | . | G | C     | 57.36    | PASS          | AC=1;AF=0.020;AN=50;BaseQRankSum=  |
| 25236 | chrY | 13465312 | . | T | A     | 5100.89  | PASS          | AC=6;AF=0.120;AN=50;BaseQRankSum=  |
| 25237 | chrY | 13465313 | . | A | C     | 168.69   | my_snp_filter | AC=2;AF=0.038;AN=52;BaseQ          |
| 25238 | chrY | 13465314 | . | G | A     | 1412.75  | PASS          | AC=3;AF=0.060;AN=50;BaseQRankSum=  |
| 25239 | chrY | 13465315 | . | G | A     | 54.11    | my_snp_filter | AC=2;AF=0.034;AN=58;DP=69          |
| 25240 | chrY | 13465317 | . | A | C     | 54.92    | my_snp_filter | AC=2;AF=0.034;AN=58;DP=55          |
| 25241 | chrY | 13465320 | . | G | T     | 66.29    | PASS          | AC=2;AF=0.036;AN=56;BaseQRankSum=  |
| 25242 | chrY | 13465321 | . | C | A     | 2686.41  | PASS          | AC=5;AF=0.083;AN=60;BaseQRankSum=  |
| 25243 | chrY | 13465322 | . | T | C     | 51769.20 | my_snp_filter | AC=20;AF=0.556;AN=                 |
| 25244 | chrY | 13465323 | . | T | C     | 504.29   | my_snp_filter | AC=2;AF=0.036;AN=56;BaseQ          |
| 25245 | chrY | 13465325 | . | G | C     | 50.88    | PASS          | AC=1;AF=0.017;AN=58;BaseQRankSum=  |
| 25246 | chrY | 13465327 | . | C | A     | 49.38    | PASS          | AC=1;AF=0.017;AN=58;BaseQRankSum=  |
| 25247 | chrY | 13465329 | . | A | T     | 79.03    | my_snp_filter | AC=1;AF=0.017;AN=58;BaseQ          |
| 25248 | chrY | 13465331 | . | A | T     | 2334.18  | PASS          | AC=4;AF=0.077;AN=52;BaseQRankSum=  |
| 25249 | chrY | 13465332 | . | G | A     | 318.07   | my_snp_filter | AC=2;AF=0.034;AN=58;BaseQ          |
| 25250 | chrY | 13465333 | . | T | A     | 40.47    | PASS          | AC=1;AF=0.017;AN=58;BaseQRankSum=  |
| 25251 | chrY | 13465337 | . | A | T     | 40.06    | PASS          | AC=1;AF=0.017;AN=58;BaseQRankSum=  |
| 25252 | chrY | 13465342 | . | T | A     | 1066.81  | my_snp_filter | AC=4;AF=0.067;AN=60;BaseQ          |
| 25253 | chrY | 13465345 | . | G | C     | 974.89   | PASS          | AC=2;AF=0.034;AN=58;BaseQRankSum=  |
| 25254 | chrY | 13465346 | . | T | G     | 39.34    | PASS          | AC=1;AF=0.017;AN=60;BaseQRankSum=  |
| 25255 | chrY | 13465347 | . | T | C     | 993.29   | PASS          | AC=2;AF=0.033;AN=60;BaseQRankSum=  |
| 25256 | chrY | 13465352 | . | A | T     | 785.73   | PASS          | AC=2;AF=0.029;AN=68;BaseQRankSum=  |
| 25257 | chrY | 13465363 | . | G | A     | 1225.43  | my_snp_filter | AC=5;AF=0.076;AN=66;BaseQ          |
| 25258 | chrY | 13465364 | . | T | C     | 61.01    | PASS          | AC=1;AF=0.015;AN=66;BaseQRankSum=  |
| 25259 | chrY | 13465365 | . | G | A     | 32.02    | my_snp_filter | AC=1;AF=0.015;AN=66;BaseQ          |
| 25260 | chrY | 13465366 | . | T | C     | 3850.59  | PASS          | AC=4;AF=0.061;AN=66;BaseQRankSum=  |
| 25261 | chrY | 13465371 | . | A | G     | 60.02    | PASS          | AC=2;AF=0.031;AN=64;BaseQRankSum=  |
| 25262 | chrY | 13465374 | . | T | C     | 820.90   | PASS          | AC=9;AF=0.145;AN=62;BaseQRankSum=  |
| 25263 | chrY | 13465380 | . | T | A     | 1231.57  | my_snp_filter | AC=11;AF=0.190;AN=58;BaseQ         |
| 25264 | chrY | 13465381 | . | A | T     | 1651.46  | my_snp_filter | AC=11;AF=0.183;AN=60;BaseQ         |
| 25265 | chrY | 13465383 | . | G | C     | 424.46   | my_snp_filter | AC=4;AF=0.065;AN=62;BaseQ          |
| 25266 | chrY | 13465386 | . | G | C     | 107.88   | PASS          | AC=4;AF=0.065;AN=62;BaseQRankSum=  |
| 25267 | chrY | 13465389 | . | C | G,A   | 3661.85  | PASS          | AC=5,5;AF=0.083,0.083;AN=60;BaseQ  |
| 25268 | chrY | 13465390 | . | T | A     | 978.01   | PASS          | AC=3;AF=0.050;AN=60;BaseQRankSum=  |
| 25269 | chrY | 13465395 | . | C | A,G   | 250.27   | my_snp_filter | AC=1,1;AF=0.016,0.016;AN=          |
| 25270 | chrY | 13465398 | . | C | G     | 29148.16 | my_snp_filter | AC=14;AF=0.259;AN=                 |
| 25271 | chrY | 13465399 | . | A | T     | 1607.91  | PASS          | AC=11;AF=0.190;AN=58;BaseQRankSum= |
| 25272 | chrY | 13465401 | . | T | G     | 2062.46  | PASS          | AC=4;AF=0.069;AN=58;BaseQRankSum=  |
| 25273 | chrY | 13465409 | . | C | T,A   | 1261.51  | PASS          | AC=3,5;AF=0.047,0.078;AN=64;BaseQ  |
| 25274 | chrY | 13465411 | . | G | C     | 62.94    | my_snp_filter | AC=1;AF=0.016;AN=64;BaseQ          |
| 25275 | chrY | 13465414 | . | T | A,C   | 225.42   | my_snp_filter | AC=3,1;AF=0.045,0.015;AN=          |
| 25276 | chrY | 13465421 | . | T | G     | 1064.26  | PASS          | AC=4;AF=0.063;AN=64;BaseQRankSum=  |
| 25277 | chrY | 13465429 | . | T | G     | 1166.90  | PASS          | AC=5;AF=0.078;AN=64;BaseQRankSum=  |
| 25278 | chrY | 13465430 | . | A | T     | 225.75   | my_snp_filter | AC=3;AF=0.047;AN=64;BaseQ          |
| 25279 | chrY | 13465431 | . | T | C     | 77.83    | PASS          | AC=1;AF=0.016;AN=62;BaseQRankSum=  |
| 25280 | chrY | 13465432 | . | G | A     | 281.92   | my_snp_filter | AC=3;AF=0.048;AN=62;BaseQ          |
| 25281 | chrY | 13465440 | . | G | A     | 1223.96  | PASS          | AC=5;AF=0.078;AN=64;BaseQRankSum=  |
| 25282 | chrY | 13465441 | . | A | T     | 10564.80 | my_snp_filter | AC=9;AF=0.155;AN=                  |
| 25283 | chrY | 13465443 | . | C | T     | 44.35    | my_snp_filter | AC=2;AF=0.032;AN=62;BaseQ          |
| 25284 | chrY | 13465444 | . | C | T     | 94.54    | PASS          | AC=2;AF=0.033;AN=60;BaseQRankSum=  |
| 25285 | chrY | 13465445 | . | A | T,C   | 11028.51 | my_snp_filter | AC=6,8;AF=0.115,0                  |
| 25286 | chrY | 13465446 | . | A | G,T   | 11708.36 | my_snp_filter | AC=6,7;AF=0.111,0                  |
| 25287 | chrY | 13465455 | . | T | A     | 95.12    | PASS          | AC=1;AF=0.016;AN=64;BaseQRankSum=  |
| 25288 | chrY | 13465459 | . | T | C     | 56.90    | PASS          | AC=3;AF=0.047;AN=64;BaseQRankSum=  |
| 25289 | chrY | 13465460 | . | A | G     | 1855.04  | PASS          | AC=8;AF=0.125;AN=64;BaseQRankSum=  |
| 25290 | chrY | 13465463 | . | C | T,G   | 2064.94  | PASS          | AC=8,2;AF=0.125,0.031;AN=64;BaseQ  |
| 25291 | chrY | 13465468 | . | G | T     | 1668.33  | PASS          | AC=7;AF=0.109;AN=64;BaseQRankSum=  |
| 25292 | chrY | 13465475 | . | C | T     | 69.62    | PASS          | AC=3;AF=0.045;AN=66;BaseQRankSum=  |
| 25293 | chrY | 13465477 | . | C | A     | 49.71    | PASS          | AC=1;AF=0.016;AN=64;BaseQRankSum=  |
| 25294 | chrY | 13465485 | . | A | T     | 1233.95  | PASS          | AC=8;AF=0.121;AN=66;BaseQRankSum=  |
| 25295 | chrY | 13465489 | . | G | T     | 98.58    | PASS          | AC=1;AF=0.015;AN=66;BaseQRankSum=  |
| 25296 | chrY | 13465493 | . | T | A,G   | 7406.18  | my_snp_filter | AC=15,3;AF=0.288,0.058;AN=         |
| 25297 | chrY | 13465499 | . | A | G     | 135.46   | my_snp_filter | AC=2;AF=0.029;AN=68;BaseQ          |
| 25298 | chrY | 13465505 | . | G | C     | 4058.58  | PASS          | AC=15;AF=0.288;AN=52;BaseQRankSum= |
| 25299 | chrY | 13465509 | . | G | C     | 48.80    | my_snp_filter | AC=2;AF=0.029;AN=68;BaseQ          |
| 25300 | chrY | 13465510 | . | C | T     | 183.94   | my_snp_filter | AC=2;AF=0.029;AN=68;BaseQ          |
| 25301 | chrY | 13465511 | . | C | G,T   | 808.63   | PASS          | AC=5,1;AF=0.074,0.015;AN=68;BaseQ  |
| 25302 | chrY | 13465516 | . | G | A     | 681.13   | PASS          | AC=4;AF=0.059;AN=68;BaseQRankSum=  |
| 25303 | chrY | 13465519 | . | G | T,C,A | 834.62   | PASS          | AC=1,2,2;AF=0.015,0.030,0.030;AN=  |
| 25304 | chrY | 13465525 | . | G | T     | 103.72   | my_snp_filter | AC=2;AF=0.029;AN=68;BaseQ          |
| 25305 | chrY | 13465546 | . | C | T     | 521.31   | PASS          | AC=3;AF=0.043;AN=70;BaseQRankSum=  |
| 25306 | chrY | 13465549 | . | A | T     | 150.85   | PASS          | AC=2;AF=0.029;AN=70;BaseQRankSum=  |
| 25307 | chrY | 13465551 | . | G | T     | 177.59   | PASS          | AC=3;AF=0.048;AN=62;BaseQRankSum=  |
| 25308 | chrY | 13465552 | . | A | T     | 2072.89  | PASS          | AC=15;AF=0.250;AN=60;BaseQRankSum= |

|       |      |          |   |   |     |         |               |                                    |
|-------|------|----------|---|---|-----|---------|---------------|------------------------------------|
| 25309 | chrY | 13465553 | . | G | T   | 430.78  | PASS          | AC=5;AF=0.083;AN=60;BaseQRankSum=  |
| 25310 | chrY | 13465555 | . | T | A   | 123.83  | PASS          | AC=1;AF=0.014;AN=70;BaseQRankSum=  |
| 25311 | chrY | 13465556 | . | C | A   | 122.66  | PASS          | AC=1;AF=0.014;AN=70;BaseQRankSum=  |
| 25312 | chrY | 13465561 | . | T | C,A | 1216.70 | PASS          | AC=8,2;AF=0.129,0.032;AN=62;BaseQ  |
| 25313 | chrY | 13465562 | . | A | T,G | 180.05  | PASS          | AC=2,1;AF=0.029,0.015;AN=68;BaseQ  |
| 25314 | chrY | 13465566 | . | G | A,T | 1152.43 | PASS          | AC=6,1;AF=0.103,0.017;AN=58;BaseQ  |
| 25315 | chrY | 13465568 | . | A | G   | 49.47   | my_snp_filter | AC=1;AF=0.014;AN=70;BaseQ          |
| 25316 | chrY | 13465573 | . | A | C   | 942.79  | PASS          | AC=4;AF=0.061;AN=66;BaseQRankSum=  |
| 25317 | chrY | 13465581 | . | C | T   | 108.90  | PASS          | AC=2;AF=0.029;AN=68;BaseQRankSum=  |
| 25318 | chrY | 13465582 | . | C | T   | 109.37  | PASS          | AC=2;AF=0.029;AN=68;BaseQRankSum=  |
| 25319 | chrY | 13465593 | . | A | G   | 334.81  | PASS          | AC=2;AF=0.030;AN=66;BaseQRankSum=  |
| 25320 | chrY | 13465601 | . | C | A   | 3343.94 | PASS          | AC=8;AF=0.133;AN=60;BaseQRankSum=  |
| 25321 | chrY | 13465606 | . | G | C   | 298.49  | PASS          | AC=2;AF=0.029;AN=68;BaseQRankSum=  |
| 25322 | chrY | 13465626 | . | A | T   | 182.38  | PASS          | AC=2;AF=0.032;AN=62;BaseQRankSum=  |
| 25323 | chrY | 13465631 | . | A | T   | 2975.26 | PASS          | AC=8;AF=0.125;AN=64;BaseQRankSum=  |
| 25324 | chrY | 13465633 | . | C | A   | 3900.95 | PASS          | AC=9;AF=0.145;AN=62;BaseQRankSum=  |
| 25325 | chrY | 13465649 | . | C | T   | 3107.42 | PASS          | AC=8;AF=0.118;AN=68;BaseQRankSum=  |
| 25326 | chrY | 13465666 | . | A | G   | 174.04  | my_snp_filter | AC=4;AF=0.057;AN=70;BaseQ          |
| 25327 | chrY | 13465674 | . | C | G   | 331.73  | PASS          | AC=3;AF=0.043;AN=70;BaseQRankSum=  |
| 25328 | chrY | 13465679 | . | A | G   | 94.84   | PASS          | AC=1;AF=0.014;AN=70;BaseQRankSum=  |
| 25329 | chrY | 13465684 | . | C | A   | 335.96  | PASS          | AC=4;AF=0.057;AN=70;BaseQRankSum=  |
| 25330 | chrY | 13465705 | . | A | G   | 31.35   | PASS          | AC=1;AF=0.014;AN=70;BaseQRankSum=  |
| 25331 | chrY | 13465707 | . | G | A   | 91.74   | PASS          | AC=1;AF=0.014;AN=70;BaseQRankSum=  |
| 25332 | chrY | 13465708 | . | T | A   | 31.37   | PASS          | AC=1;AF=0.014;AN=70;BaseQRankSum=  |
| 25333 | chrY | 13465727 | . | C | T   | 968.81  | PASS          | AC=5;AF=0.071;AN=70;BaseQRankSum=  |
| 25334 | chrY | 13465731 | . | G | C   | 874.64  | PASS          | AC=5;AF=0.071;AN=70;BaseQRankSum=  |
| 25335 | chrY | 13465742 | . | A | G   | 500.56  | PASS          | AC=3;AF=0.043;AN=70;BaseQRankSum=  |
| 25336 | chrY | 13465743 | . | T | G   | 501.81  | PASS          | AC=3;AF=0.043;AN=70;BaseQRankSum=  |
| 25337 | chrY | 13465745 | . | C | A   | 410.40  | PASS          | AC=3;AF=0.043;AN=70;BaseQRankSum=  |
| 25338 | chrY | 13465747 | . | T | C   | 408.32  | PASS          | AC=3;AF=0.043;AN=70;BaseQRankSum=  |
| 25339 | chrY | 13465761 | . | T | C   | 118.54  | PASS          | AC=2;AF=0.029;AN=70;BaseQRankSum=  |
| 25340 | chrY | 13465767 | . | C | A   | 115.27  | PASS          | AC=1;AF=0.014;AN=70;BaseQRankSum=  |
| 25341 | chrY | 13465768 | . | C | G   | 73.88   | PASS          | AC=1;AF=0.014;AN=70;BaseQRankSum=  |
| 25342 | chrY | 13465770 | . | A | G   | 82.14   | PASS          | AC=1;AF=0.014;AN=70;BaseQRankSum=  |
| 25343 | chrY | 13465894 | . | T | G   | 420.99  | PASS          | AC=2;AF=0.100;AN=20;BaseQRankSum=  |
| 25344 | chrY | 13465908 | . | G | A   | 98.10   | my_snp_filter | AC=1;AF=0.014;AN=70;BaseQ          |
| 25345 | chrY | 13465923 | . | A | C   | 359.23  | PASS          | AC=3;AF=0.094;AN=32;BaseQRankSum=  |
| 25346 | chrY | 13465931 | . | G | C   | 61.95   | PASS          | AC=1;AF=0.014;AN=70;BaseQRankSum=  |
| 25347 | chrY | 13465944 | . | C | G   | 62.70   | PASS          | AC=4;AF=0.057;AN=70;BaseQRankSum=  |
| 25348 | chrY | 13465959 | . | C | T   | 68.05   | PASS          | AC=1;AF=0.014;AN=70;BaseQRankSum=  |
| 25349 | chrY | 13465961 | . | G | C,A | 330.67  | PASS          | AC=1,3;AF=0.014,0.043;AN=70;BaseQ  |
| 25350 | chrY | 13465977 | . | C | G,A | 2434.34 | PASS          | AC=2,6;AF=0.053,0.158;AN=38;BaseQ  |
| 25351 | chrY | 13465986 | . | C | G   | 62.10   | my_snp_filter | AC=2;AF=0.029;AN=70;BaseQ          |
| 25352 | chrY | 13465988 | . | G | A   | 3767.83 | PASS          | AC=15;AF=0.417;AN=36;BaseQRankSum= |
| 25353 | chrY | 13465989 | . | A | G   | 205.24  | PASS          | AC=2;AF=0.033;AN=60;BaseQRankSum=  |
| 25354 | chrY | 13465992 | . | A | C   | 3791.23 | PASS          | AC=15;AF=0.441;AN=34;BaseQRankSum= |
| 25355 | chrY | 13465994 | . | C | A   | 549.83  | PASS          | AC=4;AF=0.059;AN=68;BaseQRankSum=  |
| 25356 | chrY | 13465997 | . | T | C   | 32.75   | PASS          | AC=1;AF=0.015;AN=68;BaseQRankSum=  |
| 25357 | chrY | 13466003 | . | G | T   | 676.91  | PASS          | AC=5;AF=0.071;AN=70;BaseQRankSum=  |
| 25358 | chrY | 13466005 | . | G | T   | 155.05  | PASS          | AC=2;AF=0.029;AN=70;BaseQRankSum=  |
| 25359 | chrY | 13466012 | . | C | A,G | 670.05  | PASS          | AC=2,2;AF=0.029,0.029;AN=70;BaseQ  |
| 25360 | chrY | 13466013 | . | A | G   | 487.29  | PASS          | AC=3;AF=0.043;AN=70;BaseQRankSum=  |
| 25361 | chrY | 13466015 | . | G | C,A | 1018.60 | PASS          | AC=2,2;AF=0.038,0.038;AN=52;BaseQ  |
| 25362 | chrY | 13466016 | . | T | A   | 3849.90 | PASS          | AC=14;AF=0.318;AN=44;BaseQRankSum= |
| 25363 | chrY | 13466019 | . | T | C   | 411.07  | PASS          | AC=4;AF=0.059;AN=68;BaseQRankSum=  |
| 25364 | chrY | 13466025 | . | T | A   | 107.87  | PASS          | AC=4;AF=0.057;AN=70;BaseQRankSum=  |
| 25365 | chrY | 13466029 | . | G | C   | 144.12  | PASS          | AC=1;AF=0.014;AN=70;BaseQRankSum=  |
| 25366 | chrY | 13466051 | . | T | A   | 55.83   | my_snp_filter | AC=3;AF=0.043;AN=70;BaseQ          |
| 25367 | chrY | 13466056 | . | A | C   | 225.28  | PASS          | AC=2;AF=0.029;AN=70;BaseQRankSum=  |
| 25368 | chrY | 13466058 | . | G | A   | 337.25  | PASS          | AC=3;AF=0.044;AN=68;BaseQRankSum=  |
| 25369 | chrY | 13466063 | . | T | C   | 90.68   | PASS          | AC=1;AF=0.014;AN=70;BaseQRankSum=  |
| 25370 | chrY | 13466070 | . | C | T   | 160.69  | PASS          | AC=2;AF=0.029;AN=70;BaseQRankSum=  |
| 25371 | chrY | 13466071 | . | G | A   | 445.77  | PASS          | AC=6;AF=0.086;AN=70;BaseQRankSum=  |
| 25372 | chrY | 13466072 | . | A | G   | 316.41  | PASS          | AC=5;AF=0.071;AN=70;BaseQRankSum=  |
| 25373 | chrY | 13466074 | . | C | A   | 77.60   | PASS          | AC=1;AF=0.014;AN=70;BaseQRankSum=  |
| 25374 | chrY | 13466078 | . | G | A   | 298.49  | PASS          | AC=5;AF=0.071;AN=70;BaseQRankSum=  |
| 25375 | chrY | 13466079 | . | A | C   | 345.67  | PASS          | AC=2;AF=0.029;AN=70;BaseQRankSum=  |
| 25376 | chrY | 13466083 | . | A | G   | 5366.83 | PASS          | AC=21;AF=0.438;AN=48;BaseQRankSum= |
| 25377 | chrY | 13466084 | . | A | T   | 213.95  | PASS          | AC=3;AF=0.048;AN=62;BaseQRankSum=  |
| 25378 | chrY | 13466085 | . | G | C   | 101.06  | PASS          | AC=1;AF=0.015;AN=66;BaseQRankSum=  |
| 25379 | chrY | 13466087 | . | T | C   | 409.78  | PASS          | AC=6;AF=0.086;AN=70;BaseQRankSum=  |
| 25380 | chrY | 13466089 | . | C | A   | 200.16  | PASS          | AC=3;AF=0.043;AN=70;BaseQRankSum=  |
| 25381 | chrY | 13466090 | . | A | T,G | 707.46  | PASS          | AC=6,5;AF=0.086,0.071;AN=70;BaseQ  |
| 25382 | chrY | 13466092 | . | C | A   | 99.92   | PASS          | AC=1;AF=0.014;AN=70;BaseQRankSum=  |
| 25383 | chrY | 13466097 | . | G | A   | 43.05   | PASS          | AC=1;AF=0.014;AN=70;BaseQRankSum=  |
| 25384 | chrY | 13466101 | . | G | C   | 847.47  | PASS          | AC=1;AF=0.015;AN=68;BaseQRankSum=  |

|       |      |          |   |   |     |          |               |                                    |
|-------|------|----------|---|---|-----|----------|---------------|------------------------------------|
| 25385 | chrY | 13466113 | . | T | G   | 1314.49  | PASS          | AC=5;AF=0.119;AN=42;BaseQRankSum=  |
| 25386 | chrY | 13466122 | . | C | G   | 71.23    | my_snp_filter | AC=3;AF=0.047;AN=64;BaseQ          |
| 25387 | chrY | 13466125 | . | T | A   | 1115.22  | PASS          | AC=2;AF=0.067;AN=30;BaseQRankSum=  |
| 25388 | chrY | 13466132 | . | A | G   | 684.24   | PASS          | AC=1;AF=0.031;AN=32;BaseQRankSum=  |
| 25389 | chrY | 13466143 | . | G | C   | 1055.61  | PASS          | AC=2;AF=0.071;AN=28;BaseQRankSum=  |
| 25390 | chrY | 13466157 | . | C | A   | 825.57   | PASS          | AC=1;AF=0.015;AN=66;BaseQRankSum=  |
| 25391 | chrY | 13466174 | . | G | C   | 229.15   | PASS          | AC=5;AF=0.074;AN=68;BaseQRankSum=  |
| 25392 | chrY | 13466190 | . | C | A   | 422.08   | PASS          | AC=3;AF=0.043;AN=70;BaseQRankSum=  |
| 25393 | chrY | 13466198 | . | A | C   | 650.79   | PASS          | AC=5;AF=0.086;AN=58;BaseQRankSum=  |
| 25394 | chrY | 13466201 | . | T | C   | 410.32   | PASS          | AC=3;AF=0.043;AN=70;BaseQRankSum=  |
| 25395 | chrY | 13466206 | . | G | A   | 412.21   | PASS          | AC=3;AF=0.043;AN=70;BaseQRankSum=  |
| 25396 | chrY | 13466213 | . | A | G   | 420.42   | PASS          | AC=3;AF=0.043;AN=70;BaseQRankSum=  |
| 25397 | chrY | 13466214 | . | G | C   | 475.63   | PASS          | AC=5;AF=0.071;AN=70;BaseQRankSum=  |
| 25398 | chrY | 13466220 | . | C | T   | 3883.06  | PASS          | AC=9;AF=0.145;AN=62;BaseQRankSum=  |
| 25399 | chrY | 13466221 | . | T | G   | 5473.26  | PASS          | AC=12;AF=0.200;AN=60;BaseQRankSum= |
| 25400 | chrY | 13466225 | . | C | T   | 391      | PASS          | AC=5;AF=0.071;AN=70;BaseQRankSum=  |
| 25401 | chrY | 13466227 | . | T | C   | 109.25   | PASS          | AC=2;AF=0.029;AN=70;BaseQRankSum=  |
| 25402 | chrY | 13466229 | . | C | A   | 5655.17  | PASS          | AC=13;AF=0.203;AN=64;BaseQRankSum= |
| 25403 | chrY | 13466253 | . | T | A   | 544.45   | my_snp_filter | AC=4;AF=0.057;AN=70;BaseQ          |
| 25404 | chrY | 13466256 | . | A | C   | 10526.52 | PASS          | AC=10;AF=0.156;AN=64;BaseQ         |
| 25405 | chrY | 13466269 | . | T | G   | 1005.66  | PASS          | AC=2;AF=0.029;AN=70;BaseQRankSum=  |
| 25406 | chrY | 13466271 | . | G | C,A | 1375.98  | PASS          | AC=2,2;AF=0.029,0.029;AN=70;BaseQ  |
| 25407 | chrY | 13466275 | . | G | C   | 161.96   | my_snp_filter | AC=2;AF=0.029;AN=70;BaseQ          |
| 25408 | chrY | 13466288 | . | A | G   | 1460.80  | PASS          | AC=3;AF=0.043;AN=70;BaseQRankSum=  |
| 25409 | chrY | 13466289 | . | G | A   | 1433.10  | PASS          | AC=3;AF=0.043;AN=70;BaseQRankSum=  |
| 25410 | chrY | 13466291 | . | C | T   | 99.73    | PASS          | AC=1;AF=0.014;AN=70;BaseQRankSum=  |
| 25411 | chrY | 13466297 | . | C | G   | 1436.86  | PASS          | AC=3;AF=0.043;AN=70;BaseQRankSum=  |
| 25412 | chrY | 13466302 | . | T | G   | 25668.94 | PASS          | AC=18;AF=0.310;AN=58;BaseQ         |
| 25413 | chrY | 13466303 | . | T | C   | 33.56    | PASS          | AC=1;AF=0.014;AN=70;BaseQRankSum=  |
| 25414 | chrY | 13466306 | . | T | C   | 350.74   | my_snp_filter | AC=3;AF=0.043;AN=70;BaseQ          |
| 25415 | chrY | 13466308 | . | A | T   | 127.43   | my_snp_filter | AC=3;AF=0.043;AN=70;BaseQ          |
| 25416 | chrY | 13466309 | . | G | T   | 159.15   | my_snp_filter | AC=3;AF=0.043;AN=70;BaseQ          |
| 25417 | chrY | 13466313 | . | A | T   | 483.99   | my_snp_filter | AC=3;AF=0.043;AN=70;BaseQ          |
| 25418 | chrY | 13466316 | . | A | T   | 100.29   | my_snp_filter | AC=1;AF=0.014;AN=70;BaseQ          |
| 25419 | chrY | 13466317 | . | A | T   | 608.08   | PASS          | AC=1;AF=0.014;AN=70;BaseQRankSum=  |
| 25420 | chrY | 13466318 | . | T | C   | 716.05   | PASS          | AC=3;AF=0.043;AN=70;BaseQRankSum=  |
| 25421 | chrY | 13466323 | . | C | T   | 33.96    | PASS          | AC=1;AF=0.014;AN=70;BaseQRankSum=  |
| 25422 | chrY | 13466324 | . | A | G   | 279.17   | PASS          | AC=2;AF=0.029;AN=70;BaseQRankSum=  |
| 25423 | chrY | 13466325 | . | C | T   | 168.60   | PASS          | AC=1;AF=0.014;AN=70;BaseQRankSum=  |
| 25424 | chrY | 13466327 | . | A | G   | 1209.93  | PASS          | AC=4;AF=0.057;AN=70;BaseQRankSum=  |
| 25425 | chrY | 13466328 | . | T | C   | 157.54   | my_snp_filter | AC=1;AF=0.014;AN=70;BaseQ          |
| 25426 | chrY | 13466329 | . | G | T   | 242.40   | my_snp_filter | AC=1;AF=0.014;AN=70;BaseQ          |
| 25427 | chrY | 13466330 | . | C | T   | 35.73    | PASS          | AC=1;AF=0.014;AN=70;BaseQRankSum=  |
| 25428 | chrY | 13466332 | . | A | G   | 3062.53  | PASS          | AC=6;AF=0.086;AN=70;BaseQRankSum=  |
| 25429 | chrY | 13466333 | . | C | T   | 201.21   | PASS          | AC=2;AF=0.029;AN=70;BaseQRankSum=  |
| 25430 | chrY | 13466341 | . | C | T   | 219.39   | my_snp_filter | AC=1;AF=0.014;AN=70;BaseQ          |
| 25431 | chrY | 13466342 | . | A | C   | 36.84    | PASS          | AC=1;AF=0.014;AN=70;BaseQRankSum=  |
| 25432 | chrY | 13466345 | . | T | C   | 37.20    | PASS          | AC=1;AF=0.014;AN=70;BaseQRankSum=  |
| 25433 | chrY | 13466350 | . | A | G   | 219.57   | PASS          | AC=2;AF=0.029;AN=70;BaseQRankSum=  |
| 25434 | chrY | 13466351 | . | C | A,G | 1963.50  | my_snp_filter | AC=7,2;AF=0.100,0.029;AN=          |
| 25435 | chrY | 13466354 | . | G | C,T | 1802.59  | PASS          | AC=6,2;AF=0.086,0.029;AN=70;BaseQ  |
| 25436 | chrY | 13466355 | . | A | T   | 61.44    | PASS          | AC=2;AF=0.029;AN=70;BaseQRankSum=  |
| 25437 | chrY | 13466356 | . | G | A   | 135.65   | PASS          | AC=3;AF=0.043;AN=70;BaseQRankSum=  |
| 25438 | chrY | 13466360 | . | C | A   | 37.26    | my_snp_filter | AC=1;AF=0.014;AN=70;BaseQ          |
| 25439 | chrY | 13466369 | . | C | T   | 1400.94  | PASS          | AC=10;AF=0.143;AN=70;BaseQRankSum= |
| 25440 | chrY | 13466372 | . | G | T   | 51.01    | PASS          | AC=3;AF=0.043;AN=70;BaseQRankSum=  |
| 25441 | chrY | 13466377 | . | C | A,G | 709.79   | my_snp_filter | AC=9,2;AF=0.129,0.029;AN=          |
| 25442 | chrY | 13466378 | . | T | G   | 242.70   | my_snp_filter | AC=4;AF=0.057;AN=70;BaseQ          |
| 25443 | chrY | 13466380 | . | C | T   | 116.24   | my_snp_filter | AC=2;AF=0.029;AN=70;BaseQ          |
| 25444 | chrY | 13466383 | . | A | G   | 946.36   | PASS          | AC=2;AF=0.029;AN=70;BaseQRankSum=  |
| 25445 | chrY | 13466384 | . | G | T   | 112.63   | PASS          | AC=3;AF=0.043;AN=70;BaseQRankSum=  |
| 25446 | chrY | 13466386 | . | T | A   | 1024.62  | PASS          | AC=2;AF=0.029;AN=70;BaseQRankSum=  |
| 25447 | chrY | 13466389 | . | G | T   | 1028.55  | PASS          | AC=7;AF=0.100;AN=70;BaseQRankSum=  |
| 25448 | chrY | 13466390 | . | T | C   | 65.94    | my_snp_filter | AC=1;AF=0.014;AN=70;BaseQ          |
| 25449 | chrY | 13466392 | . | A | T   | 1059.60  | PASS          | AC=7;AF=0.100;AN=70;BaseQRankSum=  |
| 25450 | chrY | 13466393 | . | C | A   | 1172.69  | my_snp_filter | AC=3;AF=0.043;AN=70;BaseQ          |
| 25451 | chrY | 13466397 | . | G | A   | 658.84   | my_snp_filter | AC=6;AF=0.086;AN=70;BaseQ          |
| 25452 | chrY | 13466398 | . | C | T   | 102.88   | PASS          | AC=3;AF=0.043;AN=70;BaseQRankSum=  |
| 25453 | chrY | 13466399 | . | C | T   | 334.54   | my_snp_filter | AC=3;AF=0.043;AN=70;BaseQ          |
| 25454 | chrY | 13466406 | . | G | A   | 58.24    | my_snp_filter | AC=1;AF=0.014;AN=70;BaseQ          |
| 25455 | chrY | 13466408 | . | C | T   | 33.78    | my_snp_filter | AC=2;AF=0.029;AN=70;BaseQ          |
| 25456 | chrY | 13466409 | . | A | T   | 421.41   | my_snp_filter | AC=3;AF=0.043;AN=70;BaseQ          |
| 25457 | chrY | 13466410 | . | G | T   | 532.68   | my_snp_filter | AC=3;AF=0.043;AN=70;BaseQ          |
| 25458 | chrY | 13466415 | . | T | A   | 704.77   | PASS          | AC=4;AF=0.057;AN=70;BaseQRankSum=  |
| 25459 | chrY | 13466419 | . | C | G   | 117.82   | my_snp_filter | AC=2;AF=0.029;AN=70;BaseQ          |
| 25460 | chrY | 13466420 | . | A | C   | 455.18   | my_snp_filter | AC=3;AF=0.043;AN=70;BaseQ          |

|       |      |          |   |   |       |          |               |                                    |
|-------|------|----------|---|---|-------|----------|---------------|------------------------------------|
| 25461 | chrY | 13466421 | . | A | G,C   | 849.38   | my_snp_filter | AC=5,2;AF=0.071,0.029;AN=          |
| 25462 | chrY | 13466423 | . | A | T,G,C | 3959.31  | PASS          | AC=3,6,1;AF=0.043,0.086,0.014;AN=  |
| 25463 | chrY | 13466425 | . | T | C,*   | 306.12   | my_snp_filter | AC=1,2;AF=0.014,0.029;AN=          |
| 25464 | chrY | 13466426 | . | C | T     | 136.26   | my_snp_filter | AC=1;AF=0.014;AN=70;BaseQ          |
| 25465 | chrY | 13466428 | . | C | A     | 1452.34  | PASS          | AC=7;AF=0.100;AN=70;BaseQRankSum=  |
| 25466 | chrY | 13466430 | . | T | A     | 72.24    | my_snp_filter | AC=1;AF=0.015;AN=68;BaseQ          |
| 25467 | chrY | 13466433 | . | C | A     | 56.82    | my_snp_filter | AC=1;AF=0.014;AN=70;BaseQ          |
| 25468 | chrY | 13466435 | . | T | A     | 3684.17  | PASS          | AC=8;AF=0.114;AN=70;BaseQRankSum=  |
| 25469 | chrY | 13466436 | . | G | A,T,C | 3988.26  | PASS          | AC=8,1,1;AF=0.114,0.014,0.014;AN=  |
| 25470 | chrY | 13466439 | . | T | G     | 325.01   | my_snp_filter | AC=2;AF=0.029;AN=70;BaseQ          |
| 25471 | chrY | 13466440 | . | G | A     | 87.32    | my_snp_filter | AC=2;AF=0.029;AN=70;BaseQ          |
| 25472 | chrY | 13466444 | . | A | T     | 54.49    | my_snp_filter | AC=1;AF=0.014;AN=70;BaseQ          |
| 25473 | chrY | 13466445 | . | G | A,C   | 893.80   | PASS          | AC=1,3;AF=0.015,0.044;AN=68;BaseQ  |
| 25474 | chrY | 13466447 | . | G | A     | 381.80   | PASS          | AC=1;AF=0.015;AN=66;BaseQRankSum=  |
| 25475 | chrY | 13466448 | . | C | G     | 413.43   | my_snp_filter | AC=2;AF=0.029;AN=68;BaseQ          |
| 25476 | chrY | 13466452 | . | G | A,T   | 1972.70  | PASS          | AC=3,2;AF=0.045,0.030;AN=66;BaseQ  |
| 25477 | chrY | 13466455 | . | A | G     | 147.49   | my_snp_filter | AC=2;AF=0.029;AN=68;BaseQ          |
| 25478 | chrY | 13466457 | . | G | A     | 194.66   | my_snp_filter | AC=1;AF=0.016;AN=62;BaseQ          |
| 25479 | chrY | 13466459 | . | C | T     | 49.58    | PASS          | AC=2;AF=0.030;AN=66;DP=4968;FS=4.  |
| 25480 | chrY | 13466460 | . | A | T     | 275.40   | PASS          | AC=1;AF=0.017;AN=58;BaseQRankSum=  |
| 25481 | chrY | 13466461 | . | A | C,T   | 19750.50 | PASS          | AC=10,2;AF=0.208,0.042;AN=         |
| 25482 | chrY | 13466463 | . | A | C     | 49.63    | PASS          | AC=2;AF=0.029;AN=68;DP=4948;FS=4.  |
| 25483 | chrY | 13466464 | . | T | A     | 592.24   | PASS          | AC=7;AF=0.103;AN=68;BaseQRankSum=  |
| 25484 | chrY | 13466466 | . | C | T,A   | 4680     | PASS          | AC=9,1;AF=0.145,0.016;AN=62;BaseQ  |
| 25485 | chrY | 13466467 | . | C | A     | 612.24   | PASS          | AC=1;AF=0.015;AN=66;BaseQRankSum=  |
| 25486 | chrY | 13466468 | . | C | G     | 53.23    | PASS          | AC=2;AF=0.029;AN=68;BaseQRankSum=  |
| 25487 | chrY | 13466469 | . | C | T     | 1456.60  | PASS          | AC=8;AF=0.121;AN=66;BaseQRankSum=  |
| 25488 | chrY | 13466470 | . | C | A     | 645.42   | PASS          | AC=4;AF=0.065;AN=62;BaseQRankSum=  |
| 25489 | chrY | 13466473 | . | T | C     | 1135.01  | PASS          | AC=3;AF=0.045;AN=66;BaseQRankSum=  |
| 25490 | chrY | 13466476 | . | G | A     | 179.91   | my_snp_filter | AC=2;AF=0.030;AN=66;BaseQ          |
| 25491 | chrY | 13466481 | . | G | A     | 306.75   | PASS          | AC=1;AF=0.021;AN=48;BaseQRankSum=  |
| 25492 | chrY | 13466482 | . | G | C     | 26802    | PASS          | AC=24;AF=0.667;AN=36;BaseQRankSum= |
| 25493 | chrY | 13466483 | . | C | T     | 502.71   | PASS          | AC=4;AF=0.087;AN=46;BaseQRankSum=  |
| 25494 | chrY | 13466488 | . | C | T     | 1110.62  | PASS          | AC=3;AF=0.044;AN=68;BaseQRankSum=  |
| 25495 | chrY | 13466491 | . | G | T,A   | 1806.47  | my_snp_filter | AC=3,5;AF=0.045,0.076;AN=          |
| 25496 | chrY | 13466493 | . | G | A     | 124.60   | PASS          | AC=2;AF=0.029;AN=68;BaseQRankSum=  |
| 25497 | chrY | 13466495 | . | T | G     | 384.27   | my_snp_filter | AC=2;AF=0.029;AN=68;BaseQ          |
| 25498 | chrY | 13466496 | . | A | C     | 226.32   | my_snp_filter | AC=2;AF=0.029;AN=70;BaseQ          |
| 25499 | chrY | 13466502 | . | C | T     | 81.57    | my_snp_filter | AC=2;AF=0.029;AN=70;BaseQ          |
| 25500 | chrY | 13466503 | . | C | A     | 375.14   | PASS          | AC=1;AF=0.014;AN=70;BaseQRankSum=  |
| 25501 | chrY | 13466505 | . | G | C     | 500.58   | my_snp_filter | AC=2;AF=0.029;AN=70;BaseQ          |
| 25502 | chrY | 13466507 | . | G | A     | 1220.37  | PASS          | AC=4;AF=0.057;AN=70;BaseQRankSum=  |
| 25503 | chrY | 13466513 | . | A | T     | 720.19   | PASS          | AC=3;AF=0.043;AN=70;BaseQRankSum=  |
| 25504 | chrY | 13466514 | . | G | T     | 370.43   | my_snp_filter | AC=2;AF=0.029;AN=68;BaseQ          |
| 25505 | chrY | 13466516 | . | G | T,A   | 1394.63  | PASS          | AC=1,1;AF=0.015,0.015;AN=68;BaseQ  |
| 25506 | chrY | 13466521 | . | G | A     | 195.29   | my_snp_filter | AC=1;AF=0.014;AN=70;BaseQ          |
| 25507 | chrY | 13466522 | . | A | G     | 78.22    | my_snp_filter | AC=1;AF=0.015;AN=68;BaseQ          |
| 25508 | chrY | 13466530 | . | C | G     | 66.08    | PASS          | AC=1;AF=0.015;AN=66;BaseQRankSum=  |
| 25509 | chrY | 13466531 | . | A | T     | 81.81    | my_snp_filter | AC=4;AF=0.061;AN=66;BaseQ          |
| 25510 | chrY | 13466534 | . | C | A,*   | 1356.84  | PASS          | AC=4,1;AF=0.063,0.016;AN=64;BaseQ  |
| 25511 | chrY | 13466538 | . | C | G,T   | 1233.65  | PASS          | AC=2,1;AF=0.030,0.015;AN=66;BaseQ  |
| 25512 | chrY | 13466543 | . | C | G     | 14565.31 | PASS          | AC=20;AF=0.526;AN=38;BaseQ         |
| 25513 | chrY | 13466545 | . | C | T     | 330.42   | PASS          | AC=2;AF=0.032;AN=62;BaseQRankSum=  |
| 25514 | chrY | 13466547 | . | G | T     | 150.43   | PASS          | AC=4;AF=0.061;AN=66;BaseQRankSum=  |
| 25515 | chrY | 13466551 | . | C | G,A   | 1266.89  | PASS          | AC=1,1;AF=0.015,0.015;AN=66;BaseQ  |
| 25516 | chrY | 13466554 | . | G | C     | 212.99   | my_snp_filter | AC=1;AF=0.015;AN=66;BaseQ          |
| 25517 | chrY | 13466556 | . | C | G     | 100.01   | my_snp_filter | AC=2;AF=0.032;AN=62;BaseQ          |
| 25518 | chrY | 13466560 | . | A | G     | 564.20   | PASS          | AC=3;AF=0.050;AN=60;BaseQRankSum=  |
| 25519 | chrY | 13466570 | . | G | A     | 203.15   | PASS          | AC=3;AF=0.050;AN=60;BaseQRankSum=  |
| 25520 | chrY | 13466571 | . | G | C     | 2110.07  | PASS          | AC=9;AF=0.321;AN=28;BaseQRankSum=  |
| 25521 | chrY | 13466587 | . | G | C     | 133.73   | my_snp_filter | AC=2;AF=0.032;AN=62;DP=26          |
| 25522 | chrY | 13466591 | . | C | G     | 62.02    | PASS          | AC=1;AF=0.017;AN=60;BaseQRankSum=  |
| 25523 | chrY | 13466603 | . | T | C     | 508.60   | PASS          | AC=4;AF=0.065;AN=62;BaseQRankSum=  |
| 25524 | chrY | 13466605 | . | T | C     | 3971.89  | PASS          | AC=7;AF=0.146;AN=48;BaseQRankSum=  |
| 25525 | chrY | 13466608 | . | G | A     | 275.46   | my_snp_filter | AC=2;AF=0.045;AN=44;DP=26          |
| 25526 | chrY | 13466609 | . | T | C     | 214.59   | PASS          | AC=1;AF=0.017;AN=58;BaseQRankSum=  |
| 25527 | chrY | 13466612 | . | C | A     | 256.60   | PASS          | AC=4;AF=0.071;AN=56;BaseQRankSum=  |
| 25528 | chrY | 13466621 | . | T | C     | 268.08   | PASS          | AC=1;AF=0.017;AN=58;BaseQRankSum=  |
| 25529 | chrY | 13466624 | . | G | C     | 1929.93  | PASS          | AC=9;AF=0.250;AN=36;BaseQRankSum=  |
| 25530 | chrY | 13466626 | . | A | G     | 214.65   | PASS          | AC=1;AF=0.017;AN=60;BaseQRankSum=  |
| 25531 | chrY | 13466627 | . | T | A     | 1043.71  | PASS          | AC=4;AF=0.074;AN=54;BaseQRankSum=  |
| 25532 | chrY | 13466638 | . | C | A     | 260.36   | PASS          | AC=2;AF=0.045;AN=44;BaseQRankSum=  |
| 25533 | chrY | 13466649 | . | G | A     | 611.51   | PASS          | AC=5;AF=0.227;AN=22;BaseQRankSum=  |
| 25534 | chrY | 13466671 | . | C | T     | 516.43   | PASS          | AC=1;AF=0.036;AN=28;BaseQRankSum=  |
| 25535 | chrY | 13466680 | . | T | G     | 566.57   | PASS          | AC=1;AF=0.050;AN=20;BaseQRankSum=  |
| 25536 | chrY | 13466712 | . | G | T     | 114.67   | PASS          | AC=1;AF=0.019;AN=54;BaseQRankSum=  |



|       |      |          |   |   |     |          |               |                                    |
|-------|------|----------|---|---|-----|----------|---------------|------------------------------------|
| 25537 | chrY | 13466720 | . | A | C   | 427.01   | PASS          | AC=1;AF=0.063;AN=16;BaseQRankSum=  |
| 25538 | chrY | 13466721 | . | G | T   | 168.79   | PASS          | AC=1;AF=0.021;AN=48;BaseQRankSum=  |
| 25539 | chrY | 13466742 | . | C | A   | 195.56   | PASS          | AC=1;AF=0.015;AN=66;BaseQRankSum=  |
| 25540 | chrY | 13466745 | . | G | T   | 1171.81  | PASS          | AC=8;AF=0.500;AN=16;BaseQRankSum=  |
| 25541 | chrY | 13466783 | . | G | A   | 321.67   | PASS          | AC=1;AF=0.015;AN=68;BaseQRankSum=  |
| 25542 | chrY | 13466793 | . | C | G   | 2689.18  | PASS          | AC=6;AF=0.111;AN=54;BaseQRankSum=  |
| 25543 | chrY | 13466796 | . | A | T   | 362.77   | PASS          | AC=1;AF=0.014;AN=70;BaseQRankSum=  |
| 25544 | chrY | 13466797 | . | T | C   | 169.03   | my_snp_filter | AC=2;AF=0.029;AN=70;BaseQ          |
| 25545 | chrY | 13466803 | . | T | A   | 77.57    | my_snp_filter | AC=1;AF=0.014;AN=70;BaseQ          |
| 25546 | chrY | 13466806 | . | A | G   | 168.75   | PASS          | AC=2;AF=0.029;AN=70;BaseQRankSum=  |
| 25547 | chrY | 13466809 | . | C | T   | 7840.96  | PASS          | AC=18;AF=0.257;AN=70;BaseQRankSum= |
| 25548 | chrY | 13466812 | . | C | A   | 117.13   | PASS          | AC=2;AF=0.029;AN=70;BaseQRankSum=  |
| 25549 | chrY | 13466813 | . | C | T,A | 376.72   | PASS          | AC=2,2;AF=0.029,0.029;AN=68;BaseQ  |
| 25550 | chrY | 13466816 | . | T | A   | 150.33   | my_snp_filter | AC=2;AF=0.029;AN=70;BaseQ          |
| 25551 | chrY | 13466818 | . | G | A   | 350.25   | PASS          | AC=2;AF=0.033;AN=60;BaseQRankSum=  |
| 25552 | chrY | 13466819 | . | A | T,G | 23420.26 | PASS          | AC=17,18;AF=0.386,0.409;A          |
| 25553 | chrY | 13466821 | . | A | G   | 1369.95  | PASS          | AC=3;AF=0.045;AN=66;BaseQRankSum=  |
| 25554 | chrY | 13466831 | . | C | A   | 114.46   | my_snp_filter | AC=3;AF=0.043;AN=70;BaseQ          |
| 25555 | chrY | 13466849 | . | G | T,A | 12557.51 | PASS          | AC=15,1;AF=0.221,0.015;AN          |
| 25556 | chrY | 13466850 | . | G | A   | 194.46   | my_snp_filter | AC=1;AF=0.014;AN=70;BaseQ          |
| 25557 | chrY | 13466857 | . | G | T,C | 1462.33  | my_snp_filter | AC=10,2;AF=0.143,0.029;AN          |
| 25558 | chrY | 13466859 | . | G | A   | 43.22    | PASS          | AC=1;AF=0.014;AN=70;BaseQRankSum=  |
| 25559 | chrY | 13466863 | . | T | A   | 477.79   | PASS          | AC=6;AF=0.086;AN=70;BaseQRankSum=  |
| 25560 | chrY | 13466865 | . | C | A   | 38571.46 | PASS          | AC=30;AF=0.484;AN=62;Base          |
| 25561 | chrY | 13466871 | . | G | T   | 21579.85 | PASS          | AC=23;AF=0.338;AN=68;Base          |
| 25562 | chrY | 13466876 | . | T | G   | 62.81    | my_snp_filter | AC=2;AF=0.029;AN=70;BaseQ          |
| 25563 | chrY | 13466879 | . | C | A,T | 218.92   | my_snp_filter | AC=2,2;AF=0.029,0.029;AN=          |
| 25564 | chrY | 13466882 | . | T | C   | 72.99    | PASS          | AC=2;AF=0.029;AN=70;BaseQRankSum=  |
| 25565 | chrY | 13466885 | . | A | T   | 54.60    | my_snp_filter | AC=2;AF=0.029;AN=70;BaseQ          |
| 25566 | chrY | 13466886 | . | G | A   | 50.85    | my_snp_filter | AC=2;AF=0.029;AN=70;BaseQ          |
| 25567 | chrY | 13466893 | . | C | G   | 95.25    | PASS          | AC=2;AF=0.029;AN=70;BaseQRankSum=  |
| 25568 | chrY | 13466895 | . | T | C   | 449.02   | PASS          | AC=1;AF=0.014;AN=70;BaseQRankSum=  |
| 25569 | chrY | 13466899 | . | C | A   | 327.01   | my_snp_filter | AC=3;AF=0.043;AN=70;BaseQ          |
| 25570 | chrY | 13466904 | . | G | T   | 220.49   | my_snp_filter | AC=5;AF=0.071;AN=70;BaseQ          |
| 25571 | chrY | 13466905 | . | T | C   | 81.92    | PASS          | AC=2;AF=0.029;AN=70;BaseQRankSum=  |
| 25572 | chrY | 13466908 | . | C | A   | 36.80    | PASS          | AC=2;AF=0.029;AN=70;BaseQRankSum=  |
| 25573 | chrY | 13466917 | . | G | A   | 762.12   | my_snp_filter | AC=7;AF=0.100;AN=70;BaseQ          |
| 25574 | chrY | 13466920 | . | G | A   | 35.49    | PASS          | AC=2;AF=0.029;AN=70;BaseQRankSum=  |
| 25575 | chrY | 13466924 | . | A | T   | 459.96   | my_snp_filter | AC=6;AF=0.086;AN=70;BaseQ          |
| 25576 | chrY | 13466925 | . | G | C   | 209.19   | my_snp_filter | AC=3;AF=0.043;AN=70;BaseQ          |
| 25577 | chrY | 13466928 | . | A | C   | 8415.58  | PASS          | AC=16;AF=0.276;AN=58;BaseQRankSum= |
| 25578 | chrY | 13466930 | . | G | C   | 481.50   | my_snp_filter | AC=6;AF=0.086;AN=70;BaseQ          |
| 25579 | chrY | 13466967 | . | A | T   | 33.62    | my_snp_filter | AC=1;AF=0.014;AN=70;BaseQ          |
| 25580 | chrY | 13466968 | . | C | G   | 40.70    | PASS          | AC=1;AF=0.014;AN=70;BaseQRankSum=  |
| 25581 | chrY | 13466970 | . | A | T   | 234.79   | PASS          | AC=3;AF=0.043;AN=70;BaseQRankSum=  |
| 25582 | chrY | 13466983 | . | A | C   | 724.97   | PASS          | AC=5;AF=0.086;AN=58;BaseQRankSum=  |
| 25583 | chrY | 13466989 | . | G | C   | 59.79    | PASS          | AC=1;AF=0.016;AN=62;BaseQRankSum=  |
| 25584 | chrY | 13466990 | . | G | A   | 441.66   | PASS          | AC=4;AF=0.065;AN=62;BaseQRankSum=  |
| 25585 | chrY | 13467057 | . | T | G   | 32.88    | my_snp_filter | AC=1;AF=0.015;AN=66;BaseQ          |
| 25586 | chrY | 13467063 | . | G | T   | 74.06    | PASS          | AC=1;AF=0.018;AN=56;BaseQRankSum=  |
| 25587 | chrY | 13467068 | . | T | A   | 113.07   | PASS          | AC=1;AF=0.018;AN=56;BaseQRankSum=  |
| 25588 | chrY | 13467074 | . | A | T   | 113.29   | PASS          | AC=1;AF=0.018;AN=56;BaseQRankSum=  |
| 25589 | chrY | 13467113 | . | C | A   | 212.99   | PASS          | AC=3;AF=0.047;AN=64;BaseQRankSum=  |
| 25590 | chrY | 13467120 | . | C | A   | 213.83   | PASS          | AC=3;AF=0.044;AN=68;BaseQRankSum=  |
| 25591 | chrY | 13467139 | . | A | G   | 115.87   | PASS          | AC=2;AF=0.036;AN=56;BaseQRankSum=  |
| 25592 | chrY | 13467146 | . | C | A   | 77.52    | PASS          | AC=1;AF=0.016;AN=64;BaseQRankSum=  |
| 25593 | chrY | 13467253 | . | T | A   | 1695.90  | PASS          | AC=7;AF=0.109;AN=64;BaseQRankSum=  |
| 25594 | chrY | 13467288 | . | C | T   | 5931     | PASS          | AC=8;AF=0.211;AN=38;BaseQRankSum=  |
| 25595 | chrY | 13467301 | . | A | G   | 61.43    | my_snp_filter | AC=1;AF=0.014;AN=70;BaseQ          |
| 25596 | chrY | 13467305 | . | C | T   | 4583.90  | PASS          | AC=6;AF=0.097;AN=62;BaseQRankSum=  |
| 25597 | chrY | 13467309 | . | G | A   | 349.70   | PASS          | AC=1;AF=0.014;AN=70;BaseQRankSum=  |
| 25598 | chrY | 13467314 | . | A | G,C | 1090.92  | PASS          | AC=3,1;AF=0.044,0.015;AN=68;BaseQ  |
| 25599 | chrY | 13467322 | . | T | C   | 361.85   | PASS          | AC=1;AF=0.014;AN=70;BaseQRankSum=  |
| 25600 | chrY | 13467326 | . | C | T   | 3809.12  | PASS          | AC=6;AF=0.100;AN=60;BaseQRankSum=  |
| 25601 | chrY | 13467328 | . | A | C   | 1494.99  | PASS          | AC=5;AF=0.078;AN=64;BaseQRankSum=  |
| 25602 | chrY | 13467331 | . | T | C   | 4671.72  | PASS          | AC=9;AF=0.205;AN=44;BaseQRankSum=  |
| 25603 | chrY | 13467332 | . | G | C,A | 3960.59  | PASS          | AC=6,2;AF=0.125,0.042;AN=48;BaseQ  |
| 25604 | chrY | 13467337 | . | G | T   | 339.84   | PASS          | AC=2;AF=0.029;AN=70;BaseQRankSum=  |
| 25605 | chrY | 13467340 | . | C | A   | 300.47   | PASS          | AC=2;AF=0.029;AN=70;BaseQRankSum=  |
| 25606 | chrY | 13467363 | . | C | A   | 412.41   | PASS          | AC=1;AF=0.015;AN=68;BaseQRankSum=  |
| 25607 | chrY | 13467380 | . | C | A   | 2188.73  | PASS          | AC=9;AF=0.205;AN=44;BaseQRankSum=  |
| 25608 | chrY | 13467386 | . | C | T   | 172.57   | PASS          | AC=1;AF=0.014;AN=70;BaseQRankSum=  |
| 25609 | chrY | 13467390 | . | A | T   | 1359.47  | PASS          | AC=9;AF=0.132;AN=68;BaseQRankSum=  |
| 25610 | chrY | 13467393 | . | C | G   | 758.91   | PASS          | AC=7;AF=0.100;AN=70;BaseQRankSum=  |
| 25611 | chrY | 13467396 | . | A | G   | 97.11    | PASS          | AC=2;AF=0.030;AN=66;BaseQRankSum=  |
| 25612 | chrY | 13467399 | . | T | C   | 125.85   | PASS          | AC=1;AF=0.015;AN=68;BaseQRankSum=  |

|       |      |          |   |   |       |           |               |                                    |
|-------|------|----------|---|---|-------|-----------|---------------|------------------------------------|
| 25613 | chrY | 13467408 | . | T | C     | 459.28    | PASS          | AC=1;AF=0.021;AN=48;BaseQRankSum=  |
| 25614 | chrY | 13467410 | . | G | T     | 140.43    | PASS          | AC=1;AF=0.015;AN=68;BaseQRankSum=  |
| 25615 | chrY | 13467429 | . | C | T     | 146.35    | PASS          | AC=1;AF=0.014;AN=70;BaseQRankSum=  |
| 25616 | chrY | 13467440 | . | G | T     | 94.85     | PASS          | AC=1;AF=0.014;AN=70;BaseQRankSum=  |
| 25617 | chrY | 13467441 | . | C | A     | 93.78     | PASS          | AC=1;AF=0.014;AN=70;BaseQRankSum=  |
| 25618 | chrY | 13467450 | . | G | T     | 298.33    | PASS          | AC=5;AF=0.074;AN=68;BaseQRankSum=  |
| 25619 | chrY | 13467456 | . | A | C     | 604.95    | PASS          | AC=7;AF=0.125;AN=56;BaseQRankSum=  |
| 25620 | chrY | 13467463 | . | A | C     | 508.63    | PASS          | AC=6;AF=0.094;AN=64;BaseQRankSum=  |
| 25621 | chrY | 13467468 | . | G | C     | 232.04    | PASS          | AC=1;AF=0.014;AN=70;BaseQRankSum=  |
| 25622 | chrY | 13467473 | . | G | T     | 40.77     | PASS          | AC=1;AF=0.015;AN=68;BaseQRankSum=  |
| 25623 | chrY | 13467489 | . | A | C     | 213.19    | PASS          | AC=1;AF=0.015;AN=66;BaseQRankSum=  |
| 25624 | chrY | 13467494 | . | T | C     | 256.66    | PASS          | AC=1;AF=0.018;AN=56;BaseQRankSum=  |
| 25625 | chrY | 13467495 | . | C | A     | 235.47    | PASS          | AC=1;AF=0.018;AN=56;BaseQRankSum=  |
| 25626 | chrY | 13467497 | . | C | G     | 234.82    | PASS          | AC=1;AF=0.018;AN=56;BaseQRankSum=  |
| 25627 | chrY | 13467511 | . | A | C     | 238.41    | PASS          | AC=1;AF=0.019;AN=54;BaseQRankSum=  |
| 25628 | chrY | 13467512 | . | G | A     | 270.21    | PASS          | AC=1;AF=0.019;AN=54;BaseQRankSum=  |
| 25629 | chrY | 13467559 | . | A | C     | 233.39    | PASS          | AC=4;AF=0.057;AN=70;BaseQRankSum=  |
| 25630 | chrY | 13467565 | . | T | C     | 264.86    | PASS          | AC=6;AF=0.091;AN=66;BaseQRankSum=  |
| 25631 | chrY | 13467579 | . | C | T     | 153.71    | PASS          | AC=4;AF=0.057;AN=70;BaseQRankSum=  |
| 25632 | chrY | 13467588 | . | G | T     | 31.67     | my_snp_filter | AC=1;AF=0.014;AN=70;BaseQ          |
| 25633 | chrY | 13467590 | . | G | C     | 82.49     | PASS          | AC=3;AF=0.043;AN=70;BaseQRankSum=  |
| 25634 | chrY | 13467593 | . | G | A     | 194.96    | PASS          | AC=3;AF=0.044;AN=68;BaseQRankSum=  |
| 25635 | chrY | 13467598 | . | A | T     | 51.42     | my_snp_filter | AC=2;AF=0.029;AN=70;BaseQ          |
| 25636 | chrY | 13467600 | . | C | A,T   | 151.17    | my_snp_filter | AC=2,2;AF=0.029,0.029;AN=          |
| 25637 | chrY | 13467601 | . | T | A     | 165.35    | PASS          | AC=2;AF=0.029;AN=70;BaseQRankSum=  |
| 25638 | chrY | 13467602 | . | T | G     | 497.06    | PASS          | AC=8;AF=0.138;AN=58;BaseQRankSum=  |
| 25639 | chrY | 13467607 | . | A | G     | 77.89     | my_snp_filter | AC=3;AF=0.044;AN=68;BaseQ          |
| 25640 | chrY | 13467614 | . | A | C     | 431.38    | PASS          | AC=6;AF=0.091;AN=66;BaseQRankSum=  |
| 25641 | chrY | 13467703 | . | A | C     | 63.68     | PASS          | AC=1;AF=0.015;AN=68;BaseQRankSum=  |
| 25642 | chrY | 13467709 | . | C | G     | 63.51     | PASS          | AC=1;AF=0.015;AN=68;BaseQRankSum=  |
| 25643 | chrY | 13467725 | . | A | G     | 60.15     | PASS          | AC=1;AF=0.016;AN=64;BaseQRankSum=  |
| 25644 | chrY | 13467743 | . | C | G     | 111       | PASS          | AC=1;AF=0.016;AN=62;BaseQRankSum=  |
| 25645 | chrY | 13467745 | . | T | C     | 107.44    | PASS          | AC=1;AF=0.016;AN=64;BaseQRankSum=  |
| 25646 | chrY | 13467772 | . | A | C     | 108.72    | PASS          | AC=1;AF=0.022;AN=46;BaseQRankSum=  |
| 25647 | chrY | 13467809 | . | G | A     | 261.16    | PASS          | AC=1;AF=0.016;AN=62;BaseQRankSum=  |
| 25648 | chrY | 13467810 | . | G | T     | 217.96    | PASS          | AC=1;AF=0.016;AN=64;BaseQRankSum=  |
| 25649 | chrY | 13467836 | . | G | A     | 784.69    | PASS          | AC=11;AF=0.262;AN=42;BaseQRankSum= |
| 25650 | chrY | 13467887 | . | G | T,*   | 2802.49   | my_snp_filter | AC=4,11;AF=0.057,0.157;AN=         |
| 25651 | chrY | 13467894 | . | G | C,*   | 2692.10   | my_snp_filter | AC=5,9;AF=0.074,0.132;AN=          |
| 25652 | chrY | 13467906 | . | T | A,*   | 2448.76   | my_snp_filter | AC=1,9;AF=0.015,0.136;AN=          |
| 25653 | chrY | 13467907 | . | T | A,*   | 2340.32   | my_snp_filter | AC=2,8;AF=0.030,0.121;AN=          |
| 25654 | chrY | 13467920 | . | T | C,*   | 2499.89   | PASS          | AC=4,7;AF=0.080,0.140;AN=50;BaseQ  |
| 25655 | chrY | 13467921 | . | G | T,*   | 2605.13   | my_snp_filter | AC=1,10;AF=0.017,0.172;AN=         |
| 25656 | chrY | 13467946 | . | G | A     | 391.52    | PASS          | AC=3;AF=0.048;AN=62;BaseQRankSum=  |
| 25657 | chrY | 13467947 | . | G | T     | 122.77    | PASS          | AC=1;AF=0.015;AN=66;BaseQRankSum=  |
| 25658 | chrY | 13467989 | . | C | A     | 89548.99  | PASS          | AC=10;AF=0.143;AN=70;BaseQ         |
| 25659 | chrY | 13467997 | . | A | C     | 67.53     | PASS          | AC=2;AF=0.029;AN=70;BaseQRankSum=  |
| 25660 | chrY | 13468003 | . | A | C     | 13622.27  | PASS          | AC=6;AF=0.086;AN=70;BaseQ          |
| 25661 | chrY | 13468031 | . | A | G     | 6687.65   | my_snp_filter | AC=4;AF=0.057;AN=70;BaseQ          |
| 25662 | chrY | 13468040 | . | A | G     | 39.96     | PASS          | AC=1;AF=0.014;AN=70;BaseQRankSum=  |
| 25663 | chrY | 13468042 | . | C | T     | 165.10    | my_snp_filter | AC=2;AF=0.029;AN=70;BaseQ          |
| 25664 | chrY | 13468047 | . | G | T     | 270698.50 | PASS          | AC=9;AF=0.141;AN=64;BaseQ          |
| 25665 | chrY | 13468048 | . | T | C     | 45.03     | PASS          | AC=1;AF=0.014;AN=70;BaseQRankSum=  |
| 25666 | chrY | 13468053 | . | A | C     | 269195.68 | PASS          | AC=8;AF=0.118;AN=68;BaseQ          |
| 25667 | chrY | 13468060 | . | G | A,T   | 279422.71 | PASS          | AC=15,3;AF=0.469,0.094;AN=         |
| 25668 | chrY | 13468065 | . | A | T     | 251034.39 | PASS          | AC=8;AF=0.118;AN=68;BaseQ          |
| 25669 | chrY | 13468070 | . | T | C     | 280971.56 | PASS          | AC=14;AF=0.241;AN=58;BaseQ         |
| 25670 | chrY | 13468080 | . | G | C     | 64.52     | PASS          | AC=1;AF=0.017;AN=58;BaseQRankSum=  |
| 25671 | chrY | 13468082 | . | T | G     | 261691.75 | PASS          | AC=13;AF=0.250;AN=52;BaseQ         |
| 25672 | chrY | 13468114 | . | G | A     | 1061.47   | PASS          | AC=1;AF=0.014;AN=70;BaseQRankSum=  |
| 25673 | chrY | 13468117 | . | G | C     | 44629.13  | PASS          | AC=4;AF=0.069;AN=58;BaseQ          |
| 25674 | chrY | 13468130 | . | C | A     | 284.73    | PASS          | AC=6;AF=0.086;AN=70;BaseQRankSum=  |
| 25675 | chrY | 13468134 | . | A | G     | 27243.48  | PASS          | AC=4;AF=0.067;AN=60;BaseQ          |
| 25676 | chrY | 13468141 | . | A | T     | 35949.07  | PASS          | AC=20;AF=0.400;AN=50;BaseQ         |
| 25677 | chrY | 13468144 | . | G | C,T   | 29580.07  | PASS          | AC=17,2;AF=0.354,0.042;AN=         |
| 25678 | chrY | 13468145 | . | T | C     | 99.51     | my_snp_filter | AC=1;AF=0.017;AN=58;BaseQ          |
| 25679 | chrY | 13468148 | . | G | A     | 852.61    | PASS          | AC=1;AF=0.021;AN=48;BaseQRankSum=  |
| 25680 | chrY | 13468149 | . | T | G,A   | 20782.40  | PASS          | AC=8,2;AF=0.222,0.056;AN=          |
| 25681 | chrY | 13468151 | . | G | A     | 6797.01   | PASS          | AC=5;AF=0.076;AN=66;BaseQRankSum=  |
| 25682 | chrY | 13468154 | . | C | A     | 630.44    | PASS          | AC=1;AF=0.014;AN=70;BaseQRankSum=  |
| 25683 | chrY | 13468157 | . | T | A     | 1249.49   | PASS          | AC=5;AF=0.071;AN=70;BaseQRankSum=  |
| 25684 | chrY | 13468159 | . | G | A     | 4008.96   | PASS          | AC=2;AF=0.029;AN=70;BaseQRankSum=  |
| 25685 | chrY | 13468160 | . | C | A,T,G | 1414.88   | PASS          | AC=2,1,1;AF=0.029,0.014,0.014;AN=  |
| 25686 | chrY | 13468164 | . | A | G     | 400.60    | PASS          | AC=2;AF=0.029;AN=70;BaseQRankSum=  |
| 25687 | chrY | 13468171 | . | A | T     | 72.85     | PASS          | AC=2;AF=0.029;AN=70;BaseQRankSum=  |
| 25688 | chrY | 13468172 | . | C | A     | 454.10    | my_snp_filter | AC=1;AF=0.014;AN=70;BaseQ          |

|       |      |          |   |   |     |           |               |                                   |
|-------|------|----------|---|---|-----|-----------|---------------|-----------------------------------|
| 25689 | chrY | 13468174 | . | A | G   | 1063.63   | my_snp_filter | AC=5;AF=0.071;AN=70;BaseQ         |
| 25690 | chrY | 13468177 | . | A | C,T | 24805.42  | PASS          | AC=11,3;AF=0.393,0.107;AN         |
| 25691 | chrY | 13468178 | . | C | A   | 3731.20   | PASS          | AC=1;AF=0.024;AN=42;BaseQRankSum= |
| 25692 | chrY | 13468184 | . | A | C   | 2163.08   | PASS          | AC=1;AF=0.014;AN=70;BaseQRankSum= |
| 25693 | chrY | 13468188 | . | A | T   | 68.35     | my_snp_filter | AC=3;AF=0.043;AN=70;BaseQ         |
| 25694 | chrY | 13468192 | . | C | G   | 31841.10  | PASS          | AC=3;AF=0.065;AN=46;BaseQ         |
| 25695 | chrY | 13468193 | . | T | G,* | 4436.05   | PASS          | AC=1,1;AF=0.014,0.014;AN=70;BaseQ |
| 25696 | chrY | 13468194 | . | T | A   | 2617.92   | PASS          | AC=1;AF=0.014;AN=70;BaseQRankSum= |
| 25697 | chrY | 13468195 | . | A | T   | 49.72     | my_snp_filter | AC=2;AF=0.029;AN=68;BaseQ         |
| 25698 | chrY | 13468196 | . | T | C   | 33455.91  | PASS          | AC=5;AF=0.100;AN=50;BaseQ         |
| 25699 | chrY | 13468202 | . | A | C   | 4001.56   | PASS          | AC=4;AF=0.057;AN=70;BaseQRankSum= |
| 25700 | chrY | 13468206 | . | A | G   | 489.23    | PASS          | AC=4;AF=0.057;AN=70;BaseQRankSum= |
| 25701 | chrY | 13468208 | . | A | G   | 4618.72   | PASS          | AC=1;AF=0.014;AN=70;BaseQRankSum= |
| 25702 | chrY | 13468209 | . | T | A   | 61.21     | PASS          | AC=1;AF=0.014;AN=70;BaseQRankSum= |
| 25703 | chrY | 13468212 | . | C | T   | 3065.63   | my_snp_filter | AC=5;AF=0.071;AN=70;BaseQ         |
| 25704 | chrY | 13468216 | . | G | T   | 164.34    | my_snp_filter | AC=3;AF=0.043;AN=70;BaseQ         |
| 25705 | chrY | 13468219 | . | G | T   | 8087.69   | PASS          | AC=7;AF=0.100;AN=70;BaseQRankSum= |
| 25706 | chrY | 13468221 | . | T | C   | 37.49     | PASS          | AC=1;AF=0.014;AN=70;BaseQRankSum= |
| 25707 | chrY | 13468222 | . | C | T   | 54.90     | PASS          | AC=1;AF=0.014;AN=70;BaseQRankSum= |
| 25708 | chrY | 13468230 | . | A | G   | 113.84    | PASS          | AC=2;AF=0.029;AN=70;BaseQRankSum= |
| 25709 | chrY | 13468232 | . | A | G   | 3155.43   | my_snp_filter | AC=7;AF=0.100;AN=70;BaseQ         |
| 25710 | chrY | 13468234 | . | A | T   | 86942.08  | PASS          | AC=17;AF=0.315;AN=54;Base         |
| 25711 | chrY | 13468236 | . | G | C   | 38506.87  | PASS          | AC=14;AF=0.200;AN=70;Base         |
| 25712 | chrY | 13468242 | . | A | G   | 267.24    | my_snp_filter | AC=7;AF=0.100;AN=70;BaseQ         |
| 25713 | chrY | 13468245 | . | C | A   | 173.67    | my_snp_filter | AC=5;AF=0.071;AN=70;BaseQ         |
| 25714 | chrY | 13468257 | . | G | C   | 266.87    | PASS          | AC=5;AF=0.071;AN=70;BaseQRankSum= |
| 25715 | chrY | 13468262 | . | A | G   | 40353.72  | PASS          | AC=15;AF=0.214;AN=70;Base         |
| 25716 | chrY | 13468263 | . | A | G   | 5649.42   | PASS          | AC=1;AF=0.014;AN=70;BaseQRankSum= |
| 25717 | chrY | 13468266 | . | C | G   | 158220.76 | PASS          | AC=25;AF=0.431;AN=58;Base         |
| 25718 | chrY | 13468268 | . | A | G   | 437.50    | PASS          | AC=4;AF=0.057;AN=70;BaseQRankSum= |
| 25719 | chrY | 13468270 | . | A | T   | 104.40    | PASS          | AC=1;AF=0.014;AN=70;BaseQRankSum= |
| 25720 | chrY | 13468273 | . | C | T   | 158487.14 | PASS          | AC=18;AF=0.321;AN=56;Base         |
| 25721 | chrY | 13468274 | . | C | T,A | 676.50    | my_snp_filter | AC=2,1;AF=0.029,0.014;AN=         |
| 25722 | chrY | 13468275 | . | A | G   | 140194.46 | PASS          | AC=32;AF=0.500;AN=64;Base         |
| 25723 | chrY | 13468276 | . | T | C   | 159165.01 | PASS          | AC=18;AF=0.346;AN=52;Base         |
| 25724 | chrY | 13468278 | . | A | C   | 253.26    | PASS          | AC=5;AF=0.071;AN=70;BaseQRankSum= |
| 25725 | chrY | 13468281 | . | T | A   | 123.06    | PASS          | AC=2;AF=0.029;AN=70;BaseQRankSum= |
| 25726 | chrY | 13468283 | . | G | T   | 567.46    | my_snp_filter | AC=1;AF=0.014;AN=70;BaseQ         |
| 25727 | chrY | 13468284 | . | G | A   | 46.42     | my_snp_filter | AC=1;AF=0.014;AN=70;BaseQ         |
| 25728 | chrY | 13468287 | . | A | G   | 84.71     | PASS          | AC=2;AF=0.029;AN=70;BaseQRankSum= |
| 25729 | chrY | 13468291 | . | G | A   | 153415.99 | PASS          | AC=18;AF=0.310;AN=58;Base         |
| 25730 | chrY | 13468294 | . | C | T   | 33.42     | my_snp_filter | AC=1;AF=0.014;AN=70;BaseQ         |
| 25731 | chrY | 13468295 | . | A | G   | 248.51    | PASS          | AC=3;AF=0.043;AN=70;BaseQRankSum= |
| 25732 | chrY | 13468296 | . | G | A   | 337.70    | PASS          | AC=6;AF=0.086;AN=70;BaseQRankSum= |
| 25733 | chrY | 13468299 | . | A | T   | 103.37    | PASS          | AC=1;AF=0.014;AN=70;BaseQRankSum= |
| 25734 | chrY | 13468300 | . | T | C   | 30.43     | PASS          | AC=1;AF=0.014;AN=70;BaseQRankSum= |
| 25735 | chrY | 13468304 | . | T | C   | 284.47    | PASS          | AC=6;AF=0.086;AN=70;BaseQRankSum= |
| 25736 | chrY | 13468314 | . | C | A,T | 497.81    | PASS          | AC=3,4;AF=0.043,0.057;AN=70;BaseQ |
| 25737 | chrY | 13468318 | . | T | C   | 42.41     | my_snp_filter | AC=2;AF=0.029;AN=70;BaseQ         |
| 25738 | chrY | 13468326 | . | T | G   | 303417.68 | PASS          | AC=37;AF=0.740;AN=50;Base         |
| 25739 | chrY | 13468327 | . | C | G   | 189.58    | PASS          | AC=1;AF=0.014;AN=70;BaseQRankSum= |
| 25740 | chrY | 13468329 | . | T | G   | 45.81     | my_snp_filter | AC=2;AF=0.029;AN=70;BaseQ         |
| 25741 | chrY | 13468331 | . | G | C   | 364.77    | my_snp_filter | AC=3;AF=0.043;AN=70;BaseQ         |
| 25742 | chrY | 13468340 | . | C | T   | 22149.60  | PASS          | AC=3;AF=0.043;AN=70;BaseQ         |
| 25743 | chrY | 13468341 | . | C | T   | 111.13    | PASS          | AC=2;AF=0.029;AN=70;BaseQRankSum= |
| 25744 | chrY | 13468361 | . | G | A   | 87841.84  | PASS          | AC=9;AF=0.173;AN=52;BaseQ         |
| 25745 | chrY | 13468365 | . | A | G   | 93060.39  | PASS          | AC=13;AF=0.241;AN=54;Base         |
| 25746 | chrY | 13468366 | . | G | A   | 849.15    | my_snp_filter | AC=2;AF=0.033;AN=60;BaseQ         |
| 25747 | chrY | 13468375 | . | C | A   | 13759.90  | PASS          | AC=2;AF=0.029;AN=70;BaseQ         |
| 25748 | chrY | 13468392 | . | G | C   | 3223.06   | my_snp_filter | AC=2;AF=0.036;AN=56;BaseQ         |
| 25749 | chrY | 13468395 | . | C | T   | 6183.56   | PASS          | AC=8;AF=0.154;AN=52;BaseQRankSum= |
| 25750 | chrY | 13468398 | . | G | A   | 24040.30  | PASS          | AC=13;AF=0.433;AN=30;Base         |
| 25751 | chrY | 13468401 | . | G | C   | 20073.59  | PASS          | AC=12;AF=0.429;AN=28;Base         |
| 25752 | chrY | 13468405 | . | A | T   | 1375.38   | PASS          | AC=8;AF=0.167;AN=48;BaseQRankSum= |
| 25753 | chrY | 13468417 | . | C | T   | 18055.48  | my_snp_filter | AC=9;AF=0.375;AN=                 |
| 25754 | chrY | 13468420 | . | G | A   | 16596.59  | PASS          | AC=9;AF=0.409;AN=22;BaseQ         |
| 25755 | chrY | 13468425 | . | C | T   | 5476.34   | PASS          | AC=5;AF=0.167;AN=30;BaseQRankSum= |
| 25756 | chrY | 13468434 | . | G | A   | 4859.44   | PASS          | AC=5;AF=0.109;AN=46;BaseQRankSum= |
| 25757 | chrY | 13468449 | . | C | T   | 178.25    | my_snp_filter | AC=1;AF=0.014;AN=70;BaseQ         |
| 25758 | chrY | 13468450 | . | A | T   | 5032.42   | PASS          | AC=8;AF=0.133;AN=60;BaseQRankSum= |
| 25759 | chrY | 13468451 | . | C | T   | 7073.13   | PASS          | AC=5;AF=0.208;AN=24;BaseQRankSum= |
| 25760 | chrY | 13468452 | . | T | C   | 6320.42   | PASS          | AC=4;AF=0.182;AN=22;BaseQRankSum= |
| 25761 | chrY | 13468454 | . | T | C   | 200.65    | my_snp_filter | AC=1;AF=0.014;AN=70;BaseQ         |
| 25762 | chrY | 13468457 | . | G | A   | 4797.57   | PASS          | AC=9;AF=0.129;AN=70;BaseQRankSum= |
| 25763 | chrY | 13468458 | . | C | A,T | 534.20    | PASS          | AC=1,1;AF=0.014,0.014;AN=70;BaseQ |
| 25764 | chrY | 13468463 | . | C | T,A | 7734.96   | PASS          | AC=7,2;AF=0.140,0.040;AN=50;BaseQ |

|       |      |          |   |   |     |          |               |                                         |
|-------|------|----------|---|---|-----|----------|---------------|-----------------------------------------|
| 25765 | chrY | 13468464 | . | C | T   | 330.63   | PASS          | AC=1;AF=0.014;AN=70;BaseQRankSum=       |
| 25766 | chrY | 13468467 | . | G | A   | 5707.61  | PASS          | AC=8;AF=0.114;AN=70;BaseQRankSum=       |
| 25767 | chrY | 13468469 | . | C | A   | 425.46   | PASS          | AC=3;AF=0.043;AN=70;BaseQRankSum=       |
| 25768 | chrY | 13468472 | . | C | G   | 18883.81 |               | my_snp_filter AC=9;AF=0.409;AN=         |
| 25769 | chrY | 13468473 | . | G | A,T | 13974.34 |               | PASS AC=8,6;AF=0.235,0.176;AN=          |
| 25770 | chrY | 13468474 | . | G | T   | 339.15   | PASS          | AC=1;AF=0.015;AN=66;BaseQRankSum=       |
| 25771 | chrY | 13468482 | . | A | T   | 246.13   | PASS          | AC=1;AF=0.014;AN=70;BaseQRankSum=       |
| 25772 | chrY | 13468486 | . | A | G   | 224.75   | PASS          | AC=1;AF=0.015;AN=68;BaseQRankSum=       |
| 25773 | chrY | 13468489 | . | T | A   | 3763.23  | PASS          | AC=9;AF=0.132;AN=68;BaseQRankSum=       |
| 25774 | chrY | 13468491 | . | A | G,T | 1361.53  | PASS          | AC=3,1;AF=0.043,0.014;AN=70;BaseQ       |
| 25775 | chrY | 13468495 | . | G | A   | 81.91    | my_snp_filter | AC=1;AF=0.015;AN=68;BaseQ               |
| 25776 | chrY | 13468498 | . | C | T   | 48.34    | PASS          | AC=2;AF=0.029;AN=68;DP=11122;FS=0       |
| 25777 | chrY | 13468499 | . | A | T   | 290.69   | PASS          | AC=4;AF=0.059;AN=68;BaseQRankSum=       |
| 25778 | chrY | 13468501 | . | A | G   | 106.67   | my_snp_filter | AC=1;AF=0.014;AN=70;BaseQ               |
| 25779 | chrY | 13468504 | . | T | C   | 2922.37  | PASS          | AC=8;AF=0.118;AN=68;BaseQRankSum=       |
| 25780 | chrY | 13468510 | . | G | A   | 41.73    | my_snp_filter | AC=1;AF=0.016;AN=62;BaseQ               |
| 25781 | chrY | 13468517 | . | C | G   | 300.34   | PASS          | AC=7;AF=0.140;AN=50;BaseQRankSum=       |
| 25782 | chrY | 13468526 | . | C | T   | 46.70    | PASS          | AC=2;AF=0.030;AN=66;DP=11013;FS=0       |
| 25783 | chrY | 13468528 | . | G | A   | 154.54   | my_snp_filter | AC=1;AF=0.015;AN=68;BaseQ               |
| 25784 | chrY | 13468529 | . | A | G   | 100.03   | PASS          | AC=1;AF=0.015;AN=66;BaseQRankSum=       |
| 25785 | chrY | 13468532 | . | T | C   | 10940.78 |               | my_snp_filter AC=19;AF=0.317;AN=        |
| 25786 | chrY | 13468537 | . | C | T   | 136.03   | PASS          | AC=2;AF=0.038;AN=52;BaseQRankSum=       |
| 25787 | chrY | 13468538 | . | A | G   | 75.39    | PASS          | AC=2;AF=0.042;AN=48;BaseQRankSum=       |
| 25788 | chrY | 13468541 | . | T | C   | 126.80   | PASS          | AC=2;AF=0.038;AN=52;BaseQRankSum=       |
| 25789 | chrY | 13468545 | . | A | G   | 165.08   | my_snp_filter | AC=1;AF=0.015;AN=68;BaseQ               |
| 25790 | chrY | 13468546 | . | C | T   | 88.90    | PASS          | AC=1;AF=0.015;AN=66;BaseQRankSum=       |
| 25791 | chrY | 13468566 | . | C | G   | 79.05    | PASS          | AC=1;AF=0.017;AN=58;BaseQRankSum=       |
| 25792 | chrY | 13468569 | . | G | T   | 188.84   | my_snp_filter | AC=3;AF=0.052;AN=58;BaseQ               |
| 25793 | chrY | 13468575 | . | G | A   | 121.25   | my_snp_filter | AC=3;AF=0.050;AN=60;BaseQ               |
| 25794 | chrY | 13468582 | . | A | T   | 55.04    | my_snp_filter | AC=1;AF=0.017;AN=58;BaseQ               |
| 25795 | chrY | 13468589 | . | T | A   | 145.13   | my_snp_filter | AC=4;AF=0.074;AN=54;BaseQ               |
| 25796 | chrY | 13468597 | . | A | G   | 220.66   | PASS          | AC=4;AF=0.111;AN=36;BaseQRankSum=       |
| 25797 | chrY | 13468672 | . | A | G   | 420.72   | PASS          | AC=2;AF=0.033;AN=60;BaseQRankSum=       |
| 25798 | chrY | 13468684 | . | T | A   | 375.69   | PASS          | AC=1;AF=0.017;AN=58;BaseQRankSum=       |
| 25799 | chrY | 13468707 | . | G | A   | 882.90   | PASS          | AC=4;AF=0.063;AN=64;BaseQRankSum=       |
| 25800 | chrY | 13468722 | . | A | G   | 105.13   | PASS          | AC=2;AF=0.029;AN=68;BaseQRankSum=       |
| 25801 | chrY | 13468724 | . | G | T   | 53.11    | my_snp_filter | AC=1;AF=0.015;AN=68;BaseQ               |
| 25802 | chrY | 13468728 | . | A | C   | 1563.96  | PASS          | AC=5;AF=0.081;AN=62;BaseQRankSum=       |
| 25803 | chrY | 13468730 | . | G | A   | 1341.81  | PASS          | AC=5;AF=0.083;AN=60;BaseQRankSum=       |
| 25804 | chrY | 13468732 | . | A | T   | 59.59    | PASS          | AC=1;AF=0.014;AN=70;BaseQRankSum=       |
| 25805 | chrY | 13468738 | . | A | G   | 2294.25  | PASS          | AC=5;AF=0.083;AN=60;BaseQRankSum=       |
| 25806 | chrY | 13468739 | . | A | G   | 1469.94  | PASS          | AC=3;AF=0.050;AN=60;BaseQRankSum=       |
| 25807 | chrY | 13468743 | . | A | T   | 1717.44  | PASS          | AC=3;AF=0.044;AN=68;BaseQRankSum=       |
| 25808 | chrY | 13468750 | . | A | T   | 330.24   | PASS          | AC=3;AF=0.043;AN=70;BaseQRankSum=       |
| 25809 | chrY | 13468752 | . | C | T   | 163.05   | my_snp_filter | AC=2;AF=0.029;AN=70;BaseQ               |
| 25810 | chrY | 13468766 | . | T | G   | 1272.20  | PASS          | AC=4;AF=0.061;AN=66;BaseQRankSum=       |
| 25811 | chrY | 13468777 | . | T | A   | 3108.08  | PASS          | AC=8;AF=0.125;AN=64;BaseQRankSum=       |
| 25812 | chrY | 13468786 | . | G | T   | 67.53    | my_snp_filter | AC=2;AF=0.030;AN=66;BaseQ               |
| 25813 | chrY | 13468790 | . | C | A   | 220.84   | my_snp_filter | AC=2;AF=0.029;AN=68;BaseQ               |
| 25814 | chrY | 13468804 | . | C | G   | 51.80    | PASS          | AC=4;AF=0.059;AN=68;BaseQRankSum=       |
| 25815 | chrY | 13468812 | . | G | A,C | 211.32   | my_snp_filter | AC=2,2;AF=0.029,0.029;AN=               |
| 25816 | chrY | 13468814 | . | A | G   | 10672.05 |               | PASS AC=20;AF=0.357;AN=56;Base          |
| 25817 | chrY | 13468823 | . | C | A   | 184.37   | PASS          | AC=4;AF=0.059;AN=68;BaseQRankSum=       |
| 25818 | chrY | 13468828 | . | G | A   | 125.31   | PASS          | AC=2;AF=0.029;AN=68;BaseQRankSum=       |
| 25819 | chrY | 13468829 | . | G | A   | 37.30    | PASS          | AC=1;AF=0.015;AN=68;BaseQRankSum=       |
| 25820 | chrY | 13468835 | . | G | T   | 8862.56  |               | my_snp_filter AC=9;AF=0.150;AN=60;BaseQ |
| 25821 | chrY | 13468837 | . | C | A   | 181.15   | PASS          | AC=4;AF=0.061;AN=66;BaseQRankSum=       |
| 25822 | chrY | 13468847 | . | T | C   | 284.09   | PASS          | AC=3;AF=0.050;AN=60;BaseQRankSum=       |
| 25823 | chrY | 13468850 | . | C | G   | 41.89    | PASS          | AC=1;AF=0.016;AN=64;BaseQRankSum=       |
| 25824 | chrY | 13468858 | . | C | T   | 149.04   | PASS          | AC=5;AF=0.076;AN=66;BaseQRankSum=       |
| 25825 | chrY | 13468860 | . | G | A   | 219.70   | PASS          | AC=2;AF=0.030;AN=66;BaseQRankSum=       |
| 25826 | chrY | 13468869 | . | G | A   | 219.20   | PASS          | AC=2;AF=0.030;AN=66;BaseQRankSum=       |
| 25827 | chrY | 13468876 | . | C | G   | 49.21    | my_snp_filter | AC=3;AF=0.045;AN=66;BaseQ               |
| 25828 | chrY | 13468878 | . | A | G   | 45.60    | PASS          | AC=1;AF=0.015;AN=68;BaseQRankSum=       |
| 25829 | chrY | 13468885 | . | C | A   | 1056.04  | PASS          | AC=6;AF=0.088;AN=68;BaseQRankSum=       |
| 25830 | chrY | 13468888 | . | C | T   | 4285.02  | PASS          | AC=10;AF=0.161;AN=62;BaseQRankSum=      |
| 25831 | chrY | 13468890 | . | C | A   | 479.89   | PASS          | AC=1;AF=0.015;AN=68;BaseQRankSum=       |
| 25832 | chrY | 13468891 | . | C | G   | 212.52   | PASS          | AC=2;AF=0.029;AN=68;BaseQRankSum=       |
| 25833 | chrY | 13468894 | . | G | A   | 209.13   | PASS          | AC=3;AF=0.045;AN=66;BaseQRankSum=       |
| 25834 | chrY | 13468899 | . | A | G   | 476.05   | PASS          | AC=1;AF=0.015;AN=66;BaseQRankSum=       |
| 25835 | chrY | 13468908 | . | A | T   | 43.53    | PASS          | AC=1;AF=0.015;AN=68;BaseQRankSum=       |
| 25836 | chrY | 13468909 | . | G | A   | 109.47   | PASS          | AC=3;AF=0.044;AN=68;BaseQRankSum=       |
| 25837 | chrY | 13468911 | . | T | G   | 167.14   | PASS          | AC=4;AF=0.061;AN=66;BaseQRankSum=       |
| 25838 | chrY | 13468919 | . | A | G   | 398.68   | PASS          | AC=1;AF=0.017;AN=58;BaseQRankSum=       |
| 25839 | chrY | 13468922 | . | G | T   | 407.20   | PASS          | AC=1;AF=0.018;AN=56;BaseQRankSum=       |
| 25840 | chrY | 13468923 | . | C | A,T | 583.34   | PASS          | AC=1,1;AF=0.017,0.017;AN=58;BaseQ       |

|       |      |          |   |   |     |          |               |                                    |
|-------|------|----------|---|---|-----|----------|---------------|------------------------------------|
| 25841 | chrY | 13468925 | . | T | C   | 4372.02  | PASS          | AC=10;AF=0.217;AN=46;BaseQRankSum= |
| 25842 | chrY | 13468929 | . | T | C   | 359.59   | PASS          | AC=1;AF=0.016;AN=64;BaseQRankSum=  |
| 25843 | chrY | 13468934 | . | A | C   | 283.42   | PASS          | AC=1;AF=0.017;AN=60;BaseQRankSum=  |
| 25844 | chrY | 13468947 | . | T | G   | 285.19   | PASS          | AC=6;AF=0.136;AN=44;BaseQRankSum=  |
| 25845 | chrY | 13468948 | . | T | A   | 3806.68  | PASS          | AC=8;AF=0.190;AN=42;BaseQRankSum=  |
| 25846 | chrY | 13468953 | . | T | C   | 575.93   | PASS          | AC=8;AF=0.174;AN=46;BaseQRankSum=  |
| 25847 | chrY | 13468958 | . | C | A   | 374.49   | PASS          | AC=4;AF=0.074;AN=54;BaseQRankSum=  |
| 25848 | chrY | 13468962 | . | G | A   | 451.51   | PASS          | AC=4;AF=0.091;AN=44;BaseQRankSum=  |
| 25849 | chrY | 13468963 | . | A | G   | 3744.51  | PASS          | AC=12;AF=0.400;AN=30;BaseQRankSum= |
| 25850 | chrY | 13468967 | . | T | C   | 132.15   | PASS          | AC=1;AF=0.019;AN=52;BaseQRankSum=  |
| 25851 | chrY | 13468981 | . | T | A   | 2420.66  | PASS          | AC=5;AF=0.125;AN=40;BaseQRankSum=  |
| 25852 | chrY | 13468983 | . | T | A   | 2073.50  | PASS          | AC=3;AF=0.079;AN=38;BaseQRankSum=  |
| 25853 | chrY | 13468989 | . | T | G   | 52.44    | my_snp_filter | AC=2;AF=0.045;AN=44;BaseQ          |
| 25854 | chrY | 13468992 | . | C | T   | 1688.75  | PASS          | AC=3;AF=0.150;AN=20;BaseQRankSum=  |
| 25855 | chrY | 13468995 | . | T | C   | 1789.26  | PASS          | AC=3;AF=0.214;AN=14;BaseQRankSum=  |
| 25856 | chrY | 13469008 | . | C | G   | 1771.39  | PASS          | AC=3;AF=0.071;AN=42;BaseQRankSum=  |
| 25857 | chrY | 13469017 | . | A | T   | 1887.10  | PASS          | AC=3;AF=0.068;AN=44;BaseQRankSum=  |
| 25858 | chrY | 13469023 | . | G | A   | 2071.93  | PASS          | AC=3;AF=0.107;AN=28;BaseQRankSum=  |
| 25859 | chrY | 13469034 | . | G | T   | 1687.67  | PASS          | AC=3;AF=0.063;AN=48;BaseQRankSum=  |
| 25860 | chrY | 13469039 | . | G | A   | 210.17   | PASS          | AC=1;AF=0.019;AN=54;BaseQRankSum=  |
| 25861 | chrY | 13469046 | . | C | T,G | 2588.29  | PASS          | AC=1,4;AF=0.038,0.154;AN=26;BaseQ  |
| 25862 | chrY | 13469058 | . | G | A   | 1863.32  | my_snp_filter | AC=3;AF=0.045;AN=66;BaseQ          |
| 25863 | chrY | 13469066 | . | T | A   | 1259.97  | my_snp_filter | AC=2;AF=0.029;AN=70;BaseQ          |
| 25864 | chrY | 13469074 | . | G | C   | 33.32    | PASS          | AC=1;AF=0.015;AN=68;BaseQRankSum=  |
| 25865 | chrY | 13469076 | . | C | T   | 889.80   | my_snp_filter | AC=2;AF=0.029;AN=70;BaseQ          |
| 25866 | chrY | 13469097 | . | T | G   | 257.36   | my_snp_filter | AC=2;AF=0.029;AN=70;BaseQ          |
| 25867 | chrY | 13469107 | . | G | A   | 244.73   | PASS          | AC=2;AF=0.029;AN=68;BaseQRankSum=  |
| 25868 | chrY | 13469115 | . | A | G   | 54.97    | my_snp_filter | AC=3;AF=0.043;AN=70;BaseQ          |
| 25869 | chrY | 13469116 | . | T | A   | 39.08    | PASS          | AC=2;AF=0.029;AN=70;BaseQRankSum=  |
| 25870 | chrY | 13469128 | . | C | A   | 86.50    | my_snp_filter | AC=2;AF=0.029;AN=70;BaseQ          |
| 25871 | chrY | 13469130 | . | C | A   | 55.94    | PASS          | AC=2;AF=0.029;AN=70;BaseQRankSum=  |
| 25872 | chrY | 13469131 | . | C | T   | 78.79    | my_snp_filter | AC=1;AF=0.014;AN=70;BaseQ          |
| 25873 | chrY | 13469143 | . | C | A   | 190.35   | PASS          | AC=2;AF=0.029;AN=70;BaseQRankSum=  |
| 25874 | chrY | 13469145 | . | T | C   | 109.50   | my_snp_filter | AC=5;AF=0.071;AN=70;BaseQ          |
| 25875 | chrY | 13469149 | . | C | A,G | 483.83   | my_snp_filter | AC=5,5;AF=0.071,0.071;AN=          |
| 25876 | chrY | 13469153 | . | A | G   | 224.79   | PASS          | AC=3;AF=0.043;AN=70;BaseQRankSum=  |
| 25877 | chrY | 13469155 | . | T | A   | 54.38    | PASS          | AC=2;AF=0.029;AN=70;BaseQRankSum=  |
| 25878 | chrY | 13469157 | . | A | T   | 57.71    | PASS          | AC=2;AF=0.029;AN=70;BaseQRankSum=  |
| 25879 | chrY | 13469160 | . | T | A   | 252.42   | PASS          | AC=5;AF=0.071;AN=70;BaseQRankSum=  |
| 25880 | chrY | 13469167 | . | G | T   | 79.54    | my_snp_filter | AC=1;AF=0.014;AN=70;BaseQ          |
| 25881 | chrY | 13469177 | . | G | A   | 112.61   | my_snp_filter | AC=1;AF=0.014;AN=70;BaseQ          |
| 25882 | chrY | 13469179 | . | A | G   | 310.66   | my_snp_filter | AC=7;AF=0.100;AN=70;BaseQ          |
| 25883 | chrY | 13469182 | . | G | T   | 158.04   | my_snp_filter | AC=3;AF=0.043;AN=70;BaseQ          |
| 25884 | chrY | 13469184 | . | T | C   | 85.69    | my_snp_filter | AC=1;AF=0.014;AN=70;BaseQ          |
| 25885 | chrY | 13469185 | . | A | G   | 187.09   | my_snp_filter | AC=2;AF=0.029;AN=70;BaseQ          |
| 25886 | chrY | 13469187 | . | G | T   | 451.17   | my_snp_filter | AC=5;AF=0.074;AN=68;BaseQ          |
| 25887 | chrY | 13469192 | . | A | T   | 173.56   | PASS          | AC=2;AF=0.029;AN=70;BaseQRankSum=  |
| 25888 | chrY | 13469198 | . | T | C   | 2479.99  | PASS          | AC=17;AF=0.274;AN=62;BaseQRankSum= |
| 25889 | chrY | 13469216 | . | T | A   | 380.55   | PASS          | AC=3;AF=0.052;AN=58;BaseQRankSum=  |
| 25890 | chrY | 13469217 | . | T | C   | 425.72   | PASS          | AC=3;AF=0.052;AN=58;BaseQRankSum=  |
| 25891 | chrY | 13469218 | . | G | A   | 419.30   | PASS          | AC=3;AF=0.052;AN=58;BaseQRankSum=  |
| 25892 | chrY | 13469222 | . | T | G   | 244.98   | PASS          | AC=2;AF=0.037;AN=54;BaseQRankSum=  |
| 25893 | chrY | 13469234 | . | T | G   | 58.94    | my_snp_filter | AC=1;AF=0.019;AN=52;BaseQ          |
| 25894 | chrY | 13469249 | . | C | A   | 59.29    | my_snp_filter | AC=1;AF=0.019;AN=54;BaseQ          |
| 25895 | chrY | 13469259 | . | C | A   | 86.26    | my_snp_filter | AC=1;AF=0.024;AN=42;BaseQ          |
| 25896 | chrY | 13469276 | . | G | C   | 43.37    | my_snp_filter | AC=1;AF=0.014;AN=70;BaseQ          |
| 25897 | chrY | 13469288 | . | T | G   | 1025.70  | PASS          | AC=3;AF=0.100;AN=30;BaseQRankSum=  |
| 25898 | chrY | 13469304 | . | G | A   | 245.08   | my_snp_filter | AC=2;AF=0.029;AN=70;BaseQ          |
| 25899 | chrY | 13469318 | . | G | C   | 229.94   | PASS          | AC=1;AF=0.015;AN=68;BaseQRankSum=  |
| 25900 | chrY | 13469329 | . | A | G   | 292.51   | PASS          | AC=1;AF=0.014;AN=70;BaseQRankSum=  |
| 25901 | chrY | 13469338 | . | A | C,T | 14010.07 | PASS          | AC=16,2;AF=0.364,0.045;AN=         |
| 25902 | chrY | 13469342 | . | C | G,T | 532.43   | PASS          | AC=1,1;AF=0.016,0.016;AN=64;BaseQ  |
| 25903 | chrY | 13469347 | . | T | C   | 12589.64 | PASS          | AC=16;AF=0.296;AN=54;BaseQ         |
| 25904 | chrY | 13469348 | . | G | A   | 1820.81  | PASS          | AC=5;AF=0.093;AN=54;BaseQRankSum=  |
| 25905 | chrY | 13469350 | . | A | C   | 328.97   | PASS          | AC=1;AF=0.016;AN=64;BaseQRankSum=  |
| 25906 | chrY | 13469353 | . | C | T   | 207.37   | PASS          | AC=1;AF=0.015;AN=66;BaseQRankSum=  |
| 25907 | chrY | 13469357 | . | A | T   | 1339.39  | PASS          | AC=7;AF=0.103;AN=68;BaseQRankSum=  |
| 25908 | chrY | 13469361 | . | A | G   | 103.72   | PASS          | AC=1;AF=0.015;AN=66;BaseQRankSum=  |
| 25909 | chrY | 13469362 | . | C | T   | 229.97   | my_snp_filter | AC=5;AF=0.071;AN=70;BaseQ          |
| 25910 | chrY | 13469366 | . | A | T   | 127.68   | my_snp_filter | AC=3;AF=0.045;AN=66;BaseQ          |
| 25911 | chrY | 13469367 | . | C | T   | 276.10   | my_snp_filter | AC=2;AF=0.030;AN=66;BaseQ          |
| 25912 | chrY | 13469368 | . | T | C   | 10878.91 | PASS          | AC=15;AF=0.395;AN=38;BaseQ         |
| 25913 | chrY | 13469369 | . | G | T   | 10247.29 | PASS          | AC=14;AF=0.412;AN=34;BaseQ         |
| 25914 | chrY | 13469370 | . | A | T   | 31.30    | PASS          | AC=2;AF=0.030;AN=66;BaseQRankSum=  |
| 25915 | chrY | 13469371 | . | G | C   | 291.92   | PASS          | AC=1;AF=0.015;AN=66;BaseQRankSum=  |
| 25916 | chrY | 13469372 | . | A | G   | 245.44   | my_snp_filter | AC=1;AF=0.015;AN=66;BaseQ          |

|       |      |          |   |   |     |         |               |                                    |
|-------|------|----------|---|---|-----|---------|---------------|------------------------------------|
| 25917 | chrY | 13469379 | . | G | T   | 194.68  | my_snp_filter | AC=1;AF=0.014;AN=70;BaseQ          |
| 25918 | chrY | 13469381 | . | G | T   | 111.42  | PASS          | AC=1;AF=0.014;AN=70;BaseQRankSum=  |
| 25919 | chrY | 13469386 | . | G | A   | 305.19  | PASS          | AC=1;AF=0.014;AN=70;BaseQRankSum=  |
| 25920 | chrY | 13469396 | . | A | T   | 290.32  | PASS          | AC=1;AF=0.014;AN=70;BaseQRankSum=  |
| 25921 | chrY | 13469399 | . | G | A   | 188.01  | my_snp_filter | AC=1;AF=0.014;AN=70;BaseQ          |
| 25922 | chrY | 13469407 | . | T | C   | 245.36  | my_snp_filter | AC=4;AF=0.057;AN=70;BaseQ          |
| 25923 | chrY | 13469411 | . | C | G   | 296.75  | PASS          | AC=1;AF=0.014;AN=70;BaseQRankSum=  |
| 25924 | chrY | 13469413 | . | G | T   | 132.46  | my_snp_filter | AC=1;AF=0.014;AN=70;BaseQ          |
| 25925 | chrY | 13469420 | . | G | C   | 60.45   | PASS          | AC=1;AF=0.014;AN=70;BaseQRankSum=  |
| 25926 | chrY | 13469422 | . | C | A   | 146.86  | my_snp_filter | AC=2;AF=0.029;AN=70;BaseQ          |
| 25927 | chrY | 13469427 | . | G | C   | 50.13   | my_snp_filter | AC=1;AF=0.014;AN=70;BaseQ          |
| 25928 | chrY | 13469437 | . | C | G   | 139.39  | PASS          | AC=2;AF=0.029;AN=70;BaseQRankSum=  |
| 25929 | chrY | 13469438 | . | T | A   | 111.20  | PASS          | AC=2;AF=0.029;AN=70;BaseQRankSum=  |
| 25930 | chrY | 13469439 | . | C | G   | 805.61  | my_snp_filter | AC=5;AF=0.074;AN=68;BaseQ          |
| 25931 | chrY | 13469440 | . | A | G   | 2503.15 | PASS          | AC=13;AF=0.191;AN=68;BaseQRankSum= |
| 25932 | chrY | 13469450 | . | G | A   | 232.40  | PASS          | AC=6;AF=0.086;AN=70;BaseQRankSum=  |
| 25933 | chrY | 13469455 | . | G | A   | 127.20  | PASS          | AC=1;AF=0.014;AN=70;BaseQRankSum=  |
| 25934 | chrY | 13469463 | . | A | T   | 37.99   | PASS          | AC=2;AF=0.029;AN=70;BaseQRankSum=  |
| 25935 | chrY | 13469473 | . | G | A   | 809.06  | PASS          | AC=5;AF=0.081;AN=62;BaseQRankSum=  |
| 25936 | chrY | 13469476 | . | G | T   | 126.10  | PASS          | AC=2;AF=0.036;AN=56;BaseQRankSum=  |
| 25937 | chrY | 13469478 | . | A | C,G | 1107.77 | PASS          | AC=8,2;AF=0.154,0.038;AN=52;BaseQ  |
| 25938 | chrY | 13469481 | . | A | G   | 73.35   | PASS          | AC=2;AF=0.037;AN=54;BaseQRankSum=  |
| 25939 | chrY | 13469483 | . | T | C   | 899.10  | PASS          | AC=7;AF=0.146;AN=48;BaseQRankSum=  |
| 25940 | chrY | 13469487 | . | A | G   | 587.41  | PASS          | AC=4;AF=0.080;AN=50;BaseQRankSum=  |
| 25941 | chrY | 13469488 | . | A | T   | 509.86  | PASS          | AC=4;AF=0.080;AN=50;BaseQRankSum=  |
| 25942 | chrY | 13469492 | . | G | A   | 132.48  | PASS          | AC=1;AF=0.016;AN=64;BaseQRankSum=  |
| 25943 | chrY | 13469496 | . | T | A   | 135.21  | PASS          | AC=1;AF=0.016;AN=64;BaseQRankSum=  |
| 25944 | chrY | 13469497 | . | A | G   | 91.85   | PASS          | AC=2;AF=0.029;AN=68;BaseQRankSum=  |
| 25945 | chrY | 13469506 | . | A | G   | 203.98  | PASS          | AC=2;AF=0.040;AN=50;BaseQRankSum=  |
| 25946 | chrY | 13469542 | . | C | T   | 233.72  | PASS          | AC=1;AF=0.022;AN=46;BaseQRankSum=  |
| 25947 | chrY | 13469543 | . | A | G   | 4014.75 | PASS          | AC=32;AF=0.500;AN=64;BaseQRankSum= |
| 25948 | chrY | 13469557 | . | C | T   | 1221.39 | PASS          | AC=11;AF=0.162;AN=68;BaseQRankSum= |
| 25949 | chrY | 13469571 | . | T | C   | 2149.14 | PASS          | AC=10;AF=0.192;AN=52;BaseQRankSum= |
| 25950 | chrY | 13469577 | . | T | A   | 1109.09 | PASS          | AC=9;AF=0.132;AN=68;BaseQRankSum=  |
| 25951 | chrY | 13469578 | . | T | G   | 2131.95 | PASS          | AC=9;AF=0.180;AN=50;BaseQRankSum=  |
| 25952 | chrY | 13469581 | . | C | G   | 1053.37 | PASS          | AC=9;AF=0.129;AN=70;BaseQRankSum=  |
| 25953 | chrY | 13469621 | . | T | A   | 2075.66 | PASS          | AC=3;AF=0.063;AN=48;BaseQRankSum=  |
| 25954 | chrY | 13469642 | . | G | A   | 67.33   | my_snp_filter | AC=1;AF=0.014;AN=70;BaseQ          |
| 25955 | chrY | 13469675 | . | C | G   | 603.25  | my_snp_filter | AC=5;AF=0.071;AN=70;BaseQ          |
| 25956 | chrY | 13469690 | . | A | T   | 32.11   | my_snp_filter | AC=1;AF=0.014;AN=70;BaseQ          |
| 25957 | chrY | 13469697 | . | A | T   | 1048.02 | my_snp_filter | AC=5;AF=0.078;AN=64;BaseQ          |
| 25958 | chrY | 13469698 | . | T | G   | 2939.72 | PASS          | AC=9;AF=0.141;AN=64;BaseQRankSum=  |
| 25959 | chrY | 13469703 | . | A | T,G | 498.30  | PASS          | AC=1,3;AF=0.015,0.045;AN=66;BaseQ  |
| 25960 | chrY | 13469706 | . | C | A   | 1753.18 | PASS          | AC=6;AF=0.103;AN=58;BaseQRankSum=  |
| 25961 | chrY | 13469707 | . | G | C   | 1287.80 | PASS          | AC=6;AF=0.103;AN=58;BaseQRankSum=  |
| 25962 | chrY | 13469708 | . | C | A   | 87.90   | PASS          | AC=1;AF=0.017;AN=58;BaseQRankSum=  |
| 25963 | chrY | 13469709 | . | T | A   | 64.05   | my_snp_filter | AC=1;AF=0.016;AN=62;BaseQ          |
| 25964 | chrY | 13469714 | . | A | G   | 542.07  | PASS          | AC=4;AF=0.074;AN=54;BaseQRankSum=  |
| 25965 | chrY | 13469730 | . | C | T   | 332.72  | PASS          | AC=4;AF=0.071;AN=56;BaseQRankSum=  |
| 25966 | chrY | 13469748 | . | G | T   | 66.22   | PASS          | AC=1;AF=0.017;AN=58;BaseQRankSum=  |
| 25967 | chrY | 13469749 | . | C | T   | 71.65   | PASS          | AC=1;AF=0.017;AN=58;BaseQRankSum=  |
| 25968 | chrY | 13469755 | . | A | C   | 206.28  | PASS          | AC=1;AF=0.018;AN=56;BaseQRankSum=  |
| 25969 | chrY | 13469764 | . | A | T   | 71.75   | PASS          | AC=1;AF=0.018;AN=56;BaseQRankSum=  |
| 25970 | chrY | 13469765 | . | T | G   | 215.17  | PASS          | AC=1;AF=0.018;AN=56;BaseQRankSum=  |
| 25971 | chrY | 13469768 | . | T | A   | 346.70  | PASS          | AC=3;AF=0.054;AN=56;BaseQRankSum=  |
| 25972 | chrY | 13469773 | . | A | C   | 73.38   | PASS          | AC=1;AF=0.015;AN=68;BaseQRankSum=  |
| 25973 | chrY | 13469780 | . | A | T   | 646.49  | PASS          | AC=3;AF=0.056;AN=54;BaseQRankSum=  |
| 25974 | chrY | 13469789 | . | T | C   | 342.99  | PASS          | AC=2;AF=0.037;AN=54;BaseQRankSum=  |
| 25975 | chrY | 13469792 | . | A | C   | 308.15  | PASS          | AC=1;AF=0.014;AN=70;BaseQRankSum=  |
| 25976 | chrY | 13469825 | . | T | C   | 1648.13 | PASS          | AC=9;AF=0.129;AN=70;BaseQRankSum=  |
| 25977 | chrY | 13469829 | . | C | T   | 282.94  | PASS          | AC=4;AF=0.057;AN=70;BaseQRankSum=  |
| 25978 | chrY | 13469835 | . | C | T   | 1694.62 | PASS          | AC=9;AF=0.129;AN=70;BaseQRankSum=  |
| 25979 | chrY | 13469836 | . | C | T   | 1702.05 | PASS          | AC=9;AF=0.129;AN=70;BaseQRankSum=  |
| 25980 | chrY | 13469838 | . | A | G   | 4968.75 | my_snp_filter | AC=15;AF=0.214;AN=70;BaseQ         |
| 25981 | chrY | 13469842 | . | A | G   | 118.68  | PASS          | AC=3;AF=0.043;AN=70;BaseQRankSum=  |
| 25982 | chrY | 13469851 | . | G | C   | 1708.47 | my_snp_filter | AC=11;AF=0.157;AN=70;BaseQ         |
| 25983 | chrY | 13469855 | . | G | T   | 1717.46 | PASS          | AC=8;AF=0.114;AN=70;BaseQRankSum=  |
| 25984 | chrY | 13469858 | . | G | T   | 218.54  | PASS          | AC=4;AF=0.057;AN=70;BaseQRankSum=  |
| 25985 | chrY | 13469860 | . | G | A   | 7035.64 | my_snp_filter | AC=27;AF=0.422;AN=64;BaseQ         |
| 25986 | chrY | 13469865 | . | T | C,A | 2984.49 | PASS          | AC=20,2;AF=0.303,0.030;AN=66;BaseQ |
| 25987 | chrY | 13469867 | . | G | A   | 446.01  | PASS          | AC=7;AF=0.100;AN=70;BaseQRankSum=  |
| 25988 | chrY | 13469871 | . | G | T   | 1718.29 | my_snp_filter | AC=11;AF=0.157;AN=70;BaseQ         |
| 25989 | chrY | 13469872 | . | G | T   | 403.18  | PASS          | AC=6;AF=0.086;AN=70;BaseQRankSum=  |
| 25990 | chrY | 13469875 | . | C | A   | 191.81  | PASS          | AC=4;AF=0.057;AN=70;BaseQRankSum=  |
| 25991 | chrY | 13469886 | . | C | T,A | 615.31  | PASS          | AC=3,4;AF=0.044,0.059;AN=68;BaseQ  |
| 25992 | chrY | 13469892 | . | A | C   | 55.94   | my_snp_filter | AC=2;AF=0.029;AN=70;BaseQ          |

|       |      |          |   |   |       |          |               |                                    |
|-------|------|----------|---|---|-------|----------|---------------|------------------------------------|
| 25993 | chrY | 13469894 | . | T | G     | 420.66   | PASS          | AC=6;AF=0.086;AN=70;BaseQRankSum=  |
| 25994 | chrY | 13469897 | . | G | C,A   | 5877.22  | PASS          | AC=20,2;AF=0.345,0.034;AN=58;Base  |
| 25995 | chrY | 13469898 | . | A | C     | 6290.85  | PASS          | AC=22;AF=0.379;AN=58;BaseQRankSum= |
| 25996 | chrY | 13469899 | . | A | T     | 136.91   | PASS          | AC=1;AF=0.015;AN=68;BaseQRankSum=  |
| 25997 | chrY | 13469902 | . | C | A     | 220.64   | my_snp_filter | AC=3;AF=0.043;AN=70;BaseQ          |
| 25998 | chrY | 13469903 | . | C | G,T   | 381.44   | PASS          | AC=2,2;AF=0.030,0.030;AN=66;BaseQ  |
| 25999 | chrY | 13469904 | . | G | T     | 495.06   | PASS          | AC=5;AF=0.076;AN=66;BaseQRankSum=  |
| 26000 | chrY | 13469905 | . | G | C     | 138.64   | PASS          | AC=1;AF=0.014;AN=70;BaseQRankSum=  |
| 26001 | chrY | 13469906 | . | C | A     | 134.51   | PASS          | AC=1;AF=0.014;AN=70;BaseQRankSum=  |
| 26002 | chrY | 13469908 | . | A | T     | 65.10    | PASS          | AC=2;AF=0.029;AN=68;BaseQRankSum=  |
| 26003 | chrY | 13469910 | . | A | T     | 150.07   | PASS          | AC=2;AF=0.029;AN=68;BaseQRankSum=  |
| 26004 | chrY | 13469912 | . | T | C     | 143.61   | my_snp_filter | AC=3;AF=0.044;AN=68;BaseQ          |
| 26005 | chrY | 13469914 | . | C | A     | 222.66   | my_snp_filter | AC=4;AF=0.059;AN=68;BaseQ          |
| 26006 | chrY | 13469915 | . | A | C     | 39.58    | PASS          | AC=1;AF=0.015;AN=68;BaseQRankSum=  |
| 26007 | chrY | 13469918 | . | C | A     | 1354.66  | PASS          | AC=6;AF=0.088;AN=68;BaseQRankSum=  |
| 26008 | chrY | 13469931 | . | T | C     | 2171.37  | PASS          | AC=10;AF=0.250;AN=40;BaseQRankSum= |
| 26009 | chrY | 13469933 | . | A | C     | 5167.17  | PASS          | AC=15;AF=0.395;AN=38;BaseQRankSum= |
| 26010 | chrY | 13469938 | . | G | A     | 331.41   | PASS          | AC=5;AF=0.074;AN=68;BaseQRankSum=  |
| 26011 | chrY | 13469942 | . | A | T     | 71.81    | PASS          | AC=1;AF=0.014;AN=70;BaseQRankSum=  |
| 26012 | chrY | 13469943 | . | T | G     | 73.82    | PASS          | AC=1;AF=0.014;AN=70;BaseQRankSum=  |
| 26013 | chrY | 13469945 | . | C | T     | 476.41   | PASS          | AC=4;AF=0.057;AN=70;BaseQRankSum=  |
| 26014 | chrY | 13469946 | . | A | T     | 246.12   | PASS          | AC=2;AF=0.029;AN=68;BaseQRankSum=  |
| 26015 | chrY | 13469947 | . | T | A,G   | 261.52   | PASS          | AC=2,1;AF=0.032,0.016;AN=62;BaseQ  |
| 26016 | chrY | 13469948 | . | C | A     | 1619.61  | PASS          | AC=7;AF=0.121;AN=58;BaseQRankSum=  |
| 26017 | chrY | 13469949 | . | T | G,A   | 5371.69  | PASS          | AC=15,1;AF=0.417,0.028;AN=36;Base  |
| 26018 | chrY | 13469953 | . | G | T     | 2196.57  | PASS          | AC=7;AF=0.100;AN=70;BaseQRankSum=  |
| 26019 | chrY | 13469954 | . | G | T     | 722.97   | PASS          | AC=1;AF=0.014;AN=70;BaseQRankSum=  |
| 26020 | chrY | 13469956 | . | C | T     | 343.27   | PASS          | AC=3;AF=0.043;AN=70;BaseQRankSum=  |
| 26021 | chrY | 13469958 | . | T | A     | 1235.87  | PASS          | AC=6;AF=0.086;AN=70;BaseQRankSum=  |
| 26022 | chrY | 13469964 | . | C | T     | 2242.56  | PASS          | AC=5;AF=0.114;AN=44;BaseQRankSum=  |
| 26023 | chrY | 13469965 | . | A | T,G   | 6921.92  | PASS          | AC=7,10;AF=0.175,0.250;AN=40;Base  |
| 26024 | chrY | 13469966 | . | G | T     | 373.98   | PASS          | AC=2;AF=0.034;AN=58;BaseQRankSum=  |
| 26025 | chrY | 13469967 | . | G | T     | 59.18    | PASS          | AC=1;AF=0.014;AN=70;BaseQRankSum=  |
| 26026 | chrY | 13469969 | . | A | G     | 534.16   | PASS          | AC=2;AF=0.029;AN=70;BaseQRankSum=  |
| 26027 | chrY | 13469970 | . | G | C     | 372.13   | PASS          | AC=3;AF=0.043;AN=70;BaseQRankSum=  |
| 26028 | chrY | 13469971 | . | G | A     | 1546.71  | PASS          | AC=9;AF=0.129;AN=70;BaseQRankSum=  |
| 26029 | chrY | 13469972 | . | C | T     | 1034.63  | PASS          | AC=6;AF=0.086;AN=70;BaseQRankSum=  |
| 26030 | chrY | 13469978 | . | C | G,A   | 4252.08  | PASS          | AC=7,2;AF=0.100,0.029;AN=70;BaseQ  |
| 26031 | chrY | 13469981 | . | T | G     | 469.51   | PASS          | AC=3;AF=0.043;AN=70;BaseQRankSum=  |
| 26032 | chrY | 13469982 | . | C | G     | 261.07   | PASS          | AC=2;AF=0.029;AN=70;BaseQRankSum=  |
| 26033 | chrY | 13469983 | . | T | C     | 51.42    | my_snp_filter | AC=1;AF=0.014;AN=70;BaseQ          |
| 26034 | chrY | 13469985 | . | G | T,*   | 679.92   | PASS          | AC=3,1;AF=0.043,0.014;AN=70;BaseQ  |
| 26035 | chrY | 13469986 | . | T | G     | 12547.14 | PASS          | AC=30;AF=0.500;AN=60;BaseQ         |
| 26036 | chrY | 13469987 | . | G | A,T   | 991.61   | PASS          | AC=5,2;AF=0.074,0.029;AN=68;BaseQ  |
| 26037 | chrY | 13469991 | . | C | G     | 2800.40  | PASS          | AC=6;AF=0.086;AN=70;BaseQRankSum=  |
| 26038 | chrY | 13469992 | . | G | A     | 888.18   | PASS          | AC=4;AF=0.057;AN=70;BaseQRankSum=  |
| 26039 | chrY | 13469993 | . | C | T     | 73.42    | my_snp_filter | AC=3;AF=0.043;AN=70;BaseQ          |
| 26040 | chrY | 13469995 | . | C | G,T   | 950.68   | PASS          | AC=5,1;AF=0.071,0.014;AN=70;BaseQ  |
| 26041 | chrY | 13469996 | . | T | A     | 51.92    | PASS          | AC=1;AF=0.014;AN=70;BaseQRankSum=  |
| 26042 | chrY | 13469997 | . | G | A,T   | 1231.79  | PASS          | AC=4,4;AF=0.057,0.057;AN=70;BaseQ  |
| 26043 | chrY | 13469998 | . | G | T     | 291.45   | PASS          | AC=1;AF=0.014;AN=70;BaseQRankSum=  |
| 26044 | chrY | 13470002 | . | C | T     | 634.59   | PASS          | AC=3;AF=0.043;AN=70;BaseQRankSum=  |
| 26045 | chrY | 13470004 | . | T | C     | 162.97   | PASS          | AC=3;AF=0.043;AN=70;BaseQRankSum=  |
| 26046 | chrY | 13470006 | . | C | T,G   | 4203.81  | PASS          | AC=16,3;AF=0.229,0.043;AN=70;Base  |
| 26047 | chrY | 13470007 | . | G | A     | 226.04   | PASS          | AC=4;AF=0.057;AN=70;BaseQRankSum=  |
| 26048 | chrY | 13470009 | . | G | A     | 62.85    | my_snp_filter | AC=3;AF=0.043;AN=70;BaseQ          |
| 26049 | chrY | 13470017 | . | A | G     | 192.42   | PASS          | AC=2;AF=0.029;AN=70;BaseQRankSum=  |
| 26050 | chrY | 13470018 | . | C | T,A   | 2829.87  | PASS          | AC=10,5;AF=0.143,0.071;AN=70;Base  |
| 26051 | chrY | 13470019 | . | G | A     | 122.75   | PASS          | AC=3;AF=0.043;AN=70;BaseQRankSum=  |
| 26052 | chrY | 13470021 | . | G | T     | 225.31   | PASS          | AC=1;AF=0.014;AN=70;BaseQRankSum=  |
| 26053 | chrY | 13470025 | . | C | A     | 242.64   | PASS          | AC=3;AF=0.043;AN=70;BaseQRankSum=  |
| 26054 | chrY | 13470029 | . | A | C,G,T | 11062.33 | PASS          | AC=30,3,3;AF=0.429,0.043,0.043     |
| 26055 | chrY | 13470030 | . | G | C,A   | 267.02   | my_snp_filter | AC=3,4;AF=0.043,0.057;AN=          |
| 26056 | chrY | 13470031 | . | C | T     | 251.01   | PASS          | AC=6;AF=0.086;AN=70;BaseQRankSum=  |
| 26057 | chrY | 13470032 | . | C | T     | 4354.05  | PASS          | AC=19;AF=0.271;AN=70;BaseQRankSum= |
| 26058 | chrY | 13470037 | . | T | C,A   | 1431.89  | PASS          | AC=18,1;AF=0.257,0.014;AN=70;Base  |
| 26059 | chrY | 13470038 | . | G | C     | 1050.64  | PASS          | AC=15;AF=0.214;AN=70;BaseQRankSum= |
| 26060 | chrY | 13470042 | . | G | C     | 575.69   | PASS          | AC=8;AF=0.114;AN=70;BaseQRankSum=  |
| 26061 | chrY | 13470043 | . | A | G     | 3154.99  | PASS          | AC=14;AF=0.200;AN=70;BaseQRankSum= |
| 26062 | chrY | 13470044 | . | G | C     | 1086.25  | PASS          | AC=15;AF=0.214;AN=70;BaseQRankSum= |
| 26063 | chrY | 13470047 | . | T | A     | 52.35    | my_snp_filter | AC=1;AF=0.014;AN=70;BaseQ          |
| 26064 | chrY | 13470048 | . | G | T,A   | 211.50   | my_snp_filter | AC=8,1;AF=0.114,0.014;AN=          |
| 26065 | chrY | 13470052 | . | C | T,A   | 1334.23  | PASS          | AC=13,2;AF=0.186,0.029;AN=70;Base  |
| 26066 | chrY | 13470054 | . | G | T,A,* | 626.13   | PASS          | AC=4,4,1;AF=0.057,0.057,0.014;AN=  |
| 26067 | chrY | 13470058 | . | C | T,*   | 1937.45  | PASS          | AC=14,1;AF=0.200,0.014;AN=70;Base  |
| 26068 | chrY | 13470060 | . | G | C,A,* | 684.89   | PASS          | AC=4,6,1;AF=0.057,0.086,0.014;AN=  |

|       |      |          |   |   |     |          |               |                                    |
|-------|------|----------|---|---|-----|----------|---------------|------------------------------------|
| 26069 | chrY | 13470067 | . | C | A   | 1245.52  | PASS          | AC=9;AF=0.129;AN=70;BaseQRankSum=  |
| 26070 | chrY | 13470068 | . | C | A   | 131.44   | PASS          | AC=3;AF=0.043;AN=70;BaseQRankSum=  |
| 26071 | chrY | 13470070 | . | C | T   | 59.61    | my_snp_filter | AC=2;AF=0.029;AN=70;BaseQ          |
| 26072 | chrY | 13470071 | . | A | G   | 2828.51  | PASS          | AC=8;AF=0.114;AN=70;BaseQRankSum=  |
| 26073 | chrY | 13470077 | . | T | A,G | 655.92   | my_snp_filter | AC=4,2;AF=0.057,0.029;AN=          |
| 26074 | chrY | 13470080 | . | C | G   | 1069.85  | my_snp_filter | AC=8;AF=0.114;AN=70;BaseQ          |
| 26075 | chrY | 13470081 | . | T | A   | 539.15   | my_snp_filter | AC=8;AF=0.114;AN=70;BaseQ          |
| 26076 | chrY | 13470082 | . | C | T   | 139.22   | PASS          | AC=2;AF=0.029;AN=70;BaseQRankSum=  |
| 26077 | chrY | 13470083 | . | C | T,A | 331.01   | my_snp_filter | AC=4,3;AF=0.057,0.043;AN=          |
| 26078 | chrY | 13470087 | . | T | A   | 46835.44 | PASS          | AC=23;AF=0.426;AN=54;Base          |
| 26079 | chrY | 13470089 | . | G | A   | 965.26   | PASS          | AC=7;AF=0.109;AN=64;BaseQRankSum=  |
| 26080 | chrY | 13470090 | . | G | A   | 475.15   | my_snp_filter | AC=5;AF=0.076;AN=66;BaseQ          |
| 26081 | chrY | 13470092 | . | G | T   | 76.40    | my_snp_filter | AC=4;AF=0.057;AN=70;BaseQ          |
| 26082 | chrY | 13470095 | . | A | G   | 51.09    | PASS          | AC=2;AF=0.029;AN=70;BaseQRankSum=  |
| 26083 | chrY | 13470099 | . | C | G   | 5103.13  | PASS          | AC=10;AF=0.143;AN=70;BaseQRankSum= |
| 26084 | chrY | 13470100 | . | C | A   | 72.82    | my_snp_filter | AC=1;AF=0.014;AN=70;BaseQ          |
| 26085 | chrY | 13470103 | . | G | A   | 6582.19  | PASS          | AC=10;AF=0.143;AN=70;BaseQRankSum= |
| 26086 | chrY | 13470107 | . | A | T   | 7221.96  | PASS          | AC=10;AF=0.147;AN=68;BaseQRankSum= |
| 26087 | chrY | 13470109 | . | C | T   | 25161.59 | PASS          | AC=17;AF=0.472;AN=36;Base          |
| 26088 | chrY | 13470110 | . | A | C   | 23446.02 | PASS          | AC=17;AF=0.447;AN=38;Base          |
| 26089 | chrY | 13470115 | . | C | G   | 254.73   | my_snp_filter | AC=3;AF=0.044;AN=68;BaseQ          |
| 26090 | chrY | 13470120 | . | A | T   | 253.17   | PASS          | AC=1;AF=0.016;AN=64;BaseQRankSum=  |
| 26091 | chrY | 13470121 | . | C | A,T | 249.71   | my_snp_filter | AC=1,1;AF=0.016,0.016;AN=          |
| 26092 | chrY | 13470122 | . | A | G   | 15758.85 | PASS          | AC=10;AF=0.217;AN=46;Base          |
| 26093 | chrY | 13470126 | . | G | A   | 1638.59  | PASS          | AC=5;AF=0.076;AN=66;BaseQRankSum=  |
| 26094 | chrY | 13470133 | . | T | C   | 1211.86  | PASS          | AC=5;AF=0.074;AN=68;BaseQRankSum=  |
| 26095 | chrY | 13470134 | . | C | G   | 180.79   | my_snp_filter | AC=2;AF=0.030;AN=66;BaseQ          |
| 26096 | chrY | 13470135 | . | C | T   | 45.89    | my_snp_filter | AC=1;AF=0.016;AN=64;BaseQ          |
| 26097 | chrY | 13470136 | . | A | C   | 151.21   | my_snp_filter | AC=2;AF=0.031;AN=64;BaseQ          |
| 26098 | chrY | 13470137 | . | A | C   | 11346.83 | PASS          | AC=9;AF=0.155;AN=58;BaseQ          |
| 26099 | chrY | 13470141 | . | C | T   | 2891.77  | PASS          | AC=7;AF=0.106;AN=66;BaseQRankSum=  |
| 26100 | chrY | 13470144 | . | C | T   | 162.11   | PASS          | AC=1;AF=0.015;AN=66;BaseQRankSum=  |
| 26101 | chrY | 13470158 | . | A | G   | 228.71   | PASS          | AC=2;AF=0.043;AN=46;BaseQRankSum=  |
| 26102 | chrY | 13470168 | . | A | C   | 10021.15 | PASS          | AC=9;AF=0.196;AN=46;BaseQ          |
| 26103 | chrY | 13470169 | . | G | C   | 9828.49  | PASS          | AC=9;AF=0.196;AN=46;BaseQRankSum=  |
| 26104 | chrY | 13470172 | . | G | T   | 635.66   | PASS          | AC=5;AF=0.074;AN=68;BaseQRankSum=  |
| 26105 | chrY | 13470178 | . | G | C   | 960.59   | PASS          | AC=4;AF=0.057;AN=70;BaseQRankSum=  |
| 26106 | chrY | 13470180 | . | C | T   | 536.70   | PASS          | AC=4;AF=0.057;AN=70;BaseQRankSum=  |
| 26107 | chrY | 13470181 | . | G | A   | 260.64   | my_snp_filter | AC=2;AF=0.029;AN=70;BaseQ          |
| 26108 | chrY | 13470182 | . | C | A,G | 1017.13  | PASS          | AC=2,1;AF=0.029,0.014;AN=70;BaseQ  |
| 26109 | chrY | 13470189 | . | G | T   | 426.10   | PASS          | AC=2;AF=0.029;AN=70;BaseQRankSum=  |
| 26110 | chrY | 13470190 | . | C | G   | 275.20   | my_snp_filter | AC=4;AF=0.059;AN=68;BaseQ          |
| 26111 | chrY | 13470192 | . | C | G   | 119.07   | PASS          | AC=1;AF=0.014;AN=70;BaseQRankSum=  |
| 26112 | chrY | 13470196 | . | G | T   | 67       | my_snp_filter | AC=1;AF=0.014;AN=70;BaseQ          |
| 26113 | chrY | 13470198 | . | G | T   | 127.76   | my_snp_filter | AC=1;AF=0.014;AN=70;BaseQ          |
| 26114 | chrY | 13470199 | . | T | C   | 823.79   | PASS          | AC=5;AF=0.071;AN=70;BaseQRankSum=  |
| 26115 | chrY | 13470201 | . | G | T   | 50.15    | my_snp_filter | AC=1;AF=0.014;AN=70;BaseQ          |
| 26116 | chrY | 13470205 | . | C | T   | 73.12    | PASS          | AC=1;AF=0.015;AN=68;BaseQRankSum=  |
| 26117 | chrY | 13470208 | . | G | T   | 230.87   | PASS          | AC=5;AF=0.074;AN=68;BaseQRankSum=  |
| 26118 | chrY | 13470214 | . | G | C,A | 416.85   | PASS          | AC=2,1;AF=0.029,0.015;AN=68;BaseQ  |
| 26119 | chrY | 13470215 | . | C | T,A | 292.84   | PASS          | AC=2,2;AF=0.031,0.031;AN=64;BaseQ  |
| 26120 | chrY | 13470216 | . | G | A   | 376.75   | PASS          | AC=2;AF=0.029;AN=68;BaseQRankSum=  |
| 26121 | chrY | 13470222 | . | C | T   | 103.86   | PASS          | AC=3;AF=0.043;AN=70;BaseQRankSum=  |
| 26122 | chrY | 13470226 | . | G | T   | 313.74   | PASS          | AC=1;AF=0.014;AN=70;BaseQRankSum=  |
| 26123 | chrY | 13470229 | . | T | A   | 2293.28  | PASS          | AC=14;AF=0.269;AN=52;BaseQRankSum= |
| 26124 | chrY | 13470231 | . | G | A   | 86.01    | PASS          | AC=1;AF=0.014;AN=70;BaseQRankSum=  |
| 26125 | chrY | 13470234 | . | C | T   | 626.88   | PASS          | AC=11;AF=0.157;AN=70;BaseQRankSum= |
| 26126 | chrY | 13470235 | . | G | A   | 166.57   | PASS          | AC=2;AF=0.029;AN=70;BaseQRankSum=  |
| 26127 | chrY | 13470238 | . | G | C   | 140.14   | my_snp_filter | AC=5;AF=0.071;AN=70;BaseQ          |
| 26128 | chrY | 13470241 | . | C | T   | 106.94   | PASS          | AC=2;AF=0.032;AN=62;BaseQRankSum=  |
| 26129 | chrY | 13470245 | . | T | C   | 2094.96  | PASS          | AC=14;AF=0.280;AN=50;BaseQRankSum= |
| 26130 | chrY | 13470247 | . | C | G   | 83.06    | PASS          | AC=1;AF=0.015;AN=66;BaseQRankSum=  |
| 26131 | chrY | 13470249 | . | T | C   | 385.47   | PASS          | AC=6;AF=0.100;AN=60;BaseQRankSum=  |
| 26132 | chrY | 13470250 | . | G | A   | 152.49   | my_snp_filter | AC=6;AF=0.091;AN=66;BaseQ          |
| 26133 | chrY | 13470254 | . | C | T   | 902.05   | PASS          | AC=7;AF=0.100;AN=70;BaseQRankSum=  |
| 26134 | chrY | 13470256 | . | C | T   | 46.69    | PASS          | AC=1;AF=0.014;AN=70;BaseQRankSum=  |
| 26135 | chrY | 13470257 | . | G | A   | 429.24   | PASS          | AC=1;AF=0.014;AN=70;BaseQRankSum=  |
| 26136 | chrY | 13470258 | . | C | A   | 52.78    | my_snp_filter | AC=1;AF=0.015;AN=68;BaseQ          |
| 26137 | chrY | 13470262 | . | C | T   | 48.44    | PASS          | AC=1;AF=0.015;AN=66;BaseQRankSum=  |
| 26138 | chrY | 13470263 | . | T | C   | 2160.59  | PASS          | AC=11;AF=0.204;AN=54;BaseQRankSum= |
| 26139 | chrY | 13470269 | . | C | A   | 339.36   | PASS          | AC=2;AF=0.029;AN=68;BaseQRankSum=  |
| 26140 | chrY | 13470279 | . | C | T   | 51.77    | PASS          | AC=1;AF=0.016;AN=62;BaseQRankSum=  |
| 26141 | chrY | 13470280 | . | A | G   | 1337.17  | PASS          | AC=4;AF=0.080;AN=50;BaseQRankSum=  |
| 26142 | chrY | 13470286 | . | T | A   | 302.31   | PASS          | AC=1;AF=0.016;AN=64;BaseQRankSum=  |
| 26143 | chrY | 13470295 | . | A | G   | 1277.87  | PASS          | AC=6;AF=0.111;AN=54;BaseQRankSum=  |
| 26144 | chrY | 13470299 | . | C | T,* | 542.06   | PASS          | AC=2,2;AF=0.032,0.032;AN=62;BaseQ  |



|       |      |          |   |   |       |          |               |                                    |
|-------|------|----------|---|---|-------|----------|---------------|------------------------------------|
| 26145 | chrY | 13470303 | . | A | G     | 550.32   | PASS          | AC=8;AF=0.125;AN=64;BaseQRankSum=  |
| 26146 | chrY | 13470305 | . | C | A,*   | 314.88   | PASS          | AC=2,1;AF=0.030,0.015;AN=66;BaseQ  |
| 26147 | chrY | 13470307 | . | T | C     | 784.89   | PASS          | AC=7;AF=0.106;AN=66;BaseQRankSum=  |
| 26148 | chrY | 13470310 | . | C | A,*   | 432.02   | PASS          | AC=2,2;AF=0.030,0.030;AN=66;BaseQ  |
| 26149 | chrY | 13470314 | . | A | C     | 639.59   | PASS          | AC=6;AF=0.097;AN=62;BaseQRankSum=  |
| 26150 | chrY | 13470315 | . | G | A,*   | 649.58   | PASS          | AC=6,1;AF=0.097,0.016;AN=62;BaseQ  |
| 26151 | chrY | 13470322 | . | G | C     | 667.17   | PASS          | AC=7;AF=0.109;AN=64;BaseQRankSum=  |
| 26152 | chrY | 13470329 | . | C | T     | 208.10   | PASS          | AC=2;AF=0.031;AN=64;BaseQRankSum=  |
| 26153 | chrY | 13470331 | . | C | G     | 272.83   | PASS          | AC=2;AF=0.031;AN=64;BaseQRankSum=  |
| 26154 | chrY | 13470335 | . | A | C     | 415.33   | PASS          | AC=5;AF=0.083;AN=60;BaseQRankSum=  |
| 26155 | chrY | 13470339 | . | C | A,*   | 284.58   | PASS          | AC=2,1;AF=0.034,0.017;AN=58;BaseQ  |
| 26156 | chrY | 13470341 | . | C | A     | 233.91   | PASS          | AC=2;AF=0.037;AN=54;BaseQRankSum=  |
| 26157 | chrY | 13470346 | . | A | C     | 186.64   | PASS          | AC=2;AF=0.033;AN=60;BaseQRankSum=  |
| 26158 | chrY | 13470349 | . | A | C,*   | 289.10   | PASS          | AC=4,2;AF=0.074,0.037;AN=54;BaseQ  |
| 26159 | chrY | 13470351 | . | A | T,*   | 465.90   | PASS          | AC=2,2;AF=0.036,0.036;AN=56;BaseQ  |
| 26160 | chrY | 13470352 | . | C | T     | 132.97   | PASS          | AC=2;AF=0.034;AN=58;BaseQRankSum=  |
| 26161 | chrY | 13470366 | . | G | C,*   | 385.04   | PASS          | AC=3,1;AF=0.044,0.015;AN=68;BaseQ  |
| 26162 | chrY | 13470369 | . | T | G     | 466.32   | PASS          | AC=6;AF=0.103;AN=58;BaseQRankSum=  |
| 26163 | chrY | 13470379 | . | C | G     | 63.02    | PASS          | AC=2;AF=0.033;AN=60;BaseQRankSum=  |
| 26164 | chrY | 13470380 | . | G | C     | 558.60   | PASS          | AC=6;AF=0.115;AN=52;BaseQRankSum=  |
| 26165 | chrY | 13470386 | . | T | G     | 161.66   | PASS          | AC=4;AF=0.071;AN=56;BaseQRankSum=  |
| 26166 | chrY | 13470387 | . | G | T     | 265.68   | PASS          | AC=2;AF=0.034;AN=58;BaseQRankSum=  |
| 26167 | chrY | 13470388 | . | G | A,*   | 337.39   | PASS          | AC=2,1;AF=0.032,0.016;AN=62;BaseQ  |
| 26168 | chrY | 13470394 | . | T | C,A   | 362.57   | PASS          | AC=3,2;AF=0.048,0.032;AN=62;BaseQ  |
| 26169 | chrY | 13470398 | . | C | A     | 213.26   | PASS          | AC=2;AF=0.029;AN=68;BaseQRankSum=  |
| 26170 | chrY | 13470400 | . | G | T     | 206.08   | PASS          | AC=2;AF=0.029;AN=70;BaseQRankSum=  |
| 26171 | chrY | 13470402 | . | C | T,*   | 321.64   | PASS          | AC=2,1;AF=0.029,0.014;AN=70;BaseQ  |
| 26172 | chrY | 13470403 | . | C | G,T   | 566.51   | PASS          | AC=2,1;AF=0.029,0.014;AN=70;BaseQ  |
| 26173 | chrY | 13470405 | . | A | T,*   | 312.02   | PASS          | AC=2,1;AF=0.029,0.014;AN=70;BaseQ  |
| 26174 | chrY | 13470411 | . | C | T,*   | 528.10   | PASS          | AC=1,3;AF=0.014,0.043;AN=70;BaseQ  |
| 26175 | chrY | 13470412 | . | A | G,*   | 571.36   | PASS          | AC=1,3;AF=0.014,0.043;AN=70;BaseQ  |
| 26176 | chrY | 13470414 | . | C | A,*   | 538.38   | PASS          | AC=2,1;AF=0.029,0.014;AN=70;BaseQ  |
| 26177 | chrY | 13470417 | . | C | T,*   | 289.88   | PASS          | AC=2,1;AF=0.029,0.014;AN=70;BaseQ  |
| 26178 | chrY | 13470428 | . | G | C     | 38.85    | PASS          | AC=1;AF=0.015;AN=68;BaseQRankSum=  |
| 26179 | chrY | 13470429 | . | G | A     | 82.89    | PASS          | AC=1;AF=0.015;AN=68;BaseQRankSum=  |
| 26180 | chrY | 13470433 | . | C | G     | 7409.33  | PASS          | AC=12;AF=0.333;AN=36;BaseQRankSum= |
| 26181 | chrY | 13470435 | . | G | A     | 363.80   | PASS          | AC=6;AF=0.091;AN=66;BaseQRankSum=  |
| 26182 | chrY | 13470436 | . | C | T     | 89.44    | my_snp_filter | AC=2;AF=0.030;AN=66;BaseQ          |
| 26183 | chrY | 13470437 | . | C | A     | 135.96   | PASS          | AC=1;AF=0.015;AN=68;BaseQRankSum=  |
| 26184 | chrY | 13470444 | . | T | C     | 8596.56  | PASS          | AC=13;AF=0.406;AN=32;BaseQRankSum= |
| 26185 | chrY | 13470448 | . | C | T,G   | 1087.23  | PASS          | AC=3,2;AF=0.060,0.040;AN=50;BaseQ  |
| 26186 | chrY | 13470449 | . | G | A     | 659.75   | PASS          | AC=4;AF=0.091;AN=44;BaseQRankSum=  |
| 26187 | chrY | 13470450 | . | T | G     | 11010.35 | PASS          | AC=16;AF=0.444;AN=36;BaseQ         |
| 26188 | chrY | 13470452 | . | C | A     | 47.75    | PASS          | AC=2;AF=0.030;AN=66;BaseQRankSum=  |
| 26189 | chrY | 13470456 | . | T | C     | 690.36   | PASS          | AC=2;AF=0.029;AN=70;BaseQRankSum=  |
| 26190 | chrY | 13470457 | . | A | T,G   | 2441.30  | PASS          | AC=6,1;AF=0.086,0.014;AN=70;BaseQ  |
| 26191 | chrY | 13470458 | . | T | A,G   | 2061.97  | PASS          | AC=5,2;AF=0.071,0.029;AN=70;BaseQ  |
| 26192 | chrY | 13470459 | . | A | G     | 45.97    | PASS          | AC=2;AF=0.029;AN=70;DP=6717;FS=0.  |
| 26193 | chrY | 13470460 | . | A | C     | 659.29   | PASS          | AC=3;AF=0.043;AN=70;BaseQRankSum=  |
| 26194 | chrY | 13470461 | . | G | A     | 293.88   | PASS          | AC=2;AF=0.029;AN=70;BaseQRankSum=  |
| 26195 | chrY | 13470464 | . | C | A     | 118.97   | my_snp_filter | AC=3;AF=0.043;AN=70;BaseQ          |
| 26196 | chrY | 13470465 | . | C | T     | 380.75   | PASS          | AC=1;AF=0.014;AN=70;BaseQRankSum=  |
| 26197 | chrY | 13470466 | . | G | A     | 1127.68  | PASS          | AC=6;AF=0.086;AN=70;BaseQRankSum=  |
| 26198 | chrY | 13470467 | . | C | A     | 1435.60  | PASS          | AC=5;AF=0.071;AN=70;BaseQRankSum=  |
| 26199 | chrY | 13470468 | . | T | A     | 81.11    | my_snp_filter | AC=2;AF=0.029;AN=70;BaseQ          |
| 26200 | chrY | 13470469 | . | G | A     | 42.16    | my_snp_filter | AC=1;AF=0.014;AN=70;BaseQ          |
| 26201 | chrY | 13470470 | . | G | C,A   | 720.98   | my_snp_filter | AC=1,5;AF=0.014,0.071;AN=          |
| 26202 | chrY | 13470471 | . | C | T,G   | 2363.83  | PASS          | AC=3,1;AF=0.043,0.014;AN=70;BaseQ  |
| 26203 | chrY | 13470475 | . | C | T     | 2109.20  | PASS          | AC=4;AF=0.057;AN=70;BaseQRankSum=  |
| 26204 | chrY | 13470477 | . | G | T,A   | 1748.85  | PASS          | AC=6,2;AF=0.086,0.029;AN=70;BaseQ  |
| 26205 | chrY | 13470478 | . | T | C     | 147.59   | my_snp_filter | AC=4;AF=0.057;AN=70;BaseQ          |
| 26206 | chrY | 13470480 | . | C | T     | 337.62   | my_snp_filter | AC=6;AF=0.086;AN=70;BaseQ          |
| 26207 | chrY | 13470481 | . | G | A     | 368.92   | my_snp_filter | AC=4;AF=0.057;AN=70;BaseQ          |
| 26208 | chrY | 13470482 | . | G | A,T,C | 2069.12  | PASS          | AC=3,1,3;AF=0.043,0.014,0.043;AN=  |
| 26209 | chrY | 13470483 | . | G | A,T   | 1512.09  | PASS          | AC=2,4;AF=0.029,0.057;AN=70;BaseQ  |
| 26210 | chrY | 13470484 | . | C | T     | 2718.82  | PASS          | AC=4;AF=0.057;AN=70;BaseQRankSum=  |
| 26211 | chrY | 13470487 | . | G | A     | 654.94   | my_snp_filter | AC=3;AF=0.043;AN=70;BaseQ          |
| 26212 | chrY | 13470488 | . | C | A     | 486.82   | PASS          | AC=5;AF=0.071;AN=70;BaseQRankSum=  |
| 26213 | chrY | 13470489 | . | C | T     | 404.17   | PASS          | AC=2;AF=0.029;AN=70;BaseQRankSum=  |
| 26214 | chrY | 13470490 | . | T | C     | 3594.99  | PASS          | AC=10;AF=0.147;AN=68;BaseQRankSum= |
| 26215 | chrY | 13470491 | . | C | T     | 294.68   | my_snp_filter | AC=3;AF=0.043;AN=70;BaseQ          |
| 26216 | chrY | 13470492 | . | C | A     | 269.69   | PASS          | AC=2;AF=0.029;AN=70;BaseQRankSum=  |
| 26217 | chrY | 13470495 | . | G | T     | 170.27   | PASS          | AC=2;AF=0.029;AN=70;BaseQRankSum=  |
| 26218 | chrY | 13470496 | . | C | T     | 129.83   | my_snp_filter | AC=3;AF=0.043;AN=70;BaseQ          |
| 26219 | chrY | 13470499 | . | C | T     | 2608.27  | PASS          | AC=8;AF=0.114;AN=70;BaseQRankSum=  |
| 26220 | chrY | 13470500 | . | A | G     | 2700.55  | PASS          | AC=8;AF=0.114;AN=70;BaseQRankSum=  |

|       |      |          |   |   |       |          |               |                                                     |
|-------|------|----------|---|---|-------|----------|---------------|-----------------------------------------------------|
| 26221 | chrY | 13470501 | . | C | T     | 3331.16  | PASS          | AC=8;AF=0.114;AN=70;BaseQRankSum=                   |
| 26222 | chrY | 13470506 | . | C | T     | 11489.32 | PASS          | AC=13;AF=0.186;AN=70;BaseQRankSum=                  |
| 26223 | chrY | 13470507 | . | G | A     | 7183.80  | PASS          | AC=17;AF=0.243;AN=70;BaseQRankSum=                  |
| 26224 | chrY | 13470513 | . | C | T,A   | 5231.56  | PASS          | AC=4,5;AF=0.057,0.071;AN=70;BaseQRankSum=           |
| 26225 | chrY | 13470514 | . | A | G     | 2996.44  | PASS          | AC=7;AF=0.100;AN=70;BaseQRankSum=                   |
| 26226 | chrY | 13470516 | . | A | G     | 95.62    | my_snp_filter | AC=2;AF=0.029;AN=70;BaseQRankSum=                   |
| 26227 | chrY | 13470517 | . | G | T     | 64.08    | PASS          | AC=1;AF=0.014;AN=70;BaseQRankSum=                   |
| 26228 | chrY | 13470518 | . | G | T     | 215.58   | PASS          | AC=3;AF=0.043;AN=70;BaseQRankSum=                   |
| 26229 | chrY | 13470519 | . | C | T     | 1020.14  | PASS          | AC=4;AF=0.059;AN=68;BaseQRankSum=                   |
| 26230 | chrY | 13470520 | . | T | C     | 16405.15 | PASS          | AC=29;AF=0.518;AN=56;BaseQRankSum=                  |
| 26231 | chrY | 13470521 | . | G | A     | 3414.47  | PASS          | AC=13;AF=0.232;AN=56;BaseQRankSum=                  |
| 26232 | chrY | 13470522 | . | G | A     | 2133.50  | PASS          | AC=6;AF=0.091;AN=66;BaseQRankSum=                   |
| 26233 | chrY | 13470523 | . | C | A     | 329.14   | my_snp_filter | AC=2;AF=0.029;AN=70;BaseQRankSum=                   |
| 26234 | chrY | 13470527 | . | G | A,T   | 279.61   | my_snp_filter | AC=3,1;AF=0.043,0.014;AN=68;BaseQRankSum=           |
| 26235 | chrY | 13470530 | . | G | A,T   | 2887.81  | PASS          | AC=4,3;AF=0.059,0.044;AN=68;BaseQRankSum=           |
| 26236 | chrY | 13470533 | . | C | T,G   | 4723.13  | PASS          | AC=5,4;AF=0.074,0.059;AN=68;BaseQRankSum=           |
| 26237 | chrY | 13470534 | . | G | A     | 7191.03  | PASS          | AC=16;AF=0.229;AN=70;BaseQRankSum=                  |
| 26238 | chrY | 13470535 | . | G | T     | 3030.12  | PASS          | AC=4;AF=0.061;AN=66;BaseQRankSum=                   |
| 26239 | chrY | 13470536 | . | G | A     | 417.81   | PASS          | AC=7;AF=0.100;AN=70;BaseQRankSum=                   |
| 26240 | chrY | 13470538 | . | G | A,T   | 6309.96  | PASS          | AC=10,7;AF=0.143,0.100;AN=70;BaseQRankSum=          |
| 26241 | chrY | 13470539 | . | C | T,G   | 4402.52  | PASS          | AC=2,9;AF=0.029,0.129;AN=70;BaseQRankSum=           |
| 26242 | chrY | 13470540 | . | C | A     | 3097.84  | PASS          | AC=4;AF=0.059;AN=68;BaseQRankSum=                   |
| 26243 | chrY | 13470541 | . | C | T     | 7788.56  | PASS          | AC=17;AF=0.258;AN=66;BaseQRankSum=                  |
| 26244 | chrY | 13470544 | . | C | T     | 673.15   | PASS          | AC=8;AF=0.148;AN=54;BaseQRankSum=                   |
| 26245 | chrY | 13470545 | . | A | G,T   | 15127.16 | PASS          | AC=20,2;AF=0.385,0.038;AN=68;BaseQRankSum=          |
| 26246 | chrY | 13470546 | . | G | A     | 181.73   | PASS          | AC=1;AF=0.018;AN=56;BaseQRankSum=                   |
| 26247 | chrY | 13470547 | . | C | G     | 1989.80  | PASS          | AC=7;AF=0.109;AN=64;BaseQRankSum=                   |
| 26248 | chrY | 13470548 | . | C | A     | 177.13   | PASS          | AC=2;AF=0.031;AN=64;BaseQRankSum=                   |
| 26249 | chrY | 13470550 | . | C | T     | 40.14    | PASS          | AC=1;AF=0.014;AN=70;BaseQRankSum=                   |
| 26250 | chrY | 13470551 | . | T | C     | 115.51   | PASS          | AC=1;AF=0.014;AN=70;BaseQRankSum=                   |
| 26251 | chrY | 13470554 | . | C | T     | 157.45   | PASS          | AC=3;AF=0.043;AN=70;BaseQRankSum=                   |
| 26252 | chrY | 13470556 | . | G | T     | 41.60    | PASS          | AC=1;AF=0.014;AN=70;BaseQRankSum=                   |
| 26253 | chrY | 13470557 | . | C | A     | 2543.35  | PASS          | AC=6;AF=0.088;AN=68;BaseQRankSum=                   |
| 26254 | chrY | 13470559 | . | A | C,T,G | 15427.19 | PASS          | AC=23,12,2;AF=0.460,0.240,0.038;AN=68;BaseQRankSum= |
| 26255 | chrY | 13470565 | . | C | A     | 570.17   | PASS          | AC=8;AF=0.125;AN=64;BaseQRankSum=                   |
| 26256 | chrY | 13470569 | . | C | A,T   | 4450.49  | PASS          | AC=3,10;AF=0.045,0.152;AN=66;BaseQRankSum=          |
| 26257 | chrY | 13470570 | . | G | A     | 2606.87  | PASS          | AC=9;AF=0.132;AN=68;BaseQRankSum=                   |
| 26258 | chrY | 13470572 | . | G | T,A   | 1110.36  | PASS          | AC=5,1;AF=0.071,0.014;AN=70;BaseQRankSum=           |
| 26259 | chrY | 13470574 | . | A | T     | 110.51   | PASS          | AC=1;AF=0.014;AN=70;BaseQRankSum=                   |
| 26260 | chrY | 13470575 | . | A | T     | 1294.63  | PASS          | AC=5;AF=0.071;AN=70;BaseQRankSum=                   |
| 26261 | chrY | 13470579 | . | C | T,A   | 6685.18  | PASS          | AC=11,4;AF=0.157,0.057;AN=70;BaseQRankSum=          |
| 26262 | chrY | 13470580 | . | G | A     | 141.28   | my_snp_filter | AC=3;AF=0.044;AN=68;BaseQRankSum=                   |
| 26263 | chrY | 13470582 | . | C | A     | 3227.04  | PASS          | AC=10;AF=0.143;AN=70;BaseQRankSum=                  |
| 26264 | chrY | 13470583 | . | C | T     | 4069.90  | PASS          | AC=5;AF=0.071;AN=70;BaseQRankSum=                   |
| 26265 | chrY | 13470584 | . | G | A,T   | 2844.53  | PASS          | AC=5,5;AF=0.071,0.071;AN=70;BaseQRankSum=           |
| 26266 | chrY | 13470585 | . | G | C,A   | 739.16   | PASS          | AC=5,2;AF=0.071,0.029;AN=70;BaseQRankSum=           |
| 26267 | chrY | 13470586 | . | G | A     | 80.32    | PASS          | AC=3;AF=0.043;AN=70;BaseQRankSum=                   |
| 26268 | chrY | 13470587 | . | G | T     | 2590.87  | PASS          | AC=5;AF=0.071;AN=70;BaseQRankSum=                   |
| 26269 | chrY | 13470588 | . | C | A     | 137.54   | my_snp_filter | AC=4;AF=0.057;AN=70;BaseQRankSum=                   |
| 26270 | chrY | 13470590 | . | C | G     | 3082.51  | PASS          | AC=7;AF=0.100;AN=70;BaseQRankSum=                   |
| 26271 | chrY | 13470593 | . | C | T     | 3372.63  | PASS          | AC=7;AF=0.100;AN=70;BaseQRankSum=                   |
| 26272 | chrY | 13470594 | . | G | T     | 2773.67  | PASS          | AC=6;AF=0.086;AN=70;BaseQRankSum=                   |
| 26273 | chrY | 13470595 | . | C | T,G   | 679.97   | PASS          | AC=7,4;AF=0.100,0.057;AN=70;BaseQRankSum=           |
| 26274 | chrY | 13470596 | . | G | A,C   | 4108.16  | PASS          | AC=4,7;AF=0.057,0.100;AN=70;BaseQRankSum=           |
| 26275 | chrY | 13470597 | . | A | T     | 82.22    | PASS          | AC=1;AF=0.014;AN=70;BaseQRankSum=                   |
| 26276 | chrY | 13470598 | . | T | C     | 114.15   | PASS          | AC=2;AF=0.029;AN=70;BaseQRankSum=                   |
| 26277 | chrY | 13470599 | . | G | T     | 2106.36  | PASS          | AC=7;AF=0.100;AN=70;BaseQRankSum=                   |
| 26278 | chrY | 13470600 | . | G | T     | 64.02    | PASS          | AC=1;AF=0.014;AN=70;BaseQRankSum=                   |
| 26279 | chrY | 13470601 | . | C | T     | 353.70   | PASS          | AC=2;AF=0.029;AN=70;BaseQRankSum=                   |
| 26280 | chrY | 13470602 | . | C | T     | 88.22    | PASS          | AC=1;AF=0.014;AN=70;BaseQRankSum=                   |
| 26281 | chrY | 13470603 | . | C | T     | 3002.65  | PASS          | AC=9;AF=0.129;AN=70;BaseQRankSum=                   |
| 26282 | chrY | 13470605 | . | C | G     | 363.99   | PASS          | AC=3;AF=0.043;AN=70;BaseQRankSum=                   |
| 26283 | chrY | 13470606 | . | C | T     | 62.04    | my_snp_filter | AC=2;AF=0.029;AN=70;BaseQRankSum=                   |
| 26284 | chrY | 13470607 | . | C | A,T   | 1234.85  | PASS          | AC=3,9;AF=0.043,0.129;AN=70;BaseQRankSum=           |
| 26285 | chrY | 13470608 | . | G | A     | 199.75   | PASS          | AC=3;AF=0.043;AN=70;BaseQRankSum=                   |
| 26286 | chrY | 13470610 | . | C | A     | 2712.46  | PASS          | AC=9;AF=0.129;AN=70;BaseQRankSum=                   |
| 26287 | chrY | 13470612 | . | C | G     | 146.05   | PASS          | AC=2;AF=0.029;AN=68;BaseQRankSum=                   |
| 26288 | chrY | 13470613 | . | C | T     | 1895.20  | PASS          | AC=7;AF=0.100;AN=70;BaseQRankSum=                   |
| 26289 | chrY | 13470619 | . | A | T,G   | 1942.21  | PASS          | AC=5,3;AF=0.071,0.043;AN=70;BaseQRankSum=           |
| 26290 | chrY | 13470620 | . | C | T     | 2899.37  | PASS          | AC=10;AF=0.147;AN=68;BaseQRankSum=                  |
| 26291 | chrY | 13470621 | . | G | T     | 296.73   | PASS          | AC=3;AF=0.044;AN=68;BaseQRankSum=                   |
| 26292 | chrY | 13470623 | . | C | G     | 125.90   | PASS          | AC=1;AF=0.014;AN=70;BaseQRankSum=                   |
| 26293 | chrY | 13470626 | . | A | C     | 7920.28  | PASS          | AC=21;AF=0.420;AN=50;BaseQRankSum=                  |
| 26294 | chrY | 13470627 | . | C | G     | 1805.94  | PASS          | AC=8;AF=0.138;AN=58;BaseQRankSum=                   |
| 26295 | chrY | 13470629 | . | C | A     | 83.44    | PASS          | AC=1;AF=0.014;AN=70;BaseQRankSum=                   |
| 26296 | chrY | 13470632 | . | C | T     | 2098.89  | PASS          | AC=7;AF=0.106;AN=66;BaseQRankSum=                   |

|       |      |          |   |   |       |         |               |                                    |
|-------|------|----------|---|---|-------|---------|---------------|------------------------------------|
| 26297 | chrY | 13470633 | . | G | A     | 765.81  | PASS          | AC=6;AF=0.091;AN=66;BaseQRankSum=  |
| 26298 | chrY | 13470634 | . | C | T,A   | 799.30  | PASS          | AC=3,5;AF=0.045,0.076;AN=66;BaseQ  |
| 26299 | chrY | 13470635 | . | G | A     | 1809.61 | PASS          | AC=7;AF=0.106;AN=66;BaseQRankSum=  |
| 26300 | chrY | 13470643 | . | G | A     | 2426.02 | PASS          | AC=11;AF=0.172;AN=64;BaseQRankSum= |
| 26301 | chrY | 13470645 | . | G | A     | 201.37  | PASS          | AC=3;AF=0.047;AN=64;BaseQRankSum=  |
| 26302 | chrY | 13470646 | . | G | A     | 125.22  | PASS          | AC=1;AF=0.016;AN=62;BaseQRankSum=  |
| 26303 | chrY | 13470648 | . | C | T     | 377.52  | PASS          | AC=4;AF=0.095;AN=42;BaseQRankSum=  |
| 26304 | chrY | 13470649 | . | T | G     | 6404.92 | PASS          | AC=15;AF=0.441;AN=34;BaseQRankSum= |
| 26305 | chrY | 13470654 | . | C | T,A   | 350.90  | PASS          | AC=3,3;AF=0.056,0.056;AN=54;BaseQ  |
| 26306 | chrY | 13470657 | . | T | C     | 2793.89 | PASS          | AC=13;AF=0.382;AN=34;BaseQRankSum= |
| 26307 | chrY | 13470658 | . | C | G     | 4485.95 | PASS          | AC=17;AF=0.472;AN=36;BaseQRankSum= |
| 26308 | chrY | 13470659 | . | T | A     | 4847.11 | PASS          | AC=17;AF=0.472;AN=36;BaseQRankSum= |
| 26309 | chrY | 13470666 | . | C | T     | 1006.14 | PASS          | AC=6;AF=0.086;AN=70;BaseQRankSum=  |
| 26310 | chrY | 13470668 | . | C | T     | 101.23  | my_snp_filter | AC=3;AF=0.043;AN=70;BaseQ          |
| 26311 | chrY | 13470669 | . | G | A     | 663.03  | my_snp_filter | AC=8;AF=0.114;AN=70;BaseQ          |
| 26312 | chrY | 13470673 | . | G | C     | 55.43   | my_snp_filter | AC=1;AF=0.015;AN=68;BaseQ          |
| 26313 | chrY | 13470674 | . | G | A     | 209.39  | PASS          | AC=2;AF=0.029;AN=70;BaseQRankSum=  |
| 26314 | chrY | 13470675 | . | A | T     | 60.89   | PASS          | AC=3;AF=0.043;AN=70;BaseQRankSum=  |
| 26315 | chrY | 13470677 | . | C | T     | 141.33  | PASS          | AC=2;AF=0.029;AN=70;BaseQRankSum=  |
| 26316 | chrY | 13470683 | . | C | T     | 89.23   | my_snp_filter | AC=2;AF=0.029;AN=70;BaseQ          |
| 26317 | chrY | 13470687 | . | A | T     | 492.84  | PASS          | AC=3;AF=0.044;AN=68;BaseQRankSum=  |
| 26318 | chrY | 13470689 | . | T | C,A,G | 1350.89 | PASS          | AC=4,1,2;AF=0.065,0.016,0.032;AN=  |
| 26319 | chrY | 13470692 | . | G | T     | 47.67   | my_snp_filter | AC=1;AF=0.014;AN=70;BaseQ          |
| 26320 | chrY | 13470693 | . | G | A     | 265.47  | PASS          | AC=2;AF=0.029;AN=70;BaseQRankSum=  |
| 26321 | chrY | 13470695 | . | C | A     | 186.91  | PASS          | AC=2;AF=0.029;AN=70;BaseQRankSum=  |
| 26322 | chrY | 13470700 | . | A | G     | 2369.49 | my_snp_filter | AC=11;AF=0.212;AN=52;BaseQ         |
| 26323 | chrY | 13470702 | . | G | T     | 300.94  | PASS          | AC=4;AF=0.059;AN=68;BaseQRankSum=  |
| 26324 | chrY | 13470707 | . | C | T     | 1003.40 | PASS          | AC=7;AF=0.103;AN=68;BaseQRankSum=  |
| 26325 | chrY | 13470714 | . | C | A,T   | 509.01  | PASS          | AC=2,2;AF=0.030,0.030;AN=66;BaseQ  |
| 26326 | chrY | 13470717 | . | A | T     | 2188.53 | PASS          | AC=12;AF=0.182;AN=66;BaseQRankSum= |
| 26327 | chrY | 13470719 | . | C | T     | 203.34  | PASS          | AC=2;AF=0.030;AN=66;BaseQRankSum=  |
| 26328 | chrY | 13470720 | . | C | A     | 219.22  | PASS          | AC=2;AF=0.031;AN=64;BaseQRankSum=  |
| 26329 | chrY | 13470721 | . | C | T,G   | 319.12  | PASS          | AC=2,1;AF=0.033,0.017;AN=60;BaseQ  |
| 26330 | chrY | 13470722 | . | A | G     | 337.54  | PASS          | AC=3;AF=0.050;AN=60;BaseQRankSum=  |
| 26331 | chrY | 13470725 | . | C | T     | 188.71  | PASS          | AC=1;AF=0.015;AN=66;BaseQRankSum=  |
| 26332 | chrY | 13470726 | . | C | T,G   | 408.94  | PASS          | AC=2,2;AF=0.030,0.030;AN=66;BaseQ  |
| 26333 | chrY | 13470727 | . | C | T     | 929.43  | PASS          | AC=6;AF=0.094;AN=64;BaseQRankSum=  |
| 26334 | chrY | 13470728 | . | G | A     | 282.20  | PASS          | AC=1;AF=0.015;AN=66;BaseQRankSum=  |
| 26335 | chrY | 13470730 | . | A | G     | 1715.32 | PASS          | AC=10;AF=0.185;AN=54;BaseQRankSum= |
| 26336 | chrY | 13470734 | . | C | G,T   | 636.98  | PASS          | AC=2,4;AF=0.033,0.067;AN=60;BaseQ  |
| 26337 | chrY | 13470735 | . | G | A     | 2508.62 | PASS          | AC=13;AF=0.224;AN=58;BaseQRankSum= |
| 26338 | chrY | 13470737 | . | C | A     | 200.30  | PASS          | AC=1;AF=0.016;AN=64;BaseQRankSum=  |
| 26339 | chrY | 13470739 | . | C | A     | 299.10  | PASS          | AC=1;AF=0.016;AN=64;BaseQRankSum=  |
| 26340 | chrY | 13470741 | . | A | G     | 2059.16 | PASS          | AC=12;AF=0.200;AN=60;BaseQRankSum= |
| 26341 | chrY | 13470743 | . | A | T     | 295.64  | PASS          | AC=2;AF=0.031;AN=64;BaseQRankSum=  |
| 26342 | chrY | 13470745 | . | T | A     | 4486.80 | my_snp_filter | AC=13;AF=0.260;AN=50;BaseQ         |
| 26343 | chrY | 13470747 | . | C | T     | 365.25  | PASS          | AC=1;AF=0.016;AN=62;BaseQRankSum=  |
| 26344 | chrY | 13470748 | . | C | A,G   | 3142.74 | my_snp_filter | AC=11,2;AF=0.212,0.038;AN=         |
| 26345 | chrY | 13470752 | . | G | C     | 1706.71 | PASS          | AC=11;AF=0.177;AN=62;BaseQRankSum= |
| 26346 | chrY | 13470755 | . | C | T     | 302.79  | PASS          | AC=2;AF=0.031;AN=64;BaseQRankSum=  |
| 26347 | chrY | 13470764 | . | C | T     | 224.82  | PASS          | AC=1;AF=0.016;AN=62;BaseQRankSum=  |
| 26348 | chrY | 13470765 | . | G | T     | 79.83   | PASS          | AC=1;AF=0.016;AN=64;BaseQRankSum=  |
| 26349 | chrY | 13470772 | . | T | C     | 2182.87 | my_snp_filter | AC=11;AF=0.177;AN=62;BaseQ         |
| 26350 | chrY | 13470773 | . | G | A     | 1935.46 | my_snp_filter | AC=10;AF=0.161;AN=62;BaseQ         |
| 26351 | chrY | 13470777 | . | C | G     | 151.58  | my_snp_filter | AC=3;AF=0.052;AN=58;BaseQ          |
| 26352 | chrY | 13470779 | . | T | C     | 8118.24 | PASS          | AC=12;AF=0.231;AN=52;BaseQRankSum= |
| 26353 | chrY | 13470781 | . | G | T     | 680.48  | PASS          | AC=7;AF=0.106;AN=66;BaseQRankSum=  |
| 26354 | chrY | 13470783 | . | G | A     | 297.80  | PASS          | AC=2;AF=0.030;AN=66;BaseQRankSum=  |
| 26355 | chrY | 13470785 | . | C | T     | 128.44  | my_snp_filter | AC=2;AF=0.029;AN=68;BaseQ          |
| 26356 | chrY | 13470788 | . | G | C     | 114.26  | PASS          | AC=1;AF=0.015;AN=66;BaseQRankSum=  |
| 26357 | chrY | 13470790 | . | T | A     | 5390.04 | PASS          | AC=10;AF=0.147;AN=62;BaseQRankSum= |
| 26358 | chrY | 13470797 | . | T | A     | 184.36  | PASS          | AC=1;AF=0.016;AN=62;BaseQRankSum=  |
| 26359 | chrY | 13470805 | . | G | A     | 8948.39 | PASS          | AC=16;AF=0.308;AN=52;BaseQRankSum= |
| 26360 | chrY | 13470811 | . | C | G     | 3068.65 | PASS          | AC=6;AF=0.086;AN=70;BaseQRankSum=  |
| 26361 | chrY | 13470813 | . | C | T     | 790.09  | PASS          | AC=5;AF=0.076;AN=66;BaseQRankSum=  |
| 26362 | chrY | 13470814 | . | G | A     | 1798.39 | PASS          | AC=7;AF=0.113;AN=62;BaseQRankSum=  |
| 26363 | chrY | 13470822 | . | A | T     | 856.08  | PASS          | AC=5;AF=0.071;AN=70;BaseQRankSum=  |
| 26364 | chrY | 13470823 | . | G | A     | 944.86  | PASS          | AC=5;AF=0.071;AN=70;BaseQRankSum=  |
| 26365 | chrY | 13470830 | . | C | T     | 1453.25 | PASS          | AC=7;AF=0.100;AN=70;BaseQRankSum=  |
| 26366 | chrY | 13470832 | . | G | A     | 1968.66 | PASS          | AC=6;AF=0.103;AN=58;BaseQRankSum=  |
| 26367 | chrY | 13470834 | . | T | C     | 3117.45 | PASS          | AC=9;AF=0.145;AN=62;BaseQRankSum=  |
| 26368 | chrY | 13470835 | . | G | A     | 1596.19 | PASS          | AC=8;AF=0.118;AN=68;BaseQRankSum=  |
| 26369 | chrY | 13470840 | . | T | A     | 2072.42 | PASS          | AC=6;AF=0.094;AN=64;BaseQRankSum=  |
| 26370 | chrY | 13470844 | . | G | A,T   | 3228.29 | PASS          | AC=10,2;AF=0.152,0.030;AN=66;BaseQ |
| 26371 | chrY | 13470848 | . | C | A     | 2370.84 | PASS          | AC=11;AF=0.167;AN=66;BaseQRankSum= |
| 26372 | chrY | 13470849 | . | T | A     | 1020.26 | PASS          | AC=10;AF=0.147;AN=68;BaseQRankSum= |

|       |      |          |   |   |     |         |               |                                    |
|-------|------|----------|---|---|-----|---------|---------------|------------------------------------|
| 26373 | chrY | 13470854 | . | T | C,G | 4852.88 | PASS          | AC=16,5;AF=0.320,0.100;AN=50;BaseQ |
| 26374 | chrY | 13470855 | . | T | G,A | 5918.59 | PASS          | AC=16,12;AF=0.296,0.222;AN=54;Bas  |
| 26375 | chrY | 13470860 | . | A | T,C | 2165.04 | PASS          | AC=9,8;AF=0.129,0.114;AN=70;BaseQ  |
| 26376 | chrY | 13470861 | . | C | T   | 1080.97 | PASS          | AC=10;AF=0.143;AN=70;BaseQRankSum  |
| 26377 | chrY | 13470862 | . | G | A   | 1606.72 | PASS          | AC=8;AF=0.114;AN=70;BaseQRankSum=  |
| 26378 | chrY | 13470865 | . | G | C   | 1083.21 | PASS          | AC=10;AF=0.143;AN=70;BaseQRankSum  |
| 26379 | chrY | 13470867 | . | C | A   | 32.21   | PASS          | AC=1;AF=0.014;AN=70;BaseQRankSum=  |
| 26380 | chrY | 13470869 | . | G | T   | 1271.43 | PASS          | AC=2;AF=0.029;AN=70;BaseQRankSum=  |
| 26381 | chrY | 13470882 | . | C | T,A | 2726.94 | PASS          | AC=1,7;AF=0.015,0.103;AN=68;BaseQ  |
| 26382 | chrY | 13470888 | . | C | G   | 627.65  | PASS          | AC=8;AF=0.118;AN=68;BaseQRankSum=  |
| 26383 | chrY | 13470889 | . | G | A   | 1132.74 | PASS          | AC=3;AF=0.044;AN=68;BaseQRankSum=  |
| 26384 | chrY | 13470893 | . | C | A,T | 2016.92 | PASS          | AC=8,8;AF=0.118,0.118;AN=68;BaseQ  |
| 26385 | chrY | 13470894 | . | G | A   | 2365.76 | PASS          | AC=9;AF=0.129;AN=70;BaseQRankSum=  |
| 26386 | chrY | 13470897 | . | G | T   | 1233.73 | PASS          | AC=8;AF=0.114;AN=70;BaseQRankSum=  |
| 26387 | chrY | 13470901 | . | C | A   | 1053.69 | PASS          | AC=1;AF=0.014;AN=70;BaseQRankSum=  |
| 26388 | chrY | 13470902 | . | C | T   | 4123.55 | PASS          | AC=24;AF=0.375;AN=64;BaseQRankSum  |
| 26389 | chrY | 13470903 | . | G | A   | 1119.65 | PASS          | AC=8;AF=0.121;AN=66;BaseQRankSum=  |
| 26390 | chrY | 13470925 | . | T | G   | 53.08   | PASS          | AC=1;AF=0.016;AN=64;BaseQRankSum=  |
| 26391 | chrY | 13470926 | . | C | G   | 147.07  | my_snp_filter | AC=3;AF=0.047;AN=64;BaseQ          |
| 26392 | chrY | 13470927 | . | T | C   | 808.11  | PASS          | AC=6;AF=0.091;AN=66;BaseQRankSum=  |
| 26393 | chrY | 13470942 | . | T | G   | 4745.88 | PASS          | AC=18;AF=0.450;AN=40;BaseQRankSum  |
| 26394 | chrY | 13470965 | . | T | C   | 1698.07 | PASS          | AC=9;AF=0.205;AN=44;BaseQRankSum=  |
| 26395 | chrY | 13470989 | . | G | C   | 491.49  | PASS          | AC=7;AF=0.130;AN=54;BaseQRankSum=  |
| 26396 | chrY | 13471137 | . | G | A   | 204.58  | PASS          | AC=1;AF=0.019;AN=54;BaseQRankSum=  |
| 26397 | chrY | 13471145 | . | T | C   | 275.47  | PASS          | AC=3;AF=0.056;AN=54;BaseQRankSum=  |
| 26398 | chrY | 13471151 | . | G | T   | 280.71  | PASS          | AC=2;AF=0.038;AN=52;BaseQRankSum=  |
| 26399 | chrY | 13471160 | . | A | G   | 336.14  | PASS          | AC=4;AF=0.080;AN=50;BaseQRankSum=  |
| 26400 | chrY | 13471169 | . | A | C   | 333.92  | PASS          | AC=3;AF=0.065;AN=46;BaseQRankSum=  |
| 26401 | chrY | 13471170 | . | G | A   | 124.72  | PASS          | AC=1;AF=0.019;AN=52;BaseQRankSum=  |
| 26402 | chrY | 13471188 | . | G | A   | 194.63  | PASS          | AC=1;AF=0.015;AN=66;BaseQRankSum=  |
| 26403 | chrY | 13471196 | . | T | G   | 297.66  | PASS          | AC=3;AF=0.056;AN=54;BaseQRankSum=  |
| 26404 | chrY | 13471363 | . | C | A   | 42.49   | PASS          | AC=1;AF=0.016;AN=64;BaseQRankSum=  |
| 26405 | chrY | 13471416 | . | C | T   | 83.83   | PASS          | AC=1;AF=0.018;AN=56;BaseQRankSum=  |
| 26406 | chrY | 13471418 | . | C | T   | 83.55   | PASS          | AC=1;AF=0.018;AN=56;BaseQRankSum=  |
| 26407 | chrY | 13471422 | . | G | A   | 40.19   | PASS          | AC=1;AF=0.018;AN=56;BaseQRankSum=  |
| 26408 | chrY | 13471428 | . | A | C   | 42.05   | PASS          | AC=1;AF=0.019;AN=54;BaseQRankSum=  |
| 26409 | chrY | 13471429 | . | T | C   | 41.43   | PASS          | AC=1;AF=0.019;AN=52;BaseQRankSum=  |
| 26410 | chrY | 13471438 | . | T | G   | 42.16   | PASS          | AC=1;AF=0.019;AN=54;BaseQRankSum=  |
| 26411 | chrY | 13471439 | . | C | T   | 53.30   | PASS          | AC=1;AF=0.019;AN=54;BaseQRankSum=  |
| 26412 | chrY | 13471561 | . | C | G   | 194.52  | PASS          | AC=1;AF=0.017;AN=60;BaseQRankSum=  |
| 26413 | chrY | 13471570 | . | T | A   | 278.52  | PASS          | AC=1;AF=0.017;AN=60;BaseQRankSum=  |
| 26414 | chrY | 13471585 | . | T | C   | 313.80  | PASS          | AC=2;AF=0.036;AN=56;BaseQRankSum=  |
| 26415 | chrY | 13471598 | . | G | C   | 371.70  | PASS          | AC=2;AF=0.033;AN=60;BaseQRankSum=  |
| 26416 | chrY | 13471605 | . | T | C   | 33.22   | my_snp_filter | AC=1;AF=0.017;AN=60;BaseQ          |
| 26417 | chrY | 13471628 | . | G | A   | 414.38  | PASS          | AC=6;AF=0.111;AN=54;BaseQRankSum=  |
| 26418 | chrY | 13471634 | . | A | G   | 799.89  | my_snp_filter | AC=10;AF=0.192;AN=52;Base          |
| 26419 | chrY | 13471640 | . | G | A   | 818.83  | my_snp_filter | AC=10;AF=0.192;AN=52;Base          |
| 26420 | chrY | 13471657 | . | T | C   | 1206.13 | my_snp_filter | AC=10;AF=0.185;AN=54;Base          |
| 26421 | chrY | 13471661 | . | G | A   | 281.22  | PASS          | AC=6;AF=0.094;AN=64;BaseQRankSum=  |
| 26422 | chrY | 13471663 | . | T | C   | 977.51  | my_snp_filter | AC=10;AF=0.179;AN=56;Base          |
| 26423 | chrY | 13471669 | . | A | G   | 280.30  | PASS          | AC=5;AF=0.078;AN=64;BaseQRankSum=  |
| 26424 | chrY | 13471675 | . | C | T   | 70.63   | PASS          | AC=1;AF=0.019;AN=52;BaseQRankSum=  |
| 26425 | chrY | 13471678 | . | G | A   | 67.09   | PASS          | AC=1;AF=0.019;AN=52;BaseQRankSum=  |
| 26426 | chrY | 13471680 | . | C | T   | 109.61  | PASS          | AC=1;AF=0.019;AN=52;BaseQRankSum=  |
| 26427 | chrY | 13471703 | . | C | G   | 113.45  | PASS          | AC=1;AF=0.021;AN=48;BaseQRankSum=  |
| 26428 | chrY | 13471707 | . | A | C   | 230.11  | PASS          | AC=3;AF=0.063;AN=48;BaseQRankSum=  |
| 26429 | chrY | 13471709 | . | A | G   | 272.11  | PASS          | AC=3;AF=0.063;AN=48;BaseQRankSum=  |
| 26430 | chrY | 13471723 | . | G | T   | 337.69  | PASS          | AC=4;AF=0.095;AN=42;BaseQRankSum=  |
| 26431 | chrY | 13471726 | . | C | T   | 295.74  | PASS          | AC=4;AF=0.083;AN=48;BaseQRankSum=  |
| 26432 | chrY | 13471727 | . | G | A   | 59.84   | my_snp_filter | AC=2;AF=0.033;AN=60;BaseQ          |
| 26433 | chrY | 13471731 | . | G | C   | 304.51  | PASS          | AC=4;AF=0.100;AN=40;BaseQRankSum=  |
| 26434 | chrY | 13471750 | . | C | T   | 358.39  | PASS          | AC=3;AF=0.047;AN=64;BaseQRankSum=  |
| 26435 | chrY | 13471757 | . | T | A   | 198.54  | PASS          | AC=1;AF=0.016;AN=64;BaseQRankSum=  |
| 26436 | chrY | 13471764 | . | G | T   | 39.94   | PASS          | AC=1;AF=0.015;AN=68;BaseQRankSum=  |
| 26437 | chrY | 13471765 | . | A | G   | 32.97   | my_snp_filter | AC=1;AF=0.015;AN=68;BaseQ          |
| 26438 | chrY | 13471767 | . | A | T   | 324.20  | PASS          | AC=1;AF=0.016;AN=62;BaseQRankSum=  |
| 26439 | chrY | 13471768 | . | T | C   | 580.61  | PASS          | AC=6;AF=0.097;AN=62;BaseQRankSum=  |
| 26440 | chrY | 13471770 | . | G | A   | 394.79  | PASS          | AC=1;AF=0.014;AN=70;BaseQRankSum=  |
| 26441 | chrY | 13471772 | . | G | T   | 434.63  | PASS          | AC=1;AF=0.014;AN=70;BaseQRankSum=  |
| 26442 | chrY | 13471775 | . | C | T   | 38.17   | PASS          | AC=1;AF=0.015;AN=68;BaseQRankSum=  |
| 26443 | chrY | 13471776 | . | C | T   | 1401.16 | PASS          | AC=11;AF=0.172;AN=64;BaseQRankSum  |
| 26444 | chrY | 13471777 | . | C | T   | 685.50  | PASS          | AC=5;AF=0.081;AN=62;BaseQRankSum=  |
| 26445 | chrY | 13471778 | . | G | A   | 1877.61 | PASS          | AC=12;AF=0.188;AN=64;BaseQRankSum  |
| 26446 | chrY | 13471780 | . | G | C   | 936.33  | PASS          | AC=11;AF=0.157;AN=70;BaseQRankSum  |
| 26447 | chrY | 13471783 | . | A | T   | 78.85   | PASS          | AC=1;AF=0.014;AN=70;BaseQRankSum=  |
| 26448 | chrY | 13471789 | . | A | G   | 32.61   | PASS          | AC=2;AF=0.029;AN=70;BaseQRankSum=  |

|       |      |          |   |   |       |          |               |                                    |
|-------|------|----------|---|---|-------|----------|---------------|------------------------------------|
| 26449 | chrY | 13471792 | . | C | T     | 197.83   | PASS          | AC=3;AF=0.043;AN=70;BaseQRankSum=  |
| 26450 | chrY | 13471796 | . | G | C     | 434.31   | PASS          | AC=1;AF=0.014;AN=70;BaseQRankSum=  |
| 26451 | chrY | 13471797 | . | G | C     | 645.04   | PASS          | AC=2;AF=0.029;AN=70;BaseQRankSum=  |
| 26452 | chrY | 13471801 | . | A | G     | 75.57    | PASS          | AC=2;AF=0.029;AN=70;BaseQRankSum=  |
| 26453 | chrY | 13471802 | . | G | A     | 343.63   | PASS          | AC=1;AF=0.014;AN=70;BaseQRankSum=  |
| 26454 | chrY | 13471805 | . | C | T     | 141.83   | PASS          | AC=3;AF=0.047;AN=64;BaseQRankSum=  |
| 26455 | chrY | 13471806 | . | A | G     | 4379.84  | PASS          | AC=22;AF=0.379;AN=58;BaseQRankSum= |
| 26456 | chrY | 13471807 | . | C | T     | 876.27   | PASS          | AC=2;AF=0.036;AN=56;BaseQRankSum=  |
| 26457 | chrY | 13471810 | . | T | C     | 716.01   | PASS          | AC=10;AF=0.152;AN=66;BaseQRankSum= |
| 26458 | chrY | 13471811 | . | G | T,A   | 3016.77  | PASS          | AC=14,1;AF=0.206,0.015;AN=68;BaseQ |
| 26459 | chrY | 13471815 | . | G | A     | 68.68    | PASS          | AC=3;AF=0.043;AN=70;BaseQRankSum=  |
| 26460 | chrY | 13471820 | . | A | C     | 57.62    | PASS          | AC=4;AF=0.057;AN=70;BaseQRankSum=  |
| 26461 | chrY | 13471821 | . | C | A     | 83.87    | PASS          | AC=3;AF=0.043;AN=70;BaseQRankSum=  |
| 26462 | chrY | 13471823 | . | C | T,A   | 887.60   | PASS          | AC=3,1;AF=0.045,0.015;AN=66;BaseQ  |
| 26463 | chrY | 13471828 | . | G | T     | 31.80    | my_snp_filter | AC=1;AF=0.014;AN=70;BaseQ          |
| 26464 | chrY | 13471829 | . | C | T     | 216.42   | PASS          | AC=3;AF=0.044;AN=68;BaseQRankSum=  |
| 26465 | chrY | 13471830 | . | A | G,T   | 4837.27  | PASS          | AC=16,1;AF=0.296,0.019;AN=54;BaseQ |
| 26466 | chrY | 13471833 | . | G | C     | 257.76   | PASS          | AC=3;AF=0.044;AN=68;BaseQRankSum=  |
| 26467 | chrY | 13471836 | . | G | C     | 132.59   | my_snp_filter | AC=4;AF=0.059;AN=68;BaseQ          |
| 26468 | chrY | 13471842 | . | T | G,C,A | 3062.91  | PASS          | AC=9,2,3;AF=0.161,0.036,0.054;AN=  |
| 26469 | chrY | 13471843 | . | G | T     | 328.88   | PASS          | AC=3;AF=0.043;AN=70;BaseQRankSum=  |
| 26470 | chrY | 13471848 | . | C | G     | 131.51   | my_snp_filter | AC=4;AF=0.057;AN=70;BaseQ          |
| 26471 | chrY | 13471850 | . | G | A     | 135.17   | my_snp_filter | AC=4;AF=0.057;AN=70;BaseQ          |
| 26472 | chrY | 13471851 | . | A | C     | 1916.46  | PASS          | AC=10;AF=0.143;AN=70;BaseQRankSum= |
| 26473 | chrY | 13471853 | . | G | A,C   | 1344.25  | PASS          | AC=5,1;AF=0.074,0.015;AN=68;BaseQ  |
| 26474 | chrY | 13471854 | . | G | A     | 113.58   | PASS          | AC=1;AF=0.015;AN=68;BaseQRankSum=  |
| 26475 | chrY | 13471864 | . | G | C,*   | 318.22   | PASS          | AC=3,3;AF=0.043,0.043;AN=70;BaseQ  |
| 26476 | chrY | 13471866 | . | T | A,*   | 1953.23  | PASS          | AC=12,1;AF=0.182,0.015;AN=66;BaseQ |
| 26477 | chrY | 13471867 | . | C | T     | 157.87   | my_snp_filter | AC=3;AF=0.045;AN=66;BaseQ          |
| 26478 | chrY | 13471869 | . | C | T     | 832.15   | PASS          | AC=4;AF=0.061;AN=66;BaseQRankSum=  |
| 26479 | chrY | 13471871 | . | C | C,A   | 249.95   | PASS          | AC=1,1;AF=0.014,0.014;AN=70;BaseQ  |
| 26480 | chrY | 13471872 | . | G | A     | 71.21    | my_snp_filter | AC=2;AF=0.029;AN=70;BaseQ          |
| 26481 | chrY | 13471873 | . | G | A,T   | 1051.86  | PASS          | AC=3,3;AF=0.043,0.043;AN=70;BaseQ  |
| 26482 | chrY | 13471874 | . | T | C     | 769.15   | PASS          | AC=6;AF=0.086;AN=70;BaseQRankSum=  |
| 26483 | chrY | 13471876 | . | G | T     | 559.50   | PASS          | AC=4;AF=0.057;AN=70;BaseQRankSum=  |
| 26484 | chrY | 13471880 | . | C | T,G   | 1616.60  | PASS          | AC=6,3;AF=0.091,0.045;AN=66;BaseQ  |
| 26485 | chrY | 13471881 | . | G | A     | 568.86   | PASS          | AC=5;AF=0.078;AN=64;BaseQRankSum=  |
| 26486 | chrY | 13471882 | . | G | A     | 578.30   | PASS          | AC=3;AF=0.048;AN=62;BaseQRankSum=  |
| 26487 | chrY | 13471883 | . | T | G     | 8682.99  | PASS          | AC=24;AF=0.444;AN=54;BaseQRankSum= |
| 26488 | chrY | 13471884 | . | G | T     | 262.30   | PASS          | AC=2;AF=0.029;AN=70;BaseQRankSum=  |
| 26489 | chrY | 13471887 | . | A | G     | 3616.37  | PASS          | AC=9;AF=0.129;AN=70;BaseQRankSum=  |
| 26490 | chrY | 13471891 | . | C | T     | 337.23   | PASS          | AC=2;AF=0.029;AN=70;BaseQRankSum=  |
| 26491 | chrY | 13471894 | . | G | C,T   | 182.12   | my_snp_filter | AC=2,1;AF=0.029,0.014;AN=          |
| 26492 | chrY | 13471895 | . | G | A     | 168.58   | my_snp_filter | AC=4;AF=0.057;AN=70;BaseQ          |
| 26493 | chrY | 13471896 | . | C | A     | 240.30   | my_snp_filter | AC=3;AF=0.043;AN=70;BaseQ          |
| 26494 | chrY | 13471901 | . | C | T,A   | 1689.26  | PASS          | AC=5,1;AF=0.071,0.014;AN=70;BaseQ  |
| 26495 | chrY | 13471908 | . | C | T     | 137.25   | my_snp_filter | AC=2;AF=0.029;AN=70;BaseQ          |
| 26496 | chrY | 13471912 | . | C | A     | 267.18   | PASS          | AC=3;AF=0.043;AN=70;BaseQRankSum=  |
| 26497 | chrY | 13471916 | . | C | T     | 83.30    | PASS          | AC=1;AF=0.014;AN=70;BaseQRankSum=  |
| 26498 | chrY | 13471917 | . | G | A     | 92.29    | my_snp_filter | AC=4;AF=0.059;AN=68;BaseQ          |
| 26499 | chrY | 13471918 | . | T | C,A   | 14241.21 | PASS          | AC=28,2;AF=0.412,0.029;AN=         |
| 26500 | chrY | 13471921 | . | G | A     | 223.17   | my_snp_filter | AC=5;AF=0.074;AN=68;BaseQ          |
| 26501 | chrY | 13471925 | . | C | T     | 101.93   | my_snp_filter | AC=1;AF=0.014;AN=70;BaseQ          |
| 26502 | chrY | 13471927 | . | C | A     | 232.94   | my_snp_filter | AC=7;AF=0.100;AN=70;BaseQ          |
| 26503 | chrY | 13471930 | . | T | G     | 17196.71 | PASS          | AC=31;AF=0.456;AN=68;BaseQ         |
| 26504 | chrY | 13471931 | . | G | A     | 498.91   | PASS          | AC=5;AF=0.074;AN=68;BaseQRankSum=  |
| 26505 | chrY | 13471944 | . | G | C     | 1192.75  | PASS          | AC=2;AF=0.029;AN=70;BaseQRankSum=  |
| 26506 | chrY | 13471947 | . | C | T     | 685.89   | PASS          | AC=3;AF=0.043;AN=70;BaseQRankSum=  |
| 26507 | chrY | 13471948 | . | G | A     | 970.09   | PASS          | AC=14;AF=0.200;AN=70;BaseQRankSum= |
| 26508 | chrY | 13471950 | . | G | T     | 359.67   | my_snp_filter | AC=5;AF=0.071;AN=70;BaseQ          |
| 26509 | chrY | 13471952 | . | C | T,G   | 616.98   | PASS          | AC=6,5;AF=0.086,0.071;AN=70;BaseQ  |
| 26510 | chrY | 13471953 | . | T | A     | 121.72   | PASS          | AC=2;AF=0.029;AN=70;BaseQRankSum=  |
| 26511 | chrY | 13471957 | . | A | C     | 4780.29  | PASS          | AC=23;AF=0.359;AN=64;BaseQRankSum= |
| 26512 | chrY | 13471959 | . | C | A,T   | 1904.89  | PASS          | AC=11,2;AF=0.162,0.029;AN=68;BaseQ |
| 26513 | chrY | 13471960 | . | C | A,T   | 2359.43  | PASS          | AC=6,6;AF=0.091,0.091;AN=66;BaseQ  |
| 26514 | chrY | 13471961 | . | G | A     | 1392.66  | PASS          | AC=9;AF=0.132;AN=68;BaseQRankSum=  |
| 26515 | chrY | 13471962 | . | C | A     | 265.97   | my_snp_filter | AC=4;AF=0.057;AN=70;BaseQ          |
| 26516 | chrY | 13471963 | . | C | T     | 1383.26  | PASS          | AC=4;AF=0.057;AN=70;BaseQRankSum=  |
| 26517 | chrY | 13471964 | . | C | A     | 4372.36  | PASS          | AC=17;AF=0.243;AN=70;BaseQRankSum= |
| 26518 | chrY | 13471968 | . | C | T,G   | 1808.64  | PASS          | AC=9,2;AF=0.129,0.029;AN=70;BaseQ  |
| 26519 | chrY | 13471969 | . | C | A     | 1497.75  | PASS          | AC=5;AF=0.071;AN=70;BaseQRankSum=  |
| 26520 | chrY | 13471972 | . | T | C,A   | 7719.16  | PASS          | AC=22,2;AF=0.355,0.032;AN=62;BaseQ |
| 26521 | chrY | 13471973 | . | G | A     | 1384.44  | PASS          | AC=6;AF=0.097;AN=62;BaseQRankSum=  |
| 26522 | chrY | 13471974 | . | G | A     | 65.27    | my_snp_filter | AC=1;AF=0.015;AN=68;BaseQ          |
| 26523 | chrY | 13471975 | . | G | C,A   | 1852.99  | PASS          | AC=3,9;AF=0.043,0.129;AN=70;BaseQ  |
| 26524 | chrY | 13471978 | . | G | C     | 44       | PASS          | AC=2;AF=0.029;AN=70;BaseQRankSum=  |

|       |      |          |   |   |     |         |               |                                    |
|-------|------|----------|---|---|-----|---------|---------------|------------------------------------|
| 26525 | chrY | 13471981 | . | C | T,A | 1384.25 | PASS          | AC=8,4;AF=0.114,0.057;AN=70;BaseQ  |
| 26526 | chrY | 13471982 | . | G | C   | 521.56  | PASS          | AC=8;AF=0.114;AN=70;BaseQRankSum=  |
| 26527 | chrY | 13471983 | . | G | A   | 158.44  | my_snp_filter | AC=4;AF=0.057;AN=70;BaseQ          |
| 26528 | chrY | 13471985 | . | C | G   | 69.32   | my_snp_filter | AC=1;AF=0.014;AN=70;BaseQ          |
| 26529 | chrY | 13471987 | . | G | A   | 90.74   | my_snp_filter | AC=2;AF=0.029;AN=70;BaseQ          |
| 26530 | chrY | 13471993 | . | C | G   | 536.60  | PASS          | AC=3;AF=0.043;AN=70;BaseQRankSum=  |
| 26531 | chrY | 13471997 | . | C | T   | 444.42  | PASS          | AC=1;AF=0.014;AN=70;BaseQRankSum=  |
| 26532 | chrY | 13472003 | . | T | A   | 3498.42 | PASS          | AC=11;AF=0.177;AN=62;BaseQRankSum= |
| 26533 | chrY | 13472005 | . | G | A   | 502.38  | PASS          | AC=1;AF=0.016;AN=64;BaseQRankSum=  |
| 26534 | chrY | 13472006 | . | T | A   | 37      | my_snp_filter | AC=1;AF=0.015;AN=66;BaseQ          |
| 26535 | chrY | 13472007 | . | C | A   | 37.06   | my_snp_filter | AC=1;AF=0.015;AN=66;BaseQ          |
| 26536 | chrY | 13472008 | . | T | C   | 1894.97 | PASS          | AC=8;AF=0.118;AN=68;BaseQRankSum=  |
| 26537 | chrY | 13472014 | . | C | T   | 296.77  | PASS          | AC=1;AF=0.015;AN=66;BaseQRankSum=  |
| 26538 | chrY | 13472015 | . | G | A   | 109.42  | my_snp_filter | AC=4;AF=0.061;AN=66;BaseQ          |
| 26539 | chrY | 13472018 | . | A | G   | 4309.53 | PASS          | AC=10;AF=0.217;AN=46;BaseQRankSum= |
| 26540 | chrY | 13472019 | . | A | G   | 57.09   | my_snp_filter | AC=1;AF=0.018;AN=56;BaseQ          |
| 26541 | chrY | 13472021 | . | A | G   | 1751.55 | PASS          | AC=7;AF=0.109;AN=64;BaseQRankSum=  |
| 26542 | chrY | 13472024 | . | A | C,G | 3074.92 | PASS          | AC=5,5;AF=0.089,0.089;AN=56;BaseQ  |
| 26543 | chrY | 13472026 | . | C | A   | 1783.48 | PASS          | AC=6;AF=0.097;AN=62;BaseQRankSum=  |
| 26544 | chrY | 13472029 | . | T | C   | 2471.91 | PASS          | AC=9;AF=0.180;AN=50;BaseQRankSum=  |
| 26545 | chrY | 13472031 | . | C | G   | 192.26  | my_snp_filter | AC=4;AF=0.069;AN=58;BaseQ          |
| 26546 | chrY | 13472035 | . | A | T,G | 482.21  | PASS          | AC=4,1;AF=0.077,0.019;AN=52;BaseQ  |
| 26547 | chrY | 13472064 | . | T | C   | 1164.64 | PASS          | AC=5;AF=0.104;AN=48;BaseQRankSum=  |
| 26548 | chrY | 13472066 | . | G | A   | 184.40  | PASS          | AC=2;AF=0.036;AN=56;BaseQRankSum=  |
| 26549 | chrY | 13472071 | . | A | C   | 1095.81 | PASS          | AC=5;AF=0.093;AN=54;BaseQRankSum=  |
| 26550 | chrY | 13472072 | . | C | T   | 462.33  | PASS          | AC=3;AF=0.054;AN=56;BaseQRankSum=  |
| 26551 | chrY | 13472076 | . | A | T   | 33.37   | my_snp_filter | AC=2;AF=0.034;AN=58;BaseQ          |
| 26552 | chrY | 13472077 | . | T | G   | 84.62   | my_snp_filter | AC=2;AF=0.036;AN=56;BaseQ          |
| 26553 | chrY | 13472080 | . | G | A   | 1461.83 | PASS          | AC=4;AF=0.069;AN=58;BaseQRankSum=  |
| 26554 | chrY | 13472082 | . | C | G   | 490.47  | PASS          | AC=4;AF=0.071;AN=56;BaseQRankSum=  |
| 26555 | chrY | 13472083 | . | C | A   | 689.78  | PASS          | AC=2;AF=0.034;AN=58;BaseQRankSum=  |
| 26556 | chrY | 13472091 | . | A | C   | 2003.67 | PASS          | AC=7;AF=0.146;AN=48;BaseQRankSum=  |
| 26557 | chrY | 13472093 | . | A | G   | 2342.39 | PASS          | AC=7;AF=0.146;AN=48;BaseQRankSum=  |
| 26558 | chrY | 13472100 | . | G | C   | 512.48  | PASS          | AC=3;AF=0.050;AN=60;BaseQRankSum=  |
| 26559 | chrY | 13472102 | . | C | T   | 682.04  | PASS          | AC=2;AF=0.033;AN=60;BaseQRankSum=  |
| 26560 | chrY | 13472107 | . | C | T   | 2039.64 | PASS          | AC=4;AF=0.087;AN=46;BaseQRankSum=  |
| 26561 | chrY | 13472113 | . | G | A   | 96.88   | PASS          | AC=1;AF=0.017;AN=60;BaseQRankSum=  |
| 26562 | chrY | 13472120 | . | C | T,* | 1986.27 | PASS          | AC=2,2;AF=0.048,0.048;AN=42;BaseQ  |
| 26563 | chrY | 13472121 | . | A | G,* | 2912.69 | PASS          | AC=4,2;AF=0.105,0.053;AN=38;BaseQ  |
| 26564 | chrY | 13472124 | . | T | C   | 489.48  | PASS          | AC=2;AF=0.033;AN=60;BaseQRankSum=  |
| 26565 | chrY | 13472128 | . | T | C   | 895.82  | PASS          | AC=1;AF=0.028;AN=36;BaseQRankSum=  |
| 26566 | chrY | 13472136 | . | T | C   | 2365.67 | PASS          | AC=3;AF=0.071;AN=42;BaseQRankSum=  |
| 26567 | chrY | 13472144 | . | C | A   | 882.16  | PASS          | AC=1;AF=0.017;AN=60;BaseQRankSum=  |
| 26568 | chrY | 13472166 | . | G | A   | 116.31  | PASS          | AC=1;AF=0.017;AN=60;BaseQRankSum=  |
| 26569 | chrY | 13472167 | . | C | A   | 1352.58 | PASS          | AC=3;AF=0.060;AN=50;BaseQRankSum=  |
| 26570 | chrY | 13472168 | . | C | T   | 1289.19 | PASS          | AC=12;AF=0.300;AN=40;BaseQRankSum= |
| 26571 | chrY | 13472176 | . | C | T   | 30.26   | PASS          | AC=3;AF=0.048;AN=62;BaseQRankSum=  |
| 26572 | chrY | 13472182 | . | A | C   | 39.03   | PASS          | AC=1;AF=0.016;AN=62;BaseQRankSum=  |
| 26573 | chrY | 13472184 | . | C | T   | 43.57   | PASS          | AC=1;AF=0.016;AN=62;BaseQRankSum=  |
| 26574 | chrY | 13472185 | . | A | T   | 55.31   | PASS          | AC=1;AF=0.016;AN=62;BaseQRankSum=  |
| 26575 | chrY | 13472186 | . | C | T   | 1640.92 | PASS          | AC=6;AF=0.100;AN=60;BaseQRankSum=  |
| 26576 | chrY | 13472191 | . | C | A   | 1332.47 | PASS          | AC=1;AF=0.017;AN=58;BaseQRankSum=  |
| 26577 | chrY | 13472194 | . | C | A   | 794.92  | PASS          | AC=1;AF=0.016;AN=62;BaseQRankSum=  |
| 26578 | chrY | 13472205 | . | G | C   | 888.66  | PASS          | AC=11;AF=0.423;AN=26;BaseQRankSum= |
| 26579 | chrY | 13472206 | . | A | C   | 1559.60 | PASS          | AC=9;AF=0.281;AN=32;BaseQRankSum=  |
| 26580 | chrY | 13472208 | . | C | A   | 362.82  | PASS          | AC=1;AF=0.020;AN=50;BaseQRankSum=  |
| 26581 | chrY | 13472209 | . | C | T   | 90.32   | PASS          | AC=2;AF=0.043;AN=46;DP=2211;FS=2.  |
| 26582 | chrY | 13472210 | . | A | T   | 278.31  | PASS          | AC=3;AF=0.088;AN=34;BaseQRankSum=  |
| 26583 | chrY | 13472213 | . | C | G   | 98.21   | PASS          | AC=2;AF=0.036;AN=56;BaseQRankSum=  |
| 26584 | chrY | 13472216 | . | C | A,* | 1092.05 | PASS          | AC=1,6;AF=0.019,0.111;AN=54;BaseQ  |
| 26585 | chrY | 13472222 | . | C | A   | 1397.27 | PASS          | AC=8;AF=0.154;AN=52;BaseQRankSum=  |
| 26586 | chrY | 13472223 | . | C | A   | 1133.41 | PASS          | AC=8;AF=0.167;AN=48;BaseQRankSum=  |
| 26587 | chrY | 13472224 | . | C | A   | 717.15  | PASS          | AC=2;AF=0.043;AN=46;BaseQRankSum=  |
| 26588 | chrY | 13472229 | . | C | G   | 886.49  | PASS          | AC=1;AF=0.019;AN=52;BaseQRankSum=  |
| 26589 | chrY | 13472232 | . | A | C   | 3123.63 | PASS          | AC=10;AF=0.357;AN=28;BaseQRankSum= |
| 26590 | chrY | 13472233 | . | C | T   | 118.35  | PASS          | AC=1;AF=0.026;AN=38;BaseQRankSum=  |
| 26591 | chrY | 13472236 | . | A | G   | 51.24   | PASS          | AC=2;AF=0.038;AN=52;DP=1872;FS=0.  |
| 26592 | chrY | 13472239 | . | A | T   | 173.04  | PASS          | AC=2;AF=0.042;AN=48;BaseQRankSum=  |
| 26593 | chrY | 13472243 | . | T | A   | 3640.69 | PASS          | AC=8;AF=0.250;AN=32;BaseQRankSum=  |
| 26594 | chrY | 13472249 | . | C | A   | 42.98   | my_snp_filter | AC=1;AF=0.019;AN=52;BaseQ          |
| 26595 | chrY | 13472260 | . | T | G   | 842.17  | PASS          | AC=2;AF=0.063;AN=32;BaseQRankSum=  |
| 26596 | chrY | 13472261 | . | T | C   | 2737.90 | PASS          | AC=8;AF=0.174;AN=46;BaseQRankSum=  |
| 26597 | chrY | 13472267 | . | A | C,* | 2277.97 | PASS          | AC=2,4;AF=0.059,0.118;AN=34;BaseQ  |
| 26598 | chrY | 13472268 | . | A | C,* | 950.84  | PASS          | AC=2,1;AF=0.067,0.033;AN=30;BaseQ  |
| 26599 | chrY | 13472272 | . | G | A   | 430.22  | PASS          | AC=1;AF=0.033;AN=30;BaseQRankSum=  |
| 26600 | chrY | 13472276 | . | A | C   | 3474.72 | PASS          | AC=8;AF=0.211;AN=38;BaseQRankSum=  |

|       |      |          |   |   |     |          |               |                                    |
|-------|------|----------|---|---|-----|----------|---------------|------------------------------------|
| 26601 | chrY | 13472286 | . | T | C   | 316.09   | PASS          | AC=1;AF=0.028;AN=36;BaseQRankSum=  |
| 26602 | chrY | 13472287 | . | G | A   | 289.48   | PASS          | AC=1;AF=0.025;AN=40;BaseQRankSum=  |
| 26603 | chrY | 13472295 | . | G | A   | 2842.27  | PASS          | AC=7;AF=0.135;AN=52;BaseQRankSum=  |
| 26604 | chrY | 13472300 | . | A | G   | 3012.91  | PASS          | AC=7;AF=0.125;AN=56;BaseQRankSum=  |
| 26605 | chrY | 13472312 | . | C | A   | 32.19    | my_snp_filter | AC=1;AF=0.019;AN=54;BaseQ          |
| 26606 | chrY | 13472314 | . | G | C   | 4378.86  | PASS          | AC=8;AF=0.200;AN=40;BaseQRankSum=  |
| 26607 | chrY | 13472321 | . | G | A   | 466.65   | PASS          | AC=2;AF=0.042;AN=48;BaseQRankSum=  |
| 26608 | chrY | 13472323 | . | A | T   | 4221.11  | PASS          | AC=8;AF=0.211;AN=38;BaseQRankSum=  |
| 26609 | chrY | 13472333 | . | T | C   | 890.53   | PASS          | AC=4;AF=0.143;AN=28;BaseQRankSum=  |
| 26610 | chrY | 13472334 | . | G | A   | 915.96   | PASS          | AC=4;AF=0.143;AN=28;BaseQRankSum=  |
| 26611 | chrY | 13472337 | . | T | C   | 152.47   | PASS          | AC=1;AF=0.019;AN=52;BaseQRankSum=  |
| 26612 | chrY | 13472340 | . | G | A   | 169.13   | my_snp_filter | AC=3;AF=0.056;AN=54;BaseQ          |
| 26613 | chrY | 13472341 | . | C | T   | 478.11   | PASS          | AC=2;AF=0.042;AN=48;BaseQRankSum=  |
| 26614 | chrY | 13472345 | . | C | T   | 146.14   | my_snp_filter | AC=3;AF=0.075;AN=40;BaseQ          |
| 26615 | chrY | 13472346 | . | A | G,C | 678.08   | PASS          | AC=3,1;AF=0.100,0.033;AN=30;BaseQ  |
| 26616 | chrY | 13472354 | . | G | A   | 210.14   | PASS          | AC=1;AF=0.018;AN=56;BaseQRankSum=  |
| 26617 | chrY | 13472356 | . | T | C   | 4700.97  | PASS          | AC=8;AF=0.143;AN=56;BaseQRankSum=  |
| 26618 | chrY | 13472360 | . | A | G   | 530.24   | PASS          | AC=3;AF=0.088;AN=34;BaseQRankSum=  |
| 26619 | chrY | 13472367 | . | G | C   | 6267.64  | PASS          | AC=9;AF=0.265;AN=34;BaseQRankSum=  |
| 26620 | chrY | 13472368 | . | T | C   | 6255.22  | PASS          | AC=9;AF=0.265;AN=34;BaseQRankSum=  |
| 26621 | chrY | 13472373 | . | C | A   | 6280.07  | PASS          | AC=9;AF=0.161;AN=56;BaseQRankSum=  |
| 26622 | chrY | 13472374 | . | T | C   | 6587.91  | PASS          | AC=9;AF=0.161;AN=56;BaseQRankSum=  |
| 26623 | chrY | 13472386 | . | T | C   | 8562.60  | PASS          | AC=13;AF=0.361;AN=36;BaseQRankSum= |
| 26624 | chrY | 13472388 | . | G | A   | 7823.25  | PASS          | AC=9;AF=0.161;AN=56;BaseQRankSum=  |
| 26625 | chrY | 13472389 | . | C | G   | 554.60   | PASS          | AC=6;AF=0.103;AN=58;BaseQRankSum=  |
| 26626 | chrY | 13472397 | . | A | G   | 179.02   | PASS          | AC=2;AF=0.032;AN=62;BaseQRankSum=  |
| 26627 | chrY | 13472402 | . | T | G   | 10449.15 | PASS          | AC=13;AF=0.382;AN=34;BaseQ         |
| 26628 | chrY | 13472403 | . | A | T,C | 10110.28 | PASS          | AC=4,9;AF=0.118,0.265;AN=          |
| 26629 | chrY | 13472411 | . | G | A   | 11643.32 | PASS          | AC=13;AF=0.283;AN=46;BaseQ         |
| 26630 | chrY | 13472413 | . | C | T   | 581.58   | PASS          | AC=6;AF=0.094;AN=64;BaseQRankSum=  |
| 26631 | chrY | 13472415 | . | G | A   | 10169.26 | PASS          | AC=9;AF=0.129;AN=70;BaseQ          |
| 26632 | chrY | 13472420 | . | C | A   | 479.49   | PASS          | AC=4;AF=0.057;AN=70;BaseQRankSum=  |
| 26633 | chrY | 13472442 | . | G | A   | 10069.99 | PASS          | AC=24;AF=0.400;AN=60;BaseQ         |
| 26634 | chrY | 13472444 | . | C | A   | 65.46    | my_snp_filter | AC=1;AF=0.014;AN=70;BaseQ          |
| 26635 | chrY | 13472445 | . | C | T,A | 444.09   | PASS          | AC=5,2;AF=0.071,0.029;AN=70;BaseQ  |
| 26636 | chrY | 13472450 | . | G | T   | 4817.94  | PASS          | AC=20;AF=0.286;AN=70;BaseQRankSum= |
| 26637 | chrY | 13472452 | . | C | A   | 206.94   | PASS          | AC=4;AF=0.057;AN=70;BaseQRankSum=  |
| 26638 | chrY | 13472461 | . | C | A   | 211.26   | PASS          | AC=2;AF=0.031;AN=64;BaseQRankSum=  |
| 26639 | chrY | 13472462 | . | G | A,T | 9358.35  | PASS          | AC=19,10;AF=0.317,0.167;AN=60;Bas  |
| 26640 | chrY | 13472463 | . | C | T   | 33.46    | my_snp_filter | AC=1;AF=0.015;AN=68;BaseQ          |
| 26641 | chrY | 13472465 | . | C | T,A | 301.31   | PASS          | AC=2,1;AF=0.029,0.015;AN=68;BaseQ  |
| 26642 | chrY | 13472470 | . | C | G   | 346.83   | PASS          | AC=2;AF=0.029;AN=68;BaseQRankSum=  |
| 26643 | chrY | 13472471 | . | A | G   | 1031.44  | PASS          | AC=5;AF=0.074;AN=68;BaseQRankSum=  |
| 26644 | chrY | 13472476 | . | C | G   | 192.23   | PASS          | AC=1;AF=0.019;AN=54;BaseQRankSum=  |
| 26645 | chrY | 13472477 | . | T | C   | 9750.81  | PASS          | AC=21;AF=0.420;AN=50;BaseQRankSum= |
| 26646 | chrY | 13472478 | . | G | T   | 7740.39  | PASS          | AC=23;AF=0.479;AN=48;BaseQRankSum= |
| 26647 | chrY | 13472481 | . | T | A,* | 219.32   | PASS          | AC=1,1;AF=0.020,0.020;AN=50;BaseQ  |
| 26648 | chrY | 13472484 | . | T | C   | 21401.03 | PASS          | AC=24;AF=0.500;AN=48;BaseQ         |
| 26649 | chrY | 13472485 | . | G | A   | 10234.27 | PASS          | AC=20;AF=0.400;AN=50;BaseQ         |
| 26650 | chrY | 13472488 | . | C | A   | 71.94    | PASS          | AC=1;AF=0.015;AN=66;BaseQRankSum=  |
| 26651 | chrY | 13472495 | . | C | G   | 8565.19  | PASS          | AC=19;AF=0.279;AN=68;BaseQRankSum= |
| 26652 | chrY | 13472496 | . | C | T   | 8895.34  | PASS          | AC=19;AF=0.279;AN=68;BaseQRankSum= |
| 26653 | chrY | 13472497 | . | C | A   | 11248.54 | PASS          | AC=21;AF=0.309;AN=68;BaseQ         |
| 26654 | chrY | 13472498 | . | G | T   | 102.32   | my_snp_filter | AC=2;AF=0.029;AN=70;BaseQ          |
| 26655 | chrY | 13472501 | . | C | G   | 568.89   | my_snp_filter | AC=8;AF=0.121;AN=66;BaseQ          |
| 26656 | chrY | 13472502 | . | G | T   | 39.60    | PASS          | AC=1;AF=0.014;AN=70;BaseQRankSum=  |
| 26657 | chrY | 13472510 | . | G | T   | 36.94    | PASS          | AC=1;AF=0.014;AN=70;BaseQRankSum=  |
| 26658 | chrY | 13472519 | . | T | A   | 12363.23 | PASS          | AC=21;AF=0.309;AN=68;BaseQ         |
| 26659 | chrY | 13472522 | . | A | C   | 12570.23 | PASS          | AC=21;AF=0.309;AN=68;BaseQ         |
| 26660 | chrY | 13472525 | . | T | C   | 63.29    | PASS          | AC=2;AF=0.029;AN=70;BaseQRankSum=  |
| 26661 | chrY | 13472526 | . | G | C   | 71.51    | my_snp_filter | AC=2;AF=0.029;AN=70;BaseQ          |
| 26662 | chrY | 13472532 | . | T | C   | 33.70    | PASS          | AC=1;AF=0.014;AN=70;BaseQRankSum=  |
| 26663 | chrY | 13472534 | . | C | T   | 6391.79  | PASS          | AC=16;AF=0.235;AN=68;BaseQRankSum= |
| 26664 | chrY | 13472544 | . | T | C   | 282.90   | PASS          | AC=7;AF=0.100;AN=70;BaseQRankSum=  |
| 26665 | chrY | 13472549 | . | C | A   | 72.96    | PASS          | AC=1;AF=0.014;AN=70;BaseQRankSum=  |
| 26666 | chrY | 13472556 | . | A | C   | 24723.78 | PASS          | AC=29;AF=0.483;AN=60;BaseQ         |
| 26667 | chrY | 13472560 | . | C | T   | 2693.86  | PASS          | AC=14;AF=0.200;AN=70;BaseQRankSum= |
| 26668 | chrY | 13472572 | . | G | T   | 5293.30  | PASS          | AC=17;AF=0.243;AN=70;BaseQRankSum= |
| 26669 | chrY | 13472577 | . | A | T   | 342.30   | PASS          | AC=5;AF=0.078;AN=64;BaseQRankSum=  |
| 26670 | chrY | 13472579 | . | T | C   | 12095.71 | PASS          | AC=22;AF=0.367;AN=60;BaseQ         |
| 26671 | chrY | 13472585 | . | G | A   | 10646.05 | PASS          | AC=21;AF=0.328;AN=64;BaseQ         |
| 26672 | chrY | 13472589 | . | G | A   | 11210.74 | PASS          | AC=20;AF=0.303;AN=66;BaseQ         |
| 26673 | chrY | 13472626 | . | C | A   | 11204.81 | my_snp_filter | AC=14;AF=0.219;AN=                 |
| 26674 | chrY | 13472629 | . | A | T   | 8896.56  | my_snp_filter | AC=14;AF=0.212;AN=66;BaseQ         |
| 26675 | chrY | 13472642 | . | C | G   | 10001    | my_snp_filter | AC=13;AF=0.210;AN=62;BaseQ         |
| 26676 | chrY | 13472643 | . | C | T   | 112.09   | PASS          | AC=2;AF=0.032;AN=62;BaseQRankSum=  |

|       |      |          |   |   |     |         |               |                                    |
|-------|------|----------|---|---|-----|---------|---------------|------------------------------------|
| 26677 | chrY | 13472644 | . | G | A   | 236.40  | my_snp_filter | AC=4;AF=0.065;AN=62;BaseQ          |
| 26678 | chrY | 13472667 | . | A | G   | 584.58  | PASS          | AC=4;AF=0.067;AN=60;BaseQRankSum=  |
| 26679 | chrY | 13472681 | . | C | G,A | 6044.92 | my_snp_filter | AC=10,3;AF=0.172,0.052;AN          |
| 26680 | chrY | 13472683 | . | C | T   | 1246.51 | PASS          | AC=9;AF=0.150;AN=60;BaseQRankSum=  |
| 26681 | chrY | 13472688 | . | A | T   | 1772.94 | my_snp_filter | AC=9;AF=0.161;AN=56;BaseQ          |
| 26682 | chrY | 13472705 | . | A | C,T | 5938.06 | my_snp_filter | AC=10,2;AF=0.208,0.042;AN          |
| 26683 | chrY | 13472732 | . | C | A   | 1059.83 | PASS          | AC=8;AF=0.121;AN=66;BaseQRankSum=  |
| 26684 | chrY | 13472739 | . | T | A   | 1476.99 | my_snp_filter | AC=7;AF=0.106;AN=66;BaseQ          |
| 26685 | chrY | 13472741 | . | G | A   | 1897.66 | my_snp_filter | AC=7;AF=0.106;AN=66;BaseQ          |
| 26686 | chrY | 13472744 | . | G | T   | 1199.20 | my_snp_filter | AC=7;AF=0.106;AN=66;BaseQ          |
| 26687 | chrY | 13472748 | . | A | G   | 43.88   | my_snp_filter | AC=1;AF=0.015;AN=66;BaseQ          |
| 26688 | chrY | 13472752 | . | C | A   | 788.28  | PASS          | AC=6;AF=0.091;AN=66;BaseQRankSum=  |
| 26689 | chrY | 13472755 | . | A | G   | 504.86  | PASS          | AC=6;AF=0.094;AN=64;BaseQRankSum=  |
| 26690 | chrY | 13472767 | . | T | A   | 810.02  | PASS          | AC=5;AF=0.076;AN=66;BaseQRankSum=  |
| 26691 | chrY | 13472770 | . | C | G   | 61.37   | PASS          | AC=1;AF=0.015;AN=66;BaseQRankSum=  |
| 26692 | chrY | 13472774 | . | A | G   | 64.33   | PASS          | AC=1;AF=0.015;AN=66;BaseQRankSum=  |
| 26693 | chrY | 13472779 | . | C | G   | 630.59  | PASS          | AC=5;AF=0.076;AN=66;BaseQRankSum=  |
| 26694 | chrY | 13472785 | . | C | A   | 308.38  | PASS          | AC=2;AF=0.030;AN=66;BaseQRankSum=  |
| 26695 | chrY | 13472799 | . | A | C   | 176.86  | PASS          | AC=2;AF=0.031;AN=64;BaseQRankSum=  |
| 26696 | chrY | 13472998 | . | C | G   | 90.18   | PASS          | AC=1;AF=0.015;AN=66;BaseQRankSum=  |
| 26697 | chrY | 13473041 | . | T | G   | 1052.78 | PASS          | AC=7;AF=0.113;AN=62;BaseQRankSum=  |
| 26698 | chrY | 13473042 | . | T | C   | 491.65  | PASS          | AC=5;AF=0.078;AN=64;BaseQRankSum=  |
| 26699 | chrY | 13473044 | . | T | C   | 326.78  | PASS          | AC=6;AF=0.094;AN=64;BaseQRankSum=  |
| 26700 | chrY | 13473045 | . | C | G   | 341.82  | PASS          | AC=5;AF=0.081;AN=62;BaseQRankSum=  |
| 26701 | chrY | 13473050 | . | A | T   | 66.01   | my_snp_filter | AC=2;AF=0.030;AN=66;BaseQ          |
| 26702 | chrY | 13473053 | . | C | G   | 332.86  | PASS          | AC=5;AF=0.076;AN=66;BaseQRankSum=  |
| 26703 | chrY | 13473059 | . | A | C   | 1206.61 | my_snp_filter | AC=7;AF=0.109;AN=64;BaseQ          |
| 26704 | chrY | 13473064 | . | C | T   | 430.79  | my_snp_filter | AC=6;AF=0.091;AN=66;BaseQ          |
| 26705 | chrY | 13473067 | . | T | C   | 39.75   | my_snp_filter | AC=2;AF=0.030;AN=66;BaseQ          |
| 26706 | chrY | 13473096 | . | A | T   | 102.76  | my_snp_filter | AC=1;AF=0.016;AN=64;BaseQ          |
| 26707 | chrY | 13473097 | . | G | A   | 106.78  | PASS          | AC=1;AF=0.016;AN=64;BaseQRankSum=  |
| 26708 | chrY | 13473126 | . | C | A   | 95.89   | my_snp_filter | AC=3;AF=0.044;AN=68;BaseQ          |
| 26709 | chrY | 13473132 | . | C | A   | 78.75   | my_snp_filter | AC=2;AF=0.029;AN=68;BaseQ          |
| 26710 | chrY | 13473148 | . | A | T   | 415.03  | PASS          | AC=4;AF=0.057;AN=70;BaseQRankSum=  |
| 26711 | chrY | 13473166 | . | A | T   | 257.42  | PASS          | AC=3;AF=0.043;AN=70;BaseQRankSum=  |
| 26712 | chrY | 13473172 | . | C | G   | 234.86  | PASS          | AC=3;AF=0.045;AN=66;BaseQRankSum=  |
| 26713 | chrY | 13473178 | . | T | G   | 273.74  | PASS          | AC=4;AF=0.063;AN=64;BaseQRankSum=  |
| 26714 | chrY | 13473188 | . | A | G   | 264.13  | PASS          | AC=4;AF=0.063;AN=64;BaseQRankSum=  |
| 26715 | chrY | 13473207 | . | A | T   | 210.95  | PASS          | AC=3;AF=0.047;AN=64;BaseQRankSum=  |
| 26716 | chrY | 13473214 | . | C | A   | 218.76  | PASS          | AC=3;AF=0.047;AN=64;BaseQRankSum=  |
| 26717 | chrY | 13473216 | . | A | T   | 236.45  | PASS          | AC=3;AF=0.047;AN=64;BaseQRankSum=  |
| 26718 | chrY | 13473218 | . | G | C   | 177.23  | PASS          | AC=3;AF=0.047;AN=64;BaseQRankSum=  |
| 26719 | chrY | 13473221 | . | A | G   | 182.77  | PASS          | AC=4;AF=0.063;AN=64;BaseQRankSum=  |
| 26720 | chrY | 13473375 | . | A | G   | 863     | PASS          | AC=7;AF=0.130;AN=54;BaseQRankSum=  |
| 26721 | chrY | 13473385 | . | C | T   | 204.48  | PASS          | AC=3;AF=0.048;AN=62;BaseQRankSum=  |
| 26722 | chrY | 13473390 | . | T | A   | 141.40  | PASS          | AC=1;AF=0.015;AN=68;BaseQRankSum=  |
| 26723 | chrY | 13473394 | . | C | G   | 482.53  | PASS          | AC=3;AF=0.045;AN=66;BaseQRankSum=  |
| 26724 | chrY | 13473398 | . | G | T   | 200.57  | PASS          | AC=3;AF=0.045;AN=66;BaseQRankSum=  |
| 26725 | chrY | 13473400 | . | C | A   | 277.81  | PASS          | AC=5;AF=0.074;AN=68;BaseQRankSum=  |
| 26726 | chrY | 13473401 | . | T | C   | 524.61  | PASS          | AC=3;AF=0.047;AN=64;BaseQRankSum=  |
| 26727 | chrY | 13473408 | . | C | G   | 702.86  | PASS          | AC=10;AF=0.156;AN=64;BaseQRankSum= |
| 26728 | chrY | 13473409 | . | A | T   | 49.12   | PASS          | AC=2;AF=0.029;AN=70;BaseQRankSum=  |
| 26729 | chrY | 13473411 | . | T | G   | 303.55  | PASS          | AC=5;AF=0.071;AN=70;BaseQRankSum=  |
| 26730 | chrY | 13473412 | . | T | C   | 194.96  | PASS          | AC=3;AF=0.043;AN=70;BaseQRankSum=  |
| 26731 | chrY | 13473420 | . | T | A   | 171.50  | PASS          | AC=2;AF=0.029;AN=70;BaseQRankSum=  |
| 26732 | chrY | 13473425 | . | T | A   | 500.34  | PASS          | AC=3;AF=0.043;AN=70;BaseQRankSum=  |
| 26733 | chrY | 13473426 | . | G | A   | 132.32  | my_snp_filter | AC=4;AF=0.057;AN=70;BaseQ          |
| 26734 | chrY | 13473439 | . | A | G   | 62.53   | my_snp_filter | AC=2;AF=0.029;AN=70;BaseQ          |
| 26735 | chrY | 13473440 | . | T | G   | 484.55  | PASS          | AC=3;AF=0.043;AN=70;BaseQRankSum=  |
| 26736 | chrY | 13473447 | . | C | A   | 652.46  | PASS          | AC=7;AF=0.103;AN=68;BaseQRankSum=  |
| 26737 | chrY | 13473457 | . | G | A   | 34.52   | PASS          | AC=1;AF=0.014;AN=70;BaseQRankSum=  |
| 26738 | chrY | 13473460 | . | G | A   | 35.56   | my_snp_filter | AC=3;AF=0.043;AN=70;BaseQ          |
| 26739 | chrY | 13473465 | . | A | G   | 392.51  | PASS          | AC=3;AF=0.043;AN=70;BaseQRankSum=  |
| 26740 | chrY | 13473468 | . | T | A   | 78.39   | my_snp_filter | AC=2;AF=0.029;AN=70;BaseQ          |
| 26741 | chrY | 13473479 | . | T | C   | 240.95  | PASS          | AC=2;AF=0.029;AN=70;BaseQRankSum=  |
| 26742 | chrY | 13473480 | . | C | T   | 30.91   | my_snp_filter | AC=1;AF=0.014;AN=70;BaseQ          |
| 26743 | chrY | 13473489 | . | G | C   | 48.96   | my_snp_filter | AC=2;AF=0.029;AN=70;BaseQ          |
| 26744 | chrY | 13473496 | . | C | G   | 57.68   | PASS          | AC=1;AF=0.014;AN=70;BaseQRankSum=  |
| 26745 | chrY | 13473498 | . | G | C   | 78.27   | my_snp_filter | AC=3;AF=0.043;AN=70;BaseQ          |
| 26746 | chrY | 13473507 | . | G | T   | 362.02  | PASS          | AC=5;AF=0.078;AN=64;BaseQRankSum=  |
| 26747 | chrY | 13473510 | . | A | G   | 310.69  | PASS          | AC=6;AF=0.086;AN=70;BaseQRankSum=  |
| 26748 | chrY | 13473511 | . | T | A   | 89.11   | PASS          | AC=2;AF=0.029;AN=70;BaseQRankSum=  |
| 26749 | chrY | 13473522 | . | T | C   | 187.77  | PASS          | AC=4;AF=0.061;AN=66;BaseQRankSum=  |
| 26750 | chrY | 13473535 | . | G | A,C | 179.60  | PASS          | AC=3,1;AF=0.047,0.016;AN=64;BaseQ  |
| 26751 | chrY | 13473565 | . | G | C   | 127.30  | PASS          | AC=1;AF=0.017;AN=58;BaseQRankSum=  |
| 26752 | chrY | 13473579 | . | C | G   | 79.75   | PASS          | AC=1;AF=0.016;AN=62;BaseQRankSum=  |



|       |      |          |   |   |     |         |               |                                    |
|-------|------|----------|---|---|-----|---------|---------------|------------------------------------|
| 26753 | chrY | 13473607 | . | G | A   | 351.05  | PASS          | AC=2;AF=0.038;AN=52;BaseQRankSum=  |
| 26754 | chrY | 13473618 | . | G | A   | 1123.07 | PASS          | AC=5;AF=0.089;AN=56;BaseQRankSum=  |
| 26755 | chrY | 13473626 | . | T | G   | 31.44   | PASS          | AC=1;AF=0.014;AN=70;BaseQRankSum=  |
| 26756 | chrY | 13473632 | . | A | T   | 291.81  | PASS          | AC=5;AF=0.071;AN=70;BaseQRankSum=  |
| 26757 | chrY | 13473654 | . | A | C   | 200.23  | PASS          | AC=2;AF=0.029;AN=70;BaseQRankSum=  |
| 26758 | chrY | 13473658 | . | T | A   | 108.03  | PASS          | AC=1;AF=0.015;AN=68;BaseQRankSum=  |
| 26759 | chrY | 13473659 | . | C | G   | 125     | PASS          | AC=1;AF=0.015;AN=68;BaseQRankSum=  |
| 26760 | chrY | 13473673 | . | C | A   | 101.35  | PASS          | AC=1;AF=0.016;AN=64;BaseQRankSum=  |
| 26761 | chrY | 13473679 | . | C | A   | 1986.85 | my_snp_filter | AC=8;AF=0.129;AN=62;BaseQ          |
| 26762 | chrY | 13473684 | . | C | G,A | 2982.29 | my_snp_filter | AC=8,3;AF=0.133,0.050;AN=          |
| 26763 | chrY | 13473685 | . | T | G   | 1292.47 | PASS          | AC=6;AF=0.097;AN=62;BaseQRankSum=  |
| 26764 | chrY | 13473687 | . | A | T   | 1486.26 | PASS          | AC=6;AF=0.103;AN=58;BaseQRankSum=  |
| 26765 | chrY | 13473693 | . | C | A   | 45.29   | PASS          | AC=1;AF=0.016;AN=64;BaseQRankSum=  |
| 26766 | chrY | 13473699 | . | T | A   | 123.80  | PASS          | AC=1;AF=0.019;AN=52;BaseQRankSum=  |
| 26767 | chrY | 13473703 | . | C | A   | 51.15   | PASS          | AC=1;AF=0.019;AN=52;BaseQRankSum=  |
| 26768 | chrY | 13473704 | . | A | C   | 118.84  | PASS          | AC=1;AF=0.019;AN=52;BaseQRankSum=  |
| 26769 | chrY | 13473705 | . | G | C   | 1702.97 | my_snp_filter | AC=7;AF=0.135;AN=52;BaseQ          |
| 26770 | chrY | 13473712 | . | T | A   | 888.58  | PASS          | AC=5;AF=0.104;AN=48;BaseQRankSum=  |
| 26771 | chrY | 13473716 | . | A | T   | 6687.75 | PASS          | AC=12;AF=0.286;AN=42;BaseQRankSum= |
| 26772 | chrY | 13473719 | . | C | T   | 934.38  | PASS          | AC=6;AF=0.111;AN=54;BaseQRankSum=  |
| 26773 | chrY | 13473728 | . | C | T   | 129.04  | my_snp_filter | AC=1;AF=0.016;AN=64;BaseQ          |
| 26774 | chrY | 13473729 | . | C | A   | 76.83   | PASS          | AC=1;AF=0.016;AN=64;BaseQRankSum=  |
| 26775 | chrY | 13473733 | . | A | T   | 121.49  | PASS          | AC=1;AF=0.015;AN=68;BaseQRankSum=  |
| 26776 | chrY | 13473740 | . | G | A   | 115.03  | PASS          | AC=1;AF=0.015;AN=68;BaseQRankSum=  |
| 26777 | chrY | 13473742 | . | C | A   | 791.67  | PASS          | AC=4;AF=0.061;AN=66;BaseQRankSum=  |
| 26778 | chrY | 13473744 | . | A | G   | 139.43  | my_snp_filter | AC=1;AF=0.015;AN=66;BaseQ          |
| 26779 | chrY | 13473747 | . | C | G,A | 413.35  | my_snp_filter | AC=2,1;AF=0.030,0.015;AN=          |
| 26780 | chrY | 13473751 | . | A | G   | 119.10  | PASS          | AC=1;AF=0.015;AN=66;BaseQRankSum=  |
| 26781 | chrY | 13473756 | . | C | A   | 109.38  | PASS          | AC=1;AF=0.014;AN=70;BaseQRankSum=  |
| 26782 | chrY | 13473760 | . | A | T   | 112.56  | PASS          | AC=1;AF=0.014;AN=70;BaseQRankSum=  |
| 26783 | chrY | 13473762 | . | C | T   | 124.39  | my_snp_filter | AC=2;AF=0.029;AN=68;BaseQ          |
| 26784 | chrY | 13473764 | . | G | T   | 73.72   | my_snp_filter | AC=1;AF=0.016;AN=64;BaseQ          |
| 26785 | chrY | 13473766 | . | G | A   | 31.35   | PASS          | AC=1;AF=0.014;AN=70;BaseQRankSum=  |
| 26786 | chrY | 13473768 | . | G | T   | 71.53   | my_snp_filter | AC=1;AF=0.016;AN=64;BaseQ          |
| 26787 | chrY | 13473773 | . | G | A   | 123.04  | PASS          | AC=1;AF=0.014;AN=70;BaseQRankSum=  |
| 26788 | chrY | 13473774 | . | T | G   | 94.24   | PASS          | AC=4;AF=0.057;AN=70;BaseQRankSum=  |
| 26789 | chrY | 13473776 | . | C | A   | 118.30  | PASS          | AC=1;AF=0.014;AN=70;BaseQRankSum=  |
| 26790 | chrY | 13473780 | . | G | A   | 708.62  | PASS          | AC=8;AF=0.114;AN=70;BaseQRankSum=  |
| 26791 | chrY | 13473781 | . | A | G   | 36.54   | PASS          | AC=1;AF=0.015;AN=68;BaseQRankSum=  |
| 26792 | chrY | 13473784 | . | T | C   | 205     | PASS          | AC=1;AF=0.014;AN=70;BaseQRankSum=  |
| 26793 | chrY | 13473788 | . | A | C   | 92.12   | my_snp_filter | AC=1;AF=0.016;AN=64;BaseQ          |
| 26794 | chrY | 13473793 | . | C | G   | 220.70  | PASS          | AC=3;AF=0.045;AN=66;BaseQRankSum=  |
| 26795 | chrY | 13473794 | . | C | T,G | 924.18  | PASS          | AC=7,2;AF=0.109,0.031;AN=64;BaseQ  |
| 26796 | chrY | 13473797 | . | C | A   | 128.90  | my_snp_filter | AC=1;AF=0.015;AN=68;BaseQ          |
| 26797 | chrY | 13473799 | . | C | G,T | 600.69  | PASS          | AC=4,2;AF=0.057,0.029;AN=70;BaseQ  |
| 26798 | chrY | 13473801 | . | A | T   | 268.22  | PASS          | AC=2;AF=0.029;AN=70;BaseQRankSum=  |
| 26799 | chrY | 13473802 | . | G | T   | 288.76  | PASS          | AC=4;AF=0.057;AN=70;BaseQRankSum=  |
| 26800 | chrY | 13473806 | . | G | T   | 282.15  | PASS          | AC=4;AF=0.057;AN=70;BaseQRankSum=  |
| 26801 | chrY | 13473809 | . | T | C   | 45.02   | PASS          | AC=2;AF=0.029;AN=70;BaseQRankSum=  |
| 26802 | chrY | 13473811 | . | T | C   | 273.53  | my_snp_filter | AC=4;AF=0.057;AN=70;BaseQ          |
| 26803 | chrY | 13473815 | . | G | A   | 73.15   | PASS          | AC=1;AF=0.014;AN=70;BaseQRankSum=  |
| 26804 | chrY | 13473819 | . | A | G   | 712.93  | PASS          | AC=7;AF=0.103;AN=68;BaseQRankSum=  |
| 26805 | chrY | 13473822 | . | C | T   | 236.77  | PASS          | AC=3;AF=0.043;AN=70;BaseQRankSum=  |
| 26806 | chrY | 13473823 | . | C | A   | 240.35  | PASS          | AC=3;AF=0.044;AN=68;BaseQRankSum=  |
| 26807 | chrY | 13473827 | . | C | G,T | 3168.14 | PASS          | AC=11,2;AF=0.157,0.029;AN=70;BaseQ |
| 26808 | chrY | 13473828 | . | A | C   | 34.23   | PASS          | AC=1;AF=0.014;AN=70;BaseQRankSum=  |
| 26809 | chrY | 13473832 | . | G | A   | 35.12   | my_snp_filter | AC=2;AF=0.029;AN=70;BaseQ          |
| 26810 | chrY | 13473833 | . | G | C   | 82.67   | my_snp_filter | AC=3;AF=0.043;AN=70;BaseQ          |
| 26811 | chrY | 13473834 | . | G | A   | 612.59  | PASS          | AC=3;AF=0.043;AN=70;BaseQRankSum=  |
| 26812 | chrY | 13473835 | . | T | A   | 2856.97 | PASS          | AC=10;AF=0.143;AN=70;BaseQRankSum= |
| 26813 | chrY | 13473839 | . | C | G   | 100.86  | PASS          | AC=2;AF=0.029;AN=70;BaseQRankSum=  |
| 26814 | chrY | 13473840 | . | A | C   | 40.22   | PASS          | AC=1;AF=0.014;AN=70;BaseQRankSum=  |
| 26815 | chrY | 13473842 | . | T | C   | 32.34   | PASS          | AC=1;AF=0.014;AN=70;BaseQRankSum=  |
| 26816 | chrY | 13473845 | . | A | G   | 35.50   | PASS          | AC=2;AF=0.029;AN=70;BaseQRankSum=  |
| 26817 | chrY | 13473848 | . | G | T   | 134.27  | my_snp_filter | AC=3;AF=0.043;AN=70;BaseQ          |
| 26818 | chrY | 13473852 | . | T | A   | 71.76   | PASS          | AC=1;AF=0.014;AN=70;BaseQRankSum=  |
| 26819 | chrY | 13473862 | . | C | A,* | 1032.83 | PASS          | AC=4,3;AF=0.059,0.044;AN=68;BaseQ  |
| 26820 | chrY | 13473863 | . | C | A   | 355.28  | PASS          | AC=3;AF=0.044;AN=68;BaseQRankSum=  |
| 26821 | chrY | 13473864 | . | C | T,A | 2682.36 | PASS          | AC=7,1;AF=0.100,0.014;AN=70;BaseQ  |
| 26822 | chrY | 13473873 | . | C | T   | 318.92  | PASS          | AC=3;AF=0.047;AN=64;BaseQRankSum=  |
| 26823 | chrY | 13473874 | . | A | G   | 35.65   | PASS          | AC=1;AF=0.015;AN=66;BaseQRankSum=  |
| 26824 | chrY | 13473877 | . | G | C   | 1601.59 | PASS          | AC=7;AF=0.109;AN=64;BaseQRankSum=  |
| 26825 | chrY | 13473880 | . | A | T   | 4753.21 | PASS          | AC=11;AF=0.196;AN=56;BaseQRankSum= |
| 26826 | chrY | 13473884 | . | T | C   | 5903.55 | PASS          | AC=11;AF=0.172;AN=64;BaseQRankSum= |
| 26827 | chrY | 13473888 | . | A | T   | 231.42  | my_snp_filter | AC=3;AF=0.044;AN=68;BaseQ          |
| 26828 | chrY | 13473892 | . | A | T   | 315.22  | PASS          | AC=4;AF=0.057;AN=70;BaseQRankSum=  |

|       |      |          |   |   |     |          |               |                                    |
|-------|------|----------|---|---|-----|----------|---------------|------------------------------------|
| 26829 | chrY | 13473894 | . | A | G   | 311.54   | PASS          | AC=4;AF=0.057;AN=70;BaseQRankSum=  |
| 26830 | chrY | 13473911 | . | T | A   | 158.90   | PASS          | AC=1;AF=0.014;AN=70;BaseQRankSum=  |
| 26831 | chrY | 13473917 | . | C | G   | 879.34   | PASS          | AC=4;AF=0.091;AN=44;BaseQRankSum=  |
| 26832 | chrY | 13473925 | . | A | T   | 52.44    | my_snp_filter | AC=3;AF=0.043;AN=70;BaseQ          |
| 26833 | chrY | 13473943 | . | G | A   | 136.95   | PASS          | AC=1;AF=0.014;AN=70;BaseQRankSum=  |
| 26834 | chrY | 13473963 | . | T | C   | 102.68   | PASS          | AC=1;AF=0.014;AN=70;BaseQRankSum=  |
| 26835 | chrY | 13473975 | . | C | T   | 549.78   | PASS          | AC=7;AF=0.184;AN=38;BaseQRankSum=  |
| 26836 | chrY | 13473987 | . | T | A   | 110.20   | PASS          | AC=2;AF=0.029;AN=70;BaseQRankSum=  |
| 26837 | chrY | 13474008 | . | C | G   | 266.89   | PASS          | AC=3;AF=0.094;AN=32;BaseQRankSum=  |
| 26838 | chrY | 13474011 | . | A | T   | 257.74   | PASS          | AC=3;AF=0.088;AN=34;BaseQRankSum=  |
| 26839 | chrY | 13474017 | . | T | C   | 157.07   | PASS          | AC=1;AF=0.014;AN=70;BaseQRankSum=  |
| 26840 | chrY | 13474028 | . | T | A   | 308.25   | PASS          | AC=3;AF=0.048;AN=62;BaseQRankSum=  |
| 26841 | chrY | 13474044 | . | T | C   | 150.88   | PASS          | AC=1;AF=0.014;AN=70;BaseQRankSum=  |
| 26842 | chrY | 13474046 | . | A | T   | 241.92   | PASS          | AC=2;AF=0.030;AN=66;BaseQRankSum=  |
| 26843 | chrY | 13474055 | . | G | A   | 189.17   | PASS          | AC=3;AF=0.068;AN=44;BaseQRankSum=  |
| 26844 | chrY | 13474067 | . | G | T   | 126.87   | PASS          | AC=2;AF=0.029;AN=68;BaseQRankSum=  |
| 26845 | chrY | 13474087 | . | A | G   | 384.86   | PASS          | AC=5;AF=0.071;AN=70;BaseQRankSum=  |
| 26846 | chrY | 13474089 | . | C | T   | 92.91    | PASS          | AC=1;AF=0.014;AN=70;BaseQRankSum=  |
| 26847 | chrY | 13474094 | . | C | G   | 198.55   | PASS          | AC=2;AF=0.045;AN=44;BaseQRankSum=  |
| 26848 | chrY | 13474259 | . | G | A   | 63.43    | my_snp_filter | AC=3;AF=0.075;AN=40;BaseQ          |
| 26849 | chrY | 13474274 | . | C | A   | 2981.74  | PASS          | AC=19;AF=0.271;AN=70;BaseQRankSum= |
| 26850 | chrY | 13474288 | . | A | G   | 3519.47  | PASS          | AC=21;AF=0.404;AN=52;BaseQRankSum= |
| 26851 | chrY | 13474291 | . | T | A   | 238.97   | my_snp_filter | AC=5;AF=0.071;AN=70;BaseQ          |
| 26852 | chrY | 13474297 | . | A | G   | 1098.69  | PASS          | AC=9;AF=0.129;AN=70;BaseQRankSum=  |
| 26853 | chrY | 13474299 | . | T | C   | 6234.80  | PASS          | AC=19;AF=0.317;AN=60;BaseQRankSum= |
| 26854 | chrY | 13474300 | . | G | C   | 40.03    | PASS          | AC=1;AF=0.014;AN=70;BaseQRankSum=  |
| 26855 | chrY | 13474301 | . | T | C   | 2083.82  | PASS          | AC=14;AF=0.200;AN=70;BaseQRankSum= |
| 26856 | chrY | 13474309 | . | C | G   | 893.39   | PASS          | AC=1;AF=0.014;AN=70;BaseQRankSum=  |
| 26857 | chrY | 13474310 | . | A | T   | 141.19   | my_snp_filter | AC=4;AF=0.057;AN=70;BaseQ          |
| 26858 | chrY | 13474314 | . | G | C   | 992.79   | PASS          | AC=1;AF=0.014;AN=70;BaseQRankSum=  |
| 26859 | chrY | 13474331 | . | A | C   | 177.28   | PASS          | AC=4;AF=0.057;AN=70;BaseQRankSum=  |
| 26860 | chrY | 13474336 | . | A | G   | 1586.03  | PASS          | AC=1;AF=0.014;AN=70;BaseQRankSum=  |
| 26861 | chrY | 13474337 | . | C | G   | 30.45    | my_snp_filter | AC=2;AF=0.029;AN=70;BaseQ          |
| 26862 | chrY | 13474339 | . | A | G   | 1638.92  | PASS          | AC=1;AF=0.014;AN=70;BaseQRankSum=  |
| 26863 | chrY | 13474342 | . | C | G,* | 1244.87  | PASS          | AC=1,3;AF=0.014,0.043;AN=70;BaseQ  |
| 26864 | chrY | 13474343 | . | C | T,G | 386.23   | my_snp_filter | AC=2,5;AF=0.029,0.071;AN=          |
| 26865 | chrY | 13474345 | . | C | T   | 466.59   | PASS          | AC=7;AF=0.100;AN=70;BaseQRankSum=  |
| 26866 | chrY | 13474348 | . | T | G   | 12427.07 | PASS          | AC=19;AF=0.271;AN=70;BaseQ         |
| 26867 | chrY | 13474350 | . | G | C   | 12579.76 | PASS          | AC=19;AF=0.271;AN=70;BaseQ         |
| 26868 | chrY | 13474357 | . | C | A   | 386.27   | my_snp_filter | AC=1;AF=0.014;AN=70;BaseQ          |
| 26869 | chrY | 13474358 | . | C | A   | 1316.42  | my_snp_filter | AC=2;AF=0.029;AN=70;BaseQ          |
| 26870 | chrY | 13474361 | . | G | A   | 370.91   | PASS          | AC=5;AF=0.071;AN=70;BaseQRankSum=  |
| 26871 | chrY | 13474363 | . | C | G   | 46.48    | PASS          | AC=1;AF=0.014;AN=70;BaseQRankSum=  |
| 26872 | chrY | 13474366 | . | G | A   | 278.27   | my_snp_filter | AC=1;AF=0.014;AN=70;BaseQ          |
| 26873 | chrY | 13474367 | . | A | G   | 16540.83 | PASS          | AC=20;AF=0.286;AN=70;BaseQ         |
| 26874 | chrY | 13474368 | . | G | A   | 12846.87 | PASS          | AC=19;AF=0.271;AN=70;BaseQ         |
| 26875 | chrY | 13474374 | . | C | A   | 73.60    | my_snp_filter | AC=3;AF=0.043;AN=70;BaseQ          |
| 26876 | chrY | 13474376 | . | C | G   | 13710.47 | PASS          | AC=18;AF=0.257;AN=70;BaseQ         |
| 26877 | chrY | 13474378 | . | T | A,C | 695.38   | my_snp_filter | AC=3,3;AF=0.043,0.043;AN=          |
| 26878 | chrY | 13474380 | . | G | A   | 437.42   | PASS          | AC=2;AF=0.029;AN=70;BaseQRankSum=  |
| 26879 | chrY | 13474381 | . | G | T   | 16524.07 | PASS          | AC=16;AF=0.229;AN=70;BaseQ         |
| 26880 | chrY | 13474386 | . | C | T,G | 674.92   | my_snp_filter | AC=4,2;AF=0.057,0.029;AN=          |
| 26881 | chrY | 13474388 | . | G | A   | 438.27   | PASS          | AC=2;AF=0.029;AN=70;BaseQRankSum=  |
| 26882 | chrY | 13474389 | . | T | C,A | 374.16   | my_snp_filter | AC=1,2;AF=0.014,0.029;AN=          |
| 26883 | chrY | 13474390 | . | G | A   | 500.32   | my_snp_filter | AC=4;AF=0.063;AN=64;BaseQ          |
| 26884 | chrY | 13474391 | . | T | C,A | 89725.18 | PASS          | AC=30,3;AF=0.517,0.052;AN=         |
| 26885 | chrY | 13474396 | . | A | T   | 9167.01  | PASS          | AC=11;AF=0.157;AN=70;BaseQRankSum= |
| 26886 | chrY | 13474398 | . | A | T   | 67.18    | PASS          | AC=1;AF=0.014;AN=70;BaseQRankSum=  |
| 26887 | chrY | 13474399 | . | T | C   | 182.67   | my_snp_filter | AC=4;AF=0.057;AN=70;BaseQ          |
| 26888 | chrY | 13474400 | . | G | A,T | 819.73   | my_snp_filter | AC=2,3;AF=0.029,0.043;AN=          |
| 26889 | chrY | 13474401 | . | C | T   | 2402.19  | PASS          | AC=11;AF=0.157;AN=70;BaseQRankSum= |
| 26890 | chrY | 13474404 | . | C | A   | 945.68   | my_snp_filter | AC=6;AF=0.086;AN=70;BaseQ          |
| 26891 | chrY | 13474405 | . | A | C   | 10515.79 | PASS          | AC=12;AF=0.171;AN=70;BaseQ         |
| 26892 | chrY | 13474406 | . | A | T   | 3403.91  | PASS          | AC=3;AF=0.043;AN=70;BaseQRankSum=  |
| 26893 | chrY | 13474410 | . | C | T   | 623.28   | my_snp_filter | AC=2;AF=0.029;AN=70;BaseQ          |
| 26894 | chrY | 13474411 | . | G | A   | 257.50   | my_snp_filter | AC=3;AF=0.043;AN=70;BaseQ          |
| 26895 | chrY | 13474417 | . | A | G   | 221.40   | my_snp_filter | AC=3;AF=0.043;AN=70;BaseQ          |
| 26896 | chrY | 13474424 | . | T | C   | 521.16   | my_snp_filter | AC=3;AF=0.043;AN=70;BaseQ          |
| 26897 | chrY | 13474427 | . | A | G   | 2802.19  | PASS          | AC=2;AF=0.029;AN=70;BaseQRankSum=  |
| 26898 | chrY | 13474428 | . | G | T   | 55.46    | my_snp_filter | AC=2;AF=0.029;AN=70;BaseQ          |
| 26899 | chrY | 13474430 | . | C | G   | 10487.19 | PASS          | AC=12;AF=0.171;AN=70;BaseQ         |
| 26900 | chrY | 13474434 | . | A | T   | 6150.33  | my_snp_filter | AC=5;AF=0.076;AN=66;BaseQ          |
| 26901 | chrY | 13474435 | . | G | A   | 6356.24  | my_snp_filter | AC=7;AF=0.106;AN=66;BaseQ          |
| 26902 | chrY | 13474443 | . | A | T   | 137.26   | my_snp_filter | AC=2;AF=0.029;AN=70;BaseQ          |
| 26903 | chrY | 13474446 | . | T | C   | 151.86   | my_snp_filter | AC=2;AF=0.029;AN=70;BaseQ          |
| 26904 | chrY | 13474448 | . | C | T   | 12688.42 | my_snp_filter | AC=8;AF=0.125;AN=                  |

|       |      |          |   |   |     |          |               |                                   |
|-------|------|----------|---|---|-----|----------|---------------|-----------------------------------|
| 26905 | chrY | 13474449 | . | G | C,T | 313.66   | my_snp_filter | AC=3,2;AF=0.043,0.029;AN=         |
| 26906 | chrY | 13474451 | . | G | T   | 211.50   | my_snp_filter | AC=1;AF=0.014;AN=70;BaseQ         |
| 26907 | chrY | 13474453 | . | T | A   | 273.04   | my_snp_filter | AC=2;AF=0.029;AN=70;BaseQ         |
| 26908 | chrY | 13474456 | . | C | G   | 123.66   | my_snp_filter | AC=2;AF=0.029;AN=70;BaseQ         |
| 26909 | chrY | 13474458 | . | G | T   | 11818.97 | my_snp_filter | AC=5;AF=0.076;AN=                 |
| 26910 | chrY | 13474459 | . | C | G,T | 289.07   | my_snp_filter | AC=1,1;AF=0.014,0.014;AN=         |
| 26911 | chrY | 13474460 | . | A | G   | 60.53    | my_snp_filter | AC=1;AF=0.014;AN=70;BaseQ         |
| 26912 | chrY | 13474461 | . | G | A   | 119.17   | my_snp_filter | AC=1;AF=0.014;AN=70;BaseQ         |
| 26913 | chrY | 13474463 | . | G | A   | 40.41    | my_snp_filter | AC=1;AF=0.014;AN=70;BaseQ         |
| 26914 | chrY | 13474464 | . | A | T,G | 318.84   | my_snp_filter | AC=3,1;AF=0.043,0.014;AN=         |
| 26915 | chrY | 13474465 | . | T | C   | 225.32   | my_snp_filter | AC=1;AF=0.014;AN=70;BaseQ         |
| 26916 | chrY | 13474467 | . | T | A   | 144.50   | my_snp_filter | AC=5;AF=0.071;AN=70;BaseQ         |
| 26917 | chrY | 13474469 | . | T | C   | 1740.32  | my_snp_filter | AC=2;AF=0.029;AN=70;BaseQ         |
| 26918 | chrY | 13474472 | . | C | A   | 16800.21 | my_snp_filter | AC=7;AF=0.103;AN=                 |
| 26919 | chrY | 13474477 | . | C | T   | 32.12    | my_snp_filter | AC=1;AF=0.014;AN=70;BaseQ         |
| 26920 | chrY | 13474478 | . | C | A   | 872.07   | my_snp_filter | AC=6;AF=0.086;AN=70;BaseQ         |
| 26921 | chrY | 13474479 | . | C | T   | 716.57   | my_snp_filter | AC=2;AF=0.029;AN=70;BaseQ         |
| 26922 | chrY | 13474482 | . | G | A   | 125.61   | my_snp_filter | AC=2;AF=0.029;AN=70;BaseQ         |
| 26923 | chrY | 13474485 | . | G | A   | 1147.66  | PASS          | AC=1;AF=0.014;AN=70;BaseQRankSum= |
| 26924 | chrY | 13474487 | . | C | T   | 537.56   | my_snp_filter | AC=1;AF=0.014;AN=70;BaseQ         |
| 26925 | chrY | 13474488 | . | A | T   | 111.54   | PASS          | AC=1;AF=0.014;AN=70;BaseQRankSum= |
| 26926 | chrY | 13474489 | . | G | T   | 118.56   | PASS          | AC=1;AF=0.014;AN=70;BaseQRankSum= |
| 26927 | chrY | 13474500 | . | A | G   | 181.83   | PASS          | AC=1;AF=0.014;AN=70;BaseQRankSum= |
| 26928 | chrY | 13474502 | . | A | T,G | 3548.78  | my_snp_filter | AC=5,4;AF=0.071,0.057;AN=         |
| 26929 | chrY | 13474503 | . | G | T   | 360.64   | my_snp_filter | AC=1;AF=0.014;AN=70;BaseQ         |
| 26930 | chrY | 13474506 | . | C | T   | 3603.28  | my_snp_filter | AC=4;AF=0.057;AN=70;BaseQ         |
| 26931 | chrY | 13474512 | . | C | T   | 32.18    | PASS          | AC=1;AF=0.014;AN=70;BaseQRankSum= |
| 26932 | chrY | 13474515 | . | G | A   | 231.11   | my_snp_filter | AC=1;AF=0.014;AN=70;BaseQ         |
| 26933 | chrY | 13474516 | . | G | C   | 3727.68  | my_snp_filter | AC=7;AF=0.100;AN=70;BaseQ         |
| 26934 | chrY | 13474526 | . | G | T   | 1961.72  | my_snp_filter | AC=6;AF=0.086;AN=70;BaseQ         |
| 26935 | chrY | 13474531 | . | G | C   | 726.50   | PASS          | AC=1;AF=0.014;AN=70;BaseQRankSum= |
| 26936 | chrY | 13474532 | . | T | A   | 141.73   | my_snp_filter | AC=1;AF=0.014;AN=70;BaseQ         |
| 26937 | chrY | 13474539 | . | A | G   | 3105.91  | PASS          | AC=3;AF=0.043;AN=70;BaseQRankSum= |
| 26938 | chrY | 13474540 | . | C | A   | 145.74   | my_snp_filter | AC=3;AF=0.043;AN=70;BaseQ         |
| 26939 | chrY | 13474544 | . | G | A   | 7508.43  | PASS          | AC=8;AF=0.125;AN=64;BaseQRankSum= |
| 26940 | chrY | 13474545 | . | C | T   | 1829.59  | PASS          | AC=5;AF=0.096;AN=52;BaseQRankSum= |
| 26941 | chrY | 13474547 | . | G | C   | 24667.08 | PASS          | AC=15;AF=0.469;AN=32;BaseQ        |
| 26942 | chrY | 13474549 | . | C | T   | 793.26   | PASS          | AC=2;AF=0.040;AN=50;BaseQRankSum= |
| 26943 | chrY | 13474550 | . | T | A   | 5397.74  | PASS          | AC=7;AF=0.140;AN=50;BaseQRankSum= |
| 26944 | chrY | 13474551 | . | T | G   | 41.91    | my_snp_filter | AC=3;AF=0.054;AN=56;BaseQ         |
| 26945 | chrY | 13474555 | . | G | A,T | 463.37   | PASS          | AC=1,1;AF=0.014,0.014;AN=70;BaseQ |
| 26946 | chrY | 13474556 | . | C | G   | 2138.83  | PASS          | AC=6;AF=0.086;AN=70;BaseQRankSum= |
| 26947 | chrY | 13474560 | . | G | T   | 4396.33  | PASS          | AC=7;AF=0.100;AN=70;BaseQRankSum= |
| 26948 | chrY | 13474561 | . | C | T   | 524.88   | PASS          | AC=1;AF=0.014;AN=70;BaseQRankSum= |
| 26949 | chrY | 13474567 | . | C | A   | 218.79   | my_snp_filter | AC=3;AF=0.043;AN=70;BaseQ         |
| 26950 | chrY | 13474570 | . | G | T   | 13906.43 | PASS          | AC=9;AF=0.132;AN=68;BaseQ         |
| 26951 | chrY | 13474571 | . | G | T   | 895      | my_snp_filter | AC=1;AF=0.014;AN=70;BaseQ         |
| 26952 | chrY | 13474579 | . | C | G   | 535.34   | PASS          | AC=2;AF=0.029;AN=70;BaseQRankSum= |
| 26953 | chrY | 13474581 | . | C | A   | 389.94   | PASS          | AC=2;AF=0.029;AN=70;BaseQRankSum= |
| 26954 | chrY | 13474584 | . | G | C   | 271.56   | PASS          | AC=1;AF=0.015;AN=68;BaseQRankSum= |
| 26955 | chrY | 13474587 | . | T | A   | 436.88   | PASS          | AC=2;AF=0.029;AN=70;BaseQRankSum= |
| 26956 | chrY | 13474588 | . | G | T   | 559.86   | my_snp_filter | AC=4;AF=0.057;AN=70;BaseQ         |
| 26957 | chrY | 13474596 | . | C | A   | 6598.73  | PASS          | AC=7;AF=0.106;AN=66;BaseQRankSum= |
| 26958 | chrY | 13474603 | . | A | G   | 32183.76 | PASS          | AC=10;AF=0.357;AN=28;BaseQ        |
| 26959 | chrY | 13474604 | . | T | C   | 86.64    | my_snp_filter | AC=1;AF=0.016;AN=62;BaseQ         |
| 26960 | chrY | 13474605 | . | G | T   | 1374.98  | my_snp_filter | AC=4;AF=0.065;AN=62;BaseQ         |
| 26961 | chrY | 13474610 | . | A | G   | 3558.45  | PASS          | AC=8;AF=0.138;AN=58;BaseQRankSum= |
| 26962 | chrY | 13474613 | . | C | A   | 136.90   | my_snp_filter | AC=2;AF=0.059;AN=34;BaseQ         |
| 26963 | chrY | 13474620 | . | T | C   | 352.90   | my_snp_filter | AC=3;AF=0.048;AN=62;BaseQ         |
| 26964 | chrY | 13474623 | . | C | A   | 1891.53  | my_snp_filter | AC=5;AF=0.083;AN=60;BaseQ         |
| 26965 | chrY | 13474624 | . | C | A   | 373.62   | my_snp_filter | AC=2;AF=0.033;AN=60;BaseQ         |
| 26966 | chrY | 13474628 | . | T | G,A | 71231.62 | PASS          | AC=14,2;AF=0.636,0.091;AN=        |
| 26967 | chrY | 13474629 | . | C | A   | 1247.34  | PASS          | AC=2;AF=0.043;AN=46;BaseQRankSum= |
| 26968 | chrY | 13474630 | . | T | C,A | 60049.79 | PASS          | AC=10,4;AF=0.500,0.200;AN=        |
| 26969 | chrY | 13474633 | . | G | T,C | 657.91   | my_snp_filter | AC=1,1;AF=0.016,0.016;AN=         |
| 26970 | chrY | 13474634 | . | A | T   | 2184.04  | my_snp_filter | AC=6;AF=0.091;AN=66;BaseQ         |
| 26971 | chrY | 13474635 | . | C | T   | 1618.98  | my_snp_filter | AC=3;AF=0.045;AN=66;BaseQ         |
| 26972 | chrY | 13474638 | . | G | T,* | 801.35   | my_snp_filter | AC=1,1;AF=0.014,0.014;AN=         |
| 26973 | chrY | 13474639 | . | A | G,T | 7535.55  | PASS          | AC=4,6;AF=0.059,0.088;AN=68;BaseQ |
| 26974 | chrY | 13474641 | . | T | A   | 46.04    | my_snp_filter | AC=1;AF=0.014;AN=70;BaseQ         |
| 26975 | chrY | 13474659 | . | C | A   | 367.42   | my_snp_filter | AC=1;AF=0.014;AN=70;BaseQ         |
| 26976 | chrY | 13474661 | . | G | C   | 156.73   | my_snp_filter | AC=1;AF=0.014;AN=70;BaseQ         |
| 26977 | chrY | 13474668 | . | G | A   | 271.42   | my_snp_filter | AC=1;AF=0.014;AN=70;BaseQ         |
| 26978 | chrY | 13474669 | . | A | T   | 35.77    | my_snp_filter | AC=1;AF=0.014;AN=70;BaseQ         |
| 26979 | chrY | 13474673 | . | G | T   | 247.92   | PASS          | AC=1;AF=0.014;AN=70;BaseQRankSum= |
| 26980 | chrY | 13474677 | . | C | A   | 66.36    | my_snp_filter | AC=1;AF=0.014;AN=70;BaseQ         |

|       |      |          |   |   |     |         |               |                                    |
|-------|------|----------|---|---|-----|---------|---------------|------------------------------------|
| 26981 | chrY | 13474682 | . | T | C   | 493.03  | my_snp_filter | AC=3;AF=0.043;AN=70;BaseQ          |
| 26982 | chrY | 13474683 | . | C | T   | 43.42   | my_snp_filter | AC=1;AF=0.014;AN=70;BaseQ          |
| 26983 | chrY | 13474688 | . | T | C   | 783.54  | PASS          | AC=4;AF=0.057;AN=70;BaseQRankSum=  |
| 26984 | chrY | 13474695 | . | A | T   | 129.89  | my_snp_filter | AC=5;AF=0.071;AN=70;BaseQ          |
| 26985 | chrY | 13474697 | . | C | G   | 63.44   | my_snp_filter | AC=1;AF=0.014;AN=70;BaseQ          |
| 26986 | chrY | 13474700 | . | T | G,A | 336.32  | my_snp_filter | AC=3,5;AF=0.043,0.071;AN=          |
| 26987 | chrY | 13474703 | . | C | G   | 1227.99 | PASS          | AC=7;AF=0.100;AN=70;BaseQRankSum=  |
| 26988 | chrY | 13474706 | . | A | T   | 512.64  | PASS          | AC=7;AF=0.100;AN=70;BaseQRankSum=  |
| 26989 | chrY | 13474710 | . | G | T   | 225.19  | my_snp_filter | AC=2;AF=0.029;AN=70;BaseQ          |
| 26990 | chrY | 13474714 | . | T | A   | 179.07  | my_snp_filter | AC=3;AF=0.043;AN=70;BaseQ          |
| 26991 | chrY | 13474717 | . | C | T   | 241.08  | PASS          | AC=2;AF=0.029;AN=70;BaseQRankSum=  |
| 26992 | chrY | 13474720 | . | G | A   | 246.12  | my_snp_filter | AC=4;AF=0.057;AN=70;BaseQ          |
| 26993 | chrY | 13474721 | . | G | T   | 53.67   | my_snp_filter | AC=3;AF=0.043;AN=70;BaseQ          |
| 26994 | chrY | 13474722 | . | G | A,T | 686.50  | PASS          | AC=4,4;AF=0.057,0.057;AN=70;BaseQ  |
| 26995 | chrY | 13474726 | . | T | C   | 515.59  | my_snp_filter | AC=8;AF=0.114;AN=70;BaseQ          |
| 26996 | chrY | 13474728 | . | A | C   | 611.05  | PASS          | AC=5;AF=0.071;AN=70;BaseQRankSum=  |
| 26997 | chrY | 13474730 | . | T | C   | 591.59  | my_snp_filter | AC=9;AF=0.129;AN=70;BaseQ          |
| 26998 | chrY | 13474732 | . | C | T   | 342.25  | PASS          | AC=6;AF=0.091;AN=66;BaseQRankSum=  |
| 26999 | chrY | 13474733 | . | A | G,T | 6606.78 | PASS          | AC=21,2;AF=0.318,0.030;AN=66;Base  |
| 27000 | chrY | 13474736 | . | G | T,A | 712.85  | PASS          | AC=6,2;AF=0.086,0.029;AN=70;BaseQ  |
| 27001 | chrY | 13474740 | . | T | C   | 41.94   | my_snp_filter | AC=1;AF=0.014;AN=70;BaseQ          |
| 27002 | chrY | 13474741 | . | G | A   | 87.51   | PASS          | AC=3;AF=0.043;AN=70;BaseQRankSum=  |
| 27003 | chrY | 13474744 | . | A | C   | 36.27   | my_snp_filter | AC=1;AF=0.014;AN=70;BaseQ          |
| 27004 | chrY | 13474745 | . | C | A,T | 321.16  | PASS          | AC=3,1;AF=0.043,0.014;AN=70;BaseQ  |
| 27005 | chrY | 13474747 | . | A | G   | 649.94  | my_snp_filter | AC=5;AF=0.071;AN=70;BaseQ          |
| 27006 | chrY | 13474752 | . | T | G   | 187.68  | PASS          | AC=1;AF=0.014;AN=70;BaseQRankSum=  |
| 27007 | chrY | 13474754 | . | C | T   | 1241.58 | PASS          | AC=5;AF=0.074;AN=68;BaseQRankSum=  |
| 27008 | chrY | 13474755 | . | A | T,C | 510.49  | PASS          | AC=2,2;AF=0.029,0.029;AN=68;BaseQ  |
| 27009 | chrY | 13474756 | . | G | C   | 60.69   | PASS          | AC=1;AF=0.015;AN=68;BaseQRankSum=  |
| 27010 | chrY | 13474757 | . | T | C   | 85.64   | PASS          | AC=2;AF=0.029;AN=68;BaseQRankSum=  |
| 27011 | chrY | 13474760 | . | G | A   | 102.08  | my_snp_filter | AC=2;AF=0.030;AN=66;BaseQ          |
| 27012 | chrY | 13474761 | . | C | A   | 1198.71 | PASS          | AC=4;AF=0.061;AN=66;BaseQRankSum=  |
| 27013 | chrY | 13474766 | . | T | C   | 7114.49 | my_snp_filter | AC=17;AF=0.472;AN=36;Base          |
| 27014 | chrY | 13474767 | . | C | A,G | 1036.25 | my_snp_filter | AC=2,4;AF=0.040,0.080;AN=          |
| 27015 | chrY | 13474769 | . | G | A   | 7090.38 | my_snp_filter | AC=14;AF=0.467;AN=30;Base          |
| 27016 | chrY | 13474772 | . | C | G   | 838.23  | my_snp_filter | AC=4;AF=0.065;AN=62;BaseQ          |
| 27017 | chrY | 13474776 | . | A | G   | 730.41  | my_snp_filter | AC=4;AF=0.063;AN=64;BaseQ          |
| 27018 | chrY | 13474777 | . | G | A   | 132.39  | my_snp_filter | AC=2;AF=0.032;AN=62;BaseQ          |
| 27019 | chrY | 13474781 | . | C | A   | 166.76  | my_snp_filter | AC=3;AF=0.048;AN=62;BaseQ          |
| 27020 | chrY | 13474791 | . | G | C   | 51.15   | my_snp_filter | AC=1;AF=0.021;AN=48;BaseQ          |
| 27021 | chrY | 13474798 | . | A | G   | 405.44  | PASS          | AC=3;AF=0.100;AN=30;BaseQRankSum=  |
| 27022 | chrY | 13474799 | . | T | G   | 267.31  | PASS          | AC=2;AF=0.077;AN=26;BaseQRankSum=  |
| 27023 | chrY | 13475215 | . | C | G   | 517.79  | PASS          | AC=2;AF=0.042;AN=48;BaseQRankSum=  |
| 27024 | chrY | 13475237 | . | A | G   | 618.97  | my_snp_filter | AC=9;AF=0.132;AN=68;BaseQ          |
| 27025 | chrY | 13475257 | . | T | A   | 44.31   | PASS          | AC=1;AF=0.016;AN=64;BaseQRankSum=  |
| 27026 | chrY | 13475260 | . | C | A   | 760.26  | PASS          | AC=3;AF=0.047;AN=64;BaseQRankSum=  |
| 27027 | chrY | 13475269 | . | G | A   | 5248.80 | PASS          | AC=19;AF=0.339;AN=56;BaseQRankSum= |
| 27028 | chrY | 13475270 | . | G | A   | 5248.50 | PASS          | AC=19;AF=0.328;AN=58;BaseQRankSum= |
| 27029 | chrY | 13475271 | . | T | G   | 54.21   | PASS          | AC=1;AF=0.016;AN=62;BaseQRankSum=  |
| 27030 | chrY | 13475277 | . | G | C   | 45.98   | PASS          | AC=1;AF=0.016;AN=64;BaseQRankSum=  |
| 27031 | chrY | 13475280 | . | T | G   | 5420.82 | PASS          | AC=8;AF=0.160;AN=50;BaseQRankSum=  |
| 27032 | chrY | 13475283 | . | A | T   | 988.79  | PASS          | AC=4;AF=0.063;AN=64;BaseQRankSum=  |
| 27033 | chrY | 13475291 | . | C | T   | 5688.65 | PASS          | AC=17;AF=0.327;AN=52;BaseQRankSum= |
| 27034 | chrY | 13475292 | . | A | C   | 5781.30 | PASS          | AC=17;AF=0.315;AN=54;BaseQRankSum= |
| 27035 | chrY | 13475295 | . | A | T   | 5898.91 | PASS          | AC=17;AF=0.327;AN=52;BaseQRankSum= |
| 27036 | chrY | 13475301 | . | C | A,T | 1354.28 | PASS          | AC=2,3;AF=0.032,0.048;AN=62;BaseQ  |
| 27037 | chrY | 13475303 | . | T | C   | 963.71  | PASS          | AC=4;AF=0.067;AN=60;BaseQRankSum=  |
| 27038 | chrY | 13475313 | . | C | T   | 6040.26 | PASS          | AC=17;AF=0.327;AN=52;BaseQRankSum= |
| 27039 | chrY | 13475323 | . | T | C   | 2921.20 | PASS          | AC=9;AF=0.173;AN=52;BaseQRankSum=  |
| 27040 | chrY | 13475325 | . | T | G   | 42.33   | PASS          | AC=1;AF=0.018;AN=56;BaseQRankSum=  |
| 27041 | chrY | 13475340 | . | T | A,G | 5632.05 | PASS          | AC=15,3;AF=0.395,0.079;AN=38;Base  |
| 27042 | chrY | 13475358 | . | T | C   | 53.89   | my_snp_filter | AC=1;AF=0.017;AN=60;BaseQ          |
| 27043 | chrY | 13475381 | . | C | A   | 2199.04 | PASS          | AC=7;AF=0.159;AN=44;BaseQRankSum=  |
| 27044 | chrY | 13475382 | . | C | A   | 2068.64 | PASS          | AC=7;AF=0.152;AN=46;BaseQRankSum=  |
| 27045 | chrY | 13475385 | . | T | G   | 2190.69 | my_snp_filter | AC=7;AF=0.175;AN=40;BaseQ          |
| 27046 | chrY | 13475395 | . | C | T   | 1747.64 | my_snp_filter | AC=7;AF=0.167;AN=42;BaseQ          |
| 27047 | chrY | 13475396 | . | G | A   | 1727.51 | my_snp_filter | AC=8;AF=0.222;AN=36;BaseQ          |
| 27048 | chrY | 13475408 | . | A | G   | 1451.83 | my_snp_filter | AC=5;AF=0.104;AN=48;BaseQ          |
| 27049 | chrY | 13475438 | . | G | T   | 1404.10 | my_snp_filter | AC=3;AF=0.063;AN=48;BaseQ          |
| 27050 | chrY | 13475445 | . | A | C   | 1223.88 | my_snp_filter | AC=3;AF=0.050;AN=60;BaseQ          |
| 27051 | chrY | 13475457 | . | A | G   | 2544.17 | my_snp_filter | AC=8;AF=0.129;AN=62;BaseQ          |
| 27052 | chrY | 13475483 | . | C | G   | 263     | PASS          | AC=1;AF=0.014;AN=70;BaseQRankSum=  |
| 27053 | chrY | 13475484 | . | A | G   | 262.77  | PASS          | AC=1;AF=0.014;AN=70;BaseQRankSum=  |
| 27054 | chrY | 13475487 | . | G | T   | 370.38  | PASS          | AC=4;AF=0.057;AN=70;BaseQRankSum=  |
| 27055 | chrY | 13475488 | . | A | T   | 459.81  | PASS          | AC=4;AF=0.057;AN=70;BaseQRankSum=  |
| 27056 | chrY | 13475506 | . | G | A   | 202.75  | PASS          | AC=1;AF=0.014;AN=70;BaseQRankSum=  |

|       |      |          |   |   |     |         |               |                                    |
|-------|------|----------|---|---|-----|---------|---------------|------------------------------------|
| 27057 | chrY | 13475526 | . | A | G,* | 264.95  | PASS          | AC=3,1;AF=0.043,0.014;AN=70;BaseQ  |
| 27058 | chrY | 13475530 | . | C | A   | 892.76  | PASS          | AC=8;AF=0.114;AN=70;BaseQRankSum=  |
| 27059 | chrY | 13475556 | . | G | A   | 160.09  | my_snp_filter | AC=4;AF=0.057;AN=70;BaseQ          |
| 27060 | chrY | 13475632 | . | G | A   | 51.34   | PASS          | AC=1;AF=0.017;AN=58;BaseQRankSum=  |
| 27061 | chrY | 13475663 | . | G | A   | 113.26  | PASS          | AC=2;AF=0.031;AN=64;BaseQRankSum=  |
| 27062 | chrY | 13475674 | . | C | T   | 182.43  | PASS          | AC=2;AF=0.030;AN=66;BaseQRankSum=  |
| 27063 | chrY | 13475686 | . | G | T   | 117.54  | PASS          | AC=2;AF=0.031;AN=64;BaseQRankSum=  |
| 27064 | chrY | 13475702 | . | C | T   | 60.79   | my_snp_filter | AC=2;AF=0.034;AN=58;BaseQ          |
| 27065 | chrY | 13475703 | . | G | A   | 158.63  | PASS          | AC=2;AF=0.033;AN=60;BaseQRankSum=  |
| 27066 | chrY | 13475713 | . | T | G   | 47.71   | my_snp_filter | AC=2;AF=0.031;AN=64;BaseQ          |
| 27067 | chrY | 13475717 | . | C | T   | 67.84   | my_snp_filter | AC=2;AF=0.033;AN=60;BaseQ          |
| 27068 | chrY | 13475733 | . | G | C   | 35.52   | PASS          | AC=1;AF=0.016;AN=64;BaseQRankSum=  |
| 27069 | chrY | 13475738 | . | A | G   | 39.60   | PASS          | AC=1;AF=0.016;AN=62;BaseQRankSum=  |
| 27070 | chrY | 13475742 | . | C | A   | 38.72   | PASS          | AC=1;AF=0.016;AN=64;BaseQRankSum=  |
| 27071 | chrY | 13475744 | . | T | A   | 38.28   | PASS          | AC=1;AF=0.015;AN=66;BaseQRankSum=  |
| 27072 | chrY | 13475767 | . | A | T   | 497.11  | PASS          | AC=3;AF=0.071;AN=42;BaseQRankSum=  |
| 27073 | chrY | 13475769 | . | G | A   | 328.24  | PASS          | AC=1;AF=0.038;AN=26;BaseQRankSum=  |
| 27074 | chrY | 13475831 | . | T | G   | 213.77  | PASS          | AC=3;AF=0.043;AN=70;BaseQRankSum=  |
| 27075 | chrY | 13475841 | . | T | A   | 165.85  | PASS          | AC=1;AF=0.015;AN=68;BaseQRankSum=  |
| 27076 | chrY | 13475843 | . | C | A   | 206.68  | PASS          | AC=3;AF=0.044;AN=68;BaseQRankSum=  |
| 27077 | chrY | 13475844 | . | C | A   | 81.02   | my_snp_filter | AC=2;AF=0.029;AN=68;BaseQ          |
| 27078 | chrY | 13475849 | . | C | T   | 1767.01 | PASS          | AC=13;AF=0.241;AN=54;BaseQRankSum= |
| 27079 | chrY | 13475859 | . | C | A   | 96.31   | PASS          | AC=1;AF=0.014;AN=70;BaseQRankSum=  |
| 27080 | chrY | 13475866 | . | A | G   | 108.14  | PASS          | AC=2;AF=0.029;AN=70;BaseQRankSum=  |
| 27081 | chrY | 13475869 | . | G | C   | 220.18  | PASS          | AC=2;AF=0.029;AN=70;BaseQRankSum=  |
| 27082 | chrY | 13475878 | . | A | C   | 1412.12 | PASS          | AC=11;AF=0.177;AN=62;BaseQRankSum= |
| 27083 | chrY | 13475884 | . | G | T   | 96.45   | PASS          | AC=2;AF=0.029;AN=70;BaseQRankSum=  |
| 27084 | chrY | 13475887 | . | C | A   | 44.52   | PASS          | AC=1;AF=0.014;AN=70;BaseQRankSum=  |
| 27085 | chrY | 13475896 | . | A | C   | 119.55  | PASS          | AC=2;AF=0.029;AN=68;BaseQRankSum=  |
| 27086 | chrY | 13475909 | . | T | G   | 217.42  | PASS          | AC=3;AF=0.050;AN=60;BaseQRankSum=  |
| 27087 | chrY | 13475910 | . | C | A   | 59.38   | PASS          | AC=2;AF=0.032;AN=62;BaseQRankSum=  |
| 27088 | chrY | 13475916 | . | A | G   | 272.19  | PASS          | AC=4;AF=0.065;AN=62;BaseQRankSum=  |
| 27089 | chrY | 13475917 | . | T | C   | 150.15  | PASS          | AC=2;AF=0.032;AN=62;BaseQRankSum=  |
| 27090 | chrY | 13475919 | . | A | G   | 136.33  | PASS          | AC=2;AF=0.033;AN=60;BaseQRankSum=  |
| 27091 | chrY | 13475930 | . | T | G   | 165.97  | PASS          | AC=2;AF=0.029;AN=68;BaseQRankSum=  |
| 27092 | chrY | 13475937 | . | A | G   | 120.99  | PASS          | AC=2;AF=0.029;AN=70;BaseQRankSum=  |
| 27093 | chrY | 13475961 | . | A | C   | 292.38  | PASS          | AC=4;AF=0.059;AN=68;BaseQRankSum=  |
| 27094 | chrY | 13475965 | . | G | A   | 208.02  | PASS          | AC=1;AF=0.014;AN=70;BaseQRankSum=  |
| 27095 | chrY | 13475970 | . | T | G   | 209.18  | PASS          | AC=1;AF=0.014;AN=70;BaseQRankSum=  |
| 27096 | chrY | 13475995 | . | G | A   | 41.04   | my_snp_filter | AC=2;AF=0.029;AN=68;BaseQ          |
| 27097 | chrY | 13476129 | . | A | G   | 1296.96 | PASS          | AC=12;AF=0.214;AN=56;BaseQRankSum= |
| 27098 | chrY | 13476136 | . | C | T   | 1378.16 | PASS          | AC=10;AF=0.152;AN=66;BaseQRankSum= |
| 27099 | chrY | 13476140 | . | C | A   | 1466.57 | PASS          | AC=10;AF=0.152;AN=66;BaseQRankSum= |
| 27100 | chrY | 13476155 | . | G | C,T | 635.08  | PASS          | AC=4,7;AF=0.061,0.106;AN=66;BaseQ  |
| 27101 | chrY | 13476158 | . | A | T   | 174.75  | PASS          | AC=4;AF=0.061;AN=66;BaseQRankSum=  |
| 27102 | chrY | 13476162 | . | G | T   | 43.83   | PASS          | AC=2;AF=0.030;AN=66;BaseQRankSum=  |
| 27103 | chrY | 13476167 | . | G | A   | 1051.18 | PASS          | AC=13;AF=0.197;AN=66;BaseQRankSum= |
| 27104 | chrY | 13476174 | . | G | A   | 644.86  | PASS          | AC=9;AF=0.136;AN=66;BaseQRankSum=  |
| 27105 | chrY | 13476178 | . | C | A   | 63.37   | PASS          | AC=3;AF=0.045;AN=66;BaseQRankSum=  |
| 27106 | chrY | 13476180 | . | A | T   | 43.94   | PASS          | AC=2;AF=0.030;AN=66;BaseQRankSum=  |
| 27107 | chrY | 13476181 | . | A | T   | 31.84   | my_snp_filter | AC=2;AF=0.030;AN=66;BaseQ          |
| 27108 | chrY | 13476183 | . | T | C   | 1064.99 | PASS          | AC=18;AF=0.310;AN=58;BaseQRankSum= |
| 27109 | chrY | 13476184 | . | C | T   | 181.27  | PASS          | AC=3;AF=0.045;AN=66;BaseQRankSum=  |
| 27110 | chrY | 13476185 | . | C | A   | 75.96   | PASS          | AC=3;AF=0.047;AN=64;BaseQRankSum=  |
| 27111 | chrY | 13476187 | . | C | A   | 99.16   | PASS          | AC=1;AF=0.015;AN=66;BaseQRankSum=  |
| 27112 | chrY | 13476188 | . | A | T,G | 423.26  | PASS          | AC=4,2;AF=0.061,0.030;AN=66;BaseQ  |
| 27113 | chrY | 13476191 | . | A | C,* | 7228.82 | PASS          | AC=25,1;AF=0.391,0.016;AN=64;Base  |
| 27114 | chrY | 13476192 | . | A | C   | 73.97   | PASS          | AC=1;AF=0.016;AN=62;BaseQRankSum=  |
| 27115 | chrY | 13476193 | . | T | G,C | 6927.47 | PASS          | AC=20,10;AF=0.333,0.167;AN=60;Bas  |
| 27116 | chrY | 13476195 | . | G | C   | 471.95  | PASS          | AC=4;AF=0.063;AN=64;BaseQRankSum=  |
| 27117 | chrY | 13476198 | . | C | G   | 95.95   | PASS          | AC=2;AF=0.031;AN=64;BaseQRankSum=  |
| 27118 | chrY | 13476200 | . | T | C   | 171.87  | PASS          | AC=5;AF=0.078;AN=64;BaseQRankSum=  |
| 27119 | chrY | 13476202 | . | G | C   | 46.25   | PASS          | AC=2;AF=0.031;AN=64;BaseQRankSum=  |
| 27120 | chrY | 13476205 | . | A | G   | 38.65   | PASS          | AC=1;AF=0.016;AN=64;BaseQRankSum=  |
| 27121 | chrY | 13476208 | . | G | A   | 461.74  | PASS          | AC=5;AF=0.081;AN=62;BaseQRankSum=  |
| 27122 | chrY | 13476210 | . | T | C   | 171.77  | PASS          | AC=3;AF=0.047;AN=64;BaseQRankSum=  |
| 27123 | chrY | 13476213 | . | C | A   | 50.77   | my_snp_filter | AC=2;AF=0.031;AN=64;BaseQ          |
| 27124 | chrY | 13476223 | . | G | C   | 159.78  | PASS          | AC=3;AF=0.047;AN=64;BaseQRankSum=  |
| 27125 | chrY | 13476227 | . | T | C   | 44.11   | PASS          | AC=1;AF=0.016;AN=64;BaseQRankSum=  |
| 27126 | chrY | 13476233 | . | C | A   | 89.63   | PASS          | AC=1;AF=0.016;AN=62;BaseQRankSum=  |
| 27127 | chrY | 13476242 | . | G | C   | 52.60   | PASS          | AC=2;AF=0.032;AN=62;DP=1755;FS=2.  |
| 27128 | chrY | 13476250 | . | G | A   | 39.77   | PASS          | AC=1;AF=0.017;AN=60;BaseQRankSum=  |
| 27129 | chrY | 13476251 | . | T | C   | 1103.30 | PASS          | AC=16;AF=0.421;AN=38;BaseQRankSum= |
| 27130 | chrY | 13476252 | . | C | A   | 42.01   | PASS          | AC=1;AF=0.017;AN=60;BaseQRankSum=  |
| 27131 | chrY | 13476253 | . | C | T   | 55.36   | my_snp_filter | AC=3;AF=0.050;AN=60;BaseQ          |
| 27132 | chrY | 13476266 | . | C | G   | 495.61  | PASS          | AC=5;AF=0.125;AN=40;BaseQRankSum=  |

|       |      |          |   |   |       |          |               |                                    |
|-------|------|----------|---|---|-------|----------|---------------|------------------------------------|
| 27133 | chrY | 13476267 | . | T | C     | 170.47   | PASS          | AC=3;AF=0.079;AN=38;BaseQRankSum=  |
| 27134 | chrY | 13476277 | . | G | A     | 477.54   | PASS          | AC=5;AF=0.125;AN=40;BaseQRankSum=  |
| 27135 | chrY | 13476300 | . | G | T     | 114.36   | PASS          | AC=1;AF=0.033;AN=30;BaseQRankSum=  |
| 27136 | chrY | 13476405 | . | G | A     | 501.48   | PASS          | AC=3;AF=0.043;AN=70;BaseQRankSum=  |
| 27137 | chrY | 13476410 | . | C | G     | 1804.99  | PASS          | AC=11;AF=0.250;AN=44;BaseQRankSum= |
| 27138 | chrY | 13476439 | . | A | T     | 235.70   | PASS          | AC=1;AF=0.014;AN=70;BaseQRankSum=  |
| 27139 | chrY | 13476440 | . | G | C     | 207.60   | PASS          | AC=2;AF=0.029;AN=70;BaseQRankSum=  |
| 27140 | chrY | 13476442 | . | T | A     | 30.96    | PASS          | AC=1;AF=0.014;AN=70;BaseQRankSum=  |
| 27141 | chrY | 13476450 | . | G | A     | 299.75   | PASS          | AC=1;AF=0.014;AN=70;BaseQRankSum=  |
| 27142 | chrY | 13476451 | . | C | G     | 1156.04  | PASS          | AC=7;AF=0.100;AN=70;BaseQRankSum=  |
| 27143 | chrY | 13476453 | . | G | C     | 3499.27  | PASS          | AC=13;AF=0.186;AN=70;BaseQRankSum= |
| 27144 | chrY | 13476457 | . | G | C,T   | 1241.85  | PASS          | AC=9,3;AF=0.129,0.043;AN=70;BaseQ  |
| 27145 | chrY | 13476458 | . | T | G     | 1278.63  | PASS          | AC=6;AF=0.086;AN=70;BaseQRankSum=  |
| 27146 | chrY | 13476459 | . | T | G     | 619.87   | PASS          | AC=5;AF=0.074;AN=68;BaseQRankSum=  |
| 27147 | chrY | 13476460 | . | T | C     | 3977.16  | PASS          | AC=13;AF=0.197;AN=66;BaseQRankSum= |
| 27148 | chrY | 13476461 | . | T | A,G   | 20910.82 | PASS          | AC=7,22;AF=0.106,0.333;AN=         |
| 27149 | chrY | 13476462 | . | C | T     | 1052.57  | PASS          | AC=5;AF=0.074;AN=68;BaseQRankSum=  |
| 27150 | chrY | 13476463 | . | T | A     | 662.82   | PASS          | AC=6;AF=0.088;AN=68;BaseQRankSum=  |
| 27151 | chrY | 13476466 | . | C | T     | 4176.73  | PASS          | AC=10;AF=0.143;AN=70;BaseQRankSum= |
| 27152 | chrY | 13476467 | . | G | A     | 5675.67  | PASS          | AC=10;AF=0.143;AN=70;BaseQRankSum= |
| 27153 | chrY | 13476468 | . | G | T     | 2808.17  | PASS          | AC=6;AF=0.086;AN=70;BaseQRankSum=  |
| 27154 | chrY | 13476469 | . | A | G     | 1480.65  | PASS          | AC=5;AF=0.071;AN=70;BaseQRankSum=  |
| 27155 | chrY | 13476472 | . | T | C     | 479.55   | PASS          | AC=1;AF=0.014;AN=70;BaseQRankSum=  |
| 27156 | chrY | 13476473 | . | C | G     | 1709.23  | PASS          | AC=6;AF=0.086;AN=70;BaseQRankSum=  |
| 27157 | chrY | 13476477 | . | G | T,*   | 2315.39  | PASS          | AC=6,1;AF=0.086,0.014;AN=70;BaseQ  |
| 27158 | chrY | 13476478 | . | G | A     | 2582.40  | PASS          | AC=6;AF=0.086;AN=70;BaseQRankSum=  |
| 27159 | chrY | 13476480 | . | C | A     | 310.64   | my_snp_filter | AC=4;AF=0.057;AN=70;BaseQ          |
| 27160 | chrY | 13476483 | . | C | A     | 959      | PASS          | AC=7;AF=0.100;AN=70;BaseQRankSum=  |
| 27161 | chrY | 13476485 | . | G | A     | 6586.67  | PASS          | AC=23;AF=0.329;AN=70;BaseQRankSum= |
| 27162 | chrY | 13476489 | . | A | T     | 2016.45  | PASS          | AC=6;AF=0.086;AN=70;BaseQRankSum=  |
| 27163 | chrY | 13476491 | . | A | G     | 2088.25  | PASS          | AC=6;AF=0.086;AN=70;BaseQRankSum=  |
| 27164 | chrY | 13476494 | . | A | C     | 26954.97 | PASS          | AC=32;AF=0.471;AN=68;BaseQ         |
| 27165 | chrY | 13476500 | . | A | C,G   | 4734.54  | PASS          | AC=3,6;AF=0.043,0.086;AN=70;BaseQ  |
| 27166 | chrY | 13476501 | . | G | T     | 2185.78  | PASS          | AC=6;AF=0.086;AN=70;BaseQRankSum=  |
| 27167 | chrY | 13476502 | . | G | T     | 8600.75  | PASS          | AC=14;AF=0.200;AN=70;BaseQRankSum= |
| 27168 | chrY | 13476505 | . | T | G,A   | 20073.10 | PASS          | AC=21,1;AF=0.309,0.015;AN=         |
| 27169 | chrY | 13476510 | . | A | T     | 3377.89  | PASS          | AC=6;AF=0.086;AN=70;BaseQRankSum=  |
| 27170 | chrY | 13476512 | . | C | A     | 2967.35  | PASS          | AC=6;AF=0.086;AN=70;BaseQRankSum=  |
| 27171 | chrY | 13476513 | . | G | C     | 3715.06  | PASS          | AC=7;AF=0.100;AN=70;BaseQRankSum=  |
| 27172 | chrY | 13476519 | . | G | C,T   | 4002.57  | PASS          | AC=7,1;AF=0.100,0.014;AN=70;BaseQ  |
| 27173 | chrY | 13476522 | . | C | G     | 2301.26  | PASS          | AC=5;AF=0.071;AN=70;BaseQRankSum=  |
| 27174 | chrY | 13476525 | . | T | A     | 3880.90  | PASS          | AC=8;AF=0.114;AN=70;BaseQRankSum=  |
| 27175 | chrY | 13476527 | . | T | G,A   | 20085.97 | PASS          | AC=28,2;AF=0.424,0.030;AN=         |
| 27176 | chrY | 13476531 | . | T | C     | 437.70   | PASS          | AC=3;AF=0.043;AN=70;BaseQRankSum=  |
| 27177 | chrY | 13476532 | . | C | A     | 673.79   | PASS          | AC=5;AF=0.074;AN=68;BaseQRankSum=  |
| 27178 | chrY | 13476533 | . | A | C,T   | 32969.58 | PASS          | AC=30,2;AF=0.455,0.030;AN=         |
| 27179 | chrY | 13476536 | . | G | T     | 2862.63  | PASS          | AC=6;AF=0.086;AN=70;BaseQRankSum=  |
| 27180 | chrY | 13476539 | . | A | G,C   | 3333.60  | PASS          | AC=10,4;AF=0.143,0.057;AN=70;BaseQ |
| 27181 | chrY | 13476544 | . | C | T,A   | 1954.35  | PASS          | AC=3,1;AF=0.043,0.014;AN=70;BaseQ  |
| 27182 | chrY | 13476546 | . | A | T     | 1704.46  | PASS          | AC=5;AF=0.071;AN=70;BaseQRankSum=  |
| 27183 | chrY | 13476549 | . | C | T     | 2613.15  | PASS          | AC=6;AF=0.086;AN=70;BaseQRankSum=  |
| 27184 | chrY | 13476550 | . | C | T     | 1305.87  | PASS          | AC=11;AF=0.157;AN=70;BaseQRankSum= |
| 27185 | chrY | 13476551 | . | G | T     | 1295.86  | PASS          | AC=9;AF=0.129;AN=70;BaseQRankSum=  |
| 27186 | chrY | 13476552 | . | G | A,C,T | 3029.84  | PASS          | AC=9,5,1;AF=0.132,0.074,0.015;AN=  |
| 27187 | chrY | 13476553 | . | T | C     | 39547.21 | PASS          | AC=31;AF=0.484;AN=64;BaseQ         |
| 27188 | chrY | 13476557 | . | A | T     | 35.57    | my_snp_filter | AC=2;AF=0.029;AN=70;BaseQ          |
| 27189 | chrY | 13476560 | . | G | T     | 2662.75  | PASS          | AC=6;AF=0.086;AN=70;BaseQRankSum=  |
| 27190 | chrY | 13476563 | . | G | T     | 2677.04  | PASS          | AC=6;AF=0.086;AN=70;BaseQRankSum=  |
| 27191 | chrY | 13476565 | . | C | T     | 667.29   | PASS          | AC=9;AF=0.129;AN=70;BaseQRankSum=  |
| 27192 | chrY | 13476567 | . | C | T     | 69.52    | my_snp_filter | AC=3;AF=0.043;AN=70;BaseQ          |
| 27193 | chrY | 13476569 | . | C | T     | 1057.73  | my_snp_filter | AC=5;AF=0.071;AN=70;BaseQ          |
| 27194 | chrY | 13476572 | . | T | C,G   | 462.56   | my_snp_filter | AC=3,1;AF=0.043,0.014;AN=          |
| 27195 | chrY | 13476573 | . | G | A     | 2877.76  | PASS          | AC=6;AF=0.086;AN=70;BaseQRankSum=  |
| 27196 | chrY | 13476574 | . | T | A     | 1130.36  | PASS          | AC=3;AF=0.043;AN=70;BaseQRankSum=  |
| 27197 | chrY | 13476575 | . | T | A     | 108.16   | my_snp_filter | AC=4;AF=0.057;AN=70;BaseQ          |
| 27198 | chrY | 13476578 | . | C | A     | 687.80   | my_snp_filter | AC=6;AF=0.086;AN=70;BaseQ          |
| 27199 | chrY | 13476579 | . | G | A     | 4844.62  | PASS          | AC=10;AF=0.143;AN=70;BaseQRankSum= |
| 27200 | chrY | 13476581 | . | A | G     | 886.72   | PASS          | AC=4;AF=0.057;AN=70;BaseQRankSum=  |
| 27201 | chrY | 13476582 | . | C | T     | 3962.47  | PASS          | AC=15;AF=0.214;AN=70;BaseQRankSum= |
| 27202 | chrY | 13476584 | . | C | T     | 199.37   | my_snp_filter | AC=3;AF=0.043;AN=70;BaseQ          |
| 27203 | chrY | 13476585 | . | G | T,A   | 1907.49  | PASS          | AC=1,6;AF=0.014,0.086;AN=70;BaseQ  |
| 27204 | chrY | 13476586 | . | G | A     | 585.62   | PASS          | AC=6;AF=0.086;AN=70;BaseQRankSum=  |
| 27205 | chrY | 13476590 | . | T | A     | 78.06    | PASS          | AC=2;AF=0.029;AN=70;BaseQRankSum=  |
| 27206 | chrY | 13476592 | . | C | T     | 54.74    | my_snp_filter | AC=1;AF=0.014;AN=70;BaseQ          |
| 27207 | chrY | 13476593 | . | A | G     | 1084.59  | PASS          | AC=6;AF=0.086;AN=70;BaseQRankSum=  |
| 27208 | chrY | 13476594 | . | T | A,C   | 921.51   | PASS          | AC=2,2;AF=0.029,0.029;AN=70;BaseQ  |

|       |      |          |   |   |       |          |               |                                    |
|-------|------|----------|---|---|-------|----------|---------------|------------------------------------|
| 27209 | chrY | 13476595 | . | C | T,A   | 1362.56  | PASS          | AC=8,3;AF=0.114,0.043;AN=70;BaseQ  |
| 27210 | chrY | 13476596 | . | G | A     | 6827.91  | PASS          | AC=9;AF=0.129;AN=70;BaseQRankSum=  |
| 27211 | chrY | 13476598 | . | C | A     | 297.24   | PASS          | AC=2;AF=0.029;AN=70;BaseQRankSum=  |
| 27212 | chrY | 13476599 | . | A | T     | 790.15   | PASS          | AC=2;AF=0.029;AN=70;BaseQRankSum=  |
| 27213 | chrY | 13476600 | . | G | T     | 627.92   | PASS          | AC=3;AF=0.043;AN=70;BaseQRankSum=  |
| 27214 | chrY | 13476601 | . | G | A     | 690.17   | my_snp_filter | AC=3;AF=0.043;AN=70;BaseQ          |
| 27215 | chrY | 13476602 | . | C | A     | 472.55   | my_snp_filter | AC=3;AF=0.043;AN=70;BaseQ          |
| 27216 | chrY | 13476605 | . | T | C     | 1297.68  | PASS          | AC=4;AF=0.057;AN=70;BaseQRankSum=  |
| 27217 | chrY | 13476606 | . | C | G     | 515.29   | PASS          | AC=9;AF=0.129;AN=70;BaseQRankSum=  |
| 27218 | chrY | 13476608 | . | C | T,A   | 878.73   | PASS          | AC=4,3;AF=0.059,0.044;AN=68;BaseQ  |
| 27219 | chrY | 13476611 | . | C | T,G,* | 3032.31  | PASS          | AC=4,3,6;AF=0.057,0.043,0.086;AN=  |
| 27220 | chrY | 13476612 | . | G | T,A   | 794.38   | my_snp_filter | AC=8,2;AF=0.114,0.029;AN=          |
| 27221 | chrY | 13476613 | . | G | T     | 47.54    | PASS          | AC=2;AF=0.029;AN=70;BaseQRankSum=  |
| 27222 | chrY | 13476615 | . | G | A,T   | 504.75   | my_snp_filter | AC=2,2;AF=0.029,0.029;AN=          |
| 27223 | chrY | 13476618 | . | G | A     | 742.05   | PASS          | AC=2;AF=0.029;AN=70;BaseQRankSum=  |
| 27224 | chrY | 13476625 | . | C | T,G   | 406.58   | my_snp_filter | AC=5,3;AF=0.071,0.043;AN=          |
| 27225 | chrY | 13476631 | . | G | A     | 52.25    | my_snp_filter | AC=1;AF=0.014;AN=70;BaseQ          |
| 27226 | chrY | 13476632 | . | G | T     | 1171.75  | PASS          | AC=3;AF=0.043;AN=70;BaseQRankSum=  |
| 27227 | chrY | 13476633 | . | G | C     | 182.81   | PASS          | AC=3;AF=0.043;AN=70;BaseQRankSum=  |
| 27228 | chrY | 13476634 | . | G | A     | 277.08   | my_snp_filter | AC=3;AF=0.043;AN=70;BaseQ          |
| 27229 | chrY | 13476637 | . | T | C     | 668.13   | PASS          | AC=6;AF=0.086;AN=70;BaseQRankSum=  |
| 27230 | chrY | 13476638 | . | C | G     | 38.89    | my_snp_filter | AC=1;AF=0.014;AN=70;BaseQ          |
| 27231 | chrY | 13476639 | . | C | G,T   | 10305.32 | PASS          | AC=24,1;AF=0.444,0.019;AN=         |
| 27232 | chrY | 13476643 | . | T | A     | 62.39    | PASS          | AC=1;AF=0.014;AN=70;BaseQRankSum=  |
| 27233 | chrY | 13476644 | . | G | T     | 1004.03  | PASS          | AC=4;AF=0.059;AN=68;BaseQRankSum=  |
| 27234 | chrY | 13476645 | . | G | C     | 2151.84  | PASS          | AC=8;AF=0.118;AN=68;BaseQRankSum=  |
| 27235 | chrY | 13476647 | . | C | A,*   | 1022.97  | PASS          | AC=6,3;AF=0.088,0.044;AN=68;BaseQ  |
| 27236 | chrY | 13476653 | . | C | T     | 1409.30  | PASS          | AC=12;AF=0.176;AN=68;BaseQRankSum= |
| 27237 | chrY | 13476654 | . | G | A,T   | 1985.31  | my_snp_filter | AC=1,5;AF=0.015,0.076;AN=          |
| 27238 | chrY | 13476655 | . | T | G     | 136.78   | my_snp_filter | AC=3;AF=0.044;AN=68;BaseQ          |
| 27239 | chrY | 13476656 | . | G | T,A   | 1688.34  | PASS          | AC=7,4;AF=0.103,0.059;AN=68;BaseQ  |
| 27240 | chrY | 13476657 | . | G | A     | 1241.10  | PASS          | AC=7;AF=0.103;AN=68;BaseQRankSum=  |
| 27241 | chrY | 13476662 | . | A | G,T   | 11762.29 | PASS          | AC=22,1;AF=0.393,0.018;AN=         |
| 27242 | chrY | 13476665 | . | C | T     | 756.09   | PASS          | AC=5;AF=0.081;AN=62;BaseQRankSum=  |
| 27243 | chrY | 13476666 | . | C | G     | 9372.36  | PASS          | AC=14;AF=0.233;AN=60;BaseQRankSum= |
| 27244 | chrY | 13476668 | . | G | C     | 1704.80  | PASS          | AC=7;AF=0.103;AN=68;BaseQRankSum=  |
| 27245 | chrY | 13476672 | . | C | T     | 110.17   | my_snp_filter | AC=3;AF=0.043;AN=70;BaseQ          |
| 27246 | chrY | 13476673 | . | A | C     | 1794.16  | PASS          | AC=7;AF=0.100;AN=70;BaseQRankSum=  |
| 27247 | chrY | 13476676 | . | A | C,*   | 5486.18  | PASS          | AC=17,2;AF=0.315,0.037;AN=54;Base  |
| 27248 | chrY | 13476678 | . | C | A,*   | 2079.32  | PASS          | AC=9,2;AF=0.136,0.030;AN=66;BaseQ  |
| 27249 | chrY | 13476683 | . | C | G,A   | 1897.20  | PASS          | AC=6,2;AF=0.100,0.033;AN=60;BaseQ  |
| 27250 | chrY | 13476686 | . | T | A     | 604.50   | my_snp_filter | AC=2;AF=0.029;AN=68;BaseQ          |
| 27251 | chrY | 13476689 | . | G | C     | 2462.36  | my_snp_filter | AC=9;AF=0.129;AN=70;BaseQ          |
| 27252 | chrY | 13476694 | . | T | G     | 82.65    | my_snp_filter | AC=4;AF=0.057;AN=70;BaseQ          |
| 27253 | chrY | 13476695 | . | G | A     | 1957.83  | PASS          | AC=6;AF=0.086;AN=70;BaseQRankSum=  |
| 27254 | chrY | 13476698 | . | C | T     | 1770.74  | PASS          | AC=6;AF=0.088;AN=68;BaseQRankSum=  |
| 27255 | chrY | 13476700 | . | G | A     | 624.97   | PASS          | AC=8;AF=0.114;AN=70;BaseQRankSum=  |
| 27256 | chrY | 13476701 | . | G | C     | 204.47   | PASS          | AC=5;AF=0.071;AN=70;BaseQRankSum=  |
| 27257 | chrY | 13476705 | . | T | C     | 730.14   | PASS          | AC=4;AF=0.059;AN=68;BaseQRankSum=  |
| 27258 | chrY | 13476707 | . | G | C     | 378.02   | PASS          | AC=2;AF=0.029;AN=70;BaseQRankSum=  |
| 27259 | chrY | 13476708 | . | C | T     | 61.87    | PASS          | AC=2;AF=0.029;AN=70;BaseQRankSum=  |
| 27260 | chrY | 13476709 | . | G | T     | 2987.82  | my_snp_filter | AC=8;AF=0.118;AN=68;BaseQ          |
| 27261 | chrY | 13476713 | . | G | C     | 8809.66  | PASS          | AC=20;AF=0.345;AN=58;BaseQRankSum= |
| 27262 | chrY | 13476714 | . | C | A     | 447.49   | PASS          | AC=3;AF=0.048;AN=62;BaseQRankSum=  |
| 27263 | chrY | 13476723 | . | C | T     | 1775.31  | PASS          | AC=7;AF=0.100;AN=70;BaseQRankSum=  |
| 27264 | chrY | 13476733 | . | C | A     | 991.95   | PASS          | AC=4;AF=0.057;AN=70;BaseQRankSum=  |
| 27265 | chrY | 13476735 | . | C | A     | 1028.09  | PASS          | AC=4;AF=0.059;AN=68;BaseQRankSum=  |
| 27266 | chrY | 13476736 | . | G | A     | 1301.86  | PASS          | AC=4;AF=0.059;AN=68;BaseQRankSum=  |
| 27267 | chrY | 13476741 | . | G | T     | 190      | my_snp_filter | AC=2;AF=0.029;AN=70;BaseQ          |
| 27268 | chrY | 13476746 | . | T | C     | 1639.07  | my_snp_filter | AC=16;AF=0.267;AN=60;Base          |
| 27269 | chrY | 13476759 | . | G | A     | 4313.32  | my_snp_filter | AC=15;AF=0.288;AN=52;Base          |
| 27270 | chrY | 13476763 | . | T | A     | 1138.98  | my_snp_filter | AC=9;AF=0.150;AN=60;BaseQ          |
| 27271 | chrY | 13476765 | . | C | A     | 1051.62  | my_snp_filter | AC=9;AF=0.150;AN=60;BaseQ          |
| 27272 | chrY | 13476770 | . | A | G     | 2770.59  | PASS          | AC=10;AF=0.192;AN=52;BaseQRankSum= |
| 27273 | chrY | 13476772 | . | A | G     | 429.76   | PASS          | AC=6;AF=0.111;AN=54;BaseQRankSum=  |
| 27274 | chrY | 13476776 | . | C | T     | 862.77   | my_snp_filter | AC=7;AF=0.106;AN=66;BaseQ          |
| 27275 | chrY | 13476783 | . | A | C     | 876.74   | my_snp_filter | AC=7;AF=0.106;AN=66;BaseQ          |
| 27276 | chrY | 13476787 | . | T | G     | 180.58   | PASS          | AC=3;AF=0.045;AN=66;BaseQRankSum=  |
| 27277 | chrY | 13476793 | . | C | G     | 2836.05  | PASS          | AC=8;AF=0.129;AN=62;BaseQRankSum=  |
| 27278 | chrY | 13476794 | . | C | A     | 484.79   | PASS          | AC=1;AF=0.016;AN=62;BaseQRankSum=  |
| 27279 | chrY | 13476797 | . | C | A,*   | 1265.03  | PASS          | AC=1,1;AF=0.017,0.017;AN=60;BaseQ  |
| 27280 | chrY | 13476799 | . | A | T     | 3194.87  | PASS          | AC=10;AF=0.185;AN=54;BaseQRankSum= |
| 27281 | chrY | 13476806 | . | C | G     | 379.03   | PASS          | AC=3;AF=0.045;AN=66;BaseQRankSum=  |
| 27282 | chrY | 13476808 | . | A | G     | 1782.40  | PASS          | AC=9;AF=0.145;AN=62;BaseQRankSum=  |
| 27283 | chrY | 13476821 | . | T | G     | 354.36   | my_snp_filter | AC=8;AF=0.114;AN=70;BaseQ          |
| 27284 | chrY | 13476828 | . | T | A,G   | 5259.01  | PASS          | AC=5,8;AF=0.096,0.154;AN=52;BaseQ  |

|       |      |          |   |   |     |         |               |                                    |
|-------|------|----------|---|---|-----|---------|---------------|------------------------------------|
| 27285 | chrY | 13476829 | . | C | G   | 77.85   | my_snp_filter | AC=1;AF=0.016;AN=62;BaseQ          |
| 27286 | chrY | 13476832 | . | G | A   | 79.77   | my_snp_filter | AC=5;AF=0.071;AN=70;BaseQ          |
| 27287 | chrY | 13476835 | . | A | G   | 999.68  | PASS          | AC=3;AF=0.043;AN=70;BaseQRankSum=  |
| 27288 | chrY | 13476836 | . | G | A   | 71.75   | my_snp_filter | AC=5;AF=0.071;AN=70;BaseQ          |
| 27289 | chrY | 13476839 | . | C | A   | 190.85  | PASS          | AC=2;AF=0.030;AN=66;BaseQRankSum=  |
| 27290 | chrY | 13476842 | . | A | G   | 62.74   | my_snp_filter | AC=5;AF=0.074;AN=68;BaseQ          |
| 27291 | chrY | 13476847 | . | G | A   | 247.65  | PASS          | AC=1;AF=0.015;AN=66;BaseQRankSum=  |
| 27292 | chrY | 13476853 | . | C | G   | 1390.51 | my_snp_filter | AC=5;AF=0.076;AN=66;BaseQ          |
| 27293 | chrY | 13476856 | . | T | A   | 1321.55 | PASS          | AC=5;AF=0.076;AN=66;BaseQRankSum=  |
| 27294 | chrY | 13476860 | . | T | C   | 3044.90 | my_snp_filter | AC=17;AF=0.304;AN=56;Base          |
| 27295 | chrY | 13476863 | . | T | G,C | 3854.57 | PASS          | AC=16,1;AF=0.296,0.019;AN=54;Base  |
| 27296 | chrY | 13476866 | . | A | G   | 1160.32 | PASS          | AC=7;AF=0.100;AN=70;BaseQRankSum=  |
| 27297 | chrY | 13476870 | . | C | G   | 868.38  | my_snp_filter | AC=4;AF=0.057;AN=70;BaseQ          |
| 27298 | chrY | 13476874 | . | A | C   | 686.84  | PASS          | AC=4;AF=0.057;AN=70;BaseQRankSum=  |
| 27299 | chrY | 13476880 | . | C | T   | 487.81  | PASS          | AC=4;AF=0.057;AN=70;BaseQRankSum=  |
| 27300 | chrY | 13476882 | . | G | A   | 551.26  | my_snp_filter | AC=4;AF=0.061;AN=66;BaseQ          |
| 27301 | chrY | 13476892 | . | C | G   | 206.05  | PASS          | AC=2;AF=0.029;AN=70;BaseQRankSum=  |
| 27302 | chrY | 13476895 | . | C | T   | 572.55  | PASS          | AC=5;AF=0.071;AN=70;BaseQRankSum=  |
| 27303 | chrY | 13476897 | . | A | G   | 5547.12 | PASS          | AC=19;AF=0.365;AN=52;BaseQRankSum= |
| 27304 | chrY | 13476903 | . | C | T   | 974.17  | PASS          | AC=8;AF=0.125;AN=64;BaseQRankSum=  |
| 27305 | chrY | 13476910 | . | T | C   | 733.44  | PASS          | AC=5;AF=0.078;AN=64;BaseQRankSum=  |
| 27306 | chrY | 13476914 | . | G | C   | 4065.46 | my_snp_filter | AC=19;AF=0.365;AN=52;Base          |
| 27307 | chrY | 13476944 | . | G | C   | 38.87   | PASS          | AC=1;AF=0.028;AN=36;BaseQRankSum=  |
| 27308 | chrY | 13476946 | . | C | A   | 115.14  | PASS          | AC=1;AF=0.019;AN=52;BaseQRankSum=  |
| 27309 | chrY | 13476949 | . | T | C   | 98.94   | PASS          | AC=2;AF=0.048;AN=42;BaseQRankSum=  |
| 27310 | chrY | 13477124 | . | T | G   | 355.45  | PASS          | AC=3;AF=0.050;AN=60;BaseQRankSum=  |
| 27311 | chrY | 13477127 | . | C | A   | 354.20  | PASS          | AC=3;AF=0.048;AN=62;BaseQRankSum=  |
| 27312 | chrY | 13477151 | . | A | C   | 60.76   | PASS          | AC=2;AF=0.032;AN=62;BaseQRankSum=  |
| 27313 | chrY | 13477153 | . | T | A   | 73.40   | PASS          | AC=2;AF=0.040;AN=50;BaseQRankSum=  |
| 27314 | chrY | 13477154 | . | C | G   | 73.56   | PASS          | AC=2;AF=0.040;AN=50;BaseQRankSum=  |
| 27315 | chrY | 13477181 | . | A | C   | 244.99  | PASS          | AC=6;AF=0.130;AN=46;BaseQRankSum=  |
| 27316 | chrY | 13477183 | . | A | G   | 225.31  | PASS          | AC=6;AF=0.103;AN=58;BaseQRankSum=  |
| 27317 | chrY | 13477185 | . | C | G   | 53.77   | PASS          | AC=2;AF=0.029;AN=68;BaseQRankSum=  |
| 27318 | chrY | 13477195 | . | C | T   | 173.09  | PASS          | AC=2;AF=0.032;AN=62;BaseQRankSum=  |
| 27319 | chrY | 13477196 | . | C | T   | 208.43  | PASS          | AC=2;AF=0.034;AN=58;BaseQRankSum=  |
| 27320 | chrY | 13477197 | . | A | G   | 257.25  | PASS          | AC=2;AF=0.034;AN=58;BaseQRankSum=  |
| 27321 | chrY | 13477206 | . | C | T   | 303.45  | PASS          | AC=3;AF=0.065;AN=46;BaseQRankSum=  |
| 27322 | chrY | 13477207 | . | A | G   | 499.02  | PASS          | AC=6;AF=0.130;AN=46;BaseQRankSum=  |
| 27323 | chrY | 13477213 | . | T | C   | 411.22  | PASS          | AC=6;AF=0.086;AN=70;BaseQRankSum=  |
| 27324 | chrY | 13477220 | . | T | C   | 163.07  | PASS          | AC=3;AF=0.054;AN=56;BaseQRankSum=  |
| 27325 | chrY | 13477230 | . | T | C   | 2111    | PASS          | AC=20;AF=0.370;AN=54;BaseQRankSum= |
| 27326 | chrY | 13477231 | . | G | A,T | 716.10  | PASS          | AC=8,4;AF=0.148,0.074;AN=54;BaseQ  |
| 27327 | chrY | 13477233 | . | G | A   | 128.15  | PASS          | AC=3;AF=0.044;AN=68;BaseQRankSum=  |
| 27328 | chrY | 13477239 | . | C | T   | 107.54  | PASS          | AC=3;AF=0.043;AN=70;BaseQRankSum=  |
| 27329 | chrY | 13477240 | . | C | T   | 834.05  | PASS          | AC=11;AF=0.157;AN=70;BaseQRankSum= |
| 27330 | chrY | 13477244 | . | T | C   | 323.50  | PASS          | AC=7;AF=0.109;AN=64;BaseQRankSum=  |
| 27331 | chrY | 13477247 | . | C | A   | 484.77  | PASS          | AC=8;AF=0.114;AN=70;BaseQRankSum=  |
| 27332 | chrY | 13477249 | . | A | C   | 727.26  | PASS          | AC=10;AF=0.152;AN=66;BaseQRankSum= |
| 27333 | chrY | 13477253 | . | C | T   | 107.21  | PASS          | AC=3;AF=0.043;AN=70;BaseQRankSum=  |
| 27334 | chrY | 13477258 | . | A | G   | 157.51  | PASS          | AC=3;AF=0.043;AN=70;BaseQRankSum=  |
| 27335 | chrY | 13477259 | . | G | A   | 104.91  | PASS          | AC=3;AF=0.043;AN=70;BaseQRankSum=  |
| 27336 | chrY | 13477260 | . | C | T   | 600.75  | PASS          | AC=13;AF=0.186;AN=70;BaseQRankSum= |
| 27337 | chrY | 13477263 | . | C | A   | 152.46  | PASS          | AC=1;AF=0.014;AN=70;BaseQRankSum=  |
| 27338 | chrY | 13477264 | . | C | A   | 115.33  | PASS          | AC=1;AF=0.014;AN=70;BaseQRankSum=  |
| 27339 | chrY | 13477268 | . | C | A   | 31.81   | my_snp_filter | AC=1;AF=0.014;AN=70;BaseQ          |
| 27340 | chrY | 13477269 | . | C | A   | 503.97  | PASS          | AC=7;AF=0.100;AN=70;BaseQRankSum=  |
| 27341 | chrY | 13477271 | . | C | A,T | 1419.12 | PASS          | AC=3,14;AF=0.043,0.200;AN=70;Base  |
| 27342 | chrY | 13477276 | . | G | A   | 1432.25 | PASS          | AC=15;AF=0.214;AN=70;BaseQRankSum= |
| 27343 | chrY | 13477278 | . | C | T   | 37.70   | my_snp_filter | AC=1;AF=0.014;AN=70;BaseQ          |
| 27344 | chrY | 13477279 | . | C | T   | 279.01  | PASS          | AC=5;AF=0.071;AN=70;BaseQRankSum=  |
| 27345 | chrY | 13477280 | . | G | A,T | 281.34  | PASS          | AC=3,4;AF=0.043,0.057;AN=70;BaseQ  |
| 27346 | chrY | 13477281 | . | G | C   | 37.70   | my_snp_filter | AC=1;AF=0.014;AN=70;BaseQ          |
| 27347 | chrY | 13477283 | . | G | A,T | 1664.65 | PASS          | AC=3,16;AF=0.044,0.235;AN=68;Base  |
| 27348 | chrY | 13477285 | . | C | G   | 140.33  | PASS          | AC=4;AF=0.057;AN=70;BaseQRankSum=  |
| 27349 | chrY | 13477286 | . | G | C   | 65.51   | PASS          | AC=2;AF=0.029;AN=70;BaseQRankSum=  |
| 27350 | chrY | 13477288 | . | G | T   | 369.34  | PASS          | AC=8;AF=0.114;AN=70;BaseQRankSum=  |
| 27351 | chrY | 13477291 | . | C | T   | 439.65  | PASS          | AC=9;AF=0.129;AN=70;BaseQRankSum=  |
| 27352 | chrY | 13477294 | . | C | T   | 154.08  | PASS          | AC=4;AF=0.057;AN=70;BaseQRankSum=  |
| 27353 | chrY | 13477295 | . | A | G   | 1058.72 | PASS          | AC=15;AF=0.214;AN=70;BaseQRankSum= |
| 27354 | chrY | 13477298 | . | G | T   | 65.05   | PASS          | AC=1;AF=0.014;AN=70;BaseQRankSum=  |
| 27355 | chrY | 13477301 | . | G | T   | 75.11   | PASS          | AC=1;AF=0.015;AN=68;BaseQRankSum=  |
| 27356 | chrY | 13477306 | . | G | C   | 69.41   | PASS          | AC=1;AF=0.015;AN=68;BaseQRankSum=  |
| 27357 | chrY | 13477311 | . | G | A   | 141.76  | PASS          | AC=4;AF=0.059;AN=68;BaseQRankSum=  |
| 27358 | chrY | 13477319 | . | G | C,* | 616.57  | PASS          | AC=3,3;AF=0.050,0.050;AN=60;BaseQ  |
| 27359 | chrY | 13477321 | . | C | T   | 420.67  | PASS          | AC=3;AF=0.050;AN=60;BaseQRankSum=  |
| 27360 | chrY | 13477324 | . | A | C   | 42.72   | PASS          | AC=1;AF=0.017;AN=60;BaseQRankSum=  |



|       |      |          |   |   |     |         |               |                                    |
|-------|------|----------|---|---|-----|---------|---------------|------------------------------------|
| 27361 | chrY | 13477326 | . | G | C   | 513.67  | PASS          | AC=10;AF=0.172;AN=58;BaseQRankSum= |
| 27362 | chrY | 13477327 | . | G | A   | 334.15  | PASS          | AC=6;AF=0.103;AN=58;BaseQRankSum=  |
| 27363 | chrY | 13477330 | . | G | A   | 284.18  | PASS          | AC=6;AF=0.100;AN=60;BaseQRankSum=  |
| 27364 | chrY | 13477333 | . | C | A   | 298.48  | PASS          | AC=5;AF=0.086;AN=58;BaseQRankSum=  |
| 27365 | chrY | 13477334 | . | T | G   | 188.43  | PASS          | AC=2;AF=0.036;AN=56;BaseQRankSum=  |
| 27366 | chrY | 13477336 | . | C | A   | 201.23  | PASS          | AC=3;AF=0.050;AN=60;BaseQRankSum=  |
| 27367 | chrY | 13477340 | . | G | C   | 389.70  | PASS          | AC=8;AF=0.160;AN=50;BaseQRankSum=  |
| 27368 | chrY | 13477344 | . | C | T   | 49.45   | my_snp_filter | AC=2;AF=0.032;AN=62;DP=40          |
| 27369 | chrY | 13477351 | . | A | C   | 154.26  | PASS          | AC=3;AF=0.058;AN=52;BaseQRankSum=  |
| 27370 | chrY | 13477362 | . | T | C   | 41.30   | PASS          | AC=2;AF=0.031;AN=64;BaseQRankSum=  |
| 27371 | chrY | 13477416 | . | C | A   | 65.33   | PASS          | AC=3;AF=0.045;AN=66;BaseQRankSum=  |
| 27372 | chrY | 13477420 | . | G | A   | 65.35   | PASS          | AC=3;AF=0.045;AN=66;BaseQRankSum=  |
| 27373 | chrY | 13477422 | . | C | A   | 65.68   | PASS          | AC=3;AF=0.045;AN=66;BaseQRankSum=  |
| 27374 | chrY | 13477424 | . | C | A   | 67.20   | PASS          | AC=3;AF=0.045;AN=66;BaseQRankSum=  |
| 27375 | chrY | 13478021 | . | C | T   | 121.14  | PASS          | AC=2;AF=0.031;AN=64;BaseQRankSum=  |
| 27376 | chrY | 13478025 | . | C | T   | 80.01   | PASS          | AC=1;AF=0.016;AN=64;BaseQRankSum=  |
| 27377 | chrY | 13478033 | . | G | A,T | 535.14  | PASS          | AC=3,4;AF=0.050,0.067;AN=60;BaseQ  |
| 27378 | chrY | 13478034 | . | A | G   | 186.42  | PASS          | AC=4;AF=0.067;AN=60;BaseQRankSum=  |
| 27379 | chrY | 13478037 | . | G | A   | 138.80  | PASS          | AC=4;AF=0.063;AN=64;BaseQRankSum=  |
| 27380 | chrY | 13478040 | . | C | A,T | 429.62  | PASS          | AC=1,6;AF=0.016,0.094;AN=64;BaseQ  |
| 27381 | chrY | 13478041 | . | T | C   | 365.36  | PASS          | AC=6;AF=0.097;AN=62;BaseQRankSum=  |
| 27382 | chrY | 13478049 | . | G | A   | 44.29   | PASS          | AC=2;AF=0.033;AN=60;BaseQRankSum=  |
| 27383 | chrY | 13478053 | . | A | C   | 1004.01 | PASS          | AC=10;AF=0.179;AN=56;BaseQRankSum= |
| 27384 | chrY | 13478054 | . | G | A   | 181.12  | PASS          | AC=4;AF=0.063;AN=64;BaseQRankSum=  |
| 27385 | chrY | 13478064 | . | G | A   | 135.02  | PASS          | AC=5;AF=0.078;AN=64;BaseQRankSum=  |
| 27386 | chrY | 13478065 | . | C | A   | 141.88  | PASS          | AC=4;AF=0.063;AN=64;BaseQRankSum=  |
| 27387 | chrY | 13478066 | . | C | T   | 42.07   | PASS          | AC=1;AF=0.016;AN=62;BaseQRankSum=  |
| 27388 | chrY | 13478067 | . | G | A   | 635.33  | PASS          | AC=9;AF=0.141;AN=64;BaseQRankSum=  |
| 27389 | chrY | 13478071 | . | C | T   | 143.03  | PASS          | AC=4;AF=0.065;AN=62;BaseQRankSum=  |
| 27390 | chrY | 13478076 | . | T | C   | 895.64  | PASS          | AC=11;AF=0.172;AN=64;BaseQRankSum= |
| 27391 | chrY | 13478086 | . | C | G   | 64.06   | PASS          | AC=2;AF=0.031;AN=64;BaseQRankSum=  |
| 27392 | chrY | 13478090 | . | C | G   | 496.36  | PASS          | AC=3;AF=0.047;AN=64;BaseQRankSum=  |
| 27393 | chrY | 13478092 | . | G | C   | 486.72  | PASS          | AC=3;AF=0.047;AN=64;BaseQRankSum=  |
| 27394 | chrY | 13478097 | . | C | T   | 570.95  | PASS          | AC=3;AF=0.048;AN=62;BaseQRankSum=  |
| 27395 | chrY | 13478098 | . | G | A   | 459.73  | PASS          | AC=3;AF=0.052;AN=58;BaseQRankSum=  |
| 27396 | chrY | 13478099 | . | C | G   | 207.87  | PASS          | AC=3;AF=0.050;AN=60;BaseQRankSum=  |
| 27397 | chrY | 13478101 | . | C | G   | 496.09  | PASS          | AC=2;AF=0.033;AN=60;BaseQRankSum=  |
| 27398 | chrY | 13478105 | . | C | T   | 1011.86 | PASS          | AC=6;AF=0.100;AN=60;BaseQRankSum=  |
| 27399 | chrY | 13478106 | . | G | T   | 94.33   | PASS          | AC=1;AF=0.017;AN=60;BaseQRankSum=  |
| 27400 | chrY | 13478109 | . | G | T   | 72.94   | my_snp_filter | AC=3;AF=0.052;AN=58;BaseQ          |
| 27401 | chrY | 13478110 | . | C | A   | 512.47  | PASS          | AC=4;AF=0.069;AN=58;BaseQRankSum=  |
| 27402 | chrY | 13478115 | . | A | G   | 4807.55 | my_snp_filter | AC=15;AF=0.326;AN=46;BaseQ         |
| 27403 | chrY | 13478117 | . | G | A   | 767.77  | PASS          | AC=3;AF=0.054;AN=56;BaseQRankSum=  |
| 27404 | chrY | 13478118 | . | C | A   | 163.58  | PASS          | AC=2;AF=0.034;AN=58;BaseQRankSum=  |
| 27405 | chrY | 13478122 | . | G | T,C | 691.56  | PASS          | AC=3,1;AF=0.058,0.019;AN=52;BaseQ  |
| 27406 | chrY | 13478123 | . | G | C   | 61.59   | my_snp_filter | AC=3;AF=0.058;AN=52;BaseQ          |
| 27407 | chrY | 13478125 | . | G | A   | 74.17   | my_snp_filter | AC=1;AF=0.019;AN=54;BaseQ          |
| 27408 | chrY | 13478128 | . | C | A   | 945.41  | PASS          | AC=2;AF=0.038;AN=52;BaseQRankSum=  |
| 27409 | chrY | 13478132 | . | C | T   | 845.09  | PASS          | AC=5;AF=0.104;AN=48;BaseQRankSum=  |
| 27410 | chrY | 13478133 | . | A | G   | 3749.33 | my_snp_filter | AC=7;AF=0.146;AN=48;BaseQ          |
| 27411 | chrY | 13478134 | . | T | C   | 4055.82 | my_snp_filter | AC=9;AF=0.188;AN=48;BaseQ          |
| 27412 | chrY | 13478135 | . | C | A   | 1034.09 | PASS          | AC=6;AF=0.120;AN=50;BaseQRankSum=  |
| 27413 | chrY | 13478137 | . | C | A   | 476.42  | PASS          | AC=6;AF=0.115;AN=52;BaseQRankSum=  |
| 27414 | chrY | 13478139 | . | T | C   | 4350.36 | my_snp_filter | AC=9;AF=0.188;AN=48;BaseQ          |
| 27415 | chrY | 13478140 | . | G | A,T | 739.81  | PASS          | AC=2,1;AF=0.040,0.020;AN=50;BaseQ  |
| 27416 | chrY | 13478141 | . | C | T   | 1089.08 | PASS          | AC=2;AF=0.038;AN=52;BaseQRankSum=  |
| 27417 | chrY | 13478142 | . | G | A   | 177.72  | my_snp_filter | AC=3;AF=0.058;AN=52;BaseQ          |
| 27418 | chrY | 13478144 | . | C | A   | 543.35  | PASS          | AC=1;AF=0.020;AN=50;BaseQRankSum=  |
| 27419 | chrY | 13478145 | . | C | G   | 486.87  | PASS          | AC=1;AF=0.020;AN=50;BaseQRankSum=  |
| 27420 | chrY | 13478146 | . | C | A   | 93.03   | PASS          | AC=1;AF=0.020;AN=50;BaseQRankSum=  |
| 27421 | chrY | 13478148 | . | G | A,* | 822.02  | PASS          | AC=1,7;AF=0.019,0.135;AN=52;BaseQ  |
| 27422 | chrY | 13478149 | . | G | A   | 73.13   | my_snp_filter | AC=1;AF=0.020;AN=50;BaseQ          |
| 27423 | chrY | 13478150 | . | G | T,A | 447.80  | PASS          | AC=1,1;AF=0.020,0.020;AN=50;BaseQ  |
| 27424 | chrY | 13478153 | . | G | T   | 946.48  | PASS          | AC=9;AF=0.173;AN=52;BaseQRankSum=  |
| 27425 | chrY | 13478156 | . | C | G   | 350.64  | PASS          | AC=1;AF=0.023;AN=44;BaseQRankSum=  |
| 27426 | chrY | 13478157 | . | G | A   | 1466.92 | PASS          | AC=11;AF=0.229;AN=48;BaseQRankSum= |
| 27427 | chrY | 13478158 | . | C | T   | 4867.38 | my_snp_filter | AC=14;AF=0.304;AN=46;BaseQ         |
| 27428 | chrY | 13478159 | . | G | A   | 220.60  | PASS          | AC=2;AF=0.040;AN=50;BaseQRankSum=  |
| 27429 | chrY | 13478163 | . | G | C   | 625.99  | PASS          | AC=5;AF=0.100;AN=50;BaseQRankSum=  |
| 27430 | chrY | 13478164 | . | C | A,T | 727.98  | PASS          | AC=3,2;AF=0.065,0.043;AN=46;BaseQ  |
| 27431 | chrY | 13478165 | . | G | T,A | 346.61  | PASS          | AC=1,1;AF=0.022,0.022;AN=46;BaseQ  |
| 27432 | chrY | 13478169 | . | G | T   | 1297    | PASS          | AC=11;AF=0.212;AN=52;BaseQRankSum= |
| 27433 | chrY | 13478170 | . | T | G   | 6560.53 | my_snp_filter | AC=14;AF=0.333;AN=42;BaseQ         |
| 27434 | chrY | 13478172 | . | C | A   | 1020.64 | PASS          | AC=8;AF=0.154;AN=52;BaseQRankSum=  |
| 27435 | chrY | 13478173 | . | C | A,T | 1281.84 | PASS          | AC=9,2;AF=0.167,0.037;AN=54;BaseQ  |
| 27436 | chrY | 13478174 | . | G | A   | 741.65  | PASS          | AC=5;AF=0.104;AN=48;BaseQRankSum=  |

|       |      |          |   |   |     |          |               |                                    |
|-------|------|----------|---|---|-----|----------|---------------|------------------------------------|
| 27437 | chrY | 13478175 | . | G | T   | 365.55   | PASS          | AC=1;AF=0.019;AN=54;BaseQRankSum=  |
| 27438 | chrY | 13478179 | . | C | T   | 887.17   | PASS          | AC=8;AF=0.148;AN=54;BaseQRankSum=  |
| 27439 | chrY | 13478182 | . | C | G   | 1081.94  | PASS          | AC=9;AF=0.167;AN=54;BaseQRankSum=  |
| 27440 | chrY | 13478187 | . | C | G   | 752.66   | PASS          | AC=4;AF=0.100;AN=40;BaseQRankSum=  |
| 27441 | chrY | 13478188 | . | A | G   | 4721.06  | PASS          | AC=14;AF=0.350;AN=40;BaseQRankSum= |
| 27442 | chrY | 13478190 | . | C | T   | 1318.48  | PASS          | AC=8;AF=0.143;AN=56;BaseQRankSum=  |
| 27443 | chrY | 13478191 | . | G | T   | 912.03   | PASS          | AC=10;AF=0.179;AN=56;BaseQRankSum= |
| 27444 | chrY | 13478192 | . | G | T   | 367.19   | PASS          | AC=2;AF=0.038;AN=52;BaseQRankSum=  |
| 27445 | chrY | 13478193 | . | G | T   | 943.52   | PASS          | AC=5;AF=0.089;AN=56;BaseQRankSum=  |
| 27446 | chrY | 13478194 | . | G | A   | 138.14   | my_snp_filter | AC=3;AF=0.052;AN=58;BaseQ          |
| 27447 | chrY | 13478195 | . | C | A,T | 1040.87  | PASS          | AC=5,4;AF=0.086,0.069;AN=58;BaseQ  |
| 27448 | chrY | 13478197 | . | G | T   | 464.75   | PASS          | AC=3;AF=0.056;AN=54;BaseQRankSum=  |
| 27449 | chrY | 13478198 | . | C | T   | 572.11   | PASS          | AC=2;AF=0.038;AN=52;BaseQRankSum=  |
| 27450 | chrY | 13478199 | . | G | A   | 1224.79  | PASS          | AC=8;AF=0.160;AN=50;BaseQRankSum=  |
| 27451 | chrY | 13478208 | . | C | A   | 1074.09  | PASS          | AC=7;AF=0.109;AN=64;BaseQRankSum=  |
| 27452 | chrY | 13478210 | . | A | T   | 290.01   | PASS          | AC=3;AF=0.056;AN=54;BaseQRankSum=  |
| 27453 | chrY | 13478211 | . | C | A   | 7773.80  | PASS          | AC=10;AF=0.333;AN=30;BaseQRankSum= |
| 27454 | chrY | 13478212 | . | G | T   | 51.68    | my_snp_filter | AC=1;AF=0.018;AN=56;BaseQ          |
| 27455 | chrY | 13478213 | . | C | A   | 204.41   | my_snp_filter | AC=3;AF=0.048;AN=62;BaseQ          |
| 27456 | chrY | 13478214 | . | C | T   | 2235.16  | PASS          | AC=5;AF=0.081;AN=62;BaseQRankSum=  |
| 27457 | chrY | 13478215 | . | G | A,C | 1760.27  | PASS          | AC=6,1;AF=0.103,0.017;AN=58;BaseQ  |
| 27458 | chrY | 13478217 | . | G | A   | 673.60   | PASS          | AC=4;AF=0.065;AN=62;BaseQRankSum=  |
| 27459 | chrY | 13478218 | . | G | A   | 698.45   | PASS          | AC=6;AF=0.130;AN=46;BaseQRankSum=  |
| 27460 | chrY | 13478219 | . | T | C   | 7922.58  | PASS          | AC=9;AF=0.321;AN=28;BaseQRankSum=  |
| 27461 | chrY | 13478221 | . | G | A   | 256.90   | PASS          | AC=1;AF=0.017;AN=58;BaseQRankSum=  |
| 27462 | chrY | 13478222 | . | C | T,G | 695.73   | PASS          | AC=4,1;AF=0.069,0.017;AN=58;BaseQ  |
| 27463 | chrY | 13478224 | . | C | G,A | 1100.39  | PASS          | AC=3,3;AF=0.052,0.052;AN=58;BaseQ  |
| 27464 | chrY | 13478225 | . | C | A   | 200.84   | PASS          | AC=1;AF=0.016;AN=64;BaseQRankSum=  |
| 27465 | chrY | 13478227 | . | C | T   | 729.05   | PASS          | AC=6;AF=0.088;AN=68;BaseQRankSum=  |
| 27466 | chrY | 13478228 | . | C | T   | 78.68    | PASS          | AC=1;AF=0.015;AN=68;BaseQRankSum=  |
| 27467 | chrY | 13478231 | . | G | C   | 351.90   | PASS          | AC=2;AF=0.031;AN=64;BaseQRankSum=  |
| 27468 | chrY | 13478232 | . | C | A   | 38.92    | my_snp_filter | AC=1;AF=0.015;AN=66;BaseQ          |
| 27469 | chrY | 13478235 | . | G | A   | 2087.80  | PASS          | AC=3;AF=0.047;AN=64;BaseQRankSum=  |
| 27470 | chrY | 13478238 | . | C | A,T | 1112.96  | PASS          | AC=1,2;AF=0.016,0.032;AN=62;BaseQ  |
| 27471 | chrY | 13478239 | . | G | A   | 218.80   | PASS          | AC=1;AF=0.016;AN=62;BaseQRankSum=  |
| 27472 | chrY | 13478240 | . | C | T   | 2729.44  | PASS          | AC=7;AF=0.113;AN=62;BaseQRankSum=  |
| 27473 | chrY | 13478241 | . | G | C   | 1761.02  | PASS          | AC=9;AF=0.145;AN=62;BaseQRankSum=  |
| 27474 | chrY | 13478242 | . | C | G   | 2149.88  | PASS          | AC=4;AF=0.065;AN=62;BaseQRankSum=  |
| 27475 | chrY | 13478244 | . | C | T   | 356.33   | PASS          | AC=1;AF=0.016;AN=64;BaseQRankSum=  |
| 27476 | chrY | 13478245 | . | C | T,G | 632.38   | PASS          | AC=2,2;AF=0.032,0.032;AN=62;BaseQ  |
| 27477 | chrY | 13478246 | . | C | T   | 4645.78  | PASS          | AC=11;AF=0.196;AN=56;BaseQRankSum= |
| 27478 | chrY | 13478247 | . | G | A   | 664.84   | PASS          | AC=2;AF=0.031;AN=64;BaseQRankSum=  |
| 27479 | chrY | 13478248 | . | G | A   | 42.50    | my_snp_filter | AC=1;AF=0.015;AN=66;BaseQ          |
| 27480 | chrY | 13478252 | . | C | A   | 50.32    | my_snp_filter | AC=1;AF=0.016;AN=64;BaseQ          |
| 27481 | chrY | 13478256 | . | C | T   | 336.20   | PASS          | AC=2;AF=0.037;AN=54;BaseQRankSum=  |
| 27482 | chrY | 13478257 | . | G | A   | 1057.41  | PASS          | AC=6;AF=0.136;AN=44;BaseQRankSum=  |
| 27483 | chrY | 13478258 | . | A | C   | 13417.25 | PASS          | AC=13;AF=0.433;AN=30;BaseQ         |
| 27484 | chrY | 13478259 | . | G | C   | 615.68   | PASS          | AC=2;AF=0.048;AN=42;BaseQRankSum=  |
| 27485 | chrY | 13478260 | . | T | C,G | 1383.36  | PASS          | AC=3,1;AF=0.068,0.023;AN=44;BaseQ  |
| 27486 | chrY | 13478262 | . | G | A   | 1070.55  | PASS          | AC=4;AF=0.061;AN=66;BaseQRankSum=  |
| 27487 | chrY | 13478265 | . | G | A   | 1168.30  | PASS          | AC=6;AF=0.091;AN=66;BaseQRankSum=  |
| 27488 | chrY | 13478271 | . | G | A   | 235.91   | my_snp_filter | AC=3;AF=0.043;AN=70;BaseQ          |
| 27489 | chrY | 13478275 | . | C | A   | 1515     | PASS          | AC=3;AF=0.043;AN=70;BaseQRankSum=  |
| 27490 | chrY | 13478278 | . | G | T   | 607.32   | PASS          | AC=1;AF=0.014;AN=70;BaseQRankSum=  |
| 27491 | chrY | 13478281 | . | A | C   | 1458.62  | PASS          | AC=6;AF=0.091;AN=66;BaseQRankSum=  |
| 27492 | chrY | 13478285 | . | G | C,T | 6825.78  | PASS          | AC=10,6;AF=0.294,0.176;AN=34;BaseQ |
| 27493 | chrY | 13478286 | . | G | A   | 159.34   | PASS          | AC=1;AF=0.018;AN=56;BaseQRankSum=  |
| 27494 | chrY | 13478287 | . | G | T   | 171.43   | PASS          | AC=1;AF=0.016;AN=62;BaseQRankSum=  |
| 27495 | chrY | 13478292 | . | T | C   | 5478.83  | PASS          | AC=16;AF=0.471;AN=34;BaseQRankSum= |
| 27496 | chrY | 13478297 | . | A | T   | 62.41    | PASS          | AC=1;AF=0.014;AN=70;BaseQRankSum=  |
| 27497 | chrY | 13478298 | . | G | T   | 5007.66  | PASS          | AC=7;AF=0.103;AN=68;BaseQRankSum=  |
| 27498 | chrY | 13478301 | . | G | A   | 2014.86  | PASS          | AC=5;AF=0.076;AN=66;BaseQRankSum=  |
| 27499 | chrY | 13478309 | . | A | G   | 5571.31  | PASS          | AC=8;AF=0.118;AN=68;BaseQRankSum=  |
| 27500 | chrY | 13478310 | . | G | C   | 1905.68  | PASS          | AC=6;AF=0.086;AN=70;BaseQRankSum=  |
| 27501 | chrY | 13478311 | . | C | A   | 7695.85  | PASS          | AC=11;AF=0.162;AN=68;BaseQRankSum= |
| 27502 | chrY | 13478312 | . | C | T,A | 2428.55  | PASS          | AC=8,1;AF=0.118,0.015;AN=68;BaseQ  |
| 27503 | chrY | 13478313 | . | G | A   | 1312.37  | PASS          | AC=6;AF=0.086;AN=70;BaseQRankSum=  |
| 27504 | chrY | 13478317 | . | C | T   | 4665.19  | PASS          | AC=9;AF=0.129;AN=70;BaseQRankSum=  |
| 27505 | chrY | 13478319 | . | C | A   | 51.44    | PASS          | AC=2;AF=0.029;AN=70;BaseQRankSum=  |
| 27506 | chrY | 13478322 | . | G | A   | 61.86    | PASS          | AC=2;AF=0.029;AN=68;BaseQRankSum=  |
| 27507 | chrY | 13478324 | . | C | G   | 1736.84  | PASS          | AC=5;AF=0.071;AN=70;BaseQRankSum=  |
| 27508 | chrY | 13478328 | . | A | C   | 46.86    | PASS          | AC=2;AF=0.029;AN=70;BaseQRankSum=  |
| 27509 | chrY | 13478330 | . | T | A   | 538.38   | PASS          | AC=3;AF=0.044;AN=68;BaseQRankSum=  |
| 27510 | chrY | 13478331 | . | C | T   | 4851.37  | PASS          | AC=6;AF=0.091;AN=66;BaseQRankSum=  |
| 27511 | chrY | 13478334 | . | C | A,G | 1953.56  | PASS          | AC=2,5;AF=0.029,0.071;AN=70;BaseQ  |
| 27512 | chrY | 13478337 | . | C | T   | 4661.16  | PASS          | AC=7;AF=0.100;AN=70;BaseQRankSum=  |

|       |      |          |   |   |     |          |               |                                    |
|-------|------|----------|---|---|-----|----------|---------------|------------------------------------|
| 27513 | chrY | 13478338 | . | G | A   | 2711.01  | PASS          | AC=9;AF=0.132;AN=68;BaseQRankSum=  |
| 27514 | chrY | 13478342 | . | T | G   | 1675.10  | PASS          | AC=11;AF=0.162;AN=68;BaseQRankSum= |
| 27515 | chrY | 13478347 | . | C | A,* | 917.62   | PASS          | AC=3,2;AF=0.047,0.031;AN=64;BaseQ  |
| 27516 | chrY | 13478348 | . | A | T   | 12931.97 | PASS          | AC=28;AF=0.583;AN=48;BaseQ         |
| 27517 | chrY | 13478349 | . | G | T   | 374.99   | PASS          | AC=1;AF=0.015;AN=66;BaseQRankSum=  |
| 27518 | chrY | 13478350 | . | G | A   | 1038.96  | PASS          | AC=4;AF=0.063;AN=64;BaseQRankSum=  |
| 27519 | chrY | 13478355 | . | G | A   | 2329.55  | PASS          | AC=12;AF=0.176;AN=68;BaseQRankSum= |
| 27520 | chrY | 13478356 | . | C | T   | 89.11    | my_snp_filter | AC=1;AF=0.014;AN=70;BaseQ          |
| 27521 | chrY | 13478359 | . | C | A   | 40.58    | PASS          | AC=1;AF=0.014;AN=70;BaseQRankSum=  |
| 27522 | chrY | 13478362 | . | G | A,C | 1955.56  | PASS          | AC=3,4;AF=0.044,0.059;AN=68;BaseQ  |
| 27523 | chrY | 13478363 | . | C | A,T | 3698.97  | PASS          | AC=11,4;AF=0.172,0.063;AN=64;BaseQ |
| 27524 | chrY | 13478364 | . | G | A   | 154.77   | my_snp_filter | AC=2;AF=0.029;AN=68;BaseQ          |
| 27525 | chrY | 13478367 | . | C | T   | 1517.07  | PASS          | AC=4;AF=0.057;AN=70;BaseQRankSum=  |
| 27526 | chrY | 13478369 | . | C | T,A | 1920.20  | PASS          | AC=5,3;AF=0.081,0.048;AN=62;BaseQ  |
| 27527 | chrY | 13478370 | . | G | A,T | 3510.94  | PASS          | AC=5,3;AF=0.078,0.047;AN=64;BaseQ  |
| 27528 | chrY | 13478371 | . | G | A   | 2122.57  | PASS          | AC=10;AF=0.147;AN=68;BaseQRankSum= |
| 27529 | chrY | 13478374 | . | T | A   | 164.71   | my_snp_filter | AC=4;AF=0.059;AN=68;BaseQ          |
| 27530 | chrY | 13478378 | . | T | G,A | 246.58   | PASS          | AC=1,2;AF=0.014,0.029;AN=70;BaseQ  |
| 27531 | chrY | 13478379 | . | G | A   | 67.05    | my_snp_filter | AC=1;AF=0.014;AN=70;BaseQ          |
| 27532 | chrY | 13478380 | . | C | A   | 1847.92  | PASS          | AC=3;AF=0.043;AN=70;BaseQRankSum=  |
| 27533 | chrY | 13478382 | . | G | A   | 104      | PASS          | AC=2;AF=0.029;AN=70;BaseQRankSum=  |
| 27534 | chrY | 13478384 | . | A | G   | 72.95    | PASS          | AC=2;AF=0.029;AN=70;BaseQRankSum=  |
| 27535 | chrY | 13478387 | . | A | T,C | 10806.62 | PASS          | AC=18,10;AF=0.375,0.208;A          |
| 27536 | chrY | 13478388 | . | G | A   | 74.13    | my_snp_filter | AC=1;AF=0.016;AN=62;BaseQ          |
| 27537 | chrY | 13478389 | . | C | A   | 1232.91  | PASS          | AC=9;AF=0.136;AN=66;BaseQRankSum=  |
| 27538 | chrY | 13478391 | . | A | T   | 3668.32  | PASS          | AC=4;AF=0.059;AN=68;BaseQRankSum=  |
| 27539 | chrY | 13478392 | . | C | T,A | 2379.51  | PASS          | AC=13,2;AF=0.191,0.029;AN=68;BaseQ |
| 27540 | chrY | 13478393 | . | C | A   | 624.50   | PASS          | AC=6;AF=0.088;AN=68;BaseQRankSum=  |
| 27541 | chrY | 13478400 | . | A | G   | 103.01   | PASS          | AC=2;AF=0.029;AN=70;BaseQRankSum=  |
| 27542 | chrY | 13478404 | . | A | C   | 40.47    | PASS          | AC=1;AF=0.014;AN=70;BaseQRankSum=  |
| 27543 | chrY | 13478405 | . | C | T   | 226.98   | PASS          | AC=3;AF=0.043;AN=70;BaseQRankSum=  |
| 27544 | chrY | 13478409 | . | G | A   | 104.94   | PASS          | AC=1;AF=0.014;AN=70;BaseQRankSum=  |
| 27545 | chrY | 13478410 | . | G | A   | 174.49   | PASS          | AC=1;AF=0.014;AN=70;BaseQRankSum=  |
| 27546 | chrY | 13478411 | . | C | A   | 211.99   | PASS          | AC=2;AF=0.029;AN=70;BaseQRankSum=  |
| 27547 | chrY | 13478412 | . | C | T,A | 3285.96  | PASS          | AC=3,5;AF=0.043,0.071;AN=70;BaseQ  |
| 27548 | chrY | 13478414 | . | C | T   | 2776.53  | PASS          | AC=7;AF=0.100;AN=70;BaseQRankSum=  |
| 27549 | chrY | 13478415 | . | G | A,T | 1488.48  | PASS          | AC=3,3;AF=0.043,0.043;AN=70;BaseQ  |
| 27550 | chrY | 13478417 | . | G | A   | 2257.33  | PASS          | AC=5;AF=0.071;AN=70;BaseQRankSum=  |
| 27551 | chrY | 13478418 | . | G | C   | 276.54   | PASS          | AC=1;AF=0.014;AN=70;BaseQRankSum=  |
| 27552 | chrY | 13478419 | . | G | C,T | 373.12   | PASS          | AC=2,2;AF=0.029,0.029;AN=70;BaseQ  |
| 27553 | chrY | 13478422 | . | C | A   | 155.15   | PASS          | AC=2;AF=0.029;AN=70;BaseQRankSum=  |
| 27554 | chrY | 13478427 | . | G | T   | 238.20   | PASS          | AC=2;AF=0.029;AN=70;BaseQRankSum=  |
| 27555 | chrY | 13478429 | . | C | A,T | 2967.87  | PASS          | AC=9,1;AF=0.129,0.014;AN=70;BaseQ  |
| 27556 | chrY | 13478430 | . | C | T   | 81.99    | my_snp_filter | AC=1;AF=0.014;AN=70;BaseQ          |
| 27557 | chrY | 13478431 | . | T | G   | 200.71   | PASS          | AC=1;AF=0.014;AN=70;BaseQRankSum=  |
| 27558 | chrY | 13478433 | . | G | T   | 60.68    | PASS          | AC=1;AF=0.014;AN=70;BaseQRankSum=  |
| 27559 | chrY | 13478434 | . | G | A   | 93.10    | my_snp_filter | AC=3;AF=0.043;AN=70;BaseQ          |
| 27560 | chrY | 13478436 | . | A | C   | 473.19   | PASS          | AC=3;AF=0.043;AN=70;BaseQRankSum=  |
| 27561 | chrY | 13478438 | . | A | G   | 225.79   | PASS          | AC=4;AF=0.057;AN=70;BaseQRankSum=  |
| 27562 | chrY | 13478439 | . | G | C   | 347.14   | PASS          | AC=3;AF=0.043;AN=70;BaseQRankSum=  |
| 27563 | chrY | 13478442 | . | C | T   | 5872.54  | PASS          | AC=10;AF=0.152;AN=66;BaseQRankSum= |
| 27564 | chrY | 13478443 | . | G | A   | 821.10   | PASS          | AC=6;AF=0.094;AN=64;BaseQRankSum=  |
| 27565 | chrY | 13478444 | . | C | A,T | 1298.14  | PASS          | AC=5,4;AF=0.078,0.063;AN=64;BaseQ  |
| 27566 | chrY | 13478445 | . | G | C,A | 9401.57  | PASS          | AC=22,1;AF=0.379,0.017;AN=58;BaseQ |
| 27567 | chrY | 13478446 | . | T | A   | 463.09   | PASS          | AC=3;AF=0.043;AN=70;BaseQRankSum=  |
| 27568 | chrY | 13478448 | . | G | A   | 1436.47  | PASS          | AC=10;AF=0.152;AN=66;BaseQRankSum= |
| 27569 | chrY | 13478449 | . | C | A   | 113.75   | PASS          | AC=2;AF=0.029;AN=70;BaseQRankSum=  |
| 27570 | chrY | 13478455 | . | G | T,C | 540.93   | PASS          | AC=1,1;AF=0.014,0.014;AN=70;BaseQ  |
| 27571 | chrY | 13478456 | . | C | T   | 124.23   | PASS          | AC=2;AF=0.029;AN=70;BaseQRankSum=  |
| 27572 | chrY | 13478457 | . | A | T   | 91.66    | PASS          | AC=1;AF=0.014;AN=70;BaseQRankSum=  |
| 27573 | chrY | 13478460 | . | C | G   | 99.09    | PASS          | AC=3;AF=0.043;AN=70;BaseQRankSum=  |
| 27574 | chrY | 13478462 | . | T | A   | 217.11   | PASS          | AC=1;AF=0.014;AN=70;BaseQRankSum=  |
| 27575 | chrY | 13478463 | . | C | G   | 287.75   | PASS          | AC=1;AF=0.014;AN=70;BaseQRankSum=  |
| 27576 | chrY | 13478465 | . | G | T   | 37.61    | PASS          | AC=1;AF=0.014;AN=70;BaseQRankSum=  |
| 27577 | chrY | 13478466 | . | C | T   | 1509.12  | PASS          | AC=7;AF=0.113;AN=62;BaseQRankSum=  |
| 27578 | chrY | 13478467 | . | A | G   | 3331.61  | PASS          | AC=11;AF=0.190;AN=58;BaseQRankSum= |
| 27579 | chrY | 13478468 | . | A | G   | 316.94   | PASS          | AC=3;AF=0.043;AN=70;BaseQRankSum=  |
| 27580 | chrY | 13478470 | . | G | A   | 548.06   | PASS          | AC=4;AF=0.057;AN=70;BaseQRankSum=  |
| 27581 | chrY | 13478473 | . | G | T   | 229.93   | PASS          | AC=2;AF=0.029;AN=70;BaseQRankSum=  |
| 27582 | chrY | 13478477 | . | A | T   | 66.23    | PASS          | AC=3;AF=0.043;AN=70;BaseQRankSum=  |
| 27583 | chrY | 13478479 | . | C | T   | 525.33   | PASS          | AC=6;AF=0.097;AN=62;BaseQRankSum=  |
| 27584 | chrY | 13478480 | . | A | G   | 2510.41  | PASS          | AC=13;AF=0.232;AN=56;BaseQRankSum= |
| 27585 | chrY | 13478483 | . | T | C   | 3466.74  | my_snp_filter | AC=14;AF=0.250;AN=56;BaseQ         |
| 27586 | chrY | 13478487 | . | G | C   | 892.36   | my_snp_filter | AC=3;AF=0.043;AN=70;BaseQ          |
| 27587 | chrY | 13478488 | . | C | A   | 53.18    | my_snp_filter | AC=3;AF=0.043;AN=70;BaseQ          |
| 27588 | chrY | 13478497 | . | C | T,A | 437.99   | PASS          | AC=1,4;AF=0.014,0.057;AN=70;BaseQ  |

|       |      |          |   |   |     |         |               |                                    |
|-------|------|----------|---|---|-----|---------|---------------|------------------------------------|
| 27589 | chrY | 13478505 | . | T | A,C | 1637.04 | PASS          | AC=4,5;AF=0.074,0.093;AN=54;BaseQ  |
| 27590 | chrY | 13478509 | . | T | G   | 1939.73 | PASS          | AC=6;AF=0.107;AN=56;BaseQRankSum=  |
| 27591 | chrY | 13478517 | . | A | T   | 82.32   | PASS          | AC=1;AF=0.014;AN=70;BaseQRankSum=  |
| 27592 | chrY | 13478518 | . | C | T   | 1062.78 | PASS          | AC=7;AF=0.100;AN=70;BaseQRankSum=  |
| 27593 | chrY | 13478519 | . | G | T   | 508.92  | PASS          | AC=3;AF=0.043;AN=70;BaseQRankSum=  |
| 27594 | chrY | 13478520 | . | G | T   | 209.78  | PASS          | AC=3;AF=0.043;AN=70;BaseQRankSum=  |
| 27595 | chrY | 13478521 | . | G | T   | 524.91  | PASS          | AC=4;AF=0.057;AN=70;BaseQRankSum=  |
| 27596 | chrY | 13478524 | . | C | T   | 811.33  | PASS          | AC=4;AF=0.059;AN=68;BaseQRankSum=  |
| 27597 | chrY | 13478526 | . | G | T   | 174.14  | PASS          | AC=4;AF=0.057;AN=70;BaseQRankSum=  |
| 27598 | chrY | 13478527 | . | G | T   | 169.09  | PASS          | AC=4;AF=0.057;AN=70;BaseQRankSum=  |
| 27599 | chrY | 13478530 | . | G | A   | 1130.88 | PASS          | AC=7;AF=0.100;AN=70;BaseQRankSum=  |
| 27600 | chrY | 13478532 | . | G | T   | 471.44  | PASS          | AC=3;AF=0.043;AN=70;BaseQRankSum=  |
| 27601 | chrY | 13478534 | . | C | T   | 40.83   | PASS          | AC=1;AF=0.015;AN=66;BaseQRankSum=  |
| 27602 | chrY | 13478536 | . | A | G   | 2851.88 | PASS          | AC=8;AF=0.129;AN=62;BaseQRankSum=  |
| 27603 | chrY | 13478537 | . | T | G,A | 2188.33 | PASS          | AC=6,2;AF=0.097,0.032;AN=62;BaseQ  |
| 27604 | chrY | 13478539 | . | C | T   | 202.73  | PASS          | AC=4;AF=0.057;AN=70;BaseQRankSum=  |
| 27605 | chrY | 13478544 | . | G | A   | 69.20   | my_snp_filter | AC=2;AF=0.029;AN=70;BaseQ          |
| 27606 | chrY | 13478549 | . | T | C   | 517.79  | PASS          | AC=3;AF=0.043;AN=70;BaseQRankSum=  |
| 27607 | chrY | 13478550 | . | C | A   | 162.67  | PASS          | AC=1;AF=0.014;AN=70;BaseQRankSum=  |
| 27608 | chrY | 13478556 | . | T | C   | 1133.18 | PASS          | AC=11;AF=0.162;AN=68;BaseQRankSum= |
| 27609 | chrY | 13478569 | . | T | G   | 8900.19 | PASS          | AC=25;AF=0.391;AN=64;BaseQRankSum= |
| 27610 | chrY | 13478573 | . | G | T   | 391.57  | PASS          | AC=4;AF=0.057;AN=70;BaseQRankSum=  |
| 27611 | chrY | 13478574 | . | C | T   | 94.33   | my_snp_filter | AC=3;AF=0.043;AN=70;BaseQ          |
| 27612 | chrY | 13478582 | . | G | T   | 372.11  | PASS          | AC=2;AF=0.033;AN=60;BaseQRankSum=  |
| 27613 | chrY | 13478583 | . | T | G   | 8258.53 | PASS          | AC=24;AF=0.400;AN=60;BaseQRankSum= |
| 27614 | chrY | 13478586 | . | G | T   | 392.47  | PASS          | AC=1;AF=0.016;AN=64;BaseQRankSum=  |
| 27615 | chrY | 13478589 | . | T | G   | 282.83  | PASS          | AC=2;AF=0.031;AN=64;BaseQRankSum=  |
| 27616 | chrY | 13478595 | . | C | A   | 202.57  | PASS          | AC=2;AF=0.029;AN=68;BaseQRankSum=  |
| 27617 | chrY | 13478598 | . | C | A   | 1219.13 | PASS          | AC=7;AF=0.113;AN=62;BaseQRankSum=  |
| 27618 | chrY | 13478599 | . | A | G   | 2054.97 | PASS          | AC=7;AF=0.113;AN=62;BaseQRankSum=  |
| 27619 | chrY | 13478602 | . | C | A   | 288.66  | PASS          | AC=4;AF=0.059;AN=68;BaseQRankSum=  |
| 27620 | chrY | 13478603 | . | C | T   | 68.09   | PASS          | AC=2;AF=0.029;AN=68;BaseQRankSum=  |
| 27621 | chrY | 13478606 | . | C | T   | 119.40  | PASS          | AC=1;AF=0.015;AN=66;BaseQRankSum=  |
| 27622 | chrY | 13478610 | . | C | G   | 197.86  | my_snp_filter | AC=4;AF=0.059;AN=68;BaseQ          |
| 27623 | chrY | 13478611 | . | A | G   | 915.67  | PASS          | AC=10;AF=0.147;AN=68;BaseQRankSum= |
| 27624 | chrY | 13478613 | . | A | G   | 5296.39 | PASS          | AC=23;AF=0.371;AN=62;BaseQRankSum= |
| 27625 | chrY | 13478614 | . | C | G   | 390.40  | PASS          | AC=2;AF=0.030;AN=66;BaseQRankSum=  |
| 27626 | chrY | 13478616 | . | G | C   | 133.74  | my_snp_filter | AC=4;AF=0.057;AN=70;BaseQ          |
| 27627 | chrY | 13478619 | . | T | C,A | 734.72  | PASS          | AC=5,2;AF=0.071,0.029;AN=70;BaseQ  |
| 27628 | chrY | 13478620 | . | G | A   | 50.14   | my_snp_filter | AC=2;AF=0.029;AN=70;BaseQ          |
| 27629 | chrY | 13478635 | . | T | C   | 4397.05 | PASS          | AC=12;AF=0.194;AN=62;BaseQRankSum= |
| 27630 | chrY | 13478636 | . | C | T,A | 296.13  | PASS          | AC=2,2;AF=0.030,0.030;AN=66;BaseQ  |
| 27631 | chrY | 13478642 | . | T | G   | 6214.05 | PASS          | AC=22;AF=0.344;AN=64;BaseQRankSum= |
| 27632 | chrY | 13478653 | . | G | A   | 1051.46 | PASS          | AC=7;AF=0.113;AN=62;BaseQRankSum=  |
| 27633 | chrY | 13478661 | . | A | G   | 2411.06 | PASS          | AC=15;AF=0.242;AN=62;BaseQRankSum= |
| 27634 | chrY | 13478662 | . | C | A   | 1800.75 | PASS          | AC=13;AF=0.217;AN=60;BaseQRankSum= |
| 27635 | chrY | 13478667 | . | A | C   | 3787.57 | PASS          | AC=13;AF=0.241;AN=54;BaseQRankSum= |
| 27636 | chrY | 13478672 | . | C | T   | 657.16  | PASS          | AC=6;AF=0.115;AN=52;BaseQRankSum=  |
| 27637 | chrY | 13478673 | . | G | A   | 444.52  | PASS          | AC=5;AF=0.081;AN=62;BaseQRankSum=  |
| 27638 | chrY | 13478687 | . | C | T   | 1377.74 | PASS          | AC=9;AF=0.150;AN=60;BaseQRankSum=  |
| 27639 | chrY | 13478701 | . | C | T   | 46.95   | PASS          | AC=1;AF=0.019;AN=52;BaseQRankSum=  |
| 27640 | chrY | 13478702 | . | T | C   | 914.02  | PASS          | AC=7;AF=0.140;AN=50;BaseQRankSum=  |
| 27641 | chrY | 13478703 | . | G | A   | 38.12   | my_snp_filter | AC=2;AF=0.037;AN=54;BaseQ          |
| 27642 | chrY | 13478711 | . | C | A   | 45.29   | PASS          | AC=1;AF=0.017;AN=60;BaseQRankSum=  |
| 27643 | chrY | 13478715 | . | G | C   | 80.63   | PASS          | AC=2;AF=0.034;AN=58;BaseQRankSum=  |
| 27644 | chrY | 13478718 | . | G | A   | 90.73   | PASS          | AC=1;AF=0.019;AN=52;BaseQRankSum=  |
| 27645 | chrY | 13478723 | . | C | A   | 707.42  | PASS          | AC=7;AF=0.167;AN=42;BaseQRankSum=  |
| 27646 | chrY | 13478734 | . | G | T   | 309.38  | PASS          | AC=4;AF=0.077;AN=52;BaseQRankSum=  |
| 27647 | chrY | 13478735 | . | C | G   | 424.86  | PASS          | AC=5;AF=0.114;AN=44;BaseQRankSum=  |
| 27648 | chrY | 13478744 | . | A | C   | 502.35  | PASS          | AC=5;AF=0.114;AN=44;BaseQRankSum=  |
| 27649 | chrY | 13478754 | . | T | A   | 333.29  | PASS          | AC=3;AF=0.058;AN=52;BaseQRankSum=  |
| 27650 | chrY | 13478758 | . | C | T   | 368.53  | PASS          | AC=4;AF=0.061;AN=66;BaseQRankSum=  |
| 27651 | chrY | 13478767 | . | G | A   | 159.84  | PASS          | AC=3;AF=0.047;AN=64;BaseQRankSum=  |
| 27652 | chrY | 13478774 | . | C | T   | 337.68  | PASS          | AC=3;AF=0.052;AN=58;BaseQRankSum=  |
| 27653 | chrY | 13478796 | . | T | C   | 297.87  | PASS          | AC=5;AF=0.096;AN=52;BaseQRankSum=  |
| 27654 | chrY | 13478797 | . | A | G   | 411.50  | PASS          | AC=8;AF=0.148;AN=54;BaseQRankSum=  |
| 27655 | chrY | 13478800 | . | C | T   | 148.59  | PASS          | AC=4;AF=0.061;AN=66;BaseQRankSum=  |
| 27656 | chrY | 13478802 | . | G | C   | 231.43  | PASS          | AC=2;AF=0.030;AN=66;BaseQRankSum=  |
| 27657 | chrY | 13478804 | . | G | C   | 158.71  | PASS          | AC=4;AF=0.059;AN=68;BaseQRankSum=  |
| 27658 | chrY | 13478805 | . | C | A   | 245.41  | PASS          | AC=4;AF=0.059;AN=68;BaseQRankSum=  |
| 27659 | chrY | 13478813 | . | C | A   | 54.14   | PASS          | AC=1;AF=0.015;AN=66;BaseQRankSum=  |
| 27660 | chrY | 13478821 | . | C | A   | 307.65  | PASS          | AC=2;AF=0.031;AN=64;BaseQRankSum=  |
| 27661 | chrY | 13478826 | . | A | C   | 661.36  | PASS          | AC=6;AF=0.136;AN=44;BaseQRankSum=  |
| 27662 | chrY | 13478830 | . | A | C   | 406.37  | PASS          | AC=4;AF=0.080;AN=50;BaseQRankSum=  |
| 27663 | chrY | 13478838 | . | G | A   | 53.57   | PASS          | AC=1;AF=0.017;AN=58;BaseQRankSum=  |
| 27664 | chrY | 13478841 | . | C | A   | 266.98  | PASS          | AC=3;AF=0.052;AN=58;BaseQRankSum=  |

|       |      |          |   |   |     |         |               |                                    |
|-------|------|----------|---|---|-----|---------|---------------|------------------------------------|
| 27665 | chrY | 13478861 | . | C | A   | 217.54  | PASS          | AC=1;AF=0.020;AN=50;BaseQRankSum=  |
| 27666 | chrY | 13478863 | . | G | C,A | 901.34  | PASS          | AC=4,2;AF=0.091,0.045;AN=44;BaseQ  |
| 27667 | chrY | 13478868 | . | A | C   | 523.66  | PASS          | AC=4;AF=0.071;AN=56;BaseQRankSum=  |
| 27668 | chrY | 13478869 | . | C | T   | 744.76  | PASS          | AC=6;AF=0.091;AN=66;BaseQRankSum=  |
| 27669 | chrY | 13478880 | . | C | T   | 65.58   | my_snp_filter | AC=2;AF=0.032;AN=62;BaseQ          |
| 27670 | chrY | 13478881 | . | G | A   | 104.44  | my_snp_filter | AC=4;AF=0.067;AN=60;BaseQ          |
| 27671 | chrY | 13478883 | . | C | G   | 223.81  | PASS          | AC=1;AF=0.016;AN=64;BaseQRankSum=  |
| 27672 | chrY | 13478884 | . | C | T   | 226.94  | PASS          | AC=1;AF=0.016;AN=64;BaseQRankSum=  |
| 27673 | chrY | 13478887 | . | C | T   | 39.20   | my_snp_filter | AC=2;AF=0.031;AN=64;BaseQ          |
| 27674 | chrY | 13478889 | . | A | C   | 1667.66 | PASS          | AC=10;AF=0.208;AN=48;BaseQRankSum= |
| 27675 | chrY | 13478892 | . | T | G   | 1426.12 | PASS          | AC=9;AF=0.214;AN=42;BaseQRankSum=  |
| 27676 | chrY | 13478893 | . | G | T   | 631.63  | PASS          | AC=4;AF=0.080;AN=50;BaseQRankSum=  |
| 27677 | chrY | 13478895 | . | T | A   | 284.55  | PASS          | AC=1;AF=0.017;AN=60;BaseQRankSum=  |
| 27678 | chrY | 13478897 | . | G | A   | 43.47   | my_snp_filter | AC=2;AF=0.029;AN=70;BaseQ          |
| 27679 | chrY | 13478901 | . | G | C   | 81      | PASS          | AC=3;AF=0.043;AN=70;BaseQRankSum=  |
| 27680 | chrY | 13478903 | . | G | T   | 96.52   | PASS          | AC=3;AF=0.043;AN=70;BaseQRankSum=  |
| 27681 | chrY | 13478904 | . | A | T   | 66.95   | PASS          | AC=2;AF=0.029;AN=70;BaseQRankSum=  |
| 27682 | chrY | 13478907 | . | A | C   | 614.05  | PASS          | AC=4;AF=0.087;AN=46;BaseQRankSum=  |
| 27683 | chrY | 13478909 | . | C | T   | 116.30  | PASS          | AC=2;AF=0.037;AN=54;BaseQRankSum=  |
| 27684 | chrY | 13478910 | . | G | T   | 351.71  | PASS          | AC=1;AF=0.019;AN=54;BaseQRankSum=  |
| 27685 | chrY | 13478911 | . | T | C,A | 620.28  | PASS          | AC=3,1;AF=0.050,0.017;AN=60;BaseQ  |
| 27686 | chrY | 13478916 | . | C | T   | 123.75  | PASS          | AC=1;AF=0.015;AN=68;BaseQRankSum=  |
| 27687 | chrY | 13478917 | . | G | A   | 68.13   | PASS          | AC=2;AF=0.031;AN=64;BaseQRankSum=  |
| 27688 | chrY | 13478924 | . | C | T   | 50.53   | PASS          | AC=1;AF=0.015;AN=68;BaseQRankSum=  |
| 27689 | chrY | 13478929 | . | C | A   | 279.39  | PASS          | AC=4;AF=0.063;AN=64;BaseQRankSum=  |
| 27690 | chrY | 13478930 | . | T | C,* | 1369.69 | PASS          | AC=7,1;AF=0.152,0.022;AN=46;BaseQ  |
| 27691 | chrY | 13478932 | . | T | C   | 228.60  | PASS          | AC=6;AF=0.143;AN=42;BaseQRankSum=  |
| 27692 | chrY | 13478938 | . | G | A   | 62.05   | PASS          | AC=3;AF=0.044;AN=68;BaseQRankSum=  |
| 27693 | chrY | 13478939 | . | T | C   | 46.16   | PASS          | AC=1;AF=0.014;AN=70;BaseQRankSum=  |
| 27694 | chrY | 13478949 | . | A | G   | 513.44  | PASS          | AC=3;AF=0.043;AN=70;BaseQRankSum=  |
| 27695 | chrY | 13478950 | . | C | A   | 144.57  | PASS          | AC=4;AF=0.057;AN=70;BaseQRankSum=  |
| 27696 | chrY | 13478953 | . | C | A   | 76.35   | PASS          | AC=3;AF=0.044;AN=68;BaseQRankSum=  |
| 27697 | chrY | 13478955 | . | C | A   | 72.96   | PASS          | AC=3;AF=0.044;AN=68;BaseQRankSum=  |
| 27698 | chrY | 13478958 | . | C | T   | 682.73  | PASS          | AC=3;AF=0.060;AN=50;BaseQRankSum=  |
| 27699 | chrY | 13478959 | . | A | G   | 1112.69 | PASS          | AC=7;AF=0.140;AN=50;BaseQRankSum=  |
| 27700 | chrY | 13478961 | . | C | T   | 591.85  | PASS          | AC=4;AF=0.071;AN=56;BaseQRankSum=  |
| 27701 | chrY | 13478962 | . | T | G,A | 2037.22 | PASS          | AC=6,8;AF=0.120,0.160;AN=50;BaseQ  |
| 27702 | chrY | 13478964 | . | C | T   | 464.75  | PASS          | AC=3;AF=0.047;AN=64;BaseQRankSum=  |
| 27703 | chrY | 13478966 | . | C | T   | 443.36  | PASS          | AC=2;AF=0.029;AN=68;BaseQRankSum=  |
| 27704 | chrY | 13478967 | . | G | A   | 128.08  | PASS          | AC=2;AF=0.034;AN=58;BaseQRankSum=  |
| 27705 | chrY | 13478969 | . | T | C   | 2816.78 | PASS          | AC=13;AF=0.283;AN=46;BaseQRankSum= |
| 27706 | chrY | 13478970 | . | T | C   | 67.69   | PASS          | AC=1;AF=0.015;AN=66;BaseQRankSum=  |
| 27707 | chrY | 13478971 | . | C | A   | 121.74  | PASS          | AC=2;AF=0.029;AN=68;BaseQRankSum=  |
| 27708 | chrY | 13478975 | . | T | C   | 55.15   | my_snp_filter | AC=1;AF=0.015;AN=68;BaseQ          |
| 27709 | chrY | 13478976 | . | G | T   | 99.09   | PASS          | AC=1;AF=0.015;AN=68;BaseQRankSum=  |
| 27710 | chrY | 13478977 | . | C | T   | 1743.76 | PASS          | AC=7;AF=0.113;AN=62;BaseQRankSum=  |
| 27711 | chrY | 13478978 | . | G | A   | 146.22  | PASS          | AC=3;AF=0.045;AN=66;BaseQRankSum=  |
| 27712 | chrY | 13478979 | . | C | T   | 624.05  | PASS          | AC=5;AF=0.074;AN=68;BaseQRankSum=  |
| 27713 | chrY | 13478983 | . | C | T,A | 699.43  | PASS          | AC=2,3;AF=0.030,0.045;AN=66;BaseQ  |
| 27714 | chrY | 13478984 | . | G | A,T | 816.61  | PASS          | AC=3,3;AF=0.044,0.044;AN=68;BaseQ  |
| 27715 | chrY | 13478985 | . | C | T   | 702.47  | PASS          | AC=7;AF=0.100;AN=70;BaseQRankSum=  |
| 27716 | chrY | 13478986 | . | G | A   | 187.66  | PASS          | AC=1;AF=0.015;AN=66;BaseQRankSum=  |
| 27717 | chrY | 13478987 | . | C | A   | 386.72  | PASS          | AC=5;AF=0.074;AN=68;BaseQRankSum=  |
| 27718 | chrY | 13478988 | . | C | A   | 228.46  | PASS          | AC=2;AF=0.029;AN=70;BaseQRankSum=  |
| 27719 | chrY | 13478990 | . | C | G   | 136.09  | PASS          | AC=1;AF=0.014;AN=70;BaseQRankSum=  |
| 27720 | chrY | 13478991 | . | C | A   | 447.22  | PASS          | AC=3;AF=0.045;AN=66;BaseQRankSum=  |
| 27721 | chrY | 13478992 | . | G | A   | 191.09  | PASS          | AC=3;AF=0.048;AN=62;BaseQRankSum=  |
| 27722 | chrY | 13478995 | . | G | A,* | 354.82  | PASS          | AC=1,1;AF=0.015,0.015;AN=68;BaseQ  |
| 27723 | chrY | 13478998 | . | G | A,T | 306.65  | PASS          | AC=1,1;AF=0.021,0.021;AN=48;BaseQ  |
| 27724 | chrY | 13479000 | . | C | G   | 123.80  | PASS          | AC=1;AF=0.016;AN=62;BaseQRankSum=  |
| 27725 | chrY | 13479002 | . | C | T   | 257.01  | PASS          | AC=2;AF=0.033;AN=60;BaseQRankSum=  |
| 27726 | chrY | 13479003 | . | G | A,T | 769.87  | PASS          | AC=3,1;AF=0.050,0.017;AN=60;BaseQ  |
| 27727 | chrY | 13479004 | . | C | T   | 203.30  | PASS          | AC=1;AF=0.016;AN=64;BaseQRankSum=  |
| 27728 | chrY | 13479005 | . | C | G   | 140.35  | PASS          | AC=1;AF=0.015;AN=68;BaseQRankSum=  |
| 27729 | chrY | 13479007 | . | G | A,C | 433.05  | PASS          | AC=3,1;AF=0.044,0.015;AN=68;BaseQ  |
| 27730 | chrY | 13479012 | . | C | A   | 182.55  | PASS          | AC=1;AF=0.015;AN=66;BaseQRankSum=  |
| 27731 | chrY | 13479014 | . | T | C   | 45.57   | my_snp_filter | AC=1;AF=0.015;AN=66;BaseQ          |
| 27732 | chrY | 13479016 | . | G | C,A | 3669.41 | PASS          | AC=10,1;AF=0.357,0.036;AN=28;Base  |
| 27733 | chrY | 13479018 | . | G | A   | 122.78  | my_snp_filter | AC=2;AF=0.030;AN=66;BaseQ          |
| 27734 | chrY | 13479023 | . | C | A   | 222.31  | PASS          | AC=3;AF=0.043;AN=70;BaseQRankSum=  |
| 27735 | chrY | 13479027 | . | C | A   | 122.27  | my_snp_filter | AC=3;AF=0.043;AN=70;BaseQ          |
| 27736 | chrY | 13479028 | . | T | C   | 122.46  | my_snp_filter | AC=2;AF=0.029;AN=68;BaseQ          |
| 27737 | chrY | 13479029 | . | C | G   | 4563.07 | PASS          | AC=11;AF=0.393;AN=28;BaseQRankSum= |
| 27738 | chrY | 13479031 | . | C | G   | 231.04  | PASS          | AC=2;AF=0.030;AN=66;BaseQRankSum=  |
| 27739 | chrY | 13479040 | . | G | A   | 826.93  | PASS          | AC=3;AF=0.047;AN=64;BaseQRankSum=  |
| 27740 | chrY | 13479041 | . | T | C   | 2942.49 | PASS          | AC=8;AF=0.222;AN=36;BaseQRankSum=  |

|       |      |          |   |   |       |          |               |                                    |
|-------|------|----------|---|---|-------|----------|---------------|------------------------------------|
| 27741 | chrY | 13479042 | . | G | C     | 223.66   | PASS          | AC=1;AF=0.024;AN=42;BaseQRankSum=  |
| 27742 | chrY | 13479043 | . | C | G     | 398.09   | PASS          | AC=1;AF=0.021;AN=48;BaseQRankSum=  |
| 27743 | chrY | 13479044 | . | C | A     | 365.52   | PASS          | AC=5;AF=0.074;AN=68;BaseQRankSum=  |
| 27744 | chrY | 13479048 | . | A | C,G   | 5425.78  | PASS          | AC=10,1;AF=0.357,0.036;AN=28;BaseQ |
| 27745 | chrY | 13479049 | . | G | A     | 123.02   | my_snp_filter | AC=3;AF=0.083;AN=36;BaseQ          |
| 27746 | chrY | 13479051 | . | C | T     | 217.57   | PASS          | AC=1;AF=0.020;AN=50;BaseQRankSum=  |
| 27747 | chrY | 13479052 | . | A | G     | 3350.69  | PASS          | AC=8;AF=0.182;AN=44;BaseQRankSum=  |
| 27748 | chrY | 13479053 | . | G | A     | 45.86    | PASS          | AC=2;AF=0.029;AN=68;DP=3837;FS=0.  |
| 27749 | chrY | 13479056 | . | C | T     | 1546.27  | PASS          | AC=7;AF=0.100;AN=70;BaseQRankSum=  |
| 27750 | chrY | 13479057 | . | G | A,T   | 356.78   | my_snp_filter | AC=3,2;AF=0.043,0.029;AN=          |
| 27751 | chrY | 13479058 | . | C | G     | 243.28   | my_snp_filter | AC=3;AF=0.043;AN=70;BaseQ          |
| 27752 | chrY | 13479062 | . | C | A     | 1369.04  | PASS          | AC=5;AF=0.071;AN=70;BaseQRankSum=  |
| 27753 | chrY | 13479063 | . | C | T,A,G | 1349.30  | PASS          | AC=4,2,2;AF=0.057,0.029,0.029;AN=  |
| 27754 | chrY | 13479064 | . | T | G     | 131.46   | my_snp_filter | AC=2;AF=0.029;AN=70;BaseQ          |
| 27755 | chrY | 13479068 | . | G | C,T   | 1747.96  | PASS          | AC=3,4;AF=0.043,0.057;AN=70;BaseQ  |
| 27756 | chrY | 13479070 | . | T | C     | 431.30   | PASS          | AC=1;AF=0.014;AN=70;BaseQRankSum=  |
| 27757 | chrY | 13479071 | . | C | T,G   | 496.07   | PASS          | AC=1,4;AF=0.014,0.057;AN=70;BaseQ  |
| 27758 | chrY | 13479073 | . | C | A     | 886.36   | PASS          | AC=3;AF=0.043;AN=70;BaseQRankSum=  |
| 27759 | chrY | 13479077 | . | G | C     | 85.96    | PASS          | AC=1;AF=0.014;AN=70;BaseQRankSum=  |
| 27760 | chrY | 13479079 | . | C | T     | 2543.11  | PASS          | AC=5;AF=0.071;AN=70;BaseQRankSum=  |
| 27761 | chrY | 13479080 | . | G | A     | 1739.37  | PASS          | AC=6;AF=0.086;AN=70;BaseQRankSum=  |
| 27762 | chrY | 13479081 | . | G | T,A   | 826.34   | PASS          | AC=2,2;AF=0.029,0.029;AN=70;BaseQ  |
| 27763 | chrY | 13479082 | . | C | A,T   | 851.60   | PASS          | AC=2,3;AF=0.029,0.043;AN=70;BaseQ  |
| 27764 | chrY | 13479083 | . | C | T     | 269.09   | my_snp_filter | AC=3;AF=0.043;AN=70;BaseQ          |
| 27765 | chrY | 13479085 | . | C | T     | 396.64   | my_snp_filter | AC=3;AF=0.043;AN=70;BaseQ          |
| 27766 | chrY | 13479090 | . | C | T,G   | 1606.02  | PASS          | AC=5,1;AF=0.071,0.014;AN=70;BaseQ  |
| 27767 | chrY | 13479093 | . | G | T     | 33.45    | my_snp_filter | AC=1;AF=0.014;AN=70;BaseQ          |
| 27768 | chrY | 13479094 | . | A | T     | 43.08    | my_snp_filter | AC=2;AF=0.029;AN=70;BaseQ          |
| 27769 | chrY | 13479095 | . | C | T     | 3671.27  | PASS          | AC=7;AF=0.100;AN=70;BaseQRankSum=  |
| 27770 | chrY | 13479098 | . | G | T     | 837.38   | PASS          | AC=5;AF=0.071;AN=70;BaseQRankSum=  |
| 27771 | chrY | 13479099 | . | C | T     | 177.92   | my_snp_filter | AC=2;AF=0.029;AN=70;BaseQ          |
| 27772 | chrY | 13479100 | . | G | A,C   | 784.93   | PASS          | AC=4,2;AF=0.057,0.029;AN=70;BaseQ  |
| 27773 | chrY | 13479101 | . | C | T     | 543.45   | PASS          | AC=4;AF=0.057;AN=70;BaseQRankSum=  |
| 27774 | chrY | 13479102 | . | T | C,A,G | 936.23   | PASS          | AC=2,4,1;AF=0.029,0.057,0.014;AN=  |
| 27775 | chrY | 13479103 | . | C | T     | 195.02   | PASS          | AC=2;AF=0.029;AN=70;BaseQRankSum=  |
| 27776 | chrY | 13479108 | . | C | A,G   | 6605.04  | PASS          | AC=21,3;AF=0.300,0.043;AN=70;BaseQ |
| 27777 | chrY | 13479109 | . | G | A     | 331.45   | PASS          | AC=5;AF=0.071;AN=70;BaseQRankSum=  |
| 27778 | chrY | 13479111 | . | A | T     | 57.73    | my_snp_filter | AC=1;AF=0.015;AN=68;BaseQ          |
| 27779 | chrY | 13479112 | . | C | T     | 3047.10  | PASS          | AC=7;AF=0.103;AN=68;BaseQRankSum=  |
| 27780 | chrY | 13479113 | . | C | T     | 90.39    | my_snp_filter | AC=2;AF=0.031;AN=64;BaseQ          |
| 27781 | chrY | 13479114 | . | A | C     | 17582.55 | PASS          | AC=26;AF=0.448;AN=58;BaseQ         |
| 27782 | chrY | 13479115 | . | C | T     | 790.99   | PASS          | AC=7;AF=0.117;AN=60;BaseQRankSum=  |
| 27783 | chrY | 13479116 | . | G | A     | 407.06   | PASS          | AC=5;AF=0.081;AN=62;BaseQRankSum=  |
| 27784 | chrY | 13479117 | . | G | A     | 63.67    | my_snp_filter | AC=4;AF=0.059;AN=68;BaseQ          |
| 27785 | chrY | 13479120 | . | A | G     | 7806.92  | PASS          | AC=19;AF=0.396;AN=48;BaseQRankSum= |
| 27786 | chrY | 13479121 | . | T | A     | 13190.79 | PASS          | AC=29;AF=0.500;AN=58;BaseQ         |
| 27787 | chrY | 13479125 | . | G | T     | 3073.08  | PASS          | AC=7;AF=0.103;AN=68;BaseQRankSum=  |
| 27788 | chrY | 13479126 | . | C | A,T   | 486.09   | PASS          | AC=3,4;AF=0.043,0.057;AN=70;BaseQ  |
| 27789 | chrY | 13479129 | . | G | A     | 63.78    | PASS          | AC=2;AF=0.029;AN=70;BaseQRankSum=  |
| 27790 | chrY | 13479136 | . | T | C,*   | 2690.13  | PASS          | AC=12,1;AF=0.273,0.023;AN=44;BaseQ |
| 27791 | chrY | 13479137 | . | G | A     | 1524.02  | PASS          | AC=5;AF=0.089;AN=56;BaseQRankSum=  |
| 27792 | chrY | 13479138 | . | C | A,G   | 3517.92  | PASS          | AC=5,7;AF=0.081,0.113;AN=62;BaseQ  |
| 27793 | chrY | 13479142 | . | A | C     | 21351.33 | PASS          | AC=28;AF=0.483;AN=58;BaseQ         |
| 27794 | chrY | 13479144 | . | T | C     | 10702.84 | PASS          | AC=27;AF=0.386;AN=70;BaseQ         |
| 27795 | chrY | 13479155 | . | T | C     | 10132.20 | PASS          | AC=25;AF=0.357;AN=70;BaseQ         |
| 27796 | chrY | 13479157 | . | G | C,A   | 2821.54  | PASS          | AC=3,7;AF=0.043,0.100;AN=70;BaseQ  |
| 27797 | chrY | 13479159 | . | C | A     | 678.10   | PASS          | AC=2;AF=0.029;AN=70;BaseQRankSum=  |
| 27798 | chrY | 13479161 | . | A | G     | 299.97   | my_snp_filter | AC=4;AF=0.057;AN=70;BaseQ          |
| 27799 | chrY | 13479162 | . | T | A     | 1282.17  | PASS          | AC=4;AF=0.057;AN=70;BaseQRankSum=  |
| 27800 | chrY | 13479164 | . | C | A     | 65.42    | PASS          | AC=1;AF=0.014;AN=70;BaseQRankSum=  |
| 27801 | chrY | 13479165 | . | G | A     | 284.79   | PASS          | AC=5;AF=0.071;AN=70;BaseQRankSum=  |
| 27802 | chrY | 13479166 | . | T | G,A   | 279.27   | PASS          | AC=2,1;AF=0.029,0.014;AN=70;BaseQ  |
| 27803 | chrY | 13479168 | . | A | G     | 111.32   | PASS          | AC=2;AF=0.029;AN=70;BaseQRankSum=  |
| 27804 | chrY | 13479174 | . | C | T     | 1345.30  | PASS          | AC=5;AF=0.071;AN=70;BaseQRankSum=  |
| 27805 | chrY | 13479175 | . | A | G     | 15002.64 | PASS          | AC=30;AF=0.429;AN=70;BaseQ         |
| 27806 | chrY | 13479176 | . | G | C     | 1829.67  | PASS          | AC=8;AF=0.114;AN=70;BaseQRankSum=  |
| 27807 | chrY | 13479188 | . | C | G     | 215.53   | PASS          | AC=3;AF=0.043;AN=70;BaseQRankSum=  |
| 27808 | chrY | 13479189 | . | C | A     | 62.92    | my_snp_filter | AC=1;AF=0.014;AN=70;BaseQ          |
| 27809 | chrY | 13479192 | . | C | T     | 95.01    | PASS          | AC=1;AF=0.014;AN=70;BaseQRankSum=  |
| 27810 | chrY | 13479193 | . | A | T     | 168.79   | PASS          | AC=1;AF=0.014;AN=70;BaseQRankSum=  |
| 27811 | chrY | 13479195 | . | C | T     | 1126.19  | PASS          | AC=7;AF=0.100;AN=70;BaseQRankSum=  |
| 27812 | chrY | 13479198 | . | C | G     | 130.93   | my_snp_filter | AC=5;AF=0.071;AN=70;BaseQ          |
| 27813 | chrY | 13479199 | . | C | T     | 217.94   | PASS          | AC=2;AF=0.029;AN=70;BaseQRankSum=  |
| 27814 | chrY | 13479200 | . | G | A     | 7816.70  | PASS          | AC=15;AF=0.214;AN=70;BaseQRankSum= |
| 27815 | chrY | 13479202 | . | C | A     | 917.58   | PASS          | AC=6;AF=0.088;AN=68;BaseQRankSum=  |
| 27816 | chrY | 13479203 | . | G | T     | 499.87   | PASS          | AC=5;AF=0.071;AN=70;BaseQRankSum=  |

|       |      |          |   |   |     |          |               |                                            |
|-------|------|----------|---|---|-----|----------|---------------|--------------------------------------------|
| 27817 | chrY | 13479208 | . | G | T   | 13996.75 | PASS          | AC=29;AF=0.453;AN=64;BaseQRankSum=         |
| 27818 | chrY | 13479209 | . | T | C   | 7357.54  | PASS          | AC=14;AF=0.206;AN=68;BaseQRankSum=         |
| 27819 | chrY | 13479210 | . | A | C   | 350.59   | PASS          | AC=7;AF=0.103;AN=68;BaseQRankSum=          |
| 27820 | chrY | 13479211 | . | G | C,A | 7213.43  | PASS          | AC=14,5;AF=0.206,0.074;AN=68;BaseQRankSum= |
| 27821 | chrY | 13479215 | . | G | A   | 8918.53  | PASS          | AC=23;AF=0.383;AN=60;BaseQRankSum=         |
| 27822 | chrY | 13479217 | . | G | A   | 36.90    | PASS          | AC=2;AF=0.029;AN=70;BaseQRankSum=          |
| 27823 | chrY | 13479218 | . | C | A   | 1207.81  | PASS          | AC=13;AF=0.186;AN=70;BaseQRankSum=         |
| 27824 | chrY | 13479219 | . | C | T   | 42.10    | PASS          | AC=2;AF=0.029;AN=70;BaseQRankSum=          |
| 27825 | chrY | 13479222 | . | G | C   | 674.84   | PASS          | AC=8;AF=0.114;AN=70;BaseQRankSum=          |
| 27826 | chrY | 13479233 | . | T | C   | 5851.02  | my_snp_filter | AC=13;AF=0.232;AN=56;BaseQRankSum=         |
| 27827 | chrY | 13479234 | . | A | T   | 170.54   | PASS          | AC=1;AF=0.014;AN=70;BaseQRankSum=          |
| 27828 | chrY | 13479249 | . | G | A   | 3395.89  | my_snp_filter | AC=9;AF=0.129;AN=70;BaseQRankSum=          |
| 27829 | chrY | 13479250 | . | G | A   | 32.91    | PASS          | AC=1;AF=0.014;AN=70;BaseQRankSum=          |
| 27830 | chrY | 13479256 | . | G | A   | 4219.85  | my_snp_filter | AC=13;AF=0.260;AN=50;BaseQRankSum=         |
| 27831 | chrY | 13479259 | . | T | C   | 408.49   | PASS          | AC=3;AF=0.047;AN=64;BaseQRankSum=          |
| 27832 | chrY | 13479262 | . | A | G,C | 486.52   | PASS          | AC=2,1;AF=0.043,0.022;AN=46;BaseQRankSum=  |
| 27833 | chrY | 13479266 | . | A | C   | 3822.13  | my_snp_filter | AC=9;AF=0.180;AN=50;BaseQRankSum=          |
| 27834 | chrY | 13479274 | . | G | C   | 3810.64  | my_snp_filter | AC=9;AF=0.167;AN=54;BaseQRankSum=          |
| 27835 | chrY | 13479281 | . | G | T   | 159.96   | PASS          | AC=1;AF=0.016;AN=62;BaseQRankSum=          |
| 27836 | chrY | 13479286 | . | G | A   | 37.85    | my_snp_filter | AC=1;AF=0.016;AN=64;BaseQRankSum=          |
| 27837 | chrY | 13479296 | . | G | T   | 1914.79  | my_snp_filter | AC=7;AF=0.117;AN=60;BaseQRankSum=          |
| 27838 | chrY | 13479314 | . | T | G   | 9876.76  | my_snp_filter | AC=10;AF=0.200;AN=50;BaseQRankSum=         |
| 27839 | chrY | 13479316 | . | C | T   | 9340.97  | my_snp_filter | AC=9;AF=0.188;AN=48;BaseQRankSum=          |
| 27840 | chrY | 13479322 | . | C | A   | 143.92   | PASS          | AC=1;AF=0.015;AN=66;BaseQRankSum=          |
| 27841 | chrY | 13479365 | . | G | T   | 51.60    | PASS          | AC=2;AF=0.031;AN=64;BaseQRankSum=          |
| 27842 | chrY | 13479378 | . | T | A   | 47.65    | PASS          | AC=2;AF=0.030;AN=66;BaseQRankSum=          |
| 27843 | chrY | 13479379 | . | A | C,T | 3887.70  | my_snp_filter | AC=11,2;AF=0.196,0.036;AN=66;BaseQRankSum= |
| 27844 | chrY | 13479380 | . | G | A   | 39.15    | my_snp_filter | AC=2;AF=0.033;AN=60;BaseQRankSum=          |
| 27845 | chrY | 13479388 | . | G | C   | 153.88   | PASS          | AC=3;AF=0.047;AN=64;BaseQRankSum=          |
| 27846 | chrY | 13479389 | . | T | C   | 326.93   | PASS          | AC=4;AF=0.061;AN=66;BaseQRankSum=          |
| 27847 | chrY | 13479393 | . | T | C   | 248.33   | PASS          | AC=4;AF=0.061;AN=66;BaseQRankSum=          |
| 27848 | chrY | 13479395 | . | G | T   | 299.11   | PASS          | AC=3;AF=0.045;AN=66;BaseQRankSum=          |
| 27849 | chrY | 13479402 | . | C | G   | 155.54   | PASS          | AC=2;AF=0.031;AN=64;BaseQRankSum=          |
| 27850 | chrY | 13479406 | . | A | T   | 400.67   | PASS          | AC=2;AF=0.031;AN=64;BaseQRankSum=          |
| 27851 | chrY | 13479410 | . | C | G   | 171.17   | PASS          | AC=3;AF=0.045;AN=66;BaseQRankSum=          |
| 27852 | chrY | 13479411 | . | C | A   | 379.86   | PASS          | AC=2;AF=0.031;AN=64;BaseQRankSum=          |
| 27853 | chrY | 13479414 | . | G | A   | 529.04   | my_snp_filter | AC=2;AF=0.030;AN=66;BaseQRankSum=          |
| 27854 | chrY | 13479421 | . | A | G   | 3667.83  | PASS          | AC=10;AF=0.167;AN=60;BaseQRankSum=         |
| 27855 | chrY | 13479425 | . | A | C   | 2486.69  | my_snp_filter | AC=8;AF=0.138;AN=58;BaseQRankSum=          |
| 27856 | chrY | 13479428 | . | G | T   | 207.92   | PASS          | AC=3;AF=0.044;AN=68;BaseQRankSum=          |
| 27857 | chrY | 13479434 | . | G | T   | 304.16   | PASS          | AC=2;AF=0.030;AN=66;BaseQRankSum=          |
| 27858 | chrY | 13479435 | . | G | A   | 119.42   | PASS          | AC=2;AF=0.029;AN=68;BaseQRankSum=          |
| 27859 | chrY | 13479440 | . | A | G   | 84.93    | PASS          | AC=1;AF=0.015;AN=68;BaseQRankSum=          |
| 27860 | chrY | 13479441 | . | T | C   | 48.15    | my_snp_filter | AC=1;AF=0.015;AN=68;BaseQRankSum=          |
| 27861 | chrY | 13479451 | . | G | T   | 330.66   | PASS          | AC=2;AF=0.029;AN=68;BaseQRankSum=          |
| 27862 | chrY | 13479452 | . | C | A   | 1944.50  | PASS          | AC=7;AF=0.106;AN=66;BaseQRankSum=          |
| 27863 | chrY | 13479456 | . | G | T   | 335.80   | PASS          | AC=2;AF=0.030;AN=66;BaseQRankSum=          |
| 27864 | chrY | 13479459 | . | T | G   | 37.93    | my_snp_filter | AC=1;AF=0.015;AN=68;BaseQRankSum=          |
| 27865 | chrY | 13479463 | . | G | A   | 304.18   | PASS          | AC=4;AF=0.059;AN=68;BaseQRankSum=          |
| 27866 | chrY | 13479464 | . | A | G   | 240.83   | PASS          | AC=4;AF=0.059;AN=68;BaseQRankSum=          |
| 27867 | chrY | 13479468 | . | T | G   | 760.30   | PASS          | AC=6;AF=0.091;AN=66;BaseQRankSum=          |
| 27868 | chrY | 13479472 | . | A | C   | 218.08   | PASS          | AC=4;AF=0.059;AN=68;BaseQRankSum=          |
| 27869 | chrY | 13479476 | . | T | A   | 219.70   | PASS          | AC=1;AF=0.014;AN=70;BaseQRankSum=          |
| 27870 | chrY | 13479489 | . | C | G   | 217.52   | PASS          | AC=4;AF=0.059;AN=68;BaseQRankSum=          |
| 27871 | chrY | 13479515 | . | A | T   | 122.30   | PASS          | AC=3;AF=0.043;AN=70;BaseQRankSum=          |
| 27872 | chrY | 13479518 | . | G | A   | 128.29   | PASS          | AC=3;AF=0.043;AN=70;BaseQRankSum=          |
| 27873 | chrY | 13479520 | . | C | T   | 1051.15  | PASS          | AC=11;AF=0.162;AN=68;BaseQRankSum=         |
| 27874 | chrY | 13479523 | . | G | A   | 57.95    | PASS          | AC=1;AF=0.014;AN=70;BaseQRankSum=          |
| 27875 | chrY | 13479524 | . | T | C   | 80.35    | PASS          | AC=3;AF=0.043;AN=70;BaseQRankSum=          |
| 27876 | chrY | 13479527 | . | A | C   | 66.66    | PASS          | AC=1;AF=0.014;AN=70;BaseQRankSum=          |
| 27877 | chrY | 13479529 | . | G | T,C | 216.63   | PASS          | AC=3,1;AF=0.043,0.014;AN=70;BaseQRankSum=  |
| 27878 | chrY | 13479531 | . | T | A,G | 1291.51  | PASS          | AC=6,5;AF=0.091,0.076;AN=66;BaseQRankSum=  |
| 27879 | chrY | 13479535 | . | G | T   | 35.52    | my_snp_filter | AC=1;AF=0.014;AN=70;BaseQRankSum=          |
| 27880 | chrY | 13479536 | . | T | A   | 82.38    | my_snp_filter | AC=2;AF=0.029;AN=70;BaseQRankSum=          |
| 27881 | chrY | 13479538 | . | G | A   | 65.63    | PASS          | AC=2;AF=0.029;AN=70;BaseQRankSum=          |
| 27882 | chrY | 13479540 | . | A | G   | 82.85    | PASS          | AC=1;AF=0.014;AN=70;BaseQRankSum=          |
| 27883 | chrY | 13479544 | . | C | T   | 374.01   | PASS          | AC=4;AF=0.057;AN=70;BaseQRankSum=          |
| 27884 | chrY | 13479546 | . | T | A   | 77.85    | my_snp_filter | AC=3;AF=0.043;AN=70;BaseQRankSum=          |
| 27885 | chrY | 13479547 | . | C | T   | 92.37    | my_snp_filter | AC=2;AF=0.029;AN=70;BaseQRankSum=          |
| 27886 | chrY | 13479550 | . | C | G,T | 1307.44  | PASS          | AC=7,7;AF=0.113,0.113;AN=62;BaseQRankSum=  |
| 27887 | chrY | 13479553 | . | G | T   | 249.13   | PASS          | AC=3;AF=0.043;AN=70;BaseQRankSum=          |
| 27888 | chrY | 13479554 | . | G | A   | 61.79    | my_snp_filter | AC=1;AF=0.014;AN=70;BaseQRankSum=          |
| 27889 | chrY | 13479557 | . | G | T   | 54.99    | my_snp_filter | AC=1;AF=0.014;AN=70;BaseQRankSum=          |
| 27890 | chrY | 13479560 | . | T | A   | 55.54    | my_snp_filter | AC=1;AF=0.014;AN=70;BaseQRankSum=          |
| 27891 | chrY | 13479562 | . | T | C   | 248.66   | PASS          | AC=3;AF=0.043;AN=70;BaseQRankSum=          |
| 27892 | chrY | 13479565 | . | A | T   | 241.88   | PASS          | AC=3;AF=0.043;AN=70;BaseQRankSum=          |

|       |      |          |   |   |     |          |               |                                   |
|-------|------|----------|---|---|-----|----------|---------------|-----------------------------------|
| 27893 | chrY | 13479574 | . | T | C   | 245.19   | PASS          | AC=4;AF=0.057;AN=70;BaseQRankSum= |
| 27894 | chrY | 13479579 | . | C | A,* | 266.35   | my_snp_filter | AC=3,1;AF=0.043,0.014;AN=         |
| 27895 | chrY | 13479580 | . | T | C,A | 3887.62  | PASS          | AC=22,3;AF=0.314,0.043;AN=70;Base |
| 27896 | chrY | 13479582 | . | G | A   | 127.16   | PASS          | AC=3;AF=0.043;AN=70;BaseQRankSum= |
| 27897 | chrY | 13479584 | . | G | C   | 31.99    | PASS          | AC=1;AF=0.014;AN=70;BaseQRankSum= |
| 27898 | chrY | 13479585 | . | G | T   | 235.63   | PASS          | AC=4;AF=0.057;AN=70;BaseQRankSum= |
| 27899 | chrY | 13479587 | . | G | A   | 271.74   | PASS          | AC=3;AF=0.043;AN=70;BaseQRankSum= |
| 27900 | chrY | 13479590 | . | C | G   | 37.20    | PASS          | AC=1;AF=0.014;AN=70;BaseQRankSum= |
| 27901 | chrY | 13479592 | . | G | C   | 34.12    | PASS          | AC=2;AF=0.029;AN=70;BaseQRankSum= |
| 27902 | chrY | 13479593 | . | T | A,G | 425.18   | PASS          | AC=2,5;AF=0.029,0.071;AN=70;BaseQ |
| 27903 | chrY | 13479595 | . | C | A,T | 1112.02  | PASS          | AC=4,7;AF=0.057,0.100;AN=70;BaseQ |
| 27904 | chrY | 13479596 | . | A | G   | 256.18   | PASS          | AC=4;AF=0.057;AN=70;BaseQRankSum= |
| 27905 | chrY | 13479604 | . | G | C   | 33.68    | PASS          | AC=1;AF=0.014;AN=70;BaseQRankSum= |
| 27906 | chrY | 13479607 | . | A | T   | 223.13   | PASS          | AC=4;AF=0.057;AN=70;BaseQRankSum= |
| 27907 | chrY | 13479608 | . | C | T   | 127.24   | my_snp_filter | AC=3;AF=0.043;AN=70;BaseQ         |
| 27908 | chrY | 13479612 | . | G | T   | 79.44    | PASS          | AC=3;AF=0.043;AN=70;BaseQRankSum= |
| 27909 | chrY | 13479613 | . | C | A   | 121.15   | PASS          | AC=3;AF=0.043;AN=70;BaseQRankSum= |
| 27910 | chrY | 13479615 | . | C | A   | 281.07   | PASS          | AC=5;AF=0.071;AN=70;BaseQRankSum= |
| 27911 | chrY | 13479617 | . | T | A,C | 349.26   | PASS          | AC=3,2;AF=0.043,0.029;AN=70;BaseQ |
| 27912 | chrY | 13479618 | . | G | A   | 64.12    | PASS          | AC=2;AF=0.029;AN=70;BaseQRankSum= |
| 27913 | chrY | 13479619 | . | T | C   | 101.94   | PASS          | AC=3;AF=0.043;AN=70;BaseQRankSum= |
| 27914 | chrY | 13479620 | . | A | C   | 132.19   | my_snp_filter | AC=3;AF=0.043;AN=70;BaseQ         |
| 27915 | chrY | 13479621 | . | A | G   | 53.23    | my_snp_filter | AC=4;AF=0.057;AN=70;BaseQ         |
| 27916 | chrY | 13479623 | . | C | G   | 32.41    | my_snp_filter | AC=2;AF=0.029;AN=70;BaseQ         |
| 27917 | chrY | 13479628 | . | C | G   | 320.10   | PASS          | AC=3;AF=0.043;AN=70;BaseQRankSum= |
| 27918 | chrY | 13479632 | . | G | C   | 44.85    | my_snp_filter | AC=2;AF=0.029;AN=70;BaseQ         |
| 27919 | chrY | 13479634 | . | C | A   | 146.05   | PASS          | AC=3;AF=0.043;AN=70;BaseQRankSum= |
| 27920 | chrY | 13479638 | . | G | T   | 61.99    | PASS          | AC=3;AF=0.043;AN=70;BaseQRankSum= |
| 27921 | chrY | 13479663 | . | G | C   | 474.34   | PASS          | AC=4;AF=0.057;AN=70;BaseQRankSum= |
| 27922 | chrY | 13479675 | . | A | C   | 429.12   | PASS          | AC=2;AF=0.032;AN=62;BaseQRankSum= |
| 27923 | chrY | 13479681 | . | T | C,* | 759.04   | PASS          | AC=1,3;AF=0.021,0.063;AN=48;BaseQ |
| 27924 | chrY | 13480066 | . | A | G   | 4172.56  | my_snp_filter | AC=4;AF=0.074;AN=54;BaseQ         |
| 27925 | chrY | 13480082 | . | C | A   | 802.05   | PASS          | AC=1;AF=0.015;AN=66;BaseQRankSum= |
| 27926 | chrY | 13480087 | . | C | A   | 193.30   | PASS          | AC=1;AF=0.016;AN=64;BaseQRankSum= |
| 27927 | chrY | 13480088 | . | C | G   | 351.08   | PASS          | AC=1;AF=0.016;AN=64;BaseQRankSum= |
| 27928 | chrY | 13480091 | . | C | T   | 47.67    | my_snp_filter | AC=1;AF=0.016;AN=64;BaseQ         |
| 27929 | chrY | 13480097 | . | C | T   | 167.04   | PASS          | AC=1;AF=0.016;AN=64;BaseQRankSum= |
| 27930 | chrY | 13480103 | . | C | T   | 52.06    | my_snp_filter | AC=1;AF=0.015;AN=66;BaseQ         |
| 27931 | chrY | 13480106 | . | A | G   | 9884.13  | my_snp_filter | AC=4;AF=0.077;AN=52;BaseQ         |
| 27932 | chrY | 13480108 | . | C | G   | 307.97   | my_snp_filter | AC=2;AF=0.032;AN=62;BaseQ         |
| 27933 | chrY | 13480125 | . | G | T   | 329.03   | PASS          | AC=1;AF=0.017;AN=60;BaseQRankSum= |
| 27934 | chrY | 13480128 | . | T | C   | 103.71   | my_snp_filter | AC=1;AF=0.016;AN=62;BaseQ         |
| 27935 | chrY | 13480133 | . | A | C   | 328.82   | my_snp_filter | AC=2;AF=0.033;AN=60;BaseQ         |
| 27936 | chrY | 13480141 | . | G | T,C | 841.92   | PASS          | AC=2,1;AF=0.034,0.017;AN=58;BaseQ |
| 27937 | chrY | 13480142 | . | A | C   | 116.53   | PASS          | AC=1;AF=0.017;AN=58;BaseQRankSum= |
| 27938 | chrY | 13480152 | . | A | T   | 135.84   | my_snp_filter | AC=2;AF=0.033;AN=60;BaseQ         |
| 27939 | chrY | 13480155 | . | C | A   | 65.37    | my_snp_filter | AC=1;AF=0.018;AN=56;BaseQ         |
| 27940 | chrY | 13480156 | . | C | T   | 204.61   | PASS          | AC=2;AF=0.037;AN=54;BaseQRankSum= |
| 27941 | chrY | 13480157 | . | C | A   | 128.54   | PASS          | AC=1;AF=0.019;AN=52;BaseQRankSum= |
| 27942 | chrY | 13480158 | . | C | T,A | 555.37   | PASS          | AC=2,1;AF=0.053,0.026;AN=38;BaseQ |
| 27943 | chrY | 13480159 | . | G | C   | 16762.58 | my_snp_filter | AC=22;AF=0.688;AN                 |
| 27944 | chrY | 13480161 | . | C | G,A | 2473.17  | PASS          | AC=13,2;AF=0.310,0.048;AN=42;Base |
| 27945 | chrY | 13480165 | . | G | T,A | 411.26   | PASS          | AC=1,1;AF=0.017,0.017;AN=60;BaseQ |
| 27946 | chrY | 13480171 | . | T | A   | 76.77    | my_snp_filter | AC=1;AF=0.017;AN=60;BaseQ         |
| 27947 | chrY | 13480172 | . | A | G   | 96.82    | my_snp_filter | AC=2;AF=0.032;AN=62;BaseQ         |
| 27948 | chrY | 13480175 | . | G | T   | 52.42    | my_snp_filter | AC=1;AF=0.016;AN=62;BaseQ         |
| 27949 | chrY | 13480176 | . | A | G   | 120.07   | my_snp_filter | AC=2;AF=0.032;AN=62;BaseQ         |
| 27950 | chrY | 13480183 | . | T | A   | 31.32    | my_snp_filter | AC=1;AF=0.016;AN=62;BaseQ         |
| 27951 | chrY | 13480184 | . | C | A   | 180.59   | my_snp_filter | AC=2;AF=0.032;AN=62;BaseQ         |
| 27952 | chrY | 13480193 | . | T | A   | 155.57   | my_snp_filter | AC=1;AF=0.016;AN=62;BaseQ         |
| 27953 | chrY | 13480196 | . | G | A   | 614.14   | my_snp_filter | AC=2;AF=0.032;AN=62;BaseQ         |
| 27954 | chrY | 13480199 | . | A | G   | 143.27   | my_snp_filter | AC=1;AF=0.016;AN=62;BaseQ         |
| 27955 | chrY | 13480209 | . | A | T   | 1607.20  | PASS          | AC=8;AF=0.133;AN=60;BaseQRankSum= |
| 27956 | chrY | 13480210 | . | G | T   | 379.31   | my_snp_filter | AC=1;AF=0.016;AN=62;BaseQ         |
| 27957 | chrY | 13480222 | . | T | A   | 1579.82  | PASS          | AC=8;AF=0.143;AN=56;BaseQRankSum= |
| 27958 | chrY | 13480228 | . | T | C,* | 13712.88 | my_snp_filter | AC=11,2;AF=0.306,                 |
| 27959 | chrY | 13480230 | . | G | A   | 262.80   | my_snp_filter | AC=1;AF=0.020;AN=50;BaseQ         |
| 27960 | chrY | 13480233 | . | G | C   | 636.80   | my_snp_filter | AC=4;AF=0.069;AN=58;BaseQ         |
| 27961 | chrY | 13480234 | . | G | A   | 135.77   | PASS          | AC=2;AF=0.034;AN=58;BaseQRankSum= |
| 27962 | chrY | 13480237 | . | G | A   | 81.80    | my_snp_filter | AC=1;AF=0.017;AN=58;BaseQ         |
| 27963 | chrY | 13480240 | . | A | T   | 1454.95  | PASS          | AC=4;AF=0.071;AN=56;BaseQRankSum= |
| 27964 | chrY | 13480242 | . | T | G   | 1128.75  | PASS          | AC=6;AF=0.176;AN=34;BaseQRankSum= |
| 27965 | chrY | 13480246 | . | C | G   | 637.51   | PASS          | AC=1;AF=0.025;AN=40;BaseQRankSum= |
| 27966 | chrY | 13480262 | . | T | C   | 1836.41  | PASS          | AC=2;AF=0.029;AN=70;BaseQRankSum= |
| 27967 | chrY | 13480263 | . | A | T   | 1084     | PASS          | AC=1;AF=0.014;AN=70;BaseQRankSum= |
| 27968 | chrY | 13480282 | . | G | A,T | 1581.09  | PASS          | AC=14,2;AF=0.500,0.071;AN=28;Base |



|       |      |          |   |   |       |         |               |                                    |
|-------|------|----------|---|---|-------|---------|---------------|------------------------------------|
| 27969 | chrY | 13480290 | . | A | G     | 212.27  | PASS          | AC=2;AF=0.029;AN=70;BaseQRankSum=  |
| 27970 | chrY | 13480295 | . | C | T     | 186.60  | PASS          | AC=2;AF=0.029;AN=70;BaseQRankSum=  |
| 27971 | chrY | 13480310 | . | T | A     | 37.14   | PASS          | AC=1;AF=0.014;AN=70;BaseQRankSum=  |
| 27972 | chrY | 13480312 | . | G | C     | 165.14  | PASS          | AC=2;AF=0.029;AN=70;BaseQRankSum=  |
| 27973 | chrY | 13480327 | . | A | T     | 95.19   | PASS          | AC=1;AF=0.014;AN=70;BaseQRankSum=  |
| 27974 | chrY | 13480341 | . | T | C     | 176.48  | PASS          | AC=2;AF=0.029;AN=70;BaseQRankSum=  |
| 27975 | chrY | 13480347 | . | G | C     | 164.42  | PASS          | AC=2;AF=0.029;AN=70;BaseQRankSum=  |
| 27976 | chrY | 13480349 | . | T | C     | 58.18   | PASS          | AC=1;AF=0.014;AN=70;BaseQRankSum=  |
| 27977 | chrY | 13480351 | . | T | C,G   | 1674.48 | PASS          | AC=10,2;AF=0.238,0.048;AN=42;Base  |
| 27978 | chrY | 13480352 | . | G | C     | 77.18   | PASS          | AC=1;AF=0.017;AN=60;BaseQRankSum=  |
| 27979 | chrY | 13480356 | . | C | A     | 375.34  | PASS          | AC=5;AF=0.071;AN=70;BaseQRankSum=  |
| 27980 | chrY | 13480361 | . | C | A,*   | 1037.96 | PASS          | AC=3,4;AF=0.043,0.057;AN=70;BaseQ  |
| 27981 | chrY | 13480362 | . | C | A     | 718.81  | PASS          | AC=8;AF=0.114;AN=70;BaseQRankSum=  |
| 27982 | chrY | 13480363 | . | C | T     | 139.89  | PASS          | AC=3;AF=0.043;AN=70;BaseQRankSum=  |
| 27983 | chrY | 13480364 | . | C | T     | 80.87   | PASS          | AC=3;AF=0.043;AN=70;BaseQRankSum=  |
| 27984 | chrY | 13480368 | . | T | C     | 271.13  | PASS          | AC=2;AF=0.029;AN=70;BaseQRankSum=  |
| 27985 | chrY | 13480371 | . | G | A     | 144.17  | PASS          | AC=1;AF=0.014;AN=70;BaseQRankSum=  |
| 27986 | chrY | 13480373 | . | G | A     | 187.14  | PASS          | AC=4;AF=0.057;AN=70;BaseQRankSum=  |
| 27987 | chrY | 13480376 | . | G | A,C   | 946.43  | PASS          | AC=2,4;AF=0.029,0.057;AN=70;BaseQ  |
| 27988 | chrY | 13480377 | . | C | A     | 803.22  | PASS          | AC=4;AF=0.057;AN=70;BaseQRankSum=  |
| 27989 | chrY | 13480378 | . | C | G     | 57.87   | PASS          | AC=1;AF=0.014;AN=70;BaseQRankSum=  |
| 27990 | chrY | 13480382 | . | A | G     | 119.51  | my_snp_filter | AC=2;AF=0.029;AN=70;BaseQ          |
| 27991 | chrY | 13480383 | . | C | G     | 127.20  | PASS          | AC=2;AF=0.029;AN=70;BaseQRankSum=  |
| 27992 | chrY | 13480385 | . | A | T     | 333.87  | PASS          | AC=2;AF=0.029;AN=70;BaseQRankSum=  |
| 27993 | chrY | 13480388 | . | G | C     | 179.79  | PASS          | AC=2;AF=0.029;AN=70;BaseQRankSum=  |
| 27994 | chrY | 13480392 | . | C | T     | 167.81  | PASS          | AC=1;AF=0.017;AN=60;BaseQRankSum=  |
| 27995 | chrY | 13480396 | . | A | T     | 58.52   | PASS          | AC=1;AF=0.015;AN=68;BaseQRankSum=  |
| 27996 | chrY | 13480397 | . | C | A     | 290.55  | PASS          | AC=3;AF=0.044;AN=68;BaseQRankSum=  |
| 27997 | chrY | 13480399 | . | T | C     | 55.30   | PASS          | AC=2;AF=0.029;AN=68;BaseQRankSum=  |
| 27998 | chrY | 13480408 | . | A | T     | 53.39   | PASS          | AC=1;AF=0.015;AN=68;BaseQRankSum=  |
| 27999 | chrY | 13480409 | . | G | C     | 59.18   | my_snp_filter | AC=1;AF=0.015;AN=68;BaseQ          |
| 28000 | chrY | 13480411 | . | G | A     | 267.97  | PASS          | AC=2;AF=0.029;AN=70;BaseQRankSum=  |
| 28001 | chrY | 13480413 | . | A | G     | 46.61   | my_snp_filter | AC=2;AF=0.029;AN=70;BaseQ          |
| 28002 | chrY | 13480414 | . | G | C     | 52.19   | PASS          | AC=1;AF=0.014;AN=70;BaseQRankSum=  |
| 28003 | chrY | 13480416 | . | G | C     | 271.09  | PASS          | AC=2;AF=0.029;AN=70;BaseQRankSum=  |
| 28004 | chrY | 13480418 | . | T | C     | 974.55  | PASS          | AC=3;AF=0.043;AN=70;BaseQRankSum=  |
| 28005 | chrY | 13480420 | . | T | C     | 62.90   | my_snp_filter | AC=2;AF=0.029;AN=70;BaseQ          |
| 28006 | chrY | 13480429 | . | G | A,*   | 251.15  | PASS          | AC=1,3;AF=0.014,0.043;AN=70;BaseQ  |
| 28007 | chrY | 13480432 | . | C | G     | 925.86  | PASS          | AC=3;AF=0.043;AN=70;BaseQRankSum=  |
| 28008 | chrY | 13480438 | . | G | C     | 61.27   | PASS          | AC=1;AF=0.018;AN=56;BaseQRankSum=  |
| 28009 | chrY | 13480439 | . | A | G     | 2971.02 | PASS          | AC=9;AF=0.300;AN=30;BaseQRankSum=  |
| 28010 | chrY | 13480440 | . | C | G     | 1020    | PASS          | AC=3;AF=0.071;AN=42;BaseQRankSum=  |
| 28011 | chrY | 13480441 | . | A | G     | 275.32  | PASS          | AC=2;AF=0.045;AN=44;BaseQRankSum=  |
| 28012 | chrY | 13480442 | . | G | T     | 295.62  | PASS          | AC=2;AF=0.033;AN=60;BaseQRankSum=  |
| 28013 | chrY | 13480451 | . | C | A     | 706.87  | PASS          | AC=4;AF=0.059;AN=68;BaseQRankSum=  |
| 28014 | chrY | 13480452 | . | A | T     | 656.12  | PASS          | AC=3;AF=0.044;AN=68;BaseQRankSum=  |
| 28015 | chrY | 13480455 | . | G | T,A   | 1482.20 | PASS          | AC=1,4;AF=0.042,0.167;AN=24;BaseQ  |
| 28016 | chrY | 13480460 | . | C | A     | 991.70  | PASS          | AC=3;AF=0.043;AN=70;BaseQRankSum=  |
| 28017 | chrY | 13480461 | . | A | G     | 989.50  | PASS          | AC=3;AF=0.043;AN=70;BaseQRankSum=  |
| 28018 | chrY | 13480464 | . | A | T     | 572.64  | PASS          | AC=4;AF=0.057;AN=70;BaseQRankSum=  |
| 28019 | chrY | 13480475 | . | C | G     | 436.81  | PASS          | AC=3;AF=0.043;AN=70;BaseQRankSum=  |
| 28020 | chrY | 13480487 | . | C | A     | 2859.95 | PASS          | AC=4;AF=0.125;AN=32;BaseQRankSum=  |
| 28021 | chrY | 13480498 | . | T | C     | 3205.15 | PASS          | AC=4;AF=0.074;AN=54;BaseQRankSum=  |
| 28022 | chrY | 13480510 | . | G | A     | 225.49  | PASS          | AC=2;AF=0.029;AN=70;BaseQRankSum=  |
| 28023 | chrY | 13480528 | . | T | C     | 1608.10 | PASS          | AC=4;AF=0.067;AN=60;BaseQRankSum=  |
| 28024 | chrY | 13480536 | . | G | T     | 1178.30 | PASS          | AC=4;AF=0.061;AN=66;BaseQRankSum=  |
| 28025 | chrY | 13480545 | . | G | T     | 1105.16 | PASS          | AC=4;AF=0.059;AN=68;BaseQRankSum=  |
| 28026 | chrY | 13480557 | . | A | G     | 886.10  | my_snp_filter | AC=3;AF=0.060;AN=50;BaseQ          |
| 28027 | chrY | 13480608 | . | A | G     | 69.97   | PASS          | AC=1;AF=0.016;AN=64;BaseQRankSum=  |
| 28028 | chrY | 13480614 | . | T | G     | 94.01   | PASS          | AC=1;AF=0.015;AN=68;BaseQRankSum=  |
| 28029 | chrY | 13480616 | . | G | A     | 571.33  | PASS          | AC=4;AF=0.059;AN=68;BaseQRankSum=  |
| 28030 | chrY | 13480627 | . | C | T     | 123     | my_snp_filter | AC=1;AF=0.014;AN=70;BaseQ          |
| 28031 | chrY | 13480632 | . | T | C     | 3718.91 | PASS          | AC=3;AF=0.044;AN=68;BaseQRankSum=  |
| 28032 | chrY | 13480636 | . | T | C     | 4347.38 | PASS          | AC=5;AF=0.081;AN=62;BaseQRankSum=  |
| 28033 | chrY | 13480641 | . | T | A     | 7713.40 | PASS          | AC=17;AF=0.283;AN=60;BaseQRankSum= |
| 28034 | chrY | 13480643 | . | C | G,A,* | 6302.71 | PASS          | AC=13,4,2;AF=0.217,0.067,0.033;AN  |
| 28035 | chrY | 13480645 | . | G | A     | 380.10  | PASS          | AC=3;AF=0.047;AN=64;BaseQRankSum=  |
| 28036 | chrY | 13480646 | . | C | T     | 357.43  | PASS          | AC=5;AF=0.071;AN=70;BaseQRankSum=  |
| 28037 | chrY | 13480654 | . | A | T     | 655.52  | PASS          | AC=5;AF=0.071;AN=70;BaseQRankSum=  |
| 28038 | chrY | 13480659 | . | C | A     | 85.37   | PASS          | AC=1;AF=0.014;AN=70;BaseQRankSum=  |
| 28039 | chrY | 13480660 | . | A | G     | 4115.05 | PASS          | AC=8;AF=0.129;AN=62;BaseQRankSum=  |
| 28040 | chrY | 13480662 | . | T | A     | 2248.82 | PASS          | AC=13;AF=0.191;AN=68;BaseQRankSum= |
| 28041 | chrY | 13480676 | . | G | C,A   | 2270.67 | PASS          | AC=12,1;AF=0.176,0.015;AN=68;Base  |
| 28042 | chrY | 13480681 | . | G | C     | 864.58  | PASS          | AC=2;AF=0.029;AN=70;BaseQRankSum=  |
| 28043 | chrY | 13480685 | . | A | C     | 105.89  | PASS          | AC=1;AF=0.015;AN=68;BaseQRankSum=  |
| 28044 | chrY | 13480688 | . | G | C     | 100.36  | PASS          | AC=1;AF=0.014;AN=70;BaseQRankSum=  |

|       |      |          |   |   |     |          |               |                                   |
|-------|------|----------|---|---|-----|----------|---------------|-----------------------------------|
| 28045 | chrY | 13480689 | . | A | T   | 100.40   | PASS          | AC=1;AF=0.014;AN=70;BaseQRankSum= |
| 28046 | chrY | 13480690 | . | T | C   | 1744.11  | PASS          | AC=9;AF=0.129;AN=70;BaseQRankSum= |
| 28047 | chrY | 13480691 | . | A | G   | 1249.52  | PASS          | AC=4;AF=0.057;AN=70;BaseQRankSum= |
| 28048 | chrY | 13480693 | . | G | T   | 259.75   | PASS          | AC=1;AF=0.014;AN=70;BaseQRankSum= |
| 28049 | chrY | 13480694 | . | T | A,C | 442.97   | PASS          | AC=2,1;AF=0.029,0.015;AN=68;BaseQ |
| 28050 | chrY | 13480701 | . | G | A   | 1079.75  | PASS          | AC=4;AF=0.059;AN=68;BaseQRankSum= |
| 28051 | chrY | 13480707 | . | A | G   | 59.96    | PASS          | AC=1;AF=0.015;AN=68;BaseQRankSum= |
| 28052 | chrY | 13480708 | . | T | C   | 139.30   | PASS          | AC=1;AF=0.016;AN=64;BaseQRankSum= |
| 28053 | chrY | 13480711 | . | T | G   | 10322.98 | PASS          | AC=11;AF=0.190;AN=58;BaseQ        |
| 28054 | chrY | 13480712 | . | C | A   | 801.54   | PASS          | AC=6;AF=0.094;AN=64;BaseQRankSum= |
| 28055 | chrY | 13480717 | . | C | T   | 107.14   | PASS          | AC=2;AF=0.032;AN=62;BaseQRankSum= |
| 28056 | chrY | 13480718 | . | C | T   | 174.49   | PASS          | AC=1;AF=0.017;AN=60;BaseQRankSum= |
| 28057 | chrY | 13480723 | . | C | T   | 586.83   | PASS          | AC=2;AF=0.029;AN=68;BaseQRankSum= |
| 28058 | chrY | 13480731 | . | C | T   | 824.90   | PASS          | AC=2;AF=0.031;AN=64;BaseQRankSum= |
| 28059 | chrY | 13480737 | . | C | A   | 445.90   | my_snp_filter | AC=4;AF=0.067;AN=60;BaseQ         |
| 28060 | chrY | 13480739 | . | G | A   | 177.91   | PASS          | AC=1;AF=0.021;AN=48;BaseQRankSum= |
| 28061 | chrY | 13480740 | . | A | G,T | 8465.76  | PASS          | AC=7,1;AF=0.167,0.024;AN=42;BaseQ |
| 28062 | chrY | 13480741 | . | G | T   | 311.25   | PASS          | AC=1;AF=0.017;AN=60;BaseQRankSum= |
| 28063 | chrY | 13480744 | . | A | C   | 308.82   | PASS          | AC=1;AF=0.016;AN=64;BaseQRankSum= |
| 28064 | chrY | 13480745 | . | T | C   | 834.55   | PASS          | AC=4;AF=0.063;AN=64;BaseQRankSum= |
| 28065 | chrY | 13480746 | . | C | G   | 1058.28  | PASS          | AC=2;AF=0.032;AN=62;BaseQRankSum= |
| 28066 | chrY | 13480748 | . | G | C   | 307.80   | PASS          | AC=1;AF=0.016;AN=64;BaseQRankSum= |
| 28067 | chrY | 13480752 | . | A | T   | 782.37   | my_snp_filter | AC=4;AF=0.065;AN=62;BaseQ         |
| 28068 | chrY | 13480761 | . | C | T   | 174.64   | PASS          | AC=2;AF=0.038;AN=52;BaseQRankSum= |
| 28069 | chrY | 13480767 | . | T | C   | 827.26   | PASS          | AC=4;AF=0.069;AN=58;BaseQRankSum= |
| 28070 | chrY | 13480768 | . | G | T   | 961.36   | PASS          | AC=5;AF=0.096;AN=52;BaseQRankSum= |
| 28071 | chrY | 13480769 | . | C | A   | 373.21   | PASS          | AC=2;AF=0.040;AN=50;BaseQRankSum= |
| 28072 | chrY | 13480771 | . | G | A   | 980.92   | PASS          | AC=4;AF=0.071;AN=56;BaseQRankSum= |
| 28073 | chrY | 13480773 | . | C | T   | 1354.43  | PASS          | AC=2;AF=0.036;AN=56;BaseQRankSum= |
| 28074 | chrY | 13480774 | . | A | C   | 308.96   | PASS          | AC=2;AF=0.037;AN=54;BaseQRankSum= |
| 28075 | chrY | 13480775 | . | A | G   | 7223.35  | PASS          | AC=7;AF=0.175;AN=40;BaseQRankSum= |
| 28076 | chrY | 13480777 | . | A | G   | 311.77   | PASS          | AC=1;AF=0.018;AN=56;BaseQRankSum= |
| 28077 | chrY | 13480780 | . | C | T   | 708.32   | PASS          | AC=4;AF=0.071;AN=56;BaseQRankSum= |
| 28078 | chrY | 13480782 | . | G | C   | 630.10   | PASS          | AC=1;AF=0.018;AN=56;BaseQRankSum= |
| 28079 | chrY | 13480785 | . | A | G   | 308.33   | PASS          | AC=1;AF=0.018;AN=56;BaseQRankSum= |
| 28080 | chrY | 13480787 | . | A | G   | 565.75   | PASS          | AC=2;AF=0.037;AN=54;BaseQRankSum= |
| 28081 | chrY | 13480788 | . | G | A   | 316.64   | PASS          | AC=2;AF=0.036;AN=56;BaseQRankSum= |
| 28082 | chrY | 13480790 | . | C | A   | 247.34   | PASS          | AC=7;AF=0.130;AN=54;BaseQRankSum= |
| 28083 | chrY | 13480793 | . | G | C   | 265.27   | PASS          | AC=1;AF=0.019;AN=54;BaseQRankSum= |
| 28084 | chrY | 13480796 | . | T | C   | 1487.93  | my_snp_filter | AC=2;AF=0.036;AN=56;BaseQ         |
| 28085 | chrY | 13480798 | . | A | G,T | 916.22   | my_snp_filter | AC=2,2;AF=0.037,0.037;AN=         |
| 28086 | chrY | 13480801 | . | T | C   | 221.34   | my_snp_filter | AC=1;AF=0.019;AN=54;BaseQ         |
| 28087 | chrY | 13480802 | . | C | A   | 742.37   | PASS          | AC=3;AF=0.054;AN=56;BaseQRankSum= |
| 28088 | chrY | 13480804 | . | C | A   | 1509.59  | PASS          | AC=2;AF=0.036;AN=56;BaseQRankSum= |
| 28089 | chrY | 13480805 | . | C | T   | 196.96   | my_snp_filter | AC=2;AF=0.037;AN=54;BaseQ         |
| 28090 | chrY | 13480807 | . | G | C   | 1665.64  | PASS          | AC=2;AF=0.037;AN=54;BaseQRankSum= |
| 28091 | chrY | 13480808 | . | C | T   | 187.30   | my_snp_filter | AC=3;AF=0.058;AN=52;BaseQ         |
| 28092 | chrY | 13480810 | . | T | C   | 309.29   | PASS          | AC=1;AF=0.018;AN=56;BaseQRankSum= |
| 28093 | chrY | 13480813 | . | T | C   | 309.38   | PASS          | AC=1;AF=0.018;AN=56;BaseQRankSum= |
| 28094 | chrY | 13480816 | . | C | T   | 263.36   | PASS          | AC=1;AF=0.019;AN=52;BaseQRankSum= |
| 28095 | chrY | 13480821 | . | G | A   | 308.31   | my_snp_filter | AC=1;AF=0.017;AN=60;BaseQ         |
| 28096 | chrY | 13480822 | . | A | T   | 308.93   | my_snp_filter | AC=1;AF=0.017;AN=58;BaseQ         |
| 28097 | chrY | 13480826 | . | A | G   | 309.11   | PASS          | AC=1;AF=0.017;AN=58;BaseQRankSum= |
| 28098 | chrY | 13480827 | . | T | A   | 307.83   | PASS          | AC=1;AF=0.017;AN=60;BaseQRankSum= |
| 28099 | chrY | 13480830 | . | C | A   | 1203.74  | my_snp_filter | AC=2;AF=0.032;AN=62;BaseQ         |
| 28100 | chrY | 13480831 | . | A | G   | 703.25   | my_snp_filter | AC=3;AF=0.048;AN=62;BaseQ         |
| 28101 | chrY | 13480832 | . | C | A   | 228.24   | my_snp_filter | AC=3;AF=0.050;AN=60;BaseQ         |
| 28102 | chrY | 13480837 | . | C | A   | 779.04   | my_snp_filter | AC=3;AF=0.050;AN=60;BaseQ         |
| 28103 | chrY | 13480838 | . | C | T   | 1667.21  | PASS          | AC=7;AF=0.121;AN=58;BaseQRankSum= |
| 28104 | chrY | 13480840 | . | C | A   | 313.49   | PASS          | AC=1;AF=0.016;AN=62;BaseQRankSum= |
| 28105 | chrY | 13480842 | . | G | T,C | 1025.12  | my_snp_filter | AC=3,1;AF=0.050,0.017;AN=         |
| 28106 | chrY | 13480844 | . | A | G   | 585.11   | my_snp_filter | AC=2;AF=0.032;AN=62;BaseQ         |
| 28107 | chrY | 13480845 | . | G | C   | 94.48    | my_snp_filter | AC=1;AF=0.017;AN=60;BaseQ         |
| 28108 | chrY | 13480851 | . | G | A   | 143.49   | my_snp_filter | AC=2;AF=0.037;AN=54;BaseQ         |
| 28109 | chrY | 13480855 | . | A | C   | 810.63   | my_snp_filter | AC=3;AF=0.052;AN=58;BaseQ         |
| 28110 | chrY | 13480856 | . | G | A   | 692.92   | PASS          | AC=2;AF=0.033;AN=60;BaseQRankSum= |
| 28111 | chrY | 13480858 | . | C | A   | 217.63   | my_snp_filter | AC=1;AF=0.017;AN=58;BaseQ         |
| 28112 | chrY | 13480859 | . | A | T   | 1144.32  | my_snp_filter | AC=3;AF=0.047;AN=64;BaseQ         |
| 28113 | chrY | 13480861 | . | G | A   | 387.86   | PASS          | AC=2;AF=0.031;AN=64;BaseQRankSum= |
| 28114 | chrY | 13480862 | . | A | T,G | 280.51   | my_snp_filter | AC=2,1;AF=0.032,0.016;AN=         |
| 28115 | chrY | 13480863 | . | G | T   | 157.17   | my_snp_filter | AC=1;AF=0.016;AN=64;BaseQ         |
| 28116 | chrY | 13480866 | . | C | T   | 83.91    | my_snp_filter | AC=1;AF=0.015;AN=66;BaseQ         |
| 28117 | chrY | 13480867 | . | C | T   | 110.30   | my_snp_filter | AC=1;AF=0.017;AN=60;BaseQ         |
| 28118 | chrY | 13480871 | . | A | G   | 304.88   | my_snp_filter | AC=1;AF=0.015;AN=66;BaseQ         |
| 28119 | chrY | 13480872 | . | C | A   | 1027.41  | my_snp_filter | AC=3;AF=0.047;AN=64;BaseQ         |
| 28120 | chrY | 13480874 | . | T | A   | 865.63   | my_snp_filter | AC=4;AF=0.063;AN=64;BaseQ         |

|       |      |          |   |   |       |          |               |                                    |
|-------|------|----------|---|---|-------|----------|---------------|------------------------------------|
| 28121 | chrY | 13480875 | . | G | A     | 804.72   | my_snp_filter | AC=4;AF=0.065;AN=62;BaseQ          |
| 28122 | chrY | 13480876 | . | G | T     | 113.37   | my_snp_filter | AC=1;AF=0.017;AN=60;BaseQ          |
| 28123 | chrY | 13480879 | . | G | T     | 926.91   | my_snp_filter | AC=3;AF=0.048;AN=62;BaseQ          |
| 28124 | chrY | 13480881 | . | T | A     | 41.42    | my_snp_filter | AC=1;AF=0.016;AN=64;BaseQ          |
| 28125 | chrY | 13480882 | . | C | G     | 41.18    | my_snp_filter | AC=1;AF=0.015;AN=66;BaseQ          |
| 28126 | chrY | 13480890 | . | A | G     | 862.29   | my_snp_filter | AC=2;AF=0.031;AN=64;BaseQ          |
| 28127 | chrY | 13480891 | . | G | A,T   | 1022.11  | my_snp_filter | AC=2,2;AF=0.033,0.033;AN=          |
| 28128 | chrY | 13480895 | . | T | C     | 62.63    | my_snp_filter | AC=1;AF=0.015;AN=66;BaseQ          |
| 28129 | chrY | 13480900 | . | C | T     | 906.44   | my_snp_filter | AC=2;AF=0.029;AN=68;BaseQ          |
| 28130 | chrY | 13480905 | . | C | T     | 2674.66  | my_snp_filter | AC=6;AF=0.100;AN=60;BaseQ          |
| 28131 | chrY | 13480906 | . | C | T     | 427.79   | PASS          | AC=2;AF=0.030;AN=66;BaseQRankSum=  |
| 28132 | chrY | 13480907 | . | C | A     | 343.07   | PASS          | AC=1;AF=0.016;AN=64;BaseQRankSum=  |
| 28133 | chrY | 13480908 | . | C | T     | 1515.67  | PASS          | AC=3;AF=0.047;AN=64;BaseQRankSum=  |
| 28134 | chrY | 13480911 | . | T | G     | 246.72   | PASS          | AC=1;AF=0.015;AN=68;BaseQRankSum=  |
| 28135 | chrY | 13480913 | . | T | A     | 267.99   | PASS          | AC=1;AF=0.015;AN=68;BaseQRankSum=  |
| 28136 | chrY | 13480916 | . | C | A     | 1169.31  | my_snp_filter | AC=3;AF=0.048;AN=62;BaseQ          |
| 28137 | chrY | 13480921 | . | G | C,A,T | 12322.17 | PASS          | AC=7,1,1;AF=0.152,0.022,0          |
| 28138 | chrY | 13480925 | . | G | A,T   | 375.82   | my_snp_filter | AC=2,2;AF=0.029,0.029;AN=          |
| 28139 | chrY | 13480927 | . | C | T,A   | 2769.81  | PASS          | AC=2,6;AF=0.030,0.091;AN=66;BaseQ  |
| 28140 | chrY | 13480930 | . | G | A,T   | 1341.03  | PASS          | AC=3,2;AF=0.047,0.031;AN=64;BaseQ  |
| 28141 | chrY | 13480931 | . | G | A     | 222.13   | my_snp_filter | AC=2;AF=0.029;AN=70;BaseQ          |
| 28142 | chrY | 13480932 | . | G | C,A   | 227.82   | my_snp_filter | AC=2,1;AF=0.029,0.015;AN=          |
| 28143 | chrY | 13480936 | . | C | A,T   | 563.27   | PASS          | AC=1,3;AF=0.015,0.044;AN=68;BaseQ  |
| 28144 | chrY | 13480939 | . | C | G     | 654.25   | PASS          | AC=3;AF=0.043;AN=70;BaseQRankSum=  |
| 28145 | chrY | 13480949 | . | A | C,*   | 246.81   | PASS          | AC=1,1;AF=0.015,0.015;AN=68;BaseQ  |
| 28146 | chrY | 13480951 | . | C | A     | 236.24   | PASS          | AC=1;AF=0.015;AN=66;BaseQRankSum=  |
| 28147 | chrY | 13480953 | . | G | C     | 89.17    | PASS          | AC=1;AF=0.016;AN=62;BaseQRankSum=  |
| 28148 | chrY | 13480955 | . | G | A     | 34.66    | my_snp_filter | AC=1;AF=0.016;AN=62;BaseQ          |
| 28149 | chrY | 13480959 | . | A | G     | 106.37   | my_snp_filter | AC=2;AF=0.032;AN=62;BaseQ          |
| 28150 | chrY | 13480961 | . | A | T,*   | 198.90   | PASS          | AC=1,1;AF=0.017,0.017;AN=60;BaseQ  |
| 28151 | chrY | 13480965 | . | C | G     | 6739.14  | PASS          | AC=12;AF=0.261;AN=46;BaseQRankSum= |
| 28152 | chrY | 13480967 | . | C | T     | 169.47   | PASS          | AC=1;AF=0.017;AN=60;BaseQRankSum=  |
| 28153 | chrY | 13480972 | . | G | A     | 475.20   | PASS          | AC=1;AF=0.016;AN=64;BaseQRankSum=  |
| 28154 | chrY | 13480974 | . | C | T     | 206.23   | PASS          | AC=1;AF=0.015;AN=66;BaseQRankSum=  |
| 28155 | chrY | 13480977 | . | C | T     | 390.91   | PASS          | AC=1;AF=0.016;AN=64;BaseQRankSum=  |
| 28156 | chrY | 13480979 | . | A | G,T   | 6644.81  | PASS          | AC=9,1;AF=0.141,0.016;AN=64;BaseQ  |
| 28157 | chrY | 13480983 | . | C | A     | 418.21   | my_snp_filter | AC=8;AF=0.114;AN=70;BaseQ          |
| 28158 | chrY | 13480984 | . | C | T     | 66.71    | my_snp_filter | AC=2;AF=0.029;AN=70;BaseQ          |
| 28159 | chrY | 13480986 | . | G | C     | 145.41   | PASS          | AC=1;AF=0.014;AN=70;BaseQRankSum=  |
| 28160 | chrY | 13480987 | . | A | G,*   | 429.29   | PASS          | AC=1,1;AF=0.014,0.014;AN=70;BaseQ  |
| 28161 | chrY | 13480989 | . | T | C     | 6895.92  | PASS          | AC=11;AF=0.162;AN=68;BaseQRankSum= |
| 28162 | chrY | 13480990 | . | C | A,T   | 292.91   | my_snp_filter | AC=4,1;AF=0.057,0.014;AN=          |
| 28163 | chrY | 13480991 | . | T | C     | 95.49    | my_snp_filter | AC=1;AF=0.014;AN=70;BaseQ          |
| 28164 | chrY | 13480992 | . | A | T     | 81.52    | PASS          | AC=1;AF=0.014;AN=70;BaseQRankSum=  |
| 28165 | chrY | 13480993 | . | G | C     | 301.90   | PASS          | AC=1;AF=0.014;AN=70;BaseQRankSum=  |
| 28166 | chrY | 13480994 | . | A | T,G   | 259.74   | my_snp_filter | AC=4,1;AF=0.057,0.014;AN=          |
| 28167 | chrY | 13480995 | . | C | G,T   | 690.75   | PASS          | AC=2,4;AF=0.029,0.057;AN=70;BaseQ  |
| 28168 | chrY | 13480999 | . | A | T,G   | 1071.56  | PASS          | AC=3,2;AF=0.044,0.029;AN=68;BaseQ  |
| 28169 | chrY | 13481000 | . | G | T     | 145.03   | PASS          | AC=1;AF=0.014;AN=70;BaseQRankSum=  |
| 28170 | chrY | 13481001 | . | T | A     | 90.53    | my_snp_filter | AC=1;AF=0.014;AN=70;BaseQ          |
| 28171 | chrY | 13481003 | . | A | T     | 93.26    | my_snp_filter | AC=1;AF=0.014;AN=70;BaseQ          |
| 28172 | chrY | 13481004 | . | C | T     | 95.52    | PASS          | AC=1;AF=0.014;AN=70;BaseQRankSum=  |
| 28173 | chrY | 13481005 | . | A | C     | 78.88    | PASS          | AC=1;AF=0.014;AN=70;BaseQRankSum=  |
| 28174 | chrY | 13481007 | . | C | G     | 301.52   | PASS          | AC=1;AF=0.014;AN=70;BaseQRankSum=  |
| 28175 | chrY | 13481009 | . | G | A     | 508.55   | PASS          | AC=1;AF=0.014;AN=70;BaseQRankSum=  |
| 28176 | chrY | 13481016 | . | G | T     | 141.49   | PASS          | AC=1;AF=0.014;AN=70;BaseQRankSum=  |
| 28177 | chrY | 13481021 | . | G | T     | 75.50    | PASS          | AC=1;AF=0.014;AN=70;BaseQRankSum=  |
| 28178 | chrY | 13481041 | . | G | A     | 927.78   | PASS          | AC=2;AF=0.029;AN=70;BaseQRankSum=  |
| 28179 | chrY | 13481060 | . | T | G     | 298.06   | my_snp_filter | AC=3;AF=0.043;AN=70;BaseQ          |
| 28180 | chrY | 13481073 | . | T | A     | 2102.18  | PASS          | AC=7;AF=0.106;AN=66;BaseQRankSum=  |
| 28181 | chrY | 13481074 | . | T | A     | 77.91    | PASS          | AC=1;AF=0.015;AN=68;BaseQRankSum=  |
| 28182 | chrY | 13481079 | . | A | T     | 1768.48  | PASS          | AC=6;AF=0.088;AN=68;BaseQRankSum=  |
| 28183 | chrY | 13481082 | . | T | G,A   | 1154.77  | PASS          | AC=3,4;AF=0.045,0.061;AN=66;BaseQ  |
| 28184 | chrY | 13481084 | . | G | A     | 45.27    | PASS          | AC=1;AF=0.014;AN=70;BaseQRankSum=  |
| 28185 | chrY | 13481089 | . | T | G     | 1703.72  | PASS          | AC=7;AF=0.103;AN=68;BaseQRankSum=  |
| 28186 | chrY | 13481092 | . | T | A     | 120.03   | PASS          | AC=1;AF=0.014;AN=70;BaseQRankSum=  |
| 28187 | chrY | 13481121 | . | C | G     | 158.93   | PASS          | AC=1;AF=0.014;AN=70;BaseQRankSum=  |
| 28188 | chrY | 13481135 | . | A | G     | 416.51   | PASS          | AC=4;AF=0.061;AN=66;BaseQRankSum=  |
| 28189 | chrY | 13481138 | . | T | A     | 44.88    | PASS          | AC=1;AF=0.014;AN=70;BaseQRankSum=  |
| 28190 | chrY | 13481139 | . | T | C     | 45.65    | PASS          | AC=1;AF=0.014;AN=70;BaseQRankSum=  |
| 28191 | chrY | 13481142 | . | A | G     | 34.83    | my_snp_filter | AC=1;AF=0.014;AN=70;BaseQ          |
| 28192 | chrY | 13481156 | . | G | C     | 274.73   | PASS          | AC=4;AF=0.069;AN=58;BaseQRankSum=  |
| 28193 | chrY | 13481161 | . | C | A     | 46.66    | PASS          | AC=1;AF=0.014;AN=70;BaseQRankSum=  |
| 28194 | chrY | 13481164 | . | G | T     | 173.21   | PASS          | AC=2;AF=0.036;AN=56;BaseQRankSum=  |
| 28195 | chrY | 13481166 | . | A | G     | 91.32    | PASS          | AC=2;AF=0.029;AN=68;BaseQRankSum=  |
| 28196 | chrY | 13481179 | . | C | T     | 74.45    | PASS          | AC=1;AF=0.014;AN=70;BaseQRankSum=  |

|       |      |          |   |   |     |         |               |                                    |
|-------|------|----------|---|---|-----|---------|---------------|------------------------------------|
| 28197 | chrY | 13481181 | . | C | T   | 92.44   | PASS          | AC=1;AF=0.017;AN=60;BaseQRankSum=  |
| 28198 | chrY | 13481184 | . | G | T   | 241.22  | PASS          | AC=2;AF=0.037;AN=54;BaseQRankSum=  |
| 28199 | chrY | 13481201 | . | C | G   | 125.72  | PASS          | AC=1;AF=0.014;AN=70;BaseQRankSum=  |
| 28200 | chrY | 13481218 | . | C | A   | 36.81   | my_snp_filter | AC=1;AF=0.014;AN=70;BaseQ          |
| 28201 | chrY | 13481227 | . | A | G   | 92.49   | PASS          | AC=1;AF=0.019;AN=52;BaseQRankSum=  |
| 28202 | chrY | 13481250 | . | C | T   | 42.80   | PASS          | AC=1;AF=0.014;AN=70;BaseQRankSum=  |
| 28203 | chrY | 13481308 | . | G | T   | 601.65  | PASS          | AC=10;AF=0.143;AN=70;BaseQRankSum= |
| 28204 | chrY | 13481312 | . | A | T   | 95.33   | PASS          | AC=3;AF=0.047;AN=64;BaseQRankSum=  |
| 28205 | chrY | 13481313 | . | A | T   | 105.05  | PASS          | AC=3;AF=0.063;AN=48;BaseQRankSum=  |
| 28206 | chrY | 13481342 | . | T | A   | 1260.53 | PASS          | AC=7;AF=0.184;AN=38;BaseQRankSum=  |
| 28207 | chrY | 13481355 | . | G | T   | 735.54  | PASS          | AC=5;AF=0.074;AN=68;BaseQRankSum=  |
| 28208 | chrY | 13481362 | . | C | A   | 119.86  | PASS          | AC=1;AF=0.016;AN=64;BaseQRankSum=  |
| 28209 | chrY | 13481363 | . | C | A   | 938.42  | PASS          | AC=6;AF=0.115;AN=52;BaseQRankSum=  |
| 28210 | chrY | 13481366 | . | G | T   | 181.50  | PASS          | AC=1;AF=0.014;AN=70;BaseQRankSum=  |
| 28211 | chrY | 13481386 | . | A | T,C | 688.04  | PASS          | AC=5,1;AF=0.156,0.031;AN=32;BaseQ  |
| 28212 | chrY | 13481395 | . | G | T   | 337.98  | PASS          | AC=4;AF=0.057;AN=70;BaseQRankSum=  |
| 28213 | chrY | 13481402 | . | C | A   | 225.68  | PASS          | AC=4;AF=0.059;AN=68;BaseQRankSum=  |
| 28214 | chrY | 13481403 | . | T | A   | 151.53  | PASS          | AC=2;AF=0.042;AN=48;BaseQRankSum=  |
| 28215 | chrY | 13481407 | . | A | C   | 272.87  | PASS          | AC=6;AF=0.200;AN=30;BaseQRankSum=  |
| 28216 | chrY | 13481410 | . | G | C   | 60.66   | PASS          | AC=2;AF=0.032;AN=62;BaseQRankSum=  |
| 28217 | chrY | 13481418 | . | T | A   | 149.28  | PASS          | AC=3;AF=0.043;AN=70;BaseQRankSum=  |
| 28218 | chrY | 13481421 | . | C | T   | 40.93   | PASS          | AC=1;AF=0.014;AN=70;BaseQRankSum=  |
| 28219 | chrY | 13481423 | . | T | A   | 163.48  | PASS          | AC=1;AF=0.014;AN=70;BaseQRankSum=  |
| 28220 | chrY | 13481425 | . | G | C   | 297     | PASS          | AC=2;AF=0.045;AN=44;BaseQRankSum=  |
| 28221 | chrY | 13481427 | . | T | A   | 245.03  | PASS          | AC=2;AF=0.045;AN=44;BaseQRankSum=  |
| 28222 | chrY | 13481429 | . | A | G   | 40.90   | PASS          | AC=1;AF=0.015;AN=68;BaseQRankSum=  |
| 28223 | chrY | 13481431 | . | C | A   | 245.95  | PASS          | AC=2;AF=0.048;AN=42;BaseQRankSum=  |
| 28224 | chrY | 13481435 | . | G | A   | 41.75   | PASS          | AC=1;AF=0.015;AN=68;BaseQRankSum=  |
| 28225 | chrY | 13481438 | . | G | A   | 54.22   | my_snp_filter | AC=1;AF=0.015;AN=68;BaseQ          |
| 28226 | chrY | 13481445 | . | G | C   | 41.09   | PASS          | AC=1;AF=0.014;AN=70;BaseQRankSum=  |
| 28227 | chrY | 13481449 | . | T | C   | 41.58   | PASS          | AC=1;AF=0.014;AN=70;BaseQRankSum=  |
| 28228 | chrY | 13481453 | . | C | T   | 2474.57 | PASS          | AC=6;AF=0.231;AN=26;BaseQRankSum=  |
| 28229 | chrY | 13481455 | . | C | T   | 371.15  | PASS          | AC=2;AF=0.077;AN=26;BaseQRankSum=  |
| 28230 | chrY | 13481459 | . | T | A,* | 554.55  | PASS          | AC=1,1;AF=0.056,0.056;AN=18;BaseQ  |
| 28231 | chrY | 13481461 | . | T | A,* | 554.55  | PASS          | AC=1,1;AF=0.056,0.056;AN=18;BaseQ  |
| 28232 | chrY | 13481467 | . | A | G   | 43.11   | PASS          | AC=1;AF=0.014;AN=70;BaseQRankSum=  |
| 28233 | chrY | 13481499 | . | T | G   | 4079.96 | my_snp_filter | AC=16;AF=0.400;AN=40;BaseQ         |
| 28234 | chrY | 13481504 | . | G | A   | 4115.35 | my_snp_filter | AC=15;AF=0.288;AN=52;BaseQ         |
| 28235 | chrY | 13481505 | . | C | A   | 30.96   | my_snp_filter | AC=1;AF=0.014;AN=70;BaseQ          |
| 28236 | chrY | 13481507 | . | G | A   | 60.78   | PASS          | AC=2;AF=0.029;AN=68;BaseQRankSum=  |
| 28237 | chrY | 13481508 | . | T | G   | 4371.50 | my_snp_filter | AC=14;AF=0.368;AN=38;BaseQ         |
| 28238 | chrY | 13481514 | . | C | T   | 4287.98 | my_snp_filter | AC=15;AF=0.375;AN=40;BaseQ         |
| 28239 | chrY | 13481516 | . | C | A   | 71.61   | PASS          | AC=1;AF=0.015;AN=68;BaseQRankSum=  |
| 28240 | chrY | 13481529 | . | T | C   | 45.14   | my_snp_filter | AC=2;AF=0.029;AN=70;BaseQ          |
| 28241 | chrY | 13481556 | . | C | G,A | 2388.92 | my_snp_filter | AC=12,2;AF=0.194,0.032;AN          |
| 28242 | chrY | 13481562 | . | G | C   | 31.05   | my_snp_filter | AC=1;AF=0.014;AN=70;BaseQ          |
| 28243 | chrY | 13481573 | . | T | C   | 1927.36 | my_snp_filter | AC=8;AF=0.154;AN=52;BaseQ          |
| 28244 | chrY | 13481577 | . | G | A   | 37.52   | PASS          | AC=1;AF=0.014;AN=70;BaseQRankSum=  |
| 28245 | chrY | 13481583 | . | T | A   | 298.73  | PASS          | AC=1;AF=0.014;AN=70;BaseQRankSum=  |
| 28246 | chrY | 13481584 | . | C | A   | 446.39  | PASS          | AC=4;AF=0.061;AN=66;BaseQRankSum=  |
| 28247 | chrY | 13481585 | . | A | C   | 342.02  | PASS          | AC=3;AF=0.043;AN=70;BaseQRankSum=  |
| 28248 | chrY | 13481591 | . | C | G   | 119.14  | PASS          | AC=1;AF=0.014;AN=70;BaseQRankSum=  |
| 28249 | chrY | 13481592 | . | C | A   | 40.73   | PASS          | AC=1;AF=0.015;AN=68;BaseQRankSum=  |
| 28250 | chrY | 13481593 | . | C | T   | 771.88  | PASS          | AC=6;AF=0.097;AN=62;BaseQRankSum=  |
| 28251 | chrY | 13481595 | . | T | C   | 714.79  | PASS          | AC=6;AF=0.107;AN=56;BaseQRankSum=  |
| 28252 | chrY | 13481596 | . | A | G   | 679.68  | my_snp_filter | AC=3;AF=0.052;AN=58;BaseQ          |
| 28253 | chrY | 13481603 | . | G | C   | 258.98  | PASS          | AC=2;AF=0.029;AN=70;BaseQRankSum=  |
| 28254 | chrY | 13481605 | . | G | A   | 91.42   | PASS          | AC=1;AF=0.014;AN=70;BaseQRankSum=  |
| 28255 | chrY | 13481607 | . | A | C   | 524.99  | PASS          | AC=7;AF=0.113;AN=62;BaseQRankSum=  |
| 28256 | chrY | 13481613 | . | C | A   | 514.15  | PASS          | AC=3;AF=0.052;AN=58;BaseQRankSum=  |
| 28257 | chrY | 13481620 | . | A | T   | 135.24  | PASS          | AC=1;AF=0.014;AN=70;BaseQRankSum=  |
| 28258 | chrY | 13481626 | . | T | C   | 718.76  | PASS          | AC=3;AF=0.052;AN=58;BaseQRankSum=  |
| 28259 | chrY | 13481630 | . | G | A   | 425.50  | PASS          | AC=3;AF=0.043;AN=70;BaseQRankSum=  |
| 28260 | chrY | 13481638 | . | C | A   | 576.07  | PASS          | AC=3;AF=0.052;AN=58;BaseQRankSum=  |
| 28261 | chrY | 13481642 | . | G | A   | 209.55  | PASS          | AC=2;AF=0.031;AN=64;BaseQRankSum=  |
| 28262 | chrY | 13481644 | . | A | T   | 352.50  | PASS          | AC=3;AF=0.043;AN=70;BaseQRankSum=  |
| 28263 | chrY | 13481645 | . | G | C   | 130.54  | PASS          | AC=1;AF=0.014;AN=70;BaseQRankSum=  |
| 28264 | chrY | 13481650 | . | T | G   | 846.18  | PASS          | AC=3;AF=0.048;AN=62;BaseQRankSum=  |
| 28265 | chrY | 13481651 | . | T | C   | 302.85  | PASS          | AC=3;AF=0.048;AN=62;BaseQRankSum=  |
| 28266 | chrY | 13481657 | . | C | T   | 72.40   | my_snp_filter | AC=2;AF=0.029;AN=70;BaseQ          |
| 28267 | chrY | 13481665 | . | G | T   | 51.97   | my_snp_filter | AC=1;AF=0.014;AN=70;BaseQ          |
| 28268 | chrY | 13481670 | . | C | G   | 49.29   | my_snp_filter | AC=1;AF=0.014;AN=70;BaseQ          |
| 28269 | chrY | 13481717 | . | A | G   | 96.46   | PASS          | AC=2;AF=0.029;AN=70;BaseQRankSum=  |
| 28270 | chrY | 13481723 | . | A | C   | 114.19  | PASS          | AC=2;AF=0.029;AN=68;BaseQRankSum=  |
| 28271 | chrY | 13481728 | . | C | T   | 111.29  | PASS          | AC=2;AF=0.029;AN=68;BaseQRankSum=  |
| 28272 | chrY | 13481732 | . | G | C   | 120.38  | PASS          | AC=2;AF=0.031;AN=64;BaseQRankSum=  |

|       |      |          |   |   |     |          |               |                                    |
|-------|------|----------|---|---|-----|----------|---------------|------------------------------------|
| 28273 | chrY | 13481835 | . | T | C   | 313.98   | PASS          | AC=10;AF=0.147;AN=68;BaseQRankSum= |
| 28274 | chrY | 13481853 | . | A | C   | 219.39   | PASS          | AC=6;AF=0.097;AN=62;BaseQRankSum=  |
| 28275 | chrY | 13481856 | . | G | T   | 285.52   | PASS          | AC=5;AF=0.096;AN=52;BaseQRankSum=  |
| 28276 | chrY | 13481860 | . | T | A   | 212.49   | PASS          | AC=4;AF=0.083;AN=48;BaseQRankSum=  |
| 28277 | chrY | 13481861 | . | C | A   | 183.20   | PASS          | AC=4;AF=0.087;AN=46;BaseQRankSum=  |
| 28278 | chrY | 13481864 | . | T | A   | 174.84   | PASS          | AC=4;AF=0.069;AN=58;BaseQRankSum=  |
| 28279 | chrY | 13481892 | . | A | G   | 35.18    | PASS          | AC=1;AF=0.016;AN=62;BaseQRankSum=  |
| 28280 | chrY | 13481900 | . | G | C   | 39.48    | PASS          | AC=1;AF=0.029;AN=34;BaseQRankSum=  |
| 28281 | chrY | 13481926 | . | G | T   | 43.87    | PASS          | AC=1;AF=0.015;AN=66;BaseQRankSum=  |
| 28282 | chrY | 13482053 | . | C | T   | 300.78   | my_snp_filter | AC=1;AF=0.014;AN=70;BaseQ          |
| 28283 | chrY | 13482085 | . | C | A   | 8476.97  | PASS          | AC=15;AF=0.214;AN=70;BaseQRankSum= |
| 28284 | chrY | 13482100 | . | C | T   | 42.04    | PASS          | AC=1;AF=0.014;AN=70;BaseQRankSum=  |
| 28285 | chrY | 13482112 | . | G | T   | 63.77    | PASS          | AC=2;AF=0.029;AN=70;BaseQRankSum=  |
| 28286 | chrY | 13482120 | . | C | A   | 334.74   | my_snp_filter | AC=5;AF=0.071;AN=70;BaseQ          |
| 28287 | chrY | 13482125 | . | A | T   | 332.92   | PASS          | AC=3;AF=0.043;AN=70;BaseQRankSum=  |
| 28288 | chrY | 13482137 | . | G | A   | 56.92    | PASS          | AC=1;AF=0.014;AN=70;BaseQRankSum=  |
| 28289 | chrY | 13482138 | . | C | G   | 699.73   | PASS          | AC=3;AF=0.043;AN=70;BaseQRankSum=  |
| 28290 | chrY | 13482139 | . | T | G   | 3687.74  | PASS          | AC=1;AF=0.014;AN=70;BaseQRankSum=  |
| 28291 | chrY | 13482140 | . | C | A   | 1750.83  | my_snp_filter | AC=11;AF=0.157;AN=70;Base          |
| 28292 | chrY | 13482143 | . | G | T   | 3917.68  | PASS          | AC=3;AF=0.043;AN=70;BaseQRankSum=  |
| 28293 | chrY | 13482144 | . | T | G   | 434.36   | my_snp_filter | AC=5;AF=0.071;AN=70;BaseQ          |
| 28294 | chrY | 13482148 | . | C | A   | 538.37   | PASS          | AC=6;AF=0.086;AN=70;BaseQRankSum=  |
| 28295 | chrY | 13482149 | . | A | C   | 3823.28  | PASS          | AC=4;AF=0.057;AN=70;BaseQRankSum=  |
| 28296 | chrY | 13482150 | . | G | A   | 1993.80  | my_snp_filter | AC=11;AF=0.157;AN=70;Base          |
| 28297 | chrY | 13482153 | . | C | T   | 638.60   | PASS          | AC=6;AF=0.088;AN=68;BaseQRankSum=  |
| 28298 | chrY | 13482154 | . | T | A   | 1197.16  | PASS          | AC=5;AF=0.071;AN=70;BaseQRankSum=  |
| 28299 | chrY | 13482161 | . | A | T   | 3633.01  | PASS          | AC=3;AF=0.043;AN=70;BaseQRankSum=  |
| 28300 | chrY | 13482163 | . | C | T   | 13125.73 | PASS          | AC=11;AF=0.157;AN=70;Base          |
| 28301 | chrY | 13482167 | . | A | T   | 113.94   | my_snp_filter | AC=1;AF=0.014;AN=70;BaseQ          |
| 28302 | chrY | 13482171 | . | C | A   | 2484.83  | PASS          | AC=9;AF=0.129;AN=70;BaseQRankSum=  |
| 28303 | chrY | 13482172 | . | C | A   | 5899.76  | PASS          | AC=10;AF=0.143;AN=70;BaseQRankSum= |
| 28304 | chrY | 13482173 | . | T | G   | 976.93   | PASS          | AC=5;AF=0.071;AN=70;BaseQRankSum=  |
| 28305 | chrY | 13482175 | . | G | C   | 2968.70  | PASS          | AC=10;AF=0.143;AN=70;BaseQRankSum= |
| 28306 | chrY | 13482176 | . | G | A   | 47.92    | my_snp_filter | AC=3;AF=0.043;AN=70;BaseQ          |
| 28307 | chrY | 13482178 | . | G | C   | 1252.32  | PASS          | AC=6;AF=0.086;AN=70;BaseQRankSum=  |
| 28308 | chrY | 13482190 | . | T | G   | 5164.22  | PASS          | AC=10;AF=0.143;AN=70;BaseQRankSum= |
| 28309 | chrY | 13482191 | . | G | T   | 2048.04  | PASS          | AC=8;AF=0.114;AN=70;BaseQRankSum=  |
| 28310 | chrY | 13482199 | . | A | C   | 6116     | PASS          | AC=9;AF=0.129;AN=70;BaseQRankSum=  |
| 28311 | chrY | 13482204 | . | T | C,G | 7669.87  | PASS          | AC=11,3;AF=0.172,0.047;AN=64;Base  |
| 28312 | chrY | 13482205 | . | C | A   | 1118.95  | PASS          | AC=7;AF=0.103;AN=68;BaseQRankSum=  |
| 28313 | chrY | 13482207 | . | C | A   | 124.71   | PASS          | AC=2;AF=0.029;AN=70;BaseQRankSum=  |
| 28314 | chrY | 13482211 | . | A | T   | 7394.11  | PASS          | AC=11;AF=0.162;AN=68;BaseQRankSum= |
| 28315 | chrY | 13482223 | . | A | T   | 864.99   | PASS          | AC=4;AF=0.057;AN=70;BaseQRankSum=  |
| 28316 | chrY | 13482224 | . | G | C   | 82.66    | PASS          | AC=1;AF=0.014;AN=70;BaseQRankSum=  |
| 28317 | chrY | 13482226 | . | G | C,T | 9975.90  | PASS          | AC=9,3;AF=0.132,0.044;AN=68;BaseQ  |
| 28318 | chrY | 13482227 | . | T | A   | 9882.71  | PASS          | AC=10;AF=0.147;AN=68;BaseQRankSum= |
| 28319 | chrY | 13482231 | . | G | C   | 3620.21  | PASS          | AC=8;AF=0.114;AN=70;BaseQRankSum=  |
| 28320 | chrY | 13482235 | . | C | G   | 106.11   | PASS          | AC=1;AF=0.014;AN=70;BaseQRankSum=  |
| 28321 | chrY | 13482240 | . | C | A   | 35.45    | PASS          | AC=1;AF=0.014;AN=70;BaseQRankSum=  |
| 28322 | chrY | 13482241 | . | T | A   | 74.70    | my_snp_filter | AC=1;AF=0.014;AN=70;BaseQ          |
| 28323 | chrY | 13482242 | . | T | C   | 214.19   | my_snp_filter | AC=3;AF=0.043;AN=70;BaseQ          |
| 28324 | chrY | 13482243 | . | G | C   | 1280.14  | PASS          | AC=5;AF=0.071;AN=70;BaseQRankSum=  |
| 28325 | chrY | 13482255 | . | C | G,A | 12180.65 | PASS          | AC=8,3;AF=0.129,0.048;AN=          |
| 28326 | chrY | 13482257 | . | G | A   | 69.93    | my_snp_filter | AC=1;AF=0.014;AN=70;BaseQ          |
| 28327 | chrY | 13482268 | . | C | T   | 930.52   | my_snp_filter | AC=5;AF=0.071;AN=70;BaseQ          |
| 28328 | chrY | 13482270 | . | A | T   | 1038.86  | PASS          | AC=5;AF=0.071;AN=70;BaseQRankSum=  |
| 28329 | chrY | 13482276 | . | C | A   | 709.03   | my_snp_filter | AC=4;AF=0.057;AN=70;BaseQ          |
| 28330 | chrY | 13482286 | . | A | G   | 166.88   | my_snp_filter | AC=1;AF=0.014;AN=70;BaseQ          |
| 28331 | chrY | 13482288 | . | C | G   | 232.07   | PASS          | AC=3;AF=0.043;AN=70;BaseQRankSum=  |
| 28332 | chrY | 13482292 | . | T | C   | 207.97   | PASS          | AC=3;AF=0.043;AN=70;BaseQRankSum=  |
| 28333 | chrY | 13482297 | . | C | T   | 84.56    | my_snp_filter | AC=1;AF=0.014;AN=70;BaseQ          |
| 28334 | chrY | 13482298 | . | A | T   | 565.77   | PASS          | AC=5;AF=0.071;AN=70;BaseQRankSum=  |
| 28335 | chrY | 13482308 | . | C | A   | 53.28    | my_snp_filter | AC=3;AF=0.043;AN=70;BaseQ          |
| 28336 | chrY | 13482312 | . | G | A   | 1412.59  | PASS          | AC=4;AF=0.057;AN=70;BaseQRankSum=  |
| 28337 | chrY | 13482317 | . | T | C   | 112.23   | my_snp_filter | AC=3;AF=0.043;AN=70;BaseQ          |
| 28338 | chrY | 13482319 | . | A | C   | 126.60   | my_snp_filter | AC=2;AF=0.029;AN=70;BaseQ          |
| 28339 | chrY | 13482320 | . | G | A   | 214.59   | PASS          | AC=2;AF=0.029;AN=70;BaseQRankSum=  |
| 28340 | chrY | 13482322 | . | G | A   | 100.23   | my_snp_filter | AC=2;AF=0.029;AN=70;BaseQ          |
| 28341 | chrY | 13482323 | . | C | T   | 116.34   | my_snp_filter | AC=1;AF=0.014;AN=70;BaseQ          |
| 28342 | chrY | 13482327 | . | G | C   | 2252.43  | PASS          | AC=17;AF=0.243;AN=70;BaseQRankSum= |
| 28343 | chrY | 13482328 | . | A | G   | 1653.76  | PASS          | AC=4;AF=0.057;AN=70;BaseQRankSum=  |
| 28344 | chrY | 13482335 | . | A | C   | 78.31    | my_snp_filter | AC=2;AF=0.029;AN=68;BaseQ          |
| 28345 | chrY | 13482338 | . | A | T   | 136.59   | PASS          | AC=1;AF=0.015;AN=68;BaseQRankSum=  |
| 28346 | chrY | 13482342 | . | C | T   | 196.75   | PASS          | AC=2;AF=0.030;AN=66;BaseQRankSum=  |
| 28347 | chrY | 13482343 | . | C | T   | 157.05   | PASS          | AC=1;AF=0.015;AN=68;BaseQRankSum=  |
| 28348 | chrY | 13482344 | . | A | T,C | 13369.01 | PASS          | AC=10,11;AF=0.161,0.177;A          |

|       |      |          |   |   |     |          |               |                                   |
|-------|------|----------|---|---|-----|----------|---------------|-----------------------------------|
| 28349 | chrY | 13482347 | . | T | C   | 201.45   | my_snp_filter | AC=4;AF=0.057;AN=70;BaseQ         |
| 28350 | chrY | 13482351 | . | C | T   | 3479.50  | PASS          | AC=17;AF=0.258;AN=66;BaseQRankSum |
| 28351 | chrY | 13482353 | . | A | G   | 17529.52 | PASS          | AC=20;AF=0.345;AN=58;BaseQ        |
| 28352 | chrY | 13482355 | . | T | C   | 2279.76  | PASS          | AC=3;AF=0.043;AN=70;BaseQRankSum  |
| 28353 | chrY | 13482357 | . | C | A   | 40.41    | PASS          | AC=1;AF=0.014;AN=70;BaseQRankSum  |
| 28354 | chrY | 13482360 | . | G | T,C | 426.43   | my_snp_filter | AC=3,1;AF=0.043,0.014;AN=         |
| 28355 | chrY | 13482371 | . | G | A   | 747.72   | my_snp_filter | AC=7;AF=0.100;AN=70;BaseQ         |
| 28356 | chrY | 13482373 | . | A | C   | 17545.84 | PASS          | AC=20;AF=0.333;AN=60;BaseQ        |
| 28357 | chrY | 13482374 | . | A | C   | 171.16   | my_snp_filter | AC=3;AF=0.043;AN=70;BaseQ         |
| 28358 | chrY | 13482375 | . | C | G   | 158.52   | my_snp_filter | AC=3;AF=0.043;AN=70;BaseQ         |
| 28359 | chrY | 13482379 | . | G | A   | 198.77   | PASS          | AC=1;AF=0.014;AN=70;BaseQRankSum  |
| 28360 | chrY | 13482380 | . | G | C   | 138.93   | my_snp_filter | AC=1;AF=0.014;AN=70;BaseQ         |
| 28361 | chrY | 13482384 | . | T | G,C | 957.03   | my_snp_filter | AC=3,5;AF=0.043,0.071;AN=         |
| 28362 | chrY | 13482388 | . | T | A   | 1547.77  | PASS          | AC=3;AF=0.044;AN=68;BaseQRankSum  |
| 28363 | chrY | 13482394 | . | G | T   | 90.25    | my_snp_filter | AC=1;AF=0.014;AN=70;BaseQ         |
| 28364 | chrY | 13482395 | . | A | C   | 119.70   | my_snp_filter | AC=1;AF=0.014;AN=70;BaseQ         |
| 28365 | chrY | 13482396 | . | T | A   | 684.89   | PASS          | AC=4;AF=0.057;AN=70;BaseQRankSum  |
| 28366 | chrY | 13482401 | . | G | C   | 401.57   | my_snp_filter | AC=4;AF=0.057;AN=70;BaseQ         |
| 28367 | chrY | 13482406 | . | T | A   | 819.97   | PASS          | AC=3;AF=0.043;AN=70;BaseQRankSum  |
| 28368 | chrY | 13482410 | . | C | G,T | 365.89   | my_snp_filter | AC=2,3;AF=0.029,0.043;AN=         |
| 28369 | chrY | 13482411 | . | G | A   | 435.11   | my_snp_filter | AC=4;AF=0.057;AN=70;BaseQ         |
| 28370 | chrY | 13482412 | . | T | C   | 125.34   | my_snp_filter | AC=3;AF=0.043;AN=70;BaseQ         |
| 28371 | chrY | 13482413 | . | G | A   | 735.06   | PASS          | AC=4;AF=0.057;AN=70;BaseQRankSum  |
| 28372 | chrY | 13482416 | . | G | A   | 138.83   | my_snp_filter | AC=3;AF=0.043;AN=70;BaseQ         |
| 28373 | chrY | 13482417 | . | A | G   | 5874.86  | my_snp_filter | AC=8;AF=0.118;AN=68;BaseQ         |
| 28374 | chrY | 13482420 | . | G | A   | 108.23   | my_snp_filter | AC=2;AF=0.029;AN=70;BaseQ         |
| 28375 | chrY | 13482426 | . | A | G,C | 471.74   | PASS          | AC=3,1;AF=0.044,0.015;AN=68;BaseQ |
| 28376 | chrY | 13482429 | . | G | C   | 3584.92  | my_snp_filter | AC=8;AF=0.118;AN=68;BaseQ         |
| 28377 | chrY | 13482436 | . | A | T   | 9660.65  | PASS          | AC=25;AF=0.357;AN=70;BaseQRankSum |
| 28378 | chrY | 13482437 | . | A | G   | 167.25   | PASS          | AC=2;AF=0.029;AN=70;BaseQRankSum  |
| 28379 | chrY | 13482441 | . | A | C   | 6872.55  | PASS          | AC=25;AF=0.368;AN=68;BaseQRankSum |
| 28380 | chrY | 13482444 | . | A | C   | 6007.91  | PASS          | AC=24;AF=0.353;AN=68;BaseQRankSum |
| 28381 | chrY | 13482450 | . | T | C   | 114.92   | PASS          | AC=2;AF=0.029;AN=70;BaseQRankSum  |
| 28382 | chrY | 13482459 | . | A | C   | 119.27   | PASS          | AC=1;AF=0.014;AN=70;BaseQRankSum  |
| 28383 | chrY | 13482460 | . | G | A   | 73.99    | my_snp_filter | AC=1;AF=0.014;AN=70;BaseQ         |
| 28384 | chrY | 13482461 | . | G | C   | 169.59   | PASS          | AC=1;AF=0.014;AN=70;BaseQRankSum  |
| 28385 | chrY | 13482463 | . | A | G   | 122.27   | PASS          | AC=2;AF=0.029;AN=70;BaseQRankSum  |
| 28386 | chrY | 13482467 | . | G | A   | 171.61   | PASS          | AC=2;AF=0.029;AN=70;BaseQRankSum  |
| 28387 | chrY | 13482476 | . | C | A   | 192.93   | my_snp_filter | AC=2;AF=0.029;AN=68;BaseQ         |
| 28388 | chrY | 13482477 | . | C | A   | 235.87   | PASS          | AC=2;AF=0.029;AN=68;BaseQRankSum  |
| 28389 | chrY | 13482482 | . | G | A   | 190.71   | my_snp_filter | AC=2;AF=0.029;AN=68;BaseQ         |
| 28390 | chrY | 13482483 | . | T | C   | 54.31    | my_snp_filter | AC=2;AF=0.029;AN=68;BaseQ         |
| 28391 | chrY | 13482489 | . | G | A   | 93.84    | PASS          | AC=1;AF=0.015;AN=68;BaseQRankSum  |
| 28392 | chrY | 13482493 | . | G | A   | 359.21   | PASS          | AC=3;AF=0.045;AN=66;BaseQRankSum  |
| 28393 | chrY | 13482495 | . | A | C   | 61.63    | my_snp_filter | AC=2;AF=0.029;AN=68;BaseQ         |
| 28394 | chrY | 13482496 | . | G | A   | 74.33    | PASS          | AC=1;AF=0.015;AN=68;BaseQRankSum  |
| 28395 | chrY | 13482498 | . | C | A   | 77.99    | my_snp_filter | AC=2;AF=0.029;AN=68;BaseQ         |
| 28396 | chrY | 13482502 | . | A | G   | 354.81   | PASS          | AC=4;AF=0.059;AN=68;BaseQRankSum  |
| 28397 | chrY | 13482505 | . | T | A   | 140.60   | PASS          | AC=1;AF=0.015;AN=66;BaseQRankSum  |
| 28398 | chrY | 13482511 | . | A | C   | 5466.15  | PASS          | AC=10;AF=0.185;AN=54;BaseQRankSum |
| 28399 | chrY | 13482516 | . | G | A   | 66.83    | my_snp_filter | AC=1;AF=0.016;AN=62;BaseQ         |
| 28400 | chrY | 13482519 | . | G | T   | 194.41   | PASS          | AC=1;AF=0.016;AN=62;BaseQRankSum  |
| 28401 | chrY | 13482520 | . | A | T   | 139.58   | PASS          | AC=1;AF=0.016;AN=62;BaseQRankSum  |
| 28402 | chrY | 13482521 | . | A | T   | 3533.71  | my_snp_filter | AC=9;AF=0.150;AN=60;BaseQ         |
| 28403 | chrY | 13482530 | . | A | G   | 191.02   | my_snp_filter | AC=3;AF=0.050;AN=60;BaseQ         |
| 28404 | chrY | 13482533 | . | T | G   | 107.43   | PASS          | AC=1;AF=0.017;AN=60;BaseQRankSum  |
| 28405 | chrY | 13482536 | . | G | T   | 105.43   | PASS          | AC=1;AF=0.017;AN=60;BaseQRankSum  |
| 28406 | chrY | 13482538 | . | C | G   | 243.45   | my_snp_filter | AC=3;AF=0.052;AN=58;BaseQ         |
| 28407 | chrY | 13482539 | . | A | G   | 2134.15  | my_snp_filter | AC=9;AF=0.150;AN=60;BaseQ         |
| 28408 | chrY | 13482553 | . | G | A   | 74.28    | PASS          | AC=1;AF=0.017;AN=60;BaseQRankSum  |
| 28409 | chrY | 13482562 | . | A | G   | 194.08   | PASS          | AC=1;AF=0.017;AN=60;BaseQRankSum  |
| 28410 | chrY | 13482571 | . | T | A   | 384.06   | PASS          | AC=2;AF=0.034;AN=58;BaseQRankSum  |
| 28411 | chrY | 13482576 | . | T | A   | 57.06    | PASS          | AC=2;AF=0.034;AN=58;BaseQRankSum  |
| 28412 | chrY | 13482583 | . | G | C   | 77.18    | PASS          | AC=1;AF=0.015;AN=66;BaseQRankSum  |
| 28413 | chrY | 13482591 | . | G | A   | 69.32    | PASS          | AC=4;AF=0.061;AN=66;BaseQRankSum  |
| 28414 | chrY | 13482605 | . | G | C   | 2742.55  | my_snp_filter | AC=10;AF=0.156;AN=64;BaseQ        |
| 28415 | chrY | 13482607 | . | C | A   | 160.83   | PASS          | AC=2;AF=0.030;AN=66;BaseQRankSum  |
| 28416 | chrY | 13482627 | . | C | A   | 68.52    | PASS          | AC=2;AF=0.029;AN=68;BaseQRankSum  |
| 28417 | chrY | 13482634 | . | A | C   | 68.52    | PASS          | AC=2;AF=0.030;AN=66;BaseQRankSum  |
| 28418 | chrY | 13482646 | . | C | T   | 38.05    | PASS          | AC=1;AF=0.016;AN=64;BaseQRankSum  |
| 28419 | chrY | 13482654 | . | T | A   | 1605.31  | my_snp_filter | AC=10;AF=0.172;AN=58;BaseQ        |
| 28420 | chrY | 13482667 | . | T | G   | 108.16   | PASS          | AC=2;AF=0.053;AN=38;BaseQRankSum  |
| 28421 | chrY | 13482668 | . | A | G   | 83.67    | my_snp_filter | AC=3;AF=0.088;AN=34;BaseQ         |
| 28422 | chrY | 13482670 | . | G | A   | 45.29    | PASS          | AC=1;AF=0.028;AN=36;BaseQRankSum  |
| 28423 | chrY | 13482671 | . | T | C   | 76.14    | PASS          | AC=1;AF=0.029;AN=34;BaseQRankSum  |
| 28424 | chrY | 13482674 | . | C | G   | 107.64   | PASS          | AC=2;AF=0.063;AN=32;BaseQRankSum  |

|       |      |          |   |   |     |         |               |                                    |
|-------|------|----------|---|---|-----|---------|---------------|------------------------------------|
| 28425 | chrY | 13482677 | . | T | C   | 136.34  | PASS          | AC=1;AF=0.029;AN=34;BaseQRankSum=  |
| 28426 | chrY | 13482679 | . | C | T   | 133.37  | PASS          | AC=1;AF=0.083;AN=12;BaseQRankSum=  |
| 28427 | chrY | 13482688 | . | G | C   | 35.44   | my_snp_filter | AC=2;AF=0.029;AN=70;BaseQ          |
| 28428 | chrY | 13482690 | . | A | C   | 38.74   | PASS          | AC=1;AF=0.014;AN=70;BaseQRankSum=  |
| 28429 | chrY | 13482700 | . | C | G   | 39.04   | PASS          | AC=1;AF=0.014;AN=70;BaseQRankSum=  |
| 28430 | chrY | 13482723 | . | A | T   | 2225.27 | PASS          | AC=12;AF=0.182;AN=66;BaseQRankSum= |
| 28431 | chrY | 13482734 | . | G | T,A | 1059.89 | PASS          | AC=3,5;AF=0.047,0.078;AN=64;BaseQ  |
| 28432 | chrY | 13482742 | . | C | T   | 1020.77 | PASS          | AC=6;AF=0.086;AN=70;BaseQRankSum=  |
| 28433 | chrY | 13482744 | . | A | T   | 279.43  | PASS          | AC=4;AF=0.057;AN=70;BaseQRankSum=  |
| 28434 | chrY | 13482746 | . | G | C   | 204.36  | PASS          | AC=3;AF=0.043;AN=70;BaseQRankSum=  |
| 28435 | chrY | 13482753 | . | G | A   | 596.41  | my_snp_filter | AC=3;AF=0.043;AN=70;BaseQ          |
| 28436 | chrY | 13482754 | . | T | A   | 201.20  | PASS          | AC=3;AF=0.044;AN=68;BaseQRankSum=  |
| 28437 | chrY | 13482756 | . | G | T   | 588.47  | my_snp_filter | AC=3;AF=0.044;AN=68;BaseQ          |
| 28438 | chrY | 13482758 | . | T | C,A | 2622.44 | PASS          | AC=9,3;AF=0.136,0.045;AN=66;BaseQ  |
| 28439 | chrY | 13482770 | . | A | G   | 75.08   | my_snp_filter | AC=2;AF=0.029;AN=70;BaseQ          |
| 28440 | chrY | 13482783 | . | C | G   | 421.26  | PASS          | AC=2;AF=0.029;AN=70;BaseQRankSum=  |
| 28441 | chrY | 13482786 | . | A | C   | 349.89  | PASS          | AC=2;AF=0.029;AN=70;BaseQRankSum=  |
| 28442 | chrY | 13482796 | . | T | G   | 165.72  | PASS          | AC=6;AF=0.086;AN=70;BaseQRankSum=  |
| 28443 | chrY | 13482801 | . | T | G   | 466.63  | PASS          | AC=4;AF=0.057;AN=70;BaseQRankSum=  |
| 28444 | chrY | 13482802 | . | G | C   | 142.51  | PASS          | AC=1;AF=0.014;AN=70;BaseQRankSum=  |
| 28445 | chrY | 13482804 | . | T | C   | 58.29   | PASS          | AC=2;AF=0.029;AN=70;BaseQRankSum=  |
| 28446 | chrY | 13482806 | . | A | C,T | 2385.94 | PASS          | AC=9,7;AF=0.132,0.103;AN=68;BaseQ  |
| 28447 | chrY | 13482808 | . | T | G   | 58.65   | PASS          | AC=2;AF=0.029;AN=70;BaseQRankSum=  |
| 28448 | chrY | 13482809 | . | C | G   | 143.07  | PASS          | AC=1;AF=0.014;AN=70;BaseQRankSum=  |
| 28449 | chrY | 13482818 | . | A | C   | 3063.85 | PASS          | AC=19;AF=0.288;AN=66;BaseQRankSum= |
| 28450 | chrY | 13482820 | . | C | T   | 52.99   | PASS          | AC=2;AF=0.029;AN=70;BaseQRankSum=  |
| 28451 | chrY | 13482823 | . | T | G   | 140.12  | my_snp_filter | AC=5;AF=0.071;AN=70;BaseQ          |
| 28452 | chrY | 13482824 | . | G | A   | 2789.41 | PASS          | AC=16;AF=0.242;AN=66;BaseQRankSum= |
| 28453 | chrY | 13482825 | . | G | T   | 190     | PASS          | AC=5;AF=0.074;AN=68;BaseQRankSum=  |
| 28454 | chrY | 13482830 | . | A | G   | 523.85  | PASS          | AC=2;AF=0.029;AN=70;BaseQRankSum=  |
| 28455 | chrY | 13482831 | . | G | A   | 524.37  | PASS          | AC=2;AF=0.029;AN=68;BaseQRankSum=  |
| 28456 | chrY | 13482838 | . | A | G   | 300.37  | PASS          | AC=6;AF=0.088;AN=68;BaseQRankSum=  |
| 28457 | chrY | 13482841 | . | G | T   | 76.60   | PASS          | AC=1;AF=0.015;AN=68;BaseQRankSum=  |
| 28458 | chrY | 13482852 | . | C | T   | 543.20  | PASS          | AC=2;AF=0.029;AN=68;BaseQRankSum=  |
| 28459 | chrY | 13482862 | . | C | A   | 41.73   | PASS          | AC=1;AF=0.015;AN=66;BaseQRankSum=  |
| 28460 | chrY | 13482864 | . | G | C   | 31.99   | PASS          | AC=1;AF=0.015;AN=66;BaseQRankSum=  |
| 28461 | chrY | 13482865 | . | T | G   | 31.84   | PASS          | AC=1;AF=0.016;AN=64;BaseQRankSum=  |
| 28462 | chrY | 13482881 | . | A | G   | 33.57   | PASS          | AC=2;AF=0.029;AN=68;BaseQRankSum=  |
| 28463 | chrY | 13482882 | . | C | A   | 227.44  | PASS          | AC=6;AF=0.103;AN=58;BaseQRankSum=  |
| 28464 | chrY | 13482887 | . | C | T   | 94.35   | PASS          | AC=1;AF=0.015;AN=66;BaseQRankSum=  |
| 28465 | chrY | 13482899 | . | G | T   | 94.89   | PASS          | AC=1;AF=0.016;AN=64;BaseQRankSum=  |
| 28466 | chrY | 13482926 | . | C | T   | 73.51   | PASS          | AC=1;AF=0.021;AN=48;BaseQRankSum=  |
| 28467 | chrY | 13482927 | . | A | T   | 73.11   | PASS          | AC=1;AF=0.021;AN=48;BaseQRankSum=  |
| 28468 | chrY | 13482937 | . | G | C   | 68.86   | PASS          | AC=1;AF=0.015;AN=68;BaseQRankSum=  |
| 28469 | chrY | 13482939 | . | T | A   | 73.92   | PASS          | AC=1;AF=0.021;AN=48;BaseQRankSum=  |
| 28470 | chrY | 13482954 | . | C | G   | 75.18   | PASS          | AC=1;AF=0.015;AN=66;BaseQRankSum=  |
| 28471 | chrY | 13482992 | . | G | A   | 189.93  | PASS          | AC=8;AF=0.114;AN=70;BaseQRankSum=  |
| 28472 | chrY | 13482993 | . | G | A   | 47.12   | PASS          | AC=2;AF=0.029;AN=70;DP=2502;FS=0.  |
| 28473 | chrY | 13482994 | . | G | A   | 113.99  | PASS          | AC=2;AF=0.031;AN=64;BaseQRankSum=  |
| 28474 | chrY | 13482997 | . | A | C   | 105.94  | PASS          | AC=2;AF=0.031;AN=64;BaseQRankSum=  |
| 28475 | chrY | 13483002 | . | T | G   | 43.40   | PASS          | AC=1;AF=0.016;AN=64;BaseQRankSum=  |
| 28476 | chrY | 13483012 | . | T | G   | 110.19  | PASS          | AC=2;AF=0.033;AN=60;BaseQRankSum=  |
| 28477 | chrY | 13483013 | . | T | G   | 173.59  | PASS          | AC=3;AF=0.048;AN=62;BaseQRankSum=  |
| 28478 | chrY | 13483023 | . | C | A   | 114.77  | PASS          | AC=2;AF=0.030;AN=66;BaseQRankSum=  |
| 28479 | chrY | 13483025 | . | C | A   | 173.17  | PASS          | AC=3;AF=0.045;AN=66;BaseQRankSum=  |
| 28480 | chrY | 13483028 | . | G | A   | 170.07  | PASS          | AC=3;AF=0.045;AN=66;BaseQRankSum=  |
| 28481 | chrY | 13483035 | . | G | C   | 146.03  | PASS          | AC=2;AF=0.029;AN=68;BaseQRankSum=  |
| 28482 | chrY | 13483037 | . | G | C   | 38.97   | PASS          | AC=1;AF=0.015;AN=68;BaseQRankSum=  |
| 28483 | chrY | 13483038 | . | A | G   | 145.97  | PASS          | AC=2;AF=0.029;AN=68;BaseQRankSum=  |
| 28484 | chrY | 13483041 | . | G | A   | 143.63  | PASS          | AC=2;AF=0.030;AN=66;BaseQRankSum=  |
| 28485 | chrY | 13483042 | . | G | A   | 168.72  | PASS          | AC=3;AF=0.045;AN=66;BaseQRankSum=  |
| 28486 | chrY | 13483044 | . | C | T   | 144.56  | PASS          | AC=1;AF=0.016;AN=64;BaseQRankSum=  |
| 28487 | chrY | 13483053 | . | C | G   | 175.14  | PASS          | AC=2;AF=0.030;AN=66;BaseQRankSum=  |
| 28488 | chrY | 13483054 | . | A | T   | 82.81   | PASS          | AC=1;AF=0.016;AN=64;BaseQRankSum=  |
| 28489 | chrY | 13483059 | . | T | A,G | 647.82  | my_snp_filter | AC=2,3;AF=0.034,0.052;AN=          |
| 28490 | chrY | 13483063 | . | G | T   | 467.24  | PASS          | AC=4;AF=0.067;AN=60;BaseQRankSum=  |
| 28491 | chrY | 13483070 | . | G | C   | 158.73  | PASS          | AC=2;AF=0.032;AN=62;BaseQRankSum=  |
| 28492 | chrY | 13483072 | . | G | A   | 397.08  | PASS          | AC=3;AF=0.048;AN=62;BaseQRankSum=  |
| 28493 | chrY | 13483081 | . | A | T   | 2348.57 | PASS          | AC=9;AF=0.155;AN=58;BaseQRankSum=  |
| 28494 | chrY | 13483084 | . | T | C   | 2271.70 | my_snp_filter | AC=8;AF=0.138;AN=58;BaseQ          |
| 28495 | chrY | 13483095 | . | T | A   | 155.78  | my_snp_filter | AC=4;AF=0.061;AN=66;BaseQ          |
| 28496 | chrY | 13483096 | . | G | T,A | 531.67  | PASS          | AC=3,3;AF=0.047,0.047;AN=64;BaseQ  |
| 28497 | chrY | 13483101 | . | C | T   | 379.37  | PASS          | AC=3;AF=0.048;AN=62;BaseQRankSum=  |
| 28498 | chrY | 13483104 | . | G | A   | 720.36  | PASS          | AC=5;AF=0.093;AN=54;BaseQRankSum=  |
| 28499 | chrY | 13483109 | . | A | G   | 406.35  | PASS          | AC=2;AF=0.031;AN=64;BaseQRankSum=  |
| 28500 | chrY | 13483111 | . | A | G   | 489.38  | PASS          | AC=4;AF=0.061;AN=66;BaseQRankSum=  |

|       |      |          |   |   |     |          |               |                                    |
|-------|------|----------|---|---|-----|----------|---------------|------------------------------------|
| 28501 | chrY | 13483112 | . | T | A   | 499.58   | PASS          | AC=5;AF=0.076;AN=66;BaseQRankSum=  |
| 28502 | chrY | 13483131 | . | C | G   | 794.07   | PASS          | AC=3;AF=0.052;AN=58;BaseQRankSum=  |
| 28503 | chrY | 13483139 | . | A | G   | 302.76   | PASS          | AC=2;AF=0.034;AN=58;BaseQRankSum=  |
| 28504 | chrY | 13483148 | . | A | T   | 49.08    | my_snp_filter | AC=1;AF=0.015;AN=68;BaseQ          |
| 28505 | chrY | 13483159 | . | C | A   | 49.68    | PASS          | AC=1;AF=0.014;AN=70;BaseQRankSum=  |
| 28506 | chrY | 13483160 | . | A | C   | 63.18    | PASS          | AC=1;AF=0.015;AN=68;BaseQRankSum=  |
| 28507 | chrY | 13483164 | . | T | A   | 44.92    | PASS          | AC=1;AF=0.014;AN=70;BaseQRankSum=  |
| 28508 | chrY | 13483175 | . | A | T   | 96.78    | PASS          | AC=1;AF=0.021;AN=48;BaseQRankSum=  |
| 28509 | chrY | 13483248 | . | C | G   | 202.84   | PASS          | AC=3;AF=0.167;AN=18;BaseQRankSum=  |
| 28510 | chrY | 13483282 | . | A | G   | 61.96    | PASS          | AC=1;AF=0.014;AN=70;BaseQRankSum=  |
| 28511 | chrY | 13483283 | . | G | T   | 119.78   | PASS          | AC=2;AF=0.029;AN=70;BaseQRankSum=  |
| 28512 | chrY | 13483291 | . | A | G   | 34.20    | my_snp_filter | AC=1;AF=0.014;AN=70;BaseQ          |
| 28513 | chrY | 13483292 | . | C | G   | 80.14    | my_snp_filter | AC=4;AF=0.057;AN=70;BaseQ          |
| 28514 | chrY | 13483300 | . | C | A   | 1575.33  | my_snp_filter | AC=13;AF=0.186;AN=70;Base          |
| 28515 | chrY | 13483301 | . | C | T,A | 536.47   | my_snp_filter | AC=2,3;AF=0.029,0.043;AN=          |
| 28516 | chrY | 13483302 | . | T | A   | 97.09    | my_snp_filter | AC=3;AF=0.043;AN=70;BaseQ          |
| 28517 | chrY | 13483303 | . | G | A   | 494.44   | my_snp_filter | AC=3;AF=0.043;AN=70;BaseQ          |
| 28518 | chrY | 13483304 | . | T | C   | 7098.27  | PASS          | AC=21;AF=0.300;AN=70;BaseQRankSum= |
| 28519 | chrY | 13483305 | . | A | G   | 199.01   | my_snp_filter | AC=3;AF=0.043;AN=70;BaseQ          |
| 28520 | chrY | 13483310 | . | A | T   | 7941.51  | PASS          | AC=20;AF=0.286;AN=70;BaseQRankSum= |
| 28521 | chrY | 13483311 | . | A | T   | 68.42    | my_snp_filter | AC=1;AF=0.014;AN=70;BaseQ          |
| 28522 | chrY | 13483312 | . | T | C   | 151.06   | my_snp_filter | AC=2;AF=0.029;AN=70;BaseQ          |
| 28523 | chrY | 13483313 | . | C | A,G | 566.45   | my_snp_filter | AC=3,4;AF=0.043,0.057;AN=          |
| 28524 | chrY | 13483320 | . | A | T   | 103.46   | my_snp_filter | AC=3;AF=0.043;AN=70;BaseQ          |
| 28525 | chrY | 13483322 | . | T | C   | 1194.70  | my_snp_filter | AC=11;AF=0.157;AN=70;Base          |
| 28526 | chrY | 13483324 | . | G | C   | 280.80   | my_snp_filter | AC=3;AF=0.043;AN=70;BaseQ          |
| 28527 | chrY | 13483325 | . | T | G,A | 11562.55 | PASS          | AC=17,10;AF=0.243,0.143;A          |
| 28528 | chrY | 13483328 | . | C | A   | 89.06    | my_snp_filter | AC=1;AF=0.014;AN=70;BaseQ          |
| 28529 | chrY | 13483329 | . | A | C   | 235.85   | my_snp_filter | AC=2;AF=0.029;AN=70;BaseQ          |
| 28530 | chrY | 13483336 | . | G | C   | 167.03   | my_snp_filter | AC=3;AF=0.043;AN=70;BaseQ          |
| 28531 | chrY | 13483338 | . | G | C   | 347.91   | PASS          | AC=2;AF=0.029;AN=70;BaseQRankSum=  |
| 28532 | chrY | 13483339 | . | T | C,G | 10730.65 | PASS          | AC=18,8;AF=0.257,0.114;AN          |
| 28533 | chrY | 13483340 | . | G | T   | 45.43    | my_snp_filter | AC=1;AF=0.014;AN=70;BaseQ          |
| 28534 | chrY | 13483341 | . | A | G   | 257.98   | my_snp_filter | AC=3;AF=0.043;AN=70;BaseQ          |
| 28535 | chrY | 13483343 | . | C | T   | 80.41    | my_snp_filter | AC=2;AF=0.029;AN=70;BaseQ          |
| 28536 | chrY | 13483344 | . | A | C,G | 949.46   | my_snp_filter | AC=4,2;AF=0.057,0.029;AN=          |
| 28537 | chrY | 13483345 | . | G | C,A | 9083.14  | PASS          | AC=26,2;AF=0.371,0.029;AN=70;Base  |
| 28538 | chrY | 13483346 | . | T | C   | 50.42    | my_snp_filter | AC=1;AF=0.014;AN=70;BaseQ          |
| 28539 | chrY | 13483349 | . | A | C   | 357.06   | my_snp_filter | AC=2;AF=0.029;AN=70;BaseQ          |
| 28540 | chrY | 13483351 | . | A | T,G | 2786.58  | my_snp_filter | AC=11,10;AF=0.157,0.143;A          |
| 28541 | chrY | 13483352 | . | T | C   | 135.66   | my_snp_filter | AC=3;AF=0.043;AN=70;BaseQ          |
| 28542 | chrY | 13483354 | . | T | C   | 75.06    | my_snp_filter | AC=2;AF=0.029;AN=70;BaseQ          |
| 28543 | chrY | 13483359 | . | C | T   | 173.43   | PASS          | AC=1;AF=0.014;AN=70;BaseQRankSum=  |
| 28544 | chrY | 13483360 | . | A | C,G | 391.48   | my_snp_filter | AC=2,1;AF=0.029,0.014;AN=          |
| 28545 | chrY | 13483366 | . | C | A   | 335.01   | my_snp_filter | AC=4;AF=0.057;AN=70;BaseQ          |
| 28546 | chrY | 13483369 | . | C | T,A | 3121.70  | my_snp_filter | AC=10,8;AF=0.143,0.114;AN          |
| 28547 | chrY | 13483371 | . | T | C,A | 1047.18  | my_snp_filter | AC=10,1;AF=0.143,0.014;AN          |
| 28548 | chrY | 13483375 | . | G | A   | 2986.54  | my_snp_filter | AC=11;AF=0.157;AN=70;Base          |
| 28549 | chrY | 13483376 | . | C | T,A | 1636.61  | my_snp_filter | AC=7,1;AF=0.100,0.014;AN=          |
| 28550 | chrY | 13483378 | . | C | A   | 594.29   | my_snp_filter | AC=4;AF=0.057;AN=70;BaseQ          |
| 28551 | chrY | 13483383 | . | T | A   | 53.42    | my_snp_filter | AC=1;AF=0.014;AN=70;BaseQ          |
| 28552 | chrY | 13483390 | . | G | A,* | 658.48   | my_snp_filter | AC=3,2;AF=0.043,0.029;AN=          |
| 28553 | chrY | 13483392 | . | G | A   | 1479.37  | my_snp_filter | AC=12;AF=0.171;AN=70;Base          |
| 28554 | chrY | 13483396 | . | C | A,T | 212.63   | my_snp_filter | AC=1,2;AF=0.014,0.029;AN=          |
| 28555 | chrY | 13483423 | . | A | C   | 239.42   | PASS          | AC=1;AF=0.014;AN=70;BaseQRankSum=  |
| 28556 | chrY | 13483424 | . | T | A   | 376.29   | my_snp_filter | AC=4;AF=0.057;AN=70;BaseQ          |
| 28557 | chrY | 13483431 | . | A | G   | 58.53    | my_snp_filter | AC=1;AF=0.014;AN=70;BaseQ          |
| 28558 | chrY | 13483433 | . | G | T   | 176.31   | PASS          | AC=2;AF=0.029;AN=70;BaseQRankSum=  |
| 28559 | chrY | 13483434 | . | C | G,T | 853.25   | PASS          | AC=3,6;AF=0.044,0.088;AN=68;BaseQ  |
| 28560 | chrY | 13483436 | . | G | C   | 4164.36  | PASS          | AC=23;AF=0.338;AN=68;BaseQRankSum= |
| 28561 | chrY | 13483437 | . | C | T   | 363.70   | PASS          | AC=3;AF=0.044;AN=68;BaseQRankSum=  |
| 28562 | chrY | 13483438 | . | C | T   | 80.73    | my_snp_filter | AC=2;AF=0.029;AN=68;BaseQ          |
| 28563 | chrY | 13483439 | . | A | G   | 47.81    | PASS          | AC=2;AF=0.029;AN=68;BaseQRankSum=  |
| 28564 | chrY | 13483440 | . | T | C   | 354.59   | PASS          | AC=5;AF=0.074;AN=68;BaseQRankSum=  |
| 28565 | chrY | 13483441 | . | A | G   | 156.54   | PASS          | AC=2;AF=0.029;AN=68;BaseQRankSum=  |
| 28566 | chrY | 13483444 | . | C | A   | 209.05   | my_snp_filter | AC=4;AF=0.057;AN=70;BaseQ          |
| 28567 | chrY | 13483445 | . | A | T   | 126.25   | my_snp_filter | AC=3;AF=0.043;AN=70;BaseQ          |
| 28568 | chrY | 13483450 | . | C | A   | 256.90   | PASS          | AC=4;AF=0.057;AN=70;BaseQRankSum=  |
| 28569 | chrY | 13483467 | . | T | A   | 481.93   | PASS          | AC=4;AF=0.074;AN=54;BaseQRankSum=  |
| 28570 | chrY | 13483472 | . | A | G   | 183.72   | PASS          | AC=3;AF=0.058;AN=52;BaseQRankSum=  |
| 28571 | chrY | 13483674 | . | C | A   | 126.56   | PASS          | AC=1;AF=0.014;AN=70;BaseQRankSum=  |
| 28572 | chrY | 13483695 | . | C | G   | 11103.19 | PASS          | AC=12;AF=0.182;AN=66;Base          |
| 28573 | chrY | 13483698 | . | T | A   | 39.79    | PASS          | AC=1;AF=0.014;AN=70;BaseQRankSum=  |
| 28574 | chrY | 13483699 | . | C | T   | 42.53    | my_snp_filter | AC=2;AF=0.029;AN=70;BaseQ          |
| 28575 | chrY | 13483704 | . | G | A,C | 1152.79  | PASS          | AC=3,3;AF=0.043,0.043;AN=70;BaseQ  |
| 28576 | chrY | 13483705 | . | C | A,G | 1772.67  | PASS          | AC=3,1;AF=0.043,0.014;AN=70;BaseQ  |



|       |      |          |   |   |     |          |               |                                    |
|-------|------|----------|---|---|-----|----------|---------------|------------------------------------|
| 28577 | chrY | 13483708 | . | C | T   | 613.92   | PASS          | AC=1;AF=0.015;AN=68;BaseQRankSum=  |
| 28578 | chrY | 13483709 | . | A | C,G | 9640.92  | PASS          | AC=6,3;AF=0.088,0.044;AN=68;BaseQ  |
| 28579 | chrY | 13483716 | . | C | A   | 83.40    | PASS          | AC=3;AF=0.043;AN=70;BaseQRankSum=  |
| 28580 | chrY | 13483717 | . | A | G   | 945.40   | PASS          | AC=3;AF=0.043;AN=70;BaseQRankSum=  |
| 28581 | chrY | 13483720 | . | G | A   | 82.90    | PASS          | AC=3;AF=0.043;AN=70;BaseQRankSum=  |
| 28582 | chrY | 13483721 | . | C | T   | 86.30    | my_snp_filter | AC=2;AF=0.029;AN=70;BaseQ          |
| 28583 | chrY | 13483722 | . | C | A   | 97.35    | PASS          | AC=3;AF=0.044;AN=68;BaseQRankSum=  |
| 28584 | chrY | 13483728 | . | A | T   | 550.79   | PASS          | AC=1;AF=0.014;AN=70;BaseQRankSum=  |
| 28585 | chrY | 13483730 | . | G | C   | 86.46    | PASS          | AC=3;AF=0.043;AN=70;BaseQRankSum=  |
| 28586 | chrY | 13483731 | . | A | T   | 1319.70  | PASS          | AC=1;AF=0.015;AN=68;BaseQRankSum=  |
| 28587 | chrY | 13483732 | . | G | C   | 106.35   | PASS          | AC=3;AF=0.044;AN=68;BaseQRankSum=  |
| 28588 | chrY | 13483735 | . | A | T   | 415.91   | PASS          | AC=1;AF=0.015;AN=68;BaseQRankSum=  |
| 28589 | chrY | 13483756 | . | C | A   | 77.12    | my_snp_filter | AC=1;AF=0.015;AN=68;BaseQ          |
| 28590 | chrY | 13483759 | . | T | A   | 1000.21  | PASS          | AC=3;AF=0.044;AN=68;BaseQRankSum=  |
| 28591 | chrY | 13483762 | . | C | G   | 922.06   | PASS          | AC=3;AF=0.047;AN=64;BaseQRankSum=  |
| 28592 | chrY | 13483763 | . | T | A   | 2589.50  | my_snp_filter | AC=7;AF=0.109;AN=64;BaseQ          |
| 28593 | chrY | 13483788 | . | A | C   | 946.06   | PASS          | AC=3;AF=0.047;AN=64;BaseQRankSum=  |
| 28594 | chrY | 13483789 | . | T | C   | 41.73    | my_snp_filter | AC=1;AF=0.015;AN=66;BaseQ          |
| 28595 | chrY | 13483792 | . | T | C   | 139.02   | PASS          | AC=2;AF=0.032;AN=62;BaseQRankSum=  |
| 28596 | chrY | 13483794 | . | C | T   | 1153.73  | PASS          | AC=5;AF=0.081;AN=62;BaseQRankSum=  |
| 28597 | chrY | 13483796 | . | G | C   | 958.44   | PASS          | AC=3;AF=0.048;AN=62;BaseQRankSum=  |
| 28598 | chrY | 13483811 | . | A | C   | 842.53   | PASS          | AC=3;AF=0.043;AN=70;BaseQRankSum=  |
| 28599 | chrY | 13483842 | . | A | T   | 246.64   | my_snp_filter | AC=3;AF=0.043;AN=70;BaseQ          |
| 28600 | chrY | 13483845 | . | T | C,A | 384.73   | my_snp_filter | AC=1,3;AF=0.015,0.044;AN=          |
| 28601 | chrY | 13483854 | . | G | C   | 332.03   | my_snp_filter | AC=4;AF=0.059;AN=68;BaseQ          |
| 28602 | chrY | 13483860 | . | A | G   | 9931.25  | PASS          | AC=10;AF=0.179;AN=56;BaseQRankSum= |
| 28603 | chrY | 13483861 | . | C | A   | 33.03    | my_snp_filter | AC=1;AF=0.015;AN=68;BaseQ          |
| 28604 | chrY | 13483862 | . | C | A   | 311.36   | my_snp_filter | AC=4;AF=0.061;AN=66;BaseQ          |
| 28605 | chrY | 13483871 | . | A | G   | 234.79   | my_snp_filter | AC=3;AF=0.045;AN=66;BaseQ          |
| 28606 | chrY | 13483872 | . | G | A   | 300.47   | my_snp_filter | AC=4;AF=0.061;AN=66;BaseQ          |
| 28607 | chrY | 13483878 | . | T | G   | 215.91   | my_snp_filter | AC=4;AF=0.061;AN=66;BaseQ          |
| 28608 | chrY | 13483879 | . | T | C   | 13285.19 | PASS          | AC=8;AF=0.125;AN=64;BaseQ          |
| 28609 | chrY | 13483886 | . | G | A   | 846.43   | my_snp_filter | AC=3;AF=0.045;AN=66;BaseQ          |
| 28610 | chrY | 13483893 | . | G | A   | 67.61    | my_snp_filter | AC=1;AF=0.015;AN=66;BaseQ          |
| 28611 | chrY | 13483896 | . | C | A   | 65.78    | my_snp_filter | AC=1;AF=0.015;AN=66;BaseQ          |
| 28612 | chrY | 13483899 | . | A | G   | 127.31   | my_snp_filter | AC=2;AF=0.031;AN=64;BaseQ          |
| 28613 | chrY | 13483904 | . | T | C   | 104.29   | PASS          | AC=1;AF=0.016;AN=64;BaseQRankSum=  |
| 28614 | chrY | 13483908 | . | A | T   | 220.75   | my_snp_filter | AC=3;AF=0.045;AN=66;BaseQ          |
| 28615 | chrY | 13483917 | . | C | A   | 130.13   | PASS          | AC=1;AF=0.019;AN=54;BaseQRankSum=  |
| 28616 | chrY | 13483918 | . | G | C   | 3768.57  | my_snp_filter | AC=5;AF=0.104;AN=48;BaseQ          |
| 28617 | chrY | 13483921 | . | A | T   | 4683.12  | my_snp_filter | AC=8;AF=0.148;AN=54;BaseQ          |
| 28618 | chrY | 13483924 | . | G | A   | 103.50   | PASS          | AC=1;AF=0.014;AN=70;BaseQRankSum=  |
| 28619 | chrY | 13483935 | . | A | T   | 92.80    | my_snp_filter | AC=1;AF=0.014;AN=70;BaseQ          |
| 28620 | chrY | 13483936 | . | C | G   | 122.99   | PASS          | AC=1;AF=0.014;AN=70;BaseQRankSum=  |
| 28621 | chrY | 13483941 | . | G | T   | 74.23    | my_snp_filter | AC=1;AF=0.014;AN=70;BaseQ          |
| 28622 | chrY | 13483942 | . | T | C   | 78.70    | my_snp_filter | AC=1;AF=0.014;AN=70;BaseQ          |
| 28623 | chrY | 13483953 | . | T | C   | 2246.99  | PASS          | AC=7;AF=0.117;AN=60;BaseQRankSum=  |
| 28624 | chrY | 13483954 | . | G | A   | 725.24   | PASS          | AC=1;AF=0.016;AN=62;BaseQRankSum=  |
| 28625 | chrY | 13483963 | . | T | G   | 126.82   | PASS          | AC=1;AF=0.014;AN=70;BaseQRankSum=  |
| 28626 | chrY | 13483965 | . | C | G   | 690.64   | PASS          | AC=4;AF=0.059;AN=68;BaseQRankSum=  |
| 28627 | chrY | 13483967 | . | G | C   | 172.95   | PASS          | AC=1;AF=0.014;AN=70;BaseQRankSum=  |
| 28628 | chrY | 13483969 | . | G | C,T | 182.54   | PASS          | AC=1,1;AF=0.014,0.014;AN=70;BaseQ  |
| 28629 | chrY | 13483970 | . | A | G   | 98.59    | my_snp_filter | AC=2;AF=0.029;AN=70;BaseQ          |
| 28630 | chrY | 13483973 | . | T | C   | 768.76   | PASS          | AC=4;AF=0.059;AN=68;BaseQRankSum=  |
| 28631 | chrY | 13483991 | . | C | T   | 122.31   | my_snp_filter | AC=1;AF=0.014;AN=70;BaseQ          |
| 28632 | chrY | 13483992 | . | A | G   | 256.17   | PASS          | AC=1;AF=0.014;AN=70;BaseQRankSum=  |
| 28633 | chrY | 13483994 | . | C | T   | 86.90    | PASS          | AC=1;AF=0.014;AN=70;BaseQRankSum=  |
| 28634 | chrY | 13483995 | . | G | A   | 1200.55  | PASS          | AC=3;AF=0.045;AN=66;BaseQRankSum=  |
| 28635 | chrY | 13484003 | . | A | T   | 2891.63  | PASS          | AC=8;AF=0.182;AN=44;BaseQRankSum=  |
| 28636 | chrY | 13484007 | . | C | A   | 2924.43  | PASS          | AC=8;AF=0.222;AN=36;BaseQRankSum=  |
| 28637 | chrY | 13484008 | . | G | A   | 1332.82  | PASS          | AC=3;AF=0.071;AN=42;BaseQRankSum=  |
| 28638 | chrY | 13484017 | . | T | C,A | 3778.87  | PASS          | AC=7,3;AF=0.206,0.088;AN=34;BaseQ  |
| 28639 | chrY | 13484024 | . | G | T   | 2049.95  | PASS          | AC=3;AF=0.043;AN=70;BaseQRankSum=  |
| 28640 | chrY | 13484029 | . | C | T   | 419.93   | PASS          | AC=2;AF=0.029;AN=70;BaseQRankSum=  |
| 28641 | chrY | 13484045 | . | G | T   | 319.37   | PASS          | AC=4;AF=0.071;AN=56;BaseQRankSum=  |
| 28642 | chrY | 13484057 | . | G | A   | 2316.97  | PASS          | AC=3;AF=0.043;AN=70;BaseQRankSum=  |
| 28643 | chrY | 13484062 | . | C | A   | 65.43    | my_snp_filter | AC=1;AF=0.014;AN=70;BaseQ          |
| 28644 | chrY | 13484067 | . | C | A,G | 1267.61  | PASS          | AC=4,1;AF=0.057,0.014;AN=70;BaseQ  |
| 28645 | chrY | 13484068 | . | C | T   | 254.37   | PASS          | AC=1;AF=0.014;AN=70;BaseQRankSum=  |
| 28646 | chrY | 13484069 | . | T | G,C | 1339.53  | PASS          | AC=4,1;AF=0.057,0.014;AN=70;BaseQ  |
| 28647 | chrY | 13484073 | . | C | G   | 2539.85  | PASS          | AC=3;AF=0.043;AN=70;BaseQRankSum=  |
| 28648 | chrY | 13484077 | . | A | G   | 106.63   | my_snp_filter | AC=1;AF=0.014;AN=70;BaseQ          |
| 28649 | chrY | 13484079 | . | T | C   | 1153.61  | PASS          | AC=5;AF=0.071;AN=70;BaseQRankSum=  |
| 28650 | chrY | 13484085 | . | T | C,A | 16594.61 | PASS          | AC=15,4;AF=0.288,0.077;AN=         |
| 28651 | chrY | 13484086 | . | A | T   | 417.07   | PASS          | AC=1;AF=0.014;AN=70;BaseQRankSum=  |
| 28652 | chrY | 13484087 | . | C | A   | 2721.41  | PASS          | AC=3;AF=0.043;AN=70;BaseQRankSum=  |

|       |      |          |   |   |     |          |               |                                    |
|-------|------|----------|---|---|-----|----------|---------------|------------------------------------|
| 28653 | chrY | 13484089 | . | T | G   | 870.72   | PASS          | AC=4;AF=0.057;AN=70;BaseQRankSum=  |
| 28654 | chrY | 13484091 | . | G | C   | 915.38   | PASS          | AC=3;AF=0.043;AN=70;BaseQRankSum=  |
| 28655 | chrY | 13484092 | . | G | C   | 135.25   | PASS          | AC=1;AF=0.014;AN=70;BaseQRankSum=  |
| 28656 | chrY | 13484095 | . | A | G   | 1239.45  | PASS          | AC=4;AF=0.057;AN=70;BaseQRankSum=  |
| 28657 | chrY | 13484102 | . | C | T   | 180.88   | PASS          | AC=1;AF=0.014;AN=70;BaseQRankSum=  |
| 28658 | chrY | 13484105 | . | A | C   | 87.76    | my_snp_filter | AC=1;AF=0.015;AN=68;BaseQ          |
| 28659 | chrY | 13484106 | . | C | G   | 24677.23 | PASS          | AC=28;AF=0.483;AN=58;Base          |
| 28660 | chrY | 13484107 | . | A | G   | 1251.90  | PASS          | AC=4;AF=0.059;AN=68;BaseQRankSum=  |
| 28661 | chrY | 13484109 | . | A | G   | 4935.05  | PASS          | AC=19;AF=0.279;AN=68;BaseQRankSum= |
| 28662 | chrY | 13484111 | . | T | C   | 24958.65 | PASS          | AC=29;AF=0.483;AN=60;Base          |
| 28663 | chrY | 13484115 | . | C | T   | 7405.41  | PASS          | AC=23;AF=0.338;AN=68;BaseQRankSum= |
| 28664 | chrY | 13484116 | . | A | G   | 7127.69  | PASS          | AC=22;AF=0.314;AN=70;BaseQRankSum= |
| 28665 | chrY | 13484117 | . | A | G   | 7415.02  | PASS          | AC=22;AF=0.314;AN=70;BaseQRankSum= |
| 28666 | chrY | 13484121 | . | C | A,G | 2205.48  | PASS          | AC=2,2;AF=0.029,0.029;AN=70;BaseQ  |
| 28667 | chrY | 13484122 | . | C | A,T | 664.06   | PASS          | AC=1,1;AF=0.014,0.014;AN=70;BaseQ  |
| 28668 | chrY | 13484124 | . | C | G   | 221.31   | PASS          | AC=3;AF=0.043;AN=70;BaseQRankSum=  |
| 28669 | chrY | 13484133 | . | G | A   | 195.53   | PASS          | AC=2;AF=0.029;AN=70;BaseQRankSum=  |
| 28670 | chrY | 13484137 | . | C | A   | 568.90   | PASS          | AC=3;AF=0.043;AN=70;BaseQRankSum=  |
| 28671 | chrY | 13484138 | . | T | A   | 321.38   | PASS          | AC=2;AF=0.029;AN=70;BaseQRankSum=  |
| 28672 | chrY | 13484139 | . | A | G   | 117.79   | my_snp_filter | AC=1;AF=0.014;AN=70;BaseQ          |
| 28673 | chrY | 13484140 | . | G | T   | 162.44   | my_snp_filter | AC=3;AF=0.043;AN=70;BaseQ          |
| 28674 | chrY | 13484144 | . | A | C   | 1024.71  | PASS          | AC=4;AF=0.057;AN=70;BaseQRankSum=  |
| 28675 | chrY | 13484145 | . | G | T   | 1239.08  | PASS          | AC=7;AF=0.100;AN=70;BaseQRankSum=  |
| 28676 | chrY | 13484160 | . | G | C   | 244.34   | PASS          | AC=2;AF=0.029;AN=70;BaseQRankSum=  |
| 28677 | chrY | 13484162 | . | T | A   | 325.87   | PASS          | AC=3;AF=0.043;AN=70;BaseQRankSum=  |
| 28678 | chrY | 13484163 | . | G | A   | 66.22    | PASS          | AC=2;AF=0.029;AN=70;BaseQRankSum=  |
| 28679 | chrY | 13484166 | . | C | A   | 267.98   | PASS          | AC=2;AF=0.029;AN=70;BaseQRankSum=  |
| 28680 | chrY | 13484188 | . | T | A   | 474.19   | my_snp_filter | AC=5;AF=0.071;AN=70;BaseQ          |
| 28681 | chrY | 13484189 | . | C | T   | 782.08   | my_snp_filter | AC=6;AF=0.086;AN=70;BaseQ          |
| 28682 | chrY | 13484190 | . | C | T   | 103.83   | PASS          | AC=3;AF=0.043;AN=70;BaseQRankSum=  |
| 28683 | chrY | 13484194 | . | T | A   | 77.41    | PASS          | AC=2;AF=0.029;AN=70;BaseQRankSum=  |
| 28684 | chrY | 13484195 | . | G | A   | 419.03   | PASS          | AC=1;AF=0.014;AN=70;BaseQRankSum=  |
| 28685 | chrY | 13484204 | . | G | T   | 604.93   | my_snp_filter | AC=3;AF=0.043;AN=70;BaseQ          |
| 28686 | chrY | 13484207 | . | T | A   | 621.02   | my_snp_filter | AC=3;AF=0.043;AN=70;BaseQ          |
| 28687 | chrY | 13484214 | . | G | C,T | 1295.66  | PASS          | AC=6,1;AF=0.086,0.014;AN=70;BaseQ  |
| 28688 | chrY | 13484226 | . | A | C,G | 3677.10  | PASS          | AC=9,1;AF=0.132,0.015;AN=68;BaseQ  |
| 28689 | chrY | 13484232 | . | G | A   | 716.03   | PASS          | AC=5;AF=0.071;AN=70;BaseQRankSum=  |
| 28690 | chrY | 13484233 | . | G | A   | 4409.46  | PASS          | AC=10;AF=0.147;AN=68;BaseQRankSum= |
| 28691 | chrY | 13484234 | . | T | C   | 89.64    | PASS          | AC=1;AF=0.014;AN=70;BaseQRankSum=  |
| 28692 | chrY | 13484235 | . | C | T   | 183.19   | my_snp_filter | AC=6;AF=0.086;AN=70;BaseQ          |
| 28693 | chrY | 13484240 | . | C | A   | 447.64   | PASS          | AC=2;AF=0.029;AN=70;BaseQRankSum=  |
| 28694 | chrY | 13484242 | . | A | G   | 3036.87  | PASS          | AC=9;AF=0.136;AN=66;BaseQRankSum=  |
| 28695 | chrY | 13484243 | . | A | G   | 579.85   | PASS          | AC=7;AF=0.103;AN=68;BaseQRankSum=  |
| 28696 | chrY | 13484247 | . | A | G   | 61.88    | PASS          | AC=1;AF=0.014;AN=70;BaseQRankSum=  |
| 28697 | chrY | 13484259 | . | T | C,G | 467.66   | PASS          | AC=3,2;AF=0.048,0.032;AN=62;BaseQ  |
| 28698 | chrY | 13484270 | . | G | T   | 152.49   | PASS          | AC=1;AF=0.015;AN=68;BaseQRankSum=  |
| 28699 | chrY | 13484277 | . | T | G   | 285.98   | PASS          | AC=3;AF=0.054;AN=56;BaseQRankSum=  |
| 28700 | chrY | 13484279 | . | C | A   | 73.16    | my_snp_filter | AC=2;AF=0.030;AN=66;BaseQ          |
| 28701 | chrY | 13484282 | . | T | G   | 217.30   | PASS          | AC=2;AF=0.036;AN=56;BaseQRankSum=  |
| 28702 | chrY | 13484382 | . | A | G   | 72.81    | PASS          | AC=2;AF=0.043;AN=46;BaseQRankSum=  |
| 28703 | chrY | 13484392 | . | T | C   | 213.63   | PASS          | AC=2;AF=0.034;AN=58;BaseQRankSum=  |
| 28704 | chrY | 13484410 | . | C | A   | 1085.63  | my_snp_filter | AC=4;AF=0.074;AN=54;BaseQ          |
| 28705 | chrY | 13484411 | . | C | A   | 103.41   | my_snp_filter | AC=1;AF=0.015;AN=68;BaseQ          |
| 28706 | chrY | 13484430 | . | C | T   | 38.60    | my_snp_filter | AC=1;AF=0.015;AN=68;BaseQ          |
| 28707 | chrY | 13484433 | . | G | T   | 84.41    | my_snp_filter | AC=1;AF=0.015;AN=68;BaseQ          |
| 28708 | chrY | 13484443 | . | A | T   | 1280.65  | PASS          | AC=4;AF=0.100;AN=40;BaseQRankSum=  |
| 28709 | chrY | 13484458 | . | T | C   | 329.60   | PASS          | AC=2;AF=0.048;AN=42;BaseQRankSum=  |
| 28710 | chrY | 13484591 | . | T | G   | 96.17    | PASS          | AC=1;AF=0.015;AN=68;BaseQRankSum=  |
| 28711 | chrY | 13484640 | . | T | G   | 75.17    | my_snp_filter | AC=3;AF=0.045;AN=66;BaseQ          |
| 28712 | chrY | 13484643 | . | G | T   | 31.30    | my_snp_filter | AC=3;AF=0.043;AN=70;BaseQ          |
| 28713 | chrY | 13484662 | . | C | A   | 32.62    | my_snp_filter | AC=1;AF=0.014;AN=70;BaseQ          |
| 28714 | chrY | 13484666 | . | G | A   | 100.10   | PASS          | AC=2;AF=0.030;AN=66;BaseQRankSum=  |
| 28715 | chrY | 13484675 | . | C | T   | 38.57    | my_snp_filter | AC=1;AF=0.015;AN=68;BaseQ          |
| 28716 | chrY | 13484778 | . | C | T   | 235.51   | PASS          | AC=4;AF=0.057;AN=70;BaseQRankSum=  |
| 28717 | chrY | 13484787 | . | A | T   | 78.55    | my_snp_filter | AC=3;AF=0.044;AN=68;BaseQ          |
| 28718 | chrY | 13484790 | . | A | T   | 248.31   | PASS          | AC=4;AF=0.059;AN=68;BaseQRankSum=  |
| 28719 | chrY | 13484795 | . | T | C   | 185.46   | PASS          | AC=4;AF=0.067;AN=60;BaseQRankSum=  |
| 28720 | chrY | 13484817 | . | G | T   | 93.35    | PASS          | AC=1;AF=0.014;AN=70;BaseQRankSum=  |
| 28721 | chrY | 13484827 | . | T | G   | 195.19   | PASS          | AC=4;AF=0.059;AN=68;BaseQRankSum=  |
| 28722 | chrY | 13484837 | . | A | C   | 367.02   | PASS          | AC=6;AF=0.086;AN=70;BaseQRankSum=  |
| 28723 | chrY | 13484841 | . | T | G   | 463.48   | PASS          | AC=7;AF=0.135;AN=52;BaseQRankSum=  |
| 28724 | chrY | 13484842 | . | G | T   | 259.74   | PASS          | AC=6;AF=0.097;AN=62;BaseQRankSum=  |
| 28725 | chrY | 13484846 | . | A | T   | 39.82    | PASS          | AC=1;AF=0.014;AN=70;BaseQRankSum=  |
| 28726 | chrY | 13484859 | . | C | T   | 876.70   | PASS          | AC=12;AF=0.214;AN=56;BaseQRankSum= |
| 28727 | chrY | 13484868 | . | A | G   | 105.62   | PASS          | AC=1;AF=0.014;AN=70;BaseQRankSum=  |
| 28728 | chrY | 13484873 | . | C | A   | 40.25    | PASS          | AC=1;AF=0.014;AN=70;BaseQRankSum=  |

|       |      |          |   |     |     |          |               |                                    |
|-------|------|----------|---|-----|-----|----------|---------------|------------------------------------|
| 28729 | chrY | 13484877 | . | T   | A   | 40.18    | PASS          | AC=1;AF=0.014;AN=70;BaseQRankSum=  |
| 28730 | chrY | 13484879 | . | G   | T   | 118.61   | PASS          | AC=2;AF=0.029;AN=70;BaseQRankSum=  |
| 28731 | chrY | 13484885 | . | G   | C   | 71.61    | PASS          | AC=1;AF=0.014;AN=70;BaseQRankSum=  |
| 28732 | chrY | 13484886 | . | C   | G   | 414.48   | PASS          | AC=1;AF=0.015;AN=66;BaseQRankSum=  |
| 28733 | chrY | 13484887 | . | T   | C   | 93.77    | PASS          | AC=1;AF=0.014;AN=70;BaseQRankSum=  |
| 28734 | chrY | 13484890 | . | T   | G,C | 484.07   | PASS          | AC=1,1;AF=0.016,0.016;AN=64;BaseQ  |
| 28735 | chrY | 13484895 | . | C   | G   | 160.17   | PASS          | AC=3;AF=0.043;AN=70;BaseQRankSum=  |
| 28736 | chrY | 13484896 | . | A   | T   | 327.57   | PASS          | AC=6;AF=0.091;AN=66;BaseQRankSum=  |
| 28737 | chrY | 13484897 | . | G   | T   | 109.23   | PASS          | AC=2;AF=0.029;AN=68;BaseQRankSum=  |
| 28738 | chrY | 13484907 | . | C   | A   | 93.79    | PASS          | AC=2;AF=0.029;AN=68;BaseQRankSum=  |
| 28739 | chrY | 13484908 | . | T   | A   | 92.12    | PASS          | AC=2;AF=0.029;AN=68;BaseQRankSum=  |
| 28740 | chrY | 13484911 | . | G   | A   | 51.17    | PASS          | AC=2;AF=0.032;AN=62;BaseQRankSum=  |
| 28741 | chrY | 13484912 | . | C   | T   | 2507.85  | PASS          | AC=15;AF=0.395;AN=38;BaseQRankSum= |
| 28742 | chrY | 13484928 | . | A   | T   | 507.18   | PASS          | AC=3;AF=0.045;AN=66;BaseQRankSum=  |
| 28743 | chrY | 13484932 | . | C   | A   | 252.62   | PASS          | AC=4;AF=0.059;AN=68;BaseQRankSum=  |
| 28744 | chrY | 13484933 | . | A   | T   | 142.77   | my_snp_filter | AC=3;AF=0.043;AN=70;BaseQ          |
| 28745 | chrY | 13484935 | . | A   | G   | 127.90   | my_snp_filter | AC=3;AF=0.043;AN=70;BaseQ          |
| 28746 | chrY | 13484940 | . | C   | T   | 51.02    | my_snp_filter | AC=2;AF=0.029;AN=68;BaseQ          |
| 28747 | chrY | 13484944 | . | A   | T   | 85.36    | my_snp_filter | AC=3;AF=0.043;AN=70;BaseQ          |
| 28748 | chrY | 13484951 | . | G   | A   | 205.68   | PASS          | AC=4;AF=0.057;AN=70;BaseQRankSum=  |
| 28749 | chrY | 13484955 | . | G,8 | A,C | 1613.64  | PASS          | AC=6,8;AF=0.125,0.167;AN=48;BaseQ  |
| 28750 | chrY | 13484960 | . | C   | T,G | 774.56   | PASS          | AC=4,3;AF=0.059,0.044;AN=68;BaseQ  |
| 28751 | chrY | 13484963 | . | G   | T   | 241.12   | PASS          | AC=4;AF=0.057;AN=70;BaseQRankSum=  |
| 28752 | chrY | 13484964 | . | A   | T   | 238.89   | PASS          | AC=4;AF=0.057;AN=70;BaseQRankSum=  |
| 28753 | chrY | 13484967 | . | C   | T   | 557.49   | PASS          | AC=3;AF=0.043;AN=70;BaseQRankSum=  |
| 28754 | chrY | 13484968 | . | T   | C   | 573.83   | PASS          | AC=4;AF=0.057;AN=70;BaseQRankSum=  |
| 28755 | chrY | 13484970 | . | T   | C   | 603.65   | PASS          | AC=3;AF=0.043;AN=70;BaseQRankSum=  |
| 28756 | chrY | 13484985 | . | G   | A   | 977.80   | PASS          | AC=5;AF=0.071;AN=70;BaseQRankSum=  |
| 28757 | chrY | 13484992 | . | A   | C   | 94.83    | PASS          | AC=3;AF=0.043;AN=70;BaseQRankSum=  |
| 28758 | chrY | 13485200 | . | C   | A   | 50.58    | PASS          | AC=2;AF=0.029;AN=68;BaseQRankSum=  |
| 28759 | chrY | 13485208 | . | T   | A   | 50.32    | PASS          | AC=2;AF=0.029;AN=68;BaseQRankSum=  |
| 28760 | chrY | 13485212 | . | C   | A   | 53.33    | PASS          | AC=2;AF=0.029;AN=68;BaseQRankSum=  |
| 28761 | chrY | 13485228 | . | T   | A   | 93.59    | PASS          | AC=1;AF=0.014;AN=70;BaseQRankSum=  |
| 28762 | chrY | 13485254 | . | C   | T   | 735.62   | PASS          | AC=2;AF=0.038;AN=52;BaseQRankSum=  |
| 28763 | chrY | 13485262 | . | T   | G   | 1001.12  | PASS          | AC=1;AF=0.017;AN=58;BaseQRankSum=  |
| 28764 | chrY | 13485263 | . | T   | G   | 1008.65  | PASS          | AC=1;AF=0.019;AN=54;BaseQRankSum=  |
| 28765 | chrY | 13485284 | . | A   | G   | 931.67   | PASS          | AC=1;AF=0.018;AN=56;BaseQRankSum=  |
| 28766 | chrY | 13485327 | . | T   | G   | 484.73   | PASS          | AC=2;AF=0.037;AN=54;BaseQRankSum=  |
| 28767 | chrY | 13485334 | . | T   | A   | 586.07   | PASS          | AC=2;AF=0.042;AN=48;BaseQRankSum=  |
| 28768 | chrY | 13485346 | . | C   | A   | 540.77   | PASS          | AC=2;AF=0.038;AN=52;BaseQRankSum=  |
| 28769 | chrY | 13485358 | . | G   | C   | 502.68   | PASS          | AC=2;AF=0.032;AN=62;BaseQRankSum=  |
| 28770 | chrY | 13485372 | . | G   | T   | 762.43   | PASS          | AC=1;AF=0.016;AN=64;BaseQRankSum=  |
| 28771 | chrY | 13485376 | . | T   | C   | 73.40    | my_snp_filter | AC=1;AF=0.015;AN=66;BaseQ          |
| 28772 | chrY | 13485378 | . | A   | T,G | 850.85   | PASS          | AC=3,2;AF=0.075,0.050;AN=40;BaseQ  |
| 28773 | chrY | 13485416 | . | G   | A   | 313.37   | PASS          | AC=10;AF=0.167;AN=60;BaseQRankSum= |
| 28774 | chrY | 13485418 | . | A   | G   | 4481.93  | my_snp_filter | AC=22;AF=0.579;AN=38;BaseQ         |
| 28775 | chrY | 13485426 | . | A   | T   | 218.12   | PASS          | AC=8;AF=0.129;AN=62;BaseQRankSum=  |
| 28776 | chrY | 13485436 | . | A   | T   | 41.96    | PASS          | AC=1;AF=0.017;AN=60;BaseQRankSum=  |
| 28777 | chrY | 13485439 | . | G   | T   | 45.53    | PASS          | AC=1;AF=0.017;AN=58;BaseQRankSum=  |
| 28778 | chrY | 13485442 | . | A   | G   | 292.04   | my_snp_filter | AC=1;AF=0.017;AN=60;BaseQ          |
| 28779 | chrY | 13485444 | . | A   | T   | 81.87    | PASS          | AC=4;AF=0.069;AN=58;DP=4623;FS=0.  |
| 28780 | chrY | 13485450 | . | T   | A   | 77.96    | my_snp_filter | AC=1;AF=0.017;AN=60;BaseQ          |
| 28781 | chrY | 13485458 | . | A   | C   | 34848.10 | my_snp_filter | AC=14;AF=0.412;AN=                 |
| 28782 | chrY | 13485460 | . | G   | C   | 49.23    | PASS          | AC=2;AF=0.038;AN=52;DP=3993;FS=0.  |
| 28783 | chrY | 13485461 | . | T   | A   | 463.41   | my_snp_filter | AC=1;AF=0.019;AN=54;BaseQ          |
| 28784 | chrY | 13485463 | . | C   | T   | 383.42   | my_snp_filter | AC=3;AF=0.056;AN=54;BaseQ          |
| 28785 | chrY | 13485468 | . | A   | C   | 441.51   | my_snp_filter | AC=3;AF=0.060;AN=50;BaseQ          |
| 28786 | chrY | 13485477 | . | A   | C   | 165.20   | PASS          | AC=1;AF=0.022;AN=46;BaseQRankSum=  |
| 28787 | chrY | 13485478 | . | A   | T   | 46.68    | my_snp_filter | AC=1;AF=0.021;AN=48;BaseQ          |
| 28788 | chrY | 13485479 | . | A   | T   | 22763.04 | my_snp_filter | AC=9;AF=0.281;AN=                  |
| 28789 | chrY | 13485484 | . | C   | A   | 1028.74  | PASS          | AC=1;AF=0.020;AN=50;BaseQRankSum=  |
| 28790 | chrY | 13485485 | . | C   | T   | 320.64   | my_snp_filter | AC=1;AF=0.022;AN=46;BaseQ          |
| 28791 | chrY | 13485503 | . | T   | C   | 12913.38 | my_snp_filter | AC=6;AF=0.231;AN=                  |
| 28792 | chrY | 13485506 | . | G   | C   | 2875.16  | PASS          | AC=5;AF=0.083;AN=60;BaseQRankSum=  |
| 28793 | chrY | 13485517 | . | T   | C   | 16173.01 | PASS          | AC=20;AF=0.556;AN=36;BaseQ         |
| 28794 | chrY | 13485521 | . | G   | A   | 201.37   | my_snp_filter | AC=1;AF=0.017;AN=60;BaseQ          |
| 28795 | chrY | 13485557 | . | G   | T   | 59.86    | PASS          | AC=1;AF=0.014;AN=70;BaseQRankSum=  |
| 28796 | chrY | 13485566 | . | T   | A   | 67.98    | PASS          | AC=1;AF=0.014;AN=70;BaseQRankSum=  |
| 28797 | chrY | 13485569 | . | A   | G   | 126.90   | PASS          | AC=1;AF=0.014;AN=70;BaseQRankSum=  |
| 28798 | chrY | 13485574 | . | A   | G   | 197.92   | PASS          | AC=3;AF=0.043;AN=70;BaseQRankSum=  |
| 28799 | chrY | 13485577 | . | T   | G   | 106.73   | my_snp_filter | AC=3;AF=0.043;AN=70;BaseQ          |
| 28800 | chrY | 13485579 | . | C   | A   | 50724.73 | PASS          | AC=24;AF=0.387;AN=62;BaseQ         |
| 28801 | chrY | 13485586 | . | T   | C   | 188.86   | PASS          | AC=3;AF=0.043;AN=70;BaseQRankSum=  |
| 28802 | chrY | 13485588 | . | G   | T,A | 254.35   | PASS          | AC=2,1;AF=0.029,0.015;AN=68;BaseQ  |
| 28803 | chrY | 13485589 | . | T   | A,G | 15391.50 | PASS          | AC=1,18;AF=0.016,0.281;AN=         |
| 28804 | chrY | 13485599 | . | C   | T   | 131.67   | PASS          | AC=1;AF=0.014;AN=70;BaseQRankSum=  |

|       |      |          |   |   |       |          |               |                                    |
|-------|------|----------|---|---|-------|----------|---------------|------------------------------------|
| 28805 | chrY | 13485603 | . | G | T,C   | 446.41   | my_snp_filter | AC=1,2;AF=0.014,0.029;AN=          |
| 28806 | chrY | 13485607 | . | T | G     | 515.93   | my_snp_filter | AC=1;AF=0.014;AN=70;BaseQ          |
| 28807 | chrY | 13485608 | . | G | T     | 361.58   | PASS          | AC=3;AF=0.043;AN=70;BaseQRankSum=  |
| 28808 | chrY | 13485613 | . | A | G,T   | 70990.50 | PASS          | AC=22,1;AF=0.355,0.016;AN          |
| 28809 | chrY | 13485616 | . | G | T     | 80045.21 | PASS          | AC=21;AF=0.339;AN=62;Base          |
| 28810 | chrY | 13485617 | . | C | G     | 134.28   | my_snp_filter | AC=2;AF=0.029;AN=70;BaseQ          |
| 28811 | chrY | 13485619 | . | C | T     | 19574.62 | PASS          | AC=21;AF=0.300;AN=70;Base          |
| 28812 | chrY | 13485624 | . | A | T     | 235.64   | PASS          | AC=3;AF=0.043;AN=70;BaseQRankSum=  |
| 28813 | chrY | 13485626 | . | G | T     | 242.06   | PASS          | AC=2;AF=0.029;AN=70;BaseQRankSum=  |
| 28814 | chrY | 13485628 | . | A | C     | 77506.52 | PASS          | AC=22;AF=0.344;AN=64;Base          |
| 28815 | chrY | 13485629 | . | G | T     | 203.42   | PASS          | AC=1;AF=0.014;AN=70;BaseQRankSum=  |
| 28816 | chrY | 13485631 | . | G | A     | 765.23   | PASS          | AC=11;AF=0.157;AN=70;BaseQRankSum= |
| 28817 | chrY | 13485637 | . | A | C     | 9513.95  | PASS          | AC=8;AF=0.114;AN=70;BaseQRankSum=  |
| 28818 | chrY | 13485638 | . | C | A     | 13181.29 | PASS          | AC=7;AF=0.100;AN=70;BaseQ          |
| 28819 | chrY | 13485639 | . | A | C     | 826.76   | PASS          | AC=3;AF=0.043;AN=70;BaseQRankSum=  |
| 28820 | chrY | 13485641 | . | G | C     | 587.48   | PASS          | AC=11;AF=0.157;AN=70;BaseQRankSum= |
| 28821 | chrY | 13485646 | . | A | T,*   | 1008.31  | PASS          | AC=2,3;AF=0.029,0.043;AN=70;BaseQ  |
| 28822 | chrY | 13485647 | . | C | A,*   | 713.33   | my_snp_filter | AC=1,3;AF=0.014,0.043;AN=          |
| 28823 | chrY | 13485648 | . | A | C     | 342.43   | PASS          | AC=4;AF=0.057;AN=70;BaseQRankSum=  |
| 28824 | chrY | 13485649 | . | T | A     | 546.35   | PASS          | AC=4;AF=0.057;AN=70;BaseQRankSum=  |
| 28825 | chrY | 13485654 | . | T | G,A,* | 82185.25 | PASS          | AC=5,20,1;AF=0.081,0.323,          |
| 28826 | chrY | 13485658 | . | T | G,*   | 647.13   | PASS          | AC=1,4;AF=0.014,0.057;AN=70;BaseQ  |
| 28827 | chrY | 13485663 | . | A | C,*   | 1506.90  | PASS          | AC=5,5;AF=0.071,0.071;AN=70;BaseQ  |
| 28828 | chrY | 13485664 | . | G | A     | 1487.24  | PASS          | AC=11;AF=0.157;AN=70;BaseQRankSum= |
| 28829 | chrY | 13485665 | . | T | C     | 2230.05  | my_snp_filter | AC=3;AF=0.043;AN=70;BaseQ          |
| 28830 | chrY | 13485666 | . | G | A,*   | 1174.57  | PASS          | AC=3,3;AF=0.043,0.043;AN=70;BaseQ  |
| 28831 | chrY | 13485670 | . | A | G,*   | 1487.37  | PASS          | AC=9,4;AF=0.129,0.057;AN=70;BaseQ  |
| 28832 | chrY | 13485671 | . | T | G     | 47158.99 | PASS          | AC=31;AF=0.456;AN=68;Base          |
| 28833 | chrY | 13485675 | . | T | A,*   | 1240.70  | PASS          | AC=2,5;AF=0.029,0.071;AN=70;BaseQ  |
| 28834 | chrY | 13485678 | . | C | A,*   | 749.74   | PASS          | AC=1,6;AF=0.014,0.086;AN=70;BaseQ  |
| 28835 | chrY | 13485685 | . | C | T,A,* | 59188.62 | PASS          | AC=19,4,1;AF=0.279,0.059,          |
| 28836 | chrY | 13485686 | . | C | G     | 56524.40 | PASS          | AC=19;AF=0.306;AN=62;Base          |
| 28837 | chrY | 13485687 | . | C | A,*   | 1017.77  | PASS          | AC=6,1;AF=0.086,0.014;AN=70;BaseQ  |
| 28838 | chrY | 13485688 | . | C | T,*   | 338.87   | PASS          | AC=2,2;AF=0.029,0.029;AN=70;BaseQ  |
| 28839 | chrY | 13485689 | . | C | A,T,G | 5638.88  | PASS          | AC=3,3,4;AF=0.043,0.043,0.057;AN=  |
| 28840 | chrY | 13485690 | . | T | A     | 173.85   | PASS          | AC=4;AF=0.057;AN=70;BaseQRankSum=  |
| 28841 | chrY | 13485691 | . | G | T     | 126.83   | PASS          | AC=3;AF=0.043;AN=70;BaseQRankSum=  |
| 28842 | chrY | 13485693 | . | A | T,*   | 1154.33  | PASS          | AC=3,5;AF=0.043,0.071;AN=70;BaseQ  |
| 28843 | chrY | 13485695 | . | G | T,*   | 1333.47  | PASS          | AC=5,3;AF=0.071,0.043;AN=70;BaseQ  |
| 28844 | chrY | 13485700 | . | G | T,A,* | 1524.88  | PASS          | AC=2,4,6;AF=0.029,0.057,0.086;AN=  |
| 28845 | chrY | 13485701 | . | C | G,*   | 6028.26  | PASS          | AC=4,7;AF=0.057,0.100;AN=70;BaseQ  |
| 28846 | chrY | 13485707 | . | C | G,*   | 341.69   | PASS          | AC=3,3;AF=0.043,0.043;AN=70;BaseQ  |
| 28847 | chrY | 13485708 | . | A | C,*   | 328.81   | PASS          | AC=3,3;AF=0.043,0.043;AN=70;BaseQ  |
| 28848 | chrY | 13485710 | . | G | T,*   | 1076.28  | PASS          | AC=3,5;AF=0.043,0.071;AN=70;BaseQ  |
| 28849 | chrY | 13485711 | . | A | G,*   | 421.30   | PASS          | AC=2,4;AF=0.029,0.057;AN=70;BaseQ  |
| 28850 | chrY | 13485713 | . | T | A,*   | 487.16   | PASS          | AC=4,5;AF=0.057,0.071;AN=70;BaseQ  |
| 28851 | chrY | 13485726 | . | G | A     | 85.98    | PASS          | AC=3;AF=0.043;AN=70;BaseQRankSum=  |
| 28852 | chrY | 13485733 | . | G | A     | 925.65   | PASS          | AC=10;AF=0.143;AN=70;BaseQRankSum= |
| 28853 | chrY | 13485736 | . | C | T     | 50.04    | PASS          | AC=1;AF=0.014;AN=70;BaseQRankSum=  |
| 28854 | chrY | 13485739 | . | A | G     | 749.92   | my_snp_filter | AC=10;AF=0.143;AN=70;Base          |
| 28855 | chrY | 13485742 | . | T | C     | 336.64   | PASS          | AC=3;AF=0.043;AN=70;BaseQRankSum=  |
| 28856 | chrY | 13485744 | . | T | A     | 49.01    | PASS          | AC=1;AF=0.014;AN=70;BaseQRankSum=  |
| 28857 | chrY | 13485756 | . | C | T     | 52.48    | PASS          | AC=1;AF=0.014;AN=70;BaseQRankSum=  |
| 28858 | chrY | 13485760 | . | T | G     | 2847.09  | PASS          | AC=4;AF=0.057;AN=70;BaseQRankSum=  |
| 28859 | chrY | 13485768 | . | A | G     | 3100.24  | PASS          | AC=9;AF=0.214;AN=42;BaseQRankSum=  |
| 28860 | chrY | 13485779 | . | T | A     | 903.99   | PASS          | AC=7;AF=0.140;AN=50;BaseQRankSum=  |
| 28861 | chrY | 13485780 | . | G | C     | 201.33   | PASS          | AC=1;AF=0.017;AN=58;BaseQRankSum=  |
| 28862 | chrY | 13485804 | . | C | G     | 197.92   | PASS          | AC=4;AF=0.065;AN=62;BaseQRankSum=  |
| 28863 | chrY | 13485813 | . | G | C     | 176.59   | PASS          | AC=3;AF=0.047;AN=64;BaseQRankSum=  |
| 28864 | chrY | 13485817 | . | A | C     | 2112.21  | PASS          | AC=11;AF=0.190;AN=58;BaseQRankSum= |
| 28865 | chrY | 13485819 | . | A | G     | 2031.36  | PASS          | AC=11;AF=0.172;AN=64;BaseQRankSum= |
| 28866 | chrY | 13485843 | . | T | C     | 1021.56  | PASS          | AC=6;AF=0.150;AN=40;BaseQRankSum=  |
| 28867 | chrY | 13485845 | . | A | T     | 1002.46  | PASS          | AC=6;AF=0.100;AN=60;BaseQRankSum=  |
| 28868 | chrY | 13485854 | . | C | T     | 600.88   | PASS          | AC=5;AF=0.208;AN=24;BaseQRankSum=  |
| 28869 | chrY | 13485856 | . | G | A     | 482.67   | PASS          | AC=4;AF=0.167;AN=24;BaseQRankSum=  |
| 28870 | chrY | 13485890 | . | C | A     | 170.25   | PASS          | AC=1;AF=0.020;AN=50;BaseQRankSum=  |
| 28871 | chrY | 13485893 | . | A | C     | 5153.72  | PASS          | AC=22;AF=0.579;AN=38;BaseQRankSum= |
| 28872 | chrY | 13485907 | . | C | A     | 30.31    | my_snp_filter | AC=1;AF=0.015;AN=68;BaseQ          |
| 28873 | chrY | 13485908 | . | T | A     | 129.91   | PASS          | AC=1;AF=0.015;AN=68;BaseQRankSum=  |
| 28874 | chrY | 13485912 | . | C | G     | 525.51   | PASS          | AC=7;AF=0.103;AN=68;BaseQRankSum=  |
| 28875 | chrY | 13485918 | . | T | G     | 36.80    | my_snp_filter | AC=1;AF=0.015;AN=68;BaseQ          |
| 28876 | chrY | 13485927 | . | C | A     | 106.53   | PASS          | AC=1;AF=0.014;AN=70;BaseQRankSum=  |
| 28877 | chrY | 13485928 | . | T | A     | 128.77   | PASS          | AC=6;AF=0.086;AN=70;BaseQRankSum=  |
| 28878 | chrY | 13485930 | . | G | C     | 128.93   | PASS          | AC=1;AF=0.014;AN=70;BaseQRankSum=  |
| 28879 | chrY | 13485932 | . | T | A     | 130.07   | PASS          | AC=1;AF=0.014;AN=70;BaseQRankSum=  |
| 28880 | chrY | 13485934 | . | A | T     | 162.37   | PASS          | AC=5;AF=0.071;AN=70;BaseQRankSum=  |

|       |      |          |   |   |     |         |               |                                    |
|-------|------|----------|---|---|-----|---------|---------------|------------------------------------|
| 28881 | chrY | 13485936 | . | C | A   | 134.05  | PASS          | AC=1;AF=0.014;AN=70;BaseQRankSum=  |
| 28882 | chrY | 13485938 | . | G | T   | 53.95   | PASS          | AC=4;AF=0.057;AN=70;BaseQRankSum=  |
| 28883 | chrY | 13485945 | . | G | T   | 90.39   | PASS          | AC=2;AF=0.029;AN=70;BaseQRankSum=  |
| 28884 | chrY | 13485960 | . | C | T   | 178.91  | PASS          | AC=2;AF=0.029;AN=70;BaseQRankSum=  |
| 28885 | chrY | 13485963 | . | C | A   | 86.46   | PASS          | AC=1;AF=0.014;AN=70;BaseQRankSum=  |
| 28886 | chrY | 13485964 | . | T | A   | 200.12  | PASS          | AC=3;AF=0.043;AN=70;BaseQRankSum=  |
| 28887 | chrY | 13485966 | . | T | A   | 156.51  | PASS          | AC=3;AF=0.043;AN=70;BaseQRankSum=  |
| 28888 | chrY | 13485975 | . | C | T   | 88.79   | my_snp_filter | AC=3;AF=0.043;AN=70;BaseQ          |
| 28889 | chrY | 13485977 | . | T | C   | 44.53   | my_snp_filter | AC=1;AF=0.014;AN=70;BaseQ          |
| 28890 | chrY | 13485984 | . | G | C   | 64.19   | my_snp_filter | AC=3;AF=0.043;AN=70;BaseQ          |
| 28891 | chrY | 13485996 | . | C | T   | 43.60   | PASS          | AC=1;AF=0.014;AN=70;BaseQRankSum=  |
| 28892 | chrY | 13486002 | . | G | C,* | 239.75  | PASS          | AC=2,1;AF=0.029,0.015;AN=68;BaseQ  |
| 28893 | chrY | 13486004 | . | A | T   | 3179.51 | PASS          | AC=10;AF=0.313;AN=32;BaseQRankSum= |
| 28894 | chrY | 13486005 | . | A | C   | 4269.41 | PASS          | AC=10;AF=0.313;AN=32;BaseQRankSum= |
| 28895 | chrY | 13486013 | . | A | G   | 142.33  | PASS          | AC=1;AF=0.016;AN=64;BaseQRankSum=  |
| 28896 | chrY | 13486017 | . | A | G   | 180.64  | PASS          | AC=1;AF=0.015;AN=68;BaseQRankSum=  |
| 28897 | chrY | 13486018 | . | T | C   | 89.63   | PASS          | AC=1;AF=0.023;AN=44;BaseQRankSum=  |
| 28898 | chrY | 13486019 | . | A | T,G | 1410.33 | PASS          | AC=3,2;AF=0.075,0.050;AN=40;BaseQ  |
| 28899 | chrY | 13486023 | . | C | G   | 60.97   | my_snp_filter | AC=1;AF=0.014;AN=70;BaseQ          |
| 28900 | chrY | 13486038 | . | C | A   | 155.48  | PASS          | AC=1;AF=0.014;AN=70;BaseQRankSum=  |
| 28901 | chrY | 13486048 | . | C | A   | 524.34  | PASS          | AC=2;AF=0.083;AN=24;BaseQRankSum=  |
| 28902 | chrY | 13486051 | . | A | G   | 1230.63 | PASS          | AC=3;AF=0.043;AN=70;BaseQRankSum=  |
| 28903 | chrY | 13486089 | . | C | A   | 54.51   | PASS          | AC=1;AF=0.014;AN=70;BaseQRankSum=  |
| 28904 | chrY | 13486093 | . | C | A   | 401.55  | PASS          | AC=4;AF=0.091;AN=44;BaseQRankSum=  |
| 28905 | chrY | 13486117 | . | G | C   | 171.11  | PASS          | AC=1;AF=0.016;AN=62;BaseQRankSum=  |
| 28906 | chrY | 13486126 | . | T | C   | 118.98  | PASS          | AC=1;AF=0.017;AN=60;BaseQRankSum=  |
| 28907 | chrY | 13486129 | . | G | A   | 73.50   | PASS          | AC=1;AF=0.017;AN=58;BaseQRankSum=  |
| 28908 | chrY | 13486132 | . | T | C   | 75.68   | PASS          | AC=1;AF=0.017;AN=58;BaseQRankSum=  |
| 28909 | chrY | 13486155 | . | A | G   | 46.78   | PASS          | AC=1;AF=0.019;AN=54;BaseQRankSum=  |
| 28910 | chrY | 13486303 | . | T | C   | 1454.69 | PASS          | AC=3;AF=0.065;AN=46;BaseQRankSum=  |
| 28911 | chrY | 13486304 | . | C | A   | 514.25  | PASS          | AC=1;AF=0.017;AN=58;BaseQRankSum=  |
| 28912 | chrY | 13486308 | . | T | G   | 120.55  | PASS          | AC=2;AF=0.030;AN=66;BaseQRankSum=  |
| 28913 | chrY | 13486322 | . | A | G   | 573.43  | PASS          | AC=1;AF=0.014;AN=70;BaseQRankSum=  |
| 28914 | chrY | 13486331 | . | C | A   | 76.63   | PASS          | AC=1;AF=0.014;AN=70;BaseQRankSum=  |
| 28915 | chrY | 13486332 | . | C | A   | 154.62  | PASS          | AC=1;AF=0.014;AN=70;BaseQRankSum=  |
| 28916 | chrY | 13486338 | . | G | C   | 3084.69 | PASS          | AC=2;AF=0.038;AN=52;BaseQRankSum=  |
| 28917 | chrY | 13486348 | . | G | A   | 3564.33 | my_snp_filter | AC=2;AF=0.043;AN=46;BaseQ          |
| 28918 | chrY | 13486386 | . | A | G   | 402.27  | PASS          | AC=1;AF=0.015;AN=66;BaseQRankSum=  |
| 28919 | chrY | 13486396 | . | T | G   | 4254.84 | my_snp_filter | AC=4;AF=0.083;AN=48;BaseQ          |
| 28920 | chrY | 13486398 | . | T | C   | 49.37   | PASS          | AC=2;AF=0.030;AN=66;BaseQRankSum=  |
| 28921 | chrY | 13486404 | . | A | T   | 523.57  | PASS          | AC=1;AF=0.015;AN=68;BaseQRankSum=  |
| 28922 | chrY | 13486406 | . | C | T   | 492.18  | PASS          | AC=1;AF=0.015;AN=66;BaseQRankSum=  |
| 28923 | chrY | 13486410 | . | T | A   | 4036.31 | my_snp_filter | AC=5;AF=0.093;AN=54;BaseQ          |
| 28924 | chrY | 13486415 | . | T | C   | 4491.31 | my_snp_filter | AC=6;AF=0.115;AN=52;BaseQ          |
| 28925 | chrY | 13486438 | . | C | A   | 342.32  | PASS          | AC=1;AF=0.014;AN=70;BaseQRankSum=  |
| 28926 | chrY | 13486442 | . | C | T   | 117.79  | PASS          | AC=1;AF=0.015;AN=68;BaseQRankSum=  |
| 28927 | chrY | 13486448 | . | G | T   | 158.20  | PASS          | AC=1;AF=0.014;AN=70;BaseQRankSum=  |
| 28928 | chrY | 13486453 | . | T | G   | 2348.36 | my_snp_filter | AC=4;AF=0.074;AN=54;BaseQ          |
| 28929 | chrY | 13486458 | . | G | C   | 90.98   | PASS          | AC=1;AF=0.014;AN=70;BaseQRankSum=  |
| 28930 | chrY | 13486460 | . | C | G,T | 981.39  | PASS          | AC=2,1;AF=0.029,0.014;AN=70;BaseQ  |
| 28931 | chrY | 13486463 | . | G | A   | 331.66  | PASS          | AC=1;AF=0.015;AN=68;BaseQRankSum=  |
| 28932 | chrY | 13486465 | . | G | T   | 40.71   | PASS          | AC=1;AF=0.014;AN=70;BaseQRankSum=  |
| 28933 | chrY | 13486471 | . | T | A   | 321.78  | PASS          | AC=1;AF=0.014;AN=70;BaseQRankSum=  |
| 28934 | chrY | 13486478 | . | G | A   | 53.93   | PASS          | AC=2;AF=0.029;AN=70;BaseQRankSum=  |
| 28935 | chrY | 13486479 | . | G | T   | 34.09   | PASS          | AC=1;AF=0.014;AN=70;BaseQRankSum=  |
| 28936 | chrY | 13486489 | . | C | A   | 324.42  | PASS          | AC=1;AF=0.014;AN=70;BaseQRankSum=  |
| 28937 | chrY | 13486494 | . | A | G   | 290.35  | PASS          | AC=1;AF=0.014;AN=70;BaseQRankSum=  |
| 28938 | chrY | 13486498 | . | G | A   | 280.81  | PASS          | AC=1;AF=0.014;AN=70;BaseQRankSum=  |
| 28939 | chrY | 13486502 | . | T | C   | 1677.38 | my_snp_filter | AC=4;AF=0.069;AN=58;BaseQ          |
| 28940 | chrY | 13486503 | . | T | C   | 818.36  | PASS          | AC=3;AF=0.048;AN=62;BaseQRankSum=  |
| 28941 | chrY | 13486505 | . | T | A   | 80.79   | PASS          | AC=1;AF=0.014;AN=70;BaseQRankSum=  |
| 28942 | chrY | 13486511 | . | G | A   | 278.70  | PASS          | AC=2;AF=0.029;AN=68;BaseQRankSum=  |
| 28943 | chrY | 13486515 | . | A | G   | 2438.77 | PASS          | AC=7;AF=0.152;AN=46;BaseQRankSum=  |
| 28944 | chrY | 13486530 | . | G | A   | 325.64  | PASS          | AC=3;AF=0.043;AN=70;BaseQRankSum=  |
| 28945 | chrY | 13486531 | . | C | T   | 277.11  | PASS          | AC=2;AF=0.029;AN=70;BaseQRankSum=  |
| 28946 | chrY | 13486532 | . | G | A   | 215.67  | PASS          | AC=3;AF=0.043;AN=70;BaseQRankSum=  |
| 28947 | chrY | 13486533 | . | T | A   | 292.19  | PASS          | AC=2;AF=0.029;AN=70;BaseQRankSum=  |
| 28948 | chrY | 13486545 | . | T | G   | 1275.11 | PASS          | AC=6;AF=0.091;AN=66;BaseQRankSum=  |
| 28949 | chrY | 13486549 | . | A | T   | 192.18  | PASS          | AC=1;AF=0.014;AN=70;BaseQRankSum=  |
| 28950 | chrY | 13486555 | . | G | T   | 62.41   | my_snp_filter | AC=1;AF=0.017;AN=58;BaseQ          |
| 28951 | chrY | 13486557 | . | G | A   | 4651.91 | PASS          | AC=7;AF=0.292;AN=24;BaseQRankSum=  |
| 28952 | chrY | 13486559 | . | A | T   | 1798.07 | PASS          | AC=4;AF=0.059;AN=68;BaseQRankSum=  |
| 28953 | chrY | 13486561 | . | A | C   | 245.78  | PASS          | AC=1;AF=0.014;AN=70;BaseQRankSum=  |
| 28954 | chrY | 13486573 | . | G | T   | 327.21  | PASS          | AC=1;AF=0.014;AN=70;BaseQRankSum=  |
| 28955 | chrY | 13486574 | . | C | T   | 101.56  | my_snp_filter | AC=1;AF=0.014;AN=70;BaseQ          |
| 28956 | chrY | 13486577 | . | C | A   | 42.77   | my_snp_filter | AC=1;AF=0.014;AN=70;BaseQ          |

|       |      |          |   |   |     |         |               |                                    |
|-------|------|----------|---|---|-----|---------|---------------|------------------------------------|
| 28957 | chrY | 13486578 | . | C | G   | 95.25   | my_snp_filter | AC=1;AF=0.014;AN=70;BaseQ          |
| 28958 | chrY | 13486582 | . | C | A   | 1124.67 | PASS          | AC=4;AF=0.057;AN=70;BaseQRankSum=  |
| 28959 | chrY | 13486583 | . | A | G   | 437.70  | PASS          | AC=1;AF=0.014;AN=70;BaseQRankSum=  |
| 28960 | chrY | 13486589 | . | C | G,T | 819.33  | PASS          | AC=1,1;AF=0.014,0.014;AN=70;BaseQ  |
| 28961 | chrY | 13486590 | . | C | G   | 68.92   | my_snp_filter | AC=1;AF=0.014;AN=70;BaseQ          |
| 28962 | chrY | 13486591 | . | T | C   | 754.68  | PASS          | AC=3;AF=0.043;AN=70;BaseQRankSum=  |
| 28963 | chrY | 13486593 | . | G | C   | 1296.89 | PASS          | AC=3;AF=0.043;AN=70;BaseQRankSum=  |
| 28964 | chrY | 13486598 | . | G | A   | 973.60  | PASS          | AC=2;AF=0.029;AN=70;BaseQRankSum=  |
| 28965 | chrY | 13486599 | . | T | A   | 164.61  | PASS          | AC=1;AF=0.015;AN=68;BaseQRankSum=  |
| 28966 | chrY | 13486601 | . | T | C   | 249.21  | PASS          | AC=1;AF=0.014;AN=70;BaseQRankSum=  |
| 28967 | chrY | 13486610 | . | C | T   | 238.33  | PASS          | AC=1;AF=0.014;AN=70;BaseQRankSum=  |
| 28968 | chrY | 13486612 | . | A | G   | 5333.44 | PASS          | AC=6;AF=0.375;AN=16;BaseQRankSum=  |
| 28969 | chrY | 13486614 | . | G | T   | 377.86  | PASS          | AC=1;AF=0.015;AN=68;BaseQRankSum=  |
| 28970 | chrY | 13486615 | . | T | A   | 626.95  | PASS          | AC=2;AF=0.029;AN=70;BaseQRankSum=  |
| 28971 | chrY | 13486624 | . | C | A   | 94.25   | my_snp_filter | AC=1;AF=0.014;AN=70;BaseQ          |
| 28972 | chrY | 13486627 | . | A | C   | 510.91  | PASS          | AC=1;AF=0.014;AN=70;BaseQRankSum=  |
| 28973 | chrY | 13486628 | . | A | T   | 514.95  | PASS          | AC=1;AF=0.014;AN=70;BaseQRankSum=  |
| 28974 | chrY | 13486629 | . | A | G   | 98.90   | my_snp_filter | AC=1;AF=0.014;AN=70;BaseQ          |
| 28975 | chrY | 13486637 | . | C | A   | 217.57  | PASS          | AC=1;AF=0.015;AN=68;BaseQRankSum=  |
| 28976 | chrY | 13486638 | . | A | T   | 539.79  | PASS          | AC=1;AF=0.015;AN=68;BaseQRankSum=  |
| 28977 | chrY | 13486852 | . | A | G   | 140.53  | my_snp_filter | AC=1;AF=0.014;AN=70;BaseQ          |
| 28978 | chrY | 13486855 | . | C | A   | 154.20  | my_snp_filter | AC=1;AF=0.015;AN=66;BaseQ          |
| 28979 | chrY | 13486856 | . | A | C   | 283.56  | PASS          | AC=1;AF=0.015;AN=66;BaseQRankSum=  |
| 28980 | chrY | 13486866 | . | C | A   | 412.59  | PASS          | AC=2;AF=0.034;AN=58;BaseQRankSum=  |
| 28981 | chrY | 13486870 | . | A | T   | 146.95  | PASS          | AC=1;AF=0.020;AN=50;BaseQRankSum=  |
| 28982 | chrY | 13486875 | . | C | T   | 111.84  | PASS          | AC=2;AF=0.048;AN=42;BaseQRankSum=  |
| 28983 | chrY | 13486876 | . | A | G   | 36.97   | PASS          | AC=1;AF=0.036;AN=28;BaseQRankSum=  |
| 28984 | chrY | 13486888 | . | T | A   | 42.86   | PASS          | AC=1;AF=0.500;AN=2;BaseQRankSum=-  |
| 28985 | chrY | 13487241 | . | G | C   | 618.23  | PASS          | AC=8;AF=0.138;AN=58;BaseQRankSum=  |
| 28986 | chrY | 13487243 | . | C | G   | 785.49  | PASS          | AC=9;AF=0.155;AN=58;BaseQRankSum=  |
| 28987 | chrY | 13487252 | . | G | A   | 31.27   | my_snp_filter | AC=4;AF=0.067;AN=60;BaseQ          |
| 28988 | chrY | 13487256 | . | A | G   | 32.32   | my_snp_filter | AC=1;AF=0.017;AN=60;BaseQ          |
| 28989 | chrY | 13487258 | . | T | C   | 1474.71 | PASS          | AC=10;AF=0.167;AN=60;BaseQRankSum= |
| 28990 | chrY | 13487272 | . | C | G   | 2359.30 | PASS          | AC=8;AF=0.133;AN=60;BaseQRankSum=  |
| 28991 | chrY | 13487273 | . | T | G   | 762.86  | PASS          | AC=5;AF=0.086;AN=58;BaseQRankSum=  |
| 28992 | chrY | 13487277 | . | G | T   | 1673.81 | my_snp_filter | AC=8;AF=0.133;AN=60;BaseQ          |
| 28993 | chrY | 13487284 | . | C | A   | 2344.61 | PASS          | AC=8;AF=0.143;AN=56;BaseQRankSum=  |
| 28994 | chrY | 13487287 | . | T | C   | 2862.16 | PASS          | AC=11;AF=0.190;AN=58;BaseQRankSum= |
| 28995 | chrY | 13487289 | . | G | T   | 220.58  | PASS          | AC=2;AF=0.030;AN=66;BaseQRankSum=  |
| 28996 | chrY | 13487302 | . | G | A   | 170.12  | PASS          | AC=1;AF=0.016;AN=64;BaseQRankSum=  |
| 28997 | chrY | 13487310 | . | T | G   | 165.02  | my_snp_filter | AC=2;AF=0.031;AN=64;BaseQ          |
| 28998 | chrY | 13487320 | . | C | T   | 31.26   | PASS          | AC=1;AF=0.016;AN=64;BaseQRankSum=  |
| 28999 | chrY | 13487321 | . | A | G   | 442.81  | PASS          | AC=5;AF=0.078;AN=64;BaseQRankSum=  |
| 29000 | chrY | 13487324 | . | C | A   | 571.30  | PASS          | AC=5;AF=0.078;AN=64;BaseQRankSum=  |
| 29001 | chrY | 13487325 | . | C | T   | 579.06  | PASS          | AC=7;AF=0.117;AN=60;BaseQRankSum=  |
| 29002 | chrY | 13487326 | . | G | A   | 113.04  | PASS          | AC=1;AF=0.016;AN=62;BaseQRankSum=  |
| 29003 | chrY | 13487329 | . | C | T   | 1718.87 | my_snp_filter | AC=9;AF=0.141;AN=64;BaseQ          |
| 29004 | chrY | 13487330 | . | A | T   | 1725.41 | my_snp_filter | AC=9;AF=0.141;AN=64;BaseQ          |
| 29005 | chrY | 13487332 | . | A | T   | 870.47  | PASS          | AC=7;AF=0.117;AN=60;BaseQRankSum=  |
| 29006 | chrY | 13487337 | . | A | T   | 31.21   | PASS          | AC=1;AF=0.016;AN=64;BaseQRankSum=  |
| 29007 | chrY | 13487340 | . | C | T   | 131.31  | PASS          | AC=3;AF=0.048;AN=62;BaseQRankSum=  |
| 29008 | chrY | 13487341 | . | T | A   | 99.28   | my_snp_filter | AC=1;AF=0.016;AN=64;BaseQ          |
| 29009 | chrY | 13487342 | . | C | T   | 56.49   | PASS          | AC=2;AF=0.031;AN=64;BaseQRankSum=  |
| 29010 | chrY | 13487344 | . | C | A,T | 291.79  | PASS          | AC=2,1;AF=0.031,0.016;AN=64;BaseQ  |
| 29011 | chrY | 13487347 | . | A | T   | 7495.16 | PASS          | AC=22;AF=0.367;AN=60;BaseQRankSum= |
| 29012 | chrY | 13487354 | . | G | C   | 1455.86 | my_snp_filter | AC=9;AF=0.136;AN=66;BaseQ          |
| 29013 | chrY | 13487357 | . | T | C   | 7078.58 | PASS          | AC=19;AF=0.306;AN=62;BaseQRankSum= |
| 29014 | chrY | 13487358 | . | A | C   | 66.55   | my_snp_filter | AC=1;AF=0.015;AN=66;BaseQ          |
| 29015 | chrY | 13487359 | . | A | C   | 6571.55 | PASS          | AC=18;AF=0.300;AN=60;BaseQRankSum= |
| 29016 | chrY | 13487361 | . | G | C   | 40.31   | PASS          | AC=1;AF=0.015;AN=66;BaseQRankSum=  |
| 29017 | chrY | 13487364 | . | A | T   | 269.05  | PASS          | AC=3;AF=0.045;AN=66;BaseQRankSum=  |
| 29018 | chrY | 13487367 | . | C | T   | 31.20   | PASS          | AC=1;AF=0.015;AN=66;BaseQRankSum=  |
| 29019 | chrY | 13487369 | . | T | A   | 1125.42 | my_snp_filter | AC=9;AF=0.136;AN=66;BaseQ          |
| 29020 | chrY | 13487370 | . | C | G   | 103.86  | PASS          | AC=3;AF=0.045;AN=66;BaseQRankSum=  |
| 29021 | chrY | 13487371 | . | G | A   | 871.51  | PASS          | AC=3;AF=0.047;AN=64;BaseQRankSum=  |
| 29022 | chrY | 13487373 | . | C | A   | 2884.83 | PASS          | AC=10;AF=0.161;AN=62;BaseQRankSum= |
| 29023 | chrY | 13487375 | . | G | T   | 277.14  | PASS          | AC=5;AF=0.076;AN=66;BaseQRankSum=  |
| 29024 | chrY | 13487381 | . | C | G   | 34.06   | PASS          | AC=1;AF=0.015;AN=68;BaseQRankSum=  |
| 29025 | chrY | 13487383 | . | C | T   | 50.14   | my_snp_filter | AC=2;AF=0.029;AN=68;BaseQ          |
| 29026 | chrY | 13487384 | . | G | C   | 148.72  | PASS          | AC=3;AF=0.044;AN=68;BaseQRankSum=  |
| 29027 | chrY | 13487386 | . | C | T   | 347.48  | PASS          | AC=1;AF=0.015;AN=68;BaseQRankSum=  |
| 29028 | chrY | 13487387 | . | G | A   | 4975.24 | PASS          | AC=12;AF=0.182;AN=66;BaseQRankSum= |
| 29029 | chrY | 13487389 | . | A | G   | 3075.73 | PASS          | AC=13;AF=0.203;AN=64;BaseQRankSum= |
| 29030 | chrY | 13487394 | . | C | T   | 424.93  | PASS          | AC=5;AF=0.074;AN=68;BaseQRankSum=  |
| 29031 | chrY | 13487398 | . | T | A   | 34.28   | my_snp_filter | AC=1;AF=0.015;AN=68;BaseQ          |
| 29032 | chrY | 13487400 | . | C | G   | 444.21  | PASS          | AC=6;AF=0.088;AN=68;BaseQRankSum=  |

|       |      |          |   |   |       |          |               |                                    |
|-------|------|----------|---|---|-------|----------|---------------|------------------------------------|
| 29033 | chrY | 13487408 | . | G | C     | 496.69   | PASS          | AC=6;AF=0.091;AN=66;BaseQRankSum=  |
| 29034 | chrY | 13487413 | . | C | T     | 114.64   | my_snp_filter | AC=1;AF=0.015;AN=68;BaseQ          |
| 29035 | chrY | 13487415 | . | G | C     | 5888.22  | PASS          | AC=16;AF=0.258;AN=62;BaseQRankSum= |
| 29036 | chrY | 13487423 | . | T | A     | 3933.08  | PASS          | AC=13;AF=0.191;AN=68;BaseQRankSum= |
| 29037 | chrY | 13487428 | . | C | T     | 66.24    | my_snp_filter | AC=3;AF=0.045;AN=66;BaseQ          |
| 29038 | chrY | 13487429 | . | T | G     | 612.75   | PASS          | AC=6;AF=0.091;AN=66;BaseQRankSum=  |
| 29039 | chrY | 13487431 | . | A | G     | 4932     | PASS          | AC=13;AF=0.191;AN=68;BaseQRankSum= |
| 29040 | chrY | 13487440 | . | C | T     | 149.68   | my_snp_filter | AC=3;AF=0.045;AN=66;BaseQ          |
| 29041 | chrY | 13487445 | . | G | C     | 3155.57  | PASS          | AC=11;AF=0.162;AN=68;BaseQRankSum= |
| 29042 | chrY | 13487451 | . | C | T     | 194.42   | my_snp_filter | AC=3;AF=0.045;AN=66;BaseQ          |
| 29043 | chrY | 13487458 | . | G | C     | 105.36   | my_snp_filter | AC=2;AF=0.029;AN=68;BaseQ          |
| 29044 | chrY | 13487462 | . | T | C,G   | 2275.19  | PASS          | AC=7,2;AF=0.113,0.032;AN=62;BaseQ  |
| 29045 | chrY | 13487464 | . | C | G     | 2359.65  | PASS          | AC=8;AF=0.125;AN=64;BaseQRankSum=  |
| 29046 | chrY | 13487469 | . | A | T     | 2508.98  | PASS          | AC=8;AF=0.129;AN=62;BaseQRankSum=  |
| 29047 | chrY | 13487474 | . | C | T     | 125.39   | PASS          | AC=2;AF=0.029;AN=68;BaseQRankSum=  |
| 29048 | chrY | 13487475 | . | G | A,T   | 1605.08  | PASS          | AC=7,1;AF=0.106,0.015;AN=66;BaseQ  |
| 29049 | chrY | 13487488 | . | C | T     | 161.11   | PASS          | AC=2;AF=0.031;AN=64;BaseQRankSum=  |
| 29050 | chrY | 13487492 | . | C | G     | 722.31   | PASS          | AC=6;AF=0.091;AN=66;BaseQRankSum=  |
| 29051 | chrY | 13487494 | . | G | A     | 140.11   | PASS          | AC=2;AF=0.030;AN=66;BaseQRankSum=  |
| 29052 | chrY | 13487504 | . | T | C     | 1652.77  | PASS          | AC=8;AF=0.125;AN=64;BaseQRankSum=  |
| 29053 | chrY | 13487510 | . | T | C     | 1057.01  | PASS          | AC=6;AF=0.094;AN=64;BaseQRankSum=  |
| 29054 | chrY | 13487523 | . | G | T     | 303.53   | PASS          | AC=5;AF=0.081;AN=62;BaseQRankSum=  |
| 29055 | chrY | 13487535 | . | G | C     | 395.64   | PASS          | AC=2;AF=0.031;AN=64;BaseQRankSum=  |
| 29056 | chrY | 13487536 | . | A | G     | 398.77   | PASS          | AC=2;AF=0.031;AN=64;BaseQRankSum=  |
| 29057 | chrY | 13487537 | . | A | C     | 418.17   | PASS          | AC=3;AF=0.048;AN=62;BaseQRankSum=  |
| 29058 | chrY | 13487543 | . | T | C     | 213.22   | PASS          | AC=3;AF=0.048;AN=62;BaseQRankSum=  |
| 29059 | chrY | 13487549 | . | T | G     | 366.68   | PASS          | AC=2;AF=0.031;AN=64;BaseQRankSum=  |
| 29060 | chrY | 13487561 | . | C | G     | 366.85   | PASS          | AC=2;AF=0.031;AN=64;BaseQRankSum=  |
| 29061 | chrY | 13487566 | . | C | T     | 328.08   | PASS          | AC=2;AF=0.032;AN=62;BaseQRankSum=  |
| 29062 | chrY | 13487572 | . | C | T     | 279.31   | PASS          | AC=3;AF=0.048;AN=62;BaseQRankSum=  |
| 29063 | chrY | 13487574 | . | A | T     | 814.18   | PASS          | AC=6;AF=0.100;AN=60;BaseQRankSum=  |
| 29064 | chrY | 13487578 | . | A | T     | 335.61   | PASS          | AC=3;AF=0.047;AN=64;BaseQRankSum=  |
| 29065 | chrY | 13487579 | . | G | T     | 364.83   | PASS          | AC=3;AF=0.047;AN=64;BaseQRankSum=  |
| 29066 | chrY | 13487583 | . | A | G     | 827.55   | PASS          | AC=6;AF=0.094;AN=64;BaseQRankSum=  |
| 29067 | chrY | 13487589 | . | G | T     | 872.85   | PASS          | AC=6;AF=0.100;AN=60;BaseQRankSum=  |
| 29068 | chrY | 13487605 | . | C | G     | 827.21   | my_snp_filter | AC=4;AF=0.065;AN=62;BaseQ          |
| 29069 | chrY | 13487606 | . | T | A     | 150.49   | PASS          | AC=2;AF=0.031;AN=64;BaseQRankSum=  |
| 29070 | chrY | 13487612 | . | A | C     | 498.20   | PASS          | AC=4;AF=0.067;AN=60;BaseQRankSum=  |
| 29071 | chrY | 13487613 | . | T | C     | 71.21    | PASS          | AC=2;AF=0.033;AN=60;BaseQRankSum=  |
| 29072 | chrY | 13487618 | . | G | T     | 63.29    | PASS          | AC=1;AF=0.016;AN=62;BaseQRankSum=  |
| 29073 | chrY | 13487621 | . | C | T     | 240.57   | PASS          | AC=3;AF=0.050;AN=60;BaseQRankSum=  |
| 29074 | chrY | 13487628 | . | C | T     | 65.84    | PASS          | AC=1;AF=0.019;AN=52;BaseQRankSum=  |
| 29075 | chrY | 13487629 | . | A | C     | 287.97   | PASS          | AC=3;AF=0.058;AN=52;BaseQRankSum=  |
| 29076 | chrY | 13487641 | . | A | T     | 414.82   | PASS          | AC=3;AF=0.060;AN=50;BaseQRankSum=  |
| 29077 | chrY | 13487677 | . | C | G     | 294.34   | PASS          | AC=1;AF=0.014;AN=70;BaseQRankSum=  |
| 29078 | chrY | 13487678 | . | C | A     | 598.92   | PASS          | AC=3;AF=0.043;AN=70;BaseQRankSum=  |
| 29079 | chrY | 13487682 | . | C | T     | 259.90   | PASS          | AC=1;AF=0.014;AN=70;BaseQRankSum=  |
| 29080 | chrY | 13487683 | . | C | A,T   | 381.60   | PASS          | AC=1,1;AF=0.014,0.014;AN=70;BaseQ  |
| 29081 | chrY | 13487688 | . | C | A     | 828.20   | PASS          | AC=4;AF=0.057;AN=70;BaseQRankSum=  |
| 29082 | chrY | 13487689 | . | G | T     | 235.07   | PASS          | AC=1;AF=0.014;AN=70;BaseQRankSum=  |
| 29083 | chrY | 13487703 | . | A | A,T   | 281.95   | PASS          | AC=3,1;AF=0.045,0.015;AN=66;BaseQ  |
| 29084 | chrY | 13487704 | . | G | A     | 2728.75  | PASS          | AC=10;AF=0.147;AN=68;BaseQRankSum= |
| 29085 | chrY | 13487705 | . | T | A     | 519.70   | my_snp_filter | AC=7;AF=0.100;AN=70;BaseQ          |
| 29086 | chrY | 13487706 | . | C | G     | 243.06   | PASS          | AC=3;AF=0.044;AN=68;BaseQRankSum=  |
| 29087 | chrY | 13487710 | . | C | A     | 2323.71  | PASS          | AC=10;AF=0.143;AN=70;BaseQRankSum= |
| 29088 | chrY | 13487712 | . | G | A     | 4328.54  | PASS          | AC=11;AF=0.167;AN=66;BaseQRankSum= |
| 29089 | chrY | 13487714 | . | C | T     | 50.64    | my_snp_filter | AC=1;AF=0.014;AN=70;BaseQ          |
| 29090 | chrY | 13487716 | . | C | A     | 1985.16  | PASS          | AC=9;AF=0.129;AN=70;BaseQRankSum=  |
| 29091 | chrY | 13487717 | . | C | A     | 2683.54  | PASS          | AC=10;AF=0.143;AN=70;BaseQRankSum= |
| 29092 | chrY | 13487719 | . | C | A     | 99.65    | my_snp_filter | AC=1;AF=0.014;AN=70;BaseQ          |
| 29093 | chrY | 13487720 | . | C | A     | 1803.90  | my_snp_filter | AC=8;AF=0.114;AN=70;BaseQ          |
| 29094 | chrY | 13487724 | . | A | G,*   | 804.66   | PASS          | AC=4,4;AF=0.100,0.100;AN=40;BaseQ  |
| 29095 | chrY | 13487725 | . | G | C,T   | 8996.54  | PASS          | AC=15,5;AF=0.395,0.132;AN=38;BaseQ |
| 29096 | chrY | 13487731 | . | C | T     | 106.54   | my_snp_filter | AC=1;AF=0.015;AN=68;BaseQ          |
| 29097 | chrY | 13487732 | . | C | T     | 685.68   | PASS          | AC=2;AF=0.029;AN=70;BaseQRankSum=  |
| 29098 | chrY | 13487734 | . | C | A,T   | 1176.83  | PASS          | AC=10,1;AF=0.147,0.015;AN=68;BaseQ |
| 29099 | chrY | 13487735 | . | G | A,T   | 529.02   | PASS          | AC=3,2;AF=0.044,0.029;AN=68;BaseQ  |
| 29100 | chrY | 13487738 | . | C | G     | 3360.80  | PASS          | AC=15;AF=0.227;AN=66;BaseQRankSum= |
| 29101 | chrY | 13487743 | . | T | C     | 10374.02 | PASS          | AC=20;AF=0.526;AN=38;BaseQ         |
| 29102 | chrY | 13487746 | . | C | A     | 294.43   | PASS          | AC=2;AF=0.029;AN=70;BaseQRankSum=  |
| 29103 | chrY | 13487750 | . | C | A     | 1052.66  | PASS          | AC=2;AF=0.029;AN=70;BaseQRankSum=  |
| 29104 | chrY | 13487752 | . | C | A     | 810.19   | PASS          | AC=4;AF=0.059;AN=68;BaseQRankSum=  |
| 29105 | chrY | 13487756 | . | A | T,*   | 3119.66  | PASS          | AC=3,8;AF=0.056,0.148;AN=54;BaseQ  |
| 29106 | chrY | 13487757 | . | C | A,*   | 764.70   | PASS          | AC=7,1;AF=0.113,0.016;AN=62;BaseQ  |
| 29107 | chrY | 13487758 | . | C | T,*   | 321.36   | my_snp_filter | AC=4,1;AF=0.063,0.016;AN=          |
| 29108 | chrY | 13487759 | . | C | A,T,* | 2530.76  | PASS          | AC=10,4,2;AF=0.172,0.069,0.034;AN= |

|       |      |          |   |   |     |          |               |                                   |
|-------|------|----------|---|---|-----|----------|---------------|-----------------------------------|
| 29109 | chrY | 13487761 | . | C | T,* | 1812.31  | PASS          | AC=8,2;AF=0.125,0.031;AN=64;BaseQ |
| 29110 | chrY | 13487762 | . | C | G   | 165.03   | PASS          | AC=1;AF=0.015;AN=66;BaseQRankSum= |
| 29111 | chrY | 13487767 | . | A | G   | 3572.41  | PASS          | AC=13;AF=0.217;AN=60;BaseQRankSum |
| 29112 | chrY | 13487768 | . | C | A   | 87.48    | my_snp_filter | AC=1;AF=0.014;AN=70;BaseQ         |
| 29113 | chrY | 13487771 | . | G | A   | 292.72   | PASS          | AC=3;AF=0.043;AN=70;BaseQRankSum= |
| 29114 | chrY | 13487772 | . | C | A   | 200.05   | PASS          | AC=1;AF=0.014;AN=70;BaseQRankSum= |
| 29115 | chrY | 13487773 | . | C | T   | 92.69    | my_snp_filter | AC=1;AF=0.014;AN=70;BaseQ         |
| 29116 | chrY | 13487776 | . | G | T,A | 2693.60  | PASS          | AC=7,2;AF=0.100,0.029;AN=70;BaseQ |
| 29117 | chrY | 13487778 | . | C | T   | 3509.48  | PASS          | AC=11;AF=0.172;AN=64;BaseQRankSum |
| 29118 | chrY | 13487779 | . | G | C   | 1714.14  | PASS          | AC=8;AF=0.118;AN=68;BaseQRankSum= |
| 29119 | chrY | 13487780 | . | C | A,T | 221.06   | my_snp_filter | AC=1,1;AF=0.014,0.014;AN          |
| 29120 | chrY | 13487782 | . | C | G   | 183.72   | PASS          | AC=1;AF=0.014;AN=70;BaseQRankSum= |
| 29121 | chrY | 13487788 | . | C | A   | 68.04    | my_snp_filter | AC=3;AF=0.043;AN=70;BaseQ         |
| 29122 | chrY | 13487789 | . | C | A   | 2153.68  | PASS          | AC=10;AF=0.147;AN=68;BaseQRankSum |
| 29123 | chrY | 13487790 | . | C | A   | 764.93   | PASS          | AC=5;AF=0.074;AN=68;BaseQRankSum= |
| 29124 | chrY | 13487791 | . | T | C   | 163.27   | PASS          | AC=1;AF=0.014;AN=70;BaseQRankSum= |
| 29125 | chrY | 13487792 | . | T | A   | 90.08    | my_snp_filter | AC=3;AF=0.043;AN=70;BaseQ         |
| 29126 | chrY | 13487794 | . | C | T   | 5274.93  | PASS          | AC=11;AF=0.157;AN=70;BaseQRankSum |
| 29127 | chrY | 13487795 | . | G | A   | 1412.36  | PASS          | AC=8;AF=0.118;AN=68;BaseQRankSum= |
| 29128 | chrY | 13487797 | . | G | T   | 1074.53  | PASS          | AC=7;AF=0.109;AN=64;BaseQRankSum= |
| 29129 | chrY | 13487801 | . | G | T   | 346.13   | PASS          | AC=1;AF=0.015;AN=68;BaseQRankSum= |
| 29130 | chrY | 13487802 | . | G | A   | 1105.33  | PASS          | AC=6;AF=0.088;AN=68;BaseQRankSum= |
| 29131 | chrY | 13487803 | . | G | A   | 66.32    | my_snp_filter | AC=1;AF=0.015;AN=68;BaseQ         |
| 29132 | chrY | 13487804 | . | C | T   | 1514.66  | PASS          | AC=8;AF=0.138;AN=58;BaseQRankSum= |
| 29133 | chrY | 13487805 | . | T | G   | 17427.30 | PASS          | AC=19;AF=0.452;AN=42;Base         |
| 29134 | chrY | 13487806 | . | G | T   | 1135.30  | PASS          | AC=7;AF=0.135;AN=52;BaseQRankSum= |
| 29135 | chrY | 13487807 | . | G | T   | 201.93   | PASS          | AC=1;AF=0.015;AN=66;BaseQRankSum= |
| 29136 | chrY | 13487808 | . | C | T   | 215.52   | my_snp_filter | AC=3;AF=0.044;AN=68;BaseQ         |
| 29137 | chrY | 13487809 | . | T | A   | 403.31   | PASS          | AC=3;AF=0.043;AN=70;BaseQRankSum= |
| 29138 | chrY | 13487814 | . | C | T   | 4345.21  | PASS          | AC=12;AF=0.176;AN=68;BaseQRankSum |
| 29139 | chrY | 13487815 | . | A | T   | 370.96   | PASS          | AC=3;AF=0.044;AN=68;BaseQRankSum= |
| 29140 | chrY | 13487816 | . | G | A   | 847.80   | PASS          | AC=6;AF=0.088;AN=68;BaseQRankSum= |
| 29141 | chrY | 13487817 | . | G | T   | 1543.59  | PASS          | AC=6;AF=0.088;AN=68;BaseQRankSum= |
| 29142 | chrY | 13487818 | . | G | T   | 169.39   | my_snp_filter | AC=2;AF=0.029;AN=70;BaseQ         |
| 29143 | chrY | 13487819 | . | C | T   | 773.39   | PASS          | AC=7;AF=0.100;AN=70;BaseQRankSum= |
| 29144 | chrY | 13487824 | . | A | A,G | 1063     | PASS          | AC=2,4;AF=0.029,0.057;AN=70;BaseQ |
| 29145 | chrY | 13487825 | . | G | A   | 1977.24  | PASS          | AC=7;AF=0.100;AN=70;BaseQRankSum= |
| 29146 | chrY | 13487826 | . | C | A   | 326.45   | my_snp_filter | AC=4;AF=0.057;AN=70;BaseQ         |
| 29147 | chrY | 13487828 | . | A | G   | 84.37    | my_snp_filter | AC=2;AF=0.029;AN=70;BaseQ         |
| 29148 | chrY | 13487831 | . | C | A   | 85.95    | my_snp_filter | AC=1;AF=0.014;AN=70;BaseQ         |
| 29149 | chrY | 13487833 | . | T | A   | 1529.86  | PASS          | AC=4;AF=0.057;AN=70;BaseQRankSum= |
| 29150 | chrY | 13487835 | . | A | C   | 271.74   | my_snp_filter | AC=4;AF=0.057;AN=70;BaseQ         |
| 29151 | chrY | 13487838 | . | G | T,A | 491.67   | PASS          | AC=4,1;AF=0.061,0.015;AN=66;BaseQ |
| 29152 | chrY | 13487839 | . | G | T,C | 967.23   | PASS          | AC=4,1;AF=0.061,0.015;AN=66;BaseQ |
| 29153 | chrY | 13487845 | . | G | A   | 1851.73  | PASS          | AC=5;AF=0.074;AN=68;BaseQRankSum= |
| 29154 | chrY | 13487846 | . | C | A,T | 1799.55  | PASS          | AC=5,4;AF=0.074,0.059;AN=68;BaseQ |
| 29155 | chrY | 13487849 | . | G | T   | 60.92    | my_snp_filter | AC=2;AF=0.038;AN=52;BaseQ         |
| 29156 | chrY | 13487850 | . | T | C   | 16528.33 | PASS          | AC=15;AF=0.357;AN=42;Base         |
| 29157 | chrY | 13487853 | . | G | A,T | 2874.75  | PASS          | AC=7,1;AF=0.106,0.015;AN=66;BaseQ |
| 29158 | chrY | 13487855 | . | C | A   | 1063.97  | PASS          | AC=8;AF=0.118;AN=68;BaseQRankSum= |
| 29159 | chrY | 13487857 | . | G | C   | 940.55   | PASS          | AC=7;AF=0.106;AN=66;BaseQRankSum= |
| 29160 | chrY | 13487858 | . | T | C   | 4675.75  | PASS          | AC=9;AF=0.161;AN=56;BaseQRankSum= |
| 29161 | chrY | 13487859 | . | G | C   | 625.01   | PASS          | AC=4;AF=0.067;AN=60;BaseQRankSum= |
| 29162 | chrY | 13487867 | . | A | G   | 84.94    | my_snp_filter | AC=4;AF=0.061;AN=66;BaseQ         |
| 29163 | chrY | 13487870 | . | G | C,A | 7260.26  | PASS          | AC=2,8;AF=0.037,0.148;AN=54;BaseQ |
| 29164 | chrY | 13487874 | . | C | A   | 2323.44  | PASS          | AC=4;AF=0.077;AN=52;BaseQRankSum= |
| 29165 | chrY | 13487875 | . | T | C   | 9394.21  | PASS          | AC=10;AF=0.208;AN=48;BaseQRankSum |
| 29166 | chrY | 13487876 | . | G | A   | 442.43   | PASS          | AC=5;AF=0.089;AN=56;BaseQRankSum= |
| 29167 | chrY | 13487880 | . | G | A   | 1084.03  | my_snp_filter | AC=8;AF=0.129;AN=62;BaseQ         |
| 29168 | chrY | 13487881 | . | C | G   | 35.13    | my_snp_filter | AC=2;AF=0.032;AN=62;BaseQ         |
| 29169 | chrY | 13487885 | . | C | G   | 2276.26  | PASS          | AC=4;AF=0.063;AN=64;BaseQRankSum= |
| 29170 | chrY | 13487887 | . | G | T   | 2650.71  | PASS          | AC=5;AF=0.078;AN=64;BaseQRankSum= |
| 29171 | chrY | 13487889 | . | C | A   | 352.02   | PASS          | AC=4;AF=0.065;AN=62;BaseQRankSum= |
| 29172 | chrY | 13487890 | . | T | C   | 5574.86  | PASS          | AC=11;AF=0.190;AN=58;BaseQRankSum |
| 29173 | chrY | 13487891 | . | G | A   | 364.81   | PASS          | AC=2;AF=0.033;AN=60;BaseQRankSum= |
| 29174 | chrY | 13487892 | . | G | C   | 1138.61  | my_snp_filter | AC=8;AF=0.125;AN=64;BaseQ         |
| 29175 | chrY | 13487898 | . | C | T   | 638.55   | PASS          | AC=3;AF=0.047;AN=64;BaseQRankSum= |
| 29176 | chrY | 13487902 | . | C | G   | 263.87   | my_snp_filter | AC=5;AF=0.078;AN=64;BaseQ         |
| 29177 | chrY | 13487903 | . | T | A   | 69.83    | my_snp_filter | AC=3;AF=0.047;AN=64;BaseQ         |
| 29178 | chrY | 13487904 | . | G | T   | 259.01   | my_snp_filter | AC=3;AF=0.047;AN=64;BaseQ         |
| 29179 | chrY | 13487906 | . | G | C   | 10864.92 | PASS          | AC=15;AF=0.341;AN=44;Base         |
| 29180 | chrY | 13487914 | . | G | C   | 637.30   | PASS          | AC=3;AF=0.045;AN=66;BaseQRankSum= |
| 29181 | chrY | 13487916 | . | C | T   | 484.90   | PASS          | AC=4;AF=0.061;AN=66;BaseQRankSum= |
| 29182 | chrY | 13487917 | . | G | T,A | 1662.70  | PASS          | AC=7,2;AF=0.109,0.031;AN=64;BaseQ |
| 29183 | chrY | 13487918 | . | C | G   | 574.09   | PASS          | AC=4;AF=0.059;AN=68;BaseQRankSum= |
| 29184 | chrY | 13487920 | . | G | C   | 1451.43  | PASS          | AC=5;AF=0.074;AN=68;BaseQRankSum= |



|       |      |          |   |   |       |         |               |                                    |
|-------|------|----------|---|---|-------|---------|---------------|------------------------------------|
| 29185 | chrY | 13487921 | . | T | G     | 974.36  | my_snp_filter | AC=8;AF=0.118;AN=68;BaseQ          |
| 29186 | chrY | 13487927 | . | G | T     | 1688.96 | PASS          | AC=9;AF=0.132;AN=68;BaseQRankSum=  |
| 29187 | chrY | 13487929 | . | C | A     | 210.11  | PASS          | AC=1;AF=0.015;AN=68;BaseQRankSum=  |
| 29188 | chrY | 13487931 | . | G | A,C   | 1776.99 | PASS          | AC=2,5;AF=0.030,0.076;AN=66;BaseQ  |
| 29189 | chrY | 13487932 | . | G | C     | 1354.68 | PASS          | AC=6;AF=0.088;AN=68;BaseQRankSum=  |
| 29190 | chrY | 13487935 | . | G | A     | 221.77  | my_snp_filter | AC=2;AF=0.029;AN=68;BaseQ          |
| 29191 | chrY | 13487941 | . | C | A     | 1567.40 | PASS          | AC=6;AF=0.088;AN=68;BaseQRankSum=  |
| 29192 | chrY | 13487943 | . | C | T     | 1611.09 | PASS          | AC=7;AF=0.106;AN=66;BaseQRankSum=  |
| 29193 | chrY | 13487948 | . | G | A     | 207.97  | PASS          | AC=1;AF=0.015;AN=68;BaseQRankSum=  |
| 29194 | chrY | 13487949 | . | C | A     | 170.43  | PASS          | AC=1;AF=0.015;AN=66;BaseQRankSum=  |
| 29195 | chrY | 13487952 | . | G | T     | 247.32  | PASS          | AC=1;AF=0.015;AN=66;BaseQRankSum=  |
| 29196 | chrY | 13487954 | . | C | T     | 1249.03 | PASS          | AC=4;AF=0.061;AN=66;BaseQRankSum=  |
| 29197 | chrY | 13487956 | . | G | A,C,* | 632.10  | PASS          | AC=2,1,1;AF=0.030,0.015,0.015;AN=  |
| 29198 | chrY | 13487958 | . | C | G     | 634.71  | PASS          | AC=3;AF=0.075;AN=40;BaseQRankSum=  |
| 29199 | chrY | 13487959 | . | C | T     | 6802.93 | PASS          | AC=10;AF=0.263;AN=38;BaseQRankSum= |
| 29200 | chrY | 13487960 | . | C | T     | 119.13  | PASS          | AC=1;AF=0.018;AN=56;BaseQRankSum=  |
| 29201 | chrY | 13487963 | . | T | C     | 61.84   | my_snp_filter | AC=1;AF=0.015;AN=66;BaseQ          |
| 29202 | chrY | 13487968 | . | A | T,C   | 3781.54 | PASS          | AC=2,8;AF=0.050,0.200;AN=40;BaseQ  |
| 29203 | chrY | 13487969 | . | C | T     | 565.51  | PASS          | AC=3;AF=0.071;AN=42;BaseQRankSum=  |
| 29204 | chrY | 13487971 | . | C | T     | 3504.30 | PASS          | AC=10;AF=0.263;AN=38;BaseQRankSum= |
| 29205 | chrY | 13487974 | . | C | T     | 81.91   | PASS          | AC=1;AF=0.014;AN=70;BaseQRankSum=  |
| 29206 | chrY | 13487975 | . | C | T     | 345.42  | PASS          | AC=2;AF=0.029;AN=70;BaseQRankSum=  |
| 29207 | chrY | 13487979 | . | C | T,*   | 2066.99 | PASS          | AC=7,1;AF=0.152,0.022;AN=46;BaseQ  |
| 29208 | chrY | 13487980 | . | A | G     | 2894.44 | PASS          | AC=11;AF=0.239;AN=46;BaseQRankSum= |
| 29209 | chrY | 13487984 | . | A | T     | 165.19  | PASS          | AC=2;AF=0.029;AN=68;BaseQRankSum=  |
| 29210 | chrY | 13487989 | . | C | T     | 593.09  | PASS          | AC=4;AF=0.061;AN=66;BaseQRankSum=  |
| 29211 | chrY | 13487990 | . | G | A     | 1029.71 | PASS          | AC=5;AF=0.074;AN=68;BaseQRankSum=  |
| 29212 | chrY | 13487992 | . | C | T     | 495.43  | PASS          | AC=4;AF=0.057;AN=70;BaseQRankSum=  |
| 29213 | chrY | 13487993 | . | T | C     | 268.85  | PASS          | AC=3;AF=0.044;AN=68;BaseQRankSum=  |
| 29214 | chrY | 13487994 | . | G | A     | 141.23  | PASS          | AC=1;AF=0.015;AN=68;BaseQRankSum=  |
| 29215 | chrY | 13487995 | . | G | A     | 141.99  | PASS          | AC=1;AF=0.014;AN=70;BaseQRankSum=  |
| 29216 | chrY | 13488000 | . | C | T     | 1074.62 | PASS          | AC=5;AF=0.074;AN=68;BaseQRankSum=  |
| 29217 | chrY | 13488001 | . | C | A     | 606.73  | PASS          | AC=6;AF=0.086;AN=70;BaseQRankSum=  |
| 29218 | chrY | 13488002 | . | C | G     | 145.06  | PASS          | AC=1;AF=0.014;AN=70;BaseQRankSum=  |
| 29219 | chrY | 13488004 | . | G | T     | 361.25  | PASS          | AC=7;AF=0.100;AN=70;BaseQRankSum=  |
| 29220 | chrY | 13488006 | . | G | A     | 226.75  | PASS          | AC=1;AF=0.014;AN=70;BaseQRankSum=  |
| 29221 | chrY | 13488010 | . | G | T     | 660.55  | PASS          | AC=4;AF=0.057;AN=70;BaseQRankSum=  |
| 29222 | chrY | 13488013 | . | T | C     | 2159.56 | PASS          | AC=13;AF=0.191;AN=68;BaseQRankSum= |
| 29223 | chrY | 13488017 | . | C | T     | 1460.14 | PASS          | AC=11;AF=0.162;AN=68;BaseQRankSum= |
| 29224 | chrY | 13488019 | . | A | T     | 938.48  | PASS          | AC=6;AF=0.086;AN=70;BaseQRankSum=  |
| 29225 | chrY | 13488020 | . | C | A     | 1084.43 | PASS          | AC=7;AF=0.100;AN=70;BaseQRankSum=  |
| 29226 | chrY | 13488022 | . | A | C     | 2152.43 | PASS          | AC=8;AF=0.121;AN=66;BaseQRankSum=  |
| 29227 | chrY | 13488030 | . | C | G,*   | 1587.28 | PASS          | AC=6,1;AF=0.086,0.014;AN=70;BaseQ  |
| 29228 | chrY | 13488033 | . | C | T     | 1289.88 | PASS          | AC=11;AF=0.162;AN=68;BaseQRankSum= |
| 29229 | chrY | 13488036 | . | C | A     | 135.16  | PASS          | AC=5;AF=0.076;AN=66;BaseQRankSum=  |
| 29230 | chrY | 13488037 | . | C | A     | 142.13  | PASS          | AC=5;AF=0.076;AN=66;BaseQRankSum=  |
| 29231 | chrY | 13488041 | . | C | T     | 1110.90 | PASS          | AC=6;AF=0.107;AN=56;BaseQRankSum=  |
| 29232 | chrY | 13488042 | . | C | G,T   | 2006.91 | my_snp_filter | AC=3,5;AF=0.052,0.086;AN=          |
| 29233 | chrY | 13488043 | . | A | G     | 5445.57 | my_snp_filter | AC=13;AF=0.283;AN=46;BaseQ         |
| 29234 | chrY | 13488044 | . | C | T,A   | 2198.60 | my_snp_filter | AC=5,5;AF=0.100,0.100;AN=          |
| 29235 | chrY | 13488049 | . | G | A,T   | 1730.51 | PASS          | AC=8,5;AF=0.121,0.076;AN=66;BaseQ  |
| 29236 | chrY | 13488051 | . | C | T     | 127.38  | PASS          | AC=3;AF=0.056;AN=54;BaseQRankSum=  |
| 29237 | chrY | 13488052 | . | T | C,A   | 3272.81 | my_snp_filter | AC=10,3;AF=0.192,0.058;AN=         |
| 29238 | chrY | 13488054 | . | G | C     | 125.60  | PASS          | AC=3;AF=0.050;AN=60;BaseQRankSum=  |
| 29239 | chrY | 13488056 | . | G | T     | 642.47  | PASS          | AC=8;AF=0.118;AN=68;BaseQRankSum=  |
| 29240 | chrY | 13488058 | . | C | T     | 98.79   | PASS          | AC=2;AF=0.031;AN=64;BaseQRankSum=  |
| 29241 | chrY | 13488062 | . | G | T,A   | 1467.81 | my_snp_filter | AC=3,4;AF=0.044,0.059;AN=          |
| 29242 | chrY | 13488063 | . | A | T     | 99.65   | PASS          | AC=3;AF=0.050;AN=60;BaseQRankSum=  |
| 29243 | chrY | 13488068 | . | G | A     | 665.56  | PASS          | AC=6;AF=0.094;AN=64;BaseQRankSum=  |
| 29244 | chrY | 13488069 | . | G | A     | 4320.83 | my_snp_filter | AC=10;AF=0.200;AN=50;BaseQ         |
| 29245 | chrY | 13488074 | . | C | G     | 3921.36 | my_snp_filter | AC=9;AF=0.205;AN=44;BaseQ          |
| 29246 | chrY | 13488079 | . | G | A     | 450.77  | PASS          | AC=4;AF=0.069;AN=58;BaseQRankSum=  |
| 29247 | chrY | 13488080 | . | T | G     | 406.99  | PASS          | AC=4;AF=0.069;AN=58;BaseQRankSum=  |
| 29248 | chrY | 13488084 | . | G | A     | 178.89  | PASS          | AC=4;AF=0.065;AN=62;BaseQRankSum=  |
| 29249 | chrY | 13488085 | . | A | T     | 112.61  | PASS          | AC=2;AF=0.034;AN=58;BaseQRankSum=  |
| 29250 | chrY | 13488086 | . | C | G     | 139.68  | PASS          | AC=2;AF=0.038;AN=52;BaseQRankSum=  |
| 29251 | chrY | 13488088 | . | C | T     | 1441.90 | my_snp_filter | AC=7;AF=0.125;AN=56;BaseQ          |
| 29252 | chrY | 13488094 | . | C | G     | 131.13  | PASS          | AC=2;AF=0.033;AN=60;BaseQRankSum=  |
| 29253 | chrY | 13488095 | . | A | C     | 142.20  | PASS          | AC=2;AF=0.033;AN=60;BaseQRankSum=  |
| 29254 | chrY | 13488098 | . | G | A     | 1389.20 | my_snp_filter | AC=7;AF=0.121;AN=58;BaseQ          |
| 29255 | chrY | 13488099 | . | C | T     | 187.93  | PASS          | AC=2;AF=0.033;AN=60;BaseQRankSum=  |
| 29256 | chrY | 13488100 | . | C | G,A   | 1684.14 | my_snp_filter | AC=3,6;AF=0.068,0.136;AN=          |
| 29257 | chrY | 13488103 | . | G | A,T   | 311.97  | PASS          | AC=3,2;AF=0.058,0.038;AN=52;BaseQ  |
| 29258 | chrY | 13488106 | . | C | A     | 53.28   | my_snp_filter | AC=2;AF=0.040;AN=50;BaseQ          |
| 29259 | chrY | 13488109 | . | C | G     | 259.41  | PASS          | AC=2;AF=0.038;AN=52;BaseQRankSum=  |
| 29260 | chrY | 13488112 | . | G | T     | 1249.09 | PASS          | AC=7;AF=0.109;AN=64;BaseQRankSum=  |

|       |      |          |   |   |     |         |               |                                    |
|-------|------|----------|---|---|-----|---------|---------------|------------------------------------|
| 29261 | chrY | 13488115 | . | T | A   | 160.10  | PASS          | AC=2;AF=0.033;AN=60;BaseQRankSum=  |
| 29262 | chrY | 13488117 | . | C | T   | 70.12   | my_snp_filter | AC=2;AF=0.043;AN=46;BaseQ          |
| 29263 | chrY | 13488118 | . | T | G   | 160.32  | PASS          | AC=2;AF=0.034;AN=58;BaseQRankSum=  |
| 29264 | chrY | 13488124 | . | C | T,A | 385.74  | PASS          | AC=1,2;AF=0.016,0.032;AN=62;BaseQ  |
| 29265 | chrY | 13488125 | . | G | A   | 398.49  | PASS          | AC=5;AF=0.078;AN=64;BaseQRankSum=  |
| 29266 | chrY | 13488130 | . | C | A   | 255.93  | PASS          | AC=1;AF=0.016;AN=62;BaseQRankSum=  |
| 29267 | chrY | 13488131 | . | C | A   | 111.04  | PASS          | AC=1;AF=0.016;AN=64;BaseQRankSum=  |
| 29268 | chrY | 13488132 | . | G | A   | 505.81  | PASS          | AC=5;AF=0.086;AN=58;BaseQRankSum=  |
| 29269 | chrY | 13488134 | . | A | T,G | 1213.35 | PASS          | AC=7,1;AF=0.113,0.016;AN=62;BaseQ  |
| 29270 | chrY | 13488137 | . | C | T,A | 477.24  | PASS          | AC=3,1;AF=0.048,0.016;AN=62;BaseQ  |
| 29271 | chrY | 13488148 | . | A | G   | 775.91  | PASS          | AC=6;AF=0.097;AN=62;BaseQRankSum=  |
| 29272 | chrY | 13488153 | . | A | G   | 260.17  | PASS          | AC=2;AF=0.034;AN=58;BaseQRankSum=  |
| 29273 | chrY | 13488154 | . | G | T   | 198.45  | PASS          | AC=2;AF=0.033;AN=60;BaseQRankSum=  |
| 29274 | chrY | 13488156 | . | A | T   | 119.89  | PASS          | AC=2;AF=0.033;AN=60;BaseQRankSum=  |
| 29275 | chrY | 13488157 | . | C | T,G | 433.08  | PASS          | AC=2,1;AF=0.036,0.018;AN=56;BaseQ  |
| 29276 | chrY | 13488158 | . | G | T,A | 332.08  | PASS          | AC=4,1;AF=0.071,0.018;AN=56;BaseQ  |
| 29277 | chrY | 13488159 | . | G | C   | 60.05   | PASS          | AC=1;AF=0.017;AN=60;BaseQRankSum=  |
| 29278 | chrY | 13488163 | . | G | A   | 290.03  | PASS          | AC=2;AF=0.034;AN=58;BaseQRankSum=  |
| 29279 | chrY | 13488165 | . | C | A   | 271.46  | PASS          | AC=2;AF=0.034;AN=58;BaseQRankSum=  |
| 29280 | chrY | 13488167 | . | A | G,T | 425.70  | PASS          | AC=2,2;AF=0.037,0.037;AN=54;BaseQ  |
| 29281 | chrY | 13488168 | . | C | C,T | 316.72  | PASS          | AC=2,2;AF=0.040,0.040;AN=50;BaseQ  |
| 29282 | chrY | 13488169 | . | G | A   | 1306.31 | PASS          | AC=6;AF=0.111;AN=54;BaseQRankSum=  |
| 29283 | chrY | 13488170 | . | C | A   | 1500.74 | PASS          | AC=6;AF=0.111;AN=54;BaseQRankSum=  |
| 29284 | chrY | 13488172 | . | A | G   | 39.16   | my_snp_filter | AC=2;AF=0.040;AN=50;BaseQ          |
| 29285 | chrY | 13488174 | . | C | T   | 2090.04 | PASS          | AC=10;AF=0.227;AN=44;BaseQRankSum= |
| 29286 | chrY | 13488176 | . | A | T,G | 1976.34 | my_snp_filter | AC=2,6;AF=0.053,0.158;AN=          |
| 29287 | chrY | 13488178 | . | A | T   | 351.55  | PASS          | AC=5;AF=0.104;AN=48;BaseQRankSum=  |
| 29288 | chrY | 13488183 | . | G | A   | 570.13  | PASS          | AC=3;AF=0.071;AN=42;BaseQRankSum=  |
| 29289 | chrY | 13488186 | . | G | T   | 1584.76 | PASS          | AC=6;AF=0.130;AN=46;BaseQRankSum=  |
| 29290 | chrY | 13488187 | . | C | T,A | 1800.35 | PASS          | AC=6,1;AF=0.130,0.022;AN=46;BaseQ  |
| 29291 | chrY | 13488188 | . | C | G   | 197.68  | PASS          | AC=1;AF=0.021;AN=48;BaseQRankSum=  |
| 29292 | chrY | 13488191 | . | G | T   | 350.41  | PASS          | AC=4;AF=0.095;AN=42;BaseQRankSum=  |
| 29293 | chrY | 13488192 | . | A | G   | 1059.89 | my_snp_filter | AC=4;AF=0.105;AN=38;BaseQ          |
| 29294 | chrY | 13488202 | . | T | C   | 217.51  | PASS          | AC=2;AF=0.042;AN=48;BaseQRankSum=  |
| 29295 | chrY | 13488203 | . | G | T   | 1565.74 | PASS          | AC=6;AF=0.136;AN=44;BaseQRankSum=  |
| 29296 | chrY | 13488204 | . | G | T   | 410.88  | PASS          | AC=4;AF=0.083;AN=48;BaseQRankSum=  |
| 29297 | chrY | 13488215 | . | C | A,G | 3622.46 | PASS          | AC=5,5;AF=0.156,0.156;AN=32;BaseQ  |
| 29298 | chrY | 13488223 | . | C | T   | 543.90  | PASS          | AC=5;AF=0.086;AN=58;BaseQRankSum=  |
| 29299 | chrY | 13488224 | . | G | A   | 288.79  | PASS          | AC=3;AF=0.063;AN=48;BaseQRankSum=  |
| 29300 | chrY | 13488226 | . | C | A   | 111.50  | my_snp_filter | AC=2;AF=0.038;AN=52;BaseQ          |
| 29301 | chrY | 13488229 | . | C | A   | 289.22  | PASS          | AC=3;AF=0.052;AN=58;BaseQRankSum=  |
| 29302 | chrY | 13488235 | . | C | G   | 90.52   | my_snp_filter | AC=2;AF=0.034;AN=58;BaseQ          |
| 29303 | chrY | 13488237 | . | G | A   | 82.47   | my_snp_filter | AC=3;AF=0.050;AN=60;BaseQ          |
| 29304 | chrY | 13488241 | . | C | T   | 218.14  | PASS          | AC=3;AF=0.056;AN=54;BaseQRankSum=  |
| 29305 | chrY | 13488242 | . | G | A   | 470.56  | PASS          | AC=5;AF=0.093;AN=54;BaseQRankSum=  |
| 29306 | chrY | 13488243 | . | G | C   | 251.66  | my_snp_filter | AC=5;AF=0.083;AN=60;BaseQ          |
| 29307 | chrY | 13488244 | . | C | A   | 513.53  | PASS          | AC=4;AF=0.071;AN=56;BaseQRankSum=  |
| 29308 | chrY | 13488245 | . | G | C   | 587.24  | my_snp_filter | AC=4;AF=0.069;AN=58;BaseQ          |
| 29309 | chrY | 13488246 | . | G | T,A | 592.38  | PASS          | AC=3,2;AF=0.052,0.034;AN=58;BaseQ  |
| 29310 | chrY | 13488254 | . | G | A   | 1904.18 | my_snp_filter | AC=9;AF=0.173;AN=52;BaseQ          |
| 29311 | chrY | 13488258 | . | C | T   | 76.38   | my_snp_filter | AC=2;AF=0.033;AN=60;BaseQ          |
| 29312 | chrY | 13488259 | . | T | C   | 854.71  | PASS          | AC=6;AF=0.103;AN=58;BaseQRankSum=  |
| 29313 | chrY | 13488262 | . | C | A   | 39.50   | my_snp_filter | AC=1;AF=0.017;AN=60;BaseQ          |
| 29314 | chrY | 13488263 | . | C | T   | 34.50   | my_snp_filter | AC=3;AF=0.050;AN=60;BaseQ          |
| 29315 | chrY | 13488264 | . | C | T   | 189.72  | my_snp_filter | AC=5;AF=0.083;AN=60;BaseQ          |
| 29316 | chrY | 13488265 | . | G | T,A | 868.96  | PASS          | AC=4,1;AF=0.074,0.019;AN=54;BaseQ  |
| 29317 | chrY | 13488267 | . | A | G   | 3477.74 | PASS          | AC=10;AF=0.294;AN=34;BaseQRankSum= |
| 29318 | chrY | 13488271 | . | C | T   | 72.63   | my_snp_filter | AC=2;AF=0.038;AN=52;BaseQ          |
| 29319 | chrY | 13488272 | . | G | A   | 330.94  | PASS          | AC=4;AF=0.074;AN=54;BaseQRankSum=  |
| 29320 | chrY | 13488273 | . | C | T   | 329.74  | PASS          | AC=6;AF=0.115;AN=52;BaseQRankSum=  |
| 29321 | chrY | 13488274 | . | G | A   | 181.67  | PASS          | AC=3;AF=0.048;AN=62;BaseQRankSum=  |
| 29322 | chrY | 13488279 | . | G | A,T | 1144.25 | PASS          | AC=3,4;AF=0.047,0.063;AN=64;BaseQ  |
| 29323 | chrY | 13488282 | . | A | G   | 426.41  | PASS          | AC=3;AF=0.045;AN=66;BaseQRankSum=  |
| 29324 | chrY | 13488286 | . | G | T   | 1076.54 | PASS          | AC=4;AF=0.063;AN=64;BaseQRankSum=  |
| 29325 | chrY | 13488288 | . | C | T   | 81.61   | PASS          | AC=1;AF=0.016;AN=64;BaseQRankSum=  |
| 29326 | chrY | 13488293 | . | G | A   | 271.81  | PASS          | AC=3;AF=0.050;AN=60;BaseQRankSum=  |
| 29327 | chrY | 13488297 | . | G | A   | 144.86  | PASS          | AC=6;AF=0.097;AN=62;BaseQRankSum=  |
| 29328 | chrY | 13488298 | . | C | T   | 762.10  | PASS          | AC=4;AF=0.069;AN=58;BaseQRankSum=  |
| 29329 | chrY | 13488303 | . | C | T,* | 580.54  | PASS          | AC=2,1;AF=0.034,0.017;AN=58;BaseQ  |
| 29330 | chrY | 13488304 | . | G | A,* | 615.69  | PASS          | AC=3,1;AF=0.052,0.017;AN=58;BaseQ  |
| 29331 | chrY | 13488306 | . | G | C,T | 1209.44 | PASS          | AC=8,7;AF=0.174,0.152;AN=46;BaseQ  |
| 29332 | chrY | 13488307 | . | G | A   | 80.91   | my_snp_filter | AC=2;AF=0.033;AN=60;BaseQ          |
| 29333 | chrY | 13488312 | . | C | T,A | 1520.22 | my_snp_filter | AC=7,4;AF=0.113,0.065;AN=          |
| 29334 | chrY | 13488313 | . | G | A   | 70.01   | PASS          | AC=3;AF=0.052;AN=58;BaseQRankSum=  |
| 29335 | chrY | 13488330 | . | A | G,C | 3445.31 | PASS          | AC=13,1;AF=0.271,0.021;AN=48;Base  |
| 29336 | chrY | 13488337 | . | C | T   | 422.43  | PASS          | AC=6;AF=0.107;AN=56;BaseQRankSum=  |

|       |      |          |   |   |       |         |               |                                    |
|-------|------|----------|---|---|-------|---------|---------------|------------------------------------|
| 29337 | chrY | 13488338 | . | G | A     | 704.43  | PASS          | AC=6;AF=0.103;AN=58;BaseQRankSum=  |
| 29338 | chrY | 13488341 | . | C | G     | 127.54  | PASS          | AC=2;AF=0.032;AN=62;BaseQRankSum=  |
| 29339 | chrY | 13488346 | . | G | C     | 44.03   | my_snp_filter | AC=2;AF=0.031;AN=64;BaseQ          |
| 29340 | chrY | 13488355 | . | C | T     | 690.99  | PASS          | AC=4;AF=0.061;AN=66;BaseQRankSum=  |
| 29341 | chrY | 13488363 | . | A | T     | 176.63  | PASS          | AC=2;AF=0.029;AN=68;BaseQRankSum=  |
| 29342 | chrY | 13488370 | . | G | A     | 762.72  | PASS          | AC=15;AF=0.259;AN=58;BaseQRankSum= |
| 29343 | chrY | 13488372 | . | C | T,A,G | 1527.56 | PASS          | AC=8,1,1;AF=0.133,0.017,0.017;AN=  |
| 29344 | chrY | 13488377 | . | G | A     | 194.57  | my_snp_filter | AC=4;AF=0.065;AN=62;BaseQ          |
| 29345 | chrY | 13488384 | . | G | C     | 264.89  | PASS          | AC=4;AF=0.065;AN=62;BaseQRankSum=  |
| 29346 | chrY | 13488385 | . | G | C     | 2691.41 | my_snp_filter | AC=11;AF=0.196;AN=56;Base          |
| 29347 | chrY | 13488387 | . | G | T     | 727.88  | PASS          | AC=4;AF=0.061;AN=66;BaseQRankSum=  |
| 29348 | chrY | 13488388 | . | G | T     | 659.80  | PASS          | AC=5;AF=0.076;AN=66;BaseQRankSum=  |
| 29349 | chrY | 13488391 | . | A | T     | 134.02  | my_snp_filter | AC=3;AF=0.044;AN=68;BaseQ          |
| 29350 | chrY | 13488394 | . | G | T     | 791.01  | PASS          | AC=7;AF=0.103;AN=68;BaseQRankSum=  |
| 29351 | chrY | 13488395 | . | A | G     | 591.73  | PASS          | AC=11;AF=0.157;AN=70;BaseQRankSum= |
| 29352 | chrY | 13488399 | . | G | T,A   | 715.25  | PASS          | AC=5,2;AF=0.076,0.030;AN=66;BaseQ  |
| 29353 | chrY | 13488401 | . | G | T     | 164.65  | PASS          | AC=3;AF=0.044;AN=68;BaseQRankSum=  |
| 29354 | chrY | 13488402 | . | C | T     | 474.35  | PASS          | AC=5;AF=0.074;AN=68;BaseQRankSum=  |
| 29355 | chrY | 13488407 | . | C | T     | 334.46  | PASS          | AC=1;AF=0.014;AN=70;BaseQRankSum=  |
| 29356 | chrY | 13488408 | . | A | G     | 604.82  | PASS          | AC=2;AF=0.029;AN=70;BaseQRankSum=  |
| 29357 | chrY | 13488410 | . | A | T,G   | 967.59  | PASS          | AC=11,1;AF=0.177,0.016;AN=62;Base  |
| 29358 | chrY | 13488414 | . | C | T     | 677.02  | PASS          | AC=3;AF=0.044;AN=68;BaseQRankSum=  |
| 29359 | chrY | 13488419 | . | T | G     | 43.76   | PASS          | AC=1;AF=0.015;AN=66;BaseQRankSum=  |
| 29360 | chrY | 13488421 | . | C | G     | 44.35   | PASS          | AC=1;AF=0.015;AN=66;BaseQRankSum=  |
| 29361 | chrY | 13488429 | . | A | G     | 3798.67 | PASS          | AC=15;AF=0.259;AN=58;BaseQRankSum= |
| 29362 | chrY | 13488435 | . | G | T     | 1033.44 | PASS          | AC=6;AF=0.091;AN=66;BaseQRankSum=  |
| 29363 | chrY | 13488439 | . | T | C,G   | 2713.88 | PASS          | AC=15,2;AF=0.259,0.034;AN=58;Base  |
| 29364 | chrY | 13488440 | . | G | A     | 146.90  | PASS          | AC=5;AF=0.083;AN=60;BaseQRankSum=  |
| 29365 | chrY | 13488444 | . | G | A     | 36.13   | my_snp_filter | AC=2;AF=0.031;AN=64;BaseQ          |
| 29366 | chrY | 13488446 | . | C | T     | 48.83   | PASS          | AC=2;AF=0.030;AN=66;DP=908;FS=0.0  |
| 29367 | chrY | 13488448 | . | A | T     | 47.99   | PASS          | AC=2;AF=0.030;AN=66;DP=908;FS=0.0  |
| 29368 | chrY | 13488450 | . | G | A,T   | 1294.17 | PASS          | AC=5,2;AF=0.078,0.031;AN=64;BaseQ  |
| 29369 | chrY | 13488453 | . | G | C     | 3166.84 | PASS          | AC=15;AF=0.300;AN=50;BaseQRankSum= |
| 29370 | chrY | 13488454 | . | C | T     | 98.74   | PASS          | AC=2;AF=0.034;AN=58;DP=827;FS=2.9  |
| 29371 | chrY | 13488456 | . | G | T     | 1025.66 | PASS          | AC=6;AF=0.103;AN=58;BaseQRankSum=  |
| 29372 | chrY | 13488459 | . | A | T     | 675.45  | PASS          | AC=3;AF=0.047;AN=64;BaseQRankSum=  |
| 29373 | chrY | 13488460 | . | C | A     | 206.70  | PASS          | AC=2;AF=0.033;AN=60;BaseQRankSum=  |
| 29374 | chrY | 13488463 | . | G | T     | 239.41  | PASS          | AC=1;AF=0.016;AN=64;BaseQRankSum=  |
| 29375 | chrY | 13488465 | . | T | A,*   | 616.61  | PASS          | AC=1,3;AF=0.016,0.047;AN=64;BaseQ  |
| 29376 | chrY | 13488467 | . | A | G,T   | 3491.28 | PASS          | AC=17,1;AF=0.354,0.021;AN=48;Base  |
| 29377 | chrY | 13488470 | . | G | A     | 231.11  | PASS          | AC=3;AF=0.047;AN=64;BaseQRankSum=  |
| 29378 | chrY | 13488473 | . | C | A     | 212.71  | PASS          | AC=3;AF=0.048;AN=62;BaseQRankSum=  |
| 29379 | chrY | 13488474 | . | G | A,T   | 1083.66 | PASS          | AC=5,1;AF=0.081,0.016;AN=62;BaseQ  |
| 29380 | chrY | 13488475 | . | C | T     | 493.41  | PASS          | AC=5;AF=0.081;AN=62;BaseQRankSum=  |
| 29381 | chrY | 13488477 | . | C | T     | 1218.63 | PASS          | AC=6;AF=0.097;AN=62;BaseQRankSum=  |
| 29382 | chrY | 13488478 | . | A | A,T   | 723.51  | PASS          | AC=2,3;AF=0.033,0.050;AN=60;BaseQ  |
| 29383 | chrY | 13488479 | . | C | T     | 528.20  | PASS          | AC=4;AF=0.067;AN=60;BaseQRankSum=  |
| 29384 | chrY | 13488480 | . | G | A     | 1223.76 | PASS          | AC=8;AF=0.148;AN=54;BaseQRankSum=  |
| 29385 | chrY | 13488481 | . | C | T     | 828.05  | PASS          | AC=4;AF=0.071;AN=56;BaseQRankSum=  |
| 29386 | chrY | 13488484 | . | T | G,A   | 2732.87 | PASS          | AC=15,1;AF=0.313,0.021;AN=48;Base  |
| 29387 | chrY | 13488485 | . | C | A     | 179.97  | PASS          | AC=4;AF=0.067;AN=60;BaseQRankSum=  |
| 29388 | chrY | 13488487 | . | G | A     | 703.21  | my_snp_filter | AC=2;AF=0.033;AN=60;BaseQ          |
| 29389 | chrY | 13488488 | . | G | A     | 986.66  | PASS          | AC=4;AF=0.067;AN=60;BaseQRankSum=  |
| 29390 | chrY | 13488490 | . | G | A     | 321.22  | PASS          | AC=2;AF=0.034;AN=58;BaseQRankSum=  |
| 29391 | chrY | 13488491 | . | G | C,T   | 1314.95 | PASS          | AC=5,2;AF=0.083,0.033;AN=60;BaseQ  |
| 29392 | chrY | 13488494 | . | T | G     | 550.54  | PASS          | AC=4;AF=0.067;AN=60;BaseQRankSum=  |
| 29393 | chrY | 13488498 | . | C | G     | 70.13   | PASS          | AC=1;AF=0.017;AN=60;BaseQRankSum=  |
| 29394 | chrY | 13488501 | . | A | T,C   | 3874.62 | PASS          | AC=2,13;AF=0.048,0.310;AN=42;Base  |
| 29395 | chrY | 13488502 | . | G | T,A   | 2029.06 | PASS          | AC=5,9;AF=0.100,0.180;AN=50;BaseQ  |
| 29396 | chrY | 13488504 | . | G | A     | 1125.45 | PASS          | AC=4;AF=0.071;AN=56;BaseQRankSum=  |
| 29397 | chrY | 13488506 | . | C | A     | 50.13   | PASS          | AC=1;AF=0.017;AN=60;BaseQRankSum=  |
| 29398 | chrY | 13488510 | . | A | C,T   | 2545.08 | PASS          | AC=8,8;AF=0.190,0.190;AN=42;BaseQ  |
| 29399 | chrY | 13488511 | . | G | A     | 718.32  | PASS          | AC=4;AF=0.077;AN=52;BaseQRankSum=  |
| 29400 | chrY | 13488512 | . | G | T     | 670.53  | PASS          | AC=2;AF=0.036;AN=56;BaseQRankSum=  |
| 29401 | chrY | 13488513 | . | C | T     | 1098.86 | PASS          | AC=7;AF=0.125;AN=56;BaseQRankSum=  |
| 29402 | chrY | 13488515 | . | G | T     | 505.52  | PASS          | AC=3;AF=0.045;AN=66;BaseQRankSum=  |
| 29403 | chrY | 13488516 | . | G | A     | 300.87  | PASS          | AC=5;AF=0.078;AN=64;BaseQRankSum=  |
| 29404 | chrY | 13488519 | . | T | A     | 610.12  | PASS          | AC=1;AF=0.015;AN=68;BaseQRankSum=  |
| 29405 | chrY | 13488527 | . | C | A,T   | 694.08  | my_snp_filter | AC=5,3;AF=0.074,0.044;AN=          |
| 29406 | chrY | 13488532 | . | T | A     | 215.48  | PASS          | AC=2;AF=0.029;AN=68;BaseQRankSum=  |
| 29407 | chrY | 13488535 | . | T | A     | 441.36  | PASS          | AC=1;AF=0.015;AN=68;BaseQRankSum=  |
| 29408 | chrY | 13488537 | . | G | T     | 562.21  | PASS          | AC=2;AF=0.029;AN=68;BaseQRankSum=  |
| 29409 | chrY | 13488538 | . | G | A     | 326.17  | PASS          | AC=2;AF=0.029;AN=68;BaseQRankSum=  |
| 29410 | chrY | 13488541 | . | G | A     | 1722.28 | PASS          | AC=13;AF=0.191;AN=68;BaseQRankSum= |
| 29411 | chrY | 13488542 | . | C | T     | 78.81   | my_snp_filter | AC=1;AF=0.015;AN=68;BaseQ          |
| 29412 | chrY | 13488544 | . | T | C     | 734.83  | PASS          | AC=6;AF=0.088;AN=68;BaseQRankSum=  |

|       |      |          |   |   |       |         |               |                                    |
|-------|------|----------|---|---|-------|---------|---------------|------------------------------------|
| 29413 | chrY | 13488546 | . | C | T     | 775.35  | PASS          | AC=4;AF=0.065;AN=62;BaseQRankSum=  |
| 29414 | chrY | 13488547 | . | G | C,A,T | 1696.98 | PASS          | AC=2,4,3;AF=0.032,0.065,0.048;AN=  |
| 29415 | chrY | 13488548 | . | C | A     | 136.02  | PASS          | AC=1;AF=0.015;AN=68;BaseQRankSum=  |
| 29416 | chrY | 13488549 | . | C | T     | 88.50   | PASS          | AC=1;AF=0.015;AN=68;BaseQRankSum=  |
| 29417 | chrY | 13488555 | . | C | T     | 2116.04 | PASS          | AC=5;AF=0.081;AN=62;BaseQRankSum=  |
| 29418 | chrY | 13488556 | . | G | A     | 1706.41 | PASS          | AC=12;AF=0.188;AN=64;BaseQRankSum= |
| 29419 | chrY | 13488557 | . | G | A     | 238.99  | PASS          | AC=2;AF=0.032;AN=62;BaseQRankSum=  |
| 29420 | chrY | 13488559 | . | G | T     | 1382.68 | PASS          | AC=3;AF=0.045;AN=66;BaseQRankSum=  |
| 29421 | chrY | 13488560 | . | C | G,T   | 2168.05 | PASS          | AC=6,4;AF=0.097,0.065;AN=62;BaseQ  |
| 29422 | chrY | 13488561 | . | G | A,T   | 1504.51 | PASS          | AC=4,3;AF=0.061,0.045;AN=66;BaseQ  |
| 29423 | chrY | 13488563 | . | T | G     | 7503.87 | PASS          | AC=20;AF=0.417;AN=48;BaseQRankSum= |
| 29424 | chrY | 13488569 | . | C | T,A   | 3112.82 | my_snp_filter | AC=5,1;AF=0.081,0.016;AN=          |
| 29425 | chrY | 13488570 | . | G | A     | 2146.22 | PASS          | AC=15;AF=0.250;AN=60;BaseQRankSum= |
| 29426 | chrY | 13488571 | . | G | C     | 772.80  | PASS          | AC=3;AF=0.045;AN=66;BaseQRankSum=  |
| 29427 | chrY | 13488572 | . | G | T     | 378.65  | PASS          | AC=1;AF=0.015;AN=68;BaseQRankSum=  |
| 29428 | chrY | 13488574 | . | C | T     | 39.66   | my_snp_filter | AC=1;AF=0.015;AN=66;BaseQ          |
| 29429 | chrY | 13488575 | . | T | C     | 37.74   | my_snp_filter | AC=1;AF=0.016;AN=64;BaseQ          |
| 29430 | chrY | 13488579 | . | C | T     | 798.26  | my_snp_filter | AC=2;AF=0.029;AN=68;BaseQ          |
| 29431 | chrY | 13488580 | . | A | G     | 959.49  | PASS          | AC=3;AF=0.044;AN=68;BaseQRankSum=  |
| 29432 | chrY | 13488584 | . | C | A     | 500.77  | PASS          | AC=1;AF=0.015;AN=66;BaseQRankSum=  |
| 29433 | chrY | 13488585 | . | C | A     | 573.50  | PASS          | AC=1;AF=0.015;AN=66;BaseQRankSum=  |
| 29434 | chrY | 13488588 | . | C | T     | 78.87   | my_snp_filter | AC=2;AF=0.030;AN=66;BaseQ          |
| 29435 | chrY | 13488589 | . | G | A     | 575.46  | PASS          | AC=1;AF=0.015;AN=68;BaseQRankSum=  |
| 29436 | chrY | 13488593 | . | C | T     | 88.13   | PASS          | AC=1;AF=0.015;AN=68;BaseQRankSum=  |
| 29437 | chrY | 13488598 | . | A | G     | 1169.47 | my_snp_filter | AC=6;AF=0.107;AN=56;BaseQ          |
| 29438 | chrY | 13488599 | . | C | T     | 1535.36 | PASS          | AC=9;AF=0.155;AN=58;BaseQRankSum=  |
| 29439 | chrY | 13488601 | . | A | C     | 5587.21 | PASS          | AC=22;AF=0.407;AN=54;BaseQRankSum= |
| 29440 | chrY | 13488604 | . | G | T     | 50.42   | my_snp_filter | AC=1;AF=0.015;AN=66;BaseQ          |
| 29441 | chrY | 13488606 | . | G | T,*   | 1336.03 | PASS          | AC=3,1;AF=0.045,0.015;AN=66;BaseQ  |
| 29442 | chrY | 13488613 | . | C | T     | 79.64   | my_snp_filter | AC=1;AF=0.015;AN=68;BaseQ          |
| 29443 | chrY | 13488614 | . | C | T     | 83.55   | PASS          | AC=1;AF=0.015;AN=68;BaseQRankSum=  |
| 29444 | chrY | 13488621 | . | A | G,T   | 7885.86 | PASS          | AC=20,1;AF=0.476,0.024;AN=42;Base  |
| 29445 | chrY | 13488622 | . | G | A     | 128.71  | PASS          | AC=3;AF=0.052;AN=58;BaseQRankSum=  |
| 29446 | chrY | 13488623 | . | C | G     | 1107.38 | PASS          | AC=6;AF=0.103;AN=58;BaseQRankSum=  |
| 29447 | chrY | 13488627 | . | T | C     | 8244.45 | PASS          | AC=11;AF=0.239;AN=46;BaseQRankSum= |
| 29448 | chrY | 13488629 | . | T | G     | 30.83   | my_snp_filter | AC=2;AF=0.034;AN=58;BaseQ          |
| 29449 | chrY | 13488632 | . | G | T,A   | 236.33  | PASS          | AC=1,1;AF=0.015,0.015;AN=66;BaseQ  |
| 29450 | chrY | 13488636 | . | G | T     | 1838.84 | my_snp_filter | AC=3;AF=0.044;AN=68;BaseQ          |
| 29451 | chrY | 13488638 | . | G | A     | 59.48   | PASS          | AC=1;AF=0.015;AN=68;BaseQRankSum=  |
| 29452 | chrY | 13488640 | . | G | T     | 1936.08 | my_snp_filter | AC=5;AF=0.076;AN=66;BaseQ          |
| 29453 | chrY | 13488641 | . | C | T     | 2162.47 | my_snp_filter | AC=5;AF=0.078;AN=64;BaseQ          |
| 29454 | chrY | 13488642 | . | G | C     | 470.63  | PASS          | AC=2;AF=0.029;AN=68;BaseQRankSum=  |
| 29455 | chrY | 13488645 | . | G | T     | 95.55   | PASS          | AC=1;AF=0.015;AN=68;BaseQRankSum=  |
| 29456 | chrY | 13488647 | . | C | T,A   | 1553.54 | PASS          | AC=2,3;AF=0.030,0.045;AN=66;BaseQ  |
| 29457 | chrY | 13488648 | . | C | T,A,G | 1288.49 | PASS          | AC=1,1,1;AF=0.015,0.015,0.015;AN=  |
| 29458 | chrY | 13488652 | . | C | T     | 1106.33 | PASS          | AC=3;AF=0.044;AN=68;BaseQRankSum=  |
| 29459 | chrY | 13488654 | . | C | T,A   | 3746.41 | PASS          | AC=10,3;AF=0.156,0.047;AN=64;Base  |
| 29460 | chrY | 13488655 | . | G | A,T   | 740.51  | PASS          | AC=4,2;AF=0.059,0.029;AN=68;BaseQ  |
| 29461 | chrY | 13488657 | . | G | T,A   | 164.39  | PASS          | AC=1,1;AF=0.015,0.015;AN=68;BaseQ  |
| 29462 | chrY | 13488660 | . | C | G     | 80.49   | PASS          | AC=1;AF=0.015;AN=68;BaseQRankSum=  |
| 29463 | chrY | 13488662 | . | A | T     | 649.41  | PASS          | AC=1;AF=0.015;AN=68;BaseQRankSum=  |
| 29464 | chrY | 13488664 | . | C | T     | 692.88  | PASS          | AC=5;AF=0.074;AN=68;BaseQRankSum=  |
| 29465 | chrY | 13488666 | . | C | T     | 2002.25 | PASS          | AC=12;AF=0.176;AN=68;BaseQRankSum= |
| 29466 | chrY | 13488667 | . | A | T     | 83.82   | PASS          | AC=1;AF=0.015;AN=68;BaseQRankSum=  |
| 29467 | chrY | 13488669 | . | C | A     | 912.51  | PASS          | AC=5;AF=0.074;AN=68;BaseQRankSum=  |
| 29468 | chrY | 13488670 | . | C | T     | 37.27   | my_snp_filter | AC=1;AF=0.015;AN=68;BaseQ          |
| 29469 | chrY | 13488671 | . | A | T     | 688.84  | PASS          | AC=5;AF=0.074;AN=68;BaseQRankSum=  |
| 29470 | chrY | 13488674 | . | C | G     | 964.91  | PASS          | AC=5;AF=0.076;AN=66;BaseQRankSum=  |
| 29471 | chrY | 13488675 | . | C | T     | 1024.27 | PASS          | AC=5;AF=0.076;AN=66;BaseQRankSum=  |
| 29472 | chrY | 13488676 | . | G | C,A   | 1647.03 | PASS          | AC=6,2;AF=0.091,0.030;AN=66;BaseQ  |
| 29473 | chrY | 13488677 | . | C | T,A   | 777.98  | PASS          | AC=5,1;AF=0.081,0.016;AN=62;BaseQ  |
| 29474 | chrY | 13488680 | . | C | T     | 156.62  | my_snp_filter | AC=3;AF=0.056;AN=54;BaseQ          |
| 29475 | chrY | 13488681 | . | A | G,T   | 2742.65 | my_snp_filter | AC=13,2;AF=0.260,0.040;AN=         |
| 29476 | chrY | 13488684 | . | A | T     | 88.54   | my_snp_filter | AC=2;AF=0.029;AN=68;BaseQ          |
| 29477 | chrY | 13488685 | . | G | C,A   | 1014.39 | PASS          | AC=4,4;AF=0.059,0.059;AN=68;BaseQ  |
| 29478 | chrY | 13488688 | . | G | T     | 184.11  | PASS          | AC=3;AF=0.043;AN=70;BaseQRankSum=  |
| 29479 | chrY | 13488691 | . | A | T     | 154.35  | PASS          | AC=2;AF=0.029;AN=68;BaseQRankSum=  |
| 29480 | chrY | 13488693 | . | C | T     | 95.60   | PASS          | AC=1;AF=0.014;AN=70;BaseQRankSum=  |
| 29481 | chrY | 13488696 | . | C | G     | 80.99   | PASS          | AC=1;AF=0.015;AN=68;BaseQRankSum=  |
| 29482 | chrY | 13488697 | . | C | A     | 70.54   | my_snp_filter | AC=1;AF=0.014;AN=70;BaseQ          |
| 29483 | chrY | 13488698 | . | A | C     | 136.17  | my_snp_filter | AC=2;AF=0.029;AN=70;BaseQ          |
| 29484 | chrY | 13488700 | . | C | T     | 725.47  | PASS          | AC=1;AF=0.014;AN=70;BaseQRankSum=  |
| 29485 | chrY | 13488704 | . | T | A,C   | 1855.71 | PASS          | AC=1,7;AF=0.019,0.135;AN=52;BaseQ  |
| 29486 | chrY | 13488708 | . | G | A     | 695.56  | PASS          | AC=5;AF=0.109;AN=46;BaseQRankSum=  |
| 29487 | chrY | 13488709 | . | T | G     | 4588.69 | PASS          | AC=15;AF=0.357;AN=42;BaseQRankSum= |
| 29488 | chrY | 13488715 | . | C | G     | 3403.61 | PASS          | AC=12;AF=0.286;AN=42;BaseQRankSum= |

|       |      |          |   |   |     |          |               |                                   |
|-------|------|----------|---|---|-----|----------|---------------|-----------------------------------|
| 29489 | chrY | 13488721 | . | T | A,G | 366.82   | PASS          | AC=2,1;AF=0.029,0.014;AN=70;BaseQ |
| 29490 | chrY | 13488729 | . | C | T,A | 924.23   | PASS          | AC=5,2;AF=0.100,0.040;AN=50;BaseQ |
| 29491 | chrY | 13488730 | . | A | G   | 2274.09  | PASS          | AC=10;AF=0.208;AN=48;BaseQRankSum |
| 29492 | chrY | 13488732 | . | C | T   | 193.98   | PASS          | AC=3;AF=0.050;AN=60;BaseQRankSum  |
| 29493 | chrY | 13488733 | . | G | A,T | 484.55   | PASS          | AC=2,1;AF=0.033,0.017;AN=60;BaseQ |
| 29494 | chrY | 13488736 | . | C | A   | 246.26   | PASS          | AC=2;AF=0.029;AN=68;BaseQRankSum  |
| 29495 | chrY | 13488737 | . | C | A   | 6116.05  | PASS          | AC=11;AF=0.167;AN=66;BaseQRankSum |
| 29496 | chrY | 13488738 | . | G | A   | 1860.66  | PASS          | AC=3;AF=0.044;AN=68;BaseQRankSum  |
| 29497 | chrY | 13488743 | . | C | T   | 304.89   | PASS          | AC=2;AF=0.029;AN=70;BaseQRankSum  |
| 29498 | chrY | 13488747 | . | A | G   | 5616.19  | PASS          | AC=12;AF=0.200;AN=60;BaseQRankSum |
| 29499 | chrY | 13488751 | . | G | T   | 40.77    | PASS          | AC=1;AF=0.014;AN=70;BaseQRankSum  |
| 29500 | chrY | 13488753 | . | G | T,A | 588.22   | PASS          | AC=3,1;AF=0.043,0.014;AN=70;BaseQ |
| 29501 | chrY | 13488755 | . | C | T,A | 1246.06  | PASS          | AC=4,1;AF=0.057,0.014;AN=70;BaseQ |
| 29502 | chrY | 13488756 | . | G | A,T | 2890.85  | PASS          | AC=4,1;AF=0.059,0.015;AN=68;BaseQ |
| 29503 | chrY | 13488759 | . | C | A,* | 446.49   | PASS          | AC=3,1;AF=0.043,0.014;AN=70;BaseQ |
| 29504 | chrY | 13488761 | . | C | A   | 197.32   | PASS          | AC=1;AF=0.014;AN=70;BaseQRankSum  |
| 29505 | chrY | 13488762 | . | C | T   | 2461.12  | PASS          | AC=3;AF=0.044;AN=68;BaseQRankSum  |
| 29506 | chrY | 13488765 | . | C | G   | 305.46   | PASS          | AC=2;AF=0.029;AN=70;BaseQRankSum  |
| 29507 | chrY | 13488766 | . | C | A,T | 9613.44  | PASS          | AC=11,2;AF=0.162,0.029;AN=68;Base |
| 29508 | chrY | 13488769 | . | C | T   | 422.15   | PASS          | AC=1;AF=0.014;AN=70;BaseQRankSum  |
| 29509 | chrY | 13488771 | . | G | C   | 8683.07  | PASS          | AC=13;AF=0.186;AN=70;BaseQRankSum |
| 29510 | chrY | 13488772 | . | G | A   | 8879.07  | PASS          | AC=13;AF=0.186;AN=70;BaseQRankSum |
| 29511 | chrY | 13488773 | . | C | T   | 1333.57  | PASS          | AC=4;AF=0.059;AN=68;BaseQRankSum  |
| 29512 | chrY | 13488775 | . | C | T,G | 2984.18  | PASS          | AC=1,2;AF=0.014,0.029;AN=70;BaseQ |
| 29513 | chrY | 13488776 | . | C | G   | 444.22   | PASS          | AC=3;AF=0.043;AN=70;BaseQRankSum  |
| 29514 | chrY | 13488778 | . | C | T   | 9352.95  | PASS          | AC=12;AF=0.222;AN=54;BaseQRankSum |
| 29515 | chrY | 13488779 | . | C | G,A | 20936.02 | PASS          | AC=17,6;AF=0.340,0.120;AN         |
| 29516 | chrY | 13488781 | . | T | A   | 106.26   | PASS          | AC=1;AF=0.014;AN=70;BaseQRankSum  |
| 29517 | chrY | 13488782 | . | G | T   | 873.67   | my_snp_filter | AC=7;AF=0.100;AN=70;BaseQ         |
| 29518 | chrY | 13488783 | . | G | A   | 319.22   | PASS          | AC=1;AF=0.015;AN=66;BaseQRankSum  |
| 29519 | chrY | 13488785 | . | C | A   | 10344.56 | PASS          | AC=11;AF=0.167;AN=66;Base         |
| 29520 | chrY | 13488788 | . | C | T,A | 457.53   | my_snp_filter | AC=3,1;AF=0.045,0.015;AN=         |
| 29521 | chrY | 13488789 | . | G | A   | 12593.44 | PASS          | AC=13;AF=0.203;AN=64;Base         |
| 29522 | chrY | 13488791 | . | A | G   | 173.01   | my_snp_filter | AC=1;AF=0.015;AN=66;BaseQ         |
| 29523 | chrY | 13488792 | . | C | A   | 3176.64  | PASS          | AC=8;AF=0.121;AN=66;BaseQRankSum  |
| 29524 | chrY | 13488793 | . | C | A   | 12635.30 | PASS          | AC=11;AF=0.177;AN=62;Base         |
| 29525 | chrY | 13488794 | . | C | A,T | 11456.85 | PASS          | AC=9,2;AF=0.150,0.033;AN=         |
| 29526 | chrY | 13488795 | . | G | A   | 613.55   | my_snp_filter | AC=6;AF=0.097;AN=62;BaseQ         |
| 29527 | chrY | 13488797 | . | G | A   | 12627.66 | PASS          | AC=10;AF=0.152;AN=66;Base         |
| 29528 | chrY | 13488798 | . | C | A   | 72.46    | my_snp_filter | AC=1;AF=0.014;AN=70;BaseQ         |
| 29529 | chrY | 13488800 | . | A | G,C | 531.52   | my_snp_filter | AC=1,2;AF=0.015,0.029;AN=         |
| 29530 | chrY | 13488802 | . | A | T   | 711.63   | PASS          | AC=3;AF=0.045;AN=66;BaseQRankSum  |
| 29531 | chrY | 13488803 | . | G | T   | 12719.66 | PASS          | AC=10;AF=0.156;AN=64;Base         |
| 29532 | chrY | 13488806 | . | G | A   | 1765.96  | PASS          | AC=8;AF=0.121;AN=66;BaseQRankSum  |
| 29533 | chrY | 13488808 | . | G | A   | 13043.26 | PASS          | AC=10;AF=0.167;AN=60;Base         |
| 29534 | chrY | 13488810 | . | G | C   | 57.77    | my_snp_filter | AC=1;AF=0.016;AN=62;BaseQ         |
| 29535 | chrY | 13488811 | . | G | A   | 747.92   | PASS          | AC=3;AF=0.050;AN=60;BaseQRankSum  |
| 29536 | chrY | 13488812 | . | A | G   | 2671.27  | PASS          | AC=8;AF=0.133;AN=60;BaseQRankSum  |
| 29537 | chrY | 13488813 | . | C | A   | 435.31   | my_snp_filter | AC=2;AF=0.034;AN=58;BaseQ         |
| 29538 | chrY | 13488814 | . | C | T   | 22987.22 | PASS          | AC=9;AF=0.225;AN=40;BaseQ         |
| 29539 | chrY | 13488815 | . | C | G,A | 34398.19 | PASS          | AC=13,1;AF=0.361,0.028;AN         |
| 29540 | chrY | 13488818 | . | A | T   | 3074.52  | PASS          | AC=8;AF=0.143;AN=56;BaseQRankSum  |
| 29541 | chrY | 13488820 | . | C | G   | 16250.69 | PASS          | AC=9;AF=0.180;AN=50;BaseQ         |
| 29542 | chrY | 13488821 | . | C | T   | 6495.43  | PASS          | AC=8;AF=0.160;AN=50;BaseQRankSum  |
| 29543 | chrY | 13488822 | . | G | A   | 3788.98  | PASS          | AC=6;AF=0.111;AN=54;BaseQRankSum  |
| 29544 | chrY | 13488826 | . | C | G,T | 735.17   | my_snp_filter | AC=2,1;AF=0.045,0.023;AN=         |
| 29545 | chrY | 13488827 | . | G | T   | 521.15   | PASS          | AC=2;AF=0.053;AN=38;BaseQRankSum  |
| 29546 | chrY | 13488828 | . | T | C   | 25393.26 | PASS          | AC=10;AF=0.278;AN=36;Base         |
| 29547 | chrY | 13488830 | . | A | T,* | 757.64   | my_snp_filter | AC=3,1;AF=0.056,0.019;AN=         |
| 29548 | chrY | 13488831 | . | C | T   | 299.75   | my_snp_filter | AC=2;AF=0.063;AN=32;BaseQ         |
| 29549 | chrY | 13488832 | . | A | G   | 37625.87 | PASS          | AC=9;AF=0.300;AN=30;BaseQ         |
| 29550 | chrY | 13488833 | . | G | C   | 6411.24  | PASS          | AC=8;AF=0.182;AN=44;BaseQRankSum  |
| 29551 | chrY | 13488834 | . | C | T   | 375.98   | my_snp_filter | AC=2;AF=0.032;AN=62;BaseQ         |
| 29552 | chrY | 13488835 | . | C | T   | 178.21   | my_snp_filter | AC=1;AF=0.019;AN=54;BaseQ         |
| 29553 | chrY | 13488840 | . | G | A   | 16485.24 | PASS          | AC=9;AF=0.167;AN=54;BaseQ         |
| 29554 | chrY | 13488842 | . | T | A,* | 7337.57  | PASS          | AC=2,7;AF=0.100,0.350;AN=20;BaseQ |
| 29555 | chrY | 13488843 | . | T | C,* | 13053.30 | PASS          | AC=2,4;AF=0.091,0.182;AN=         |
| 29556 | chrY | 13488849 | . | C | T,G | 10043.69 | PASS          | AC=1,7;AF=0.017,0.117;AN=         |
| 29557 | chrY | 13488850 | . | G | A   | 2081.88  | PASS          | AC=4;AF=0.071;AN=56;BaseQRankSum  |
| 29558 | chrY | 13488851 | . | C | T   | 2918.05  | PASS          | AC=5;AF=0.089;AN=56;BaseQRankSum  |
| 29559 | chrY | 13488852 | . | G | A   | 708.71   | PASS          | AC=1;AF=0.017;AN=58;BaseQRankSum  |
| 29560 | chrY | 13488853 | . | G | T   | 5935.41  | PASS          | AC=8;AF=0.121;AN=66;BaseQRankSum  |
| 29561 | chrY | 13488857 | . | G | A   | 226.38   | my_snp_filter | AC=1;AF=0.014;AN=70;BaseQ         |
| 29562 | chrY | 13488858 | . | A | G   | 17972.19 | PASS          | AC=10;AF=0.143;AN=70;Base         |
| 29563 | chrY | 13488859 | . | C | T   | 398.02   | my_snp_filter | AC=1;AF=0.014;AN=70;BaseQ         |
| 29564 | chrY | 13488863 | . | C | A   | 875.70   | my_snp_filter | AC=4;AF=0.057;AN=70;BaseQ         |

|       |      |          |   |   |     |          |               |                                   |
|-------|------|----------|---|---|-----|----------|---------------|-----------------------------------|
| 29565 | chrY | 13488864 | . | T | A   | 5796.01  | PASS          | AC=8;AF=0.114;AN=70;BaseQRankSum= |
| 29566 | chrY | 13488865 | . | G | T   | 66.08    | my_snp_filter | AC=1;AF=0.014;AN=70;BaseQ         |
| 29567 | chrY | 13488868 | . | C | T   | 66.02    | my_snp_filter | AC=1;AF=0.014;AN=70;BaseQ         |
| 29568 | chrY | 13488869 | . | C | T   | 79.18    | my_snp_filter | AC=2;AF=0.029;AN=70;BaseQ         |
| 29569 | chrY | 13488870 | . | C | T   | 228.78   | my_snp_filter | AC=5;AF=0.071;AN=70;BaseQ         |
| 29570 | chrY | 13488871 | . | G | T   | 16512.12 | PASS          | AC=13;AF=0.197;AN=66;Base         |
| 29571 | chrY | 13488874 | . | C | G   | 3759.07  | PASS          | AC=9;AF=0.129;AN=70;BaseQRankSum= |
| 29572 | chrY | 13488879 | . | G | A,T | 13980.15 | PASS          | AC=10,5;AF=0.147,0.074;AN         |
| 29573 | chrY | 13488880 | . | G | A   | 76.83    | my_snp_filter | AC=1;AF=0.014;AN=70;BaseQ         |
| 29574 | chrY | 13488881 | . | G | A   | 66.81    | my_snp_filter | AC=3;AF=0.043;AN=70;BaseQ         |
| 29575 | chrY | 13488883 | . | C | T   | 65.24    | PASS          | AC=3;AF=0.043;AN=70;BaseQRankSum= |
| 29576 | chrY | 13488886 | . | C | G   | 41.22    | my_snp_filter | AC=1;AF=0.014;AN=70;BaseQ         |
| 29577 | chrY | 13488888 | . | G | T   | 45.65    | PASS          | AC=2;AF=0.029;AN=70;BaseQRankSum= |
| 29578 | chrY | 13488889 | . | G | C   | 57.89    | PASS          | AC=2;AF=0.029;AN=70;BaseQRankSum= |
| 29579 | chrY | 13488891 | . | C | A   | 3903.27  | PASS          | AC=9;AF=0.129;AN=70;BaseQRankSum= |
| 29580 | chrY | 13488892 | . | C | G   | 40.24    | PASS          | AC=1;AF=0.014;AN=70;BaseQRankSum= |
| 29581 | chrY | 13488894 | . | A | T   | 13567.88 | PASS          | AC=9;AF=0.129;AN=70;BaseQ         |
| 29582 | chrY | 13488895 | . | G | A   | 414.10   | my_snp_filter | AC=3;AF=0.044;AN=68;BaseQ         |
| 29583 | chrY | 13488896 | . | G | T   | 1585.31  | PASS          | AC=4;AF=0.057;AN=70;BaseQRankSum= |
| 29584 | chrY | 13488897 | . | T | C   | 266.08   | my_snp_filter | AC=1;AF=0.014;AN=70;BaseQ         |
| 29585 | chrY | 13488900 | . | G | C   | 863.96   | PASS          | AC=1;AF=0.014;AN=70;BaseQRankSum= |
| 29586 | chrY | 13488901 | . | C | A   | 109.01   | PASS          | AC=2;AF=0.029;AN=70;BaseQRankSum= |
| 29587 | chrY | 13488902 | . | T | C   | 80.07    | my_snp_filter | AC=3;AF=0.043;AN=70;BaseQ         |
| 29588 | chrY | 13488905 | . | C | T   | 19898.26 | PASS          | AC=11;AF=0.167;AN=66;Base         |
| 29589 | chrY | 13488906 | . | G | A,C | 2099.89  | my_snp_filter | AC=5,5;AF=0.074,0.074;AN=         |
| 29590 | chrY | 13488910 | . | C | A   | 1614.11  | PASS          | AC=5;AF=0.074;AN=68;BaseQRankSum= |
| 29591 | chrY | 13488912 | . | C | G   | 2905.97  | PASS          | AC=7;AF=0.103;AN=68;BaseQRankSum= |
| 29592 | chrY | 13488913 | . | G | T   | 1303.52  | PASS          | AC=1;AF=0.015;AN=68;BaseQRankSum= |
| 29593 | chrY | 13488914 | . | C | T,A | 1512.06  | PASS          | AC=4,1;AF=0.059,0.015;AN=68;BaseQ |
| 29594 | chrY | 13488922 | . | G | A   | 3429.89  | PASS          | AC=7;AF=0.103;AN=68;BaseQRankSum= |
| 29595 | chrY | 13488924 | . | G | T,A | 7577.87  | PASS          | AC=7,3;AF=0.106,0.045;AN=66;BaseQ |
| 29596 | chrY | 13488926 | . | G | C   | 1292.54  | PASS          | AC=1;AF=0.017;AN=60;BaseQRankSum= |
| 29597 | chrY | 13488928 | . | C | A   | 3285.30  | PASS          | AC=8;AF=0.138;AN=58;BaseQRankSum= |
| 29598 | chrY | 13488929 | . | C | T   | 839.93   | my_snp_filter | AC=3;AF=0.052;AN=58;BaseQ         |
| 29599 | chrY | 13488930 | . | G | A   | 2476.99  | PASS          | AC=6;AF=0.107;AN=56;BaseQRankSum= |
| 29600 | chrY | 13488931 | . | T | C   | 537.91   | my_snp_filter | AC=3;AF=0.056;AN=54;BaseQ         |
| 29601 | chrY | 13488932 | . | G | C   | 550.40   | my_snp_filter | AC=3;AF=0.071;AN=42;BaseQ         |
| 29602 | chrY | 13488933 | . | T | G   | 34393.91 | PASS          | AC=13;AF=0.406;AN=32;Base         |
| 29603 | chrY | 13488934 | . | T | C   | 274.59   | PASS          | AC=1;AF=0.019;AN=54;BaseQRankSum= |
| 29604 | chrY | 13488935 | . | G | T   | 17688.38 | PASS          | AC=9;AF=0.167;AN=54;BaseQ         |
| 29605 | chrY | 13488936 | . | G | C   | 453.93   | PASS          | AC=1;AF=0.017;AN=60;BaseQRankSum= |
| 29606 | chrY | 13488938 | . | G | A   | 831.53   | PASS          | AC=1;AF=0.017;AN=58;BaseQRankSum= |
| 29607 | chrY | 13488939 | . | C | G   | 4475.42  | PASS          | AC=3;AF=0.052;AN=58;BaseQRankSum= |
| 29608 | chrY | 13488940 | . | T | A   | 13417.65 | PASS          | AC=9;AF=0.150;AN=60;BaseQ         |
| 29609 | chrY | 13488941 | . | G | A   | 846.35   | PASS          | AC=3;AF=0.050;AN=60;BaseQRankSum= |
| 29610 | chrY | 13488942 | . | G | T   | 338.87   | my_snp_filter | AC=3;AF=0.054;AN=56;BaseQ         |
| 29611 | chrY | 13488943 | . | G | A   | 4205.40  | PASS          | AC=3;AF=0.056;AN=54;BaseQRankSum= |
| 29612 | chrY | 13488946 | . | A | C   | 9180.23  | PASS          | AC=8;AF=0.333;AN=24;BaseQRankSum= |
| 29613 | chrY | 13488948 | . | G | A   | 465.99   | my_snp_filter | AC=1;AF=0.019;AN=52;BaseQ         |
| 29614 | chrY | 13488952 | . | T | C,A | 17948.10 | PASS          | AC=1,8;AF=0.038,0.308;AN=         |
| 29615 | chrY | 13488959 | . | G | T   | 12734.58 | PASS          | AC=9;AF=0.375;AN=24;BaseQ         |
| 29616 | chrY | 13488963 | . | A | C   | 10378.43 | PASS          | AC=9;AF=0.265;AN=34;BaseQ         |
| 29617 | chrY | 13488964 | . | G | T   | 460.19   | PASS          | AC=2;AF=0.045;AN=44;BaseQRankSum= |
| 29618 | chrY | 13488966 | . | G | T   | 3065.33  | PASS          | AC=5;AF=0.089;AN=56;BaseQRankSum= |
| 29619 | chrY | 13488968 | . | C | T   | 3663.26  | PASS          | AC=5;AF=0.089;AN=56;BaseQRankSum= |
| 29620 | chrY | 13488969 | . | G | T   | 8947.26  | PASS          | AC=9;AF=0.161;AN=56;BaseQRankSum= |
| 29621 | chrY | 13488972 | . | C | G   | 13968.21 | PASS          | AC=9;AF=0.300;AN=30;BaseQ         |
| 29622 | chrY | 13488975 | . | G | A   | 53.30    | my_snp_filter | AC=1;AF=0.015;AN=68;BaseQ         |
| 29623 | chrY | 13488979 | . | C | T   | 447.61   | PASS          | AC=1;AF=0.015;AN=68;BaseQRankSum= |
| 29624 | chrY | 13488980 | . | C | T   | 6027.69  | PASS          | AC=9;AF=0.132;AN=68;BaseQRankSum= |
| 29625 | chrY | 13488981 | . | C | T   | 3007.32  | PASS          | AC=5;AF=0.074;AN=68;BaseQRankSum= |
| 29626 | chrY | 13488987 | . | C | A,T | 3623.71  | PASS          | AC=6,3;AF=0.107,0.054;AN=56;BaseQ |
| 29627 | chrY | 13488988 | . | A | G   | 12887.82 | PASS          | AC=9;AF=0.188;AN=48;BaseQ         |
| 29628 | chrY | 13488992 | . | T | C   | 14533.24 | PASS          | AC=9;AF=0.281;AN=32;BaseQ         |
| 29629 | chrY | 13488994 | . | G | A,T | 3821.56  | PASS          | AC=6,1;AF=0.091,0.015;AN=66;BaseQ |
| 29630 | chrY | 13488995 | . | C | A,* | 412.17   | PASS          | AC=2,1;AF=0.031,0.016;AN=64;BaseQ |
| 29631 | chrY | 13488996 | . | T | C,* | 823.23   | PASS          | AC=3,1;AF=0.045,0.015;AN=66;BaseQ |
| 29632 | chrY | 13488998 | . | C | A   | 71.42    | my_snp_filter | AC=1;AF=0.015;AN=68;BaseQ         |
| 29633 | chrY | 13489001 | . | C | T   | 338.14   | PASS          | AC=2;AF=0.029;AN=68;BaseQRankSum= |
| 29634 | chrY | 13489003 | . | C | T   | 51.85    | PASS          | AC=1;AF=0.015;AN=68;BaseQRankSum= |
| 29635 | chrY | 13489004 | . | G | A   | 4088.43  | PASS          | AC=7;AF=0.106;AN=66;BaseQRankSum= |
| 29636 | chrY | 13489007 | . | A | T   | 3548.83  | PASS          | AC=9;AF=0.132;AN=68;BaseQRankSum= |
| 29637 | chrY | 13489008 | . | G | A   | 40.65    | PASS          | AC=1;AF=0.015;AN=68;BaseQRankSum= |
| 29638 | chrY | 13489010 | . | C | A   | 305.75   | PASS          | AC=1;AF=0.017;AN=60;BaseQRankSum= |
| 29639 | chrY | 13489012 | . | A | G   | 6568.20  | PASS          | AC=9;AF=0.188;AN=48;BaseQRankSum= |
| 29640 | chrY | 13489013 | . | T | C   | 5129.24  | PASS          | AC=8;AF=0.190;AN=42;BaseQRankSum= |

|       |      |          |   |   |       |          |               |                                    |
|-------|------|----------|---|---|-------|----------|---------------|------------------------------------|
| 29641 | chrY | 13489015 | . | C | T     | 363.47   | PASS          | AC=1;AF=0.016;AN=62;BaseQRankSum=  |
| 29642 | chrY | 13489016 | . | C | T     | 951.43   | PASS          | AC=5;AF=0.081;AN=62;BaseQRankSum=  |
| 29643 | chrY | 13489019 | . | T | C     | 8464.96  | PASS          | AC=9;AF=0.214;AN=42;BaseQRankSum=  |
| 29644 | chrY | 13489020 | . | G | A     | 6810.08  | PASS          | AC=8;AF=0.160;AN=50;BaseQRankSum=  |
| 29645 | chrY | 13489029 | . | T | C     | 10873.81 | PASS          | AC=9;AF=0.225;AN=40;BaseQ          |
| 29646 | chrY | 13489030 | . | G | A     | 5076.61  | PASS          | AC=6;AF=0.120;AN=50;BaseQRankSum=  |
| 29647 | chrY | 13489031 | . | C | T     | 3474.54  | PASS          | AC=9;AF=0.173;AN=52;BaseQRankSum=  |
| 29648 | chrY | 13489032 | . | G | C,A   | 7388.65  | PASS          | AC=3,5;AF=0.068,0.114;AN=44;BaseQ  |
| 29649 | chrY | 13489033 | . | C | T     | 2859.73  | PASS          | AC=7;AF=0.175;AN=40;BaseQRankSum=  |
| 29650 | chrY | 13489034 | . | G | A     | 577.85   | PASS          | AC=3;AF=0.052;AN=58;BaseQRankSum=  |
| 29651 | chrY | 13489040 | . | G | T,*   | 674.20   | PASS          | AC=5,1;AF=0.071,0.014;AN=70;BaseQ  |
| 29652 | chrY | 13489042 | . | C | A,*   | 1010.75  | PASS          | AC=2,1;AF=0.036,0.018;AN=56;BaseQ  |
| 29653 | chrY | 13489043 | . | G | A     | 22864.80 | PASS          | AC=10;AF=0.385;AN=26;BaseQ         |
| 29654 | chrY | 13489044 | . | G | A     | 1391.47  | PASS          | AC=4;AF=0.059;AN=68;BaseQRankSum=  |
| 29655 | chrY | 13489045 | . | A | T     | 500.03   | PASS          | AC=2;AF=0.029;AN=68;BaseQRankSum=  |
| 29656 | chrY | 13489046 | . | T | G     | 421.59   | PASS          | AC=1;AF=0.014;AN=70;BaseQRankSum=  |
| 29657 | chrY | 13489047 | . | G | C     | 1679.76  | PASS          | AC=5;AF=0.074;AN=68;BaseQRankSum=  |
| 29658 | chrY | 13489048 | . | C | T     | 4596.80  | PASS          | AC=9;AF=0.132;AN=68;BaseQRankSum=  |
| 29659 | chrY | 13489049 | . | A | T     | 1782.04  | PASS          | AC=5;AF=0.074;AN=68;BaseQRankSum=  |
| 29660 | chrY | 13489054 | . | A | C     | 4720     | PASS          | AC=9;AF=0.132;AN=68;BaseQRankSum=  |
| 29661 | chrY | 13489056 | . | C | G,A   | 5920.31  | PASS          | AC=8,1;AF=0.121,0.015;AN=66;BaseQ  |
| 29662 | chrY | 13489057 | . | C | T     | 10775.45 | PASS          | AC=7;AF=0.103;AN=68;BaseQ          |
| 29663 | chrY | 13489058 | . | C | T     | 4931.36  | PASS          | AC=9;AF=0.132;AN=68;BaseQRankSum=  |
| 29664 | chrY | 13489060 | . | G | T     | 1573.69  | PASS          | AC=4;AF=0.059;AN=68;BaseQRankSum=  |
| 29665 | chrY | 13489061 | . | C | T     | 94.51    | my_snp_filter | AC=2;AF=0.030;AN=66;BaseQ          |
| 29666 | chrY | 13489062 | . | G | A     | 12094.42 | PASS          | AC=7;AF=0.106;AN=66;BaseQ          |
| 29667 | chrY | 13489063 | . | C | T     | 2287.55  | PASS          | AC=6;AF=0.088;AN=68;BaseQRankSum=  |
| 29668 | chrY | 13489065 | . | C | T     | 2843.22  | PASS          | AC=4;AF=0.057;AN=70;BaseQRankSum=  |
| 29669 | chrY | 13489066 | . | T | A     | 889.37   | PASS          | AC=2;AF=0.029;AN=70;BaseQRankSum=  |
| 29670 | chrY | 13489067 | . | C | A     | 32.74    | PASS          | AC=1;AF=0.014;AN=70;BaseQRankSum=  |
| 29671 | chrY | 13489068 | . | C | T     | 780.10   | PASS          | AC=2;AF=0.029;AN=68;BaseQRankSum=  |
| 29672 | chrY | 13489069 | . | A | C     | 41253.47 | PASS          | AC=13;AF=0.464;AN=28;BaseQ         |
| 29673 | chrY | 13489071 | . | G | T     | 3993.49  | PASS          | AC=5;AF=0.081;AN=62;BaseQRankSum=  |
| 29674 | chrY | 13489073 | . | C | T     | 7326.25  | PASS          | AC=9;AF=0.141;AN=64;BaseQRankSum=  |
| 29675 | chrY | 13489074 | . | G | A     | 7654.85  | PASS          | AC=9;AF=0.155;AN=58;BaseQRankSum=  |
| 29676 | chrY | 13489077 | . | T | C     | 49362.49 | PASS          | AC=14;AF=0.438;AN=32;BaseQ         |
| 29677 | chrY | 13489079 | . | A | T,G   | 10464.09 | PASS          | AC=6,1;AF=0.094,0.016;AN=          |
| 29678 | chrY | 13489081 | . | G | A     | 2699.39  | PASS          | AC=4;AF=0.059;AN=68;BaseQRankSum=  |
| 29679 | chrY | 13489082 | . | A | G     | 4833.74  | PASS          | AC=5;AF=0.076;AN=66;BaseQRankSum=  |
| 29680 | chrY | 13489083 | . | G | A     | 1844.87  | PASS          | AC=5;AF=0.076;AN=66;BaseQRankSum=  |
| 29681 | chrY | 13489084 | . | C | T,A   | 6856.56  | PASS          | AC=4,4;AF=0.061,0.061;AN=66;BaseQ  |
| 29682 | chrY | 13489085 | . | C | T     | 10073.15 | PASS          | AC=11;AF=0.172;AN=64;BaseQ         |
| 29683 | chrY | 13489086 | . | G | A     | 9576.34  | PASS          | AC=9;AF=0.136;AN=66;BaseQRankSum=  |
| 29684 | chrY | 13489088 | . | G | A     | 7710.40  | PASS          | AC=9;AF=0.129;AN=70;BaseQRankSum=  |
| 29685 | chrY | 13489089 | . | G | A     | 1872.62  | PASS          | AC=3;AF=0.043;AN=70;BaseQRankSum=  |
| 29686 | chrY | 13489090 | . | C | T     | 22508.87 | PASS          | AC=10;AF=0.143;AN=70;BaseQ         |
| 29687 | chrY | 13489091 | . | G | T     | 207.37   | my_snp_filter | AC=1;AF=0.014;AN=70;BaseQ          |
| 29688 | chrY | 13489094 | . | C | G     | 1152.81  | my_snp_filter | AC=4;AF=0.057;AN=70;BaseQ          |
| 29689 | chrY | 13489095 | . | G | A,T   | 9116.57  | PASS          | AC=9,1;AF=0.129,0.014;AN=70;BaseQ  |
| 29690 | chrY | 13489096 | . | T | C     | 556.73   | my_snp_filter | AC=3;AF=0.043;AN=70;BaseQ          |
| 29691 | chrY | 13489097 | . | C | T     | 37.86    | PASS          | AC=1;AF=0.014;AN=70;BaseQRankSum=  |
| 29692 | chrY | 13489098 | . | T | G     | 30.60    | PASS          | AC=1;AF=0.014;AN=70;BaseQRankSum=  |
| 29693 | chrY | 13489102 | . | C | T     | 1697.68  | my_snp_filter | AC=4;AF=0.057;AN=70;BaseQ          |
| 29694 | chrY | 13489103 | . | T | A     | 3660.31  | PASS          | AC=5;AF=0.071;AN=70;BaseQRankSum=  |
| 29695 | chrY | 13489104 | . | C | T     | 6363.68  | PASS          | AC=4;AF=0.057;AN=70;BaseQRankSum=  |
| 29696 | chrY | 13489106 | . | C | A     | 11990.58 | PASS          | AC=7;AF=0.100;AN=70;BaseQ          |
| 29697 | chrY | 13489107 | . | C | A     | 894.49   | my_snp_filter | AC=4;AF=0.057;AN=70;BaseQ          |
| 29698 | chrY | 13489110 | . | C | T     | 15992.08 | PASS          | AC=14;AF=0.200;AN=70;BaseQ         |
| 29699 | chrY | 13489111 | . | G | A     | 24112.98 | PASS          | AC=18;AF=0.265;AN=68;BaseQ         |
| 29700 | chrY | 13489113 | . | C | T,*   | 6726.72  | PASS          | AC=6,5;AF=0.086,0.071;AN=70;BaseQ  |
| 29701 | chrY | 13489114 | . | C | G,A,* | 5541.76  | PASS          | AC=4,2,3;AF=0.057,0.029,0.043;AN=  |
| 29702 | chrY | 13489115 | . | T | G,C   | 1365.41  | my_snp_filter | AC=3,3;AF=0.043,0.043;AN=          |
| 29703 | chrY | 13489116 | . | G | A     | 398.54   | my_snp_filter | AC=1;AF=0.014;AN=70;BaseQ          |
| 29704 | chrY | 13489117 | . | C | T     | 251.51   | my_snp_filter | AC=1;AF=0.014;AN=70;BaseQ          |
| 29705 | chrY | 13489118 | . | T | A     | 1183.81  | my_snp_filter | AC=8;AF=0.114;AN=70;BaseQ          |
| 29706 | chrY | 13489119 | . | G | A     | 30.69    | PASS          | AC=1;AF=0.014;AN=70;BaseQRankSum=  |
| 29707 | chrY | 13489120 | . | C | T,A   | 4297.92  | PASS          | AC=3,5;AF=0.043,0.071;AN=70;BaseQ  |
| 29708 | chrY | 13489121 | . | T | A     | 579.45   | my_snp_filter | AC=2;AF=0.029;AN=70;BaseQ          |
| 29709 | chrY | 13489122 | . | G | T,A   | 222.95   | my_snp_filter | AC=3,1;AF=0.043,0.014;AN=          |
| 29710 | chrY | 13489123 | . | G | A     | 6685.77  | PASS          | AC=11;AF=0.157;AN=70;BaseQRankSum= |
| 29711 | chrY | 13489124 | . | A | G     | 108.59   | PASS          | AC=1;AF=0.014;AN=70;BaseQRankSum=  |
| 29712 | chrY | 13489126 | . | G | T     | 1006.28  | PASS          | AC=2;AF=0.029;AN=70;BaseQRankSum=  |
| 29713 | chrY | 13489127 | . | A | C     | 3354.74  | PASS          | AC=7;AF=0.100;AN=70;BaseQRankSum=  |
| 29714 | chrY | 13489128 | . | G | A     | 4503.11  | PASS          | AC=13;AF=0.186;AN=70;BaseQRankSum= |
| 29715 | chrY | 13489129 | . | C | G     | 167.39   | PASS          | AC=2;AF=0.029;AN=70;BaseQRankSum=  |
| 29716 | chrY | 13489130 | . | T | A     | 197      | PASS          | AC=6;AF=0.086;AN=70;BaseQRankSum=  |

|       |      |          |   |   |       |          |               |                                    |
|-------|------|----------|---|---|-------|----------|---------------|------------------------------------|
| 29717 | chrY | 13489131 | . | C | A,T   | 8152.55  | PASS          | AC=10,3;AF=0.143,0.043;AN=70;BaseQ |
| 29718 | chrY | 13489132 | . | C | T     | 1054.53  | PASS          | AC=5;AF=0.071;AN=70;BaseQRankSum=  |
| 29719 | chrY | 13489133 | . | T | A     | 74.47    | my_snp_filter | AC=1;AF=0.014;AN=70;BaseQ          |
| 29720 | chrY | 13489134 | . | G | T     | 7274.21  | PASS          | AC=9;AF=0.129;AN=70;BaseQRankSum=  |
| 29721 | chrY | 13489135 | . | G | T     | 706.37   | PASS          | AC=4;AF=0.059;AN=68;BaseQRankSum=  |
| 29722 | chrY | 13489136 | . | C | A,G,T | 8722.54  | PASS          | AC=8,1,4;AF=0.118,0.015,0.059;AN=  |
| 29723 | chrY | 13489137 | . | G | A     | 172.89   | my_snp_filter | AC=3;AF=0.043;AN=70;BaseQ          |
| 29724 | chrY | 13489138 | . | A | G     | 286.12   | my_snp_filter | AC=2;AF=0.029;AN=70;BaseQ          |
| 29725 | chrY | 13489139 | . | G | C     | 542.72   | my_snp_filter | AC=3;AF=0.043;AN=70;BaseQ          |
| 29726 | chrY | 13489140 | . | C | A     | 596.68   | my_snp_filter | AC=4;AF=0.057;AN=70;BaseQ          |
| 29727 | chrY | 13489141 | . | C | T,A,G | 612.50   | PASS          | AC=2,4,3;AF=0.029,0.057,0.043;AN=  |
| 29728 | chrY | 13489142 | . | C | T,G,A | 9817.59  | PASS          | AC=11,9,1;AF=0.157,0.129,0.014;AN= |
| 29729 | chrY | 13489143 | . | G | A     | 3734.08  | PASS          | AC=23;AF=0.329;AN=70;BaseQRankSum= |
| 29730 | chrY | 13489144 | . | G | A,C   | 4284.57  | PASS          | AC=5,3;AF=0.071,0.043;AN=70;BaseQ  |
| 29731 | chrY | 13489146 | . | G | A     | 149.96   | PASS          | AC=4;AF=0.057;AN=70;BaseQRankSum=  |
| 29732 | chrY | 13489147 | . | T | A     | 5033.96  | PASS          | AC=8;AF=0.114;AN=70;BaseQRankSum=  |
| 29733 | chrY | 13489149 | . | T | G     | 56.59    | PASS          | AC=1;AF=0.014;AN=70;BaseQRankSum=  |
| 29734 | chrY | 13489150 | . | C | T     | 554.87   | my_snp_filter | AC=9;AF=0.129;AN=70;BaseQ          |
| 29735 | chrY | 13489151 | . | T | A     | 269.52   | PASS          | AC=6;AF=0.086;AN=70;BaseQRankSum=  |
| 29736 | chrY | 13489152 | . | G | A     | 256.48   | PASS          | AC=4;AF=0.057;AN=70;BaseQRankSum=  |
| 29737 | chrY | 13489155 | . | G | T     | 58.91    | PASS          | AC=2;AF=0.029;AN=70;BaseQRankSum=  |
| 29738 | chrY | 13489160 | . | C | T,G   | 1150.74  | PASS          | AC=11,2;AF=0.157,0.029;AN=70;Base  |
| 29739 | chrY | 13489161 | . | G | A     | 170.68   | my_snp_filter | AC=6;AF=0.086;AN=70;BaseQ          |
| 29740 | chrY | 13489162 | . | C | A     | 2191.05  | PASS          | AC=4;AF=0.057;AN=70;BaseQRankSum=  |
| 29741 | chrY | 13489165 | . | C | A,T,* | 7507.70  | PASS          | AC=9,5,4;AF=0.129,0.071,0.057;AN=  |
| 29742 | chrY | 13489166 | . | C | A,G   | 9492.26  | PASS          | AC=3,12;AF=0.043,0.171;AN=70;Base  |
| 29743 | chrY | 13489167 | . | T | A     | 3105.18  | PASS          | AC=4;AF=0.057;AN=70;BaseQRankSum=  |
| 29744 | chrY | 13489168 | . | T | C     | 140.59   | my_snp_filter | AC=1;AF=0.014;AN=70;BaseQ          |
| 29745 | chrY | 13489171 | . | C | A     | 715.26   | PASS          | AC=2;AF=0.029;AN=70;BaseQRankSum=  |
| 29746 | chrY | 13489172 | . | T | C     | 981.12   | PASS          | AC=2;AF=0.029;AN=70;BaseQRankSum=  |
| 29747 | chrY | 13489173 | . | A | G     | 122.65   | my_snp_filter | AC=1;AF=0.014;AN=70;BaseQ          |
| 29748 | chrY | 13489175 | . | A | G     | 70.43    | my_snp_filter | AC=2;AF=0.029;AN=70;BaseQ          |
| 29749 | chrY | 13489177 | . | A | T     | 1582.73  | PASS          | AC=4;AF=0.057;AN=70;BaseQRankSum=  |
| 29750 | chrY | 13489178 | . | C | T     | 2510.08  | PASS          | AC=14;AF=0.200;AN=70;BaseQRankSum= |
| 29751 | chrY | 13489179 | . | G | A,T   | 335.36   | PASS          | AC=3,2;AF=0.043,0.029;AN=70;BaseQ  |
| 29752 | chrY | 13489180 | . | G | A     | 1089.67  | PASS          | AC=7;AF=0.100;AN=70;BaseQRankSum=  |
| 29753 | chrY | 13489182 | . | G | T     | 1561.06  | PASS          | AC=7;AF=0.100;AN=70;BaseQRankSum=  |
| 29754 | chrY | 13489183 | . | G | T     | 850.06   | PASS          | AC=3;AF=0.043;AN=70;BaseQRankSum=  |
| 29755 | chrY | 13489185 | . | C | A     | 792.99   | PASS          | AC=6;AF=0.086;AN=70;BaseQRankSum=  |
| 29756 | chrY | 13489186 | . | C | G     | 386.45   | PASS          | AC=2;AF=0.029;AN=70;BaseQRankSum=  |
| 29757 | chrY | 13489187 | . | C | T     | 8970.78  | PASS          | AC=10;AF=0.143;AN=70;BaseQRankSum= |
| 29758 | chrY | 13489188 | . | G | T,A   | 4667.47  | PASS          | AC=7,14;AF=0.100,0.200;AN=70;Base  |
| 29759 | chrY | 13489189 | . | G | A     | 411.61   | my_snp_filter | AC=2;AF=0.029;AN=70;BaseQ          |
| 29760 | chrY | 13489191 | . | G | T     | 578.24   | my_snp_filter | AC=6;AF=0.086;AN=70;BaseQ          |
| 29761 | chrY | 13489194 | . | G | T,A,* | 2768.19  | PASS          | AC=6,2,2;AF=0.088,0.029,0.029;AN=  |
| 29762 | chrY | 13489198 | . | G | T,*   | 1394.02  | PASS          | AC=1,4;AF=0.014,0.057;AN=70;BaseQ  |
| 29763 | chrY | 13489200 | . | G | A,*   | 1766.85  | PASS          | AC=2,4;AF=0.029,0.057;AN=70;BaseQ  |
| 29764 | chrY | 13489202 | . | C | T,*   | 2347.49  | PASS          | AC=3,4;AF=0.043,0.057;AN=70;BaseQ  |
| 29765 | chrY | 13489203 | . | C | T,*   | 1353.17  | PASS          | AC=2,3;AF=0.029,0.043;AN=70;BaseQ  |
| 29766 | chrY | 13489204 | . | T | A,*   | 1312.91  | PASS          | AC=1,3;AF=0.015,0.044;AN=68;BaseQ  |
| 29767 | chrY | 13489206 | . | C | G     | 12819.97 | PASS          | AC=24;AF=0.429;AN=56;BaseQ         |
| 29768 | chrY | 13489207 | . | G | T,C   | 2340.91  | PASS          | AC=7,2;AF=0.117,0.033;AN=60;BaseQ  |
| 29769 | chrY | 13489211 | . | A | G,T   | 2750.09  | PASS          | AC=7,4;AF=0.100,0.057;AN=70;BaseQ  |
| 29770 | chrY | 13489212 | . | G | A     | 1496.78  | PASS          | AC=6;AF=0.088;AN=68;BaseQRankSum=  |
| 29771 | chrY | 13489214 | . | C | T,*   | 1881.82  | PASS          | AC=1,5;AF=0.015,0.074;AN=68;BaseQ  |
| 29772 | chrY | 13489215 | . | C | T,G   | 4642.10  | PASS          | AC=9,5;AF=0.132,0.074;AN=68;BaseQ  |
| 29773 | chrY | 13489217 | . | C | T     | 936.83   | PASS          | AC=4;AF=0.059;AN=68;BaseQRankSum=  |
| 29774 | chrY | 13489220 | . | T | C     | 10885.70 | PASS          | AC=17;AF=0.354;AN=48;BaseQ         |
| 29775 | chrY | 13489221 | . | G | A,C   | 1655.96  | PASS          | AC=5,6;AF=0.096,0.115;AN=52;BaseQ  |
| 29776 | chrY | 13489224 | . | G | A,T,* | 2968.97  | PASS          | AC=6,1,2;AF=0.094,0.016,0.031;AN=  |
| 29777 | chrY | 13489228 | . | G | T,C   | 1263.88  | PASS          | AC=1,3;AF=0.015,0.044;AN=68;BaseQ  |
| 29778 | chrY | 13489231 | . | C | A     | 246.24   | PASS          | AC=1;AF=0.015;AN=68;BaseQRankSum=  |
| 29779 | chrY | 13489232 | . | C | T     | 240.96   | PASS          | AC=1;AF=0.015;AN=68;BaseQRankSum=  |
| 29780 | chrY | 13489233 | . | C | A,*   | 1818.39  | PASS          | AC=1,2;AF=0.015,0.029;AN=68;BaseQ  |
| 29781 | chrY | 13489234 | . | T | C,A   | 10629.96 | PASS          | AC=16,4;AF=0.333,0.083;AN=         |
| 29782 | chrY | 13489236 | . | C | G,T,* | 2285.98  | PASS          | AC=3,3,1;AF=0.044,0.044,0.015;AN=  |
| 29783 | chrY | 13489238 | . | G | C,*   | 2480.99  | PASS          | AC=5,2;AF=0.071,0.029;AN=70;BaseQ  |
| 29784 | chrY | 13489239 | . | C | T,G   | 5395.27  | PASS          | AC=7,2;AF=0.106,0.030;AN=66;BaseQ  |
| 29785 | chrY | 13489240 | . | G | A,T,* | 2792.29  | PASS          | AC=2,5,1;AF=0.029,0.074,0.015;AN=  |
| 29786 | chrY | 13489245 | . | A | G,*   | 1380.92  | PASS          | AC=2,2;AF=0.029,0.029;AN=70;BaseQ  |
| 29787 | chrY | 13489246 | . | G | T     | 886.09   | PASS          | AC=3;AF=0.043;AN=70;BaseQRankSum=  |
| 29788 | chrY | 13489250 | . | A | G,*   | 1525.07  | PASS          | AC=2,2;AF=0.029,0.029;AN=70;BaseQ  |
| 29789 | chrY | 13489251 | . | C | A,*   | 1945.52  | PASS          | AC=4,1;AF=0.059,0.015;AN=68;BaseQ  |
| 29790 | chrY | 13489255 | . | A | G     | 6524.85  | PASS          | AC=21;AF=0.438;AN=48;BaseQRankSum= |
| 29791 | chrY | 13489257 | . | T | A     | 125.36   | my_snp_filter | AC=3;AF=0.044;AN=68;BaseQ          |
| 29792 | chrY | 13489261 | . | C | A,*   | 2043.40  | PASS          | AC=1,2;AF=0.015,0.029;AN=68;BaseQ  |



|       |      |          |   |   |         |          |               |                                    |
|-------|------|----------|---|---|---------|----------|---------------|------------------------------------|
| 29793 | chrY | 13489264 | . | G | C,A     | 973.51   | PASS          | AC=2,2;AF=0.029,0.029;AN=70;BaseQ  |
| 29794 | chrY | 13489265 | . | A | C       | 507.37   | PASS          | AC=2;AF=0.029;AN=70;BaseQRankSum=  |
| 29795 | chrY | 13489266 | . | G | A,*     | 1811.53  | PASS          | AC=2,2;AF=0.029,0.029;AN=70;BaseQ  |
| 29796 | chrY | 13489267 | . | G | A,*     | 1528.85  | PASS          | AC=2,2;AF=0.029,0.029;AN=70;BaseQ  |
| 29797 | chrY | 13489269 | . | G | A,*     | 2732.97  | PASS          | AC=5,1;AF=0.071,0.014;AN=70;BaseQ  |
| 29798 | chrY | 13489270 | . | C | A,T     | 2509.56  | PASS          | AC=2,3;AF=0.029,0.043;AN=70;BaseQ  |
| 29799 | chrY | 13489271 | . | T | A       | 137.03   | PASS          | AC=1;AF=0.014;AN=70;BaseQRankSum=  |
| 29800 | chrY | 13489272 | . | T | C,*     | 2835.89  | PASS          | AC=5,2;AF=0.071,0.029;AN=70;BaseQ  |
| 29801 | chrY | 13489273 | . | T | C,*     | 3446.64  | PASS          | AC=4,1;AF=0.057,0.014;AN=70;BaseQ  |
| 29802 | chrY | 13489278 | . | T | C,*     | 11427.65 | PASS          | AC=9,3;AF=0.129,0.043;AN=          |
| 29803 | chrY | 13489279 | . | G | A,*     | 1304.88  | PASS          | AC=4,2;AF=0.057,0.029;AN=70;BaseQ  |
| 29804 | chrY | 13489281 | . | G | A,*     | 5611.60  | PASS          | AC=26,1;AF=0.371,0.014;AN=70;BaseQ |
| 29805 | chrY | 13489282 | . | G | A,T     | 4576.30  | PASS          | AC=22,3;AF=0.314,0.043;AN=70;BaseQ |
| 29806 | chrY | 13489283 | . | G | A,*     | 401.89   | PASS          | AC=1,1;AF=0.014,0.014;AN=70;BaseQ  |
| 29807 | chrY | 13489286 | . | T | G,*     | 1638.10  | PASS          | AC=1,2;AF=0.014,0.029;AN=70;BaseQ  |
| 29808 | chrY | 13489287 | . | A | A,*     | 649.94   | PASS          | AC=4,1;AF=0.057,0.014;AN=70;BaseQ  |
| 29809 | chrY | 13489288 | . | G | C,*     | 610.37   | PASS          | AC=1,1;AF=0.014,0.014;AN=70;BaseQ  |
| 29810 | chrY | 13489289 | . | G | T,*     | 1913.60  | PASS          | AC=3,2;AF=0.043,0.029;AN=70;BaseQ  |
| 29811 | chrY | 13489292 | . | A | G       | 15137.08 | PASS          | AC=32;AF=0.485;AN=66;BaseQ         |
| 29812 | chrY | 13489293 | . | G | A,*     | 5424.03  | PASS          | AC=4,1;AF=0.059,0.015;AN=68;BaseQ  |
| 29813 | chrY | 13489298 | . | G | A       | 1885.05  | PASS          | AC=8;AF=0.118;AN=68;BaseQRankSum=  |
| 29814 | chrY | 13489299 | . | G | C       | 5132.79  | PASS          | AC=4;AF=0.061;AN=66;BaseQRankSum=  |
| 29815 | chrY | 13489300 | . | A | C,G,T,* | 11487.86 | PASS          | AC=23,10,3,1;AF=0.338,0.1          |
| 29816 | chrY | 13489302 | . | C | T       | 619.22   | PASS          | AC=8;AF=0.114;AN=70;BaseQRankSum=  |
| 29817 | chrY | 13489303 | . | G | A,*     | 6023.73  | PASS          | AC=24,1;AF=0.343,0.014;AN=70;BaseQ |
| 29818 | chrY | 13489304 | . | G | T       | 231.20   | PASS          | AC=1;AF=0.014;AN=70;BaseQRankSum=  |
| 29819 | chrY | 13489306 | . | G | T,*     | 1965.32  | PASS          | AC=4,1;AF=0.057,0.014;AN=70;BaseQ  |
| 29820 | chrY | 13489307 | . | C | A,*     | 1161.96  | PASS          | AC=2,1;AF=0.029,0.014;AN=70;BaseQ  |
| 29821 | chrY | 13489309 | . | G | T,*     | 2496.06  | PASS          | AC=2,2;AF=0.029,0.029;AN=70;BaseQ  |
| 29822 | chrY | 13489311 | . | G | A,*     | 1420.89  | PASS          | AC=1,2;AF=0.014,0.029;AN=70;BaseQ  |
| 29823 | chrY | 13489312 | . | C | T       | 3301.23  | PASS          | AC=10;AF=0.143;AN=70;BaseQRankSum= |
| 29824 | chrY | 13489313 | . | G | A       | 121.68   | PASS          | AC=2;AF=0.029;AN=70;BaseQRankSum=  |
| 29825 | chrY | 13489314 | . | G | C,T     | 6767.53  | PASS          | AC=1,4;AF=0.014,0.057;AN=70;BaseQ  |
| 29826 | chrY | 13489317 | . | G | A,*     | 1563.07  | PASS          | AC=4,1;AF=0.057,0.014;AN=70;BaseQ  |
| 29827 | chrY | 13489319 | . | C | A,*     | 6889.62  | PASS          | AC=4,3;AF=0.057,0.043;AN=70;BaseQ  |
| 29828 | chrY | 13489323 | . | C | A       | 1389.98  | PASS          | AC=2;AF=0.029;AN=70;BaseQRankSum=  |
| 29829 | chrY | 13489329 | . | C | T,*     | 2650.20  | PASS          | AC=10,5;AF=0.156,0.078;AN=64;BaseQ |
| 29830 | chrY | 13489330 | . | A | G,*     | 12641.29 | PASS          | AC=16,4;AF=0.250,0.063;AN=         |
| 29831 | chrY | 13489332 | . | G | A,*     | 2382.75  | PASS          | AC=3,2;AF=0.043,0.029;AN=70;BaseQ  |
| 29832 | chrY | 13489335 | . | A | G,*     | 1348.83  | PASS          | AC=2,1;AF=0.029,0.014;AN=70;BaseQ  |
| 29833 | chrY | 13489338 | . | C | G,*     | 2371.57  | PASS          | AC=2,2;AF=0.029,0.029;AN=70;BaseQ  |
| 29834 | chrY | 13489339 | . | C | A,T,*   | 1706.54  | PASS          | AC=2,3,1;AF=0.029,0.043,0.014;AN=  |
| 29835 | chrY | 13489340 | . | T | G,*     | 1038.22  | PASS          | AC=2,1;AF=0.029,0.014;AN=70;BaseQ  |
| 29836 | chrY | 13489343 | . | C | A,*     | 2837.90  | PASS          | AC=2,2;AF=0.029,0.029;AN=70;BaseQ  |
| 29837 | chrY | 13489345 | . | G | T,*     | 8843.05  | PASS          | AC=4,2;AF=0.057,0.029;AN=70;BaseQ  |
| 29838 | chrY | 13489347 | . | C | A,*     | 1424.63  | PASS          | AC=1,2;AF=0.014,0.029;AN=70;BaseQ  |
| 29839 | chrY | 13489350 | . | T | A,*     | 1582.41  | PASS          | AC=1,2;AF=0.014,0.029;AN=70;BaseQ  |
| 29840 | chrY | 13489351 | . | G | T,*     | 1598.50  | PASS          | AC=1,2;AF=0.014,0.029;AN=70;BaseQ  |
| 29841 | chrY | 13489352 | . | G | T,*     | 4741.05  | PASS          | AC=16,1;AF=0.229,0.014;AN=70;BaseQ |
| 29842 | chrY | 13489354 | . | G | A,*     | 9062.15  | PASS          | AC=4,2;AF=0.057,0.029;AN=70;BaseQ  |
| 29843 | chrY | 13489356 | . | T | G       | 30226.41 | PASS          | AC=28;AF=0.438;AN=64;BaseQ         |
| 29844 | chrY | 13489357 | . | G | T,A,C   | 4998.53  | PASS          | AC=18,2,1;AF=0.290,0.032,0.016;AN= |
| 29845 | chrY | 13489358 | . | C | T,*     | 4101.49  | PASS          | AC=6,1;AF=0.094,0.016;AN=64;BaseQ  |
| 29846 | chrY | 13489359 | . | G | T,A,*   | 1970.09  | PASS          | AC=3,5,1;AF=0.047,0.078,0.016;AN=  |
| 29847 | chrY | 13489361 | . | G | A,T     | 9448.87  | PASS          | AC=6,2;AF=0.086,0.029;AN=70;BaseQ  |
| 29848 | chrY | 13489362 | . | T | A,C     | 2150.06  | PASS          | AC=1,2;AF=0.014,0.029;AN=70;BaseQ  |
| 29849 | chrY | 13489364 | . | T | C,*     | 3091.88  | PASS          | AC=2,2;AF=0.029,0.029;AN=70;BaseQ  |
| 29850 | chrY | 13489367 | . | T | C,A     | 22335.28 | PASS          | AC=25,2;AF=0.417,0.033;AN=         |
| 29851 | chrY | 13489369 | . | C | A,*     | 3681.64  | PASS          | AC=10,1;AF=0.147,0.015;AN=68;BaseQ |
| 29852 | chrY | 13489370 | . | C | A       | 3362.85  | PASS          | AC=17;AF=0.250;AN=68;BaseQRankSum= |
| 29853 | chrY | 13489372 | . | G | A,T,*   | 1710.55  | PASS          | AC=4,2,2;AF=0.057,0.029,0.029;AN=  |
| 29854 | chrY | 13489375 | . | C | A       | 4314.04  | PASS          | AC=18;AF=0.265;AN=68;BaseQRankSum= |
| 29855 | chrY | 13489376 | . | C | T       | 1719.18  | my_snp_filter | AC=9;AF=0.129;AN=70;BaseQ          |
| 29856 | chrY | 13489379 | . | C | T,*     | 2004.18  | PASS          | AC=4,2;AF=0.057,0.029;AN=70;BaseQ  |
| 29857 | chrY | 13489380 | . | C | A,*     | 1459.39  | PASS          | AC=3,2;AF=0.043,0.029;AN=70;BaseQ  |
| 29858 | chrY | 13489385 | . | G | A,*     | 1787.66  | PASS          | AC=3,1;AF=0.043,0.014;AN=70;BaseQ  |
| 29859 | chrY | 13489386 | . | G | T       | 167.02   | my_snp_filter | AC=3;AF=0.043;AN=70;BaseQ          |
| 29860 | chrY | 13489392 | . | C | T       | 487.43   | PASS          | AC=6;AF=0.088;AN=68;BaseQRankSum=  |
| 29861 | chrY | 13489393 | . | T | G,A     | 21196.73 | PASS          | AC=13,19;AF=0.210,0.306;AN=        |
| 29862 | chrY | 13489395 | . | C | G,T     | 3649.58  | PASS          | AC=7,1;AF=0.100,0.014;AN=70;BaseQ  |
| 29863 | chrY | 13489398 | . | G | A,*     | 3979.68  | PASS          | AC=10,2;AF=0.143,0.029;AN=70;BaseQ |
| 29864 | chrY | 13489399 | . | G | T,*     | 4154.45  | PASS          | AC=10,2;AF=0.143,0.029;AN=70;BaseQ |
| 29865 | chrY | 13489402 | . | T | G,*     | 2496.12  | PASS          | AC=6,1;AF=0.086,0.014;AN=70;BaseQ  |
| 29866 | chrY | 13489403 | . | T | A,*     | 1726.77  | PASS          | AC=1,1;AF=0.014,0.014;AN=70;BaseQ  |
| 29867 | chrY | 13489407 | . | G | C,*     | 10183.70 | PASS          | AC=6,2;AF=0.086,0.029;AN=          |
| 29868 | chrY | 13489409 | . | C | A,*     | 2038.63  | PASS          | AC=3,2;AF=0.043,0.029;AN=70;BaseQ  |

|       |      |          |   |   |       |          |               |                                    |
|-------|------|----------|---|---|-------|----------|---------------|------------------------------------|
| 29869 | chrY | 13489410 | . | T | A,*   | 1193.86  | PASS          | AC=1,1;AF=0.014,0.014;AN=70;BaseQ  |
| 29870 | chrY | 13489413 | . | T | A,*   | 1477.78  | PASS          | AC=1,2;AF=0.014,0.029;AN=70;BaseQ  |
| 29871 | chrY | 13489415 | . | G | T,A   | 11249.56 | PASS          | AC=9,5;AF=0.132,0.074;AN=          |
| 29872 | chrY | 13489418 | . | C | G     | 9599.38  | PASS          | AC=10;AF=0.147;AN=68;BaseQRankSum  |
| 29873 | chrY | 13489423 | . | C | T     | 1577.74  | PASS          | AC=3;AF=0.045;AN=66;BaseQRankSum=  |
| 29874 | chrY | 13489424 | . | C | A,T   | 2528.40  | PASS          | AC=4,2;AF=0.061,0.030;AN=66;BaseQ  |
| 29875 | chrY | 13489425 | . | T | C     | 25734.30 | PASS          | AC=22;AF=0.440;AN=50;BaseQ         |
| 29876 | chrY | 13489426 | . | G | A     | 285.42   | my_snp_filter | AC=5;AF=0.086;AN=58;BaseQ          |
| 29877 | chrY | 13489427 | . | G | A     | 1669.62  | PASS          | AC=8;AF=0.125;AN=64;BaseQRankSum=  |
| 29878 | chrY | 13489433 | . | G | A     | 459.42   | PASS          | AC=1;AF=0.014;AN=70;BaseQRankSum=  |
| 29879 | chrY | 13489434 | . | G | A     | 18350.95 | PASS          | AC=7;AF=0.103;AN=68;BaseQ          |
| 29880 | chrY | 13489435 | . | C | A     | 500.15   | PASS          | AC=2;AF=0.029;AN=68;BaseQRankSum=  |
| 29881 | chrY | 13489437 | . | C | T     | 1421     | PASS          | AC=2;AF=0.029;AN=70;BaseQRankSum=  |
| 29882 | chrY | 13489439 | . | A | G     | 105.80   | my_snp_filter | AC=1;AF=0.014;AN=70;BaseQ          |
| 29883 | chrY | 13489441 | . | A | G,C   | 8157.58  | PASS          | AC=4,1;AF=0.057,0.014;AN=70;BaseQ  |
| 29884 | chrY | 13489442 | . | C | G     | 481.30   | my_snp_filter | AC=4;AF=0.057;AN=70;BaseQ          |
| 29885 | chrY | 13489445 | . | C | T     | 10153.21 | PASS          | AC=14;AF=0.200;AN=70;BaseQ         |
| 29886 | chrY | 13489446 | . | G | A     | 6569.29  | PASS          | AC=15;AF=0.221;AN=68;BaseQRankSum  |
| 29887 | chrY | 13489447 | . | G | T,A   | 552.37   | my_snp_filter | AC=3,4;AF=0.043,0.057;AN=          |
| 29888 | chrY | 13489448 | . | A | T,G   | 1889.95  | my_snp_filter | AC=8,1;AF=0.114,0.014;AN=          |
| 29889 | chrY | 13489449 | . | G | T,A   | 8686.13  | PASS          | AC=6,1;AF=0.086,0.014;AN=70;BaseQ  |
| 29890 | chrY | 13489452 | . | C | T     | 56.18    | PASS          | AC=2;AF=0.029;AN=70;BaseQRankSum=  |
| 29891 | chrY | 13489453 | . | T | A     | 90.10    | PASS          | AC=3;AF=0.043;AN=70;BaseQRankSum=  |
| 29892 | chrY | 13489457 | . | A | C     | 652.80   | PASS          | AC=4;AF=0.057;AN=70;BaseQRankSum=  |
| 29893 | chrY | 13489464 | . | C | G     | 921      | my_snp_filter | AC=8;AF=0.114;AN=70;BaseQ          |
| 29894 | chrY | 13489465 | . | C | G,A   | 4110.93  | PASS          | AC=13,2;AF=0.186,0.029;AN=70;BaseQ |
| 29895 | chrY | 13489468 | . | G | A     | 9245.42  | PASS          | AC=11;AF=0.157;AN=70;BaseQRankSum  |
| 29896 | chrY | 13489469 | . | G | A     | 5295.51  | PASS          | AC=17;AF=0.243;AN=70;BaseQRankSum  |
| 29897 | chrY | 13489471 | . | A | T     | 129.72   | my_snp_filter | AC=1;AF=0.014;AN=70;BaseQ          |
| 29898 | chrY | 13489472 | . | T | A     | 10775.09 | PASS          | AC=18;AF=0.257;AN=70;BaseQ         |
| 29899 | chrY | 13489474 | . | C | A,*   | 1134.46  | PASS          | AC=2,2;AF=0.031,0.031;AN=64;BaseQ  |
| 29900 | chrY | 13489475 | . | T | C     | 52682.61 | PASS          | AC=23;AF=0.383;AN=60;BaseQ         |
| 29901 | chrY | 13489477 | . | G | T,A   | 9283.75  | PASS          | AC=4,7;AF=0.059,0.103;AN=68;BaseQ  |
| 29902 | chrY | 13489479 | . | G | T     | 675.48   | my_snp_filter | AC=2;AF=0.029;AN=68;BaseQ          |
| 29903 | chrY | 13489482 | . | C | T,A   | 14505.17 | PASS          | AC=20,1;AF=0.286,0.014;AN=         |
| 29904 | chrY | 13489483 | . | C | T,G   | 3862.70  | PASS          | AC=9,3;AF=0.129,0.043;AN=70;BaseQ  |
| 29905 | chrY | 13489486 | . | G | C     | 264.11   | PASS          | AC=7;AF=0.100;AN=70;BaseQRankSum=  |
| 29906 | chrY | 13489488 | . | G | T     | 14047.61 | PASS          | AC=10;AF=0.152;AN=66;BaseQ         |
| 29907 | chrY | 13489491 | . | G | T,A   | 11186.11 | PASS          | AC=16,8;AF=0.235,0.118;AN=         |
| 29908 | chrY | 13489492 | . | G | A     | 60.08    | my_snp_filter | AC=3;AF=0.044;AN=68;BaseQ          |
| 29909 | chrY | 13489493 | . | C | A,G   | 9962.89  | PASS          | AC=19,1;AF=0.279,0.015;AN=68;BaseQ |
| 29910 | chrY | 13489494 | . | C | A     | 61.08    | my_snp_filter | AC=3;AF=0.044;AN=68;BaseQ          |
| 29911 | chrY | 13489497 | . | G | T     | 155.37   | PASS          | AC=4;AF=0.057;AN=70;BaseQRankSum=  |
| 29912 | chrY | 13489498 | . | G | T     | 727.91   | my_snp_filter | AC=2;AF=0.029;AN=70;BaseQ          |
| 29913 | chrY | 13489501 | . | C | T     | 957.93   | my_snp_filter | AC=2;AF=0.029;AN=70;BaseQ          |
| 29914 | chrY | 13489505 | . | C | A     | 3300.58  | PASS          | AC=10;AF=0.143;AN=70;BaseQRankSum  |
| 29915 | chrY | 13489507 | . | G | T     | 13648.14 | PASS          | AC=21;AF=0.300;AN=70;BaseQ         |
| 29916 | chrY | 13489508 | . | G | T     | 13408.63 | PASS          | AC=23;AF=0.329;AN=70;BaseQ         |
| 29917 | chrY | 13489510 | . | G | T     | 346.21   | my_snp_filter | AC=3;AF=0.043;AN=70;BaseQ          |
| 29918 | chrY | 13489513 | . | C | G,T   | 1703.75  | PASS          | AC=3,9;AF=0.043,0.129;AN=70;BaseQ  |
| 29919 | chrY | 13489514 | . | C | G     | 6348.05  | PASS          | AC=8;AF=0.114;AN=70;BaseQRankSum=  |
| 29920 | chrY | 13489515 | . | G | A     | 24302.47 | PASS          | AC=25;AF=0.357;AN=70;BaseQ         |
| 29921 | chrY | 13489518 | . | T | C     | 75.12    | PASS          | AC=1;AF=0.015;AN=68;BaseQRankSum=  |
| 29922 | chrY | 13489519 | . | A | G,T   | 4746.40  | PASS          | AC=7,11;AF=0.100,0.157;AN=70;BaseQ |
| 29923 | chrY | 13489524 | . | G | A     | 17505.86 | PASS          | AC=18;AF=0.265;AN=68;BaseQ         |
| 29924 | chrY | 13489525 | . | C | T     | 356.51   | PASS          | AC=5;AF=0.071;AN=70;BaseQRankSum=  |
| 29925 | chrY | 13489527 | . | C | G,T   | 14335    | PASS          | AC=13,8;AF=0.210,0.129;AN=62;BaseQ |
| 29926 | chrY | 13489528 | . | C | G,A   | 82355.49 | PASS          | AC=22,25;AF=0.355,0.403;AN=        |
| 29927 | chrY | 13489529 | . | C | T,G   | 18462.26 | PASS          | AC=16,2;AF=0.250,0.031;AN=         |
| 29928 | chrY | 13489530 | . | G | A     | 2455.83  | my_snp_filter | AC=9;AF=0.129;AN=70;BaseQ          |
| 29929 | chrY | 13489531 | . | C | T     | 10874.48 | PASS          | AC=9;AF=0.129;AN=70;BaseQ          |
| 29930 | chrY | 13489532 | . | G | A,C,* | 2546.36  | PASS          | AC=6,5,4;AF=0.088,0.074,0.059;AN=  |
| 29931 | chrY | 13489533 | . | G | T,*   | 1908.55  | my_snp_filter | AC=9,3;AF=0.132,0.044;AN=          |
| 29932 | chrY | 13489538 | . | G | A     | 5515.02  | PASS          | AC=10;AF=0.152;AN=66;BaseQRankSum  |
| 29933 | chrY | 13489539 | . | C | T     | 19331.37 | PASS          | AC=19;AF=0.288;AN=66;BaseQ         |
| 29934 | chrY | 13489540 | . | G | C,T   | 7670.17  | PASS          | AC=10,1;AF=0.152,0.015;AN=66;BaseQ |
| 29935 | chrY | 13489541 | . | G | T     | 32.95    | my_snp_filter | AC=2;AF=0.029;AN=68;BaseQ          |
| 29936 | chrY | 13489543 | . | C | T     | 256.57   | PASS          | AC=6;AF=0.088;AN=68;BaseQRankSum=  |
| 29937 | chrY | 13489547 | . | C | T     | 531.20   | my_snp_filter | AC=3;AF=0.045;AN=66;BaseQ          |
| 29938 | chrY | 13489548 | . | G | A     | 30405.49 | PASS          | AC=26;AF=0.394;AN=66;BaseQ         |
| 29939 | chrY | 13489551 | . | T | A     | 77.54    | PASS          | AC=2;AF=0.029;AN=68;BaseQRankSum=  |
| 29940 | chrY | 13489553 | . | G | A     | 285.55   | my_snp_filter | AC=5;AF=0.076;AN=66;BaseQ          |
| 29941 | chrY | 13489555 | . | C | A     | 69.61    | my_snp_filter | AC=1;AF=0.015;AN=68;BaseQ          |
| 29942 | chrY | 13489557 | . | T | G     | 81159.11 | PASS          | AC=21;AF=0.457;AN=46;BaseQ         |
| 29943 | chrY | 13489559 | . | G | T,*   | 8278.32  | PASS          | AC=11,3;AF=0.167,0.045;AN=66;BaseQ |
| 29944 | chrY | 13489560 | . | G | A     | 3503.76  | my_snp_filter | AC=7;AF=0.100;AN=70;BaseQ          |

|       |      |          |   |   |       |          |               |                                    |
|-------|------|----------|---|---|-------|----------|---------------|------------------------------------|
| 29945 | chrY | 13489561 | . | G | A     | 1223.18  | my_snp_filter | AC=5;AF=0.071;AN=70;BaseQ          |
| 29946 | chrY | 13489563 | . | G | T     | 1311.41  | my_snp_filter | AC=5;AF=0.071;AN=70;BaseQ          |
| 29947 | chrY | 13489568 | . | C | T     | 1301     | PASS          | AC=2;AF=0.029;AN=68;BaseQRankSum=  |
| 29948 | chrY | 13489569 | . | G | C,T,A | 93381.03 | PASS          | AC=28,12,3;AF=0.467,0.200          |
| 29949 | chrY | 13489570 | . | G | A     | 458.44   | my_snp_filter | AC=3;AF=0.047;AN=64;BaseQ          |
| 29950 | chrY | 13489571 | . | G | T     | 8050.23  | PASS          | AC=6;AF=0.088;AN=68;BaseQRankSum=  |
| 29951 | chrY | 13489572 | . | G | A     | 7797.75  | PASS          | AC=9;AF=0.132;AN=68;BaseQRankSum=  |
| 29952 | chrY | 13489578 | . | C | A,T   | 4332.27  | PASS          | AC=6,5;AF=0.086,0.071;AN=70;BaseQ  |
| 29953 | chrY | 13489579 | . | T | A,C   | 2145.99  | PASS          | AC=5,1;AF=0.071,0.014;AN=70;BaseQ  |
| 29954 | chrY | 13489580 | . | C | A     | 5958.80  | PASS          | AC=2;AF=0.029;AN=70;BaseQRankSum=  |
| 29955 | chrY | 13489581 | . | T | C     | 115.83   | PASS          | AC=1;AF=0.014;AN=70;BaseQRankSum=  |
| 29956 | chrY | 13489583 | . | A | C,T   | 693.93   | PASS          | AC=1,4;AF=0.014,0.057;AN=70;BaseQ  |
| 29957 | chrY | 13489584 | . | T | C     | 74.92    | my_snp_filter | AC=1;AF=0.014;AN=70;BaseQ          |
| 29958 | chrY | 13489585 | . | G | A     | 234.68   | my_snp_filter | AC=2;AF=0.029;AN=70;BaseQ          |
| 29959 | chrY | 13489586 | . | C | A,T   | 6674.46  | PASS          | AC=5,2;AF=0.071,0.029;AN=70;BaseQ  |
| 29960 | chrY | 13489587 | . | C | T,A   | 237.16   | my_snp_filter | AC=3,2;AF=0.043,0.029;AN=          |
| 29961 | chrY | 13489589 | . | T | A     | 812.07   | PASS          | AC=2;AF=0.029;AN=70;BaseQRankSum=  |
| 29962 | chrY | 13489592 | . | C | T     | 1381.02  | my_snp_filter | AC=4;AF=0.057;AN=70;BaseQ          |
| 29963 | chrY | 13489594 | . | C | A     | 917.19   | PASS          | AC=6;AF=0.086;AN=70;BaseQRankSum=  |
| 29964 | chrY | 13489595 | . | C | A,T   | 5899.03  | PASS          | AC=7,2;AF=0.100,0.029;AN=70;BaseQ  |
| 29965 | chrY | 13489597 | . | C | T,A   | 1820.73  | PASS          | AC=5,2;AF=0.071,0.029;AN=70;BaseQ  |
| 29966 | chrY | 13489598 | . | C | A,T   | 1000.01  | my_snp_filter | AC=3,1;AF=0.043,0.014;AN=          |
| 29967 | chrY | 13489599 | . | C | T,A   | 6704.07  | PASS          | AC=3,6;AF=0.043,0.086;AN=70;BaseQ  |
| 29968 | chrY | 13489600 | . | C | G     | 1006.81  | PASS          | AC=6;AF=0.086;AN=70;BaseQRankSum=  |
| 29969 | chrY | 13489601 | . | A | T     | 713.60   | PASS          | AC=5;AF=0.071;AN=70;BaseQRankSum=  |
| 29970 | chrY | 13489602 | . | C | A     | 1900.35  | PASS          | AC=4;AF=0.057;AN=70;BaseQRankSum=  |
| 29971 | chrY | 13489604 | . | C | A,T   | 11807.16 | PASS          | AC=2,13;AF=0.029,0.186;AN=         |
| 29972 | chrY | 13489605 | . | C | A,T   | 1083.45  | my_snp_filter | AC=6,2;AF=0.086,0.029;AN=          |
| 29973 | chrY | 13489606 | . | C | T,A   | 9929.58  | PASS          | AC=8,3;AF=0.114,0.043;AN=70;BaseQ  |
| 29974 | chrY | 13489607 | . | G | T,A   | 6651.67  | PASS          | AC=2,9;AF=0.029,0.129;AN=70;BaseQ  |
| 29975 | chrY | 13489609 | . | C | T     | 1593.36  | PASS          | AC=3;AF=0.048;AN=62;BaseQRankSum=  |
| 29976 | chrY | 13489610 | . | T | A     | 193.98   | PASS          | AC=2;AF=0.033;AN=60;BaseQRankSum=  |
| 29977 | chrY | 13489611 | . | G | T     | 1753.13  | PASS          | AC=7;AF=0.117;AN=60;BaseQRankSum=  |
| 29978 | chrY | 13489614 | . | C | A,*   | 5566.24  | PASS          | AC=11,1;AF=0.220,0.020;AN=50;Base  |
| 29979 | chrY | 13489623 | . | C | T,A   | 9754.48  | PASS          | AC=10,3;AF=0.192,0.058;AN=52;Base  |
| 29980 | chrY | 13489628 | . | A | C     | 13617.76 | PASS          | AC=19;AF=0.500;AN=38;Base          |
| 29981 | chrY | 13489637 | . | C | A     | 2235.65  | PASS          | AC=7;AF=0.121;AN=58;BaseQRankSum=  |
| 29982 | chrY | 13489638 | . | A | T     | 433.47   | PASS          | AC=1;AF=0.019;AN=54;BaseQRankSum=  |
| 29983 | chrY | 13489639 | . | C | G,T,A | 3597.34  | PASS          | AC=2,7,5;AF=0.037,0.130,0.093;AN=  |
| 29984 | chrY | 13489642 | . | C | A,*   | 2472.68  | PASS          | AC=3,2;AF=0.047,0.031;AN=64;BaseQ  |
| 29985 | chrY | 13489643 | . | C | T,A   | 699.75   | PASS          | AC=3,2;AF=0.045,0.030;AN=66;BaseQ  |
| 29986 | chrY | 13489644 | . | G | A     | 9735.07  | PASS          | AC=6;AF=0.091;AN=66;BaseQRankSum=  |
| 29987 | chrY | 13489646 | . | A | G     | 802.68   | PASS          | AC=1;AF=0.015;AN=66;BaseQRankSum=  |
| 29988 | chrY | 13489649 | . | A | T     | 383.33   | PASS          | AC=1;AF=0.015;AN=68;BaseQRankSum=  |
| 29989 | chrY | 13489652 | . | C | T     | 2492.64  | PASS          | AC=6;AF=0.088;AN=68;BaseQRankSum=  |
| 29990 | chrY | 13489653 | . | G | A     | 8931.81  | PASS          | AC=9;AF=0.132;AN=68;BaseQRankSum=  |
| 29991 | chrY | 13489656 | . | C | T     | 930.42   | PASS          | AC=2;AF=0.029;AN=68;BaseQRankSum=  |
| 29992 | chrY | 13489659 | . | C | T     | 3280.62  | PASS          | AC=3;AF=0.044;AN=68;BaseQRankSum=  |
| 29993 | chrY | 13489660 | . | C | T,A   | 855.06   | my_snp_filter | AC=2,2;AF=0.029,0.029;AN=          |
| 29994 | chrY | 13489661 | . | C | A,G   | 423.33   | my_snp_filter | AC=1,1;AF=0.014,0.014;AN=          |
| 29995 | chrY | 13489662 | . | T | A,G   | 4106.33  | PASS          | AC=2,2;AF=0.029,0.029;AN=70;BaseQ  |
| 29996 | chrY | 13489663 | . | G | T     | 1391.35  | PASS          | AC=2;AF=0.029;AN=70;BaseQRankSum=  |
| 29997 | chrY | 13489664 | . | G | T     | 515.87   | my_snp_filter | AC=5;AF=0.071;AN=70;BaseQ          |
| 29998 | chrY | 13489665 | . | G | T     | 3277.12  | PASS          | AC=2;AF=0.029;AN=70;BaseQRankSum=  |
| 29999 | chrY | 13489666 | . | C | A     | 169.93   | PASS          | AC=4;AF=0.057;AN=70;BaseQRankSum=  |
| 30000 | chrY | 13489667 | . | T | A     | 121.16   | my_snp_filter | AC=1;AF=0.014;AN=70;BaseQ          |
| 30001 | chrY | 13489668 | . | G | T,A   | 1412.94  | PASS          | AC=2,1;AF=0.029,0.014;AN=70;BaseQ  |
| 30002 | chrY | 13489669 | . | G | A     | 6612.53  | PASS          | AC=7;AF=0.100;AN=70;BaseQRankSum=  |
| 30003 | chrY | 13489670 | . | G | T     | 384.44   | my_snp_filter | AC=2;AF=0.029;AN=70;BaseQ          |
| 30004 | chrY | 13489671 | . | T | A     | 2220.55  | PASS          | AC=4;AF=0.057;AN=70;BaseQRankSum=  |
| 30005 | chrY | 13489672 | . | G | T     | 81.38    | PASS          | AC=1;AF=0.014;AN=70;BaseQRankSum=  |
| 30006 | chrY | 13489674 | . | A | G,*   | 1002.23  | my_snp_filter | AC=2,3;AF=0.029,0.043;AN=          |
| 30007 | chrY | 13489675 | . | G | A,T   | 2662.96  | PASS          | AC=6,1;AF=0.086,0.014;AN=70;BaseQ  |
| 30008 | chrY | 13489677 | . | C | T,G   | 479.22   | PASS          | AC=1,1;AF=0.014,0.014;AN=70;BaseQ  |
| 30009 | chrY | 13489678 | . | C | T     | 4223.43  | PASS          | AC=6;AF=0.086;AN=70;BaseQRankSum=  |
| 30010 | chrY | 13489679 | . | C | A     | 942.12   | PASS          | AC=2;AF=0.029;AN=70;BaseQRankSum=  |
| 30011 | chrY | 13489680 | . | C | T,A   | 1157.16  | my_snp_filter | AC=9,1;AF=0.129,0.014;AN=          |
| 30012 | chrY | 13489681 | . | C | T,G,A | 8098.87  | PASS          | AC=10,1,1;AF=0.143,0.014,0.014;AN= |
| 30013 | chrY | 13489682 | . | G | T,A   | 7010.24  | PASS          | AC=6,9;AF=0.086,0.129;AN=70;BaseQ  |
| 30014 | chrY | 13489687 | . | A | G,T   | 36601.76 | PASS          | AC=19,1;AF=0.365,0.019;AN=         |
| 30015 | chrY | 13489693 | . | C | T,A   | 445.37   | my_snp_filter | AC=3,1;AF=0.047,0.016;AN=          |
| 30016 | chrY | 13489694 | . | A | T     | 916.28   | my_snp_filter | AC=2;AF=0.031;AN=64;BaseQ          |
| 30017 | chrY | 13489695 | . | C | T,A   | 763.02   | PASS          | AC=3,3;AF=0.047,0.047;AN=64;BaseQ  |
| 30018 | chrY | 13489697 | . | G | A     | 3435.89  | PASS          | AC=8;AF=0.129;AN=62;BaseQRankSum=  |
| 30019 | chrY | 13489700 | . | C | A,T,* | 1494.12  | PASS          | AC=3,3,2;AF=0.047,0.047,0.031;AN=  |
| 30020 | chrY | 13489702 | . | C | A,T,G | 9382.05  | PASS          | AC=4,3,10;AF=0.077,0.058,0.192;AN= |

|       |      |          |   |   |         |          |               |                                    |
|-------|------|----------|---|---|---------|----------|---------------|------------------------------------|
| 30021 | chrY | 13489703 | . | G | A,T     | 4405.50  | PASS          | AC=5,4;AF=0.119,0.095;AN=42;BaseQ  |
| 30022 | chrY | 13489704 | . | C | T,G     | 843.53   | PASS          | AC=3,2;AF=0.068,0.045;AN=44;BaseQ  |
| 30023 | chrY | 13489705 | . | A | G       | 23031.33 | PASS          | AC=20;AF=0.476;AN=42;BaseQ         |
| 30024 | chrY | 13489706 | . | C | T       | 2697     | PASS          | AC=5;AF=0.078;AN=64;BaseQRankSum=  |
| 30025 | chrY | 13489707 | . | A | G       | 2518.10  | PASS          | AC=3;AF=0.043;AN=70;BaseQRankSum=  |
| 30026 | chrY | 13489708 | . | G | A       | 318.68   | my_snp_filter | AC=2;AF=0.029;AN=70;BaseQ          |
| 30027 | chrY | 13489709 | . | C | T       | 2345.71  | PASS          | AC=3;AF=0.043;AN=70;BaseQRankSum=  |
| 30028 | chrY | 13489710 | . | G | A       | 8602.69  | PASS          | AC=17;AF=0.243;AN=70;BaseQRankSum= |
| 30029 | chrY | 13489712 | . | C | G       | 945.27   | PASS          | AC=2;AF=0.029;AN=70;BaseQRankSum=  |
| 30030 | chrY | 13489714 | . | A | T       | 30.45    | PASS          | AC=1;AF=0.014;AN=70;BaseQRankSum=  |
| 30031 | chrY | 13489716 | . | G | T,C     | 381.08   | PASS          | AC=3,3;AF=0.043,0.043;AN=70;BaseQ  |
| 30032 | chrY | 13489717 | . | C | G,T     | 1982.90  | PASS          | AC=1,3;AF=0.014,0.043;AN=70;BaseQ  |
| 30033 | chrY | 13489718 | . | C | T,A     | 1356.09  | my_snp_filter | AC=3,3;AF=0.043,0.043;AN=          |
| 30034 | chrY | 13489719 | . | T | A       | 3523.40  | PASS          | AC=2;AF=0.029;AN=70;BaseQRankSum=  |
| 30035 | chrY | 13489720 | . | G | C       | 875.81   | PASS          | AC=2;AF=0.029;AN=70;BaseQRankSum=  |
| 30036 | chrY | 13489721 | . | A | T       | 1669.90  | PASS          | AC=1;AF=0.014;AN=70;BaseQRankSum=  |
| 30037 | chrY | 13489722 | . | C | A,T     | 1078.44  | PASS          | AC=2,1;AF=0.029,0.014;AN=70;BaseQ  |
| 30038 | chrY | 13489724 | . | C | T,A     | 10719.87 | PASS          | AC=11,1;AF=0.157,0.014;AN=         |
| 30039 | chrY | 13489725 | . | C | G,A     | 2563.18  | PASS          | AC=2,4;AF=0.029,0.059;AN=68;BaseQ  |
| 30040 | chrY | 13489726 | . | C | A       | 1780.26  | PASS          | AC=3;AF=0.044;AN=68;BaseQRankSum=  |
| 30041 | chrY | 13489727 | . | C | T,G,A   | 2700.77  | PASS          | AC=3,2,1;AF=0.045,0.030,0.015;AN=  |
| 30042 | chrY | 13489730 | . | T | C,G     | 2202.27  | PASS          | AC=14,1;AF=0.219,0.016;AN=         |
| 30043 | chrY | 13489733 | . | C | T,G,A,* | 4664.63  | PASS          | AC=3,2,1,5;AF=0.052,0.034,0.017,0  |
| 30044 | chrY | 13489734 | . | C | G,A     | 30007.93 | PASS          | AC=20,4;AF=0.400,0.080;AN=         |
| 30045 | chrY | 13489735 | . | G | A,T     | 10905.28 | PASS          | AC=3,11;AF=0.047,0.172;AN=         |
| 30046 | chrY | 13489736 | . | C | T       | 1629.88  | PASS          | AC=4;AF=0.059;AN=68;BaseQRankSum=  |
| 30047 | chrY | 13489737 | . | T | A       | 180.06   | my_snp_filter | AC=1;AF=0.015;AN=68;BaseQ          |
| 30048 | chrY | 13489738 | . | C | G,T     | 689.73   | PASS          | AC=1,1;AF=0.015,0.015;AN=68;BaseQ  |
| 30049 | chrY | 13489739 | . | G | A       | 15581.93 | PASS          | AC=14;AF=0.206;AN=68;BaseQ         |
| 30050 | chrY | 13489740 | . | C | T       | 166.76   | my_snp_filter | AC=1;AF=0.014;AN=70;BaseQ          |
| 30051 | chrY | 13489743 | . | C | A       | 1054.85  | my_snp_filter | AC=4;AF=0.057;AN=70;BaseQ          |
| 30052 | chrY | 13489744 | . | C | A,T     | 376.60   | my_snp_filter | AC=1,2;AF=0.014,0.029;AN=          |
| 30053 | chrY | 13489745 | . | T | A,G     | 3259.91  | PASS          | AC=1,4;AF=0.014,0.057;AN=70;BaseQ  |
| 30054 | chrY | 13489746 | . | C | T,A     | 1846.88  | PASS          | AC=4,1;AF=0.057,0.014;AN=70;BaseQ  |
| 30055 | chrY | 13489751 | . | C | A,*     | 1708.65  | PASS          | AC=3,2;AF=0.043,0.029;AN=70;BaseQ  |
| 30056 | chrY | 13489755 | . | C | T       | 9816.70  | PASS          | AC=9;AF=0.129;AN=70;BaseQRankSum=  |
| 30057 | chrY | 13489756 | . | G | A,C     | 10798.92 | PASS          | AC=6,7;AF=0.086,0.100;AN=          |
| 30058 | chrY | 13489759 | . | C | A,T     | 1512.08  | PASS          | AC=3,1;AF=0.043,0.014;AN=70;BaseQ  |
| 30059 | chrY | 13489760 | . | C | T       | 1491.41  | PASS          | AC=1;AF=0.014;AN=70;BaseQRankSum=  |
| 30060 | chrY | 13489763 | . | C | T,A     | 8119.26  | PASS          | AC=5,10;AF=0.076,0.152;AN=66;BaseQ |
| 30061 | chrY | 13489766 | . | A | C,*     | 28337.93 | PASS          | AC=15,1;AF=0.357,0.024;AN=         |
| 30062 | chrY | 13489769 | . | C | T       | 583.84   | my_snp_filter | AC=4;AF=0.071;AN=56;BaseQ          |
| 30063 | chrY | 13489770 | . | G | A,C     | 4805.97  | PASS          | AC=6,2;AF=0.111,0.037;AN=54;BaseQ  |
| 30064 | chrY | 13489772 | . | C | T       | 1703.19  | PASS          | AC=2;AF=0.036;AN=56;BaseQRankSum=  |
| 30065 | chrY | 13489774 | . | C | A,T     | 838.44   | PASS          | AC=2,1;AF=0.032,0.016;AN=62;BaseQ  |
| 30066 | chrY | 13489775 | . | G | A,T     | 3401.26  | PASS          | AC=2,5;AF=0.032,0.081;AN=62;BaseQ  |
| 30067 | chrY | 13489776 | . | C | A       | 1301.40  | PASS          | AC=1;AF=0.016;AN=64;BaseQRankSum=  |
| 30068 | chrY | 13489777 | . | C | G       | 193.90   | PASS          | AC=1;AF=0.017;AN=60;BaseQRankSum=  |
| 30069 | chrY | 13489778 | . | T | C,A,G   | 24303.49 | PASS          | AC=12,1,4;AF=0.286,0.024,0         |
| 30070 | chrY | 13489780 | . | T | G       | 36.21    | PASS          | AC=1;AF=0.016;AN=64;BaseQRankSum=  |
| 30071 | chrY | 13489781 | . | C | A       | 1113.03  | PASS          | AC=1,3;AF=0.016,0.047;AN=64;BaseQ  |
| 30072 | chrY | 13489782 | . | C | T,A     | 349.88   | PASS          | AC=1,1;AF=0.015,0.015;AN=66;BaseQ  |
| 30073 | chrY | 13489783 | . | C | A       | 379.10   | PASS          | AC=1;AF=0.015;AN=68;BaseQRankSum=  |
| 30074 | chrY | 13489784 | . | C | A       | 1853.57  | PASS          | AC=3;AF=0.044;AN=68;BaseQRankSum=  |
| 30075 | chrY | 13489785 | . | C | T       | 41.98    | my_snp_filter | AC=1;AF=0.014;AN=70;BaseQ          |
| 30076 | chrY | 13489788 | . | C | T       | 100.92   | my_snp_filter | AC=2;AF=0.029;AN=70;BaseQ          |
| 30077 | chrY | 13489790 | . | G | A       | 2540.40  | PASS          | AC=4;AF=0.057;AN=70;BaseQRankSum=  |
| 30078 | chrY | 13489793 | . | T | G       | 30.87    | PASS          | AC=1;AF=0.014;AN=70;BaseQRankSum=  |
| 30079 | chrY | 13489795 | . | C | T       | 3402.60  | PASS          | AC=7;AF=0.100;AN=70;BaseQRankSum=  |
| 30080 | chrY | 13489796 | . | C | T       | 41.48    | my_snp_filter | AC=1;AF=0.014;AN=70;BaseQ          |
| 30081 | chrY | 13489798 | . | G | C       | 121.21   | PASS          | AC=1;AF=0.014;AN=70;BaseQRankSum=  |
| 30082 | chrY | 13489799 | . | C | A,G     | 2502.59  | PASS          | AC=3,1;AF=0.043,0.014;AN=70;BaseQ  |
| 30083 | chrY | 13489802 | . | C | T       | 543.98   | PASS          | AC=1;AF=0.015;AN=68;BaseQRankSum=  |
| 30084 | chrY | 13489803 | . | C | A       | 1961.57  | PASS          | AC=7;AF=0.103;AN=68;BaseQRankSum=  |
| 30085 | chrY | 13489804 | . | C | A,G     | 48416.43 | PASS          | AC=26,5;AF=0.433,0.083;AN=         |
| 30086 | chrY | 13489808 | . | T | C       | 42.13    | PASS          | AC=1;AF=0.014;AN=70;BaseQRankSum=  |
| 30087 | chrY | 13489810 | . | G | A       | 41.76    | PASS          | AC=2;AF=0.029;AN=70;BaseQRankSum=  |
| 30088 | chrY | 13489811 | . | A | G       | 388.93   | PASS          | AC=2;AF=0.029;AN=70;BaseQRankSum=  |
| 30089 | chrY | 13489813 | . | T | A,C     | 17055.60 | PASS          | AC=4,20;AF=0.063,0.313;AN=         |
| 30090 | chrY | 13489814 | . | G | A       | 1851.33  | PASS          | AC=7;AF=0.106;AN=66;BaseQRankSum=  |
| 30091 | chrY | 13489815 | . | C | A,T,G   | 1031.47  | PASS          | AC=4,4,1;AF=0.059,0.059,0.015;AN=  |
| 30092 | chrY | 13489817 | . | T | C,*     | 1609.50  | PASS          | AC=4,1;AF=0.059,0.015;AN=68;BaseQ  |
| 30093 | chrY | 13489818 | . | G | A,*     | 1634.67  | PASS          | AC=1,1;AF=0.015,0.015;AN=68;BaseQ  |
| 30094 | chrY | 13489820 | . | T | C,A     | 22908.26 | PASS          | AC=18,6;AF=0.333,0.111;AN=         |
| 30095 | chrY | 13489821 | . | G | A       | 1154.19  | PASS          | AC=3;AF=0.054;AN=56;BaseQRankSum=  |
| 30096 | chrY | 13489823 | . | T | C       | 25750.03 | PASS          | AC=21;AF=0.389;AN=54;BaseQ         |

|       |      |          |   |   |       |          |               |                                    |
|-------|------|----------|---|---|-------|----------|---------------|------------------------------------|
| 30097 | chrY | 13489824 | . | G | A,C   | 1357.78  | PASS          | AC=2,3;AF=0.033,0.050;AN=60;BaseQ  |
| 30098 | chrY | 13489825 | . | G | A     | 94.29    | PASS          | AC=2;AF=0.029;AN=70;BaseQRankSum=  |
| 30099 | chrY | 13489828 | . | C | T,A   | 5723.73  | PASS          | AC=10,2;AF=0.147,0.029;AN=68;Base  |
| 30100 | chrY | 13489829 | . | G | A,C   | 3451.59  | PASS          | AC=7,1;AF=0.103,0.015;AN=68;BaseQ  |
| 30101 | chrY | 13489830 | . | C | G     | 97.48    | PASS          | AC=1;AF=0.015;AN=68;BaseQRankSum=  |
| 30102 | chrY | 13489832 | . | C | G     | 36480.26 | PASS          | AC=29;AF=0.518;AN=56;Base          |
| 30103 | chrY | 13489834 | . | C | A,T   | 8029.63  | PASS          | AC=10,3;AF=0.147,0.044;AN=68;Base  |
| 30104 | chrY | 13489835 | . | C | T,A,G | 3375.89  | PASS          | AC=4,8,1;AF=0.061,0.121,0.015;AN=  |
| 30105 | chrY | 13489837 | . | C | A     | 50.87    | PASS          | AC=1;AF=0.014;AN=70;BaseQRankSum=  |
| 30106 | chrY | 13489838 | . | T | A     | 1279.72  | PASS          | AC=6;AF=0.086;AN=70;BaseQRankSum=  |
| 30107 | chrY | 13489840 | . | G | C     | 1038.46  | PASS          | AC=3;AF=0.043;AN=70;BaseQRankSum=  |
| 30108 | chrY | 13489842 | . | T | C,A   | 2624.96  | PASS          | AC=10,2;AF=0.143,0.029;AN=70;Base  |
| 30109 | chrY | 13489843 | . | C | G     | 1980.20  | PASS          | AC=4;AF=0.057;AN=70;BaseQRankSum=  |
| 30110 | chrY | 13489845 | . | C | T     | 1578.08  | PASS          | AC=6;AF=0.086;AN=70;BaseQRankSum=  |
| 30111 | chrY | 13489849 | . | G | T,C   | 1625.03  | PASS          | AC=8,4;AF=0.114,0.057;AN=70;BaseQ  |
| 30112 | chrY | 13489850 | . | C | T     | 1275.94  | PASS          | AC=4;AF=0.057;AN=70;BaseQRankSum=  |
| 30113 | chrY | 13489851 | . | C | T     | 558.19   | my_snp_filter | AC=4;AF=0.057;AN=70;BaseQ          |
| 30114 | chrY | 13489852 | . | G | A,T   | 11684.52 | PASS          | AC=13,1;AF=0.186,0.014;AN=         |
| 30115 | chrY | 13489853 | . | G | T     | 667.44   | PASS          | AC=3;AF=0.043;AN=70;BaseQRankSum=  |
| 30116 | chrY | 13489854 | . | C | G,A   | 4670.90  | PASS          | AC=7,4;AF=0.100,0.057;AN=70;BaseQ  |
| 30117 | chrY | 13489855 | . | C | T,A   | 3806.38  | PASS          | AC=4,4;AF=0.057,0.057;AN=70;BaseQ  |
| 30118 | chrY | 13489856 | . | T | C     | 514.47   | PASS          | AC=2;AF=0.029;AN=70;BaseQRankSum=  |
| 30119 | chrY | 13489857 | . | C | A     | 39.34    | my_snp_filter | AC=2;AF=0.029;AN=70;BaseQ          |
| 30120 | chrY | 13489860 | . | G | A,*   | 2994.27  | PASS          | AC=5,1;AF=0.071,0.014;AN=70;BaseQ  |
| 30121 | chrY | 13489861 | . | G | T,*   | 220.03   | my_snp_filter | AC=3,1;AF=0.043,0.014;AN=          |
| 30122 | chrY | 13489862 | . | C | A,T   | 2138.40  | PASS          | AC=2,5;AF=0.029,0.071;AN=70;BaseQ  |
| 30123 | chrY | 13489865 | . | G | A,*   | 137.13   | my_snp_filter | AC=1,1;AF=0.014,0.014;AN=          |
| 30124 | chrY | 13489867 | . | C | A     | 88.29    | PASS          | AC=3;AF=0.043;AN=70;BaseQRankSum=  |
| 30125 | chrY | 13489868 | . | C | A     | 1867     | PASS          | AC=11;AF=0.157;AN=70;BaseQRankSum= |
| 30126 | chrY | 13489870 | . | G | C     | 1088.20  | PASS          | AC=3;AF=0.043;AN=70;BaseQRankSum=  |
| 30127 | chrY | 13489871 | . | C | T     | 5092.85  | PASS          | AC=20;AF=0.286;AN=70;BaseQRankSum= |
| 30128 | chrY | 13489872 | . | G | A,C   | 3996.70  | PASS          | AC=11,3;AF=0.157,0.043;AN=70;Base  |
| 30129 | chrY | 13489873 | . | C | A     | 449.94   | PASS          | AC=1;AF=0.014;AN=70;BaseQRankSum=  |
| 30130 | chrY | 13489874 | . | T | A     | 1166.22  | PASS          | AC=8;AF=0.114;AN=70;BaseQRankSum=  |
| 30131 | chrY | 13489875 | . | C | A,T   | 617.56   | PASS          | AC=2,1;AF=0.029,0.014;AN=70;BaseQ  |
| 30132 | chrY | 13489880 | . | C | G,T   | 4340.18  | PASS          | AC=1,10;AF=0.014,0.143;AN=70;Base  |
| 30133 | chrY | 13489881 | . | G | A     | 4872     | PASS          | AC=16;AF=0.229;AN=70;BaseQRankSum= |
| 30134 | chrY | 13489882 | . | C | G     | 884.87   | PASS          | AC=2;AF=0.029;AN=70;BaseQRankSum=  |
| 30135 | chrY | 13489883 | . | A | T     | 266.95   | PASS          | AC=1;AF=0.014;AN=70;BaseQRankSum=  |
| 30136 | chrY | 13489886 | . | C | A,T   | 2062.96  | PASS          | AC=2,3;AF=0.029,0.044;AN=68;BaseQ  |
| 30137 | chrY | 13489888 | . | G | A,*   | 1953.57  | PASS          | AC=7,5;AF=0.103,0.074;AN=68;BaseQ  |
| 30138 | chrY | 13489890 | . | C | G     | 140.64   | PASS          | AC=2;AF=0.029;AN=70;BaseQRankSum=  |
| 30139 | chrY | 13489891 | . | T | A     | 31.48    | PASS          | AC=1;AF=0.014;AN=70;BaseQRankSum=  |
| 30140 | chrY | 13489893 | . | A | T     | 1026.88  | PASS          | AC=4;AF=0.057;AN=70;BaseQRankSum=  |
| 30141 | chrY | 13489894 | . | C | T,A   | 1857.63  | PASS          | AC=5,1;AF=0.071,0.014;AN=70;BaseQ  |
| 30142 | chrY | 13489895 | . | G | A,C   | 4915.22  | PASS          | AC=18,3;AF=0.257,0.043;AN=70;Base  |
| 30143 | chrY | 13489897 | . | G | T     | 745.33   | PASS          | AC=4;AF=0.059;AN=68;BaseQRankSum=  |
| 30144 | chrY | 13489901 | . | C | G     | 20797.77 | PASS          | AC=32;AF=0.500;AN=64;Base          |
| 30145 | chrY | 13489904 | . | A | T,*   | 1045.94  | PASS          | AC=2,1;AF=0.029,0.015;AN=68;BaseQ  |
| 30146 | chrY | 13489905 | . | G | T     | 335.03   | my_snp_filter | AC=3;AF=0.044;AN=68;BaseQ          |
| 30147 | chrY | 13489906 | . | A | C     | 14474.56 | PASS          | AC=29;AF=0.468;AN=62;Base          |
| 30148 | chrY | 13489907 | . | C | T     | 2341.68  | PASS          | AC=7;AF=0.103;AN=68;BaseQRankSum=  |
| 30149 | chrY | 13489908 | . | C | T     | 1941.49  | PASS          | AC=9;AF=0.132;AN=68;BaseQRankSum=  |
| 30150 | chrY | 13489910 | . | C | A,G,T | 4303.29  | PASS          | AC=7,2,1;AF=0.100,0.029,0.014;AN=  |
| 30151 | chrY | 13489913 | . | T | G     | 19476.52 | PASS          | AC=31;AF=0.456;AN=68;Base          |
| 30152 | chrY | 13489915 | . | C | T     | 933.72   | PASS          | AC=6;AF=0.086;AN=70;BaseQRankSum=  |
| 30153 | chrY | 13489921 | . | G | C,A   | 1289.02  | PASS          | AC=2,1;AF=0.029,0.014;AN=70;BaseQ  |
| 30154 | chrY | 13489922 | . | T | G     | 110.43   | my_snp_filter | AC=1;AF=0.014;AN=70;BaseQ          |
| 30155 | chrY | 13489924 | . | C | A,*   | 560.90   | PASS          | AC=5,2;AF=0.071,0.029;AN=70;BaseQ  |
| 30156 | chrY | 13489926 | . | C | T     | 521.93   | PASS          | AC=1;AF=0.014;AN=70;BaseQRankSum=  |
| 30157 | chrY | 13489929 | . | G | A,C   | 4035.33  | PASS          | AC=5,6;AF=0.071,0.086;AN=70;BaseQ  |
| 30158 | chrY | 13489931 | . | C | G     | 1521.92  | PASS          | AC=9;AF=0.129;AN=70;BaseQRankSum=  |
| 30159 | chrY | 13489933 | . | G | A     | 8150.61  | PASS          | AC=13;AF=0.186;AN=70;BaseQRankSum= |
| 30160 | chrY | 13489936 | . | C | A,T   | 2107.69  | PASS          | AC=4,4;AF=0.057,0.057;AN=70;BaseQ  |
| 30161 | chrY | 13489937 | . | G | C     | 662.26   | PASS          | AC=1;AF=0.014;AN=70;BaseQRankSum=  |
| 30162 | chrY | 13489938 | . | T | G     | 185.99   | PASS          | AC=1;AF=0.014;AN=70;BaseQRankSum=  |
| 30163 | chrY | 13489939 | . | G | A,C   | 1043.39  | PASS          | AC=3,4;AF=0.043,0.057;AN=70;BaseQ  |
| 30164 | chrY | 13489940 | . | A | G     | 906.49   | PASS          | AC=4;AF=0.057;AN=70;BaseQRankSum=  |
| 30165 | chrY | 13489941 | . | A | G     | 296.43   | PASS          | AC=1;AF=0.014;AN=70;BaseQRankSum=  |
| 30166 | chrY | 13489942 | . | A | G     | 33.08    | my_snp_filter | AC=2;AF=0.029;AN=70;BaseQ          |
| 30167 | chrY | 13489946 | . | C | T     | 1553.51  | PASS          | AC=11;AF=0.157;AN=70;BaseQRankSum= |
| 30168 | chrY | 13489947 | . | G | A     | 942.89   | PASS          | AC=4;AF=0.057;AN=70;BaseQRankSum=  |
| 30169 | chrY | 13489949 | . | C | T     | 4558.23  | PASS          | AC=26;AF=0.371;AN=70;BaseQRankSum= |
| 30170 | chrY | 13489953 | . | G | A     | 72.55    | PASS          | AC=1;AF=0.014;AN=70;BaseQRankSum=  |
| 30171 | chrY | 13489954 | . | T | G     | 28859.45 | PASS          | AC=38;AF=0.543;AN=70;Base          |
| 30172 | chrY | 13489955 | . | C | T     | 274.87   | my_snp_filter | AC=2;AF=0.029;AN=70;BaseQ          |

|       |      |          |   |   |       |          |               |                                    |
|-------|------|----------|---|---|-------|----------|---------------|------------------------------------|
| 30173 | chrY | 13489957 | . | C | T     | 1472.77  | PASS          | AC=3;AF=0.043;AN=70;BaseQRankSum=  |
| 30174 | chrY | 13489960 | . | C | A     | 259.52   | my_snp_filter | AC=2;AF=0.029;AN=70;BaseQ          |
| 30175 | chrY | 13489961 | . | C | A     | 576.72   | PASS          | AC=8;AF=0.114;AN=70;BaseQRankSum=  |
| 30176 | chrY | 13489962 | . | A | G     | 37.95    | my_snp_filter | AC=2;AF=0.029;AN=70;BaseQ          |
| 30177 | chrY | 13489963 | . | A | G     | 134.96   | my_snp_filter | AC=3;AF=0.043;AN=70;BaseQ          |
| 30178 | chrY | 13489965 | . | A | T     | 296.75   | PASS          | AC=5;AF=0.071;AN=70;BaseQRankSum=  |
| 30179 | chrY | 13489968 | . | T | C     | 33.42    | PASS          | AC=1;AF=0.014;AN=70;BaseQRankSum=  |
| 30180 | chrY | 13489971 | . | C | T,*   | 2039.14  | PASS          | AC=9,2;AF=0.129,0.029;AN=70;BaseQ  |
| 30181 | chrY | 13489972 | . | G | A,*   | 855.06   | PASS          | AC=6,2;AF=0.086,0.029;AN=70;BaseQ  |
| 30182 | chrY | 13489974 | . | A | C,T   | 12255.37 | PASS          | AC=24,3;AF=0.353,0.044;AN=         |
| 30183 | chrY | 13489982 | . | T | A,C   | 18558.68 | PASS          | AC=31,3;AF=0.443,0.043;AN=         |
| 30184 | chrY | 13489983 | . | G | A     | 3727.55  | PASS          | AC=10;AF=0.143;AN=70;BaseQRankSum= |
| 30185 | chrY | 13489984 | . | T | G,A,* | 10481.23 | PASS          | AC=26,4,1;AF=0.371,0.057,          |
| 30186 | chrY | 13489987 | . | A | G,C   | 5020.52  | PASS          | AC=15,4;AF=0.214,0.057;AN=70;Base  |
| 30187 | chrY | 13489989 | . | T | G     | 16759.59 | PASS          | AC=33;AF=0.485;AN=68;Base          |
| 30188 | chrY | 13489990 | . | C | A     | 1658.05  | PASS          | AC=15;AF=0.221;AN=68;BaseQRankSum= |
| 30189 | chrY | 13489991 | . | C | T     | 313.44   | PASS          | AC=5;AF=0.071;AN=70;BaseQRankSum=  |
| 30190 | chrY | 13489992 | . | T | A,*   | 1540.46  | PASS          | AC=1,3;AF=0.014,0.043;AN=70;BaseQ  |
| 30191 | chrY | 13489994 | . | G | C,T   | 9886.82  | PASS          | AC=18,3;AF=0.257,0.043;AN=70;Base  |
| 30192 | chrY | 13489995 | . | A | C     | 5139.76  | PASS          | AC=25;AF=0.357;AN=70;BaseQRankSum= |
| 30193 | chrY | 13490000 | . | A | T     | 1046.64  | PASS          | AC=10;AF=0.143;AN=70;BaseQRankSum= |
| 30194 | chrY | 13490001 | . | C | T,G   | 23793.02 | PASS          | AC=19,25;AF=0.271,0.357;A          |
| 30195 | chrY | 13490002 | . | T | A     | 902.55   | PASS          | AC=3;AF=0.043;AN=70;BaseQRankSum=  |
| 30196 | chrY | 13490005 | . | T | C     | 12038.98 | PASS          | AC=29;AF=0.414;AN=70;Base          |
| 30197 | chrY | 13490006 | . | A | T     | 779.40   | PASS          | AC=7;AF=0.100;AN=70;BaseQRankSum=  |
| 30198 | chrY | 13490007 | . | T | A,C   | 3051.55  | my_snp_filter | AC=2,4;AF=0.029,0.057;AN=          |
| 30199 | chrY | 13490011 | . | C | T     | 4047.87  | PASS          | AC=23;AF=0.329;AN=70;BaseQRankSum= |
| 30200 | chrY | 13490013 | . | G | C     | 220.70   | PASS          | AC=1;AF=0.014;AN=70;BaseQRankSum=  |
| 30201 | chrY | 13490020 | . | C | A,T   | 2534.02  | PASS          | AC=4,4;AF=0.057,0.057;AN=70;BaseQ  |
| 30202 | chrY | 13490021 | . | G | A     | 626.88   | PASS          | AC=4;AF=0.057;AN=70;BaseQRankSum=  |
| 30203 | chrY | 13490022 | . | G | T     | 218.43   | PASS          | AC=1;AF=0.014;AN=70;BaseQRankSum=  |
| 30204 | chrY | 13490027 | . | G | T     | 2131.94  | my_snp_filter | AC=4;AF=0.057;AN=70;BaseQ          |
| 30205 | chrY | 13490031 | . | T | C     | 769.66   | PASS          | AC=9;AF=0.129;AN=70;BaseQRankSum=  |
| 30206 | chrY | 13490033 | . | T | C     | 110.37   | my_snp_filter | AC=6;AF=0.086;AN=70;BaseQ          |
| 30207 | chrY | 13490034 | . | G | C     | 383.87   | PASS          | AC=4;AF=0.057;AN=70;BaseQRankSum=  |
| 30208 | chrY | 13490044 | . | C | T     | 218.39   | PASS          | AC=4;AF=0.057;AN=70;BaseQRankSum=  |
| 30209 | chrY | 13490046 | . | C | A     | 1770.19  | PASS          | AC=6;AF=0.086;AN=70;BaseQRankSum=  |
| 30210 | chrY | 13490047 | . | C | T     | 147.46   | my_snp_filter | AC=7;AF=0.100;AN=70;BaseQ          |
| 30211 | chrY | 13490049 | . | C | A     | 159.80   | PASS          | AC=2;AF=0.029;AN=70;BaseQRankSum=  |
| 30212 | chrY | 13490051 | . | C | T     | 256.22   | PASS          | AC=4;AF=0.057;AN=70;BaseQRankSum=  |
| 30213 | chrY | 13490053 | . | G | T,A   | 492.87   | PASS          | AC=4,3;AF=0.057,0.043;AN=70;BaseQ  |
| 30214 | chrY | 13490054 | . | C | A,T   | 3015.07  | PASS          | AC=16,5;AF=0.229,0.071;AN=70;Base  |
| 30215 | chrY | 13490055 | . | G | A     | 8265.43  | PASS          | AC=28;AF=0.400;AN=70;BaseQRankSum= |
| 30216 | chrY | 13490059 | . | C | A     | 247.06   | PASS          | AC=10;AF=0.143;AN=70;BaseQRankSum= |
| 30217 | chrY | 13490060 | . | C | T     | 56.56    | PASS          | AC=1;AF=0.014;AN=70;BaseQRankSum=  |
| 30218 | chrY | 13490065 | . | G | C     | 183.70   | PASS          | AC=6;AF=0.086;AN=70;BaseQRankSum=  |
| 30219 | chrY | 13490067 | . | A | C     | 33.58    | PASS          | AC=1;AF=0.014;AN=70;BaseQRankSum=  |
| 30220 | chrY | 13490097 | . | T | A     | 10318.99 | PASS          | AC=30;AF=0.517;AN=58;Base          |
| 30221 | chrY | 13490138 | . | T | A     | 8314.37  | PASS          | AC=16;AF=0.250;AN=64;BaseQRankSum= |
| 30222 | chrY | 13490144 | . | A | G     | 6532.29  | my_snp_filter | AC=14;AF=0.206;AN=68;Base          |
| 30223 | chrY | 13490155 | . | A | C     | 6905.43  | my_snp_filter | AC=12;AF=0.171;AN=70;Base          |
| 30224 | chrY | 13490161 | . | T | C     | 43.69    | my_snp_filter | AC=2;AF=0.029;AN=70;BaseQ          |
| 30225 | chrY | 13490163 | . | A | C     | 6912.89  | my_snp_filter | AC=11;AF=0.157;AN=70;Base          |
| 30226 | chrY | 13490173 | . | G | C     | 33.71    | my_snp_filter | AC=1;AF=0.014;AN=70;BaseQ          |
| 30227 | chrY | 13490186 | . | G | C     | 6822.34  | my_snp_filter | AC=13;AF=0.186;AN=70;Base          |
| 30228 | chrY | 13490194 | . | G | T     | 6548.05  | my_snp_filter | AC=13;AF=0.186;AN=70;Base          |
| 30229 | chrY | 13490197 | . | A | G     | 6322.96  | my_snp_filter | AC=13;AF=0.186;AN=70;Base          |
| 30230 | chrY | 13490270 | . | G | A     | 2239.88  | my_snp_filter | AC=14;AF=0.200;AN=70;Base          |
| 30231 | chrY | 13490284 | . | G | C     | 1860.59  | my_snp_filter | AC=13;AF=0.186;AN=70;Base          |
| 30232 | chrY | 13490316 | . | T | A     | 818.66   | my_snp_filter | AC=4;AF=0.061;AN=66;BaseQ          |
| 30233 | chrY | 13490454 | . | C | A     | 612.17   | my_snp_filter | AC=8;AF=0.114;AN=70;BaseQ          |
| 30234 | chrY | 13490503 | . | T | A     | 1888.69  | my_snp_filter | AC=15;AF=0.250;AN=60;Base          |
| 30235 | chrY | 13490563 | . | G | A     | 149.67   | PASS          | AC=3;AF=0.044;AN=68;BaseQRankSum=  |
| 30236 | chrY | 13490663 | . | G | A     | 490.84   | PASS          | AC=11;AF=0.157;AN=70;BaseQRankSum= |
| 30237 | chrY | 13490676 | . | A | G     | 444.14   | PASS          | AC=11;AF=0.157;AN=70;BaseQRankSum= |
| 30238 | chrY | 13490724 | . | C | A     | 2532.64  | PASS          | AC=9;AF=0.132;AN=68;BaseQRankSum=  |
| 30239 | chrY | 13490725 | . | G | T     | 2535.30  | PASS          | AC=9;AF=0.132;AN=68;BaseQRankSum=  |
| 30240 | chrY | 13490793 | . | G | T     | 1874.99  | my_snp_filter | AC=9;AF=0.136;AN=66;BaseQ          |
| 30241 | chrY | 13490808 | . | A | C     | 1793.39  | my_snp_filter | AC=9;AF=0.136;AN=66;BaseQ          |
| 30242 | chrY | 13490834 | . | C | A     | 2346.67  | my_snp_filter | AC=9;AF=0.141;AN=64;BaseQ          |
| 30243 | chrY | 13490836 | . | A | G     | 2180.25  | my_snp_filter | AC=8;AF=0.125;AN=64;BaseQ          |
| 30244 | chrY | 13490893 | . | C | T     | 547.42   | my_snp_filter | AC=3;AF=0.045;AN=66;BaseQ          |
| 30245 | chrY | 13490895 | . | G | A     | 2486.62  | my_snp_filter | AC=8;AF=0.121;AN=66;BaseQ          |
| 30246 | chrY | 13490907 | . | A | G     | 2151.48  | my_snp_filter | AC=7;AF=0.106;AN=66;BaseQ          |
| 30247 | chrY | 13490923 | . | C | A     | 2146.92  | my_snp_filter | AC=6;AF=0.094;AN=64;BaseQ          |
| 30248 | chrY | 13490925 | . | A | C     | 2117.07  | my_snp_filter | AC=6;AF=0.094;AN=64;BaseQ          |

|       |      |          |   |   |   |          |               |                                    |
|-------|------|----------|---|---|---|----------|---------------|------------------------------------|
| 30249 | chrY | 13490932 | . | T | A | 2010.39  | my_snp_filter | AC=7;AF=0.106;AN=66;BaseQ          |
| 30250 | chrY | 13490986 | . | T | C | 682      | PASS          | AC=5;AF=0.074;AN=68;BaseQRankSum=  |
| 30251 | chrY | 13490991 | . | A | C | 797.09   | PASS          | AC=4;AF=0.059;AN=68;BaseQRankSum=  |
| 30252 | chrY | 13491002 | . | G | A | 339.28   | PASS          | AC=4;AF=0.059;AN=68;BaseQRankSum=  |
| 30253 | chrY | 13491009 | . | C | A | 227.52   | PASS          | AC=2;AF=0.029;AN=68;BaseQRankSum=  |
| 30254 | chrY | 13491011 | . | C | A | 759.97   | PASS          | AC=5;AF=0.074;AN=68;BaseQRankSum=  |
| 30255 | chrY | 13491019 | . | G | A | 1220.86  | PASS          | AC=4;AF=0.057;AN=70;BaseQRankSum=  |
| 30256 | chrY | 13491032 | . | C | G | 630.92   | PASS          | AC=5;AF=0.074;AN=68;BaseQRankSum=  |
| 30257 | chrY | 13491034 | . | A | C | 627.60   | PASS          | AC=5;AF=0.074;AN=68;BaseQRankSum=  |
| 30258 | chrY | 13491053 | . | C | T | 532.30   | PASS          | AC=5;AF=0.076;AN=66;BaseQRankSum=  |
| 30259 | chrY | 13491086 | . | G | T | 252.72   | PASS          | AC=3;AF=0.047;AN=64;BaseQRankSum=  |
| 30260 | chrY | 13491095 | . | T | C | 485.05   | PASS          | AC=5;AF=0.076;AN=66;BaseQRankSum=  |
| 30261 | chrY | 13491116 | . | T | C | 243.03   | PASS          | AC=4;AF=0.059;AN=68;BaseQRankSum=  |
| 30262 | chrY | 13491117 | . | T | G | 245.89   | PASS          | AC=4;AF=0.059;AN=68;BaseQRankSum=  |
| 30263 | chrY | 13491143 | . | C | T | 46.27    | PASS          | AC=1;AF=0.015;AN=66;BaseQRankSum=  |
| 30264 | chrY | 13491145 | . | A | G | 46.54    | PASS          | AC=1;AF=0.015;AN=66;BaseQRankSum=  |
| 30265 | chrY | 13491228 | . | T | C | 712.79   | PASS          | AC=12;AF=0.188;AN=64;BaseQRankSum= |
| 30266 | chrY | 13491249 | . | C | A | 730.97   | PASS          | AC=4;AF=0.065;AN=62;BaseQRankSum=  |
| 30267 | chrY | 13491262 | . | G | A | 33.91    | my_snp_filter | AC=3;AF=0.048;AN=62;BaseQ          |
| 30268 | chrY | 13491304 | . | A | G | 38.05    | my_snp_filter | AC=3;AF=0.045;AN=66;BaseQ          |
| 30269 | chrY | 13491319 | . | G | A | 417.31   | PASS          | AC=7;AF=0.106;AN=66;BaseQRankSum=  |
| 30270 | chrY | 13491657 | . | C | G | 66.18    | PASS          | AC=2;AF=0.029;AN=70;BaseQRankSum=  |
| 30271 | chrY | 13491708 | . | T | C | 60.64    | PASS          | AC=1;AF=0.014;AN=70;BaseQRankSum=  |
| 30272 | chrY | 13491729 | . | G | A | 80.49    | PASS          | AC=1;AF=0.014;AN=70;BaseQRankSum=  |
| 30273 | chrY | 13491745 | . | A | T | 79.48    | PASS          | AC=1;AF=0.014;AN=70;BaseQRankSum=  |
| 30274 | chrY | 13491758 | . | A | T | 85.26    | PASS          | AC=1;AF=0.014;AN=70;BaseQRankSum=  |
| 30275 | chrY | 13491792 | . | A | G | 46.34    | PASS          | AC=1;AF=0.014;AN=70;BaseQRankSum=  |
| 30276 | chrY | 13491794 | . | G | C | 46.08    | PASS          | AC=1;AF=0.014;AN=70;BaseQRankSum=  |
| 30277 | chrY | 13491838 | . | C | A | 109.12   | PASS          | AC=2;AF=0.029;AN=70;BaseQRankSum=  |
| 30278 | chrY | 13491845 | . | T | G | 6637.59  | PASS          | AC=26;AF=0.371;AN=70;BaseQRankSum= |
| 30279 | chrY | 13491848 | . | A | C | 6921.92  | PASS          | AC=26;AF=0.371;AN=70;BaseQRankSum= |
| 30280 | chrY | 13491907 | . | T | C | 15314.64 | PASS          | AC=32;AF=0.457;AN=70;BaseQ         |
| 30281 | chrY | 13491912 | . | T | C | 15288.64 | PASS          | AC=32;AF=0.457;AN=70;BaseQ         |
| 30282 | chrY | 13492025 | . | A | G | 3512.73  | my_snp_filter | AC=12;AF=0.214;AN=56;BaseQ         |
| 30283 | chrY | 13492043 | . | C | T | 3167.08  | my_snp_filter | AC=11;AF=0.212;AN=52;BaseQ         |
| 30284 | chrY | 13492132 | . | T | G | 388.69   | PASS          | AC=4;AF=0.059;AN=68;BaseQRankSum=  |
| 30285 | chrY | 13492158 | . | C | G | 3338.63  | PASS          | AC=21;AF=0.328;AN=64;BaseQRankSum= |
| 30286 | chrY | 13492246 | . | A | G | 124.42   | PASS          | AC=1;AF=0.014;AN=70;BaseQRankSum=  |
| 30287 | chrY | 13492247 | . | A | T | 33204.72 | PASS          | AC=35;AF=0.500;AN=70;BaseQ         |
| 30288 | chrY | 13492264 | . | C | A | 35056.72 | PASS          | AC=35;AF=0.500;AN=70;BaseQ         |
| 30289 | chrY | 13492320 | . | A | G | 12883.72 | PASS          | AC=35;AF=0.500;AN=70;BaseQ         |
| 30290 | chrY | 13492355 | . | A | G | 168.13   | my_snp_filter | AC=5;AF=0.071;AN=70;BaseQ          |
| 30291 | chrY | 13492646 | . | C | T | 226.76   | my_snp_filter | AC=5;AF=0.076;AN=66;BaseQ          |
| 30292 | chrY | 13492717 | . | C | T | 617.28   | PASS          | AC=7;AF=0.100;AN=70;BaseQRankSum=  |
| 30293 | chrY | 13492765 | . | C | T | 3293.13  | my_snp_filter | AC=9;AF=0.141;AN=64;BaseQ          |
| 30294 | chrY | 13492771 | . | T | C | 3250.87  | my_snp_filter | AC=9;AF=0.136;AN=66;BaseQ          |
| 30295 | chrY | 13492775 | . | A | T | 3185.03  | my_snp_filter | AC=9;AF=0.132;AN=68;BaseQ          |
| 30296 | chrY | 13492824 | . | G | T | 1027.16  | my_snp_filter | AC=9;AF=0.136;AN=66;BaseQ          |
| 30297 | chrY | 13492827 | . | G | C | 1658.30  | my_snp_filter | AC=9;AF=0.136;AN=66;BaseQ          |
| 30298 | chrY | 13492876 | . | C | A | 99.58    | PASS          | AC=2;AF=0.029;AN=70;BaseQRankSum=  |
| 30299 | chrY | 13492886 | . | T | C | 224.66   | PASS          | AC=3;AF=0.043;AN=70;BaseQRankSum=  |
| 30300 | chrY | 13492942 | . | C | T | 2415.29  | PASS          | AC=17;AF=0.243;AN=70;BaseQRankSum= |
| 30301 | chrY | 13492973 | . | T | C | 5577.67  | PASS          | AC=20;AF=0.286;AN=70;BaseQRankSum= |
| 30302 | chrY | 13492975 | . | C | T | 5631.28  | PASS          | AC=20;AF=0.286;AN=70;BaseQRankSum= |
| 30303 | chrY | 13492977 | . | G | A | 5628.41  | PASS          | AC=20;AF=0.286;AN=70;BaseQRankSum= |
| 30304 | chrY | 13493016 | . | G | T | 1304.86  | PASS          | AC=15;AF=0.214;AN=70;BaseQRankSum= |
| 30305 | chrY | 13493033 | . | G | A | 130.84   | PASS          | AC=1;AF=0.014;AN=70;BaseQRankSum=  |
| 30306 | chrY | 13493046 | . | C | A | 1032.31  | PASS          | AC=12;AF=0.176;AN=68;BaseQRankSum= |
| 30307 | chrY | 13493079 | . | C | G | 317.89   | my_snp_filter | AC=8;AF=0.114;AN=70;BaseQ          |
| 30308 | chrY | 13493105 | . | T | C | 236.36   | my_snp_filter | AC=6;AF=0.086;AN=70;BaseQ          |
| 30309 | chrY | 13493109 | . | A | G | 234.16   | my_snp_filter | AC=6;AF=0.086;AN=70;BaseQ          |
| 30310 | chrY | 13493133 | . | A | C | 70.74    | PASS          | AC=1;AF=0.014;AN=70;BaseQRankSum=  |
| 30311 | chrY | 13493935 | . | C | G | 1152.77  | PASS          | AC=8;AF=0.333;AN=24;BaseQRankSum=  |
| 30312 | chrY | 13493959 | . | C | T | 1056.82  | PASS          | AC=3;AF=0.125;AN=24;BaseQRankSum=  |
| 30313 | chrY | 13494015 | . | G | C | 2819.88  | PASS          | AC=7;AF=0.350;AN=20;BaseQRankSum=  |
| 30314 | chrY | 13494024 | . | T | G | 2716.87  | PASS          | AC=7;AF=0.350;AN=20;BaseQRankSum=  |
| 30315 | chrY | 13494028 | . | T | C | 2500.88  | PASS          | AC=7;AF=0.350;AN=20;BaseQRankSum=  |
| 30316 | chrY | 13494052 | . | T | A | 162.57   | PASS          | AC=1;AF=0.056;AN=18;BaseQRankSum=  |
| 30317 | chrY | 13494054 | . | G | C | 1232.06  | PASS          | AC=7;AF=0.389;AN=18;BaseQRankSum=  |
| 30318 | chrY | 13494067 | . | G | T | 885.79   | PASS          | AC=6;AF=0.333;AN=18;BaseQRankSum=  |
| 30319 | chrY | 13494068 | . | T | G | 883.98   | PASS          | AC=6;AF=0.333;AN=18;BaseQRankSum=  |
| 30320 | chrY | 13494168 | . | A | C | 1014.51  | PASS          | AC=6;AF=0.300;AN=20;BaseQRankSum=  |
| 30321 | chrY | 13494176 | . | A | G | 1177.67  | PASS          | AC=6;AF=0.300;AN=20;BaseQRankSum=  |
| 30322 | chrY | 13494230 | . | C | T | 2072.03  | PASS          | AC=9;AF=0.409;AN=22;BaseQRankSum=  |
| 30323 | chrY | 13494390 | . | A | G | 2707.39  | PASS          | AC=10;AF=0.167;AN=60;BaseQRankSum= |
| 30324 | chrY | 13494397 | . | T | C | 2572.99  | PASS          | AC=10;AF=0.167;AN=60;BaseQRankSum= |

|       |      |          |   |   |     |          |               |                                    |
|-------|------|----------|---|---|-----|----------|---------------|------------------------------------|
| 30325 | chrY | 13494403 | . | C | G   | 2589.90  | PASS          | AC=10;AF=0.167;AN=60;BaseQRankSum= |
| 30326 | chrY | 13494404 | . | A | T   | 248.36   | PASS          | AC=1;AF=0.016;AN=64;BaseQRankSum=  |
| 30327 | chrY | 13494435 | . | C | T   | 186.80   | my_snp_filter | AC=4;AF=0.061;AN=66;BaseQ          |
| 30328 | chrY | 13494455 | . | A | C   | 2079.35  | PASS          | AC=12;AF=0.188;AN=64;BaseQRankSum= |
| 30329 | chrY | 13494460 | . | A | C   | 1628.52  | PASS          | AC=12;AF=0.200;AN=60;BaseQRankSum= |
| 30330 | chrY | 13494512 | . | T | A   | 79.46    | PASS          | AC=3;AF=0.075;AN=40;BaseQRankSum=  |
| 30331 | chrY | 13494560 | . | T | A   | 644.03   | PASS          | AC=6;AF=0.273;AN=22;DP=71;FS=0.00  |
| 30332 | chrY | 13495000 | . | G | C   | 538.31   | PASS          | AC=8;AF=0.129;AN=62;BaseQRankSum=  |
| 30333 | chrY | 13495003 | . | A | C   | 791.99   | PASS          | AC=8;AF=0.125;AN=64;BaseQRankSum=  |
| 30334 | chrY | 13495006 | . | A | G   | 876.70   | PASS          | AC=8;AF=0.121;AN=66;BaseQRankSum=  |
| 30335 | chrY | 13495012 | . | A | G   | 1003.97  | PASS          | AC=8;AF=0.125;AN=64;BaseQRankSum=  |
| 30336 | chrY | 13495077 | . | T | C   | 3624.19  | PASS          | AC=26;AF=0.371;AN=70;BaseQRankSum= |
| 30337 | chrY | 13495083 | . | G | A   | 1047.55  | PASS          | AC=3;AF=0.043;AN=70;BaseQRankSum=  |
| 30338 | chrY | 13495092 | . | A | G   | 3658.59  | PASS          | AC=26;AF=0.371;AN=70;BaseQRankSum= |
| 30339 | chrY | 13495116 | . | T | G   | 2740.42  | PASS          | AC=23;AF=0.329;AN=70;BaseQRankSum= |
| 30340 | chrY | 13495134 | . | A | T   | 1485.56  | PASS          | AC=12;AF=0.171;AN=70;BaseQRankSum= |
| 30341 | chrY | 13495140 | . | C | T   | 1014.20  | PASS          | AC=7;AF=0.100;AN=70;BaseQRankSum=  |
| 30342 | chrY | 13495203 | . | C | T   | 3743.63  | my_snp_filter | AC=13;AF=0.186;AN=70;BaseQ         |
| 30343 | chrY | 13495207 | . | T | C   | 3863.17  | my_snp_filter | AC=13;AF=0.186;AN=70;BaseQ         |
| 30344 | chrY | 13495259 | . | T | G   | 4168.40  | PASS          | AC=22;AF=0.314;AN=70;BaseQRankSum= |
| 30345 | chrY | 13495327 | . | T | C   | 2952.14  | my_snp_filter | AC=10;AF=0.143;AN=70;BaseQ         |
| 30346 | chrY | 13495339 | . | A | G   | 3469.29  | my_snp_filter | AC=9;AF=0.129;AN=70;BaseQ          |
| 30347 | chrY | 13495343 | . | T | C   | 3467.96  | my_snp_filter | AC=9;AF=0.129;AN=70;BaseQ          |
| 30348 | chrY | 13495396 | . | A | T   | 4743.68  | PASS          | AC=14;AF=0.200;AN=70;BaseQRankSum= |
| 30349 | chrY | 13495408 | . | A | G   | 5839.83  | PASS          | AC=20;AF=0.303;AN=66;BaseQRankSum= |
| 30350 | chrY | 13495453 | . | G | A   | 10564.71 | PASS          | AC=35;AF=0.500;AN=70;BaseQ         |
| 30351 | chrY | 13495538 | . | C | T   | 9960.29  | PASS          | AC=31;AF=0.517;AN=60;BaseQRankSum= |
| 30352 | chrY | 13495556 | . | T | G   | 1092.16  | PASS          | AC=4;AF=0.065;AN=62;BaseQRankSum=  |
| 30353 | chrY | 13495564 | . | A | G   | 8573.90  | PASS          | AC=21;AF=0.477;AN=44;BaseQRankSum= |
| 30354 | chrY | 13495739 | . | C | T   | 5068.94  | my_snp_filter | AC=10;AF=0.208;AN=48;BaseQ         |
| 30355 | chrY | 13495819 | . | T | A   | 76.39    | PASS          | AC=2;AF=0.029;AN=70;BaseQRankSum=  |
| 30356 | chrY | 13495833 | . | C | T   | 8873.35  | PASS          | AC=34;AF=0.486;AN=70;BaseQRankSum= |
| 30357 | chrY | 13495953 | . | G | T   | 1074.18  | my_snp_filter | AC=8;AF=0.114;AN=70;BaseQ          |
| 30358 | chrY | 13495992 | . | C | G   | 366.21   | my_snp_filter | AC=4;AF=0.059;AN=68;BaseQ          |
| 30359 | chrY | 13496180 | . | C | T   | 797      | PASS          | AC=9;AF=0.129;AN=70;BaseQRankSum=  |
| 30360 | chrY | 13496234 | . | A | C   | 1380.53  | my_snp_filter | AC=9;AF=0.132;AN=68;BaseQ          |
| 30361 | chrY | 13496344 | . | G | A   | 194.53   | PASS          | AC=1;AF=0.014;AN=70;BaseQRankSum=  |
| 30362 | chrY | 13496371 | . | T | A   | 1518.24  | my_snp_filter | AC=9;AF=0.129;AN=70;BaseQ          |
| 30363 | chrY | 13496385 | . | G | A   | 55.67    | PASS          | AC=1;AF=0.014;AN=70;BaseQRankSum=  |
| 30364 | chrY | 13496413 | . | T | G   | 2115.97  | PASS          | AC=9;AF=0.129;AN=70;BaseQRankSum=  |
| 30365 | chrY | 13496428 | . | T | C   | 1944.92  | PASS          | AC=9;AF=0.129;AN=70;BaseQRankSum=  |
| 30366 | chrY | 13496474 | . | C | T   | 6585.04  | my_snp_filter | AC=13;AF=0.186;AN=70;BaseQ         |
| 30367 | chrY | 13496541 | . | C | G   | 2447.23  | my_snp_filter | AC=10;AF=0.143;AN=70;BaseQ         |
| 30368 | chrY | 13496562 | . | A | G   | 2121.16  | PASS          | AC=9;AF=0.129;AN=70;BaseQRankSum=  |
| 30369 | chrY | 13496576 | . | A | T   | 90.25    | PASS          | AC=2;AF=0.034;AN=58;BaseQRankSum=  |
| 30370 | chrY | 13496577 | . | G | A   | 7631.20  | PASS          | AC=13;AF=0.191;AN=68;BaseQRankSum= |
| 30371 | chrY | 13496587 | . | G | T   | 11310.73 | PASS          | AC=18;AF=0.257;AN=70;BaseQ         |
| 30372 | chrY | 13496620 | . | C | A   | 3948.51  | PASS          | AC=25;AF=0.357;AN=70;BaseQRankSum= |
| 30373 | chrY | 13496635 | . | G | C   | 282.22   | my_snp_filter | AC=5;AF=0.071;AN=70;BaseQ          |
| 30374 | chrY | 13496653 | . | G | A   | 1168.82  | PASS          | AC=12;AF=0.171;AN=70;BaseQRankSum= |
| 30375 | chrY | 13496659 | . | A | C   | 116.15   | my_snp_filter | AC=4;AF=0.057;AN=70;BaseQ          |
| 30376 | chrY | 13496734 | . | A | G   | 33542.25 | PASS          | AC=35;AF=0.500;AN=70;BaseQ         |
| 30377 | chrY | 13496777 | . | T | C   | 56231.72 | PASS          | AC=35;AF=0.500;AN=70;BaseQ         |
| 30378 | chrY | 13496781 | . | G | A   | 57074.72 | PASS          | AC=35;AF=0.500;AN=70;BaseQ         |
| 30379 | chrY | 13496915 | . | C | T   | 11404.69 | PASS          | AC=32;AF=0.471;AN=68;BaseQ         |
| 30380 | chrY | 13496928 | . | C | T   | 202.72   | PASS          | AC=4;AF=0.057;AN=70;BaseQRankSum=  |
| 30381 | chrY | 13496999 | . | A | G   | 97.85    | my_snp_filter | AC=3;AF=0.043;AN=70;BaseQ          |
| 30382 | chrY | 13497035 | . | G | C   | 6898.95  | PASS          | AC=23;AF=0.348;AN=66;BaseQRankSum= |
| 30383 | chrY | 13497062 | . | C | A   | 102.27   | my_snp_filter | AC=3;AF=0.043;AN=70;BaseQ          |
| 30384 | chrY | 13497069 | . | T | C   | 101.19   | my_snp_filter | AC=4;AF=0.059;AN=68;BaseQ          |
| 30385 | chrY | 13497084 | . | G | C,* | 7265.34  | PASS          | AC=5,26;AF=0.071,0.371;AN=70;BaseQ |
| 30386 | chrY | 13497182 | . | C | A   | 721.74   | PASS          | AC=3;AF=0.043;AN=70;BaseQRankSum=  |
| 30387 | chrY | 13497242 | . | A | G   | 9728.86  | PASS          | AC=35;AF=0.500;AN=70;BaseQRankSum= |
| 30388 | chrY | 13497244 | . | T | A   | 1936.18  | my_snp_filter | AC=13;AF=0.186;AN=70;BaseQ         |
| 30389 | chrY | 13497247 | . | T | A   | 179.56   | PASS          | AC=1;AF=0.014;AN=70;BaseQRankSum=  |
| 30390 | chrY | 13497270 | . | T | C   | 1064.33  | my_snp_filter | AC=10;AF=0.143;AN=70;BaseQ         |
| 30391 | chrY | 13497289 | . | A | G   | 11979.34 | PASS          | AC=32;AF=0.471;AN=68;BaseQ         |
| 30392 | chrY | 13497329 | . | A | G   | 4988.93  | PASS          | AC=17;AF=0.250;AN=68;BaseQRankSum= |
| 30393 | chrY | 13497335 | . | G | A,C | 14417.26 | PASS          | AC=31,10;AF=0.456,0.147;AN=        |
| 30394 | chrY | 13497353 | . | T | C   | 3937.94  | PASS          | AC=19;AF=0.279;AN=68;BaseQRankSum= |
| 30395 | chrY | 13497377 | . | A | G   | 8267.48  | PASS          | AC=36;AF=0.529;AN=68;BaseQRankSum= |
| 30396 | chrY | 13497482 | . | A | C   | 12250.37 | PASS          | AC=12;AF=0.240;AN=50;BaseQ         |
| 30397 | chrY | 13497485 | . | T | C   | 3517.76  | PASS          | AC=12;AF=0.240;AN=50;BaseQRankSum= |
| 30398 | chrY | 13497529 | . | A | T   | 2859.48  | PASS          | AC=9;AF=0.136;AN=66;BaseQRankSum=  |
| 30399 | chrY | 13497534 | . | A | T   | 9009.60  | PASS          | AC=11;AF=0.177;AN=62;BaseQRankSum= |
| 30400 | chrY | 13497540 | . | A | C   | 4371.22  | PASS          | AC=10;AF=0.152;AN=66;BaseQRankSum= |



|       |      |          |   |   |   |          |               |                                    |
|-------|------|----------|---|---|---|----------|---------------|------------------------------------|
| 30401 | chrY | 13497581 | . | G | A | 5213.14  | PASS          | AC=23;AF=0.329;AN=70;BaseQRankSum= |
| 30402 | chrY | 13497585 | . | T | C | 1391.28  | PASS          | AC=8;AF=0.114;AN=70;BaseQRankSum=  |
| 30403 | chrY | 13497593 | . | C | G | 1295.08  | my_snp_filter | AC=8;AF=0.114;AN=70;BaseQ          |
| 30404 | chrY | 13497675 | . | A | G | 7424.59  | PASS          | AC=24;AF=0.375;AN=64;BaseQRankSum= |
| 30405 | chrY | 13497691 | . | A | G | 148.22   | PASS          | AC=2;AF=0.033;AN=60;BaseQRankSum=  |
| 30406 | chrY | 13497893 | . | C | T | 1055.07  | PASS          | AC=7;AF=0.103;AN=68;BaseQRankSum=  |
| 30407 | chrY | 13497908 | . | A | G | 800.23   | PASS          | AC=8;AF=0.118;AN=68;BaseQRankSum=  |
| 30408 | chrY | 13497949 | . | A | C | 2077.22  | PASS          | AC=15;AF=0.227;AN=66;BaseQRankSum= |
| 30409 | chrY | 13497997 | . | A | G | 11526.49 | PASS          | AC=29;AF=0.414;AN=70;Base          |
| 30410 | chrY | 13498002 | . | T | A | 11918.52 | PASS          | AC=29;AF=0.414;AN=70;Base          |
| 30411 | chrY | 13498003 | . | G | A | 11885.52 | PASS          | AC=29;AF=0.414;AN=70;Base          |
| 30412 | chrY | 13498039 | . | T | G | 7493.53  | PASS          | AC=28;AF=0.400;AN=70;BaseQRankSum= |
| 30413 | chrY | 13498059 | . | A | G | 6507.20  | PASS          | AC=27;AF=0.397;AN=68;BaseQRankSum= |
| 30414 | chrY | 13498123 | . | C | T | 6598.29  | PASS          | AC=24;AF=0.353;AN=68;BaseQRankSum= |
| 30415 | chrY | 13498124 | . | A | G | 6681.78  | PASS          | AC=24;AF=0.353;AN=68;BaseQRankSum= |
| 30416 | chrY | 13498156 | . | G | A | 235.78   | PASS          | AC=5;AF=0.071;AN=70;BaseQRankSum=  |
| 30417 | chrY | 13498224 | . | G | A | 13998.70 | PASS          | AC=34;AF=0.486;AN=70;Base          |
| 30418 | chrY | 13498236 | . | G | A | 1602.79  | PASS          | AC=9;AF=0.129;AN=70;BaseQRankSum=  |
| 30419 | chrY | 13498254 | . | G | A | 12094.72 | PASS          | AC=35;AF=0.500;AN=70;Base          |
| 30420 | chrY | 13498266 | . | A | C | 196.58   | my_snp_filter | AC=3;AF=0.043;AN=70;BaseQ          |
| 30421 | chrY | 13498289 | . | A | G | 8027.33  | PASS          | AC=34;AF=0.486;AN=70;BaseQRankSum= |
| 30422 | chrY | 13498329 | . | C | T | 3711.92  | my_snp_filter | AC=19;AF=0.339;AN=56;Base          |
| 30423 | chrY | 13498378 | . | T | A | 2924.80  | my_snp_filter | AC=10;AF=0.333;AN=30;Base          |
| 30424 | chrY | 13498380 | . | T | C | 2922.26  | my_snp_filter | AC=10;AF=0.313;AN=32;Base          |
| 30425 | chrY | 13498417 | . | T | C | 1632.06  | my_snp_filter | AC=8;AF=0.250;AN=32;BaseQ          |
| 30426 | chrY | 13498426 | . | C | T | 1440.62  | my_snp_filter | AC=8;AF=0.250;AN=32;BaseQ          |
| 30427 | chrY | 13498780 | . | A | G | 92.65    | PASS          | AC=3;AF=0.044;AN=68;BaseQRankSum=  |
| 30428 | chrY | 13498786 | . | C | G | 127.96   | PASS          | AC=3;AF=0.044;AN=68;BaseQRankSum=  |
| 30429 | chrY | 13498814 | . | T | C | 970.85   | my_snp_filter | AC=14;AF=0.200;AN=70;Base          |
| 30430 | chrY | 13498829 | . | G | A | 6512.83  | PASS          | AC=28;AF=0.400;AN=70;BaseQRankSum= |
| 30431 | chrY | 13498833 | . | A | G | 6928.32  | PASS          | AC=28;AF=0.400;AN=70;BaseQRankSum= |
| 30432 | chrY | 13498854 | . | T | A | 8925.11  | PASS          | AC=30;AF=0.429;AN=70;BaseQRankSum= |
| 30433 | chrY | 13498926 | . | T | C | 10976.85 | PASS          | AC=32;AF=0.457;AN=70;Base          |
| 30434 | chrY | 13498939 | . | C | T | 9984.80  | PASS          | AC=32;AF=0.457;AN=70;BaseQRankSum= |
| 30435 | chrY | 13498994 | . | A | G | 109.46   | PASS          | AC=1;AF=0.014;AN=70;BaseQRankSum=  |
| 30436 | chrY | 13499003 | . | G | A | 177.44   | my_snp_filter | AC=4;AF=0.057;AN=70;BaseQ          |
| 30437 | chrY | 13499008 | . | T | A | 7791.34  | PASS          | AC=32;AF=0.457;AN=70;BaseQRankSum= |
| 30438 | chrY | 13499023 | . | C | A | 7622.48  | PASS          | AC=32;AF=0.457;AN=70;BaseQRankSum= |
| 30439 | chrY | 13499059 | . | G | A | 37       | PASS          | AC=1;AF=0.014;AN=70;BaseQRankSum=  |
| 30440 | chrY | 13499061 | . | G | A | 1729.48  | PASS          | AC=14;AF=0.200;AN=70;BaseQRankSum= |
| 30441 | chrY | 13499179 | . | C | T | 57.93    | my_snp_filter | AC=3;AF=0.058;AN=52;BaseQ          |
| 30442 | chrY | 13499203 | . | C | T | 532.11   | PASS          | AC=4;AF=0.111;AN=36;BaseQRankSum=  |
| 30443 | chrY | 13499210 | . | A | G | 691.33   | PASS          | AC=6;AF=0.176;AN=34;BaseQRankSum=  |
| 30444 | chrY | 13499226 | . | C | T | 918.56   | PASS          | AC=6;AF=0.176;AN=34;BaseQRankSum=  |
| 30445 | chrY | 13499311 | . | T | C | 111.49   | my_snp_filter | AC=4;AF=0.125;AN=32;BaseQ          |
| 30446 | chrY | 13499330 | . | G | A | 5664.78  | my_snp_filter | AC=9;AF=0.375;AN=24;BaseQ          |
| 30447 | chrY | 13499332 | . | G | T | 5097.48  | my_snp_filter | AC=8;AF=0.333;AN=24;BaseQ          |
| 30448 | chrY | 13499346 | . | C | A | 5095.11  | my_snp_filter | AC=9;AF=0.409;AN=22;BaseQ          |
| 30449 | chrY | 13499357 | . | G | T | 3583.33  | PASS          | AC=8;AF=0.400;AN=20;BaseQRankSum=  |
| 30450 | chrY | 13499445 | . | A | C | 59.27    | PASS          | AC=1;AF=0.042;AN=24;BaseQRankSum=  |
| 30451 | chrY | 13499484 | . | T | C | 170.36   | PASS          | AC=1;AF=0.033;AN=30;BaseQRankSum=  |
| 30452 | chrY | 13499706 | . | G | A | 1087.25  | PASS          | AC=6;AF=0.086;AN=70;DP=524;FS=0.0  |
| 30453 | chrY | 13499820 | . | C | T | 846.48   | my_snp_filter | AC=4;AF=0.080;AN=50;BaseQ          |
| 30454 | chrY | 13499837 | . | A | G | 1110.78  | my_snp_filter | AC=4;AF=0.083;AN=48;BaseQ          |
| 30455 | chrY | 13499839 | . | A | G | 1121.17  | my_snp_filter | AC=4;AF=0.091;AN=44;BaseQ          |
| 30456 | chrY | 13499880 | . | T | A | 3914.13  | my_snp_filter | AC=9;AF=0.321;AN=28;BaseQ          |
| 30457 | chrY | 13499887 | . | T | C | 4055.68  | my_snp_filter | AC=9;AF=0.321;AN=28;BaseQ          |
| 30458 | chrY | 13499987 | . | A | C | 1588.14  | PASS          | AC=7;AF=0.389;AN=18;BaseQRankSum=  |
| 30459 | chrY | 13500049 | . | G | T | 2496.31  | PASS          | AC=9;AF=0.500;AN=18;BaseQRankSum=  |
| 30460 | chrY | 13500058 | . | A | G | 2378.09  | PASS          | AC=9;AF=0.500;AN=18;BaseQRankSum=  |
| 30461 | chrY | 13500089 | . | G | A | 227.80   | PASS          | AC=4;AF=0.222;AN=18;BaseQRankSum=  |
| 30462 | chrY | 13500139 | . | C | T | 3997.09  | PASS          | AC=9;AF=0.500;AN=18;BaseQRankSum=  |
| 30463 | chrY | 13500208 | . | A | G | 1961.09  | PASS          | AC=9;AF=0.500;AN=18;BaseQRankSum=  |
| 30464 | chrY | 13500242 | . | G | A | 1779.21  | PASS          | AC=9;AF=0.500;AN=18;BaseQRankSum=  |
| 30465 | chrY | 13500318 | . | T | G | 9440.70  | PASS          | AC=9;AF=0.346;AN=26;BaseQRankSum=  |
| 30466 | chrY | 13500323 | . | A | T | 8709.70  | PASS          | AC=9;AF=0.346;AN=26;BaseQRankSum=  |
| 30467 | chrY | 13500340 | . | G | A | 9783.75  | PASS          | AC=9;AF=0.300;AN=30;BaseQRankSum=  |
| 30468 | chrY | 13500341 | . | T | C | 9801.75  | PASS          | AC=9;AF=0.300;AN=30;BaseQRankSum=  |
| 30469 | chrY | 13500344 | . | C | T | 497.67   | my_snp_filter | AC=6;AF=0.143;AN=42;BaseQ          |
| 30470 | chrY | 13500366 | . | A | T | 374.80   | my_snp_filter | AC=6;AF=0.111;AN=54;BaseQ          |
| 30471 | chrY | 13500371 | . | A | G | 38.06    | my_snp_filter | AC=1;AF=0.017;AN=60;BaseQ          |
| 30472 | chrY | 13500391 | . | G | A | 367.02   | PASS          | AC=3;AF=0.047;AN=64;BaseQRankSum=  |
| 30473 | chrY | 13500400 | . | G | C | 884.62   | PASS          | AC=7;AF=0.113;AN=62;BaseQRankSum=  |
| 30474 | chrY | 13500410 | . | T | G | 13102.86 | PASS          | AC=19;AF=0.365;AN=52;Base          |
| 30475 | chrY | 13500424 | . | T | C | 7166.88  | PASS          | AC=11;AF=0.172;AN=64;BaseQRankSum= |
| 30476 | chrY | 13500434 | . | C | T | 1849.29  | PASS          | AC=6;AF=0.100;AN=60;BaseQRankSum=  |

|       |      |          |   |   |     |          |               |                                   |
|-------|------|----------|---|---|-----|----------|---------------|-----------------------------------|
| 30477 | chrY | 13500438 | . | G | A   | 86.96    | my_snp_filter | AC=1;AF=0.016;AN=64;BaseQ         |
| 30478 | chrY | 13500443 | . | T | C   | 11611.03 | PASS          | AC=14;AF=0.226;AN=62;BaseQ        |
| 30479 | chrY | 13500453 | . | A | G   | 10463.99 | PASS          | AC=16;AF=0.267;AN=60;BaseQ        |
| 30480 | chrY | 13500598 | . | A | G   | 8525.70  | PASS          | AC=32;AF=0.457;AN=70;BaseQRankSum |
| 30481 | chrY | 13500604 | . | A | T   | 2687.85  | PASS          | AC=28;AF=0.400;AN=70;BaseQRankSum |
| 30482 | chrY | 13500639 | . | C | T   | 349.77   | my_snp_filter | AC=8;AF=0.114;AN=70;BaseQ         |
| 30483 | chrY | 13500658 | . | T | A   | 3351.44  | PASS          | AC=29;AF=0.414;AN=70;BaseQRankSum |
| 30484 | chrY | 13500729 | . | A | G   | 1563.79  | my_snp_filter | AC=7;AF=0.100;AN=70;BaseQ         |
| 30485 | chrY | 13500730 | . | T | C   | 31.67    | PASS          | AC=1;AF=0.014;AN=70;BaseQRankSum  |
| 30486 | chrY | 13500732 | . | T | G   | 1501.70  | my_snp_filter | AC=7;AF=0.100;AN=70;BaseQ         |
| 30487 | chrY | 13500768 | . | G | T   | 481.75   | PASS          | AC=4;AF=0.057;AN=70;BaseQRankSum  |
| 30488 | chrY | 13500769 | . | A | C   | 1296.59  | PASS          | AC=6;AF=0.086;AN=70;BaseQRankSum  |
| 30489 | chrY | 13500773 | . | A | G   | 1292.66  | PASS          | AC=6;AF=0.086;AN=70;BaseQRankSum  |
| 30490 | chrY | 13500776 | . | T | C   | 1111.03  | PASS          | AC=5;AF=0.071;AN=70;BaseQRankSum  |
| 30491 | chrY | 13500828 | . | A | G   | 237.46   | PASS          | AC=6;AF=0.086;AN=70;BaseQRankSum  |
| 30492 | chrY | 13500860 | . | G | A   | 643.45   | PASS          | AC=8;AF=0.114;AN=70;BaseQRankSum  |
| 30493 | chrY | 13500887 | . | T | G   | 508.99   | PASS          | AC=8;AF=0.118;AN=68;BaseQRankSum  |
| 30494 | chrY | 13500989 | . | A | T   | 599.81   | PASS          | AC=6;AF=0.111;AN=54;BaseQRankSum  |
| 30495 | chrY | 13501004 | . | G | A   | 1229.98  | PASS          | AC=8;AF=0.148;AN=54;BaseQRankSum  |
| 30496 | chrY | 13501064 | . | T | A   | 1537.80  | PASS          | AC=8;AF=0.333;AN=24;BaseQRankSum  |
| 30497 | chrY | 13501089 | . | G | A   | 1843.19  | PASS          | AC=8;AF=0.333;AN=24;BaseQRankSum  |
| 30498 | chrY | 13501212 | . | A | G   | 2629.83  | PASS          | AC=9;AF=0.300;AN=30;BaseQRankSum  |
| 30499 | chrY | 13501222 | . | A | T,* | 225.59   | my_snp_filter | AC=2,2;AF=0.063,0.063;AN=         |
| 30500 | chrY | 13501247 | . | G | A   | 63.46    | my_snp_filter | AC=2;AF=0.043;AN=46;BaseQ         |
| 30501 | chrY | 13501287 | . | T | C   | 3429.02  | PASS          | AC=14;AF=0.259;AN=54;BaseQRankSum |
| 30502 | chrY | 13501332 | . | A | T   | 5531.44  | PASS          | AC=12;AF=0.188;AN=64;BaseQRankSum |
| 30503 | chrY | 13501337 | . | T | C   | 5427.48  | PASS          | AC=12;AF=0.176;AN=68;BaseQRankSum |
| 30504 | chrY | 13501362 | . | C | G   | 2596.36  | PASS          | AC=12;AF=0.171;AN=70;BaseQRankSum |
| 30505 | chrY | 13501373 | . | C | A   | 1702.05  | PASS          | AC=8;AF=0.114;AN=70;BaseQRankSum  |
| 30506 | chrY | 13501384 | . | T | C   | 1338.81  | PASS          | AC=8;AF=0.114;AN=70;BaseQRankSum  |
| 30507 | chrY | 13501391 | . | A | G   | 81.78    | PASS          | AC=2;AF=0.029;AN=70;BaseQRankSum  |
| 30508 | chrY | 13501398 | . | A | G   | 1188.89  | PASS          | AC=7;AF=0.100;AN=70;BaseQRankSum  |
| 30509 | chrY | 13501413 | . | C | T   | 1564.76  | PASS          | AC=7;AF=0.100;AN=70;BaseQRankSum  |
| 30510 | chrY | 13501422 | . | A | G   | 1527.23  | PASS          | AC=5;AF=0.071;AN=70;BaseQRankSum  |
| 30511 | chrY | 13501426 | . | G | C   | 1744.20  | PASS          | AC=5;AF=0.071;AN=70;BaseQRankSum  |
| 30512 | chrY | 13501471 | . | A | G   | 2428.27  | my_snp_filter | AC=10;AF=0.143;AN=70;BaseQ        |
| 30513 | chrY | 13501498 | . | G | A   | 2033.75  | my_snp_filter | AC=11;AF=0.157;AN=70;BaseQ        |
| 30514 | chrY | 13501528 | . | A | T   | 1876.27  | my_snp_filter | AC=10;AF=0.143;AN=70;BaseQ        |
| 30515 | chrY | 13501657 | . | A | T   | 152.19   | PASS          | AC=4;AF=0.091;AN=44;BaseQRankSum  |
| 30516 | chrY | 13501688 | . | A | G   | 195.20   | PASS          | AC=3;AF=0.056;AN=54;BaseQRankSum  |
| 30517 | chrY | 13501793 | . | A | T   | 1049.99  | PASS          | AC=6;AF=0.086;AN=70;BaseQRankSum  |
| 30518 | chrY | 13501800 | . | T | A   | 1309.97  | PASS          | AC=7;AF=0.106;AN=66;BaseQRankSum  |
| 30519 | chrY | 13501817 | . | T | C   | 57.31    | PASS          | AC=3;AF=0.044;AN=68;BaseQRankSum  |
| 30520 | chrY | 13501850 | . | C | G   | 672.21   | PASS          | AC=9;AF=0.141;AN=64;BaseQRankSum  |
| 30521 | chrY | 13501856 | . | T | C   | 125.21   | PASS          | AC=7;AF=0.103;AN=68;BaseQRankSum  |
| 30522 | chrY | 13501858 | . | T | C   | 70.22    | PASS          | AC=2;AF=0.029;AN=68;BaseQRankSum  |
| 30523 | chrY | 13501921 | . | T | G   | 2588.67  | my_snp_filter | AC=9;AF=0.173;AN=52;BaseQ         |
| 30524 | chrY | 13501929 | . | A | T   | 39.46    | my_snp_filter | AC=1;AF=0.018;AN=56;BaseQ         |
| 30525 | chrY | 13501938 | . | T | C   | 33.15    | my_snp_filter | AC=1;AF=0.018;AN=56;BaseQ         |
| 30526 | chrY | 13501943 | . | C | A   | 100.24   | PASS          | AC=1;AF=0.018;AN=56;BaseQRankSum  |
| 30527 | chrY | 13501963 | . | A | G   | 5404.69  | my_snp_filter | AC=11;AF=0.220;AN=50;BaseQ        |
| 30528 | chrY | 13501983 | . | G | C   | 6451.11  | my_snp_filter | AC=13;AF=0.283;AN=46;BaseQ        |
| 30529 | chrY | 13501991 | . | A | T   | 4980.49  | PASS          | AC=13;AF=0.283;AN=46;BaseQRankSum |
| 30530 | chrY | 13502048 | . | C | T   | 3904.15  | PASS          | AC=19;AF=0.500;AN=38;BaseQRankSum |
| 30531 | chrY | 13502130 | . | G | A   | 9947.52  | PASS          | AC=17;AF=0.405;AN=42;BaseQRankSum |
| 30532 | chrY | 13502131 | . | G | A   | 4149.10  | PASS          | AC=12;AF=0.250;AN=48;BaseQRankSum |
| 30533 | chrY | 13502161 | . | A | T   | 650.58   | PASS          | AC=9;AF=0.141;AN=64;BaseQRankSum  |
| 30534 | chrY | 13502230 | . | G | A   | 562.54   | PASS          | AC=7;AF=0.100;AN=70;BaseQRankSum  |
| 30535 | chrY | 13502235 | . | T | A   | 8675.94  | PASS          | AC=24;AF=0.353;AN=68;BaseQRankSum |
| 30536 | chrY | 13502238 | . | A | G   | 8788.31  | PASS          | AC=24;AF=0.353;AN=68;BaseQRankSum |
| 30537 | chrY | 13502259 | . | G | A   | 7127.39  | my_snp_filter | AC=13;AF=0.186;AN=70;BaseQ        |
| 30538 | chrY | 13502269 | . | G | A   | 6062.97  | my_snp_filter | AC=11;AF=0.162;AN=68;BaseQ        |
| 30539 | chrY | 13502271 | . | A | T   | 6064.36  | my_snp_filter | AC=11;AF=0.162;AN=68;BaseQ        |
| 30540 | chrY | 13502281 | . | T | C   | 5535.10  | my_snp_filter | AC=9;AF=0.132;AN=68;BaseQ         |
| 30541 | chrY | 13502282 | . | G | T   | 5451.56  | my_snp_filter | AC=9;AF=0.132;AN=68;BaseQ         |
| 30542 | chrY | 13502311 | . | C | T   | 2503.59  | my_snp_filter | AC=12;AF=0.171;AN=70;BaseQ        |
| 30543 | chrY | 13502359 | . | C | T   | 88.16    | PASS          | AC=2;AF=0.029;AN=70;BaseQRankSum  |
| 30544 | chrY | 13502398 | . | A | G   | 1617.18  | my_snp_filter | AC=9;AF=0.129;AN=70;BaseQ         |
| 30545 | chrY | 13502411 | . | G | A   | 1610.06  | my_snp_filter | AC=9;AF=0.129;AN=70;BaseQ         |
| 30546 | chrY | 13502453 | . | G | T   | 1008.12  | PASS          | AC=6;AF=0.086;AN=70;BaseQRankSum  |
| 30547 | chrY | 13502468 | . | A | G   | 664.59   | PASS          | AC=6;AF=0.086;AN=70;BaseQRankSum  |
| 30548 | chrY | 13502510 | . | T | C   | 679.71   | PASS          | AC=8;AF=0.114;AN=70;BaseQRankSum  |
| 30549 | chrY | 13502542 | . | G | A   | 1914.17  | PASS          | AC=14;AF=0.200;AN=70;BaseQRankSum |
| 30550 | chrY | 13502609 | . | G | A   | 2982.49  | PASS          | AC=20;AF=0.286;AN=70;BaseQRankSum |
| 30551 | chrY | 13502656 | . | A | G   | 623.27   | PASS          | AC=9;AF=0.129;AN=70;BaseQRankSum  |
| 30552 | chrY | 13502674 | . | C | A   | 83.48    | my_snp_filter | AC=1;AF=0.014;AN=70;BaseQ         |

|       |      |          |   |   |     |         |               |                                    |
|-------|------|----------|---|---|-----|---------|---------------|------------------------------------|
| 30553 | chrY | 13502682 | . | T | C   | 85.46   | PASS          | AC=1;AF=0.014;AN=70;BaseQRankSum=  |
| 30554 | chrY | 13502690 | . | A | C   | 2143.36 | my_snp_filter | AC=10;AF=0.143;AN=70;BaseQ         |
| 30555 | chrY | 13502696 | . | T | C   | 1969.15 | my_snp_filter | AC=9;AF=0.129;AN=70;BaseQ          |
| 30556 | chrY | 13502712 | . | T | C   | 1145.47 | my_snp_filter | AC=9;AF=0.129;AN=70;BaseQ          |
| 30557 | chrY | 13502822 | . | A | T   | 1935.92 | PASS          | AC=10;AF=0.156;AN=64;BaseQRankSum= |
| 30558 | chrY | 13502851 | . | C | T   | 234.03  | PASS          | AC=4;AF=0.067;AN=60;BaseQRankSum=  |
| 30559 | chrY | 13502853 | . | T | A   | 1387.55 | PASS          | AC=12;AF=0.200;AN=60;BaseQRankSum= |
| 30560 | chrY | 13502916 | . | A | G   | 49.97   | PASS          | AC=2;AF=0.045;AN=44;DP=324;FS=0.0  |
| 30561 | chrY | 13502936 | . | A | C   | 971.70  | PASS          | AC=12;AF=0.333;AN=36;BaseQRankSum= |
| 30562 | chrY | 13502953 | . | C | T   | 291.17  | PASS          | AC=2;AF=0.071;AN=28;BaseQRankSum=  |
| 30563 | chrY | 13502960 | . | A | G   | 49.64   | my_snp_filter | AC=1;AF=0.036;AN=28;BaseQ          |
| 30564 | chrY | 13503073 | . | G | A   | 393.87  | PASS          | AC=5;AF=0.125;AN=40;BaseQRankSum=  |
| 30565 | chrY | 13503094 | . | A | T   | 53.32   | PASS          | AC=1;AF=0.024;AN=42;BaseQRankSum=  |
| 30566 | chrY | 13503096 | . | T | G   | 285.62  | PASS          | AC=4;AF=0.095;AN=42;BaseQRankSum=  |
| 30567 | chrY | 13503131 | . | A | C   | 668.28  | PASS          | AC=7;AF=0.140;AN=50;BaseQRankSum=  |
| 30568 | chrY | 13503141 | . | C | G   | 110.43  | PASS          | AC=2;AF=0.036;AN=56;BaseQRankSum=  |
| 30569 | chrY | 13503158 | . | G | A   | 609.83  | PASS          | AC=3;AF=0.052;AN=58;BaseQRankSum=  |
| 30570 | chrY | 13503160 | . | A | G   | 677.29  | PASS          | AC=7;AF=0.121;AN=58;BaseQRankSum=  |
| 30571 | chrY | 13503163 | . | T | A   | 63.46   | my_snp_filter | AC=2;AF=0.034;AN=58;BaseQ          |
| 30572 | chrY | 13503195 | . | A | G   | 519.17  | PASS          | AC=3;AF=0.048;AN=62;BaseQRankSum=  |
| 30573 | chrY | 13503200 | . | G | A   | 2127.45 | PASS          | AC=8;AF=0.129;AN=62;BaseQRankSum=  |
| 30574 | chrY | 13503202 | . | A | G   | 2081.78 | PASS          | AC=8;AF=0.129;AN=62;BaseQRankSum=  |
| 30575 | chrY | 13503298 | . | C | T   | 3228.29 | PASS          | AC=11;AF=0.190;AN=58;BaseQRankSum= |
| 30576 | chrY | 13503362 | . | G | A   | 2620.13 | PASS          | AC=9;AF=0.214;AN=42;BaseQRankSum=  |
| 30577 | chrY | 13503429 | . | T | C   | 112.23  | my_snp_filter | AC=4;AF=0.182;AN=22;BaseQ          |
| 30578 | chrY | 13503438 | . | A | T   | 2744.30 | PASS          | AC=9;AF=0.409;AN=22;BaseQRankSum=  |
| 30579 | chrY | 13503471 | . | A | G   | 4890.06 | PASS          | AC=11;AF=0.550;AN=20;BaseQRankSum= |
| 30580 | chrY | 13503526 | . | T | C   | 117.96  | PASS          | AC=3;AF=0.150;AN=20;BaseQRankSum=  |
| 30581 | chrY | 13503528 | . | T | C   | 2894.26 | PASS          | AC=9;AF=0.500;AN=18;BaseQRankSum=  |
| 30582 | chrY | 13503538 | . | T | C   | 81.43   | PASS          | AC=2;AF=0.100;AN=20;BaseQRankSum=  |
| 30583 | chrY | 13503552 | . | G | T   | 2322.37 | PASS          | AC=7;AF=0.438;AN=16;BaseQRankSum=  |
| 30584 | chrY | 13503563 | . | G | A   | 4643.54 | PASS          | AC=6;AF=0.429;AN=14;BaseQRankSum=  |
| 30585 | chrY | 13503599 | . | G | A   | 4031.88 | PASS          | AC=6;AF=0.429;AN=14;BaseQRankSum=  |
| 30586 | chrY | 13503620 | . | T | G   | 3900.70 | PASS          | AC=6;AF=0.375;AN=16;BaseQRankSum=  |
| 30587 | chrY | 13503636 | . | T | C   | 4053.18 | PASS          | AC=6;AF=0.333;AN=18;BaseQRankSum=  |
| 30588 | chrY | 13503640 | . | T | C   | 3969.20 | PASS          | AC=6;AF=0.333;AN=18;BaseQRankSum=  |
| 30589 | chrY | 13503675 | . | A | T   | 3634.33 | PASS          | AC=6;AF=0.250;AN=24;BaseQRankSum=  |
| 30590 | chrY | 13503677 | . | G | A   | 3597.45 | PASS          | AC=6;AF=0.273;AN=22;BaseQRankSum=  |
| 30591 | chrY | 13503749 | . | A | G   | 2187.83 | my_snp_filter | AC=9;AF=0.150;AN=60;BaseQ          |
| 30592 | chrY | 13503768 | . | A | G   | 1299.09 | my_snp_filter | AC=7;AF=0.113;AN=62;BaseQ          |
| 30593 | chrY | 13503798 | . | C | A   | 2011.15 | my_snp_filter | AC=9;AF=0.141;AN=64;BaseQ          |
| 30594 | chrY | 13503842 | . | A | C   | 558.35  | my_snp_filter | AC=7;AF=0.113;AN=62;BaseQ          |
| 30595 | chrY | 13503895 | . | A | G   | 315.32  | PASS          | AC=5;AF=0.086;AN=58;BaseQRankSum=  |
| 30596 | chrY | 13503912 | . | A | C   | 248.20  | PASS          | AC=4;AF=0.069;AN=58;BaseQRankSum=  |
| 30597 | chrY | 13504123 | . | A | G   | 93.56   | my_snp_filter | AC=3;AF=0.045;AN=66;BaseQ          |
| 30598 | chrY | 13504210 | . | G | A   | 2908.49 | my_snp_filter | AC=14;AF=0.200;AN=70;BaseQ         |
| 30599 | chrY | 13504252 | . | C | T   | 3969.02 | my_snp_filter | AC=17;AF=0.243;AN=70;BaseQ         |
| 30600 | chrY | 13504306 | . | A | G   | 4087.01 | my_snp_filter | AC=11;AF=0.177;AN=62;BaseQ         |
| 30601 | chrY | 13504405 | . | A | G   | 178.56  | my_snp_filter | AC=2;AF=0.033;AN=60;BaseQ          |
| 30602 | chrY | 13504424 | . | A | G   | 189.58  | PASS          | AC=2;AF=0.032;AN=62;BaseQRankSum=  |
| 30603 | chrY | 13504431 | . | G | A   | 456.36  | PASS          | AC=3;AF=0.052;AN=58;BaseQRankSum=  |
| 30604 | chrY | 13504436 | . | G | T   | 205.51  | my_snp_filter | AC=3;AF=0.054;AN=56;BaseQ          |
| 30605 | chrY | 13504441 | . | T | C   | 4209.71 | PASS          | AC=17;AF=0.425;AN=40;BaseQRankSum= |
| 30606 | chrY | 13504471 | . | T | C   | 5941.83 | PASS          | AC=13;AF=0.406;AN=32;BaseQRankSum= |
| 30607 | chrY | 13504474 | . | G | A   | 5952.82 | PASS          | AC=13;AF=0.406;AN=32;BaseQRankSum= |
| 30608 | chrY | 13504489 | . | A | G   | 5584.43 | PASS          | AC=13;AF=0.500;AN=26;BaseQRankSum= |
| 30609 | chrY | 13504519 | . | G | A   | 149.76  | my_snp_filter | AC=3;AF=0.125;AN=24;BaseQ          |
| 30610 | chrY | 13504630 | . | C | G   | 2335.06 | my_snp_filter | AC=10;AF=0.167;AN=60;BaseQ         |
| 30611 | chrY | 13504632 | . | G | A   | 730.87  | PASS          | AC=13;AF=0.325;AN=40;BaseQRankSum= |
| 30612 | chrY | 13504673 | . | C | T   | 3355.43 | PASS          | AC=8;AF=0.129;AN=62;BaseQRankSum=  |
| 30613 | chrY | 13504674 | . | A | G   | 3355.21 | PASS          | AC=8;AF=0.129;AN=62;BaseQRankSum=  |
| 30614 | chrY | 13504675 | . | C | T   | 3355.20 | PASS          | AC=8;AF=0.129;AN=62;BaseQRankSum=  |
| 30615 | chrY | 13504702 | . | C | T   | 859.85  | PASS          | AC=6;AF=0.091;AN=66;BaseQRankSum=  |
| 30616 | chrY | 13504705 | . | G | C   | 805.55  | PASS          | AC=6;AF=0.091;AN=66;BaseQRankSum=  |
| 30617 | chrY | 13504724 | . | T | G   | 43.43   | PASS          | AC=1;AF=0.015;AN=68;BaseQRankSum=  |
| 30618 | chrY | 13504823 | . | G | T   | 1016.01 | PASS          | AC=6;AF=0.086;AN=70;BaseQRankSum=  |
| 30619 | chrY | 13504824 | . | G | T   | 1019.37 | PASS          | AC=6;AF=0.086;AN=70;BaseQRankSum=  |
| 30620 | chrY | 13504848 | . | A | G   | 1333.17 | PASS          | AC=7;AF=0.100;AN=70;BaseQRankSum=  |
| 30621 | chrY | 13504883 | . | C | T   | 2366.07 | PASS          | AC=10;AF=0.152;AN=66;BaseQRankSum= |
| 30622 | chrY | 13504905 | . | C | A   | 212.82  | PASS          | AC=4;AF=0.069;AN=58;BaseQRankSum=  |
| 30623 | chrY | 13504932 | . | T | C   | 6825.95 | PASS          | AC=11;AF=0.289;AN=38;BaseQRankSum= |
| 30624 | chrY | 13505049 | . | A | C,* | 2842.54 | PASS          | AC=7,1;AF=0.350,0.050;AN=20;BaseQ  |
| 30625 | chrY | 13505086 | . | T | C   | 4490.97 | PASS          | AC=9;AF=0.375;AN=24;BaseQRankSum=  |
| 30626 | chrY | 13505111 | . | T | A   | 5343.11 | PASS          | AC=9;AF=0.409;AN=22;BaseQRankSum=  |
| 30627 | chrY | 13505128 | . | A | G   | 5330.84 | PASS          | AC=9;AF=0.375;AN=24;BaseQRankSum=  |
| 30628 | chrY | 13505130 | . | T | G   | 5329.84 | PASS          | AC=9;AF=0.375;AN=24;BaseQRankSum=  |

|       |      |          |   |   |     |          |               |                                    |
|-------|------|----------|---|---|-----|----------|---------------|------------------------------------|
| 30629 | chrY | 13505149 | . | A | G   | 5233.78  | PASS          | AC=9;AF=0.375;AN=24;BaseQRankSum=  |
| 30630 | chrY | 13505190 | . | G | T   | 6491.11  | my_snp_filter | AC=9;AF=0.409;AN=22;BaseQ          |
| 30631 | chrY | 13505192 | . | C | T   | 6516.11  | my_snp_filter | AC=9;AF=0.409;AN=22;BaseQ          |
| 30632 | chrY | 13505201 | . | T | G   | 6326.11  | my_snp_filter | AC=9;AF=0.409;AN=22;BaseQ          |
| 30633 | chrY | 13505230 | . | A | G   | 2666.11  | my_snp_filter | AC=9;AF=0.409;AN=22;BaseQ          |
| 30634 | chrY | 13505284 | . | T | A   | 1224.07  | PASS          | AC=6;AF=0.167;AN=36;BaseQRankSum=  |
| 30635 | chrY | 13505361 | . | T | C   | 185.80   | PASS          | AC=3;AF=0.043;AN=70;BaseQRankSum=  |
| 30636 | chrY | 13505365 | . | T | C   | 187.99   | PASS          | AC=3;AF=0.043;AN=70;BaseQRankSum=  |
| 30637 | chrY | 13505936 | . | A | G   | 145.08   | PASS          | AC=4;AF=0.059;AN=68;BaseQRankSum=  |
| 30638 | chrY | 13506065 | . | G | A   | 182.89   | PASS          | AC=1;AF=0.036;AN=28;BaseQRankSum=  |
| 30639 | chrY | 13506068 | . | A | G   | 179.33   | PASS          | AC=1;AF=0.036;AN=28;BaseQRankSum=  |
| 30640 | chrY | 13506141 | . | T | G   | 304.25   | PASS          | AC=6;AF=0.091;AN=66;BaseQRankSum=  |
| 30641 | chrY | 13506170 | . | T | A   | 364.88   | PASS          | AC=9;AF=0.136;AN=66;BaseQRankSum=  |
| 30642 | chrY | 13506199 | . | T | G   | 686.76   | PASS          | AC=7;AF=0.109;AN=64;BaseQRankSum=  |
| 30643 | chrY | 13506237 | . | C | G   | 1720.75  | my_snp_filter | AC=9;AF=0.145;AN=62;BaseQ          |
| 30644 | chrY | 13506379 | . | A | G   | 34.64    | my_snp_filter | AC=3;AF=0.107;AN=28;BaseQ          |
| 30645 | chrY | 13506387 | . | T | A   | 2092.85  | my_snp_filter | AC=9;AF=0.300;AN=30;BaseQ          |
| 30646 | chrY | 13506468 | . | T | A   | 53.05    | my_snp_filter | AC=1;AF=0.023;AN=44;BaseQ          |
| 30647 | chrY | 13506562 | . | A | G   | 8741.46  | PASS          | AC=9;AF=0.129;AN=70;BaseQRankSum=  |
| 30648 | chrY | 13506576 | . | G | A   | 9182.74  | PASS          | AC=9;AF=0.129;AN=70;BaseQRankSum=  |
| 30649 | chrY | 13506601 | . | G | T   | 7631.74  | PASS          | AC=9;AF=0.129;AN=70;BaseQRankSum=  |
| 30650 | chrY | 13506615 | . | T | A   | 6871.95  | PASS          | AC=9;AF=0.129;AN=70;BaseQRankSum=  |
| 30651 | chrY | 13506616 | . | A | G   | 1942.64  | PASS          | AC=8;AF=0.114;AN=70;BaseQRankSum=  |
| 30652 | chrY | 13506630 | . | G | C   | 5566.56  | PASS          | AC=9;AF=0.129;AN=70;BaseQRankSum=  |
| 30653 | chrY | 13506651 | . | T | G   | 4806.71  | PASS          | AC=9;AF=0.129;AN=70;BaseQRankSum=  |
| 30654 | chrY | 13506671 | . | C | A   | 5376.10  | PASS          | AC=8;AF=0.114;AN=70;BaseQRankSum=  |
| 30655 | chrY | 13506684 | . | T | A   | 5491.15  | PASS          | AC=8;AF=0.114;AN=70;BaseQRankSum=  |
| 30656 | chrY | 13506753 | . | T | C   | 11475.86 | PASS          | AC=21;AF=0.318;AN=66;BaseQ         |
| 30657 | chrY | 13506771 | . | A | T   | 12120.29 | PASS          | AC=21;AF=0.339;AN=62;BaseQ         |
| 30658 | chrY | 13506815 | . | G | A   | 3085.53  | PASS          | AC=9;AF=0.132;AN=68;BaseQRankSum=  |
| 30659 | chrY | 13506828 | . | G | C   | 2763.40  | PASS          | AC=8;AF=0.118;AN=68;BaseQRankSum=  |
| 30660 | chrY | 13506838 | . | T | A   | 1992.48  | PASS          | AC=8;AF=0.118;AN=68;BaseQRankSum=  |
| 30661 | chrY | 13506844 | . | T | C   | 9007.48  | PASS          | AC=32;AF=0.471;AN=68;BaseQRankSum= |
| 30662 | chrY | 13506845 | . | G | T   | 1675.44  | PASS          | AC=8;AF=0.118;AN=68;BaseQRankSum=  |
| 30663 | chrY | 13506864 | . | T | A   | 1960.62  | PASS          | AC=8;AF=0.121;AN=66;BaseQRankSum=  |
| 30664 | chrY | 13506882 | . | G | A   | 2163.83  | PASS          | AC=8;AF=0.118;AN=68;BaseQRankSum=  |
| 30665 | chrY | 13506929 | . | A | G   | 10197.36 | PASS          | AC=34;AF=0.500;AN=68;BaseQ         |
| 30666 | chrY | 13506941 | . | T | C   | 2797.39  | PASS          | AC=12;AF=0.176;AN=68;BaseQRankSum= |
| 30667 | chrY | 13506950 | . | T | G   | 31.43    | PASS          | AC=1;AF=0.015;AN=68;BaseQRankSum=  |
| 30668 | chrY | 13506967 | . | G | A   | 14966.24 | PASS          | AC=24;AF=0.444;AN=54;BaseQ         |
| 30669 | chrY | 13506968 | . | G | A   | 15033.24 | PASS          | AC=24;AF=0.444;AN=54;BaseQ         |
| 30670 | chrY | 13506974 | . | T | C   | 14453.43 | PASS          | AC=24;AF=0.429;AN=56;BaseQ         |
| 30671 | chrY | 13507005 | . | C | T   | 3919.15  | PASS          | AC=11;AF=0.229;AN=48;BaseQRankSum= |
| 30672 | chrY | 13507025 | . | G | T   | 11862.08 | PASS          | AC=12;AF=0.300;AN=40;BaseQ         |
| 30673 | chrY | 13507041 | . | T | A   | 130.26   | PASS          | AC=1;AF=0.024;AN=42;BaseQRankSum=  |
| 30674 | chrY | 13507055 | . | C | G   | 2094.28  | PASS          | AC=5;AF=0.147;AN=34;BaseQRankSum=  |
| 30675 | chrY | 13507058 | . | G | A   | 3233.06  | PASS          | AC=6;AF=0.200;AN=30;BaseQRankSum=  |
| 30676 | chrY | 13507074 | . | T | G   | 1920.33  | PASS          | AC=6;AF=0.200;AN=30;BaseQRankSum=  |
| 30677 | chrY | 13507085 | . | G | T   | 10950.80 | PASS          | AC=10;AF=0.385;AN=26;BaseQ         |
| 30678 | chrY | 13507132 | . | A | G   | 7459.45  | my_snp_filter | AC=15;AF=0.313;AN=48;BaseQ         |
| 30679 | chrY | 13507146 | . | G | T   | 7158.47  | my_snp_filter | AC=14;AF=0.269;AN=52;BaseQ         |
| 30680 | chrY | 13507147 | . | G | A   | 7126.47  | my_snp_filter | AC=14;AF=0.269;AN=52;BaseQ         |
| 30681 | chrY | 13507174 | . | C | A   | 1765.42  | PASS          | AC=8;AF=0.125;AN=64;BaseQRankSum=  |
| 30682 | chrY | 13507182 | . | A | G   | 4324.80  | my_snp_filter | AC=11;AF=0.190;AN=58;BaseQ         |
| 30683 | chrY | 13507214 | . | T | C   | 3645.16  | my_snp_filter | AC=18;AF=0.281;AN=64;BaseQ         |
| 30684 | chrY | 13507242 | . | T | G   | 7473.28  | my_snp_filter | AC=21;AF=0.328;AN=64;BaseQ         |
| 30685 | chrY | 13507262 | . | A | G   | 8053.49  | PASS          | AC=24;AF=0.343;AN=70;BaseQRankSum= |
| 30686 | chrY | 13507292 | . | A | G   | 6649.55  | PASS          | AC=22;AF=0.324;AN=68;BaseQRankSum= |
| 30687 | chrY | 13507305 | . | T | A   | 6682.78  | PASS          | AC=21;AF=0.309;AN=68;BaseQRankSum= |
| 30688 | chrY | 13507307 | . | T | C   | 6613.16  | PASS          | AC=21;AF=0.318;AN=66;BaseQRankSum= |
| 30689 | chrY | 13507323 | . | A | G   | 123.72   | PASS          | AC=1;AF=0.014;AN=70;BaseQRankSum=  |
| 30690 | chrY | 13507331 | . | A | T   | 4596.22  | PASS          | AC=17;AF=0.243;AN=70;BaseQRankSum= |
| 30691 | chrY | 13507393 | . | C | T   | 1318.19  | PASS          | AC=10;AF=0.152;AN=66;BaseQRankSum= |
| 30692 | chrY | 13507402 | . | A | G   | 1078.10  | PASS          | AC=9;AF=0.150;AN=60;BaseQRankSum=  |
| 30693 | chrY | 13507416 | . | C | A   | 843.41   | PASS          | AC=7;AF=0.140;AN=50;BaseQRankSum=  |
| 30694 | chrY | 13507428 | . | T | G   | 593.67   | PASS          | AC=7;AF=0.140;AN=50;BaseQRankSum=  |
| 30695 | chrY | 13507457 | . | C | A,G | 438.53   | PASS          | AC=3,3;AF=0.088,0.088;AN=34;BaseQ  |
| 30696 | chrY | 13507461 | . | G | C   | 381.02   | PASS          | AC=6;AF=0.188;AN=32;BaseQRankSum=  |
| 30697 | chrY | 13507481 | . | C | T   | 98.38    | PASS          | AC=2;AF=0.071;AN=28;BaseQRankSum=  |
| 30698 | chrY | 13507536 | . | A | C   | 109.98   | my_snp_filter | AC=4;AF=0.222;AN=18;BaseQ          |
| 30699 | chrY | 13507578 | . | T | G   | 175.78   | PASS          | AC=4;AF=0.200;AN=20;BaseQRankSum=  |
| 30700 | chrY | 13507611 | . | A | G   | 599.69   | PASS          | AC=6;AF=0.300;AN=20;BaseQRankSum=  |
| 30701 | chrY | 13507703 | . | T | C   | 205.32   | PASS          | AC=5;AF=0.147;AN=34;BaseQRankSum=  |
| 30702 | chrY | 13507721 | . | A | G   | 43.60    | my_snp_filter | AC=4;AF=0.069;AN=58;BaseQ          |
| 30703 | chrY | 13507807 | . | G | A   | 606.41   | PASS          | AC=5;AF=0.074;AN=68;BaseQRankSum=  |
| 30704 | chrY | 13507808 | . | A | G   | 606.44   | PASS          | AC=5;AF=0.076;AN=66;BaseQRankSum=  |

|       |      |          |   |   |   |          |               |                                    |
|-------|------|----------|---|---|---|----------|---------------|------------------------------------|
| 30705 | chrY | 13507854 | . | C | T | 1130.98  | PASS          | AC=7;AF=0.100;AN=70;BaseQRankSum=  |
| 30706 | chrY | 13507869 | . | G | T | 1197.91  | PASS          | AC=7;AF=0.100;AN=70;BaseQRankSum=  |
| 30707 | chrY | 13507875 | . | T | A | 1128.95  | PASS          | AC=7;AF=0.100;AN=70;BaseQRankSum=  |
| 30708 | chrY | 13507881 | . | A | C | 1145.77  | PASS          | AC=7;AF=0.100;AN=70;BaseQRankSum=  |
| 30709 | chrY | 13507927 | . | G | A | 250.97   | PASS          | AC=4;AF=0.059;AN=68;BaseQRankSum=  |
| 30710 | chrY | 13507935 | . | C | A | 690.31   | PASS          | AC=7;AF=0.100;AN=70;BaseQRankSum=  |
| 30711 | chrY | 13507994 | . | A | T | 41.09    | my_snp_filter | AC=2;AF=0.033;AN=60;BaseQ          |
| 30712 | chrY | 13508004 | . | A | G | 30.15    | my_snp_filter | AC=2;AF=0.030;AN=66;BaseQ          |
| 30713 | chrY | 13508016 | . | T | A | 2335.90  | my_snp_filter | AC=22;AF=0.314;AN=70;Base          |
| 30714 | chrY | 13508027 | . | A | G | 2516.56  | my_snp_filter | AC=22;AF=0.333;AN=66;Base          |
| 30715 | chrY | 13508086 | . | T | C | 745.20   | PASS          | AC=3;AF=0.043;AN=70;BaseQRankSum=  |
| 30716 | chrY | 13508110 | . | A | G | 8823.48  | PASS          | AC=28;AF=0.412;AN=68;BaseQRankSum= |
| 30717 | chrY | 13508114 | . | A | C | 8809.49  | PASS          | AC=28;AF=0.412;AN=68;BaseQRankSum= |
| 30718 | chrY | 13508154 | . | T | A | 78.63    | PASS          | AC=2;AF=0.029;AN=68;BaseQRankSum=  |
| 30719 | chrY | 13508193 | . | G | C | 59       | my_snp_filter | AC=1;AF=0.016;AN=64;BaseQ          |
| 30720 | chrY | 13508194 | . | T | C | 104.84   | PASS          | AC=2;AF=0.032;AN=62;BaseQRankSum=  |
| 30721 | chrY | 13508229 | . | G | A | 2021.77  | my_snp_filter | AC=9;AF=0.167;AN=54;BaseQ          |
| 30722 | chrY | 13508231 | . | G | A | 2155.91  | my_snp_filter | AC=9;AF=0.167;AN=54;BaseQ          |
| 30723 | chrY | 13508300 | . | C | T | 424.79   | my_snp_filter | AC=6;AF=0.086;AN=70;BaseQ          |
| 30724 | chrY | 13508327 | . | A | T | 847.11   | PASS          | AC=6;AF=0.088;AN=68;BaseQRankSum=  |
| 30725 | chrY | 13508366 | . | A | C | 371.35   | PASS          | AC=6;AF=0.086;AN=70;BaseQRankSum=  |
| 30726 | chrY | 13508402 | . | A | G | 88.35    | PASS          | AC=2;AF=0.029;AN=70;BaseQRankSum=  |
| 30727 | chrY | 13508454 | . | A | G | 1344.28  | PASS          | AC=7;AF=0.100;AN=70;BaseQRankSum=  |
| 30728 | chrY | 13508466 | . | G | T | 1547.17  | PASS          | AC=7;AF=0.103;AN=68;BaseQRankSum=  |
| 30729 | chrY | 13508470 | . | T | C | 1572.13  | PASS          | AC=7;AF=0.103;AN=68;BaseQRankSum=  |
| 30730 | chrY | 13508507 | . | A | G | 1490.88  | my_snp_filter | AC=12;AF=0.171;AN=70;Base          |
| 30731 | chrY | 13508530 | . | T | A | 98.09    | my_snp_filter | AC=2;AF=0.029;AN=70;BaseQ          |
| 30732 | chrY | 13508587 | . | T | A | 470.09   | PASS          | AC=4;AF=0.059;AN=68;DP=519;FS=0.0  |
| 30733 | chrY | 13508594 | . | G | T | 3941.67  | my_snp_filter | AC=15;AF=0.221;AN=68;Base          |
| 30734 | chrY | 13508603 | . | G | A | 3155.58  | my_snp_filter | AC=8;AF=0.114;AN=70;BaseQ          |
| 30735 | chrY | 13508679 | . | G | A | 5042.33  | my_snp_filter | AC=26;AF=0.433;AN=60;Base          |
| 30736 | chrY | 13508681 | . | A | G | 5160.79  | my_snp_filter | AC=26;AF=0.448;AN=58;Base          |
| 30737 | chrY | 13508697 | . | T | G | 3435.04  | PASS          | AC=22;AF=0.344;AN=64;BaseQRankSum= |
| 30738 | chrY | 13508715 | . | T | C | 9405.26  | PASS          | AC=32;AF=0.485;AN=66;BaseQRankSum= |
| 30739 | chrY | 13508798 | . | T | C | 17342.92 | PASS          | AC=36;AF=0.514;AN=70;Base          |
| 30740 | chrY | 13508841 | . | A | G | 10609.75 | PASS          | AC=35;AF=0.500;AN=70;Base          |
| 30741 | chrY | 13508896 | . | T | G | 5353.10  | PASS          | AC=21;AF=0.309;AN=68;BaseQRankSum= |
| 30742 | chrY | 13508957 | . | T | C | 60.34    | PASS          | AC=1;AF=0.014;AN=70;BaseQRankSum=  |
| 30743 | chrY | 13509024 | . | C | A | 282.81   | PASS          | AC=4;AF=0.057;AN=70;BaseQRankSum=  |
| 30744 | chrY | 13509025 | . | A | C | 2045.43  | PASS          | AC=13;AF=0.186;AN=70;BaseQRankSum= |
| 30745 | chrY | 13509078 | . | C | G | 4034.52  | PASS          | AC=25;AF=0.368;AN=68;BaseQRankSum= |
| 30746 | chrY | 13509102 | . | C | T | 150.27   | my_snp_filter | AC=3;AF=0.044;AN=68;BaseQ          |
| 30747 | chrY | 13509128 | . | C | G | 5137.88  | PASS          | AC=23;AF=0.338;AN=68;BaseQRankSum= |
| 30748 | chrY | 13509148 | . | T | A | 892.54   | PASS          | AC=9;AF=0.136;AN=66;BaseQRankSum=  |
| 30749 | chrY | 13509185 | . | C | A | 2740.26  | PASS          | AC=16;AF=0.250;AN=64;BaseQRankSum= |
| 30750 | chrY | 13509223 | . | G | A | 117.34   | my_snp_filter | AC=3;AF=0.044;AN=68;BaseQ          |
| 30751 | chrY | 13509257 | . | T | C | 2021.19  | PASS          | AC=15;AF=0.214;AN=70;BaseQRankSum= |
| 30752 | chrY | 13509288 | . | C | T | 927.28   | PASS          | AC=11;AF=0.157;AN=70;BaseQRankSum= |
| 30753 | chrY | 13509295 | . | A | G | 99.45    | PASS          | AC=2;AF=0.029;AN=70;BaseQRankSum=  |
| 30754 | chrY | 13509296 | . | G | C | 99.43    | PASS          | AC=2;AF=0.029;AN=70;BaseQRankSum=  |
| 30755 | chrY | 13509317 | . | A | G | 337.66   | PASS          | AC=5;AF=0.071;AN=70;BaseQRankSum=  |
| 30756 | chrY | 13509325 | . | C | T | 300.63   | PASS          | AC=4;AF=0.057;AN=70;BaseQRankSum=  |
| 30757 | chrY | 13509395 | . | T | G | 56.90    | PASS          | AC=2;AF=0.029;AN=70;BaseQRankSum=  |
| 30758 | chrY | 13509450 | . | T | C | 120.27   | my_snp_filter | AC=4;AF=0.057;AN=70;BaseQ          |
| 30759 | chrY | 13509526 | . | T | G | 943.68   | PASS          | AC=9;AF=0.132;AN=68;BaseQRankSum=  |
| 30760 | chrY | 13509543 | . | A | G | 745.27   | PASS          | AC=4;AF=0.065;AN=62;BaseQRankSum=  |
| 30761 | chrY | 13509606 | . | A | C | 401.01   | PASS          | AC=6;AF=0.130;AN=46;BaseQRankSum=  |
| 30762 | chrY | 13509654 | . | G | T | 507.43   | PASS          | AC=5;AF=0.167;AN=30;BaseQRankSum=  |
| 30763 | chrY | 13509702 | . | C | T | 265.78   | PASS          | AC=3;AF=0.100;AN=30;BaseQRankSum=  |
| 30764 | chrY | 13509881 | . | A | G | 71.42    | my_snp_filter | AC=2;AF=0.029;AN=68;BaseQ          |
| 30765 | chrY | 13509957 | . | G | A | 1110.84  | PASS          | AC=6;AF=0.086;AN=70;BaseQRankSum=  |
| 30766 | chrY | 13509965 | . | G | A | 1131.61  | PASS          | AC=6;AF=0.086;AN=70;BaseQRankSum=  |
| 30767 | chrY | 13509983 | . | A | G | 1259.09  | PASS          | AC=6;AF=0.086;AN=70;BaseQRankSum=  |
| 30768 | chrY | 13510036 | . | C | A | 845.25   | PASS          | AC=9;AF=0.132;AN=68;BaseQRankSum=  |
| 30769 | chrY | 13510091 | . | G | A | 824.52   | PASS          | AC=6;AF=0.150;AN=40;BaseQRankSum=  |
| 30770 | chrY | 13510123 | . | T | G | 2217.74  | PASS          | AC=11;AF=0.250;AN=44;BaseQRankSum= |
| 30771 | chrY | 13510134 | . | T | A | 179.55   | PASS          | AC=5;AF=0.096;AN=52;BaseQRankSum=  |
| 30772 | chrY | 13510139 | . | A | G | 2278.23  | PASS          | AC=11;AF=0.229;AN=48;BaseQRankSum= |
| 30773 | chrY | 13510187 | . | A | G | 95.88    | PASS          | AC=3;AF=0.052;AN=58;BaseQRankSum=  |
| 30774 | chrY | 13510219 | . | A | G | 1091.97  | my_snp_filter | AC=11;AF=0.162;AN=68;Base          |
| 30775 | chrY | 13510279 | . | T | G | 1291.61  | my_snp_filter | AC=8;AF=0.114;AN=70;BaseQ          |
| 30776 | chrY | 13510281 | . | T | C | 453.94   | PASS          | AC=5;AF=0.071;AN=70;BaseQRankSum=  |
| 30777 | chrY | 13510304 | . | G | A | 814.14   | my_snp_filter | AC=6;AF=0.086;AN=70;BaseQ          |
| 30778 | chrY | 13510315 | . | C | T | 516.24   | PASS          | AC=4;AF=0.057;AN=70;BaseQRankSum=  |
| 30779 | chrY | 13510448 | . | T | C | 31.29    | PASS          | AC=1;AF=0.015;AN=66;BaseQRankSum=  |
| 30780 | chrY | 13510464 | . | T | A | 60.05    | PASS          | AC=2;AF=0.037;AN=54;BaseQRankSum=  |

|       |      |          |   |   |   |         |               |                                    |
|-------|------|----------|---|---|---|---------|---------------|------------------------------------|
| 30781 | chrY | 13510640 | . | T | C | 232.37  | PASS          | AC=1;AF=0.050;AN=20;BaseQRankSum=  |
| 30782 | chrY | 13510644 | . | C | T | 272.76  | PASS          | AC=1;AF=0.045;AN=22;BaseQRankSum=  |
| 30783 | chrY | 13510663 | . | T | C | 301.68  | PASS          | AC=1;AF=0.050;AN=20;BaseQRankSum=  |
| 30784 | chrY | 13510670 | . | A | C | 333.08  | PASS          | AC=1;AF=0.045;AN=22;BaseQRankSum=  |
| 30785 | chrY | 13510711 | . | T | C | 2232.83 | my_snp_filter | AC=18;AF=0.500;AN=36;BaseQ         |
| 30786 | chrY | 13510745 | . | A | T | 211.42  | PASS          | AC=7;AF=0.109;AN=64;BaseQRankSum=  |
| 30787 | chrY | 13510771 | . | G | C | 7582.42 | my_snp_filter | AC=32;AF=0.471;AN=68;BaseQ         |
| 30788 | chrY | 13510775 | . | G | T | 7697.83 | my_snp_filter | AC=31;AF=0.456;AN=68;BaseQ         |
| 30789 | chrY | 13510796 | . | C | A | 8294.50 | PASS          | AC=34;AF=0.486;AN=70;BaseQRankSum= |
| 30790 | chrY | 13510808 | . | A | G | 9331.80 | PASS          | AC=32;AF=0.485;AN=66;BaseQRankSum= |
| 30791 | chrY | 13510810 | . | G | A | 752.02  | PASS          | AC=9;AF=0.129;AN=70;BaseQRankSum=  |
| 30792 | chrY | 13510820 | . | T | C | 59.97   | PASS          | AC=3;AF=0.043;AN=70;BaseQRankSum=  |
| 30793 | chrY | 13510823 | . | T | C | 9251.95 | PASS          | AC=32;AF=0.485;AN=66;BaseQRankSum= |
| 30794 | chrY | 13510841 | . | T | C | 8256.77 | PASS          | AC=30;AF=0.469;AN=64;BaseQRankSum= |
| 30795 | chrY | 13510852 | . | A | G | 144.91  | PASS          | AC=3;AF=0.043;AN=70;BaseQRankSum=  |
| 30796 | chrY | 13510943 | . | T | C | 206.18  | PASS          | AC=3;AF=0.058;AN=52;BaseQRankSum=  |
| 30797 | chrY | 13510967 | . | T | C | 1897.49 | my_snp_filter | AC=14;AF=0.333;AN=42;BaseQ         |
| 30798 | chrY | 13511019 | . | T | G | 954.86  | my_snp_filter | AC=9;AF=0.136;AN=66;BaseQ          |
| 30799 | chrY | 13511050 | . | G | C | 1082.11 | PASS          | AC=9;AF=0.129;AN=70;BaseQRankSum=  |
| 30800 | chrY | 13511060 | . | C | G | 984.29  | PASS          | AC=9;AF=0.129;AN=70;BaseQRankSum=  |
| 30801 | chrY | 13511110 | . | C | A | 623.82  | PASS          | AC=6;AF=0.086;AN=70;BaseQRankSum=  |
| 30802 | chrY | 13511115 | . | A | T | 632.82  | PASS          | AC=6;AF=0.086;AN=70;BaseQRankSum=  |
| 30803 | chrY | 13511130 | . | T | G | 468.03  | PASS          | AC=4;AF=0.057;AN=70;BaseQRankSum=  |
| 30804 | chrY | 13511131 | . | T | C | 467.53  | PASS          | AC=4;AF=0.057;AN=70;BaseQRankSum=  |
| 30805 | chrY | 13511147 | . | T | C | 9688.08 | PASS          | AC=70;AF=1.00;AN=70;DP=343;FS=0.0  |
| 30806 | chrY | 13511179 | . | C | T | 1046.39 | PASS          | AC=3;AF=0.043;AN=70;BaseQRankSum=  |
| 30807 | chrY | 13511197 | . | A | G | 1252.94 | PASS          | AC=11;AF=0.167;AN=66;BaseQRankSum= |
| 30808 | chrY | 13511202 | . | A | C | 1783.30 | PASS          | AC=15;AF=0.259;AN=58;BaseQRankSum= |
| 30809 | chrY | 13511299 | . | A | T | 199.64  | PASS          | AC=1;AF=0.031;AN=32;BaseQRankSum=  |
| 30810 | chrY | 13511302 | . | T | C | 176.77  | PASS          | AC=1;AF=0.033;AN=30;BaseQRankSum=  |
| 30811 | chrY | 13511598 | . | T | G | 169.90  | my_snp_filter | AC=5;AF=0.086;AN=58;BaseQ          |
| 30812 | chrY | 13511605 | . | C | A | 901.34  | my_snp_filter | AC=9;AF=0.150;AN=60;BaseQ          |
| 30813 | chrY | 13511661 | . | C | G | 158.48  | my_snp_filter | AC=4;AF=0.057;AN=70;BaseQ          |
| 30814 | chrY | 13511717 | . | C | T | 147.89  | my_snp_filter | AC=3;AF=0.043;AN=70;BaseQ          |
| 30815 | chrY | 13511730 | . | T | C | 79.42   | my_snp_filter | AC=2;AF=0.029;AN=70;BaseQ          |
| 30816 | chrY | 13511749 | . | T | A | 41.79   | my_snp_filter | AC=3;AF=0.043;AN=70;BaseQ          |
| 30817 | chrY | 13511757 | . | C | T | 32.56   | my_snp_filter | AC=1;AF=0.014;AN=70;BaseQ          |
| 30818 | chrY | 13511876 | . | T | A | 716.03  | PASS          | AC=9;AF=0.132;AN=68;BaseQRankSum=  |
| 30819 | chrY | 13511885 | . | T | C | 744.14  | my_snp_filter | AC=7;AF=0.106;AN=66;BaseQ          |
| 30820 | chrY | 13511886 | . | G | A | 744.61  | my_snp_filter | AC=7;AF=0.109;AN=64;BaseQ          |
| 30821 | chrY | 13511970 | . | T | A | 118.39  | PASS          | AC=2;AF=0.029;AN=70;BaseQRankSum=  |
| 30822 | chrY | 13511994 | . | T | G | 106.40  | my_snp_filter | AC=3;AF=0.044;AN=68;BaseQ          |
| 30823 | chrY | 13512208 | . | A | C | 123.14  | my_snp_filter | AC=3;AF=0.043;AN=70;BaseQ          |
| 30824 | chrY | 13512285 | . | C | A | 1085.51 | PASS          | AC=4;AF=0.057;AN=70;DP=646;FS=0.0  |
| 30825 | chrY | 13512418 | . | C | T | 322.70  | PASS          | AC=3;AF=0.044;AN=68;BaseQRankSum=  |
| 30826 | chrY | 13512434 | . | T | C | 386.41  | PASS          | AC=4;AF=0.059;AN=68;BaseQRankSum=  |
| 30827 | chrY | 13512468 | . | T | A | 572.54  | my_snp_filter | AC=7;AF=0.167;AN=42;BaseQ          |
| 30828 | chrY | 13512551 | . | A | G | 1662.72 | PASS          | AC=8;AF=0.444;AN=18;BaseQRankSum=  |
| 30829 | chrY | 13512559 | . | G | A | 1426.01 | PASS          | AC=8;AF=0.444;AN=18;BaseQRankSum=  |
| 30830 | chrY | 13512567 | . | T | A | 1426.54 | PASS          | AC=8;AF=0.444;AN=18;BaseQRankSum=  |
| 30831 | chrY | 13512570 | . | C | T | 108.96  | PASS          | AC=2;AF=0.111;AN=18;BaseQRankSum=  |
| 30832 | chrY | 13512610 | . | A | T | 892.50  | PASS          | AC=4;AF=0.200;AN=20;BaseQRankSum=  |
| 30833 | chrY | 13512623 | . | A | G | 269.50  | PASS          | AC=4;AF=0.167;AN=24;BaseQRankSum=  |
| 30834 | chrY | 13512627 | . | C | T | 826.23  | PASS          | AC=3;AF=0.125;AN=24;BaseQRankSum=  |
| 30835 | chrY | 13512633 | . | A | G | 136.25  | PASS          | AC=1;AF=0.042;AN=24;BaseQRankSum=  |
| 30836 | chrY | 13512645 | . | G | A | 498.08  | my_snp_filter | AC=6;AF=0.214;AN=28;BaseQ          |
| 30837 | chrY | 13512833 | . | A | G | 162.28  | PASS          | AC=2;AF=0.029;AN=70;BaseQRankSum=  |
| 30838 | chrY | 13512843 | . | G | A | 63.81   | PASS          | AC=1;AF=0.014;AN=70;BaseQRankSum=  |
| 30839 | chrY | 13513076 | . | G | A | 340.69  | PASS          | AC=5;AF=0.147;AN=34;BaseQRankSum=  |
| 30840 | chrY | 13513077 | . | G | A | 259.43  | PASS          | AC=2;AF=0.056;AN=36;DP=203;FS=0.0  |
| 30841 | chrY | 13513078 | . | T | G | 343.22  | PASS          | AC=5;AF=0.156;AN=32;BaseQRankSum=  |
| 30842 | chrY | 13513093 | . | G | T | 543.49  | PASS          | AC=5;AF=0.147;AN=34;BaseQRankSum=  |
| 30843 | chrY | 13513099 | . | A | G | 549.57  | PASS          | AC=6;AF=0.176;AN=34;BaseQRankSum=  |
| 30844 | chrY | 13513100 | . | A | T | 551.65  | PASS          | AC=6;AF=0.176;AN=34;BaseQRankSum=  |
| 30845 | chrY | 13513130 | . | A | G | 1666.62 | PASS          | AC=16;AF=0.333;AN=48;BaseQRankSum= |
| 30846 | chrY | 13513136 | . | G | C | 1754.31 | my_snp_filter | AC=16;AF=0.320;AN=50;BaseQ         |
| 30847 | chrY | 13513180 | . | A | C | 3216.43 | PASS          | AC=17;AF=0.266;AN=64;BaseQRankSum= |
| 30848 | chrY | 13513186 | . | G | A | 2762.34 | PASS          | AC=41;AF=0.641;AN=64;BaseQRankSum= |
| 30849 | chrY | 13513187 | . | A | G | 3259.01 | my_snp_filter | AC=17;AF=0.266;AN=64;BaseQ         |
| 30850 | chrY | 13513220 | . | A | G | 1678.72 | PASS          | AC=14;AF=0.226;AN=62;BaseQRankSum= |
| 30851 | chrY | 13513260 | . | A | G | 3739.89 | my_snp_filter | AC=17;AF=0.315;AN=54;BaseQ         |
| 30852 | chrY | 13513412 | . | C | T | 538.32  | PASS          | AC=4;AF=0.118;AN=34;BaseQRankSum=  |
| 30853 | chrY | 13513507 | . | C | A | 5510.05 | PASS          | AC=13;AF=0.210;AN=62;BaseQRankSum= |
| 30854 | chrY | 13513551 | . | A | C | 5604.36 | PASS          | AC=26;AF=0.371;AN=70;BaseQRankSum= |
| 30855 | chrY | 13513622 | . | A | G | 384.21  | PASS          | AC=5;AF=0.076;AN=66;BaseQRankSum=  |
| 30856 | chrY | 13513655 | . | T | A | 350.30  | my_snp_filter | AC=7;AF=0.100;AN=70;BaseQ          |

|       |      |          |   |   |     |          |               |                                    |
|-------|------|----------|---|---|-----|----------|---------------|------------------------------------|
| 30857 | chrY | 13513666 | . | G | T   | 1699.92  | my_snp_filter | AC=9;AF=0.129;AN=70;BaseQ          |
| 30858 | chrY | 13513671 | . | C | A   | 1815.92  | my_snp_filter | AC=9;AF=0.129;AN=70;BaseQ          |
| 30859 | chrY | 13513672 | . | G | T   | 5167.88  | PASS          | AC=27;AF=0.386;AN=70;BaseQRankSum  |
| 30860 | chrY | 13513673 | . | T | C   | 1823.15  | my_snp_filter | AC=9;AF=0.129;AN=70;BaseQ          |
| 30861 | chrY | 13513709 | . | C | T   | 975.26   | PASS          | AC=9;AF=0.129;AN=70;BaseQRankSum=  |
| 30862 | chrY | 13513839 | . | T | C   | 9508.76  | PASS          | AC=18;AF=0.375;AN=48;BaseQRankSum  |
| 30863 | chrY | 13513848 | . | T | A   | 9741.45  | PASS          | AC=19;AF=0.452;AN=42;BaseQRankSum  |
| 30864 | chrY | 13513852 | . | T | A   | 46.04    | PASS          | AC=1;AF=0.020;AN=50;BaseQRankSum=  |
| 30865 | chrY | 13513858 | . | C | T   | 2748.63  | PASS          | AC=9;AF=0.205;AN=44;BaseQRankSum=  |
| 30866 | chrY | 13513895 | . | G | A   | 576.47   | my_snp_filter | AC=5;AF=0.104;AN=48;BaseQ          |
| 30867 | chrY | 13513955 | . | A | T,G | 9575.96  | PASS          | AC=11,9;AF=0.177,0.145;AN=62;BaseQ |
| 30868 | chrY | 13514023 | . | C | T   | 14849.26 | PASS          | AC=9;AF=0.132;AN=68;BaseQ          |
| 30869 | chrY | 13514034 | . | T | G   | 14069.41 | PASS          | AC=9;AF=0.132;AN=68;BaseQ          |
| 30870 | chrY | 13514038 | . | A | C   | 1592.62  | PASS          | AC=8;AF=0.114;AN=70;BaseQRankSum=  |
| 30871 | chrY | 13514039 | . | T | C   | 3049.11  | PASS          | AC=8;AF=0.114;AN=70;BaseQRankSum=  |
| 30872 | chrY | 13514085 | . | A | G   | 3720.48  | PASS          | AC=10;AF=0.143;AN=70;BaseQRankSum= |
| 30873 | chrY | 13514097 | . | C | T   | 176.78   | PASS          | AC=1;AF=0.014;AN=70;BaseQRankSum=  |
| 30874 | chrY | 13514118 | . | A | C   | 4428.43  | my_snp_filter | AC=9;AF=0.129;AN=70;BaseQ          |
| 30875 | chrY | 13514121 | . | A | C   | 4535.35  | my_snp_filter | AC=9;AF=0.129;AN=70;BaseQ          |
| 30876 | chrY | 13514126 | . | A | C   | 4423.36  | PASS          | AC=9;AF=0.129;AN=70;BaseQRankSum=  |
| 30877 | chrY | 13514141 | . | T | A   | 10091.28 | PASS          | AC=43;AF=0.694;AN=62;BaseQ         |
| 30878 | chrY | 13514166 | . | A | G   | 9403.54  | PASS          | AC=10;AF=0.147;AN=68;BaseQRankSum= |
| 30879 | chrY | 13514189 | . | A | G   | 11208.56 | PASS          | AC=10;AF=0.147;AN=68;BaseQ         |
| 30880 | chrY | 13514191 | . | G | T   | 11262.25 | PASS          | AC=10;AF=0.147;AN=68;BaseQ         |
| 30881 | chrY | 13514207 | . | C | A   | 5190.64  | PASS          | AC=9;AF=0.141;AN=64;BaseQRankSum=  |
| 30882 | chrY | 13514211 | . | A | C   | 800.97   | PASS          | AC=2;AF=0.030;AN=66;BaseQRankSum=  |
| 30883 | chrY | 13514243 | . | T | C   | 874.41   | PASS          | AC=5;AF=0.083;AN=60;BaseQRankSum=  |
| 30884 | chrY | 13514248 | . | C | T   | 86.26    | my_snp_filter | AC=2;AF=0.036;AN=56;BaseQ          |
| 30885 | chrY | 13514251 | . | C | T   | 3253.07  | PASS          | AC=7;AF=0.125;AN=56;BaseQRankSum=  |
| 30886 | chrY | 13514291 | . | G | T   | 4978.94  | PASS          | AC=9;AF=0.173;AN=52;BaseQRankSum=  |
| 30887 | chrY | 13514338 | . | C | T   | 190.97   | my_snp_filter | AC=5;AF=0.093;AN=54;BaseQ          |
| 30888 | chrY | 13514378 | . | A | C   | 2896.08  | my_snp_filter | AC=8;AF=0.114;AN=70;BaseQ          |
| 30889 | chrY | 13514383 | . | T | C   | 527.33   | PASS          | AC=6;AF=0.086;AN=70;BaseQRankSum=  |
| 30890 | chrY | 13514442 | . | C | T   | 1190.90  | my_snp_filter | AC=8;AF=0.114;AN=70;BaseQ          |
| 30891 | chrY | 13514483 | . | T | G   | 2993.44  | PASS          | AC=10;AF=0.143;AN=70;BaseQRankSum= |
| 30892 | chrY | 13514493 | . | T | G   | 2956.85  | PASS          | AC=10;AF=0.143;AN=70;BaseQRankSum= |
| 30893 | chrY | 13514506 | . | A | C   | 2924.23  | PASS          | AC=9;AF=0.132;AN=68;BaseQRankSum=  |
| 30894 | chrY | 13514513 | . | G | A   | 2854.64  | PASS          | AC=10;AF=0.147;AN=68;BaseQRankSum= |
| 30895 | chrY | 13514518 | . | G | A   | 2727.62  | PASS          | AC=10;AF=0.147;AN=68;BaseQRankSum= |
| 30896 | chrY | 13514540 | . | G | C   | 1927.97  | PASS          | AC=9;AF=0.132;AN=68;BaseQRankSum=  |
| 30897 | chrY | 13514547 | . | C | T   | 1838.28  | PASS          | AC=9;AF=0.132;AN=68;BaseQRankSum=  |
| 30898 | chrY | 13514554 | . | T | C   | 1786.63  | PASS          | AC=8;AF=0.114;AN=70;BaseQRankSum=  |
| 30899 | chrY | 13514591 | . | T | C   | 859.05   | PASS          | AC=5;AF=0.074;AN=68;BaseQRankSum=  |
| 30900 | chrY | 13514609 | . | G | T   | 461.83   | PASS          | AC=4;AF=0.057;AN=70;BaseQRankSum=  |
| 30901 | chrY | 13514622 | . | A | G   | 162.15   | PASS          | AC=2;AF=0.029;AN=68;BaseQRankSum=  |
| 30902 | chrY | 13514633 | . | G | C   | 52.05    | PASS          | AC=1;AF=0.014;AN=70;BaseQRankSum=  |
| 30903 | chrY | 13514643 | . | T | G   | 43.57    | PASS          | AC=1;AF=0.014;AN=70;BaseQRankSum=  |
| 30904 | chrY | 13514649 | . | T | C   | 43.59    | PASS          | AC=1;AF=0.014;AN=70;BaseQRankSum=  |
| 30905 | chrY | 13514670 | . | T | C   | 102.13   | PASS          | AC=2;AF=0.029;AN=68;BaseQRankSum=  |
| 30906 | chrY | 13514677 | . | T | G   | 103      | PASS          | AC=2;AF=0.029;AN=68;BaseQRankSum=  |
| 30907 | chrY | 13514707 | . | G | T   | 597.30   | my_snp_filter | AC=7;AF=0.113;AN=62;BaseQ          |
| 30908 | chrY | 13514719 | . | A | T   | 772.44   | my_snp_filter | AC=7;AF=0.109;AN=64;BaseQ          |
| 30909 | chrY | 13514810 | . | C | G   | 9232.72  | my_snp_filter | AC=19;AF=0.339;AN=56;BaseQ         |
| 30910 | chrY | 13514811 | . | C | T   | 9234.70  | my_snp_filter | AC=19;AF=0.339;AN=56;BaseQ         |
| 30911 | chrY | 13514836 | . | A | C   | 11293.01 | PASS          | AC=23;AF=0.397;AN=58;BaseQ         |
| 30912 | chrY | 13514851 | . | G | A   | 11698.30 | PASS          | AC=27;AF=0.466;AN=58;BaseQ         |
| 30913 | chrY | 13514899 | . | G | T   | 15789.02 | PASS          | AC=36;AF=0.545;AN=66;BaseQ         |
| 30914 | chrY | 13514917 | . | G | A   | 16495.08 | PASS          | AC=36;AF=0.545;AN=66;BaseQ         |
| 30915 | chrY | 13514964 | . | G | A   | 59.62    | my_snp_filter | AC=1;AF=0.015;AN=68;BaseQ          |
| 30916 | chrY | 13514970 | . | T | G   | 19423.50 | PASS          | AC=34;AF=0.515;AN=66;BaseQ         |
| 30917 | chrY | 13514971 | . | T | C   | 19630.50 | PASS          | AC=34;AF=0.515;AN=66;BaseQ         |
| 30918 | chrY | 13514981 | . | T | C   | 20662.99 | PASS          | AC=33;AF=0.500;AN=66;BaseQ         |
| 30919 | chrY | 13514988 | . | A | G   | 20914.76 | PASS          | AC=33;AF=0.500;AN=66;BaseQ         |
| 30920 | chrY | 13515061 | . | A | T   | 105.84   | PASS          | AC=1;AF=0.014;AN=70;BaseQRankSum=  |
| 30921 | chrY | 13515090 | . | A | C   | 50.43    | my_snp_filter | AC=1;AF=0.015;AN=66;BaseQ          |
| 30922 | chrY | 13515111 | . | G | A   | 9945.13  | PASS          | AC=26;AF=0.481;AN=54;BaseQRankSum= |
| 30923 | chrY | 13515112 | . | T | C   | 9946.45  | PASS          | AC=26;AF=0.481;AN=54;BaseQRankSum= |
| 30924 | chrY | 13515161 | . | A | C   | 5058.65  | PASS          | AC=12;AF=0.316;AN=38;BaseQRankSum= |
| 30925 | chrY | 13515238 | . | A | G   | 991.59   | PASS          | AC=4;AF=0.133;AN=30;BaseQRankSum=  |
| 30926 | chrY | 13515252 | . | G | C   | 38.28    | my_snp_filter | AC=1;AF=0.045;AN=22;BaseQ          |
| 30927 | chrY | 13515257 | . | T | G   | 5575.21  | PASS          | AC=9;AF=0.409;AN=22;BaseQRankSum=  |
| 30928 | chrY | 13515292 | . | A | G   | 4832.52  | PASS          | AC=9;AF=0.450;AN=20;BaseQRankSum=  |
| 30929 | chrY | 13515301 | . | C | A   | 4805.09  | PASS          | AC=9;AF=0.500;AN=18;BaseQRankSum=  |
| 30930 | chrY | 13515313 | . | A | G   | 4699.09  | PASS          | AC=9;AF=0.500;AN=18;BaseQRankSum=  |
| 30931 | chrY | 13515340 | . | G | T   | 3091.52  | PASS          | AC=9;AF=0.450;AN=20;BaseQRankSum=  |
| 30932 | chrY | 13515395 | . | G | A   | 5455.99  | PASS          | AC=9;AF=0.409;AN=22;BaseQRankSum=  |

|       |      |          |   |   |   |          |               |                                    |
|-------|------|----------|---|---|---|----------|---------------|------------------------------------|
| 30933 | chrY | 13515485 | . | C | A | 6117.52  | PASS          | AC=9;AF=0.450;AN=20;BaseQRankSum=  |
| 30934 | chrY | 13515516 | . | T | C | 10493.74 | PASS          | AC=11;AF=0.458;AN=24;BaseQRankSum= |
| 30935 | chrY | 13515526 | . | T | C | 10461.05 | PASS          | AC=11;AF=0.458;AN=24;BaseQRankSum= |
| 30936 | chrY | 13515549 | . | T | A | 6463.99  | PASS          | AC=9;AF=0.409;AN=22;BaseQRankSum=  |
| 30937 | chrY | 13515580 | . | T | C | 2579.73  | PASS          | AC=9;AF=0.375;AN=24;BaseQRankSum=  |
| 30938 | chrY | 13515612 | . | T | C | 1371.79  | PASS          | AC=9;AF=0.375;AN=24;BaseQRankSum=  |
| 30939 | chrY | 13515666 | . | C | A | 1407.29  | PASS          | AC=7;AF=0.389;AN=18;BaseQRankSum=  |
| 30940 | chrY | 13515671 | . | T | C | 1332.36  | PASS          | AC=7;AF=0.350;AN=20;BaseQRankSum=  |
| 30941 | chrY | 13515676 | . | T | C | 1136.46  | PASS          | AC=7;AF=0.389;AN=18;BaseQRankSum=  |
| 30942 | chrY | 13515677 | . | G | A | 1014.06  | PASS          | AC=7;AF=0.389;AN=18;BaseQRankSum=  |
| 30943 | chrY | 13515701 | . | A | T | 2090.03  | PASS          | AC=4;AF=0.222;AN=18;BaseQRankSum=  |
| 30944 | chrY | 13515707 | . | A | G | 3104.01  | PASS          | AC=8;AF=0.444;AN=18;BaseQRankSum=  |
| 30945 | chrY | 13515709 | . | T | G | 3106.01  | PASS          | AC=8;AF=0.444;AN=18;BaseQRankSum=  |
| 30946 | chrY | 13515745 | . | C | T | 4595.34  | PASS          | AC=11;AF=0.550;AN=20;BaseQRankSum= |
| 30947 | chrY | 13515762 | . | C | T | 6162.34  | PASS          | AC=11;AF=0.550;AN=20;BaseQRankSum= |
| 30948 | chrY | 13515809 | . | G | A | 50.74    | PASS          | AC=2;AF=0.063;AN=32;DP=479;FS=0.0  |
| 30949 | chrY | 13515814 | . | T | C | 50.74    | PASS          | AC=2;AF=0.063;AN=32;DP=479;FS=0.0  |
| 30950 | chrY | 13515912 | . | G | C | 4452.09  | PASS          | AC=9;AF=0.500;AN=18;BaseQRankSum=  |
| 30951 | chrY | 13515997 | . | G | A | 9534.18  | PASS          | AC=11;AF=0.500;AN=22;BaseQRankSum= |
| 30952 | chrY | 13516020 | . | G | A | 9934.94  | PASS          | AC=11;AF=0.458;AN=24;BaseQRankSum= |
| 30953 | chrY | 13516071 | . | C | A | 6995.78  | PASS          | AC=9;AF=0.375;AN=24;BaseQRankSum=  |
| 30954 | chrY | 13516113 | . | G | A | 5212.78  | PASS          | AC=9;AF=0.375;AN=24;BaseQRankSum=  |
| 30955 | chrY | 13516195 | . | C | T | 3027.52  | PASS          | AC=9;AF=0.450;AN=20;BaseQRankSum=  |
| 30956 | chrY | 13516203 | . | A | T | 184.77   | PASS          | AC=2;AF=0.100;AN=20;BaseQRankSum=  |
| 30957 | chrY | 13516240 | . | C | A | 156.04   | my_snp_filter | AC=2;AF=0.111;AN=18;BaseQRankSum=  |
| 30958 | chrY | 13516242 | . | C | A | 6334.09  | PASS          | AC=9;AF=0.500;AN=18;BaseQRankSum=  |
| 30959 | chrY | 13516255 | . | G | A | 6998.09  | PASS          | AC=9;AF=0.500;AN=18;BaseQRankSum=  |
| 30960 | chrY | 13516266 | . | A | C | 5310.09  | PASS          | AC=9;AF=0.500;AN=18;BaseQRankSum=  |
| 30961 | chrY | 13516285 | . | A | T | 137.13   | my_snp_filter | AC=2;AF=0.111;AN=18;BaseQRankSum=  |
| 30962 | chrY | 13516360 | . | T | C | 9927.52  | PASS          | AC=9;AF=0.450;AN=20;BaseQRankSum=  |
| 30963 | chrY | 13516361 | . | G | A | 9946.52  | PASS          | AC=9;AF=0.450;AN=20;BaseQRankSum=  |
| 30964 | chrY | 13516368 | . | C | T | 9613.52  | PASS          | AC=9;AF=0.450;AN=20;BaseQRankSum=  |
| 30965 | chrY | 13516414 | . | T | C | 3285.45  | PASS          | AC=11;AF=0.500;AN=22;BaseQRankSum= |
| 30966 | chrY | 13516442 | . | A | T | 4653.45  | PASS          | AC=11;AF=0.500;AN=22;BaseQRankSum= |
| 30967 | chrY | 13516477 | . | C | A | 5280.45  | PASS          | AC=11;AF=0.500;AN=22;BaseQRankSum= |
| 30968 | chrY | 13516574 | . | G | A | 4625.45  | PASS          | AC=11;AF=0.500;AN=22;BaseQRankSum= |
| 30969 | chrY | 13516616 | . | A | G | 3307.60  | PASS          | AC=8;AF=0.400;AN=20;BaseQRankSum=  |
| 30970 | chrY | 13516632 | . | C | T | 2963.38  | PASS          | AC=8;AF=0.400;AN=20;BaseQRankSum=  |
| 30971 | chrY | 13516633 | . | T | G | 2918.38  | PASS          | AC=8;AF=0.400;AN=20;BaseQRankSum=  |
| 30972 | chrY | 13516638 | . | T | C | 2410.38  | PASS          | AC=8;AF=0.400;AN=20;BaseQRankSum=  |
| 30973 | chrY | 13516655 | . | T | C | 1128.01  | PASS          | AC=8;AF=0.444;AN=18;BaseQRankSum=  |
| 30974 | chrY | 13516696 | . | C | T | 995.49   | PASS          | AC=7;AF=0.350;AN=20;BaseQRankSum=  |
| 30975 | chrY | 13516698 | . | A | G | 2742.09  | PASS          | AC=9;AF=0.500;AN=18;BaseQRankSum=  |
| 30976 | chrY | 13516726 | . | G | A | 3184.09  | PASS          | AC=9;AF=0.500;AN=18;BaseQRankSum=  |
| 30977 | chrY | 13516738 | . | C | T | 3839.09  | PASS          | AC=9;AF=0.500;AN=18;BaseQRankSum=  |
| 30978 | chrY | 13516739 | . | A | G | 3870.09  | PASS          | AC=9;AF=0.500;AN=18;BaseQRankSum=  |
| 30979 | chrY | 13516745 | . | T | G | 44.32    | my_snp_filter | AC=1;AF=0.056;AN=18;BaseQRankSum=  |
| 30980 | chrY | 13516786 | . | C | A | 7335.11  | PASS          | AC=9;AF=0.409;AN=22;BaseQRankSum=  |
| 30981 | chrY | 13516804 | . | A | G | 7079.11  | PASS          | AC=9;AF=0.409;AN=22;BaseQRankSum=  |
| 30982 | chrY | 13516814 | . | A | G | 6461.11  | PASS          | AC=9;AF=0.409;AN=22;BaseQRankSum=  |
| 30983 | chrY | 13516825 | . | C | T | 5907.99  | PASS          | AC=9;AF=0.409;AN=22;BaseQRankSum=  |
| 30984 | chrY | 13516886 | . | A | G | 907.22   | PASS          | AC=9;AF=0.409;AN=22;BaseQRankSum=  |
| 30985 | chrY | 13516928 | . | T | C | 2778.09  | my_snp_filter | AC=9;AF=0.500;AN=18;BaseQRankSum=  |
| 30986 | chrY | 13516943 | . | A | C | 2896.09  | my_snp_filter | AC=9;AF=0.500;AN=18;BaseQRankSum=  |
| 30987 | chrY | 13516947 | . | G | A | 2941.09  | my_snp_filter | AC=9;AF=0.500;AN=18;BaseQRankSum=  |
| 30988 | chrY | 13517022 | . | T | A | 4205.11  | PASS          | AC=9;AF=0.409;AN=22;BaseQRankSum=  |
| 30989 | chrY | 13517037 | . | C | T | 2516.49  | PASS          | AC=8;AF=0.333;AN=24;BaseQRankSum=  |
| 30990 | chrY | 13517094 | . | A | G | 6436.64  | PASS          | AC=13;AF=0.464;AN=28;BaseQRankSum= |
| 30991 | chrY | 13517162 | . | G | A | 6458.09  | PASS          | AC=9;AF=0.500;AN=18;BaseQRankSum=  |
| 30992 | chrY | 13517191 | . | G | C | 5847.36  | PASS          | AC=9;AF=0.409;AN=22;BaseQRankSum=  |
| 30993 | chrY | 13517206 | . | T | A | 4834.11  | PASS          | AC=9;AF=0.409;AN=22;BaseQRankSum=  |
| 30994 | chrY | 13517267 | . | G | A | 1009.37  | PASS          | AC=5;AF=0.250;AN=20;BaseQRankSum=  |
| 30995 | chrY | 13517281 | . | A | C | 1011.47  | PASS          | AC=5;AF=0.227;AN=22;BaseQRankSum=  |
| 30996 | chrY | 13517286 | . | G | T | 900.33   | PASS          | AC=6;AF=0.273;AN=22;BaseQRankSum=  |
| 30997 | chrY | 13517295 | . | A | C | 553.71   | PASS          | AC=2;AF=0.100;AN=20;BaseQRankSum=  |
| 30998 | chrY | 13517302 | . | T | C | 1019.18  | PASS          | AC=5;AF=0.250;AN=20;BaseQRankSum=  |
| 30999 | chrY | 13517323 | . | C | A | 174.75   | PASS          | AC=2;AF=0.091;AN=22;BaseQRankSum=  |
| 31000 | chrY | 13517436 | . | C | A | 3667.09  | PASS          | AC=9;AF=0.500;AN=18;BaseQRankSum=  |
| 31001 | chrY | 13517501 | . | G | A | 2568.57  | my_snp_filter | AC=6;AF=0.333;AN=18;BaseQRankSum=  |
| 31002 | chrY | 13517505 | . | T | C | 2466.34  | my_snp_filter | AC=6;AF=0.333;AN=18;BaseQRankSum=  |
| 31003 | chrY | 13517535 | . | T | A | 105.92   | my_snp_filter | AC=3;AF=0.167;AN=18;BaseQRankSum=  |
| 31004 | chrY | 13517543 | . | T | C | 2420.54  | PASS          | AC=8;AF=0.444;AN=18;BaseQRankSum=  |
| 31005 | chrY | 13517560 | . | T | G | 2824.09  | PASS          | AC=9;AF=0.500;AN=18;BaseQRankSum=  |
| 31006 | chrY | 13517717 | . | G | A | 54.13    | PASS          | AC=1;AF=0.050;AN=20;BaseQRankSum=  |
| 31007 | chrY | 13517723 | . | G | A | 66.09    | my_snp_filter | AC=2;AF=0.100;AN=20;BaseQRankSum=  |
| 31008 | chrY | 13517724 | . | A | C | 64.82    | my_snp_filter | AC=2;AF=0.100;AN=20;BaseQRankSum=  |



|       |      |          |   |   |   |         |               |                                    |
|-------|------|----------|---|---|---|---------|---------------|------------------------------------|
| 31009 | chrY | 13517758 | . | A | G | 849.82  | PASS          | AC=7;AF=0.350;AN=20;BaseQRankSum=  |
| 31010 | chrY | 13517787 | . | C | T | 565.16  | PASS          | AC=5;AF=0.250;AN=20;BaseQRankSum=  |
| 31011 | chrY | 13517816 | . | A | T | 129.11  | my_snp_filter | AC=3;AF=0.150;AN=20;BaseQ          |
| 31012 | chrY | 13517828 | . | G | T | 2882.09 | PASS          | AC=9;AF=0.500;AN=18;BaseQRankSum=  |
| 31013 | chrY | 13517833 | . | A | T | 105.05  | my_snp_filter | AC=2;AF=0.111;AN=18;BaseQ          |
| 31014 | chrY | 13517858 | . | C | A | 96.14   | my_snp_filter | AC=3;AF=0.167;AN=18;BaseQ          |
| 31015 | chrY | 13517929 | . | T | C | 1335.78 | PASS          | AC=3;AF=0.167;AN=18;BaseQRankSum=  |
| 31016 | chrY | 13517931 | . | T | C | 4016.54 | PASS          | AC=8;AF=0.444;AN=18;BaseQRankSum=  |
| 31017 | chrY | 13517933 | . | A | G | 4017.12 | PASS          | AC=8;AF=0.444;AN=18;BaseQRankSum=  |
| 31018 | chrY | 13517949 | . | T | G | 2334.01 | PASS          | AC=8;AF=0.444;AN=18;BaseQRankSum=  |
| 31019 | chrY | 13518006 | . | A | G | 70.30   | my_snp_filter | AC=1;AF=0.050;AN=20;BaseQ          |
| 31020 | chrY | 13518022 | . | A | G | 2748.52 | PASS          | AC=9;AF=0.450;AN=20;BaseQRankSum=  |
| 31021 | chrY | 13518141 | . | C | A | 395.57  | PASS          | AC=5;AF=0.278;AN=18;BaseQRankSum=  |
| 31022 | chrY | 13518162 | . | G | A | 1493.16 | PASS          | AC=5;AF=0.278;AN=18;BaseQRankSum=  |
| 31023 | chrY | 13518191 | . | G | C | 2344.54 | PASS          | AC=8;AF=0.444;AN=18;BaseQRankSum=  |
| 31024 | chrY | 13518204 | . | A | G | 2919.42 | PASS          | AC=8;AF=0.444;AN=18;BaseQRankSum=  |
| 31025 | chrY | 13518227 | . | A | C | 3420.10 | PASS          | AC=9;AF=0.500;AN=18;BaseQRankSum=  |
| 31026 | chrY | 13518305 | . | T | A | 8744.34 | PASS          | AC=11;AF=0.550;AN=20;BaseQRankSum= |
| 31027 | chrY | 13518312 | . | C | T | 9273.34 | PASS          | AC=11;AF=0.550;AN=20;BaseQRankSum= |
| 31028 | chrY | 13518328 | . | C | T | 7472.34 | PASS          | AC=11;AF=0.550;AN=20;BaseQRankSum= |
| 31029 | chrY | 13518333 | . | T | A | 7268.34 | PASS          | AC=11;AF=0.550;AN=20;BaseQRankSum= |
| 31030 | chrY | 13518351 | . | T | C | 3781.09 | PASS          | AC=9;AF=0.500;AN=18;BaseQRankSum=  |
| 31031 | chrY | 13518387 | . | T | C | 2333.52 | my_snp_filter | AC=9;AF=0.450;AN=20;BaseQ          |
| 31032 | chrY | 13518424 | . | G | C | 2246.21 | my_snp_filter | AC=11;AF=0.500;AN=22;Base          |
| 31033 | chrY | 13518488 | . | G | T | 2979.09 | my_snp_filter | AC=9;AF=0.500;AN=18;BaseQ          |
| 31034 | chrY | 13518489 | . | A | C | 2979.09 | my_snp_filter | AC=9;AF=0.500;AN=18;BaseQ          |
| 31035 | chrY | 13518490 | . | G | C | 7697.86 | PASS          | AC=18;AF=1.00;AN=18;DP=259;FS=0.0  |
| 31036 | chrY | 13518547 | . | T | A | 178.05  | my_snp_filter | AC=4;AF=0.222;AN=18;BaseQ          |
| 31037 | chrY | 13518562 | . | A | G | 2820.85 | PASS          | AC=11;AF=0.611;AN=18;BaseQRankSum= |
| 31038 | chrY | 13518577 | . | G | A | 228.44  | PASS          | AC=2;AF=0.111;AN=18;BaseQRankSum=  |
| 31039 | chrY | 13518617 | . | G | A | 804.28  | PASS          | AC=6;AF=0.333;AN=18;BaseQRankSum=  |
| 31040 | chrY | 13518618 | . | C | T | 804.27  | PASS          | AC=6;AF=0.333;AN=18;BaseQRankSum=  |
| 31041 | chrY | 13518619 | . | G | A | 804.28  | PASS          | AC=6;AF=0.333;AN=18;BaseQRankSum=  |
| 31042 | chrY | 13518645 | . | T | G | 821.60  | PASS          | AC=6;AF=0.333;AN=18;BaseQRankSum=  |
| 31043 | chrY | 13518649 | . | T | C | 816.71  | PASS          | AC=6;AF=0.333;AN=18;BaseQRankSum=  |
| 31044 | chrY | 13518715 | . | A | C | 146.08  | my_snp_filter | AC=3;AF=0.150;AN=20;BaseQ          |
| 31045 | chrY | 13518716 | . | T | C | 149.51  | my_snp_filter | AC=3;AF=0.150;AN=20;BaseQ          |
| 31046 | chrY | 13518879 | . | C | G | 453.63  | my_snp_filter | AC=6;AF=0.300;AN=20;BaseQ          |
| 31047 | chrY | 13518902 | . | T | C | 997.81  | my_snp_filter | AC=7;AF=0.350;AN=20;BaseQ          |
| 31048 | chrY | 13518920 | . | G | A | 1637.38 | my_snp_filter | AC=8;AF=0.400;AN=20;BaseQ          |
| 31049 | chrY | 13518946 | . | T | A | 2179.39 | my_snp_filter | AC=8;AF=0.400;AN=20;BaseQ          |
| 31050 | chrY | 13518961 | . | G | A | 2884.54 | my_snp_filter | AC=8;AF=0.444;AN=18;BaseQ          |
| 31051 | chrY | 13518981 | . | G | A | 2984.38 | PASS          | AC=8;AF=0.400;AN=20;BaseQRankSum=  |
| 31052 | chrY | 13519022 | . | G | A | 331.29  | PASS          | AC=3;AF=0.125;AN=24;BaseQRankSum=  |
| 31053 | chrY | 13519024 | . | G | A | 221.09  | my_snp_filter | AC=4;AF=0.167;AN=24;BaseQ          |
| 31054 | chrY | 13519054 | . | T | C | 664.01  | PASS          | AC=4;AF=0.167;AN=24;BaseQRankSum=  |
| 31055 | chrY | 13519065 | . | A | C | 687.07  | PASS          | AC=4;AF=0.167;AN=24;BaseQRankSum=  |
| 31056 | chrY | 13519083 | . | T | C | 7036.63 | PASS          | AC=12;AF=0.500;AN=24;BaseQRankSum= |
| 31057 | chrY | 13519113 | . | C | A | 163.37  | PASS          | AC=2;AF=0.091;AN=22;BaseQRankSum=  |
| 31058 | chrY | 13519116 | . | C | A | 237.91  | my_snp_filter | AC=3;AF=0.136;AN=22;BaseQ          |
| 31059 | chrY | 13519149 | . | G | A | 826.31  | PASS          | AC=3;AF=0.136;AN=22;BaseQRankSum=  |
| 31060 | chrY | 13519152 | . | T | C | 302.39  | my_snp_filter | AC=5;AF=0.227;AN=22;BaseQ          |
| 31061 | chrY | 13519160 | . | A | T | 6749.11 | PASS          | AC=9;AF=0.409;AN=22;BaseQRankSum=  |
| 31062 | chrY | 13519185 | . | C | A | 651.32  | PASS          | AC=8;AF=0.333;AN=24;BaseQRankSum=  |
| 31063 | chrY | 13519254 | . | G | T | 363.70  | PASS          | AC=3;AF=0.150;AN=20;BaseQRankSum=  |
| 31064 | chrY | 13519269 | . | A | G | 241     | my_snp_filter | AC=2;AF=0.100;AN=20;BaseQ          |
| 31065 | chrY | 13519282 | . | A | G | 341.72  | PASS          | AC=3;AF=0.136;AN=22;BaseQRankSum=  |
| 31066 | chrY | 13519284 | . | A | G | 7918.34 | PASS          | AC=9;AF=0.450;AN=20;BaseQRankSum=  |
| 31067 | chrY | 13519320 | . | G | A | 9562.70 | PASS          | AC=13;AF=0.542;AN=24;BaseQRankSum= |
| 31068 | chrY | 13519346 | . | G | C | 6183.05 | PASS          | AC=11;AF=0.423;AN=26;BaseQRankSum= |
| 31069 | chrY | 13519348 | . | C | T | 1546.40 | PASS          | AC=8;AF=0.286;AN=28;BaseQRankSum=  |
| 31070 | chrY | 13519363 | . | G | A | 1501.16 | PASS          | AC=8;AF=0.286;AN=28;BaseQRankSum=  |
| 31071 | chrY | 13519369 | . | G | T | 1531.68 | PASS          | AC=9;AF=0.346;AN=26;BaseQRankSum=  |
| 31072 | chrY | 13519382 | . | A | C | 4588.35 | PASS          | AC=8;AF=0.364;AN=22;BaseQRankSum=  |
| 31073 | chrY | 13519418 | . | G | A | 3136.38 | PASS          | AC=8;AF=0.400;AN=20;BaseQRankSum=  |
| 31074 | chrY | 13519432 | . | T | G | 6888.52 | my_snp_filter | AC=9;AF=0.450;AN=20;BaseQ          |
| 31075 | chrY | 13519437 | . | A | C | 6847.52 | my_snp_filter | AC=9;AF=0.450;AN=20;BaseQ          |
| 31076 | chrY | 13519570 | . | A | G | 4091.52 | my_snp_filter | AC=9;AF=0.450;AN=20;BaseQ          |
| 31077 | chrY | 13519602 | . | C | T | 1166.44 | PASS          | AC=6;AF=0.273;AN=22;BaseQRankSum=  |
| 31078 | chrY | 13519907 | . | T | A | 89.14   | PASS          | AC=1;AF=0.050;AN=20;BaseQRankSum=  |
| 31079 | chrY | 13519910 | . | G | A | 85.45   | PASS          | AC=1;AF=0.050;AN=20;BaseQRankSum=  |
| 31080 | chrY | 13519917 | . | G | C | 85.19   | PASS          | AC=1;AF=0.050;AN=20;BaseQRankSum=  |
| 31081 | chrY | 13519972 | . | G | A | 263.06  | PASS          | AC=5;AF=0.250;AN=20;BaseQRankSum=  |
| 31082 | chrY | 13520001 | . | A | C | 329.02  | PASS          | AC=4;AF=0.222;AN=18;BaseQRankSum=  |
| 31083 | chrY | 13520181 | . | C | T | 129.97  | my_snp_filter | AC=3;AF=0.150;AN=20;BaseQ          |
| 31084 | chrY | 13520260 | . | C | T | 759.38  | PASS          | AC=7;AF=0.250;AN=28;BaseQRankSum=  |

|       |      |          |   |   |   |          |               |                                    |
|-------|------|----------|---|---|---|----------|---------------|------------------------------------|
| 31085 | chrY | 13520266 | . | G | A | 813.73   | PASS          | AC=7;AF=0.250;AN=28;BaseQRankSum=  |
| 31086 | chrY | 13520279 | . | A | C | 600.26   | PASS          | AC=7;AF=0.219;AN=32;BaseQRankSum=  |
| 31087 | chrY | 13520293 | . | G | A | 1045.76  | PASS          | AC=7;AF=0.175;AN=40;BaseQRankSum=  |
| 31088 | chrY | 13520387 | . | G | T | 2850.53  | PASS          | AC=6;AF=0.094;AN=64;BaseQRankSum=  |
| 31089 | chrY | 13520396 | . | A | T | 2745.98  | PASS          | AC=6;AF=0.094;AN=64;BaseQRankSum=  |
| 31090 | chrY | 13520440 | . | G | A | 1562.85  | PASS          | AC=5;AF=0.071;AN=70;BaseQRankSum=  |
| 31091 | chrY | 13520448 | . | G | C | 1502.65  | PASS          | AC=4;AF=0.057;AN=70;BaseQRankSum=  |
| 31092 | chrY | 13520457 | . | T | G | 1472.53  | PASS          | AC=4;AF=0.057;AN=70;BaseQRankSum=  |
| 31093 | chrY | 13520479 | . | C | G | 899.37   | PASS          | AC=3;AF=0.043;AN=70;BaseQRankSum=  |
| 31094 | chrY | 13520576 | . | G | A | 121.61   | my_snp_filter | AC=3;AF=0.065;AN=46;BaseQ          |
| 31095 | chrY | 13520795 | . | A | C | 44.91    | PASS          | AC=1;AF=0.023;AN=44;BaseQRankSum=  |
| 31096 | chrY | 13520913 | . | C | T | 45.98    | my_snp_filter | AC=2;AF=0.029;AN=70;BaseQ          |
| 31097 | chrY | 13521122 | . | C | T | 52.14    | my_snp_filter | AC=3;AF=0.045;AN=66;BaseQ          |
| 31098 | chrY | 13521124 | . | T | A | 478.08   | PASS          | AC=6;AF=0.091;AN=66;BaseQRankSum=  |
| 31099 | chrY | 13521132 | . | T | A | 92.57    | my_snp_filter | AC=3;AF=0.044;AN=68;BaseQ          |
| 31100 | chrY | 13521171 | . | C | T | 35.57    | my_snp_filter | AC=2;AF=0.029;AN=68;BaseQ          |
| 31101 | chrY | 13521183 | . | G | A | 2244.80  | my_snp_filter | AC=9;AF=0.136;AN=66;BaseQ          |
| 31102 | chrY | 13521212 | . | A | G | 389.69   | PASS          | AC=8;AF=0.125;AN=64;BaseQRankSum=  |
| 31103 | chrY | 13521289 | . | A | C | 1367.04  | my_snp_filter | AC=9;AF=0.167;AN=54;BaseQ          |
| 31104 | chrY | 13521290 | . | A | G | 1598.33  | my_snp_filter | AC=9;AF=0.167;AN=54;BaseQ          |
| 31105 | chrY | 13521321 | . | A | T | 58.66    | my_snp_filter | AC=2;AF=0.053;AN=38;BaseQ          |
| 31106 | chrY | 13521343 | . | A | T | 1938.76  | my_snp_filter | AC=9;AF=0.321;AN=28;BaseQ          |
| 31107 | chrY | 13521346 | . | G | A | 2012.68  | my_snp_filter | AC=8;AF=0.235;AN=34;BaseQ          |
| 31108 | chrY | 13521356 | . | T | C | 2165.87  | PASS          | AC=8;AF=0.235;AN=34;BaseQRankSum=  |
| 31109 | chrY | 13521412 | . | T | A | 4358.34  | PASS          | AC=11;AF=0.500;AN=22;BaseQRankSum= |
| 31110 | chrY | 13521515 | . | T | C | 3688.83  | PASS          | AC=10;AF=0.172;AN=58;BaseQRankSum= |
| 31111 | chrY | 13521541 | . | A | G | 4388.64  | my_snp_filter | AC=9;AF=0.141;AN=64;BaseQ          |
| 31112 | chrY | 13521548 | . | A | C | 4375.52  | my_snp_filter | AC=9;AF=0.136;AN=66;BaseQ          |
| 31113 | chrY | 13521617 | . | C | A | 8284.13  | PASS          | AC=26;AF=0.371;AN=70;BaseQRankSum= |
| 31114 | chrY | 13521662 | . | A | C | 3085.11  | PASS          | AC=15;AF=0.214;AN=70;BaseQRankSum= |
| 31115 | chrY | 13521663 | . | G | A | 3233.06  | PASS          | AC=15;AF=0.214;AN=70;BaseQRankSum= |
| 31116 | chrY | 13521695 | . | G | T | 1007.70  | PASS          | AC=5;AF=0.071;AN=70;BaseQRankSum=  |
| 31117 | chrY | 13521698 | . | T | A | 308.50   | PASS          | AC=1;AF=0.014;AN=70;BaseQRankSum=  |
| 31118 | chrY | 13521700 | . | G | A | 3986.82  | PASS          | AC=20;AF=0.286;AN=70;BaseQRankSum= |
| 31119 | chrY | 13521711 | . | C | T | 21243.22 | PASS          | AC=33;AF=0.471;AN=70;BaseQ         |
| 31120 | chrY | 13521737 | . | T | C | 150.02   | my_snp_filter | AC=3;AF=0.043;AN=70;BaseQ          |
| 31121 | chrY | 13521780 | . | C | A | 13492.73 | PASS          | AC=35;AF=0.500;AN=70;BaseQ         |
| 31122 | chrY | 13521821 | . | T | G | 5875.20  | PASS          | AC=30;AF=0.441;AN=68;BaseQRankSum= |
| 31123 | chrY | 13521837 | . | G | A | 240.57   | PASS          | AC=2;AF=0.032;AN=62;BaseQRankSum=  |
| 31124 | chrY | 13521848 | . | A | G | 1768.84  | PASS          | AC=11;AF=0.177;AN=62;BaseQRankSum= |
| 31125 | chrY | 13521857 | . | G | A | 7487.06  | PASS          | AC=13;AF=0.210;AN=62;BaseQRankSum= |
| 31126 | chrY | 13521872 | . | T | C | 821.85   | PASS          | AC=9;AF=0.150;AN=60;BaseQRankSum=  |
| 31127 | chrY | 13521918 | . | T | A | 4525.15  | my_snp_filter | AC=9;AF=0.281;AN=32;BaseQ          |
| 31128 | chrY | 13521934 | . | C | T | 1485.49  | PASS          | AC=9;AF=0.346;AN=26;BaseQRankSum=  |
| 31129 | chrY | 13521940 | . | C | G | 5644.62  | my_snp_filter | AC=9;AF=0.346;AN=26;BaseQ          |
| 31130 | chrY | 13521949 | . | T | C | 5643.22  | my_snp_filter | AC=9;AF=0.346;AN=26;BaseQ          |
| 31131 | chrY | 13521971 | . | A | C | 5266.20  | PASS          | AC=11;AF=0.423;AN=26;BaseQRankSum= |
| 31132 | chrY | 13521972 | . | G | A | 5266.20  | PASS          | AC=11;AF=0.423;AN=26;BaseQRankSum= |
| 31133 | chrY | 13521982 | . | G | C | 5571.20  | PASS          | AC=11;AF=0.423;AN=26;BaseQRankSum= |
| 31134 | chrY | 13522003 | . | C | T | 4815.34  | PASS          | AC=9;AF=0.450;AN=20;BaseQRankSum=  |
| 31135 | chrY | 13522010 | . | G | A | 429.04   | my_snp_filter | AC=6;AF=0.300;AN=20;BaseQ          |
| 31136 | chrY | 13522019 | . | G | A | 231.07   | my_snp_filter | AC=3;AF=0.150;AN=20;BaseQ          |
| 31137 | chrY | 13522026 | . | C | G | 3453.34  | PASS          | AC=9;AF=0.450;AN=20;BaseQRankSum=  |
| 31138 | chrY | 13522050 | . | T | G | 2207.52  | PASS          | AC=9;AF=0.450;AN=20;BaseQRankSum=  |
| 31139 | chrY | 13522055 | . | A | G | 4387.52  | PASS          | AC=9;AF=0.450;AN=20;BaseQRankSum=  |
| 31140 | chrY | 13522063 | . | G | T | 1767.52  | PASS          | AC=9;AF=0.450;AN=20;BaseQRankSum=  |
| 31141 | chrY | 13522075 | . | A | C | 6501.52  | my_snp_filter | AC=9;AF=0.450;AN=20;BaseQ          |
| 31142 | chrY | 13522140 | . | G | C | 113.55   | PASS          | AC=2;AF=0.100;AN=20;BaseQRankSum=  |
| 31143 | chrY | 13522243 | . | T | A | 294.29   | my_snp_filter | AC=5;AF=0.278;AN=18;BaseQ          |
| 31144 | chrY | 13522291 | . | A | C | 952.53   | PASS          | AC=8;AF=0.364;AN=22;BaseQRankSum=  |
| 31145 | chrY | 13522308 | . | C | A | 898.20   | PASS          | AC=8;AF=0.333;AN=24;BaseQRankSum=  |
| 31146 | chrY | 13522317 | . | G | A | 1758.78  | my_snp_filter | AC=9;AF=0.375;AN=24;BaseQ          |
| 31147 | chrY | 13522957 | . | T | C | 482.44   | PASS          | AC=4;AF=0.118;AN=34;BaseQRankSum=  |
| 31148 | chrY | 13522985 | . | C | T | 53.71    | my_snp_filter | AC=1;AF=0.029;AN=34;BaseQ          |
| 31149 | chrY | 13522998 | . | T | A | 470.06   | my_snp_filter | AC=5;AF=0.132;AN=38;BaseQ          |
| 31150 | chrY | 13523032 | . | C | T | 92.84    | PASS          | AC=2;AF=0.042;AN=48;BaseQRankSum=  |
| 31151 | chrY | 13523044 | . | A | G | 89.47    | my_snp_filter | AC=2;AF=0.040;AN=50;BaseQ          |
| 31152 | chrY | 13523053 | . | G | A | 659.58   | my_snp_filter | AC=7;AF=0.125;AN=56;BaseQ          |
| 31153 | chrY | 13523088 | . | T | A | 1675.82  | my_snp_filter | AC=8;AF=0.133;AN=60;BaseQ          |
| 31154 | chrY | 13523092 | . | T | G | 1484.23  | PASS          | AC=8;AF=0.133;AN=60;BaseQRankSum=  |
| 31155 | chrY | 13523096 | . | C | T | 132.86   | PASS          | AC=2;AF=0.033;AN=60;BaseQRankSum=  |
| 31156 | chrY | 13523099 | . | C | A | 1466.15  | PASS          | AC=8;AF=0.125;AN=64;BaseQRankSum=  |
| 31157 | chrY | 13523143 | . | G | A | 3151.33  | PASS          | AC=9;AF=0.132;AN=68;BaseQRankSum=  |
| 31158 | chrY | 13523149 | . | G | A | 3311.90  | PASS          | AC=9;AF=0.129;AN=70;BaseQRankSum=  |
| 31159 | chrY | 13523151 | . | T | C | 3496.86  | PASS          | AC=9;AF=0.129;AN=70;BaseQRankSum=  |
| 31160 | chrY | 13523173 | . | T | A | 3664.14  | PASS          | AC=9;AF=0.129;AN=70;BaseQRankSum=  |

|       |      |          |   |   |     |          |               |                                    |
|-------|------|----------|---|---|-----|----------|---------------|------------------------------------|
| 31161 | chrY | 13523196 | . | T | C   | 5160.74  | PASS          | AC=10;AF=0.143;AN=70;BaseQRankSum= |
| 31162 | chrY | 13523202 | . | A | G   | 5221.47  | PASS          | AC=9;AF=0.129;AN=70;BaseQRankSum=  |
| 31163 | chrY | 13523219 | . | A | G   | 5185.90  | PASS          | AC=9;AF=0.136;AN=66;BaseQRankSum=  |
| 31164 | chrY | 13523370 | . | A | G   | 2501.41  | PASS          | AC=10;AF=0.556;AN=18;BaseQRankSum= |
| 31165 | chrY | 13523381 | . | A | G   | 1430.72  | PASS          | AC=6;AF=0.273;AN=22;BaseQRankSum=  |
| 31166 | chrY | 13523393 | . | T | C   | 1366.12  | PASS          | AC=6;AF=0.300;AN=20;BaseQRankSum=  |
| 31167 | chrY | 13523400 | . | C | T   | 291.06   | PASS          | AC=4;AF=0.222;AN=18;BaseQRankSum=  |
| 31168 | chrY | 13523453 | . | C | T   | 645.68   | PASS          | AC=5;AF=0.278;AN=18;BaseQRankSum=  |
| 31169 | chrY | 13523465 | . | A | C   | 5342.34  | PASS          | AC=11;AF=0.550;AN=20;BaseQRankSum= |
| 31170 | chrY | 13523547 | . | C | T   | 4267.50  | PASS          | AC=15;AF=0.375;AN=40;BaseQRankSum= |
| 31171 | chrY | 13523557 | . | A | C   | 3769.76  | PASS          | AC=15;AF=0.357;AN=42;BaseQRankSum= |
| 31172 | chrY | 13523585 | . | T | G   | 2959.30  | PASS          | AC=12;AF=0.273;AN=44;BaseQRankSum= |
| 31173 | chrY | 13523595 | . | G | C   | 2643.50  | PASS          | AC=12;AF=0.273;AN=44;BaseQRankSum= |
| 31174 | chrY | 13523629 | . | T | A,* | 1358.80  | PASS          | AC=14,2;AF=0.259,0.037;AN=54;BaseQ |
| 31175 | chrY | 13523658 | . | A | C   | 8275.89  | my_snp_filter | AC=27;AF=0.422;AN=64;BaseQ         |
| 31176 | chrY | 13523668 | . | T | C   | 8428.57  | PASS          | AC=28;AF=0.424;AN=66;BaseQRankSum= |
| 31177 | chrY | 13523745 | . | G | A   | 6596.01  | PASS          | AC=30;AF=0.441;AN=68;BaseQRankSum= |
| 31178 | chrY | 13523809 | . | A | C   | 108.40   | PASS          | AC=1;AF=0.017;AN=58;BaseQRankSum=  |
| 31179 | chrY | 13523946 | . | G | A   | 74.82    | my_snp_filter | AC=4;AF=0.057;AN=70;BaseQ          |
| 31180 | chrY | 13523947 | . | C | T   | 899.45   | my_snp_filter | AC=6;AF=0.086;AN=70;BaseQ          |
| 31181 | chrY | 13523966 | . | T | A   | 4060.05  | my_snp_filter | AC=9;AF=0.129;AN=70;BaseQ          |
| 31182 | chrY | 13523973 | . | C | T   | 245.84   | PASS          | AC=3;AF=0.043;AN=70;BaseQRankSum=  |
| 31183 | chrY | 13523974 | . | A | G   | 3089.59  | my_snp_filter | AC=7;AF=0.100;AN=70;BaseQ          |
| 31184 | chrY | 13524009 | . | C | T   | 13113.10 | PASS          | AC=66;AF=1.00;AN=66;DP=37          |
| 31185 | chrY | 13524018 | . | T | A   | 1087.10  | PASS          | AC=7;AF=0.103;AN=68;BaseQRankSum=  |
| 31186 | chrY | 13524029 | . | G | C   | 2095.99  | my_snp_filter | AC=9;AF=0.132;AN=68;BaseQ          |
| 31187 | chrY | 13524034 | . | G | A   | 2198.65  | my_snp_filter | AC=9;AF=0.136;AN=66;BaseQ          |
| 31188 | chrY | 13524055 | . | C | A   | 2339.09  | my_snp_filter | AC=9;AF=0.132;AN=68;BaseQ          |
| 31189 | chrY | 13524079 | . | G | T   | 794.40   | PASS          | AC=7;AF=0.100;AN=70;BaseQRankSum=  |
| 31190 | chrY | 13524095 | . | T | A   | 1295.32  | my_snp_filter | AC=8;AF=0.114;AN=70;BaseQ          |
| 31191 | chrY | 13524108 | . | C | T   | 3695.90  | my_snp_filter | AC=11;AF=0.157;AN=70;BaseQ         |
| 31192 | chrY | 13524138 | . | T | C   | 40.86    | my_snp_filter | AC=1;AF=0.014;AN=70;BaseQ          |
| 31193 | chrY | 13524146 | . | A | G   | 44.08    | my_snp_filter | AC=1;AF=0.014;AN=70;BaseQ          |
| 31194 | chrY | 13524150 | . | G | C   | 1304.32  | my_snp_filter | AC=8;AF=0.114;AN=70;BaseQ          |
| 31195 | chrY | 13524162 | . | G | T   | 953.69   | PASS          | AC=8;AF=0.114;AN=70;BaseQRankSum=  |
| 31196 | chrY | 13524174 | . | G | A   | 128.57   | PASS          | AC=3;AF=0.043;AN=70;BaseQRankSum=  |
| 31197 | chrY | 13524225 | . | A | T   | 1395.25  | PASS          | AC=17;AF=0.250;AN=68;BaseQRankSum= |
| 31198 | chrY | 13524270 | . | C | A   | 1349.85  | PASS          | AC=14;AF=0.200;AN=70;BaseQRankSum= |
| 31199 | chrY | 13524296 | . | T | A   | 38.71    | my_snp_filter | AC=3;AF=0.045;AN=66;BaseQ          |
| 31200 | chrY | 13524301 | . | A | G   | 139.73   | PASS          | AC=1;AF=0.015;AN=68;BaseQRankSum=  |
| 31201 | chrY | 13524322 | . | G | T   | 6001.81  | PASS          | AC=24;AF=0.343;AN=70;BaseQRankSum= |
| 31202 | chrY | 13524355 | . | T | A   | 7602.97  | PASS          | AC=24;AF=0.353;AN=68;BaseQRankSum= |
| 31203 | chrY | 13524372 | . | A | G   | 2819.44  | PASS          | AC=17;AF=0.243;AN=70;BaseQRankSum= |
| 31204 | chrY | 13524378 | . | T | C   | 7798.64  | PASS          | AC=26;AF=0.394;AN=66;BaseQRankSum= |
| 31205 | chrY | 13524407 | . | T | G,* | 2077.86  | PASS          | AC=4,10;AF=0.057,0.143;AN=70;BaseQ |
| 31206 | chrY | 13524455 | . | A | T   | 223.59   | my_snp_filter | AC=6;AF=0.086;AN=70;BaseQ          |
| 31207 | chrY | 13524507 | . | C | T   | 11717    | PASS          | AC=32;AF=0.457;AN=70;BaseQRankSum= |
| 31208 | chrY | 13524548 | . | T | G   | 5520.63  | PASS          | AC=28;AF=0.400;AN=70;BaseQRankSum= |
| 31209 | chrY | 13524585 | . | T | G   | 41.87    | my_snp_filter | AC=2;AF=0.029;AN=70;BaseQ          |
| 31210 | chrY | 13524594 | . | G | T   | 11749.04 | PASS          | AC=30;AF=0.429;AN=70;BaseQ         |
| 31211 | chrY | 13524639 | . | C | T   | 2694.18  | PASS          | AC=24;AF=0.343;AN=70;BaseQRankSum= |
| 31212 | chrY | 13524664 | . | C | A   | 13560.77 | PASS          | AC=33;AF=0.471;AN=70;BaseQ         |
| 31213 | chrY | 13524719 | . | C | T   | 3506.48  | PASS          | AC=24;AF=0.343;AN=70;BaseQRankSum= |
| 31214 | chrY | 13524750 | . | C | T   | 9019.35  | PASS          | AC=13;AF=0.186;AN=70;BaseQRankSum= |
| 31215 | chrY | 13524752 | . | G | T   | 13939.69 | PASS          | AC=13;AF=0.186;AN=70;BaseQ         |
| 31216 | chrY | 13524753 | . | C | A   | 2721.64  | PASS          | AC=10;AF=0.143;AN=70;BaseQRankSum= |
| 31217 | chrY | 13524761 | . | C | T   | 11757.48 | PASS          | AC=11;AF=0.157;AN=70;BaseQ         |
| 31218 | chrY | 13524873 | . | T | C   | 8580.49  | PASS          | AC=25;AF=0.357;AN=70;BaseQRankSum= |
| 31219 | chrY | 13524882 | . | G | A   | 7310.41  | PASS          | AC=29;AF=0.414;AN=70;BaseQRankSum= |
| 31220 | chrY | 13524907 | . | G | A   | 78.99    | my_snp_filter | AC=4;AF=0.057;AN=70;BaseQ          |
| 31221 | chrY | 13524914 | . | C | A   | 59.91    | my_snp_filter | AC=3;AF=0.043;AN=70;BaseQ          |
| 31222 | chrY | 13524938 | . | A | G   | 7021.10  | PASS          | AC=32;AF=0.457;AN=70;BaseQRankSum= |
| 31223 | chrY | 13524998 | . | C | T   | 9570.72  | PASS          | AC=32;AF=0.457;AN=70;BaseQRankSum= |
| 31224 | chrY | 13525085 | . | G | C   | 549.89   | my_snp_filter | AC=13;AF=0.186;AN=70;BaseQ         |
| 31225 | chrY | 13525117 | . | A | G   | 3761.60  | my_snp_filter | AC=21;AF=0.300;AN=70;BaseQ         |
| 31226 | chrY | 13525156 | . | C | A   | 79.26    | my_snp_filter | AC=2;AF=0.029;AN=70;BaseQ          |
| 31227 | chrY | 13525403 | . | T | C   | 70.24    | PASS          | AC=1;AF=0.014;AN=70;BaseQRankSum=  |
| 31228 | chrY | 13525413 | . | G | T   | 64.24    | PASS          | AC=1;AF=0.014;AN=70;BaseQRankSum=  |
| 31229 | chrY | 13525459 | . | T | A   | 89.36    | PASS          | AC=2;AF=0.029;AN=70;BaseQRankSum=  |
| 31230 | chrY | 13525460 | . | G | A   | 89.69    | PASS          | AC=2;AF=0.029;AN=70;BaseQRankSum=  |
| 31231 | chrY | 13525462 | . | T | A   | 89.71    | PASS          | AC=2;AF=0.029;AN=70;BaseQRankSum=  |
| 31232 | chrY | 13525493 | . | T | C   | 1355.85  | my_snp_filter | AC=18;AF=0.257;AN=70;BaseQ         |
| 31233 | chrY | 13525501 | . | A | G   | 1732.38  | my_snp_filter | AC=20;AF=0.286;AN=70;BaseQ         |
| 31234 | chrY | 13525521 | . | A | C   | 3449.21  | PASS          | AC=28;AF=0.400;AN=70;BaseQRankSum= |
| 31235 | chrY | 13525614 | . | G | A   | 3905.28  | PASS          | AC=28;AF=0.400;AN=70;BaseQRankSum= |
| 31236 | chrY | 13525653 | . | G | T   | 4700.24  | PASS          | AC=33;AF=0.471;AN=70;BaseQRankSum= |

|       |      |          |   |   |   |          |               |                                    |
|-------|------|----------|---|---|---|----------|---------------|------------------------------------|
| 31237 | chrY | 13525669 | . | C | T | 402.34   | PASS          | AC=14;AF=0.200;AN=70;BaseQRankSum= |
| 31238 | chrY | 13525680 | . | C | T | 3048.60  | PASS          | AC=25;AF=0.357;AN=70;BaseQRankSum= |
| 31239 | chrY | 13525698 | . | C | T | 2748.28  | my_snp_filter | AC=23;AF=0.338;AN=68;BaseQRankSum= |
| 31240 | chrY | 13525718 | . | G | A | 179.63   | PASS          | AC=5;AF=0.076;AN=66;BaseQRankSum=  |
| 31241 | chrY | 13525720 | . | T | A | 2047.25  | my_snp_filter | AC=21;AF=0.318;AN=66;BaseQRankSum= |
| 31242 | chrY | 13525779 | . | G | C | 430.61   | PASS          | AC=4;AF=0.065;AN=62;BaseQRankSum=  |
| 31243 | chrY | 13525797 | . | A | C | 266.29   | PASS          | AC=3;AF=0.045;AN=66;BaseQRankSum=  |
| 31244 | chrY | 13525808 | . | C | T | 208.66   | PASS          | AC=3;AF=0.044;AN=68;BaseQRankSum=  |
| 31245 | chrY | 13525809 | . | A | G | 205.56   | PASS          | AC=3;AF=0.044;AN=68;BaseQRankSum=  |
| 31246 | chrY | 13526375 | . | T | G | 96.11    | my_snp_filter | AC=2;AF=0.053;AN=38;BaseQRankSum=  |
| 31247 | chrY | 13526417 | . | G | T | 678.43   | PASS          | AC=6;AF=0.111;AN=54;BaseQRankSum=  |
| 31248 | chrY | 13526461 | . | C | T | 2377.82  | PASS          | AC=15;AF=0.242;AN=62;BaseQRankSum= |
| 31249 | chrY | 13526462 | . | C | G | 2380.83  | my_snp_filter | AC=15;AF=0.242;AN=62;BaseQRankSum= |
| 31250 | chrY | 13526496 | . | C | T | 2414.01  | PASS          | AC=22;AF=0.344;AN=64;BaseQRankSum= |
| 31251 | chrY | 13526522 | . | G | C | 4934.63  | PASS          | AC=27;AF=0.386;AN=70;BaseQRankSum= |
| 31252 | chrY | 13526523 | . | A | T | 4934.09  | PASS          | AC=27;AF=0.386;AN=70;BaseQRankSum= |
| 31253 | chrY | 13526566 | . | A | C | 2476.98  | PASS          | AC=22;AF=0.314;AN=70;BaseQRankSum= |
| 31254 | chrY | 13526568 | . | T | A | 2478.56  | PASS          | AC=22;AF=0.314;AN=70;BaseQRankSum= |
| 31255 | chrY | 13526592 | . | A | G | 61.70    | PASS          | AC=1;AF=0.014;AN=70;BaseQRankSum=  |
| 31256 | chrY | 13526600 | . | A | G | 1036.15  | PASS          | AC=16;AF=0.229;AN=70;BaseQRankSum= |
| 31257 | chrY | 13526681 | . | A | G | 225.99   | PASS          | AC=2;AF=0.037;AN=54;BaseQRankSum=  |
| 31258 | chrY | 13526697 | . | A | C | 230.60   | PASS          | AC=2;AF=0.032;AN=62;BaseQRankSum=  |
| 31259 | chrY | 13526767 | . | C | T | 170.54   | PASS          | AC=2;AF=0.029;AN=70;BaseQRankSum=  |
| 31260 | chrY | 13526808 | . | A | C | 78.36    | PASS          | AC=1;AF=0.014;AN=70;BaseQRankSum=  |
| 31261 | chrY | 13526889 | . | G | A | 69.97    | PASS          | AC=2;AF=0.036;AN=56;BaseQRankSum=  |
| 31262 | chrY | 13527052 | . | A | C | 471      | PASS          | AC=9;AF=0.300;AN=30;BaseQRankSum=  |
| 31263 | chrY | 13527080 | . | A | T | 1005.90  | PASS          | AC=15;AF=0.417;AN=36;BaseQRankSum= |
| 31264 | chrY | 13527111 | . | G | A | 1194.15  | PASS          | AC=14;AF=0.350;AN=40;BaseQRankSum= |
| 31265 | chrY | 13527167 | . | C | A | 515.10   | PASS          | AC=2;AF=0.034;AN=58;BaseQRankSum=  |
| 31266 | chrY | 13527168 | . | A | C | 514.90   | PASS          | AC=2;AF=0.033;AN=60;BaseQRankSum=  |
| 31267 | chrY | 13527360 | . | T | A | 68.40    | my_snp_filter | AC=4;AF=0.057;AN=70;BaseQRankSum=  |
| 31268 | chrY | 13527501 | . | T | A | 43.21    | PASS          | AC=1;AF=0.017;AN=60;BaseQRankSum=  |
| 31269 | chrY | 13527717 | . | T | C | 220.64   | PASS          | AC=3;AF=0.048;AN=62;BaseQRankSum=  |
| 31270 | chrY | 13527757 | . | C | A | 2831.18  | my_snp_filter | AC=15;AF=0.214;AN=70;BaseQRankSum= |
| 31271 | chrY | 13527768 | . | T | G | 3338.81  | my_snp_filter | AC=18;AF=0.257;AN=70;BaseQRankSum= |
| 31272 | chrY | 13527789 | . | G | A | 5064.30  | my_snp_filter | AC=26;AF=0.371;AN=70;BaseQRankSum= |
| 31273 | chrY | 13527802 | . | T | G | 6436.52  | my_snp_filter | AC=29;AF=0.414;AN=70;BaseQRankSum= |
| 31274 | chrY | 13527830 | . | A | T | 272.02   | PASS          | AC=4;AF=0.057;AN=70;BaseQRankSum=  |
| 31275 | chrY | 13527866 | . | G | A | 123.06   | my_snp_filter | AC=3;AF=0.043;AN=70;BaseQRankSum=  |
| 31276 | chrY | 13527880 | . | T | G | 348.14   | PASS          | AC=4;AF=0.057;AN=70;BaseQRankSum=  |
| 31277 | chrY | 13527896 | . | C | A | 15078    | PASS          | AC=35;AF=0.500;AN=70;BaseQRankSum= |
| 31278 | chrY | 13527907 | . | A | G | 15494.58 | PASS          | AC=36;AF=0.514;AN=70;BaseQRankSum= |
| 31279 | chrY | 13527911 | . | C | A | 280.48   | my_snp_filter | AC=5;AF=0.071;AN=70;BaseQRankSum=  |
| 31280 | chrY | 13527924 | . | A | G | 13110.58 | PASS          | AC=33;AF=0.485;AN=68;BaseQRankSum= |
| 31281 | chrY | 13527964 | . | G | C | 777.10   | PASS          | AC=11;AF=0.162;AN=68;BaseQRankSum= |
| 31282 | chrY | 13527977 | . | T | A | 9848.57  | PASS          | AC=24;AF=0.429;AN=56;BaseQRankSum= |
| 31283 | chrY | 13527981 | . | T | A | 9805.45  | PASS          | AC=24;AF=0.414;AN=58;BaseQRankSum= |
| 31284 | chrY | 13528016 | . | C | G | 8083.57  | PASS          | AC=24;AF=0.353;AN=68;BaseQRankSum= |
| 31285 | chrY | 13528039 | . | T | A | 6997.73  | PASS          | AC=21;AF=0.318;AN=66;BaseQRankSum= |
| 31286 | chrY | 13528048 | . | T | G | 39.93    | my_snp_filter | AC=2;AF=0.029;AN=68;BaseQRankSum=  |
| 31287 | chrY | 13528061 | . | G | A | 84.28    | my_snp_filter | AC=3;AF=0.044;AN=68;BaseQRankSum=  |
| 31288 | chrY | 13528070 | . | A | G | 85.73    | my_snp_filter | AC=3;AF=0.047;AN=64;BaseQRankSum=  |
| 31289 | chrY | 13528086 | . | A | T | 6805.61  | my_snp_filter | AC=9;AF=0.145;AN=62;BaseQRankSum=  |
| 31290 | chrY | 13528097 | . | T | C | 5469.68  | my_snp_filter | AC=9;AF=0.141;AN=64;BaseQRankSum=  |
| 31291 | chrY | 13528103 | . | G | C | 114.28   | my_snp_filter | AC=5;AF=0.076;AN=66;BaseQRankSum=  |
| 31292 | chrY | 13528106 | . | T | C | 6045.07  | my_snp_filter | AC=9;AF=0.150;AN=60;BaseQRankSum=  |
| 31293 | chrY | 13528144 | . | T | C | 3198.46  | my_snp_filter | AC=11;AF=0.162;AN=68;BaseQRankSum= |
| 31294 | chrY | 13528175 | . | A | G | 5239.35  | my_snp_filter | AC=9;AF=0.132;AN=68;BaseQRankSum=  |
| 31295 | chrY | 13528196 | . | T | C | 5143.98  | my_snp_filter | AC=9;AF=0.129;AN=70;BaseQRankSum=  |
| 31296 | chrY | 13528200 | . | C | T | 2478.49  | my_snp_filter | AC=9;AF=0.129;AN=70;BaseQRankSum=  |
| 31297 | chrY | 13528234 | . | T | C | 2137.07  | my_snp_filter | AC=7;AF=0.100;AN=70;BaseQRankSum=  |
| 31298 | chrY | 13528257 | . | G | A | 1921.68  | PASS          | AC=7;AF=0.100;AN=70;BaseQRankSum=  |
| 31299 | chrY | 13528263 | . | T | C | 1816.55  | PASS          | AC=7;AF=0.103;AN=68;BaseQRankSum=  |
| 31300 | chrY | 13528269 | . | T | C | 1617.62  | PASS          | AC=7;AF=0.103;AN=68;BaseQRankSum=  |
| 31301 | chrY | 13528350 | . | A | G | 671.37   | PASS          | AC=5;AF=0.074;AN=68;BaseQRankSum=  |
| 31302 | chrY | 13528386 | . | T | G | 57.52    | my_snp_filter | AC=2;AF=0.029;AN=68;BaseQRankSum=  |
| 31303 | chrY | 13528419 | . | C | G | 79.29    | my_snp_filter | AC=2;AF=0.029;AN=70;BaseQRankSum=  |
| 31304 | chrY | 13528494 | . | A | G | 135.49   | PASS          | AC=2;AF=0.029;AN=70;BaseQRankSum=  |
| 31305 | chrY | 13528502 | . | G | A | 171.29   | my_snp_filter | AC=4;AF=0.057;AN=70;BaseQRankSum=  |
| 31306 | chrY | 13528521 | . | G | A | 672.23   | my_snp_filter | AC=7;AF=0.103;AN=68;BaseQRankSum=  |
| 31307 | chrY | 13528560 | . | C | T | 81.97    | my_snp_filter | AC=3;AF=0.045;AN=66;BaseQRankSum=  |
| 31308 | chrY | 13528617 | . | T | C | 10039.36 | PASS          | AC=10;AF=0.161;AN=62;BaseQRankSum= |
| 31309 | chrY | 13528635 | . | C | T | 10562    | PASS          | AC=10;AF=0.179;AN=56;BaseQRankSum= |
| 31310 | chrY | 13528650 | . | G | A | 805.50   | PASS          | AC=7;AF=0.135;AN=52;BaseQRankSum=  |
| 31311 | chrY | 13528660 | . | A | C | 789.43   | PASS          | AC=7;AF=0.152;AN=46;BaseQRankSum=  |
| 31312 | chrY | 13528693 | . | G | A | 7741.08  | PASS          | AC=14;AF=0.412;AN=34;BaseQRankSum= |

|       |      |          |   |   |     |          |               |                                   |
|-------|------|----------|---|---|-----|----------|---------------|-----------------------------------|
| 31313 | chrY | 13528718 | . | A | G   | 712.08   | my_snp_filter | AC=9;AF=0.196;AN=46;BaseQ         |
| 31314 | chrY | 13528770 | . | C | A   | 10640.04 | PASS          | AC=16;AF=0.267;AN=60;BaseQ        |
| 31315 | chrY | 13528794 | . | T | C   | 8923.16  | PASS          | AC=15;AF=0.214;AN=70;BaseQRankSum |
| 31316 | chrY | 13528832 | . | A | G   | 162.24   | my_snp_filter | AC=6;AF=0.086;AN=70;BaseQ         |
| 31317 | chrY | 13528866 | . | G | C   | 12838.40 | PASS          | AC=11;AF=0.157;AN=70;BaseQ        |
| 31318 | chrY | 13528880 | . | A | G   | 11978.09 | PASS          | AC=9;AF=0.129;AN=70;BaseQ         |
| 31319 | chrY | 13528893 | . | C | T   | 11354.12 | PASS          | AC=9;AF=0.129;AN=70;BaseQ         |
| 31320 | chrY | 13528911 | . | A | T   | 462.11   | PASS          | AC=6;AF=0.086;AN=70;DP=637;FS=0.0 |
| 31321 | chrY | 13528995 | . | A | G   | 113.66   | PASS          | AC=1;AF=0.016;AN=64;BaseQRankSum  |
| 31322 | chrY | 13529004 | . | T | G   | 11331.62 | PASS          | AC=9;AF=0.150;AN=60;BaseQ         |
| 31323 | chrY | 13529010 | . | C | A   | 9091.03  | PASS          | AC=9;AF=0.155;AN=58;BaseQRankSum  |
| 31324 | chrY | 13529041 | . | C | T   | 314.62   | my_snp_filter | AC=3;AF=0.056;AN=54;BaseQ         |
| 31325 | chrY | 13529068 | . | G | A   | 260.71   | my_snp_filter | AC=3;AF=0.083;AN=36;BaseQ         |
| 31326 | chrY | 13529074 | . | T | A   | 5039.37  | PASS          | AC=9;AF=0.300;AN=30;BaseQRankSum  |
| 31327 | chrY | 13529141 | . | A | C   | 1000.02  | PASS          | AC=9;AF=0.346;AN=26;BaseQRankSum  |
| 31328 | chrY | 13529194 | . | A | G   | 497.41   | PASS          | AC=6;AF=0.200;AN=30;BaseQRankSum  |
| 31329 | chrY | 13529209 | . | T | A   | 3766.27  | PASS          | AC=9;AF=0.250;AN=36;BaseQRankSum  |
| 31330 | chrY | 13529238 | . | G | T   | 591.16   | my_snp_filter | AC=7;AF=0.152;AN=46;BaseQ         |
| 31331 | chrY | 13529242 | . | G | A   | 601.84   | my_snp_filter | AC=7;AF=0.140;AN=50;BaseQ         |
| 31332 | chrY | 13529319 | . | C | G   | 1556.13  | PASS          | AC=11;AF=0.172;AN=64;BaseQRankSum |
| 31333 | chrY | 13529347 | . | G | T   | 1824.88  | PASS          | AC=7;AF=0.106;AN=66;BaseQRankSum  |
| 31334 | chrY | 13529358 | . | A | G   | 1521.71  | PASS          | AC=7;AF=0.103;AN=68;BaseQRankSum  |
| 31335 | chrY | 13529361 | . | A | T   | 1397.34  | PASS          | AC=7;AF=0.103;AN=68;BaseQRankSum  |
| 31336 | chrY | 13529366 | . | T | G   | 1067.96  | PASS          | AC=7;AF=0.106;AN=66;BaseQRankSum  |
| 31337 | chrY | 13529469 | . | T | C   | 269.06   | PASS          | AC=4;AF=0.087;AN=46;BaseQRankSum  |
| 31338 | chrY | 13529496 | . | C | T   | 5658.51  | PASS          | AC=11;AF=0.393;AN=28;BaseQRankSum |
| 31339 | chrY | 13529500 | . | A | G   | 6061.99  | PASS          | AC=11;AF=0.423;AN=26;BaseQRankSum |
| 31340 | chrY | 13529513 | . | G | A   | 5762.85  | PASS          | AC=9;AF=0.375;AN=24;BaseQRankSum  |
| 31341 | chrY | 13529581 | . | C | A   | 184.88   | PASS          | AC=3;AF=0.125;AN=24;BaseQRankSum  |
| 31342 | chrY | 13529602 | . | T | C   | 51.26    | my_snp_filter | AC=1;AF=0.045;AN=22;BaseQ         |
| 31343 | chrY | 13529635 | . | G | A   | 59.15    | my_snp_filter | AC=3;AF=0.136;AN=22;BaseQ         |
| 31344 | chrY | 13529646 | . | G | A   | 85.18    | my_snp_filter | AC=3;AF=0.136;AN=22;BaseQ         |
| 31345 | chrY | 13529699 | . | A | C   | 2072.34  | PASS          | AC=9;AF=0.450;AN=20;BaseQRankSum  |
| 31346 | chrY | 13529708 | . | A | G   | 1726.38  | PASS          | AC=8;AF=0.400;AN=20;BaseQRankSum  |
| 31347 | chrY | 13529716 | . | C | T   | 1689.58  | PASS          | AC=8;AF=0.400;AN=20;BaseQRankSum  |
| 31348 | chrY | 13529749 | . | T | G   | 671.35   | PASS          | AC=8;AF=0.364;AN=22;BaseQRankSum  |
| 31349 | chrY | 13529798 | . | A | T   | 2056.02  | PASS          | AC=8;AF=0.444;AN=18;BaseQRankSum  |
| 31350 | chrY | 13529825 | . | T | C   | 3329.09  | PASS          | AC=9;AF=0.500;AN=18;BaseQRankSum  |
| 31351 | chrY | 13529856 | . | G | T   | 4955.09  | PASS          | AC=9;AF=0.500;AN=18;BaseQRankSum  |
| 31352 | chrY | 13529859 | . | G | A   | 5026.09  | PASS          | AC=9;AF=0.500;AN=18;BaseQRankSum  |
| 31353 | chrY | 13529927 | . | C | A   | 5759.09  | PASS          | AC=11;AF=0.550;AN=20;BaseQRankSum |
| 31354 | chrY | 13529949 | . | G | C   | 5058.09  | PASS          | AC=9;AF=0.500;AN=18;BaseQRankSum  |
| 31355 | chrY | 13529985 | . | G | C   | 73.79    | my_snp_filter | AC=2;AF=0.100;AN=20;BaseQ         |
| 31356 | chrY | 13530010 | . | G | A   | 2610.11  | PASS          | AC=9;AF=0.409;AN=22;BaseQRankSum  |
| 31357 | chrY | 13530026 | . | A | G   | 2042.14  | PASS          | AC=9;AF=0.409;AN=22;BaseQRankSum  |
| 31358 | chrY | 13530029 | . | T | C   | 2015.14  | PASS          | AC=9;AF=0.409;AN=22;BaseQRankSum  |
| 31359 | chrY | 13530058 | . | T | G   | 911.41   | PASS          | AC=6;AF=0.200;AN=30;BaseQRankSum  |
| 31360 | chrY | 13530059 | . | T | G   | 911.41   | PASS          | AC=6;AF=0.200;AN=30;BaseQRankSum  |
| 31361 | chrY | 13530085 | . | A | C,* | 455.05   | PASS          | AC=2,1;AF=0.111,0.056;AN=18;BaseQ |
| 31362 | chrY | 13530088 | . | A | C   | 83.85    | PASS          | AC=1;AF=0.033;AN=30;BaseQRankSum  |
| 31363 | chrY | 13530165 | . | T | C   | 1185.89  | my_snp_filter | AC=6;AF=0.086;AN=70;BaseQ         |
| 31364 | chrY | 13530169 | . | C | T   | 1147.89  | my_snp_filter | AC=6;AF=0.086;AN=70;BaseQ         |
| 31365 | chrY | 13530217 | . | A | C   | 100.56   | my_snp_filter | AC=4;AF=0.057;AN=70;BaseQ         |
| 31366 | chrY | 13530244 | . | A | G   | 38.86    | my_snp_filter | AC=2;AF=0.029;AN=70;BaseQ         |
| 31367 | chrY | 13530306 | . | A | G   | 168.57   | PASS          | AC=2;AF=0.029;AN=68;BaseQRankSum  |
| 31368 | chrY | 13530319 | . | A | T   | 162.97   | PASS          | AC=2;AF=0.029;AN=68;BaseQRankSum  |
| 31369 | chrY | 13530416 | . | C | T   | 342.11   | PASS          | AC=2;AF=0.029;AN=70;DP=557;FS=0.0 |
| 31370 | chrY | 13530639 | . | G | C   | 34.13    | PASS          | AC=1;AF=0.015;AN=66;BaseQRankSum  |
| 31371 | chrY | 13530642 | . | C | T   | 34.20    | PASS          | AC=1;AF=0.015;AN=66;BaseQRankSum  |
| 31372 | chrY | 13530646 | . | T | A   | 124.68   | PASS          | AC=4;AF=0.061;AN=66;BaseQRankSum  |
| 31373 | chrY | 13530659 | . | G | A   | 118.40   | PASS          | AC=3;AF=0.043;AN=70;BaseQRankSum  |
| 31374 | chrY | 13530784 | . | A | G   | 41.41    | PASS          | AC=1;AF=0.015;AN=68;BaseQRankSum  |
| 31375 | chrY | 13530814 | . | G | C   | 37.11    | PASS          | AC=1;AF=0.016;AN=64;BaseQRankSum  |
| 31376 | chrY | 13530825 | . | G | T   | 40.32    | PASS          | AC=1;AF=0.016;AN=64;BaseQRankSum  |
| 31377 | chrY | 13531041 | . | A | G   | 110.37   | PASS          | AC=1;AF=0.017;AN=60;BaseQRankSum  |
| 31378 | chrY | 13531044 | . | C | A   | 110.66   | PASS          | AC=1;AF=0.017;AN=60;BaseQRankSum  |
| 31379 | chrY | 13531051 | . | T | C   | 107.21   | PASS          | AC=1;AF=0.017;AN=60;BaseQRankSum  |
| 31380 | chrY | 13531140 | . | G | A   | 34.47    | PASS          | AC=1;AF=0.016;AN=64;BaseQRankSum  |
| 31381 | chrY | 13531157 | . | A | T   | 617.84   | my_snp_filter | AC=7;AF=0.109;AN=64;BaseQ         |
| 31382 | chrY | 13531185 | . | C | T   | 1587.62  | my_snp_filter | AC=8;AF=0.125;AN=64;BaseQ         |
| 31383 | chrY | 13531203 | . | T | C   | 1919.79  | my_snp_filter | AC=8;AF=0.118;AN=68;BaseQ         |
| 31384 | chrY | 13531207 | . | A | T   | 1896.46  | my_snp_filter | AC=8;AF=0.118;AN=68;BaseQ         |
| 31385 | chrY | 13531225 | . | G | C   | 1847.15  | my_snp_filter | AC=8;AF=0.114;AN=70;BaseQ         |
| 31386 | chrY | 13531230 | . | A | G   | 1760.16  | my_snp_filter | AC=8;AF=0.114;AN=70;BaseQ         |
| 31387 | chrY | 13531259 | . | G | A   | 1500.58  | my_snp_filter | AC=10;AF=0.147;AN=68;BaseQ        |
| 31388 | chrY | 13531269 | . | C | T   | 1357.80  | my_snp_filter | AC=9;AF=0.132;AN=68;BaseQ         |

|       |      |          |   |   |   |          |               |                                    |
|-------|------|----------|---|---|---|----------|---------------|------------------------------------|
| 31389 | chrY | 13531304 | . | A | G | 264.32   | PASS          | AC=3;AF=0.044;AN=68;BaseQRankSum=  |
| 31390 | chrY | 13531311 | . | T | A | 325.66   | PASS          | AC=2;AF=0.031;AN=64;BaseQRankSum=  |
| 31391 | chrY | 13531312 | . | A | G | 542.18   | PASS          | AC=6;AF=0.094;AN=64;BaseQRankSum=  |
| 31392 | chrY | 13531406 | . | G | A | 2927.67  | PASS          | AC=15;AF=0.221;AN=68;BaseQRankSum= |
| 31393 | chrY | 13531416 | . | G | A | 3079.88  | PASS          | AC=15;AF=0.227;AN=66;BaseQRankSum= |
| 31394 | chrY | 13531453 | . | C | A | 1739.84  | PASS          | AC=15;AF=0.250;AN=60;BaseQRankSum= |
| 31395 | chrY | 13531507 | . | A | G | 1313.19  | PASS          | AC=4;AF=0.063;AN=64;BaseQRankSum=  |
| 31396 | chrY | 13531525 | . | T | C | 1038.55  | PASS          | AC=3;AF=0.044;AN=68;BaseQRankSum=  |
| 31397 | chrY | 13531536 | . | G | A | 746.52   | PASS          | AC=3;AF=0.044;AN=68;BaseQRankSum=  |
| 31398 | chrY | 13531538 | . | G | T | 704.18   | PASS          | AC=3;AF=0.044;AN=68;BaseQRankSum=  |
| 31399 | chrY | 13531556 | . | G | A | 188.36   | PASS          | AC=3;AF=0.044;AN=68;BaseQRankSum=  |
| 31400 | chrY | 13531566 | . | C | T | 129.01   | PASS          | AC=2;AF=0.029;AN=70;BaseQRankSum=  |
| 31401 | chrY | 13531583 | . | G | C | 37.97    | my_snp_filter | AC=2;AF=0.029;AN=70;BaseQ          |
| 31402 | chrY | 13531720 | . | C | T | 348.43   | PASS          | AC=4;AF=0.071;AN=56;BaseQRankSum=  |
| 31403 | chrY | 13531733 | . | G | A | 362.58   | PASS          | AC=4;AF=0.095;AN=42;BaseQRankSum=  |
| 31404 | chrY | 13531777 | . | C | A | 84.13    | PASS          | AC=3;AF=0.188;AN=16;BaseQRankSum=  |
| 31405 | chrY | 13531850 | . | A | T | 1420.69  | PASS          | AC=6;AF=0.273;AN=22;BaseQRankSum=  |
| 31406 | chrY | 13531870 | . | T | A | 3388.89  | PASS          | AC=13;AF=0.591;AN=22;BaseQRankSum= |
| 31407 | chrY | 13531908 | . | G | C | 2729.34  | PASS          | AC=11;AF=0.550;AN=20;BaseQRankSum= |
| 31408 | chrY | 13531968 | . | C | T | 4007.71  | my_snp_filter | AC=9;AF=0.321;AN=28;BaseQ          |
| 31409 | chrY | 13531976 | . | C | A | 3846.83  | my_snp_filter | AC=9;AF=0.300;AN=30;BaseQ          |
| 31410 | chrY | 13531991 | . | T | C | 256.77   | PASS          | AC=1;AF=0.031;AN=32;BaseQRankSum=  |
| 31411 | chrY | 13532013 | . | T | C | 2405.93  | my_snp_filter | AC=8;AF=0.182;AN=44;BaseQ          |
| 31412 | chrY | 13532016 | . | G | A | 2429.14  | my_snp_filter | AC=9;AF=0.214;AN=42;BaseQ          |
| 31413 | chrY | 13532037 | . | G | A | 1851.10  | my_snp_filter | AC=9;AF=0.188;AN=48;BaseQ          |
| 31414 | chrY | 13532054 | . | C | A | 1436.75  | PASS          | AC=3;AF=0.056;AN=54;BaseQRankSum=  |
| 31415 | chrY | 13532152 | . | T | C | 392.62   | PASS          | AC=5;AF=0.071;AN=70;BaseQRankSum=  |
| 31416 | chrY | 13532157 | . | C | A | 254.89   | PASS          | AC=4;AF=0.057;AN=70;BaseQRankSum=  |
| 31417 | chrY | 13532179 | . | A | T | 508.19   | PASS          | AC=14;AF=0.200;AN=70;BaseQRankSum= |
| 31418 | chrY | 13532192 | . | A | T | 584.75   | PASS          | AC=14;AF=0.200;AN=70;BaseQRankSum= |
| 31419 | chrY | 13532197 | . | G | A | 190.45   | PASS          | AC=7;AF=0.100;AN=70;BaseQRankSum=  |
| 31420 | chrY | 13532221 | . | A | T | 204.91   | my_snp_filter | AC=8;AF=0.114;AN=70;BaseQ          |
| 31421 | chrY | 13532249 | . | C | T | 148.83   | PASS          | AC=4;AF=0.057;AN=70;BaseQRankSum=  |
| 31422 | chrY | 13532646 | . | T | G | 124.62   | PASS          | AC=3;AF=0.047;AN=64;BaseQRankSum=  |
| 31423 | chrY | 13532685 | . | A | G | 238.02   | my_snp_filter | AC=4;AF=0.069;AN=58;BaseQ          |
| 31424 | chrY | 13532726 | . | C | T | 742.29   | my_snp_filter | AC=5;AF=0.093;AN=54;BaseQ          |
| 31425 | chrY | 13532745 | . | G | A | 588.29   | PASS          | AC=7;AF=0.140;AN=50;BaseQRankSum=  |
| 31426 | chrY | 13532746 | . | G | A | 476.92   | PASS          | AC=5;AF=0.100;AN=50;BaseQRankSum=  |
| 31427 | chrY | 13532774 | . | A | G | 1249.95  | my_snp_filter | AC=8;AF=0.182;AN=44;BaseQ          |
| 31428 | chrY | 13532820 | . | C | T | 322.31   | PASS          | AC=4;AF=0.143;AN=28;BaseQRankSum=  |
| 31429 | chrY | 13532941 | . | C | T | 6863.71  | PASS          | AC=9;AF=0.321;AN=28;BaseQRankSum=  |
| 31430 | chrY | 13532944 | . | A | C | 6950.71  | PASS          | AC=9;AF=0.321;AN=28;BaseQRankSum=  |
| 31431 | chrY | 13532948 | . | A | G | 5913.07  | PASS          | AC=9;AF=0.300;AN=30;BaseQRankSum=  |
| 31432 | chrY | 13533014 | . | T | G | 5724.33  | PASS          | AC=9;AF=0.180;AN=50;BaseQRankSum=  |
| 31433 | chrY | 13533133 | . | T | C | 142.49   | my_snp_filter | AC=3;AF=0.043;AN=70;BaseQ          |
| 31434 | chrY | 13533149 | . | G | A | 6530.90  | PASS          | AC=9;AF=0.129;AN=70;BaseQRankSum=  |
| 31435 | chrY | 13533158 | . | T | C | 9869.76  | PASS          | AC=9;AF=0.129;AN=70;BaseQRankSum=  |
| 31436 | chrY | 13533172 | . | T | C | 166.19   | PASS          | AC=2;AF=0.029;AN=70;BaseQRankSum=  |
| 31437 | chrY | 13533174 | . | T | C | 5878.28  | PASS          | AC=9;AF=0.129;AN=70;BaseQRankSum=  |
| 31438 | chrY | 13533178 | . | C | G | 114.20   | my_snp_filter | AC=2;AF=0.029;AN=70;BaseQ          |
| 31439 | chrY | 13533179 | . | C | T | 117.30   | my_snp_filter | AC=2;AF=0.029;AN=70;BaseQ          |
| 31440 | chrY | 13533181 | . | A | T | 120.30   | my_snp_filter | AC=2;AF=0.029;AN=70;BaseQ          |
| 31441 | chrY | 13533301 | . | G | A | 48.17    | my_snp_filter | AC=2;AF=0.029;AN=70;BaseQ          |
| 31442 | chrY | 13533339 | . | A | G | 16524.48 | PASS          | AC=34;AF=0.486;AN=70;BaseQ         |
| 31443 | chrY | 13533349 | . | G | A | 18028.60 | PASS          | AC=34;AF=0.486;AN=70;BaseQ         |
| 31444 | chrY | 13533372 | . | C | A | 1759.74  | PASS          | AC=8;AF=0.114;AN=70;BaseQRankSum=  |
| 31445 | chrY | 13533402 | . | C | G | 23453.76 | PASS          | AC=35;AF=0.500;AN=70;BaseQ         |
| 31446 | chrY | 13533430 | . | G | A | 999.78   | PASS          | AC=7;AF=0.100;AN=70;BaseQRankSum=  |
| 31447 | chrY | 13533485 | . | C | T | 34743.79 | PASS          | AC=36;AF=0.514;AN=70;BaseQ         |
| 31448 | chrY | 13533486 | . | A | G | 34815.34 | PASS          | AC=36;AF=0.514;AN=70;BaseQ         |
| 31449 | chrY | 13533504 | . | T | A | 24216.76 | PASS          | AC=38;AF=0.543;AN=70;BaseQ         |
| 31450 | chrY | 13533574 | . | A | G | 10656.17 | PASS          | AC=27;AF=0.563;AN=48;BaseQ         |
| 31451 | chrY | 13533586 | . | T | G | 12141.56 | PASS          | AC=22;AF=0.458;AN=48;BaseQ         |
| 31452 | chrY | 13533591 | . | C | T | 11895.44 | PASS          | AC=21;AF=0.457;AN=46;BaseQ         |
| 31453 | chrY | 13533715 | . | A | G | 9518.83  | PASS          | AC=13;AF=0.283;AN=46;BaseQRankSum= |
| 31454 | chrY | 13533721 | . | A | G | 9408     | PASS          | AC=13;AF=0.250;AN=52;BaseQRankSum= |
| 31455 | chrY | 13533727 | . | A | C | 8931.14  | my_snp_filter | AC=12;AF=0.222;AN=54;BaseQ         |
| 31456 | chrY | 13533744 | . | G | A | 5787.60  | my_snp_filter | AC=9;AF=0.167;AN=54;BaseQ          |
| 31457 | chrY | 13533763 | . | T | A | 3961.29  | my_snp_filter | AC=9;AF=0.145;AN=62;BaseQ          |
| 31458 | chrY | 13533793 | . | A | G | 3093.61  | my_snp_filter | AC=9;AF=0.132;AN=68;BaseQ          |
| 31459 | chrY | 13533794 | . | A | G | 3091.94  | my_snp_filter | AC=9;AF=0.132;AN=68;BaseQ          |
| 31460 | chrY | 13533827 | . | A | T | 1684.54  | my_snp_filter | AC=6;AF=0.086;AN=70;BaseQ          |
| 31461 | chrY | 13533834 | . | G | T | 731.94   | my_snp_filter | AC=5;AF=0.074;AN=68;BaseQ          |
| 31462 | chrY | 13533845 | . | A | G | 1750.59  | my_snp_filter | AC=7;AF=0.103;AN=68;BaseQ          |
| 31463 | chrY | 13533856 | . | C | T | 135.75   | PASS          | AC=1;AF=0.014;AN=70;BaseQRankSum=  |
| 31464 | chrY | 13533930 | . | G | T | 903.52   | my_snp_filter | AC=7;AF=0.103;AN=68;BaseQ          |

|       |      |          |   |   |     |          |               |                                    |
|-------|------|----------|---|---|-----|----------|---------------|------------------------------------|
| 31465 | chrY | 13533950 | . | C | T   | 782.28   | PASS          | AC=5;AF=0.074;AN=68;BaseQRankSum=  |
| 31466 | chrY | 13533957 | . | G | A   | 522.25   | my_snp_filter | AC=6;AF=0.088;AN=68;BaseQ          |
| 31467 | chrY | 13533991 | . | C | A   | 263.34   | PASS          | AC=4;AF=0.077;AN=52;BaseQRankSum=  |
| 31468 | chrY | 13533992 | . | C | A   | 125.20   | PASS          | AC=3;AF=0.058;AN=52;BaseQRankSum=  |
| 31469 | chrY | 13534333 | . | A | C   | 107.95   | PASS          | AC=2;AF=0.029;AN=70;BaseQRankSum=  |
| 31470 | chrY | 13534349 | . | G | C   | 106.61   | PASS          | AC=2;AF=0.029;AN=70;BaseQRankSum=  |
| 31471 | chrY | 13534584 | . | A | T   | 507.32   | PASS          | AC=5;AF=0.096;AN=52;BaseQRankSum=  |
| 31472 | chrY | 13534585 | . | A | C   | 104.81   | PASS          | AC=2;AF=0.038;AN=52;BaseQRankSum=  |
| 31473 | chrY | 13534628 | . | A | T   | 5281.30  | PASS          | AC=24;AF=0.364;AN=66;BaseQRankSum= |
| 31474 | chrY | 13534639 | . | C | T   | 750.82   | PASS          | AC=8;AF=0.114;AN=70;BaseQRankSum=  |
| 31475 | chrY | 13534641 | . | G | A   | 7269.05  | PASS          | AC=26;AF=0.433;AN=60;BaseQRankSum= |
| 31476 | chrY | 13534653 | . | G | A   | 177.13   | PASS          | AC=3;AF=0.043;AN=70;BaseQRankSum=  |
| 31477 | chrY | 13534656 | . | A | G   | 51.62    | PASS          | AC=1;AF=0.014;AN=70;BaseQRankSum=  |
| 31478 | chrY | 13534675 | . | G | A   | 15365.75 | PASS          | AC=35;AF=0.500;AN=70;BaseQ         |
| 31479 | chrY | 13534696 | . | C | A   | 15115.53 | PASS          | AC=34;AF=0.486;AN=70;BaseQ         |
| 31480 | chrY | 13534697 | . | G | C   | 1274.18  | PASS          | AC=14;AF=0.200;AN=70;BaseQRankSum= |
| 31481 | chrY | 13534759 | . | G | A   | 11985.72 | PASS          | AC=35;AF=0.500;AN=70;BaseQ         |
| 31482 | chrY | 13534767 | . | T | G   | 122.28   | my_snp_filter | AC=4;AF=0.057;AN=70;BaseQ          |
| 31483 | chrY | 13534839 | . | T | A,C | 3769.99  | PASS          | AC=10,22;AF=0.147,0.324;AN=68;Bas  |
| 31484 | chrY | 13534869 | . | G | T   | 2111.66  | PASS          | AC=19;AF=0.328;AN=58;BaseQRankSum= |
| 31485 | chrY | 13534887 | . | C | A   | 938.81   | PASS          | AC=9;AF=0.180;AN=50;BaseQRankSum=  |
| 31486 | chrY | 13534912 | . | T | C   | 755.27   | PASS          | AC=5;AF=0.125;AN=40;BaseQRankSum=  |
| 31487 | chrY | 13534914 | . | C | T   | 75.55    | my_snp_filter | AC=2;AF=0.053;AN=38;BaseQ          |
| 31488 | chrY | 13534929 | . | G | T   | 2020.09  | PASS          | AC=7;AF=0.219;AN=32;BaseQRankSum=  |
| 31489 | chrY | 13534935 | . | A | G   | 2404.61  | PASS          | AC=7;AF=0.269;AN=26;BaseQRankSum=  |
| 31490 | chrY | 13535056 | . | A | G   | 7314.85  | PASS          | AC=9;AF=0.375;AN=24;BaseQRankSum=  |
| 31491 | chrY | 13535073 | . | T | A   | 7092.11  | PASS          | AC=9;AF=0.409;AN=22;BaseQRankSum=  |
| 31492 | chrY | 13535098 | . | C | A   | 5579.33  | PASS          | AC=8;AF=0.364;AN=22;BaseQRankSum=  |
| 31493 | chrY | 13535154 | . | A | G   | 800.91   | PASS          | AC=7;AF=0.389;AN=18;BaseQRankSum=  |
| 31494 | chrY | 13535164 | . | C | A   | 588.57   | PASS          | AC=5;AF=0.278;AN=18;BaseQRankSum=  |
| 31495 | chrY | 13535167 | . | T | C   | 515.59   | PASS          | AC=5;AF=0.278;AN=18;BaseQRankSum=  |
| 31496 | chrY | 13535178 | . | T | G   | 203.12   | PASS          | AC=3;AF=0.167;AN=18;BaseQRankSum=  |
| 31497 | chrY | 13535217 | . | C | G   | 1779.95  | PASS          | AC=8;AF=0.364;AN=22;BaseQRankSum=  |
| 31498 | chrY | 13535228 | . | G | C   | 1928.33  | PASS          | AC=8;AF=0.364;AN=22;BaseQRankSum=  |
| 31499 | chrY | 13535283 | . | C | T   | 2261.35  | my_snp_filter | AC=9;AF=0.281;AN=32;BaseQ          |
| 31500 | chrY | 13535337 | . | A | C   | 1953.50  | PASS          | AC=8;AF=0.167;AN=48;BaseQRankSum=  |
| 31501 | chrY | 13535532 | . | A | G   | 151.19   | PASS          | AC=2;AF=0.031;AN=64;BaseQRankSum=  |
| 31502 | chrY | 13535777 | . | T | C   | 166.08   | PASS          | AC=1;AF=0.250;AN=4;BaseQRankSum=   |
| 31503 | chrY | 13535805 | . | G | A   | 1459.09  | PASS          | AC=3;AF=0.500;AN=6;BaseQRankSum=1  |
| 31504 | chrY | 13535824 | . | C | T   | 68.73    | my_snp_filter | AC=1;AF=0.045;AN=22;BaseQ          |
| 31505 | chrY | 13535963 | . | C | A   | 426.40   | PASS          | AC=3;AF=0.136;AN=22;BaseQRankSum=  |
| 31506 | chrY | 13536039 | . | T | C   | 6394.56  | PASS          | AC=10;AF=0.357;AN=28;BaseQRankSum= |
| 31507 | chrY | 13536041 | . | G | T   | 1713.55  | PASS          | AC=6;AF=0.231;AN=26;BaseQRankSum=  |
| 31508 | chrY | 13536091 | . | T | C   | 3171.04  | PASS          | AC=15;AF=0.441;AN=34;BaseQRankSum= |
| 31509 | chrY | 13536155 | . | C | A   | 11018.15 | PASS          | AC=29;AF=0.414;AN=70;BaseQ         |
| 31510 | chrY | 13536194 | . | T | G   | 12104.13 | PASS          | AC=33;AF=0.471;AN=70;BaseQ         |
| 31511 | chrY | 13536236 | . | G | C   | 12094.28 | PASS          | AC=33;AF=0.471;AN=70;BaseQ         |
| 31512 | chrY | 13536270 | . | C | T   | 9929.02  | PASS          | AC=31;AF=0.443;AN=70;BaseQRankSum= |
| 31513 | chrY | 13536274 | . | A | G   | 506.80   | PASS          | AC=8;AF=0.114;AN=70;BaseQRankSum=  |
| 31514 | chrY | 13536324 | . | G | A   | 8006.64  | PASS          | AC=33;AF=0.471;AN=70;BaseQRankSum= |
| 31515 | chrY | 13536342 | . | G | A   | 7950.30  | PASS          | AC=31;AF=0.456;AN=68;BaseQRankSum= |
| 31516 | chrY | 13536394 | . | T | C   | 74.67    | PASS          | AC=4;AF=0.059;AN=68;BaseQRankSum=  |
| 31517 | chrY | 13536423 | . | C | G   | 15618.48 | PASS          | AC=33;AF=0.485;AN=68;BaseQ         |
| 31518 | chrY | 13536425 | . | T | A   | 841.87   | PASS          | AC=13;AF=0.191;AN=68;BaseQRankSum= |
| 31519 | chrY | 13536428 | . | C | T   | 14010.64 | PASS          | AC=31;AF=0.456;AN=68;BaseQ         |
| 31520 | chrY | 13536435 | . | C | A   | 13687.17 | PASS          | AC=31;AF=0.456;AN=68;BaseQ         |
| 31521 | chrY | 13536436 | . | C | T   | 3714.17  | PASS          | AC=21;AF=0.309;AN=68;BaseQRankSum= |
| 31522 | chrY | 13536441 | . | A | C   | 56.65    | my_snp_filter | AC=2;AF=0.029;AN=70;BaseQ          |
| 31523 | chrY | 13536470 | . | G | C   | 6774.77  | PASS          | AC=29;AF=0.426;AN=68;BaseQRankSum= |
| 31524 | chrY | 13536524 | . | G | A   | 11294.84 | PASS          | AC=34;AF=0.486;AN=70;BaseQ         |
| 31525 | chrY | 13536526 | . | T | A   | 11294.84 | PASS          | AC=34;AF=0.486;AN=70;BaseQ         |
| 31526 | chrY | 13536630 | . | C | G   | 250.16   | PASS          | AC=6;AF=0.097;AN=62;BaseQRankSum=  |
| 31527 | chrY | 13536643 | . | T | A   | 544.79   | PASS          | AC=7;AF=0.109;AN=64;BaseQRankSum=  |
| 31528 | chrY | 13536672 | . | A | G   | 739.85   | my_snp_filter | AC=9;AF=0.141;AN=64;BaseQ          |
| 31529 | chrY | 13536706 | . | A | G   | 1250.96  | my_snp_filter | AC=9;AF=0.132;AN=68;BaseQ          |
| 31530 | chrY | 13536797 | . | C | T   | 5872.70  | PASS          | AC=24;AF=0.343;AN=70;BaseQRankSum= |
| 31531 | chrY | 13536822 | . | T | A   | 6248.14  | PASS          | AC=26;AF=0.371;AN=70;BaseQRankSum= |
| 31532 | chrY | 13536848 | . | T | C   | 5728.03  | PASS          | AC=24;AF=0.343;AN=70;BaseQRankSum= |
| 31533 | chrY | 13536889 | . | C | T   | 156.42   | my_snp_filter | AC=3;AF=0.043;AN=70;BaseQ          |
| 31534 | chrY | 13536906 | . | T | A   | 11886.07 | PASS          | AC=32;AF=0.471;AN=68;BaseQ         |
| 31535 | chrY | 13536917 | . | C | T   | 12181.06 | PASS          | AC=32;AF=0.485;AN=66;BaseQ         |
| 31536 | chrY | 13536933 | . | T | G   | 12140.80 | PASS          | AC=33;AF=0.516;AN=64;BaseQ         |
| 31537 | chrY | 13536954 | . | A | T   | 1695.12  | PASS          | AC=7;AF=0.113;AN=62;BaseQRankSum=  |
| 31538 | chrY | 13536972 | . | T | C   | 2229.76  | PASS          | AC=10;AF=0.152;AN=66;BaseQRankSum= |
| 31539 | chrY | 13537004 | . | G | C   | 803.82   | PASS          | AC=8;AF=0.118;AN=68;BaseQRankSum=  |
| 31540 | chrY | 13537035 | . | T | A   | 6715.39  | PASS          | AC=15;AF=0.221;AN=68;BaseQRankSum= |

|       |      |          |   |   |     |          |               |                                    |
|-------|------|----------|---|---|-----|----------|---------------|------------------------------------|
| 31541 | chrY | 13537056 | . | T | C   | 2068.80  | PASS          | AC=9;AF=0.129;AN=70;BaseQRankSum=  |
| 31542 | chrY | 13537078 | . | T | G   | 4027.06  | PASS          | AC=9;AF=0.129;AN=70;BaseQRankSum=  |
| 31543 | chrY | 13537080 | . | G | C   | 413.77   | PASS          | AC=6;AF=0.086;AN=70;BaseQRankSum=  |
| 31544 | chrY | 13537086 | . | T | C   | 490.26   | PASS          | AC=6;AF=0.086;AN=70;BaseQRankSum=  |
| 31545 | chrY | 13537105 | . | G | A   | 5037.83  | PASS          | AC=9;AF=0.129;AN=70;BaseQRankSum=  |
| 31546 | chrY | 13537107 | . | T | G   | 6936.87  | PASS          | AC=9;AF=0.129;AN=70;BaseQRankSum=  |
| 31547 | chrY | 13537112 | . | T | G   | 859.72   | my_snp_filter | AC=6;AF=0.086;AN=70;BaseQ          |
| 31548 | chrY | 13537129 | . | G | A   | 6553.20  | PASS          | AC=10;AF=0.143;AN=70;BaseQRankSum= |
| 31549 | chrY | 13537142 | . | T | C   | 191.62   | PASS          | AC=2;AF=0.029;AN=70;BaseQRankSum=  |
| 31550 | chrY | 13537222 | . | A | G   | 8506.12  | PASS          | AC=26;AF=0.394;AN=66;BaseQRankSum= |
| 31551 | chrY | 13537275 | . | T | C   | 45.95    | PASS          | AC=2;AF=0.029;AN=70;DP=739;FS=0.0  |
| 31552 | chrY | 13537276 | . | C | T   | 883.43   | my_snp_filter | AC=8;AF=0.114;AN=70;BaseQ          |
| 31553 | chrY | 13537278 | . | G | A,T | 13451.30 | PASS          | AC=37,7;AF=0.544,0.103;AN=         |
| 31554 | chrY | 13537294 | . | T | A   | 71.45    | my_snp_filter | AC=5;AF=0.071;AN=70;BaseQ          |
| 31555 | chrY | 13537371 | . | C | T   | 1600.78  | PASS          | AC=10;AF=0.143;AN=70;BaseQRankSum= |
| 31556 | chrY | 13537392 | . | A | T   | 18177.20 | PASS          | AC=37;AF=0.529;AN=70;BaseQ         |
| 31557 | chrY | 13537468 | . | A | G   | 13605.27 | PASS          | AC=32;AF=0.500;AN=64;BaseQ         |
| 31558 | chrY | 13537472 | . | C | T   | 7303.22  | PASS          | AC=26;AF=0.406;AN=64;BaseQRankSum= |
| 31559 | chrY | 13537479 | . | T | G   | 12557.65 | PASS          | AC=32;AF=0.516;AN=62;BaseQ         |
| 31560 | chrY | 13537569 | . | A | T   | 4869.65  | my_snp_filter | AC=9;AF=0.150;AN=60;BaseQ          |
| 31561 | chrY | 13537581 | . | C | T   | 5380.32  | my_snp_filter | AC=11;AF=0.177;AN=62;BaseQ         |
| 31562 | chrY | 13537602 | . | T | C   | 259.64   | PASS          | AC=1;AF=0.017;AN=60;BaseQRankSum=  |
| 31563 | chrY | 13537628 | . | A | T   | 156.59   | PASS          | AC=1;AF=0.018;AN=56;BaseQRankSum=  |
| 31564 | chrY | 13537634 | . | T | C   | 158.09   | PASS          | AC=1;AF=0.020;AN=50;BaseQRankSum=  |
| 31565 | chrY | 13537661 | . | T | G   | 44.64    | my_snp_filter | AC=2;AF=0.031;AN=64;BaseQ          |
| 31566 | chrY | 13537666 | . | G | T   | 40.94    | PASS          | AC=1;AF=0.015;AN=66;BaseQRankSum=  |
| 31567 | chrY | 13537669 | . | C | A   | 554.67   | PASS          | AC=2;AF=0.032;AN=62;BaseQRankSum=  |
| 31568 | chrY | 13537686 | . | A | C   | 551.15   | PASS          | AC=2;AF=0.031;AN=64;BaseQRankSum=  |
| 31569 | chrY | 13537696 | . | G | A   | 640.21   | PASS          | AC=4;AF=0.061;AN=66;BaseQRankSum=  |
| 31570 | chrY | 13537741 | . | A | C   | 10527.12 | PASS          | AC=9;AF=0.129;AN=70;BaseQ          |
| 31571 | chrY | 13537744 | . | T | G   | 2525.54  | my_snp_filter | AC=9;AF=0.129;AN=70;BaseQ          |
| 31572 | chrY | 13537747 | . | G | C   | 6447.10  | PASS          | AC=8;AF=0.114;AN=70;BaseQRankSum=  |
| 31573 | chrY | 13537778 | . | C | G   | 8718.57  | PASS          | AC=13;AF=0.186;AN=70;BaseQRankSum= |
| 31574 | chrY | 13537792 | . | A | G   | 8969.92  | PASS          | AC=14;AF=0.206;AN=68;BaseQRankSum= |
| 31575 | chrY | 13537827 | . | A | C   | 3900.04  | PASS          | AC=14;AF=0.206;AN=68;BaseQRankSum= |
| 31576 | chrY | 13537839 | . | C | T   | 4886.60  | PASS          | AC=16;AF=0.235;AN=68;BaseQRankSum= |
| 31577 | chrY | 13537843 | . | A | T   | 46.49    | my_snp_filter | AC=4;AF=0.061;AN=66;BaseQ          |
| 31578 | chrY | 13537919 | . | A | G   | 12288.22 | PASS          | AC=10;AF=0.156;AN=64;BaseQ         |
| 31579 | chrY | 13537923 | . | A | G   | 1866.69  | PASS          | AC=8;AF=0.125;AN=64;BaseQRankSum=  |
| 31580 | chrY | 13537967 | . | C | T   | 5755.64  | PASS          | AC=12;AF=0.182;AN=66;BaseQRankSum= |
| 31581 | chrY | 13538006 | . | A | G   | 8356.26  | PASS          | AC=23;AF=0.329;AN=70;BaseQRankSum= |
| 31582 | chrY | 13538021 | . | G | A   | 11732.09 | PASS          | AC=27;AF=0.397;AN=68;BaseQ         |
| 31583 | chrY | 13538024 | . | T | C   | 11852.37 | PASS          | AC=27;AF=0.422;AN=64;BaseQ         |
| 31584 | chrY | 13538036 | . | A | G   | 3919.41  | PASS          | AC=11;AF=0.162;AN=68;BaseQRankSum= |
| 31585 | chrY | 13538038 | . | A | G   | 3924.06  | PASS          | AC=12;AF=0.176;AN=68;BaseQRankSum= |
| 31586 | chrY | 13538047 | . | T | C   | 3612.69  | PASS          | AC=12;AF=0.176;AN=68;BaseQRankSum= |
| 31587 | chrY | 13538086 | . | G | A   | 172.24   | PASS          | AC=1;AF=0.014;AN=70;BaseQRankSum=  |
| 31588 | chrY | 13538121 | . | A | C   | 1391.17  | PASS          | AC=9;AF=0.129;AN=70;BaseQRankSum=  |
| 31589 | chrY | 13538135 | . | A | T   | 16946.98 | PASS          | AC=35;AF=0.500;AN=70;BaseQ         |
| 31590 | chrY | 13538152 | . | A | T   | 563.17   | my_snp_filter | AC=8;AF=0.114;AN=70;BaseQ          |
| 31591 | chrY | 13538197 | . | C | G   | 1856.76  | PASS          | AC=13;AF=0.186;AN=70;BaseQRankSum= |
| 31592 | chrY | 13538206 | . | G | T,* | 1795.57  | PASS          | AC=11,2;AF=0.167,0.030;AN=66;BaseQ |
| 31593 | chrY | 13538212 | . | T | C   | 15062.94 | PASS          | AC=34;AF=0.548;AN=62;BaseQ         |
| 31594 | chrY | 13538215 | . | G | A   | 14997.96 | PASS          | AC=34;AF=0.548;AN=62;BaseQ         |
| 31595 | chrY | 13538231 | . | C | T   | 526.27   | PASS          | AC=4;AF=0.069;AN=58;BaseQRankSum=  |
| 31596 | chrY | 13538247 | . | C | T   | 9473.15  | PASS          | AC=16;AF=0.471;AN=34;BaseQRankSum= |
| 31597 | chrY | 13538257 | . | G | A   | 8729.98  | PASS          | AC=13;AF=0.382;AN=34;BaseQRankSum= |
| 31598 | chrY | 13538260 | . | C | T   | 8582.26  | PASS          | AC=12;AF=0.353;AN=34;BaseQRankSum= |
| 31599 | chrY | 13538280 | . | T | C   | 7406.82  | PASS          | AC=9;AF=0.321;AN=28;BaseQRankSum=  |
| 31600 | chrY | 13538347 | . | T | G   | 243      | PASS          | AC=2;AF=0.048;AN=42;BaseQRankSum=  |
| 31601 | chrY | 13538350 | . | C | A   | 2659.98  | my_snp_filter | AC=8;AF=0.190;AN=42;BaseQ          |
| 31602 | chrY | 13538367 | . | A | G   | 2392.35  | my_snp_filter | AC=8;AF=0.154;AN=52;BaseQ          |
| 31603 | chrY | 13538371 | . | G | A   | 100.07   | PASS          | AC=2;AF=0.036;AN=56;BaseQRankSum=  |
| 31604 | chrY | 13538381 | . | T | C   | 65.10    | my_snp_filter | AC=2;AF=0.034;AN=58;BaseQ          |
| 31605 | chrY | 13538393 | . | A | G   | 2336.94  | my_snp_filter | AC=8;AF=0.148;AN=54;BaseQ          |
| 31606 | chrY | 13538400 | . | A | C   | 2393.99  | my_snp_filter | AC=8;AF=0.143;AN=56;BaseQ          |
| 31607 | chrY | 13538421 | . | T | G   | 171.07   | PASS          | AC=2;AF=0.031;AN=64;BaseQRankSum=  |
| 31608 | chrY | 13538517 | . | T | C   | 1483.29  | my_snp_filter | AC=7;AF=0.100;AN=70;BaseQ          |
| 31609 | chrY | 13538563 | . | A | G   | 334.13   | PASS          | AC=4;AF=0.057;AN=70;BaseQRankSum=  |
| 31610 | chrY | 13538791 | . | G | C   | 865.30   | PASS          | AC=10;AF=0.152;AN=66;BaseQRankSum= |
| 31611 | chrY | 13538792 | . | G | A   | 868.28   | PASS          | AC=10;AF=0.152;AN=66;BaseQRankSum= |
| 31612 | chrY | 13538802 | . | C | G   | 1154.27  | PASS          | AC=13;AF=0.191;AN=68;BaseQRankSum= |
| 31613 | chrY | 13538815 | . | T | C   | 46.56    | PASS          | AC=2;AF=0.029;AN=70;BaseQRankSum=  |
| 31614 | chrY | 13538856 | . | A | T   | 3230.05  | PASS          | AC=26;AF=0.371;AN=70;BaseQRankSum= |
| 31615 | chrY | 13538867 | . | T | G   | 456.25   | PASS          | AC=5;AF=0.071;AN=70;BaseQRankSum=  |
| 31616 | chrY | 13538891 | . | T | C   | 816.17   | PASS          | AC=12;AF=0.171;AN=70;BaseQRankSum= |



|       |      |          |   |   |   |          |               |                                    |
|-------|------|----------|---|---|---|----------|---------------|------------------------------------|
| 31617 | chrY | 13538931 | . | T | G | 40.60    | PASS          | AC=1;AF=0.015;AN=68;BaseQRankSum=  |
| 31618 | chrY | 13538934 | . | T | C | 38.21    | PASS          | AC=1;AF=0.014;AN=70;BaseQRankSum=  |
| 31619 | chrY | 13538991 | . | T | G | 1037.21  | PASS          | AC=13;AF=0.186;AN=70;BaseQRankSum= |
| 31620 | chrY | 13539025 | . | C | T | 33.96    | my_snp_filter | AC=2;AF=0.029;AN=70;BaseQ          |
| 31621 | chrY | 13539044 | . | G | A | 287.36   | my_snp_filter | AC=8;AF=0.114;AN=70;BaseQ          |
| 31622 | chrY | 13539059 | . | G | A | 934.31   | PASS          | AC=10;AF=0.147;AN=68;BaseQRankSum= |
| 31623 | chrY | 13539063 | . | T | G | 913.44   | PASS          | AC=10;AF=0.147;AN=68;BaseQRankSum= |
| 31624 | chrY | 13539196 | . | G | T | 751.45   | PASS          | AC=11;AF=0.157;AN=70;BaseQRankSum= |
| 31625 | chrY | 13539214 | . | T | C | 4474.05  | PASS          | AC=22;AF=0.314;AN=70;BaseQRankSum= |
| 31626 | chrY | 13539222 | . | G | A | 4749.61  | PASS          | AC=23;AF=0.329;AN=70;BaseQRankSum= |
| 31627 | chrY | 13539226 | . | T | G | 4784.90  | PASS          | AC=23;AF=0.329;AN=70;BaseQRankSum= |
| 31628 | chrY | 13539257 | . | G | C | 4041.34  | PASS          | AC=27;AF=0.397;AN=68;BaseQRankSum= |
| 31629 | chrY | 13539269 | . | T | C | 1750.46  | PASS          | AC=17;AF=0.250;AN=68;BaseQRankSum= |
| 31630 | chrY | 13539307 | . | G | T | 4352.11  | PASS          | AC=26;AF=0.371;AN=70;BaseQRankSum= |
| 31631 | chrY | 13539334 | . | G | A | 3223.52  | PASS          | AC=20;AF=0.286;AN=70;BaseQRankSum= |
| 31632 | chrY | 13539360 | . | T | C | 2038.24  | PASS          | AC=17;AF=0.283;AN=60;BaseQRankSum= |
| 31633 | chrY | 13539438 | . | A | G | 858.93   | PASS          | AC=6;AF=0.136;AN=44;BaseQRankSum=  |
| 31634 | chrY | 13539506 | . | T | C | 938.53   | my_snp_filter | AC=6;AF=0.107;AN=56;BaseQ          |
| 31635 | chrY | 13539590 | . | G | T | 220.56   | PASS          | AC=4;AF=0.059;AN=68;BaseQRankSum=  |
| 31636 | chrY | 13539607 | . | C | T | 213.44   | PASS          | AC=4;AF=0.057;AN=70;BaseQRankSum=  |
| 31637 | chrY | 13539633 | . | A | T | 31.85    | my_snp_filter | AC=1;AF=0.014;AN=70;BaseQ          |
| 31638 | chrY | 13539680 | . | G | A | 89.30    | PASS          | AC=2;AF=0.029;AN=70;BaseQRankSum=  |
| 31639 | chrY | 13539690 | . | G | C | 183.92   | PASS          | AC=4;AF=0.059;AN=68;BaseQRankSum=  |
| 31640 | chrY | 13539707 | . | T | C | 96.23    | my_snp_filter | AC=5;AF=0.076;AN=66;BaseQ          |
| 31641 | chrY | 13539837 | . | A | C | 342.75   | PASS          | AC=4;AF=0.067;AN=60;BaseQRankSum=  |
| 31642 | chrY | 13540005 | . | G | A | 764.42   | PASS          | AC=5;AF=0.074;AN=68;BaseQRankSum=  |
| 31643 | chrY | 13540028 | . | A | G | 1162.49  | PASS          | AC=6;AF=0.097;AN=62;BaseQRankSum=  |
| 31644 | chrY | 13540032 | . | C | T | 1624.78  | PASS          | AC=6;AF=0.100;AN=60;BaseQRankSum=  |
| 31645 | chrY | 13540059 | . | T | C | 83.82    | PASS          | AC=1;AF=0.016;AN=62;BaseQRankSum=  |
| 31646 | chrY | 13540075 | . | T | G | 82.16    | PASS          | AC=1;AF=0.014;AN=70;BaseQRankSum=  |
| 31647 | chrY | 13540076 | . | A | C | 81.99    | PASS          | AC=1;AF=0.014;AN=70;BaseQRankSum=  |
| 31648 | chrY | 13540146 | . | G | A | 108.10   | PASS          | AC=1;AF=0.014;AN=70;BaseQRankSum=  |
| 31649 | chrY | 13540195 | . | T | C | 1006.41  | PASS          | AC=9;AF=0.141;AN=64;BaseQRankSum=  |
| 31650 | chrY | 13540248 | . | C | T | 388.47   | PASS          | AC=6;AF=0.100;AN=60;BaseQRankSum=  |
| 31651 | chrY | 13540300 | . | A | T | 347.20   | PASS          | AC=5;AF=0.083;AN=60;BaseQRankSum=  |
| 31652 | chrY | 13540364 | . | G | A | 4860.13  | PASS          | AC=28;AF=0.500;AN=56;BaseQRankSum= |
| 31653 | chrY | 13540389 | . | G | A | 607.66   | PASS          | AC=5;AF=0.071;AN=70;BaseQRankSum=  |
| 31654 | chrY | 13540422 | . | T | C | 363.21   | PASS          | AC=3;AF=0.043;AN=70;BaseQRankSum=  |
| 31655 | chrY | 13540448 | . | G | T | 199.78   | PASS          | AC=2;AF=0.029;AN=70;BaseQRankSum=  |
| 31656 | chrY | 13540514 | . | G | A | 831.36   | my_snp_filter | AC=8;AF=0.125;AN=64;BaseQ          |
| 31657 | chrY | 13540588 | . | C | T | 101.87   | PASS          | AC=2;AF=0.034;AN=58;BaseQRankSum=  |
| 31658 | chrY | 13540668 | . | T | C | 96.99    | PASS          | AC=1;AF=0.015;AN=66;BaseQRankSum=  |
| 31659 | chrY | 13540678 | . | C | T | 166.05   | PASS          | AC=1;AF=0.015;AN=68;BaseQRankSum=  |
| 31660 | chrY | 13540695 | . | G | A | 127.15   | PASS          | AC=2;AF=0.029;AN=68;BaseQRankSum=  |
| 31661 | chrY | 13540697 | . | G | T | 127.15   | PASS          | AC=2;AF=0.029;AN=68;BaseQRankSum=  |
| 31662 | chrY | 13540703 | . | A | G | 786.73   | PASS          | AC=6;AF=0.086;AN=70;BaseQRankSum=  |
| 31663 | chrY | 13540717 | . | A | G | 2003.09  | my_snp_filter | AC=9;AF=0.129;AN=70;BaseQ          |
| 31664 | chrY | 13540721 | . | A | C | 165.12   | PASS          | AC=1;AF=0.014;AN=70;BaseQRankSum=  |
| 31665 | chrY | 13540734 | . | G | A | 446.99   | my_snp_filter | AC=9;AF=0.129;AN=70;BaseQ          |
| 31666 | chrY | 13540744 | . | A | C | 1990.14  | PASS          | AC=10;AF=0.143;AN=70;BaseQRankSum= |
| 31667 | chrY | 13540755 | . | G | T | 590.05   | my_snp_filter | AC=10;AF=0.143;AN=70;BaseQ         |
| 31668 | chrY | 13540842 | . | G | A | 11041.33 | my_snp_filter | AC=23;AF=0.329;AN=                 |
| 31669 | chrY | 13540858 | . | T | C | 7385.79  | PASS          | AC=9;AF=0.129;AN=70;BaseQRankSum=  |
| 31670 | chrY | 13540878 | . | T | C | 7954.84  | PASS          | AC=9;AF=0.132;AN=68;BaseQRankSum=  |
| 31671 | chrY | 13540880 | . | C | T | 3202.14  | PASS          | AC=7;AF=0.103;AN=68;BaseQRankSum=  |
| 31672 | chrY | 13540881 | . | G | A | 3384.24  | PASS          | AC=30;AF=0.455;AN=66;BaseQRankSum= |
| 31673 | chrY | 13540902 | . | A | G | 7708.88  | PASS          | AC=11;AF=0.167;AN=66;BaseQRankSum= |
| 31674 | chrY | 13540934 | . | G | A | 6536.18  | my_snp_filter | AC=14;AF=0.212;AN=66;BaseQ         |
| 31675 | chrY | 13540959 | . | T | A | 859.37   | my_snp_filter | AC=8;AF=0.190;AN=42;BaseQ          |
| 31676 | chrY | 13541022 | . | C | A | 7412.15  | PASS          | AC=21;AF=0.500;AN=42;BaseQRankSum= |
| 31677 | chrY | 13541043 | . | T | C | 148.13   | my_snp_filter | AC=5;AF=0.125;AN=40;BaseQ          |
| 31678 | chrY | 13541068 | . | T | C | 15345.55 | PASS          | AC=27;AF=0.563;AN=48;BaseQ         |
| 31679 | chrY | 13541091 | . | A | G | 124.75   | my_snp_filter | AC=1;AF=0.017;AN=58;BaseQ          |
| 31680 | chrY | 13541199 | . | A | G | 4896.74  | PASS          | AC=18;AF=0.290;AN=62;BaseQRankSum= |
| 31681 | chrY | 13541232 | . | A | T | 5940.45  | PASS          | AC=27;AF=0.397;AN=68;BaseQRankSum= |
| 31682 | chrY | 13541288 | . | G | A | 16940.81 | PASS          | AC=36;AF=0.514;AN=70;BaseQ         |
| 31683 | chrY | 13541420 | . | A | C | 5871.37  | PASS          | AC=31;AF=0.443;AN=70;BaseQRankSum= |
| 31684 | chrY | 13541454 | . | T | C | 5473.98  | my_snp_filter | AC=23;AF=0.329;AN=70;BaseQ         |
| 31685 | chrY | 13541478 | . | G | T | 4705.40  | my_snp_filter | AC=23;AF=0.329;AN=70;BaseQ         |
| 31686 | chrY | 13541520 | . | C | T | 2647.92  | my_snp_filter | AC=17;AF=0.243;AN=70;BaseQ         |
| 31687 | chrY | 13541556 | . | A | C | 4288.66  | my_snp_filter | AC=12;AF=0.171;AN=70;BaseQ         |
| 31688 | chrY | 13541561 | . | T | G | 4414.72  | my_snp_filter | AC=12;AF=0.176;AN=68;BaseQ         |
| 31689 | chrY | 13541566 | . | T | C | 4252.54  | my_snp_filter | AC=11;AF=0.162;AN=68;BaseQ         |
| 31690 | chrY | 13541584 | . | C | G | 3603.22  | my_snp_filter | AC=9;AF=0.150;AN=60;BaseQ          |
| 31691 | chrY | 13541624 | . | A | G | 1267.53  | my_snp_filter | AC=8;AF=0.167;AN=48;BaseQ          |
| 31692 | chrY | 13541665 | . | T | C | 1183.23  | my_snp_filter | AC=6;AF=0.150;AN=40;BaseQ          |

|       |      |          |   |   |     |          |               |                                   |
|-------|------|----------|---|---|-----|----------|---------------|-----------------------------------|
| 31693 | chrY | 13541667 | . | A | G   | 1187.49  | my_snp_filter | AC=6;AF=0.150;AN=40;BaseQ         |
| 31694 | chrY | 13541676 | . | A | T   | 226.52   | PASS          | AC=2;AF=0.063;AN=32;BaseQRankSum= |
| 31695 | chrY | 13541725 | . | G | A   | 327.62   | PASS          | AC=4;AF=0.167;AN=24;BaseQRankSum= |
| 31696 | chrY | 13541739 | . | T | C   | 195.48   | PASS          | AC=2;AF=0.100;AN=20;BaseQRankSum= |
| 31697 | chrY | 13541746 | . | C | A   | 249.52   | PASS          | AC=3;AF=0.150;AN=20;BaseQRankSum= |
| 31698 | chrY | 13541756 | . | T | C   | 111.73   | PASS          | AC=2;AF=0.083;AN=24;BaseQRankSum= |
| 31699 | chrY | 13542062 | . | T | C   | 578.07   | my_snp_filter | AC=6;AF=0.086;AN=70;BaseQ         |
| 31700 | chrY | 13542079 | . | G | A   | 995.31   | my_snp_filter | AC=8;AF=0.118;AN=68;BaseQ         |
| 31701 | chrY | 13542195 | . | T | A   | 2314.77  | my_snp_filter | AC=10;AF=0.143;AN=70;Base         |
| 31702 | chrY | 13542240 | . | A | G   | 3860.06  | my_snp_filter | AC=9;AF=0.129;AN=70;BaseQ         |
| 31703 | chrY | 13542250 | . | T | A   | 3966.39  | my_snp_filter | AC=10;AF=0.143;AN=70;Base         |
| 31704 | chrY | 13542260 | . | A | G   | 3899.38  | my_snp_filter | AC=14;AF=0.200;AN=70;Base         |
| 31705 | chrY | 13542287 | . | A | G   | 8377.64  | my_snp_filter | AC=32;AF=0.457;AN=70;Base         |
| 31706 | chrY | 13542296 | . | A | G   | 9350.64  | PASS          | AC=32;AF=0.457;AN=70;BaseQRankSum |
| 31707 | chrY | 13542373 | . | T | A   | 15091.79 | PASS          | AC=36;AF=0.514;AN=70;Base         |
| 31708 | chrY | 13542416 | . | C | T   | 6149.46  | PASS          | AC=29;AF=0.414;AN=70;BaseQRankSum |
| 31709 | chrY | 13542438 | . | T | A   | 15991.72 | PASS          | AC=35;AF=0.500;AN=70;Base         |
| 31710 | chrY | 13542466 | . | G | T   | 16754.72 | PASS          | AC=35;AF=0.500;AN=70;Base         |
| 31711 | chrY | 13542483 | . | C | A   | 883.51   | PASS          | AC=3;AF=0.043;AN=70;BaseQRankSum= |
| 31712 | chrY | 13542486 | . | T | A,C | 12633.84 | PASS          | AC=23,13;AF=0.329,0.186;A         |
| 31713 | chrY | 13542504 | . | T | A   | 15988.84 | PASS          | AC=34;AF=0.486;AN=70;Base         |
| 31714 | chrY | 13542508 | . | C | T   | 20907.72 | PASS          | AC=35;AF=0.500;AN=70;Base         |
| 31715 | chrY | 13542570 | . | T | C   | 5460.38  | PASS          | AC=27;AF=0.386;AN=70;BaseQRankSum |
| 31716 | chrY | 13542595 | . | T | C   | 2176.55  | PASS          | AC=12;AF=0.171;AN=70;BaseQRankSum |
| 31717 | chrY | 13542620 | . | T | C   | 1911.47  | PASS          | AC=6;AF=0.088;AN=68;BaseQRankSum= |
| 31718 | chrY | 13542627 | . | G | C   | 2044.62  | PASS          | AC=6;AF=0.088;AN=68;BaseQRankSum= |
| 31719 | chrY | 13542629 | . | C | T   | 1907.53  | PASS          | AC=6;AF=0.088;AN=68;BaseQRankSum= |
| 31720 | chrY | 13542695 | . | G | A   | 1857.24  | PASS          | AC=9;AF=0.132;AN=68;BaseQRankSum= |
| 31721 | chrY | 13542699 | . | T | C   | 1889.22  | PASS          | AC=9;AF=0.132;AN=68;BaseQRankSum= |
| 31722 | chrY | 13542741 | . | C | T   | 9735.10  | PASS          | AC=14;AF=0.226;AN=62;BaseQRankSum |
| 31723 | chrY | 13542754 | . | C | T   | 2433.53  | PASS          | AC=12;AF=0.176;AN=68;BaseQRankSum |
| 31724 | chrY | 13542756 | . | C | T   | 282.27   | PASS          | AC=1;AF=0.015;AN=66;BaseQRankSum= |
| 31725 | chrY | 13542766 | . | T | C   | 9397.91  | PASS          | AC=11;AF=0.177;AN=62;BaseQRankSum |
| 31726 | chrY | 13542796 | . | G | A   | 1282.49  | PASS          | AC=8;AF=0.200;AN=40;BaseQRankSum= |
| 31727 | chrY | 13542811 | . | T | G   | 3551.41  | PASS          | AC=8;AF=0.235;AN=34;BaseQRankSum= |
| 31728 | chrY | 13542828 | . | G | C   | 1545.39  | PASS          | AC=6;AF=0.188;AN=32;BaseQRankSum= |
| 31729 | chrY | 13542837 | . | C | G   | 5495.14  | PASS          | AC=8;AF=0.267;AN=30;BaseQRankSum= |
| 31730 | chrY | 13542840 | . | G | A   | 1377.46  | PASS          | AC=6;AF=0.200;AN=30;BaseQRankSum= |
| 31731 | chrY | 13542862 | . | A | G   | 3796.11  | PASS          | AC=8;AF=0.174;AN=46;BaseQRankSum= |
| 31732 | chrY | 13542874 | . | G | T   | 47.86    | PASS          | AC=1;AF=0.022;AN=46;BaseQRankSum= |
| 31733 | chrY | 13542886 | . | T | C   | 3224.61  | PASS          | AC=8;AF=0.148;AN=54;BaseQRankSum= |
| 31734 | chrY | 13542887 | . | G | A   | 158.94   | my_snp_filter | AC=4;AF=0.077;AN=52;BaseQ         |
| 31735 | chrY | 13542963 | . | A | T   | 2007.31  | PASS          | AC=13;AF=0.186;AN=70;BaseQRankSum |
| 31736 | chrY | 13542988 | . | A | G   | 8595.88  | PASS          | AC=18;AF=0.257;AN=70;BaseQRankSum |
| 31737 | chrY | 13543029 | . | A | C   | 17773.03 | PASS          | AC=16;AF=0.229;AN=70;Base         |
| 31738 | chrY | 13543032 | . | A | G   | 2727.30  | PASS          | AC=9;AF=0.129;AN=70;BaseQRankSum= |
| 31739 | chrY | 13543043 | . | T | G   | 18786.73 | PASS          | AC=16;AF=0.229;AN=70;Base         |
| 31740 | chrY | 13543083 | . | G | T   | 3291.98  | PASS          | AC=17;AF=0.243;AN=70;BaseQRankSum |
| 31741 | chrY | 13543096 | . | T | A   | 8589.10  | PASS          | AC=16;AF=0.229;AN=70;BaseQRankSum |
| 31742 | chrY | 13543101 | . | G | T   | 9470.63  | PASS          | AC=27;AF=0.386;AN=70;BaseQRankSum |
| 31743 | chrY | 13543121 | . | C | T   | 8568.81  | PASS          | AC=15;AF=0.214;AN=70;BaseQRankSum |
| 31744 | chrY | 13543165 | . | G | A   | 568.40   | my_snp_filter | AC=5;AF=0.071;AN=70;BaseQ         |
| 31745 | chrY | 13543171 | . | C | G   | 1435.29  | PASS          | AC=16;AF=0.229;AN=70;BaseQRankSum |
| 31746 | chrY | 13543218 | . | A | G   | 3183.92  | PASS          | AC=11;AF=0.162;AN=68;BaseQRankSum |
| 31747 | chrY | 13543255 | . | G | A   | 3189.75  | PASS          | AC=8;AF=0.129;AN=62;BaseQRankSum= |
| 31748 | chrY | 13543271 | . | A | C   | 6239.85  | my_snp_filter | AC=10;AF=0.152;AN=66;Base         |
| 31749 | chrY | 13543294 | . | A | G   | 4039.43  | PASS          | AC=9;AF=0.129;AN=70;BaseQRankSum= |
| 31750 | chrY | 13543310 | . | G | A   | 2660.24  | my_snp_filter | AC=9;AF=0.129;AN=70;BaseQ         |
| 31751 | chrY | 13543341 | . | G | A   | 113.77   | my_snp_filter | AC=2;AF=0.029;AN=70;BaseQ         |
| 31752 | chrY | 13543347 | . | C | G   | 5144.88  | PASS          | AC=9;AF=0.129;AN=70;BaseQRankSum= |
| 31753 | chrY | 13543382 | . | T | G   | 291.31   | PASS          | AC=3;AF=0.045;AN=66;BaseQRankSum= |
| 31754 | chrY | 13543439 | . | A | G   | 2283.50  | PASS          | AC=9;AF=0.167;AN=54;BaseQRankSum= |
| 31755 | chrY | 13543452 | . | G | A   | 79.37    | PASS          | AC=1;AF=0.021;AN=48;BaseQRankSum= |
| 31756 | chrY | 13543540 | . | C | G   | 329.54   | PASS          | AC=3;AF=0.052;AN=58;BaseQRankSum= |
| 31757 | chrY | 13543556 | . | T | G   | 498.41   | PASS          | AC=4;AF=0.077;AN=52;BaseQRankSum= |
| 31758 | chrY | 13543575 | . | C | G   | 516.98   | PASS          | AC=4;AF=0.077;AN=52;BaseQRankSum= |
| 31759 | chrY | 13543631 | . | C | A   | 2929.45  | PASS          | AC=26;AF=0.765;AN=34;BaseQRankSum |
| 31760 | chrY | 13543634 | . | A | C,G | 1566.95  | PASS          | AC=4,4;AF=0.080,0.080;AN=50;BaseQ |
| 31761 | chrY | 13543701 | . | T | C   | 1067.91  | PASS          | AC=6;AF=0.120;AN=50;BaseQRankSum= |
| 31762 | chrY | 13543753 | . | A | G   | 2098.36  | PASS          | AC=7;AF=0.184;AN=38;BaseQRankSum= |
| 31763 | chrY | 13543758 | . | A | C   | 2161.88  | PASS          | AC=7;AF=0.184;AN=38;BaseQRankSum= |
| 31764 | chrY | 13544092 | . | T | C   | 584.88   | PASS          | AC=4;AF=0.059;AN=68;BaseQRankSum= |
| 31765 | chrY | 13544100 | . | G | T   | 587.78   | PASS          | AC=4;AF=0.057;AN=70;BaseQRankSum= |
| 31766 | chrY | 13544261 | . | T | A   | 2283.26  | PASS          | AC=25;AF=0.357;AN=70;BaseQRankSum |
| 31767 | chrY | 13544264 | . | G | T   | 382.32   | PASS          | AC=5;AF=0.071;AN=70;BaseQRankSum= |
| 31768 | chrY | 13544283 | . | G | C   | 2318.10  | PASS          | AC=23;AF=0.329;AN=70;BaseQRankSum |

|       |      |          |   |   |     |          |               |                                    |
|-------|------|----------|---|---|-----|----------|---------------|------------------------------------|
| 31769 | chrY | 13544327 | . | C | A   | 2685.97  | my_snp_filter | AC=20;AF=0.286;AN=70;BaseQ         |
| 31770 | chrY | 13544493 | . | G | C   | 59.30    | PASS          | AC=1;AF=0.015;AN=66;BaseQRankSum=  |
| 31771 | chrY | 13544494 | . | T | C   | 59.32    | PASS          | AC=1;AF=0.015;AN=66;BaseQRankSum=  |
| 31772 | chrY | 13544498 | . | T | C   | 59.35    | PASS          | AC=1;AF=0.015;AN=66;BaseQRankSum=  |
| 31773 | chrY | 13544546 | . | T | C   | 320.57   | PASS          | AC=3;AF=0.044;AN=68;BaseQRankSum=  |
| 31774 | chrY | 13544547 | . | G | A   | 320.70   | PASS          | AC=3;AF=0.044;AN=68;BaseQRankSum=  |
| 31775 | chrY | 13544609 | . | A | G   | 721.80   | PASS          | AC=4;AF=0.074;AN=54;BaseQRankSum=  |
| 31776 | chrY | 13544613 | . | T | C   | 766.93   | PASS          | AC=4;AF=0.074;AN=54;BaseQRankSum=  |
| 31777 | chrY | 13544618 | . | G | C   | 821.92   | PASS          | AC=4;AF=0.074;AN=54;BaseQRankSum=  |
| 31778 | chrY | 13544680 | . | T | C   | 1895.55  | my_snp_filter | AC=8;AF=0.211;AN=38;BaseQ          |
| 31779 | chrY | 13544730 | . | T | C   | 3112.18  | my_snp_filter | AC=15;AF=0.300;AN=50;BaseQ         |
| 31780 | chrY | 13544790 | . | A | C   | 174.08   | PASS          | AC=2;AF=0.029;AN=70;BaseQRankSum=  |
| 31781 | chrY | 13544839 | . | C | A   | 27428.87 | PASS          | AC=36;AF=0.514;AN=70;BaseQ         |
| 31782 | chrY | 13544874 | . | C | G   | 3285.03  | PASS          | AC=14;AF=0.200;AN=70;BaseQRankSum= |
| 31783 | chrY | 13544968 | . | T | A   | 64304.72 | PASS          | AC=35;AF=0.500;AN=70;BaseQ         |
| 31784 | chrY | 13544972 | . | A | G   | 63511.72 | PASS          | AC=35;AF=0.500;AN=70;BaseQ         |
| 31785 | chrY | 13544985 | . | G | A   | 4310.46  | PASS          | AC=15;AF=0.214;AN=70;BaseQRankSum= |
| 31786 | chrY | 13545116 | . | G | C   | 408.41   | PASS          | AC=2;AF=0.038;AN=52;BaseQRankSum=  |
| 31787 | chrY | 13545130 | . | T | G   | 10266.23 | PASS          | AC=11;AF=0.289;AN=38;BaseQ         |
| 31788 | chrY | 13545140 | . | A | G   | 10315.28 | PASS          | AC=9;AF=0.281;AN=32;BaseQ          |
| 31789 | chrY | 13545160 | . | A | G   | 7724.68  | PASS          | AC=9;AF=0.321;AN=28;BaseQRankSum=  |
| 31790 | chrY | 13545185 | . | A | G   | 1268.47  | PASS          | AC=6;AF=0.231;AN=26;BaseQRankSum=  |
| 31791 | chrY | 13545209 | . | A | G   | 5865.95  | PASS          | AC=10;AF=0.417;AN=24;BaseQRankSum= |
| 31792 | chrY | 13545271 | . | C | A   | 13544.18 | PASS          | AC=9;AF=0.321;AN=28;BaseQ          |
| 31793 | chrY | 13545339 | . | G | A,* | 1628.41  | PASS          | AC=2,6;AF=0.031,0.094;AN=64;BaseQ  |
| 31794 | chrY | 13545402 | . | G | A,* | 8817.11  | PASS          | AC=17,3;AF=0.250,0.044;AN=68;BaseQ |
| 31795 | chrY | 13545446 | . | G | C   | 15141.57 | PASS          | AC=23;AF=0.329;AN=70;BaseQ         |
| 31796 | chrY | 13545470 | . | T | C   | 15239.82 | PASS          | AC=23;AF=0.329;AN=70;BaseQ         |
| 31797 | chrY | 13545519 | . | T | C   | 12766.80 | PASS          | AC=29;AF=0.439;AN=66;BaseQ         |
| 31798 | chrY | 13545530 | . | C | A   | 5207.89  | PASS          | AC=19;AF=0.279;AN=68;BaseQRankSum= |
| 31799 | chrY | 13545548 | . | G | T   | 15691.25 | PASS          | AC=34;AF=0.515;AN=66;BaseQ         |
| 31800 | chrY | 13545559 | . | T | C   | 1755.17  | PASS          | AC=9;AF=0.129;AN=70;BaseQRankSum=  |
| 31801 | chrY | 13545770 | . | C | T   | 3579.54  | PASS          | AC=14;AF=0.280;AN=50;BaseQRankSum= |
| 31802 | chrY | 13545834 | . | A | G   | 2320.03  | my_snp_filter | AC=7;AF=0.106;AN=66;BaseQ          |
| 31803 | chrY | 13545860 | . | C | G   | 1639.36  | PASS          | AC=7;AF=0.100;AN=70;BaseQRankSum=  |
| 31804 | chrY | 13545867 | . | C | T   | 1779.04  | my_snp_filter | AC=7;AF=0.103;AN=68;BaseQ          |
| 31805 | chrY | 13545871 | . | A | G   | 1807.08  | my_snp_filter | AC=7;AF=0.103;AN=68;BaseQ          |
| 31806 | chrY | 13545946 | . | C | T   | 1095.04  | my_snp_filter | AC=11;AF=0.157;AN=70;BaseQ         |
| 31807 | chrY | 13545981 | . | A | C   | 1820.87  | my_snp_filter | AC=8;AF=0.114;AN=70;BaseQ          |
| 31808 | chrY | 13545982 | . | T | C   | 1817.87  | my_snp_filter | AC=8;AF=0.114;AN=70;BaseQ          |
| 31809 | chrY | 13546002 | . | A | C   | 1616.16  | my_snp_filter | AC=8;AF=0.114;AN=70;BaseQ          |
| 31810 | chrY | 13546009 | . | T | C   | 1583.26  | my_snp_filter | AC=8;AF=0.114;AN=70;BaseQ          |
| 31811 | chrY | 13546038 | . | C | T   | 86.66    | PASS          | AC=2;AF=0.030;AN=66;BaseQRankSum=  |
| 31812 | chrY | 13546301 | . | A | C   | 44.40    | PASS          | AC=1;AF=0.021;AN=48;BaseQRankSum=  |
| 31813 | chrY | 13546343 | . | A | G   | 696.86   | my_snp_filter | AC=6;AF=0.150;AN=40;BaseQ          |
| 31814 | chrY | 13546463 | . | T | C   | 5854.34  | my_snp_filter | AC=21;AF=0.350;AN=60;BaseQ         |
| 31815 | chrY | 13546467 | . | C | T   | 3161.92  | my_snp_filter | AC=12;AF=0.188;AN=64;BaseQ         |
| 31816 | chrY | 13546500 | . | G | T   | 10284.40 | PASS          | AC=30;AF=0.429;AN=70;BaseQ         |
| 31817 | chrY | 13546523 | . | T | G   | 9434.15  | PASS          | AC=30;AF=0.429;AN=70;BaseQRankSum= |
| 31818 | chrY | 13546558 | . | C | A   | 1206.64  | PASS          | AC=10;AF=0.143;AN=70;BaseQRankSum= |
| 31819 | chrY | 13546567 | . | G | A   | 7543.73  | PASS          | AC=33;AF=0.471;AN=70;BaseQRankSum= |
| 31820 | chrY | 13546700 | . | G | C   | 5471.38  | my_snp_filter | AC=20;AF=0.294;AN=68;BaseQ         |
| 31821 | chrY | 13546719 | . | C | T   | 5189.42  | PASS          | AC=20;AF=0.286;AN=70;BaseQRankSum= |
| 31822 | chrY | 13546834 | . | C | A   | 825.03   | PASS          | AC=4;AF=0.065;AN=62;BaseQRankSum=  |
| 31823 | chrY | 13546835 | . | A | G   | 864.70   | PASS          | AC=4;AF=0.063;AN=64;BaseQRankSum=  |
| 31824 | chrY | 13546851 | . | C | G   | 533.46   | PASS          | AC=4;AF=0.067;AN=60;BaseQRankSum=  |
| 31825 | chrY | 13546867 | . | G | T   | 375.25   | PASS          | AC=3;AF=0.050;AN=60;BaseQRankSum=  |
| 31826 | chrY | 13546947 | . | G | A   | 157.52   | PASS          | AC=6;AF=0.115;AN=52;BaseQRankSum=  |
| 31827 | chrY | 13549070 | . | C | A   | 3708.86  | PASS          | AC=18;AF=1.00;AN=18;BaseQRankSum=  |
| 31828 | chrY | 13549146 | . | A | G   | 3473.86  | PASS          | AC=18;AF=1.00;AN=18;DP=147;FS=0.0  |
| 31829 | chrY | 13549630 | . | T | C   | 540.62   | my_snp_filter | AC=4;AF=0.133;AN=30;BaseQ          |
| 31830 | chrY | 13549663 | . | C | G   | 785.19   | my_snp_filter | AC=7;AF=0.194;AN=36;BaseQ          |
| 31831 | chrY | 13549697 | . | C | G   | 49.13    | PASS          | AC=2;AF=0.042;AN=48;DP=284;FS=0.0  |
| 31832 | chrY | 13549701 | . | T | A   | 2542.20  | my_snp_filter | AC=16;AF=0.348;AN=46;BaseQ         |
| 31833 | chrY | 13549746 | . | G | A,T | 3240.81  | PASS          | AC=11,1;AF=0.204,0.019;AN=54;BaseQ |
| 31834 | chrY | 13549747 | . | A | T   | 121.51   | PASS          | AC=1;AF=0.017;AN=60;BaseQRankSum=  |
| 31835 | chrY | 13549759 | . | C | T   | 3254.28  | PASS          | AC=11;AF=0.172;AN=64;BaseQRankSum= |
| 31836 | chrY | 13549796 | . | G | T   | 9744.05  | PASS          | AC=19;AF=0.365;AN=52;BaseQRankSum= |
| 31837 | chrY | 13549813 | . | A | G   | 10143.82 | PASS          | AC=29;AF=0.414;AN=70;BaseQ         |
| 31838 | chrY | 13549853 | . | T | A   | 12241.56 | PASS          | AC=33;AF=0.471;AN=70;BaseQ         |
| 31839 | chrY | 13549882 | . | G | A   | 10100.25 | PASS          | AC=31;AF=0.443;AN=70;BaseQ         |
| 31840 | chrY | 13549908 | . | C | G,* | 4858.40  | PASS          | AC=5,21;AF=0.074,0.309;AN=68;BaseQ |
| 31841 | chrY | 13549982 | . | A | G   | 2024.12  | PASS          | AC=13;AF=0.250;AN=52;BaseQRankSum= |
| 31842 | chrY | 13550084 | . | G | A   | 2618.52  | PASS          | AC=9;AF=0.450;AN=20;BaseQRankSum=  |
| 31843 | chrY | 13550125 | . | A | T   | 881.29   | PASS          | AC=5;AF=0.250;AN=20;BaseQRankSum=  |
| 31844 | chrY | 13550139 | . | C | T   | 3096.52  | PASS          | AC=9;AF=0.450;AN=20;BaseQRankSum=  |

|       |      |          |   |   |   |          |               |                                    |
|-------|------|----------|---|---|---|----------|---------------|------------------------------------|
| 31845 | chrY | 13550167 | . | G | A | 2743.52  | PASS          | AC=9;AF=0.450;AN=20;BaseQRankSum=  |
| 31846 | chrY | 13550182 | . | G | A | 2203.88  | PASS          | AC=8;AF=0.444;AN=18;BaseQRankSum=  |
| 31847 | chrY | 13550225 | . | G | A | 599.22   | PASS          | AC=8;AF=0.444;AN=18;BaseQRankSum=  |
| 31848 | chrY | 13550240 | . | C | T | 180.32   | PASS          | AC=1;AF=0.056;AN=18;BaseQRankSum=  |
| 31849 | chrY | 13550252 | . | T | A | 675.67   | PASS          | AC=8;AF=0.444;AN=18;BaseQRankSum=  |
| 31850 | chrY | 13550258 | . | G | A | 564.81   | PASS          | AC=3;AF=0.167;AN=18;BaseQRankSum=  |
| 31851 | chrY | 13550291 | . | C | G | 1637.09  | my_snp_filter | AC=9;AF=0.500;AN=18;BaseQ          |
| 31852 | chrY | 13550310 | . | T | G | 2531.09  | PASS          | AC=9;AF=0.500;AN=18;BaseQRankSum=  |
| 31853 | chrY | 13550324 | . | G | A | 3351.09  | PASS          | AC=9;AF=0.500;AN=18;BaseQRankSum=  |
| 31854 | chrY | 13550359 | . | A | G | 3244.09  | PASS          | AC=9;AF=0.500;AN=18;BaseQRankSum=  |
| 31855 | chrY | 13550439 | . | C | T | 1106.32  | PASS          | AC=6;AF=0.300;AN=20;BaseQRankSum=  |
| 31856 | chrY | 13550510 | . | A | T | 235.49   | my_snp_filter | AC=2;AF=0.091;AN=22;BaseQ          |
| 31857 | chrY | 13550587 | . | G | C | 63.61    | my_snp_filter | AC=1;AF=0.023;AN=44;BaseQ          |
| 31858 | chrY | 13550599 | . | G | A | 196.75   | my_snp_filter | AC=4;AF=0.091;AN=44;BaseQ          |
| 31859 | chrY | 13550603 | . | A | G | 3340.35  | PASS          | AC=11;AF=0.262;AN=42;BaseQRankSum= |
| 31860 | chrY | 13550653 | . | T | C | 4251.26  | PASS          | AC=8;AF=0.129;AN=62;BaseQRankSum=  |
| 31861 | chrY | 13550668 | . | C | T | 4798.42  | PASS          | AC=9;AF=0.136;AN=66;BaseQRankSum=  |
| 31862 | chrY | 13550714 | . | G | C | 6948.89  | PASS          | AC=10;AF=0.143;AN=70;BaseQRankSum= |
| 31863 | chrY | 13550759 | . | C | A | 126.79   | my_snp_filter | AC=2;AF=0.029;AN=70;BaseQ          |
| 31864 | chrY | 13550782 | . | A | G | 6135.69  | PASS          | AC=18;AF=0.257;AN=70;BaseQRankSum= |
| 31865 | chrY | 13550796 | . | T | C | 6296.86  | PASS          | AC=17;AF=0.243;AN=70;BaseQRankSum= |
| 31866 | chrY | 13550800 | . | T | C | 6313.84  | PASS          | AC=17;AF=0.243;AN=70;BaseQRankSum= |
| 31867 | chrY | 13550801 | . | G | A | 6240.81  | PASS          | AC=17;AF=0.243;AN=70;BaseQRankSum= |
| 31868 | chrY | 13550851 | . | T | C | 1936.49  | PASS          | AC=6;AF=0.086;AN=70;BaseQRankSum=  |
| 31869 | chrY | 13550873 | . | A | C | 2395.91  | PASS          | AC=13;AF=0.186;AN=70;BaseQRankSum= |
| 31870 | chrY | 13550946 | . | A | C | 5973.90  | PASS          | AC=23;AF=0.329;AN=70;BaseQRankSum= |
| 31871 | chrY | 13550958 | . | T | G | 21453.53 | PASS          | AC=34;AF=0.486;AN=70;BaseQ         |
| 31872 | chrY | 13551088 | . | T | C | 456.95   | PASS          | AC=4;AF=0.087;AN=46;BaseQRankSum=  |
| 31873 | chrY | 13551141 | . | C | T | 716.01   | PASS          | AC=5;AF=0.179;AN=28;BaseQRankSum=  |
| 31874 | chrY | 13551147 | . | A | T | 691.54   | PASS          | AC=5;AF=0.227;AN=22;BaseQRankSum=  |
| 31875 | chrY | 13551380 | . | C | T | 327.20   | PASS          | AC=5;AF=0.096;AN=52;BaseQRankSum=  |
| 31876 | chrY | 13551470 | . | C | T | 14642.26 | PASS          | AC=32;AF=0.457;AN=70;BaseQ         |
| 31877 | chrY | 13551502 | . | A | G | 19522.79 | PASS          | AC=34;AF=0.486;AN=70;BaseQ         |
| 31878 | chrY | 13551566 | . | T | G | 43974.72 | PASS          | AC=35;AF=0.500;AN=70;BaseQ         |
| 31879 | chrY | 13551571 | . | G | T | 26081.19 | PASS          | AC=33;AF=0.471;AN=70;BaseQ         |
| 31880 | chrY | 13551609 | . | A | T | 26078.53 | PASS          | AC=34;AF=0.486;AN=70;BaseQ         |
| 31881 | chrY | 13551616 | . | G | A | 1090.51  | PASS          | AC=6;AF=0.086;AN=70;BaseQRankSum=  |
| 31882 | chrY | 13551688 | . | T | C | 9766.66  | my_snp_filter | AC=33;AF=0.471;AN=70;BaseQ         |
| 31883 | chrY | 13551722 | . | C | T | 3389.89  | my_snp_filter | AC=23;AF=0.329;AN=70;BaseQ         |
| 31884 | chrY | 13551775 | . | T | G | 3114     | my_snp_filter | AC=9;AF=0.132;AN=68;BaseQ          |
| 31885 | chrY | 13551883 | . | T | G | 5099.91  | PASS          | AC=21;AF=0.300;AN=70;BaseQRankSum= |
| 31886 | chrY | 13551963 | . | G | A | 3289.30  | PASS          | AC=24;AF=0.375;AN=64;BaseQRankSum= |
| 31887 | chrY | 13552257 | . | G | A | 585.66   | PASS          | AC=5;AF=0.071;AN=70;BaseQRankSum=  |
| 31888 | chrY | 13552295 | . | G | T | 544.14   | PASS          | AC=5;AF=0.071;AN=70;BaseQRankSum=  |
| 31889 | chrY | 13552325 | . | A | G | 60.85    | my_snp_filter | AC=3;AF=0.043;AN=70;BaseQ          |
| 31890 | chrY | 13552574 | . | T | C | 4902.89  | my_snp_filter | AC=11;AF=0.183;AN=60;BaseQ         |
| 31891 | chrY | 13552584 | . | G | A | 5152.55  | my_snp_filter | AC=11;AF=0.196;AN=56;BaseQ         |
| 31892 | chrY | 13552588 | . | T | C | 5051.85  | my_snp_filter | AC=11;AF=0.204;AN=54;BaseQ         |
| 31893 | chrY | 13552590 | . | C | G | 4930.44  | my_snp_filter | AC=11;AF=0.204;AN=54;BaseQ         |
| 31894 | chrY | 13552593 | . | G | A | 59.69    | PASS          | AC=1;AF=0.017;AN=58;BaseQRankSum=  |
| 31895 | chrY | 13552601 | . | C | A | 749.79   | PASS          | AC=7;AF=0.130;AN=54;BaseQRankSum=  |
| 31896 | chrY | 13552721 | . | C | T | 2456.10  | PASS          | AC=10;AF=0.313;AN=32;BaseQRankSum= |
| 31897 | chrY | 13552785 | . | T | C | 717.14   | my_snp_filter | AC=8;AF=0.148;AN=54;BaseQ          |
| 31898 | chrY | 13552810 | . | A | G | 38.14    | PASS          | AC=1;AF=0.017;AN=58;BaseQRankSum=  |
| 31899 | chrY | 13552844 | . | A | G | 1095.73  | my_snp_filter | AC=8;AF=0.114;AN=70;BaseQ          |
| 31900 | chrY | 13552961 | . | T | C | 121.09   | PASS          | AC=3;AF=0.043;AN=70;BaseQRankSum=  |
| 31901 | chrY | 13552969 | . | C | T | 222.63   | PASS          | AC=3;AF=0.043;AN=70;BaseQRankSum=  |
| 31902 | chrY | 13553037 | . | G | T | 1033.57  | PASS          | AC=5;AF=0.071;AN=70;BaseQRankSum=  |
| 31903 | chrY | 13553041 | . | A | G | 1030.35  | PASS          | AC=5;AF=0.071;AN=70;BaseQRankSum=  |
| 31904 | chrY | 13553140 | . | A | C | 887.14   | PASS          | AC=5;AF=0.078;AN=64;BaseQRankSum=  |
| 31905 | chrY | 13553161 | . | C | A | 778.84   | my_snp_filter | AC=5;AF=0.078;AN=64;BaseQ          |
| 31906 | chrY | 13553211 | . | T | A | 907.15   | PASS          | AC=8;AF=0.133;AN=60;BaseQRankSum=  |
| 31907 | chrY | 13553223 | . | A | G | 807.50   | PASS          | AC=8;AF=0.143;AN=56;BaseQRankSum=  |
| 31908 | chrY | 13553339 | . | T | C | 6410.98  | PASS          | AC=33;AF=0.471;AN=70;BaseQRankSum= |
| 31909 | chrY | 13553457 | . | C | A | 403.81   | PASS          | AC=5;AF=0.147;AN=34;BaseQRankSum=  |
| 31910 | chrY | 13553465 | . | A | G | 250.85   | PASS          | AC=3;AF=0.094;AN=32;BaseQRankSum=  |
| 31911 | chrY | 13553475 | . | G | T | 173.69   | PASS          | AC=2;AF=0.067;AN=30;BaseQRankSum=  |
| 31912 | chrY | 13553510 | . | T | C | 114.75   | PASS          | AC=2;AF=0.077;AN=26;BaseQRankSum=  |
| 31913 | chrY | 13553614 | . | A | G | 109.60   | PASS          | AC=2;AF=0.100;AN=20;BaseQRankSum=  |
| 31914 | chrY | 13553655 | . | A | C | 186.39   | PASS          | AC=3;AF=0.167;AN=18;BaseQRankSum=  |
| 31915 | chrY | 13554255 | . | A | C | 1157.88  | PASS          | AC=4;AF=0.059;AN=68;BaseQRankSum=  |
| 31916 | chrY | 13554370 | . | G | A | 42.27    | PASS          | AC=1;AF=0.019;AN=52;BaseQRankSum=  |
| 31917 | chrY | 13554532 | . | G | A | 48.48    | my_snp_filter | AC=2;AF=0.030;AN=66;BaseQ          |
| 31918 | chrY | 13554559 | . | A | T | 322.06   | PASS          | AC=5;AF=0.083;AN=60;BaseQRankSum=  |
| 31919 | chrY | 13554730 | . | A | G | 149.87   | my_snp_filter | AC=4;AF=0.059;AN=68;BaseQ          |
| 31920 | chrY | 13554812 | . | C | T | 97.98    | my_snp_filter | AC=5;AF=0.071;AN=70;BaseQ          |

|       |      |          |   |   |   |          |               |                                    |
|-------|------|----------|---|---|---|----------|---------------|------------------------------------|
| 31921 | chrY | 13554844 | . | C | T | 486.53   | PASS          | AC=8;AF=0.118;AN=68;BaseQRankSum=  |
| 31922 | chrY | 13554946 | . | T | A | 602.26   | PASS          | AC=4;AF=0.057;AN=70;BaseQRankSum=  |
| 31923 | chrY | 13554952 | . | T | C | 658.02   | PASS          | AC=4;AF=0.057;AN=70;BaseQRankSum=  |
| 31924 | chrY | 13555655 | . | T | G | 436.85   | PASS          | AC=4;AF=0.057;AN=70;BaseQRankSum=  |
| 31925 | chrY | 13555659 | . | C | T | 466.93   | PASS          | AC=4;AF=0.057;AN=70;BaseQRankSum=  |
| 31926 | chrY | 13555664 | . | A | T | 562.42   | PASS          | AC=4;AF=0.057;AN=70;BaseQRankSum=  |
| 31927 | chrY | 13555727 | . | T | A | 1772.74  | PASS          | AC=14;AF=0.200;AN=70;BaseQRankSum= |
| 31928 | chrY | 13555729 | . | G | A | 1770.98  | PASS          | AC=14;AF=0.200;AN=70;BaseQRankSum= |
| 31929 | chrY | 13555794 | . | A | G | 538.84   | PASS          | AC=5;AF=0.074;AN=68;BaseQRankSum=  |
| 31930 | chrY | 13555806 | . | C | T | 1029.73  | PASS          | AC=5;AF=0.074;AN=68;BaseQRankSum=  |
| 31931 | chrY | 13555814 | . | C | T | 1056.10  | PASS          | AC=5;AF=0.071;AN=70;BaseQRankSum=  |
| 31932 | chrY | 13555817 | . | T | A | 1063.20  | PASS          | AC=5;AF=0.071;AN=70;BaseQRankSum=  |
| 31933 | chrY | 13555833 | . | G | A | 765.42   | PASS          | AC=5;AF=0.071;AN=70;BaseQRankSum=  |
| 31934 | chrY | 13555848 | . | G | T | 879.04   | PASS          | AC=7;AF=0.100;AN=70;BaseQRankSum=  |
| 31935 | chrY | 13555877 | . | G | C | 564.87   | my_snp_filter | AC=8;AF=0.114;AN=70;BaseQ          |
| 31936 | chrY | 13555934 | . | A | C | 1225.88  | my_snp_filter | AC=9;AF=0.132;AN=68;BaseQ          |
| 31937 | chrY | 13555954 | . | G | T | 1468.32  | my_snp_filter | AC=8;AF=0.118;AN=68;BaseQ          |
| 31938 | chrY | 13555973 | . | A | T | 1789.07  | my_snp_filter | AC=8;AF=0.121;AN=66;BaseQ          |
| 31939 | chrY | 13556017 | . | C | G | 2976.07  | my_snp_filter | AC=12;AF=0.200;AN=60;Base          |
| 31940 | chrY | 13556051 | . | G | T | 139.42   | my_snp_filter | AC=5;AF=0.089;AN=56;BaseQ          |
| 31941 | chrY | 13556121 | . | C | T | 2361.37  | my_snp_filter | AC=8;AF=0.308;AN=26;BaseQ          |
| 31942 | chrY | 13556159 | . | C | T | 2406.65  | PASS          | AC=8;AF=0.333;AN=24;BaseQRankSum=  |
| 31943 | chrY | 13556170 | . | C | T | 49.44    | my_snp_filter | AC=4;AF=0.143;AN=28;BaseQ          |
| 31944 | chrY | 13556376 | . | G | C | 1973.19  | my_snp_filter | AC=9;AF=0.129;AN=70;BaseQ          |
| 31945 | chrY | 13556416 | . | C | A | 467.09   | PASS          | AC=4;AF=0.057;AN=70;BaseQRankSum=  |
| 31946 | chrY | 13556425 | . | G | C | 273.58   | PASS          | AC=3;AF=0.043;AN=70;BaseQRankSum=  |
| 31947 | chrY | 13556428 | . | G | T | 243.18   | PASS          | AC=3;AF=0.043;AN=70;BaseQRankSum=  |
| 31948 | chrY | 13556437 | . | A | T | 114.53   | PASS          | AC=2;AF=0.029;AN=70;BaseQRankSum=  |
| 31949 | chrY | 13556505 | . | T | A | 36.65    | my_snp_filter | AC=1;AF=0.014;AN=70;BaseQ          |
| 31950 | chrY | 13556508 | . | T | G | 31.57    | my_snp_filter | AC=1;AF=0.014;AN=70;BaseQ          |
| 31951 | chrY | 13556518 | . | G | A | 204.03   | PASS          | AC=1;AF=0.014;AN=70;BaseQRankSum=  |
| 31952 | chrY | 13556522 | . | T | G | 212.88   | PASS          | AC=1;AF=0.014;AN=70;BaseQRankSum=  |
| 31953 | chrY | 13556524 | . | T | C | 215.62   | PASS          | AC=1;AF=0.014;AN=70;BaseQRankSum=  |
| 31954 | chrY | 13556673 | . | A | G | 7060.55  | PASS          | AC=31;AF=0.443;AN=70;BaseQRankSum= |
| 31955 | chrY | 13556689 | . | G | C | 5673.12  | PASS          | AC=31;AF=0.443;AN=70;BaseQRankSum= |
| 31956 | chrY | 13556705 | . | T | C | 5009.54  | PASS          | AC=29;AF=0.414;AN=70;BaseQRankSum= |
| 31957 | chrY | 13556716 | . | T | C | 4739.85  | PASS          | AC=30;AF=0.429;AN=70;BaseQRankSum= |
| 31958 | chrY | 13556746 | . | A | T | 6898.47  | PASS          | AC=32;AF=0.457;AN=70;BaseQRankSum= |
| 31959 | chrY | 13556778 | . | A | C | 9451.53  | PASS          | AC=33;AF=0.471;AN=70;BaseQRankSum= |
| 31960 | chrY | 13556880 | . | T | C | 7595.13  | PASS          | AC=14;AF=0.200;AN=70;BaseQRankSum= |
| 31961 | chrY | 13556881 | . | T | C | 7594.72  | PASS          | AC=14;AF=0.200;AN=70;BaseQRankSum= |
| 31962 | chrY | 13556901 | . | A | T | 616.12   | PASS          | AC=4;AF=0.057;AN=70;BaseQRankSum=  |
| 31963 | chrY | 13556942 | . | A | T | 5710.33  | PASS          | AC=14;AF=0.200;AN=70;BaseQRankSum= |
| 31964 | chrY | 13556952 | . | A | G | 5782.78  | PASS          | AC=15;AF=0.214;AN=70;BaseQRankSum= |
| 31965 | chrY | 13556996 | . | T | A | 93.50    | my_snp_filter | AC=1;AF=0.014;AN=70;BaseQ          |
| 31966 | chrY | 13557004 | . | G | T | 6842.47  | PASS          | AC=18;AF=0.257;AN=70;BaseQRankSum= |
| 31967 | chrY | 13557015 | . | A | G | 7312.77  | PASS          | AC=19;AF=0.271;AN=70;BaseQRankSum= |
| 31968 | chrY | 13557038 | . | C | T | 70.96    | my_snp_filter | AC=2;AF=0.029;AN=70;BaseQ          |
| 31969 | chrY | 13557042 | . | A | G | 10201.29 | PASS          | AC=28;AF=0.400;AN=70;Base          |
| 31970 | chrY | 13557116 | . | C | T | 43733.85 | PASS          | AC=34;AF=0.486;AN=70;Base          |
| 31971 | chrY | 13557119 | . | C | G | 44118.85 | PASS          | AC=34;AF=0.486;AN=70;Base          |
| 31972 | chrY | 13557130 | . | C | T | 34264.20 | PASS          | AC=35;AF=0.500;AN=70;Base          |
| 31973 | chrY | 13557365 | . | T | A | 13140.07 | PASS          | AC=34;AF=0.630;AN=54;Base          |
| 31974 | chrY | 13557384 | . | T | C | 12222.11 | PASS          | AC=22;AF=0.611;AN=36;Base          |
| 31975 | chrY | 13557397 | . | T | A | 11805.98 | PASS          | AC=20;AF=0.588;AN=34;Base          |
| 31976 | chrY | 13557422 | . | T | G | 13593.30 | PASS          | AC=10;AF=0.500;AN=20;Base          |
| 31977 | chrY | 13557429 | . | C | A | 13474.52 | PASS          | AC=11;AF=0.550;AN=20;Base          |
| 31978 | chrY | 13557477 | . | A | G | 212.32   | PASS          | AC=1;AF=0.056;AN=18;BaseQRankSum=  |
| 31979 | chrY | 13557556 | . | A | G | 9979.52  | PASS          | AC=9;AF=0.450;AN=20;BaseQRankSum=  |
| 31980 | chrY | 13557557 | . | C | T | 9979.52  | PASS          | AC=9;AF=0.450;AN=20;BaseQRankSum=  |
| 31981 | chrY | 13557652 | . | T | G | 5663.99  | my_snp_filter | AC=9;AF=0.409;AN=22;BaseQ          |
| 31982 | chrY | 13557668 | . | C | A | 6427.84  | my_snp_filter | AC=9;AF=0.375;AN=24;BaseQ          |
| 31983 | chrY | 13557734 | . | A | G | 989.57   | PASS          | AC=5;AF=0.139;AN=36;BaseQRankSum=  |
| 31984 | chrY | 13557751 | . | G | A | 792.81   | PASS          | AC=6;AF=0.150;AN=40;BaseQRankSum=  |
| 31985 | chrY | 13557763 | . | C | T | 3264.70  | my_snp_filter | AC=11;AF=0.275;AN=40;Base          |
| 31986 | chrY | 13557808 | . | T | A | 838.33   | my_snp_filter | AC=7;AF=0.159;AN=44;BaseQ          |
| 31987 | chrY | 13557839 | . | A | G | 350.63   | PASS          | AC=4;AF=0.074;AN=54;BaseQRankSum=  |
| 31988 | chrY | 13557858 | . | C | T | 178.14   | PASS          | AC=3;AF=0.052;AN=58;BaseQRankSum=  |
| 31989 | chrY | 13557956 | . | A | T | 949.12   | PASS          | AC=4;AF=0.057;AN=70;BaseQRankSum=  |
| 31990 | chrY | 13557963 | . | A | G | 1006.12  | PASS          | AC=4;AF=0.059;AN=68;BaseQRankSum=  |
| 31991 | chrY | 13557964 | . | G | C | 1028.85  | PASS          | AC=4;AF=0.057;AN=70;BaseQRankSum=  |
| 31992 | chrY | 13557966 | . | C | T | 1031.65  | PASS          | AC=4;AF=0.057;AN=70;BaseQRankSum=  |
| 31993 | chrY | 13558005 | . | T | C | 510.38   | PASS          | AC=4;AF=0.059;AN=68;BaseQRankSum=  |
| 31994 | chrY | 13558029 | . | C | G | 838.70   | PASS          | AC=4;AF=0.059;AN=68;BaseQRankSum=  |
| 31995 | chrY | 13558030 | . | A | G | 837.63   | PASS          | AC=4;AF=0.059;AN=68;BaseQRankSum=  |
| 31996 | chrY | 13558042 | . | G | C | 369.63   | PASS          | AC=4;AF=0.059;AN=68;BaseQRankSum=  |

|       |      |          |   |   |   |          |               |                                    |
|-------|------|----------|---|---|---|----------|---------------|------------------------------------|
| 31997 | chrY | 13558044 | . | A | G | 369.98   | PASS          | AC=4;AF=0.057;AN=70;BaseQRankSum=  |
| 31998 | chrY | 13558114 | . | T | A | 879.51   | PASS          | AC=6;AF=0.086;AN=70;BaseQRankSum=  |
| 31999 | chrY | 13558124 | . | C | T | 862.93   | PASS          | AC=6;AF=0.088;AN=68;BaseQRankSum=  |
| 32000 | chrY | 13558127 | . | T | A | 898.61   | PASS          | AC=6;AF=0.088;AN=68;BaseQRankSum=  |
| 32001 | chrY | 13558135 | . | G | A | 1000.53  | PASS          | AC=7;AF=0.103;AN=68;BaseQRankSum=  |
| 32002 | chrY | 13558138 | . | C | A | 921.36   | PASS          | AC=7;AF=0.103;AN=68;BaseQRankSum=  |
| 32003 | chrY | 13558165 | . | G | C | 1170.93  | PASS          | AC=7;AF=0.106;AN=66;BaseQRankSum=  |
| 32004 | chrY | 13558181 | . | C | T | 1885.96  | PASS          | AC=6;AF=0.088;AN=68;BaseQRankSum=  |
| 32005 | chrY | 13558182 | . | G | A | 432.28   | PASS          | AC=6;AF=0.088;AN=68;DP=473;FS=0.0  |
| 32006 | chrY | 13558190 | . | G | T | 90.45    | my_snp_filter | AC=2;AF=0.030;AN=66;BaseQ          |
| 32007 | chrY | 13558196 | . | C | T | 2418.61  | PASS          | AC=6;AF=0.091;AN=66;BaseQRankSum=  |
| 32008 | chrY | 13558220 | . | A | C | 2398.07  | PASS          | AC=7;AF=0.109;AN=64;BaseQRankSum=  |
| 32009 | chrY | 13558270 | . | G | T | 3451.97  | PASS          | AC=14;AF=0.200;AN=70;BaseQRankSum= |
| 32010 | chrY | 13558285 | . | C | T | 3314.63  | PASS          | AC=14;AF=0.200;AN=70;BaseQRankSum= |
| 32011 | chrY | 13558324 | . | C | T | 1786.37  | PASS          | AC=8;AF=0.114;AN=70;BaseQRankSum=  |
| 32012 | chrY | 13558345 | . | T | G | 913.93   | PASS          | AC=7;AF=0.100;AN=70;BaseQRankSum=  |
| 32013 | chrY | 13558360 | . | A | C | 1158.45  | PASS          | AC=8;AF=0.114;AN=70;BaseQRankSum=  |
| 32014 | chrY | 13558367 | . | G | A | 1106.63  | PASS          | AC=8;AF=0.114;AN=70;BaseQRankSum=  |
| 32015 | chrY | 13558372 | . | G | T | 39.84    | PASS          | AC=1;AF=0.014;AN=70;BaseQRankSum=  |
| 32016 | chrY | 13558394 | . | T | C | 82       | my_snp_filter | AC=3;AF=0.043;AN=70;BaseQ          |
| 32017 | chrY | 13558465 | . | A | G | 9815.18  | PASS          | AC=54;AF=0.818;AN=66;DP=442;FS=0.  |
| 32018 | chrY | 13558504 | . | A | G | 98.27    | PASS          | AC=2;AF=0.032;AN=62;BaseQRankSum=  |
| 32019 | chrY | 13558548 | . | A | G | 2431.99  | PASS          | AC=8;AF=0.167;AN=48;BaseQRankSum=  |
| 32020 | chrY | 13558554 | . | A | G | 2610.98  | PASS          | AC=8;AF=0.182;AN=44;BaseQRankSum=  |
| 32021 | chrY | 13558580 | . | A | T | 218.78   | PASS          | AC=1;AF=0.038;AN=26;BaseQRankSum=  |
| 32022 | chrY | 13558588 | . | T | A | 2567.90  | PASS          | AC=8;AF=0.333;AN=24;BaseQRankSum=  |
| 32023 | chrY | 13558604 | . | A | G | 992.95   | PASS          | AC=6;AF=0.273;AN=22;BaseQRankSum=  |
| 32024 | chrY | 13558622 | . | A | T | 3577.84  | PASS          | AC=9;AF=0.375;AN=24;BaseQRankSum=  |
| 32025 | chrY | 13558674 | . | A | T | 2633.20  | my_snp_filter | AC=11;AF=0.423;AN=26;BaseQ         |
| 32026 | chrY | 13558707 | . | T | G | 4044.52  | PASS          | AC=9;AF=0.450;AN=20;BaseQRankSum=  |
| 32027 | chrY | 13558712 | . | A | T | 4001.52  | PASS          | AC=9;AF=0.450;AN=20;BaseQRankSum=  |
| 32028 | chrY | 13558724 | . | C | G | 2774.09  | PASS          | AC=9;AF=0.500;AN=18;BaseQRankSum=  |
| 32029 | chrY | 13558741 | . | G | T | 1060.93  | PASS          | AC=6;AF=0.333;AN=18;BaseQRankSum=  |
| 32030 | chrY | 13558802 | . | G | T | 3131.71  | PASS          | AC=9;AF=0.321;AN=28;BaseQRankSum=  |
| 32031 | chrY | 13558817 | . | A | T | 979.87   | PASS          | AC=6;AF=0.176;AN=34;BaseQRankSum=  |
| 32032 | chrY | 13559055 | . | G | A | 1454.30  | my_snp_filter | AC=6;AF=0.086;AN=70;BaseQ          |
| 32033 | chrY | 13559064 | . | A | C | 1981.38  | PASS          | AC=6;AF=0.086;AN=70;BaseQRankSum=  |
| 32034 | chrY | 13559069 | . | C | A | 2084.38  | PASS          | AC=6;AF=0.086;AN=70;BaseQRankSum=  |
| 32035 | chrY | 13559094 | . | G | A | 48.12    | my_snp_filter | AC=2;AF=0.029;AN=70;BaseQ          |
| 32036 | chrY | 13559115 | . | G | A | 3786.99  | PASS          | AC=8;AF=0.121;AN=66;BaseQRankSum=  |
| 32037 | chrY | 13559135 | . | C | G | 4274.59  | my_snp_filter | AC=8;AF=0.121;AN=66;BaseQ          |
| 32038 | chrY | 13559179 | . | C | T | 5422.85  | PASS          | AC=9;AF=0.150;AN=60;BaseQRankSum=  |
| 32039 | chrY | 13559224 | . | A | G | 4387.40  | my_snp_filter | AC=9;AF=0.214;AN=42;BaseQ          |
| 32040 | chrY | 13559244 | . | G | C | 3959.28  | my_snp_filter | AC=10;AF=0.263;AN=38;BaseQ         |
| 32041 | chrY | 13559293 | . | T | C | 4296.74  | PASS          | AC=13;AF=0.406;AN=32;BaseQRankSum= |
| 32042 | chrY | 13559307 | . | C | T | 7183.31  | PASS          | AC=12;AF=0.429;AN=28;BaseQRankSum= |
| 32043 | chrY | 13559410 | . | A | G | 3613.43  | PASS          | AC=6;AF=0.250;AN=24;BaseQRankSum=  |
| 32044 | chrY | 13559510 | . | T | A | 11606.52 | PASS          | AC=9;AF=0.450;AN=20;BaseQ          |
| 32045 | chrY | 13559516 | . | T | A | 11636.52 | PASS          | AC=9;AF=0.450;AN=20;BaseQ          |
| 32046 | chrY | 13559625 | . | T | A | 8732.09  | PASS          | AC=9;AF=0.500;AN=18;BaseQRankSum=  |
| 32047 | chrY | 13559638 | . | A | G | 8360.09  | PASS          | AC=9;AF=0.500;AN=18;BaseQRankSum=  |
| 32048 | chrY | 13559640 | . | T | G | 8354.09  | PASS          | AC=9;AF=0.500;AN=18;BaseQRankSum=  |
| 32049 | chrY | 13559651 | . | A | G | 7577.09  | PASS          | AC=9;AF=0.500;AN=18;BaseQRankSum=  |
| 32050 | chrY | 13559666 | . | C | T | 38.34    | my_snp_filter | AC=2;AF=0.111;AN=18;BaseQ          |
| 32051 | chrY | 13559692 | . | T | C | 2594.09  | PASS          | AC=9;AF=0.500;AN=18;BaseQRankSum=  |
| 32052 | chrY | 13559726 | . | C | T | 2900.01  | PASS          | AC=8;AF=0.444;AN=18;BaseQRankSum=  |
| 32053 | chrY | 13559736 | . | T | C | 3224.61  | PASS          | AC=8;AF=0.444;AN=18;BaseQRankSum=  |
| 32054 | chrY | 13559741 | . | A | C | 3362.01  | PASS          | AC=8;AF=0.444;AN=18;BaseQRankSum=  |
| 32055 | chrY | 13559742 | . | C | T | 3497.01  | PASS          | AC=8;AF=0.444;AN=18;BaseQRankSum=  |
| 32056 | chrY | 13559743 | . | A | C | 3360.01  | PASS          | AC=8;AF=0.444;AN=18;BaseQRankSum=  |
| 32057 | chrY | 13559757 | . | A | G | 3610.01  | PASS          | AC=8;AF=0.444;AN=18;BaseQRankSum=  |
| 32058 | chrY | 13559785 | . | T | C | 3172     | my_snp_filter | AC=8;AF=0.444;AN=18;BaseQ          |
| 32059 | chrY | 13559788 | . | C | T | 600.32   | PASS          | AC=1;AF=0.056;AN=18;BaseQRankSum=  |
| 32060 | chrY | 13559790 | . | G | A | 600.32   | PASS          | AC=1;AF=0.056;AN=18;BaseQRankSum=  |
| 32061 | chrY | 13559812 | . | G | A | 5489.09  | my_snp_filter | AC=9;AF=0.500;AN=18;BaseQ          |
| 32062 | chrY | 13559823 | . | C | G | 1934.81  | PASS          | AC=6;AF=0.300;AN=20;BaseQRankSum=  |
| 32063 | chrY | 13559826 | . | T | A | 1938.81  | PASS          | AC=6;AF=0.300;AN=20;BaseQRankSum=  |
| 32064 | chrY | 13559944 | . | A | C | 913.75   | PASS          | AC=6;AF=0.333;AN=18;BaseQRankSum=  |
| 32065 | chrY | 13559962 | . | G | T | 307.68   | PASS          | AC=3;AF=0.167;AN=18;BaseQRankSum=  |
| 32066 | chrY | 13559963 | . | A | G | 305.69   | PASS          | AC=3;AF=0.167;AN=18;BaseQRankSum=  |
| 32067 | chrY | 13560112 | . | C | A | 150.50   | PASS          | AC=2;AF=0.100;AN=20;BaseQRankSum=  |
| 32068 | chrY | 13560113 | . | G | A | 150.84   | PASS          | AC=2;AF=0.100;AN=20;BaseQRankSum=  |
| 32069 | chrY | 13560150 | . | T | C | 147.96   | PASS          | AC=3;AF=0.150;AN=20;BaseQRankSum=  |
| 32070 | chrY | 13560186 | . | G | T | 41.40    | PASS          | AC=1;AF=0.050;AN=20;BaseQRankSum=  |
| 32071 | chrY | 13560196 | . | A | C | 379.73   | PASS          | AC=4;AF=0.200;AN=20;BaseQRankSum=  |
| 32072 | chrY | 13560225 | . | T | G | 323.46   | PASS          | AC=3;AF=0.150;AN=20;BaseQRankSum=  |

|       |      |          |   |   |   |          |               |                                    |
|-------|------|----------|---|---|---|----------|---------------|------------------------------------|
| 32073 | chrY | 13560237 | . | C | T | 208.15   | PASS          | AC=1;AF=0.050;AN=20;BaseQRankSum=  |
| 32074 | chrY | 13560359 | . | C | A | 918.57   | PASS          | AC=5;AF=0.278;AN=18;BaseQRankSum=  |
| 32075 | chrY | 13561499 | . | G | A | 58.23    | PASS          | AC=1;AF=0.050;AN=20;BaseQRankSum=  |
| 32076 | chrY | 13561548 | . | G | A | 1399.09  | my_snp_filter | AC=9;AF=0.500;AN=18;BaseQ          |
| 32077 | chrY | 13561562 | . | A | G | 1923.09  | my_snp_filter | AC=9;AF=0.500;AN=18;BaseQ          |
| 32078 | chrY | 13561586 | . | T | A | 918.24   | my_snp_filter | AC=6;AF=0.333;AN=18;BaseQ          |
| 32079 | chrY | 13561611 | . | G | A | 3600.09  | my_snp_filter | AC=9;AF=0.500;AN=18;BaseQ          |
| 32080 | chrY | 13561686 | . | A | G | 7286.52  | my_snp_filter | AC=9;AF=0.450;AN=20;BaseQ          |
| 32081 | chrY | 13561690 | . | G | A | 7307.52  | my_snp_filter | AC=9;AF=0.450;AN=20;BaseQ          |
| 32082 | chrY | 13561722 | . | G | C | 2216.81  | my_snp_filter | AC=8;AF=0.400;AN=20;BaseQ          |
| 32083 | chrY | 13561765 | . | C | T | 2989.52  | PASS          | AC=9;AF=0.450;AN=20;BaseQRankSum=  |
| 32084 | chrY | 13561802 | . | A | G | 4594.85  | PASS          | AC=9;AF=0.375;AN=24;BaseQRankSum=  |
| 32085 | chrY | 13561827 | . | G | A | 85.22    | my_snp_filter | AC=2;AF=0.083;AN=24;BaseQ          |
| 32086 | chrY | 13561833 | . | C | G | 82.22    | my_snp_filter | AC=2;AF=0.083;AN=24;BaseQ          |
| 32087 | chrY | 13561896 | . | C | T | 55.21    | my_snp_filter | AC=1;AF=0.042;AN=24;BaseQ          |
| 32088 | chrY | 13561928 | . | G | A | 8165.52  | PASS          | AC=9;AF=0.450;AN=20;BaseQRankSum=  |
| 32089 | chrY | 13562010 | . | C | T | 5896.09  | PASS          | AC=9;AF=0.500;AN=18;BaseQRankSum=  |
| 32090 | chrY | 13562032 | . | G | A | 1331.24  | PASS          | AC=6;AF=0.333;AN=18;BaseQRankSum=  |
| 32091 | chrY | 13562095 | . | G | C | 4444.52  | PASS          | AC=9;AF=0.450;AN=20;BaseQRankSum=  |
| 32092 | chrY | 13562103 | . | G | C | 4303.52  | PASS          | AC=9;AF=0.450;AN=20;BaseQRankSum=  |
| 32093 | chrY | 13562145 | . | A | C | 3081.39  | my_snp_filter | AC=8;AF=0.400;AN=20;BaseQ          |
| 32094 | chrY | 13562155 | . | A | G | 3491.38  | my_snp_filter | AC=8;AF=0.400;AN=20;BaseQ          |
| 32095 | chrY | 13562159 | . | A | T | 3626.38  | my_snp_filter | AC=8;AF=0.400;AN=20;BaseQ          |
| 32096 | chrY | 13562168 | . | T | G | 3605.57  | my_snp_filter | AC=8;AF=0.444;AN=18;BaseQ          |
| 32097 | chrY | 13562206 | . | A | T | 74.83    | my_snp_filter | AC=1;AF=0.042;AN=24;BaseQ          |
| 32098 | chrY | 13562208 | . | C | G | 3313.45  | PASS          | AC=11;AF=0.500;AN=22;BaseQRankSum= |
| 32099 | chrY | 13562223 | . | A | G | 122.39   | PASS          | AC=2;AF=0.067;AN=30;BaseQRankSum=  |
| 32100 | chrY | 13562246 | . | T | C | 3444.67  | PASS          | AC=12;AF=0.462;AN=26;BaseQRankSum= |
| 32101 | chrY | 13562255 | . | G | A | 227.71   | my_snp_filter | AC=4;AF=0.143;AN=28;BaseQ          |
| 32102 | chrY | 13562324 | . | T | C | 307.67   | PASS          | AC=1;AF=0.045;AN=22;BaseQRankSum=  |
| 32103 | chrY | 13562335 | . | C | T | 8084     | PASS          | AC=9;AF=0.409;AN=22;BaseQRankSum=  |
| 32104 | chrY | 13562339 | . | C | G | 8042.11  | PASS          | AC=9;AF=0.409;AN=22;BaseQRankSum=  |
| 32105 | chrY | 13562405 | . | T | C | 4502.85  | PASS          | AC=9;AF=0.375;AN=24;BaseQRankSum=  |
| 32106 | chrY | 13562414 | . | T | G | 4708.78  | PASS          | AC=9;AF=0.375;AN=24;BaseQRankSum=  |
| 32107 | chrY | 13562425 | . | C | A | 34.87    | my_snp_filter | AC=1;AF=0.042;AN=24;BaseQ          |
| 32108 | chrY | 13562436 | . | C | A | 3903.99  | PASS          | AC=9;AF=0.409;AN=22;BaseQRankSum=  |
| 32109 | chrY | 13562463 | . | T | A | 36.83    | my_snp_filter | AC=1;AF=0.042;AN=24;BaseQ          |
| 32110 | chrY | 13562499 | . | G | C | 5645.52  | PASS          | AC=9;AF=0.450;AN=20;BaseQRankSum=  |
| 32111 | chrY | 13562597 | . | T | A | 3814.52  | PASS          | AC=9;AF=0.450;AN=20;BaseQRankSum=  |
| 32112 | chrY | 13562637 | . | C | T | 98.30    | PASS          | AC=1;AF=0.050;AN=20;BaseQRankSum=  |
| 32113 | chrY | 13562653 | . | C | T | 1360.55  | PASS          | AC=9;AF=0.450;AN=20;BaseQRankSum=  |
| 32114 | chrY | 13562662 | . | A | C | 120.97   | PASS          | AC=2;AF=0.100;AN=20;BaseQRankSum=  |
| 32115 | chrY | 13562665 | . | T | A | 1016.61  | PASS          | AC=7;AF=0.350;AN=20;BaseQRankSum=  |
| 32116 | chrY | 13562691 | . | A | C | 1494.81  | PASS          | AC=7;AF=0.389;AN=18;BaseQRankSum=  |
| 32117 | chrY | 13562698 | . | C | T | 1929.35  | PASS          | AC=7;AF=0.389;AN=18;BaseQRankSum=  |
| 32118 | chrY | 13562699 | . | A | G | 2041.24  | PASS          | AC=7;AF=0.389;AN=18;BaseQRankSum=  |
| 32119 | chrY | 13562701 | . | A | G | 2057.15  | PASS          | AC=7;AF=0.389;AN=18;BaseQRankSum=  |
| 32120 | chrY | 13562720 | . | T | C | 67.33    | my_snp_filter | AC=4;AF=0.182;AN=22;BaseQ          |
| 32121 | chrY | 13562868 | . | G | A | 7597.89  | PASS          | AC=11;AF=0.500;AN=22;BaseQRankSum= |
| 32122 | chrY | 13562893 | . | A | G | 6247.91  | PASS          | AC=9;AF=0.409;AN=22;BaseQRankSum=  |
| 32123 | chrY | 13562936 | . | A | G | 334.86   | PASS          | AC=4;AF=0.200;AN=20;BaseQRankSum=  |
| 32124 | chrY | 13562990 | . | G | T | 3148.09  | my_snp_filter | AC=9;AF=0.500;AN=18;BaseQ          |
| 32125 | chrY | 13562993 | . | T | A | 3154.09  | my_snp_filter | AC=9;AF=0.500;AN=18;BaseQ          |
| 32126 | chrY | 13563039 | . | A | G | 872.36   | my_snp_filter | AC=6;AF=0.333;AN=18;BaseQ          |
| 32127 | chrY | 13563074 | . | A | G | 1072.26  | my_snp_filter | AC=6;AF=0.333;AN=18;BaseQ          |
| 32128 | chrY | 13563076 | . | A | C | 1069.62  | my_snp_filter | AC=6;AF=0.333;AN=18;BaseQ          |
| 32129 | chrY | 13563134 | . | G | A | 40.01    | my_snp_filter | AC=2;AF=0.111;AN=18;BaseQ          |
| 32130 | chrY | 13563578 | . | A | T | 216.56   | PASS          | AC=5;AF=0.278;AN=18;BaseQRankSum=  |
| 32131 | chrY | 13563615 | . | G | A | 1730.93  | my_snp_filter | AC=6;AF=0.300;AN=20;BaseQ          |
| 32132 | chrY | 13563618 | . | G | T | 1864.40  | my_snp_filter | AC=6;AF=0.300;AN=20;BaseQ          |
| 32133 | chrY | 13563622 | . | C | T | 1982.60  | my_snp_filter | AC=6;AF=0.300;AN=20;BaseQ          |
| 32134 | chrY | 13563647 | . | C | G | 2394.31  | PASS          | AC=8;AF=0.364;AN=22;BaseQRankSum=  |
| 32135 | chrY | 13563681 | . | G | A | 4691.85  | my_snp_filter | AC=10;AF=0.455;AN=22;BaseQ         |
| 32136 | chrY | 13563685 | . | C | A | 1592.69  | PASS          | AC=6;AF=0.273;AN=22;BaseQRankSum=  |
| 32137 | chrY | 13563698 | . | T | C | 4716.46  | my_snp_filter | AC=10;AF=0.500;AN=20;BaseQ         |
| 32138 | chrY | 13563699 | . | G | A | 1554.01  | PASS          | AC=6;AF=0.300;AN=20;BaseQRankSum=  |
| 32139 | chrY | 13563712 | . | T | C | 4927.30  | my_snp_filter | AC=10;AF=0.455;AN=22;BaseQ         |
| 32140 | chrY | 13563713 | . | G | A | 4930.30  | my_snp_filter | AC=10;AF=0.455;AN=22;BaseQ         |
| 32141 | chrY | 13563786 | . | G | T | 353.22   | PASS          | AC=7;AF=0.159;AN=44;BaseQRankSum=  |
| 32142 | chrY | 13563875 | . | T | G | 2106.32  | PASS          | AC=8;AF=0.125;AN=64;BaseQRankSum=  |
| 32143 | chrY | 13563885 | . | A | G | 2283.74  | PASS          | AC=9;AF=0.145;AN=62;BaseQRankSum=  |
| 32144 | chrY | 13563907 | . | A | T | 2674.02  | PASS          | AC=11;AF=0.162;AN=68;BaseQRankSum= |
| 32145 | chrY | 13563985 | . | G | A | 11215.59 | PASS          | AC=31;AF=0.443;AN=70;BaseQ         |
| 32146 | chrY | 13564004 | . | A | G | 11212.23 | PASS          | AC=31;AF=0.443;AN=70;BaseQ         |
| 32147 | chrY | 13564080 | . | T | C | 15066.12 | PASS          | AC=31;AF=0.443;AN=70;BaseQ         |
| 32148 | chrY | 13564081 | . | G | C | 15066.12 | PASS          | AC=31;AF=0.443;AN=70;BaseQ         |

|       |      |          |   |   |   |          |               |                                    |
|-------|------|----------|---|---|---|----------|---------------|------------------------------------|
| 32149 | chrY | 13564093 | . | T | C | 12953.25 | PASS          | AC=29;AF=0.426;AN=68;BaseQRankSum= |
| 32150 | chrY | 13564097 | . | A | G | 12569.03 | PASS          | AC=29;AF=0.426;AN=68;BaseQRankSum= |
| 32151 | chrY | 13564162 | . | T | G | 4824.10  | PASS          | AC=14;AF=0.226;AN=62;BaseQRankSum= |
| 32152 | chrY | 13564164 | . | A | T | 406.41   | PASS          | AC=3;AF=0.044;AN=68;BaseQRankSum=  |
| 32153 | chrY | 13564273 | . | T | A | 10117.94 | PASS          | AC=34;AF=0.500;AN=68;BaseQRankSum= |
| 32154 | chrY | 13564305 | . | C | A | 4974.51  | PASS          | AC=27;AF=0.386;AN=70;BaseQRankSum= |
| 32155 | chrY | 13564339 | . | A | G | 4542.13  | PASS          | AC=17;AF=0.274;AN=62;BaseQRankSum= |
| 32156 | chrY | 13564369 | . | A | G | 246.80   | PASS          | AC=4;AF=0.067;AN=60;BaseQRankSum=  |
| 32157 | chrY | 13564408 | . | G | C | 1710.94  | PASS          | AC=18;AF=0.346;AN=52;BaseQRankSum= |
| 32158 | chrY | 13564421 | . | A | G | 68.54    | my_snp_filter | AC=2;AF=0.037;AN=54;BaseQRankSum=  |
| 32159 | chrY | 13564424 | . | A | G | 157.75   | PASS          | AC=3;AF=0.058;AN=52;BaseQRankSum=  |
| 32160 | chrY | 13564431 | . | C | A | 357.22   | PASS          | AC=6;AF=0.100;AN=60;BaseQRankSum=  |
| 32161 | chrY | 13564438 | . | G | C | 256.81   | PASS          | AC=5;AF=0.081;AN=62;BaseQRankSum=  |
| 32162 | chrY | 13564490 | . | A | T | 5826.34  | PASS          | AC=32;AF=0.457;AN=70;BaseQRankSum= |
| 32163 | chrY | 13564520 | . | G | A | 7659.81  | PASS          | AC=36;AF=0.514;AN=70;BaseQRankSum= |
| 32164 | chrY | 13564609 | . | T | C | 4570.38  | PASS          | AC=23;AF=0.338;AN=68;BaseQRankSum= |
| 32165 | chrY | 13564612 | . | G | A | 3919.29  | PASS          | AC=20;AF=0.286;AN=70;BaseQRankSum= |
| 32166 | chrY | 13564656 | . | T | C | 160.60   | PASS          | AC=4;AF=0.063;AN=64;BaseQRankSum=  |
| 32167 | chrY | 13564681 | . | T | A | 157.94   | PASS          | AC=3;AF=0.045;AN=66;BaseQRankSum=  |
| 32168 | chrY | 13564743 | . | G | C | 69.91    | my_snp_filter | AC=4;AF=0.059;AN=68;BaseQRankSum=  |
| 32169 | chrY | 13564751 | . | T | C | 273.55   | PASS          | AC=5;AF=0.074;AN=68;BaseQRankSum=  |
| 32170 | chrY | 13564754 | . | C | T | 344.57   | PASS          | AC=5;AF=0.074;AN=68;BaseQRankSum=  |
| 32171 | chrY | 13564769 | . | G | A | 946.91   | PASS          | AC=8;AF=0.118;AN=68;BaseQRankSum=  |
| 32172 | chrY | 13564789 | . | G | T | 1757.48  | PASS          | AC=8;AF=0.121;AN=66;BaseQRankSum=  |
| 32173 | chrY | 13564984 | . | C | A | 863.47   | PASS          | AC=4;AF=0.057;AN=70;BaseQRankSum=  |
| 32174 | chrY | 13564989 | . | G | C | 14409.61 | PASS          | AC=37;AF=0.529;AN=70;BaseQRankSum= |
| 32175 | chrY | 13564990 | . | C | T | 889.96   | PASS          | AC=6;AF=0.086;AN=70;BaseQRankSum=  |
| 32176 | chrY | 13564995 | . | C | G | 442.63   | PASS          | AC=3;AF=0.043;AN=70;BaseQRankSum=  |
| 32177 | chrY | 13565045 | . | C | A | 12740.20 | PASS          | AC=34;AF=0.486;AN=70;BaseQRankSum= |
| 32178 | chrY | 13565107 | . | A | G | 17258.80 | PASS          | AC=28;AF=0.412;AN=68;BaseQRankSum= |
| 32179 | chrY | 13565113 | . | G | A | 17430.88 | PASS          | AC=28;AF=0.412;AN=68;BaseQRankSum= |
| 32180 | chrY | 13565116 | . | T | C | 17145.94 | PASS          | AC=28;AF=0.412;AN=68;BaseQRankSum= |
| 32181 | chrY | 13565166 | . | T | C | 10026.92 | PASS          | AC=29;AF=0.414;AN=70;BaseQRankSum= |
| 32182 | chrY | 13565182 | . | A | G | 816.78   | PASS          | AC=6;AF=0.086;AN=70;BaseQRankSum=  |
| 32183 | chrY | 13565341 | . | T | G | 10141.66 | PASS          | AC=34;AF=0.486;AN=70;BaseQRankSum= |
| 32184 | chrY | 13565368 | . | G | C | 194.74   | PASS          | AC=4;AF=0.059;AN=68;BaseQRankSum=  |
| 32185 | chrY | 13565410 | . | T | C | 7063.93  | my_snp_filter | AC=31;AF=0.500;AN=62;BaseQRankSum= |
| 32186 | chrY | 13565515 | . | T | G | 74.03    | PASS          | AC=1;AF=0.050;AN=20;BaseQRankSum=  |
| 32187 | chrY | 13565519 | . | A | G | 73.94    | PASS          | AC=1;AF=0.050;AN=20;BaseQRankSum=  |
| 32188 | chrY | 13565705 | . | G | C | 192.84   | my_snp_filter | AC=6;AF=0.273;AN=22;BaseQRankSum=  |
| 32189 | chrY | 13565725 | . | T | C | 518.10   | PASS          | AC=6;AF=0.250;AN=24;BaseQRankSum=  |
| 32190 | chrY | 13565924 | . | C | T | 1520.03  | PASS          | AC=14;AF=0.212;AN=66;BaseQRankSum= |
| 32191 | chrY | 13565926 | . | T | A | 1521.34  | PASS          | AC=14;AF=0.212;AN=66;BaseQRankSum= |
| 32192 | chrY | 13565960 | . | C | G | 357.96   | PASS          | AC=6;AF=0.088;AN=68;BaseQRankSum=  |
| 32193 | chrY | 13566068 | . | A | G | 1079.10  | PASS          | AC=11;AF=0.239;AN=46;BaseQRankSum= |
| 32194 | chrY | 13566116 | . | G | T | 44.70    | my_snp_filter | AC=1;AF=0.018;AN=56;BaseQRankSum=  |
| 32195 | chrY | 13566191 | . | A | G | 133.42   | PASS          | AC=1;AF=0.016;AN=64;BaseQRankSum=  |
| 32196 | chrY | 13566210 | . | T | C | 3202.93  | PASS          | AC=10;AF=0.192;AN=52;BaseQRankSum= |
| 32197 | chrY | 13566223 | . | G | A | 3072.33  | PASS          | AC=10;AF=0.192;AN=52;BaseQRankSum= |
| 32198 | chrY | 13566259 | . | A | G | 1779.71  | PASS          | AC=8;AF=0.133;AN=60;BaseQRankSum=  |
| 32199 | chrY | 13566268 | . | C | T | 1830.09  | PASS          | AC=8;AF=0.129;AN=62;BaseQRankSum=  |
| 32200 | chrY | 13566325 | . | A | G | 3017.76  | PASS          | AC=17;AF=0.250;AN=68;BaseQRankSum= |
| 32201 | chrY | 13566336 | . | C | G | 1457.50  | PASS          | AC=12;AF=0.188;AN=64;BaseQRankSum= |
| 32202 | chrY | 13566439 | . | G | C | 1305.31  | PASS          | AC=5;AF=0.125;AN=40;BaseQRankSum=  |
| 32203 | chrY | 13566453 | . | C | A | 1216.07  | PASS          | AC=5;AF=0.132;AN=38;BaseQRankSum=  |
| 32204 | chrY | 13566499 | . | G | A | 839.46   | PASS          | AC=6;AF=0.214;AN=28;BaseQRankSum=  |
| 32205 | chrY | 13566510 | . | C | A | 1031.78  | my_snp_filter | AC=6;AF=0.214;AN=28;BaseQRankSum=  |
| 32206 | chrY | 13566543 | . | T | G | 747.42   | my_snp_filter | AC=6;AF=0.136;AN=44;BaseQRankSum=  |
| 32207 | chrY | 13566572 | . | G | T | 699.27   | my_snp_filter | AC=6;AF=0.107;AN=56;BaseQRankSum=  |
| 32208 | chrY | 13567025 | . | A | G | 164.99   | PASS          | AC=3;AF=0.150;AN=20;BaseQRankSum=  |
| 32209 | chrY | 13567070 | . | G | C | 581.29   | PASS          | AC=5;AF=0.147;AN=34;BaseQRankSum=  |
| 32210 | chrY | 13567075 | . | T | G | 572.34   | PASS          | AC=5;AF=0.147;AN=34;BaseQRankSum=  |
| 32211 | chrY | 13567082 | . | C | T | 529.30   | PASS          | AC=5;AF=0.139;AN=36;BaseQRankSum=  |
| 32212 | chrY | 13567159 | . | T | G | 150.11   | PASS          | AC=4;AF=0.069;AN=58;BaseQRankSum=  |
| 32213 | chrY | 13567202 | . | A | G | 1126.63  | PASS          | AC=11;AF=0.157;AN=70;BaseQRankSum= |
| 32214 | chrY | 13567214 | . | A | C | 2013.95  | PASS          | AC=17;AF=0.243;AN=70;BaseQRankSum= |
| 32215 | chrY | 13567254 | . | A | C | 4878.53  | PASS          | AC=25;AF=0.357;AN=70;BaseQRankSum= |
| 32216 | chrY | 13567313 | . | A | T | 3567.80  | PASS          | AC=25;AF=0.368;AN=68;BaseQRankSum= |
| 32217 | chrY | 13567325 | . | T | C | 2079.79  | PASS          | AC=20;AF=0.286;AN=70;BaseQRankSum= |
| 32218 | chrY | 13567342 | . | G | A | 813.59   | PASS          | AC=15;AF=0.221;AN=68;BaseQRankSum= |
| 32219 | chrY | 13567986 | . | C | T | 84.89    | PASS          | AC=1;AF=0.014;AN=70;BaseQRankSum=  |
| 32220 | chrY | 13567994 | . | C | T | 82.17    | PASS          | AC=1;AF=0.014;AN=70;BaseQRankSum=  |
| 32221 | chrY | 13568873 | . | T | C | 56.82    | my_snp_filter | AC=3;AF=0.043;AN=70;BaseQRankSum=  |
| 32222 | chrY | 13568948 | . | C | G | 32.88    | PASS          | AC=1;AF=0.014;AN=70;BaseQRankSum=  |
| 32223 | chrY | 13568949 | . | T | G | 32.88    | PASS          | AC=1;AF=0.014;AN=70;BaseQRankSum=  |
| 32224 | chrY | 13569004 | . | G | C | 97.83    | PASS          | AC=1;AF=0.014;AN=70;BaseQRankSum=  |



|       |      |          |   |   |   |          |               |                                    |
|-------|------|----------|---|---|---|----------|---------------|------------------------------------|
| 32225 | chrY | 13569087 | . | T | C | 81.55    | my_snp_filter | AC=3;AF=0.043;AN=70;BaseQ          |
| 32226 | chrY | 13569136 | . | T | G | 1367.30  | my_snp_filter | AC=14;AF=0.200;AN=70;BaseQ         |
| 32227 | chrY | 13569148 | . | C | G | 781.68   | my_snp_filter | AC=14;AF=0.200;AN=70;BaseQ         |
| 32228 | chrY | 13569176 | . | T | C | 2572.07  | my_snp_filter | AC=12;AF=0.171;AN=70;BaseQ         |
| 32229 | chrY | 13569312 | . | C | A | 5979.49  | PASS          | AC=12;AF=0.273;AN=44;BaseQRankSum= |
| 32230 | chrY | 13569389 | . | A | C | 4468.78  | PASS          | AC=9;AF=0.375;AN=24;BaseQRankSum=  |
| 32231 | chrY | 13569443 | . | A | C | 3860.99  | PASS          | AC=9;AF=0.409;AN=22;BaseQRankSum=  |
| 32232 | chrY | 13569498 | . | G | A | 8044.11  | PASS          | AC=9;AF=0.409;AN=22;BaseQRankSum=  |
| 32233 | chrY | 13569507 | . | T | C | 8334.52  | PASS          | AC=9;AF=0.450;AN=20;BaseQRankSum=  |
| 32234 | chrY | 13569509 | . | C | A | 8364.52  | PASS          | AC=9;AF=0.450;AN=20;BaseQRankSum=  |
| 32235 | chrY | 13569532 | . | T | C | 8273.52  | PASS          | AC=9;AF=0.450;AN=20;BaseQRankSum=  |
| 32236 | chrY | 13569580 | . | G | A | 11032.09 | PASS          | AC=9;AF=0.500;AN=18;BaseQ          |
| 32237 | chrY | 13569582 | . | C | T | 11164.09 | PASS          | AC=9;AF=0.500;AN=18;BaseQ          |
| 32238 | chrY | 13569606 | . | C | G | 11259.09 | PASS          | AC=9;AF=0.500;AN=18;BaseQ          |
| 32239 | chrY | 13569676 | . | G | T | 12347.52 | PASS          | AC=9;AF=0.450;AN=20;BaseQ          |
| 32240 | chrY | 13569677 | . | C | G | 12347.52 | PASS          | AC=9;AF=0.450;AN=20;BaseQ          |
| 32241 | chrY | 13569683 | . | C | T | 97.30    | my_snp_filter | AC=1;AF=0.050;AN=20;BaseQ          |
| 32242 | chrY | 13569734 | . | G | A | 6985.10  | PASS          | AC=9;AF=0.500;AN=18;BaseQRankSum=  |
| 32243 | chrY | 13569772 | . | G | A | 6324.72  | PASS          | AC=13;AF=0.500;AN=26;BaseQRankSum= |
| 32244 | chrY | 13569874 | . | C | T | 6557.39  | my_snp_filter | AC=12;AF=0.188;AN=64;BaseQ         |
| 32245 | chrY | 13569882 | . | C | G | 6674.44  | my_snp_filter | AC=11;AF=0.167;AN=66;BaseQ         |
| 32246 | chrY | 13569904 | . | C | T | 5770.43  | my_snp_filter | AC=11;AF=0.162;AN=68;BaseQ         |
| 32247 | chrY | 13569939 | . | A | G | 4591.81  | my_snp_filter | AC=9;AF=0.132;AN=68;BaseQ          |
| 32248 | chrY | 13569945 | . | G | A | 4534.77  | my_snp_filter | AC=9;AF=0.132;AN=68;BaseQ          |
| 32249 | chrY | 13569951 | . | G | A | 4296.29  | my_snp_filter | AC=9;AF=0.136;AN=66;BaseQ          |
| 32250 | chrY | 13569960 | . | C | G | 4015.05  | my_snp_filter | AC=9;AF=0.141;AN=64;BaseQ          |
| 32251 | chrY | 13570023 | . | A | G | 350.26   | my_snp_filter | AC=5;AF=0.074;AN=68;BaseQ          |
| 32252 | chrY | 13570068 | . | T | C | 177.20   | PASS          | AC=4;AF=0.059;AN=68;BaseQRankSum=  |
| 32253 | chrY | 13570072 | . | C | T | 223.15   | PASS          | AC=4;AF=0.059;AN=68;BaseQRankSum=  |
| 32254 | chrY | 13570107 | . | T | C | 949.26   | PASS          | AC=5;AF=0.071;AN=70;BaseQRankSum=  |
| 32255 | chrY | 13570109 | . | C | T | 949.70   | PASS          | AC=5;AF=0.071;AN=70;BaseQRankSum=  |
| 32256 | chrY | 13570201 | . | T | C | 5138.25  | PASS          | AC=28;AF=0.400;AN=70;BaseQRankSum= |
| 32257 | chrY | 13570213 | . | T | G | 7222.71  | PASS          | AC=27;AF=0.386;AN=70;BaseQRankSum= |
| 32258 | chrY | 13570214 | . | A | T | 2567.57  | PASS          | AC=18;AF=0.257;AN=70;BaseQRankSum= |
| 32259 | chrY | 13570240 | . | G | A | 5412.31  | PASS          | AC=24;AF=0.343;AN=70;BaseQRankSum= |
| 32260 | chrY | 13570257 | . | T | G | 5196.36  | my_snp_filter | AC=17;AF=0.243;AN=70;BaseQ         |
| 32261 | chrY | 13570410 | . | G | A | 5860.18  | PASS          | AC=26;AF=0.371;AN=70;BaseQRankSum= |
| 32262 | chrY | 13570439 | . | A | C | 3173.81  | PASS          | AC=14;AF=0.200;AN=70;BaseQRankSum= |
| 32263 | chrY | 13570473 | . | T | C | 8557.30  | PASS          | AC=20;AF=0.286;AN=70;BaseQRankSum= |
| 32264 | chrY | 13570484 | . | C | T | 8001.49  | PASS          | AC=20;AF=0.286;AN=70;BaseQRankSum= |
| 32265 | chrY | 13570501 | . | A | G | 8475.61  | PASS          | AC=21;AF=0.300;AN=70;BaseQRankSum= |
| 32266 | chrY | 13570555 | . | A | T | 11917.97 | PASS          | AC=15;AF=0.214;AN=70;BaseQ         |
| 32267 | chrY | 13570558 | . | C | T | 11860.78 | PASS          | AC=15;AF=0.214;AN=70;BaseQ         |
| 32268 | chrY | 13570637 | . | A | G | 3625.73  | my_snp_filter | AC=9;AF=0.321;AN=28;BaseQ          |
| 32269 | chrY | 13570641 | . | C | T | 67.15    | my_snp_filter | AC=1;AF=0.038;AN=26;BaseQ          |
| 32270 | chrY | 13570696 | . | T | C | 3905.52  | my_snp_filter | AC=9;AF=0.450;AN=20;BaseQ          |
| 32271 | chrY | 13570757 | . | T | C | 182.32   | PASS          | AC=1;AF=0.056;AN=18;BaseQRankSum=  |
| 32272 | chrY | 13570760 | . | C | T | 1777.71  | PASS          | AC=6;AF=0.300;AN=20;BaseQRankSum=  |
| 32273 | chrY | 13570763 | . | A | G | 4361.53  | my_snp_filter | AC=9;AF=0.450;AN=20;BaseQ          |
| 32274 | chrY | 13570848 | . | C | T | 1430.54  | PASS          | AC=8;AF=0.444;AN=18;BaseQRankSum=  |
| 32275 | chrY | 13570876 | . | C | T | 686.48   | PASS          | AC=6;AF=0.300;AN=20;BaseQRankSum=  |
| 32276 | chrY | 13570928 | . | T | C | 373.37   | PASS          | AC=3;AF=0.125;AN=24;BaseQRankSum=  |
| 32277 | chrY | 13570953 | . | A | G | 111.03   | PASS          | AC=2;AF=0.056;AN=36;BaseQRankSum=  |
| 32278 | chrY | 13570963 | . | G | T | 74.53    | PASS          | AC=2;AF=0.048;AN=42;BaseQRankSum=  |
| 32279 | chrY | 13571008 | . | A | G | 110.41   | PASS          | AC=2;AF=0.029;AN=70;BaseQRankSum=  |
| 32280 | chrY | 13571106 | . | C | T | 971.55   | PASS          | AC=4;AF=0.057;AN=70;BaseQRankSum=  |
| 32281 | chrY | 13571109 | . | A | C | 969.86   | PASS          | AC=4;AF=0.057;AN=70;BaseQRankSum=  |
| 32282 | chrY | 13571174 | . | T | C | 496.20   | PASS          | AC=3;AF=0.043;AN=70;BaseQRankSum=  |
| 32283 | chrY | 13571183 | . | T | G | 449.35   | PASS          | AC=3;AF=0.043;AN=70;BaseQRankSum=  |
| 32284 | chrY | 13571234 | . | A | T | 110.71   | my_snp_filter | AC=3;AF=0.043;AN=70;BaseQ          |
| 32285 | chrY | 13571383 | . | A | G | 254.97   | PASS          | AC=4;AF=0.059;AN=68;BaseQRankSum=  |
| 32286 | chrY | 13571464 | . | T | C | 1580.69  | PASS          | AC=8;AF=0.154;AN=52;BaseQRankSum=  |
| 32287 | chrY | 13571482 | . | C | T | 1561.81  | PASS          | AC=8;AF=0.190;AN=42;BaseQRankSum=  |
| 32288 | chrY | 13571484 | . | C | T | 1573.80  | PASS          | AC=8;AF=0.211;AN=38;BaseQRankSum=  |
| 32289 | chrY | 13571544 | . | C | T | 57.71    | PASS          | AC=1;AF=0.038;AN=26;BaseQRankSum=  |
| 32290 | chrY | 13571695 | . | T | G | 317.17   | PASS          | AC=7;AF=0.350;AN=20;BaseQRankSum=  |
| 32291 | chrY | 13571778 | . | T | G | 1400.70  | PASS          | AC=8;AF=0.444;AN=18;BaseQRankSum=  |
| 32292 | chrY | 13571779 | . | C | T | 1405.05  | PASS          | AC=8;AF=0.444;AN=18;BaseQRankSum=  |
| 32293 | chrY | 13571780 | . | C | G | 1400.96  | PASS          | AC=8;AF=0.444;AN=18;BaseQRankSum=  |
| 32294 | chrY | 13571844 | . | A | T | 113.34   | PASS          | AC=1;AF=0.056;AN=18;BaseQRankSum=  |
| 32295 | chrY | 13571845 | . | G | A | 111.01   | PASS          | AC=1;AF=0.056;AN=18;BaseQRankSum=  |
| 32296 | chrY | 13571850 | . | A | C | 112.32   | PASS          | AC=1;AF=0.056;AN=18;BaseQRankSum=  |
| 32297 | chrY | 13571853 | . | C | T | 114.28   | PASS          | AC=1;AF=0.056;AN=18;BaseQRankSum=  |
| 32298 | chrY | 13571858 | . | A | T | 72.45    | PASS          | AC=1;AF=0.056;AN=18;BaseQRankSum=  |
| 32299 | chrY | 13571998 | . | T | C | 245.22   | PASS          | AC=3;AF=0.136;AN=22;BaseQRankSum=  |
| 32300 | chrY | 13572046 | . | T | A | 71.27    | my_snp_filter | AC=2;AF=0.091;AN=22;BaseQ          |

|       |      |          |   |   |   |          |               |                                    |
|-------|------|----------|---|---|---|----------|---------------|------------------------------------|
| 32301 | chrY | 13572066 | . | A | G | 4570.99  | PASS          | AC=9;AF=0.409;AN=22;BaseQRankSum=  |
| 32302 | chrY | 13572072 | . | G | A | 4759.99  | PASS          | AC=9;AF=0.409;AN=22;BaseQRankSum=  |
| 32303 | chrY | 13572085 | . | G | C | 2706.36  | PASS          | AC=8;AF=0.364;AN=22;BaseQRankSum=  |
| 32304 | chrY | 13572088 | . | C | A | 4780.08  | PASS          | AC=9;AF=0.409;AN=22;BaseQRankSum=  |
| 32305 | chrY | 13572150 | . | A | G | 4880.83  | PASS          | AC=9;AF=0.300;AN=30;BaseQRankSum=  |
| 32306 | chrY | 13572174 | . | C | T | 4959.83  | PASS          | AC=9;AF=0.225;AN=40;BaseQRankSum=  |
| 32307 | chrY | 13572195 | . | T | C | 5136.68  | PASS          | AC=9;AF=0.214;AN=42;BaseQRankSum=  |
| 32308 | chrY | 13572301 | . | C | G | 5447.40  | PASS          | AC=20;AF=0.294;AN=68;BaseQRankSum= |
| 32309 | chrY | 13572309 | . | C | T | 58.23    | my_snp_filter | AC=2;AF=0.029;AN=68;BaseQ          |
| 32310 | chrY | 13572354 | . | C | G | 6213.47  | PASS          | AC=12;AF=0.176;AN=68;BaseQRankSum= |
| 32311 | chrY | 13572366 | . | G | T | 6792.51  | PASS          | AC=12;AF=0.176;AN=68;BaseQRankSum= |
| 32312 | chrY | 13572369 | . | A | G | 6695.98  | PASS          | AC=12;AF=0.176;AN=68;BaseQRankSum= |
| 32313 | chrY | 13572438 | . | T | C | 18932.72 | PASS          | AC=35;AF=0.500;AN=70;BaseQ         |
| 32314 | chrY | 13572510 | . | C | T | 709.54   | PASS          | AC=5;AF=0.071;AN=70;BaseQRankSum=  |
| 32315 | chrY | 13572524 | . | G | T | 15892.54 | PASS          | AC=34;AF=0.486;AN=70;BaseQ         |
| 32316 | chrY | 13572527 | . | T | A | 704.49   | PASS          | AC=5;AF=0.071;AN=70;BaseQRankSum=  |
| 32317 | chrY | 13572588 | . | C | T | 35.92    | PASS          | AC=1;AF=0.014;AN=70;BaseQRankSum=  |
| 32318 | chrY | 13572613 | . | T | G | 8629.93  | PASS          | AC=24;AF=0.375;AN=64;BaseQRankSum= |
| 32319 | chrY | 13572626 | . | A | G | 8036.76  | PASS          | AC=22;AF=0.344;AN=64;BaseQRankSum= |
| 32320 | chrY | 13572647 | . | G | C | 5049.91  | PASS          | AC=22;AF=0.324;AN=68;BaseQRankSum= |
| 32321 | chrY | 13572704 | . | T | C | 4653.52  | PASS          | AC=11;AF=0.157;AN=70;BaseQRankSum= |
| 32322 | chrY | 13572705 | . | G | A | 510.73   | PASS          | AC=4;AF=0.057;AN=70;BaseQRankSum=  |
| 32323 | chrY | 13572709 | . | G | A | 998.29   | PASS          | AC=9;AF=0.129;AN=70;BaseQRankSum=  |
| 32324 | chrY | 13572721 | . | T | C | 3582.02  | PASS          | AC=9;AF=0.129;AN=70;BaseQRankSum=  |
| 32325 | chrY | 13572726 | . | T | C | 3355.08  | PASS          | AC=9;AF=0.132;AN=68;BaseQRankSum=  |
| 32326 | chrY | 13572727 | . | G | A | 191.61   | PASS          | AC=2;AF=0.029;AN=68;BaseQRankSum=  |
| 32327 | chrY | 13572754 | . | T | G | 1332.53  | PASS          | AC=8;AF=0.118;AN=68;BaseQRankSum=  |
| 32328 | chrY | 13572803 | . | A | T | 539.16   | PASS          | AC=2;AF=0.030;AN=66;BaseQRankSum=  |
| 32329 | chrY | 13572804 | . | T | G | 536.65   | PASS          | AC=2;AF=0.030;AN=66;BaseQRankSum=  |
| 32330 | chrY | 13572807 | . | G | A | 521.65   | PASS          | AC=2;AF=0.030;AN=66;BaseQRankSum=  |
| 32331 | chrY | 13572881 | . | C | T | 4537.06  | PASS          | AC=23;AF=0.348;AN=66;BaseQRankSum= |
| 32332 | chrY | 13572922 | . | A | C | 15294.53 | PASS          | AC=32;AF=0.457;AN=70;BaseQ         |
| 32333 | chrY | 13572932 | . | T | C | 16525.51 | PASS          | AC=32;AF=0.457;AN=70;BaseQ         |
| 32334 | chrY | 13572999 | . | A | G | 26056.72 | PASS          | AC=35;AF=0.500;AN=70;BaseQ         |
| 32335 | chrY | 13573033 | . | A | C | 21534.72 | PASS          | AC=35;AF=0.500;AN=70;BaseQ         |
| 32336 | chrY | 13573108 | . | G | C | 9375.11  | PASS          | AC=36;AF=0.514;AN=70;BaseQRankSum= |
| 32337 | chrY | 13573152 | . | C | A | 4074.20  | PASS          | AC=23;AF=0.383;AN=60;BaseQRankSum= |
| 32338 | chrY | 13573216 | . | G | A | 3735.57  | my_snp_filter | AC=17;AF=0.283;AN=60;BaseQ         |
| 32339 | chrY | 13573240 | . | C | T | 3776.48  | PASS          | AC=15;AF=0.227;AN=66;BaseQRankSum= |
| 32340 | chrY | 13573271 | . | G | T | 6317.28  | PASS          | AC=28;AF=0.400;AN=70;BaseQRankSum= |
| 32341 | chrY | 13573324 | . | A | G | 81.06    | my_snp_filter | AC=2;AF=0.029;AN=70;BaseQ          |
| 32342 | chrY | 13573413 | . | T | C | 9089.58  | PASS          | AC=26;AF=0.371;AN=70;BaseQRankSum= |
| 32343 | chrY | 13573418 | . | T | G | 8952.42  | PASS          | AC=26;AF=0.382;AN=68;BaseQRankSum= |
| 32344 | chrY | 13573600 | . | G | A | 6644.74  | PASS          | AC=9;AF=0.375;AN=24;BaseQRankSum=  |
| 32345 | chrY | 13573609 | . | G | A | 9718.34  | PASS          | AC=9;AF=0.450;AN=20;BaseQRankSum=  |
| 32346 | chrY | 13573618 | . | T | C | 9810.34  | PASS          | AC=9;AF=0.450;AN=20;BaseQRankSum=  |
| 32347 | chrY | 13573622 | . | C | T | 9419.34  | PASS          | AC=9;AF=0.450;AN=20;BaseQRankSum=  |
| 32348 | chrY | 13573731 | . | C | T | 6190.52  | PASS          | AC=9;AF=0.450;AN=20;BaseQRankSum=  |
| 32349 | chrY | 13573755 | . | T | C | 5468.11  | PASS          | AC=9;AF=0.409;AN=22;BaseQRankSum=  |
| 32350 | chrY | 13573795 | . | T | A | 3018.20  | my_snp_filter | AC=8;AF=0.333;AN=24;BaseQ          |
| 32351 | chrY | 13573809 | . | G | C | 100.25   | PASS          | AC=1;AF=0.033;AN=30;BaseQRankSum=  |
| 32352 | chrY | 13573846 | . | T | A | 1570.24  | my_snp_filter | AC=8;AF=0.190;AN=42;BaseQ          |
| 32353 | chrY | 13573885 | . | G | C | 3162.60  | my_snp_filter | AC=8;AF=0.160;AN=50;BaseQ          |
| 32354 | chrY | 13573897 | . | A | G | 2626.21  | my_snp_filter | AC=8;AF=0.138;AN=58;BaseQ          |
| 32355 | chrY | 13573941 | . | A | G | 959.77   | my_snp_filter | AC=8;AF=0.121;AN=66;BaseQ          |
| 32356 | chrY | 13573986 | . | A | G | 687.55   | my_snp_filter | AC=7;AF=0.103;AN=68;BaseQ          |
| 32357 | chrY | 13574421 | . | A | G | 70.14    | PASS          | AC=1;AF=0.024;AN=42;BaseQRankSum=  |
| 32358 | chrY | 13574443 | . | A | T | 109.89   | PASS          | AC=1;AF=0.050;AN=20;BaseQRankSum=  |
| 32359 | chrY | 13575228 | . | A | G | 79.73    | PASS          | AC=1;AF=0.028;AN=36;BaseQRankSum=  |
| 32360 | chrY | 13575274 | . | G | A | 66.64    | my_snp_filter | AC=2;AF=0.036;AN=56;BaseQ          |
| 32361 | chrY | 13575300 | . | C | T | 61.12    | my_snp_filter | AC=2;AF=0.031;AN=64;BaseQ          |
| 32362 | chrY | 13575542 | . | T | A | 921.34   | PASS          | AC=6;AF=0.086;AN=70;DP=588;FS=0.0  |
| 32363 | chrY | 13575656 | . | C | A | 562.75   | PASS          | AC=7;AF=0.100;AN=70;BaseQRankSum=  |
| 32364 | chrY | 13575671 | . | G | T | 437.41   | PASS          | AC=6;AF=0.086;AN=70;BaseQRankSum=  |
| 32365 | chrY | 13576786 | . | G | A | 85.14    | PASS          | AC=1;AF=0.056;AN=18;BaseQRankSum=  |
| 32366 | chrY | 13576799 | . | A | G | 109.48   | PASS          | AC=2;AF=0.111;AN=18;BaseQRankSum=  |
| 32367 | chrY | 13577696 | . | G | T | 51.56    | my_snp_filter | AC=2;AF=0.029;AN=70;BaseQ          |
| 32368 | chrY | 13577725 | . | A | C | 44.27    | my_snp_filter | AC=2;AF=0.029;AN=70;BaseQ          |
| 32369 | chrY | 13577753 | . | G | A | 64.53    | my_snp_filter | AC=2;AF=0.031;AN=64;BaseQ          |
| 32370 | chrY | 13577797 | . | A | G | 110.56   | PASS          | AC=2;AF=0.036;AN=56;BaseQRankSum=  |
| 32371 | chrY | 13577802 | . | A | T | 107.35   | PASS          | AC=2;AF=0.036;AN=56;BaseQRankSum=  |
| 32372 | chrY | 13577811 | . | G | A | 107.47   | PASS          | AC=2;AF=0.036;AN=56;BaseQRankSum=  |
| 32373 | chrY | 13577907 | . | T | C | 222.16   | PASS          | AC=2;AF=0.077;AN=26;BaseQRankSum=  |
| 32374 | chrY | 13577929 | . | A | C | 240.69   | PASS          | AC=2;AF=0.091;AN=22;BaseQRankSum=  |
| 32375 | chrY | 13577999 | . | C | T | 1044.81  | PASS          | AC=9;AF=0.225;AN=40;BaseQRankSum=  |
| 32376 | chrY | 13578007 | . | C | T | 1097.29  | PASS          | AC=10;AF=0.263;AN=38;BaseQRankSum= |

|       |      |          |   |   |   |         |               |                                   |
|-------|------|----------|---|---|---|---------|---------------|-----------------------------------|
| 32377 | chrY | 13578048 | . | A | G | 302.72  | PASS          | AC=4;AF=0.059;AN=68;BaseQRankSum= |
| 32378 | chrY | 13578291 | . | C | G | 525.72  | my_snp_filter | AC=8;AF=0.118;AN=68;BaseQ         |
| 32379 | chrY | 13578321 | . | C | T | 258.04  | my_snp_filter | AC=5;AF=0.074;AN=68;BaseQ         |
| 32380 | chrY | 13578840 | . | C | T | 91.43   | my_snp_filter | AC=3;AF=0.043;AN=70;BaseQ         |
| 32381 | chrY | 13578852 | . | G | A | 228.80  | PASS          | AC=4;AF=0.057;AN=70;BaseQRankSum= |
| 32382 | chrY | 13579222 | . | C | T | 67.48   | my_snp_filter | AC=2;AF=0.030;AN=66;BaseQ         |
| 32383 | chrY | 13579259 | . | A | G | 318.96  | PASS          | AC=2;AF=0.036;AN=56;BaseQRankSum= |
| 32384 | chrY | 13579269 | . | G | A | 273.86  | PASS          | AC=2;AF=0.037;AN=54;BaseQRankSum= |
| 32385 | chrY | 13579270 | . | T | C | 320.48  | PASS          | AC=2;AF=0.037;AN=54;BaseQRankSum= |
| 32386 | chrY | 13579346 | . | T | C | 102.95  | PASS          | AC=3;AF=0.115;AN=26;BaseQRankSum= |
| 32387 | chrY | 13579347 | . | G | C | 106.40  | PASS          | AC=3;AF=0.115;AN=26;BaseQRankSum= |
| 32388 | chrY | 13579357 | . | C | T | 100.09  | PASS          | AC=3;AF=0.136;AN=22;BaseQRankSum= |
| 32389 | chrY | 13579528 | . | T | C | 102.28  | PASS          | AC=3;AF=0.300;AN=10;BaseQRankSum= |
| 32390 | chrY | 13579537 | . | A | G | 86.42   | PASS          | AC=2;AF=0.111;AN=18;BaseQRankSum= |
| 32391 | chrY | 13579573 | . | A | G | 75.39   | PASS          | AC=2;AF=0.111;AN=18;BaseQRankSum= |
| 32392 | chrY | 13580566 | . | A | C | 51.69   | PASS          | AC=2;AF=0.100;AN=20;DP=160;FS=0.0 |
| 32393 | chrY | 13580572 | . | G | T | 51.69   | PASS          | AC=2;AF=0.100;AN=20;DP=159;FS=0.0 |
| 32394 | chrY | 13580574 | . | A | C | 51.69   | PASS          | AC=2;AF=0.100;AN=20;DP=162;FS=0.0 |
| 32395 | chrY | 13580608 | . | A | C | 51.69   | PASS          | AC=2;AF=0.100;AN=20;DP=159;FS=0.0 |
| 32396 | chrY | 13580610 | . | G | C | 51.69   | PASS          | AC=2;AF=0.100;AN=20;DP=160;FS=0.0 |
| 32397 | chrY | 13580611 | . | C | T | 51.69   | PASS          | AC=2;AF=0.100;AN=20;DP=157;FS=0.0 |
| 32398 | chrY | 13582018 | . | G | A | 47.61   | PASS          | AC=4;AF=0.182;AN=22;DP=171;FS=0.0 |
| 32399 | chrY | 13583093 | . | C | T | 101.24  | PASS          | AC=3;AF=0.047;AN=64;BaseQRankSum= |
| 32400 | chrY | 13583214 | . | C | A | 200.90  | PASS          | AC=3;AF=0.100;AN=30;BaseQRankSum= |
| 32401 | chrY | 13583305 | . | G | A | 1169.52 | PASS          | AC=5;AF=0.250;AN=20;BaseQRankSum= |
| 32402 | chrY | 13583326 | . | C | T | 1090.78 | PASS          | AC=5;AF=0.250;AN=20;BaseQRankSum= |
| 32403 | chrY | 13583327 | . | A | G | 1096.48 | PASS          | AC=5;AF=0.250;AN=20;BaseQRankSum= |
| 32404 | chrY | 13583368 | . | A | C | 193.60  | PASS          | AC=3;AF=0.150;AN=20;BaseQRankSum= |
| 32405 | chrY | 13583380 | . | C | A | 103.04  | PASS          | AC=1;AF=0.050;AN=20;BaseQRankSum= |
| 32406 | chrY | 13583616 | . | C | T | 356.59  | PASS          | AC=5;AF=0.278;AN=18;BaseQRankSum= |
| 32407 | chrY | 13583668 | . | G | A | 2139.09 | PASS          | AC=9;AF=0.500;AN=18;BaseQRankSum= |
| 32408 | chrY | 13583716 | . | C | T | 386.83  | PASS          | AC=5;AF=0.278;AN=18;BaseQRankSum= |
| 32409 | chrY | 13583731 | . | T | G | 196.16  | PASS          | AC=3;AF=0.167;AN=18;BaseQRankSum= |
| 32410 | chrY | 13583816 | . | G | T | 203.56  | PASS          | AC=2;AF=0.111;AN=18;BaseQRankSum= |
| 32411 | chrY | 13583827 | . | T | A | 274.61  | PASS          | AC=2;AF=0.111;AN=18;BaseQRankSum= |
| 32412 | chrY | 13583853 | . | G | C | 62.25   | PASS          | AC=1;AF=0.056;AN=18;BaseQRankSum= |
| 32413 | chrY | 13583867 | . | G | T | 104.62  | my_snp_filter | AC=3;AF=0.167;AN=18;BaseQ         |
| 32414 | chrY | 13583879 | . | G | A | 4879.09 | PASS          | AC=9;AF=0.500;AN=18;BaseQRankSum= |
| 32415 | chrY | 13583889 | . | G | A | 5162.09 | PASS          | AC=9;AF=0.500;AN=18;BaseQRankSum= |
| 32416 | chrY | 13583974 | . | A | T | 1558.35 | PASS          | AC=7;AF=0.350;AN=20;BaseQRankSum= |
| 32417 | chrY | 13583982 | . | T | C | 118.75  | my_snp_filter | AC=3;AF=0.150;AN=20;BaseQ         |
| 32418 | chrY | 13583989 | . | T | A | 3060.52 | PASS          | AC=9;AF=0.450;AN=20;BaseQRankSum= |
| 32419 | chrY | 13584042 | . | T | G | 155.61  | PASS          | AC=3;AF=0.150;AN=20;BaseQRankSum= |
| 32420 | chrY | 13584048 | . | A | C | 171.53  | PASS          | AC=3;AF=0.150;AN=20;BaseQRankSum= |
| 32421 | chrY | 13584049 | . | A | T | 396.82  | PASS          | AC=4;AF=0.200;AN=20;BaseQRankSum= |
| 32422 | chrY | 13584117 | . | C | T | 902.84  | my_snp_filter | AC=7;AF=0.389;AN=18;BaseQ         |
| 32423 | chrY | 13584131 | . | C | A | 1070.81 | my_snp_filter | AC=7;AF=0.389;AN=18;BaseQ         |
| 32424 | chrY | 13584176 | . | C | T | 121.75  | PASS          | AC=2;AF=0.100;AN=20;BaseQRankSum= |
| 32425 | chrY | 13584247 | . | T | A | 72.83   | my_snp_filter | AC=3;AF=0.100;AN=30;BaseQ         |
| 32426 | chrY | 13584618 | . | G | A | 37.88   | PASS          | AC=1;AF=0.014;AN=70;BaseQRankSum= |
| 32427 | chrY | 13584714 | . | A | T | 329.53  | my_snp_filter | AC=5;AF=0.071;AN=70;BaseQ         |
| 32428 | chrY | 13584735 | . | A | T | 147.75  | my_snp_filter | AC=2;AF=0.029;AN=70;BaseQ         |
| 32429 | chrY | 13586599 | . | G | A | 34.52   | PASS          | AC=1;AF=0.014;AN=70;BaseQRankSum= |
| 32430 | chrY | 13586628 | . | C | T | 123.54  | my_snp_filter | AC=6;AF=0.086;AN=70;BaseQ         |
| 32431 | chrY | 13586645 | . | T | C | 596.39  | my_snp_filter | AC=8;AF=0.114;AN=70;BaseQ         |
| 32432 | chrY | 13586658 | . | A | G | 834.88  | my_snp_filter | AC=8;AF=0.114;AN=70;BaseQ         |
| 32433 | chrY | 13586724 | . | G | C | 540.79  | my_snp_filter | AC=3;AF=0.043;AN=70;BaseQ         |
| 32434 | chrY | 13586733 | . | A | T | 2080.28 | my_snp_filter | AC=8;AF=0.114;AN=70;BaseQ         |
| 32435 | chrY | 13586749 | . | C | A | 2175    | my_snp_filter | AC=8;AF=0.114;AN=70;BaseQ         |
| 32436 | chrY | 13586809 | . | G | T | 941.71  | PASS          | AC=3;AF=0.068;AN=44;BaseQRankSum= |
| 32437 | chrY | 13586819 | . | G | A | 3056.76 | my_snp_filter | AC=9;AF=0.196;AN=46;BaseQ         |
| 32438 | chrY | 13586823 | . | A | G | 2904.12 | my_snp_filter | AC=9;AF=0.196;AN=46;BaseQ         |
| 32439 | chrY | 13586843 | . | T | C | 3853.55 | my_snp_filter | AC=9;AF=0.237;AN=38;BaseQ         |
| 32440 | chrY | 13586851 | . | C | G | 3987.67 | my_snp_filter | AC=9;AF=0.250;AN=36;BaseQ         |
| 32441 | chrY | 13586892 | . | G | A | 3651.11 | PASS          | AC=9;AF=0.409;AN=22;BaseQRankSum= |
| 32442 | chrY | 13586979 | . | A | G | 5459.99 | PASS          | AC=9;AF=0.409;AN=22;BaseQRankSum= |
| 32443 | chrY | 13586998 | . | G | T | 301.39  | PASS          | AC=2;AF=0.077;AN=26;BaseQRankSum= |
| 32444 | chrY | 13587030 | . | A | G | 4745.78 | PASS          | AC=9;AF=0.375;AN=24;BaseQRankSum= |
| 32445 | chrY | 13587084 | . | G | T | 5144.34 | my_snp_filter | AC=9;AF=0.450;AN=20;BaseQ         |
| 32446 | chrY | 13587093 | . | C | T | 5246.52 | my_snp_filter | AC=9;AF=0.450;AN=20;BaseQ         |
| 32447 | chrY | 13587107 | . | C | T | 4459.12 | my_snp_filter | AC=9;AF=0.409;AN=22;BaseQ         |
| 32448 | chrY | 13587122 | . | T | C | 4947.11 | my_snp_filter | AC=9;AF=0.409;AN=22;BaseQ         |
| 32449 | chrY | 13587130 | . | T | A | 4826.21 | my_snp_filter | AC=9;AF=0.409;AN=22;BaseQ         |
| 32450 | chrY | 13587161 | . | C | T | 2905.52 | my_snp_filter | AC=9;AF=0.225;AN=40;BaseQ         |
| 32451 | chrY | 13587178 | . | T | A | 2697.90 | my_snp_filter | AC=9;AF=0.205;AN=44;BaseQ         |
| 32452 | chrY | 13587195 | . | G | T | 2346.58 | my_snp_filter | AC=9;AF=0.173;AN=52;BaseQ         |

|       |      |          |   |   |     |          |               |                                    |
|-------|------|----------|---|---|-----|----------|---------------|------------------------------------|
| 32453 | chrY | 13587214 | . | T | A   | 106.29   | PASS          | AC=1;AF=0.015;AN=66;BaseQRankSum=  |
| 32454 | chrY | 13587274 | . | C | T   | 98.12    | PASS          | AC=1;AF=0.015;AN=68;BaseQRankSum=  |
| 32455 | chrY | 13587283 | . | A | G   | 115.07   | PASS          | AC=1;AF=0.014;AN=70;BaseQRankSum=  |
| 32456 | chrY | 13587512 | . | C | T   | 1126.74  | PASS          | AC=6;AF=0.214;AN=28;DP=163;FS=0.0  |
| 32457 | chrY | 13588209 | . | C | T   | 47.46    | PASS          | AC=2;AF=0.100;AN=20;DP=90;FS=0.00  |
| 32458 | chrY | 13590026 | . | A | G   | 49.06    | PASS          | AC=1;AF=0.045;AN=22;BaseQRankSum=  |
| 32459 | chrY | 13590028 | . | C | A   | 49.06    | PASS          | AC=1;AF=0.045;AN=22;BaseQRankSum=  |
| 32460 | chrY | 13590346 | . | A | C   | 81.90    | my_snp_filter | AC=4;AF=0.057;AN=70;BaseQ          |
| 32461 | chrY | 13590366 | . | G | T   | 131.27   | my_snp_filter | AC=4;AF=0.057;AN=70;BaseQ          |
| 32462 | chrY | 13590517 | . | G | T   | 185.02   | PASS          | AC=3;AF=0.107;AN=28;BaseQRankSum=  |
| 32463 | chrY | 13590554 | . | C | T   | 661.94   | PASS          | AC=4;AF=0.200;AN=20;BaseQRankSum=  |
| 32464 | chrY | 13590560 | . | G | A   | 667.96   | PASS          | AC=4;AF=0.200;AN=20;BaseQRankSum=  |
| 32465 | chrY | 13590643 | . | A | C   | 623.07   | PASS          | AC=7;AF=0.206;AN=34;BaseQRankSum=  |
| 32466 | chrY | 13590701 | . | G | A   | 1757.42  | PASS          | AC=7;AF=0.175;AN=40;BaseQRankSum=  |
| 32467 | chrY | 13590702 | . | C | T   | 1757.42  | PASS          | AC=7;AF=0.175;AN=40;BaseQRankSum=  |
| 32468 | chrY | 13590730 | . | C | T   | 1356.38  | PASS          | AC=6;AF=0.176;AN=34;BaseQRankSum=  |
| 32469 | chrY | 13590731 | . | A | G   | 1356.33  | PASS          | AC=6;AF=0.176;AN=34;BaseQRankSum=  |
| 32470 | chrY | 13590824 | . | A | G   | 1227.88  | PASS          | AC=7;AF=0.206;AN=34;BaseQRankSum=  |
| 32471 | chrY | 13590830 | . | T | C   | 1219.06  | PASS          | AC=7;AF=0.206;AN=34;BaseQRankSum=  |
| 32472 | chrY | 13590835 | . | T | A   | 1158.29  | PASS          | AC=7;AF=0.219;AN=32;BaseQRankSum=  |
| 32473 | chrY | 13590859 | . | C | T   | 639.80   | PASS          | AC=7;AF=0.184;AN=38;BaseQRankSum=  |
| 32474 | chrY | 13590878 | . | C | T   | 414.25   | PASS          | AC=5;AF=0.100;AN=50;BaseQRankSum=  |
| 32475 | chrY | 13590892 | . | A | G   | 382.21   | PASS          | AC=6;AF=0.111;AN=54;BaseQRankSum=  |
| 32476 | chrY | 13590911 | . | T | C   | 220.08   | PASS          | AC=4;AF=0.063;AN=64;BaseQRankSum=  |
| 32477 | chrY | 13590935 | . | C | T   | 120.19   | PASS          | AC=2;AF=0.029;AN=68;BaseQRankSum=  |
| 32478 | chrY | 13590942 | . | T | C   | 45.08    | PASS          | AC=1;AF=0.015;AN=68;BaseQRankSum=  |
| 32479 | chrY | 13590943 | . | G | A   | 45.03    | PASS          | AC=1;AF=0.015;AN=68;BaseQRankSum=  |
| 32480 | chrY | 13590945 | . | C | T   | 44.93    | PASS          | AC=1;AF=0.015;AN=68;BaseQRankSum=  |
| 32481 | chrY | 13590957 | . | T | C   | 75.57    | PASS          | AC=1;AF=0.014;AN=70;BaseQRankSum=  |
| 32482 | chrY | 13590992 | . | A | G   | 88.84    | PASS          | AC=2;AF=0.029;AN=70;BaseQRankSum=  |
| 32483 | chrY | 13591023 | . | G | A   | 305.79   | PASS          | AC=3;AF=0.043;AN=70;BaseQRankSum=  |
| 32484 | chrY | 13591036 | . | G | A   | 419.83   | PASS          | AC=4;AF=0.059;AN=68;BaseQRankSum=  |
| 32485 | chrY | 13591042 | . | C | T   | 608.36   | PASS          | AC=5;AF=0.074;AN=68;BaseQRankSum=  |
| 32486 | chrY | 13591060 | . | A | T   | 514.24   | PASS          | AC=5;AF=0.076;AN=66;BaseQRankSum=  |
| 32487 | chrY | 13591078 | . | T | C   | 1038.14  | PASS          | AC=6;AF=0.091;AN=66;BaseQRankSum=  |
| 32488 | chrY | 13591085 | . | C | T   | 787.70   | PASS          | AC=6;AF=0.088;AN=68;BaseQRankSum=  |
| 32489 | chrY | 13591086 | . | T | G   | 814.79   | PASS          | AC=6;AF=0.088;AN=68;BaseQRankSum=  |
| 32490 | chrY | 13591109 | . | G | A   | 1379.58  | PASS          | AC=7;AF=0.106;AN=66;BaseQRankSum=  |
| 32491 | chrY | 13591168 | . | G | T   | 2122.23  | PASS          | AC=14;AF=0.206;AN=68;BaseQRankSum= |
| 32492 | chrY | 13591179 | . | A | T,G | 2669.23  | my_snp_filter | AC=5,14;AF=0.074,0.206;AN          |
| 32493 | chrY | 13591259 | . | C | T   | 5639.54  | PASS          | AC=23;AF=0.329;AN=70;BaseQRankSum= |
| 32494 | chrY | 13591269 | . | G | A   | 5240.22  | PASS          | AC=22;AF=0.314;AN=70;BaseQRankSum= |
| 32495 | chrY | 13591306 | . | T | C   | 117.54   | PASS          | AC=4;AF=0.059;AN=68;BaseQRankSum=  |
| 32496 | chrY | 13591312 | . | T | C   | 87.01    | PASS          | AC=3;AF=0.044;AN=68;BaseQRankSum=  |
| 32497 | chrY | 13591316 | . | A | C   | 80.71    | PASS          | AC=3;AF=0.044;AN=68;BaseQRankSum=  |
| 32498 | chrY | 13591366 | . | A | G   | 47.04    | PASS          | AC=1;AF=0.015;AN=68;BaseQRankSum=  |
| 32499 | chrY | 13591385 | . | T | C   | 100.33   | PASS          | AC=3;AF=0.048;AN=62;BaseQRankSum=  |
| 32500 | chrY | 13591415 | . | T | A   | 1774.82  | PASS          | AC=15;AF=0.227;AN=66;BaseQRankSum= |
| 32501 | chrY | 13591428 | . | G | A   | 2345.19  | PASS          | AC=18;AF=0.257;AN=70;BaseQRankSum= |
| 32502 | chrY | 13591443 | . | G | A   | 2709.90  | PASS          | AC=18;AF=0.273;AN=66;BaseQRankSum= |
| 32503 | chrY | 13591495 | . | C | T   | 1870.99  | PASS          | AC=12;AF=0.182;AN=66;BaseQRankSum= |
| 32504 | chrY | 13591562 | . | T | C   | 518.86   | PASS          | AC=4;AF=0.061;AN=66;BaseQRankSum=  |
| 32505 | chrY | 13591575 | . | T | G   | 185.39   | PASS          | AC=3;AF=0.045;AN=66;BaseQRankSum=  |
| 32506 | chrY | 13591578 | . | A | T   | 185.32   | PASS          | AC=3;AF=0.045;AN=66;BaseQRankSum=  |
| 32507 | chrY | 13591801 | . | G | A   | 149.62   | my_snp_filter | AC=3;AF=0.044;AN=68;BaseQ          |
| 32508 | chrY | 13591861 | . | T | C   | 100.75   | PASS          | AC=1;AF=0.014;AN=70;BaseQRankSum=  |
| 32509 | chrY | 13591865 | . | C | T   | 76.69    | PASS          | AC=1;AF=0.014;AN=70;BaseQRankSum=  |
| 32510 | chrY | 13592142 | . | G | A   | 49.43    | my_snp_filter | AC=1;AF=0.015;AN=68;BaseQ          |
| 32511 | chrY | 13593214 | . | C | T   | 950.60   | PASS          | AC=6;AF=0.086;AN=70;DP=542;FS=0.0  |
| 32512 | chrY | 13593583 | . | C | T   | 131.51   | PASS          | AC=3;AF=0.088;AN=34;BaseQRankSum=  |
| 32513 | chrY | 13593743 | . | G | T   | 309.27   | PASS          | AC=3;AF=0.047;AN=64;BaseQRankSum=  |
| 32514 | chrY | 13593757 | . | A | C   | 262.08   | PASS          | AC=3;AF=0.045;AN=66;BaseQRankSum=  |
| 32515 | chrY | 13593758 | . | T | A   | 238.59   | PASS          | AC=3;AF=0.045;AN=66;BaseQRankSum=  |
| 32516 | chrY | 13593779 | . | C | T   | 30.03    | my_snp_filter | AC=2;AF=0.030;AN=66;BaseQ          |
| 32517 | chrY | 13595227 | . | G | T   | 141.95   | PASS          | AC=3;AF=0.044;AN=68;BaseQRankSum=  |
| 32518 | chrY | 13595233 | . | A | G   | 142.65   | PASS          | AC=3;AF=0.044;AN=68;BaseQRankSum=  |
| 32519 | chrY | 13595254 | . | G | T   | 316.40   | PASS          | AC=4;AF=0.065;AN=62;BaseQRankSum=  |
| 32520 | chrY | 13595280 | . | T | C   | 237      | PASS          | AC=5;AF=0.083;AN=60;BaseQRankSum=  |
| 32521 | chrY | 13595418 | . | T | G   | 107.29   | PASS          | AC=3;AF=0.079;AN=38;BaseQRankSum=  |
| 32522 | chrY | 13595434 | . | T | C   | 261.92   | PASS          | AC=3;AF=0.075;AN=40;BaseQRankSum=  |
| 32523 | chrY | 13595444 | . | C | T   | 229.22   | PASS          | AC=3;AF=0.075;AN=40;BaseQRankSum=  |
| 32524 | chrY | 13595587 | . | G | A   | 1114.24  | PASS          | AC=6;AF=0.086;AN=70;DP=366;FS=0.0  |
| 32525 | chrY | 13595645 | . | C | G   | 1085.43  | PASS          | AC=6;AF=0.086;AN=70;DP=356;FS=0.0  |
| 32526 | chrY | 13596792 | . | C | G   | 427.35   | PASS          | AC=6;AF=0.086;AN=70;DP=629;FS=0.0  |
| 32527 | chrY | 13597023 | . | T | C   | 15850.99 | PASS          | AC=70;AF=1.00;AN=70;BaseQ          |
| 32528 | chrY | 13597348 | . | G | A   | 1132.41  | PASS          | AC=6;AF=0.086;AN=70;DP=527;FS=0.0  |

|       |      |          |   |   |   |         |               |                                    |
|-------|------|----------|---|---|---|---------|---------------|------------------------------------|
| 32529 | chrY | 13597366 | . | T | C | 33.64   | PASS          | AC=1;AF=0.014;AN=70;BaseQRankSum=  |
| 32530 | chrY | 13597576 | . | C | T | 1118.47 | PASS          | AC=6;AF=0.086;AN=70;BaseQRankSum=  |
| 32531 | chrY | 13597907 | . | T | A | 1201.95 | my_snp_filter | AC=10;AF=0.167;AN=60;BaseQ         |
| 32532 | chrY | 13597981 | . | T | A | 1331.15 | PASS          | AC=12;AF=0.429;AN=28;BaseQRankSum= |
| 32533 | chrY | 13598033 | . | G | A | 476.77  | PASS          | AC=4;AF=0.167;AN=24;BaseQRankSum=  |
| 32534 | chrY | 13598054 | . | A | T | 191.32  | PASS          | AC=3;AF=0.136;AN=22;BaseQRankSum=  |
| 32535 | chrY | 13598086 | . | G | A | 287.13  | PASS          | AC=3;AF=0.136;AN=22;BaseQRankSum=  |
| 32536 | chrY | 13598087 | . | C | T | 287.13  | PASS          | AC=3;AF=0.136;AN=22;BaseQRankSum=  |
| 32537 | chrY | 13598103 | . | T | C | 415.22  | PASS          | AC=3;AF=0.150;AN=20;BaseQRankSum=  |
| 32538 | chrY | 13598167 | . | G | A | 1172.05 | PASS          | AC=7;AF=0.389;AN=18;BaseQRankSum=  |
| 32539 | chrY | 13598223 | . | T | C | 2507.33 | PASS          | AC=8;AF=0.444;AN=18;BaseQRankSum=  |
| 32540 | chrY | 13598229 | . | T | C | 2542.01 | PASS          | AC=8;AF=0.444;AN=18;BaseQRankSum=  |
| 32541 | chrY | 13598260 | . | A | G | 804.81  | PASS          | AC=6;AF=0.333;AN=18;BaseQRankSum=  |
| 32542 | chrY | 13598371 | . | T | G | 3359.01 | PASS          | AC=8;AF=0.444;AN=18;BaseQRankSum=  |
| 32543 | chrY | 13598385 | . | T | C | 3298.33 | PASS          | AC=8;AF=0.444;AN=18;BaseQRankSum=  |
| 32544 | chrY | 13598418 | . | A | T | 142.12  | my_snp_filter | AC=4;AF=0.222;AN=18;BaseQ          |
| 32545 | chrY | 13598478 | . | A | G | 479.60  | PASS          | AC=4;AF=0.222;AN=18;BaseQRankSum=  |
| 32546 | chrY | 13598501 | . | A | G | 273.71  | PASS          | AC=4;AF=0.222;AN=18;BaseQRankSum=  |
| 32547 | chrY | 13598511 | . | C | G | 412.72  | PASS          | AC=4;AF=0.222;AN=18;BaseQRankSum=  |
| 32548 | chrY | 13598727 | . | T | C | 2124.09 | PASS          | AC=9;AF=0.500;AN=18;BaseQRankSum=  |
| 32549 | chrY | 13598752 | . | G | A | 2240.09 | PASS          | AC=9;AF=0.500;AN=18;BaseQRankSum=  |
| 32550 | chrY | 13598810 | . | C | T | 2277.52 | PASS          | AC=9;AF=0.450;AN=20;BaseQRankSum=  |
| 32551 | chrY | 13598839 | . | C | T | 618.69  | PASS          | AC=4;AF=0.200;AN=20;BaseQRankSum=  |
| 32552 | chrY | 13599174 | . | T | G | 866.15  | PASS          | AC=6;AF=0.333;AN=18;BaseQRankSum=  |
| 32553 | chrY | 13599188 | . | A | G | 1014.69 | PASS          | AC=6;AF=0.333;AN=18;BaseQRankSum=  |
| 32554 | chrY | 13599203 | . | C | G | 708.06  | PASS          | AC=6;AF=0.333;AN=18;BaseQRankSum=  |
| 32555 | chrY | 13599243 | . | A | T | 1185.53 | PASS          | AC=5;AF=0.278;AN=18;BaseQRankSum=  |
| 32556 | chrY | 13599630 | . | T | A | 927.35  | PASS          | AC=7;AF=0.438;AN=16;BaseQRankSum=  |
| 32557 | chrY | 13599670 | . | T | C | 985.93  | PASS          | AC=6;AF=0.300;AN=20;BaseQRankSum=  |
| 32558 | chrY | 13599674 | . | A | C | 940.50  | PASS          | AC=6;AF=0.300;AN=20;BaseQRankSum=  |
| 32559 | chrY | 13599713 | . | C | T | 80.70   | PASS          | AC=2;AF=0.091;AN=22;BaseQRankSum=  |
| 32560 | chrY | 13599716 | . | G | T | 81.02   | PASS          | AC=2;AF=0.091;AN=22;BaseQRankSum=  |
| 32561 | chrY | 13599722 | . | T | A | 67.79   | my_snp_filter | AC=2;AF=0.091;AN=22;BaseQ          |
| 32562 | chrY | 13599765 | . | A | G | 438.69  | PASS          | AC=3;AF=0.125;AN=24;BaseQRankSum=  |
| 32563 | chrY | 13599807 | . | C | G | 311.83  | PASS          | AC=3;AF=0.125;AN=24;BaseQRankSum=  |
| 32564 | chrY | 13599829 | . | T | C | 288.92  | PASS          | AC=3;AF=0.125;AN=24;BaseQRankSum=  |
| 32565 | chrY | 13599837 | . | G | A | 287.79  | PASS          | AC=3;AF=0.136;AN=22;BaseQRankSum=  |
| 32566 | chrY | 13600271 | . | T | A | 121.34  | PASS          | AC=5;AF=0.192;AN=26;BaseQRankSum=  |
| 32567 | chrY | 13601238 | . | A | G | 131.13  | PASS          | AC=3;AF=0.167;AN=18;BaseQRankSum=  |
| 32568 | chrY | 13601336 | . | A | G | 179.85  | PASS          | AC=5;AF=0.227;AN=22;BaseQRankSum=  |
| 32569 | chrY | 13601469 | . | G | T | 596.50  | PASS          | AC=7;AF=0.350;AN=20;BaseQRankSum=  |
| 32570 | chrY | 13601505 | . | C | A | 663.09  | my_snp_filter | AC=9;AF=0.500;AN=18;BaseQ          |
| 32571 | chrY | 13601541 | . | G | C | 230.46  | my_snp_filter | AC=4;AF=0.222;AN=18;BaseQ          |
| 32572 | chrY | 13601578 | . | C | A | 3657.52 | my_snp_filter | AC=9;AF=0.450;AN=20;BaseQ          |
| 32573 | chrY | 13601579 | . | A | G | 3660.52 | my_snp_filter | AC=9;AF=0.450;AN=20;BaseQ          |
| 32574 | chrY | 13601601 | . | C | T | 575.17  | PASS          | AC=6;AF=0.250;AN=24;BaseQRankSum=  |
| 32575 | chrY | 13601606 | . | T | C | 555.94  | PASS          | AC=6;AF=0.231;AN=26;BaseQRankSum=  |
| 32576 | chrY | 13601623 | . | T | C | 672.35  | PASS          | AC=8;AF=0.364;AN=22;BaseQRankSum=  |
| 32577 | chrY | 13601639 | . | G | T | 112.95  | my_snp_filter | AC=2;AF=0.077;AN=26;BaseQ          |
| 32578 | chrY | 13601654 | . | A | C | 130.73  | my_snp_filter | AC=2;AF=0.077;AN=26;BaseQ          |
| 32579 | chrY | 13601658 | . | G | A | 1345.26 | PASS          | AC=8;AF=0.364;AN=22;BaseQRankSum=  |
| 32580 | chrY | 13601688 | . | G | A | 376.86  | PASS          | AC=5;AF=0.192;AN=26;BaseQRankSum=  |
| 32581 | chrY | 13601698 | . | G | A | 431.63  | my_snp_filter | AC=6;AF=0.214;AN=28;BaseQ          |
| 32582 | chrY | 13601710 | . | A | G | 1627.78 | PASS          | AC=9;AF=0.375;AN=24;BaseQRankSum=  |
| 32583 | chrY | 13601717 | . | A | G | 213.01  | my_snp_filter | AC=6;AF=0.214;AN=28;BaseQ          |
| 32584 | chrY | 13601824 | . | C | G | 3639.09 | PASS          | AC=9;AF=0.500;AN=18;BaseQRankSum=  |
| 32585 | chrY | 13601840 | . | T | C | 2831.09 | PASS          | AC=9;AF=0.500;AN=18;BaseQRankSum=  |
| 32586 | chrY | 13601900 | . | T | C | 177.66  | PASS          | AC=2;AF=0.091;AN=22;BaseQRankSum=  |
| 32587 | chrY | 13601903 | . | C | T | 179.14  | PASS          | AC=2;AF=0.100;AN=20;BaseQRankSum=  |
| 32588 | chrY | 13602125 | . | G | A | 158.08  | PASS          | AC=2;AF=0.100;AN=20;BaseQRankSum=  |
| 32589 | chrY | 13602164 | . | T | C | 102.77  | PASS          | AC=1;AF=0.050;AN=20;BaseQRankSum=  |
| 32590 | chrY | 13602208 | . | A | G | 51.42   | PASS          | AC=2;AF=0.071;AN=28;DP=218;FS=0.0  |
| 32591 | chrY | 13602216 | . | A | T | 132.83  | PASS          | AC=4;AF=0.133;AN=30;BaseQRankSum=  |
| 32592 | chrY | 13603924 | . | C | T | 1298.84 | PASS          | AC=6;AF=0.086;AN=70;DP=721;FS=0.0  |
| 32593 | chrY | 13604922 | . | A | G | 277.23  | my_snp_filter | AC=7;AF=0.167;AN=42;BaseQ          |
| 32594 | chrY | 13604987 | . | G | T | 339.66  | PASS          | AC=7;AF=0.113;AN=62;BaseQRankSum=  |
| 32595 | chrY | 13605055 | . | C | T | 152.03  | PASS          | AC=3;AF=0.043;AN=70;BaseQRankSum=  |
| 32596 | chrY | 13605074 | . | C | T | 66.69   | PASS          | AC=2;AF=0.029;AN=70;BaseQRankSum=  |
| 32597 | chrY | 13605085 | . | T | C | 80.89   | PASS          | AC=2;AF=0.029;AN=70;BaseQRankSum=  |
| 32598 | chrY | 13605230 | . | A | G | 794.13  | PASS          | AC=6;AF=0.086;AN=70;BaseQRankSum=  |
| 32599 | chrY | 13605255 | . | C | T | 613.99  | PASS          | AC=5;AF=0.071;AN=70;BaseQRankSum=  |
| 32600 | chrY | 13605268 | . | T | C | 147.66  | PASS          | AC=4;AF=0.057;AN=70;BaseQRankSum=  |
| 32601 | chrY | 13605277 | . | C | G | 179.45  | PASS          | AC=4;AF=0.057;AN=70;BaseQRankSum=  |
| 32602 | chrY | 13605289 | . | C | G | 156.94  | my_snp_filter | AC=4;AF=0.059;AN=68;BaseQ          |
| 32603 | chrY | 13605627 | . | C | T | 76.69   | my_snp_filter | AC=2;AF=0.111;AN=18;BaseQ          |
| 32604 | chrY | 13605640 | . | T | C | 122.14  | PASS          | AC=2;AF=0.111;AN=18;BaseQRankSum=  |

|       |      |          |   |   |     |         |               |                                    |
|-------|------|----------|---|---|-----|---------|---------------|------------------------------------|
| 32605 | chrY | 13605764 | . | T | C   | 241.76  | PASS          | AC=2;AF=0.100;AN=20;BaseQRankSum=  |
| 32606 | chrY | 13605784 | . | T | A   | 130.53  | PASS          | AC=2;AF=0.100;AN=20;BaseQRankSum=  |
| 32607 | chrY | 13605822 | . | T | G   | 36.25   | PASS          | AC=1;AF=0.056;AN=18;BaseQRankSum=  |
| 32608 | chrY | 13605827 | . | C | T   | 36.72   | PASS          | AC=1;AF=0.056;AN=18;BaseQRankSum=  |
| 32609 | chrY | 13605832 | . | G | C   | 34.33   | PASS          | AC=1;AF=0.056;AN=18;BaseQRankSum=  |
| 32610 | chrY | 13605913 | . | C | T   | 375.89  | PASS          | AC=5;AF=0.278;AN=18;BaseQRankSum=  |
| 32611 | chrY | 13605958 | . | C | A   | 964.27  | PASS          | AC=6;AF=0.333;AN=18;BaseQRankSum=  |
| 32612 | chrY | 13605982 | . | A | G   | 849.45  | PASS          | AC=5;AF=0.278;AN=18;BaseQRankSum=  |
| 32613 | chrY | 13606013 | . | T | G   | 33.07   | my_snp_filter | AC=4;AF=0.222;AN=18;BaseQ          |
| 32614 | chrY | 13606055 | . | T | C   | 303.98  | PASS          | AC=3;AF=0.167;AN=18;BaseQRankSum=  |
| 32615 | chrY | 13606080 | . | T | C   | 495.26  | PASS          | AC=6;AF=0.333;AN=18;BaseQRankSum=  |
| 32616 | chrY | 13606090 | . | C | T   | 135.04  | PASS          | AC=2;AF=0.111;AN=18;BaseQRankSum=  |
| 32617 | chrY | 13606091 | . | T | A   | 135.04  | PASS          | AC=2;AF=0.111;AN=18;BaseQRankSum=  |
| 32618 | chrY | 13606105 | . | G | T   | 99.79   | PASS          | AC=2;AF=0.111;AN=18;BaseQRankSum=  |
| 32619 | chrY | 13606163 | . | C | T   | 75.35   | PASS          | AC=1;AF=0.056;AN=18;BaseQRankSum=  |
| 32620 | chrY | 13606219 | . | G | A   | 1984.90 | PASS          | AC=7;AF=0.389;AN=18;BaseQRankSum=  |
| 32621 | chrY | 13606298 | . | C | T   | 47.32   | my_snp_filter | AC=1;AF=0.056;AN=18;BaseQ          |
| 32622 | chrY | 13606336 | . | C | T   | 361.64  | PASS          | AC=4;AF=0.222;AN=18;BaseQRankSum=  |
| 32623 | chrY | 13606401 | . | A | C   | 927.81  | PASS          | AC=7;AF=0.389;AN=18;BaseQRankSum=  |
| 32624 | chrY | 13606441 | . | T | C   | 929.39  | PASS          | AC=7;AF=0.389;AN=18;BaseQRankSum=  |
| 32625 | chrY | 13606498 | . | A | C   | 1654.88 | my_snp_filter | AC=7;AF=0.389;AN=18;BaseQ          |
| 32626 | chrY | 13606503 | . | A | T   | 1227.25 | my_snp_filter | AC=6;AF=0.333;AN=18;BaseQ          |
| 32627 | chrY | 13607054 | . | C | T   | 279.45  | PASS          | AC=2;AF=0.056;AN=36;DP=130;FS=0.0  |
| 32628 | chrY | 13607490 | . | T | C   | 111.89  | PASS          | AC=1;AF=0.031;AN=32;BaseQRankSum=  |
| 32629 | chrY | 13607493 | . | C | T   | 112.53  | PASS          | AC=1;AF=0.033;AN=30;BaseQRankSum=  |
| 32630 | chrY | 13607516 | . | T | C   | 119.94  | PASS          | AC=1;AF=0.033;AN=30;BaseQRankSum=  |
| 32631 | chrY | 13607532 | . | A | G   | 119.21  | PASS          | AC=1;AF=0.025;AN=40;BaseQRankSum=  |
| 32632 | chrY | 13607558 | . | G | C   | 336.88  | PASS          | AC=3;AF=0.071;AN=42;BaseQRankSum=  |
| 32633 | chrY | 13607561 | . | T | C   | 337.33  | PASS          | AC=3;AF=0.075;AN=40;BaseQRankSum=  |
| 32634 | chrY | 13607564 | . | A | C   | 336.26  | PASS          | AC=3;AF=0.075;AN=40;BaseQRankSum=  |
| 32635 | chrY | 13607590 | . | C | T   | 42.19   | PASS          | AC=2;AF=0.045;AN=44;BaseQRankSum=  |
| 32636 | chrY | 13607617 | . | G | A   | 63.37   | PASS          | AC=1;AF=0.017;AN=60;BaseQRankSum=  |
| 32637 | chrY | 13607622 | . | G | A   | 62.91   | PASS          | AC=1;AF=0.015;AN=66;BaseQRankSum=  |
| 32638 | chrY | 13607714 | . | A | T   | 434.38  | PASS          | AC=6;AF=0.088;AN=68;BaseQRankSum=  |
| 32639 | chrY | 13608891 | . | C | T   | 121.22  | PASS          | AC=4;AF=0.057;AN=70;BaseQRankSum=  |
| 32640 | chrY | 13608902 | . | A | G   | 307.47  | PASS          | AC=4;AF=0.059;AN=68;BaseQRankSum=  |
| 32641 | chrY | 13608945 | . | A | G   | 444.86  | PASS          | AC=7;AF=0.103;AN=68;BaseQRankSum=  |
| 32642 | chrY | 13608946 | . | T | C   | 483.80  | PASS          | AC=7;AF=0.103;AN=68;BaseQRankSum=  |
| 32643 | chrY | 13608953 | . | G | T,A | 1009.49 | my_snp_filter | AC=3,9;AF=0.044,0.132;AN=          |
| 32644 | chrY | 13608957 | . | C | T   | 43.27   | my_snp_filter | AC=5;AF=0.076;AN=66;BaseQ          |
| 32645 | chrY | 13609023 | . | T | C   | 86.34   | PASS          | AC=1;AF=0.017;AN=58;BaseQRankSum=  |
| 32646 | chrY | 13609037 | . | C | G   | 2374.92 | PASS          | AC=10;AF=0.161;AN=62;BaseQRankSum= |
| 32647 | chrY | 13609042 | . | C | T   | 2510.77 | PASS          | AC=10;AF=0.185;AN=54;BaseQRankSum= |
| 32648 | chrY | 13609043 | . | G | A   | 2984    | PASS          | AC=14;AF=0.269;AN=52;BaseQRankSum= |
| 32649 | chrY | 13609045 | . | G | T   | 2491.94 | PASS          | AC=10;AF=0.185;AN=54;BaseQRankSum= |
| 32650 | chrY | 13609066 | . | T | C   | 1348.34 | PASS          | AC=9;AF=0.188;AN=48;BaseQRankSum=  |
| 32651 | chrY | 13609074 | . | C | T   | 1479.82 | PASS          | AC=11;AF=0.289;AN=38;BaseQRankSum= |
| 32652 | chrY | 13609136 | . | C | T   | 1857.09 | PASS          | AC=9;AF=0.500;AN=18;BaseQRankSum=  |
| 32653 | chrY | 13609180 | . | C | T   | 210.74  | PASS          | AC=2;AF=0.111;AN=18;BaseQRankSum=  |
| 32654 | chrY | 13609197 | . | C | A   | 338.70  | PASS          | AC=3;AF=0.167;AN=18;BaseQRankSum=  |
| 32655 | chrY | 13609200 | . | T | C   | 313.75  | PASS          | AC=3;AF=0.167;AN=18;BaseQRankSum=  |
| 32656 | chrY | 13609220 | . | G | A   | 79.78   | PASS          | AC=2;AF=0.111;AN=18;BaseQRankSum=  |
| 32657 | chrY | 13609233 | . | G | A   | 109.08  | PASS          | AC=3;AF=0.167;AN=18;BaseQRankSum=  |
| 32658 | chrY | 13609247 | . | C | G   | 516.95  | PASS          | AC=5;AF=0.250;AN=20;BaseQRankSum=  |
| 32659 | chrY | 13609248 | . | T | A   | 134.76  | PASS          | AC=3;AF=0.150;AN=20;BaseQRankSum=  |
| 32660 | chrY | 13609250 | . | C | T   | 230.95  | PASS          | AC=6;AF=0.300;AN=20;BaseQRankSum=  |
| 32661 | chrY | 13609350 | . | T | C   | 1024.06 | my_snp_filter | AC=9;AF=0.250;AN=36;BaseQ          |
| 32662 | chrY | 13609494 | . | C | T   | 976.33  | PASS          | AC=6;AF=0.086;AN=70;DP=519;FS=0.0  |
| 32663 | chrY | 13610448 | . | T | G   | 72.44   | PASS          | AC=2;AF=0.029;AN=70;BaseQRankSum=  |
| 32664 | chrY | 13610456 | . | A | G   | 78.23   | PASS          | AC=2;AF=0.029;AN=70;BaseQRankSum=  |
| 32665 | chrY | 13610461 | . | C | T   | 81.69   | PASS          | AC=2;AF=0.029;AN=70;BaseQRankSum=  |
| 32666 | chrY | 13610466 | . | T | C   | 81.35   | PASS          | AC=2;AF=0.029;AN=70;BaseQRankSum=  |
| 32667 | chrY | 13610468 | . | C | G   | 81.42   | PASS          | AC=2;AF=0.029;AN=70;BaseQRankSum=  |
| 32668 | chrY | 13610482 | . | A | G   | 36.87   | my_snp_filter | AC=1;AF=0.014;AN=70;BaseQ          |
| 32669 | chrY | 13610494 | . | C | T   | 35.14   | my_snp_filter | AC=2;AF=0.029;AN=70;BaseQ          |
| 32670 | chrY | 13610507 | . | C | T   | 91.53   | PASS          | AC=2;AF=0.029;AN=70;BaseQRankSum=  |
| 32671 | chrY | 13610509 | . | G | C   | 91.31   | PASS          | AC=2;AF=0.029;AN=70;BaseQRankSum=  |
| 32672 | chrY | 13610524 | . | C | T   | 239.61  | PASS          | AC=4;AF=0.059;AN=68;BaseQRankSum=  |
| 32673 | chrY | 13610569 | . | G | A   | 287.88  | PASS          | AC=5;AF=0.074;AN=68;BaseQRankSum=  |
| 32674 | chrY | 13610577 | . | A | C   | 804.54  | my_snp_filter | AC=7;AF=0.103;AN=68;BaseQ          |
| 32675 | chrY | 13610664 | . | A | T   | 1133.26 | PASS          | AC=3;AF=0.088;AN=34;BaseQRankSum=  |
| 32676 | chrY | 13610675 | . | G | A   | 48.50   | my_snp_filter | AC=3;AF=0.100;AN=30;BaseQ          |
| 32677 | chrY | 13610809 | . | A | G   | 1773.89 | PASS          | AC=9;AF=0.409;AN=22;BaseQRankSum=  |
| 32678 | chrY | 13610818 | . | A | C   | 158.53  | my_snp_filter | AC=4;AF=0.200;AN=20;BaseQ          |
| 32679 | chrY | 13610843 | . | A | C   | 132.47  | my_snp_filter | AC=3;AF=0.150;AN=20;BaseQ          |
| 32680 | chrY | 13610953 | . | G | T   | 580.01  | PASS          | AC=8;AF=0.444;AN=18;BaseQRankSum=  |

|       |      |          |   |   |     |         |               |                                   |
|-------|------|----------|---|---|-----|---------|---------------|-----------------------------------|
| 32681 | chrY | 13610965 | . | A | T   | 263.90  | PASS          | AC=4;AF=0.222;AN=18;BaseQRankSum= |
| 32682 | chrY | 13610966 | . | C | T   | 435.32  | PASS          | AC=5;AF=0.278;AN=18;BaseQRankSum= |
| 32683 | chrY | 13610978 | . | G | T   | 64.11   | my_snp_filter | AC=2;AF=0.111;AN=18;BaseQ         |
| 32684 | chrY | 13611135 | . | G | T   | 64.36   | PASS          | AC=2;AF=0.111;AN=18;BaseQRankSum= |
| 32685 | chrY | 13611172 | . | T | C   | 1283.10 | PASS          | AC=9;AF=0.500;AN=18;BaseQRankSum= |
| 32686 | chrY | 13611181 | . | C | T   | 3506.09 | PASS          | AC=9;AF=0.500;AN=18;BaseQRankSum= |
| 32687 | chrY | 13611188 | . | C | A   | 3545.09 | PASS          | AC=9;AF=0.500;AN=18;BaseQRankSum= |
| 32688 | chrY | 13611191 | . | G | A   | 1524.09 | PASS          | AC=9;AF=0.500;AN=18;BaseQRankSum= |
| 32689 | chrY | 13611223 | . | G | A   | 51.32   | PASS          | AC=1;AF=0.056;AN=18;BaseQRankSum= |
| 32690 | chrY | 13611278 | . | C | T   | 77.30   | PASS          | AC=1;AF=0.050;AN=20;BaseQRankSum= |
| 32691 | chrY | 13611321 | . | A | G   | 2589.52 | PASS          | AC=9;AF=0.450;AN=20;BaseQRankSum= |
| 32692 | chrY | 13611331 | . | C | T,G | 867.27  | PASS          | AC=3,2;AF=0.150,0.100;AN=20;BaseQ |
| 32693 | chrY | 13611342 | . | A | T   | 1199.59 | PASS          | AC=8;AF=0.400;AN=20;BaseQRankSum= |
| 32694 | chrY | 13611361 | . | T | A   | 1219.59 | PASS          | AC=8;AF=0.400;AN=20;BaseQRankSum= |
| 32695 | chrY | 13611365 | . | T | G   | 1601.33 | PASS          | AC=8;AF=0.400;AN=20;BaseQRankSum= |
| 32696 | chrY | 13611374 | . | C | T   | 324.04  | PASS          | AC=4;AF=0.222;AN=18;BaseQRankSum= |
| 32697 | chrY | 13611375 | . | T | C   | 326.06  | PASS          | AC=4;AF=0.222;AN=18;BaseQRankSum= |
| 32698 | chrY | 13611386 | . | T | C   | 952.62  | PASS          | AC=8;AF=0.400;AN=20;BaseQRankSum= |
| 32699 | chrY | 13611393 | . | G | C   | 273.63  | PASS          | AC=3;AF=0.167;AN=18;BaseQRankSum= |
| 32700 | chrY | 13611413 | . | A | G   | 521.59  | PASS          | AC=8;AF=0.400;AN=20;BaseQRankSum= |
| 32701 | chrY | 13611492 | . | C | T   | 72.52   | PASS          | AC=1;AF=0.056;AN=18;BaseQRankSum= |
| 32702 | chrY | 13611506 | . | T | C   | 73.27   | PASS          | AC=2;AF=0.111;AN=18;BaseQRankSum= |
| 32703 | chrY | 13611525 | . | A | G   | 122     | PASS          | AC=2;AF=0.111;AN=18;BaseQRankSum= |
| 32704 | chrY | 13611575 | . | G | A   | 164.33  | PASS          | AC=3;AF=0.167;AN=18;BaseQRankSum= |
| 32705 | chrY | 13611578 | . | C | T   | 296.75  | PASS          | AC=5;AF=0.278;AN=18;BaseQRankSum= |
| 32706 | chrY | 13611580 | . | G | A   | 164.01  | PASS          | AC=3;AF=0.167;AN=18;BaseQRankSum= |
| 32707 | chrY | 13611671 | . | C | T   | 2650.34 | PASS          | AC=9;AF=0.450;AN=20;BaseQRankSum= |
| 32708 | chrY | 13611675 | . | T | G   | 2627.34 | PASS          | AC=9;AF=0.450;AN=20;BaseQRankSum= |
| 32709 | chrY | 13611684 | . | C | A   | 2449.34 | my_snp_filter | AC=9;AF=0.450;AN=20;BaseQ         |
| 32710 | chrY | 13611716 | . | T | G   | 1257.78 | my_snp_filter | AC=9;AF=0.450;AN=20;BaseQ         |
| 32711 | chrY | 13611755 | . | C | G   | 1838.64 | PASS          | AC=7;AF=0.389;AN=18;BaseQRankSum= |
| 32712 | chrY | 13611770 | . | T | C   | 1742.43 | PASS          | AC=7;AF=0.389;AN=18;BaseQRankSum= |
| 32713 | chrY | 13611794 | . | C | T   | 1017.32 | PASS          | AC=7;AF=0.389;AN=18;BaseQRankSum= |
| 32714 | chrY | 13611806 | . | T | C   | 676.44  | PASS          | AC=7;AF=0.389;AN=18;BaseQRankSum= |
| 32715 | chrY | 13611881 | . | C | A   | 1131.10 | PASS          | AC=7;AF=0.389;AN=18;BaseQRankSum= |
| 32716 | chrY | 13611901 | . | T | C   | 1144.53 | PASS          | AC=7;AF=0.350;AN=20;BaseQRankSum= |
| 32717 | chrY | 13611907 | . | T | C   | 1146.10 | PASS          | AC=7;AF=0.389;AN=18;BaseQRankSum= |
| 32718 | chrY | 13611908 | . | C | G   | 1146.10 | PASS          | AC=7;AF=0.389;AN=18;BaseQRankSum= |
| 32719 | chrY | 13611961 | . | A | T   | 1710.81 | PASS          | AC=8;AF=0.400;AN=20;BaseQRankSum= |
| 32720 | chrY | 13611965 | . | C | A   | 1710.81 | PASS          | AC=8;AF=0.400;AN=20;BaseQRankSum= |
| 32721 | chrY | 13611966 | . | C | A   | 234.07  | PASS          | AC=3;AF=0.150;AN=20;BaseQRankSum= |
| 32722 | chrY | 13611970 | . | G | A   | 1639.81 | PASS          | AC=8;AF=0.400;AN=20;BaseQRankSum= |
| 32723 | chrY | 13611971 | . | C | T   | 1639.81 | PASS          | AC=8;AF=0.400;AN=20;BaseQRankSum= |
| 32724 | chrY | 13612066 | . | G | A   | 482.99  | PASS          | AC=4;AF=0.222;AN=18;BaseQRankSum= |
| 32725 | chrY | 13612108 | . | C | A   | 165.88  | PASS          | AC=4;AF=0.222;AN=18;BaseQRankSum= |
| 32726 | chrY | 13615431 | . | T | C   | 382.08  | PASS          | AC=3;AF=0.043;AN=70;BaseQRankSum= |
| 32727 | chrY | 13615455 | . | T | A   | 394.44  | PASS          | AC=3;AF=0.044;AN=68;BaseQRankSum= |
| 32728 | chrY | 13616132 | . | C | T   | 39.54   | my_snp_filter | AC=2;AF=0.029;AN=68;BaseQ         |
| 32729 | chrY | 13616146 | . | T | A   | 44.73   | my_snp_filter | AC=2;AF=0.029;AN=70;BaseQ         |
| 32730 | chrY | 13616159 | . | G | A   | 110.89  | PASS          | AC=3;AF=0.043;AN=70;BaseQRankSum= |
| 32731 | chrY | 13616193 | . | T | C   | 254.64  | my_snp_filter | AC=6;AF=0.088;AN=68;BaseQ         |
| 32732 | chrY | 13616304 | . | A | T   | 1391.69 | my_snp_filter | AC=8;AF=0.250;AN=32;BaseQ         |
| 32733 | chrY | 13616306 | . | T | C   | 657.34  | my_snp_filter | AC=7;AF=0.219;AN=32;BaseQ         |
| 32734 | chrY | 13616366 | . | A | G   | 375.37  | PASS          | AC=4;AF=0.222;AN=18;BaseQRankSum= |
| 32735 | chrY | 13616381 | . | C | T   | 357.82  | PASS          | AC=4;AF=0.222;AN=18;BaseQRankSum= |
| 32736 | chrY | 13616383 | . | G | C   | 378.87  | PASS          | AC=5;AF=0.278;AN=18;BaseQRankSum= |
| 32737 | chrY | 13616421 | . | T | A   | 618.24  | PASS          | AC=5;AF=0.313;AN=16;BaseQRankSum= |
| 32738 | chrY | 13616426 | . | G | C   | 838.09  | PASS          | AC=4;AF=0.400;AN=10;BaseQRankSum= |
| 32739 | chrY | 13616457 | . | G | T   | 3122.10 | PASS          | AC=9;AF=0.643;AN=14;BaseQRankSum= |
| 32740 | chrY | 13616470 | . | T | G   | 1755.94 | PASS          | AC=4;AF=0.400;AN=10;BaseQRankSum= |
| 32741 | chrY | 13616537 | . | A | C   | 2145.09 | PASS          | AC=9;AF=0.500;AN=18;BaseQRankSum= |
| 32742 | chrY | 13616562 | . | G | C   | 108.98  | my_snp_filter | AC=2;AF=0.111;AN=18;BaseQ         |
| 32743 | chrY | 13616570 | . | A | C   | 6151.09 | PASS          | AC=9;AF=0.500;AN=18;BaseQRankSum= |
| 32744 | chrY | 13616595 | . | A | C   | 3166.54 | PASS          | AC=8;AF=0.444;AN=18;BaseQRankSum= |
| 32745 | chrY | 13616601 | . | T | G   | 3255.54 | PASS          | AC=8;AF=0.444;AN=18;BaseQRankSum= |
| 32746 | chrY | 13616620 | . | C | T   | 3313.09 | PASS          | AC=9;AF=0.500;AN=18;BaseQRankSum= |
| 32747 | chrY | 13616629 | . | G | A   | 9635.09 | PASS          | AC=9;AF=0.500;AN=18;BaseQRankSum= |
| 32748 | chrY | 13616660 | . | A | G   | 8060.52 | PASS          | AC=9;AF=0.450;AN=20;BaseQRankSum= |
| 32749 | chrY | 13616755 | . | A | T   | 381.60  | my_snp_filter | AC=8;AF=0.400;AN=20;BaseQ         |
| 32750 | chrY | 13616769 | . | C | A   | 5310.52 | my_snp_filter | AC=9;AF=0.450;AN=20;BaseQ         |
| 32751 | chrY | 13616836 | . | A | G   | 3828.09 | PASS          | AC=9;AF=0.500;AN=18;BaseQRankSum= |
| 32752 | chrY | 13616912 | . | A | G   | 3580.09 | PASS          | AC=9;AF=0.500;AN=18;BaseQRankSum= |
| 32753 | chrY | 13616925 | . | C | T   | 3360.09 | PASS          | AC=9;AF=0.500;AN=18;BaseQRankSum= |
| 32754 | chrY | 13616929 | . | G | C   | 241.78  | PASS          | AC=3;AF=0.167;AN=18;BaseQRankSum= |
| 32755 | chrY | 13616970 | . | G | C   | 2803.09 | PASS          | AC=9;AF=0.500;AN=18;BaseQRankSum= |
| 32756 | chrY | 13616991 | . | T | C   | 1456.09 | PASS          | AC=9;AF=0.500;AN=18;BaseQRankSum= |

|       |      |          |   |   |   |          |               |                                    |
|-------|------|----------|---|---|---|----------|---------------|------------------------------------|
| 32757 | chrY | 13617064 | . | T | C | 5589.11  | my_snp_filter | AC=9;AF=0.409;AN=22;BaseQ          |
| 32758 | chrY | 13617183 | . | A | G | 187.88   | my_snp_filter | AC=5;AF=0.083;AN=60;BaseQ          |
| 32759 | chrY | 13617318 | . | G | A | 12986.89 | PASS          | AC=70;AF=1.00;AN=70;BaseQ          |
| 32760 | chrY | 13618495 | . | G | A | 190.06   | PASS          | AC=3;AF=0.167;AN=18;BaseQRankSum=  |
| 32761 | chrY | 13618508 | . | T | A | 195.71   | PASS          | AC=3;AF=0.167;AN=18;BaseQRankSum=  |
| 32762 | chrY | 13618581 | . | G | A | 50.75    | my_snp_filter | AC=2;AF=0.100;AN=20;BaseQ          |
| 32763 | chrY | 13618653 | . | G | A | 397.29   | PASS          | AC=5;AF=0.250;AN=20;BaseQRankSum=  |
| 32764 | chrY | 13618801 | . | C | T | 55.87    | my_snp_filter | AC=2;AF=0.111;AN=18;BaseQ          |
| 32765 | chrY | 13618812 | . | C | T | 67.47    | my_snp_filter | AC=2;AF=0.111;AN=18;BaseQ          |
| 32766 | chrY | 13618825 | . | A | C | 45.55    | my_snp_filter | AC=2;AF=0.111;AN=18;BaseQ          |
| 32767 | chrY | 13618855 | . | T | A | 129.49   | PASS          | AC=1;AF=0.056;AN=18;BaseQRankSum=  |
| 32768 | chrY | 13618861 | . | A | T | 129.77   | PASS          | AC=1;AF=0.056;AN=18;BaseQRankSum=  |
| 32769 | chrY | 13618863 | . | A | C | 36.72    | my_snp_filter | AC=1;AF=0.056;AN=18;BaseQ          |
| 32770 | chrY | 13620021 | . | G | A | 68.22    | my_snp_filter | AC=3;AF=0.167;AN=18;BaseQ          |
| 32771 | chrY | 13620099 | . | C | A | 155.05   | my_snp_filter | AC=4;AF=0.222;AN=18;BaseQ          |
| 32772 | chrY | 13620117 | . | C | T | 58.30    | my_snp_filter | AC=3;AF=0.167;AN=18;BaseQ          |
| 32773 | chrY | 13620141 | . | C | G | 713.52   | PASS          | AC=9;AF=0.450;AN=20;BaseQRankSum=  |
| 32774 | chrY | 13620160 | . | G | A | 78.50    | PASS          | AC=2;AF=0.100;AN=20;BaseQRankSum=  |
| 32775 | chrY | 13620252 | . | T | C | 38.88    | my_snp_filter | AC=1;AF=0.056;AN=18;BaseQ          |
| 32776 | chrY | 13620304 | . | G | C | 331.34   | PASS          | AC=2;AF=0.083;AN=24;BaseQRankSum=  |
| 32777 | chrY | 13620311 | . | A | C | 313.54   | PASS          | AC=2;AF=0.077;AN=26;BaseQRankSum=  |
| 32778 | chrY | 13620360 | . | C | T | 527.69   | PASS          | AC=5;AF=0.109;AN=46;BaseQRankSum=  |
| 32779 | chrY | 13620372 | . | A | T | 505.70   | PASS          | AC=5;AF=0.096;AN=52;BaseQRankSum=  |
| 32780 | chrY | 13620374 | . | C | A | 505.54   | PASS          | AC=5;AF=0.096;AN=52;BaseQRankSum=  |
| 32781 | chrY | 13621221 | . | C | T | 3394.05  | PASS          | AC=42;AF=0.677;AN=62;BaseQRankSum= |
| 32782 | chrY | 13621648 | . | A | G | 39.65    | PASS          | AC=1;AF=0.014;AN=70;BaseQRankSum=  |
| 32783 | chrY | 13621657 | . | G | A | 36.65    | PASS          | AC=1;AF=0.014;AN=70;BaseQRankSum=  |
| 32784 | chrY | 13622184 | . | G | T | 876.27   | my_snp_filter | AC=6;AF=0.091;AN=66;BaseQ          |
| 32785 | chrY | 13622191 | . | C | T | 891.61   | my_snp_filter | AC=6;AF=0.094;AN=64;BaseQ          |
| 32786 | chrY | 13622200 | . | G | A | 53.56    | PASS          | AC=1;AF=0.016;AN=62;BaseQRankSum=  |
| 32787 | chrY | 13622263 | . | T | C | 1609.74  | my_snp_filter | AC=7;AF=0.206;AN=34;BaseQ          |
| 32788 | chrY | 13622298 | . | G | A | 4309.69  | PASS          | AC=9;AF=0.346;AN=26;BaseQRankSum=  |
| 32789 | chrY | 13622302 | . | A | C | 4467.69  | PASS          | AC=9;AF=0.346;AN=26;BaseQRankSum=  |
| 32790 | chrY | 13622315 | . | G | T | 4573.78  | PASS          | AC=9;AF=0.375;AN=24;BaseQRankSum=  |
| 32791 | chrY | 13622324 | . | G | C | 4504.78  | PASS          | AC=9;AF=0.375;AN=24;BaseQRankSum=  |
| 32792 | chrY | 13622377 | . | A | T | 795.87   | PASS          | AC=7;AF=0.292;AN=24;BaseQRankSum=  |
| 32793 | chrY | 13622383 | . | G | A | 3201.48  | PASS          | AC=9;AF=0.450;AN=20;BaseQRankSum=  |
| 32794 | chrY | 13622397 | . | G | A | 3357.52  | PASS          | AC=9;AF=0.450;AN=20;BaseQRankSum=  |
| 32795 | chrY | 13622398 | . | C | T | 3360.09  | PASS          | AC=9;AF=0.500;AN=18;BaseQRankSum=  |
| 32796 | chrY | 13622489 | . | G | A | 117.03   | PASS          | AC=2;AF=0.100;AN=20;BaseQRankSum=  |
| 32797 | chrY | 13622497 | . | G | T | 146.83   | PASS          | AC=3;AF=0.150;AN=20;BaseQRankSum=  |
| 32798 | chrY | 13622526 | . | C | T | 424.58   | PASS          | AC=5;AF=0.250;AN=20;BaseQRankSum=  |
| 32799 | chrY | 13622535 | . | C | A | 432.45   | PASS          | AC=4;AF=0.200;AN=20;BaseQRankSum=  |
| 32800 | chrY | 13622661 | . | A | G | 985.67   | my_snp_filter | AC=4;AF=0.065;AN=62;BaseQ          |
| 32801 | chrY | 13622662 | . | C | T | 987.08   | my_snp_filter | AC=4;AF=0.067;AN=60;BaseQ          |
| 32802 | chrY | 13622681 | . | G | T | 444.49   | my_snp_filter | AC=3;AF=0.045;AN=66;BaseQ          |
| 32803 | chrY | 13622694 | . | G | A | 322.20   | PASS          | AC=3;AF=0.044;AN=68;BaseQRankSum=  |
| 32804 | chrY | 13623183 | . | G | A | 179.26   | PASS          | AC=6;AF=0.167;AN=36;DP=189;FS=0.0  |
| 32805 | chrY | 13624488 | . | T | C | 6630.09  | PASS          | AC=56;AF=1.00;AN=56;DP=227;FS=0.0  |
| 32806 | chrY | 13626585 | . | A | C | 1508.01  | PASS          | AC=6;AF=0.214;AN=28;BaseQRankSum=  |
| 32807 | chrY | 13627316 | . | C | T | 7480.14  | PASS          | AC=44;AF=0.647;AN=68;DP=472;FS=0.0 |
| 32808 | chrY | 13627888 | . | G | A | 535      | my_snp_filter | AC=7;AF=0.103;AN=68;BaseQ          |
| 32809 | chrY | 13627966 | . | T | C | 1497.43  | my_snp_filter | AC=9;AF=0.129;AN=70;BaseQ          |
| 32810 | chrY | 13627978 | . | T | C | 1481.43  | my_snp_filter | AC=9;AF=0.129;AN=70;BaseQ          |
| 32811 | chrY | 13628121 | . | A | G | 418.66   | PASS          | AC=8;AF=0.154;AN=52;BaseQRankSum=  |
| 32812 | chrY | 13628176 | . | C | A | 234.86   | PASS          | AC=6;AF=0.094;AN=64;BaseQRankSum=  |
| 32813 | chrY | 13628181 | . | G | T | 73.14    | my_snp_filter | AC=6;AF=0.094;AN=64;BaseQ          |
| 32814 | chrY | 13628185 | . | T | G | 420.90   | PASS          | AC=9;AF=0.145;AN=62;BaseQRankSum=  |
| 32815 | chrY | 13628212 | . | G | A | 648.21   | PASS          | AC=13;AF=0.203;AN=64;BaseQRankSum= |
| 32816 | chrY | 13628252 | . | C | T | 421      | PASS          | AC=6;AF=0.097;AN=62;BaseQRankSum=  |
| 32817 | chrY | 13628274 | . | T | C | 428.80   | PASS          | AC=5;AF=0.089;AN=56;BaseQRankSum=  |
| 32818 | chrY | 13628295 | . | T | A | 240.02   | PASS          | AC=3;AF=0.050;AN=60;BaseQRankSum=  |
| 32819 | chrY | 13628306 | . | T | G | 637      | PASS          | AC=7;AF=0.106;AN=66;BaseQRankSum=  |
| 32820 | chrY | 13628309 | . | G | A | 2330.20  | PASS          | AC=9;AF=0.136;AN=66;BaseQRankSum=  |
| 32821 | chrY | 13628441 | . | G | A | 77.20    | PASS          | AC=2;AF=0.029;AN=70;BaseQRankSum=  |
| 32822 | chrY | 13628444 | . | A | T | 34.39    | my_snp_filter | AC=1;AF=0.014;AN=70;BaseQ          |
| 32823 | chrY | 13628477 | . | T | C | 3174.94  | my_snp_filter | AC=9;AF=0.129;AN=70;BaseQ          |
| 32824 | chrY | 13628478 | . | G | A | 3174.90  | my_snp_filter | AC=9;AF=0.129;AN=70;BaseQ          |
| 32825 | chrY | 13628553 | . | T | C | 278.74   | PASS          | AC=6;AF=0.086;AN=70;BaseQRankSum=  |
| 32826 | chrY | 13628566 | . | C | T | 238.28   | PASS          | AC=3;AF=0.043;AN=70;BaseQRankSum=  |
| 32827 | chrY | 13628567 | . | A | G | 237.79   | PASS          | AC=3;AF=0.043;AN=70;BaseQRankSum=  |
| 32828 | chrY | 13628573 | . | G | T | 984.74   | my_snp_filter | AC=9;AF=0.129;AN=70;BaseQ          |
| 32829 | chrY | 13628579 | . | C | A | 75.19    | my_snp_filter | AC=3;AF=0.043;AN=70;BaseQ          |
| 32830 | chrY | 13629732 | . | A | G | 3635.86  | PASS          | AC=18;AF=1.00;AN=18;DP=150;FS=0.0  |
| 32831 | chrY | 13630360 | . | T | A | 1083.48  | PASS          | AC=6;AF=0.091;AN=66;DP=259;FS=0.0  |
| 32832 | chrY | 13630708 | . | A | G | 41.95    | PASS          | AC=1;AF=0.015;AN=68;BaseQRankSum=  |



|       |      |          |   |   |   |         |               |                                    |
|-------|------|----------|---|---|---|---------|---------------|------------------------------------|
| 32833 | chrY | 13630755 | . | A | G | 369.95  | PASS          | AC=7;AF=0.103;AN=68;BaseQRankSum=  |
| 32834 | chrY | 13631187 | . | C | T | 657.14  | PASS          | AC=6;AF=0.088;AN=68;BaseQRankSum=  |
| 32835 | chrY | 13631192 | . | G | C | 1116.04 | PASS          | AC=8;AF=0.118;AN=68;BaseQRankSum=  |
| 32836 | chrY | 13631230 | . | A | G | 101.85  | my_snp_filter | AC=6;AF=0.103;AN=58;BaseQ          |
| 32837 | chrY | 13631453 | . | A | T | 540.16  | my_snp_filter | AC=7;AF=0.103;AN=68;BaseQ          |
| 32838 | chrY | 13631502 | . | T | C | 43.24   | my_snp_filter | AC=4;AF=0.061;AN=66;BaseQ          |
| 32839 | chrY | 13632780 | . | G | C | 116.61  | PASS          | AC=4;AF=0.087;AN=46;BaseQRankSum=  |
| 32840 | chrY | 13632853 | . | A | G | 666.03  | PASS          | AC=7;AF=0.106;AN=66;BaseQRankSum=  |
| 32841 | chrY | 13632867 | . | C | T | 585.40  | PASS          | AC=7;AF=0.103;AN=68;BaseQRankSum=  |
| 32842 | chrY | 13632869 | . | G | C | 432.35  | PASS          | AC=5;AF=0.074;AN=68;BaseQRankSum=  |
| 32843 | chrY | 13632896 | . | C | T | 353.57  | PASS          | AC=4;AF=0.059;AN=68;BaseQRankSum=  |
| 32844 | chrY | 13632902 | . | C | T | 351.61  | PASS          | AC=4;AF=0.059;AN=68;BaseQRankSum=  |
| 32845 | chrY | 13633041 | . | C | A | 1431.05 | PASS          | AC=7;AF=0.103;AN=68;BaseQRankSum=  |
| 32846 | chrY | 13633044 | . | C | A | 8554.36 | PASS          | AC=63;AF=0.984;AN=64;BaseQRankSum= |
| 32847 | chrY | 13633115 | . | T | C | 231.65  | PASS          | AC=5;AF=0.089;AN=56;BaseQRankSum=  |
| 32848 | chrY | 13633123 | . | G | T | 268.92  | PASS          | AC=5;AF=0.100;AN=50;BaseQRankSum=  |
| 32849 | chrY | 13633193 | . | C | G | 597.48  | PASS          | AC=7;AF=0.350;AN=20;BaseQRankSum=  |
| 32850 | chrY | 13633202 | . | A | C | 758.09  | my_snp_filter | AC=7;AF=0.350;AN=20;BaseQ          |
| 32851 | chrY | 13633213 | . | A | G | 637.40  | PASS          | AC=7;AF=0.318;AN=22;BaseQRankSum=  |
| 32852 | chrY | 13634067 | . | T | C | 34.12   | my_snp_filter | AC=3;AF=0.043;AN=70;BaseQ          |
| 32853 | chrY | 13634070 | . | A | G | 48.89   | my_snp_filter | AC=2;AF=0.029;AN=70;BaseQ          |
| 32854 | chrY | 13634073 | . | T | C | 48.78   | my_snp_filter | AC=2;AF=0.029;AN=70;BaseQ          |
| 32855 | chrY | 13634115 | . | A | G | 127.80  | my_snp_filter | AC=6;AF=0.086;AN=70;BaseQ          |
| 32856 | chrY | 13634427 | . | T | C | 300.70  | PASS          | AC=5;AF=0.071;AN=70;BaseQRankSum=  |
| 32857 | chrY | 13634487 | . | G | C | 242     | PASS          | AC=2;AF=0.029;AN=70;BaseQRankSum=  |
| 32858 | chrY | 13634493 | . | G | T | 528.70  | PASS          | AC=4;AF=0.057;AN=70;BaseQRankSum=  |
| 32859 | chrY | 13634501 | . | C | G | 551.47  | PASS          | AC=4;AF=0.057;AN=70;BaseQRankSum=  |
| 32860 | chrY | 13634571 | . | A | C | 431.24  | PASS          | AC=7;AF=0.103;AN=68;BaseQRankSum=  |
| 32861 | chrY | 13634619 | . | T | C | 1027.43 | my_snp_filter | AC=9;AF=0.145;AN=62;BaseQ          |
| 32862 | chrY | 13634695 | . | T | C | 3270.51 | PASS          | AC=9;AF=0.237;AN=38;BaseQRankSum=  |
| 32863 | chrY | 13634721 | . | C | G | 210.92  | my_snp_filter | AC=5;AF=0.132;AN=38;BaseQ          |
| 32864 | chrY | 13634727 | . | A | T | 315.81  | my_snp_filter | AC=6;AF=0.167;AN=36;BaseQ          |
| 32865 | chrY | 13634759 | . | A | C | 74.32   | my_snp_filter | AC=3;AF=0.107;AN=28;BaseQ          |
| 32866 | chrY | 13634792 | . | C | T | 2267.11 | my_snp_filter | AC=9;AF=0.409;AN=22;BaseQ          |
| 32867 | chrY | 13634826 | . | C | T | 448.13  | PASS          | AC=5;AF=0.250;AN=20;BaseQRankSum=  |
| 32868 | chrY | 13634919 | . | A | T | 207.88  | my_snp_filter | AC=5;AF=0.250;AN=20;BaseQ          |
| 32869 | chrY | 13634954 | . | A | T | 2618.31 | PASS          | AC=10;AF=0.455;AN=22;BaseQRankSum= |
| 32870 | chrY | 13635000 | . | A | G | 446.57  | PASS          | AC=3;AF=0.115;AN=26;BaseQRankSum=  |
| 32871 | chrY | 13635011 | . | C | T | 30.12   | my_snp_filter | AC=2;AF=0.077;AN=26;BaseQ          |
| 32872 | chrY | 13635012 | . | G | A | 281.06  | my_snp_filter | AC=4;AF=0.167;AN=24;BaseQ          |
| 32873 | chrY | 13635026 | . | G | A | 31.88   | my_snp_filter | AC=2;AF=0.071;AN=28;BaseQ          |
| 32874 | chrY | 13635072 | . | T | G | 900.33  | my_snp_filter | AC=8;AF=0.364;AN=22;BaseQ          |
| 32875 | chrY | 13635105 | . | C | T | 346.06  | PASS          | AC=4;AF=0.125;AN=32;BaseQRankSum=  |
| 32876 | chrY | 13635107 | . | C | G | 346.06  | PASS          | AC=4;AF=0.125;AN=32;BaseQRankSum=  |
| 32877 | chrY | 13635126 | . | C | A | 71.98   | my_snp_filter | AC=3;AF=0.079;AN=38;BaseQ          |
| 32878 | chrY | 13635244 | . | T | C | 109.47  | PASS          | AC=2;AF=0.029;AN=70;BaseQRankSum=  |
| 32879 | chrY | 13635280 | . | T | G | 191.55  | PASS          | AC=2;AF=0.029;AN=70;BaseQRankSum=  |
| 32880 | chrY | 13635289 | . | C | G | 196.26  | PASS          | AC=2;AF=0.029;AN=68;BaseQRankSum=  |
| 32881 | chrY | 13635966 | . | G | A | 221.45  | my_snp_filter | AC=9;AF=0.346;AN=26;BaseQ          |
| 32882 | chrY | 13636000 | . | G | A | 314.53  | PASS          | AC=11;AF=0.423;AN=26;BaseQRankSum= |
| 32883 | chrY | 13636016 | . | C | T | 950.14  | PASS          | AC=13;AF=0.464;AN=28;BaseQRankSum= |
| 32884 | chrY | 13636021 | . | G | A | 939.37  | PASS          | AC=13;AF=0.433;AN=30;BaseQRankSum= |
| 32885 | chrY | 13636212 | . | T | G | 239.85  | my_snp_filter | AC=6;AF=0.097;AN=62;BaseQ          |
| 32886 | chrY | 13636217 | . | A | G | 1400.62 | PASS          | AC=7;AF=0.109;AN=64;BaseQRankSum=  |
| 32887 | chrY | 13636496 | . | G | C | 1791.17 | my_snp_filter | AC=9;AF=0.188;AN=48;BaseQ          |
| 32888 | chrY | 13636499 | . | C | A | 457.30  | PASS          | AC=4;AF=0.087;AN=46;BaseQRankSum=  |
| 32889 | chrY | 13636646 | . | A | C | 316.65  | PASS          | AC=3;AF=0.136;AN=22;BaseQRankSum=  |
| 32890 | chrY | 13636656 | . | T | C | 3400.52 | PASS          | AC=9;AF=0.450;AN=20;BaseQRankSum=  |
| 32891 | chrY | 13636667 | . | T | C | 5273.52 | PASS          | AC=9;AF=0.450;AN=20;BaseQRankSum=  |
| 32892 | chrY | 13636675 | . | C | G | 3547.78 | PASS          | AC=9;AF=0.375;AN=24;BaseQRankSum=  |
| 32893 | chrY | 13636683 | . | G | T | 1650.20 | PASS          | AC=7;AF=0.292;AN=24;BaseQRankSum=  |
| 32894 | chrY | 13636714 | . | A | G | 2221.73 | PASS          | AC=9;AF=0.375;AN=24;BaseQRankSum=  |
| 32895 | chrY | 13636745 | . | G | C | 46.98   | PASS          | AC=4;AF=0.154;AN=26;BaseQRankSum=  |
| 32896 | chrY | 13636765 | . | C | T | 95.99   | my_snp_filter | AC=3;AF=0.125;AN=24;BaseQ          |
| 32897 | chrY | 13636788 | . | C | T | 43.42   | my_snp_filter | AC=4;AF=0.182;AN=22;BaseQ          |
| 32898 | chrY | 13636790 | . | A | C | 2484.52 | PASS          | AC=9;AF=0.450;AN=20;BaseQRankSum=  |
| 32899 | chrY | 13636843 | . | G | C | 60.24   | my_snp_filter | AC=3;AF=0.088;AN=34;BaseQ          |
| 32900 | chrY | 13636871 | . | T | G | 1580.47 | my_snp_filter | AC=9;AF=0.196;AN=46;BaseQ          |
| 32901 | chrY | 13636889 | . | C | A | 1613.75 | my_snp_filter | AC=9;AF=0.188;AN=48;BaseQ          |
| 32902 | chrY | 13636903 | . | A | G | 591.02  | PASS          | AC=7;AF=0.140;AN=50;BaseQRankSum=  |
| 32903 | chrY | 13636932 | . | A | T | 1006.76 | PASS          | AC=8;AF=0.148;AN=54;BaseQRankSum=  |
| 32904 | chrY | 13636943 | . | G | C | 355.82  | PASS          | AC=4;AF=0.067;AN=60;BaseQRankSum=  |
| 32905 | chrY | 13636951 | . | T | A | 299.32  | PASS          | AC=4;AF=0.063;AN=64;BaseQRankSum=  |
| 32906 | chrY | 13636965 | . | T | G | 174.23  | PASS          | AC=4;AF=0.061;AN=66;BaseQRankSum=  |
| 32907 | chrY | 13637085 | . | C | G | 67.40   | my_snp_filter | AC=3;AF=0.058;AN=52;BaseQ          |
| 32908 | chrY | 13637127 | . | T | G | 139.16  | my_snp_filter | AC=3;AF=0.068;AN=44;BaseQ          |

|       |      |          |   |   |   |         |               |                                   |
|-------|------|----------|---|---|---|---------|---------------|-----------------------------------|
| 32909 | chrY | 13637141 | . | C | T | 111.63  | my_snp_filter | AC=4;AF=0.091;AN=44;BaseQ         |
| 32910 | chrY | 13637178 | . | T | C | 781.94  | PASS          | AC=3;AF=0.075;AN=40;BaseQRankSum= |
| 32911 | chrY | 13637182 | . | G | T | 783.63  | PASS          | AC=3;AF=0.075;AN=40;BaseQRankSum= |
| 32912 | chrY | 13637205 | . | C | T | 1626.93 | PASS          | AC=4;AF=0.111;AN=36;BaseQRankSum= |
| 32913 | chrY | 13637207 | . | G | T | 861.70  | PASS          | AC=3;AF=0.079;AN=38;BaseQRankSum= |
| 32914 | chrY | 13637213 | . | C | T | 725.92  | PASS          | AC=3;AF=0.075;AN=40;BaseQRankSum= |
| 32915 | chrY | 13637217 | . | C | T | 469.75  | PASS          | AC=3;AF=0.065;AN=46;BaseQRankSum= |
| 32916 | chrY | 13637233 | . | C | A | 611.89  | PASS          | AC=3;AF=0.079;AN=38;BaseQRankSum= |
| 32917 | chrY | 13637234 | . | G | C | 515.48  | PASS          | AC=3;AF=0.079;AN=38;BaseQRankSum= |
| 32918 | chrY | 13637247 | . | A | G | 1154.67 | PASS          | AC=4;AF=0.100;AN=40;BaseQRankSum= |
| 32919 | chrY | 13637248 | . | C | A | 397.27  | PASS          | AC=3;AF=0.065;AN=46;BaseQRankSum= |
| 32920 | chrY | 13637255 | . | G | A | 391.43  | PASS          | AC=3;AF=0.071;AN=42;BaseQRankSum= |
| 32921 | chrY | 13637265 | . | A | G | 339.63  | PASS          | AC=3;AF=0.068;AN=44;BaseQRankSum= |
| 32922 | chrY | 13637267 | . | G | A | 321.10  | PASS          | AC=3;AF=0.079;AN=38;BaseQRankSum= |
| 32923 | chrY | 13637269 | . | C | T | 276.10  | PASS          | AC=3;AF=0.079;AN=38;BaseQRankSum= |
| 32924 | chrY | 13637272 | . | C | T | 282.29  | PASS          | AC=3;AF=0.083;AN=36;BaseQRankSum= |
| 32925 | chrY | 13637275 | . | G | A | 106.19  | PASS          | AC=2;AF=0.048;AN=42;BaseQRankSum= |
| 32926 | chrY | 13637277 | . | T | G | 497.70  | PASS          | AC=4;AF=0.118;AN=34;BaseQRankSum= |
| 32927 | chrY | 13637285 | . | G | C | 167.55  | PASS          | AC=2;AF=0.048;AN=42;BaseQRankSum= |
| 32928 | chrY | 13637288 | . | G | A | 167.16  | PASS          | AC=2;AF=0.053;AN=38;BaseQRankSum= |
| 32929 | chrY | 13637292 | . | A | C | 191.40  | PASS          | AC=2;AF=0.050;AN=40;BaseQRankSum= |
| 32930 | chrY | 13637399 | . | C | T | 2477.70 | my_snp_filter | AC=8;AF=0.190;AN=42;BaseQ         |
| 32931 | chrY | 13637424 | . | C | G | 2815.39 | my_snp_filter | AC=8;AF=0.286;AN=28;BaseQ         |
| 32932 | chrY | 13637458 | . | A | G | 236.25  | PASS          | AC=4;AF=0.182;AN=22;BaseQRankSum= |
| 32933 | chrY | 13637461 | . | A | G | 3366.33 | my_snp_filter | AC=8;AF=0.364;AN=22;BaseQ         |
| 32934 | chrY | 13637469 | . | G | C | 225.48  | PASS          | AC=1;AF=0.042;AN=24;BaseQRankSum= |
| 32935 | chrY | 13637477 | . | G | C | 3086.20 | my_snp_filter | AC=8;AF=0.333;AN=24;BaseQ         |
| 32936 | chrY | 13637524 | . | T | A | 1166.39 | my_snp_filter | AC=8;AF=0.364;AN=22;BaseQ         |
| 32937 | chrY | 13637542 | . | G | C | 891.73  | my_snp_filter | AC=8;AF=0.444;AN=18;BaseQ         |
| 32938 | chrY | 13637546 | . | T | G | 855.66  | my_snp_filter | AC=8;AF=0.444;AN=18;BaseQ         |
| 32939 | chrY | 13638201 | . | G | C | 639.16  | my_snp_filter | AC=6;AF=0.088;AN=68;BaseQ         |
| 32940 | chrY | 13638223 | . | T | A | 67.23   | my_snp_filter | AC=2;AF=0.038;AN=52;BaseQ         |
| 32941 | chrY | 13638257 | . | C | T | 206.19  | my_snp_filter | AC=3;AF=0.094;AN=32;BaseQ         |
| 32942 | chrY | 13638262 | . | C | A | 780.11  | my_snp_filter | AC=7;AF=0.233;AN=30;BaseQ         |
| 32943 | chrY | 13638286 | . | G | T | 227.74  | my_snp_filter | AC=3;AF=0.115;AN=26;BaseQ         |
| 32944 | chrY | 13638300 | . | G | A | 190.47  | my_snp_filter | AC=3;AF=0.136;AN=22;BaseQ         |
| 32945 | chrY | 13638311 | . | C | T | 163.59  | my_snp_filter | AC=3;AF=0.136;AN=22;BaseQ         |
| 32946 | chrY | 13638332 | . | G | A | 512.85  | my_snp_filter | AC=7;AF=0.292;AN=24;BaseQ         |
| 32947 | chrY | 13638339 | . | G | A | 1430.44 | PASS          | AC=8;AF=0.333;AN=24;BaseQRankSum= |
| 32948 | chrY | 13638347 | . | C | T | 222.53  | my_snp_filter | AC=5;AF=0.208;AN=24;BaseQ         |
| 32949 | chrY | 13638367 | . | G | C | 53.58   | my_snp_filter | AC=2;AF=0.091;AN=22;BaseQ         |
| 32950 | chrY | 13638384 | . | A | G | 3852.11 | my_snp_filter | AC=9;AF=0.409;AN=22;BaseQ         |
| 32951 | chrY | 13638386 | . | T | G | 3461.22 | PASS          | AC=9;AF=0.409;AN=22;BaseQRankSum= |
| 32952 | chrY | 13638426 | . | T | A | 36.31   | my_snp_filter | AC=2;AF=0.100;AN=20;BaseQ         |
| 32953 | chrY | 13638429 | . | G | C | 1744.96 | PASS          | AC=7;AF=0.350;AN=20;BaseQRankSum= |
| 32954 | chrY | 13638442 | . | A | G | 1862.48 | PASS          | AC=7;AF=0.350;AN=20;BaseQRankSum= |
| 32955 | chrY | 13638451 | . | A | G | 63.17   | my_snp_filter | AC=2;AF=0.100;AN=20;BaseQ         |
| 32956 | chrY | 13638475 | . | G | A | 43.32   | my_snp_filter | AC=1;AF=0.050;AN=20;BaseQ         |
| 32957 | chrY | 13638507 | . | T | C | 423.78  | my_snp_filter | AC=3;AF=0.167;AN=18;BaseQ         |
| 32958 | chrY | 13638538 | . | C | T | 2978.09 | PASS          | AC=9;AF=0.500;AN=18;BaseQRankSum= |
| 32959 | chrY | 13638544 | . | G | C | 1207.93 | PASS          | AC=6;AF=0.333;AN=18;BaseQRankSum= |
| 32960 | chrY | 13638545 | . | G | A | 1213.93 | PASS          | AC=6;AF=0.333;AN=18;BaseQRankSum= |
| 32961 | chrY | 13638570 | . | C | G | 399.51  | my_snp_filter | AC=4;AF=0.222;AN=18;BaseQ         |
| 32962 | chrY | 13638580 | . | C | T | 338.49  | my_snp_filter | AC=4;AF=0.200;AN=20;BaseQ         |
| 32963 | chrY | 13638584 | . | T | A | 519.91  | PASS          | AC=3;AF=0.150;AN=20;BaseQRankSum= |
| 32964 | chrY | 13638603 | . | G | C | 118.03  | my_snp_filter | AC=2;AF=0.083;AN=24;BaseQ         |
| 32965 | chrY | 13638607 | . | A | G | 737.74  | PASS          | AC=7;AF=0.269;AN=26;BaseQRankSum= |
| 32966 | chrY | 13638623 | . | G | T | 63.89   | PASS          | AC=2;AF=0.053;AN=38;BaseQRankSum= |
| 32967 | chrY | 13638676 | . | T | C | 464.39  | PASS          | AC=3;AF=0.048;AN=62;BaseQRankSum= |
| 32968 | chrY | 13638678 | . | C | G | 528.37  | PASS          | AC=5;AF=0.078;AN=64;BaseQRankSum= |
| 32969 | chrY | 13638688 | . | G | A | 454.76  | PASS          | AC=3;AF=0.050;AN=60;BaseQRankSum= |
| 32970 | chrY | 13638705 | . | T | C | 53.69   | my_snp_filter | AC=1;AF=0.016;AN=62;BaseQ         |
| 32971 | chrY | 13638714 | . | A | G | 50.62   | my_snp_filter | AC=1;AF=0.016;AN=62;BaseQ         |
| 32972 | chrY | 13638750 | . | A | G | 288.08  | PASS          | AC=2;AF=0.030;AN=66;BaseQRankSum= |
| 32973 | chrY | 13638760 | . | G | C | 280.67  | PASS          | AC=2;AF=0.030;AN=66;BaseQRankSum= |
| 32974 | chrY | 13638902 | . | C | G | 187.52  | PASS          | AC=3;AF=0.043;AN=70;BaseQRankSum= |
| 32975 | chrY | 13638914 | . | A | G | 326.54  | PASS          | AC=5;AF=0.071;AN=70;BaseQRankSum= |
| 32976 | chrY | 13638915 | . | C | T | 35.45   | my_snp_filter | AC=2;AF=0.029;AN=70;BaseQ         |
| 32977 | chrY | 13638975 | . | T | G | 170.55  | PASS          | AC=2;AF=0.029;AN=68;BaseQRankSum= |
| 32978 | chrY | 13638977 | . | T | A | 111.02  | PASS          | AC=2;AF=0.029;AN=68;BaseQRankSum= |
| 32979 | chrY | 13638991 | . | T | C | 40.65   | my_snp_filter | AC=2;AF=0.029;AN=68;BaseQ         |
| 32980 | chrY | 13639005 | . | C | G | 202.61  | PASS          | AC=4;AF=0.057;AN=70;BaseQRankSum= |
| 32981 | chrY | 13639015 | . | C | T | 181.78  | PASS          | AC=4;AF=0.057;AN=70;BaseQRankSum= |
| 32982 | chrY | 13639023 | . | A | G | 135.50  | PASS          | AC=3;AF=0.043;AN=70;BaseQRankSum= |
| 32983 | chrY | 13639155 | . | T | A | 43.75   | my_snp_filter | AC=3;AF=0.060;AN=50;BaseQ         |
| 32984 | chrY | 13639290 | . | G | A | 37.61   | my_snp_filter | AC=2;AF=0.032;AN=62;BaseQ         |

|       |      |          |   |   |     |         |               |                                    |
|-------|------|----------|---|---|-----|---------|---------------|------------------------------------|
| 32985 | chrY | 13640445 | . | G | T   | 31.62   | my_snp_filter | AC=4;AF=0.074;AN=54;BaseQ          |
| 32986 | chrY | 13640469 | . | C | T   | 127.27  | my_snp_filter | AC=5;AF=0.093;AN=54;BaseQ          |
| 32987 | chrY | 13640508 | . | T | C   | 160     | my_snp_filter | AC=5;AF=0.086;AN=58;BaseQ          |
| 32988 | chrY | 13640567 | . | A | T   | 1470.12 | my_snp_filter | AC=9;AF=0.150;AN=60;BaseQ          |
| 32989 | chrY | 13640571 | . | A | T   | 39.07   | PASS          | AC=1;AF=0.017;AN=60;BaseQRankSum=  |
| 32990 | chrY | 13640577 | . | A | G   | 1346.75 | my_snp_filter | AC=9;AF=0.150;AN=60;BaseQ          |
| 32991 | chrY | 13640608 | . | C | A   | 36.34   | my_snp_filter | AC=1;AF=0.020;AN=50;BaseQ          |
| 32992 | chrY | 13640613 | . | A | C   | 530.45  | my_snp_filter | AC=6;AF=0.120;AN=50;BaseQ          |
| 32993 | chrY | 13640618 | . | A | T   | 37.30   | my_snp_filter | AC=1;AF=0.019;AN=54;BaseQ          |
| 32994 | chrY | 13640645 | . | T | C   | 415.58  | my_snp_filter | AC=6;AF=0.150;AN=40;BaseQ          |
| 32995 | chrY | 13640703 | . | T | G   | 599.99  | PASS          | AC=7;AF=0.206;AN=34;BaseQRankSum=  |
| 32996 | chrY | 13640710 | . | C | G   | 584.79  | PASS          | AC=5;AF=0.147;AN=34;BaseQRankSum=  |
| 32997 | chrY | 13640738 | . | T | A   | 1607.03 | PASS          | AC=9;AF=0.281;AN=32;BaseQRankSum=  |
| 32998 | chrY | 13640750 | . | G | C   | 1705.10 | PASS          | AC=9;AF=0.250;AN=36;BaseQRankSum=  |
| 32999 | chrY | 13640813 | . | A | G   | 381.35  | PASS          | AC=5;AF=0.096;AN=52;BaseQRankSum=  |
| 33000 | chrY | 13640836 | . | C | G   | 438.67  | my_snp_filter | AC=8;AF=0.125;AN=64;BaseQ          |
| 33001 | chrY | 13640845 | . | C | A   | 5011.48 | PASS          | AC=9;AF=0.145;AN=62;BaseQRankSum=  |
| 33002 | chrY | 13640859 | . | G | A   | 4412.23 | PASS          | AC=9;AF=0.141;AN=64;BaseQRankSum=  |
| 33003 | chrY | 13640873 | . | C | G   | 3882.44 | PASS          | AC=9;AF=0.141;AN=64;BaseQRankSum=  |
| 33004 | chrY | 13640901 | . | G | A   | 39.24   | PASS          | AC=1;AF=0.014;AN=70;BaseQRankSum=  |
| 33005 | chrY | 13640908 | . | C | G   | 1875.11 | PASS          | AC=8;AF=0.121;AN=66;BaseQRankSum=  |
| 33006 | chrY | 13640914 | . | G | A   | 1657.62 | PASS          | AC=8;AF=0.121;AN=66;BaseQRankSum=  |
| 33007 | chrY | 13640926 | . | C | T   | 979.07  | PASS          | AC=8;AF=0.118;AN=68;BaseQRankSum=  |
| 33008 | chrY | 13640927 | . | A | G   | 964.80  | PASS          | AC=8;AF=0.118;AN=68;BaseQRankSum=  |
| 33009 | chrY | 13640968 | . | A | G   | 564.42  | PASS          | AC=5;AF=0.078;AN=64;BaseQRankSum=  |
| 33010 | chrY | 13641015 | . | G | T   | 1990.27 | PASS          | AC=9;AF=0.214;AN=42;BaseQRankSum=  |
| 33011 | chrY | 13641031 | . | C | G   | 1766.63 | PASS          | AC=8;AF=0.182;AN=44;BaseQRankSum=  |
| 33012 | chrY | 13641061 | . | T | C   | 1203.59 | PASS          | AC=9;AF=0.225;AN=40;BaseQRankSum=  |
| 33013 | chrY | 13641089 | . | A | G,T | 1977.53 | PASS          | AC=6,5;AF=0.125,0.104;AN=48;BaseQ  |
| 33014 | chrY | 13641105 | . | A | C   | 827.10  | PASS          | AC=6;AF=0.120;AN=50;BaseQRankSum=  |
| 33015 | chrY | 13641120 | . | T | C   | 709.98  | PASS          | AC=4;AF=0.074;AN=54;BaseQRankSum=  |
| 33016 | chrY | 13641146 | . | G | A   | 336.32  | PASS          | AC=6;AF=0.107;AN=56;BaseQRankSum=  |
| 33017 | chrY | 13641174 | . | C | T   | 515.40  | PASS          | AC=5;AF=0.076;AN=66;BaseQRankSum=  |
| 33018 | chrY | 13641177 | . | T | C   | 493     | PASS          | AC=5;AF=0.078;AN=64;BaseQRankSum=  |
| 33019 | chrY | 13641224 | . | A | T   | 895.11  | PASS          | AC=8;AF=0.121;AN=66;BaseQRankSum=  |
| 33020 | chrY | 13641232 | . | T | G   | 36.36   | my_snp_filter | AC=3;AF=0.045;AN=66;BaseQ          |
| 33021 | chrY | 13641249 | . | G | A   | 1142    | PASS          | AC=9;AF=0.132;AN=68;BaseQRankSum=  |
| 33022 | chrY | 13641262 | . | C | T   | 1622.86 | PASS          | AC=10;AF=0.152;AN=66;BaseQRankSum= |
| 33023 | chrY | 13641268 | . | T | C   | 1597.04 | PASS          | AC=10;AF=0.152;AN=66;BaseQRankSum= |
| 33024 | chrY | 13641308 | . | G | C   | 765.45  | PASS          | AC=12;AF=0.176;AN=68;BaseQRankSum= |
| 33025 | chrY | 13641354 | . | T | G   | 160.64  | my_snp_filter | AC=5;AF=0.074;AN=68;BaseQ          |
| 33026 | chrY | 13641374 | . | A | C   | 84.68   | my_snp_filter | AC=4;AF=0.059;AN=68;BaseQ          |
| 33027 | chrY | 13641378 | . | G | C   | 57.28   | my_snp_filter | AC=4;AF=0.057;AN=70;BaseQ          |
| 33028 | chrY | 13641391 | . | A | G   | 45.78   | my_snp_filter | AC=3;AF=0.043;AN=70;BaseQ          |
| 33029 | chrY | 13641473 | . | C | T   | 47.31   | PASS          | AC=1;AF=0.015;AN=68;BaseQRankSum=  |
| 33030 | chrY | 13641480 | . | C | A   | 413.56  | PASS          | AC=4;AF=0.059;AN=68;BaseQRankSum=  |
| 33031 | chrY | 13641545 | . | A | C   | 127.26  | PASS          | AC=3;AF=0.054;AN=56;BaseQRankSum=  |
| 33032 | chrY | 13641589 | . | C | A   | 220.81  | PASS          | AC=1;AF=0.017;AN=60;BaseQRankSum=  |
| 33033 | chrY | 13641604 | . | G | T   | 456.52  | PASS          | AC=3;AF=0.047;AN=64;BaseQRankSum=  |
| 33034 | chrY | 13641647 | . | A | C   | 31.09   | PASS          | AC=1;AF=0.014;AN=70;BaseQRankSum=  |
| 33035 | chrY | 13642051 | . | T | A   | 1321.67 | PASS          | AC=6;AF=0.086;AN=70;DP=334;FS=0.0  |
| 33036 | chrY | 13642593 | . | T | C   | 134.51  | PASS          | AC=2;AF=0.029;AN=70;BaseQRankSum=  |
| 33037 | chrY | 13642630 | . | G | A   | 786.38  | PASS          | AC=7;AF=0.100;AN=70;BaseQRankSum=  |
| 33038 | chrY | 13642643 | . | A | C   | 588.61  | PASS          | AC=6;AF=0.086;AN=70;BaseQRankSum=  |
| 33039 | chrY | 13642644 | . | T | C   | 586.84  | PASS          | AC=6;AF=0.086;AN=70;BaseQRankSum=  |
| 33040 | chrY | 13642662 | . | G | A   | 322     | PASS          | AC=5;AF=0.071;AN=70;BaseQRankSum=  |
| 33041 | chrY | 13642667 | . | T | C   | 66.26   | my_snp_filter | AC=3;AF=0.043;AN=70;BaseQ          |
| 33042 | chrY | 13642865 | . | G | T   | 245.81  | PASS          | AC=3;AF=0.045;AN=66;BaseQRankSum=  |
| 33043 | chrY | 13642873 | . | T | C   | 220.86  | PASS          | AC=3;AF=0.045;AN=66;BaseQRankSum=  |
| 33044 | chrY | 13642911 | . | A | G   | 34.50   | PASS          | AC=2;AF=0.029;AN=70;BaseQRankSum=  |
| 33045 | chrY | 13643672 | . | C | G   | 85.63   | my_snp_filter | AC=3;AF=0.043;AN=70;BaseQ          |
| 33046 | chrY | 13643681 | . | G | C   | 91.38   | my_snp_filter | AC=3;AF=0.043;AN=70;BaseQ          |
| 33047 | chrY | 13643694 | . | A | G   | 80.50   | my_snp_filter | AC=3;AF=0.043;AN=70;BaseQ          |
| 33048 | chrY | 13643702 | . | T | A   | 71.76   | my_snp_filter | AC=3;AF=0.043;AN=70;BaseQ          |
| 33049 | chrY | 13643703 | . | T | C   | 71.76   | my_snp_filter | AC=3;AF=0.043;AN=70;BaseQ          |
| 33050 | chrY | 13643704 | . | G | A   | 71.69   | my_snp_filter | AC=3;AF=0.043;AN=70;BaseQ          |
| 33051 | chrY | 13643716 | . | T | G   | 80.54   | my_snp_filter | AC=3;AF=0.043;AN=70;BaseQ          |
| 33052 | chrY | 13643717 | . | C | G   | 84.49   | my_snp_filter | AC=3;AF=0.043;AN=70;BaseQ          |
| 33053 | chrY | 13643721 | . | C | A   | 92.34   | my_snp_filter | AC=3;AF=0.043;AN=70;BaseQ          |
| 33054 | chrY | 13643733 | . | G | A   | 75.90   | PASS          | AC=2;AF=0.029;AN=70;BaseQRankSum=  |
| 33055 | chrY | 13643743 | . | G | A   | 73.66   | PASS          | AC=2;AF=0.029;AN=70;BaseQRankSum=  |
| 33056 | chrY | 13643748 | . | T | C   | 69.96   | PASS          | AC=2;AF=0.029;AN=70;BaseQRankSum=  |
| 33057 | chrY | 13643752 | . | C | G   | 75.87   | PASS          | AC=2;AF=0.029;AN=70;BaseQRankSum=  |
| 33058 | chrY | 13643758 | . | T | A   | 72.64   | PASS          | AC=2;AF=0.029;AN=70;BaseQRankSum=  |
| 33059 | chrY | 13643778 | . | A | T   | 66.87   | my_snp_filter | AC=2;AF=0.029;AN=70;BaseQ          |
| 33060 | chrY | 13644480 | . | A | C   | 2443.73 | PASS          | AC=21;AF=0.309;AN=68;BaseQRankSum= |

|       |      |          |   |   |     |         |               |                                   |
|-------|------|----------|---|---|-----|---------|---------------|-----------------------------------|
| 33061 | chrY | 13644481 | . | G | C   | 2439.68 | PASS          | AC=21;AF=0.309;AN=68;BaseQRankSum |
| 33062 | chrY | 13644491 | . | A | G   | 2294.45 | PASS          | AC=21;AF=0.300;AN=70;BaseQRankSum |
| 33063 | chrY | 13644492 | . | A | G   | 2258.13 | PASS          | AC=21;AF=0.300;AN=70;BaseQRankSum |
| 33064 | chrY | 13644494 | . | G | A   | 2036.45 | PASS          | AC=21;AF=0.300;AN=70;BaseQRankSum |
| 33065 | chrY | 13644502 | . | T | C   | 1917.79 | PASS          | AC=21;AF=0.300;AN=70;BaseQRankSum |
| 33066 | chrY | 13644520 | . | A | G   | 1291.90 | PASS          | AC=17;AF=0.258;AN=66;BaseQRankSum |
| 33067 | chrY | 13644527 | . | T | A   | 1125.37 | PASS          | AC=13;AF=0.197;AN=66;BaseQRankSum |
| 33068 | chrY | 13644529 | . | C | T,* | 1098.69 | PASS          | AC=12,1;AF=0.182,0.015;AN=66;Base |
| 33069 | chrY | 13644555 | . | T | C   | 578.47  | PASS          | AC=8;AF=0.125;AN=64;BaseQRankSum  |
| 33070 | chrY | 13644556 | . | G | T   | 577.32  | PASS          | AC=8;AF=0.125;AN=64;BaseQRankSum  |
| 33071 | chrY | 13644559 | . | T | A   | 492.79  | PASS          | AC=7;AF=0.106;AN=66;BaseQRankSum  |
| 33072 | chrY | 13644560 | . | T | C   | 502.73  | PASS          | AC=7;AF=0.106;AN=66;BaseQRankSum  |
| 33073 | chrY | 13644567 | . | A | C   | 423.91  | PASS          | AC=7;AF=0.109;AN=64;BaseQRankSum  |
| 33074 | chrY | 13644573 | . | T | C   | 441.57  | PASS          | AC=6;AF=0.097;AN=62;BaseQRankSum  |
| 33075 | chrY | 13644579 | . | G | A   | 442.14  | PASS          | AC=6;AF=0.107;AN=56;BaseQRankSum  |
| 33076 | chrY | 13644608 | . | A | T   | 593.21  | PASS          | AC=7;AF=0.146;AN=48;BaseQRankSum  |
| 33077 | chrY | 13644611 | . | C | T   | 595.71  | PASS          | AC=7;AF=0.152;AN=46;BaseQRankSum  |
| 33078 | chrY | 13644869 | . | A | T   | 55.21   | PASS          | AC=1;AF=0.014;AN=70;BaseQRankSum  |
| 33079 | chrY | 13644873 | . | A | G   | 59.32   | PASS          | AC=1;AF=0.014;AN=70;BaseQRankSum  |
| 33080 | chrY | 13644899 | . | A | T   | 293.13  | PASS          | AC=2;AF=0.029;AN=70;BaseQRankSum  |
| 33081 | chrY | 13644914 | . | C | T   | 300.50  | PASS          | AC=3;AF=0.043;AN=70;BaseQRankSum  |
| 33082 | chrY | 13644915 | . | A | C   | 296.43  | PASS          | AC=3;AF=0.043;AN=70;BaseQRankSum  |
| 33083 | chrY | 13644930 | . | T | C   | 306.89  | PASS          | AC=3;AF=0.045;AN=66;BaseQRankSum  |
| 33084 | chrY | 13644937 | . | C | T   | 310.68  | PASS          | AC=3;AF=0.043;AN=70;BaseQRankSum  |
| 33085 | chrY | 13645008 | . | C | A   | 260.38  | PASS          | AC=4;AF=0.074;AN=54;BaseQRankSum  |
| 33086 | chrY | 13645009 | . | A | G   | 260.66  | PASS          | AC=4;AF=0.077;AN=52;BaseQRankSum  |
| 33087 | chrY | 13645012 | . | C | T   | 262.53  | PASS          | AC=4;AF=0.087;AN=46;BaseQRankSum  |
| 33088 | chrY | 13645013 | . | A | G   | 262.53  | PASS          | AC=4;AF=0.087;AN=46;BaseQRankSum  |
| 33089 | chrY | 13645015 | . | T | C   | 775.73  | PASS          | AC=5;AF=0.104;AN=48;BaseQRankSum  |
| 33090 | chrY | 13645023 | . | A | T   | 278.93  | PASS          | AC=5;AF=0.114;AN=44;BaseQRankSum  |
| 33091 | chrY | 13645026 | . | C | T   | 282.55  | PASS          | AC=6;AF=0.136;AN=44;BaseQRankSum  |
| 33092 | chrY | 13645036 | . | T | C   | 227.25  | PASS          | AC=6;AF=0.136;AN=44;BaseQRankSum  |
| 33093 | chrY | 13645037 | . | G | T   | 224.50  | PASS          | AC=6;AF=0.136;AN=44;BaseQRankSum  |
| 33094 | chrY | 13645041 | . | G | T   | 182.97  | PASS          | AC=6;AF=0.136;AN=44;BaseQRankSum  |
| 33095 | chrY | 13645647 | . | G | A   | 97.29   | PASS          | AC=1;AF=0.031;AN=32;BaseQRankSum  |
| 33096 | chrY | 13646098 | . | A | T   | 53.58   | PASS          | AC=1;AF=0.014;AN=70;BaseQRankSum  |
| 33097 | chrY | 13646099 | . | A | G   | 468.36  | PASS          | AC=4;AF=0.057;AN=70;BaseQRankSum  |
| 33098 | chrY | 13646101 | . | G | T,A | 635.84  | PASS          | AC=2,5;AF=0.030,0.076;AN=66;BaseQ |
| 33099 | chrY | 13646115 | . | C | A   | 692.38  | PASS          | AC=6;AF=0.091;AN=66;BaseQRankSum  |
| 33100 | chrY | 13646166 | . | C | T   | 50.36   | my_snp_filter | AC=2;AF=0.032;AN=62;BaseQ         |
| 33101 | chrY | 13646178 | . | G | T   | 39.37   | my_snp_filter | AC=2;AF=0.029;AN=70;BaseQ         |
| 33102 | chrY | 13646463 | . | G | A   | 1250.04 | PASS          | AC=6;AF=0.086;AN=70;BaseQRankSum  |
| 33103 | chrY | 13646500 | . | A | G   | 3402.79 | PASS          | AC=36;AF=0.545;AN=66;DP=432;FS=0. |
| 33104 | chrY | 13646549 | . | C | G   | 394.48  | PASS          | AC=6;AF=0.088;AN=68;BaseQRankSum  |
| 33105 | chrY | 13646551 | . | A | T   | 393.50  | PASS          | AC=6;AF=0.088;AN=68;BaseQRankSum  |
| 33106 | chrY | 13646552 | . | A | C   | 394.68  | PASS          | AC=6;AF=0.088;AN=68;BaseQRankSum  |
| 33107 | chrY | 13646832 | . | G | A   | 1455.83 | PASS          | AC=6;AF=0.088;AN=68;DP=417;FS=0.0 |
| 33108 | chrY | 13646933 | . | T | G   | 388.53  | PASS          | AC=4;AF=0.057;AN=70;BaseQRankSum  |
| 33109 | chrY | 13646937 | . | C | G   | 340.09  | PASS          | AC=3;AF=0.043;AN=70;BaseQRankSum  |
| 33110 | chrY | 13646938 | . | G | C   | 293.22  | PASS          | AC=3;AF=0.043;AN=70;BaseQRankSum  |
| 33111 | chrY | 13647394 | . | A | T   | 298.08  | PASS          | AC=1;AF=0.015;AN=66;BaseQRankSum  |
| 33112 | chrY | 13647474 | . | T | A   | 1307.82 | PASS          | AC=8;AF=0.133;AN=60;BaseQRankSum  |
| 33113 | chrY | 13647481 | . | G | C   | 640.91  | PASS          | AC=5;AF=0.078;AN=64;BaseQRankSum  |
| 33114 | chrY | 13647522 | . | G | A   | 65.10   | PASS          | AC=2;AF=0.029;AN=68;BaseQRankSum  |
| 33115 | chrY | 13647530 | . | T | A   | 60.09   | PASS          | AC=2;AF=0.029;AN=68;BaseQRankSum  |
| 33116 | chrY | 13647531 | . | C | T   | 61.69   | PASS          | AC=2;AF=0.029;AN=68;BaseQRankSum  |
| 33117 | chrY | 13647535 | . | T | G   | 64.54   | PASS          | AC=2;AF=0.029;AN=68;BaseQRankSum  |
| 33118 | chrY | 13647781 | . | G | T   | 1196.29 | PASS          | AC=6;AF=0.086;AN=70;DP=653;FS=0.0 |
| 33119 | chrY | 13647900 | . | A | C   | 358.85  | PASS          | AC=5;AF=0.076;AN=66;BaseQRankSum  |
| 33120 | chrY | 13647911 | . | A | G   | 365.12  | PASS          | AC=5;AF=0.086;AN=58;BaseQRankSum  |
| 33121 | chrY | 13647919 | . | C | A   | 365.70  | PASS          | AC=5;AF=0.074;AN=68;BaseQRankSum  |
| 33122 | chrY | 13647930 | . | G | A   | 290.87  | PASS          | AC=3;AF=0.043;AN=70;BaseQRankSum  |
| 33123 | chrY | 13647932 | . | A | T   | 186.09  | PASS          | AC=2;AF=0.029;AN=70;BaseQRankSum  |
| 33124 | chrY | 13647934 | . | T | C   | 165.78  | PASS          | AC=2;AF=0.029;AN=70;BaseQRankSum  |
| 33125 | chrY | 13648002 | . | A | C   | 260.61  | PASS          | AC=1;AF=0.014;AN=70;BaseQRankSum  |
| 33126 | chrY | 13648131 | . | G | T   | 303.30  | PASS          | AC=2;AF=0.029;AN=70;DP=2286;FS=0. |
| 33127 | chrY | 13648149 | . | T | A   | 216.06  | PASS          | AC=3;AF=0.050;AN=60;BaseQRankSum  |
| 33128 | chrY | 13648177 | . | A | G   | 92.60   | PASS          | AC=3;AF=0.043;AN=70;BaseQRankSum  |
| 33129 | chrY | 13648179 | . | T | A   | 62.13   | PASS          | AC=3;AF=0.050;AN=60;BaseQRankSum  |
| 33130 | chrY | 13648193 | . | A | G   | 105.39  | PASS          | AC=3;AF=0.045;AN=66;BaseQRankSum  |
| 33131 | chrY | 13648195 | . | A | C   | 112.12  | PASS          | AC=2;AF=0.038;AN=52;BaseQRankSum  |
| 33132 | chrY | 13648199 | . | C | T   | 50.56   | PASS          | AC=1;AF=0.019;AN=52;BaseQRankSum  |
| 33133 | chrY | 13648217 | . | T | A   | 45.86   | PASS          | AC=1;AF=0.016;AN=62;BaseQRankSum  |
| 33134 | chrY | 13648224 | . | A | T   | 45.12   | PASS          | AC=1;AF=0.017;AN=60;BaseQRankSum  |
| 33135 | chrY | 13648226 | . | T | G   | 41.46   | PASS          | AC=1;AF=0.017;AN=60;BaseQRankSum  |
| 33136 | chrY | 13648231 | . | G | A   | 37.89   | PASS          | AC=1;AF=0.014;AN=70;BaseQRankSum  |

|       |      |          |   |   |   |         |               |                                   |
|-------|------|----------|---|---|---|---------|---------------|-----------------------------------|
| 33137 | chrY | 13648284 | . | A | T | 32.06   | PASS          | AC=1;AF=0.015;AN=68;BaseQRankSum= |
| 33138 | chrY | 13649680 | . | A | C | 264.69  | my_snp_filter | AC=5;AF=0.076;AN=66;BaseQ         |
| 33139 | chrY | 13649699 | . | C | A | 976.08  | PASS          | AC=4;AF=0.061;AN=66;BaseQRankSum= |
| 33140 | chrY | 13649708 | . | A | C | 842.69  | PASS          | AC=2;AF=0.029;AN=68;BaseQRankSum= |
| 33141 | chrY | 13649710 | . | G | A | 205.40  | PASS          | AC=1;AF=0.015;AN=66;DP=553;FS=0.0 |
| 33142 | chrY | 13649925 | . | C | T | 1124.50 | PASS          | AC=7;AF=0.103;AN=68;BaseQRankSum= |
| 33143 | chrY | 13649929 | . | T | G | 1134.32 | PASS          | AC=7;AF=0.103;AN=68;BaseQRankSum= |
| 33144 | chrY | 13650391 | . | A | G | 2237.98 | PASS          | AC=9;AF=0.129;AN=70;BaseQRankSum= |
| 33145 | chrY | 13650397 | . | C | T | 2245.54 | PASS          | AC=9;AF=0.129;AN=70;BaseQRankSum= |
| 33146 | chrY | 13650597 | . | A | T | 36.55   | PASS          | AC=3;AF=0.048;AN=62;BaseQRankSum= |
| 33147 | chrY | 13650599 | . | G | T | 34.06   | PASS          | AC=3;AF=0.044;AN=68;BaseQRankSum= |
| 33148 | chrY | 13650757 | . | T | C | 196.93  | PASS          | AC=2;AF=0.029;AN=70;BaseQRankSum= |
| 33149 | chrY | 13650760 | . | A | T | 195.72  | PASS          | AC=2;AF=0.029;AN=70;BaseQRankSum= |
| 33150 | chrY | 13650807 | . | T | A | 3177.46 | my_snp_filter | AC=1;AF=0.021;AN=48;BaseQ         |
| 33151 | chrY | 13650813 | . | G | A | 49.99   | PASS          | AC=1;AF=0.014;AN=70;BaseQRankSum= |
| 33152 | chrY | 13650842 | . | T | A | 53.56   | PASS          | AC=1;AF=0.020;AN=50;BaseQRankSum= |
| 33153 | chrY | 13650850 | . | G | T | 59.09   | PASS          | AC=1;AF=0.025;AN=40;BaseQRankSum= |
| 33154 | chrY | 13650851 | . | G | A | 59.41   | PASS          | AC=1;AF=0.025;AN=40;BaseQRankSum= |
| 33155 | chrY | 13650862 | . | T | C | 47.34   | PASS          | AC=1;AF=0.021;AN=48;BaseQRankSum= |
| 33156 | chrY | 13650872 | . | G | C | 747.14  | PASS          | AC=2;AF=0.029;AN=68;BaseQRankSum= |
| 33157 | chrY | 13650877 | . | G | T | 753.33  | PASS          | AC=2;AF=0.029;AN=70;BaseQRankSum= |
| 33158 | chrY | 13650883 | . | T | G | 1442.74 | PASS          | AC=3;AF=0.063;AN=48;BaseQRankSum= |
| 33159 | chrY | 13650884 | . | G | C | 1488.72 | PASS          | AC=3;AF=0.063;AN=48;BaseQRankSum= |
| 33160 | chrY | 13650892 | . | C | T | 1396.87 | PASS          | AC=2;AF=0.040;AN=50;BaseQRankSum= |
| 33161 | chrY | 13650893 | . | A | G | 1453.48 | PASS          | AC=2;AF=0.040;AN=50;BaseQRankSum= |
| 33162 | chrY | 13650897 | . | T | A | 1401.19 | PASS          | AC=2;AF=0.037;AN=54;BaseQRankSum= |
| 33163 | chrY | 13650899 | . | T | G | 1399.11 | PASS          | AC=2;AF=0.037;AN=54;BaseQRankSum= |
| 33164 | chrY | 13650904 | . | G | C | 1324.96 | PASS          | AC=2;AF=0.037;AN=54;BaseQRankSum= |
| 33165 | chrY | 13650912 | . | T | G | 1180.28 | PASS          | AC=2;AF=0.037;AN=54;BaseQRankSum= |
| 33166 | chrY | 13650923 | . | A | G | 667.16  | PASS          | AC=2;AF=0.036;AN=56;BaseQRankSum= |
| 33167 | chrY | 13650933 | . | T | G | 928.49  | PASS          | AC=2;AF=0.036;AN=56;BaseQRankSum= |
| 33168 | chrY | 13650948 | . | T | G | 809.56  | PASS          | AC=2;AF=0.037;AN=54;BaseQRankSum= |
| 33169 | chrY | 13650958 | . | T | G | 264.28  | PASS          | AC=2;AF=0.038;AN=52;BaseQRankSum= |
| 33170 | chrY | 13650959 | . | A | G | 181.88  | PASS          | AC=2;AF=0.038;AN=52;BaseQRankSum= |
| 33171 | chrY | 13650980 | . | T | C | 37.87   | my_snp_filter | AC=1;AF=0.019;AN=52;BaseQ         |
| 33172 | chrY | 13650992 | . | G | A | 442.27  | PASS          | AC=2;AF=0.042;AN=48;BaseQRankSum= |
| 33173 | chrY | 13651002 | . | A | C | 286.24  | PASS          | AC=2;AF=0.037;AN=54;BaseQRankSum= |
| 33174 | chrY | 13651005 | . | A | G | 47.44   | PASS          | AC=2;AF=0.031;AN=64;DP=1377;FS=0. |
| 33175 | chrY | 13651009 | . | G | A | 48.11   | PASS          | AC=2;AF=0.033;AN=60;DP=1415;FS=0. |
| 33176 | chrY | 13651024 | . | G | A | 231.18  | PASS          | AC=2;AF=0.040;AN=50;BaseQRankSum= |
| 33177 | chrY | 13651032 | . | T | C | 243.74  | PASS          | AC=2;AF=0.038;AN=52;BaseQRankSum= |
| 33178 | chrY | 13651033 | . | G | A | 249.83  | PASS          | AC=2;AF=0.040;AN=50;BaseQRankSum= |
| 33179 | chrY | 13651327 | . | T | A | 552.51  | PASS          | AC=2;AF=0.029;AN=68;BaseQRankSum= |
| 33180 | chrY | 13651342 | . | A | G | 72.79   | PASS          | AC=3;AF=0.044;AN=68;BaseQRankSum= |
| 33181 | chrY | 13651354 | . | G | C | 33.01   | PASS          | AC=3;AF=0.043;AN=70;BaseQRankSum= |
| 33182 | chrY | 13651368 | . | G | T | 1004.97 | my_snp_filter | AC=6;AF=0.088;AN=68;BaseQ         |
| 33183 | chrY | 13651369 | . | G | T | 674.38  | PASS          | AC=1;AF=0.015;AN=68;BaseQRankSum= |
| 33184 | chrY | 13651372 | . | A | T | 369.95  | my_snp_filter | AC=4;AF=0.059;AN=68;BaseQ         |
| 33185 | chrY | 13651379 | . | G | C | 334.80  | my_snp_filter | AC=4;AF=0.057;AN=70;BaseQ         |
| 33186 | chrY | 13651394 | . | A | G | 100.14  | PASS          | AC=2;AF=0.029;AN=68;BaseQRankSum= |
| 33187 | chrY | 13651407 | . | C | T | 167.24  | PASS          | AC=3;AF=0.048;AN=62;BaseQRankSum= |
| 33188 | chrY | 13651408 | . | A | T | 133.07  | PASS          | AC=1;AF=0.016;AN=62;BaseQRankSum= |
| 33189 | chrY | 13651413 | . | T | G | 74.63   | PASS          | AC=2;AF=0.031;AN=64;BaseQRankSum= |
| 33190 | chrY | 13651414 | . | T | G | 90.53   | PASS          | AC=2;AF=0.032;AN=62;BaseQRankSum= |
| 33191 | chrY | 13651428 | . | C | G | 37.74   | my_snp_filter | AC=2;AF=0.034;AN=58;BaseQ         |
| 33192 | chrY | 13651438 | . | C | G | 795.77  | PASS          | AC=2;AF=0.031;AN=64;BaseQRankSum= |
| 33193 | chrY | 13651838 | . | G | A | 1003.36 | PASS          | AC=6;AF=0.086;AN=70;DP=657;FS=0.0 |
| 33194 | chrY | 13651925 | . | A | G | 147.57  | PASS          | AC=3;AF=0.043;AN=70;BaseQRankSum= |
| 33195 | chrY | 13651928 | . | G | A | 116.57  | PASS          | AC=3;AF=0.043;AN=70;BaseQRankSum= |
| 33196 | chrY | 13651931 | . | A | T | 178.45  | PASS          | AC=4;AF=0.059;AN=68;BaseQRankSum= |
| 33197 | chrY | 13651939 | . | A | T | 2093.89 | PASS          | AC=6;AF=0.086;AN=70;BaseQRankSum= |
| 33198 | chrY | 13651941 | . | T | A | 2102.01 | PASS          | AC=6;AF=0.086;AN=70;BaseQRankSum= |
| 33199 | chrY | 13651945 | . | A | C | 36.94   | my_snp_filter | AC=2;AF=0.029;AN=70;BaseQ         |
| 33200 | chrY | 13651950 | . | A | C | 35.33   | my_snp_filter | AC=2;AF=0.029;AN=70;BaseQ         |
| 33201 | chrY | 13651952 | . | G | C | 2078.84 | PASS          | AC=6;AF=0.086;AN=70;BaseQRankSum= |
| 33202 | chrY | 13652792 | . | G | A | 1351.31 | PASS          | AC=6;AF=0.086;AN=70;DP=497;FS=0.0 |
| 33203 | chrY | 13652985 | . | C | A | 34.57   | my_snp_filter | AC=1;AF=0.014;AN=70;BaseQ         |
| 33204 | chrY | 13653822 | . | A | G | 72.49   | my_snp_filter | AC=2;AF=0.029;AN=68;BaseQ         |
| 33205 | chrY | 13653834 | . | T | A | 55.60   | my_snp_filter | AC=3;AF=0.043;AN=70;BaseQ         |
| 33206 | chrY | 13654112 | . | T | G | 36.28   | PASS          | AC=1;AF=0.014;AN=70;BaseQRankSum= |
| 33207 | chrY | 13654537 | . | A | T | 50.82   | my_snp_filter | AC=2;AF=0.030;AN=66;BaseQ         |
| 33208 | chrY | 13654538 | . | A | G | 49.97   | my_snp_filter | AC=2;AF=0.030;AN=66;BaseQ         |
| 33209 | chrY | 13654558 | . | G | A | 106.38  | PASS          | AC=3;AF=0.047;AN=64;BaseQRankSum= |
| 33210 | chrY | 13654575 | . | C | G | 113.71  | PASS          | AC=3;AF=0.047;AN=64;BaseQRankSum= |
| 33211 | chrY | 13654579 | . | A | C | 86.41   | PASS          | AC=2;AF=0.029;AN=70;BaseQRankSum= |
| 33212 | chrY | 13654882 | . | G | A | 792.64  | PASS          | AC=4;AF=0.059;AN=68;DP=418;FS=0.0 |

|       |      |          |   |   |     |          |               |                                    |
|-------|------|----------|---|---|-----|----------|---------------|------------------------------------|
| 33213 | chrY | 13654916 | . | T | A   | 1130.24  | PASS          | AC=5;AF=0.071;AN=70;BaseQRankSum=  |
| 33214 | chrY | 13655585 | . | T | A   | 33.90    | PASS          | AC=1;AF=0.014;AN=70;BaseQRankSum=  |
| 33215 | chrY | 13655597 | . | G | T   | 33.65    | PASS          | AC=1;AF=0.014;AN=70;BaseQRankSum=  |
| 33216 | chrY | 13655605 | . | C | T   | 164.09   | my_snp_filter | AC=6;AF=0.086;AN=70;BaseQ          |
| 33217 | chrY | 13655627 | . | A | G   | 106.19   | PASS          | AC=3;AF=0.043;AN=70;BaseQRankSum=  |
| 33218 | chrY | 13655711 | . | C | A   | 223.62   | PASS          | AC=3;AF=0.044;AN=68;BaseQRankSum=  |
| 33219 | chrY | 13655783 | . | T | A   | 55.33    | PASS          | AC=2;AF=0.029;AN=70;BaseQRankSum=  |
| 33220 | chrY | 13655801 | . | T | C   | 39.34    | PASS          | AC=1;AF=0.016;AN=64;BaseQRankSum=  |
| 33221 | chrY | 13655805 | . | A | G   | 50.47    | my_snp_filter | AC=2;AF=0.029;AN=68;BaseQ          |
| 33222 | chrY | 13655812 | . | A | C   | 63.01    | PASS          | AC=2;AF=0.029;AN=68;BaseQRankSum=  |
| 33223 | chrY | 13655849 | . | G | A   | 542.66   | PASS          | AC=4;AF=0.063;AN=64;BaseQRankSum=  |
| 33224 | chrY | 13655851 | . | G | T   | 492.24   | PASS          | AC=3;AF=0.045;AN=66;BaseQRankSum=  |
| 33225 | chrY | 13655857 | . | G | C   | 452.87   | PASS          | AC=3;AF=0.044;AN=68;BaseQRankSum=  |
| 33226 | chrY | 13655860 | . | C | T   | 431.67   | PASS          | AC=3;AF=0.045;AN=66;BaseQRankSum=  |
| 33227 | chrY | 13655865 | . | T | C   | 402.86   | PASS          | AC=3;AF=0.043;AN=70;BaseQRankSum=  |
| 33228 | chrY | 13655874 | . | C | A   | 366.95   | PASS          | AC=3;AF=0.043;AN=70;BaseQRankSum=  |
| 33229 | chrY | 13655880 | . | C | T   | 354.98   | PASS          | AC=4;AF=0.061;AN=66;BaseQRankSum=  |
| 33230 | chrY | 13655881 | . | G | A   | 389.20   | PASS          | AC=4;AF=0.061;AN=66;BaseQRankSum=  |
| 33231 | chrY | 13655882 | . | G | T   | 256.34   | PASS          | AC=2;AF=0.029;AN=68;BaseQRankSum=  |
| 33232 | chrY | 13655884 | . | A | T   | 259.11   | PASS          | AC=2;AF=0.029;AN=70;BaseQRankSum=  |
| 33233 | chrY | 13655885 | . | C | T   | 218.89   | PASS          | AC=2;AF=0.029;AN=70;BaseQRankSum=  |
| 33234 | chrY | 13655896 | . | G | T   | 172.25   | PASS          | AC=2;AF=0.029;AN=70;BaseQRankSum=  |
| 33235 | chrY | 13655899 | . | A | G   | 174.94   | PASS          | AC=2;AF=0.029;AN=70;BaseQRankSum=  |
| 33236 | chrY | 13655900 | . | T | A   | 174.89   | PASS          | AC=2;AF=0.029;AN=70;BaseQRankSum=  |
| 33237 | chrY | 13655904 | . | A | T   | 151.45   | PASS          | AC=3;AF=0.044;AN=68;BaseQRankSum=  |
| 33238 | chrY | 13655913 | . | A | G   | 88.23    | PASS          | AC=2;AF=0.029;AN=68;BaseQRankSum=  |
| 33239 | chrY | 13656195 | . | T | A   | 8098.45  | PASS          | AC=50;AF=0.735;AN=68;DP=428;FS=0.  |
| 33240 | chrY | 13656660 | . | A | G   | 16544.89 | PASS          | AC=70;AF=1.00;AN=70;BaseQ          |
| 33241 | chrY | 13657030 | . | T | G   | 91.06    | PASS          | AC=1;AF=0.016;AN=62;BaseQRankSum=  |
| 33242 | chrY | 13657031 | . | T | C   | 82.87    | PASS          | AC=1;AF=0.016;AN=64;BaseQRankSum=  |
| 33243 | chrY | 13657036 | . | A | C   | 77.42    | PASS          | AC=1;AF=0.015;AN=66;BaseQRankSum=  |
| 33244 | chrY | 13657048 | . | A | G   | 45.54    | PASS          | AC=1;AF=0.017;AN=60;BaseQRankSum=  |
| 33245 | chrY | 13657051 | . | G | C   | 45.60    | PASS          | AC=1;AF=0.017;AN=60;BaseQRankSum=  |
| 33246 | chrY | 13657597 | . | A | T   | 284.36   | PASS          | AC=2;AF=0.029;AN=70;DP=544;FS=0.0  |
| 33247 | chrY | 13657723 | . | C | T   | 2093.62  | PASS          | AC=8;AF=0.118;AN=68;BaseQRankSum=  |
| 33248 | chrY | 13657748 | . | G | A   | 79.59    | my_snp_filter | AC=5;AF=0.074;AN=68;BaseQ          |
| 33249 | chrY | 13657755 | . | A | C   | 2191.36  | PASS          | AC=9;AF=0.132;AN=68;BaseQRankSum=  |
| 33250 | chrY | 13657775 | . | A | C   | 465.22   | PASS          | AC=4;AF=0.059;AN=68;BaseQRankSum=  |
| 33251 | chrY | 13657777 | . | C | T   | 9957.46  | PASS          | AC=60;AF=0.909;AN=66;BaseQRankSum= |
| 33252 | chrY | 13657872 | . | G | C   | 207.78   | PASS          | AC=1;AF=0.014;AN=70;BaseQRankSum=  |
| 33253 | chrY | 13657873 | . | G | A   | 207.76   | PASS          | AC=1;AF=0.014;AN=70;BaseQRankSum=  |
| 33254 | chrY | 13657978 | . | C | G   | 71.70    | PASS          | AC=1;AF=0.014;AN=70;BaseQRankSum=  |
| 33255 | chrY | 13657979 | . | A | T   | 69.85    | PASS          | AC=1;AF=0.014;AN=70;BaseQRankSum=  |
| 33256 | chrY | 13657993 | . | T | G   | 38.46    | PASS          | AC=1;AF=0.014;AN=70;BaseQRankSum=  |
| 33257 | chrY | 13657996 | . | T | C   | 37.33    | PASS          | AC=1;AF=0.014;AN=70;BaseQRankSum=  |
| 33258 | chrY | 13658011 | . | C | T   | 35.07    | PASS          | AC=1;AF=0.014;AN=70;BaseQRankSum=  |
| 33259 | chrY | 13658062 | . | G | A   | 1136.10  | PASS          | AC=6;AF=0.086;AN=70;DP=466;FS=0.0  |
| 33260 | chrY | 13658247 | . | G | A   | 446.33   | PASS          | AC=2;AF=0.029;AN=70;BaseQRankSum=  |
| 33261 | chrY | 13658305 | . | G | A   | 1755.55  | PASS          | AC=5;AF=0.076;AN=66;BaseQRankSum=  |
| 33262 | chrY | 13658313 | . | T | G   | 1750.91  | PASS          | AC=5;AF=0.078;AN=64;BaseQRankSum=  |
| 33263 | chrY | 13658652 | . | G | A   | 733.06   | PASS          | AC=1;AF=0.015;AN=68;BaseQRankSum=  |
| 33264 | chrY | 13658816 | . | G | A   | 30.97    | PASS          | AC=1;AF=0.014;AN=70;BaseQRankSum=  |
| 33265 | chrY | 13658820 | . | T | A   | 31.08    | PASS          | AC=1;AF=0.014;AN=70;BaseQRankSum=  |
| 33266 | chrY | 13658825 | . | T | A   | 245.30   | PASS          | AC=3;AF=0.043;AN=70;BaseQRankSum=  |
| 33267 | chrY | 13658826 | . | G | A   | 30.69    | PASS          | AC=1;AF=0.014;AN=70;BaseQRankSum=  |
| 33268 | chrY | 13658833 | . | A | T   | 207.16   | PASS          | AC=4;AF=0.057;AN=70;BaseQRankSum=  |
| 33269 | chrY | 13658839 | . | A | G   | 72.89    | PASS          | AC=2;AF=0.029;AN=70;BaseQRankSum=  |
| 33270 | chrY | 13658852 | . | G | T,A | 232.23   | PASS          | AC=3,3;AF=0.045,0.045;AN=66;BaseQ  |
| 33271 | chrY | 13658856 | . | G | A   | 42.22    | PASS          | AC=2;AF=0.029;AN=68;BaseQRankSum=  |
| 33272 | chrY | 13658857 | . | C | G   | 752.70   | PASS          | AC=10;AF=0.172;AN=58;BaseQRankSum= |
| 33273 | chrY | 13658861 | . | G | T   | 34.91    | PASS          | AC=2;AF=0.029;AN=68;BaseQRankSum=  |
| 33274 | chrY | 13658866 | . | C | T   | 182.31   | PASS          | AC=1;AF=0.017;AN=58;BaseQRankSum=  |
| 33275 | chrY | 13658867 | . | A | G   | 469.69   | PASS          | AC=2;AF=0.036;AN=56;BaseQRankSum=  |
| 33276 | chrY | 13658868 | . | A | G   | 72.98    | PASS          | AC=2;AF=0.029;AN=68;BaseQRankSum=  |
| 33277 | chrY | 13658871 | . | G | A   | 126.70   | PASS          | AC=2;AF=0.030;AN=66;BaseQRankSum=  |
| 33278 | chrY | 13658876 | . | T | G   | 214.75   | PASS          | AC=3;AF=0.054;AN=56;BaseQRankSum=  |
| 33279 | chrY | 13659120 | . | C | A   | 33.39    | PASS          | AC=1;AF=0.015;AN=68;BaseQRankSum=  |
| 33280 | chrY | 13659130 | . | A | T   | 36.38    | PASS          | AC=1;AF=0.021;AN=48;BaseQRankSum=  |
| 33281 | chrY | 13659132 | . | T | A   | 38.33    | my_snp_filter | AC=3;AF=0.043;AN=70;BaseQ          |
| 33282 | chrY | 13659137 | . | C | G   | 59.89    | my_snp_filter | AC=3;AF=0.052;AN=58;BaseQ          |
| 33283 | chrY | 13659139 | . | T | C   | 37.15    | PASS          | AC=1;AF=0.019;AN=54;BaseQRankSum=  |
| 33284 | chrY | 13659148 | . | A | C   | 33.94    | PASS          | AC=1;AF=0.014;AN=70;BaseQRankSum=  |
| 33285 | chrY | 13659151 | . | T | A   | 37.56    | PASS          | AC=1;AF=0.015;AN=66;BaseQRankSum=  |
| 33286 | chrY | 13659156 | . | T | C   | 5988.43  | my_snp_filter | AC=2;AF=0.033;AN=60;BaseQ          |
| 33287 | chrY | 13659159 | . | A | T,G | 906.66   | PASS          | AC=1,3;AF=0.016,0.047;AN=64;BaseQ  |
| 33288 | chrY | 13659173 | . | A | C   | 213.30   | PASS          | AC=1;AF=0.014;AN=70;BaseQRankSum=  |

|       |      |          |   |   |   |         |               |                                    |
|-------|------|----------|---|---|---|---------|---------------|------------------------------------|
| 33289 | chrY | 13659185 | . | A | T | 250.54  | PASS          | AC=2;AF=0.034;AN=58;BaseQRankSum=  |
| 33290 | chrY | 13659187 | . | A | G | 235.03  | PASS          | AC=2;AF=0.036;AN=56;BaseQRankSum=  |
| 33291 | chrY | 13659189 | . | T | A | 329.30  | PASS          | AC=2;AF=0.036;AN=56;BaseQRankSum=  |
| 33292 | chrY | 13659199 | . | G | A | 762.88  | PASS          | AC=2;AF=0.038;AN=52;BaseQRankSum=  |
| 33293 | chrY | 13659211 | . | G | A | 1981.48 | PASS          | AC=2;AF=0.032;AN=62;BaseQRankSum=  |
| 33294 | chrY | 13659213 | . | G | A | 2285.35 | PASS          | AC=2;AF=0.036;AN=56;BaseQRankSum=  |
| 33295 | chrY | 13659214 | . | A | G | 1039.93 | PASS          | AC=2;AF=0.034;AN=58;BaseQRankSum=  |
| 33296 | chrY | 13659216 | . | C | T | 3125.16 | PASS          | AC=2;AF=0.036;AN=56;BaseQRankSum=  |
| 33297 | chrY | 13659227 | . | T | G | 3802.32 | my_snp_filter | AC=2;AF=0.043;AN=46;BaseQ          |
| 33298 | chrY | 13659237 | . | G | A | 6046.24 | PASS          | AC=2;AF=0.036;AN=56;BaseQRankSum=  |
| 33299 | chrY | 13659279 | . | A | G | 32.40   | my_snp_filter | AC=1;AF=0.019;AN=54;BaseQ          |
| 33300 | chrY | 13659282 | . | T | A | 33.13   | my_snp_filter | AC=1;AF=0.021;AN=48;BaseQ          |
| 33301 | chrY | 13659286 | . | A | G | 129.92  | PASS          | AC=1;AF=0.019;AN=52;BaseQRankSum=  |
| 33302 | chrY | 13659320 | . | T | C | 541.11  | PASS          | AC=3;AF=0.054;AN=56;BaseQRankSum=  |
| 33303 | chrY | 13659343 | . | A | G | 416.05  | my_snp_filter | AC=2;AF=0.029;AN=70;BaseQ          |
| 33304 | chrY | 13659351 | . | T | G | 1645.88 | PASS          | AC=6;AF=0.111;AN=54;BaseQRankSum=  |
| 33305 | chrY | 13659355 | . | T | A | 698.21  | PASS          | AC=5;AF=0.100;AN=50;BaseQRankSum=  |
| 33306 | chrY | 13659359 | . | A | G | 1847.18 | PASS          | AC=4;AF=0.061;AN=66;BaseQRankSum=  |
| 33307 | chrY | 13659364 | . | A | G | 603.64  | PASS          | AC=4;AF=0.080;AN=50;BaseQRankSum=  |
| 33308 | chrY | 13659372 | . | A | T | 1903.40 | PASS          | AC=4;AF=0.077;AN=52;BaseQRankSum=  |
| 33309 | chrY | 13659385 | . | T | A | 1447.72 | PASS          | AC=4;AF=0.061;AN=66;BaseQRankSum=  |
| 33310 | chrY | 13659390 | . | T | G | 1232.02 | PASS          | AC=4;AF=0.061;AN=66;BaseQRankSum=  |
| 33311 | chrY | 13659392 | . | C | G | 1233.72 | PASS          | AC=4;AF=0.071;AN=56;BaseQRankSum=  |
| 33312 | chrY | 13659397 | . | G | A | 1064.81 | PASS          | AC=4;AF=0.061;AN=66;BaseQRankSum=  |
| 33313 | chrY | 13659400 | . | A | T | 1117.27 | PASS          | AC=4;AF=0.067;AN=60;BaseQRankSum=  |
| 33314 | chrY | 13659401 | . | G | A | 1028.76 | PASS          | AC=4;AF=0.069;AN=58;BaseQRankSum=  |
| 33315 | chrY | 13659413 | . | C | A | 999.84  | PASS          | AC=4;AF=0.069;AN=58;BaseQRankSum=  |
| 33316 | chrY | 13659426 | . | T | C | 673.92  | PASS          | AC=4;AF=0.067;AN=60;BaseQRankSum=  |
| 33317 | chrY | 13659435 | . | C | T | 266.61  | PASS          | AC=2;AF=0.036;AN=56;BaseQRankSum=  |
| 33318 | chrY | 13659437 | . | G | A | 69.83   | PASS          | AC=1;AF=0.014;AN=70;BaseQRankSum=  |
| 33319 | chrY | 13659438 | . | A | T | 69.83   | PASS          | AC=1;AF=0.014;AN=70;BaseQRankSum=  |
| 33320 | chrY | 13659446 | . | A | G | 103.62  | PASS          | AC=2;AF=0.036;AN=56;BaseQRankSum=  |
| 33321 | chrY | 13659596 | . | A | G | 1294.11 | PASS          | AC=9;AF=0.136;AN=66;BaseQRankSum=  |
| 33322 | chrY | 13659600 | . | A | C | 1317.80 | PASS          | AC=9;AF=0.132;AN=68;BaseQRankSum=  |
| 33323 | chrY | 13659601 | . | C | A | 1290.80 | PASS          | AC=9;AF=0.132;AN=68;BaseQRankSum=  |
| 33324 | chrY | 13659613 | . | T | A | 1301.68 | PASS          | AC=9;AF=0.132;AN=68;BaseQRankSum=  |
| 33325 | chrY | 13659614 | . | C | A | 1293.21 | PASS          | AC=9;AF=0.132;AN=68;BaseQRankSum=  |
| 33326 | chrY | 13659622 | . | C | G | 1279.56 | PASS          | AC=9;AF=0.129;AN=70;BaseQRankSum=  |
| 33327 | chrY | 13659629 | . | A | C | 1293.36 | PASS          | AC=9;AF=0.129;AN=70;BaseQRankSum=  |
| 33328 | chrY | 13659658 | . | A | T | 1167.86 | PASS          | AC=12;AF=0.171;AN=70;BaseQRankSum= |
| 33329 | chrY | 13659660 | . | T | C | 1158.02 | PASS          | AC=12;AF=0.171;AN=70;BaseQRankSum= |
| 33330 | chrY | 13659691 | . | T | C | 81.36   | PASS          | AC=1;AF=0.015;AN=66;BaseQRankSum=  |
| 33331 | chrY | 13659697 | . | C | G | 72.91   | PASS          | AC=1;AF=0.017;AN=60;BaseQRankSum=  |
| 33332 | chrY | 13660235 | . | C | G | 48.60   | my_snp_filter | AC=1;AF=0.015;AN=66;BaseQ          |
| 33333 | chrY | 13660449 | . | C | A | 840.80  | PASS          | AC=7;AF=0.100;AN=70;BaseQRankSum=  |
| 33334 | chrY | 13660466 | . | G | A | 861.81  | PASS          | AC=7;AF=0.103;AN=68;BaseQRankSum=  |
| 33335 | chrY | 13660467 | . | A | C | 800.37  | PASS          | AC=7;AF=0.103;AN=68;BaseQRankSum=  |
| 33336 | chrY | 13660469 | . | T | A | 31.71   | my_snp_filter | AC=2;AF=0.029;AN=68;BaseQ          |
| 33337 | chrY | 13660474 | . | T | A | 782.99  | PASS          | AC=7;AF=0.103;AN=68;BaseQRankSum=  |
| 33338 | chrY | 13660475 | . | T | A | 130.29  | PASS          | AC=2;AF=0.030;AN=66;BaseQRankSum=  |
| 33339 | chrY | 13660476 | . | G | A | 30.21   | PASS          | AC=1;AF=0.015;AN=66;BaseQRankSum=  |
| 33340 | chrY | 13660491 | . | G | A | 35.16   | my_snp_filter | AC=2;AF=0.029;AN=68;BaseQ          |
| 33341 | chrY | 13660493 | . | C | A | 690.10  | PASS          | AC=7;AF=0.103;AN=68;BaseQRankSum=  |
| 33342 | chrY | 13660495 | . | C | A | 633.73  | PASS          | AC=7;AF=0.103;AN=68;BaseQRankSum=  |
| 33343 | chrY | 13660501 | . | G | A | 512.87  | PASS          | AC=6;AF=0.086;AN=70;BaseQRankSum=  |
| 33344 | chrY | 13660510 | . | T | C | 300.15  | PASS          | AC=2;AF=0.030;AN=66;BaseQRankSum=  |
| 33345 | chrY | 13660511 | . | G | A | 235.76  | PASS          | AC=2;AF=0.030;AN=66;BaseQRankSum=  |
| 33346 | chrY | 13660517 | . | G | A | 462.85  | PASS          | AC=5;AF=0.076;AN=66;BaseQRankSum=  |
| 33347 | chrY | 13660518 | . | G | A | 462.85  | PASS          | AC=5;AF=0.076;AN=66;BaseQRankSum=  |
| 33348 | chrY | 13660519 | . | T | A | 78.35   | my_snp_filter | AC=2;AF=0.030;AN=66;BaseQ          |
| 33349 | chrY | 13660524 | . | A | G | 85.32   | my_snp_filter | AC=2;AF=0.030;AN=66;BaseQ          |
| 33350 | chrY | 13660525 | . | C | T | 78.40   | my_snp_filter | AC=2;AF=0.030;AN=66;BaseQ          |
| 33351 | chrY | 13660526 | . | A | G | 78.99   | my_snp_filter | AC=2;AF=0.030;AN=66;BaseQ          |
| 33352 | chrY | 13660528 | . | A | G | 78.05   | my_snp_filter | AC=2;AF=0.029;AN=70;BaseQ          |
| 33353 | chrY | 13660540 | . | C | T | 253.06  | PASS          | AC=3;AF=0.043;AN=70;BaseQRankSum=  |
| 33354 | chrY | 13660544 | . | T | A | 174.19  | PASS          | AC=3;AF=0.043;AN=70;BaseQRankSum=  |
| 33355 | chrY | 13660551 | . | G | T | 65.07   | PASS          | AC=2;AF=0.029;AN=70;BaseQRankSum=  |
| 33356 | chrY | 13661155 | . | T | C | 2016.43 | PASS          | AC=4;AF=0.059;AN=68;BaseQRankSum=  |
| 33357 | chrY | 13661158 | . | A | T | 2009.11 | PASS          | AC=4;AF=0.057;AN=70;BaseQRankSum=  |
| 33358 | chrY | 13661163 | . | A | G | 1982.07 | PASS          | AC=4;AF=0.057;AN=70;BaseQRankSum=  |
| 33359 | chrY | 13661165 | . | G | A | 1957.80 | PASS          | AC=4;AF=0.057;AN=70;BaseQRankSum=  |
| 33360 | chrY | 13662600 | . | C | T | 195.48  | my_snp_filter | AC=5;AF=0.074;AN=68;BaseQ          |
| 33361 | chrY | 13662641 | . | T | G | 1057.86 | PASS          | AC=6;AF=0.086;AN=70;BaseQRankSum=  |
| 33362 | chrY | 13662649 | . | A | T | 1005.62 | PASS          | AC=6;AF=0.086;AN=70;BaseQRankSum=  |
| 33363 | chrY | 13662672 | . | C | G | 617.39  | PASS          | AC=7;AF=0.103;AN=68;BaseQRankSum=  |
| 33364 | chrY | 13662674 | . | G | A | 616.75  | PASS          | AC=7;AF=0.100;AN=70;BaseQRankSum=  |

|       |      |          |   |   |     |         |               |                                    |
|-------|------|----------|---|---|-----|---------|---------------|------------------------------------|
| 33365 | chrY | 13662700 | . | T | G   | 458.33  | PASS          | AC=5;AF=0.071;AN=70;BaseQRankSum=  |
| 33366 | chrY | 13662701 | . | G | A   | 459.34  | PASS          | AC=5;AF=0.071;AN=70;BaseQRankSum=  |
| 33367 | chrY | 13662715 | . | A | T   | 397.52  | PASS          | AC=4;AF=0.057;AN=70;BaseQRankSum=  |
| 33368 | chrY | 13662717 | . | T | G   | 100.28  | PASS          | AC=3;AF=0.043;AN=70;BaseQRankSum=  |
| 33369 | chrY | 13662917 | . | G | C,A | 1024.70 | PASS          | AC=5,1;AF=0.078,0.016;AN=64;BaseQ  |
| 33370 | chrY | 13663014 | . | A | G   | 272.89  | PASS          | AC=4;AF=0.059;AN=68;BaseQRankSum=  |
| 33371 | chrY | 13663021 | . | A | G   | 279.61  | PASS          | AC=4;AF=0.059;AN=68;BaseQRankSum=  |
| 33372 | chrY | 13663041 | . | G | A   | 966.77  | PASS          | AC=5;AF=0.076;AN=66;BaseQRankSum=  |
| 33373 | chrY | 13663047 | . | A | G   | 33.50   | my_snp_filter | AC=1;AF=0.015;AN=66;BaseQ          |
| 33374 | chrY | 13663075 | . | A | T   | 351.71  | PASS          | AC=6;AF=0.088;AN=68;BaseQRankSum=  |
| 33375 | chrY | 13663081 | . | A | G   | 311.33  | PASS          | AC=6;AF=0.091;AN=66;BaseQRankSum=  |
| 33376 | chrY | 13663097 | . | T | G   | 311.65  | PASS          | AC=5;AF=0.076;AN=66;BaseQRankSum=  |
| 33377 | chrY | 13663102 | . | A | T   | 292.22  | PASS          | AC=4;AF=0.061;AN=66;BaseQRankSum=  |
| 33378 | chrY | 13663106 | . | T | C   | 298.57  | PASS          | AC=4;AF=0.061;AN=66;BaseQRankSum=  |
| 33379 | chrY | 13663107 | . | G | A   | 295.93  | PASS          | AC=4;AF=0.061;AN=66;BaseQRankSum=  |
| 33380 | chrY | 13663121 | . | A | C   | 249.38  | PASS          | AC=3;AF=0.045;AN=66;BaseQRankSum=  |
| 33381 | chrY | 13663123 | . | G | A   | 255.38  | PASS          | AC=3;AF=0.045;AN=66;BaseQRankSum=  |
| 33382 | chrY | 13663145 | . | A | T   | 87.40   | PASS          | AC=1;AF=0.014;AN=70;BaseQRankSum=  |
| 33383 | chrY | 13663151 | . | C | T   | 87.07   | PASS          | AC=1;AF=0.015;AN=68;BaseQRankSum=  |
| 33384 | chrY | 13663167 | . | G | A   | 49.08   | PASS          | AC=1;AF=0.014;AN=70;BaseQRankSum=  |
| 33385 | chrY | 13663175 | . | T | A   | 77.58   | my_snp_filter | AC=3;AF=0.043;AN=70;BaseQ          |
| 33386 | chrY | 13663180 | . | C | T   | 46.28   | PASS          | AC=1;AF=0.014;AN=70;BaseQRankSum=  |
| 33387 | chrY | 13663194 | . | A | C   | 601.84  | PASS          | AC=7;AF=0.117;AN=60;BaseQRankSum=  |
| 33388 | chrY | 13663195 | . | T | A   | 511.69  | PASS          | AC=5;AF=0.071;AN=70;BaseQRankSum=  |
| 33389 | chrY | 13663196 | . | G | C   | 482.71  | PASS          | AC=5;AF=0.071;AN=70;BaseQRankSum=  |
| 33390 | chrY | 13663204 | . | A | C   | 319.51  | PASS          | AC=4;AF=0.057;AN=70;BaseQRankSum=  |
| 33391 | chrY | 13663214 | . | T | A   | 37.86   | my_snp_filter | AC=2;AF=0.029;AN=70;BaseQ          |
| 33392 | chrY | 13664278 | . | A | G   | 207.32  | PASS          | AC=2;AF=0.029;AN=70;BaseQRankSum=  |
| 33393 | chrY | 13664291 | . | C | A   | 225.61  | PASS          | AC=1;AF=0.015;AN=68;BaseQRankSum=  |
| 33394 | chrY | 13664406 | . | A | G   | 187.71  | my_snp_filter | AC=4;AF=0.057;AN=70;BaseQ          |
| 33395 | chrY | 13664409 | . | C | G   | 1133.77 | PASS          | AC=9;AF=0.132;AN=68;BaseQRankSum=  |
| 33396 | chrY | 13664414 | . | C | A   | 268.20  | PASS          | AC=4;AF=0.061;AN=66;BaseQRankSum=  |
| 33397 | chrY | 13664418 | . | G | A   | 2212.03 | PASS          | AC=8;AF=0.121;AN=66;BaseQRankSum=  |
| 33398 | chrY | 13664424 | . | A | G,T | 2705.62 | PASS          | AC=4,5;AF=0.067,0.083;AN=60;BaseQ  |
| 33399 | chrY | 13664428 | . | A | G   | 930.49  | PASS          | AC=7;AF=0.106;AN=66;BaseQRankSum=  |
| 33400 | chrY | 13664429 | . | G | C   | 59      | my_snp_filter | AC=2;AF=0.029;AN=68;BaseQ          |
| 33401 | chrY | 13664433 | . | A | G   | 4259.06 | PASS          | AC=10;AF=0.156;AN=64;BaseQRankSum= |
| 33402 | chrY | 13664437 | . | T | G,A | 729.60  | PASS          | AC=3,6;AF=0.045,0.091;AN=66;BaseQ  |
| 33403 | chrY | 13664438 | . | A | T   | 3400.53 | PASS          | AC=7;AF=0.113;AN=62;BaseQRankSum=  |
| 33404 | chrY | 13664440 | . | T | A   | 4385.56 | PASS          | AC=10;AF=0.167;AN=60;BaseQRankSum= |
| 33405 | chrY | 13664452 | . | T | C   | 153.31  | my_snp_filter | AC=5;AF=0.071;AN=70;BaseQ          |
| 33406 | chrY | 13664453 | . | C | T   | 2127.19 | PASS          | AC=6;AF=0.088;AN=68;BaseQRankSum=  |
| 33407 | chrY | 13664456 | . | A | G   | 2074.53 | PASS          | AC=6;AF=0.086;AN=70;BaseQRankSum=  |
| 33408 | chrY | 13664464 | . | G | C   | 46.49   | my_snp_filter | AC=4;AF=0.057;AN=70;BaseQ          |
| 33409 | chrY | 13664468 | . | C | T   | 2827.52 | PASS          | AC=7;AF=0.103;AN=68;BaseQRankSum=  |
| 33410 | chrY | 13664472 | . | T | A   | 2021.58 | PASS          | AC=6;AF=0.088;AN=68;BaseQRankSum=  |
| 33411 | chrY | 13664475 | . | A | G   | 2026.05 | PASS          | AC=6;AF=0.086;AN=70;BaseQRankSum=  |
| 33412 | chrY | 13664488 | . | G | A   | 2031.14 | PASS          | AC=8;AF=0.118;AN=68;BaseQRankSum=  |
| 33413 | chrY | 13664492 | . | A | T   | 2296.98 | PASS          | AC=9;AF=0.132;AN=68;BaseQRankSum=  |
| 33414 | chrY | 13664496 | . | A | C   | 2322.30 | PASS          | AC=8;AF=0.125;AN=64;BaseQRankSum=  |
| 33415 | chrY | 13664498 | . | C | G   | 87.35   | PASS          | AC=2;AF=0.030;AN=66;BaseQRankSum=  |
| 33416 | chrY | 13664499 | . | C | G   | 2254.52 | PASS          | AC=11;AF=0.172;AN=64;BaseQRankSum= |
| 33417 | chrY | 13664514 | . | C | A   | 1513.94 | PASS          | AC=6;AF=0.091;AN=66;BaseQRankSum=  |
| 33418 | chrY | 13664527 | . | C | T   | 881.37  | PASS          | AC=5;AF=0.083;AN=60;BaseQRankSum=  |
| 33419 | chrY | 13664528 | . | T | G   | 710.31  | PASS          | AC=5;AF=0.083;AN=60;BaseQRankSum=  |
| 33420 | chrY | 13664532 | . | C | T   | 790.27  | PASS          | AC=4;AF=0.067;AN=60;BaseQRankSum=  |
| 33421 | chrY | 13664533 | . | A | G   | 359.32  | PASS          | AC=4;AF=0.067;AN=60;BaseQRankSum=  |
| 33422 | chrY | 13664539 | . | G | C   | 167.75  | PASS          | AC=2;AF=0.029;AN=68;BaseQRankSum=  |
| 33423 | chrY | 13664543 | . | C | A   | 122.83  | PASS          | AC=2;AF=0.030;AN=66;BaseQRankSum=  |
| 33424 | chrY | 13664766 | . | C | A,* | 1067.15 | PASS          | AC=2,1;AF=0.033,0.017;AN=60;BaseQ  |
| 33425 | chrY | 13664768 | . | T | A,* | 1066.44 | PASS          | AC=2,1;AF=0.034,0.017;AN=58;BaseQ  |
| 33426 | chrY | 13664771 | . | A | T   | 59.25   | PASS          | AC=1;AF=0.016;AN=64;BaseQRankSum=  |
| 33427 | chrY | 13664772 | . | A | T   | 60.81   | PASS          | AC=1;AF=0.018;AN=56;BaseQRankSum=  |
| 33428 | chrY | 13664862 | . | T | G   | 236.30  | PASS          | AC=3;AF=0.045;AN=66;BaseQRankSum=  |
| 33429 | chrY | 13664866 | . | G | A   | 503.60  | PASS          | AC=4;AF=0.061;AN=66;BaseQRankSum=  |
| 33430 | chrY | 13664867 | . | T | A   | 503.11  | PASS          | AC=4;AF=0.059;AN=68;BaseQRankSum=  |
| 33431 | chrY | 13664872 | . | A | T   | 42.13   | my_snp_filter | AC=1;AF=0.015;AN=68;BaseQ          |
| 33432 | chrY | 13664873 | . | G | A   | 41.64   | my_snp_filter | AC=1;AF=0.015;AN=68;BaseQ          |
| 33433 | chrY | 13664878 | . | T | C   | 367.15  | PASS          | AC=4;AF=0.063;AN=64;BaseQRankSum=  |
| 33434 | chrY | 13664884 | . | G | A   | 154.22  | PASS          | AC=3;AF=0.045;AN=66;BaseQRankSum=  |
| 33435 | chrY | 13664899 | . | A | G   | 199.08  | PASS          | AC=1;AF=0.015;AN=66;BaseQRankSum=  |
| 33436 | chrY | 13664906 | . | T | A   | 198.89  | PASS          | AC=1;AF=0.015;AN=68;BaseQRankSum=  |
| 33437 | chrY | 13664913 | . | A | G   | 240.82  | PASS          | AC=1;AF=0.015;AN=68;BaseQRankSum=  |
| 33438 | chrY | 13664926 | . | C | G   | 191.04  | PASS          | AC=1;AF=0.015;AN=68;BaseQRankSum=  |
| 33439 | chrY | 13664931 | . | A | G   | 193.40  | PASS          | AC=1;AF=0.014;AN=70;BaseQRankSum=  |
| 33440 | chrY | 13664941 | . | A | C   | 196.34  | PASS          | AC=1;AF=0.015;AN=68;BaseQRankSum=  |



|       |      |          |   |   |     |         |               |                                    |
|-------|------|----------|---|---|-----|---------|---------------|------------------------------------|
| 33441 | chrY | 13664968 | . | G | A   | 211.17  | PASS          | AC=1;AF=0.014;AN=70;BaseQRankSum=  |
| 33442 | chrY | 13664973 | . | C | G   | 212.01  | PASS          | AC=1;AF=0.014;AN=70;BaseQRankSum=  |
| 33443 | chrY | 13665003 | . | T | G   | 289.14  | PASS          | AC=1;AF=0.014;AN=70;BaseQRankSum=  |
| 33444 | chrY | 13665027 | . | C | T   | 211.56  | PASS          | AC=1;AF=0.014;AN=70;BaseQRankSum=  |
| 33445 | chrY | 13665029 | . | G | T   | 211.38  | PASS          | AC=1;AF=0.014;AN=70;BaseQRankSum=  |
| 33446 | chrY | 13665032 | . | A | T   | 205.89  | PASS          | AC=1;AF=0.014;AN=70;BaseQRankSum=  |
| 33447 | chrY | 13665053 | . | G | C   | 118.56  | PASS          | AC=1;AF=0.015;AN=68;BaseQRankSum=  |
| 33448 | chrY | 13665054 | . | G | A   | 118.65  | PASS          | AC=1;AF=0.015;AN=66;BaseQRankSum=  |
| 33449 | chrY | 13665073 | . | T | A   | 76.59   | PASS          | AC=1;AF=0.015;AN=68;BaseQRankSum=  |
| 33450 | chrY | 13665078 | . | A | C   | 37.59   | my_snp_filter | AC=1;AF=0.015;AN=68;BaseQ          |
| 33451 | chrY | 13665094 | . | G | A   | 31.46   | my_snp_filter | AC=1;AF=0.016;AN=64;BaseQ          |
| 33452 | chrY | 13665095 | . | C | A   | 31.13   | my_snp_filter | AC=1;AF=0.016;AN=64;BaseQ          |
| 33453 | chrY | 13665148 | . | A | G   | 8167.84 | PASS          | AC=50;AF=0.806;AN=62;DP=410;FS=0.  |
| 33454 | chrY | 13665477 | . | C | T   | 56.11   | PASS          | AC=2;AF=0.029;AN=68;BaseQRankSum=  |
| 33455 | chrY | 13665509 | . | A | G   | 32.05   | PASS          | AC=1;AF=0.015;AN=68;BaseQRankSum=  |
| 33456 | chrY | 13665517 | . | A | T   | 31.45   | PASS          | AC=1;AF=0.014;AN=70;BaseQRankSum=  |
| 33457 | chrY | 13665608 | . | T | C   | 31.67   | PASS          | AC=1;AF=0.014;AN=70;BaseQRankSum=  |
| 33458 | chrY | 13665903 | . | C | G   | 79.48   | PASS          | AC=1;AF=0.016;AN=64;BaseQRankSum=  |
| 33459 | chrY | 13665974 | . | T | A   | 584.11  | PASS          | AC=4;AF=0.059;AN=68;BaseQRankSum=  |
| 33460 | chrY | 13666000 | . | A | T   | 880.21  | PASS          | AC=3;AF=0.043;AN=70;BaseQRankSum=  |
| 33461 | chrY | 13666005 | . | C | A   | 877.32  | PASS          | AC=3;AF=0.043;AN=70;BaseQRankSum=  |
| 33462 | chrY | 13666081 | . | G | T   | 220.01  | PASS          | AC=1;AF=0.017;AN=60;BaseQRankSum=  |
| 33463 | chrY | 13666094 | . | G | A   | 185.28  | PASS          | AC=3;AF=0.058;AN=52;BaseQRankSum=  |
| 33464 | chrY | 13666096 | . | C | G   | 205.72  | PASS          | AC=3;AF=0.050;AN=60;BaseQRankSum=  |
| 33465 | chrY | 13666206 | . | C | T   | 208.13  | PASS          | AC=2;AF=0.030;AN=66;BaseQRankSum=  |
| 33466 | chrY | 13666211 | . | G | A   | 195.70  | PASS          | AC=2;AF=0.030;AN=66;BaseQRankSum=  |
| 33467 | chrY | 13666275 | . | T | G   | 174.47  | my_snp_filter | AC=4;AF=0.059;AN=68;BaseQ          |
| 33468 | chrY | 13666878 | . | A | C   | 59.24   | my_snp_filter | AC=6;AF=0.088;AN=68;BaseQ          |
| 33469 | chrY | 13666897 | . | A | C   | 128.05  | PASS          | AC=2;AF=0.029;AN=68;BaseQRankSum=  |
| 33470 | chrY | 13666905 | . | C | A   | 157.72  | my_snp_filter | AC=3;AF=0.044;AN=68;BaseQ          |
| 33471 | chrY | 13666924 | . | C | T   | 70.68   | PASS          | AC=1;AF=0.015;AN=68;BaseQRankSum=  |
| 33472 | chrY | 13666929 | . | C | T   | 303.34  | PASS          | AC=6;AF=0.088;AN=68;BaseQRankSum=  |
| 33473 | chrY | 13666937 | . | A | G   | 149.75  | my_snp_filter | AC=4;AF=0.057;AN=70;BaseQ          |
| 33474 | chrY | 13666941 | . | C | G   | 152.50  | PASS          | AC=4;AF=0.057;AN=70;BaseQRankSum=  |
| 33475 | chrY | 13666966 | . | C | T   | 1431.80 | PASS          | AC=6;AF=0.086;AN=70;DP=571;FS=0.0  |
| 33476 | chrY | 13667438 | . | T | C   | 87.87   | PASS          | AC=1;AF=0.014;AN=70;BaseQRankSum=  |
| 33477 | chrY | 13667441 | . | A | G   | 125.79  | PASS          | AC=1;AF=0.019;AN=54;BaseQRankSum=  |
| 33478 | chrY | 13667447 | . | G | C   | 148.38  | PASS          | AC=1;AF=0.014;AN=70;BaseQRankSum=  |
| 33479 | chrY | 13667674 | . | A | G   | 270.12  | PASS          | AC=4;AF=0.059;AN=68;BaseQRankSum=  |
| 33480 | chrY | 13668003 | . | A | G   | 631.27  | my_snp_filter | AC=5;AF=0.074;AN=68;BaseQ          |
| 33481 | chrY | 13668011 | . | T | G   | 534.90  | PASS          | AC=3;AF=0.044;AN=68;BaseQRankSum=  |
| 33482 | chrY | 13668023 | . | C | G   | 45.55   | PASS          | AC=1;AF=0.016;AN=64;BaseQRankSum=  |
| 33483 | chrY | 13668024 | . | T | A   | 44.84   | PASS          | AC=1;AF=0.016;AN=64;BaseQRankSum=  |
| 33484 | chrY | 13668028 | . | A | T   | 30.86   | my_snp_filter | AC=1;AF=0.015;AN=68;BaseQ          |
| 33485 | chrY | 13668054 | . | A | T   | 705.32  | PASS          | AC=8;AF=0.118;AN=68;BaseQRankSum=  |
| 33486 | chrY | 13668056 | . | G | C   | 698.09  | PASS          | AC=8;AF=0.118;AN=68;BaseQRankSum=  |
| 33487 | chrY | 13668060 | . | G | A   | 608.28  | PASS          | AC=8;AF=0.118;AN=68;BaseQRankSum=  |
| 33488 | chrY | 13668069 | . | A | G,C | 603.22  | PASS          | AC=1,7;AF=0.014,0.100;AN=70;BaseQ  |
| 33489 | chrY | 13668071 | . | G | A   | 457.27  | PASS          | AC=7;AF=0.100;AN=70;BaseQRankSum=  |
| 33490 | chrY | 13668084 | . | A | T   | 52.87   | my_snp_filter | AC=1;AF=0.014;AN=70;BaseQ          |
| 33491 | chrY | 13668159 | . | T | G   | 844.25  | PASS          | AC=7;AF=0.100;AN=70;BaseQRankSum=  |
| 33492 | chrY | 13668188 | . | A | G   | 2019.58 | PASS          | AC=8;AF=0.114;AN=70;BaseQRankSum=  |
| 33493 | chrY | 13668190 | . | C | T   | 2068.29 | PASS          | AC=8;AF=0.114;AN=70;BaseQRankSum=  |
| 33494 | chrY | 13668191 | . | G | T   | 2010.64 | PASS          | AC=8;AF=0.114;AN=70;BaseQRankSum=  |
| 33495 | chrY | 13668203 | . | T | G   | 2055.21 | PASS          | AC=7;AF=0.100;AN=70;BaseQRankSum=  |
| 33496 | chrY | 13668593 | . | G | T   | 59.50   | my_snp_filter | AC=2;AF=0.029;AN=70;BaseQ          |
| 33497 | chrY | 13668613 | . | A | C   | 31.24   | my_snp_filter | AC=1;AF=0.014;AN=70;BaseQ          |
| 33498 | chrY | 13669047 | . | C | A   | 270.11  | PASS          | AC=1;AF=0.015;AN=66;BaseQRankSum=  |
| 33499 | chrY | 13669076 | . | G | T   | 1290.87 | PASS          | AC=4;AF=0.059;AN=68;BaseQRankSum=  |
| 33500 | chrY | 13669081 | . | C | T   | 1267    | PASS          | AC=4;AF=0.063;AN=64;BaseQRankSum=  |
| 33501 | chrY | 13669086 | . | G | T   | 1169.61 | PASS          | AC=4;AF=0.057;AN=70;BaseQRankSum=  |
| 33502 | chrY | 13669092 | . | G | A   | 566.40  | PASS          | AC=5;AF=0.071;AN=70;BaseQRankSum=  |
| 33503 | chrY | 13669330 | . | A | T   | 1532.17 | PASS          | AC=6;AF=0.086;AN=70;BaseQRankSum=  |
| 33504 | chrY | 13669331 | . | T | A   | 1533.51 | PASS          | AC=6;AF=0.086;AN=70;BaseQRankSum=  |
| 33505 | chrY | 13669343 | . | G | A   | 1101.24 | PASS          | AC=2;AF=0.029;AN=70;BaseQRankSum=  |
| 33506 | chrY | 13669344 | . | A | G   | 1070.81 | PASS          | AC=2;AF=0.029;AN=70;BaseQRankSum=  |
| 33507 | chrY | 13669346 | . | A | G   | 100.70  | PASS          | AC=2;AF=0.029;AN=70;BaseQRankSum=  |
| 33508 | chrY | 13669357 | . | A | C   | 46.11   | my_snp_filter | AC=2;AF=0.029;AN=70;BaseQ          |
| 33509 | chrY | 13669359 | . | A | G   | 45.71   | my_snp_filter | AC=2;AF=0.029;AN=70;BaseQ          |
| 33510 | chrY | 13669365 | . | C | A   | 50.10   | my_snp_filter | AC=2;AF=0.029;AN=70;BaseQ          |
| 33511 | chrY | 13669367 | . | T | A   | 49.71   | my_snp_filter | AC=2;AF=0.029;AN=70;BaseQ          |
| 33512 | chrY | 13669370 | . | A | T   | 40.47   | PASS          | AC=1;AF=0.014;AN=70;BaseQRankSum=  |
| 33513 | chrY | 13669794 | . | C | T   | 668.49  | PASS          | AC=10;AF=0.152;AN=66;BaseQRankSum= |
| 33514 | chrY | 13669797 | . | C | A   | 640.84  | PASS          | AC=10;AF=0.143;AN=70;BaseQRankSum= |
| 33515 | chrY | 13669828 | . | T | C   | 161.41  | PASS          | AC=2;AF=0.032;AN=62;BaseQRankSum=  |
| 33516 | chrY | 13669841 | . | G | T   | 733.92  | PASS          | AC=6;AF=0.088;AN=68;BaseQRankSum=  |

|       |      |          |   |   |     |          |               |                                    |
|-------|------|----------|---|---|-----|----------|---------------|------------------------------------|
| 33517 | chrY | 13670169 | . | T | G   | 247.68   | PASS          | AC=4;AF=0.057;AN=70;BaseQRankSum=  |
| 33518 | chrY | 13670199 | . | C | G   | 856.28   | PASS          | AC=6;AF=0.086;AN=70;BaseQRankSum=  |
| 33519 | chrY | 13670202 | . | A | G   | 856.53   | PASS          | AC=6;AF=0.086;AN=70;BaseQRankSum=  |
| 33520 | chrY | 13670212 | . | G | A   | 862.08   | PASS          | AC=6;AF=0.086;AN=70;BaseQRankSum=  |
| 33521 | chrY | 13670214 | . | C | T   | 880.93   | PASS          | AC=6;AF=0.086;AN=70;BaseQRankSum=  |
| 33522 | chrY | 13670958 | . | C | T   | 1968.37  | PASS          | AC=3;AF=0.048;AN=62;BaseQRankSum=  |
| 33523 | chrY | 13670975 | . | A | G   | 1648.38  | PASS          | AC=1;AF=0.014;AN=70;BaseQRankSum=  |
| 33524 | chrY | 13670977 | . | C | G   | 38.57    | PASS          | AC=1;AF=0.015;AN=68;DP=492;FS=0.0  |
| 33525 | chrY | 13671195 | . | T | C   | 7556.65  | PASS          | AC=44;AF=0.647;AN=68;DP=489;FS=0   |
| 33526 | chrY | 13671394 | . | T | A   | 92.30    | PASS          | AC=1;AF=0.016;AN=64;BaseQRankSum=  |
| 33527 | chrY | 13672090 | . | G | A   | 10329.03 | PASS          | AC=64;AF=1.00;AN=64;DP=36          |
| 33528 | chrY | 13672421 | . | A | G   | 263.50   | PASS          | AC=4;AF=0.063;AN=64;BaseQRankSum=  |
| 33529 | chrY | 13672508 | . | A | G   | 142.34   | PASS          | AC=3;AF=0.044;AN=68;BaseQRankSum=  |
| 33530 | chrY | 13672518 | . | A | T   | 91.81    | PASS          | AC=2;AF=0.030;AN=66;BaseQRankSum=  |
| 33531 | chrY | 13672519 | . | C | T   | 96.56    | PASS          | AC=2;AF=0.030;AN=66;BaseQRankSum=  |
| 33532 | chrY | 13673097 | . | C | A   | 354.17   | PASS          | AC=5;AF=0.071;AN=70;BaseQRankSum=  |
| 33533 | chrY | 13673679 | . | C | G   | 2061.76  | PASS          | AC=34;AF=0.680;AN=50;DP=363;FS=0.  |
| 33534 | chrY | 13673732 | . | T | A   | 287.33   | PASS          | AC=1;AF=0.015;AN=66;BaseQRankSum=  |
| 33535 | chrY | 13673843 | . | C | T   | 1341.43  | PASS          | AC=12;AF=0.176;AN=68;DP=436;FS=0.  |
| 33536 | chrY | 13673908 | . | T | G   | 153.56   | PASS          | AC=2;AF=0.029;AN=68;BaseQRankSum=  |
| 33537 | chrY | 13674710 | . | G | A   | 217.54   | PASS          | AC=5;AF=0.089;AN=56;BaseQRankSum=  |
| 33538 | chrY | 13674711 | . | T | A   | 176.29   | PASS          | AC=5;AF=0.081;AN=62;BaseQRankSum=  |
| 33539 | chrY | 13674716 | . | A | T   | 193.15   | PASS          | AC=5;AF=0.083;AN=60;BaseQRankSum=  |
| 33540 | chrY | 13674717 | . | A | G   | 200.15   | PASS          | AC=5;AF=0.083;AN=60;BaseQRankSum=  |
| 33541 | chrY | 13674718 | . | A | C   | 200.18   | PASS          | AC=5;AF=0.083;AN=60;BaseQRankSum=  |
| 33542 | chrY | 13674737 | . | A | C   | 76.65    | PASS          | AC=1;AF=0.017;AN=58;BaseQRankSum=  |
| 33543 | chrY | 13674738 | . | G | A   | 75.67    | PASS          | AC=1;AF=0.018;AN=56;BaseQRankSum=  |
| 33544 | chrY | 13675442 | . | G | A   | 112.57   | my_snp_filter | AC=3;AF=0.045;AN=66;BaseQ          |
| 33545 | chrY | 13675448 | . | G | T   | 101.69   | PASS          | AC=2;AF=0.031;AN=64;BaseQRankSum=  |
| 33546 | chrY | 13675486 | . | T | C   | 56.49    | my_snp_filter | AC=3;AF=0.044;AN=68;BaseQ          |
| 33547 | chrY | 13675502 | . | C | A   | 202.72   | my_snp_filter | AC=6;AF=0.091;AN=66;BaseQ          |
| 33548 | chrY | 13675672 | . | C | A   | 969.45   | PASS          | AC=3;AF=0.056;AN=54;BaseQRankSum=  |
| 33549 | chrY | 13675711 | . | C | T   | 38.60    | my_snp_filter | AC=1;AF=0.015;AN=68;BaseQ          |
| 33550 | chrY | 13675712 | . | A | G   | 36.88    | my_snp_filter | AC=1;AF=0.015;AN=68;BaseQ          |
| 33551 | chrY | 13675722 | . | A | G   | 38.85    | PASS          | AC=1;AF=0.015;AN=68;BaseQRankSum=  |
| 33552 | chrY | 13676203 | . | T | G   | 839      | PASS          | AC=8;AF=0.125;AN=64;BaseQRankSum=  |
| 33553 | chrY | 13676511 | . | G | A   | 49.40    | my_snp_filter | AC=1;AF=0.014;AN=70;BaseQ          |
| 33554 | chrY | 13676541 | . | C | G   | 80.89    | my_snp_filter | AC=3;AF=0.045;AN=66;BaseQ          |
| 33555 | chrY | 13676885 | . | G | C   | 230.36   | my_snp_filter | AC=6;AF=0.094;AN=64;BaseQ          |
| 33556 | chrY | 13677112 | . | T | G   | 36.57    | my_snp_filter | AC=1;AF=0.015;AN=66;BaseQ          |
| 33557 | chrY | 13677797 | . | T | G   | 322.88   | PASS          | AC=1;AF=0.014;AN=70;BaseQRankSum=  |
| 33558 | chrY | 13677809 | . | G | C   | 35.76    | PASS          | AC=1;AF=0.015;AN=68;BaseQRankSum=  |
| 33559 | chrY | 13677813 | . | T | G   | 388.82   | PASS          | AC=2;AF=0.033;AN=60;BaseQRankSum=  |
| 33560 | chrY | 13677818 | . | G | A   | 70.07    | PASS          | AC=2;AF=0.029;AN=70;BaseQRankSum=  |
| 33561 | chrY | 13677823 | . | C | A   | 89.84    | PASS          | AC=3;AF=0.050;AN=60;BaseQRankSum=  |
| 33562 | chrY | 13677832 | . | T | C   | 158.48   | PASS          | AC=3;AF=0.044;AN=68;BaseQRankSum=  |
| 33563 | chrY | 13677834 | . | A | C,G | 407.94   | PASS          | AC=3,3;AF=0.054,0.054;AN=56;BaseQ  |
| 33564 | chrY | 13677835 | . | A | G   | 40.09    | PASS          | AC=1;AF=0.015;AN=68;BaseQRankSum=  |
| 33565 | chrY | 13677842 | . | G | T   | 995.36   | PASS          | AC=11;AF=0.177;AN=62;BaseQRankSum= |
| 33566 | chrY | 13677844 | . | G | C   | 121.50   | PASS          | AC=1;AF=0.014;AN=70;BaseQRankSum=  |
| 33567 | chrY | 13677848 | . | G | T   | 34.46    | PASS          | AC=1;AF=0.015;AN=68;BaseQRankSum=  |
| 33568 | chrY | 13677852 | . | T | A   | 37.70    | PASS          | AC=1;AF=0.014;AN=70;BaseQRankSum=  |
| 33569 | chrY | 13677858 | . | T | G   | 330.19   | PASS          | AC=2;AF=0.029;AN=70;BaseQRankSum=  |
| 33570 | chrY | 13677864 | . | A | G   | 358.43   | PASS          | AC=7;AF=0.135;AN=52;BaseQRankSum=  |
| 33571 | chrY | 13677865 | . | A | T   | 263.88   | PASS          | AC=5;AF=0.078;AN=64;BaseQRankSum=  |
| 33572 | chrY | 13677869 | . | G | C   | 258.61   | PASS          | AC=5;AF=0.078;AN=64;BaseQRankSum=  |
| 33573 | chrY | 13677874 | . | G | A   | 38.43    | PASS          | AC=1;AF=0.015;AN=66;BaseQRankSum=  |
| 33574 | chrY | 13677993 | . | G | T   | 887.86   | PASS          | AC=3;AF=0.048;AN=62;BaseQRankSum=  |
| 33575 | chrY | 13677996 | . | C | A   | 887.99   | PASS          | AC=3;AF=0.050;AN=60;BaseQRankSum=  |
| 33576 | chrY | 13677999 | . | A | G   | 224.20   | PASS          | AC=2;AF=0.029;AN=68;BaseQRankSum=  |
| 33577 | chrY | 13678003 | . | A | G   | 937.20   | PASS          | AC=3;AF=0.050;AN=60;BaseQRankSum=  |
| 33578 | chrY | 13678005 | . | A | T   | 121.52   | my_snp_filter | AC=5;AF=0.074;AN=68;BaseQ          |
| 33579 | chrY | 13678013 | . | A | C,T | 729.19   | PASS          | AC=2,1;AF=0.031,0.016;AN=64;BaseQ  |
| 33580 | chrY | 13678026 | . | C | A   | 435.59   | PASS          | AC=1;AF=0.015;AN=68;BaseQRankSum=  |
| 33581 | chrY | 13678027 | . | T | A   | 85.65    | PASS          | AC=1;AF=0.015;AN=68;BaseQRankSum=  |
| 33582 | chrY | 13678073 | . | C | T   | 35.60    | PASS          | AC=1;AF=0.016;AN=64;BaseQRankSum=  |
| 33583 | chrY | 13678074 | . | G | A   | 43.92    | my_snp_filter | AC=3;AF=0.047;AN=64;BaseQ          |
| 33584 | chrY | 13678246 | . | G | A   | 57.78    | PASS          | AC=1;AF=0.015;AN=68;BaseQRankSum=  |
| 33585 | chrY | 13678260 | . | C | T   | 111.16   | PASS          | AC=1;AF=0.015;AN=68;BaseQRankSum=  |
| 33586 | chrY | 13678264 | . | A | G   | 118.95   | PASS          | AC=1;AF=0.015;AN=66;BaseQRankSum=  |
| 33587 | chrY | 13678270 | . | A | G   | 132.31   | PASS          | AC=2;AF=0.037;AN=54;BaseQRankSum=  |
| 33588 | chrY | 13678274 | . | A | T   | 118.84   | PASS          | AC=1;AF=0.017;AN=60;BaseQRankSum=  |
| 33589 | chrY | 13678275 | . | C | A   | 118.26   | PASS          | AC=1;AF=0.017;AN=60;BaseQRankSum=  |
| 33590 | chrY | 13678276 | . | A | G   | 120.01   | PASS          | AC=1;AF=0.018;AN=56;BaseQRankSum=  |
| 33591 | chrY | 13678314 | . | T | G   | 64.01    | PASS          | AC=2;AF=0.029;AN=68;BaseQRankSum=  |
| 33592 | chrY | 13678320 | . | A | G   | 81.85    | PASS          | AC=4;AF=0.065;AN=62;BaseQRankSum=  |

|       |      |          |   |   |       |         |               |                                   |
|-------|------|----------|---|---|-------|---------|---------------|-----------------------------------|
| 33593 | chrY | 13678321 | . | G | C     | 37.47   | PASS          | AC=2;AF=0.032;AN=62;BaseQRankSum= |
| 33594 | chrY | 13678377 | . | T | A     | 44.68   | my_snp_filter | AC=2;AF=0.029;AN=68;BaseQ         |
| 33595 | chrY | 13678467 | . | T | A     | 119.24  | PASS          | AC=1;AF=0.014;AN=70;BaseQRankSum= |
| 33596 | chrY | 13678484 | . | G | A     | 34.25   | my_snp_filter | AC=2;AF=0.029;AN=70;BaseQ         |
| 33597 | chrY | 13678487 | . | A | T     | 34.63   | PASS          | AC=2;AF=0.029;AN=70;BaseQRankSum= |
| 33598 | chrY | 13678496 | . | T | A     | 90.27   | PASS          | AC=2;AF=0.029;AN=70;BaseQRankSum= |
| 33599 | chrY | 13678503 | . | T | G     | 118.77  | PASS          | AC=2;AF=0.029;AN=70;BaseQRankSum= |
| 33600 | chrY | 13678639 | . | G | A     | 89.93   | PASS          | AC=2;AF=0.029;AN=68;BaseQRankSum= |
| 33601 | chrY | 13678642 | . | G | T     | 96.80   | PASS          | AC=2;AF=0.033;AN=60;BaseQRankSum= |
| 33602 | chrY | 13678643 | . | C | G     | 96.99   | PASS          | AC=2;AF=0.032;AN=62;BaseQRankSum= |
| 33603 | chrY | 13678858 | . | T | A     | 112.65  | PASS          | AC=1;AF=0.015;AN=66;BaseQRankSum= |
| 33604 | chrY | 13678863 | . | C | T     | 184.88  | PASS          | AC=3;AF=0.045;AN=66;BaseQRankSum= |
| 33605 | chrY | 13678864 | . | T | G     | 229.77  | PASS          | AC=3;AF=0.045;AN=66;BaseQRankSum= |
| 33606 | chrY | 13678867 | . | T | A     | 115.56  | PASS          | AC=1;AF=0.015;AN=68;BaseQRankSum= |
| 33607 | chrY | 13678869 | . | G | T     | 36.55   | PASS          | AC=2;AF=0.029;AN=68;BaseQRankSum= |
| 33608 | chrY | 13678878 | . | C | T     | 31.63   | PASS          | AC=1;AF=0.015;AN=68;BaseQRankSum= |
| 33609 | chrY | 13678879 | . | A | T     | 186.68  | PASS          | AC=1;AF=0.015;AN=66;BaseQRankSum= |
| 33610 | chrY | 13678888 | . | G | A     | 123.87  | PASS          | AC=1;AF=0.014;AN=70;BaseQRankSum= |
| 33611 | chrY | 13678908 | . | G | T     | 1089.37 | PASS          | AC=5;AF=0.076;AN=66;BaseQRankSum= |
| 33612 | chrY | 13678909 | . | G | T     | 1089.68 | PASS          | AC=5;AF=0.076;AN=66;BaseQRankSum= |
| 33613 | chrY | 13678928 | . | A | G     | 675.61  | PASS          | AC=3;AF=0.044;AN=68;BaseQRankSum= |
| 33614 | chrY | 13678936 | . | A | C     | 114.36  | PASS          | AC=1;AF=0.015;AN=66;BaseQRankSum= |
| 33615 | chrY | 13679130 | . | A | C     | 321.16  | my_snp_filter | AC=8;AF=0.114;AN=70;BaseQ         |
| 33616 | chrY | 13679146 | . | C | G     | 922.48  | PASS          | AC=6;AF=0.086;AN=70;BaseQRankSum= |
| 33617 | chrY | 13679152 | . | T | C     | 900.58  | PASS          | AC=6;AF=0.088;AN=68;BaseQRankSum= |
| 33618 | chrY | 13679257 | . | T | G     | 70.24   | PASS          | AC=1;AF=0.015;AN=68;BaseQRankSum= |
| 33619 | chrY | 13679268 | . | G | C     | 61.02   | PASS          | AC=1;AF=0.015;AN=68;BaseQRankSum= |
| 33620 | chrY | 13679269 | . | G | A     | 55.50   | PASS          | AC=1;AF=0.015;AN=68;BaseQRankSum= |
| 33621 | chrY | 13679293 | . | G | C     | 49.22   | my_snp_filter | AC=1;AF=0.015;AN=66;BaseQ         |
| 33622 | chrY | 13679779 | . | G | T     | 150.70  | my_snp_filter | AC=2;AF=0.030;AN=66;BaseQ         |
| 33623 | chrY | 13679786 | . | A | G     | 146     | my_snp_filter | AC=2;AF=0.029;AN=70;BaseQ         |
| 33624 | chrY | 13679906 | . | T | G     | 1783.77 | PASS          | AC=3;AF=0.054;AN=56;BaseQRankSum= |
| 33625 | chrY | 13679907 | . | G | T     | 1775.74 | PASS          | AC=3;AF=0.054;AN=56;BaseQRankSum= |
| 33626 | chrY | 13679927 | . | G | T     | 241.02  | PASS          | AC=1;AF=0.015;AN=68;BaseQRankSum= |
| 33627 | chrY | 13679959 | . | A | T     | 82.86   | PASS          | AC=2;AF=0.030;AN=66;BaseQRankSum= |
| 33628 | chrY | 13679962 | . | A | G     | 121.93  | PASS          | AC=2;AF=0.030;AN=66;BaseQRankSum= |
| 33629 | chrY | 13679984 | . | G | T     | 76.84   | PASS          | AC=2;AF=0.033;AN=60;BaseQRankSum= |
| 33630 | chrY | 13679985 | . | T | C     | 44.10   | PASS          | AC=1;AF=0.016;AN=64;BaseQRankSum= |
| 33631 | chrY | 13680000 | . | C | T     | 112.37  | PASS          | AC=2;AF=0.030;AN=66;BaseQRankSum= |
| 33632 | chrY | 13680001 | . | T | C     | 131.12  | PASS          | AC=2;AF=0.030;AN=66;BaseQRankSum= |
| 33633 | chrY | 13680016 | . | G | T     | 41.22   | PASS          | AC=1;AF=0.015;AN=68;BaseQRankSum= |
| 33634 | chrY | 13680394 | . | A | T     | 160.56  | my_snp_filter | AC=4;AF=0.057;AN=70;BaseQ         |
| 33635 | chrY | 13680949 | . | T | A,*   | 494.60  | my_snp_filter | AC=2,1;AF=0.032,0.016;AN=         |
| 33636 | chrY | 13681005 | . | G | C,T,A | 2074.33 | my_snp_filter | AC=6,1,1;AF=0.125,0.021,0         |
| 33637 | chrY | 13681006 | . | A | G     | 3228.29 | my_snp_filter | AC=12;AF=0.222;AN=54;Base         |
| 33638 | chrY | 13681013 | . | G | A     | 1265.63 | PASS          | AC=8;AF=0.160;AN=50;BaseQRankSum= |
| 33639 | chrY | 13681023 | . | C | A     | 209.33  | PASS          | AC=4;AF=0.091;AN=44;BaseQRankSum= |
| 33640 | chrY | 13681024 | . | T | C     | 142.70  | PASS          | AC=4;AF=0.057;AN=70;BaseQRankSum= |
| 33641 | chrY | 13681026 | . | C | G     | 71.24   | my_snp_filter | AC=2;AF=0.050;AN=40;BaseQ         |
| 33642 | chrY | 13681031 | . | T | G     | 72.08   | PASS          | AC=2;AF=0.048;AN=42;BaseQRankSum= |
| 33643 | chrY | 13681750 | . | G | A     | 2622.01 | PASS          | AC=9;AF=0.132;AN=68;BaseQRankSum= |
| 33644 | chrY | 13681752 | . | C | A     | 2615.30 | PASS          | AC=9;AF=0.136;AN=66;BaseQRankSum= |
| 33645 | chrY | 13681753 | . | C | G     | 2617.62 | PASS          | AC=9;AF=0.136;AN=66;BaseQRankSum= |
| 33646 | chrY | 13681802 | . | T | A     | 479.72  | PASS          | AC=1;AF=0.014;AN=70;BaseQRankSum= |
| 33647 | chrY | 13681810 | . | A | T     | 895.64  | PASS          | AC=3;AF=0.050;AN=60;BaseQRankSum= |
| 33648 | chrY | 13681815 | . | A | G     | 4323.75 | PASS          | AC=6;AF=0.086;AN=70;BaseQRankSum= |
| 33649 | chrY | 13681817 | . | G | A     | 4328.20 | PASS          | AC=6;AF=0.086;AN=70;BaseQRankSum= |
| 33650 | chrY | 13681835 | . | A | C     | 522.06  | PASS          | AC=2;AF=0.029;AN=68;DP=625;FS=0.0 |
| 33651 | chrY | 13682052 | . | G | A     | 439.62  | PASS          | AC=4;AF=0.057;AN=70;BaseQRankSum= |
| 33652 | chrY | 13682535 | . | T | A     | 557.25  | PASS          | AC=2;AF=0.029;AN=70;BaseQRankSum= |
| 33653 | chrY | 13682963 | . | G | A     | 1780.79 | PASS          | AC=2;AF=0.067;AN=30;BaseQRankSum= |
| 33654 | chrY | 13682967 | . | A | G     | 1758.24 | PASS          | AC=2;AF=0.077;AN=26;BaseQRankSum= |
| 33655 | chrY | 13682977 | . | A | G     | 1340.84 | my_snp_filter | AC=1;AF=0.045;AN=22;BaseQ         |
| 33656 | chrY | 13683181 | . | T | A     | 700.85  | PASS          | AC=7;AF=0.103;AN=68;BaseQRankSum= |
| 33657 | chrY | 13683182 | . | G | A     | 726.45  | PASS          | AC=7;AF=0.100;AN=70;BaseQRankSum= |
| 33658 | chrY | 13683184 | . | C | T     | 669.52  | PASS          | AC=6;AF=0.086;AN=70;BaseQRankSum= |
| 33659 | chrY | 13683188 | . | G | T     | 474.62  | PASS          | AC=6;AF=0.086;AN=70;BaseQRankSum= |
| 33660 | chrY | 13683193 | . | C | G     | 544.45  | PASS          | AC=7;AF=0.100;AN=70;BaseQRankSum= |
| 33661 | chrY | 13683196 | . | C | T     | 533.48  | PASS          | AC=6;AF=0.086;AN=70;BaseQRankSum= |
| 33662 | chrY | 13683198 | . | A | G     | 497.54  | PASS          | AC=6;AF=0.086;AN=70;BaseQRankSum= |
| 33663 | chrY | 13683203 | . | G | A     | 367.85  | PASS          | AC=5;AF=0.071;AN=70;BaseQRankSum= |
| 33664 | chrY | 13683206 | . | A | T     | 370.66  | PASS          | AC=5;AF=0.071;AN=70;BaseQRankSum= |
| 33665 | chrY | 13683220 | . | A | C     | 275.16  | PASS          | AC=4;AF=0.057;AN=70;BaseQRankSum= |
| 33666 | chrY | 13683221 | . | A | T     | 271.48  | PASS          | AC=4;AF=0.057;AN=70;BaseQRankSum= |
| 33667 | chrY | 13683232 | . | A | G     | 265.74  | PASS          | AC=4;AF=0.057;AN=70;BaseQRankSum= |
| 33668 | chrY | 13683235 | . | C | T     | 181.04  | PASS          | AC=4;AF=0.059;AN=68;BaseQRankSum= |

|       |      |          |   |   |   |           |               |                                   |
|-------|------|----------|---|---|---|-----------|---------------|-----------------------------------|
| 33669 | chrY | 13683238 | . | T | G | 166.24    | PASS          | AC=3;AF=0.044;AN=68;BaseQRankSum= |
| 33670 | chrY | 13683248 | . | C | T | 166.51    | PASS          | AC=3;AF=0.044;AN=68;BaseQRankSum= |
| 33671 | chrY | 13683251 | . | G | T | 168.38    | PASS          | AC=3;AF=0.045;AN=66;BaseQRankSum= |
| 33672 | chrY | 13683261 | . | T | G | 161.02    | PASS          | AC=2;AF=0.031;AN=64;BaseQRankSum= |
| 33673 | chrY | 13683265 | . | G | T | 161.46    | PASS          | AC=2;AF=0.031;AN=64;BaseQRankSum= |
| 33674 | chrY | 13683601 | . | T | A | 327.47    | PASS          | AC=2;AF=0.029;AN=70;DP=459;FS=0.0 |
| 33675 | chrY | 13683787 | . | G | A | 511.52    | PASS          | AC=6;AF=0.094;AN=64;DP=436;FS=0.0 |
| 33676 | chrY | 13684275 | . | G | A | 508       | PASS          | AC=4;AF=0.057;AN=70;DP=450;FS=0.0 |
| 33677 | chrY | 13684322 | . | T | A | 37.32     | my_snp_filter | AC=1;AF=0.016;AN=62;BaseQ         |
| 33678 | chrY | 13684351 | . | A | T | 48.37     | PASS          | AC=1;AF=0.015;AN=66;BaseQRankSum= |
| 33679 | chrY | 13684371 | . | C | G | 402.02    | PASS          | AC=3;AF=0.048;AN=62;BaseQRankSum= |
| 33680 | chrY | 13684373 | . | C | T | 293.43    | PASS          | AC=3;AF=0.048;AN=62;BaseQRankSum= |
| 33681 | chrY | 13684379 | . | C | G | 384.41    | PASS          | AC=4;AF=0.083;AN=48;BaseQRankSum= |
| 33682 | chrY | 13684380 | . | A | G | 307.36    | PASS          | AC=3;AF=0.054;AN=56;BaseQRankSum= |
| 33683 | chrY | 13684389 | . | A | C | 417.13    | PASS          | AC=3;AF=0.052;AN=58;BaseQRankSum= |
| 33684 | chrY | 13684393 | . | G | C | 324.19    | PASS          | AC=3;AF=0.048;AN=62;BaseQRankSum= |
| 33685 | chrY | 13684400 | . | C | A | 333.91    | PASS          | AC=3;AF=0.050;AN=60;BaseQRankSum= |
| 33686 | chrY | 13684403 | . | T | C | 446.21    | PASS          | AC=4;AF=0.077;AN=52;BaseQRankSum= |
| 33687 | chrY | 13684410 | . | A | C | 323.29    | PASS          | AC=3;AF=0.058;AN=52;BaseQRankSum= |
| 33688 | chrY | 13684412 | . | G | T | 431.91    | PASS          | AC=5;AF=0.109;AN=46;BaseQRankSum= |
| 33689 | chrY | 13684427 | . | T | C | 193.64    | PASS          | AC=2;AF=0.037;AN=54;BaseQRankSum= |
| 33690 | chrY | 13684428 | . | C | T | 53.45     | PASS          | AC=2;AF=0.037;AN=54;DP=492;FS=0.0 |
| 33691 | chrY | 13684431 | . | A | G | 49.05     | PASS          | AC=2;AF=0.036;AN=56;DP=515;FS=0.0 |
| 33692 | chrY | 13684432 | . | T | A | 51.62     | PASS          | AC=2;AF=0.036;AN=56;DP=518;FS=0.0 |
| 33693 | chrY | 13684447 | . | T | A | 55.25     | PASS          | AC=1;AF=0.025;AN=40;BaseQRankSum= |
| 33694 | chrY | 13684463 | . | T | A | 95.35     | PASS          | AC=1;AF=0.024;AN=42;BaseQRankSum= |
| 33695 | chrY | 13684464 | . | T | G | 98.70     | PASS          | AC=1;AF=0.025;AN=40;BaseQRankSum= |
| 33696 | chrY | 13684772 | . | G | A | 32.12     | PASS          | AC=1;AF=0.016;AN=62;BaseQRankSum= |
| 33697 | chrY | 13684775 | . | T | C | 32.93     | PASS          | AC=1;AF=0.017;AN=58;BaseQRankSum= |
| 33698 | chrY | 13684776 | . | A | C | 36.69     | PASS          | AC=1;AF=0.019;AN=54;BaseQRankSum= |
| 33699 | chrY | 13684779 | . | A | G | 33.51     | PASS          | AC=1;AF=0.019;AN=54;BaseQRankSum= |
| 33700 | chrY | 13684786 | . | A | G | 41.31     | PASS          | AC=1;AF=0.021;AN=48;BaseQRankSum= |
| 33701 | chrY | 13684787 | . | T | G | 41.99     | PASS          | AC=1;AF=0.021;AN=48;BaseQRankSum= |
| 33702 | chrY | 13685037 | . | G | T | 1215.31   | PASS          | AC=6;AF=0.086;AN=70;DP=571;FS=0.0 |
| 33703 | chrY | 13685386 | . | C | A | 142.67    | PASS          | AC=2;AF=0.029;AN=70;BaseQRankSum= |
| 33704 | chrY | 13685429 | . | A | C | 120.01    | PASS          | AC=1;AF=0.015;AN=68;BaseQRankSum= |
| 33705 | chrY | 13685721 | . | A | G | 155.15    | my_snp_filter | AC=4;AF=0.057;AN=70;BaseQ         |
| 33706 | chrY | 13685723 | . | G | C | 95.48     | my_snp_filter | AC=6;AF=0.086;AN=70;BaseQ         |
| 33707 | chrY | 13685736 | . | G | A | 151.20    | my_snp_filter | AC=4;AF=0.057;AN=70;BaseQ         |
| 33708 | chrY | 13685999 | . | G | A | 1262.68   | PASS          | AC=6;AF=0.091;AN=66;DP=411;FS=0.0 |
| 33709 | chrY | 13686062 | . | C | G | 38.23     | PASS          | AC=1;AF=0.015;AN=66;BaseQRankSum= |
| 33710 | chrY | 13686083 | . | G | A | 40.40     | PASS          | AC=1;AF=0.015;AN=66;BaseQRankSum= |
| 33711 | chrY | 13686129 | . | G | A | 699.94    | PASS          | AC=1;AF=0.014;AN=70;BaseQRankSum= |
| 33712 | chrY | 13686136 | . | A | G | 613.15    | PASS          | AC=1;AF=0.014;AN=70;BaseQRankSum= |
| 33713 | chrY | 13686138 | . | G | A | 591.10    | PASS          | AC=1;AF=0.014;AN=70;BaseQRankSum= |
| 33714 | chrY | 13686147 | . | G | T | 600.47    | PASS          | AC=1;AF=0.014;AN=70;BaseQRankSum= |
| 33715 | chrY | 13686193 | . | C | A | 742.64    | PASS          | AC=7;AF=0.100;AN=70;BaseQRankSum= |
| 33716 | chrY | 13686383 | . | G | C | 34.31     | my_snp_filter | AC=1;AF=0.014;AN=70;BaseQ         |
| 33717 | chrY | 13686387 | . | T | G | 34.33     | my_snp_filter | AC=1;AF=0.014;AN=70;BaseQ         |
| 33718 | chrY | 13686578 | . | A | G | 451.67    | PASS          | AC=5;AF=0.086;AN=58;BaseQRankSum= |
| 33719 | chrY | 13686579 | . | C | A | 452.58    | PASS          | AC=5;AF=0.086;AN=58;BaseQRankSum= |
| 33720 | chrY | 13686602 | . | T | G | 376.89    | PASS          | AC=3;AF=0.050;AN=60;BaseQRankSum= |
| 33721 | chrY | 13686603 | . | T | G | 378.61    | PASS          | AC=3;AF=0.050;AN=60;BaseQRankSum= |
| 33722 | chrY | 13686608 | . | C | T | 176.55    | PASS          | AC=2;AF=0.032;AN=62;BaseQRankSum= |
| 33723 | chrY | 13686610 | . | A | G | 178.55    | PASS          | AC=3;AF=0.045;AN=66;BaseQRankSum= |
| 33724 | chrY | 13686634 | . | A | T | 127.24    | PASS          | AC=2;AF=0.029;AN=70;BaseQRankSum= |
| 33725 | chrY | 13686653 | . | T | G | 95.52     | PASS          | AC=2;AF=0.032;AN=62;BaseQRankSum= |
| 33726 | chrY | 13686662 | . | G | C | 101.24    | PASS          | AC=2;AF=0.029;AN=70;BaseQRankSum= |
| 33727 | chrY | 13686663 | . | A | G | 176.54    | my_snp_filter | AC=6;AF=0.086;AN=70;BaseQ         |
| 33728 | chrY | 13686687 | . | G | T | 58.97     | my_snp_filter | AC=2;AF=0.029;AN=70;BaseQ         |
| 33729 | chrY | 13686688 | . | T | G | 63.06     | my_snp_filter | AC=2;AF=0.029;AN=70;BaseQ         |
| 33730 | chrY | 13686695 | . | T | A | 46.55     | PASS          | AC=1;AF=0.015;AN=66;BaseQRankSum= |
| 33731 | chrY | 13686698 | . | C | G | 42.99     | PASS          | AC=1;AF=0.014;AN=70;BaseQRankSum= |
| 33732 | chrY | 13686709 | . | C | A | 46.31     | PASS          | AC=1;AF=0.014;AN=70;BaseQRankSum= |
| 33733 | chrY | 13686711 | . | A | T | 45.29     | PASS          | AC=1;AF=0.014;AN=70;BaseQRankSum= |
| 33734 | chrY | 13686963 | . | C | G | 6662.45   | PASS          | AC=4;AF=0.500;AN=8;BaseQRankSum=2 |
| 33735 | chrY | 13686971 | . | T | G | 76.87     | my_snp_filter | AC=2;AF=0.029;AN=70;BaseQ         |
| 33736 | chrY | 13687028 | . | G | A | 1545.42   | PASS          | AC=1;AF=0.014;AN=70;BaseQRankSum= |
| 33737 | chrY | 13687047 | . | T | C | 592063.85 | PASS          | AC=59;AF=0.843;AN=70;BaseQ        |
| 33738 | chrY | 13687050 | . | A | G | 2532.05   | PASS          | AC=2;AF=0.029;AN=70;BaseQRankSum= |
| 33739 | chrY | 13687052 | . | G | T | 543738.52 | PASS          | AC=57;AF=0.814;AN=70;BaseQ        |
| 33740 | chrY | 13687053 | . | G | T | 565328.72 | PASS          | AC=57;AF=0.814;AN=70;BaseQ        |
| 33741 | chrY | 13687106 | . | T | C | 509060.65 | PASS          | AC=59;AF=0.843;AN=70;BaseQ        |
| 33742 | chrY | 13687112 | . | G | A | 505925.69 | PASS          | AC=59;AF=0.843;AN=70;BaseQ        |
| 33743 | chrY | 13687128 | . | A | G | 494157.41 | PASS          | AC=61;AF=0.871;AN=70;BaseQ        |
| 33744 | chrY | 13687139 | . | T | A | 52835.72  | PASS          | AC=33;AF=0.471;AN=70;BaseQ        |

|       |      |          |   |   |     |           |               |                                     |
|-------|------|----------|---|---|-----|-----------|---------------|-------------------------------------|
| 33745 | chrY | 13687157 | . | A | G   | 483896.61 | PASS          | AC=61;AF=0.871;AN=70;BaseQ          |
| 33746 | chrY | 13687186 | . | T | G   | 459509.95 | PASS          | AC=62;AF=0.886;AN=70;BaseQ          |
| 33747 | chrY | 13687197 | . | A | C   | 385370.25 | PASS          | AC=62;AF=0.886;AN=70;BaseQ          |
| 33748 | chrY | 13687268 | . | A | T   | 449332.33 | PASS          | AC=59;AF=0.843;AN=70;BaseQ          |
| 33749 | chrY | 13687270 | . | G | C   | 458720.77 | PASS          | AC=59;AF=0.843;AN=70;BaseQ          |
| 33750 | chrY | 13687279 | . | G | T   | 444537.38 | PASS          | AC=58;AF=0.829;AN=70;BaseQ          |
| 33751 | chrY | 13687286 | . | C | G   | 84180.56  | PASS          | AC=34;AF=0.486;AN=70;BaseQ          |
| 33752 | chrY | 13687294 | . | A | G   | 13197.81  | my_snp_filter | AC=30;AF=0.429;AN=70;BaseQ          |
| 33753 | chrY | 13687313 | . | A | G   | 51456.89  | PASS          | AC=34;AF=0.486;AN=70;BaseQ          |
| 33754 | chrY | 13687378 | . | A | T   | 289548.17 | PASS          | AC=66;AF=0.943;AN=70;BaseQ          |
| 33755 | chrY | 13687415 | . | C | T   | 442900.25 | PASS          | AC=60;AF=0.857;AN=70;BaseQ          |
| 33756 | chrY | 13687432 | . | G | T   | 508.43    | my_snp_filter | AC=9;AF=0.129;AN=70;BaseQ           |
| 33757 | chrY | 13687433 | . | A | T   | 445412.83 | PASS          | AC=55;AF=0.786;AN=70;BaseQ          |
| 33758 | chrY | 13687451 | . | C | G   | 419218.38 | PASS          | AC=50;AF=0.714;AN=70;BaseQ          |
| 33759 | chrY | 13687465 | . | C | T   | 428359.05 | PASS          | AC=50;AF=0.714;AN=70;BaseQ          |
| 33760 | chrY | 13687478 | . | G | T   | 423349.33 | PASS          | AC=51;AF=0.729;AN=70;BaseQ          |
| 33761 | chrY | 13687485 | . | G | A   | 418135.72 | PASS          | AC=50;AF=0.714;AN=70;BaseQ          |
| 33762 | chrY | 13687497 | . | A | G   | 403896.37 | PASS          | AC=50;AF=0.714;AN=70;BaseQ          |
| 33763 | chrY | 13687520 | . | T | C   | 85024.86  | PASS          | AC=35;AF=0.500;AN=70;BaseQ          |
| 33764 | chrY | 13687570 | . | A | T   | 368670.57 | PASS          | AC=49;AF=0.700;AN=70;BaseQ          |
| 33765 | chrY | 13687591 | . | T | C,G | 325561.15 | PASS          | AC=32,31;AF=0.457,0.443;AN=70;BaseQ |
| 33766 | chrY | 13687601 | . | A | G   | 413637.58 | PASS          | AC=47;AF=0.671;AN=70;BaseQ          |
| 33767 | chrY | 13687615 | . | T | C   | 408985.45 | PASS          | AC=48;AF=0.706;AN=68;BaseQ          |
| 33768 | chrY | 13687623 | . | A | C   | 82.46     | my_snp_filter | AC=2;AF=0.029;AN=70;BaseQ           |
| 33769 | chrY | 13687627 | . | A | C   | 380165.39 | PASS          | AC=44;AF=0.647;AN=68;BaseQ          |
| 33770 | chrY | 13687629 | . | T | A   | 381346.13 | PASS          | AC=43;AF=0.632;AN=68;BaseQ          |
| 33771 | chrY | 13687655 | . | T | G   | 53.40     | my_snp_filter | AC=1;AF=0.014;AN=70;BaseQ           |
| 33772 | chrY | 13687662 | . | C | G   | 412018.06 | PASS          | AC=46;AF=0.676;AN=68;BaseQ          |
| 33773 | chrY | 13687665 | . | A | T   | 401412.57 | PASS          | AC=46;AF=0.676;AN=68;BaseQ          |
| 33774 | chrY | 13687667 | . | A | G   | 413374.57 | PASS          | AC=46;AF=0.676;AN=68;BaseQ          |
| 33775 | chrY | 13687696 | . | A | C   | 284341.19 | PASS          | AC=37;AF=0.544;AN=68;BaseQ          |
| 33776 | chrY | 13687697 | . | T | C   | 302216.19 | PASS          | AC=37;AF=0.544;AN=68;BaseQ          |
| 33777 | chrY | 13687740 | . | A | T   | 422969.24 | PASS          | AC=57;AF=0.814;AN=70;BaseQ          |
| 33778 | chrY | 13687747 | . | C | G   | 447236.36 | PASS          | AC=57;AF=0.814;AN=70;BaseQ          |
| 33779 | chrY | 13687753 | . | A | T   | 562.07    | my_snp_filter | AC=6;AF=0.086;AN=70;BaseQ           |
| 33780 | chrY | 13687761 | . | G | T   | 565.80    | my_snp_filter | AC=6;AF=0.086;AN=70;BaseQ           |
| 33781 | chrY | 13687807 | . | T | G   | 419466.79 | PASS          | AC=67;AF=0.957;AN=70;BaseQ          |
| 33782 | chrY | 13687810 | . | A | G   | 369.08    | my_snp_filter | AC=5;AF=0.071;AN=70;BaseQ           |
| 33783 | chrY | 13687826 | . | A | G   | 498407.06 | PASS          | AC=68;AF=0.971;AN=70;BaseQ          |
| 33784 | chrY | 13687917 | . | G | A   | 39237.41  | PASS          | AC=31;AF=0.443;AN=70;BaseQ          |
| 33785 | chrY | 13687937 | . | G | T   | 4852.41   | my_snp_filter | AC=19;AF=0.271;AN=70;BaseQ          |
| 33786 | chrY | 13687954 | . | A | G   | 1250.46   | my_snp_filter | AC=8;AF=0.114;AN=70;BaseQ           |
| 33787 | chrY | 13687959 | . | G | A,C | 45006.19  | PASS          | AC=1,32;AF=0.014,0.457;AN=70;BaseQ  |
| 33788 | chrY | 13687963 | . | A | T   | 30.43     | my_snp_filter | AC=1;AF=0.014;AN=70;BaseQ           |
| 33789 | chrY | 13687977 | . | T | G   | 359717.45 | PASS          | AC=54;AF=0.771;AN=70;BaseQ          |
| 33790 | chrY | 13687985 | . | T | C   | 1965.76   | my_snp_filter | AC=8;AF=0.114;AN=70;BaseQ           |
| 33791 | chrY | 13687991 | . | G | A   | 134.13    | my_snp_filter | AC=2;AF=0.029;AN=70;BaseQ           |
| 33792 | chrY | 13687993 | . | A | T   | 1574.27   | my_snp_filter | AC=8;AF=0.118;AN=68;BaseQ           |
| 33793 | chrY | 13687996 | . | T | G   | 279219.47 | PASS          | AC=44;AF=0.647;AN=68;BaseQ          |
| 33794 | chrY | 13688004 | . | C | T   | 119.22    | my_snp_filter | AC=3;AF=0.043;AN=70;BaseQ           |
| 33795 | chrY | 13688006 | . | C | T   | 716.78    | my_snp_filter | AC=6;AF=0.086;AN=70;BaseQ           |
| 33796 | chrY | 13688007 | . | G | T   | 1753.22   | my_snp_filter | AC=10;AF=0.143;AN=70;BaseQ          |
| 33797 | chrY | 13688015 | . | T | G   | 90.56     | my_snp_filter | AC=3;AF=0.043;AN=70;BaseQ           |
| 33798 | chrY | 13688027 | . | G | T   | 1322.24   | my_snp_filter | AC=14;AF=0.200;AN=70;BaseQ          |
| 33799 | chrY | 13688030 | . | A | T   | 198511.11 | PASS          | AC=42;AF=0.618;AN=68;BaseQ          |
| 33800 | chrY | 13688032 | . | G | C   | 15094.54  | PASS          | AC=28;AF=0.400;AN=70;BaseQ          |
| 33801 | chrY | 13688036 | . | G | A   | 151.50    | my_snp_filter | AC=4;AF=0.057;AN=70;BaseQ           |
| 33802 | chrY | 13688039 | . | A | G   | 91384.89  | my_snp_filter | AC=33;AF=0.471;AN=70;BaseQ          |
| 33803 | chrY | 13688059 | . | A | C   | 874.64    | my_snp_filter | AC=6;AF=0.086;AN=70;BaseQ           |
| 33804 | chrY | 13688065 | . | C | A   | 3541.17   | my_snp_filter | AC=13;AF=0.186;AN=70;BaseQ          |
| 33805 | chrY | 13688070 | . | A | T   | 178907.68 | PASS          | AC=39;AF=0.609;AN=64;BaseQ          |
| 33806 | chrY | 13688072 | . | G | T   | 5091.34   | my_snp_filter | AC=15;AF=0.214;AN=70;BaseQ          |
| 33807 | chrY | 13688083 | . | A | G   | 4541.54   | my_snp_filter | AC=14;AF=0.200;AN=70;BaseQ          |
| 33808 | chrY | 13688086 | . | A | C   | 178690.81 | PASS          | AC=38;AF=0.594;AN=64;BaseQ          |
| 33809 | chrY | 13688087 | . | G | A   | 4730.38   | my_snp_filter | AC=14;AF=0.206;AN=68;BaseQ          |
| 33810 | chrY | 13688100 | . | T | C   | 2546.89   | my_snp_filter | AC=7;AF=0.100;AN=70;BaseQ           |
| 33811 | chrY | 13688107 | . | G | T   | 506.20    | my_snp_filter | AC=4;AF=0.057;AN=70;BaseQ           |
| 33812 | chrY | 13688119 | . | A | T   | 43480.04  | PASS          | AC=8;AF=0.308;AN=26;BaseQ           |
| 33813 | chrY | 13688140 | . | C | T   | 62349.22  | PASS          | AC=27;AF=0.563;AN=48;BaseQ          |
| 33814 | chrY | 13688147 | . | G | C,A | 45815.60  | PASS          | AC=16,8;AF=0.320,0.160;AN=70;BaseQ  |
| 33815 | chrY | 13688149 | . | C | A   | 33.42     | PASS          | AC=1;AF=0.014;AN=70;BaseQRankSum=   |
| 33816 | chrY | 13688150 | . | A | T   | 33.42     | PASS          | AC=1;AF=0.014;AN=70;BaseQRankSum=   |
| 33817 | chrY | 13688151 | . | C | G   | 308.91    | my_snp_filter | AC=1;AF=0.014;AN=70;BaseQ           |
| 33818 | chrY | 13688175 | . | T | G   | 1201.53   | PASS          | AC=4;AF=0.057;AN=70;BaseQRankSum=   |
| 33819 | chrY | 13688205 | . | T | A   | 249.24    | PASS          | AC=7;AF=0.100;AN=70;BaseQRankSum=   |
| 33820 | chrY | 13688210 | . | T | G   | 356.17    | PASS          | AC=3;AF=0.043;AN=70;BaseQRankSum=   |

|       |      |          |   |   |     |          |               |                                   |
|-------|------|----------|---|---|-----|----------|---------------|-----------------------------------|
| 33821 | chrY | 13688218 | . | A | T   | 493.01   | my_snp_filter | AC=2;AF=0.029;AN=70;BaseQ         |
| 33822 | chrY | 13688223 | . | C | A   | 8563.18  | PASS          | AC=16;AF=0.229;AN=70;BaseQRankSum |
| 33823 | chrY | 13688228 | . | A | C   | 1336.74  | PASS          | AC=13;AF=0.186;AN=70;BaseQRankSum |
| 33824 | chrY | 13688232 | . | G | T   | 1015.42  | PASS          | AC=8;AF=0.121;AN=66;BaseQRankSum  |
| 33825 | chrY | 13688234 | . | A | T   | 188.17   | PASS          | AC=2;AF=0.030;AN=66;BaseQRankSum  |
| 33826 | chrY | 13688243 | . | A | C   | 52.16    | PASS          | AC=1;AF=0.014;AN=70;BaseQRankSum  |
| 33827 | chrY | 13688251 | . | G | T   | 29746.77 | PASS          | AC=23;AF=0.383;AN=60;BaseQ        |
| 33828 | chrY | 13688265 | . | C | T   | 36777.03 | PASS          | AC=19;AF=0.432;AN=44;BaseQ        |
| 33829 | chrY | 13688267 | . | G | T   | 7054.53  | PASS          | AC=10;AF=0.217;AN=46;BaseQRankSum |
| 33830 | chrY | 13688268 | . | A | G,T | 29670.02 | PASS          | AC=18,7;AF=0.409,0.159;AN         |
| 33831 | chrY | 13688325 | . | A | C   | 1670.90  | PASS          | AC=4;AF=0.143;AN=28;BaseQRankSum  |
| 33832 | chrY | 13688342 | . | T | C   | 726.15   | PASS          | AC=1;AF=0.017;AN=60;BaseQRankSum  |
| 33833 | chrY | 13688351 | . | A | G   | 539.49   | PASS          | AC=1;AF=0.016;AN=62;BaseQRankSum  |
| 33834 | chrY | 13688355 | . | A | T   | 679.55   | PASS          | AC=2;AF=0.048;AN=42;BaseQRankSum  |
| 33835 | chrY | 13688432 | . | C | G   | 152.11   | PASS          | AC=2;AF=0.033;AN=60;BaseQRankSum  |
| 33836 | chrY | 13688446 | . | A | G   | 3233.06  | PASS          | AC=38;AF=0.760;AN=50;DP=244;FS=0. |
| 33837 | chrY | 13688450 | . | A | T   | 139.43   | PASS          | AC=3;AF=0.052;AN=58;BaseQRankSum  |
| 33838 | chrY | 13688491 | . | G | A   | 79.49    | my_snp_filter | AC=1;AF=0.015;AN=66;BaseQ         |
| 33839 | chrY | 13688492 | . | G | A   | 301.40   | my_snp_filter | AC=4;AF=0.061;AN=66;BaseQ         |
| 33840 | chrY | 13688497 | . | A | G   | 10443.86 | PASS          | AC=9;AF=0.136;AN=66;BaseQ         |
| 33841 | chrY | 13688507 | . | C | T   | 11661.29 | PASS          | AC=9;AF=0.136;AN=66;BaseQ         |
| 33842 | chrY | 13688515 | . | T | C   | 1518.43  | PASS          | AC=6;AF=0.088;AN=68;BaseQRankSum  |
| 33843 | chrY | 13688517 | . | G | A   | 1497.80  | PASS          | AC=8;AF=0.118;AN=68;BaseQRankSum  |
| 33844 | chrY | 13688522 | . | G | A   | 585.74   | PASS          | AC=3;AF=0.043;AN=70;BaseQRankSum  |
| 33845 | chrY | 13688532 | . | C | T   | 612.27   | PASS          | AC=3;AF=0.043;AN=70;BaseQRankSum  |
| 33846 | chrY | 13688538 | . | A | C   | 1126.75  | PASS          | AC=6;AF=0.086;AN=70;BaseQRankSum  |
| 33847 | chrY | 13688546 | . | A | C   | 16650.23 | PASS          | AC=19;AF=0.352;AN=54;BaseQ        |
| 33848 | chrY | 13688556 | . | G | T   | 297.91   | PASS          | AC=1;AF=0.014;AN=70;BaseQRankSum  |
| 33849 | chrY | 13688565 | . | A | G   | 22794.22 | PASS          | AC=21;AF=0.362;AN=58;BaseQ        |
| 33850 | chrY | 13688567 | . | A | G   | 12983.55 | PASS          | AC=19;AF=0.328;AN=58;BaseQ        |
| 33851 | chrY | 13688579 | . | T | G   | 312.85   | my_snp_filter | AC=4;AF=0.057;AN=70;BaseQ         |
| 33852 | chrY | 13688589 | . | G | A   | 150.46   | my_snp_filter | AC=2;AF=0.029;AN=70;BaseQ         |
| 33853 | chrY | 13688590 | . | C | G   | 370.07   | my_snp_filter | AC=3;AF=0.043;AN=70;BaseQ         |
| 33854 | chrY | 13688595 | . | A | G   | 136.46   | PASS          | AC=1;AF=0.014;AN=70;BaseQRankSum  |
| 33855 | chrY | 13688625 | . | T | C   | 355.15   | PASS          | AC=4;AF=0.105;AN=38;BaseQRankSum  |
| 33856 | chrY | 13688640 | . | C | A   | 110.31   | my_snp_filter | AC=4;AF=0.077;AN=52;BaseQ         |
| 33857 | chrY | 13688735 | . | G | A   | 208.70   | my_snp_filter | AC=6;AF=0.086;AN=70;BaseQ         |
| 33858 | chrY | 13688743 | . | T | G   | 26774.11 | PASS          | AC=30;AF=0.429;AN=70;BaseQ        |
| 33859 | chrY | 13688748 | . | G | A   | 66337.66 | PASS          | AC=38;AF=0.559;AN=68;BaseQ        |
| 33860 | chrY | 13688749 | . | T | A   | 227.62   | my_snp_filter | AC=7;AF=0.100;AN=70;BaseQ         |
| 33861 | chrY | 13688755 | . | T | G   | 944.78   | my_snp_filter | AC=14;AF=0.200;AN=70;BaseQ        |
| 33862 | chrY | 13688774 | . | T | A   | 7365.92  | PASS          | AC=14;AF=0.200;AN=70;BaseQRankSum |
| 33863 | chrY | 13688780 | . | C | A,G | 1928.14  | my_snp_filter | AC=9,1;AF=0.129,0.014;AN=         |
| 33864 | chrY | 13688788 | . | A | T   | 178.52   | PASS          | AC=3;AF=0.043;AN=70;BaseQRankSum  |
| 33865 | chrY | 13688794 | . | T | G   | 17088.07 | PASS          | AC=21;AF=0.300;AN=70;BaseQ        |
| 33866 | chrY | 13688801 | . | G | C   | 17020.06 | PASS          | AC=20;AF=0.286;AN=70;BaseQ        |
| 33867 | chrY | 13688808 | . | C | T   | 189.81   | my_snp_filter | AC=2;AF=0.029;AN=70;BaseQ         |
| 33868 | chrY | 13688809 | . | T | C   | 60.29    | my_snp_filter | AC=1;AF=0.014;AN=70;BaseQ         |
| 33869 | chrY | 13688820 | . | G | T   | 254.88   | my_snp_filter | AC=7;AF=0.100;AN=70;BaseQ         |
| 33870 | chrY | 13688821 | . | G | T   | 248.12   | my_snp_filter | AC=7;AF=0.100;AN=70;BaseQ         |
| 33871 | chrY | 13688825 | . | C | G   | 90120.17 | PASS          | AC=36;AF=0.514;AN=70;BaseQ        |
| 33872 | chrY | 13688826 | . | A | C   | 1810.25  | my_snp_filter | AC=7;AF=0.100;AN=70;BaseQ         |
| 33873 | chrY | 13688829 | . | T | C   | 1072.99  | my_snp_filter | AC=16;AF=0.229;AN=70;BaseQ        |
| 33874 | chrY | 13688832 | . | A | C   | 97.29    | my_snp_filter | AC=1;AF=0.014;AN=70;BaseQ         |
| 33875 | chrY | 13688835 | . | G | T   | 3541.68  | PASS          | AC=12;AF=0.171;AN=70;BaseQRankSum |
| 33876 | chrY | 13688836 | . | G | T   | 3574.58  | PASS          | AC=12;AF=0.171;AN=70;BaseQRankSum |
| 33877 | chrY | 13688840 | . | C | G   | 4124.89  | PASS          | AC=23;AF=0.329;AN=70;BaseQRankSum |
| 33878 | chrY | 13688844 | . | T | A   | 112.81   | my_snp_filter | AC=1;AF=0.014;AN=70;BaseQ         |
| 33879 | chrY | 13688845 | . | G | A   | 3596.55  | PASS          | AC=12;AF=0.171;AN=70;BaseQRankSum |
| 33880 | chrY | 13688851 | . | G | C   | 1285.06  | PASS          | AC=7;AF=0.100;AN=70;BaseQRankSum  |
| 33881 | chrY | 13688854 | . | T | A   | 511.75   | my_snp_filter | AC=5;AF=0.071;AN=70;BaseQ         |
| 33882 | chrY | 13688860 | . | G | T   | 16047.68 | PASS          | AC=31;AF=0.443;AN=70;BaseQ        |
| 33883 | chrY | 13688864 | . | A | T   | 561.78   | my_snp_filter | AC=5;AF=0.071;AN=70;BaseQ         |
| 33884 | chrY | 13688866 | . | C | T   | 51.14    | my_snp_filter | AC=2;AF=0.029;AN=70;BaseQ         |
| 33885 | chrY | 13688867 | . | A | C   | 7831.87  | PASS          | AC=26;AF=0.371;AN=70;BaseQRankSum |
| 33886 | chrY | 13688876 | . | T | A   | 135.88   | PASS          | AC=3;AF=0.043;AN=70;BaseQRankSum  |
| 33887 | chrY | 13688879 | . | T | C   | 13433.06 | PASS          | AC=20;AF=0.286;AN=70;BaseQ        |
| 33888 | chrY | 13688881 | . | G | T   | 23445.95 | PASS          | AC=32;AF=0.457;AN=70;BaseQ        |
| 33889 | chrY | 13688885 | . | A | G   | 13373.76 | PASS          | AC=21;AF=0.300;AN=70;BaseQ        |
| 33890 | chrY | 13688889 | . | T | A   | 1331.56  | my_snp_filter | AC=13;AF=0.186;AN=70;BaseQ        |
| 33891 | chrY | 13688894 | . | C | T   | 83.16    | PASS          | AC=2;AF=0.029;AN=70;BaseQRankSum  |
| 33892 | chrY | 13688895 | . | G | C   | 153.99   | PASS          | AC=2;AF=0.029;AN=70;BaseQRankSum  |
| 33893 | chrY | 13688901 | . | G | C   | 302.92   | my_snp_filter | AC=5;AF=0.071;AN=70;BaseQ         |
| 33894 | chrY | 13688909 | . | T | C   | 133.93   | my_snp_filter | AC=2;AF=0.031;AN=64;BaseQ         |
| 33895 | chrY | 13688911 | . | G | A   | 3979.12  | PASS          | AC=15;AF=0.227;AN=66;BaseQRankSum |
| 33896 | chrY | 13688915 | . | G | A   | 1350.03  | PASS          | AC=5;AF=0.074;AN=68;BaseQRankSum  |

|       |      |          |   |   |     |           |               |                                    |
|-------|------|----------|---|---|-----|-----------|---------------|------------------------------------|
| 33897 | chrY | 13688924 | . | C | T   | 32891.59  | my_snp_filter | AC=36;AF=0.643;AN=                 |
| 33898 | chrY | 13688925 | . | G | T   | 67.72     | my_snp_filter | AC=2;AF=0.033;AN=60;BaseQ          |
| 33899 | chrY | 13688935 | . | C | G   | 152.48    | PASS          | AC=1;AF=0.017;AN=60;BaseQRankSum=  |
| 33900 | chrY | 13688948 | . | T | A   | 69.13     | my_snp_filter | AC=2;AF=0.034;AN=58;BaseQ          |
| 33901 | chrY | 13688965 | . | T | G   | 6197.13   | PASS          | AC=15;AF=0.288;AN=52;BaseQRankSum= |
| 33902 | chrY | 13688969 | . | T | A   | 12893.38  | my_snp_filter | AC=17;AF=0.354;AN=                 |
| 33903 | chrY | 13688976 | . | G | T   | 502.85    | PASS          | AC=5;AF=0.086;AN=58;BaseQRankSum=  |
| 33904 | chrY | 13688984 | . | T | A   | 122.34    | PASS          | AC=2;AF=0.033;AN=60;BaseQRankSum=  |
| 33905 | chrY | 13688995 | . | T | G   | 124       | PASS          | AC=1;AF=0.018;AN=56;BaseQRankSum=  |
| 33906 | chrY | 13689001 | . | G | C   | 39.03     | my_snp_filter | AC=1;AF=0.019;AN=54;BaseQ          |
| 33907 | chrY | 13689019 | . | A | T   | 42.46     | my_snp_filter | AC=2;AF=0.038;AN=52;BaseQ          |
| 33908 | chrY | 13689020 | . | C | G   | 3870.73   | my_snp_filter | AC=11;AF=0.212;AN=52;BaseQ         |
| 33909 | chrY | 13689049 | . | A | T   | 1139.20   | my_snp_filter | AC=9;AF=0.180;AN=50;BaseQ          |
| 33910 | chrY | 13689055 | . | A | G,* | 551.96    | PASS          | AC=3,2;AF=0.060,0.040;AN=50;BaseQ  |
| 33911 | chrY | 13689068 | . | C | A,G | 557.90    | PASS          | AC=1,6;AF=0.019,0.115;AN=52;BaseQ  |
| 33912 | chrY | 13689079 | . | T | C   | 191.04    | PASS          | AC=5;AF=0.093;AN=54;BaseQRankSum=  |
| 33913 | chrY | 13689085 | . | G | A   | 182.06    | PASS          | AC=4;AF=0.074;AN=54;BaseQRankSum=  |
| 33914 | chrY | 13689095 | . | G | A   | 217.90    | PASS          | AC=3;AF=0.056;AN=54;BaseQRankSum=  |
| 33915 | chrY | 13689099 | . | T | A   | 213.79    | PASS          | AC=3;AF=0.056;AN=54;BaseQRankSum=  |
| 33916 | chrY | 13689195 | . | T | G   | 34.20     | my_snp_filter | AC=1;AF=0.017;AN=60;BaseQ          |
| 33917 | chrY | 13689210 | . | C | G   | 83.51     | PASS          | AC=1;AF=0.025;AN=40;BaseQRankSum=  |
| 33918 | chrY | 13689211 | . | A | G   | 84.22     | PASS          | AC=1;AF=0.025;AN=40;BaseQRankSum=  |
| 33919 | chrY | 13689214 | . | A | T   | 939.27    | PASS          | AC=4;AF=0.286;AN=14;BaseQRankSum=  |
| 33920 | chrY | 13689225 | . | G | A   | 117.99    | my_snp_filter | AC=1;AF=0.014;AN=70;BaseQ          |
| 33921 | chrY | 13689266 | . | G | C   | 116719.72 | my_snp_filter | AC=35;AF=0.500;AN=                 |
| 33922 | chrY | 13689276 | . | C | G   | 270381.51 | my_snp_filter | AC=59;AF=0.843;AN=                 |
| 33923 | chrY | 13689283 | . | A | G   | 409.73    | my_snp_filter | AC=4;AF=0.057;AN=70;BaseQ          |
| 33924 | chrY | 13689288 | . | C | A   | 1296.94   | my_snp_filter | AC=9;AF=0.129;AN=70;BaseQ          |
| 33925 | chrY | 13689320 | . | G | C   | 628.59    | my_snp_filter | AC=3;AF=0.043;AN=70;BaseQ          |
| 33926 | chrY | 13689325 | . | C | T   | 9605.49   | my_snp_filter | AC=22;AF=0.314;AN=70;BaseQ         |
| 33927 | chrY | 13689354 | . | C | T   | 92.42     | my_snp_filter | AC=1;AF=0.014;AN=70;BaseQ          |
| 33928 | chrY | 13689355 | . | G | A   | 159.42    | my_snp_filter | AC=1;AF=0.014;AN=70;BaseQ          |
| 33929 | chrY | 13689356 | . | G | C   | 139.42    | my_snp_filter | AC=1;AF=0.014;AN=70;BaseQ          |
| 33930 | chrY | 13689368 | . | A | C   | 101794.53 | my_snp_filter | AC=55;AF=0.786;AN=                 |
| 33931 | chrY | 13689407 | . | T | A   | 55958.53  | PASS          | AC=39;AF=0.557;AN=70;BaseQ         |
| 33932 | chrY | 13689409 | . | T | A   | 2966.18   | PASS          | AC=18;AF=0.257;AN=70;BaseQRankSum= |
| 33933 | chrY | 13689411 | . | T | G   | 52922.29  | PASS          | AC=39;AF=0.557;AN=70;BaseQ         |
| 33934 | chrY | 13689418 | . | A | C   | 4028.23   | PASS          | AC=15;AF=0.214;AN=70;BaseQRankSum= |
| 33935 | chrY | 13689440 | . | G | A   | 2812.64   | PASS          | AC=14;AF=0.200;AN=70;BaseQRankSum= |
| 33936 | chrY | 13689447 | . | A | C   | 16044.02  | PASS          | AC=33;AF=0.516;AN=64;BaseQ         |
| 33937 | chrY | 13689451 | . | G | C   | 2018.37   | PASS          | AC=8;AF=0.121;AN=66;BaseQRankSum=  |
| 33938 | chrY | 13689480 | . | C | G   | 674.63    | PASS          | AC=5;AF=0.076;AN=66;BaseQRankSum=  |
| 33939 | chrY | 13689483 | . | T | A   | 1949.63   | PASS          | AC=10;AF=0.161;AN=62;BaseQRankSum= |
| 33940 | chrY | 13689504 | . | A | T   | 196.16    | PASS          | AC=4;AF=0.059;AN=68;BaseQRankSum=  |
| 33941 | chrY | 13689509 | . | T | C   | 67.36     | PASS          | AC=1;AF=0.014;AN=70;BaseQRankSum=  |
| 33942 | chrY | 13689515 | . | C | G   | 74.17     | my_snp_filter | AC=2;AF=0.029;AN=70;BaseQ          |
| 33943 | chrY | 13689616 | . | T | G   | 268.59    | PASS          | AC=2;AF=0.111;AN=18;BaseQRankSum=  |
| 33944 | chrY | 13689634 | . | T | C   | 200.12    | PASS          | AC=1;AF=0.125;AN=8;BaseQRankSum=-  |
| 33945 | chrY | 13689668 | . | C | G   | 53410.83  | PASS          | AC=30;AF=0.484;AN=62;BaseQ         |
| 33946 | chrY | 13689676 | . | G | C   | 267.05    | my_snp_filter | AC=2;AF=0.029;AN=70;BaseQ          |
| 33947 | chrY | 13689686 | . | G | A   | 132.16    | my_snp_filter | AC=3;AF=0.043;AN=70;BaseQ          |
| 33948 | chrY | 13689706 | . | A | G   | 133.83    | my_snp_filter | AC=1;AF=0.014;AN=70;BaseQ          |
| 33949 | chrY | 13689715 | . | C | G   | 73.65     | PASS          | AC=1;AF=0.014;AN=70;BaseQRankSum=  |
| 33950 | chrY | 13689740 | . | C | G   | 2109.51   | my_snp_filter | AC=10;AF=0.143;AN=70;BaseQ         |
| 33951 | chrY | 13689745 | . | G | A   | 2386.28   | my_snp_filter | AC=7;AF=0.100;AN=70;BaseQ          |
| 33952 | chrY | 13689755 | . | G | C   | 505383.36 | PASS          | AC=64;AF=0.970;AN=66;BaseQ         |
| 33953 | chrY | 13689785 | . | C | G   | 107.42    | my_snp_filter | AC=1;AF=0.014;AN=70;BaseQ          |
| 33954 | chrY | 13689850 | . | C | G   | 1936      | my_snp_filter | AC=8;AF=0.114;AN=70;BaseQ          |
| 33955 | chrY | 13689886 | . | G | T   | 180.05    | my_snp_filter | AC=2;AF=0.029;AN=70;BaseQ          |
| 33956 | chrY | 13689887 | . | A | T   | 192.05    | my_snp_filter | AC=2;AF=0.029;AN=70;BaseQ          |
| 33957 | chrY | 13689894 | . | T | A   | 59.45     | my_snp_filter | AC=1;AF=0.014;AN=70;BaseQ          |
| 33958 | chrY | 13689901 | . | G | A   | 75.67     | my_snp_filter | AC=1;AF=0.014;AN=70;BaseQ          |
| 33959 | chrY | 13689902 | . | A | G   | 1345.58   | my_snp_filter | AC=5;AF=0.071;AN=70;BaseQ          |
| 33960 | chrY | 13689911 | . | G | A   | 31.67     | my_snp_filter | AC=1;AF=0.014;AN=70;BaseQ          |
| 33961 | chrY | 13689912 | . | A | G   | 5905.31   | my_snp_filter | AC=13;AF=0.186;AN=70;BaseQ         |
| 33962 | chrY | 13689915 | . | G | T   | 662.83    | PASS          | AC=7;AF=0.103;AN=68;BaseQRankSum=  |
| 33963 | chrY | 13689916 | . | C | G   | 321989.18 | PASS          | AC=58;AF=0.906;AN=64;BaseQ         |
| 33964 | chrY | 13689920 | . | G | T   | 432.77    | my_snp_filter | AC=4;AF=0.057;AN=70;BaseQ          |
| 33965 | chrY | 13689921 | . | G | T   | 388.33    | my_snp_filter | AC=4;AF=0.057;AN=70;BaseQ          |
| 33966 | chrY | 13689934 | . | C | T   | 63727.97  | my_snp_filter | AC=19;AF=0.475;AN=                 |
| 33967 | chrY | 13689938 | . | G | A   | 169362.06 | my_snp_filter | AC=38;AF=0.704;AN=                 |
| 33968 | chrY | 13689949 | . | G | T   | 130721.16 | my_snp_filter | AC=34;AF=0.607;AN=                 |
| 33969 | chrY | 13689956 | . | G | C   | 4212.70   | my_snp_filter | AC=10;AF=0.143;AN=70;BaseQ         |
| 33970 | chrY | 13689969 | . | T | A   | 84183.69  | my_snp_filter | AC=28;AF=0.467;AN=                 |
| 33971 | chrY | 13690024 | . | T | G   | 42.30     | my_snp_filter | AC=2;AF=0.030;AN=66;BaseQ          |
| 33972 | chrY | 13690026 | . | G | A   | 358.90    | my_snp_filter | AC=10;AF=0.152;AN=66;BaseQ         |

|       |      |          |   |   |   |           |               |                                    |
|-------|------|----------|---|---|---|-----------|---------------|------------------------------------|
| 33973 | chrY | 13690045 | . | G | C | 119797.34 | my_snp_filter | AC=36;AF=0.563;AN=                 |
| 33974 | chrY | 13690047 | . | G | C | 954.88    | my_snp_filter | AC=8;AF=0.118;AN=68;BaseQ          |
| 33975 | chrY | 13690064 | . | C | G | 846.96    | my_snp_filter | AC=4;AF=0.065;AN=62;BaseQ          |
| 33976 | chrY | 13690067 | . | A | T | 41.57     | my_snp_filter | AC=1;AF=0.017;AN=60;BaseQ          |
| 33977 | chrY | 13690070 | . | G | T | 234.11    | my_snp_filter | AC=3;AF=0.050;AN=60;BaseQ          |
| 33978 | chrY | 13690079 | . | C | G | 67.23     | my_snp_filter | AC=3;AF=0.052;AN=58;BaseQ          |
| 33979 | chrY | 13690089 | . | G | A | 62.30     | my_snp_filter | AC=2;AF=0.167;AN=12;DP=10          |
| 33980 | chrY | 13690090 | . | G | T | 5969.16   | my_snp_filter | AC=7;AF=0.113;AN=62;BaseQ          |
| 33981 | chrY | 13690096 | . | A | C | 47.01     | my_snp_filter | AC=2;AF=0.031;AN=64;DP=94          |
| 33982 | chrY | 13690098 | . | T | C | 5732.63   | my_snp_filter | AC=7;AF=0.109;AN=64;BaseQ          |
| 33983 | chrY | 13690109 | . | C | T | 47.42     | my_snp_filter | AC=2;AF=0.031;AN=64;DP=92          |
| 33984 | chrY | 13690110 | . | A | C | 5229.84   | my_snp_filter | AC=8;AF=0.129;AN=62;BaseQ          |
| 33985 | chrY | 13690112 | . | A | G | 51.91     | PASS          | AC=2;AF=0.032;AN=62;DP=7157;FS=4.  |
| 33986 | chrY | 13690120 | . | G | A | 75.56     | my_snp_filter | AC=2;AF=0.033;AN=60;BaseQ          |
| 33987 | chrY | 13690126 | . | A | C | 47.37     | my_snp_filter | AC=2;AF=0.033;AN=60;DP=71          |
| 33988 | chrY | 13690138 | . | T | A | 1698.17   | my_snp_filter | AC=7;AF=0.117;AN=60;BaseQ          |
| 33989 | chrY | 13690154 | . | G | C | 112776.81 | my_snp_filter | AC=23;AF=0.767;AN=                 |
| 33990 | chrY | 13690155 | . | A | C | 856.27    | my_snp_filter | AC=6;AF=0.136;AN=44;BaseQ          |
| 33991 | chrY | 13690220 | . | T | A | 43249.31  | my_snp_filter | AC=9;AF=0.500;AN=                  |
| 33992 | chrY | 13690284 | . | G | T | 53.52     | my_snp_filter | AC=2;AF=0.091;AN=22;BaseQ          |
| 33993 | chrY | 13690289 | . | G | T | 117.53    | my_snp_filter | AC=2;AF=0.091;AN=22;BaseQ          |
| 33994 | chrY | 13690314 | . | A | T | 6222.78   | my_snp_filter | AC=8;AF=0.308;AN=26;BaseQ          |
| 33995 | chrY | 13690315 | . | T | A | 18627.68  | my_snp_filter | AC=8;AF=0.308;AN=                  |
| 33996 | chrY | 13690324 | . | A | G | 11970.93  | PASS          | AC=8;AF=0.286;AN=28;BaseQ          |
| 33997 | chrY | 13690348 | . | A | T | 4615.77   | PASS          | AC=9;AF=0.265;AN=34;BaseQRankSum=  |
| 33998 | chrY | 13690376 | . | C | T | 65.36     | PASS          | AC=1;AF=0.021;AN=48;BaseQRankSum=  |
| 33999 | chrY | 13690377 | . | G | T | 1182.61   | PASS          | AC=13;AF=0.342;AN=38;BaseQRankSum= |
| 34000 | chrY | 13690397 | . | C | G | 1279.99   | my_snp_filter | AC=9;AF=0.225;AN=40;BaseQ          |
| 34001 | chrY | 13690420 | . | A | T | 1917.88   | my_snp_filter | AC=9;AF=0.173;AN=52;BaseQ          |
| 34002 | chrY | 13690424 | . | G | A | 47.21     | PASS          | AC=1;AF=0.014;AN=70;BaseQRankSum=  |
| 34003 | chrY | 13690429 | . | G | C | 44.55     | my_snp_filter | AC=1;AF=0.015;AN=68;BaseQ          |
| 34004 | chrY | 13690439 | . | T | C | 5113.14   | my_snp_filter | AC=21;AF=0.389;AN=54;BaseQ         |
| 34005 | chrY | 13690441 | . | A | G | 2595.94   | my_snp_filter | AC=10;AF=0.208;AN=48;BaseQ         |
| 34006 | chrY | 13690462 | . | T | A | 471.67    | my_snp_filter | AC=9;AF=0.129;AN=70;BaseQ          |
| 34007 | chrY | 13690464 | . | G | C | 76.26     | PASS          | AC=2;AF=0.029;AN=70;BaseQRankSum=  |
| 34008 | chrY | 13690480 | . | A | T | 88.83     | my_snp_filter | AC=4;AF=0.057;AN=70;BaseQ          |
| 34009 | chrY | 13690497 | . | T | C | 45.69     | my_snp_filter | AC=2;AF=0.029;AN=70;BaseQ          |
| 34010 | chrY | 13690515 | . | G | A | 78538     | PASS          | AC=43;AF=0.614;AN=70;BaseQRankSum= |
| 34011 | chrY | 13690517 | . | T | C | 728.05    | my_snp_filter | AC=10;AF=0.143;AN=70;BaseQ         |
| 34012 | chrY | 13690526 | . | G | C | 13209.53  | PASS          | AC=34;AF=0.486;AN=70;BaseQ         |
| 34013 | chrY | 13690562 | . | C | T | 124061.48 | PASS          | AC=48;AF=0.686;AN=70;BaseQ         |
| 34014 | chrY | 13690564 | . | G | T | 135.42    | my_snp_filter | AC=2;AF=0.029;AN=70;BaseQ          |
| 34015 | chrY | 13690567 | . | T | C | 126.06    | my_snp_filter | AC=2;AF=0.029;AN=70;BaseQ          |
| 34016 | chrY | 13690569 | . | T | G | 7278.87   | PASS          | AC=19;AF=0.271;AN=70;BaseQRankSum= |
| 34017 | chrY | 13690571 | . | A | G | 51492.72  | PASS          | AC=35;AF=0.500;AN=70;BaseQ         |
| 34018 | chrY | 13690579 | . | G | A | 1454.14   | my_snp_filter | AC=7;AF=0.100;AN=70;BaseQ          |
| 34019 | chrY | 13690581 | . | A | C | 66834.72  | PASS          | AC=35;AF=0.500;AN=70;BaseQ         |
| 34020 | chrY | 13690588 | . | G | A | 339.70    | my_snp_filter | AC=6;AF=0.086;AN=70;BaseQ          |
| 34021 | chrY | 13690596 | . | C | G | 11007.84  | PASS          | AC=28;AF=0.400;AN=70;BaseQ         |
| 34022 | chrY | 13690599 | . | G | A | 38506.05  | PASS          | AC=14;AF=0.206;AN=68;BaseQ         |
| 34023 | chrY | 13690600 | . | A | C | 402.54    | my_snp_filter | AC=7;AF=0.100;AN=70;BaseQ          |
| 34024 | chrY | 13690613 | . | G | C | 34835.82  | PASS          | AC=13;AF=0.197;AN=66;BaseQ         |
| 34025 | chrY | 13690644 | . | A | C | 19194.67  | PASS          | AC=12;AF=0.194;AN=62;BaseQ         |
| 34026 | chrY | 13690653 | . | T | G | 145.85    | PASS          | AC=4;AF=0.057;AN=70;BaseQRankSum=  |
| 34027 | chrY | 13690670 | . | T | A | 13847.38  | PASS          | AC=25;AF=0.463;AN=54;BaseQ         |
| 34028 | chrY | 13690673 | . | G | A | 7892.43   | PASS          | AC=8;AF=0.138;AN=58;BaseQRankSum=  |
| 34029 | chrY | 13690676 | . | T | A | 8005.49   | PASS          | AC=8;AF=0.148;AN=54;BaseQRankSum=  |
| 34030 | chrY | 13690678 | . | G | A | 6228.13   | PASS          | AC=8;AF=0.143;AN=56;BaseQRankSum=  |
| 34031 | chrY | 13690681 | . | A | T | 7728.26   | PASS          | AC=15;AF=0.375;AN=40;BaseQRankSum= |
| 34032 | chrY | 13690684 | . | T | A | 6814.10   | PASS          | AC=11;AF=0.262;AN=42;BaseQRankSum= |
| 34033 | chrY | 13690691 | . | T | A | 5460.79   | my_snp_filter | AC=8;AF=0.174;AN=46;BaseQ          |
| 34034 | chrY | 13690692 | . | T | G | 5375.52   | my_snp_filter | AC=8;AF=0.174;AN=46;BaseQ          |
| 34035 | chrY | 13690693 | . | G | A | 5454.04   | my_snp_filter | AC=8;AF=0.174;AN=46;BaseQ          |
| 34036 | chrY | 13690696 | . | T | A | 4804.27   | my_snp_filter | AC=8;AF=0.167;AN=48;BaseQ          |
| 34037 | chrY | 13690724 | . | A | T | 3894.72   | my_snp_filter | AC=8;AF=0.148;AN=54;BaseQ          |
| 34038 | chrY | 13690728 | . | A | G | 4556.58   | my_snp_filter | AC=10;AF=0.238;AN=42;BaseQ         |
| 34039 | chrY | 13690735 | . | A | C | 100.63    | my_snp_filter | AC=3;AF=0.052;AN=58;BaseQ          |
| 34040 | chrY | 13690745 | . | C | G | 65.34     | my_snp_filter | AC=2;AF=0.034;AN=58;BaseQ          |
| 34041 | chrY | 13690756 | . | C | G | 45.70     | my_snp_filter | AC=2;AF=0.034;AN=58;BaseQ          |
| 34042 | chrY | 13690764 | . | A | C | 78.56     | my_snp_filter | AC=2;AF=0.036;AN=56;BaseQ          |
| 34043 | chrY | 13690767 | . | G | T | 80.98     | PASS          | AC=3;AF=0.056;AN=54;BaseQRankSum=  |
| 34044 | chrY | 13690807 | . | T | G | 33.94     | PASS          | AC=1;AF=0.023;AN=44;BaseQRankSum=  |
| 34045 | chrY | 13690848 | . | C | G | 9100.25   | my_snp_filter | AC=9;AF=0.281;AN=32;BaseQ          |
| 34046 | chrY | 13690850 | . | A | T | 70.60     | my_snp_filter | AC=2;AF=0.067;AN=30;BaseQ          |
| 34047 | chrY | 13690859 | . | A | C | 7620.51   | my_snp_filter | AC=9;AF=0.225;AN=40;BaseQ          |
| 34048 | chrY | 13690867 | . | G | A | 60.55     | PASS          | AC=3;AF=0.083;AN=36;BaseQRankSum=  |



|       |      |          |   |   |     |          |               |                                   |
|-------|------|----------|---|---|-----|----------|---------------|-----------------------------------|
| 34049 | chrY | 13690868 | . | C | A   | 183.79   | my_snp_filter | AC=4;AF=0.091;AN=44;BaseQ         |
| 34050 | chrY | 13690973 | . | T | C   | 72.92    | my_snp_filter | AC=2;AF=0.029;AN=70;BaseQ         |
| 34051 | chrY | 13690986 | . | A | T   | 4816.56  | PASS          | AC=10;AF=0.147;AN=68;BaseQRankSum |
| 34052 | chrY | 13691001 | . | C | T   | 4306.52  | PASS          | AC=10;AF=0.147;AN=68;BaseQRankSum |
| 34053 | chrY | 13691024 | . | A | C   | 185.04   | my_snp_filter | AC=6;AF=0.086;AN=70;BaseQ         |
| 34054 | chrY | 13691040 | . | A | T   | 904.65   | PASS          | AC=7;AF=0.100;AN=70;BaseQRankSum= |
| 34055 | chrY | 13691042 | . | T | G   | 890.89   | PASS          | AC=7;AF=0.100;AN=70;BaseQRankSum= |
| 34056 | chrY | 13691129 | . | C | A   | 206.99   | PASS          | AC=3;AF=0.043;AN=70;BaseQRankSum= |
| 34057 | chrY | 13691179 | . | G | A   | 5011.80  | PASS          | AC=26;AF=0.371;AN=70;BaseQRankSum |
| 34058 | chrY | 13691182 | . | A | C   | 17068.09 | PASS          | AC=42;AF=0.618;AN=68;Base         |
| 34059 | chrY | 13691193 | . | C | G   | 922.80   | my_snp_filter | AC=10;AF=0.143;AN=70;Base         |
| 34060 | chrY | 13691197 | . | C | T   | 5734.49  | PASS          | AC=26;AF=0.371;AN=70;BaseQRankSum |
| 34061 | chrY | 13691202 | . | C | G   | 914.06   | my_snp_filter | AC=10;AF=0.143;AN=70;Base         |
| 34062 | chrY | 13691217 | . | T | G   | 734.67   | my_snp_filter | AC=2;AF=0.029;AN=70;BaseQ         |
| 34063 | chrY | 13691232 | . | C | G   | 7562.63  | PASS          | AC=29;AF=0.414;AN=70;BaseQRankSum |
| 34064 | chrY | 13691234 | . | C | G   | 7565.63  | PASS          | AC=29;AF=0.414;AN=70;BaseQRankSum |
| 34065 | chrY | 13691249 | . | G | A   | 555.76   | PASS          | AC=3;AF=0.043;AN=70;BaseQRankSum= |
| 34066 | chrY | 13691266 | . | A | T   | 1028.49  | PASS          | AC=19;AF=0.271;AN=70;BaseQRankSum |
| 34067 | chrY | 13691281 | . | A | G   | 33.92    | PASS          | AC=1;AF=0.014;AN=70;BaseQRankSum= |
| 34068 | chrY | 13691289 | . | G | T   | 617.72   | PASS          | AC=12;AF=0.182;AN=66;BaseQRankSum |
| 34069 | chrY | 13691291 | . | A | T   | 615      | PASS          | AC=11;AF=0.167;AN=66;BaseQRankSum |
| 34070 | chrY | 13691297 | . | T | A,* | 1810.33  | PASS          | AC=17,1;AF=0.266,0.016;AN=64;Base |
| 34071 | chrY | 13691309 | . | A | T   | 1749.29  | PASS          | AC=11;AF=0.172;AN=64;BaseQRankSum |
| 34072 | chrY | 13691324 | . | G | A   | 347.77   | PASS          | AC=5;AF=0.081;AN=62;BaseQRankSum= |
| 34073 | chrY | 13691352 | . | C | G   | 410.44   | PASS          | AC=9;AF=0.173;AN=52;BaseQRankSum= |
| 34074 | chrY | 13691368 | . | G | A   | 255.25   | PASS          | AC=5;AF=0.100;AN=50;BaseQRankSum= |
| 34075 | chrY | 13691411 | . | G | T   | 69.13    | PASS          | AC=1;AF=0.023;AN=44;BaseQRankSum= |
| 34076 | chrY | 13691419 | . | T | G   | 158.07   | PASS          | AC=1;AF=0.021;AN=48;BaseQRankSum= |
| 34077 | chrY | 13691423 | . | T | G   | 79.85    | PASS          | AC=1;AF=0.021;AN=48;BaseQRankSum= |
| 34078 | chrY | 13691432 | . | T | A   | 36.67    | PASS          | AC=1;AF=0.023;AN=44;BaseQRankSum= |
| 34079 | chrY | 13691522 | . | C | T   | 58.07    | PASS          | AC=1;AF=0.015;AN=66;BaseQRankSum= |
| 34080 | chrY | 13691591 | . | C | G   | 67.09    | PASS          | AC=1;AF=0.014;AN=70;BaseQRankSum= |
| 34081 | chrY | 13691614 | . | A | T   | 70.24    | PASS          | AC=1;AF=0.014;AN=70;BaseQRankSum= |
| 34082 | chrY | 13691626 | . | C | T   | 108.73   | PASS          | AC=2;AF=0.040;AN=50;BaseQRankSum= |
| 34083 | chrY | 13691628 | . | A | G   | 64.84    | PASS          | AC=1;AF=0.020;AN=50;BaseQRankSum= |
| 34084 | chrY | 13691632 | . | A | T   | 108.98   | PASS          | AC=2;AF=0.040;AN=50;BaseQRankSum= |
| 34085 | chrY | 13691667 | . | A | G   | 565.44   | PASS          | AC=8;AF=0.154;AN=52;BaseQRankSum= |
| 34086 | chrY | 13691686 | . | T | C   | 478.44   | PASS          | AC=7;AF=0.100;AN=70;BaseQRankSum= |
| 34087 | chrY | 13691696 | . | A | C   | 448.18   | PASS          | AC=7;AF=0.100;AN=70;BaseQRankSum= |
| 34088 | chrY | 13691712 | . | A | T   | 566.54   | PASS          | AC=6;AF=0.086;AN=70;BaseQRankSum= |
| 34089 | chrY | 13691730 | . | C | G   | 13150.22 | my_snp_filter | AC=16;AF=0.235;AN                 |
| 34090 | chrY | 13691737 | . | G | T   | 31.54    | PASS          | AC=1;AF=0.014;AN=70;BaseQRankSum= |
| 34091 | chrY | 13691839 | . | A | G   | 9567.27  | PASS          | AC=9;AF=0.205;AN=44;BaseQRankSum= |
| 34092 | chrY | 13691860 | . | C | T,A | 31706.50 | PASS          | AC=10,9;AF=0.294,0.265;AN         |
| 34093 | chrY | 13691870 | . | A | G   | 260.61   | PASS          | AC=1;AF=0.023;AN=44;BaseQRankSum= |
| 34094 | chrY | 13691874 | . | A | G   | 10431.60 | PASS          | AC=9;AF=0.214;AN=42;BaseQ         |
| 34095 | chrY | 13691899 | . | A | G   | 34.61    | my_snp_filter | AC=2;AF=0.053;AN=38;BaseQ         |
| 34096 | chrY | 13691905 | . | C | G   | 451.40   | PASS          | AC=1;AF=0.029;AN=34;BaseQRankSum= |
| 34097 | chrY | 13691929 | . | A | G   | 195.02   | my_snp_filter | AC=3;AF=0.100;AN=30;BaseQ         |
| 34098 | chrY | 13691951 | . | G | A   | 1423.21  | PASS          | AC=4;AF=0.105;AN=38;BaseQRankSum= |
| 34099 | chrY | 13691962 | . | G | A   | 65.34    | my_snp_filter | AC=1;AF=0.028;AN=36;BaseQ         |
| 34100 | chrY | 13691965 | . | G | T   | 46738.73 | PASS          | AC=11;AF=0.500;AN=22;Base         |
| 34101 | chrY | 13691971 | . | G | A,T | 47683.38 | PASS          | AC=11,2;AF=0.458,0.083;AN         |
| 34102 | chrY | 13691975 | . | A | T   | 57582.30 | PASS          | AC=10;AF=0.455;AN=22;Base         |
| 34103 | chrY | 13691991 | . | C | T   | 13598.16 | PASS          | AC=9;AF=0.167;AN=54;BaseQ         |
| 34104 | chrY | 13691995 | . | T | C   | 23510.31 | PASS          | AC=10;AF=0.172;AN=58;Base         |
| 34105 | chrY | 13692011 | . | G | A   | 24249.28 | PASS          | AC=10;AF=0.156;AN=64;Base         |
| 34106 | chrY | 13692017 | . | G | A   | 164.88   | my_snp_filter | AC=1;AF=0.015;AN=66;BaseQ         |
| 34107 | chrY | 13692030 | . | T | C   | 31.68    | PASS          | AC=1;AF=0.015;AN=66;BaseQRankSum= |
| 34108 | chrY | 13692047 | . | T | A   | 32.20    | PASS          | AC=1;AF=0.015;AN=68;BaseQRankSum= |
| 34109 | chrY | 13692057 | . | G | C   | 86.09    | PASS          | AC=2;AF=0.034;AN=58;BaseQRankSum= |
| 34110 | chrY | 13692066 | . | A | G   | 89.24    | PASS          | AC=2;AF=0.036;AN=56;BaseQRankSum= |
| 34111 | chrY | 13692074 | . | A | G   | 19372.10 | PASS          | AC=13;AF=0.224;AN=58;Base         |
| 34112 | chrY | 13692080 | . | C | A   | 21470.11 | PASS          | AC=11;AF=0.172;AN=64;Base         |
| 34113 | chrY | 13692089 | . | A | G   | 20975.05 | PASS          | AC=10;AF=0.147;AN=68;Base         |
| 34114 | chrY | 13692112 | . | A | T   | 16713.51 | PASS          | AC=10;AF=0.147;AN=68;Base         |
| 34115 | chrY | 13692147 | . | G | A   | 214.08   | PASS          | AC=2;AF=0.029;AN=70;BaseQRankSum= |
| 34116 | chrY | 13692151 | . | T | G   | 320.01   | my_snp_filter | AC=3;AF=0.045;AN=66;BaseQ         |
| 34117 | chrY | 13692164 | . | G | A   | 7943.43  | my_snp_filter | AC=17;AF=0.274;AN=62;Base         |
| 34118 | chrY | 13692167 | . | G | T   | 789.73   | my_snp_filter | AC=7;AF=0.100;AN=70;BaseQ         |
| 34119 | chrY | 13692175 | . | T | C   | 709.82   | PASS          | AC=4;AF=0.057;AN=70;BaseQRankSum= |
| 34120 | chrY | 13692185 | . | G | C   | 4461.40  | my_snp_filter | AC=12;AF=0.182;AN=66;Base         |
| 34121 | chrY | 13692194 | . | A | T   | 75.15    | my_snp_filter | AC=2;AF=0.029;AN=70;BaseQ         |
| 34122 | chrY | 13692205 | . | T | A   | 191.51   | PASS          | AC=3;AF=0.043;AN=70;BaseQRankSum= |
| 34123 | chrY | 13692223 | . | A | C   | 1475.73  | PASS          | AC=15;AF=0.214;AN=70;BaseQRankSum |
| 34124 | chrY | 13692231 | . | T | C   | 5580.01  | PASS          | AC=29;AF=0.414;AN=70;BaseQRankSum |

|       |      |          |   |   |     |          |               |                                    |
|-------|------|----------|---|---|-----|----------|---------------|------------------------------------|
| 34125 | chrY | 13692255 | . | C | G   | 2577.80  | PASS          | AC=18;AF=0.257;AN=70;BaseQRankSum= |
| 34126 | chrY | 13692257 | . | G | T   | 1126.67  | PASS          | AC=5;AF=0.071;AN=70;BaseQRankSum=  |
| 34127 | chrY | 13692261 | . | C | G   | 373.37   | my_snp_filter | AC=6;AF=0.086;AN=70;BaseQ          |
| 34128 | chrY | 13692275 | . | T | G   | 399.73   | my_snp_filter | AC=5;AF=0.071;AN=70;BaseQ          |
| 34129 | chrY | 13692279 | . | A | G   | 179.77   | my_snp_filter | AC=3;AF=0.043;AN=70;BaseQ          |
| 34130 | chrY | 13692281 | . | A | G,T | 10317.95 | PASS          | AC=31,2;AF=0.456,0.029;AN          |
| 34131 | chrY | 13692291 | . | C | T   | 950.29   | PASS          | AC=9;AF=0.129;AN=70;BaseQRankSum=  |
| 34132 | chrY | 13692320 | . | T | A   | 638.83   | PASS          | AC=5;AF=0.071;AN=70;BaseQRankSum=  |
| 34133 | chrY | 13692321 | . | C | A   | 623.83   | PASS          | AC=5;AF=0.071;AN=70;BaseQRankSum=  |
| 34134 | chrY | 13692324 | . | G | A   | 34159.72 | PASS          | AC=35;AF=0.500;AN=70;Base          |
| 34135 | chrY | 13692331 | . | G | A   | 1121.14  | my_snp_filter | AC=14;AF=0.200;AN=70;Base          |
| 34136 | chrY | 13692335 | . | T | C   | 8601.09  | PASS          | AC=29;AF=0.414;AN=70;BaseQRankSum= |
| 34137 | chrY | 13692343 | . | A | G   | 8095.63  | PASS          | AC=28;AF=0.400;AN=70;BaseQRankSum= |
| 34138 | chrY | 13692361 | . | T | A   | 1940.84  | my_snp_filter | AC=16;AF=0.229;AN=70;Base          |
| 34139 | chrY | 13692365 | . | G | A   | 193.48   | PASS          | AC=2;AF=0.029;AN=70;BaseQRankSum=  |
| 34140 | chrY | 13692389 | . | T | A   | 2790.05  | PASS          | AC=18;AF=0.265;AN=68;BaseQRankSum= |
| 34141 | chrY | 13692390 | . | C | G   | 11807.50 | PASS          | AC=28;AF=0.412;AN=68;Base          |
| 34142 | chrY | 13692420 | . | A | G   | 1503.06  | my_snp_filter | AC=10;AF=0.156;AN=64;Base          |
| 34143 | chrY | 13692440 | . | G | C   | 1710.49  | PASS          | AC=10;AF=0.172;AN=58;BaseQRankSum= |
| 34144 | chrY | 13692455 | . | G | C   | 1569.92  | PASS          | AC=11;AF=0.196;AN=56;BaseQRankSum= |
| 34145 | chrY | 13692466 | . | G | C   | 586.19   | PASS          | AC=3;AF=0.054;AN=56;BaseQRankSum=  |
| 34146 | chrY | 13692467 | . | A | C   | 946.56   | PASS          | AC=6;AF=0.107;AN=56;BaseQRankSum=  |
| 34147 | chrY | 13692470 | . | G | T   | 48.88    | my_snp_filter | AC=2;AF=0.036;AN=56;DP=38          |
| 34148 | chrY | 13692486 | . | A | G   | 113.13   | PASS          | AC=1;AF=0.022;AN=46;BaseQRankSum=  |
| 34149 | chrY | 13692492 | . | T | A   | 685.18   | PASS          | AC=5;AF=0.139;AN=36;BaseQRankSum=  |
| 34150 | chrY | 13692512 | . | A | T,C | 614.72   | PASS          | AC=4,1;AF=0.143,0.036;AN=28;BaseQ  |
| 34151 | chrY | 13692518 | . | A | T   | 1569.45  | PASS          | AC=11;AF=0.500;AN=22;BaseQRankSum= |
| 34152 | chrY | 13692543 | . | T | G   | 298.57   | PASS          | AC=4;AF=0.167;AN=24;BaseQRankSum=  |
| 34153 | chrY | 13692558 | . | A | T   | 774.15   | PASS          | AC=6;AF=0.231;AN=26;BaseQRankSum=  |
| 34154 | chrY | 13692573 | . | C | T   | 310.75   | PASS          | AC=3;AF=0.115;AN=26;BaseQRankSum=  |
| 34155 | chrY | 13692590 | . | G | A   | 248.67   | PASS          | AC=4;AF=0.143;AN=28;BaseQRankSum=  |
| 34156 | chrY | 13692602 | . | A | C   | 52.89    | PASS          | AC=2;AF=0.067;AN=30;BaseQRankSum=  |
| 34157 | chrY | 13692613 | . | C | T   | 661.73   | PASS          | AC=6;AF=0.176;AN=34;BaseQRankSum=  |
| 34158 | chrY | 13692628 | . | G | C   | 601.02   | PASS          | AC=5;AF=0.139;AN=36;BaseQRankSum=  |
| 34159 | chrY | 13692638 | . | T | A   | 421.81   | PASS          | AC=4;AF=0.111;AN=36;BaseQRankSum=  |
| 34160 | chrY | 13692659 | . | A | G   | 387.82   | PASS          | AC=4;AF=0.111;AN=36;BaseQRankSum=  |
| 34161 | chrY | 13692668 | . | A | T   | 1747.92  | my_snp_filter | AC=8;AF=0.235;AN=34;BaseQ          |
| 34162 | chrY | 13692703 | . | T | C   | 220.07   | my_snp_filter | AC=8;AF=0.160;AN=50;BaseQ          |
| 34163 | chrY | 13692748 | . | T | A   | 3297.04  | PASS          | AC=9;AF=0.237;AN=38;BaseQRankSum=  |
| 34164 | chrY | 13692751 | . | C | A   | 6855.24  | PASS          | AC=9;AF=0.237;AN=38;BaseQRankSum=  |
| 34165 | chrY | 13692767 | . | A | G   | 2062.52  | my_snp_filter | AC=7;AF=0.175;AN=40;BaseQ          |
| 34166 | chrY | 13692783 | . | A | G   | 13644.80 | my_snp_filter | AC=13;AF=0.542;AN                  |
| 34167 | chrY | 13692795 | . | G | T   | 3155.30  | my_snp_filter | AC=11;AF=0.289;AN=38;Base          |
| 34168 | chrY | 13692824 | . | G | A   | 15759.06 | my_snp_filter | AC=15;AF=0.288;AN                  |
| 34169 | chrY | 13692828 | . | C | T   | 5858.93  | my_snp_filter | AC=13;AF=0.210;AN=62;Base          |
| 34170 | chrY | 13692834 | . | T | G   | 47.23    | PASS          | AC=2;AF=0.030;AN=66;DP=1426;FS=0.  |
| 34171 | chrY | 13692848 | . | A | T   | 47.50    | PASS          | AC=2;AF=0.030;AN=66;DP=1449;FS=0.  |
| 34172 | chrY | 13692852 | . | A | G   | 46.61    | PASS          | AC=2;AF=0.029;AN=68;DP=1457;FS=0.  |
| 34173 | chrY | 13692861 | . | A | C   | 526.23   | my_snp_filter | AC=11;AF=0.172;AN=64;Base          |
| 34174 | chrY | 13692863 | . | T | C   | 244.41   | PASS          | AC=5;AF=0.076;AN=66;BaseQRankSum=  |
| 34175 | chrY | 13692875 | . | G | C   | 479.58   | my_snp_filter | AC=8;AF=0.118;AN=68;BaseQ          |
| 34176 | chrY | 13692893 | . | T | A   | 5271.65  | PASS          | AC=15;AF=0.242;AN=62;BaseQRankSum= |
| 34177 | chrY | 13692894 | . | G | T   | 71.18    | my_snp_filter | AC=1;AF=0.016;AN=64;BaseQ          |
| 34178 | chrY | 13692904 | . | C | A   | 137.01   | my_snp_filter | AC=5;AF=0.083;AN=60;BaseQ          |
| 34179 | chrY | 13692913 | . | T | C   | 15397.64 | PASS          | AC=14;AF=0.538;AN=26;Base          |
| 34180 | chrY | 13692918 | . | A | T   | 430.87   | my_snp_filter | AC=4;AF=0.080;AN=50;BaseQ          |
| 34181 | chrY | 13692920 | . | T | G   | 13144.45 | PASS          | AC=9;AF=0.409;AN=22;BaseQ          |
| 34182 | chrY | 13692923 | . | A | T   | 12634.21 | PASS          | AC=8;AF=0.400;AN=20;BaseQ          |
| 34183 | chrY | 13692931 | . | A | C   | 643.60   | PASS          | AC=3;AF=0.048;AN=62;BaseQRankSum=  |
| 34184 | chrY | 13692934 | . | C | T   | 288.93   | my_snp_filter | AC=2;AF=0.034;AN=58;BaseQ          |
| 34185 | chrY | 13692941 | . | A | T   | 3154.21  | PASS          | AC=7;AF=0.125;AN=56;BaseQRankSum=  |
| 34186 | chrY | 13692950 | . | G | A   | 841.47   | PASS          | AC=3;AF=0.058;AN=52;BaseQRankSum=  |
| 34187 | chrY | 13692953 | . | A | T   | 10512.28 | my_snp_filter | AC=9;AF=0.409;AN=                  |
| 34188 | chrY | 13692956 | . | A | T   | 3263.62  | PASS          | AC=5;AF=0.100;AN=50;BaseQRankSum=  |
| 34189 | chrY | 13692959 | . | G | A   | 556.98   | PASS          | AC=4;AF=0.071;AN=56;BaseQRankSum=  |
| 34190 | chrY | 13692984 | . | A | G   | 4668.96  | PASS          | AC=7;AF=0.250;AN=28;BaseQRankSum=  |
| 34191 | chrY | 13693005 | . | G | A   | 2260.07  | PASS          | AC=5;AF=0.104;AN=48;BaseQRankSum=  |
| 34192 | chrY | 13693017 | . | G | C   | 754.04   | PASS          | AC=4;AF=0.105;AN=38;BaseQRankSum=  |
| 34193 | chrY | 13693024 | . | A | G   | 101.27   | PASS          | AC=2;AF=0.040;AN=50;BaseQRankSum=  |
| 34194 | chrY | 13693067 | . | A | G   | 105.87   | PASS          | AC=1;AF=0.015;AN=66;BaseQRankSum=  |
| 34195 | chrY | 13693068 | . | T | A   | 175.06   | PASS          | AC=1;AF=0.014;AN=70;BaseQRankSum=  |
| 34196 | chrY | 13693075 | . | C | G   | 2951.88  | my_snp_filter | AC=3;AF=0.500;AN=6;BaseQR          |
| 34197 | chrY | 13693097 | . | G | A   | 7968.88  | my_snp_filter | AC=3;AF=0.500;AN=6;BaseQR          |
| 34198 | chrY | 13693112 | . | A | T   | 2891.70  | my_snp_filter | AC=3;AF=0.043;AN=70;BaseQ          |
| 34199 | chrY | 13693134 | . | A | G,* | 16079.59 | PASS          | AC=17,7;AF=0.243,0.100;AN          |
| 34200 | chrY | 13693148 | . | A | T   | 65031.72 | PASS          | AC=35;AF=0.500;AN=70;Base          |

|       |      |          |   |   |     |           |               |                                    |
|-------|------|----------|---|---|-----|-----------|---------------|------------------------------------|
| 34201 | chrY | 13693164 | . | C | G   | 447.70    | my_snp_filter | AC=6;AF=0.086;AN=70;BaseQ          |
| 34202 | chrY | 13693201 | . | A | C   | 185362.72 | PASS          | AC=35;AF=0.500;AN=70;Base          |
| 34203 | chrY | 13693205 | . | A | G   | 190640.72 | PASS          | AC=35;AF=0.500;AN=70;Base          |
| 34204 | chrY | 13693223 | . | T | A   | 3508.29   | PASS          | AC=2;AF=0.029;AN=68;BaseQRankSum=  |
| 34205 | chrY | 13693257 | . | G | A   | 71899.20  | PASS          | AC=25;AF=0.521;AN=48;Base          |
| 34206 | chrY | 13693267 | . | C | G   | 8446.04   | PASS          | AC=9;AF=0.129;AN=70;BaseQRankSum=  |
| 34207 | chrY | 13693279 | . | G | A   | 758.44    | PASS          | AC=6;AF=0.086;AN=70;BaseQRankSum=  |
| 34208 | chrY | 13693284 | . | C | G,* | 12848.45  | PASS          | AC=14,1;AF=0.350,0.025;AN          |
| 34209 | chrY | 13693292 | . | A | G   | 5828.66   | my_snp_filter | AC=7;AF=0.103;AN=68;BaseQ          |
| 34210 | chrY | 13693295 | . | C | G,* | 8604.60   | PASS          | AC=9,2;AF=0.150,0.033;AN=60;BaseQ  |
| 34211 | chrY | 13693297 | . | G | C,* | 988.16    | PASS          | AC=1,2;AF=0.016,0.032;AN=62;BaseQ  |
| 34212 | chrY | 13693301 | . | A | C   | 6165.20   | my_snp_filter | AC=7;AF=0.100;AN=70;BaseQ          |
| 34213 | chrY | 13693308 | . | C | T   | 5885.70   | my_snp_filter | AC=10;AF=0.179;AN=56;Base          |
| 34214 | chrY | 13693327 | . | A | C   | 202.57    | PASS          | AC=1;AF=0.014;AN=70;BaseQRankSum=  |
| 34215 | chrY | 13693330 | . | C | G,* | 5105.94   | PASS          | AC=10,1;AF=0.200,0.020;AN=50;Base  |
| 34216 | chrY | 13693365 | . | C | G   | 5507.17   | PASS          | AC=20;AF=0.294;AN=68;BaseQRankSum= |
| 34217 | chrY | 13693424 | . | G | A,* | 421.76    | my_snp_filter | AC=4,1;AF=0.057,0.014;AN=          |
| 34218 | chrY | 13693427 | . | A | T   | 56304.63  | my_snp_filter | AC=28;AF=0.467;AN                  |
| 34219 | chrY | 13693434 | . | C | G   | 64320.04  | PASS          | AC=29;AF=0.500;AN=58;Base          |
| 34220 | chrY | 13693444 | . | G | T   | 3590.82   | PASS          | AC=11;AF=0.157;AN=70;BaseQRankSum= |
| 34221 | chrY | 13693461 | . | A | G   | 2459.73   | my_snp_filter | AC=10;AF=0.143;AN=70;Base          |
| 34222 | chrY | 13693466 | . | G | C,A | 7964.62   | PASS          | AC=16,1;AF=0.229,0.014;AN=70;Base  |
| 34223 | chrY | 13693492 | . | T | C   | 2304.54   | my_snp_filter | AC=9;AF=0.129;AN=70;BaseQ          |
| 34224 | chrY | 13693498 | . | G | A   | 4879.61   | my_snp_filter | AC=6;AF=0.086;AN=70;BaseQ          |
| 34225 | chrY | 13693500 | . | A | T   | 2591.83   | my_snp_filter | AC=9;AF=0.129;AN=70;BaseQ          |
| 34226 | chrY | 13693511 | . | C | T   | 4907.48   | my_snp_filter | AC=6;AF=0.086;AN=70;BaseQ          |
| 34227 | chrY | 13693513 | . | C | T   | 9467.34   | PASS          | AC=11;AF=0.157;AN=70;BaseQRankSum= |
| 34228 | chrY | 13693514 | . | G | T   | 17952.14  | PASS          | AC=21;AF=0.300;AN=70;Base          |
| 34229 | chrY | 13693522 | . | T | G   | 996.46    | my_snp_filter | AC=6;AF=0.086;AN=70;BaseQ          |
| 34230 | chrY | 13693539 | . | G | C   | 2577.56   | my_snp_filter | AC=19;AF=0.271;AN=70;Base          |
| 34231 | chrY | 13693543 | . | G | A   | 1461.40   | my_snp_filter | AC=7;AF=0.100;AN=70;BaseQ          |
| 34232 | chrY | 13693545 | . | T | A   | 212875.04 | my_snp_filter | AC=51;AF=0.729;AN                  |
| 34233 | chrY | 13693546 | . | A | G   | 80585.72  | my_snp_filter | AC=35;AF=0.500;AN                  |
| 34234 | chrY | 13693566 | . | A | C   | 113.17    | my_snp_filter | AC=2;AF=0.029;AN=70;BaseQ          |
| 34235 | chrY | 13693572 | . | C | A   | 121.47    | my_snp_filter | AC=4;AF=0.057;AN=70;BaseQ          |
| 34236 | chrY | 13693579 | . | G | T   | 300.63    | my_snp_filter | AC=5;AF=0.071;AN=70;BaseQ          |
| 34237 | chrY | 13693590 | . | A | G   | 269.16    | my_snp_filter | AC=5;AF=0.071;AN=70;BaseQ          |
| 34238 | chrY | 13693594 | . | G | A   | 224.38    | my_snp_filter | AC=4;AF=0.057;AN=70;BaseQ          |
| 34239 | chrY | 13693607 | . | T | C   | 2098.21   | PASS          | AC=2;AF=0.034;AN=58;BaseQRankSum=  |
| 34240 | chrY | 13693609 | . | G | A   | 695.42    | PASS          | AC=1;AF=0.014;AN=70;BaseQRankSum=  |
| 34241 | chrY | 13693614 | . | T | G   | 25377.77  | PASS          | AC=18;AF=0.360;AN=50;Base          |
| 34242 | chrY | 13693626 | . | A | G,T | 6897.23   | PASS          | AC=2,4;AF=0.200,0.400;AN=10;BaseQ  |
| 34243 | chrY | 13693628 | . | G | A   | 84.46     | my_snp_filter | AC=1;AF=0.014;AN=70;BaseQ          |
| 34244 | chrY | 13693629 | . | G | C   | 84.18     | my_snp_filter | AC=1;AF=0.014;AN=70;BaseQ          |
| 34245 | chrY | 13693639 | . | C | T   | 69.92     | my_snp_filter | AC=1;AF=0.014;AN=70;BaseQ          |
| 34246 | chrY | 13693644 | . | A | G   | 2970.45   | PASS          | AC=4;AF=0.500;AN=8;BaseQRankSum=0  |
| 34247 | chrY | 13693654 | . | G | A   | 679.28    | PASS          | AC=2;AF=0.034;AN=58;BaseQRankSum=  |
| 34248 | chrY | 13693658 | . | C | G   | 107.65    | PASS          | AC=1;AF=0.016;AN=64;BaseQRankSum=  |
| 34249 | chrY | 13693663 | . | C | G   | 756.75    | PASS          | AC=3;AF=0.214;AN=14;BaseQRankSum=  |
| 34250 | chrY | 13693683 | . | A | G   | 170.63    | PASS          | AC=2;AF=0.037;AN=54;BaseQRankSum=  |
| 34251 | chrY | 13693686 | . | C | A   | 131.08    | PASS          | AC=2;AF=0.036;AN=56;BaseQRankSum=  |
| 34252 | chrY | 13693745 | . | C | T   | 126.66    | my_snp_filter | AC=4;AF=0.057;AN=70;BaseQ          |
| 34253 | chrY | 13693758 | . | G | T   | 43.04     | my_snp_filter | AC=3;AF=0.043;AN=70;BaseQ          |
| 34254 | chrY | 13693812 | . | T | C   | 20596.90  | PASS          | AC=70;AF=1.00;AN=70;BaseQ          |
| 34255 | chrY | 13693987 | . | A | G   | 187.46    | PASS          | AC=4;AF=0.067;AN=60;BaseQRankSum=  |
| 34256 | chrY | 13693993 | . | A | C   | 101.51    | PASS          | AC=1;AF=0.015;AN=68;BaseQRankSum=  |
| 34257 | chrY | 13694001 | . | T | C   | 161.50    | PASS          | AC=2;AF=0.029;AN=68;BaseQRankSum=  |
| 34258 | chrY | 13694010 | . | A | C   | 51.24     | my_snp_filter | AC=5;AF=0.071;AN=70;BaseQ          |
| 34259 | chrY | 13694032 | . | G | A   | 131.26    | my_snp_filter | AC=2;AF=0.029;AN=70;BaseQ          |
| 34260 | chrY | 13694033 | . | G | A   | 123.23    | my_snp_filter | AC=4;AF=0.057;AN=70;BaseQ          |
| 34261 | chrY | 13694043 | . | G | C   | 3764.40   | my_snp_filter | AC=31;AF=0.443;AN=70;Base          |
| 34262 | chrY | 13694056 | . | T | C   | 10948.02  | my_snp_filter | AC=35;AF=0.500;AN                  |
| 34263 | chrY | 13694058 | . | G | A   | 6413.85   | my_snp_filter | AC=31;AF=0.443;AN=70;Base          |
| 34264 | chrY | 13694073 | . | C | T   | 116.82    | my_snp_filter | AC=3;AF=0.043;AN=70;BaseQ          |
| 34265 | chrY | 13694079 | . | A | C   | 6230.85   | my_snp_filter | AC=30;AF=0.429;AN=70;Base          |
| 34266 | chrY | 13694088 | . | G | A   | 135.92    | my_snp_filter | AC=1;AF=0.014;AN=70;BaseQ          |
| 34267 | chrY | 13694108 | . | A | G   | 30817.72  | my_snp_filter | AC=35;AF=0.500;AN                  |
| 34268 | chrY | 13694116 | . | G | C   | 94820.26  | my_snp_filter | AC=39;AF=0.557;AN                  |
| 34269 | chrY | 13694120 | . | T | G   | 722.37    | my_snp_filter | AC=10;AF=0.143;AN=70;Base          |
| 34270 | chrY | 13694136 | . | A | G   | 54.76     | my_snp_filter | AC=1;AF=0.014;AN=70;BaseQ          |
| 34271 | chrY | 13694139 | . | T | A   | 97072.22  | my_snp_filter | AC=37;AF=0.529;AN                  |
| 34272 | chrY | 13694144 | . | C | G   | 114.19    | my_snp_filter | AC=3;AF=0.043;AN=70;BaseQ          |
| 34273 | chrY | 13694158 | . | T | C   | 922.77    | my_snp_filter | AC=10;AF=0.143;AN=70;Base          |
| 34274 | chrY | 13694159 | . | G | C   | 95077.88  | my_snp_filter | AC=36;AF=0.514;AN                  |
| 34275 | chrY | 13694172 | . | T | C   | 75.42     | my_snp_filter | AC=1;AF=0.014;AN=70;BaseQ          |
| 34276 | chrY | 13694178 | . | A | G   | 57.68     | my_snp_filter | AC=1;AF=0.014;AN=70;BaseQ          |

|       |      |          |   |   |     |           |               |                                             |
|-------|------|----------|---|---|-----|-----------|---------------|---------------------------------------------|
| 34277 | chrY | 13694195 | . | T | A,C | 6369.54   | PASS          | AC=16,11;AF=0.229,0.157;AN=70;BaseQRankSum= |
| 34278 | chrY | 13694199 | . | T | A   | 26586.53  | PASS          | AC=34;AF=0.486;AN=70;BaseQRankSum=          |
| 34279 | chrY | 13694211 | . | T | A   | 2783.48   | PASS          | AC=13;AF=0.186;AN=70;BaseQRankSum=          |
| 34280 | chrY | 13694222 | . | G | A   | 1063.74   | my_snp_filter | AC=14;AF=0.200;AN=70;BaseQRankSum=          |
| 34281 | chrY | 13694237 | . | G | C   | 2832.66   | PASS          | AC=12;AF=0.171;AN=70;BaseQRankSum=          |
| 34282 | chrY | 13694270 | . | A | G   | 6756.77   | my_snp_filter | AC=19;AF=0.271;AN=70;BaseQRankSum=          |
| 34283 | chrY | 13694274 | . | C | A   | 13109.04  | PASS          | AC=30;AF=0.429;AN=70;BaseQRankSum=          |
| 34284 | chrY | 13694294 | . | T | G   | 3534.82   | PASS          | AC=22;AF=0.314;AN=70;BaseQRankSum=          |
| 34285 | chrY | 13694306 | . | T | G   | 5787.53   | PASS          | AC=24;AF=0.343;AN=70;BaseQRankSum=          |
| 34286 | chrY | 13694339 | . | A | T   | 313.84    | PASS          | AC=2;AF=0.029;AN=70;BaseQRankSum=           |
| 34287 | chrY | 13694341 | . | T | G   | 315       | PASS          | AC=2;AF=0.029;AN=70;BaseQRankSum=           |
| 34288 | chrY | 13694374 | . | T | C,* | 7478.58   | PASS          | AC=4,7;AF=0.057,0.100;AN=70;BaseQRankSum=   |
| 34289 | chrY | 13694376 | . | T | C,* | 7469.89   | PASS          | AC=4,7;AF=0.057,0.100;AN=70;BaseQRankSum=   |
| 34290 | chrY | 13694462 | . | G | A,* | 5441.17   | PASS          | AC=2,5;AF=0.029,0.071;AN=70;BaseQRankSum=   |
| 34291 | chrY | 13694465 | . | A | T,* | 7565.67   | PASS          | AC=17,2;AF=0.293,0.034;AN=58;BaseQRankSum=  |
| 34292 | chrY | 13694487 | . | G | A   | 11420.72  | PASS          | AC=15;AF=0.214;AN=70;BaseQRankSum=          |
| 34293 | chrY | 13694499 | . | T | A   | 1673.24   | my_snp_filter | AC=14;AF=0.200;AN=70;BaseQRankSum=          |
| 34294 | chrY | 13694516 | . | T | G,A | 19418.73  | PASS          | AC=32,2;AF=0.457,0.029;AN=70;BaseQRankSum=  |
| 34295 | chrY | 13694527 | . | G | T   | 541.63    | my_snp_filter | AC=7;AF=0.100;AN=70;BaseQRankSum=           |
| 34296 | chrY | 13694535 | . | T | A   | 1749.93   | my_snp_filter | AC=15;AF=0.214;AN=70;BaseQRankSum=          |
| 34297 | chrY | 13694556 | . | C | T   | 51.43     | my_snp_filter | AC=1;AF=0.014;AN=70;BaseQRankSum=           |
| 34298 | chrY | 13694570 | . | A | T   | 33518.68  | PASS          | AC=26;AF=0.371;AN=70;BaseQRankSum=          |
| 34299 | chrY | 13694583 | . | A | C   | 21765.71  | PASS          | AC=23;AF=0.329;AN=70;BaseQRankSum=          |
| 34300 | chrY | 13694586 | . | T | G   | 125.43    | my_snp_filter | AC=1;AF=0.014;AN=70;BaseQRankSum=           |
| 34301 | chrY | 13694590 | . | C | T   | 77578.99  | PASS          | AC=36;AF=0.514;AN=70;BaseQRankSum=          |
| 34302 | chrY | 13694595 | . | T | C   | 1696.36   | PASS          | AC=10;AF=0.143;AN=70;BaseQRankSum=          |
| 34303 | chrY | 13694607 | . | G | A   | 10839.56  | PASS          | AC=26;AF=0.371;AN=70;BaseQRankSum=          |
| 34304 | chrY | 13694619 | . | C | G,A | 47514.36  | PASS          | AC=32,18;AF=0.457,0.257;AN=70;BaseQRankSum= |
| 34305 | chrY | 13694627 | . | G | T   | 529.58    | PASS          | AC=6;AF=0.086;AN=70;BaseQRankSum=           |
| 34306 | chrY | 13694652 | . | G | A   | 134.14    | my_snp_filter | AC=6;AF=0.086;AN=70;BaseQRankSum=           |
| 34307 | chrY | 13694667 | . | T | G   | 1010.12   | my_snp_filter | AC=14;AF=0.212;AN=66;BaseQRankSum=          |
| 34308 | chrY | 13694670 | . | A | C   | 27716.41  | PASS          | AC=20;AF=0.333;AN=60;BaseQRankSum=          |
| 34309 | chrY | 13694673 | . | A | C   | 28445.77  | PASS          | AC=21;AF=0.339;AN=62;BaseQRankSum=          |
| 34310 | chrY | 13694687 | . | G | A   | 29498.19  | PASS          | AC=19;AF=0.297;AN=64;BaseQRankSum=          |
| 34311 | chrY | 13694690 | . | T | A   | 1312.44   | my_snp_filter | AC=9;AF=0.129;AN=70;BaseQRankSum=           |
| 34312 | chrY | 13694700 | . | T | A   | 2894.65   | my_snp_filter | AC=7;AF=0.103;AN=68;BaseQRankSum=           |
| 34313 | chrY | 13694705 | . | T | A   | 662.05    | my_snp_filter | AC=5;AF=0.071;AN=70;BaseQRankSum=           |
| 34314 | chrY | 13694707 | . | C | G   | 45485.64  | PASS          | AC=15;AF=0.221;AN=68;BaseQRankSum=          |
| 34315 | chrY | 13694715 | . | T | A,* | 17294.25  | PASS          | AC=5,10;AF=0.071,0.143;AN=70;BaseQRankSum=  |
| 34316 | chrY | 13694727 | . | A | C   | 102872.77 | my_snp_filter | AC=29;AF=0.537;AN=70;BaseQRankSum=          |
| 34317 | chrY | 13694750 | . | C | T   | 155878.08 | my_snp_filter | AC=39;AF=0.609;AN=70;BaseQRankSum=          |
| 34318 | chrY | 13694751 | . | C | G   | 1537.11   | my_snp_filter | AC=8;AF=0.118;AN=68;BaseQRankSum=           |
| 34319 | chrY | 13694812 | . | A | G   | 599890.72 | my_snp_filter | AC=57;AF=0.814;AN=70;BaseQRankSum=          |
| 34320 | chrY | 13694815 | . | G | T   | 598358.53 | my_snp_filter | AC=57;AF=0.814;AN=70;BaseQRankSum=          |
| 34321 | chrY | 13694817 | . | G | C   | 283554.73 | my_snp_filter | AC=35;AF=0.500;AN=70;BaseQRankSum=          |
| 34322 | chrY | 13694834 | . | A | G   | 165.42    | my_snp_filter | AC=1;AF=0.014;AN=70;BaseQRankSum=           |
| 34323 | chrY | 13694839 | . | C | A   | 222.42    | my_snp_filter | AC=1;AF=0.014;AN=70;BaseQRankSum=           |
| 34324 | chrY | 13694857 | . | C | G   | 57.55     | my_snp_filter | AC=1;AF=0.014;AN=70;BaseQRankSum=           |
| 34325 | chrY | 13694871 | . | G | C   | 467.26    | my_snp_filter | AC=8;AF=0.114;AN=70;BaseQRankSum=           |
| 34326 | chrY | 13694876 | . | C | T   | 7319.99   | my_snp_filter | AC=22;AF=0.324;AN=68;BaseQRankSum=          |
| 34327 | chrY | 13694899 | . | G | A   | 327400.68 | my_snp_filter | AC=54;AF=0.771;AN=70;BaseQRankSum=          |
| 34328 | chrY | 13694919 | . | A | C   | 318831.20 | my_snp_filter | AC=50;AF=0.714;AN=70;BaseQRankSum=          |
| 34329 | chrY | 13694929 | . | G | A   | 393703.97 | PASS          | AC=58;AF=0.829;AN=70;BaseQRankSum=          |
| 34330 | chrY | 13694935 | . | T | C   | 119.42    | PASS          | AC=1;AF=0.014;AN=70;BaseQRankSum=           |
| 34331 | chrY | 13694960 | . | T | A   | 776.13    | my_snp_filter | AC=5;AF=0.071;AN=70;BaseQRankSum=           |
| 34332 | chrY | 13694969 | . | C | A   | 28505.61  | my_snp_filter | AC=26;AF=0.371;AN=70;BaseQRankSum=          |
| 34333 | chrY | 13694983 | . | T | A   | 746764.87 | PASS          | AC=70;AF=1.00;AN=70;BaseQRankSum=           |
| 34334 | chrY | 13694991 | . | G | A   | 1289.75   | my_snp_filter | AC=6;AF=0.086;AN=70;BaseQRankSum=           |
| 34335 | chrY | 13694997 | . | G | T   | 110.04    | my_snp_filter | AC=3;AF=0.043;AN=70;BaseQRankSum=           |
| 34336 | chrY | 13695001 | . | C | G   | 38.52     | my_snp_filter | AC=1;AF=0.014;AN=70;BaseQRankSum=           |
| 34337 | chrY | 13695002 | . | G | C   | 12720.71  | my_snp_filter | AC=11;AF=0.157;AN=70;BaseQRankSum=          |
| 34338 | chrY | 13695026 | . | G | T   | 126.52    | my_snp_filter | AC=6;AF=0.086;AN=70;BaseQRankSum=           |
| 34339 | chrY | 13695031 | . | C | G   | 29797.70  | my_snp_filter | AC=21;AF=0.300;AN=70;BaseQRankSum=          |
| 34340 | chrY | 13695045 | . | T | G   | 43.19     | my_snp_filter | AC=3;AF=0.043;AN=70;BaseQRankSum=           |
| 34341 | chrY | 13695046 | . | A | C   | 7672.23   | my_snp_filter | AC=25;AF=0.357;AN=70;BaseQRankSum=          |
| 34342 | chrY | 13695051 | . | T | G,A | 677441.58 | PASS          | AC=36,7;AF=0.514,0.100;AN=70;BaseQRankSum=  |
| 34343 | chrY | 13695061 | . | C | A   | 5657.70   | my_snp_filter | AC=14;AF=0.200;AN=70;BaseQRankSum=          |
| 34344 | chrY | 13695106 | . | G | A   | 70.42     | my_snp_filter | AC=1;AF=0.014;AN=70;BaseQRankSum=           |
| 34345 | chrY | 13695124 | . | G | A   | 1328.05   | my_snp_filter | AC=11;AF=0.157;AN=70;BaseQRankSum=          |
| 34346 | chrY | 13695169 | . | A | T   | 620.46    | PASS          | AC=3;AF=0.058;AN=52;BaseQRankSum=           |
| 34347 | chrY | 13695177 | . | A | G   | 446.20    | PASS          | AC=4;AF=0.077;AN=52;BaseQRankSum=           |
| 34348 | chrY | 13695179 | . | A | G   | 317.37    | PASS          | AC=3;AF=0.058;AN=52;BaseQRankSum=           |
| 34349 | chrY | 13695180 | . | G | T   | 213.37    | PASS          | AC=3;AF=0.058;AN=52;BaseQRankSum=           |
| 34350 | chrY | 13695185 | . | C | A   | 60.70     | PASS          | AC=1;AF=0.019;AN=52;BaseQRankSum=           |
| 34351 | chrY | 13695204 | . | G | C,T | 25596.82  | PASS          | AC=18,2;AF=0.310,0.034;AN=58;BaseQRankSum=  |
| 34352 | chrY | 13695208 | . | T | A   | 25369.04  | PASS          | AC=20;AF=0.345;AN=58;BaseQRankSum=          |

|       |      |          |   |   |     |           |               |                                     |
|-------|------|----------|---|---|-----|-----------|---------------|-------------------------------------|
| 34353 | chrY | 13695219 | . | C | G   | 20064.55  | PASS          | AC=19;AF=0.317;AN=60;BaseQ=10       |
| 34354 | chrY | 13695230 | . | T | A   | 2809.59   | PASS          | AC=3;AF=0.043;AN=70;BaseQRankSum=10 |
| 34355 | chrY | 13695235 | . | G | T,* | 17842.13  | PASS          | AC=7,9;AF=0.113,0.145;AN=100        |
| 34356 | chrY | 13695237 | . | G | C,* | 17530.34  | PASS          | AC=4,9;AF=0.063,0.141;AN=100        |
| 34357 | chrY | 13695246 | . | T | G,* | 17449.37  | PASS          | AC=3,9;AF=0.047,0.141;AN=100        |
| 34358 | chrY | 13695264 | . | T | C   | 39755.66  | my_snp_filter | AC=11;AF=0.172;AN=100               |
| 34359 | chrY | 13695281 | . | C | G   | 41.08     | my_snp_filter | AC=1;AF=0.015;AN=66;BaseQ=10        |
| 34360 | chrY | 13695298 | . | G | A   | 67756.49  | my_snp_filter | AC=12;AF=0.194;AN=100               |
| 34361 | chrY | 13695310 | . | A | T   | 75229.01  | my_snp_filter | AC=12;AF=0.194;AN=100               |
| 34362 | chrY | 13695338 | . | T | C   | 77719.45  | my_snp_filter | AC=9;AF=0.145;AN=100                |
| 34363 | chrY | 13695342 | . | A | G   | 70452.61  | my_snp_filter | AC=12;AF=0.188;AN=100               |
| 34364 | chrY | 13695350 | . | A | T   | 90761.23  | PASS          | AC=28;AF=0.424;AN=66;BaseQ=10       |
| 34365 | chrY | 13695421 | . | C | G   | 109.15    | my_snp_filter | AC=2;AF=0.029;AN=70;BaseQ=10        |
| 34366 | chrY | 13695469 | . | G | C   | 102636.88 | my_snp_filter | AC=47;AF=0.691;AN=100               |
| 34367 | chrY | 13695471 | . | G | C   | 101963.54 | my_snp_filter | AC=47;AF=0.691;AN=100               |
| 34368 | chrY | 13695473 | . | A | G   | 65.85     | my_snp_filter | AC=2;AF=0.029;AN=70;BaseQ=10        |
| 34369 | chrY | 13695483 | . | A | G   | 627.74    | my_snp_filter | AC=10;AF=0.143;AN=70;BaseQ=10       |
| 34370 | chrY | 13695491 | . | G | T   | 30.32     | my_snp_filter | AC=4;AF=0.057;AN=70;BaseQ=10        |
| 34371 | chrY | 13695527 | . | G | C   | 7149.50   | my_snp_filter | AC=23;AF=0.338;AN=68;BaseQ=10       |
| 34372 | chrY | 13695540 | . | T | A   | 19984.20  | my_snp_filter | AC=18;AF=0.391;AN=100               |
| 34373 | chrY | 13695549 | . | T | C   | 75.99     | my_snp_filter | AC=1;AF=0.019;AN=52;BaseQ=10        |
| 34374 | chrY | 13695553 | . | C | A   | 19975.54  | my_snp_filter | AC=21;AF=0.525;AN=100               |
| 34375 | chrY | 13695562 | . | T | A   | 11354.52  | my_snp_filter | AC=12;AF=0.353;AN=100               |
| 34376 | chrY | 13695616 | . | G | C   | 1628.72   | my_snp_filter | AC=6;AF=0.333;AN=18;BaseQ=10        |
| 34377 | chrY | 13695650 | . | T | C   | 209.60    | PASS          | AC=2;AF=0.091;AN=22;BaseQRankSum=10 |
| 34378 | chrY | 13695656 | . | G | C   | 41.30     | my_snp_filter | AC=2;AF=0.100;AN=20;BaseQ=10        |
| 34379 | chrY | 13695669 | . | T | C   | 42.72     | PASS          | AC=2;AF=0.100;AN=20;BaseQRankSum=10 |
| 34380 | chrY | 13695674 | . | A | T   | 59.55     | PASS          | AC=1;AF=0.050;AN=20;BaseQRankSum=10 |
| 34381 | chrY | 13695709 | . | T | A   | 193.06    | my_snp_filter | AC=1;AF=0.056;AN=18;BaseQ=10        |
| 34382 | chrY | 13695715 | . | T | C   | 12907.49  | my_snp_filter | AC=9;AF=0.409;AN=100                |
| 34383 | chrY | 13695726 | . | A | C   | 212.90    | my_snp_filter | AC=1;AF=0.045;AN=22;BaseQ=10        |
| 34384 | chrY | 13695791 | . | T | A   | 13123.85  | my_snp_filter | AC=9;AF=0.375;AN=100                |
| 34385 | chrY | 13695861 | . | A | G   | 385.30    | my_snp_filter | AC=7;AF=0.269;AN=26;BaseQ=10        |
| 34386 | chrY | 13695972 | . | G | A   | 1213.10   | PASS          | AC=6;AF=0.167;AN=36;BaseQRankSum=10 |
| 34387 | chrY | 13696029 | . | C | T   | 389.51    | PASS          | AC=2;AF=0.045;AN=44;DP=193;FS=0.0   |
| 34388 | chrY | 13696121 | . | A | C   | 1267.44   | my_snp_filter | AC=24;AF=0.571;AN=42;DP=1           |
| 34389 | chrY | 13696442 | . | T | A   | 347.56    | my_snp_filter | AC=11;AF=0.306;AN=36;BaseQ=10       |
| 34390 | chrY | 13696552 | . | A | T   | 31.27     | my_snp_filter | AC=3;AF=0.045;AN=66;BaseQ=10        |
| 34391 | chrY | 13696608 | . | T | G   | 92.78     | PASS          | AC=3;AF=0.047;AN=64;BaseQRankSum=10 |
| 34392 | chrY | 13696618 | . | A | G   | 205.92    | PASS          | AC=2;AF=0.031;AN=64;BaseQRankSum=10 |
| 34393 | chrY | 13696622 | . | T | A   | 159.06    | PASS          | AC=3;AF=0.047;AN=64;BaseQRankSum=10 |
| 34394 | chrY | 13696627 | . | T | A   | 339.89    | PASS          | AC=3;AF=0.048;AN=62;BaseQRankSum=10 |
| 34395 | chrY | 13696629 | . | A | G   | 968.23    | PASS          | AC=6;AF=0.097;AN=62;BaseQRankSum=10 |
| 34396 | chrY | 13696640 | . | A | C   | 457.22    | PASS          | AC=2;AF=0.029;AN=70;BaseQRankSum=10 |
| 34397 | chrY | 13696647 | . | A | T   | 1861.64   | PASS          | AC=4;AF=0.057;AN=70;BaseQRankSum=10 |
| 34398 | chrY | 13696655 | . | T | C,A | 9057.31   | my_snp_filter | AC=21,3;AF=0.404,0.058;AN=100       |
| 34399 | chrY | 13696657 | . | C | T   | 1603.94   | my_snp_filter | AC=3;AF=0.043;AN=70;BaseQ=10        |
| 34400 | chrY | 13696666 | . | A | T   | 95.01     | my_snp_filter | AC=3;AF=0.043;AN=70;BaseQ=10        |
| 34401 | chrY | 13696674 | . | T | C   | 56.86     | my_snp_filter | AC=2;AF=0.029;AN=70;BaseQ=10        |
| 34402 | chrY | 13696677 | . | T | G   | 53.84     | my_snp_filter | AC=1;AF=0.014;AN=70;BaseQ=10        |
| 34403 | chrY | 13696703 | . | G | T   | 1226.40   | my_snp_filter | AC=10;AF=0.143;AN=70;BaseQ=10       |
| 34404 | chrY | 13696725 | . | A | C   | 59.72     | my_snp_filter | AC=2;AF=0.029;AN=70;BaseQ=10        |
| 34405 | chrY | 13696739 | . | G | T   | 3742.32   | my_snp_filter | AC=15;AF=0.214;AN=70;BaseQ=10       |
| 34406 | chrY | 13696745 | . | G | A   | 6794.05   | my_snp_filter | AC=10;AF=0.143;AN=70;BaseQ=10       |
| 34407 | chrY | 13696755 | . | G | T   | 43.42     | my_snp_filter | AC=1;AF=0.014;AN=70;BaseQ=10        |
| 34408 | chrY | 13696759 | . | C | G   | 10941.43  | my_snp_filter | AC=28;AF=0.400;AN=100               |
| 34409 | chrY | 13696763 | . | C | T   | 12292.94  | my_snp_filter | AC=11;AF=0.190;AN=100               |
| 34410 | chrY | 13696768 | . | C | G   | 568.52    | my_snp_filter | AC=8;AF=0.114;AN=70;BaseQ=10        |
| 34411 | chrY | 13696798 | . | C | G   | 881.23    | PASS          | AC=4;AF=0.077;AN=52;BaseQRankSum=10 |
| 34412 | chrY | 13696799 | . | T | G   | 2063.84   | PASS          | AC=6;AF=0.111;AN=54;BaseQRankSum=10 |
| 34413 | chrY | 13696812 | . | C | T   | 338.98    | my_snp_filter | AC=5;AF=0.076;AN=66;BaseQ=10        |
| 34414 | chrY | 13696898 | . | T | A   | 1871.82   | my_snp_filter | AC=13;AF=0.232;AN=56;BaseQ=10       |
| 34415 | chrY | 13696920 | . | G | C   | 3020.28   | my_snp_filter | AC=10;AF=0.208;AN=48;BaseQ=10       |
| 34416 | chrY | 13696928 | . | C | G   | 1328.28   | my_snp_filter | AC=12;AF=0.261;AN=46;BaseQ=10       |
| 34417 | chrY | 13696944 | . | G | A   | 162.96    | my_snp_filter | AC=4;AF=0.087;AN=46;BaseQ=10        |
| 34418 | chrY | 13696949 | . | T | G   | 962.89    | my_snp_filter | AC=7;AF=0.140;AN=50;BaseQ=10        |
| 34419 | chrY | 13696950 | . | C | G   | 948.75    | my_snp_filter | AC=7;AF=0.146;AN=48;BaseQ=10        |
| 34420 | chrY | 13696960 | . | G | C   | 1939.79   | my_snp_filter | AC=8;AF=0.190;AN=42;BaseQ=10        |
| 34421 | chrY | 13696961 | . | A | G   | 162.91    | my_snp_filter | AC=2;AF=0.048;AN=42;BaseQ=10        |
| 34422 | chrY | 13697008 | . | T | A   | 4548.99   | my_snp_filter | AC=9;AF=0.409;AN=22;BaseQ=10        |
| 34423 | chrY | 13697048 | . | T | A   | 66.77     | my_snp_filter | AC=3;AF=0.136;AN=22;BaseQ=10        |
| 34424 | chrY | 13697069 | . | G | A   | 744.43    | my_snp_filter | AC=3;AF=0.100;AN=30;BaseQ=10        |
| 34425 | chrY | 13697074 | . | T | G   | 9204.83   | my_snp_filter | AC=9;AF=0.300;AN=30;BaseQ=10        |
| 34426 | chrY | 13697143 | . | T | C   | 36.95     | my_snp_filter | AC=1;AF=0.024;AN=42;BaseQ=10        |
| 34427 | chrY | 13697149 | . | A | G   | 4136.66   | my_snp_filter | AC=9;AF=0.300;AN=30;BaseQ=10        |
| 34428 | chrY | 13697154 | . | C | G,* | 749.19    | my_snp_filter | AC=4,1;AF=0.125,0.031;AN=100        |

|       |      |          |   |   |   |          |               |                                   |
|-------|------|----------|---|---|---|----------|---------------|-----------------------------------|
| 34429 | chrY | 13697182 | . | C | G | 3206.91  | my_snp_filter | AC=7;AF=0.233;AN=30;BaseQ         |
| 34430 | chrY | 13697205 | . | A | T | 1791.71  | my_snp_filter | AC=6;AF=0.176;AN=34;BaseQ         |
| 34431 | chrY | 13697214 | . | T | G | 5675.83  | my_snp_filter | AC=9;AF=0.250;AN=36;BaseQ         |
| 34432 | chrY | 13697222 | . | C | T | 2551.33  | my_snp_filter | AC=6;AF=0.167;AN=36;BaseQ         |
| 34433 | chrY | 13697223 | . | A | T | 2482.82  | my_snp_filter | AC=6;AF=0.167;AN=36;BaseQ         |
| 34434 | chrY | 13697242 | . | A | T | 356.73   | my_snp_filter | AC=2;AF=0.059;AN=34;BaseQ         |
| 34435 | chrY | 13697248 | . | T | C | 5450.11  | my_snp_filter | AC=9;AF=0.265;AN=34;BaseQ         |
| 34436 | chrY | 13697273 | . | C | A | 1902.15  | my_snp_filter | AC=8;AF=0.211;AN=38;BaseQ         |
| 34437 | chrY | 13697283 | . | G | T | 272.23   | my_snp_filter | AC=4;AF=0.105;AN=38;BaseQ         |
| 34438 | chrY | 13697285 | . | T | A | 4747.43  | my_snp_filter | AC=9;AF=0.250;AN=36;BaseQ         |
| 34439 | chrY | 13697328 | . | G | C | 64.58    | my_snp_filter | AC=2;AF=0.040;AN=50;BaseQ         |
| 34440 | chrY | 13697329 | . | A | C | 526.29   | my_snp_filter | AC=3;AF=0.065;AN=46;BaseQ         |
| 34441 | chrY | 13697359 | . | C | G | 4147.88  | my_snp_filter | AC=6;AF=0.176;AN=34;BaseQ         |
| 34442 | chrY | 13697376 | . | G | A | 1056.15  | my_snp_filter | AC=3;AF=0.083;AN=36;BaseQ         |
| 34443 | chrY | 13697453 | . | C | G | 177.51   | my_snp_filter | AC=5;AF=0.156;AN=32;BaseQ         |
| 34444 | chrY | 13697755 | . | A | T | 439.83   | my_snp_filter | AC=3;AF=0.167;AN=18;BaseQ         |
| 34445 | chrY | 13698217 | . | G | A | 304.56   | my_snp_filter | AC=10;AF=0.313;AN=32;DP=2         |
| 34446 | chrY | 13698659 | . | G | A | 125.20   | my_snp_filter | AC=2;AF=0.125;AN=16;BaseQ         |
| 34447 | chrY | 13698671 | . | A | T | 128.34   | my_snp_filter | AC=2;AF=0.125;AN=16;BaseQ         |
| 34448 | chrY | 13698707 | . | A | G | 132.73   | my_snp_filter | AC=2;AF=0.125;AN=16;BaseQ         |
| 34449 | chrY | 13698710 | . | A | G | 79.85    | my_snp_filter | AC=1;AF=0.056;AN=18;BaseQ         |
| 34450 | chrY | 13698713 | . | T | G | 129.73   | my_snp_filter | AC=2;AF=0.125;AN=16;BaseQ         |
| 34451 | chrY | 13698764 | . | A | T | 108.83   | my_snp_filter | AC=3;AF=0.167;AN=18;BaseQ         |
| 34452 | chrY | 13698777 | . | G | T | 249.04   | my_snp_filter | AC=3;AF=0.167;AN=18;BaseQ         |
| 34453 | chrY | 13698783 | . | G | A | 83.63    | my_snp_filter | AC=3;AF=0.167;AN=18;BaseQ         |
| 34454 | chrY | 13698785 | . | A | T | 854.10   | my_snp_filter | AC=9;AF=0.500;AN=18;BaseQ         |
| 34455 | chrY | 13698811 | . | T | A | 123.34   | my_snp_filter | AC=3;AF=0.167;AN=18;BaseQ         |
| 34456 | chrY | 13698826 | . | T | A | 111.05   | my_snp_filter | AC=3;AF=0.167;AN=18;BaseQ         |
| 34457 | chrY | 13698830 | . | G | C | 2055.09  | my_snp_filter | AC=9;AF=0.500;AN=18;BaseQ         |
| 34458 | chrY | 13698832 | . | G | C | 2055.09  | my_snp_filter | AC=9;AF=0.500;AN=18;BaseQ         |
| 34459 | chrY | 13698844 | . | A | G | 217.58   | my_snp_filter | AC=4;AF=0.200;AN=20;BaseQ         |
| 34460 | chrY | 13698901 | . | T | A | 537.26   | my_snp_filter | AC=3;AF=0.167;AN=18;BaseQ         |
| 34461 | chrY | 13698914 | . | C | A | 461.77   | my_snp_filter | AC=3;AF=0.167;AN=18;BaseQ         |
| 34462 | chrY | 13698923 | . | T | A | 306.08   | my_snp_filter | AC=3;AF=0.150;AN=20;BaseQ         |
| 34463 | chrY | 13698935 | . | T | C | 40.01    | my_snp_filter | AC=1;AF=0.042;AN=24;BaseQ         |
| 34464 | chrY | 13698960 | . | C | G | 45.47    | my_snp_filter | AC=2;AF=0.083;AN=24;BaseQ         |
| 34465 | chrY | 13698977 | . | G | C | 1143.06  | PASS          | AC=11;AF=0.458;AN=24;BaseQRankSum |
| 34466 | chrY | 13698978 | . | A | T | 329.42   | my_snp_filter | AC=5;AF=0.179;AN=28;BaseQ         |
| 34467 | chrY | 13698997 | . | G | C | 365.88   | my_snp_filter | AC=5;AF=0.192;AN=26;BaseQ         |
| 34468 | chrY | 13699005 | . | T | A | 57.16    | PASS          | AC=1;AF=0.038;AN=26;BaseQRankSum  |
| 34469 | chrY | 13699044 | . | A | G | 398.06   | PASS          | AC=8;AF=0.235;AN=34;BaseQRankSum  |
| 34470 | chrY | 13699046 | . | G | A | 136.01   | PASS          | AC=2;AF=0.056;AN=36;BaseQRankSum  |
| 34471 | chrY | 13699051 | . | G | A | 36.22    | my_snp_filter | AC=2;AF=0.056;AN=36;BaseQ         |
| 34472 | chrY | 13699076 | . | T | A | 2815.31  | PASS          | AC=15;AF=0.500;AN=30;BaseQRankSum |
| 34473 | chrY | 13699085 | . | T | A | 136.74   | PASS          | AC=2;AF=0.067;AN=30;BaseQRankSum  |
| 34474 | chrY | 13699090 | . | T | A | 224.66   | PASS          | AC=4;AF=0.154;AN=26;BaseQRankSum  |
| 34475 | chrY | 13699096 | . | G | A | 182.30   | PASS          | AC=2;AF=0.071;AN=28;BaseQRankSum  |
| 34476 | chrY | 13699099 | . | G | C | 132.53   | PASS          | AC=2;AF=0.071;AN=28;BaseQRankSum  |
| 34477 | chrY | 13699152 | . | T | A | 797.21   | my_snp_filter | AC=9;AF=0.500;AN=18;BaseQ         |
| 34478 | chrY | 13699355 | . | C | A | 44.90    | my_snp_filter | AC=1;AF=0.042;AN=24;BaseQ         |
| 34479 | chrY | 13699369 | . | T | A | 109.14   | my_snp_filter | AC=2;AF=0.083;AN=24;BaseQ         |
| 34480 | chrY | 13699374 | . | T | C | 106.28   | my_snp_filter | AC=2;AF=0.083;AN=24;BaseQ         |
| 34481 | chrY | 13699376 | . | G | T | 282.30   | my_snp_filter | AC=2;AF=0.100;AN=20;BaseQ         |
| 34482 | chrY | 13700072 | . | A | C | 123.69   | PASS          | AC=1;AF=0.016;AN=64;BaseQRankSum  |
| 34483 | chrY | 13700124 | . | T | C | 2773.24  | my_snp_filter | AC=24;AF=0.500;AN=48;BaseQ        |
| 34484 | chrY | 13700134 | . | G | T | 2905.49  | my_snp_filter | AC=28;AF=0.609;AN=46;DP=3         |
| 34485 | chrY | 13700159 | . | C | A | 3150.20  | PASS          | AC=12;AF=0.194;AN=62;BaseQRankSum |
| 34486 | chrY | 13700239 | . | T | G | 561.51   | PASS          | AC=4;AF=0.080;AN=50;BaseQRankSum  |
| 34487 | chrY | 13700241 | . | G | T | 551.67   | PASS          | AC=3;AF=0.058;AN=52;BaseQRankSum  |
| 34488 | chrY | 13700254 | . | T | A | 793.71   | my_snp_filter | AC=3;AF=0.065;AN=46;BaseQ         |
| 34489 | chrY | 13700276 | . | G | C | 1260.10  | my_snp_filter | AC=3;AF=0.065;AN=46;BaseQ         |
| 34490 | chrY | 13700284 | . | C | G | 1148.45  | my_snp_filter | AC=7;AF=0.167;AN=42;BaseQ         |
| 34491 | chrY | 13700298 | . | A | G | 68.01    | my_snp_filter | AC=1;AF=0.033;AN=30;BaseQ         |
| 34492 | chrY | 13700300 | . | G | A | 82.87    | my_snp_filter | AC=2;AF=0.067;AN=30;BaseQ         |
| 34493 | chrY | 13700305 | . | T | G | 583.88   | my_snp_filter | AC=3;AF=0.107;AN=28;BaseQ         |
| 34494 | chrY | 13700306 | . | C | G | 589.34   | my_snp_filter | AC=3;AF=0.115;AN=26;BaseQ         |
| 34495 | chrY | 13700316 | . | G | C | 912.72   | my_snp_filter | AC=3;AF=0.115;AN=26;BaseQ         |
| 34496 | chrY | 13700358 | . | C | G | 2864.75  | my_snp_filter | AC=7;AF=0.250;AN=28;BaseQ         |
| 34497 | chrY | 13700364 | . | T | A | 17248.71 | my_snp_filter | AC=8;AF=0.308;AN=                 |
| 34498 | chrY | 13700381 | . | G | C | 56.22    | my_snp_filter | AC=2;AF=0.083;AN=24;BaseQ         |
| 34499 | chrY | 13700404 | . | T | A | 1801.62  | my_snp_filter | AC=8;AF=0.308;AN=26;BaseQ         |
| 34500 | chrY | 13700417 | . | A | G | 125.15   | my_snp_filter | AC=1;AF=0.038;AN=26;BaseQ         |
| 34501 | chrY | 13700418 | . | C | T | 125.22   | my_snp_filter | AC=1;AF=0.038;AN=26;BaseQ         |
| 34502 | chrY | 13700430 | . | T | G | 16505.75 | my_snp_filter | AC=11;AF=0.367;AN                 |
| 34503 | chrY | 13700481 | . | G | T | 842.85   | my_snp_filter | AC=5;AF=0.125;AN=40;BaseQ         |
| 34504 | chrY | 13700489 | . | T | C | 121.33   | my_snp_filter | AC=2;AF=0.037;AN=54;BaseQ         |

|       |      |          |   |   |     |          |               |                                   |
|-------|------|----------|---|---|-----|----------|---------------|-----------------------------------|
| 34505 | chrY | 13700501 | . | C | G   | 478.56   | PASS          | AC=3;AF=0.048;AN=62;BaseQRankSum= |
| 34506 | chrY | 13700509 | . | T | C   | 1182.08  | my_snp_filter | AC=9;AF=0.250;AN=36;BaseQ         |
| 34507 | chrY | 13700510 | . | A | G   | 6319.02  | my_snp_filter | AC=15;AF=0.417;AN=36;Base         |
| 34508 | chrY | 13700514 | . | C | T   | 1505.25  | my_snp_filter | AC=8;AF=0.200;AN=40;BaseQ         |
| 34509 | chrY | 13700515 | . | C | G   | 5780.02  | my_snp_filter | AC=13;AF=0.382;AN=34;Base         |
| 34510 | chrY | 13700517 | . | A | C   | 1822.12  | my_snp_filter | AC=10;AF=0.192;AN=52;Base         |
| 34511 | chrY | 13700543 | . | C | G,T | 11733.03 | my_snp_filter | AC=19,19;AF=0.297                 |
| 34512 | chrY | 13700561 | . | A | G   | 678.55   | my_snp_filter | AC=2;AF=0.029;AN=68;BaseQ         |
| 34513 | chrY | 13700566 | . | A | T   | 340.61   | my_snp_filter | AC=4;AF=0.061;AN=66;BaseQ         |
| 34514 | chrY | 13700575 | . | T | G   | 4655.85  | my_snp_filter | AC=25;AF=0.379;AN=66;Base         |
| 34515 | chrY | 13700582 | . | A | T   | 3491.22  | my_snp_filter | AC=17;AF=0.266;AN=64;Base         |
| 34516 | chrY | 13700583 | . | C | T   | 24934.86 | my_snp_filter | AC=31;AF=0.500;AN                 |
| 34517 | chrY | 13700584 | . | A | T   | 25051.71 | my_snp_filter | AC=31;AF=0.500;AN                 |
| 34518 | chrY | 13700588 | . | T | A   | 532.88   | my_snp_filter | AC=4;AF=0.059;AN=68;BaseQ         |
| 34519 | chrY | 13700594 | . | G | A,T | 1544.66  | my_snp_filter | AC=6,1;AF=0.088,0.015;AN=         |
| 34520 | chrY | 13700600 | . | G | A   | 146.92   | my_snp_filter | AC=2;AF=0.029;AN=68;BaseQ         |
| 34521 | chrY | 13700607 | . | A | G   | 3605.89  | my_snp_filter | AC=18;AF=0.273;AN=66;Base         |
| 34522 | chrY | 13700609 | . | T | G,C | 34103.91 | my_snp_filter | AC=12,41;AF=0.194                 |
| 34523 | chrY | 13700630 | . | A | C   | 284.81   | my_snp_filter | AC=2;AF=0.030;AN=66;BaseQ         |
| 34524 | chrY | 13700634 | . | C | A   | 22281.35 | my_snp_filter | AC=35;AF=0.547;AN                 |
| 34525 | chrY | 13700644 | . | G | T   | 3130.57  | my_snp_filter | AC=9;AF=0.136;AN=66;BaseQ         |
| 34526 | chrY | 13700678 | . | T | A   | 221.95   | my_snp_filter | AC=8;AF=0.129;AN=62;BaseQ         |
| 34527 | chrY | 13700689 | . | G | T   | 85.81    | my_snp_filter | AC=4;AF=0.063;AN=64;BaseQ         |
| 34528 | chrY | 13700690 | . | A | C   | 411.75   | my_snp_filter | AC=12;AF=0.188;AN=64;Base         |
| 34529 | chrY | 13700720 | . | C | G   | 6478.35  | my_snp_filter | AC=21;AF=0.438;AN=48;Base         |
| 34530 | chrY | 13700772 | . | A | T   | 183.66   | my_snp_filter | AC=1;AF=0.050;AN=20;BaseQ         |
| 34531 | chrY | 13700777 | . | A | T   | 107.39   | my_snp_filter | AC=1;AF=0.050;AN=20;BaseQ         |
| 34532 | chrY | 13700778 | . | A | G   | 113.23   | my_snp_filter | AC=1;AF=0.050;AN=20;BaseQ         |
| 34533 | chrY | 13700810 | . | C | T   | 268.74   | PASS          | AC=8;AF=1.00;AN=8;DP=20;FS=0.000; |
| 34534 | chrY | 13700839 | . | T | G   | 216.10   | my_snp_filter | AC=2;AF=0.500;AN=4;BaseQR         |
| 34535 | chrY | 13700857 | . | T | C   | 467.62   | my_snp_filter | AC=2;AF=0.333;AN=6;BaseQR         |
| 34536 | chrY | 13700903 | . | G | A   | 215.61   | my_snp_filter | AC=5;AF=0.313;AN=16;BaseQ         |
| 34537 | chrY | 13700916 | . | A | G   | 126.91   | my_snp_filter | AC=2;AF=0.111;AN=18;BaseQ         |
| 34538 | chrY | 13700930 | . | T | A   | 542.16   | my_snp_filter | AC=5;AF=0.357;AN=14;BaseQ         |
| 34539 | chrY | 13700947 | . | T | C   | 166.78   | my_snp_filter | AC=2;AF=0.111;AN=18;BaseQ         |
| 34540 | chrY | 13700951 | . | A | C   | 167.80   | my_snp_filter | AC=2;AF=0.125;AN=16;BaseQ         |
| 34541 | chrY | 13700959 | . | G | T   | 236.96   | my_snp_filter | AC=2;AF=0.200;AN=10;BaseQ         |
| 34542 | chrY | 13700963 | . | G | A   | 172.52   | my_snp_filter | AC=2;AF=0.167;AN=12;BaseQ         |
| 34543 | chrY | 13700984 | . | A | G   | 88.89    | my_snp_filter | AC=1;AF=0.167;AN=6;BaseQR         |
| 34544 | chrY | 13701231 | . | G | A   | 614.48   | my_snp_filter | AC=10;AF=0.385;AN=26;Base         |
| 34545 | chrY | 13701292 | . | A | T   | 2901.79  | my_snp_filter | AC=8;AF=0.167;AN=48;BaseQ         |
| 34546 | chrY | 13701305 | . | A | C   | 1630.15  | my_snp_filter | AC=7;AF=0.146;AN=48;BaseQ         |
| 34547 | chrY | 13701308 | . | T | G   | 319.57   | my_snp_filter | AC=3;AF=0.071;AN=42;BaseQ         |
| 34548 | chrY | 13701318 | . | C | A   | 113.10   | my_snp_filter | AC=6;AF=0.200;AN=30;DP=43         |
| 34549 | chrY | 13701329 | . | G | A   | 2064.85  | my_snp_filter | AC=8;AF=0.222;AN=36;BaseQ         |
| 34550 | chrY | 13701331 | . | A | T   | 115.54   | my_snp_filter | AC=2;AF=0.056;AN=36;BaseQ         |
| 34551 | chrY | 13701333 | . | A | G   | 6878.33  | my_snp_filter | AC=11;AF=0.344;AN=32;Base         |
| 34552 | chrY | 13701341 | . | C | G,A | 5990.71  | my_snp_filter | AC=8,5;AF=0.267,0.167;AN=         |
| 34553 | chrY | 13701363 | . | G | T   | 251.58   | my_snp_filter | AC=2;AF=0.037;AN=54;BaseQ         |
| 34554 | chrY | 13701372 | . | T | A   | 122.98   | my_snp_filter | AC=3;AF=0.054;AN=56;BaseQ         |
| 34555 | chrY | 13701374 | . | G | A   | 553.19   | my_snp_filter | AC=6;AF=0.111;AN=54;BaseQ         |
| 34556 | chrY | 13701389 | . | G | T   | 71.12    | my_snp_filter | AC=4;AF=0.069;AN=58;BaseQ         |
| 34557 | chrY | 13701392 | . | A | C   | 77.13    | my_snp_filter | AC=4;AF=0.069;AN=58;BaseQ         |
| 34558 | chrY | 13701395 | . | A | C   | 634.76   | my_snp_filter | AC=4;AF=0.069;AN=58;BaseQ         |
| 34559 | chrY | 13701409 | . | G | A   | 479.31   | my_snp_filter | AC=4;AF=0.067;AN=60;BaseQ         |
| 34560 | chrY | 13701462 | . | A | C   | 39.37    | my_snp_filter | AC=1;AF=0.018;AN=56;BaseQ         |
| 34561 | chrY | 13701469 | . | A | G   | 540.16   | my_snp_filter | AC=10;AF=0.200;AN=50;Base         |
| 34562 | chrY | 13701470 | . | A | T   | 138.15   | my_snp_filter | AC=3;AF=0.056;AN=54;BaseQ         |
| 34563 | chrY | 13701473 | . | C | G   | 82.78    | my_snp_filter | AC=1;AF=0.020;AN=50;BaseQ         |
| 34564 | chrY | 13701504 | . | C | G   | 2719.86  | my_snp_filter | AC=12;AF=0.300;AN=40;Base         |
| 34565 | chrY | 13701518 | . | C | T   | 43.34    | my_snp_filter | AC=1;AF=0.020;AN=50;BaseQ         |
| 34566 | chrY | 13701537 | . | G | T   | 24719.63 | my_snp_filter | AC=16;AF=0.421;AN                 |
| 34567 | chrY | 13701539 | . | G | C   | 8938.57  | my_snp_filter | AC=10;AF=0.238;AN=42;Base         |
| 34568 | chrY | 13701554 | . | A | G   | 37577.83 | my_snp_filter | AC=14;AF=0.318;AN                 |
| 34569 | chrY | 13701556 | . | A | G   | 2362.71  | my_snp_filter | AC=6;AF=0.125;AN=48;BaseQ         |
| 34570 | chrY | 13701561 | . | T | C,A | 38880.07 | my_snp_filter | AC=9,5;AF=0.205,0                 |
| 34571 | chrY | 13701593 | . | G | C   | 113.84   | my_snp_filter | AC=2;AF=0.029;AN=68;BaseQ         |
| 34572 | chrY | 13701598 | . | C | T   | 1331.25  | my_snp_filter | AC=7;AF=0.106;AN=66;BaseQ         |
| 34573 | chrY | 13701615 | . | A | C   | 43.77    | my_snp_filter | AC=1;AF=0.014;AN=70;BaseQ         |
| 34574 | chrY | 13701619 | . | G | A   | 41.48    | my_snp_filter | AC=1;AF=0.016;AN=64;BaseQ         |
| 34575 | chrY | 13701624 | . | G | C   | 210.19   | my_snp_filter | AC=4;AF=0.057;AN=70;BaseQ         |
| 34576 | chrY | 13701629 | . | G | C   | 71.33    | my_snp_filter | AC=2;AF=0.029;AN=70;BaseQ         |
| 34577 | chrY | 13701634 | . | G | C   | 84.19    | my_snp_filter | AC=2;AF=0.029;AN=70;BaseQ         |
| 34578 | chrY | 13701638 | . | G | A   | 161.98   | my_snp_filter | AC=3;AF=0.043;AN=70;BaseQ         |
| 34579 | chrY | 13701641 | . | A | C   | 98144.38 | my_snp_filter | AC=52;AF=0.743;AN                 |
| 34580 | chrY | 13701647 | . | T | A   | 112.48   | my_snp_filter | AC=4;AF=0.057;AN=70;BaseQ         |

|       |      |          |   |   |     |          |               |                                   |
|-------|------|----------|---|---|-----|----------|---------------|-----------------------------------|
| 34581 | chrY | 13701650 | . | A | T   | 174.45   | my_snp_filter | AC=6;AF=0.086;AN=70;BaseQ         |
| 34582 | chrY | 13701652 | . | T | C   | 40.79    | my_snp_filter | AC=1;AF=0.014;AN=70;BaseQ         |
| 34583 | chrY | 13701663 | . | C | G   | 75.51    | my_snp_filter | AC=3;AF=0.043;AN=70;BaseQ         |
| 34584 | chrY | 13701668 | . | G | A   | 176      | my_snp_filter | AC=3;AF=0.043;AN=70;BaseQ         |
| 34585 | chrY | 13701672 | . | T | A   | 31.22    | my_snp_filter | AC=1;AF=0.014;AN=70;BaseQ         |
| 34586 | chrY | 13701679 | . | C | G,T | 96045.05 | my_snp_filter | AC=57,3;AF=0.864,                 |
| 34587 | chrY | 13701682 | . | T | A   | 109.64   | my_snp_filter | AC=3;AF=0.044;AN=68;BaseQ         |
| 34588 | chrY | 13701691 | . | C | A   | 1778.59  | my_snp_filter | AC=4;AF=0.059;AN=68;BaseQ         |
| 34589 | chrY | 13701696 | . | A | G   | 34.56    | my_snp_filter | AC=1;AF=0.017;AN=58;BaseQ         |
| 34590 | chrY | 13701705 | . | T | A   | 73381.36 | my_snp_filter | AC=34;AF=0.895;AN                 |
| 34591 | chrY | 13701706 | . | G | C   | 73554.96 | my_snp_filter | AC=34;AF=0.895;AN                 |
| 34592 | chrY | 13701719 | . | G | T   | 44.94    | my_snp_filter | AC=1;AF=0.031;AN=32;BaseQ         |
| 34593 | chrY | 13701723 | . | C | G   | 45.08    | my_snp_filter | AC=1;AF=0.036;AN=28;BaseQ         |
| 34594 | chrY | 13701724 | . | G | A   | 134.75   | my_snp_filter | AC=1;AF=0.042;AN=24;BaseQ         |
| 34595 | chrY | 13701753 | . | C | G   | 49.62    | my_snp_filter | AC=1;AF=0.056;AN=18;BaseQ         |
| 34596 | chrY | 13701759 | . | C | G   | 834.23   | my_snp_filter | AC=4;AF=0.500;AN=8;BaseQR         |
| 34597 | chrY | 13701762 | . | C | T   | 712.58   | my_snp_filter | AC=5;AF=0.625;AN=8;BaseQR         |
| 34598 | chrY | 13701798 | . | C | T   | 47.55    | my_snp_filter | AC=1;AF=0.038;AN=26;BaseQ         |
| 34599 | chrY | 13701864 | . | G | T   | 278.34   | my_snp_filter | AC=1;AF=0.022;AN=46;BaseQ         |
| 34600 | chrY | 13701869 | . | G | C   | 147.21   | my_snp_filter | AC=2;AF=0.048;AN=42;BaseQ         |
| 34601 | chrY | 13701891 | . | A | T   | 15075.09 | my_snp_filter | AC=8;AF=0.500;AN=                 |
| 34602 | chrY | 13701898 | . | C | A   | 265.63   | my_snp_filter | AC=1;AF=0.028;AN=36;BaseQ         |
| 34603 | chrY | 13701916 | . | T | A   | 24151.95 | my_snp_filter | AC=5;AF=0.833;AN=                 |
| 34604 | chrY | 13701923 | . | A | G   | 17591.85 | my_snp_filter | AC=3;AF=0.750;AN=                 |
| 34605 | chrY | 13701928 | . | C | G   | 105.73   | my_snp_filter | AC=1;AF=0.056;AN=18;BaseQ         |
| 34606 | chrY | 13701932 | . | A | T   | 20755.75 | my_snp_filter | AC=4;AF=1.00;AN=4                 |
| 34607 | chrY | 13701988 | . | A | G   | 786.87   | my_snp_filter | AC=4;AF=1.00;AN=4;DP=56;F         |
| 34608 | chrY | 13702020 | . | G | A   | 313.01   | my_snp_filter | AC=5;AF=0.500;AN=10;BaseQ         |
| 34609 | chrY | 13702032 | . | A | T   | 237.10   | my_snp_filter | AC=6;AF=0.500;AN=12;BaseQ         |
| 34610 | chrY | 13702068 | . | A | G   | 235.83   | my_snp_filter | AC=7;AF=0.700;AN=10;BaseQ         |
| 34611 | chrY | 13702074 | . | T | G   | 232.83   | my_snp_filter | AC=7;AF=0.700;AN=10;BaseQ         |
| 34612 | chrY | 13702146 | . | A | T   | 263.79   | my_snp_filter | AC=5;AF=0.357;AN=14;BaseQ         |
| 34613 | chrY | 13702191 | . | G | C   | 56.70    | my_snp_filter | AC=2;AF=0.167;AN=12;BaseQ         |
| 34614 | chrY | 13702193 | . | G | C   | 57.82    | my_snp_filter | AC=2;AF=0.167;AN=12;BaseQ         |
| 34615 | chrY | 13702338 | . | G | C   | 78.72    | my_snp_filter | AC=2;AF=0.167;AN=12;BaseQ         |
| 34616 | chrY | 13702412 | . | G | C   | 418.42   | my_snp_filter | AC=3;AF=0.188;AN=16;BaseQ         |
| 34617 | chrY | 13702433 | . | C | T   | 656.26   | my_snp_filter | AC=5;AF=0.313;AN=16;BaseQ         |
| 34618 | chrY | 13702437 | . | C | A   | 71.80    | my_snp_filter | AC=3;AF=0.188;AN=16;BaseQ         |
| 34619 | chrY | 13702441 | . | T | C   | 71.69    | my_snp_filter | AC=3;AF=0.188;AN=16;BaseQ         |
| 34620 | chrY | 13702445 | . | A | T   | 71.77    | my_snp_filter | AC=3;AF=0.188;AN=16;BaseQ         |
| 34621 | chrY | 13702448 | . | A | G   | 374.22   | my_snp_filter | AC=5;AF=0.313;AN=16;BaseQ         |
| 34622 | chrY | 13702458 | . | G | A   | 85.92    | my_snp_filter | AC=3;AF=0.167;AN=18;BaseQ         |
| 34623 | chrY | 13702513 | . | T | A   | 209.73   | my_snp_filter | AC=6;AF=0.300;AN=20;BaseQ         |
| 34624 | chrY | 13702600 | . | A | G   | 40.72    | my_snp_filter | AC=1;AF=0.038;AN=26;BaseQ         |
| 34625 | chrY | 13702687 | . | G | T   | 135.78   | my_snp_filter | AC=2;AF=0.100;AN=20;BaseQ         |
| 34626 | chrY | 13703908 | . | C | G   | 332.60   | my_snp_filter | AC=4;AF=0.080;AN=50;BaseQ         |
| 34627 | chrY | 13703926 | . | A | G   | 399.97   | my_snp_filter | AC=3;AF=0.054;AN=56;BaseQ         |
| 34628 | chrY | 13703948 | . | C | T   | 618.50   | my_snp_filter | AC=3;AF=0.065;AN=46;BaseQ         |
| 34629 | chrY | 13703949 | . | A | T   | 570.50   | my_snp_filter | AC=3;AF=0.065;AN=46;BaseQ         |
| 34630 | chrY | 13703971 | . | T | C   | 38.67    | my_snp_filter | AC=1;AF=0.018;AN=56;BaseQ         |
| 34631 | chrY | 13703974 | . | T | C   | 828.98   | my_snp_filter | AC=5;AF=0.096;AN=52;BaseQ         |
| 34632 | chrY | 13703988 | . | A | C   | 243.38   | PASS          | AC=2;AF=0.034;AN=58;BaseQRankSum= |
| 34633 | chrY | 13703997 | . | A | G   | 331.85   | my_snp_filter | AC=3;AF=0.058;AN=52;BaseQ         |
| 34634 | chrY | 13703999 | . | C | A   | 567.80   | my_snp_filter | AC=4;AF=0.077;AN=52;BaseQ         |
| 34635 | chrY | 13704010 | . | G | C   | 326.61   | my_snp_filter | AC=3;AF=0.065;AN=46;BaseQ         |
| 34636 | chrY | 13704085 | . | C | G   | 385.88   | PASS          | AC=7;AF=0.233;AN=30;BaseQRankSum= |
| 34637 | chrY | 13704156 | . | A | G   | 65.87    | my_snp_filter | AC=2;AF=0.100;AN=20;BaseQ         |
| 34638 | chrY | 13704207 | . | G | A   | 68.18    | PASS          | AC=2;AF=0.111;AN=18;BaseQRankSum= |
| 34639 | chrY | 13704254 | . | C | G   | 591.22   | PASS          | AC=4;AF=0.400;AN=10;DP=261;FS=0.0 |
| 34640 | chrY | 13704357 | . | T | C   | 353.27   | PASS          | AC=2;AF=0.053;AN=38;BaseQRankSum= |
| 34641 | chrY | 13704367 | . | T | A   | 982.47   | my_snp_filter | AC=15;AF=0.357;AN=42;Base         |
| 34642 | chrY | 13704373 | . | G | A,* | 5573.58  | PASS          | AC=16,9;AF=0.400,0.225;AN=40;Base |
| 34643 | chrY | 13704377 | . | C | T,* | 5089.78  | PASS          | AC=18,8;AF=0.474,0.211;AN=38;Base |
| 34644 | chrY | 13704391 | . | C | G   | 417.68   | PASS          | AC=5;AF=0.500;AN=10;BaseQRankSum= |
| 34645 | chrY | 13704508 | . | T | G   | 915.36   | my_snp_filter | AC=5;AF=0.086;AN=58;BaseQ         |
| 34646 | chrY | 13704521 | . | G | A   | 15331.91 | my_snp_filter | AC=8;AF=0.129;AN=                 |
| 34647 | chrY | 13704524 | . | G | T   | 953.41   | my_snp_filter | AC=5;AF=0.076;AN=66;BaseQ         |
| 34648 | chrY | 13704532 | . | T | C   | 680.47   | my_snp_filter | AC=4;AF=0.061;AN=66;BaseQ         |
| 34649 | chrY | 13704580 | . | A | C   | 276.62   | my_snp_filter | AC=3;AF=0.043;AN=70;BaseQ         |
| 34650 | chrY | 13704612 | . | C | G   | 510.56   | my_snp_filter | AC=6;AF=0.086;AN=70;BaseQ         |
| 34651 | chrY | 13704621 | . | T | A   | 3448.85  | my_snp_filter | AC=8;AF=0.118;AN=68;BaseQ         |
| 34652 | chrY | 13704630 | . | A | G   | 101.78   | my_snp_filter | AC=1;AF=0.015;AN=68;BaseQ         |
| 34653 | chrY | 13704632 | . | G | T   | 1512.93  | my_snp_filter | AC=8;AF=0.118;AN=68;BaseQ         |
| 34654 | chrY | 13704665 | . | A | T   | 49.20    | my_snp_filter | AC=1;AF=0.015;AN=68;BaseQ         |
| 34655 | chrY | 13704681 | . | G | A   | 3475.15  | my_snp_filter | AC=8;AF=0.121;AN=66;BaseQ         |
| 34656 | chrY | 13704692 | . | T | C   | 2732.62  | my_snp_filter | AC=8;AF=0.121;AN=66;BaseQ         |



|       |      |          |   |   |       |          |               |                                   |
|-------|------|----------|---|---|-------|----------|---------------|-----------------------------------|
| 34657 | chrY | 13704700 | . | A | G     | 2836.73  | my_snp_filter | AC=8;AF=0.125;AN=64;BaseQ         |
| 34658 | chrY | 13704721 | . | C | T     | 5438.28  | my_snp_filter | AC=8;AF=0.125;AN=64;BaseQ         |
| 34659 | chrY | 13704722 | . | G | A     | 174.05   | my_snp_filter | AC=2;AF=0.031;AN=64;BaseQ         |
| 34660 | chrY | 13704724 | . | A | T     | 67.17    | my_snp_filter | AC=1;AF=0.017;AN=60;BaseQ         |
| 34661 | chrY | 13704746 | . | T | A     | 4060.88  | my_snp_filter | AC=8;AF=0.148;AN=54;BaseQ         |
| 34662 | chrY | 13704792 | . | C | G     | 138.55   | my_snp_filter | AC=1;AF=0.029;AN=34;BaseQ         |
| 34663 | chrY | 13704793 | . | C | T     | 293.55   | my_snp_filter | AC=4;AF=0.118;AN=34;BaseQ         |
| 34664 | chrY | 13704797 | . | G | C     | 3460.14  | my_snp_filter | AC=7;AF=0.233;AN=30;BaseQ         |
| 34665 | chrY | 13704812 | . | G | C     | 3431.12  | my_snp_filter | AC=7;AF=0.250;AN=28;BaseQ         |
| 34666 | chrY | 13704816 | . | G | A     | 293.17   | my_snp_filter | AC=3;AF=0.115;AN=26;BaseQ         |
| 34667 | chrY | 13704822 | . | G | T     | 497.81   | my_snp_filter | AC=4;AF=0.167;AN=24;BaseQ         |
| 34668 | chrY | 13704823 | . | G | C     | 933.01   | my_snp_filter | AC=6;AF=0.214;AN=28;BaseQ         |
| 34669 | chrY | 13704824 | . | A | C     | 5757.13  | my_snp_filter | AC=8;AF=0.286;AN=28;BaseQ         |
| 34670 | chrY | 13704827 | . | G | T     | 83.28    | my_snp_filter | AC=1;AF=0.036;AN=28;BaseQ         |
| 34671 | chrY | 13704849 | . | T | A     | 6159.28  | my_snp_filter | AC=8;AF=0.308;AN=26;BaseQ         |
| 34672 | chrY | 13704869 | . | A | C,T   | 4242.92  | my_snp_filter | AC=1,7;AF=0.038,0.269;AN=         |
| 34673 | chrY | 13704875 | . | A | T     | 16470.22 | my_snp_filter | AC=8;AF=0.364;AN=                 |
| 34674 | chrY | 13704900 | . | T | G     | 1693.73  | my_snp_filter | AC=5;AF=0.167;AN=30;BaseQ         |
| 34675 | chrY | 13704921 | . | G | A     | 50.53    | my_snp_filter | AC=2;AF=0.056;AN=36;BaseQ         |
| 34676 | chrY | 13704923 | . | A | G     | 9153.31  | my_snp_filter | AC=12;AF=0.333;AN=36;Base         |
| 34677 | chrY | 13704930 | . | C | T     | 1106     | my_snp_filter | AC=5;AF=0.179;AN=28;BaseQ         |
| 34678 | chrY | 13704934 | . | C | G     | 122.47   | my_snp_filter | AC=3;AF=0.100;AN=30;BaseQ         |
| 34679 | chrY | 13704947 | . | G | A,*   | 3544.92  | my_snp_filter | AC=4,6;AF=0.143,0.214;AN=         |
| 34680 | chrY | 13704949 | . | A | C,*   | 2445.58  | my_snp_filter | AC=11,4;AF=0.344,0.125;AN         |
| 34681 | chrY | 13704959 | . | A | C     | 137.25   | my_snp_filter | AC=4;AF=0.100;AN=40;BaseQ         |
| 34682 | chrY | 13704962 | . | T | A     | 45.87    | my_snp_filter | AC=1;AF=0.024;AN=42;BaseQ         |
| 34683 | chrY | 13704995 | . | T | A     | 313.83   | my_snp_filter | AC=4;AF=0.100;AN=40;BaseQ         |
| 34684 | chrY | 13705016 | . | A | G     | 767.65   | my_snp_filter | AC=6;AF=0.158;AN=38;BaseQ         |
| 34685 | chrY | 13705038 | . | A | T     | 793.43   | PASS          | AC=8;AF=0.267;AN=30;BaseQRankSum= |
| 34686 | chrY | 13705045 | . | G | T     | 1879.74  | PASS          | AC=8;AF=0.308;AN=26;BaseQRankSum= |
| 34687 | chrY | 13705050 | . | A | T     | 1753.73  | PASS          | AC=8;AF=0.286;AN=28;BaseQRankSum= |
| 34688 | chrY | 13705060 | . | T | C     | 381.30   | PASS          | AC=3;AF=0.100;AN=30;BaseQRankSum= |
| 34689 | chrY | 13705062 | . | G | A     | 354.50   | PASS          | AC=6;AF=0.176;AN=34;BaseQRankSum= |
| 34690 | chrY | 13705110 | . | T | A     | 38.65    | my_snp_filter | AC=2;AF=0.045;AN=44;BaseQ         |
| 34691 | chrY | 13705116 | . | G | T     | 129.93   | PASS          | AC=2;AF=0.043;AN=46;BaseQRankSum= |
| 34692 | chrY | 13705117 | . | G | T     | 43.65    | my_snp_filter | AC=2;AF=0.043;AN=46;BaseQ         |
| 34693 | chrY | 13705340 | . | A | G     | 37.61    | my_snp_filter | AC=3;AF=0.058;AN=52;BaseQ         |
| 34694 | chrY | 13705356 | . | G | A     | 100.08   | PASS          | AC=3;AF=0.043;AN=70;BaseQRankSum= |
| 34695 | chrY | 13705361 | . | G | A     | 1604.67  | my_snp_filter | AC=7;AF=0.100;AN=70;BaseQ         |
| 34696 | chrY | 13705375 | . | C | G     | 282.01   | my_snp_filter | AC=2;AF=0.029;AN=70;BaseQ         |
| 34697 | chrY | 13705423 | . | A | G     | 26911.36 | my_snp_filter | AC=19;AF=0.288;AN                 |
| 34698 | chrY | 13705431 | . | C | G     | 68295.58 | my_snp_filter | AC=25;AF=0.463;AN                 |
| 34699 | chrY | 13705453 | . | G | A     | 69981.05 | my_snp_filter | AC=24;AF=0.522;AN                 |
| 34700 | chrY | 13705458 | . | T | A     | 978.26   | my_snp_filter | AC=8;AF=0.118;AN=68;BaseQ         |
| 34701 | chrY | 13705468 | . | A | T     | 5961.56  | my_snp_filter | AC=11;AF=0.162;AN=68;Base         |
| 34702 | chrY | 13705498 | . | A | G,T,* | 3695.82  | my_snp_filter | AC=9,1,2;AF=0.129,0.014,0         |
| 34703 | chrY | 13705500 | . | G | C,*   | 3721.60  | my_snp_filter | AC=1,6;AF=0.014,0.086;AN=         |
| 34704 | chrY | 13705508 | . | A | T,*   | 5609.41  | my_snp_filter | AC=10,1;AF=0.143,0.014;AN         |
| 34705 | chrY | 13705510 | . | G | C,*   | 6967.61  | my_snp_filter | AC=7,4;AF=0.100,0.057;AN=         |
| 34706 | chrY | 13705523 | . | A | T     | 17800.73 | my_snp_filter | AC=16;AF=0.421;AN                 |
| 34707 | chrY | 13705525 | . | C | A     | 1242.06  | my_snp_filter | AC=7;AF=0.100;AN=70;BaseQ         |
| 34708 | chrY | 13705530 | . | G | A     | 999.36   | my_snp_filter | AC=6;AF=0.086;AN=70;BaseQ         |
| 34709 | chrY | 13705535 | . | G | T     | 3034.62  | my_snp_filter | AC=7;AF=0.100;AN=70;BaseQ         |
| 34710 | chrY | 13705536 | . | G | T     | 3007.48  | my_snp_filter | AC=8;AF=0.114;AN=70;BaseQ         |
| 34711 | chrY | 13705546 | . | G | T     | 3181.70  | my_snp_filter | AC=8;AF=0.114;AN=70;BaseQ         |
| 34712 | chrY | 13705549 | . | T | C     | 229.06   | my_snp_filter | AC=2;AF=0.029;AN=70;BaseQ         |
| 34713 | chrY | 13705566 | . | A | G     | 67137.68 | my_snp_filter | AC=20;AF=0.435;AN                 |
| 34714 | chrY | 13705572 | . | A | G     | 1810.14  | my_snp_filter | AC=5;AF=0.071;AN=70;BaseQ         |
| 34715 | chrY | 13705581 | . | A | T     | 614.93   | my_snp_filter | AC=6;AF=0.086;AN=70;BaseQ         |
| 34716 | chrY | 13705584 | . | T | A     | 51260.96 | my_snp_filter | AC=19;AF=0.500;AN                 |
| 34717 | chrY | 13705585 | . | A | G     | 52544.87 | my_snp_filter | AC=19;AF=0.500;AN                 |
| 34718 | chrY | 13705586 | . | A | G     | 1194.90  | my_snp_filter | AC=4;AF=0.057;AN=70;BaseQ         |
| 34719 | chrY | 13705589 | . | T | A     | 1610.81  | my_snp_filter | AC=8;AF=0.114;AN=70;BaseQ         |
| 34720 | chrY | 13705590 | . | T | A     | 1290.58  | my_snp_filter | AC=5;AF=0.071;AN=70;BaseQ         |
| 34721 | chrY | 13705592 | . | C | A     | 55309.23 | my_snp_filter | AC=20;AF=0.500;AN                 |
| 34722 | chrY | 13705596 | . | G | A     | 250.24   | my_snp_filter | AC=2;AF=0.029;AN=70;BaseQ         |
| 34723 | chrY | 13705605 | . | C | A     | 15194.16 | my_snp_filter | AC=19;AF=0.271;AN                 |
| 34724 | chrY | 13705609 | . | T | C     | 1826.07  | my_snp_filter | AC=13;AF=0.186;AN=70;Base         |
| 34725 | chrY | 13705628 | . | C | G     | 21933.06 | my_snp_filter | AC=9;AF=0.136;AN=                 |
| 34726 | chrY | 13705640 | . | G | A,*   | 2347.15  | my_snp_filter | AC=8,4;AF=0.114,0.057;AN=         |
| 34727 | chrY | 13705644 | . | T | A,*   | 853.51   | my_snp_filter | AC=6,3;AF=0.088,0.044;AN=         |
| 34728 | chrY | 13705653 | . | A | G     | 19443.42 | my_snp_filter | AC=9;AF=0.141;AN=                 |
| 34729 | chrY | 13705655 | . | G | A     | 110.55   | my_snp_filter | AC=1;AF=0.015;AN=68;BaseQ         |
| 34730 | chrY | 13705658 | . | G | C,A   | 1961.95  | my_snp_filter | AC=4,8;AF=0.057,0.114;AN=         |
| 34731 | chrY | 13705669 | . | C | T     | 37099.37 | my_snp_filter | AC=14;AF=0.368;AN                 |
| 34732 | chrY | 13705675 | . | C | A     | 112.21   | my_snp_filter | AC=3;AF=0.045;AN=66;BaseQ         |

|       |      |          |   |   |       |          |               |                                     |
|-------|------|----------|---|---|-------|----------|---------------|-------------------------------------|
| 34733 | chrY | 13705689 | . | T | G     | 1553.81  | my_snp_filter | AC=15;AF=0.214;AN=70;BaseQ=         |
| 34734 | chrY | 13705691 | . | C | G     | 28334.24 | my_snp_filter | AC=10;AF=0.313;AN=                  |
| 34735 | chrY | 13705712 | . | A | T     | 263.45   | my_snp_filter | AC=6;AF=0.086;AN=70;BaseQ=          |
| 34736 | chrY | 13705720 | . | T | G     | 28712.05 | my_snp_filter | AC=10;AF=0.167;AN=                  |
| 34737 | chrY | 13705722 | . | A | T     | 347.71   | my_snp_filter | AC=6;AF=0.086;AN=70;BaseQ=          |
| 34738 | chrY | 13705734 | . | T | C     | 783.17   | my_snp_filter | AC=9;AF=0.129;AN=70;BaseQ=          |
| 34739 | chrY | 13705739 | . | A | T     | 27369.27 | my_snp_filter | AC=10;AF=0.143;AN=                  |
| 34740 | chrY | 13705746 | . | G | A     | 721.42   | PASS          | AC=9;AF=0.129;AN=70;BaseQRankSum=   |
| 34741 | chrY | 13705785 | . | G | A     | 302.86   | my_snp_filter | AC=5;AF=0.071;AN=70;BaseQ=          |
| 34742 | chrY | 13705821 | . | A | G     | 2291.30  | PASS          | AC=13;AF=0.186;AN=70;BaseQRankSum=  |
| 34743 | chrY | 13705826 | . | G | C     | 4926.92  | PASS          | AC=20;AF=0.286;AN=70;BaseQRankSum=  |
| 34744 | chrY | 13705828 | . | G | A     | 90.84    | my_snp_filter | AC=2;AF=0.029;AN=70;BaseQ=          |
| 34745 | chrY | 13705832 | . | T | C     | 86.83    | my_snp_filter | AC=2;AF=0.029;AN=70;BaseQ=          |
| 34746 | chrY | 13705848 | . | G | T     | 248.38   | my_snp_filter | AC=5;AF=0.071;AN=70;BaseQ=          |
| 34747 | chrY | 13705858 | . | G | A     | 1438.23  | PASS          | AC=4;AF=0.057;AN=70;BaseQRankSum=   |
| 34748 | chrY | 13705871 | . | C | T     | 1349.05  | PASS          | AC=5;AF=0.071;AN=70;BaseQRankSum=   |
| 34749 | chrY | 13705873 | . | C | T     | 1543.12  | PASS          | AC=6;AF=0.086;AN=70;BaseQRankSum=   |
| 34750 | chrY | 13705874 | . | G | T     | 1510.35  | PASS          | AC=6;AF=0.086;AN=70;BaseQRankSum=   |
| 34751 | chrY | 13705888 | . | G | C     | 1451.95  | PASS          | AC=8;AF=0.114;AN=70;BaseQRankSum=   |
| 34752 | chrY | 13705893 | . | A | G     | 1049.62  | PASS          | AC=8;AF=0.114;AN=70;BaseQRankSum=   |
| 34753 | chrY | 13705894 | . | G | T     | 303.58   | PASS          | AC=3;AF=0.043;AN=70;BaseQRankSum=   |
| 34754 | chrY | 13705902 | . | T | A     | 59.63    | my_snp_filter | AC=2;AF=0.029;AN=70;BaseQ=          |
| 34755 | chrY | 13705951 | . | G | A     | 138.01   | PASS          | AC=3;AF=0.056;AN=54;BaseQRankSum=   |
| 34756 | chrY | 13706008 | . | T | G     | 307.31   | PASS          | AC=1;AF=0.042;AN=24;BaseQRankSum=   |
| 34757 | chrY | 13706065 | . | A | C     | 1940.28  | PASS          | AC=5;AF=0.071;AN=70;BaseQRankSum=   |
| 34758 | chrY | 13706082 | . | T | A,*   | 1426.09  | PASS          | AC=3,3;AF=0.052,0.052;AN=58;BaseQ=  |
| 34759 | chrY | 13706085 | . | T | A,C,* | 2113.32  | PASS          | AC=7,2,2;AF=0.167,0.048,0.048;AN=   |
| 34760 | chrY | 13706089 | . | G | C,*   | 733.34   | PASS          | AC=1,2;AF=0.018,0.036;AN=56;BaseQ=  |
| 34761 | chrY | 13706091 | . | G | A,*   | 1262.46  | PASS          | AC=7,3;AF=0.167,0.071;AN=42;BaseQ=  |
| 34762 | chrY | 13706115 | . | T | A,C   | 1501.94  | PASS          | AC=2,4;AF=0.045,0.091;AN=44;BaseQ=  |
| 34763 | chrY | 13706120 | . | A | C     | 307.24   | PASS          | AC=2;AF=0.029;AN=70;BaseQRankSum=   |
| 34764 | chrY | 13706124 | . | G | T     | 2455.75  | PASS          | AC=4;AF=0.059;AN=68;BaseQRankSum=   |
| 34765 | chrY | 13706130 | . | A | T,C   | 996.73   | PASS          | AC=1,2;AF=0.014,0.029;AN=70;BaseQ=  |
| 34766 | chrY | 13706143 | . | G | T     | 5552.79  | PASS          | AC=5;AF=0.089;AN=56;BaseQRankSum=   |
| 34767 | chrY | 13706152 | . | T | G     | 108.77   | my_snp_filter | AC=6;AF=0.086;AN=70;BaseQ=          |
| 34768 | chrY | 13706154 | . | G | A     | 302.40   | PASS          | AC=2;AF=0.029;AN=70;BaseQRankSum=   |
| 34769 | chrY | 13706155 | . | G | A     | 524.45   | PASS          | AC=2;AF=0.029;AN=70;BaseQRankSum=   |
| 34770 | chrY | 13706159 | . | G | T     | 370.73   | PASS          | AC=2;AF=0.029;AN=70;BaseQRankSum=   |
| 34771 | chrY | 13706160 | . | G | T     | 375.86   | PASS          | AC=2;AF=0.029;AN=70;BaseQRankSum=   |
| 34772 | chrY | 13706161 | . | C | T     | 527.03   | PASS          | AC=2;AF=0.029;AN=70;BaseQRankSum=   |
| 34773 | chrY | 13706166 | . | A | G     | 54.58    | PASS          | AC=1;AF=0.014;AN=70;BaseQRankSum=   |
| 34774 | chrY | 13706172 | . | T | A     | 2417.77  | PASS          | AC=4;AF=0.083;AN=48;BaseQRankSum=   |
| 34775 | chrY | 13706173 | . | A | G     | 8712.24  | PASS          | AC=6;AF=0.130;AN=46;BaseQRankSum=   |
| 34776 | chrY | 13706193 | . | C | G     | 293.94   | my_snp_filter | AC=2;AF=0.029;AN=68;BaseQ=          |
| 34777 | chrY | 13706206 | . | G | T     | 9920.60  | my_snp_filter | AC=10;AF=0.179;AN=56;BaseQ=         |
| 34778 | chrY | 13706217 | . | T | C     | 9301.95  | my_snp_filter | AC=9;AF=0.132;AN=68;BaseQ=          |
| 34779 | chrY | 13706234 | . | T | C     | 11564.08 | my_snp_filter | AC=6;AF=0.086;AN=                   |
| 34780 | chrY | 13706243 | . | A | G     | 12008.99 | my_snp_filter | AC=6;AF=0.086;AN=                   |
| 34781 | chrY | 13706265 | . | A | G     | 897.10   | my_snp_filter | AC=3;AF=0.043;AN=70;BaseQ=          |
| 34782 | chrY | 13706269 | . | G | A     | 1708.35  | my_snp_filter | AC=15;AF=0.221;AN=68;BaseQ=         |
| 34783 | chrY | 13706283 | . | C | T     | 1490.72  | my_snp_filter | AC=5;AF=0.074;AN=68;BaseQ=          |
| 34784 | chrY | 13706320 | . | A | T     | 845.63   | my_snp_filter | AC=10;AF=0.152;AN=66;BaseQ=         |
| 34785 | chrY | 13706331 | . | A | T     | 17482.19 | my_snp_filter | AC=24;AF=0.375;AN=                  |
| 34786 | chrY | 13706344 | . | A | C     | 4751.86  | my_snp_filter | AC=13;AF=0.197;AN=66;BaseQ=         |
| 34787 | chrY | 13706352 | . | T | C     | 2074.34  | my_snp_filter | AC=6;AF=0.088;AN=68;BaseQ=          |
| 34788 | chrY | 13706379 | . | T | G     | 3817.21  | my_snp_filter | AC=7;AF=0.103;AN=68;BaseQ=          |
| 34789 | chrY | 13706384 | . | G | A     | 132.63   | PASS          | AC=2;AF=0.029;AN=70;BaseQRankSum=   |
| 34790 | chrY | 13706390 | . | G | A     | 2517.86  | my_snp_filter | AC=7;AF=0.100;AN=70;BaseQ=          |
| 34791 | chrY | 13706407 | . | T | C     | 181.95   | PASS          | AC=2;AF=0.029;AN=70;BaseQRankSum=   |
| 34792 | chrY | 13706409 | . | G | A     | 287.08   | PASS          | AC=5;AF=0.071;AN=70;BaseQRankSum=   |
| 34793 | chrY | 13706430 | . | A | C     | 85.51    | PASS          | AC=1;AF=0.014;AN=70;BaseQRankSum=   |
| 34794 | chrY | 13706546 | . | T | A,C   | 2798.41  | PASS          | AC=3,10;AF=0.043,0.143;AN=70;BaseQ= |
| 34795 | chrY | 13706560 | . | A | G     | 695.64   | my_snp_filter | AC=8;AF=0.114;AN=70;BaseQ=          |
| 34796 | chrY | 13706562 | . | T | A     | 106.61   | PASS          | AC=2;AF=0.029;AN=70;BaseQRankSum=   |
| 34797 | chrY | 13706573 | . | G | A     | 1350.56  | PASS          | AC=8;AF=0.114;AN=70;BaseQRankSum=   |
| 34798 | chrY | 13706588 | . | G | C     | 475.37   | my_snp_filter | AC=6;AF=0.086;AN=70;BaseQ=          |
| 34799 | chrY | 13706630 | . | C | A     | 3437.84  | my_snp_filter | AC=12;AF=0.176;AN=68;BaseQ=         |
| 34800 | chrY | 13706632 | . | G | A     | 11954.88 | my_snp_filter | AC=15;AF=0.227;AN=                  |
| 34801 | chrY | 13706645 | . | T | G     | 6702.63  | my_snp_filter | AC=8;AF=0.121;AN=66;BaseQ=          |
| 34802 | chrY | 13706649 | . | T | A     | 9119.53  | my_snp_filter | AC=12;AF=0.182;AN=66;BaseQ=         |
| 34803 | chrY | 13706657 | . | T | G     | 152.63   | my_snp_filter | AC=4;AF=0.059;AN=68;BaseQ=          |
| 34804 | chrY | 13706700 | . | A | T     | 928.48   | PASS          | AC=7;AF=0.100;AN=70;BaseQRankSum=   |
| 34805 | chrY | 13706715 | . | A | G     | 1515.51  | PASS          | AC=8;AF=0.114;AN=70;BaseQRankSum=   |
| 34806 | chrY | 13706720 | . | A | G,*   | 309.45   | my_snp_filter | AC=3,2;AF=0.044,0.029;AN=           |
| 34807 | chrY | 13706723 | . | G | C,*   | 250.77   | my_snp_filter | AC=3,1;AF=0.044,0.015;AN=           |
| 34808 | chrY | 13706727 | . | C | G     | 3258.08  | PASS          | AC=9;AF=0.136;AN=66;BaseQRankSum=   |

|       |      |          |   |   |     |           |               |                                    |
|-------|------|----------|---|---|-----|-----------|---------------|------------------------------------|
| 34809 | chrY | 13706731 | . | T | C   | 1281.05   | PASS          | AC=3;AF=0.048;AN=62;BaseQRankSum=  |
| 34810 | chrY | 13706741 | . | A | T,* | 260.60    | PASS          | AC=2,1;AF=0.032,0.016;AN=62;BaseQ  |
| 34811 | chrY | 13706748 | . | T | G,* | 261.40    | PASS          | AC=2,1;AF=0.032,0.016;AN=62;BaseQ  |
| 34812 | chrY | 13706761 | . | T | C   | 5055.52   | PASS          | AC=19;AF=0.396;AN=48;BaseQRankSum= |
| 34813 | chrY | 13706793 | . | G | A   | 46.48     | PASS          | AC=2;AF=0.030;AN=66;BaseQRankSum=  |
| 34814 | chrY | 13706796 | . | C | T   | 85.33     | my_snp_filter | AC=2;AF=0.030;AN=66;BaseQ          |
| 34815 | chrY | 13706813 | . | G | A   | 153.03    | PASS          | AC=3;AF=0.044;AN=68;BaseQRankSum=  |
| 34816 | chrY | 13706837 | . | C | G   | 34.84     | my_snp_filter | AC=5;AF=0.074;AN=68;BaseQ          |
| 34817 | chrY | 13706838 | . | G | A   | 375.53    | PASS          | AC=3;AF=0.044;AN=68;BaseQRankSum=  |
| 34818 | chrY | 13706850 | . | T | A   | 4730.90   | PASS          | AC=12;AF=0.176;AN=68;BaseQRankSum= |
| 34819 | chrY | 13706867 | . | T | G,A | 11088.43  | PASS          | AC=26,4;AF=0.382,0.059;AN=         |
| 34820 | chrY | 13706878 | . | G | T   | 187.58    | my_snp_filter | AC=2;AF=0.029;AN=70;BaseQ          |
| 34821 | chrY | 13706893 | . | A | G,* | 5504.98   | PASS          | AC=9,4;AF=0.129,0.057;AN=70;BaseQ  |
| 34822 | chrY | 13706896 | . | C | T,* | 4049.63   | PASS          | AC=9,4;AF=0.129,0.057;AN=70;BaseQ  |
| 34823 | chrY | 13706946 | . | T | C   | 38.77     | my_snp_filter | AC=3;AF=0.043;AN=70;BaseQ          |
| 34824 | chrY | 13706951 | . | A | T   | 4873.49   | my_snp_filter | AC=20;AF=0.286;AN=70;BaseQ         |
| 34825 | chrY | 13706958 | . | G | A   | 798.28    | PASS          | AC=8;AF=0.114;AN=70;BaseQRankSum=  |
| 34826 | chrY | 13706970 | . | C | G   | 4767.45   | my_snp_filter | AC=20;AF=0.294;AN=68;BaseQ         |
| 34827 | chrY | 13707001 | . | T | A   | 512.38    | my_snp_filter | AC=5;AF=0.074;AN=68;BaseQ          |
| 34828 | chrY | 13707003 | . | G | A   | 130.89    | my_snp_filter | AC=3;AF=0.047;AN=64;BaseQ          |
| 34829 | chrY | 13707008 | . | A | G   | 3233.06   | my_snp_filter | AC=11;AF=0.177;AN=62;BaseQ         |
| 34830 | chrY | 13707019 | . | A | G   | 83.65     | my_snp_filter | AC=1;AF=0.016;AN=62;BaseQ          |
| 34831 | chrY | 13707065 | . | A | G   | 48.62     | my_snp_filter | AC=2;AF=0.037;AN=54;DP=87          |
| 34832 | chrY | 13707078 | . | A | C   | 4611.44   | my_snp_filter | AC=19;AF=0.413;AN=46;BaseQ         |
| 34833 | chrY | 13707096 | . | G | C   | 17533.83  | my_snp_filter | AC=32;AF=1.00;AN=                  |
| 34834 | chrY | 13707106 | . | T | A   | 1004.10   | my_snp_filter | AC=7;AF=0.175;AN=40;BaseQ          |
| 34835 | chrY | 13707121 | . | T | G   | 59.27     | my_snp_filter | AC=1;AF=0.017;AN=58;BaseQ          |
| 34836 | chrY | 13707133 | . | G | C   | 49.32     | my_snp_filter | AC=1;AF=0.016;AN=64;BaseQ          |
| 34837 | chrY | 13707161 | . | G | T,A | 20321.81  | my_snp_filter | AC=23,2;AF=0.411,                  |
| 34838 | chrY | 13707163 | . | T | C,G | 20912.81  | my_snp_filter | AC=23,2;AF=0.411,                  |
| 34839 | chrY | 13707178 | . | A | G   | 24838.80  | my_snp_filter | AC=23;AF=0.397;AN=                 |
| 34840 | chrY | 13707222 | . | C | T   | 143.11    | my_snp_filter | AC=1;AF=0.016;AN=62;BaseQ          |
| 34841 | chrY | 13707233 | . | A | G   | 15579.53  | my_snp_filter | AC=9;AF=0.145;AN=                  |
| 34842 | chrY | 13707265 | . | A | C   | 30583.23  | my_snp_filter | AC=18;AF=0.450;AN=                 |
| 34843 | chrY | 13707303 | . | C | G   | 43213.17  | my_snp_filter | AC=27;AF=0.587;AN=                 |
| 34844 | chrY | 13707311 | . | T | G   | 71.22     | my_snp_filter | AC=1;AF=0.019;AN=54;BaseQ          |
| 34845 | chrY | 13707329 | . | T | A   | 37940.21  | my_snp_filter | AC=9;AF=0.409;AN=                  |
| 34846 | chrY | 13707330 | . | G | C   | 37784.97  | my_snp_filter | AC=9;AF=0.409;AN=                  |
| 34847 | chrY | 13707377 | . | C | G   | 60.81     | my_snp_filter | AC=1;AF=0.018;AN=56;BaseQ          |
| 34848 | chrY | 13707392 | . | A | G   | 282.60    | my_snp_filter | AC=4;AF=0.105;AN=38;BaseQ          |
| 34849 | chrY | 13707393 | . | C | G   | 4990.92   | my_snp_filter | AC=10;AF=0.357;AN=28;BaseQ         |
| 34850 | chrY | 13707394 | . | C | T   | 5093.92   | my_snp_filter | AC=10;AF=0.357;AN=28;BaseQ         |
| 34851 | chrY | 13707397 | . | T | G,A | 3498.94   | my_snp_filter | AC=7,1;AF=0.184,0.026;AN=          |
| 34852 | chrY | 13707409 | . | A | T   | 501.31    | PASS          | AC=5;AF=0.076;AN=66;BaseQRankSum=  |
| 34853 | chrY | 13707433 | . | G | T   | 3740.27   | my_snp_filter | AC=8;AF=0.160;AN=50;BaseQ          |
| 34854 | chrY | 13707474 | . | C | A   | 32324.97  | my_snp_filter | AC=26;AF=0.619;AN=                 |
| 34855 | chrY | 13707510 | . | T | G   | 157275.90 | my_snp_filter | AC=50;AF=0.758;AN=                 |
| 34856 | chrY | 13707515 | . | A | T   | 91126.20  | my_snp_filter | AC=34;AF=0.515;AN=                 |
| 34857 | chrY | 13707525 | . | G | A   | 56.45     | my_snp_filter | AC=1;AF=0.014;AN=70;BaseQ          |
| 34858 | chrY | 13707526 | . | T | A   | 56.44     | my_snp_filter | AC=1;AF=0.014;AN=70;BaseQ          |
| 34859 | chrY | 13707540 | . | T | A   | 197890.57 | my_snp_filter | AC=54;AF=0.818;AN=                 |
| 34860 | chrY | 13707547 | . | A | G   | 198328.09 | my_snp_filter | AC=55;AF=0.833;AN=                 |
| 34861 | chrY | 13707580 | . | C | G   | 104899.70 | my_snp_filter | AC=39;AF=0.591;AN=                 |
| 34862 | chrY | 13707627 | . | C | G   | 32.75     | my_snp_filter | AC=3;AF=0.043;AN=70;BaseQ          |
| 34863 | chrY | 13707644 | . | T | A   | 105567.97 | my_snp_filter | AC=40;AF=0.571;AN=                 |
| 34864 | chrY | 13707656 | . | A | T   | 98202.76  | my_snp_filter | AC=40;AF=0.571;AN=                 |
| 34865 | chrY | 13707692 | . | T | G   | 82389.09  | PASS          | AC=68;AF=0.971;AN=70;BaseQ         |
| 34866 | chrY | 13707694 | . | C | A   | 19841.08  | my_snp_filter | AC=12;AF=0.171;AN=                 |
| 34867 | chrY | 13707711 | . | T | C   | 11594.65  | PASS          | AC=26;AF=0.371;AN=70;BaseQ         |
| 34868 | chrY | 13707785 | . | T | A   | 1867.06   | my_snp_filter | AC=14;AF=0.226;AN=62;BaseQ         |
| 34869 | chrY | 13707992 | . | T | G   | 368.99    | PASS          | AC=2;AF=0.083;AN=24;BaseQRankSum=  |
| 34870 | chrY | 13707994 | . | C | A   | 782.36    | PASS          | AC=4;AF=0.167;AN=24;BaseQRankSum=  |
| 34871 | chrY | 13707996 | . | C | G   | 208.92    | PASS          | AC=1;AF=0.042;AN=24;BaseQRankSum=  |
| 34872 | chrY | 13708036 | . | G | C   | 266.27    | my_snp_filter | AC=3;AF=0.150;AN=20;BaseQ          |
| 34873 | chrY | 13708057 | . | C | G   | 13163.43  | my_snp_filter | AC=8;AF=0.364;AN=                  |
| 34874 | chrY | 13708065 | . | T | C   | 1496.55   | my_snp_filter | AC=8;AF=0.364;AN=22;BaseQ          |
| 34875 | chrY | 13708069 | . | A | T   | 1561.12   | my_snp_filter | AC=8;AF=0.364;AN=22;BaseQ          |
| 34876 | chrY | 13708082 | . | G | A   | 1059.62   | my_snp_filter | AC=7;AF=0.318;AN=22;BaseQ          |
| 34877 | chrY | 13708137 | . | T | A   | 39161.15  | my_snp_filter | AC=10;AF=0.556;AN=                 |
| 34878 | chrY | 13708226 | . | T | G   | 49.22     | my_snp_filter | AC=2;AF=0.038;AN=52;DP=23          |
| 34879 | chrY | 13708231 | . | A | T   | 46309.01  | my_snp_filter | AC=23;AF=0.605;AN=                 |
| 34880 | chrY | 13708232 | . | T | A   | 77008.36  | my_snp_filter | AC=25;AF=0.735;AN=                 |
| 34881 | chrY | 13708265 | . | A | T   | 50377.37  | my_snp_filter | AC=16;AF=0.615;AN=                 |
| 34882 | chrY | 13708361 | . | G | A   | 376.80    | my_snp_filter | AC=12;AF=0.286;AN=42;BaseQ         |
| 34883 | chrY | 13708432 | . | G | A   | 3865.85   | my_snp_filter | AC=8;AF=0.500;AN=16;BaseQ          |
| 34884 | chrY | 13708442 | . | C | T   | 98.88     | my_snp_filter | AC=1;AF=0.063;AN=16;BaseQ          |

|       |      |          |   |   |     |           |               |                                   |
|-------|------|----------|---|---|-----|-----------|---------------|-----------------------------------|
| 34885 | chrY | 13708443 | . | G | C   | 1145.01   | my_snp_filter | AC=8;AF=0.500;AN=16;BaseQ         |
| 34886 | chrY | 13708463 | . | A | G   | 4256.72   | my_snp_filter | AC=8;AF=0.333;AN=24;BaseQ         |
| 34887 | chrY | 13708486 | . | G | T   | 7814.69   | my_snp_filter | AC=8;AF=0.333;AN=24;BaseQ         |
| 34888 | chrY | 13708500 | . | G | T   | 124.73    | my_snp_filter | AC=2;AF=0.067;AN=30;BaseQ         |
| 34889 | chrY | 13708514 | . | A | T   | 5047.24   | my_snp_filter | AC=8;AF=0.250;AN=32;BaseQ         |
| 34890 | chrY | 13708608 | . | T | A   | 9119.84   | my_snp_filter | AC=7;AF=0.389;AN=18;BaseQ         |
| 34891 | chrY | 13708636 | . | A | T   | 113.38    | my_snp_filter | AC=1;AF=0.063;AN=16;BaseQ         |
| 34892 | chrY | 13708683 | . | T | A   | 576.33    | my_snp_filter | AC=3;AF=0.167;AN=18;BaseQ         |
| 34893 | chrY | 13708719 | . | T | G   | 331.38    | my_snp_filter | AC=2;AF=0.111;AN=18;BaseQ         |
| 34894 | chrY | 13708744 | . | G | A   | 1097.45   | my_snp_filter | AC=6;AF=0.333;AN=18;BaseQ         |
| 34895 | chrY | 13708762 | . | A | T   | 1790.75   | my_snp_filter | AC=7;AF=0.389;AN=18;BaseQ         |
| 34896 | chrY | 13708771 | . | C | A   | 423.19    | my_snp_filter | AC=1;AF=0.056;AN=18;BaseQ         |
| 34897 | chrY | 13708879 | . | C | G   | 3468.88   | my_snp_filter | AC=19;AF=0.279;AN=68;BaseQ        |
| 34898 | chrY | 13708884 | . | T | A   | 76932.98  | my_snp_filter | AC=37;AF=0.544;AN=                |
| 34899 | chrY | 13708885 | . | T | C   | 5515.51   | my_snp_filter | AC=26;AF=0.382;AN=68;BaseQ        |
| 34900 | chrY | 13708897 | . | A | C   | 5852.24   | my_snp_filter | AC=26;AF=0.382;AN=68;BaseQ        |
| 34901 | chrY | 13708936 | . | A | C   | 4212.65   | my_snp_filter | AC=25;AF=0.368;AN=68;BaseQ        |
| 34902 | chrY | 13708940 | . | A | C   | 46.84     | my_snp_filter | AC=1;AF=0.015;AN=68;BaseQ         |
| 34903 | chrY | 13708954 | . | T | G   | 129160.16 | my_snp_filter | AC=36;AF=0.529;AN=                |
| 34904 | chrY | 13708968 | . | T | A   | 14861.91  | my_snp_filter | AC=25;AF=0.368;AN=                |
| 34905 | chrY | 13708970 | . | G | A   | 653.10    | my_snp_filter | AC=4;AF=0.059;AN=68;BaseQ         |
| 34906 | chrY | 13708973 | . | T | A   | 27928.62  | my_snp_filter | AC=31;AF=0.443;AN=                |
| 34907 | chrY | 13708986 | . | A | C   | 61.67     | my_snp_filter | AC=2;AF=0.029;AN=70;BaseQ         |
| 34908 | chrY | 13708993 | . | A | T   | 29158.83  | my_snp_filter | AC=30;AF=0.429;AN=                |
| 34909 | chrY | 13709001 | . | T | A,C | 91734.18  | my_snp_filter | AC=11,34;AF=0.157                 |
| 34910 | chrY | 13709003 | . | C | T   | 4197.32   | my_snp_filter | AC=10;AF=0.143;AN=70;BaseQ        |
| 34911 | chrY | 13709020 | . | T | C   | 1182.24   | my_snp_filter | AC=11;AF=0.157;AN=70;BaseQ        |
| 34912 | chrY | 13709044 | . | C | G   | 130.05    | my_snp_filter | AC=4;AF=0.057;AN=70;BaseQ         |
| 34913 | chrY | 13709049 | . | G | T   | 132.09    | my_snp_filter | AC=6;AF=0.086;AN=70;BaseQ         |
| 34914 | chrY | 13709064 | . | G | C   | 92.92     | my_snp_filter | AC=1;AF=0.014;AN=70;BaseQ         |
| 34915 | chrY | 13709071 | . | A | C   | 386.31    | my_snp_filter | AC=6;AF=0.086;AN=70;BaseQ         |
| 34916 | chrY | 13709072 | . | A | C   | 17932.19  | my_snp_filter | AC=26;AF=0.371;AN=                |
| 34917 | chrY | 13709085 | . | G | T   | 335.88    | my_snp_filter | AC=3;AF=0.043;AN=70;BaseQ         |
| 34918 | chrY | 13709091 | . | G | A   | 3285.91   | my_snp_filter | AC=10;AF=0.143;AN=70;BaseQ        |
| 34919 | chrY | 13709105 | . | C | G   | 3878.82   | my_snp_filter | AC=9;AF=0.129;AN=70;BaseQ         |
| 34920 | chrY | 13709109 | . | C | A,T | 2651.44   | PASS          | AC=2,8;AF=0.029,0.114;AN=70;BaseQ |
| 34921 | chrY | 13709114 | . | C | G   | 216.14    | my_snp_filter | AC=3;AF=0.043;AN=70;BaseQ         |
| 34922 | chrY | 13709144 | . | C | G   | 1905.25   | PASS          | AC=6;AF=0.086;AN=70;BaseQRankSum= |
| 34923 | chrY | 13709156 | . | C | G   | 2074.67   | PASS          | AC=8;AF=0.114;AN=70;BaseQRankSum= |
| 34924 | chrY | 13709157 | . | A | G   | 242.82    | PASS          | AC=4;AF=0.059;AN=68;BaseQRankSum= |
| 34925 | chrY | 13709158 | . | C | T   | 1181.72   | PASS          | AC=5;AF=0.071;AN=70;BaseQRankSum= |
| 34926 | chrY | 13709184 | . | T | G   | 1287.63   | PASS          | AC=5;AF=0.071;AN=70;BaseQRankSum= |
| 34927 | chrY | 13709209 | . | T | A   | 142.67    | PASS          | AC=2;AF=0.029;AN=68;DP=745;FS=0.0 |
| 34928 | chrY | 13709243 | . | A | G   | 1222.15   | PASS          | AC=6;AF=0.091;AN=66;BaseQRankSum= |
| 34929 | chrY | 13709255 | . | C | T   | 337.20    | PASS          | AC=8;AF=0.129;AN=62;BaseQRankSum= |
| 34930 | chrY | 13709276 | . | G | C   | 1019.88   | PASS          | AC=6;AF=0.115;AN=52;BaseQRankSum= |
| 34931 | chrY | 13709284 | . | C | G   | 69.69     | my_snp_filter | AC=2;AF=0.043;AN=46;BaseQ         |
| 34932 | chrY | 13709346 | . | A | G   | 2755.87   | my_snp_filter | AC=6;AF=0.200;AN=30;BaseQ         |
| 34933 | chrY | 13709364 | . | T | A   | 1004.38   | my_snp_filter | AC=6;AF=0.231;AN=26;BaseQ         |
| 34934 | chrY | 13709417 | . | A | G   | 406.03    | my_snp_filter | AC=4;AF=0.074;AN=54;BaseQ         |
| 34935 | chrY | 13709418 | . | C | T   | 401.71    | my_snp_filter | AC=4;AF=0.074;AN=54;BaseQ         |
| 34936 | chrY | 13709441 | . | A | C   | 264.89    | my_snp_filter | AC=2;AF=0.037;AN=54;BaseQ         |
| 34937 | chrY | 13709473 | . | A | C   | 415.62    | my_snp_filter | AC=8;AF=0.148;AN=54;BaseQ         |
| 34938 | chrY | 13709476 | . | T | G,A | 574.41    | my_snp_filter | AC=3,8;AF=0.063,0.167;AN=         |
| 34939 | chrY | 13709481 | . | G | C   | 78.48     | my_snp_filter | AC=2;AF=0.048;AN=42;BaseQ         |
| 34940 | chrY | 13709504 | . | T | C   | 447.93    | my_snp_filter | AC=4;AF=0.154;AN=26;BaseQ         |
| 34941 | chrY | 13709505 | . | A | G   | 2955.46   | my_snp_filter | AC=9;AF=0.346;AN=26;BaseQ         |
| 34942 | chrY | 13709509 | . | C | T   | 287.66    | my_snp_filter | AC=1;AF=0.036;AN=28;BaseQ         |
| 34943 | chrY | 13709510 | . | C | G   | 1155.82   | my_snp_filter | AC=6;AF=0.250;AN=24;BaseQ         |
| 34944 | chrY | 13709512 | . | A | C   | 289.69    | my_snp_filter | AC=4;AF=0.125;AN=32;BaseQ         |
| 34945 | chrY | 13709538 | . | C | T,G | 2042.49   | my_snp_filter | AC=14,16;AF=0.333,0.381;AN=       |
| 34946 | chrY | 13709561 | . | A | T   | 335.54    | my_snp_filter | AC=5;AF=0.086;AN=58;BaseQ         |
| 34947 | chrY | 13709570 | . | T | G   | 1026.96   | my_snp_filter | AC=10;AF=0.172;AN=58;BaseQ        |
| 34948 | chrY | 13709577 | . | A | T   | 504.76    | my_snp_filter | AC=5;AF=0.114;AN=44;BaseQ         |
| 34949 | chrY | 13709578 | . | C | T   | 3865.49   | my_snp_filter | AC=21;AF=0.525;AN=40;BaseQ        |
| 34950 | chrY | 13709579 | . | A | T   | 3853.22   | my_snp_filter | AC=21;AF=0.525;AN=40;BaseQ        |
| 34951 | chrY | 13709602 | . | A | G   | 535.03    | my_snp_filter | AC=5;AF=0.086;AN=58;BaseQ         |
| 34952 | chrY | 13709604 | . | T | C   | 3830.49   | my_snp_filter | AC=18;AF=0.500;AN=36;BaseQ        |
| 34953 | chrY | 13709629 | . | C | A   | 1401.63   | PASS          | AC=8;AF=0.222;AN=36;BaseQRankSum= |
| 34954 | chrY | 13709641 | . | T | A   | 1565.92   | PASS          | AC=7;AF=0.167;AN=42;BaseQRankSum= |
| 34955 | chrY | 13709778 | . | A | G   | 3845.08   | my_snp_filter | AC=7;AF=0.250;AN=28;BaseQ         |
| 34956 | chrY | 13709792 | . | A | C   | 2767.09   | my_snp_filter | AC=7;AF=0.250;AN=28;BaseQ         |
| 34957 | chrY | 13709804 | . | A | C   | 410.57    | my_snp_filter | AC=6;AF=0.188;AN=32;BaseQ         |
| 34958 | chrY | 13709821 | . | A | G   | 493.37    | my_snp_filter | AC=3;AF=0.115;AN=26;BaseQ         |
| 34959 | chrY | 13709898 | . | G | A   | 4677.92   | PASS          | AC=8;AF=0.200;AN=40;BaseQRankSum= |
| 34960 | chrY | 13709912 | . | T | C   | 4346.56   | PASS          | AC=8;AF=0.174;AN=46;BaseQRankSum= |

|       |      |          |   |   |   |           |               |                                   |
|-------|------|----------|---|---|---|-----------|---------------|-----------------------------------|
| 34961 | chrY | 13709925 | . | T | A | 48988.23  | PASS          | AC=14;AF=0.438;AN=32;BaseQ        |
| 34962 | chrY | 13709938 | . | C | T | 2345.41   | my_snp_filter | AC=7;AF=0.130;AN=54;BaseQ         |
| 34963 | chrY | 13709942 | . | T | C | 10642.19  | PASS          | AC=8;AF=0.143;AN=56;BaseQ         |
| 34964 | chrY | 13709954 | . | G | T | 4615.90   | PASS          | AC=16;AF=0.364;AN=44;BaseQRankSum |
| 34965 | chrY | 13709958 | . | G | T | 44.49     | PASS          | AC=1;AF=0.016;AN=64;BaseQRankSum  |
| 34966 | chrY | 13710016 | . | A | G | 4084.73   | PASS          | AC=5;AF=0.083;AN=60;BaseQRankSum  |
| 34967 | chrY | 13710022 | . | C | A | 3719.49   | PASS          | AC=5;AF=0.089;AN=56;BaseQRankSum  |
| 34968 | chrY | 13710031 | . | A | G | 3525.82   | my_snp_filter | AC=5;AF=0.093;AN=54;BaseQ         |
| 34969 | chrY | 13710048 | . | G | A | 44.51     | my_snp_filter | AC=2;AF=0.029;AN=70;BaseQ         |
| 34970 | chrY | 13710054 | . | A | T | 2394.87   | my_snp_filter | AC=6;AF=0.086;AN=70;BaseQ         |
| 34971 | chrY | 13710056 | . | A | T | 32.41     | my_snp_filter | AC=1;AF=0.014;AN=70;BaseQ         |
| 34972 | chrY | 13710068 | . | A | G | 560.46    | my_snp_filter | AC=6;AF=0.088;AN=68;BaseQ         |
| 34973 | chrY | 13710074 | . | G | A | 846.48    | my_snp_filter | AC=7;AF=0.100;AN=70;BaseQ         |
| 34974 | chrY | 13710087 | . | T | C | 702.08    | my_snp_filter | AC=6;AF=0.088;AN=68;BaseQ         |
| 34975 | chrY | 13710091 | . | A | T | 677.66    | my_snp_filter | AC=5;AF=0.074;AN=68;BaseQ         |
| 34976 | chrY | 13710093 | . | T | G | 20002.87  | my_snp_filter | AC=30;AF=0.455;AN                 |
| 34977 | chrY | 13710106 | . | G | A | 138772.82 | my_snp_filter | AC=34;AF=0.515;AN                 |
| 34978 | chrY | 13710107 | . | T | A | 85.94     | my_snp_filter | AC=1;AF=0.015;AN=68;BaseQ         |
| 34979 | chrY | 13710109 | . | G | T | 2578.20   | my_snp_filter | AC=13;AF=0.191;AN=68;Base         |
| 34980 | chrY | 13710117 | . | T | C | 2548.99   | my_snp_filter | AC=14;AF=0.206;AN=68;Base         |
| 34981 | chrY | 13710165 | . | A | C | 3800.36   | my_snp_filter | AC=7;AF=0.103;AN=68;BaseQ         |
| 34982 | chrY | 13710197 | . | C | G | 3926.62   | my_snp_filter | AC=11;AF=0.162;AN=68;Base         |
| 34983 | chrY | 13710199 | . | G | T | 9565.87   | my_snp_filter | AC=8;AF=0.118;AN=68;BaseQ         |
| 34984 | chrY | 13710203 | . | C | G | 21994.60  | my_snp_filter | AC=30;AF=0.441;AN                 |
| 34985 | chrY | 13710217 | . | G | T | 50441.84  | my_snp_filter | AC=33;AF=0.485;AN                 |
| 34986 | chrY | 13710221 | . | A | G | 8918.21   | my_snp_filter | AC=19;AF=0.279;AN=68;Base         |
| 34987 | chrY | 13710233 | . | C | T | 6271.57   | my_snp_filter | AC=18;AF=0.265;AN=68;Base         |
| 34988 | chrY | 13710266 | . | G | A | 39577.19  | my_snp_filter | AC=33;AF=0.532;AN                 |
| 34989 | chrY | 13710277 | . | T | C | 121.03    | my_snp_filter | AC=2;AF=0.036;AN=56;BaseQ         |
| 34990 | chrY | 13710285 | . | A | G | 196.06    | my_snp_filter | AC=3;AF=0.060;AN=50;BaseQ         |
| 34991 | chrY | 13710297 | . | A | G | 124.76    | my_snp_filter | AC=3;AF=0.075;AN=40;BaseQ         |
| 34992 | chrY | 13710306 | . | C | T | 13492.98  | my_snp_filter | AC=13;AF=0.464;AN                 |
| 34993 | chrY | 13710387 | . | G | A | 6843.15   | my_snp_filter | AC=14;AF=0.269;AN=52;Base         |
| 34994 | chrY | 13710411 | . | G | A | 37.77     | PASS          | AC=3;AF=0.054;AN=56;BaseQRankSum  |
| 34995 | chrY | 13710437 | . | C | T | 81.02     | my_snp_filter | AC=3;AF=0.048;AN=62;BaseQ         |
| 34996 | chrY | 13710460 | . | A | T | 14581.82  | my_snp_filter | AC=24;AF=0.480;AN                 |
| 34997 | chrY | 13710467 | . | G | T | 157       | my_snp_filter | AC=1;AF=0.019;AN=54;BaseQ         |
| 34998 | chrY | 13710482 | . | T | A | 1262.87   | my_snp_filter | AC=10;AF=0.227;AN=44;Base         |
| 34999 | chrY | 13710486 | . | G | A | 677.01    | my_snp_filter | AC=8;AF=0.222;AN=36;BaseQ         |
| 35000 | chrY | 13710517 | . | T | G | 4566.90   | my_snp_filter | AC=10;AF=0.714;AN=14;Base         |
| 35001 | chrY | 13710544 | . | A | C | 1867.42   | my_snp_filter | AC=7;AF=0.438;AN=16;BaseQ         |
| 35002 | chrY | 13710552 | . | A | T | 3840.12   | my_snp_filter | AC=8;AF=0.500;AN=16;BaseQ         |
| 35003 | chrY | 13710557 | . | G | A | 72.13     | my_snp_filter | AC=2;AF=0.111;AN=18;BaseQ         |
| 35004 | chrY | 13710623 | . | A | T | 49.38     | my_snp_filter | AC=1;AF=0.063;AN=16;BaseQ         |
| 35005 | chrY | 13710635 | . | A | T | 3800.96   | my_snp_filter | AC=7;AF=0.438;AN=16;BaseQ         |
| 35006 | chrY | 13710647 | . | G | A | 49.07     | my_snp_filter | AC=1;AF=0.056;AN=18;BaseQ         |
| 35007 | chrY | 13710693 | . | A | C | 1448.70   | my_snp_filter | AC=7;AF=0.350;AN=20;BaseQ         |
| 35008 | chrY | 13710737 | . | G | T | 177.87    | my_snp_filter | AC=4;AF=0.111;AN=36;BaseQ         |
| 35009 | chrY | 13710766 | . | G | T | 437.95    | my_snp_filter | AC=6;AF=0.125;AN=48;BaseQ         |
| 35010 | chrY | 13710770 | . | C | T | 443.35    | my_snp_filter | AC=6;AF=0.130;AN=46;BaseQ         |
| 35011 | chrY | 13710772 | . | G | C | 309.82    | PASS          | AC=4;AF=0.091;AN=44;BaseQRankSum  |
| 35012 | chrY | 13710816 | . | C | G | 37.15     | my_snp_filter | AC=2;AF=0.063;AN=32;BaseQ         |
| 35013 | chrY | 13710835 | . | T | A | 32.99     | my_snp_filter | AC=2;AF=0.077;AN=26;DP=12         |
| 35014 | chrY | 13711202 | . | G | A | 2804.58   | my_snp_filter | AC=9;AF=0.141;AN=64;BaseQ         |
| 35015 | chrY | 13711209 | . | G | T | 91.86     | PASS          | AC=2;AF=0.029;AN=68;BaseQRankSum  |
| 35016 | chrY | 13711244 | . | G | T | 179.58    | PASS          | AC=2;AF=0.030;AN=66;BaseQRankSum  |
| 35017 | chrY | 13711245 | . | A | T | 111.31    | my_snp_filter | AC=2;AF=0.030;AN=66;BaseQ         |
| 35018 | chrY | 13711249 | . | A | G | 74        | my_snp_filter | AC=1;AF=0.015;AN=66;BaseQ         |
| 35019 | chrY | 13711253 | . | T | A | 1078.21   | PASS          | AC=7;AF=0.106;AN=66;BaseQRankSum  |
| 35020 | chrY | 13711256 | . | C | A | 97.94     | PASS          | AC=1;AF=0.017;AN=60;BaseQRankSum  |
| 35021 | chrY | 13711273 | . | T | C | 399.41    | my_snp_filter | AC=5;AF=0.074;AN=68;BaseQ         |
| 35022 | chrY | 13711292 | . | C | G | 721.36    | my_snp_filter | AC=3;AF=0.044;AN=68;BaseQ         |
| 35023 | chrY | 13711294 | . | C | T | 522.62    | my_snp_filter | AC=10;AF=0.152;AN=66;Base         |
| 35024 | chrY | 13711298 | . | T | G | 64.85     | my_snp_filter | AC=4;AF=0.061;AN=66;BaseQ         |
| 35025 | chrY | 13711299 | . | G | A | 125.09    | my_snp_filter | AC=2;AF=0.030;AN=66;BaseQ         |
| 35026 | chrY | 13711308 | . | T | A | 114.10    | my_snp_filter | AC=3;AF=0.044;AN=68;BaseQ         |
| 35027 | chrY | 13711317 | . | A | G | 731.87    | my_snp_filter | AC=3;AF=0.047;AN=64;BaseQ         |
| 35028 | chrY | 13711333 | . | C | T | 2470.23   | my_snp_filter | AC=8;AF=0.133;AN=60;BaseQ         |
| 35029 | chrY | 13711355 | . | C | G | 2032.28   | my_snp_filter | AC=6;AF=0.094;AN=64;BaseQ         |
| 35030 | chrY | 13711398 | . | T | C | 948.86    | my_snp_filter | AC=9;AF=0.136;AN=66;BaseQ         |
| 35031 | chrY | 13711408 | . | C | T | 9549.41   | my_snp_filter | AC=24;AF=0.364;AN=66;Base         |
| 35032 | chrY | 13711410 | . | G | A | 993.64    | my_snp_filter | AC=9;AF=0.132;AN=68;BaseQ         |
| 35033 | chrY | 13711423 | . | A | G | 96.35     | my_snp_filter | AC=1;AF=0.014;AN=70;BaseQ         |
| 35034 | chrY | 13711449 | . | G | A | 863.09    | my_snp_filter | AC=7;AF=0.100;AN=70;BaseQ         |
| 35035 | chrY | 13711457 | . | T | A | 303.59    | my_snp_filter | AC=5;AF=0.071;AN=70;BaseQ         |
| 35036 | chrY | 13711469 | . | G | T | 1553.89   | my_snp_filter | AC=5;AF=0.071;AN=70;BaseQ         |

|       |      |          |   |   |       |           |               |                                    |
|-------|------|----------|---|---|-------|-----------|---------------|------------------------------------|
| 35037 | chrY | 13711486 | . | A | G     | 1245.14   | my_snp_filter | AC=5;AF=0.071;AN=70;BaseQ          |
| 35038 | chrY | 13711491 | . | G | C     | 3855.67   | my_snp_filter | AC=14;AF=0.200;AN=70;BaseQ         |
| 35039 | chrY | 13711492 | . | C | G     | 140.11    | my_snp_filter | AC=1;AF=0.014;AN=70;BaseQ          |
| 35040 | chrY | 13711493 | . | G | A     | 327.99    | my_snp_filter | AC=6;AF=0.086;AN=70;BaseQ          |
| 35041 | chrY | 13711497 | . | T | C     | 519.36    | my_snp_filter | AC=6;AF=0.086;AN=70;BaseQ          |
| 35042 | chrY | 13711502 | . | T | C     | 144.47    | my_snp_filter | AC=1;AF=0.014;AN=70;BaseQ          |
| 35043 | chrY | 13711504 | . | G | A     | 95.47     | my_snp_filter | AC=1;AF=0.014;AN=70;BaseQ          |
| 35044 | chrY | 13711508 | . | G | C     | 63446.18  | my_snp_filter | AC=44;AF=0.647;AN=                 |
| 35045 | chrY | 13711513 | . | G | T     | 228.84    | my_snp_filter | AC=5;AF=0.071;AN=70;BaseQ          |
| 35046 | chrY | 13711523 | . | G | A     | 1054.92   | my_snp_filter | AC=5;AF=0.071;AN=70;BaseQ          |
| 35047 | chrY | 13711525 | . | A | T     | 31.20     | my_snp_filter | AC=2;AF=0.029;AN=70;BaseQ          |
| 35048 | chrY | 13711536 | . | C | T     | 1118.31   | my_snp_filter | AC=5;AF=0.071;AN=70;BaseQ          |
| 35049 | chrY | 13711538 | . | C | T     | 2288.32   | my_snp_filter | AC=6;AF=0.086;AN=70;BaseQ          |
| 35050 | chrY | 13711539 | . | G | T     | 3356.72   | my_snp_filter | AC=7;AF=0.106;AN=66;BaseQ          |
| 35051 | chrY | 13711552 | . | A | T     | 154.18    | my_snp_filter | AC=2;AF=0.029;AN=68;BaseQ          |
| 35052 | chrY | 13711553 | . | G | C     | 10078.95  | my_snp_filter | AC=8;AF=0.118;AN=                  |
| 35053 | chrY | 13711554 | . | C | G     | 41217.65  | my_snp_filter | AC=63;AF=0.955;AN=                 |
| 35054 | chrY | 13711559 | . | G | A,T   | 1434.44   | my_snp_filter | AC=2,7;AF=0.029,0.100;AN=          |
| 35055 | chrY | 13711571 | . | A | G     | 733.39    | my_snp_filter | AC=9;AF=0.129;AN=70;BaseQ          |
| 35056 | chrY | 13711591 | . | A | C     | 221.54    | my_snp_filter | AC=2;AF=0.029;AN=70;BaseQ          |
| 35057 | chrY | 13711592 | . | T | A     | 315.81    | my_snp_filter | AC=6;AF=0.086;AN=70;BaseQ          |
| 35058 | chrY | 13711597 | . | C | A     | 284.76    | my_snp_filter | AC=2;AF=0.029;AN=70;BaseQ          |
| 35059 | chrY | 13711603 | . | G | T     | 277.13    | my_snp_filter | AC=4;AF=0.057;AN=70;BaseQ          |
| 35060 | chrY | 13711604 | . | G | T     | 104.92    | my_snp_filter | AC=3;AF=0.043;AN=70;BaseQ          |
| 35061 | chrY | 13711614 | . | T | G     | 15793.12  | my_snp_filter | AC=29;AF=0.414;AN=                 |
| 35062 | chrY | 13711626 | . | G | A     | 1401.17   | my_snp_filter | AC=11;AF=0.157;AN=70;BaseQ         |
| 35063 | chrY | 13711629 | . | G | A     | 162.53    | PASS          | AC=5;AF=0.071;AN=70;BaseQRankSum=  |
| 35064 | chrY | 13711651 | . | A | T,G   | 761.17    | my_snp_filter | AC=4,3;AF=0.057,0.043;AN=          |
| 35065 | chrY | 13711674 | . | G | C     | 255.47    | my_snp_filter | AC=5;AF=0.074;AN=68;BaseQ          |
| 35066 | chrY | 13711679 | . | G | A     | 314.01    | my_snp_filter | AC=4;AF=0.059;AN=68;BaseQ          |
| 35067 | chrY | 13711683 | . | C | G,T   | 727.74    | PASS          | AC=4,1;AF=0.059,0.015;AN=68;BaseQ  |
| 35068 | chrY | 13711688 | . | C | G     | 1688.84   | my_snp_filter | AC=6;AF=0.088;AN=68;BaseQ          |
| 35069 | chrY | 13711689 | . | A | G     | 5558.07   | my_snp_filter | AC=18;AF=0.273;AN=66;BaseQ         |
| 35070 | chrY | 13711695 | . | A | T     | 131.96    | my_snp_filter | AC=3;AF=0.045;AN=66;BaseQ          |
| 35071 | chrY | 13711701 | . | A | C     | 195.13    | my_snp_filter | AC=3;AF=0.044;AN=68;BaseQ          |
| 35072 | chrY | 13711707 | . | T | A,C   | 1276.27   | my_snp_filter | AC=10,1;AF=0.152,0.015;AN=         |
| 35073 | chrY | 13711708 | . | G | T     | 390.88    | my_snp_filter | AC=7;AF=0.106;AN=66;BaseQ          |
| 35074 | chrY | 13711712 | . | T | A     | 395.91    | my_snp_filter | AC=7;AF=0.106;AN=66;BaseQ          |
| 35075 | chrY | 13711763 | . | T | G,*   | 3946.58   | PASS          | AC=2,14;AF=0.032,0.226;AN=62;BaseQ |
| 35076 | chrY | 13711764 | . | A | G,*   | 3961.69   | PASS          | AC=2,15;AF=0.031,0.234;AN=64;BaseQ |
| 35077 | chrY | 13711772 | . | C | T,*   | 4521.16   | PASS          | AC=2,14;AF=0.040,0.280;AN=64;BaseQ |
| 35078 | chrY | 13711799 | . | G | A,*   | 2024.19   | my_snp_filter | AC=4,7;AF=0.059,0.103;AN=          |
| 35079 | chrY | 13711806 | . | A | T,*   | 3296.47   | my_snp_filter | AC=7,6;AF=0.100,0.086;AN=          |
| 35080 | chrY | 13711810 | . | A | C,*   | 6534.15   | my_snp_filter | AC=16,3;AF=0.229,0.043;AN=         |
| 35081 | chrY | 13711812 | . | T | C,*   | 4029.39   | my_snp_filter | AC=11,5;AF=0.157,0.071;AN=         |
| 35082 | chrY | 13711815 | . | A | C,*   | 7705.09   | my_snp_filter | AC=15,6;AF=0.214,0.086;AN=         |
| 35083 | chrY | 13711821 | . | A | G,*   | 1422.44   | my_snp_filter | AC=2,5;AF=0.029,0.071;AN=          |
| 35084 | chrY | 13711825 | . | A | T,C,* | 15747.25  | my_snp_filter | AC=2,21,2;AF=0.02,0.071,0.071;AN=  |
| 35085 | chrY | 13711834 | . | A | G,*   | 924.40    | my_snp_filter | AC=4,4;AF=0.057,0.057;AN=          |
| 35086 | chrY | 13711836 | . | A | G     | 51.67     | my_snp_filter | AC=3;AF=0.043;AN=70;BaseQ          |
| 35087 | chrY | 13711838 | . | G | T     | 50343.41  | my_snp_filter | AC=24;AF=0.414;AN=                 |
| 35088 | chrY | 13711845 | . | A | T     | 5537.22   | my_snp_filter | AC=15;AF=0.214;AN=70;BaseQ         |
| 35089 | chrY | 13711847 | . | T | G     | 245.16    | my_snp_filter | AC=4;AF=0.057;AN=70;BaseQ          |
| 35090 | chrY | 13711849 | . | G | A     | 842.28    | my_snp_filter | AC=10;AF=0.143;AN=70;BaseQ         |
| 35091 | chrY | 13711854 | . | G | T,A   | 1647.23   | my_snp_filter | AC=3,1;AF=0.043,0.014;AN=          |
| 35092 | chrY | 13711855 | . | G | T,A   | 2473.92   | my_snp_filter | AC=3,7;AF=0.043,0.100;AN=          |
| 35093 | chrY | 13711861 | . | A | C     | 2614.73   | my_snp_filter | AC=10;AF=0.143;AN=70;BaseQ         |
| 35094 | chrY | 13711867 | . | T | A     | 31853.80  | my_snp_filter | AC=23;AF=0.359;AN=                 |
| 35095 | chrY | 13711868 | . | A | G     | 129288.68 | my_snp_filter | AC=29;AF=0.453;AN=                 |
| 35096 | chrY | 13711873 | . | C | A     | 819.71    | my_snp_filter | AC=3;AF=0.043;AN=70;BaseQ          |
| 35097 | chrY | 13711874 | . | A | C     | 58.42     | my_snp_filter | AC=1;AF=0.014;AN=70;BaseQ          |
| 35098 | chrY | 13711875 | . | A | C     | 23264.91  | my_snp_filter | AC=23;AF=0.329;AN=                 |
| 35099 | chrY | 13711877 | . | T | G     | 23256.76  | my_snp_filter | AC=23;AF=0.329;AN=                 |
| 35100 | chrY | 13711882 | . | G | A     | 1422.30   | my_snp_filter | AC=4;AF=0.057;AN=70;BaseQ          |
| 35101 | chrY | 13711890 | . | A | G     | 43.42     | my_snp_filter | AC=1;AF=0.014;AN=70;BaseQ          |
| 35102 | chrY | 13711891 | . | A | G     | 334.81    | my_snp_filter | AC=7;AF=0.100;AN=70;BaseQ          |
| 35103 | chrY | 13711897 | . | T | C     | 277.33    | my_snp_filter | AC=7;AF=0.100;AN=70;BaseQ          |
| 35104 | chrY | 13711901 | . | C | T,G   | 175437.27 | my_snp_filter | AC=30,1;AF=0.455,0.014;AN=         |
| 35105 | chrY | 13711904 | . | G | T     | 846.11    | my_snp_filter | AC=3;AF=0.043;AN=70;BaseQ          |
| 35106 | chrY | 13711929 | . | T | C     | 116855.59 | my_snp_filter | AC=31;AF=0.443;AN=                 |
| 35107 | chrY | 13711938 | . | A | G     | 109000.01 | my_snp_filter | AC=31;AF=0.443;AN=                 |
| 35108 | chrY | 13711960 | . | A | G     | 18326.70  | my_snp_filter | AC=30;AF=0.429;AN=                 |
| 35109 | chrY | 13711962 | . | T | C     | 9238.35   | my_snp_filter | AC=25;AF=0.357;AN=70;BaseQ         |
| 35110 | chrY | 13711964 | . | G | A     | 1639.46   | my_snp_filter | AC=17;AF=0.243;AN=70;BaseQ         |
| 35111 | chrY | 13711974 | . | G | T     | 594.81    | my_snp_filter | AC=7;AF=0.100;AN=70;BaseQ          |
| 35112 | chrY | 13711978 | . | C | T     | 16673.88  | my_snp_filter | AC=30;AF=0.429;AN=                 |

|       |      |          |   |   |     |          |               |                                    |
|-------|------|----------|---|---|-----|----------|---------------|------------------------------------|
| 35113 | chrY | 13711998 | . | G | A   | 743.25   | my_snp_filter | AC=9;AF=0.129;AN=70;BaseQ          |
| 35114 | chrY | 13712002 | . | T | G   | 759.53   | my_snp_filter | AC=11;AF=0.157;AN=70;Base          |
| 35115 | chrY | 13712013 | . | G | T   | 218.24   | my_snp_filter | AC=3;AF=0.043;AN=70;BaseQ          |
| 35116 | chrY | 13712014 | . | G | T   | 224.87   | my_snp_filter | AC=3;AF=0.043;AN=70;BaseQ          |
| 35117 | chrY | 13712026 | . | A | T   | 6080.86  | my_snp_filter | AC=30;AF=0.469;AN=64;Base          |
| 35118 | chrY | 13712032 | . | C | G   | 47.83    | my_snp_filter | AC=1;AF=0.016;AN=62;BaseQ          |
| 35119 | chrY | 13712033 | . | C | G   | 5199.77  | my_snp_filter | AC=20;AF=0.385;AN=52;Base          |
| 35120 | chrY | 13712039 | . | A | C   | 396.99   | my_snp_filter | AC=3;AF=0.048;AN=62;BaseQ          |
| 35121 | chrY | 13712047 | . | T | C   | 206.40   | PASS          | AC=3;AF=0.047;AN=64;BaseQRankSum=  |
| 35122 | chrY | 13712057 | . | T | C   | 656.96   | PASS          | AC=6;AF=0.097;AN=62;BaseQRankSum=  |
| 35123 | chrY | 13712078 | . | G | A   | 987.85   | PASS          | AC=3;AF=0.050;AN=60;BaseQRankSum=  |
| 35124 | chrY | 13712083 | . | T | C   | 2450.63  | PASS          | AC=15;AF=0.250;AN=60;BaseQRankSum= |
| 35125 | chrY | 13712129 | . | G | C   | 944.60   | PASS          | AC=8;AF=0.121;AN=66;BaseQRankSum=  |
| 35126 | chrY | 13712196 | . | T | A   | 1112.94  | PASS          | AC=9;AF=0.150;AN=60;BaseQRankSum=  |
| 35127 | chrY | 13712246 | . | T | A   | 418.82   | PASS          | AC=2;AF=0.032;AN=62;BaseQRankSum=  |
| 35128 | chrY | 13712262 | . | T | A   | 274.06   | my_snp_filter | AC=3;AF=0.047;AN=64;BaseQ          |
| 35129 | chrY | 13712273 | . | G | A   | 425.75   | my_snp_filter | AC=4;AF=0.057;AN=70;BaseQ          |
| 35130 | chrY | 13712288 | . | G | C   | 285.29   | my_snp_filter | AC=4;AF=0.057;AN=70;BaseQ          |
| 35131 | chrY | 13712297 | . | G | A   | 406.86   | my_snp_filter | AC=8;AF=0.114;AN=70;BaseQ          |
| 35132 | chrY | 13712314 | . | A | C   | 1038.62  | my_snp_filter | AC=11;AF=0.157;AN=70;Base          |
| 35133 | chrY | 13712330 | . | C | A   | 1816.13  | my_snp_filter | AC=7;AF=0.100;AN=70;BaseQ          |
| 35134 | chrY | 13712332 | . | G | A   | 15166.88 | my_snp_filter | AC=25;AF=0.357;AN                  |
| 35135 | chrY | 13712340 | . | A | G   | 1289.99  | my_snp_filter | AC=7;AF=0.100;AN=70;BaseQ          |
| 35136 | chrY | 13712345 | . | T | G   | 6824.79  | my_snp_filter | AC=12;AF=0.171;AN=70;Base          |
| 35137 | chrY | 13712351 | . | T | A   | 425.01   | my_snp_filter | AC=3;AF=0.043;AN=70;BaseQ          |
| 35138 | chrY | 13712357 | . | T | G   | 2139.32  | my_snp_filter | AC=19;AF=0.271;AN=70;Base          |
| 35139 | chrY | 13712363 | . | A | T   | 1461.97  | my_snp_filter | AC=7;AF=0.100;AN=70;BaseQ          |
| 35140 | chrY | 13712396 | . | T | G   | 297.55   | my_snp_filter | AC=2;AF=0.029;AN=70;BaseQ          |
| 35141 | chrY | 13712403 | . | G | C   | 267.77   | my_snp_filter | AC=1;AF=0.014;AN=70;BaseQ          |
| 35142 | chrY | 13712422 | . | G | T   | 1552.88  | PASS          | AC=13;AF=0.186;AN=70;BaseQRankSum= |
| 35143 | chrY | 13712423 | . | T | G   | 4732.58  | PASS          | AC=7;AF=0.103;AN=68;BaseQRankSum=  |
| 35144 | chrY | 13712427 | . | C | G   | 241.33   | PASS          | AC=1;AF=0.015;AN=68;BaseQRankSum=  |
| 35145 | chrY | 13712439 | . | C | A   | 1727.11  | PASS          | AC=13;AF=0.197;AN=66;BaseQRankSum= |
| 35146 | chrY | 13712442 | . | G | C   | 1341.72  | PASS          | AC=10;AF=0.161;AN=62;BaseQRankSum= |
| 35147 | chrY | 13712448 | . | G | T   | 2422.67  | PASS          | AC=7;AF=0.113;AN=62;BaseQRankSum=  |
| 35148 | chrY | 13712461 | . | T | C   | 933.04   | my_snp_filter | AC=7;AF=0.113;AN=62;BaseQ          |
| 35149 | chrY | 13712462 | . | G | T   | 576.15   | my_snp_filter | AC=6;AF=0.097;AN=62;BaseQ          |
| 35150 | chrY | 13712518 | . | G | T   | 157.48   | my_snp_filter | AC=3;AF=0.054;AN=56;BaseQ          |
| 35151 | chrY | 13712537 | . | C | G   | 79.59    | my_snp_filter | AC=2;AF=0.036;AN=56;BaseQ          |
| 35152 | chrY | 13712550 | . | T | A   | 3293.34  | my_snp_filter | AC=7;AF=0.113;AN=62;BaseQ          |
| 35153 | chrY | 13712587 | . | T | A   | 141.02   | my_snp_filter | AC=3;AF=0.045;AN=66;BaseQ          |
| 35154 | chrY | 13712611 | . | A | G   | 277.25   | my_snp_filter | AC=5;AF=0.071;AN=70;BaseQ          |
| 35155 | chrY | 13712622 | . | A | T   | 1451.87  | my_snp_filter | AC=11;AF=0.157;AN=70;Base          |
| 35156 | chrY | 13712635 | . | A | C   | 232.55   | my_snp_filter | AC=4;AF=0.057;AN=70;BaseQ          |
| 35157 | chrY | 13712638 | . | T | G   | 833.77   | my_snp_filter | AC=8;AF=0.114;AN=70;BaseQ          |
| 35158 | chrY | 13712639 | . | G | A   | 450.90   | my_snp_filter | AC=3;AF=0.043;AN=70;BaseQ          |
| 35159 | chrY | 13712647 | . | T | C   | 3247.65  | my_snp_filter | AC=12;AF=0.176;AN=68;Base          |
| 35160 | chrY | 13712657 | . | G | C   | 180.69   | my_snp_filter | AC=1;AF=0.015;AN=68;BaseQ          |
| 35161 | chrY | 13712659 | . | G | A   | 7372.09  | my_snp_filter | AC=20;AF=0.294;AN=68;Base          |
| 35162 | chrY | 13712661 | . | A | T   | 37.99    | my_snp_filter | AC=3;AF=0.044;AN=68;BaseQ          |
| 35163 | chrY | 13712663 | . | A | G   | 19954.22 | my_snp_filter | AC=29;AF=0.483;AN                  |
| 35164 | chrY | 13712671 | . | C | G   | 16562.91 | my_snp_filter | AC=29;AF=0.518;AN                  |
| 35165 | chrY | 13712698 | . | G | A   | 36.60    | my_snp_filter | AC=2;AF=0.029;AN=70;BaseQ          |
| 35166 | chrY | 13712702 | . | T | A   | 1605     | my_snp_filter | AC=14;AF=0.200;AN=70;Base          |
| 35167 | chrY | 13712704 | . | G | A   | 331.45   | my_snp_filter | AC=6;AF=0.086;AN=70;BaseQ          |
| 35168 | chrY | 13712752 | . | T | A   | 34416.72 | my_snp_filter | AC=35;AF=0.500;AN                  |
| 35169 | chrY | 13712767 | . | T | A   | 1122.40  | my_snp_filter | AC=12;AF=0.171;AN=70;Base          |
| 35170 | chrY | 13712779 | . | A | C   | 87617.72 | my_snp_filter | AC=35;AF=0.500;AN                  |
| 35171 | chrY | 13712782 | . | T | C   | 33.87    | my_snp_filter | AC=3;AF=0.043;AN=70;BaseQ          |
| 35172 | chrY | 13712803 | . | C | G   | 1056.13  | my_snp_filter | AC=13;AF=0.186;AN=70;Base          |
| 35173 | chrY | 13712863 | . | C | T,A | 3176.06  | PASS          | AC=1,1;AF=0.014,0.014;AN=70;BaseQ  |
| 35174 | chrY | 13712867 | . | G | T,A | 7048.16  | my_snp_filter | AC=2,5;AF=0.083,0.208;AN=          |
| 35175 | chrY | 13712869 | . | G | C   | 3551.51  | PASS          | AC=3;AF=0.150;AN=20;BaseQRankSum=  |
| 35176 | chrY | 13712884 | . | A | G   | 5006.54  | my_snp_filter | AC=6;AF=0.429;AN=14;BaseQ          |
| 35177 | chrY | 13712902 | . | A | T   | 335.21   | PASS          | AC=3;AF=0.150;AN=20;BaseQRankSum=  |
| 35178 | chrY | 13712904 | . | G | C   | 228.67   | PASS          | AC=2;AF=0.034;AN=58;BaseQRankSum=  |
| 35179 | chrY | 13712935 | . | G | A   | 90.44    | my_snp_filter | AC=3;AF=0.058;AN=52;BaseQ          |
| 35180 | chrY | 13712992 | . | C | T   | 199.07   | my_snp_filter | AC=5;AF=0.100;AN=50;BaseQ          |
| 35181 | chrY | 13713021 | . | T | A   | 3577.52  | PASS          | AC=7;AF=0.140;AN=50;BaseQRankSum=  |
| 35182 | chrY | 13713034 | . | C | G   | 651.48   | PASS          | AC=4;AF=0.111;AN=36;BaseQRankSum=  |
| 35183 | chrY | 13713038 | . | T | G   | 815.36   | PASS          | AC=2;AF=0.056;AN=36;BaseQRankSum=  |
| 35184 | chrY | 13713048 | . | C | A   | 127.76   | my_snp_filter | AC=3;AF=0.052;AN=58;BaseQ          |
| 35185 | chrY | 13713079 | . | A | C   | 36.61    | my_snp_filter | AC=2;AF=0.033;AN=60;BaseQ          |
| 35186 | chrY | 13713106 | . | A | G   | 48.02    | my_snp_filter | AC=2;AF=0.033;AN=60;BaseQ          |
| 35187 | chrY | 13713111 | . | G | A   | 264.22   | my_snp_filter | AC=6;AF=0.100;AN=60;BaseQ          |
| 35188 | chrY | 13713141 | . | C | G,* | 3483.68  | PASS          | AC=8,3;AF=0.148,0.056;AN=54;BaseQ  |

|       |      |          |   |   |     |          |               |                                    |
|-------|------|----------|---|---|-----|----------|---------------|------------------------------------|
| 35189 | chrY | 13713171 | . | A | T   | 5443.42  | PASS          | AC=7;AF=0.167;AN=42;BaseQRankSum=  |
| 35190 | chrY | 13713196 | . | T | A   | 13634.35 | my_snp_filter | AC=12;AF=0.429;AN                  |
| 35191 | chrY | 13713203 | . | A | G   | 11892.28 | my_snp_filter | AC=13;AF=0.464;AN                  |
| 35192 | chrY | 13713221 | . | C | T   | 30.16    | my_snp_filter | AC=2;AF=0.029;AN=70;BaseQ          |
| 35193 | chrY | 13713236 | . | C | G   | 49671.55 | my_snp_filter | AC=33;AF=0.516;AN                  |
| 35194 | chrY | 13713300 | . | G | A   | 96319.13 | my_snp_filter | AC=47;AF=0.691;AN                  |
| 35195 | chrY | 13713307 | . | T | G   | 130.21   | my_snp_filter | AC=4;AF=0.057;AN=70;BaseQ          |
| 35196 | chrY | 13713312 | . | A | T   | 94222.85 | my_snp_filter | AC=44;AF=0.647;AN                  |
| 35197 | chrY | 13713373 | . | G | T   | 20327.75 | my_snp_filter | AC=20;AF=0.357;AN                  |
| 35198 | chrY | 13713382 | . | C | T   | 12380.69 | my_snp_filter | AC=11;AF=0.177;AN                  |
| 35199 | chrY | 13713471 | . | G | C   | 16288.33 | my_snp_filter | AC=14;AF=0.280;AN                  |
| 35200 | chrY | 13713473 | . | G | C   | 16264.48 | my_snp_filter | AC=14;AF=0.250;AN                  |
| 35201 | chrY | 13713506 | . | T | A   | 16056.23 | my_snp_filter | AC=7;AF=0.146;AN=                  |
| 35202 | chrY | 13713529 | . | G | C   | 4231.67  | my_snp_filter | AC=7;AF=0.159;AN=44;BaseQ          |
| 35203 | chrY | 13713542 | . | G | A   | 14192.36 | my_snp_filter | AC=7;AF=0.175;AN=                  |
| 35204 | chrY | 13713552 | . | G | A   | 61.45    | my_snp_filter | AC=2;AF=0.059;AN=34;BaseQ          |
| 35205 | chrY | 13713617 | . | G | C   | 2265.04  | my_snp_filter | AC=7;AF=0.292;AN=24;BaseQ          |
| 35206 | chrY | 13713712 | . | C | A,* | 1343.50  | PASS          | AC=4,2;AF=0.182,0.091;AN=22;BaseQ  |
| 35207 | chrY | 13713726 | . | T | C   | 274.52   | PASS          | AC=4;AF=0.167;AN=24;BaseQRankSum=  |
| 35208 | chrY | 13714083 | . | G | A   | 804.32   | my_snp_filter | AC=7;AF=0.135;AN=52;BaseQ          |
| 35209 | chrY | 13714094 | . | G | C   | 202.58   | my_snp_filter | AC=4;AF=0.069;AN=58;BaseQ          |
| 35210 | chrY | 13714218 | . | A | C   | 159.53   | my_snp_filter | AC=4;AF=0.071;AN=56;BaseQ          |
| 35211 | chrY | 13714226 | . | A | C,T | 313.15   | PASS          | AC=3,4;AF=0.060,0.080;AN=50;BaseQ  |
| 35212 | chrY | 13714254 | . | T | A   | 49.99    | my_snp_filter | AC=1;AF=0.017;AN=58;BaseQ          |
| 35213 | chrY | 13714266 | . | G | A   | 34.39    | my_snp_filter | AC=3;AF=0.052;AN=58;BaseQ          |
| 35214 | chrY | 13714311 | . | C | T   | 275.57   | my_snp_filter | AC=6;AF=0.115;AN=52;BaseQ          |
| 35215 | chrY | 13714312 | . | C | G   | 64.74    | PASS          | AC=1;AF=0.019;AN=54;BaseQRankSum=  |
| 35216 | chrY | 13714321 | . | G | T   | 71.92    | PASS          | AC=1;AF=0.024;AN=42;BaseQRankSum=  |
| 35217 | chrY | 13714535 | . | T | A   | 30.54    | my_snp_filter | AC=1;AF=0.015;AN=66;BaseQ          |
| 35218 | chrY | 13714550 | . | T | G   | 161.25   | PASS          | AC=2;AF=0.029;AN=68;BaseQRankSum=  |
| 35219 | chrY | 13714605 | . | T | G   | 557.93   | my_snp_filter | AC=7;AF=0.106;AN=66;BaseQ          |
| 35220 | chrY | 13714624 | . | T | A   | 101.02   | my_snp_filter | AC=2;AF=0.029;AN=68;BaseQ          |
| 35221 | chrY | 13714644 | . | A | T   | 100.65   | my_snp_filter | AC=2;AF=0.029;AN=68;BaseQ          |
| 35222 | chrY | 13714652 | . | T | C   | 258.89   | PASS          | AC=5;AF=0.074;AN=68;BaseQRankSum=  |
| 35223 | chrY | 13714756 | . | C | G   | 45.53    | PASS          | AC=1;AF=0.014;AN=70;BaseQRankSum=  |
| 35224 | chrY | 13714803 | . | A | G   | 293.14   | PASS          | AC=2;AF=0.029;AN=70;BaseQRankSum=  |
| 35225 | chrY | 13714825 | . | A | T   | 3685.76  | PASS          | AC=21;AF=0.300;AN=70;BaseQRankSum= |
| 35226 | chrY | 13714850 | . | T | C   | 180.05   | my_snp_filter | AC=4;AF=0.061;AN=66;BaseQ          |
| 35227 | chrY | 13714859 | . | A | G   | 742.64   | PASS          | AC=3;AF=0.045;AN=66;BaseQRankSum=  |
| 35228 | chrY | 13714861 | . | G | A   | 745.66   | PASS          | AC=3;AF=0.045;AN=66;BaseQRankSum=  |
| 35229 | chrY | 13714882 | . | T | A   | 60.11    | PASS          | AC=1;AF=0.016;AN=64;BaseQRankSum=  |
| 35230 | chrY | 13714896 | . | C | T   | 427.19   | PASS          | AC=6;AF=0.100;AN=60;BaseQRankSum=  |
| 35231 | chrY | 13714911 | . | A | G   | 1034.44  | PASS          | AC=7;AF=0.140;AN=50;BaseQRankSum=  |
| 35232 | chrY | 13714999 | . | C | G   | 217.98   | my_snp_filter | AC=5;AF=0.109;AN=46;BaseQ          |
| 35233 | chrY | 13715004 | . | G | A   | 36.86    | my_snp_filter | AC=1;AF=0.018;AN=56;BaseQ          |
| 35234 | chrY | 13715005 | . | T | A   | 2540.40  | my_snp_filter | AC=8;AF=0.235;AN=34;BaseQ          |
| 35235 | chrY | 13715022 | . | G | A   | 43.75    | my_snp_filter | AC=1;AF=0.018;AN=56;BaseQ          |
| 35236 | chrY | 13715058 | . | A | G   | 342.60   | my_snp_filter | AC=5;AF=0.089;AN=56;BaseQ          |
| 35237 | chrY | 13715059 | . | C | T   | 344.90   | my_snp_filter | AC=5;AF=0.089;AN=56;BaseQ          |
| 35238 | chrY | 13715062 | . | G | T   | 47.97    | my_snp_filter | AC=2;AF=0.034;AN=58;BaseQ          |
| 35239 | chrY | 13715082 | . | A | C   | 224.52   | my_snp_filter | AC=5;AF=0.083;AN=60;BaseQ          |
| 35240 | chrY | 13715117 | . | T | G   | 155.29   | my_snp_filter | AC=3;AF=0.068;AN=44;BaseQ          |
| 35241 | chrY | 13715124 | . | A | G   | 34.69    | my_snp_filter | AC=1;AF=0.024;AN=42;BaseQ          |
| 35242 | chrY | 13715146 | . | A | G   | 283.94   | my_snp_filter | AC=3;AF=0.083;AN=36;BaseQ          |
| 35243 | chrY | 13715151 | . | C | G   | 207.02   | my_snp_filter | AC=2;AF=0.053;AN=38;BaseQ          |
| 35244 | chrY | 13715179 | . | C | G   | 55.67    | my_snp_filter | AC=1;AF=0.023;AN=44;BaseQ          |
| 35245 | chrY | 13715417 | . | A | G   | 752.06   | PASS          | AC=3;AF=0.136;AN=22;BaseQRankSum=  |
| 35246 | chrY | 13715419 | . | A | G   | 194.33   | my_snp_filter | AC=6;AF=0.273;AN=22;BaseQ          |
| 35247 | chrY | 13715592 | . | A | G   | 775.99   | my_snp_filter | AC=6;AF=0.250;AN=24;BaseQ          |
| 35248 | chrY | 13715594 | . | T | G   | 250.55   | PASS          | AC=2;AF=0.083;AN=24;DP=150;FS=0.0  |
| 35249 | chrY | 13715827 | . | G | A   | 114.10   | my_snp_filter | AC=6;AF=0.086;AN=70;DP=35          |
| 35250 | chrY | 13715897 | . | G | A   | 97.26    | my_snp_filter | AC=3;AF=0.045;AN=66;BaseQ          |
| 35251 | chrY | 13715937 | . | C | T   | 932.82   | my_snp_filter | AC=5;AF=0.100;AN=50;BaseQ          |
| 35252 | chrY | 13715957 | . | T | G   | 896.12   | my_snp_filter | AC=5;AF=0.132;AN=38;BaseQ          |
| 35253 | chrY | 13715959 | . | G | C   | 896.12   | my_snp_filter | AC=5;AF=0.132;AN=38;BaseQ          |
| 35254 | chrY | 13715981 | . | A | G   | 943.50   | my_snp_filter | AC=5;AF=0.156;AN=32;BaseQ          |
| 35255 | chrY | 13716041 | . | C | T   | 306.94   | my_snp_filter | AC=3;AF=0.167;AN=18;BaseQ          |
| 35256 | chrY | 13716059 | . | A | C   | 553.86   | my_snp_filter | AC=6;AF=0.333;AN=18;BaseQ          |
| 35257 | chrY | 13716078 | . | T | C   | 766.39   | my_snp_filter | AC=6;AF=0.333;AN=18;BaseQ          |
| 35258 | chrY | 13716091 | . | A | T   | 909.21   | my_snp_filter | AC=6;AF=0.375;AN=16;BaseQ          |
| 35259 | chrY | 13716155 | . | A | G   | 2038.69  | my_snp_filter | AC=5;AF=0.250;AN=20;BaseQ          |
| 35260 | chrY | 13716167 | . | T | A   | 1965.69  | my_snp_filter | AC=5;AF=0.250;AN=20;BaseQ          |
| 35261 | chrY | 13716183 | . | A | T   | 2009.74  | my_snp_filter | AC=5;AF=0.250;AN=20;BaseQ          |
| 35262 | chrY | 13716241 | . | T | A   | 685.46   | my_snp_filter | AC=5;AF=0.278;AN=18;BaseQ          |
| 35263 | chrY | 13716266 | . | A | T   | 613.52   | my_snp_filter | AC=3;AF=0.167;AN=18;BaseQ          |
| 35264 | chrY | 13716276 | . | T | C   | 32.79    | my_snp_filter | AC=1;AF=0.071;AN=14;BaseQ          |



|       |      |          |   |   |     |          |               |                                    |
|-------|------|----------|---|---|-----|----------|---------------|------------------------------------|
| 35265 | chrY | 13716290 | . | C | T   | 298.86   | my_snp_filter | AC=2;AF=0.167;AN=12;BaseQ          |
| 35266 | chrY | 13716309 | . | A | G   | 89.70    | my_snp_filter | AC=2;AF=0.200;AN=10;DP=40          |
| 35267 | chrY | 13716314 | . | A | T   | 132.13   | my_snp_filter | AC=3;AF=0.214;AN=14;BaseQ          |
| 35268 | chrY | 13716368 | . | G | T   | 34.23    | my_snp_filter | AC=1;AF=0.071;AN=14;BaseQ          |
| 35269 | chrY | 13716382 | . | G | A   | 186.44   | my_snp_filter | AC=1;AF=0.071;AN=14;BaseQ          |
| 35270 | chrY | 13716402 | . | G | A   | 164.67   | my_snp_filter | AC=1;AF=0.071;AN=14;BaseQ          |
| 35271 | chrY | 13716408 | . | G | A   | 165.21   | my_snp_filter | AC=1;AF=0.071;AN=14;BaseQ          |
| 35272 | chrY | 13716422 | . | C | T   | 163.21   | my_snp_filter | AC=1;AF=0.071;AN=14;BaseQ          |
| 35273 | chrY | 13716447 | . | C | G   | 232.74   | my_snp_filter | AC=2;AF=0.143;AN=14;BaseQ          |
| 35274 | chrY | 13716466 | . | T | A   | 230.31   | my_snp_filter | AC=2;AF=0.143;AN=14;BaseQ          |
| 35275 | chrY | 13716467 | . | A | G   | 276.17   | my_snp_filter | AC=2;AF=0.143;AN=14;BaseQ          |
| 35276 | chrY | 13716483 | . | G | C   | 36.86    | my_snp_filter | AC=1;AF=0.071;AN=14;BaseQ          |
| 35277 | chrY | 13716967 | . | G | T   | 110.85   | PASS          | AC=4;AF=0.063;AN=64;BaseQRankSum=  |
| 35278 | chrY | 13717019 | . | T | A   | 33.14    | my_snp_filter | AC=2;AF=0.029;AN=70;BaseQ          |
| 35279 | chrY | 13717064 | . | C | T   | 1412.84  | PASS          | AC=14;AF=0.206;AN=68;BaseQRankSum= |
| 35280 | chrY | 13717070 | . | G | C   | 1487.26  | PASS          | AC=14;AF=0.206;AN=68;BaseQRankSum= |
| 35281 | chrY | 13717115 | . | G | C   | 58.45    | my_snp_filter | AC=3;AF=0.043;AN=70;BaseQ          |
| 35282 | chrY | 13717126 | . | G | C   | 48.33    | PASS          | AC=2;AF=0.029;AN=70;BaseQRankSum=  |
| 35283 | chrY | 13717152 | . | A | C   | 36.54    | PASS          | AC=1;AF=0.014;AN=70;BaseQRankSum=  |
| 35284 | chrY | 13717336 | . | A | C   | 213.53   | PASS          | AC=1;AF=0.018;AN=56;BaseQRankSum=  |
| 35285 | chrY | 13717337 | . | A | C   | 58.55    | PASS          | AC=1;AF=0.017;AN=60;BaseQRankSum=  |
| 35286 | chrY | 13717344 | . | C | T   | 106.03   | PASS          | AC=2;AF=0.032;AN=62;BaseQRankSum=  |
| 35287 | chrY | 13717386 | . | G | T   | 285.15   | PASS          | AC=2;AF=0.031;AN=64;BaseQRankSum=  |
| 35288 | chrY | 13717458 | . | C | T   | 1454.11  | PASS          | AC=6;AF=0.086;AN=70;BaseQRankSum=  |
| 35289 | chrY | 13717473 | . | G | T   | 231.93   | PASS          | AC=5;AF=0.074;AN=68;BaseQRankSum=  |
| 35290 | chrY | 13717500 | . | G | T   | 15997.07 | PASS          | AC=66;AF=1.00;AN=66;DP=50          |
| 35291 | chrY | 13717501 | . | T | C   | 1271.71  | my_snp_filter | AC=8;AF=0.125;AN=64;BaseQ          |
| 35292 | chrY | 13717554 | . | T | A   | 41.92    | my_snp_filter | AC=2;AF=0.030;AN=66;BaseQ          |
| 35293 | chrY | 13717676 | . | G | A   | 1404.11  | my_snp_filter | AC=15;AF=0.268;AN=56;BaseQ         |
| 35294 | chrY | 13717726 | . | A | G   | 12600.02 | my_snp_filter | AC=32;AF=0.533;AN=                 |
| 35295 | chrY | 13717734 | . | G | C   | 14136.98 | my_snp_filter | AC=31;AF=0.554;AN=                 |
| 35296 | chrY | 13717757 | . | T | A   | 26103.54 | my_snp_filter | AC=30;AF=0.500;AN=                 |
| 35297 | chrY | 13717777 | . | G | C   | 29704.34 | my_snp_filter | AC=29;AF=0.483;AN=                 |
| 35298 | chrY | 13717780 | . | A | G   | 29290.31 | my_snp_filter | AC=29;AF=0.483;AN=                 |
| 35299 | chrY | 13717802 | . | A | C   | 33.73    | my_snp_filter | AC=2;AF=0.029;AN=70;BaseQ          |
| 35300 | chrY | 13717809 | . | C | A   | 36.97    | my_snp_filter | AC=2;AF=0.029;AN=70;BaseQ          |
| 35301 | chrY | 13717810 | . | G | T   | 36.88    | my_snp_filter | AC=2;AF=0.029;AN=70;BaseQ          |
| 35302 | chrY | 13717813 | . | T | A,C | 19041.83 | my_snp_filter | AC=8,36;AF=0.114,AN=               |
| 35303 | chrY | 13717834 | . | C | G   | 1873.90  | my_snp_filter | AC=8;AF=0.114;AN=70;BaseQ          |
| 35304 | chrY | 13717866 | . | G | A   | 5239     | PASS          | AC=35;AF=0.515;AN=68;BaseQRankSum= |
| 35305 | chrY | 13717897 | . | C | A   | 2208.83  | my_snp_filter | AC=14;AF=0.241;AN=58;BaseQ         |
| 35306 | chrY | 13717899 | . | G | A   | 2204.59  | my_snp_filter | AC=14;AF=0.241;AN=58;BaseQ         |
| 35307 | chrY | 13717904 | . | G | A   | 845.31   | PASS          | AC=3;AF=0.052;AN=58;BaseQRankSum=  |
| 35308 | chrY | 13717907 | . | A | G   | 131.08   | PASS          | AC=2;AF=0.032;AN=62;BaseQRankSum=  |
| 35309 | chrY | 13717912 | . | T | G   | 219.46   | my_snp_filter | AC=3;AF=0.052;AN=58;BaseQ          |
| 35310 | chrY | 13717914 | . | A | G   | 1713.65  | PASS          | AC=6;AF=0.111;AN=54;BaseQRankSum=  |
| 35311 | chrY | 13717930 | . | A | T   | 92.67    | my_snp_filter | AC=2;AF=0.032;AN=62;BaseQ          |
| 35312 | chrY | 13717955 | . | G | C   | 114.45   | my_snp_filter | AC=2;AF=0.030;AN=66;BaseQ          |
| 35313 | chrY | 13717960 | . | G | T   | 126.41   | my_snp_filter | AC=3;AF=0.045;AN=66;BaseQ          |
| 35314 | chrY | 13717982 | . | G | T   | 517.85   | my_snp_filter | AC=4;AF=0.061;AN=66;BaseQ          |
| 35315 | chrY | 13717994 | . | C | G   | 9913.13  | my_snp_filter | AC=17;AF=0.266;AN=64;BaseQ         |
| 35316 | chrY | 13717997 | . | A | T   | 336.82   | my_snp_filter | AC=2;AF=0.031;AN=64;BaseQ          |
| 35317 | chrY | 13717998 | . | T | C   | 1600.22  | my_snp_filter | AC=12;AF=0.188;AN=64;BaseQ         |
| 35318 | chrY | 13718005 | . | G | A   | 596.45   | my_snp_filter | AC=4;AF=0.069;AN=58;BaseQ          |
| 35319 | chrY | 13718006 | . | C | A   | 9789.07  | my_snp_filter | AC=11;AF=0.190;AN=58;BaseQ         |
| 35320 | chrY | 13718009 | . | G | C   | 601.46   | my_snp_filter | AC=4;AF=0.071;AN=56;BaseQ          |
| 35321 | chrY | 13718015 | . | G | T   | 17144.48 | my_snp_filter | AC=16;AF=0.286;AN=                 |
| 35322 | chrY | 13718028 | . | T | C   | 9333.48  | my_snp_filter | AC=7;AF=0.113;AN=62;BaseQ          |
| 35323 | chrY | 13718030 | . | G | C   | 743.19   | my_snp_filter | AC=7;AF=0.113;AN=62;BaseQ          |
| 35324 | chrY | 13718034 | . | G | A   | 49.14    | my_snp_filter | AC=2;AF=0.032;AN=62;BaseQ          |
| 35325 | chrY | 13718085 | . | G | T   | 565.86   | my_snp_filter | AC=10;AF=0.156;AN=64;BaseQ         |
| 35326 | chrY | 13718088 | . | T | C   | 721.36   | my_snp_filter | AC=11;AF=0.177;AN=62;BaseQ         |
| 35327 | chrY | 13718117 | . | T | A   | 40.12    | my_snp_filter | AC=1;AF=0.014;AN=70;BaseQ          |
| 35328 | chrY | 13718214 | . | T | C   | 741.06   | PASS          | AC=2;AF=0.029;AN=70;BaseQRankSum=  |
| 35329 | chrY | 13718219 | . | A | T   | 1940.41  | PASS          | AC=6;AF=0.086;AN=70;BaseQRankSum=  |
| 35330 | chrY | 13718226 | . | G | A   | 1490.55  | PASS          | AC=4;AF=0.057;AN=70;BaseQRankSum=  |
| 35331 | chrY | 13718232 | . | A | C   | 72.78    | my_snp_filter | AC=1;AF=0.014;AN=70;BaseQ          |
| 35332 | chrY | 13718238 | . | C | G   | 2486.30  | my_snp_filter | AC=17;AF=0.243;AN=70;BaseQ         |
| 35333 | chrY | 13718246 | . | G | C   | 1207.94  | my_snp_filter | AC=16;AF=0.229;AN=70;BaseQ         |
| 35334 | chrY | 13718252 | . | A | G   | 291.71   | my_snp_filter | AC=6;AF=0.086;AN=70;BaseQ          |
| 35335 | chrY | 13718261 | . | G | A   | 5170.94  | my_snp_filter | AC=24;AF=0.343;AN=70;BaseQ         |
| 35336 | chrY | 13718265 | . | G | A   | 30.74    | my_snp_filter | AC=1;AF=0.014;AN=70;BaseQ          |
| 35337 | chrY | 13718269 | . | T | A   | 58.83    | my_snp_filter | AC=3;AF=0.043;AN=70;BaseQ          |
| 35338 | chrY | 13718270 | . | C | T   | 45.50    | my_snp_filter | AC=1;AF=0.014;AN=70;BaseQ          |
| 35339 | chrY | 13718271 | . | G | A   | 59.11    | my_snp_filter | AC=2;AF=0.029;AN=70;BaseQ          |
| 35340 | chrY | 13718274 | . | C | G   | 975.36   | my_snp_filter | AC=9;AF=0.129;AN=70;BaseQ          |

|       |      |          |   |   |     |          |               |                                    |
|-------|------|----------|---|---|-----|----------|---------------|------------------------------------|
| 35341 | chrY | 13718284 | . | T | C   | 1503.81  | my_snp_filter | AC=19;AF=0.279;AN=68;BaseQ         |
| 35342 | chrY | 13718288 | . | G | T   | 458.38   | my_snp_filter | AC=6;AF=0.091;AN=66;BaseQ          |
| 35343 | chrY | 13718297 | . | A | C   | 516.80   | my_snp_filter | AC=6;AF=0.091;AN=66;BaseQ          |
| 35344 | chrY | 13718304 | . | T | A,* | 2037.16  | my_snp_filter | AC=12,5;AF=0.182,0.076;AN          |
| 35345 | chrY | 13718311 | . | G | A,* | 1433.04  | my_snp_filter | AC=6,9;AF=0.088,0.132;AN=          |
| 35346 | chrY | 13718319 | . | T | A   | 5802.76  | my_snp_filter | AC=22;AF=0.333;AN=66;BaseQ         |
| 35347 | chrY | 13718346 | . | A | C   | 18200.70 | my_snp_filter | AC=29;AF=0.453;AN                  |
| 35348 | chrY | 13718365 | . | A | G   | 34690.63 | my_snp_filter | AC=45;AF=0.682;AN                  |
| 35349 | chrY | 13718373 | . | A | G   | 73.77    | my_snp_filter | AC=1;AF=0.015;AN=66;BaseQ          |
| 35350 | chrY | 13718399 | . | T | G   | 200.95   | my_snp_filter | AC=2;AF=0.030;AN=66;BaseQ          |
| 35351 | chrY | 13718407 | . | A | G   | 270.85   | my_snp_filter | AC=3;AF=0.045;AN=66;BaseQ          |
| 35352 | chrY | 13718409 | . | T | G   | 274.11   | my_snp_filter | AC=4;AF=0.061;AN=66;BaseQ          |
| 35353 | chrY | 13718411 | . | G | T   | 54.64    | my_snp_filter | AC=2;AF=0.030;AN=66;BaseQ          |
| 35354 | chrY | 13718424 | . | G | T   | 31357.57 | my_snp_filter | AC=33;AF=0.516;AN                  |
| 35355 | chrY | 13718434 | . | G | C,T | 18302.76 | my_snp_filter | AC=19,16;AF=0.288                  |
| 35356 | chrY | 13718436 | . | G | C   | 5974.79  | my_snp_filter | AC=16;AF=0.250;AN=64;BaseQ         |
| 35357 | chrY | 13718441 | . | G | C   | 72.59    | my_snp_filter | AC=2;AF=0.030;AN=66;BaseQ          |
| 35358 | chrY | 13718451 | . | A | G   | 20761.20 | my_snp_filter | AC=17;AF=0.274;AN                  |
| 35359 | chrY | 13718471 | . | G | C   | 920.22   | my_snp_filter | AC=5;AF=0.076;AN=66;BaseQ          |
| 35360 | chrY | 13718490 | . | G | C   | 124.65   | my_snp_filter | AC=3;AF=0.045;AN=66;BaseQ          |
| 35361 | chrY | 13718495 | . | C | A,T | 290.53   | my_snp_filter | AC=4,3;AF=0.061,0.045;AN=          |
| 35362 | chrY | 13718506 | . | G | C   | 64.64    | my_snp_filter | AC=1;AF=0.015;AN=66;BaseQ          |
| 35363 | chrY | 13718507 | . | A | C   | 149.69   | my_snp_filter | AC=2;AF=0.030;AN=66;BaseQ          |
| 35364 | chrY | 13718534 | . | C | T   | 205.59   | my_snp_filter | AC=2;AF=0.030;AN=66;BaseQ          |
| 35365 | chrY | 13718538 | . | A | C   | 5751.12  | my_snp_filter | AC=30;AF=0.536;AN=56;BaseQ         |
| 35366 | chrY | 13718564 | . | T | A   | 97.28    | my_snp_filter | AC=1;AF=0.021;AN=48;BaseQ          |
| 35367 | chrY | 13718567 | . | A | G   | 86.64    | my_snp_filter | AC=2;AF=0.045;AN=44;BaseQ          |
| 35368 | chrY | 13718574 | . | A | T   | 444.75   | my_snp_filter | AC=3;AF=0.100;AN=30;BaseQ          |
| 35369 | chrY | 13718576 | . | C | G   | 443.38   | my_snp_filter | AC=3;AF=0.083;AN=36;BaseQ          |
| 35370 | chrY | 13718590 | . | G | A   | 101      | my_snp_filter | AC=1;AF=0.029;AN=34;BaseQ          |
| 35371 | chrY | 13718619 | . | A | T   | 4995.98  | PASS          | AC=7;AF=0.292;AN=24;BaseQRankSum=  |
| 35372 | chrY | 13718624 | . | C | T   | 513.31   | PASS          | AC=3;AF=0.115;AN=26;BaseQRankSum=  |
| 35373 | chrY | 13718650 | . | A | C   | 1893.09  | PASS          | AC=6;AF=0.200;AN=30;BaseQRankSum=  |
| 35374 | chrY | 13718664 | . | A | T,C | 1518.17  | PASS          | AC=6,3;AF=0.188,0.094;AN=32;BaseQ  |
| 35375 | chrY | 13718687 | . | A | C   | 479.33   | PASS          | AC=2;AF=0.033;AN=60;BaseQRankSum=  |
| 35376 | chrY | 13718695 | . | C | G   | 419.10   | PASS          | AC=4;AF=0.065;AN=62;BaseQRankSum=  |
| 35377 | chrY | 13718706 | . | G | T,* | 6069.57  | PASS          | AC=17,3;AF=0.274,0.048;AN=62;BaseQ |
| 35378 | chrY | 13718723 | . | A | G   | 41.22    | my_snp_filter | AC=1;AF=0.015;AN=68;BaseQ          |
| 35379 | chrY | 13718739 | . | T | A   | 1340.78  | my_snp_filter | AC=6;AF=0.088;AN=68;BaseQ          |
| 35380 | chrY | 13718756 | . | C | T   | 446.39   | my_snp_filter | AC=10;AF=0.143;AN=70;BaseQ         |
| 35381 | chrY | 13718760 | . | G | A   | 816.99   | my_snp_filter | AC=5;AF=0.071;AN=70;BaseQ          |
| 35382 | chrY | 13718773 | . | C | G,A | 63398.16 | PASS          | AC=50,6;AF=0.714,0.086;AN          |
| 35383 | chrY | 13718774 | . | T | C   | 1698.86  | PASS          | AC=2;AF=0.029;AN=70;BaseQRankSum=  |
| 35384 | chrY | 13718775 | . | G | A   | 1842.95  | PASS          | AC=5;AF=0.071;AN=70;BaseQRankSum=  |
| 35385 | chrY | 13718776 | . | G | A   | 661.94   | my_snp_filter | AC=10;AF=0.143;AN=70;BaseQ         |
| 35386 | chrY | 13718781 | . | A | G   | 23578    | PASS          | AC=34;AF=0.486;AN=70;BaseQRankSum= |
| 35387 | chrY | 13718784 | . | T | A   | 1647.59  | PASS          | AC=5;AF=0.071;AN=70;BaseQRankSum=  |
| 35388 | chrY | 13718785 | . | G | T   | 1507.48  | PASS          | AC=7;AF=0.100;AN=70;BaseQRankSum=  |
| 35389 | chrY | 13718788 | . | A | T   | 934.44   | PASS          | AC=4;AF=0.057;AN=70;BaseQRankSum=  |
| 35390 | chrY | 13718813 | . | T | A   | 40577.54 | PASS          | AC=33;AF=0.485;AN=68;BaseQ         |
| 35391 | chrY | 13718820 | . | A | G   | 41655.52 | PASS          | AC=33;AF=0.485;AN=68;BaseQ         |
| 35392 | chrY | 13718849 | . | T | C   | 1615.11  | my_snp_filter | AC=19;AF=0.271;AN=70;BaseQ         |
| 35393 | chrY | 13718853 | . | C | G   | 429.94   | my_snp_filter | AC=7;AF=0.100;AN=70;BaseQ          |
| 35394 | chrY | 13718854 | . | T | A   | 1537.13  | my_snp_filter | AC=16;AF=0.229;AN=70;BaseQ         |
| 35395 | chrY | 13718855 | . | C | T   | 259.13   | my_snp_filter | AC=7;AF=0.100;AN=70;BaseQ          |
| 35396 | chrY | 13718856 | . | G | A   | 48.69    | my_snp_filter | AC=4;AF=0.057;AN=70;BaseQ          |
| 35397 | chrY | 13718864 | . | T | C   | 2190.09  | my_snp_filter | AC=16;AF=0.229;AN=70;BaseQ         |
| 35398 | chrY | 13718874 | . | C | G   | 444.52   | my_snp_filter | AC=6;AF=0.086;AN=70;BaseQ          |
| 35399 | chrY | 13718885 | . | C | G   | 5248.18  | PASS          | AC=22;AF=0.314;AN=70;BaseQRankSum= |
| 35400 | chrY | 13718889 | . | T | A   | 335.09   | my_snp_filter | AC=6;AF=0.086;AN=70;BaseQ          |
| 35401 | chrY | 13718902 | . | G | A   | 61712.73 | PASS          | AC=33;AF=0.471;AN=70;BaseQ         |
| 35402 | chrY | 13718903 | . | A | C   | 81.31    | my_snp_filter | AC=3;AF=0.043;AN=70;BaseQ          |
| 35403 | chrY | 13718914 | . | A | T   | 58666.73 | PASS          | AC=33;AF=0.471;AN=70;BaseQ         |
| 35404 | chrY | 13718932 | . | A | G   | 85.27    | my_snp_filter | AC=4;AF=0.057;AN=70;BaseQ          |
| 35405 | chrY | 13718935 | . | G | A   | 7089.30  | my_snp_filter | AC=20;AF=0.286;AN=70;BaseQ         |
| 35406 | chrY | 13718942 | . | C | T   | 66.44    | my_snp_filter | AC=2;AF=0.029;AN=70;BaseQ          |
| 35407 | chrY | 13718960 | . | C | G   | 1172.12  | my_snp_filter | AC=11;AF=0.157;AN=70;BaseQ         |
| 35408 | chrY | 13718970 | . | G | C   | 112.47   | PASS          | AC=1;AF=0.014;AN=70;BaseQRankSum=  |
| 35409 | chrY | 13718972 | . | A | C   | 93.47    | my_snp_filter | AC=2;AF=0.029;AN=70;BaseQ          |
| 35410 | chrY | 13718973 | . | A | G   | 94.59    | my_snp_filter | AC=4;AF=0.057;AN=70;BaseQ          |
| 35411 | chrY | 13718975 | . | G | T   | 41234.24 | my_snp_filter | AC=30;AF=0.429;AN                  |
| 35412 | chrY | 13718984 | . | G | T   | 38956.21 | my_snp_filter | AC=29;AF=0.414;AN                  |
| 35413 | chrY | 13719000 | . | G | T   | 88.25    | my_snp_filter | AC=4;AF=0.057;AN=70;BaseQ          |
| 35414 | chrY | 13719053 | . | A | T   | 110.43   | my_snp_filter | AC=2;AF=0.029;AN=70;BaseQ          |
| 35415 | chrY | 13719069 | . | G | T,A | 41092.40 | my_snp_filter | AC=9,4;AF=0.150,0                  |
| 35416 | chrY | 13719073 | . | G | C   | 50125.59 | my_snp_filter | AC=9;AF=0.150;AN=                  |

|       |      |          |   |   |     |           |               |                                   |
|-------|------|----------|---|---|-----|-----------|---------------|-----------------------------------|
| 35417 | chrY | 13719075 | . | G | C   | 51071.72  | my_snp_filter | AC=9;AF=0.141;AN=                 |
| 35418 | chrY | 13719077 | . | A | G   | 64        | my_snp_filter | AC=1;AF=0.014;AN=70;BaseQ         |
| 35419 | chrY | 13719087 | . | A | G   | 3666.93   | my_snp_filter | AC=5;AF=0.074;AN=68;BaseQ         |
| 35420 | chrY | 13719107 | . | A | C   | 34.05     | PASS          | AC=1;AF=0.014;AN=70;BaseQRankSum= |
| 35421 | chrY | 13719109 | . | T | C   | 81.95     | my_snp_filter | AC=4;AF=0.057;AN=70;BaseQ         |
| 35422 | chrY | 13719110 | . | G | A   | 34.03     | PASS          | AC=1;AF=0.014;AN=70;BaseQRankSum= |
| 35423 | chrY | 13719131 | . | G | C   | 8110.20   | my_snp_filter | AC=9;AF=0.129;AN=70;BaseQ         |
| 35424 | chrY | 13719136 | . | T | G   | 224221.33 | my_snp_filter | AC=53;AF=0.855;AN=                |
| 35425 | chrY | 13719144 | . | T | A   | 95776.33  | my_snp_filter | AC=23;AF=0.359;AN=                |
| 35426 | chrY | 13719147 | . | A | G   | 37.40     | PASS          | AC=1;AF=0.015;AN=68;BaseQRankSum= |
| 35427 | chrY | 13719201 | . | G | A   | 2688.07   | my_snp_filter | AC=3;AF=0.048;AN=62;BaseQ         |
| 35428 | chrY | 13719220 | . | G | C   | 122256.44 | my_snp_filter | AC=19;AF=0.413;AN=                |
| 35429 | chrY | 13719222 | . | G | C   | 4136.14   | my_snp_filter | AC=7;AF=0.121;AN=58;BaseQ         |
| 35430 | chrY | 13719245 | . | G | T   | 705.71    | my_snp_filter | AC=2;AF=0.033;AN=60;BaseQ         |
| 35431 | chrY | 13719265 | . | G | T   | 11615.79  | my_snp_filter | AC=6;AF=0.176;AN=                 |
| 35432 | chrY | 13719273 | . | T | C   | 12532.23  | my_snp_filter | AC=6;AF=0.167;AN=                 |
| 35433 | chrY | 13719285 | . | A | C   | 13525.53  | my_snp_filter | AC=7;AF=0.206;AN=                 |
| 35434 | chrY | 13719293 | . | T | C   | 7717.71   | my_snp_filter | AC=4;AF=0.125;AN=32;BaseQ         |
| 35435 | chrY | 13719313 | . | T | A   | 10533.52  | my_snp_filter | AC=6;AF=0.200;AN=                 |
| 35436 | chrY | 13719315 | . | C | G   | 135123.24 | my_snp_filter | AC=16;AF=0.800;AN=                |
| 35437 | chrY | 13719318 | . | C | G   | 7791.64   | my_snp_filter | AC=4;AF=0.125;AN=32;BaseQ         |
| 35438 | chrY | 13719330 | . | A | C   | 9620.52   | my_snp_filter | AC=6;AF=0.176;AN=34;BaseQ         |
| 35439 | chrY | 13719395 | . | T | A   | 83372.60  | my_snp_filter | AC=21;AF=0.525;AN=                |
| 35440 | chrY | 13719475 | . | G | T   | 53.69     | my_snp_filter | AC=3;AF=0.043;AN=70;BaseQ         |
| 35441 | chrY | 13719476 | . | G | T   | 43.08     | my_snp_filter | AC=1;AF=0.014;AN=70;BaseQ         |
| 35442 | chrY | 13719484 | . | T | G   | 164.18    | my_snp_filter | AC=5;AF=0.071;AN=70;BaseQ         |
| 35443 | chrY | 13719489 | . | A | T   | 95649.85  | my_snp_filter | AC=29;AF=0.483;AN=                |
| 35444 | chrY | 13719490 | . | T | A   | 250921.73 | my_snp_filter | AC=40;AF=0.645;AN=                |
| 35445 | chrY | 13719506 | . | A | G   | 84.20     | my_snp_filter | AC=3;AF=0.043;AN=70;BaseQ         |
| 35446 | chrY | 13719508 | . | T | G   | 103.47    | my_snp_filter | AC=5;AF=0.071;AN=70;BaseQ         |
| 35447 | chrY | 13719510 | . | T | C   | 13395.61  | my_snp_filter | AC=18;AF=0.257;AN=                |
| 35448 | chrY | 13719524 | . | C | T   | 1625.03   | my_snp_filter | AC=4;AF=0.057;AN=70;BaseQ         |
| 35449 | chrY | 13719557 | . | T | A   | 3902.81   | my_snp_filter | AC=3;AF=0.047;AN=64;BaseQ         |
| 35450 | chrY | 13719565 | . | T | A   | 157108.15 | my_snp_filter | AC=52;AF=0.839;AN=                |
| 35451 | chrY | 13719589 | . | G | C   | 46.49     | my_snp_filter | AC=2;AF=0.030;AN=66;DP=44         |
| 35452 | chrY | 13719595 | . | A | T   | 5889.53   | my_snp_filter | AC=10;AF=0.152;AN=66;BaseQ        |
| 35453 | chrY | 13719616 | . | A | G   | 7478.97   | my_snp_filter | AC=12;AF=0.188;AN=64;BaseQ        |
| 35454 | chrY | 13719631 | . | C | T   | 3123.13   | my_snp_filter | AC=9;AF=0.145;AN=62;BaseQ         |
| 35455 | chrY | 13719652 | . | T | G   | 109.60    | my_snp_filter | AC=1;AF=0.021;AN=48;BaseQ         |
| 35456 | chrY | 13719690 | . | G | A   | 32471.02  | my_snp_filter | AC=21;AF=0.618;AN=                |
| 35457 | chrY | 13719701 | . | G | C   | 4830.51   | my_snp_filter | AC=7;AF=0.194;AN=36;BaseQ         |
| 35458 | chrY | 13719733 | . | T | G   | 9021.37   | my_snp_filter | AC=7;AF=0.250;AN=28;BaseQ         |
| 35459 | chrY | 13719751 | . | C | A   | 921.64    | my_snp_filter | AC=3;AF=0.083;AN=36;BaseQ         |
| 35460 | chrY | 13719765 | . | A | C   | 11184.40  | my_snp_filter | AC=7;AF=0.194;AN=                 |
| 35461 | chrY | 13719766 | . | C | G   | 738.43    | my_snp_filter | AC=3;AF=0.083;AN=36;BaseQ         |
| 35462 | chrY | 13719768 | . | C | T   | 656.48    | my_snp_filter | AC=5;AF=0.132;AN=38;BaseQ         |
| 35463 | chrY | 13719769 | . | G | A   | 978.42    | my_snp_filter | AC=3;AF=0.088;AN=34;BaseQ         |
| 35464 | chrY | 13719772 | . | A | T   | 31253.73  | my_snp_filter | AC=7;AF=0.350;AN=                 |
| 35465 | chrY | 13719783 | . | C | G   | 4859.41   | my_snp_filter | AC=7;AF=0.184;AN=38;BaseQ         |
| 35466 | chrY | 13719788 | . | A | G   | 228.78    | my_snp_filter | AC=1;AF=0.025;AN=40;BaseQ         |
| 35467 | chrY | 13719814 | . | A | C   | 3449.68   | my_snp_filter | AC=5;AF=0.250;AN=20;BaseQ         |
| 35468 | chrY | 13719843 | . | G | A   | 3878.12   | my_snp_filter | AC=7;AF=0.438;AN=16;BaseQ         |
| 35469 | chrY | 13719846 | . | T | A   | 4296.12   | my_snp_filter | AC=7;AF=0.438;AN=16;BaseQ         |
| 35470 | chrY | 13719848 | . | G | A   | 4029.12   | my_snp_filter | AC=7;AF=0.438;AN=16;BaseQ         |
| 35471 | chrY | 13719861 | . | T | A   | 4274.58   | my_snp_filter | AC=7;AF=0.500;AN=14;BaseQ         |
| 35472 | chrY | 13719863 | . | G | A   | 4066.58   | my_snp_filter | AC=7;AF=0.500;AN=14;BaseQ         |
| 35473 | chrY | 13719866 | . | T | A   | 9296.58   | my_snp_filter | AC=7;AF=0.500;AN=14;BaseQ         |
| 35474 | chrY | 13719894 | . | A | T   | 2047.58   | my_snp_filter | AC=7;AF=0.500;AN=14;BaseQ         |
| 35475 | chrY | 13719905 | . | A | C   | 312.47    | my_snp_filter | AC=6;AF=0.429;AN=14;BaseQ         |
| 35476 | chrY | 13719918 | . | C | T   | 333.22    | my_snp_filter | AC=3;AF=0.214;AN=14;BaseQ         |
| 35477 | chrY | 13719926 | . | C | G   | 46.11     | my_snp_filter | AC=4;AF=0.286;AN=14;BaseQ         |
| 35478 | chrY | 13719977 | . | T | G   | 122.53    | my_snp_filter | AC=3;AF=0.214;AN=14;BaseQ         |
| 35479 | chrY | 13720002 | . | G | A   | 93.41     | my_snp_filter | AC=2;AF=0.143;AN=14;BaseQ         |
| 35480 | chrY | 13720020 | . | A | T   | 244.86    | my_snp_filter | AC=3;AF=0.188;AN=16;BaseQ         |
| 35481 | chrY | 13720142 | . | T | A   | 144.27    | my_snp_filter | AC=3;AF=0.063;AN=48;BaseQ         |
| 35482 | chrY | 13720171 | . | T | G   | 53.27     | PASS          | AC=2;AF=0.031;AN=64;DP=228;FS=0.0 |
| 35483 | chrY | 13720429 | . | G | T   | 219.09    | PASS          | AC=3;AF=0.044;AN=68;BaseQRankSum= |
| 35484 | chrY | 13720439 | . | G | C   | 44.71     | my_snp_filter | AC=3;AF=0.044;AN=68;BaseQ         |
| 35485 | chrY | 13720471 | . | A | C   | 33.29     | my_snp_filter | AC=1;AF=0.015;AN=66;BaseQ         |
| 35486 | chrY | 13720502 | . | T | A   | 409.51    | PASS          | AC=4;AF=0.074;AN=54;BaseQRankSum= |
| 35487 | chrY | 13720524 | . | G | C   | 938.83    | PASS          | AC=5;AF=0.114;AN=44;BaseQRankSum= |
| 35488 | chrY | 13720548 | . | G | A   | 94.72     | PASS          | AC=2;AF=0.053;AN=38;BaseQRankSum= |
| 35489 | chrY | 13720553 | . | T | G   | 569.72    | my_snp_filter | AC=5;AF=0.156;AN=32;BaseQ         |
| 35490 | chrY | 13720554 | . | C | G   | 569.72    | my_snp_filter | AC=5;AF=0.156;AN=32;BaseQ         |
| 35491 | chrY | 13720564 | . | T | G,C | 1131.90   | my_snp_filter | AC=3,5;AF=0.100,0.167;AN=         |
| 35492 | chrY | 13720565 | . | A | G   | 51.76     | my_snp_filter | AC=2;AF=0.071;AN=28;BaseQ         |

|       |      |          |   |   |     |          |               |                                   |
|-------|------|----------|---|---|-----|----------|---------------|-----------------------------------|
| 35493 | chrY | 13720576 | . | C | A   | 147.75   | my_snp_filter | AC=4;AF=0.133;AN=30;BaseQ         |
| 35494 | chrY | 13720652 | . | T | A   | 603.59   | my_snp_filter | AC=4;AF=0.083;AN=48;BaseQ         |
| 35495 | chrY | 13720665 | . | A | G   | 754.19   | my_snp_filter | AC=5;AF=0.093;AN=54;BaseQ         |
| 35496 | chrY | 13720666 | . | C | T   | 674.03   | my_snp_filter | AC=5;AF=0.093;AN=54;BaseQ         |
| 35497 | chrY | 13720689 | . | C | A   | 2125.83  | my_snp_filter | AC=6;AF=0.100;AN=60;BaseQ         |
| 35498 | chrY | 13720721 | . | A | C   | 301.05   | PASS          | AC=2;AF=0.033;AN=60;BaseQRankSum= |
| 35499 | chrY | 13720724 | . | T | G,A | 526.47   | PASS          | AC=1,2;AF=0.019,0.037;AN=54;BaseQ |
| 35500 | chrY | 13720731 | . | A | G   | 389.03   | PASS          | AC=2;AF=0.034;AN=58;BaseQRankSum= |
| 35501 | chrY | 13720732 | . | T | A   | 548.87   | PASS          | AC=2;AF=0.033;AN=60;BaseQRankSum= |
| 35502 | chrY | 13720737 | . | T | A   | 153.27   | my_snp_filter | AC=1;AF=0.016;AN=62;BaseQ         |
| 35503 | chrY | 13720752 | . | T | C   | 855.37   | my_snp_filter | AC=3;AF=0.075;AN=40;BaseQ         |
| 35504 | chrY | 13720753 | . | A | G   | 1961.19  | my_snp_filter | AC=7;AF=0.184;AN=38;BaseQ         |
| 35505 | chrY | 13720757 | . | C | T   | 126.82   | my_snp_filter | AC=2;AF=0.037;AN=54;BaseQ         |
| 35506 | chrY | 13720758 | . | C | G   | 1318.01  | my_snp_filter | AC=5;AF=0.109;AN=46;BaseQ         |
| 35507 | chrY | 13720760 | . | A | C   | 927.76   | my_snp_filter | AC=3;AF=0.068;AN=44;BaseQ         |
| 35508 | chrY | 13720770 | . | G | T   | 143.49   | my_snp_filter | AC=1;AF=0.018;AN=56;BaseQ         |
| 35509 | chrY | 13720780 | . | G | A   | 4588     | my_snp_filter | AC=7;AF=0.121;AN=58;BaseQ         |
| 35510 | chrY | 13720786 | . | C | T,G | 2858.09  | my_snp_filter | AC=11,3;AF=0.212,0.058;AN=        |
| 35511 | chrY | 13720807 | . | G | T   | 1556.67  | my_snp_filter | AC=3;AF=0.050;AN=60;BaseQ         |
| 35512 | chrY | 13720808 | . | G | T   | 1541.64  | my_snp_filter | AC=3;AF=0.050;AN=60;BaseQ         |
| 35513 | chrY | 13720809 | . | A | T   | 293.47   | my_snp_filter | AC=2;AF=0.033;AN=60;BaseQ         |
| 35514 | chrY | 13720818 | . | T | G   | 5215.92  | my_snp_filter | AC=16;AF=0.286;AN=56;BaseQ        |
| 35515 | chrY | 13720825 | . | A | T   | 4421.42  | my_snp_filter | AC=6;AF=0.107;AN=56;BaseQ         |
| 35516 | chrY | 13720826 | . | C | T   | 14383.45 | my_snp_filter | AC=17;AF=0.304;AN=                |
| 35517 | chrY | 13720827 | . | A | T   | 14415.36 | my_snp_filter | AC=17;AF=0.304;AN=                |
| 35518 | chrY | 13720850 | . | A | G   | 4840.22  | my_snp_filter | AC=6;AF=0.100;AN=60;BaseQ         |
| 35519 | chrY | 13720852 | . | T | C   | 28072.02 | my_snp_filter | AC=30;AF=0.536;AN=                |
| 35520 | chrY | 13720858 | . | G | T   | 221.41   | my_snp_filter | AC=3;AF=0.050;AN=60;BaseQ         |
| 35521 | chrY | 13720863 | . | G | A   | 938.78   | my_snp_filter | AC=4;AF=0.067;AN=60;BaseQ         |
| 35522 | chrY | 13720877 | . | C | A   | 11690.45 | my_snp_filter | AC=16;AF=0.320;AN=                |
| 35523 | chrY | 13720892 | . | G | A   | 2288.90  | my_snp_filter | AC=7;AF=0.125;AN=56;BaseQ         |
| 35524 | chrY | 13720933 | . | A | C   | 402.74   | my_snp_filter | AC=2;AF=0.045;AN=44;BaseQ         |
| 35525 | chrY | 13720957 | . | T | G   | 3955.89  | PASS          | AC=7;AF=0.206;AN=34;BaseQRankSum= |
| 35526 | chrY | 13720958 | . | T | G   | 3878.89  | PASS          | AC=7;AF=0.206;AN=34;BaseQRankSum= |
| 35527 | chrY | 13721017 | . | G | A   | 188.48   | my_snp_filter | AC=1;AF=0.023;AN=44;BaseQ         |
| 35528 | chrY | 13721021 | . | A | T   | 241.49   | my_snp_filter | AC=1;AF=0.022;AN=46;BaseQ         |
| 35529 | chrY | 13721034 | . | A | G   | 1591.11  | my_snp_filter | AC=5;AF=0.125;AN=40;BaseQ         |
| 35530 | chrY | 13721052 | . | A | C   | 122.59   | my_snp_filter | AC=2;AF=0.045;AN=44;BaseQ         |
| 35531 | chrY | 13721055 | . | T | A   | 3640.31  | my_snp_filter | AC=8;AF=0.182;AN=44;BaseQ         |
| 35532 | chrY | 13721065 | . | A | G   | 325.73   | my_snp_filter | AC=2;AF=0.045;AN=44;BaseQ         |
| 35533 | chrY | 13721069 | . | A | G   | 8027     | my_snp_filter | AC=8;AF=0.222;AN=36;BaseQ         |
| 35534 | chrY | 13721100 | . | C | G   | 466.35   | my_snp_filter | AC=2;AF=0.083;AN=24;BaseQ         |
| 35535 | chrY | 13721146 | . | G | A   | 233.32   | my_snp_filter | AC=2;AF=0.091;AN=22;BaseQ         |
| 35536 | chrY | 13721173 | . | T | A   | 10351.89 | my_snp_filter | AC=7;AF=0.350;AN=                 |
| 35537 | chrY | 13721254 | . | A | G   | 1155.56  | my_snp_filter | AC=4;AF=0.133;AN=30;BaseQ         |
| 35538 | chrY | 13721260 | . | C | A   | 1306.12  | my_snp_filter | AC=4;AF=0.133;AN=30;BaseQ         |
| 35539 | chrY | 13721269 | . | A | G   | 1474.19  | my_snp_filter | AC=4;AF=0.125;AN=32;BaseQ         |
| 35540 | chrY | 13721271 | . | G | T   | 39.04    | my_snp_filter | AC=1;AF=0.031;AN=32;BaseQ         |
| 35541 | chrY | 13721292 | . | A | T   | 1464.48  | my_snp_filter | AC=4;AF=0.091;AN=44;BaseQ         |
| 35542 | chrY | 13721331 | . | T | G   | 347.92   | my_snp_filter | AC=4;AF=0.074;AN=54;BaseQ         |
| 35543 | chrY | 13721344 | . | G | A   | 17797.54 | my_snp_filter | AC=8;AF=0.133;AN=                 |
| 35544 | chrY | 13721356 | . | A | G   | 25808.76 | my_snp_filter | AC=9;AF=0.150;AN=                 |
| 35545 | chrY | 13721405 | . | T | A   | 71.84    | my_snp_filter | AC=1;AF=0.017;AN=60;BaseQ         |
| 35546 | chrY | 13721441 | . | C | G   | 367.21   | my_snp_filter | AC=4;AF=0.069;AN=58;BaseQ         |
| 35547 | chrY | 13721455 | . | G | T   | 95.36    | my_snp_filter | AC=2;AF=0.033;AN=60;BaseQ         |
| 35548 | chrY | 13721459 | . | A | G   | 92.02    | my_snp_filter | AC=1;AF=0.018;AN=56;BaseQ         |
| 35549 | chrY | 13721504 | . | G | A   | 529.16   | my_snp_filter | AC=7;AF=0.159;AN=44;BaseQ         |
| 35550 | chrY | 13721544 | . | C | T   | 113.39   | my_snp_filter | AC=4;AF=0.133;AN=30;BaseQ         |
| 35551 | chrY | 13721624 | . | G | A   | 387.94   | my_snp_filter | AC=2;AF=0.125;AN=16;BaseQ         |
| 35552 | chrY | 13721646 | . | G | C   | 74.02    | my_snp_filter | AC=2;AF=0.125;AN=16;BaseQ         |
| 35553 | chrY | 13721647 | . | A | C   | 74.10    | my_snp_filter | AC=2;AF=0.125;AN=16;BaseQ         |
| 35554 | chrY | 13721666 | . | A | C   | 319.60   | my_snp_filter | AC=3;AF=0.188;AN=16;BaseQ         |
| 35555 | chrY | 13721672 | . | T | A   | 114.75   | my_snp_filter | AC=2;AF=0.125;AN=16;BaseQ         |
| 35556 | chrY | 13721685 | . | T | C   | 322.62   | my_snp_filter | AC=3;AF=0.188;AN=16;BaseQ         |
| 35557 | chrY | 13721692 | . | A | C   | 182.33   | my_snp_filter | AC=2;AF=0.125;AN=16;BaseQ         |
| 35558 | chrY | 13721698 | . | A | T   | 801.62   | my_snp_filter | AC=5;AF=0.313;AN=16;BaseQ         |
| 35559 | chrY | 13721703 | . | T | G   | 296.27   | my_snp_filter | AC=6;AF=0.375;AN=16;BaseQ         |
| 35560 | chrY | 13721732 | . | A | T   | 660.28   | my_snp_filter | AC=3;AF=0.214;AN=14;BaseQ         |
| 35561 | chrY | 13721762 | . | A | G   | 183.58   | my_snp_filter | AC=2;AF=0.111;AN=18;BaseQ         |
| 35562 | chrY | 13721774 | . | T | A   | 151.15   | my_snp_filter | AC=2;AF=0.111;AN=18;BaseQ         |
| 35563 | chrY | 13721790 | . | A | T   | 73.35    | my_snp_filter | AC=1;AF=0.056;AN=18;BaseQ         |
| 35564 | chrY | 13721873 | . | A | T   | 227.82   | my_snp_filter | AC=4;AF=0.222;AN=18;BaseQ         |
| 35565 | chrY | 13721883 | . | T | C   | 255.39   | my_snp_filter | AC=3;AF=0.167;AN=18;BaseQ         |
| 35566 | chrY | 13721929 | . | C | G   | 165.44   | my_snp_filter | AC=3;AF=0.150;AN=20;BaseQ         |
| 35567 | chrY | 13721947 | . | A | G   | 1000.21  | my_snp_filter | AC=7;AF=0.438;AN=16;BaseQ         |
| 35568 | chrY | 13721950 | . | G | C   | 38.28    | my_snp_filter | AC=1;AF=0.063;AN=16;BaseQ         |

|       |      |          |   |   |     |          |               |                                   |
|-------|------|----------|---|---|-----|----------|---------------|-----------------------------------|
| 35569 | chrY | 13721953 | . | A | G   | 105.25   | my_snp_filter | AC=1;AF=0.063;AN=16;BaseQ         |
| 35570 | chrY | 13722004 | . | G | A   | 5036.58  | my_snp_filter | AC=7;AF=0.500;AN=14;BaseQ         |
| 35571 | chrY | 13722008 | . | C | T   | 2947.41  | my_snp_filter | AC=7;AF=0.438;AN=16;BaseQ         |
| 35572 | chrY | 13722009 | . | G | A   | 146.59   | my_snp_filter | AC=3;AF=0.188;AN=16;BaseQ         |
| 35573 | chrY | 13722054 | . | C | G   | 3931.12  | my_snp_filter | AC=7;AF=0.438;AN=16;BaseQ         |
| 35574 | chrY | 13722065 | . | G | A   | 138.94   | my_snp_filter | AC=2;AF=0.125;AN=16;BaseQ         |
| 35575 | chrY | 13722069 | . | G | A   | 102.53   | my_snp_filter | AC=1;AF=0.063;AN=16;BaseQ         |
| 35576 | chrY | 13722073 | . | T | A   | 228.27   | my_snp_filter | AC=3;AF=0.188;AN=16;BaseQ         |
| 35577 | chrY | 13722074 | . | A | G   | 5105.43  | my_snp_filter | AC=7;AF=0.438;AN=16;BaseQ         |
| 35578 | chrY | 13722121 | . | A | T   | 348.76   | my_snp_filter | AC=3;AF=0.167;AN=18;BaseQ         |
| 35579 | chrY | 13722144 | . | A | G   | 723.01   | my_snp_filter | AC=4;AF=0.286;AN=14;BaseQ         |
| 35580 | chrY | 13722195 | . | C | A   | 442.13   | my_snp_filter | AC=4;AF=0.250;AN=16;BaseQ         |
| 35581 | chrY | 13722246 | . | A | G   | 290.50   | my_snp_filter | AC=4;AF=0.167;AN=24;BaseQ         |
| 35582 | chrY | 13722254 | . | C | G   | 10029.83 | my_snp_filter | AC=11;AF=0.344;AN=                |
| 35583 | chrY | 13722276 | . | G | A   | 10120    | my_snp_filter | AC=14;AF=0.350;AN=40;Base         |
| 35584 | chrY | 13722278 | . | G | A   | 112.54   | my_snp_filter | AC=3;AF=0.068;AN=44;BaseQ         |
| 35585 | chrY | 13722288 | . | C | T   | 198.12   | my_snp_filter | AC=3;AF=0.058;AN=52;BaseQ         |
| 35586 | chrY | 13722291 | . | A | T   | 2185.95  | my_snp_filter | AC=9;AF=0.150;AN=60;BaseQ         |
| 35587 | chrY | 13722326 | . | A | G   | 93.07    | my_snp_filter | AC=1;AF=0.015;AN=66;BaseQ         |
| 35588 | chrY | 13722333 | . | G | T   | 175.58   | my_snp_filter | AC=4;AF=0.065;AN=62;BaseQ         |
| 35589 | chrY | 13722338 | . | C | G   | 138.49   | my_snp_filter | AC=2;AF=0.032;AN=62;BaseQ         |
| 35590 | chrY | 13722351 | . | A | G   | 141.65   | PASS          | AC=2;AF=0.032;AN=62;BaseQRankSum= |
| 35591 | chrY | 13722354 | . | G | A   | 49.41    | my_snp_filter | AC=2;AF=0.031;AN=64;DP=81         |
| 35592 | chrY | 13722357 | . | T | A   | 48.12    | my_snp_filter | AC=2;AF=0.031;AN=64;DP=80         |
| 35593 | chrY | 13722363 | . | G | T   | 74.51    | my_snp_filter | AC=2;AF=0.036;AN=56;BaseQ         |
| 35594 | chrY | 13722364 | . | G | T   | 74.51    | my_snp_filter | AC=2;AF=0.036;AN=56;BaseQ         |
| 35595 | chrY | 13722367 | . | C | T   | 48.60    | my_snp_filter | AC=2;AF=0.032;AN=62;DP=72         |
| 35596 | chrY | 13722368 | . | G | C   | 48.05    | my_snp_filter | AC=2;AF=0.032;AN=62;DP=71         |
| 35597 | chrY | 13722371 | . | T | A   | 48.18    | my_snp_filter | AC=2;AF=0.032;AN=62;DP=71         |
| 35598 | chrY | 13722374 | . | G | T   | 171.15   | my_snp_filter | AC=3;AF=0.054;AN=56;BaseQ         |
| 35599 | chrY | 13722377 | . | T | C   | 173.87   | my_snp_filter | AC=3;AF=0.050;AN=60;BaseQ         |
| 35600 | chrY | 13722390 | . | A | C   | 57.02    | my_snp_filter | AC=1;AF=0.019;AN=54;BaseQ         |
| 35601 | chrY | 13722394 | . | A | G   | 459.38   | my_snp_filter | AC=8;AF=0.167;AN=48;BaseQ         |
| 35602 | chrY | 13722400 | . | A | G   | 63.16    | my_snp_filter | AC=3;AF=0.052;AN=58;BaseQ         |
| 35603 | chrY | 13722412 | . | T | A   | 223.78   | my_snp_filter | AC=5;AF=0.119;AN=42;BaseQ         |
| 35604 | chrY | 13722413 | . | A | G   | 236.49   | my_snp_filter | AC=6;AF=0.143;AN=42;BaseQ         |
| 35605 | chrY | 13722417 | . | T | A   | 386.98   | my_snp_filter | AC=5;AF=0.100;AN=50;BaseQ         |
| 35606 | chrY | 13722420 | . | C | A   | 197.39   | my_snp_filter | AC=6;AF=0.136;AN=44;BaseQ         |
| 35607 | chrY | 13722424 | . | G | A   | 46.45    | my_snp_filter | AC=1;AF=0.021;AN=48;BaseQ         |
| 35608 | chrY | 13722427 | . | A | T   | 1113.04  | my_snp_filter | AC=12;AF=0.375;AN=32;Base         |
| 35609 | chrY | 13722437 | . | T | C   | 231.11   | my_snp_filter | AC=3;AF=0.063;AN=48;BaseQ         |
| 35610 | chrY | 13722448 | . | G | A   | 50.09    | PASS          | AC=2;AF=0.043;AN=46;BaseQRankSum= |
| 35611 | chrY | 13722474 | . | T | G   | 220.38   | my_snp_filter | AC=5;AF=0.192;AN=26;BaseQ         |
| 35612 | chrY | 13722492 | . | T | A   | 201.50   | my_snp_filter | AC=3;AF=0.075;AN=40;BaseQ         |
| 35613 | chrY | 13722572 | . | C | T   | 1411.37  | my_snp_filter | AC=10;AF=0.200;AN=50;Base         |
| 35614 | chrY | 13722643 | . | A | G   | 1638.32  | my_snp_filter | AC=9;AF=0.141;AN=64;BaseQ         |
| 35615 | chrY | 13722651 | . | A | T   | 4656.81  | my_snp_filter | AC=7;AF=0.135;AN=52;BaseQ         |
| 35616 | chrY | 13722652 | . | C | G   | 5101.56  | my_snp_filter | AC=9;AF=0.180;AN=50;BaseQ         |
| 35617 | chrY | 13722655 | . | G | A   | 110.27   | my_snp_filter | AC=2;AF=0.031;AN=64;BaseQ         |
| 35618 | chrY | 13722664 | . | A | C   | 465.68   | my_snp_filter | AC=4;AF=0.059;AN=68;BaseQ         |
| 35619 | chrY | 13722703 | . | G | T   | 201.81   | my_snp_filter | AC=4;AF=0.059;AN=68;BaseQ         |
| 35620 | chrY | 13722716 | . | A | T   | 120.90   | my_snp_filter | AC=2;AF=0.029;AN=68;BaseQ         |
| 35621 | chrY | 13722717 | . | G | C   | 16183.36 | my_snp_filter | AC=31;AF=0.470;AN=                |
| 35622 | chrY | 13722728 | . | G | C   | 1244.64  | my_snp_filter | AC=15;AF=0.221;AN=68;Base         |
| 35623 | chrY | 13722732 | . | G | A   | 413.04   | my_snp_filter | AC=7;AF=0.103;AN=68;BaseQ         |
| 35624 | chrY | 13722735 | . | A | G   | 10936.11 | my_snp_filter | AC=26;AF=0.382;AN=                |
| 35625 | chrY | 13722756 | . | T | C   | 66.25    | my_snp_filter | AC=1;AF=0.015;AN=68;BaseQ         |
| 35626 | chrY | 13722761 | . | C | A   | 31.10    | my_snp_filter | AC=1;AF=0.015;AN=68;BaseQ         |
| 35627 | chrY | 13722767 | . | G | T   | 64.10    | my_snp_filter | AC=1;AF=0.015;AN=68;BaseQ         |
| 35628 | chrY | 13722790 | . | G | A   | 14677.88 | my_snp_filter | AC=15;AF=0.417;AN=                |
| 35629 | chrY | 13722810 | . | T | A   | 20109.71 | my_snp_filter | AC=39;AF=0.609;AN=                |
| 35630 | chrY | 13722815 | . | A | T   | 7252.05  | my_snp_filter | AC=13;AF=0.210;AN=62;Base         |
| 35631 | chrY | 13722831 | . | T | A   | 194.98   | my_snp_filter | AC=2;AF=0.029;AN=70;BaseQ         |
| 35632 | chrY | 13722843 | . | G | A   | 7144.30  | my_snp_filter | AC=13;AF=0.224;AN=58;Base         |
| 35633 | chrY | 13722852 | . | C | G,* | 12865.72 | my_snp_filter | AC=12,1;AF=0.333,AN=              |
| 35634 | chrY | 13722859 | . | A | T   | 363.31   | my_snp_filter | AC=4;AF=0.057;AN=70;BaseQ         |
| 35635 | chrY | 13722865 | . | A | C   | 444.86   | my_snp_filter | AC=6;AF=0.086;AN=70;BaseQ         |
| 35636 | chrY | 13722868 | . | A | T   | 78.09    | my_snp_filter | AC=2;AF=0.029;AN=70;BaseQ         |
| 35637 | chrY | 13722871 | . | T | A   | 207.86   | my_snp_filter | AC=6;AF=0.086;AN=70;BaseQ         |
| 35638 | chrY | 13722901 | . | T | A   | 771.41   | my_snp_filter | AC=10;AF=0.172;AN=58;Base         |
| 35639 | chrY | 13722920 | . | A | T   | 126.55   | my_snp_filter | AC=1;AF=0.018;AN=56;BaseQ         |
| 35640 | chrY | 13722937 | . | T | G,* | 1866.84  | PASS          | AC=10,3;AF=0.313,0.094;AN=32;Base |
| 35641 | chrY | 13722943 | . | T | G,* | 1264.09  | PASS          | AC=5,3;AF=0.132,0.079;AN=38;BaseQ |
| 35642 | chrY | 13722944 | . | C | G,* | 355.69   | my_snp_filter | AC=1,2;AF=0.033,0.067;AN=         |
| 35643 | chrY | 13722959 | . | C | A   | 340.94   | my_snp_filter | AC=2;AF=0.056;AN=36;BaseQ         |
| 35644 | chrY | 13722969 | . | A | C,* | 920.84   | my_snp_filter | AC=4,2;AF=0.083,0.042;AN=         |

|       |      |          |   |   |     |          |               |                                   |
|-------|------|----------|---|---|-----|----------|---------------|-----------------------------------|
| 35645 | chrY | 13722971 | . | T | C   | 178.52   | PASS          | AC=1;AF=0.020;AN=50;BaseQRankSum= |
| 35646 | chrY | 13722974 | . | A | C,* | 696.19   | my_snp_filter | AC=2,2;AF=0.048,0.048;AN=         |
| 35647 | chrY | 13722984 | . | A | C,T | 1412.22  | my_snp_filter | AC=4,1;AF=0.087,0.022;AN=         |
| 35648 | chrY | 13722988 | . | G | C   | 135.24   | my_snp_filter | AC=1;AF=0.019;AN=54;BaseQ         |
| 35649 | chrY | 13722997 | . | G | T   | 309.03   | my_snp_filter | AC=2;AF=0.040;AN=50;BaseQ         |
| 35650 | chrY | 13723006 | . | T | G   | 174.42   | my_snp_filter | AC=2;AF=0.037;AN=54;BaseQ         |
| 35651 | chrY | 13723009 | . | G | A   | 135.42   | my_snp_filter | AC=2;AF=0.037;AN=54;BaseQ         |
| 35652 | chrY | 13723013 | . | G | T   | 72.56    | my_snp_filter | AC=1;AF=0.019;AN=52;BaseQ         |
| 35653 | chrY | 13723014 | . | G | T   | 89.15    | my_snp_filter | AC=1;AF=0.019;AN=52;BaseQ         |
| 35654 | chrY | 13723015 | . | C | T   | 94.04    | my_snp_filter | AC=2;AF=0.037;AN=54;BaseQ         |
| 35655 | chrY | 13723022 | . | G | C   | 40.17    | my_snp_filter | AC=1;AF=0.019;AN=54;BaseQ         |
| 35656 | chrY | 13723026 | . | T | A   | 142.36   | my_snp_filter | AC=1;AF=0.017;AN=58;BaseQ         |
| 35657 | chrY | 13723027 | . | A | G   | 1085.54  | my_snp_filter | AC=5;AF=0.119;AN=42;BaseQ         |
| 35658 | chrY | 13723047 | . | C | G   | 267.25   | my_snp_filter | AC=1;AF=0.016;AN=64;BaseQ         |
| 35659 | chrY | 13723050 | . | A | G   | 102.49   | my_snp_filter | AC=1;AF=0.017;AN=58;BaseQ         |
| 35660 | chrY | 13723051 | . | G | T   | 2901.20  | my_snp_filter | AC=6;AF=0.143;AN=42;BaseQ         |
| 35661 | chrY | 13723060 | . | G | T   | 3048.30  | my_snp_filter | AC=6;AF=0.167;AN=36;BaseQ         |
| 35662 | chrY | 13723063 | . | G | T   | 2463.24  | my_snp_filter | AC=3;AF=0.065;AN=46;BaseQ         |
| 35663 | chrY | 13723088 | . | T | C   | 143.30   | my_snp_filter | AC=2;AF=0.031;AN=64;BaseQ         |
| 35664 | chrY | 13723097 | . | A | G   | 168.20   | my_snp_filter | AC=2;AF=0.030;AN=66;BaseQ         |
| 35665 | chrY | 13723113 | . | G | T   | 225.29   | my_snp_filter | AC=4;AF=0.061;AN=66;BaseQ         |
| 35666 | chrY | 13723114 | . | A | T   | 147.32   | my_snp_filter | AC=4;AF=0.061;AN=66;BaseQ         |
| 35667 | chrY | 13723116 | . | T | C   | 147.93   | my_snp_filter | AC=4;AF=0.061;AN=66;BaseQ         |
| 35668 | chrY | 13723119 | . | A | G   | 4070.30  | my_snp_filter | AC=8;AF=0.121;AN=66;BaseQ         |
| 35669 | chrY | 13723125 | . | A | G   | 415.21   | my_snp_filter | AC=2;AF=0.031;AN=64;BaseQ         |
| 35670 | chrY | 13723127 | . | G | A   | 4011.17  | my_snp_filter | AC=7;AF=0.109;AN=64;BaseQ         |
| 35671 | chrY | 13723132 | . | G | T   | 93.24    | my_snp_filter | AC=2;AF=0.031;AN=64;BaseQ         |
| 35672 | chrY | 13723163 | . | G | C   | 367.38   | my_snp_filter | AC=5;AF=0.074;AN=68;BaseQ         |
| 35673 | chrY | 13723165 | . | A | C   | 361.89   | my_snp_filter | AC=5;AF=0.074;AN=68;BaseQ         |
| 35674 | chrY | 13723167 | . | G | T   | 5203.94  | my_snp_filter | AC=17;AF=0.266;AN=64;BaseQ        |
| 35675 | chrY | 13723168 | . | G | T   | 5173.94  | my_snp_filter | AC=17;AF=0.266;AN=64;BaseQ        |
| 35676 | chrY | 13723171 | . | T | A   | 80.23    | my_snp_filter | AC=2;AF=0.029;AN=68;BaseQ         |
| 35677 | chrY | 13723175 | . | G | A   | 251.06   | my_snp_filter | AC=5;AF=0.074;AN=68;BaseQ         |
| 35678 | chrY | 13723180 | . | A | T   | 29187.53 | my_snp_filter | AC=25;AF=0.463;AN=                |
| 35679 | chrY | 13723193 | . | A | C   | 889.27   | my_snp_filter | AC=6;AF=0.088;AN=68;BaseQ         |
| 35680 | chrY | 13723201 | . | T | C   | 936.69   | my_snp_filter | AC=6;AF=0.091;AN=66;BaseQ         |
| 35681 | chrY | 13723210 | . | A | C   | 756.85   | my_snp_filter | AC=12;AF=0.182;AN=66;BaseQ        |
| 35682 | chrY | 13723215 | . | A | C   | 95.54    | my_snp_filter | AC=2;AF=0.029;AN=68;BaseQ         |
| 35683 | chrY | 13723226 | . | T | A   | 131.56   | my_snp_filter | AC=2;AF=0.029;AN=68;BaseQ         |
| 35684 | chrY | 13723233 | . | G | A   | 4441.65  | my_snp_filter | AC=8;AF=0.125;AN=64;BaseQ         |
| 35685 | chrY | 13723256 | . | T | C   | 410      | my_snp_filter | AC=2;AF=0.033;AN=60;BaseQ         |
| 35686 | chrY | 13723279 | . | A | C   | 389.12   | my_snp_filter | AC=2;AF=0.059;AN=34;BaseQ         |
| 35687 | chrY | 13723305 | . | T | C   | 111.91   | my_snp_filter | AC=4;AF=0.143;AN=28;DP=41         |
| 35688 | chrY | 13723308 | . | A | G   | 5399.82  | my_snp_filter | AC=7;AF=0.233;AN=30;BaseQ         |
| 35689 | chrY | 13723316 | . | G | C   | 5583.59  | my_snp_filter | AC=8;AF=0.286;AN=28;BaseQ         |
| 35690 | chrY | 13723324 | . | A | C   | 184.35   | my_snp_filter | AC=2;AF=0.053;AN=38;BaseQ         |
| 35691 | chrY | 13723329 | . | G | A,C | 6381.67  | my_snp_filter | AC=7,11;AF=0.389,0.611;AN=        |
| 35692 | chrY | 13723330 | . | G | A   | 184.52   | my_snp_filter | AC=2;AF=0.048;AN=42;BaseQ         |
| 35693 | chrY | 13723339 | . | T | A   | 6851.29  | my_snp_filter | AC=8;AF=0.308;AN=26;BaseQ         |
| 35694 | chrY | 13723344 | . | C | G,A | 516.94   | my_snp_filter | AC=3,1;AF=0.060,0.020;AN=         |
| 35695 | chrY | 13723348 | . | T | C   | 298.30   | my_snp_filter | AC=2;AF=0.038;AN=52;BaseQ         |
| 35696 | chrY | 13723359 | . | G | C   | 8227.25  | my_snp_filter | AC=7;AF=0.350;AN=20;BaseQ         |
| 35697 | chrY | 13723362 | . | A | G   | 9460.28  | my_snp_filter | AC=8;AF=0.308;AN=26;BaseQ         |
| 35698 | chrY | 13723383 | . | A | T   | 34.37    | my_snp_filter | AC=2;AF=0.040;AN=50;BaseQ         |
| 35699 | chrY | 13723392 | . | G | A   | 37.60    | my_snp_filter | AC=3;AF=0.056;AN=54;BaseQ         |
| 35700 | chrY | 13723395 | . | T | C   | 247.39   | my_snp_filter | AC=6;AF=0.130;AN=46;BaseQ         |
| 35701 | chrY | 13723407 | . | C | G   | 88.70    | my_snp_filter | AC=3;AF=0.058;AN=52;BaseQ         |
| 35702 | chrY | 13723409 | . | A | G   | 62.94    | my_snp_filter | AC=2;AF=0.045;AN=44;BaseQ         |
| 35703 | chrY | 13723417 | . | G | A   | 1618.10  | my_snp_filter | AC=6;AF=0.188;AN=32;BaseQ         |
| 35704 | chrY | 13723432 | . | G | C   | 114.39   | my_snp_filter | AC=3;AF=0.115;AN=26;BaseQ         |
| 35705 | chrY | 13723479 | . | C | A   | 332.29   | my_snp_filter | AC=2;AF=0.143;AN=14;BaseQ         |
| 35706 | chrY | 13723481 | . | G | A   | 9495.29  | my_snp_filter | AC=12;AF=0.857;AN=14;BaseQ        |
| 35707 | chrY | 13723486 | . | G | A   | 1735.90  | my_snp_filter | AC=7;AF=0.389;AN=18;BaseQ         |
| 35708 | chrY | 13723494 | . | T | G   | 379.88   | my_snp_filter | AC=5;AF=0.357;AN=14;BaseQ         |
| 35709 | chrY | 13723525 | . | T | A   | 59.31    | my_snp_filter | AC=1;AF=0.100;AN=10;BaseQ         |
| 35710 | chrY | 13723545 | . | T | G   | 67.84    | my_snp_filter | AC=2;AF=1.00;AN=2;DP=60;F         |
| 35711 | chrY | 13723552 | . | G | C   | 66.69    | my_snp_filter | AC=2;AF=0.500;AN=4;DP=54;         |
| 35712 | chrY | 13724680 | . | G | C   | 96.43    | my_snp_filter | AC=5;AF=0.417;AN=12;BaseQ         |
| 35713 | chrY | 13724682 | . | G | C   | 96.43    | my_snp_filter | AC=5;AF=0.417;AN=12;BaseQ         |
| 35714 | chrY | 13724757 | . | G | A   | 57.91    | my_snp_filter | AC=2;AF=0.143;AN=14;DP=33         |
| 35715 | chrY | 13724765 | . | C | T   | 56.39    | my_snp_filter | AC=2;AF=0.143;AN=14;DP=32         |
| 35716 | chrY | 13724771 | . | G | T   | 51.52    | my_snp_filter | AC=1;AF=0.056;AN=18;DP=35         |
| 35717 | chrY | 13724780 | . | A | T   | 51.21    | my_snp_filter | AC=1;AF=0.050;AN=20;BaseQ         |
| 35718 | chrY | 13725117 | . | T | G   | 79.88    | my_snp_filter | AC=1;AF=0.071;AN=14;BaseQ         |
| 35719 | chrY | 13725119 | . | A | T   | 78.93    | my_snp_filter | AC=1;AF=0.071;AN=14;BaseQ         |
| 35720 | chrY | 13725131 | . | C | G   | 93.86    | my_snp_filter | AC=1;AF=0.500;AN=2;BaseQR         |

|       |      |          |   |   |     |          |               |                                    |
|-------|------|----------|---|---|-----|----------|---------------|------------------------------------|
| 35721 | chrY | 13725554 | . | G | T   | 47.81    | PASS          | AC=1;AF=0.063;AN=16;BaseQRankSum=  |
| 35722 | chrY | 13725557 | . | T | A   | 44.71    | my_snp_filter | AC=1;AF=0.063;AN=16;BaseQ          |
| 35723 | chrY | 13725609 | . | G | A   | 83.67    | my_snp_filter | AC=3;AF=0.188;AN=16;BaseQ          |
| 35724 | chrY | 13725688 | . | C | T   | 5203.87  | my_snp_filter | AC=14;AF=1.00;AN=14;BaseQ          |
| 35725 | chrY | 13725749 | . | T | A   | 8565.38  | my_snp_filter | AC=12;AF=0.750;AN=16;BaseQ         |
| 35726 | chrY | 13725750 | . | T | C   | 663.45   | my_snp_filter | AC=6;AF=0.333;AN=18;BaseQ          |
| 35727 | chrY | 13725778 | . | G | T   | 7582.38  | my_snp_filter | AC=12;AF=0.750;AN=16;BaseQ         |
| 35728 | chrY | 13725801 | . | A | C   | 746.20   | my_snp_filter | AC=7;AF=0.438;AN=16;BaseQ          |
| 35729 | chrY | 13725819 | . | T | G   | 13417.23 | my_snp_filter | AC=12;AF=0.750;AN=                 |
| 35730 | chrY | 13725833 | . | T | A   | 537.71   | my_snp_filter | AC=5;AF=0.250;AN=20;BaseQ          |
| 35731 | chrY | 13725835 | . | G | A   | 220.78   | my_snp_filter | AC=3;AF=0.150;AN=20;BaseQ          |
| 35732 | chrY | 13725838 | . | T | A   | 152.08   | my_snp_filter | AC=4;AF=0.182;AN=22;BaseQ          |
| 35733 | chrY | 13725840 | . | A | G   | 15672.11 | my_snp_filter | AC=13;AF=0.929;AN=                 |
| 35734 | chrY | 13725857 | . | T | A   | 13945.17 | my_snp_filter | AC=14;AF=1.00;AN=                  |
| 35735 | chrY | 13725858 | . | A | T   | 91.80    | my_snp_filter | AC=4;AF=0.080;AN=50;BaseQ          |
| 35736 | chrY | 13725860 | . | G | A   | 260.63   | my_snp_filter | AC=4;AF=0.067;AN=60;BaseQ          |
| 35737 | chrY | 13725866 | . | T | C,A | 13946.63 | my_snp_filter | AC=14,4;AF=0.778,                  |
| 35738 | chrY | 13725868 | . | C | A   | 78.60    | my_snp_filter | AC=1;AF=0.015;AN=66;BaseQ          |
| 35739 | chrY | 13725885 | . | T | C   | 1728     | my_snp_filter | AC=7;AF=0.113;AN=62;BaseQ          |
| 35740 | chrY | 13725888 | . | T | G   | 404.27   | my_snp_filter | AC=4;AF=0.065;AN=62;BaseQ          |
| 35741 | chrY | 13725909 | . | G | C   | 20143.12 | my_snp_filter | AC=38;AF=0.594;AN=                 |
| 35742 | chrY | 13725923 | . | T | A   | 265.46   | my_snp_filter | AC=4;AF=0.057;AN=70;BaseQ          |
| 35743 | chrY | 13725936 | . | A | C   | 743.29   | my_snp_filter | AC=14;AF=0.206;AN=68;BaseQ         |
| 35744 | chrY | 13725939 | . | A | T   | 290.12   | my_snp_filter | AC=2;AF=0.029;AN=70;BaseQ          |
| 35745 | chrY | 13725956 | . | G | A   | 21182.63 | my_snp_filter | AC=31;AF=0.470;AN=                 |
| 35746 | chrY | 13725970 | . | C | G   | 22669.24 | my_snp_filter | AC=32;AF=0.457;AN=                 |
| 35747 | chrY | 13725973 | . | A | T   | 90.45    | my_snp_filter | AC=1;AF=0.014;AN=70;BaseQ          |
| 35748 | chrY | 13725974 | . | C | A,T | 40105.33 | my_snp_filter | AC=7,34;AF=0.103,                  |
| 35749 | chrY | 13725975 | . | G | A   | 92.85    | my_snp_filter | AC=2;AF=0.029;AN=68;BaseQ          |
| 35750 | chrY | 13725979 | . | C | G   | 11265.67 | my_snp_filter | AC=30;AF=0.429;AN=                 |
| 35751 | chrY | 13725984 | . | T | A   | 438.19   | my_snp_filter | AC=6;AF=0.086;AN=70;BaseQ          |
| 35752 | chrY | 13725986 | . | G | T   | 1138.82  | my_snp_filter | AC=12;AF=0.171;AN=70;BaseQ         |
| 35753 | chrY | 13725990 | . | G | T   | 66.92    | my_snp_filter | AC=4;AF=0.057;AN=70;BaseQ          |
| 35754 | chrY | 13725991 | . | G | T   | 210.98   | my_snp_filter | AC=2;AF=0.029;AN=70;BaseQ          |
| 35755 | chrY | 13725996 | . | G | T   | 402.77   | my_snp_filter | AC=7;AF=0.100;AN=70;BaseQ          |
| 35756 | chrY | 13725997 | . | T | A   | 2880.10  | my_snp_filter | AC=21;AF=0.300;AN=70;BaseQ         |
| 35757 | chrY | 13726009 | . | C | G   | 98208.35 | my_snp_filter | AC=68;AF=0.971;AN=                 |
| 35758 | chrY | 13726023 | . | C | T   | 70013.74 | my_snp_filter | AC=41;AF=0.586;AN=                 |
| 35759 | chrY | 13726057 | . | A | G   | 926.52   | my_snp_filter | AC=11;AF=0.157;AN=70;BaseQ         |
| 35760 | chrY | 13726074 | . | T | A   | 53508.98 | PASS          | AC=36;AF=0.514;AN=70;BaseQ         |
| 35761 | chrY | 13726085 | . | G | A   | 5207.95  | PASS          | AC=23;AF=0.329;AN=70;BaseQRankSum= |
| 35762 | chrY | 13726089 | . | T | C   | 7036.26  | PASS          | AC=24;AF=0.343;AN=70;BaseQRankSum= |
| 35763 | chrY | 13726092 | . | A | G   | 346.19   | my_snp_filter | AC=4;AF=0.057;AN=70;BaseQ          |
| 35764 | chrY | 13726099 | . | T | A   | 34.36    | my_snp_filter | AC=2;AF=0.029;AN=70;BaseQ          |
| 35765 | chrY | 13726101 | . | G | A   | 12617.76 | PASS          | AC=22;AF=0.314;AN=70;BaseQ         |
| 35766 | chrY | 13726121 | . | G | C   | 152.30   | PASS          | AC=4;AF=0.057;AN=70;BaseQRankSum=  |
| 35767 | chrY | 13726129 | . | C | G   | 26840.64 | PASS          | AC=40;AF=0.625;AN=64;BaseQ         |
| 35768 | chrY | 13726143 | . | A | G   | 81.54    | PASS          | AC=2;AF=0.036;AN=56;BaseQRankSum=  |
| 35769 | chrY | 13726146 | . | G | A   | 32.43    | PASS          | AC=1;AF=0.018;AN=56;BaseQRankSum=  |
| 35770 | chrY | 13726149 | . | T | C   | 97.13    | my_snp_filter | AC=3;AF=0.054;AN=56;BaseQ          |
| 35771 | chrY | 13726154 | . | C | G   | 68.39    | my_snp_filter | AC=3;AF=0.058;AN=52;BaseQ          |
| 35772 | chrY | 13726203 | . | C | G   | 3568.18  | my_snp_filter | AC=9;AF=0.250;AN=36;BaseQ          |
| 35773 | chrY | 13726209 | . | T | A   | 20746.57 | my_snp_filter | AC=16;AF=0.615;AN=                 |
| 35774 | chrY | 13726226 | . | G | C   | 765.38   | my_snp_filter | AC=5;AF=0.156;AN=32;BaseQ          |
| 35775 | chrY | 13726249 | . | T | A   | 1453.83  | my_snp_filter | AC=6;AF=0.250;AN=24;BaseQ          |
| 35776 | chrY | 13726251 | . | G | T   | 138.65   | my_snp_filter | AC=2;AF=0.071;AN=28;BaseQ          |
| 35777 | chrY | 13726295 | . | G | C   | 30158.86 | my_snp_filter | AC=14;AF=1.00;AN=                  |
| 35778 | chrY | 13726318 | . | A | C   | 53.67    | my_snp_filter | AC=1;AF=0.071;AN=14;BaseQ          |
| 35779 | chrY | 13726321 | . | T | A   | 58.50    | my_snp_filter | AC=1;AF=0.071;AN=14;BaseQ          |
| 35780 | chrY | 13726326 | . | G | C   | 3284.58  | my_snp_filter | AC=7;AF=0.500;AN=14;BaseQ          |
| 35781 | chrY | 13726355 | . | C | G   | 13387.38 | my_snp_filter | AC=7;AF=0.500;AN=                  |
| 35782 | chrY | 13726357 | . | A | G,* | 1463.23  | my_snp_filter | AC=1,2;AF=0.063,0.125;AN=          |
| 35783 | chrY | 13726368 | . | T | C   | 181.98   | my_snp_filter | AC=1;AF=0.063;AN=16;BaseQ          |
| 35784 | chrY | 13726383 | . | C | G   | 15782.81 | my_snp_filter | AC=16;AF=1.00;AN=                  |
| 35785 | chrY | 13726406 | . | A | T   | 395.20   | my_snp_filter | AC=4;AF=0.250;AN=16;BaseQ          |
| 35786 | chrY | 13726423 | . | C | T   | 7225.47  | my_snp_filter | AC=8;AF=0.800;AN=10;DP=32          |
| 35787 | chrY | 13726424 | . | A | T   | 7309.69  | my_snp_filter | AC=8;AF=0.800;AN=10;DP=31          |
| 35788 | chrY | 13726428 | . | T | A   | 101.21   | my_snp_filter | AC=3;AF=0.188;AN=16;BaseQ          |
| 35789 | chrY | 13726434 | . | G | A   | 324.09   | my_snp_filter | AC=4;AF=0.250;AN=16;BaseQ          |
| 35790 | chrY | 13726449 | . | T | C,G | 4516.39  | my_snp_filter | AC=4,4;AF=0.500,0.500;AN=          |
| 35791 | chrY | 13726460 | . | A | G   | 3621.86  | my_snp_filter | AC=8;AF=1.00;AN=8;DP=168;          |
| 35792 | chrY | 13726470 | . | A | C   | 34.44    | my_snp_filter | AC=1;AF=0.071;AN=14;BaseQ          |
| 35793 | chrY | 13726474 | . | C | A   | 2670.38  | my_snp_filter | AC=8;AF=1.00;AN=8;DP=105;          |
| 35794 | chrY | 13726484 | . | G | T   | 45.33    | my_snp_filter | AC=2;AF=0.167;AN=12;BaseQ          |
| 35795 | chrY | 13726489 | . | A | G   | 1032.38  | my_snp_filter | AC=5;AF=0.625;AN=8;BaseQR          |
| 35796 | chrY | 13726504 | . | A | T,* | 345.25   | my_snp_filter | AC=1,2;AF=0.083,0.167;AN=          |

|       |      |          |   |   |     |          |               |                                   |
|-------|------|----------|---|---|-----|----------|---------------|-----------------------------------|
| 35797 | chrY | 13728470 | . | T | A   | 372.31   | PASS          | AC=6;AF=0.429;AN=14;BaseQRankSum= |
| 35798 | chrY | 13728718 | . | T | C   | 133.12   | my_snp_filter | AC=1;AF=0.063;AN=16;BaseQ         |
| 35799 | chrY | 13728730 | . | G | T   | 133.38   | my_snp_filter | AC=1;AF=0.063;AN=16;BaseQ         |
| 35800 | chrY | 13728758 | . | T | G   | 72.40    | my_snp_filter | AC=1;AF=0.063;AN=16;BaseQ         |
| 35801 | chrY | 13728774 | . | G | T   | 450.55   | my_snp_filter | AC=2;AF=0.111;AN=18;DP=20         |
| 35802 | chrY | 13728782 | . | A | T   | 480.30   | my_snp_filter | AC=2;AF=0.111;AN=18;DP=21         |
| 35803 | chrY | 13728800 | . | A | C   | 80.51    | my_snp_filter | AC=1;AF=0.050;AN=20;BaseQ         |
| 35804 | chrY | 13728858 | . | T | C   | 171.53   | my_snp_filter | AC=2;AF=0.056;AN=36;BaseQ         |
| 35805 | chrY | 13728881 | . | A | C   | 87.30    | my_snp_filter | AC=1;AF=0.042;AN=24;BaseQ         |
| 35806 | chrY | 13728910 | . | A | G   | 187.28   | my_snp_filter | AC=3;AF=0.107;AN=28;BaseQ         |
| 35807 | chrY | 13728918 | . | G | C   | 591.15   | my_snp_filter | AC=4;AF=0.133;AN=30;BaseQ         |
| 35808 | chrY | 13728922 | . | T | G   | 183.27   | my_snp_filter | AC=1;AF=0.029;AN=34;BaseQ         |
| 35809 | chrY | 13728941 | . | T | A   | 690.08   | my_snp_filter | AC=3;AF=0.100;AN=30;BaseQ         |
| 35810 | chrY | 13728961 | . | G | C   | 155.07   | my_snp_filter | AC=1;AF=0.038;AN=26;BaseQ         |
| 35811 | chrY | 13728985 | . | A | T   | 91.19    | my_snp_filter | AC=1;AF=0.042;AN=24;BaseQ         |
| 35812 | chrY | 13729039 | . | G | T   | 124.90   | my_snp_filter | AC=1;AF=0.071;AN=14;BaseQ         |
| 35813 | chrY | 13729885 | . | G | T   | 45.86    | my_snp_filter | AC=4;AF=0.667;AN=6;DP=8;F         |
| 35814 | chrY | 13729982 | . | A | T   | 265.14   | my_snp_filter | AC=2;AF=0.250;AN=8;BaseQR         |
| 35815 | chrY | 13730007 | . | T | A   | 341.12   | my_snp_filter | AC=2;AF=0.500;AN=4;BaseQR         |
| 35816 | chrY | 13730014 | . | A | G   | 383.13   | my_snp_filter | AC=2;AF=0.500;AN=4;BaseQR         |
| 35817 | chrY | 13730047 | . | C | G   | 405.90   | my_snp_filter | AC=3;AF=0.750;AN=4;BaseQR         |
| 35818 | chrY | 13730070 | . | A | G   | 612.13   | my_snp_filter | AC=5;AF=0.833;AN=6;BaseQR         |
| 35819 | chrY | 13730111 | . | G | A   | 1228.25  | my_snp_filter | AC=8;AF=0.571;AN=14;BaseQ         |
| 35820 | chrY | 13730123 | . | A | T   | 1204.62  | my_snp_filter | AC=7;AF=0.500;AN=14;BaseQ         |
| 35821 | chrY | 13730124 | . | C | G   | 379.26   | my_snp_filter | AC=3;AF=0.214;AN=14;BaseQ         |
| 35822 | chrY | 13730129 | . | G | A   | 312.30   | my_snp_filter | AC=3;AF=0.214;AN=14;BaseQ         |
| 35823 | chrY | 13730169 | . | G | C   | 340.56   | my_snp_filter | AC=4;AF=0.286;AN=14;BaseQ         |
| 35824 | chrY | 13730182 | . | A | G   | 383.12   | my_snp_filter | AC=4;AF=0.250;AN=16;BaseQ         |
| 35825 | chrY | 13730184 | . | G | T   | 1274.20  | my_snp_filter | AC=6;AF=0.375;AN=16;BaseQ         |
| 35826 | chrY | 13730193 | . | C | T   | 1042.63  | my_snp_filter | AC=6;AF=0.333;AN=18;BaseQ         |
| 35827 | chrY | 13730270 | . | G | T   | 171.96   | my_snp_filter | AC=3;AF=0.056;AN=54;BaseQ         |
| 35828 | chrY | 13730271 | . | A | T   | 169.20   | my_snp_filter | AC=3;AF=0.056;AN=54;BaseQ         |
| 35829 | chrY | 13730282 | . | G | C   | 24148.85 | my_snp_filter | AC=29;AF=0.659;AN=                |
| 35830 | chrY | 13730284 | . | G | C   | 24046.39 | my_snp_filter | AC=29;AF=0.690;AN=                |
| 35831 | chrY | 13730286 | . | A | G   | 174.88   | my_snp_filter | AC=3;AF=0.058;AN=52;BaseQ         |
| 35832 | chrY | 13730304 | . | G | T   | 267.67   | my_snp_filter | AC=3;AF=0.058;AN=52;BaseQ         |
| 35833 | chrY | 13730305 | . | G | C,T | 409.27   | my_snp_filter | AC=2,3;AF=0.038,0.058;AN=         |
| 35834 | chrY | 13730340 | . | G | C   | 5467.09  | my_snp_filter | AC=12;AF=0.231;AN=52;Base         |
| 35835 | chrY | 13730353 | . | T | A   | 12656.66 | my_snp_filter | AC=19;AF=0.413;AN=                |
| 35836 | chrY | 13730377 | . | T | A   | 11138.27 | my_snp_filter | AC=34;AF=0.739;AN=                |
| 35837 | chrY | 13730401 | . | A | C   | 73.26    | my_snp_filter | AC=2;AF=0.045;AN=44;BaseQ         |
| 35838 | chrY | 13730410 | . | G | A   | 521.36   | my_snp_filter | AC=6;AF=0.188;AN=32;BaseQ         |
| 35839 | chrY | 13730429 | . | G | C   | 3515.81  | my_snp_filter | AC=6;AF=0.333;AN=18;BaseQ         |
| 35840 | chrY | 13730459 | . | T | G   | 1434.18  | my_snp_filter | AC=6;AF=0.429;AN=14;BaseQ         |
| 35841 | chrY | 13730463 | . | C | G   | 800.49   | my_snp_filter | AC=5;AF=0.357;AN=14;BaseQ         |
| 35842 | chrY | 13730524 | . | C | G   | 1114.63  | my_snp_filter | AC=8;AF=0.571;AN=14;BaseQ         |
| 35843 | chrY | 13730574 | . | A | G   | 577.68   | my_snp_filter | AC=5;AF=0.357;AN=14;BaseQ         |
| 35844 | chrY | 13730579 | . | T | A   | 664.28   | my_snp_filter | AC=5;AF=0.417;AN=12;BaseQ         |
| 35845 | chrY | 13730604 | . | T | A   | 534.68   | my_snp_filter | AC=5;AF=0.357;AN=14;BaseQ         |
| 35846 | chrY | 13730698 | . | A | T   | 444.61   | my_snp_filter | AC=7;AF=0.500;AN=14;BaseQ         |
| 35847 | chrY | 13730699 | . | T | A   | 2371.58  | my_snp_filter | AC=7;AF=0.500;AN=14;BaseQ         |
| 35848 | chrY | 13730719 | . | T | C   | 226.86   | my_snp_filter | AC=6;AF=0.429;AN=14;BaseQ         |
| 35849 | chrY | 13730732 | . | A | T,C | 2160.29  | my_snp_filter | AC=7,2;AF=0.500,0.143;AN=         |
| 35850 | chrY | 13730734 | . | G | T   | 87.54    | my_snp_filter | AC=3;AF=0.214;AN=14;BaseQ         |
| 35851 | chrY | 13730735 | . | A | C   | 89.33    | my_snp_filter | AC=3;AF=0.214;AN=14;BaseQ         |
| 35852 | chrY | 13730781 | . | C | G   | 39.85    | my_snp_filter | AC=2;AF=0.143;AN=14;BaseQ         |
| 35853 | chrY | 13733874 | . | A | T   | 75.39    | my_snp_filter | AC=3;AF=0.750;AN=4;BaseQR         |
| 35854 | chrY | 13733931 | . | G | C   | 3148.15  | my_snp_filter | AC=8;AF=0.571;AN=14;BaseQ         |
| 35855 | chrY | 13733937 | . | G | T   | 47.69    | my_snp_filter | AC=2;AF=0.125;AN=16;BaseQ         |
| 35856 | chrY | 13733942 | . | G | C   | 429.84   | my_snp_filter | AC=6;AF=0.375;AN=16;BaseQ         |
| 35857 | chrY | 13733949 | . | A | G   | 1534.79  | my_snp_filter | AC=7;AF=0.438;AN=16;BaseQ         |
| 35858 | chrY | 13733969 | . | A | C   | 226.87   | my_snp_filter | AC=1;AF=0.063;AN=16;BaseQ         |
| 35859 | chrY | 13733975 | . | C | A   | 285.59   | my_snp_filter | AC=2;AF=0.125;AN=16;BaseQ         |
| 35860 | chrY | 13733982 | . | G | T   | 300.16   | my_snp_filter | AC=1;AF=0.063;AN=16;BaseQ         |
| 35861 | chrY | 13733993 | . | A | G   | 298.29   | my_snp_filter | AC=1;AF=0.063;AN=16;BaseQ         |
| 35862 | chrY | 13733997 | . | G | A   | 294.04   | my_snp_filter | AC=1;AF=0.063;AN=16;BaseQ         |
| 35863 | chrY | 13734004 | . | G | A   | 7342.85  | my_snp_filter | AC=8;AF=0.500;AN=16;BaseQ         |
| 35864 | chrY | 13734024 | . | T | A   | 8959.58  | my_snp_filter | AC=12;AF=0.750;AN=16;Base         |
| 35865 | chrY | 13734029 | . | A | T   | 6645.85  | my_snp_filter | AC=8;AF=0.500;AN=16;BaseQ         |
| 35866 | chrY | 13734042 | . | C | T   | 213      | my_snp_filter | AC=1;AF=0.063;AN=16;BaseQ         |
| 35867 | chrY | 13734057 | . | G | A   | 6925.68  | my_snp_filter | AC=8;AF=0.500;AN=16;BaseQ         |
| 35868 | chrY | 13734066 | . | C | G   | 7342.85  | my_snp_filter | AC=8;AF=0.500;AN=16;BaseQ         |
| 35869 | chrY | 13734082 | . | T | A   | 14022.03 | my_snp_filter | AC=16;AF=1.00;AN=                 |
| 35870 | chrY | 13734115 | . | T | A   | 942.35   | my_snp_filter | AC=7;AF=0.438;AN=16;BaseQ         |
| 35871 | chrY | 13734135 | . | C | T   | 300.61   | my_snp_filter | AC=2;AF=0.100;AN=20;BaseQ         |
| 35872 | chrY | 13734141 | . | T | G,* | 1290.59  | my_snp_filter | AC=7,1;AF=0.438,0.063;AN=         |



|       |      |          |   |   |     |          |               |                            |
|-------|------|----------|---|---|-----|----------|---------------|----------------------------|
| 35873 | chrY | 13734147 | . | T | G,* | 1105.69  | my_snp_filter | AC=7,1;AF=0.438,0.063;AN=  |
| 35874 | chrY | 13734160 | . | T | A   | 72.52    | my_snp_filter | AC=2;AF=0.059;AN=34;BaseQ  |
| 35875 | chrY | 13734163 | . | C | A   | 497.73   | my_snp_filter | AC=4;AF=0.182;AN=22;BaseQ  |
| 35876 | chrY | 13734169 | . | A | T   | 258.86   | my_snp_filter | AC=3;AF=0.094;AN=32;BaseQ  |
| 35877 | chrY | 13734175 | . | T | C   | 3735.74  | my_snp_filter | AC=8;AF=0.222;AN=36;BaseQ  |
| 35878 | chrY | 13734188 | . | A | C   | 695.69   | my_snp_filter | AC=3;AF=0.125;AN=24;BaseQ  |
| 35879 | chrY | 13734201 | . | G | T   | 13147.69 | my_snp_filter | AC=8;AF=0.250;AN=          |
| 35880 | chrY | 13734207 | . | G | T   | 50.80    | my_snp_filter | AC=2;AF=0.059;AN=34;BaseQ  |
| 35881 | chrY | 13734208 | . | A | T   | 198.62   | my_snp_filter | AC=3;AF=0.094;AN=32;BaseQ  |
| 35882 | chrY | 13734210 | . | T | G   | 142.76   | my_snp_filter | AC=2;AF=0.059;AN=34;BaseQ  |
| 35883 | chrY | 13734217 | . | G | T   | 265.49   | my_snp_filter | AC=2;AF=0.067;AN=30;BaseQ  |
| 35884 | chrY | 13734218 | . | G | T   | 220.83   | my_snp_filter | AC=2;AF=0.071;AN=28;BaseQ  |
| 35885 | chrY | 13734230 | . | T | A   | 10979.74 | my_snp_filter | AC=8;AF=0.222;AN=          |
| 35886 | chrY | 13734231 | . | A | G   | 15910.01 | my_snp_filter | AC=8;AF=0.444;AN=          |
| 35887 | chrY | 13734238 | . | A | C   | 131.62   | my_snp_filter | AC=1;AF=0.028;AN=36;BaseQ  |
| 35888 | chrY | 13734240 | . | T | G   | 99.02    | my_snp_filter | AC=1;AF=0.028;AN=36;BaseQ  |
| 35889 | chrY | 13734255 | . | G | T   | 16391.15 | my_snp_filter | AC=8;AF=0.444;AN=          |
| 35890 | chrY | 13734264 | . | G | T   | 15769.34 | my_snp_filter | AC=25;AF=0.658;AN=         |
| 35891 | chrY | 13734292 | . | T | C   | 20056.95 | my_snp_filter | AC=20;AF=0.345;AN=         |
| 35892 | chrY | 13734301 | . | A | G   | 20461.12 | my_snp_filter | AC=21;AF=0.362;AN=         |
| 35893 | chrY | 13734323 | . | A | G   | 8015.28  | my_snp_filter | AC=25;AF=0.357;AN=70;BaseQ |
| 35894 | chrY | 13734325 | . | T | C   | 344.16   | my_snp_filter | AC=5;AF=0.076;AN=66;BaseQ  |
| 35895 | chrY | 13734327 | . | G | A   | 1731.29  | my_snp_filter | AC=11;AF=0.162;AN=68;BaseQ |
| 35896 | chrY | 13734341 | . | C | T   | 11756.64 | my_snp_filter | AC=26;AF=0.371;AN=         |
| 35897 | chrY | 13734378 | . | A | T   | 2854.46  | my_snp_filter | AC=13;AF=0.186;AN=70;BaseQ |
| 35898 | chrY | 13734389 | . | A | T   | 90280.59 | my_snp_filter | AC=43;AF=0.614;AN=         |
| 35899 | chrY | 13734402 | . | A | C   | 40272.66 | my_snp_filter | AC=32;AF=0.457;AN=         |
| 35900 | chrY | 13734410 | . | T | C   | 26056.09 | my_snp_filter | AC=30;AF=0.429;AN=         |
| 35901 | chrY | 13734452 | . | G | C   | 1162.40  | my_snp_filter | AC=15;AF=0.214;AN=70;BaseQ |
| 35902 | chrY | 13734465 | . | T | C   | 17066.57 | my_snp_filter | AC=33;AF=0.500;AN=         |
| 35903 | chrY | 13734467 | . | G | A   | 4666.89  | my_snp_filter | AC=24;AF=0.353;AN=68;BaseQ |
| 35904 | chrY | 13734482 | . | C | T   | 55.96    | my_snp_filter | AC=2;AF=0.029;AN=68;BaseQ  |
| 35905 | chrY | 13734488 | . | A | C   | 1545.95  | my_snp_filter | AC=18;AF=0.265;AN=68;BaseQ |
| 35906 | chrY | 13734517 | . | A | G   | 2185.54  | my_snp_filter | AC=16;AF=0.320;AN=50;BaseQ |
| 35907 | chrY | 13734525 | . | G | C   | 2572.71  | my_snp_filter | AC=19;AF=0.475;AN=40;BaseQ |
| 35908 | chrY | 13734548 | . | T | A   | 1380.24  | my_snp_filter | AC=12;AF=0.316;AN=38;BaseQ |
| 35909 | chrY | 13734568 | . | G | C   | 283.16   | my_snp_filter | AC=6;AF=0.200;AN=30;BaseQ  |
| 35910 | chrY | 13734578 | . | T | C   | 78.70    | my_snp_filter | AC=5;AF=0.192;AN=26;BaseQ  |
| 35911 | chrY | 13734604 | . | T | A   | 441.19   | my_snp_filter | AC=3;AF=0.115;AN=26;BaseQ  |
| 35912 | chrY | 13734618 | . | A | G   | 240.86   | my_snp_filter | AC=2;AF=0.077;AN=26;BaseQ  |
| 35913 | chrY | 13734631 | . | G | A   | 360.96   | my_snp_filter | AC=4;AF=0.154;AN=26;BaseQ  |
| 35914 | chrY | 13734688 | . | C | A   | 2463.92  | my_snp_filter | AC=7;AF=0.350;AN=20;BaseQ  |
| 35915 | chrY | 13734690 | . | G | A   | 10980.80 | my_snp_filter | AC=8;AF=0.400;AN=          |
| 35916 | chrY | 13734703 | . | T | G   | 6525.63  | my_snp_filter | AC=8;AF=0.400;AN=20;BaseQ  |
| 35917 | chrY | 13734715 | . | T | G   | 601.10   | my_snp_filter | AC=5;AF=0.250;AN=20;BaseQ  |
| 35918 | chrY | 13734750 | . | G | T   | 365.85   | my_snp_filter | AC=1;AF=0.056;AN=18;BaseQ  |
| 35919 | chrY | 13734783 | . | T | C   | 2430.43  | my_snp_filter | AC=5;AF=0.313;AN=16;BaseQ  |
| 35920 | chrY | 13734785 | . | C | G   | 1114.18  | my_snp_filter | AC=3;AF=0.167;AN=18;BaseQ  |
| 35921 | chrY | 13734789 | . | T | C   | 255.67   | my_snp_filter | AC=1;AF=0.056;AN=18;BaseQ  |
| 35922 | chrY | 13734796 | . | G | T   | 304.58   | my_snp_filter | AC=1;AF=0.063;AN=16;BaseQ  |
| 35923 | chrY | 13734797 | . | C | A   | 1082.33  | my_snp_filter | AC=3;AF=0.188;AN=16;BaseQ  |
| 35924 | chrY | 13734806 | . | G | T   | 669.82   | my_snp_filter | AC=4;AF=0.286;AN=14;BaseQ  |
| 35925 | chrY | 13734819 | . | T | C   | 245.33   | my_snp_filter | AC=3;AF=0.188;AN=16;BaseQ  |
| 35926 | chrY | 13734821 | . | G | C   | 155.35   | my_snp_filter | AC=1;AF=0.063;AN=16;BaseQ  |
| 35927 | chrY | 13737025 | . | T | C   | 112.01   | my_snp_filter | AC=2;AF=0.125;AN=16;BaseQ  |
| 35928 | chrY | 13737027 | . | T | G   | 209.86   | my_snp_filter | AC=4;AF=0.286;AN=14;BaseQ  |
| 35929 | chrY | 13737065 | . | T | A   | 1375.35  | my_snp_filter | AC=11;AF=0.786;AN=14;BaseQ |
| 35930 | chrY | 13737067 | . | G | C   | 81.73    | my_snp_filter | AC=2;AF=0.125;AN=16;BaseQ  |
| 35931 | chrY | 13737074 | . | T | C   | 586.40   | my_snp_filter | AC=6;AF=0.429;AN=14;BaseQ  |
| 35932 | chrY | 13737093 | . | T | C   | 190.65   | my_snp_filter | AC=2;AF=0.143;AN=14;BaseQ  |
| 35933 | chrY | 13737096 | . | T | G   | 129.85   | my_snp_filter | AC=1;AF=0.063;AN=16;BaseQ  |
| 35934 | chrY | 13737421 | . | C | G   | 291.89   | my_snp_filter | AC=5;AF=0.357;AN=14;BaseQ  |
| 35935 | chrY | 13737427 | . | T | A   | 541.55   | my_snp_filter | AC=6;AF=0.429;AN=14;BaseQ  |
| 35936 | chrY | 13737430 | . | A | G   | 163.94   | my_snp_filter | AC=3;AF=0.188;AN=16;BaseQ  |
| 35937 | chrY | 13737444 | . | G | C   | 156.08   | my_snp_filter | AC=1;AF=0.063;AN=16;BaseQ  |
| 35938 | chrY | 13737513 | . | G | C   | 153.16   | my_snp_filter | AC=6;AF=0.600;AN=10;BaseQ  |
| 35939 | chrY | 13739898 | . | T | C   | 1790.59  | my_snp_filter | AC=8;AF=0.400;AN=20;BaseQ  |
| 35940 | chrY | 13739907 | . | A | G   | 1790.59  | my_snp_filter | AC=8;AF=0.400;AN=20;BaseQ  |
| 35941 | chrY | 13739929 | . | A | G   | 73.46    | my_snp_filter | AC=3;AF=0.136;AN=22;BaseQ  |
| 35942 | chrY | 13739931 | . | T | C   | 30.75    | my_snp_filter | AC=2;AF=0.083;AN=24;BaseQ  |
| 35943 | chrY | 13739933 | . | G | A   | 71.82    | my_snp_filter | AC=1;AF=0.042;AN=24;BaseQ  |
| 35944 | chrY | 13739941 | . | T | A   | 146.71   | my_snp_filter | AC=2;AF=0.063;AN=32;BaseQ  |
| 35945 | chrY | 13739947 | . | C | T   | 157.85   | my_snp_filter | AC=5;AF=0.192;AN=26;BaseQ  |
| 35946 | chrY | 13739951 | . | T | A   | 146.87   | my_snp_filter | AC=2;AF=0.067;AN=30;BaseQ  |
| 35947 | chrY | 13739984 | . | A | T   | 109.30   | my_snp_filter | AC=1;AF=0.031;AN=32;BaseQ  |
| 35948 | chrY | 13739995 | . | A | T   | 1448.35  | my_snp_filter | AC=10;AF=0.417;AN=24;BaseQ |

|       |      |          |   |   |     |          |               |                                   |
|-------|------|----------|---|---|-----|----------|---------------|-----------------------------------|
| 35949 | chrY | 13740008 | . | A | C   | 302.04   | my_snp_filter | AC=4;AF=0.182;AN=22;BaseQ         |
| 35950 | chrY | 13740016 | . | T | C   | 158.14   | my_snp_filter | AC=3;AF=0.150;AN=20;BaseQ         |
| 35951 | chrY | 13740071 | . | T | C   | 62.57    | my_snp_filter | AC=2;AF=0.143;AN=14;BaseQ         |
| 35952 | chrY | 13740094 | . | A | C   | 111.68   | my_snp_filter | AC=2;AF=0.111;AN=18;BaseQ         |
| 35953 | chrY | 13740123 | . | A | G   | 268.62   | my_snp_filter | AC=5;AF=0.250;AN=20;BaseQ         |
| 35954 | chrY | 13740131 | . | G | C   | 1434.92  | my_snp_filter | AC=10;AF=0.500;AN=20;BaseQ        |
| 35955 | chrY | 13740135 | . | T | G   | 218.14   | my_snp_filter | AC=2;AF=0.091;AN=22;BaseQ         |
| 35956 | chrY | 13740145 | . | G | A   | 240.06   | my_snp_filter | AC=2;AF=0.091;AN=22;BaseQ         |
| 35957 | chrY | 13740151 | . | A | G   | 163.96   | my_snp_filter | AC=2;AF=0.077;AN=26;BaseQ         |
| 35958 | chrY | 13740154 | . | T | A   | 1637.53  | my_snp_filter | AC=9;AF=0.450;AN=20;BaseQ         |
| 35959 | chrY | 13740173 | . | T | C   | 157.43   | my_snp_filter | AC=2;AF=0.077;AN=26;BaseQ         |
| 35960 | chrY | 13740174 | . | G | C   | 1725.36  | my_snp_filter | AC=9;AF=0.450;AN=20;BaseQ         |
| 35961 | chrY | 13740177 | . | A | G   | 1329.09  | my_snp_filter | AC=9;AF=0.450;AN=20;BaseQ         |
| 35962 | chrY | 13740193 | . | A | G   | 155.57   | my_snp_filter | AC=2;AF=0.067;AN=30;BaseQ         |
| 35963 | chrY | 13740210 | . | T | A   | 661.29   | my_snp_filter | AC=7;AF=0.292;AN=24;BaseQ         |
| 35964 | chrY | 13740226 | . | T | A   | 288.90   | my_snp_filter | AC=5;AF=0.208;AN=24;BaseQ         |
| 35965 | chrY | 13740252 | . | G | C   | 166.47   | my_snp_filter | AC=5;AF=0.313;AN=16;BaseQ         |
| 35966 | chrY | 13740296 | . | G | A   | 63.46    | my_snp_filter | AC=4;AF=0.500;AN=8;DP=12;         |
| 35967 | chrY | 13740716 | . | T | A   | 68.53    | my_snp_filter | AC=4;AF=0.400;AN=10;DP=15         |
| 35968 | chrY | 13740743 | . | A | C   | 66.68    | my_snp_filter | AC=2;AF=0.500;AN=4;DP=16;         |
| 35969 | chrY | 13740761 | . | G | C   | 64.97    | my_snp_filter | AC=2;AF=0.333;AN=6;DP=17;         |
| 35970 | chrY | 13740913 | . | G | C   | 152.88   | my_snp_filter | AC=4;AF=0.667;AN=6;DP=7;F         |
| 35971 | chrY | 13740929 | . | A | C   | 152.69   | my_snp_filter | AC=4;AF=0.667;AN=6;DP=7;F         |
| 35972 | chrY | 13740930 | . | A | C   | 152.72   | my_snp_filter | AC=4;AF=0.667;AN=6;DP=7;F         |
| 35973 | chrY | 13740966 | . | A | T   | 135.99   | my_snp_filter | AC=4;AF=0.667;AN=6;DP=7;F         |
| 35974 | chrY | 13740968 | . | C | G   | 140.98   | my_snp_filter | AC=4;AF=1.000;AN=4;DP=7;FS        |
| 35975 | chrY | 13740969 | . | A | T   | 43.85    | my_snp_filter | AC=2;AF=0.250;AN=8;DP=7;F         |
| 35976 | chrY | 13742672 | . | T | A   | 850.99   | my_snp_filter | AC=13;AF=0.929;AN=14;BaseQ        |
| 35977 | chrY | 13742970 | . | G | A   | 85.34    | my_snp_filter | AC=1;AF=0.056;AN=18;BaseQ         |
| 35978 | chrY | 13743163 | . | A | G   | 2553.19  | my_snp_filter | AC=4;AF=0.222;AN=18;BaseQ         |
| 35979 | chrY | 13743368 | . | C | T   | 682.45   | my_snp_filter | AC=4;AF=0.250;AN=16;BaseQ         |
| 35980 | chrY | 13743379 | . | G | T   | 710.60   | my_snp_filter | AC=4;AF=0.222;AN=18;BaseQ         |
| 35981 | chrY | 13743380 | . | G | T   | 687.48   | my_snp_filter | AC=4;AF=0.222;AN=18;BaseQ         |
| 35982 | chrY | 13744297 | . | G | A   | 392.99   | my_snp_filter | AC=5;AF=0.278;AN=18;BaseQ         |
| 35983 | chrY | 13745087 | . | A | T   | 135.34   | my_snp_filter | AC=5;AF=0.313;AN=16;BaseQ         |
| 35984 | chrY | 13745144 | . | G | C   | 336.85   | my_snp_filter | AC=4;AF=0.250;AN=16;BaseQ         |
| 35985 | chrY | 13745162 | . | A | G   | 349.86   | my_snp_filter | AC=4;AF=0.167;AN=24;BaseQ         |
| 35986 | chrY | 13745217 | . | G | A   | 147.62   | my_snp_filter | AC=3;AF=0.188;AN=16;BaseQ         |
| 35987 | chrY | 13745237 | . | T | A   | 189.93   | PASS          | AC=2;AF=0.143;AN=14;BaseQRankSum= |
| 35988 | chrY | 13745242 | . | A | T   | 62.31    | PASS          | AC=1;AF=0.063;AN=16;BaseQRankSum= |
| 35989 | chrY | 13745295 | . | T | A   | 166.07   | my_snp_filter | AC=6;AF=0.375;AN=16;BaseQ         |
| 35990 | chrY | 13745370 | . | G | A   | 52.74    | my_snp_filter | AC=2;AF=0.100;AN=20;DP=15         |
| 35991 | chrY | 13745381 | . | A | C   | 53.29    | PASS          | AC=2;AF=0.100;AN=20;DP=127;FS=0.0 |
| 35992 | chrY | 13745386 | . | A | C   | 59.23    | PASS          | AC=2;AF=0.111;AN=18;DP=114;FS=0.0 |
| 35993 | chrY | 13745615 | . | A | C   | 410.72   | my_snp_filter | AC=7;AF=0.700;AN=10;BaseQ         |
| 35994 | chrY | 13747928 | . | T | A   | 229.95   | my_snp_filter | AC=2;AF=0.100;AN=20;BaseQ         |
| 35995 | chrY | 13747980 | . | T | A   | 97.50    | my_snp_filter | AC=2;AF=0.091;AN=22;BaseQ         |
| 35996 | chrY | 13748161 | . | C | G   | 372.43   | my_snp_filter | AC=5;AF=0.083;AN=60;BaseQ         |
| 35997 | chrY | 13748166 | . | T | A   | 6038.09  | my_snp_filter | AC=10;AF=0.167;AN=60;BaseQ        |
| 35998 | chrY | 13748179 | . | A | C   | 3960.41  | my_snp_filter | AC=11;AF=0.183;AN=60;BaseQ        |
| 35999 | chrY | 13748195 | . | G | T   | 12429.23 | my_snp_filter | AC=16;AF=0.258;AN=60;BaseQ        |
| 36000 | chrY | 13748234 | . | T | C   | 497.77   | my_snp_filter | AC=6;AF=0.086;AN=70;BaseQ         |
| 36001 | chrY | 13748236 | . | T | G   | 19412.49 | my_snp_filter | AC=32;AF=0.457;AN=70;BaseQ        |
| 36002 | chrY | 13748250 | . | T | A   | 1387.16  | my_snp_filter | AC=9;AF=0.129;AN=70;BaseQ         |
| 36003 | chrY | 13748254 | . | A | G   | 599.53   | my_snp_filter | AC=11;AF=0.157;AN=70;BaseQ        |
| 36004 | chrY | 13748255 | . | T | A   | 6540.39  | my_snp_filter | AC=23;AF=0.329;AN=70;BaseQ        |
| 36005 | chrY | 13748275 | . | A | T   | 6341.68  | my_snp_filter | AC=22;AF=0.314;AN=70;BaseQ        |
| 36006 | chrY | 13748276 | . | G | C   | 179.07   | my_snp_filter | AC=4;AF=0.057;AN=70;BaseQ         |
| 36007 | chrY | 13748283 | . | T | C,A | 25788.91 | my_snp_filter | AC=28,7;AF=0.400,0.400            |
| 36008 | chrY | 13748285 | . | C | T   | 1177.59  | my_snp_filter | AC=3;AF=0.043;AN=70;BaseQ         |
| 36009 | chrY | 13748301 | . | G | T   | 82.42    | my_snp_filter | AC=1;AF=0.014;AN=70;BaseQ         |
| 36010 | chrY | 13748302 | . | T | C   | 4186.87  | my_snp_filter | AC=21;AF=0.300;AN=70;BaseQ        |
| 36011 | chrY | 13748305 | . | T | G   | 882.37   | my_snp_filter | AC=7;AF=0.100;AN=70;BaseQ         |
| 36012 | chrY | 13748367 | . | G | T   | 191.04   | my_snp_filter | AC=2;AF=0.029;AN=70;BaseQ         |
| 36013 | chrY | 13748373 | . | G | A   | 342.97   | my_snp_filter | AC=7;AF=0.100;AN=70;BaseQ         |
| 36014 | chrY | 13748387 | . | C | G   | 4543.04  | my_snp_filter | AC=12;AF=0.207;AN=58;BaseQ        |
| 36015 | chrY | 13748391 | . | C | T   | 6647.52  | my_snp_filter | AC=21;AF=0.318;AN=66;BaseQ        |
| 36016 | chrY | 13748396 | . | C | G   | 1825.62  | my_snp_filter | AC=7;AF=0.100;AN=70;BaseQ         |
| 36017 | chrY | 13748401 | . | T | A   | 520.49   | my_snp_filter | AC=3;AF=0.043;AN=70;BaseQ         |
| 36018 | chrY | 13748413 | . | G | T   | 454.28   | my_snp_filter | AC=3;AF=0.043;AN=70;BaseQ         |
| 36019 | chrY | 13748414 | . | T | A   | 1063.92  | my_snp_filter | AC=9;AF=0.129;AN=70;BaseQ         |
| 36020 | chrY | 13748426 | . | C | G   | 6460.65  | my_snp_filter | AC=12;AF=0.207;AN=58;BaseQ        |
| 36021 | chrY | 13748440 | . | C | T   | 4502     | my_snp_filter | AC=14;AF=0.304;AN=46;BaseQ        |
| 36022 | chrY | 13748448 | . | G | A,* | 666.73   | my_snp_filter | AC=4,3;AF=0.059,0.044;AN=7        |
| 36023 | chrY | 13748517 | . | G | T   | 56.88    | my_snp_filter | AC=3;AF=0.083;AN=36;BaseQ         |
| 36024 | chrY | 13748526 | . | T | A   | 424.70   | my_snp_filter | AC=4;AF=0.167;AN=24;BaseQ         |

|       |      |          |   |   |   |         |               |                                    |
|-------|------|----------|---|---|---|---------|---------------|------------------------------------|
| 36025 | chrY | 13748548 | . | G | C | 416.47  | my_snp_filter | AC=4;AF=0.333;AN=12;BaseQ          |
| 36026 | chrY | 13748553 | . | G | C | 99.32   | my_snp_filter | AC=4;AF=0.222;AN=18;BaseQ          |
| 36027 | chrY | 13798761 | . | G | T | 57.35   | PASS          | AC=1;AF=0.014;AN=70;BaseQRankSum=  |
| 36028 | chrY | 13798765 | . | G | A | 55.02   | PASS          | AC=1;AF=0.015;AN=68;BaseQRankSum=  |
| 36029 | chrY | 13798776 | . | T | G | 42.86   | PASS          | AC=1;AF=0.015;AN=68;BaseQRankSum=  |
| 36030 | chrY | 13798854 | . | A | G | 82.97   | my_snp_filter | AC=2;AF=0.029;AN=70;BaseQ          |
| 36031 | chrY | 13798939 | . | A | G | 594.14  | PASS          | AC=4;AF=0.059;AN=68;BaseQRankSum=  |
| 36032 | chrY | 13798942 | . | A | C | 580.53  | PASS          | AC=4;AF=0.061;AN=66;BaseQRankSum=  |
| 36033 | chrY | 13798945 | . | G | A | 593.12  | PASS          | AC=4;AF=0.065;AN=62;BaseQRankSum=  |
| 36034 | chrY | 13798954 | . | T | A | 605.23  | PASS          | AC=4;AF=0.069;AN=58;BaseQRankSum=  |
| 36035 | chrY | 13798966 | . | T | C | 661.81  | PASS          | AC=4;AF=0.063;AN=64;BaseQRankSum=  |
| 36036 | chrY | 13798973 | . | G | A | 655.97  | PASS          | AC=4;AF=0.069;AN=58;BaseQRankSum=  |
| 36037 | chrY | 13799009 | . | T | C | 657.31  | PASS          | AC=3;AF=0.052;AN=58;BaseQRankSum=  |
| 36038 | chrY | 13799010 | . | C | A | 702.62  | PASS          | AC=3;AF=0.052;AN=58;BaseQRankSum=  |
| 36039 | chrY | 13799023 | . | G | A | 1080.02 | PASS          | AC=3;AF=0.052;AN=58;BaseQRankSum=  |
| 36040 | chrY | 13799025 | . | A | G | 1125.39 | PASS          | AC=3;AF=0.052;AN=58;BaseQRankSum=  |
| 36041 | chrY | 13799033 | . | T | G | 1282.95 | PASS          | AC=3;AF=0.050;AN=60;BaseQRankSum=  |
| 36042 | chrY | 13799036 | . | C | G | 1253.06 | PASS          | AC=3;AF=0.044;AN=68;BaseQRankSum=  |
| 36043 | chrY | 13799088 | . | C | G | 914.73  | PASS          | AC=5;AF=0.071;AN=70;BaseQRankSum=  |
| 36044 | chrY | 13799104 | . | G | T | 44.87   | my_snp_filter | AC=1;AF=0.020;AN=50;BaseQ          |
| 36045 | chrY | 13799146 | . | C | G | 230.47  | PASS          | AC=6;AF=0.086;AN=70;BaseQRankSum=  |
| 36046 | chrY | 13799151 | . | T | G | 234.08  | PASS          | AC=5;AF=0.071;AN=70;BaseQRankSum=  |
| 36047 | chrY | 13799154 | . | T | A | 119.88  | PASS          | AC=1;AF=0.014;AN=70;BaseQRankSum=  |
| 36048 | chrY | 13799186 | . | G | A | 79.51   | PASS          | AC=1;AF=0.014;AN=70;BaseQRankSum=  |
| 36049 | chrY | 13799190 | . | G | A | 79.17   | PASS          | AC=1;AF=0.014;AN=70;BaseQRankSum=  |
| 36050 | chrY | 13799197 | . | G | C | 94.49   | PASS          | AC=1;AF=0.015;AN=66;BaseQRankSum=  |
| 36051 | chrY | 13799204 | . | G | C | 112.30  | PASS          | AC=1;AF=0.015;AN=66;BaseQRankSum=  |
| 36052 | chrY | 13799205 | . | G | A | 91.97   | PASS          | AC=1;AF=0.015;AN=66;BaseQRankSum=  |
| 36053 | chrY | 13799220 | . | A | C | 60.56   | PASS          | AC=1;AF=0.016;AN=64;BaseQRankSum=  |
| 36054 | chrY | 13799223 | . | T | A | 53.71   | PASS          | AC=1;AF=0.017;AN=60;BaseQRankSum=  |
| 36055 | chrY | 13799225 | . | G | T | 5039.10 | PASS          | AC=44;AF=0.647;AN=68;DP=1444;FS=0  |
| 36056 | chrY | 13799243 | . | T | G | 9700.83 | PASS          | AC=10;AF=0.152;AN=66;BaseQRankSum= |
| 36057 | chrY | 13799258 | . | C | T | 553.81  | PASS          | AC=3;AF=0.047;AN=64;BaseQRankSum=  |
| 36058 | chrY | 13799344 | . | T | C | 184.43  | PASS          | AC=1;AF=0.015;AN=66;BaseQRankSum=  |
| 36059 | chrY | 13799410 | . | T | G | 533.56  | PASS          | AC=8;AF=0.133;AN=60;BaseQRankSum=  |
| 36060 | chrY | 13799424 | . | G | A | 511.21  | PASS          | AC=8;AF=0.114;AN=70;BaseQRankSum=  |
| 36061 | chrY | 13799465 | . | G | A | 97.28   | PASS          | AC=2;AF=0.038;AN=52;BaseQRankSum=  |
| 36062 | chrY | 13799471 | . | G | T | 86.75   | PASS          | AC=3;AF=0.052;AN=58;BaseQRankSum=  |
| 36063 | chrY | 13799916 | . | T | G | 440.89  | PASS          | AC=6;AF=0.091;AN=66;BaseQRankSum=  |
| 36064 | chrY | 13799918 | . | G | A | 356.02  | PASS          | AC=5;AF=0.078;AN=64;BaseQRankSum=  |
| 36065 | chrY | 13799929 | . | T | A | 249.52  | PASS          | AC=4;AF=0.065;AN=62;BaseQRankSum=  |
| 36066 | chrY | 13799936 | . | G | C | 277.22  | PASS          | AC=4;AF=0.065;AN=62;BaseQRankSum=  |
| 36067 | chrY | 13800044 | . | A | T | 156.04  | PASS          | AC=3;AF=0.047;AN=64;BaseQRankSum=  |
| 36068 | chrY | 13800046 | . | T | C | 156.21  | PASS          | AC=3;AF=0.048;AN=62;BaseQRankSum=  |
| 36069 | chrY | 13800288 | . | C | T | 148.77  | PASS          | AC=1;AF=0.015;AN=66;BaseQRankSum=  |
| 36070 | chrY | 13800298 | . | G | T | 148.43  | PASS          | AC=1;AF=0.015;AN=68;BaseQRankSum=  |
| 36071 | chrY | 13800309 | . | G | A | 151.29  | PASS          | AC=1;AF=0.014;AN=70;BaseQRankSum=  |
| 36072 | chrY | 13800385 | . | G | T | 597.72  | PASS          | AC=4;AF=0.057;AN=70;DP=566;FS=0.0  |
| 36073 | chrY | 13800443 | . | G | C | 36.90   | my_snp_filter | AC=1;AF=0.014;AN=70;BaseQ          |
| 36074 | chrY | 13800503 | . | A | G | 48.59   | my_snp_filter | AC=3;AF=0.048;AN=62;BaseQ          |
| 36075 | chrY | 13800514 | . | A | T | 70.88   | PASS          | AC=4;AF=0.059;AN=68;BaseQRankSum=  |
| 36076 | chrY | 13800550 | . | T | A | 32.86   | my_snp_filter | AC=1;AF=0.016;AN=64;BaseQ          |
| 36077 | chrY | 13800553 | . | C | A | 32.90   | my_snp_filter | AC=1;AF=0.014;AN=70;BaseQ          |
| 36078 | chrY | 13800562 | . | G | T | 31.93   | my_snp_filter | AC=1;AF=0.016;AN=64;BaseQ          |
| 36079 | chrY | 13800573 | . | G | C | 33.66   | my_snp_filter | AC=1;AF=0.014;AN=70;BaseQ          |
| 36080 | chrY | 13800582 | . | C | T | 36.94   | my_snp_filter | AC=1;AF=0.015;AN=68;BaseQ          |
| 36081 | chrY | 13800583 | . | A | G | 36.94   | my_snp_filter | AC=1;AF=0.015;AN=68;BaseQ          |
| 36082 | chrY | 13800592 | . | C | T | 47.71   | PASS          | AC=1;AF=0.015;AN=68;BaseQRankSum=  |
| 36083 | chrY | 13800593 | . | A | G | 50.79   | PASS          | AC=1;AF=0.015;AN=68;BaseQRankSum=  |
| 36084 | chrY | 13800613 | . | T | G | 55.12   | PASS          | AC=1;AF=0.015;AN=66;BaseQRankSum=  |
| 36085 | chrY | 13801236 | . | G | A | 4759.04 | PASS          | AC=34;AF=1.00;AN=34;DP=1123;FS=0   |
| 36086 | chrY | 13801289 | . | C | G | 34.72   | PASS          | AC=1;AF=0.028;AN=36;BaseQRankSum=  |
| 36087 | chrY | 13801326 | . | A | C | 331.49  | PASS          | AC=2;AF=0.045;AN=44;BaseQRankSum=  |
| 36088 | chrY | 13801343 | . | C | T | 103.97  | PASS          | AC=1;AF=0.024;AN=42;BaseQRankSum=  |
| 36089 | chrY | 13801344 | . | T | G | 106.20  | PASS          | AC=1;AF=0.024;AN=42;BaseQRankSum=  |
| 36090 | chrY | 13801348 | . | C | A | 103.47  | PASS          | AC=1;AF=0.022;AN=46;BaseQRankSum=  |
| 36091 | chrY | 13801352 | . | A | T | 103.10  | PASS          | AC=1;AF=0.024;AN=42;BaseQRankSum=  |
| 36092 | chrY | 13801391 | . | G | A | 71.30   | PASS          | AC=1;AF=0.036;AN=28;BaseQRankSum=  |
| 36093 | chrY | 13801406 | . | C | A | 103.58  | PASS          | AC=2;AF=0.031;AN=64;BaseQRankSum=  |
| 36094 | chrY | 13801418 | . | G | A | 58.24   | PASS          | AC=1;AF=0.019;AN=54;BaseQRankSum=  |
| 36095 | chrY | 13801419 | . | G | C | 57.49   | PASS          | AC=1;AF=0.019;AN=54;BaseQRankSum=  |
| 36096 | chrY | 13801431 | . | A | C | 194.80  | PASS          | AC=2;AF=0.029;AN=70;BaseQRankSum=  |
| 36097 | chrY | 13801436 | . | A | T | 164.51  | PASS          | AC=1;AF=0.019;AN=52;BaseQRankSum=  |
| 36098 | chrY | 13801437 | . | T | G | 122.96  | PASS          | AC=1;AF=0.017;AN=60;BaseQRankSum=  |
| 36099 | chrY | 13801439 | . | C | A | 139.10  | PASS          | AC=1;AF=0.017;AN=60;BaseQRankSum=  |
| 36100 | chrY | 13801443 | . | T | G | 4437.62 | PASS          | AC=22;AF=0.379;AN=58;BaseQRankSum= |

|       |      |          |   |   |     |         |               |                                    |
|-------|------|----------|---|---|-----|---------|---------------|------------------------------------|
| 36101 | chrY | 13801445 | . | G | A   | 279.84  | PASS          | AC=5;AF=0.093;AN=54;BaseQRankSum=  |
| 36102 | chrY | 13801448 | . | T | A   | 108.60  | PASS          | AC=2;AF=0.029;AN=70;BaseQRankSum=  |
| 36103 | chrY | 13801453 | . | C | T   | 50.36   | my_snp_filter | AC=2;AF=0.029;AN=70;BaseQ          |
| 36104 | chrY | 13801454 | . | G | A   | 108.20  | PASS          | AC=2;AF=0.029;AN=70;BaseQRankSum=  |
| 36105 | chrY | 13801457 | . | T | C   | 33.73   | PASS          | AC=1;AF=0.014;AN=70;BaseQRankSum=  |
| 36106 | chrY | 13801459 | . | G | T   | 4093.26 | PASS          | AC=19;AF=0.279;AN=68;BaseQRankSum= |
| 36107 | chrY | 13801463 | . | G | A   | 34.82   | PASS          | AC=1;AF=0.014;AN=70;BaseQRankSum=  |
| 36108 | chrY | 13801467 | . | G | T   | 4477.71 | PASS          | AC=21;AF=0.350;AN=60;BaseQRankSum= |
| 36109 | chrY | 13801471 | . | A | G   | 69.62   | PASS          | AC=2;AF=0.029;AN=70;BaseQRankSum=  |
| 36110 | chrY | 13801472 | . | T | G   | 69.59   | PASS          | AC=2;AF=0.029;AN=70;BaseQRankSum=  |
| 36111 | chrY | 13801473 | . | G | C   | 3626.16 | PASS          | AC=19;AF=0.279;AN=68;BaseQRankSum= |
| 36112 | chrY | 13801479 | . | T | C   | 135.77  | PASS          | AC=3;AF=0.043;AN=70;BaseQRankSum=  |
| 36113 | chrY | 13801502 | . | T | G,A | 2251.66 | PASS          | AC=12,2;AF=0.182,0.030;AN=66;Base  |
| 36114 | chrY | 13801503 | . | A | G,T | 2517.83 | PASS          | AC=14,2;AF=0.212,0.030;AN=66;Base  |
| 36115 | chrY | 13801504 | . | C | A   | 2136.08 | PASS          | AC=12;AF=0.182;AN=66;BaseQRankSum= |
| 36116 | chrY | 13801507 | . | A | T   | 109.01  | my_snp_filter | AC=4;AF=0.063;AN=64;BaseQ          |
| 36117 | chrY | 13801508 | . | G | A   | 2103.20 | PASS          | AC=12;AF=0.176;AN=68;BaseQRankSum= |
| 36118 | chrY | 13801531 | . | G | A   | 1383.83 | PASS          | AC=8;AF=0.121;AN=66;BaseQRankSum=  |
| 36119 | chrY | 13801542 | . | C | T   | 1188.03 | PASS          | AC=7;AF=0.106;AN=66;BaseQRankSum=  |
| 36120 | chrY | 13801547 | . | T | C   | 683.09  | PASS          | AC=6;AF=0.086;AN=70;BaseQRankSum=  |
| 36121 | chrY | 13801558 | . | C | T   | 579.72  | PASS          | AC=4;AF=0.059;AN=68;BaseQRankSum=  |
| 36122 | chrY | 13801714 | . | G | A   | 45.73   | PASS          | AC=1;AF=0.015;AN=68;BaseQRankSum=  |
| 36123 | chrY | 13801717 | . | G | A   | 49.23   | PASS          | AC=1;AF=0.016;AN=64;BaseQRankSum=  |
| 36124 | chrY | 13801719 | . | T | G   | 45.13   | PASS          | AC=1;AF=0.016;AN=64;BaseQRankSum=  |
| 36125 | chrY | 13801734 | . | T | G   | 60.43   | PASS          | AC=1;AF=0.016;AN=64;BaseQRankSum=  |
| 36126 | chrY | 13801735 | . | T | A   | 63.71   | PASS          | AC=1;AF=0.016;AN=64;BaseQRankSum=  |
| 36127 | chrY | 13801900 | . | A | G   | 152.67  | PASS          | AC=1;AF=0.014;AN=70;BaseQRankSum=  |
| 36128 | chrY | 13801902 | . | A | C   | 146.15  | PASS          | AC=1;AF=0.014;AN=70;BaseQRankSum=  |
| 36129 | chrY | 13801904 | . | G | T   | 151.59  | PASS          | AC=1;AF=0.014;AN=70;BaseQRankSum=  |
| 36130 | chrY | 13801920 | . | G | T   | 163.19  | PASS          | AC=1;AF=0.015;AN=68;BaseQRankSum=  |
| 36131 | chrY | 13801929 | . | T | G   | 155.11  | PASS          | AC=1;AF=0.015;AN=68;BaseQRankSum=  |
| 36132 | chrY | 13801930 | . | G | C   | 152.60  | PASS          | AC=1;AF=0.015;AN=68;BaseQRankSum=  |
| 36133 | chrY | 13801940 | . | A | G   | 153.36  | PASS          | AC=1;AF=0.015;AN=68;BaseQRankSum=  |
| 36134 | chrY | 13801953 | . | A | T   | 156.21  | PASS          | AC=2;AF=0.029;AN=70;BaseQRankSum=  |
| 36135 | chrY | 13801961 | . | A | T   | 157.11  | PASS          | AC=1;AF=0.014;AN=70;BaseQRankSum=  |
| 36136 | chrY | 13801963 | . | T | C   | 31.67   | my_snp_filter | AC=1;AF=0.014;AN=70;BaseQ          |
| 36137 | chrY | 13801964 | . | G | A   | 31.64   | my_snp_filter | AC=1;AF=0.014;AN=70;BaseQ          |
| 36138 | chrY | 13801968 | . | C | T   | 30.03   | my_snp_filter | AC=1;AF=0.015;AN=68;BaseQ          |
| 36139 | chrY | 13801977 | . | G | A   | 32.37   | my_snp_filter | AC=1;AF=0.015;AN=66;BaseQ          |
| 36140 | chrY | 13801982 | . | A | G   | 31.35   | my_snp_filter | AC=1;AF=0.014;AN=70;BaseQ          |
| 36141 | chrY | 13802024 | . | T | C   | 802.26  | PASS          | AC=6;AF=0.088;AN=68;BaseQRankSum=  |
| 36142 | chrY | 13802380 | . | C | A   | 1241.12 | PASS          | AC=1;AF=0.019;AN=54;BaseQRankSum=  |
| 36143 | chrY | 13802743 | . | C | G   | 126.77  | PASS          | AC=3;AF=0.045;AN=66;BaseQRankSum=  |
| 36144 | chrY | 13802762 | . | C | A   | 48.63   | PASS          | AC=1;AF=0.016;AN=64;BaseQRankSum=  |
| 36145 | chrY | 13802767 | . | A | G   | 54.27   | PASS          | AC=1;AF=0.016;AN=62;BaseQRankSum=  |
| 36146 | chrY | 13802770 | . | C | A   | 57.03   | PASS          | AC=1;AF=0.017;AN=58;BaseQRankSum=  |
| 36147 | chrY | 13802771 | . | T | C   | 58.26   | PASS          | AC=1;AF=0.017;AN=60;BaseQRankSum=  |
| 36148 | chrY | 13802772 | . | G | A   | 58.35   | PASS          | AC=1;AF=0.016;AN=62;BaseQRankSum=  |
| 36149 | chrY | 13803166 | . | A | T   | 117.25  | PASS          | AC=1;AF=0.018;AN=56;BaseQRankSum=  |
| 36150 | chrY | 13803167 | . | A | G   | 82.77   | PASS          | AC=1;AF=0.018;AN=56;BaseQRankSum=  |
| 36151 | chrY | 13803171 | . | T | A   | 50.25   | my_snp_filter | AC=1;AF=0.015;AN=68;BaseQ          |
| 36152 | chrY | 13803172 | . | C | A   | 51.73   | my_snp_filter | AC=1;AF=0.015;AN=68;BaseQ          |
| 36153 | chrY | 13803179 | . | G | A   | 41.59   | my_snp_filter | AC=1;AF=0.019;AN=54;BaseQ          |
| 36154 | chrY | 13803181 | . | C | T   | 34.80   | my_snp_filter | AC=1;AF=0.019;AN=54;BaseQ          |
| 36155 | chrY | 13803198 | . | T | A   | 492.43  | PASS          | AC=1;AF=0.014;AN=70;BaseQRankSum=  |
| 36156 | chrY | 13803200 | . | C | T   | 495.12  | PASS          | AC=1;AF=0.019;AN=54;BaseQRankSum=  |
| 36157 | chrY | 13803208 | . | C | A   | 517.84  | PASS          | AC=1;AF=0.019;AN=52;BaseQRankSum=  |
| 36158 | chrY | 13803231 | . | A | T   | 797.85  | PASS          | AC=1;AF=0.020;AN=50;BaseQRankSum=  |
| 36159 | chrY | 13803256 | . | A | T   | 879.21  | PASS          | AC=1;AF=0.021;AN=48;BaseQRankSum=  |
| 36160 | chrY | 13803266 | . | T | A   | 870.10  | PASS          | AC=1;AF=0.014;AN=70;BaseQRankSum=  |
| 36161 | chrY | 13803276 | . | C | A   | 33.44   | my_snp_filter | AC=1;AF=0.015;AN=66;BaseQ          |
| 36162 | chrY | 13803277 | . | A | G   | 31.81   | my_snp_filter | AC=1;AF=0.015;AN=66;BaseQ          |
| 36163 | chrY | 13803290 | . | C | A   | 793     | PASS          | AC=1;AF=0.014;AN=70;BaseQRankSum=  |
| 36164 | chrY | 13803292 | . | G | A   | 749.60  | PASS          | AC=1;AF=0.014;AN=70;BaseQRankSum=  |
| 36165 | chrY | 13803301 | . | A | C   | 813.66  | PASS          | AC=2;AF=0.040;AN=50;BaseQRankSum=  |
| 36166 | chrY | 13803302 | . | G | A   | 787.03  | PASS          | AC=1;AF=0.020;AN=50;BaseQRankSum=  |
| 36167 | chrY | 13803312 | . | G | A   | 105.39  | PASS          | AC=2;AF=0.029;AN=68;BaseQRankSum=  |
| 36168 | chrY | 13803313 | . | G | T   | 231.67  | PASS          | AC=7;AF=0.103;AN=68;BaseQRankSum=  |
| 36169 | chrY | 13803335 | . | C | T   | 1142.62 | PASS          | AC=8;AF=0.148;AN=54;BaseQRankSum=  |
| 36170 | chrY | 13803338 | . | A | G   | 1263.16 | PASS          | AC=8;AF=0.118;AN=68;BaseQRankSum=  |
| 36171 | chrY | 13803340 | . | C | A   | 1241.46 | PASS          | AC=8;AF=0.148;AN=54;BaseQRankSum=  |
| 36172 | chrY | 13803352 | . | C | T   | 1223.33 | PASS          | AC=8;AF=0.114;AN=70;BaseQRankSum=  |
| 36173 | chrY | 13803371 | . | A | T   | 1823.98 | PASS          | AC=6;AF=0.120;AN=50;BaseQRankSum=  |
| 36174 | chrY | 13803375 | . | G | A   | 1061.65 | PASS          | AC=5;AF=0.104;AN=48;BaseQRankSum=  |
| 36175 | chrY | 13803376 | . | T | C   | 1019.10 | PASS          | AC=5;AF=0.104;AN=48;BaseQRankSum=  |
| 36176 | chrY | 13803377 | . | G | A   | 1020.79 | PASS          | AC=5;AF=0.100;AN=50;BaseQRankSum=  |

|       |      |          |   |   |     |          |               |                                    |
|-------|------|----------|---|---|-----|----------|---------------|------------------------------------|
| 36177 | chrY | 13803396 | . | T | C   | 32.13    | PASS          | AC=1;AF=0.016;AN=64;BaseQRankSum=  |
| 36178 | chrY | 13803397 | . | G | A   | 32.81    | PASS          | AC=1;AF=0.016;AN=64;BaseQRankSum=  |
| 36179 | chrY | 13803403 | . | C | G   | 680.08   | PASS          | AC=2;AF=0.038;AN=52;BaseQRankSum=  |
| 36180 | chrY | 13803417 | . | C | G   | 698.27   | PASS          | AC=1;AF=0.020;AN=50;BaseQRankSum=  |
| 36181 | chrY | 13803418 | . | T | G   | 661.12   | PASS          | AC=2;AF=0.040;AN=50;BaseQRankSum=  |
| 36182 | chrY | 13803419 | . | C | A   | 661.77   | PASS          | AC=2;AF=0.040;AN=50;BaseQRankSum=  |
| 36183 | chrY | 13803426 | . | C | T   | 677.92   | PASS          | AC=1;AF=0.015;AN=68;BaseQRankSum=  |
| 36184 | chrY | 13803427 | . | G | A   | 32.44    | PASS          | AC=1;AF=0.015;AN=66;BaseQRankSum=  |
| 36185 | chrY | 13803438 | . | T | G   | 817.42   | PASS          | AC=2;AF=0.040;AN=50;BaseQRankSum=  |
| 36186 | chrY | 13803442 | . | G | A   | 803.36   | PASS          | AC=1;AF=0.015;AN=66;BaseQRankSum=  |
| 36187 | chrY | 13803467 | . | C | T   | 986.07   | PASS          | AC=1;AF=0.018;AN=56;BaseQRankSum=  |
| 36188 | chrY | 13803469 | . | T | A   | 958.55   | PASS          | AC=2;AF=0.037;AN=54;BaseQRankSum=  |
| 36189 | chrY | 13803472 | . | G | T   | 949.10   | PASS          | AC=1;AF=0.015;AN=66;BaseQRankSum=  |
| 36190 | chrY | 13803507 | . | G | A   | 226.44   | PASS          | AC=2;AF=0.029;AN=68;BaseQRankSum=  |
| 36191 | chrY | 13803516 | . | T | C   | 220.18   | PASS          | AC=2;AF=0.040;AN=50;BaseQRankSum=  |
| 36192 | chrY | 13803517 | . | G | A   | 240.31   | PASS          | AC=2;AF=0.038;AN=52;BaseQRankSum=  |
| 36193 | chrY | 13803521 | . | C | T   | 172.53   | PASS          | AC=2;AF=0.040;AN=50;BaseQRankSum=  |
| 36194 | chrY | 13803532 | . | G | A   | 137.90   | PASS          | AC=2;AF=0.033;AN=60;BaseQRankSum=  |
| 36195 | chrY | 13803538 | . | C | G   | 224.61   | PASS          | AC=2;AF=0.038;AN=52;BaseQRankSum=  |
| 36196 | chrY | 13803546 | . | T | A   | 185.94   | PASS          | AC=2;AF=0.033;AN=60;BaseQRankSum=  |
| 36197 | chrY | 13803552 | . | T | G   | 272.88   | PASS          | AC=2;AF=0.038;AN=52;BaseQRankSum=  |
| 36198 | chrY | 13803746 | . | G | A   | 323.54   | PASS          | AC=2;AF=0.029;AN=70;DP=550;FS=0.0  |
| 36199 | chrY | 13803881 | . | G | T   | 61.23    | PASS          | AC=1;AF=0.015;AN=68;BaseQRankSum=  |
| 36200 | chrY | 13803992 | . | C | A   | 166.61   | PASS          | AC=2;AF=0.036;AN=56;BaseQRankSum=  |
| 36201 | chrY | 13804034 | . | T | C   | 1104.89  | PASS          | AC=8;AF=0.118;AN=68;BaseQRankSum=  |
| 36202 | chrY | 13804035 | . | G | C   | 1163.15  | PASS          | AC=8;AF=0.121;AN=66;BaseQRankSum=  |
| 36203 | chrY | 13804049 | . | T | A   | 1059.78  | PASS          | AC=7;AF=0.103;AN=68;BaseQRankSum=  |
| 36204 | chrY | 13804050 | . | C | T   | 359.69   | PASS          | AC=2;AF=0.030;AN=66;BaseQRankSum=  |
| 36205 | chrY | 13804057 | . | A | T   | 42.75    | PASS          | AC=2;AF=0.029;AN=68;BaseQRankSum=  |
| 36206 | chrY | 13804059 | . | A | T   | 1262.07  | PASS          | AC=10;AF=0.152;AN=66;BaseQRankSum= |
| 36207 | chrY | 13804063 | . | G | C,T | 1004.57  | PASS          | AC=8,2;AF=0.121,0.030;AN=66;BaseQ  |
| 36208 | chrY | 13804080 | . | T | C   | 168.11   | PASS          | AC=1;AF=0.014;AN=70;BaseQRankSum=  |
| 36209 | chrY | 13804084 | . | T | C   | 312.77   | PASS          | AC=3;AF=0.043;AN=70;BaseQRankSum=  |
| 36210 | chrY | 13804086 | . | G | A   | 117.52   | PASS          | AC=1;AF=0.014;AN=70;BaseQRankSum=  |
| 36211 | chrY | 13804087 | . | A | G   | 115.11   | PASS          | AC=1;AF=0.014;AN=70;BaseQRankSum=  |
| 36212 | chrY | 13804090 | . | T | G   | 528.02   | PASS          | AC=3;AF=0.048;AN=62;BaseQRankSum=  |
| 36213 | chrY | 13804096 | . | G | C   | 136.48   | PASS          | AC=1;AF=0.016;AN=64;BaseQRankSum=  |
| 36214 | chrY | 13804109 | . | C | A   | 180.39   | PASS          | AC=1;AF=0.015;AN=66;BaseQRankSum=  |
| 36215 | chrY | 13804116 | . | C | G   | 240.79   | PASS          | AC=2;AF=0.034;AN=58;BaseQRankSum=  |
| 36216 | chrY | 13804122 | . | G | A   | 620.07   | PASS          | AC=10;AF=0.147;AN=68;BaseQRankSum= |
| 36217 | chrY | 13804126 | . | G | A   | 71.33    | my_snp_filter | AC=1;AF=0.014;AN=70;BaseQ          |
| 36218 | chrY | 13804129 | . | T | G   | 157.31   | PASS          | AC=1;AF=0.014;AN=70;BaseQRankSum=  |
| 36219 | chrY | 13804130 | . | T | G   | 840.95   | PASS          | AC=12;AF=0.176;AN=68;BaseQRankSum= |
| 36220 | chrY | 13804131 | . | G | A   | 463.34   | PASS          | AC=8;AF=0.114;AN=70;BaseQRankSum=  |
| 36221 | chrY | 13804140 | . | C | T   | 125.92   | PASS          | AC=1;AF=0.015;AN=66;BaseQRankSum=  |
| 36222 | chrY | 13804144 | . | T | C   | 448.49   | PASS          | AC=8;AF=0.114;AN=70;BaseQRankSum=  |
| 36223 | chrY | 13804146 | . | C | G   | 746.76   | PASS          | AC=10;AF=0.156;AN=64;BaseQRankSum= |
| 36224 | chrY | 13804150 | . | A | G   | 518.34   | PASS          | AC=9;AF=0.141;AN=64;BaseQRankSum=  |
| 36225 | chrY | 13804153 | . | A | C   | 739.41   | PASS          | AC=8;AF=0.125;AN=64;BaseQRankSum=  |
| 36226 | chrY | 13804154 | . | C | A   | 382.63   | PASS          | AC=7;AF=0.100;AN=70;BaseQRankSum=  |
| 36227 | chrY | 13804159 | . | C | T   | 54.55    | PASS          | AC=1;AF=0.018;AN=56;BaseQRankSum=  |
| 36228 | chrY | 13804160 | . | G | A,T | 372.03   | PASS          | AC=7,1;AF=0.103,0.015;AN=68;BaseQ  |
| 36229 | chrY | 13804162 | . | A | C   | 243.06   | PASS          | AC=6;AF=0.086;AN=70;BaseQRankSum=  |
| 36230 | chrY | 13804163 | . | A | G   | 456.82   | PASS          | AC=1;AF=0.016;AN=64;BaseQRankSum=  |
| 36231 | chrY | 13804174 | . | T | C   | 82.47    | PASS          | AC=1;AF=0.014;AN=70;BaseQRankSum=  |
| 36232 | chrY | 13804176 | . | G | A   | 447.59   | PASS          | AC=1;AF=0.018;AN=56;BaseQRankSum=  |
| 36233 | chrY | 13804181 | . | G | T   | 83.22    | PASS          | AC=1;AF=0.015;AN=68;BaseQRankSum=  |
| 36234 | chrY | 13804186 | . | C | G   | 748.32   | PASS          | AC=5;AF=0.083;AN=60;BaseQRankSum=  |
| 36235 | chrY | 13804192 | . | A | G   | 59.19    | my_snp_filter | AC=1;AF=0.014;AN=70;BaseQ          |
| 36236 | chrY | 13804194 | . | T | C   | 183.87   | PASS          | AC=4;AF=0.057;AN=70;BaseQRankSum=  |
| 36237 | chrY | 13804202 | . | A | T   | 175.67   | PASS          | AC=4;AF=0.057;AN=70;BaseQRankSum=  |
| 36238 | chrY | 13804211 | . | G | A   | 1209.28  | PASS          | AC=4;AF=0.057;AN=70;BaseQRankSum=  |
| 36239 | chrY | 13804293 | . | A | G   | 8142.97  | PASS          | AC=38;AF=0.559;AN=68;DP=653;FS=0.  |
| 36240 | chrY | 13804501 | . | G | A   | 293.05   | PASS          | AC=1;AF=0.021;AN=48;BaseQRankSum=  |
| 36241 | chrY | 13804508 | . | C | T   | 280.30   | PASS          | AC=3;AF=0.048;AN=62;BaseQRankSum=  |
| 36242 | chrY | 13804514 | . | G | T   | 277.20   | PASS          | AC=1;AF=0.015;AN=66;BaseQRankSum=  |
| 36243 | chrY | 13804543 | . | T | G   | 127.16   | my_snp_filter | AC=6;AF=0.103;AN=58;BaseQ          |
| 36244 | chrY | 13804788 | . | A | T   | 17701.91 | PASS          | AC=11;AF=0.611;AN=18;BaseQ         |
| 36245 | chrY | 13804794 | . | C | A   | 17925.21 | PASS          | AC=11;AF=0.611;AN=18;BaseQ         |
| 36246 | chrY | 13804797 | . | G | A   | 17556.21 | PASS          | AC=11;AF=0.611;AN=18;BaseQ         |
| 36247 | chrY | 13804798 | . | T | A   | 17989.02 | PASS          | AC=11;AF=0.611;AN=18;BaseQ         |
| 36248 | chrY | 13804800 | . | T | G   | 17518.21 | PASS          | AC=11;AF=0.611;AN=18;BaseQ         |
| 36249 | chrY | 13804809 | . | A | C   | 18260.86 | PASS          | AC=11;AF=0.500;AN=22;BaseQ         |
| 36250 | chrY | 13804810 | . | T | C   | 69.43    | PASS          | AC=1;AF=0.014;AN=70;BaseQRankSum=  |
| 36251 | chrY | 13804813 | . | A | T   | 73.35    | PASS          | AC=1;AF=0.014;AN=70;BaseQRankSum=  |
| 36252 | chrY | 13804821 | . | A | G   | 18452.32 | PASS          | AC=13;AF=0.542;AN=24;BaseQ         |

|       |      |          |   |   |   |          |               |                                    |
|-------|------|----------|---|---|---|----------|---------------|------------------------------------|
| 36253 | chrY | 13804824 | . | C | T | 48.16    | PASS          | AC=2;AF=0.029;AN=70;BaseQRankSum=  |
| 36254 | chrY | 13804825 | . | T | G | 33.93    | PASS          | AC=1;AF=0.014;AN=70;BaseQRankSum=  |
| 36255 | chrY | 13804832 | . | G | A | 18372.44 | PASS          | AC=11;AF=0.611;AN=18;BaseQRankSum= |
| 36256 | chrY | 13804834 | . | A | T | 33.43    | PASS          | AC=1;AF=0.014;AN=70;BaseQRankSum=  |
| 36257 | chrY | 13804838 | . | T | A | 73.33    | PASS          | AC=1;AF=0.014;AN=70;BaseQRankSum=  |
| 36258 | chrY | 13804841 | . | C | T | 18104.93 | PASS          | AC=12;AF=0.545;AN=22;BaseQRankSum= |
| 36259 | chrY | 13804847 | . | G | A | 45.02    | PASS          | AC=1;AF=0.014;AN=70;BaseQRankSum=  |
| 36260 | chrY | 13804850 | . | T | C | 17421.33 | PASS          | AC=11;AF=0.550;AN=20;BaseQRankSum= |
| 36261 | chrY | 13804862 | . | G | T | 15920.33 | PASS          | AC=11;AF=0.500;AN=22;BaseQRankSum= |
| 36262 | chrY | 13804872 | . | G | C | 63.74    | my_snp_filter | AC=2;AF=0.029;AN=70;BaseQRankSum=  |
| 36263 | chrY | 13804875 | . | T | A | 70.44    | PASS          | AC=3;AF=0.043;AN=70;BaseQRankSum=  |
| 36264 | chrY | 13804877 | . | G | C | 70.26    | PASS          | AC=3;AF=0.043;AN=70;BaseQRankSum=  |
| 36265 | chrY | 13804879 | . | T | A | 9399.12  | PASS          | AC=9;AF=0.346;AN=26;BaseQRankSum=  |
| 36266 | chrY | 13804891 | . | G | A | 73.59    | PASS          | AC=4;AF=0.057;AN=70;BaseQRankSum=  |
| 36267 | chrY | 13804902 | . | C | A | 273.65   | PASS          | AC=4;AF=0.105;AN=38;BaseQRankSum=  |
| 36268 | chrY | 13805078 | . | A | C | 30.06    | my_snp_filter | AC=1;AF=0.014;AN=70;BaseQRankSum=  |
| 36269 | chrY | 13805110 | . | T | A | 1734.17  | PASS          | AC=3;AF=0.043;AN=70;BaseQRankSum=  |
| 36270 | chrY | 13805112 | . | G | T | 1737.17  | PASS          | AC=3;AF=0.043;AN=70;BaseQRankSum=  |
| 36271 | chrY | 13805115 | . | C | A | 1176.29  | PASS          | AC=4;AF=0.057;AN=70;BaseQRankSum=  |
| 36272 | chrY | 13805127 | . | A | G | 1135.50  | PASS          | AC=4;AF=0.069;AN=58;BaseQRankSum=  |
| 36273 | chrY | 13805128 | . | T | A | 80.93    | my_snp_filter | AC=2;AF=0.034;AN=58;BaseQRankSum=  |
| 36274 | chrY | 13805132 | . | G | A | 79       | my_snp_filter | AC=2;AF=0.029;AN=70;BaseQRankSum=  |
| 36275 | chrY | 13805137 | . | C | G | 81.24    | my_snp_filter | AC=2;AF=0.029;AN=70;BaseQRankSum=  |
| 36276 | chrY | 13805144 | . | A | G | 1080.08  | PASS          | AC=4;AF=0.067;AN=60;BaseQRankSum=  |
| 36277 | chrY | 13805157 | . | T | G | 1054.64  | PASS          | AC=2;AF=0.034;AN=58;BaseQRankSum=  |
| 36278 | chrY | 13805183 | . | A | T | 78.74    | my_snp_filter | AC=2;AF=0.029;AN=70;BaseQRankSum=  |
| 36279 | chrY | 13805185 | . | C | T | 81.96    | my_snp_filter | AC=2;AF=0.036;AN=56;BaseQRankSum=  |
| 36280 | chrY | 13805186 | . | T | C | 86.75    | my_snp_filter | AC=2;AF=0.034;AN=58;BaseQRankSum=  |
| 36281 | chrY | 13805191 | . | G | T | 84.38    | my_snp_filter | AC=2;AF=0.029;AN=70;BaseQRankSum=  |
| 36282 | chrY | 13805194 | . | T | A | 87.40    | my_snp_filter | AC=2;AF=0.036;AN=56;BaseQRankSum=  |
| 36283 | chrY | 13805197 | . | T | A | 74.32    | PASS          | AC=1;AF=0.019;AN=54;BaseQRankSum=  |
| 36284 | chrY | 13805198 | . | T | A | 74.43    | PASS          | AC=1;AF=0.019;AN=54;BaseQRankSum=  |
| 36285 | chrY | 13805241 | . | G | C | 74.66    | PASS          | AC=1;AF=0.014;AN=70;BaseQRankSum=  |
| 36286 | chrY | 13805245 | . | G | A | 80.74    | PASS          | AC=1;AF=0.015;AN=68;BaseQRankSum=  |
| 36287 | chrY | 13805257 | . | G | A | 63.59    | PASS          | AC=1;AF=0.014;AN=70;BaseQRankSum=  |
| 36288 | chrY | 13805266 | . | A | C | 67.03    | PASS          | AC=1;AF=0.014;AN=70;BaseQRankSum=  |
| 36289 | chrY | 13805452 | . | C | G | 33.70    | PASS          | AC=1;AF=0.019;AN=52;BaseQRankSum=  |
| 36290 | chrY | 13805486 | . | C | T | 1077.32  | PASS          | AC=6;AF=0.103;AN=58;DP=913;FS=0.0  |
| 36291 | chrY | 13805640 | . | G | T | 55.39    | my_snp_filter | AC=2;AF=0.029;AN=70;BaseQRankSum=  |
| 36292 | chrY | 13805646 | . | G | A | 55.65    | my_snp_filter | AC=2;AF=0.029;AN=70;BaseQRankSum=  |
| 36293 | chrY | 13805651 | . | G | A | 43.99    | PASS          | AC=1;AF=0.014;AN=70;BaseQRankSum=  |
| 36294 | chrY | 13805655 | . | A | G | 43.48    | PASS          | AC=2;AF=0.029;AN=70;BaseQRankSum=  |
| 36295 | chrY | 13805656 | . | G | C | 34.88    | my_snp_filter | AC=1;AF=0.014;AN=70;BaseQRankSum=  |
| 36296 | chrY | 13805664 | . | T | A | 31.03    | my_snp_filter | AC=1;AF=0.014;AN=70;BaseQRankSum=  |
| 36297 | chrY | 13805746 | . | G | T | 49.94    | my_snp_filter | AC=2;AF=0.029;AN=70;BaseQRankSum=  |
| 36298 | chrY | 13805765 | . | T | G | 38.95    | PASS          | AC=1;AF=0.014;AN=70;BaseQRankSum=  |
| 36299 | chrY | 13806212 | . | G | T | 517.13   | PASS          | AC=5;AF=0.086;AN=58;BaseQRankSum=  |
| 36300 | chrY | 13806306 | . | T | A | 233.21   | PASS          | AC=5;AF=0.078;AN=64;BaseQRankSum=  |
| 36301 | chrY | 13806307 | . | T | A | 242.52   | PASS          | AC=5;AF=0.078;AN=64;BaseQRankSum=  |
| 36302 | chrY | 13806311 | . | T | G | 227.84   | PASS          | AC=5;AF=0.074;AN=68;BaseQRankSum=  |
| 36303 | chrY | 13806326 | . | A | C | 173.24   | PASS          | AC=5;AF=0.086;AN=58;BaseQRankSum=  |
| 36304 | chrY | 13806334 | . | T | A | 109.21   | PASS          | AC=3;AF=0.056;AN=54;BaseQRankSum=  |
| 36305 | chrY | 13806357 | . | C | A | 104.52   | my_snp_filter | AC=4;AF=0.067;AN=60;BaseQRankSum=  |
| 36306 | chrY | 13807235 | . | G | C | 218.43   | PASS          | AC=4;AF=0.057;AN=70;BaseQRankSum=  |
| 36307 | chrY | 13807236 | . | T | G | 216.58   | PASS          | AC=4;AF=0.057;AN=70;BaseQRankSum=  |
| 36308 | chrY | 13807242 | . | G | C | 228.42   | PASS          | AC=4;AF=0.057;AN=70;BaseQRankSum=  |
| 36309 | chrY | 13807250 | . | A | C | 260.18   | PASS          | AC=6;AF=0.086;AN=70;BaseQRankSum=  |
| 36310 | chrY | 13807274 | . | A | T | 77.40    | PASS          | AC=4;AF=0.065;AN=62;BaseQRankSum=  |
| 36311 | chrY | 13807296 | . | T | A | 335.58   | PASS          | AC=4;AF=0.071;AN=56;BaseQRankSum=  |
| 36312 | chrY | 13807318 | . | G | T | 111.43   | my_snp_filter | AC=5;AF=0.089;AN=56;BaseQRankSum=  |
| 36313 | chrY | 13807392 | . | G | A | 1061.83  | PASS          | AC=8;AF=0.129;AN=62;BaseQRankSum=  |
| 36314 | chrY | 13807393 | . | A | T | 1064.28  | PASS          | AC=8;AF=0.129;AN=62;BaseQRankSum=  |
| 36315 | chrY | 13807401 | . | G | C | 963.09   | PASS          | AC=8;AF=0.129;AN=62;BaseQRankSum=  |
| 36316 | chrY | 13807402 | . | A | C | 968.93   | PASS          | AC=8;AF=0.129;AN=62;BaseQRankSum=  |
| 36317 | chrY | 13807415 | . | G | T | 964.14   | PASS          | AC=8;AF=0.129;AN=62;BaseQRankSum=  |
| 36318 | chrY | 13807475 | . | A | C | 9139.92  | PASS          | AC=62;AF=1.00;AN=62;BaseQRankSum=  |
| 36319 | chrY | 13807486 | . | G | A | 707.26   | PASS          | AC=4;AF=0.061;AN=66;DP=442;FS=0.0  |
| 36320 | chrY | 13807527 | . | T | C | 11406.73 | PASS          | AC=50;AF=0.735;AN=68;DP=5          |
| 36321 | chrY | 13807682 | . | G | T | 43.05    | my_snp_filter | AC=4;AF=0.057;AN=70;BaseQRankSum=  |
| 36322 | chrY | 13807983 | . | G | A | 336.35   | PASS          | AC=3;AF=0.045;AN=66;BaseQRankSum=  |
| 36323 | chrY | 13808010 | . | G | A | 202.30   | my_snp_filter | AC=4;AF=0.059;AN=68;BaseQRankSum=  |
| 36324 | chrY | 13808020 | . | G | C | 211.13   | my_snp_filter | AC=4;AF=0.059;AN=68;BaseQRankSum=  |
| 36325 | chrY | 13808022 | . | A | C | 210.59   | my_snp_filter | AC=4;AF=0.059;AN=68;BaseQRankSum=  |
| 36326 | chrY | 13808023 | . | T | A | 373.83   | PASS          | AC=5;AF=0.074;AN=68;BaseQRankSum=  |
| 36327 | chrY | 13808294 | . | A | T | 118.41   | PASS          | AC=1;AF=0.042;AN=24;BaseQRankSum=  |
| 36328 | chrY | 13808302 | . | G | A | 47.91    | PASS          | AC=1;AF=0.028;AN=36;BaseQRankSum=  |

|       |      |          |   |   |   |          |               |                                    |
|-------|------|----------|---|---|---|----------|---------------|------------------------------------|
| 36329 | chrY | 13808307 | . | C | A | 47.13    | PASS          | AC=1;AF=0.025;AN=40;BaseQRankSum=  |
| 36330 | chrY | 13808308 | . | A | G | 43.75    | PASS          | AC=1;AF=0.019;AN=54;BaseQRankSum=  |
| 36331 | chrY | 13808345 | . | A | G | 823.41   | PASS          | AC=1;AF=0.024;AN=42;BaseQRankSum=  |
| 36332 | chrY | 13808358 | . | C | G | 832.42   | my_snp_filter | AC=1;AF=0.022;AN=46;BaseQ          |
| 36333 | chrY | 13808376 | . | A | C | 243.80   | my_snp_filter | AC=2;AF=0.029;AN=70;BaseQ          |
| 36334 | chrY | 13808389 | . | C | T | 1366.44  | PASS          | AC=2;AF=0.033;AN=60;BaseQRankSum=  |
| 36335 | chrY | 13808403 | . | A | C | 938.60   | PASS          | AC=1;AF=0.016;AN=64;BaseQRankSum=  |
| 36336 | chrY | 13808405 | . | G | C | 71.11    | PASS          | AC=1;AF=0.015;AN=66;BaseQRankSum=  |
| 36337 | chrY | 13808407 | . | G | C | 794.31   | PASS          | AC=4;AF=0.067;AN=60;BaseQRankSum=  |
| 36338 | chrY | 13808409 | . | A | T | 824.13   | PASS          | AC=4;AF=0.067;AN=60;BaseQRankSum=  |
| 36339 | chrY | 13808420 | . | T | G | 52.93    | PASS          | AC=1;AF=0.017;AN=58;BaseQRankSum=  |
| 36340 | chrY | 13808508 | . | T | A | 37.57    | PASS          | AC=1;AF=0.019;AN=52;BaseQRankSum=  |
| 36341 | chrY | 13808515 | . | A | C | 40.62    | PASS          | AC=1;AF=0.016;AN=64;BaseQRankSum=  |
| 36342 | chrY | 13808550 | . | G | A | 235.65   | PASS          | AC=1;AF=0.015;AN=68;BaseQRankSum=  |
| 36343 | chrY | 13808635 | . | C | T | 346.39   | PASS          | AC=2;AF=0.038;AN=52;DP=1197;FS=0.  |
| 36344 | chrY | 13808740 | . | C | G | 415.89   | PASS          | AC=4;AF=0.069;AN=58;BaseQRankSum=  |
| 36345 | chrY | 13808779 | . | G | A | 198.03   | PASS          | AC=1;AF=0.021;AN=48;BaseQRankSum=  |
| 36346 | chrY | 13808780 | . | C | G | 2522.81  | PASS          | AC=2;AF=0.045;AN=44;BaseQRankSum=  |
| 36347 | chrY | 13809000 | . | G | A | 74.28    | PASS          | AC=1;AF=0.023;AN=44;BaseQRankSum=  |
| 36348 | chrY | 13809008 | . | T | C | 77.28    | PASS          | AC=1;AF=0.020;AN=50;BaseQRankSum=  |
| 36349 | chrY | 13809013 | . | C | T | 79.38    | PASS          | AC=1;AF=0.022;AN=46;BaseQRankSum=  |
| 36350 | chrY | 13809019 | . | C | G | 78.85    | PASS          | AC=1;AF=0.022;AN=46;BaseQRankSum=  |
| 36351 | chrY | 13809022 | . | A | T | 79.17    | PASS          | AC=1;AF=0.024;AN=42;BaseQRankSum=  |
| 36352 | chrY | 13809023 | . | C | T | 79.19    | PASS          | AC=1;AF=0.024;AN=42;BaseQRankSum=  |
| 36353 | chrY | 13809029 | . | G | T | 74.19    | PASS          | AC=1;AF=0.019;AN=52;BaseQRankSum=  |
| 36354 | chrY | 13809064 | . | T | G | 37.21    | PASS          | AC=1;AF=0.022;AN=46;BaseQRankSum=  |
| 36355 | chrY | 13809088 | . | C | G | 2005.54  | PASS          | AC=16;AF=0.267;AN=60;BaseQRankSum= |
| 36356 | chrY | 13809089 | . | G | C | 1904.10  | PASS          | AC=16;AF=0.258;AN=62;BaseQRankSum= |
| 36357 | chrY | 13809098 | . | T | G | 2093.42  | PASS          | AC=16;AF=0.276;AN=58;BaseQRankSum= |
| 36358 | chrY | 13809112 | . | G | A | 2260.54  | PASS          | AC=15;AF=0.288;AN=52;BaseQRankSum= |
| 36359 | chrY | 13809114 | . | G | T | 2081.21  | PASS          | AC=14;AF=0.212;AN=66;BaseQRankSum= |
| 36360 | chrY | 13809117 | . | T | A | 2156.31  | PASS          | AC=14;AF=0.269;AN=52;BaseQRankSum= |
| 36361 | chrY | 13809121 | . | T | C | 2054.56  | PASS          | AC=14;AF=0.259;AN=54;BaseQRankSum= |
| 36362 | chrY | 13809122 | . | T | A | 79.67    | PASS          | AC=1;AF=0.014;AN=70;BaseQRankSum=  |
| 36363 | chrY | 13809128 | . | G | A | 79.99    | PASS          | AC=1;AF=0.015;AN=66;BaseQRankSum=  |
| 36364 | chrY | 13809129 | . | G | T | 118.52   | PASS          | AC=1;AF=0.015;AN=66;BaseQRankSum=  |
| 36365 | chrY | 13809134 | . | G | C | 2120.19  | PASS          | AC=14;AF=0.219;AN=64;BaseQRankSum= |
| 36366 | chrY | 13809136 | . | C | T | 2135.85  | PASS          | AC=15;AF=0.242;AN=62;BaseQRankSum= |
| 36367 | chrY | 13809137 | . | T | A | 132.73   | PASS          | AC=1;AF=0.019;AN=52;BaseQRankSum=  |
| 36368 | chrY | 13809149 | . | G | A | 116.26   | PASS          | AC=1;AF=0.015;AN=66;BaseQRankSum=  |
| 36369 | chrY | 13809163 | . | G | A | 1790.69  | PASS          | AC=10;AF=0.167;AN=60;BaseQRankSum= |
| 36370 | chrY | 13809172 | . | T | G | 1958.50  | PASS          | AC=8;AF=0.129;AN=62;BaseQRankSum=  |
| 36371 | chrY | 13809175 | . | C | G | 4755.31  | PASS          | AC=11;AF=0.212;AN=52;BaseQRankSum= |
| 36372 | chrY | 13809176 | . | A | G | 1920.54  | PASS          | AC=8;AF=0.138;AN=58;BaseQRankSum=  |
| 36373 | chrY | 13809182 | . | T | A | 2010.90  | PASS          | AC=8;AF=0.138;AN=58;BaseQRankSum=  |
| 36374 | chrY | 13809184 | . | C | G | 4731.77  | PASS          | AC=9;AF=0.161;AN=56;BaseQRankSum=  |
| 36375 | chrY | 13809194 | . | C | G | 3851.66  | PASS          | AC=9;AF=0.167;AN=54;BaseQRankSum=  |
| 36376 | chrY | 13809199 | . | G | A | 1706.95  | PASS          | AC=8;AF=0.143;AN=56;BaseQRankSum=  |
| 36377 | chrY | 13809200 | . | A | G | 3398.10  | PASS          | AC=9;AF=0.173;AN=52;BaseQRankSum=  |
| 36378 | chrY | 13809215 | . | A | T | 168.86   | my_snp_filter | AC=2;AF=0.034;AN=58;BaseQ          |
| 36379 | chrY | 13809222 | . | T | A | 1235.80  | PASS          | AC=8;AF=0.129;AN=62;BaseQRankSum=  |
| 36380 | chrY | 13809229 | . | A | G | 1284.22  | PASS          | AC=8;AF=0.129;AN=62;BaseQRankSum=  |
| 36381 | chrY | 13809233 | . | T | A | 1264.92  | PASS          | AC=8;AF=0.129;AN=62;BaseQRankSum=  |
| 36382 | chrY | 13809234 | . | G | T | 400.55   | PASS          | AC=5;AF=0.081;AN=62;BaseQRankSum=  |
| 36383 | chrY | 13809249 | . | T | C | 848.80   | my_snp_filter | AC=8;AF=0.125;AN=64;BaseQ          |
| 36384 | chrY | 13809254 | . | G | A | 1013.01  | my_snp_filter | AC=8;AF=0.118;AN=68;BaseQ          |
| 36385 | chrY | 13809258 | . | A | G | 813.44   | my_snp_filter | AC=8;AF=0.118;AN=68;BaseQ          |
| 36386 | chrY | 13809259 | . | T | G | 820.72   | PASS          | AC=8;AF=0.118;AN=68;BaseQRankSum=  |
| 36387 | chrY | 13809272 | . | T | A | 517.88   | PASS          | AC=5;AF=0.071;AN=70;BaseQRankSum=  |
| 36388 | chrY | 13809279 | . | G | A | 510.34   | PASS          | AC=5;AF=0.071;AN=70;BaseQRankSum=  |
| 36389 | chrY | 13809281 | . | C | A | 381.88   | PASS          | AC=5;AF=0.071;AN=70;BaseQRankSum=  |
| 36390 | chrY | 13809511 | . | A | C | 702.05   | PASS          | AC=3;AF=0.043;AN=70;BaseQRankSum=  |
| 36391 | chrY | 13809512 | . | T | A | 703.34   | PASS          | AC=3;AF=0.043;AN=70;BaseQRankSum=  |
| 36392 | chrY | 13809697 | . | T | C | 37.71    | my_snp_filter | AC=1;AF=0.015;AN=68;BaseQ          |
| 36393 | chrY | 13809698 | . | G | C | 1214.86  | PASS          | AC=3;AF=0.044;AN=68;BaseQRankSum=  |
| 36394 | chrY | 13809702 | . | T | C | 1209.86  | PASS          | AC=3;AF=0.043;AN=70;BaseQRankSum=  |
| 36395 | chrY | 13809708 | . | C | A | 986.86   | PASS          | AC=3;AF=0.043;AN=70;BaseQRankSum=  |
| 36396 | chrY | 13809723 | . | C | T | 75.94    | my_snp_filter | AC=2;AF=0.029;AN=70;BaseQ          |
| 36397 | chrY | 13809728 | . | A | G | 465.41   | PASS          | AC=3;AF=0.071;AN=42;BaseQRankSum=  |
| 36398 | chrY | 13809729 | . | T | G | 522.48   | PASS          | AC=4;AF=0.095;AN=42;BaseQRankSum=  |
| 36399 | chrY | 13809732 | . | A | T | 12248.67 | PASS          | AC=4;AF=0.080;AN=50;BaseQRankSum=  |
| 36400 | chrY | 13809738 | . | T | C | 1202.66  | PASS          | AC=4;AF=0.071;AN=56;BaseQRankSum=  |
| 36401 | chrY | 13809743 | . | G | T | 330.80   | PASS          | AC=2;AF=0.032;AN=62;BaseQRankSum=  |
| 36402 | chrY | 13809744 | . | T | G | 1198.46  | PASS          | AC=4;AF=0.074;AN=54;BaseQRankSum=  |
| 36403 | chrY | 13809763 | . | G | T | 1666.85  | PASS          | AC=5;AF=0.074;AN=68;BaseQRankSum=  |
| 36404 | chrY | 13809764 | . | G | T | 938.42   | PASS          | AC=5;AF=0.074;AN=68;BaseQRankSum=  |

|       |      |          |   |   |     |         |               |                                   |
|-------|------|----------|---|---|-----|---------|---------------|-----------------------------------|
| 36405 | chrY | 13809768 | . | G | C   | 256.57  | my_snp_filter | AC=4;AF=0.059;AN=68;BaseQ         |
| 36406 | chrY | 13809771 | . | G | A   | 4050.49 | PASS          | AC=7;AF=0.121;AN=58;BaseQRankSum= |
| 36407 | chrY | 13809784 | . | G | A   | 733.23  | PASS          | AC=6;AF=0.097;AN=62;BaseQRankSum= |
| 36408 | chrY | 13809787 | . | A | T   | 1331    | PASS          | AC=7;AF=0.117;AN=60;BaseQRankSum= |
| 36409 | chrY | 13809794 | . | A | G   | 2317.99 | PASS          | AC=8;AF=0.148;AN=54;BaseQRankSum= |
| 36410 | chrY | 13809796 | . | G | C   | 1847.53 | PASS          | AC=7;AF=0.125;AN=56;BaseQRankSum= |
| 36411 | chrY | 13809798 | . | G | A   | 132.54  | PASS          | AC=2;AF=0.034;AN=58;BaseQRankSum= |
| 36412 | chrY | 13809811 | . | A | T   | 294.97  | PASS          | AC=4;AF=0.059;AN=68;BaseQRankSum= |
| 36413 | chrY | 13809817 | . | C | T   | 135.34  | PASS          | AC=2;AF=0.033;AN=60;BaseQRankSum= |
| 36414 | chrY | 13809818 | . | A | G   | 584.77  | PASS          | AC=4;AF=0.067;AN=60;BaseQRankSum= |
| 36415 | chrY | 13809826 | . | C | A   | 628.19  | PASS          | AC=5;AF=0.132;AN=38;BaseQRankSum= |
| 36416 | chrY | 13809828 | . | T | G   | 134.95  | PASS          | AC=2;AF=0.053;AN=38;BaseQRankSum= |
| 36417 | chrY | 13809877 | . | A | T   | 145.27  | PASS          | AC=1;AF=0.017;AN=58;BaseQRankSum= |
| 36418 | chrY | 13809887 | . | A | T   | 111.21  | PASS          | AC=1;AF=0.015;AN=66;BaseQRankSum= |
| 36419 | chrY | 13810004 | . | C | G   | 64.63   | PASS          | AC=1;AF=0.022;AN=46;BaseQRankSum= |
| 36420 | chrY | 13810016 | . | A | G   | 59.61   | PASS          | AC=1;AF=0.017;AN=58;BaseQRankSum= |
| 36421 | chrY | 13810104 | . | T | G   | 129.42  | PASS          | AC=5;AF=0.208;AN=24;BaseQRankSum= |
| 36422 | chrY | 13810109 | . | G | A   | 650.26  | PASS          | AC=1;AF=0.017;AN=60;BaseQRankSum= |
| 36423 | chrY | 13810111 | . | A | T   | 648.61  | PASS          | AC=1;AF=0.018;AN=56;BaseQRankSum= |
| 36424 | chrY | 13810116 | . | A | G   | 620.72  | PASS          | AC=1;AF=0.017;AN=58;BaseQRankSum= |
| 36425 | chrY | 13810118 | . | G | A   | 657.40  | PASS          | AC=3;AF=0.048;AN=62;BaseQRankSum= |
| 36426 | chrY | 13810166 | . | C | G   | 392.80  | PASS          | AC=2;AF=0.063;AN=32;BaseQRankSum= |
| 36427 | chrY | 13810173 | . | A | C   | 361.91  | PASS          | AC=2;AF=0.056;AN=36;BaseQRankSum= |
| 36428 | chrY | 13810206 | . | T | A   | 222.83  | PASS          | AC=2;AF=0.042;AN=48;BaseQRankSum= |
| 36429 | chrY | 13810213 | . | C | A   | 211.31  | PASS          | AC=2;AF=0.031;AN=64;BaseQRankSum= |
| 36430 | chrY | 13810216 | . | A | G   | 198.77  | PASS          | AC=2;AF=0.030;AN=66;BaseQRankSum= |
| 36431 | chrY | 13810226 | . | T | A,G | 453.59  | PASS          | AC=2,1;AF=0.045,0.023;AN=44;BaseQ |
| 36432 | chrY | 13810228 | . | A | C   | 83.15   | PASS          | AC=1;AF=0.028;AN=36;BaseQRankSum= |
| 36433 | chrY | 13810229 | . | G | C   | 79.38   | PASS          | AC=1;AF=0.017;AN=58;BaseQRankSum= |
| 36434 | chrY | 13810232 | . | T | A   | 74.67   | PASS          | AC=1;AF=0.016;AN=64;BaseQRankSum= |
| 36435 | chrY | 13810233 | . | T | G   | 267.29  | PASS          | AC=2;AF=0.038;AN=52;BaseQRankSum= |
| 36436 | chrY | 13810239 | . | A | C   | 251.40  | PASS          | AC=2;AF=0.038;AN=52;BaseQRankSum= |
| 36437 | chrY | 13810240 | . | C | A   | 247.06  | PASS          | AC=2;AF=0.038;AN=52;BaseQRankSum= |
| 36438 | chrY | 13810248 | . | G | T   | 102.09  | PASS          | AC=1;AF=0.014;AN=70;BaseQRankSum= |
| 36439 | chrY | 13810278 | . | C | T   | 186.76  | PASS          | AC=3;AF=0.060;AN=50;BaseQRankSum= |
| 36440 | chrY | 13810291 | . | T | A   | 142.56  | PASS          | AC=2;AF=0.038;AN=52;BaseQRankSum= |
| 36441 | chrY | 13810295 | . | A | T   | 71.11   | PASS          | AC=1;AF=0.020;AN=50;BaseQRankSum= |
| 36442 | chrY | 13810298 | . | T | A   | 139.16  | PASS          | AC=2;AF=0.040;AN=50;BaseQRankSum= |
| 36443 | chrY | 13810302 | . | A | T   | 134.47  | PASS          | AC=2;AF=0.040;AN=50;BaseQRankSum= |
| 36444 | chrY | 13810468 | . | T | A   | 598.85  | PASS          | AC=6;AF=0.086;AN=70;BaseQRankSum= |
| 36445 | chrY | 13810474 | . | A | G   | 573.30  | PASS          | AC=6;AF=0.086;AN=70;BaseQRankSum= |
| 36446 | chrY | 13810485 | . | T | A   | 572.32  | PASS          | AC=6;AF=0.086;AN=70;BaseQRankSum= |
| 36447 | chrY | 13810492 | . | T | A   | 523.95  | PASS          | AC=5;AF=0.071;AN=70;BaseQRankSum= |
| 36448 | chrY | 13810500 | . | A | C   | 432.71  | PASS          | AC=4;AF=0.057;AN=70;BaseQRankSum= |
| 36449 | chrY | 13810512 | . | T | A   | 172.75  | PASS          | AC=2;AF=0.029;AN=70;BaseQRankSum= |
| 36450 | chrY | 13810517 | . | A | T   | 191.80  | PASS          | AC=2;AF=0.029;AN=70;BaseQRankSum= |
| 36451 | chrY | 13810523 | . | T | G   | 148.14  | PASS          | AC=3;AF=0.044;AN=68;BaseQRankSum= |
| 36452 | chrY | 13810622 | . | A | T   | 601.45  | PASS          | AC=2;AF=0.029;AN=70;BaseQRankSum= |
| 36453 | chrY | 13810663 | . | C | T   | 109.62  | PASS          | AC=3;AF=0.060;AN=50;BaseQRankSum= |
| 36454 | chrY | 13810668 | . | G | A   | 104.93  | PASS          | AC=3;AF=0.058;AN=52;BaseQRankSum= |
| 36455 | chrY | 13810678 | . | G | A   | 101.90  | PASS          | AC=3;AF=0.063;AN=48;BaseQRankSum= |
| 36456 | chrY | 13810686 | . | A | C   | 103.82  | PASS          | AC=3;AF=0.047;AN=64;BaseQRankSum= |
| 36457 | chrY | 13810700 | . | A | T   | 77.80   | PASS          | AC=2;AF=0.038;AN=52;BaseQRankSum= |
| 36458 | chrY | 13810701 | . | G | C   | 81.86   | PASS          | AC=2;AF=0.038;AN=52;BaseQRankSum= |
| 36459 | chrY | 13811124 | . | C | G   | 154.89  | PASS          | AC=2;AF=0.053;AN=38;BaseQRankSum= |
| 36460 | chrY | 13811129 | . | G | C   | 140.82  | PASS          | AC=2;AF=0.030;AN=66;BaseQRankSum= |
| 36461 | chrY | 13811174 | . | C | G   | 94.03   | my_snp_filter | AC=1;AF=0.021;AN=48;BaseQ         |
| 36462 | chrY | 13811184 | . | G | A   | 171.14  | PASS          | AC=1;AF=0.015;AN=66;BaseQRankSum= |
| 36463 | chrY | 13811399 | . | T | C   | 174.49  | my_snp_filter | AC=5;AF=0.076;AN=66;BaseQ         |
| 36464 | chrY | 13811427 | . | T | A   | 625.40  | PASS          | AC=7;AF=0.100;AN=70;BaseQRankSum= |
| 36465 | chrY | 13811430 | . | A | G   | 607.79  | PASS          | AC=7;AF=0.100;AN=70;BaseQRankSum= |
| 36466 | chrY | 13811433 | . | A | G   | 569.53  | PASS          | AC=7;AF=0.100;AN=70;BaseQRankSum= |
| 36467 | chrY | 13811438 | . | G | T   | 499.64  | PASS          | AC=7;AF=0.100;AN=70;BaseQRankSum= |
| 36468 | chrY | 13811443 | . | T | G   | 364.77  | PASS          | AC=7;AF=0.100;AN=70;BaseQRankSum= |
| 36469 | chrY | 13811446 | . | T | C   | 327.06  | PASS          | AC=6;AF=0.086;AN=70;BaseQRankSum= |
| 36470 | chrY | 13811456 | . | T | G   | 224.61  | PASS          | AC=2;AF=0.029;AN=70;BaseQRankSum= |
| 36471 | chrY | 13811513 | . | G | A   | 68.71   | PASS          | AC=2;AF=0.029;AN=68;BaseQRankSum= |
| 36472 | chrY | 13811516 | . | A | C   | 68.24   | PASS          | AC=2;AF=0.032;AN=62;BaseQRankSum= |
| 36473 | chrY | 13811526 | . | T | A   | 64.48   | PASS          | AC=1;AF=0.016;AN=64;BaseQRankSum= |
| 36474 | chrY | 13811528 | . | A | T   | 65.87   | PASS          | AC=3;AF=0.052;AN=58;BaseQRankSum= |
| 36475 | chrY | 13811675 | . | A | T   | 108.69  | PASS          | AC=1;AF=0.023;AN=44;BaseQRankSum= |
| 36476 | chrY | 13811771 | . | T | C   | 99.23   | my_snp_filter | AC=4;AF=0.065;AN=62;BaseQ         |
| 36477 | chrY | 13811772 | . | G | A   | 93.69   | my_snp_filter | AC=4;AF=0.065;AN=62;BaseQ         |
| 36478 | chrY | 13811776 | . | A | T   | 264.09  | PASS          | AC=7;AF=0.146;AN=48;BaseQRankSum= |
| 36479 | chrY | 13811783 | . | G | A,T | 239.25  | PASS          | AC=2,3;AF=0.033,0.050;AN=60;BaseQ |
| 36480 | chrY | 13811786 | . | C | G   | 116.18  | PASS          | AC=2;AF=0.038;AN=52;BaseQRankSum= |



|       |      |          |   |   |       |          |               |                                    |
|-------|------|----------|---|---|-------|----------|---------------|------------------------------------|
| 36481 | chrY | 13811787 | . | G | A     | 110.66   | PASS          | AC=2;AF=0.034;AN=58;BaseQRankSum=  |
| 36482 | chrY | 13811791 | . | C | A     | 46.36    | PASS          | AC=1;AF=0.022;AN=46;BaseQRankSum=  |
| 36483 | chrY | 13811797 | . | A | G     | 43.90    | my_snp_filter | AC=2;AF=0.036;AN=56;BaseQ          |
| 36484 | chrY | 13811812 | . | C | G     | 44.09    | my_snp_filter | AC=2;AF=0.029;AN=68;BaseQ          |
| 36485 | chrY | 13812018 | . | G | T     | 97.33    | my_snp_filter | AC=2;AF=0.029;AN=70;BaseQ          |
| 36486 | chrY | 13812025 | . | G | A     | 1148.34  | PASS          | AC=7;AF=0.100;AN=70;BaseQRankSum=  |
| 36487 | chrY | 13812028 | . | G | C     | 1178.69  | PASS          | AC=7;AF=0.100;AN=70;BaseQRankSum=  |
| 36488 | chrY | 13812030 | . | A | G     | 1220.60  | PASS          | AC=7;AF=0.100;AN=70;BaseQRankSum=  |
| 36489 | chrY | 13812038 | . | A | G     | 1269.95  | PASS          | AC=8;AF=0.114;AN=70;BaseQRankSum=  |
| 36490 | chrY | 13812061 | . | A | T     | 1381.51  | PASS          | AC=7;AF=0.100;AN=70;BaseQRankSum=  |
| 36491 | chrY | 13812062 | . | G | A     | 1435.63  | PASS          | AC=7;AF=0.100;AN=70;BaseQRankSum=  |
| 36492 | chrY | 13812071 | . | T | A     | 1341.59  | PASS          | AC=6;AF=0.088;AN=68;BaseQRankSum=  |
| 36493 | chrY | 13812079 | . | A | G     | 1359.16  | PASS          | AC=6;AF=0.086;AN=70;BaseQRankSum=  |
| 36494 | chrY | 13812083 | . | A | C     | 1358.50  | PASS          | AC=6;AF=0.088;AN=68;BaseQRankSum=  |
| 36495 | chrY | 13812090 | . | T | A     | 1323.78  | PASS          | AC=6;AF=0.091;AN=66;BaseQRankSum=  |
| 36496 | chrY | 13812092 | . | T | C     | 1323.07  | PASS          | AC=6;AF=0.088;AN=68;BaseQRankSum=  |
| 36497 | chrY | 13812098 | . | G | T     | 1329.65  | PASS          | AC=6;AF=0.086;AN=70;BaseQRankSum=  |
| 36498 | chrY | 13812101 | . | C | T     | 1335.05  | PASS          | AC=6;AF=0.086;AN=70;BaseQRankSum=  |
| 36499 | chrY | 13812108 | . | C | G     | 1260.13  | PASS          | AC=6;AF=0.088;AN=68;BaseQRankSum=  |
| 36500 | chrY | 13812137 | . | C | T     | 679.07   | PASS          | AC=5;AF=0.071;AN=70;BaseQRankSum=  |
| 36501 | chrY | 13812158 | . | C | G     | 652.68   | PASS          | AC=4;AF=0.057;AN=70;BaseQRankSum=  |
| 36502 | chrY | 13812160 | . | T | A     | 627.10   | PASS          | AC=4;AF=0.057;AN=70;BaseQRankSum=  |
| 36503 | chrY | 13812166 | . | T | A     | 578.25   | PASS          | AC=4;AF=0.057;AN=70;BaseQRankSum=  |
| 36504 | chrY | 13812205 | . | T | C     | 179.89   | PASS          | AC=1;AF=0.014;AN=70;BaseQRankSum=  |
| 36505 | chrY | 13812208 | . | A | G     | 177.15   | PASS          | AC=1;AF=0.014;AN=70;BaseQRankSum=  |
| 36506 | chrY | 13812280 | . | C | T     | 4538.14  | PASS          | AC=13;AF=0.186;AN=70;BaseQRankSum= |
| 36507 | chrY | 13812290 | . | C | A     | 4651.26  | PASS          | AC=13;AF=0.191;AN=68;BaseQRankSum= |
| 36508 | chrY | 13812321 | . | C | T     | 3244.52  | PASS          | AC=9;AF=0.136;AN=66;BaseQRankSum=  |
| 36509 | chrY | 13812328 | . | G | A     | 3122.78  | PASS          | AC=9;AF=0.129;AN=70;BaseQRankSum=  |
| 36510 | chrY | 13812342 | . | T | C     | 2837.43  | PASS          | AC=8;AF=0.114;AN=70;BaseQRankSum=  |
| 36511 | chrY | 13812346 | . | G | T     | 2634.79  | PASS          | AC=7;AF=0.100;AN=70;BaseQRankSum=  |
| 36512 | chrY | 13812361 | . | T | A     | 1720.15  | PASS          | AC=7;AF=0.100;AN=70;BaseQRankSum=  |
| 36513 | chrY | 13812367 | . | C | G     | 1380.38  | PASS          | AC=7;AF=0.103;AN=68;BaseQRankSum=  |
| 36514 | chrY | 13812375 | . | G | A     | 981.25   | PASS          | AC=6;AF=0.088;AN=68;BaseQRankSum=  |
| 36515 | chrY | 13812382 | . | T | G     | 510.73   | PASS          | AC=6;AF=0.088;AN=68;BaseQRankSum=  |
| 36516 | chrY | 13812383 | . | T | G     | 492.68   | PASS          | AC=5;AF=0.074;AN=68;BaseQRankSum=  |
| 36517 | chrY | 13812388 | . | G | A     | 446.87   | PASS          | AC=5;AF=0.071;AN=70;BaseQRankSum=  |
| 36518 | chrY | 13812391 | . | G | T     | 372.21   | PASS          | AC=5;AF=0.074;AN=68;BaseQRankSum=  |
| 36519 | chrY | 13812397 | . | T | G     | 295.18   | PASS          | AC=4;AF=0.061;AN=66;BaseQRankSum=  |
| 36520 | chrY | 13812406 | . | C | T     | 242.42   | PASS          | AC=4;AF=0.057;AN=70;BaseQRankSum=  |
| 36521 | chrY | 13812407 | . | A | G     | 239.42   | PASS          | AC=4;AF=0.057;AN=70;BaseQRankSum=  |
| 36522 | chrY | 13812414 | . | A | T     | 140.66   | PASS          | AC=2;AF=0.029;AN=70;BaseQRankSum=  |
| 36523 | chrY | 13812526 | . | G | A     | 1277     | PASS          | AC=6;AF=0.086;AN=70;DP=582;FS=0.0  |
| 36524 | chrY | 13812840 | . | T | C     | 55.11    | my_snp_filter | AC=5;AF=0.071;AN=70;BaseQ          |
| 36525 | chrY | 13812884 | . | A | T     | 148.12   | PASS          | AC=2;AF=0.034;AN=58;BaseQRankSum=  |
| 36526 | chrY | 13812887 | . | G | T,C   | 867.96   | PASS          | AC=11,2;AF=0.167,0.030;AN=66;BaseQ |
| 36527 | chrY | 13812889 | . | A | G     | 52440.50 | PASS          | AC=5;AF=0.074;AN=68;BaseQ          |
| 36528 | chrY | 13812890 | . | T | C     | 134.31   | PASS          | AC=2;AF=0.029;AN=70;BaseQRankSum=  |
| 36529 | chrY | 13812891 | . | G | T,A   | 52636.59 | PASS          | AC=2,5;AF=0.031,0.078;AN=          |
| 36530 | chrY | 13812894 | . | A | T     | 127.48   | PASS          | AC=2;AF=0.029;AN=70;BaseQRankSum=  |
| 36531 | chrY | 13812900 | . | G | T     | 52370.35 | PASS          | AC=5;AF=0.086;AN=58;BaseQ          |
| 36532 | chrY | 13812911 | . | C | T,*   | 698.59   | PASS          | AC=5,1;AF=0.071,0.014;AN=70;BaseQ  |
| 36533 | chrY | 13812914 | . | A | T     | 121.43   | PASS          | AC=2;AF=0.029;AN=70;BaseQRankSum=  |
| 36534 | chrY | 13812920 | . | G | T,*   | 2320.73  | PASS          | AC=12,3;AF=0.188,0.047;AN=64;Base  |
| 36535 | chrY | 13812922 | . | C | G,A,* | 1449.61  | PASS          | AC=6,6,3;AF=0.094,0.094,0.047;AN=  |
| 36536 | chrY | 13812926 | . | A | C     | 1857.40  | PASS          | AC=10;AF=0.152;AN=66;BaseQRankSum= |
| 36537 | chrY | 13812927 | . | G | A     | 64.25    | PASS          | AC=1;AF=0.016;AN=62;BaseQRankSum=  |
| 36538 | chrY | 13812931 | . | G | C     | 61.43    | PASS          | AC=2;AF=0.029;AN=70;BaseQRankSum=  |
| 36539 | chrY | 13812932 | . | G | C     | 94.24    | PASS          | AC=1;AF=0.014;AN=70;BaseQRankSum=  |
| 36540 | chrY | 13812941 | . | C | T     | 304.86   | PASS          | AC=6;AF=0.088;AN=68;BaseQRankSum=  |
| 36541 | chrY | 13812949 | . | G | A     | 332.33   | PASS          | AC=7;AF=0.106;AN=66;BaseQRankSum=  |
| 36542 | chrY | 13812952 | . | T | C     | 131.84   | PASS          | AC=2;AF=0.031;AN=64;BaseQRankSum=  |
| 36543 | chrY | 13813136 | . | A | G     | 50.95    | my_snp_filter | AC=1;AF=0.014;AN=70;BaseQ          |
| 36544 | chrY | 13813144 | . | C | G     | 100.64   | PASS          | AC=1;AF=0.014;AN=70;BaseQRankSum=  |
| 36545 | chrY | 13813150 | . | T | A     | 48.97    | my_snp_filter | AC=1;AF=0.014;AN=70;BaseQ          |
| 36546 | chrY | 13813151 | . | G | A     | 35.47    | my_snp_filter | AC=1;AF=0.014;AN=70;BaseQ          |
| 36547 | chrY | 13813152 | . | C | G     | 27454    | PASS          | AC=34;AF=0.500;AN=68;BaseQRankSum= |
| 36548 | chrY | 13813166 | . | A | G     | 99.15    | my_snp_filter | AC=4;AF=0.057;AN=70;BaseQ          |
| 36549 | chrY | 13813175 | . | T | A     | 1837.40  | PASS          | AC=11;AF=0.157;AN=70;BaseQRankSum= |
| 36550 | chrY | 13813176 | . | C | T     | 2389.61  | PASS          | AC=16;AF=0.229;AN=70;BaseQRankSum= |
| 36551 | chrY | 13813177 | . | G | C     | 32.05    | PASS          | AC=1;AF=0.014;AN=70;BaseQRankSum=  |
| 36552 | chrY | 13813182 | . | G | C     | 80.15    | my_snp_filter | AC=2;AF=0.029;AN=70;BaseQ          |
| 36553 | chrY | 13813192 | . | G | A     | 136.42   | my_snp_filter | AC=3;AF=0.043;AN=70;BaseQ          |
| 36554 | chrY | 13813216 | . | G | T     | 634.43   | PASS          | AC=6;AF=0.086;AN=70;BaseQRankSum=  |
| 36555 | chrY | 13813221 | . | C | A     | 197.06   | PASS          | AC=2;AF=0.029;AN=68;BaseQRankSum=  |
| 36556 | chrY | 13813534 | . | A | G     | 256.99   | PASS          | AC=2;AF=0.042;AN=48;DP=1361;FS=0.  |

|       |      |          |   |   |     |         |               |                                    |
|-------|------|----------|---|---|-----|---------|---------------|------------------------------------|
| 36557 | chrY | 13813920 | . | G | T   | 470.24  | PASS          | AC=5;AF=0.156;AN=32;BaseQRankSum=  |
| 36558 | chrY | 13813931 | . | G | A   | 442.10  | PASS          | AC=6;AF=0.094;AN=64;BaseQRankSum=  |
| 36559 | chrY | 13813937 | . | T | A   | 416.68  | PASS          | AC=7;AF=0.175;AN=40;BaseQRankSum=  |
| 36560 | chrY | 13813941 | . | C | T   | 384.39  | PASS          | AC=4;AF=0.077;AN=52;BaseQRankSum=  |
| 36561 | chrY | 13813950 | . | A | T   | 369.34  | PASS          | AC=4;AF=0.071;AN=56;BaseQRankSum=  |
| 36562 | chrY | 13814050 | . | T | A   | 60.10   | my_snp_filter | AC=5;AF=0.071;AN=70;BaseQ          |
| 36563 | chrY | 13814054 | . | C | A,T | 549.48  | PASS          | AC=5,8;AF=0.074,0.118;AN=68;BaseQ  |
| 36564 | chrY | 13814055 | . | T | A   | 965.61  | PASS          | AC=6;AF=0.091;AN=66;BaseQRankSum=  |
| 36565 | chrY | 13814056 | . | G | C,T | 1748.73 | PASS          | AC=11,5;AF=0.167,0.076;AN=66;Base  |
| 36566 | chrY | 13814066 | . | G | C   | 434.01  | PASS          | AC=8;AF=0.118;AN=68;BaseQRankSum=  |
| 36567 | chrY | 13814067 | . | C | G,A | 1003.08 | PASS          | AC=6,8;AF=0.088,0.118;AN=68;BaseQ  |
| 36568 | chrY | 13814079 | . | A | G   | 213.23  | PASS          | AC=5;AF=0.071;AN=70;BaseQRankSum=  |
| 36569 | chrY | 13814084 | . | T | C   | 816.20  | PASS          | AC=5;AF=0.081;AN=62;BaseQRankSum=  |
| 36570 | chrY | 13814086 | . | C | G   | 44.35   | my_snp_filter | AC=2;AF=0.029;AN=68;BaseQ          |
| 36571 | chrY | 13814087 | . | A | G   | 728.02  | PASS          | AC=5;AF=0.074;AN=68;BaseQRankSum=  |
| 36572 | chrY | 13814091 | . | G | A   | 605.41  | PASS          | AC=4;AF=0.061;AN=66;BaseQRankSum=  |
| 36573 | chrY | 13814095 | . | T | A   | 537.02  | PASS          | AC=3;AF=0.043;AN=70;BaseQRankSum=  |
| 36574 | chrY | 13814097 | . | G | A   | 270.17  | PASS          | AC=5;AF=0.071;AN=70;BaseQRankSum=  |
| 36575 | chrY | 13814106 | . | A | G   | 579.37  | PASS          | AC=5;AF=0.089;AN=56;BaseQRankSum=  |
| 36576 | chrY | 13814108 | . | A | T   | 447.63  | PASS          | AC=3;AF=0.043;AN=70;BaseQRankSum=  |
| 36577 | chrY | 13814117 | . | A | G   | 201.21  | PASS          | AC=1;AF=0.015;AN=66;BaseQRankSum=  |
| 36578 | chrY | 13814122 | . | C | G   | 216.20  | PASS          | AC=2;AF=0.036;AN=56;BaseQRankSum=  |
| 36579 | chrY | 13814132 | . | A | G   | 413.09  | PASS          | AC=3;AF=0.054;AN=56;BaseQRankSum=  |
| 36580 | chrY | 13814135 | . | T | A   | 127.21  | PASS          | AC=1;AF=0.014;AN=70;BaseQRankSum=  |
| 36581 | chrY | 13814142 | . | C | G   | 84.42   | my_snp_filter | AC=2;AF=0.029;AN=68;BaseQ          |
| 36582 | chrY | 13814146 | . | G | A   | 176.05  | PASS          | AC=1;AF=0.018;AN=56;BaseQRankSum=  |
| 36583 | chrY | 13814148 | . | C | T   | 138.91  | PASS          | AC=1;AF=0.019;AN=54;BaseQRankSum=  |
| 36584 | chrY | 13815490 | . | A | C   | 507.39  | PASS          | AC=8;AF=0.118;AN=68;BaseQRankSum=  |
| 36585 | chrY | 13815495 | . | A | T   | 891.77  | PASS          | AC=8;AF=0.118;AN=68;BaseQRankSum=  |
| 36586 | chrY | 13815502 | . | C | T   | 912.97  | PASS          | AC=8;AF=0.160;AN=50;BaseQRankSum=  |
| 36587 | chrY | 13815503 | . | G | C   | 1034.49 | PASS          | AC=9;AF=0.188;AN=48;BaseQRankSum=  |
| 36588 | chrY | 13815516 | . | T | A   | 598.03  | PASS          | AC=11;AF=0.162;AN=68;BaseQRankSum= |
| 36589 | chrY | 13815527 | . | G | T   | 121.85  | PASS          | AC=4;AF=0.059;AN=68;BaseQRankSum=  |
| 36590 | chrY | 13815536 | . | T | A   | 281.32  | PASS          | AC=7;AF=0.103;AN=68;BaseQRankSum=  |
| 36591 | chrY | 13815543 | . | A | G   | 1793.06 | PASS          | AC=15;AF=0.395;AN=38;BaseQRankSum= |
| 36592 | chrY | 13815548 | . | A | G   | 1437.38 | PASS          | AC=13;AF=0.342;AN=38;BaseQRankSum= |
| 36593 | chrY | 13815557 | . | G | A   | 1735.92 | PASS          | AC=13;AF=0.217;AN=60;BaseQRankSum= |
| 36594 | chrY | 13815563 | . | G | A   | 244.42  | PASS          | AC=2;AF=0.030;AN=66;BaseQRankSum=  |
| 36595 | chrY | 13815566 | . | T | G   | 786.27  | PASS          | AC=9;AF=0.161;AN=56;BaseQRankSum=  |
| 36596 | chrY | 13815567 | . | A | G   | 2098.50 | PASS          | AC=14;AF=0.304;AN=46;BaseQRankSum= |
| 36597 | chrY | 13815569 | . | A | T   | 668.03  | PASS          | AC=9;AF=0.141;AN=64;BaseQRankSum=  |
| 36598 | chrY | 13815577 | . | G | A   | 87.21   | PASS          | AC=2;AF=0.029;AN=70;BaseQRankSum=  |
| 36599 | chrY | 13815582 | . | G | A,T | 306.15  | PASS          | AC=2,2;AF=0.029,0.029;AN=70;BaseQ  |
| 36600 | chrY | 13815592 | . | C | T   | 291.03  | PASS          | AC=3;AF=0.043;AN=70;BaseQRankSum=  |
| 36601 | chrY | 13815603 | . | G | T   | 158.72  | PASS          | AC=2;AF=0.029;AN=70;BaseQRankSum=  |
| 36602 | chrY | 13815607 | . | A | T,C | 753.94  | PASS          | AC=4,3;AF=0.065,0.048;AN=62;BaseQ  |
| 36603 | chrY | 13815608 | . | G | C   | 556     | PASS          | AC=6;AF=0.097;AN=62;BaseQRankSum=  |
| 36604 | chrY | 13815610 | . | A | T   | 43.55   | my_snp_filter | AC=2;AF=0.029;AN=70;BaseQ          |
| 36605 | chrY | 13815611 | . | T | C   | 102.86  | my_snp_filter | AC=2;AF=0.029;AN=70;BaseQ          |
| 36606 | chrY | 13815613 | . | G | A   | 239.24  | my_snp_filter | AC=5;AF=0.071;AN=70;BaseQ          |
| 36607 | chrY | 13815615 | . | A | G   | 50.82   | PASS          | AC=1;AF=0.014;AN=70;BaseQRankSum=  |
| 36608 | chrY | 13815616 | . | T | G   | 49.26   | PASS          | AC=1;AF=0.014;AN=70;BaseQRankSum=  |
| 36609 | chrY | 13815622 | . | C | A   | 762.69  | PASS          | AC=5;AF=0.074;AN=68;BaseQRankSum=  |
| 36610 | chrY | 13815623 | . | G | A   | 342.57  | PASS          | AC=5;AF=0.074;AN=68;BaseQRankSum=  |
| 36611 | chrY | 13815627 | . | T | G   | 1296.60 | PASS          | AC=10;AF=0.167;AN=60;BaseQRankSum= |
| 36612 | chrY | 13815635 | . | A | T   | 95.12   | PASS          | AC=2;AF=0.029;AN=70;BaseQRankSum=  |
| 36613 | chrY | 13815637 | . | C | T   | 411.05  | PASS          | AC=6;AF=0.091;AN=66;BaseQRankSum=  |
| 36614 | chrY | 13815638 | . | A | G   | 587.12  | PASS          | AC=8;AF=0.133;AN=60;BaseQRankSum=  |
| 36615 | chrY | 13815640 | . | A | T   | 48.08   | PASS          | AC=1;AF=0.014;AN=70;BaseQRankSum=  |
| 36616 | chrY | 13815644 | . | A | T   | 42.56   | my_snp_filter | AC=1;AF=0.014;AN=70;BaseQ          |
| 36617 | chrY | 13815646 | . | T | A   | 40.75   | PASS          | AC=1;AF=0.014;AN=70;BaseQRankSum=  |
| 36618 | chrY | 13815648 | . | G | T   | 711.70  | PASS          | AC=5;AF=0.071;AN=70;BaseQRankSum=  |
| 36619 | chrY | 13815650 | . | C | T   | 52.37   | my_snp_filter | AC=1;AF=0.015;AN=66;BaseQ          |
| 36620 | chrY | 13815651 | . | A | T   | 2190.38 | PASS          | AC=9;AF=0.145;AN=62;BaseQRankSum=  |
| 36621 | chrY | 13815663 | . | G | T   | 518.20  | PASS          | AC=5;AF=0.071;AN=70;BaseQRankSum=  |
| 36622 | chrY | 13815666 | . | A | T   | 822.98  | PASS          | AC=7;AF=0.113;AN=62;BaseQRankSum=  |
| 36623 | chrY | 13815668 | . | G | T   | 636.43  | PASS          | AC=7;AF=0.106;AN=66;BaseQRankSum=  |
| 36624 | chrY | 13815675 | . | G | A   | 216.59  | PASS          | AC=3;AF=0.047;AN=64;BaseQRankSum=  |
| 36625 | chrY | 13815680 | . | C | G   | 284.48  | PASS          | AC=4;AF=0.061;AN=66;BaseQRankSum=  |
| 36626 | chrY | 13815681 | . | G | A   | 606.86  | PASS          | AC=7;AF=0.109;AN=64;BaseQRankSum=  |
| 36627 | chrY | 13815682 | . | G | T   | 30.03   | my_snp_filter | AC=1;AF=0.015;AN=68;BaseQ          |
| 36628 | chrY | 13815684 | . | A | T   | 56.13   | my_snp_filter | AC=2;AF=0.029;AN=68;BaseQ          |
| 36629 | chrY | 13815692 | . | C | G   | 163.52  | PASS          | AC=3;AF=0.048;AN=62;BaseQRankSum=  |
| 36630 | chrY | 13815712 | . | G | C   | 53.39   | my_snp_filter | AC=1;AF=0.014;AN=70;BaseQ          |
| 36631 | chrY | 13815934 | . | T | G   | 489.78  | PASS          | AC=1;AF=0.014;AN=70;BaseQRankSum=  |
| 36632 | chrY | 13815937 | . | G | A   | 492.36  | PASS          | AC=1;AF=0.014;AN=70;BaseQRankSum=  |

|       |      |          |   |   |   |          |               |                                    |
|-------|------|----------|---|---|---|----------|---------------|------------------------------------|
| 36633 | chrY | 13816025 | . | A | G | 21053.91 | PASS          | AC=70;AF=1.00;AN=70;DP=74          |
| 36634 | chrY | 13816082 | . | A | C | 162.18   | PASS          | AC=2;AF=0.029;AN=70;BaseQRankSum=  |
| 36635 | chrY | 13816083 | . | T | A | 157.97   | PASS          | AC=2;AF=0.029;AN=70;BaseQRankSum=  |
| 36636 | chrY | 13816088 | . | T | G | 154.65   | PASS          | AC=2;AF=0.029;AN=70;BaseQRankSum=  |
| 36637 | chrY | 13816095 | . | G | C | 152.93   | PASS          | AC=2;AF=0.029;AN=70;BaseQRankSum=  |
| 36638 | chrY | 13816100 | . | C | G | 153.96   | PASS          | AC=2;AF=0.029;AN=70;BaseQRankSum=  |
| 36639 | chrY | 13816113 | . | T | A | 157.92   | PASS          | AC=1;AF=0.016;AN=64;BaseQRankSum=  |
| 36640 | chrY | 13816118 | . | A | T | 116.76   | PASS          | AC=1;AF=0.015;AN=66;BaseQRankSum=  |
| 36641 | chrY | 13816678 | . | A | C | 84.83    | my_snp_filter | AC=2;AF=0.029;AN=70;BaseQ          |
| 36642 | chrY | 13816679 | . | A | C | 81.86    | my_snp_filter | AC=2;AF=0.029;AN=70;BaseQ          |
| 36643 | chrY | 13816682 | . | C | T | 82.08    | my_snp_filter | AC=2;AF=0.032;AN=62;BaseQ          |
| 36644 | chrY | 13816705 | . | A | C | 65.33    | my_snp_filter | AC=2;AF=0.029;AN=70;BaseQ          |
| 36645 | chrY | 13816716 | . | C | A | 65.70    | PASS          | AC=2;AF=0.029;AN=70;BaseQRankSum=  |
| 36646 | chrY | 13816947 | . | T | A | 365.55   | PASS          | AC=2;AF=0.029;AN=70;DP=418;FS=0.0  |
| 36647 | chrY | 13817003 | . | G | A | 4356.84  | PASS          | AC=32;AF=0.516;AN=62;DP=413;FS=0.  |
| 36648 | chrY | 13817142 | . | G | A | 36.14    | PASS          | AC=1;AF=0.016;AN=64;BaseQRankSum=  |
| 36649 | chrY | 13817166 | . | C | T | 61.80    | PASS          | AC=2;AF=0.042;AN=48;BaseQRankSum=  |
| 36650 | chrY | 13817177 | . | A | C | 64.34    | PASS          | AC=2;AF=0.042;AN=48;BaseQRankSum=  |
| 36651 | chrY | 13817178 | . | G | C | 70.74    | PASS          | AC=2;AF=0.034;AN=58;BaseQRankSum=  |
| 36652 | chrY | 13817183 | . | T | G | 104.16   | PASS          | AC=2;AF=0.045;AN=44;BaseQRankSum=  |
| 36653 | chrY | 13817196 | . | T | A | 81.25    | PASS          | AC=2;AF=0.031;AN=64;BaseQRankSum=  |
| 36654 | chrY | 13817197 | . | A | G | 348.90   | PASS          | AC=10;AF=0.185;AN=54;BaseQRankSum= |
| 36655 | chrY | 13817233 | . | G | C | 1576.83  | PASS          | AC=11;AF=0.162;AN=68;BaseQRankSum= |
| 36656 | chrY | 13817235 | . | T | C | 31.12    | PASS          | AC=1;AF=0.015;AN=68;BaseQRankSum=  |
| 36657 | chrY | 13817236 | . | G | T | 329.07   | PASS          | AC=4;AF=0.063;AN=64;BaseQRankSum=  |
| 36658 | chrY | 13817239 | . | A | T | 75.63    | PASS          | AC=1;AF=0.015;AN=66;BaseQRankSum=  |
| 36659 | chrY | 13817240 | . | A | G | 68.17    | my_snp_filter | AC=3;AF=0.045;AN=66;BaseQ          |
| 36660 | chrY | 13817246 | . | C | T | 2309.86  | PASS          | AC=13;AF=0.217;AN=60;BaseQRankSum= |
| 36661 | chrY | 13817248 | . | G | A | 1592.92  | PASS          | AC=11;AF=0.157;AN=70;BaseQRankSum= |
| 36662 | chrY | 13817256 | . | T | C | 31.70    | PASS          | AC=1;AF=0.014;AN=70;BaseQRankSum=  |
| 36663 | chrY | 13817262 | . | G | C | 1452.20  | PASS          | AC=9;AF=0.129;AN=70;BaseQRankSum=  |
| 36664 | chrY | 13817267 | . | C | G | 1578.08  | PASS          | AC=9;AF=0.132;AN=68;BaseQRankSum=  |
| 36665 | chrY | 13817268 | . | G | T | 77.24    | my_snp_filter | AC=2;AF=0.029;AN=68;BaseQ          |
| 36666 | chrY | 13817277 | . | A | G | 272.69   | PASS          | AC=4;AF=0.065;AN=62;BaseQRankSum=  |
| 36667 | chrY | 13817278 | . | T | C | 71.13    | PASS          | AC=1;AF=0.016;AN=62;BaseQRankSum=  |
| 36668 | chrY | 13817281 | . | T | C | 107.70   | PASS          | AC=2;AF=0.029;AN=68;BaseQRankSum=  |
| 36669 | chrY | 13817282 | . | C | A | 70.75    | my_snp_filter | AC=3;AF=0.045;AN=66;BaseQ          |
| 36670 | chrY | 13817283 | . | T | C | 114.93   | PASS          | AC=1;AF=0.016;AN=62;BaseQRankSum=  |
| 36671 | chrY | 13817292 | . | T | G | 134.13   | PASS          | AC=3;AF=0.044;AN=68;BaseQRankSum=  |
| 36672 | chrY | 13817297 | . | A | T | 163.02   | PASS          | AC=3;AF=0.045;AN=66;BaseQRankSum=  |
| 36673 | chrY | 13817301 | . | T | A | 68.30    | my_snp_filter | AC=3;AF=0.043;AN=70;BaseQ          |
| 36674 | chrY | 13817303 | . | C | A | 74.53    | my_snp_filter | AC=3;AF=0.043;AN=70;BaseQ          |
| 36675 | chrY | 13817318 | . | T | A | 97.12    | my_snp_filter | AC=3;AF=0.044;AN=68;BaseQ          |
| 36676 | chrY | 13817322 | . | G | A | 69.86    | my_snp_filter | AC=3;AF=0.043;AN=70;BaseQ          |
| 36677 | chrY | 13817323 | . | G | A | 55.48    | my_snp_filter | AC=3;AF=0.043;AN=70;BaseQ          |
| 36678 | chrY | 13817440 | . | C | G | 136.93   | PASS          | AC=1;AF=0.014;AN=70;BaseQRankSum=  |
| 36679 | chrY | 13817581 | . | C | T | 162.97   | PASS          | AC=4;AF=0.111;AN=36;BaseQRankSum=  |
| 36680 | chrY | 13817596 | . | T | G | 133.53   | PASS          | AC=3;AF=0.056;AN=54;BaseQRankSum=  |
| 36681 | chrY | 13817597 | . | C | G | 240.83   | PASS          | AC=3;AF=0.083;AN=36;BaseQRankSum=  |
| 36682 | chrY | 13817642 | . | G | C | 52.06    | PASS          | AC=2;AF=0.045;AN=44;BaseQRankSum=  |
| 36683 | chrY | 13817647 | . | C | A | 155.77   | PASS          | AC=1;AF=0.029;AN=34;BaseQRankSum=  |
| 36684 | chrY | 13817650 | . | A | T | 110.05   | PASS          | AC=1;AF=0.026;AN=38;BaseQRankSum=  |
| 36685 | chrY | 13817660 | . | T | C | 179.78   | PASS          | AC=2;AF=0.071;AN=28;BaseQRankSum=  |
| 36686 | chrY | 13817662 | . | C | G | 42.93    | PASS          | AC=1;AF=0.042;AN=24;BaseQRankSum=  |
| 36687 | chrY | 13817818 | . | G | C | 50.81    | my_snp_filter | AC=3;AF=0.063;AN=48;BaseQ          |
| 36688 | chrY | 13817823 | . | G | C | 50.06    | my_snp_filter | AC=3;AF=0.058;AN=52;BaseQ          |
| 36689 | chrY | 13817982 | . | A | C | 161.44   | PASS          | AC=2;AF=0.037;AN=54;BaseQRankSum=  |
| 36690 | chrY | 13818202 | . | G | T | 128.75   | PASS          | AC=2;AF=0.029;AN=68;BaseQRankSum=  |
| 36691 | chrY | 13818253 | . | A | G | 31.07    | my_snp_filter | AC=1;AF=0.015;AN=68;BaseQ          |
| 36692 | chrY | 13818258 | . | G | T | 31.13    | my_snp_filter | AC=1;AF=0.014;AN=70;BaseQ          |
| 36693 | chrY | 13818262 | . | T | C | 89.71    | my_snp_filter | AC=3;AF=0.043;AN=70;BaseQ          |
| 36694 | chrY | 13818365 | . | A | C | 131.77   | my_snp_filter | AC=4;AF=0.057;AN=70;BaseQ          |
| 36695 | chrY | 13818367 | . | T | C | 138.22   | my_snp_filter | AC=4;AF=0.059;AN=68;BaseQ          |
| 36696 | chrY | 13818633 | . | G | A | 234.76   | PASS          | AC=2;AF=0.029;AN=70;BaseQRankSum=  |
| 36697 | chrY | 13818636 | . | T | C | 237.68   | PASS          | AC=2;AF=0.029;AN=70;BaseQRankSum=  |
| 36698 | chrY | 13818725 | . | G | A | 99.68    | PASS          | AC=2;AF=0.048;AN=42;BaseQRankSum=  |
| 36699 | chrY | 13818750 | . | G | T | 364.85   | PASS          | AC=1;AF=0.014;AN=70;BaseQRankSum=  |
| 36700 | chrY | 13818751 | . | T | C | 635.30   | PASS          | AC=2;AF=0.029;AN=70;BaseQRankSum=  |
| 36701 | chrY | 13818752 | . | G | A | 93.83    | my_snp_filter | AC=2;AF=0.029;AN=70;BaseQ          |
| 36702 | chrY | 13818754 | . | A | T | 368.94   | PASS          | AC=1;AF=0.014;AN=70;BaseQRankSum=  |
| 36703 | chrY | 13818761 | . | A | T | 837.89   | PASS          | AC=7;AF=0.100;AN=70;BaseQRankSum=  |
| 36704 | chrY | 13818762 | . | G | A | 833.37   | PASS          | AC=6;AF=0.086;AN=70;BaseQRankSum=  |
| 36705 | chrY | 13818767 | . | C | G | 818.90   | PASS          | AC=6;AF=0.086;AN=70;BaseQRankSum=  |
| 36706 | chrY | 13818768 | . | G | C | 97.78    | my_snp_filter | AC=2;AF=0.029;AN=70;BaseQ          |
| 36707 | chrY | 13818775 | . | A | G | 810.25   | PASS          | AC=6;AF=0.086;AN=70;BaseQRankSum=  |
| 36708 | chrY | 13818783 | . | G | T | 91.29    | PASS          | AC=2;AF=0.029;AN=70;BaseQRankSum=  |

|       |      |          |   |   |   |         |               |                                    |
|-------|------|----------|---|---|---|---------|---------------|------------------------------------|
| 36709 | chrY | 13818786 | . | C | T | 1392.40 | PASS          | AC=13;AF=0.217;AN=60;BaseQRankSum= |
| 36710 | chrY | 13818788 | . | G | C | 639.27  | PASS          | AC=6;AF=0.086;AN=70;BaseQRankSum=  |
| 36711 | chrY | 13818790 | . | A | G | 627.14  | PASS          | AC=6;AF=0.088;AN=68;BaseQRankSum=  |
| 36712 | chrY | 13818792 | . | G | T | 140.09  | PASS          | AC=2;AF=0.029;AN=68;BaseQRankSum=  |
| 36713 | chrY | 13818795 | . | A | C | 907.24  | PASS          | AC=8;AF=0.118;AN=68;BaseQRankSum=  |
| 36714 | chrY | 13818796 | . | A | T | 56.53   | PASS          | AC=2;AF=0.031;AN=64;BaseQRankSum=  |
| 36715 | chrY | 13818798 | . | G | A | 653.90  | PASS          | AC=6;AF=0.088;AN=68;BaseQRankSum=  |
| 36716 | chrY | 13818803 | . | G | C | 151.20  | PASS          | AC=2;AF=0.029;AN=68;BaseQRankSum=  |
| 36717 | chrY | 13818817 | . | T | G | 402.94  | PASS          | AC=3;AF=0.056;AN=54;BaseQRankSum=  |
| 36718 | chrY | 13818821 | . | A | T | 170.22  | PASS          | AC=2;AF=0.030;AN=66;BaseQRankSum=  |
| 36719 | chrY | 13818824 | . | T | A | 120.11  | PASS          | AC=1;AF=0.017;AN=58;BaseQRankSum=  |
| 36720 | chrY | 13818826 | . | T | A | 69.56   | PASS          | AC=1;AF=0.016;AN=62;BaseQRankSum=  |
| 36721 | chrY | 13819007 | . | G | T | 803.44  | PASS          | AC=6;AF=0.086;AN=70;BaseQRankSum=  |
| 36722 | chrY | 13819090 | . | C | A | 928.76  | PASS          | AC=6;AF=0.091;AN=66;DP=802;FS=0.0  |
| 36723 | chrY | 13819234 | . | C | A | 34.04   | PASS          | AC=1;AF=0.015;AN=68;BaseQRankSum=  |
| 36724 | chrY | 13819241 | . | C | G | 32.64   | PASS          | AC=1;AF=0.015;AN=68;BaseQRankSum=  |
| 36725 | chrY | 13819252 | . | C | G | 34.91   | PASS          | AC=1;AF=0.015;AN=66;BaseQRankSum=  |
| 36726 | chrY | 13819271 | . | C | T | 193.25  | PASS          | AC=2;AF=0.029;AN=68;DP=476;FS=0.0  |
| 36727 | chrY | 13819487 | . | C | G | 43.02   | PASS          | AC=1;AF=0.015;AN=66;BaseQRankSum=  |
| 36728 | chrY | 13819492 | . | T | G | 50      | PASS          | AC=1;AF=0.015;AN=66;BaseQRankSum=  |
| 36729 | chrY | 13819493 | . | T | G | 43.86   | PASS          | AC=1;AF=0.015;AN=66;BaseQRankSum=  |
| 36730 | chrY | 13819497 | . | G | T | 45.27   | PASS          | AC=1;AF=0.014;AN=70;BaseQRankSum=  |
| 36731 | chrY | 13819502 | . | T | G | 50.25   | PASS          | AC=1;AF=0.015;AN=68;BaseQRankSum=  |
| 36732 | chrY | 13819513 | . | T | G | 85.65   | PASS          | AC=1;AF=0.016;AN=64;BaseQRankSum=  |
| 36733 | chrY | 13819612 | . | G | A | 671.82  | PASS          | AC=6;AF=0.088;AN=68;DP=592;FS=0.0  |
| 36734 | chrY | 13819832 | . | A | C | 32.60   | my_snp_filter | AC=1;AF=0.014;AN=70;BaseQ          |
| 36735 | chrY | 13819974 | . | G | A | 209.48  | PASS          | AC=1;AF=0.021;AN=48;BaseQRankSum=  |
| 36736 | chrY | 13820273 | . | C | T | 81.99   | PASS          | AC=1;AF=0.014;AN=70;BaseQRankSum=  |
| 36737 | chrY | 13820280 | . | G | A | 78.82   | PASS          | AC=1;AF=0.014;AN=70;BaseQRankSum=  |
| 36738 | chrY | 13820283 | . | T | G | 79.32   | PASS          | AC=1;AF=0.014;AN=70;BaseQRankSum=  |
| 36739 | chrY | 13820289 | . | G | T | 133.97  | my_snp_filter | AC=3;AF=0.043;AN=70;BaseQ          |
| 36740 | chrY | 13820299 | . | T | G | 80.42   | PASS          | AC=1;AF=0.014;AN=70;BaseQRankSum=  |
| 36741 | chrY | 13820303 | . | T | A | 71.48   | PASS          | AC=1;AF=0.014;AN=70;BaseQRankSum=  |
| 36742 | chrY | 13820311 | . | A | T | 61.44   | PASS          | AC=1;AF=0.015;AN=68;BaseQRankSum=  |
| 36743 | chrY | 13820320 | . | G | A | 65.11   | PASS          | AC=1;AF=0.014;AN=70;BaseQRankSum=  |
| 36744 | chrY | 13820481 | . | A | C | 154.03  | my_snp_filter | AC=4;AF=0.057;AN=70;BaseQ          |
| 36745 | chrY | 13820917 | . | T | A | 475.34  | PASS          | AC=1;AF=0.038;AN=26;BaseQRankSum=  |
| 36746 | chrY | 13820922 | . | A | T | 532.79  | PASS          | AC=1;AF=0.167;AN=6;BaseQRankSum=0  |
| 36747 | chrY | 13820926 | . | A | G | 442.43  | PASS          | AC=1;AF=0.050;AN=20;BaseQRankSum=  |
| 36748 | chrY | 13820929 | . | G | T | 401.02  | PASS          | AC=1;AF=0.063;AN=16;BaseQRankSum=  |
| 36749 | chrY | 13820932 | . | T | A | 442.73  | PASS          | AC=1;AF=0.045;AN=22;BaseQRankSum=  |
| 36750 | chrY | 13820958 | . | G | A | 942.62  | PASS          | AC=5;AF=0.132;AN=38;BaseQRankSum=  |
| 36751 | chrY | 13820997 | . | T | A | 96.51   | PASS          | AC=1;AF=0.026;AN=38;BaseQRankSum=  |
| 36752 | chrY | 13820999 | . | C | A | 195.15  | PASS          | AC=1;AF=0.050;AN=20;BaseQRankSum=  |
| 36753 | chrY | 13821231 | . | C | T | 84.28   | PASS          | AC=1;AF=0.015;AN=68;BaseQRankSum=  |
| 36754 | chrY | 13822123 | . | A | G | 42.41   | PASS          | AC=1;AF=0.036;AN=28;BaseQRankSum=  |
| 36755 | chrY | 13822152 | . | G | C | 118.56  | PASS          | AC=2;AF=0.043;AN=46;BaseQRankSum=  |
| 36756 | chrY | 13822155 | . | A | C | 109.97  | PASS          | AC=2;AF=0.050;AN=40;BaseQRankSum=  |
| 36757 | chrY | 13822157 | . | T | G | 66.89   | PASS          | AC=2;AF=0.048;AN=42;BaseQRankSum=  |
| 36758 | chrY | 13822158 | . | T | G | 68.91   | PASS          | AC=2;AF=0.053;AN=38;BaseQRankSum=  |
| 36759 | chrY | 13822196 | . | T | C | 134.06  | PASS          | AC=2;AF=0.042;AN=48;BaseQRankSum=  |
| 36760 | chrY | 13822231 | . | A | T | 89.10   | PASS          | AC=1;AF=0.021;AN=48;BaseQRankSum=  |
| 36761 | chrY | 13822237 | . | T | G | 113.08  | PASS          | AC=1;AF=0.019;AN=52;BaseQRankSum=  |
| 36762 | chrY | 13822256 | . | A | T | 162.32  | PASS          | AC=2;AF=0.038;AN=52;BaseQRankSum=  |
| 36763 | chrY | 13822263 | . | T | G | 134.60  | PASS          | AC=1;AF=0.023;AN=44;BaseQRankSum=  |
| 36764 | chrY | 13822266 | . | A | T | 136.39  | PASS          | AC=1;AF=0.023;AN=44;BaseQRankSum=  |
| 36765 | chrY | 13822287 | . | C | T | 122.42  | PASS          | AC=1;AF=0.021;AN=48;BaseQRankSum=  |
| 36766 | chrY | 13822292 | . | A | G | 204.35  | PASS          | AC=2;AF=0.038;AN=52;BaseQRankSum=  |
| 36767 | chrY | 13822356 | . | A | T | 1717.97 | PASS          | AC=12;AF=0.182;AN=66;BaseQRankSum= |
| 36768 | chrY | 13822383 | . | T | G | 2158.55 | PASS          | AC=7;AF=0.121;AN=58;BaseQRankSum=  |
| 36769 | chrY | 13822392 | . | C | A | 2297.66 | PASS          | AC=7;AF=0.100;AN=70;BaseQRankSum=  |
| 36770 | chrY | 13822403 | . | G | A | 2243.29 | PASS          | AC=7;AF=0.100;AN=70;BaseQRankSum=  |
| 36771 | chrY | 13822406 | . | T | C | 2156.20 | PASS          | AC=7;AF=0.100;AN=70;BaseQRankSum=  |
| 36772 | chrY | 13822407 | . | C | T | 151.85  | PASS          | AC=4;AF=0.057;AN=70;BaseQRankSum=  |
| 36773 | chrY | 13822416 | . | T | A | 121.71  | PASS          | AC=4;AF=0.057;AN=70;BaseQRankSum=  |
| 36774 | chrY | 13822418 | . | T | G | 142.89  | PASS          | AC=4;AF=0.057;AN=70;BaseQRankSum=  |
| 36775 | chrY | 13822423 | . | G | C | 123.84  | PASS          | AC=4;AF=0.057;AN=70;BaseQRankSum=  |
| 36776 | chrY | 13822430 | . | A | T | 2115.08 | PASS          | AC=6;AF=0.086;AN=70;BaseQRankSum=  |
| 36777 | chrY | 13822435 | . | C | T | 2241.21 | PASS          | AC=6;AF=0.086;AN=70;BaseQRankSum=  |
| 36778 | chrY | 13822439 | . | G | A | 2294.58 | PASS          | AC=9;AF=0.150;AN=60;BaseQRankSum=  |
| 36779 | chrY | 13822446 | . | C | T | 2349.73 | PASS          | AC=6;AF=0.091;AN=66;BaseQRankSum=  |
| 36780 | chrY | 13822448 | . | G | T | 2165.36 | PASS          | AC=6;AF=0.086;AN=70;BaseQRankSum=  |
| 36781 | chrY | 13822452 | . | C | G | 2113.91 | PASS          | AC=5;AF=0.078;AN=64;BaseQRankSum=  |
| 36782 | chrY | 13822453 | . | A | G | 2128.04 | PASS          | AC=5;AF=0.078;AN=64;BaseQRankSum=  |
| 36783 | chrY | 13822459 | . | G | A | 2139.09 | PASS          | AC=5;AF=0.081;AN=62;BaseQRankSum=  |
| 36784 | chrY | 13822461 | . | T | C | 2125.86 | PASS          | AC=5;AF=0.071;AN=70;BaseQRankSum=  |

|       |      |          |   |   |     |          |               |                                   |
|-------|------|----------|---|---|-----|----------|---------------|-----------------------------------|
| 36785 | chrY | 13822471 | . | T | A   | 2048.03  | PASS          | AC=5;AF=0.071;AN=70;BaseQRankSum= |
| 36786 | chrY | 13822475 | . | T | A   | 1972.91  | PASS          | AC=5;AF=0.076;AN=66;BaseQRankSum= |
| 36787 | chrY | 13822483 | . | A | G   | 1794.12  | PASS          | AC=5;AF=0.071;AN=70;BaseQRankSum= |
| 36788 | chrY | 13822493 | . | C | G   | 1447.60  | PASS          | AC=5;AF=0.076;AN=66;BaseQRankSum= |
| 36789 | chrY | 13822501 | . | T | C   | 1278.28  | PASS          | AC=5;AF=0.071;AN=70;BaseQRankSum= |
| 36790 | chrY | 13822503 | . | A | G   | 1198.12  | PASS          | AC=5;AF=0.074;AN=68;BaseQRankSum= |
| 36791 | chrY | 13822516 | . | T | A   | 996.71   | PASS          | AC=5;AF=0.071;AN=70;BaseQRankSum= |
| 36792 | chrY | 13822518 | . | G | A   | 951.48   | PASS          | AC=5;AF=0.071;AN=70;BaseQRankSum= |
| 36793 | chrY | 13822526 | . | G | A   | 857.69   | PASS          | AC=4;AF=0.057;AN=70;BaseQRankSum= |
| 36794 | chrY | 13822532 | . | T | A   | 787      | PASS          | AC=4;AF=0.059;AN=68;BaseQRankSum= |
| 36795 | chrY | 13822533 | . | A | C   | 782.43   | PASS          | AC=4;AF=0.059;AN=68;BaseQRankSum= |
| 36796 | chrY | 13822541 | . | T | C   | 677.23   | PASS          | AC=4;AF=0.057;AN=70;BaseQRankSum= |
| 36797 | chrY | 13822556 | . | A | T   | 496.84   | PASS          | AC=3;AF=0.045;AN=66;BaseQRankSum= |
| 36798 | chrY | 13822557 | . | T | G   | 412.95   | PASS          | AC=3;AF=0.045;AN=66;BaseQRankSum= |
| 36799 | chrY | 13822571 | . | G | C   | 290.62   | PASS          | AC=2;AF=0.030;AN=66;BaseQRankSum= |
| 36800 | chrY | 13822582 | . | T | C   | 290.43   | PASS          | AC=2;AF=0.029;AN=68;BaseQRankSum= |
| 36801 | chrY | 13822594 | . | C | A   | 130.94   | PASS          | AC=2;AF=0.030;AN=66;BaseQRankSum= |
| 36802 | chrY | 13822631 | . | A | T   | 81.36    | PASS          | AC=1;AF=0.014;AN=70;BaseQRankSum= |
| 36803 | chrY | 13822632 | . | G | T   | 35.77    | PASS          | AC=1;AF=0.014;AN=70;BaseQRankSum= |
| 36804 | chrY | 13822638 | . | G | C   | 504.70   | PASS          | AC=4;AF=0.057;AN=70;BaseQRankSum= |
| 36805 | chrY | 13822640 | . | T | C   | 51.16    | PASS          | AC=2;AF=0.029;AN=70;BaseQRankSum= |
| 36806 | chrY | 13822642 | . | C | T   | 502.98   | PASS          | AC=4;AF=0.057;AN=70;BaseQRankSum= |
| 36807 | chrY | 13822652 | . | G | C   | 141.86   | my_snp_filter | AC=4;AF=0.067;AN=60;BaseQ         |
| 36808 | chrY | 13822655 | . | A | C   | 328.21   | PASS          | AC=2;AF=0.029;AN=70;BaseQRankSum= |
| 36809 | chrY | 13822667 | . | G | T   | 30.04    | PASS          | AC=1;AF=0.016;AN=62;BaseQRankSum= |
| 36810 | chrY | 13822668 | . | T | G   | 31.92    | PASS          | AC=1;AF=0.017;AN=60;BaseQRankSum= |
| 36811 | chrY | 13822833 | . | T | G   | 11482.99 | PASS          | AC=68;AF=1.00;AN=68;DP=39         |
| 36812 | chrY | 13822877 | . | A | G   | 42.84    | my_snp_filter | AC=1;AF=0.015;AN=68;BaseQ         |
| 36813 | chrY | 13822908 | . | C | T   | 5429.72  | PASS          | AC=46;AF=0.793;AN=58;DP=289;FS=8. |
| 36814 | chrY | 13822989 | . | A | C   | 62.29    | PASS          | AC=1;AF=0.014;AN=70;BaseQRankSum= |
| 36815 | chrY | 13823244 | . | G | A   | 452.82   | PASS          | AC=2;AF=0.030;AN=66;BaseQRankSum= |
| 36816 | chrY | 13823249 | . | G | A   | 424.36   | PASS          | AC=2;AF=0.030;AN=66;BaseQRankSum= |
| 36817 | chrY | 13823264 | . | G | A   | 428.61   | PASS          | AC=2;AF=0.030;AN=66;BaseQRankSum= |
| 36818 | chrY | 13823270 | . | A | C   | 333.56   | PASS          | AC=2;AF=0.029;AN=68;BaseQRankSum= |
| 36819 | chrY | 13823285 | . | G | A   | 249.51   | PASS          | AC=1;AF=0.015;AN=68;BaseQRankSum= |
| 36820 | chrY | 13823725 | . | T | C   | 36       | my_snp_filter | AC=3;AF=0.043;AN=70;BaseQ         |
| 36821 | chrY | 13823886 | . | C | T   | 136.88   | PASS          | AC=2;AF=0.029;AN=70;BaseQRankSum= |
| 36822 | chrY | 13823896 | . | A | G   | 108.66   | PASS          | AC=2;AF=0.029;AN=70;BaseQRankSum= |
| 36823 | chrY | 13823906 | . | G | T   | 118.46   | PASS          | AC=2;AF=0.029;AN=70;BaseQRankSum= |
| 36824 | chrY | 13823919 | . | T | A   | 129.12   | PASS          | AC=2;AF=0.029;AN=70;BaseQRankSum= |
| 36825 | chrY | 13823925 | . | A | T   | 94.46    | my_snp_filter | AC=3;AF=0.043;AN=70;BaseQ         |
| 36826 | chrY | 13823961 | . | C | G   | 44.18    | my_snp_filter | AC=2;AF=0.030;AN=66;BaseQ         |
| 36827 | chrY | 13824166 | . | C | T   | 47.96    | my_snp_filter | AC=3;AF=0.044;AN=68;BaseQ         |
| 36828 | chrY | 13824171 | . | T | A   | 58.62    | my_snp_filter | AC=3;AF=0.045;AN=66;BaseQ         |
| 36829 | chrY | 13824200 | . | A | T   | 390.96   | PASS          | AC=3;AF=0.056;AN=54;BaseQRankSum= |
| 36830 | chrY | 13824201 | . | A | G   | 390.69   | PASS          | AC=3;AF=0.056;AN=54;BaseQRankSum= |
| 36831 | chrY | 13824204 | . | G | A   | 381.67   | PASS          | AC=4;AF=0.074;AN=54;BaseQRankSum= |
| 36832 | chrY | 13824215 | . | A | T   | 501.22   | PASS          | AC=6;AF=0.107;AN=56;BaseQRankSum= |
| 36833 | chrY | 13824228 | . | A | T   | 315.27   | PASS          | AC=3;AF=0.044;AN=68;BaseQRankSum= |
| 36834 | chrY | 13824235 | . | T | A   | 401.76   | PASS          | AC=3;AF=0.044;AN=68;BaseQRankSum= |
| 36835 | chrY | 13824237 | . | T | G   | 767.36   | PASS          | AC=4;AF=0.074;AN=54;BaseQRankSum= |
| 36836 | chrY | 13824239 | . | T | A,C | 682.09   | PASS          | AC=3,1;AF=0.048,0.016;AN=62;BaseQ |
| 36837 | chrY | 13824241 | . | C | A   | 230.82   | PASS          | AC=1;AF=0.015;AN=66;BaseQRankSum= |
| 36838 | chrY | 13824251 | . | G | A   | 495.53   | PASS          | AC=3;AF=0.043;AN=70;BaseQRankSum= |
| 36839 | chrY | 13824256 | . | T | C   | 756.15   | PASS          | AC=4;AF=0.061;AN=66;BaseQRankSum= |
| 36840 | chrY | 13824257 | . | G | C,A | 671.57   | PASS          | AC=3,1;AF=0.045,0.015;AN=66;BaseQ |
| 36841 | chrY | 13824276 | . | A | C   | 615.68   | PASS          | AC=4;AF=0.057;AN=70;BaseQRankSum= |
| 36842 | chrY | 13824290 | . | A | T   | 833.73   | PASS          | AC=4;AF=0.063;AN=64;BaseQRankSum= |
| 36843 | chrY | 13824296 | . | T | G   | 945.92   | PASS          | AC=4;AF=0.063;AN=64;BaseQRankSum= |
| 36844 | chrY | 13824301 | . | G | A   | 983.72   | PASS          | AC=4;AF=0.065;AN=62;BaseQRankSum= |
| 36845 | chrY | 13824303 | . | A | T   | 982.85   | PASS          | AC=4;AF=0.061;AN=66;BaseQRankSum= |
| 36846 | chrY | 13824310 | . | T | A   | 964.77   | PASS          | AC=4;AF=0.057;AN=70;BaseQRankSum= |
| 36847 | chrY | 13824325 | . | T | A   | 1137.98  | PASS          | AC=4;AF=0.059;AN=68;BaseQRankSum= |
| 36848 | chrY | 13824331 | . | C | T   | 1165.25  | PASS          | AC=4;AF=0.057;AN=70;BaseQRankSum= |
| 36849 | chrY | 13824359 | . | A | C   | 894.62   | PASS          | AC=4;AF=0.067;AN=60;BaseQRankSum= |
| 36850 | chrY | 13824360 | . | G | T   | 937.07   | PASS          | AC=4;AF=0.067;AN=60;BaseQRankSum= |
| 36851 | chrY | 13824367 | . | C | A   | 405.37   | PASS          | AC=2;AF=0.029;AN=68;BaseQRankSum= |
| 36852 | chrY | 13824370 | . | T | C   | 320.44   | PASS          | AC=3;AF=0.043;AN=70;BaseQRankSum= |
| 36853 | chrY | 13824374 | . | A | C   | 1041.21  | PASS          | AC=5;AF=0.083;AN=60;BaseQRankSum= |
| 36854 | chrY | 13824377 | . | G | A   | 314.82   | PASS          | AC=3;AF=0.043;AN=70;BaseQRankSum= |
| 36855 | chrY | 13824380 | . | C | T   | 1126.39  | PASS          | AC=5;AF=0.083;AN=60;BaseQRankSum= |
| 36856 | chrY | 13824381 | . | A | G   | 1063.63  | PASS          | AC=5;AF=0.083;AN=60;BaseQRankSum= |
| 36857 | chrY | 13824391 | . | T | G   | 458.90   | PASS          | AC=3;AF=0.050;AN=60;BaseQRankSum= |
| 36858 | chrY | 13824395 | . | T | C,A | 751.12   | PASS          | AC=3,2;AF=0.044,0.029;AN=68;BaseQ |
| 36859 | chrY | 13824396 | . | G | A   | 493.75   | PASS          | AC=5;AF=0.074;AN=68;BaseQRankSum= |
| 36860 | chrY | 13824405 | . | T | A   | 419.07   | PASS          | AC=4;AF=0.069;AN=58;BaseQRankSum= |

|       |      |          |   |   |     |          |               |                                    |
|-------|------|----------|---|---|-----|----------|---------------|------------------------------------|
| 36861 | chrY | 13824406 | . | A | C   | 1505.93  | PASS          | AC=5;AF=0.086;AN=58;BaseQRankSum=  |
| 36862 | chrY | 13824411 | . | G | A   | 419.75   | PASS          | AC=4;AF=0.059;AN=68;BaseQRankSum=  |
| 36863 | chrY | 13824421 | . | C | A   | 1571.81  | PASS          | AC=5;AF=0.086;AN=58;BaseQRankSum=  |
| 36864 | chrY | 13824447 | . | G | A,C | 1739.16  | PASS          | AC=10,3;AF=0.143,0.043;AN=70;Base  |
| 36865 | chrY | 13824450 | . | A | T   | 2840.57  | PASS          | AC=13;AF=0.197;AN=66;BaseQRankSum= |
| 36866 | chrY | 13824451 | . | G | A   | 138.78   | PASS          | AC=1;AF=0.014;AN=70;BaseQRankSum=  |
| 36867 | chrY | 13824460 | . | T | C   | 1120.64  | PASS          | AC=7;AF=0.103;AN=68;BaseQRankSum=  |
| 36868 | chrY | 13824466 | . | G | T   | 1518.78  | PASS          | AC=10;AF=0.143;AN=70;BaseQRankSum= |
| 36869 | chrY | 13824470 | . | A | T   | 3393.65  | PASS          | AC=12;AF=0.182;AN=66;BaseQRankSum= |
| 36870 | chrY | 13824472 | . | G | T   | 1713.57  | PASS          | AC=10;AF=0.143;AN=70;BaseQRankSum= |
| 36871 | chrY | 13824477 | . | G | A   | 390.44   | PASS          | AC=2;AF=0.029;AN=70;BaseQRankSum=  |
| 36872 | chrY | 13824482 | . | C | G   | 368.77   | PASS          | AC=2;AF=0.029;AN=70;BaseQRankSum=  |
| 36873 | chrY | 13824491 | . | A | G   | 4118.28  | PASS          | AC=11;AF=0.196;AN=56;BaseQRankSum= |
| 36874 | chrY | 13824495 | . | T | A,C | 2598.41  | PASS          | AC=9,2;AF=0.136,0.030;AN=66;BaseQ  |
| 36875 | chrY | 13824502 | . | A | T   | 2452.15  | PASS          | AC=10;AF=0.147;AN=68;BaseQRankSum= |
| 36876 | chrY | 13824506 | . | T | C   | 4890.90  | PASS          | AC=11;AF=0.190;AN=58;BaseQRankSum= |
| 36877 | chrY | 13824521 | . | C | A   | 2578.59  | PASS          | AC=10;AF=0.172;AN=58;BaseQRankSum= |
| 36878 | chrY | 13824522 | . | A | G   | 5825.40  | PASS          | AC=11;AF=0.190;AN=58;BaseQRankSum= |
| 36879 | chrY | 13824531 | . | T | G   | 2604.77  | PASS          | AC=10;AF=0.172;AN=58;BaseQRankSum= |
| 36880 | chrY | 13824555 | . | T | G   | 2261.14  | PASS          | AC=10;AF=0.147;AN=68;BaseQRankSum= |
| 36881 | chrY | 13824556 | . | G | T   | 2258.08  | PASS          | AC=10;AF=0.147;AN=68;BaseQRankSum= |
| 36882 | chrY | 13824570 | . | T | C   | 3085.62  | PASS          | AC=7;AF=0.100;AN=70;BaseQRankSum=  |
| 36883 | chrY | 13824577 | . | G | T   | 3151.60  | PASS          | AC=7;AF=0.103;AN=68;BaseQRankSum=  |
| 36884 | chrY | 13824581 | . | A | T   | 1777.33  | PASS          | AC=9;AF=0.129;AN=70;BaseQRankSum=  |
| 36885 | chrY | 13824586 | . | G | A   | 1358.32  | PASS          | AC=8;AF=0.114;AN=70;BaseQRankSum=  |
| 36886 | chrY | 13824600 | . | A | C   | 630.46   | PASS          | AC=4;AF=0.057;AN=70;BaseQRankSum=  |
| 36887 | chrY | 13824604 | . | T | A   | 5428.86  | PASS          | AC=14;AF=0.233;AN=60;BaseQRankSum= |
| 36888 | chrY | 13824606 | . | T | G   | 5422.71  | PASS          | AC=14;AF=0.233;AN=60;BaseQRankSum= |
| 36889 | chrY | 13824612 | . | A | T   | 478.84   | PASS          | AC=4;AF=0.057;AN=70;BaseQRankSum=  |
| 36890 | chrY | 13824615 | . | A | G   | 4487.86  | PASS          | AC=14;AF=0.233;AN=60;BaseQRankSum= |
| 36891 | chrY | 13824618 | . | T | A   | 5250.19  | PASS          | AC=13;AF=0.217;AN=60;BaseQRankSum= |
| 36892 | chrY | 13824619 | . | T | A   | 476.09   | PASS          | AC=4;AF=0.065;AN=62;BaseQRankSum=  |
| 36893 | chrY | 13824630 | . | T | C   | 382.59   | PASS          | AC=4;AF=0.057;AN=70;BaseQRankSum=  |
| 36894 | chrY | 13824635 | . | C | T   | 4285.43  | PASS          | AC=13;AF=0.217;AN=60;BaseQRankSum= |
| 36895 | chrY | 13824642 | . | A | G   | 3467.77  | PASS          | AC=12;AF=0.188;AN=64;BaseQRankSum= |
| 36896 | chrY | 13824657 | . | G | C   | 2437.49  | PASS          | AC=6;AF=0.088;AN=68;BaseQRankSum=  |
| 36897 | chrY | 13824660 | . | T | G   | 64.30    | my_snp_filter | AC=3;AF=0.045;AN=66;BaseQ          |
| 36898 | chrY | 13824665 | . | A | T   | 2237.32  | PASS          | AC=6;AF=0.094;AN=64;BaseQRankSum=  |
| 36899 | chrY | 13824667 | . | A | G   | 2070.72  | PASS          | AC=6;AF=0.094;AN=64;BaseQRankSum=  |
| 36900 | chrY | 13824670 | . | C | T   | 1960.27  | PASS          | AC=6;AF=0.100;AN=60;BaseQRankSum=  |
| 36901 | chrY | 13824672 | . | A | G   | 1608.35  | PASS          | AC=6;AF=0.088;AN=68;BaseQRankSum=  |
| 36902 | chrY | 13824696 | . | G | C   | 345.29   | PASS          | AC=2;AF=0.029;AN=68;BaseQRankSum=  |
| 36903 | chrY | 13824697 | . | G | A   | 345.58   | PASS          | AC=2;AF=0.029;AN=68;BaseQRankSum=  |
| 36904 | chrY | 13824699 | . | T | A   | 334.86   | PASS          | AC=4;AF=0.059;AN=68;BaseQRankSum=  |
| 36905 | chrY | 13824706 | . | T | G   | 94.27    | my_snp_filter | AC=4;AF=0.063;AN=64;BaseQ          |
| 36906 | chrY | 13824908 | . | C | T   | 136.87   | my_snp_filter | AC=5;AF=0.078;AN=64;BaseQ          |
| 36907 | chrY | 13824995 | . | A | T   | 58816.94 | my_snp_filter | AC=5;AF=0.119;AN=                  |
| 36908 | chrY | 13825001 | . | C | A   | 56383.33 | my_snp_filter | AC=4;AF=0.100;AN=                  |
| 36909 | chrY | 13825007 | . | T | G   | 57586.20 | my_snp_filter | AC=5;AF=0.125;AN=                  |
| 36910 | chrY | 13825019 | . | A | G   | 6862.14  | PASS          | AC=36;AF=0.514;AN=70;BaseQRankSum= |
| 36911 | chrY | 13825098 | . | C | G   | 114.98   | PASS          | AC=1;AF=0.019;AN=52;BaseQRankSum=  |
| 36912 | chrY | 13825108 | . | T | A,G | 6492.38  | PASS          | AC=1,1;AF=0.018,0.018;AN=56;BaseQ  |
| 36913 | chrY | 13825126 | . | G | T   | 2535.57  | my_snp_filter | AC=2;AF=0.037;AN=54;BaseQ          |
| 36914 | chrY | 13825130 | . | A | T   | 2196.35  | PASS          | AC=1;AF=0.019;AN=54;BaseQRankSum=  |
| 36915 | chrY | 13825135 | . | C | A   | 3399.89  | PASS          | AC=1;AF=0.019;AN=54;BaseQRankSum=  |
| 36916 | chrY | 13825138 | . | G | A   | 1735.87  | PASS          | AC=1;AF=0.019;AN=54;BaseQRankSum=  |
| 36917 | chrY | 13825142 | . | G | C   | 1423.87  | PASS          | AC=1;AF=0.019;AN=54;BaseQRankSum=  |
| 36918 | chrY | 13825143 | . | C | G   | 2102.99  | PASS          | AC=1;AF=0.019;AN=54;BaseQRankSum=  |
| 36919 | chrY | 13825145 | . | A | G   | 323.44   | PASS          | AC=1;AF=0.014;AN=70;BaseQRankSum=  |
| 36920 | chrY | 13825157 | . | G | A   | 425.57   | PASS          | AC=1;AF=0.018;AN=56;BaseQRankSum=  |
| 36921 | chrY | 13825161 | . | C | T   | 145.98   | PASS          | AC=1;AF=0.019;AN=52;BaseQRankSum=  |
| 36922 | chrY | 13825162 | . | T | A   | 131.09   | PASS          | AC=1;AF=0.019;AN=54;BaseQRankSum=  |
| 36923 | chrY | 13825184 | . | A | T   | 234.13   | PASS          | AC=1;AF=0.016;AN=64;BaseQRankSum=  |
| 36924 | chrY | 13825186 | . | A | T   | 233.95   | PASS          | AC=1;AF=0.019;AN=52;BaseQRankSum=  |
| 36925 | chrY | 13825228 | . | G | C   | 83.25    | PASS          | AC=1;AF=0.015;AN=68;BaseQRankSum=  |
| 36926 | chrY | 13825466 | . | T | G   | 32.36    | my_snp_filter | AC=2;AF=0.029;AN=70;BaseQ          |
| 36927 | chrY | 13825470 | . | C | A   | 627.89   | PASS          | AC=4;AF=0.057;AN=70;BaseQRankSum=  |
| 36928 | chrY | 13825471 | . | T | A   | 618.61   | PASS          | AC=4;AF=0.057;AN=70;BaseQRankSum=  |
| 36929 | chrY | 13825478 | . | G | A   | 40.12    | my_snp_filter | AC=2;AF=0.029;AN=70;BaseQ          |
| 36930 | chrY | 13825487 | . | T | C   | 861.44   | PASS          | AC=5;AF=0.083;AN=60;BaseQRankSum=  |
| 36931 | chrY | 13825488 | . | G | A   | 695.36   | PASS          | AC=5;AF=0.078;AN=64;BaseQRankSum=  |
| 36932 | chrY | 13825493 | . | A | T   | 777.53   | PASS          | AC=5;AF=0.071;AN=70;BaseQRankSum=  |
| 36933 | chrY | 13825498 | . | G | A   | 833.94   | PASS          | AC=5;AF=0.071;AN=70;BaseQRankSum=  |
| 36934 | chrY | 13825500 | . | C | T   | 1011.67  | PASS          | AC=6;AF=0.086;AN=70;BaseQRankSum=  |
| 36935 | chrY | 13825502 | . | C | G   | 872.41   | PASS          | AC=6;AF=0.086;AN=70;BaseQRankSum=  |
| 36936 | chrY | 13825508 | . | A | G   | 1192.27  | PASS          | AC=6;AF=0.097;AN=62;BaseQRankSum=  |

|       |      |          |   |   |     |          |               |                                    |
|-------|------|----------|---|---|-----|----------|---------------|------------------------------------|
| 36937 | chrY | 13825518 | . | G | A   | 864.18   | PASS          | AC=6;AF=0.088;AN=68;BaseQRankSum=  |
| 36938 | chrY | 13825521 | . | T | C   | 62.23    | PASS          | AC=1;AF=0.015;AN=68;BaseQRankSum=  |
| 36939 | chrY | 13825531 | . | C | T   | 1129.27  | PASS          | AC=6;AF=0.107;AN=56;BaseQRankSum=  |
| 36940 | chrY | 13825533 | . | G | A   | 36.25    | my_snp_filter | AC=1;AF=0.018;AN=56;BaseQ          |
| 36941 | chrY | 13825535 | . | A | G   | 967.19   | PASS          | AC=6;AF=0.086;AN=70;BaseQRankSum=  |
| 36942 | chrY | 13825542 | . | G | A   | 1035.12  | PASS          | AC=6;AF=0.086;AN=70;BaseQRankSum=  |
| 36943 | chrY | 13825544 | . | C | A   | 1284.45  | PASS          | AC=6;AF=0.115;AN=52;BaseQRankSum=  |
| 36944 | chrY | 13825547 | . | T | A   | 129.13   | PASS          | AC=1;AF=0.020;AN=50;BaseQRankSum=  |
| 36945 | chrY | 13825551 | . | T | C   | 114.25   | PASS          | AC=1;AF=0.014;AN=70;BaseQRankSum=  |
| 36946 | chrY | 13825566 | . | T | A   | 1135.53  | PASS          | AC=6;AF=0.086;AN=70;BaseQRankSum=  |
| 36947 | chrY | 13825568 | . | G | A   | 1246.34  | PASS          | AC=6;AF=0.086;AN=70;BaseQRankSum=  |
| 36948 | chrY | 13825577 | . | T | C,A | 966.19   | PASS          | AC=14,1;AF=0.212,0.015;AN=66;Base  |
| 36949 | chrY | 13825586 | . | C | T,A | 914.60   | PASS          | AC=4,4;AF=0.063,0.063;AN=64;BaseQ  |
| 36950 | chrY | 13825588 | . | G | C   | 447.66   | PASS          | AC=4;AF=0.057;AN=70;BaseQRankSum=  |
| 36951 | chrY | 13825590 | . | C | A   | 409.38   | PASS          | AC=3;AF=0.043;AN=70;BaseQRankSum=  |
| 36952 | chrY | 13825591 | . | C | T   | 412.41   | PASS          | AC=4;AF=0.057;AN=70;BaseQRankSum=  |
| 36953 | chrY | 13825592 | . | G | A   | 94.64    | PASS          | AC=3;AF=0.043;AN=70;BaseQRankSum=  |
| 36954 | chrY | 13825603 | . | G | A   | 437.92   | PASS          | AC=3;AF=0.043;AN=70;BaseQRankSum=  |
| 36955 | chrY | 13825605 | . | C | A   | 439.94   | PASS          | AC=3;AF=0.043;AN=70;BaseQRankSum=  |
| 36956 | chrY | 13825606 | . | T | A   | 439.68   | PASS          | AC=3;AF=0.043;AN=70;BaseQRankSum=  |
| 36957 | chrY | 13825611 | . | T | G   | 346.03   | PASS          | AC=3;AF=0.043;AN=70;BaseQRankSum=  |
| 36958 | chrY | 13825613 | . | G | A   | 346.07   | PASS          | AC=3;AF=0.043;AN=70;BaseQRankSum=  |
| 36959 | chrY | 13825616 | . | C | T   | 10963.01 | PASS          | AC=25;AF=0.368;AN=68;Base          |
| 36960 | chrY | 13825617 | . | G | A   | 53.33    | my_snp_filter | AC=4;AF=0.059;AN=68;BaseQ          |
| 36961 | chrY | 13825620 | . | T | C   | 11553.86 | PASS          | AC=25;AF=0.368;AN=68;Base          |
| 36962 | chrY | 13825622 | . | T | C   | 5873.41  | PASS          | AC=18;AF=0.265;AN=68;BaseQRankSum= |
| 36963 | chrY | 13825625 | . | A | C   | 119.15   | my_snp_filter | AC=4;AF=0.057;AN=70;BaseQ          |
| 36964 | chrY | 13825626 | . | A | T   | 12443.39 | PASS          | AC=26;AF=0.394;AN=66;Base          |
| 36965 | chrY | 13825628 | . | T | C   | 221.68   | PASS          | AC=3;AF=0.043;AN=70;BaseQRankSum=  |
| 36966 | chrY | 13825632 | . | T | G   | 12879.14 | PASS          | AC=26;AF=0.382;AN=68;Base          |
| 36967 | chrY | 13825634 | . | T | A   | 12977.15 | PASS          | AC=26;AF=0.382;AN=68;Base          |
| 36968 | chrY | 13825635 | . | T | C   | 66.97    | PASS          | AC=2;AF=0.029;AN=68;BaseQRankSum=  |
| 36969 | chrY | 13825639 | . | A | T   | 164.39   | my_snp_filter | AC=4;AF=0.057;AN=70;BaseQ          |
| 36970 | chrY | 13825641 | . | T | A   | 6700.76  | PASS          | AC=18;AF=0.265;AN=68;BaseQRankSum= |
| 36971 | chrY | 13825642 | . | T | G   | 74.09    | PASS          | AC=2;AF=0.029;AN=68;BaseQRankSum=  |
| 36972 | chrY | 13825647 | . | A | T   | 72.45    | PASS          | AC=2;AF=0.029;AN=68;BaseQRankSum=  |
| 36973 | chrY | 13825652 | . | C | T   | 7055.72  | PASS          | AC=18;AF=0.265;AN=68;BaseQRankSum= |
| 36974 | chrY | 13825657 | . | G | A   | 73.85    | PASS          | AC=1;AF=0.014;AN=70;BaseQRankSum=  |
| 36975 | chrY | 13825661 | . | T | A   | 82.75    | PASS          | AC=1;AF=0.014;AN=70;BaseQRankSum=  |
| 36976 | chrY | 13825663 | . | A | T,G | 10664.74 | PASS          | AC=13,17;AF=0.191,0.250;A          |
| 36977 | chrY | 13825668 | . | G | A   | 5496.75  | PASS          | AC=22;AF=0.314;AN=70;BaseQRankSum= |
| 36978 | chrY | 13825696 | . | T | A   | 1012.46  | PASS          | AC=7;AF=0.106;AN=66;BaseQRankSum=  |
| 36979 | chrY | 13825711 | . | A | T   | 815.23   | PASS          | AC=6;AF=0.094;AN=64;BaseQRankSum=  |
| 36980 | chrY | 13825712 | . | G | T   | 816.32   | PASS          | AC=5;AF=0.076;AN=66;BaseQRankSum=  |
| 36981 | chrY | 13825716 | . | T | C   | 753.53   | PASS          | AC=4;AF=0.057;AN=70;BaseQRankSum=  |
| 36982 | chrY | 13825728 | . | C | T   | 498.83   | PASS          | AC=2;AF=0.029;AN=70;BaseQRankSum=  |
| 36983 | chrY | 13825731 | . | G | C   | 1672.36  | PASS          | AC=7;AF=0.135;AN=52;BaseQRankSum=  |
| 36984 | chrY | 13825732 | . | G | A   | 477.31   | PASS          | AC=2;AF=0.037;AN=54;BaseQRankSum=  |
| 36985 | chrY | 13825743 | . | A | G   | 1372.84  | PASS          | AC=5;AF=0.104;AN=48;BaseQRankSum=  |
| 36986 | chrY | 13825756 | . | C | T   | 1238.04  | PASS          | AC=5;AF=0.104;AN=48;BaseQRankSum=  |
| 36987 | chrY | 13825767 | . | C | A   | 351.17   | PASS          | AC=1;AF=0.014;AN=70;BaseQRankSum=  |
| 36988 | chrY | 13825782 | . | G | A   | 225.32   | PASS          | AC=1;AF=0.018;AN=56;BaseQRankSum=  |
| 36989 | chrY | 13825786 | . | G | C   | 281.77   | PASS          | AC=3;AF=0.044;AN=68;BaseQRankSum=  |
| 36990 | chrY | 13825793 | . | C | A,* | 553.86   | PASS          | AC=1,3;AF=0.021,0.063;AN=48;BaseQ  |
| 36991 | chrY | 13825801 | . | G | T   | 133.55   | PASS          | AC=1;AF=0.015;AN=68;BaseQRankSum=  |
| 36992 | chrY | 13825806 | . | C | A   | 145.37   | PASS          | AC=2;AF=0.042;AN=48;BaseQRankSum=  |
| 36993 | chrY | 13825810 | . | T | A   | 123.63   | PASS          | AC=2;AF=0.036;AN=56;BaseQRankSum=  |
| 36994 | chrY | 13825812 | . | C | G   | 129.21   | PASS          | AC=3;AF=0.058;AN=52;BaseQRankSum=  |
| 36995 | chrY | 13825957 | . | C | G   | 67.62    | PASS          | AC=2;AF=0.056;AN=36;BaseQRankSum=  |
| 36996 | chrY | 13825963 | . | A | T   | 63.88    | PASS          | AC=1;AF=0.015;AN=68;BaseQRankSum=  |
| 36997 | chrY | 13825965 | . | A | T   | 67.08    | PASS          | AC=1;AF=0.015;AN=68;BaseQRankSum=  |
| 36998 | chrY | 13825976 | . | T | A   | 57.85    | PASS          | AC=1;AF=0.014;AN=70;BaseQRankSum=  |
| 36999 | chrY | 13826012 | . | T | A   | 116.13   | PASS          | AC=3;AF=0.054;AN=56;BaseQRankSum=  |
| 37000 | chrY | 13826015 | . | T | A   | 115.02   | PASS          | AC=3;AF=0.044;AN=68;BaseQRankSum=  |
| 37001 | chrY | 13826021 | . | A | G   | 164.28   | PASS          | AC=3;AF=0.052;AN=58;BaseQRankSum=  |
| 37002 | chrY | 13826036 | . | A | G   | 109.56   | PASS          | AC=3;AF=0.044;AN=68;BaseQRankSum=  |
| 37003 | chrY | 13826044 | . | C | A   | 53.81    | PASS          | AC=2;AF=0.030;AN=66;BaseQRankSum=  |
| 37004 | chrY | 13826077 | . | C | A   | 33.40    | PASS          | AC=1;AF=0.020;AN=50;BaseQRankSum=  |
| 37005 | chrY | 13826087 | . | A | G   | 36.11    | PASS          | AC=1;AF=0.020;AN=50;BaseQRankSum=  |
| 37006 | chrY | 13826100 | . | T | A   | 930.14   | PASS          | AC=6;AF=0.086;AN=70;BaseQRankSum=  |
| 37007 | chrY | 13826400 | . | A | G   | 68.18    | my_snp_filter | AC=3;AF=0.044;AN=68;BaseQ          |
| 37008 | chrY | 13826408 | . | T | A   | 85.73    | PASS          | AC=1;AF=0.014;AN=70;BaseQRankSum=  |
| 37009 | chrY | 13826421 | . | T | G   | 40.68    | PASS          | AC=1;AF=0.014;AN=70;BaseQRankSum=  |
| 37010 | chrY | 13826423 | . | C | T   | 37.86    | PASS          | AC=1;AF=0.014;AN=70;BaseQRankSum=  |
| 37011 | chrY | 13826426 | . | G | A   | 32.49    | PASS          | AC=1;AF=0.014;AN=70;BaseQRankSum=  |
| 37012 | chrY | 13826436 | . | A | G   | 39.11    | PASS          | AC=1;AF=0.015;AN=68;BaseQRankSum=  |

|       |      |          |   |     |     |         |               |                                   |
|-------|------|----------|---|-----|-----|---------|---------------|-----------------------------------|
| 37013 | chrY | 13826545 | . | T   | G   | 40.07   | PASS          | AC=1;AF=0.016;AN=62;BaseQRankSum= |
| 37014 | chrY | 13826552 | . | G   | A   | 40.73   | PASS          | AC=1;AF=0.016;AN=62;BaseQRankSum= |
| 37015 | chrY | 13826558 | . | A   | T   | 40.58   | PASS          | AC=1;AF=0.015;AN=66;BaseQRankSum= |
| 37016 | chrY | 13826636 | . | A   | T   | 121.05  | PASS          | AC=2;AF=0.030;AN=66;DP=659;FS=0.0 |
| 37017 | chrY | 13826653 | . | G   | T,* | 749.66  | PASS          | AC=7,1;AF=0.113,0.016;AN=62;BaseQ |
| 37018 | chrY | 13826662 | . | A   | T   | 670.23  | PASS          | AC=7;AF=0.113;AN=62;BaseQRankSum= |
| 37019 | chrY | 13826665 | . | A   | C   | 378.98  | PASS          | AC=5;AF=0.083;AN=60;BaseQRankSum= |
| 37020 | chrY | 13826678 | . | G   | C,T | 1124.66 | PASS          | AC=3,5;AF=0.050,0.083;AN=60;BaseQ |
| 37021 | chrY | 13826690 | . | A   | G   | 696.75  | PASS          | AC=5;AF=0.081;AN=62;BaseQRankSum= |
| 37022 | chrY | 13826694 | . | G   | C   | 1950.64 | PASS          | AC=5;AF=0.086;AN=58;BaseQRankSum= |
| 37023 | chrY | 13826695 | . | C   | G   | 1947.91 | PASS          | AC=5;AF=0.086;AN=58;BaseQRankSum= |
| 37024 | chrY | 13826713 | . | T   | G   | 2540.53 | PASS          | AC=5;AF=0.081;AN=62;BaseQRankSum= |
| 37025 | chrY | 13827069 | . | G   | A   | 221.83  | PASS          | AC=1;AF=0.015;AN=66;BaseQRankSum= |
| 37026 | chrY | 13827095 | . | A   | T   | 43.30   | my_snp_filter | AC=1;AF=0.015;AN=66;BaseQ         |
| 37027 | chrY | 13827168 | . | G   | A   | 146.25  | PASS          | AC=2;AF=0.033;AN=60;BaseQRankSum= |
| 37028 | chrY | 13827174 | . | G   | A   | 117.46  | PASS          | AC=2;AF=0.030;AN=66;BaseQRankSum= |
| 37029 | chrY | 13827214 | . | T   | G   | 143.45  | PASS          | AC=2;AF=0.030;AN=66;BaseQRankSum= |
| 37030 | chrY | 13827218 | . | C   | G   | 145.91  | PASS          | AC=2;AF=0.029;AN=70;BaseQRankSum= |
| 37031 | chrY | 13827219 | . | G   | C   | 144.42  | PASS          | AC=2;AF=0.029;AN=70;BaseQRankSum= |
| 37032 | chrY | 13827229 | . | G   | T   | 140.84  | PASS          | AC=2;AF=0.029;AN=70;BaseQRankSum= |
| 37033 | chrY | 13827234 | . | G   | A   | 138.82  | PASS          | AC=2;AF=0.029;AN=70;BaseQRankSum= |
| 37034 | chrY | 13827241 | . | T   | A   | 131.95  | PASS          | AC=2;AF=0.029;AN=68;BaseQRankSum= |
| 37035 | chrY | 13827248 | . | T   | G   | 92.27   | PASS          | AC=2;AF=0.029;AN=70;BaseQRankSum= |
| 37036 | chrY | 13827251 | . | A   | G   | 87.89   | PASS          | AC=1;AF=0.014;AN=70;BaseQRankSum= |
| 37037 | chrY | 13827257 | . | T   | A   | 93.43   | PASS          | AC=1;AF=0.015;AN=68;BaseQRankSum= |
| 37038 | chrY | 13827258 | . | T,2 | T,A | 208.06  | PASS          | AC=1,2;AF=0.015,0.029;AN=68;BaseQ |
| 37039 | chrY | 13827261 | . | T   | A   | 94      | PASS          | AC=1;AF=0.015;AN=66;BaseQRankSum= |
| 37040 | chrY | 13827262 | . | T   | G   | 90.86   | PASS          | AC=1;AF=0.015;AN=68;BaseQRankSum= |
| 37041 | chrY | 13827273 | . | T   | G   | 92.20   | PASS          | AC=1;AF=0.015;AN=68;BaseQRankSum= |
| 37042 | chrY | 13827275 | . | T   | G   | 102.94  | PASS          | AC=1;AF=0.015;AN=66;BaseQRankSum= |
| 37043 | chrY | 13827284 | . | A   | G   | 102.83  | PASS          | AC=1;AF=0.014;AN=70;BaseQRankSum= |
| 37044 | chrY | 13827294 | . | A   | G   | 102.76  | PASS          | AC=1;AF=0.014;AN=70;BaseQRankSum= |
| 37045 | chrY | 13827308 | . | G   | T   | 39.38   | PASS          | AC=1;AF=0.014;AN=70;BaseQRankSum= |
| 37046 | chrY | 13827311 | . | A   | T   | 41.87   | PASS          | AC=1;AF=0.014;AN=70;BaseQRankSum= |
| 37047 | chrY | 13827488 | . | A   | G   | 244     | PASS          | AC=2;AF=0.033;AN=60;BaseQRankSum= |
| 37048 | chrY | 13827492 | . | C   | T   | 244.49  | PASS          | AC=2;AF=0.034;AN=58;BaseQRankSum= |
| 37049 | chrY | 13827493 | . | A   | G   | 243.68  | PASS          | AC=2;AF=0.034;AN=58;BaseQRankSum= |
| 37050 | chrY | 13827646 | . | G   | A   | 1017.08 | PASS          | AC=6;AF=0.088;AN=68;DP=543;FS=0.0 |
| 37051 | chrY | 13827879 | . | A   | T   | 100.17  | PASS          | AC=3;AF=0.043;AN=70;BaseQRankSum= |
| 37052 | chrY | 13827892 | . | A   | T   | 192.17  | PASS          | AC=4;AF=0.063;AN=64;BaseQRankSum= |
| 37053 | chrY | 13827901 | . | C   | T   | 129.21  | PASS          | AC=1;AF=0.015;AN=66;BaseQRankSum= |
| 37054 | chrY | 13827905 | . | T   | A   | 128.96  | PASS          | AC=3;AF=0.045;AN=66;BaseQRankSum= |
| 37055 | chrY | 13827914 | . | T   | A   | 249.83  | PASS          | AC=4;AF=0.087;AN=46;BaseQRankSum= |
| 37056 | chrY | 13827916 | . | C   | A   | 250.45  | PASS          | AC=3;AF=0.045;AN=66;BaseQRankSum= |
| 37057 | chrY | 13827917 | . | G   | A   | 86.26   | PASS          | AC=1;AF=0.015;AN=66;BaseQRankSum= |
| 37058 | chrY | 13827920 | . | A   | T   | 293.12  | PASS          | AC=4;AF=0.091;AN=44;BaseQRankSum= |
| 37059 | chrY | 13827925 | . | A   | T   | 166.84  | PASS          | AC=2;AF=0.032;AN=62;BaseQRankSum= |
| 37060 | chrY | 13827926 | . | G   | A   | 38.34   | PASS          | AC=1;AF=0.015;AN=66;BaseQRankSum= |
| 37061 | chrY | 13827933 | . | A   | G   | 45.64   | PASS          | AC=1;AF=0.016;AN=62;BaseQRankSum= |
| 37062 | chrY | 13827948 | . | A   | T   | 51.81   | PASS          | AC=1;AF=0.019;AN=52;BaseQRankSum= |
| 37063 | chrY | 13827956 | . | T   | G   | 194.64  | PASS          | AC=2;AF=0.083;AN=24;BaseQRankSum= |
| 37064 | chrY | 13827957 | . | T   | G   | 262.68  | PASS          | AC=2;AF=0.083;AN=24;BaseQRankSum= |
| 37065 | chrY | 13827961 | . | T   | G   | 195.87  | PASS          | AC=2;AF=0.048;AN=42;BaseQRankSum= |
| 37066 | chrY | 13827965 | . | T   | A   | 147.92  | PASS          | AC=2;AF=0.040;AN=50;BaseQRankSum= |
| 37067 | chrY | 13827972 | . | G   | A   | 63.04   | my_snp_filter | AC=2;AF=0.042;AN=48;BaseQ         |
| 37068 | chrY | 13827976 | . | T   | G   | 174.63  | PASS          | AC=2;AF=0.071;AN=28;BaseQRankSum= |
| 37069 | chrY | 13828085 | . | T   | G   | 226.43  | my_snp_filter | AC=4;AF=0.061;AN=66;BaseQ         |
| 37070 | chrY | 13828097 | . | A   | C   | 293.34  | PASS          | AC=4;AF=0.061;AN=66;BaseQRankSum= |
| 37071 | chrY | 13828106 | . | T   | C   | 358.62  | PASS          | AC=4;AF=0.071;AN=56;BaseQRankSum= |
| 37072 | chrY | 13828111 | . | T   | G   | 291.06  | PASS          | AC=3;AF=0.068;AN=44;BaseQRankSum= |
| 37073 | chrY | 13828114 | . | A   | T   | 252.39  | PASS          | AC=4;AF=0.080;AN=50;BaseQRankSum= |
| 37074 | chrY | 13828115 | . | T   | C   | 53.61   | my_snp_filter | AC=3;AF=0.054;AN=56;BaseQ         |
| 37075 | chrY | 13828120 | . | C   | T   | 185.06  | PASS          | AC=4;AF=0.087;AN=46;BaseQRankSum= |
| 37076 | chrY | 13828132 | . | A   | G   | 155.22  | PASS          | AC=3;AF=0.050;AN=60;BaseQRankSum= |
| 37077 | chrY | 13828135 | . | T   | A   | 70.81   | my_snp_filter | AC=2;AF=0.030;AN=66;BaseQ         |
| 37078 | chrY | 13828146 | . | C   | G   | 125.61  | PASS          | AC=2;AF=0.031;AN=64;BaseQRankSum= |
| 37079 | chrY | 13828348 | . | T   | C   | 110.40  | PASS          | AC=3;AF=0.044;AN=68;BaseQRankSum= |
| 37080 | chrY | 13828350 | . | C   | G   | 114.58  | PASS          | AC=3;AF=0.044;AN=68;BaseQRankSum= |
| 37081 | chrY | 13828356 | . | A   | G   | 142.01  | PASS          | AC=3;AF=0.044;AN=68;BaseQRankSum= |
| 37082 | chrY | 13828387 | . | A   | G   | 142.70  | PASS          | AC=2;AF=0.029;AN=68;BaseQRankSum= |
| 37083 | chrY | 13828390 | . | G   | T   | 479.65  | PASS          | AC=4;AF=0.059;AN=68;BaseQRankSum= |
| 37084 | chrY | 13828400 | . | G   | A,T | 425.24  | PASS          | AC=1,2;AF=0.016,0.031;AN=64;BaseQ |
| 37085 | chrY | 13828401 | . | T   | G   | 419.89  | PASS          | AC=4;AF=0.061;AN=66;BaseQRankSum= |
| 37086 | chrY | 13828402 | . | G   | A   | 85.95   | PASS          | AC=1;AF=0.015;AN=68;BaseQRankSum= |
| 37087 | chrY | 13828411 | . | G   | T   | 165.91  | PASS          | AC=4;AF=0.059;AN=68;DP=434;FS=0.0 |
| 37088 | chrY | 13828432 | . | T   | G   | 68.43   | PASS          | AC=2;AF=0.029;AN=68;BaseQRankSum= |



|       |      |          |   |   |     |         |               |                                    |
|-------|------|----------|---|---|-----|---------|---------------|------------------------------------|
| 37089 | chrY | 13828535 | . | A | T   | 69.95   | PASS          | AC=1;AF=0.015;AN=68;BaseQRankSum=  |
| 37090 | chrY | 13828542 | . | G | T   | 128.08  | PASS          | AC=2;AF=0.029;AN=70;BaseQRankSum=  |
| 37091 | chrY | 13828550 | . | T | C   | 116.58  | PASS          | AC=1;AF=0.015;AN=68;BaseQRankSum=  |
| 37092 | chrY | 13828552 | . | C | G   | 244.28  | PASS          | AC=1;AF=0.015;AN=66;BaseQRankSum=  |
| 37093 | chrY | 13828566 | . | A | G   | 325.93  | PASS          | AC=1;AF=0.015;AN=66;BaseQRankSum=  |
| 37094 | chrY | 13828571 | . | T | C   | 326.07  | PASS          | AC=1;AF=0.015;AN=66;BaseQRankSum=  |
| 37095 | chrY | 13828580 | . | T | A   | 350.95  | PASS          | AC=1;AF=0.014;AN=70;BaseQRankSum=  |
| 37096 | chrY | 13828621 | . | T | C   | 2126.67 | PASS          | AC=13;AF=0.197;AN=66;BaseQRankSum= |
| 37097 | chrY | 13828635 | . | C | T   | 3002.07 | PASS          | AC=14;AF=0.206;AN=68;BaseQRankSum= |
| 37098 | chrY | 13828636 | . | A | G   | 3086.07 | PASS          | AC=14;AF=0.206;AN=68;BaseQRankSum= |
| 37099 | chrY | 13828649 | . | A | T   | 3954.29 | PASS          | AC=14;AF=0.212;AN=66;BaseQRankSum= |
| 37100 | chrY | 13828650 | . | C | T   | 3904.46 | PASS          | AC=14;AF=0.212;AN=66;BaseQRankSum= |
| 37101 | chrY | 13828656 | . | T | G   | 4129.50 | PASS          | AC=14;AF=0.212;AN=66;BaseQRankSum= |
| 37102 | chrY | 13828660 | . | G | C   | 4075.06 | PASS          | AC=14;AF=0.206;AN=68;BaseQRankSum= |
| 37103 | chrY | 13828687 | . | A | T   | 5356.64 | PASS          | AC=21;AF=0.300;AN=70;BaseQRankSum= |
| 37104 | chrY | 13828698 | . | A | T   | 5967.07 | PASS          | AC=22;AF=0.324;AN=68;BaseQRankSum= |
| 37105 | chrY | 13828699 | . | C | T   | 6284.43 | PASS          | AC=22;AF=0.324;AN=68;BaseQRankSum= |
| 37106 | chrY | 13828705 | . | T | C   | 6449.04 | PASS          | AC=22;AF=0.333;AN=66;BaseQRankSum= |
| 37107 | chrY | 13828740 | . | G | A   | 7216.59 | PASS          | AC=22;AF=0.324;AN=68;BaseQRankSum= |
| 37108 | chrY | 13828744 | . | T | A   | 7244    | PASS          | AC=22;AF=0.324;AN=68;BaseQRankSum= |
| 37109 | chrY | 13828761 | . | G | A   | 396.57  | PASS          | AC=5;AF=0.071;AN=70;BaseQRankSum=  |
| 37110 | chrY | 13828773 | . | C | A,G | 5964.39 | PASS          | AC=21,3;AF=0.300,0.043;AN=70;BaseQ |
| 37111 | chrY | 13828789 | . | A | C   | 4808.03 | PASS          | AC=21;AF=0.300;AN=70;BaseQRankSum= |
| 37112 | chrY | 13828795 | . | T | G   | 4825.67 | PASS          | AC=23;AF=0.329;AN=70;BaseQRankSum= |
| 37113 | chrY | 13828802 | . | A | T   | 337.14  | PASS          | AC=4;AF=0.057;AN=70;BaseQRankSum=  |
| 37114 | chrY | 13828804 | . | T | G   | 3586.98 | PASS          | AC=21;AF=0.300;AN=70;BaseQRankSum= |
| 37115 | chrY | 13828806 | . | G | A   | 4706.22 | PASS          | AC=22;AF=0.314;AN=70;BaseQRankSum= |
| 37116 | chrY | 13828808 | . | G | A   | 3407.10 | PASS          | AC=22;AF=0.314;AN=70;BaseQRankSum= |
| 37117 | chrY | 13828811 | . | G | C   | 2664.69 | PASS          | AC=18;AF=0.257;AN=70;BaseQRankSum= |
| 37118 | chrY | 13828813 | . | T | C   | 2891.75 | PASS          | AC=20;AF=0.286;AN=70;BaseQRankSum= |
| 37119 | chrY | 13828819 | . | C | G   | 238.26  | PASS          | AC=2;AF=0.029;AN=70;BaseQRankSum=  |
| 37120 | chrY | 13828821 | . | G | T   | 190.26  | PASS          | AC=2;AF=0.029;AN=70;BaseQRankSum=  |
| 37121 | chrY | 13828828 | . | T | A,C | 1884.13 | PASS          | AC=12,2;AF=0.171,0.029;AN=70;BaseQ |
| 37122 | chrY | 13828831 | . | G | A   | 1414.98 | PASS          | AC=11;AF=0.157;AN=70;BaseQRankSum= |
| 37123 | chrY | 13828834 | . | T | A   | 1533.59 | PASS          | AC=13;AF=0.186;AN=70;BaseQRankSum= |
| 37124 | chrY | 13828840 | . | G | A   | 323.47  | PASS          | AC=2;AF=0.029;AN=70;DP=615;FS=0.0  |
| 37125 | chrY | 13828842 | . | C | T   | 1023.10 | PASS          | AC=12;AF=0.171;AN=70;BaseQRankSum= |
| 37126 | chrY | 13828848 | . | T | A,* | 526.35  | PASS          | AC=5,1;AF=0.071,0.014;AN=70;BaseQ  |
| 37127 | chrY | 13828860 | . | C | T   | 207.61  | PASS          | AC=3;AF=0.043;AN=70;BaseQRankSum=  |
| 37128 | chrY | 13828861 | . | A | G   | 329.40  | PASS          | AC=4;AF=0.057;AN=70;BaseQRankSum=  |
| 37129 | chrY | 13828864 | . | T | A   | 96.96   | PASS          | AC=1;AF=0.014;AN=70;BaseQRankSum=  |
| 37130 | chrY | 13828880 | . | G | C   | 106.64  | PASS          | AC=2;AF=0.029;AN=70;BaseQRankSum=  |
| 37131 | chrY | 13829088 | . | A | G   | 95.31   | PASS          | AC=4;AF=0.059;AN=68;BaseQRankSum=  |
| 37132 | chrY | 13829104 | . | A | T   | 53.44   | my_snp_filter | AC=2;AF=0.029;AN=70;BaseQ          |
| 37133 | chrY | 13829380 | . | G | A   | 875.68  | PASS          | AC=6;AF=0.086;AN=70;BaseQRankSum=  |
| 37134 | chrY | 13830250 | . | A | G   | 120.87  | PASS          | AC=3;AF=0.071;AN=42;BaseQRankSum=  |
| 37135 | chrY | 13830271 | . | A | G   | 114.98  | PASS          | AC=3;AF=0.060;AN=50;BaseQRankSum=  |
| 37136 | chrY | 13830273 | . | A | T   | 118.91  | PASS          | AC=3;AF=0.063;AN=48;BaseQRankSum=  |
| 37137 | chrY | 13830274 | . | G | A   | 43.98   | PASS          | AC=1;AF=0.023;AN=44;BaseQRankSum=  |
| 37138 | chrY | 13830293 | . | T | A   | 63.80   | my_snp_filter | AC=2;AF=0.059;AN=34;BaseQ          |
| 37139 | chrY | 13830666 | . | T | A   | 49.59   | PASS          | AC=2;AF=0.029;AN=68;BaseQRankSum=  |
| 37140 | chrY | 13830667 | . | T | C   | 102.91  | PASS          | AC=3;AF=0.044;AN=68;BaseQRankSum=  |
| 37141 | chrY | 13830669 | . | A | C   | 95.07   | PASS          | AC=3;AF=0.044;AN=68;BaseQRankSum=  |
| 37142 | chrY | 13830675 | . | G | A   | 81.64   | PASS          | AC=3;AF=0.043;AN=70;BaseQRankSum=  |
| 37143 | chrY | 13830676 | . | A | C   | 38.20   | PASS          | AC=2;AF=0.029;AN=70;BaseQRankSum=  |
| 37144 | chrY | 13830679 | . | G | A   | 1146.35 | PASS          | AC=7;AF=0.100;AN=70;BaseQRankSum=  |
| 37145 | chrY | 13830682 | . | A | C   | 42.37   | PASS          | AC=2;AF=0.029;AN=70;BaseQRankSum=  |
| 37146 | chrY | 13830684 | . | G | C   | 43.78   | PASS          | AC=2;AF=0.029;AN=70;BaseQRankSum=  |
| 37147 | chrY | 13830685 | . | G | T   | 45.90   | PASS          | AC=2;AF=0.029;AN=70;BaseQRankSum=  |
| 37148 | chrY | 13830687 | . | A | G   | 1136.31 | PASS          | AC=7;AF=0.100;AN=70;BaseQRankSum=  |
| 37149 | chrY | 13830689 | . | G | A   | 1016.61 | PASS          | AC=6;AF=0.086;AN=70;BaseQRankSum=  |
| 37150 | chrY | 13830723 | . | C | G,* | 1086.08 | PASS          | AC=3,7;AF=0.043,0.100;AN=70;BaseQ  |
| 37151 | chrY | 13830728 | . | T | A,* | 1008.66 | PASS          | AC=4,7;AF=0.057,0.100;AN=70;BaseQ  |
| 37152 | chrY | 13830769 | . | C | T   | 392.96  | PASS          | AC=8;AF=0.118;AN=68;BaseQRankSum=  |
| 37153 | chrY | 13830804 | . | T | G   | 7750.87 | PASS          | AC=25;AF=0.417;AN=60;BaseQRankSum= |
| 37154 | chrY | 13830805 | . | T | A   | 7740.87 | PASS          | AC=25;AF=0.417;AN=60;BaseQRankSum= |
| 37155 | chrY | 13830810 | . | T | C   | 7706.06 | PASS          | AC=25;AF=0.417;AN=60;BaseQRankSum= |
| 37156 | chrY | 13830814 | . | T | A   | 7749.19 | PASS          | AC=24;AF=0.414;AN=58;BaseQRankSum= |
| 37157 | chrY | 13830815 | . | T | G   | 7743.01 | PASS          | AC=24;AF=0.414;AN=58;BaseQRankSum= |
| 37158 | chrY | 13830821 | . | T | A   | 7875.92 | PASS          | AC=24;AF=0.387;AN=62;BaseQRankSum= |
| 37159 | chrY | 13830822 | . | A | G   | 7806.47 | PASS          | AC=24;AF=0.387;AN=62;BaseQRankSum= |
| 37160 | chrY | 13830826 | . | A | C   | 7935.51 | PASS          | AC=25;AF=0.403;AN=62;BaseQRankSum= |
| 37161 | chrY | 13830857 | . | T | C   | 1014.95 | PASS          | AC=9;AF=0.173;AN=52;BaseQRankSum=  |
| 37162 | chrY | 13830865 | . | A | G   | 596.67  | PASS          | AC=7;AF=0.140;AN=50;BaseQRankSum=  |
| 37163 | chrY | 13830867 | . | A | T   | 445.59  | PASS          | AC=7;AF=0.125;AN=56;BaseQRankSum=  |
| 37164 | chrY | 13830872 | . | A | C   | 32.97   | my_snp_filter | AC=2;AF=0.038;AN=52;BaseQ          |

|       |      |          |   |   |   |          |               |                                    |
|-------|------|----------|---|---|---|----------|---------------|------------------------------------|
| 37165 | chrY | 13831090 | . | G | T | 123.24   | PASS          | AC=4;AF=0.057;AN=70;BaseQRankSum=  |
| 37166 | chrY | 13831103 | . | C | T | 133.80   | PASS          | AC=4;AF=0.059;AN=68;BaseQRankSum=  |
| 37167 | chrY | 13831108 | . | T | A | 108.19   | PASS          | AC=4;AF=0.057;AN=70;BaseQRankSum=  |
| 37168 | chrY | 13831270 | . | G | A | 1508.28  | PASS          | AC=9;AF=0.129;AN=70;BaseQRankSum=  |
| 37169 | chrY | 13831280 | . | G | C | 1476.99  | PASS          | AC=9;AF=0.129;AN=70;BaseQRankSum=  |
| 37170 | chrY | 13831296 | . | A | C | 1464.98  | PASS          | AC=8;AF=0.114;AN=70;BaseQRankSum=  |
| 37171 | chrY | 13831311 | . | G | A | 347.35   | PASS          | AC=3;AF=0.043;AN=70;BaseQRankSum=  |
| 37172 | chrY | 13831428 | . | C | T | 123.04   | PASS          | AC=2;AF=0.029;AN=68;BaseQRankSum=  |
| 37173 | chrY | 13831432 | . | A | G | 79.95    | PASS          | AC=2;AF=0.029;AN=68;BaseQRankSum=  |
| 37174 | chrY | 13831675 | . | T | C | 1002.33  | PASS          | AC=1;AF=0.017;AN=58;DP=643;FS=0.0  |
| 37175 | chrY | 13831676 | . | A | T | 1003.87  | PASS          | AC=1;AF=0.018;AN=56;DP=644;FS=0.0  |
| 37176 | chrY | 13831691 | . | C | A | 990.53   | my_snp_filter | AC=1;AF=0.017;AN=60;BaseQ          |
| 37177 | chrY | 13831877 | . | G | C | 289.51   | PASS          | AC=4;AF=0.057;AN=70;BaseQRankSum=  |
| 37178 | chrY | 13831910 | . | C | T | 1193.77  | PASS          | AC=7;AF=0.100;AN=70;BaseQRankSum=  |
| 37179 | chrY | 13831922 | . | C | A | 1146.37  | PASS          | AC=7;AF=0.100;AN=70;BaseQRankSum=  |
| 37180 | chrY | 13831925 | . | C | T | 1158.58  | PASS          | AC=7;AF=0.109;AN=64;BaseQRankSum=  |
| 37181 | chrY | 13831930 | . | A | T | 1162.96  | PASS          | AC=7;AF=0.100;AN=70;BaseQRankSum=  |
| 37182 | chrY | 13831942 | . | G | T | 993.68   | PASS          | AC=5;AF=0.071;AN=70;BaseQRankSum=  |
| 37183 | chrY | 13832160 | . | G | A | 2528.45  | PASS          | AC=21;AF=0.318;AN=66;BaseQRankSum= |
| 37184 | chrY | 13832238 | . | G | T | 42.09    | PASS          | AC=1;AF=0.014;AN=70;BaseQRankSum=  |
| 37185 | chrY | 13832240 | . | G | A | 41.71    | PASS          | AC=1;AF=0.015;AN=68;BaseQRankSum=  |
| 37186 | chrY | 13832243 | . | T | C | 41.19    | PASS          | AC=1;AF=0.014;AN=70;BaseQRankSum=  |
| 37187 | chrY | 13832287 | . | T | G | 40.75    | my_snp_filter | AC=2;AF=0.029;AN=68;BaseQ          |
| 37188 | chrY | 13832547 | . | G | A | 32       | PASS          | AC=1;AF=0.014;AN=70;BaseQRankSum=  |
| 37189 | chrY | 13832661 | . | C | T | 1199.66  | PASS          | AC=6;AF=0.100;AN=60;DP=701;FS=0.0  |
| 37190 | chrY | 13833091 | . | T | C | 473.66   | PASS          | AC=7;AF=0.140;AN=50;BaseQRankSum=  |
| 37191 | chrY | 13833096 | . | G | T | 388.11   | PASS          | AC=6;AF=0.120;AN=50;BaseQRankSum=  |
| 37192 | chrY | 13833098 | . | C | A | 378.96   | PASS          | AC=6;AF=0.120;AN=50;BaseQRankSum=  |
| 37193 | chrY | 13833106 | . | C | A | 341.58   | PASS          | AC=4;AF=0.080;AN=50;BaseQRankSum=  |
| 37194 | chrY | 13833115 | . | C | T | 340.21   | PASS          | AC=4;AF=0.080;AN=50;BaseQRankSum=  |
| 37195 | chrY | 13833119 | . | T | A | 343.56   | PASS          | AC=4;AF=0.080;AN=50;BaseQRankSum=  |
| 37196 | chrY | 13833122 | . | G | C | 340.49   | PASS          | AC=4;AF=0.080;AN=50;BaseQRankSum=  |
| 37197 | chrY | 13833135 | . | A | C | 336.81   | PASS          | AC=4;AF=0.080;AN=50;BaseQRankSum=  |
| 37198 | chrY | 13833136 | . | A | T | 336.74   | PASS          | AC=4;AF=0.080;AN=50;BaseQRankSum=  |
| 37199 | chrY | 13833142 | . | A | G | 82.20    | PASS          | AC=1;AF=0.020;AN=50;BaseQRankSum=  |
| 37200 | chrY | 13833242 | . | A | G | 42.88    | PASS          | AC=1;AF=0.045;AN=22;BaseQRankSum=  |
| 37201 | chrY | 13833257 | . | A | G | 1935.33  | PASS          | AC=2;AF=0.083;AN=24;BaseQRankSum=  |
| 37202 | chrY | 13833269 | . | A | G | 157.12   | PASS          | AC=3;AF=0.043;AN=70;BaseQRankSum=  |
| 37203 | chrY | 13833271 | . | T | G | 11783.33 | my_snp_filter | AC=19;AF=0.475;AN                  |
| 37204 | chrY | 13833275 | . | T | G | 3507.10  | PASS          | AC=2;AF=0.143;AN=14;BaseQRankSum=  |
| 37205 | chrY | 13833284 | . | A | G | 3462.45  | my_snp_filter | AC=2;AF=0.143;AN=14;BaseQ          |
| 37206 | chrY | 13833286 | . | G | T | 21458.07 | PASS          | AC=22;AF=0.500;AN=44;Base          |
| 37207 | chrY | 13833289 | . | G | A | 25407.88 | PASS          | AC=21;AF=0.525;AN=40;Base          |
| 37208 | chrY | 13833304 | . | A | G | 3290.13  | PASS          | AC=14;AF=0.200;AN=70;BaseQRankSum= |
| 37209 | chrY | 13833307 | . | G | A | 39060.88 | PASS          | AC=21;AF=0.525;AN=40;Base          |
| 37210 | chrY | 13833315 | . | T | C | 38078.45 | PASS          | AC=21;AF=0.525;AN=40;Base          |
| 37211 | chrY | 13833317 | . | G | A | 19529.95 | PASS          | AC=14;AF=0.438;AN=32;Base          |
| 37212 | chrY | 13833320 | . | T | G | 81.71    | my_snp_filter | AC=1;AF=0.014;AN=70;BaseQ          |
| 37213 | chrY | 13833352 | . | A | G | 238.80   | my_snp_filter | AC=2;AF=0.029;AN=70;BaseQ          |
| 37214 | chrY | 13833354 | . | C | A | 205.20   | my_snp_filter | AC=2;AF=0.500;AN=4;BaseQR          |
| 37215 | chrY | 13833356 | . | G | C | 239.05   | PASS          | AC=1;AF=0.014;AN=70;BaseQRankSum=  |
| 37216 | chrY | 13833370 | . | A | G | 2050.46  | PASS          | AC=6;AF=0.333;AN=18;BaseQRankSum=  |
| 37217 | chrY | 13833372 | . | T | G | 1957.18  | PASS          | AC=6;AF=0.333;AN=18;BaseQRankSum=  |
| 37218 | chrY | 13833379 | . | A | T | 442.97   | PASS          | AC=5;AF=0.071;AN=70;BaseQRankSum=  |
| 37219 | chrY | 13833386 | . | G | A | 406.22   | PASS          | AC=6;AF=0.086;AN=70;BaseQRankSum=  |
| 37220 | chrY | 13833390 | . | G | C | 437.23   | PASS          | AC=6;AF=0.300;AN=20;BaseQRankSum=  |
| 37221 | chrY | 13833398 | . | A | T | 294.21   | PASS          | AC=5;AF=0.071;AN=70;BaseQRankSum=  |
| 37222 | chrY | 13833892 | . | C | G | 94       | my_snp_filter | AC=2;AF=0.029;AN=68;BaseQ          |
| 37223 | chrY | 13833901 | . | G | T | 114.21   | my_snp_filter | AC=2;AF=0.029;AN=68;BaseQ          |
| 37224 | chrY | 13833909 | . | T | A | 295.49   | PASS          | AC=2;AF=0.031;AN=64;BaseQRankSum=  |
| 37225 | chrY | 13834067 | . | A | G | 8206.62  | PASS          | AC=46;AF=0.657;AN=70;DP=584;FS=0.  |
| 37226 | chrY | 13834532 | . | G | T | 234.74   | PASS          | AC=1;AF=0.015;AN=66;BaseQRankSum=  |
| 37227 | chrY | 13834541 | . | G | T | 228.91   | PASS          | AC=1;AF=0.016;AN=62;BaseQRankSum=  |
| 37228 | chrY | 13834674 | . | C | A | 67.72    | PASS          | AC=1;AF=0.024;AN=42;BaseQRankSum=  |
| 37229 | chrY | 13834694 | . | G | A | 110.81   | PASS          | AC=1;AF=0.023;AN=44;BaseQRankSum=  |
| 37230 | chrY | 13835281 | . | A | T | 207.51   | my_snp_filter | AC=7;AF=0.130;AN=54;BaseQ          |
| 37231 | chrY | 13835312 | . | A | C | 52.05    | my_snp_filter | AC=2;AF=0.042;AN=48;BaseQ          |
| 37232 | chrY | 13835343 | . | A | T | 153.92   | PASS          | AC=3;AF=0.065;AN=46;BaseQRankSum=  |
| 37233 | chrY | 13835346 | . | A | C | 91.54    | PASS          | AC=2;AF=0.042;AN=48;BaseQRankSum=  |
| 37234 | chrY | 13835410 | . | A | G | 50.18    | PASS          | AC=1;AF=0.014;AN=70;BaseQRankSum=  |
| 37235 | chrY | 13835422 | . | A | G | 40.24    | PASS          | AC=1;AF=0.014;AN=70;BaseQRankSum=  |
| 37236 | chrY | 13835440 | . | A | G | 40.10    | PASS          | AC=1;AF=0.014;AN=70;BaseQRankSum=  |
| 37237 | chrY | 13835865 | . | A | G | 669.88   | PASS          | AC=2;AF=0.029;AN=68;DP=443;FS=0.0  |
| 37238 | chrY | 13835972 | . | A | T | 323.09   | PASS          | AC=6;AF=0.088;AN=68;BaseQRankSum=  |
| 37239 | chrY | 13836033 | . | T | G | 64.15    | my_snp_filter | AC=3;AF=0.047;AN=64;BaseQ          |
| 37240 | chrY | 13836038 | . | A | G | 473.15   | PASS          | AC=5;AF=0.083;AN=60;BaseQRankSum=  |

|       |      |          |   |   |   |         |               |                                   |
|-------|------|----------|---|---|---|---------|---------------|-----------------------------------|
| 37241 | chrY | 13836042 | . | T | A | 468.07  | PASS          | AC=5;AF=0.081;AN=62;BaseQRankSum= |
| 37242 | chrY | 13836044 | . | C | T | 411.35  | PASS          | AC=4;AF=0.065;AN=62;BaseQRankSum= |
| 37243 | chrY | 13836064 | . | G | A | 363.84  | PASS          | AC=3;AF=0.047;AN=64;BaseQRankSum= |
| 37244 | chrY | 13836066 | . | G | A | 329.80  | PASS          | AC=3;AF=0.050;AN=60;BaseQRankSum= |
| 37245 | chrY | 13836078 | . | C | T | 415.22  | PASS          | AC=3;AF=0.050;AN=60;BaseQRankSum= |
| 37246 | chrY | 13836079 | . | C | G | 1043.62 | PASS          | AC=3;AF=0.050;AN=60;BaseQRankSum= |
| 37247 | chrY | 13836084 | . | G | T | 114.68  | PASS          | AC=3;AF=0.045;AN=66;BaseQRankSum= |
| 37248 | chrY | 13836090 | . | T | A | 960.98  | PASS          | AC=3;AF=0.044;AN=68;BaseQRankSum= |
| 37249 | chrY | 13836109 | . | A | G | 84.53   | PASS          | AC=1;AF=0.014;AN=70;DP=564;FS=0.0 |
| 37250 | chrY | 13836167 | . | C | A | 321.80  | PASS          | AC=2;AF=0.029;AN=70;DP=569;FS=0.0 |
| 37251 | chrY | 13836292 | . | C | T | 32.76   | my_snp_filter | AC=1;AF=0.016;AN=62;BaseQ         |
| 37252 | chrY | 13836293 | . | A | G | 33.65   | my_snp_filter | AC=1;AF=0.016;AN=62;BaseQ         |
| 37253 | chrY | 13836299 | . | T | G | 205.71  | PASS          | AC=1;AF=0.016;AN=62;BaseQRankSum= |
| 37254 | chrY | 13836300 | . | T | A | 205.71  | PASS          | AC=1;AF=0.017;AN=60;BaseQRankSum= |
| 37255 | chrY | 13836322 | . | C | T | 201.81  | PASS          | AC=1;AF=0.017;AN=60;BaseQRankSum= |
| 37256 | chrY | 13836329 | . | G | A | 199.63  | PASS          | AC=1;AF=0.015;AN=66;BaseQRankSum= |
| 37257 | chrY | 13836331 | . | A | T | 188.64  | PASS          | AC=1;AF=0.015;AN=66;BaseQRankSum= |
| 37258 | chrY | 13836337 | . | T | A | 207.05  | PASS          | AC=3;AF=0.045;AN=66;BaseQRankSum= |
| 37259 | chrY | 13836339 | . | G | C | 181.34  | PASS          | AC=1;AF=0.015;AN=66;BaseQRankSum= |
| 37260 | chrY | 13836346 | . | A | T | 172.52  | PASS          | AC=1;AF=0.016;AN=64;BaseQRankSum= |
| 37261 | chrY | 13836349 | . | A | T | 190.38  | PASS          | AC=1;AF=0.016;AN=64;BaseQRankSum= |
| 37262 | chrY | 13836350 | . | A | G | 38.11   | PASS          | AC=1;AF=0.016;AN=64;BaseQRankSum= |
| 37263 | chrY | 13836368 | . | G | C | 38.18   | PASS          | AC=1;AF=0.015;AN=66;BaseQRankSum= |
| 37264 | chrY | 13836370 | . | A | G | 55.53   | PASS          | AC=2;AF=0.030;AN=66;BaseQRankSum= |
| 37265 | chrY | 13836374 | . | C | G | 72.15   | PASS          | AC=1;AF=0.017;AN=60;BaseQRankSum= |
| 37266 | chrY | 13836384 | . | G | T | 32.39   | PASS          | AC=1;AF=0.016;AN=62;BaseQRankSum= |
| 37267 | chrY | 13836386 | . | A | C | 36.02   | PASS          | AC=1;AF=0.017;AN=60;BaseQRankSum= |
| 37268 | chrY | 13836387 | . | A | T | 104.91  | PASS          | AC=2;AF=0.033;AN=60;BaseQRankSum= |
| 37269 | chrY | 13836389 | . | G | C | 43.61   | PASS          | AC=1;AF=0.015;AN=66;BaseQRankSum= |
| 37270 | chrY | 13836393 | . | G | T | 32.58   | PASS          | AC=1;AF=0.015;AN=68;BaseQRankSum= |
| 37271 | chrY | 13836394 | . | G | T | 34.91   | PASS          | AC=1;AF=0.015;AN=68;BaseQRankSum= |
| 37272 | chrY | 13836399 | . | C | G | 37.22   | PASS          | AC=1;AF=0.015;AN=66;BaseQRankSum= |
| 37273 | chrY | 13836402 | . | T | C | 293.15  | PASS          | AC=4;AF=0.059;AN=68;DP=448;FS=0.0 |
| 37274 | chrY | 13836703 | . | G | A | 36.30   | my_snp_filter | AC=2;AF=0.029;AN=68;BaseQ         |
| 37275 | chrY | 13836757 | . | C | G | 138.23  | my_snp_filter | AC=5;AF=0.074;AN=68;BaseQ         |
| 37276 | chrY | 13836768 | . | G | A | 74.35   | my_snp_filter | AC=2;AF=0.029;AN=68;BaseQ         |
| 37277 | chrY | 13836769 | . | A | T | 75.85   | my_snp_filter | AC=2;AF=0.029;AN=68;BaseQ         |
| 37278 | chrY | 13836777 | . | G | T | 86.84   | PASS          | AC=2;AF=0.029;AN=70;BaseQRankSum= |
| 37279 | chrY | 13836781 | . | C | T | 95.40   | PASS          | AC=2;AF=0.029;AN=68;BaseQRankSum= |
| 37280 | chrY | 13836782 | . | G | T | 88.21   | PASS          | AC=2;AF=0.029;AN=70;BaseQRankSum= |
| 37281 | chrY | 13836792 | . | G | A | 64.94   | my_snp_filter | AC=2;AF=0.029;AN=70;BaseQ         |
| 37282 | chrY | 13836799 | . | T | A | 36      | my_snp_filter | AC=1;AF=0.015;AN=68;BaseQ         |
| 37283 | chrY | 13836806 | . | C | T | 36.77   | my_snp_filter | AC=1;AF=0.015;AN=66;BaseQ         |
| 37284 | chrY | 13836807 | . | A | G | 37.13   | my_snp_filter | AC=1;AF=0.015;AN=66;BaseQ         |
| 37285 | chrY | 13836811 | . | C | T | 37.35   | my_snp_filter | AC=1;AF=0.015;AN=66;BaseQ         |
| 37286 | chrY | 13836812 | . | G | A | 33.21   | my_snp_filter | AC=1;AF=0.015;AN=68;BaseQ         |
| 37287 | chrY | 13836818 | . | A | G | 84.69   | PASS          | AC=1;AF=0.015;AN=66;BaseQRankSum= |
| 37288 | chrY | 13836819 | . | T | A | 85.40   | PASS          | AC=1;AF=0.015;AN=66;BaseQRankSum= |
| 37289 | chrY | 13836822 | . | T | G | 171.53  | PASS          | AC=1;AF=0.015;AN=66;BaseQRankSum= |
| 37290 | chrY | 13836823 | . | T | G | 172.15  | PASS          | AC=1;AF=0.015;AN=66;BaseQRankSum= |
| 37291 | chrY | 13836843 | . | G | C | 494.68  | PASS          | AC=5;AF=0.071;AN=70;BaseQRankSum= |
| 37292 | chrY | 13836853 | . | A | T | 2052.99 | PASS          | AC=9;AF=0.129;AN=70;BaseQRankSum= |
| 37293 | chrY | 13836863 | . | A | G | 2107.04 | PASS          | AC=9;AF=0.129;AN=70;BaseQRankSum= |
| 37294 | chrY | 13836876 | . | T | A | 2374.70 | PASS          | AC=8;AF=0.114;AN=70;BaseQRankSum= |
| 37295 | chrY | 13836888 | . | G | C | 2209.42 | PASS          | AC=8;AF=0.114;AN=70;BaseQRankSum= |
| 37296 | chrY | 13836893 | . | G | A | 2202.75 | PASS          | AC=8;AF=0.114;AN=70;BaseQRankSum= |
| 37297 | chrY | 13836894 | . | A | C | 2198.11 | PASS          | AC=8;AF=0.114;AN=70;BaseQRankSum= |
| 37298 | chrY | 13836907 | . | A | G | 2674.09 | PASS          | AC=8;AF=0.118;AN=68;BaseQRankSum= |
| 37299 | chrY | 13836922 | . | G | A | 2274.36 | PASS          | AC=8;AF=0.114;AN=70;BaseQRankSum= |
| 37300 | chrY | 13836936 | . | C | G | 373.91  | my_snp_filter | AC=6;AF=0.086;AN=70;BaseQ         |
| 37301 | chrY | 13836967 | . | G | C | 457.69  | PASS          | AC=4;AF=0.057;AN=70;BaseQRankSum= |
| 37302 | chrY | 13836970 | . | G | T | 458.85  | PASS          | AC=4;AF=0.057;AN=70;BaseQRankSum= |
| 37303 | chrY | 13836983 | . | T | A | 512.46  | PASS          | AC=8;AF=0.114;AN=70;BaseQRankSum= |
| 37304 | chrY | 13836989 | . | A | T | 140.57  | PASS          | AC=5;AF=0.071;AN=70;BaseQRankSum= |
| 37305 | chrY | 13836990 | . | A | C | 117.51  | PASS          | AC=2;AF=0.029;AN=70;BaseQRankSum= |
| 37306 | chrY | 13837002 | . | T | C | 106.44  | my_snp_filter | AC=4;AF=0.057;AN=70;BaseQ         |
| 37307 | chrY | 13837006 | . | T | G | 113.64  | PASS          | AC=4;AF=0.059;AN=68;BaseQRankSum= |
| 37308 | chrY | 13837010 | . | A | T | 109.29  | PASS          | AC=4;AF=0.059;AN=68;BaseQRankSum= |
| 37309 | chrY | 13837015 | . | A | T | 59.93   | my_snp_filter | AC=4;AF=0.057;AN=70;BaseQ         |
| 37310 | chrY | 13837030 | . | T | A | 1085.04 | PASS          | AC=8;AF=0.114;AN=70;BaseQRankSum= |
| 37311 | chrY | 13837380 | . | C | T | 31.15   | PASS          | AC=2;AF=0.038;AN=52;BaseQRankSum= |
| 37312 | chrY | 13837470 | . | A | T | 107.11  | PASS          | AC=4;AF=0.067;AN=60;BaseQRankSum= |
| 37313 | chrY | 13837472 | . | A | G | 57.09   | PASS          | AC=2;AF=0.037;AN=54;BaseQRankSum= |
| 37314 | chrY | 13837500 | . | A | C | 47.77   | my_snp_filter | AC=1;AF=0.019;AN=52;BaseQ         |
| 37315 | chrY | 13837525 | . | C | T | 36.10   | my_snp_filter | AC=2;AF=0.031;AN=64;BaseQ         |
| 37316 | chrY | 13837576 | . | T | G | 48.76   | my_snp_filter | AC=3;AF=0.045;AN=66;BaseQ         |

|       |      |          |   |   |   |          |               |                                    |
|-------|------|----------|---|---|---|----------|---------------|------------------------------------|
| 37317 | chrY | 13837682 | . | T | A | 544.92   | PASS          | AC=1;AF=0.016;AN=62;BaseQRankSum=  |
| 37318 | chrY | 13838469 | . | T | A | 151.16   | PASS          | AC=1;AF=0.019;AN=52;BaseQRankSum=  |
| 37319 | chrY | 13838497 | . | G | C | 36.22    | PASS          | AC=1;AF=0.014;AN=70;BaseQRankSum=  |
| 37320 | chrY | 13838745 | . | A | G | 338.04   | PASS          | AC=1;AF=0.021;AN=48;BaseQRankSum=  |
| 37321 | chrY | 13838787 | . | C | A | 25422.88 | PASS          | AC=10;AF=0.161;AN=62;BaseQRankSum= |
| 37322 | chrY | 13838794 | . | C | T | 24939.45 | PASS          | AC=10;AF=0.161;AN=62;BaseQRankSum= |
| 37323 | chrY | 13838801 | . | G | T | 19190.30 | PASS          | AC=10;AF=0.161;AN=62;BaseQRankSum= |
| 37324 | chrY | 13838819 | . | T | A | 6082.24  | PASS          | AC=9;AF=0.136;AN=66;BaseQRankSum=  |
| 37325 | chrY | 13838821 | . | A | T | 16425.13 | PASS          | AC=9;AF=0.150;AN=60;BaseQRankSum=  |
| 37326 | chrY | 13838824 | . | A | T | 14697.53 | PASS          | AC=9;AF=0.150;AN=60;BaseQRankSum=  |
| 37327 | chrY | 13838826 | . | C | G | 14660.36 | PASS          | AC=9;AF=0.145;AN=62;BaseQRankSum=  |
| 37328 | chrY | 13838885 | . | A | G | 333.42   | PASS          | AC=1;AF=0.019;AN=54;BaseQRankSum=  |
| 37329 | chrY | 13838951 | . | T | G | 75.66    | PASS          | AC=2;AF=0.042;AN=48;BaseQRankSum=  |
| 37330 | chrY | 13838955 | . | G | A | 37.71    | PASS          | AC=1;AF=0.015;AN=66;BaseQRankSum=  |
| 37331 | chrY | 13838961 | . | G | T | 39.92    | PASS          | AC=2;AF=0.033;AN=60;BaseQRankSum=  |
| 37332 | chrY | 13838964 | . | T | A | 36.72    | PASS          | AC=2;AF=0.030;AN=66;BaseQRankSum=  |
| 37333 | chrY | 13838965 | . | C | T | 182.99   | PASS          | AC=3;AF=0.047;AN=64;BaseQRankSum=  |
| 37334 | chrY | 13838968 | . | A | T | 47.86    | PASS          | AC=1;AF=0.016;AN=64;BaseQRankSum=  |
| 37335 | chrY | 13838969 | . | T | C | 37.65    | PASS          | AC=2;AF=0.030;AN=66;BaseQRankSum=  |
| 37336 | chrY | 13838970 | . | G | A | 50.16    | PASS          | AC=1;AF=0.016;AN=64;BaseQRankSum=  |
| 37337 | chrY | 13838979 | . | A | T | 64.86    | PASS          | AC=2;AF=0.034;AN=58;BaseQRankSum=  |
| 37338 | chrY | 13838984 | . | T | A | 45.37    | PASS          | AC=1;AF=0.015;AN=68;BaseQRankSum=  |
| 37339 | chrY | 13838991 | . | G | A | 58.20    | PASS          | AC=1;AF=0.015;AN=68;BaseQRankSum=  |
| 37340 | chrY | 13838993 | . | A | C | 53.68    | PASS          | AC=1;AF=0.015;AN=68;BaseQRankSum=  |
| 37341 | chrY | 13839000 | . | G | A | 56.94    | PASS          | AC=1;AF=0.014;AN=70;BaseQRankSum=  |
| 37342 | chrY | 13839181 | . | A | C | 5102.86  | PASS          | AC=1;AF=0.017;AN=58;BaseQRankSum=  |
| 37343 | chrY | 13839194 | . | C | T | 5088.75  | my_snp_filter | AC=3;AF=0.060;AN=50;BaseQRankSum=  |
| 37344 | chrY | 13839211 | . | A | G | 43.02    | PASS          | AC=2;AF=0.029;AN=70;BaseQRankSum=  |
| 37345 | chrY | 13839224 | . | T | C | 9909.72  | my_snp_filter | AC=6;AF=0.100;AN=60;BaseQRankSum=  |
| 37346 | chrY | 13839230 | . | G | A | 155      | PASS          | AC=4;AF=0.057;AN=70;BaseQRankSum=  |
| 37347 | chrY | 13839231 | . | G | C | 9100.37  | my_snp_filter | AC=2;AF=0.031;AN=64;BaseQRankSum=  |
| 37348 | chrY | 13839233 | . | A | G | 13148.83 | PASS          | AC=2;AF=0.033;AN=60;BaseQRankSum=  |
| 37349 | chrY | 13839236 | . | G | C | 99.11    | PASS          | AC=1;AF=0.016;AN=64;BaseQRankSum=  |
| 37350 | chrY | 13839241 | . | G | A | 143.50   | my_snp_filter | AC=5;AF=0.076;AN=66;BaseQRankSum=  |
| 37351 | chrY | 13839244 | . | A | T | 12406.91 | PASS          | AC=9;AF=0.136;AN=66;BaseQRankSum=  |
| 37352 | chrY | 13839246 | . | G | A | 11066.42 | my_snp_filter | AC=3;AF=0.048;AN=66;BaseQRankSum=  |
| 37353 | chrY | 13839249 | . | C | T | 211.75   | PASS          | AC=5;AF=0.071;AN=70;BaseQRankSum=  |
| 37354 | chrY | 13839251 | . | G | T | 164.37   | PASS          | AC=5;AF=0.071;AN=70;BaseQRankSum=  |
| 37355 | chrY | 13839256 | . | C | G | 301.33   | PASS          | AC=4;AF=0.069;AN=58;BaseQRankSum=  |
| 37356 | chrY | 13839270 | . | G | T | 1305.67  | my_snp_filter | AC=2;AF=0.029;AN=70;BaseQRankSum=  |
| 37357 | chrY | 13839276 | . | C | T | 6965.46  | PASS          | AC=6;AF=0.107;AN=56;BaseQRankSum=  |
| 37358 | chrY | 13839285 | . | T | C | 2310.70  | PASS          | AC=2;AF=0.045;AN=44;BaseQRankSum=  |
| 37359 | chrY | 13839287 | . | A | T | 56.30    | PASS          | AC=2;AF=0.030;AN=66;BaseQRankSum=  |
| 37360 | chrY | 13839291 | . | T | G | 2738.88  | PASS          | AC=5;AF=0.100;AN=50;BaseQRankSum=  |
| 37361 | chrY | 13839300 | . | T | C | 2740.96  | PASS          | AC=2;AF=0.029;AN=70;BaseQRankSum=  |
| 37362 | chrY | 13839302 | . | A | C | 2741.05  | PASS          | AC=2;AF=0.029;AN=70;BaseQRankSum=  |
| 37363 | chrY | 13839311 | . | T | C | 31.62    | my_snp_filter | AC=1;AF=0.023;AN=44;BaseQRankSum=  |
| 37364 | chrY | 13839325 | . | G | T | 37.75    | PASS          | AC=2;AF=0.029;AN=70;BaseQRankSum=  |
| 37365 | chrY | 13839345 | . | G | T | 328.16   | PASS          | AC=1;AF=0.014;AN=70;BaseQRankSum=  |
| 37366 | chrY | 13839346 | . | T | G | 323.06   | PASS          | AC=1;AF=0.015;AN=68;BaseQRankSum=  |
| 37367 | chrY | 13839357 | . | G | A | 43.51    | my_snp_filter | AC=1;AF=0.025;AN=40;BaseQRankSum=  |
| 37368 | chrY | 13839363 | . | A | G | 41.74    | my_snp_filter | AC=1;AF=0.014;AN=70;BaseQRankSum=  |
| 37369 | chrY | 13839536 | . | A | G | 9615.91  | PASS          | AC=64;AF=0.970;AN=66;BaseQRankSum= |
| 37370 | chrY | 13839555 | . | A | G | 139.54   | PASS          | AC=2;AF=0.038;AN=52;BaseQRankSum=  |
| 37371 | chrY | 13839564 | . | A | T | 135.67   | PASS          | AC=2;AF=0.037;AN=54;BaseQRankSum=  |
| 37372 | chrY | 13839566 | . | A | G | 173.54   | PASS          | AC=4;AF=0.077;AN=52;BaseQRankSum=  |
| 37373 | chrY | 13839568 | . | A | T | 123.12   | PASS          | AC=2;AF=0.029;AN=70;BaseQRankSum=  |
| 37374 | chrY | 13839569 | . | T | A | 123.12   | PASS          | AC=2;AF=0.029;AN=68;BaseQRankSum=  |
| 37375 | chrY | 13839575 | . | C | T | 121.47   | PASS          | AC=2;AF=0.043;AN=46;BaseQRankSum=  |
| 37376 | chrY | 13839581 | . | G | T | 116.42   | PASS          | AC=2;AF=0.029;AN=68;BaseQRankSum=  |
| 37377 | chrY | 13840050 | . | G | T | 46.88    | my_snp_filter | AC=1;AF=0.015;AN=66;BaseQRankSum=  |
| 37378 | chrY | 13840051 | . | G | A | 167.02   | PASS          | AC=3;AF=0.045;AN=66;BaseQRankSum=  |
| 37379 | chrY | 13840052 | . | G | A | 168.25   | PASS          | AC=3;AF=0.045;AN=66;BaseQRankSum=  |
| 37380 | chrY | 13840063 | . | C | T | 1294.68  | PASS          | AC=5;AF=0.071;AN=70;BaseQRankSum=  |
| 37381 | chrY | 13840255 | . | G | A | 34.33    | PASS          | AC=1;AF=0.015;AN=68;BaseQRankSum=  |
| 37382 | chrY | 13840268 | . | A | G | 34.02    | PASS          | AC=1;AF=0.015;AN=68;BaseQRankSum=  |
| 37383 | chrY | 13840277 | . | A | T | 31.18    | PASS          | AC=1;AF=0.015;AN=66;BaseQRankSum=  |
| 37384 | chrY | 13841359 | . | C | G | 423.17   | PASS          | AC=2;AF=0.029;AN=68;DP=615;FS=0.0  |
| 37385 | chrY | 13841419 | . | C | G | 76.01    | my_snp_filter | AC=2;AF=0.029;AN=70;BaseQRankSum=  |
| 37386 | chrY | 13841420 | . | A | G | 92.46    | PASS          | AC=1;AF=0.014;AN=70;BaseQRankSum=  |
| 37387 | chrY | 13841425 | . | G | T | 83.70    | PASS          | AC=1;AF=0.014;AN=70;BaseQRankSum=  |
| 37388 | chrY | 13841426 | . | A | G | 81.76    | PASS          | AC=1;AF=0.014;AN=70;BaseQRankSum=  |
| 37389 | chrY | 13841434 | . | T | C | 98.34    | PASS          | AC=1;AF=0.015;AN=68;BaseQRankSum=  |
| 37390 | chrY | 13841440 | . | G | A | 90.77    | PASS          | AC=1;AF=0.014;AN=70;BaseQRankSum=  |
| 37391 | chrY | 13841448 | . | C | T | 63.89    | PASS          | AC=1;AF=0.014;AN=70;BaseQRankSum=  |
| 37392 | chrY | 13841449 | . | G | A | 40.35    | my_snp_filter | AC=6;AF=0.086;AN=70;BaseQRankSum=  |

|       |      |          |   |   |     |         |               |                                    |
|-------|------|----------|---|---|-----|---------|---------------|------------------------------------|
| 37393 | chrY | 13841462 | . | A | C   | 134.76  | PASS          | AC=6;AF=0.094;AN=64;BaseQRankSum=  |
| 37394 | chrY | 13841487 | . | A | T   | 80.10   | PASS          | AC=1;AF=0.015;AN=68;BaseQRankSum=  |
| 37395 | chrY | 13841488 | . | A | T   | 147.55  | PASS          | AC=3;AF=0.045;AN=66;BaseQRankSum=  |
| 37396 | chrY | 13841490 | . | A | G   | 116.67  | PASS          | AC=3;AF=0.054;AN=56;BaseQRankSum=  |
| 37397 | chrY | 13841492 | . | A | C   | 65.91   | PASS          | AC=1;AF=0.019;AN=54;BaseQRankSum=  |
| 37398 | chrY | 13841607 | . | T | G   | 88.04   | PASS          | AC=1;AF=0.015;AN=66;BaseQRankSum=  |
| 37399 | chrY | 13841610 | . | G | A   | 82.70   | PASS          | AC=1;AF=0.015;AN=66;BaseQRankSum=  |
| 37400 | chrY | 13841614 | . | C | G   | 79.97   | PASS          | AC=1;AF=0.016;AN=64;BaseQRankSum=  |
| 37401 | chrY | 13841615 | . | G | T   | 4787    | PASS          | AC=42;AF=0.700;AN=60;BaseQRankSum= |
| 37402 | chrY | 13842180 | . | A | G   | 1396.95 | PASS          | AC=6;AF=0.086;AN=70;BaseQRankSum=  |
| 37403 | chrY | 13842194 | . | C | A   | 1228.48 | PASS          | AC=5;AF=0.071;AN=70;BaseQRankSum=  |
| 37404 | chrY | 13842195 | . | A | G   | 1229.29 | PASS          | AC=5;AF=0.071;AN=70;BaseQRankSum=  |
| 37405 | chrY | 13842206 | . | G | T   | 202.62  | PASS          | AC=2;AF=0.029;AN=70;BaseQRankSum=  |
| 37406 | chrY | 13842391 | . | C | A   | 31.57   | PASS          | AC=1;AF=0.014;AN=70;BaseQRankSum=  |
| 37407 | chrY | 13842392 | . | A | G   | 31.94   | PASS          | AC=1;AF=0.014;AN=70;BaseQRankSum=  |
| 37408 | chrY | 13842397 | . | G | A   | 34.03   | PASS          | AC=1;AF=0.015;AN=68;BaseQRankSum=  |
| 37409 | chrY | 13842405 | . | C | A   | 40.53   | PASS          | AC=1;AF=0.015;AN=68;BaseQRankSum=  |
| 37410 | chrY | 13842406 | . | T | A   | 40.12   | PASS          | AC=1;AF=0.015;AN=68;BaseQRankSum=  |
| 37411 | chrY | 13842803 | . | G | C   | 277.16  | PASS          | AC=1;AF=0.021;AN=48;BaseQRankSum=  |
| 37412 | chrY | 13842805 | . | A | G   | 273.04  | PASS          | AC=1;AF=0.014;AN=70;BaseQRankSum=  |
| 37413 | chrY | 13842806 | . | T | G   | 272     | PASS          | AC=1;AF=0.014;AN=70;BaseQRankSum=  |
| 37414 | chrY | 13842808 | . | G | A   | 125.39  | my_snp_filter | AC=1;AF=0.015;AN=68;BaseQ          |
| 37415 | chrY | 13842818 | . | C | G   | 2458.40 | PASS          | AC=4;AF=0.080;AN=50;BaseQRankSum=  |
| 37416 | chrY | 13842868 | . | G | A   | 433.44  | PASS          | AC=2;AF=0.040;AN=50;DP=2100;FS=0.  |
| 37417 | chrY | 13842999 | . | A | G   | 62.91   | my_snp_filter | AC=1;AF=0.014;AN=70;BaseQ          |
| 37418 | chrY | 13843009 | . | G | A   | 113.34  | my_snp_filter | AC=2;AF=0.029;AN=70;BaseQ          |
| 37419 | chrY | 13843010 | . | T | G   | 59.08   | my_snp_filter | AC=1;AF=0.014;AN=70;BaseQ          |
| 37420 | chrY | 13843019 | . | A | T   | 482.76  | PASS          | AC=6;AF=0.086;AN=70;BaseQRankSum=  |
| 37421 | chrY | 13843023 | . | A | T   | 486.72  | PASS          | AC=6;AF=0.086;AN=70;BaseQRankSum=  |
| 37422 | chrY | 13843026 | . | C | T   | 850.01  | PASS          | AC=6;AF=0.086;AN=70;BaseQRankSum=  |
| 37423 | chrY | 13843027 | . | A | G   | 505.22  | PASS          | AC=6;AF=0.086;AN=70;BaseQRankSum=  |
| 37424 | chrY | 13843032 | . | G | C   | 515.86  | PASS          | AC=6;AF=0.088;AN=68;BaseQRankSum=  |
| 37425 | chrY | 13843050 | . | G | A   | 799.43  | PASS          | AC=5;AF=0.076;AN=66;BaseQRankSum=  |
| 37426 | chrY | 13843056 | . | G | T   | 796.03  | PASS          | AC=5;AF=0.071;AN=70;BaseQRankSum=  |
| 37427 | chrY | 13843062 | . | A | T   | 793.23  | PASS          | AC=5;AF=0.071;AN=70;BaseQRankSum=  |
| 37428 | chrY | 13843069 | . | A | C   | 893.27  | PASS          | AC=6;AF=0.091;AN=66;BaseQRankSum=  |
| 37429 | chrY | 13843085 | . | G | C   | 1035.17 | PASS          | AC=6;AF=0.094;AN=64;BaseQRankSum=  |
| 37430 | chrY | 13843106 | . | T | C   | 657.52  | PASS          | AC=3;AF=0.045;AN=66;BaseQRankSum=  |
| 37431 | chrY | 13843112 | . | A | G   | 556.86  | PASS          | AC=3;AF=0.044;AN=68;BaseQRankSum=  |
| 37432 | chrY | 13843128 | . | C | T,A | 536.38  | PASS          | AC=1,3;AF=0.014,0.043;AN=70;BaseQ  |
| 37433 | chrY | 13843130 | . | C | T   | 432.92  | PASS          | AC=3;AF=0.044;AN=68;BaseQRankSum=  |
| 37434 | chrY | 13843131 | . | G | A   | 61.30   | PASS          | AC=1;AF=0.014;AN=70;BaseQRankSum=  |
| 37435 | chrY | 13843140 | . | T | A   | 188.27  | PASS          | AC=2;AF=0.029;AN=70;BaseQRankSum=  |
| 37436 | chrY | 13843146 | . | G | A   | 190.20  | PASS          | AC=2;AF=0.029;AN=70;BaseQRankSum=  |
| 37437 | chrY | 13843150 | . | T | A   | 370.81  | PASS          | AC=4;AF=0.057;AN=70;BaseQRankSum=  |
| 37438 | chrY | 13843155 | . | G | T   | 45.50   | PASS          | AC=1;AF=0.014;AN=70;BaseQRankSum=  |
| 37439 | chrY | 13843156 | . | G | A   | 101.15  | PASS          | AC=2;AF=0.029;AN=70;BaseQRankSum=  |
| 37440 | chrY | 13843158 | . | A | C   | 247.87  | PASS          | AC=4;AF=0.057;AN=70;BaseQRankSum=  |
| 37441 | chrY | 13843166 | . | G | T   | 256.32  | PASS          | AC=4;AF=0.057;AN=70;BaseQRankSum=  |
| 37442 | chrY | 13843185 | . | G | T   | 215.61  | PASS          | AC=1;AF=0.014;AN=70;BaseQRankSum=  |
| 37443 | chrY | 13843202 | . | T | A   | 1178.13 | PASS          | AC=9;AF=0.136;AN=66;BaseQRankSum=  |
| 37444 | chrY | 13843206 | . | G | A   | 114.60  | PASS          | AC=1;AF=0.015;AN=66;BaseQRankSum=  |
| 37445 | chrY | 13843207 | . | A | G   | 367.28  | my_snp_filter | AC=8;AF=0.118;AN=68;BaseQ          |
| 37446 | chrY | 13843215 | . | C | G   | 1313.84 | PASS          | AC=8;AF=0.121;AN=66;BaseQRankSum=  |
| 37447 | chrY | 13843218 | . | T | A   | 94.30   | PASS          | AC=1;AF=0.015;AN=66;BaseQRankSum=  |
| 37448 | chrY | 13843220 | . | C | G   | 1484.29 | PASS          | AC=8;AF=0.121;AN=66;BaseQRankSum=  |
| 37449 | chrY | 13843228 | . | T | A   | 1109.28 | PASS          | AC=10;AF=0.147;AN=68;BaseQRankSum= |
| 37450 | chrY | 13843234 | . | T | C   | 456.90  | PASS          | AC=1;AF=0.014;AN=70;BaseQRankSum=  |
| 37451 | chrY | 13843236 | . | A | T   | 1245.85 | PASS          | AC=9;AF=0.129;AN=70;BaseQRankSum=  |
| 37452 | chrY | 13843238 | . | C | T   | 370.35  | PASS          | AC=1;AF=0.015;AN=68;BaseQRankSum=  |
| 37453 | chrY | 13843239 | . | A | G   | 328.26  | PASS          | AC=1;AF=0.015;AN=68;BaseQRankSum=  |
| 37454 | chrY | 13843243 | . | A | T   | 1869.50 | PASS          | AC=9;AF=0.136;AN=66;BaseQRankSum=  |
| 37455 | chrY | 13843246 | . | A | C   | 36.86   | my_snp_filter | AC=1;AF=0.014;AN=70;BaseQ          |
| 37456 | chrY | 13843250 | . | G | A   | 2013.12 | PASS          | AC=9;AF=0.129;AN=70;BaseQRankSum=  |
| 37457 | chrY | 13843254 | . | T | G   | 1435.41 | PASS          | AC=8;AF=0.118;AN=68;BaseQRankSum=  |
| 37458 | chrY | 13843258 | . | C | T   | 1437.52 | PASS          | AC=7;AF=0.106;AN=66;BaseQRankSum=  |
| 37459 | chrY | 13843295 | . | A | G   | 340.56  | PASS          | AC=7;AF=0.100;AN=70;BaseQRankSum=  |
| 37460 | chrY | 13843305 | . | T | G   | 310.03  | PASS          | AC=7;AF=0.140;AN=50;BaseQRankSum=  |
| 37461 | chrY | 13843307 | . | A | G   | 190.50  | PASS          | AC=4;AF=0.057;AN=70;BaseQRankSum=  |
| 37462 | chrY | 13843310 | . | A | G   | 197.98  | PASS          | AC=4;AF=0.057;AN=70;BaseQRankSum=  |
| 37463 | chrY | 13843312 | . | G | A   | 322.24  | PASS          | AC=7;AF=0.135;AN=52;BaseQRankSum=  |
| 37464 | chrY | 13843313 | . | T | A   | 83.99   | PASS          | AC=3;AF=0.056;AN=54;BaseQRankSum=  |
| 37465 | chrY | 13843318 | . | T | C   | 201.71  | PASS          | AC=4;AF=0.059;AN=68;BaseQRankSum=  |
| 37466 | chrY | 13843320 | . | G | C   | 91.39   | PASS          | AC=3;AF=0.043;AN=70;BaseQRankSum=  |
| 37467 | chrY | 13843343 | . | A | T   | 67.71   | PASS          | AC=2;AF=0.029;AN=70;BaseQRankSum=  |
| 37468 | chrY | 13843920 | . | A | G   | 71.86   | PASS          | AC=2;AF=0.042;AN=48;BaseQRankSum=  |

|       |      |          |   |   |     |         |               |                                    |
|-------|------|----------|---|---|-----|---------|---------------|------------------------------------|
| 37469 | chrY | 13843938 | . | T | A   | 3543.96 | my_snp_filter | AC=21;AF=0.420;AN=50;BaseQ         |
| 37470 | chrY | 13843994 | . | A | G   | 139.61  | PASS          | AC=1;AF=0.020;AN=50;BaseQRankSum=  |
| 37471 | chrY | 13843997 | . | C | A   | 1609.78 | PASS          | AC=2;AF=0.043;AN=46;BaseQRankSum=  |
| 37472 | chrY | 13844078 | . | A | T   | 1008.69 | PASS          | AC=1;AF=0.018;AN=56;BaseQRankSum=  |
| 37473 | chrY | 13844305 | . | T | G   | 2405.48 | my_snp_filter | AC=8;AF=0.118;AN=68;BaseQ          |
| 37474 | chrY | 13844308 | . | T | A   | 2441.80 | my_snp_filter | AC=8;AF=0.114;AN=70;BaseQ          |
| 37475 | chrY | 13844311 | . | A | C   | 2395.39 | my_snp_filter | AC=8;AF=0.118;AN=68;BaseQ          |
| 37476 | chrY | 13844314 | . | T | G   | 2174.50 | my_snp_filter | AC=7;AF=0.106;AN=66;BaseQ          |
| 37477 | chrY | 13844317 | . | A | C   | 2039.66 | my_snp_filter | AC=7;AF=0.106;AN=66;BaseQ          |
| 37478 | chrY | 13844325 | . | A | G   | 1983.60 | my_snp_filter | AC=7;AF=0.103;AN=68;BaseQ          |
| 37479 | chrY | 13844335 | . | T | G   | 2022.18 | my_snp_filter | AC=7;AF=0.106;AN=66;BaseQ          |
| 37480 | chrY | 13844339 | . | G | A   | 1862.21 | my_snp_filter | AC=7;AF=0.103;AN=68;BaseQ          |
| 37481 | chrY | 13844354 | . | A | G   | 1897.19 | my_snp_filter | AC=7;AF=0.103;AN=68;BaseQ          |
| 37482 | chrY | 13844358 | . | C | T   | 2106.93 | my_snp_filter | AC=7;AF=0.103;AN=68;BaseQ          |
| 37483 | chrY | 13844359 | . | A | G   | 2108.23 | my_snp_filter | AC=7;AF=0.103;AN=68;BaseQ          |
| 37484 | chrY | 13844363 | . | T | C   | 2274.72 | my_snp_filter | AC=7;AF=0.100;AN=70;BaseQ          |
| 37485 | chrY | 13844370 | . | T | G   | 2319.92 | PASS          | AC=7;AF=0.103;AN=68;BaseQRankSum=  |
| 37486 | chrY | 13844378 | . | C | T   | 2381.38 | PASS          | AC=7;AF=0.103;AN=68;BaseQRankSum=  |
| 37487 | chrY | 13844379 | . | T | C   | 2546.38 | PASS          | AC=7;AF=0.103;AN=68;BaseQRankSum=  |
| 37488 | chrY | 13844380 | . | G | A   | 2590.35 | PASS          | AC=7;AF=0.103;AN=68;BaseQRankSum=  |
| 37489 | chrY | 13844385 | . | C | G   | 2829.48 | PASS          | AC=7;AF=0.103;AN=68;BaseQRankSum=  |
| 37490 | chrY | 13844390 | . | A | G   | 3037.67 | PASS          | AC=7;AF=0.103;AN=68;BaseQRankSum=  |
| 37491 | chrY | 13844391 | . | A | G   | 877.42  | PASS          | AC=4;AF=0.059;AN=68;BaseQRankSum=  |
| 37492 | chrY | 13844407 | . | C | A   | 100.77  | PASS          | AC=1;AF=0.014;AN=70;BaseQRankSum=  |
| 37493 | chrY | 13844408 | . | T | C   | 1784.17 | PASS          | AC=7;AF=0.100;AN=70;BaseQRankSum=  |
| 37494 | chrY | 13844409 | . | G | A   | 1832.99 | PASS          | AC=7;AF=0.100;AN=70;BaseQRankSum=  |
| 37495 | chrY | 13844425 | . | G | A,C | 2574    | PASS          | AC=9,4;AF=0.129,0.057;AN=70;BaseQ  |
| 37496 | chrY | 13844427 | . | A | G   | 615.46  | PASS          | AC=4;AF=0.057;AN=70;BaseQRankSum=  |
| 37497 | chrY | 13844429 | . | G | A   | 4878.92 | PASS          | AC=15;AF=0.221;AN=68;BaseQRankSum= |
| 37498 | chrY | 13844433 | . | G | C   | 645.35  | PASS          | AC=5;AF=0.071;AN=70;BaseQRankSum=  |
| 37499 | chrY | 13844444 | . | G | A   | 2013.93 | PASS          | AC=8;AF=0.114;AN=70;BaseQRankSum=  |
| 37500 | chrY | 13844455 | . | C | G   | 461.79  | PASS          | AC=1;AF=0.015;AN=68;BaseQRankSum=  |
| 37501 | chrY | 13844467 | . | C | T   | 407.02  | PASS          | AC=5;AF=0.109;AN=46;BaseQRankSum=  |
| 37502 | chrY | 13844485 | . | G | A   | 289.28  | PASS          | AC=3;AF=0.060;AN=50;BaseQRankSum=  |
| 37503 | chrY | 13844486 | . | G | A   | 293.32  | PASS          | AC=3;AF=0.060;AN=50;BaseQRankSum=  |
| 37504 | chrY | 13844492 | . | A | G   | 233.87  | PASS          | AC=2;AF=0.040;AN=50;BaseQRankSum=  |
| 37505 | chrY | 13844493 | . | G | T   | 236.55  | PASS          | AC=2;AF=0.040;AN=50;BaseQRankSum=  |
| 37506 | chrY | 13844504 | . | G | A   | 70.05   | PASS          | AC=2;AF=0.029;AN=70;BaseQRankSum=  |
| 37507 | chrY | 13844558 | . | C | G   | 122.74  | PASS          | AC=1;AF=0.015;AN=68;BaseQRankSum=  |
| 37508 | chrY | 13844578 | . | C | T   | 80.55   | PASS          | AC=1;AF=0.023;AN=44;BaseQRankSum=  |
| 37509 | chrY | 13844618 | . | C | T   | 945.52  | PASS          | AC=5;AF=0.109;AN=46;BaseQRankSum=  |
| 37510 | chrY | 13844628 | . | A | T   | 986.53  | PASS          | AC=4;AF=0.087;AN=46;BaseQRankSum=  |
| 37511 | chrY | 13844648 | . | G | A   | 896.03  | PASS          | AC=2;AF=0.036;AN=56;BaseQRankSum=  |
| 37512 | chrY | 13844657 | . | T | C   | 878.79  | PASS          | AC=1;AF=0.018;AN=56;BaseQRankSum=  |
| 37513 | chrY | 13844659 | . | G | T   | 879.07  | PASS          | AC=1;AF=0.015;AN=68;BaseQRankSum=  |
| 37514 | chrY | 13844669 | . | T | G   | 925.56  | PASS          | AC=1;AF=0.019;AN=54;BaseQRankSum=  |
| 37515 | chrY | 13844670 | . | A | G   | 925.56  | PASS          | AC=1;AF=0.019;AN=54;BaseQRankSum=  |
| 37516 | chrY | 13844675 | . | C | G   | 923.30  | PASS          | AC=1;AF=0.019;AN=54;BaseQRankSum=  |
| 37517 | chrY | 13844679 | . | A | T   | 1010.23 | PASS          | AC=1;AF=0.019;AN=54;BaseQRankSum=  |
| 37518 | chrY | 13844690 | . | C | T   | 1007.42 | PASS          | AC=1;AF=0.019;AN=54;BaseQRankSum=  |
| 37519 | chrY | 13844691 | . | G | A   | 1049.36 | PASS          | AC=1;AF=0.019;AN=54;BaseQRankSum=  |
| 37520 | chrY | 13844705 | . | T | G   | 957.26  | PASS          | AC=1;AF=0.015;AN=68;BaseQRankSum=  |
| 37521 | chrY | 13844713 | . | G | T   | 878.48  | PASS          | AC=1;AF=0.019;AN=54;BaseQRankSum=  |
| 37522 | chrY | 13844730 | . | G | A   | 837.20  | PASS          | AC=1;AF=0.015;AN=68;BaseQRankSum=  |
| 37523 | chrY | 13844740 | . | T | G   | 840.43  | PASS          | AC=2;AF=0.037;AN=54;BaseQRankSum=  |
| 37524 | chrY | 13844743 | . | G | T   | 841.18  | PASS          | AC=2;AF=0.037;AN=54;BaseQRankSum=  |
| 37525 | chrY | 13844745 | . | A | G   | 840.52  | PASS          | AC=1;AF=0.015;AN=68;BaseQRankSum=  |
| 37526 | chrY | 13844748 | . | C | T   | 843.71  | PASS          | AC=2;AF=0.037;AN=54;BaseQRankSum=  |
| 37527 | chrY | 13844759 | . | C | T   | 882.46  | PASS          | AC=1;AF=0.015;AN=68;BaseQRankSum=  |
| 37528 | chrY | 13844786 | . | C | A   | 980.85  | PASS          | AC=2;AF=0.037;AN=54;BaseQRankSum=  |
| 37529 | chrY | 13844799 | . | C | T   | 874.30  | PASS          | AC=1;AF=0.016;AN=64;BaseQRankSum=  |
| 37530 | chrY | 13844834 | . | G | T   | 33.59   | PASS          | AC=1;AF=0.015;AN=66;BaseQRankSum=  |
| 37531 | chrY | 13844839 | . | T | A   | 34.80   | PASS          | AC=1;AF=0.015;AN=68;BaseQRankSum=  |
| 37532 | chrY | 13844846 | . | C | A   | 33.97   | PASS          | AC=1;AF=0.020;AN=50;BaseQRankSum=  |
| 37533 | chrY | 13845039 | . | C | G   | 192.50  | PASS          | AC=2;AF=0.029;AN=68;BaseQRankSum=  |
| 37534 | chrY | 13845040 | . | A | G   | 191.82  | PASS          | AC=2;AF=0.029;AN=68;BaseQRankSum=  |
| 37535 | chrY | 13845214 | . | C | G   | 396.20  | PASS          | AC=3;AF=0.043;AN=70;BaseQRankSum=  |
| 37536 | chrY | 13845244 | . | C | G   | 271.95  | PASS          | AC=1;AF=0.015;AN=68;BaseQRankSum=  |
| 37537 | chrY | 13845257 | . | T | G   | 255.97  | PASS          | AC=1;AF=0.014;AN=70;BaseQRankSum=  |
| 37538 | chrY | 13845260 | . | T | C   | 1116.48 | PASS          | AC=5;AF=0.071;AN=70;BaseQRankSum=  |
| 37539 | chrY | 13845274 | . | T | C   | 1697.70 | PASS          | AC=5;AF=0.074;AN=68;BaseQRankSum=  |
| 37540 | chrY | 13845284 | . | A | G   | 1883.48 | PASS          | AC=5;AF=0.078;AN=64;BaseQRankSum=  |
| 37541 | chrY | 13845290 | . | G | A   | 859.66  | PASS          | AC=4;AF=0.061;AN=66;BaseQRankSum=  |
| 37542 | chrY | 13845292 | . | A | T   | 859.33  | PASS          | AC=4;AF=0.061;AN=66;BaseQRankSum=  |
| 37543 | chrY | 13845297 | . | T | A   | 2100.25 | PASS          | AC=5;AF=0.076;AN=66;BaseQRankSum=  |
| 37544 | chrY | 13845300 | . | T | G,C | 1460.24 | PASS          | AC=2,3;AF=0.032,0.048;AN=62;BaseQ  |

|       |      |          |   |   |   |         |               |                                    |
|-------|------|----------|---|---|---|---------|---------------|------------------------------------|
| 37545 | chrY | 13845343 | . | G | A | 1731.66 | PASS          | AC=5;AF=0.074;AN=68;BaseQRankSum=  |
| 37546 | chrY | 13845351 | . | T | A | 37.23   | my_snp_filter | AC=2;AF=0.029;AN=70;BaseQ          |
| 37547 | chrY | 13845352 | . | T | A | 36.13   | my_snp_filter | AC=2;AF=0.029;AN=70;BaseQ          |
| 37548 | chrY | 13845354 | . | G | A | 143.73  | my_snp_filter | AC=3;AF=0.043;AN=70;BaseQ          |
| 37549 | chrY | 13845358 | . | G | A | 47.34   | my_snp_filter | AC=2;AF=0.029;AN=70;BaseQ          |
| 37550 | chrY | 13845362 | . | T | A | 51.52   | my_snp_filter | AC=1;AF=0.014;AN=70;BaseQ          |
| 37551 | chrY | 13845364 | . | G | C | 50.25   | my_snp_filter | AC=1;AF=0.014;AN=70;BaseQ          |
| 37552 | chrY | 13845367 | . | C | T | 544.77  | PASS          | AC=6;AF=0.150;AN=40;BaseQRankSum=  |
| 37553 | chrY | 13845368 | . | G | T | 49.84   | my_snp_filter | AC=1;AF=0.015;AN=66;BaseQ          |
| 37554 | chrY | 13845388 | . | T | G | 72.07   | PASS          | AC=1;AF=0.016;AN=62;BaseQRankSum=  |
| 37555 | chrY | 13845389 | . | A | G | 71.74   | PASS          | AC=1;AF=0.017;AN=60;BaseQRankSum=  |
| 37556 | chrY | 13845398 | . | C | A | 116.35  | PASS          | AC=2;AF=0.032;AN=62;BaseQRankSum=  |
| 37557 | chrY | 13845405 | . | A | C | 36.95   | PASS          | AC=2;AF=0.033;AN=60;BaseQRankSum=  |
| 37558 | chrY | 13845411 | . | A | T | 78.57   | PASS          | AC=1;AF=0.016;AN=62;BaseQRankSum=  |
| 37559 | chrY | 13845414 | . | G | C | 53.57   | PASS          | AC=1;AF=0.022;AN=46;BaseQRankSum=  |
| 37560 | chrY | 13845419 | . | T | C | 44.37   | PASS          | AC=1;AF=0.019;AN=54;BaseQRankSum=  |
| 37561 | chrY | 13845424 | . | A | G | 59.69   | PASS          | AC=1;AF=0.063;AN=16;BaseQRankSum=  |
| 37562 | chrY | 13845432 | . | G | T | 92.39   | PASS          | AC=1;AF=0.100;AN=10;BaseQRankSum=  |
| 37563 | chrY | 13845434 | . | A | G | 87.75   | PASS          | AC=1;AF=0.022;AN=46;BaseQRankSum=  |
| 37564 | chrY | 13845585 | . | C | G | 87.90   | PASS          | AC=1;AF=0.015;AN=66;BaseQRankSum=  |
| 37565 | chrY | 13845586 | . | A | G | 99.57   | PASS          | AC=1;AF=0.015;AN=66;BaseQRankSum=  |
| 37566 | chrY | 13845595 | . | A | G | 90.58   | PASS          | AC=1;AF=0.016;AN=64;BaseQRankSum=  |
| 37567 | chrY | 13846108 | . | A | G | 214.67  | PASS          | AC=2;AF=0.029;AN=70;BaseQRankSum=  |
| 37568 | chrY | 13846253 | . | T | C | 366.10  | PASS          | AC=1;AF=0.015;AN=68;BaseQRankSum=  |
| 37569 | chrY | 13846296 | . | A | G | 77.62   | PASS          | AC=2;AF=0.032;AN=62;BaseQRankSum=  |
| 37570 | chrY | 13846298 | . | T | C | 87.07   | PASS          | AC=2;AF=0.034;AN=58;BaseQRankSum=  |
| 37571 | chrY | 13846299 | . | A | G | 153.22  | PASS          | AC=2;AF=0.071;AN=28;BaseQRankSum=  |
| 37572 | chrY | 13846313 | . | C | T | 85.52   | PASS          | AC=2;AF=0.083;AN=24;BaseQRankSum=  |
| 37573 | chrY | 13846314 | . | A | T | 137.49  | PASS          | AC=2;AF=0.083;AN=24;BaseQRankSum=  |
| 37574 | chrY | 13846435 | . | G | C | 355.86  | PASS          | AC=4;AF=0.057;AN=70;BaseQRankSum=  |
| 37575 | chrY | 13846441 | . | G | A | 505.07  | PASS          | AC=4;AF=0.250;AN=16;BaseQRankSum=  |
| 37576 | chrY | 13846448 | . | T | C | 378.51  | PASS          | AC=4;AF=0.057;AN=70;BaseQRankSum=  |
| 37577 | chrY | 13846463 | . | T | A | 353.81  | PASS          | AC=4;AF=0.057;AN=70;BaseQRankSum=  |
| 37578 | chrY | 13846473 | . | T | C | 340.32  | PASS          | AC=4;AF=0.057;AN=70;BaseQRankSum=  |
| 37579 | chrY | 13846487 | . | A | G | 92.52   | my_snp_filter | AC=3;AF=0.043;AN=70;BaseQ          |
| 37580 | chrY | 13846512 | . | A | T | 134.02  | PASS          | AC=1;AF=0.014;AN=70;BaseQRankSum=  |
| 37581 | chrY | 13846517 | . | C | A | 196.44  | PASS          | AC=1;AF=0.019;AN=54;BaseQRankSum=  |
| 37582 | chrY | 13846520 | . | G | A | 143.33  | PASS          | AC=1;AF=0.019;AN=52;BaseQRankSum=  |
| 37583 | chrY | 13846523 | . | T | C | 346.73  | PASS          | AC=4;AF=0.061;AN=66;BaseQRankSum=  |
| 37584 | chrY | 13846524 | . | G | C | 111.93  | PASS          | AC=1;AF=0.015;AN=66;BaseQRankSum=  |
| 37585 | chrY | 13846527 | . | T | A | 493.70  | PASS          | AC=3;AF=0.088;AN=34;BaseQRankSum=  |
| 37586 | chrY | 13846529 | . | C | G | 604.87  | PASS          | AC=2;AF=0.063;AN=32;BaseQRankSum=  |
| 37587 | chrY | 13846530 | . | C | G | 516.73  | PASS          | AC=2;AF=0.063;AN=32;BaseQRankSum=  |
| 37588 | chrY | 13846532 | . | A | C | 488.64  | PASS          | AC=2;AF=0.048;AN=42;BaseQRankSum=  |
| 37589 | chrY | 13846543 | . | C | T | 166.54  | PASS          | AC=2;AF=0.029;AN=70;BaseQRankSum=  |
| 37590 | chrY | 13846558 | . | T | C | 32.67   | my_snp_filter | AC=1;AF=0.014;AN=70;BaseQ          |
| 37591 | chrY | 13846560 | . | G | A | 87.17   | PASS          | AC=2;AF=0.029;AN=68;BaseQRankSum=  |
| 37592 | chrY | 13846562 | . | T | C | 157.71  | PASS          | AC=1;AF=0.014;AN=70;BaseQRankSum=  |
| 37593 | chrY | 13846569 | . | G | A | 68.51   | PASS          | AC=2;AF=0.043;AN=46;BaseQRankSum=  |
| 37594 | chrY | 13846570 | . | C | T | 325.94  | PASS          | AC=4;AF=0.091;AN=44;BaseQRankSum=  |
| 37595 | chrY | 13846572 | . | G | A | 235.06  | PASS          | AC=5;AF=0.192;AN=26;BaseQRankSum=  |
| 37596 | chrY | 13846579 | . | T | C | 180.99  | PASS          | AC=1;AF=0.016;AN=62;BaseQRankSum=  |
| 37597 | chrY | 13846583 | . | T | A | 224.91  | PASS          | AC=1;AF=0.014;AN=70;BaseQRankSum=  |
| 37598 | chrY | 13846594 | . | T | C | 148.20  | PASS          | AC=4;AF=0.069;AN=58;BaseQRankSum=  |
| 37599 | chrY | 13846595 | . | G | A | 80.23   | PASS          | AC=1;AF=0.017;AN=60;BaseQRankSum=  |
| 37600 | chrY | 13846604 | . | G | C | 109.75  | PASS          | AC=1;AF=0.014;AN=70;BaseQRankSum=  |
| 37601 | chrY | 13846609 | . | C | A | 98.65   | PASS          | AC=1;AF=0.015;AN=68;BaseQRankSum=  |
| 37602 | chrY | 13846610 | . | A | C | 98.59   | PASS          | AC=1;AF=0.015;AN=68;BaseQRankSum=  |
| 37603 | chrY | 13846623 | . | C | G | 202.86  | PASS          | AC=1;AF=0.050;AN=20;BaseQRankSum=  |
| 37604 | chrY | 13846625 | . | A | G | 91.11   | PASS          | AC=2;AF=0.083;AN=24;BaseQRankSum=  |
| 37605 | chrY | 13846626 | . | T | A | 79.34   | PASS          | AC=1;AF=0.045;AN=22;BaseQRankSum=  |
| 37606 | chrY | 13846633 | . | T | G | 85.89   | PASS          | AC=1;AF=0.016;AN=62;BaseQRankSum=  |
| 37607 | chrY | 13846634 | . | T | G | 102.61  | PASS          | AC=2;AF=0.038;AN=52;BaseQRankSum=  |
| 37608 | chrY | 13846653 | . | G | T | 59.58   | PASS          | AC=1;AF=0.020;AN=50;BaseQRankSum=  |
| 37609 | chrY | 13846785 | . | G | A | 1310.31 | PASS          | AC=6;AF=0.086;AN=70;BaseQRankSum=  |
| 37610 | chrY | 13846883 | . | C | T | 446.28  | PASS          | AC=7;AF=0.106;AN=66;BaseQRankSum=  |
| 37611 | chrY | 13846911 | . | T | A | 2940.53 | PASS          | AC=17;AF=0.258;AN=66;BaseQRankSum= |
| 37612 | chrY | 13846915 | . | T | G | 2925.29 | PASS          | AC=17;AF=0.258;AN=66;BaseQRankSum= |
| 37613 | chrY | 13846916 | . | A | T | 1877.65 | PASS          | AC=17;AF=0.250;AN=68;BaseQRankSum= |
| 37614 | chrY | 13846920 | . | G | A | 1943.86 | PASS          | AC=17;AF=0.243;AN=70;BaseQRankSum= |
| 37615 | chrY | 13846935 | . | G | T | 420.68  | PASS          | AC=8;AF=0.118;AN=68;BaseQRankSum=  |
| 37616 | chrY | 13846936 | . | A | C | 374.57  | PASS          | AC=7;AF=0.103;AN=68;BaseQRankSum=  |
| 37617 | chrY | 13846940 | . | T | G | 2898.23 | PASS          | AC=15;AF=0.221;AN=68;BaseQRankSum= |
| 37618 | chrY | 13846942 | . | T | A | 2862.82 | PASS          | AC=15;AF=0.221;AN=68;BaseQRankSum= |
| 37619 | chrY | 13846947 | . | G | A | 2695.51 | PASS          | AC=15;AF=0.221;AN=68;BaseQRankSum= |
| 37620 | chrY | 13846950 | . | T | C | 158.61  | my_snp_filter | AC=7;AF=0.103;AN=68;BaseQ          |

|       |      |          |   |   |     |         |               |                                   |
|-------|------|----------|---|---|-----|---------|---------------|-----------------------------------|
| 37621 | chrY | 13846966 | . | A | T   | 267.88  | PASS          | AC=7;AF=0.100;AN=70;BaseQRankSum= |
| 37622 | chrY | 13846979 | . | G | T   | 472.08  | PASS          | AC=7;AF=0.100;AN=70;BaseQRankSum= |
| 37623 | chrY | 13846999 | . | G | C   | 378.06  | PASS          | AC=3;AF=0.043;AN=70;BaseQRankSum= |
| 37624 | chrY | 13847003 | . | T | C   | 425     | PASS          | AC=3;AF=0.043;AN=70;BaseQRankSum= |
| 37625 | chrY | 13847010 | . | C | A,G | 547.69  | PASS          | AC=4,3;AF=0.059,0.044;AN=68;BaseQ |
| 37626 | chrY | 13847014 | . | A | C   | 106.70  | my_snp_filter | AC=4;AF=0.057;AN=70;BaseQ         |
| 37627 | chrY | 13847018 | . | C | T   | 398.97  | PASS          | AC=3;AF=0.043;AN=70;BaseQRankSum= |
| 37628 | chrY | 13847019 | . | A | G   | 360.96  | PASS          | AC=3;AF=0.043;AN=70;BaseQRankSum= |
| 37629 | chrY | 13847026 | . | A | T   | 107.23  | PASS          | AC=3;AF=0.043;AN=70;BaseQRankSum= |
| 37630 | chrY | 13847038 | . | C | T   | 201.22  | PASS          | AC=2;AF=0.029;AN=70;BaseQRankSum= |
| 37631 | chrY | 13847041 | . | G | A   | 348.75  | PASS          | AC=5;AF=0.071;AN=70;BaseQRankSum= |
| 37632 | chrY | 13847044 | . | A | G   | 239.02  | PASS          | AC=3;AF=0.043;AN=70;BaseQRankSum= |
| 37633 | chrY | 13847049 | . | G | T   | 85.57   | my_snp_filter | AC=2;AF=0.029;AN=70;BaseQ         |
| 37634 | chrY | 13847058 | . | T | A   | 226.90  | PASS          | AC=2;AF=0.029;AN=70;BaseQRankSum= |
| 37635 | chrY | 13847063 | . | T | C   | 203.91  | PASS          | AC=2;AF=0.029;AN=70;BaseQRankSum= |
| 37636 | chrY | 13847075 | . | C | G   | 47.86   | PASS          | AC=1;AF=0.014;AN=70;BaseQRankSum= |
| 37637 | chrY | 13847231 | . | C | T   | 290.21  | PASS          | AC=4;AF=0.111;AN=36;BaseQRankSum= |
| 37638 | chrY | 13847238 | . | G | A   | 278.94  | PASS          | AC=4;AF=0.071;AN=56;BaseQRankSum= |
| 37639 | chrY | 13847354 | . | G | C   | 375.36  | PASS          | AC=2;AF=0.042;AN=48;BaseQRankSum= |
| 37640 | chrY | 13847399 | . | A | G   | 32.56   | my_snp_filter | AC=1;AF=0.016;AN=62;BaseQ         |
| 37641 | chrY | 13847409 | . | G | T   | 62.47   | PASS          | AC=1;AF=0.016;AN=62;BaseQRankSum= |
| 37642 | chrY | 13847414 | . | A | G   | 63.06   | PASS          | AC=1;AF=0.016;AN=62;BaseQRankSum= |
| 37643 | chrY | 13847429 | . | C | G   | 115.47  | PASS          | AC=1;AF=0.017;AN=60;BaseQRankSum= |
| 37644 | chrY | 13847431 | . | G | A   | 156.74  | PASS          | AC=2;AF=0.038;AN=52;BaseQRankSum= |
| 37645 | chrY | 13847478 | . | A | G   | 1898.35 | PASS          | AC=7;AF=0.103;AN=68;BaseQRankSum= |
| 37646 | chrY | 13847485 | . | A | G   | 1847.57 | PASS          | AC=7;AF=0.100;AN=70;BaseQRankSum= |
| 37647 | chrY | 13847490 | . | C | A   | 1711.46 | PASS          | AC=7;AF=0.109;AN=64;BaseQRankSum= |
| 37648 | chrY | 13847496 | . | T | C   | 1628.54 | PASS          | AC=7;AF=0.103;AN=68;BaseQRankSum= |
| 37649 | chrY | 13847499 | . | T | A   | 1619.18 | PASS          | AC=7;AF=0.109;AN=64;BaseQRankSum= |
| 37650 | chrY | 13847503 | . | G | T   | 1522.27 | PASS          | AC=6;AF=0.086;AN=70;BaseQRankSum= |
| 37651 | chrY | 13847523 | . | G | T   | 1014.15 | PASS          | AC=6;AF=0.100;AN=60;BaseQRankSum= |
| 37652 | chrY | 13847524 | . | T | C   | 997.74  | PASS          | AC=6;AF=0.094;AN=64;BaseQRankSum= |
| 37653 | chrY | 13847529 | . | G | A   | 842.12  | PASS          | AC=5;AF=0.078;AN=64;BaseQRankSum= |
| 37654 | chrY | 13847549 | . | G | T   | 647.72  | PASS          | AC=4;AF=0.057;AN=70;BaseQRankSum= |
| 37655 | chrY | 13847559 | . | T | G   | 366.07  | PASS          | AC=4;AF=0.063;AN=64;BaseQRankSum= |
| 37656 | chrY | 13847727 | . | C | T   | 396.73  | PASS          | AC=3;AF=0.043;AN=70;BaseQRankSum= |
| 37657 | chrY | 13847742 | . | C | T   | 294.80  | PASS          | AC=2;AF=0.029;AN=70;BaseQRankSum= |
| 37658 | chrY | 13847748 | . | T | G   | 273.31  | PASS          | AC=2;AF=0.029;AN=70;BaseQRankSum= |
| 37659 | chrY | 13847750 | . | A | G   | 270.34  | PASS          | AC=2;AF=0.029;AN=70;BaseQRankSum= |
| 37660 | chrY | 13847751 | . | G | T   | 272.76  | PASS          | AC=2;AF=0.029;AN=70;BaseQRankSum= |
| 37661 | chrY | 13847757 | . | T | C   | 221.22  | PASS          | AC=3;AF=0.043;AN=70;BaseQRankSum= |
| 37662 | chrY | 13847876 | . | G | T   | 1131.23 | PASS          | AC=2;AF=0.033;AN=60;BaseQRankSum= |
| 37663 | chrY | 13847898 | . | A | G   | 938.55  | PASS          | AC=2;AF=0.031;AN=64;BaseQRankSum= |
| 37664 | chrY | 13847911 | . | A | T   | 790.20  | PASS          | AC=2;AF=0.034;AN=58;BaseQRankSum= |
| 37665 | chrY | 13847923 | . | T | G   | 577.48  | PASS          | AC=2;AF=0.032;AN=62;BaseQRankSum= |
| 37666 | chrY | 13847940 | . | A | G   | 410.91  | PASS          | AC=2;AF=0.029;AN=70;BaseQRankSum= |
| 37667 | chrY | 13847948 | . | G | A   | 367.57  | PASS          | AC=2;AF=0.029;AN=70;BaseQRankSum= |
| 37668 | chrY | 13847949 | . | A | T   | 367.62  | PASS          | AC=2;AF=0.029;AN=68;BaseQRankSum= |
| 37669 | chrY | 13847966 | . | A | T   | 245.37  | PASS          | AC=2;AF=0.030;AN=66;BaseQRankSum= |
| 37670 | chrY | 13847971 | . | C | T   | 228.34  | PASS          | AC=2;AF=0.029;AN=70;BaseQRankSum= |
| 37671 | chrY | 13847997 | . | C | T   | 120.93  | PASS          | AC=1;AF=0.014;AN=70;BaseQRankSum= |
| 37672 | chrY | 13848001 | . | A | T   | 203.88  | PASS          | AC=3;AF=0.047;AN=64;BaseQRankSum= |
| 37673 | chrY | 13848007 | . | A | G   | 180.23  | PASS          | AC=3;AF=0.045;AN=66;BaseQRankSum= |
| 37674 | chrY | 13848012 | . | T | C   | 166.47  | PASS          | AC=2;AF=0.030;AN=66;BaseQRankSum= |
| 37675 | chrY | 13848047 | . | C | A   | 76.01   | PASS          | AC=1;AF=0.015;AN=66;BaseQRankSum= |
| 37676 | chrY | 13848058 | . | T | C   | 74.35   | PASS          | AC=1;AF=0.016;AN=64;BaseQRankSum= |
| 37677 | chrY | 13848059 | . | C | A   | 78.64   | PASS          | AC=1;AF=0.016;AN=64;BaseQRankSum= |
| 37678 | chrY | 13848073 | . | C | T   | 160.37  | PASS          | AC=2;AF=0.029;AN=68;BaseQRankSum= |
| 37679 | chrY | 13848074 | . | A | G   | 162.63  | PASS          | AC=2;AF=0.029;AN=68;BaseQRankSum= |
| 37680 | chrY | 13848083 | . | G | A   | 202.32  | PASS          | AC=2;AF=0.029;AN=68;BaseQRankSum= |
| 37681 | chrY | 13848088 | . | G | A   | 244.41  | PASS          | AC=2;AF=0.029;AN=68;BaseQRankSum= |
| 37682 | chrY | 13848118 | . | A | G   | 324.67  | PASS          | AC=2;AF=0.029;AN=70;BaseQRankSum= |
| 37683 | chrY | 13848119 | . | G | C   | 323.77  | PASS          | AC=2;AF=0.029;AN=70;BaseQRankSum= |
| 37684 | chrY | 13848126 | . | A | G   | 278.36  | PASS          | AC=2;AF=0.029;AN=70;BaseQRankSum= |
| 37685 | chrY | 13848128 | . | C | T   | 367.72  | PASS          | AC=1;AF=0.014;AN=70;BaseQRankSum= |
| 37686 | chrY | 13848129 | . | A | G   | 410.68  | PASS          | AC=1;AF=0.014;AN=70;BaseQRankSum= |
| 37687 | chrY | 13848137 | . | A | T   | 405.15  | PASS          | AC=2;AF=0.029;AN=70;BaseQRankSum= |
| 37688 | chrY | 13848139 | . | C | G   | 450.34  | PASS          | AC=2;AF=0.029;AN=68;BaseQRankSum= |
| 37689 | chrY | 13848147 | . | T | A   | 451.88  | PASS          | AC=2;AF=0.029;AN=68;BaseQRankSum= |
| 37690 | chrY | 13848159 | . | A | G   | 541.61  | PASS          | AC=2;AF=0.029;AN=68;BaseQRankSum= |
| 37691 | chrY | 13848172 | . | C | T   | 672.22  | PASS          | AC=2;AF=0.029;AN=68;BaseQRankSum= |
| 37692 | chrY | 13848175 | . | A | G   | 628.77  | PASS          | AC=2;AF=0.029;AN=68;BaseQRankSum= |
| 37693 | chrY | 13848183 | . | A | G   | 650.74  | PASS          | AC=2;AF=0.029;AN=68;BaseQRankSum= |
| 37694 | chrY | 13848192 | . | A | T   | 641.26  | PASS          | AC=1;AF=0.015;AN=68;BaseQRankSum= |
| 37695 | chrY | 13848194 | . | C | G   | 641.33  | PASS          | AC=1;AF=0.015;AN=66;BaseQRankSum= |
| 37696 | chrY | 13848201 | . | A | G   | 622.53  | PASS          | AC=1;AF=0.015;AN=66;BaseQRankSum= |



|       |      |          |   |   |     |         |               |                                    |
|-------|------|----------|---|---|-----|---------|---------------|------------------------------------|
| 37697 | chrY | 13848229 | . | T | G   | 2634.98 | PASS          | AC=6;AF=0.088;AN=68;BaseQRankSum=  |
| 37698 | chrY | 13848242 | . | T | G   | 2559.50 | PASS          | AC=6;AF=0.091;AN=66;BaseQRankSum=  |
| 37699 | chrY | 13848248 | . | A | G   | 2457.56 | PASS          | AC=6;AF=0.088;AN=68;BaseQRankSum=  |
| 37700 | chrY | 13848249 | . | C | G   | 2457.87 | PASS          | AC=6;AF=0.088;AN=68;BaseQRankSum=  |
| 37701 | chrY | 13848270 | . | A | G   | 602.71  | PASS          | AC=4;AF=0.059;AN=68;BaseQRankSum=  |
| 37702 | chrY | 13848273 | . | C | T   | 1315.60 | PASS          | AC=6;AF=0.088;AN=68;BaseQRankSum=  |
| 37703 | chrY | 13848278 | . | T | A,G | 1394.65 | PASS          | AC=2,3;AF=0.029,0.044;AN=68;BaseQ  |
| 37704 | chrY | 13848283 | . | T | G   | 180.59  | PASS          | AC=2;AF=0.029;AN=70;BaseQRankSum=  |
| 37705 | chrY | 13848304 | . | A | G   | 64.90   | my_snp_filter | AC=2;AF=0.030;AN=66;BaseQ          |
| 37706 | chrY | 13848567 | . | C | T   | 354.23  | PASS          | AC=2;AF=0.029;AN=70;DP=554;FS=0.0  |
| 37707 | chrY | 13849174 | . | G | A   | 53.39   | PASS          | AC=1;AF=0.019;AN=52;BaseQRankSum=  |
| 37708 | chrY | 13849325 | . | C | T   | 1125.88 | PASS          | AC=6;AF=0.097;AN=62;DP=612;FS=0.0  |
| 37709 | chrY | 13849696 | . | T | A   | 336.17  | PASS          | AC=4;AF=0.061;AN=66;BaseQRankSum=  |
| 37710 | chrY | 13849697 | . | T | G   | 334.37  | PASS          | AC=4;AF=0.061;AN=66;BaseQRankSum=  |
| 37711 | chrY | 13849709 | . | A | T   | 327.67  | PASS          | AC=4;AF=0.057;AN=70;BaseQRankSum=  |
| 37712 | chrY | 13849710 | . | A | T   | 353.06  | PASS          | AC=5;AF=0.071;AN=70;BaseQRankSum=  |
| 37713 | chrY | 13849724 | . | T | A   | 128.94  | PASS          | AC=1;AF=0.014;AN=70;BaseQRankSum=  |
| 37714 | chrY | 13849758 | . | G | A   | 117.08  | PASS          | AC=2;AF=0.029;AN=68;BaseQRankSum=  |
| 37715 | chrY | 13849766 | . | C | A   | 168.51  | PASS          | AC=3;AF=0.044;AN=68;BaseQRankSum=  |
| 37716 | chrY | 13850083 | . | A | T   | 873.70  | PASS          | AC=6;AF=0.086;AN=70;BaseQRankSum=  |
| 37717 | chrY | 13850201 | . | G | A   | 1648.62 | PASS          | AC=12;AF=0.222;AN=54;DP=374;FS=0.0 |
| 37718 | chrY | 13850524 | . | A | T   | 43.97   | PASS          | AC=2;AF=0.036;AN=56;BaseQRankSum=  |
| 37719 | chrY | 13850525 | . | G | A   | 39.92   | PASS          | AC=1;AF=0.017;AN=58;BaseQRankSum=  |
| 37720 | chrY | 13850530 | . | A | T   | 37.48   | PASS          | AC=1;AF=0.017;AN=58;BaseQRankSum=  |
| 37721 | chrY | 13850531 | . | A | G   | 40.34   | PASS          | AC=1;AF=0.018;AN=56;BaseQRankSum=  |
| 37722 | chrY | 13850533 | . | A | G   | 36.01   | PASS          | AC=1;AF=0.016;AN=62;BaseQRankSum=  |
| 37723 | chrY | 13850537 | . | C | A   | 39.56   | PASS          | AC=1;AF=0.019;AN=52;BaseQRankSum=  |
| 37724 | chrY | 13850549 | . | T | A   | 32.42   | PASS          | AC=1;AF=0.016;AN=64;BaseQRankSum=  |
| 37725 | chrY | 13850550 | . | G | T   | 35.78   | PASS          | AC=1;AF=0.016;AN=64;BaseQRankSum=  |
| 37726 | chrY | 13851002 | . | T | C   | 61.34   | PASS          | AC=2;AF=0.045;AN=44;DP=3813;FS=0.0 |
| 37727 | chrY | 13851006 | . | T | A   | 64.24   | PASS          | AC=2;AF=0.063;AN=32;DP=3836;FS=0.0 |
| 37728 | chrY | 13851025 | . | T | G   | 45.94   | PASS          | AC=2;AF=0.029;AN=70;DP=4280;FS=0.0 |
| 37729 | chrY | 13851027 | . | G | A   | 51.88   | PASS          | AC=2;AF=0.033;AN=60;DP=4399;FS=0.0 |
| 37730 | chrY | 13851030 | . | T | C   | 55.68   | PASS          | AC=2;AF=0.029;AN=70;DP=4396;FS=0.0 |
| 37731 | chrY | 13851042 | . | T | A   | 463.09  | PASS          | AC=7;AF=0.100;AN=70;BaseQRankSum=  |
| 37732 | chrY | 13851048 | . | G | A   | 2223.12 | PASS          | AC=16;AF=0.400;AN=40;BaseQRankSum= |
| 37733 | chrY | 13851058 | . | A | G   | 46.19   | PASS          | AC=3;AF=0.043;AN=70;BaseQRankSum=  |
| 37734 | chrY | 13851061 | . | T | A   | 34.92   | PASS          | AC=2;AF=0.029;AN=70;BaseQRankSum=  |
| 37735 | chrY | 13851075 | . | T | A   | 54      | PASS          | AC=3;AF=0.043;AN=70;BaseQRankSum=  |
| 37736 | chrY | 13851076 | . | G | C   | 54.82   | PASS          | AC=3;AF=0.043;AN=70;BaseQRankSum=  |
| 37737 | chrY | 13851081 | . | C | T   | 56      | PASS          | AC=3;AF=0.047;AN=64;BaseQRankSum=  |
| 37738 | chrY | 13851082 | . | A | G   | 156.46  | PASS          | AC=3;AF=0.060;AN=50;BaseQRankSum=  |
| 37739 | chrY | 13851095 | . | A | T   | 179.67  | PASS          | AC=2;AF=0.042;AN=48;BaseQRankSum=  |
| 37740 | chrY | 13851116 | . | C | G   | 384.03  | PASS          | AC=4;AF=0.095;AN=42;BaseQRankSum=  |
| 37741 | chrY | 13851119 | . | G | A   | 372.43  | PASS          | AC=4;AF=0.100;AN=40;BaseQRankSum=  |
| 37742 | chrY | 13851126 | . | G | A   | 48.99   | PASS          | AC=2;AF=0.036;AN=56;BaseQRankSum=  |
| 37743 | chrY | 13851131 | . | A | G   | 53.19   | PASS          | AC=2;AF=0.038;AN=52;BaseQRankSum=  |
| 37744 | chrY | 13851136 | . | G | A   | 149.53  | PASS          | AC=4;AF=0.091;AN=44;BaseQRankSum=  |
| 37745 | chrY | 13851137 | . | A | G   | 376.20  | PASS          | AC=4;AF=0.118;AN=34;BaseQRankSum=  |
| 37746 | chrY | 13851141 | . | T | G   | 372.03  | PASS          | AC=4;AF=0.111;AN=36;BaseQRankSum=  |
| 37747 | chrY | 13851155 | . | C | A   | 133.82  | PASS          | AC=2;AF=0.048;AN=42;BaseQRankSum=  |
| 37748 | chrY | 13851156 | . | A | G   | 268.99  | PASS          | AC=5;AF=0.119;AN=42;BaseQRankSum=  |
| 37749 | chrY | 13851160 | . | A | T   | 127.41  | PASS          | AC=3;AF=0.079;AN=38;BaseQRankSum=  |
| 37750 | chrY | 13851186 | . | G | A   | 311.67  | PASS          | AC=1;AF=0.022;AN=46;BaseQRankSum=  |
| 37751 | chrY | 13851241 | . | C | T   | 338.65  | PASS          | AC=1;AF=0.019;AN=52;BaseQRankSum=  |
| 37752 | chrY | 13851297 | . | G | C   | 65.70   | PASS          | AC=2;AF=0.029;AN=68;BaseQRankSum=  |
| 37753 | chrY | 13851301 | . | A | G   | 82.16   | PASS          | AC=2;AF=0.048;AN=42;BaseQRankSum=  |
| 37754 | chrY | 13851310 | . | T | A   | 38.08   | my_snp_filter | AC=1;AF=0.015;AN=66;BaseQ          |
| 37755 | chrY | 13851316 | . | G | C   | 48.04   | PASS          | AC=1;AF=0.020;AN=50;BaseQRankSum=  |
| 37756 | chrY | 13851318 | . | T | A   | 48.10   | PASS          | AC=1;AF=0.019;AN=54;BaseQRankSum=  |
| 37757 | chrY | 13851322 | . | G | A   | 40.73   | PASS          | AC=1;AF=0.015;AN=68;BaseQRankSum=  |
| 37758 | chrY | 13851332 | . | T | G   | 46.01   | PASS          | AC=1;AF=0.022;AN=46;BaseQRankSum=  |
| 37759 | chrY | 13851389 | . | C | A   | 211.28  | PASS          | AC=1;AF=0.014;AN=70;BaseQRankSum=  |
| 37760 | chrY | 13851394 | . | A | G   | 253.35  | PASS          | AC=3;AF=0.054;AN=56;BaseQRankSum=  |
| 37761 | chrY | 13851507 | . | C | G   | 836.76  | PASS          | AC=9;AF=0.180;AN=50;BaseQRankSum=  |
| 37762 | chrY | 13851509 | . | A | C   | 58.13   | PASS          | AC=1;AF=0.015;AN=68;BaseQRankSum=  |
| 37763 | chrY | 13851522 | . | G | A   | 774.92  | PASS          | AC=6;AF=0.111;AN=54;BaseQRankSum=  |
| 37764 | chrY | 13851524 | . | T | A   | 773.83  | PASS          | AC=6;AF=0.125;AN=48;BaseQRankSum=  |
| 37765 | chrY | 13851526 | . | T | A   | 777.65  | PASS          | AC=6;AF=0.111;AN=54;BaseQRankSum=  |
| 37766 | chrY | 13851535 | . | T | C   | 569.91  | PASS          | AC=6;AF=0.094;AN=64;BaseQRankSum=  |
| 37767 | chrY | 13851541 | . | G | C   | 480.80  | PASS          | AC=5;AF=0.086;AN=58;BaseQRankSum=  |
| 37768 | chrY | 13851542 | . | G | T   | 479.16  | PASS          | AC=5;AF=0.086;AN=58;BaseQRankSum=  |
| 37769 | chrY | 13851555 | . | G | T   | 711.04  | PASS          | AC=7;AF=0.167;AN=42;BaseQRankSum=  |
| 37770 | chrY | 13851562 | . | A | G   | 577.79  | PASS          | AC=6;AF=0.143;AN=42;BaseQRankSum=  |
| 37771 | chrY | 13851571 | . | G | T   | 281.18  | PASS          | AC=2;AF=0.030;AN=66;BaseQRankSum=  |
| 37772 | chrY | 13851584 | . | T | A   | 359.11  | PASS          | AC=2;AF=0.032;AN=62;BaseQRankSum=  |

|       |      |          |   |   |     |         |               |                                    |
|-------|------|----------|---|---|-----|---------|---------------|------------------------------------|
| 37773 | chrY | 13851590 | . | T | C   | 202.88  | PASS          | AC=1;AF=0.015;AN=66;BaseQRankSum=  |
| 37774 | chrY | 13851591 | . | A | C   | 437.52  | PASS          | AC=3;AF=0.115;AN=26;BaseQRankSum=  |
| 37775 | chrY | 13851594 | . | C | A   | 903.77  | PASS          | AC=5;AF=0.096;AN=52;BaseQRankSum=  |
| 37776 | chrY | 13851605 | . | T | A,* | 465.07  | PASS          | AC=1,2;AF=0.017,0.034;AN=58;BaseQ  |
| 37777 | chrY | 13851606 | . | T | A,* | 547.18  | PASS          | AC=1,1;AF=0.083,0.083;AN=12;BaseQ  |
| 37778 | chrY | 13851610 | . | T | A,* | 685.10  | PASS          | AC=3,1;AF=0.136,0.045;AN=22;BaseQ  |
| 37779 | chrY | 13851612 | . | G | T,* | 463.27  | PASS          | AC=1,2;AF=0.015,0.030;AN=66;BaseQ  |
| 37780 | chrY | 13851616 | . | C | G   | 1049.07 | PASS          | AC=3;AF=0.250;AN=12;BaseQRankSum=  |
| 37781 | chrY | 13851634 | . | C | A   | 184.89  | PASS          | AC=1;AF=0.167;AN=6;BaseQRankSum=   |
| 37782 | chrY | 13851642 | . | T | A   | 195.09  | PASS          | AC=2;AF=0.029;AN=70;BaseQRankSum=  |
| 37783 | chrY | 13851646 | . | A | G   | 2148.26 | PASS          | AC=5;AF=0.417;AN=12;BaseQRankSum=  |
| 37784 | chrY | 13851651 | . | T | C   | 367.06  | PASS          | AC=3;AF=0.043;AN=70;BaseQRankSum=  |
| 37785 | chrY | 13851655 | . | A | T   | 2023.94 | PASS          | AC=4;AF=0.400;AN=10;BaseQRankSum=  |
| 37786 | chrY | 13851668 | . | A | T   | 1751.05 | PASS          | AC=2;AF=0.250;AN=8;BaseQRankSum=   |
| 37787 | chrY | 13851678 | . | A | G   | 105.43  | PASS          | AC=1;AF=0.014;AN=70;BaseQRankSum=  |
| 37788 | chrY | 13851679 | . | C | T   | 105.68  | PASS          | AC=1;AF=0.014;AN=70;BaseQRankSum=  |
| 37789 | chrY | 13851687 | . | C | A   | 105.87  | PASS          | AC=1;AF=0.014;AN=70;BaseQRankSum=  |
| 37790 | chrY | 13851695 | . | A | T   | 121.19  | PASS          | AC=2;AF=0.167;AN=12;BaseQRankSum=  |
| 37791 | chrY | 13851697 | . | A | G   | 130.97  | PASS          | AC=2;AF=0.100;AN=20;BaseQRankSum=  |
| 37792 | chrY | 13851711 | . | T | C   | 183.27  | PASS          | AC=1;AF=0.071;AN=14;BaseQRankSum=  |
| 37793 | chrY | 13851712 | . | G | A   | 86.28   | PASS          | AC=1;AF=0.100;AN=10;BaseQRankSum=  |
| 37794 | chrY | 13851770 | . | T | C   | 283.78  | PASS          | AC=1;AF=0.015;AN=68;BaseQRankSum=  |
| 37795 | chrY | 13851801 | . | A | C   | 340.86  | PASS          | AC=2;AF=0.031;AN=64;BaseQRankSum=  |
| 37796 | chrY | 13851814 | . | C | T   | 238.71  | PASS          | AC=2;AF=0.029;AN=68;BaseQRankSum=  |
| 37797 | chrY | 13851816 | . | G | C   | 246.06  | PASS          | AC=2;AF=0.029;AN=70;BaseQRankSum=  |
| 37798 | chrY | 13851832 | . | G | A   | 265.51  | PASS          | AC=2;AF=0.029;AN=70;BaseQRankSum=  |
| 37799 | chrY | 13851835 | . | A | T   | 263.52  | PASS          | AC=2;AF=0.029;AN=68;BaseQRankSum=  |
| 37800 | chrY | 13851846 | . | A | C   | 264.39  | PASS          | AC=2;AF=0.032;AN=62;BaseQRankSum=  |
| 37801 | chrY | 13851852 | . | G | T   | 260.58  | PASS          | AC=2;AF=0.034;AN=58;BaseQRankSum=  |
| 37802 | chrY | 13851871 | . | T | G   | 295.80  | PASS          | AC=2;AF=0.037;AN=54;BaseQRankSum=  |
| 37803 | chrY | 13851977 | . | A | G,* | 2590.18 | PASS          | AC=6,26;AF=0.100,0.433;AN=60;DP=8  |
| 37804 | chrY | 13852075 | . | T | A   | 99.97   | my_snp_filter | AC=1;AF=0.021;AN=48;BaseQ          |
| 37805 | chrY | 13852076 | . | G | C   | 103.44  | PASS          | AC=1;AF=0.021;AN=48;BaseQRankSum=  |
| 37806 | chrY | 13852077 | . | G | A   | 30.29   | my_snp_filter | AC=1;AF=0.016;AN=62;BaseQ          |
| 37807 | chrY | 13852232 | . | A | G   | 131.16  | PASS          | AC=2;AF=0.029;AN=68;BaseQRankSum=  |
| 37808 | chrY | 13852235 | . | T | A   | 46.25   | my_snp_filter | AC=3;AF=0.043;AN=70;BaseQ          |
| 37809 | chrY | 13852237 | . | G | T   | 30.59   | my_snp_filter | AC=1;AF=0.015;AN=68;BaseQ          |
| 37810 | chrY | 13852238 | . | A | G   | 1049.15 | PASS          | AC=7;AF=0.100;AN=70;BaseQRankSum=  |
| 37811 | chrY | 13852239 | . | A | G   | 1047.08 | PASS          | AC=7;AF=0.100;AN=70;BaseQRankSum=  |
| 37812 | chrY | 13852245 | . | A | T   | 1175.93 | PASS          | AC=7;AF=0.103;AN=68;BaseQRankSum=  |
| 37813 | chrY | 13852246 | . | G | A   | 65.61   | my_snp_filter | AC=2;AF=0.029;AN=70;BaseQ          |
| 37814 | chrY | 13852255 | . | T | C   | 1089.55 | PASS          | AC=7;AF=0.100;AN=70;BaseQRankSum=  |
| 37815 | chrY | 13852259 | . | T | C   | 100.56  | my_snp_filter | AC=6;AF=0.088;AN=68;BaseQ          |
| 37816 | chrY | 13852270 | . | T | C   | 1195.64 | PASS          | AC=7;AF=0.100;AN=70;BaseQRankSum=  |
| 37817 | chrY | 13852271 | . | G | T   | 1035.80 | PASS          | AC=6;AF=0.086;AN=70;BaseQRankSum=  |
| 37818 | chrY | 13852280 | . | A | T   | 3561.43 | PASS          | AC=20;AF=0.286;AN=70;BaseQRankSum= |
| 37819 | chrY | 13852286 | . | G | A   | 30.48   | my_snp_filter | AC=1;AF=0.014;AN=70;BaseQ          |
| 37820 | chrY | 13852289 | . | T | C   | 857.66  | PASS          | AC=6;AF=0.086;AN=70;BaseQRankSum=  |
| 37821 | chrY | 13852297 | . | G | C   | 2580.70 | PASS          | AC=17;AF=0.250;AN=68;BaseQRankSum= |
| 37822 | chrY | 13852299 | . | G | A   | 2649.04 | PASS          | AC=17;AF=0.250;AN=68;BaseQRankSum= |
| 37823 | chrY | 13852302 | . | G | A   | 2493.94 | PASS          | AC=17;AF=0.243;AN=70;BaseQRankSum= |
| 37824 | chrY | 13852304 | . | A | T   | 2662.53 | PASS          | AC=17;AF=0.243;AN=70;BaseQRankSum= |
| 37825 | chrY | 13852322 | . | A | G   | 2509.09 | PASS          | AC=16;AF=0.229;AN=70;BaseQRankSum= |
| 37826 | chrY | 13852347 | . | T | G   | 2067.20 | PASS          | AC=15;AF=0.214;AN=70;BaseQRankSum= |
| 37827 | chrY | 13852358 | . | G | A   | 1649.76 | PASS          | AC=14;AF=0.200;AN=70;BaseQRankSum= |
| 37828 | chrY | 13852361 | . | T | G   | 1777.33 | PASS          | AC=14;AF=0.200;AN=70;BaseQRankSum= |
| 37829 | chrY | 13852372 | . | A | G   | 1578.82 | PASS          | AC=9;AF=0.129;AN=70;BaseQRankSum=  |
| 37830 | chrY | 13852381 | . | C | T   | 1453.38 | PASS          | AC=8;AF=0.114;AN=70;BaseQRankSum=  |
| 37831 | chrY | 13852396 | . | C | T   | 1297.14 | PASS          | AC=8;AF=0.118;AN=68;BaseQRankSum=  |
| 37832 | chrY | 13852397 | . | C | G   | 1253.21 | PASS          | AC=8;AF=0.118;AN=68;BaseQRankSum=  |
| 37833 | chrY | 13852399 | . | G | A   | 1017.26 | PASS          | AC=8;AF=0.118;AN=68;BaseQRankSum=  |
| 37834 | chrY | 13852401 | . | A | G   | 1009.33 | PASS          | AC=8;AF=0.118;AN=68;BaseQRankSum=  |
| 37835 | chrY | 13852404 | . | A | G   | 1008.70 | PASS          | AC=8;AF=0.118;AN=68;BaseQRankSum=  |
| 37836 | chrY | 13852405 | . | G | T   | 1008.85 | PASS          | AC=8;AF=0.118;AN=68;BaseQRankSum=  |
| 37837 | chrY | 13852435 | . | T | C   | 472.69  | PASS          | AC=5;AF=0.071;AN=70;BaseQRankSum=  |
| 37838 | chrY | 13852438 | . | T | A   | 430.22  | PASS          | AC=5;AF=0.071;AN=70;BaseQRankSum=  |
| 37839 | chrY | 13852447 | . | A | G   | 278.08  | PASS          | AC=4;AF=0.057;AN=70;BaseQRankSum=  |
| 37840 | chrY | 13852452 | . | T | G   | 160.01  | PASS          | AC=4;AF=0.057;AN=70;BaseQRankSum=  |
| 37841 | chrY | 13852465 | . | C | T   | 96.64   | my_snp_filter | AC=3;AF=0.044;AN=68;BaseQ          |
| 37842 | chrY | 13852471 | . | C | G   | 41.21   | my_snp_filter | AC=2;AF=0.029;AN=70;BaseQ          |
| 37843 | chrY | 13852646 | . | G | C   | 140.66  | PASS          | AC=5;AF=0.074;AN=68;BaseQRankSum=  |
| 37844 | chrY | 13852650 | . | T | C   | 169.44  | PASS          | AC=7;AF=0.103;AN=68;BaseQRankSum=  |
| 37845 | chrY | 13852654 | . | G | T   | 161.70  | PASS          | AC=6;AF=0.086;AN=70;BaseQRankSum=  |
| 37846 | chrY | 13852690 | . | T | C   | 87.59   | PASS          | AC=3;AF=0.043;AN=70;BaseQRankSum=  |
| 37847 | chrY | 13852697 | . | T | G   | 99.14   | PASS          | AC=3;AF=0.043;AN=70;BaseQRankSum=  |
| 37848 | chrY | 13852699 | . | T | A   | 57.81   | my_snp_filter | AC=2;AF=0.029;AN=70;BaseQ          |

|       |      |          |   |   |     |         |               |                                    |
|-------|------|----------|---|---|-----|---------|---------------|------------------------------------|
| 37849 | chrY | 13852706 | . | C | G   | 505.21  | PASS          | AC=6;AF=0.086;AN=70;BaseQRankSum=  |
| 37850 | chrY | 13852709 | . | A | G   | 371.10  | PASS          | AC=6;AF=0.086;AN=70;BaseQRankSum=  |
| 37851 | chrY | 13852855 | . | G | A   | 771.95  | PASS          | AC=5;AF=0.071;AN=70;BaseQRankSum=  |
| 37852 | chrY | 13852971 | . | A | T   | 551.95  | PASS          | AC=3;AF=0.044;AN=68;BaseQRankSum=  |
| 37853 | chrY | 13852983 | . | C | A   | 558.27  | PASS          | AC=3;AF=0.044;AN=68;BaseQRankSum=  |
| 37854 | chrY | 13853265 | . | A | C   | 301.27  | PASS          | AC=2;AF=0.030;AN=66;BaseQRankSum=  |
| 37855 | chrY | 13853271 | . | A | T   | 304.14  | PASS          | AC=2;AF=0.034;AN=58;BaseQRankSum=  |
| 37856 | chrY | 13853272 | . | G | T   | 258.26  | PASS          | AC=2;AF=0.034;AN=58;BaseQRankSum=  |
| 37857 | chrY | 13853280 | . | C | T   | 244.66  | PASS          | AC=2;AF=0.029;AN=70;BaseQRankSum=  |
| 37858 | chrY | 13853291 | . | T | C   | 250.60  | PASS          | AC=2;AF=0.029;AN=70;BaseQRankSum=  |
| 37859 | chrY | 13853299 | . | A | C   | 300.02  | PASS          | AC=2;AF=0.029;AN=70;BaseQRankSum=  |
| 37860 | chrY | 13853305 | . | A | G   | 299.56  | PASS          | AC=2;AF=0.029;AN=70;BaseQRankSum=  |
| 37861 | chrY | 13853312 | . | G | C   | 881.54  | PASS          | AC=3;AF=0.052;AN=58;BaseQRankSum=  |
| 37862 | chrY | 13853330 | . | G | A   | 30.62   | my_snp_filter | AC=2;AF=0.029;AN=68;BaseQ          |
| 37863 | chrY | 13853337 | . | G | C   | 1240.02 | PASS          | AC=5;AF=0.071;AN=70;BaseQRankSum=  |
| 37864 | chrY | 13853342 | . | C | T   | 932.53  | PASS          | AC=5;AF=0.074;AN=68;BaseQRankSum=  |
| 37865 | chrY | 13853346 | . | G | T   | 30.41   | my_snp_filter | AC=2;AF=0.029;AN=70;BaseQ          |
| 37866 | chrY | 13853387 | . | G | A   | 421.67  | PASS          | AC=2;AF=0.029;AN=68;BaseQRankSum=  |
| 37867 | chrY | 13853388 | . | G | C,T | 309.48  | PASS          | AC=1,3;AF=0.015,0.044;AN=68;BaseQ  |
| 37868 | chrY | 13853392 | . | G | C,A | 181.55  | PASS          | AC=1,2;AF=0.014,0.029;AN=70;BaseQ  |
| 37869 | chrY | 13853393 | . | G | A,T | 173.17  | PASS          | AC=1,2;AF=0.014,0.029;AN=70;BaseQ  |
| 37870 | chrY | 13853401 | . | T | C   | 93.34   | my_snp_filter | AC=2;AF=0.029;AN=70;BaseQ          |
| 37871 | chrY | 13853410 | . | T | G   | 933.49  | PASS          | AC=3;AF=0.050;AN=60;BaseQRankSum=  |
| 37872 | chrY | 13853411 | . | C | T   | 920.70  | PASS          | AC=4;AF=0.067;AN=60;BaseQRankSum=  |
| 37873 | chrY | 13853417 | . | A | C   | 963.90  | PASS          | AC=4;AF=0.059;AN=68;BaseQRankSum=  |
| 37874 | chrY | 13853418 | . | G | A   | 921.09  | PASS          | AC=4;AF=0.059;AN=68;BaseQRankSum=  |
| 37875 | chrY | 13853427 | . | G | A   | 439.35  | PASS          | AC=1;AF=0.014;AN=70;BaseQRankSum=  |
| 37876 | chrY | 13853447 | . | T | C   | 1527.54 | PASS          | AC=7;AF=0.103;AN=68;BaseQRankSum=  |
| 37877 | chrY | 13853461 | . | A | T   | 89.47   | PASS          | AC=2;AF=0.034;AN=58;BaseQRankSum=  |
| 37878 | chrY | 13853481 | . | A | T   | 137.68  | PASS          | AC=2;AF=0.032;AN=62;BaseQRankSum=  |
| 37879 | chrY | 13853494 | . | G | A   | 138.28  | PASS          | AC=2;AF=0.037;AN=54;BaseQRankSum=  |
| 37880 | chrY | 13853506 | . | T | G   | 101.67  | PASS          | AC=3;AF=0.048;AN=62;BaseQRankSum=  |
| 37881 | chrY | 13853515 | . | G | A   | 39.24   | PASS          | AC=2;AF=0.036;AN=56;BaseQRankSum=  |
| 37882 | chrY | 13853542 | . | A | G   | 964.02  | PASS          | AC=5;AF=0.083;AN=60;BaseQRankSum=  |
| 37883 | chrY | 13853544 | . | A | T   | 929.57  | PASS          | AC=5;AF=0.076;AN=66;BaseQRankSum=  |
| 37884 | chrY | 13853555 | . | T | C   | 878.10  | PASS          | AC=6;AF=0.107;AN=56;BaseQRankSum=  |
| 37885 | chrY | 13853573 | . | A | G   | 917.38  | PASS          | AC=5;AF=0.089;AN=56;BaseQRankSum=  |
| 37886 | chrY | 13853746 | . | T | A   | 105.68  | PASS          | AC=3;AF=0.052;AN=58;BaseQRankSum=  |
| 37887 | chrY | 13853757 | . | A | G   | 576.01  | PASS          | AC=8;AF=0.167;AN=48;BaseQRankSum=  |
| 37888 | chrY | 13853758 | . | G | T   | 50.32   | PASS          | AC=2;AF=0.038;AN=52;DP=1250;FS=0.  |
| 37889 | chrY | 13853762 | . | C | A   | 401.95  | PASS          | AC=2;AF=0.037;AN=54;BaseQRankSum=  |
| 37890 | chrY | 13853770 | . | A | T   | 34.40   | PASS          | AC=1;AF=0.019;AN=54;BaseQRankSum=  |
| 37891 | chrY | 13853775 | . | A | C   | 377.54  | PASS          | AC=2;AF=0.040;AN=50;BaseQRankSum=  |
| 37892 | chrY | 13853777 | . | G | T   | 52.15   | PASS          | AC=2;AF=0.037;AN=54;DP=1007;FS=0.  |
| 37893 | chrY | 13853780 | . | A | G   | 69.42   | PASS          | AC=1;AF=0.017;AN=58;BaseQRankSum=  |
| 37894 | chrY | 13853781 | . | C | G   | 58.20   | PASS          | AC=1;AF=0.019;AN=54;BaseQRankSum=  |
| 37895 | chrY | 13853787 | . | C | G   | 166.45  | PASS          | AC=6;AF=0.150;AN=40;BaseQRankSum=  |
| 37896 | chrY | 13853792 | . | T | C   | 113.05  | PASS          | AC=3;AF=0.058;AN=52;BaseQRankSum=  |
| 37897 | chrY | 13853798 | . | G | C   | 50.60   | PASS          | AC=2;AF=0.036;AN=56;DP=857;FS=0.0  |
| 37898 | chrY | 13853919 | . | T | A   | 6638.44 | PASS          | AC=16;AF=0.235;AN=68;BaseQRankSum= |
| 37899 | chrY | 13853936 | . | C | T   | 7383.45 | PASS          | AC=16;AF=0.235;AN=68;BaseQRankSum= |
| 37900 | chrY | 13853952 | . | C | T   | 7748.38 | PASS          | AC=16;AF=0.235;AN=68;BaseQRankSum= |
| 37901 | chrY | 13853955 | . | C | A   | 7838.44 | PASS          | AC=15;AF=0.221;AN=68;BaseQRankSum= |
| 37902 | chrY | 13853960 | . | T | A   | 7907.61 | PASS          | AC=14;AF=0.206;AN=68;BaseQRankSum= |
| 37903 | chrY | 13853976 | . | C | T   | 6963.12 | PASS          | AC=13;AF=0.203;AN=64;BaseQRankSum= |
| 37904 | chrY | 13853978 | . | G | A   | 6814.19 | PASS          | AC=13;AF=0.197;AN=66;BaseQRankSum= |
| 37905 | chrY | 13853982 | . | T | C   | 6737.50 | PASS          | AC=13;AF=0.197;AN=66;BaseQRankSum= |
| 37906 | chrY | 13853986 | . | A | T   | 6674.90 | PASS          | AC=13;AF=0.197;AN=66;BaseQRankSum= |
| 37907 | chrY | 13853987 | . | G | C   | 6652.18 | PASS          | AC=13;AF=0.197;AN=66;BaseQRankSum= |
| 37908 | chrY | 13854011 | . | T | A   | 246.52  | PASS          | AC=1;AF=0.014;AN=70;BaseQRankSum=  |
| 37909 | chrY | 13854012 | . | C | T   | 6283.47 | PASS          | AC=13;AF=0.191;AN=68;BaseQRankSum= |
| 37910 | chrY | 13854041 | . | A | T   | 5386.93 | PASS          | AC=16;AF=0.235;AN=68;BaseQRankSum= |
| 37911 | chrY | 13854051 | . | C | T   | 5535.66 | PASS          | AC=16;AF=0.242;AN=66;BaseQRankSum= |
| 37912 | chrY | 13854067 | . | G | A   | 5291.99 | PASS          | AC=15;AF=0.221;AN=68;BaseQRankSum= |
| 37913 | chrY | 13854073 | . | T | G   | 5132.80 | PASS          | AC=15;AF=0.221;AN=68;BaseQRankSum= |
| 37914 | chrY | 13854086 | . | C | T   | 4735.72 | PASS          | AC=14;AF=0.206;AN=68;BaseQRankSum= |
| 37915 | chrY | 13854096 | . | A | T   | 4855.38 | my_snp_filter | AC=14;AF=0.206;AN=68;Base          |
| 37916 | chrY | 13854097 | . | C | G   | 4849.38 | my_snp_filter | AC=14;AF=0.206;AN=68;Base          |
| 37917 | chrY | 13854098 | . | A | C   | 4810.31 | my_snp_filter | AC=14;AF=0.206;AN=68;Base          |
| 37918 | chrY | 13854113 | . | A | G   | 4543.98 | my_snp_filter | AC=13;AF=0.191;AN=68;Base          |
| 37919 | chrY | 13854122 | . | G | A   | 4305.96 | my_snp_filter | AC=11;AF=0.162;AN=68;Base          |
| 37920 | chrY | 13854143 | . | C | G   | 483.41  | PASS          | AC=4;AF=0.063;AN=64;BaseQRankSum=  |
| 37921 | chrY | 13854160 | . | T | A   | 253.56  | PASS          | AC=3;AF=0.043;AN=70;BaseQRankSum=  |
| 37922 | chrY | 13854161 | . | T | C   | 253.56  | PASS          | AC=3;AF=0.043;AN=70;BaseQRankSum=  |
| 37923 | chrY | 13854168 | . | A | G   | 219.74  | PASS          | AC=3;AF=0.044;AN=68;BaseQRankSum=  |
| 37924 | chrY | 13854169 | . | G | A   | 178.31  | PASS          | AC=3;AF=0.044;AN=68;BaseQRankSum=  |

|       |      |          |   |   |     |          |               |                                    |
|-------|------|----------|---|---|-----|----------|---------------|------------------------------------|
| 37925 | chrY | 13854170 | . | A | T   | 443.09   | PASS          | AC=2;AF=0.029;AN=70;DP=579;FS=0.0  |
| 37926 | chrY | 13854173 | . | T | G   | 184.37   | PASS          | AC=3;AF=0.044;AN=68;BaseQRankSum=  |
| 37927 | chrY | 13854200 | . | G | A   | 105.73   | PASS          | AC=1;AF=0.015;AN=66;BaseQRankSum=  |
| 37928 | chrY | 13854203 | . | T | G   | 81.63    | PASS          | AC=1;AF=0.015;AN=68;BaseQRankSum=  |
| 37929 | chrY | 13854207 | . | C | A   | 68.32    | PASS          | AC=1;AF=0.014;AN=70;BaseQRankSum=  |
| 37930 | chrY | 13854208 | . | A | G   | 66.73    | PASS          | AC=1;AF=0.014;AN=70;BaseQRankSum=  |
| 37931 | chrY | 13854227 | . | G | A   | 47.35    | my_snp_filter | AC=1;AF=0.014;AN=70;BaseQ          |
| 37932 | chrY | 13854287 | . | A | C   | 8648.84  | PASS          | AC=1;AF=0.021;AN=48;BaseQRankSum=  |
| 37933 | chrY | 13854289 | . | A | T   | 10161.27 | PASS          | AC=2;AF=0.029;AN=68;BaseQ          |
| 37934 | chrY | 13854310 | . | T | A   | 13450.22 | my_snp_filter | AC=2;AF=0.053;AN=                  |
| 37935 | chrY | 13854317 | . | C | T   | 13890.87 | my_snp_filter | AC=2;AF=0.053;AN=                  |
| 37936 | chrY | 13854318 | . | C | G   | 8601.63  | my_snp_filter | AC=2;AF=0.053;AN=38;BaseQ          |
| 37937 | chrY | 13854326 | . | T | C   | 13705.91 | my_snp_filter | AC=2;AF=0.043;AN=                  |
| 37938 | chrY | 13854332 | . | T | C   | 4347.11  | my_snp_filter | AC=1;AF=0.023;AN=44;BaseQ          |
| 37939 | chrY | 13854338 | . | G | T   | 14049.04 | my_snp_filter | AC=2;AF=0.043;AN=                  |
| 37940 | chrY | 13854342 | . | G | T   | 248.36   | my_snp_filter | AC=1;AF=0.014;AN=70;BaseQ          |
| 37941 | chrY | 13854347 | . | C | A   | 205.99   | my_snp_filter | AC=1;AF=0.014;AN=70;BaseQ          |
| 37942 | chrY | 13854377 | . | C | A   | 2910.61  | my_snp_filter | AC=1;AF=0.014;AN=70;BaseQ          |
| 37943 | chrY | 13854383 | . | T | G   | 3480.23  | PASS          | AC=6;AF=0.097;AN=62;BaseQRankSum=  |
| 37944 | chrY | 13854389 | . | A | G   | 441.74   | PASS          | AC=2;AF=0.029;AN=70;BaseQRankSum=  |
| 37945 | chrY | 13854393 | . | A | G   | 16553.89 | my_snp_filter | AC=9;AF=0.136;AN=                  |
| 37946 | chrY | 13854607 | . | T | G   | 32.05    | PASS          | AC=1;AF=0.015;AN=68;BaseQRankSum=  |
| 37947 | chrY | 13854621 | . | C | G   | 30.49    | PASS          | AC=1;AF=0.015;AN=66;BaseQRankSum=  |
| 37948 | chrY | 13854633 | . | A | G   | 239.28   | PASS          | AC=1;AF=0.014;AN=70;BaseQRankSum=  |
| 37949 | chrY | 13855117 | . | A | C,G | 530.48   | my_snp_filter | AC=2,7;AF=0.029,0.103;AN=          |
| 37950 | chrY | 13855120 | . | A | T   | 147.96   | PASS          | AC=2;AF=0.029;AN=70;BaseQRankSum=  |
| 37951 | chrY | 13855124 | . | A | T   | 143.42   | PASS          | AC=2;AF=0.029;AN=70;BaseQRankSum=  |
| 37952 | chrY | 13855131 | . | C | T   | 109.74   | PASS          | AC=2;AF=0.029;AN=70;BaseQRankSum=  |
| 37953 | chrY | 13855145 | . | A | T   | 40       | PASS          | AC=1;AF=0.020;AN=50;BaseQRankSum=  |
| 37954 | chrY | 13855157 | . | A | G   | 44.34    | PASS          | AC=1;AF=0.015;AN=66;BaseQRankSum=  |
| 37955 | chrY | 13855161 | . | G | T   | 40.57    | PASS          | AC=1;AF=0.014;AN=70;BaseQRankSum=  |
| 37956 | chrY | 13855167 | . | G | A   | 42.96    | PASS          | AC=1;AF=0.014;AN=70;BaseQRankSum=  |
| 37957 | chrY | 13855366 | . | A | G   | 94.10    | my_snp_filter | AC=6;AF=0.086;AN=70;BaseQ          |
| 37958 | chrY | 13855376 | . | A | G   | 30.82    | PASS          | AC=1;AF=0.014;AN=70;BaseQRankSum=  |
| 37959 | chrY | 13855539 | . | T | C   | 85.82    | my_snp_filter | AC=4;AF=0.074;AN=54;BaseQ          |
| 37960 | chrY | 13855844 | . | G | C   | 134.40   | PASS          | AC=2;AF=0.029;AN=68;BaseQRankSum=  |
| 37961 | chrY | 13855853 | . | C | A   | 144.70   | PASS          | AC=2;AF=0.029;AN=68;BaseQRankSum=  |
| 37962 | chrY | 13855857 | . | G | A   | 145.37   | PASS          | AC=2;AF=0.029;AN=68;BaseQRankSum=  |
| 37963 | chrY | 13856508 | . | T | G   | 64.71    | PASS          | AC=1;AF=0.019;AN=54;BaseQRankSum=  |
| 37964 | chrY | 13856557 | . | G | A   | 345.53   | PASS          | AC=3;AF=0.043;AN=70;BaseQRankSum=  |
| 37965 | chrY | 13856562 | . | C | T   | 32.18    | PASS          | AC=2;AF=0.029;AN=70;BaseQRankSum=  |
| 37966 | chrY | 13856563 | . | A | G,C | 1634.14  | PASS          | AC=2,10;AF=0.029,0.147;AN=68;Base  |
| 37967 | chrY | 13856566 | . | C | T,A | 1909.91  | PASS          | AC=4,10;AF=0.065,0.161;AN=62;Base  |
| 37968 | chrY | 13856570 | . | A | G   | 1452.71  | PASS          | AC=11;AF=0.157;AN=70;BaseQRankSum= |
| 37969 | chrY | 13856573 | . | C | T   | 215.44   | PASS          | AC=3;AF=0.043;AN=70;BaseQRankSum=  |
| 37970 | chrY | 13856576 | . | T | C   | 32.44    | PASS          | AC=1;AF=0.015;AN=66;BaseQRankSum=  |
| 37971 | chrY | 13856580 | . | A | G   | 93.77    | PASS          | AC=1;AF=0.014;AN=70;BaseQRankSum=  |
| 37972 | chrY | 13856582 | . | G | C   | 1451.24  | PASS          | AC=9;AF=0.129;AN=70;BaseQRankSum=  |
| 37973 | chrY | 13856583 | . | G | A   | 1457.43  | PASS          | AC=9;AF=0.129;AN=70;BaseQRankSum=  |
| 37974 | chrY | 13856589 | . | A | T   | 1288.81  | PASS          | AC=8;AF=0.114;AN=70;BaseQRankSum=  |
| 37975 | chrY | 13856591 | . | T | G   | 46.02    | my_snp_filter | AC=1;AF=0.015;AN=66;BaseQ          |
| 37976 | chrY | 13856592 | . | T | C   | 61.14    | PASS          | AC=1;AF=0.017;AN=58;BaseQRankSum=  |
| 37977 | chrY | 13856598 | . | C | G   | 103.56   | PASS          | AC=3;AF=0.058;AN=52;BaseQRankSum=  |
| 37978 | chrY | 13856667 | . | G | C   | 8049.38  | PASS          | AC=50;AF=0.735;AN=68;BaseQRankSum= |
| 37979 | chrY | 13856697 | . | G | T   | 42.21    | my_snp_filter | AC=3;AF=0.043;AN=70;BaseQ          |
| 37980 | chrY | 13857036 | . | A | G   | 33.64    | PASS          | AC=1;AF=0.014;AN=70;BaseQRankSum=  |
| 37981 | chrY | 13857250 | . | T | A   | 75.66    | my_snp_filter | AC=4;AF=0.057;AN=70;BaseQ          |
| 37982 | chrY | 13857331 | . | A | G   | 16886.90 | PASS          | AC=70;AF=1.00;AN=70;BaseQ          |
| 37983 | chrY | 13857506 | . | G | C   | 218.30   | PASS          | AC=6;AF=0.088;AN=68;BaseQRankSum=  |
| 37984 | chrY | 13857511 | . | G | A   | 229.97   | PASS          | AC=6;AF=0.100;AN=60;BaseQRankSum=  |
| 37985 | chrY | 13857513 | . | C | A   | 256.65   | PASS          | AC=6;AF=0.273;AN=22;BaseQRankSum=  |
| 37986 | chrY | 13857514 | . | C | T   | 256.72   | PASS          | AC=6;AF=0.273;AN=22;BaseQRankSum=  |
| 37987 | chrY | 13857521 | . | G | C   | 219.35   | PASS          | AC=6;AF=0.100;AN=60;BaseQRankSum=  |
| 37988 | chrY | 13857524 | . | T | C   | 207.87   | PASS          | AC=6;AF=0.103;AN=58;BaseQRankSum=  |
| 37989 | chrY | 13857537 | . | A | C   | 206.12   | PASS          | AC=6;AF=0.214;AN=28;BaseQRankSum=  |
| 37990 | chrY | 13857545 | . | G | A   | 133.24   | PASS          | AC=2;AF=0.042;AN=48;BaseQRankSum=  |
| 37991 | chrY | 13857556 | . | G | C   | 114.53   | PASS          | AC=2;AF=0.037;AN=54;BaseQRankSum=  |
| 37992 | chrY | 13857685 | . | C | T   | 8268.91  | PASS          | AC=46;AF=0.676;AN=68;DP=1011;FS=0  |
| 37993 | chrY | 13857696 | . | C | G   | 2698.30  | PASS          | AC=3;AF=0.056;AN=54;BaseQRankSum=  |
| 37994 | chrY | 13857710 | . | A | G   | 5333.37  | PASS          | AC=4;AF=0.071;AN=56;BaseQRankSum=  |
| 37995 | chrY | 13857715 | . | C | T   | 5731.18  | PASS          | AC=5;AF=0.078;AN=64;BaseQRankSum=  |
| 37996 | chrY | 13857718 | . | A | G   | 32.15    | my_snp_filter | AC=1;AF=0.014;AN=70;BaseQ          |
| 37997 | chrY | 13857731 | . | G | A   | 5815.11  | PASS          | AC=5;AF=0.076;AN=66;BaseQRankSum=  |
| 37998 | chrY | 13857745 | . | T | G   | 3835.74  | PASS          | AC=5;AF=0.083;AN=60;BaseQRankSum=  |
| 37999 | chrY | 13857751 | . | A | G   | 3941.74  | PASS          | AC=5;AF=0.074;AN=68;BaseQRankSum=  |
| 38000 | chrY | 13857754 | . | T | A   | 4050.64  | PASS          | AC=5;AF=0.071;AN=70;BaseQRankSum=  |

|       |      |          |   |   |     |          |               |                                    |
|-------|------|----------|---|---|-----|----------|---------------|------------------------------------|
| 38001 | chrY | 13857756 | . | A | G   | 3984.25  | PASS          | AC=5;AF=0.089;AN=56;BaseQRankSum=  |
| 38002 | chrY | 13857760 | . | G | A   | 149.14   | PASS          | AC=1;AF=0.014;AN=70;BaseQRankSum=  |
| 38003 | chrY | 13857766 | . | A | G   | 208.06   | PASS          | AC=1;AF=0.022;AN=46;BaseQRankSum=  |
| 38004 | chrY | 13857769 | . | T | A,* | 1768.77  | PASS          | AC=1,2;AF=0.014,0.029;AN=70;BaseQ  |
| 38005 | chrY | 13857770 | . | G | T,* | 1810.01  | PASS          | AC=1,2;AF=0.014,0.029;AN=70;BaseQ  |
| 38006 | chrY | 13857775 | . | G | C   | 6203.83  | PASS          | AC=5;AF=0.071;AN=70;BaseQRankSum=  |
| 38007 | chrY | 13857780 | . | T | C   | 570.80   | PASS          | AC=1;AF=0.016;AN=62;BaseQRankSum=  |
| 38008 | chrY | 13857791 | . | G | A   | 7530.72  | PASS          | AC=5;AF=0.071;AN=70;BaseQRankSum=  |
| 38009 | chrY | 13857794 | . | T | A   | 7555.84  | PASS          | AC=5;AF=0.119;AN=42;BaseQRankSum=  |
| 38010 | chrY | 13857795 | . | G | C   | 8526.25  | PASS          | AC=5;AF=0.132;AN=38;BaseQRankSum=  |
| 38011 | chrY | 13857799 | . | T | A   | 8449.08  | PASS          | AC=5;AF=0.071;AN=70;BaseQRankSum=  |
| 38012 | chrY | 13857808 | . | C | A   | 36.07    | my_snp_filter | AC=2;AF=0.029;AN=70;BaseQ          |
| 38013 | chrY | 13857809 | . | C | T   | 465.26   | PASS          | AC=1;AF=0.014;AN=70;BaseQRankSum=  |
| 38014 | chrY | 13857814 | . | T | C   | 990.43   | PASS          | AC=1;AF=0.014;AN=70;BaseQRankSum=  |
| 38015 | chrY | 13857815 | . | G | T   | 530.26   | PASS          | AC=1;AF=0.014;AN=70;BaseQRankSum=  |
| 38016 | chrY | 13857834 | . | T | C   | 3795.41  | PASS          | AC=11;AF=0.177;AN=62;BaseQRankSum= |
| 38017 | chrY | 13857837 | . | G | A   | 3604.69  | PASS          | AC=12;AF=0.182;AN=66;BaseQRankSum= |
| 38018 | chrY | 13857840 | . | C | T   | 3650.67  | PASS          | AC=12;AF=0.214;AN=56;BaseQRankSum= |
| 38019 | chrY | 13857841 | . | G | C   | 3725.31  | PASS          | AC=11;AF=0.196;AN=56;BaseQRankSum= |
| 38020 | chrY | 13857847 | . | A | T   | 3163.82  | PASS          | AC=16;AF=0.235;AN=68;BaseQRankSum= |
| 38021 | chrY | 13857849 | . | T | C   | 8076.20  | PASS          | AC=20;AF=0.357;AN=56;BaseQRankSum= |
| 38022 | chrY | 13857852 | . | A | C   | 3378.20  | PASS          | AC=17;AF=0.250;AN=68;BaseQRankSum= |
| 38023 | chrY | 13857854 | . | T | C   | 3475.20  | PASS          | AC=17;AF=0.274;AN=62;BaseQRankSum= |
| 38024 | chrY | 13857855 | . | T | G,A | 8607.51  | PASS          | AC=19,8;AF=0.306,0.129;AN=62;Base  |
| 38025 | chrY | 13857859 | . | T | C   | 1767.27  | PASS          | AC=17;AF=0.243;AN=70;BaseQRankSum= |
| 38026 | chrY | 13857868 | . | A | G,T | 10601.93 | PASS          | AC=6,22;AF=0.097,0.355;AN=         |
| 38027 | chrY | 13857879 | . | T | G   | 1699.07  | PASS          | AC=14;AF=0.200;AN=70;BaseQRankSum= |
| 38028 | chrY | 13857885 | . | C | T   | 5347.33  | PASS          | AC=17;AF=0.243;AN=70;BaseQRankSum= |
| 38029 | chrY | 13857886 | . | G | T   | 1607.22  | PASS          | AC=14;AF=0.200;AN=70;BaseQRankSum= |
| 38030 | chrY | 13857887 | . | A | C   | 5329.48  | PASS          | AC=17;AF=0.243;AN=70;BaseQRankSum= |
| 38031 | chrY | 13857889 | . | T | A   | 1561.26  | PASS          | AC=15;AF=0.214;AN=70;BaseQRankSum= |
| 38032 | chrY | 13857904 | . | T | A   | 4183.90  | PASS          | AC=12;AF=0.171;AN=70;BaseQRankSum= |
| 38033 | chrY | 13857912 | . | A | T   | 141.17   | PASS          | AC=3;AF=0.043;AN=70;BaseQRankSum=  |
| 38034 | chrY | 13857915 | . | G | T   | 1201.03  | PASS          | AC=13;AF=0.191;AN=68;BaseQRankSum= |
| 38035 | chrY | 13857916 | . | G | T   | 1859.91  | PASS          | AC=12;AF=0.171;AN=70;BaseQRankSum= |
| 38036 | chrY | 13857921 | . | C | T   | 999.13   | PASS          | AC=12;AF=0.182;AN=66;BaseQRankSum= |
| 38037 | chrY | 13857922 | . | A | C   | 5085.87  | PASS          | AC=21;AF=0.318;AN=66;BaseQRankSum= |
| 38038 | chrY | 13857926 | . | G | A   | 1522.58  | PASS          | AC=12;AF=0.176;AN=68;BaseQRankSum= |
| 38039 | chrY | 13857928 | . | A | G   | 206.80   | PASS          | AC=2;AF=0.029;AN=68;BaseQRankSum=  |
| 38040 | chrY | 13857929 | . | T | G   | 1291.42  | PASS          | AC=12;AF=0.182;AN=66;BaseQRankSum= |
| 38041 | chrY | 13857933 | . | A | G   | 1205.01  | PASS          | AC=10;AF=0.147;AN=68;BaseQRankSum= |
| 38042 | chrY | 13857934 | . | T | A,G | 3871.47  | PASS          | AC=9,3;AF=0.136,0.045;AN=66;BaseQ  |
| 38043 | chrY | 13857935 | . | A | G   | 794.16   | PASS          | AC=10;AF=0.152;AN=66;BaseQRankSum= |
| 38044 | chrY | 13857939 | . | T | C   | 267.34   | PASS          | AC=3;AF=0.047;AN=64;BaseQRankSum=  |
| 38045 | chrY | 13857940 | . | G | C   | 269.24   | PASS          | AC=3;AF=0.045;AN=66;BaseQRankSum=  |
| 38046 | chrY | 13857941 | . | G | A   | 837.32   | PASS          | AC=6;AF=0.094;AN=64;BaseQRankSum=  |
| 38047 | chrY | 13857944 | . | T | C   | 746.77   | PASS          | AC=6;AF=0.091;AN=66;BaseQRankSum=  |
| 38048 | chrY | 13857946 | . | C | T   | 3310.19  | PASS          | AC=7;AF=0.106;AN=66;BaseQRankSum=  |
| 38049 | chrY | 13857947 | . | A | T   | 459.12   | PASS          | AC=8;AF=0.121;AN=66;BaseQRankSum=  |
| 38050 | chrY | 13857948 | . | A | T   | 291.90   | PASS          | AC=4;AF=0.061;AN=66;BaseQRankSum=  |
| 38051 | chrY | 13857949 | . | T | C   | 73.09    | my_snp_filter | AC=1;AF=0.015;AN=66;BaseQ          |
| 38052 | chrY | 13857953 | . | A | G   | 77.10    | my_snp_filter | AC=1;AF=0.015;AN=66;BaseQ          |
| 38053 | chrY | 13857959 | . | T | C   | 2076.78  | PASS          | AC=8;AF=0.143;AN=56;BaseQRankSum=  |
| 38054 | chrY | 13857960 | . | G | C,T | 1864.41  | PASS          | AC=2,4;AF=0.036,0.071;AN=56;BaseQ  |
| 38055 | chrY | 13857962 | . | A | C   | 63.31    | PASS          | AC=1;AF=0.017;AN=60;BaseQRankSum=  |
| 38056 | chrY | 13857965 | . | G | T   | 165.63   | PASS          | AC=2;AF=0.031;AN=64;BaseQRankSum=  |
| 38057 | chrY | 13857969 | . | C | A,T | 1092.39  | PASS          | AC=2,6;AF=0.071,0.214;AN=28;BaseQ  |
| 38058 | chrY | 13857970 | . | C | A   | 164.83   | PASS          | AC=3;AF=0.100;AN=30;BaseQRankSum=  |
| 38059 | chrY | 13857973 | . | G | A   | 311.95   | PASS          | AC=3;AF=0.054;AN=56;BaseQRankSum=  |
| 38060 | chrY | 13857974 | . | T | A   | 153.17   | PASS          | AC=3;AF=0.052;AN=58;BaseQRankSum=  |
| 38061 | chrY | 13857979 | . | A | T   | 1495.86  | PASS          | AC=9;AF=0.237;AN=38;BaseQRankSum=  |
| 38062 | chrY | 13857985 | . | T | C   | 407.12   | PASS          | AC=5;AF=0.096;AN=52;BaseQRankSum=  |
| 38063 | chrY | 13857986 | . | G | T   | 187.28   | PASS          | AC=3;AF=0.056;AN=54;BaseQRankSum=  |
| 38064 | chrY | 13857994 | . | T | G   | 290.41   | PASS          | AC=3;AF=0.054;AN=56;BaseQRankSum=  |
| 38065 | chrY | 13857996 | . | A | G,C | 609.45   | PASS          | AC=3,3;AF=0.068,0.068;AN=44;BaseQ  |
| 38066 | chrY | 13857999 | . | T | A   | 69.32    | my_snp_filter | AC=3;AF=0.050;AN=60;BaseQ          |
| 38067 | chrY | 13858000 | . | C | T   | 65.07    | my_snp_filter | AC=2;AF=0.037;AN=54;BaseQ          |
| 38068 | chrY | 13858001 | . | A | G   | 522.24   | PASS          | AC=5;AF=0.096;AN=52;BaseQRankSum=  |
| 38069 | chrY | 13858009 | . | C | T   | 474.57   | PASS          | AC=4;AF=0.125;AN=32;BaseQRankSum=  |
| 38070 | chrY | 13858011 | . | G | C   | 38.04    | my_snp_filter | AC=1;AF=0.014;AN=70;BaseQ          |
| 38071 | chrY | 13858014 | . | T | A   | 38.24    | my_snp_filter | AC=1;AF=0.015;AN=68;BaseQ          |
| 38072 | chrY | 13858016 | . | G | A   | 46.17    | my_snp_filter | AC=1;AF=0.016;AN=62;BaseQ          |
| 38073 | chrY | 13858028 | . | T | C   | 308.18   | PASS          | AC=2;AF=0.053;AN=38;BaseQRankSum=  |
| 38074 | chrY | 13858029 | . | T | C   | 151.73   | PASS          | AC=2;AF=0.050;AN=40;BaseQRankSum=  |
| 38075 | chrY | 13858031 | . | G | C   | 80.65    | PASS          | AC=1;AF=0.015;AN=68;BaseQRankSum=  |
| 38076 | chrY | 13858043 | . | A | C   | 67.29    | my_snp_filter | AC=3;AF=0.058;AN=52;BaseQ          |

|       |      |          |   |   |     |          |               |                                    |
|-------|------|----------|---|---|-----|----------|---------------|------------------------------------|
| 38077 | chrY | 13858046 | . | G | A   | 38.76    | my_snp_filter | AC=1;AF=0.016;AN=64;BaseQ          |
| 38078 | chrY | 13858053 | . | T | A   | 215.89   | PASS          | AC=4;AF=0.083;AN=48;BaseQRankSum=  |
| 38079 | chrY | 13858064 | . | T | C   | 319.56   | PASS          | AC=2;AF=0.038;AN=52;BaseQRankSum=  |
| 38080 | chrY | 13858078 | . | T | A   | 299.33   | PASS          | AC=3;AF=0.075;AN=40;BaseQRankSum=  |
| 38081 | chrY | 13858079 | . | T | C   | 294.12   | PASS          | AC=3;AF=0.075;AN=40;BaseQRankSum=  |
| 38082 | chrY | 13858106 | . | G | T   | 11913.91 | PASS          | AC=65;AF=0.985;AN=66;BaseQ         |
| 38083 | chrY | 13858150 | . | C | G   | 77.48    | my_snp_filter | AC=2;AF=0.029;AN=70;BaseQ          |
| 38084 | chrY | 13858159 | . | C | T   | 53.45    | my_snp_filter | AC=2;AF=0.030;AN=66;BaseQ          |
| 38085 | chrY | 13858215 | . | T | A   | 308.78   | PASS          | AC=4;AF=0.059;AN=68;BaseQRankSum=  |
| 38086 | chrY | 13858234 | . | A | G   | 475.39   | PASS          | AC=4;AF=0.059;AN=68;BaseQRankSum=  |
| 38087 | chrY | 13858249 | . | C | G   | 15709.96 | PASS          | AC=66;AF=1.00;AN=66;DP=36          |
| 38088 | chrY | 13858251 | . | G | A   | 15677.96 | PASS          | AC=66;AF=1.00;AN=66;DP=36          |
| 38089 | chrY | 13858258 | . | G | T   | 252.03   | PASS          | AC=2;AF=0.030;AN=66;BaseQRankSum=  |
| 38090 | chrY | 13858269 | . | A | G   | 290.53   | PASS          | AC=2;AF=0.031;AN=64;BaseQRankSum=  |
| 38091 | chrY | 13858272 | . | A | C   | 247.91   | PASS          | AC=2;AF=0.030;AN=66;BaseQRankSum=  |
| 38092 | chrY | 13858277 | . | T | A   | 90       | PASS          | AC=2;AF=0.031;AN=64;BaseQRankSum=  |
| 38093 | chrY | 13858287 | . | T | C   | 48.12    | my_snp_filter | AC=2;AF=0.029;AN=68;BaseQ          |
| 38094 | chrY | 13858288 | . | T | A   | 47.22    | my_snp_filter | AC=2;AF=0.029;AN=68;BaseQ          |
| 38095 | chrY | 13858295 | . | A | G   | 211.63   | PASS          | AC=1;AF=0.016;AN=64;BaseQRankSum=  |
| 38096 | chrY | 13858402 | . | T | G   | 1866.37  | PASS          | AC=5;AF=0.074;AN=68;BaseQRankSum=  |
| 38097 | chrY | 13858414 | . | G | A   | 2457.50  | PASS          | AC=5;AF=0.074;AN=68;BaseQRankSum=  |
| 38098 | chrY | 13858417 | . | T | A   | 2547.30  | PASS          | AC=5;AF=0.074;AN=68;BaseQRankSum=  |
| 38099 | chrY | 13858435 | . | A | G   | 3013.51  | PASS          | AC=5;AF=0.081;AN=62;BaseQRankSum=  |
| 38100 | chrY | 13858675 | . | G | A   | 246.72   | PASS          | AC=1;AF=0.015;AN=68;BaseQRankSum=  |
| 38101 | chrY | 13858689 | . | T | C,* | 1260.09  | PASS          | AC=3,2;AF=0.045,0.030;AN=66;BaseQ  |
| 38102 | chrY | 13858693 | . | T | A   | 363.73   | PASS          | AC=3;AF=0.043;AN=70;BaseQRankSum=  |
| 38103 | chrY | 13858695 | . | G | T   | 528.12   | PASS          | AC=2;AF=0.029;AN=68;BaseQRankSum=  |
| 38104 | chrY | 13858700 | . | C | G   | 194.73   | PASS          | AC=2;AF=0.029;AN=70;BaseQRankSum=  |
| 38105 | chrY | 13858704 | . | A | C   | 125.76   | PASS          | AC=2;AF=0.029;AN=70;BaseQRankSum=  |
| 38106 | chrY | 13858706 | . | A | T,G | 1320.95  | PASS          | AC=4,2;AF=0.065,0.032;AN=62;BaseQ  |
| 38107 | chrY | 13858708 | . | T | G   | 146.86   | PASS          | AC=2;AF=0.029;AN=70;BaseQRankSum=  |
| 38108 | chrY | 13858710 | . | G | A   | 47.59    | my_snp_filter | AC=2;AF=0.029;AN=70;BaseQ          |
| 38109 | chrY | 13858715 | . | G | A   | 229.83   | PASS          | AC=2;AF=0.029;AN=70;BaseQRankSum=  |
| 38110 | chrY | 13858719 | . | C | G   | 379.27   | PASS          | AC=2;AF=0.029;AN=68;BaseQRankSum=  |
| 38111 | chrY | 13858729 | . | C | T   | 504.93   | PASS          | AC=2;AF=0.042;AN=48;BaseQRankSum=  |
| 38112 | chrY | 13858730 | . | G | A   | 217.62   | PASS          | AC=1;AF=0.019;AN=54;BaseQRankSum=  |
| 38113 | chrY | 13858733 | . | T | C   | 491.74   | PASS          | AC=3;AF=0.044;AN=68;BaseQRankSum=  |
| 38114 | chrY | 13858734 | . | G | A   | 111.30   | PASS          | AC=4;AF=0.059;AN=68;BaseQRankSum=  |
| 38115 | chrY | 13858748 | . | T | G   | 213.74   | PASS          | AC=1;AF=0.015;AN=68;BaseQRankSum=  |
| 38116 | chrY | 13858749 | . | G | A   | 356.18   | PASS          | AC=2;AF=0.029;AN=68;BaseQRankSum=  |
| 38117 | chrY | 13858768 | . | A | T   | 418.35   | PASS          | AC=2;AF=0.042;AN=48;BaseQRankSum=  |
| 38118 | chrY | 13858769 | . | C | T   | 414.63   | PASS          | AC=2;AF=0.042;AN=48;BaseQRankSum=  |
| 38119 | chrY | 13858773 | . | T | C   | 370.89   | PASS          | AC=2;AF=0.029;AN=70;BaseQRankSum=  |
| 38120 | chrY | 13858782 | . | T | A   | 297.25   | PASS          | AC=2;AF=0.031;AN=64;BaseQRankSum=  |
| 38121 | chrY | 13858803 | . | T | A   | 209.35   | PASS          | AC=2;AF=0.029;AN=68;BaseQRankSum=  |
| 38122 | chrY | 13858806 | . | A | G   | 170.35   | PASS          | AC=2;AF=0.029;AN=68;BaseQRankSum=  |
| 38123 | chrY | 13858829 | . | C | T   | 1053.17  | PASS          | AC=5;AF=0.071;AN=70;BaseQRankSum=  |
| 38124 | chrY | 13858830 | . | A | C   | 118.64   | PASS          | AC=1;AF=0.014;AN=70;BaseQRankSum=  |
| 38125 | chrY | 13858834 | . | G | A   | 1052.61  | PASS          | AC=5;AF=0.071;AN=70;BaseQRankSum=  |
| 38126 | chrY | 13858846 | . | T | C   | 702.92   | PASS          | AC=6;AF=0.091;AN=66;BaseQRankSum=  |
| 38127 | chrY | 13858850 | . | T | C   | 685.12   | PASS          | AC=5;AF=0.081;AN=62;BaseQRankSum=  |
| 38128 | chrY | 13858858 | . | G | T   | 626.47   | PASS          | AC=7;AF=0.106;AN=66;BaseQRankSum=  |
| 38129 | chrY | 13858875 | . | G | C   | 638.87   | PASS          | AC=7;AF=0.100;AN=70;BaseQRankSum=  |
| 38130 | chrY | 13858990 | . | T | G   | 1891.50  | PASS          | AC=16;AF=0.229;AN=70;BaseQRankSum= |
| 38131 | chrY | 13858995 | . | C | G   | 1910.99  | PASS          | AC=16;AF=0.229;AN=70;BaseQRankSum= |
| 38132 | chrY | 13859000 | . | A | G   | 1937.46  | PASS          | AC=16;AF=0.229;AN=70;BaseQRankSum= |
| 38133 | chrY | 13859005 | . | A | G   | 2086.15  | PASS          | AC=16;AF=0.229;AN=70;BaseQRankSum= |
| 38134 | chrY | 13859014 | . | C | T   | 2152.94  | PASS          | AC=17;AF=0.243;AN=70;BaseQRankSum= |
| 38135 | chrY | 13859039 | . | C | G   | 1630.24  | PASS          | AC=15;AF=0.214;AN=70;BaseQRankSum= |
| 38136 | chrY | 13859040 | . | T | G   | 1597.15  | PASS          | AC=15;AF=0.214;AN=70;BaseQRankSum= |
| 38137 | chrY | 13859050 | . | T | G   | 1438.12  | PASS          | AC=14;AF=0.206;AN=68;BaseQRankSum= |
| 38138 | chrY | 13859627 | . | T | C   | 139.90   | PASS          | AC=3;AF=0.043;AN=70;BaseQRankSum=  |
| 38139 | chrY | 13859630 | . | G | A   | 149.24   | PASS          | AC=3;AF=0.043;AN=70;BaseQRankSum=  |
| 38140 | chrY | 13859632 | . | G | A   | 163.41   | PASS          | AC=3;AF=0.058;AN=52;BaseQRankSum=  |
| 38141 | chrY | 13859636 | . | C | A   | 165.34   | PASS          | AC=3;AF=0.058;AN=52;BaseQRankSum=  |
| 38142 | chrY | 13859637 | . | T | A   | 165.18   | PASS          | AC=3;AF=0.058;AN=52;BaseQRankSum=  |
| 38143 | chrY | 13859644 | . | C | T   | 163.20   | PASS          | AC=3;AF=0.047;AN=64;BaseQRankSum=  |
| 38144 | chrY | 13859649 | . | G | T   | 155.58   | PASS          | AC=3;AF=0.043;AN=70;BaseQRankSum=  |
| 38145 | chrY | 13859650 | . | G | T   | 155.44   | PASS          | AC=3;AF=0.043;AN=70;BaseQRankSum=  |
| 38146 | chrY | 13859657 | . | A | G   | 150.16   | PASS          | AC=3;AF=0.043;AN=70;BaseQRankSum=  |
| 38147 | chrY | 13859684 | . | T | A   | 124.13   | PASS          | AC=1;AF=0.019;AN=52;BaseQRankSum=  |
| 38148 | chrY | 13859928 | . | T | C   | 70.87    | PASS          | AC=1;AF=0.100;AN=10;BaseQRankSum=  |
| 38149 | chrY | 13859949 | . | G | A   | 55.92    | PASS          | AC=1;AF=0.014;AN=70;BaseQRankSum=  |
| 38150 | chrY | 13859954 | . | C | G   | 59.73    | PASS          | AC=1;AF=0.014;AN=70;BaseQRankSum=  |
| 38151 | chrY | 13859958 | . | A | T   | 58.43    | PASS          | AC=1;AF=0.014;AN=70;BaseQRankSum=  |
| 38152 | chrY | 13859959 | . | G | C   | 114.92   | PASS          | AC=1;AF=0.014;AN=70;BaseQRankSum=  |

|       |      |          |   |   |     |         |               |                                    |
|-------|------|----------|---|---|-----|---------|---------------|------------------------------------|
| 38153 | chrY | 13859963 | . | T | A   | 120.67  | PASS          | AC=1;AF=0.014;AN=70;BaseQRankSum=  |
| 38154 | chrY | 13859965 | . | G | A   | 30.67   | my_snp_filter | AC=1;AF=0.014;AN=70;BaseQ          |
| 38155 | chrY | 13859977 | . | G | T,* | 3398.03 | my_snp_filter | AC=7,1;AF=0.500,0.071;AN=          |
| 38156 | chrY | 13859978 | . | T | C,* | 3398.03 | my_snp_filter | AC=7,1;AF=0.500,0.071;AN=          |
| 38157 | chrY | 13859981 | . | A | T,* | 3393.93 | my_snp_filter | AC=7,1;AF=0.438,0.063;AN=          |
| 38158 | chrY | 13859984 | . | A | G,* | 3716.68 | PASS          | AC=10,1;AF=0.625,0.063;AN=16;Base  |
| 38159 | chrY | 13859991 | . | T | C,A | 3511.07 | my_snp_filter | AC=7,1;AF=0.583,0.083;AN=          |
| 38160 | chrY | 13859994 | . | T | C,A | 3718.22 | PASS          | AC=7,1;AF=0.583,0.083;AN=12;BaseQ  |
| 38161 | chrY | 13860014 | . | G | T   | 1107.51 | my_snp_filter | AC=5;AF=0.250;AN=20;BaseQ          |
| 38162 | chrY | 13860019 | . | A | C   | 3737.45 | PASS          | AC=8;AF=0.800;AN=10;BaseQRankSum=  |
| 38163 | chrY | 13860043 | . | T | C   | 677.71  | PASS          | AC=2;AF=0.071;AN=28;BaseQRankSum=  |
| 38164 | chrY | 13860048 | . | T | A   | 44.61   | PASS          | AC=1;AF=0.014;AN=70;BaseQRankSum=  |
| 38165 | chrY | 13860049 | . | C | G   | 111.54  | PASS          | AC=2;AF=0.029;AN=70;DP=60618;FS=0  |
| 38166 | chrY | 13860061 | . | A | G   | 42.69   | my_snp_filter | AC=1;AF=0.014;AN=70;BaseQ          |
| 38167 | chrY | 13860062 | . | C | A   | 43.80   | my_snp_filter | AC=1;AF=0.014;AN=70;BaseQ          |
| 38168 | chrY | 13860065 | . | G | T   | 52.48   | PASS          | AC=2;AF=0.029;AN=70;BaseQRankSum=  |
| 38169 | chrY | 13860067 | . | G | A   | 586     | PASS          | AC=1;AF=0.028;AN=36;BaseQRankSum=  |
| 38170 | chrY | 13860068 | . | T | A   | 145.81  | PASS          | AC=3;AF=0.060;AN=50;BaseQRankSum=  |
| 38171 | chrY | 13860069 | . | G | A   | 54.89   | PASS          | AC=2;AF=0.029;AN=68;BaseQRankSum=  |
| 38172 | chrY | 13860072 | . | A | G   | 40.61   | PASS          | AC=1;AF=0.014;AN=70;BaseQRankSum=  |
| 38173 | chrY | 13860077 | . | C | T   | 652.33  | PASS          | AC=3;AF=0.136;AN=22;BaseQRankSum=  |
| 38174 | chrY | 13860082 | . | A | G   | 64.60   | PASS          | AC=2;AF=0.034;AN=58;DP=22746;FS=0  |
| 38175 | chrY | 13860087 | . | A | C   | 494.47  | PASS          | AC=1;AF=0.071;AN=14;BaseQRankSum=  |
| 38176 | chrY | 13860088 | . | C | T   | 659.20  | PASS          | AC=3;AF=0.188;AN=16;BaseQRankSum=  |
| 38177 | chrY | 13860092 | . | A | G   | 302.29  | PASS          | AC=1;AF=0.100;AN=10;BaseQRankSum=  |
| 38178 | chrY | 13860094 | . | T | G   | 530.14  | PASS          | AC=2;AF=0.143;AN=14;BaseQRankSum=  |
| 38179 | chrY | 13860100 | . | C | G   | 285.79  | PASS          | AC=3;AF=0.300;AN=10;BaseQRankSum=  |
| 38180 | chrY | 13860102 | . | A | C   | 251.19  | PASS          | AC=1;AF=0.019;AN=54;BaseQRankSum=  |
| 38181 | chrY | 13860104 | . | G | C   | 234.30  | PASS          | AC=1;AF=0.017;AN=60;BaseQRankSum=  |
| 38182 | chrY | 13860184 | . | G | T   | 56.24   | PASS          | AC=2;AF=0.029;AN=70;BaseQRankSum=  |
| 38183 | chrY | 13860199 | . | G | A   | 35.50   | my_snp_filter | AC=1;AF=0.014;AN=70;BaseQ          |
| 38184 | chrY | 13860204 | . | T | G   | 136.48  | PASS          | AC=4;AF=0.065;AN=62;BaseQRankSum=  |
| 38185 | chrY | 13860216 | . | G | A   | 135.43  | PASS          | AC=3;AF=0.054;AN=56;BaseQRankSum=  |
| 38186 | chrY | 13860228 | . | C | T   | 107.59  | PASS          | AC=3;AF=0.050;AN=60;BaseQRankSum=  |
| 38187 | chrY | 13860229 | . | A | G   | 104.33  | PASS          | AC=2;AF=0.033;AN=60;BaseQRankSum=  |
| 38188 | chrY | 13860235 | . | C | G   | 91.73   | PASS          | AC=2;AF=0.033;AN=60;BaseQRankSum=  |
| 38189 | chrY | 13860364 | . | A | G   | 39.77   | PASS          | AC=1;AF=0.023;AN=44;BaseQRankSum=  |
| 38190 | chrY | 13860365 | . | G | T   | 66.96   | PASS          | AC=1;AF=0.017;AN=58;BaseQRankSum=  |
| 38191 | chrY | 13860367 | . | T | A   | 85.21   | PASS          | AC=1;AF=0.024;AN=42;BaseQRankSum=  |
| 38192 | chrY | 13860369 | . | T | C   | 49.62   | PASS          | AC=1;AF=0.022;AN=46;BaseQRankSum=  |
| 38193 | chrY | 13860558 | . | T | C   | 72.58   | PASS          | AC=1;AF=0.014;AN=70;BaseQRankSum=  |
| 38194 | chrY | 13860625 | . | T | C   | 173.25  | PASS          | AC=4;AF=0.059;AN=68;BaseQRankSum=  |
| 38195 | chrY | 13860645 | . | T | C   | 34.60   | my_snp_filter | AC=1;AF=0.015;AN=68;BaseQ          |
| 38196 | chrY | 13860647 | . | C | T   | 207.42  | PASS          | AC=4;AF=0.061;AN=66;BaseQRankSum=  |
| 38197 | chrY | 13860648 | . | T | G   | 94.34   | PASS          | AC=1;AF=0.015;AN=68;BaseQRankSum=  |
| 38198 | chrY | 13860650 | . | G | A   | 167.23  | PASS          | AC=2;AF=0.030;AN=66;BaseQRankSum=  |
| 38199 | chrY | 13860652 | . | G | A   | 226.90  | PASS          | AC=4;AF=0.061;AN=66;BaseQRankSum=  |
| 38200 | chrY | 13860664 | . | C | A   | 53.04   | PASS          | AC=1;AF=0.014;AN=70;BaseQRankSum=  |
| 38201 | chrY | 13860668 | . | A | T   | 59.99   | PASS          | AC=1;AF=0.014;AN=70;BaseQRankSum=  |
| 38202 | chrY | 13860748 | . | T | A   | 67.97   | PASS          | AC=4;AF=0.057;AN=70;BaseQRankSum=  |
| 38203 | chrY | 13860776 | . | G | A   | 478.29  | PASS          | AC=9;AF=0.141;AN=64;BaseQRankSum=  |
| 38204 | chrY | 13860778 | . | C | T   | 480.28  | PASS          | AC=9;AF=0.145;AN=62;BaseQRankSum=  |
| 38205 | chrY | 13860779 | . | T | A   | 95.30   | PASS          | AC=2;AF=0.031;AN=64;BaseQRankSum=  |
| 38206 | chrY | 13860787 | . | A | G   | 344.98  | PASS          | AC=6;AF=0.091;AN=66;BaseQRankSum=  |
| 38207 | chrY | 13860789 | . | G | A   | 414.39  | PASS          | AC=7;AF=0.106;AN=66;BaseQRankSum=  |
| 38208 | chrY | 13860912 | . | T | A   | 46.82   | my_snp_filter | AC=2;AF=0.029;AN=70;BaseQ          |
| 38209 | chrY | 13861210 | . | G | A   | 237.85  | PASS          | AC=6;AF=0.086;AN=70;BaseQRankSum=  |
| 38210 | chrY | 13861219 | . | G | A   | 146.34  | my_snp_filter | AC=4;AF=0.057;AN=70;BaseQ          |
| 38211 | chrY | 13861235 | . | A | G   | 619.36  | PASS          | AC=3;AF=0.043;AN=70;BaseQRankSum=  |
| 38212 | chrY | 13861240 | . | G | A   | 490.64  | PASS          | AC=3;AF=0.043;AN=70;BaseQRankSum=  |
| 38213 | chrY | 13861249 | . | G | C   | 422.23  | PASS          | AC=4;AF=0.059;AN=68;BaseQRankSum=  |
| 38214 | chrY | 13861254 | . | G | A   | 197.03  | PASS          | AC=2;AF=0.029;AN=70;BaseQRankSum=  |
| 38215 | chrY | 13861255 | . | G | T   | 157.30  | PASS          | AC=2;AF=0.029;AN=70;BaseQRankSum=  |
| 38216 | chrY | 13861332 | . | C | A   | 45.19   | my_snp_filter | AC=1;AF=0.015;AN=68;BaseQ          |
| 38217 | chrY | 13861365 | . | G | A   | 283.79  | PASS          | AC=2;AF=0.033;AN=60;DP=477;FS=0.0  |
| 38218 | chrY | 13861469 | . | G | A   | 2366.45 | PASS          | AC=15;AF=0.341;AN=44;BaseQRankSum= |
| 38219 | chrY | 13861483 | . | C | T   | 2505.07 | PASS          | AC=15;AF=0.288;AN=52;BaseQRankSum= |
| 38220 | chrY | 13861484 | . | A | G   | 2554.45 | PASS          | AC=15;AF=0.341;AN=44;BaseQRankSum= |
| 38221 | chrY | 13861486 | . | G | A   | 2541.84 | PASS          | AC=15;AF=0.375;AN=40;BaseQRankSum= |
| 38222 | chrY | 13861492 | . | T | C   | 2411.96 | PASS          | AC=15;AF=0.214;AN=70;BaseQRankSum= |
| 38223 | chrY | 13861504 | . | G | T   | 2273.72 | PASS          | AC=14;AF=0.206;AN=68;BaseQRankSum= |
| 38224 | chrY | 13861509 | . | G | T   | 2192.26 | PASS          | AC=12;AF=0.171;AN=70;BaseQRankSum= |
| 38225 | chrY | 13861514 | . | C | G   | 91.48   | PASS          | AC=1;AF=0.014;AN=70;BaseQRankSum=  |
| 38226 | chrY | 13861523 | . | G | A   | 976.88  | PASS          | AC=5;AF=0.071;AN=70;BaseQRankSum=  |
| 38227 | chrY | 13861527 | . | T | C   | 332.07  | PASS          | AC=5;AF=0.156;AN=32;BaseQRankSum=  |
| 38228 | chrY | 13861528 | . | A | T,G | 1341.40 | PASS          | AC=5,5;AF=0.114,0.114;AN=44;BaseQ  |

|       |      |          |   |   |     |         |               |                                    |
|-------|------|----------|---|---|-----|---------|---------------|------------------------------------|
| 38229 | chrY | 13861539 | . | C | G   | 1651.65 | PASS          | AC=12;AF=0.300;AN=40;BaseQRankSum= |
| 38230 | chrY | 13861545 | . | T | A,* | 2333.35 | PASS          | AC=6,7;AF=0.150,0.175;AN=40;BaseQ  |
| 38231 | chrY | 13861555 | . | A | G   | 84.02   | PASS          | AC=1;AF=0.014;AN=70;BaseQRankSum=  |
| 38232 | chrY | 13861559 | . | G | A   | 465.99  | PASS          | AC=6;AF=0.143;AN=42;BaseQRankSum=  |
| 38233 | chrY | 13861566 | . | A | T   | 172     | PASS          | AC=1;AF=0.016;AN=62;BaseQRankSum=  |
| 38234 | chrY | 13861569 | . | T | G   | 3233.06 | PASS          | AC=17;AF=0.405;AN=42;BaseQRankSum= |
| 38235 | chrY | 13861573 | . | A | G   | 2391.06 | PASS          | AC=15;AF=0.250;AN=60;BaseQRankSum= |
| 38236 | chrY | 13861579 | . | G | C   | 245.92  | PASS          | AC=4;AF=0.095;AN=42;BaseQRankSum=  |
| 38237 | chrY | 13861580 | . | A | C   | 2254.10 | PASS          | AC=11;AF=0.172;AN=64;BaseQRankSum= |
| 38238 | chrY | 13861581 | . | T | A,G | 2947.37 | PASS          | AC=14,3;AF=0.333,0.071;AN=42;Base  |
| 38239 | chrY | 13861586 | . | G | C   | 2893.61 | PASS          | AC=17;AF=0.405;AN=42;BaseQRankSum= |
| 38240 | chrY | 13861594 | . | G | A   | 97.20   | my_snp_filter | AC=2;AF=0.040;AN=50;DP=11          |
| 38241 | chrY | 13861597 | . | C | T   | 154.15  | PASS          | AC=2;AF=0.032;AN=62;BaseQRankSum=  |
| 38242 | chrY | 13861598 | . | A | C,G | 271.35  | PASS          | AC=1,3;AF=0.022,0.065;AN=46;BaseQ  |
| 38243 | chrY | 13861609 | . | T | G   | 2185.03 | PASS          | AC=11;AF=0.157;AN=70;BaseQRankSum= |
| 38244 | chrY | 13861620 | . | A | T   | 84.48   | PASS          | AC=1;AF=0.015;AN=68;BaseQRankSum=  |
| 38245 | chrY | 13861633 | . | T | C   | 186.04  | PASS          | AC=1;AF=0.021;AN=48;BaseQRankSum=  |
| 38246 | chrY | 13861637 | . | A | T   | 156.13  | PASS          | AC=2;AF=0.045;AN=44;BaseQRankSum=  |
| 38247 | chrY | 13861646 | . | G | C   | 1296.32 | PASS          | AC=11;AF=0.172;AN=64;BaseQRankSum= |
| 38248 | chrY | 13861652 | . | A | T   | 1403.23 | PASS          | AC=12;AF=0.182;AN=66;BaseQRankSum= |
| 38249 | chrY | 13861654 | . | G | T   | 1033.15 | PASS          | AC=10;AF=0.152;AN=66;BaseQRankSum= |
| 38250 | chrY | 13861673 | . | C | G,* | 235.20  | PASS          | AC=3,1;AF=0.047,0.016;AN=64;BaseQ  |
| 38251 | chrY | 13861914 | . | C | T   | 1134.39 | PASS          | AC=1;AF=0.019;AN=52;BaseQRankSum=  |
| 38252 | chrY | 13861950 | . | G | T   | 43.49   | PASS          | AC=1;AF=0.014;AN=70;BaseQRankSum=  |
| 38253 | chrY | 13861954 | . | T | G   | 710.45  | PASS          | AC=2;AF=0.032;AN=62;BaseQRankSum=  |
| 38254 | chrY | 13861955 | . | C | T   | 799.27  | PASS          | AC=3;AF=0.048;AN=62;BaseQRankSum=  |
| 38255 | chrY | 13861957 | . | A | T   | 49.08   | PASS          | AC=1;AF=0.015;AN=66;BaseQRankSum=  |
| 38256 | chrY | 13861961 | . | G | T   | 707.26  | PASS          | AC=2;AF=0.029;AN=70;BaseQRankSum=  |
| 38257 | chrY | 13862126 | . | G | A,* | 7184.38 | my_snp_filter | AC=1,3;AF=0.017,0.050;AN=          |
| 38258 | chrY | 13862128 | . | G | A,* | 7070.89 | PASS          | AC=1,2;AF=0.018,0.036;AN=56;BaseQ  |
| 38259 | chrY | 13862138 | . | A | G   | 376.88  | PASS          | AC=3;AF=0.047;AN=64;BaseQRankSum=  |
| 38260 | chrY | 13862139 | . | T | A   | 6856.18 | PASS          | AC=1;AF=0.020;AN=50;BaseQRankSum=  |
| 38261 | chrY | 13862145 | . | A | G   | 379.28  | PASS          | AC=3;AF=0.047;AN=64;BaseQRankSum=  |
| 38262 | chrY | 13862425 | . | G | A   | 42.95   | PASS          | AC=1;AF=0.015;AN=68;BaseQRankSum=  |
| 38263 | chrY | 13862427 | . | A | T   | 36.34   | PASS          | AC=1;AF=0.015;AN=68;BaseQRankSum=  |
| 38264 | chrY | 13862468 | . | A | T   | 961.32  | PASS          | AC=3;AF=0.047;AN=64;BaseQRankSum=  |
| 38265 | chrY | 13862470 | . | A | G   | 969.01  | PASS          | AC=3;AF=0.045;AN=66;BaseQRankSum=  |
| 38266 | chrY | 13862475 | . | G | T   | 960.52  | PASS          | AC=4;AF=0.061;AN=66;BaseQRankSum=  |
| 38267 | chrY | 13862499 | . | G | A   | 7394.57 | PASS          | AC=44;AF=0.647;AN=68;BaseQRankSum= |
| 38268 | chrY | 13862684 | . | C | T   | 99.50   | PASS          | AC=2;AF=0.029;AN=70;BaseQRankSum=  |
| 38269 | chrY | 13862690 | . | G | A   | 162.39  | PASS          | AC=4;AF=0.061;AN=66;BaseQRankSum=  |
| 38270 | chrY | 13862694 | . | G | A   | 161.60  | PASS          | AC=4;AF=0.061;AN=66;BaseQRankSum=  |
| 38271 | chrY | 13862698 | . | C | T   | 145.18  | PASS          | AC=4;AF=0.061;AN=66;BaseQRankSum=  |
| 38272 | chrY | 13862703 | . | A | T   | 147.29  | PASS          | AC=4;AF=0.059;AN=68;BaseQRankSum=  |
| 38273 | chrY | 13862704 | . | A | G   | 147.65  | PASS          | AC=4;AF=0.059;AN=68;BaseQRankSum=  |
| 38274 | chrY | 13862707 | . | A | G   | 146.05  | PASS          | AC=4;AF=0.057;AN=70;BaseQRankSum=  |
| 38275 | chrY | 13862708 | . | T | G   | 95.75   | PASS          | AC=2;AF=0.029;AN=70;BaseQRankSum=  |
| 38276 | chrY | 13862711 | . | T | C   | 148.08  | PASS          | AC=4;AF=0.057;AN=70;BaseQRankSum=  |
| 38277 | chrY | 13862743 | . | T | C   | 30.43   | my_snp_filter | AC=1;AF=0.015;AN=68;BaseQ          |
| 38278 | chrY | 13862753 | . | C | T   | 222.13  | PASS          | AC=2;AF=0.029;AN=68;BaseQRankSum=  |
| 38279 | chrY | 13862760 | . | A | G   | 190.48  | PASS          | AC=2;AF=0.029;AN=70;BaseQRankSum=  |
| 38280 | chrY | 13862779 | . | A | T   | 190.29  | PASS          | AC=2;AF=0.029;AN=70;BaseQRankSum=  |
| 38281 | chrY | 13862782 | . | A | T   | 192.99  | PASS          | AC=2;AF=0.029;AN=70;BaseQRankSum=  |
| 38282 | chrY | 13862788 | . | G | T   | 151.52  | PASS          | AC=2;AF=0.029;AN=70;BaseQRankSum=  |
| 38283 | chrY | 13862803 | . | T | C   | 114.88  | PASS          | AC=2;AF=0.029;AN=70;BaseQRankSum=  |
| 38284 | chrY | 13862808 | . | T | A   | 124.77  | PASS          | AC=2;AF=0.029;AN=68;BaseQRankSum=  |
| 38285 | chrY | 13862814 | . | G | T   | 120.84  | PASS          | AC=2;AF=0.029;AN=70;BaseQRankSum=  |
| 38286 | chrY | 13862819 | . | T | C   | 96.01   | PASS          | AC=2;AF=0.029;AN=70;BaseQRankSum=  |
| 38287 | chrY | 13862838 | . | T | C   | 53.07   | PASS          | AC=1;AF=0.014;AN=70;BaseQRankSum=  |
| 38288 | chrY | 13862839 | . | T | G   | 54.59   | PASS          | AC=1;AF=0.014;AN=70;BaseQRankSum=  |
| 38289 | chrY | 13862845 | . | G | C   | 56.05   | PASS          | AC=1;AF=0.014;AN=70;BaseQRankSum=  |
| 38290 | chrY | 13863083 | . | T | G   | 291.77  | PASS          | AC=2;AF=0.038;AN=52;BaseQRankSum=  |
| 38291 | chrY | 13863088 | . | G | A   | 251.39  | PASS          | AC=2;AF=0.029;AN=68;BaseQRankSum=  |
| 38292 | chrY | 13863094 | . | T | A,G | 604.66  | PASS          | AC=2,2;AF=0.036,0.036;AN=56;BaseQ  |
| 38293 | chrY | 13863108 | . | C | T   | 85.39   | my_snp_filter | AC=1;AF=0.015;AN=66;BaseQ          |
| 38294 | chrY | 13863109 | . | G | C   | 2873.43 | PASS          | AC=7;AF=0.106;AN=66;BaseQRankSum=  |
| 38295 | chrY | 13863113 | . | A | G   | 3142.89 | PASS          | AC=8;AF=0.129;AN=62;BaseQRankSum=  |
| 38296 | chrY | 13863123 | . | G | A   | 2485.01 | PASS          | AC=7;AF=0.117;AN=60;BaseQRankSum=  |
| 38297 | chrY | 13863131 | . | A | T   | 2332.82 | my_snp_filter | AC=1;AF=0.025;AN=40;BaseQ          |
| 38298 | chrY | 13863132 | . | C | T   | 2888.09 | PASS          | AC=7;AF=0.117;AN=60;BaseQRankSum=  |
| 38299 | chrY | 13863135 | . | T | C   | 2778.64 | PASS          | AC=7;AF=0.117;AN=60;BaseQRankSum=  |
| 38300 | chrY | 13863145 | . | T | C   | 1788.68 | my_snp_filter | AC=1;AF=0.020;AN=50;BaseQ          |
| 38301 | chrY | 13863148 | . | T | C   | 8038.93 | PASS          | AC=8;AF=0.174;AN=46;BaseQRankSum=  |
| 38302 | chrY | 13863149 | . | G | A   | 2574.35 | PASS          | AC=7;AF=0.113;AN=62;BaseQRankSum=  |
| 38303 | chrY | 13863160 | . | C | A   | 7591.94 | PASS          | AC=8;AF=0.190;AN=42;BaseQRankSum=  |
| 38304 | chrY | 13863163 | . | G | T   | 5313.05 | my_snp_filter | AC=1;AF=0.025;AN=40;BaseQ          |



|       |      |          |   |   |     |         |               |                                    |
|-------|------|----------|---|---|-----|---------|---------------|------------------------------------|
| 38305 | chrY | 13863167 | . | G | C,T | 6420.94 | PASS          | AC=7,1;AF=0.175,0.025;AN=40;BaseQ  |
| 38306 | chrY | 13863177 | . | T | A   | 1858.03 | PASS          | AC=7;AF=0.109;AN=64;BaseQRankSum=  |
| 38307 | chrY | 13863184 | . | G | T   | 1076.47 | PASS          | AC=4;AF=0.065;AN=62;BaseQRankSum=  |
| 38308 | chrY | 13863191 | . | G | A   | 4743.50 | my_snp_filter | AC=1;AF=0.028;AN=36;BaseQ          |
| 38309 | chrY | 13863192 | . | T | C   | 4657.13 | my_snp_filter | AC=1;AF=0.026;AN=38;BaseQ          |
| 38310 | chrY | 13863194 | . | A | G   | 2648.16 | PASS          | AC=3;AF=0.083;AN=36;BaseQRankSum=  |
| 38311 | chrY | 13863209 | . | G | T   | 161.87  | PASS          | AC=3;AF=0.058;AN=52;BaseQRankSum=  |
| 38312 | chrY | 13863308 | . | A | G   | 75.55   | PASS          | AC=3;AF=0.047;AN=64;BaseQRankSum=  |
| 38313 | chrY | 13863314 | . | A | G   | 55.75   | my_snp_filter | AC=2;AF=0.059;AN=34;DP=11          |
| 38314 | chrY | 13863539 | . | A | G   | 7051.01 | PASS          | AC=58;AF=1.00;AN=58;BaseQRankSum=  |
| 38315 | chrY | 13863575 | . | T | A   | 128.87  | PASS          | AC=1;AF=0.038;AN=26;BaseQRankSum=  |
| 38316 | chrY | 13863580 | . | A | G   | 143.02  | PASS          | AC=1;AF=0.015;AN=66;BaseQRankSum=  |
| 38317 | chrY | 13863586 | . | A | G   | 99.99   | PASS          | AC=1;AF=0.016;AN=64;BaseQRankSum=  |
| 38318 | chrY | 13863592 | . | A | T   | 177.19  | PASS          | AC=1;AF=0.045;AN=22;BaseQRankSum=  |
| 38319 | chrY | 13863608 | . | T | C   | 238.20  | PASS          | AC=1;AF=0.026;AN=38;BaseQRankSum=  |
| 38320 | chrY | 13863612 | . | C | T   | 180.93  | PASS          | AC=1;AF=0.042;AN=24;BaseQRankSum=  |
| 38321 | chrY | 13863613 | . | A | G   | 178.58  | PASS          | AC=1;AF=0.038;AN=26;BaseQRankSum=  |
| 38322 | chrY | 13863629 | . | A | G   | 221.93  | PASS          | AC=2;AF=0.100;AN=20;BaseQRankSum=  |
| 38323 | chrY | 13863645 | . | A | C   | 130.69  | PASS          | AC=2;AF=0.029;AN=70;BaseQRankSum=  |
| 38324 | chrY | 13863659 | . | A | T   | 1260.77 | PASS          | AC=14;AF=0.200;AN=70;BaseQRankSum= |
| 38325 | chrY | 13863669 | . | G | C   | 1308.55 | PASS          | AC=15;AF=0.214;AN=70;BaseQRankSum= |
| 38326 | chrY | 13863673 | . | C | T   | 1295.97 | PASS          | AC=15;AF=0.214;AN=70;BaseQRankSum= |
| 38327 | chrY | 13863674 | . | G | A   | 658.54  | PASS          | AC=9;AF=0.129;AN=70;BaseQRankSum=  |
| 38328 | chrY | 13863677 | . | C | T   | 1504.10 | PASS          | AC=19;AF=0.339;AN=56;BaseQRankSum= |
| 38329 | chrY | 13863678 | . | T | G   | 1504.12 | PASS          | AC=19;AF=0.339;AN=56;BaseQRankSum= |
| 38330 | chrY | 13863688 | . | C | T   | 1182.19 | PASS          | AC=14;AF=0.200;AN=70;BaseQRankSum= |
| 38331 | chrY | 13863698 | . | A | G   | 2402.94 | PASS          | AC=19;AF=0.380;AN=50;BaseQRankSum= |
| 38332 | chrY | 13863699 | . | T | A   | 1167.79 | PASS          | AC=14;AF=0.280;AN=50;BaseQRankSum= |
| 38333 | chrY | 13863712 | . | T | C   | 79.47   | my_snp_filter | AC=1;AF=0.014;AN=70;BaseQ          |
| 38334 | chrY | 13863713 | . | G | T   | 1419.47 | PASS          | AC=8;AF=0.114;AN=70;BaseQRankSum=  |
| 38335 | chrY | 13863719 | . | G | T   | 77.01   | my_snp_filter | AC=1;AF=0.014;AN=70;BaseQ          |
| 38336 | chrY | 13863730 | . | G | A,* | 1023.11 | PASS          | AC=6,1;AF=0.100,0.017;AN=60;BaseQ  |
| 38337 | chrY | 13863734 | . | G | A,* | 207.12  | PASS          | AC=1,1;AF=0.016,0.016;AN=62;BaseQ  |
| 38338 | chrY | 13863745 | . | A | G   | 76.07   | PASS          | AC=1;AF=0.014;AN=70;BaseQRankSum=  |
| 38339 | chrY | 13863758 | . | G | A   | 1082.33 | PASS          | AC=3;AF=0.043;AN=70;BaseQRankSum=  |
| 38340 | chrY | 13863763 | . | T | A   | 896.50  | PASS          | AC=3;AF=0.044;AN=68;BaseQRankSum=  |
| 38341 | chrY | 13863765 | . | T | A   | 944.34  | PASS          | AC=3;AF=0.045;AN=66;BaseQRankSum=  |
| 38342 | chrY | 13863768 | . | A | G   | 837.74  | PASS          | AC=3;AF=0.044;AN=68;BaseQRankSum=  |
| 38343 | chrY | 13863769 | . | C | G   | 810.81  | PASS          | AC=3;AF=0.045;AN=66;BaseQRankSum=  |
| 38344 | chrY | 13863773 | . | T | C   | 757.84  | PASS          | AC=3;AF=0.043;AN=70;BaseQRankSum=  |
| 38345 | chrY | 13863779 | . | G | A   | 82.04   | PASS          | AC=2;AF=0.030;AN=66;DP=356;FS=9.6  |
| 38346 | chrY | 13863784 | . | C | G   | 507.18  | PASS          | AC=3;AF=0.044;AN=68;BaseQRankSum=  |
| 38347 | chrY | 13863801 | . | A | T   | 209.27  | PASS          | AC=2;AF=0.029;AN=68;BaseQRankSum=  |
| 38348 | chrY | 13863948 | . | A | T   | 7659.42 | PASS          | AC=52;AF=0.743;AN=70;BaseQRankSum= |
| 38349 | chrY | 13864004 | . | A | T   | 326.01  | PASS          | AC=2;AF=0.029;AN=70;BaseQRankSum=  |
| 38350 | chrY | 13864006 | . | C | G   | 1419.27 | PASS          | AC=6;AF=0.094;AN=64;BaseQRankSum=  |
| 38351 | chrY | 13864011 | . | G | A   | 331.98  | PASS          | AC=2;AF=0.029;AN=70;BaseQRankSum=  |
| 38352 | chrY | 13864020 | . | A | T,G | 1286.50 | PASS          | AC=6,1;AF=0.094,0.016;AN=64;BaseQ  |
| 38353 | chrY | 13864035 | . | T | C   | 1472.55 | PASS          | AC=6;AF=0.091;AN=66;BaseQRankSum=  |
| 38354 | chrY | 13864041 | . | T | G   | 1343.36 | PASS          | AC=6;AF=0.091;AN=66;BaseQRankSum=  |
| 38355 | chrY | 13864048 | . | A | G   | 907.43  | PASS          | AC=5;AF=0.071;AN=70;BaseQRankSum=  |
| 38356 | chrY | 13864051 | . | G | A   | 910.39  | PASS          | AC=5;AF=0.071;AN=70;BaseQRankSum=  |
| 38357 | chrY | 13864055 | . | A | G   | 1182.74 | PASS          | AC=6;AF=0.086;AN=70;BaseQRankSum=  |
| 38358 | chrY | 13864063 | . | G | T   | 47.13   | my_snp_filter | AC=2;AF=0.029;AN=70;BaseQ          |
| 38359 | chrY | 13864073 | . | A | G   | 38.55   | my_snp_filter | AC=2;AF=0.029;AN=70;BaseQ          |
| 38360 | chrY | 13864104 | . | T | G   | 626.17  | PASS          | AC=3;AF=0.043;AN=70;BaseQRankSum=  |
| 38361 | chrY | 13864123 | . | A | C   | 582.90  | PASS          | AC=3;AF=0.043;AN=70;BaseQRankSum=  |
| 38362 | chrY | 13864126 | . | C | G   | 541.15  | PASS          | AC=3;AF=0.043;AN=70;BaseQRankSum=  |
| 38363 | chrY | 13864135 | . | G | A   | 421.71  | PASS          | AC=3;AF=0.044;AN=68;BaseQRankSum=  |
| 38364 | chrY | 13864136 | . | A | C   | 421.52  | PASS          | AC=3;AF=0.044;AN=68;BaseQRankSum=  |
| 38365 | chrY | 13864144 | . | A | T   | 133.28  | PASS          | AC=3;AF=0.043;AN=70;BaseQRankSum=  |
| 38366 | chrY | 13864822 | . | A | G   | 316.27  | PASS          | AC=2;AF=0.029;AN=70;DP=573;FS=0.0  |
| 38367 | chrY | 13864855 | . | T | C   | 44.30   | my_snp_filter | AC=2;AF=0.029;AN=70;BaseQ          |
| 38368 | chrY | 13864866 | . | G | T   | 308.51  | PASS          | AC=3;AF=0.043;AN=70;BaseQRankSum=  |
| 38369 | chrY | 13864868 | . | A | T   | 349.17  | PASS          | AC=2;AF=0.029;AN=70;BaseQRankSum=  |
| 38370 | chrY | 13864871 | . | A | G   | 386.10  | PASS          | AC=2;AF=0.029;AN=70;BaseQRankSum=  |
| 38371 | chrY | 13864886 | . | G | C   | 34.16   | PASS          | AC=1;AF=0.014;AN=70;BaseQRankSum=  |
| 38372 | chrY | 13864890 | . | A | G   | 264.02  | PASS          | AC=4;AF=0.059;AN=68;BaseQRankSum=  |
| 38373 | chrY | 13864893 | . | A | G   | 59.42   | PASS          | AC=1;AF=0.015;AN=68;BaseQRankSum=  |
| 38374 | chrY | 13864894 | . | T | A   | 87.49   | my_snp_filter | AC=2;AF=0.029;AN=68;BaseQ          |
| 38375 | chrY | 13864908 | . | A | T   | 125.80  | PASS          | AC=1;AF=0.017;AN=58;BaseQRankSum=  |
| 38376 | chrY | 13864910 | . | G | C   | 126.92  | PASS          | AC=1;AF=0.017;AN=58;BaseQRankSum=  |
| 38377 | chrY | 13864916 | . | C | T   | 131.39  | PASS          | AC=1;AF=0.017;AN=60;BaseQRankSum=  |
| 38378 | chrY | 13864923 | . | A | C   | 129.95  | PASS          | AC=1;AF=0.017;AN=60;BaseQRankSum=  |
| 38379 | chrY | 13865051 | . | G | T   | 6184    | PASS          | AC=46;AF=0.719;AN=64;DP=482;FS=0.  |
| 38380 | chrY | 13865250 | . | G | C   | 170.09  | my_snp_filter | AC=3;AF=0.044;AN=68;BaseQ          |

|       |      |          |   |   |       |          |               |                                    |
|-------|------|----------|---|---|-------|----------|---------------|------------------------------------|
| 38381 | chrY | 13865320 | . | G | C     | 329.73   | PASS          | AC=4;AF=0.057;AN=70;BaseQRankSum=  |
| 38382 | chrY | 13865321 | . | G | A     | 349.76   | PASS          | AC=4;AF=0.057;AN=70;BaseQRankSum=  |
| 38383 | chrY | 13865325 | . | C | A     | 325.75   | PASS          | AC=4;AF=0.057;AN=70;BaseQRankSum=  |
| 38384 | chrY | 13865587 | . | G | A     | 57.93    | my_snp_filter | AC=4;AF=0.061;AN=66;BaseQ          |
| 38385 | chrY | 13866088 | . | G | T     | 1044.28  | PASS          | AC=2;AF=0.029;AN=68;BaseQRankSum=  |
| 38386 | chrY | 13866109 | . | G | T,C   | 3151.15  | PASS          | AC=7,2;AF=0.167,0.048;AN=42;BaseQ  |
| 38387 | chrY | 13866110 | . | A | G     | 2380.18  | PASS          | AC=7;AF=0.175;AN=40;BaseQRankSum=  |
| 38388 | chrY | 13866119 | . | G | T     | 2161.41  | PASS          | AC=7;AF=0.117;AN=60;BaseQRankSum=  |
| 38389 | chrY | 13866125 | . | A | G     | 2792.88  | PASS          | AC=9;AF=0.196;AN=46;BaseQRankSum=  |
| 38390 | chrY | 13866129 | . | T | C     | 2492.59  | PASS          | AC=9;AF=0.188;AN=48;BaseQRankSum=  |
| 38391 | chrY | 13866131 | . | C | A     | 112.14   | PASS          | AC=2;AF=0.033;AN=60;BaseQRankSum=  |
| 38392 | chrY | 13866133 | . | T | G     | 1355.69  | PASS          | AC=7;AF=0.135;AN=52;BaseQRankSum=  |
| 38393 | chrY | 13866135 | . | C | T     | 754.84   | PASS          | AC=3;AF=0.058;AN=52;BaseQRankSum=  |
| 38394 | chrY | 13866136 | . | G | A     | 1191.59  | PASS          | AC=7;AF=0.159;AN=44;BaseQRankSum=  |
| 38395 | chrY | 13866155 | . | A | G     | 1401.35  | PASS          | AC=7;AF=0.135;AN=52;BaseQRankSum=  |
| 38396 | chrY | 13866158 | . | T | G     | 572.93   | PASS          | AC=5;AF=0.076;AN=66;BaseQRankSum=  |
| 38397 | chrY | 13866169 | . | T | C     | 606      | PASS          | AC=5;AF=0.104;AN=48;BaseQRankSum=  |
| 38398 | chrY | 13866172 | . | T | A     | 34.28    | PASS          | AC=1;AF=0.022;AN=46;BaseQRankSum=  |
| 38399 | chrY | 13866202 | . | A | C     | 521.98   | PASS          | AC=1;AF=0.015;AN=68;BaseQRankSum=  |
| 38400 | chrY | 13866205 | . | T | C     | 526.23   | PASS          | AC=1;AF=0.023;AN=44;BaseQRankSum=  |
| 38401 | chrY | 13866215 | . | G | A     | 473.98   | PASS          | AC=1;AF=0.014;AN=70;BaseQRankSum=  |
| 38402 | chrY | 13866223 | . | T | C     | 432.10   | PASS          | AC=1;AF=0.014;AN=70;BaseQRankSum=  |
| 38403 | chrY | 13866315 | . | G | C     | 57.20    | PASS          | AC=1;AF=0.014;AN=70;BaseQRankSum=  |
| 38404 | chrY | 13866336 | . | A | G     | 68.10    | PASS          | AC=1;AF=0.018;AN=56;BaseQRankSum=  |
| 38405 | chrY | 13866340 | . | T | G     | 207.17   | PASS          | AC=2;AF=0.038;AN=52;BaseQRankSum=  |
| 38406 | chrY | 13866343 | . | T | C     | 101.89   | PASS          | AC=2;AF=0.034;AN=58;BaseQRankSum=  |
| 38407 | chrY | 13866344 | . | C | A     | 86.88    | PASS          | AC=2;AF=0.034;AN=58;BaseQRankSum=  |
| 38408 | chrY | 13866349 | . | T | G     | 201.52   | PASS          | AC=2;AF=0.042;AN=48;BaseQRankSum=  |
| 38409 | chrY | 13866353 | . | T | A     | 66.58    | PASS          | AC=1;AF=0.014;AN=70;BaseQRankSum=  |
| 38410 | chrY | 13866362 | . | A | C     | 33.48    | PASS          | AC=2;AF=0.029;AN=70;BaseQRankSum=  |
| 38411 | chrY | 13866363 | . | T | A     | 30.24    | PASS          | AC=2;AF=0.029;AN=70;BaseQRankSum=  |
| 38412 | chrY | 13866370 | . | G | T     | 261.36   | PASS          | AC=1;AF=0.014;AN=70;BaseQRankSum=  |
| 38413 | chrY | 13866375 | . | A | G     | 112.57   | PASS          | AC=4;AF=0.065;AN=62;BaseQRankSum=  |
| 38414 | chrY | 13866385 | . | G | C,*   | 764.06   | PASS          | AC=6,2;AF=0.086,0.029;AN=70;BaseQ  |
| 38415 | chrY | 13866387 | . | G | C,*   | 1419.75  | PASS          | AC=9,1;AF=0.180,0.020;AN=50;BaseQ  |
| 38416 | chrY | 13866389 | . | G | A     | 221.27   | PASS          | AC=3;AF=0.043;AN=70;BaseQRankSum=  |
| 38417 | chrY | 13866390 | . | G | C     | 379.59   | PASS          | AC=6;AF=0.086;AN=70;BaseQRankSum=  |
| 38418 | chrY | 13866395 | . | C | G,*   | 408.08   | PASS          | AC=3,1;AF=0.043,0.014;AN=70;BaseQ  |
| 38419 | chrY | 13866398 | . | T | C,*   | 794.42   | PASS          | AC=3,1;AF=0.043,0.014;AN=70;BaseQ  |
| 38420 | chrY | 13866399 | . | G | A,*   | 347.69   | PASS          | AC=2,1;AF=0.029,0.014;AN=70;BaseQ  |
| 38421 | chrY | 13866401 | . | A | T,*   | 341.94   | PASS          | AC=1,1;AF=0.021,0.021;AN=48;BaseQ  |
| 38422 | chrY | 13866402 | . | C | G,T,* | 1295.80  | PASS          | AC=6,1,1;AF=0.107,0.018,0.018;AN=  |
| 38423 | chrY | 13866404 | . | C | T,*   | 726.35   | PASS          | AC=6,1;AF=0.086,0.014;AN=70;BaseQ  |
| 38424 | chrY | 13866407 | . | T | A,*   | 345.16   | PASS          | AC=2,1;AF=0.029,0.014;AN=70;BaseQ  |
| 38425 | chrY | 13866409 | . | G | A,*   | 336.58   | PASS          | AC=2,1;AF=0.029,0.014;AN=70;BaseQ  |
| 38426 | chrY | 13866413 | . | T | A,*   | 879.23   | PASS          | AC=6,1;AF=0.086,0.014;AN=70;BaseQ  |
| 38427 | chrY | 13866417 | . | C | G,*   | 786.71   | PASS          | AC=1,1;AF=0.014,0.014;AN=70;BaseQ  |
| 38428 | chrY | 13866429 | . | A | G     | 7454.93  | PASS          | AC=20;AF=0.323;AN=62;BaseQRankSum= |
| 38429 | chrY | 13866434 | . | C | T     | 501.59   | PASS          | AC=4;AF=0.057;AN=70;BaseQRankSum=  |
| 38430 | chrY | 13866435 | . | G | C     | 3482.67  | PASS          | AC=16;AF=0.229;AN=70;BaseQRankSum= |
| 38431 | chrY | 13866438 | . | C | T,*   | 968.43   | PASS          | AC=2,1;AF=0.029,0.014;AN=70;BaseQ  |
| 38432 | chrY | 13866440 | . | C | G,A   | 11378.92 | PASS          | AC=21,3;AF=0.339,0.048;AN=         |
| 38433 | chrY | 13866443 | . | T | C     | 8686.55  | PASS          | AC=23;AF=0.371;AN=62;BaseQRankSum= |
| 38434 | chrY | 13866444 | . | G | A     | 8650.60  | PASS          | AC=23;AF=0.371;AN=62;BaseQRankSum= |
| 38435 | chrY | 13866450 | . | G | T,*   | 1632.68  | PASS          | AC=4,11;AF=0.065,0.177;AN=62;BaseQ |
| 38436 | chrY | 13866460 | . | G | T,C   | 5354.28  | PASS          | AC=17,1;AF=0.243,0.014;AN=70;BaseQ |
| 38437 | chrY | 13866464 | . | G | A     | 12030.82 | PASS          | AC=23;AF=0.371;AN=62;BaseQ         |
| 38438 | chrY | 13866468 | . | T | A     | 69.80    | my_snp_filter | AC=1;AF=0.014;AN=70;BaseQ          |
| 38439 | chrY | 13866490 | . | C | G,A   | 15732.89 | PASS          | AC=23,2;AF=0.397,0.034;AN=         |
| 38440 | chrY | 13866504 | . | G | A     | 4694.28  | PASS          | AC=19;AF=0.271;AN=70;BaseQRankSum= |
| 38441 | chrY | 13866510 | . | G | T     | 1055.81  | PASS          | AC=7;AF=0.100;AN=70;BaseQRankSum=  |
| 38442 | chrY | 13866514 | . | C | T     | 196.02   | PASS          | AC=3;AF=0.043;AN=70;BaseQRankSum=  |
| 38443 | chrY | 13866515 | . | G | A     | 2015.78  | PASS          | AC=11;AF=0.157;AN=70;BaseQRankSum= |
| 38444 | chrY | 13866520 | . | C | G     | 19150.06 | PASS          | AC=22;AF=0.379;AN=58;BaseQ         |
| 38445 | chrY | 13866521 | . | A | T     | 15741.25 | PASS          | AC=22;AF=0.379;AN=58;BaseQ         |
| 38446 | chrY | 13866523 | . | T | C     | 1367.47  | PASS          | AC=9;AF=0.129;AN=70;BaseQRankSum=  |
| 38447 | chrY | 13866533 | . | G | A,T   | 4208.80  | PASS          | AC=7,15;AF=0.113,0.242;AN=62;BaseQ |
| 38448 | chrY | 13866538 | . | T | A     | 1531.04  | PASS          | AC=9;AF=0.136;AN=66;BaseQRankSum=  |
| 38449 | chrY | 13866539 | . | T | C     | 14851.61 | PASS          | AC=22;AF=0.333;AN=66;BaseQ         |
| 38450 | chrY | 13866545 | . | G | T     | 249.76   | PASS          | AC=2;AF=0.029;AN=70;BaseQRankSum=  |
| 38451 | chrY | 13866548 | . | T | A     | 13328.84 | PASS          | AC=21;AF=0.318;AN=66;BaseQ         |
| 38452 | chrY | 13866565 | . | T | A     | 3690.86  | PASS          | AC=17;AF=0.243;AN=70;BaseQRankSum= |
| 38453 | chrY | 13866569 | . | G | A     | 715.68   | PASS          | AC=2;AF=0.029;AN=70;BaseQRankSum=  |
| 38454 | chrY | 13866579 | . | C | T     | 694.67   | PASS          | AC=5;AF=0.071;AN=70;BaseQRankSum=  |
| 38455 | chrY | 13866580 | . | G | A     | 81.52    | my_snp_filter | AC=1;AF=0.014;AN=70;BaseQ          |
| 38456 | chrY | 13866585 | . | G | A     | 1221.13  | PASS          | AC=3;AF=0.043;AN=70;BaseQRankSum=  |

|       |      |          |   |   |     |          |                |                                    |
|-------|------|----------|---|---|-----|----------|----------------|------------------------------------|
| 38457 | chrY | 13866595 | . | A | G   | 7010.76  | PASS           | AC=16;AF=0.250;AN=64;BaseQRankSum= |
| 38458 | chrY | 13866597 | . | G | A   | 745.36   | PASS           | AC=7;AF=0.100;AN=70;BaseQRankSum=  |
| 38459 | chrY | 13866598 | . | T | G   | 5073.41  | PASS           | AC=12;AF=0.171;AN=70;BaseQRankSum= |
| 38460 | chrY | 13866601 | . | A | C   | 244.22   | PASS           | AC=3;AF=0.043;AN=70;BaseQRankSum=  |
| 38461 | chrY | 13866604 | . | C | A   | 9353.65  | PASS           | AC=13;AF=0.186;AN=70;BaseQRankSum= |
| 38462 | chrY | 13866605 | . | G | A   | 580.06   | PASS           | AC=7;AF=0.100;AN=70;BaseQRankSum=  |
| 38463 | chrY | 13866610 | . | A | G   | 11971.72 | PASS           | PASS AC=17;AF=0.283;AN=60;BaseQ    |
| 38464 | chrY | 13866615 | . | A | G   | 6549.05  | PASS           | AC=16;AF=0.267;AN=60;BaseQRankSum= |
| 38465 | chrY | 13866619 | . | C | A,G | 4776.13  | PASS           | AC=5,11;AF=0.081,0.177;AN=62;BaseQ |
| 38466 | chrY | 13866621 | . | T | A,G | 4570.60  | PASS           | AC=6,9;AF=0.097,0.145;AN=62;BaseQ  |
| 38467 | chrY | 13866623 | . | T | A   | 53.39    | PASS           | AC=1;AF=0.014;AN=70;BaseQRankSum=  |
| 38468 | chrY | 13866625 | . | G | C   | 3669.63  | PASS           | AC=10;AF=0.143;AN=70;BaseQRankSum= |
| 38469 | chrY | 13866628 | . | C | T   | 6855.51  | PASS           | AC=10;AF=0.143;AN=70;BaseQRankSum= |
| 38470 | chrY | 13866634 | . | G | A   | 7649.96  | PASS           | AC=12;AF=0.182;AN=66;BaseQRankSum= |
| 38471 | chrY | 13866636 | . | A | T   | 787.73   | PASS           | AC=4;AF=0.057;AN=70;BaseQRankSum=  |
| 38472 | chrY | 13866637 | . | C | T   | 6722.03  | PASS           | AC=10;AF=0.143;AN=70;BaseQRankSum= |
| 38473 | chrY | 13866649 | . | T | A,G | 6486.88  | PASS           | AC=2,10;AF=0.029,0.147;AN=68;BaseQ |
| 38474 | chrY | 13866652 | . | A | C   | 770.92   | PASS           | AC=3;AF=0.043;AN=70;BaseQRankSum=  |
| 38475 | chrY | 13866658 | . | C | T   | 5764.49  | PASS           | AC=9;AF=0.132;AN=68;BaseQRankSum=  |
| 38476 | chrY | 13866659 | . | A | G   | 6711.87  | PASS           | AC=10;AF=0.147;AN=68;BaseQRankSum= |
| 38477 | chrY | 13866670 | . | G | A   | 1539.88  | PASS           | AC=9;AF=0.132;AN=68;BaseQRankSum=  |
| 38478 | chrY | 13866673 | . | G | T   | 4737.07  | PASS           | AC=9;AF=0.141;AN=64;BaseQRankSum=  |
| 38479 | chrY | 13866680 | . | G | A   | 1594.95  | PASS           | AC=8;AF=0.121;AN=66;BaseQRankSum=  |
| 38480 | chrY | 13866682 | . | C | A   | 38.06    | PASS           | AC=1;AF=0.015;AN=68;BaseQRankSum=  |
| 38481 | chrY | 13866687 | . | A | G   | 4375.61  | PASS           | AC=9;AF=0.141;AN=64;BaseQRankSum=  |
| 38482 | chrY | 13866697 | . | T | C   | 4193.33  | PASS           | AC=9;AF=0.136;AN=66;BaseQRankSum=  |
| 38483 | chrY | 13866699 | . | A | C   | 4017.97  | PASS           | AC=9;AF=0.136;AN=66;BaseQRankSum=  |
| 38484 | chrY | 13866703 | . | A | C   | 325.68   | PASS           | AC=2;AF=0.030;AN=66;BaseQRankSum=  |
| 38485 | chrY | 13866705 | . | G | A   | 811.42   | PASS           | AC=7;AF=0.109;AN=64;BaseQRankSum=  |
| 38486 | chrY | 13866714 | . | C | G   | 3719.98  | PASS           | AC=9;AF=0.141;AN=64;BaseQRankSum=  |
| 38487 | chrY | 13866718 | . | C | T   | 3541.17  | PASS           | AC=9;AF=0.155;AN=58;BaseQRankSum=  |
| 38488 | chrY | 13866765 | . | G | A   | 400.12   | PASS           | AC=9;AF=0.196;AN=46;BaseQRankSum=  |
| 38489 | chrY | 13866779 | . | A | C   | 400.41   | PASS           | AC=9;AF=0.250;AN=36;BaseQRankSum=  |
| 38490 | chrY | 13866780 | . | G | A   | 399.65   | PASS           | AC=9;AF=0.250;AN=36;BaseQRankSum=  |
| 38491 | chrY | 13866783 | . | T | C   | 242.39   | PASS           | AC=5;AF=0.078;AN=64;BaseQRankSum=  |
| 38492 | chrY | 13866800 | . | C | G   | 239.34   | PASS           | AC=4;AF=0.095;AN=42;BaseQRankSum=  |
| 38493 | chrY | 13866813 | . | T | G   | 166.42   | PASS           | AC=3;AF=0.065;AN=46;BaseQRankSum=  |
| 38494 | chrY | 13866950 | . | A | G   | 1883.57  | PASS           | AC=5;AF=0.167;AN=30;BaseQRankSum=  |
| 38495 | chrY | 13867011 | . | T | A   | 49.99    | my_snps_filter | AC=2;AF=0.167;AN=12;BaseQ          |
| 38496 | chrY | 13867033 | . | A | T   | 33.96    | my_snps_filter | AC=1;AF=0.014;AN=70;BaseQ          |
| 38497 | chrY | 13867037 | . | A | G   | 34.91    | my_snps_filter | AC=1;AF=0.014;AN=70;BaseQ          |
| 38498 | chrY | 13867087 | . | C | A   | 546.73   | PASS           | AC=4;AF=0.074;AN=54;BaseQRankSum=  |
| 38499 | chrY | 13867088 | . | A | T   | 15253.32 | PASS           | PASS AC=56;AF=0.933;AN=60;BaseQ    |
| 38500 | chrY | 13867100 | . | A | G   | 540.73   | PASS           | AC=4;AF=0.067;AN=60;BaseQRankSum=  |
| 38501 | chrY | 13867105 | . | G | T   | 526.96   | PASS           | AC=4;AF=0.057;AN=70;BaseQRankSum=  |
| 38502 | chrY | 13867110 | . | T | A   | 627.72   | PASS           | AC=4;AF=0.067;AN=60;BaseQRankSum=  |
| 38503 | chrY | 13867120 | . | A | G   | 657.74   | PASS           | AC=4;AF=0.067;AN=60;BaseQRankSum=  |
| 38504 | chrY | 13867122 | . | A | G   | 658.25   | PASS           | AC=4;AF=0.063;AN=64;BaseQRankSum=  |
| 38505 | chrY | 13867123 | . | T | G   | 657.68   | PASS           | AC=4;AF=0.063;AN=64;BaseQRankSum=  |
| 38506 | chrY | 13867128 | . | C | G   | 432.75   | PASS           | AC=3;AF=0.052;AN=58;BaseQRankSum=  |
| 38507 | chrY | 13867132 | . | G | T   | 509.95   | PASS           | AC=3;AF=0.052;AN=58;BaseQRankSum=  |
| 38508 | chrY | 13867137 | . | A | G   | 598.33   | PASS           | AC=4;AF=0.067;AN=60;BaseQRankSum=  |
| 38509 | chrY | 13867147 | . | G | A   | 805.19   | PASS           | AC=7;AF=0.106;AN=66;BaseQRankSum=  |
| 38510 | chrY | 13867153 | . | C | G   | 830.76   | PASS           | AC=7;AF=0.106;AN=66;BaseQRankSum=  |
| 38511 | chrY | 13867154 | . | T | A   | 830.37   | PASS           | AC=7;AF=0.106;AN=66;BaseQRankSum=  |
| 38512 | chrY | 13867155 | . | T | A   | 827.98   | PASS           | AC=7;AF=0.106;AN=66;BaseQRankSum=  |
| 38513 | chrY | 13867158 | . | A | G   | 784.33   | PASS           | AC=7;AF=0.106;AN=66;BaseQRankSum=  |
| 38514 | chrY | 13867161 | . | A | T   | 1030.32  | PASS           | AC=7;AF=0.106;AN=66;BaseQRankSum=  |
| 38515 | chrY | 13867191 | . | A | T   | 533.88   | PASS           | AC=6;AF=0.088;AN=68;BaseQRankSum=  |
| 38516 | chrY | 13867201 | . | C | T   | 382.39   | PASS           | AC=5;AF=0.078;AN=64;BaseQRankSum=  |
| 38517 | chrY | 13867206 | . | A | T   | 384.91   | PASS           | AC=5;AF=0.078;AN=64;BaseQRankSum=  |
| 38518 | chrY | 13867232 | . | G | T   | 103.24   | PASS           | AC=1;AF=0.014;AN=70;BaseQRankSum=  |
| 38519 | chrY | 13867250 | . | A | G   | 668.73   | PASS           | AC=3;AF=0.043;AN=70;BaseQRankSum=  |
| 38520 | chrY | 13867262 | . | A | G   | 1142.89  | PASS           | AC=3;AF=0.094;AN=32;BaseQRankSum=  |
| 38521 | chrY | 13867268 | . | T | C   | 587.92   | PASS           | AC=3;AF=0.056;AN=54;BaseQRankSum=  |
| 38522 | chrY | 13867272 | . | T | G   | 1357.77  | PASS           | AC=2;AF=0.143;AN=14;BaseQRankSum=  |
| 38523 | chrY | 13867280 | . | A | G   | 243.53   | PASS           | AC=1;AF=0.017;AN=60;BaseQRankSum=  |
| 38524 | chrY | 13867282 | . | C | T   | 392.95   | PASS           | AC=2;AF=0.040;AN=50;BaseQRankSum=  |
| 38525 | chrY | 13867283 | . | G | A   | 239.06   | PASS           | AC=1;AF=0.015;AN=66;BaseQRankSum=  |
| 38526 | chrY | 13867303 | . | G | A   | 1003.63  | PASS           | AC=1;AF=0.014;AN=70;BaseQRankSum=  |
| 38527 | chrY | 13867304 | . | A | C   | 255.54   | PASS           | AC=1;AF=0.014;AN=70;BaseQRankSum=  |
| 38528 | chrY | 13867308 | . | G | T   | 2369.92  | PASS           | AC=7;AF=0.100;AN=70;BaseQRankSum=  |
| 38529 | chrY | 13867316 | . | T | A   | 2642.65  | PASS           | AC=7;AF=0.106;AN=66;BaseQRankSum=  |
| 38530 | chrY | 13867325 | . | A | T   | 236.37   | PASS           | AC=2;AF=0.029;AN=70;BaseQRankSum=  |
| 38531 | chrY | 13867328 | . | A | G   | 4192.01  | PASS           | AC=8;AF=0.444;AN=18;BaseQRankSum=  |
| 38532 | chrY | 13867333 | . | G | C   | 287.76   | PASS           | AC=2;AF=0.034;AN=58;BaseQRankSum=  |

|       |      |          |   |   |     |          |               |                                    |
|-------|------|----------|---|---|-----|----------|---------------|------------------------------------|
| 38533 | chrY | 13867337 | . | G | T   | 2131.06  | PASS          | AC=7;AF=0.100;AN=70;BaseQRankSum=  |
| 38534 | chrY | 13867345 | . | C | T   | 3790.96  | PASS          | AC=7;AF=0.103;AN=68;BaseQRankSum=  |
| 38535 | chrY | 13867354 | . | G | A   | 6742.01  | PASS          | AC=8;AF=0.444;AN=18;BaseQRankSum=  |
| 38536 | chrY | 13867361 | . | T | A   | 1231.03  | PASS          | AC=1;AF=0.014;AN=70;BaseQRankSum=  |
| 38537 | chrY | 13867407 | . | C | G   | 229.26   | PASS          | AC=2;AF=0.077;AN=26;BaseQRankSum=  |
| 38538 | chrY | 13867417 | . | A | G   | 200.35   | PASS          | AC=2;AF=0.034;AN=58;BaseQRankSum=  |
| 38539 | chrY | 13867422 | . | G | T   | 216.13   | PASS          | AC=2;AF=0.050;AN=40;BaseQRankSum=  |
| 38540 | chrY | 13867426 | . | C | T   | 217.80   | PASS          | AC=2;AF=0.053;AN=38;BaseQRankSum=  |
| 38541 | chrY | 13867428 | . | A | G   | 216.17   | PASS          | AC=2;AF=0.056;AN=36;BaseQRankSum=  |
| 38542 | chrY | 13867442 | . | T | G   | 212.03   | PASS          | AC=2;AF=0.053;AN=38;BaseQRankSum=  |
| 38543 | chrY | 13867486 | . | C | A   | 577.25   | PASS          | AC=2;AF=0.037;AN=54;BaseQRankSum=  |
| 38544 | chrY | 13867542 | . | G | A   | 67.03    | my_snp_filter | AC=1;AF=0.014;AN=70;BaseQ          |
| 38545 | chrY | 13867671 | . | G | A   | 211.23   | PASS          | AC=2;AF=0.029;AN=70;BaseQRankSum=  |
| 38546 | chrY | 13867676 | . | C | G   | 208.74   | PASS          | AC=2;AF=0.029;AN=70;BaseQRankSum=  |
| 38547 | chrY | 13867811 | . | T | C   | 84.73    | my_snp_filter | AC=2;AF=0.029;AN=70;BaseQ          |
| 38548 | chrY | 13867816 | . | T | G   | 582.05   | PASS          | AC=4;AF=0.057;AN=70;BaseQRankSum=  |
| 38549 | chrY | 13867821 | . | G | T   | 71.67    | my_snp_filter | AC=1;AF=0.014;AN=70;BaseQ          |
| 38550 | chrY | 13867827 | . | G | T   | 66.58    | my_snp_filter | AC=1;AF=0.014;AN=70;BaseQ          |
| 38551 | chrY | 13867840 | . | C | T,A | 34612.48 | PASS          | AC=10,1;AF=0.333,0.033;AN          |
| 38552 | chrY | 13867842 | . | C | G   | 38244.86 | PASS          | AC=11;AF=0.367;AN=30;Base          |
| 38553 | chrY | 13867849 | . | A | C   | 31548.15 | PASS          | AC=11;AF=0.344;AN=32;Base          |
| 38554 | chrY | 13867851 | . | C | G   | 34057.35 | PASS          | AC=11;AF=0.367;AN=30;Base          |
| 38555 | chrY | 13867852 | . | G | T   | 34410.91 | PASS          | AC=11;AF=0.367;AN=30;Base          |
| 38556 | chrY | 13867862 | . | C | G   | 356.04   | PASS          | AC=1;AF=0.014;AN=70;BaseQRankSum=  |
| 38557 | chrY | 13868209 | . | G | C   | 732.26   | PASS          | AC=4;AF=0.105;AN=38;BaseQRankSum=  |
| 38558 | chrY | 13868230 | . | G | A   | 1082.81  | PASS          | AC=3;AF=0.043;AN=70;BaseQRankSum=  |
| 38559 | chrY | 13868254 | . | T | A   | 968.51   | PASS          | AC=3;AF=0.043;AN=70;BaseQRankSum=  |
| 38560 | chrY | 13868265 | . | T | G   | 834.45   | PASS          | AC=3;AF=0.100;AN=30;BaseQRankSum=  |
| 38561 | chrY | 13868271 | . | G | C   | 738.62   | PASS          | AC=3;AF=0.047;AN=64;BaseQRankSum=  |
| 38562 | chrY | 13868279 | . | A | T   | 712.32   | PASS          | AC=3;AF=0.115;AN=26;BaseQRankSum=  |
| 38563 | chrY | 13868291 | . | G | A   | 437.53   | PASS          | AC=3;AF=0.043;AN=70;BaseQRankSum=  |
| 38564 | chrY | 13868375 | . | G | A   | 690.21   | my_snp_filter | AC=1;AF=0.014;AN=70;BaseQ          |
| 38565 | chrY | 13868414 | . | T | C   | 1050.60  | PASS          | AC=8;AF=0.118;AN=68;BaseQRankSum=  |
| 38566 | chrY | 13868439 | . | T | C   | 79.07    | my_snp_filter | AC=2;AF=0.029;AN=70;BaseQ          |
| 38567 | chrY | 13868450 | . | G | T   | 60.85    | my_snp_filter | AC=2;AF=0.029;AN=70;BaseQ          |
| 38568 | chrY | 13868452 | . | A | T   | 55.36    | my_snp_filter | AC=2;AF=0.029;AN=70;BaseQ          |
| 38569 | chrY | 13868460 | . | C | G   | 283      | PASS          | AC=2;AF=0.167;AN=12;BaseQRankSum=  |
| 38570 | chrY | 13868461 | . | G | A   | 223.85   | PASS          | AC=2;AF=0.100;AN=20;BaseQRankSum=  |
| 38571 | chrY | 13868516 | . | C | A   | 215.68   | PASS          | AC=2;AF=0.091;AN=22;BaseQRankSum=  |
| 38572 | chrY | 13868546 | . | G | C   | 158.44   | PASS          | AC=2;AF=0.029;AN=70;BaseQRankSum=  |
| 38573 | chrY | 13868557 | . | A | T   | 48.43    | PASS          | AC=1;AF=0.014;AN=70;BaseQRankSum=  |
| 38574 | chrY | 13868559 | . | T | G   | 1368.76  | PASS          | AC=2;AF=0.029;AN=70;BaseQRankSum=  |
| 38575 | chrY | 13868561 | . | G | A   | 153.15   | PASS          | AC=3;AF=0.043;AN=70;BaseQRankSum=  |
| 38576 | chrY | 13868563 | . | A | T   | 1280.95  | PASS          | AC=2;AF=0.029;AN=70;BaseQRankSum=  |
| 38577 | chrY | 13868565 | . | G | A   | 55.26    | PASS          | AC=2;AF=0.029;AN=70;BaseQRankSum=  |
| 38578 | chrY | 13868571 | . | G | A   | 3422.04  | PASS          | AC=3;AF=0.043;AN=70;BaseQRankSum=  |
| 38579 | chrY | 13868572 | . | T | A   | 209.56   | PASS          | AC=3;AF=0.043;AN=70;BaseQRankSum=  |
| 38580 | chrY | 13868576 | . | G | A   | 1534.44  | PASS          | AC=2;AF=0.029;AN=70;BaseQRankSum=  |
| 38581 | chrY | 13868585 | . | G | C   | 3588.53  | PASS          | AC=5;AF=0.227;AN=22;BaseQRankSum=  |
| 38582 | chrY | 13868586 | . | A | G   | 4304.32  | PASS          | AC=2;AF=0.111;AN=18;BaseQRankSum=  |
| 38583 | chrY | 13868599 | . | A | C   | 1090.15  | PASS          | AC=1;AF=0.045;AN=22;BaseQRankSum=  |
| 38584 | chrY | 13868600 | . | C | A   | 943.88   | PASS          | AC=1;AF=0.045;AN=22;BaseQRankSum=  |
| 38585 | chrY | 13868610 | . | T | G   | 2791.94  | PASS          | AC=1;AF=0.033;AN=30;BaseQRankSum=  |
| 38586 | chrY | 13868621 | . | G | A   | 869.27   | PASS          | AC=1;AF=0.019;AN=54;BaseQRankSum=  |
| 38587 | chrY | 13868625 | . | G | A   | 975.19   | PASS          | AC=1;AF=0.015;AN=68;BaseQRankSum=  |
| 38588 | chrY | 13868629 | . | T | C   | 856.82   | PASS          | AC=1;AF=0.014;AN=70;BaseQRankSum=  |
| 38589 | chrY | 13868635 | . | G | A   | 695.01   | PASS          | AC=1;AF=0.016;AN=64;BaseQRankSum=  |
| 38590 | chrY | 13868638 | . | A | T   | 1644.40  | PASS          | AC=1;AF=0.015;AN=66;BaseQRankSum=  |
| 38591 | chrY | 13868641 | . | G | C   | 1607.58  | PASS          | AC=1;AF=0.014;AN=70;BaseQRankSum=  |
| 38592 | chrY | 13868644 | . | A | T   | 1763.43  | PASS          | AC=1;AF=0.026;AN=38;BaseQRankSum=  |
| 38593 | chrY | 13868645 | . | G | A   | 1555.39  | PASS          | AC=1;AF=0.025;AN=40;BaseQRankSum=  |
| 38594 | chrY | 13868650 | . | G | A   | 1410.95  | PASS          | AC=1;AF=0.014;AN=70;BaseQRankSum=  |
| 38595 | chrY | 13868655 | . | C | T   | 1666.52  | PASS          | AC=1;AF=0.038;AN=26;BaseQRankSum=  |
| 38596 | chrY | 13868665 | . | T | G   | 1431.54  | PASS          | AC=1;AF=0.024;AN=42;BaseQRankSum=  |
| 38597 | chrY | 13868676 | . | A | G   | 1273.40  | PASS          | AC=1;AF=0.020;AN=50;BaseQRankSum=  |
| 38598 | chrY | 13868692 | . | A | T   | 228.77   | PASS          | AC=4;AF=0.057;AN=70;BaseQRankSum=  |
| 38599 | chrY | 13868694 | . | T | G   | 192.16   | PASS          | AC=3;AF=0.043;AN=70;BaseQRankSum=  |
| 38600 | chrY | 13868696 | . | G | A   | 178.06   | PASS          | AC=3;AF=0.043;AN=70;BaseQRankSum=  |
| 38601 | chrY | 13868697 | . | A | T   | 75.07    | my_snp_filter | AC=3;AF=0.043;AN=70;BaseQ          |
| 38602 | chrY | 13868699 | . | T | A   | 73.85    | my_snp_filter | AC=4;AF=0.057;AN=70;BaseQ          |
| 38603 | chrY | 13868701 | . | G | T   | 193.80   | PASS          | AC=3;AF=0.043;AN=70;BaseQRankSum=  |
| 38604 | chrY | 13868706 | . | G | A   | 206.25   | PASS          | AC=5;AF=0.071;AN=70;BaseQRankSum=  |
| 38605 | chrY | 13868707 | . | A | T   | 285.83   | PASS          | AC=4;AF=0.057;AN=70;BaseQRankSum=  |
| 38606 | chrY | 13868714 | . | T | A   | 3596.74  | PASS          | AC=13;AF=0.186;AN=70;BaseQRankSum= |
| 38607 | chrY | 13868715 | . | G | A   | 204.24   | PASS          | AC=2;AF=0.033;AN=60;BaseQRankSum=  |
| 38608 | chrY | 13868720 | . | G | T   | 72.59    | my_snp_filter | AC=2;AF=0.037;AN=54;BaseQ          |

|       |      |          |   |   |     |         |               |                                   |
|-------|------|----------|---|---|-----|---------|---------------|-----------------------------------|
| 38609 | chrY | 13868721 | . | G | A   | 44.42   | my_snp_filter | AC=3;AF=0.050;AN=60;BaseQ         |
| 38610 | chrY | 13868722 | . | A | T   | 2469.76 | PASS          | AC=12;AF=0.171;AN=70;BaseQRankSum |
| 38611 | chrY | 13868724 | . | T | C   | 1733.03 | PASS          | AC=10;AF=0.143;AN=70;BaseQRankSum |
| 38612 | chrY | 13868729 | . | T | A   | 459.97  | PASS          | AC=1;AF=0.014;AN=70;BaseQRankSum  |
| 38613 | chrY | 13868730 | . | G | A   | 76.45   | PASS          | AC=2;AF=0.029;AN=70;BaseQRankSum  |
| 38614 | chrY | 13868731 | . | G | C   | 161.68  | my_snp_filter | AC=1;AF=0.014;AN=70;BaseQ         |
| 38615 | chrY | 13868734 | . | T | C   | 465.72  | PASS          | AC=1;AF=0.014;AN=70;BaseQRankSum  |
| 38616 | chrY | 13868736 | . | C | T   | 45.08   | PASS          | AC=1;AF=0.014;AN=70;BaseQRankSum  |
| 38617 | chrY | 13868738 | . | A | G   | 86.28   | my_snp_filter | AC=2;AF=0.029;AN=70;BaseQ         |
| 38618 | chrY | 13868739 | . | T | A   | 467.73  | PASS          | AC=1;AF=0.014;AN=70;BaseQRankSum  |
| 38619 | chrY | 13868740 | . | G | A   | 40.19   | PASS          | AC=1;AF=0.014;AN=70;BaseQRankSum  |
| 38620 | chrY | 13868746 | . | G | C   | 54.76   | PASS          | AC=2;AF=0.029;AN=70;BaseQRankSum  |
| 38621 | chrY | 13868749 | . | C | T   | 259.86  | PASS          | AC=5;AF=0.071;AN=70;BaseQRankSum  |
| 38622 | chrY | 13868753 | . | G | A   | 44.25   | PASS          | AC=1;AF=0.014;AN=70;BaseQRankSum  |
| 38623 | chrY | 13868756 | . | A | G   | 867.19  | PASS          | AC=8;AF=0.114;AN=70;BaseQRankSum  |
| 38624 | chrY | 13868760 | . | C | T   | 304.95  | PASS          | AC=1;AF=0.014;AN=70;BaseQRankSum  |
| 38625 | chrY | 13868761 | . | G | T   | 39.87   | PASS          | AC=1;AF=0.014;AN=70;BaseQRankSum  |
| 38626 | chrY | 13868769 | . | C | T,* | 1464.09 | PASS          | AC=5,7;AF=0.076,0.106;AN=66;BaseQ |
| 38627 | chrY | 13868770 | . | A | G,* | 1577.77 | PASS          | AC=6,7;AF=0.091,0.106;AN=66;BaseQ |
| 38628 | chrY | 13868795 | . | G | C   | 449.28  | PASS          | AC=6;AF=0.086;AN=70;BaseQRankSum  |
| 38629 | chrY | 13868805 | . | T | C   | 356.48  | PASS          | AC=6;AF=0.097;AN=62;BaseQRankSum  |
| 38630 | chrY | 13868819 | . | A | T   | 184.47  | PASS          | AC=4;AF=0.067;AN=60;BaseQRankSum  |
| 38631 | chrY | 13868826 | . | C | G   | 80.66   | my_snp_filter | AC=3;AF=0.058;AN=52;BaseQ         |
| 38632 | chrY | 13868839 | . | T | A   | 32.62   | my_snp_filter | AC=2;AF=0.040;AN=50;BaseQ         |
| 38633 | chrY | 13869104 | . | T | C   | 1313.98 | PASS          | AC=1;AF=0.042;AN=24;BaseQRankSum  |
| 38634 | chrY | 13869239 | . | G | C   | 63.97   | PASS          | AC=2;AF=0.100;AN=20;DP=8093;FS=0. |
| 38635 | chrY | 13869245 | . | A | C   | 1104.52 | PASS          | AC=6;AF=0.136;AN=44;DP=4840;FS=0. |
| 38636 | chrY | 13869489 | . | A | C   | 128.68  | PASS          | AC=1;AF=0.019;AN=52;BaseQRankSum  |
| 38637 | chrY | 13869490 | . | T | C   | 129.81  | PASS          | AC=1;AF=0.020;AN=50;BaseQRankSum  |
| 38638 | chrY | 13869742 | . | A | G   | 73.68   | PASS          | AC=2;AF=0.030;AN=66;BaseQRankSum  |
| 38639 | chrY | 13869769 | . | G | T   | 1133.77 | PASS          | AC=7;AF=0.184;AN=38;BaseQRankSum  |
| 38640 | chrY | 13869799 | . | C | G   | 428.46  | PASS          | AC=2;AF=0.083;AN=24;BaseQRankSum  |
| 38641 | chrY | 13869802 | . | A | C   | 359.59  | PASS          | AC=2;AF=0.056;AN=36;BaseQRankSum  |
| 38642 | chrY | 13869814 | . | A | G   | 42.33   | PASS          | AC=1;AF=0.015;AN=68;BaseQRankSum  |
| 38643 | chrY | 13870004 | . | T | G   | 105.49  | PASS          | AC=1;AF=0.015;AN=68;BaseQRankSum  |
| 38644 | chrY | 13870023 | . | G | A   | 77.79   | PASS          | AC=1;AF=0.019;AN=52;BaseQRankSum  |
| 38645 | chrY | 13870029 | . | C | T   | 161.75  | PASS          | AC=3;AF=0.056;AN=54;BaseQRankSum  |
| 38646 | chrY | 13870032 | . | T | A   | 40.52   | PASS          | AC=1;AF=0.021;AN=48;BaseQRankSum  |
| 38647 | chrY | 13870049 | . | T | A   | 100.86  | PASS          | AC=3;AF=0.050;AN=60;BaseQRankSum  |
| 38648 | chrY | 13870053 | . | T | A   | 120.74  | PASS          | AC=3;AF=0.056;AN=54;BaseQRankSum  |
| 38649 | chrY | 13873384 | . | T | C   | 88.81   | PASS          | AC=10;AF=0.147;AN=68;DP=93;FS=0.0 |
| 38650 | chrY | 13874135 | . | C | G   | 996.66  | PASS          | AC=6;AF=0.086;AN=70;DP=296;FS=0.0 |
| 38651 | chrY | 13874766 | . | A | G   | 39.26   | my_snp_filter | AC=2;AF=0.030;AN=66;BaseQ         |
| 38652 | chrY | 13874859 | . | G | C   | 210.23  | PASS          | AC=4;AF=0.057;AN=70;BaseQRankSum  |
| 38653 | chrY | 13874880 | . | C | T   | 118.32  | PASS          | AC=4;AF=0.059;AN=68;BaseQRankSum  |
| 38654 | chrY | 13874881 | . | C | A   | 118.32  | PASS          | AC=4;AF=0.059;AN=68;BaseQRankSum  |
| 38655 | chrY | 13875206 | . | C | T   | 1012.23 | PASS          | AC=6;AF=0.086;AN=70;DP=623;FS=0.0 |
| 38656 | chrY | 13876479 | . | G | T   | 311.03  | PASS          | AC=2;AF=0.111;AN=18;DP=193;FS=0.0 |
| 38657 | chrY | 13877586 | . | C | T   | 1124.35 | PASS          | AC=3;AF=0.150;AN=20;BaseQRankSum  |
| 38658 | chrY | 13878432 | . | A | T   | 79.47   | PASS          | AC=1;AF=0.071;AN=14;BaseQRankSum  |
| 38659 | chrY | 13878588 | . | G | A   | 1038.17 | PASS          | AC=14;AF=0.875;AN=16;DP=62;FS=3.5 |
| 38660 | chrY | 13879034 | . | A | T   | 227.48  | PASS          | AC=1;AF=0.014;AN=70;BaseQRankSum  |
| 38661 | chrY | 13880120 | . | T | G   | 6251.74 | PASS          | AC=44;AF=0.647;AN=68;DP=338;FS=0. |
| 38662 | chrY | 13882646 | . | A | C   | 1081.20 | PASS          | AC=6;AF=0.086;AN=70;DP=344;FS=0.0 |
| 38663 | chrY | 13883369 | . | G | A   | 46.93   | my_snp_filter | AC=1;AF=0.014;AN=70;BaseQ         |
| 38664 | chrY | 13883407 | . | A | G   | 956.05  | PASS          | AC=7;AF=0.100;AN=70;BaseQRankSum  |
| 38665 | chrY | 13883722 | . | A | G   | 92.24   | PASS          | AC=2;AF=0.029;AN=68;BaseQRankSum  |
| 38666 | chrY | 13883908 | . | A | T   | 401.32  | PASS          | AC=10;AF=0.147;AN=68;BaseQRankSum |
| 38667 | chrY | 13883999 | . | A | G   | 254.61  | PASS          | AC=2;AF=0.029;AN=68;BaseQRankSum  |
| 38668 | chrY | 13884008 | . | G | T   | 250.28  | PASS          | AC=2;AF=0.029;AN=68;BaseQRankSum  |
| 38669 | chrY | 13884139 | . | T | C   | 1105.12 | my_snp_filter | AC=11;AF=0.162;AN=68;BaseQ        |
| 38670 | chrY | 13884163 | . | T | C   | 1448.90 | PASS          | AC=11;AF=0.162;AN=68;BaseQRankSum |
| 38671 | chrY | 13884278 | . | C | A   | 4115.36 | PASS          | AC=16;AF=0.242;AN=66;BaseQRankSum |
| 38672 | chrY | 13884396 | . | G | A   | 733.81  | PASS          | AC=6;AF=0.200;AN=30;BaseQRankSum  |
| 38673 | chrY | 13884423 | . | A | G   | 703.79  | PASS          | AC=4;AF=0.143;AN=28;BaseQRankSum  |
| 38674 | chrY | 13884445 | . | G | A   | 568.49  | PASS          | AC=2;AF=0.071;AN=28;BaseQRankSum  |
| 38675 | chrY | 13884506 | . | A | G   | 113.75  | PASS          | AC=2;AF=0.059;AN=34;BaseQRankSum  |
| 38676 | chrY | 13884507 | . | A | G   | 114.48  | PASS          | AC=2;AF=0.059;AN=34;BaseQRankSum  |
| 38677 | chrY | 13886423 | . | T | A   | 32.37   | PASS          | AC=1;AF=0.017;AN=60;BaseQRankSum  |
| 38678 | chrY | 13886457 | . | C | G   | 31.54   | PASS          | AC=1;AF=0.014;AN=70;BaseQRankSum  |
| 38679 | chrY | 13886464 | . | A | G   | 34.27   | PASS          | AC=1;AF=0.014;AN=70;BaseQRankSum  |
| 38680 | chrY | 13886846 | . | G | T   | 4429.21 | PASS          | AC=38;AF=1.00;AN=38;DP=175;FS=0.0 |
| 38681 | chrY | 13886875 | . | C | G   | 1208.11 | PASS          | AC=6;AF=0.136;AN=44;DP=161;FS=0.0 |
| 38682 | chrY | 13887941 | . | A | G   | 9232.02 | PASS          | AC=68;AF=1.00;AN=68;DP=338;FS=0.0 |
| 38683 | chrY | 13888443 | . | T | C   | 315.84  | PASS          | AC=4;AF=0.063;AN=64;DP=329;FS=0.0 |
| 38684 | chrY | 13889472 | . | C | T   | 68.99   | PASS          | AC=1;AF=0.015;AN=68;BaseQRankSum  |

|       |      |          |   |   |   |          |               |                                    |
|-------|------|----------|---|---|---|----------|---------------|------------------------------------|
| 38685 | chrY | 13890176 | . | A | G | 3097     | PASS          | AC=20;AF=1.00;AN=20;DP=133;FS=0.0  |
| 38686 | chrY | 13891133 | . | C | A | 346.31   | PASS          | AC=2;AF=0.029;AN=70;DP=435;FS=0.0  |
| 38687 | chrY | 13891657 | . | C | A | 2102.87  | PASS          | AC=34;AF=0.548;AN=62;DP=220;FS=0.0 |
| 38688 | chrY | 13894687 | . | G | A | 766.21   | PASS          | AC=6;AF=0.086;AN=70;DP=427;FS=0.0  |
| 38689 | chrY | 13895063 | . | G | A | 459.15   | PASS          | AC=2;AF=0.031;AN=64;DP=279;FS=0.0  |
| 38690 | chrY | 13896473 | . | C | T | 423.01   | PASS          | AC=4;AF=0.059;AN=68;DP=413;FS=0.0  |
| 38691 | chrY | 13898621 | . | C | G | 473.64   | PASS          | AC=6;AF=0.086;AN=70;DP=228;FS=0.0  |
| 38692 | chrY | 13898759 | . | T | G | 840.14   | PASS          | AC=14;AF=0.500;AN=28;BaseQRankSum= |
| 38693 | chrY | 13899767 | . | T | C | 632.63   | PASS          | AC=11;AF=0.162;AN=68;BaseQRankSum= |
| 38694 | chrY | 13900281 | . | T | C | 7886.06  | PASS          | AC=62;AF=1.00;AN=62;DP=281;FS=0.0  |
| 38695 | chrY | 13903151 | . | T | C | 171.79   | PASS          | AC=2;AF=0.029;AN=70;BaseQRankSum=  |
| 38696 | chrY | 13903163 | . | A | G | 229.03   | PASS          | AC=3;AF=0.043;AN=70;BaseQRankSum=  |
| 38697 | chrY | 13903202 | . | A | G | 6123.64  | PASS          | AC=24;AF=0.343;AN=70;BaseQRankSum= |
| 38698 | chrY | 13906690 | . | T | A | 43.19    | my_snp_filter | AC=3;AF=0.045;AN=66;BaseQ          |
| 38699 | chrY | 13907422 | . | A | G | 17693.95 | PASS          | AC=70;AF=1.00;AN=70;DP=59          |
| 38700 | chrY | 13907799 | . | T | G | 9465.38  | PASS          | AC=52;AF=0.813;AN=64;DP=406;FS=0.0 |
| 38701 | chrY | 13908362 | . | A | G | 711.56   | my_snp_filter | AC=13;AF=0.186;AN=70;Base          |
| 38702 | chrY | 13908604 | . | T | C | 39.87    | PASS          | AC=1;AF=0.014;AN=70;BaseQRankSum=  |
| 38703 | chrY | 13908613 | . | T | G | 40.14    | PASS          | AC=1;AF=0.014;AN=70;BaseQRankSum=  |
| 38704 | chrY | 13908650 | . | A | C | 34.43    | my_snp_filter | AC=3;AF=0.043;AN=70;BaseQ          |
| 38705 | chrY | 13908706 | . | G | T | 1136.76  | my_snp_filter | AC=9;AF=0.132;AN=68;BaseQ          |
| 38706 | chrY | 13908787 | . | T | G | 9255.69  | PASS          | AC=35;AF=0.500;AN=70;BaseQRankSum= |
| 38707 | chrY | 13908941 | . | G | A | 17619.80 | PASS          | AC=36;AF=0.514;AN=70;Base          |
| 38708 | chrY | 13909007 | . | A | G | 17879.07 | PASS          | AC=41;AF=0.586;AN=70;Base          |
| 38709 | chrY | 13909032 | . | G | A | 13272.15 | PASS          | AC=34;AF=0.548;AN=62;Base          |
| 38710 | chrY | 13909050 | . | G | A | 10560.29 | PASS          | AC=38;AF=0.594;AN=64;Base          |
| 38711 | chrY | 13909081 | . | A | G | 3457.23  | PASS          | AC=32;AF=0.593;AN=54;BaseQRankSum= |
| 38712 | chrY | 13909140 | . | T | C | 658.06   | PASS          | AC=7;AF=0.292;AN=24;BaseQRankSum=  |
| 38713 | chrY | 13909162 | . | A | G | 455.26   | PASS          | AC=6;AF=0.250;AN=24;BaseQRankSum=  |
| 38714 | chrY | 13909177 | . | T | C | 433.07   | PASS          | AC=6;AF=0.200;AN=30;BaseQRankSum=  |
| 38715 | chrY | 13909208 | . | G | A | 1308.48  | my_snp_filter | AC=5;AF=0.125;AN=40;BaseQ          |
| 38716 | chrY | 13917504 | . | A | G | 872.13   | PASS          | AC=6;AF=0.086;AN=70;DP=439;FS=0.0  |
| 38717 | chrY | 13926311 | . | T | C | 30.33    | PASS          | AC=1;AF=0.050;AN=20;BaseQRankSum=  |
| 38718 | chrY | 13926316 | . | C | T | 30.28    | PASS          | AC=1;AF=0.045;AN=22;BaseQRankSum=  |
| 38719 | chrY | 13930193 | . | G | A | 49.75    | PASS          | AC=2;AF=0.040;AN=50;BaseQRankSum=  |
| 38720 | chrY | 13930200 | . | G | A | 47.24    | PASS          | AC=2;AF=0.032;AN=62;BaseQRankSum=  |
| 38721 | chrY | 13930206 | . | G | A | 44.28    | PASS          | AC=1;AF=0.015;AN=66;BaseQRankSum=  |
| 38722 | chrY | 13930211 | . | G | A | 42.88    | PASS          | AC=1;AF=0.015;AN=66;BaseQRankSum=  |
| 38723 | chrY | 13931591 | . | T | C | 69.56    | PASS          | AC=1;AF=0.014;AN=70;BaseQRankSum=  |
| 38724 | chrY | 13932542 | . | C | G | 410.02   | PASS          | AC=9;AF=0.129;AN=70;BaseQRankSum=  |
| 38725 | chrY | 13939269 | . | G | T | 202.20   | my_snp_filter | AC=5;AF=0.071;AN=70;BaseQ          |
| 38726 | chrY | 13939338 | . | G | C | 1245.96  | PASS          | AC=10;AF=0.172;AN=58;BaseQRankSum= |
| 38727 | chrY | 13939349 | . | A | G | 843.55   | PASS          | AC=13;AF=0.241;AN=54;BaseQRankSum= |
| 38728 | chrY | 13939373 | . | T | C | 2049.70  | PASS          | AC=21;AF=0.300;AN=70;BaseQRankSum= |
| 38729 | chrY | 13939446 | . | C | A | 4151.74  | PASS          | AC=30;AF=0.429;AN=70;BaseQRankSum= |
| 38730 | chrY | 13939492 | . | G | C | 2292.98  | my_snp_filter | AC=26;AF=0.371;AN=70;Base          |
| 38731 | chrY | 13939517 | . | C | T | 1122.38  | PASS          | AC=18;AF=0.257;AN=70;BaseQRankSum= |
| 38732 | chrY | 13944438 | . | A | T | 56.67    | PASS          | AC=2;AF=0.029;AN=70;BaseQRankSum=  |
| 38733 | chrY | 13945593 | . | T | A | 3209.92  | PASS          | AC=28;AF=1.00;AN=28;DP=128;FS=0.0  |
| 38734 | chrY | 13949200 | . | G | A | 3587.25  | PASS          | AC=34;AF=0.531;AN=64;DP=284;FS=0.0 |
| 38735 | chrY | 13949258 | . | G | A | 1550.80  | PASS          | AC=6;AF=0.091;AN=66;DP=527;FS=0.0  |
| 38736 | chrY | 13949466 | . | G | A | 1580.67  | PASS          | AC=6;AF=0.086;AN=70;DP=623;FS=0.0  |
| 38737 | chrY | 13951585 | . | T | A | 311.60   | PASS          | AC=8;AF=0.308;AN=26;DP=121;FS=0.0  |
| 38738 | chrY | 13952214 | . | C | T | 185.68   | PASS          | AC=4;AF=0.069;AN=58;BaseQRankSum=  |
| 38739 | chrY | 13952218 | . | T | C | 218.95   | PASS          | AC=4;AF=0.067;AN=60;BaseQRankSum=  |
| 38740 | chrY | 13952265 | . | T | C | 793.08   | PASS          | AC=6;AF=0.088;AN=68;BaseQRankSum=  |
| 38741 | chrY | 13952278 | . | A | C | 609.77   | PASS          | AC=7;AF=0.100;AN=70;BaseQRankSum=  |
| 38742 | chrY | 13952297 | . | A | G | 357.19   | PASS          | AC=3;AF=0.043;AN=70;BaseQRankSum=  |
| 38743 | chrY | 13952304 | . | A | G | 166.12   | my_snp_filter | AC=3;AF=0.043;AN=70;BaseQ          |
| 38744 | chrY | 13952311 | . | G | C | 121.84   | PASS          | AC=1;AF=0.014;AN=70;BaseQRankSum=  |
| 38745 | chrY | 13952374 | . | C | T | 128.03   | PASS          | AC=2;AF=0.029;AN=70;BaseQRankSum=  |
| 38746 | chrY | 13952382 | . | C | T | 46.26    | my_snp_filter | AC=2;AF=0.029;AN=70;BaseQ          |
| 38747 | chrY | 13954494 | . | A | T | 375.86   | PASS          | AC=6;AF=0.097;AN=62;DP=255;FS=0.0  |
| 38748 | chrY | 13957017 | . | C | T | 1225.85  | my_snp_filter | AC=11;AF=0.157;AN=70;Base          |
| 38749 | chrY | 13958741 | . | C | T | 1016.97  | PASS          | AC=6;AF=0.086;AN=70;DP=682;FS=0.0  |
| 38750 | chrY | 13961257 | . | T | C | 721.89   | PASS          | AC=6;AF=0.086;AN=70;DP=668;FS=0.0  |
| 38751 | chrY | 13962840 | . | T | C | 279.19   | PASS          | AC=4;AF=0.059;AN=68;DP=412;FS=0.0  |
| 38752 | chrY | 13963821 | . | T | C | 4756.07  | PASS          | AC=48;AF=1.00;AN=48;DP=175;FS=0.0  |
| 38753 | chrY | 13963822 | . | T | A | 553.71   | PASS          | AC=6;AF=0.125;AN=48;DP=189;FS=0.0  |
| 38754 | chrY | 13964228 | . | T | C | 48.94    | PASS          | AC=1;AF=0.014;AN=70;BaseQRankSum=  |
| 38755 | chrY | 13966289 | . | G | T | 1129.61  | PASS          | AC=6;AF=0.091;AN=66;DP=429;FS=0.0  |
| 38756 | chrY | 13966693 | . | C | G | 545.47   | PASS          | AC=7;AF=0.117;AN=60;BaseQRankSum=  |
| 38757 | chrY | 13968869 | . | C | A | 215.38   | PASS          | AC=2;AF=0.030;AN=66;DP=314;FS=0.0  |
| 38758 | chrY | 13971440 | . | C | T | 192.99   | PASS          | AC=2;AF=0.083;AN=24;BaseQRankSum=  |
| 38759 | chrY | 13971449 | . | C | T | 128.92   | PASS          | AC=1;AF=0.042;AN=24;BaseQRankSum=  |
| 38760 | chrY | 13971462 | . | A | G | 389.47   | PASS          | AC=3;AF=0.136;AN=22;BaseQRankSum=  |

|       |      |          |   |   |   |          |               |                                    |
|-------|------|----------|---|---|---|----------|---------------|------------------------------------|
| 38761 | chrY | 13971479 | . | A | G | 490.72   | PASS          | AC=3;AF=0.136;AN=22;BaseQRankSum=  |
| 38762 | chrY | 13971547 | . | G | A | 749.30   | PASS          | AC=3;AF=0.167;AN=18;BaseQRankSum=  |
| 38763 | chrY | 13971595 | . | G | A | 450.72   | PASS          | AC=3;AF=0.167;AN=18;BaseQRankSum=  |
| 38764 | chrY | 13971599 | . | G | A | 429.07   | PASS          | AC=2;AF=0.111;AN=18;BaseQRankSum=  |
| 38765 | chrY | 13971609 | . | G | A | 390.19   | PASS          | AC=2;AF=0.111;AN=18;BaseQRankSum=  |
| 38766 | chrY | 13971629 | . | A | G | 127.74   | PASS          | AC=2;AF=0.111;AN=18;BaseQRankSum=  |
| 38767 | chrY | 13974074 | . | G | A | 362.41   | PASS          | AC=2;AF=0.029;AN=70;DP=535;FS=0.0  |
| 38768 | chrY | 13976148 | . | C | A | 476.15   | PASS          | AC=6;AF=0.086;AN=70;DP=566;FS=0.0  |
| 38769 | chrY | 13977048 | . | A | G | 623.34   | PASS          | AC=8;AF=0.114;AN=70;BaseQRankSum=  |
| 38770 | chrY | 13977089 | . | A | G | 644.22   | PASS          | AC=5;AF=0.076;AN=66;BaseQRankSum=  |
| 38771 | chrY | 13977094 | . | C | T | 84.71    | PASS          | AC=2;AF=0.029;AN=68;DP=372;FS=0.0  |
| 38772 | chrY | 13977096 | . | G | C | 543.18   | PASS          | AC=6;AF=0.091;AN=66;BaseQRankSum=  |
| 38773 | chrY | 13977127 | . | G | A | 174.31   | PASS          | AC=2;AF=0.032;AN=62;BaseQRankSum=  |
| 38774 | chrY | 13977131 | . | T | C | 177.62   | PASS          | AC=2;AF=0.032;AN=62;BaseQRankSum=  |
| 38775 | chrY | 13980198 | . | C | T | 1349.18  | PASS          | AC=6;AF=0.333;AN=18;BaseQRankSum=  |
| 38776 | chrY | 13985147 | . | C | T | 1989.87  | PASS          | AC=34;AF=0.654;AN=52;DP=222;FS=0.0 |
| 38777 | chrY | 13988782 | . | T | C | 156.65   | PASS          | AC=2;AF=0.031;AN=64;BaseQRankSum=  |
| 38778 | chrY | 13988786 | . | T | C | 159.42   | PASS          | AC=2;AF=0.031;AN=64;BaseQRankSum=  |
| 38779 | chrY | 13988789 | . | C | T | 159.48   | PASS          | AC=2;AF=0.031;AN=64;BaseQRankSum=  |
| 38780 | chrY | 13988795 | . | T | C | 163.17   | PASS          | AC=2;AF=0.032;AN=62;BaseQRankSum=  |
| 38781 | chrY | 13988803 | . | A | G | 77.71    | PASS          | AC=1;AF=0.017;AN=60;BaseQRankSum=  |
| 38782 | chrY | 13989021 | . | C | T | 62.45    | PASS          | AC=1;AF=0.015;AN=68;BaseQRankSum=  |
| 38783 | chrY | 13989022 | . | C | G | 62.06    | PASS          | AC=1;AF=0.015;AN=68;BaseQRankSum=  |
| 38784 | chrY | 13989026 | . | C | T | 62.08    | PASS          | AC=1;AF=0.014;AN=70;BaseQRankSum=  |
| 38785 | chrY | 13989028 | . | C | T | 62.19    | PASS          | AC=1;AF=0.014;AN=70;BaseQRankSum=  |
| 38786 | chrY | 13989029 | . | T | C | 62.27    | PASS          | AC=1;AF=0.014;AN=70;BaseQRankSum=  |
| 38787 | chrY | 13991351 | . | G | T | 902.22   | PASS          | AC=6;AF=0.086;AN=70;DP=403;FS=0.0  |
| 38788 | chrY | 13991417 | . | G | A | 1020.21  | PASS          | AC=6;AF=0.086;AN=70;DP=401;FS=0.0  |
| 38789 | chrY | 13994675 | . | G | A | 1291.93  | PASS          | AC=6;AF=0.086;AN=70;DP=610;FS=0.0  |
| 38790 | chrY | 13995307 | . | T | G | 13405.71 | PASS          | AC=52;AF=0.743;AN=70;DP=6          |
| 38791 | chrY | 13995966 | . | T | C | 809.08   | PASS          | AC=4;AF=0.057;AN=70;DP=516;FS=0.0  |
| 38792 | chrY | 13995972 | . | T | A | 2387.14  | PASS          | AC=12;AF=0.171;AN=70;DP=505;FS=0.0 |
| 38793 | chrY | 13996129 | . | A | G | 104.71   | PASS          | AC=1;AF=0.014;AN=70;BaseQRankSum=  |
| 38794 | chrY | 13996133 | . | G | A | 101.72   | PASS          | AC=1;AF=0.014;AN=70;BaseQRankSum=  |
| 38795 | chrY | 13996141 | . | A | C | 104.85   | PASS          | AC=1;AF=0.014;AN=70;BaseQRankSum=  |
| 38796 | chrY | 13996142 | . | C | T | 105.09   | PASS          | AC=1;AF=0.014;AN=70;BaseQRankSum=  |
| 38797 | chrY | 13996214 | . | A | T | 212.95   | PASS          | AC=2;AF=0.031;AN=64;BaseQRankSum=  |
| 38798 | chrY | 13996220 | . | T | G | 210.06   | PASS          | AC=2;AF=0.030;AN=66;BaseQRankSum=  |
| 38799 | chrY | 13996226 | . | C | A | 216.11   | PASS          | AC=2;AF=0.029;AN=68;BaseQRankSum=  |
| 38800 | chrY | 13996227 | . | A | C | 215.66   | PASS          | AC=2;AF=0.029;AN=68;BaseQRankSum=  |
| 38801 | chrY | 13996230 | . | T | C | 212.50   | PASS          | AC=2;AF=0.029;AN=68;BaseQRankSum=  |
| 38802 | chrY | 13996242 | . | G | A | 170.93   | PASS          | AC=2;AF=0.031;AN=64;BaseQRankSum=  |
| 38803 | chrY | 13996248 | . | T | A | 170.75   | PASS          | AC=2;AF=0.030;AN=66;BaseQRankSum=  |
| 38804 | chrY | 13996249 | . | G | A | 170.70   | PASS          | AC=2;AF=0.030;AN=66;BaseQRankSum=  |
| 38805 | chrY | 13996250 | . | C | G | 131.70   | PASS          | AC=2;AF=0.030;AN=66;BaseQRankSum=  |
| 38806 | chrY | 13996604 | . | C | A | 1375.43  | PASS          | AC=6;AF=0.086;AN=70;DP=617;FS=0.0  |
| 38807 | chrY | 13998219 | . | C | T | 1103.37  | PASS          | AC=6;AF=0.250;AN=24;DP=138;FS=0.0  |
| 38808 | chrY | 14001179 | . | G | A | 637.72   | PASS          | AC=4;AF=0.059;AN=68;DP=384;FS=0.0  |
| 38809 | chrY | 14005779 | . | A | G | 2249.88  | PASS          | AC=18;AF=1.00;AN=18;DP=100;FS=0.0  |
| 38810 | chrY | 14006122 | . | C | T | 984.80   | PASS          | AC=6;AF=0.086;AN=70;DP=488;FS=0.0  |
| 38811 | chrY | 14006436 | . | C | T | 5984.34  | PASS          | AC=26;AF=0.371;AN=70;DP=515;FS=0.0 |
| 38812 | chrY | 14008621 | . | G | T | 1125.45  | PASS          | AC=6;AF=0.086;AN=70;DP=268;FS=0.0  |
| 38813 | chrY | 14009001 | . | G | T | 640.58   | PASS          | AC=6;AF=0.086;AN=70;DP=340;FS=0.0  |
| 38814 | chrY | 14010080 | . | T | A | 485.76   | PASS          | AC=2;AF=0.029;AN=70;DP=388;FS=0.0  |
| 38815 | chrY | 14012713 | . | A | G | 1190.27  | PASS          | AC=2;AF=0.029;AN=70;DP=579;FS=0.0  |
| 38816 | chrY | 14013101 | . | G | A | 4347.96  | PASS          | AC=48;AF=0.727;AN=66;DP=307;FS=0.0 |
| 38817 | chrY | 14019497 | . | C | A | 648.18   | PASS          | AC=6;AF=0.300;AN=20;DP=140;FS=0.0  |
| 38818 | chrY | 14021265 | . | G | T | 701.10   | PASS          | AC=6;AF=0.086;AN=70;DP=586;FS=0.0  |
| 38819 | chrY | 14029663 | . | G | A | 750.49   | PASS          | AC=4;AF=0.057;AN=70;DP=532;FS=0.0  |
| 38820 | chrY | 14032186 | . | A | C | 437.33   | PASS          | AC=2;AF=0.029;AN=70;DP=414;FS=0.0  |
| 38821 | chrY | 14034448 | . | T | C | 429.22   | PASS          | AC=2;AF=0.029;AN=70;DP=429;FS=0.0  |
| 38822 | chrY | 14036412 | . | C | A | 9660.58  | PASS          | AC=52;AF=0.743;AN=70;DP=463;FS=0.0 |
| 38823 | chrY | 14036486 | . | G | A | 10490.90 | PASS          | AC=52;AF=0.743;AN=70;BaseQ         |
| 38824 | chrY | 14037152 | . | C | T | 382.31   | PASS          | AC=2;AF=0.029;AN=70;DP=522;FS=0.0  |
| 38825 | chrY | 14037833 | . | C | T | 93.59    | PASS          | AC=1;AF=0.014;AN=70;BaseQRankSum=  |
| 38826 | chrY | 14038274 | . | C | G | 295.18   | PASS          | AC=2;AF=0.029;AN=70;DP=741;FS=0.0  |
| 38827 | chrY | 14040630 | . | C | G | 345.53   | PASS          | AC=2;AF=0.029;AN=68;DP=400;FS=0.0  |
| 38828 | chrY | 14040717 | . | A | G | 135.26   | PASS          | AC=2;AF=0.029;AN=70;DP=504;FS=0.0  |
| 38829 | chrY | 14042701 | . | T | C | 7523.23  | PASS          | AC=64;AF=1.00;AN=64;DP=267;FS=0.0  |
| 38830 | chrY | 14043151 | . | C | T | 294.36   | PASS          | AC=2;AF=0.029;AN=70;DP=526;FS=0.0  |
| 38831 | chrY | 14046765 | . | C | T | 82.39    | my_snp_filter | AC=3;AF=0.043;AN=70;BaseQ          |
| 38832 | chrY | 14048219 | . | T | C | 154.25   | PASS          | AC=2;AF=0.029;AN=70;DP=353;FS=0.0  |
| 38833 | chrY | 14050022 | . | C | T | 1394.55  | PASS          | AC=6;AF=0.200;AN=30;DP=190;FS=0.0  |
| 38834 | chrY | 14055718 | . | G | A | 39.42    | my_snp_filter | AC=1;AF=0.056;AN=18;BaseQ          |
| 38835 | chrY | 14055727 | . | A | C | 36.32    | my_snp_filter | AC=1;AF=0.056;AN=18;BaseQ          |
| 38836 | chrY | 14055728 | . | C | T | 36.32    | my_snp_filter | AC=1;AF=0.056;AN=18;BaseQ          |

|       |      |          |   |   |   |          |               |                                   |
|-------|------|----------|---|---|---|----------|---------------|-----------------------------------|
| 38837 | chrY | 14055843 | . | A | G | 74.47    | my_snp_filter | AC=6;AF=0.333;AN=18;BaseQ         |
| 38838 | chrY | 14055873 | . | C | T | 148.98   | PASS          | AC=4;AF=0.222;AN=18;BaseQRankSum= |
| 38839 | chrY | 14055892 | . | A | G | 94.94    | PASS          | AC=2;AF=0.111;AN=18;BaseQRankSum= |
| 38840 | chrY | 14055903 | . | C | T | 94.68    | my_snp_filter | AC=3;AF=0.167;AN=18;BaseQ         |
| 38841 | chrY | 14055916 | . | C | A | 65.62    | my_snp_filter | AC=2;AF=0.111;AN=18;BaseQ         |
| 38842 | chrY | 14056823 | . | G | A | 1006.25  | PASS          | AC=6;AF=0.333;AN=18;DP=147;FS=0.0 |
| 38843 | chrY | 14060639 | . | T | A | 462.43   | PASS          | AC=4;AF=0.105;AN=38;DP=83;FS=0.00 |
| 38844 | chrY | 14065592 | . | T | C | 2061.43  | PASS          | AC=6;AF=0.086;AN=70;DP=661;FS=0.0 |
| 38845 | chrY | 14065715 | . | A | G | 1746.34  | PASS          | AC=4;AF=0.057;AN=70;DP=644;FS=0.0 |
| 38846 | chrY | 14066046 | . | G | C | 9739.92  | PASS          | AC=38;AF=0.559;AN=68;DP=548;FS=0  |
| 38847 | chrY | 14067841 | . | C | G | 38.51    | my_snp_filter | AC=2;AF=0.029;AN=70;BaseQ         |
| 38848 | chrY | 14067860 | . | A | G | 55.86    | PASS          | AC=2;AF=0.029;AN=70;BaseQRankSum= |
| 38849 | chrY | 14071209 | . | T | A | 5711.25  | PASS          | AC=52;AF=0.743;AN=70;DP=303;FS=0. |
| 38850 | chrY | 14071348 | . | A | T | 3225.28  | PASS          | AC=36;AF=1.00;AN=36;DP=92;FS=0.00 |
| 38851 | chrY | 14071351 | . | C | T | 3061.39  | PASS          | AC=36;AF=1.00;AN=36;DP=84;FS=0.00 |
| 38852 | chrY | 14074744 | . | C | T | 72.04    | PASS          | AC=2;AF=0.034;AN=58;DP=211;FS=0.0 |
| 38853 | chrY | 14076879 | . | C | A | 1010.22  | PASS          | AC=6;AF=0.088;AN=68;DP=537;FS=0.0 |
| 38854 | chrY | 14079811 | . | A | T | 12686.90 | PASS          | AC=70;AF=1.00;AN=70;DP=42         |
| 38855 | chrY | 14080223 | . | C | T | 722.46   | PASS          | AC=4;AF=0.059;AN=68;DP=335;FS=0.0 |
| 38856 | chrY | 14081111 | . | A | G | 496.48   | PASS          | AC=2;AF=0.029;AN=70;DP=425;FS=0.0 |
| 38857 | chrY | 14083486 | . | A | G | 117.79   | PASS          | AC=1;AF=0.014;AN=70;BaseQRankSum= |
| 38858 | chrY | 14085009 | . | G | T | 1031.18  | PASS          | AC=6;AF=0.086;AN=70;DP=516;FS=0.0 |
| 38859 | chrY | 14088642 | . | G | C | 9448.90  | PASS          | AC=50;AF=0.735;AN=68;DP=444;FS=0. |
| 38860 | chrY | 14091959 | . | G | A | 1244.55  | PASS          | AC=6;AF=0.088;AN=68;DP=340;FS=0.0 |
| 38861 | chrY | 14096649 | . | A | G | 334.46   | PASS          | AC=6;AF=0.091;AN=66;DP=195;FS=0.0 |
| 38862 | chrY | 14096676 | . | A | T | 487.25   | PASS          | AC=6;AF=0.086;AN=70;DP=274;FS=0.0 |
| 38863 | chrY | 14096806 | . | G | A | 880.85   | PASS          | AC=6;AF=0.086;AN=70;DP=389;FS=0.0 |
| 38864 | chrY | 14097025 | . | G | A | 1083.66  | PASS          | AC=6;AF=0.086;AN=70;DP=506;FS=0.0 |
| 38865 | chrY | 14100019 | . | G | A | 202.80   | PASS          | AC=2;AF=0.032;AN=62;DP=350;FS=0.0 |
| 38866 | chrY | 14100436 | . | C | T | 159.80   | PASS          | AC=2;AF=0.033;AN=60;DP=196;FS=0.0 |
| 38867 | chrY | 14101136 | . | C | T | 246.86   | PASS          | AC=2;AF=0.100;AN=20;DP=141;FS=0.0 |
| 38868 | chrY | 14101360 | . | T | C | 55.10    | PASS          | AC=2;AF=0.045;AN=44;DP=169;FS=0.0 |
| 38869 | chrY | 14101575 | . | T | C | 1144.21  | PASS          | AC=2;AF=0.029;AN=70;DP=589;FS=0.0 |
| 38870 | chrY | 14102979 | . | T | G | 224.24   | PASS          | AC=4;AF=0.057;AN=70;DP=566;FS=0.0 |
| 38871 | chrY | 14103489 | . | G | T | 1193.84  | PASS          | AC=6;AF=0.086;AN=70;DP=389;FS=0.0 |
| 38872 | chrY | 14104939 | . | C | A | 2654.96  | PASS          | AC=40;AF=0.645;AN=62;DP=255;FS=0. |
| 38873 | chrY | 14107068 | . | A | C | 714.77   | my_snp_filter | AC=11;AF=0.167;AN=66;BaseQ        |
| 38874 | chrY | 14107314 | . | T | C | 425.85   | my_snp_filter | AC=8;AF=0.129;AN=62;BaseQ         |
| 38875 | chrY | 14107438 | . | C | T | 341.76   | PASS          | AC=6;AF=0.103;AN=58;BaseQRankSum= |
| 38876 | chrY | 14107471 | . | G | T | 189.47   | PASS          | AC=6;AF=0.103;AN=58;BaseQRankSum= |
| 38877 | chrY | 14109477 | . | A | C | 41.46    | PASS          | AC=2;AF=0.100;AN=20;BaseQRankSum= |
| 38878 | chrY | 14109657 | . | T | G | 54.28    | PASS          | AC=1;AF=0.056;AN=18;BaseQRankSum= |
| 38879 | chrY | 14109694 | . | C | A | 264.46   | PASS          | AC=4;AF=0.222;AN=18;BaseQRankSum= |
| 38880 | chrY | 14109721 | . | G | T | 243.03   | PASS          | AC=4;AF=0.222;AN=18;BaseQRankSum= |
| 38881 | chrY | 14109802 | . | C | A | 151.78   | PASS          | AC=2;AF=0.111;AN=18;BaseQRankSum= |
| 38882 | chrY | 14110634 | . | T | C | 836.85   | PASS          | AC=6;AF=0.300;AN=20;DP=172;FS=0.0 |
| 38883 | chrY | 14110723 | . | G | A | 1147.21  | PASS          | AC=6;AF=0.333;AN=18;DP=158;FS=0.0 |
| 38884 | chrY | 14111596 | . | C | A | 1138.21  | PASS          | AC=6;AF=0.333;AN=18;DP=148;FS=0.0 |
| 38885 | chrY | 14113581 | . | A | T | 73.24    | PASS          | AC=1;AF=0.056;AN=18;BaseQRankSum= |
| 38886 | chrY | 14113588 | . | C | A | 70.24    | PASS          | AC=1;AF=0.056;AN=18;BaseQRankSum= |
| 38887 | chrY | 14113595 | . | T | G | 69.45    | PASS          | AC=1;AF=0.056;AN=18;BaseQRankSum= |
| 38888 | chrY | 14113596 | . | G | A | 69.57    | PASS          | AC=1;AF=0.056;AN=18;BaseQRankSum= |
| 38889 | chrY | 14114741 | . | G | T | 1170.07  | PASS          | AC=6;AF=0.300;AN=20;DP=139;FS=0.0 |
| 38890 | chrY | 14116584 | . | A | T | 11397.89 | PASS          | AC=68;AF=1.00;AN=68;DP=38         |
| 38891 | chrY | 14117810 | . | T | C | 13239.95 | PASS          | AC=66;AF=1.00;AN=66;DP=43         |
| 38892 | chrY | 14118948 | . | C | A | 622.02   | PASS          | AC=2;AF=0.111;AN=18;DP=191;FS=0.0 |
| 38893 | chrY | 14119160 | . | T | G | 1190.18  | PASS          | AC=6;AF=0.333;AN=18;DP=178;FS=0.0 |
| 38894 | chrY | 14119326 | . | T | C | 1161.23  | PASS          | AC=6;AF=0.333;AN=18;DP=154;FS=0.0 |
| 38895 | chrY | 14120054 | . | T | A | 4394.86  | PASS          | AC=18;AF=1.00;AN=18;DP=170;FS=0.0 |
| 38896 | chrY | 14123696 | . | T | G | 33.61    | my_snp_filter | AC=1;AF=0.014;AN=70;BaseQ         |
| 38897 | chrY | 14123699 | . | A | G | 33.58    | my_snp_filter | AC=1;AF=0.014;AN=70;BaseQ         |
| 38898 | chrY | 14123707 | . | A | G | 42.59    | PASS          | AC=1;AF=0.014;AN=70;BaseQRankSum= |
| 38899 | chrY | 14123721 | . | C | T | 33.61    | my_snp_filter | AC=1;AF=0.014;AN=70;BaseQ         |
| 38900 | chrY | 14123729 | . | C | T | 36.75    | my_snp_filter | AC=1;AF=0.014;AN=70;BaseQ         |
| 38901 | chrY | 14123741 | . | C | A | 36.80    | my_snp_filter | AC=1;AF=0.015;AN=68;BaseQ         |
| 38902 | chrY | 14123744 | . | T | C | 36.78    | my_snp_filter | AC=1;AF=0.015;AN=68;BaseQ         |
| 38903 | chrY | 14123815 | . | A | C | 71.50    | PASS          | AC=1;AF=0.016;AN=62;BaseQRankSum= |
| 38904 | chrY | 14123816 | . | G | T | 71.23    | PASS          | AC=1;AF=0.016;AN=62;BaseQRankSum= |
| 38905 | chrY | 14123819 | . | T | A | 71.51    | PASS          | AC=1;AF=0.016;AN=62;BaseQRankSum= |
| 38906 | chrY | 14123846 | . | C | T | 60.04    | PASS          | AC=1;AF=0.017;AN=58;BaseQRankSum= |
| 38907 | chrY | 14123850 | . | A | G | 57.50    | my_snp_filter | AC=1;AF=0.018;AN=56;BaseQ         |
| 38908 | chrY | 14123853 | . | A | G | 57.85    | my_snp_filter | AC=1;AF=0.017;AN=58;BaseQ         |
| 38909 | chrY | 14123856 | . | T | C | 57.04    | my_snp_filter | AC=1;AF=0.017;AN=58;BaseQ         |
| 38910 | chrY | 14123857 | . | G | A | 57.08    | my_snp_filter | AC=1;AF=0.017;AN=58;BaseQ         |
| 38911 | chrY | 14123868 | . | A | G | 49.44    | my_snp_filter | AC=1;AF=0.019;AN=54;BaseQ         |
| 38912 | chrY | 14123872 | . | T | A | 59.51    | PASS          | AC=1;AF=0.019;AN=54;BaseQRankSum= |



|       |      |          |   |   |   |          |      |                                   |
|-------|------|----------|---|---|---|----------|------|-----------------------------------|
| 38913 | chrY | 14124940 | . | C | G | 6385.75  | PASS | AC=52;AF=0.813;AN=64;DP=302;FS=0. |
| 38914 | chrY | 14128164 | . | T | C | 699.89   | PASS | AC=6;AF=0.300;AN=20;DP=112;FS=0.0 |
| 38915 | chrY | 14128727 | . | C | T | 3750.86  | PASS | AC=18;AF=1.00;AN=18;DP=147;FS=0.0 |
| 38916 | chrY | 14136291 | . | A | G | 21530.93 | PASS | AC=68;AF=1.00;AN=68;DP=73         |
| 38917 | chrY | 14137030 | . | C | T | 7581.38  | PASS | AC=46;AF=0.657;AN=70;DP=413;FS=0. |
| 38918 | chrY | 14140442 | . | G | A | 555.27   | PASS | AC=2;AF=0.029;AN=70;DP=457;FS=0.0 |
| 38919 | chrY | 14144641 | . | G | T | 14478.93 | PASS | AC=70;AF=1.00;AN=70;DP=48         |
| 38920 | chrY | 14149422 | . | G | T | 233.27   | PASS | AC=2;AF=0.083;AN=24;DP=139;FS=0.0 |
| 38921 | chrY | 14149772 | . | T | C | 11760.73 | PASS | AC=58;AF=0.829;AN=70;DP=5         |
| 38922 | chrY | 14156152 | . | A | G | 4060.57  | PASS | AC=17;AF=0.944;AN=18;BaseQRankSum |
| 38923 | chrY | 14156566 | . | C | G | 249.79   | PASS | AC=2;AF=0.100;AN=20;DP=164;FS=0.0 |
| 38924 | chrY | 14157236 | . | T | C | 278.75   | PASS | AC=2;AF=0.100;AN=20;DP=180;FS=0.0 |
| 38925 | chrY | 14160364 | . | A | G | 350.60   | PASS | AC=8;AF=0.308;AN=26;DP=211;FS=0.0 |
| 38926 | chrY | 14160599 | . | C | T | 1629.19  | PASS | AC=6;AF=0.333;AN=18;DP=159;FS=0.0 |
| 38927 | chrY | 14160921 | . | G | C | 1217.43  | PASS | AC=6;AF=0.273;AN=22;DP=159;FS=0.0 |
| 38928 | chrY | 14162311 | . | G | A | 1017.52  | PASS | AC=8;AF=0.400;AN=20;DP=169;FS=0.0 |
| 38929 | chrY | 14164231 | . | G | A | 672.75   | PASS | AC=2;AF=0.100;AN=20;DP=171;FS=0.0 |
| 38930 | chrY | 14165942 | . | C | A | 1093.39  | PASS | AC=6;AF=0.273;AN=22;DP=147;FS=0.0 |
| 38931 | chrY | 14166869 | . | C | G | 876.81   | PASS | AC=6;AF=0.300;AN=20;DP=157;FS=0.0 |
| 38932 | chrY | 14167369 | . | T | C | 817.57   | PASS | AC=6;AF=0.333;AN=18;DP=166;FS=0.0 |
| 38933 | chrY | 14168453 | . | G | T | 852.84   | PASS | AC=6;AF=0.100;AN=60;DP=171;FS=0.0 |
| 38934 | chrY | 14169993 | . | T | C | 807.76   | PASS | AC=5;AF=0.071;AN=70;BaseQRankSum  |
| 38935 | chrY | 14171665 | . | T | C | 6217.03  | PASS | AC=56;AF=0.824;AN=68;DP=274;FS=0. |
| 38936 | chrY | 14171812 | . | T | G | 6581.97  | PASS | AC=55;AF=0.809;AN=68;BaseQRankSum |
| 38937 | chrY | 14172005 | . | T | C | 12066.82 | PASS | AC=46;AF=0.657;AN=70;DP=6         |
| 38938 | chrY | 14172513 | . | T | C | 37.91    | PASS | AC=1;AF=0.015;AN=66;BaseQRankSum  |
| 38939 | chrY | 14172523 | . | A | G | 41.10    | PASS | AC=1;AF=0.016;AN=64;BaseQRankSum  |
| 38940 | chrY | 14172758 | . | T | C | 65.58    | PASS | AC=2;AF=0.031;AN=64;BaseQRankSum  |
| 38941 | chrY | 14172762 | . | C | A | 60.04    | PASS | AC=2;AF=0.032;AN=62;BaseQRankSum  |
| 38942 | chrY | 14174283 | . | G | A | 1480.74  | PASS | AC=6;AF=0.088;AN=68;DP=621;FS=0.0 |
| 38943 | chrY | 14174454 | . | G | A | 18611.08 | PASS | AC=52;AF=0.743;AN=70;DP=7         |
| 38944 | chrY | 14178161 | . | G | A | 772.45   | PASS | AC=6;AF=0.086;AN=70;DP=540;FS=0.0 |
| 38945 | chrY | 14178942 | . | A | C | 382.94   | PASS | AC=2;AF=0.077;AN=26;DP=160;FS=0.0 |
| 38946 | chrY | 14179970 | . | C | T | 2905.54  | PASS | AC=40;AF=0.690;AN=58;DP=269;FS=0. |
| 38947 | chrY | 14181646 | . | T | C | 2602.33  | PASS | AC=34;AF=0.739;AN=46;DP=228;FS=0. |
| 38948 | chrY | 14182537 | . | C | T | 458.02   | PASS | AC=2;AF=0.111;AN=18;DP=172;FS=0.0 |
| 38949 | chrY | 14184743 | . | T | A | 47.76    | PASS | AC=2;AF=0.031;AN=64;BaseQRankSum  |
| 38950 | chrY | 14192779 | . | G | A | 94.34    | PASS | AC=2;AF=0.029;AN=70;DP=424;FS=0.0 |
| 38951 | chrY | 14193384 | . | A | G | 17295.92 | PASS | AC=70;AF=1.00;AN=70;BaseQ         |
| 38952 | chrY | 14194231 | . | T | C | 31.88    | PASS | AC=1;AF=0.018;AN=56;BaseQRankSum  |
| 38953 | chrY | 14194583 | . | T | A | 1230.69  | PASS | AC=6;AF=0.088;AN=68;DP=508;FS=0.0 |
| 38954 | chrY | 14195377 | . | T | A | 618.08   | PASS | AC=6;AF=0.086;AN=70;DP=364;FS=0.0 |
| 38955 | chrY | 14197551 | . | G | A | 416.46   | PASS | AC=2;AF=0.030;AN=66;DP=273;FS=0.0 |
| 38956 | chrY | 14197867 | . | A | G | 1111.47  | PASS | AC=6;AF=0.086;AN=70;DP=549;FS=0.0 |
| 38957 | chrY | 14199284 | . | C | T | 8120.20  | PASS | AC=56;AF=0.824;AN=68;DP=361;FS=0. |
| 38958 | chrY | 14203192 | . | C | T | 34.93    | PASS | AC=1;AF=0.016;AN=64;BaseQRankSum  |
| 38959 | chrY | 14203197 | . | A | T | 37.99    | PASS | AC=1;AF=0.016;AN=64;BaseQRankSum  |
| 38960 | chrY | 14205302 | . | A | C | 6306.20  | PASS | AC=52;AF=0.963;AN=54;BaseQRankSum |
| 38961 | chrY | 14206273 | . | A | G | 342.04   | PASS | AC=2;AF=0.029;AN=70;BaseQRankSum  |
| 38962 | chrY | 14206892 | . | C | T | 9058.18  | PASS | AC=52;AF=0.743;AN=70;DP=438;FS=0. |
| 38963 | chrY | 14209003 | . | T | A | 583.03   | PASS | AC=6;AF=0.086;AN=70;DP=328;FS=0.0 |
| 38964 | chrY | 14209004 | . | C | T | 582.87   | PASS | AC=6;AF=0.086;AN=70;DP=331;FS=0.0 |
| 38965 | chrY | 14214013 | . | C | T | 1583.03  | PASS | AC=6;AF=0.086;AN=70;DP=758;FS=0.0 |
| 38966 | chrY | 14217650 | . | C | T | 210.78   | PASS | AC=2;AF=0.029;AN=70;DP=488;FS=0.0 |
| 38967 | chrY | 14219249 | . | C | G | 38.42    | PASS | AC=2;AF=0.029;AN=70;DP=275;FS=0.0 |
| 38968 | chrY | 14222748 | . | A | G | 734.21   | PASS | AC=6;AF=0.333;AN=18;DP=135;FS=0.0 |
| 38969 | chrY | 14223711 | . | T | C | 155.69   | PASS | AC=2;AF=0.029;AN=70;DP=373;FS=0.0 |
| 38970 | chrY | 14225475 | . | G | A | 1281.37  | PASS | AC=6;AF=0.086;AN=70;DP=468;FS=0.0 |
| 38971 | chrY | 14226692 | . | A | T | 7822.14  | PASS | AC=60;AF=1.00;AN=60;DP=270;FS=0.0 |
| 38972 | chrY | 14228328 | . | A | G | 903.25   | PASS | AC=6;AF=0.086;AN=70;DP=695;FS=0.0 |
| 38973 | chrY | 14230923 | . | C | G | 960.07   | PASS | AC=6;AF=0.086;AN=70;DP=641;FS=0.0 |
| 38974 | chrY | 14231292 | . | A | G | 9129.97  | PASS | AC=66;AF=1.00;AN=66;BaseQRankSum  |
| 38975 | chrY | 14232066 | . | G | A | 1412.88  | PASS | AC=26;AF=0.520;AN=50;DP=210;FS=0. |
| 38976 | chrY | 14233197 | . | C | A | 47.01    | PASS | AC=2;AF=0.032;AN=62;DP=267;FS=0.0 |
| 38977 | chrY | 14235054 | . | T | A | 202.82   | PASS | AC=2;AF=0.029;AN=70;DP=613;FS=0.0 |
| 38978 | chrY | 14237068 | . | T | A | 233.23   | PASS | AC=2;AF=0.029;AN=70;DP=585;FS=0.0 |
| 38979 | chrY | 14237670 | . | T | C | 6369.86  | PASS | AC=54;AF=0.818;AN=66;BaseQRankSum |
| 38980 | chrY | 14242558 | . | T | C | 5774.50  | PASS | AC=52;AF=0.743;AN=70;DP=311;FS=0. |
| 38981 | chrY | 14243251 | . | C | A | 8768.88  | PASS | AC=42;AF=0.636;AN=66;DP=491;FS=0. |
| 38982 | chrY | 14244937 | . | C | G | 707.26   | PASS | AC=6;AF=0.086;AN=70;DP=388;FS=0.0 |
| 38983 | chrY | 14246663 | . | T | C | 1379.68  | PASS | AC=6;AF=0.214;AN=28;DP=144;FS=0.0 |
| 38984 | chrY | 14247016 | . | T | C | 223.02   | PASS | AC=2;AF=0.111;AN=18;DP=168;FS=0.0 |
| 38985 | chrY | 14247694 | . | C | A | 726.74   | PASS | AC=6;AF=0.097;AN=62;DP=237;FS=0.0 |
| 38986 | chrY | 14250193 | . | G | T | 241.19   | PASS | AC=2;AF=0.063;AN=32;DP=186;FS=0.0 |
| 38987 | chrY | 14252311 | . | A | G | 44.95    | PASS | AC=2;AF=0.100;AN=20;DP=35;FS=0.00 |
| 38988 | chrY | 14252561 | . | G | A | 771.12   | PASS | AC=16;AF=0.348;AN=46;DP=96;FS=0.0 |

|       |      |          |   |   |     |          |               |                                    |
|-------|------|----------|---|---|-----|----------|---------------|------------------------------------|
| 38989 | chrY | 14253619 | . | C | T   | 638.04   | PASS          | AC=6;AF=0.088;AN=68;BaseQRankSum=  |
| 38990 | chrY | 14259933 | . | T | G   | 1472.18  | PASS          | AC=6;AF=0.333;AN=18;DP=176;FS=0.0  |
| 38991 | chrY | 14262122 | . | A | T   | 494.25   | PASS          | AC=2;AF=0.029;AN=70;DP=486;FS=0.0  |
| 38992 | chrY | 14263271 | . | G | A   | 2720     | PASS          | AC=36;AF=0.667;AN=54;DP=230;FS=0.  |
| 38993 | chrY | 14266799 | . | G | A   | 656.03   | PASS          | AC=6;AF=0.086;AN=70;DP=463;FS=0.0  |
| 38994 | chrY | 14269712 | . | A | G   | 1311.28  | PASS          | AC=6;AF=0.086;AN=70;DP=482;FS=0.0  |
| 38995 | chrY | 14272044 | . | C | T   | 166.52   | PASS          | AC=4;AF=0.069;AN=58;DP=231;FS=0.0  |
| 38996 | chrY | 14273103 | . | G | T   | 8562.01  | PASS          | AC=58;AF=1.00;AN=58;DP=284;FS=0.0  |
| 38997 | chrY | 14274572 | . | G | T   | 301.32   | PASS          | AC=2;AF=0.029;AN=70;DP=465;FS=0.0  |
| 38998 | chrY | 14275582 | . | G | A   | 311.60   | PASS          | AC=2;AF=0.030;AN=66;DP=303;FS=0.0  |
| 38999 | chrY | 14277168 | . | G | A   | 1244.53  | PASS          | AC=6;AF=0.086;AN=70;DP=361;FS=0.0  |
| 39000 | chrY | 14277239 | . | G | A   | 1358.98  | PASS          | AC=6;AF=0.086;AN=70;DP=288;FS=0.0  |
| 39001 | chrY | 14280366 | . | A | G   | 173.65   | PASS          | AC=2;AF=0.029;AN=70;DP=432;FS=0.0  |
| 39002 | chrY | 14281450 | . | G | A   | 11855.50 | PASS          | AC=48;AF=0.727;AN=66;DP=5          |
| 39003 | chrY | 14283555 | . | A | C   | 1187.74  | PASS          | AC=6;AF=0.086;AN=70;DP=503;FS=0.0  |
| 39004 | chrY | 14288615 | . | T | C   | 1123.64  | PASS          | AC=6;AF=0.086;AN=70;DP=364;FS=0.0  |
| 39005 | chrY | 14294504 | . | G | T   | 3355.29  | PASS          | AC=44;AF=0.786;AN=56;BaseQRankSum  |
| 39006 | chrY | 14296496 | . | G | T   | 1143.60  | PASS          | AC=6;AF=0.103;AN=58;DP=198;FS=0.0  |
| 39007 | chrY | 14297122 | . | G | C   | 5775.62  | PASS          | AC=46;AF=0.719;AN=64;DP=238;FS=0.  |
| 39008 | chrY | 14297894 | . | C | T   | 966.19   | PASS          | AC=6;AF=0.333;AN=18;DP=132;FS=0.0  |
| 39009 | chrY | 14300124 | . | C | T   | 1102.50  | PASS          | AC=6;AF=0.125;AN=48;DP=171;FS=0.0  |
| 39010 | chrY | 14300457 | . | A | G   | 6626.06  | PASS          | AC=52;AF=1.00;AN=52;DP=248;FS=0.0  |
| 39011 | chrY | 14300581 | . | G | T   | 49.67    | PASS          | AC=2;AF=0.053;AN=38;DP=176;FS=0.0  |
| 39012 | chrY | 14302267 | . | C | T   | 703.86   | PASS          | AC=2;AF=0.029;AN=70;DP=412;FS=0.0  |
| 39013 | chrY | 14304077 | . | T | C   | 1128.21  | PASS          | AC=6;AF=0.333;AN=18;DP=161;FS=0.0  |
| 39014 | chrY | 14304719 | . | C | A   | 1033.35  | PASS          | AC=6;AF=0.300;AN=20;DP=177;FS=0.0  |
| 39015 | chrY | 14317555 | . | A | G   | 16316.91 | PASS          | AC=70;AF=1.00;AN=70;DP=55          |
| 39016 | chrY | 14319988 | . | C | A   | 33.55    | PASS          | AC=1;AF=0.014;AN=70;BaseQRankSum=  |
| 39017 | chrY | 14324523 | . | C | T   | 1181.76  | PASS          | AC=6;AF=0.176;AN=34;DP=173;FS=0.0  |
| 39018 | chrY | 14324714 | . | T | C   | 14010.99 | PASS          | AC=58;AF=0.829;AN=70;DP=5          |
| 39019 | chrY | 14325752 | . | T | C   | 30.58    | PASS          | AC=1;AF=0.014;AN=70;BaseQRankSum=  |
| 39020 | chrY | 14327533 | . | C | T   | 1003.62  | PASS          | AC=6;AF=0.088;AN=68;DP=570;FS=0.0  |
| 39021 | chrY | 14327870 | . | G | A   | 592.98   | PASS          | AC=6;AF=0.088;AN=68;DP=398;FS=0.0  |
| 39022 | chrY | 14330570 | . | A | T   | 11575.92 | PASS          | AC=57;AF=0.814;AN=70;DP=4          |
| 39023 | chrY | 14331157 | . | G | T   | 46.48    | PASS          | AC=2;AF=0.037;AN=54;BaseQRankSum=  |
| 39024 | chrY | 14331158 | . | C | T   | 45.65    | PASS          | AC=2;AF=0.037;AN=54;BaseQRankSum=  |
| 39025 | chrY | 14331272 | . | G | A   | 20633.90 | PASS          | AC=70;AF=1.00;AN=70;DP=68          |
| 39026 | chrY | 14331581 | . | T | C   | 11080    | PASS          | AC=70;AF=1.00;AN=70;DP=365;FS=0.0  |
| 39027 | chrY | 14332189 | . | A | G   | 1271.22  | PASS          | AC=6;AF=0.086;AN=70;DP=302;FS=0.0  |
| 39028 | chrY | 14333201 | . | A | C   | 81.55    | PASS          | AC=1;AF=0.014;AN=70;BaseQRankSum=  |
| 39029 | chrY | 14333210 | . | C | G   | 81.57    | PASS          | AC=1;AF=0.014;AN=70;BaseQRankSum=  |
| 39030 | chrY | 14334396 | . | T | G   | 19993.07 | PASS          | AC=58;AF=0.829;AN=70;DP=7          |
| 39031 | chrY | 14339267 | . | C | A   | 44.07    | PASS          | AC=2;AF=0.029;AN=70;DP=395;FS=0.0  |
| 39032 | chrY | 14340575 | . | T | C   | 337.35   | PASS          | AC=2;AF=0.029;AN=70;DP=484;FS=0.0  |
| 39033 | chrY | 14347828 | . | A | T   | 541.22   | PASS          | AC=2;AF=0.029;AN=70;DP=630;FS=0.0  |
| 39034 | chrY | 14351330 | . | C | T   | 1420.85  | PASS          | AC=6;AF=0.086;AN=70;DP=507;FS=0.0  |
| 39035 | chrY | 14354843 | . | A | C   | 1240.22  | PASS          | AC=6;AF=0.086;AN=70;BaseQRankSum=  |
| 39036 | chrY | 14356148 | . | C | A   | 906.24   | PASS          | AC=6;AF=0.086;AN=70;DP=513;FS=0.0  |
| 39037 | chrY | 14357783 | . | A | C   | 163.65   | PASS          | AC=5;AF=0.071;AN=70;BaseQRankSum=  |
| 39038 | chrY | 14357795 | . | C | A   | 464.61   | PASS          | AC=5;AF=0.071;AN=70;BaseQRankSum=  |
| 39039 | chrY | 14357804 | . | C | T   | 606.66   | PASS          | AC=5;AF=0.071;AN=70;BaseQRankSum=  |
| 39040 | chrY | 14357835 | . | C | T   | 1178.19  | PASS          | AC=6;AF=0.088;AN=68;BaseQRankSum=  |
| 39041 | chrY | 14357949 | . | T | C   | 1671.99  | PASS          | AC=7;AF=0.100;AN=70;BaseQRankSum=  |
| 39042 | chrY | 14358013 | . | G | A   | 514.01   | PASS          | AC=4;AF=0.059;AN=68;BaseQRankSum=  |
| 39043 | chrY | 14358074 | . | A | G   | 262.38   | PASS          | AC=2;AF=0.037;AN=54;BaseQRankSum=  |
| 39044 | chrY | 14358076 | . | A | G   | 262.38   | PASS          | AC=2;AF=0.037;AN=54;BaseQRankSum=  |
| 39045 | chrY | 14358221 | . | C | A   | 81.76    | PASS          | AC=1;AF=0.029;AN=34;BaseQRankSum=  |
| 39046 | chrY | 14358235 | . | A | G   | 43.98    | my_snp_filter | AC=1;AF=0.026;AN=38;BaseQ          |
| 39047 | chrY | 14358336 | . | T | A   | 37.73    | PASS          | AC=1;AF=0.015;AN=68;BaseQRankSum=  |
| 39048 | chrY | 14358445 | . | G | A   | 185.93   | PASS          | AC=2;AF=0.029;AN=70;DP=433;FS=0.0  |
| 39049 | chrY | 14359235 | . | G | A   | 8341.82  | PASS          | AC=50;AF=0.735;AN=68;DP=450;FS=0.  |
| 39050 | chrY | 14359804 | . | T | C   | 51.26    | PASS          | AC=2;AF=0.071;AN=28;DP=125;FS=0.0  |
| 39051 | chrY | 14359805 | . | C | A   | 51.24    | PASS          | AC=2;AF=0.071;AN=28;DP=125;FS=0.0  |
| 39052 | chrY | 14366723 | . | T | C   | 12749.94 | PASS          | AC=68;AF=1.00;AN=68;DP=48          |
| 39053 | chrY | 14367181 | . | A | G   | 8592.98  | PASS          | AC=56;AF=0.824;AN=68;BaseQRankSum= |
| 39054 | chrY | 14367269 | . | C | A   | 12707.94 | PASS          | AC=64;AF=1.00;AN=64;BaseQ          |
| 39055 | chrY | 14369471 | . | G | A   | 2925.36  | PASS          | AC=12;AF=0.171;AN=70;DP=789;FS=0.  |
| 39056 | chrY | 14370165 | . | G | A   | 1271.70  | PASS          | AC=6;AF=0.086;AN=70;DP=380;FS=0.0  |
| 39057 | chrY | 14373254 | . | G | A   | 736.76   | PASS          | AC=6;AF=0.091;AN=66;DP=223;FS=0.0  |
| 39058 | chrY | 14379606 | . | C | G,* | 3237.03  | PASS          | AC=19,28;AF=0.297,0.438;AN=64;Bas  |
| 39059 | chrY | 14379614 | . | G | C   | 45.20    | PASS          | AC=2;AF=0.029;AN=70;DP=274;FS=0.0  |
| 39060 | chrY | 14381087 | . | A | T   | 262.70   | PASS          | AC=2;AF=0.029;AN=70;DP=361;FS=0.0  |
| 39061 | chrY | 14381223 | . | G | A   | 315.93   | PASS          | AC=2;AF=0.029;AN=70;DP=411;FS=0.0  |
| 39062 | chrY | 14381806 | . | A | C   | 747.90   | PASS          | AC=6;AF=0.200;AN=30;DP=179;FS=0.0  |
| 39063 | chrY | 14382516 | . | C | T   | 4966.97  | PASS          | AC=44;AF=0.710;AN=62;DP=314;FS=0.  |
| 39064 | chrY | 14392996 | . | G | C   | 5688.09  | PASS          | AC=42;AF=1.00;AN=42;DP=209;FS=0.0  |

|       |      |          |   |   |   |          |                |                                   |
|-------|------|----------|---|---|---|----------|----------------|-----------------------------------|
| 39065 | chrY | 14394512 | . | C | G | 7811.05  | PASS           | AC=68;AF=1.00;AN=68;DP=263;FS=0.0 |
| 39066 | chrY | 14395779 | . | C | T | 2179.24  | PASS           | AC=36;AF=0.667;AN=54;DP=216;FS=0. |
| 39067 | chrY | 14396223 | . | C | G | 201.15   | PASS           | AC=1;AF=0.025;AN=40;BaseQRankSum= |
| 39068 | chrY | 14398276 | . | G | T | 1043.11  | PASS           | AC=6;AF=0.091;AN=66;DP=202;FS=0.0 |
| 39069 | chrY | 14398980 | . | A | G | 12969.93 | PASS           | AC=64;AF=1.00;AN=64;DP=28         |
| 39070 | chrY | 14398990 | . | G | A | 14391.91 | PASS           | AC=64;AF=1.00;AN=64;DP=32         |
| 39071 | chrY | 14399014 | . | T | G | 14827.93 | PASS           | AC=64;AF=1.00;AN=64;DP=35         |
| 39072 | chrY | 14399057 | . | T | G | 18561.92 | PASS           | AC=66;AF=1.00;AN=66;DP=41         |
| 39073 | chrY | 14399061 | . | A | G | 19611.89 | PASS           | AC=66;AF=1.00;AN=66;DP=42         |
| 39074 | chrY | 14399063 | . | A | G | 19832.89 | PASS           | AC=66;AF=1.00;AN=66;DP=43         |
| 39075 | chrY | 14399074 | . | A | G | 20271.89 | PASS           | AC=66;AF=1.00;AN=66;DP=43         |
| 39076 | chrY | 14399077 | . | G | A | 20451.89 | PASS           | AC=66;AF=1.00;AN=66;DP=45         |
| 39077 | chrY | 14399105 | . | G | A | 24114.88 | PASS           | AC=66;AF=1.00;AN=66;DP=54         |
| 39078 | chrY | 14405675 | . | G | A | 2842.02  | PASS           | AC=30;AF=0.556;AN=54;BaseQRankSum |
| 39079 | chrY | 14406952 | . | G | A | 1022.12  | PASS           | AC=6;AF=0.088;AN=68;DP=361;FS=0.0 |
| 39080 | chrY | 14407021 | . | A | C | 540.23   | PASS           | AC=6;AF=0.086;AN=70;BaseQRankSum= |
| 39081 | chrY | 14408338 | . | G | C | 1097.39  | PASS           | AC=6;AF=0.088;AN=68;DP=576;FS=0.0 |
| 39082 | chrY | 14412831 | . | G | A | 287.15   | PASS           | AC=2;AF=0.037;AN=54;DP=223;FS=0.0 |
| 39083 | chrY | 14415575 | . | A | T | 2291.23  | PASS           | AC=24;AF=1.00;AN=24;BaseQRankSum= |
| 39084 | chrY | 14419203 | . | T | C | 661.52   | PASS           | AC=6;AF=0.086;AN=70;DP=473;FS=0.0 |
| 39085 | chrY | 14419674 | . | G | T | 1348.50  | PASS           | AC=6;AF=0.086;AN=70;DP=426;FS=0.0 |
| 39086 | chrY | 14420387 | . | G | C | 1270.74  | PASS           | AC=6;AF=0.086;AN=70;DP=451;FS=0.0 |
| 39087 | chrY | 14423856 | . | A | G | 3963.14  | PASS           | AC=24;AF=1.00;AN=24;DP=167;FS=0.0 |
| 39088 | chrY | 14424848 | . | C | T | 1358.24  | PASS           | AC=6;AF=0.100;AN=60;DP=266;FS=0.0 |
| 39089 | chrY | 14427787 | . | G | A | 738.22   | PASS           | AC=4;AF=0.059;AN=68;DP=525;FS=0.0 |
| 39090 | chrY | 14427915 | . | A | G | 1382.92  | PASS           | AC=6;AF=0.086;AN=70;DP=387;FS=0.0 |
| 39091 | chrY | 14429837 | . | G | A | 375.44   | PASS           | AC=2;AF=0.029;AN=70;DP=379;FS=0.0 |
| 39092 | chrY | 14431735 | . | A | G | 253.81   | PASS           | AC=2;AF=0.029;AN=68;DP=512;FS=0.0 |
| 39093 | chrY | 14432928 | . | A | G | 12553.97 | PASS           | AC=70;AF=1.00;AN=70;BaseQ         |
| 39094 | chrY | 14434372 | . | C | T | 1192.41  | PASS           | AC=6;AF=0.091;AN=66;DP=569;FS=0.0 |
| 39095 | chrY | 14434802 | . | G | A | 112.08   | PASS           | AC=4;AF=0.286;AN=14;DP=28;FS=0.00 |
| 39096 | chrY | 14435782 | . | A | G | 2711.81  | PASS           | AC=17;AF=0.243;AN=70;BaseQRankSum |
| 39097 | chrY | 14435790 | . | T | C | 3539.69  | PASS           | AC=18;AF=0.257;AN=70;BaseQRankSum |
| 39098 | chrY | 14435792 | . | G | C | 3498.19  | PASS           | AC=18;AF=0.257;AN=70;BaseQRankSum |
| 39099 | chrY | 14435818 | . | T | C | 7446.90  | PASS           | AC=24;AF=0.343;AN=70;BaseQRankSum |
| 39100 | chrY | 14436052 | . | G | A | 166.46   | my_snps_filter | AC=2;AF=0.029;AN=70;BaseQ         |
| 39101 | chrY | 14439238 | . | C | T | 10869.03 | PASS           | AC=50;AF=0.735;AN=68;DP=4         |
| 39102 | chrY | 14443152 | . | T | G | 64.09    | PASS           | AC=1;AF=0.014;AN=70;BaseQRankSum= |
| 39103 | chrY | 14443158 | . | C | T | 67.16    | PASS           | AC=1;AF=0.014;AN=70;BaseQRankSum= |
| 39104 | chrY | 14443181 | . | T | C | 61.05    | PASS           | AC=1;AF=0.015;AN=68;BaseQRankSum= |
| 39105 | chrY | 14443185 | . | G | A | 61.15    | PASS           | AC=1;AF=0.015;AN=68;BaseQRankSum= |
| 39106 | chrY | 14443194 | . | A | G | 58.46    | PASS           | AC=1;AF=0.015;AN=68;BaseQRankSum= |
| 39107 | chrY | 14443195 | . | G | A | 61.31    | PASS           | AC=1;AF=0.015;AN=68;BaseQRankSum= |
| 39108 | chrY | 14443205 | . | G | C | 54.97    | PASS           | AC=1;AF=0.015;AN=66;BaseQRankSum= |
| 39109 | chrY | 14443210 | . | A | C | 61.22    | PASS           | AC=1;AF=0.015;AN=66;BaseQRankSum= |
| 39110 | chrY | 14443230 | . | A | G | 111.59   | PASS           | AC=1;AF=0.014;AN=70;BaseQRankSum= |
| 39111 | chrY | 14443246 | . | A | T | 182.63   | PASS           | AC=1;AF=0.015;AN=68;BaseQRankSum= |
| 39112 | chrY | 14443260 | . | T | A | 184.51   | PASS           | AC=1;AF=0.015;AN=68;BaseQRankSum= |
| 39113 | chrY | 14443261 | . | G | A | 184.71   | PASS           | AC=1;AF=0.015;AN=68;BaseQRankSum= |
| 39114 | chrY | 14443328 | . | G | C | 51.96    | my_snps_filter | AC=1;AF=0.014;AN=70;BaseQ         |
| 39115 | chrY | 14443329 | . | C | A | 52.17    | my_snps_filter | AC=1;AF=0.014;AN=70;BaseQ         |
| 39116 | chrY | 14443332 | . | C | T | 54.94    | my_snps_filter | AC=1;AF=0.014;AN=70;BaseQ         |
| 39117 | chrY | 14443339 | . | T | A | 57.90    | PASS           | AC=1;AF=0.014;AN=70;BaseQRankSum= |
| 39118 | chrY | 14443351 | . | T | C | 61.20    | PASS           | AC=1;AF=0.014;AN=70;BaseQRankSum= |
| 39119 | chrY | 14443471 | . | A | C | 91.17    | PASS           | AC=1;AF=0.016;AN=64;BaseQRankSum= |
| 39120 | chrY | 14443474 | . | G | A | 91.50    | PASS           | AC=1;AF=0.016;AN=64;BaseQRankSum= |
| 39121 | chrY | 14443475 | . | C | T | 91.18    | PASS           | AC=1;AF=0.015;AN=66;BaseQRankSum= |
| 39122 | chrY | 14443495 | . | C | A | 233.20   | PASS           | AC=1;AF=0.015;AN=66;BaseQRankSum= |
| 39123 | chrY | 14443507 | . | T | C | 227.27   | PASS           | AC=1;AF=0.015;AN=66;BaseQRankSum= |
| 39124 | chrY | 14443519 | . | T | C | 182.22   | PASS           | AC=1;AF=0.015;AN=68;BaseQRankSum= |
| 39125 | chrY | 14443579 | . | T | G | 214.36   | PASS           | AC=1;AF=0.014;AN=70;BaseQRankSum= |
| 39126 | chrY | 14443583 | . | A | T | 214.31   | PASS           | AC=1;AF=0.014;AN=70;BaseQRankSum= |
| 39127 | chrY | 14443596 | . | G | A | 202.51   | PASS           | AC=1;AF=0.014;AN=70;BaseQRankSum= |
| 39128 | chrY | 14443601 | . | A | G | 202.34   | PASS           | AC=1;AF=0.014;AN=70;BaseQRankSum= |
| 39129 | chrY | 14443624 | . | C | T | 121.09   | PASS           | AC=1;AF=0.014;AN=70;BaseQRankSum= |
| 39130 | chrY | 14443634 | . | C | T | 76.17    | PASS           | AC=1;AF=0.014;AN=70;BaseQRankSum= |
| 39131 | chrY | 14443637 | . | G | A | 34.28    | my_snps_filter | AC=1;AF=0.014;AN=70;BaseQ         |
| 39132 | chrY | 14443801 | . | T | A | 204.63   | PASS           | AC=2;AF=0.032;AN=62;BaseQRankSum= |
| 39133 | chrY | 14443806 | . | G | A | 204.61   | PASS           | AC=2;AF=0.033;AN=60;BaseQRankSum= |
| 39134 | chrY | 14443816 | . | T | A | 195.65   | PASS           | AC=2;AF=0.033;AN=60;BaseQRankSum= |
| 39135 | chrY | 14444695 | . | T | C | 30.65    | PASS           | AC=1;AF=0.014;AN=70;BaseQRankSum= |
| 39136 | chrY | 14444701 | . | G | T | 30.92    | PASS           | AC=1;AF=0.014;AN=70;BaseQRankSum= |
| 39137 | chrY | 14447150 | . | A | T | 89.69    | PASS           | AC=2;AF=0.029;AN=70;BaseQRankSum= |
| 39138 | chrY | 14447155 | . | A | T | 41.61    | PASS           | AC=2;AF=0.029;AN=70;BaseQRankSum= |
| 39139 | chrY | 14448315 | . | C | A | 5042.20  | PASS           | AC=36;AF=0.600;AN=60;DP=377;FS=0. |
| 39140 | chrY | 14455205 | . | T | C | 1180.69  | PASS           | AC=6;AF=0.086;AN=70;DP=328;FS=0.0 |

|       |      |          |   |   |   |          |               |                                    |
|-------|------|----------|---|---|---|----------|---------------|------------------------------------|
| 39141 | chrY | 14456011 | . | C | A | 44.17    | PASS          | AC=2;AF=0.030;AN=66;DP=239;FS=0.0  |
| 39142 | chrY | 14456034 | . | C | G | 1243.59  | PASS          | AC=6;AF=0.094;AN=64;BaseQRankSum=  |
| 39143 | chrY | 14459210 | . | T | C | 83.31    | PASS          | AC=1;AF=0.015;AN=68;BaseQRankSum=  |
| 39144 | chrY | 14459211 | . | G | A | 82.95    | PASS          | AC=1;AF=0.015;AN=68;BaseQRankSum=  |
| 39145 | chrY | 14459216 | . | T | C | 35.74    | PASS          | AC=1;AF=0.015;AN=68;BaseQRankSum=  |
| 39146 | chrY | 14459219 | . | G | A | 35.09    | PASS          | AC=1;AF=0.015;AN=68;BaseQRankSum=  |
| 39147 | chrY | 14459546 | . | T | C | 50.97    | PASS          | AC=1;AF=0.015;AN=68;BaseQRankSum=  |
| 39148 | chrY | 14466858 | . | C | T | 31.65    | my_snp_filter | AC=1;AF=0.022;AN=46;BaseQ          |
| 39149 | chrY | 14466881 | . | C | T | 32.57    | my_snp_filter | AC=1;AF=0.029;AN=34;BaseQ          |
| 39150 | chrY | 14466917 | . | T | C | 204.14   | PASS          | AC=2;AF=0.083;AN=24;BaseQRankSum=  |
| 39151 | chrY | 14466924 | . | T | G | 179.22   | PASS          | AC=2;AF=0.091;AN=22;BaseQRankSum=  |
| 39152 | chrY | 14466948 | . | T | C | 66.64    | PASS          | AC=2;AF=0.111;AN=18;BaseQRankSum=  |
| 39153 | chrY | 14466973 | . | C | T | 60.99    | PASS          | AC=2;AF=0.111;AN=18;BaseQRankSum=  |
| 39154 | chrY | 14467152 | . | G | A | 1284.99  | PASS          | AC=6;AF=0.300;AN=20;DP=157;FS=0.0  |
| 39155 | chrY | 14467214 | . | C | T | 311.86   | PASS          | AC=3;AF=0.167;AN=18;BaseQRankSum=  |
| 39156 | chrY | 14467221 | . | G | T | 324.32   | PASS          | AC=3;AF=0.167;AN=18;BaseQRankSum=  |
| 39157 | chrY | 14467245 | . | C | T | 333.78   | PASS          | AC=3;AF=0.167;AN=18;BaseQRankSum=  |
| 39158 | chrY | 14467270 | . | T | C | 49.14    | PASS          | AC=1;AF=0.056;AN=18;BaseQRankSum=  |
| 39159 | chrY | 14468996 | . | T | A | 281.73   | PASS          | AC=4;AF=0.059;AN=68;BaseQRankSum=  |
| 39160 | chrY | 14469411 | . | A | C | 14638.96 | PASS          | AC=68;AF=1.00;AN=68;DP=47          |
| 39161 | chrY | 14474626 | . | C | A | 359.69   | PASS          | AC=2;AF=0.029;AN=70;DP=607;FS=0.0  |
| 39162 | chrY | 14475117 | . | C | A | 82.45    | my_snp_filter | AC=3;AF=0.044;AN=68;BaseQ          |
| 39163 | chrY | 14475135 | . | A | G | 116.50   | my_snp_filter | AC=3;AF=0.044;AN=68;BaseQ          |
| 39164 | chrY | 14475139 | . | G | A | 113.71   | my_snp_filter | AC=3;AF=0.044;AN=68;BaseQ          |
| 39165 | chrY | 14475143 | . | T | C | 136.67   | my_snp_filter | AC=4;AF=0.063;AN=64;BaseQ          |
| 39166 | chrY | 14475152 | . | T | G | 134.66   | my_snp_filter | AC=4;AF=0.065;AN=62;BaseQ          |
| 39167 | chrY | 14475171 | . | T | A | 141.50   | my_snp_filter | AC=4;AF=0.059;AN=68;BaseQ          |
| 39168 | chrY | 14475175 | . | T | G | 139.82   | my_snp_filter | AC=4;AF=0.057;AN=70;BaseQ          |
| 39169 | chrY | 14475183 | . | G | T | 147.65   | my_snp_filter | AC=4;AF=0.057;AN=70;BaseQ          |
| 39170 | chrY | 14475200 | . | A | G | 141.80   | my_snp_filter | AC=4;AF=0.059;AN=68;BaseQ          |
| 39171 | chrY | 14475210 | . | A | G | 144.68   | my_snp_filter | AC=4;AF=0.059;AN=68;BaseQ          |
| 39172 | chrY | 14475212 | . | G | A | 144.04   | my_snp_filter | AC=4;AF=0.059;AN=68;BaseQ          |
| 39173 | chrY | 14475215 | . | T | C | 126.07   | PASS          | AC=3;AF=0.043;AN=70;BaseQRankSum=  |
| 39174 | chrY | 14475220 | . | C | T | 126.03   | PASS          | AC=3;AF=0.043;AN=70;BaseQRankSum=  |
| 39175 | chrY | 14475227 | . | G | A | 123.14   | PASS          | AC=3;AF=0.043;AN=70;BaseQRankSum=  |
| 39176 | chrY | 14475235 | . | G | A | 61.09    | PASS          | AC=1;AF=0.014;AN=70;BaseQRankSum=  |
| 39177 | chrY | 14475527 | . | T | A | 37.09    | my_snp_filter | AC=2;AF=0.029;AN=70;BaseQ          |
| 39178 | chrY | 14475572 | . | C | G | 770.51   | PASS          | AC=4;AF=0.061;AN=66;BaseQRankSum=  |
| 39179 | chrY | 14475576 | . | G | A | 769.77   | PASS          | AC=4;AF=0.061;AN=66;BaseQRankSum=  |
| 39180 | chrY | 14475694 | . | C | T | 359.19   | PASS          | AC=7;AF=0.100;AN=70;BaseQRankSum=  |
| 39181 | chrY | 14475697 | . | T | C | 442.58   | PASS          | AC=7;AF=0.103;AN=68;BaseQRankSum=  |
| 39182 | chrY | 14475707 | . | T | C | 981      | PASS          | AC=9;AF=0.129;AN=70;BaseQRankSum=  |
| 39183 | chrY | 14475715 | . | G | A | 1387.99  | PASS          | AC=8;AF=0.118;AN=68;BaseQRankSum=  |
| 39184 | chrY | 14475719 | . | G | T | 1310.86  | PASS          | AC=8;AF=0.118;AN=68;BaseQRankSum=  |
| 39185 | chrY | 14475723 | . | T | C | 1395.46  | PASS          | AC=8;AF=0.118;AN=68;BaseQRankSum=  |
| 39186 | chrY | 14475739 | . | G | C | 1839.42  | PASS          | AC=8;AF=0.114;AN=70;BaseQRankSum=  |
| 39187 | chrY | 14475740 | . | C | T | 1838.55  | PASS          | AC=8;AF=0.114;AN=70;BaseQRankSum=  |
| 39188 | chrY | 14475758 | . | C | A | 2534.69  | PASS          | AC=10;AF=0.143;AN=70;BaseQRankSum= |
| 39189 | chrY | 14475815 | . | G | A | 12775.93 | PASS          | AC=23;AF=0.329;AN=70;BaseQ         |
| 39190 | chrY | 14475824 | . | C | T | 12539.91 | PASS          | AC=22;AF=0.324;AN=68;BaseQ         |
| 39191 | chrY | 14475831 | . | A | G | 11691.65 | PASS          | AC=21;AF=0.309;AN=68;BaseQ         |
| 39192 | chrY | 14475833 | . | A | T | 11398.58 | PASS          | AC=21;AF=0.300;AN=70;BaseQ         |
| 39193 | chrY | 14475840 | . | T | G | 10428.47 | PASS          | AC=22;AF=0.324;AN=68;BaseQ         |
| 39194 | chrY | 14475846 | . | C | T | 9772.23  | PASS          | AC=22;AF=0.324;AN=68;BaseQRankSum= |
| 39195 | chrY | 14475856 | . | C | T | 8687.08  | PASS          | AC=19;AF=0.279;AN=68;BaseQRankSum= |
| 39196 | chrY | 14475857 | . | C | G | 8594     | PASS          | AC=19;AF=0.279;AN=68;BaseQRankSum= |
| 39197 | chrY | 14475860 | . | G | A | 8106.87  | PASS          | AC=20;AF=0.294;AN=68;BaseQRankSum= |
| 39198 | chrY | 14475880 | . | G | A | 6215.98  | PASS          | AC=18;AF=0.257;AN=70;BaseQRankSum= |
| 39199 | chrY | 14475887 | . | G | T | 5824.11  | PASS          | AC=17;AF=0.243;AN=70;BaseQRankSum= |
| 39200 | chrY | 14475888 | . | G | T | 5788.18  | PASS          | AC=17;AF=0.243;AN=70;BaseQRankSum= |
| 39201 | chrY | 14475900 | . | C | T | 4685.91  | PASS          | AC=15;AF=0.214;AN=70;BaseQRankSum= |
| 39202 | chrY | 14475905 | . | C | T | 4495.45  | PASS          | AC=15;AF=0.214;AN=70;BaseQRankSum= |
| 39203 | chrY | 14475911 | . | G | C | 4024.18  | PASS          | AC=12;AF=0.171;AN=70;BaseQRankSum= |
| 39204 | chrY | 14475917 | . | G | T | 3361.86  | PASS          | AC=11;AF=0.157;AN=70;BaseQRankSum= |
| 39205 | chrY | 14475919 | . | A | G | 3029.39  | PASS          | AC=10;AF=0.143;AN=70;BaseQRankSum= |
| 39206 | chrY | 14475923 | . | G | A | 3069.42  | PASS          | AC=11;AF=0.157;AN=70;BaseQRankSum= |
| 39207 | chrY | 14475928 | . | T | C | 2834.88  | PASS          | AC=10;AF=0.143;AN=70;BaseQRankSum= |
| 39208 | chrY | 14475931 | . | C | T | 2530.04  | PASS          | AC=10;AF=0.143;AN=70;BaseQRankSum= |
| 39209 | chrY | 14475933 | . | A | G | 2326.48  | PASS          | AC=10;AF=0.143;AN=70;BaseQRankSum= |
| 39210 | chrY | 14475934 | . | A | G | 2236.38  | PASS          | AC=10;AF=0.143;AN=70;BaseQRankSum= |
| 39211 | chrY | 14475937 | . | G | A | 1996.72  | PASS          | AC=9;AF=0.129;AN=70;BaseQRankSum=  |
| 39212 | chrY | 14475940 | . | T | G | 1879.63  | PASS          | AC=9;AF=0.129;AN=70;BaseQRankSum=  |
| 39213 | chrY | 14475943 | . | C | A | 1754.29  | PASS          | AC=8;AF=0.114;AN=70;BaseQRankSum=  |
| 39214 | chrY | 14475947 | . | T | C | 1492.25  | PASS          | AC=7;AF=0.100;AN=70;BaseQRankSum=  |
| 39215 | chrY | 14475949 | . | A | T | 1450.85  | PASS          | AC=7;AF=0.103;AN=68;BaseQRankSum=  |
| 39216 | chrY | 14475951 | . | T | C | 1498.98  | PASS          | AC=6;AF=0.086;AN=70;BaseQRankSum=  |

|       |      |          |   |   |     |         |               |                                   |
|-------|------|----------|---|---|-----|---------|---------------|-----------------------------------|
| 39217 | chrY | 14475955 | . | G | A   | 1456.92 | PASS          | AC=6;AF=0.086;AN=70;BaseQRankSum= |
| 39218 | chrY | 14475967 | . | T | C   | 807.72  | PASS          | AC=2;AF=0.029;AN=70;BaseQRankSum= |
| 39219 | chrY | 14475996 | . | C | T   | 789.34  | PASS          | AC=4;AF=0.059;AN=68;BaseQRankSum= |
| 39220 | chrY | 14476000 | . | C | T   | 834.01  | PASS          | AC=4;AF=0.059;AN=68;BaseQRankSum= |
| 39221 | chrY | 14476004 | . | T | C   | 873.02  | PASS          | AC=4;AF=0.059;AN=68;BaseQRankSum= |
| 39222 | chrY | 14476005 | . | T | C   | 899.29  | PASS          | AC=4;AF=0.059;AN=68;BaseQRankSum= |
| 39223 | chrY | 14476010 | . | C | T   | 858.22  | PASS          | AC=4;AF=0.059;AN=68;BaseQRankSum= |
| 39224 | chrY | 14476021 | . | C | G   | 1097.11 | PASS          | AC=4;AF=0.059;AN=68;BaseQRankSum= |
| 39225 | chrY | 14476025 | . | G | C   | 1086.46 | PASS          | AC=4;AF=0.059;AN=68;BaseQRankSum= |
| 39226 | chrY | 14476026 | . | A | G   | 1086.23 | PASS          | AC=4;AF=0.059;AN=68;BaseQRankSum= |
| 39227 | chrY | 14476028 | . | A | C   | 1089.25 | PASS          | AC=4;AF=0.059;AN=68;BaseQRankSum= |
| 39228 | chrY | 14476039 | . | A | G   | 997.05  | PASS          | AC=4;AF=0.059;AN=68;BaseQRankSum= |
| 39229 | chrY | 14476047 | . | T | G   | 1012.59 | PASS          | AC=4;AF=0.057;AN=70;BaseQRankSum= |
| 39230 | chrY | 14476049 | . | G | T   | 1020.90 | PASS          | AC=5;AF=0.071;AN=70;BaseQRankSum= |
| 39231 | chrY | 14476051 | . | A | G   | 1027.53 | PASS          | AC=5;AF=0.071;AN=70;BaseQRankSum= |
| 39232 | chrY | 14476056 | . | C | T   | 1111.57 | PASS          | AC=5;AF=0.074;AN=68;BaseQRankSum= |
| 39233 | chrY | 14476057 | . | T | C   | 1158.36 | PASS          | AC=5;AF=0.074;AN=68;BaseQRankSum= |
| 39234 | chrY | 14476062 | . | C | T   | 1265.05 | PASS          | AC=7;AF=0.103;AN=68;BaseQRankSum= |
| 39235 | chrY | 14476063 | . | A | G   | 1221.90 | PASS          | AC=7;AF=0.103;AN=68;BaseQRankSum= |
| 39236 | chrY | 14476069 | . | C | T   | 1204.50 | PASS          | AC=6;AF=0.088;AN=68;BaseQRankSum= |
| 39237 | chrY | 14476070 | . | A | G   | 1201.56 | PASS          | AC=6;AF=0.088;AN=68;BaseQRankSum= |
| 39238 | chrY | 14476073 | . | C | T   | 1471.61 | PASS          | AC=6;AF=0.086;AN=70;BaseQRankSum= |
| 39239 | chrY | 14476079 | . | A | G   | 1265.21 | PASS          | AC=6;AF=0.086;AN=70;BaseQRankSum= |
| 39240 | chrY | 14476090 | . | G | A   | 926.68  | PASS          | AC=6;AF=0.086;AN=70;BaseQRankSum= |
| 39241 | chrY | 14476112 | . | A | G   | 835.58  | PASS          | AC=7;AF=0.103;AN=68;BaseQRankSum= |
| 39242 | chrY | 14476125 | . | T | G   | 173.85  | my_snp_filter | AC=6;AF=0.086;AN=70;BaseQ         |
| 39243 | chrY | 14479393 | . | A | G   | 291.13  | PASS          | AC=3;AF=0.100;AN=30;BaseQRankSum= |
| 39244 | chrY | 14479396 | . | A | G,* | 8282.82 | PASS          | AC=3,38;AF=0.044,0.559;AN=68;Base |
| 39245 | chrY | 14479401 | . | C | T   | 280.64  | PASS          | AC=3;AF=0.044;AN=68;BaseQRankSum= |
| 39246 | chrY | 14479407 | . | T | C   | 275.44  | PASS          | AC=3;AF=0.044;AN=68;BaseQRankSum= |
| 39247 | chrY | 14479415 | . | C | T   | 287.32  | PASS          | AC=3;AF=0.043;AN=70;BaseQRankSum= |
| 39248 | chrY | 14479420 | . | A | G   | 281.43  | PASS          | AC=3;AF=0.043;AN=70;BaseQRankSum= |
| 39249 | chrY | 14479421 | . | G | T   | 284.51  | PASS          | AC=3;AF=0.043;AN=70;BaseQRankSum= |
| 39250 | chrY | 14479427 | . | A | T   | 275.38  | PASS          | AC=3;AF=0.044;AN=68;BaseQRankSum= |
| 39251 | chrY | 14479433 | . | G | A   | 272.21  | PASS          | AC=3;AF=0.043;AN=70;BaseQRankSum= |
| 39252 | chrY | 14479440 | . | T | C   | 264.87  | PASS          | AC=3;AF=0.044;AN=68;BaseQRankSum= |
| 39253 | chrY | 14479458 | . | A | G   | 226.43  | PASS          | AC=3;AF=0.043;AN=70;BaseQRankSum= |
| 39254 | chrY | 14479462 | . | A | T   | 226.89  | PASS          | AC=3;AF=0.043;AN=70;BaseQRankSum= |
| 39255 | chrY | 14479465 | . | G | A   | 223.02  | PASS          | AC=3;AF=0.043;AN=70;BaseQRankSum= |
| 39256 | chrY | 14480060 | . | A | C   | 31.95   | PASS          | AC=1;AF=0.015;AN=68;BaseQRankSum= |
| 39257 | chrY | 14480064 | . | G | A   | 32.08   | PASS          | AC=1;AF=0.015;AN=68;BaseQRankSum= |
| 39258 | chrY | 14480567 | . | A | C   | 109.12  | PASS          | AC=3;AF=0.043;AN=70;BaseQRankSum= |
| 39259 | chrY | 14480572 | . | C | T   | 109.54  | PASS          | AC=2;AF=0.029;AN=70;BaseQRankSum= |
| 39260 | chrY | 14480573 | . | A | G   | 109.22  | PASS          | AC=2;AF=0.029;AN=70;BaseQRankSum= |
| 39261 | chrY | 14480612 | . | T | C   | 173     | PASS          | AC=5;AF=0.074;AN=68;BaseQRankSum= |
| 39262 | chrY | 14480624 | . | G | A   | 368.45  | PASS          | AC=7;AF=0.103;AN=68;BaseQRankSum= |
| 39263 | chrY | 14480626 | . | G | T   | 365.91  | PASS          | AC=7;AF=0.106;AN=66;BaseQRankSum= |
| 39264 | chrY | 14480627 | . | C | G   | 368.91  | PASS          | AC=7;AF=0.106;AN=66;BaseQRankSum= |
| 39265 | chrY | 14480630 | . | G | T   | 372.03  | PASS          | AC=7;AF=0.106;AN=66;BaseQRankSum= |
| 39266 | chrY | 14480639 | . | T | C   | 392.91  | PASS          | AC=7;AF=0.106;AN=66;BaseQRankSum= |
| 39267 | chrY | 14480640 | . | G | A   | 395.94  | PASS          | AC=7;AF=0.106;AN=66;BaseQRankSum= |
| 39268 | chrY | 14480652 | . | C | T   | 289.83  | PASS          | AC=7;AF=0.103;AN=68;BaseQRankSum= |
| 39269 | chrY | 14480679 | . | T | C   | 291.72  | PASS          | AC=5;AF=0.071;AN=70;BaseQRankSum= |
| 39270 | chrY | 14480685 | . | G | A   | 289.09  | PASS          | AC=5;AF=0.071;AN=70;BaseQRankSum= |
| 39271 | chrY | 14480694 | . | C | T   | 289.52  | PASS          | AC=5;AF=0.071;AN=70;BaseQRankSum= |
| 39272 | chrY | 14480695 | . | C | T   | 247.55  | PASS          | AC=5;AF=0.071;AN=70;BaseQRankSum= |
| 39273 | chrY | 14480705 | . | C | T   | 245.45  | PASS          | AC=5;AF=0.071;AN=70;BaseQRankSum= |
| 39274 | chrY | 14480716 | . | A | G   | 363.20  | PASS          | AC=3;AF=0.043;AN=70;BaseQRankSum= |
| 39275 | chrY | 14480724 | . | C | T   | 217.97  | PASS          | AC=2;AF=0.030;AN=66;BaseQRankSum= |
| 39276 | chrY | 14480725 | . | A | G   | 257.02  | PASS          | AC=2;AF=0.030;AN=66;BaseQRankSum= |
| 39277 | chrY | 14480729 | . | T | C   | 257.38  | PASS          | AC=2;AF=0.031;AN=64;BaseQRankSum= |
| 39278 | chrY | 14480730 | . | G | A   | 257.12  | PASS          | AC=2;AF=0.031;AN=64;BaseQRankSum= |
| 39279 | chrY | 14480736 | . | T | C   | 305.30  | PASS          | AC=2;AF=0.031;AN=64;BaseQRankSum= |
| 39280 | chrY | 14480737 | . | G | A   | 308.15  | PASS          | AC=2;AF=0.031;AN=64;BaseQRankSum= |
| 39281 | chrY | 14480742 | . | T | G   | 183.49  | PASS          | AC=1;AF=0.016;AN=64;BaseQRankSum= |
| 39282 | chrY | 14480746 | . | C | T   | 189.42  | PASS          | AC=1;AF=0.015;AN=66;BaseQRankSum= |
| 39283 | chrY | 14480773 | . | C | T   | 2931.42 | PASS          | AC=9;AF=0.141;AN=64;BaseQRankSum= |
| 39284 | chrY | 14480774 | . | A | G   | 2934.42 | PASS          | AC=9;AF=0.141;AN=64;BaseQRankSum= |
| 39285 | chrY | 14480785 | . | C | T   | 3423.31 | PASS          | AC=9;AF=0.141;AN=64;BaseQRankSum= |
| 39286 | chrY | 14480786 | . | C | T   | 3537.31 | PASS          | AC=9;AF=0.141;AN=64;BaseQRankSum= |
| 39287 | chrY | 14480787 | . | A | G   | 3660.53 | PASS          | AC=9;AF=0.141;AN=64;BaseQRankSum= |
| 39288 | chrY | 14480793 | . | C | T   | 3660.81 | PASS          | AC=9;AF=0.145;AN=62;BaseQRankSum= |
| 39289 | chrY | 14480798 | . | C | A   | 3815.47 | PASS          | AC=9;AF=0.145;AN=62;BaseQRankSum= |
| 39290 | chrY | 14480807 | . | C | T   | 4184.73 | PASS          | AC=9;AF=0.141;AN=64;BaseQRankSum= |
| 39291 | chrY | 14480829 | . | A | T   | 4216.07 | PASS          | AC=9;AF=0.145;AN=62;BaseQRankSum= |
| 39292 | chrY | 14480847 | . | T | C   | 4133.98 | PASS          | AC=9;AF=0.141;AN=64;BaseQRankSum= |

|       |      |          |   |   |   |          |               |                                    |
|-------|------|----------|---|---|---|----------|---------------|------------------------------------|
| 39293 | chrY | 14480848 | . | G | A | 4136.98  | PASS          | AC=9;AF=0.141;AN=64;BaseQRankSum=  |
| 39294 | chrY | 14480851 | . | T | C | 4138.27  | PASS          | AC=9;AF=0.141;AN=64;BaseQRankSum=  |
| 39295 | chrY | 14480852 | . | G | C | 4138.36  | PASS          | AC=9;AF=0.141;AN=64;BaseQRankSum=  |
| 39296 | chrY | 14480862 | . | T | C | 4086.11  | PASS          | AC=9;AF=0.129;AN=70;BaseQRankSum=  |
| 39297 | chrY | 14480863 | . | G | A | 4005.02  | PASS          | AC=9;AF=0.129;AN=70;BaseQRankSum=  |
| 39298 | chrY | 14480865 | . | G | A | 3956.95  | PASS          | AC=9;AF=0.129;AN=70;BaseQRankSum=  |
| 39299 | chrY | 14481458 | . | G | T | 145.05   | PASS          | AC=5;AF=0.078;AN=64;BaseQRankSum=  |
| 39300 | chrY | 14481463 | . | C | T | 493.52   | PASS          | AC=9;AF=0.141;AN=64;BaseQRankSum=  |
| 39301 | chrY | 14481464 | . | A | G | 493.52   | PASS          | AC=9;AF=0.141;AN=64;BaseQRankSum=  |
| 39302 | chrY | 14481469 | . | G | A | 702.44   | PASS          | AC=10;AF=0.152;AN=66;BaseQRankSum= |
| 39303 | chrY | 14481471 | . | A | G | 735.13   | PASS          | AC=11;AF=0.167;AN=66;BaseQRankSum= |
| 39304 | chrY | 14481474 | . | T | C | 841.44   | PASS          | AC=12;AF=0.182;AN=66;BaseQRankSum= |
| 39305 | chrY | 14481475 | . | G | A | 882.53   | PASS          | AC=12;AF=0.182;AN=66;BaseQRankSum= |
| 39306 | chrY | 14481478 | . | G | A | 880.76   | PASS          | AC=12;AF=0.182;AN=66;BaseQRankSum= |
| 39307 | chrY | 14481485 | . | G | A | 897.86   | PASS          | AC=10;AF=0.152;AN=66;BaseQRankSum= |
| 39308 | chrY | 14481492 | . | T | G | 1157.05  | PASS          | AC=10;AF=0.156;AN=64;BaseQRankSum= |
| 39309 | chrY | 14481493 | . | G | T | 1155.62  | PASS          | AC=10;AF=0.156;AN=64;BaseQRankSum= |
| 39310 | chrY | 14481499 | . | C | T | 1207.16  | PASS          | AC=10;AF=0.152;AN=66;BaseQRankSum= |
| 39311 | chrY | 14481500 | . | A | G | 1200.97  | PASS          | AC=10;AF=0.152;AN=66;BaseQRankSum= |
| 39312 | chrY | 14481511 | . | T | G | 1086.89  | PASS          | AC=8;AF=0.121;AN=66;BaseQRankSum=  |
| 39313 | chrY | 14481525 | . | C | A | 1311.62  | PASS          | AC=10;AF=0.152;AN=66;BaseQRankSum= |
| 39314 | chrY | 14481546 | . | T | C | 1312.24  | PASS          | AC=10;AF=0.152;AN=66;BaseQRankSum= |
| 39315 | chrY | 14481603 | . | C | T | 951.81   | PASS          | AC=11;AF=0.212;AN=52;BaseQRankSum= |
| 39316 | chrY | 14481605 | . | C | T | 947.13   | PASS          | AC=11;AF=0.196;AN=56;BaseQRankSum= |
| 39317 | chrY | 14481625 | . | G | A | 716.61   | PASS          | AC=10;AF=0.172;AN=58;BaseQRankSum= |
| 39318 | chrY | 14481643 | . | A | G | 427.55   | PASS          | AC=5;AF=0.081;AN=62;BaseQRankSum=  |
| 39319 | chrY | 14481645 | . | A | G | 239.55   | PASS          | AC=3;AF=0.044;AN=68;BaseQRankSum=  |
| 39320 | chrY | 14483622 | . | T | C | 1364.10  | PASS          | AC=6;AF=0.086;AN=70;DP=687;FS=0.0  |
| 39321 | chrY | 14484895 | . | A | C | 5398.83  | PASS          | AC=14;AF=0.200;AN=70;DP=792;FS=0.0 |
| 39322 | chrY | 14487982 | . | G | C | 13316.71 | PASS          | AC=44;AF=0.647;AN=68;DP=6          |
| 39323 | chrY | 14489203 | . | C | T | 12702.57 | PASS          | AC=44;AF=0.647;AN=68;DP=5          |
| 39324 | chrY | 14490208 | . | A | C | 446.76   | my_snp_filter | AC=7;AF=0.103;AN=68;BaseQ          |
| 39325 | chrY | 14490237 | . | C | T | 108.71   | PASS          | AC=1;AF=0.014;AN=70;BaseQRankSum=  |
| 39326 | chrY | 14490286 | . | A | G | 35.68    | my_snp_filter | AC=2;AF=0.029;AN=70;BaseQ          |
| 39327 | chrY | 14490302 | . | T | C | 50.14    | my_snp_filter | AC=2;AF=0.029;AN=70;BaseQ          |
| 39328 | chrY | 14490393 | . | A | G | 1653.67  | PASS          | AC=19;AF=0.271;AN=70;BaseQRankSum= |
| 39329 | chrY | 14490984 | . | G | A | 69.76    | PASS          | AC=1;AF=0.029;AN=34;BaseQRankSum=  |
| 39330 | chrY | 14490989 | . | C | T | 69.44    | PASS          | AC=1;AF=0.033;AN=30;BaseQRankSum=  |
| 39331 | chrY | 14491301 | . | C | A | 964.35   | PASS          | AC=9;AF=0.188;AN=48;BaseQRankSum=  |
| 39332 | chrY | 14491649 | . | T | C | 288.11   | PASS          | AC=4;AF=0.059;AN=68;DP=403;FS=0.0  |
| 39333 | chrY | 14495244 | . | T | C | 1636.36  | PASS          | AC=6;AF=0.130;AN=46;DP=162;FS=0.0  |
| 39334 | chrY | 14495251 | . | G | A | 423.08   | PASS          | AC=10;AF=0.357;AN=28;DP=174;FS=0.0 |
| 39335 | chrY | 14509327 | . | C | T | 1299.48  | PASS          | AC=6;AF=0.111;AN=54;DP=191;FS=0.0  |
| 39336 | chrY | 14510515 | . | G | A | 542.82   | PASS          | AC=6;AF=0.125;AN=48;DP=135;FS=0.0  |
| 39337 | chrY | 14512004 | . | A | G | 132.54   | my_snp_filter | AC=6;AF=0.086;AN=70;BaseQ          |
| 39338 | chrY | 14513436 | . | G | C | 196.60   | PASS          | AC=2;AF=0.031;AN=64;DP=264;FS=0.0  |
| 39339 | chrY | 14518023 | . | C | G | 1563.45  | PASS          | AC=28;AF=0.500;AN=56;DP=240;FS=0.0 |
| 39340 | chrY | 14520309 | . | G | A | 991.55   | PASS          | AC=6;AF=0.091;AN=66;DP=503;FS=0.0  |
| 39341 | chrY | 14521295 | . | A | T | 685.25   | PASS          | AC=6;AF=0.086;AN=70;DP=350;FS=0.0  |
| 39342 | chrY | 14522432 | . | G | C | 159.98   | PASS          | AC=2;AF=0.029;AN=68;DP=390;FS=0.0  |
| 39343 | chrY | 14523476 | . | A | G | 41.31    | PASS          | AC=2;AF=0.029;AN=68;BaseQRankSum=  |
| 39344 | chrY | 14530516 | . | T | C | 44.57    | PASS          | AC=2;AF=0.042;AN=48;DP=192;FS=0.0  |
| 39345 | chrY | 14532743 | . | T | C | 78.27    | my_snp_filter | AC=4;AF=0.083;AN=48;BaseQ          |
| 39346 | chrY | 14533362 | . | C | T | 704.12   | PASS          | AC=6;AF=0.167;AN=36;DP=151;FS=0.0  |
| 39347 | chrY | 14541054 | . | T | C | 38.22    | my_snp_filter | AC=4;AF=0.061;AN=66;BaseQ          |
| 39348 | chrY | 14547781 | . | C | A | 1394.33  | PASS          | AC=6;AF=0.086;AN=70;DP=370;FS=0.0  |
| 39349 | chrY | 14551892 | . | G | A | 866.68   | PASS          | AC=6;AF=0.086;AN=70;DP=459;FS=0.0  |
| 39350 | chrY | 14557622 | . | A | C | 31.80    | PASS          | AC=1;AF=0.014;AN=70;BaseQRankSum=  |
| 39351 | chrY | 14557626 | . | G | A | 32.31    | PASS          | AC=1;AF=0.014;AN=70;BaseQRankSum=  |
| 39352 | chrY | 14558029 | . | G | A | 37.60    | my_snp_filter | AC=1;AF=0.014;AN=70;BaseQ          |
| 39353 | chrY | 14558032 | . | T | G | 34.70    | my_snp_filter | AC=1;AF=0.014;AN=70;BaseQ          |
| 39354 | chrY | 14558033 | . | T | G | 34.62    | my_snp_filter | AC=1;AF=0.014;AN=70;BaseQ          |
| 39355 | chrY | 14558045 | . | C | A | 31.36    | my_snp_filter | AC=1;AF=0.015;AN=68;BaseQ          |
| 39356 | chrY | 14558487 | . | T | C | 935.45   | PASS          | AC=14;AF=0.438;AN=32;DP=201;FS=0.0 |
| 39357 | chrY | 14560286 | . | G | C | 63.62    | PASS          | AC=4;AF=0.091;AN=44;BaseQRankSum=  |
| 39358 | chrY | 14560297 | . | G | T | 149.37   | PASS          | AC=2;AF=0.045;AN=44;BaseQRankSum=  |
| 39359 | chrY | 14560299 | . | G | A | 149.07   | PASS          | AC=2;AF=0.048;AN=42;BaseQRankSum=  |
| 39360 | chrY | 14563004 | . | G | A | 17448.05 | PASS          | AC=46;AF=0.657;AN=70;DP=8          |
| 39361 | chrY | 14565245 | . | G | A | 535.67   | PASS          | AC=5;AF=0.278;AN=18;BaseQRankSum=  |
| 39362 | chrY | 14565265 | . | G | A | 44.22    | PASS          | AC=2;AF=0.111;AN=18;BaseQRankSum=  |
| 39363 | chrY | 14565281 | . | A | C | 34.40    | PASS          | AC=1;AF=0.056;AN=18;BaseQRankSum=  |
| 39364 | chrY | 14565283 | . | G | A | 31.39    | PASS          | AC=1;AF=0.056;AN=18;BaseQRankSum=  |
| 39365 | chrY | 14565310 | . | A | C | 515.77   | PASS          | AC=5;AF=0.278;AN=18;BaseQRankSum=  |
| 39366 | chrY | 14565470 | . | C | T | 545.41   | PASS          | AC=7;AF=0.318;AN=22;BaseQRankSum=  |
| 39367 | chrY | 14567291 | . | G | C | 31.46    | PASS          | AC=1;AF=0.016;AN=64;BaseQRankSum=  |
| 39368 | chrY | 14567311 | . | T | G | 31.92    | PASS          | AC=1;AF=0.015;AN=66;BaseQRankSum=  |

|       |      |          |   |   |   |          |               |                                    |
|-------|------|----------|---|---|---|----------|---------------|------------------------------------|
| 39369 | chrY | 14567318 | . | G | A | 32.04    | PASS          | AC=1;AF=0.015;AN=66;BaseQRankSum=  |
| 39370 | chrY | 14567319 | . | A | T | 31.69    | PASS          | AC=1;AF=0.015;AN=66;BaseQRankSum=  |
| 39371 | chrY | 14571542 | . | T | G | 6016.63  | PASS          | AC=38;AF=0.559;AN=68;DP=397;FS=0.  |
| 39372 | chrY | 14575570 | . | A | G | 315.75   | PASS          | AC=2;AF=0.100;AN=20;DP=157;FS=0.0  |
| 39373 | chrY | 14576138 | . | A | G | 39.98    | PASS          | AC=1;AF=0.017;AN=58;BaseQRankSum=  |
| 39374 | chrY | 14576185 | . | G | A | 780.02   | PASS          | AC=6;AF=0.088;AN=68;DP=536;FS=0.0  |
| 39375 | chrY | 14577044 | . | T | C | 8452.98  | PASS          | AC=46;AF=0.719;AN=64;DP=480;FS=0.  |
| 39376 | chrY | 14577177 | . | A | G | 16688.93 | PASS          | AC=70;AF=1.00;AN=70;DP=56          |
| 39377 | chrY | 14581011 | . | C | G | 1489.86  | PASS          | AC=6;AF=0.086;AN=70;DP=529;FS=0.0  |
| 39378 | chrY | 14581342 | . | C | A | 771.41   | PASS          | AC=6;AF=0.086;AN=70;DP=414;FS=0.0  |
| 39379 | chrY | 14582105 | . | C | A | 1120.83  | PASS          | AC=6;AF=0.086;AN=70;DP=457;FS=0.0  |
| 39380 | chrY | 14584564 | . | G | A | 306.67   | PASS          | AC=2;AF=0.029;AN=68;DP=377;FS=0.0  |
| 39381 | chrY | 14585324 | . | C | T | 10082.01 | PASS          | AC=70;AF=1.00;AN=70;BaseQ          |
| 39382 | chrY | 14586671 | . | G | C | 285.18   | PASS          | AC=2;AF=0.030;AN=66;BaseQRankSum=  |
| 39383 | chrY | 14587658 | . | T | C | 1912.24  | PASS          | AC=32;AF=0.640;AN=50;DP=243;FS=0.  |
| 39384 | chrY | 14593958 | . | C | T | 1262.99  | PASS          | AC=6;AF=0.086;AN=70;DP=509;FS=0.0  |
| 39385 | chrY | 14595328 | . | T | C | 8346.32  | PASS          | AC=36;AF=0.529;AN=68;DP=408;FS=0.  |
| 39386 | chrY | 14597055 | . | A | G | 694.26   | PASS          | AC=6;AF=0.088;AN=68;DP=532;FS=0.0  |
| 39387 | chrY | 14603298 | . | C | T | 11453.90 | PASS          | AC=48;AF=0.727;AN=66;DP=4          |
| 39388 | chrY | 14604456 | . | C | A | 1172.38  | PASS          | AC=6;AF=0.086;AN=70;DP=493;FS=0.0  |
| 39389 | chrY | 14604832 | . | C | A | 861.54   | PASS          | AC=6;AF=0.086;AN=70;DP=262;FS=0.0  |
| 39390 | chrY | 14605477 | . | C | A | 1227.50  | PASS          | AC=6;AF=0.086;AN=70;BaseQRankSum=  |
| 39391 | chrY | 14606044 | . | G | A | 1428.94  | PASS          | AC=6;AF=0.088;AN=68;BaseQRankSum=  |
| 39392 | chrY | 14608189 | . | A | G | 58       | PASS          | AC=1;AF=0.015;AN=68;BaseQRankSum=  |
| 39393 | chrY | 14608192 | . | C | T | 151.01   | PASS          | AC=1;AF=0.015;AN=66;BaseQRankSum=  |
| 39394 | chrY | 14608201 | . | A | G | 154.08   | PASS          | AC=1;AF=0.015;AN=66;BaseQRankSum=  |
| 39395 | chrY | 14608608 | . | T | C | 75.94    | PASS          | AC=1;AF=0.014;AN=70;BaseQRankSum=  |
| 39396 | chrY | 14608609 | . | G | A | 75.92    | PASS          | AC=1;AF=0.014;AN=70;BaseQRankSum=  |
| 39397 | chrY | 14608617 | . | G | A | 72.85    | PASS          | AC=1;AF=0.014;AN=70;BaseQRankSum=  |
| 39398 | chrY | 14608753 | . | C | T | 1228.72  | PASS          | AC=6;AF=0.088;AN=68;DP=639;FS=0.0  |
| 39399 | chrY | 14609511 | . | C | A | 46.78    | PASS          | AC=2;AF=0.030;AN=66;DP=227;FS=0.0  |
| 39400 | chrY | 14609515 | . | C | G | 5329.23  | PASS          | AC=62;AF=1.00;AN=62;DP=188;FS=0.0  |
| 39401 | chrY | 14609947 | . | G | A | 547.79   | PASS          | AC=6;AF=0.088;AN=68;DP=448;FS=0.0  |
| 39402 | chrY | 14610167 | . | T | A | 456.11   | PASS          | AC=2;AF=0.029;AN=70;DP=638;FS=0.0  |
| 39403 | chrY | 14610658 | . | C | T | 2216.76  | PASS          | AC=28;AF=0.933;AN=30;BaseQRankSum= |
| 39404 | chrY | 14611330 | . | T | A | 7673.11  | PASS          | AC=66;AF=1.00;AN=66;DP=279;FS=0.0  |
| 39405 | chrY | 14611417 | . | C | G | 1047.89  | PASS          | AC=6;AF=0.097;AN=62;DP=264;FS=0.0  |
| 39406 | chrY | 14612163 | . | A | G | 405.48   | PASS          | AC=3;AF=0.043;AN=70;BaseQRankSum=  |
| 39407 | chrY | 14612171 | . | T | A | 414.81   | PASS          | AC=3;AF=0.043;AN=70;BaseQRankSum=  |
| 39408 | chrY | 14612173 | . | A | G | 414.82   | PASS          | AC=3;AF=0.043;AN=70;BaseQRankSum=  |
| 39409 | chrY | 14612278 | . | C | T | 49.16    | PASS          | AC=2;AF=0.032;AN=62;DP=202;FS=0.0  |
| 39410 | chrY | 14615491 | . | T | C | 62.59    | my_snp_filter | AC=3;AF=0.045;AN=66;BaseQ          |
| 39411 | chrY | 14615626 | . | T | C | 67.08    | my_snp_filter | AC=4;AF=0.057;AN=70;BaseQ          |
| 39412 | chrY | 14616315 | . | C | T | 11117.70 | PASS          | AC=46;AF=0.657;AN=70;DP=5          |
| 39413 | chrY | 14617648 | . | C | T | 941.40   | PASS          | AC=6;AF=0.167;AN=36;DP=159;FS=0.0  |
| 39414 | chrY | 14619528 | . | G | T | 7011.57  | PASS          | AC=44;AF=0.786;AN=56;BaseQRankSum= |
| 39415 | chrY | 14619819 | . | C | G | 875.36   | PASS          | AC=11;AF=0.157;AN=70;BaseQRankSum= |
| 39416 | chrY | 14624254 | . | C | T | 578.63   | PASS          | AC=16;AF=0.889;AN=18;DP=40;FS=0.0  |
| 39417 | chrY | 14627760 | . | A | T | 719.88   | PASS          | AC=6;AF=0.094;AN=64;DP=199;FS=0.0  |
| 39418 | chrY | 14630334 | . | T | C | 13195.03 | PASS          | AC=68;AF=1.00;AN=68;DP=30          |
| 39419 | chrY | 14630342 | . | T | C | 12882.08 | PASS          | AC=68;AF=1.00;AN=68;DP=28          |
| 39420 | chrY | 14630357 | . | T | C | 11187.19 | PASS          | AC=66;AF=1.00;AN=66;DP=25          |
| 39421 | chrY | 14631227 | . | C | T | 3504.86  | PASS          | AC=18;AF=1.00;AN=18;DP=141;FS=0.0  |
| 39422 | chrY | 14634680 | . | C | T | 1553.63  | PASS          | AC=6;AF=0.273;AN=22;DP=179;FS=0.0  |
| 39423 | chrY | 14635223 | . | C | T | 1395.86  | PASS          | AC=6;AF=0.086;AN=70;DP=756;FS=0.0  |
| 39424 | chrY | 14636530 | . | A | T | 16274    | PASS          | AC=58;AF=0.829;AN=70;DP=617;FS=0.  |
| 39425 | chrY | 14639427 | . | C | A | 17144.89 | PASS          | AC=66;AF=1.00;AN=66;DP=58          |
| 39426 | chrY | 14641542 | . | T | G | 10357.41 | PASS          | AC=67;AF=0.985;AN=68;Base          |
| 39427 | chrY | 14644698 | . | C | T | 27202.88 | PASS          | AC=70;AF=1.00;AN=70;DP=86          |
| 39428 | chrY | 14644742 | . | C | T | 25727.89 | PASS          | AC=70;AF=1.00;AN=70;DP=83          |
| 39429 | chrY | 14645498 | . | A | G | 152.15   | PASS          | AC=2;AF=0.030;AN=66;DP=249;FS=0.0  |
| 39430 | chrY | 14646186 | . | C | T | 161.17   | PASS          | AC=2;AF=0.032;AN=62;BaseQRankSum=  |
| 39431 | chrY | 14646187 | . | A | G | 161.84   | PASS          | AC=2;AF=0.034;AN=58;BaseQRankSum=  |
| 39432 | chrY | 14646203 | . | G | T | 93.49    | PASS          | AC=2;AF=0.045;AN=44;BaseQRankSum=  |
| 39433 | chrY | 14646209 | . | A | T | 71.06    | my_snp_filter | AC=2;AF=0.048;AN=42;BaseQ          |
| 39434 | chrY | 14646338 | . | G | A | 4059.06  | PASS          | AC=22;AF=1.00;AN=22;DP=185;FS=0.0  |
| 39435 | chrY | 14647154 | . | G | A | 1829.37  | PASS          | AC=6;AF=0.086;AN=70;DP=525;FS=0.0  |
| 39436 | chrY | 14649108 | . | C | T | 70.72    | PASS          | AC=2;AF=0.031;AN=64;BaseQRankSum=  |
| 39437 | chrY | 14649109 | . | C | T | 69.38    | PASS          | AC=2;AF=0.031;AN=64;BaseQRankSum=  |
| 39438 | chrY | 14649112 | . | T | G | 70.05    | PASS          | AC=2;AF=0.031;AN=64;BaseQRankSum=  |
| 39439 | chrY | 14649126 | . | G | T | 59.04    | PASS          | AC=1;AF=0.016;AN=64;BaseQRankSum=  |
| 39440 | chrY | 14654127 | . | T | C | 1154.40  | PASS          | AC=6;AF=0.097;AN=62;DP=326;FS=0.0  |
| 39441 | chrY | 14655245 | . | G | A | 1384.16  | PASS          | AC=6;AF=0.088;AN=68;DP=538;FS=0.0  |
| 39442 | chrY | 14656737 | . | C | T | 993      | PASS          | AC=4;AF=0.061;AN=66;DP=440;FS=0.0  |
| 39443 | chrY | 14658617 | . | C | A | 779.47   | PASS          | AC=6;AF=0.088;AN=68;DP=520;FS=0.0  |
| 39444 | chrY | 14664512 | . | C | T | 563.64   | PASS          | AC=2;AF=0.029;AN=70;DP=466;FS=0.0  |

|       |      |          |   |   |     |          |      |                                    |
|-------|------|----------|---|---|-----|----------|------|------------------------------------|
| 39445 | chrY | 14664692 | . | A | G   | 1445.15  | PASS | AC=6;AF=0.088;AN=68;DP=315;FS=0.0  |
| 39446 | chrY | 14672472 | . | C | T   | 771.07   | PASS | AC=6;AF=0.088;AN=68;DP=373;FS=0.0  |
| 39447 | chrY | 14673320 | . | G | A   | 1146.97  | PASS | AC=6;AF=0.088;AN=68;DP=447;FS=0.0  |
| 39448 | chrY | 14674410 | . | A | G   | 207.10   | PASS | AC=2;AF=0.033;AN=60;DP=207;FS=0.0  |
| 39449 | chrY | 14675085 | . | G | A   | 624.26   | PASS | AC=2;AF=0.029;AN=70;DP=707;FS=0.0  |
| 39450 | chrY | 14675492 | . | C | T   | 16791.93 | PASS | AC=52;AF=0.743;AN=70;DP=7          |
| 39451 | chrY | 14676647 | . | T | C   | 629.03   | PASS | AC=6;AF=0.088;AN=68;DP=368;FS=0.0  |
| 39452 | chrY | 14677851 | . | C | A   | 1256.98  | PASS | AC=6;AF=0.086;AN=70;DP=497;FS=0.0  |
| 39453 | chrY | 14681686 | . | G | A   | 43.04    | PASS | AC=4;AF=0.182;AN=22;DP=174;FS=0.0  |
| 39454 | chrY | 14684272 | . | G | C   | 1385.75  | PASS | AC=6;AF=0.300;AN=20;DP=169;FS=0.0  |
| 39455 | chrY | 14687942 | . | A | C   | 461.32   | PASS | AC=12;AF=0.400;AN=30;DP=152;FS=0.0 |
| 39456 | chrY | 14688824 | . | T | C   | 399.66   | PASS | AC=4;AF=0.061;AN=66;DP=296;FS=0.0  |
| 39457 | chrY | 14692220 | . | T | C   | 43.10    | PASS | AC=1;AF=0.015;AN=66;BaseQRankSum=  |
| 39458 | chrY | 14692227 | . | C | T   | 8064.06  | PASS | AC=64;AF=1.00;AN=64;DP=277;FS=0.0  |
| 39459 | chrY | 14693087 | . | A | G   | 727.28   | PASS | AC=6;AF=0.086;AN=70;DP=486;FS=0.0  |
| 39460 | chrY | 14696972 | . | C | T   | 273.08   | PASS | AC=6;AF=0.091;AN=66;DP=193;FS=0.0  |
| 39461 | chrY | 14697012 | . | A | T   | 169.77   | PASS | AC=2;AF=0.030;AN=66;DP=275;FS=0.0  |
| 39462 | chrY | 14698928 | . | T | C   | 14768.95 | PASS | AC=70;AF=1.00;AN=70;DP=48          |
| 39463 | chrY | 14700337 | . | A | G   | 168.44   | PASS | AC=2;AF=0.029;AN=70;DP=377;FS=0.0  |
| 39464 | chrY | 14701020 | . | T | C   | 2740.14  | PASS | AC=26;AF=1.00;AN=26;BaseQRankSum=  |
| 39465 | chrY | 14709276 | . | A | T   | 13732    | PASS | AC=64;AF=1.00;AN=64;DP=308;FS=0.0  |
| 39466 | chrY | 14709277 | . | C | G   | 13732    | PASS | AC=64;AF=1.00;AN=64;DP=302;FS=0.0  |
| 39467 | chrY | 14709298 | . | T | G   | 4182.26  | PASS | AC=12;AF=0.171;AN=70;DP=262;FS=0.0 |
| 39468 | chrY | 14709951 | . | A | G   | 1103.02  | PASS | AC=6;AF=0.088;AN=68;DP=429;FS=0.0  |
| 39469 | chrY | 14710538 | . | C | T   | 2693.25  | PASS | AC=12;AF=0.176;AN=68;DP=329;FS=0.0 |
| 39470 | chrY | 14716696 | . | A | G   | 9995.30  | PASS | AC=58;AF=0.829;AN=70;DP=447;FS=0.0 |
| 39471 | chrY | 14721562 | . | T | A   | 153.22   | PASS | AC=2;AF=0.111;AN=18;BaseQRankSum=  |
| 39472 | chrY | 14721563 | . | C | G   | 150.13   | PASS | AC=2;AF=0.111;AN=18;BaseQRankSum=  |
| 39473 | chrY | 14727776 | . | A | G   | 1250.01  | PASS | AC=6;AF=0.086;AN=70;DP=315;FS=0.0  |
| 39474 | chrY | 14732984 | . | C | T   | 78.97    | PASS | AC=2;AF=0.029;AN=70;DP=351;FS=0.0  |
| 39475 | chrY | 14738110 | . | T | C   | 451.48   | PASS | AC=2;AF=0.091;AN=22;DP=134;FS=0.0  |
| 39476 | chrY | 14742373 | . | C | T   | 8559.01  | PASS | AC=52;AF=0.743;AN=70;DP=416;FS=0.0 |
| 39477 | chrY | 14747511 | . | G | A   | 141.38   | PASS | AC=4;AF=0.200;AN=20;DP=59;FS=0.00  |
| 39478 | chrY | 14750668 | . | C | A   | 11471.93 | PASS | AC=68;AF=1.00;AN=68;DP=39          |
| 39479 | chrY | 14753563 | . | C | T   | 349.73   | PASS | AC=6;AF=0.086;AN=70;DP=285;FS=0.0  |
| 39480 | chrY | 14753989 | . | T | C   | 8770.99  | PASS | AC=64;AF=1.00;AN=64;DP=312;FS=0.0  |
| 39481 | chrY | 14755880 | . | C | T   | 9698.40  | PASS | AC=50;AF=0.735;AN=68;DP=471;FS=0.0 |
| 39482 | chrY | 14757407 | . | A | G   | 2598.75  | PASS | AC=24;AF=0.364;AN=66;DP=348;FS=0.0 |
| 39483 | chrY | 14765698 | . | G | T   | 31.10    | PASS | AC=2;AF=0.063;AN=32;BaseQRankSum=  |
| 39484 | chrY | 14768947 | . | T | A   | 772.45   | PASS | AC=6;AF=0.086;AN=70;DP=273;FS=0.0  |
| 39485 | chrY | 14770599 | . | C | T   | 1142.26  | PASS | AC=6;AF=0.086;AN=70;DP=292;FS=0.0  |
| 39486 | chrY | 14773984 | . | G | C   | 668.40   | PASS | AC=6;AF=0.086;AN=70;DP=377;FS=0.0  |
| 39487 | chrY | 14774854 | . | T | C   | 7952.64  | PASS | AC=42;AF=0.636;AN=66;DP=420;FS=0.0 |
| 39488 | chrY | 14776357 | . | C | A   | 5492.88  | PASS | AC=46;AF=0.657;AN=70;DP=351;FS=0.0 |
| 39489 | chrY | 14777842 | . | C | T   | 13092.94 | PASS | AC=70;AF=1.00;AN=70;DP=42          |
| 39490 | chrY | 14782259 | . | A | G   | 34.27    | PASS | AC=1;AF=0.014;AN=70;BaseQRankSum=  |
| 39491 | chrY | 14785154 | . | C | G   | 1038.35  | PASS | AC=6;AF=0.125;AN=48;DP=170;FS=0.0  |
| 39492 | chrY | 14786636 | . | T | A   | 969.81   | PASS | AC=6;AF=0.120;AN=50;DP=157;FS=0.0  |
| 39493 | chrY | 14792418 | . | T | C   | 1219.95  | PASS | AC=6;AF=0.088;AN=68;DP=444;FS=0.0  |
| 39494 | chrY | 14793427 | . | C | T   | 1600.72  | PASS | AC=6;AF=0.086;AN=70;DP=352;FS=0.0  |
| 39495 | chrY | 14794867 | . | A | G   | 278.69   | PASS | AC=2;AF=0.029;AN=68;DP=224;FS=0.0  |
| 39496 | chrY | 14796358 | . | A | T   | 967.08   | PASS | AC=6;AF=0.086;AN=70;DP=269;FS=0.0  |
| 39497 | chrY | 14804668 | . | A | G   | 682.04   | PASS | AC=6;AF=0.086;AN=70;DP=453;FS=0.0  |
| 39498 | chrY | 14805238 | . | G | A   | 358.47   | PASS | AC=2;AF=0.029;AN=70;DP=432;FS=0.0  |
| 39499 | chrY | 14811099 | . | G | A   | 200.23   | PASS | AC=4;AF=0.061;AN=66;DP=237;FS=0.0  |
| 39500 | chrY | 14814713 | . | A | G   | 678.28   | PASS | AC=6;AF=0.091;AN=66;DP=274;FS=0.0  |
| 39501 | chrY | 14814786 | . | A | G   | 106.77   | PASS | AC=2;AF=0.029;AN=70;DP=376;FS=0.0  |
| 39502 | chrY | 14818118 | . | C | T   | 82.69    | PASS | AC=2;AF=0.029;AN=68;DP=326;FS=0.0  |
| 39503 | chrY | 14825719 | . | T | G   | 2359.82  | PASS | AC=37;AF=0.685;AN=54;BaseQRankSum= |
| 39504 | chrY | 14825720 | . | T | G   | 371.12   | PASS | AC=6;AF=0.100;AN=60;BaseQRankSum=  |
| 39505 | chrY | 14832620 | . | G | T   | 7749.27  | PASS | AC=58;AF=0.829;AN=70;DP=381;FS=0.0 |
| 39506 | chrY | 14835086 | . | G | A   | 644.26   | PASS | AC=6;AF=0.086;AN=70;DP=183;FS=0.0  |
| 39507 | chrY | 14840884 | . | G | A   | 1138.65  | PASS | AC=6;AF=0.094;AN=64;DP=225;FS=0.0  |
| 39508 | chrY | 14841692 | . | A | C   | 12467.57 | PASS | AC=46;AF=0.657;AN=70;DP=6          |
| 39509 | chrY | 14842223 | . | C | T   | 1075.94  | PASS | AC=6;AF=0.086;AN=70;DP=465;FS=0.0  |
| 39510 | chrY | 14843790 | . | C | G   | 623.73   | PASS | AC=6;AF=0.088;AN=68;DP=352;FS=0.0  |
| 39511 | chrY | 14845988 | . | T | C   | 1176.08  | PASS | AC=6;AF=0.086;AN=70;DP=608;FS=0.0  |
| 39512 | chrY | 14848753 | . | A | G   | 921.18   | PASS | AC=6;AF=0.086;AN=70;DP=478;FS=0.0  |
| 39513 | chrY | 14849556 | . | T | C   | 158.89   | PASS | AC=2;AF=0.029;AN=70;DP=455;FS=0.0  |
| 39514 | chrY | 14851526 | . | C | G   | 1139.89  | PASS | AC=6;AF=0.086;AN=70;DP=400;FS=0.0  |
| 39515 | chrY | 14856013 | . | G | A   | 1394.80  | PASS | AC=6;AF=0.086;AN=70;DP=438;FS=0.0  |
| 39516 | chrY | 14857294 | . | G | A   | 6389.29  | PASS | AC=44;AF=0.647;AN=68;DP=398;FS=0.0 |
| 39517 | chrY | 14862808 | . | C | A   | 40.10    | PASS | AC=1;AF=0.014;AN=70;BaseQRankSum=  |
| 39518 | chrY | 14868170 | . | T | C   | 1708.99  | PASS | AC=6;AF=0.086;AN=70;DP=630;FS=0.0  |
| 39519 | chrY | 14871976 | . | T | C   | 11128.94 | PASS | AC=70;AF=1.00;AN=70;DP=37          |
| 39520 | chrY | 14879538 | . | G | C,* | 313.97   | PASS | AC=2,3;AF=0.033,0.050;AN=60;BaseQ  |



|       |      |          |   |   |   |          |               |                                   |
|-------|------|----------|---|---|---|----------|---------------|-----------------------------------|
| 39521 | chrY | 14893637 | . | C | T | 597.97   | PASS          | AC=6;AF=0.086;AN=70;DP=417;FS=0.0 |
| 39522 | chrY | 14903225 | . | G | A | 3655.74  | PASS          | AC=40;AF=0.625;AN=64;DP=289;FS=0. |
| 39523 | chrY | 14910888 | . | A | C | 566.96   | PASS          | AC=6;AF=0.120;AN=50;DP=130;FS=0.0 |
| 39524 | chrY | 14916429 | . | T | C | 209.44   | PASS          | AC=2;AF=0.029;AN=68;DP=447;FS=0.0 |
| 39525 | chrY | 14917272 | . | T | A | 46.36    | PASS          | AC=2;AF=0.029;AN=70;DP=353;FS=0.0 |
| 39526 | chrY | 14917284 | . | C | A | 5956.96  | PASS          | AC=50;AF=0.735;AN=68;BaseQRankSum |
| 39527 | chrY | 14918099 | . | T | A | 987.67   | PASS          | AC=16;AF=0.471;AN=34;DP=180;FS=0. |
| 39528 | chrY | 14920666 | . | A | G | 3003.62  | PASS          | AC=36;AF=0.545;AN=66;DP=269;FS=0. |
| 39529 | chrY | 14924643 | . | G | T | 2530.33  | PASS          | AC=38;AF=0.679;AN=56;DP=234;FS=0. |
| 39530 | chrY | 14928437 | . | A | G | 1359.12  | PASS          | AC=6;AF=0.088;AN=68;DP=371;FS=0.0 |
| 39531 | chrY | 14931124 | . | G | A | 41.34    | PASS          | AC=2;AF=0.037;AN=54;DP=201;FS=0.0 |
| 39532 | chrY | 14935686 | . | T | C | 1328.10  | PASS          | AC=6;AF=0.094;AN=64;DP=239;FS=0.0 |
| 39533 | chrY | 14936460 | . | C | T | 42.79    | PASS          | AC=1;AF=0.021;AN=48;BaseQRankSum= |
| 39534 | chrY | 14936470 | . | A | T | 603.68   | PASS          | AC=24;AF=0.571;AN=42;DP=190;FS=0. |
| 39535 | chrY | 14937018 | . | T | C | 277.74   | PASS          | AC=2;AF=0.043;AN=46;DP=157;FS=0.0 |
| 39536 | chrY | 14937918 | . | A | G | 274.57   | PASS          | AC=2;AF=0.091;AN=22;DP=117;FS=0.0 |
| 39537 | chrY | 14940229 | . | C | T | 1470.97  | PASS          | AC=6;AF=0.091;AN=66;DP=318;FS=0.0 |
| 39538 | chrY | 14945358 | . | T | C | 396.56   | PASS          | AC=2;AF=0.029;AN=68;DP=399;FS=0.0 |
| 39539 | chrY | 14948532 | . | A | T | 1085.91  | PASS          | AC=6;AF=0.086;AN=70;DP=328;FS=0.0 |
| 39540 | chrY | 14954047 | . | C | T | 8347.87  | PASS          | AC=51;AF=0.729;AN=70;BaseQRankSum |
| 39541 | chrY | 14954280 | . | T | C | 807.89   | PASS          | AC=6;AF=0.086;AN=70;DP=489;FS=0.0 |
| 39542 | chrY | 14958218 | . | C | T | 5444.21  | PASS          | AC=48;AF=1.00;AN=48;BaseQRankSum= |
| 39543 | chrY | 14959554 | . | G | C | 173.18   | PASS          | AC=3;AF=0.167;AN=18;BaseQRankSum= |
| 39544 | chrY | 14959560 | . | A | C | 54.98    | PASS          | AC=2;AF=0.125;AN=16;BaseQRankSum= |
| 39545 | chrY | 14960909 | . | A | G | 1230.74  | PASS          | AC=6;AF=0.300;AN=20;DP=169;FS=0.0 |
| 39546 | chrY | 14970408 | . | C | T | 1158.66  | PASS          | AC=6;AF=0.136;AN=44;DP=170;FS=0.0 |
| 39547 | chrY | 14970934 | . | G | A | 1247.60  | PASS          | AC=6;AF=0.086;AN=70;DP=433;FS=0.0 |
| 39548 | chrY | 14989721 | . | G | C | 10630.94 | PASS          | AC=64;AF=1.00;AN=64;DP=36         |
| 39549 | chrY | 14990947 | . | A | C | 995.46   | PASS          | AC=6;AF=0.273;AN=22;BaseQRankSum= |
| 39550 | chrY | 14991805 | . | A | G | 739.92   | PASS          | AC=6;AF=0.086;AN=70;DP=565;FS=0.0 |
| 39551 | chrY | 14991978 | . | G | A | 1408.24  | PASS          | AC=6;AF=0.086;AN=70;DP=405;FS=0.0 |
| 39552 | chrY | 14993358 | . | G | A | 2555.99  | PASS          | AC=20;AF=1.00;AN=20;DP=111;FS=0.0 |
| 39553 | chrY | 14996020 | . | A | G | 656.19   | PASS          | AC=6;AF=0.086;AN=70;DP=603;FS=0.0 |
| 39554 | chrY | 14996960 | . | G | A | 8280.95  | PASS          | AC=56;AF=0.824;AN=68;DP=374;FS=0. |
| 39555 | chrY | 14997159 | . | C | T | 400.15   | PASS          | AC=2;AF=0.029;AN=68;DP=342;FS=0.0 |
| 39556 | chrY | 15000453 | . | C | T | 2352.81  | PASS          | AC=12;AF=0.333;AN=36;DP=158;FS=0. |
| 39557 | chrY | 15007555 | . | A | G | 448.28   | PASS          | AC=6;AF=0.086;AN=70;DP=509;FS=0.0 |
| 39558 | chrY | 15021516 | . | A | G | 1053.26  | PASS          | AC=6;AF=0.086;AN=70;DP=455;FS=0.0 |
| 39559 | chrY | 15025050 | . | T | A | 32.39    | PASS          | AC=1;AF=0.016;AN=62;BaseQRankSum= |
| 39560 | chrY | 15027529 | . | T | G | 10338.98 | PASS          | AC=68;AF=1.00;AN=68;BaseQ         |
| 39561 | chrY | 15028232 | . | G | T | 122.55   | PASS          | AC=2;AF=0.029;AN=70;DP=359;FS=0.0 |
| 39562 | chrY | 15043282 | . | A | T | 413.34   | PASS          | AC=6;AF=0.088;AN=68;DP=279;FS=0.0 |
| 39563 | chrY | 15047295 | . | T | A | 64.32    | PASS          | AC=2;AF=1.00;AN=2;BaseQRankSum=-7 |
| 39564 | chrY | 15055505 | . | C | G | 528.03   | PASS          | AC=6;AF=0.086;AN=70;DP=434;FS=0.0 |
| 39565 | chrY | 15056634 | . | A | G | 952.95   | PASS          | AC=6;AF=0.097;AN=62;DP=244;FS=0.0 |
| 39566 | chrY | 15058878 | . | G | A | 6968.21  | PASS          | AC=56;AF=1.00;AN=56;DP=248;FS=0.0 |
| 39567 | chrY | 15060025 | . | T | C | 3629.45  | PASS          | AC=42;AF=0.700;AN=60;DP=238;FS=0. |
| 39568 | chrY | 15062639 | . | C | T | 14273.84 | PASS          | AC=42;AF=0.636;AN=66;DP=6         |
| 39569 | chrY | 15073162 | . | G | A | 225.30   | PASS          | AC=4;AF=0.083;AN=48;BaseQRankSum= |
| 39570 | chrY | 15073172 | . | T | C | 229.57   | PASS          | AC=4;AF=0.083;AN=48;BaseQRankSum= |
| 39571 | chrY | 15073173 | . | G | A | 228.54   | PASS          | AC=4;AF=0.083;AN=48;BaseQRankSum= |
| 39572 | chrY | 15073181 | . | C | G | 220.06   | PASS          | AC=4;AF=0.083;AN=48;BaseQRankSum= |
| 39573 | chrY | 15073185 | . | G | A | 222.31   | PASS          | AC=4;AF=0.080;AN=50;BaseQRankSum= |
| 39574 | chrY | 15073222 | . | G | A | 70.60    | my_snp_filter | AC=3;AF=0.058;AN=52;BaseQ         |
| 39575 | chrY | 15074196 | . | A | G | 5977.33  | PASS          | AC=44;AF=0.647;AN=68;DP=376;FS=0. |
| 39576 | chrY | 15086183 | . | C | G | 7385.07  | PASS          | AC=62;AF=1.00;AN=62;BaseQRankSum= |
| 39577 | chrY | 15089515 | . | T | A | 30.91    | PASS          | AC=1;AF=0.015;AN=68;BaseQRankSum= |
| 39578 | chrY | 15089516 | . | G | A | 30.91    | PASS          | AC=1;AF=0.015;AN=68;BaseQRankSum= |
| 39579 | chrY | 15089603 | . | A | G | 554.72   | PASS          | AC=6;AF=0.088;AN=68;DP=326;FS=0.0 |
| 39580 | chrY | 15089795 | . | C | T | 355.72   | PASS          | AC=4;AF=0.059;AN=68;DP=227;FS=0.0 |
| 39581 | chrY | 15091089 | . | C | T | 1318.74  | PASS          | AC=6;AF=0.086;AN=70;DP=320;FS=0.0 |
| 39582 | chrY | 15092687 | . | G | A | 783.26   | PASS          | AC=6;AF=0.333;AN=18;BaseQRankSum= |
| 39583 | chrY | 15094399 | . | T | C | 19944.95 | PASS          | AC=68;AF=1.00;AN=68;DP=45         |
| 39584 | chrY | 15094400 | . | G | T | 19944.95 | PASS          | AC=68;AF=1.00;AN=68;DP=45         |
| 39585 | chrY | 15095345 | . | G | A | 12385.27 | PASS          | AC=58;AF=0.829;AN=70;DP=5         |
| 39586 | chrY | 15096036 | . | G | A | 2532.18  | PASS          | AC=36;AF=0.667;AN=54;DP=261;FS=0. |
| 39587 | chrY | 15097043 | . | C | T | 10287.78 | PASS          | AC=48;AF=0.727;AN=66;DP=4         |
| 39588 | chrY | 15107084 | . | C | A | 1075.37  | PASS          | AC=6;AF=0.091;AN=66;DP=226;FS=0.0 |
| 39589 | chrY | 15109081 | . | T | C | 300.39   | PASS          | AC=3;AF=0.048;AN=62;BaseQRankSum= |
| 39590 | chrY | 15109082 | . | C | T | 300.36   | PASS          | AC=3;AF=0.048;AN=62;BaseQRankSum= |
| 39591 | chrY | 15109086 | . | G | A | 254.99   | PASS          | AC=3;AF=0.047;AN=64;BaseQRankSum= |
| 39592 | chrY | 15109092 | . | G | A | 136.06   | PASS          | AC=3;AF=0.047;AN=64;BaseQRankSum= |
| 39593 | chrY | 15109099 | . | C | T | 122.43   | PASS          | AC=2;AF=0.032;AN=62;BaseQRankSum= |
| 39594 | chrY | 15109101 | . | A | C | 122.26   | PASS          | AC=2;AF=0.031;AN=64;BaseQRankSum= |
| 39595 | chrY | 15109103 | . | G | T | 79.92    | PASS          | AC=2;AF=0.031;AN=64;BaseQRankSum= |
| 39596 | chrY | 15109857 | . | T | A | 40       | PASS          | AC=1;AF=0.015;AN=68;BaseQRankSum= |

|       |      |          |   |   |   |          |               |                                    |
|-------|------|----------|---|---|---|----------|---------------|------------------------------------|
| 39597 | chrY | 15109860 | . | T | A | 40.14    | PASS          | AC=1;AF=0.015;AN=68;BaseQRankSum=  |
| 39598 | chrY | 15109935 | . | C | T | 144.78   | PASS          | AC=2;AF=0.029;AN=68;BaseQRankSum=  |
| 39599 | chrY | 15109936 | . | A | G | 144.78   | PASS          | AC=2;AF=0.030;AN=66;BaseQRankSum=  |
| 39600 | chrY | 15109954 | . | A | C | 138.80   | PASS          | AC=3;AF=0.047;AN=64;BaseQRankSum=  |
| 39601 | chrY | 15109958 | . | T | C | 145.29   | PASS          | AC=3;AF=0.047;AN=64;BaseQRankSum=  |
| 39602 | chrY | 15109979 | . | G | C | 65.66    | PASS          | AC=3;AF=0.044;AN=68;BaseQRankSum=  |
| 39603 | chrY | 15109982 | . | T | C | 64.51    | PASS          | AC=3;AF=0.045;AN=66;BaseQRankSum=  |
| 39604 | chrY | 15109989 | . | T | C | 51.17    | my_snp_filter | AC=3;AF=0.045;AN=66;BaseQ          |
| 39605 | chrY | 15109996 | . | T | C | 46.86    | my_snp_filter | AC=3;AF=0.047;AN=64;BaseQ          |
| 39606 | chrY | 15109998 | . | G | A | 46.98    | my_snp_filter | AC=3;AF=0.045;AN=66;BaseQ          |
| 39607 | chrY | 15110001 | . | A | G | 44.89    | my_snp_filter | AC=3;AF=0.045;AN=66;BaseQ          |
| 39608 | chrY | 15110006 | . | T | G | 45.08    | my_snp_filter | AC=3;AF=0.045;AN=66;BaseQ          |
| 39609 | chrY | 15110011 | . | T | A | 42.02    | my_snp_filter | AC=3;AF=0.045;AN=66;BaseQ          |
| 39610 | chrY | 15110014 | . | A | G | 37.84    | my_snp_filter | AC=2;AF=0.030;AN=66;BaseQ          |
| 39611 | chrY | 15110046 | . | C | T | 48.62    | PASS          | AC=1;AF=0.015;AN=66;BaseQRankSum=  |
| 39612 | chrY | 15110112 | . | A | G | 113.04   | PASS          | AC=3;AF=0.048;AN=62;BaseQRankSum=  |
| 39613 | chrY | 15110113 | . | G | A | 113.47   | PASS          | AC=3;AF=0.048;AN=62;BaseQRankSum=  |
| 39614 | chrY | 15110121 | . | C | T | 119.41   | PASS          | AC=3;AF=0.048;AN=62;BaseQRankSum=  |
| 39615 | chrY | 15110122 | . | A | G | 116.65   | PASS          | AC=3;AF=0.048;AN=62;BaseQRankSum=  |
| 39616 | chrY | 15110129 | . | A | C | 118.83   | PASS          | AC=3;AF=0.047;AN=64;BaseQRankSum=  |
| 39617 | chrY | 15110132 | . | A | G | 111.46   | PASS          | AC=2;AF=0.031;AN=64;BaseQRankSum=  |
| 39618 | chrY | 15110195 | . | T | A | 39.73    | PASS          | AC=1;AF=0.015;AN=68;BaseQRankSum=  |
| 39619 | chrY | 15110204 | . | T | C | 39.28    | PASS          | AC=1;AF=0.015;AN=68;BaseQRankSum=  |
| 39620 | chrY | 15110364 | . | G | T | 9017.99  | PASS          | AC=68;AF=1.00;AN=68;DP=303;FS=0.0  |
| 39621 | chrY | 15110724 | . | T | A | 145.14   | PASS          | AC=4;AF=0.057;AN=70;BaseQRankSum=  |
| 39622 | chrY | 15110734 | . | C | T | 144.21   | PASS          | AC=4;AF=0.057;AN=70;BaseQRankSum=  |
| 39623 | chrY | 15110747 | . | C | A | 139.51   | PASS          | AC=3;AF=0.043;AN=70;BaseQRankSum=  |
| 39624 | chrY | 15110752 | . | A | G | 139.29   | PASS          | AC=3;AF=0.043;AN=70;BaseQRankSum=  |
| 39625 | chrY | 15110763 | . | G | A | 139.76   | PASS          | AC=3;AF=0.043;AN=70;BaseQRankSum=  |
| 39626 | chrY | 15110769 | . | C | T | 136.34   | PASS          | AC=3;AF=0.043;AN=70;BaseQRankSum=  |
| 39627 | chrY | 15110773 | . | C | T | 140.78   | PASS          | AC=3;AF=0.044;AN=68;BaseQRankSum=  |
| 39628 | chrY | 15110924 | . | C | A | 83.01    | my_snp_filter | AC=9;AF=0.129;AN=70;BaseQ          |
| 39629 | chrY | 15110936 | . | A | G | 95.38    | my_snp_filter | AC=10;AF=0.143;AN=70;BaseQ         |
| 39630 | chrY | 15110973 | . | T | C | 649.27   | PASS          | AC=11;AF=0.157;AN=70;BaseQRankSum= |
| 39631 | chrY | 15110974 | . | G | A | 645.84   | PASS          | AC=11;AF=0.157;AN=70;BaseQRankSum= |
| 39632 | chrY | 15110980 | . | C | T | 340.95   | PASS          | AC=7;AF=0.100;AN=70;BaseQRankSum=  |
| 39633 | chrY | 15110985 | . | G | T | 346.14   | PASS          | AC=7;AF=0.100;AN=70;BaseQRankSum=  |
| 39634 | chrY | 15110986 | . | A | G | 346.64   | PASS          | AC=7;AF=0.100;AN=70;BaseQRankSum=  |
| 39635 | chrY | 15110990 | . | T | A | 384.63   | PASS          | AC=7;AF=0.100;AN=70;BaseQRankSum=  |
| 39636 | chrY | 15111001 | . | T | G | 217.62   | PASS          | AC=4;AF=0.057;AN=70;BaseQRankSum=  |
| 39637 | chrY | 15111002 | . | G | A | 218.07   | PASS          | AC=4;AF=0.057;AN=70;BaseQRankSum=  |
| 39638 | chrY | 15111004 | . | C | T | 213.91   | PASS          | AC=3;AF=0.043;AN=70;BaseQRankSum=  |
| 39639 | chrY | 15111006 | . | G | A | 216.75   | PASS          | AC=3;AF=0.043;AN=70;BaseQRankSum=  |
| 39640 | chrY | 15111038 | . | A | G | 70.14    | PASS          | AC=3;AF=0.043;AN=70;BaseQRankSum=  |
| 39641 | chrY | 15111040 | . | T | C | 111.92   | PASS          | AC=2;AF=0.029;AN=70;BaseQRankSum=  |
| 39642 | chrY | 15111046 | . | T | C | 217.96   | PASS          | AC=4;AF=0.057;AN=70;BaseQRankSum=  |
| 39643 | chrY | 15111060 | . | A | G | 203.11   | PASS          | AC=3;AF=0.043;AN=70;BaseQRankSum=  |
| 39644 | chrY | 15111063 | . | A | G | 245.34   | PASS          | AC=3;AF=0.043;AN=70;BaseQRankSum=  |
| 39645 | chrY | 15111073 | . | A | G | 280.66   | PASS          | AC=3;AF=0.043;AN=70;BaseQRankSum=  |
| 39646 | chrY | 15111079 | . | G | A | 279.68   | PASS          | AC=3;AF=0.043;AN=70;BaseQRankSum=  |
| 39647 | chrY | 15111111 | . | G | A | 361.09   | PASS          | AC=4;AF=0.057;AN=70;BaseQRankSum=  |
| 39648 | chrY | 15111129 | . | G | T | 363.07   | PASS          | AC=3;AF=0.043;AN=70;BaseQRankSum=  |
| 39649 | chrY | 15111130 | . | G | A | 362.78   | PASS          | AC=3;AF=0.043;AN=70;BaseQRankSum=  |
| 39650 | chrY | 15111132 | . | T | C | 354.28   | PASS          | AC=3;AF=0.043;AN=70;BaseQRankSum=  |
| 39651 | chrY | 15111140 | . | C | T | 362.73   | PASS          | AC=3;AF=0.043;AN=70;BaseQRankSum=  |
| 39652 | chrY | 15111142 | . | C | G | 362.12   | PASS          | AC=3;AF=0.043;AN=70;BaseQRankSum=  |
| 39653 | chrY | 15111148 | . | G | A | 362.69   | PASS          | AC=3;AF=0.043;AN=70;BaseQRankSum=  |
| 39654 | chrY | 15111159 | . | G | A | 366.07   | PASS          | AC=3;AF=0.044;AN=68;BaseQRankSum=  |
| 39655 | chrY | 15115789 | . | C | T | 332.61   | PASS          | AC=8;AF=0.286;AN=28;DP=158;FS=0.0  |
| 39656 | chrY | 15122573 | . | A | G | 798.61   | PASS          | AC=6;AF=0.086;AN=70;DP=349;FS=0.0  |
| 39657 | chrY | 15124218 | . | C | A | 42.22    | PASS          | AC=1;AF=0.019;AN=54;BaseQRankSum=  |
| 39658 | chrY | 15124224 | . | C | A | 42.16    | PASS          | AC=1;AF=0.017;AN=58;BaseQRankSum=  |
| 39659 | chrY | 15129242 | . | G | A | 1245.50  | PASS          | AC=6;AF=0.088;AN=68;DP=318;FS=0.0  |
| 39660 | chrY | 15129415 | . | A | G | 14142.96 | PASS          | AC=70;AF=1.00;AN=70;BaseQ          |
| 39661 | chrY | 15136357 | . | C | T | 18326.06 | PASS          | AC=46;AF=0.657;AN=70;DP=7          |
| 39662 | chrY | 15139183 | . | A | T | 1656.66  | PASS          | AC=6;AF=0.086;AN=70;DP=487;FS=0.0  |
| 39663 | chrY | 15143001 | . | A | G | 1055.38  | PASS          | AC=6;AF=0.273;AN=22;DP=183;FS=0.0  |
| 39664 | chrY | 15145751 | . | C | A | 1433.09  | PASS          | AC=6;AF=0.250;AN=24;BaseQRankSum=  |
| 39665 | chrY | 15150938 | . | G | A | 1386.01  | PASS          | AC=6;AF=0.136;AN=44;DP=190;FS=0.0  |
| 39666 | chrY | 15152104 | . | T | G | 1158.66  | PASS          | AC=6;AF=0.088;AN=68;DP=287;FS=0.0  |
| 39667 | chrY | 15152317 | . | A | G | 9212.97  | PASS          | AC=66;AF=1.00;AN=66;DP=383;FS=0.0  |
| 39668 | chrY | 15153497 | . | T | C | 7788.30  | PASS          | AC=40;AF=0.571;AN=70;DP=466;FS=0.0 |
| 39669 | chrY | 15156398 | . | G | A | 432.34   | PASS          | AC=2;AF=0.033;AN=60;DP=228;FS=0.0  |
| 39670 | chrY | 15158950 | . | C | G | 397.17   | PASS          | AC=2;AF=0.036;AN=56;DP=185;FS=0.0  |
| 39671 | chrY | 15160065 | . | G | A | 287.21   | PASS          | AC=2;AF=0.031;AN=64;DP=178;FS=0.0  |
| 39672 | chrY | 15166573 | . | G | A | 329.40   | PASS          | AC=2;AF=0.029;AN=70;DP=439;FS=0.0  |

|       |      |          |   |   |   |          |               |                                    |
|-------|------|----------|---|---|---|----------|---------------|------------------------------------|
| 39673 | chrY | 15167624 | . | G | A | 1169.47  | PASS          | AC=6;AF=0.086;AN=70;DP=607;FS=0.0  |
| 39674 | chrY | 15169439 | . | T | A | 31866.88 | PASS          | AC=70;AF=1.00;AN=70;BaseQ          |
| 39675 | chrY | 15177941 | . | A | G | 43.97    | PASS          | AC=1;AF=0.014;AN=70;BaseQRankSum=  |
| 39676 | chrY | 15177949 | . | T | A | 44.56    | PASS          | AC=1;AF=0.015;AN=68;BaseQRankSum=  |
| 39677 | chrY | 15180091 | . | A | C | 3612.29  | PASS          | AC=42;AF=1.00;AN=42;DP=153;FS=0.0  |
| 39678 | chrY | 15203676 | . | G | A | 1420.75  | PASS          | AC=6;AF=0.086;AN=70;DP=543;FS=0.0  |
| 39679 | chrY | 15204708 | . | G | T | 17679.02 | PASS          | AC=68;AF=1.00;AN=68;DP=39          |
| 39680 | chrY | 15204710 | . | C | A | 17679.02 | PASS          | AC=68;AF=1.00;AN=68;DP=39          |
| 39681 | chrY | 15213879 | . | G | A | 51.63    | my_snp_filter | AC=2;AF=0.091;AN=22;DP=17          |
| 39682 | chrY | 15213883 | . | A | G | 51.63    | my_snp_filter | AC=2;AF=0.091;AN=22;DP=17          |
| 39683 | chrY | 15215449 | . | A | C | 1084.23  | PASS          | AC=18;AF=1.00;AN=18;BaseQRankSum=  |
| 39684 | chrY | 15223675 | . | C | T | 536.26   | PASS          | AC=2;AF=0.029;AN=68;DP=408;FS=0.0  |
| 39685 | chrY | 15226253 | . | C | T | 15836.85 | PASS          | AC=52;AF=0.743;AN=70;DP=6          |
| 39686 | chrY | 15226285 | . | C | T | 728.23   | PASS          | AC=2;AF=0.029;AN=70;DP=594;FS=0.0  |
| 39687 | chrY | 15226287 | . | C | G | 728.23   | PASS          | AC=2;AF=0.029;AN=70;DP=585;FS=0.0  |
| 39688 | chrY | 15226313 | . | C | T | 1516.71  | PASS          | AC=6;AF=0.088;AN=68;DP=394;FS=0.0  |
| 39689 | chrY | 15226328 | . | T | C | 5798.81  | PASS          | AC=44;AF=0.710;AN=62;DP=310;FS=0.0 |
| 39690 | chrY | 15226331 | . | A | G | 5520.29  | PASS          | AC=44;AF=0.710;AN=62;DP=291;FS=0.0 |
| 39691 | chrY | 15226335 | . | C | T | 4740.11  | PASS          | AC=42;AF=0.700;AN=60;DP=276;FS=0.0 |
| 39692 | chrY | 15226338 | . | G | A | 4251.46  | PASS          | AC=38;AF=0.679;AN=56;DP=260;FS=0.0 |
| 39693 | chrY | 15226343 | . | A | T | 3080.77  | PASS          | AC=34;AF=0.654;AN=52;DP=235;FS=0.0 |
| 39694 | chrY | 15226371 | . | T | A | 118.50   | PASS          | AC=2;AF=0.100;AN=20;DP=166;FS=0.0  |
| 39695 | chrY | 15226377 | . | G | A | 86.38    | PASS          | AC=2;AF=0.100;AN=20;DP=167;FS=0.0  |
| 39696 | chrY | 15226548 | . | A | G | 1090.80  | my_snp_filter | AC=6;AF=0.250;AN=24;DP=19          |
| 39697 | chrY | 15234440 | . | G | C | 1151     | PASS          | AC=6;AF=0.086;AN=70;DP=478;FS=0.0  |
| 39698 | chrY | 15234830 | . | T | A | 10130.63 | PASS          | AC=58;AF=0.829;AN=70;DP=4          |
| 39699 | chrY | 15237234 | . | G | A | 2084.22  | PASS          | AC=12;AF=0.171;AN=70;DP=313;FS=0.0 |
| 39700 | chrY | 15238129 | . | C | T | 34.14    | PASS          | AC=1;AF=0.015;AN=66;BaseQRankSum=  |
| 39701 | chrY | 15238269 | . | C | G | 670.82   | PASS          | AC=4;AF=0.057;AN=70;DP=389;FS=0.0  |
| 39702 | chrY | 15243427 | . | C | A | 36.26    | my_snp_filter | AC=1;AF=0.056;AN=18;BaseQ          |
| 39703 | chrY | 15243909 | . | G | A | 244.91   | PASS          | AC=3;AF=0.167;AN=18;BaseQRankSum=  |
| 39704 | chrY | 15243915 | . | T | C | 242.79   | PASS          | AC=3;AF=0.167;AN=18;BaseQRankSum=  |
| 39705 | chrY | 15243917 | . | T | C | 241.44   | PASS          | AC=3;AF=0.167;AN=18;BaseQRankSum=  |
| 39706 | chrY | 15243928 | . | G | A | 310.19   | PASS          | AC=4;AF=0.222;AN=18;BaseQRankSum=  |
| 39707 | chrY | 15243955 | . | G | T | 262.51   | PASS          | AC=4;AF=0.222;AN=18;BaseQRankSum=  |
| 39708 | chrY | 15243957 | . | C | G | 224      | PASS          | AC=4;AF=0.222;AN=18;BaseQRankSum=  |
| 39709 | chrY | 15243962 | . | G | A | 217.80   | PASS          | AC=4;AF=0.200;AN=20;BaseQRankSum=  |
| 39710 | chrY | 15244250 | . | T | C | 318.15   | PASS          | AC=2;AF=0.100;AN=20;BaseQRankSum=  |
| 39711 | chrY | 15244254 | . | T | A | 320.38   | PASS          | AC=2;AF=0.100;AN=20;BaseQRankSum=  |
| 39712 | chrY | 15244975 | . | T | A | 110.31   | PASS          | AC=1;AF=0.056;AN=18;BaseQRankSum=  |
| 39713 | chrY | 15244991 | . | C | A | 88.30    | PASS          | AC=1;AF=0.056;AN=18;BaseQRankSum=  |
| 39714 | chrY | 15245000 | . | C | T | 91.36    | PASS          | AC=1;AF=0.056;AN=18;BaseQRankSum=  |
| 39715 | chrY | 15245024 | . | C | T | 49.70    | PASS          | AC=1;AF=0.056;AN=18;BaseQRankSum=  |
| 39716 | chrY | 15245039 | . | G | A | 51.88    | PASS          | AC=1;AF=0.056;AN=18;BaseQRankSum=  |
| 39717 | chrY | 15246469 | . | T | G | 86.80    | my_snp_filter | AC=3;AF=0.150;AN=20;BaseQ          |
| 39718 | chrY | 15246537 | . | G | C | 74.69    | PASS          | AC=1;AF=0.050;AN=20;BaseQRankSum=  |
| 39719 | chrY | 15246542 | . | G | A | 77.18    | PASS          | AC=1;AF=0.050;AN=20;BaseQRankSum=  |
| 39720 | chrY | 15246563 | . | G | T | 1804.18  | PASS          | AC=6;AF=0.333;AN=18;DP=194;FS=0.0  |
| 39721 | chrY | 15246711 | . | A | T | 33.90    | my_snp_filter | AC=2;AF=0.111;AN=18;BaseQ          |
| 39722 | chrY | 15247785 | . | C | G | 131.25   | PASS          | AC=1;AF=0.056;AN=18;BaseQRankSum=  |
| 39723 | chrY | 15247788 | . | A | G | 131.30   | PASS          | AC=1;AF=0.056;AN=18;BaseQRankSum=  |
| 39724 | chrY | 15247886 | . | G | T | 1263.63  | PASS          | AC=6;AF=0.273;AN=22;DP=156;FS=0.0  |
| 39725 | chrY | 15250230 | . | G | A | 2073.95  | PASS          | AC=30;AF=0.500;AN=60;DP=211;FS=0.0 |
| 39726 | chrY | 15251706 | . | A | T | 2396.01  | PASS          | AC=40;AF=0.625;AN=64;DP=283;FS=0.0 |
| 39727 | chrY | 15253322 | . | T | C | 1060.30  | PASS          | AC=6;AF=0.086;AN=70;DP=256;FS=0.0  |
| 39728 | chrY | 15257003 | . | C | G | 4514.93  | PASS          | AC=46;AF=0.719;AN=64;DP=292;FS=0.0 |
| 39729 | chrY | 15268404 | . | C | T | 4637.91  | PASS          | AC=46;AF=0.657;AN=70;DP=319;FS=0.0 |
| 39730 | chrY | 15271994 | . | C | G | 593.22   | PASS          | AC=12;AF=0.182;AN=66;DP=290;FS=0.0 |
| 39731 | chrY | 15275200 | . | G | C | 14129.91 | PASS          | AC=68;AF=1.00;AN=68;DP=46          |
| 39732 | chrY | 15276772 | . | T | C | 372.62   | PASS          | AC=6;AF=0.120;AN=50;DP=128;FS=0.0  |
| 39733 | chrY | 15279589 | . | C | T | 1144.66  | PASS          | AC=6;AF=0.086;AN=70;DP=435;FS=0.0  |
| 39734 | chrY | 15281135 | . | T | G | 3140.13  | PASS          | AC=42;AF=0.778;AN=54;DP=232;FS=0.0 |
| 39735 | chrY | 15281995 | . | G | A | 1438.57  | PASS          | AC=6;AF=0.088;AN=68;DP=443;FS=0.0  |
| 39736 | chrY | 15284719 | . | T | C | 265.87   | PASS          | AC=2;AF=0.029;AN=70;DP=339;FS=0.0  |
| 39737 | chrY | 15285288 | . | G | A | 4305.21  | PASS          | AC=52;AF=0.743;AN=70;DP=317;FS=0.0 |
| 39738 | chrY | 15287141 | . | G | A | 1241.02  | PASS          | AC=6;AF=0.086;AN=70;DP=628;FS=0.0  |
| 39739 | chrY | 15289013 | . | C | T | 957.56   | PASS          | AC=6;AF=0.273;AN=22;DP=132;FS=0.0  |
| 39740 | chrY | 15292303 | . | A | T | 1357.18  | PASS          | AC=6;AF=0.333;AN=18;DP=172;FS=0.0  |
| 39741 | chrY | 15296345 | . | G | A | 1012.20  | PASS          | AC=6;AF=0.333;AN=18;BaseQRankSum=  |
| 39742 | chrY | 15297992 | . | C | A | 209.48   | PASS          | AC=4;AF=0.074;AN=54;DP=198;FS=0.0  |
| 39743 | chrY | 15309390 | . | C | T | 862.35   | PASS          | AC=6;AF=0.088;AN=68;DP=302;FS=0.0  |
| 39744 | chrY | 15315059 | . | T | A | 1433.74  | PASS          | AC=6;AF=0.086;AN=70;DP=457;FS=0.0  |
| 39745 | chrY | 15318221 | . | T | C | 208.73   | PASS          | AC=2;AF=0.030;AN=66;DP=259;FS=0.0  |
| 39746 | chrY | 15318251 | . | A | T | 1132.14  | PASS          | AC=6;AF=0.091;AN=66;DP=330;FS=0.0  |
| 39747 | chrY | 15323154 | . | G | A | 19164.80 | PASS          | AC=58;AF=0.829;AN=70;DP=7          |
| 39748 | chrY | 15323457 | . | T | A | 113.49   | PASS          | AC=2;AF=0.067;AN=30;DP=112;FS=0.0  |

|       |      |          |   |   |   |          |               |                                    |
|-------|------|----------|---|---|---|----------|---------------|------------------------------------|
| 39749 | chrY | 15324565 | . | T | A | 298.96   | PASS          | AC=6;AF=0.091;AN=66;BaseQRankSum=  |
| 39750 | chrY | 15327052 | . | G | T | 4285.10  | PASS          | AC=36;AF=0.545;AN=66;DP=341;FS=0.  |
| 39751 | chrY | 15331925 | . | A | G | 782.60   | PASS          | AC=6;AF=0.086;AN=70;DP=450;FS=0.0  |
| 39752 | chrY | 15338905 | . | G | A | 1251.56  | PASS          | AC=6;AF=0.115;AN=52;DP=183;FS=0.0  |
| 39753 | chrY | 15339328 | . | C | T | 1116.43  | PASS          | AC=6;AF=0.086;AN=70;DP=572;FS=0.0  |
| 39754 | chrY | 15343571 | . | T | C | 2187.30  | PASS          | AC=6;AF=0.086;AN=70;DP=436;FS=0.0  |
| 39755 | chrY | 15343575 | . | T | G | 2188.16  | PASS          | AC=6;AF=0.086;AN=70;DP=431;FS=0.0  |
| 39756 | chrY | 15344716 | . | A | C | 8735.26  | PASS          | AC=48;AF=0.727;AN=66;DP=472;FS=0.  |
| 39757 | chrY | 15350628 | . | A | G | 37.31    | PASS          | AC=1;AF=0.015;AN=68;BaseQRankSum=  |
| 39758 | chrY | 15352951 | . | G | A | 208.17   | PASS          | AC=2;AF=0.034;AN=58;DP=179;FS=0.   |
| 39759 | chrY | 15354555 | . | C | T | 36.81    | PASS          | AC=2;AF=0.030;AN=66;DP=228;FS=0.0  |
| 39760 | chrY | 15357228 | . | C | T | 1594.45  | PASS          | AC=6;AF=0.088;AN=68;DP=400;FS=0.0  |
| 39761 | chrY | 15359961 | . | A | G | 133.78   | PASS          | AC=2;AF=0.033;AN=60;DP=196;FS=0.0  |
| 39762 | chrY | 15362750 | . | T | C | 670.59   | PASS          | AC=6;AF=0.094;AN=64;DP=318;FS=0.0  |
| 39763 | chrY | 15363974 | . | G | C | 36.87    | my_snp_filter | AC=1;AF=0.033;AN=30;BaseQ          |
| 39764 | chrY | 15363975 | . | G | A | 36.17    | my_snp_filter | AC=1;AF=0.033;AN=30;BaseQ          |
| 39765 | chrY | 15367191 | . | G | A | 3480.59  | PASS          | AC=36;AF=0.563;AN=64;DP=319;FS=0.  |
| 39766 | chrY | 15370523 | . | T | G | 1400.42  | PASS          | AC=6;AF=0.086;AN=70;DP=554;FS=0.0  |
| 39767 | chrY | 15374340 | . | C | A | 709.38   | PASS          | AC=4;AF=0.057;AN=70;DP=669;FS=0.0  |
| 39768 | chrY | 15375926 | . | G | A | 1646.51  | PASS          | AC=6;AF=0.088;AN=68;DP=545;FS=0.0  |
| 39769 | chrY | 15377120 | . | G | A | 4014.86  | PASS          | AC=18;AF=1.00;AN=18;DP=155;FS=0.0  |
| 39770 | chrY | 15382221 | . | A | C | 1565.11  | PASS          | AC=6;AF=0.086;AN=70;DP=566;FS=0.0  |
| 39771 | chrY | 15385733 | . | T | C | 113.09   | PASS          | AC=6;AF=0.300;AN=20;DP=52;FS=0.00  |
| 39772 | chrY | 15393774 | . | T | A | 1395.27  | PASS          | AC=6;AF=0.088;AN=68;DP=318;FS=0.0  |
| 39773 | chrY | 15406063 | . | A | G | 337.32   | PASS          | AC=2;AF=0.030;AN=66;DP=311;FS=0.0  |
| 39774 | chrY | 15407795 | . | C | G | 328.52   | PASS          | AC=2;AF=0.029;AN=70;DP=463;FS=0.0  |
| 39775 | chrY | 15409274 | . | T | G | 710.80   | PASS          | AC=6;AF=0.086;AN=70;DP=239;FS=0.0  |
| 39776 | chrY | 15411564 | . | C | T | 977.47   | PASS          | AC=6;AF=0.086;AN=70;DP=410;FS=0.0  |
| 39777 | chrY | 15412847 | . | C | T | 889.59   | PASS          | AC=6;AF=0.150;AN=40;DP=121;FS=0.0  |
| 39778 | chrY | 15415115 | . | A | G | 721.42   | PASS          | AC=6;AF=0.086;AN=70;DP=386;FS=0.0  |
| 39779 | chrY | 15421164 | . | A | G | 2452.19  | PASS          | AC=32;AF=0.516;AN=62;DP=248;FS=0.  |
| 39780 | chrY | 15421242 | . | G | A | 2473.10  | PASS          | AC=12;AF=0.273;AN=44;DP=167;FS=0.  |
| 39781 | chrY | 15423590 | . | C | T | 4030.03  | PASS          | AC=50;AF=0.806;AN=62;DP=248;FS=0.  |
| 39782 | chrY | 15424808 | . | T | C | 1245.19  | PASS          | AC=6;AF=0.086;AN=70;DP=600;FS=0.0  |
| 39783 | chrY | 15428714 | . | C | T | 338.88   | PASS          | AC=4;AF=0.059;AN=68;DP=338;FS=0.0  |
| 39784 | chrY | 15428732 | . | A | C | 512.29   | PASS          | AC=6;AF=0.086;AN=70;DP=388;FS=0.0  |
| 39785 | chrY | 15431772 | . | T | A | 738.31   | PASS          | AC=20;AF=0.476;AN=42;DP=197;FS=0.  |
| 39786 | chrY | 15437152 | . | C | T | 1113.14  | PASS          | AC=6;AF=0.088;AN=68;DP=248;FS=0.0  |
| 39787 | chrY | 15437333 | . | A | C | 2003.93  | PASS          | AC=38;AF=0.679;AN=56;DP=213;FS=0.  |
| 39788 | chrY | 15437564 | . | C | T | 3869.87  | PASS          | AC=42;AF=0.700;AN=60;DP=277;FS=0.0 |
| 39789 | chrY | 15439006 | . | T | C | 48.88    | PASS          | AC=2;AF=0.038;AN=52;DP=149;FS=0.0  |
| 39790 | chrY | 15439411 | . | T | C | 128.39   | PASS          | AC=4;AF=0.065;AN=62;DP=192;FS=0.0  |
| 39791 | chrY | 15439570 | . | G | A | 1045.38  | PASS          | AC=6;AF=0.086;AN=70;DP=276;FS=0.0  |
| 39792 | chrY | 15440730 | . | C | A | 997.11   | PASS          | AC=6;AF=0.111;AN=54;DP=182;FS=0.0  |
| 39793 | chrY | 15442442 | . | G | C | 944.79   | PASS          | AC=6;AF=0.094;AN=64;DP=364;FS=0.0  |
| 39794 | chrY | 15443639 | . | T | C | 805.89   | PASS          | AC=6;AF=0.088;AN=68;DP=383;FS=0.0  |
| 39795 | chrY | 15460145 | . | T | A | 35.23    | PASS          | AC=1;AF=0.015;AN=66;BaseQRankSum=  |
| 39796 | chrY | 15460146 | . | A | T | 35.23    | PASS          | AC=1;AF=0.015;AN=66;BaseQRankSum=  |
| 39797 | chrY | 15463763 | . | C | G | 346.90   | PASS          | AC=2;AF=0.029;AN=68;DP=525;FS=0.0  |
| 39798 | chrY | 15467639 | . | A | G | 481.09   | PASS          | AC=2;AF=0.032;AN=62;DP=238;FS=0.0  |
| 39799 | chrY | 15467664 | . | A | T | 38.17    | PASS          | AC=1;AF=0.017;AN=60;BaseQRankSum=  |
| 39800 | chrY | 15467674 | . | T | A | 38.29    | PASS          | AC=1;AF=0.017;AN=60;BaseQRankSum=  |
| 39801 | chrY | 15468042 | . | T | C | 683.07   | PASS          | AC=6;AF=0.086;AN=70;DP=376;FS=0.0  |
| 39802 | chrY | 15469724 | . | G | A | 1115.19  | PASS          | AC=6;AF=0.088;AN=68;DP=279;FS=0.0  |
| 39803 | chrY | 15471925 | . | T | C | 1183.55  | PASS          | AC=12;AF=0.171;AN=70;BaseQRankSum  |
| 39804 | chrY | 15472087 | . | T | A | 69.52    | PASS          | AC=2;AF=0.059;AN=34;DP=158;FS=0.0  |
| 39805 | chrY | 15472863 | . | T | C | 4543.64  | PASS          | AC=50;AF=0.806;AN=62;DP=237;FS=0.  |
| 39806 | chrY | 15474955 | . | T | G | 87.68    | PASS          | AC=1;AF=0.033;AN=30;BaseQRankSum=  |
| 39807 | chrY | 15474963 | . | T | G | 93.72    | PASS          | AC=1;AF=0.033;AN=30;BaseQRankSum=  |
| 39808 | chrY | 15474964 | . | A | G | 93.19    | PASS          | AC=1;AF=0.038;AN=26;BaseQRankSum=  |
| 39809 | chrY | 15474968 | . | G | C | 57.28    | PASS          | AC=1;AF=0.038;AN=26;BaseQRankSum=  |
| 39810 | chrY | 15474975 | . | T | G | 60.18    | PASS          | AC=1;AF=0.038;AN=26;BaseQRankSum=  |
| 39811 | chrY | 15476276 | . | T | A | 1300.28  | PASS          | AC=6;AF=0.115;AN=52;BaseQRankSum=  |
| 39812 | chrY | 15476390 | . | G | A | 1338.88  | PASS          | AC=6;AF=0.130;AN=46;DP=172;FS=0.0  |
| 39813 | chrY | 15480547 | . | G | C | 12586.93 | PASS          | AC=70;AF=1.00;AN=70;DP=35          |
| 39814 | chrY | 15480934 | . | C | T | 1331.86  | PASS          | AC=6;AF=0.120;AN=50;DP=186;FS=0.0  |
| 39815 | chrY | 15485869 | . | C | T | 1071.48  | PASS          | AC=6;AF=0.086;AN=70;DP=657;FS=0.0  |
| 39816 | chrY | 15489960 | . | T | G | 235.65   | PASS          | AC=4;AF=0.061;AN=66;DP=245;FS=0.0  |
| 39817 | chrY | 15489983 | . | A | G | 46.74    | PASS          | AC=2;AF=0.030;AN=66;DP=266;FS=0.0  |
| 39818 | chrY | 15494078 | . | C | T | 895.60   | PASS          | AC=6;AF=0.088;AN=68;DP=300;FS=0.0  |
| 39819 | chrY | 15496762 | . | C | G | 847.93   | PASS          | AC=6;AF=0.111;AN=54;DP=180;FS=0.0  |
| 39820 | chrY | 15497285 | . | C | G | 10463.96 | PASS          | AC=70;AF=1.00;AN=70;DP=35          |
| 39821 | chrY | 15498774 | . | G | A | 131.70   | PASS          | AC=2;AF=0.050;AN=40;DP=120;FS=0.0  |
| 39822 | chrY | 15510064 | . | G | T | 6927.31  | PASS          | AC=64;AF=1.00;AN=64;DP=247;FS=0.0  |
| 39823 | chrY | 15510285 | . | T | C | 6656.33  | PASS          | AC=51;AF=0.729;AN=70;BaseQRankSum  |
| 39824 | chrY | 15513035 | . | G | A | 460.13   | PASS          | AC=2;AF=0.029;AN=70;DP=578;FS=0.0  |

|       |      |          |   |   |   |          |               |                                   |
|-------|------|----------|---|---|---|----------|---------------|-----------------------------------|
| 39825 | chrY | 15517954 | . | A | G | 573.60   | PASS          | AC=6;AF=0.091;AN=66;DP=298;FS=0.0 |
| 39826 | chrY | 15526751 | . | C | T | 3119.09  | PASS          | AC=46;AF=0.793;AN=58;DP=192;FS=0. |
| 39827 | chrY | 15528756 | . | C | A | 1674.89  | PASS          | AC=6;AF=0.086;AN=70;DP=401;FS=0.0 |
| 39828 | chrY | 15529876 | . | C | T | 6703.37  | PASS          | AC=48;AF=0.800;AN=60;DP=317;FS=0. |
| 39829 | chrY | 15529918 | . | T | G | 2790.59  | PASS          | AC=36;AF=0.750;AN=48;DP=215;FS=0. |
| 39830 | chrY | 15537906 | . | C | A | 331.43   | PASS          | AC=2;AF=0.029;AN=68;DP=370;FS=0.0 |
| 39831 | chrY | 15540359 | . | C | G | 1007.93  | PASS          | AC=6;AF=0.086;AN=70;DP=523;FS=0.0 |
| 39832 | chrY | 15543875 | . | C | T | 1285     | PASS          | AC=6;AF=0.094;AN=64;DP=230;FS=0.0 |
| 39833 | chrY | 15548923 | . | C | A | 1570.01  | PASS          | AC=6;AF=0.086;AN=70;DP=422;FS=0.0 |
| 39834 | chrY | 15548924 | . | C | A | 1570.01  | PASS          | AC=6;AF=0.086;AN=70;DP=421;FS=0.0 |
| 39835 | chrY | 15553123 | . | T | C | 3224.61  | PASS          | AC=44;AF=0.786;AN=56;DP=207;FS=0. |
| 39836 | chrY | 15558495 | . | T | C | 733.86   | PASS          | AC=7;AF=0.389;AN=18;BaseQRankSum= |
| 39837 | chrY | 15560659 | . | C | T | 199.81   | PASS          | AC=4;AF=0.067;AN=60;DP=213;FS=0.0 |
| 39838 | chrY | 15568288 | . | G | T | 324.68   | PASS          | AC=2;AF=0.029;AN=70;DP=415;FS=0.0 |
| 39839 | chrY | 15573247 | . | T | C | 232.30   | PASS          | AC=2;AF=0.029;AN=68;DP=313;FS=0.0 |
| 39840 | chrY | 15576411 | . | A | G | 41.82    | PASS          | AC=2;AF=0.033;AN=60;BaseQRankSum= |
| 39841 | chrY | 15576683 | . | A | G | 31.15    | PASS          | AC=1;AF=0.050;AN=20;BaseQRankSum= |
| 39842 | chrY | 15581983 | . | G | A | 6693.27  | PASS          | AC=56;AF=1.00;AN=56;DP=236;FS=0.0 |
| 39843 | chrY | 15582706 | . | T | G | 44.46    | PASS          | AC=1;AF=0.015;AN=66;BaseQRankSum= |
| 39844 | chrY | 15582709 | . | A | G | 43.96    | PASS          | AC=1;AF=0.014;AN=70;BaseQRankSum= |
| 39845 | chrY | 15590342 | . | T | G | 12627.93 | PASS          | AC=68;AF=1.00;AN=68;BaseQ         |
| 39846 | chrY | 15590674 | . | T | A | 1214.27  | PASS          | AC=6;AF=0.088;AN=68;DP=392;FS=0.0 |
| 39847 | chrY | 15591537 | . | G | C | 778.07   | PASS          | AC=6;AF=0.086;AN=70;DP=503;FS=0.0 |
| 39848 | chrY | 15592990 | . | A | G | 1136.58  | PASS          | AC=6;AF=0.086;AN=70;DP=521;FS=0.0 |
| 39849 | chrY | 15594523 | . | G | A | 11664.95 | PASS          | AC=70;AF=1.00;AN=70;DP=39         |
| 39850 | chrY | 15595096 | . | C | T | 16344.39 | PASS          | AC=50;AF=0.735;AN=68;DP=6         |
| 39851 | chrY | 15605449 | . | G | T | 4873.66  | PASS          | AC=34;AF=0.531;AN=64;DP=329;FS=0. |
| 39852 | chrY | 15614964 | . | C | G | 543.04   | PASS          | AC=6;AF=0.086;AN=70;DP=538;FS=0.0 |
| 39853 | chrY | 15617822 | . | G | A | 1757.92  | PASS          | AC=6;AF=0.125;AN=48;DP=196;FS=0.0 |
| 39854 | chrY | 15622389 | . | C | A | 1117.19  | PASS          | AC=6;AF=0.333;AN=18;DP=148;FS=0.0 |
| 39855 | chrY | 15628269 | . | A | G | 1325.90  | PASS          | AC=6;AF=0.273;AN=22;DP=160;FS=0.0 |
| 39856 | chrY | 15630182 | . | G | T | 154.33   | PASS          | AC=2;AF=0.030;AN=66;DP=274;FS=0.0 |
| 39857 | chrY | 15635100 | . | T | C | 654.39   | PASS          | AC=6;AF=0.086;AN=70;DP=483;FS=0.0 |
| 39858 | chrY | 15638056 | . | G | A | 473.02   | PASS          | AC=2;AF=0.111;AN=18;DP=157;FS=0.0 |
| 39859 | chrY | 15639038 | . | A | G | 1183.47  | PASS          | AC=6;AF=0.333;AN=18;BaseQRankSum= |
| 39860 | chrY | 15639890 | . | T | G | 57.26    | PASS          | AC=1;AF=0.056;AN=18;BaseQRankSum= |
| 39861 | chrY | 15639895 | . | A | G | 56.48    | PASS          | AC=1;AF=0.056;AN=18;BaseQRankSum= |
| 39862 | chrY | 15644675 | . | A | G | 296.77   | PASS          | AC=2;AF=0.100;AN=20;DP=152;FS=0.0 |
| 39863 | chrY | 15645670 | . | C | T | 1146.43  | PASS          | AC=6;AF=0.273;AN=22;DP=162;FS=0.0 |
| 39864 | chrY | 15648415 | . | T | C | 16513.96 | PASS          | AC=70;AF=1.00;AN=70;DP=55         |
| 39865 | chrY | 15651438 | . | T | A | 10386.60 | PASS          | AC=50;AF=0.806;AN=62;DP=4         |
| 39866 | chrY | 15658296 | . | C | G | 117.86   | PASS          | AC=4;AF=0.059;AN=68;DP=219;FS=0.0 |
| 39867 | chrY | 15658426 | . | T | G | 1222.18  | PASS          | AC=6;AF=0.086;AN=70;DP=478;FS=0.0 |
| 39868 | chrY | 15658737 | . | G | A | 84.44    | PASS          | AC=2;AF=0.030;AN=66;DP=202;FS=0.0 |
| 39869 | chrY | 15662633 | . | A | T | 10985.79 | PASS          | AC=58;AF=0.829;AN=70;DP=4         |
| 39870 | chrY | 15667208 | . | C | G | 13808.97 | PASS          | AC=68;AF=1.00;AN=68;DP=47         |
| 39871 | chrY | 15667924 | . | G | T | 310.93   | PASS          | AC=4;AF=0.059;AN=68;DP=375;FS=0.0 |
| 39872 | chrY | 15669776 | . | G | A | 858.41   | PASS          | AC=6;AF=0.111;AN=54;DP=181;FS=0.0 |
| 39873 | chrY | 15674221 | . | T | C | 304.30   | PASS          | AC=3;AF=0.150;AN=20;BaseQRankSum= |
| 39874 | chrY | 15674281 | . | G | C | 45.07    | my_snp_filter | AC=1;AF=0.056;AN=18;BaseQ         |
| 39875 | chrY | 15675282 | . | T | C | 2194.64  | PASS          | AC=17;AF=0.944;AN=18;BaseQRankSum |
| 39876 | chrY | 15675869 | . | C | T | 223.78   | my_snp_filter | AC=3;AF=0.167;AN=18;BaseQ         |
| 39877 | chrY | 15675915 | . | T | C | 62.32    | my_snp_filter | AC=1;AF=0.056;AN=18;BaseQ         |
| 39878 | chrY | 15675921 | . | T | A | 47.24    | my_snp_filter | AC=1;AF=0.056;AN=18;BaseQ         |
| 39879 | chrY | 15675942 | . | G | A | 225.79   | PASS          | AC=1;AF=0.056;AN=18;BaseQRankSum= |
| 39880 | chrY | 15676067 | . | C | G | 91.37    | my_snp_filter | AC=1;AF=0.056;AN=18;BaseQ         |
| 39881 | chrY | 15676177 | . | C | T | 61.84    | my_snp_filter | AC=2;AF=0.100;AN=20;BaseQ         |
| 39882 | chrY | 15681751 | . | G | T | 1067.31  | PASS          | AC=6;AF=0.086;AN=70;DP=415;FS=0.0 |
| 39883 | chrY | 15684681 | . | A | T | 4069.14  | PASS          | AC=24;AF=1.00;AN=24;BaseQRankSum= |
| 39884 | chrY | 15705693 | . | A | G | 30.59    | PASS          | AC=1;AF=0.014;AN=70;BaseQRankSum= |
| 39885 | chrY | 15705696 | . | A | G | 30.83    | PASS          | AC=1;AF=0.014;AN=70;BaseQRankSum= |
| 39886 | chrY | 15706446 | . | G | C | 1066.89  | PASS          | AC=6;AF=0.086;AN=70;BaseQRankSum= |
| 39887 | chrY | 15708460 | . | T | C | 1039.51  | PASS          | AC=6;AF=0.086;AN=70;DP=514;FS=0.0 |
| 39888 | chrY | 15712801 | . | T | A | 19417.33 | PASS          | AC=58;AF=0.829;AN=70;DP=7         |
| 39889 | chrY | 15723335 | . | C | T | 6467.44  | PASS          | AC=40;AF=0.571;AN=70;DP=411;FS=0. |
| 39890 | chrY | 15724326 | . | A | G | 463.74   | PASS          | AC=6;AF=0.091;AN=66;DP=325;FS=0.0 |
| 39891 | chrY | 15725229 | . | A | G | 5378.22  | PASS          | AC=38;AF=0.576;AN=66;BaseQRankSum |
| 39892 | chrY | 15726664 | . | T | C | 1888.28  | PASS          | AC=14;AF=0.200;AN=70;DP=428;FS=0. |
| 39893 | chrY | 15728053 | . | G | T | 284.29   | PASS          | AC=2;AF=0.029;AN=68;DP=367;FS=0.0 |
| 39894 | chrY | 15729830 | . | A | G | 30.61    | PASS          | AC=1;AF=0.014;AN=70;BaseQRankSum= |
| 39895 | chrY | 15730907 | . | A | C | 1398.18  | PASS          | AC=6;AF=0.333;AN=18;DP=169;FS=0.0 |
| 39896 | chrY | 15732786 | . | C | T | 18518.93 | PASS          | AC=70;AF=1.00;AN=70;BaseQ         |
| 39897 | chrY | 15737083 | . | A | G | 257.89   | PASS          | AC=2;AF=0.029;AN=68;DP=371;FS=0.0 |
| 39898 | chrY | 15738682 | . | C | T | 532.33   | PASS          | AC=2;AF=0.030;AN=66;DP=258;FS=0.0 |
| 39899 | chrY | 15740440 | . | G | A | 15908.92 | PASS          | AC=66;AF=1.00;AN=66;DP=52         |
| 39900 | chrY | 15746910 | . | T | C | 1323.87  | PASS          | AC=6;AF=0.086;AN=70;BaseQRankSum= |

|       |      |          |   |   |     |          |               |                                    |
|-------|------|----------|---|---|-----|----------|---------------|------------------------------------|
| 39901 | chrY | 15747004 | . | T | A   | 33.49    | PASS          | AC=1;AF=0.014;AN=70;BaseQRankSum=  |
| 39902 | chrY | 15747008 | . | C | T   | 33.49    | PASS          | AC=1;AF=0.014;AN=70;BaseQRankSum=  |
| 39903 | chrY | 15752636 | . | C | T,* | 3038.82  | PASS          | AC=22,1;AF=0.500,0.023;AN=44;DP=3  |
| 39904 | chrY | 15753197 | . | T | C   | 119.60   | PASS          | AC=3;AF=0.071;AN=42;BaseQRankSum=  |
| 39905 | chrY | 15754313 | . | C | A   | 1369.29  | PASS          | AC=6;AF=0.086;AN=70;DP=627;FS=0.0  |
| 39906 | chrY | 15760243 | . | G | A   | 1182.48  | PASS          | AC=6;AF=0.120;AN=50;DP=176;FS=0.0  |
| 39907 | chrY | 15760765 | . | G | C   | 204.37   | PASS          | AC=2;AF=0.029;AN=68;DP=348;FS=0.0  |
| 39908 | chrY | 15761126 | . | A | G   | 918.75   | PASS          | AC=6;AF=0.300;AN=20;DP=163;FS=0.0  |
| 39909 | chrY | 15762839 | . | A | G   | 15653.02 | PASS          | AC=50;AF=0.735;AN=68;DP=7          |
| 39910 | chrY | 15763177 | . | A | G   | 3853.20  | PASS          | AC=44;AF=0.710;AN=62;DP=290;FS=0   |
| 39911 | chrY | 15769171 | . | C | T   | 3082.39  | PASS          | AC=38;AF=0.679;AN=56;DP=240;FS=0   |
| 39912 | chrY | 15772751 | . | G | A   | 10222.13 | PASS          | AC=46;AF=0.657;AN=70;DP=5          |
| 39913 | chrY | 15775202 | . | T | C   | 1245.16  | PASS          | AC=6;AF=0.086;AN=70;DP=501;FS=0.0  |
| 39914 | chrY | 15775388 | . | G | A   | 1081.02  | PASS          | AC=6;AF=0.091;AN=66;DP=490;FS=0.0  |
| 39915 | chrY | 15777458 | . | G | C   | 1199.81  | PASS          | AC=6;AF=0.088;AN=68;DP=546;FS=0.0  |
| 39916 | chrY | 15777595 | . | T | C   | 1265.97  | PASS          | AC=6;AF=0.086;AN=70;BaseQRankSum=  |
| 39917 | chrY | 15780501 | . | C | A   | 755.02   | PASS          | AC=4;AF=0.067;AN=60;DP=241;FS=0.0  |
| 39918 | chrY | 15784387 | . | C | T   | 749.02   | PASS          | AC=6;AF=0.086;AN=70;DP=480;FS=0.0  |
| 39919 | chrY | 15785245 | . | C | T   | 1269.98  | PASS          | AC=6;AF=0.088;AN=68;DP=366;FS=0.0  |
| 39920 | chrY | 15790691 | . | C | T   | 7640.51  | PASS          | AC=54;AF=0.818;AN=66;DP=368;FS=0   |
| 39921 | chrY | 15793131 | . | A | T   | 1136.72  | PASS          | AC=6;AF=0.100;AN=60;BaseQRankSum=  |
| 39922 | chrY | 15793639 | . | A | T   | 1180.99  | PASS          | AC=6;AF=0.091;AN=66;BaseQRankSum=  |
| 39923 | chrY | 15801167 | . | A | T   | 503.54   | PASS          | AC=6;AF=0.100;AN=60;DP=204;FS=0.0  |
| 39924 | chrY | 15803415 | . | A | G   | 2783.97  | PASS          | AC=20;AF=1.00;AN=20;DP=154;FS=0.0  |
| 39925 | chrY | 15804514 | . | G | A   | 1120.18  | PASS          | AC=6;AF=0.333;AN=18;DP=167;FS=0.0  |
| 39926 | chrY | 15806605 | . | C | T   | 1016.75  | PASS          | AC=6;AF=0.300;AN=20;DP=173;FS=0.0  |
| 39927 | chrY | 15807605 | . | C | T   | 1138.18  | PASS          | AC=6;AF=0.333;AN=18;DP=168;FS=0.0  |
| 39928 | chrY | 15808901 | . | G | T   | 461.48   | PASS          | AC=2;AF=0.091;AN=22;DP=163;FS=0.0  |
| 39929 | chrY | 15812579 | . | C | A   | 2982.16  | PASS          | AC=40;AF=0.625;AN=64;DP=242;FS=0   |
| 39930 | chrY | 15813129 | . | C | G   | 12387.71 | PASS          | AC=52;AF=0.743;AN=70;DP=5          |
| 39931 | chrY | 15818409 | . | G | A   | 7243.16  | PASS          | AC=62;AF=1.00;AN=62;DP=265;FS=0    |
| 39932 | chrY | 15822628 | . | A | G   | 130.89   | PASS          | AC=2;AF=0.030;AN=66;DP=210;FS=0    |
| 39933 | chrY | 15837480 | . | G | T   | 1656.18  | PASS          | AC=6;AF=0.333;AN=18;DP=185;FS=0    |
| 39934 | chrY | 15838043 | . | T | C   | 980.18   | PASS          | AC=6;AF=0.333;AN=18;DP=181;FS=0    |
| 39935 | chrY | 15838880 | . | T | G   | 82.81    | PASS          | AC=1;AF=0.056;AN=18;BaseQRankSum=  |
| 39936 | chrY | 15838884 | . | C | A   | 39.62    | my_snp_filter | AC=1;AF=0.056;AN=18;BaseQ          |
| 39937 | chrY | 15838919 | . | C | T   | 120.34   | PASS          | AC=1;AF=0.056;AN=18;BaseQRankSum=  |
| 39938 | chrY | 15838927 | . | C | A   | 114.35   | PASS          | AC=1;AF=0.056;AN=18;BaseQRankSum=  |
| 39939 | chrY | 15838947 | . | A | T   | 126.34   | PASS          | AC=1;AF=0.056;AN=18;BaseQRankSum=  |
| 39940 | chrY | 15838952 | . | A | T   | 129.33   | PASS          | AC=1;AF=0.056;AN=18;BaseQRankSum=  |
| 39941 | chrY | 15839012 | . | T | G   | 51.33    | my_snp_filter | AC=1;AF=0.056;AN=18;BaseQ          |
| 39942 | chrY | 15839029 | . | C | T   | 136.07   | PASS          | AC=1;AF=0.056;AN=18;BaseQRankSum=  |
| 39943 | chrY | 15839030 | . | C | G   | 135.64   | PASS          | AC=1;AF=0.056;AN=18;BaseQRankSum=  |
| 39944 | chrY | 15839045 | . | A | T   | 89.49    | PASS          | AC=1;AF=0.056;AN=18;BaseQRankSum=  |
| 39945 | chrY | 15839047 | . | A | G   | 90.72    | PASS          | AC=1;AF=0.056;AN=18;BaseQRankSum=  |
| 39946 | chrY | 15839053 | . | G | A   | 92.99    | PASS          | AC=1;AF=0.056;AN=18;BaseQRankSum=  |
| 39947 | chrY | 15839133 | . | C | A   | 117.30   | PASS          | AC=1;AF=0.050;AN=20;BaseQRankSum=  |
| 39948 | chrY | 15839134 | . | C | G   | 117.30   | PASS          | AC=1;AF=0.050;AN=20;BaseQRankSum=  |
| 39949 | chrY | 15839175 | . | A | C   | 75.09    | PASS          | AC=1;AF=0.045;AN=22;BaseQRankSum=  |
| 39950 | chrY | 15842187 | . | T | A   | 3989.58  | PASS          | AC=42;AF=0.636;AN=66;DP=276;FS=0   |
| 39951 | chrY | 15842844 | . | A | G   | 13133.74 | PASS          | AC=58;AF=0.829;AN=70;DP=5          |
| 39952 | chrY | 15844914 | . | G | A   | 1178.68  | PASS          | AC=6;AF=0.088;AN=68;DP=567;FS=0    |
| 39953 | chrY | 15845248 | . | A | G   | 10814.26 | PASS          | AC=40;AF=0.571;AN=70;DP=5          |
| 39954 | chrY | 15845531 | . | G | A   | 982.22   | PASS          | AC=6;AF=0.086;AN=70;DP=351;FS=0    |
| 39955 | chrY | 15856736 | . | C | T   | 1258.20  | PASS          | AC=6;AF=0.333;AN=18;DP=160;FS=0    |
| 39956 | chrY | 15858945 | . | T | A   | 277.70   | PASS          | AC=2;AF=0.029;AN=70;DP=599;FS=0    |
| 39957 | chrY | 15865984 | . | G | T   | 53.72    | PASS          | AC=2;AF=0.143;AN=14;DP=48;FS=0     |
| 39958 | chrY | 15866469 | . | A | C   | 469.37   | PASS          | AC=2;AF=0.029;AN=70;DP=557;FS=0    |
| 39959 | chrY | 15867412 | . | C | A   | 4445.58  | PASS          | AC=38;AF=0.559;AN=68;BaseQRankSum= |
| 39960 | chrY | 15869282 | . | C | G   | 153.13   | PASS          | AC=2;AF=0.045;AN=44;DP=166;FS=0    |
| 39961 | chrY | 15874245 | . | T | C   | 1588.02  | PASS          | AC=22;AF=1.00;AN=22;DP=113;FS=0    |
| 39962 | chrY | 15887869 | . | G | A   | 1241.09  | PASS          | AC=6;AF=0.250;AN=24;DP=160;FS=0    |
| 39963 | chrY | 15887989 | . | C | A   | 3414.86  | PASS          | AC=18;AF=1.00;AN=18;DP=136;FS=0    |
| 39964 | chrY | 15890427 | . | C | T   | 1177.75  | PASS          | AC=6;AF=0.300;AN=20;DP=175;FS=0    |
| 39965 | chrY | 15890966 | . | C | G   | 174.40   | PASS          | AC=2;AF=0.111;AN=18;BaseQRankSum=  |
| 39966 | chrY | 15890985 | . | A | G   | 175.56   | PASS          | AC=2;AF=0.111;AN=18;BaseQRankSum=  |
| 39967 | chrY | 15890998 | . | G | T   | 231.79   | PASS          | AC=2;AF=0.111;AN=18;BaseQRankSum=  |
| 39968 | chrY | 15891004 | . | T | A   | 170.26   | PASS          | AC=1;AF=0.056;AN=18;BaseQRankSum=  |
| 39969 | chrY | 15891023 | . | G | A   | 169.60   | PASS          | AC=1;AF=0.056;AN=18;BaseQRankSum=  |
| 39970 | chrY | 15891024 | . | C | A   | 169.84   | PASS          | AC=1;AF=0.056;AN=18;BaseQRankSum=  |
| 39971 | chrY | 15891033 | . | A | G   | 181.42   | PASS          | AC=1;AF=0.050;AN=20;BaseQRankSum=  |
| 39972 | chrY | 15891035 | . | T | G   | 181.46   | PASS          | AC=1;AF=0.050;AN=20;BaseQRankSum=  |
| 39973 | chrY | 15891061 | . | C | T   | 37.18    | my_snp_filter | AC=1;AF=0.050;AN=20;BaseQ          |
| 39974 | chrY | 15893835 | . | T | G   | 1194.18  | PASS          | AC=6;AF=0.333;AN=18;DP=175;FS=0    |
| 39975 | chrY | 15896404 | . | A | G   | 6370.16  | PASS          | AC=50;AF=0.735;AN=68;DP=411;FS=0   |
| 39976 | chrY | 15896549 | . | G | T   | 1455.53  | PASS          | AC=6;AF=0.086;AN=70;DP=531;FS=0    |

|       |      |          |   |   |   |          |               |                                   |
|-------|------|----------|---|---|---|----------|---------------|-----------------------------------|
| 39977 | chrY | 15904605 | . | T | G | 1011.94  | PASS          | AC=6;AF=0.086;AN=70;BaseQRankSum= |
| 39978 | chrY | 15907452 | . | G | A | 331.75   | PASS          | AC=6;AF=0.086;AN=70;DP=421;FS=0.0 |
| 39979 | chrY | 15909160 | . | C | T | 2364.22  | PASS          | AC=34;AF=0.654;AN=52;DP=224;FS=0. |
| 39980 | chrY | 15910164 | . | G | T | 300.66   | PASS          | AC=2;AF=0.029;AN=70;DP=377;FS=0.0 |
| 39981 | chrY | 15913078 | . | T | C | 1478.49  | PASS          | AC=12;AF=0.171;AN=70;BaseQRankSum |
| 39982 | chrY | 15915747 | . | G | A | 312.62   | PASS          | AC=2;AF=0.029;AN=70;DP=421;FS=0.0 |
| 39983 | chrY | 15918592 | . | C | T | 11566.92 | PASS          | AC=70;AF=1.00;AN=70;DP=38         |
| 39984 | chrY | 15918671 | . | A | C | 86.35    | PASS          | AC=2;AF=0.029;AN=70;DP=253;FS=0.0 |
| 39985 | chrY | 15920775 | . | T | C | 136.15   | PASS          | AC=4;AF=0.080;AN=50;DP=196;FS=0.0 |
| 39986 | chrY | 15922321 | . | A | G | 36.72    | PASS          | AC=1;AF=0.014;AN=70;BaseQRankSum= |
| 39987 | chrY | 15922825 | . | C | T | 415.69   | PASS          | AC=2;AF=0.029;AN=70;DP=580;FS=0.0 |
| 39988 | chrY | 15923259 | . | A | G | 346.32   | PASS          | AC=2;AF=0.029;AN=70;DP=601;FS=0.0 |
| 39989 | chrY | 15924956 | . | A | G | 1188.29  | PASS          | AC=6;AF=0.111;AN=54;DP=176;FS=0.0 |
| 39990 | chrY | 15931671 | . | T | G | 797.24   | PASS          | AC=6;AF=0.333;AN=18;DP=131;FS=0.0 |
| 39991 | chrY | 15937165 | . | T | A | 43.41    | PASS          | AC=1;AF=0.025;AN=40;BaseQRankSum= |
| 39992 | chrY | 15937171 | . | A | T | 43.39    | PASS          | AC=1;AF=0.025;AN=40;BaseQRankSum= |
| 39993 | chrY | 15937199 | . | A | G | 410.20   | PASS          | AC=8;AF=0.267;AN=30;DP=177;FS=0.0 |
| 39994 | chrY | 15944541 | . | T | G | 618.86   | PASS          | AC=2;AF=0.034;AN=58;DP=218;FS=0.0 |
| 39995 | chrY | 15944600 | . | T | A | 1100.20  | PASS          | AC=6;AF=0.086;AN=70;DP=318;FS=0.0 |
| 39996 | chrY | 15944828 | . | C | G | 16115.89 | PASS          | AC=70;AF=1.00;AN=70;DP=52         |
| 39997 | chrY | 15945037 | . | G | T | 324.24   | PASS          | AC=4;AF=0.057;AN=70;DP=559;FS=0.0 |
| 39998 | chrY | 15946507 | . | G | A | 492.65   | PASS          | AC=2;AF=0.030;AN=66;DP=355;FS=0.0 |
| 39999 | chrY | 15948265 | . | A | G | 795.21   | PASS          | AC=6;AF=0.086;AN=70;DP=417;FS=0.0 |
| 40000 | chrY | 15951636 | . | T | G | 1092.63  | PASS          | AC=6;AF=0.088;AN=68;DP=306;FS=0.0 |
| 40001 | chrY | 15952016 | . | A | G | 628.81   | PASS          | AC=6;AF=0.120;AN=50;DP=175;FS=0.0 |
| 40002 | chrY | 15953654 | . | C | A | 1034.36  | PASS          | AC=6;AF=0.086;AN=70;DP=559;FS=0.0 |
| 40003 | chrY | 15955432 | . | T | A | 9380.50  | PASS          | AC=58;AF=0.829;AN=70;DP=404;FS=0. |
| 40004 | chrY | 15955962 | . | T | C | 933.04   | PASS          | AC=6;AF=0.086;AN=70;DP=514;FS=0.0 |
| 40005 | chrY | 15956560 | . | A | G | 39.69    | PASS          | AC=1;AF=0.014;AN=70;BaseQRankSum= |
| 40006 | chrY | 15956561 | . | G | A | 39.68    | PASS          | AC=1;AF=0.014;AN=70;BaseQRankSum= |
| 40007 | chrY | 15956588 | . | G | A | 46.53    | PASS          | AC=2;AF=0.029;AN=68;BaseQRankSum= |
| 40008 | chrY | 15957773 | . | G | A | 3619.29  | PASS          | AC=32;AF=1.00;AN=32;DP=153;FS=0.0 |
| 40009 | chrY | 15958079 | . | G | A | 947.47   | PASS          | AC=5;AF=0.227;AN=22;BaseQRankSum= |
| 40010 | chrY | 15963071 | . | A | C | 1171.96  | PASS          | AC=6;AF=0.300;AN=20;DP=175;FS=0.0 |
| 40011 | chrY | 15963975 | . | C | T | 36.06    | my_snp_filter | AC=1;AF=0.015;AN=66;BaseQ         |
| 40012 | chrY | 15963980 | . | G | T | 31.40    | my_snp_filter | AC=1;AF=0.016;AN=64;BaseQ         |
| 40013 | chrY | 15964912 | . | G | T | 130.21   | PASS          | AC=4;AF=0.080;AN=50;DP=170;FS=0.0 |
| 40014 | chrY | 15967518 | . | G | T | 101.55   | PASS          | AC=4;AF=0.182;AN=22;BaseQRankSum= |
| 40015 | chrY | 15974459 | . | C | A | 85.15    | PASS          | AC=2;AF=0.036;AN=56;DP=194;FS=0.0 |
| 40016 | chrY | 15980484 | . | A | C | 755.68   | PASS          | AC=6;AF=0.086;AN=70;DP=350;FS=0.0 |
| 40017 | chrY | 15982345 | . | T | C | 40.58    | PASS          | AC=1;AF=0.015;AN=66;BaseQRankSum= |
| 40018 | chrY | 15982364 | . | A | G | 47.26    | PASS          | AC=2;AF=0.030;AN=66;DP=259;FS=0.0 |
| 40019 | chrY | 15985397 | . | C | T | 1262.60  | PASS          | AC=6;AF=0.091;AN=66;DP=334;FS=0.0 |
| 40020 | chrY | 15988343 | . | T | C | 315.54   | PASS          | AC=2;AF=0.029;AN=70;DP=499;FS=0.0 |
| 40021 | chrY | 15990714 | . | T | G | 1004.97  | PASS          | AC=6;AF=0.086;AN=70;DP=482;FS=0.0 |
| 40022 | chrY | 15995622 | . | G | T | 1105.59  | PASS          | AC=6;AF=0.086;AN=70;DP=540;FS=0.0 |
| 40023 | chrY | 16000245 | . | A | G | 42.33    | PASS          | AC=1;AF=0.050;AN=20;BaseQRankSum= |
| 40024 | chrY | 16000247 | . | A | T | 42.31    | PASS          | AC=1;AF=0.050;AN=20;BaseQRankSum= |
| 40025 | chrY | 16000894 | . | C | G | 246.50   | PASS          | AC=3;AF=0.115;AN=26;BaseQRankSum= |
| 40026 | chrY | 16000904 | . | G | A | 238.41   | PASS          | AC=3;AF=0.100;AN=30;BaseQRankSum= |
| 40027 | chrY | 16000930 | . | C | G | 462.02   | PASS          | AC=3;AF=0.100;AN=30;BaseQRankSum= |
| 40028 | chrY | 16000935 | . | T | C | 499.50   | PASS          | AC=3;AF=0.107;AN=28;BaseQRankSum= |
| 40029 | chrY | 16000948 | . | C | T | 616.31   | PASS          | AC=3;AF=0.100;AN=30;BaseQRankSum= |
| 40030 | chrY | 16000952 | . | G | A | 619.78   | PASS          | AC=3;AF=0.100;AN=30;BaseQRankSum= |
| 40031 | chrY | 16000957 | . | T | C | 616.87   | PASS          | AC=3;AF=0.107;AN=28;BaseQRankSum= |
| 40032 | chrY | 16001035 | . | T | C | 348.41   | PASS          | AC=3;AF=0.047;AN=64;BaseQRankSum= |
| 40033 | chrY | 16001058 | . | C | T | 297.68   | PASS          | AC=3;AF=0.044;AN=68;BaseQRankSum= |
| 40034 | chrY | 16001068 | . | A | G | 161.38   | PASS          | AC=2;AF=0.029;AN=68;BaseQRankSum= |
| 40035 | chrY | 16001075 | . | T | C | 164.67   | PASS          | AC=2;AF=0.029;AN=70;BaseQRankSum= |
| 40036 | chrY | 16001084 | . | C | T | 128.03   | PASS          | AC=2;AF=0.029;AN=70;BaseQRankSum= |
| 40037 | chrY | 16001085 | . | A | G | 128.30   | PASS          | AC=2;AF=0.029;AN=70;BaseQRankSum= |
| 40038 | chrY | 16001885 | . | G | T | 240.69   | PASS          | AC=2;AF=0.029;AN=70;DP=509;FS=0.0 |
| 40039 | chrY | 16005138 | . | C | A | 10564.98 | PASS          | AC=68;AF=1.00;AN=68;DP=37         |
| 40040 | chrY | 16005526 | . | G | A | 1795.60  | PASS          | AC=6;AF=0.086;AN=70;DP=572;FS=0.0 |
| 40041 | chrY | 16010265 | . | C | A | 149.89   | PASS          | AC=4;AF=0.057;AN=70;BaseQRankSum= |
| 40042 | chrY | 16013006 | . | T | C | 43.23    | my_snp_filter | AC=2;AF=0.029;AN=70;BaseQ         |
| 40043 | chrY | 16015369 | . | A | T | 562.51   | PASS          | AC=6;AF=0.086;AN=70;DP=321;FS=0.0 |
| 40044 | chrY | 16017035 | . | T | C | 34.21    | PASS          | AC=1;AF=0.015;AN=68;BaseQRankSum= |
| 40045 | chrY | 16017045 | . | C | T | 34.35    | PASS          | AC=1;AF=0.014;AN=70;BaseQRankSum= |
| 40046 | chrY | 16020053 | . | A | T | 1128     | PASS          | AC=6;AF=0.086;AN=70;DP=610;FS=0.0 |
| 40047 | chrY | 16021009 | . | T | C | 6245.44  | PASS          | AC=40;AF=0.571;AN=70;DP=399;FS=0. |
| 40048 | chrY | 16021660 | . | T | C | 1279.85  | PASS          | AC=6;AF=0.188;AN=32;BaseQRankSum= |
| 40049 | chrY | 16024284 | . | C | G | 1038.41  | PASS          | AC=6;AF=0.300;AN=20;DP=141;FS=0.0 |
| 40050 | chrY | 16025124 | . | G | T | 82.36    | PASS          | AC=1;AF=0.056;AN=18;BaseQRankSum= |
| 40051 | chrY | 16025125 | . | G | A | 81.38    | PASS          | AC=1;AF=0.056;AN=18;BaseQRankSum= |
| 40052 | chrY | 16025467 | . | A | C | 1319.41  | PASS          | AC=3;AF=0.150;AN=20;BaseQRankSum= |

|       |      |          |   |   |   |          |               |                                    |
|-------|------|----------|---|---|---|----------|---------------|------------------------------------|
| 40053 | chrY | 16025701 | . | T | G | 1044.18  | PASS          | AC=6;AF=0.333;AN=18;DP=187;FS=0.0  |
| 40054 | chrY | 16026241 | . | C | G | 1234.18  | PASS          | AC=6;AF=0.333;AN=18;DP=166;FS=0.0  |
| 40055 | chrY | 16026844 | . | G | A | 1309.39  | PASS          | AC=6;AF=0.273;AN=22;DP=173;FS=0.0  |
| 40056 | chrY | 16027838 | . | A | T | 2456.59  | PASS          | AC=12;AF=0.182;AN=66;DP=409;FS=0.0 |
| 40057 | chrY | 16027923 | . | T | C | 76.73    | PASS          | AC=2;AF=0.029;AN=68;DP=403;FS=0.0  |
| 40058 | chrY | 16028996 | . | A | G | 98.70    | PASS          | AC=4;AF=0.067;AN=60;DP=185;FS=0.0  |
| 40059 | chrY | 16029529 | . | A | G | 391.90   | PASS          | AC=8;AF=0.114;AN=70;BaseQRankSum=  |
| 40060 | chrY | 16029626 | . | T | C | 2159.96  | PASS          | AC=16;AF=0.229;AN=70;BaseQRankSum= |
| 40061 | chrY | 16029783 | . | G | T | 40.84    | PASS          | AC=1;AF=0.014;AN=70;BaseQRankSum=  |
| 40062 | chrY | 16030708 | . | C | A | 30.74    | PASS          | AC=1;AF=0.014;AN=70;BaseQRankSum=  |
| 40063 | chrY | 16030718 | . | T | C | 30.66    | PASS          | AC=1;AF=0.014;AN=70;BaseQRankSum=  |
| 40064 | chrY | 16033352 | . | G | C | 1245.65  | PASS          | AC=6;AF=0.086;AN=70;DP=385;FS=0.0  |
| 40065 | chrY | 16035637 | . | A | C | 7708.34  | PASS          | AC=52;AF=0.743;AN=70;DP=417;FS=0.0 |
| 40066 | chrY | 16040014 | . | T | G | 3859.56  | PASS          | AC=46;AF=0.719;AN=64;DP=263;FS=0.0 |
| 40067 | chrY | 16043971 | . | T | C | 1462.59  | PASS          | AC=6;AF=0.094;AN=64;DP=204;FS=0.0  |
| 40068 | chrY | 16044635 | . | T | C | 406.48   | PASS          | AC=2;AF=0.029;AN=70;DP=618;FS=0.0  |
| 40069 | chrY | 16050903 | . | T | C | 1134.28  | PASS          | AC=6;AF=0.231;AN=26;BaseQRankSum=  |
| 40070 | chrY | 16052813 | . | C | A | 840.94   | PASS          | AC=6;AF=0.086;AN=70;DP=397;FS=0.0  |
| 40071 | chrY | 16056469 | . | A | C | 40.56    | PASS          | AC=1;AF=0.014;AN=70;BaseQRankSum=  |
| 40072 | chrY | 16065993 | . | G | A | 1457.63  | PASS          | AC=6;AF=0.273;AN=22;DP=183;FS=0.0  |
| 40073 | chrY | 16067564 | . | C | T | 4485.86  | PASS          | AC=18;AF=1.00;AN=18;DP=176;FS=0.0  |
| 40074 | chrY | 16068990 | . | G | T | 1001.25  | PASS          | AC=6;AF=0.333;AN=18;DP=162;FS=0.0  |
| 40075 | chrY | 16070765 | . | C | T | 34.80    | PASS          | AC=1;AF=0.014;AN=70;BaseQRankSum=  |
| 40076 | chrY | 16070836 | . | G | T | 1371.92  | PASS          | AC=6;AF=0.086;AN=70;DP=570;FS=0.0  |
| 40077 | chrY | 16072806 | . | T | C | 1473.65  | PASS          | AC=6;AF=0.086;AN=70;DP=559;FS=0.0  |
| 40078 | chrY | 16080618 | . | G | C | 474.75   | PASS          | AC=2;AF=0.100;AN=20;DP=187;FS=0.0  |
| 40079 | chrY | 16083704 | . | G | C | 45.42    | my_snp_filter | AC=3;AF=0.167;AN=18;BaseQ          |
| 40080 | chrY | 16083764 | . | C | T | 50.51    | my_snp_filter | AC=2;AF=0.100;AN=20;BaseQ          |
| 40081 | chrY | 16083816 | . | T | A | 1292.86  | PASS          | AC=6;AF=0.273;AN=22;BaseQRankSum=  |
| 40082 | chrY | 16084515 | . | G | C | 904.75   | PASS          | AC=6;AF=0.088;AN=68;DP=321;FS=0.0  |
| 40083 | chrY | 16087982 | . | A | G | 919.84   | PASS          | AC=6;AF=0.115;AN=52;DP=153;FS=0.0  |
| 40084 | chrY | 16094323 | . | A | G | 1226     | PASS          | AC=6;AF=0.088;AN=68;DP=321;FS=0.0  |
| 40085 | chrY | 16094472 | . | A | G | 276.39   | PASS          | AC=2;AF=0.029;AN=68;DP=270;FS=0.0  |
| 40086 | chrY | 16095596 | . | A | G | 1192.89  | PASS          | AC=24;AF=0.545;AN=44;DP=83;FS=0.0  |
| 40087 | chrY | 16095827 | . | C | T | 178.38   | PASS          | AC=6;AF=0.086;AN=70;DP=322;FS=0.0  |
| 40088 | chrY | 16096206 | . | G | A | 109.67   | PASS          | AC=2;AF=0.059;AN=34;DP=46;FS=0.00  |
| 40089 | chrY | 16131630 | . | G | T | 13289.52 | PASS          | AC=46;AF=0.657;AN=70;DP=6          |
| 40090 | chrY | 16172191 | . | C | G | 8854.54  | PASS          | AC=58;AF=0.829;AN=70;BaseQRankSum= |
| 40091 | chrY | 16174352 | . | C | A | 508.37   | PASS          | AC=4;AF=0.057;AN=70;DP=370;FS=0.0  |
| 40092 | chrY | 16177608 | . | T | C | 748.12   | PASS          | AC=6;AF=0.086;AN=70;DP=482;FS=0.0  |
| 40093 | chrY | 16178042 | . | T | A | 3800.21  | PASS          | AC=52;AF=0.788;AN=66;DP=257;FS=0.0 |
| 40094 | chrY | 16180081 | . | T | A | 1333.66  | PASS          | AC=6;AF=0.086;AN=70;DP=549;FS=0.0  |
| 40095 | chrY | 16183412 | . | A | C | 18378.89 | PASS          | AC=70;AF=1.00;AN=70;DP=60          |
| 40096 | chrY | 16188674 | . | T | C | 1145.19  | PASS          | AC=6;AF=0.094;AN=64;DP=249;FS=0.0  |
| 40097 | chrY | 16191528 | . | G | A | 858.03   | PASS          | AC=6;AF=0.086;AN=70;DP=608;FS=0.0  |
| 40098 | chrY | 16198725 | . | G | A | 1146.53  | PASS          | AC=6;AF=0.097;AN=62;DP=240;FS=0.0  |
| 40099 | chrY | 16202980 | . | C | G | 1933.64  | PASS          | AC=12;AF=0.182;AN=66;DP=287;FS=0.0 |
| 40100 | chrY | 16203382 | . | A | G | 1016.92  | PASS          | AC=6;AF=0.086;AN=70;DP=545;FS=0.0  |
| 40101 | chrY | 16203597 | . | G | A | 1352.60  | PASS          | AC=6;AF=0.088;AN=68;DP=535;FS=0.0  |
| 40102 | chrY | 16208785 | . | C | T | 10851.45 | PASS          | AC=48;AF=0.727;AN=66;BaseQ         |
| 40103 | chrY | 16210156 | . | T | A | 1649.18  | PASS          | AC=6;AF=0.333;AN=18;BaseQRankSum=  |
| 40104 | chrY | 16214874 | . | T | C | 3250.86  | PASS          | AC=18;AF=1.00;AN=18;DP=181;FS=0.0  |
| 40105 | chrY | 16215250 | . | A | C | 380.75   | PASS          | AC=2;AF=0.100;AN=20;DP=185;FS=0.0  |
| 40106 | chrY | 16215552 | . | T | C | 48.30    | PASS          | AC=1;AF=0.050;AN=20;BaseQRankSum=  |
| 40107 | chrY | 16215585 | . | G | A | 64.94    | my_snp_filter | AC=2;AF=0.100;AN=20;BaseQ          |
| 40108 | chrY | 16215620 | . | C | A | 184.09   | PASS          | AC=2;AF=0.111;AN=18;BaseQRankSum=  |
| 40109 | chrY | 16215623 | . | G | T | 51.24    | PASS          | AC=1;AF=0.056;AN=18;BaseQRankSum=  |
| 40110 | chrY | 16218955 | . | G | T | 1155.95  | PASS          | AC=6;AF=0.094;AN=64;DP=230;FS=0.0  |
| 40111 | chrY | 16220923 | . | C | T | 299.81   | PASS          | AC=2;AF=0.029;AN=70;DP=276;FS=0.0  |
| 40112 | chrY | 16222561 | . | T | C | 16924.92 | PASS          | AC=68;AF=1.00;AN=68;DP=63          |
| 40113 | chrY | 16224402 | . | C | T | 331.83   | PASS          | AC=2;AF=0.033;AN=60;DP=174;FS=0.0  |
| 40114 | chrY | 16228445 | . | T | A | 33.88    | PASS          | AC=1;AF=0.014;AN=70;BaseQRankSum=  |
| 40115 | chrY | 16228446 | . | G | A | 34.12    | PASS          | AC=1;AF=0.014;AN=70;BaseQRankSum=  |
| 40116 | chrY | 16236831 | . | G | T | 3780.57  | PASS          | AC=26;AF=0.371;AN=70;DP=370;FS=0.0 |
| 40117 | chrY | 16240819 | . | G | A | 1255.16  | PASS          | AC=6;AF=0.086;AN=70;DP=554;FS=0.0  |
| 40118 | chrY | 16242268 | . | C | T | 30.76    | PASS          | AC=1;AF=0.015;AN=68;BaseQRankSum=  |
| 40119 | chrY | 16242316 | . | T | A | 10426.69 | PASS          | AC=58;AF=0.829;AN=70;DP=4          |
| 40120 | chrY | 16242541 | . | T | C | 48.80    | PASS          | AC=1;AF=0.014;AN=70;BaseQRankSum=  |
| 40121 | chrY | 16242575 | . | G | A | 3739.41  | PASS          | AC=42;AF=0.700;AN=60;DP=256;FS=0.0 |
| 40122 | chrY | 16243337 | . | G | A | 7458.27  | PASS          | AC=40;AF=0.571;AN=70;BaseQRankSum= |
| 40123 | chrY | 16244894 | . | C | G | 374.39   | PASS          | AC=2;AF=0.029;AN=70;DP=420;FS=0.0  |
| 40124 | chrY | 16247355 | . | C | G | 545.81   | PASS          | AC=2;AF=0.029;AN=70;DP=344;FS=0.0  |
| 40125 | chrY | 16247952 | . | T | C | 944.22   | my_snp_filter | AC=5;AF=0.081;AN=62;BaseQ          |
| 40126 | chrY | 16247957 | . | T | C | 1057.39  | my_snp_filter | AC=6;AF=0.097;AN=62;BaseQ          |
| 40127 | chrY | 16247962 | . | T | C | 88.92    | PASS          | AC=1;AF=0.015;AN=68;DP=385;FS=0.0  |
| 40128 | chrY | 16250280 | . | T | C | 903.67   | PASS          | AC=6;AF=0.086;AN=70;DP=320;FS=0.0  |



|       |      |          |   |   |   |          |      |                                    |
|-------|------|----------|---|---|---|----------|------|------------------------------------|
| 40129 | chrY | 16251407 | . | C | T | 793.67   | PASS | AC=6;AF=0.086;AN=70;DP=479;FS=0.0  |
| 40130 | chrY | 16255953 | . | C | T | 6590.15  | PASS | AC=52;AF=0.743;AN=70;DP=359;FS=0.  |
| 40131 | chrY | 16258469 | . | G | T | 9127.18  | PASS | AC=50;AF=0.735;AN=68;DP=435;FS=0.  |
| 40132 | chrY | 16259161 | . | C | G | 131.15   | PASS | AC=2;AF=0.059;AN=34;DP=198;FS=0.0  |
| 40133 | chrY | 16262459 | . | G | T | 443.35   | PASS | AC=6;AF=0.088;AN=68;DP=321;FS=0.0  |
| 40134 | chrY | 16263188 | . | C | T | 3705.25  | PASS | AC=38;AF=1.00;AN=38;DP=140;FS=0.0  |
| 40135 | chrY | 16263192 | . | T | C | 215.69   | PASS | AC=4;AF=0.080;AN=50;DP=121;FS=0.0  |
| 40136 | chrY | 16270583 | . | A | G | 11992.39 | PASS | AC=56;AF=0.824;AN=68;DP=5          |
| 40137 | chrY | 16271259 | . | C | T | 120.56   | PASS | AC=2;AF=0.029;AN=70;DP=456;FS=0.0  |
| 40138 | chrY | 16273059 | . | T | C | 707.53   | PASS | AC=6;AF=0.086;AN=70;DP=346;FS=0.0  |
| 40139 | chrY | 16275407 | . | C | T | 3530.98  | PASS | AC=40;AF=0.690;AN=58;DP=296;FS=0.  |
| 40140 | chrY | 16276717 | . | C | G | 8164.48  | PASS | AC=38;AF=0.559;AN=68;DP=476;FS=0.  |
| 40141 | chrY | 16280570 | . | G | A | 244.63   | PASS | AC=2;AF=0.029;AN=70;DP=397;FS=0.0  |
| 40142 | chrY | 16281210 | . | T | A | 30.72    | PASS | AC=1;AF=0.015;AN=68;BaseQRankSum=  |
| 40143 | chrY | 16281254 | . | A | G | 36.53    | PASS | AC=1;AF=0.014;AN=70;BaseQRankSum=  |
| 40144 | chrY | 16286659 | . | G | A | 458.28   | PASS | AC=2;AF=0.032;AN=62;DP=204;FS=0.0  |
| 40145 | chrY | 16288097 | . | T | A | 3433.17  | PASS | AC=37;AF=0.974;AN=38;BaseQRankSum= |
| 40146 | chrY | 16294167 | . | T | A | 1318.63  | PASS | AC=6;AF=0.088;AN=68;DP=302;FS=0.0  |
| 40147 | chrY | 16296146 | . | C | G | 498.65   | PASS | AC=2;AF=0.031;AN=64;DP=243;FS=0.0  |
| 40148 | chrY | 16297724 | . | G | C | 3994.87  | PASS | AC=44;AF=0.647;AN=68;DP=279;FS=0.  |
| 40149 | chrY | 16298899 | . | T | C | 1057.80  | PASS | AC=6;AF=0.088;AN=68;DP=473;FS=0.0  |
| 40150 | chrY | 16301305 | . | T | C | 645.87   | PASS | AC=6;AF=0.097;AN=62;DP=199;FS=0.0  |
| 40151 | chrY | 16302173 | . | C | G | 38.28    | PASS | AC=1;AF=0.016;AN=62;BaseQRankSum=  |
| 40152 | chrY | 16302175 | . | T | A | 38.38    | PASS | AC=1;AF=0.016;AN=62;BaseQRankSum=  |
| 40153 | chrY | 16302927 | . | A | T | 3303.05  | PASS | AC=52;AF=0.743;AN=70;DP=274;FS=0.  |
| 40154 | chrY | 16306630 | . | G | A | 1238.33  | PASS | AC=6;AF=0.088;AN=68;DP=490;FS=0.0  |
| 40155 | chrY | 16307000 | . | C | T | 35.47    | PASS | AC=2;AF=0.029;AN=68;DP=316;FS=0.0  |
| 40156 | chrY | 16313498 | . | G | T | 287.79   | PASS | AC=2;AF=0.029;AN=70;DP=525;FS=0.0  |
| 40157 | chrY | 16316281 | . | T | A | 1077.37  | PASS | AC=6;AF=0.120;AN=50;DP=178;FS=0.0  |
| 40158 | chrY | 16317266 | . | T | C | 561.02   | PASS | AC=6;AF=0.086;AN=70;DP=662;FS=0.0  |
| 40159 | chrY | 16320405 | . | T | A | 1253.29  | PASS | AC=15;AF=0.833;AN=18;BaseQRankSum= |
| 40160 | chrY | 16325878 | . | G | A | 1198.40  | PASS | AC=6;AF=0.086;AN=70;DP=597;FS=0.0  |
| 40161 | chrY | 16326877 | . | C | T | 33.58    | PASS | AC=1;AF=0.014;AN=70;BaseQRankSum=  |
| 40162 | chrY | 16326878 | . | C | T | 33.58    | PASS | AC=1;AF=0.014;AN=70;BaseQRankSum=  |
| 40163 | chrY | 16331558 | . | A | G | 8513.07  | PASS | AC=64;AF=1.00;AN=64;DP=297;FS=0.0  |
| 40164 | chrY | 16337459 | . | C | A | 363.79   | PASS | AC=2;AF=0.029;AN=70;DP=386;FS=0.0  |
| 40165 | chrY | 16341091 | . | G | T | 11613.60 | PASS | AC=52;AF=0.743;AN=70;Base          |
| 40166 | chrY | 16344603 | . | T | C | 882.39   | PASS | AC=6;AF=0.333;AN=18;BaseQRankSum=  |
| 40167 | chrY | 16345225 | . | T | C | 759.95   | PASS | AC=4;AF=0.057;AN=70;DP=378;FS=0.0  |
| 40168 | chrY | 16346239 | . | C | T | 1400.36  | PASS | AC=6;AF=0.086;AN=70;DP=488;FS=0.0  |
| 40169 | chrY | 16346570 | . | A | T | 682.67   | PASS | AC=4;AF=0.057;AN=70;DP=392;FS=0.0  |
| 40170 | chrY | 16346883 | . | G | A | 1134.83  | PASS | AC=6;AF=0.086;AN=70;DP=407;FS=0.0  |
| 40171 | chrY | 16349174 | . | G | C | 1229.89  | PASS | AC=6;AF=0.086;AN=70;DP=502;FS=0.0  |
| 40172 | chrY | 16353644 | . | A | G | 30.33    | PASS | AC=1;AF=0.014;AN=70;BaseQRankSum=  |
| 40173 | chrY | 16362484 | . | G | A | 9401.13  | PASS | AC=38;AF=0.559;AN=68;DP=531;FS=0.0 |
| 40174 | chrY | 16362498 | . | C | T | 1271.76  | PASS | AC=6;AF=0.086;AN=70;DP=579;FS=0.0  |
| 40175 | chrY | 16364286 | . | A | C | 11634.19 | PASS | AC=56;AF=0.824;AN=68;Base          |
| 40176 | chrY | 16366818 | . | G | T | 31.38    | PASS | AC=1;AF=0.017;AN=58;BaseQRankSum=  |
| 40177 | chrY | 16368310 | . | G | A | 7629.22  | PASS | AC=54;AF=0.818;AN=66;DP=373;FS=0.  |
| 40178 | chrY | 16369982 | . | A | T | 6386.40  | PASS | AC=48;AF=0.727;AN=66;DP=352;FS=0.0 |
| 40179 | chrY | 16370123 | . | C | T | 1097.36  | PASS | AC=6;AF=0.091;AN=66;DP=254;FS=0.0  |
| 40180 | chrY | 16370564 | . | G | T | 818.40   | PASS | AC=4;AF=0.057;AN=70;DP=462;FS=0.0  |
| 40181 | chrY | 16373480 | . | T | A | 1132.80  | PASS | AC=6;AF=0.086;AN=70;DP=266;FS=0.0  |
| 40182 | chrY | 16375727 | . | G | A | 1943.73  | PASS | AC=32;AF=0.533;AN=60;DP=230;FS=0.  |
| 40183 | chrY | 16375764 | . | T | C | 1015.60  | PASS | AC=5;AF=0.074;AN=68;BaseQRankSum=  |
| 40184 | chrY | 16375855 | . | C | T | 288.09   | PASS | AC=2;AF=0.031;AN=64;DP=246;FS=0.0  |
| 40185 | chrY | 16376421 | . | C | G | 6016.71  | PASS | AC=46;AF=0.657;AN=70;DP=381;FS=0.  |
| 40186 | chrY | 16376495 | . | C | A | 10825.99 | PASS | AC=68;AF=1.00;AN=68;BaseQ          |
| 40187 | chrY | 16379112 | . | C | A | 38.75    | PASS | AC=1;AF=0.018;AN=56;BaseQRankSum=  |
| 40188 | chrY | 16379116 | . | G | A | 38.86    | PASS | AC=1;AF=0.019;AN=54;BaseQRankSum=  |
| 40189 | chrY | 16383689 | . | C | T | 173.47   | PASS | AC=6;AF=0.231;AN=26;DP=169;FS=0.0  |
| 40190 | chrY | 16394317 | . | T | C | 51.67    | PASS | AC=2;AF=0.031;AN=64;BaseQRankSum=  |
| 40191 | chrY | 16394489 | . | G | T | 18473.91 | PASS | AC=66;AF=1.00;AN=66;BaseQ          |
| 40192 | chrY | 16395294 | . | A | C | 1395.77  | PASS | AC=6;AF=0.300;AN=20;DP=153;FS=0.0  |
| 40193 | chrY | 16401339 | . | T | C | 9120.24  | PASS | AC=56;AF=0.824;AN=68;DP=415;FS=0.  |
| 40194 | chrY | 16401798 | . | T | C | 38.12    | PASS | AC=1;AF=0.014;AN=70;BaseQRankSum=  |
| 40195 | chrY | 16401807 | . | T | A | 38       | PASS | AC=1;AF=0.015;AN=68;BaseQRankSum=  |
| 40196 | chrY | 16401983 | . | A | G | 252.57   | PASS | AC=2;AF=0.100;AN=20;DP=50;FS=0.00  |
| 40197 | chrY | 16402912 | . | A | G | 757.86   | PASS | AC=6;AF=0.107;AN=56;DP=244;FS=0.0  |
| 40198 | chrY | 16403895 | . | A | T | 1373.52  | PASS | AC=6;AF=0.086;AN=70;DP=382;FS=0.0  |
| 40199 | chrY | 16407174 | . | T | C | 1062.40  | PASS | AC=6;AF=0.086;AN=70;DP=304;FS=0.0  |
| 40200 | chrY | 16409159 | . | C | A | 725.75   | PASS | AC=18;AF=0.500;AN=36;DP=170;FS=0.  |
| 40201 | chrY | 16411247 | . | A | G | 696.44   | PASS | AC=6;AF=0.086;AN=70;DP=250;FS=0.0  |
| 40202 | chrY | 16413930 | . | G | A | 1131.15  | PASS | AC=6;AF=0.091;AN=66;DP=263;FS=0.0  |
| 40203 | chrY | 16415858 | . | C | T | 111.18   | PASS | AC=4;AF=0.057;AN=70;DP=344;FS=0.0  |
| 40204 | chrY | 16415936 | . | A | G | 1212.73  | PASS | AC=6;AF=0.086;AN=70;DP=384;FS=0.0  |

|       |      |          |   |   |   |          |               |                                    |
|-------|------|----------|---|---|---|----------|---------------|------------------------------------|
| 40205 | chrY | 16421639 | . | T | C | 1396.53  | PASS          | AC=6;AF=0.200;AN=30;DP=149;FS=0.0  |
| 40206 | chrY | 16425449 | . | T | C | 17915.89 | PASS          | AC=70;AF=1.00;AN=70;BaseQ          |
| 40207 | chrY | 16426937 | . | G | C | 3885.97  | PASS          | AC=20;AF=1.00;AN=20;DP=153;FS=0.0  |
| 40208 | chrY | 16429385 | . | C | A | 129.77   | PASS          | AC=2;AF=0.029;AN=70;DP=352;FS=0.0  |
| 40209 | chrY | 16435956 | . | G | T | 51.82    | PASS          | AC=2;AF=0.045;AN=44;BaseQRankSum=  |
| 40210 | chrY | 16438514 | . | A | G | 3586.32  | PASS          | AC=44;AF=0.710;AN=62;DP=248;FS=0.0 |
| 40211 | chrY | 16440192 | . | T | C | 80.07    | PASS          | AC=2;AF=0.030;AN=66;DP=259;FS=0.0  |
| 40212 | chrY | 16441971 | . | C | A | 121.14   | PASS          | AC=2;AF=0.056;AN=36;BaseQRankSum=  |
| 40213 | chrY | 16441973 | . | A | C | 1219.81  | PASS          | AC=23;AF=0.676;AN=34;BaseQRankSum= |
| 40214 | chrY | 16441975 | . | A | C | 327.76   | PASS          | AC=8;AF=0.167;AN=48;DP=96;FS=0.00  |
| 40215 | chrY | 16441977 | . | A | C | 50.56    | PASS          | AC=2;AF=0.048;AN=42;DP=80;FS=0.00  |
| 40216 | chrY | 16442413 | . | G | T | 1119.12  | PASS          | AC=6;AF=0.086;AN=70;DP=541;FS=0.0  |
| 40217 | chrY | 16442429 | . | G | C | 1142.86  | PASS          | AC=6;AF=0.086;AN=70;DP=615;FS=0.0  |
| 40218 | chrY | 16446449 | . | C | T | 448.20   | PASS          | AC=2;AF=0.029;AN=70;DP=626;FS=0.0  |
| 40219 | chrY | 16450159 | . | C | A | 2669.29  | PASS          | AC=12;AF=0.182;AN=66;DP=267;FS=0.0 |
| 40220 | chrY | 16454814 | . | C | T | 1118.88  | PASS          | AC=6;AF=0.086;AN=70;DP=397;FS=0.0  |
| 40221 | chrY | 16455146 | . | G | T | 602.62   | PASS          | AC=6;AF=0.086;AN=70;DP=455;FS=0.0  |
| 40222 | chrY | 16456515 | . | A | G | 356.52   | PASS          | AC=2;AF=0.029;AN=70;DP=499;FS=0.0  |
| 40223 | chrY | 16456522 | . | G | A | 2653.90  | PASS          | AC=14;AF=0.200;AN=70;DP=499;FS=0.0 |
| 40224 | chrY | 16458291 | . | A | G | 806.32   | PASS          | AC=6;AF=0.086;AN=70;DP=339;FS=0.0  |
| 40225 | chrY | 16459782 | . | T | C | 841.90   | PASS          | AC=6;AF=0.086;AN=70;DP=306;FS=0.0  |
| 40226 | chrY | 16460572 | . | C | A | 111.70   | PASS          | AC=1;AF=0.014;AN=70;BaseQRankSum=  |
| 40227 | chrY | 16460576 | . | T | A | 108.71   | PASS          | AC=1;AF=0.014;AN=70;BaseQRankSum=  |
| 40228 | chrY | 16460591 | . | G | A | 144.17   | PASS          | AC=1;AF=0.014;AN=70;BaseQRankSum=  |
| 40229 | chrY | 16460618 | . | C | A | 33.67    | PASS          | AC=1;AF=0.014;AN=70;BaseQRankSum=  |
| 40230 | chrY | 16467111 | . | T | C | 10244.52 | PASS          | AC=56;AF=0.824;AN=68;DP=5          |
| 40231 | chrY | 16477410 | . | G | A | 1341.33  | PASS          | AC=6;AF=0.086;AN=70;DP=515;FS=0.0  |
| 40232 | chrY | 16478764 | . | G | A | 74.69    | PASS          | AC=1;AF=0.015;AN=68;BaseQRankSum=  |
| 40233 | chrY | 16478768 | . | G | C | 31.19    | my_snp_filter | AC=1;AF=0.015;AN=68;BaseQ          |
| 40234 | chrY | 16478770 | . | G | C | 31.11    | my_snp_filter | AC=1;AF=0.015;AN=68;BaseQ          |
| 40235 | chrY | 16480738 | . | A | G | 687.31   | PASS          | AC=6;AF=0.086;AN=70;DP=517;FS=0.0  |
| 40236 | chrY | 16483478 | . | C | T | 1364.81  | PASS          | AC=6;AF=0.086;AN=70;DP=403;FS=0.0  |
| 40237 | chrY | 16486412 | . | G | A | 900.25   | PASS          | AC=6;AF=0.086;AN=70;BaseQRankSum=  |
| 40238 | chrY | 16487601 | . | A | G | 69.17    | PASS          | AC=1;AF=0.015;AN=68;BaseQRankSum=  |
| 40239 | chrY | 16487622 | . | C | T | 74.78    | PASS          | AC=1;AF=0.014;AN=70;BaseQRankSum=  |
| 40240 | chrY | 16487623 | . | A | T | 74.64    | PASS          | AC=1;AF=0.014;AN=70;BaseQRankSum=  |
| 40241 | chrY | 16487627 | . | A | T | 74.92    | PASS          | AC=1;AF=0.014;AN=70;BaseQRankSum=  |
| 40242 | chrY | 16487640 | . | A | G | 32.25    | my_snp_filter | AC=1;AF=0.014;AN=70;BaseQ          |
| 40243 | chrY | 16487654 | . | C | A | 31.79    | my_snp_filter | AC=1;AF=0.014;AN=70;BaseQ          |
| 40244 | chrY | 16487661 | . | G | A | 32.08    | my_snp_filter | AC=1;AF=0.014;AN=70;BaseQ          |
| 40245 | chrY | 16487666 | . | C | T | 31.62    | my_snp_filter | AC=1;AF=0.014;AN=70;BaseQ          |
| 40246 | chrY | 16489668 | . | T | G | 9398.02  | PASS          | AC=66;AF=1.00;AN=66;BaseQRankSum=  |
| 40247 | chrY | 16489797 | . | A | G | 104.58   | PASS          | AC=1;AF=0.015;AN=66;BaseQRankSum=  |
| 40248 | chrY | 16489798 | . | T | A | 104.55   | PASS          | AC=1;AF=0.015;AN=66;BaseQRankSum=  |
| 40249 | chrY | 16489799 | . | A | C | 128.25   | PASS          | AC=1;AF=0.015;AN=66;BaseQRankSum=  |
| 40250 | chrY | 16489808 | . | T | C | 131.59   | PASS          | AC=1;AF=0.016;AN=64;BaseQRankSum=  |
| 40251 | chrY | 16489819 | . | T | C | 313.11   | PASS          | AC=2;AF=0.032;AN=62;BaseQRankSum=  |
| 40252 | chrY | 16489820 | . | G | A | 311.03   | PASS          | AC=2;AF=0.032;AN=62;BaseQRankSum=  |
| 40253 | chrY | 16489827 | . | G | T | 334.44   | PASS          | AC=3;AF=0.048;AN=62;BaseQRankSum=  |
| 40254 | chrY | 16489875 | . | G | A | 299.46   | PASS          | AC=5;AF=0.076;AN=66;BaseQRankSum=  |
| 40255 | chrY | 16489886 | . | A | G | 744.46   | PASS          | AC=8;AF=0.121;AN=66;BaseQRankSum=  |
| 40256 | chrY | 16489887 | . | G | C | 740.08   | PASS          | AC=8;AF=0.121;AN=66;BaseQRankSum=  |
| 40257 | chrY | 16489891 | . | C | A | 746.75   | PASS          | AC=8;AF=0.118;AN=68;BaseQRankSum=  |
| 40258 | chrY | 16489893 | . | G | A | 752.74   | PASS          | AC=8;AF=0.118;AN=68;BaseQRankSum=  |
| 40259 | chrY | 16489898 | . | T | G | 752.82   | PASS          | AC=8;AF=0.118;AN=68;BaseQRankSum=  |
| 40260 | chrY | 16489904 | . | C | G | 741.23   | PASS          | AC=8;AF=0.118;AN=68;BaseQRankSum=  |
| 40261 | chrY | 16489921 | . | T | A | 658.52   | PASS          | AC=6;AF=0.091;AN=66;BaseQRankSum=  |
| 40262 | chrY | 16489931 | . | A | G | 669.80   | PASS          | AC=6;AF=0.091;AN=66;BaseQRankSum=  |
| 40263 | chrY | 16489974 | . | G | C | 181.76   | PASS          | AC=3;AF=0.043;AN=70;BaseQRankSum=  |
| 40264 | chrY | 16489979 | . | C | T | 186.25   | PASS          | AC=3;AF=0.043;AN=70;BaseQRankSum=  |
| 40265 | chrY | 16489981 | . | C | T | 186.50   | PASS          | AC=3;AF=0.043;AN=70;BaseQRankSum=  |
| 40266 | chrY | 16490062 | . | G | A | 110.71   | my_snp_filter | AC=5;AF=0.071;AN=70;BaseQ          |
| 40267 | chrY | 16490066 | . | A | G | 115.29   | my_snp_filter | AC=5;AF=0.071;AN=70;BaseQ          |
| 40268 | chrY | 16490079 | . | G | A | 124.93   | my_snp_filter | AC=5;AF=0.071;AN=70;BaseQ          |
| 40269 | chrY | 16490083 | . | C | T | 107.95   | my_snp_filter | AC=5;AF=0.071;AN=70;BaseQ          |
| 40270 | chrY | 16490087 | . | C | T | 93.76    | my_snp_filter | AC=5;AF=0.071;AN=70;BaseQ          |
| 40271 | chrY | 16490097 | . | C | T | 100.68   | my_snp_filter | AC=3;AF=0.043;AN=70;BaseQ          |
| 40272 | chrY | 16490108 | . | G | T | 88.62    | my_snp_filter | AC=5;AF=0.074;AN=68;BaseQ          |
| 40273 | chrY | 16490111 | . | A | G | 91.58    | my_snp_filter | AC=6;AF=0.088;AN=68;BaseQ          |
| 40274 | chrY | 16490115 | . | G | A | 12782.67 | PASS          | AC=56;AF=0.824;AN=68;BaseQ         |
| 40275 | chrY | 16490119 | . | A | T | 91.55    | my_snp_filter | AC=6;AF=0.088;AN=68;BaseQ          |
| 40276 | chrY | 16490126 | . | T | A | 90       | my_snp_filter | AC=6;AF=0.088;AN=68;BaseQ          |
| 40277 | chrY | 16490133 | . | G | A | 85.94    | my_snp_filter | AC=5;AF=0.071;AN=70;BaseQ          |
| 40278 | chrY | 16490144 | . | C | T | 107.48   | my_snp_filter | AC=5;AF=0.071;AN=70;BaseQ          |
| 40279 | chrY | 16490148 | . | A | G | 102.85   | my_snp_filter | AC=6;AF=0.086;AN=70;BaseQ          |
| 40280 | chrY | 16490151 | . | C | A | 95.19    | my_snp_filter | AC=6;AF=0.086;AN=70;BaseQ          |

|       |      |          |   |   |   |          |               |                                    |
|-------|------|----------|---|---|---|----------|---------------|------------------------------------|
| 40281 | chrY | 16490158 | . | G | C | 94.05    | my_snp_filter | AC=7;AF=0.100;AN=70;BaseQ          |
| 40282 | chrY | 16490165 | . | G | A | 85.96    | my_snp_filter | AC=5;AF=0.071;AN=70;BaseQ          |
| 40283 | chrY | 16490171 | . | C | A | 92.30    | my_snp_filter | AC=5;AF=0.071;AN=70;BaseQ          |
| 40284 | chrY | 16490174 | . | T | C | 64.04    | my_snp_filter | AC=3;AF=0.043;AN=70;BaseQ          |
| 40285 | chrY | 16490247 | . | C | T | 535.35   | PASS          | AC=3;AF=0.043;AN=70;BaseQRankSum=  |
| 40286 | chrY | 16490256 | . | C | T | 532.14   | PASS          | AC=3;AF=0.043;AN=70;BaseQRankSum=  |
| 40287 | chrY | 16490260 | . | G | C | 535.65   | PASS          | AC=3;AF=0.043;AN=70;BaseQRankSum=  |
| 40288 | chrY | 16490261 | . | G | T | 535.82   | PASS          | AC=3;AF=0.043;AN=70;BaseQRankSum=  |
| 40289 | chrY | 16490283 | . | T | C | 573.15   | PASS          | AC=3;AF=0.043;AN=70;BaseQRankSum=  |
| 40290 | chrY | 16490308 | . | G | A | 554.92   | PASS          | AC=3;AF=0.043;AN=70;BaseQRankSum=  |
| 40291 | chrY | 16490311 | . | T | G | 547.94   | PASS          | AC=3;AF=0.043;AN=70;BaseQRankSum=  |
| 40292 | chrY | 16490333 | . | T | C | 518.88   | PASS          | AC=3;AF=0.043;AN=70;BaseQRankSum=  |
| 40293 | chrY | 16490334 | . | G | A | 515.89   | PASS          | AC=3;AF=0.043;AN=70;BaseQRankSum=  |
| 40294 | chrY | 16490335 | . | A | G | 435.13   | PASS          | AC=3;AF=0.043;AN=70;BaseQRankSum=  |
| 40295 | chrY | 16490339 | . | C | G | 401.95   | PASS          | AC=2;AF=0.029;AN=70;BaseQRankSum=  |
| 40296 | chrY | 16490345 | . | G | A | 320.60   | PASS          | AC=2;AF=0.029;AN=70;BaseQRankSum=  |
| 40297 | chrY | 16490349 | . | T | A | 229.09   | PASS          | AC=1;AF=0.014;AN=70;BaseQRankSum=  |
| 40298 | chrY | 16490350 | . | G | C | 229.09   | PASS          | AC=1;AF=0.014;AN=70;BaseQRankSum=  |
| 40299 | chrY | 16490357 | . | C | A | 223.52   | PASS          | AC=1;AF=0.014;AN=70;BaseQRankSum=  |
| 40300 | chrY | 16490359 | . | T | C | 223.32   | PASS          | AC=1;AF=0.014;AN=70;BaseQRankSum=  |
| 40301 | chrY | 16490413 | . | T | C | 71.45    | PASS          | AC=1;AF=0.014;AN=70;BaseQRankSum=  |
| 40302 | chrY | 16490414 | . | G | A | 71.23    | PASS          | AC=1;AF=0.014;AN=70;BaseQRankSum=  |
| 40303 | chrY | 16490422 | . | T | C | 75.16    | PASS          | AC=1;AF=0.014;AN=70;BaseQRankSum=  |
| 40304 | chrY | 16490423 | . | G | A | 127.93   | PASS          | AC=2;AF=0.029;AN=70;BaseQRankSum=  |
| 40305 | chrY | 16490446 | . | C | A | 167.83   | PASS          | AC=3;AF=0.047;AN=64;BaseQRankSum=  |
| 40306 | chrY | 16490451 | . | T | A | 206.87   | PASS          | AC=3;AF=0.047;AN=64;BaseQRankSum=  |
| 40307 | chrY | 16490460 | . | A | G | 218.41   | PASS          | AC=3;AF=0.045;AN=66;BaseQRankSum=  |
| 40308 | chrY | 16490466 | . | G | T | 224.92   | PASS          | AC=4;AF=0.059;AN=68;BaseQRankSum=  |
| 40309 | chrY | 16490494 | . | A | T | 177.92   | PASS          | AC=5;AF=0.071;AN=70;BaseQRankSum=  |
| 40310 | chrY | 16490497 | . | C | A | 155.41   | PASS          | AC=4;AF=0.059;AN=68;BaseQRankSum=  |
| 40311 | chrY | 16490513 | . | G | C | 134.97   | PASS          | AC=3;AF=0.043;AN=70;BaseQRankSum=  |
| 40312 | chrY | 16490522 | . | C | G | 126.64   | PASS          | AC=3;AF=0.043;AN=70;BaseQRankSum=  |
| 40313 | chrY | 16490523 | . | T | C | 129.92   | PASS          | AC=3;AF=0.043;AN=70;BaseQRankSum=  |
| 40314 | chrY | 16490537 | . | C | A | 89.90    | PASS          | AC=2;AF=0.029;AN=70;BaseQRankSum=  |
| 40315 | chrY | 16490538 | . | A | G | 89.53    | PASS          | AC=2;AF=0.029;AN=70;BaseQRankSum=  |
| 40316 | chrY | 16490545 | . | C | T | 95.52    | PASS          | AC=2;AF=0.029;AN=70;BaseQRankSum=  |
| 40317 | chrY | 16490566 | . | C | T | 43.67    | PASS          | AC=1;AF=0.015;AN=66;BaseQRankSum=  |
| 40318 | chrY | 16490567 | . | A | G | 41.07    | PASS          | AC=1;AF=0.015;AN=66;BaseQRankSum=  |
| 40319 | chrY | 16490570 | . | C | T | 44.62    | PASS          | AC=1;AF=0.015;AN=66;BaseQRankSum=  |
| 40320 | chrY | 16490572 | . | A | C | 40.93    | PASS          | AC=1;AF=0.015;AN=66;BaseQRankSum=  |
| 40321 | chrY | 16491135 | . | T | C | 12085.94 | PASS          | AC=70;AF=1.00;AN=70;DP=40          |
| 40322 | chrY | 16492547 | . | T | C | 10788.05 | PASS          | AC=68;AF=1.00;AN=68;DP=38          |
| 40323 | chrY | 16494359 | . | A | C | 605.73   | PASS          | AC=14;AF=0.778;AN=18;DP=31;FS=0.0  |
| 40324 | chrY | 16494392 | . | T | G | 505.20   | PASS          | AC=4;AF=0.154;AN=26;DP=49;FS=9.33  |
| 40325 | chrY | 16494394 | . | T | G | 430.14   | PASS          | AC=4;AF=0.154;AN=26;DP=51;FS=9.70  |
| 40326 | chrY | 16494396 | . | T | G | 883.27   | PASS          | AC=6;AF=0.214;AN=28;BaseQRankSum=  |
| 40327 | chrY | 16494418 | . | T | G | 286.11   | PASS          | AC=6;AF=0.143;AN=42;DP=72;FS=0.00  |
| 40328 | chrY | 16497020 | . | C | T | 13084.02 | PASS          | AC=68;AF=1.00;AN=68;DP=43          |
| 40329 | chrY | 16497651 | . | C | G | 523.13   | PASS          | AC=2;AF=0.029;AN=70;DP=682;FS=0.0  |
| 40330 | chrY | 16499878 | . | A | G | 4682.86  | PASS          | AC=18;AF=1.00;AN=18;DP=178;FS=0.0  |
| 40331 | chrY | 16500468 | . | C | T | 1043.18  | PASS          | AC=6;AF=0.333;AN=18;DP=173;FS=0.0  |
| 40332 | chrY | 16508696 | . | C | G | 116.36   | PASS          | AC=2;AF=0.077;AN=26;DP=113;FS=0.0  |
| 40333 | chrY | 16511867 | . | T | C | 2368.92  | PASS          | AC=12;AF=0.171;AN=70;DP=444;FS=0.0 |
| 40334 | chrY | 16513359 | . | A | T | 43.99    | PASS          | AC=1;AF=0.016;AN=64;BaseQRankSum=  |
| 40335 | chrY | 16513362 | . | G | A | 43.89    | PASS          | AC=1;AF=0.016;AN=64;BaseQRankSum=  |
| 40336 | chrY | 16525245 | . | G | A | 7191.49  | PASS          | AC=52;AF=0.743;AN=70;DP=371;FS=0.0 |
| 40337 | chrY | 16530795 | . | A | G | 635.86   | PASS          | AC=6;AF=0.097;AN=62;DP=172;FS=0.0  |
| 40338 | chrY | 16531401 | . | G | T | 302.40   | PASS          | AC=2;AF=0.029;AN=70;DP=463;FS=0.0  |
| 40339 | chrY | 16535034 | . | G | A | 6737.01  | PASS          | AC=62;AF=1.00;AN=62;DP=230;FS=0.0  |
| 40340 | chrY | 16540803 | . | A | G | 51.69    | PASS          | AC=2;AF=0.100;AN=20;DP=163;FS=0.0  |
| 40341 | chrY | 16546187 | . | T | A | 1344.64  | PASS          | AC=6;AF=0.086;AN=70;DP=401;FS=0.0  |
| 40342 | chrY | 16546485 | . | T | C | 88.73    | PASS          | AC=2;AF=0.031;AN=64;DP=190;FS=0.0  |
| 40343 | chrY | 16549528 | . | G | A | 1744.87  | PASS          | AC=6;AF=0.088;AN=68;DP=454;FS=0.0  |
| 40344 | chrY | 16549877 | . | G | A | 1466.95  | PASS          | AC=6;AF=0.088;AN=68;DP=386;FS=0.0  |
| 40345 | chrY | 16550226 | . | G | T | 1204.48  | PASS          | AC=6;AF=0.086;AN=70;DP=483;FS=0.0  |
| 40346 | chrY | 16560334 | . | T | C | 608.33   | PASS          | AC=6;AF=0.086;AN=70;DP=587;FS=0.0  |
| 40347 | chrY | 16567551 | . | A | G | 11061.76 | PASS          | AC=54;AF=0.818;AN=66;BaseQ         |
| 40348 | chrY | 16573458 | . | A | G | 119.95   | PASS          | AC=2;AF=0.029;AN=68;DP=380;FS=0.0  |
| 40349 | chrY | 16574438 | . | A | T | 463.67   | PASS          | AC=2;AF=0.040;AN=50;DP=185;FS=0.0  |
| 40350 | chrY | 16574499 | . | A | C | 2243.03  | PASS          | AC=34;AF=0.654;AN=52;DP=232;FS=0.0 |
| 40351 | chrY | 16583538 | . | G | A | 1190.45  | PASS          | AC=6;AF=0.086;AN=70;DP=569;FS=0.0  |
| 40352 | chrY | 16590836 | . | C | T | 465.05   | PASS          | AC=6;AF=0.200;AN=30;DP=117;FS=0.0  |
| 40353 | chrY | 16595733 | . | C | T | 7664.01  | PASS          | AC=50;AF=0.735;AN=68;BaseQRankSum= |
| 40354 | chrY | 16607811 | . | C | A | 409.84   | PASS          | AC=2;AF=0.029;AN=68;DP=275;FS=0.0  |
| 40355 | chrY | 16607930 | . | T | G | 6739.11  | PASS          | AC=60;AF=1.00;AN=60;DP=242;FS=0.0  |
| 40356 | chrY | 16609794 | . | C | A | 1103.17  | PASS          | AC=6;AF=0.086;AN=70;DP=580;FS=0.0  |

|       |      |          |   |   |   |          |               |                                    |
|-------|------|----------|---|---|---|----------|---------------|------------------------------------|
| 40357 | chrY | 16610279 | . | C | T | 127.30   | PASS          | AC=2;AF=0.029;AN=70;DP=413;FS=0.0  |
| 40358 | chrY | 16615413 | . | T | G | 12423    | PASS          | AC=70;AF=1.00;AN=70;DP=396;FS=0.0  |
| 40359 | chrY | 16618045 | . | G | A | 43.87    | my_snp_filter | AC=2;AF=0.050;AN=40;BaseQ          |
| 40360 | chrY | 16618273 | . | T | G | 823.76   | PASS          | AC=6;AF=0.300;AN=20;DP=147;FS=0.0  |
| 40361 | chrY | 16621442 | . | T | C | 347.07   | PASS          | AC=6;AF=0.086;AN=70;DP=295;FS=0.0  |
| 40362 | chrY | 16621786 | . | G | A | 4207.80  | PASS          | AC=34;AF=0.548;AN=62;DP=345;FS=0.0 |
| 40363 | chrY | 16622019 | . | T | A | 8308.75  | PASS          | AC=34;AF=0.486;AN=70;DP=613;FS=0.0 |
| 40364 | chrY | 16625037 | . | G | A | 1112.38  | PASS          | AC=6;AF=0.250;AN=24;DP=139;FS=0.0  |
| 40365 | chrY | 16628931 | . | A | T | 868.48   | PASS          | AC=6;AF=0.088;AN=68;DP=226;FS=0.0  |
| 40366 | chrY | 16629782 | . | C | T | 16931.98 | PASS          | AC=70;AF=1.00;AN=70;DP=55          |
| 40367 | chrY | 16635445 | . | T | G | 800.63   | PASS          | AC=6;AF=0.086;AN=70;DP=511;FS=0.0  |
| 40368 | chrY | 16639435 | . | A | G | 489.76   | PASS          | AC=6;AF=0.088;AN=68;DP=301;FS=0.0  |
| 40369 | chrY | 16642608 | . | C | T | 666.42   | PASS          | AC=5;AF=0.071;AN=70;BaseQRankSum=  |
| 40370 | chrY | 16642612 | . | G | C | 703.25   | PASS          | AC=5;AF=0.071;AN=70;BaseQRankSum=  |
| 40371 | chrY | 16642677 | . | A | T | 1445.37  | PASS          | AC=6;AF=0.086;AN=70;BaseQRankSum=  |
| 40372 | chrY | 16642696 | . | C | T | 1732.35  | my_snp_filter | AC=6;AF=0.086;AN=70;BaseQ          |
| 40373 | chrY | 16642698 | . | A | T | 1771.83  | my_snp_filter | AC=6;AF=0.086;AN=70;BaseQ          |
| 40374 | chrY | 16642704 | . | G | C | 1910.31  | my_snp_filter | AC=6;AF=0.086;AN=70;BaseQ          |
| 40375 | chrY | 16642710 | . | C | T | 1701.29  | PASS          | AC=5;AF=0.071;AN=70;BaseQRankSum=  |
| 40376 | chrY | 16642721 | . | A | G | 1623.55  | PASS          | AC=6;AF=0.086;AN=70;BaseQRankSum=  |
| 40377 | chrY | 16642724 | . | G | A | 1578.94  | PASS          | AC=6;AF=0.086;AN=70;BaseQRankSum=  |
| 40378 | chrY | 16642741 | . | T | A | 1568.76  | PASS          | AC=7;AF=0.103;AN=68;BaseQRankSum=  |
| 40379 | chrY | 16642743 | . | T | C | 1524.80  | PASS          | AC=7;AF=0.103;AN=68;BaseQRankSum=  |
| 40380 | chrY | 16642758 | . | T | C | 267.31   | PASS          | AC=3;AF=0.043;AN=70;BaseQRankSum=  |
| 40381 | chrY | 16642771 | . | A | T | 328.98   | PASS          | AC=7;AF=0.103;AN=68;BaseQRankSum=  |
| 40382 | chrY | 16642772 | . | A | T | 323.05   | PASS          | AC=7;AF=0.103;AN=68;BaseQRankSum=  |
| 40383 | chrY | 16642777 | . | A | G | 336.25   | PASS          | AC=8;AF=0.114;AN=70;BaseQRankSum=  |
| 40384 | chrY | 16642808 | . | C | T | 236.21   | PASS          | AC=7;AF=0.100;AN=70;BaseQRankSum=  |
| 40385 | chrY | 16642824 | . | A | G | 179.35   | PASS          | AC=6;AF=0.086;AN=70;BaseQRankSum=  |
| 40386 | chrY | 16642830 | . | T | C | 176.95   | PASS          | AC=5;AF=0.071;AN=70;BaseQRankSum=  |
| 40387 | chrY | 16642838 | . | C | A | 253.73   | PASS          | AC=5;AF=0.071;AN=70;BaseQRankSum=  |
| 40388 | chrY | 16642866 | . | C | T | 522.68   | PASS          | AC=6;AF=0.086;AN=70;BaseQRankSum=  |
| 40389 | chrY | 16642873 | . | A | G | 574      | PASS          | AC=6;AF=0.086;AN=70;BaseQRankSum=  |
| 40390 | chrY | 16642875 | . | T | C | 543.86   | PASS          | AC=6;AF=0.086;AN=70;BaseQRankSum=  |
| 40391 | chrY | 16642876 | . | A | G | 544.06   | PASS          | AC=6;AF=0.086;AN=70;BaseQRankSum=  |
| 40392 | chrY | 16642879 | . | T | A | 541.86   | PASS          | AC=6;AF=0.086;AN=70;BaseQRankSum=  |
| 40393 | chrY | 16642880 | . | A | G | 535.67   | PASS          | AC=6;AF=0.086;AN=70;BaseQRankSum=  |
| 40394 | chrY | 16642884 | . | A | C | 539.94   | PASS          | AC=6;AF=0.086;AN=70;BaseQRankSum=  |
| 40395 | chrY | 16642886 | . | G | A | 536.72   | PASS          | AC=6;AF=0.086;AN=70;BaseQRankSum=  |
| 40396 | chrY | 16642890 | . | T | G | 581.54   | PASS          | AC=6;AF=0.086;AN=70;BaseQRankSum=  |
| 40397 | chrY | 16642893 | . | G | A | 589.85   | PASS          | AC=6;AF=0.086;AN=70;BaseQRankSum=  |
| 40398 | chrY | 16642946 | . | C | T | 697.96   | PASS          | AC=8;AF=0.121;AN=66;BaseQRankSum=  |
| 40399 | chrY | 16642956 | . | A | T | 699.32   | PASS          | AC=8;AF=0.121;AN=66;BaseQRankSum=  |
| 40400 | chrY | 16642962 | . | T | C | 511.45   | PASS          | AC=6;AF=0.091;AN=66;BaseQRankSum=  |
| 40401 | chrY | 16644119 | . | A | G | 1082.94  | PASS          | AC=6;AF=0.086;AN=70;DP=612;FS=0.0  |
| 40402 | chrY | 16644388 | . | G | A | 259.74   | PASS          | AC=2;AF=0.029;AN=70;DP=333;FS=0.0  |
| 40403 | chrY | 16645202 | . | C | T | 1104.82  | PASS          | AC=6;AF=0.086;AN=70;DP=309;FS=0.0  |
| 40404 | chrY | 16645425 | . | A | G | 51.74    | PASS          | AC=1;AF=0.014;AN=70;BaseQRankSum=  |
| 40405 | chrY | 16645435 | . | A | G | 79.80    | PASS          | AC=1;AF=0.014;AN=70;BaseQRankSum=  |
| 40406 | chrY | 16645593 | . | G | C | 1648.41  | PASS          | AC=6;AF=0.086;AN=70;DP=624;FS=0.0  |
| 40407 | chrY | 16646059 | . | C | A | 97.42    | PASS          | AC=4;AF=0.071;AN=56;DP=205;FS=0.0  |
| 40408 | chrY | 16648220 | . | G | T | 32.58    | PASS          | AC=1;AF=0.056;AN=18;BaseQRankSum=  |
| 40409 | chrY | 16648664 | . | C | G | 964.48   | PASS          | AC=6;AF=0.091;AN=66;DP=211;FS=0.0  |
| 40410 | chrY | 16648816 | . | G | A | 1401.90  | PASS          | AC=6;AF=0.086;AN=70;DP=620;FS=0.0  |
| 40411 | chrY | 16649534 | . | A | G | 441.99   | PASS          | AC=2;AF=0.029;AN=70;DP=415;FS=0.0  |
| 40412 | chrY | 16656810 | . | T | C | 80.41    | PASS          | AC=4;AF=0.222;AN=18;BaseQRankSum=  |
| 40413 | chrY | 16656818 | . | A | C | 182.48   | my_snp_filter | AC=5;AF=0.313;AN=16;BaseQ          |
| 40414 | chrY | 16658284 | . | C | T | 725.75   | PASS          | AC=2;AF=0.100;AN=20;DP=186;FS=0.0  |
| 40415 | chrY | 16661107 | . | T | G | 15402.76 | PASS          | AC=58;AF=0.829;AN=70;DP=6          |
| 40416 | chrY | 16663493 | . | C | G | 2069.72  | PASS          | AC=32;AF=0.593;AN=54;DP=244;FS=0.0 |
| 40417 | chrY | 16666962 | . | T | C | 252.07   | PASS          | AC=2;AF=0.029;AN=68;DP=319;FS=0.0  |
| 40418 | chrY | 16672108 | . | G | A | 496.24   | PASS          | AC=2;AF=0.029;AN=70;DP=486;FS=0.0  |
| 40419 | chrY | 16681389 | . | C | T | 461.07   | PASS          | AC=2;AF=0.029;AN=68;DP=394;FS=0.0  |
| 40420 | chrY | 16685562 | . | T | A | 230.21   | PASS          | AC=2;AF=0.091;AN=22;DP=194;FS=0.0  |
| 40421 | chrY | 16687539 | . | G | T | 1409.18  | PASS          | AC=6;AF=0.333;AN=18;BaseQRankSum=  |
| 40422 | chrY | 16690780 | . | C | T | 4160.57  | PASS          | AC=46;AF=0.793;AN=58;DP=275;FS=0.0 |
| 40423 | chrY | 16692387 | . | G | A | 709.21   | PASS          | AC=6;AF=0.086;AN=70;DP=292;FS=0.0  |
| 40424 | chrY | 16692682 | . | G | T | 436.39   | PASS          | AC=6;AF=0.097;AN=62;DP=304;FS=0.0  |
| 40425 | chrY | 16693532 | . | G | A | 1191.03  | PASS          | AC=6;AF=0.086;AN=70;DP=456;FS=0.0  |
| 40426 | chrY | 16696676 | . | G | A | 809.24   | PASS          | AC=20;AF=0.455;AN=44;DP=187;FS=0.0 |
| 40427 | chrY | 16698746 | . | T | G | 498.13   | PASS          | AC=2;AF=0.029;AN=70;DP=590;FS=0.0  |
| 40428 | chrY | 16704749 | . | G | A | 638.46   | PASS          | AC=4;AF=0.057;AN=70;DP=600;FS=0.0  |
| 40429 | chrY | 16710189 | . | A | G | 833.60   | PASS          | AC=6;AF=0.136;AN=44;DP=184;FS=0.0  |
| 40430 | chrY | 16713287 | . | A | G | 20557.96 | PASS          | AC=70;AF=1.00;AN=70;DP=68          |
| 40431 | chrY | 16714685 | . | G | A | 1112.50  | PASS          | AC=6;AF=0.088;AN=68;DP=464;FS=0.0  |
| 40432 | chrY | 16718720 | . | T | C | 4068.19  | PASS          | AC=36;AF=1.00;AN=36;DP=170;FS=0.0  |

|       |      |          |   |   |     |          |      |                                    |
|-------|------|----------|---|---|-----|----------|------|------------------------------------|
| 40433 | chrY | 16720013 | . | T | C   | 2450.87  | PASS | AC=18;AF=1.00;AN=18;DP=166;FS=0.0  |
| 40434 | chrY | 16720052 | . | T | C   | 1297.30  | PASS | AC=6;AF=0.333;AN=18;BaseQRankSum=  |
| 40435 | chrY | 16720143 | . | G | T   | 1178.19  | PASS | AC=6;AF=0.333;AN=18;DP=158;FS=0.0  |
| 40436 | chrY | 16723271 | . | C | T   | 780.40   | PASS | AC=12;AF=0.500;AN=24;BaseQRankSum  |
| 40437 | chrY | 16723439 | . | A | G,* | 913      | PASS | AC=16,2;AF=0.400,0.050;AN=40;DP=1  |
| 40438 | chrY | 16726837 | . | G | T   | 2491.90  | PASS | AC=18;AF=1.00;AN=18;DP=95;FS=0.00  |
| 40439 | chrY | 16727574 | . | A | G   | 343.20   | PASS | AC=2;AF=0.083;AN=24;DP=189;FS=0.0  |
| 40440 | chrY | 16731665 | . | C | T   | 7951.50  | PASS | AC=56;AF=0.824;AN=68;DP=345;FS=0.  |
| 40441 | chrY | 16733053 | . | G | A   | 493.72   | PASS | AC=2;AF=0.029;AN=70;DP=402;FS=0.0  |
| 40442 | chrY | 16739600 | . | G | A   | 1126.28  | PASS | AC=6;AF=0.094;AN=64;DP=336;FS=0.0  |
| 40443 | chrY | 16742224 | . | G | A   | 15926.88 | PASS | AC=64;AF=1.00;AN=64;DP=54          |
| 40444 | chrY | 16750304 | . | T | C   | 185.42   | PASS | AC=2;AF=0.029;AN=70;DP=311;FS=0.0  |
| 40445 | chrY | 16751375 | . | G | A   | 1295.18  | PASS | AC=6;AF=0.086;AN=70;DP=558;FS=0.0  |
| 40446 | chrY | 16751825 | . | A | G   | 9585.11  | PASS | AC=64;AF=1.00;AN=64;DP=332;FS=0.0  |
| 40447 | chrY | 16755578 | . | G | T   | 7016.63  | PASS | AC=38;AF=0.559;AN=68;BaseQRankSum  |
| 40448 | chrY | 16756078 | . | A | T   | 302.95   | PASS | AC=2;AF=0.029;AN=70;DP=369;FS=0.0  |
| 40449 | chrY | 16757900 | . | C | T   | 28237.68 | PASS | AC=52;AF=0.743;AN=70;DP=1          |
| 40450 | chrY | 16760911 | . | C | A   | 696.54   | PASS | AC=6;AF=0.103;AN=58;DP=190;FS=0.0  |
| 40451 | chrY | 16765490 | . | C | T   | 1542.82  | PASS | AC=6;AF=0.300;AN=20;DP=159;FS=0.0  |
| 40452 | chrY | 16767163 | . | T | C   | 35.71    | PASS | AC=1;AF=0.019;AN=54;BaseQRankSum=  |
| 40453 | chrY | 16768835 | . | C | T   | 1835.70  | PASS | AC=30;AF=0.625;AN=48;DP=181;FS=0.  |
| 40454 | chrY | 16768929 | . | T | C   | 1052.58  | PASS | AC=16;AF=0.571;AN=28;BaseQRankSum  |
| 40455 | chrY | 16769582 | . | G | A   | 1012.03  | PASS | AC=6;AF=0.097;AN=62;DP=424;FS=0.0  |
| 40456 | chrY | 16770163 | . | A | T   | 769.43   | PASS | AC=6;AF=0.088;AN=68;DP=320;FS=0.0  |
| 40457 | chrY | 16773870 | . | G | A   | 9971.05  | PASS | AC=66;AF=1.00;AN=66;DP=345;FS=0.0  |
| 40458 | chrY | 16777644 | . | G | T   | 31.32    | PASS | AC=1;AF=0.015;AN=66;BaseQRankSum=  |
| 40459 | chrY | 16778040 | . | C | T   | 2131.93  | PASS | AC=32;AF=0.571;AN=56;DP=265;FS=0.  |
| 40460 | chrY | 16780809 | . | G | A   | 14269.90 | PASS | AC=50;AF=0.735;AN=68;DP=6          |
| 40461 | chrY | 16780848 | . | T | C   | 438.19   | PASS | AC=2;AF=0.029;AN=70;DP=592;FS=0.0  |
| 40462 | chrY | 16781770 | . | A | C   | 953.01   | PASS | AC=6;AF=0.088;AN=68;DP=437;FS=0.0  |
| 40463 | chrY | 16786131 | . | C | A   | 47.47    | PASS | AC=1;AF=0.020;AN=50;BaseQRankSum=  |
| 40464 | chrY | 16796295 | . | C | A   | 3720.62  | PASS | AC=36;AF=0.545;AN=66;DP=326;FS=0.  |
| 40465 | chrY | 16796375 | . | C | G   | 6988.14  | PASS | AC=50;AF=0.735;AN=68;DP=396;FS=0.  |
| 40466 | chrY | 16818679 | . | T | A   | 686.11   | PASS | AC=16;AF=1.00;AN=16;DP=29;FS=0.00  |
| 40467 | chrY | 16818681 | . | T | A   | 435.26   | PASS | AC=8;AF=0.500;AN=16;DP=26;FS=0.00  |
| 40468 | chrY | 16823201 | . | T | C   | 3718.01  | PASS | AC=44;AF=0.710;AN=62;DP=251;FS=0.  |
| 40469 | chrY | 16823982 | . | A | G   | 612.90   | PASS | AC=6;AF=0.088;AN=68;DP=261;FS=0.0  |
| 40470 | chrY | 16832763 | . | T | C   | 1275.08  | PASS | AC=6;AF=0.086;AN=70;DP=483;FS=0.0  |
| 40471 | chrY | 16839641 | . | T | A   | 8906.42  | PASS | AC=56;AF=0.824;AN=68;DP=408;FS=0.  |
| 40472 | chrY | 16843208 | . | T | C   | 358.83   | PASS | AC=4;AF=0.057;AN=70;DP=336;FS=0.0  |
| 40473 | chrY | 16844417 | . | C | T   | 1088.43  | PASS | AC=6;AF=0.086;AN=70;DP=462;FS=0.0  |
| 40474 | chrY | 16847534 | . | G | C   | 1296.76  | PASS | AC=6;AF=0.103;AN=58;DP=235;FS=0.0  |
| 40475 | chrY | 16848084 | . | T | C   | 639.68   | PASS | AC=6;AF=0.086;AN=70;DP=597;FS=0.0  |
| 40476 | chrY | 16850199 | . | A | G   | 182.70   | PASS | AC=2;AF=0.029;AN=70;DP=269;FS=0.0  |
| 40477 | chrY | 16854800 | . | C | T   | 714.61   | PASS | AC=6;AF=0.107;AN=56;DP=129;FS=0.0  |
| 40478 | chrY | 16855781 | . | C | T   | 1360.47  | PASS | AC=6;AF=0.086;AN=70;DP=621;FS=0.0  |
| 40479 | chrY | 16856357 | . | C | T   | 13420.93 | PASS | AC=68;AF=1.00;AN=68;DP=45          |
| 40480 | chrY | 16857131 | . | C | T   | 1650.78  | PASS | AC=6;AF=0.086;AN=70;DP=447;FS=0.0  |
| 40481 | chrY | 16859254 | . | A | G   | 797.71   | PASS | AC=6;AF=0.088;AN=68;BaseQRankSum=  |
| 40482 | chrY | 16863259 | . | G | C   | 1096.26  | PASS | AC=6;AF=0.086;AN=70;DP=562;FS=0.0  |
| 40483 | chrY | 16863918 | . | C | A   | 9403.22  | PASS | AC=52;AF=0.743;AN=70;DP=450;FS=0.  |
| 40484 | chrY | 16865215 | . | T | C   | 32.26    | PASS | AC=1;AF=0.056;AN=18;BaseQRankSum=  |
| 40485 | chrY | 16869284 | . | C | T   | 881.40   | PASS | AC=6;AF=0.086;AN=70;DP=404;FS=0.0  |
| 40486 | chrY | 16870987 | . | G | C   | 1021.96  | PASS | AC=6;AF=0.086;AN=70;DP=358;FS=0.0  |
| 40487 | chrY | 16871809 | . | C | A   | 6376.69  | PASS | AC=50;AF=0.735;AN=68;DP=352;FS=0.0 |
| 40488 | chrY | 16882568 | . | C | T   | 17897.93 | PASS | AC=70;AF=1.00;AN=70;DP=62          |
| 40489 | chrY | 16889464 | . | G | A   | 181.77   | PASS | AC=2;AF=0.029;AN=70;DP=340;FS=0.0  |
| 40490 | chrY | 16894620 | . | C | T   | 1473.27  | PASS | AC=6;AF=0.086;AN=70;DP=621;FS=0.0  |
| 40491 | chrY | 16898155 | . | T | C   | 1176.58  | PASS | AC=6;AF=0.086;AN=70;DP=423;FS=0.0  |
| 40492 | chrY | 16898766 | . | A | C   | 451.12   | PASS | AC=2;AF=0.029;AN=70;DP=606;FS=0.0  |
| 40493 | chrY | 16902070 | . | A | G   | 833.38   | PASS | AC=6;AF=0.088;AN=68;DP=233;FS=0.0  |
| 40494 | chrY | 16903082 | . | G | C   | 837.22   | PASS | AC=6;AF=0.086;AN=70;DP=477;FS=0.0  |
| 40495 | chrY | 16903417 | . | G | A   | 1147.03  | PASS | AC=6;AF=0.086;AN=70;DP=618;FS=0.0  |
| 40496 | chrY | 16904813 | . | A | T   | 599.09   | PASS | AC=6;AF=0.086;AN=70;DP=290;FS=0.0  |
| 40497 | chrY | 16906683 | . | A | G   | 8668.34  | PASS | AC=56;AF=0.824;AN=68;DP=418;FS=0.  |
| 40498 | chrY | 16906927 | . | G | A   | 343.41   | PASS | AC=2;AF=0.063;AN=32;DP=156;FS=0.0  |
| 40499 | chrY | 16908601 | . | G | C   | 1014.63  | PASS | AC=6;AF=0.086;AN=70;DP=338;FS=0.0  |
| 40500 | chrY | 16915498 | . | T | G   | 1066.82  | PASS | AC=6;AF=0.086;AN=70;DP=436;FS=0.0  |
| 40501 | chrY | 16922757 | . | G | T   | 5218.84  | PASS | AC=44;AF=0.647;AN=68;DP=328;FS=0.  |
| 40502 | chrY | 16925709 | . | T | C   | 11863.08 | PASS | AC=52;AF=0.743;AN=70;DP=5          |
| 40503 | chrY | 16926235 | . | C | G   | 390.76   | PASS | AC=2;AF=0.029;AN=68;DP=475;FS=0.0  |
| 40504 | chrY | 16932181 | . | C | T   | 11089.57 | PASS | AC=50;AF=0.735;AN=68;DP=5          |
| 40505 | chrY | 16932723 | . | C | T   | 316.97   | PASS | AC=2;AF=0.030;AN=66;DP=374;FS=0.0  |
| 40506 | chrY | 16932886 | . | C | G   | 317.15   | PASS | AC=2;AF=0.029;AN=70;DP=331;FS=0.0  |
| 40507 | chrY | 16939406 | . | C | A   | 8596.10  | PASS | AC=64;AF=1.00;AN=64;BaseQRankSum=  |
| 40508 | chrY | 16944053 | . | C | T   | 13138.96 | PASS | AC=68;AF=1.00;AN=68;DP=43          |

|       |      |          |   |   |   |          |               |                                    |
|-------|------|----------|---|---|---|----------|---------------|------------------------------------|
| 40509 | chrY | 16945894 | . | A | G | 3846.59  | PASS          | AC=49;AF=0.721;AN=68;BaseQRankSum= |
| 40510 | chrY | 16946036 | . | C | T | 1072.67  | PASS          | AC=6;AF=0.086;AN=70;DP=546;FS=0.0  |
| 40511 | chrY | 16950107 | . | C | T | 2023.45  | PASS          | AC=6;AF=0.103;AN=58;DP=163;FS=0.0  |
| 40512 | chrY | 16952778 | . | T | G | 76.89    | PASS          | AC=1;AF=0.014;AN=70;BaseQRankSum=  |
| 40513 | chrY | 16954110 | . | A | T | 1367.80  | PASS          | AC=6;AF=0.088;AN=68;DP=431;FS=0.0  |
| 40514 | chrY | 16954365 | . | G | A | 1124.29  | PASS          | AC=6;AF=0.086;AN=70;DP=549;FS=0.0  |
| 40515 | chrY | 16957887 | . | T | C | 317.37   | PASS          | AC=2;AF=0.029;AN=70;DP=279;FS=0.0  |
| 40516 | chrY | 16959482 | . | T | A | 818.60   | PASS          | AC=6;AF=0.094;AN=64;DP=191;FS=0.0  |
| 40517 | chrY | 16960327 | . | A | T | 34.13    | PASS          | AC=1;AF=0.015;AN=66;BaseQRankSum=  |
| 40518 | chrY | 16960334 | . | T | A | 33.84    | PASS          | AC=1;AF=0.015;AN=68;BaseQRankSum=  |
| 40519 | chrY | 16960346 | . | A | G | 34.23    | PASS          | AC=1;AF=0.014;AN=70;BaseQRankSum=  |
| 40520 | chrY | 16962349 | . | G | A | 3626.12  | PASS          | AC=40;AF=0.625;AN=64;DP=320;FS=0.  |
| 40521 | chrY | 16965477 | . | G | A | 405.29   | PASS          | AC=2;AF=0.029;AN=70;DP=397;FS=0.0  |
| 40522 | chrY | 16967534 | . | C | T | 111.25   | PASS          | AC=2;AF=0.029;AN=68;DP=252;FS=0.0  |
| 40523 | chrY | 16971648 | . | G | T | 10656.05 | PASS          | AC=66;AF=1.00;AN=66;BaseQ          |
| 40524 | chrY | 16975302 | . | C | A | 7694.42  | PASS          | AC=56;AF=0.824;AN=68;BaseQRankSum= |
| 40525 | chrY | 16976800 | . | C | A | 103.51   | PASS          | AC=4;AF=0.167;AN=24;DP=202;FS=0.0  |
| 40526 | chrY | 16987831 | . | G | A | 1238.19  | PASS          | AC=6;AF=0.333;AN=18;DP=159;FS=0.0  |
| 40527 | chrY | 16993058 | . | C | T | 1144.77  | PASS          | AC=6;AF=0.086;AN=70;DP=437;FS=0.0  |
| 40528 | chrY | 16994286 | . | T | G | 1120.76  | PASS          | AC=6;AF=0.300;AN=20;DP=166;FS=0.0  |
| 40529 | chrY | 16994673 | . | G | A | 1420.18  | PASS          | AC=6;AF=0.333;AN=18;DP=152;FS=0.0  |
| 40530 | chrY | 16996654 | . | C | T | 482.21   | PASS          | AC=13;AF=0.929;AN=14;BaseQRankSum= |
| 40531 | chrY | 16996698 | . | C | T | 47.18    | PASS          | AC=1;AF=0.056;AN=18;BaseQRankSum=  |
| 40532 | chrY | 16996714 | . | G | T | 42.52    | PASS          | AC=1;AF=0.056;AN=18;BaseQRankSum=  |
| 40533 | chrY | 16996725 | . | C | T | 43.42    | PASS          | AC=1;AF=0.056;AN=18;BaseQRankSum=  |
| 40534 | chrY | 16996733 | . | G | C | 42.55    | PASS          | AC=1;AF=0.056;AN=18;BaseQRankSum=  |
| 40535 | chrY | 16996734 | . | C | T | 43.42    | PASS          | AC=1;AF=0.056;AN=18;BaseQRankSum=  |
| 40536 | chrY | 16996738 | . | G | A | 42.59    | PASS          | AC=1;AF=0.056;AN=18;BaseQRankSum=  |
| 40537 | chrY | 16996739 | . | C | G | 42.49    | PASS          | AC=1;AF=0.056;AN=18;BaseQRankSum=  |
| 40538 | chrY | 16998568 | . | T | C | 472.91   | PASS          | AC=4;AF=0.182;AN=22;DP=157;FS=0.0  |
| 40539 | chrY | 16999205 | . | A | G | 277.02   | PASS          | AC=2;AF=0.111;AN=18;DP=178;FS=0.0  |
| 40540 | chrY | 17003020 | . | C | T | 997.22   | PASS          | AC=6;AF=0.086;AN=70;DP=483;FS=0.0  |
| 40541 | chrY | 17003761 | . | G | A | 1416.51  | PASS          | AC=6;AF=0.086;AN=70;DP=364;FS=0.0  |
| 40542 | chrY | 17005069 | . | A | T | 10258.94 | PASS          | AC=68;AF=1.00;AN=68;DP=33          |
| 40543 | chrY | 17011456 | . | G | A | 1996.14  | PASS          | AC=6;AF=0.086;AN=70;DP=458;FS=0.0  |
| 40544 | chrY | 17013398 | . | A | G | 1078.69  | PASS          | AC=6;AF=0.091;AN=66;DP=237;FS=0.0  |
| 40545 | chrY | 17013730 | . | A | G | 5037.79  | PASS          | AC=55;AF=0.982;AN=56;BaseQRankSum= |
| 40546 | chrY | 17018227 | . | C | T | 320.29   | PASS          | AC=6;AF=0.097;AN=62;DP=268;FS=0.0  |
| 40547 | chrY | 17018656 | . | C | G | 397.59   | PASS          | AC=2;AF=0.032;AN=62;DP=241;FS=0.0  |
| 40548 | chrY | 17027791 | . | A | C | 1570.03  | PASS          | AC=6;AF=0.091;AN=66;DP=297;FS=0.0  |
| 40549 | chrY | 17033780 | . | T | C | 578.47   | PASS          | AC=6;AF=0.115;AN=52;DP=181;FS=0.0  |
| 40550 | chrY | 17035449 | . | A | T | 1102.19  | PASS          | AC=6;AF=0.333;AN=18;DP=141;FS=0.0  |
| 40551 | chrY | 17035711 | . | A | G | 392.92   | PASS          | AC=3;AF=0.167;AN=18;BaseQRankSum=  |
| 40552 | chrY | 17040435 | . | T | G | 3023.47  | PASS          | AC=32;AF=0.571;AN=56;DP=265;FS=0.  |
| 40553 | chrY | 17048682 | . | A | T | 851.93   | PASS          | AC=6;AF=0.086;AN=70;DP=556;FS=0.0  |
| 40554 | chrY | 17053586 | . | A | G | 1385.35  | PASS          | AC=6;AF=0.086;AN=70;DP=547;FS=0.0  |
| 40555 | chrY | 17054046 | . | C | G | 43.82    | PASS          | AC=2;AF=0.033;AN=60;DP=243;FS=0.0  |
| 40556 | chrY | 17054936 | . | A | T | 375.94   | PASS          | AC=6;AF=0.500;AN=12;DP=24;FS=0.00  |
| 40557 | chrY | 17056170 | . | A | T | 13911.88 | PASS          | AC=46;AF=0.657;AN=70;DP=6          |
| 40558 | chrY | 17059145 | . | G | A | 1275.81  | my_snp_filter | AC=7;AF=0.350;AN=20;BaseQ          |
| 40559 | chrY | 17059146 | . | G | T | 1627.32  | my_snp_filter | AC=9;AF=0.500;AN=18;BaseQ          |
| 40560 | chrY | 17059149 | . | T | A | 1523.52  | my_snp_filter | AC=9;AF=0.450;AN=20;BaseQ          |
| 40561 | chrY | 17059180 | . | C | T | 71.81    | my_snp_filter | AC=3;AF=0.150;AN=20;BaseQ          |
| 40562 | chrY | 17059182 | . | C | T | 2084.08  | my_snp_filter | AC=9;AF=0.450;AN=20;BaseQ          |
| 40563 | chrY | 17059183 | . | T | G | 2096.08  | my_snp_filter | AC=9;AF=0.450;AN=20;BaseQ          |
| 40564 | chrY | 17059198 | . | T | A | 2157.31  | my_snp_filter | AC=9;AF=0.500;AN=18;BaseQ          |
| 40565 | chrY | 17059204 | . | T | A | 2045.09  | my_snp_filter | AC=9;AF=0.500;AN=18;BaseQ          |
| 40566 | chrY | 17059205 | . | A | T | 2045.09  | my_snp_filter | AC=9;AF=0.500;AN=18;BaseQ          |
| 40567 | chrY | 17059217 | . | C | T | 1733.09  | my_snp_filter | AC=9;AF=0.500;AN=18;BaseQ          |
| 40568 | chrY | 17059247 | . | C | T | 626.06   | my_snp_filter | AC=6;AF=0.333;AN=18;BaseQ          |
| 40569 | chrY | 17059255 | . | T | C | 630.92   | PASS          | AC=5;AF=0.278;AN=18;BaseQRankSum=  |
| 40570 | chrY | 17059258 | . | C | G | 560.13   | PASS          | AC=3;AF=0.167;AN=18;BaseQRankSum=  |
| 40571 | chrY | 17059267 | . | G | A | 475.48   | my_snp_filter | AC=5;AF=0.278;AN=18;BaseQ          |
| 40572 | chrY | 17059280 | . | G | T | 424.09   | PASS          | AC=4;AF=0.222;AN=18;BaseQRankSum=  |
| 40573 | chrY | 17059303 | . | T | A | 863.07   | PASS          | AC=6;AF=0.333;AN=18;BaseQRankSum=  |
| 40574 | chrY | 17059329 | . | T | A | 53.04    | my_snp_filter | AC=3;AF=0.167;AN=18;BaseQ          |
| 40575 | chrY | 17059338 | . | G | T | 1910.09  | PASS          | AC=9;AF=0.500;AN=18;BaseQRankSum=  |
| 40576 | chrY | 17059428 | . | C | A | 2437.01  | my_snp_filter | AC=8;AF=0.444;AN=18;BaseQ          |
| 40577 | chrY | 17059436 | . | C | A | 2416.01  | my_snp_filter | AC=8;AF=0.444;AN=18;BaseQ          |
| 40578 | chrY | 17059437 | . | A | T | 2393.01  | my_snp_filter | AC=8;AF=0.444;AN=18;BaseQ          |
| 40579 | chrY | 17059446 | . | T | C | 1970.60  | my_snp_filter | AC=8;AF=0.444;AN=18;BaseQ          |
| 40580 | chrY | 17059449 | . | G | T | 1883.54  | my_snp_filter | AC=8;AF=0.444;AN=18;BaseQ          |
| 40581 | chrY | 17059453 | . | G | A | 1676.54  | my_snp_filter | AC=8;AF=0.444;AN=18;BaseQ          |
| 40582 | chrY | 17065539 | . | C | A | 1431.38  | PASS          | AC=6;AF=0.250;AN=24;DP=169;FS=0.0  |
| 40583 | chrY | 17066797 | . | A | G | 1423.18  | PASS          | AC=6;AF=0.333;AN=18;DP=173;FS=0.0  |
| 40584 | chrY | 17067265 | . | C | A | 1221.76  | PASS          | AC=6;AF=0.300;AN=20;BaseQRankSum=  |

|       |      |          |   |   |     |          |               |                                    |
|-------|------|----------|---|---|-----|----------|---------------|------------------------------------|
| 40585 | chrY | 17070884 | . | T | A   | 187.28   | PASS          | AC=6;AF=0.273;AN=22;BaseQRankSum=  |
| 40586 | chrY | 17071093 | . | G | A   | 456.51   | PASS          | AC=6;AF=0.094;AN=64;DP=213;FS=0.0  |
| 40587 | chrY | 17071974 | . | C | T   | 8560.17  | PASS          | AC=50;AF=0.735;AN=68;DP=428;FS=0.  |
| 40588 | chrY | 17080017 | . | G | A   | 344.81   | PASS          | AC=4;AF=0.065;AN=62;DP=220;FS=0.0  |
| 40589 | chrY | 17084066 | . | A | G   | 791.18   | PASS          | AC=6;AF=0.333;AN=18;DP=192;FS=0.0  |
| 40590 | chrY | 17085914 | . | C | A   | 109.34   | PASS          | AC=2;AF=0.040;AN=50;DP=138;FS=0.0  |
| 40591 | chrY | 17094924 | . | A | T   | 32.38    | PASS          | AC=2;AF=0.037;AN=54;DP=182;FS=0.0  |
| 40592 | chrY | 17094925 | . | T | A   | 32.26    | PASS          | AC=2;AF=0.036;AN=56;DP=185;FS=0.0  |
| 40593 | chrY | 17099623 | . | A | T   | 940.65   | PASS          | AC=6;AF=0.086;AN=70;DP=478;FS=0.0  |
| 40594 | chrY | 17102925 | . | G | A   | 357.19   | PASS          | AC=2;AF=0.029;AN=70;DP=658;FS=0.0  |
| 40595 | chrY | 17103702 | . | C | T   | 1805.77  | PASS          | AC=6;AF=0.086;AN=70;DP=488;FS=0.0  |
| 40596 | chrY | 17103704 | . | A | G   | 1805.80  | PASS          | AC=6;AF=0.086;AN=70;DP=492;FS=0.0  |
| 40597 | chrY | 17106822 | . | A | G   | 46.12    | PASS          | AC=2;AF=0.029;AN=68;DP=415;FS=0.0  |
| 40598 | chrY | 17106840 | . | C | T   | 8664.14  | PASS          | AC=48;AF=0.727;AN=66;BaseQRankSum= |
| 40599 | chrY | 17113314 | . | G | T   | 981.05   | PASS          | AC=6;AF=0.086;AN=70;DP=563;FS=0.0  |
| 40600 | chrY | 17117608 | . | C | T   | 5294.56  | PASS          | AC=40;AF=0.625;AN=64;DP=313;FS=0.  |
| 40601 | chrY | 17122766 | . | T | A   | 202.37   | PASS          | AC=2;AF=0.083;AN=24;DP=144;FS=0.0  |
| 40602 | chrY | 17126807 | . | G | C   | 330.26   | PASS          | AC=2;AF=0.067;AN=30;DP=181;FS=0.0  |
| 40603 | chrY | 17127570 | . | G | T   | 33.87    | PASS          | AC=1;AF=0.014;AN=70;BaseQRankSum=  |
| 40604 | chrY | 17129406 | . | C | T   | 701.79   | PASS          | AC=6;AF=0.091;AN=66;DP=327;FS=0.0  |
| 40605 | chrY | 17132580 | . | T | C   | 13850.89 | PASS          | AC=66;AF=1.00;AN=66;DP=46          |
| 40606 | chrY | 17137589 | . | G | A   | 726.13   | PASS          | AC=6;AF=0.086;AN=70;DP=470;FS=0.0  |
| 40607 | chrY | 17142068 | . | T | A   | 10403.23 | PASS          | AC=54;AF=0.818;AN=66;DP=4          |
| 40608 | chrY | 17152659 | . | C | T   | 2095.78  | PASS          | AC=32;AF=0.727;AN=44;DP=181;FS=0.  |
| 40609 | chrY | 17153049 | . | A | T   | 32.34    | my_snp_filter | AC=1;AF=0.014;AN=70;BaseQ          |
| 40610 | chrY | 17153051 | . | A | G   | 32.29    | my_snp_filter | AC=1;AF=0.014;AN=70;BaseQ          |
| 40611 | chrY | 17154887 | . | G | A   | 1393.38  | PASS          | AC=6;AF=0.273;AN=22;DP=173;FS=0.0  |
| 40612 | chrY | 17157093 | . | C | T   | 17518.01 | PASS          | AC=52;AF=0.743;AN=70;Base          |
| 40613 | chrY | 17157702 | . | G | T   | 904.63   | PASS          | AC=6;AF=0.086;AN=70;DP=589;FS=0.0  |
| 40614 | chrY | 17164353 | . | T | A   | 4275.86  | PASS          | AC=18;AF=1.00;AN=18;DP=175;FS=0.0  |
| 40615 | chrY | 17169008 | . | T | C   | 744.65   | PASS          | AC=4;AF=0.061;AN=66;DP=282;FS=0.0  |
| 40616 | chrY | 17175773 | . | T | C   | 3324.68  | PASS          | AC=42;AF=0.700;AN=60;DP=276;FS=0.  |
| 40617 | chrY | 17176797 | . | A | T   | 7743.83  | PASS          | AC=48;AF=0.727;AN=66;DP=358;FS=0.  |
| 40618 | chrY | 17184198 | . | C | G   | 500.60   | PASS          | AC=2;AF=0.029;AN=70;DP=292;FS=0.0  |
| 40619 | chrY | 17190810 | . | A | C   | 982.63   | PASS          | AC=6;AF=0.086;AN=70;DP=248;FS=0.0  |
| 40620 | chrY | 17192238 | . | C | T   | 1284.22  | PASS          | AC=6;AF=0.086;AN=70;DP=523;FS=0.0  |
| 40621 | chrY | 17193400 | . | C | T   | 789.62   | PASS          | AC=16;AF=0.471;AN=34;DP=117;FS=0.  |
| 40622 | chrY | 17195931 | . | C | T   | 339.82   | PASS          | AC=2;AF=0.034;AN=58;DP=162;FS=0.0  |
| 40623 | chrY | 17201524 | . | A | T   | 1147.01  | PASS          | AC=6;AF=0.086;AN=70;DP=499;FS=0.0  |
| 40624 | chrY | 17203230 | . | G | A   | 160.76   | PASS          | AC=2;AF=0.029;AN=70;DP=445;FS=0.0  |
| 40625 | chrY | 17206350 | . | T | G   | 4476.13  | PASS          | AC=30;AF=1.00;AN=30;BaseQRankSum=  |
| 40626 | chrY | 17211530 | . | G | A   | 512.78   | PASS          | AC=6;AF=0.086;AN=70;DP=502;FS=0.0  |
| 40627 | chrY | 17222906 | . | G | T   | 9085.10  | PASS          | AC=66;AF=1.00;AN=66;DP=305;FS=0.0  |
| 40628 | chrY | 17226779 | . | A | G   | 1616.74  | PASS          | AC=6;AF=0.300;AN=20;DP=189;FS=0.0  |
| 40629 | chrY | 17229713 | . | T | G   | 5084.25  | PASS          | AC=48;AF=0.800;AN=60;DP=279;FS=0.  |
| 40630 | chrY | 17230585 | . | T | C   | 1431.18  | PASS          | AC=6;AF=0.333;AN=18;DP=173;FS=0.0  |
| 40631 | chrY | 17233615 | . | G | A   | 167.81   | PASS          | AC=2;AF=0.029;AN=70;DP=296;FS=0.0  |
| 40632 | chrY | 17245963 | . | T | G   | 210.09   | PASS          | AC=2;AF=0.111;AN=18;DP=166;FS=0.0  |
| 40633 | chrY | 17246175 | . | C | G   | 1918.84  | PASS          | AC=13;AF=0.191;AN=68;BaseQRankSum= |
| 40634 | chrY | 17252323 | . | G | A   | 1104.58  | PASS          | AC=6;AF=0.088;AN=68;DP=380;FS=0.0  |
| 40635 | chrY | 17254423 | . | C | T   | 1175.68  | PASS          | AC=6;AF=0.086;AN=70;DP=438;FS=0.0  |
| 40636 | chrY | 17256018 | . | T | C   | 7408.10  | PASS          | AC=56;AF=0.824;AN=68;DP=317;FS=0.  |
| 40637 | chrY | 17267277 | . | T | G   | 4516.97  | PASS          | AC=20;AF=1.00;AN=20;DP=173;FS=0.0  |
| 40638 | chrY | 17268266 | . | G | T   | 2533.18  | PASS          | AC=12;AF=0.667;AN=18;DP=158;FS=0.  |
| 40639 | chrY | 17268879 | . | T | A   | 1772.18  | PASS          | AC=6;AF=0.333;AN=18;DP=186;FS=0.0  |
| 40640 | chrY | 17270957 | . | A | C   | 3866.01  | PASS          | AC=46;AF=0.719;AN=64;DP=256;FS=0.  |
| 40641 | chrY | 17271875 | . | A | C   | 1074.57  | PASS          | AC=6;AF=0.086;AN=70;DP=343;FS=0.0  |
| 40642 | chrY | 17273922 | . | G | A   | 1558.12  | PASS          | AC=6;AF=0.086;AN=70;DP=706;FS=0.0  |
| 40643 | chrY | 17275703 | . | A | G   | 2554.09  | PASS          | AC=22;AF=1.00;AN=22;DP=115;FS=0.0  |
| 40644 | chrY | 17277520 | . | C | T   | 49.25    | PASS          | AC=2;AF=0.029;AN=68;DP=291;FS=0.0  |
| 40645 | chrY | 17281258 | . | G | T,* | 4852.21  | PASS          | AC=42,2;AF=0.955,0.045;AN=44;DP=1  |
| 40646 | chrY | 17285531 | . | A | C   | 281.49   | PASS          | AC=2;AF=0.029;AN=70;DP=276;FS=0.0  |
| 40647 | chrY | 17285993 | . | T | C   | 8472.03  | PASS          | AC=66;AF=1.00;AN=66;DP=291;FS=0.0  |
| 40648 | chrY | 17286006 | . | A | C   | 4634.30  | PASS          | AC=48;AF=0.727;AN=66;DP=305;FS=0.  |
| 40649 | chrY | 17293267 | . | T | G   | 33.88    | PASS          | AC=1;AF=0.014;AN=70;BaseQRankSum=  |
| 40650 | chrY | 17293933 | . | G | A   | 5709.33  | PASS          | AC=39;AF=0.557;AN=70;BaseQRankSum= |
| 40651 | chrY | 17298476 | . | C | A   | 1635.55  | PASS          | AC=6;AF=0.086;AN=70;DP=481;FS=0.0  |
| 40652 | chrY | 17299199 | . | A | C   | 4337.16  | PASS          | AC=43;AF=0.694;AN=62;BaseQRankSum= |
| 40653 | chrY | 17300645 | . | C | A   | 1390.87  | PASS          | AC=6;AF=0.333;AN=18;DP=128;FS=0.0  |
| 40654 | chrY | 17301262 | . | G | A   | 95       | PASS          | AC=2;AF=0.038;AN=52;BaseQRankSum=  |
| 40655 | chrY | 17301267 | . | G | A   | 43.28    | PASS          | AC=1;AF=0.019;AN=54;BaseQRankSum=  |
| 40656 | chrY | 17301401 | . | A | G   | 14730.93 | PASS          | AC=70;AF=1.00;AN=70;DP=49          |
| 40657 | chrY | 17307256 | . | T | C   | 643.69   | PASS          | AC=4;AF=0.083;AN=48;BaseQRankSum=  |
| 40658 | chrY | 17307261 | . | T | C   | 647.54   | PASS          | AC=4;AF=0.077;AN=52;BaseQRankSum=  |
| 40659 | chrY | 17307420 | . | G | A   | 462.09   | PASS          | AC=2;AF=0.032;AN=62;DP=211;FS=0.0  |
| 40660 | chrY | 17309013 | . | T | C   | 591.47   | PASS          | AC=6;AF=0.103;AN=58;DP=178;FS=0.0  |

|       |      |          |   |   |   |          |      |                                    |
|-------|------|----------|---|---|---|----------|------|------------------------------------|
| 40661 | chrY | 17309455 | . | G | A | 858.61   | PASS | AC=6;AF=0.088;AN=68;DP=496;FS=0.0  |
| 40662 | chrY | 17311975 | . | C | G | 5426.28  | PASS | AC=56;AF=0.824;AN=68;DP=256;FS=0.  |
| 40663 | chrY | 17314435 | . | G | A | 915.63   | PASS | AC=6;AF=0.086;AN=70;DP=453;FS=0.0  |
| 40664 | chrY | 17319340 | . | T | C | 874.21   | PASS | AC=2;AF=0.029;AN=70;DP=557;FS=0.0  |
| 40665 | chrY | 17322546 | . | G | A | 207.45   | PASS | AC=2;AF=0.029;AN=70;DP=684;FS=0.0  |
| 40666 | chrY | 17323414 | . | A | G | 40.47    | PASS | AC=1;AF=0.026;AN=38;BaseQRankSum=  |
| 40667 | chrY | 17323420 | . | G | A | 35.54    | PASS | AC=1;AF=0.026;AN=38;BaseQRankSum=  |
| 40668 | chrY | 17323793 | . | G | C | 474.66   | PASS | AC=6;AF=0.158;AN=38;DP=136;FS=0.0  |
| 40669 | chrY | 17324032 | . | C | A | 68.41    | PASS | AC=2;AF=0.029;AN=70;BaseQRankSum=  |
| 40670 | chrY | 17324038 | . | A | G | 43.44    | PASS | AC=2;AF=0.029;AN=70;BaseQRankSum=  |
| 40671 | chrY | 17324039 | . | G | C | 37.73    | PASS | AC=2;AF=0.029;AN=70;BaseQRankSum=  |
| 40672 | chrY | 17328425 | . | C | T | 8519.58  | PASS | AC=51;AF=0.729;AN=70;BaseQRankSum= |
| 40673 | chrY | 17330136 | . | A | T | 1046.38  | PASS | AC=6;AF=0.158;AN=38;BaseQRankSum=  |
| 40674 | chrY | 17331881 | . | C | A | 1087.75  | PASS | AC=6;AF=0.086;AN=70;DP=597;FS=0.0  |
| 40675 | chrY | 17332858 | . | A | G | 464.89   | PASS | AC=6;AF=0.088;AN=68;DP=333;FS=0.0  |
| 40676 | chrY | 17334694 | . | T | G | 6499.11  | PASS | AC=58;AF=0.967;AN=60;DP=236;FS=0.  |
| 40677 | chrY | 17338843 | . | G | A | 551.34   | PASS | AC=2;AF=0.029;AN=70;DP=603;FS=0.0  |
| 40678 | chrY | 17341195 | . | G | T | 13574.04 | PASS | AC=52;AF=0.743;AN=70;DP=6          |
| 40679 | chrY | 17341271 | . | A | T | 1243.58  | PASS | AC=6;AF=0.086;AN=70;DP=525;FS=0.0  |
| 40680 | chrY | 17341676 | . | G | A | 13077.90 | PASS | AC=68;AF=1.00;AN=68;BaseQ          |
| 40681 | chrY | 17342227 | . | G | C | 877.87   | PASS | AC=6;AF=0.086;AN=70;DP=480;FS=0.0  |
| 40682 | chrY | 17349942 | . | A | G | 533.44   | PASS | AC=2;AF=0.029;AN=70;DP=574;FS=0.0  |
| 40683 | chrY | 17358069 | . | G | A | 1286.07  | PASS | AC=6;AF=0.088;AN=68;DP=504;FS=0.0  |
| 40684 | chrY | 17359042 | . | A | T | 30.56    | PASS | AC=1;AF=0.014;AN=70;BaseQRankSum=  |
| 40685 | chrY | 17359052 | . | A | G | 33.55    | PASS | AC=1;AF=0.014;AN=70;BaseQRankSum=  |
| 40686 | chrY | 17359530 | . | T | C | 84.56    | PASS | AC=2;AF=0.029;AN=70;DP=271;FS=0.0  |
| 40687 | chrY | 17360185 | . | G | T | 511.32   | PASS | AC=2;AF=0.029;AN=70;DP=552;FS=0.0  |
| 40688 | chrY | 17364455 | . | G | T | 779.09   | PASS | AC=6;AF=0.088;AN=68;DP=387;FS=0.0  |
| 40689 | chrY | 17367377 | . | C | T | 1097.49  | PASS | AC=6;AF=0.086;AN=70;BaseQRankSum=  |
| 40690 | chrY | 17368851 | . | A | G | 404.72   | PASS | AC=2;AF=0.029;AN=70;DP=527;FS=0.0  |
| 40691 | chrY | 17374007 | . | T | G | 13901.95 | PASS | AC=70;AF=1.00;AN=70;BaseQ          |
| 40692 | chrY | 17375556 | . | C | T | 237.98   | PASS | AC=2;AF=0.029;AN=68;DP=385;FS=0.0  |
| 40693 | chrY | 17376528 | . | G | A | 1491.05  | PASS | AC=6;AF=0.086;AN=70;DP=617;FS=0.0  |
| 40694 | chrY | 17382723 | . | C | T | 3384.06  | PASS | AC=42;AF=0.636;AN=66;DP=274;FS=0.  |
| 40695 | chrY | 17384938 | . | A | T | 1493.05  | PASS | AC=6;AF=0.088;AN=68;DP=535;FS=0.0  |
| 40696 | chrY | 17386294 | . | A | G | 1245.85  | PASS | AC=6;AF=0.086;AN=70;DP=394;FS=0.0  |
| 40697 | chrY | 17386406 | . | A | G | 905.65   | PASS | AC=6;AF=0.088;AN=68;DP=560;FS=0.0  |
| 40698 | chrY | 17389382 | . | A | G | 35.58    | PASS | AC=1;AF=0.018;AN=56;BaseQRankSum=  |
| 40699 | chrY | 17389393 | . | T | C | 35.43    | PASS | AC=1;AF=0.019;AN=54;BaseQRankSum=  |
| 40700 | chrY | 17396108 | . | T | C | 158.26   | PASS | AC=2;AF=0.029;AN=70;DP=382;FS=0.0  |
| 40701 | chrY | 17396832 | . | C | A | 999.59   | PASS | AC=6;AF=0.086;AN=70;DP=497;FS=0.0  |
| 40702 | chrY | 17397645 | . | C | T | 10791.04 | PASS | AC=66;AF=1.00;AN=66;DP=37          |
| 40703 | chrY | 17398598 | . | T | C | 8166.47  | PASS | AC=58;AF=0.829;AN=70;DP=383;FS=0.  |
| 40704 | chrY | 17399444 | . | G | T | 1309.92  | PASS | AC=6;AF=0.086;AN=70;DP=450;FS=0.0  |
| 40705 | chrY | 17400785 | . | A | G | 5597.24  | PASS | AC=56;AF=1.00;AN=56;DP=251;FS=0.0  |
| 40706 | chrY | 17406441 | . | C | A | 1036.11  | PASS | AC=6;AF=0.094;AN=64;BaseQRankSum=  |
| 40707 | chrY | 17406793 | . | A | G | 777.94   | PASS | AC=6;AF=0.086;AN=70;DP=324;FS=0.0  |
| 40708 | chrY | 17410206 | . | C | T | 895.43   | PASS | AC=6;AF=0.088;AN=68;DP=371;FS=0.0  |
| 40709 | chrY | 17412198 | . | T | C | 4692.06  | PASS | AC=50;AF=0.806;AN=62;DP=266;FS=0.  |
| 40710 | chrY | 17412741 | . | T | G | 488.52   | PASS | AC=6;AF=0.088;AN=68;DP=368;FS=0.0  |
| 40711 | chrY | 17418386 | . | G | C | 1097.96  | PASS | AC=6;AF=0.086;AN=70;DP=585;FS=0.0  |
| 40712 | chrY | 17424798 | . | C | T | 185.20   | PASS | AC=2;AF=0.029;AN=70;DP=573;FS=0.0  |
| 40713 | chrY | 17429560 | . | C | T | 557.80   | PASS | AC=6;AF=0.086;AN=70;DP=402;FS=0.0  |
| 40714 | chrY | 17429912 | . | A | T | 639.20   | PASS | AC=2;AF=0.083;AN=24;DP=166;FS=0.0  |
| 40715 | chrY | 17431387 | . | C | T | 1229.96  | PASS | AC=6;AF=0.086;AN=70;DP=351;FS=0.0  |
| 40716 | chrY | 17434784 | . | T | C | 831.69   | PASS | AC=6;AF=0.086;AN=70;DP=496;FS=0.0  |
| 40717 | chrY | 17436057 | . | A | G | 12467.51 | PASS | AC=50;AF=0.735;AN=68;DP=6          |
| 40718 | chrY | 17436821 | . | C | A | 262.50   | PASS | AC=4;AF=0.059;AN=68;DP=362;FS=0.0  |
| 40719 | chrY | 17440195 | . | C | T | 1130.42  | PASS | AC=6;AF=0.086;AN=70;DP=535;FS=0.0  |
| 40720 | chrY | 17444848 | . | G | C | 349.26   | PASS | AC=2;AF=0.029;AN=70;DP=629;FS=0.0  |
| 40721 | chrY | 17445733 | . | C | T | 999.77   | PASS | AC=6;AF=0.091;AN=66;DP=359;FS=0.0  |
| 40722 | chrY | 17452496 | . | G | A | 356.27   | PASS | AC=2;AF=0.040;AN=50;DP=205;FS=0.0  |
| 40723 | chrY | 17456014 | . | C | G | 464.76   | PASS | AC=6;AF=0.086;AN=70;DP=528;FS=0.0  |
| 40724 | chrY | 17457010 | . | C | T | 18234.70 | PASS | AC=52;AF=0.743;AN=70;DP=7          |
| 40725 | chrY | 17460519 | . | A | G | 241.40   | PASS | AC=2;AF=0.029;AN=70;DP=640;FS=0.0  |
| 40726 | chrY | 17461478 | . | C | T | 12103.99 | PASS | AC=66;AF=1.00;AN=66;DP=40          |
| 40727 | chrY | 17462124 | . | A | G | 1378.97  | PASS | AC=6;AF=0.115;AN=52;DP=193;FS=0.0  |
| 40728 | chrY | 17464197 | . | C | T | 13754.92 | PASS | AC=58;AF=0.829;AN=70;DP=5          |
| 40729 | chrY | 17464651 | . | G | A | 663.06   | PASS | AC=6;AF=0.086;AN=70;DP=426;FS=0.0  |
| 40730 | chrY | 17464987 | . | G | C | 738.55   | PASS | AC=6;AF=0.088;AN=68;DP=413;FS=0.0  |
| 40731 | chrY | 17466722 | . | T | C | 46.26    | PASS | AC=1;AF=0.050;AN=20;BaseQRankSum=  |
| 40732 | chrY | 17466724 | . | A | T | 46.89    | PASS | AC=1;AF=0.050;AN=20;BaseQRankSum=  |
| 40733 | chrY | 17468144 | . | A | G | 613.35   | PASS | AC=6;AF=0.086;AN=70;DP=423;FS=0.0  |
| 40734 | chrY | 17470112 | . | A | G | 17910.96 | PASS | AC=70;AF=1.00;AN=70;DP=59          |
| 40735 | chrY | 17473622 | . | T | A | 433.08   | PASS | AC=2;AF=0.048;AN=42;DP=145;FS=0.0  |
| 40736 | chrY | 17478208 | . | C | T | 1290.78  | PASS | AC=6;AF=0.086;AN=70;DP=498;FS=0.0  |



|       |      |          |   |   |     |          |      |                                    |
|-------|------|----------|---|---|-----|----------|------|------------------------------------|
| 40737 | chrY | 17479395 | . | C | G   | 648.41   | PASS | AC=6;AF=0.115;AN=52;DP=211;FS=0.0  |
| 40738 | chrY | 17480413 | . | G | C   | 12317.09 | PASS | AC=44;AF=0.647;AN=68;DP=5          |
| 40739 | chrY | 17482729 | . | C | A   | 3255.01  | PASS | AC=42;AF=0.636;AN=66;DP=254;FS=0.  |
| 40740 | chrY | 17486536 | . | T | C   | 1027.19  | PASS | AC=6;AF=0.086;AN=70;DP=601;FS=0.0  |
| 40741 | chrY | 17492573 | . | T | G   | 533.48   | PASS | AC=2;AF=0.029;AN=70;DP=487;FS=0.0  |
| 40742 | chrY | 17493513 | . | T | C   | 8672.94  | PASS | AC=56;AF=0.824;AN=68;DP=390;FS=0.  |
| 40743 | chrY | 17493725 | . | G | C   | 289.67   | PASS | AC=4;AF=0.059;AN=68;DP=385;FS=0.0  |
| 40744 | chrY | 17495224 | . | A | T   | 10288.10 | PASS | AC=52;AF=0.743;AN=70;DP=4          |
| 40745 | chrY | 17500841 | . | G | A   | 36.55    | PASS | AC=1;AF=0.015;AN=68;BaseQRankSum=  |
| 40746 | chrY | 17502468 | . | T | C   | 21878.92 | PASS | AC=70;AF=1.00;AN=70;DP=73          |
| 40747 | chrY | 17505429 | . | C | T   | 225.30   | PASS | AC=2;AF=0.031;AN=64;DP=441;FS=0.0  |
| 40748 | chrY | 17508337 | . | T | C   | 12249.90 | PASS | AC=70;AF=1.00;AN=70;DP=41          |
| 40749 | chrY | 17509176 | . | C | T   | 874.32   | PASS | AC=6;AF=0.088;AN=68;DP=415;FS=0.0  |
| 40750 | chrY | 17509926 | . | C | T   | 1873.60  | PASS | AC=6;AF=0.086;AN=70;DP=560;FS=0.0  |
| 40751 | chrY | 17509927 | . | T | A   | 1873.60  | PASS | AC=6;AF=0.086;AN=70;DP=560;FS=0.0  |
| 40752 | chrY | 17509929 | . | G | A   | 1873.51  | PASS | AC=6;AF=0.086;AN=70;DP=560;FS=0.0  |
| 40753 | chrY | 17510269 | . | C | T   | 263.26   | PASS | AC=2;AF=0.030;AN=66;DP=485;FS=0.0  |
| 40754 | chrY | 17510288 | . | A | G   | 1101.09  | PASS | AC=6;AF=0.091;AN=66;DP=491;FS=0.0  |
| 40755 | chrY | 17510402 | . | C | G   | 10100.43 | PASS | AC=54;AF=0.818;AN=66;DP=4          |
| 40756 | chrY | 17511078 | . | G | T   | 471.53   | PASS | AC=6;AF=0.086;AN=70;DP=433;FS=0.0  |
| 40757 | chrY | 17513375 | . | G | T   | 1510.75  | PASS | AC=6;AF=0.086;AN=70;DP=393;FS=0.0  |
| 40758 | chrY | 17514328 | . | G | A   | 1148.20  | PASS | AC=6;AF=0.086;AN=70;DP=400;FS=0.0  |
| 40759 | chrY | 17517054 | . | T | A   | 480.67   | PASS | AC=2;AF=0.029;AN=70;DP=412;FS=0.0  |
| 40760 | chrY | 17523884 | . | C | G   | 1002.20  | PASS | AC=6;AF=0.333;AN=18;DP=159;FS=0.0  |
| 40761 | chrY | 17525398 | . | A | C   | 1186.41  | PASS | AC=6;AF=0.088;AN=68;DP=339;FS=0.0  |
| 40762 | chrY | 17526503 | . | G | A   | 9581.27  | PASS | AC=50;AF=0.735;AN=68;DP=457;FS=0.0 |
| 40763 | chrY | 17529945 | . | G | A   | 899.47   | PASS | AC=6;AF=0.086;AN=70;DP=290;FS=0.0  |
| 40764 | chrY | 17533118 | . | A | G   | 768.97   | PASS | AC=6;AF=0.086;AN=70;DP=458;FS=0.0  |
| 40765 | chrY | 17533255 | . | G | A   | 1080.81  | PASS | AC=6;AF=0.086;AN=70;DP=611;FS=0.0  |
| 40766 | chrY | 17534389 | . | A | T,* | 1600.86  | PASS | AC=29,2;AF=0.630,0.043;AN=46;Base  |
| 40767 | chrY | 17535032 | . | A | G   | 1230.23  | PASS | AC=6;AF=0.086;AN=70;DP=466;FS=0.0  |
| 40768 | chrY | 17535297 | . | C | A   | 2320.58  | PASS | AC=6;AF=0.086;AN=70;DP=521;FS=0.0  |
| 40769 | chrY | 17537568 | . | C | A   | 535.94   | PASS | AC=2;AF=0.029;AN=68;DP=424;FS=0.0  |
| 40770 | chrY | 17542867 | . | C | A   | 82.30    | PASS | AC=1;AF=0.056;AN=18;BaseQRankSum=  |
| 40771 | chrY | 17542869 | . | T | C   | 81.39    | PASS | AC=1;AF=0.056;AN=18;BaseQRankSum=  |
| 40772 | chrY | 17542877 | . | G | A   | 85.28    | PASS | AC=1;AF=0.056;AN=18;BaseQRankSum=  |
| 40773 | chrY | 17542919 | . | A | G   | 84.47    | PASS | AC=1;AF=0.056;AN=18;BaseQRankSum=  |
| 40774 | chrY | 17542923 | . | A | C   | 87.49    | PASS | AC=1;AF=0.056;AN=18;BaseQRankSum=  |
| 40775 | chrY | 17544876 | . | C | T   | 1209.98  | PASS | AC=6;AF=0.086;AN=70;DP=718;FS=0.0  |
| 40776 | chrY | 17545328 | . | C | T   | 1113.80  | PASS | AC=6;AF=0.086;AN=70;DP=374;FS=0.0  |
| 40777 | chrY | 17545608 | . | T | G   | 4065.19  | PASS | AC=32;AF=1.00;AN=32;DP=170;FS=0.0  |
| 40778 | chrY | 17546158 | . | G | T   | 154.35   | PASS | AC=4;AF=0.063;AN=64;DP=343;FS=0.0  |
| 40779 | chrY | 17550757 | . | A | G   | 45.84    | PASS | AC=2;AF=0.029;AN=70;DP=571;FS=0.0  |
| 40780 | chrY | 17550782 | . | A | G   | 45.84    | PASS | AC=2;AF=0.029;AN=70;DP=553;FS=0.0  |
| 40781 | chrY | 17551116 | . | C | T   | 2938.32  | PASS | AC=12;AF=0.171;AN=70;DP=602;FS=0.  |
| 40782 | chrY | 17557314 | . | G | A   | 1188.86  | PASS | AC=6;AF=0.188;AN=32;DP=147;FS=0.0  |
| 40783 | chrY | 17557999 | . | A | G   | 252.90   | PASS | AC=6;AF=0.088;AN=68;DP=334;FS=0.0  |
| 40784 | chrY | 17558158 | . | G | A   | 480.05   | PASS | AC=2;AF=0.029;AN=68;DP=281;FS=0.0  |
| 40785 | chrY | 17559652 | . | C | T   | 6862.14  | PASS | AC=62;AF=1.00;AN=62;DP=238;FS=0.0  |
| 40786 | chrY | 17567396 | . | C | T   | 1087.79  | PASS | AC=6;AF=0.086;AN=70;DP=415;FS=0.0  |
| 40787 | chrY | 17568340 | . | T | C   | 801.11   | PASS | AC=6;AF=0.100;AN=60;DP=308;FS=0.0  |
| 40788 | chrY | 17580090 | . | C | T   | 270.90   | PASS | AC=2;AF=0.030;AN=66;DP=300;FS=0.0  |
| 40789 | chrY | 17581577 | . | G | A   | 1077.76  | PASS | AC=6;AF=0.086;AN=70;DP=557;FS=0.0  |
| 40790 | chrY | 17581836 | . | A | G   | 5722.26  | PASS | AC=42;AF=0.636;AN=66;DP=370;FS=0   |
| 40791 | chrY | 17589518 | . | T | C   | 6496.13  | PASS | AC=66;AF=1.00;AN=66;DP=267;FS=0.0  |
| 40792 | chrY | 17594966 | . | G | C   | 11194.01 | PASS | AC=68;AF=1.00;AN=68;DP=38          |
| 40793 | chrY | 17595050 | . | C | G   | 171.50   | PASS | AC=2;AF=0.029;AN=70;DP=364;FS=0.0  |
| 40794 | chrY | 17595451 | . | C | A   | 976.64   | PASS | AC=6;AF=0.086;AN=70;DP=580;FS=0.0  |
| 40795 | chrY | 17595603 | . | T | C   | 1107.09  | PASS | AC=6;AF=0.086;AN=70;DP=562;FS=0.0  |
| 40796 | chrY | 17597179 | . | C | T   | 51.25    | PASS | AC=1;AF=0.029;AN=34;BaseQRankSum=  |
| 40797 | chrY | 17606096 | . | G | A   | 1924.02  | PASS | AC=6;AF=0.086;AN=70;DP=680;FS=0.0  |
| 40798 | chrY | 17610245 | . | T | A   | 1431.21  | PASS | AC=6;AF=0.086;AN=70;DP=441;FS=0.0  |
| 40799 | chrY | 17610570 | . | C | T   | 910.45   | PASS | AC=6;AF=0.086;AN=70;DP=583;FS=0.0  |
| 40800 | chrY | 17615618 | . | C | A   | 1383.67  | PASS | AC=6;AF=0.086;AN=70;DP=272;FS=0.0  |
| 40801 | chrY | 17615937 | . | T | C   | 350.71   | PASS | AC=2;AF=0.029;AN=70;DP=385;FS=0.0  |
| 40802 | chrY | 17618521 | . | G | A   | 1414.96  | PASS | AC=6;AF=0.273;AN=22;DP=184;FS=0.0  |
| 40803 | chrY | 17620544 | . | A | T   | 1596.65  | PASS | AC=6;AF=0.273;AN=22;DP=166;FS=0.0  |
| 40804 | chrY | 17621013 | . | T | C   | 38.01    | PASS | AC=1;AF=0.016;AN=62;BaseQRankSum=  |
| 40805 | chrY | 17625145 | . | C | G   | 1048.52  | PASS | AC=6;AF=0.086;AN=70;DP=465;FS=0.0  |
| 40806 | chrY | 17627976 | . | A | G   | 240.02   | PASS | AC=2;AF=0.111;AN=18;DP=179;FS=0.0  |
| 40807 | chrY | 17630545 | . | T | C   | 31.66    | PASS | AC=1;AF=0.015;AN=68;BaseQRankSum=  |
| 40808 | chrY | 17635466 | . | G | A   | 4848.34  | PASS | AC=17;AF=0.944;AN=18;BaseQRankSum= |
| 40809 | chrY | 17642615 | . | T | C   | 343      | PASS | AC=2;AF=0.029;AN=68;DP=382;FS=0.0  |
| 40810 | chrY | 17643584 | . | C | T   | 4884.76  | PASS | AC=12;AF=0.545;AN=22;DP=180;FS=0.  |
| 40811 | chrY | 17643607 | . | G | A   | 4931.32  | PASS | AC=12;AF=0.500;AN=24;DP=181;FS=0.  |
| 40812 | chrY | 17645869 | . | C | T   | 271.47   | PASS | AC=2;AF=0.029;AN=70;DP=425;FS=0.0  |

|       |      |          |   |   |     |          |      |                                    |
|-------|------|----------|---|---|-----|----------|------|------------------------------------|
| 40813 | chrY | 17648352 | . | C | A   | 41.38    | PASS | AC=2;AF=0.100;AN=20;DP=139;FS=0.0  |
| 40814 | chrY | 17656713 | . | G | C   | 814.08   | PASS | AC=6;AF=0.086;AN=70;DP=565;FS=0.0  |
| 40815 | chrY | 17656766 | . | A | G   | 550.15   | PASS | AC=6;AF=0.086;AN=70;DP=540;FS=0.0  |
| 40816 | chrY | 17657250 | . | A | T   | 546.24   | PASS | AC=2;AF=0.029;AN=70;DP=486;FS=0.0  |
| 40817 | chrY | 17659786 | . | T | C   | 393.46   | PASS | AC=6;AF=0.086;AN=70;DP=338;FS=0.0  |
| 40818 | chrY | 17660074 | . | T | G   | 11651.93 | PASS | AC=56;AF=0.824;AN=68;DP=4          |
| 40819 | chrY | 17662486 | . | T | C   | 704.76   | PASS | AC=6;AF=0.107;AN=56;BaseQRankSum=  |
| 40820 | chrY | 17663864 | . | C | A   | 11029.80 | PASS | AC=46;AF=0.657;AN=70;Base          |
| 40821 | chrY | 17665849 | . | C | G   | 1246.23  | PASS | AC=6;AF=0.086;AN=70;DP=385;FS=0.0  |
| 40822 | chrY | 17668868 | . | G | T   | 281.99   | PASS | AC=2;AF=0.029;AN=70;DP=360;FS=0.0  |
| 40823 | chrY | 17670031 | . | A | T   | 856.92   | PASS | AC=6;AF=0.088;AN=68;DP=282;FS=0.0  |
| 40824 | chrY | 17672182 | . | T | A   | 352.43   | PASS | AC=4;AF=0.059;AN=68;DP=422;FS=0.0  |
| 40825 | chrY | 17673490 | . | A | G   | 439.85   | PASS | AC=6;AF=0.086;AN=70;DP=469;FS=0.0  |
| 40826 | chrY | 17684085 | . | A | T   | 67.01    | PASS | AC=1;AF=0.050;AN=20;BaseQRankSum=  |
| 40827 | chrY | 17684089 | . | G | A   | 66.87    | PASS | AC=1;AF=0.050;AN=20;BaseQRankSum=  |
| 40828 | chrY | 17685931 | . | T | C   | 2372.04  | PASS | AC=30;AF=0.556;AN=54;DP=266;FS=0.0 |
| 40829 | chrY | 17686819 | . | T | C   | 960.80   | PASS | AC=6;AF=0.086;AN=70;DP=381;FS=0.0  |
| 40830 | chrY | 17687741 | . | C | T   | 938.12   | PASS | AC=6;AF=0.086;AN=70;DP=630;FS=0.0  |
| 40831 | chrY | 17689245 | . | T | C   | 5730.41  | PASS | AC=54;AF=0.818;AN=66;DP=297;FS=0.0 |
| 40832 | chrY | 17690901 | . | T | G   | 1131.56  | PASS | AC=6;AF=0.086;AN=70;DP=477;FS=0.0  |
| 40833 | chrY | 17691171 | . | A | G   | 311.75   | PASS | AC=2;AF=0.033;AN=60;DP=219;FS=0.0  |
| 40834 | chrY | 17692975 | . | C | T   | 1672.10  | PASS | AC=6;AF=0.086;AN=70;DP=401;FS=0.0  |
| 40835 | chrY | 17696029 | . | T | C   | 34.54    | PASS | AC=1;AF=0.015;AN=66;BaseQRankSum=  |
| 40836 | chrY | 17696030 | . | A | T   | 34.49    | PASS | AC=1;AF=0.015;AN=66;BaseQRankSum=  |
| 40837 | chrY | 17697807 | . | C | T   | 4200.86  | PASS | AC=18;AF=1.00;AN=18;DP=159;FS=0.0  |
| 40838 | chrY | 17709870 | . | C | G   | 262.28   | PASS | AC=2;AF=0.029;AN=70;DP=457;FS=0.0  |
| 40839 | chrY | 17710924 | . | C | T   | 1234.05  | PASS | AC=6;AF=0.088;AN=68;DP=343;FS=0.0  |
| 40840 | chrY | 17714662 | . | A | G   | 427.69   | PASS | AC=2;AF=0.029;AN=68;DP=427;FS=0.0  |
| 40841 | chrY | 17716251 | . | T | C   | 6721.09  | PASS | AC=44;AF=1.00;AN=44;DP=241;FS=0.0  |
| 40842 | chrY | 17717633 | . | G | T   | 299.74   | PASS | AC=2;AF=0.029;AN=70;DP=389;FS=0.0  |
| 40843 | chrY | 17720134 | . | A | T   | 632.60   | PASS | AC=6;AF=0.088;AN=68;DP=415;FS=0.0  |
| 40844 | chrY | 17722802 | . | A | G   | 8124.12  | PASS | AC=64;AF=1.00;AN=64;DP=283;FS=0.0  |
| 40845 | chrY | 17723403 | . | G | A   | 1023.47  | PASS | AC=8;AF=0.400;AN=20;DP=146;FS=0.0  |
| 40846 | chrY | 17723850 | . | T | C   | 4385.06  | PASS | AC=22;AF=1.00;AN=22;DP=163;FS=0.0  |
| 40847 | chrY | 17726102 | . | C | A   | 1295.75  | PASS | AC=6;AF=0.300;AN=20;DP=167;FS=0.0  |
| 40848 | chrY | 17726250 | . | G | T   | 4193.86  | PASS | AC=18;AF=1.00;AN=18;DP=169;FS=0.0  |
| 40849 | chrY | 17726918 | . | C | A   | 1426.75  | PASS | AC=6;AF=0.300;AN=20;DP=196;FS=0.0  |
| 40850 | chrY | 17727666 | . | G | T   | 865.22   | PASS | AC=6;AF=0.333;AN=18;DP=130;FS=0.0  |
| 40851 | chrY | 17731050 | . | T | A   | 31.81    | PASS | AC=1;AF=0.045;AN=22;BaseQRankSum=  |
| 40852 | chrY | 17731051 | . | C | A   | 33.51    | PASS | AC=1;AF=0.050;AN=20;BaseQRankSum=  |
| 40853 | chrY | 17731053 | . | G | A   | 32.77    | PASS | AC=1;AF=0.045;AN=22;BaseQRankSum=  |
| 40854 | chrY | 17731966 | . | G | A   | 1975.45  | PASS | AC=26;AF=0.433;AN=60;DP=251;FS=0.0 |
| 40855 | chrY | 17732408 | . | C | T   | 9069.17  | PASS | AC=66;AF=1.00;AN=66;DP=321;FS=0.0  |
| 40856 | chrY | 17732587 | . | C | A   | 2670.77  | PASS | AC=12;AF=0.500;AN=24;DP=173;FS=0.0 |
| 40857 | chrY | 17733547 | . | G | A   | 636.53   | PASS | AC=6;AF=0.333;AN=18;DP=95;FS=0.00  |
| 40858 | chrY | 17735413 | . | G | A   | 1192.91  | PASS | AC=6;AF=0.120;AN=50;DP=188;FS=0.0  |
| 40859 | chrY | 17739376 | . | G | A   | 1274.49  | PASS | AC=6;AF=0.088;AN=68;DP=351;FS=0.0  |
| 40860 | chrY | 17742266 | . | A | C   | 1181.08  | PASS | AC=6;AF=0.086;AN=70;DP=465;FS=0.0  |
| 40861 | chrY | 17747644 | . | C | A   | 1286.45  | PASS | AC=6;AF=0.086;AN=70;DP=274;FS=0.0  |
| 40862 | chrY | 17748163 | . | T | C   | 5246.73  | PASS | AC=48;AF=0.727;AN=66;DP=339;FS=0.0 |
| 40863 | chrY | 17754738 | . | A | T   | 64.91    | PASS | AC=2;AF=0.029;AN=68;DP=374;FS=0.0  |
| 40864 | chrY | 17755905 | . | A | G   | 6753.12  | PASS | AC=62;AF=1.00;AN=62;DP=236;FS=0.0  |
| 40865 | chrY | 17756426 | . | A | T   | 1029.04  | PASS | AC=6;AF=0.088;AN=68;DP=542;FS=0.0  |
| 40866 | chrY | 17762091 | . | C | T   | 1554.92  | PASS | AC=6;AF=0.086;AN=70;DP=372;FS=0.0  |
| 40867 | chrY | 17762668 | . | C | T   | 13838.22 | PASS | AC=55;AF=0.809;AN=68;Base          |
| 40868 | chrY | 17770379 | . | C | A   | 1011     | PASS | AC=6;AF=0.086;AN=70;DP=428;FS=0.0  |
| 40869 | chrY | 17772838 | . | A | G   | 608.03   | PASS | AC=6;AF=0.086;AN=70;DP=436;FS=0.0  |
| 40870 | chrY | 17781687 | . | T | C   | 630.98   | PASS | AC=8;AF=0.400;AN=20;DP=118;FS=0.0  |
| 40871 | chrY | 17782178 | . | G | C   | 8385.11  | PASS | AC=68;AF=1.00;AN=68;DP=303;FS=0.0  |
| 40872 | chrY | 17785901 | . | C | T   | 30.49    | PASS | AC=1;AF=0.014;AN=70;BaseQRankSum=  |
| 40873 | chrY | 17791140 | . | C | G   | 423.66   | PASS | AC=4;AF=0.059;AN=68;DP=402;FS=0.0  |
| 40874 | chrY | 17791990 | . | C | G   | 1208.09  | PASS | AC=6;AF=0.086;AN=70;DP=657;FS=0.0  |
| 40875 | chrY | 17792483 | . | T | G   | 488.72   | PASS | AC=6;AF=0.086;AN=70;DP=512;FS=0.0  |
| 40876 | chrY | 17794253 | . | G | T,* | 2169.68  | PASS | AC=6,10;AF=0.333,0.556;AN=18;DP=8  |
| 40877 | chrY | 17796093 | . | A | G   | 1199.18  | PASS | AC=6;AF=0.333;AN=18;DP=161;FS=0.0  |
| 40878 | chrY | 17796967 | . | T | C   | 811.82   | PASS | AC=6;AF=0.300;AN=20;DP=152;FS=0.0  |
| 40879 | chrY | 17800729 | . | T | A   | 982.65   | PASS | AC=6;AF=0.086;AN=70;DP=341;FS=0.0  |
| 40880 | chrY | 17800868 | . | T | G   | 1160.56  | PASS | AC=6;AF=0.086;AN=70;DP=328;FS=0.0  |
| 40881 | chrY | 17800918 | . | G | A   | 6292.36  | PASS | AC=46;AF=0.657;AN=70;DP=367;FS=0.0 |
| 40882 | chrY | 17803021 | . | A | G   | 1238.22  | PASS | AC=6;AF=0.086;AN=70;DP=592;FS=0.0  |
| 40883 | chrY | 17803867 | . | T | C   | 1744.55  | PASS | AC=4;AF=0.057;AN=70;DP=618;FS=0.0  |
| 40884 | chrY | 17807620 | . | T | A   | 382.52   | PASS | AC=2;AF=0.029;AN=70;DP=351;FS=0.0  |
| 40885 | chrY | 17809157 | . | T | C   | 1445.17  | PASS | AC=6;AF=0.086;AN=70;DP=526;FS=0.0  |
| 40886 | chrY | 17810927 | . | G | A   | 1590.95  | PASS | AC=6;AF=0.086;AN=70;DP=669;FS=0.0  |
| 40887 | chrY | 17813541 | . | T | C   | 3766.87  | PASS | AC=18;AF=1.00;AN=18;DP=145;FS=0.0  |
| 40888 | chrY | 17816063 | . | T | A   | 697.73   | PASS | AC=16;AF=1.00;AN=16;DP=27;FS=0.00  |

|       |      |          |   |   |   |          |               |                                    |
|-------|------|----------|---|---|---|----------|---------------|------------------------------------|
| 40889 | chrY | 17819026 | . | C | T | 1613.21  | PASS          | AC=6;AF=0.086;AN=70;DP=371;FS=0.0  |
| 40890 | chrY | 17819955 | . | G | A | 443.90   | PASS          | AC=6;AF=0.115;AN=52;DP=114;FS=0.0  |
| 40891 | chrY | 17820514 | . | C | T | 12355.18 | PASS          | AC=48;AF=0.727;AN=66;DP=5          |
| 40892 | chrY | 17822719 | . | T | G | 891.33   | PASS          | AC=6;AF=0.333;AN=18;DP=157;FS=0.0  |
| 40893 | chrY | 17829115 | . | G | C | 419.75   | PASS          | AC=2;AF=0.100;AN=20;DP=178;FS=0.0  |
| 40894 | chrY | 17833394 | . | T | C | 2363.47  | PASS          | AC=30;AF=0.625;AN=48;DP=211;FS=0.0 |
| 40895 | chrY | 17839184 | . | C | T | 1360.63  | PASS          | AC=6;AF=0.273;AN=22;DP=192;FS=0.0  |
| 40896 | chrY | 17839800 | . | C | T | 464.26   | PASS          | AC=2;AF=0.083;AN=24;DP=159;FS=0.0  |
| 40897 | chrY | 17839981 | . | A | G | 2851.97  | PASS          | AC=20;AF=1.00;AN=20;DP=194;FS=0.0  |
| 40898 | chrY | 17840021 | . | G | A | 705.20   | PASS          | AC=2;AF=0.083;AN=24;DP=212;FS=0.0  |
| 40899 | chrY | 17840163 | . | C | T | 1358.98  | PASS          | AC=30;AF=0.625;AN=48;DP=225;FS=0.0 |
| 40900 | chrY | 17840282 | . | G | A | 567.46   | PASS          | AC=2;AF=0.029;AN=70;DP=406;FS=0.0  |
| 40901 | chrY | 17842686 | . | T | G | 38.50    | PASS          | AC=3;AF=0.047;AN=64;BaseQRankSum=  |
| 40902 | chrY | 17844001 | . | T | C | 498.62   | PASS          | AC=4;AF=0.059;AN=68;DP=513;FS=0.0  |
| 40903 | chrY | 17844018 | . | C | T | 15279.89 | PASS          | AC=68;AF=1.00;AN=68;BaseQ          |
| 40904 | chrY | 17844781 | . | C | G | 12509.92 | PASS          | AC=70;AF=1.00;AN=70;DP=43          |
| 40905 | chrY | 17848615 | . | A | T | 33.79    | PASS          | AC=1;AF=0.015;AN=68;BaseQRankSum=  |
| 40906 | chrY | 17848622 | . | C | A | 33.89    | PASS          | AC=1;AF=0.015;AN=68;BaseQRankSum=  |
| 40907 | chrY | 17851862 | . | C | T | 1245.64  | PASS          | AC=30;AF=0.625;AN=48;DP=183;FS=0.0 |
| 40908 | chrY | 17853198 | . | C | T | 5502.06  | PASS          | AC=36;AF=0.545;AN=66;DP=360;FS=0.0 |
| 40909 | chrY | 17854551 | . | A | G | 1223.75  | PASS          | AC=6;AF=0.300;AN=20;DP=149;FS=0.0  |
| 40910 | chrY | 17855267 | . | T | C | 1312.09  | PASS          | AC=6;AF=0.250;AN=24;DP=177;FS=0.0  |
| 40911 | chrY | 17856975 | . | C | G | 1305.49  | PASS          | AC=6;AF=0.273;AN=22;DP=183;FS=0.0  |
| 40912 | chrY | 17859665 | . | C | T | 343.72   | PASS          | AC=2;AF=0.029;AN=70;DP=482;FS=0.0  |
| 40913 | chrY | 17860352 | . | C | G | 1191.19  | PASS          | AC=6;AF=0.086;AN=70;DP=774;FS=0.0  |
| 40914 | chrY | 17860729 | . | A | G | 12498.98 | PASS          | AC=68;AF=1.00;AN=68;BaseQ          |
| 40915 | chrY | 17863898 | . | A | G | 398.17   | PASS          | AC=6;AF=0.086;AN=70;DP=310;FS=0.0  |
| 40916 | chrY | 17864392 | . | A | T | 8029.59  | PASS          | AC=44;AF=0.647;AN=68;DP=416;FS=0.0 |
| 40917 | chrY | 17866037 | . | A | G | 891.29   | PASS          | AC=6;AF=0.107;AN=56;DP=163;FS=0.0  |
| 40918 | chrY | 17867916 | . | C | T | 60.56    | PASS          | AC=2;AF=0.031;AN=64;BaseQRankSum=  |
| 40919 | chrY | 17868314 | . | G | A | 307.05   | PASS          | AC=2;AF=0.029;AN=70;DP=513;FS=0.0  |
| 40920 | chrY | 17868374 | . | C | T | 345.32   | PASS          | AC=2;AF=0.029;AN=70;DP=579;FS=0.0  |
| 40921 | chrY | 17877485 | . | T | C | 3886.38  | PASS          | AC=46;AF=0.719;AN=64;DP=254;FS=0.0 |
| 40922 | chrY | 17879035 | . | C | A | 1124.10  | PASS          | AC=6;AF=0.086;AN=70;DP=558;FS=0.0  |
| 40923 | chrY | 17879785 | . | C | G | 1144.76  | PASS          | AC=6;AF=0.086;AN=70;DP=426;FS=0.0  |
| 40924 | chrY | 17881230 | . | C | G | 9732.96  | PASS          | AC=66;AF=1.00;AN=66;DP=337;FS=0.0  |
| 40925 | chrY | 17882541 | . | G | T | 1105.60  | PASS          | AC=6;AF=0.086;AN=70;DP=579;FS=0.0  |
| 40926 | chrY | 17883221 | . | G | A | 4865.48  | PASS          | AC=48;AF=0.727;AN=66;DP=348;FS=0.0 |
| 40927 | chrY | 17888282 | . | G | T | 39.67    | PASS          | AC=1;AF=0.014;AN=70;BaseQRankSum=  |
| 40928 | chrY | 17888291 | . | G | A | 36.70    | my_snp_filter | AC=1;AF=0.014;AN=70;BaseQ          |
| 40929 | chrY | 17891210 | . | T | G | 1299.79  | PASS          | AC=6;AF=0.088;AN=68;DP=412;FS=0.0  |
| 40930 | chrY | 17891505 | . | C | T | 397.68   | PASS          | AC=2;AF=0.029;AN=68;DP=379;FS=0.0  |
| 40931 | chrY | 17896075 | . | G | A | 295.32   | PASS          | AC=2;AF=0.032;AN=62;DP=243;FS=0.0  |
| 40932 | chrY | 17899464 | . | A | G | 1115.28  | PASS          | AC=6;AF=0.333;AN=18;BaseQRankSum=  |
| 40933 | chrY | 17899805 | . | A | G | 1639.18  | PASS          | AC=6;AF=0.333;AN=18;DP=173;FS=0.0  |
| 40934 | chrY | 17901907 | . | C | A | 211.14   | PASS          | AC=2;AF=0.111;AN=18;DP=147;FS=0.0  |
| 40935 | chrY | 17903050 | . | C | T | 593.47   | PASS          | AC=2;AF=0.091;AN=22;DP=188;FS=0.0  |
| 40936 | chrY | 17903269 | . | G | A | 289.80   | PASS          | AC=4;AF=0.061;AN=66;DP=280;FS=0.0  |
| 40937 | chrY | 17907368 | . | T | C | 3844.93  | PASS          | AC=50;AF=0.735;AN=68;DP=281;FS=0.0 |
| 40938 | chrY | 17908393 | . | T | C | 337.20   | PASS          | AC=4;AF=0.057;AN=70;DP=331;FS=0.0  |
| 40939 | chrY | 17909688 | . | C | T | 68.10    | PASS          | AC=2;AF=0.029;AN=70;DP=488;FS=0.0  |
| 40940 | chrY | 17909881 | . | A | G | 2860.98  | PASS          | AC=12;AF=0.176;AN=68;DP=353;FS=0.0 |
| 40941 | chrY | 17913484 | . | C | T | 3536.90  | PASS          | AC=36;AF=0.545;AN=66;DP=317;FS=0.0 |
| 40942 | chrY | 17914187 | . | G | A | 343.20   | PASS          | AC=6;AF=0.097;AN=62;DP=129;FS=0.0  |
| 40943 | chrY | 17917010 | . | G | A | 1457.78  | PASS          | AC=6;AF=0.086;AN=70;DP=403;FS=0.0  |
| 40944 | chrY | 17920486 | . | G | A | 1198.86  | PASS          | AC=6;AF=0.086;AN=70;DP=620;FS=0.0  |
| 40945 | chrY | 17924152 | . | A | T | 30.84    | PASS          | AC=1;AF=0.014;AN=70;BaseQRankSum=  |
| 40946 | chrY | 17924762 | . | T | A | 11496.67 | PASS          | AC=50;AF=0.735;AN=68;DP=5          |
| 40947 | chrY | 17926690 | . | T | C | 1124.50  | PASS          | AC=6;AF=0.086;AN=70;DP=427;FS=0.0  |
| 40948 | chrY | 17930099 | . | A | C | 9086.07  | PASS          | AC=64;AF=1.00;AN=64;BaseQRankSum=  |
| 40949 | chrY | 17931211 | . | G | A | 357.88   | PASS          | AC=6;AF=0.097;AN=62;DP=221;FS=0.0  |
| 40950 | chrY | 17931232 | . | C | A | 33.73    | PASS          | AC=1;AF=0.016;AN=62;BaseQRankSum=  |
| 40951 | chrY | 17931246 | . | G | A | 37.35    | PASS          | AC=2;AF=0.034;AN=58;DP=199;FS=0.0  |
| 40952 | chrY | 17932763 | . | T | C | 4054.87  | PASS          | AC=18;AF=1.00;AN=18;DP=183;FS=0.0  |
| 40953 | chrY | 17934124 | . | G | A | 5150.55  | PASS          | AC=48;AF=0.727;AN=66;BaseQRankSum= |
| 40954 | chrY | 17936756 | . | G | T | 44.75    | PASS          | AC=1;AF=0.017;AN=60;BaseQRankSum=  |
| 40955 | chrY | 17936764 | . | A | T | 41.63    | PASS          | AC=1;AF=0.017;AN=58;BaseQRankSum=  |
| 40956 | chrY | 17940247 | . | G | A | 70.05    | PASS          | AC=1;AF=0.014;AN=70;BaseQRankSum=  |
| 40957 | chrY | 17940250 | . | A | G | 70.22    | PASS          | AC=1;AF=0.014;AN=70;BaseQRankSum=  |
| 40958 | chrY | 17940792 | . | T | C | 792.71   | PASS          | AC=6;AF=0.214;AN=28;DP=122;FS=0.0  |
| 40959 | chrY | 17941969 | . | G | A | 513.27   | PASS          | AC=4;AF=0.059;AN=68;DP=260;FS=0.0  |
| 40960 | chrY | 17942143 | . | A | G | 2092.87  | PASS          | AC=16;AF=1.00;AN=16;DP=111;FS=0.0  |
| 40961 | chrY | 17942517 | . | T | C | 673.71   | PASS          | AC=6;AF=0.088;AN=68;DP=352;FS=0.0  |
| 40962 | chrY | 17942987 | . | T | G | 608.50   | PASS          | AC=6;AF=0.088;AN=68;DP=316;FS=0.0  |
| 40963 | chrY | 17947171 | . | C | T | 905.83   | PASS          | AC=6;AF=0.086;AN=70;DP=299;FS=0.0  |
| 40964 | chrY | 17947454 | . | A | T | 13600.18 | PASS          | AC=52;AF=0.743;AN=70;DP=5          |

|       |      |          |   |   |   |          |               |                                    |
|-------|------|----------|---|---|---|----------|---------------|------------------------------------|
| 40965 | chrY | 17947542 | . | C | T | 3155.59  | PASS          | AC=43;AF=0.694;AN=62;BaseQRankSum  |
| 40966 | chrY | 17951267 | . | C | A | 5070.23  | PASS          | AC=64;AF=1.00;AN=64;DP=173;FS=0.0  |
| 40967 | chrY | 17953636 | . | G | C | 3738.86  | PASS          | AC=18;AF=1.00;AN=18;DP=137;FS=0.0  |
| 40968 | chrY | 17954035 | . | C | T | 4122.97  | PASS          | AC=20;AF=1.00;AN=20;DP=166;FS=0.0  |
| 40969 | chrY | 17957241 | . | G | A | 382.65   | PASS          | AC=2;AF=0.029;AN=68;DP=535;FS=0.0  |
| 40970 | chrY | 17957903 | . | T | C | 8596.72  | PASS          | AC=50;AF=0.735;AN=68;DP=442;FS=0.0 |
| 40971 | chrY | 17957933 | . | C | T | 885.06   | PASS          | AC=6;AF=0.088;AN=68;DP=453;FS=0.0  |
| 40972 | chrY | 17959705 | . | G | A | 1258.47  | PASS          | AC=6;AF=0.086;AN=70;DP=434;FS=0.0  |
| 40973 | chrY | 17962120 | . | A | C | 581.91   | PASS          | AC=2;AF=0.029;AN=68;DP=333;FS=0.0  |
| 40974 | chrY | 17962125 | . | G | T | 581.85   | PASS          | AC=2;AF=0.029;AN=70;DP=342;FS=0.0  |
| 40975 | chrY | 17963688 | . | T | A | 360.67   | PASS          | AC=2;AF=0.083;AN=24;BaseQRankSum   |
| 40976 | chrY | 17964057 | . | C | T | 1392.42  | PASS          | AC=6;AF=0.086;AN=70;DP=504;FS=0.0  |
| 40977 | chrY | 17964194 | . | C | A | 306.48   | PASS          | AC=2;AF=0.030;AN=66;DP=387;FS=0.0  |
| 40978 | chrY | 17964682 | . | C | A | 1362.27  | PASS          | AC=6;AF=0.094;AN=64;DP=245;FS=0.0  |
| 40979 | chrY | 17968786 | . | A | T | 1194.73  | PASS          | AC=6;AF=0.125;AN=48;DP=180;FS=0.0  |
| 40980 | chrY | 17976596 | . | G | A | 972.14   | PASS          | AC=6;AF=0.088;AN=68;DP=463;FS=0.0  |
| 40981 | chrY | 17980274 | . | A | G | 4785.81  | PASS          | AC=44;AF=0.647;AN=68;DP=346;FS=0.0 |
| 40982 | chrY | 17980858 | . | G | T | 1250.66  | PASS          | AC=6;AF=0.086;AN=70;DP=453;FS=0.0  |
| 40983 | chrY | 17981104 | . | G | T | 273.72   | PASS          | AC=2;AF=0.029;AN=70;DP=438;FS=0.0  |
| 40984 | chrY | 17983088 | . | G | C | 4322.71  | PASS          | AC=40;AF=0.571;AN=70;DP=328;FS=0.0 |
| 40985 | chrY | 17984143 | . | T | C | 2942.03  | PASS          | AC=40;AF=0.690;AN=58;DP=263;FS=0.0 |
| 40986 | chrY | 17985511 | . | C | G | 762.37   | PASS          | AC=6;AF=0.086;AN=70;DP=507;FS=0.0  |
| 40987 | chrY | 17986687 | . | A | C | 15377.90 | PASS          | AC=66;AF=1.00;AN=66;DP=50          |
| 40988 | chrY | 17987068 | . | T | G | 371.37   | PASS          | AC=8;AF=0.400;AN=20;DP=114;FS=0.0  |
| 40989 | chrY | 17998406 | . | G | T | 44.85    | my_snp_filter | AC=2;AF=0.111;AN=18;BaseQ          |
| 40990 | chrY | 17998574 | . | G | C | 360.32   | PASS          | AC=3;AF=0.167;AN=18;BaseQRankSum   |
| 40991 | chrY | 17998578 | . | G | C | 353.06   | PASS          | AC=3;AF=0.167;AN=18;BaseQRankSum   |
| 40992 | chrY | 17998593 | . | G | A | 359.01   | PASS          | AC=3;AF=0.167;AN=18;BaseQRankSum   |
| 40993 | chrY | 17998622 | . | G | A | 291.79   | PASS          | AC=5;AF=0.278;AN=18;BaseQRankSum   |
| 40994 | chrY | 17998929 | . | G | T | 72.30    | PASS          | AC=1;AF=0.050;AN=20;BaseQRankSum   |
| 40995 | chrY | 17998932 | . | T | C | 69.30    | PASS          | AC=1;AF=0.050;AN=20;BaseQRankSum   |
| 40996 | chrY | 17998942 | . | T | A | 92.32    | PASS          | AC=1;AF=0.056;AN=18;BaseQRankSum   |
| 40997 | chrY | 17998972 | . | A | C | 102.32   | PASS          | AC=1;AF=0.056;AN=18;BaseQRankSum   |
| 40998 | chrY | 17998979 | . | G | A | 102.32   | PASS          | AC=1;AF=0.056;AN=18;BaseQRankSum   |
| 40999 | chrY | 17999044 | . | T | G | 995.33   | PASS          | AC=4;AF=0.222;AN=18;BaseQRankSum   |
| 41000 | chrY | 17999842 | . | G | T | 1351.28  | PASS          | AC=6;AF=0.333;AN=18;DP=158;FS=0.0  |
| 41001 | chrY | 18000901 | . | T | C | 1561.23  | PASS          | AC=6;AF=0.333;AN=18;DP=155;FS=0.0  |
| 41002 | chrY | 18002074 | . | A | G | 3475.88  | PASS          | AC=18;AF=1.00;AN=18;DP=132;FS=0.0  |
| 41003 | chrY | 18003724 | . | C | T | 1174.38  | PASS          | AC=6;AF=0.088;AN=68;DP=239;FS=0.0  |
| 41004 | chrY | 18008688 | . | G | T | 64.67    | my_snp_filter | AC=2;AF=0.111;AN=18;BaseQ          |
| 41005 | chrY | 18016828 | . | T | C | 13619.09 | PASS          | AC=52;AF=0.743;AN=70;DP=5          |
| 41006 | chrY | 18017210 | . | C | G | 31.16    | PASS          | AC=2;AF=0.034;AN=58;DP=128;FS=0.0  |
| 41007 | chrY | 18017528 | . | T | G | 14191.92 | PASS          | AC=70;AF=1.00;AN=70;DP=47          |
| 41008 | chrY | 18018268 | . | G | A | 1350.03  | PASS          | AC=6;AF=0.091;AN=66;DP=428;FS=0.0  |
| 41009 | chrY | 18019841 | . | T | C | 223.67   | PASS          | AC=2;AF=0.059;AN=34;DP=74;FS=0.00  |
| 41010 | chrY | 18023284 | . | G | T | 4208.13  | PASS          | AC=50;AF=0.735;AN=68;DP=271;FS=0.0 |
| 41011 | chrY | 18026855 | . | A | G | 12366.94 | PASS          | AC=70;AF=1.00;AN=70;DP=42          |
| 41012 | chrY | 18028351 | . | A | T | 457.90   | PASS          | AC=4;AF=0.063;AN=64;DP=317;FS=0.0  |
| 41013 | chrY | 18028661 | . | G | A | 4662.03  | PASS          | AC=38;AF=1.00;AN=38;DP=209;FS=0.0  |
| 41014 | chrY | 18030738 | . | C | T | 7662.29  | PASS          | AC=52;AF=0.743;AN=70;BaseQRankSum  |
| 41015 | chrY | 18030831 | . | G | A | 318.03   | PASS          | AC=2;AF=0.029;AN=70;DP=385;FS=0.0  |
| 41016 | chrY | 18033437 | . | C | T | 918.67   | PASS          | AC=6;AF=0.086;AN=70;DP=377;FS=0.0  |
| 41017 | chrY | 18040700 | . | T | A | 663.83   | PASS          | AC=6;AF=0.088;AN=68;DP=321;FS=0.0  |
| 41018 | chrY | 18041777 | . | G | A | 1862.23  | PASS          | AC=6;AF=0.333;AN=18;DP=179;FS=0.0  |
| 41019 | chrY | 18042861 | . | G | A | 2751.98  | PASS          | AC=20;AF=1.00;AN=20;DP=109;FS=0.0  |
| 41020 | chrY | 18045085 | . | A | T | 31.42    | my_snp_filter | AC=1;AF=0.015;AN=68;BaseQ          |
| 41021 | chrY | 18047475 | . | C | A | 11062.01 | PASS          | AC=66;AF=1.00;AN=66;DP=39          |
| 41022 | chrY | 18051289 | . | G | C | 6939.13  | PASS          | AC=54;AF=0.818;AN=66;DP=333;FS=0.0 |
| 41023 | chrY | 18053083 | . | A | G | 180.58   | PASS          | AC=6;AF=0.097;AN=62;DP=222;FS=0.0  |
| 41024 | chrY | 18058588 | . | T | A | 1450.53  | PASS          | AC=6;AF=0.143;AN=42;DP=169;FS=0.0  |
| 41025 | chrY | 18060417 | . | C | G | 1303.25  | PASS          | AC=18;AF=1.00;AN=18;DP=130;FS=0.0  |
| 41026 | chrY | 18063802 | . | A | G | 1335.80  | PASS          | AC=6;AF=0.088;AN=68;DP=572;FS=0.0  |
| 41027 | chrY | 18066156 | . | T | C | 10356.98 | PASS          | AC=62;AF=1.00;AN=62;DP=36          |
| 41028 | chrY | 18066200 | . | C | T | 1489.73  | PASS          | AC=6;AF=0.086;AN=70;DP=310;FS=0.0  |
| 41029 | chrY | 18066327 | . | A | T | 2632.37  | PASS          | AC=40;AF=0.690;AN=58;BaseQRankSum  |
| 41030 | chrY | 18066940 | . | T | G | 86.21    | PASS          | AC=2;AF=0.029;AN=70;DP=356;FS=0.0  |
| 41031 | chrY | 18071170 | . | C | T | 1299.28  | PASS          | AC=6;AF=0.088;AN=68;DP=404;FS=0.0  |
| 41032 | chrY | 18075043 | . | T | C | 4826.13  | PASS          | AC=42;AF=0.636;AN=66;DP=323;FS=0.0 |
| 41033 | chrY | 18076161 | . | C | T | 37.08    | PASS          | AC=1;AF=0.014;AN=70;BaseQRankSum   |
| 41034 | chrY | 18076177 | . | G | A | 39.99    | PASS          | AC=1;AF=0.014;AN=70;BaseQRankSum   |
| 41035 | chrY | 18083170 | . | A | G | 578.76   | PASS          | AC=5;AF=0.089;AN=56;BaseQRankSum   |
| 41036 | chrY | 18086000 | . | C | T | 9392.99  | PASS          | AC=50;AF=0.735;AN=68;DP=486;FS=0.0 |
| 41037 | chrY | 18088319 | . | A | C | 1269.47  | PASS          | AC=6;AF=0.086;AN=70;DP=427;FS=0.0  |
| 41038 | chrY | 18088599 | . | G | A | 4293.29  | PASS          | AC=46;AF=0.719;AN=64;BaseQRankSum  |
| 41039 | chrY | 18090558 | . | G | A | 1079.10  | PASS          | AC=6;AF=0.086;AN=70;DP=527;FS=0.0  |
| 41040 | chrY | 18091127 | . | T | C | 830.15   | PASS          | AC=6;AF=0.088;AN=68;DP=433;FS=0.0  |

|       |      |          |   |   |   |          |                |                                    |
|-------|------|----------|---|---|---|----------|----------------|------------------------------------|
| 41041 | chrY | 18094675 | . | A | G | 1075.67  | PASS           | AC=6;AF=0.086;AN=70;DP=428;FS=0.0  |
| 41042 | chrY | 18095336 | . | C | A | 6432.18  | PASS           | AC=60;AF=1.00;AN=60;BaseQRankSum=  |
| 41043 | chrY | 18095775 | . | G | A | 42.51    | PASS           | AC=2;AF=0.037;AN=54;DP=69;FS=0.00  |
| 41044 | chrY | 18096073 | . | T | C | 870.86   | PASS           | AC=4;AF=0.057;AN=70;DP=540;FS=0.0  |
| 41045 | chrY | 18096360 | . | G | T | 1101.10  | PASS           | AC=18;AF=1.00;AN=18;DP=53;FS=0.00  |
| 41046 | chrY | 18096806 | . | C | A | 346.85   | PASS           | AC=2;AF=0.029;AN=70;DP=472;FS=0.0  |
| 41047 | chrY | 18097251 | . | A | C | 4820.50  | PASS           | AC=50;AF=0.806;AN=62;DP=266;FS=0.  |
| 41048 | chrY | 18103101 | . | T | A | 3051.56  | PASS           | AC=36;AF=0.750;AN=48;DP=194;FS=0.  |
| 41049 | chrY | 18106997 | . | C | T | 2660.94  | PASS           | AC=12;AF=0.171;AN=70;DP=374;FS=0.  |
| 41050 | chrY | 18109555 | . | A | C | 13477.94 | PASS           | AC=70;AF=1.00;AN=70;BaseQ          |
| 41051 | chrY | 18111804 | . | C | T | 1061.49  | PASS           | AC=6;AF=0.086;AN=70;DP=446;FS=0.0  |
| 41052 | chrY | 18111848 | . | C | T | 1095.34  | PASS           | AC=6;AF=0.086;AN=70;DP=409;FS=0.0  |
| 41053 | chrY | 18115963 | . | G | T | 1203.28  | PASS           | AC=6;AF=0.086;AN=70;DP=362;FS=0.0  |
| 41054 | chrY | 18116596 | . | T | C | 9331.08  | PASS           | AC=68;AF=1.00;AN=68;DP=314;FS=0.0  |
| 41055 | chrY | 18117165 | . | T | C | 7877.78  | PASS           | AC=52;AF=0.743;AN=70;DP=430;FS=0.  |
| 41056 | chrY | 18117193 | . | T | C | 15966.92 | PASS           | AC=68;AF=1.00;AN=68;DP=54          |
| 41057 | chrY | 18121600 | . | C | T | 994.23   | PASS           | AC=6;AF=0.333;AN=18;DP=148;FS=0.0  |
| 41058 | chrY | 18127224 | . | T | C | 363.87   | PASS           | AC=2;AF=0.029;AN=68;DP=264;FS=0.0  |
| 41059 | chrY | 18127293 | . | A | G | 111.53   | PASS           | AC=2;AF=0.030;AN=66;DP=280;FS=0.0  |
| 41060 | chrY | 18131000 | . | A | T | 1736.75  | PASS           | AC=6;AF=0.300;AN=20;DP=188;FS=0.0  |
| 41061 | chrY | 18131055 | . | T | C | 397.02   | PASS           | AC=2;AF=0.111;AN=18;DP=202;FS=0.0  |
| 41062 | chrY | 18134442 | . | T | C | 959.60   | PASS           | AC=6;AF=0.273;AN=22;BaseQRankSum=  |
| 41063 | chrY | 18135279 | . | G | A | 1682.18  | PASS           | AC=6;AF=0.333;AN=18;DP=175;FS=0.0  |
| 41064 | chrY | 18137831 | . | C | T | 15157.93 | PASS           | AC=70;AF=1.00;AN=70;DP=50          |
| 41065 | chrY | 18141343 | . | C | A | 68.48    | PASS           | AC=1;AF=0.056;AN=18;BaseQRankSum=  |
| 41066 | chrY | 18148540 | . | G | T | 327.97   | PASS           | AC=2;AF=0.030;AN=66;DP=252;FS=0.0  |
| 41067 | chrY | 18149586 | . | G | C | 79.64    | PASS           | AC=2;AF=0.032;AN=62;DP=198;FS=0.0  |
| 41068 | chrY | 18150566 | . | A | G | 660.19   | PASS           | AC=6;AF=0.086;AN=70;DP=636;FS=0.0  |
| 41069 | chrY | 18153367 | . | T | C | 605.07   | PASS           | AC=6;AF=0.088;AN=68;DP=286;FS=0.0  |
| 41070 | chrY | 18155165 | . | A | G | 1064.16  | PASS           | AC=6;AF=0.086;AN=70;DP=495;FS=0.0  |
| 41071 | chrY | 18155754 | . | T | C | 1266.95  | PASS           | AC=6;AF=0.097;AN=62;DP=198;FS=0.0  |
| 41072 | chrY | 18157468 | . | T | C | 556.13   | PASS           | AC=2;AF=0.029;AN=70;DP=612;FS=0.0  |
| 41073 | chrY | 18159948 | . | G | T | 197.44   | PASS           | AC=4;AF=0.069;AN=58;DP=212;FS=0.0  |
| 41074 | chrY | 18161937 | . | A | G | 34.26    | PASS           | AC=1;AF=0.015;AN=68;BaseQRankSum=  |
| 41075 | chrY | 18161938 | . | T | C | 34.25    | PASS           | AC=1;AF=0.015;AN=68;BaseQRankSum=  |
| 41076 | chrY | 18167403 | . | T | C | 11552.98 | PASS           | AC=66;AF=1.00;AN=66;DP=40          |
| 41077 | chrY | 18167933 | . | G | A | 960.07   | PASS           | AC=4;AF=0.059;AN=68;DP=618;FS=0.0  |
| 41078 | chrY | 18168470 | . | C | T | 215.84   | PASS           | AC=2;AF=0.029;AN=70;DP=354;FS=0.0  |
| 41079 | chrY | 18168561 | . | C | G | 681.23   | PASS           | AC=6;AF=0.086;AN=70;DP=622;FS=0.0  |
| 41080 | chrY | 18168708 | . | G | A | 153.74   | PASS           | AC=3;AF=0.043;AN=70;BaseQRankSum=  |
| 41081 | chrY | 18173194 | . | C | T | 746.70   | PASS           | AC=6;AF=0.088;AN=68;DP=281;FS=0.0  |
| 41082 | chrY | 18174445 | . | A | G | 552.91   | PASS           | AC=6;AF=0.088;AN=68;DP=303;FS=0.0  |
| 41083 | chrY | 18175815 | . | G | A | 1067.48  | PASS           | AC=6;AF=0.086;AN=70;DP=491;FS=0.0  |
| 41084 | chrY | 18178091 | . | A | G | 2053.97  | PASS           | AC=38;AF=0.760;AN=50;DP=106;FS=0.  |
| 41085 | chrY | 18180446 | . | A | C | 7152.06  | PASS           | AC=62;AF=1.00;AN=62;DP=271;FS=0.0  |
| 41086 | chrY | 18182250 | . | C | T | 208.25   | PASS           | AC=2;AF=0.029;AN=68;DP=426;FS=0.0  |
| 41087 | chrY | 18182374 | . | G | A | 7386.64  | PASS           | AC=44;AF=0.647;AN=68;DP=427;FS=0.  |
| 41088 | chrY | 18186097 | . | A | G | 287.59   | PASS           | AC=2;AF=0.029;AN=70;DP=428;FS=0.0  |
| 41089 | chrY | 18186596 | . | C | T | 11812.21 | PASS           | AC=50;AF=0.735;AN=68;DP=5          |
| 41090 | chrY | 18187990 | . | A | T | 1642.42  | PASS           | AC=6;AF=0.088;AN=68;DP=496;FS=0.0  |
| 41091 | chrY | 18188734 | . | C | G | 4233.46  | PASS           | AC=40;AF=0.571;AN=70;DP=347;FS=0.  |
| 41092 | chrY | 18192176 | . | C | T | 1515.68  | PASS           | AC=6;AF=0.214;AN=28;DP=173;FS=0.0  |
| 41093 | chrY | 18194796 | . | T | C | 611.03   | PASS           | AC=4;AF=0.061;AN=66;DP=248;FS=0.0  |
| 41094 | chrY | 18195189 | . | G | A | 81.94    | PASS           | AC=2;AF=0.111;AN=18;DP=72;FS=0.00  |
| 41095 | chrY | 18197426 | . | T | C | 7183.11  | PASS           | AC=44;AF=0.647;AN=68;DP=463;FS=0.0 |
| 41096 | chrY | 18197805 | . | C | T | 275.55   | PASS           | AC=2;AF=0.029;AN=70;DP=372;FS=0.0  |
| 41097 | chrY | 18206858 | . | C | T | 3199.13  | PASS           | AC=36;AF=0.545;AN=66;BaseQRankSum= |
| 41098 | chrY | 18211697 | . | A | G | 652.73   | PASS           | AC=6;AF=0.120;AN=50;DP=188;FS=0.0  |
| 41099 | chrY | 18212954 | . | C | T | 1066.19  | PASS           | AC=6;AF=0.086;AN=70;DP=475;FS=0.0  |
| 41100 | chrY | 18213440 | . | A | G | 793.23   | PASS           | AC=6;AF=0.091;AN=66;DP=295;FS=0.0  |
| 41101 | chrY | 18219512 | . | G | A | 162.17   | PASS           | AC=2;AF=0.029;AN=70;DP=488;FS=0.0  |
| 41102 | chrY | 18223104 | . | T | C | 34.47    | PASS           | AC=1;AF=0.014;AN=70;BaseQRankSum=  |
| 41103 | chrY | 18233782 | . | G | A | 1154.56  | PASS           | AC=6;AF=0.088;AN=68;DP=396;FS=0.0  |
| 41104 | chrY | 18238343 | . | A | T | 395.46   | PASS           | AC=2;AF=0.029;AN=70;DP=509;FS=0.0  |
| 41105 | chrY | 18243338 | . | T | A | 907.44   | PASS           | AC=26;AF=0.520;AN=50;DP=223;FS=0.  |
| 41106 | chrY | 18248698 | . | G | A | 12429.95 | PASS           | AC=68;AF=1.00;AN=68;DP=42          |
| 41107 | chrY | 18256619 | . | G | A | 68.81    | PASS           | AC=2;AF=0.032;AN=62;DP=200;FS=0.0  |
| 41108 | chrY | 18259159 | . | C | T | 1538.89  | PASS           | AC=6;AF=0.086;AN=70;DP=354;FS=0.0  |
| 41109 | chrY | 18263316 | . | G | A | 6994.89  | PASS           | AC=50;AF=0.735;AN=68;DP=345;FS=0.  |
| 41110 | chrY | 18263926 | . | C | A | 100.07   | PASS           | AC=4;AF=0.091;AN=44;DP=131;FS=0.0  |
| 41111 | chrY | 18266293 | . | A | C | 2431.24  | PASS           | AC=12;AF=0.250;AN=48;BaseQRankSum= |
| 41112 | chrY | 18269236 | . | C | T | 37.97    | PASS           | AC=1;AF=0.015;AN=66;BaseQRankSum=  |
| 41113 | chrY | 18269261 | . | C | T | 34.94    | PASS           | AC=1;AF=0.015;AN=66;BaseQRankSum=  |
| 41114 | chrY | 18269675 | . | C | T | 992.38   | PASS           | AC=6;AF=0.094;AN=64;DP=209;FS=0.0  |
| 41115 | chrY | 18271616 | . | T | C | 728.64   | my_snps_filter | AC=9;AF=0.129;AN=70;BaseQ          |
| 41116 | chrY | 18281233 | . | G | T | 424.95   | my_snps_filter | AC=3;AF=0.044;AN=68;BaseQ          |

|       |      |          |   |   |     |          |               |                                    |
|-------|------|----------|---|---|-----|----------|---------------|------------------------------------|
| 41117 | chrY | 18285396 | . | G | T   | 41.77    | my_snp_filter | AC=2;AF=0.143;AN=14;DP=25          |
| 41118 | chrY | 18289883 | . | G | A   | 72.58    | PASS          | AC=2;AF=0.032;AN=62;BaseQRankSum=  |
| 41119 | chrY | 18290306 | . | G | C   | 652.85   | my_snp_filter | AC=6;AF=0.136;AN=44;DP=91          |
| 41120 | chrY | 18290476 | . | C | T   | 240.27   | my_snp_filter | AC=6;AF=0.500;AN=12;DP=26          |
| 41121 | chrY | 18307175 | . | G | C   | 39080.79 | PASS          | AC=61;AF=0.871;AN=70;Base          |
| 41122 | chrY | 18307228 | . | T | C   | 438.92   | PASS          | AC=3;AF=0.043;AN=70;BaseQRankSum=  |
| 41123 | chrY | 18381485 | . | T | C   | 280.25   | PASS          | AC=2;AF=0.029;AN=68;DP=364;FS=0.0  |
| 41124 | chrY | 18381735 | . | G | A   | 14370.93 | PASS          | AC=68;AF=1.00;AN=68;DP=47          |
| 41125 | chrY | 18382410 | . | C | A   | 1187.42  | PASS          | AC=6;AF=0.088;AN=68;DP=446;FS=0.0  |
| 41126 | chrY | 18383140 | . | C | T   | 1465.77  | PASS          | AC=6;AF=0.086;AN=70;DP=773;FS=0.0  |
| 41127 | chrY | 18387196 | . | C | A   | 2976.93  | PASS          | AC=6;AF=0.088;AN=68;DP=634;FS=0.0  |
| 41128 | chrY | 18387204 | . | T | A   | 2946.52  | PASS          | AC=6;AF=0.086;AN=70;DP=614;FS=0.0  |
| 41129 | chrY | 18389530 | . | C | A   | 1141.20  | PASS          | AC=6;AF=0.088;AN=68;BaseQRankSum=  |
| 41130 | chrY | 18394634 | . | C | T   | 14649.60 | PASS          | AC=67;AF=0.985;AN=68;Base          |
| 41131 | chrY | 18400574 | . | G | A   | 792.99   | PASS          | AC=6;AF=0.091;AN=66;DP=310;FS=0.0  |
| 41132 | chrY | 18407611 | . | T | C   | 14496.03 | PASS          | AC=70;AF=1.00;AN=70;BaseQ          |
| 41133 | chrY | 18408935 | . | C | G   | 4096.86  | PASS          | AC=18;AF=1.00;AN=18;DP=183;FS=0.0  |
| 41134 | chrY | 18410696 | . | C | T   | 1311.55  | PASS          | AC=30;AF=0.625;AN=48;DP=184;FS=0.  |
| 41135 | chrY | 18413033 | . | A | C   | 3921.86  | PASS          | AC=44;AF=0.647;AN=68;DP=286;FS=0.  |
| 41136 | chrY | 18414562 | . | A | G   | 36.53    | PASS          | AC=1;AF=0.014;AN=70;BaseQRankSum=  |
| 41137 | chrY | 18414584 | . | C | G   | 36.83    | PASS          | AC=1;AF=0.014;AN=70;BaseQRankSum=  |
| 41138 | chrY | 18414585 | . | G | A   | 352.37   | PASS          | AC=2;AF=0.029;AN=70;DP=518;FS=0.0  |
| 41139 | chrY | 18414586 | . | A | C   | 36.61    | PASS          | AC=1;AF=0.014;AN=70;BaseQRankSum=  |
| 41140 | chrY | 18415345 | . | C | T   | 560.63   | PASS          | AC=2;AF=0.029;AN=68;DP=453;FS=0.0  |
| 41141 | chrY | 18416442 | . | T | C   | 40.04    | PASS          | AC=1;AF=0.015;AN=68;BaseQRankSum=  |
| 41142 | chrY | 18416444 | . | A | T   | 40.05    | PASS          | AC=1;AF=0.015;AN=66;BaseQRankSum=  |
| 41143 | chrY | 18424328 | . | A | G   | 32.88    | PASS          | AC=1;AF=0.018;AN=56;BaseQRankSum=  |
| 41144 | chrY | 18424335 | . | A | G   | 32.76    | PASS          | AC=1;AF=0.017;AN=58;BaseQRankSum=  |
| 41145 | chrY | 18424949 | . | T | A   | 1401.24  | PASS          | AC=6;AF=0.088;AN=68;DP=249;FS=0.0  |
| 41146 | chrY | 18425202 | . | A | G   | 990.98   | PASS          | AC=6;AF=0.103;AN=58;DP=212;FS=0.0  |
| 41147 | chrY | 18454880 | . | C | T,* | 525.99   | PASS          | AC=6,2;AF=0.500,0.167;AN=12;DP=36  |
| 41148 | chrY | 18468548 | . | T | A   | 373.49   | my_snp_filter | AC=14;AF=0.875;AN=16;DP=3          |
| 41149 | chrY | 18471881 | . | A | T   | 2290.30  | PASS          | AC=9;AF=0.136;AN=66;BaseQRankSum=  |
| 41150 | chrY | 18517637 | . | G | A   | 462.82   | my_snp_filter | AC=3;AF=0.150;AN=20;BaseQ          |
| 41151 | chrY | 18518135 | . | T | A   | 121.31   | my_snp_filter | AC=1;AF=0.056;AN=18;BaseQ          |
| 41152 | chrY | 18518925 | . | T | C   | 170.94   | PASS          | AC=4;AF=0.057;AN=70;DP=577;FS=0.0  |
| 41153 | chrY | 18518974 | . | C | T   | 876.81   | my_snp_filter | AC=6;AF=0.086;AN=70;DP=82          |
| 41154 | chrY | 18537493 | . | G | A   | 404.31   | my_snp_filter | AC=6;AF=0.086;AN=70;DP=55          |
| 41155 | chrY | 18537567 | . | A | G   | 9401.20  | PASS          | AC=63;AF=0.984;AN=64;BaseQRankSum= |
| 41156 | chrY | 18538031 | . | T | A   | 844.10   | PASS          | AC=6;AF=0.091;AN=66;DP=199;FS=0.0  |
| 41157 | chrY | 18541296 | . | A | T   | 249.19   | PASS          | AC=2;AF=0.091;AN=22;DP=186;FS=0.0  |
| 41158 | chrY | 18541298 | . | A | C   | 1375.63  | PASS          | AC=6;AF=0.273;AN=22;DP=181;FS=0.0  |
| 41159 | chrY | 18544963 | . | A | G   | 597.61   | PASS          | AC=6;AF=0.150;AN=40;DP=146;FS=0.0  |
| 41160 | chrY | 18552719 | . | C | T   | 5020.94  | PASS          | AC=40;AF=0.571;AN=70;DP=353;FS=0.  |
| 41161 | chrY | 18561042 | . | T | G   | 987.07   | PASS          | AC=6;AF=0.088;AN=68;DP=271;FS=0.0  |
| 41162 | chrY | 18568902 | . | C | G   | 707.64   | PASS          | AC=6;AF=0.086;AN=70;DP=443;FS=0.0  |
| 41163 | chrY | 18572332 | . | T | C   | 5765.56  | PASS          | AC=48;AF=0.727;AN=66;DP=342;FS=0.  |
| 41164 | chrY | 18573145 | . | T | G   | 549.74   | PASS          | AC=6;AF=0.086;AN=70;DP=316;FS=0.0  |
| 41165 | chrY | 18575023 | . | T | G   | 61.35    | PASS          | AC=2;AF=0.029;AN=68;BaseQRankSum=  |
| 41166 | chrY | 18578476 | . | A | G   | 7291.43  | PASS          | AC=54;AF=0.818;AN=66;DP=341;FS=0.  |
| 41167 | chrY | 18578720 | . | C | T   | 2348.13  | PASS          | AC=28;AF=0.438;AN=64;DP=254;FS=0.  |
| 41168 | chrY | 18585796 | . | C | T   | 234.04   | PASS          | AC=4;AF=0.182;AN=22;DP=137;FS=0.0  |
| 41169 | chrY | 18589702 | . | T | A   | 146.71   | PASS          | AC=2;AF=0.056;AN=36;BaseQRankSum=  |
| 41170 | chrY | 18589703 | . | T | A   | 1022.74  | PASS          | AC=8;AF=0.333;AN=24;BaseQRankSum=  |
| 41171 | chrY | 18592273 | . | G | C   | 656.35   | PASS          | AC=6;AF=0.086;AN=70;DP=434;FS=0.0  |
| 41172 | chrY | 18594398 | . | A | G   | 11415.29 | PASS          | AC=46;AF=0.657;AN=70;DP=5          |
| 41173 | chrY | 18596847 | . | A | G   | 7178.26  | PASS          | AC=58;AF=0.829;AN=70;DP=332;FS=0.  |
| 41174 | chrY | 18602729 | . | C | A   | 379.81   | PASS          | AC=2;AF=0.029;AN=68;DP=379;FS=0.0  |
| 41175 | chrY | 18607826 | . | G | A   | 138.46   | PASS          | AC=2;AF=0.029;AN=70;BaseQRankSum=  |
| 41176 | chrY | 18609311 | . | A | G   | 260.91   | PASS          | AC=2;AF=0.029;AN=70;DP=411;FS=0.0  |
| 41177 | chrY | 18611644 | . | T | A   | 4890.33  | PASS          | AC=46;AF=1.00;AN=46;DP=185;FS=0.0  |
| 41178 | chrY | 18612761 | . | A | G   | 53.34    | PASS          | AC=3;AF=0.500;AN=6;BaseQRankSum=-  |
| 41179 | chrY | 18613753 | . | C | T   | 3884.07  | PASS          | AC=48;AF=0.727;AN=66;DP=288;FS=0.  |
| 41180 | chrY | 18617596 | . | T | C   | 16190.92 | PASS          | AC=64;AF=1.00;AN=64;DP=53          |
| 41181 | chrY | 18621300 | . | A | G   | 1074.54  | PASS          | AC=6;AF=0.086;AN=70;DP=443;FS=0.0  |
| 41182 | chrY | 18625199 | . | T | A   | 947.78   | PASS          | AC=6;AF=0.300;AN=20;DP=129;FS=0.0  |
| 41183 | chrY | 18630185 | . | A | G   | 1110.50  | PASS          | AC=6;AF=0.125;AN=48;DP=190;FS=0.0  |
| 41184 | chrY | 18647146 | . | C | A   | 10436.97 | PASS          | AC=68;AF=1.00;AN=68;DP=36          |
| 41185 | chrY | 18654150 | . | A | G,* | 369.77   | PASS          | AC=2,5;AF=0.032,0.081;AN=62;DP=27  |
| 41186 | chrY | 18656449 | . | T | G   | 246.82   | PASS          | AC=2;AF=0.029;AN=70;DP=288;FS=0.0  |
| 41187 | chrY | 18656508 | . | C | G   | 9439.96  | PASS          | AC=68;AF=1.00;AN=68;DP=332;FS=0.0  |
| 41188 | chrY | 18661309 | . | A | G   | 935.50   | PASS          | AC=6;AF=0.086;AN=70;DP=494;FS=0.0  |
| 41189 | chrY | 18663706 | . | C | G   | 7698.44  | PASS          | AC=52;AF=0.743;AN=70;DP=399;FS=0.  |
| 41190 | chrY | 18671871 | . | G | A   | 9853.35  | PASS          | AC=46;AF=0.657;AN=70;DP=513;FS=0.  |
| 41191 | chrY | 18674851 | . | C | A   | 7754.52  | PASS          | AC=52;AF=0.743;AN=70;DP=398;FS=0.  |
| 41192 | chrY | 18680398 | . | A | C   | 69.40    | PASS          | AC=1;AF=0.015;AN=68;BaseQRankSum=  |

|       |      |          |   |   |   |          |      |                                    |
|-------|------|----------|---|---|---|----------|------|------------------------------------|
| 41193 | chrY | 18680402 | . | G | C | 65.43    | PASS | AC=1;AF=0.015;AN=68;BaseQRankSum=  |
| 41194 | chrY | 18680406 | . | G | T | 69.15    | PASS | AC=1;AF=0.015;AN=68;BaseQRankSum=  |
| 41195 | chrY | 18680409 | . | A | C | 69.04    | PASS | AC=1;AF=0.015;AN=66;BaseQRankSum=  |
| 41196 | chrY | 18680412 | . | A | T | 68.60    | PASS | AC=1;AF=0.015;AN=66;BaseQRankSum=  |
| 41197 | chrY | 18680421 | . | C | T | 71.95    | PASS | AC=1;AF=0.016;AN=64;BaseQRankSum=  |
| 41198 | chrY | 18680422 | . | A | G | 72.01    | PASS | AC=1;AF=0.015;AN=66;BaseQRankSum=  |
| 41199 | chrY | 18680432 | . | A | G | 68.03    | PASS | AC=1;AF=0.015;AN=68;BaseQRankSum=  |
| 41200 | chrY | 18680434 | . | A | C | 61.92    | PASS | AC=1;AF=0.015;AN=68;BaseQRankSum=  |
| 41201 | chrY | 18680435 | . | G | C | 62.44    | PASS | AC=1;AF=0.015;AN=68;BaseQRankSum=  |
| 41202 | chrY | 18681816 | . | A | G | 31.91    | PASS | AC=1;AF=0.015;AN=68;BaseQRankSum=  |
| 41203 | chrY | 18685536 | . | C | T | 488.63   | PASS | AC=2;AF=0.029;AN=70;DP=377;FS=0.0  |
| 41204 | chrY | 18687682 | . | A | T | 155.45   | PASS | AC=4;AF=0.111;AN=36;DP=82;FS=0.00  |
| 41205 | chrY | 18689874 | . | A | C | 1599.01  | PASS | AC=16;AF=0.267;AN=60;DP=196;FS=0.  |
| 41206 | chrY | 18696215 | . | C | A | 1386.34  | PASS | AC=6;AF=0.086;AN=70;DP=360;FS=0.0  |
| 41207 | chrY | 18697375 | . | C | T | 1857.42  | PASS | AC=30;AF=0.517;AN=58;DP=197;FS=0.  |
| 41208 | chrY | 18702597 | . | T | G | 1260.57  | PASS | AC=6;AF=0.088;AN=68;DP=501;FS=0.0  |
| 41209 | chrY | 18710014 | . | A | T | 762.05   | PASS | AC=4;AF=0.222;AN=18;DP=139;FS=0.0  |
| 41210 | chrY | 18717224 | . | A | G | 570.56   | PASS | AC=6;AF=0.086;AN=70;DP=364;FS=0.0  |
| 41211 | chrY | 18719565 | . | C | T | 9591.03  | PASS | AC=70;AF=1.00;AN=70;DP=325;FS=0.0  |
| 41212 | chrY | 18720028 | . | T | C | 3302.86  | PASS | AC=18;AF=1.00;AN=18;DP=189;FS=0.0  |
| 41213 | chrY | 18726258 | . | T | G | 32.72    | PASS | AC=1;AF=0.014;AN=70;BaseQRankSum=  |
| 41214 | chrY | 18727936 | . | C | T | 5155.87  | PASS | AC=38;AF=0.576;AN=66;BaseQRankSum= |
| 41215 | chrY | 18729756 | . | T | G | 318.56   | PASS | AC=2;AF=0.029;AN=70;DP=376;FS=0.0  |
| 41216 | chrY | 18730463 | . | A | G | 1203.86  | PASS | AC=6;AF=0.088;AN=68;DP=333;FS=0.0  |
| 41217 | chrY | 18734510 | . | C | A | 1355.96  | PASS | AC=6;AF=0.300;AN=20;DP=151;FS=0.0  |
| 41218 | chrY | 18735666 | . | T | C | 455.94   | PASS | AC=6;AF=0.091;AN=66;DP=222;FS=0.0  |
| 41219 | chrY | 18739426 | . | A | G | 201.44   | PASS | AC=2;AF=0.029;AN=70;DP=425;FS=0.0  |
| 41220 | chrY | 18740421 | . | G | T | 1090.37  | PASS | AC=6;AF=0.086;AN=70;DP=328;FS=0.0  |
| 41221 | chrY | 18742202 | . | C | T | 835.94   | PASS | AC=6;AF=0.130;AN=46;DP=118;FS=0.0  |
| 41222 | chrY | 18743050 | . | A | G | 1356.03  | PASS | AC=6;AF=0.088;AN=68;DP=327;FS=0.0  |
| 41223 | chrY | 18744476 | . | C | T | 3602.23  | PASS | AC=28;AF=1.00;AN=28;DP=142;FS=0.0  |
| 41224 | chrY | 18751418 | . | T | C | 1404.95  | PASS | AC=6;AF=0.086;AN=70;DP=810;FS=0.0  |
| 41225 | chrY | 18756158 | . | T | C | 1579.81  | PASS | AC=6;AF=0.086;AN=70;DP=507;FS=0.0  |
| 41226 | chrY | 18759240 | . | G | A | 1827.41  | PASS | AC=4;AF=0.057;AN=70;DP=704;FS=0.0  |
| 41227 | chrY | 18765649 | . | C | T | 4607.75  | PASS | AC=54;AF=0.818;AN=66;DP=229;FS=0.  |
| 41228 | chrY | 18767237 | . | T | A | 36.49    | PASS | AC=1;AF=0.056;AN=18;BaseQRankSum=  |
| 41229 | chrY | 18767251 | . | C | T | 190.69   | PASS | AC=6;AF=0.333;AN=18;BaseQRankSum=  |
| 41230 | chrY | 18773196 | . | A | G | 126.36   | PASS | AC=2;AF=0.029;AN=70;DP=504;FS=0.0  |
| 41231 | chrY | 18776516 | . | T | A | 3492.55  | PASS | AC=44;AF=0.647;AN=68;DP=271;FS=0.  |
| 41232 | chrY | 18776629 | . | A | T | 1432.82  | PASS | AC=6;AF=0.094;AN=64;DP=271;FS=0.0  |
| 41233 | chrY | 18778981 | . | C | A | 1211.56  | PASS | AC=6;AF=0.088;AN=68;DP=591;FS=0.0  |
| 41234 | chrY | 18782816 | . | T | G | 934.96   | PASS | AC=6;AF=0.086;AN=70;DP=582;FS=0.0  |
| 41235 | chrY | 18787125 | . | G | A | 2154.56  | PASS | AC=32;AF=0.640;AN=50;DP=220;FS=0.  |
| 41236 | chrY | 18795682 | . | T | C | 1790.27  | PASS | AC=10;AF=0.455;AN=22;DP=172;FS=0.  |
| 41237 | chrY | 18795722 | . | G | T | 1606.75  | PASS | AC=6;AF=0.300;AN=20;DP=162;FS=0.0  |
| 41238 | chrY | 18797196 | . | A | C | 6364.52  | PASS | AC=52;AF=0.813;AN=64;DP=295;FS=0.  |
| 41239 | chrY | 18801280 | . | A | T | 333.85   | PASS | AC=12;AF=1.00;AN=12;DP=19;FS=0.00  |
| 41240 | chrY | 18801906 | . | A | C | 3642.92  | PASS | AC=20;AF=1.00;AN=20;DP=151;FS=0.0  |
| 41241 | chrY | 18802968 | . | T | G | 237.79   | PASS | AC=4;AF=0.061;AN=66;DP=271;FS=0.0  |
| 41242 | chrY | 18803812 | . | G | A | 1061.59  | PASS | AC=6;AF=0.088;AN=68;DP=260;FS=0.0  |
| 41243 | chrY | 18818812 | . | T | C | 1661.18  | PASS | AC=6;AF=0.333;AN=18;DP=183;FS=0.0  |
| 41244 | chrY | 18821773 | . | C | T | 868.71   | PASS | AC=6;AF=0.088;AN=68;BaseQRankSum=  |
| 41245 | chrY | 18831084 | . | G | A | 10087.08 | PASS | AC=68;AF=1.00;AN=68;DP=33          |
| 41246 | chrY | 18831625 | . | G | T | 48.25    | PASS | AC=2;AF=0.037;AN=54;DP=173;FS=0.0  |
| 41247 | chrY | 18831626 | . | G | T | 48.57    | PASS | AC=2;AF=0.037;AN=54;DP=173;FS=0.0  |
| 41248 | chrY | 18832816 | . | T | C | 1801.89  | PASS | AC=32;AF=0.640;AN=50;DP=194;FS=0.  |
| 41249 | chrY | 18835758 | . | T | G | 308.01   | PASS | AC=2;AF=0.029;AN=70;DP=294;FS=0.0  |
| 41250 | chrY | 18838575 | . | C | T | 657.28   | PASS | AC=6;AF=0.231;AN=26;DP=134;FS=0.0  |
| 41251 | chrY | 18843140 | . | C | T | 4868.31  | PASS | AC=48;AF=0.727;AN=66;DP=331;FS=0.  |
| 41252 | chrY | 18849089 | . | C | T | 364.82   | PASS | AC=2;AF=0.056;AN=36;DP=193;FS=0.0  |
| 41253 | chrY | 18852066 | . | G | A | 3200.38  | PASS | AC=40;AF=0.625;AN=64;DP=244;FS=0.  |
| 41254 | chrY | 18860537 | . | G | A | 1364.54  | PASS | AC=6;AF=0.333;AN=18;DP=160;FS=0.0  |
| 41255 | chrY | 18860907 | . | C | T | 4749.86  | PASS | AC=40;AF=0.625;AN=64;DP=316;FS=0.  |
| 41256 | chrY | 18861458 | . | T | G | 421.96   | PASS | AC=4;AF=0.057;AN=70;DP=551;FS=0.0  |
| 41257 | chrY | 18865298 | . | T | C | 9588.98  | PASS | AC=62;AF=1.00;AN=62;DP=338;FS=0.0  |
| 41258 | chrY | 18865996 | . | T | A | 1041.17  | PASS | AC=6;AF=0.158;AN=38;DP=137;FS=0.0  |
| 41259 | chrY | 18871667 | . | T | G | 4828.46  | PASS | AC=47;AF=0.940;AN=50;BaseQRankSum= |
| 41260 | chrY | 18871677 | . | G | A | 95.58    | PASS | AC=6;AF=0.115;AN=52;BaseQRankSum=  |
| 41261 | chrY | 18871681 | . | A | G | 55.70    | PASS | AC=5;AF=0.093;AN=54;BaseQRankSum=  |
| 41262 | chrY | 18871685 | . | G | A | 49.77    | PASS | AC=5;AF=0.093;AN=54;BaseQRankSum=  |
| 41263 | chrY | 18872082 | . | T | C | 543.80   | PASS | AC=10;AF=0.357;AN=28;DP=159;FS=0.  |
| 41264 | chrY | 18872409 | . | C | A | 621.78   | PASS | AC=6;AF=0.086;AN=70;DP=660;FS=0.0  |
| 41265 | chrY | 18873040 | . | T | C | 2220.45  | PASS | AC=6;AF=0.086;AN=70;DP=719;FS=0.0  |
| 41266 | chrY | 18875673 | . | A | C | 988.76   | PASS | AC=6;AF=0.300;AN=20;DP=170;FS=0.0  |
| 41267 | chrY | 18876095 | . | G | A | 1644.74  | PASS | AC=6;AF=0.300;AN=20;DP=187;FS=0.0  |
| 41268 | chrY | 18880574 | . | A | G | 10363.84 | PASS | AC=58;AF=0.829;AN=70;DP=4          |

|       |      |          |   |   |   |          |                |                                    |
|-------|------|----------|---|---|---|----------|----------------|------------------------------------|
| 41269 | chrY | 18882293 | . | A | G | 145.24   | PASS           | AC=2;AF=0.029;AN=70;DP=387;FS=0.0  |
| 41270 | chrY | 18886218 | . | T | C | 385.66   | PASS           | AC=6;AF=0.091;AN=66;DP=216;FS=0.0  |
| 41271 | chrY | 18890063 | . | C | T | 17091.07 | PASS           | AC=52;AF=0.743;AN=70;DP=6          |
| 41272 | chrY | 18890140 | . | G | A | 1208.78  | PASS           | AC=6;AF=0.086;AN=70;DP=610;FS=0.0  |
| 41273 | chrY | 18892377 | . | C | T | 233.89   | PASS           | AC=4;AF=0.200;AN=20;DP=74;FS=0.00  |
| 41274 | chrY | 18896061 | . | A | G | 154.40   | PASS           | AC=2;AF=0.029;AN=68;DP=299;FS=0.0  |
| 41275 | chrY | 18900172 | . | C | T | 347.88   | PASS           | AC=2;AF=0.030;AN=66;DP=249;FS=0.0  |
| 41276 | chrY | 18903362 | . | C | T | 1366.05  | PASS           | AC=6;AF=0.088;AN=68;DP=301;FS=0.0  |
| 41277 | chrY | 18904838 | . | T | A | 3959.60  | PASS           | AC=48;AF=0.800;AN=60;DP=242;FS=0   |
| 41278 | chrY | 18907236 | . | C | A | 11853.96 | PASS           | AC=64;AF=1.00;AN=64;DP=41          |
| 41279 | chrY | 18907927 | . | A | G | 449.31   | PASS           | AC=6;AF=0.103;AN=58;DP=133;FS=0.0  |
| 41280 | chrY | 18914441 | . | T | C | 12853.92 | PASS           | AC=70;AF=1.00;AN=70;DP=41          |
| 41281 | chrY | 18916557 | . | C | T | 620.53   | PASS           | AC=6;AF=0.086;AN=70;DP=441;FS=0.0  |
| 41282 | chrY | 18917306 | . | T | C | 1849.89  | PASS           | AC=38;AF=0.679;AN=56;DP=204;FS=0.  |
| 41283 | chrY | 18925314 | . | T | G | 1172.96  | PASS           | AC=8;AF=0.211;AN=38;DP=140;FS=0.0  |
| 41284 | chrY | 18930547 | . | C | A | 1168.03  | PASS           | AC=6;AF=0.086;AN=70;DP=625;FS=0.0  |
| 41285 | chrY | 18932147 | . | G | A | 4154.86  | PASS           | AC=18;AF=1.00;AN=18;DP=161;FS=0.0  |
| 41286 | chrY | 18935906 | . | C | G | 1231.16  | PASS           | AC=6;AF=0.100;AN=60;DP=199;FS=0.0  |
| 41287 | chrY | 18941356 | . | G | A | 1022.87  | PASS           | AC=6;AF=0.088;AN=68;DP=374;FS=0.0  |
| 41288 | chrY | 18942716 | . | A | G | 39.87    | PASS           | AC=1;AF=0.014;AN=70;BaseQRankSum=  |
| 41289 | chrY | 18942736 | . | T | C | 40.05    | PASS           | AC=1;AF=0.014;AN=70;BaseQRankSum=  |
| 41290 | chrY | 18944063 | . | T | C | 902.12   | PASS           | AC=6;AF=0.086;AN=70;DP=622;FS=0.0  |
| 41291 | chrY | 18944332 | . | G | T | 33.14    | PASS           | AC=1;AF=0.016;AN=64;BaseQRankSum=  |
| 41292 | chrY | 18949709 | . | C | G | 83.69    | PASS           | AC=2;AF=0.029;AN=68;DP=346;FS=0.0  |
| 41293 | chrY | 18949779 | . | A | T | 1100.66  | PASS           | AC=6;AF=0.086;AN=70;DP=401;FS=0.0  |
| 41294 | chrY | 18950932 | . | A | C | 5592.10  | PASS           | AC=46;AF=0.793;AN=58;DP=290;FS=0.  |
| 41295 | chrY | 18952296 | . | T | A | 1141     | PASS           | AC=6;AF=0.086;AN=70;DP=501;FS=0.0  |
| 41296 | chrY | 18954139 | . | G | C | 1090.36  | PASS           | AC=6;AF=0.086;AN=70;DP=258;FS=0.0  |
| 41297 | chrY | 18956270 | . | T | C | 586.59   | PASS           | AC=6;AF=0.097;AN=62;DP=189;FS=0.0  |
| 41298 | chrY | 18962007 | . | A | G | 303.35   | PASS           | AC=2;AF=0.030;AN=66;DP=253;FS=0.0  |
| 41299 | chrY | 18963906 | . | G | A | 794.95   | PASS           | AC=6;AF=0.231;AN=26;DP=134;FS=0.0  |
| 41300 | chrY | 18964171 | . | A | G | 37.88    | PASS           | AC=1;AF=0.015;AN=68;BaseQRankSum=  |
| 41301 | chrY | 18964179 | . | A | G | 37.35    | PASS           | AC=1;AF=0.014;AN=70;BaseQRankSum=  |
| 41302 | chrY | 18964263 | . | G | A | 10289.94 | PASS           | AC=68;AF=1.00;AN=68;DP=33          |
| 41303 | chrY | 18964479 | . | C | T | 6308.71  | PASS           | AC=48;AF=0.727;AN=66;DP=361;FS=0.  |
| 41304 | chrY | 18965493 | . | T | A | 254.33   | PASS           | AC=2;AF=0.029;AN=70;DP=481;FS=0.0  |
| 41305 | chrY | 18966381 | . | G | A | 487.65   | PASS           | AC=2;AF=0.032;AN=62;DP=179;FS=0.0  |
| 41306 | chrY | 18970170 | . | C | A | 486.74   | PASS           | AC=6;AF=0.333;AN=18;BaseQRankSum=  |
| 41307 | chrY | 18970429 | . | G | A | 989.57   | PASS           | AC=6;AF=0.273;AN=22;DP=137;FS=0.0  |
| 41308 | chrY | 18970668 | . | C | G | 1080.96  | PASS           | AC=6;AF=0.300;AN=20;DP=169;FS=0.0  |
| 41309 | chrY | 18974541 | . | C | T | 54.27    | PASS           | AC=1;AF=0.045;AN=22;BaseQRankSum=  |
| 41310 | chrY | 18974542 | . | A | G | 54.26    | PASS           | AC=1;AF=0.045;AN=22;BaseQRankSum=  |
| 41311 | chrY | 18982614 | . | A | G | 804.84   | PASS           | AC=12;AF=0.176;AN=68;BaseQRankSum= |
| 41312 | chrY | 18984083 | . | G | T | 938.23   | PASS           | AC=6;AF=0.231;AN=26;DP=157;FS=0.0  |
| 41313 | chrY | 18985269 | . | T | C | 889.72   | PASS           | AC=6;AF=0.086;AN=70;DP=331;FS=0.0  |
| 41314 | chrY | 18986087 | . | A | G | 7005.02  | PASS           | AC=62;AF=1.00;AN=62;DP=263;FS=0.0  |
| 41315 | chrY | 18990246 | . | G | T | 1554.36  | PASS           | AC=24;AF=0.571;AN=42;DP=212;FS=0.  |
| 41316 | chrY | 18993110 | . | A | C | 8480.20  | PASS           | AC=40;AF=0.571;AN=70;DP=518;FS=0.  |
| 41317 | chrY | 18998868 | . | T | C | 1353.74  | PASS           | AC=6;AF=0.088;AN=68;DP=342;FS=0.0  |
| 41318 | chrY | 19001112 | . | G | C | 2398.39  | PASS           | AC=6;AF=0.333;AN=18;DP=149;FS=0.0  |
| 41319 | chrY | 19001117 | . | A | G | 2371.28  | PASS           | AC=6;AF=0.333;AN=18;DP=156;FS=0.0  |
| 41320 | chrY | 19002327 | . | C | T | 1213.31  | PASS           | AC=6;AF=0.091;AN=66;DP=403;FS=0.0  |
| 41321 | chrY | 19002447 | . | T | C | 842.76   | PASS           | AC=6;AF=0.094;AN=64;DP=216;FS=0.0  |
| 41322 | chrY | 19004180 | . | A | T | 993.04   | PASS           | AC=6;AF=0.086;AN=70;DP=264;FS=0.0  |
| 41323 | chrY | 19007731 | . | A | G | 412.88   | PASS           | AC=6;AF=0.300;AN=20;DP=69;FS=0.00  |
| 41324 | chrY | 19018320 | . | T | G | 3798.86  | PASS           | AC=18;AF=1.00;AN=18;DP=146;FS=0.0  |
| 41325 | chrY | 19019519 | . | G | A | 820.69   | PASS           | AC=6;AF=0.273;AN=22;DP=153;FS=0.0  |
| 41326 | chrY | 19019789 | . | A | T | 863.98   | PASS           | AC=6;AF=0.300;AN=20;DP=136;FS=0.0  |
| 41327 | chrY | 19020340 | . | C | G | 17958.90 | PASS           | AC=68;AF=1.00;AN=68;DP=60          |
| 41328 | chrY | 19020366 | . | A | G | 11086.02 | PASS           | AC=50;AF=0.735;AN=68;BaseQ         |
| 41329 | chrY | 19020916 | . | G | A | 985.74   | PASS           | AC=6;AF=0.088;AN=68;DP=414;FS=0.0  |
| 41330 | chrY | 19025057 | . | C | G | 46.99    | PASS           | AC=1;AF=0.045;AN=22;BaseQRankSum=  |
| 41331 | chrY | 19025058 | . | C | T | 47.73    | PASS           | AC=1;AF=0.045;AN=22;BaseQRankSum=  |
| 41332 | chrY | 19025435 | . | A | T | 1314.75  | PASS           | AC=6;AF=0.300;AN=20;DP=176;FS=0.0  |
| 41333 | chrY | 19025638 | . | T | G | 284.26   | my_snps_filter | AC=5;AF=0.208;AN=24;BaseQ          |
| 41334 | chrY | 19025727 | . | C | T | 961.04   | PASS           | AC=9;AF=0.450;AN=20;BaseQRankSum=  |
| 41335 | chrY | 19025729 | . | G | T | 1315.05  | PASS           | AC=10;AF=0.500;AN=20;BaseQRankSum= |
| 41336 | chrY | 19025741 | . | C | G | 695.05   | PASS           | AC=8;AF=0.444;AN=18;BaseQRankSum=  |
| 41337 | chrY | 19025744 | . | G | A | 698.02   | PASS           | AC=8;AF=0.444;AN=18;BaseQRankSum=  |
| 41338 | chrY | 19025774 | . | A | T | 108.14   | my_snps_filter | AC=3;AF=0.150;AN=20;BaseQ          |
| 41339 | chrY | 19025775 | . | A | T | 106.20   | my_snps_filter | AC=3;AF=0.150;AN=20;BaseQ          |
| 41340 | chrY | 19025861 | . | G | T | 124.26   | my_snps_filter | AC=3;AF=0.167;AN=18;BaseQ          |
| 41341 | chrY | 19025871 | . | T | A | 126.91   | my_snps_filter | AC=4;AF=0.222;AN=18;BaseQ          |
| 41342 | chrY | 19025886 | . | T | C | 108.08   | my_snps_filter | AC=5;AF=0.278;AN=18;BaseQ          |
| 41343 | chrY | 19025920 | . | G | T | 33.59    | my_snps_filter | AC=2;AF=0.111;AN=18;BaseQ          |
| 41344 | chrY | 19025924 | . | G | A | 99.64    | my_snps_filter | AC=2;AF=0.111;AN=18;BaseQ          |



|       |      |          |   |   |     |          |               |                                    |
|-------|------|----------|---|---|-----|----------|---------------|------------------------------------|
| 41345 | chrY | 19025925 | . | T | C   | 42.18    | my_snp_filter | AC=2;AF=0.111;AN=18;BaseQ          |
| 41346 | chrY | 19025954 | . | C | A   | 567.15   | my_snp_filter | AC=6;AF=0.333;AN=18;BaseQ          |
| 41347 | chrY | 19025956 | . | G | A   | 38.93    | my_snp_filter | AC=3;AF=0.167;AN=18;BaseQ          |
| 41348 | chrY | 19025958 | . | C | T   | 86.04    | my_snp_filter | AC=2;AF=0.111;AN=18;BaseQ          |
| 41349 | chrY | 19025959 | . | G | A   | 580.60   | my_snp_filter | AC=6;AF=0.333;AN=18;BaseQ          |
| 41350 | chrY | 19026104 | . | T | G   | 600.53   | PASS          | AC=5;AF=0.278;AN=18;BaseQRankSum=  |
| 41351 | chrY | 19026153 | . | C | A   | 126.73   | my_snp_filter | AC=4;AF=0.222;AN=18;BaseQ          |
| 41352 | chrY | 19026187 | . | A | G   | 233.79   | PASS          | AC=5;AF=0.250;AN=20;BaseQRankSum=  |
| 41353 | chrY | 19026214 | . | A | G   | 38.77    | my_snp_filter | AC=3;AF=0.150;AN=20;BaseQ          |
| 41354 | chrY | 19029493 | . | C | G   | 1231.58  | PASS          | AC=6;AF=0.333;AN=18;BaseQRankSum=  |
| 41355 | chrY | 19029889 | . | A | G   | 92.19    | PASS          | AC=2;AF=0.091;AN=22;DP=124;FS=0.0  |
| 41356 | chrY | 19029978 | . | T | C   | 1508.91  | PASS          | AC=18;AF=1.00;AN=18;BaseQRankSum=  |
| 41357 | chrY | 19031997 | . | A | T   | 435.88   | PASS          | AC=4;AF=0.057;AN=70;DP=372;FS=0.0  |
| 41358 | chrY | 19040560 | . | C | T   | 261.90   | PASS          | AC=2;AF=0.029;AN=68;DP=506;FS=0.0  |
| 41359 | chrY | 19045018 | . | A | T   | 963.79   | PASS          | AC=6;AF=0.136;AN=44;DP=145;FS=0.0  |
| 41360 | chrY | 19045124 | . | C | T   | 3443.27  | PASS          | AC=32;AF=1.00;AN=32;DP=142;FS=0.0  |
| 41361 | chrY | 19045552 | . | T | C   | 13438.91 | PASS          | AC=66;AF=1.00;AN=66;DP=44          |
| 41362 | chrY | 19045666 | . | G | A   | 197.95   | PASS          | AC=2;AF=0.030;AN=66;DP=315;FS=0.0  |
| 41363 | chrY | 19047453 | . | G | A   | 134.65   | PASS          | AC=2;AF=0.083;AN=24;DP=141;FS=0.0  |
| 41364 | chrY | 19048394 | . | G | T,* | 1430.88  | PASS          | AC=12,15;AF=0.250,0.313;AN=48;DP=  |
| 41365 | chrY | 19051726 | . | T | C   | 16172.24 | PASS          | AC=40;AF=0.571;AN=70;DP=7          |
| 41366 | chrY | 19054560 | . | C | T   | 309      | PASS          | AC=2;AF=0.033;AN=60;DP=213;FS=0.0  |
| 41367 | chrY | 19054889 | . | T | C   | 7340.11  | PASS          | AC=66;AF=1.00;AN=66;DP=297;FS=0.0  |
| 41368 | chrY | 19057896 | . | A | C   | 208.02   | PASS          | AC=4;AF=0.083;AN=48;DP=114;FS=0.0  |
| 41369 | chrY | 19058744 | . | C | A   | 5836.63  | PASS          | AC=46;AF=0.719;AN=64;DP=352;FS=0.0 |
| 41370 | chrY | 19059148 | . | A | G   | 359.11   | PASS          | AC=2;AF=0.029;AN=70;DP=338;FS=0.0  |
| 41371 | chrY | 19060233 | . | T | A   | 1061.91  | PASS          | AC=6;AF=0.086;AN=70;DP=417;FS=0.0  |
| 41372 | chrY | 19060966 | . | C | A   | 5583.92  | PASS          | AC=36;AF=0.545;AN=66;BaseQRankSum= |
| 41373 | chrY | 19061349 | . | T | G   | 16527.97 | PASS          | AC=68;AF=1.00;AN=68;DP=53          |
| 41374 | chrY | 19062072 | . | C | A   | 1281.99  | PASS          | AC=6;AF=0.086;AN=70;DP=603;FS=0.0  |
| 41375 | chrY | 19064443 | . | G | T   | 4242.72  | PASS          | AC=42;AF=0.636;AN=66;DP=350;FS=0.0 |
| 41376 | chrY | 19065445 | . | A | G   | 1211.95  | PASS          | AC=12;AF=0.171;AN=70;DP=512;FS=0.0 |
| 41377 | chrY | 19067032 | . | G | A   | 548.78   | PASS          | AC=6;AF=0.088;AN=68;DP=466;FS=0.0  |
| 41378 | chrY | 19067144 | . | C | A   | 6101.23  | PASS          | AC=40;AF=0.645;AN=62;DP=392;FS=0.0 |
| 41379 | chrY | 19067469 | . | T | C   | 7323.06  | PASS          | AC=66;AF=1.00;AN=66;BaseQRankSum=  |
| 41380 | chrY | 19069100 | . | G | C   | 328.96   | PASS          | AC=2;AF=0.029;AN=70;DP=479;FS=0.0  |
| 41381 | chrY | 19070244 | . | G | A   | 3483.36  | PASS          | AC=38;AF=0.559;AN=68;DP=321;FS=0.0 |
| 41382 | chrY | 19071198 | . | G | A   | 9059.70  | PASS          | AC=38;AF=0.559;AN=68;DP=460;FS=0.0 |
| 41383 | chrY | 19071339 | . | T | C   | 52.61    | PASS          | AC=1;AF=0.014;AN=70;BaseQRankSum=  |
| 41384 | chrY | 19071340 | . | G | A   | 53.44    | PASS          | AC=1;AF=0.014;AN=70;BaseQRankSum=  |
| 41385 | chrY | 19071346 | . | C | T   | 50.40    | PASS          | AC=1;AF=0.015;AN=68;BaseQRankSum=  |
| 41386 | chrY | 19071384 | . | G | T   | 400.34   | PASS          | AC=6;AF=0.088;AN=68;BaseQRankSum=  |
| 41387 | chrY | 19071385 | . | T | C   | 1586.94  | my_snp_filter | AC=18;AF=0.273;AN=66;BaseQ         |
| 41388 | chrY | 19071411 | . | T | C   | 2347.15  | PASS          | AC=22;AF=0.314;AN=70;BaseQRankSum= |
| 41389 | chrY | 19071418 | . | C | T   | 1191.71  | PASS          | AC=10;AF=0.143;AN=70;BaseQRankSum= |
| 41390 | chrY | 19071473 | . | T | C   | 250.66   | PASS          | AC=5;AF=0.071;AN=70;BaseQRankSum=  |
| 41391 | chrY | 19071489 | . | C | T   | 401.86   | PASS          | AC=5;AF=0.081;AN=62;BaseQRankSum=  |
| 41392 | chrY | 19071493 | . | A | G   | 359.02   | PASS          | AC=4;AF=0.063;AN=64;BaseQRankSum=  |
| 41393 | chrY | 19071953 | . | C | T   | 819.36   | PASS          | AC=6;AF=0.086;AN=70;DP=458;FS=0.0  |
| 41394 | chrY | 19073715 | . | G | T   | 4988.31  | PASS          | AC=42;AF=0.636;AN=66;DP=278;FS=0.0 |
| 41395 | chrY | 19077394 | . | G | A   | 8743.23  | PASS          | AC=54;AF=0.818;AN=66;BaseQRankSum= |
| 41396 | chrY | 19077866 | . | C | T   | 1329.05  | PASS          | AC=6;AF=0.086;AN=70;DP=569;FS=0.0  |
| 41397 | chrY | 19078724 | . | G | A   | 329.54   | PASS          | AC=2;AF=0.029;AN=70;DP=369;FS=0.0  |
| 41398 | chrY | 19079502 | . | T | G   | 43.98    | PASS          | AC=1;AF=0.015;AN=68;BaseQRankSum=  |
| 41399 | chrY | 19079503 | . | C | T   | 43.92    | PASS          | AC=1;AF=0.015;AN=68;BaseQRankSum=  |
| 41400 | chrY | 19080602 | . | G | A   | 1291.73  | PASS          | AC=6;AF=0.088;AN=68;DP=302;FS=0.0  |
| 41401 | chrY | 19086211 | . | C | A   | 1241.18  | PASS          | AC=6;AF=0.097;AN=62;DP=238;FS=0.0  |
| 41402 | chrY | 19086774 | . | T | A   | 106.74   | PASS          | AC=2;AF=0.029;AN=70;DP=348;FS=0.0  |
| 41403 | chrY | 19087877 | . | T | C   | 327.08   | PASS          | AC=2;AF=0.031;AN=64;DP=239;FS=0.0  |
| 41404 | chrY | 19089441 | . | G | T   | 2018.88  | PASS          | AC=32;AF=0.533;AN=60;DP=281;FS=0.0 |
| 41405 | chrY | 19094565 | . | T | G   | 407.47   | PASS          | AC=2;AF=0.029;AN=70;DP=401;FS=0.0  |
| 41406 | chrY | 19095285 | . | A | G   | 7245     | PASS          | AC=60;AF=1.00;AN=60;DP=271;FS=0.0  |
| 41407 | chrY | 19098924 | . | A | G   | 360.02   | PASS          | AC=2;AF=0.111;AN=18;DP=185;FS=0.0  |
| 41408 | chrY | 19102270 | . | G | C   | 232.04   | PASS          | AC=2;AF=0.111;AN=18;DP=160;FS=0.0  |
| 41409 | chrY | 19102447 | . | A | G   | 52.24    | PASS          | AC=1;AF=0.056;AN=18;BaseQRankSum=  |
| 41410 | chrY | 19102454 | . | C | T   | 69.24    | PASS          | AC=1;AF=0.056;AN=18;BaseQRankSum=  |
| 41411 | chrY | 19102543 | . | C | T   | 30.34    | PASS          | AC=1;AF=0.056;AN=18;BaseQRankSum=  |
| 41412 | chrY | 19112874 | . | C | A   | 209.92   | PASS          | AC=4;AF=0.059;AN=68;DP=367;FS=0.0  |
| 41413 | chrY | 19122820 | . | T | C   | 75.04    | PASS          | AC=2;AF=0.029;AN=70;DP=510;FS=0.0  |
| 41414 | chrY | 19123396 | . | C | T   | 294.35   | PASS          | AC=2;AF=0.029;AN=70;DP=710;FS=0.0  |
| 41415 | chrY | 19124701 | . | C | A   | 1321.02  | PASS          | AC=6;AF=0.086;AN=70;DP=294;FS=0.0  |
| 41416 | chrY | 19124931 | . | T | G   | 43.10    | PASS          | AC=1;AF=0.015;AN=68;BaseQRankSum=  |
| 41417 | chrY | 19136088 | . | A | T   | 43.71    | PASS          | AC=1;AF=0.016;AN=64;BaseQRankSum=  |
| 41418 | chrY | 19136089 | . | C | T   | 43.69    | PASS          | AC=1;AF=0.016;AN=64;BaseQRankSum=  |
| 41419 | chrY | 19143015 | . | A | G   | 727.85   | PASS          | AC=6;AF=0.086;AN=70;DP=553;FS=0.0  |
| 41420 | chrY | 19144375 | . | T | C   | 14856.90 | PASS          | AC=70;AF=1.00;AN=70;DP=49          |

|       |      |          |   |   |   |          |               |                                    |
|-------|------|----------|---|---|---|----------|---------------|------------------------------------|
| 41421 | chrY | 19146735 | . | G | T | 716.31   | PASS          | AC=6;AF=0.167;AN=36;DP=112;FS=0.0  |
| 41422 | chrY | 19148465 | . | T | C | 9861.75  | PASS          | AC=52;AF=0.743;AN=70;DP=471;FS=0.  |
| 41423 | chrY | 19148481 | . | G | A | 998.94   | PASS          | AC=6;AF=0.086;AN=70;DP=461;FS=0.0  |
| 41424 | chrY | 19150945 | . | A | G | 524.13   | PASS          | AC=6;AF=0.086;AN=70;DP=373;FS=0.0  |
| 41425 | chrY | 19151936 | . | A | T | 1363.97  | PASS          | AC=6;AF=0.094;AN=64;DP=210;FS=0.0  |
| 41426 | chrY | 19152428 | . | T | G | 327.35   | PASS          | AC=2;AF=0.029;AN=70;DP=702;FS=0.0  |
| 41427 | chrY | 19156924 | . | A | G | 706.11   | PASS          | AC=6;AF=0.086;AN=70;DP=383;FS=0.0  |
| 41428 | chrY | 19158392 | . | A | G | 419.66   | PASS          | AC=4;AF=0.057;AN=70;DP=460;FS=0.0  |
| 41429 | chrY | 19159397 | . | C | T | 882.39   | PASS          | AC=2;AF=0.029;AN=68;DP=639;FS=0.0  |
| 41430 | chrY | 19162322 | . | G | A | 167.73   | PASS          | AC=2;AF=0.031;AN=64;DP=307;FS=0.0  |
| 41431 | chrY | 19165908 | . | A | C | 2304.98  | PASS          | AC=28;AF=0.700;AN=40;DP=199;FS=0.  |
| 41432 | chrY | 19167366 | . | T | G | 240.23   | PASS          | AC=2;AF=0.029;AN=70;DP=540;FS=0.0  |
| 41433 | chrY | 19173957 | . | T | C | 146.94   | my_snp_filter | AC=2;AF=0.111;AN=18;BaseQ          |
| 41434 | chrY | 19175891 | . | G | C | 1539.22  | PASS          | AC=6;AF=0.333;AN=18;BaseQRankSum=  |
| 41435 | chrY | 19176064 | . | A | C | 5160.86  | PASS          | AC=18;AF=1.00;AN=18;DP=197;FS=0.0  |
| 41436 | chrY | 19179540 | . | A | G | 9887     | PASS          | AC=66;AF=1.00;AN=66;DP=347;FS=0.0  |
| 41437 | chrY | 19179606 | . | C | A | 9297.04  | PASS          | AC=64;AF=1.00;AN=64;DP=317;FS=0.0  |
| 41438 | chrY | 19182708 | . | C | T | 1917.11  | PASS          | AC=6;AF=0.086;AN=70;DP=677;FS=0.0  |
| 41439 | chrY | 19182853 | . | C | G | 13261.29 | PASS          | AC=50;AF=0.735;AN=68;DP=5          |
| 41440 | chrY | 19188381 | . | G | C | 1622.06  | PASS          | AC=6;AF=0.086;AN=70;DP=742;FS=0.0  |
| 41441 | chrY | 19197028 | . | T | A | 555.32   | PASS          | AC=2;AF=0.029;AN=70;DP=691;FS=0.0  |
| 41442 | chrY | 19198212 | . | G | A | 3474.16  | PASS          | AC=38;AF=1.00;AN=38;DP=143;FS=0.0  |
| 41443 | chrY | 19205814 | . | T | A | 8742.57  | PASS          | AC=52;AF=0.813;AN=64;DP=420;FS=0.  |
| 41444 | chrY | 19207781 | . | G | T | 1031.44  | PASS          | AC=6;AF=0.086;AN=70;DP=472;FS=0.0  |
| 41445 | chrY | 19207887 | . | G | T | 677.64   | PASS          | AC=6;AF=0.086;AN=70;DP=498;FS=0.0  |
| 41446 | chrY | 19210606 | . | G | T | 3751.79  | PASS          | AC=17;AF=0.944;AN=18;BaseQRankSum= |
| 41447 | chrY | 19214038 | . | C | T | 47.54    | PASS          | AC=2;AF=0.033;AN=60;DP=191;FS=0.0  |
| 41448 | chrY | 19214059 | . | G | A | 164.05   | PASS          | AC=2;AF=0.032;AN=62;DP=230;FS=0.0  |
| 41449 | chrY | 19220444 | . | G | A | 17110.37 | PASS          | AC=58;AF=0.829;AN=70;DP=6          |
| 41450 | chrY | 19223555 | . | A | G | 1078.99  | PASS          | AC=6;AF=0.094;AN=64;DP=278;FS=0.0  |
| 41451 | chrY | 19226430 | . | C | A | 4235.53  | PASS          | AC=36;AF=0.600;AN=60;DP=263;FS=0.  |
| 41452 | chrY | 19226833 | . | C | T | 571.02   | PASS          | AC=6;AF=0.088;AN=68;DP=304;FS=0.0  |
| 41453 | chrY | 19227158 | . | C | G | 1476.34  | PASS          | AC=6;AF=0.086;AN=70;DP=473;FS=0.0  |
| 41454 | chrY | 19233271 | . | C | A | 33.72    | PASS          | AC=1;AF=0.014;AN=70;BaseQRankSum=  |
| 41455 | chrY | 19233278 | . | G | A | 33.73    | PASS          | AC=1;AF=0.014;AN=70;BaseQRankSum=  |
| 41456 | chrY | 19233286 | . | A | G | 33.69    | PASS          | AC=1;AF=0.014;AN=70;BaseQRankSum=  |
| 41457 | chrY | 19233304 | . | T | G | 39.61    | PASS          | AC=1;AF=0.014;AN=70;BaseQRankSum=  |
| 41458 | chrY | 19233305 | . | C | T | 39.60    | PASS          | AC=1;AF=0.014;AN=70;BaseQRankSum=  |
| 41459 | chrY | 19233307 | . | T | G | 39.58    | PASS          | AC=1;AF=0.014;AN=70;BaseQRankSum=  |
| 41460 | chrY | 19233990 | . | A | T | 1106.38  | PASS          | AC=22;AF=0.500;AN=44;DP=200;FS=0.  |
| 41461 | chrY | 19234292 | . | G | A | 583.16   | PASS          | AC=2;AF=0.029;AN=68;DP=299;FS=0.0  |
| 41462 | chrY | 19236092 | . | T | C | 1162.28  | PASS          | AC=6;AF=0.086;AN=70;BaseQRankSum=  |
| 41463 | chrY | 19236136 | . | G | A | 9422.17  | PASS          | AC=52;AF=0.743;AN=70;DP=467;FS=0.  |
| 41464 | chrY | 19237093 | . | T | G | 7356.61  | PASS          | AC=54;AF=0.818;AN=66;DP=339;FS=0.  |
| 41465 | chrY | 19244249 | . | T | A | 1030.51  | PASS          | AC=4;AF=0.057;AN=70;DP=437;FS=0.0  |
| 41466 | chrY | 19244922 | . | C | T | 1241.50  | PASS          | AC=6;AF=0.086;AN=70;DP=493;FS=0.0  |
| 41467 | chrY | 19245417 | . | A | C | 10937.03 | PASS          | AC=70;AF=1.00;AN=70;BaseQ          |
| 41468 | chrY | 19246276 | . | T | A | 4185.14  | PASS          | AC=46;AF=0.719;AN=64;DP=305;FS=0.  |
| 41469 | chrY | 19246407 | . | A | T | 190.97   | PASS          | AC=1;AF=0.015;AN=68;BaseQRankSum=  |
| 41470 | chrY | 19246561 | . | G | A | 14312.91 | PASS          | AC=66;AF=1.00;AN=66;BaseQ          |
| 41471 | chrY | 19252717 | . | A | C | 322.33   | PASS          | AC=2;AF=0.029;AN=70;DP=496;FS=0.0  |
| 41472 | chrY | 19267344 | . | A | C | 7856.91  | PASS          | AC=58;AF=1.00;AN=58;DP=292;FS=0.0  |
| 41473 | chrY | 19267426 | . | C | A | 44.06    | PASS          | AC=2;AF=0.029;AN=70;DP=375;FS=0.0  |
| 41474 | chrY | 19269306 | . | C | T | 1480.37  | PASS          | AC=6;AF=0.088;AN=68;DP=408;FS=0.0  |
| 41475 | chrY | 19269854 | . | A | T | 3344.77  | PASS          | AC=42;AF=0.700;AN=60;DP=271;FS=0.  |
| 41476 | chrY | 19269898 | . | T | A | 1260.39  | PASS          | AC=6;AF=0.086;AN=70;BaseQRankSum=  |
| 41477 | chrY | 19271400 | . | A | G | 900.16   | PASS          | AC=6;AF=0.086;AN=70;DP=241;FS=0.0  |
| 41478 | chrY | 19274282 | . | G | T | 1338.92  | PASS          | AC=6;AF=0.086;AN=70;DP=274;FS=0.0  |
| 41479 | chrY | 19277753 | . | C | T | 1529.36  | PASS          | AC=6;AF=0.103;AN=58;DP=217;FS=0.0  |
| 41480 | chrY | 19278725 | . | C | T | 1011.56  | PASS          | AC=6;AF=0.086;AN=70;DP=485;FS=0.0  |
| 41481 | chrY | 19279765 | . | A | G | 1571.99  | PASS          | AC=12;AF=0.171;AN=70;DP=329;FS=0.  |
| 41482 | chrY | 19286146 | . | A | C | 6345.10  | PASS          | AC=52;AF=0.743;AN=70;DP=352;FS=0.  |
| 41483 | chrY | 19286660 | . | A | G | 274.50   | PASS          | AC=2;AF=0.029;AN=68;DP=351;FS=0.0  |
| 41484 | chrY | 19291359 | . | C | T | 7704.05  | PASS          | AC=60;AF=1.00;AN=60;DP=277;FS=0.0  |
| 41485 | chrY | 19292612 | . | T | G | 880.01   | PASS          | AC=6;AF=0.086;AN=70;DP=438;FS=0.0  |
| 41486 | chrY | 19298321 | . | A | G | 10190.95 | PASS          | AC=68;AF=1.00;AN=68;BaseQ          |
| 41487 | chrY | 19299411 | . | G | A | 800.47   | PASS          | AC=6;AF=0.088;AN=68;DP=469;FS=0.0  |
| 41488 | chrY | 19301681 | . | C | A | 1351.96  | PASS          | AC=24;AF=0.571;AN=42;DP=199;FS=0.  |
| 41489 | chrY | 19303108 | . | C | A | 15331.88 | PASS          | AC=70;AF=1.00;AN=70;BaseQ          |
| 41490 | chrY | 19303194 | . | C | T | 1090.13  | PASS          | AC=6;AF=0.086;AN=70;BaseQRankSum=  |
| 41491 | chrY | 19306761 | . | A | G | 31.64    | PASS          | AC=1;AF=0.015;AN=68;BaseQRankSum=  |
| 41492 | chrY | 19306993 | . | T | C | 5720.13  | PASS          | AC=37;AF=0.544;AN=68;BaseQRankSum= |
| 41493 | chrY | 19307451 | . | C | T | 453.97   | PASS          | AC=4;AF=0.059;AN=68;DP=329;FS=0.0  |
| 41494 | chrY | 19309460 | . | T | C | 347.43   | PASS          | AC=10;AF=0.333;AN=30;DP=40;FS=0.0  |
| 41495 | chrY | 19311468 | . | T | G | 1672.11  | PASS          | AC=6;AF=0.086;AN=70;DP=553;FS=0.0  |
| 41496 | chrY | 19315274 | . | C | T | 475.59   | PASS          | AC=8;AF=0.114;AN=70;DP=309;FS=0.0  |

|       |      |          |   |   |   |          |               |                                    |
|-------|------|----------|---|---|---|----------|---------------|------------------------------------|
| 41497 | chrY | 19315987 | . | A | G | 46.72    | PASS          | AC=2;AF=0.029;AN=70;DP=281;FS=0.0  |
| 41498 | chrY | 19315988 | . | T | A | 7959.04  | PASS          | AC=66;AF=1.00;AN=66;DP=272;FS=0.0  |
| 41499 | chrY | 19320942 | . | G | A | 1627.83  | PASS          | AC=6;AF=0.088;AN=68;DP=352;FS=0.0  |
| 41500 | chrY | 19327333 | . | C | A | 4409.86  | PASS          | AC=18;AF=1.00;AN=18;DP=171;FS=0.0  |
| 41501 | chrY | 19327508 | . | A | G | 1196.18  | PASS          | AC=6;AF=0.333;AN=18;DP=184;FS=0.0  |
| 41502 | chrY | 19338287 | . | T | C | 683.80   | PASS          | AC=6;AF=0.094;AN=64;DP=408;FS=0.0  |
| 41503 | chrY | 19340515 | . | T | C | 182.26   | PASS          | AC=4;AF=0.063;AN=64;DP=227;FS=0.0  |
| 41504 | chrY | 19341097 | . | A | T | 765.68   | PASS          | AC=4;AF=0.057;AN=70;DP=430;FS=0.0  |
| 41505 | chrY | 19341448 | . | G | A | 585.24   | PASS          | AC=6;AF=0.086;AN=70;DP=463;FS=0.0  |
| 41506 | chrY | 19343844 | . | A | T | 36.86    | PASS          | AC=1;AF=0.014;AN=70;BaseQRankSum=  |
| 41507 | chrY | 19343849 | . | A | G | 36.91    | PASS          | AC=1;AF=0.014;AN=70;BaseQRankSum=  |
| 41508 | chrY | 19346785 | . | C | A | 438.46   | PASS          | AC=12;AF=0.316;AN=38;DP=166;FS=0.0 |
| 41509 | chrY | 19349409 | . | A | G | 1563.54  | PASS          | AC=6;AF=0.086;AN=70;DP=463;FS=0.0  |
| 41510 | chrY | 19349615 | . | T | C | 8284.43  | PASS          | AC=58;AF=0.829;AN=70;DP=378;FS=0.0 |
| 41511 | chrY | 19351340 | . | A | G | 1384.74  | PASS          | AC=6;AF=0.136;AN=44;DP=180;FS=0.0  |
| 41512 | chrY | 19352339 | . | T | G | 6754.80  | PASS          | AC=46;AF=0.657;AN=70;DP=435;FS=0.0 |
| 41513 | chrY | 19353691 | . | G | A | 51.71    | PASS          | AC=2;AF=0.100;AN=20;DP=149;FS=0.0  |
| 41514 | chrY | 19353705 | . | T | C | 51.70    | PASS          | AC=2;AF=0.100;AN=20;DP=165;FS=0.0  |
| 41515 | chrY | 19355475 | . | G | A | 1602.70  | PASS          | AC=6;AF=0.088;AN=68;DP=785;FS=0.0  |
| 41516 | chrY | 19357627 | . | T | A | 430.60   | PASS          | AC=2;AF=0.029;AN=70;DP=392;FS=0.0  |
| 41517 | chrY | 19357794 | . | G | A | 1103.01  | PASS          | AC=6;AF=0.088;AN=68;DP=381;FS=0.0  |
| 41518 | chrY | 19360192 | . | C | T | 5706.97  | PASS          | AC=54;AF=0.818;AN=66;DP=293;FS=0.0 |
| 41519 | chrY | 19361507 | . | G | A | 7057.94  | PASS          | AC=52;AF=0.743;AN=70;DP=363;FS=0.0 |
| 41520 | chrY | 19368842 | . | C | G | 336.48   | PASS          | AC=2;AF=0.029;AN=70;DP=536;FS=0.0  |
| 41521 | chrY | 19370916 | . | G | A | 1143.85  | PASS          | AC=6;AF=0.086;AN=70;DP=497;FS=0.0  |
| 41522 | chrY | 19371568 | . | A | G | 1326.73  | PASS          | AC=6;AF=0.088;AN=68;DP=405;FS=0.0  |
| 41523 | chrY | 19372386 | . | T | G | 2267.74  | PASS          | AC=34;AF=0.654;AN=52;DP=251;FS=0.0 |
| 41524 | chrY | 19372700 | . | G | A | 909.68   | PASS          | AC=6;AF=0.086;AN=70;DP=511;FS=0.0  |
| 41525 | chrY | 19375658 | . | G | C | 1310.18  | PASS          | AC=6;AF=0.333;AN=18;DP=165;FS=0.0  |
| 41526 | chrY | 19376983 | . | C | T | 225.41   | PASS          | AC=4;AF=0.182;AN=22;DP=99;FS=0.00  |
| 41527 | chrY | 19380397 | . | A | G | 1214.12  | PASS          | AC=6;AF=0.094;AN=64;DP=316;FS=0.0  |
| 41528 | chrY | 19384549 | . | A | T | 1252.08  | PASS          | AC=6;AF=0.086;AN=70;DP=364;FS=0.0  |
| 41529 | chrY | 19389735 | . | G | A | 88.81    | PASS          | AC=1;AF=0.017;AN=60;BaseQRankSum=  |
| 41530 | chrY | 19389740 | . | G | A | 83.46    | PASS          | AC=1;AF=0.015;AN=66;BaseQRankSum=  |
| 41531 | chrY | 19405037 | . | T | G | 1477.11  | PASS          | AC=6;AF=0.097;AN=62;DP=248;FS=0.0  |
| 41532 | chrY | 19405469 | . | C | G | 1119.19  | PASS          | AC=6;AF=0.086;AN=70;DP=678;FS=0.0  |
| 41533 | chrY | 19406997 | . | T | C | 1235.97  | PASS          | AC=6;AF=0.086;AN=70;DP=423;FS=0.0  |
| 41534 | chrY | 19411754 | . | G | A | 8238.63  | PASS          | AC=50;AF=0.735;AN=68;DP=394;FS=0.0 |
| 41535 | chrY | 19411985 | . | A | G | 150.89   | PASS          | AC=1;AF=0.056;AN=18;BaseQRankSum=  |
| 41536 | chrY | 19413283 | . | A | T | 197.34   | PASS          | AC=4;AF=0.063;AN=64;DP=238;FS=0.0  |
| 41537 | chrY | 19416670 | . | C | A | 4255.10  | PASS          | AC=32;AF=0.571;AN=56;DP=349;FS=0.0 |
| 41538 | chrY | 19417241 | . | A | G | 6880.27  | PASS          | AC=60;AF=1.00;AN=60;DP=247;FS=0.0  |
| 41539 | chrY | 19417394 | . | C | A | 9329.02  | PASS          | AC=60;AF=1.00;AN=60;DP=334;FS=0.0  |
| 41540 | chrY | 19418178 | . | C | T | 3198.16  | PASS          | AC=22;AF=1.00;AN=22;BaseQRankSum=  |
| 41541 | chrY | 19421627 | . | C | G | 284.77   | PASS          | AC=4;AF=0.059;AN=68;DP=302;FS=0.0  |
| 41542 | chrY | 19425608 | . | G | C | 3519.86  | PASS          | AC=18;AF=1.00;AN=18;DP=158;FS=0.0  |
| 41543 | chrY | 19427172 | . | T | C | 1126.63  | PASS          | AC=6;AF=0.273;AN=22;DP=195;FS=0.0  |
| 41544 | chrY | 19430898 | . | G | T | 36.64    | PASS          | AC=1;AF=0.014;AN=70;BaseQRankSum=  |
| 41545 | chrY | 19430906 | . | G | T | 37.08    | PASS          | AC=1;AF=0.014;AN=70;BaseQRankSum=  |
| 41546 | chrY | 19433111 | . | T | G | 1011.47  | PASS          | AC=6;AF=0.088;AN=68;DP=301;FS=0.0  |
| 41547 | chrY | 19437769 | . | C | A | 38.26    | PASS          | AC=1;AF=0.045;AN=22;BaseQRankSum=  |
| 41548 | chrY | 19439452 | . | G | T | 355.90   | PASS          | AC=6;AF=0.088;AN=68;BaseQRankSum=  |
| 41549 | chrY | 19442691 | . | G | A | 414.64   | PASS          | AC=2;AF=0.029;AN=68;DP=355;FS=0.0  |
| 41550 | chrY | 19451784 | . | G | T | 563.74   | PASS          | AC=2;AF=0.029;AN=70;DP=376;FS=0.0  |
| 41551 | chrY | 19457443 | . | A | G | 13346.94 | PASS          | AC=52;AF=0.743;AN=70;DP=5          |
| 41552 | chrY | 19462180 | . | T | C | 8922.12  | PASS          | AC=68;AF=1.00;AN=68;DP=306;FS=0.0  |
| 41553 | chrY | 19463273 | . | C | T | 13370.90 | PASS          | AC=68;AF=1.00;AN=68;BaseQ          |
| 41554 | chrY | 19467946 | . | T | C | 894.52   | PASS          | AC=6;AF=0.086;AN=70;DP=295;FS=0.0  |
| 41555 | chrY | 19469865 | . | C | T | 90.88    | PASS          | AC=2;AF=0.059;AN=34;DP=139;FS=0.0  |
| 41556 | chrY | 19469886 | . | C | A | 441.82   | PASS          | AC=6;AF=0.214;AN=28;DP=106;FS=0.0  |
| 41557 | chrY | 19470230 | . | C | G | 1146.13  | PASS          | AC=6;AF=0.086;AN=70;DP=355;FS=0.0  |
| 41558 | chrY | 19471097 | . | A | G | 495.18   | PASS          | AC=6;AF=0.091;AN=66;DP=282;FS=0.0  |
| 41559 | chrY | 19476605 | . | T | C | 37.12    | PASS          | AC=1;AF=0.017;AN=58;BaseQRankSum=  |
| 41560 | chrY | 19476809 | . | C | A | 590.11   | PASS          | AC=12;AF=0.333;AN=36;DP=166;FS=0.0 |
| 41561 | chrY | 19480880 | . | T | C | 1302.89  | PASS          | AC=6;AF=0.088;AN=68;DP=277;FS=0.0  |
| 41562 | chrY | 19483845 | . | G | C | 70.04    | PASS          | AC=2;AF=0.032;AN=62;DP=230;FS=0.0  |
| 41563 | chrY | 19488919 | . | T | C | 61.42    | my_snp_filter | AC=4;AF=0.222;AN=18;BaseQ          |
| 41564 | chrY | 19489856 | . | G | T | 227.70   | PASS          | AC=2;AF=0.029;AN=70;DP=547;FS=0.0  |
| 41565 | chrY | 19490184 | . | T | C | 47.57    | PASS          | AC=2;AF=0.030;AN=66;DP=342;FS=0.0  |
| 41566 | chrY | 19490437 | . | A | G | 11703.15 | PASS          | AC=52;AF=0.743;AN=70;DP=5          |
| 41567 | chrY | 19492677 | . | A | G | 3676.91  | PASS          | AC=32;AF=0.571;AN=56;DP=297;FS=0.0 |
| 41568 | chrY | 19495839 | . | A | G | 842      | PASS          | AC=6;AF=0.086;AN=70;DP=386;FS=0.0  |
| 41569 | chrY | 19495908 | . | A | G | 1150.86  | PASS          | AC=6;AF=0.086;AN=70;DP=416;FS=0.0  |
| 41570 | chrY | 19499040 | . | T | A | 414.88   | PASS          | AC=2;AF=0.029;AN=70;DP=298;FS=0.0  |
| 41571 | chrY | 19500986 | . | G | A | 5511.18  | PASS          | AC=46;AF=0.719;AN=64;DP=294;FS=0.0 |
| 41572 | chrY | 19502094 | . | T | A | 339.90   | PASS          | AC=6;AF=0.091;AN=66;DP=278;FS=0.0  |

|       |      |          |   |   |   |          |               |                                   |
|-------|------|----------|---|---|---|----------|---------------|-----------------------------------|
| 41573 | chrY | 19504659 | . | A | T | 5792.21  | PASS          | AC=54;AF=1.00;AN=54;DP=205;FS=0.0 |
| 41574 | chrY | 19510292 | . | G | T | 35.31    | PASS          | AC=2;AF=0.059;AN=34;BaseQRankSum= |
| 41575 | chrY | 19510294 | . | A | T | 34.68    | PASS          | AC=2;AF=0.050;AN=40;BaseQRankSum= |
| 41576 | chrY | 19513004 | . | G | T | 82.38    | PASS          | AC=2;AF=0.029;AN=70;DP=346;FS=0.0 |
| 41577 | chrY | 19513070 | . | C | T | 1311.98  | PASS          | AC=12;AF=0.176;AN=68;DP=385;FS=0. |
| 41578 | chrY | 19515280 | . | A | G | 741.29   | PASS          | AC=6;AF=0.088;AN=68;DP=414;FS=0.0 |
| 41579 | chrY | 19515450 | . | G | T | 499.38   | PASS          | AC=2;AF=0.029;AN=70;DP=413;FS=0.0 |
| 41580 | chrY | 19524921 | . | G | A | 212.41   | PASS          | AC=2;AF=0.029;AN=70;DP=506;FS=0.0 |
| 41581 | chrY | 19525037 | . | T | C | 47.23    | PASS          | AC=2;AF=0.029;AN=70;DP=451;FS=0.0 |
| 41582 | chrY | 19525191 | . | G | A | 1209.09  | PASS          | AC=6;AF=0.086;AN=70;DP=546;FS=0.0 |
| 41583 | chrY | 19525421 | . | C | T | 14371.30 | PASS          | AC=52;AF=0.743;AN=70;BaseQ        |
| 41584 | chrY | 19537289 | . | C | T | 104.98   | PASS          | AC=2;AF=0.029;AN=68;DP=278;FS=0.0 |
| 41585 | chrY | 19537991 | . | A | C | 880.49   | PASS          | AC=6;AF=0.086;AN=70;DP=451;FS=0.0 |
| 41586 | chrY | 19539300 | . | A | T | 376.24   | PASS          | AC=2;AF=0.029;AN=70;DP=427;FS=0.0 |
| 41587 | chrY | 19542811 | . | G | A | 569.16   | PASS          | AC=6;AF=0.086;AN=70;DP=442;FS=0.0 |
| 41588 | chrY | 19543300 | . | G | T | 1089.13  | PASS          | AC=6;AF=0.088;AN=68;DP=355;FS=0.0 |
| 41589 | chrY | 19547187 | . | C | A | 31.51    | PASS          | AC=1;AF=0.019;AN=52;BaseQRankSum= |
| 41590 | chrY | 19547218 | . | T | C | 49.65    | PASS          | AC=1;AF=0.022;AN=46;BaseQRankSum= |
| 41591 | chrY | 19547223 | . | G | A | 47.81    | PASS          | AC=1;AF=0.022;AN=46;BaseQRankSum= |
| 41592 | chrY | 19547230 | . | G | T | 50.13    | PASS          | AC=1;AF=0.024;AN=42;BaseQRankSum= |
| 41593 | chrY | 19551340 | . | T | C | 14912.93 | PASS          | AC=52;AF=0.743;AN=70;DP=4         |
| 41594 | chrY | 19555082 | . | G | A | 53.96    | PASS          | AC=1;AF=0.016;AN=64;BaseQRankSum= |
| 41595 | chrY | 19561148 | . | C | G | 678.96   | PASS          | AC=6;AF=0.300;AN=20;DP=165;FS=0.0 |
| 41596 | chrY | 19561202 | . | C | T | 1347.64  | PASS          | AC=6;AF=0.273;AN=22;DP=164;FS=0.0 |
| 41597 | chrY | 19561883 | . | C | G | 1535.95  | PASS          | AC=6;AF=0.300;AN=20;DP=191;FS=0.0 |
| 41598 | chrY | 19562066 | . | C | T | 1732.18  | PASS          | AC=6;AF=0.333;AN=18;DP=171;FS=0.0 |
| 41599 | chrY | 19562084 | . | T | G | 1935.78  | PASS          | AC=6;AF=0.300;AN=20;DP=184;FS=0.0 |
| 41600 | chrY | 19562455 | . | T | A | 1231.75  | PASS          | AC=6;AF=0.300;AN=20;DP=173;FS=0.0 |
| 41601 | chrY | 19563188 | . | G | T | 187.41   | PASS          | AC=4;AF=0.059;AN=68;DP=295;FS=0.0 |
| 41602 | chrY | 19576142 | . | T | C | 416.30   | my_snp_filter | AC=10;AF=0.714;AN=14;BaseQ        |
| 41603 | chrY | 19583030 | . | G | A | 84.31    | my_snp_filter | AC=4;AF=0.222;AN=18;BaseQ         |
| 41604 | chrY | 19583035 | . | A | G | 371.92   | my_snp_filter | AC=6;AF=0.333;AN=18;BaseQ         |
| 41605 | chrY | 19583037 | . | C | A | 371.92   | my_snp_filter | AC=6;AF=0.333;AN=18;BaseQ         |
| 41606 | chrY | 19583038 | . | C | G | 371.92   | my_snp_filter | AC=6;AF=0.333;AN=18;BaseQ         |
| 41607 | chrY | 19583072 | . | T | G | 265.99   | my_snp_filter | AC=7;AF=0.389;AN=18;BaseQ         |
| 41608 | chrY | 19583081 | . | G | A | 261      | my_snp_filter | AC=7;AF=0.350;AN=20;BaseQ         |
| 41609 | chrY | 19583092 | . | G | A | 125.34   | my_snp_filter | AC=5;AF=0.250;AN=20;BaseQ         |
| 41610 | chrY | 19583095 | . | T | A | 258      | my_snp_filter | AC=7;AF=0.350;AN=20;BaseQ         |
| 41611 | chrY | 19583100 | . | G | C | 251.87   | my_snp_filter | AC=6;AF=0.300;AN=20;BaseQ         |
| 41612 | chrY | 19583104 | . | C | T | 247.54   | my_snp_filter | AC=6;AF=0.300;AN=20;BaseQ         |
| 41613 | chrY | 19583108 | . | A | G | 248.87   | my_snp_filter | AC=6;AF=0.300;AN=20;BaseQ         |
| 41614 | chrY | 19583115 | . | G | T | 124.52   | my_snp_filter | AC=4;AF=0.200;AN=20;BaseQ         |
| 41615 | chrY | 19583118 | . | T | G | 212.88   | my_snp_filter | AC=6;AF=0.300;AN=20;BaseQ         |
| 41616 | chrY | 19583119 | . | T | A | 206.93   | my_snp_filter | AC=6;AF=0.300;AN=20;BaseQ         |
| 41617 | chrY | 19583123 | . | T | C | 58.42    | my_snp_filter | AC=2;AF=0.125;AN=16;BaseQ         |
| 41618 | chrY | 19583130 | . | T | G | 60.91    | my_snp_filter | AC=2;AF=0.111;AN=18;BaseQ         |
| 41619 | chrY | 19583135 | . | G | A | 57.95    | my_snp_filter | AC=2;AF=0.111;AN=18;BaseQ         |
| 41620 | chrY | 19583138 | . | G | A | 51.52    | my_snp_filter | AC=2;AF=0.100;AN=20;BaseQ         |
| 41621 | chrY | 19583155 | . | T | A | 40.79    | my_snp_filter | AC=1;AF=0.042;AN=24;BaseQ         |
| 41622 | chrY | 19583333 | . | C | T | 85.73    | my_snp_filter | AC=3;AF=0.043;AN=70;BaseQ         |
| 41623 | chrY | 19583334 | . | T | G | 83.74    | my_snp_filter | AC=3;AF=0.043;AN=70;BaseQ         |
| 41624 | chrY | 19583341 | . | G | A | 81       | my_snp_filter | AC=3;AF=0.043;AN=70;BaseQ         |
| 41625 | chrY | 19583345 | . | A | T | 159.86   | my_snp_filter | AC=3;AF=0.043;AN=70;BaseQ         |
| 41626 | chrY | 19583350 | . | C | A | 159.92   | my_snp_filter | AC=3;AF=0.043;AN=70;BaseQ         |
| 41627 | chrY | 19583354 | . | A | C | 150.88   | my_snp_filter | AC=3;AF=0.043;AN=70;BaseQ         |
| 41628 | chrY | 19583358 | . | A | T | 144.83   | my_snp_filter | AC=3;AF=0.043;AN=70;BaseQ         |
| 41629 | chrY | 19583361 | . | A | G | 309.84   | my_snp_filter | AC=4;AF=0.057;AN=70;BaseQ         |
| 41630 | chrY | 19583363 | . | G | A | 305.91   | my_snp_filter | AC=4;AF=0.057;AN=70;BaseQ         |
| 41631 | chrY | 19583366 | . | T | C | 306.13   | my_snp_filter | AC=4;AF=0.057;AN=70;BaseQ         |
| 41632 | chrY | 19583367 | . | G | A | 305.83   | my_snp_filter | AC=4;AF=0.057;AN=70;BaseQ         |
| 41633 | chrY | 19583397 | . | C | A | 65.71    | my_snp_filter | AC=2;AF=0.029;AN=70;BaseQ         |
| 41634 | chrY | 19583407 | . | C | A | 79.56    | my_snp_filter | AC=2;AF=0.029;AN=70;BaseQ         |
| 41635 | chrY | 19583429 | . | C | G | 96.88    | my_snp_filter | AC=2;AF=0.029;AN=68;BaseQ         |
| 41636 | chrY | 19583432 | . | T | G | 101.56   | my_snp_filter | AC=2;AF=0.029;AN=68;BaseQ         |
| 41637 | chrY | 19583439 | . | T | C | 104.50   | my_snp_filter | AC=2;AF=0.029;AN=70;BaseQ         |
| 41638 | chrY | 19583443 | . | A | C | 102.89   | my_snp_filter | AC=2;AF=0.029;AN=70;BaseQ         |
| 41639 | chrY | 19583444 | . | T | A | 102.88   | my_snp_filter | AC=2;AF=0.029;AN=70;BaseQ         |
| 41640 | chrY | 19583451 | . | C | T | 49       | my_snp_filter | AC=1;AF=0.015;AN=68;BaseQ         |
| 41641 | chrY | 19583453 | . | G | C | 10518.82 | my_snp_filter | AC=46;AF=0.719;AN                 |
| 41642 | chrY | 19583629 | . | A | G | 685.99   | my_snp_filter | AC=6;AF=0.300;AN=20;DP=68         |
| 41643 | chrY | 19631225 | . | A | T | 491      | my_snp_filter | AC=6;AF=0.103;AN=58;DP=47         |
| 41644 | chrY | 19746097 | . | C | A | 282.69   | my_snp_filter | AC=3;AF=0.048;AN=62;BaseQ         |
| 41645 | chrY | 19753731 | . | C | T | 441.08   | my_snp_filter | AC=6;AF=0.300;AN=20;DP=91         |
| 41646 | chrY | 19793913 | . | A | G | 35.98    | my_snp_filter | AC=1;AF=0.063;AN=16;BaseQ         |
| 41647 | chrY | 19812607 | . | T | C | 347.91   | my_snp_filter | AC=6;AF=0.333;AN=18;DP=48         |
| 41648 | chrY | 19936492 | . | T | C | 238.09   | PASS          | AC=6;AF=0.600;AN=10;DP=19;FS=0.00 |

|       |      |          |   |   |     |          |               |                                   |
|-------|------|----------|---|---|-----|----------|---------------|-----------------------------------|
| 41649 | chrY | 19937356 | . | G | A   | 40.76    | my_snp_filter | AC=2;AF=0.333;AN=6;DP=11;         |
| 41650 | chrY | 19966779 | . | T | C   | 75.96    | my_snp_filter | AC=2;AF=0.083;AN=24;DP=76         |
| 41651 | chrY | 19967464 | . | T | A   | 47.13    | my_snp_filter | AC=2;AF=0.500;AN=4;DP=13;         |
| 41652 | chrY | 19986086 | . | A | T   | 2110.36  | my_snp_filter | AC=17;AF=0.243;AN=70;Base         |
| 41653 | chrY | 20000418 | . | A | G   | 636.16   | PASS          | AC=3;AF=0.045;AN=66;BaseQRankSum= |
| 41654 | chrY | 20063661 | . | G | A   | 787.39   | PASS          | AC=4;AF=0.059;AN=68;DP=391;FS=0.0 |
| 41655 | chrY | 20105652 | . | T | C   | 491.79   | PASS          | AC=6;AF=0.250;AN=24;BaseQRankSum= |
| 41656 | chrY | 20105942 | . | G | A   | 195.49   | my_snp_filter | AC=1;AF=0.019;AN=52;BaseQ         |
| 41657 | chrY | 20114265 | . | G | A   | 134.15   | my_snp_filter | AC=2;AF=0.050;AN=40;BaseQ         |
| 41658 | chrY | 20132001 | . | A | G   | 114.98   | PASS          | AC=8;AF=1.00;AN=8;DP=19;FS=0.000; |
| 41659 | chrY | 20137429 | . | A | G   | 173.02   | my_snp_filter | AC=2;AF=0.031;AN=64;DP=30         |
| 41660 | chrY | 20137624 | . | T | C   | 149.02   | my_snp_filter | AC=2;AF=0.029;AN=68;BaseQ         |
| 41661 | chrY | 20137794 | . | G | A   | 687.34   | my_snp_filter | AC=2;AF=0.029;AN=68;BaseQ         |
| 41662 | chrY | 20242374 | . | A | G   | 50.31    | my_snp_filter | AC=1;AF=0.017;AN=58;BaseQ         |
| 41663 | chrY | 20366770 | . | C | T   | 725.46   | my_snp_filter | AC=6;AF=0.103;AN=58;DP=14         |
| 41664 | chrY | 20379674 | . | G | C   | 301.96   | my_snp_filter | AC=1;AF=0.016;AN=62;BaseQ         |
| 41665 | chrY | 20408595 | . | G | A   | 273.94   | my_snp_filter | AC=4;AF=0.500;AN=8;DP=27;         |
| 41666 | chrY | 20434394 | . | G | A   | 45.60    | my_snp_filter | AC=2;AF=0.250;AN=8;DP=7;F         |
| 41667 | chrY | 20454868 | . | G | C   | 70.35    | my_snp_filter | AC=1;AF=0.100;AN=10;BaseQ         |
| 41668 | chrY | 20554062 | . | C | A   | 58.65    | my_snp_filter | AC=2;AF=0.250;AN=8;BaseQ          |
| 41669 | chrY | 20596320 | . | C | G   | 809.61   | my_snp_filter | AC=6;AF=0.107;AN=56;DP=36         |
| 41670 | chrY | 20657052 | . | T | C   | 1002.39  | my_snp_filter | AC=6;AF=0.111;AN=54;DP=30         |
| 41671 | chrY | 20659109 | . | G | A   | 291.14   | my_snp_filter | AC=2;AF=0.034;AN=58;BaseQ         |
| 41672 | chrY | 20736297 | . | G | A   | 32.81    | my_snp_filter | AC=2;AF=0.036;AN=56;DP=24         |
| 41673 | chrY | 20736310 | . | A | G   | 5575.52  | my_snp_filter | AC=43;AF=0.827;AN=52;Base         |
| 41674 | chrY | 20802151 | . | C | T   | 671.83   | PASS          | AC=6;AF=0.086;AN=70;DP=229;FS=0.0 |
| 41675 | chrY | 20805003 | . | A | G   | 85.53    | PASS          | AC=2;AF=0.029;AN=70;DP=280;FS=0.0 |
| 41676 | chrY | 20811307 | . | A | G   | 11645.98 | PASS          | AC=68;AF=1.00;AN=68;DP=38         |
| 41677 | chrY | 20812228 | . | C | T   | 11019    | PASS          | AC=68;AF=1.00;AN=68;DP=371;FS=0.0 |
| 41678 | chrY | 20815591 | . | C | G   | 922.63   | PASS          | AC=6;AF=0.086;AN=70;DP=229;FS=0.0 |
| 41679 | chrY | 20825072 | . | G | A   | 6636.74  | PASS          | AC=52;AF=0.743;AN=70;DP=364;FS=0. |
| 41680 | chrY | 20828795 | . | A | G   | 17573.87 | PASS          | AC=70;AF=1.00;AN=70;DP=63         |
| 41681 | chrY | 20835461 | . | C | G   | 602.65   | PASS          | AC=6;AF=0.103;AN=58;BaseQRankSum= |
| 41682 | chrY | 20835468 | . | C | G   | 183.86   | PASS          | AC=4;AF=0.069;AN=58;DP=302;FS=0.0 |
| 41683 | chrY | 20837553 | . | T | C   | 5302.49  | PASS          | AC=50;AF=0.806;AN=62;DP=287;FS=0. |
| 41684 | chrY | 20838224 | . | G | A   | 14848.94 | PASS          | AC=70;AF=1.00;AN=70;DP=51         |
| 41685 | chrY | 20839063 | . | A | G   | 778.34   | PASS          | AC=6;AF=0.086;AN=70;DP=605;FS=0.0 |
| 41686 | chrY | 20839716 | . | T | C   | 1006.33  | PASS          | AC=6;AF=0.086;AN=70;DP=270;FS=0.0 |
| 41687 | chrY | 20957817 | . | A | G   | 156.27   | my_snp_filter | AC=3;AF=0.167;AN=18;BaseQ         |
| 41688 | chrY | 20985099 | . | C | T   | 162.87   | my_snp_filter | AC=2;AF=0.030;AN=66;DP=70         |
| 41689 | chrY | 21039089 | . | T | C   | 98.36    | PASS          | AC=2;AF=0.029;AN=68;DP=374;FS=0.0 |
| 41690 | chrY | 21046000 | . | T | C   | 3361.50  | PASS          | AC=40;AF=0.690;AN=58;DP=278;FS=0. |
| 41691 | chrY | 21046119 | . | A | G   | 1066.39  | PASS          | AC=6;AF=0.111;AN=54;DP=187;FS=0.0 |
| 41692 | chrY | 21050697 | . | A | G,* | 2661.25  | PASS          | AC=6,14;AF=0.091,0.212;AN=66;DP=2 |
| 41693 | chrY | 21051253 | . | C | G   | 1222.39  | PASS          | AC=6;AF=0.086;AN=70;DP=433;FS=0.0 |
| 41694 | chrY | 21053143 | . | T | A   | 1291.57  | PASS          | AC=6;AF=0.086;AN=70;DP=583;FS=0.0 |
| 41695 | chrY | 21053145 | . | A | T   | 1438.68  | PASS          | AC=6;AF=0.086;AN=70;DP=572;FS=0.0 |
| 41696 | chrY | 21054334 | . | G | A   | 275.38   | PASS          | AC=2;AF=0.037;AN=54;DP=144;FS=0.0 |
| 41697 | chrY | 21063654 | . | A | G   | 533.47   | PASS          | AC=2;AF=0.029;AN=70;DP=477;FS=0.0 |
| 41698 | chrY | 21066184 | . | G | C   | 234.35   | PASS          | AC=2;AF=0.043;AN=46;DP=188;FS=0.0 |
| 41699 | chrY | 21077636 | . | C | T   | 585.75   | PASS          | AC=2;AF=0.100;AN=20;DP=181;FS=0.0 |
| 41700 | chrY | 21080707 | . | G | A   | 10238.79 | PASS          | AC=54;AF=0.818;AN=66;DP=4         |
| 41701 | chrY | 21087879 | . | C | T   | 1061.92  | PASS          | AC=6;AF=0.086;AN=70;DP=405;FS=0.0 |
| 41702 | chrY | 21089620 | . | C | T   | 1025.84  | PASS          | AC=6;AF=0.088;AN=68;DP=427;FS=0.0 |
| 41703 | chrY | 21091703 | . | A | G   | 45.89    | PASS          | AC=1;AF=0.015;AN=68;BaseQRankSum= |
| 41704 | chrY | 21092908 | . | A | G   | 37.43    | PASS          | AC=1;AF=0.016;AN=64;BaseQRankSum= |
| 41705 | chrY | 21093637 | . | C | G   | 4341.42  | PASS          | AC=42;AF=0.700;AN=60;DP=287;FS=0. |
| 41706 | chrY | 21101486 | . | A | G   | 31.64    | PASS          | AC=1;AF=0.014;AN=70;BaseQRankSum= |
| 41707 | chrY | 21103141 | . | C | T   | 45.06    | PASS          | AC=1;AF=0.019;AN=54;BaseQRankSum= |
| 41708 | chrY | 21103144 | . | G | T   | 45.14    | PASS          | AC=1;AF=0.019;AN=54;BaseQRankSum= |
| 41709 | chrY | 21108189 | . | G | T   | 13860.39 | PASS          | AC=46;AF=0.657;AN=70;DP=6         |
| 41710 | chrY | 21114597 | . | C | G   | 5944.73  | PASS          | AC=48;AF=0.727;AN=66;DP=346;FS=0. |
| 41711 | chrY | 21116317 | . | C | A   | 1344.87  | PASS          | AC=6;AF=0.086;AN=70;DP=588;FS=0.0 |
| 41712 | chrY | 21116585 | . | C | T   | 322.39   | PASS          | AC=6;AF=0.086;AN=70;DP=379;FS=0.0 |
| 41713 | chrY | 21117439 | . | C | T   | 1157.91  | PASS          | AC=6;AF=0.231;AN=26;DP=166;FS=0.0 |
| 41714 | chrY | 21117888 | . | C | T   | 14930.89 | PASS          | AC=66;AF=1.00;AN=66;DP=49         |
| 41715 | chrY | 21118218 | . | C | A   | 809.18   | PASS          | AC=6;AF=0.097;AN=62;DP=216;FS=0.0 |
| 41716 | chrY | 21121986 | . | T | A   | 6127.21  | PASS          | AC=48;AF=1.00;AN=48;DP=222;FS=0.0 |
| 41717 | chrY | 21126496 | . | T | C   | 1383.97  | PASS          | AC=6;AF=0.086;AN=70;DP=437;FS=0.0 |
| 41718 | chrY | 21127920 | . | A | G   | 1021.43  | PASS          | AC=6;AF=0.086;AN=70;DP=515;FS=0.0 |
| 41719 | chrY | 21131856 | . | A | G   | 2740.81  | PASS          | AC=26;AF=0.419;AN=62;DP=318;FS=0. |
| 41720 | chrY | 21132049 | . | T | C   | 3454.98  | PASS          | AC=48;AF=0.727;AN=66;DP=288;FS=0. |
| 41721 | chrY | 21134763 | . | T | G   | 447.36   | PASS          | AC=4;AF=0.100;AN=40;DP=159;FS=0.0 |
| 41722 | chrY | 21136028 | . | T | G   | 263.82   | PASS          | AC=4;AF=0.059;AN=68;DP=426;FS=0.0 |
| 41723 | chrY | 21139399 | . | A | C   | 7493.08  | PASS          | AC=56;AF=1.00;AN=56;DP=257;FS=0.0 |
| 41724 | chrY | 21147336 | . | C | T   | 6107.51  | PASS          | AC=52;AF=0.813;AN=64;DP=307;FS=0. |

|       |      |          |   |   |   |          |               |                                    |
|-------|------|----------|---|---|---|----------|---------------|------------------------------------|
| 41725 | chrY | 21152701 | . | G | T | 20576.73 | PASS          | AC=35;AF=0.500;AN=70;Base          |
| 41726 | chrY | 21152718 | . | C | A | 126.43   | PASS          | AC=1;AF=0.014;AN=70;BaseQRankSum=  |
| 41727 | chrY | 21152719 | . | T | C | 19856.61 | PASS          | AC=34;AF=0.486;AN=70;Base          |
| 41728 | chrY | 21152731 | . | G | C | 19446.97 | PASS          | AC=34;AF=0.486;AN=70;Base          |
| 41729 | chrY | 21152795 | . | A | G | 5483.65  | PASS          | AC=26;AF=0.371;AN=70;BaseQRankSum  |
| 41730 | chrY | 21152862 | . | C | A | 24347.72 | PASS          | AC=35;AF=0.500;AN=70;Base          |
| 41731 | chrY | 21152868 | . | T | G | 24042.72 | PASS          | AC=35;AF=0.500;AN=70;Base          |
| 41732 | chrY | 21152967 | . | A | G | 18588.59 | PASS          | AC=35;AF=0.500;AN=70;Base          |
| 41733 | chrY | 21152971 | . | C | T | 15120.53 | PASS          | AC=34;AF=0.486;AN=70;Base          |
| 41734 | chrY | 21153096 | . | G | A | 16741.73 | PASS          | AC=35;AF=0.500;AN=70;Base          |
| 41735 | chrY | 21153166 | . | T | A | 22347.72 | PASS          | AC=35;AF=0.500;AN=70;Base          |
| 41736 | chrY | 21153174 | . | T | A | 21857.72 | PASS          | AC=35;AF=0.500;AN=70;Base          |
| 41737 | chrY | 21153275 | . | A | G | 4873.30  | PASS          | AC=24;AF=0.414;AN=58;BaseQRankSum  |
| 41738 | chrY | 21153458 | . | C | T | 46.95    | PASS          | AC=2;AF=0.032;AN=62;DP=470;FS=0.0  |
| 41739 | chrY | 21153459 | . | A | G | 10972.67 | PASS          | AC=30;AF=0.500;AN=60;Base          |
| 41740 | chrY | 21153474 | . | A | G | 11572.52 | PASS          | AC=30;AF=0.500;AN=60;Base          |
| 41741 | chrY | 21153540 | . | C | T | 8201     | PASS          | AC=20;AF=0.286;AN=70;BaseQRankSum  |
| 41742 | chrY | 21153581 | . | T | A | 233.42   | PASS          | AC=1;AF=0.014;AN=70;BaseQRankSum=  |
| 41743 | chrY | 21153609 | . | T | C | 33055.73 | PASS          | AC=35;AF=0.500;AN=70;Base          |
| 41744 | chrY | 21153667 | . | C | A | 31484.72 | PASS          | AC=35;AF=0.500;AN=70;Base          |
| 41745 | chrY | 21153740 | . | C | T | 25233.76 | PASS          | AC=35;AF=0.500;AN=70;Base          |
| 41746 | chrY | 21153846 | . | A | T | 28077.97 | PASS          | AC=36;AF=0.514;AN=70;Base          |
| 41747 | chrY | 21153854 | . | C | T | 27224.97 | PASS          | AC=36;AF=0.514;AN=70;Base          |
| 41748 | chrY | 21153936 | . | A | G | 808.52   | PASS          | AC=3;AF=0.043;AN=70;BaseQRankSum=  |
| 41749 | chrY | 21154004 | . | A | C | 19579.89 | PASS          | AC=35;AF=0.500;AN=70;Base          |
| 41750 | chrY | 21154323 | . | G | A | 25131.72 | PASS          | AC=35;AF=0.500;AN=70;Base          |
| 41751 | chrY | 21154426 | . | G | A | 5359.80  | PASS          | AC=22;AF=0.314;AN=70;BaseQRankSum  |
| 41752 | chrY | 21154466 | . | T | A | 9841.86  | PASS          | AC=35;AF=0.500;AN=70;BaseQRankSum  |
| 41753 | chrY | 21154531 | . | G | A | 44.77    | PASS          | AC=1;AF=0.019;AN=52;BaseQRankSum=  |
| 41754 | chrY | 21154535 | . | G | A | 46.30    | PASS          | AC=1;AF=0.019;AN=52;BaseQRankSum=  |
| 41755 | chrY | 21154569 | . | A | G | 2868.62  | PASS          | AC=22;AF=0.333;AN=66;BaseQRankSum  |
| 41756 | chrY | 21154603 | . | A | C | 4040.98  | PASS          | AC=23;AF=0.371;AN=62;BaseQRankSum  |
| 41757 | chrY | 21154675 | . | A | G | 546.41   | my_snp_filter | AC=4;AF=0.067;AN=60;BaseQ          |
| 41758 | chrY | 21154684 | . | G | A | 707.64   | my_snp_filter | AC=5;AF=0.081;AN=62;BaseQ          |
| 41759 | chrY | 21154692 | . | A | G | 724.69   | my_snp_filter | AC=5;AF=0.093;AN=54;BaseQ          |
| 41760 | chrY | 21154700 | . | A | C | 992.35   | my_snp_filter | AC=5;AF=0.125;AN=40;BaseQ          |
| 41761 | chrY | 21154779 | . | C | G | 2795.13  | PASS          | AC=16;AF=0.444;AN=36;BaseQRankSum  |
| 41762 | chrY | 21154790 | . | G | T | 142.51   | PASS          | AC=2;AF=0.042;AN=48;BaseQRankSum=  |
| 41763 | chrY | 21154904 | . | C | T | 7040.52  | PASS          | AC=26;AF=0.481;AN=54;BaseQRankSum  |
| 41764 | chrY | 21154937 | . | G | A | 6962.83  | PASS          | AC=30;AF=0.500;AN=60;BaseQRankSum  |
| 41765 | chrY | 21154966 | . | C | G | 7234.35  | PASS          | AC=31;AF=0.534;AN=58;BaseQRankSum  |
| 41766 | chrY | 21155023 | . | A | G | 5851.23  | PASS          | AC=25;AF=0.481;AN=52;BaseQRankSum  |
| 41767 | chrY | 21155091 | . | G | C | 689.24   | PASS          | AC=6;AF=0.158;AN=38;DP=250;FS=0.0  |
| 41768 | chrY | 21159055 | . | A | C | 13252.95 | PASS          | AC=68;AF=1.00;AN=68;DP=44          |
| 41769 | chrY | 21165594 | . | T | G | 130.09   | PASS          | AC=2;AF=0.029;AN=70;DP=422;FS=0.0  |
| 41770 | chrY | 21166358 | . | G | T | 6090.20  | PASS          | AC=56;AF=1.00;AN=56;DP=209;FS=0.0  |
| 41771 | chrY | 21170975 | . | A | G | 139.81   | PASS          | AC=2;AF=0.111;AN=18;BaseQRankSum=  |
| 41772 | chrY | 21172620 | . | G | C | 793.24   | PASS          | AC=6;AF=0.176;AN=34;DP=161;FS=0.0  |
| 41773 | chrY | 21177080 | . | G | A | 566.68   | PASS          | AC=14;AF=1.00;AN=14;DP=25;FS=0.00  |
| 41774 | chrY | 21183643 | . | G | A | 6344.20  | PASS          | AC=60;AF=1.00;AN=60;DP=233;FS=0.0  |
| 41775 | chrY | 21186558 | . | A | G | 11040.95 | PASS          | AC=46;AF=0.719;AN=64;DP=5          |
| 41776 | chrY | 21189443 | . | G | A | 186.67   | PASS          | AC=2;AF=0.032;AN=62;DP=172;FS=0.0  |
| 41777 | chrY | 21190881 | . | T | A | 36.08    | PASS          | AC=1;AF=0.018;AN=56;BaseQRankSum=  |
| 41778 | chrY | 21193291 | . | A | G | 815.58   | PASS          | AC=6;AF=0.088;AN=68;DP=351;FS=0.0  |
| 41779 | chrY | 21208641 | . | G | C | 142.97   | PASS          | AC=2;AF=0.038;AN=52;DP=234;FS=0.0  |
| 41780 | chrY | 21213313 | . | C | A | 349.04   | PASS          | AC=12;AF=0.316;AN=38;DP=181;FS=0.0 |
| 41781 | chrY | 21219443 | . | G | A | 18305.91 | PASS          | AC=70;AF=1.00;AN=70;BaseQ          |
| 41782 | chrY | 21221551 | . | G | T | 9418.96  | PASS          | AC=26;AF=0.371;AN=70;DP=668;FS=0.0 |
| 41783 | chrY | 21222868 | . | G | C | 11645.95 | PASS          | AC=70;AF=1.00;AN=70;DP=38          |
| 41784 | chrY | 21224566 | . | G | A | 1464.87  | PASS          | AC=4;AF=0.059;AN=68;DP=526;FS=0.0  |
| 41785 | chrY | 21227195 | . | C | G | 6504.41  | PASS          | AC=46;AF=0.657;AN=70;DP=394;FS=0.0 |
| 41786 | chrY | 21227423 | . | G | T | 359.45   | PASS          | AC=6;AF=0.097;AN=62;DP=188;FS=0.0  |
| 41787 | chrY | 21228954 | . | T | C | 364.36   | PASS          | AC=6;AF=0.086;AN=70;DP=370;FS=0.0  |
| 41788 | chrY | 21229917 | . | C | T | 812.16   | PASS          | AC=6;AF=0.086;AN=70;DP=566;FS=0.0  |
| 41789 | chrY | 21230995 | . | C | T | 7491.20  | PASS          | AC=44;AF=0.647;AN=68;BaseQRankSum  |
| 41790 | chrY | 21245171 | . | G | A | 33.96    | PASS          | AC=1;AF=0.015;AN=68;BaseQRankSum=  |
| 41791 | chrY | 21245174 | . | A | T | 33.94    | PASS          | AC=1;AF=0.015;AN=68;BaseQRankSum=  |
| 41792 | chrY | 21245176 | . | C | T | 33.90    | PASS          | AC=1;AF=0.015;AN=68;BaseQRankSum=  |
| 41793 | chrY | 21245607 | . | C | T | 1359.21  | PASS          | AC=6;AF=0.086;AN=70;DP=524;FS=0.0  |
| 41794 | chrY | 21245693 | . | G | T | 710.20   | PASS          | AC=6;AF=0.086;AN=70;DP=362;FS=0.0  |
| 41795 | chrY | 21249370 | . | A | G | 857.38   | PASS          | AC=6;AF=0.086;AN=70;DP=529;FS=0.0  |
| 41796 | chrY | 21252070 | . | G | A | 11905.33 | PASS          | AC=40;AF=0.571;AN=70;DP=6          |
| 41797 | chrY | 21256680 | . | C | T | 3443.60  | PASS          | AC=33;AF=0.516;AN=64;BaseQRankSum  |
| 41798 | chrY | 21256746 | . | C | A | 370.32   | PASS          | AC=4;AF=0.059;AN=68;DP=316;FS=0.0  |
| 41799 | chrY | 21258577 | . | G | A | 1538.76  | PASS          | AC=6;AF=0.088;AN=68;DP=605;FS=0.0  |
| 41800 | chrY | 21260907 | . | T | G | 160.48   | PASS          | AC=4;AF=0.065;AN=62;DP=208;FS=0.0  |

|       |      |          |   |   |   |          |      |                                   |
|-------|------|----------|---|---|---|----------|------|-----------------------------------|
| 41801 | chrY | 21262445 | . | C | G | 30.70    | PASS | AC=1;AF=0.014;AN=70;BaseQRankSum= |
| 41802 | chrY | 21262465 | . | C | T | 1086.33  | PASS | AC=6;AF=0.088;AN=68;DP=420;FS=0.0 |
| 41803 | chrY | 21263029 | . | A | G | 12733.94 | PASS | AC=70;AF=1.00;AN=70;BaseQ         |
| 41804 | chrY | 21263902 | . | A | G | 14955.16 | PASS | AC=46;AF=0.657;AN=70;Base         |
| 41805 | chrY | 21269484 | . | A | C | 1081.71  | PASS | AC=7;AF=0.103;AN=68;BaseQRankSum= |
| 41806 | chrY | 21269852 | . | T | A | 984.65   | PASS | AC=6;AF=0.086;AN=70;DP=363;FS=0.0 |
| 41807 | chrY | 21272878 | . | C | T | 1002.27  | PASS | AC=6;AF=0.088;AN=68;DP=379;FS=0.0 |
| 41808 | chrY | 21273057 | . | G | T | 1368.12  | PASS | AC=6;AF=0.097;AN=62;DP=353;FS=0.0 |
| 41809 | chrY | 21278679 | . | T | C | 988.35   | PASS | AC=6;AF=0.086;AN=70;DP=637;FS=0.0 |
| 41810 | chrY | 21279461 | . | C | T | 1457.20  | PASS | AC=6;AF=0.333;AN=18;DP=140;FS=0.0 |
| 41811 | chrY | 21283111 | . | A | T | 1344.09  | PASS | AC=6;AF=0.143;AN=42;DP=198;FS=0.0 |
| 41812 | chrY | 21284447 | . | G | T | 2077.29  | PASS | AC=36;AF=0.621;AN=58;DP=226;FS=0. |
| 41813 | chrY | 21285190 | . | A | T | 41.66    | PASS | AC=2;AF=0.037;AN=54;DP=194;FS=0.0 |
| 41814 | chrY | 21285494 | . | A | C | 1375.10  | PASS | AC=6;AF=0.250;AN=24;DP=178;FS=0.0 |
| 41815 | chrY | 21285962 | . | A | T | 1379.21  | PASS | AC=6;AF=0.086;AN=70;DP=665;FS=0.0 |
| 41816 | chrY | 21290339 | . | A | C | 312.72   | PASS | AC=2;AF=0.029;AN=70;DP=435;FS=0.0 |
| 41817 | chrY | 21291275 | . | G | A | 5942.50  | PASS | AC=50;AF=0.735;AN=68;DP=357;FS=0. |
| 41818 | chrY | 21291828 | . | C | G | 634.70   | PASS | AC=6;AF=0.088;AN=68;DP=276;FS=0.0 |
| 41819 | chrY | 21292853 | . | T | C | 320.01   | PASS | AC=2;AF=0.029;AN=68;DP=383;FS=0.0 |
| 41820 | chrY | 21297263 | . | T | C | 1001.58  | PASS | AC=6;AF=0.086;AN=70;DP=394;FS=0.0 |
| 41821 | chrY | 21298239 | . | G | C | 11645.95 | PASS | AC=68;AF=1.00;AN=68;DP=39         |
| 41822 | chrY | 21302198 | . | G | C | 377.94   | PASS | AC=4;AF=0.057;AN=70;DP=688;FS=0.0 |
| 41823 | chrY | 21306315 | . | G | A | 621.75   | PASS | AC=6;AF=0.115;AN=52;BaseQRankSum= |
| 41824 | chrY | 21307871 | . | A | C | 5320.73  | PASS | AC=40;AF=0.571;AN=70;DP=392;FS=0. |
| 41825 | chrY | 21308145 | . | G | C | 8865.15  | PASS | AC=38;AF=0.559;AN=68;DP=555;FS=0. |
| 41826 | chrY | 21312064 | . | A | C | 6748.21  | PASS | AC=62;AF=1.00;AN=62;DP=240;FS=0.0 |
| 41827 | chrY | 21314518 | . | G | A | 306.55   | PASS | AC=2;AF=0.029;AN=68;DP=267;FS=0.0 |
| 41828 | chrY | 21320604 | . | C | A | 3756.41  | PASS | AC=32;AF=0.571;AN=56;DP=370;FS=0. |
| 41829 | chrY | 21320664 | . | C | A | 1181     | PASS | AC=6;AF=0.094;AN=64;BaseQRankSum= |
| 41830 | chrY | 21323286 | . | C | T | 1511.30  | PASS | AC=10;AF=0.455;AN=22;DP=156;FS=0. |
| 41831 | chrY | 21323834 | . | C | T | 414.68   | PASS | AC=2;AF=0.056;AN=36;DP=183;FS=0.0 |
| 41832 | chrY | 21323986 | . | C | T | 436.08   | PASS | AC=2;AF=0.029;AN=68;DP=476;FS=0.0 |
| 41833 | chrY | 21325729 | . | G | A | 1093.84  | PASS | AC=6;AF=0.300;AN=20;DP=133;FS=0.0 |
| 41834 | chrY | 21326878 | . | G | A | 10151.12 | PASS | AC=52;AF=0.743;AN=70;DP=4         |
| 41835 | chrY | 21331373 | . | C | T | 207.99   | PASS | AC=2;AF=0.029;AN=70;DP=403;FS=0.0 |
| 41836 | chrY | 21332179 | . | A | G | 1185.95  | PASS | AC=6;AF=0.086;AN=70;DP=499;FS=0.0 |
| 41837 | chrY | 21332417 | . | C | T | 441.42   | PASS | AC=4;AF=0.061;AN=66;DP=400;FS=0.0 |
| 41838 | chrY | 21338286 | . | C | T | 1485.74  | PASS | AC=6;AF=0.300;AN=20;DP=177;FS=0.0 |
| 41839 | chrY | 21340827 | . | C | T | 723.79   | PASS | AC=6;AF=0.086;AN=70;DP=397;FS=0.0 |
| 41840 | chrY | 21348329 | . | G | A | 1542.75  | PASS | AC=6;AF=0.300;AN=20;DP=162;FS=0.0 |
| 41841 | chrY | 21350208 | . | T | C | 591.02   | PASS | AC=2;AF=0.111;AN=18;DP=177;FS=0.0 |
| 41842 | chrY | 21356191 | . | G | A | 440.20   | PASS | AC=2;AF=0.029;AN=70;DP=535;FS=0.0 |
| 41843 | chrY | 21358553 | . | A | G | 15492.91 | PASS | AC=70;AF=1.00;AN=70;DP=51         |
| 41844 | chrY | 21359174 | . | C | T | 1180.79  | PASS | AC=6;AF=0.086;AN=70;DP=477;FS=0.0 |
| 41845 | chrY | 21365572 | . | C | A | 928.40   | PASS | AC=6;AF=0.086;AN=70;DP=528;FS=0.0 |
| 41846 | chrY | 21367157 | . | C | A | 240.16   | PASS | AC=4;AF=0.063;AN=64;DP=236;FS=0.0 |
| 41847 | chrY | 21367244 | . | T | G | 75.67    | PASS | AC=2;AF=0.056;AN=36;DP=139;FS=0.0 |
| 41848 | chrY | 21369624 | . | A | G | 1442.01  | PASS | AC=6;AF=0.086;AN=70;DP=506;FS=0.0 |
| 41849 | chrY | 21373816 | . | T | G | 925.33   | PASS | AC=6;AF=0.111;AN=54;DP=168;FS=0.0 |
| 41850 | chrY | 21374056 | . | C | T | 643.41   | PASS | AC=2;AF=0.029;AN=70;DP=551;FS=0.0 |
| 41851 | chrY | 21381973 | . | G | A | 670.74   | PASS | AC=4;AF=0.057;AN=70;DP=409;FS=0.0 |
| 41852 | chrY | 21382007 | . | G | A | 66.14    | PASS | AC=2;AF=0.029;AN=70;DP=404;FS=0.0 |
| 41853 | chrY | 21385679 | . | A | G | 772.98   | PASS | AC=6;AF=0.200;AN=30;DP=144;FS=0.0 |
| 41854 | chrY | 21390072 | . | G | C | 738.80   | PASS | AC=6;AF=0.086;AN=70;DP=479;FS=0.0 |
| 41855 | chrY | 21392318 | . | T | G | 749.69   | PASS | AC=6;AF=0.088;AN=68;DP=447;FS=0.0 |
| 41856 | chrY | 21397457 | . | A | G | 1859.04  | PASS | AC=12;AF=0.222;AN=54;DP=245;FS=0. |
| 41857 | chrY | 21398584 | . | T | A | 1176.30  | PASS | AC=6;AF=0.100;AN=60;BaseQRankSum= |
| 41858 | chrY | 21401751 | . | G | A | 1207.99  | PASS | AC=6;AF=0.086;AN=70;DP=657;FS=0.0 |
| 41859 | chrY | 21409706 | . | C | G | 8715.03  | PASS | AC=70;AF=1.00;AN=70;DP=316;FS=0.0 |
| 41860 | chrY | 21410840 | . | T | G | 10415.01 | PASS | AC=66;AF=1.00;AN=66;DP=35         |
| 41861 | chrY | 21424831 | . | T | A | 1260.20  | PASS | AC=6;AF=0.086;AN=70;DP=437;FS=0.0 |
| 41862 | chrY | 21425000 | . | T | C | 584.40   | PASS | AC=6;AF=0.088;AN=68;DP=336;FS=0.0 |
| 41863 | chrY | 21425257 | . | C | G | 477.45   | PASS | AC=6;AF=0.086;AN=70;DP=283;FS=0.0 |
| 41864 | chrY | 21427199 | . | C | T | 1184.30  | PASS | AC=6;AF=0.091;AN=66;DP=254;FS=0.0 |
| 41865 | chrY | 21427599 | . | A | G | 967.02   | PASS | AC=6;AF=0.086;AN=70;DP=611;FS=0.0 |
| 41866 | chrY | 21432591 | . | A | G | 941.60   | PASS | AC=6;AF=0.086;AN=70;DP=414;FS=0.0 |
| 41867 | chrY | 21433601 | . | C | T | 1034.53  | PASS | AC=6;AF=0.086;AN=70;DP=624;FS=0.0 |
| 41868 | chrY | 21445546 | . | C | T | 206.65   | PASS | AC=2;AF=0.029;AN=68;DP=281;FS=0.0 |
| 41869 | chrY | 21447844 | . | T | A | 4827.86  | PASS | AC=18;AF=1.00;AN=18;DP=190;FS=0.0 |
| 41870 | chrY | 21447936 | . | T | C | 2544.07  | PASS | AC=12;AF=0.600;AN=20;BaseQRankSum |
| 41871 | chrY | 21452617 | . | G | A | 1094.20  | PASS | AC=6;AF=0.086;AN=70;DP=333;FS=0.0 |
| 41872 | chrY | 21456883 | . | A | G | 10822.06 | PASS | AC=68;AF=1.00;AN=68;DP=38         |
| 41873 | chrY | 21458554 | . | C | T | 383.47   | PASS | AC=2;AF=0.029;AN=70;DP=488;FS=0.0 |
| 41874 | chrY | 21458735 | . | A | G | 1113.51  | PASS | AC=6;AF=0.094;AN=64;DP=258;FS=0.0 |
| 41875 | chrY | 21460961 | . | T | C | 1522.14  | PASS | AC=6;AF=0.086;AN=70;DP=588;FS=0.0 |
| 41876 | chrY | 21461232 | . | T | C | 1124.29  | PASS | AC=6;AF=0.086;AN=70;DP=555;FS=0.0 |

|       |      |          |   |   |   |          |               |                                    |
|-------|------|----------|---|---|---|----------|---------------|------------------------------------|
| 41877 | chrY | 21461386 | . | A | C | 1841.41  | PASS          | AC=6;AF=0.086;AN=70;DP=439;FS=0.0  |
| 41878 | chrY | 21463509 | . | A | C | 837.01   | PASS          | AC=20;AF=0.526;AN=38;DP=179;FS=0.  |
| 41879 | chrY | 21467565 | . | G | A | 1067.02  | PASS          | AC=6;AF=0.086;AN=70;DP=414;FS=0.0  |
| 41880 | chrY | 21467850 | . | A | G | 1024.32  | PASS          | AC=6;AF=0.200;AN=30;DP=144;FS=0.0  |
| 41881 | chrY | 21468798 | . | G | A | 349.41   | PASS          | AC=6;AF=0.088;AN=68;DP=265;FS=0.0  |
| 41882 | chrY | 21474401 | . | T | G | 3989.86  | PASS          | AC=18;AF=1.00;AN=18;BaseQRankSum=  |
| 41883 | chrY | 21476910 | . | G | T | 11427.95 | PASS          | PASS AC=70;AF=1.00;AN=70;BaseQ     |
| 41884 | chrY | 21481847 | . | A | G | 450.67   | PASS          | AC=6;AF=0.088;AN=68;DP=387;FS=0.0  |
| 41885 | chrY | 21482611 | . | G | A | 7630.71  | PASS          | AC=52;AF=0.743;AN=70;DP=356;FS=0.  |
| 41886 | chrY | 21483285 | . | G | A | 1100.26  | PASS          | AC=6;AF=0.097;AN=62;DP=242;FS=0.0  |
| 41887 | chrY | 21484188 | . | T | A | 635.52   | PASS          | AC=4;AF=0.057;AN=70;DP=412;FS=0.0  |
| 41888 | chrY | 21484680 | . | G | A | 335.97   | PASS          | AC=4;AF=0.059;AN=68;DP=258;FS=0.0  |
| 41889 | chrY | 21484924 | . | T | A | 1531.81  | PASS          | AC=6;AF=0.086;AN=70;BaseQRankSum=  |
| 41890 | chrY | 21485578 | . | G | A | 1262.30  | PASS          | AC=6;AF=0.086;AN=70;DP=489;FS=0.0  |
| 41891 | chrY | 21486905 | . | G | A | 989.62   | PASS          | AC=6;AF=0.111;AN=54;BaseQRankSum=  |
| 41892 | chrY | 21492272 | . | C | T | 293.06   | PASS          | AC=2;AF=0.029;AN=70;DP=361;FS=0.0  |
| 41893 | chrY | 21496525 | . | C | T | 60.58    | PASS          | AC=2;AF=0.029;AN=70;DP=470;FS=0.0  |
| 41894 | chrY | 21499869 | . | T | G | 3795.05  | PASS          | AC=53;AF=0.981;AN=54;BaseQRankSum= |
| 41895 | chrY | 21502782 | . | C | T | 191.82   | PASS          | AC=2;AF=0.048;AN=42;BaseQRankSum=  |
| 41896 | chrY | 21507294 | . | C | G | 12978.65 | PASS          | PASS AC=56;AF=0.824;AN=68;DP=5     |
| 41897 | chrY | 21509862 | . | A | T | 1189.65  | PASS          | AC=6;AF=0.103;AN=58;DP=215;FS=0.0  |
| 41898 | chrY | 21510833 | . | T | C | 313.09   | PASS          | AC=4;AF=0.071;AN=56;DP=211;FS=0.0  |
| 41899 | chrY | 21513607 | . | C | T | 9803     | PASS          | AC=62;AF=1.00;AN=62;DP=342;FS=0.0  |
| 41900 | chrY | 21515828 | . | A | G | 48.48    | PASS          | AC=1;AF=0.056;AN=18;BaseQRankSum=  |
| 41901 | chrY | 21515928 | . | T | G | 107.30   | PASS          | AC=2;AF=0.029;AN=68;DP=198;FS=0.0  |
| 41902 | chrY | 21522814 | . | G | A | 356.07   | PASS          | AC=2;AF=0.029;AN=68;DP=388;FS=0.0  |
| 41903 | chrY | 21525115 | . | T | C | 428.60   | PASS          | AC=2;AF=0.030;AN=66;DP=367;FS=0.0  |
| 41904 | chrY | 21527645 | . | C | A | 54.05    | PASS          | AC=2;AF=0.042;AN=48;DP=121;FS=0.0  |
| 41905 | chrY | 21528257 | . | C | T | 6221.18  | PASS          | AC=52;AF=1.00;AN=52;DP=228;FS=0.0  |
| 41906 | chrY | 21532389 | . | G | T | 8724.72  | PASS          | AC=50;AF=0.735;AN=68;DP=443;FS=0.  |
| 41907 | chrY | 21532835 | . | G | A | 2435.97  | PASS          | AC=12;AF=0.188;AN=64;DP=250;FS=0.  |
| 41908 | chrY | 21533418 | . | G | A | 3534.20  | PASS          | AC=40;AF=0.625;AN=64;DP=297;FS=0.  |
| 41909 | chrY | 21534408 | . | C | A | 84.27    | PASS          | AC=2;AF=0.029;AN=68;DP=236;FS=0.0  |
| 41910 | chrY | 21535176 | . | T | A | 98.54    | PASS          | AC=4;AF=0.125;AN=32;DP=153;FS=0.0  |
| 41911 | chrY | 21535480 | . | C | T | 51.26    | PASS          | AC=1;AF=0.056;AN=18;BaseQRankSum=  |
| 41912 | chrY | 21535495 | . | A | T | 92.39    | PASS          | AC=1;AF=0.056;AN=18;BaseQRankSum=  |
| 41913 | chrY | 21535531 | . | G | T | 47.34    | my_snp_filter | AC=2;AF=0.111;AN=18;BaseQ          |
| 41914 | chrY | 21535804 | . | A | C | 43.42    | PASS          | AC=1;AF=0.056;AN=18;BaseQRankSum=  |
| 41915 | chrY | 21537856 | . | T | C | 1178.01  | PASS          | AC=6;AF=0.300;AN=20;BaseQRankSum=  |
| 41916 | chrY | 21539476 | . | T | C | 358.02   | PASS          | AC=2;AF=0.111;AN=18;DP=150;FS=0.0  |
| 41917 | chrY | 21540458 | . | T | G | 160.05   | PASS          | AC=2;AF=0.111;AN=18;DP=175;FS=0.0  |
| 41918 | chrY | 21542787 | . | A | G | 1539.15  | PASS          | AC=6;AF=0.088;AN=68;DP=630;FS=0.0  |
| 41919 | chrY | 21544295 | . | A | T | 1260.99  | PASS          | AC=6;AF=0.086;AN=70;DP=606;FS=0.0  |
| 41920 | chrY | 21547222 | . | G | C | 221.51   | PASS          | AC=2;AF=0.029;AN=70;DP=444;FS=0.0  |
| 41921 | chrY | 21549050 | . | A | T | 148.03   | PASS          | AC=2;AF=0.033;AN=60;DP=188;FS=0.0  |
| 41922 | chrY | 21549905 | . | T | C | 664.23   | PASS          | AC=7;AF=0.106;AN=66;BaseQRankSum=  |
| 41923 | chrY | 21551607 | . | A | G | 88.84    | PASS          | AC=2;AF=0.100;AN=20;DP=52;FS=0.00  |
| 41924 | chrY | 21551652 | . | T | C | 377.26   | PASS          | AC=4;AF=0.250;AN=16;DP=46;FS=0.00  |
| 41925 | chrY | 21551712 | . | T | C | 524.84   | PASS          | AC=10;AF=0.833;AN=12;BaseQRankSum= |
| 41926 | chrY | 21551793 | . | G | A | 250.17   | PASS          | AC=4;AF=1.00;AN=4;DP=28;FS=0.000;  |
| 41927 | chrY | 21553510 | . | A | G | 7946.44  | PASS          | AC=52;AF=0.743;AN=70;DP=386;FS=0.  |
| 41928 | chrY | 21553949 | . | C | T | 9517.48  | PASS          | AC=52;AF=0.743;AN=70;DP=463;FS=0.  |
| 41929 | chrY | 21554459 | . | G | C | 1083.71  | PASS          | AC=6;AF=0.086;AN=70;DP=237;FS=0.0  |
| 41930 | chrY | 21554468 | . | A | G | 4658.59  | PASS          | AC=51;AF=0.944;AN=54;BaseQRankSum= |
| 41931 | chrY | 21556943 | . | G | T | 37.88    | PASS          | AC=2;AF=0.045;AN=44;BaseQRankSum=  |
| 41932 | chrY | 21556945 | . | C | T | 35.87    | PASS          | AC=2;AF=0.043;AN=46;BaseQRankSum=  |
| 41933 | chrY | 21558298 | . | T | G | 14086.91 | PASS          | PASS AC=70;AF=1.00;AN=70;BaseQ     |
| 41934 | chrY | 21560146 | . | T | C | 4924.11  | PASS          | AC=56;AF=1.00;AN=56;DP=222;FS=0.0  |
| 41935 | chrY | 21561705 | . | G | A | 710.26   | PASS          | AC=6;AF=0.167;AN=36;DP=114;FS=0.0  |
| 41936 | chrY | 21562115 | . | C | T | 870.22   | PASS          | AC=6;AF=0.088;AN=68;DP=264;FS=0.0  |
| 41937 | chrY | 21562790 | . | C | A | 1361.73  | PASS          | AC=6;AF=0.086;AN=70;DP=240;FS=0.0  |
| 41938 | chrY | 21562848 | . | C | T | 37.10    | PASS          | AC=1;AF=0.014;AN=70;BaseQRankSum=  |
| 41939 | chrY | 21562869 | . | A | G | 36.66    | PASS          | AC=1;AF=0.014;AN=70;BaseQRankSum=  |
| 41940 | chrY | 21565508 | . | G | A | 314.99   | PASS          | AC=2;AF=0.029;AN=68;DP=294;FS=0.0  |
| 41941 | chrY | 21566042 | . | C | T | 3876.14  | PASS          | AC=44;AF=0.688;AN=64;DP=280;FS=0.  |
| 41942 | chrY | 21566956 | . | A | C | 168.05   | PASS          | AC=2;AF=0.029;AN=68;DP=301;FS=0.0  |
| 41943 | chrY | 21567932 | . | C | T | 17848.64 | PASS          | PASS AC=58;AF=0.829;AN=70;DP=6     |
| 41944 | chrY | 21570974 | . | A | G | 17874.90 | PASS          | PASS AC=70;AF=1.00;AN=70;DP=66     |
| 41945 | chrY | 21571895 | . | A | G | 11841.13 | PASS          | PASS AC=54;AF=0.818;AN=66;DP=4     |
| 41946 | chrY | 21575220 | . | C | T | 524.40   | PASS          | AC=12;AF=1.00;AN=12;DP=44;FS=0.00  |
| 41947 | chrY | 21575282 | . | G | C | 291.18   | PASS          | AC=2;AF=0.125;AN=16;BaseQRankSum=  |
| 41948 | chrY | 21575367 | . | G | C | 84.05    | PASS          | AC=1;AF=0.056;AN=18;BaseQRankSum=  |
| 41949 | chrY | 21575553 | . | C | T | 164.87   | PASS          | AC=3;AF=0.167;AN=18;BaseQRankSum=  |
| 41950 | chrY | 21575561 | . | T | C | 210.39   | PASS          | AC=1;AF=0.056;AN=18;BaseQRankSum=  |
| 41951 | chrY | 21575562 | . | G | A | 210.38   | PASS          | AC=1;AF=0.056;AN=18;BaseQRankSum=  |
| 41952 | chrY | 21575565 | . | T | C | 1096.80  | PASS          | AC=4;AF=0.222;AN=18;BaseQRankSum=  |



|       |      |          |   |   |     |          |               |                                    |
|-------|------|----------|---|---|-----|----------|---------------|------------------------------------|
| 41953 | chrY | 21575566 | . | G | A   | 433.71   | PASS          | AC=3;AF=0.167;AN=18;BaseQRankSum=  |
| 41954 | chrY | 21575567 | . | C | T   | 270.33   | PASS          | AC=1;AF=0.056;AN=18;BaseQRankSum=  |
| 41955 | chrY | 21575573 | . | T | G   | 249.32   | PASS          | AC=1;AF=0.056;AN=18;BaseQRankSum=  |
| 41956 | chrY | 21575580 | . | T | C   | 688.91   | PASS          | AC=3;AF=0.167;AN=18;BaseQRankSum=  |
| 41957 | chrY | 21575581 | . | G | C   | 58.81    | PASS          | AC=1;AF=0.056;AN=18;BaseQRankSum=  |
| 41958 | chrY | 21575586 | . | A | G   | 186.39   | PASS          | AC=2;AF=0.111;AN=18;BaseQRankSum=  |
| 41959 | chrY | 21575589 | . | G | A   | 137.45   | PASS          | AC=2;AF=0.111;AN=18;BaseQRankSum=  |
| 41960 | chrY | 21575601 | . | G | T   | 132.33   | PASS          | AC=1;AF=0.056;AN=18;BaseQRankSum=  |
| 41961 | chrY | 21575614 | . | A | G   | 122.48   | PASS          | AC=1;AF=0.056;AN=18;BaseQRankSum=  |
| 41962 | chrY | 21575622 | . | G | A   | 125.38   | PASS          | AC=1;AF=0.056;AN=18;BaseQRankSum=  |
| 41963 | chrY | 21575626 | . | G | A   | 124.35   | PASS          | AC=1;AF=0.056;AN=18;BaseQRankSum=  |
| 41964 | chrY | 21581064 | . | T | C   | 6093.14  | PASS          | AC=58;AF=1.00;AN=58;DP=266;FS=0.0  |
| 41965 | chrY | 21582168 | . | G | T   | 1158.70  | PASS          | AC=6;AF=0.086;AN=70;DP=599;FS=0.0  |
| 41966 | chrY | 21582351 | . | A | G   | 1307.59  | PASS          | AC=6;AF=0.086;AN=70;BaseQRankSum=  |
| 41967 | chrY | 21587924 | . | C | T   | 14150.44 | PASS          | AC=58;AF=0.829;AN=70;DP=5          |
| 41968 | chrY | 21592027 | . | A | T   | 192.69   | PASS          | AC=2;AF=0.029;AN=68;DP=505;FS=0.0  |
| 41969 | chrY | 21598044 | . | C | T   | 327.66   | PASS          | AC=2;AF=0.029;AN=70;DP=445;FS=0.0  |
| 41970 | chrY | 21598839 | . | G | A   | 136.60   | PASS          | AC=6;AF=0.094;AN=64;DP=270;FS=0.0  |
| 41971 | chrY | 21600034 | . | T | C   | 43.65    | PASS          | AC=1;AF=0.014;AN=70;BaseQRankSum=  |
| 41972 | chrY | 21600035 | . | T | A   | 43.62    | PASS          | AC=1;AF=0.014;AN=70;BaseQRankSum=  |
| 41973 | chrY | 21600124 | . | A | T   | 1246.91  | PASS          | AC=6;AF=0.088;AN=68;DP=406;FS=0.0  |
| 41974 | chrY | 21600151 | . | C | T   | 34.08    | PASS          | AC=1;AF=0.015;AN=68;BaseQRankSum=  |
| 41975 | chrY | 21600156 | . | A | G   | 34.09    | PASS          | AC=1;AF=0.015;AN=68;BaseQRankSum=  |
| 41976 | chrY | 21603164 | . | G | T   | 10038.92 | PASS          | AC=68;AF=1.00;AN=68;DP=35          |
| 41977 | chrY | 21604901 | . | T | C   | 759.19   | PASS          | AC=6;AF=0.086;AN=70;DP=363;FS=0.0  |
| 41978 | chrY | 21613023 | . | A | T   | 1542.11  | PASS          | AC=6;AF=0.091;AN=66;DP=505;FS=0.0  |
| 41979 | chrY | 21613024 | . | T | A   | 1542.11  | PASS          | AC=6;AF=0.091;AN=66;DP=504;FS=0.0  |
| 41980 | chrY | 21614288 | . | C | T   | 1594.64  | PASS          | AC=6;AF=0.086;AN=70;BaseQRankSum=  |
| 41981 | chrY | 21615072 | . | A | G   | 336.47   | PASS          | AC=2;AF=0.029;AN=70;DP=463;FS=0.0  |
| 41982 | chrY | 21617793 | . | A | T   | 331.92   | PASS          | AC=5;AF=0.089;AN=56;BaseQRankSum=  |
| 41983 | chrY | 21618856 | . | T | C   | 9443.76  | PASS          | AC=58;AF=0.829;AN=70;BaseQRankSum= |
| 41984 | chrY | 21625227 | . | G | T   | 1113.94  | PASS          | AC=6;AF=0.088;AN=68;DP=300;FS=0.0  |
| 41985 | chrY | 21625977 | . | G | T   | 39.26    | PASS          | AC=1;AF=0.016;AN=62;BaseQRankSum=  |
| 41986 | chrY | 21625985 | . | T | A   | 38.88    | PASS          | AC=1;AF=0.016;AN=64;BaseQRankSum=  |
| 41987 | chrY | 21633158 | . | C | A   | 1315.75  | PASS          | AC=6;AF=0.300;AN=20;DP=164;FS=0.0  |
| 41988 | chrY | 21634039 | . | C | T   | 48.26    | PASS          | AC=1;AF=0.045;AN=22;BaseQRankSum=  |
| 41989 | chrY | 21634040 | . | A | G   | 48.30    | PASS          | AC=1;AF=0.045;AN=22;BaseQRankSum=  |
| 41990 | chrY | 21635855 | . | C | A   | 316.34   | PASS          | AC=2;AF=0.029;AN=70;DP=642;FS=0.0  |
| 41991 | chrY | 21641985 | . | G | C   | 10355.61 | PASS          | AC=42;AF=0.636;AN=66;DP=5          |
| 41992 | chrY | 21648377 | . | A | G   | 2823.13  | PASS          | AC=34;AF=0.586;AN=58;DP=272;FS=0.0 |
| 41993 | chrY | 21648390 | . | T | C   | 826.99   | PASS          | AC=6;AF=0.088;AN=68;DP=291;FS=0.0  |
| 41994 | chrY | 21651669 | . | C | A   | 994.75   | PASS          | AC=6;AF=0.333;AN=18;DP=104;FS=0.0  |
| 41995 | chrY | 21652612 | . | G | A   | 1279.02  | PASS          | AC=6;AF=0.086;AN=70;DP=462;FS=0.0  |
| 41996 | chrY | 21655748 | . | A | G   | 7821.40  | PASS          | AC=44;AF=0.647;AN=68;DP=456;FS=0.0 |
| 41997 | chrY | 21661530 | . | C | T   | 86.46    | PASS          | AC=2;AF=0.037;AN=54;DP=223;FS=0.0  |
| 41998 | chrY | 21661676 | . | G | T   | 4545.05  | PASS          | AC=24;AF=1.00;AN=24;DP=175;FS=0.0  |
| 41999 | chrY | 21663278 | . | G | A   | 97.55    | PASS          | AC=2;AF=0.038;AN=52;BaseQRankSum=  |
| 42000 | chrY | 21663692 | . | G | A   | 946.62   | PASS          | AC=6;AF=0.086;AN=70;DP=376;FS=0.0  |
| 42001 | chrY | 21664672 | . | G | C   | 992.17   | PASS          | AC=6;AF=0.094;AN=64;DP=340;FS=0.0  |
| 42002 | chrY | 21666182 | . | A | C   | 860.84   | PASS          | AC=6;AF=0.086;AN=70;DP=397;FS=0.0  |
| 42003 | chrY | 21670941 | . | T | A   | 1444.69  | PASS          | AC=6;AF=0.088;AN=68;DP=621;FS=0.0  |
| 42004 | chrY | 21680415 | . | T | C   | 1284.18  | PASS          | AC=6;AF=0.333;AN=18;DP=176;FS=0.0  |
| 42005 | chrY | 21681617 | . | G | T   | 1381.87  | PASS          | AC=6;AF=0.107;AN=56;DP=214;FS=0.0  |
| 42006 | chrY | 21681650 | . | A | T   | 1062.72  | PASS          | AC=6;AF=0.088;AN=68;DP=266;FS=0.0  |
| 42007 | chrY | 21682151 | . | C | T   | 435.91   | PASS          | AC=2;AF=0.029;AN=70;DP=413;FS=0.0  |
| 42008 | chrY | 21685040 | . | A | G   | 271.32   | PASS          | AC=2;AF=0.029;AN=70;DP=532;FS=0.0  |
| 42009 | chrY | 21687987 | . | G | C,* | 1288.47  | PASS          | AC=8,5;AF=0.286,0.179;AN=28;BaseQ  |
| 42010 | chrY | 21687989 | . | G | C,* | 1144.88  | PASS          | AC=7,4;AF=0.159,0.091;AN=44;BaseQ  |
| 42011 | chrY | 21687991 | . | G | C,* | 1149.71  | PASS          | AC=6,4;AF=0.120,0.080;AN=50;DP=20  |
| 42012 | chrY | 21691320 | . | T | C   | 866.61   | PASS          | AC=6;AF=0.094;AN=64;DP=281;FS=0.0  |
| 42013 | chrY | 21697098 | . | T | C   | 35.31    | PASS          | AC=1;AF=0.017;AN=60;BaseQRankSum=  |
| 42014 | chrY | 21697484 | . | T | G   | 30.36    | my_snp_filter | AC=1;AF=0.056;AN=18;BaseQ          |
| 42015 | chrY | 21697486 | . | T | C   | 30.40    | my_snp_filter | AC=1;AF=0.050;AN=20;BaseQ          |
| 42016 | chrY | 21697497 | . | T | C   | 173.92   | PASS          | AC=2;AF=0.100;AN=20;BaseQRankSum=  |
| 42017 | chrY | 21697501 | . | T | C   | 114.40   | PASS          | AC=1;AF=0.050;AN=20;BaseQRankSum=  |
| 42018 | chrY | 21697504 | . | C | G   | 111.42   | PASS          | AC=1;AF=0.050;AN=20;BaseQRankSum=  |
| 42019 | chrY | 21697526 | . | G | A   | 102.26   | PASS          | AC=1;AF=0.045;AN=22;BaseQRankSum=  |
| 42020 | chrY | 21699194 | . | G | A   | 172.35   | PASS          | AC=6;AF=0.250;AN=24;DP=132;FS=0.0  |
| 42021 | chrY | 21700771 | . | A | T   | 1144.70  | PASS          | AC=6;AF=0.120;AN=50;DP=186;FS=0.0  |
| 42022 | chrY | 21707315 | . | C | G   | 965.93   | PASS          | AC=6;AF=0.086;AN=70;DP=283;FS=0.0  |
| 42023 | chrY | 21707919 | . | C | A   | 366.35   | PASS          | AC=2;AF=0.029;AN=70;DP=296;FS=0.0  |
| 42024 | chrY | 21709133 | . | A | T   | 590.75   | PASS          | AC=6;AF=0.086;AN=70;DP=285;FS=0.0  |
| 42025 | chrY | 21709394 | . | C | T   | 2815.71  | PASS          | AC=32;AF=0.516;AN=62;DP=241;FS=0.0 |
| 42026 | chrY | 21709855 | . | C | T   | 30.83    | PASS          | AC=1;AF=0.015;AN=68;BaseQRankSum=  |
| 42027 | chrY | 21717208 | . | C | T   | 1036.06  | PASS          | AC=6;AF=0.091;AN=66;DP=481;FS=0.0  |
| 42028 | chrY | 21724700 | . | G | A   | 2035.89  | PASS          | AC=6;AF=0.086;AN=70;DP=533;FS=0.0  |

|       |      |          |   |   |   |          |                |                                    |
|-------|------|----------|---|---|---|----------|----------------|------------------------------------|
| 42029 | chrY | 21730257 | . | G | C | 5901.34  | PASS           | AC=50;AF=0.806;AN=62;DP=300;FS=0.0 |
| 42030 | chrY | 21740914 | . | G | A | 606.54   | PASS           | AC=2;AF=0.029;AN=70;DP=596;FS=0.0  |
| 42031 | chrY | 21744094 | . | C | A | 4530.86  | PASS           | AC=18;AF=1.00;AN=18;DP=172;FS=0.0  |
| 42032 | chrY | 21749881 | . | A | G | 842.69   | PASS           | AC=6;AF=0.088;AN=68;DP=361;FS=0.0  |
| 42033 | chrY | 21757201 | . | A | G | 40.15    | PASS           | AC=1;AF=0.014;AN=70;BaseQRankSum=  |
| 42034 | chrY | 21757205 | . | C | T | 39.96    | PASS           | AC=1;AF=0.014;AN=70;BaseQRankSum=  |
| 42035 | chrY | 21759138 | . | C | T | 975.20   | PASS           | AC=6;AF=0.086;AN=70;DP=431;FS=0.0  |
| 42036 | chrY | 21760973 | . | A | T | 1181.33  | PASS           | AC=6;AF=0.086;AN=70;DP=589;FS=0.0  |
| 42037 | chrY | 21761275 | . | G | T | 6202.18  | PASS           | AC=50;AF=1.00;AN=50;DP=215;FS=0.0  |
| 42038 | chrY | 21761737 | . | A | T | 564.78   | PASS           | AC=6;AF=0.107;AN=56;DP=195;FS=0.0  |
| 42039 | chrY | 21766997 | . | A | G | 46.66    | PASS           | AC=2;AF=0.029;AN=70;DP=241;FS=0.0  |
| 42040 | chrY | 21768404 | . | G | A | 8387.88  | PASS           | AC=58;AF=0.829;AN=70;DP=374;FS=0.0 |
| 42041 | chrY | 21768723 | . | C | A | 424.82   | PASS           | AC=2;AF=0.029;AN=68;BaseQRankSum=  |
| 42042 | chrY | 21769943 | . | G | A | 264.66   | PASS           | AC=4;AF=0.065;AN=62;DP=247;FS=0.0  |
| 42043 | chrY | 21775066 | . | C | T | 339.30   | PASS           | AC=2;AF=0.063;AN=32;DP=158;FS=0.0  |
| 42044 | chrY | 21778941 | . | T | A | 42.60    | PASS           | AC=1;AF=0.014;AN=70;BaseQRankSum=  |
| 42045 | chrY | 21778942 | . | G | A | 42.58    | PASS           | AC=1;AF=0.014;AN=70;BaseQRankSum=  |
| 42046 | chrY | 21778943 | . | T | A | 42.59    | PASS           | AC=1;AF=0.014;AN=70;BaseQRankSum=  |
| 42047 | chrY | 21782593 | . | A | G | 679.79   | PASS           | AC=6;AF=0.086;AN=70;DP=408;FS=0.0  |
| 42048 | chrY | 21783904 | . | C | T | 1521.43  | PASS           | AC=6;AF=0.088;AN=68;DP=414;FS=0.0  |
| 42049 | chrY | 21784286 | . | A | G | 9834.01  | PASS           | AC=66;AF=1.00;AN=66;DP=350;FS=0.0  |
| 42050 | chrY | 21787705 | . | G | T | 1466.77  | PASS           | AC=6;AF=0.300;AN=20;DP=167;FS=0.0  |
| 42051 | chrY | 21787923 | . | G | T | 1123.18  | PASS           | AC=6;AF=0.333;AN=18;DP=160;FS=0.0  |
| 42052 | chrY | 21788031 | . | G | T | 1165.19  | PASS           | AC=6;AF=0.333;AN=18;DP=154;FS=0.0  |
| 42053 | chrY | 21792125 | . | G | A | 7207.56  | PASS           | AC=52;AF=0.743;AN=70;DP=378;FS=0.0 |
| 42054 | chrY | 21797488 | . | C | T | 252.29   | PASS           | AC=2;AF=0.029;AN=70;DP=255;FS=0.0  |
| 42055 | chrY | 21797754 | . | T | C | 1514.81  | PASS           | AC=12;AF=0.171;AN=70;DP=214;FS=0.0 |
| 42056 | chrY | 21797986 | . | T | A | 4394.85  | PASS           | AC=45;AF=0.703;AN=64;BaseQRankSum= |
| 42057 | chrY | 21798371 | . | G | C | 3644.34  | PASS           | AC=40;AF=0.625;AN=64;DP=258;FS=0.0 |
| 42058 | chrY | 21801722 | . | A | G | 5836.25  | PASS           | AC=40;AF=1.00;AN=40;DP=213;FS=0.0  |
| 42059 | chrY | 21803813 | . | C | A | 9781.95  | PASS           | AC=52;AF=0.813;AN=64;DP=463;FS=0.0 |
| 42060 | chrY | 21804435 | . | T | C | 3995.86  | PASS           | AC=18;AF=1.00;AN=18;DP=159;FS=0.0  |
| 42061 | chrY | 21806392 | . | A | G | 2148.07  | PASS           | AC=12;AF=0.214;AN=56;DP=196;FS=0.0 |
| 42062 | chrY | 21807381 | . | A | G | 1182.47  | PASS           | AC=6;AF=0.094;AN=64;DP=254;FS=0.0  |
| 42063 | chrY | 21809035 | . | G | A | 12177.10 | PASS           | AC=52;AF=0.743;AN=70;DP=5          |
| 42064 | chrY | 21810124 | . | C | T | 5308.46  | PASS           | AC=46;AF=0.719;AN=64;DP=314;FS=0.0 |
| 42065 | chrY | 21810698 | . | C | T | 13452.81 | PASS           | AC=45;AF=0.643;AN=70;BaseQ         |
| 42066 | chrY | 21811108 | . | T | G | 13001.98 | PASS           | AC=70;AF=1.00;AN=70;DP=43          |
| 42067 | chrY | 21811276 | . | T | C | 6446.75  | PASS           | AC=54;AF=0.818;AN=66;DP=346;FS=0.0 |
| 42068 | chrY | 21815957 | . | T | G | 807.73   | PASS           | AC=6;AF=0.088;AN=68;DP=334;FS=0.0  |
| 42069 | chrY | 21816356 | . | T | C | 41.57    | PASS           | AC=1;AF=0.015;AN=66;BaseQRankSum=  |
| 42070 | chrY | 21824766 | . | G | A | 4529.57  | PASS           | AC=30;AF=0.500;AN=60;DP=355;FS=0.0 |
| 42071 | chrY | 21825454 | . | G | A | 113.56   | PASS           | AC=2;AF=0.029;AN=70;BaseQRankSum=  |
| 42072 | chrY | 21827824 | . | G | A | 294.74   | PASS           | AC=2;AF=0.030;AN=66;DP=287;FS=0.0  |
| 42073 | chrY | 21829329 | . | G | A | 148.30   | PASS           | AC=2;AF=0.111;AN=18;DP=168;FS=0.0  |
| 42074 | chrY | 21829394 | . | A | G | 4544.86  | PASS           | AC=18;AF=1.00;AN=18;DP=177;FS=0.0  |
| 42075 | chrY | 21830079 | . | C | T | 35.01    | PASS           | AC=2;AF=0.111;AN=18;DP=130;FS=0.0  |
| 42076 | chrY | 21831622 | . | C | A | 314.43   | PASS           | AC=2;AF=0.029;AN=70;DP=378;FS=0.0  |
| 42077 | chrY | 21832300 | . | G | A | 4465.08  | PASS           | AC=46;AF=0.719;AN=64;DP=304;FS=0.0 |
| 42078 | chrY | 21835949 | . | C | T | 896.71   | PASS           | AC=6;AF=0.086;AN=70;DP=320;FS=0.0  |
| 42079 | chrY | 21840230 | . | G | A | 281.30   | my_snps_filter | AC=5;AF=0.278;AN=18;BaseQ          |
| 42080 | chrY | 21840252 | . | A | G | 459.19   | my_snps_filter | AC=6;AF=0.333;AN=18;BaseQ          |
| 42081 | chrY | 21840279 | . | C | T | 507.40   | my_snps_filter | AC=6;AF=0.333;AN=18;BaseQ          |
| 42082 | chrY | 21840315 | . | T | C | 727.75   | my_snps_filter | AC=6;AF=0.333;AN=18;BaseQ          |
| 42083 | chrY | 21840338 | . | T | C | 273.75   | my_snps_filter | AC=4;AF=0.222;AN=18;BaseQ          |
| 42084 | chrY | 21840400 | . | G | C | 312.64   | my_snps_filter | AC=3;AF=0.167;AN=18;BaseQ          |
| 42085 | chrY | 21840409 | . | A | C | 267.23   | my_snps_filter | AC=2;AF=0.111;AN=18;BaseQ          |
| 42086 | chrY | 21840423 | . | A | G | 246.59   | my_snps_filter | AC=4;AF=0.222;AN=18;BaseQ          |
| 42087 | chrY | 21840454 | . | C | G | 789.30   | my_snps_filter | AC=6;AF=0.333;AN=18;BaseQ          |
| 42088 | chrY | 21840468 | . | C | T | 863.39   | my_snps_filter | AC=6;AF=0.333;AN=18;BaseQ          |
| 42089 | chrY | 21840480 | . | A | G | 1272.93  | my_snps_filter | AC=6;AF=0.333;AN=18;BaseQ          |
| 42090 | chrY | 21840481 | . | C | T | 1276.29  | my_snps_filter | AC=6;AF=0.333;AN=18;BaseQ          |
| 42091 | chrY | 21840517 | . | A | T | 625.46   | my_snps_filter | AC=6;AF=0.333;AN=18;BaseQ          |
| 42092 | chrY | 21840545 | . | C | T | 668.08   | my_snps_filter | AC=4;AF=0.222;AN=18;BaseQ          |
| 42093 | chrY | 21840554 | . | A | C | 662.11   | my_snps_filter | AC=4;AF=0.222;AN=18;BaseQ          |
| 42094 | chrY | 21840576 | . | G | T | 990.71   | my_snps_filter | AC=6;AF=0.333;AN=18;BaseQ          |
| 42095 | chrY | 21840590 | . | G | A | 655.85   | my_snps_filter | AC=6;AF=0.333;AN=18;BaseQ          |
| 42096 | chrY | 21843090 | . | G | C | 13585.94 | PASS           | AC=68;AF=1.00;AN=68;DP=46          |
| 42097 | chrY | 21845436 | . | G | A | 1246.94  | PASS           | AC=6;AF=0.100;AN=60;DP=215;FS=0.0  |
| 42098 | chrY | 21848764 | . | C | A | 3574.97  | PASS           | AC=20;AF=1.00;AN=20;DP=142;FS=0.0  |
| 42099 | chrY | 21861676 | . | T | C | 305.16   | PASS           | AC=8;AF=0.286;AN=28;DP=182;FS=0.0  |
| 42100 | chrY | 21867787 | . | A | G | 10953.93 | PASS           | AC=68;AF=1.00;AN=68;DP=36          |
| 42101 | chrY | 21869132 | . | T | C | 2578.52  | PASS           | AC=22;AF=0.355;AN=62;DP=334;FS=0.0 |
| 42102 | chrY | 21875321 | . | A | G | 241.56   | PASS           | AC=6;AF=0.107;AN=56;DP=250;FS=0.0  |
| 42103 | chrY | 21875538 | . | T | C | 20928.44 | PASS           | AC=52;AF=0.743;AN=70;DP=8          |
| 42104 | chrY | 21888500 | . | A | G | 935.91   | PASS           | AC=6;AF=0.091;AN=66;DP=238;FS=0.0  |

|       |      |          |   |   |   |          |      |                                    |
|-------|------|----------|---|---|---|----------|------|------------------------------------|
| 42105 | chrY | 21888793 | . | T | C | 1259.19  | PASS | AC=20;AF=0.417;AN=48;DP=211;FS=0.0 |
| 42106 | chrY | 21889767 | . | A | G | 3835.34  | PASS | AC=34;AF=1.00;AN=34;BaseQRankSum=  |
| 42107 | chrY | 21890919 | . | G | A | 1212.04  | PASS | AC=6;AF=0.300;AN=20;BaseQRankSum=  |
| 42108 | chrY | 21900849 | . | A | G | 85.83    | PASS | AC=2;AF=0.029;AN=70;DP=577;FS=0.0  |
| 42109 | chrY | 21905300 | . | G | A | 59.78    | PASS | AC=2;AF=0.037;AN=54;BaseQRankSum=  |
| 42110 | chrY | 21905301 | . | G | A | 58.41    | PASS | AC=2;AF=0.036;AN=56;BaseQRankSum=  |
| 42111 | chrY | 21905917 | . | T | G | 417.08   | PASS | AC=6;AF=0.088;AN=68;DP=412;FS=0.0  |
| 42112 | chrY | 21916889 | . | A | G | 1064.84  | PASS | AC=6;AF=0.088;AN=68;DP=443;FS=0.0  |
| 42113 | chrY | 21917313 | . | T | C | 12080.97 | PASS | AC=56;AF=0.824;AN=68;DP=4          |
| 42114 | chrY | 21917832 | . | C | T | 10604.01 | PASS | AC=70;AF=1.00;AN=70;DP=35          |
| 42115 | chrY | 21921588 | . | A | C | 215.05   | PASS | AC=2;AF=0.029;AN=70;DP=619;FS=0.0  |
| 42116 | chrY | 21926547 | . | T | G | 53.28    | PASS | AC=1;AF=0.017;AN=60;BaseQRankSum=  |
| 42117 | chrY | 21932275 | . | G | A | 157.39   | PASS | AC=2;AF=0.029;AN=70;DP=292;FS=0.0  |
| 42118 | chrY | 21937573 | . | G | A | 2269.95  | PASS | AC=24;AF=0.667;AN=36;DP=182;FS=0.0 |
| 42119 | chrY | 21938444 | . | C | T | 1207.77  | PASS | AC=6;AF=0.086;AN=70;DP=654;FS=0.0  |
| 42120 | chrY | 21944885 | . | C | G | 1034.20  | PASS | AC=6;AF=0.333;AN=18;DP=154;FS=0.0  |
| 42121 | chrY | 21946408 | . | G | T | 281.80   | PASS | AC=6;AF=0.120;AN=50;DP=112;FS=0.0  |
| 42122 | chrY | 21947480 | . | T | C | 619.42   | PASS | AC=6;AF=0.111;AN=54;DP=173;FS=0.0  |
| 42123 | chrY | 21950315 | . | G | T | 2914.35  | PASS | AC=40;AF=0.690;AN=58;DP=193;FS=0.0 |
| 42124 | chrY | 21952388 | . | T | C | 6816.03  | PASS | AC=64;AF=1.00;AN=64;DP=282;FS=0.0  |
| 42125 | chrY | 21956085 | . | A | T | 462.02   | PASS | AC=2;AF=0.111;AN=18;DP=171;FS=0.0  |
| 42126 | chrY | 21957292 | . | C | G | 232.26   | PASS | AC=2;AF=0.029;AN=70;DP=358;FS=0.0  |
| 42127 | chrY | 21964243 | . | A | G | 24236.35 | PASS | AC=40;AF=0.571;AN=70;Base          |
| 42128 | chrY | 21965846 | . | G | C | 882.29   | PASS | AC=6;AF=0.333;AN=18;DP=136;FS=0.0  |
| 42129 | chrY | 21968675 | . | C | T | 695.87   | PASS | AC=2;AF=0.042;AN=48;DP=205;FS=0.0  |
| 42130 | chrY | 21972927 | . | G | A | 1494.04  | PASS | AC=6;AF=0.086;AN=70;DP=504;FS=0.0  |
| 42131 | chrY | 21974190 | . | T | C | 10754.72 | PASS | AC=52;AF=0.743;AN=70;DP=5          |
| 42132 | chrY | 21978177 | . | G | C | 539.45   | PASS | AC=6;AF=0.088;AN=68;DP=389;FS=0.0  |
| 42133 | chrY | 21983276 | . | T | C | 1235.90  | PASS | AC=6;AF=0.097;AN=62;DP=248;FS=0.0  |
| 42134 | chrY | 21983827 | . | T | C | 11675.91 | PASS | AC=70;AF=1.00;AN=70;DP=39          |
| 42135 | chrY | 21984733 | . | G | A | 99.65    | PASS | AC=2;AF=0.029;AN=70;DP=248;FS=0.0  |
| 42136 | chrY | 21987460 | . | C | T | 31.72    | PASS | AC=1;AF=0.015;AN=66;BaseQRankSum=  |
| 42137 | chrY | 21990058 | . | C | T | 4234.79  | PASS | AC=26;AF=0.371;AN=70;DP=435;FS=0.0 |
| 42138 | chrY | 21990257 | . | T | C | 13959.97 | PASS | AC=70;AF=1.00;AN=70;DP=47          |
| 42139 | chrY | 21992542 | . | G | A | 950.74   | PASS | AC=6;AF=0.086;AN=70;DP=414;FS=0.0  |
| 42140 | chrY | 21993844 | . | A | G | 6990.13  | PASS | AC=58;AF=1.00;AN=58;DP=267;FS=0.0  |
| 42141 | chrY | 21994261 | . | G | A | 15572.46 | PASS | AC=46;AF=0.719;AN=64;DP=6          |
| 42142 | chrY | 21995972 | . | A | T | 2360.25  | PASS | AC=26;AF=1.00;AN=26;DP=104;FS=0.0  |
| 42143 | chrY | 21999747 | . | C | T | 1058.79  | PASS | AC=6;AF=0.300;AN=20;BaseQRankSum=  |
| 42144 | chrY | 22000392 | . | C | A | 17797.35 | PASS | AC=40;AF=0.571;AN=70;DP=8          |
| 42145 | chrY | 22000975 | . | C | T | 1481.18  | PASS | AC=6;AF=0.333;AN=18;DP=171;FS=0.0  |
| 42146 | chrY | 22003770 | . | A | G | 13545.97 | PASS | AC=70;AF=1.00;AN=70;DP=45          |
| 42147 | chrY | 22011214 | . | T | C | 417.65   | PASS | AC=2;AF=0.029;AN=70;DP=507;FS=0.0  |
| 42148 | chrY | 22011448 | . | C | T | 904.55   | PASS | AC=6;AF=0.250;AN=24;DP=114;FS=0.0  |
| 42149 | chrY | 22012657 | . | C | G | 1509.75  | PASS | AC=6;AF=0.300;AN=20;BaseQRankSum=  |
| 42150 | chrY | 22014732 | . | C | G | 750.18   | PASS | AC=6;AF=0.333;AN=18;DP=174;FS=0.0  |
| 42151 | chrY | 22014916 | . | C | A | 288.02   | PASS | AC=2;AF=0.111;AN=18;DP=160;FS=0.0  |
| 42152 | chrY | 22019711 | . | T | C | 362.60   | PASS | AC=6;AF=0.091;AN=66;DP=201;FS=0.0  |
| 42153 | chrY | 22020463 | . | C | G | 503.18   | PASS | AC=2;AF=0.029;AN=68;DP=313;FS=0.0  |
| 42154 | chrY | 22020795 | . | T | G | 1147.28  | PASS | AC=6;AF=0.086;AN=70;DP=447;FS=0.0  |
| 42155 | chrY | 22022234 | . | G | C | 13560.01 | PASS | AC=52;AF=0.743;AN=70;DP=5          |
| 42156 | chrY | 22024547 | . | A | G | 1916.72  | PASS | AC=12;AF=0.171;AN=70;DP=347;FS=0.0 |
| 42157 | chrY | 22031833 | . | T | C | 545.46   | PASS | AC=6;AF=0.097;AN=62;DP=282;FS=0.0  |
| 42158 | chrY | 22040221 | . | C | G | 5095.36  | PASS | AC=52;AF=1.00;AN=52;DP=200;FS=0.0  |
| 42159 | chrY | 22051934 | . | G | A | 1170.84  | PASS | AC=6;AF=0.086;AN=70;DP=776;FS=0.0  |
| 42160 | chrY | 22054621 | . | G | A | 380.55   | PASS | AC=2;AF=0.029;AN=70;DP=428;FS=0.0  |
| 42161 | chrY | 22056822 | . | A | G | 40.59    | PASS | AC=1;AF=0.015;AN=68;BaseQRankSum=  |
| 42162 | chrY | 22059661 | . | C | T | 1140.48  | PASS | AC=6;AF=0.086;AN=70;DP=248;FS=0.0  |
| 42163 | chrY | 22062471 | . | G | A | 1278.46  | PASS | AC=26;AF=0.520;AN=50;DP=220;FS=0.0 |
| 42164 | chrY | 22063097 | . | T | G | 774.91   | PASS | AC=6;AF=0.088;AN=68;DP=225;FS=0.0  |
| 42165 | chrY | 22063882 | . | C | A | 43.65    | PASS | AC=1;AF=0.015;AN=66;BaseQRankSum=  |
| 42166 | chrY | 22063887 | . | A | G | 43.67    | PASS | AC=1;AF=0.015;AN=66;DP=214;FS=0.0  |
| 42167 | chrY | 22063890 | . | T | A | 47.24    | PASS | AC=2;AF=0.031;AN=64;DP=208;FS=0.0  |
| 42168 | chrY | 22066461 | . | A | G | 4321.43  | PASS | AC=44;AF=0.710;AN=62;DP=294;FS=0.0 |
| 42169 | chrY | 22072340 | . | G | C | 23788.87 | PASS | AC=70;AF=1.00;AN=70;BaseQ          |
| 42170 | chrY | 22075070 | . | C | T | 456.09   | PASS | AC=2;AF=0.029;AN=68;DP=296;FS=0.0  |
| 42171 | chrY | 22078021 | . | T | C | 742.35   | PASS | AC=2;AF=0.029;AN=70;DP=559;FS=0.0  |
| 42172 | chrY | 22082306 | . | A | G | 133.15   | PASS | AC=2;AF=0.029;AN=70;DP=508;FS=0.0  |
| 42173 | chrY | 22084580 | . | G | A | 901.75   | PASS | AC=6;AF=0.094;AN=64;DP=249;FS=0.0  |
| 42174 | chrY | 22085382 | . | G | T | 145.44   | PASS | AC=2;AF=0.111;AN=18;BaseQRankSum=  |
| 42175 | chrY | 22088759 | . | C | T | 52.05    | PASS | AC=2;AF=0.071;AN=28;BaseQRankSum=  |
| 42176 | chrY | 22088760 | . | A | G | 51.31    | PASS | AC=2;AF=0.071;AN=28;BaseQRankSum=  |
| 42177 | chrY | 22089030 | . | A | G | 163.27   | PASS | AC=1;AF=0.026;AN=38;BaseQRankSum=  |
| 42178 | chrY | 22091767 | . | C | G | 1118.49  | PASS | AC=6;AF=0.088;AN=68;DP=384;FS=0.0  |
| 42179 | chrY | 22094491 | . | T | C | 6355.09  | PASS | AC=64;AF=1.00;AN=64;DP=301;FS=0.0  |
| 42180 | chrY | 22098605 | . | T | C | 935.55   | PASS | AC=6;AF=0.088;AN=68;DP=353;FS=0.0  |

|       |      |          |   |   |   |          |               |                                    |
|-------|------|----------|---|---|---|----------|---------------|------------------------------------|
| 42181 | chrY | 22099636 | . | A | T | 941.63   | PASS          | AC=20;AF=1.00;AN=20;DP=37;FS=0.00  |
| 42182 | chrY | 22100010 | . | T | A | 753.52   | PASS          | AC=6;AF=0.158;AN=38;DP=125;FS=0.0  |
| 42183 | chrY | 22108101 | . | A | G | 6438.98  | PASS          | AC=56;AF=0.824;AN=68;BaseQRankSum  |
| 42184 | chrY | 22108605 | . | G | A | 35.45    | PASS          | AC=1;AF=0.017;AN=60;BaseQRankSum=  |
| 42185 | chrY | 22108630 | . | G | A | 38.09    | PASS          | AC=1;AF=0.016;AN=64;BaseQRankSum=  |
| 42186 | chrY | 22117033 | . | T | G | 1025.43  | PASS          | AC=6;AF=0.086;AN=70;DP=434;FS=0.0  |
| 42187 | chrY | 22131437 | . | G | A | 99.51    | PASS          | AC=2;AF=0.034;AN=58;DP=220;FS=0.0  |
| 42188 | chrY | 22133306 | . | T | C | 1260.27  | PASS          | AC=18;AF=0.409;AN=44;DP=218;FS=0.  |
| 42189 | chrY | 22133425 | . | G | A | 1531     | PASS          | AC=6;AF=0.086;AN=70;DP=344;FS=0.0  |
| 42190 | chrY | 22140302 | . | T | C | 1026.19  | PASS          | AC=6;AF=0.097;AN=62;BaseQRankSum=  |
| 42191 | chrY | 22141397 | . | G | A | 286.47   | PASS          | AC=2;AF=0.029;AN=70;DP=385;FS=0.0  |
| 42192 | chrY | 22141632 | . | A | T | 1256.49  | PASS          | AC=6;AF=0.086;AN=70;DP=468;FS=0.0  |
| 42193 | chrY | 22143282 | . | A | T | 335.44   | PASS          | AC=2;AF=0.029;AN=70;DP=337;FS=0.0  |
| 42194 | chrY | 22148722 | . | G | A | 1434.13  | PASS          | AC=6;AF=0.086;AN=70;DP=394;FS=0.0  |
| 42195 | chrY | 22149947 | . | T | A | 976.47   | PASS          | AC=6;AF=0.333;AN=18;DP=155;FS=0.0  |
| 42196 | chrY | 22151345 | . | A | C | 4015.86  | PASS          | AC=18;AF=1.00;AN=18;BaseQRankSum=  |
| 42197 | chrY | 22153858 | . | G | A | 1251.75  | PASS          | AC=6;AF=0.300;AN=20;DP=184;FS=0.0  |
| 42198 | chrY | 22154366 | . | C | A | 129.32   | my_snp_filter | AC=4;AF=0.222;AN=18;BaseQ          |
| 42199 | chrY | 22154396 | . | G | A | 121.26   | my_snp_filter | AC=4;AF=0.222;AN=18;BaseQ          |
| 42200 | chrY | 22154412 | . | C | T | 50.65    | my_snp_filter | AC=2;AF=0.111;AN=18;BaseQ          |
| 42201 | chrY | 22154439 | . | T | C | 30.78    | my_snp_filter | AC=2;AF=0.111;AN=18;BaseQ          |
| 42202 | chrY | 22154569 | . | C | A | 46.11    | PASS          | AC=1;AF=0.045;AN=22;BaseQRankSum=  |
| 42203 | chrY | 22154579 | . | G | A | 52.71    | my_snp_filter | AC=3;AF=0.136;AN=22;BaseQ          |
| 42204 | chrY | 22154582 | . | T | C | 146.05   | PASS          | AC=4;AF=0.182;AN=22;BaseQRankSum=  |
| 42205 | chrY | 22156498 | . | A | C | 7299.59  | PASS          | AC=54;AF=0.818;AN=66;DP=331;FS=0.  |
| 42206 | chrY | 22157311 | . | A | C | 18403.93 | PASS          | AC=68;AF=1.00;AN=68;DP=60          |
| 42207 | chrY | 22158687 | . | C | A | 779.78   | PASS          | AC=6;AF=0.107;AN=56;DP=164;FS=0.0  |
| 42208 | chrY | 22159889 | . | G | A | 3264.02  | PASS          | AC=42;AF=0.636;AN=66;DP=236;FS=0.  |
| 42209 | chrY | 22163757 | . | C | A | 138.69   | PASS          | AC=4;AF=0.061;AN=66;DP=269;FS=0.0  |
| 42210 | chrY | 22164441 | . | A | G | 967.22   | PASS          | AC=16;AF=1.00;AN=16;DP=50;FS=0.00  |
| 42211 | chrY | 22164905 | . | A | G | 300.77   | PASS          | AC=2;AF=0.033;AN=60;DP=199;FS=0.0  |
| 42212 | chrY | 22166455 | . | G | T | 347.32   | PASS          | AC=6;AF=0.091;AN=66;DP=181;FS=0.0  |
| 42213 | chrY | 22168468 | . | A | G | 15365.92 | PASS          | AC=50;AF=0.735;AN=68;BaseQ         |
| 42214 | chrY | 22168522 | . | G | A | 1088.31  | PASS          | AC=6;AF=0.086;AN=70;DP=597;FS=0.0  |
| 42215 | chrY | 22173931 | . | C | T | 591.17   | PASS          | AC=6;AF=0.107;AN=56;DP=170;FS=0.0  |
| 42216 | chrY | 22175388 | . | C | T | 1443.60  | PASS          | AC=6;AF=0.086;AN=70;DP=384;FS=0.0  |
| 42217 | chrY | 22176853 | . | A | G | 8186.73  | PASS          | AC=52;AF=0.813;AN=64;DP=378;FS=0.  |
| 42218 | chrY | 22177486 | . | G | T | 1624.35  | PASS          | AC=6;AF=0.097;AN=62;DP=260;FS=0.0  |
| 42219 | chrY | 22178215 | . | C | A | 745.13   | PASS          | AC=6;AF=0.088;AN=68;DP=449;FS=0.0  |
| 42220 | chrY | 22180534 | . | G | T | 190.69   | PASS          | AC=2;AF=0.030;AN=66;DP=295;FS=0.0  |
| 42221 | chrY | 22186158 | . | T | C | 348.37   | PASS          | AC=2;AF=0.029;AN=70;DP=460;FS=0.0  |
| 42222 | chrY | 22186571 | . | C | T | 1159.16  | PASS          | AC=6;AF=0.086;AN=70;DP=438;FS=0.0  |
| 42223 | chrY | 22190371 | . | G | A | 6590.21  | PASS          | AC=60;AF=1.00;AN=60;DP=245;FS=0.0  |
| 42224 | chrY | 22190538 | . | C | T | 226.24   | PASS          | AC=6;AF=0.094;AN=64;DP=265;FS=0.0  |
| 42225 | chrY | 22192647 | . | C | T | 46.36    | PASS          | AC=2;AF=0.029;AN=68;DP=365;FS=0.0  |
| 42226 | chrY | 22199622 | . | T | C | 5811.33  | PASS          | AC=38;AF=0.559;AN=68;DP=416;FS=0.  |
| 42227 | chrY | 22203556 | . | C | G | 1243.14  | PASS          | AC=6;AF=0.086;AN=70;DP=564;FS=0.0  |
| 42228 | chrY | 22204546 | . | G | T | 257.15   | PASS          | AC=2;AF=0.029;AN=68;DP=417;FS=0.0  |
| 42229 | chrY | 22205208 | . | T | A | 240.99   | PASS          | AC=2;AF=0.029;AN=68;DP=369;FS=0.0  |
| 42230 | chrY | 22205347 | . | C | T | 176.19   | PASS          | AC=2;AF=0.029;AN=68;DP=330;FS=0.0  |
| 42231 | chrY | 22208309 | . | A | G | 964.74   | PASS          | AC=6;AF=0.100;AN=60;DP=213;FS=0.0  |
| 42232 | chrY | 22208408 | . | G | A | 770.71   | PASS          | AC=22;AF=0.550;AN=40;DP=164;FS=0.  |
| 42233 | chrY | 22208589 | . | T | A | 33.87    | PASS          | AC=1;AF=0.014;AN=70;BaseQRankSum=  |
| 42234 | chrY | 22208599 | . | A | T | 33.81    | PASS          | AC=1;AF=0.014;AN=70;BaseQRankSum=  |
| 42235 | chrY | 22210953 | . | A | T | 1279.87  | PASS          | AC=6;AF=0.088;AN=68;DP=369;FS=0.0  |
| 42236 | chrY | 22212735 | . | A | G | 39.77    | PASS          | AC=1;AF=0.014;AN=70;BaseQRankSum=  |
| 42237 | chrY | 22212741 | . | G | T | 42.82    | PASS          | AC=1;AF=0.014;AN=70;BaseQRankSum=  |
| 42238 | chrY | 22212844 | . | G | A | 75.01    | PASS          | AC=2;AF=0.029;AN=68;DP=328;FS=0.0  |
| 42239 | chrY | 22212900 | . | G | A | 202.39   | PASS          | AC=4;AF=0.067;AN=60;DP=190;FS=0.0  |
| 42240 | chrY | 22214221 | . | T | G | 2785.91  | PASS          | AC=12;AF=0.171;AN=70;DP=441;FS=0.  |
| 42241 | chrY | 22215952 | . | T | A | 1534.09  | PASS          | AC=6;AF=0.250;AN=24;DP=166;FS=0.0  |
| 42242 | chrY | 22216842 | . | C | T | 12838.13 | PASS          | AC=40;AF=0.571;AN=70;BaseQ         |
| 42243 | chrY | 22216949 | . | C | T | 76.48    | PASS          | AC=1;AF=0.014;AN=70;BaseQRankSum=  |
| 42244 | chrY | 22216956 | . | T | C | 76.30    | PASS          | AC=1;AF=0.015;AN=68;BaseQRankSum=  |
| 42245 | chrY | 22217469 | . | A | C | 2109.98  | PASS          | AC=16;AF=0.400;AN=40;DP=304;FS=0.  |
| 42246 | chrY | 22217553 | . | C | T | 53.56    | PASS          | AC=1;AF=0.018;AN=56;BaseQRankSum=  |
| 42247 | chrY | 22217717 | . | A | T | 101.41   | PASS          | AC=2;AF=0.036;AN=56;BaseQRankSum=  |
| 42248 | chrY | 22217725 | . | A | C | 76.17    | PASS          | AC=2;AF=0.036;AN=56;BaseQRankSum=  |
| 42249 | chrY | 22218124 | . | G | A | 904.15   | PASS          | AC=3;AF=0.044;AN=68;BaseQRankSum=  |
| 42250 | chrY | 22218133 | . | G | A | 1168.90  | PASS          | AC=7;AF=0.109;AN=64;BaseQRankSum=  |
| 42251 | chrY | 22218151 | . | T | C | 2354.78  | PASS          | AC=16;AF=0.242;AN=66;BaseQRankSum= |
| 42252 | chrY | 22218161 | . | G | A | 844.78   | PASS          | AC=8;AF=0.125;AN=64;BaseQRankSum=  |
| 42253 | chrY | 22218163 | . | T | G | 2465.94  | PASS          | AC=17;AF=0.258;AN=66;BaseQRankSum= |
| 42254 | chrY | 22218169 | . | C | A | 5138.93  | PASS          | AC=23;AF=0.426;AN=54;BaseQRankSum= |
| 42255 | chrY | 22218173 | . | C | G | 4688.90  | PASS          | AC=22;AF=0.440;AN=50;BaseQRankSum= |
| 42256 | chrY | 22218178 | . | T | C | 197.99   | PASS          | AC=1;AF=0.015;AN=68;BaseQRankSum=  |

|       |      |          |   |   |   |          |               |                                    |
|-------|------|----------|---|---|---|----------|---------------|------------------------------------|
| 42257 | chrY | 22218181 | . | C | A | 190.19   | PASS          | AC=2;AF=0.029;AN=68;BaseQRankSum=  |
| 42258 | chrY | 22218199 | . | T | C | 456.80   | PASS          | AC=5;AF=0.078;AN=64;BaseQRankSum=  |
| 42259 | chrY | 22218203 | . | T | G | 1948.93  | PASS          | AC=16;AF=0.286;AN=56;BaseQRankSum= |
| 42260 | chrY | 22218206 | . | C | T | 231.95   | PASS          | AC=1;AF=0.016;AN=62;BaseQRankSum=  |
| 42261 | chrY | 22218208 | . | C | A | 700.54   | PASS          | AC=8;AF=0.121;AN=66;BaseQRankSum=  |
| 42262 | chrY | 22218230 | . | C | A | 257.20   | PASS          | AC=2;AF=0.033;AN=60;BaseQRankSum=  |
| 42263 | chrY | 22218251 | . | A | C | 137.55   | PASS          | AC=1;AF=0.016;AN=62;BaseQRankSum=  |
| 42264 | chrY | 22218252 | . | T | C | 212.15   | PASS          | AC=2;AF=0.034;AN=58;BaseQRankSum=  |
| 42265 | chrY | 22218294 | . | C | A | 47.13    | my_snp_filter | AC=2;AF=0.031;AN=64;DP=35          |
| 42266 | chrY | 22218297 | . | A | T | 47.09    | my_snp_filter | AC=2;AF=0.031;AN=64;DP=35          |
| 42267 | chrY | 22218298 | . | C | G | 109.85   | PASS          | AC=3;AF=0.047;AN=64;BaseQRankSum=  |
| 42268 | chrY | 22218813 | . | A | T | 1407.58  | PASS          | AC=6;AF=0.100;AN=60;DP=328;FS=0.0  |
| 42269 | chrY | 22219299 | . | C | T | 1026.85  | PASS          | AC=8;AF=0.125;AN=64;BaseQRankSum=  |
| 42270 | chrY | 22219518 | . | G | C | 2271.64  | my_snp_filter | AC=19;AF=0.306;AN=62;BaseQ         |
| 42271 | chrY | 22219992 | . | G | C | 218.21   | PASS          | AC=3;AF=0.047;AN=64;BaseQRankSum=  |
| 42272 | chrY | 22219994 | . | T | C | 217.67   | PASS          | AC=3;AF=0.047;AN=64;BaseQRankSum=  |
| 42273 | chrY | 22220025 | . | T | G | 46.75    | PASS          | AC=1;AF=0.016;AN=64;BaseQRankSum=  |
| 42274 | chrY | 22220030 | . | A | C | 40.90    | PASS          | AC=1;AF=0.016;AN=64;BaseQRankSum=  |
| 42275 | chrY | 22220033 | . | T | C | 115.53   | PASS          | AC=2;AF=0.033;AN=60;BaseQRankSum=  |
| 42276 | chrY | 22220246 | . | C | A | 5911.10  | PASS          | AC=46;AF=0.719;AN=64;DP=337;FS=0.  |
| 42277 | chrY | 22220275 | . | T | G | 876.62   | PASS          | AC=6;AF=0.100;AN=60;DP=323;FS=0.0  |
| 42278 | chrY | 22220514 | . | T | G | 38.41    | PASS          | AC=2;AF=0.029;AN=68;DP=349;FS=1.5  |
| 42279 | chrY | 22220520 | . | T | G | 115.74   | PASS          | AC=2;AF=0.033;AN=60;BaseQRankSum=  |
| 42280 | chrY | 22220601 | . | G | C | 6349.08  | PASS          | AC=28;AF=0.400;AN=70;BaseQRankSum= |
| 42281 | chrY | 22220616 | . | T | C | 6938.93  | PASS          | AC=26;AF=0.382;AN=68;BaseQRankSum= |
| 42282 | chrY | 22220745 | . | T | A | 60.84    | my_snp_filter | AC=1;AF=0.014;AN=70;BaseQ          |
| 42283 | chrY | 22220748 | . | A | G | 60.82    | my_snp_filter | AC=1;AF=0.014;AN=70;BaseQ          |
| 42284 | chrY | 22220787 | . | T | A | 950.69   | PASS          | AC=3;AF=0.043;AN=70;BaseQRankSum=  |
| 42285 | chrY | 22220955 | . | C | G | 27092.80 | PASS          | AC=38;AF=0.543;AN=70;BaseQ         |
| 42286 | chrY | 22220963 | . | G | A | 25436.83 | PASS          | AC=38;AF=0.543;AN=70;BaseQ         |
| 42287 | chrY | 22220971 | . | C | T | 3719.92  | PASS          | AC=6;AF=0.086;AN=70;BaseQRankSum=  |
| 42288 | chrY | 22220993 | . | T | C | 312.53   | PASS          | AC=1;AF=0.014;AN=70;BaseQRankSum=  |
| 42289 | chrY | 22221146 | . | T | A | 2233.40  | PASS          | AC=18;AF=0.310;AN=58;BaseQRankSum= |
| 42290 | chrY | 22221319 | . | T | C | 5104.99  | PASS          | AC=33;AF=0.516;AN=64;BaseQRankSum= |
| 42291 | chrY | 22221327 | . | T | C | 46.32    | PASS          | AC=2;AF=0.029;AN=68;DP=516;FS=0.0  |
| 42292 | chrY | 22221452 | . | T | A | 55.25    | my_snp_filter | AC=1;AF=0.017;AN=60;BaseQ          |
| 42293 | chrY | 22221623 | . | C | A | 1476.85  | PASS          | AC=12;AF=0.171;AN=70;BaseQRankSum= |
| 42294 | chrY | 22221769 | . | G | C | 2136.37  | my_snp_filter | AC=20;AF=0.313;AN=64;BaseQ         |
| 42295 | chrY | 22221931 | . | T | C | 3393.93  | PASS          | AC=23;AF=0.359;AN=64;BaseQRankSum= |
| 42296 | chrY | 22221991 | . | C | G | 2494.41  | PASS          | AC=21;AF=0.339;AN=62;BaseQRankSum= |
| 42297 | chrY | 22222030 | . | A | T | 6651.02  | PASS          | AC=41;AF=0.854;AN=48;BaseQRankSum= |
| 42298 | chrY | 22222044 | . | T | C | 1013.43  | PASS          | AC=7;AF=0.135;AN=52;BaseQRankSum=  |
| 42299 | chrY | 22222059 | . | T | C | 830.71   | PASS          | AC=8;AF=0.133;AN=60;BaseQRankSum=  |
| 42300 | chrY | 22222070 | . | G | A | 8545.17  | PASS          | AC=52;AF=1.00;AN=52;DP=260;FS=0.0  |
| 42301 | chrY | 22222079 | . | C | T | 312.01   | PASS          | AC=2;AF=0.033;AN=60;BaseQRankSum=  |
| 42302 | chrY | 22222109 | . | A | G | 1707.83  | PASS          | AC=33;AF=0.611;AN=54;BaseQRankSum= |
| 42303 | chrY | 22222111 | . | A | G | 595.68   | PASS          | AC=5;AF=0.081;AN=62;BaseQRankSum=  |
| 42304 | chrY | 22222134 | . | A | G | 834.98   | PASS          | AC=6;AF=0.097;AN=62;BaseQRankSum=  |
| 42305 | chrY | 22222193 | . | G | T | 468.30   | PASS          | AC=6;AF=0.107;AN=56;BaseQRankSum=  |
| 42306 | chrY | 22222281 | . | A | T | 80.91    | my_snp_filter | AC=1;AF=0.017;AN=60;BaseQ          |
| 42307 | chrY | 22222293 | . | A | C | 88.32    | PASS          | AC=2;AF=0.036;AN=56;DP=327;FS=0.0  |
| 42308 | chrY | 22222318 | . | T | A | 976.99   | PASS          | AC=5;AF=0.089;AN=56;BaseQRankSum=  |
| 42309 | chrY | 22222322 | . | T | G | 65.36    | PASS          | AC=2;AF=0.037;AN=54;BaseQRankSum=  |
| 42310 | chrY | 22222488 | . | T | A | 42.94    | PASS          | AC=2;AF=0.032;AN=62;BaseQRankSum=  |
| 42311 | chrY | 22222490 | . | A | G | 43.17    | PASS          | AC=2;AF=0.033;AN=60;BaseQRankSum=  |
| 42312 | chrY | 22222524 | . | C | T | 804      | PASS          | AC=6;AF=0.115;AN=52;BaseQRankSum=  |
| 42313 | chrY | 22222543 | . | C | G | 904.41   | PASS          | AC=7;AF=0.125;AN=56;BaseQRankSum=  |
| 42314 | chrY | 22222579 | . | C | T | 100.29   | PASS          | AC=1;AF=0.015;AN=66;BaseQRankSum=  |
| 42315 | chrY | 22222586 | . | A | C | 100.33   | PASS          | AC=1;AF=0.015;AN=66;BaseQRankSum=  |
| 42316 | chrY | 22222598 | . | T | G | 635.43   | PASS          | AC=3;AF=0.045;AN=66;BaseQRankSum=  |
| 42317 | chrY | 22222605 | . | G | C | 4104.01  | PASS          | AC=18;AF=0.333;AN=54;BaseQRankSum= |
| 42318 | chrY | 22222614 | . | T | G | 3911.31  | PASS          | AC=17;AF=0.304;AN=56;BaseQRankSum= |
| 42319 | chrY | 22222671 | . | T | C | 314.30   | PASS          | AC=4;AF=0.065;AN=62;BaseQRankSum=  |
| 42320 | chrY | 22222704 | . | A | T | 69.09    | PASS          | AC=4;AF=1.00;AN=4;DP=2;FS=0.000;M  |
| 42321 | chrY | 22224801 | . | C | A | 44.48    | my_snp_filter | AC=1;AF=0.020;AN=50;BaseQ          |
| 42322 | chrY | 22224802 | . | T | C | 43.62    | my_snp_filter | AC=1;AF=0.020;AN=50;BaseQ          |
| 42323 | chrY | 22224862 | . | C | A | 1002.52  | PASS          | AC=3;AF=0.048;AN=62;BaseQRankSum=  |
| 42324 | chrY | 22224873 | . | C | G | 896.04   | PASS          | AC=2;AF=0.031;AN=64;BaseQRankSum=  |
| 42325 | chrY | 22225047 | . | A | T | 709.62   | PASS          | AC=6;AF=0.086;AN=70;DP=364;FS=0.0  |
| 42326 | chrY | 22225604 | . | A | C | 601.37   | PASS          | AC=5;AF=0.081;AN=62;BaseQRankSum=  |
| 42327 | chrY | 22225925 | . | A | C | 128.54   | PASS          | AC=1;AF=0.017;AN=60;BaseQRankSum=  |
| 42328 | chrY | 22225950 | . | C | A | 41.49    | my_snp_filter | AC=1;AF=0.017;AN=60;BaseQ          |
| 42329 | chrY | 22226020 | . | C | T | 55.87    | PASS          | AC=2;AF=0.042;AN=48;DP=148;FS=0.0  |
| 42330 | chrY | 22226843 | . | C | T | 36.38    | my_snp_filter | AC=2;AF=1.00;AN=2;DP=50;F          |
| 42331 | chrY | 22227019 | . | T | C | 61.29    | PASS          | AC=2;AF=0.250;AN=8;DP=14;FS=0.000  |
| 42332 | chrY | 22227051 | . | G | A | 63.61    | PASS          | AC=2;AF=0.200;AN=10;DP=15;FS=0.00  |

|       |      |          |   |   |   |          |               |                                    |
|-------|------|----------|---|---|---|----------|---------------|------------------------------------|
| 42333 | chrY | 22227061 | . | G | C | 140.55   | my_snp_filter | AC=1;AF=0.100;AN=10;BaseQ          |
| 42334 | chrY | 22227071 | . | C | A | 174.41   | my_snp_filter | AC=1;AF=0.100;AN=10;BaseQ          |
| 42335 | chrY | 22227089 | . | T | G | 170.18   | my_snp_filter | AC=1;AF=0.063;AN=16;BaseQ          |
| 42336 | chrY | 22227147 | . | A | C | 92.49    | my_snp_filter | AC=1;AF=0.083;AN=12;BaseQ          |
| 42337 | chrY | 22227202 | . | A | G | 84.39    | my_snp_filter | AC=1;AF=0.031;AN=32;BaseQ          |
| 42338 | chrY | 22227315 | . | T | C | 2156.88  | PASS          | AC=27;AF=0.466;AN=58;BaseQRankSum  |
| 42339 | chrY | 22227986 | . | G | T | 64.76    | PASS          | AC=2;AF=0.200;AN=10;DP=16;FS=0.00  |
| 42340 | chrY | 22227998 | . | G | A | 45.46    | PASS          | AC=2;AF=0.125;AN=16;DP=17;FS=0.00  |
| 42341 | chrY | 22228171 | . | A | C | 3103.86  | PASS          | AC=12;AF=0.667;AN=18;BaseQRankSum  |
| 42342 | chrY | 22228196 | . | C | T | 3310.97  | PASS          | AC=10;AF=0.625;AN=16;BaseQRankSum  |
| 42343 | chrY | 22228200 | . | A | C | 3255.97  | PASS          | AC=10;AF=0.625;AN=16;BaseQRankSum  |
| 42344 | chrY | 22228269 | . | C | T | 72.36    | PASS          | AC=3;AF=0.044;AN=68;BaseQRankSum=  |
| 42345 | chrY | 22228295 | . | T | C | 482.36   | PASS          | AC=7;AF=0.106;AN=66;BaseQRankSum=  |
| 42346 | chrY | 22228316 | . | T | A | 454.60   | PASS          | AC=7;AF=0.103;AN=68;BaseQRankSum=  |
| 42347 | chrY | 22228338 | . | T | G | 231.65   | my_snp_filter | AC=5;AF=0.074;AN=68;BaseQ          |
| 42348 | chrY | 22228346 | . | C | T | 1456.45  | PASS          | AC=18;AF=0.265;AN=68;BaseQRankSum  |
| 42349 | chrY | 22228391 | . | A | G | 36.22    | my_snp_filter | AC=2;AF=0.029;AN=68;BaseQ          |
| 42350 | chrY | 22228395 | . | A | G | 416.72   | PASS          | AC=8;AF=0.118;AN=68;BaseQRankSum=  |
| 42351 | chrY | 22228408 | . | A | G | 294.97   | PASS          | AC=5;AF=0.074;AN=68;BaseQRankSum=  |
| 42352 | chrY | 22228415 | . | C | G | 131.74   | my_snp_filter | AC=4;AF=0.059;AN=68;BaseQ          |
| 42353 | chrY | 22228550 | . | A | C | 68.43    | my_snp_filter | AC=2;AF=0.029;AN=70;BaseQ          |
| 42354 | chrY | 22228615 | . | G | T | 130.79   | my_snp_filter | AC=4;AF=0.059;AN=68;BaseQ          |
| 42355 | chrY | 22228628 | . | T | A | 5267.57  | PASS          | AC=24;AF=0.353;AN=68;BaseQRankSum  |
| 42356 | chrY | 22228678 | . | G | T | 4954.99  | PASS          | AC=21;AF=0.309;AN=68;BaseQRankSum  |
| 42357 | chrY | 22228683 | . | G | A | 7836.58  | PASS          | AC=23;AF=0.371;AN=62;BaseQRankSum  |
| 42358 | chrY | 22228690 | . | T | A | 5402.61  | PASS          | AC=21;AF=0.318;AN=66;BaseQRankSum  |
| 42359 | chrY | 22228691 | . | T | G | 5501.61  | PASS          | AC=21;AF=0.318;AN=66;BaseQRankSum  |
| 42360 | chrY | 22228712 | . | T | C | 1401.40  | PASS          | AC=10;AF=0.147;AN=68;BaseQRankSum  |
| 42361 | chrY | 22228720 | . | T | G | 1048.07  | PASS          | AC=10;AF=0.147;AN=68;BaseQRankSum  |
| 42362 | chrY | 22228732 | . | C | T | 4288.68  | PASS          | AC=22;AF=0.324;AN=68;BaseQRankSum  |
| 42363 | chrY | 22228758 | . | G | A | 3799.32  | PASS          | AC=18;AF=0.273;AN=66;BaseQRankSum  |
| 42364 | chrY | 22228818 | . | C | A | 126.11   | PASS          | AC=3;AF=0.050;AN=60;BaseQRankSum=  |
| 42365 | chrY | 22228902 | . | G | A | 281.50   | PASS          | AC=6;AF=0.086;AN=70;BaseQRankSum=  |
| 42366 | chrY | 22228943 | . | A | G | 433.57   | PASS          | AC=1;AF=0.014;AN=70;BaseQRankSum=  |
| 42367 | chrY | 22229037 | . | A | G | 10636.86 | PASS          | AC=24;AF=0.364;AN=66;BaseQ         |
| 42368 | chrY | 22229062 | . | A | C | 11542.21 | PASS          | AC=25;AF=0.357;AN=70;BaseQ         |
| 42369 | chrY | 22229065 | . | G | T | 11647.52 | PASS          | AC=25;AF=0.357;AN=70;BaseQ         |
| 42370 | chrY | 22229066 | . | T | A | 11714.52 | PASS          | AC=25;AF=0.357;AN=70;BaseQ         |
| 42371 | chrY | 22229069 | . | C | A | 614.43   | PASS          | AC=1;AF=0.014;AN=70;BaseQRankSum=  |
| 42372 | chrY | 22229096 | . | T | G | 8693.95  | PASS          | AC=24;AF=0.343;AN=70;BaseQRankSum  |
| 42373 | chrY | 22229105 | . | T | A | 339.94   | PASS          | AC=1;AF=0.014;AN=70;BaseQRankSum=  |
| 42374 | chrY | 22229136 | . | C | T | 4296.16  | PASS          | AC=17;AF=0.258;AN=66;BaseQRankSum  |
| 42375 | chrY | 22229165 | . | G | T | 2237.26  | my_snp_filter | AC=15;AF=0.227;AN=66;BaseQ         |
| 42376 | chrY | 22229168 | . | C | A | 1781.99  | my_snp_filter | AC=15;AF=0.227;AN=66;BaseQ         |
| 42377 | chrY | 22229169 | . | G | C | 1707.70  | my_snp_filter | AC=15;AF=0.227;AN=66;BaseQ         |
| 42378 | chrY | 22229188 | . | A | C | 370.64   | PASS          | AC=6;AF=0.091;AN=66;BaseQRankSum=  |
| 42379 | chrY | 22229191 | . | T | C | 348.29   | PASS          | AC=5;AF=0.076;AN=66;BaseQRankSum=  |
| 42380 | chrY | 22229193 | . | T | A | 362.73   | PASS          | AC=5;AF=0.076;AN=66;BaseQRankSum=  |
| 42381 | chrY | 22229194 | . | A | G | 276.87   | PASS          | AC=5;AF=0.076;AN=66;BaseQRankSum=  |
| 42382 | chrY | 22229269 | . | T | G | 7532.16  | PASS          | AC=48;AF=1.00;AN=48;DP=220;FS=0.00 |
| 42383 | chrY | 22229290 | . | A | T | 6001.21  | PASS          | AC=42;AF=1.00;AN=42;DP=160;FS=0.00 |
| 42384 | chrY | 22229291 | . | C | G | 5929.26  | PASS          | AC=42;AF=1.00;AN=42;DP=157;FS=0.00 |
| 42385 | chrY | 22229324 | . | T | G | 2992.50  | PASS          | AC=34;AF=1.00;AN=34;DP=80;FS=0.00  |
| 42386 | chrY | 22229325 | . | C | G | 2857.56  | PASS          | AC=34;AF=1.00;AN=34;DP=77;FS=0.00  |
| 42387 | chrY | 22229326 | . | T | C | 2677.68  | PASS          | AC=34;AF=1.00;AN=34;DP=76;FS=0.00  |
| 42388 | chrY | 22229383 | . | A | C | 252.90   | PASS          | AC=3;AF=0.045;AN=66;BaseQRankSum=  |
| 42389 | chrY | 22229387 | . | C | G | 248.80   | PASS          | AC=3;AF=0.045;AN=66;BaseQRankSum=  |
| 42390 | chrY | 22229393 | . | A | T | 80.66    | PASS          | AC=2;AF=0.029;AN=68;BaseQRankSum=  |
| 42391 | chrY | 22229426 | . | A | T | 6190.80  | PASS          | AC=35;AF=0.500;AN=70;BaseQRankSum  |
| 42392 | chrY | 22229548 | . | T | C | 5119.15  | PASS          | AC=34;AF=0.486;AN=70;BaseQRankSum  |
| 42393 | chrY | 22229562 | . | A | G | 16586.01 | PASS          | AC=70;AF=1.00;AN=70;BaseQ          |
| 42394 | chrY | 22229572 | . | A | G | 237.20   | PASS          | AC=3;AF=0.043;AN=70;BaseQRankSum=  |
| 42395 | chrY | 22229606 | . | T | G | 2018.76  | my_snp_filter | AC=18;AF=0.300;AN=60;BaseQ         |
| 42396 | chrY | 22229617 | . | T | G | 7325.53  | PASS          | AC=55;AF=0.982;AN=56;BaseQRankSum  |
| 42397 | chrY | 22229665 | . | A | T | 49.80    | PASS          | AC=1;AF=0.071;AN=14;BaseQRankSum=  |
| 42398 | chrY | 22229666 | . | C | G | 49.80    | PASS          | AC=1;AF=0.071;AN=14;BaseQRankSum=  |
| 42399 | chrY | 22229672 | . | A | C | 37.26    | PASS          | AC=1;AF=0.015;AN=66;BaseQRankSum=  |
| 42400 | chrY | 22229673 | . | A | C | 71.73    | PASS          | AC=4;AF=0.061;AN=66;BaseQRankSum=  |
| 42401 | chrY | 22229681 | . | G | A | 60.98    | PASS          | AC=2;AF=0.200;AN=10;DP=397;FS=0.00 |
| 42402 | chrY | 22229704 | . | A | T | 79.42    | PASS          | AC=5;AF=0.078;AN=64;BaseQRankSum=  |
| 42403 | chrY | 22229722 | . | T | A | 15149.31 | PASS          | AC=57;AF=0.983;AN=58;BaseQ         |
| 42404 | chrY | 22229865 | . | A | G | 98182.86 | PASS          | AC=64;AF=1.00;AN=64;DP=21          |
| 42405 | chrY | 22229868 | . | A | C | 98645.86 | PASS          | AC=64;AF=1.00;AN=64;DP=21          |
| 42406 | chrY | 22229901 | . | G | C | 91145.11 | PASS          | AC=64;AF=1.00;AN=64;BaseQ          |
| 42407 | chrY | 22229905 | . | A | G | 91636.11 | PASS          | AC=64;AF=1.00;AN=64;BaseQ          |
| 42408 | chrY | 22229906 | . | T | G | 91811.87 | PASS          | AC=64;AF=1.00;AN=64;DP=19          |

|       |      |          |   |   |     |          |               |                                    |
|-------|------|----------|---|---|-----|----------|---------------|------------------------------------|
| 42409 | chrY | 22229913 | . | C | G   | 89089.87 | PASS          | AC=64;AF=1.00;AN=64;DP=19          |
| 42410 | chrY | 22230252 | . | C | A   | 1087.58  | PASS          | AC=7;AF=0.106;AN=66;BaseQRankSum=  |
| 42411 | chrY | 22230254 | . | C | T   | 1091.90  | PASS          | AC=7;AF=0.106;AN=66;BaseQRankSum=  |
| 42412 | chrY | 22230364 | . | A | G   | 36.96    | my_snp_filter | AC=3;AF=0.045;AN=66;BaseQ          |
| 42413 | chrY | 22230486 | . | T | C   | 953.40   | PASS          | AC=5;AF=0.078;AN=64;BaseQRankSum=  |
| 42414 | chrY | 22230688 | . | C | G   | 49.03    | PASS          | AC=5;AF=0.100;AN=50;BaseQRankSum=  |
| 42415 | chrY | 22230712 | . | A | G   | 165.08   | PASS          | AC=3;AF=0.115;AN=26;BaseQRankSum=  |
| 42416 | chrY | 22231091 | . | G | A   | 262.57   | PASS          | AC=1;AF=0.018;AN=56;BaseQRankSum=  |
| 42417 | chrY | 22231207 | . | C | A   | 1517.18  | PASS          | AC=6;AF=0.111;AN=54;DP=287;FS=0.0  |
| 42418 | chrY | 22231491 | . | C | G   | 336.64   | PASS          | AC=3;AF=0.150;AN=20;BaseQRankSum=  |
| 42419 | chrY | 22232967 | . | T | C   | 811.34   | PASS          | AC=6;AF=0.111;AN=54;DP=194;FS=0.0  |
| 42420 | chrY | 22233024 | . | G | A   | 80.61    | PASS          | AC=1;AF=0.019;AN=54;BaseQRankSum=  |
| 42421 | chrY | 22233034 | . | G | C   | 77.18    | PASS          | AC=1;AF=0.019;AN=54;BaseQRankSum=  |
| 42422 | chrY | 22233050 | . | G | A   | 78.09    | PASS          | AC=1;AF=0.019;AN=52;BaseQRankSum=  |
| 42423 | chrY | 22233052 | . | C | A   | 323.64   | PASS          | AC=2;AF=0.038;AN=52;DP=315;FS=0.0  |
| 42424 | chrY | 22233053 | . | C | A   | 112.40   | PASS          | AC=2;AF=0.038;AN=52;BaseQRankSum=  |
| 42425 | chrY | 22233060 | . | C | T   | 111.49   | PASS          | AC=2;AF=0.037;AN=54;BaseQRankSum=  |
| 42426 | chrY | 22233088 | . | G | T   | 583.38   | PASS          | AC=3;AF=0.050;AN=60;BaseQRankSum=  |
| 42427 | chrY | 22233165 | . | C | A   | 37.19    | PASS          | AC=1;AF=0.016;AN=62;BaseQRankSum=  |
| 42428 | chrY | 22233278 | . | A | G   | 180.18   | PASS          | AC=1;AF=0.016;AN=62;BaseQRankSum=  |
| 42429 | chrY | 22233360 | . | G | T   | 15201.25 | PASS          | AC=57;AF=0.950;AN=60;BaseQ         |
| 42430 | chrY | 22233509 | . | G | T   | 40.08    | PASS          | AC=1;AF=0.017;AN=60;BaseQRankSum=  |
| 42431 | chrY | 22233514 | . | A | G   | 112.27   | PASS          | AC=1;AF=0.017;AN=60;BaseQRankSum=  |
| 42432 | chrY | 22233539 | . | G | A,* | 1601.76  | PASS          | AC=3,6;AF=0.054,0.107;AN=56;BaseQ  |
| 42433 | chrY | 22233551 | . | C | T,* | 1527.83  | PASS          | AC=1,6;AF=0.017,0.103;AN=58;BaseQ  |
| 42434 | chrY | 22233565 | . | T | A,* | 1519.97  | PASS          | AC=1,6;AF=0.017,0.103;AN=58;BaseQ  |
| 42435 | chrY | 22233578 | . | A | G,* | 1941.38  | PASS          | AC=3,6;AF=0.054,0.107;AN=56;BaseQ  |
| 42436 | chrY | 22233597 | . | G | A,* | 1577.25  | PASS          | AC=3,6;AF=0.056,0.111;AN=54;BaseQ  |
| 42437 | chrY | 22233732 | . | C | G   | 12339.01 | PASS          | AC=56;AF=1.00;AN=56;DP=42          |
| 42438 | chrY | 22234065 | . | T | A   | 167.06   | PASS          | AC=1;AF=0.016;AN=64;BaseQRankSum=  |
| 42439 | chrY | 22234681 | . | T | C   | 67.84    | PASS          | AC=2;AF=1.00;AN=2;DP=4;FS=0.000;M  |
| 42440 | chrY | 22234686 | . | C | T   | 60.97    | PASS          | AC=2;AF=0.333;AN=6;DP=6;FS=0.000;  |
| 42441 | chrY | 22234690 | . | T | G   | 60.97    | PASS          | AC=2;AF=0.333;AN=6;DP=6;FS=0.000;  |
| 42442 | chrY | 22234696 | . | T | A   | 60.97    | PASS          | AC=2;AF=0.333;AN=6;DP=6;FS=0.000;  |
| 42443 | chrY | 22234704 | . | A | C   | 96.67    | PASS          | AC=4;AF=0.667;AN=6;DP=8;FS=0.000;  |
| 42444 | chrY | 22234979 | . | C | A   | 62.62    | PASS          | AC=2;AF=0.500;AN=4;DP=5;FS=0.000;  |
| 42445 | chrY | 22234989 | . | G | A   | 63.49    | PASS          | AC=2;AF=0.500;AN=4;DP=5;FS=0.000;  |
| 42446 | chrY | 22235149 | . | T | C   | 47.84    | my_snp_filter | AC=2;AF=1.00;AN=2;DP=23;FS=0.000   |
| 42447 | chrY | 22235226 | . | C | T   | 6594.36  | PASS          | AC=54;AF=0.964;AN=56;BaseQRankSum= |
| 42448 | chrY | 22235416 | . | C | A   | 54.18    | my_snp_filter | AC=2;AF=0.031;AN=64;BaseQ          |
| 42449 | chrY | 22235425 | . | T | C   | 66.40    | my_snp_filter | AC=2;AF=0.031;AN=64;BaseQ          |
| 42450 | chrY | 22235517 | . | T | A   | 3641.84  | my_snp_filter | AC=32;AF=0.640;AN=50;BaseQ         |
| 42451 | chrY | 22235556 | . | C | G   | 55.71    | my_snp_filter | AC=1;AF=0.017;AN=58;BaseQ          |
| 42452 | chrY | 22235568 | . | C | T   | 359.97   | PASS          | AC=3;AF=0.060;AN=50;BaseQRankSum=  |
| 42453 | chrY | 22235592 | . | A | C   | 60.30    | PASS          | AC=3;AF=0.054;AN=56;BaseQRankSum=  |
| 42454 | chrY | 22235624 | . | G | C   | 93.57    | PASS          | AC=3;AF=0.056;AN=54;BaseQRankSum=  |
| 42455 | chrY | 22235654 | . | T | C   | 147.60   | PASS          | AC=2;AF=0.036;AN=56;BaseQRankSum=  |
| 42456 | chrY | 22235675 | . | C | A   | 146.07   | PASS          | AC=2;AF=0.038;AN=52;BaseQRankSum=  |
| 42457 | chrY | 22235683 | . | G | C   | 44.06    | my_snp_filter | AC=1;AF=0.026;AN=38;BaseQ          |
| 42458 | chrY | 22235686 | . | T | A   | 45.47    | my_snp_filter | AC=1;AF=0.025;AN=40;BaseQ          |
| 42459 | chrY | 22235688 | . | T | A   | 209.73   | PASS          | AC=2;AF=0.038;AN=52;BaseQRankSum=  |
| 42460 | chrY | 22235694 | . | A | C   | 225.05   | PASS          | AC=2;AF=0.053;AN=38;BaseQRankSum=  |
| 42461 | chrY | 22235695 | . | T | A   | 89.51    | my_snp_filter | AC=1;AF=0.026;AN=38;BaseQ          |
| 42462 | chrY | 22235745 | . | C | T   | 249.25   | PASS          | AC=2;AF=0.043;AN=46;BaseQRankSum=  |
| 42463 | chrY | 22235746 | . | T | G   | 248.90   | PASS          | AC=2;AF=0.043;AN=46;BaseQRankSum=  |
| 42464 | chrY | 22235797 | . | G | A   | 74.49    | PASS          | AC=1;AF=0.017;AN=60;BaseQRankSum=  |
| 42465 | chrY | 22235813 | . | T | C   | 35.20    | PASS          | AC=1;AF=0.016;AN=62;BaseQRankSum=  |
| 42466 | chrY | 22235836 | . | C | G   | 435.33   | PASS          | AC=4;AF=0.071;AN=56;DP=255;FS=0.0  |
| 42467 | chrY | 22236003 | . | A | T   | 2403.58  | PASS          | AC=15;AF=0.259;AN=58;BaseQRankSum= |
| 42468 | chrY | 22236022 | . | G | A   | 1587.38  | PASS          | AC=12;AF=0.194;AN=62;BaseQRankSum= |
| 42469 | chrY | 22236033 | . | A | G   | 881.93   | PASS          | AC=5;AF=0.078;AN=64;BaseQRankSum=  |
| 42470 | chrY | 22236034 | . | T | G   | 862.51   | PASS          | AC=5;AF=0.078;AN=64;BaseQRankSum=  |
| 42471 | chrY | 22236036 | . | C | T   | 400.59   | PASS          | AC=3;AF=0.047;AN=64;BaseQRankSum=  |
| 42472 | chrY | 22236043 | . | G | A   | 439.73   | PASS          | AC=3;AF=0.050;AN=60;BaseQRankSum=  |
| 42473 | chrY | 22236045 | . | T | A   | 552.91   | PASS          | AC=4;AF=0.065;AN=62;BaseQRankSum=  |
| 42474 | chrY | 22236047 | . | A | G   | 1011.92  | PASS          | AC=7;AF=0.121;AN=58;BaseQRankSum=  |
| 42475 | chrY | 22236054 | . | C | T   | 302.33   | PASS          | AC=2;AF=0.031;AN=64;BaseQRankSum=  |
| 42476 | chrY | 22236068 | . | C | A   | 85.57    | PASS          | AC=1;AF=0.016;AN=64;BaseQRankSum=  |
| 42477 | chrY | 22236075 | . | G | T   | 507.20   | PASS          | AC=5;AF=0.096;AN=52;BaseQRankSum=  |
| 42478 | chrY | 22236142 | . | C | A   | 1421.24  | PASS          | AC=17;AF=0.315;AN=54;BaseQRankSum= |
| 42479 | chrY | 22236154 | . | C | T   | 419.87   | PASS          | AC=3;AF=0.050;AN=60;BaseQRankSum=  |
| 42480 | chrY | 22236178 | . | A | T   | 289.52   | PASS          | AC=8;AF=0.174;AN=46;BaseQRankSum=  |
| 42481 | chrY | 22236188 | . | T | A   | 135.18   | my_snp_filter | AC=4;AF=0.118;AN=34;BaseQ          |
| 42482 | chrY | 22236192 | . | A | T   | 89.54    | my_snp_filter | AC=3;AF=0.167;AN=18;BaseQ          |
| 42483 | chrY | 22236199 | . | A | T   | 224.51   | my_snp_filter | AC=4;AF=0.667;AN=6;BaseQR          |
| 42484 | chrY | 22236200 | . | G | A   | 224.51   | my_snp_filter | AC=4;AF=0.667;AN=6;BaseQR          |

|       |      |          |   |   |     |          |               |                                    |
|-------|------|----------|---|---|-----|----------|---------------|------------------------------------|
| 42485 | chrY | 22236205 | . | G | T   | 221.97   | my_snp_filter | AC=4;AF=0.500;AN=8;BaseQR          |
| 42486 | chrY | 22236209 | . | C | A   | 224.30   | my_snp_filter | AC=4;AF=0.500;AN=8;BaseQR          |
| 42487 | chrY | 22236213 | . | C | A   | 142.93   | my_snp_filter | AC=3;AF=0.375;AN=8;BaseQR          |
| 42488 | chrY | 22236219 | . | C | G   | 67.84    | my_snp_filter | AC=2;AF=1.00;AN=2;DP=9;FS          |
| 42489 | chrY | 22236231 | . | T | C   | 65.10    | my_snp_filter | AC=2;AF=0.250;AN=8;DP=11;          |
| 42490 | chrY | 22236827 | . | A | G   | 615.21   | my_snp_filter | AC=9;AF=0.900;AN=10;BaseQ          |
| 42491 | chrY | 22236848 | . | T | G   | 1257.36  | PASS          | AC=11;AF=0.917;AN=12;BaseQRankSum  |
| 42492 | chrY | 22236953 | . | C | G   | 638.35   | PASS          | AC=10;AF=0.156;AN=64;BaseQRankSum  |
| 42493 | chrY | 22236967 | . | G | A   | 5478.68  | my_snp_filter | AC=41;AF=0.732;AN=56;Base          |
| 42494 | chrY | 22236968 | . | C | T   | 125.76   | PASS          | AC=1;AF=0.016;AN=62;BaseQRankSum=  |
| 42495 | chrY | 22237007 | . | A | T   | 454.55   | PASS          | AC=3;AF=0.056;AN=54;BaseQRankSum=  |
| 42496 | chrY | 22237110 | . | T | A   | 247.10   | PASS          | AC=3;AF=0.058;AN=52;BaseQRankSum=  |
| 42497 | chrY | 22237175 | . | C | G   | 186.65   | PASS          | AC=6;AF=0.097;AN=62;BaseQRankSum=  |
| 42498 | chrY | 22237186 | . | A | C   | 217.85   | PASS          | AC=4;AF=0.067;AN=60;BaseQRankSum=  |
| 42499 | chrY | 22237216 | . | C | T   | 145.11   | PASS          | AC=2;AF=0.031;AN=64;BaseQRankSum=  |
| 42500 | chrY | 22237221 | . | A | T   | 144.80   | PASS          | AC=2;AF=0.031;AN=64;BaseQRankSum=  |
| 42501 | chrY | 22237258 | . | G | A   | 1306.39  | my_snp_filter | AC=12;AF=0.214;AN=56;Base          |
| 42502 | chrY | 22237270 | . | A | C   | 1483.71  | PASS          | AC=12;AF=0.231;AN=52;BaseQRankSum  |
| 42503 | chrY | 22237289 | . | A | C   | 1486.28  | PASS          | AC=13;AF=0.464;AN=28;BaseQRankSum  |
| 42504 | chrY | 22237314 | . | C | A   | 197.14   | PASS          | AC=4;AF=0.667;AN=6;DP=75;FS=0.000  |
| 42505 | chrY | 22237315 | . | C | T,A | 1359.83  | PASS          | AC=13,2;AF=0.813,0.125;AN=16;DP=6  |
| 42506 | chrY | 22237319 | . | A | T   | 51.61    | PASS          | AC=2;AF=0.048;AN=42;DP=69;FS=0.00  |
| 42507 | chrY | 22237339 | . | T | A   | 907.45   | my_snp_filter | AC=11;AF=0.500;AN=22;Base          |
| 42508 | chrY | 22237372 | . | A | G   | 266.06   | PASS          | AC=4;AF=0.167;AN=24;BaseQRankSum=  |
| 42509 | chrY | 22237516 | . | G | A   | 30.41    | PASS          | AC=2;AF=0.063;AN=32;BaseQRankSum=  |
| 42510 | chrY | 22237582 | . | A | T   | 104.69   | PASS          | AC=4;AF=1.00;AN=4;DP=69;FS=0.000;  |
| 42511 | chrY | 22237631 | . | C | A   | 5188.40  | PASS          | AC=38;AF=1.00;AN=38;DP=136;FS=0.0  |
| 42512 | chrY | 22237634 | . | G | C   | 5233.40  | PASS          | AC=38;AF=1.00;AN=38;DP=136;FS=0.0  |
| 42513 | chrY | 22237652 | . | T | C   | 4358.84  | PASS          | AC=30;AF=0.652;AN=46;DP=138;FS=0.  |
| 42514 | chrY | 22237670 | . | C | G   | 45.72    | PASS          | AC=1;AF=0.020;AN=50;BaseQRankSum=  |
| 42515 | chrY | 22237676 | . | T | C   | 44.72    | PASS          | AC=1;AF=0.024;AN=42;BaseQRankSum=  |
| 42516 | chrY | 22237688 | . | C | A   | 109.09   | PASS          | AC=3;AF=0.107;AN=28;BaseQRankSum=  |
| 42517 | chrY | 22237695 | . | G | A   | 912.80   | PASS          | AC=7;AF=0.194;AN=36;BaseQRankSum=  |
| 42518 | chrY | 22237724 | . | A | C   | 32.04    | PASS          | AC=1;AF=0.022;AN=46;BaseQRankSum=  |
| 42519 | chrY | 22237729 | . | T | C   | 72.47    | PASS          | AC=2;AF=0.043;AN=46;BaseQRankSum=  |
| 42520 | chrY | 22237827 | . | A | G   | 831      | PASS          | AC=3;AF=0.054;AN=56;BaseQRankSum=  |
| 42521 | chrY | 22237873 | . | A | T   | 228.93   | PASS          | AC=4;AF=0.074;AN=54;DP=326;FS=0.0  |
| 42522 | chrY | 22237952 | . | A | G   | 915.77   | PASS          | AC=6;AF=0.107;AN=56;DP=365;FS=0.0  |
| 42523 | chrY | 22238276 | . | G | C   | 56.19    | PASS          | AC=1;AF=0.019;AN=54;BaseQRankSum=  |
| 42524 | chrY | 22238304 | . | A | C   | 131.67   | PASS          | AC=1;AF=0.019;AN=54;BaseQRankSum=  |
| 42525 | chrY | 22238310 | . | C | A   | 176.55   | PASS          | AC=2;AF=0.036;AN=56;BaseQRankSum=  |
| 42526 | chrY | 22238317 | . | T | G   | 354.54   | PASS          | AC=6;AF=0.231;AN=26;BaseQRankSum=  |
| 42527 | chrY | 22238323 | . | T | A   | 572.83   | PASS          | AC=13;AF=0.241;AN=54;BaseQRankSum= |
| 42528 | chrY | 22238326 | . | A | C   | 599.47   | PASS          | AC=14;AF=0.269;AN=52;BaseQRankSum= |
| 42529 | chrY | 22238417 | . | C | G   | 2679.40  | PASS          | AC=37;AF=0.617;AN=60;BaseQRankSum= |
| 42530 | chrY | 22238494 | . | G | T   | 62.41    | PASS          | AC=3;AF=0.047;AN=64;BaseQRankSum=  |
| 42531 | chrY | 22238576 | . | C | G   | 80.35    | PASS          | AC=2;AF=0.029;AN=70;BaseQRankSum=  |
| 42532 | chrY | 22238678 | . | A | C   | 173.08   | PASS          | AC=2;AF=0.030;AN=66;DP=250;FS=0.0  |
| 42533 | chrY | 22238832 | . | C | T   | 4625.13  | PASS          | AC=42;AF=0.700;AN=60;DP=315;FS=8.  |
| 42534 | chrY | 22239128 | . | G | C   | 17061.90 | PASS          | AC=68;AF=1.00;AN=68;DP=54          |
| 42535 | chrY | 22239294 | . | C | T   | 22351.45 | PASS          | AC=57;AF=0.814;AN=70;Base          |
| 42536 | chrY | 22239335 | . | T | A   | 16413.38 | PASS          | AC=51;AF=0.729;AN=70;Base          |
| 42537 | chrY | 22239362 | . | G | A   | 828.74   | PASS          | AC=4;AF=0.057;AN=70;BaseQRankSum=  |
| 42538 | chrY | 22239414 | . | C | A   | 184.19   | PASS          | AC=2;AF=0.029;AN=70;BaseQRankSum=  |
| 42539 | chrY | 22239420 | . | C | T   | 113.07   | PASS          | AC=2;AF=0.029;AN=70;BaseQRankSum=  |
| 42540 | chrY | 22239436 | . | T | A   | 70.59    | PASS          | AC=2;AF=0.029;AN=70;BaseQRankSum=  |
| 42541 | chrY | 22239437 | . | T | A   | 317.63   | PASS          | AC=3;AF=0.043;AN=70;BaseQRankSum=  |
| 42542 | chrY | 22239484 | . | T | A   | 860.39   | my_snp_filter | AC=5;AF=0.071;AN=70;BaseQ          |
| 42543 | chrY | 22239493 | . | C | A   | 950.41   | my_snp_filter | AC=5;AF=0.071;AN=70;BaseQ          |
| 42544 | chrY | 22239504 | . | C | T   | 975.43   | my_snp_filter | AC=5;AF=0.071;AN=70;BaseQ          |
| 42545 | chrY | 22239506 | . | C | A   | 1612.80  | my_snp_filter | AC=8;AF=0.118;AN=68;BaseQ          |
| 42546 | chrY | 22239515 | . | G | A   | 537.10   | PASS          | AC=5;AF=0.071;AN=70;BaseQRankSum=  |
| 42547 | chrY | 22239547 | . | G | A   | 548.06   | PASS          | AC=3;AF=0.043;AN=70;BaseQRankSum=  |
| 42548 | chrY | 22239550 | . | C | T   | 40.71    | PASS          | AC=1;AF=0.014;AN=70;BaseQRankSum=  |
| 42549 | chrY | 22239618 | . | A | C   | 121.61   | my_snp_filter | AC=4;AF=0.059;AN=68;BaseQ          |
| 42550 | chrY | 22239819 | . | G | T   | 664.93   | PASS          | AC=3;AF=0.044;AN=68;BaseQRankSum=  |
| 42551 | chrY | 22239872 | . | C | T   | 469.54   | PASS          | AC=3;AF=0.043;AN=70;BaseQRankSum=  |
| 42552 | chrY | 22239972 | . | G | A   | 2376.12  | PASS          | AC=9;AF=0.129;AN=70;BaseQRankSum=  |
| 42553 | chrY | 22240008 | . | T | C   | 24749.46 | PASS          | AC=39;AF=0.557;AN=70;Base          |
| 42554 | chrY | 22240014 | . | A | G   | 144.46   | PASS          | AC=1;AF=0.014;AN=70;BaseQRankSum=  |
| 42555 | chrY | 22240084 | . | G | T   | 416.42   | PASS          | AC=1;AF=0.014;AN=70;BaseQRankSum=  |
| 42556 | chrY | 22240122 | . | C | G   | 1501.51  | PASS          | AC=3;AF=0.043;AN=70;BaseQRankSum=  |
| 42557 | chrY | 22240256 | . | G | T   | 216.49   | PASS          | AC=1;AF=0.014;AN=70;BaseQRankSum=  |
| 42558 | chrY | 22240289 | . | G | T   | 5040.11  | PASS          | AC=9;AF=0.129;AN=70;BaseQRankSum=  |
| 42559 | chrY | 22240292 | . | C | A   | 5047.03  | PASS          | AC=9;AF=0.129;AN=70;BaseQRankSum=  |
| 42560 | chrY | 22240301 | . | A | G   | 19710.36 | PASS          | AC=36;AF=0.514;AN=70;Base          |



|       |      |          |   |   |     |          |               |                                   |
|-------|------|----------|---|---|-----|----------|---------------|-----------------------------------|
| 42561 | chrY | 22240317 | . | G | C   | 4716.94  | PASS          | AC=9;AF=0.129;AN=70;BaseQRankSum= |
| 42562 | chrY | 22240354 | . | T | C   | 20550.99 | PASS          | AC=34;AF=0.486;AN=70;Base         |
| 42563 | chrY | 22240398 | . | C | G   | 6667.44  | PASS          | AC=22;AF=0.314;AN=70;BaseQRankSum |
| 42564 | chrY | 22240405 | . | C | A   | 6599.36  | PASS          | AC=22;AF=0.314;AN=70;BaseQRankSum |
| 42565 | chrY | 22240420 | . | A | T   | 6329.69  | PASS          | AC=22;AF=0.314;AN=70;BaseQRankSum |
| 42566 | chrY | 22240481 | . | C | T   | 31199.05 | PASS          | AC=38;AF=0.543;AN=70;Base         |
| 42567 | chrY | 22240505 | . | A | T   | 18803.72 | PASS          | AC=35;AF=0.500;AN=70;Base         |
| 42568 | chrY | 22240534 | . | C | A   | 10823.74 | PASS          | AC=35;AF=0.500;AN=70;Base         |
| 42569 | chrY | 22240627 | . | T | A   | 6701.41  | my_snp_filter | AC=43;AF=0.827;AN=52;Base         |
| 42570 | chrY | 22240640 | . | A | G   | 48.11    | my_snp_filter | AC=2;AF=0.031;AN=64;BaseQ         |
| 42571 | chrY | 22240673 | . | A | C   | 2149.76  | my_snp_filter | AC=18;AF=0.333;AN=54;BaseQ        |
| 42572 | chrY | 22240696 | . | T | C,G | 431.07   | PASS          | AC=2,3;AF=0.034,0.052;AN=58;BaseQ |
| 42573 | chrY | 22240713 | . | A | G   | 140.88   | my_snp_filter | AC=2;AF=0.040;AN=50;BaseQ         |
| 42574 | chrY | 22240714 | . | C | G   | 45.57    | my_snp_filter | AC=1;AF=0.020;AN=50;BaseQ         |
| 42575 | chrY | 22240760 | . | C | G   | 731.30   | PASS          | AC=6;AF=0.333;AN=18;BaseQRankSum= |
| 42576 | chrY | 22240838 | . | A | C   | 123.05   | PASS          | AC=1;AF=0.021;AN=48;BaseQRankSum= |
| 42577 | chrY | 22240888 | . | A | T   | 1921.29  | my_snp_filter | AC=11;AF=0.306;AN=36;Base         |
| 42578 | chrY | 22240927 | . | C | G   | 698.94   | PASS          | AC=9;AF=0.300;AN=30;BaseQRankSum= |
| 42579 | chrY | 22241049 | . | T | C   | 553.22   | my_snp_filter | AC=7;AF=0.438;AN=16;BaseQ         |
| 42580 | chrY | 22241075 | . | C | G   | 992.27   | my_snp_filter | AC=14;AF=1.00;AN=14;BaseQ         |
| 42581 | chrY | 22241092 | . | T | G   | 54.72    | my_snp_filter | AC=2;AF=0.100;AN=20;DP=60         |
| 42582 | chrY | 22241156 | . | C | T   | 1764.02  | PASS          | AC=10;AF=0.455;AN=22;BaseQRankSum |
| 42583 | chrY | 22241170 | . | A | C   | 2272.18  | PASS          | AC=11;AF=0.550;AN=20;BaseQRankSum |
| 42584 | chrY | 22241179 | . | G | A   | 2675.11  | PASS          | AC=11;AF=0.550;AN=20;BaseQRankSum |
| 42585 | chrY | 22241181 | . | T | C   | 2755.75  | PASS          | AC=13;AF=0.722;AN=18;BaseQRankSum |
| 42586 | chrY | 22241183 | . | A | T   | 2975.82  | PASS          | AC=13;AF=0.813;AN=16;BaseQRankSum |
| 42587 | chrY | 22241205 | . | C | A   | 3325.54  | PASS          | AC=13;AF=0.929;AN=14;BaseQRankSum |
| 42588 | chrY | 22241313 | . | C | A   | 31.97    | PASS          | AC=1;AF=0.022;AN=46;BaseQRankSum= |
| 42589 | chrY | 22241361 | . | A | G   | 2754.31  | PASS          | AC=30;AF=1.00;AN=30;DP=103;FS=0.0 |
| 42590 | chrY | 22241631 | . | C | T   | 655.20   | my_snp_filter | AC=8;AF=0.250;AN=32;BaseQ         |
| 42591 | chrY | 22241673 | . | T | A   | 258.84   | PASS          | AC=3;AF=0.136;AN=22;BaseQRankSum= |
| 42592 | chrY | 22241789 | . | T | A   | 7937.41  | PASS          | AC=37;AF=0.712;AN=52;BaseQRankSum |
| 42593 | chrY | 22241803 | . | G | A,* | 7690.48  | PASS          | AC=29,2;AF=0.630,0.043;AN=46;Base |
| 42594 | chrY | 22241818 | . | A | C   | 2288.39  | PASS          | AC=5;AF=0.083;AN=60;BaseQRankSum= |
| 42595 | chrY | 22241897 | . | A | G   | 82.12    | PASS          | AC=1;AF=0.019;AN=54;BaseQRankSum= |
| 42596 | chrY | 22241902 | . | T | A   | 82.90    | PASS          | AC=1;AF=0.019;AN=54;BaseQRankSum= |
| 42597 | chrY | 22241903 | . | A | C   | 83.17    | PASS          | AC=1;AF=0.019;AN=54;BaseQRankSum= |
| 42598 | chrY | 22241918 | . | A | T   | 5657.85  | PASS          | AC=36;AF=0.692;AN=52;BaseQRankSum |
| 42599 | chrY | 22241929 | . | T | G   | 5223.01  | my_snp_filter | AC=36;AF=0.692;AN=52;Base         |
| 42600 | chrY | 22241930 | . | A | C   | 5251.02  | my_snp_filter | AC=36;AF=0.692;AN=52;Base         |
| 42601 | chrY | 22241979 | . | G | T   | 875.32   | my_snp_filter | AC=7;AF=0.233;AN=30;BaseQ         |
| 42602 | chrY | 22241982 | . | A | T   | 864.16   | my_snp_filter | AC=7;AF=0.233;AN=30;BaseQ         |
| 42603 | chrY | 22241998 | . | C | T   | 714.88   | my_snp_filter | AC=5;AF=0.167;AN=30;BaseQ         |
| 42604 | chrY | 22242004 | . | T | C   | 730      | PASS          | AC=5;AF=0.167;AN=30;BaseQRankSum= |
| 42605 | chrY | 22242017 | . | A | G   | 469.24   | PASS          | AC=4;AF=0.133;AN=30;BaseQRankSum= |
| 42606 | chrY | 22242143 | . | A | G   | 53.21    | my_snp_filter | AC=2;AF=0.056;AN=36;BaseQ         |
| 42607 | chrY | 22242147 | . | G | A   | 61.50    | my_snp_filter | AC=3;AF=0.083;AN=36;BaseQ         |
| 42608 | chrY | 22242171 | . | T | G   | 35.34    | PASS          | AC=1;AF=0.028;AN=36;BaseQRankSum= |
| 42609 | chrY | 22242214 | . | T | C   | 32.42    | PASS          | AC=1;AF=0.033;AN=30;BaseQRankSum= |
| 42610 | chrY | 22242215 | . | A | C   | 32.35    | PASS          | AC=1;AF=0.033;AN=30;BaseQRankSum= |
| 42611 | chrY | 22242293 | . | T | A   | 181.27   | PASS          | AC=5;AF=0.147;AN=34;BaseQRankSum= |
| 42612 | chrY | 22242299 | . | A | C   | 73.91    | PASS          | AC=2;AF=0.042;AN=48;BaseQRankSum= |
| 42613 | chrY | 22242372 | . | C | G   | 50.19    | PASS          | AC=2;AF=0.063;AN=32;DP=324;FS=0.0 |
| 42614 | chrY | 22242390 | . | C | T   | 1529.94  | PASS          | AC=6;AF=0.103;AN=58;BaseQRankSum= |
| 42615 | chrY | 22242424 | . | A | C   | 202.52   | PASS          | AC=5;AF=0.100;AN=50;BaseQRankSum= |
| 42616 | chrY | 22242456 | . | A | G   | 61.11    | my_snp_filter | AC=4;AF=0.063;AN=64;BaseQ         |
| 42617 | chrY | 22242532 | . | A | G   | 2212.56  | PASS          | AC=10;AF=0.192;AN=52;BaseQRankSum |
| 42618 | chrY | 22242572 | . | G | A   | 863.70   | PASS          | AC=4;AF=0.074;AN=54;BaseQRankSum= |
| 42619 | chrY | 22242681 | . | C | G,* | 301.97   | PASS          | AC=3,1;AF=0.088,0.029;AN=34;BaseQ |
| 42620 | chrY | 22242700 | . | T | C,* | 284.81   | PASS          | AC=3,1;AF=0.088,0.029;AN=34;BaseQ |
| 42621 | chrY | 22242773 | . | G | A   | 554.44   | my_snp_filter | AC=6;AF=0.158;AN=38;BaseQ         |
| 42622 | chrY | 22242777 | . | A | T   | 867.28   | PASS          | AC=9;AF=0.281;AN=32;BaseQRankSum= |
| 42623 | chrY | 22242849 | . | A | G   | 52.38    | my_snp_filter | AC=2;AF=0.071;AN=28;BaseQ         |
| 42624 | chrY | 22242951 | . | G | A   | 310.80   | PASS          | AC=2;AF=0.067;AN=30;BaseQRankSum= |
| 42625 | chrY | 22243146 | . | A | G   | 44.83    | my_snp_filter | AC=3;AF=0.115;AN=26;BaseQ         |
| 42626 | chrY | 22243175 | . | T | C   | 2123.43  | PASS          | AC=18;AF=0.474;AN=38;BaseQRankSum |
| 42627 | chrY | 22243222 | . | G | T   | 89.72    | PASS          | AC=1;AF=0.016;AN=64;BaseQRankSum= |
| 42628 | chrY | 22243239 | . | A | T   | 81.02    | PASS          | AC=1;AF=0.016;AN=64;BaseQRankSum= |
| 42629 | chrY | 22243242 | . | C | T   | 80.83    | PASS          | AC=1;AF=0.015;AN=66;BaseQRankSum= |
| 42630 | chrY | 22243259 | . | A | G   | 82.71    | PASS          | AC=1;AF=0.015;AN=66;BaseQRankSum= |
| 42631 | chrY | 22243296 | . | T | G   | 86.12    | PASS          | AC=1;AF=0.015;AN=68;BaseQRankSum= |
| 42632 | chrY | 22243298 | . | T | A   | 86.04    | PASS          | AC=1;AF=0.014;AN=70;BaseQRankSum= |
| 42633 | chrY | 22243322 | . | C | A   | 101.82   | PASS          | AC=1;AF=0.014;AN=70;BaseQRankSum= |
| 42634 | chrY | 22243374 | . | G | A   | 26440.25 | PASS          | AC=55;AF=0.786;AN=70;Base         |
| 42635 | chrY | 22243389 | . | C | T   | 27492.96 | PASS          | AC=55;AF=0.786;AN=70;Base         |
| 42636 | chrY | 22243468 | . | C | A   | 1626.93  | PASS          | AC=3;AF=0.043;AN=70;BaseQRankSum= |

|       |      |          |   |   |     |          |                |                                    |
|-------|------|----------|---|---|-----|----------|----------------|------------------------------------|
| 42637 | chrY | 22243566 | . | C | T   | 15590.96 | PASS           | AC=46;AF=0.719;AN=64;BaseQ         |
| 42638 | chrY | 22243595 | . | G | A   | 23501.38 | PASS           | AC=44;AF=0.710;AN=62;BaseQ         |
| 42639 | chrY | 22243597 | . | A | G   | 23368.38 | PASS           | AC=44;AF=0.710;AN=62;BaseQ         |
| 42640 | chrY | 22243678 | . | C | A   | 932.62   | PASS           | AC=3;AF=0.043;AN=70;BaseQRankSum=  |
| 42641 | chrY | 22243714 | . | C | A   | 3828.85  | PASS           | AC=10;AF=0.156;AN=64;BaseQRankSum= |
| 42642 | chrY | 22243730 | . | G | A   | 17709.73 | PASS           | AC=35;AF=0.500;AN=70;BaseQ         |
| 42643 | chrY | 22243769 | . | T | C   | 27898.72 | PASS           | AC=35;AF=0.500;AN=70;BaseQ         |
| 42644 | chrY | 22243798 | . | G | A   | 31834.72 | PASS           | AC=35;AF=0.500;AN=70;BaseQ         |
| 42645 | chrY | 22243815 | . | C | T   | 29922.72 | PASS           | AC=35;AF=0.500;AN=70;BaseQ         |
| 42646 | chrY | 22243922 | . | A | C   | 9060.76  | PASS           | AC=31;AF=0.470;AN=66;BaseQRankSum= |
| 42647 | chrY | 22243989 | . | T | C   | 196.10   | PASS           | AC=1;AF=0.015;AN=68;BaseQRankSum=  |
| 42648 | chrY | 22244026 | . | A | G   | 2140.17  | PASS           | AC=9;AF=0.265;AN=34;BaseQRankSum=  |
| 42649 | chrY | 22244089 | . | A | C   | 1552.87  | PASS           | AC=6;AF=0.094;AN=64;BaseQRankSum=  |
| 42650 | chrY | 22244122 | . | G | C   | 1583.43  | PASS           | AC=3;AF=0.044;AN=68;BaseQRankSum=  |
| 42651 | chrY | 22244151 | . | A | T   | 980.53   | PASS           | AC=5;AF=0.078;AN=64;BaseQRankSum=  |
| 42652 | chrY | 22244163 | . | T | C   | 522.12   | PASS           | AC=3;AF=0.045;AN=66;BaseQRankSum=  |
| 42653 | chrY | 22244165 | . | A | G   | 586.01   | PASS           | AC=4;AF=0.061;AN=66;BaseQRankSum=  |
| 42654 | chrY | 22244169 | . | C | A   | 446.14   | PASS           | AC=3;AF=0.044;AN=68;BaseQRankSum=  |
| 42655 | chrY | 22244200 | . | A | C   | 444.36   | PASS           | AC=3;AF=0.063;AN=48;BaseQRankSum=  |
| 42656 | chrY | 22244211 | . | T | A   | 540.11   | PASS           | AC=3;AF=0.054;AN=56;BaseQRankSum=  |
| 42657 | chrY | 22244238 | . | T | A   | 171.96   | PASS           | AC=1;AF=0.015;AN=68;BaseQRankSum=  |
| 42658 | chrY | 22244242 | . | T | C   | 235.51   | PASS           | AC=1;AF=0.022;AN=46;BaseQRankSum=  |
| 42659 | chrY | 22244290 | . | G | C   | 4477.92  | PASS           | AC=16;AF=0.333;AN=48;BaseQRankSum= |
| 42660 | chrY | 22244317 | . | A | C   | 4631.91  | PASS           | AC=15;AF=0.288;AN=52;BaseQRankSum= |
| 42661 | chrY | 22244334 | . | C | T   | 1541.02  | PASS           | AC=7;AF=0.125;AN=56;BaseQRankSum=  |
| 42662 | chrY | 22244401 | . | A | T   | 5781.16  | PASS           | AC=18;AF=0.333;AN=54;BaseQRankSum= |
| 42663 | chrY | 22244410 | . | G | C   | 5973.79  | PASS           | AC=18;AF=0.346;AN=52;BaseQRankSum= |
| 42664 | chrY | 22244458 | . | A | G   | 3496.50  | PASS           | AC=14;AF=0.280;AN=50;BaseQRankSum= |
| 42665 | chrY | 22244514 | . | A | G,* | 1397.14  | PASS           | AC=8,1;AF=0.143,0.018;AN=56;BaseQ  |
| 42666 | chrY | 22244546 | . | T | A,* | 312.77   | PASS           | AC=3,1;AF=0.060,0.020;AN=50;BaseQ  |
| 42667 | chrY | 22244556 | . | C | C,* | 359.71   | PASS           | AC=4,1;AF=0.074,0.019;AN=54;BaseQ  |
| 42668 | chrY | 22244563 | . | T | C,* | 1084.40  | PASS           | AC=6,1;AF=0.111,0.019;AN=54;BaseQ  |
| 42669 | chrY | 22244572 | . | C | T   | 1672.46  | PASS           | AC=24;AF=0.545;AN=44;BaseQRankSum= |
| 42670 | chrY | 22244648 | . | A | T   | 34.94    | my_snps_filter | AC=1;AF=0.016;AN=62;BaseQ          |
| 42671 | chrY | 22244658 | . | A | C   | 37.66    | my_snps_filter | AC=1;AF=0.016;AN=62;BaseQ          |
| 42672 | chrY | 22244696 | . | A | T   | 1525.12  | PASS           | AC=8;AF=0.121;AN=66;BaseQRankSum=  |
| 42673 | chrY | 22244750 | . | G | T   | 1756.01  | PASS           | AC=19;AF=0.306;AN=62;BaseQRankSum= |
| 42674 | chrY | 22244785 | . | C | G   | 1718.44  | PASS           | AC=13;AF=0.203;AN=64;BaseQRankSum= |
| 42675 | chrY | 22244786 | . | T | C   | 1715.66  | PASS           | AC=13;AF=0.203;AN=64;BaseQRankSum= |
| 42676 | chrY | 22244804 | . | A | T   | 1130.01  | PASS           | AC=8;AF=0.125;AN=64;BaseQRankSum=  |
| 42677 | chrY | 22244824 | . | C | G   | 844.78   | PASS           | AC=7;AF=0.109;AN=64;BaseQRankSum=  |
| 42678 | chrY | 22244848 | . | T | G   | 818.54   | PASS           | AC=7;AF=0.109;AN=64;BaseQRankSum=  |
| 42679 | chrY | 22244849 | . | A | T   | 963.09   | PASS           | AC=8;AF=0.125;AN=64;BaseQRankSum=  |
| 42680 | chrY | 22244877 | . | A | G   | 9398     | PASS           | AC=55;AF=0.833;AN=66;BaseQRankSum= |
| 42681 | chrY | 22244895 | . | G | A   | 282.36   | PASS           | AC=3;AF=0.044;AN=68;BaseQRankSum=  |
| 42682 | chrY | 22244905 | . | G | A   | 1374.38  | PASS           | AC=17;AF=0.258;AN=66;BaseQRankSum= |
| 42683 | chrY | 22244926 | . | G | A,* | 5482.32  | PASS           | AC=12,36;AF=0.194,0.581;AN=62;Bas  |
| 42684 | chrY | 22244935 | . | T | A   | 943.28   | PASS           | AC=12;AF=0.182;AN=66;BaseQRankSum= |
| 42685 | chrY | 22244982 | . | G | C   | 183.69   | PASS           | AC=4;AF=1.00;AN=4;DP=5;FS=0.000;M  |
| 42686 | chrY | 22245749 | . | C | T   | 37.92    | PASS           | AC=1;AF=0.018;AN=56;BaseQRankSum=  |
| 42687 | chrY | 22245793 | . | C | A   | 58.25    | PASS           | AC=1;AF=0.016;AN=64;BaseQRankSum=  |
| 42688 | chrY | 22245825 | . | A | C   | 45.74    | PASS           | AC=1;AF=0.016;AN=62;BaseQRankSum=  |
| 42689 | chrY | 22245828 | . | T | G   | 43.88    | PASS           | AC=1;AF=0.015;AN=66;BaseQRankSum=  |
| 42690 | chrY | 22245832 | . | T | G   | 46.55    | PASS           | AC=1;AF=0.016;AN=62;BaseQRankSum=  |
| 42691 | chrY | 22245923 | . | A | G   | 1437.38  | PASS           | AC=6;AF=0.097;AN=62;DP=304;FS=0.0  |
| 42692 | chrY | 22245979 | . | A | T   | 5702.40  | PASS           | AC=35;AF=0.583;AN=60;BaseQRankSum= |
| 42693 | chrY | 22246045 | . | C | G   | 14184.95 | PASS           | AC=68;AF=1.00;AN=68;DP=45          |
| 42694 | chrY | 22246199 | . | G | A   | 15863.91 | PASS           | AC=64;AF=1.00;AN=64;DP=46          |
| 42695 | chrY | 22246220 | . | A | G   | 7839.33  | PASS           | AC=34;AF=0.531;AN=64;DP=426;FS=0.  |
| 42696 | chrY | 22246669 | . | A | G   | 11352.92 | PASS           | AC=65;AF=0.985;AN=66;BaseQ         |
| 42697 | chrY | 22246685 | . | C | G   | 2369.23  | PASS           | AC=6;AF=0.086;AN=70;DP=344;FS=2.8  |
| 42698 | chrY | 22246772 | . | G | C   | 88.98    | PASS           | AC=2;AF=0.031;AN=64;BaseQRankSum=  |
| 42699 | chrY | 22246818 | . | G | T   | 522.49   | PASS           | AC=5;AF=0.081;AN=62;BaseQRankSum=  |
| 42700 | chrY | 22246827 | . | T | C   | 1722.78  | PASS           | AC=25;AF=0.500;AN=50;BaseQRankSum= |
| 42701 | chrY | 22246834 | . | C | G   | 653.63   | PASS           | AC=6;AF=0.097;AN=62;BaseQRankSum=  |
| 42702 | chrY | 22246861 | . | C | A   | 32.74    | my_snps_filter | AC=2;AF=0.040;AN=50;BaseQ          |
| 42703 | chrY | 22246933 | . | C | T   | 107.68   | PASS           | AC=2;AF=0.032;AN=62;BaseQRankSum=  |
| 42704 | chrY | 22246951 | . | C | G   | 135.82   | PASS           | AC=2;AF=0.032;AN=62;BaseQRankSum=  |
| 42705 | chrY | 22246982 | . | T | G   | 128.82   | PASS           | AC=2;AF=0.056;AN=36;BaseQRankSum=  |
| 42706 | chrY | 22247002 | . | G | A   | 259.43   | PASS           | AC=6;AF=0.600;AN=10;BaseQRankSum=  |
| 42707 | chrY | 22247064 | . | T | G   | 93.80    | my_snps_filter | AC=1;AF=0.063;AN=16;BaseQ          |
| 42708 | chrY | 22247247 | . | T | A   | 745.02   | my_snps_filter | AC=6;AF=1.00;AN=6;DP=27;F          |
| 42709 | chrY | 22247270 | . | G | C   | 328.88   | my_snps_filter | AC=3;AF=0.500;AN=6;BaseQR          |
| 42710 | chrY | 22249832 | . | C | G   | 195.82   | my_snps_filter | AC=5;AF=0.179;AN=28;BaseQ          |
| 42711 | chrY | 22249882 | . | T | A   | 147.63   | PASS           | AC=2;AF=0.033;AN=60;BaseQRankSum=  |
| 42712 | chrY | 22249938 | . | A | G   | 1171.78  | my_snps_filter | AC=17;AF=0.283;AN=60;Base          |

|       |      |          |   |   |     |          |               |                                    |
|-------|------|----------|---|---|-----|----------|---------------|------------------------------------|
| 42713 | chrY | 22250000 | . | T | C   | 2795.12  | my_snp_filter | AC=23;AF=0.426;AN=54;BaseQ         |
| 42714 | chrY | 22250008 | . | G | A   | 911.11   | my_snp_filter | AC=12;AF=0.222;AN=54;BaseQ         |
| 42715 | chrY | 22250059 | . | T | A   | 133.75   | my_snp_filter | AC=3;AF=0.054;AN=56;BaseQ          |
| 42716 | chrY | 22250166 | . | T | A   | 33.27    | my_snp_filter | AC=2;AF=0.067;AN=30;BaseQ          |
| 42717 | chrY | 22250842 | . | C | T   | 146.63   | my_snp_filter | AC=2;AF=0.077;AN=26;BaseQ          |
| 42718 | chrY | 22251147 | . | C | T   | 42.01    | my_snp_filter | AC=3;AF=0.250;AN=12;BaseQ          |
| 42719 | chrY | 22251713 | . | C | G   | 341.87   | my_snp_filter | AC=6;AF=0.188;AN=32;DP=53          |
| 42720 | chrY | 22251944 | . | G | A   | 56.81    | my_snp_filter | AC=1;AF=0.016;AN=62;BaseQ          |
| 42721 | chrY | 22251945 | . | C | A   | 55.30    | my_snp_filter | AC=1;AF=0.016;AN=62;BaseQ          |
| 42722 | chrY | 22251946 | . | C | T   | 55.65    | my_snp_filter | AC=1;AF=0.016;AN=62;BaseQ          |
| 42723 | chrY | 22252084 | . | G | C   | 398.56   | my_snp_filter | AC=6;AF=0.111;AN=54;DP=17          |
| 42724 | chrY | 22252965 | . | G | T   | 74.98    | PASS          | AC=4;AF=1.00;AN=4;DP=5;FS=0.000;M  |
| 42725 | chrY | 22253090 | . | G | T   | 3591.15  | PASS          | AC=38;AF=1.00;AN=38;DP=148;FS=0.0  |
| 42726 | chrY | 22253170 | . | G | T   | 63.42    | my_snp_filter | AC=1;AF=0.017;AN=60;BaseQ          |
| 42727 | chrY | 22253173 | . | A | C   | 54.89    | my_snp_filter | AC=1;AF=0.033;AN=30;BaseQ          |
| 42728 | chrY | 22253181 | . | C | A   | 57.03    | PASS          | AC=2;AF=0.050;AN=40;DP=247;FS=0.0  |
| 42729 | chrY | 22253215 | . | G | T   | 283.54   | PASS          | AC=6;AF=0.103;AN=58;BaseQRankSum=  |
| 42730 | chrY | 22253248 | . | T | C   | 31.88    | my_snp_filter | AC=1;AF=0.016;AN=64;BaseQ          |
| 42731 | chrY | 22253250 | . | A | T   | 129.38   | PASS          | AC=1;AF=0.017;AN=60;BaseQRankSum=  |
| 42732 | chrY | 22253491 | . | C | T   | 2754.97  | PASS          | AC=24;AF=0.429;AN=56;BaseQRankSum= |
| 42733 | chrY | 22253516 | . | C | T   | 427.26   | PASS          | AC=6;AF=0.097;AN=62;DP=340;FS=0.0  |
| 42734 | chrY | 22253527 | . | C | T   | 37.21    | PASS          | AC=1;AF=0.016;AN=64;BaseQRankSum=  |
| 42735 | chrY | 22253683 | . | A | T   | 5934.16  | PASS          | AC=36;AF=0.600;AN=60;DP=452;FS=0.  |
| 42736 | chrY | 22253976 | . | T | C   | 19828.57 | PASS          | AC=65;AF=0.929;AN=70;BaseQ         |
| 42737 | chrY | 22254172 | . | T | C   | 493.37   | PASS          | AC=6;AF=0.094;AN=64;DP=319;FS=0.0  |
| 42738 | chrY | 22254173 | . | G | T   | 3097.94  | PASS          | AC=40;AF=0.690;AN=58;DP=316;FS=0.  |
| 42739 | chrY | 22254313 | . | A | T   | 383.16   | my_snp_filter | AC=2;AF=0.067;AN=30;BaseQ          |
| 42740 | chrY | 22254490 | . | A | T   | 294.60   | PASS          | AC=1;AF=0.016;AN=64;BaseQRankSum=  |
| 42741 | chrY | 22254494 | . | C | A   | 109.84   | PASS          | AC=1;AF=0.016;AN=64;BaseQRankSum=  |
| 42742 | chrY | 22254503 | . | C | G   | 110.44   | PASS          | AC=1;AF=0.015;AN=66;BaseQRankSum=  |
| 42743 | chrY | 22254515 | . | A | G   | 110.36   | PASS          | AC=1;AF=0.014;AN=70;BaseQRankSum=  |
| 42744 | chrY | 22254518 | . | A | T   | 110.04   | PASS          | AC=1;AF=0.014;AN=70;BaseQRankSum=  |
| 42745 | chrY | 22254547 | . | T | G   | 254.19   | PASS          | AC=3;AF=0.044;AN=68;BaseQRankSum=  |
| 42746 | chrY | 22254606 | . | A | T   | 1190.12  | PASS          | AC=14;AF=0.212;AN=66;BaseQRankSum= |
| 42747 | chrY | 22254614 | . | G | C   | 396.71   | PASS          | AC=4;AF=0.061;AN=66;BaseQRankSum=  |
| 42748 | chrY | 22254623 | . | C | G   | 449.92   | PASS          | AC=4;AF=0.063;AN=64;BaseQRankSum=  |
| 42749 | chrY | 22254639 | . | G | C   | 503.59   | PASS          | AC=6;AF=0.094;AN=64;BaseQRankSum=  |
| 42750 | chrY | 22254661 | . | C | T   | 208.66   | PASS          | AC=1;AF=0.016;AN=64;BaseQRankSum=  |
| 42751 | chrY | 22254669 | . | T | A   | 186.95   | PASS          | AC=2;AF=0.032;AN=62;BaseQRankSum=  |
| 42752 | chrY | 22254750 | . | A | C   | 600.43   | PASS          | AC=3;AF=0.050;AN=60;BaseQRankSum=  |
| 42753 | chrY | 22254823 | . | G | A   | 4239.83  | PASS          | AC=33;AF=0.550;AN=60;BaseQRankSum= |
| 42754 | chrY | 22254982 | . | C | A   | 165.09   | PASS          | AC=1;AF=0.017;AN=60;BaseQRankSum=  |
| 42755 | chrY | 22255293 | . | C | G   | 3432.24  | PASS          | AC=26;AF=0.520;AN=50;DP=415;FS=0.  |
| 42756 | chrY | 22255295 | . | A | G   | 7098.64  | PASS          | AC=44;AF=0.957;AN=46;BaseQRankSum= |
| 42757 | chrY | 22255318 | . | A | G   | 135.69   | PASS          | AC=1;AF=0.016;AN=62;BaseQRankSum=  |
| 42758 | chrY | 22255378 | . | A | G   | 159.85   | PASS          | AC=2;AF=0.036;AN=56;BaseQRankSum=  |
| 42759 | chrY | 22255446 | . | A | G   | 76.80    | PASS          | AC=1;AF=0.015;AN=66;BaseQRankSum=  |
| 42760 | chrY | 22255457 | . | G | T   | 68.90    | PASS          | AC=1;AF=0.015;AN=66;BaseQRankSum=  |
| 42761 | chrY | 22255459 | . | C | A   | 65.05    | PASS          | AC=1;AF=0.015;AN=66;BaseQRankSum=  |
| 42762 | chrY | 22255467 | . | G | C   | 55.70    | my_snp_filter | AC=2;AF=0.030;AN=66;DP=62          |
| 42763 | chrY | 22255472 | . | G | T   | 65.12    | PASS          | AC=2;AF=0.031;AN=64;BaseQRankSum=  |
| 42764 | chrY | 22255480 | . | C | T   | 54.72    | my_snp_filter | AC=2;AF=0.030;AN=66;DP=62          |
| 42765 | chrY | 22255483 | . | T | C   | 56.60    | my_snp_filter | AC=2;AF=0.030;AN=66;DP=59          |
| 42766 | chrY | 22255529 | . | G | T   | 104.55   | PASS          | AC=1;AF=0.017;AN=60;BaseQRankSum=  |
| 42767 | chrY | 22255562 | . | A | G   | 126.75   | PASS          | AC=1;AF=0.016;AN=64;BaseQRankSum=  |
| 42768 | chrY | 22255744 | . | T | A   | 9720.96  | PASS          | AC=58;AF=1.00;AN=58;BaseQRankSum=  |
| 42769 | chrY | 22255778 | . | T | G   | 336.88   | PASS          | AC=4;AF=0.080;AN=50;BaseQRankSum=  |
| 42770 | chrY | 22255832 | . | T | A,G | 3707.63  | my_snp_filter | AC=12,12;AF=0.200,0.200;A          |
| 42771 | chrY | 22255846 | . | T | G   | 2855.35  | my_snp_filter | AC=14;AF=0.206;AN=68;BaseQ         |
| 42772 | chrY | 22255861 | . | A | C   | 1506.66  | PASS          | AC=13;AF=0.186;AN=70;BaseQRankSum= |
| 42773 | chrY | 22255870 | . | T | G   | 213.99   | my_snp_filter | AC=7;AF=0.100;AN=70;BaseQ          |
| 42774 | chrY | 22255871 | . | G | A   | 216.23   | my_snp_filter | AC=7;AF=0.100;AN=70;BaseQ          |
| 42775 | chrY | 22255893 | . | T | C   | 39.07    | PASS          | AC=2;AF=0.029;AN=70;BaseQRankSum=  |
| 42776 | chrY | 22255903 | . | T | G   | 58.63    | PASS          | AC=1;AF=0.014;AN=70;BaseQRankSum=  |
| 42777 | chrY | 22255904 | . | A | T   | 50.20    | my_snp_filter | AC=2;AF=0.029;AN=70;BaseQ          |
| 42778 | chrY | 22255906 | . | T | C   | 34.91    | PASS          | AC=1;AF=0.014;AN=70;BaseQRankSum=  |
| 42779 | chrY | 22255938 | . | G | C   | 4330.32  | PASS          | AC=22;AF=0.379;AN=58;BaseQRankSum= |
| 42780 | chrY | 22255992 | . | G | T   | 4726.18  | PASS          | AC=16;AF=0.286;AN=56;BaseQRankSum= |
| 42781 | chrY | 22256015 | . | C | G   | 4804.76  | PASS          | AC=13;AF=0.232;AN=56;BaseQRankSum= |
| 42782 | chrY | 22256022 | . | T | A   | 4645.63  | PASS          | AC=11;AF=0.177;AN=62;BaseQRankSum= |
| 42783 | chrY | 22256036 | . | T | C   | 4074.60  | PASS          | AC=11;AF=0.177;AN=62;BaseQRankSum= |
| 42784 | chrY | 22256043 | . | C | G   | 3858.26  | PASS          | AC=11;AF=0.177;AN=62;BaseQRankSum= |
| 42785 | chrY | 22256061 | . | A | T   | 3226.07  | PASS          | AC=9;AF=0.145;AN=62;BaseQRankSum=  |
| 42786 | chrY | 22256102 | . | G | T   | 36.91    | PASS          | AC=2;AF=0.030;AN=66;BaseQRankSum=  |
| 42787 | chrY | 22256105 | . | T | C   | 649.16   | PASS          | AC=5;AF=0.076;AN=66;BaseQRankSum=  |
| 42788 | chrY | 22256110 | . | C | A   | 47.71    | my_snp_filter | AC=2;AF=0.030;AN=66;BaseQ          |

|       |      |          |   |   |   |          |               |                                    |
|-------|------|----------|---|---|---|----------|---------------|------------------------------------|
| 42789 | chrY | 22256114 | . | A | G | 2473.62  | PASS          | AC=12;AF=0.182;AN=66;BaseQRankSum= |
| 42790 | chrY | 22256123 | . | T | A | 2464.36  | PASS          | AC=12;AF=0.182;AN=66;BaseQRankSum= |
| 42791 | chrY | 22256127 | . | A | T | 2452.09  | PASS          | AC=12;AF=0.171;AN=70;BaseQRankSum= |
| 42792 | chrY | 22256137 | . | T | A | 2333.71  | PASS          | AC=12;AF=0.171;AN=70;BaseQRankSum= |
| 42793 | chrY | 22256173 | . | G | T | 106.06   | my_snp_filter | AC=5;AF=0.071;AN=70;BaseQ          |
| 42794 | chrY | 22256241 | . | A | T | 83.62    | PASS          | AC=1;AF=0.014;AN=70;BaseQRankSum=  |
| 42795 | chrY | 22256365 | . | G | C | 17930.47 | PASS          | AC=58;AF=0.829;AN=70;DP=6          |
| 42796 | chrY | 22256449 | . | T | C | 1021.02  | PASS          | AC=10;AF=0.143;AN=70;BaseQRankSum= |
| 42797 | chrY | 22256455 | . | G | T | 1119.14  | PASS          | AC=10;AF=0.143;AN=70;BaseQRankSum= |
| 42798 | chrY | 22256479 | . | T | G | 1831.29  | PASS          | AC=11;AF=0.157;AN=70;BaseQRankSum= |
| 42799 | chrY | 22256496 | . | T | G | 1539.59  | PASS          | AC=9;AF=0.129;AN=70;BaseQRankSum=  |
| 42800 | chrY | 22256515 | . | G | C | 8142.90  | PASS          | AC=28;AF=0.424;AN=66;BaseQRankSum= |
| 42801 | chrY | 22256574 | . | C | G | 88.37    | PASS          | AC=1;AF=0.015;AN=68;BaseQRankSum=  |
| 42802 | chrY | 22256588 | . | C | T | 101.21   | PASS          | AC=1;AF=0.016;AN=64;BaseQRankSum=  |
| 42803 | chrY | 22256602 | . | G | A | 104.03   | PASS          | AC=1;AF=0.016;AN=64;BaseQRankSum=  |
| 42804 | chrY | 22256617 | . | T | G | 103.76   | PASS          | AC=1;AF=0.016;AN=64;BaseQRankSum=  |
| 42805 | chrY | 22256622 | . | G | A | 106.68   | PASS          | AC=1;AF=0.016;AN=64;BaseQRankSum=  |
| 42806 | chrY | 22256624 | . | A | G | 109.89   | PASS          | AC=1;AF=0.016;AN=64;BaseQRankSum=  |
| 42807 | chrY | 22256646 | . | G | T | 8014.13  | PASS          | AC=62;AF=1.00;AN=62;DP=233;FS=0.0  |
| 42808 | chrY | 22256663 | . | T | C | 2512.66  | PASS          | AC=6;AF=0.091;AN=66;DP=260;FS=0.0  |
| 42809 | chrY | 22256731 | . | G | T | 826.41   | PASS          | AC=6;AF=0.097;AN=62;DP=333;FS=0.0  |
| 42810 | chrY | 22257455 | . | T | G | 591.35   | my_snp_filter | AC=11;AF=0.172;AN=64;BaseQ         |
| 42811 | chrY | 22257484 | . | C | G | 634.02   | my_snp_filter | AC=13;AF=0.210;AN=62;BaseQ         |
| 42812 | chrY | 22257523 | . | T | A | 751.85   | my_snp_filter | AC=12;AF=0.194;AN=62;BaseQ         |
| 42813 | chrY | 22257525 | . | G | T | 746.78   | my_snp_filter | AC=12;AF=0.194;AN=62;BaseQ         |
| 42814 | chrY | 22257537 | . | A | G | 535.63   | my_snp_filter | AC=9;AF=0.161;AN=56;BaseQ          |
| 42815 | chrY | 22257553 | . | C | A | 34.59    | my_snp_filter | AC=2;AF=0.037;AN=54;BaseQ          |
| 42816 | chrY | 22257561 | . | C | A | 30.89    | my_snp_filter | AC=1;AF=0.018;AN=56;BaseQ          |
| 42817 | chrY | 22257819 | . | T | A | 39.88    | PASS          | AC=1;AF=0.016;AN=62;BaseQRankSum=  |
| 42818 | chrY | 22257827 | . | T | G | 269.26   | PASS          | AC=5;AF=0.086;AN=58;BaseQRankSum=  |
| 42819 | chrY | 22258059 | . | A | T | 246.64   | PASS          | AC=5;AF=0.086;AN=58;BaseQRankSum=  |
| 42820 | chrY | 22258098 | . | C | T | 66.40    | PASS          | AC=1;AF=0.016;AN=62;BaseQRankSum=  |
| 42821 | chrY | 22258131 | . | G | A | 68.59    | PASS          | AC=2;AF=0.033;AN=60;BaseQRankSum=  |
| 42822 | chrY | 22258136 | . | C | A | 77.85    | PASS          | AC=2;AF=0.033;AN=60;BaseQRankSum=  |
| 42823 | chrY | 22258144 | . | G | A | 30.69    | PASS          | AC=1;AF=0.017;AN=60;BaseQRankSum=  |
| 42824 | chrY | 22258162 | . | T | C | 119.20   | my_snp_filter | AC=2;AF=0.056;AN=36;DP=77          |
| 42825 | chrY | 22258163 | . | A | T | 2148.34  | PASS          | AC=28;AF=1.00;AN=28;DP=73;FS=0.00  |
| 42826 | chrY | 22258168 | . | G | C | 1810.50  | my_snp_filter | AC=26;AF=0.867;AN=30;DP=5          |
| 42827 | chrY | 22258190 | . | T | C | 370.14   | PASS          | AC=6;AF=0.600;AN=10;DP=18;FS=0.00  |
| 42828 | chrY | 22258221 | . | T | G | 54.57    | my_snp_filter | AC=1;AF=0.167;AN=6;BaseQR          |
| 42829 | chrY | 22258247 | . | C | T | 282.78   | PASS          | AC=11;AF=0.550;AN=20;BaseQRankSum= |
| 42830 | chrY | 22258367 | . | G | C | 1864.11  | PASS          | AC=16;AF=1.00;AN=16;DP=47;FS=0.00  |
| 42831 | chrY | 22258368 | . | A | T | 1864.11  | PASS          | AC=16;AF=1.00;AN=16;DP=48;FS=0.00  |
| 42832 | chrY | 22258383 | . | T | C | 1889.10  | PASS          | AC=16;AF=1.00;AN=16;DP=45;FS=0.00  |
| 42833 | chrY | 22258385 | . | G | C | 1889.10  | PASS          | AC=16;AF=1.00;AN=16;DP=46;FS=0.00  |
| 42834 | chrY | 22258468 | . | T | A | 33.07    | PASS          | AC=1;AF=0.045;AN=22;BaseQRankSum=  |
| 42835 | chrY | 22258511 | . | G | C | 617.04   | my_snp_filter | AC=6;AF=0.333;AN=18;BaseQ          |
| 42836 | chrY | 22258516 | . | C | G | 646.07   | my_snp_filter | AC=6;AF=0.300;AN=20;BaseQ          |
| 42837 | chrY | 22258654 | . | T | C | 288.95   | my_snp_filter | AC=5;AF=0.086;AN=58;BaseQ          |
| 42838 | chrY | 22258686 | . | T | G | 218.98   | my_snp_filter | AC=3;AF=0.050;AN=60;BaseQ          |
| 42839 | chrY | 22258726 | . | A | T | 47       | my_snp_filter | AC=2;AF=0.033;AN=60;BaseQ          |
| 42840 | chrY | 22258730 | . | T | C | 41.21    | my_snp_filter | AC=2;AF=0.032;AN=62;BaseQ          |
| 42841 | chrY | 22258738 | . | G | C | 46.74    | my_snp_filter | AC=2;AF=0.033;AN=60;BaseQ          |
| 42842 | chrY | 22258756 | . | C | T | 48.79    | my_snp_filter | AC=2;AF=0.033;AN=60;BaseQ          |
| 42843 | chrY | 22258776 | . | G | T | 64.32    | PASS          | AC=3;AF=0.050;AN=60;BaseQRankSum=  |
| 42844 | chrY | 22258817 | . | A | T | 170.36   | PASS          | AC=5;AF=0.086;AN=58;BaseQRankSum=  |
| 42845 | chrY | 22258952 | . | A | C | 621.47   | PASS          | AC=8;AF=1.00;AN=8;DP=22;FS=0.000;  |
| 42846 | chrY | 22258953 | . | T | C | 621.47   | PASS          | AC=8;AF=1.00;AN=8;DP=21;FS=0.000;  |
| 42847 | chrY | 22258963 | . | T | C | 241.66   | my_snp_filter | AC=4;AF=0.667;AN=6;DP=11;          |
| 42848 | chrY | 22258978 | . | G | C | 112.20   | my_snp_filter | AC=2;AF=0.500;AN=4;DP=8;F          |
| 42849 | chrY | 22259014 | . | A | C | 256.89   | my_snp_filter | AC=8;AF=0.800;AN=10;DP=27          |
| 42850 | chrY | 22259090 | . | C | T | 41.43    | PASS          | AC=1;AF=0.015;AN=66;BaseQRankSum=  |
| 42851 | chrY | 22259094 | . | T | G | 41.35    | PASS          | AC=1;AF=0.015;AN=66;BaseQRankSum=  |
| 42852 | chrY | 22259222 | . | G | C | 8180.95  | my_snp_filter | AC=56;AF=1.00;AN=56;DP=28          |
| 42853 | chrY | 22259311 | . | C | G | 271.97   | PASS          | AC=1;AF=0.015;AN=68;BaseQRankSum=  |
| 42854 | chrY | 22259340 | . | C | A | 70.06    | PASS          | AC=2;AF=0.033;AN=60;BaseQRankSum=  |
| 42855 | chrY | 22259479 | . | T | G | 3741.07  | PASS          | AC=17;AF=0.243;AN=70;BaseQRankSum= |
| 42856 | chrY | 22259500 | . | T | C | 8059.62  | PASS          | AC=26;AF=0.371;AN=70;BaseQRankSum= |
| 42857 | chrY | 22259516 | . | T | C | 701.39   | PASS          | AC=2;AF=0.029;AN=70;BaseQRankSum=  |
| 42858 | chrY | 22259519 | . | G | A | 397.42   | PASS          | AC=1;AF=0.014;AN=70;BaseQRankSum=  |
| 42859 | chrY | 22259520 | . | G | T | 15485.97 | PASS          | AC=34;AF=0.486;AN=70;BaseQ         |
| 42860 | chrY | 22259538 | . | A | T | 161.61   | PASS          | AC=2;AF=0.029;AN=70;BaseQRankSum=  |
| 42861 | chrY | 22259577 | . | C | T | 113.34   | PASS          | AC=2;AF=0.029;AN=70;BaseQRankSum=  |
| 42862 | chrY | 22259587 | . | T | C | 5217.80  | PASS          | AC=30;AF=0.429;AN=70;BaseQRankSum= |
| 42863 | chrY | 22259599 | . | G | T | 1640.70  | PASS          | AC=14;AF=0.200;AN=70;BaseQRankSum= |
| 42864 | chrY | 22259633 | . | C | T | 3824.43  | PASS          | AC=23;AF=0.338;AN=68;BaseQRankSum= |

|       |      |          |   |   |     |          |               |                                            |
|-------|------|----------|---|---|-----|----------|---------------|--------------------------------------------|
| 42865 | chrY | 22259652 | . | T | G   | 403.72   | PASS          | AC=3;AF=0.044;AN=68;BaseQRankSum=          |
| 42866 | chrY | 22259657 | . | A | G   | 3009.04  | PASS          | AC=13;AF=0.197;AN=66;BaseQRankSum=         |
| 42867 | chrY | 22259728 | . | A | C   | 5327.87  | my_snp_filter | AC=29;AF=0.518;AN=56;BaseQRankSum=         |
| 42868 | chrY | 22259729 | . | T | C   | 15965.11 | my_snp_filter | AC=53;AF=0.946;AN=66;BaseQRankSum=         |
| 42869 | chrY | 22259785 | . | C | A   | 2328.96  | PASS          | AC=6;AF=0.086;AN=70;BaseQRankSum=          |
| 42870 | chrY | 22259798 | . | T | G   | 744.50   | PASS          | AC=3;AF=0.043;AN=70;BaseQRankSum=          |
| 42871 | chrY | 22259810 | . | G | C   | 2469.46  | PASS          | AC=18;AF=0.257;AN=70;BaseQRankSum=         |
| 42872 | chrY | 22259839 | . | C | T,A | 7119.39  | PASS          | AC=27,1;AF=0.409,0.015;AN=66;BaseQRankSum= |
| 42873 | chrY | 22259923 | . | T | A   | 368.65   | PASS          | AC=3;AF=0.043;AN=70;BaseQRankSum=          |
| 42874 | chrY | 22259924 | . | G | A   | 48.67    | my_snp_filter | AC=1;AF=0.014;AN=70;BaseQRankSum=          |
| 42875 | chrY | 22259935 | . | G | T   | 388.52   | PASS          | AC=3;AF=0.043;AN=70;BaseQRankSum=          |
| 42876 | chrY | 22259947 | . | G | A   | 283.22   | PASS          | AC=2;AF=0.029;AN=70;BaseQRankSum=          |
| 42877 | chrY | 22259951 | . | C | G   | 213.43   | PASS          | AC=1;AF=0.014;AN=70;BaseQRankSum=          |
| 42878 | chrY | 22259957 | . | T | G   | 457.53   | PASS          | AC=3;AF=0.043;AN=70;BaseQRankSum=          |
| 42879 | chrY | 22259988 | . | G | T   | 323.56   | PASS          | AC=3;AF=0.043;AN=70;BaseQRankSum=          |
| 42880 | chrY | 22260002 | . | A | G   | 14272.56 | PASS          | AC=34;AF=0.486;AN=70;BaseQRankSum=         |
| 42881 | chrY | 22260047 | . | A | G   | 5490.99  | PASS          | AC=20;AF=0.286;AN=70;BaseQRankSum=         |
| 42882 | chrY | 22260060 | . | G | T   | 15070.05 | PASS          | AC=29;AF=0.439;AN=66;BaseQRankSum=         |
| 42883 | chrY | 22260071 | . | G | T   | 718.45   | PASS          | AC=7;AF=0.103;AN=68;BaseQRankSum=          |
| 42884 | chrY | 22260072 | . | G | C   | 6019.90  | PASS          | AC=19;AF=0.271;AN=70;BaseQRankSum=         |
| 42885 | chrY | 22260089 | . | C | T   | 6780.09  | PASS          | AC=27;AF=0.386;AN=70;BaseQRankSum=         |
| 42886 | chrY | 22260119 | . | C | G   | 662.49   | PASS          | AC=3;AF=0.043;AN=70;BaseQRankSum=          |
| 42887 | chrY | 22260122 | . | G | C   | 73.36    | my_snp_filter | AC=3;AF=0.043;AN=70;BaseQRankSum=          |
| 42888 | chrY | 22260153 | . | T | C   | 335.06   | my_snp_filter | AC=6;AF=0.086;AN=70;BaseQRankSum=          |
| 42889 | chrY | 22260185 | . | G | T   | 2749.06  | PASS          | AC=17;AF=0.243;AN=70;BaseQRankSum=         |
| 42890 | chrY | 22260187 | . | T | G   | 1177.28  | PASS          | AC=10;AF=0.143;AN=70;BaseQRankSum=         |
| 42891 | chrY | 22260197 | . | G | A   | 23300.32 | PASS          | AC=27;AF=0.422;AN=64;BaseQRankSum=         |
| 42892 | chrY | 22260221 | . | C | A   | 637.84   | PASS          | AC=4;AF=0.057;AN=70;BaseQRankSum=          |
| 42893 | chrY | 22260229 | . | T | C   | 1153.19  | PASS          | AC=8;AF=0.114;AN=70;BaseQRankSum=          |
| 42894 | chrY | 22260237 | . | C | T   | 5243.71  | PASS          | AC=18;AF=0.257;AN=70;BaseQRankSum=         |
| 42895 | chrY | 22260238 | . | T | C   | 324.02   | my_snp_filter | AC=3;AF=0.043;AN=70;BaseQRankSum=          |
| 42896 | chrY | 22260255 | . | C | T   | 517.85   | PASS          | AC=4;AF=0.059;AN=68;BaseQRankSum=          |
| 42897 | chrY | 22260275 | . | G | T   | 36.41    | my_snp_filter | AC=1;AF=0.015;AN=68;BaseQRankSum=          |
| 42898 | chrY | 22260315 | . | G | T   | 9825.23  | PASS          | AC=25;AF=0.391;AN=64;BaseQRankSum=         |
| 42899 | chrY | 22260348 | . | G | T   | 2110     | PASS          | AC=9;AF=0.132;AN=68;BaseQRankSum=          |
| 42900 | chrY | 22260426 | . | C | T   | 2131.60  | PASS          | AC=11;AF=0.172;AN=64;BaseQRankSum=         |
| 42901 | chrY | 22260432 | . | G | T   | 4171.45  | PASS          | AC=11;AF=0.196;AN=56;BaseQRankSum=         |
| 42902 | chrY | 22260433 | . | T | A   | 2216.87  | PASS          | AC=10;AF=0.179;AN=56;BaseQRankSum=         |
| 42903 | chrY | 22260435 | . | G | C   | 2022.61  | PASS          | AC=10;AF=0.156;AN=64;BaseQRankSum=         |
| 42904 | chrY | 22260439 | . | C | G   | 82.88    | PASS          | AC=1;AF=0.015;AN=66;BaseQRankSum=          |
| 42905 | chrY | 22260519 | . | G | T   | 147.17   | PASS          | AC=3;AF=0.048;AN=62;BaseQRankSum=          |
| 42906 | chrY | 22260556 | . | A | G   | 910.70   | my_snp_filter | AC=10;AF=0.238;AN=42;BaseQRankSum=         |
| 42907 | chrY | 22260577 | . | C | T   | 162.97   | my_snp_filter | AC=2;AF=0.048;AN=42;BaseQRankSum=          |
| 42908 | chrY | 22260581 | . | A | G   | 167.96   | my_snp_filter | AC=2;AF=0.053;AN=38;BaseQRankSum=          |
| 42909 | chrY | 22260591 | . | T | A   | 178.46   | my_snp_filter | AC=3;AF=0.083;AN=36;BaseQRankSum=          |
| 42910 | chrY | 22260592 | . | T | C   | 707.21   | my_snp_filter | AC=7;AF=0.206;AN=34;BaseQRankSum=          |
| 42911 | chrY | 22260598 | . | G | T   | 56.59    | my_snp_filter | AC=2;AF=0.071;AN=28;BaseQRankSum=          |
| 42912 | chrY | 22260604 | . | T | C   | 37.95    | my_snp_filter | AC=1;AF=0.042;AN=24;BaseQRankSum=          |
| 42913 | chrY | 22260614 | . | T | C   | 41.26    | my_snp_filter | AC=1;AF=0.056;AN=18;BaseQRankSum=          |
| 42914 | chrY | 22260663 | . | G | A   | 970.37   | my_snp_filter | AC=12;AF=0.857;AN=14;DP=3                  |
| 42915 | chrY | 22260679 | . | G | C   | 54.52    | PASS          | AC=2;AF=0.111;AN=18;DP=41;FS=0.00          |
| 42916 | chrY | 22260692 | . | T | C   | 596.35   | my_snp_filter | AC=8;AF=1.00;AN=8;DP=30;FS=0.00            |
| 42917 | chrY | 22260702 | . | T | C   | 150.52   | my_snp_filter | AC=2;AF=0.111;AN=18;DP=52                  |
| 42918 | chrY | 22260813 | . | G | T   | 60.32    | PASS          | AC=2;AF=0.048;AN=42;DP=177;FS=0.00         |
| 42919 | chrY | 22260859 | . | T | G   | 44.27    | PASS          | AC=2;AF=0.033;AN=60;BaseQRankSum=          |
| 42920 | chrY | 22260924 | . | G | T   | 54.41    | PASS          | AC=2;AF=0.029;AN=68;BaseQRankSum=          |
| 42921 | chrY | 22260962 | . | T | C   | 227.34   | PASS          | AC=4;AF=0.057;AN=70;BaseQRankSum=          |
| 42922 | chrY | 22260966 | . | T | C   | 143.24   | PASS          | AC=2;AF=0.029;AN=68;BaseQRankSum=          |
| 42923 | chrY | 22260997 | . | C | T   | 207.21   | my_snp_filter | AC=5;AF=0.071;AN=70;BaseQRankSum=          |
| 42924 | chrY | 22261044 | . | A | G   | 44       | my_snp_filter | AC=2;AF=0.030;AN=66;BaseQRankSum=          |
| 42925 | chrY | 22261055 | . | C | A   | 312.21   | PASS          | AC=9;AF=0.136;AN=66;BaseQRankSum=          |
| 42926 | chrY | 22261064 | . | T | G   | 93.08    | PASS          | AC=5;AF=0.071;AN=70;BaseQRankSum=          |
| 42927 | chrY | 22261170 | . | G | A   | 436.34   | PASS          | AC=4;AF=0.061;AN=66;BaseQRankSum=          |
| 42928 | chrY | 22261181 | . | C | A   | 498.21   | PASS          | AC=6;AF=0.091;AN=66;BaseQRankSum=          |
| 42929 | chrY | 22261418 | . | G | A   | 416.66   | PASS          | AC=4;AF=0.065;AN=62;BaseQRankSum=          |
| 42930 | chrY | 22261558 | . | G | A   | 2657.76  | PASS          | AC=20;AF=0.313;AN=64;BaseQRankSum=         |
| 42931 | chrY | 22261608 | . | G | T   | 54.75    | PASS          | AC=2;AF=0.029;AN=68;BaseQRankSum=          |
| 42932 | chrY | 22261622 | . | T | C   | 4222.54  | PASS          | AC=31;AF=0.484;AN=64;BaseQRankSum=         |
| 42933 | chrY | 22261675 | . | G | A   | 6531.48  | PASS          | AC=19;AF=0.328;AN=58;BaseQRankSum=         |
| 42934 | chrY | 22261688 | . | G | A   | 6592.31  | PASS          | AC=17;AF=0.283;AN=60;BaseQRankSum=         |
| 42935 | chrY | 22261766 | . | C | T   | 4791.01  | PASS          | AC=28;AF=0.452;AN=62;BaseQRankSum=         |
| 42936 | chrY | 22261838 | . | C | T   | 474      | PASS          | AC=3;AF=0.045;AN=66;BaseQRankSum=          |
| 42937 | chrY | 22261858 | . | G | T   | 8555.61  | PASS          | AC=24;AF=0.400;AN=60;BaseQRankSum=         |
| 42938 | chrY | 22261902 | . | T | G   | 8716.91  | PASS          | AC=18;AF=0.300;AN=60;BaseQRankSum=         |
| 42939 | chrY | 22261913 | . | T | C   | 8297.04  | PASS          | AC=18;AF=0.321;AN=56;BaseQRankSum=         |
| 42940 | chrY | 22261970 | . | T | A   | 763.04   | PASS          | AC=3;AF=0.047;AN=64;BaseQRankSum=          |

|       |      |          |   |   |     |          |               |                                    |
|-------|------|----------|---|---|-----|----------|---------------|------------------------------------|
| 42941 | chrY | 22261985 | . | C | A   | 6392.68  | PASS          | AC=24;AF=0.364;AN=66;BaseQRankSum= |
| 42942 | chrY | 22262017 | . | T | G   | 811.23   | PASS          | AC=3;AF=0.045;AN=66;BaseQRankSum=  |
| 42943 | chrY | 22262030 | . | T | C   | 257.79   | PASS          | AC=3;AF=0.045;AN=66;BaseQRankSum=  |
| 42944 | chrY | 22262057 | . | C | A   | 411.51   | PASS          | AC=4;AF=0.063;AN=64;BaseQRankSum=  |
| 42945 | chrY | 22262062 | . | G | C   | 46.62    | PASS          | AC=1;AF=0.015;AN=68;BaseQRankSum=  |
| 42946 | chrY | 22262145 | . | T | C   | 66.71    | my_snp_filter | AC=3;AF=0.043;AN=70;BaseQ          |
| 42947 | chrY | 22262162 | . | A | C   | 118.64   | PASS          | AC=3;AF=0.043;AN=70;BaseQRankSum=  |
| 42948 | chrY | 22262199 | . | G | T   | 100.49   | my_snp_filter | AC=3;AF=0.043;AN=70;BaseQ          |
| 42949 | chrY | 22262201 | . | C | G   | 7935.47  | PASS          | AC=24;AF=0.343;AN=70;BaseQRankSum= |
| 42950 | chrY | 22262218 | . | T | C   | 132.48   | my_snp_filter | AC=7;AF=0.100;AN=70;BaseQ          |
| 42951 | chrY | 22262437 | . | T | A   | 22719.73 | PASS          | AC=35;AF=0.500;AN=70;BaseQ         |
| 42952 | chrY | 22262459 | . | G | C   | 20919.72 | PASS          | AC=35;AF=0.500;AN=70;BaseQ         |
| 42953 | chrY | 22262478 | . | T | G   | 16152.72 | PASS          | AC=35;AF=0.500;AN=70;BaseQ         |
| 42954 | chrY | 22262502 | . | A | G   | 12772.72 | PASS          | AC=35;AF=0.500;AN=70;BaseQ         |
| 42955 | chrY | 22262545 | . | T | A   | 6635.57  | PASS          | AC=25;AF=0.357;AN=70;BaseQRankSum= |
| 42956 | chrY | 22262577 | . | A | G   | 3612.83  | PASS          | AC=18;AF=0.257;AN=70;BaseQRankSum= |
| 42957 | chrY | 22262580 | . | T | C   | 3186.56  | PASS          | AC=19;AF=0.271;AN=70;BaseQRankSum= |
| 42958 | chrY | 22262600 | . | A | G   | 148.59   | PASS          | AC=3;AF=0.043;AN=70;BaseQRankSum=  |
| 42959 | chrY | 22262677 | . | G | A   | 2019.77  | my_snp_filter | AC=19;AF=0.328;AN=58;BaseQ         |
| 42960 | chrY | 22262679 | . | G | T,A | 1594.30  | my_snp_filter | AC=11,4;AF=0.177,0.065;AN=         |
| 42961 | chrY | 22262681 | . | C | A   | 1457.99  | my_snp_filter | AC=15;AF=0.234;AN=64;BaseQ         |
| 42962 | chrY | 22262690 | . | T | G   | 220.26   | PASS          | AC=5;AF=0.081;AN=62;BaseQRankSum=  |
| 42963 | chrY | 22262695 | . | T | A   | 52.95    | PASS          | AC=2;AF=0.032;AN=62;BaseQRankSum=  |
| 42964 | chrY | 22262827 | . | G | A   | 694.92   | PASS          | AC=2;AF=0.030;AN=66;DP=533;FS=0.0  |
| 42965 | chrY | 22262889 | . | A | T   | 23681.94 | PASS          | AC=66;AF=1.00;AN=66;DP=61          |
| 42966 | chrY | 22262913 | . | G | A   | 19625.58 | PASS          | AC=54;AF=0.818;AN=66;BaseQ         |
| 42967 | chrY | 22263175 | . | T | A   | 837.02   | PASS          | AC=6;AF=0.088;AN=68;DP=524;FS=0.0  |
| 42968 | chrY | 22263522 | . | C | A   | 8434.20  | PASS          | AC=54;AF=1.00;AN=54;DP=218;FS=0.0  |
| 42969 | chrY | 22263524 | . | T | C   | 8479.20  | PASS          | AC=54;AF=1.00;AN=54;DP=217;FS=0.0  |
| 42970 | chrY | 22263541 | . | A | G   | 7169.52  | PASS          | AC=51;AF=0.981;AN=52;BaseQRankSum= |
| 42971 | chrY | 22263573 | . | C | G   | 3333.95  | PASS          | AC=29;AF=0.906;AN=32;BaseQRankSum= |
| 42972 | chrY | 22263585 | . | C | T   | 2427.05  | PASS          | AC=23;AF=0.885;AN=26;BaseQRankSum= |
| 42973 | chrY | 22263601 | . | C | A   | 1523.56  | PASS          | AC=17;AF=0.850;AN=20;BaseQRankSum= |
| 42974 | chrY | 22263604 | . | A | G   | 1299.99  | PASS          | AC=15;AF=0.833;AN=18;BaseQRankSum= |
| 42975 | chrY | 22263608 | . | G | T   | 1082.60  | PASS          | AC=13;AF=0.813;AN=16;BaseQRankSum= |
| 42976 | chrY | 22263611 | . | C | G   | 53.83    | my_snp_filter | AC=2;AF=0.063;AN=32;DP=35          |
| 42977 | chrY | 22263648 | . | C | G   | 56.75    | my_snp_filter | AC=1;AF=0.125;AN=8;BaseQR          |
| 42978 | chrY | 22263894 | . | G | A   | 209.33   | my_snp_filter | AC=6;AF=0.333;AN=18;DP=41          |
| 42979 | chrY | 22263903 | . | C | A   | 48.85    | my_snp_filter | AC=1;AF=0.031;AN=32;BaseQ          |
| 42980 | chrY | 22264236 | . | G | A   | 133.93   | PASS          | AC=1;AF=0.029;AN=34;BaseQRankSum=  |
| 42981 | chrY | 22264249 | . | A | T   | 213.17   | PASS          | AC=3;AF=0.167;AN=18;BaseQRankSum=  |
| 42982 | chrY | 22264255 | . | A | C   | 98.43    | my_snp_filter | AC=2;AF=0.111;AN=18;DP=41          |
| 42983 | chrY | 22264256 | . | G | A   | 57.22    | my_snp_filter | AC=2;AF=0.111;AN=18;DP=41          |
| 42984 | chrY | 22264374 | . | C | A   | 223.54   | my_snp_filter | AC=3;AF=0.150;AN=20;BaseQ          |
| 42985 | chrY | 22264622 | . | G | A   | 927.57   | PASS          | AC=3;AF=0.044;AN=68;BaseQRankSum=  |
| 42986 | chrY | 22264674 | . | G | A   | 358.11   | PASS          | AC=3;AF=0.047;AN=64;BaseQRankSum=  |
| 42987 | chrY | 22264819 | . | A | T   | 41.15    | my_snp_filter | AC=1;AF=0.056;AN=18;BaseQ          |
| 42988 | chrY | 22264831 | . | G | T   | 41.79    | my_snp_filter | AC=1;AF=0.056;AN=18;BaseQ          |
| 42989 | chrY | 22264839 | . | A | C   | 329.61   | PASS          | AC=3;AF=0.167;AN=18;BaseQRankSum=  |
| 42990 | chrY | 22264845 | . | G | C   | 40.22    | my_snp_filter | AC=1;AF=0.056;AN=18;BaseQ          |
| 42991 | chrY | 22264864 | . | G | T   | 43.31    | my_snp_filter | AC=1;AF=0.056;AN=18;BaseQ          |
| 42992 | chrY | 22264868 | . | C | A   | 440.06   | my_snp_filter | AC=4;AF=0.222;AN=18;BaseQ          |
| 42993 | chrY | 22266177 | . | A | T   | 206.52   | my_snp_filter | AC=6;AF=1.00;AN=6;DP=18;F          |
| 42994 | chrY | 22268472 | . | G | T   | 3442.47  | my_snp_filter | AC=34;AF=1.00;AN=34;DP=88          |
| 42995 | chrY | 22268487 | . | T | C   | 3702.58  | my_snp_filter | AC=40;AF=1.00;AN=40;DP=10          |
| 42996 | chrY | 22268536 | . | C | A   | 8308.11  | my_snp_filter | AC=40;AF=0.800;AN=50;BaseQ         |
| 42997 | chrY | 22268697 | . | A | T   | 125.71   | PASS          | AC=2;AF=0.033;AN=60;BaseQRankSum=  |
| 42998 | chrY | 22268836 | . | G | T   | 70.69    | PASS          | AC=3;AF=0.044;AN=68;BaseQRankSum=  |
| 42999 | chrY | 22268908 | . | G | A   | 724.37   | my_snp_filter | AC=11;AF=0.162;AN=68;BaseQ         |
| 43000 | chrY | 22268911 | . | C | G   | 3922.41  | PASS          | AC=13;AF=0.191;AN=68;BaseQRankSum= |
| 43001 | chrY | 22268919 | . | C | G   | 4313.76  | PASS          | AC=13;AF=0.197;AN=66;BaseQRankSum= |
| 43002 | chrY | 22268921 | . | G | T   | 172.15   | my_snp_filter | AC=2;AF=0.030;AN=66;BaseQ          |
| 43003 | chrY | 22268941 | . | A | G   | 1881.78  | PASS          | AC=11;AF=0.167;AN=66;BaseQRankSum= |
| 43004 | chrY | 22268948 | . | T | A   | 15590.56 | PASS          | AC=29;AF=0.468;AN=62;BaseQ         |
| 43005 | chrY | 22268952 | . | C | G   | 2892.12  | PASS          | AC=9;AF=0.145;AN=62;BaseQRankSum=  |
| 43006 | chrY | 22268977 | . | C | T   | 2899.09  | PASS          | AC=13;AF=0.197;AN=66;BaseQRankSum= |
| 43007 | chrY | 22268989 | . | T | C   | 10639.37 | PASS          | AC=22;AF=0.367;AN=60;BaseQ         |
| 43008 | chrY | 22269023 | . | T | G   | 23423    | PASS          | AC=31;AF=0.484;AN=64;BaseQRankSum= |
| 43009 | chrY | 22269060 | . | A | C   | 51.78    | my_snp_filter | AC=1;AF=0.015;AN=66;BaseQ          |
| 43010 | chrY | 22269067 | . | G | T   | 48.74    | my_snp_filter | AC=1;AF=0.015;AN=68;BaseQ          |
| 43011 | chrY | 22269103 | . | C | G   | 14811.82 | PASS          | AC=32;AF=0.471;AN=68;BaseQ         |
| 43012 | chrY | 22269121 | . | G | C   | 219.97   | PASS          | AC=1;AF=0.015;AN=68;BaseQRankSum=  |
| 43013 | chrY | 22269122 | . | C | T   | 14980.64 | PASS          | AC=30;AF=0.441;AN=68;BaseQ         |
| 43014 | chrY | 22269136 | . | T | G   | 3282.56  | PASS          | AC=21;AF=0.309;AN=68;BaseQRankSum= |
| 43015 | chrY | 22269137 | . | G | A   | 505.92   | my_snp_filter | AC=3;AF=0.044;AN=68;BaseQ          |
| 43016 | chrY | 22269145 | . | C | T   | 2720.51  | PASS          | AC=21;AF=0.309;AN=68;BaseQRankSum= |

|       |      |          |   |   |   |          |               |                                    |
|-------|------|----------|---|---|---|----------|---------------|------------------------------------|
| 43017 | chrY | 22269155 | . | T | G | 760.90   | PASS          | AC=3;AF=0.044;AN=68;BaseQRankSum=  |
| 43018 | chrY | 22269163 | . | T | C | 1565.37  | PASS          | AC=14;AF=0.206;AN=68;BaseQRankSum= |
| 43019 | chrY | 22269176 | . | T | A | 11665.35 | PASS          | AC=24;AF=0.353;AN=68;BaseQRankSum= |
| 43020 | chrY | 22269220 | . | C | T | 130.84   | my_snp_filter | AC=3;AF=0.043;AN=70;BaseQRankSum=  |
| 43021 | chrY | 22269229 | . | G | C | 112.56   | my_snp_filter | AC=3;AF=0.043;AN=70;BaseQRankSum=  |
| 43022 | chrY | 22269237 | . | T | A | 150.48   | my_snp_filter | AC=4;AF=0.057;AN=70;BaseQRankSum=  |
| 43023 | chrY | 22269244 | . | T | C | 181.62   | my_snp_filter | AC=4;AF=0.057;AN=70;BaseQRankSum=  |
| 43024 | chrY | 22269249 | . | G | A | 132.84   | my_snp_filter | AC=2;AF=0.029;AN=70;BaseQRankSum=  |
| 43025 | chrY | 22269251 | . | C | G | 4817.22  | PASS          | AC=32;AF=0.457;AN=70;BaseQRankSum= |
| 43026 | chrY | 22269272 | . | T | A | 162.94   | PASS          | AC=1;AF=0.014;AN=70;BaseQRankSum=  |
| 43027 | chrY | 22269285 | . | C | A | 51.74    | my_snp_filter | AC=2;AF=0.029;AN=70;BaseQRankSum=  |
| 43028 | chrY | 22269293 | . | C | A | 85.85    | PASS          | AC=2;AF=0.029;AN=70;BaseQRankSum=  |
| 43029 | chrY | 22269304 | . | G | T | 10617.76 | PASS          | AC=33;AF=0.589;AN=56;BaseQRankSum= |
| 43030 | chrY | 22269313 | . | A | C | 8789.85  | my_snp_filter | AC=32;AF=0.593;AN=54;BaseQRankSum= |
| 43031 | chrY | 22269315 | . | C | G | 7443.08  | my_snp_filter | AC=31;AF=0.554;AN=56;BaseQRankSum= |
| 43032 | chrY | 22269333 | . | A | T | 2226.26  | my_snp_filter | AC=14;AF=0.250;AN=56;BaseQRankSum= |
| 43033 | chrY | 22269340 | . | C | G | 1367.67  | my_snp_filter | AC=10;AF=0.172;AN=58;BaseQRankSum= |
| 43034 | chrY | 22269347 | . | T | C | 664.21   | my_snp_filter | AC=7;AF=0.130;AN=54;BaseQRankSum=  |
| 43035 | chrY | 22269348 | . | A | G | 657.58   | PASS          | AC=7;AF=0.130;AN=54;BaseQRankSum=  |
| 43036 | chrY | 22269352 | . | A | G | 342.80   | PASS          | AC=4;AF=0.071;AN=56;BaseQRankSum=  |
| 43037 | chrY | 22269430 | . | T | C | 37.94    | PASS          | AC=1;AF=0.017;AN=60;BaseQRankSum=  |
| 43038 | chrY | 22269433 | . | C | T | 38.59    | PASS          | AC=1;AF=0.017;AN=60;BaseQRankSum=  |
| 43039 | chrY | 22269456 | . | C | A | 1604.40  | PASS          | AC=18;AF=0.333;AN=54;BaseQRankSum= |
| 43040 | chrY | 22269465 | . | A | G | 91.70    | PASS          | AC=2;AF=0.033;AN=60;BaseQRankSum=  |
| 43041 | chrY | 22269640 | . | C | G | 2448.68  | my_snp_filter | AC=38;AF=1.00;AN=38;DP=75          |
| 43042 | chrY | 22269664 | . | C | G | 4029.22  | my_snp_filter | AC=50;AF=1.00;AN=50;DP=12          |
| 43043 | chrY | 22269751 | . | T | A | 17107.91 | PASS          | AC=66;AF=1.00;AN=66;DP=47          |
| 43044 | chrY | 22269795 | . | A | T | 22513.91 | PASS          | AC=66;AF=1.00;AN=66;DP=51          |
| 43045 | chrY | 22269796 | . | T | A | 22509.91 | PASS          | AC=66;AF=1.00;AN=66;DP=51          |
| 43046 | chrY | 22269812 | . | C | A | 11933.29 | PASS          | AC=42;AF=0.636;AN=66;DP=4          |
| 43047 | chrY | 22269813 | . | A | T | 11618.29 | PASS          | AC=42;AF=0.636;AN=66;DP=4          |
| 43048 | chrY | 22269918 | . | A | T | 31.36    | my_snp_filter | AC=1;AF=0.015;AN=68;BaseQRankSum=  |
| 43049 | chrY | 22269943 | . | A | T | 62.18    | my_snp_filter | AC=2;AF=0.029;AN=68;BaseQRankSum=  |
| 43050 | chrY | 22269961 | . | T | A | 1015.98  | PASS          | AC=10;AF=0.161;AN=62;BaseQRankSum= |
| 43051 | chrY | 22269979 | . | T | C | 254.43   | PASS          | AC=2;AF=0.031;AN=64;DP=373;FS=0.0  |
| 43052 | chrY | 22269987 | . | C | G | 479.93   | PASS          | AC=7;AF=0.113;AN=62;BaseQRankSum=  |
| 43053 | chrY | 22269999 | . | A | C | 129.44   | PASS          | AC=2;AF=0.032;AN=62;BaseQRankSum=  |
| 43054 | chrY | 22270000 | . | G | T | 129.41   | PASS          | AC=2;AF=0.032;AN=62;BaseQRankSum=  |
| 43055 | chrY | 22270016 | . | A | C | 100.01   | PASS          | AC=1;AF=0.017;AN=60;BaseQRankSum=  |
| 43056 | chrY | 22270017 | . | G | A | 98.95    | PASS          | AC=1;AF=0.017;AN=60;BaseQRankSum=  |
| 43057 | chrY | 22270101 | . | G | A | 101.13   | PASS          | AC=4;AF=0.067;AN=60;BaseQRankSum=  |
| 43058 | chrY | 22270392 | . | T | A | 121.19   | PASS          | AC=3;AF=0.048;AN=62;BaseQRankSum=  |
| 43059 | chrY | 22270449 | . | T | C | 388.02   | PASS          | AC=3;AF=0.043;AN=70;BaseQRankSum=  |
| 43060 | chrY | 22270477 | . | C | T | 80.29    | my_snp_filter | AC=2;AF=0.029;AN=70;BaseQRankSum=  |
| 43061 | chrY | 22270487 | . | C | T | 1324.72  | PASS          | AC=9;AF=0.141;AN=64;BaseQRankSum=  |
| 43062 | chrY | 22270491 | . | T | A | 40.86    | PASS          | AC=1;AF=0.014;AN=70;BaseQRankSum=  |
| 43063 | chrY | 22270515 | . | C | T | 138.20   | PASS          | AC=2;AF=0.029;AN=68;BaseQRankSum=  |
| 43064 | chrY | 22270517 | . | C | T | 138.32   | PASS          | AC=2;AF=0.029;AN=68;BaseQRankSum=  |
| 43065 | chrY | 22271105 | . | T | A | 1086.39  | PASS          | AC=6;AF=0.088;AN=68;BaseQRankSum=  |
| 43066 | chrY | 22271997 | . | T | C | 51.68    | my_snp_filter | AC=2;AF=0.031;AN=64;BaseQRankSum=  |
| 43067 | chrY | 22272029 | . | C | A | 31.80    | my_snp_filter | AC=1;AF=0.016;AN=64;BaseQRankSum=  |
| 43068 | chrY | 22272226 | . | C | T | 360.41   | PASS          | AC=2;AF=0.029;AN=68;BaseQRankSum=  |
| 43069 | chrY | 22272266 | . | T | A | 55.21    | my_snp_filter | AC=2;AF=0.029;AN=70;BaseQRankSum=  |
| 43070 | chrY | 22272340 | . | C | T | 728.82   | PASS          | AC=2;AF=0.029;AN=68;BaseQRankSum=  |
| 43071 | chrY | 22272383 | . | G | T | 39.54    | PASS          | AC=1;AF=0.014;AN=70;BaseQRankSum=  |
| 43072 | chrY | 22272403 | . | C | A | 341.23   | PASS          | AC=6;AF=0.091;AN=66;BaseQRankSum=  |
| 43073 | chrY | 22272940 | . | T | G | 7227.16  | PASS          | AC=42;AF=1.00;AN=42;DP=170;FS=0.0  |
| 43074 | chrY | 22273530 | . | C | T | 547.34   | PASS          | AC=16;AF=1.00;AN=16;DP=47;FS=0.00  |
| 43075 | chrY | 22273537 | . | G | C | 484.56   | PASS          | AC=14;AF=1.00;AN=14;DP=40;FS=0.00  |
| 43076 | chrY | 22273540 | . | T | C | 69.09    | PASS          | AC=4;AF=0.667;AN=6;DP=40;FS=0.000  |
| 43077 | chrY | 22274913 | . | G | A | 154.41   | PASS          | AC=2;AF=0.031;AN=64;DP=289;FS=0.0  |
| 43078 | chrY | 22274931 | . | C | T | 88.80    | PASS          | AC=2;AF=0.030;AN=66;DP=311;FS=0.0  |
| 43079 | chrY | 22275542 | . | A | C | 30.22    | PASS          | AC=1;AF=0.016;AN=62;BaseQRankSum=  |
| 43080 | chrY | 22275704 | . | T | C | 294.28   | my_snp_filter | AC=3;AF=0.045;AN=66;BaseQRankSum=  |
| 43081 | chrY | 22275731 | . | A | G | 526.12   | my_snp_filter | AC=6;AF=0.091;AN=66;BaseQRankSum=  |
| 43082 | chrY | 22275733 | . | T | C | 333.14   | my_snp_filter | AC=6;AF=0.094;AN=64;BaseQRankSum=  |
| 43083 | chrY | 22275764 | . | T | C | 782.88   | my_snp_filter | AC=9;AF=0.173;AN=52;BaseQRankSum=  |
| 43084 | chrY | 22275776 | . | T | G | 44.08    | my_snp_filter | AC=1;AF=0.017;AN=58;BaseQRankSum=  |
| 43085 | chrY | 22275781 | . | G | T | 172.26   | my_snp_filter | AC=3;AF=0.052;AN=58;BaseQRankSum=  |
| 43086 | chrY | 22275800 | . | G | A | 205.33   | my_snp_filter | AC=3;AF=0.058;AN=52;BaseQRankSum=  |
| 43087 | chrY | 22275806 | . | C | T | 932.02   | my_snp_filter | AC=4;AF=0.071;AN=56;BaseQRankSum=  |
| 43088 | chrY | 22275818 | . | T | G | 107.76   | my_snp_filter | AC=2;AF=0.040;AN=50;BaseQRankSum=  |
| 43089 | chrY | 22275837 | . | C | T | 34.26    | my_snp_filter | AC=3;AF=0.063;AN=48;BaseQRankSum=  |
| 43090 | chrY | 22275873 | . | G | T | 136.29   | my_snp_filter | AC=5;AF=0.114;AN=44;BaseQRankSum=  |
| 43091 | chrY | 22275903 | . | A | C | 135.26   | my_snp_filter | AC=3;AF=0.100;AN=30;BaseQRankSum=  |
| 43092 | chrY | 22275950 | . | G | A | 51.09    | my_snp_filter | AC=1;AF=0.029;AN=34;BaseQRankSum=  |

|       |      |          |   |   |   |          |               |                                    |
|-------|------|----------|---|---|---|----------|---------------|------------------------------------|
| 43093 | chrY | 22275951 | . | T | G | 844.96   | my_snp_filter | AC=4;AF=0.118;AN=34;BaseQ          |
| 43094 | chrY | 22275952 | . | G | A | 52.57    | my_snp_filter | AC=1;AF=0.033;AN=30;BaseQ          |
| 43095 | chrY | 22275972 | . | G | C | 49.54    | my_snp_filter | AC=1;AF=0.036;AN=28;BaseQ          |
| 43096 | chrY | 22276710 | . | G | C | 109.90   | my_snp_filter | AC=4;AF=0.400;AN=10;DP=22          |
| 43097 | chrY | 22276801 | . | T | A | 128.55   | my_snp_filter | AC=2;AF=0.125;AN=16;BaseQ          |
| 43098 | chrY | 22277072 | . | T | A | 9963.74  | my_snp_filter | AC=50;AF=0.806;AN=62;DP=4          |
| 43099 | chrY | 22277299 | . | G | T | 1369.17  | PASS          | AC=4;AF=0.071;AN=56;BaseQRankSum=  |
| 43100 | chrY | 22277506 | . | A | T | 13533.55 | PASS          | AC=40;AF=0.571;AN=70;DP=7          |
| 43101 | chrY | 22277829 | . | C | A | 226.68   | PASS          | AC=2;AF=0.042;AN=48;BaseQRankSum=  |
| 43102 | chrY | 22277862 | . | G | A | 245.52   | my_snp_filter | AC=3;AF=0.050;AN=60;BaseQ          |
| 43103 | chrY | 22277920 | . | T | G | 137.66   | PASS          | AC=2;AF=0.030;AN=66;BaseQRankSum=  |
| 43104 | chrY | 22278070 | . | C | G | 120.90   | PASS          | AC=4;AF=0.067;AN=60;BaseQRankSum=  |
| 43105 | chrY | 22278140 | . | T | G | 771.75   | PASS          | AC=10;AF=0.147;AN=68;BaseQRankSum= |
| 43106 | chrY | 22278160 | . | G | T | 622.60   | PASS          | AC=5;AF=0.074;AN=68;BaseQRankSum=  |
| 43107 | chrY | 22278169 | . | G | T | 1079.26  | PASS          | AC=6;AF=0.088;AN=68;BaseQRankSum=  |
| 43108 | chrY | 22278198 | . | C | T | 52.60    | PASS          | AC=1;AF=0.014;AN=70;BaseQRankSum=  |
| 43109 | chrY | 22278204 | . | A | T | 56.27    | PASS          | AC=1;AF=0.014;AN=70;BaseQRankSum=  |
| 43110 | chrY | 22278209 | . | G | C | 401.32   | PASS          | AC=3;AF=0.045;AN=66;BaseQRankSum=  |
| 43111 | chrY | 22278231 | . | G | T | 263.98   | PASS          | AC=2;AF=0.030;AN=66;BaseQRankSum=  |
| 43112 | chrY | 22278341 | . | T | C | 926.09   | PASS          | AC=3;AF=0.045;AN=66;BaseQRankSum=  |
| 43113 | chrY | 22278508 | . | A | C | 1242.50  | PASS          | AC=3;AF=0.043;AN=70;BaseQRankSum=  |
| 43114 | chrY | 22278560 | . | G | A | 478.35   | PASS          | AC=6;AF=0.086;AN=70;DP=472;FS=0.0  |
| 43115 | chrY | 22278850 | . | A | T | 84.99    | PASS          | AC=2;AF=0.029;AN=68;BaseQRankSum=  |
| 43116 | chrY | 22278857 | . | A | G | 83.95    | PASS          | AC=2;AF=0.029;AN=68;BaseQRankSum=  |
| 43117 | chrY | 22278858 | . | G | C | 35.42    | PASS          | AC=1;AF=0.015;AN=68;BaseQRankSum=  |
| 43118 | chrY | 22278895 | . | G | A | 37.57    | PASS          | AC=1;AF=0.015;AN=66;BaseQRankSum=  |
| 43119 | chrY | 22279126 | . | T | A | 511.81   | PASS          | AC=4;AF=0.063;AN=64;DP=410;FS=0.0  |
| 43120 | chrY | 22279286 | . | A | C | 947.57   | PASS          | AC=9;AF=0.161;AN=56;BaseQRankSum=  |
| 43121 | chrY | 22279290 | . | T | G | 41.28    | PASS          | AC=1;AF=0.016;AN=64;BaseQRankSum=  |
| 43122 | chrY | 22279292 | . | C | T | 606.36   | PASS          | AC=3;AF=0.045;AN=66;BaseQRankSum=  |
| 43123 | chrY | 22279295 | . | A | T | 1006.35  | PASS          | AC=8;AF=0.133;AN=60;BaseQRankSum=  |
| 43124 | chrY | 22279314 | . | G | A | 1001.68  | PASS          | AC=7;AF=0.109;AN=64;BaseQRankSum=  |
| 43125 | chrY | 22279342 | . | T | A | 88.97    | PASS          | AC=2;AF=0.031;AN=64;BaseQRankSum=  |
| 43126 | chrY | 22279349 | . | A | C | 101.35   | PASS          | AC=4;AF=0.063;AN=64;BaseQRankSum=  |
| 43127 | chrY | 22279375 | . | A | G | 952.28   | PASS          | AC=9;AF=0.150;AN=60;BaseQRankSum=  |
| 43128 | chrY | 22279387 | . | G | T | 774.50   | PASS          | AC=8;AF=0.125;AN=64;BaseQRankSum=  |
| 43129 | chrY | 22279399 | . | A | T | 424.63   | PASS          | AC=5;AF=0.078;AN=64;BaseQRankSum=  |
| 43130 | chrY | 22279451 | . | T | G | 47.24    | my_snp_filter | AC=1;AF=0.015;AN=68;BaseQ          |
| 43131 | chrY | 22279457 | . | T | C | 46.08    | my_snp_filter | AC=1;AF=0.014;AN=70;BaseQ          |
| 43132 | chrY | 22279461 | . | G | A | 81.63    | my_snp_filter | AC=1;AF=0.014;AN=70;BaseQ          |
| 43133 | chrY | 22279481 | . | T | C | 511.39   | PASS          | AC=5;AF=0.071;AN=70;BaseQRankSum=  |
| 43134 | chrY | 22279486 | . | G | C | 51.62    | my_snp_filter | AC=3;AF=0.043;AN=70;BaseQ          |
| 43135 | chrY | 22279502 | . | T | A | 691.37   | PASS          | AC=4;AF=0.057;AN=70;BaseQRankSum=  |
| 43136 | chrY | 22279535 | . | T | C | 616.64   | PASS          | AC=8;AF=0.114;AN=70;BaseQRankSum=  |
| 43137 | chrY | 22279540 | . | C | A | 602.79   | PASS          | AC=8;AF=0.114;AN=70;BaseQRankSum=  |
| 43138 | chrY | 22279565 | . | A | G | 218.09   | PASS          | AC=3;AF=0.043;AN=70;BaseQRankSum=  |
| 43139 | chrY | 22279577 | . | C | A | 212.44   | PASS          | AC=1;AF=0.014;AN=70;BaseQRankSum=  |
| 43140 | chrY | 22279581 | . | A | C | 11988.10 | PASS          | AC=24;AF=0.343;AN=70;BaseQ         |
| 43141 | chrY | 22279613 | . | G | T | 1300.55  | PASS          | AC=3;AF=0.043;AN=70;BaseQRankSum=  |
| 43142 | chrY | 22279625 | . | A | G | 14927.04 | PASS          | AC=22;AF=0.324;AN=68;BaseQ         |
| 43143 | chrY | 22279671 | . | C | A | 8612.11  | PASS          | AC=19;AF=0.271;AN=70;BaseQRankSum= |
| 43144 | chrY | 22279707 | . | A | C | 4776.04  | PASS          | AC=16;AF=0.235;AN=68;BaseQRankSum= |
| 43145 | chrY | 22279714 | . | G | T | 175.02   | PASS          | AC=2;AF=0.029;AN=70;BaseQRankSum=  |
| 43146 | chrY | 22279719 | . | T | G | 163.59   | PASS          | AC=2;AF=0.029;AN=70;BaseQRankSum=  |
| 43147 | chrY | 22279722 | . | C | T | 246.59   | PASS          | AC=3;AF=0.043;AN=70;BaseQRankSum=  |
| 43148 | chrY | 22279831 | . | C | T | 1088.43  | PASS          | AC=13;AF=0.191;AN=68;BaseQRankSum= |
| 43149 | chrY | 22279854 | . | A | C | 466.81   | PASS          | AC=7;AF=0.100;AN=70;BaseQRankSum=  |
| 43150 | chrY | 22279870 | . | C | A | 143.21   | PASS          | AC=4;AF=0.059;AN=68;BaseQRankSum=  |
| 43151 | chrY | 22280008 | . | C | A | 61.19    | PASS          | AC=1;AF=0.016;AN=62;BaseQRankSum=  |
| 43152 | chrY | 22280011 | . | T | C | 61.24    | PASS          | AC=1;AF=0.016;AN=62;BaseQRankSum=  |
| 43153 | chrY | 22280037 | . | A | T | 80.48    | PASS          | AC=2;AF=0.031;AN=64;BaseQRankSum=  |
| 43154 | chrY | 22280215 | . | T | A | 2131.93  | PASS          | AC=26;AF=0.520;AN=50;DP=279;FS=0.0 |
| 43155 | chrY | 22280222 | . | T | C | 1620.52  | PASS          | AC=6;AF=0.111;AN=54;DP=262;FS=0.0  |
| 43156 | chrY | 22280229 | . | C | A | 1667.87  | PASS          | AC=6;AF=0.115;AN=52;DP=259;FS=0.0  |
| 43157 | chrY | 22280235 | . | A | G | 1592.44  | PASS          | AC=4;AF=0.077;AN=52;DP=266;FS=0.0  |
| 43158 | chrY | 22280247 | . | G | A | 1546.13  | PASS          | AC=4;AF=0.069;AN=58;DP=260;FS=0.0  |
| 43159 | chrY | 22280254 | . | A | C | 1558.12  | PASS          | AC=4;AF=0.071;AN=56;DP=271;FS=0.0  |
| 43160 | chrY | 22280297 | . | C | A | 32.78    | PASS          | AC=1;AF=0.016;AN=62;BaseQRankSum=  |
| 43161 | chrY | 22280408 | . | T | C | 36.34    | PASS          | AC=1;AF=0.017;AN=60;BaseQRankSum=  |
| 43162 | chrY | 22280409 | . | A | T | 36.70    | PASS          | AC=1;AF=0.017;AN=60;BaseQRankSum=  |
| 43163 | chrY | 22280550 | . | G | T | 429.73   | my_snp_filter | AC=2;AF=0.029;AN=68;DP=49          |
| 43164 | chrY | 22280564 | . | T | A | 515.10   | my_snp_filter | AC=2;AF=0.029;AN=68;DP=53          |
| 43165 | chrY | 22281177 | . | G | T | 2534.60  | PASS          | AC=9;AF=0.129;AN=70;BaseQRankSum=  |
| 43166 | chrY | 22281356 | . | G | A | 434.75   | PASS          | AC=4;AF=0.067;AN=60;BaseQRankSum=  |
| 43167 | chrY | 22281364 | . | G | A | 1377.13  | PASS          | AC=6;AF=0.100;AN=60;BaseQRankSum=  |
| 43168 | chrY | 22281387 | . | T | A | 750.02   | PASS          | AC=5;AF=0.083;AN=60;BaseQRankSum=  |



|       |      |          |   |   |     |          |               |                                    |
|-------|------|----------|---|---|-----|----------|---------------|------------------------------------|
| 43169 | chrY | 22281397 | . | T | C   | 819.36   | PASS          | AC=6;AF=0.097;AN=62;BaseQRankSum=  |
| 43170 | chrY | 22281430 | . | C | G   | 583.62   | PASS          | AC=5;AF=0.081;AN=62;BaseQRankSum=  |
| 43171 | chrY | 22281441 | . | C | G   | 493.03   | PASS          | AC=5;AF=0.078;AN=64;BaseQRankSum=  |
| 43172 | chrY | 22281444 | . | A | G   | 494.60   | PASS          | AC=4;AF=0.063;AN=64;BaseQRankSum=  |
| 43173 | chrY | 22281460 | . | T | A   | 194.65   | PASS          | AC=3;AF=0.048;AN=62;BaseQRankSum=  |
| 43174 | chrY | 22281503 | . | G | A   | 268.57   | PASS          | AC=5;AF=0.083;AN=60;BaseQRankSum=  |
| 43175 | chrY | 22281510 | . | C | G   | 272.95   | PASS          | AC=5;AF=0.083;AN=60;BaseQRankSum=  |
| 43176 | chrY | 22281520 | . | A | T   | 275.55   | PASS          | AC=5;AF=0.083;AN=60;BaseQRankSum=  |
| 43177 | chrY | 22281614 | . | G | A   | 961.75   | PASS          | AC=3;AF=0.048;AN=62;BaseQRankSum=  |
| 43178 | chrY | 22281765 | . | A | G   | 53.23    | PASS          | AC=2;AF=0.038;AN=52;DP=123;FS=0.   |
| 43179 | chrY | 22281789 | . | C | T   | 1240.42  | PASS          | AC=15;AF=0.833;AN=18;BaseQRankSum= |
| 43180 | chrY | 22281790 | . | G | T   | 1240.42  | PASS          | AC=15;AF=0.833;AN=18;BaseQRankSum= |
| 43181 | chrY | 22281798 | . | T | A   | 742.36   | PASS          | AC=12;AF=0.667;AN=18;BaseQRankSum= |
| 43182 | chrY | 22281808 | . | C | G   | 101.60   | PASS          | AC=4;AF=0.250;AN=16;DP=23;FS=0.00  |
| 43183 | chrY | 22281811 | . | A | C   | 103.13   | PASS          | AC=4;AF=0.333;AN=12;DP=23;FS=0.00  |
| 43184 | chrY | 22281813 | . | C | T   | 60.48    | PASS          | AC=2;AF=0.167;AN=12;DP=19;FS=0.00  |
| 43185 | chrY | 22281842 | . | C | G   | 76.19    | PASS          | AC=4;AF=1.00;AN=4;DP=9;FS=0.00;M   |
| 43186 | chrY | 22283518 | . | G | A   | 138.44   | my_snp_filter | AC=4;AF=0.400;AN=10;DP=20          |
| 43187 | chrY | 22283859 | . | G | T   | 490.77   | my_snp_filter | AC=3;AF=0.050;AN=60;BaseQ          |
| 43188 | chrY | 22283921 | . | G | T   | 669.44   | my_snp_filter | AC=3;AF=0.054;AN=56;BaseQ          |
| 43189 | chrY | 22284116 | . | C | G   | 424.81   | my_snp_filter | AC=2;AF=0.067;AN=30;BaseQ          |
| 43190 | chrY | 22284151 | . | C | T   | 489.78   | my_snp_filter | AC=2;AF=0.045;AN=44;BaseQ          |
| 43191 | chrY | 22284307 | . | T | G   | 605.18   | PASS          | AC=3;AF=0.060;AN=50;BaseQRankSum=  |
| 43192 | chrY | 22284507 | . | T | A   | 716.28   | my_snp_filter | AC=8;AF=1.00;AN=8;DP=31;F          |
| 43193 | chrY | 22284513 | . | G | C   | 380.28   | my_snp_filter | AC=7;AF=0.700;AN=10;BaseQ          |
| 43194 | chrY | 22286523 | . | T | A   | 75.45    | my_snp_filter | AC=1;AF=0.036;AN=28;BaseQ          |
| 43195 | chrY | 22286549 | . | C | G   | 214.23   | my_snp_filter | AC=4;AF=0.111;AN=36;DP=72          |
| 43196 | chrY | 22286553 | . | A | T   | 106.34   | PASS          | AC=4;AF=0.182;AN=22;DP=72;FS=0.00  |
| 43197 | chrY | 22286760 | . | T | A   | 2284.72  | my_snp_filter | AC=34;AF=0.654;AN=52;DP=2          |
| 43198 | chrY | 22286795 | . | A | G   | 48.82    | my_snp_filter | AC=2;AF=0.043;AN=46;DP=15          |
| 43199 | chrY | 22287125 | . | A | G   | 762.66   | my_snp_filter | AC=8;AF=0.571;AN=14;DP=65          |
| 43200 | chrY | 22287126 | . | A | T   | 762.66   | my_snp_filter | AC=8;AF=0.571;AN=14;DP=66          |
| 43201 | chrY | 22287145 | . | G | C   | 1184.92  | my_snp_filter | AC=13;AF=0.722;AN=18;Base          |
| 43202 | chrY | 22287151 | . | G | T   | 38       | PASS          | AC=2;AF=0.042;AN=48;BaseQRankSum=  |
| 43203 | chrY | 22287229 | . | G | C   | 594.98   | PASS          | AC=4;AF=0.069;AN=58;BaseQRankSum=  |
| 43204 | chrY | 22287259 | . | C | G   | 5300.27  | PASS          | AC=45;AF=0.804;AN=56;BaseQRankSum= |
| 43205 | chrY | 22287262 | . | C | T   | 737.44   | PASS          | AC=3;AF=0.052;AN=58;BaseQRankSum=  |
| 43206 | chrY | 22287292 | . | C | A   | 897.42   | PASS          | AC=3;AF=0.060;AN=50;BaseQRankSum=  |
| 43207 | chrY | 22287293 | . | A | T   | 999.38   | PASS          | AC=3;AF=0.060;AN=50;BaseQRankSum=  |
| 43208 | chrY | 22287344 | . | G | T   | 2729.82  | PASS          | AC=23;AF=0.383;AN=60;BaseQRankSum= |
| 43209 | chrY | 22287415 | . | G | C   | 10861.53 | PASS          | AC=62;AF=0.969;AN=64;Base          |
| 43210 | chrY | 22287462 | . | T | C   | 6221.47  | PASS          | AC=25;AF=0.403;AN=62;BaseQRankSum= |
| 43211 | chrY | 22287464 | . | G | A   | 6249.30  | PASS          | AC=25;AF=0.368;AN=68;BaseQRankSum= |
| 43212 | chrY | 22287485 | . | A | G   | 6091.72  | PASS          | AC=25;AF=0.417;AN=60;BaseQRankSum= |
| 43213 | chrY | 22287533 | . | C | T   | 5515.05  | PASS          | AC=24;AF=0.400;AN=60;BaseQRankSum= |
| 43214 | chrY | 22287544 | . | G | T,* | 6657.11  | PASS          | AC=26,1;AF=0.448,0.017;AN=58;Base  |
| 43215 | chrY | 22287563 | . | G | T,* | 6122.29  | PASS          | AC=18,1;AF=0.281,0.016;AN=64;Base  |
| 43216 | chrY | 22287576 | . | G | T,* | 2860.62  | PASS          | AC=10,1;AF=0.161,0.016;AN=62;Base  |
| 43217 | chrY | 22287598 | . | G | A   | 1690.93  | PASS          | AC=15;AF=0.227;AN=66;BaseQRankSum= |
| 43218 | chrY | 22287610 | . | T | G   | 7994.97  | PASS          | AC=24;AF=0.400;AN=60;BaseQRankSum= |
| 43219 | chrY | 22287620 | . | C | A   | 1382.66  | PASS          | AC=14;AF=0.200;AN=70;BaseQRankSum= |
| 43220 | chrY | 22287637 | . | G | A   | 895.34   | PASS          | AC=10;AF=0.147;AN=68;BaseQRankSum= |
| 43221 | chrY | 22287645 | . | C | G   | 7103.79  | PASS          | AC=18;AF=0.300;AN=60;BaseQRankSum= |
| 43222 | chrY | 22287664 | . | T | C   | 8309.59  | PASS          | AC=18;AF=0.333;AN=54;BaseQRankSum= |
| 43223 | chrY | 22287669 | . | T | G   | 261.50   | my_snp_filter | AC=4;AF=0.057;AN=70;BaseQ          |
| 43224 | chrY | 22287670 | . | C | G   | 222.29   | my_snp_filter | AC=4;AF=0.059;AN=68;BaseQ          |
| 43225 | chrY | 22287677 | . | A | G   | 131.06   | my_snp_filter | AC=4;AF=0.059;AN=68;BaseQ          |
| 43226 | chrY | 22287689 | . | C | A   | 44.10    | my_snp_filter | AC=2;AF=0.029;AN=70;BaseQ          |
| 43227 | chrY | 22287721 | . | A | T   | 10881.59 | PASS          | AC=30;AF=0.429;AN=70;Base          |
| 43228 | chrY | 22287728 | . | C | A   | 10820.08 | PASS          | AC=30;AF=0.429;AN=70;Base          |
| 43229 | chrY | 22287741 | . | G | T   | 10272.87 | PASS          | AC=30;AF=0.429;AN=70;Base          |
| 43230 | chrY | 22287753 | . | G | A   | 9655.61  | PASS          | AC=29;AF=0.426;AN=68;BaseQRankSum= |
| 43231 | chrY | 22287819 | . | C | G   | 12912.69 | PASS          | AC=33;AF=0.471;AN=70;Base          |
| 43232 | chrY | 22287822 | . | T | C   | 13355.51 | PASS          | AC=33;AF=0.471;AN=70;Base          |
| 43233 | chrY | 22287854 | . | C | T   | 13680.18 | PASS          | AC=31;AF=0.443;AN=70;Base          |
| 43234 | chrY | 22287880 | . | G | T   | 14190.49 | PASS          | AC=23;AF=0.329;AN=70;Base          |
| 43235 | chrY | 22287883 | . | C | T   | 13603.46 | PASS          | AC=30;AF=0.429;AN=70;Base          |
| 43236 | chrY | 22287898 | . | T | C   | 12897.33 | PASS          | AC=29;AF=0.426;AN=68;Base          |
| 43237 | chrY | 22287924 | . | T | A   | 10986.19 | PASS          | AC=28;AF=0.412;AN=68;Base          |
| 43238 | chrY | 22287932 | . | T | G   | 10706.99 | PASS          | AC=27;AF=0.397;AN=68;Base          |
| 43239 | chrY | 22287951 | . | C | G   | 9006.59  | PASS          | AC=25;AF=0.379;AN=66;BaseQRankSum= |
| 43240 | chrY | 22287985 | . | G | T   | 9289.95  | PASS          | AC=27;AF=0.397;AN=68;BaseQRankSum= |
| 43241 | chrY | 22288036 | . | G | T   | 37.47    | my_snp_filter | AC=1;AF=0.014;AN=70;BaseQ          |
| 43242 | chrY | 22288100 | . | G | T   | 16161.12 | PASS          | AC=38;AF=0.559;AN=68;Base          |
| 43243 | chrY | 22288107 | . | C | T   | 1852.39  | PASS          | AC=3;AF=0.043;AN=70;BaseQRankSum=  |
| 43244 | chrY | 22288108 | . | T | A   | 1852.38  | PASS          | AC=3;AF=0.043;AN=70;BaseQRankSum=  |

|       |      |          |   |   |     |          |               |                                    |
|-------|------|----------|---|---|-----|----------|---------------|------------------------------------|
| 43245 | chrY | 22288195 | . | T | A   | 4900.22  | PASS          | AC=30;AF=0.429;AN=70;BaseQRankSum  |
| 43246 | chrY | 22288217 | . | T | A   | 1599.28  | PASS          | AC=19;AF=0.279;AN=68;BaseQRankSum  |
| 43247 | chrY | 22288218 | . | A | G   | 3185.39  | PASS          | AC=24;AF=0.353;AN=68;BaseQRankSum  |
| 43248 | chrY | 22288235 | . | G | A   | 1026.40  | PASS          | AC=16;AF=0.229;AN=70;BaseQRankSum  |
| 43249 | chrY | 22288244 | . | C | A   | 298.42   | my_snp_filter | AC=8;AF=0.114;AN=70;BaseQ          |
| 43250 | chrY | 22288298 | . | T | A   | 63.25    | PASS          | AC=1;AF=0.014;AN=70;BaseQRankSum=  |
| 43251 | chrY | 22288347 | . | G | C   | 5442.13  | PASS          | AC=30;AF=0.441;AN=68;BaseQRankSum  |
| 43252 | chrY | 22288416 | . | G | C   | 83       | my_snp_filter | AC=2;AF=0.029;AN=68;BaseQ          |
| 43253 | chrY | 22288421 | . | T | C   | 109.93   | my_snp_filter | AC=3;AF=0.045;AN=66;BaseQ          |
| 43254 | chrY | 22288443 | . | C | A   | 7082.38  | PASS          | AC=33;AF=0.471;AN=70;BaseQRankSum  |
| 43255 | chrY | 22288464 | . | A | T   | 88.81    | my_snp_filter | AC=3;AF=0.043;AN=70;BaseQ          |
| 43256 | chrY | 22288519 | . | C | T   | 7489.13  | PASS          | AC=32;AF=0.457;AN=70;BaseQRankSum  |
| 43257 | chrY | 22288528 | . | G | T   | 1243.54  | PASS          | AC=3;AF=0.043;AN=70;BaseQRankSum=  |
| 43258 | chrY | 22288544 | . | C | A   | 3748.02  | PASS          | AC=25;AF=0.357;AN=70;BaseQRankSum  |
| 43259 | chrY | 22288550 | . | C | A   | 3481.63  | PASS          | AC=24;AF=0.343;AN=70;BaseQRankSum  |
| 43260 | chrY | 22288551 | . | A | G   | 3438.70  | PASS          | AC=24;AF=0.343;AN=70;BaseQRankSum  |
| 43261 | chrY | 22288556 | . | G | T   | 3011.53  | PASS          | AC=22;AF=0.314;AN=70;BaseQRankSum  |
| 43262 | chrY | 22288585 | . | T | C   | 14816.90 | PASS          | AC=34;AF=0.486;AN=70;BaseQ         |
| 43263 | chrY | 22288607 | . | C | A   | 127.36   | my_snp_filter | AC=7;AF=0.100;AN=70;BaseQ          |
| 43264 | chrY | 22288615 | . | T | G   | 15559.53 | PASS          | AC=34;AF=0.486;AN=70;BaseQ         |
| 43265 | chrY | 22288616 | . | A | T   | 15491.53 | PASS          | AC=34;AF=0.486;AN=70;BaseQ         |
| 43266 | chrY | 22288627 | . | A | G   | 113.51   | my_snp_filter | AC=4;AF=0.057;AN=70;BaseQ          |
| 43267 | chrY | 22288634 | . | G | T   | 157.36   | my_snp_filter | AC=4;AF=0.057;AN=70;BaseQ          |
| 43268 | chrY | 22288646 | . | T | G   | 150.55   | my_snp_filter | AC=4;AF=0.057;AN=70;BaseQ          |
| 43269 | chrY | 22288668 | . | A | T   | 31975.87 | PASS          | AC=70;AF=1.00;AN=70;BaseQ          |
| 43270 | chrY | 22288703 | . | C | A   | 57.64    | my_snp_filter | AC=3;AF=0.043;AN=70;BaseQ          |
| 43271 | chrY | 22288731 | . | C | A   | 80.93    | my_snp_filter | AC=5;AF=0.074;AN=68;BaseQ          |
| 43272 | chrY | 22288750 | . | A | G   | 6233.66  | PASS          | AC=28;AF=0.412;AN=68;BaseQRankSum  |
| 43273 | chrY | 22288774 | . | T | G   | 60.17    | my_snp_filter | AC=3;AF=0.044;AN=68;BaseQ          |
| 43274 | chrY | 22288784 | . | T | G   | 58.23    | my_snp_filter | AC=2;AF=0.029;AN=68;BaseQ          |
| 43275 | chrY | 22288793 | . | A | T   | 6207     | PASS          | AC=29;AF=0.426;AN=68;BaseQRankSum  |
| 43276 | chrY | 22288822 | . | T | C   | 24513.93 | PASS          | AC=68;AF=1.00;AN=68;BaseQ          |
| 43277 | chrY | 22288829 | . | G | T   | 24118.95 | PASS          | AC=66;AF=1.00;AN=66;BaseQ          |
| 43278 | chrY | 22288851 | . | G | C   | 5384.74  | PASS          | AC=24;AF=0.353;AN=68;BaseQRankSum  |
| 43279 | chrY | 22288864 | . | G | A   | 5933.49  | PASS          | AC=23;AF=0.338;AN=68;BaseQRankSum  |
| 43280 | chrY | 22288897 | . | T | C   | 17734.23 | PASS          | AC=62;AF=0.969;AN=64;BaseQ         |
| 43281 | chrY | 22288914 | . | G | A   | 131.79   | PASS          | AC=3;AF=0.044;AN=68;BaseQRankSum=  |
| 43282 | chrY | 22289138 | . | C | G   | 7815.95  | PASS          | AC=29;AF=0.453;AN=64;BaseQRankSum  |
| 43283 | chrY | 22289157 | . | G | T   | 7059.49  | PASS          | AC=25;AF=0.391;AN=64;BaseQRankSum  |
| 43284 | chrY | 22289167 | . | C | T   | 6414.89  | PASS          | AC=25;AF=0.391;AN=64;BaseQRankSum  |
| 43285 | chrY | 22289174 | . | T | A   | 5918.40  | PASS          | AC=24;AF=0.375;AN=64;BaseQRankSum  |
| 43286 | chrY | 22289192 | . | C | T   | 4643.73  | my_snp_filter | AC=23;AF=0.383;AN=60;BaseQ         |
| 43287 | chrY | 22289217 | . | T | C   | 73.22    | PASS          | AC=3;AF=0.047;AN=64;BaseQRankSum=  |
| 43288 | chrY | 22289232 | . | T | A   | 333.43   | PASS          | AC=4;AF=0.065;AN=62;BaseQRankSum=  |
| 43289 | chrY | 22289233 | . | A | G   | 2200.24  | PASS          | AC=23;AF=0.371;AN=62;BaseQRankSum  |
| 43290 | chrY | 22289236 | . | C | A   | 2709.59  | PASS          | AC=4;AF=0.065;AN=62;BaseQRankSum=  |
| 43291 | chrY | 22289263 | . | G | T   | 708.08   | PASS          | AC=9;AF=0.136;AN=66;BaseQRankSum=  |
| 43292 | chrY | 22289264 | . | A | C   | 139.72   | PASS          | AC=3;AF=0.045;AN=66;BaseQRankSum=  |
| 43293 | chrY | 22289275 | . | A | G   | 786.42   | my_snp_filter | AC=9;AF=0.136;AN=66;BaseQ          |
| 43294 | chrY | 22289308 | . | A | G   | 223.16   | PASS          | AC=4;AF=0.067;AN=60;BaseQRankSum=  |
| 43295 | chrY | 22289312 | . | T | A   | 224.83   | PASS          | AC=4;AF=0.069;AN=58;BaseQRankSum=  |
| 43296 | chrY | 22289314 | . | T | C   | 203.86   | PASS          | AC=4;AF=0.067;AN=60;BaseQRankSum=  |
| 43297 | chrY | 22289319 | . | G | T   | 183.31   | PASS          | AC=3;AF=0.052;AN=58;BaseQRankSum=  |
| 43298 | chrY | 22289321 | . | C | G,* | 4612.08  | PASS          | AC=45,1;AF=0.900,0.020;AN=50;BaseQ |
| 43299 | chrY | 22289322 | . | C | A   | 156.89   | PASS          | AC=3;AF=0.054;AN=56;BaseQRankSum=  |
| 43300 | chrY | 22289327 | . | C | T   | 120.61   | PASS          | AC=2;AF=0.034;AN=58;BaseQRankSum=  |
| 43301 | chrY | 22289333 | . | G | T   | 82.61    | PASS          | AC=1;AF=0.017;AN=58;BaseQRankSum=  |
| 43302 | chrY | 22289351 | . | T | G   | 1984.44  | my_snp_filter | AC=21;AF=0.955;AN=22;BaseQ         |
| 43303 | chrY | 22289358 | . | G | A   | 1386.96  | my_snp_filter | AC=17;AF=0.850;AN=20;BaseQ         |
| 43304 | chrY | 22289363 | . | G | C   | 1029.76  | my_snp_filter | AC=11;AF=0.786;AN=14;BaseQ         |
| 43305 | chrY | 22289385 | . | G | C   | 676.13   | my_snp_filter | AC=9;AF=0.900;AN=10;BaseQ          |
| 43306 | chrY | 22289412 | . | T | A   | 157.13   | my_snp_filter | AC=2;AF=1.00;AN=2;DP=8;FS          |
| 43307 | chrY | 22292095 | . | G | T   | 59.25    | PASS          | AC=2;AF=0.250;AN=8;DP=9;FS=0.000;  |
| 43308 | chrY | 22292130 | . | T | C   | 61.75    | PASS          | AC=2;AF=0.250;AN=8;DP=9;FS=0.000;  |
| 43309 | chrY | 22292139 | . | T | C   | 63.01    | PASS          | AC=2;AF=0.333;AN=6;DP=5;FS=0.000;  |
| 43310 | chrY | 22292142 | . | C | T   | 63.02    | PASS          | AC=2;AF=0.333;AN=6;DP=4;FS=0.000;  |
| 43311 | chrY | 22292935 | . | A | C   | 30.02    | PASS          | AC=2;AF=0.333;AN=6;DP=5;FS=0.000;  |
| 43312 | chrY | 22292945 | . | G | C   | 31.93    | PASS          | AC=2;AF=0.500;AN=4;DP=4;FS=0.000;  |
| 43313 | chrY | 22293311 | . | G | T   | 53.24    | my_snp_filter | AC=2;AF=0.063;AN=32;DP=71          |
| 43314 | chrY | 22293312 | . | A | T   | 49.18    | PASS          | AC=2;AF=0.038;AN=52;DP=75;FS=0.00  |
| 43315 | chrY | 22293314 | . | A | C   | 51.09    | PASS          | AC=2;AF=0.043;AN=46;DP=70;FS=0.00  |
| 43316 | chrY | 22293320 | . | G | T   | 52.57    | PASS          | AC=2;AF=0.053;AN=38;DP=62;FS=0.00  |
| 43317 | chrY | 22293350 | . | G | A   | 55.68    | PASS          | AC=2;AF=0.111;AN=18;DP=22;FS=0.00  |
| 43318 | chrY | 22293358 | . | A | T   | 60.95    | PASS          | AC=2;AF=0.333;AN=6;DP=18;FS=0.000  |
| 43319 | chrY | 22293378 | . | C | T   | 54.86    | PASS          | AC=2;AF=0.111;AN=18;DP=27;FS=0.00  |
| 43320 | chrY | 22293437 | . | T | A   | 487.36   | PASS          | AC=10;AF=0.833;AN=12;DP=81;FS=0.00 |

|       |      |          |   |   |   |          |               |                                    |
|-------|------|----------|---|---|---|----------|---------------|------------------------------------|
| 43321 | chrY | 22293473 | . | A | G | 1864.95  | PASS          | AC=25;AF=0.625;AN=40;BaseQRankSum= |
| 43322 | chrY | 22293571 | . | G | A | 772.66   | PASS          | AC=6;AF=0.088;AN=68;DP=391;FS=10.  |
| 43323 | chrY | 22293676 | . | T | G | 11452.98 | PASS          | AC=58;AF=1.00;AN=58;BaseQ          |
| 43324 | chrY | 22293825 | . | G | A | 166.35   | PASS          | AC=2;AF=0.030;AN=66;DP=313;FS=0.0  |
| 43325 | chrY | 22293914 | . | G | T | 213.21   | PASS          | AC=2;AF=0.029;AN=70;BaseQRankSum=  |
| 43326 | chrY | 22293969 | . | G | T | 667.37   | PASS          | AC=2;AF=0.029;AN=70;DP=586;FS=0.0  |
| 43327 | chrY | 22293981 | . | C | G | 19306.88 | PASS          | AC=64;AF=1.00;AN=64;BaseQ          |
| 43328 | chrY | 22293992 | . | G | T | 2456.58  | PASS          | AC=6;AF=0.088;AN=68;BaseQRankSum=  |
| 43329 | chrY | 22294043 | . | C | A | 84.98    | PASS          | AC=1;AF=0.014;AN=70;BaseQRankSum=  |
| 43330 | chrY | 22294045 | . | T | A | 78.82    | PASS          | AC=1;AF=0.014;AN=70;BaseQRankSum=  |
| 43331 | chrY | 22294068 | . | A | G | 75.84    | PASS          | AC=1;AF=0.014;AN=70;BaseQRankSum=  |
| 43332 | chrY | 22294071 | . | T | G | 81.66    | PASS          | AC=1;AF=0.014;AN=70;BaseQRankSum=  |
| 43333 | chrY | 22294072 | . | C | T | 81.98    | PASS          | AC=1;AF=0.014;AN=70;BaseQRankSum=  |
| 43334 | chrY | 22294073 | . | T | C | 188.72   | PASS          | AC=1;AF=0.014;AN=70;BaseQRankSum=  |
| 43335 | chrY | 22294292 | . | A | T | 927.08   | PASS          | AC=6;AF=0.086;AN=70;DP=487;FS=0.0  |
| 43336 | chrY | 22294405 | . | G | C | 1075.26  | PASS          | AC=2;AF=0.029;AN=70;DP=654;FS=0.0  |
| 43337 | chrY | 22294521 | . | C | T | 16373.06 | PASS          | AC=62;AF=1.00;AN=62;BaseQ          |
| 43338 | chrY | 22294522 | . | C | T | 16048.17 | PASS          | AC=62;AF=1.00;AN=62;BaseQ          |
| 43339 | chrY | 22294535 | . | C | T | 14321.96 | PASS          | AC=60;AF=1.00;AN=60;DP=31          |
| 43340 | chrY | 22294541 | . | C | T | 13335.97 | PASS          | AC=60;AF=1.00;AN=60;DP=30          |
| 43341 | chrY | 22294664 | . | T | C | 463.83   | PASS          | AC=8;AF=0.121;AN=66;BaseQRankSum=  |
| 43342 | chrY | 22294666 | . | T | A | 382.80   | my_snp_filter | AC=8;AF=0.121;AN=66;BaseQ          |
| 43343 | chrY | 22294693 | . | G | C | 62.59    | my_snp_filter | AC=2;AF=0.032;AN=62;BaseQ          |
| 43344 | chrY | 22294694 | . | C | T | 62.30    | my_snp_filter | AC=2;AF=0.031;AN=64;BaseQ          |
| 43345 | chrY | 22294699 | . | T | C | 62.21    | my_snp_filter | AC=2;AF=0.030;AN=66;BaseQ          |
| 43346 | chrY | 22294706 | . | T | A | 45.13    | my_snp_filter | AC=1;AF=0.016;AN=64;BaseQ          |
| 43347 | chrY | 22294786 | . | G | C | 304.88   | my_snp_filter | AC=4;AF=0.069;AN=58;DP=26          |
| 43348 | chrY | 22294944 | . | G | A | 730.73   | my_snp_filter | AC=19;AF=0.528;AN=36;BaseQ         |
| 43349 | chrY | 22295001 | . | T | A | 584.69   | PASS          | AC=11;AF=0.611;AN=18;BaseQRankSum= |
| 43350 | chrY | 22295012 | . | G | A | 605.33   | my_snp_filter | AC=8;AF=0.400;AN=20;BaseQ          |
| 43351 | chrY | 22295019 | . | C | T | 222.99   | PASS          | AC=4;AF=0.222;AN=18;DP=43;FS=0.00  |
| 43352 | chrY | 22295021 | . | T | A | 45.24    | my_snp_filter | AC=1;AF=0.033;AN=30;BaseQ          |
| 43353 | chrY | 22295025 | . | A | G | 223.33   | my_snp_filter | AC=3;AF=0.250;AN=12;BaseQ          |
| 43354 | chrY | 22295027 | . | C | T | 141.12   | my_snp_filter | AC=2;AF=0.111;AN=18;DP=45          |
| 43355 | chrY | 22295038 | . | T | A | 55.25    | my_snp_filter | AC=2;AF=0.091;AN=22;DP=47          |
| 43356 | chrY | 22295041 | . | T | A | 55.21    | my_snp_filter | AC=2;AF=0.091;AN=22;DP=49          |
| 43357 | chrY | 22295109 | . | C | G | 526.11   | my_snp_filter | AC=3;AF=0.150;AN=20;BaseQ          |
| 43358 | chrY | 22295117 | . | T | A | 524.93   | my_snp_filter | AC=3;AF=0.150;AN=20;BaseQ          |
| 43359 | chrY | 22295128 | . | G | A | 520.54   | my_snp_filter | AC=3;AF=0.150;AN=20;BaseQ          |
| 43360 | chrY | 22295193 | . | C | T | 347.29   | my_snp_filter | AC=5;AF=0.139;AN=36;BaseQ          |
| 43361 | chrY | 22295221 | . | T | A | 206.10   | my_snp_filter | AC=2;AF=0.045;AN=44;BaseQ          |
| 43362 | chrY | 22295230 | . | C | G | 112.30   | my_snp_filter | AC=2;AF=0.045;AN=44;BaseQ          |
| 43363 | chrY | 22295252 | . | T | G | 65.15    | my_snp_filter | AC=1;AF=0.020;AN=50;BaseQ          |
| 43364 | chrY | 22295355 | . | C | A | 508.72   | my_snp_filter | AC=9;AF=0.132;AN=68;BaseQ          |
| 43365 | chrY | 22295364 | . | C | G | 757.87   | my_snp_filter | AC=14;AF=0.219;AN=64;BaseQ         |
| 43366 | chrY | 22295372 | . | A | C | 172.82   | my_snp_filter | AC=4;AF=0.061;AN=66;BaseQ          |
| 43367 | chrY | 22295384 | . | A | C | 339.45   | PASS          | AC=6;AF=0.088;AN=68;BaseQRankSum=  |
| 43368 | chrY | 22295408 | . | T | G | 212.21   | PASS          | AC=4;AF=0.065;AN=62;DP=257;FS=0.0  |
| 43369 | chrY | 22295437 | . | G | A | 47.71    | PASS          | AC=1;AF=0.019;AN=54;BaseQRankSum=  |
| 43370 | chrY | 22295445 | . | C | A | 47.78    | PASS          | AC=1;AF=0.018;AN=56;DP=167;FS=0.0  |
| 43371 | chrY | 22295446 | . | A | C | 52.81    | PASS          | AC=2;AF=0.037;AN=54;DP=163;FS=0.0  |
| 43372 | chrY | 22295570 | . | A | C | 2544.63  | my_snp_filter | AC=30;AF=0.714;AN=42;DP=2          |
| 43373 | chrY | 22295778 | . | C | A | 243.23   | my_snp_filter | AC=6;AF=0.250;AN=24;DP=50          |
| 43374 | chrY | 22295906 | . | G | T | 34.15    | my_snp_filter | AC=2;AF=0.167;AN=12;DP=17          |
| 43375 | chrY | 22295995 | . | C | T | 60.86    | PASS          | AC=3;AF=0.150;AN=20;BaseQRankSum=  |
| 43376 | chrY | 22296044 | . | C | T | 402.22   | PASS          | AC=5;AF=0.096;AN=52;BaseQRankSum=  |
| 43377 | chrY | 22296093 | . | G | T | 66.95    | PASS          | AC=3;AF=0.068;AN=44;BaseQRankSum=  |
| 43378 | chrY | 22296098 | . | C | G | 3224.61  | PASS          | AC=21;AF=0.955;AN=22;BaseQRankSum= |
| 43379 | chrY | 22296099 | . | A | G | 3224.61  | PASS          | AC=21;AF=0.955;AN=22;BaseQRankSum= |
| 43380 | chrY | 22296126 | . | G | T | 63.86    | PASS          | AC=3;AF=0.071;AN=42;BaseQRankSum=  |
| 43381 | chrY | 22296131 | . | G | C | 64.42    | PASS          | AC=3;AF=0.071;AN=42;BaseQRankSum=  |
| 43382 | chrY | 22296133 | . | T | A | 66.19    | PASS          | AC=3;AF=0.068;AN=44;BaseQRankSum=  |
| 43383 | chrY | 22296152 | . | T | G | 2443.07  | PASS          | AC=24;AF=0.923;AN=26;BaseQRankSum= |
| 43384 | chrY | 22296169 | . | C | T | 65.22    | PASS          | AC=2;AF=0.040;AN=50;BaseQRankSum=  |
| 43385 | chrY | 22296171 | . | C | T | 57.57    | PASS          | AC=2;AF=0.040;AN=50;BaseQRankSum=  |
| 43386 | chrY | 22296174 | . | C | A | 58.38    | PASS          | AC=2;AF=0.038;AN=52;BaseQRankSum=  |
| 43387 | chrY | 22296181 | . | A | G | 33.33    | PASS          | AC=1;AF=0.019;AN=52;BaseQRankSum=  |
| 43388 | chrY | 22296209 | . | T | C | 32.44    | PASS          | AC=1;AF=0.020;AN=50;BaseQRankSum=  |
| 43389 | chrY | 22296218 | . | G | T | 30.31    | PASS          | AC=1;AF=0.021;AN=48;BaseQRankSum=  |
| 43390 | chrY | 22296341 | . | C | A | 377.99   | PASS          | AC=4;AF=0.069;AN=58;BaseQRankSum=  |
| 43391 | chrY | 22296362 | . | A | T | 375.13   | PASS          | AC=4;AF=0.065;AN=62;BaseQRankSum=  |
| 43392 | chrY | 22296392 | . | A | C | 37.14    | PASS          | AC=1;AF=0.017;AN=58;BaseQRankSum=  |
| 43393 | chrY | 22296396 | . | G | C | 36.49    | PASS          | AC=1;AF=0.017;AN=60;BaseQRankSum=  |
| 43394 | chrY | 22296540 | . | G | C | 534.13   | my_snp_filter | AC=9;AF=0.145;AN=62;BaseQ          |
| 43395 | chrY | 22296563 | . | T | G | 40.56    | PASS          | AC=1;AF=0.016;AN=64;BaseQRankSum=  |
| 43396 | chrY | 22296570 | . | G | C | 44.56    | PASS          | AC=1;AF=0.016;AN=62;BaseQRankSum=  |

|       |      |          |   |   |     |          |               |                                   |
|-------|------|----------|---|---|-----|----------|---------------|-----------------------------------|
| 43397 | chrY | 22296579 | . | T | G   | 40.38    | my_snp_filter | AC=1;AF=0.016;AN=62;BaseQ         |
| 43398 | chrY | 22296608 | . | T | C   | 6491.26  | PASS          | AC=30;AF=0.484;AN=62;BaseQRankSum |
| 43399 | chrY | 22296636 | . | T | C   | 295.20   | PASS          | AC=2;AF=0.029;AN=70;BaseQRankSum= |
| 43400 | chrY | 22296684 | . | A | T   | 4512.20  | PASS          | AC=17;AF=0.250;AN=68;BaseQRankSum |
| 43401 | chrY | 22296687 | . | G | C   | 4788.51  | PASS          | AC=17;AF=0.250;AN=68;BaseQRankSum |
| 43402 | chrY | 22296689 | . | T | G   | 4759.50  | PASS          | AC=17;AF=0.250;AN=68;BaseQRankSum |
| 43403 | chrY | 22296695 | . | C | A   | 7774.15  | PASS          | AC=29;AF=0.426;AN=68;BaseQRankSum |
| 43404 | chrY | 22296697 | . | T | C   | 5055.53  | PASS          | AC=17;AF=0.250;AN=68;BaseQRankSum |
| 43405 | chrY | 22296754 | . | G | A   | 4648.94  | PASS          | AC=19;AF=0.288;AN=66;BaseQRankSum |
| 43406 | chrY | 22296756 | . | G | A   | 604.73   | PASS          | AC=1;AF=0.015;AN=66;BaseQRankSum= |
| 43407 | chrY | 22296777 | . | G | A   | 1811.57  | PASS          | AC=3;AF=0.045;AN=66;BaseQRankSum= |
| 43408 | chrY | 22296783 | . | A | T   | 14534.15 | PASS          | AC=32;AF=0.500;AN=64;BaseQ        |
| 43409 | chrY | 22296789 | . | C | T   | 3473.14  | PASS          | AC=15;AF=0.227;AN=66;BaseQRankSum |
| 43410 | chrY | 22296801 | . | A | C   | 3139.68  | PASS          | AC=12;AF=0.188;AN=64;BaseQRankSum |
| 43411 | chrY | 22296805 | . | A | G   | 3079.87  | PASS          | AC=12;AF=0.188;AN=64;BaseQRankSum |
| 43412 | chrY | 22296826 | . | G | T   | 2264.66  | PASS          | AC=8;AF=0.125;AN=64;BaseQRankSum= |
| 43413 | chrY | 22296828 | . | A | T   | 160.33   | PASS          | AC=2;AF=0.030;AN=66;BaseQRankSum= |
| 43414 | chrY | 22296836 | . | T | A   | 157.25   | PASS          | AC=2;AF=0.029;AN=68;BaseQRankSum= |
| 43415 | chrY | 22296849 | . | G | T   | 1335.65  | PASS          | AC=7;AF=0.109;AN=64;BaseQRankSum= |
| 43416 | chrY | 22296856 | . | C | G   | 6590.74  | PASS          | AC=28;AF=0.483;AN=58;BaseQRankSum |
| 43417 | chrY | 22296919 | . | C | T   | 3125.93  | PASS          | AC=22;AF=0.355;AN=62;BaseQRankSum |
| 43418 | chrY | 22296923 | . | C | A   | 43.38    | PASS          | AC=1;AF=0.015;AN=68;BaseQRankSum= |
| 43419 | chrY | 22296936 | . | G | T   | 53.89    | PASS          | AC=2;AF=0.030;AN=66;BaseQRankSum= |
| 43420 | chrY | 22296937 | . | C | G   | 973.05   | PASS          | AC=3;AF=0.045;AN=66;BaseQRankSum= |
| 43421 | chrY | 22296941 | . | A | T   | 3344.70  | PASS          | AC=18;AF=0.310;AN=58;BaseQRankSum |
| 43422 | chrY | 22296951 | . | C | G   | 2945.34  | PASS          | AC=16;AF=0.276;AN=58;BaseQRankSum |
| 43423 | chrY | 22296968 | . | T | G   | 35       | PASS          | AC=1;AF=0.016;AN=62;BaseQRankSum= |
| 43424 | chrY | 22296975 | . | T | A   | 35.06    | PASS          | AC=1;AF=0.017;AN=58;BaseQRankSum= |
| 43425 | chrY | 22296981 | . | G | A   | 38.08    | PASS          | AC=1;AF=0.018;AN=56;BaseQRankSum= |
| 43426 | chrY | 22297025 | . | G | T,* | 2681.33  | PASS          | AC=20,6;AF=0.714,0.214;AN=28;DP=7 |
| 43427 | chrY | 22297028 | . | C | A   | 1980.04  | PASS          | AC=20;AF=0.909;AN=22;DP=84;FS=0.0 |
| 43428 | chrY | 22297029 | . | T | A   | 1980.04  | PASS          | AC=20;AF=0.909;AN=22;DP=84;FS=0.0 |
| 43429 | chrY | 22297073 | . | G | A,* | 894.64   | PASS          | AC=4,6;AF=0.333,0.500;AN=12;DP=20 |
| 43430 | chrY | 22297817 | . | C | G   | 196.03   | PASS          | AC=6;AF=1.00;AN=6;DP=67;FS=0.000; |
| 43431 | chrY | 22297867 | . | T | A   | 589.56   | PASS          | AC=7;AF=0.292;AN=24;BaseQRankSum= |
| 43432 | chrY | 22297870 | . | G | T   | 605.32   | PASS          | AC=7;AF=0.500;AN=14;BaseQRankSum= |
| 43433 | chrY | 22297973 | . | A | G   | 641.33   | PASS          | AC=3;AF=0.045;AN=66;BaseQRankSum= |
| 43434 | chrY | 22298015 | . | G | C   | 531.73   | PASS          | AC=5;AF=0.083;AN=60;BaseQRankSum= |
| 43435 | chrY | 22298024 | . | T | A   | 395.48   | PASS          | AC=4;AF=0.069;AN=58;BaseQRankSum= |
| 43436 | chrY | 22298063 | . | T | G   | 108.46   | PASS          | AC=2;AF=0.033;AN=60;DP=222;FS=0.0 |
| 43437 | chrY | 22298258 | . | A | G   | 1368.13  | PASS          | AC=16;AF=0.250;AN=64;BaseQRankSum |
| 43438 | chrY | 22298279 | . | G | A   | 4698.50  | PASS          | AC=21;AF=0.318;AN=66;BaseQRankSum |
| 43439 | chrY | 22298321 | . | C | A   | 286.35   | PASS          | AC=2;AF=0.030;AN=66;BaseQRankSum= |
| 43440 | chrY | 22298322 | . | C | T   | 4211.89  | PASS          | AC=23;AF=0.348;AN=66;BaseQRankSum |
| 43441 | chrY | 22298339 | . | C | A   | 3954.96  | PASS          | AC=22;AF=0.314;AN=70;BaseQRankSum |
| 43442 | chrY | 22298344 | . | C | T   | 348.77   | PASS          | AC=2;AF=0.029;AN=68;BaseQRankSum= |
| 43443 | chrY | 22298346 | . | T | G   | 346.30   | PASS          | AC=2;AF=0.029;AN=68;BaseQRankSum= |
| 43444 | chrY | 22298366 | . | A | T   | 1562.27  | PASS          | AC=14;AF=0.212;AN=66;BaseQRankSum |
| 43445 | chrY | 22298393 | . | A | T   | 221.54   | PASS          | AC=5;AF=0.078;AN=64;BaseQRankSum= |
| 43446 | chrY | 22298403 | . | G | A   | 7481.50  | PASS          | AC=42;AF=0.618;AN=68;BaseQRankSum |
| 43447 | chrY | 22298413 | . | T | A   | 46.30    | PASS          | AC=2;AF=0.029;AN=70;DP=489;FS=0.0 |
| 43448 | chrY | 22298433 | . | A | G   | 45.76    | PASS          | AC=2;AF=0.029;AN=70;DP=539;FS=0.0 |
| 43449 | chrY | 22298447 | . | C | A   | 1521.15  | my_snp_filter | AC=11;AF=0.167;AN=66;BaseQ        |
| 43450 | chrY | 22298450 | . | T | C   | 107.17   | my_snp_filter | AC=2;AF=0.029;AN=70;BaseQ         |
| 43451 | chrY | 22298452 | . | C | T   | 3393.70  | my_snp_filter | AC=20;AF=0.313;AN=64;BaseQ        |
| 43452 | chrY | 22298454 | . | G | C   | 104.25   | my_snp_filter | AC=2;AF=0.029;AN=70;BaseQ         |
| 43453 | chrY | 22298457 | . | A | C   | 1943.55  | my_snp_filter | AC=11;AF=0.167;AN=66;BaseQ        |
| 43454 | chrY | 22298458 | . | G | T   | 1940.56  | my_snp_filter | AC=11;AF=0.167;AN=66;BaseQ        |
| 43455 | chrY | 22298469 | . | C | G   | 7473.87  | my_snp_filter | AC=30;AF=0.429;AN=70;BaseQ        |
| 43456 | chrY | 22298481 | . | A | G   | 7027.34  | my_snp_filter | AC=30;AF=0.441;AN=68;BaseQ        |
| 43457 | chrY | 22298497 | . | C | T   | 6326.62  | my_snp_filter | AC=27;AF=0.386;AN=70;BaseQ        |
| 43458 | chrY | 22298545 | . | G | C   | 7601.55  | PASS          | AC=28;AF=0.412;AN=68;BaseQRankSum |
| 43459 | chrY | 22298549 | . | G | C   | 2292.77  | my_snp_filter | AC=20;AF=0.294;AN=68;BaseQ        |
| 43460 | chrY | 22298554 | . | A | C   | 2243.89  | my_snp_filter | AC=20;AF=0.303;AN=66;BaseQ        |
| 43461 | chrY | 22298572 | . | C | T,A | 7732.50  | PASS          | AC=16,16;AF=0.250,0.250;AN=64;Bas |
| 43462 | chrY | 22298581 | . | T | A   | 7967.42  | PASS          | AC=35;AF=0.530;AN=66;BaseQRankSum |
| 43463 | chrY | 22298595 | . | T | A   | 4495.37  | PASS          | AC=23;AF=0.348;AN=66;BaseQRankSum |
| 43464 | chrY | 22298619 | . | T | G   | 282.63   | PASS          | AC=4;AF=0.065;AN=62;BaseQRankSum= |
| 43465 | chrY | 22298663 | . | T | A   | 1219.63  | my_snp_filter | AC=11;AF=0.190;AN=58;BaseQ        |
| 43466 | chrY | 22298716 | . | A | G   | 41.95    | my_snp_filter | AC=2;AF=0.034;AN=58;BaseQ         |
| 43467 | chrY | 22298718 | . | T | A   | 36.03    | my_snp_filter | AC=2;AF=0.034;AN=58;BaseQ         |
| 43468 | chrY | 22298805 | . | A | C   | 405.92   | PASS          | AC=3;AF=0.050;AN=60;BaseQRankSum= |
| 43469 | chrY | 22298822 | . | C | T   | 25188.84 | PASS          | AC=45;AF=0.750;AN=60;BaseQ        |
| 43470 | chrY | 22298879 | . | A | T   | 793.92   | PASS          | AC=3;AF=0.050;AN=60;BaseQRankSum= |
| 43471 | chrY | 22299040 | . | G | T   | 514.36   | PASS          | AC=1;AF=0.017;AN=60;BaseQRankSum= |
| 43472 | chrY | 22299099 | . | T | A   | 46.66    | my_snp_filter | AC=2;AF=0.034;AN=58;DP=52         |

|       |      |          |   |   |     |          |               |                                    |
|-------|------|----------|---|---|-----|----------|---------------|------------------------------------|
| 43473 | chrY | 22299121 | . | T | C   | 73.97    | my_snp_filter | AC=2;AF=0.034;AN=58;DP=48          |
| 43474 | chrY | 22299430 | . | C | T   | 1100.97  | PASS          | AC=5;AF=0.078;AN=64;BaseQRankSum=  |
| 43475 | chrY | 22299577 | . | T | C   | 32.19    | my_snp_filter | AC=1;AF=0.016;AN=62;BaseQ          |
| 43476 | chrY | 22299601 | . | A | T   | 53.36    | my_snp_filter | AC=1;AF=0.017;AN=60;BaseQ          |
| 43477 | chrY | 22299603 | . | G | T   | 56.65    | PASS          | AC=1;AF=0.017;AN=60;BaseQRankSum=  |
| 43478 | chrY | 22299706 | . | G | T   | 1016.33  | PASS          | AC=6;AF=0.094;AN=64;BaseQRankSum=  |
| 43479 | chrY | 22299726 | . | A | T   | 7867.44  | PASS          | AC=40;AF=0.625;AN=64;DP=478;FS=0.  |
| 43480 | chrY | 22299830 | . | G | T   | 722.87   | PASS          | AC=3;AF=0.047;AN=64;BaseQRankSum=  |
| 43481 | chrY | 22299844 | . | T | C   | 15914.90 | PASS          | AC=64;AF=1.00;AN=64;BaseQ          |
| 43482 | chrY | 22300054 | . | C | T   | 515.96   | PASS          | AC=6;AF=0.097;AN=62;DP=476;FS=0.   |
| 43483 | chrY | 22300233 | . | T | G   | 6282.39  | PASS          | AC=31;AF=0.554;AN=56;BaseQRankSum= |
| 43484 | chrY | 22300485 | . | C | A   | 31       | my_snp_filter | AC=1;AF=0.016;AN=64;BaseQ          |
| 43485 | chrY | 22300500 | . | C | T   | 31.76    | my_snp_filter | AC=1;AF=0.016;AN=64;BaseQ          |
| 43486 | chrY | 22300514 | . | A | T   | 43.37    | my_snp_filter | AC=1;AF=0.016;AN=64;BaseQ          |
| 43487 | chrY | 22300707 | . | A | G   | 286.55   | PASS          | AC=3;AF=0.050;AN=60;BaseQRankSum=  |
| 43488 | chrY | 22300724 | . | A | C   | 443.30   | PASS          | AC=9;AF=0.167;AN=54;BaseQRankSum=  |
| 43489 | chrY | 22300813 | . | G | A   | 122.33   | PASS          | AC=1;AF=0.026;AN=38;BaseQRankSum=  |
| 43490 | chrY | 22300822 | . | C | A   | 127.59   | PASS          | AC=1;AF=0.063;AN=16;BaseQRankSum=  |
| 43491 | chrY | 22300825 | . | A | T   | 49.05    | PASS          | AC=1;AF=0.083;AN=12;BaseQRankSum=  |
| 43492 | chrY | 22300826 | . | G | A   | 44.88    | PASS          | AC=1;AF=0.071;AN=14;BaseQRankSum=  |
| 43493 | chrY | 22300832 | . | A | C   | 46.02    | PASS          | AC=1;AF=0.063;AN=16;BaseQRankSum=  |
| 43494 | chrY | 22300833 | . | G | T   | 47.46    | PASS          | AC=1;AF=0.063;AN=16;BaseQRankSum=  |
| 43495 | chrY | 22300834 | . | G | T   | 52.92    | PASS          | AC=1;AF=0.071;AN=14;BaseQRankSum=  |
| 43496 | chrY | 22300851 | . | T | G   | 101.08   | PASS          | AC=2;AF=0.500;AN=4;DP=12;FS=0.000  |
| 43497 | chrY | 22300874 | . | G | T   | 101.06   | PASS          | AC=2;AF=0.500;AN=4;DP=5;FS=0.000;  |
| 43498 | chrY | 22301114 | . | A | G   | 62.28    | my_snp_filter | AC=2;AF=0.040;AN=50;BaseQ          |
| 43499 | chrY | 22301149 | . | T | A   | 367.94   | PASS          | AC=5;AF=0.081;AN=62;BaseQRankSum=  |
| 43500 | chrY | 22301220 | . | A | T   | 7844.63  | PASS          | AC=57;AF=0.983;AN=58;BaseQRankSum= |
| 43501 | chrY | 22301237 | . | G | C   | 104.45   | PASS          | AC=4;AF=0.061;AN=66;BaseQRankSum=  |
| 43502 | chrY | 22301243 | . | G | T   | 2166.12  | my_snp_filter | AC=14;AF=0.219;AN=64;Base          |
| 43503 | chrY | 22301260 | . | T | C   | 418.26   | PASS          | AC=7;AF=0.109;AN=64;BaseQRankSum=  |
| 43504 | chrY | 22301398 | . | T | C   | 213.73   | PASS          | AC=1;AF=0.015;AN=68;BaseQRankSum=  |
| 43505 | chrY | 22301584 | . | T | G   | 41.48    | PASS          | AC=1;AF=0.022;AN=46;BaseQRankSum=  |
| 43506 | chrY | 22301589 | . | A | G   | 1402.35  | PASS          | AC=26;AF=0.765;AN=34;BaseQRankSum= |
| 43507 | chrY | 22301598 | . | G | T   | 471.11   | my_snp_filter | AC=12;AF=0.462;AN=26;Base          |
| 43508 | chrY | 22301617 | . | T | G   | 180.19   | my_snp_filter | AC=7;AF=0.318;AN=22;BaseQ          |
| 43509 | chrY | 22301663 | . | C | G   | 5466.31  | PASS          | AC=51;AF=0.981;AN=52;BaseQRankSum= |
| 43510 | chrY | 22301742 | . | G | T   | 371.05   | PASS          | AC=3;AF=0.043;AN=70;BaseQRankSum=  |
| 43511 | chrY | 22301798 | . | A | C   | 5568.21  | my_snp_filter | AC=31;AF=0.443;AN=70;Base          |
| 43512 | chrY | 22301823 | . | A | G   | 61.13    | PASS          | AC=1;AF=0.014;AN=70;BaseQRankSum=  |
| 43513 | chrY | 22301827 | . | T | G   | 88.50    | my_snp_filter | AC=3;AF=0.043;AN=70;BaseQ          |
| 43514 | chrY | 22301828 | . | T | G   | 58.03    | PASS          | AC=1;AF=0.014;AN=70;BaseQRankSum=  |
| 43515 | chrY | 22301867 | . | A | G   | 313.13   | my_snp_filter | AC=3;AF=0.043;AN=70;BaseQ          |
| 43516 | chrY | 22301989 | . | A | T   | 825.67   | PASS          | AC=11;AF=0.162;AN=68;BaseQRankSum= |
| 43517 | chrY | 22301992 | . | C | G   | 825.26   | PASS          | AC=11;AF=0.162;AN=68;BaseQRankSum= |
| 43518 | chrY | 22302080 | . | A | G   | 4852.81  | PASS          | AC=28;AF=0.424;AN=66;BaseQRankSum= |
| 43519 | chrY | 22302093 | . | G | A   | 99.16    | my_snp_filter | AC=2;AF=0.030;AN=66;BaseQ          |
| 43520 | chrY | 22302096 | . | T | C   | 93.16    | my_snp_filter | AC=2;AF=0.030;AN=66;BaseQ          |
| 43521 | chrY | 22302097 | . | A | T   | 73.56    | my_snp_filter | AC=2;AF=0.030;AN=66;BaseQ          |
| 43522 | chrY | 22302105 | . | G | A   | 75.19    | my_snp_filter | AC=2;AF=0.030;AN=66;BaseQ          |
| 43523 | chrY | 22302112 | . | G | C   | 4292.52  | PASS          | AC=30;AF=0.455;AN=66;BaseQRankSum= |
| 43524 | chrY | 22302171 | . | A | T   | 43.27    | my_snp_filter | AC=1;AF=0.015;AN=66;BaseQ          |
| 43525 | chrY | 22302276 | . | G | T   | 11929.93 | PASS          | AC=56;AF=1.00;AN=56;DP=39          |
| 43526 | chrY | 22302429 | . | T | C   | 7215.68  | my_snp_filter | AC=41;AF=0.621;AN=66;Base          |
| 43527 | chrY | 22302537 | . | C | T   | 16219.93 | PASS          | AC=60;AF=1.00;AN=60;DP=37          |
| 43528 | chrY | 22302708 | . | T | A   | 4092.41  | PASS          | AC=44;AF=0.786;AN=56;DP=309;FS=0.  |
| 43529 | chrY | 22302729 | . | G | T   | 1060.77  | PASS          | AC=3;AF=0.050;AN=60;BaseQRankSum=  |
| 43530 | chrY | 22302997 | . | T | A   | 48.80    | PASS          | AC=2;AF=0.034;AN=58;BaseQRankSum=  |
| 43531 | chrY | 22303000 | . | T | G   | 33.77    | PASS          | AC=1;AF=0.018;AN=56;BaseQRankSum=  |
| 43532 | chrY | 22303133 | . | T | A   | 5740.27  | PASS          | AC=37;AF=0.974;AN=38;BaseQRankSum= |
| 43533 | chrY | 22303211 | . | G | T,* | 1582.91  | PASS          | AC=10,2;AF=0.147,0.029;AN=68;Base  |
| 43534 | chrY | 22303218 | . | C | T,* | 1812.81  | PASS          | AC=10,2;AF=0.156,0.031;AN=64;Base  |
| 43535 | chrY | 22303306 | . | T | C,* | 1848.89  | PASS          | AC=10,4;AF=0.152,0.061;AN=66;Base  |
| 43536 | chrY | 22303309 | . | C | T   | 158.91   | PASS          | AC=3;AF=0.044;AN=68;BaseQRankSum=  |
| 43537 | chrY | 22303311 | . | A | G   | 153.92   | PASS          | AC=3;AF=0.043;AN=70;BaseQRankSum=  |
| 43538 | chrY | 22303364 | . | A | T   | 6361.71  | my_snp_filter | AC=20;AF=0.294;AN=68;Base          |
| 43539 | chrY | 22303387 | . | G | A   | 1211.39  | PASS          | AC=3;AF=0.045;AN=66;BaseQRankSum=  |
| 43540 | chrY | 22303422 | . | A | G   | 9549.60  | PASS          | AC=24;AF=0.364;AN=66;BaseQRankSum= |
| 43541 | chrY | 22303425 | . | T | A   | 663.44   | PASS          | AC=9;AF=0.129;AN=70;BaseQRankSum=  |
| 43542 | chrY | 22303453 | . | C | T   | 622.33   | PASS          | AC=7;AF=0.109;AN=64;BaseQRankSum=  |
| 43543 | chrY | 22303458 | . | C | G   | 8349.69  | PASS          | AC=18;AF=0.321;AN=56;BaseQRankSum= |
| 43544 | chrY | 22303463 | . | A | G   | 7807.73  | PASS          | AC=18;AF=0.310;AN=58;BaseQRankSum= |
| 43545 | chrY | 22303464 | . | A | G   | 618.39   | PASS          | AC=5;AF=0.081;AN=62;BaseQRankSum=  |
| 43546 | chrY | 22303466 | . | C | T   | 8228.96  | PASS          | AC=23;AF=0.442;AN=52;BaseQRankSum= |
| 43547 | chrY | 22303470 | . | C | A   | 527.24   | my_snp_filter | AC=5;AF=0.078;AN=64;BaseQ          |
| 43548 | chrY | 22303500 | . | G | C   | 5738.94  | PASS          | AC=20;AF=0.303;AN=66;BaseQRankSum= |

|       |      |          |   |   |     |          |               |                                     |
|-------|------|----------|---|---|-----|----------|---------------|-------------------------------------|
| 43549 | chrY | 22303512 | . | C | G   | 9878.60  | my_snp_filter | AC=29;AF=0.537;AN=54;BaseQ=         |
| 43550 | chrY | 22303528 | . | C | T   | 3044.76  | my_snp_filter | AC=10;AF=0.152;AN=66;BaseQ=         |
| 43551 | chrY | 22303530 | . | T | A   | 42.92    | PASS          | AC=1;AF=0.015;AN=68;BaseQRankSum=   |
| 43552 | chrY | 22303578 | . | C | A   | 1257.24  | my_snp_filter | AC=7;AF=0.103;AN=68;BaseQ=          |
| 43553 | chrY | 22303583 | . | C | T   | 1814.26  | my_snp_filter | AC=11;AF=0.172;AN=64;BaseQ=         |
| 43554 | chrY | 22303588 | . | A | C   | 1032.64  | PASS          | AC=6;AF=0.094;AN=64;BaseQRankSum=   |
| 43555 | chrY | 22303589 | . | G | T   | 1031.83  | my_snp_filter | AC=6;AF=0.094;AN=64;BaseQ=          |
| 43556 | chrY | 22303730 | . | T | A   | 248.94   | my_snp_filter | AC=5;AF=0.109;AN=46;BaseQ=          |
| 43557 | chrY | 22303739 | . | G | A   | 157.41   | my_snp_filter | AC=2;AF=0.040;AN=50;DP=18           |
| 43558 | chrY | 22303926 | . | T | A   | 574.84   | PASS          | AC=5;AF=0.076;AN=66;BaseQRankSum=   |
| 43559 | chrY | 22303945 | . | C | A   | 523.27   | PASS          | AC=4;AF=0.059;AN=68;BaseQRankSum=   |
| 43560 | chrY | 22303981 | . | G | A,* | 2491.63  | PASS          | AC=3,10;AF=0.044,0.147;AN=68;BaseQ= |
| 43561 | chrY | 22303983 | . | T | C,* | 2068.69  | PASS          | AC=3,10;AF=0.045,0.152;AN=66;BaseQ= |
| 43562 | chrY | 22303995 | . | A | C,* | 2496.24  | PASS          | AC=3,10;AF=0.045,0.152;AN=66;BaseQ= |
| 43563 | chrY | 22304006 | . | T | A,* | 2294.60  | PASS          | AC=3,10;AF=0.045,0.152;AN=66;BaseQ= |
| 43564 | chrY | 22304012 | . | T | G,* | 2310.50  | PASS          | AC=3,10;AF=0.045,0.152;AN=66;BaseQ= |
| 43565 | chrY | 22304054 | . | C | A,* | 2032.44  | PASS          | AC=1,10;AF=0.016,0.161;AN=62;BaseQ= |
| 43566 | chrY | 22306601 | . | C | G   | 178.44   | my_snp_filter | AC=2;AF=0.100;AN=20;BaseQ=          |
| 43567 | chrY | 22307089 | . | A | G   | 109.09   | my_snp_filter | AC=3;AF=0.375;AN=8;BaseQR=          |
| 43568 | chrY | 22307339 | . | T | C   | 43.44    | my_snp_filter | AC=1;AF=0.016;AN=62;BaseQ=          |
| 43569 | chrY | 22307369 | . | C | G   | 186.58   | my_snp_filter | AC=9;AF=0.145;AN=62;BaseQ=          |
| 43570 | chrY | 22307385 | . | G | T   | 43.38    | my_snp_filter | AC=2;AF=0.030;AN=66;BaseQ=          |
| 43571 | chrY | 22307452 | . | A | C   | 170.89   | my_snp_filter | AC=4;AF=0.077;AN=52;BaseQ=          |
| 43572 | chrY | 22307470 | . | G | T   | 109.41   | my_snp_filter | AC=2;AF=0.045;AN=44;BaseQ=          |
| 43573 | chrY | 22307480 | . | C | G   | 116.10   | my_snp_filter | AC=2;AF=0.040;AN=50;BaseQ=          |
| 43574 | chrY | 22308467 | . | G | T   | 112.38   | my_snp_filter | AC=2;AF=1.00;AN=2;DP=10;FS=         |
| 43575 | chrY | 22308470 | . | A | G   | 112.38   | my_snp_filter | AC=2;AF=1.00;AN=2;DP=10;FS=         |
| 43576 | chrY | 22308473 | . | A | T   | 112.38   | my_snp_filter | AC=2;AF=1.00;AN=2;DP=10;FS=         |
| 43577 | chrY | 22308489 | . | A | C   | 112.38   | my_snp_filter | AC=2;AF=1.00;AN=2;DP=9;FS=          |
| 43578 | chrY | 22308491 | . | G | C   | 112.38   | my_snp_filter | AC=2;AF=1.00;AN=2;DP=9;FS=          |
| 43579 | chrY | 22308494 | . | G | T   | 112.38   | my_snp_filter | AC=2;AF=1.00;AN=2;DP=9;FS=          |
| 43580 | chrY | 22308502 | . | C | T   | 112.38   | my_snp_filter | AC=2;AF=1.00;AN=2;DP=8;FS=          |
| 43581 | chrY | 22308531 | . | G | A   | 112.38   | my_snp_filter | AC=2;AF=1.00;AN=2;DP=9;FS=          |
| 43582 | chrY | 22311189 | . | A | G   | 47.93    | PASS          | AC=1;AF=0.063;AN=16;BaseQRankSum=   |
| 43583 | chrY | 22311205 | . | C | A   | 47.93    | PASS          | AC=1;AF=0.063;AN=16;BaseQRankSum=   |
| 43584 | chrY | 22311206 | . | C | A   | 48.82    | PASS          | AC=1;AF=0.071;AN=14;BaseQRankSum=   |
| 43585 | chrY | 22311214 | . | G | T   | 48.38    | PASS          | AC=1;AF=0.056;AN=18;BaseQRankSum=   |
| 43586 | chrY | 22311216 | . | G | C   | 48.38    | PASS          | AC=1;AF=0.056;AN=18;BaseQRankSum=   |
| 43587 | chrY | 22311218 | . | G | C   | 91.71    | PASS          | AC=3;AF=0.250;AN=12;BaseQRankSum=   |
| 43588 | chrY | 22311220 | . | A | T   | 48.38    | PASS          | AC=1;AF=0.056;AN=18;BaseQRankSum=   |
| 43589 | chrY | 22311223 | . | G | C   | 47.50    | PASS          | AC=1;AF=0.045;AN=22;BaseQRankSum=   |
| 43590 | chrY | 22312293 | . | G | T   | 331.31   | my_snp_filter | AC=6;AF=0.375;AN=16;DP=30           |
| 43591 | chrY | 22312640 | . | C | T   | 420.70   | my_snp_filter | AC=2;AF=0.029;AN=68;DP=45           |
| 43592 | chrY | 22312706 | . | G | T   | 636.05   | PASS          | AC=6;AF=0.100;AN=60;DP=175;FS=0.0   |
| 43593 | chrY | 22312709 | . | C | T   | 149.89   | PASS          | AC=1;AF=0.017;AN=60;BaseQRankSum=   |
| 43594 | chrY | 22312710 | . | C | A   | 149.53   | PASS          | AC=1;AF=0.017;AN=60;BaseQRankSum=   |
| 43595 | chrY | 22312790 | . | G | T   | 587.58   | PASS          | AC=6;AF=0.188;AN=32;DP=92;FS=0.00   |
| 43596 | chrY | 22314402 | . | C | T   | 1257.84  | PASS          | AC=6;AF=0.300;AN=20;DP=301;FS=0.0   |
| 43597 | chrY | 22314446 | . | T | G   | 7479.92  | my_snp_filter | AC=59;AF=0.952;AN=62;BaseQ=         |
| 43598 | chrY | 22314822 | . | A | C   | 334.91   | PASS          | AC=12;AF=1.00;AN=12;DP=15;FS=0.00   |
| 43599 | chrY | 22315433 | . | C | G   | 148.75   | my_snp_filter | AC=2;AF=0.100;AN=20;BaseQ=          |
| 43600 | chrY | 22315440 | . | G | T   | 40.09    | PASS          | AC=2;AF=0.083;AN=24;DP=54;FS=0.00   |
| 43601 | chrY | 22315533 | . | G | A   | 59.20    | PASS          | AC=2;AF=0.043;AN=46;DP=80;FS=0.00   |
| 43602 | chrY | 22315744 | . | C | T   | 231.35   | PASS          | AC=2;AF=0.031;AN=64;BaseQRankSum=   |
| 43603 | chrY | 22316252 | . | T | G   | 57.83    | PASS          | AC=1;AF=0.017;AN=58;BaseQRankSum=   |
| 43604 | chrY | 22316280 | . | A | C   | 163.88   | my_snp_filter | AC=4;AF=0.074;AN=54;BaseQ=          |
| 43605 | chrY | 22316304 | . | C | G   | 120.88   | my_snp_filter | AC=3;AF=0.058;AN=52;BaseQ=          |
| 43606 | chrY | 22316366 | . | A | G   | 661.57   | my_snp_filter | AC=8;AF=0.182;AN=44;BaseQ=          |
| 43607 | chrY | 22316424 | . | A | T   | 2957.85  | my_snp_filter | AC=11;AF=0.550;AN=20;BaseQ=         |
| 43608 | chrY | 22316445 | . | T | A   | 124.14   | my_snp_filter | AC=1;AF=0.019;AN=54;BaseQ=          |
| 43609 | chrY | 22316451 | . | C | G   | 4337.27  | my_snp_filter | AC=25;AF=0.735;AN=34;BaseQ=         |
| 43610 | chrY | 22316543 | . | T | C   | 3628.77  | PASS          | AC=30;AF=0.500;AN=60;BaseQRankSum=  |
| 43611 | chrY | 22316549 | . | G | T   | 95.43    | PASS          | AC=3;AF=0.047;AN=64;BaseQRankSum=   |
| 43612 | chrY | 22316560 | . | C | G   | 96.97    | PASS          | AC=3;AF=0.047;AN=64;BaseQRankSum=   |
| 43613 | chrY | 22316578 | . | A | T   | 89.36    | my_snp_filter | AC=2;AF=0.030;AN=66;DP=47           |
| 43614 | chrY | 22316647 | . | C | G   | 11046.02 | PASS          | AC=60;AF=1.00;AN=60;DP=39           |
| 43615 | chrY | 22316728 | . | A | G   | 67.39    | PASS          | AC=1;AF=0.016;AN=64;BaseQRankSum=   |
| 43616 | chrY | 22316739 | . | C | T   | 58.78    | PASS          | AC=1;AF=0.015;AN=66;BaseQRankSum=   |
| 43617 | chrY | 22316743 | . | T | A   | 58.78    | PASS          | AC=1;AF=0.015;AN=66;BaseQRankSum=   |
| 43618 | chrY | 22316759 | . | T | A   | 64.32    | PASS          | AC=1;AF=0.015;AN=68;BaseQRankSum=   |
| 43619 | chrY | 22316772 | . | G | C   | 71.22    | PASS          | AC=1;AF=0.015;AN=68;BaseQRankSum=   |
| 43620 | chrY | 22316774 | . | A | T   | 67.25    | PASS          | AC=1;AF=0.015;AN=68;BaseQRankSum=   |
| 43621 | chrY | 22316789 | . | G | T   | 77.08    | PASS          | AC=2;AF=0.030;AN=66;BaseQRankSum=   |
| 43622 | chrY | 22316807 | . | G | C   | 42.58    | PASS          | AC=2;AF=0.029;AN=68;BaseQRankSum=   |
| 43623 | chrY | 22316911 | . | C | G   | 656.54   | PASS          | AC=3;AF=0.048;AN=62;BaseQRankSum=   |
| 43624 | chrY | 22316928 | . | A | T   | 1685.69  | PASS          | AC=26;AF=0.464;AN=56;DP=300;FS=0.   |

|       |      |          |   |   |     |          |               |                                    |
|-------|------|----------|---|---|-----|----------|---------------|------------------------------------|
| 43625 | chrY | 22317325 | . | C | A   | 340.40   | PASS          | AC=6;AF=0.088;AN=68;BaseQRankSum=  |
| 43626 | chrY | 22317328 | . | G | C   | 218.05   | PASS          | AC=4;AF=0.061;AN=66;BaseQRankSum=  |
| 43627 | chrY | 22317333 | . | A | T   | 621.53   | PASS          | AC=9;AF=0.136;AN=66;BaseQRankSum=  |
| 43628 | chrY | 22317597 | . | G | T   | 348.45   | PASS          | AC=5;AF=0.093;AN=54;BaseQRankSum=  |
| 43629 | chrY | 22317604 | . | G | T   | 209.80   | PASS          | AC=4;AF=0.080;AN=50;DP=154;FS=0.0  |
| 43630 | chrY | 22317605 | . | T | A   | 290.02   | PASS          | AC=4;AF=0.083;AN=48;BaseQRankSum=  |
| 43631 | chrY | 22317611 | . | T | C   | 125.19   | PASS          | AC=4;AF=0.080;AN=50;DP=136;FS=0.0  |
| 43632 | chrY | 22317618 | . | G | T   | 50.31    | PASS          | AC=2;AF=0.048;AN=42;DP=132;FS=0.0  |
| 43633 | chrY | 22317621 | . | G | T   | 50.36    | PASS          | AC=2;AF=0.045;AN=44;DP=131;FS=0.0  |
| 43634 | chrY | 22317624 | . | T | A   | 50.57    | PASS          | AC=2;AF=0.048;AN=42;DP=127;FS=0.0  |
| 43635 | chrY | 22317674 | . | C | G   | 1989.87  | my_snp_filter | AC=12;AF=1.00;AN=12;DP=81          |
| 43636 | chrY | 22317949 | . | A | C   | 1031.66  | my_snp_filter | AC=8;AF=0.667;AN=12;BaseQ          |
| 43637 | chrY | 22317950 | . | A | C   | 1036.79  | my_snp_filter | AC=8;AF=0.800;AN=10;BaseQ          |
| 43638 | chrY | 22318092 | . | T | A   | 240.21   | my_snp_filter | AC=3;AF=0.056;AN=54;BaseQ          |
| 43639 | chrY | 22318146 | . | C | T   | 92.61    | my_snp_filter | AC=3;AF=0.047;AN=64;BaseQ          |
| 43640 | chrY | 22318148 | . | A | G   | 91.07    | my_snp_filter | AC=3;AF=0.045;AN=66;BaseQ          |
| 43641 | chrY | 22318156 | . | G | T   | 83.38    | my_snp_filter | AC=2;AF=0.031;AN=64;BaseQ          |
| 43642 | chrY | 22318161 | . | A | G   | 86.55    | my_snp_filter | AC=2;AF=0.030;AN=66;BaseQ          |
| 43643 | chrY | 22318171 | . | G | T   | 88.94    | my_snp_filter | AC=2;AF=0.031;AN=64;BaseQ          |
| 43644 | chrY | 22318188 | . | T | G   | 52.92    | my_snp_filter | AC=1;AF=0.016;AN=62;BaseQ          |
| 43645 | chrY | 22318195 | . | T | A   | 52.97    | my_snp_filter | AC=1;AF=0.016;AN=62;BaseQ          |
| 43646 | chrY | 22318259 | . | A | G   | 74.58    | my_snp_filter | AC=1;AF=0.019;AN=54;BaseQ          |
| 43647 | chrY | 22318260 | . | T | C   | 74.50    | my_snp_filter | AC=1;AF=0.019;AN=54;BaseQ          |
| 43648 | chrY | 22318301 | . | T | G   | 3349.27  | my_snp_filter | AC=40;AF=1.00;AN=40;DP=14          |
| 43649 | chrY | 22318302 | . | T | A   | 141.71   | my_snp_filter | AC=1;AF=0.019;AN=54;BaseQ          |
| 43650 | chrY | 22318501 | . | G | T   | 321.47   | PASS          | AC=3;AF=0.068;AN=44;BaseQRankSum=  |
| 43651 | chrY | 22318641 | . | A | C   | 9652.15  | PASS          | AC=32;AF=1.00;AN=32;DP=231;FS=0.0  |
| 43652 | chrY | 22318642 | . | G | A   | 9710.14  | PASS          | AC=32;AF=1.00;AN=32;DP=230;FS=0.0  |
| 43653 | chrY | 22318643 | . | A | C   | 9710.14  | PASS          | AC=32;AF=1.00;AN=32;DP=232;FS=0.0  |
| 43654 | chrY | 22318649 | . | T | A   | 6243.51  | PASS          | AC=28;AF=0.875;AN=32;BaseQRankSum= |
| 43655 | chrY | 22318732 | . | G | C   | 64.74    | PASS          | AC=1;AF=0.016;AN=64;BaseQRankSum=  |
| 43656 | chrY | 22318748 | . | A | C   | 1600.26  | PASS          | AC=6;AF=0.094;AN=64;BaseQRankSum=  |
| 43657 | chrY | 22318765 | . | G | C   | 73.35    | PASS          | AC=1;AF=0.016;AN=64;BaseQRankSum=  |
| 43658 | chrY | 22318768 | . | C | T   | 89.96    | PASS          | AC=1;AF=0.015;AN=66;BaseQRankSum=  |
| 43659 | chrY | 22318836 | . | T | C   | 93.45    | PASS          | AC=1;AF=0.020;AN=50;BaseQRankSum=  |
| 43660 | chrY | 22318855 | . | G | A   | 172.63   | PASS          | AC=2;AF=0.038;AN=52;BaseQRankSum=  |
| 43661 | chrY | 22318893 | . | T | C   | 212.15   | PASS          | AC=3;AF=0.063;AN=48;BaseQRankSum=  |
| 43662 | chrY | 22318895 | . | T | C   | 75.14    | my_snp_filter | AC=1;AF=0.014;AN=70;BaseQ          |
| 43663 | chrY | 22318904 | . | T | A   | 38.44    | my_snp_filter | AC=1;AF=0.014;AN=70;BaseQ          |
| 43664 | chrY | 22318917 | . | A | T   | 83.86    | PASS          | AC=1;AF=0.014;AN=70;BaseQRankSum=  |
| 43665 | chrY | 22318955 | . | C | G   | 1178.59  | PASS          | AC=17;AF=0.258;AN=66;BaseQRankSum= |
| 43666 | chrY | 22318978 | . | T | C   | 9894.83  | PASS          | AC=46;AF=0.920;AN=50;BaseQRankSum= |
| 43667 | chrY | 22318999 | . | T | G   | 9054.42  | PASS          | AC=40;AF=0.909;AN=44;BaseQRankSum= |
| 43668 | chrY | 22319065 | . | T | C   | 7471.93  | PASS          | AC=34;AF=0.850;AN=40;BaseQRankSum= |
| 43669 | chrY | 22319066 | . | A | T   | 7429.93  | PASS          | AC=34;AF=0.850;AN=40;BaseQRankSum= |
| 43670 | chrY | 22319170 | . | A | T   | 11521.83 | PASS          | AC=45;AF=0.900;AN=50;BaseQ         |
| 43671 | chrY | 22319171 | . | G | T   | 11583.56 | PASS          | AC=46;AF=0.920;AN=50;BaseQ         |
| 43672 | chrY | 22319202 | . | G | T   | 2007.38  | PASS          | AC=18;AF=0.429;AN=42;DP=378;FS=0.  |
| 43673 | chrY | 22319261 | . | T | G   | 11464.06 | PASS          | AC=44;AF=1.00;AN=44;DP=31          |
| 43674 | chrY | 22319287 | . | C | G   | 12145.01 | PASS          | AC=36;AF=1.00;AN=36;DP=29          |
| 43675 | chrY | 22319288 | . | C | A   | 12210.02 | PASS          | AC=36;AF=1.00;AN=36;DP=28          |
| 43676 | chrY | 22319362 | . | A | T   | 16079.80 | PASS          | AC=50;AF=1.00;AN=50;DP=39          |
| 43677 | chrY | 22319363 | . | T | A   | 16025.98 | PASS          | AC=50;AF=1.00;AN=50;DP=39          |
| 43678 | chrY | 22319609 | . | G | A   | 16024.99 | PASS          | AC=60;AF=1.00;AN=60;DP=51          |
| 43679 | chrY | 22320099 | . | G | C   | 258.60   | PASS          | AC=2;AF=0.031;AN=64;DP=453;FS=0.0  |
| 43680 | chrY | 22320386 | . | C | A   | 126.72   | PASS          | AC=1;AF=0.071;AN=14;BaseQRankSum=  |
| 43681 | chrY | 22320387 | . | G | T   | 124.72   | PASS          | AC=1;AF=0.071;AN=14;BaseQRankSum=  |
| 43682 | chrY | 22320395 | . | G | T   | 82.71    | PASS          | AC=1;AF=0.071;AN=14;BaseQRankSum=  |
| 43683 | chrY | 22320533 | . | C | G   | 87.31    | PASS          | AC=2;AF=0.250;AN=8;BaseQRankSum=0  |
| 43684 | chrY | 22321378 | . | C | T   | 899.04   | my_snp_filter | AC=12;AF=1.00;AN=12;BaseQ          |
| 43685 | chrY | 22321735 | . | G | A   | 187.54   | my_snp_filter | AC=6;AF=0.143;AN=42;DP=66          |
| 43686 | chrY | 22325173 | . | C | T   | 63.03    | my_snp_filter | AC=2;AF=0.333;AN=6;DP=4;FS=0.0     |
| 43687 | chrY | 22325364 | . | G | C,* | 387.45   | my_snp_filter | AC=2,2;AF=0.333,0.333;AN=          |
| 43688 | chrY | 22325410 | . | T | C,* | 436.33   | my_snp_filter | AC=2,2;AF=0.333,0.333;AN=          |
| 43689 | chrY | 22325500 | . | T | C   | 234.04   | PASS          | AC=6;AF=0.120;AN=50;DP=120;FS=0.0  |
| 43690 | chrY | 22325770 | . | G | A   | 432.36   | my_snp_filter | AC=6;AF=0.333;AN=18;DP=50          |
| 43691 | chrY | 22325813 | . | T | G   | 436.62   | my_snp_filter | AC=7;AF=0.875;AN=8;BaseQR          |
| 43692 | chrY | 22325989 | . | G | A   | 36.66    | PASS          | AC=2;AF=0.125;AN=16;DP=38;FS=0.00  |
| 43693 | chrY | 22326770 | . | G | T   | 145.95   | my_snp_filter | AC=2;AF=0.125;AN=16;DP=47          |
| 43694 | chrY | 22328616 | . | T | A   | 407.10   | my_snp_filter | AC=3;AF=0.060;AN=50;BaseQ          |
| 43695 | chrY | 22328862 | . | A | T   | 51.51    | my_snp_filter | AC=1;AF=0.063;AN=16;BaseQ          |
| 43696 | chrY | 22334020 | . | A | G   | 129.73   | my_snp_filter | AC=1;AF=0.045;AN=22;BaseQ          |
| 43697 | chrY | 22334024 | . | A | C   | 108.82   | my_snp_filter | AC=1;AF=0.045;AN=22;BaseQ          |
| 43698 | chrY | 22334025 | . | A | T   | 108.82   | my_snp_filter | AC=1;AF=0.045;AN=22;BaseQ          |
| 43699 | chrY | 22334763 | . | C | A   | 76.50    | my_snp_filter | AC=1;AF=0.045;AN=22;BaseQ          |
| 43700 | chrY | 22334782 | . | G | T   | 74.97    | my_snp_filter | AC=1;AF=0.042;AN=24;BaseQ          |

|       |      |          |   |   |   |          |               |                                    |
|-------|------|----------|---|---|---|----------|---------------|------------------------------------|
| 43701 | chrY | 22334888 | . | C | T | 1186.02  | PASS          | AC=20;AF=0.526;AN=38;DP=217;FS=0.0 |
| 43702 | chrY | 22335141 | . | C | A | 52.15    | PASS          | AC=1;AF=0.015;AN=66;BaseQRankSum=  |
| 43703 | chrY | 22335187 | . | A | G | 190.31   | my_snp_filter | AC=3;AF=0.054;AN=56;BaseQ          |
| 43704 | chrY | 22335188 | . | G | T | 186.24   | my_snp_filter | AC=3;AF=0.054;AN=56;BaseQ          |
| 43705 | chrY | 22336437 | . | G | A | 542.60   | my_snp_filter | AC=3;AF=0.054;AN=56;BaseQ          |
| 43706 | chrY | 22336504 | . | G | T | 131.67   | my_snp_filter | AC=2;AF=0.029;AN=68;DP=24          |
| 43707 | chrY | 22336957 | . | A | G | 70.54    | my_snp_filter | AC=1;AF=0.056;AN=18;BaseQ          |
| 43708 | chrY | 22339370 | . | T | G | 405.78   | PASS          | AC=9;AF=0.155;AN=58;BaseQRankSum=  |
| 43709 | chrY | 22339397 | . | T | C | 905.50   | PASS          | AC=6;AF=0.100;AN=60;DP=192;FS=0.0  |
| 43710 | chrY | 22339469 | . | G | T | 37.67    | my_snp_filter | AC=2;AF=0.036;AN=56;BaseQ          |
| 43711 | chrY | 22339483 | . | G | C | 75.95    | my_snp_filter | AC=2;AF=0.038;AN=52;BaseQ          |
| 43712 | chrY | 22339491 | . | T | A | 157.15   | my_snp_filter | AC=2;AF=0.038;AN=52;BaseQ          |
| 43713 | chrY | 22339494 | . | T | C | 150.34   | my_snp_filter | AC=2;AF=0.037;AN=54;BaseQ          |
| 43714 | chrY | 22339503 | . | G | A | 144.29   | my_snp_filter | AC=2;AF=0.038;AN=52;BaseQ          |
| 43715 | chrY | 22339506 | . | T | A | 147.29   | my_snp_filter | AC=2;AF=0.038;AN=52;BaseQ          |
| 43716 | chrY | 22339532 | . | A | T | 1053.29  | my_snp_filter | AC=5;AF=0.083;AN=60;BaseQ          |
| 43717 | chrY | 22339835 | . | C | A | 1800.12  | PASS          | AC=6;AF=0.107;AN=56;DP=225;FS=0.0  |
| 43718 | chrY | 22339836 | . | C | A | 1800.04  | PASS          | AC=6;AF=0.107;AN=56;DP=226;FS=0.0  |
| 43719 | chrY | 22339950 | . | T | G | 4401.54  | my_snp_filter | AC=38;AF=0.760;AN=50;Base          |
| 43720 | chrY | 22339997 | . | C | T | 38.79    | my_snp_filter | AC=3;AF=0.048;AN=62;BaseQ          |
| 43721 | chrY | 22340047 | . | C | A | 540.53   | PASS          | AC=7;AF=0.109;AN=64;BaseQRankSum=  |
| 43722 | chrY | 22340048 | . | T | C | 153.73   | PASS          | AC=3;AF=0.047;AN=64;BaseQRankSum=  |
| 43723 | chrY | 22340052 | . | C | T | 748.79   | my_snp_filter | AC=9;AF=0.141;AN=64;BaseQ          |
| 43724 | chrY | 22340057 | . | A | C | 452.13   | PASS          | AC=7;AF=0.106;AN=66;BaseQRankSum=  |
| 43725 | chrY | 22340058 | . | G | T | 452.22   | PASS          | AC=7;AF=0.106;AN=66;BaseQRankSum=  |
| 43726 | chrY | 22340078 | . | A | G | 112.13   | PASS          | AC=1;AF=0.017;AN=60;BaseQRankSum=  |
| 43727 | chrY | 22340243 | . | T | C | 834.84   | PASS          | AC=1;AF=0.016;AN=62;BaseQRankSum=  |
| 43728 | chrY | 22340244 | . | C | T | 834.77   | PASS          | AC=1;AF=0.016;AN=62;BaseQRankSum=  |
| 43729 | chrY | 22340341 | . | T | A | 198.79   | PASS          | AC=3;AF=0.044;AN=68;BaseQRankSum=  |
| 43730 | chrY | 22340345 | . | A | T | 194.86   | PASS          | AC=3;AF=0.044;AN=68;BaseQRankSum=  |
| 43731 | chrY | 22340347 | . | G | C | 194.27   | PASS          | AC=3;AF=0.043;AN=70;BaseQRankSum=  |
| 43732 | chrY | 22340354 | . | A | T | 181.52   | PASS          | AC=3;AF=0.044;AN=68;BaseQRankSum=  |
| 43733 | chrY | 22340376 | . | C | T | 147.02   | PASS          | AC=2;AF=0.029;AN=68;BaseQRankSum=  |
| 43734 | chrY | 22341012 | . | G | T | 267.63   | PASS          | AC=5;AF=0.074;AN=68;DP=346;FS=0.0  |
| 43735 | chrY | 22341114 | . | C | A | 228.65   | PASS          | AC=8;AF=1.00;AN=8;DP=23;FS=0.000;  |
| 43736 | chrY | 22344364 | . | A | G | 67.84    | PASS          | AC=2;AF=1.00;AN=2;DP=2;FS=0.000;M  |
| 43737 | chrY | 22344365 | . | A | T | 67.84    | PASS          | AC=2;AF=1.00;AN=2;DP=2;FS=0.000;M  |
| 43738 | chrY | 22344918 | . | A | T | 418.74   | PASS          | AC=10;AF=0.833;AN=12;DP=29;FS=0.0  |
| 43739 | chrY | 22345015 | . | G | T | 450.17   | PASS          | AC=6;AF=0.125;AN=48;DP=120;FS=0.0  |
| 43740 | chrY | 22345105 | . | C | G | 342.85   | PASS          | AC=3;AF=0.047;AN=64;BaseQRankSum=  |
| 43741 | chrY | 22345364 | . | T | G | 245.55   | PASS          | AC=1;AF=0.015;AN=66;BaseQRankSum=  |
| 43742 | chrY | 22345480 | . | G | T | 981.54   | my_snp_filter | AC=9;AF=0.132;AN=68;BaseQ          |
| 43743 | chrY | 22345494 | . | G | C | 987.56   | PASS          | AC=9;AF=0.132;AN=68;BaseQRankSum=  |
| 43744 | chrY | 22345513 | . | G | T | 629.13   | PASS          | AC=6;AF=0.088;AN=68;BaseQRankSum=  |
| 43745 | chrY | 22345517 | . | T | A | 576.21   | PASS          | AC=7;AF=0.106;AN=66;BaseQRankSum=  |
| 43746 | chrY | 22345687 | . | C | G | 3993.94  | PASS          | AC=29;AF=0.806;AN=36;BaseQRankSum= |
| 43747 | chrY | 22345688 | . | C | T | 4171.95  | PASS          | AC=29;AF=0.853;AN=34;BaseQRankSum= |
| 43748 | chrY | 22345695 | . | T | C | 82.13    | PASS          | AC=2;AF=0.053;AN=38;BaseQRankSum=  |
| 43749 | chrY | 22345699 | . | A | T | 89.06    | PASS          | AC=2;AF=0.053;AN=38;BaseQRankSum=  |
| 43750 | chrY | 22345700 | . | C | T | 32.12    | PASS          | AC=1;AF=0.026;AN=38;BaseQRankSum=  |
| 43751 | chrY | 22345703 | . | C | T | 92.28    | PASS          | AC=2;AF=0.056;AN=36;BaseQRankSum=  |
| 43752 | chrY | 22345711 | . | G | A | 52.87    | PASS          | AC=2;AF=0.056;AN=36;DP=126;FS=0.0  |
| 43753 | chrY | 22345714 | . | G | T | 33.67    | PASS          | AC=1;AF=0.028;AN=36;BaseQRankSum=  |
| 43754 | chrY | 22345735 | . | T | C | 48.98    | PASS          | AC=1;AF=0.033;AN=30;BaseQRankSum=  |
| 43755 | chrY | 22345737 | . | C | G | 375.03   | PASS          | AC=8;AF=0.286;AN=28;BaseQRankSum=  |
| 43756 | chrY | 22345738 | . | A | T | 376.68   | PASS          | AC=8;AF=0.308;AN=26;BaseQRankSum=  |
| 43757 | chrY | 22345782 | . | C | T | 478.52   | PASS          | AC=11;AF=0.917;AN=12;BaseQRankSum= |
| 43758 | chrY | 22345932 | . | C | A | 971.90   | PASS          | AC=6;AF=0.091;AN=66;DP=366;FS=0.0  |
| 43759 | chrY | 22345984 | . | T | C | 9805.12  | PASS          | AC=54;AF=1.00;AN=54;DP=223;FS=0.0  |
| 43760 | chrY | 22345985 | . | T | A | 9940.12  | PASS          | AC=54;AF=1.00;AN=54;DP=223;FS=0.0  |
| 43761 | chrY | 22345997 | . | C | G | 10413.90 | PASS          | AC=46;AF=1.00;AN=46;DP=23          |
| 43762 | chrY | 22346014 | . | A | C | 10516.18 | PASS          | AC=58;AF=1.00;AN=58;DP=26          |
| 43763 | chrY | 22346168 | . | A | T | 16112.94 | my_snp_filter | AC=62;AF=1.00;AN=                  |
| 43764 | chrY | 22346292 | . | G | A | 2599.30  | PASS          | AC=28;AF=0.933;AN=30;BaseQRankSum= |
| 43765 | chrY | 22346360 | . | C | G | 7993.12  | PASS          | AC=38;AF=1.00;AN=38;BaseQRankSum=  |
| 43766 | chrY | 22346361 | . | A | T | 8018.11  | PASS          | AC=38;AF=1.00;AN=38;BaseQRankSum=  |
| 43767 | chrY | 22346388 | . | G | A | 1351.05  | PASS          | AC=6;AF=0.103;AN=58;BaseQRankSum=  |
| 43768 | chrY | 22346400 | . | T | A | 2146.78  | PASS          | AC=6;AF=0.100;AN=60;BaseQRankSum=  |
| 43769 | chrY | 22346651 | . | C | A | 168.92   | PASS          | AC=2;AF=0.063;AN=32;BaseQRankSum=  |
| 43770 | chrY | 22346809 | . | A | T | 113.51   | PASS          | AC=4;AF=1.00;AN=4;DP=6;FS=0.000;M  |
| 43771 | chrY | 22346810 | . | C | A | 113.51   | PASS          | AC=4;AF=1.00;AN=4;DP=6;FS=0.000;M  |
| 43772 | chrY | 22348539 | . | C | A | 74.86    | PASS          | AC=1;AF=0.045;AN=22;BaseQRankSum=  |
| 43773 | chrY | 22352446 | . | C | A | 153.61   | my_snp_filter | AC=2;AF=0.500;AN=4;DP=9;F          |
| 43774 | chrY | 22352458 | . | G | T | 157.13   | my_snp_filter | AC=2;AF=1.00;AN=2;DP=8;FS          |
| 43775 | chrY | 22352465 | . | A | G | 151.51   | my_snp_filter | AC=2;AF=0.333;AN=6;DP=9;F          |
| 43776 | chrY | 22352500 | . | T | C | 153.68   | my_snp_filter | AC=2;AF=0.500;AN=4;DP=8;F          |



|       |      |          |   |   |     |         |               |                                   |
|-------|------|----------|---|---|-----|---------|---------------|-----------------------------------|
| 43777 | chrY | 22352514 | . | G | C   | 63.08   | PASS          | AC=2;AF=0.333;AN=6;DP=5;FS=0.000; |
| 43778 | chrY | 22353089 | . | C | G   | 115.39  | my_snp_filter | AC=3;AF=0.083;AN=36;BaseQ         |
| 43779 | chrY | 22353151 | . | A | G   | 855.85  | my_snp_filter | AC=13;AF=0.250;AN=52;Base         |
| 43780 | chrY | 22353209 | . | A | T   | 4068.05 | PASS          | AC=23;AF=0.359;AN=64;BaseQRankSum |
| 43781 | chrY | 22353237 | . | C | G   | 4077.88 | PASS          | AC=25;AF=0.391;AN=64;BaseQRankSum |
| 43782 | chrY | 22353327 | . | G | A   | 78.97   | PASS          | AC=1;AF=0.019;AN=54;BaseQRankSum= |
| 43783 | chrY | 22353336 | . | T | C   | 219.08  | PASS          | AC=2;AF=0.036;AN=56;BaseQRankSum= |
| 43784 | chrY | 22353371 | . | G | C,* | 939.17  | my_snp_filter | AC=12,2;AF=0.857,0.143;AN         |
| 43785 | chrY | 22353372 | . | A | T,* | 939.17  | my_snp_filter | AC=12,2;AF=0.857,0.143;AN         |
| 43786 | chrY | 22357298 | . | T | G   | 63.11   | PASS          | AC=2;AF=0.333;AN=6;DP=13;FS=0.000 |
| 43787 | chrY | 22357303 | . | G | C   | 59.42   | PASS          | AC=2;AF=0.143;AN=14;DP=14;FS=0.00 |
| 43788 | chrY | 22357628 | . | A | T   | 173.02  | my_snp_filter | AC=3;AF=0.500;AN=6;BaseQR         |
| 43789 | chrY | 22357638 | . | C | T   | 136.31  | my_snp_filter | AC=2;AF=0.250;AN=8;DP=16;         |
| 43790 | chrY | 22357658 | . | G | T   | 108.59  | my_snp_filter | AC=2;AF=0.333;AN=6;DP=11;         |
| 43791 | chrY | 22358590 | . | A | G   | 204.74  | PASS          | AC=6;AF=0.750;AN=8;DP=10;FS=0.000 |
| 43792 | chrY | 22358634 | . | G | C   | 310.49  | PASS          | AC=6;AF=0.750;AN=8;DP=9;FS=0.000; |
| 43793 | chrY | 22358648 | . | T | G   | 281.04  | PASS          | AC=6;AF=0.600;AN=10;DP=9;FS=0.000 |
| 43794 | chrY | 22358657 | . | T | G   | 193.76  | PASS          | AC=4;AF=0.500;AN=8;DP=7;FS=0.000; |
| 43795 | chrY | 22359341 | . | C | G   | 389.61  | my_snp_filter | AC=3;AF=0.214;AN=14;BaseQ         |
| 43796 | chrY | 22359343 | . | G | A   | 439.11  | my_snp_filter | AC=3;AF=0.167;AN=18;BaseQ         |
| 43797 | chrY | 22359384 | . | G | C   | 395.89  | my_snp_filter | AC=3;AF=0.136;AN=22;BaseQ         |
| 43798 | chrY | 22359389 | . | T | C   | 131.08  | my_snp_filter | AC=1;AF=0.042;AN=24;BaseQ         |
| 43799 | chrY | 22359391 | . | C | G   | 441.83  | my_snp_filter | AC=3;AF=0.136;AN=22;BaseQ         |
| 43800 | chrY | 22359418 | . | G | T   | 410.39  | my_snp_filter | AC=3;AF=0.167;AN=18;BaseQ         |
| 43801 | chrY | 22359440 | . | C | G   | 254.82  | my_snp_filter | AC=2;AF=0.063;AN=32;BaseQ         |
| 43802 | chrY | 22359509 | . | G | C   | 512.89  | my_snp_filter | AC=7;AF=0.125;AN=56;BaseQ         |
| 43803 | chrY | 22359544 | . | G | A   | 535.55  | my_snp_filter | AC=3;AF=0.044;AN=68;BaseQ         |
| 43804 | chrY | 22359548 | . | G | T   | 238.57  | my_snp_filter | AC=1;AF=0.015;AN=68;BaseQ         |
| 43805 | chrY | 22359560 | . | G | C   | 148.08  | my_snp_filter | AC=10;AF=0.152;AN=66;Base         |
| 43806 | chrY | 22359563 | . | C | T   | 165.79  | my_snp_filter | AC=3;AF=0.044;AN=68;BaseQ         |
| 43807 | chrY | 22359579 | . | C | G   | 1226.16 | my_snp_filter | AC=11;AF=0.162;AN=68;Base         |
| 43808 | chrY | 22359583 | . | A | C   | 495.28  | my_snp_filter | AC=3;AF=0.044;AN=68;BaseQ         |
| 43809 | chrY | 22359587 | . | C | T   | 1285.93 | my_snp_filter | AC=10;AF=0.152;AN=66;Base         |
| 43810 | chrY | 22359601 | . | T | C   | 1182.96 | my_snp_filter | AC=9;AF=0.136;AN=66;BaseQ         |
| 43811 | chrY | 22359602 | . | T | C   | 406.90  | my_snp_filter | AC=2;AF=0.030;AN=66;BaseQ         |
| 43812 | chrY | 22359612 | . | G | C,A | 6368.25 | my_snp_filter | AC=35,12;AF=0.625,0.214;A         |
| 43813 | chrY | 22359615 | . | T | G   | 2209.36 | my_snp_filter | AC=14;AF=0.241;AN=58;Base         |
| 43814 | chrY | 22359618 | . | G | A   | 404.19  | my_snp_filter | AC=2;AF=0.029;AN=68;BaseQ         |
| 43815 | chrY | 22359634 | . | T | G   | 857.19  | my_snp_filter | AC=6;AF=0.120;AN=50;BaseQ         |
| 43816 | chrY | 22359645 | . | T | A   | 163.99  | my_snp_filter | AC=2;AF=0.031;AN=64;BaseQ         |
| 43817 | chrY | 22359646 | . | G | T,A | 782.02  | my_snp_filter | AC=2,5;AF=0.032,0.081;AN=         |
| 43818 | chrY | 22359824 | . | C | T   | 246.65  | my_snp_filter | AC=3;AF=0.188;AN=16;BaseQ         |
| 43819 | chrY | 22359858 | . | A | C   | 468.32  | my_snp_filter | AC=3;AF=0.188;AN=16;BaseQ         |
| 43820 | chrY | 22359878 | . | C | G   | 639.94  | my_snp_filter | AC=4;AF=0.333;AN=12;BaseQ         |
| 43821 | chrY | 22359881 | . | T | A   | 545.47  | my_snp_filter | AC=3;AF=0.167;AN=18;BaseQ         |
| 43822 | chrY | 22359993 | . | G | T   | 220.77  | my_snp_filter | AC=3;AF=0.188;AN=16;BaseQ         |
| 43823 | chrY | 22360004 | . | T | A   | 163.21  | my_snp_filter | AC=2;AF=0.167;AN=12;BaseQ         |
| 43824 | chrY | 22360009 | . | G | T   | 164.29  | my_snp_filter | AC=2;AF=0.125;AN=16;BaseQ         |
| 43825 | chrY | 22360059 | . | G | T   | 69.09   | my_snp_filter | AC=2;AF=0.500;AN=4;DP=7;F         |
| 43826 | chrY | 22360086 | . | C | A   | 67.84   | my_snp_filter | AC=2;AF=1.00;AN=2;DP=5;FS         |
| 43827 | chrY | 22360092 | . | C | T   | 67.84   | my_snp_filter | AC=2;AF=1.00;AN=2;DP=5;FS         |
| 43828 | chrY | 22360101 | . | T | A   | 62.78   | my_snp_filter | AC=2;AF=0.500;AN=4;BaseQR         |
| 43829 | chrY | 22360266 | . | C | T   | 58.97   | PASS          | AC=2;AF=0.333;AN=6;DP=21;FS=0.000 |
| 43830 | chrY | 22360268 | . | A | T   | 56.45   | PASS          | AC=2;AF=0.167;AN=12;DP=20;FS=0.00 |
| 43831 | chrY | 22360966 | . | A | C   | 146.51  | PASS          | AC=4;AF=0.222;AN=18;DP=95;FS=0.00 |
| 43832 | chrY | 22360968 | . | T | A   | 133.69  | PASS          | AC=4;AF=0.125;AN=32;DP=92;FS=0.00 |
| 43833 | chrY | 22361484 | . | G | A   | 47.26   | my_snp_filter | AC=1;AF=0.063;AN=16;BaseQ         |
| 43834 | chrY | 22361486 | . | A | C   | 58.28   | my_snp_filter | AC=2;AF=0.111;AN=18;DP=42         |
| 43835 | chrY | 22361509 | . | T | A   | 57.79   | my_snp_filter | AC=2;AF=0.125;AN=16;DP=47         |
| 43836 | chrY | 22361512 | . | G | A   | 186.68  | my_snp_filter | AC=1;AF=0.083;AN=12;BaseQ         |
| 43837 | chrY | 22361525 | . | T | G   | 33.04   | my_snp_filter | AC=1;AF=0.056;AN=18;BaseQ         |
| 43838 | chrY | 22361583 | . | T | G   | 170.96  | my_snp_filter | AC=1;AF=0.071;AN=14;BaseQ         |
| 43839 | chrY | 22361594 | . | G | A   | 208.14  | my_snp_filter | AC=2;AF=0.167;AN=12;BaseQ         |
| 43840 | chrY | 22361610 | . | T | C   | 194.69  | my_snp_filter | AC=2;AF=0.250;AN=8;BaseQR         |
| 43841 | chrY | 22361621 | . | G | T   | 163.05  | my_snp_filter | AC=1;AF=0.056;AN=18;BaseQ         |
| 43842 | chrY | 22361859 | . | G | A   | 34.72   | PASS          | AC=1;AF=0.017;AN=60;BaseQRankSum= |
| 43843 | chrY | 22361868 | . | C | G   | 98.77   | PASS          | AC=2;AF=0.034;AN=58;BaseQRankSum= |
| 43844 | chrY | 22361878 | . | C | G   | 31.33   | PASS          | AC=1;AF=0.017;AN=60;BaseQRankSum= |
| 43845 | chrY | 22361882 | . | T | A   | 33.05   | PASS          | AC=1;AF=0.017;AN=58;BaseQRankSum= |
| 43846 | chrY | 22361930 | . | G | T   | 325.02  | PASS          | AC=2;AF=0.036;AN=56;BaseQRankSum= |
| 43847 | chrY | 22361933 | . | G | A   | 66.40   | my_snp_filter | AC=1;AF=0.018;AN=56;BaseQ         |
| 43848 | chrY | 22362001 | . | G | T   | 260.53  | my_snp_filter | AC=3;AF=0.047;AN=64;BaseQ         |
| 43849 | chrY | 22362012 | . | G | C   | 288.97  | my_snp_filter | AC=3;AF=0.048;AN=62;BaseQ         |
| 43850 | chrY | 22362058 | . | G | T   | 717.49  | PASS          | AC=3;AF=0.047;AN=64;BaseQRankSum= |
| 43851 | chrY | 22362154 | . | T | C   | 9674.91 | PASS          | AC=54;AF=0.844;AN=64;DP=402;FS=0. |
| 43852 | chrY | 22362284 | . | T | A   | 151.62  | PASS          | AC=1;AF=0.015;AN=66;BaseQRankSum= |

|       |      |          |   |   |     |         |               |                                    |
|-------|------|----------|---|---|-----|---------|---------------|------------------------------------|
| 43853 | chrY | 22362299 | . | A | T   | 154.34  | PASS          | AC=1;AF=0.015;AN=68;BaseQRankSum=  |
| 43854 | chrY | 22362300 | . | G | A   | 154.62  | PASS          | AC=1;AF=0.015;AN=68;BaseQRankSum=  |
| 43855 | chrY | 22362305 | . | C | G   | 156.17  | PASS          | AC=1;AF=0.015;AN=68;BaseQRankSum=  |
| 43856 | chrY | 22362322 | . | T | A   | 36.28   | PASS          | AC=1;AF=0.015;AN=66;BaseQRankSum=  |
| 43857 | chrY | 22362323 | . | T | C   | 32.59   | PASS          | AC=1;AF=0.015;AN=66;BaseQRankSum=  |
| 43858 | chrY | 22362482 | . | T | C   | 1205.14 | my_snp_filter | AC=16;AF=1.00;AN=16;DP=57          |
| 43859 | chrY | 22364425 | . | T | G   | 354.81  | my_snp_filter | AC=6;AF=0.500;AN=12;BaseQ          |
| 43860 | chrY | 22364507 | . | T | A,G | 371.92  | my_snp_filter | AC=5,2;AF=0.278,0.111;AN=          |
| 43861 | chrY | 22364518 | . | T | A   | 47.07   | my_snp_filter | AC=1;AF=0.042;AN=24;BaseQ          |
| 43862 | chrY | 22364601 | . | A | G   | 104.23  | my_snp_filter | AC=2;AF=0.056;AN=36;BaseQ          |
| 43863 | chrY | 22364657 | . | T | C   | 59.49   | my_snp_filter | AC=3;AF=0.063;AN=48;BaseQ          |
| 43864 | chrY | 22364685 | . | C | G   | 83.48   | my_snp_filter | AC=1;AF=0.019;AN=52;BaseQ          |
| 43865 | chrY | 22364714 | . | C | G   | 109.03  | my_snp_filter | AC=2;AF=0.038;AN=52;BaseQ          |
| 43866 | chrY | 22364758 | . | G | A   | 112.38  | my_snp_filter | AC=2;AF=1.00;AN=2;DP=8;FS          |
| 43867 | chrY | 22364761 | . | C | T   | 112.38  | my_snp_filter | AC=2;AF=1.00;AN=2;DP=3;FS          |
| 43868 | chrY | 22366175 | . | T | G   | 34.84   | my_snp_filter | AC=2;AF=1.00;AN=2;DP=123;          |
| 43869 | chrY | 22366219 | . | C | G   | 530.07  | PASS          | AC=8;AF=0.200;AN=40;BaseQRankSum=  |
| 43870 | chrY | 22366262 | . | G | T   | 448.61  | PASS          | AC=5;AF=0.083;AN=60;BaseQRankSum=  |
| 43871 | chrY | 22366282 | . | A | C   | 267.19  | PASS          | AC=2;AF=0.032;AN=62;BaseQRankSum=  |
| 43872 | chrY | 22366300 | . | T | G   | 259.05  | PASS          | AC=3;AF=0.071;AN=42;BaseQRankSum=  |
| 43873 | chrY | 22366307 | . | G | C   | 183.94  | PASS          | AC=2;AF=0.031;AN=64;BaseQRankSum=  |
| 43874 | chrY | 22366313 | . | G | T   | 4324.81 | PASS          | AC=17;AF=0.354;AN=48;BaseQRankSum= |
| 43875 | chrY | 22366339 | . | C | T   | 3137.94 | PASS          | AC=11;AF=0.204;AN=54;BaseQRankSum= |
| 43876 | chrY | 22366341 | . | T | G   | 3050.02 | PASS          | AC=11;AF=0.204;AN=54;BaseQRankSum= |
| 43877 | chrY | 22366344 | . | C | G   | 117.27  | my_snp_filter | AC=2;AF=0.032;AN=62;BaseQ          |
| 43878 | chrY | 22366380 | . | A | G   | 296.03  | my_snp_filter | AC=3;AF=0.052;AN=58;BaseQ          |
| 43879 | chrY | 22366407 | . | T | A   | 383.38  | PASS          | AC=5;AF=0.125;AN=40;BaseQRankSum=  |
| 43880 | chrY | 22366410 | . | T | G,C | 386.96  | PASS          | AC=3,2;AF=0.075,0.050;AN=40;BaseQ  |
| 43881 | chrY | 22366412 | . | C | A   | 147.01  | PASS          | AC=3;AF=0.071;AN=42;BaseQRankSum=  |
| 43882 | chrY | 22366421 | . | G | A   | 54.41   | PASS          | AC=2;AF=0.050;AN=40;BaseQRankSum=  |
| 43883 | chrY | 22366424 | . | A | G   | 33.91   | PASS          | AC=1;AF=0.026;AN=38;BaseQRankSum=  |
| 43884 | chrY | 22366432 | . | G | T   | 34.48   | PASS          | AC=1;AF=0.028;AN=36;BaseQRankSum=  |
| 43885 | chrY | 22366435 | . | C | G   | 49.69   | PASS          | AC=2;AF=0.059;AN=34;BaseQRankSum=  |
| 43886 | chrY | 22366443 | . | C | T   | 104     | PASS          | AC=3;AF=0.094;AN=32;BaseQRankSum=  |
| 43887 | chrY | 22366582 | . | T | C   | 45.86   | my_snp_filter | AC=1;AF=0.500;AN=2;BaseQR          |
| 43888 | chrY | 22366601 | . | C | G   | 45.86   | my_snp_filter | AC=1;AF=0.500;AN=2;BaseQR          |
| 43889 | chrY | 22366844 | . | G | A   | 231.30  | PASS          | AC=2;AF=0.143;AN=14;DP=24;FS=0.00  |
| 43890 | chrY | 22366859 | . | G | C   | 54      | PASS          | AC=2;AF=0.111;AN=18;DP=28;FS=0.00  |
| 43891 | chrY | 22366862 | . | C | G   | 79.66   | PASS          | AC=2;AF=0.111;AN=18;DP=29;FS=0.00  |
| 43892 | chrY | 22366863 | . | G | T   | 223.78  | my_snp_filter | AC=5;AF=0.417;AN=12;BaseQ          |
| 43893 | chrY | 22366887 | . | G | A   | 51.42   | my_snp_filter | AC=1;AF=0.063;AN=16;BaseQ          |
| 43894 | chrY | 22366891 | . | C | T   | 50.25   | my_snp_filter | AC=1;AF=0.063;AN=16;BaseQ          |
| 43895 | chrY | 22366904 | . | C | A   | 120.52  | PASS          | AC=2;AF=0.100;AN=20;DP=29;FS=0.00  |
| 43896 | chrY | 22366920 | . | T | A   | 99.67   | PASS          | AC=2;AF=0.125;AN=16;DP=19;FS=0.00  |
| 43897 | chrY | 22366930 | . | A | G   | 60.21   | PASS          | AC=2;AF=0.125;AN=16;DP=15;FS=0.00  |
| 43898 | chrY | 22367094 | . | A | C   | 59.21   | my_snp_filter | AC=2;AF=0.200;AN=10;DP=12          |
| 43899 | chrY | 22367101 | . | G | A   | 58.55   | my_snp_filter | AC=2;AF=0.167;AN=12;DP=13          |
| 43900 | chrY | 22367119 | . | A | G   | 203.03  | my_snp_filter | AC=6;AF=1.00;AN=6;DP=14;F          |
| 43901 | chrY | 22367134 | . | T | A   | 59.49   | my_snp_filter | AC=2;AF=0.167;AN=12;DP=14          |
| 43902 | chrY | 22367152 | . | T | C   | 62.98   | my_snp_filter | AC=2;AF=0.250;AN=8;DP=10;          |
| 43903 | chrY | 22367158 | . | G | C   | 62.99   | my_snp_filter | AC=2;AF=0.250;AN=8;DP=10;          |
| 43904 | chrY | 22367457 | . | T | C   | 64.18   | my_snp_filter | AC=2;AF=0.500;AN=4;BaseQR          |
| 43905 | chrY | 22367532 | . | A | G,C | 281.49  | my_snp_filter | AC=2,1;AF=0.111,0.056;AN=          |
| 43906 | chrY | 22367550 | . | T | G   | 1003.90 | my_snp_filter | AC=9;AF=0.500;AN=18;BaseQ          |
| 43907 | chrY | 22367604 | . | T | C   | 312.61  | my_snp_filter | AC=3;AF=0.125;AN=24;BaseQ          |
| 43908 | chrY | 22367619 | . | G | A   | 67.76   | my_snp_filter | AC=1;AF=0.036;AN=28;BaseQ          |
| 43909 | chrY | 22367632 | . | T | G   | 458.08  | my_snp_filter | AC=3;AF=0.107;AN=28;BaseQ          |
| 43910 | chrY | 22367643 | . | T | A   | 252.82  | my_snp_filter | AC=2;AF=0.059;AN=34;BaseQ          |
| 43911 | chrY | 22367712 | . | G | T   | 140.60  | my_snp_filter | AC=2;AF=0.056;AN=36;BaseQ          |
| 43912 | chrY | 22367714 | . | C | T   | 140.52  | my_snp_filter | AC=2;AF=0.059;AN=34;BaseQ          |
| 43913 | chrY | 22367716 | . | G | T   | 147.70  | my_snp_filter | AC=2;AF=0.083;AN=24;BaseQ          |
| 43914 | chrY | 22367719 | . | C | T   | 100.28  | PASS          | AC=2;AF=0.050;AN=40;BaseQRankSum=  |
| 43915 | chrY | 22367726 | . | A | G   | 66.99   | PASS          | AC=2;AF=0.059;AN=34;BaseQRankSum=  |
| 43916 | chrY | 22367768 | . | C | T   | 1029.18 | my_snp_filter | AC=14;AF=0.875;AN=16;DP=7          |
| 43917 | chrY | 22367862 | . | G | C   | 266.50  | my_snp_filter | AC=3;AF=0.071;AN=42;BaseQ          |
| 43918 | chrY | 22367881 | . | C | G   | 330.63  | my_snp_filter | AC=2;AF=0.048;AN=42;BaseQ          |
| 43919 | chrY | 22367910 | . | T | A   | 229.50  | my_snp_filter | AC=2;AF=0.077;AN=26;BaseQ          |
| 43920 | chrY | 22367917 | . | T | C   | 193.69  | my_snp_filter | AC=3;AF=0.150;AN=20;BaseQ          |
| 43921 | chrY | 22367981 | . | G | A   | 331.26  | my_snp_filter | AC=3;AF=0.500;AN=6;BaseQR          |
| 43922 | chrY | 22419780 | . | T | G   | 994.60  | PASS          | AC=6;AF=0.100;AN=60;BaseQRankSum=  |
| 43923 | chrY | 22420165 | . | A | G   | 269.93  | PASS          | AC=5;AF=0.089;AN=56;BaseQRankSum=  |
| 43924 | chrY | 22420187 | . | G | C   | 696.73  | PASS          | AC=5;AF=0.139;AN=36;BaseQRankSum=  |
| 43925 | chrY | 22420333 | . | A | T   | 53.52   | my_snp_filter | AC=1;AF=0.045;AN=22;BaseQ          |
| 43926 | chrY | 22420386 | . | A | T   | 318.63  | my_snp_filter | AC=6;AF=0.750;AN=8;DP=13;          |
| 43927 | chrY | 22420399 | . | T | A   | 241.65  | my_snp_filter | AC=4;AF=0.667;AN=6;DP=9;F          |
| 43928 | chrY | 22422138 | . | G | A   | 122.97  | PASS          | AC=4;AF=0.080;AN=50;DP=81;FS=0.00  |

|       |      |          |   |   |   |          |               |                                    |
|-------|------|----------|---|---|---|----------|---------------|------------------------------------|
| 43929 | chrY | 22422202 | . | T | C | 6657.10  | PASS          | AC=50;AF=1.00;AN=50;DP=225;FS=0.0  |
| 43930 | chrY | 22422218 | . | G | T | 1274.57  | PASS          | AC=5;AF=0.081;AN=62;BaseQRankSum=  |
| 43931 | chrY | 22422220 | . | C | T | 116.14   | my_snp_filter | AC=6;AF=0.100;AN=60;BaseQ          |
| 43932 | chrY | 22422271 | . | A | C | 160.19   | PASS          | AC=3;AF=0.052;AN=58;BaseQRankSum=  |
| 43933 | chrY | 22422273 | . | A | T | 160.74   | PASS          | AC=3;AF=0.054;AN=56;BaseQRankSum=  |
| 43934 | chrY | 22422281 | . | C | A | 157      | PASS          | AC=3;AF=0.058;AN=52;BaseQRankSum=  |
| 43935 | chrY | 22422365 | . | G | A | 73.75    | PASS          | AC=3;AF=0.063;AN=48;BaseQRankSum=  |
| 43936 | chrY | 22422391 | . | G | A | 33.15    | PASS          | AC=2;AF=0.030;AN=66;BaseQRankSum=  |
| 43937 | chrY | 22422444 | . | T | G | 41.54    | PASS          | AC=1;AF=0.014;AN=70;BaseQRankSum=  |
| 43938 | chrY | 22422555 | . | A | C | 203.18   | PASS          | AC=5;AF=0.081;AN=62;BaseQRankSum=  |
| 43939 | chrY | 22422556 | . | C | A | 57.23    | my_snp_filter | AC=2;AF=0.029;AN=70;BaseQ          |
| 43940 | chrY | 22422589 | . | T | C | 43.77    | PASS          | AC=1;AF=0.015;AN=68;BaseQRankSum=  |
| 43941 | chrY | 22422638 | . | G | C | 76.98    | PASS          | AC=2;AF=0.032;AN=62;DP=322;FS=0.0  |
| 43942 | chrY | 22422771 | . | G | A | 35.97    | PASS          | AC=2;AF=0.045;AN=44;BaseQRankSum=  |
| 43943 | chrY | 22422796 | . | C | A | 1333.29  | my_snp_filter | AC=18;AF=0.818;AN=22;Base          |
| 43944 | chrY | 22422799 | . | G | T | 1304.98  | my_snp_filter | AC=18;AF=0.692;AN=26;Base          |
| 43945 | chrY | 22422811 | . | C | G | 171.57   | my_snp_filter | AC=2;AF=0.063;AN=32;BaseQ          |
| 43946 | chrY | 22422828 | . | T | C | 56.74    | my_snp_filter | AC=2;AF=0.091;AN=22;DP=11          |
| 43947 | chrY | 22422829 | . | T | A | 61.58    | my_snp_filter | AC=2;AF=0.091;AN=22;DP=11          |
| 43948 | chrY | 22422834 | . | A | G | 222.26   | my_snp_filter | AC=4;AF=0.250;AN=16;BaseQ          |
| 43949 | chrY | 22423081 | . | A | T | 240.99   | my_snp_filter | AC=6;AF=0.214;AN=28;DP=19          |
| 43950 | chrY | 22423190 | . | G | A | 1190.24  | PASS          | AC=6;AF=0.107;AN=56;BaseQRankSum=  |
| 43951 | chrY | 22423208 | . | T | A | 1350.63  | PASS          | AC=6;AF=0.107;AN=56;BaseQRankSum=  |
| 43952 | chrY | 22423215 | . | G | A | 1363.74  | PASS          | AC=6;AF=0.107;AN=56;BaseQRankSum=  |
| 43953 | chrY | 22423248 | . | T | A | 941.93   | PASS          | AC=3;AF=0.052;AN=58;BaseQRankSum=  |
| 43954 | chrY | 22423344 | . | A | G | 7923.31  | PASS          | AC=32;AF=0.552;AN=58;BaseQRankSum= |
| 43955 | chrY | 22423351 | . | G | C | 777.60   | PASS          | AC=10;AF=0.156;AN=64;BaseQRankSum= |
| 43956 | chrY | 22423377 | . | T | G | 62.79    | PASS          | AC=1;AF=0.016;AN=64;BaseQRankSum=  |
| 43957 | chrY | 22423561 | . | C | G | 70.42    | my_snp_filter | AC=4;AF=0.087;AN=46;BaseQ          |
| 43958 | chrY | 22423729 | . | T | C | 37.06    | my_snp_filter | AC=2;AF=0.056;AN=36;BaseQ          |
| 43959 | chrY | 22423833 | . | A | T | 795.27   | my_snp_filter | AC=12;AF=1.00;AN=12;DP=40          |
| 43960 | chrY | 22424345 | . | T | A | 78.25    | my_snp_filter | AC=1;AF=0.017;AN=58;BaseQ          |
| 43961 | chrY | 22424369 | . | T | A | 556.11   | my_snp_filter | AC=6;AF=0.103;AN=58;BaseQ          |
| 43962 | chrY | 22424469 | . | G | A | 264.23   | my_snp_filter | AC=6;AF=0.125;AN=48;DP=18          |
| 43963 | chrY | 22424553 | . | G | A | 171.87   | my_snp_filter | AC=6;AF=0.333;AN=18;DP=97          |
| 43964 | chrY | 22424838 | . | G | C | 2432.36  | my_snp_filter | AC=14;AF=0.206;AN=68;Base          |
| 43965 | chrY | 22424861 | . | C | T | 203.43   | my_snp_filter | AC=6;AF=0.086;AN=70;BaseQ          |
| 43966 | chrY | 22424865 | . | G | A | 2437.87  | my_snp_filter | AC=16;AF=0.242;AN=66;Base          |
| 43967 | chrY | 22424877 | . | T | C | 1105.05  | my_snp_filter | AC=12;AF=0.176;AN=68;Base          |
| 43968 | chrY | 22424895 | . | G | C | 288.49   | PASS          | AC=3;AF=0.045;AN=66;BaseQRankSum=  |
| 43969 | chrY | 22424917 | . | C | G | 640.40   | PASS          | AC=3;AF=0.044;AN=68;BaseQRankSum=  |
| 43970 | chrY | 22424925 | . | T | A | 1124.32  | my_snp_filter | AC=11;AF=0.183;AN=60;Base          |
| 43971 | chrY | 22425174 | . | A | G | 517.81   | PASS          | AC=8;AF=0.138;AN=58;BaseQRankSum=  |
| 43972 | chrY | 22425290 | . | C | T | 2142.17  | PASS          | AC=7;AF=0.159;AN=44;BaseQRankSum=  |
| 43973 | chrY | 22425343 | . | T | C | 813.17   | PASS          | AC=2;AF=0.034;AN=58;BaseQRankSum=  |
| 43974 | chrY | 22425646 | . | A | C | 1065.93  | PASS          | AC=11;AF=0.196;AN=56;BaseQRankSum= |
| 43975 | chrY | 22425670 | . | C | A | 1695.74  | PASS          | AC=6;AF=0.103;AN=58;BaseQRankSum=  |
| 43976 | chrY | 22425714 | . | T | A | 2816.02  | my_snp_filter | AC=26;AF=0.481;AN=54;Base          |
| 43977 | chrY | 22425832 | . | C | T | 2307.32  | PASS          | AC=22;AF=0.423;AN=52;BaseQRankSum= |
| 43978 | chrY | 22425924 | . | T | G | 3008.77  | PASS          | AC=17;AF=0.327;AN=52;BaseQRankSum= |
| 43979 | chrY | 22426104 | . | C | T | 153.47   | PASS          | AC=1;AF=0.017;AN=60;BaseQRankSum=  |
| 43980 | chrY | 22426195 | . | G | C | 590.10   | PASS          | AC=3;AF=0.050;AN=60;BaseQRankSum=  |
| 43981 | chrY | 22426261 | . | C | T | 253.74   | my_snp_filter | AC=4;AF=0.087;AN=46;BaseQ          |
| 43982 | chrY | 22426375 | . | G | C | 227.29   | my_snp_filter | AC=6;AF=0.176;AN=34;DP=20          |
| 43983 | chrY | 22426416 | . | T | G | 132.99   | my_snp_filter | AC=1;AF=0.029;AN=34;BaseQ          |
| 43984 | chrY | 22426663 | . | A | T | 108.70   | my_snp_filter | AC=3;AF=0.052;AN=58;BaseQ          |
| 43985 | chrY | 22426782 | . | C | G | 693.93   | PASS          | AC=3;AF=0.052;AN=58;BaseQRankSum=  |
| 43986 | chrY | 22426937 | . | A | T | 90.78    | my_snp_filter | AC=3;AF=0.052;AN=58;BaseQ          |
| 43987 | chrY | 22427009 | . | C | T | 97.98    | my_snp_filter | AC=1;AF=0.017;AN=60;BaseQ          |
| 43988 | chrY | 22427033 | . | G | A | 129.18   | PASS          | AC=1;AF=0.017;AN=58;BaseQRankSum=  |
| 43989 | chrY | 22427067 | . | A | G | 501.46   | PASS          | AC=10;AF=0.208;AN=48;BaseQRankSum= |
| 43990 | chrY | 22427448 | . | G | A | 1096.37  | my_snp_filter | AC=3;AF=0.050;AN=60;BaseQ          |
| 43991 | chrY | 22427502 | . | A | G | 4055.96  | my_snp_filter | AC=24;AF=0.400;AN=60;Base          |
| 43992 | chrY | 22427587 | . | C | T | 221.53   | my_snp_filter | AC=3;AF=0.058;AN=52;BaseQ          |
| 43993 | chrY | 22427660 | . | C | G | 46.26    | my_snp_filter | AC=1;AF=0.016;AN=62;BaseQ          |
| 43994 | chrY | 22427743 | . | C | G | 149.17   | my_snp_filter | AC=1;AF=0.017;AN=58;BaseQ          |
| 43995 | chrY | 22427828 | . | A | T | 10752.05 | my_snp_filter | AC=56;AF=1.00;AN=                  |
| 43996 | chrY | 22427831 | . | C | G | 1427.42  | PASS          | AC=9;AF=0.155;AN=58;BaseQRankSum=  |
| 43997 | chrY | 22427852 | . | G | A | 1591     | PASS          | AC=10;AF=0.172;AN=58;BaseQRankSum= |
| 43998 | chrY | 22427876 | . | G | C | 359.14   | my_snp_filter | AC=3;AF=0.056;AN=54;BaseQ          |
| 43999 | chrY | 22428007 | . | T | G | 400.05   | PASS          | AC=3;AF=0.050;AN=60;BaseQRankSum=  |
| 44000 | chrY | 22428079 | . | G | C | 3768.21  | PASS          | AC=14;AF=0.233;AN=60;BaseQRankSum= |
| 44001 | chrY | 22428095 | . | C | A | 453.29   | PASS          | AC=3;AF=0.048;AN=62;BaseQRankSum=  |
| 44002 | chrY | 22428113 | . | G | A | 672.18   | PASS          | AC=3;AF=0.048;AN=62;BaseQRankSum=  |
| 44003 | chrY | 22428138 | . | C | G | 191.38   | PASS          | AC=1;AF=0.017;AN=60;BaseQRankSum=  |
| 44004 | chrY | 22428212 | . | A | C | 2623.94  | my_snp_filter | AC=10;AF=0.172;AN=58;Base          |

|       |      |          |   |   |     |          |               |                                    |
|-------|------|----------|---|---|-----|----------|---------------|------------------------------------|
| 44005 | chrY | 22428232 | . | C | T   | 2541.41  | my_snp_filter | AC=9;AF=0.161;AN=56;BaseQ          |
| 44006 | chrY | 22428252 | . | C | G   | 611.86   | my_snp_filter | AC=3;AF=0.048;AN=62;BaseQ          |
| 44007 | chrY | 22428312 | . | C | T   | 321.57   | PASS          | AC=1;AF=0.020;AN=50;BaseQRankSum=  |
| 44008 | chrY | 22428338 | . | G | C   | 385.58   | PASS          | AC=1;AF=0.022;AN=46;BaseQRankSum=  |
| 44009 | chrY | 22428345 | . | C | A   | 332.03   | my_snp_filter | AC=1;AF=0.022;AN=46;BaseQ          |
| 44010 | chrY | 22428430 | . | A | G   | 1920.06  | my_snp_filter | AC=22;AF=0.550;AN=40;BaseQ         |
| 44011 | chrY | 22428451 | . | A | T   | 119.52   | my_snp_filter | AC=1;AF=0.018;AN=56;BaseQ          |
| 44012 | chrY | 22428505 | . | G | C   | 1295.09  | my_snp_filter | AC=6;AF=0.103;AN=58;DP=29          |
| 44013 | chrY | 22428593 | . | G | C   | 790.03   | PASS          | AC=4;AF=0.074;AN=54;BaseQRankSum=  |
| 44014 | chrY | 22428651 | . | G | A   | 892.31   | my_snp_filter | AC=6;AF=0.103;AN=58;BaseQ          |
| 44015 | chrY | 22428995 | . | C | T   | 522.06   | my_snp_filter | AC=6;AF=1.00;AN=6;DP=23;F          |
| 44016 | chrY | 22429057 | . | C | G   | 753.01   | my_snp_filter | AC=12;AF=0.857;AN=14;DP=3          |
| 44017 | chrY | 22429306 | . | A | T   | 2013.97  | PASS          | AC=18;AF=1.00;AN=18;DP=84;FS=0.00  |
| 44018 | chrY | 22429701 | . | C | T   | 113.93   | PASS          | AC=1;AF=0.017;AN=58;BaseQRankSum=  |
| 44019 | chrY | 22429742 | . | A | G   | 81.32    | PASS          | AC=2;AF=0.034;AN=58;BaseQRankSum=  |
| 44020 | chrY | 22429745 | . | A | C   | 81.18    | PASS          | AC=2;AF=0.034;AN=58;BaseQRankSum=  |
| 44021 | chrY | 22429774 | . | C | A   | 45.24    | PASS          | AC=1;AF=0.017;AN=60;BaseQRankSum=  |
| 44022 | chrY | 22430020 | . | A | C   | 48.52    | my_snp_filter | AC=1;AF=0.018;AN=56;BaseQ          |
| 44023 | chrY | 22430024 | . | C | A   | 48.23    | my_snp_filter | AC=1;AF=0.019;AN=54;BaseQ          |
| 44024 | chrY | 22430060 | . | G | T   | 42.32    | my_snp_filter | AC=2;AF=0.038;AN=52;BaseQ          |
| 44025 | chrY | 22430084 | . | G | C   | 36.96    | my_snp_filter | AC=1;AF=0.019;AN=52;BaseQ          |
| 44026 | chrY | 22430173 | . | A | T   | 552.94   | PASS          | AC=5;AF=0.114;AN=44;BaseQRankSum=  |
| 44027 | chrY | 22430245 | . | C | A   | 270.08   | my_snp_filter | AC=4;AF=0.063;AN=64;BaseQ          |
| 44028 | chrY | 22430269 | . | T | G   | 87.24    | PASS          | AC=3;AF=0.047;AN=64;BaseQRankSum=  |
| 44029 | chrY | 22430406 | . | G | A   | 314.25   | PASS          | AC=3;AF=0.047;AN=64;BaseQRankSum=  |
| 44030 | chrY | 22430410 | . | G | C   | 376.80   | PASS          | AC=3;AF=0.047;AN=64;BaseQRankSum=  |
| 44031 | chrY | 22430421 | . | C | A   | 400.52   | PASS          | AC=3;AF=0.047;AN=64;BaseQRankSum=  |
| 44032 | chrY | 22430427 | . | G | T   | 310.91   | PASS          | AC=3;AF=0.047;AN=64;BaseQRankSum=  |
| 44033 | chrY | 22430429 | . | G | T   | 375.37   | PASS          | AC=4;AF=0.063;AN=64;BaseQRankSum=  |
| 44034 | chrY | 22430456 | . | A | G   | 353.17   | PASS          | AC=4;AF=0.063;AN=64;BaseQRankSum=  |
| 44035 | chrY | 22430489 | . | G | T   | 70.37    | PASS          | AC=1;AF=0.015;AN=68;BaseQRankSum=  |
| 44036 | chrY | 22430522 | . | A | C   | 574.49   | PASS          | AC=5;AF=0.078;AN=64;BaseQRankSum=  |
| 44037 | chrY | 22430523 | . | T | A   | 570.81   | PASS          | AC=5;AF=0.078;AN=64;BaseQRankSum=  |
| 44038 | chrY | 22430528 | . | G | A   | 529.23   | PASS          | AC=4;AF=0.063;AN=64;BaseQRankSum=  |
| 44039 | chrY | 22430569 | . | G | C,T | 365.90   | PASS          | AC=1,1;AF=0.016,0.016;AN=64;BaseQ  |
| 44040 | chrY | 22431078 | . | G | T   | 532.59   | my_snp_filter | AC=6;AF=0.103;AN=58;DP=17          |
| 44041 | chrY | 22431397 | . | T | C   | 136.24   | my_snp_filter | AC=4;AF=0.400;AN=10;DP=16          |
| 44042 | chrY | 22431984 | . | A | T   | 63.91    | PASS          | AC=4;AF=0.333;AN=12;DP=14;FS=0.00  |
| 44043 | chrY | 22432103 | . | A | G   | 141.99   | PASS          | AC=6;AF=0.300;AN=20;DP=48;FS=0.00  |
| 44044 | chrY | 22432138 | . | G | T   | 173.82   | PASS          | AC=4;AF=0.182;AN=22;DP=50;FS=0.00  |
| 44045 | chrY | 22432170 | . | T | C   | 77.51    | my_snp_filter | AC=4;AF=0.182;AN=22;DP=74          |
| 44046 | chrY | 22432269 | . | G | T   | 481.20   | PASS          | AC=3;AF=0.056;AN=54;BaseQRankSum=  |
| 44047 | chrY | 22432368 | . | G | C   | 12673.02 | PASS          | AC=62;AF=1.00;AN=62;BaseQ          |
| 44048 | chrY | 22432454 | . | A | T   | 755.78   | PASS          | AC=3;AF=0.050;AN=60;BaseQRankSum=  |
| 44049 | chrY | 22432609 | . | G | C   | 2838.99  | PASS          | AC=21;AF=0.375;AN=56;BaseQRankSum= |
| 44050 | chrY | 22432891 | . | G | A   | 55.63    | PASS          | AC=1;AF=0.020;AN=50;BaseQRankSum=  |
| 44051 | chrY | 22433022 | . | T | G   | 94.74    | PASS          | AC=2;AF=0.091;AN=22;DP=72;FS=0.00  |
| 44052 | chrY | 22433109 | . | C | G   | 98.50    | PASS          | AC=2;AF=0.167;AN=12;DP=30;FS=0.00  |
| 44053 | chrY | 22433128 | . | C | T   | 99.22    | PASS          | AC=2;AF=0.167;AN=12;DP=25;FS=0.00  |
| 44054 | chrY | 22433275 | . | T | C   | 175.07   | my_snp_filter | AC=4;AF=1.00;AN=4;DP=16;F          |
| 44055 | chrY | 22433447 | . | C | T   | 408.44   | my_snp_filter | AC=5;AF=0.250;AN=20;BaseQ          |
| 44056 | chrY | 22433464 | . | G | C   | 439.58   | my_snp_filter | AC=5;AF=0.167;AN=30;BaseQ          |
| 44057 | chrY | 22433472 | . | T | C   | 441.82   | my_snp_filter | AC=5;AF=0.156;AN=32;BaseQ          |
| 44058 | chrY | 22433507 | . | C | G   | 517.46   | my_snp_filter | AC=5;AF=0.096;AN=52;BaseQ          |
| 44059 | chrY | 22433534 | . | A | C   | 718.77   | my_snp_filter | AC=7;AF=0.135;AN=52;BaseQ          |
| 44060 | chrY | 22433542 | . | A | T   | 684.74   | my_snp_filter | AC=7;AF=0.135;AN=52;BaseQ          |
| 44061 | chrY | 22433602 | . | C | A   | 213.09   | my_snp_filter | AC=5;AF=0.074;AN=68;BaseQ          |
| 44062 | chrY | 22433654 | . | T | C   | 3418.85  | my_snp_filter | AC=20;AF=0.323;AN=62;BaseQ         |
| 44063 | chrY | 22433678 | . | C | T   | 3617.61  | my_snp_filter | AC=18;AF=0.281;AN=64;BaseQ         |
| 44064 | chrY | 22433693 | . | G | T   | 3681.43  | my_snp_filter | AC=17;AF=0.266;AN=64;BaseQ         |
| 44065 | chrY | 22433699 | . | T | A   | 3873.49  | my_snp_filter | AC=17;AF=0.266;AN=64;BaseQ         |
| 44066 | chrY | 22433708 | . | C | A   | 3882.17  | my_snp_filter | AC=17;AF=0.266;AN=64;BaseQ         |
| 44067 | chrY | 22433711 | . | G | C   | 231.54   | my_snp_filter | AC=1;AF=0.014;AN=70;BaseQ          |
| 44068 | chrY | 22433723 | . | T | C   | 940.77   | my_snp_filter | AC=3;AF=0.043;AN=70;BaseQ          |
| 44069 | chrY | 22433724 | . | G | T   | 943.77   | my_snp_filter | AC=3;AF=0.043;AN=70;BaseQ          |
| 44070 | chrY | 22433740 | . | C | A   | 2765.82  | my_snp_filter | AC=13;AF=0.203;AN=64;BaseQ         |
| 44071 | chrY | 22433770 | . | T | G   | 2032.61  | my_snp_filter | AC=8;AF=0.138;AN=58;BaseQ          |
| 44072 | chrY | 22433792 | . | A | T   | 1322.01  | my_snp_filter | AC=8;AF=0.133;AN=60;BaseQ          |
| 44073 | chrY | 22433804 | . | C | G   | 947.84   | my_snp_filter | AC=7;AF=0.113;AN=62;BaseQ          |
| 44074 | chrY | 22433882 | . | A | T   | 43.88    | my_snp_filter | AC=1;AF=0.022;AN=46;BaseQ          |
| 44075 | chrY | 22433893 | . | C | G   | 83.89    | my_snp_filter | AC=1;AF=0.025;AN=40;BaseQ          |
| 44076 | chrY | 22433906 | . | C | T   | 108.05   | my_snp_filter | AC=1;AF=0.031;AN=32;BaseQ          |
| 44077 | chrY | 22433926 | . | A | T   | 113.93   | my_snp_filter | AC=1;AF=0.045;AN=22;BaseQ          |
| 44078 | chrY | 22433998 | . | G | T   | 632.17   | my_snp_filter | AC=8;AF=0.444;AN=18;BaseQ          |
| 44079 | chrY | 22434007 | . | C | G   | 251.45   | my_snp_filter | AC=2;AF=0.111;AN=18;BaseQ          |
| 44080 | chrY | 22434009 | . | T | C   | 269.44   | my_snp_filter | AC=3;AF=0.167;AN=18;BaseQ          |

|       |      |          |   |     |     |          |               |                                   |
|-------|------|----------|---|-----|-----|----------|---------------|-----------------------------------|
| 44081 | chrY | 22434026 | . | G   | A   | 40.20    | my_snp_filter | AC=1;AF=0.056;AN=18;BaseQ         |
| 44082 | chrY | 22434093 | . | G   | C   | 176.99   | my_snp_filter | AC=6;AF=0.333;AN=18;DP=36         |
| 44083 | chrY | 22435394 | . | G   | A   | 911.47   | PASS          | AC=17;AF=0.944;AN=18;BaseQRankSum |
| 44084 | chrY | 22435481 | . | A   | C   | 54.55    | my_snp_filter | AC=2;AF=0.036;AN=56;BaseQ         |
| 44085 | chrY | 22435502 | . | G   | C   | 54.67    | my_snp_filter | AC=2;AF=0.034;AN=58;BaseQ         |
| 44086 | chrY | 22435569 | . | C   | G   | 453.88   | PASS          | AC=4;AF=0.061;AN=66;BaseQRankSum  |
| 44087 | chrY | 22435609 | . | A   | G   | 124.59   | my_snp_filter | AC=4;AF=0.065;AN=62;BaseQ         |
| 44088 | chrY | 22435617 | . | A   | G   | 70.69    | PASS          | AC=1;AF=0.015;AN=66;BaseQRankSum  |
| 44089 | chrY | 22435621 | . | T   | C   | 71.14    | PASS          | AC=1;AF=0.015;AN=68;BaseQRankSum  |
| 44090 | chrY | 22435646 | . | C   | T   | 1118.45  | my_snp_filter | AC=11;AF=0.172;AN=64;BaseQ        |
| 44091 | chrY | 22435694 | . | G   | A   | 1678.42  | PASS          | AC=17;AF=0.472;AN=36;BaseQRankSum |
| 44092 | chrY | 22435711 | . | G   | T   | 1278.25  | PASS          | AC=18;AF=0.750;AN=24;BaseQRankSum |
| 44093 | chrY | 22435729 | . | T   | C   | 521.70   | PASS          | AC=8;AF=0.667;AN=12;DP=27;FS=0.00 |
| 44094 | chrY | 22435744 | . | T   | A   | 292.28   | PASS          | AC=4;AF=1.00;AN=4;DP=7;FS=0.000;M |
| 44095 | chrY | 22435746 | . | A   | C   | 292.28   | PASS          | AC=4;AF=1.00;AN=4;DP=7;FS=0.000;M |
| 44096 | chrY | 22435870 | . | C   | T   | 113.51   | my_snp_filter | AC=4;AF=1.00;AN=4;DP=30;F         |
| 44097 | chrY | 22435876 | . | A   | T   | 191.03   | my_snp_filter | AC=6;AF=1.00;AN=6;DP=37;F         |
| 44098 | chrY | 22435997 | . | A   | T   | 34.56    | my_snp_filter | AC=1;AF=0.019;AN=54;BaseQ         |
| 44099 | chrY | 22436028 | . | G   | A   | 182.06   | my_snp_filter | AC=3;AF=0.071;AN=42;BaseQ         |
| 44100 | chrY | 22436085 | . | T   | G   | 6253.19  | my_snp_filter | AC=40;AF=1.00;AN=40;DP=20         |
| 44101 | chrY | 22436108 | . | G   | C   | 1357.44  | my_snp_filter | AC=16;AF=0.333;AN=48;BaseQ        |
| 44102 | chrY | 22436214 | . | A   | C   | 1232.89  | my_snp_filter | AC=4;AF=0.065;AN=62;BaseQ         |
| 44103 | chrY | 22436217 | . | T   | G   | 15463.99 | my_snp_filter | AC=58;AF=1.00;AN=                 |
| 44104 | chrY | 22436230 | . | T   | C   | 17461.94 | my_snp_filter | AC=58;AF=1.00;AN=                 |
| 44105 | chrY | 22436233 | . | G   | A   | 15863.68 | my_snp_filter | AC=54;AF=0.931;AN=                |
| 44106 | chrY | 22436247 | . | T   | A   | 1272.70  | PASS          | AC=3;AF=0.047;AN=64;BaseQRankSum  |
| 44107 | chrY | 22436253 | . | A   | G   | 1230.65  | PASS          | AC=3;AF=0.047;AN=64;BaseQRankSum  |
| 44108 | chrY | 22436300 | . | A   | C   | 49917.87 | PASS          | AC=64;AF=1.00;AN=64;DP=11         |
| 44109 | chrY | 22436303 | . | C   | A   | 141.83   | PASS          | AC=1;AF=0.016;AN=64;BaseQRankSum  |
| 44110 | chrY | 22436354 | . | T   | G   | 1447.82  | PASS          | AC=3;AF=0.047;AN=64;BaseQRankSum  |
| 44111 | chrY | 22436396 | . | A   | C   | 16245.96 | PASS          | AC=64;AF=1.00;AN=64;BaseQ         |
| 44112 | chrY | 22436428 | . | C   | T   | 92.38    | my_snp_filter | AC=2;AF=0.033;AN=60;BaseQ         |
| 44113 | chrY | 22436519 | . | C   | A   | 1499.28  | PASS          | AC=14;AF=0.333;AN=42;BaseQRankSum |
| 44114 | chrY | 22436585 | . | T   | G   | 73.90    | my_snp_filter | AC=3;AF=0.048;AN=62;BaseQ         |
| 44115 | chrY | 22436780 | . | G   | T   | 100.59   | PASS          | AC=2;AF=0.029;AN=68;BaseQRankSum  |
| 44116 | chrY | 22436793 | . | T   | A   | 101.30   | PASS          | AC=2;AF=0.029;AN=68;BaseQRankSum  |
| 44117 | chrY | 22436822 | . | T   | C   | 377.87   | my_snp_filter | AC=7;AF=0.100;AN=70;BaseQ         |
| 44118 | chrY | 22436841 | . | G   | T   | 311.27   | PASS          | AC=4;AF=0.057;AN=70;BaseQRankSum  |
| 44119 | chrY | 22436865 | . | G   | T   | 213.53   | PASS          | AC=1;AF=0.014;AN=70;BaseQRankSum  |
| 44120 | chrY | 22436870 | . | A   | G   | 203.67   | PASS          | AC=1;AF=0.014;AN=70;BaseQRankSum  |
| 44121 | chrY | 22436874 | . | C   | A   | 172.09   | PASS          | AC=3;AF=0.047;AN=64;BaseQRankSum  |
| 44122 | chrY | 22436880 | . | G   | T   | 340.60   | PASS          | AC=2;AF=0.029;AN=70;BaseQRankSum  |
| 44123 | chrY | 22436883 | . | G   | C   | 45.01    | my_snp_filter | AC=1;AF=0.014;AN=70;BaseQ         |
| 44124 | chrY | 22436895 | . | A   | C   | 35.81    | my_snp_filter | AC=1;AF=0.015;AN=68;BaseQ         |
| 44125 | chrY | 22436896 | . | T   | C   | 487.07   | PASS          | AC=3;AF=0.044;AN=68;BaseQRankSum  |
| 44126 | chrY | 22436898 | . | T   | G   | 35.92    | my_snp_filter | AC=1;AF=0.015;AN=68;BaseQ         |
| 44127 | chrY | 22436902 | . | G   | C   | 113.27   | PASS          | AC=1;AF=0.016;AN=64;BaseQRankSum  |
| 44128 | chrY | 22436903 | . | G   | C   | 63.51    | my_snp_filter | AC=1;AF=0.015;AN=66;BaseQ         |
| 44129 | chrY | 22436915 | . | G   | C   | 95.25    | PASS          | AC=1;AF=0.015;AN=66;BaseQRankSum  |
| 44130 | chrY | 22436946 | . | C   | T   | 49.54    | PASS          | AC=1;AF=0.016;AN=62;BaseQRankSum  |
| 44131 | chrY | 22436960 | . | G   | T   | 2701.82  | PASS          | AC=3;AF=0.048;AN=62;BaseQRankSum  |
| 44132 | chrY | 22436961 | . | C   | T   | 371.74   | PASS          | AC=4;AF=0.065;AN=62;BaseQRankSum  |
| 44133 | chrY | 22436972 | . | G   | T   | 40.94    | my_snp_filter | AC=2;AF=0.032;AN=62;BaseQ         |
| 44134 | chrY | 22437196 | . | T   | C   | 81.89    | PASS          | AC=2;AF=0.032;AN=62;BaseQRankSum  |
| 44135 | chrY | 22437476 | . | T   | C,* | 1227.06  | PASS          | AC=5,2;AF=0.093,0.037;AN=54;BaseQ |
| 44136 | chrY | 22437482 | . | G,* | C,* | 1294.75  | PASS          | AC=5,2;AF=0.096,0.038;AN=52;BaseQ |
| 44137 | chrY | 22437562 | . | A   | C   | 98.53    | PASS          | AC=1;AF=0.017;AN=58;BaseQRankSum  |
| 44138 | chrY | 22437574 | . | T   | C   | 101.45   | PASS          | AC=1;AF=0.017;AN=58;BaseQRankSum  |
| 44139 | chrY | 22437651 | . | T   | A   | 1448.12  | PASS          | AC=11;AF=0.196;AN=56;BaseQRankSum |
| 44140 | chrY | 22437652 | . | T   | A   | 5407.04  | PASS          | AC=21;AF=0.362;AN=58;BaseQRankSum |
| 44141 | chrY | 22437711 | . | T   | C   | 3114.44  | PASS          | AC=22;AF=0.458;AN=48;BaseQRankSum |
| 44142 | chrY | 22437743 | . | A   | G   | 1570.81  | PASS          | AC=10;AF=0.185;AN=54;BaseQRankSum |
| 44143 | chrY | 22437744 | . | T   | G   | 15410.26 | PASS          | AC=47;AF=0.940;AN=50;DP=5         |
| 44144 | chrY | 22437776 | . | A   | T   | 605.59   | PASS          | AC=2;AF=0.032;AN=62;BaseQRankSum  |
| 44145 | chrY | 22437841 | . | C   | T   | 4521.21  | PASS          | AC=18;AF=0.375;AN=48;BaseQRankSum |
| 44146 | chrY | 22437881 | . | G   | T   | 195.32   | my_snp_filter | AC=2;AF=0.032;AN=62;BaseQ         |
| 44147 | chrY | 22437888 | . | A   | C   | 4473.07  | PASS          | AC=17;AF=0.340;AN=50;BaseQRankSum |
| 44148 | chrY | 22437960 | . | T   | A   | 354.73   | PASS          | AC=3;AF=0.048;AN=62;BaseQRankSum  |
| 44149 | chrY | 22437969 | . | G   | T   | 1716.76  | PASS          | AC=8;AF=0.143;AN=56;BaseQRankSum  |
| 44150 | chrY | 22437992 | . | T   | C   | 1710.81  | PASS          | AC=7;AF=0.125;AN=56;BaseQRankSum  |
| 44151 | chrY | 22437995 | . | A   | T   | 339.27   | PASS          | AC=3;AF=0.050;AN=60;BaseQRankSum  |
| 44152 | chrY | 22437997 | . | C   | G   | 314.96   | PASS          | AC=3;AF=0.048;AN=62;BaseQRankSum  |
| 44153 | chrY | 22438014 | . | C   | T   | 1342.27  | PASS          | AC=5;AF=0.089;AN=56;BaseQRankSum  |
| 44154 | chrY | 22438024 | . | A   | T   | 1380.88  | PASS          | AC=5;AF=0.086;AN=58;BaseQRankSum  |
| 44155 | chrY | 22438025 | . | G   | C   | 161.29   | PASS          | AC=2;AF=0.032;AN=62;BaseQRankSum  |
| 44156 | chrY | 22438026 | . | T   | G   | 12184.74 | PASS          | AC=49;AF=0.907;AN=54;BaseQ        |

|       |      |          |   |   |     |          |               |                                    |
|-------|------|----------|---|---|-----|----------|---------------|------------------------------------|
| 44157 | chrY | 22438077 | . | G | C   | 1560.64  | PASS          | AC=14;AF=0.226;AN=62;BaseQRankSum= |
| 44158 | chrY | 22438093 | . | G | T   | 748.56   | PASS          | AC=5;AF=0.078;AN=64;BaseQRankSum=  |
| 44159 | chrY | 22438114 | . | G | A   | 679.99   | PASS          | AC=5;AF=0.078;AN=64;BaseQRankSum=  |
| 44160 | chrY | 22438121 | . | A | T   | 2219.73  | PASS          | AC=11;AF=0.177;AN=62;BaseQRankSum= |
| 44161 | chrY | 22438132 | . | T | C   | 579.36   | PASS          | AC=4;AF=0.063;AN=64;BaseQRankSum=  |
| 44162 | chrY | 22438152 | . | G | C   | 1683.82  | PASS          | AC=8;AF=0.129;AN=62;BaseQRankSum=  |
| 44163 | chrY | 22438167 | . | G | T,* | 7573.21  | PASS          | AC=32,1;AF=0.615,0.019;AN=52;BaseQ |
| 44164 | chrY | 22438195 | . | T | C   | 755.63   | PASS          | AC=5;AF=0.083;AN=60;BaseQRankSum=  |
| 44165 | chrY | 22438206 | . | G | A   | 179.02   | PASS          | AC=3;AF=0.048;AN=62;BaseQRankSum=  |
| 44166 | chrY | 22438210 | . | A | T   | 418.43   | PASS          | AC=7;AF=0.125;AN=56;BaseQRankSum=  |
| 44167 | chrY | 22438241 | . | A | T   | 201.98   | PASS          | AC=1;AF=0.016;AN=62;BaseQRankSum=  |
| 44168 | chrY | 22438302 | . | A | T   | 50.60    | PASS          | AC=1;AF=0.016;AN=62;BaseQRankSum=  |
| 44169 | chrY | 22438337 | . | A | G   | 57.53    | PASS          | AC=1;AF=0.016;AN=62;BaseQRankSum=  |
| 44170 | chrY | 22438367 | . | G | T   | 61.20    | PASS          | AC=1;AF=0.017;AN=60;BaseQRankSum=  |
| 44171 | chrY | 22438425 | . | C | A   | 81.44    | PASS          | AC=2;AF=0.034;AN=58;BaseQRankSum=  |
| 44172 | chrY | 22438431 | . | G | T   | 917.28   | PASS          | AC=3;AF=0.052;AN=58;BaseQRankSum=  |
| 44173 | chrY | 22438462 | . | G | T   | 3766.84  | my_snp_filter | AC=26;AF=0.448;AN=58;BaseQ         |
| 44174 | chrY | 22438483 | . | G | C   | 52.24    | PASS          | AC=1;AF=0.016;AN=62;BaseQRankSum=  |
| 44175 | chrY | 22438536 | . | A | G   | 245.35   | PASS          | AC=1;AF=0.016;AN=62;BaseQRankSum=  |
| 44176 | chrY | 22438569 | . | C | A   | 5322.87  | PASS          | AC=23;AF=0.397;AN=58;BaseQRankSum= |
| 44177 | chrY | 22438574 | . | T | C   | 5067.81  | PASS          | AC=23;AF=0.397;AN=58;BaseQRankSum= |
| 44178 | chrY | 22438598 | . | C | T   | 43.72    | my_snp_filter | AC=2;AF=0.033;AN=60;BaseQ          |
| 44179 | chrY | 22438600 | . | C | T   | 37.41    | PASS          | AC=1;AF=0.017;AN=60;BaseQRankSum=  |
| 44180 | chrY | 22438672 | . | C | T   | 156.38   | my_snp_filter | AC=4;AF=0.063;AN=64;BaseQ          |
| 44181 | chrY | 22438828 | . | T | A   | 380.16   | PASS          | AC=2;AF=0.031;AN=64;BaseQRankSum=  |
| 44182 | chrY | 22438839 | . | C | A   | 120.20   | my_snp_filter | AC=2;AF=0.029;AN=68;BaseQ          |
| 44183 | chrY | 22438895 | . | A | G   | 89.22    | PASS          | AC=4;AF=0.067;AN=60;BaseQRankSum=  |
| 44184 | chrY | 22438905 | . | G | T   | 101.03   | PASS          | AC=5;AF=0.081;AN=62;BaseQRankSum=  |
| 44185 | chrY | 22438923 | . | T | C   | 33.68    | my_snp_filter | AC=4;AF=0.067;AN=60;BaseQ          |
| 44186 | chrY | 22438952 | . | C | A   | 4993.89  | PASS          | AC=34;AF=0.586;AN=58;BaseQRankSum= |
| 44187 | chrY | 22439097 | . | T | C,* | 1222.60  | PASS          | AC=3,2;AF=0.058,0.038;AN=52;BaseQ  |
| 44188 | chrY | 22439118 | . | C | A,* | 1151.08  | PASS          | AC=2,2;AF=0.048,0.048;AN=42;BaseQ  |
| 44189 | chrY | 22439146 | . | G | T   | 194.48   | my_snp_filter | AC=4;AF=0.182;AN=22;DP=19          |
| 44190 | chrY | 22439283 | . | A | G   | 47.71    | my_snp_filter | AC=1;AF=0.033;AN=30;BaseQ          |
| 44191 | chrY | 22439297 | . | A | C   | 659.68   | PASS          | AC=8;AF=0.364;AN=22;BaseQRankSum=  |
| 44192 | chrY | 22439313 | . | T | C   | 1029.03  | my_snp_filter | AC=18;AF=0.429;AN=42;BaseQ         |
| 44193 | chrY | 22439326 | . | G | A   | 1210.17  | PASS          | AC=4;AF=0.067;AN=60;BaseQRankSum=  |
| 44194 | chrY | 22439375 | . | G | A   | 952.77   | PASS          | AC=3;AF=0.052;AN=58;BaseQRankSum=  |
| 44195 | chrY | 22439435 | . | A | T   | 846.19   | PASS          | AC=3;AF=0.050;AN=60;BaseQRankSum=  |
| 44196 | chrY | 22439436 | . | G | A   | 137.61   | my_snp_filter | AC=2;AF=0.033;AN=60;BaseQ          |
| 44197 | chrY | 22439445 | . | T | C   | 133.30   | PASS          | AC=2;AF=0.032;AN=62;BaseQRankSum=  |
| 44198 | chrY | 22439456 | . | T | C   | 9886.80  | my_snp_filter | AC=46;AF=0.821;AN=56;BaseQ         |
| 44199 | chrY | 22439458 | . | A | T   | 90.88    | PASS          | AC=1;AF=0.016;AN=62;BaseQRankSum=  |
| 44200 | chrY | 22439488 | . | C | T   | 11280.03 | my_snp_filter | AC=44;AF=0.815;AN=                 |
| 44201 | chrY | 22439500 | . | A | G   | 9640.06  | my_snp_filter | AC=42;AF=0.808;AN=52;BaseQ         |
| 44202 | chrY | 22439504 | . | T | C   | 194.58   | my_snp_filter | AC=7;AF=0.121;AN=58;BaseQ          |
| 44203 | chrY | 22439646 | . | G | A   | 81.92    | my_snp_filter | AC=1;AF=0.038;AN=26;BaseQ          |
| 44204 | chrY | 22439703 | . | T | G   | 1885.09  | my_snp_filter | AC=9;AF=0.500;AN=18;BaseQ          |
| 44205 | chrY | 22439726 | . | G | C   | 292.74   | my_snp_filter | AC=6;AF=0.300;AN=20;BaseQ          |
| 44206 | chrY | 22439835 | . | T | G   | 232.68   | my_snp_filter | AC=5;AF=0.250;AN=20;BaseQ          |
| 44207 | chrY | 22439848 | . | T | C   | 181.05   | PASS          | AC=4;AF=0.200;AN=20;BaseQRankSum=  |
| 44208 | chrY | 22439851 | . | G | A   | 176.98   | PASS          | AC=4;AF=0.200;AN=20;BaseQRankSum=  |
| 44209 | chrY | 22439918 | . | A | C   | 172.58   | my_snp_filter | AC=4;AF=0.182;AN=22;DP=24          |
| 44210 | chrY | 22439953 | . | G | T   | 465.50   | PASS          | AC=4;AF=0.167;AN=24;BaseQRankSum=  |
| 44211 | chrY | 22439962 | . | C | G   | 78.41    | PASS          | AC=2;AF=0.037;AN=54;BaseQRankSum=  |
| 44212 | chrY | 22439997 | . | T | C   | 2377.34  | PASS          | AC=23;AF=0.397;AN=58;BaseQRankSum= |
| 44213 | chrY | 22440021 | . | G | T   | 49.40    | my_snp_filter | AC=1;AF=0.017;AN=60;BaseQ          |
| 44214 | chrY | 22440068 | . | C | T   | 70.08    | my_snp_filter | AC=2;AF=0.034;AN=58;BaseQ          |
| 44215 | chrY | 22440073 | . | G | T   | 47.58    | PASS          | AC=2;AF=0.034;AN=58;DP=382;FS=0.0  |
| 44216 | chrY | 22440077 | . | G | A   | 359.56   | my_snp_filter | AC=5;AF=0.096;AN=52;BaseQ          |
| 44217 | chrY | 22440091 | . | C | T   | 49.22    | PASS          | AC=2;AF=0.040;AN=50;DP=296;FS=0.0  |
| 44218 | chrY | 22440092 | . | T | C   | 49.44    | PASS          | AC=2;AF=0.043;AN=46;DP=288;FS=0.0  |
| 44219 | chrY | 22440108 | . | A | G   | 48.09    | my_snp_filter | AC=1;AF=0.033;AN=30;DP=25          |
| 44220 | chrY | 22440112 | . | C | T   | 179.44   | PASS          | AC=2;AF=0.091;AN=22;DP=251;FS=0.0  |
| 44221 | chrY | 22440118 | . | C | T   | 52.52    | my_snp_filter | AC=2;AF=0.091;AN=22;DP=24          |
| 44222 | chrY | 22440164 | . | G | C   | 1233.43  | PASS          | AC=6;AF=0.333;AN=18;BaseQRankSum=  |
| 44223 | chrY | 22440234 | . | C | A   | 158.09   | PASS          | AC=3;AF=0.150;AN=20;BaseQRankSum=  |
| 44224 | chrY | 22440258 | . | G | A   | 282.77   | PASS          | AC=3;AF=0.167;AN=18;BaseQRankSum=  |
| 44225 | chrY | 22440264 | . | C | G   | 293.70   | PASS          | AC=3;AF=0.167;AN=18;BaseQRankSum=  |
| 44226 | chrY | 22440289 | . | G | C   | 395.72   | PASS          | AC=3;AF=0.167;AN=18;BaseQRankSum=  |
| 44227 | chrY | 22440312 | . | C | T   | 428      | PASS          | AC=3;AF=0.167;AN=18;BaseQRankSum=  |
| 44228 | chrY | 22440314 | . | T | G   | 123.62   | PASS          | AC=1;AF=0.033;AN=30;BaseQRankSum=  |
| 44229 | chrY | 22440329 | . | A | C   | 323.76   | PASS          | AC=3;AF=0.167;AN=18;BaseQRankSum=  |
| 44230 | chrY | 22440333 | . | G | C   | 2459.81  | PASS          | AC=5;AF=0.192;AN=26;BaseQRankSum=  |
| 44231 | chrY | 22440348 | . | T | A   | 2739.95  | PASS          | AC=8;AF=0.444;AN=18;BaseQRankSum=  |
| 44232 | chrY | 22440355 | . | A | T   | 104.96   | PASS          | AC=2;AF=0.111;AN=18;BaseQRankSum=  |

|       |      |          |   |   |   |          |               |                                    |
|-------|------|----------|---|---|---|----------|---------------|------------------------------------|
| 44233 | chrY | 22440425 | . | G | A | 334.32   | PASS          | AC=1;AF=0.056;AN=18;BaseQRankSum=  |
| 44234 | chrY | 22440551 | . | T | G | 1164.89  | PASS          | AC=17;AF=0.654;AN=26;BaseQRankSum= |
| 44235 | chrY | 22440571 | . | G | A | 537.74   | PASS          | AC=3;AF=0.054;AN=56;BaseQRankSum=  |
| 44236 | chrY | 22440615 | . | A | C | 4309.33  | my_snp_filter | AC=41;AF=0.820;AN=50;BaseQ         |
| 44237 | chrY | 22440658 | . | G | T | 5276.20  | my_snp_filter | AC=39;AF=0.722;AN=54;BaseQ         |
| 44238 | chrY | 22440685 | . | T | A | 5486.77  | my_snp_filter | AC=40;AF=0.741;AN=54;BaseQ         |
| 44239 | chrY | 22440696 | . | G | T | 4757.14  | my_snp_filter | AC=35;AF=0.700;AN=50;BaseQ         |
| 44240 | chrY | 22440717 | . | C | A | 3550     | my_snp_filter | AC=37;AF=0.740;AN=50;BaseQ         |
| 44241 | chrY | 22440804 | . | C | T | 1148.78  | PASS          | AC=18;AF=0.500;AN=36;BaseQRankSum= |
| 44242 | chrY | 22440821 | . | G | C | 498.74   | PASS          | AC=8;AF=0.308;AN=26;DP=248;FS=0.0  |
| 44243 | chrY | 22441064 | . | C | A | 140.05   | PASS          | AC=1;AF=0.056;AN=18;BaseQRankSum=  |
| 44244 | chrY | 22441069 | . | T | C | 140.41   | PASS          | AC=1;AF=0.056;AN=18;BaseQRankSum=  |
| 44245 | chrY | 22441109 | . | C | T | 122.04   | PASS          | AC=1;AF=0.019;AN=52;BaseQRankSum=  |
| 44246 | chrY | 22441136 | . | T | C | 91.28    | PASS          | AC=1;AF=0.022;AN=46;BaseQRankSum=  |
| 44247 | chrY | 22441176 | . | A | T | 340.80   | PASS          | AC=5;AF=0.278;AN=18;BaseQRankSum=  |
| 44248 | chrY | 22441239 | . | G | C | 3874.54  | my_snp_filter | AC=32;AF=0.800;AN=40;BaseQ         |
| 44249 | chrY | 22441260 | . | A | C | 520.62   | my_snp_filter | AC=5;AF=0.100;AN=50;BaseQ          |
| 44250 | chrY | 22441305 | . | A | G | 6711.55  | my_snp_filter | AC=39;AF=0.975;AN=40;BaseQ         |
| 44251 | chrY | 22441323 | . | T | A | 1188.67  | PASS          | AC=3;AF=0.050;AN=60;BaseQRankSum=  |
| 44252 | chrY | 22441324 | . | G | A | 1183.21  | PASS          | AC=3;AF=0.048;AN=62;BaseQRankSum=  |
| 44253 | chrY | 22441345 | . | C | A | 103.11   | my_snp_filter | AC=2;AF=0.032;AN=62;DP=48          |
| 44254 | chrY | 22441359 | . | C | T | 1130.39  | PASS          | AC=3;AF=0.047;AN=64;BaseQRankSum=  |
| 44255 | chrY | 22441389 | . | A | T | 70.05    | my_snp_filter | AC=3;AF=0.045;AN=66;BaseQ          |
| 44256 | chrY | 22441404 | . | A | C | 9100.54  | PASS          | AC=36;AF=0.563;AN=64;BaseQRankSum= |
| 44257 | chrY | 22441408 | . | T | A | 43.98    | my_snp_filter | AC=1;AF=0.016;AN=64;BaseQ          |
| 44258 | chrY | 22441417 | . | T | C | 132.67   | PASS          | AC=1;AF=0.015;AN=68;BaseQRankSum=  |
| 44259 | chrY | 22441418 | . | T | C | 703.61   | PASS          | AC=12;AF=0.194;AN=62;BaseQRankSum= |
| 44260 | chrY | 22441419 | . | A | G | 125.70   | my_snp_filter | AC=1;AF=0.015;AN=68;BaseQ          |
| 44261 | chrY | 22441431 | . | A | C | 83.97    | PASS          | AC=3;AF=0.047;AN=64;BaseQRankSum=  |
| 44262 | chrY | 22441437 | . | T | G | 125.62   | PASS          | AC=1;AF=0.015;AN=68;BaseQRankSum=  |
| 44263 | chrY | 22441449 | . | A | G | 865.69   | PASS          | AC=2;AF=0.030;AN=66;BaseQRankSum=  |
| 44264 | chrY | 22441451 | . | T | A | 10207.83 | PASS          | AC=28;AF=0.424;AN=66;BaseQ         |
| 44265 | chrY | 22441488 | . | C | T | 2319.17  | PASS          | AC=23;AF=0.338;AN=68;BaseQRankSum= |
| 44266 | chrY | 22441515 | . | T | A | 108.52   | PASS          | AC=4;AF=0.063;AN=64;BaseQRankSum=  |
| 44267 | chrY | 22441583 | . | A | C | 148.30   | my_snp_filter | AC=6;AF=0.100;AN=60;BaseQ          |
| 44268 | chrY | 22441594 | . | C | G | 62.02    | my_snp_filter | AC=2;AF=0.034;AN=58;BaseQ          |
| 44269 | chrY | 22441641 | . | G | T | 2658.99  | my_snp_filter | AC=11;AF=0.212;AN=52;BaseQ         |
| 44270 | chrY | 22441648 | . | T | G | 52.86    | my_snp_filter | AC=3;AF=0.052;AN=58;BaseQ          |
| 44271 | chrY | 22441674 | . | G | T | 1377.91  | PASS          | AC=15;AF=0.250;AN=60;BaseQRankSum= |
| 44272 | chrY | 22441738 | . | A | C | 3998.24  | PASS          | AC=19;AF=0.297;AN=64;BaseQRankSum= |
| 44273 | chrY | 22441764 | . | A | G | 2855.61  | PASS          | AC=4;AF=0.065;AN=62;BaseQRankSum=  |
| 44274 | chrY | 22441797 | . | A | G | 365.80   | PASS          | AC=5;AF=0.078;AN=64;BaseQRankSum=  |
| 44275 | chrY | 22441798 | . | T | G | 762.82   | PASS          | AC=1;AF=0.016;AN=64;BaseQRankSum=  |
| 44276 | chrY | 22441808 | . | T | C | 4689.84  | PASS          | AC=10;AF=0.167;AN=60;BaseQRankSum= |
| 44277 | chrY | 22441922 | . | G | A | 527.19   | my_snp_filter | AC=3;AF=0.048;AN=62;BaseQ          |
| 44278 | chrY | 22441940 | . | T | C | 56.62    | my_snp_filter | AC=2;AF=0.032;AN=62;BaseQ          |
| 44279 | chrY | 22441951 | . | T | C | 1021.04  | my_snp_filter | AC=8;AF=0.143;AN=56;BaseQ          |
| 44280 | chrY | 22441952 | . | A | C | 1205.23  | my_snp_filter | AC=8;AF=0.143;AN=56;BaseQ          |
| 44281 | chrY | 22441983 | . | C | T | 1657.07  | my_snp_filter | AC=9;AF=0.173;AN=52;BaseQ          |
| 44282 | chrY | 22441989 | . | A | T | 1632.49  | my_snp_filter | AC=9;AF=0.173;AN=52;BaseQ          |
| 44283 | chrY | 22441999 | . | T | C | 837.27   | my_snp_filter | AC=8;AF=0.167;AN=48;BaseQ          |
| 44284 | chrY | 22442000 | . | C | A | 153.15   | my_snp_filter | AC=3;AF=0.060;AN=50;BaseQ          |
| 44285 | chrY | 22442190 | . | C | T | 134.97   | my_snp_filter | AC=5;AF=0.083;AN=60;BaseQ          |
| 44286 | chrY | 22442215 | . | T | C | 251.71   | PASS          | AC=5;AF=0.086;AN=58;BaseQRankSum=  |
| 44287 | chrY | 22442280 | . | C | G | 174.54   | PASS          | AC=4;AF=0.061;AN=66;BaseQRankSum=  |
| 44288 | chrY | 22442318 | . | T | G | 550.73   | PASS          | AC=4;AF=0.069;AN=58;BaseQRankSum=  |
| 44289 | chrY | 22442321 | . | T | A | 837.50   | PASS          | AC=4;AF=0.069;AN=58;BaseQRankSum=  |
| 44290 | chrY | 22442346 | . | G | A | 1686.34  | PASS          | AC=7;AF=0.125;AN=56;BaseQRankSum=  |
| 44291 | chrY | 22442360 | . | T | A | 332.34   | PASS          | AC=2;AF=0.031;AN=64;BaseQRankSum=  |
| 44292 | chrY | 22442381 | . | T | G | 226.03   | PASS          | AC=2;AF=0.031;AN=64;BaseQRankSum=  |
| 44293 | chrY | 22442427 | . | C | T | 1413.46  | PASS          | AC=10;AF=0.161;AN=62;BaseQRankSum= |
| 44294 | chrY | 22442434 | . | T | C | 1033.95  | PASS          | AC=6;AF=0.097;AN=62;BaseQRankSum=  |
| 44295 | chrY | 22442439 | . | C | T | 669.07   | PASS          | AC=4;AF=0.065;AN=62;BaseQRankSum=  |
| 44296 | chrY | 22442446 | . | C | G | 140.82   | PASS          | AC=1;AF=0.016;AN=64;BaseQRankSum=  |
| 44297 | chrY | 22442451 | . | T | A | 185.73   | PASS          | AC=1;AF=0.016;AN=64;BaseQRankSum=  |
| 44298 | chrY | 22442486 | . | A | T | 177.50   | PASS          | AC=1;AF=0.016;AN=64;BaseQRankSum=  |
| 44299 | chrY | 22442488 | . | C | G | 176.68   | PASS          | AC=1;AF=0.016;AN=64;BaseQRankSum=  |
| 44300 | chrY | 22442505 | . | C | T | 2431.21  | PASS          | AC=13;AF=0.224;AN=58;BaseQRankSum= |
| 44301 | chrY | 22442515 | . | A | T | 2297.64  | PASS          | AC=12;AF=0.207;AN=58;BaseQRankSum= |
| 44302 | chrY | 22442516 | . | G | C | 172.12   | PASS          | AC=1;AF=0.016;AN=62;BaseQRankSum=  |
| 44303 | chrY | 22442523 | . | T | C | 53.95    | PASS          | AC=2;AF=0.031;AN=64;DP=579;FS=0.0  |
| 44304 | chrY | 22442568 | . | G | C | 766.87   | PASS          | AC=4;AF=0.069;AN=58;BaseQRankSum=  |
| 44305 | chrY | 22442572 | . | T | G | 919.28   | PASS          | AC=7;AF=0.140;AN=50;BaseQRankSum=  |
| 44306 | chrY | 22442584 | . | G | T | 80.45    | PASS          | AC=1;AF=0.016;AN=62;BaseQRankSum=  |
| 44307 | chrY | 22442586 | . | T | A | 822.03   | PASS          | AC=4;AF=0.063;AN=64;BaseQRankSum=  |
| 44308 | chrY | 22442589 | . | G | C | 847.04   | PASS          | AC=6;AF=0.130;AN=46;BaseQRankSum=  |

|       |      |          |   |   |   |          |               |                                    |
|-------|------|----------|---|---|---|----------|---------------|------------------------------------|
| 44309 | chrY | 22442605 | . | G | A | 103.20   | PASS          | AC=1;AF=0.016;AN=62;BaseQRankSum=  |
| 44310 | chrY | 22442623 | . | T | C | 58.91    | my_snp_filter | AC=2;AF=0.032;AN=62;BaseQ          |
| 44311 | chrY | 22442668 | . | A | C | 100.80   | PASS          | AC=1;AF=0.016;AN=62;BaseQRankSum=  |
| 44312 | chrY | 22442697 | . | G | A | 696.36   | PASS          | AC=8;AF=0.133;AN=60;BaseQRankSum=  |
| 44313 | chrY | 22442701 | . | A | T | 4596.30  | PASS          | AC=24;AF=0.387;AN=62;BaseQRankSum= |
| 44314 | chrY | 22442733 | . | A | G | 3468.48  | my_snp_filter | AC=19;AF=0.317;AN=60;Base          |
| 44315 | chrY | 22442737 | . | A | T | 546.95   | PASS          | AC=5;AF=0.083;AN=60;BaseQRankSum=  |
| 44316 | chrY | 22442767 | . | G | T | 346.01   | PASS          | AC=5;AF=0.081;AN=62;BaseQRankSum=  |
| 44317 | chrY | 22442793 | . | A | T | 115.09   | my_snp_filter | AC=3;AF=0.050;AN=60;BaseQ          |
| 44318 | chrY | 22442876 | . | T | C | 160.77   | my_snp_filter | AC=1;AF=0.020;AN=50;BaseQ          |
| 44319 | chrY | 22442916 | . | C | A | 178.29   | PASS          | AC=4;AF=0.091;AN=44;BaseQRankSum=  |
| 44320 | chrY | 22442953 | . | G | T | 73.67    | PASS          | AC=2;AF=0.038;AN=52;BaseQRankSum=  |
| 44321 | chrY | 22443045 | . | G | A | 869.63   | PASS          | AC=6;AF=0.100;AN=60;DP=275;FS=0.0  |
| 44322 | chrY | 22443109 | . | A | C | 95.59    | PASS          | AC=2;AF=0.034;AN=58;BaseQRankSum=  |
| 44323 | chrY | 22443119 | . | T | A | 194.98   | PASS          | AC=3;AF=0.052;AN=58;BaseQRankSum=  |
| 44324 | chrY | 22443150 | . | G | C | 4681.12  | my_snp_filter | AC=20;AF=0.333;AN=60;Base          |
| 44325 | chrY | 22443251 | . | C | A | 4347.76  | PASS          | AC=18;AF=0.281;AN=64;BaseQRankSum= |
| 44326 | chrY | 22443255 | . | A | C | 2535.04  | PASS          | AC=16;AF=0.250;AN=64;BaseQRankSum= |
| 44327 | chrY | 22443338 | . | C | T | 66.74    | PASS          | AC=1;AF=0.016;AN=62;BaseQRankSum=  |
| 44328 | chrY | 22443359 | . | A | C | 697.45   | PASS          | AC=11;AF=0.196;AN=56;BaseQRankSum= |
| 44329 | chrY | 22443466 | . | A | C | 505.19   | PASS          | AC=3;AF=0.054;AN=56;BaseQRankSum=  |
| 44330 | chrY | 22443470 | . | G | T | 7229.95  | my_snp_filter | AC=44;AF=0.957;AN=46;Base          |
| 44331 | chrY | 22443489 | . | C | G | 1535.17  | my_snp_filter | AC=16;AF=0.296;AN=54;Base          |
| 44332 | chrY | 22443648 | . | A | G | 431.24   | my_snp_filter | AC=2;AF=0.031;AN=64;BaseQ          |
| 44333 | chrY | 22443666 | . | T | G | 115.81   | my_snp_filter | AC=1;AF=0.016;AN=64;BaseQ          |
| 44334 | chrY | 22443678 | . | T | C | 10237.30 | PASS          | AC=28;AF=0.438;AN=64;Base          |
| 44335 | chrY | 22443736 | . | T | A | 4806.60  | my_snp_filter | AC=25;AF=0.391;AN=64;Base          |
| 44336 | chrY | 22443761 | . | G | T | 647.10   | PASS          | AC=3;AF=0.047;AN=64;BaseQRankSum=  |
| 44337 | chrY | 22443890 | . | T | G | 2858.20  | PASS          | AC=24;AF=0.545;AN=44;DP=292;FS=0.  |
| 44338 | chrY | 22444028 | . | T | C | 924.06   | PASS          | AC=6;AF=0.107;AN=56;BaseQRankSum=  |
| 44339 | chrY | 22444038 | . | G | T | 904.97   | PASS          | AC=6;AF=0.097;AN=62;DP=289;FS=0.0  |
| 44340 | chrY | 22444051 | . | T | A | 67.24    | my_snp_filter | AC=4;AF=0.067;AN=60;BaseQ          |
| 44341 | chrY | 22444114 | . | G | T | 45.67    | my_snp_filter | AC=1;AF=0.016;AN=62;BaseQ          |
| 44342 | chrY | 22444136 | . | T | G | 71.43    | my_snp_filter | AC=2;AF=0.029;AN=70;BaseQ          |
| 44343 | chrY | 22444142 | . | T | G | 690.52   | PASS          | AC=9;AF=0.129;AN=70;BaseQRankSum=  |
| 44344 | chrY | 22444164 | . | A | G | 273      | my_snp_filter | AC=7;AF=0.100;AN=70;BaseQ          |
| 44345 | chrY | 22444166 | . | G | T | 2242.11  | my_snp_filter | AC=15;AF=0.227;AN=66;Base          |
| 44346 | chrY | 22444170 | . | C | G | 692.67   | PASS          | AC=7;AF=0.100;AN=70;BaseQRankSum=  |
| 44347 | chrY | 22444171 | . | C | A | 2581.44  | PASS          | AC=20;AF=0.303;AN=66;BaseQRankSum= |
| 44348 | chrY | 22444175 | . | G | C | 690.66   | my_snp_filter | AC=7;AF=0.100;AN=70;BaseQ          |
| 44349 | chrY | 22444239 | . | G | T | 237.89   | PASS          | AC=1;AF=0.015;AN=68;BaseQRankSum=  |
| 44350 | chrY | 22444260 | . | G | T | 264.54   | PASS          | AC=1;AF=0.015;AN=68;BaseQRankSum=  |
| 44351 | chrY | 22444271 | . | C | T | 209.45   | PASS          | AC=1;AF=0.015;AN=68;BaseQRankSum=  |
| 44352 | chrY | 22444276 | . | T | A | 212.16   | PASS          | AC=1;AF=0.015;AN=68;BaseQRankSum=  |
| 44353 | chrY | 22444290 | . | T | A | 118.78   | PASS          | AC=1;AF=0.015;AN=68;BaseQRankSum=  |
| 44354 | chrY | 22444294 | . | T | G | 119.27   | PASS          | AC=1;AF=0.015;AN=68;BaseQRankSum=  |
| 44355 | chrY | 22444295 | . | C | T | 119.16   | PASS          | AC=1;AF=0.015;AN=68;BaseQRankSum=  |
| 44356 | chrY | 22444300 | . | T | G | 1301.52  | PASS          | AC=12;AF=0.182;AN=66;BaseQRankSum= |
| 44357 | chrY | 22444316 | . | A | G | 38.40    | my_snp_filter | AC=1;AF=0.016;AN=64;BaseQ          |
| 44358 | chrY | 22444318 | . | T | G | 1092.61  | PASS          | AC=6;AF=0.097;AN=62;BaseQRankSum=  |
| 44359 | chrY | 22444356 | . | C | A | 1000.08  | PASS          | AC=5;AF=0.083;AN=60;BaseQRankSum=  |
| 44360 | chrY | 22444394 | . | C | T | 852.10   | PASS          | AC=6;AF=0.103;AN=58;BaseQRankSum=  |
| 44361 | chrY | 22444399 | . | G | A | 857.63   | PASS          | AC=6;AF=0.103;AN=58;BaseQRankSum=  |
| 44362 | chrY | 22444425 | . | G | C | 5487.90  | PASS          | AC=34;AF=0.548;AN=62;BaseQRankSum= |
| 44363 | chrY | 22444449 | . | T | G | 369.35   | PASS          | AC=8;AF=0.125;AN=64;BaseQRankSum=  |
| 44364 | chrY | 22444495 | . | G | A | 719.31   | PASS          | AC=7;AF=0.106;AN=66;BaseQRankSum=  |
| 44365 | chrY | 22444508 | . | C | A | 792.64   | PASS          | AC=6;AF=0.091;AN=66;BaseQRankSum=  |
| 44366 | chrY | 22444537 | . | G | T | 846.59   | PASS          | AC=6;AF=0.094;AN=64;BaseQRankSum=  |
| 44367 | chrY | 22444558 | . | C | T | 639.73   | PASS          | AC=6;AF=0.094;AN=64;BaseQRankSum=  |
| 44368 | chrY | 22444562 | . | G | A | 601.21   | PASS          | AC=6;AF=0.094;AN=64;BaseQRankSum=  |
| 44369 | chrY | 22444617 | . | G | C | 188.72   | PASS          | AC=4;AF=0.063;AN=64;BaseQRankSum=  |
| 44370 | chrY | 22444628 | . | C | A | 247.93   | PASS          | AC=4;AF=0.063;AN=64;BaseQRankSum=  |
| 44371 | chrY | 22444631 | . | C | A | 229.81   | PASS          | AC=4;AF=0.063;AN=64;BaseQRankSum=  |
| 44372 | chrY | 22444634 | . | G | T | 225.98   | PASS          | AC=4;AF=0.063;AN=64;BaseQRankSum=  |
| 44373 | chrY | 22444636 | . | G | T | 232.21   | PASS          | AC=4;AF=0.063;AN=64;BaseQRankSum=  |
| 44374 | chrY | 22444659 | . | A | T | 25621.13 | PASS          | AC=61;AF=0.984;AN=62;Base          |
| 44375 | chrY | 22444992 | . | G | T | 56.86    | PASS          | AC=2;AF=0.033;AN=60;BaseQRankSum=  |
| 44376 | chrY | 22444995 | . | G | A | 557.79   | PASS          | AC=6;AF=0.103;AN=58;BaseQRankSum=  |
| 44377 | chrY | 22445023 | . | A | T | 641.46   | PASS          | AC=6;AF=0.097;AN=62;BaseQRankSum=  |
| 44378 | chrY | 22445063 | . | A | T | 317.58   | PASS          | AC=2;AF=0.033;AN=60;BaseQRankSum=  |
| 44379 | chrY | 22445065 | . | T | G | 312.92   | PASS          | AC=2;AF=0.033;AN=60;BaseQRankSum=  |
| 44380 | chrY | 22445076 | . | T | C | 381.75   | PASS          | AC=3;AF=0.050;AN=60;BaseQRankSum=  |
| 44381 | chrY | 22445087 | . | A | G | 62.25    | PASS          | AC=1;AF=0.019;AN=54;BaseQRankSum=  |
| 44382 | chrY | 22445103 | . | C | T | 1150.94  | PASS          | AC=4;AF=0.077;AN=52;BaseQRankSum=  |
| 44383 | chrY | 22445113 | . | C | G | 458.73   | PASS          | AC=7;AF=0.130;AN=54;BaseQRankSum=  |
| 44384 | chrY | 22445132 | . | G | T | 775.79   | PASS          | AC=4;AF=0.069;AN=58;BaseQRankSum=  |



|       |      |          |   |   |     |         |               |                                    |
|-------|------|----------|---|---|-----|---------|---------------|------------------------------------|
| 44385 | chrY | 22445134 | . | T | G   | 3078.12 | PASS          | AC=22;AF=0.423;AN=52;BaseQRankSum= |
| 44386 | chrY | 22445186 | . | A | G   | 2339.85 | PASS          | AC=13;AF=0.224;AN=58;BaseQRankSum= |
| 44387 | chrY | 22445221 | . | C | A   | 2916.83 | PASS          | AC=11;AF=0.204;AN=54;BaseQRankSum= |
| 44388 | chrY | 22445251 | . | C | G   | 2748.96 | PASS          | AC=8;AF=0.148;AN=54;BaseQRankSum=  |
| 44389 | chrY | 22445276 | . | G | C   | 3071.83 | PASS          | AC=8;AF=0.143;AN=56;BaseQRankSum=  |
| 44390 | chrY | 22445299 | . | C | T,* | 3042.42 | PASS          | AC=5,3;AF=0.089,0.054;AN=56;BaseQ  |
| 44391 | chrY | 22445342 | . | A | T   | 4556.05 | PASS          | AC=18;AF=0.300;AN=60;BaseQRankSum= |
| 44392 | chrY | 22445345 | . | A | T   | 4499.21 | PASS          | AC=18;AF=0.300;AN=60;BaseQRankSum= |
| 44393 | chrY | 22445374 | . | C | T   | 1230.68 | PASS          | AC=3;AF=0.043;AN=70;BaseQRankSum=  |
| 44394 | chrY | 22445376 | . | G | A   | 1357.17 | PASS          | AC=12;AF=0.200;AN=60;BaseQRankSum= |
| 44395 | chrY | 22445419 | . | A | T   | 3705.27 | PASS          | AC=21;AF=0.328;AN=64;BaseQRankSum= |
| 44396 | chrY | 22445428 | . | T | C   | 3500.18 | PASS          | AC=20;AF=0.323;AN=62;BaseQRankSum= |
| 44397 | chrY | 22445435 | . | A | C   | 3033.28 | PASS          | AC=16;AF=0.286;AN=56;BaseQRankSum= |
| 44398 | chrY | 22445459 | . | A | C   | 2323.10 | PASS          | AC=16;AF=0.286;AN=56;BaseQRankSum= |
| 44399 | chrY | 22445467 | . | A | T   | 169.67  | PASS          | AC=1;AF=0.017;AN=60;BaseQRankSum=  |
| 44400 | chrY | 22445496 | . | A | G   | 810.38  | PASS          | AC=6;AF=0.120;AN=50;BaseQRankSum=  |
| 44401 | chrY | 22445524 | . | T | G   | 478.19  | PASS          | AC=5;AF=0.093;AN=54;BaseQRankSum=  |
| 44402 | chrY | 22445558 | . | G | A   | 154.46  | PASS          | AC=2;AF=0.033;AN=60;BaseQRankSum=  |
| 44403 | chrY | 22445562 | . | C | G   | 83.15   | PASS          | AC=2;AF=0.033;AN=60;BaseQRankSum=  |
| 44404 | chrY | 22445610 | . | G | T   | 166.98  | PASS          | AC=3;AF=0.050;AN=60;BaseQRankSum=  |
| 44405 | chrY | 22445615 | . | T | G   | 413.99  | PASS          | AC=3;AF=0.050;AN=60;BaseQRankSum=  |
| 44406 | chrY | 22445645 | . | G | T   | 457.61  | PASS          | AC=3;AF=0.054;AN=56;BaseQRankSum=  |
| 44407 | chrY | 22445669 | . | A | C   | 471.67  | PASS          | AC=3;AF=0.054;AN=56;BaseQRankSum=  |
| 44408 | chrY | 22445672 | . | T | A   | 466.21  | PASS          | AC=3;AF=0.054;AN=56;BaseQRankSum=  |
| 44409 | chrY | 22445683 | . | G | T   | 422.76  | PASS          | AC=3;AF=0.052;AN=58;BaseQRankSum=  |
| 44410 | chrY | 22445740 | . | T | G   | 228.89  | PASS          | AC=7;AF=0.125;AN=56;BaseQRankSum=  |
| 44411 | chrY | 22445777 | . | C | T   | 741.04  | PASS          | AC=5;AF=0.086;AN=58;BaseQRankSum=  |
| 44412 | chrY | 22445778 | . | C | A   | 740.94  | PASS          | AC=5;AF=0.086;AN=58;BaseQRankSum=  |
| 44413 | chrY | 22445790 | . | A | C   | 754.09  | PASS          | AC=8;AF=0.138;AN=58;BaseQRankSum=  |
| 44414 | chrY | 22445795 | . | G | T   | 47.53   | my_snp_filter | AC=2;AF=0.034;AN=58;DP=28          |
| 44415 | chrY | 22445808 | . | G | C   | 743.38  | PASS          | AC=7;AF=0.113;AN=62;BaseQRankSum=  |
| 44416 | chrY | 22445815 | . | T | C   | 215.44  | PASS          | AC=2;AF=0.033;AN=60;DP=261;FS=0.0  |
| 44417 | chrY | 22445851 | . | C | G   | 252.82  | PASS          | AC=3;AF=0.050;AN=60;BaseQRankSum=  |
| 44418 | chrY | 22445858 | . | G | C   | 665.29  | PASS          | AC=6;AF=0.094;AN=64;BaseQRankSum=  |
| 44419 | chrY | 22445958 | . | C | G   | 69.36   | PASS          | AC=2;AF=0.032;AN=62;BaseQRankSum=  |
| 44420 | chrY | 22446124 | . | C | T   | 468.74  | PASS          | AC=11;AF=0.550;AN=20;BaseQRankSum= |
| 44421 | chrY | 22446149 | . | T | C   | 206.77  | PASS          | AC=2;AF=0.143;AN=14;BaseQRankSum=  |
| 44422 | chrY | 22446154 | . | A | T   | 2556.86 | PASS          | AC=32;AF=0.842;AN=38;BaseQRankSum= |
| 44423 | chrY | 22446186 | . | A | T   | 817.70  | PASS          | AC=5;AF=0.074;AN=68;BaseQRankSum=  |
| 44424 | chrY | 22446209 | . | A | T   | 79.32   | PASS          | AC=2;AF=0.031;AN=64;BaseQRankSum=  |
| 44425 | chrY | 22446216 | . | A | T   | 70.40   | PASS          | AC=2;AF=0.031;AN=64;BaseQRankSum=  |
| 44426 | chrY | 22446231 | . | G | C   | 368.29  | PASS          | AC=2;AF=0.031;AN=64;BaseQRankSum=  |
| 44427 | chrY | 22446240 | . | G | T   | 384.69  | PASS          | AC=2;AF=0.029;AN=68;BaseQRankSum=  |
| 44428 | chrY | 22446256 | . | T | G   | 534.22  | PASS          | AC=2;AF=0.038;AN=52;BaseQRankSum=  |
| 44429 | chrY | 22446286 | . | G | C   | 768.33  | PASS          | AC=2;AF=0.031;AN=64;BaseQRankSum=  |
| 44430 | chrY | 22446299 | . | C | T   | 789.25  | PASS          | AC=2;AF=0.030;AN=64;BaseQRankSum=  |
| 44431 | chrY | 22446305 | . | A | G   | 66.48   | PASS          | AC=1;AF=0.014;AN=70;BaseQRankSum=  |
| 44432 | chrY | 22446331 | . | T | G   | 512.25  | PASS          | AC=2;AF=0.030;AN=66;BaseQRankSum=  |
| 44433 | chrY | 22446337 | . | T | A   | 4512.89 | PASS          | AC=19;AF=0.306;AN=62;BaseQRankSum= |
| 44434 | chrY | 22446350 | . | T | A   | 4200.77 | PASS          | AC=16;AF=0.242;AN=66;BaseQRankSum= |
| 44435 | chrY | 22446352 | . | G | C   | 4139.98 | PASS          | AC=16;AF=0.258;AN=62;BaseQRankSum= |
| 44436 | chrY | 22446381 | . | G | A   | 2185.99 | PASS          | AC=10;AF=0.143;AN=70;BaseQRankSum= |
| 44437 | chrY | 22446387 | . | T | G   | 244.23  | PASS          | AC=4;AF=0.059;AN=68;BaseQRankSum=  |
| 44438 | chrY | 22446397 | . | T | C   | 494.25  | PASS          | AC=2;AF=0.029;AN=70;DP=815;FS=0.0  |
| 44439 | chrY | 22446400 | . | C | T   | 2281.58 | PASS          | AC=9;AF=0.132;AN=68;BaseQRankSum=  |
| 44440 | chrY | 22446411 | . | G | A   | 1080.07 | PASS          | AC=7;AF=0.100;AN=70;BaseQRankSum=  |
| 44441 | chrY | 22446434 | . | G | A   | 160.14  | PASS          | AC=4;AF=0.059;AN=68;BaseQRankSum=  |
| 44442 | chrY | 22446477 | . | C | T   | 984.87  | PASS          | AC=3;AF=0.044;AN=68;BaseQRankSum=  |
| 44443 | chrY | 22446488 | . | A | G   | 3501.97 | PASS          | AC=18;AF=0.281;AN=64;BaseQRankSum= |
| 44444 | chrY | 22446513 | . | G | T   | 3752.64 | PASS          | AC=19;AF=0.306;AN=62;BaseQRankSum= |
| 44445 | chrY | 22446525 | . | T | A   | 236.06  | PASS          | AC=2;AF=0.031;AN=64;BaseQRankSum=  |
| 44446 | chrY | 22446605 | . | A | G   | 2131.12 | PASS          | AC=21;AF=0.404;AN=52;BaseQRankSum= |
| 44447 | chrY | 22446611 | . | T | G   | 164.32  | PASS          | AC=2;AF=0.042;AN=48;BaseQRankSum=  |
| 44448 | chrY | 22446612 | . | T | A   | 166.14  | PASS          | AC=2;AF=0.042;AN=48;BaseQRankSum=  |
| 44449 | chrY | 22446632 | . | T | G   | 4488.81 | PASS          | AC=17;AF=0.327;AN=52;BaseQRankSum= |
| 44450 | chrY | 22446643 | . | G | C   | 3846.61 | PASS          | AC=15;AF=0.268;AN=56;BaseQRankSum= |
| 44451 | chrY | 22446658 | . | G | T   | 3092.26 | PASS          | AC=13;AF=0.232;AN=56;BaseQRankSum= |
| 44452 | chrY | 22446675 | . | T | C   | 2282.19 | PASS          | AC=11;AF=0.196;AN=56;BaseQRankSum= |
| 44453 | chrY | 22446678 | . | C | G   | 2128.16 | PASS          | AC=10;AF=0.156;AN=64;BaseQRankSum= |
| 44454 | chrY | 22446689 | . | T | C   | 1624.43 | PASS          | AC=9;AF=0.145;AN=62;BaseQRankSum=  |
| 44455 | chrY | 22446703 | . | C | G   | 201.70  | PASS          | AC=3;AF=0.048;AN=62;BaseQRankSum=  |
| 44456 | chrY | 22446727 | . | A | C   | 674.05  | PASS          | AC=10;AF=0.172;AN=58;BaseQRankSum= |
| 44457 | chrY | 22446748 | . | A | C   | 39.96   | PASS          | AC=1;AF=0.016;AN=62;BaseQRankSum=  |
| 44458 | chrY | 22446820 | . | G | T   | 164.55  | PASS          | AC=1;AF=0.015;AN=66;BaseQRankSum=  |
| 44459 | chrY | 22446855 | . | A | T   | 52.76   | PASS          | AC=3;AF=0.045;AN=66;BaseQRankSum=  |
| 44460 | chrY | 22446859 | . | G | C   | 1199.66 | PASS          | AC=10;AF=0.152;AN=66;BaseQRankSum= |

|       |      |          |   |   |     |          |               |                                    |
|-------|------|----------|---|---|-----|----------|---------------|------------------------------------|
| 44461 | chrY | 22446875 | . | T | G   | 1349.72  | PASS          | AC=11;AF=0.167;AN=66;BaseQRankSum= |
| 44462 | chrY | 22446877 | . | G | A   | 604.54   | PASS          | AC=3;AF=0.044;AN=68;BaseQRankSum=  |
| 44463 | chrY | 22446920 | . | G | A   | 230.58   | my_snp_filter | AC=7;AF=0.113;AN=62;BaseQ          |
| 44464 | chrY | 22446964 | . | T | G   | 2158.28  | my_snp_filter | AC=16;AF=0.250;AN=64;Base          |
| 44465 | chrY | 22447013 | . | A | G   | 110.80   | my_snp_filter | AC=2;AF=0.032;AN=62;BaseQ          |
| 44466 | chrY | 22447021 | . | T | C   | 84.27    | my_snp_filter | AC=2;AF=0.031;AN=64;BaseQ          |
| 44467 | chrY | 22447024 | . | G | T   | 61.21    | my_snp_filter | AC=2;AF=0.031;AN=64;BaseQ          |
| 44468 | chrY | 22447059 | . | G | A   | 992.49   | PASS          | AC=10;AF=0.161;AN=62;BaseQRankSum= |
| 44469 | chrY | 22447081 | . | T | A   | 1230.08  | PASS          | AC=3;AF=0.045;AN=66;BaseQRankSum=  |
| 44470 | chrY | 22447121 | . | G | T   | 216.09   | PASS          | AC=1;AF=0.015;AN=66;BaseQRankSum=  |
| 44471 | chrY | 22447124 | . | C | A   | 652.81   | PASS          | AC=3;AF=0.044;AN=68;BaseQRankSum=  |
| 44472 | chrY | 22447160 | . | G | A   | 1923.61  | PASS          | AC=16;AF=0.258;AN=62;BaseQRankSum= |
| 44473 | chrY | 22447161 | . | G | T   | 6172.47  | PASS          | AC=26;AF=0.448;AN=58;BaseQRankSum= |
| 44474 | chrY | 22447234 | . | G | T   | 129.04   | PASS          | AC=1;AF=0.015;AN=68;BaseQRankSum=  |
| 44475 | chrY | 22447244 | . | C | A   | 104.76   | PASS          | AC=1;AF=0.015;AN=68;BaseQRankSum=  |
| 44476 | chrY | 22447245 | . | A | C   | 3038.46  | PASS          | AC=17;AF=0.250;AN=68;BaseQRankSum= |
| 44477 | chrY | 22447269 | . | A | T   | 205.64   | my_snp_filter | AC=2;AF=0.029;AN=68;BaseQ          |
| 44478 | chrY | 22447352 | . | T | C   | 637.88   | my_snp_filter | AC=4;AF=0.059;AN=68;BaseQ          |
| 44479 | chrY | 22447363 | . | C | G   | 16126.96 | my_snp_filter | AC=62;AF=1.00;AN=                  |
| 44480 | chrY | 22447399 | . | T | A   | 168.65   | my_snp_filter | AC=3;AF=0.043;AN=70;BaseQ          |
| 44481 | chrY | 22447403 | . | C | T   | 148      | my_snp_filter | AC=3;AF=0.043;AN=70;BaseQ          |
| 44482 | chrY | 22447434 | . | G | A   | 131.97   | PASS          | AC=2;AF=0.029;AN=70;BaseQRankSum=  |
| 44483 | chrY | 22447435 | . | C | G   | 129.43   | PASS          | AC=2;AF=0.029;AN=70;BaseQRankSum=  |
| 44484 | chrY | 22447438 | . | T | G   | 8963.36  | PASS          | AC=22;AF=0.440;AN=50;BaseQRankSum= |
| 44485 | chrY | 22447467 | . | A | C   | 96.69    | my_snp_filter | AC=3;AF=0.043;AN=70;BaseQ          |
| 44486 | chrY | 22447470 | . | T | C   | 774.70   | PASS          | AC=7;AF=0.100;AN=70;BaseQRankSum=  |
| 44487 | chrY | 22447475 | . | A | T   | 121.61   | PASS          | AC=1;AF=0.014;AN=70;BaseQRankSum=  |
| 44488 | chrY | 22447497 | . | C | G   | 155.16   | my_snp_filter | AC=3;AF=0.043;AN=70;BaseQ          |
| 44489 | chrY | 22447513 | . | G | C,A | 2505.90  | my_snp_filter | AC=11,10;AF=0.157,0.143;A          |
| 44490 | chrY | 22447521 | . | T | A   | 860.87   | my_snp_filter | AC=8;AF=0.114;AN=70;BaseQ          |
| 44491 | chrY | 22447524 | . | G | T   | 239.20   | PASS          | AC=2;AF=0.029;AN=68;BaseQRankSum=  |
| 44492 | chrY | 22447536 | . | G | A   | 881.37   | my_snp_filter | AC=14;AF=0.200;AN=70;Base          |
| 44493 | chrY | 22447542 | . | A | T   | 215.67   | my_snp_filter | AC=7;AF=0.100;AN=70;BaseQ          |
| 44494 | chrY | 22447545 | . | G | C   | 620.53   | my_snp_filter | AC=8;AF=0.114;AN=70;BaseQ          |
| 44495 | chrY | 22447547 | . | T | G   | 30.83    | my_snp_filter | AC=2;AF=0.029;AN=70;BaseQ          |
| 44496 | chrY | 22447567 | . | A | T   | 114.41   | my_snp_filter | AC=2;AF=0.029;AN=70;BaseQ          |
| 44497 | chrY | 22447570 | . | G | C   | 180.89   | my_snp_filter | AC=3;AF=0.043;AN=70;BaseQ          |
| 44498 | chrY | 22447572 | . | G | C   | 31.80    | my_snp_filter | AC=1;AF=0.014;AN=70;BaseQ          |
| 44499 | chrY | 22447573 | . | T | C   | 72.80    | PASS          | AC=1;AF=0.014;AN=70;BaseQRankSum=  |
| 44500 | chrY | 22447586 | . | C | G   | 773.72   | my_snp_filter | AC=4;AF=0.061;AN=66;BaseQ          |
| 44501 | chrY | 22447608 | . | G | A   | 724.60   | my_snp_filter | AC=8;AF=0.114;AN=70;BaseQ          |
| 44502 | chrY | 22447621 | . | G | A   | 1138.74  | my_snp_filter | AC=10;AF=0.147;AN=68;Base          |
| 44503 | chrY | 22447624 | . | C | G   | 2306.01  | my_snp_filter | AC=19;AF=0.288;AN=66;Base          |
| 44504 | chrY | 22447630 | . | A | G   | 4475.53  | my_snp_filter | AC=25;AF=0.431;AN=58;Base          |
| 44505 | chrY | 22447640 | . | C | T   | 47.11    | my_snp_filter | AC=2;AF=0.030;AN=66;BaseQ          |
| 44506 | chrY | 22447649 | . | G | C   | 505.87   | my_snp_filter | AC=5;AF=0.081;AN=62;BaseQ          |
| 44507 | chrY | 22447656 | . | C | T,G | 1010.64  | my_snp_filter | AC=2,4;AF=0.036,0.071;AN=          |
| 44508 | chrY | 22447661 | . | G | A   | 375.99   | my_snp_filter | AC=3;AF=0.048;AN=62;BaseQ          |
| 44509 | chrY | 22447664 | . | T | A   | 35.80    | my_snp_filter | AC=1;AF=0.017;AN=58;BaseQ          |
| 44510 | chrY | 22447674 | . | T | C   | 989.28   | my_snp_filter | AC=5;AF=0.104;AN=48;BaseQ          |
| 44511 | chrY | 22447682 | . | T | C   | 762.92   | my_snp_filter | AC=5;AF=0.125;AN=40;BaseQ          |
| 44512 | chrY | 22447683 | . | G | T   | 1132.90  | my_snp_filter | AC=3;AF=0.071;AN=42;BaseQ          |
| 44513 | chrY | 22447689 | . | T | G   | 53.96    | my_snp_filter | AC=1;AF=0.020;AN=50;BaseQ          |
| 44514 | chrY | 22447694 | . | G | A   | 266.32   | my_snp_filter | AC=2;AF=0.038;AN=52;BaseQ          |
| 44515 | chrY | 22447838 | . | A | C   | 138.70   | PASS          | AC=1;AF=0.024;AN=42;BaseQRankSum=  |
| 44516 | chrY | 22447848 | . | T | A   | 656.75   | my_snp_filter | AC=18;AF=0.600;AN=30;DP=1          |
| 44517 | chrY | 22447915 | . | C | T   | 50.90    | my_snp_filter | AC=2;AF=0.037;AN=54;BaseQ          |
| 44518 | chrY | 22448171 | . | G | T   | 2038.34  | my_snp_filter | AC=6;AF=0.120;AN=50;BaseQ          |
| 44519 | chrY | 22448195 | . | G | T   | 4344.69  | my_snp_filter | AC=10;AF=0.227;AN=44;Base          |
| 44520 | chrY | 22448196 | . | G | T   | 636.05   | my_snp_filter | AC=3;AF=0.054;AN=56;BaseQ          |
| 44521 | chrY | 22448250 | . | C | T   | 1143     | my_snp_filter | AC=5;AF=0.078;AN=64;BaseQ          |
| 44522 | chrY | 22448295 | . | C | A   | 79.52    | my_snp_filter | AC=1;AF=0.016;AN=64;BaseQ          |
| 44523 | chrY | 22448298 | . | T | G   | 78.96    | my_snp_filter | AC=1;AF=0.016;AN=64;BaseQ          |
| 44524 | chrY | 22448320 | . | A | G   | 4670.33  | my_snp_filter | AC=13;AF=0.210;AN=62;Base          |
| 44525 | chrY | 22448326 | . | G | C   | 3928.48  | my_snp_filter | AC=13;AF=0.203;AN=64;Base          |
| 44526 | chrY | 22448327 | . | C | T   | 83.73    | my_snp_filter | AC=1;AF=0.016;AN=64;BaseQ          |
| 44527 | chrY | 22448328 | . | T | A   | 216.83   | my_snp_filter | AC=4;AF=0.063;AN=64;BaseQ          |
| 44528 | chrY | 22448350 | . | G | A   | 95.82    | my_snp_filter | AC=1;AF=0.017;AN=58;BaseQ          |
| 44529 | chrY | 22448354 | . | A | T   | 92.92    | my_snp_filter | AC=1;AF=0.017;AN=60;BaseQ          |
| 44530 | chrY | 22448355 | . | T | C   | 97.40    | my_snp_filter | AC=1;AF=0.017;AN=58;BaseQ          |
| 44531 | chrY | 22448367 | . | T | C   | 90.32    | my_snp_filter | AC=1;AF=0.017;AN=60;BaseQ          |
| 44532 | chrY | 22448378 | . | C | A   | 93.39    | my_snp_filter | AC=1;AF=0.017;AN=58;BaseQ          |
| 44533 | chrY | 22448435 | . | G | T   | 969.57   | my_snp_filter | AC=13;AF=0.224;AN=58;Base          |
| 44534 | chrY | 22448504 | . | T | A   | 1267.54  | PASS          | AC=8;AF=0.125;AN=64;BaseQRankSum=  |
| 44535 | chrY | 22448520 | . | T | A   | 61.06    | my_snp_filter | AC=3;AF=0.048;AN=62;BaseQ          |
| 44536 | chrY | 22448540 | . | T | C   | 83.48    | my_snp_filter | AC=2;AF=0.036;AN=56;BaseQ          |

|       |      |          |   |   |     |         |               |                                    |
|-------|------|----------|---|---|-----|---------|---------------|------------------------------------|
| 44537 | chrY | 22448629 | . | A | T   | 124.94  | my_snp_filter | AC=3;AF=0.060;AN=50;BaseQ          |
| 44538 | chrY | 22448639 | . | G | T   | 176.22  | my_snp_filter | AC=2;AF=0.042;AN=48;BaseQ          |
| 44539 | chrY | 22448650 | . | G | C   | 145.28  | my_snp_filter | AC=2;AF=0.048;AN=42;BaseQ          |
| 44540 | chrY | 22448793 | . | G | A   | 3131.02 | my_snp_filter | AC=22;AF=1.00;AN=22;DP=13          |
| 44541 | chrY | 22448858 | . | T | G   | 283.48  | my_snp_filter | AC=3;AF=0.063;AN=48;BaseQ          |
| 44542 | chrY | 22449026 | . | T | G   | 2795.56 | my_snp_filter | AC=22;AF=0.355;AN=62;BaseQ         |
| 44543 | chrY | 22449027 | . | T | C   | 598.94  | my_snp_filter | AC=3;AF=0.045;AN=66;BaseQ          |
| 44544 | chrY | 22449126 | . | G | T   | 55.11   | my_snp_filter | AC=1;AF=0.014;AN=70;BaseQ          |
| 44545 | chrY | 22449174 | . | A | T   | 141.63  | my_snp_filter | AC=6;AF=0.091;AN=66;BaseQ          |
| 44546 | chrY | 22449197 | . | T | A   | 139.28  | my_snp_filter | AC=1;AF=0.015;AN=68;BaseQ          |
| 44547 | chrY | 22449287 | . | G | A   | 505.59  | my_snp_filter | AC=4;AF=0.059;AN=68;BaseQ          |
| 44548 | chrY | 22449522 | . | T | G   | 918.88  | my_snp_filter | AC=3;AF=0.048;AN=62;BaseQ          |
| 44549 | chrY | 22449713 | . | A | T   | 795.44  | my_snp_filter | AC=3;AF=0.100;AN=30;BaseQ          |
| 44550 | chrY | 22449787 | . | G | A   | 72.51   | my_snp_filter | AC=1;AF=0.050;AN=20;BaseQ          |
| 44551 | chrY | 22449934 | . | T | G,* | 794.47  | my_snp_filter | AC=8,1;AF=0.800,0.100;AN=          |
| 44552 | chrY | 22457231 | . | C | A   | 67.84   | my_snp_filter | AC=2;AF=1.00;AN=2;DP=3;FS          |
| 44553 | chrY | 22457252 | . | T | A   | 67.84   | my_snp_filter | AC=2;AF=1.00;AN=2;DP=4;FS          |
| 44554 | chrY | 22457256 | . | G | T   | 63.49   | my_snp_filter | AC=2;AF=0.500;AN=4;DP=4;F          |
| 44555 | chrY | 22457483 | . | G | T   | 370.28  | PASS          | AC=6;AF=0.086;AN=70;BaseQRankSum=  |
| 44556 | chrY | 22457515 | . | C | T   | 600.62  | PASS          | AC=6;AF=0.086;AN=70;BaseQRankSum=  |
| 44557 | chrY | 22457517 | . | G | A   | 111.09  | my_snp_filter | AC=2;AF=0.029;AN=70;BaseQ          |
| 44558 | chrY | 22457520 | . | T | A   | 594.51  | PASS          | AC=5;AF=0.071;AN=70;BaseQRankSum=  |
| 44559 | chrY | 22457523 | . | C | G   | 86.96   | my_snp_filter | AC=2;AF=0.029;AN=70;BaseQ          |
| 44560 | chrY | 22457534 | . | T | A   | 656.76  | PASS          | AC=4;AF=0.057;AN=70;BaseQRankSum=  |
| 44561 | chrY | 22457538 | . | T | G   | 575.79  | PASS          | AC=4;AF=0.057;AN=70;BaseQRankSum=  |
| 44562 | chrY | 22457539 | . | C | T   | 564.51  | PASS          | AC=4;AF=0.057;AN=70;BaseQRankSum=  |
| 44563 | chrY | 22457560 | . | A | G   | 439.61  | PASS          | AC=4;AF=0.057;AN=70;BaseQRankSum=  |
| 44564 | chrY | 22457562 | . | G | A   | 443.74  | PASS          | AC=4;AF=0.057;AN=70;BaseQRankSum=  |
| 44565 | chrY | 22457600 | . | C | A   | 4306.79 | PASS          | AC=27;AF=0.386;AN=70;BaseQRankSum= |
| 44566 | chrY | 22457637 | . | A | G   | 571.54  | PASS          | AC=11;AF=0.167;AN=66;BaseQRankSum= |
| 44567 | chrY | 22457642 | . | T | G   | 405.17  | PASS          | AC=5;AF=0.078;AN=64;BaseQRankSum=  |
| 44568 | chrY | 22457643 | . | G | A   | 378.51  | PASS          | AC=5;AF=0.078;AN=64;BaseQRankSum=  |
| 44569 | chrY | 22457682 | . | G | T   | 787.20  | PASS          | AC=6;AF=0.091;AN=66;BaseQRankSum=  |
| 44570 | chrY | 22457739 | . | G | A   | 46.76   | my_snp_filter | AC=4;AF=0.067;AN=60;BaseQ          |
| 44571 | chrY | 22457870 | . | C | T   | 328.47  | PASS          | AC=2;AF=0.033;AN=60;DP=339;FS=0.0  |
| 44572 | chrY | 22458004 | . | G | T   | 161.84  | PASS          | AC=2;AF=0.031;AN=64;BaseQRankSum=  |
| 44573 | chrY | 22458007 | . | T | A   | 159.13  | PASS          | AC=2;AF=0.031;AN=64;BaseQRankSum=  |
| 44574 | chrY | 22458504 | . | T | A   | 1032.26 | PASS          | AC=6;AF=0.107;AN=56;BaseQRankSum=  |
| 44575 | chrY | 22458687 | . | C | A   | 51.61   | my_snp_filter | AC=2;AF=0.034;AN=58;BaseQ          |
| 44576 | chrY | 22458807 | . | T | G   | 184.87  | PASS          | AC=3;AF=0.054;AN=56;BaseQRankSum=  |
| 44577 | chrY | 22458814 | . | C | G   | 176.72  | PASS          | AC=3;AF=0.054;AN=56;BaseQRankSum=  |
| 44578 | chrY | 22458821 | . | C | A   | 229.97  | PASS          | AC=4;AF=0.071;AN=56;BaseQRankSum=  |
| 44579 | chrY | 22458828 | . | G | C   | 330.66  | PASS          | AC=6;AF=0.107;AN=56;BaseQRankSum=  |
| 44580 | chrY | 22458859 | . | T | A   | 976.84  | PASS          | AC=3;AF=0.047;AN=64;BaseQRankSum=  |
| 44581 | chrY | 22458862 | . | T | C   | 315.88  | PASS          | AC=5;AF=0.086;AN=58;BaseQRankSum=  |
| 44582 | chrY | 22458877 | . | T | G   | 100.67  | PASS          | AC=1;AF=0.016;AN=64;BaseQRankSum=  |
| 44583 | chrY | 22458898 | . | C | T   | 202.02  | PASS          | AC=4;AF=0.069;AN=58;BaseQRankSum=  |
| 44584 | chrY | 22458906 | . | A | G   | 123.67  | PASS          | AC=2;AF=0.030;AN=66;BaseQRankSum=  |
| 44585 | chrY | 22458907 | . | C | T   | 372.03  | PASS          | AC=4;AF=0.071;AN=56;BaseQRankSum=  |
| 44586 | chrY | 22458915 | . | G | T   | 4096.87 | PASS          | AC=22;AF=0.344;AN=64;BaseQRankSum= |
| 44587 | chrY | 22459019 | . | T | G   | 5703.71 | PASS          | AC=28;AF=0.424;AN=66;BaseQRankSum= |
| 44588 | chrY | 22459048 | . | C | A   | 59.83   | my_snp_filter | AC=3;AF=0.043;AN=70;BaseQ          |
| 44589 | chrY | 22459063 | . | T | A   | 73.04   | my_snp_filter | AC=3;AF=0.043;AN=70;BaseQ          |
| 44590 | chrY | 22459064 | . | G | T   | 73.57   | my_snp_filter | AC=3;AF=0.043;AN=70;BaseQ          |
| 44591 | chrY | 22459084 | . | T | G   | 8702.26 | PASS          | AC=27;AF=0.409;AN=66;BaseQRankSum= |
| 44592 | chrY | 22459127 | . | G | T   | 6546.27 | PASS          | AC=25;AF=0.391;AN=64;BaseQRankSum= |
| 44593 | chrY | 22459138 | . | G | T   | 4872.09 | PASS          | AC=24;AF=0.364;AN=66;BaseQRankSum= |
| 44594 | chrY | 22459170 | . | T | C   | 1341.90 | PASS          | AC=14;AF=0.241;AN=58;BaseQRankSum= |
| 44595 | chrY | 22459179 | . | G | A   | 647.51  | PASS          | AC=8;AF=0.143;AN=56;BaseQRankSum=  |
| 44596 | chrY | 22459182 | . | G | T   | 613.35  | PASS          | AC=8;AF=0.143;AN=56;BaseQRankSum=  |
| 44597 | chrY | 22459190 | . | G | A   | 560.07  | PASS          | AC=4;AF=0.069;AN=58;BaseQRankSum=  |
| 44598 | chrY | 22459192 | . | C | A   | 559.44  | PASS          | AC=4;AF=0.069;AN=58;BaseQRankSum=  |
| 44599 | chrY | 22459194 | . | T | G   | 2065.23 | PASS          | AC=21;AF=0.389;AN=54;BaseQRankSum= |
| 44600 | chrY | 22459219 | . | T | G   | 871.50  | PASS          | AC=12;AF=0.333;AN=36;DP=185;FS=0.  |
| 44601 | chrY | 22459229 | . | G | T   | 584.70  | PASS          | AC=10;AF=0.278;AN=36;DP=163;FS=0.  |
| 44602 | chrY | 22459262 | . | A | G   | 246.49  | my_snp_filter | AC=6;AF=0.250;AN=24;DP=11          |
| 44603 | chrY | 22459281 | . | T | A   | 130.05  | my_snp_filter | AC=4;AF=0.182;AN=22;DP=97          |
| 44604 | chrY | 22459625 | . | G | T   | 57.15   | PASS          | AC=1;AF=0.017;AN=60;BaseQRankSum=  |
| 44605 | chrY | 22459694 | . | T | C   | 64.58   | my_snp_filter | AC=2;AF=0.031;AN=64;BaseQ          |
| 44606 | chrY | 22459716 | . | G | T   | 49.41   | PASS          | AC=1;AF=0.015;AN=66;BaseQRankSum=  |
| 44607 | chrY | 22459729 | . | T | G   | 1881.32 | PASS          | AC=13;AF=0.382;AN=34;BaseQRankSum= |
| 44608 | chrY | 22459731 | . | G | C   | 93.61   | my_snp_filter | AC=3;AF=0.056;AN=54;BaseQ          |
| 44609 | chrY | 22459734 | . | T | A   | 1373.91 | PASS          | AC=10;AF=0.185;AN=54;BaseQRankSum= |
| 44610 | chrY | 22459744 | . | C | T   | 45.63   | PASS          | AC=1;AF=0.016;AN=64;BaseQRankSum=  |
| 44611 | chrY | 22459789 | . | A | C   | 49.64   | PASS          | AC=2;AF=0.036;AN=56;DP=223;FS=0.0  |
| 44612 | chrY | 22459798 | . | C | T   | 49.60   | PASS          | AC=2;AF=0.042;AN=48;DP=202;FS=0.0  |

|       |      |          |   |   |   |          |               |                                    |
|-------|------|----------|---|---|---|----------|---------------|------------------------------------|
| 44613 | chrY | 22460109 | . | T | G | 632.92   | PASS          | AC=6;AF=0.333;AN=18;DP=114;FS=0.0  |
| 44614 | chrY | 22460427 | . | G | C | 4848.01  | PASS          | AC=36;AF=0.750;AN=48;DP=236;FS=0.  |
| 44615 | chrY | 22460441 | . | C | A | 188.12   | PASS          | AC=2;AF=0.037;AN=54;DP=241;FS=0.0  |
| 44616 | chrY | 22460570 | . | T | C | 8438.10  | PASS          | AC=52;AF=0.963;AN=54;DP=269;FS=0.  |
| 44617 | chrY | 22460605 | . | G | T | 230.78   | PASS          | AC=1;AF=0.018;AN=56;BaseQRankSum=  |
| 44618 | chrY | 22460780 | . | G | C | 387.29   | PASS          | AC=2;AF=0.037;AN=54;DP=295;FS=0.0  |
| 44619 | chrY | 22460810 | . | G | A | 485.73   | PASS          | AC=2;AF=0.037;AN=54;DP=284;FS=0.0  |
| 44620 | chrY | 22461259 | . | T | C | 126.40   | PASS          | AC=2;AF=0.037;AN=54;DP=253;FS=0.0  |
| 44621 | chrY | 22461262 | . | G | T | 1060.95  | PASS          | AC=6;AF=0.111;AN=54;BaseQRankSum=  |
| 44622 | chrY | 22461368 | . | G | C | 337.07   | my_snp_filter | AC=10;AF=0.143;AN=70;BaseQ         |
| 44623 | chrY | 22461409 | . | T | A | 377.34   | PASS          | AC=10;AF=0.143;AN=70;BaseQRankSum= |
| 44624 | chrY | 22461427 | . | A | T | 1820.25  | PASS          | AC=16;AF=0.267;AN=60;BaseQRankSum= |
| 44625 | chrY | 22461435 | . | A | G | 132.57   | PASS          | AC=4;AF=0.065;AN=62;BaseQRankSum=  |
| 44626 | chrY | 22461457 | . | C | A | 448.82   | PASS          | AC=8;AF=0.129;AN=62;BaseQRankSum=  |
| 44627 | chrY | 22461490 | . | A | C | 337.46   | PASS          | AC=8;AF=0.133;AN=60;BaseQRankSum=  |
| 44628 | chrY | 22461492 | . | A | C | 121.38   | PASS          | AC=1;AF=0.016;AN=64;BaseQRankSum=  |
| 44629 | chrY | 22461508 | . | G | C | 136.06   | PASS          | AC=3;AF=0.047;AN=64;BaseQRankSum=  |
| 44630 | chrY | 22461514 | . | T | A | 135.34   | PASS          | AC=3;AF=0.047;AN=64;BaseQRankSum=  |
| 44631 | chrY | 22461574 | . | G | A | 1871.03  | PASS          | AC=19;AF=0.297;AN=64;BaseQRankSum= |
| 44632 | chrY | 22461576 | . | A | T | 33.17    | my_snp_filter | AC=1;AF=0.016;AN=64;BaseQ          |
| 44633 | chrY | 22461588 | . | T | A | 34.16    | my_snp_filter | AC=1;AF=0.016;AN=64;BaseQ          |
| 44634 | chrY | 22461589 | . | C | T | 33.52    | my_snp_filter | AC=1;AF=0.016;AN=64;BaseQ          |
| 44635 | chrY | 22461590 | . | C | A | 33.45    | my_snp_filter | AC=1;AF=0.016;AN=64;BaseQ          |
| 44636 | chrY | 22461631 | . | G | A | 40.11    | PASS          | AC=3;AF=0.048;AN=62;BaseQRankSum=  |
| 44637 | chrY | 22461722 | . | A | G | 802.39   | PASS          | AC=6;AF=0.097;AN=62;DP=362;FS=0.0  |
| 44638 | chrY | 22461815 | . | T | C | 100.88   | PASS          | AC=4;AF=0.065;AN=62;BaseQRankSum=  |
| 44639 | chrY | 22461831 | . | G | A | 84.63    | PASS          | AC=3;AF=0.050;AN=60;BaseQRankSum=  |
| 44640 | chrY | 22461835 | . | C | A | 85.04    | PASS          | AC=3;AF=0.048;AN=62;BaseQRankSum=  |
| 44641 | chrY | 22461838 | . | A | G | 46.81    | my_snp_filter | AC=2;AF=0.030;AN=66;DP=33          |
| 44642 | chrY | 22461841 | . | T | C | 88.08    | PASS          | AC=3;AF=0.047;AN=64;BaseQRankSum=  |
| 44643 | chrY | 22462062 | . | T | G | 19836.36 | PASS          | AC=46;AF=0.719;AN=64;BaseQ         |
| 44644 | chrY | 22462091 | . | T | A | 100.69   | PASS          | AC=1;AF=0.016;AN=64;BaseQRankSum=  |
| 44645 | chrY | 22462100 | . | G | A | 102.24   | PASS          | AC=1;AF=0.016;AN=64;BaseQRankSum=  |
| 44646 | chrY | 22462142 | . | T | A | 391.07   | PASS          | AC=3;AF=0.045;AN=66;BaseQRankSum=  |
| 44647 | chrY | 22462153 | . | C | G | 37.16    | PASS          | AC=1;AF=0.014;AN=70;BaseQRankSum=  |
| 44648 | chrY | 22462162 | . | C | T | 411.65   | PASS          | AC=3;AF=0.047;AN=64;BaseQRankSum=  |
| 44649 | chrY | 22462166 | . | C | T | 37.21    | my_snp_filter | AC=1;AF=0.014;AN=70;BaseQ          |
| 44650 | chrY | 22462175 | . | G | C | 414.24   | PASS          | AC=3;AF=0.047;AN=64;BaseQRankSum=  |
| 44651 | chrY | 22462183 | . | T | G | 407.20   | PASS          | AC=5;AF=0.081;AN=62;BaseQRankSum=  |
| 44652 | chrY | 22462234 | . | G | A | 2172.55  | PASS          | AC=16;AF=0.250;AN=64;BaseQRankSum= |
| 44653 | chrY | 22462241 | . | A | C | 2123.63  | PASS          | AC=16;AF=0.250;AN=64;BaseQRankSum= |
| 44654 | chrY | 22462276 | . | A | C | 1401.82  | PASS          | AC=11;AF=0.177;AN=62;BaseQRankSum= |
| 44655 | chrY | 22462310 | . | T | C | 142.17   | PASS          | AC=2;AF=0.033;AN=60;BaseQRankSum=  |
| 44656 | chrY | 22462335 | . | G | A | 47.59    | PASS          | AC=1;AF=0.017;AN=60;BaseQRankSum=  |
| 44657 | chrY | 22462475 | . | G | T | 378      | PASS          | AC=3;AF=0.052;AN=58;BaseQRankSum=  |
| 44658 | chrY | 22462481 | . | G | A | 370.47   | PASS          | AC=3;AF=0.050;AN=60;BaseQRankSum=  |
| 44659 | chrY | 22462485 | . | T | A | 62.85    | PASS          | AC=2;AF=0.033;AN=60;BaseQRankSum=  |
| 44660 | chrY | 22462486 | . | T | G | 282.41   | PASS          | AC=3;AF=0.050;AN=60;BaseQRankSum=  |
| 44661 | chrY | 22462490 | . | T | G | 359.18   | PASS          | AC=4;AF=0.067;AN=60;BaseQRankSum=  |
| 44662 | chrY | 22462491 | . | G | A | 195.83   | PASS          | AC=3;AF=0.050;AN=60;BaseQRankSum=  |
| 44663 | chrY | 22462493 | . | G | A | 155.97   | PASS          | AC=3;AF=0.050;AN=60;BaseQRankSum=  |
| 44664 | chrY | 22462509 | . | G | C | 41.90    | my_snp_filter | AC=2;AF=0.034;AN=58;BaseQ          |
| 44665 | chrY | 22462525 | . | G | C | 39.66    | my_snp_filter | AC=2;AF=0.034;AN=58;BaseQ          |
| 44666 | chrY | 22462613 | . | C | A | 67.55    | PASS          | AC=1;AF=0.017;AN=58;BaseQRankSum=  |
| 44667 | chrY | 22462616 | . | T | A | 67.44    | PASS          | AC=1;AF=0.017;AN=58;BaseQRankSum=  |
| 44668 | chrY | 22462783 | . | T | C | 113.25   | PASS          | AC=2;AF=0.034;AN=58;BaseQRankSum=  |
| 44669 | chrY | 22462894 | . | G | A | 987.18   | PASS          | AC=6;AF=0.100;AN=60;BaseQRankSum=  |
| 44670 | chrY | 22462967 | . | G | A | 729.82   | PASS          | AC=5;AF=0.081;AN=62;BaseQRankSum=  |
| 44671 | chrY | 22462971 | . | G | C | 767.80   | PASS          | AC=5;AF=0.083;AN=60;BaseQRankSum=  |
| 44672 | chrY | 22462982 | . | T | A | 944.90   | PASS          | AC=5;AF=0.089;AN=56;BaseQRankSum=  |
| 44673 | chrY | 22462988 | . | G | T | 1070.33  | PASS          | AC=5;AF=0.089;AN=56;BaseQRankSum=  |
| 44674 | chrY | 22463017 | . | A | G | 847.27   | PASS          | AC=5;AF=0.086;AN=58;BaseQRankSum=  |
| 44675 | chrY | 22463114 | . | T | G | 92.25    | PASS          | AC=2;AF=0.042;AN=48;BaseQRankSum=  |
| 44676 | chrY | 22463130 | . | G | C | 89.82    | PASS          | AC=2;AF=0.037;AN=54;BaseQRankSum=  |
| 44677 | chrY | 22463410 | . | G | T | 841.94   | PASS          | AC=8;AF=0.129;AN=62;BaseQRankSum=  |
| 44678 | chrY | 22463411 | . | C | T | 304.32   | PASS          | AC=2;AF=0.033;AN=60;BaseQRankSum=  |
| 44679 | chrY | 22463429 | . | T | G | 1027.65  | PASS          | AC=6;AF=0.103;AN=58;BaseQRankSum=  |
| 44680 | chrY | 22463572 | . | G | A | 596.93   | PASS          | AC=6;AF=0.120;AN=50;BaseQRankSum=  |
| 44681 | chrY | 22463576 | . | C | T | 533.29   | PASS          | AC=6;AF=0.120;AN=50;BaseQRankSum=  |
| 44682 | chrY | 22463653 | . | C | G | 618.72   | PASS          | AC=5;AF=0.093;AN=54;BaseQRankSum=  |
| 44683 | chrY | 22463694 | . | G | T | 3693.03  | PASS          | AC=26;AF=0.591;AN=44;DP=282;FS=0.  |
| 44684 | chrY | 22463830 | . | T | G | 709.12   | PASS          | AC=5;AF=0.071;AN=70;BaseQRankSum=  |
| 44685 | chrY | 22463886 | . | A | G | 389.69   | PASS          | AC=6;AF=0.091;AN=66;BaseQRankSum=  |
| 44686 | chrY | 22463911 | . | G | A | 137.88   | my_snp_filter | AC=3;AF=0.044;AN=68;BaseQ          |
| 44687 | chrY | 22463930 | . | C | A | 94.04    | PASS          | AC=2;AF=0.029;AN=70;BaseQRankSum=  |
| 44688 | chrY | 22463931 | . | A | G | 301.10   | PASS          | AC=3;AF=0.043;AN=70;BaseQRankSum=  |

|       |      |          |   |   |     |          |               |                                    |
|-------|------|----------|---|---|-----|----------|---------------|------------------------------------|
| 44689 | chrY | 22463936 | . | A | C   | 55.25    | my_snp_filter | AC=2;AF=0.029;AN=70;BaseQ          |
| 44690 | chrY | 22463946 | . | C | T   | 41.78    | my_snp_filter | AC=2;AF=0.029;AN=70;BaseQ          |
| 44691 | chrY | 22463959 | . | A | C   | 119.94   | my_snp_filter | AC=2;AF=0.029;AN=70;BaseQ          |
| 44692 | chrY | 22463960 | . | G | A   | 116.36   | my_snp_filter | AC=2;AF=0.029;AN=70;BaseQ          |
| 44693 | chrY | 22464080 | . | T | A   | 12037.08 | PASS          | AC=29;AF=0.453;AN=64;BaseQ         |
| 44694 | chrY | 22464127 | . | C | T   | 6060.78  | PASS          | AC=23;AF=0.371;AN=62;BaseQRankSum  |
| 44695 | chrY | 22464131 | . | T | A   | 5298.80  | PASS          | AC=22;AF=0.344;AN=64;BaseQRankSum  |
| 44696 | chrY | 22464151 | . | C | T   | 3480.40  | my_snp_filter | AC=19;AF=0.288;AN=66;BaseQ         |
| 44697 | chrY | 22464164 | . | G | C   | 2633.10  | PASS          | AC=18;AF=0.273;AN=66;BaseQRankSum  |
| 44698 | chrY | 22464172 | . | G | C   | 56.47    | PASS          | AC=1;AF=0.014;AN=70;BaseQRankSum   |
| 44699 | chrY | 22464174 | . | C | G   | 31.02    | PASS          | AC=1;AF=0.014;AN=70;BaseQRankSum   |
| 44700 | chrY | 22464196 | . | T | C   | 919.91   | PASS          | AC=8;AF=0.125;AN=64;BaseQRankSum   |
| 44701 | chrY | 22464223 | . | G | A   | 751.36   | PASS          | AC=6;AF=0.094;AN=64;BaseQRankSum   |
| 44702 | chrY | 22464230 | . | A | C   | 715.61   | PASS          | AC=6;AF=0.094;AN=64;BaseQRankSum   |
| 44703 | chrY | 22464254 | . | T | C   | 499.01   | PASS          | AC=4;AF=0.065;AN=62;BaseQRankSum   |
| 44704 | chrY | 22464395 | . | T | A   | 20502.20 | PASS          | AC=46;AF=0.676;AN=68;BaseQ         |
| 44705 | chrY | 22464838 | . | G | T   | 2181.71  | PASS          | AC=24;AF=0.429;AN=56;DP=286;FS=0.  |
| 44706 | chrY | 22464928 | . | T | C   | 9136.28  | PASS          | AC=55;AF=0.982;AN=56;BaseQRankSum  |
| 44707 | chrY | 22465065 | . | G | T   | 227.58   | PASS          | AC=3;AF=0.058;AN=52;BaseQRankSum   |
| 44708 | chrY | 22465068 | . | A | G   | 549.30   | PASS          | AC=5;AF=0.100;AN=50;BaseQRankSum   |
| 44709 | chrY | 22465072 | . | A | T   | 346.46   | PASS          | AC=4;AF=0.087;AN=46;BaseQRankSum   |
| 44710 | chrY | 22465074 | . | C | A   | 511.05   | PASS          | AC=4;AF=0.087;AN=46;BaseQRankSum   |
| 44711 | chrY | 22465103 | . | G | T   | 2704.90  | PASS          | AC=15;AF=0.288;AN=52;BaseQRankSum  |
| 44712 | chrY | 22465121 | . | T | G,* | 2419.94  | PASS          | AC=8,3;AF=0.133,0.050;AN=60;BaseQ  |
| 44713 | chrY | 22465142 | . | C | G,* | 1862.42  | PASS          | AC=8,2;AF=0.133,0.033;AN=60;BaseQ  |
| 44714 | chrY | 22465199 | . | G | C,* | 5598.35  | PASS          | AC=20,2;AF=0.345,0.034;AN=58;BaseQ |
| 44715 | chrY | 22465230 | . | G | A   | 5364.94  | PASS          | AC=18;AF=0.290;AN=62;BaseQRankSum  |
| 44716 | chrY | 22465267 | . | G | T   | 6000.73  | PASS          | AC=18;AF=0.300;AN=60;BaseQRankSum  |
| 44717 | chrY | 22465269 | . | G | T   | 85.12    | PASS          | AC=1;AF=0.015;AN=66;BaseQRankSum   |
| 44718 | chrY | 22465278 | . | C | A   | 462.24   | PASS          | AC=4;AF=0.061;AN=66;BaseQRankSum   |
| 44719 | chrY | 22465285 | . | G | T   | 6182.76  | PASS          | AC=18;AF=0.290;AN=62;BaseQRankSum  |
| 44720 | chrY | 22465341 | . | T | C   | 1798.20  | PASS          | AC=3;AF=0.044;AN=68;BaseQRankSum   |
| 44721 | chrY | 22465344 | . | C | T   | 7724.21  | PASS          | AC=28;AF=0.452;AN=62;BaseQRankSum  |
| 44722 | chrY | 22465346 | . | C | T   | 1792.56  | PASS          | AC=3;AF=0.045;AN=66;BaseQRankSum   |
| 44723 | chrY | 22465388 | . | C | A   | 6909.73  | PASS          | AC=27;AF=0.397;AN=68;BaseQRankSum  |
| 44724 | chrY | 22465422 | . | A | G   | 2784.18  | PASS          | AC=20;AF=0.303;AN=66;BaseQRankSum  |
| 44725 | chrY | 22465424 | . | A | T   | 2734.18  | PASS          | AC=20;AF=0.303;AN=66;BaseQRankSum  |
| 44726 | chrY | 22465436 | . | T | A   | 2001.37  | my_snp_filter | AC=16;AF=0.242;AN=66;BaseQ         |
| 44727 | chrY | 22465439 | . | A | T   | 1871.05  | my_snp_filter | AC=15;AF=0.227;AN=66;BaseQ         |
| 44728 | chrY | 22465466 | . | T | C   | 784.50   | my_snp_filter | AC=8;AF=0.118;AN=68;BaseQ          |
| 44729 | chrY | 22465474 | . | G | A   | 743.32   | my_snp_filter | AC=5;AF=0.074;AN=68;BaseQ          |
| 44730 | chrY | 22465555 | . | G | C   | 915.24   | PASS          | AC=8;AF=0.114;AN=70;BaseQRankSum   |
| 44731 | chrY | 22465561 | . | C | G   | 920.64   | PASS          | AC=7;AF=0.100;AN=70;BaseQRankSum   |
| 44732 | chrY | 22465574 | . | G | C   | 910.43   | PASS          | AC=7;AF=0.100;AN=70;BaseQRankSum   |
| 44733 | chrY | 22465586 | . | T | C   | 908.08   | PASS          | AC=2;AF=0.029;AN=70;BaseQRankSum   |
| 44734 | chrY | 22465615 | . | G | T   | 417.86   | PASS          | AC=4;AF=0.057;AN=70;BaseQRankSum   |
| 44735 | chrY | 22465643 | . | A | T   | 262.93   | PASS          | AC=5;AF=0.071;AN=70;BaseQRankSum   |
| 44736 | chrY | 22465656 | . | G | A   | 216.59   | PASS          | AC=3;AF=0.043;AN=70;BaseQRankSum   |
| 44737 | chrY | 22465734 | . | C | T   | 89.22    | PASS          | AC=1;AF=0.015;AN=66;BaseQRankSum   |
| 44738 | chrY | 22465741 | . | T | A   | 89.22    | PASS          | AC=1;AF=0.015;AN=66;BaseQRankSum   |
| 44739 | chrY | 22465978 | . | G | T   | 51.51    | PASS          | AC=1;AF=0.014;AN=70;BaseQRankSum   |
| 44740 | chrY | 22466041 | . | G | T   | 191.71   | PASS          | AC=2;AF=0.029;AN=70;BaseQRankSum   |
| 44741 | chrY | 22466062 | . | G | T   | 103.52   | PASS          | AC=2;AF=0.029;AN=70;BaseQRankSum   |
| 44742 | chrY | 22466098 | . | T | C   | 382.23   | PASS          | AC=2;AF=0.029;AN=70;DP=706;FS=0.0  |
| 44743 | chrY | 22466200 | . | T | A   | 917.30   | PASS          | AC=6;AF=0.086;AN=70;DP=479;FS=0.0  |
| 44744 | chrY | 22466352 | . | G | T   | 320.68   | PASS          | AC=2;AF=0.033;AN=60;BaseQRankSum   |
| 44745 | chrY | 22466451 | . | A | T   | 34.59    | PASS          | AC=1;AF=0.015;AN=66;BaseQRankSum   |
| 44746 | chrY | 22466601 | . | T | G   | 979.82   | PASS          | AC=6;AF=0.100;AN=60;DP=297;FS=0.0  |
| 44747 | chrY | 22466682 | . | A | T   | 131.09   | PASS          | AC=2;AF=0.031;AN=64;BaseQRankSum   |
| 44748 | chrY | 22466843 | . | T | A   | 1205.17  | PASS          | AC=6;AF=0.088;AN=68;BaseQRankSum   |
| 44749 | chrY | 22466846 | . | A | G   | 381.64   | PASS          | AC=2;AF=0.029;AN=68;BaseQRankSum   |
| 44750 | chrY | 22466961 | . | C | T   | 20639.56 | PASS          | AC=47;AF=0.691;AN=68;BaseQ         |
| 44751 | chrY | 22467076 | . | G | T   | 269.42   | PASS          | AC=2;AF=0.029;AN=70;BaseQRankSum   |
| 44752 | chrY | 22467097 | . | G | T   | 1249.15  | PASS          | AC=8;AF=0.118;AN=68;BaseQRankSum   |
| 44753 | chrY | 22467098 | . | G | A   | 684.56   | PASS          | AC=4;AF=0.059;AN=68;BaseQRankSum   |
| 44754 | chrY | 22467126 | . | A | T   | 1344.75  | PASS          | AC=9;AF=0.132;AN=68;BaseQRankSum   |
| 44755 | chrY | 22467191 | . | G | T   | 41.55    | my_snp_filter | AC=3;AF=0.044;AN=68;BaseQ          |
| 44756 | chrY | 22467214 | . | C | G   | 5609.97  | PASS          | AC=32;AF=0.516;AN=62;DP=436;FS=0.  |
| 44757 | chrY | 22467366 | . | T | G   | 870.74   | PASS          | AC=6;AF=0.100;AN=60;DP=299;FS=0.0  |
| 44758 | chrY | 22467541 | . | G | C   | 4482.60  | PASS          | AC=42;AF=0.700;AN=60;DP=324;FS=12  |
| 44759 | chrY | 22467558 | . | A | G   | 1170.89  | PASS          | AC=6;AF=0.100;AN=60;BaseQRankSum   |
| 44760 | chrY | 22467650 | . | G | A   | 1163.13  | PASS          | AC=6;AF=0.100;AN=60;BaseQRankSum   |
| 44761 | chrY | 22467867 | . | C | T   | 3278.98  | PASS          | AC=33;AF=0.516;AN=64;BaseQRankSum  |
| 44762 | chrY | 22468072 | . | T | G   | 1240.73  | my_snp_filter | AC=6;AF=0.086;AN=70;BaseQ          |
| 44763 | chrY | 22468504 | . | C | T   | 4804.91  | my_snp_filter | AC=42;AF=0.700;AN=60;BaseQ         |
| 44764 | chrY | 22468603 | . | C | T   | 393.27   | PASS          | AC=3;AF=0.050;AN=60;BaseQRankSum   |

|       |      |          |   |   |     |          |               |                                    |
|-------|------|----------|---|---|-----|----------|---------------|------------------------------------|
| 44765 | chrY | 22469206 | . | A | T   | 64.32    | PASS          | AC=1;AF=0.017;AN=58;BaseQRankSum=  |
| 44766 | chrY | 22469209 | . | A | G,T | 474.61   | my_snp_filter | AC=6,1;AF=0.111,0.019;AN=          |
| 44767 | chrY | 22469214 | . | G | C   | 67.56    | PASS          | AC=1;AF=0.019;AN=54;BaseQRankSum=  |
| 44768 | chrY | 22469238 | . | G | T   | 343.96   | my_snp_filter | AC=6;AF=0.107;AN=56;BaseQ          |
| 44769 | chrY | 22469243 | . | A | G   | 308.60   | my_snp_filter | AC=4;AF=0.071;AN=56;BaseQ          |
| 44770 | chrY | 22469244 | . | A | G   | 309.55   | my_snp_filter | AC=4;AF=0.071;AN=56;BaseQ          |
| 44771 | chrY | 22469266 | . | G | A   | 219.60   | my_snp_filter | AC=4;AF=0.069;AN=58;BaseQ          |
| 44772 | chrY | 22469280 | . | C | T   | 134.21   | my_snp_filter | AC=4;AF=0.067;AN=60;BaseQ          |
| 44773 | chrY | 22469486 | . | A | C   | 91.40    | PASS          | AC=2;AF=0.037;AN=54;DP=211;FS=0.0  |
| 44774 | chrY | 22469496 | . | C | G   | 90.92    | PASS          | AC=2;AF=0.034;AN=58;DP=216;FS=0.0  |
| 44775 | chrY | 22469565 | . | C | T   | 35.27    | my_snp_filter | AC=1;AF=0.017;AN=60;BaseQ          |
| 44776 | chrY | 22469746 | . | G | T   | 954.50   | PASS          | AC=6;AF=0.094;AN=64;BaseQRankSum=  |
| 44777 | chrY | 22469846 | . | T | G   | 41.68    | PASS          | AC=1;AF=0.016;AN=64;BaseQRankSum=  |
| 44778 | chrY | 22469858 | . | T | G   | 40.14    | PASS          | AC=1;AF=0.015;AN=66;BaseQRankSum=  |
| 44779 | chrY | 22469869 | . | A | G   | 96.30    | PASS          | AC=2;AF=0.031;AN=64;BaseQRankSum=  |
| 44780 | chrY | 22469881 | . | T | A   | 77.42    | PASS          | AC=1;AF=0.015;AN=66;BaseQRankSum=  |
| 44781 | chrY | 22469979 | . | A | T   | 64.59    | PASS          | AC=3;AF=0.050;AN=60;BaseQRankSum=  |
| 44782 | chrY | 22470114 | . | C | T   | 1147.31  | PASS          | AC=6;AF=0.091;AN=66;BaseQRankSum=  |
| 44783 | chrY | 22470139 | . | G | A   | 8827.69  | PASS          | AC=37;AF=0.597;AN=62;BaseQRankSum= |
| 44784 | chrY | 22470193 | . | A | T   | 16537.53 | PASS          | AC=50;AF=0.806;AN=62;DP=6          |
| 44785 | chrY | 22470291 | . | A | G   | 8431.55  | PASS          | AC=48;AF=0.800;AN=60;BaseQRankSum= |
| 44786 | chrY | 22470300 | . | C | G   | 1164.33  | PASS          | AC=6;AF=0.097;AN=62;DP=341;FS=0.0  |
| 44787 | chrY | 22470358 | . | C | G   | 1159.13  | PASS          | AC=6;AF=0.100;AN=60;DP=259;FS=0.0  |
| 44788 | chrY | 22470512 | . | C | A   | 431.55   | my_snp_filter | AC=3;AF=0.048;AN=62;BaseQ          |
| 44789 | chrY | 22470542 | . | G | C   | 158.49   | PASS          | AC=5;AF=0.076;AN=66;BaseQRankSum=  |
| 44790 | chrY | 22470656 | . | C | G   | 577.24   | PASS          | AC=2;AF=0.033;AN=60;DP=257;FS=0.0  |
| 44791 | chrY | 22470665 | . | A | C   | 604.13   | PASS          | AC=2;AF=0.033;AN=60;DP=268;FS=0.0  |
| 44792 | chrY | 22470667 | . | C | G   | 605.13   | PASS          | AC=2;AF=0.033;AN=60;DP=277;FS=0.0  |
| 44793 | chrY | 22470800 | . | T | A   | 57.98    | PASS          | AC=1;AF=0.015;AN=68;BaseQRankSum=  |
| 44794 | chrY | 22470808 | . | C | T   | 58.16    | PASS          | AC=1;AF=0.015;AN=68;BaseQRankSum=  |
| 44795 | chrY | 22470971 | . | G | C   | 1307.78  | PASS          | AC=6;AF=0.088;AN=68;BaseQRankSum=  |
| 44796 | chrY | 22471051 | . | G | A   | 181.61   | PASS          | AC=1;AF=0.015;AN=68;BaseQRankSum=  |
| 44797 | chrY | 22471323 | . | A | G   | 309.34   | PASS          | AC=3;AF=0.045;AN=66;BaseQRankSum=  |
| 44798 | chrY | 22471624 | . | G | C   | 3145.20  | PASS          | AC=34;AF=0.654;AN=52;DP=259;FS=0.0 |
| 44799 | chrY | 22471726 | . | T | C   | 694.94   | PASS          | AC=2;AF=0.029;AN=68;DP=333;FS=0.0  |
| 44800 | chrY | 22471756 | . | T | C   | 8526.38  | PASS          | AC=42;AF=0.700;AN=60;DP=366;FS=0.0 |
| 44801 | chrY | 22471758 | . | G | T   | 12872.02 | PASS          | AC=60;AF=1.00;AN=60;DP=36          |
| 44802 | chrY | 22472425 | . | C | T   | 377.18   | PASS          | AC=2;AF=0.034;AN=58;DP=258;FS=0.0  |
| 44803 | chrY | 22472893 | . | G | T   | 171.67   | PASS          | AC=2;AF=0.034;AN=58;DP=213;FS=0.0  |
| 44804 | chrY | 22472947 | . | G | C   | 86.62    | PASS          | AC=2;AF=0.033;AN=60;BaseQRankSum=  |
| 44805 | chrY | 22473147 | . | G | A   | 836.88   | PASS          | AC=6;AF=0.088;AN=68;DP=248;FS=0.0  |
| 44806 | chrY | 22473165 | . | G | C   | 74.74    | PASS          | AC=2;AF=0.029;AN=68;BaseQRankSum=  |
| 44807 | chrY | 22473168 | . | G | T   | 74.94    | PASS          | AC=2;AF=0.029;AN=70;BaseQRankSum=  |
| 44808 | chrY | 22473177 | . | A | T   | 77.56    | PASS          | AC=2;AF=0.029;AN=70;BaseQRankSum=  |
| 44809 | chrY | 22473178 | . | C | G   | 77.82    | PASS          | AC=2;AF=0.029;AN=70;BaseQRankSum=  |
| 44810 | chrY | 22473179 | . | C | T   | 127.49   | PASS          | AC=3;AF=0.044;AN=68;BaseQRankSum=  |
| 44811 | chrY | 22473186 | . | G | T   | 155.03   | PASS          | AC=3;AF=0.043;AN=70;BaseQRankSum=  |
| 44812 | chrY | 22473193 | . | G | A   | 37       | PASS          | AC=1;AF=0.014;AN=70;BaseQRankSum=  |
| 44813 | chrY | 22473203 | . | G | T   | 37.79    | my_snp_filter | AC=2;AF=0.029;AN=70;BaseQ          |
| 44814 | chrY | 22473255 | . | G | C   | 402.24   | PASS          | AC=5;AF=0.071;AN=70;BaseQRankSum=  |
| 44815 | chrY | 22473273 | . | C | T   | 218.09   | my_snp_filter | AC=5;AF=0.071;AN=70;BaseQ          |
| 44816 | chrY | 22473302 | . | A | T   | 485.37   | PASS          | AC=2;AF=0.029;AN=70;DP=758;FS=0.0  |
| 44817 | chrY | 22473540 | . | C | G   | 859.39   | PASS          | AC=6;AF=0.097;AN=62;DP=280;FS=0.0  |
| 44818 | chrY | 22473543 | . | G | T   | 499.32   | PASS          | AC=6;AF=0.100;AN=60;BaseQRankSum=  |
| 44819 | chrY | 22473720 | . | C | T   | 5109.71  | PASS          | AC=42;AF=0.700;AN=60;BaseQRankSum= |
| 44820 | chrY | 22473884 | . | A | T   | 30.43    | my_snp_filter | AC=2;AF=0.030;AN=66;BaseQ          |
| 44821 | chrY | 22474043 | . | G | T   | 78.08    | my_snp_filter | AC=3;AF=0.043;AN=70;BaseQ          |
| 44822 | chrY | 22474638 | . | G | T   | 2411.51  | PASS          | AC=14;AF=0.212;AN=66;BaseQRankSum= |
| 44823 | chrY | 22474686 | . | T | G   | 7132.75  | PASS          | AC=29;AF=0.426;AN=68;BaseQRankSum= |
| 44824 | chrY | 22474721 | . | A | C,* | 1123     | PASS          | AC=11,3;AF=0.162,0.044;AN=68;BaseQ |
| 44825 | chrY | 22474730 | . | A | G,* | 820.50   | PASS          | AC=8,3;AF=0.114,0.043;AN=70;BaseQ  |
| 44826 | chrY | 22474797 | . | T | C   | 979.73   | PASS          | AC=4;AF=0.061;AN=66;BaseQRankSum=  |
| 44827 | chrY | 22474930 | . | T | G   | 39.34    | my_snp_filter | AC=2;AF=0.033;AN=60;BaseQ          |
| 44828 | chrY | 22475101 | . | A | T   | 38.25    | PASS          | AC=1;AF=0.016;AN=62;BaseQRankSum=  |
| 44829 | chrY | 22475104 | . | T | G   | 38.15    | PASS          | AC=1;AF=0.016;AN=62;BaseQRankSum=  |
| 44830 | chrY | 22475178 | . | A | T   | 235.03   | PASS          | AC=6;AF=0.097;AN=62;BaseQRankSum=  |
| 44831 | chrY | 22475181 | . | A | C   | 131.51   | PASS          | AC=2;AF=0.029;AN=68;BaseQRankSum=  |
| 44832 | chrY | 22475194 | . | G | T   | 8649.96  | PASS          | AC=55;AF=0.948;AN=58;BaseQRankSum= |
| 44833 | chrY | 22475196 | . | T | A   | 281.93   | PASS          | AC=4;AF=0.061;AN=66;BaseQRankSum=  |
| 44834 | chrY | 22475212 | . | G | T   | 36.64    | PASS          | AC=1;AF=0.015;AN=68;BaseQRankSum=  |
| 44835 | chrY | 22475217 | . | T | C   | 39.99    | PASS          | AC=1;AF=0.014;AN=70;BaseQRankSum=  |
| 44836 | chrY | 22475235 | . | C | T   | 269.12   | PASS          | AC=4;AF=0.061;AN=66;BaseQRankSum=  |
| 44837 | chrY | 22475248 | . | T | C   | 273.48   | PASS          | AC=4;AF=0.063;AN=64;BaseQRankSum=  |
| 44838 | chrY | 22475279 | . | A | C   | 37.73    | my_snp_filter | AC=1;AF=0.014;AN=70;BaseQ          |
| 44839 | chrY | 22475280 | . | G | T   | 37.67    | my_snp_filter | AC=1;AF=0.014;AN=70;BaseQ          |
| 44840 | chrY | 22475403 | . | C | A   | 4811.44  | PASS          | AC=38;AF=0.760;AN=50;DP=277;FS=0.0 |

|       |      |          |   |   |     |         |               |                                    |
|-------|------|----------|---|---|-----|---------|---------------|------------------------------------|
| 44841 | chrY | 22475590 | . | T | A   | 33.28   | PASS          | AC=1;AF=0.017;AN=60;BaseQRankSum=  |
| 44842 | chrY | 22475605 | . | G | A   | 33.85   | PASS          | AC=1;AF=0.016;AN=62;BaseQRankSum=  |
| 44843 | chrY | 22475695 | . | A | G   | 90.51   | PASS          | AC=3;AF=0.048;AN=62;BaseQRankSum=  |
| 44844 | chrY | 22475819 | . | T | A   | 50.72   | PASS          | AC=5;AF=0.078;AN=64;BaseQRankSum=  |
| 44845 | chrY | 22475821 | . | T | A   | 114.33  | PASS          | AC=2;AF=0.031;AN=64;BaseQRankSum=  |
| 44846 | chrY | 22475851 | . | A | G   | 140.34  | PASS          | AC=4;AF=0.061;AN=66;BaseQRankSum=  |
| 44847 | chrY | 22475855 | . | G | A   | 61.49   | my_snp_filter | AC=2;AF=0.030;AN=66;BaseQ          |
| 44848 | chrY | 22475863 | . | A | C   | 140.43  | PASS          | AC=4;AF=0.061;AN=66;BaseQRankSum=  |
| 44849 | chrY | 22475864 | . | G | A   | 69.76   | PASS          | AC=2;AF=0.030;AN=66;BaseQRankSum=  |
| 44850 | chrY | 22475865 | . | T | A   | 505.34  | PASS          | AC=9;AF=0.136;AN=66;BaseQRankSum=  |
| 44851 | chrY | 22475874 | . | T | A   | 547.41  | PASS          | AC=9;AF=0.132;AN=68;BaseQRankSum=  |
| 44852 | chrY | 22475881 | . | G | A   | 47.16   | my_snp_filter | AC=2;AF=0.030;AN=66;DP=35          |
| 44853 | chrY | 22475883 | . | T | A   | 486.70  | PASS          | AC=9;AF=0.132;AN=68;BaseQRankSum=  |
| 44854 | chrY | 22475895 | . | C | T   | 303.54  | PASS          | AC=6;AF=0.094;AN=64;BaseQRankSum=  |
| 44855 | chrY | 22476381 | . | A | T   | 236.89  | PASS          | AC=4;AF=0.059;AN=68;BaseQRankSum=  |
| 44856 | chrY | 22476393 | . | G | T   | 356.37  | PASS          | AC=6;AF=0.088;AN=68;BaseQRankSum=  |
| 44857 | chrY | 22476404 | . | A | T   | 287.34  | PASS          | AC=4;AF=0.059;AN=68;BaseQRankSum=  |
| 44858 | chrY | 22476419 | . | T | A   | 299.74  | PASS          | AC=4;AF=0.059;AN=68;BaseQRankSum=  |
| 44859 | chrY | 22476544 | . | T | C,* | 2097.65 | PASS          | AC=11,2;AF=0.157,0.029;AN=70;Base  |
| 44860 | chrY | 22476572 | . | G | T   | 6737.91 | PASS          | AC=35;AF=0.547;AN=64;BaseQRankSum= |
| 44861 | chrY | 22476607 | . | T | C   | 857.01  | PASS          | AC=8;AF=0.118;AN=68;BaseQRankSum=  |
| 44862 | chrY | 22476654 | . | A | T   | 73.31   | my_snp_filter | AC=4;AF=0.059;AN=68;BaseQ          |
| 44863 | chrY | 22476669 | . | T | A   | 34.30   | my_snp_filter | AC=4;AF=0.061;AN=66;BaseQ          |
| 44864 | chrY | 22476673 | . | T | G   | 305.87  | PASS          | AC=5;AF=0.081;AN=62;BaseQRankSum=  |
| 44865 | chrY | 22476690 | . | C | T   | 267.95  | PASS          | AC=5;AF=0.081;AN=62;BaseQRankSum=  |
| 44866 | chrY | 22476691 | . | T | A   | 1944.81 | PASS          | AC=14;AF=0.212;AN=66;BaseQRankSum= |
| 44867 | chrY | 22476696 | . | A | G   | 2386.41 | PASS          | AC=18;AF=0.281;AN=64;BaseQRankSum= |
| 44868 | chrY | 22476701 | . | T | G   | 160.76  | PASS          | AC=4;AF=0.063;AN=64;BaseQRankSum=  |
| 44869 | chrY | 22476712 | . | T | C   | 88.12   | my_snp_filter | AC=3;AF=0.047;AN=64;BaseQ          |
| 44870 | chrY | 22476727 | . | T | G   | 844.84  | PASS          | AC=8;AF=0.133;AN=60;BaseQRankSum=  |
| 44871 | chrY | 22476734 | . | C | G   | 639.32  | PASS          | AC=8;AF=0.125;AN=64;BaseQRankSum=  |
| 44872 | chrY | 22476737 | . | T | A   | 526.59  | PASS          | AC=7;AF=0.106;AN=66;BaseQRankSum=  |
| 44873 | chrY | 22476755 | . | T | A   | 347.85  | PASS          | AC=5;AF=0.076;AN=66;BaseQRankSum=  |
| 44874 | chrY | 22476785 | . | C | G   | 58.16   | PASS          | AC=2;AF=0.031;AN=64;BaseQRankSum=  |
| 44875 | chrY | 22476799 | . | A | G   | 56.39   | PASS          | AC=2;AF=0.029;AN=68;BaseQRankSum=  |
| 44876 | chrY | 22476803 | . | A | C   | 55.38   | PASS          | AC=2;AF=0.029;AN=68;BaseQRankSum=  |
| 44877 | chrY | 22476834 | . | T | G   | 9090.88 | PASS          | AC=48;AF=0.800;AN=60;DP=332;FS=0.  |
| 44878 | chrY | 22476835 | . | T | A   | 9091.12 | PASS          | AC=48;AF=0.800;AN=60;DP=328;FS=0.  |
| 44879 | chrY | 22476901 | . | A | T   | 1432.79 | PASS          | AC=6;AF=0.091;AN=66;DP=279;FS=0.0  |
| 44880 | chrY | 22477129 | . | G | A   | 456.53  | PASS          | AC=2;AF=0.032;AN=62;DP=234;FS=0.0  |
| 44881 | chrY | 22477292 | . | C | A   | 1617.84 | PASS          | AC=6;AF=0.091;AN=66;BaseQRankSum=  |
| 44882 | chrY | 22477300 | . | G | A   | 395.23  | PASS          | AC=1;AF=0.015;AN=66;BaseQRankSum=  |
| 44883 | chrY | 22477339 | . | T | A   | 83.84   | PASS          | AC=5;AF=0.078;AN=64;BaseQRankSum=  |
| 44884 | chrY | 22477348 | . | A | T   | 2090.03 | PASS          | AC=5;AF=0.081;AN=62;BaseQRankSum=  |
| 44885 | chrY | 22477360 | . | C | A   | 31.86   | PASS          | AC=3;AF=0.048;AN=62;BaseQRankSum=  |
| 44886 | chrY | 22477372 | . | C | G   | 322.73  | PASS          | AC=2;AF=0.032;AN=62;BaseQRankSum=  |
| 44887 | chrY | 22477374 | . | G | T   | 558.33  | PASS          | AC=6;AF=0.097;AN=62;DP=337;FS=0.0  |
| 44888 | chrY | 22477427 | . | C | G   | 222.10  | PASS          | AC=2;AF=0.034;AN=58;BaseQRankSum=  |
| 44889 | chrY | 22477446 | . | G | T   | 508.93  | PASS          | AC=2;AF=0.031;AN=64;DP=374;FS=0.0  |
| 44890 | chrY | 22477449 | . | G | T   | 124.83  | PASS          | AC=1;AF=0.016;AN=62;BaseQRankSum=  |
| 44891 | chrY | 22477462 | . | T | A   | 130.51  | PASS          | AC=1;AF=0.015;AN=66;BaseQRankSum=  |
| 44892 | chrY | 22477484 | . | A | G   | 174.60  | PASS          | AC=1;AF=0.015;AN=66;BaseQRankSum=  |
| 44893 | chrY | 22477518 | . | C | T   | 199.98  | PASS          | AC=2;AF=0.029;AN=68;BaseQRankSum=  |
| 44894 | chrY | 22477572 | . | T | G   | 92.36   | PASS          | AC=3;AF=0.044;AN=68;BaseQRankSum=  |
| 44895 | chrY | 22477751 | . | G | C   | 193.03  | PASS          | AC=2;AF=0.030;AN=66;BaseQRankSum=  |
| 44896 | chrY | 22477818 | . | A | C,* | 289.45  | PASS          | AC=2,1;AF=0.029,0.014;AN=70;BaseQ  |
| 44897 | chrY | 22477840 | . | T | G   | 2868.20 | PASS          | AC=12;AF=0.176;AN=68;BaseQRankSum= |
| 44898 | chrY | 22477859 | . | G | C,* | 1894.10 | PASS          | AC=3,1;AF=0.044,0.015;AN=68;BaseQ  |
| 44899 | chrY | 22477884 | . | T | G,* | 2232.65 | PASS          | AC=7,1;AF=0.121,0.017;AN=58;BaseQ  |
| 44900 | chrY | 22477922 | . | C | A,* | 726.49  | PASS          | AC=2,1;AF=0.036,0.018;AN=56;BaseQ  |
| 44901 | chrY | 22477925 | . | T | G,* | 512.65  | PASS          | AC=2,1;AF=0.036,0.018;AN=56;BaseQ  |
| 44902 | chrY | 22477926 | . | T | G   | 380.10  | PASS          | AC=2;AF=0.036;AN=56;BaseQRankSum=  |
| 44903 | chrY | 22477952 | . | A | T,* | 184.65  | my_snp_filter | AC=2,1;AF=0.036,0.018;AN=          |
| 44904 | chrY | 22477956 | . | A | C,* | 233.13  | my_snp_filter | AC=3,1;AF=0.054,0.018;AN=          |
| 44905 | chrY | 22477957 | . | A | C,* | 185.21  | my_snp_filter | AC=3,1;AF=0.054,0.018;AN=          |
| 44906 | chrY | 22478500 | . | C | G   | 2716.18 | PASS          | AC=6;AF=0.097;AN=62;DP=370;FS=0.0  |
| 44907 | chrY | 22478538 | . | C | A   | 46.67   | PASS          | AC=1;AF=0.016;AN=64;BaseQRankSum=  |
| 44908 | chrY | 22478541 | . | A | C   | 46.61   | PASS          | AC=1;AF=0.015;AN=66;BaseQRankSum=  |
| 44909 | chrY | 22478546 | . | G | C   | 46.52   | PASS          | AC=1;AF=0.015;AN=68;BaseQRankSum=  |
| 44910 | chrY | 22478735 | . | A | G   | 4346.89 | PASS          | AC=36;AF=0.750;AN=48;DP=283;FS=0.  |
| 44911 | chrY | 22478922 | . | C | T   | 6604.92 | PASS          | AC=44;AF=0.957;AN=46;BaseQRankSum= |
| 44912 | chrY | 22479390 | . | G | C   | 138.47  | PASS          | AC=2;AF=0.029;AN=68;BaseQRankSum=  |
| 44913 | chrY | 22479418 | . | C | T   | 4589.50 | PASS          | AC=19;AF=0.339;AN=56;BaseQRankSum= |
| 44914 | chrY | 22479427 | . | A | C   | 204.36  | PASS          | AC=3;AF=0.043;AN=70;BaseQRankSum=  |
| 44915 | chrY | 22479439 | . | C | G   | 486.51  | PASS          | AC=4;AF=0.057;AN=70;BaseQRankSum=  |
| 44916 | chrY | 22479449 | . | T | C   | 491.73  | PASS          | AC=4;AF=0.057;AN=70;BaseQRankSum=  |

|       |      |          |   |   |   |         |               |                                    |
|-------|------|----------|---|---|---|---------|---------------|------------------------------------|
| 44917 | chrY | 22479461 | . | T | A | 475.04  | PASS          | AC=2;AF=0.030;AN=66;BaseQRankSum=  |
| 44918 | chrY | 22479476 | . | G | A | 519.32  | PASS          | AC=2;AF=0.031;AN=64;BaseQRankSum=  |
| 44919 | chrY | 22479478 | . | C | G | 123.55  | PASS          | AC=2;AF=0.030;AN=66;BaseQRankSum=  |
| 44920 | chrY | 22479484 | . | A | C | 114.32  | PASS          | AC=2;AF=0.030;AN=66;BaseQRankSum=  |
| 44921 | chrY | 22479500 | . | A | C | 422.08  | PASS          | AC=2;AF=0.031;AN=64;BaseQRankSum=  |
| 44922 | chrY | 22479510 | . | G | C | 192.14  | PASS          | AC=1;AF=0.015;AN=66;BaseQRankSum=  |
| 44923 | chrY | 22479566 | . | A | G | 296.30  | PASS          | AC=4;AF=0.063;AN=64;BaseQRankSum=  |
| 44924 | chrY | 22479589 | . | C | G | 332.85  | PASS          | AC=4;AF=0.061;AN=66;BaseQRankSum=  |
| 44925 | chrY | 22479595 | . | G | T | 339.93  | PASS          | AC=4;AF=0.063;AN=64;BaseQRankSum=  |
| 44926 | chrY | 22479600 | . | A | G | 421.02  | PASS          | AC=4;AF=0.065;AN=62;BaseQRankSum=  |
| 44927 | chrY | 22479601 | . | A | G | 420.65  | PASS          | AC=4;AF=0.065;AN=62;BaseQRankSum=  |
| 44928 | chrY | 22479623 | . | G | A | 391.41  | PASS          | AC=5;AF=0.081;AN=62;BaseQRankSum=  |
| 44929 | chrY | 22479637 | . | C | T | 367.36  | PASS          | AC=4;AF=0.063;AN=64;BaseQRankSum=  |
| 44930 | chrY | 22479746 | . | T | C | 4392.27 | my_snp_filter | AC=34;AF=0.739;AN=46;DP=2          |
| 44931 | chrY | 22479759 | . | G | T | 2738.35 | my_snp_filter | AC=26;AF=0.591;AN=44;DP=2          |
| 44932 | chrY | 22479873 | . | G | C | 52.06   | PASS          | AC=2;AF=0.029;AN=70;BaseQRankSum=  |
| 44933 | chrY | 22479891 | . | C | T | 133.53  | PASS          | AC=2;AF=0.029;AN=70;BaseQRankSum=  |
| 44934 | chrY | 22479905 | . | G | T | 126.70  | PASS          | AC=2;AF=0.029;AN=70;BaseQRankSum=  |
| 44935 | chrY | 22479936 | . | A | G | 84.79   | PASS          | AC=3;AF=0.043;AN=70;BaseQRankSum=  |
| 44936 | chrY | 22479943 | . | A | C | 84.26   | PASS          | AC=3;AF=0.043;AN=70;BaseQRankSum=  |
| 44937 | chrY | 22479960 | . | G | T | 84.94   | PASS          | AC=2;AF=0.029;AN=68;BaseQRankSum=  |
| 44938 | chrY | 22480101 | . | A | T | 3263.39 | PASS          | AC=36;AF=0.667;AN=54;BaseQRankSum= |
| 44939 | chrY | 22480186 | . | A | T | 1803.68 | PASS          | AC=28;AF=0.583;AN=48;BaseQRankSum= |
| 44940 | chrY | 22480393 | . | C | A | 865.50  | PASS          | AC=6;AF=0.097;AN=62;BaseQRankSum=  |
| 44941 | chrY | 22480614 | . | C | A | 4404.14 | PASS          | AC=33;AF=0.971;AN=34;BaseQRankSum= |
| 44942 | chrY | 22480615 | . | G | A | 4359.17 | PASS          | AC=33;AF=0.971;AN=34;BaseQRankSum= |
| 44943 | chrY | 22480645 | . | C | G | 1333.49 | PASS          | AC=14;AF=1.00;AN=14;DP=39;FS=0.00  |
| 44944 | chrY | 22480655 | . | A | C | 821.95  | PASS          | AC=8;AF=0.800;AN=10;DP=18;FS=0.00  |
| 44945 | chrY | 22480656 | . | G | T | 736.47  | PASS          | AC=8;AF=0.800;AN=10;DP=16;FS=0.00  |
| 44946 | chrY | 22480678 | . | G | A | 202.69  | PASS          | AC=4;AF=1.00;AN=4;DP=5;FS=0.000;M  |
| 44947 | chrY | 22480679 | . | T | G | 202.69  | PASS          | AC=4;AF=1.00;AN=4;DP=5;FS=0.000;M  |
| 44948 | chrY | 22481333 | . | G | T | 48.84   | my_snp_filter | AC=2;AF=1.00;AN=2;DP=22;F          |
| 44949 | chrY | 22481344 | . | G | C | 32.76   | my_snp_filter | AC=1;AF=0.045;AN=22;BaseQ          |
| 44950 | chrY | 22481563 | . | G | A | 259.51  | my_snp_filter | AC=7;AF=0.875;AN=8;BaseQR          |
| 44951 | chrY | 22481616 | . | T | A | 194.29  | my_snp_filter | AC=4;AF=0.333;AN=12;DP=22          |
| 44952 | chrY | 22481631 | . | A | T | 194.48  | my_snp_filter | AC=4;AF=0.333;AN=12;DP=23          |
| 44953 | chrY | 22481632 | . | G | A | 194.47  | my_snp_filter | AC=4;AF=0.333;AN=12;DP=23          |
| 44954 | chrY | 22481673 | . | A | T | 89.81   | my_snp_filter | AC=2;AF=0.250;AN=8;DP=20;          |
| 44955 | chrY | 22481703 | . | G | A | 60.18   | my_snp_filter | AC=2;AF=0.167;AN=12;DP=15          |
| 44956 | chrY | 22483082 | . | T | A | 749.92  | PASS          | AC=6;AF=0.188;AN=32;DP=69;FS=0.00  |
| 44957 | chrY | 22483123 | . | A | C | 1943.06 | PASS          | AC=20;AF=1.00;AN=20;DP=82;FS=0.00  |
| 44958 | chrY | 22483403 | . | T | C | 7235.08 | PASS          | AC=58;AF=1.00;AN=58;DP=259;FS=0.0  |
| 44959 | chrY | 22483449 | . | A | T | 1177.76 | PASS          | AC=6;AF=0.094;AN=64;BaseQRankSum=  |
| 44960 | chrY | 22483535 | . | G | A | 205.95  | PASS          | AC=2;AF=0.033;AN=60;BaseQRankSum=  |
| 44961 | chrY | 22483714 | . | A | G | 658.58  | PASS          | AC=6;AF=0.111;AN=54;DP=248;FS=0.0  |
| 44962 | chrY | 22483757 | . | G | C | 567.71  | PASS          | AC=5;AF=0.083;AN=60;BaseQRankSum=  |
| 44963 | chrY | 22483887 | . | G | A | 540.66  | my_snp_filter | AC=9;AF=0.145;AN=62;BaseQ          |
| 44964 | chrY | 22483941 | . | A | G | 536     | my_snp_filter | AC=5;AF=0.083;AN=60;BaseQ          |
| 44965 | chrY | 22483947 | . | A | T | 78.22   | PASS          | AC=2;AF=0.029;AN=68;BaseQRankSum=  |
| 44966 | chrY | 22483966 | . | T | A | 69.09   | PASS          | AC=2;AF=0.029;AN=68;BaseQRankSum=  |
| 44967 | chrY | 22483988 | . | G | T | 68.20   | my_snp_filter | AC=3;AF=0.044;AN=68;BaseQ          |
| 44968 | chrY | 22483991 | . | C | T | 8076.53 | my_snp_filter | AC=29;AF=0.518;AN=56;Base          |
| 44969 | chrY | 22483998 | . | C | A | 2812.43 | my_snp_filter | AC=14;AF=0.206;AN=68;Base          |
| 44970 | chrY | 22484004 | . | G | C | 1404.69 | PASS          | AC=13;AF=0.191;AN=68;BaseQRankSum= |
| 44971 | chrY | 22484013 | . | T | C | 2823.41 | my_snp_filter | AC=15;AF=0.221;AN=68;Base          |
| 44972 | chrY | 22484034 | . | T | A | 39.75   | my_snp_filter | AC=1;AF=0.015;AN=68;BaseQ          |
| 44973 | chrY | 22484037 | . | A | C | 1551.43 | PASS          | AC=10;AF=0.147;AN=68;BaseQRankSum= |
| 44974 | chrY | 22484060 | . | T | G | 48.04   | PASS          | AC=1;AF=0.015;AN=68;BaseQRankSum=  |
| 44975 | chrY | 22484067 | . | C | G | 107.28  | PASS          | AC=1;AF=0.015;AN=68;BaseQRankSum=  |
| 44976 | chrY | 22484068 | . | A | T | 1238.12 | PASS          | AC=12;AF=0.176;AN=68;BaseQRankSum= |
| 44977 | chrY | 22484074 | . | A | T | 58.42   | my_snp_filter | AC=3;AF=0.045;AN=66;BaseQ          |
| 44978 | chrY | 22484076 | . | T | G | 2086.09 | my_snp_filter | AC=19;AF=0.317;AN=60;Base          |
| 44979 | chrY | 22484092 | . | C | T | 622.41  | PASS          | AC=7;AF=0.125;AN=56;BaseQRankSum=  |
| 44980 | chrY | 22484094 | . | G | T | 264.01  | PASS          | AC=2;AF=0.030;AN=66;BaseQRankSum=  |
| 44981 | chrY | 22484185 | . | T | G | 4663.38 | PASS          | AC=38;AF=0.760;AN=50;DP=268;FS=0.  |
| 44982 | chrY | 22484389 | . | C | G | 34.76   | my_snp_filter | AC=2;AF=0.031;AN=64;BaseQ          |
| 44983 | chrY | 22484456 | . | A | T | 1514.57 | PASS          | AC=6;AF=0.103;AN=58;DP=268;FS=0.0  |
| 44984 | chrY | 22485034 | . | C | T | 440.32  | my_snp_filter | AC=6;AF=0.107;AN=56;DP=27          |
| 44985 | chrY | 22485062 | . | T | A | 336.96  | PASS          | AC=3;AF=0.048;AN=62;BaseQRankSum=  |
| 44986 | chrY | 22485316 | . | G | C | 203.08  | PASS          | AC=2;AF=0.034;AN=58;DP=212;FS=0.0  |
| 44987 | chrY | 22485545 | . | A | T | 2497.62 | PASS          | AC=6;AF=0.091;AN=66;BaseQRankSum=  |
| 44988 | chrY | 22485547 | . | C | T | 2498.45 | PASS          | AC=6;AF=0.091;AN=66;BaseQRankSum=  |
| 44989 | chrY | 22485571 | . | C | T | 97.35   | PASS          | AC=2;AF=0.031;AN=64;BaseQRankSum=  |
| 44990 | chrY | 22485597 | . | C | T | 95.68   | PASS          | AC=3;AF=0.048;AN=62;BaseQRankSum=  |
| 44991 | chrY | 22485807 | . | A | T | 1314.22 | PASS          | AC=6;AF=0.103;AN=58;BaseQRankSum=  |
| 44992 | chrY | 22485930 | . | T | G | 34.46   | PASS          | AC=1;AF=0.016;AN=64;BaseQRankSum=  |



|       |      |          |   |   |     |          |               |                                    |
|-------|------|----------|---|---|-----|----------|---------------|------------------------------------|
| 44993 | chrY | 22485934 | . | G | T   | 35.07    | PASS          | AC=1;AF=0.016;AN=64;BaseQRankSum=  |
| 44994 | chrY | 22485942 | . | C | T   | 34.57    | PASS          | AC=1;AF=0.016;AN=64;BaseQRankSum=  |
| 44995 | chrY | 22486040 | . | T | G   | 735.62   | PASS          | AC=4;AF=0.061;AN=66;BaseQRankSum=  |
| 44996 | chrY | 22486050 | . | A | G   | 73.34    | PASS          | AC=1;AF=0.015;AN=66;BaseQRankSum=  |
| 44997 | chrY | 22486112 | . | G | T   | 280.36   | PASS          | AC=6;AF=0.094;AN=64;BaseQRankSum=  |
| 44998 | chrY | 22486114 | . | C | A   | 41.72    | PASS          | AC=1;AF=0.016;AN=64;BaseQRankSum=  |
| 44999 | chrY | 22486125 | . | T | A   | 41.12    | PASS          | AC=1;AF=0.016;AN=64;BaseQRankSum=  |
| 45000 | chrY | 22486130 | . | C | T   | 40.69    | PASS          | AC=1;AF=0.016;AN=64;BaseQRankSum=  |
| 45001 | chrY | 22486146 | . | C | G   | 40.93    | PASS          | AC=1;AF=0.016;AN=62;BaseQRankSum=  |
| 45002 | chrY | 22486351 | . | C | G   | 127.43   | my_snp_filter | AC=4;AF=0.095;AN=42;BaseQ          |
| 45003 | chrY | 22486353 | . | G | T   | 89.15    | my_snp_filter | AC=2;AF=0.050;AN=40;DP=22          |
| 45004 | chrY | 22486369 | . | A | C   | 495.88   | PASS          | AC=5;AF=0.114;AN=44;BaseQRankSum=  |
| 45005 | chrY | 22486472 | . | C | T   | 40.98    | PASS          | AC=1;AF=0.016;AN=62;BaseQRankSum=  |
| 45006 | chrY | 22486490 | . | G | A   | 76.99    | PASS          | AC=1;AF=0.016;AN=62;BaseQRankSum=  |
| 45007 | chrY | 22486512 | . | A | C   | 37.93    | PASS          | AC=1;AF=0.016;AN=62;BaseQRankSum=  |
| 45008 | chrY | 22486663 | . | A | G   | 48.10    | PASS          | AC=2;AF=0.033;AN=60;DP=346;FS=0.0  |
| 45009 | chrY | 22486700 | . | T | G   | 9921.04  | PASS          | AC=56;AF=0.966;AN=58;BaseQRankSum= |
| 45010 | chrY | 22486833 | . | G | A   | 76.19    | PASS          | AC=2;AF=0.029;AN=70;BaseQRankSum=  |
| 45011 | chrY | 22486864 | . | G | A   | 245.13   | PASS          | AC=3;AF=0.043;AN=70;BaseQRankSum=  |
| 45012 | chrY | 22486890 | . | T | G   | 344.63   | PASS          | AC=3;AF=0.052;AN=58;BaseQRankSum=  |
| 45013 | chrY | 22486933 | . | C | G   | 665.27   | PASS          | AC=7;AF=0.125;AN=56;BaseQRankSum=  |
| 45014 | chrY | 22486949 | . | A | G   | 337.73   | PASS          | AC=3;AF=0.047;AN=64;BaseQRankSum=  |
| 45015 | chrY | 22487014 | . | G | T   | 3015.66  | PASS          | AC=23;AF=0.426;AN=54;BaseQRankSum= |
| 45016 | chrY | 22487017 | . | C | G   | 151.96   | PASS          | AC=4;AF=0.061;AN=66;BaseQRankSum=  |
| 45017 | chrY | 22487020 | . | G | T   | 36.08    | PASS          | AC=1;AF=0.015;AN=66;BaseQRankSum=  |
| 45018 | chrY | 22487022 | . | T | A   | 93.76    | my_snp_filter | AC=4;AF=0.061;AN=66;BaseQ          |
| 45019 | chrY | 22487029 | . | C | A   | 340.06   | PASS          | AC=6;AF=0.091;AN=66;BaseQRankSum=  |
| 45020 | chrY | 22487037 | . | A | T   | 92.27    | PASS          | AC=3;AF=0.045;AN=66;BaseQRankSum=  |
| 45021 | chrY | 22487047 | . | C | T   | 92.88    | PASS          | AC=3;AF=0.045;AN=66;BaseQRankSum=  |
| 45022 | chrY | 22487098 | . | T | C   | 9486.85  | PASS          | AC=63;AF=0.984;AN=64;BaseQRankSum= |
| 45023 | chrY | 22487198 | . | A | G   | 19202.74 | PASS          | AC=50;AF=0.735;AN=68;DP=5          |
| 45024 | chrY | 22487215 | . | A | G   | 24163.89 | PASS          | AC=68;AF=1.00;AN=68;DP=63          |
| 45025 | chrY | 22487541 | . | T | G   | 52.18    | PASS          | AC=1;AF=0.015;AN=66;BaseQRankSum=  |
| 45026 | chrY | 22487546 | . | C | T   | 44.45    | PASS          | AC=1;AF=0.015;AN=66;BaseQRankSum=  |
| 45027 | chrY | 22487558 | . | G | T   | 41.49    | PASS          | AC=1;AF=0.015;AN=66;BaseQRankSum=  |
| 45028 | chrY | 22487727 | . | T | A   | 8389.13  | PASS          | AC=56;AF=0.966;AN=58;BaseQRankSum= |
| 45029 | chrY | 22487851 | . | C | G   | 277.62   | PASS          | AC=3;AF=0.047;AN=64;BaseQRankSum=  |
| 45030 | chrY | 22487858 | . | T | G   | 334.07   | PASS          | AC=4;AF=0.063;AN=64;BaseQRankSum=  |
| 45031 | chrY | 22487871 | . | T | C   | 46.65    | my_snp_filter | AC=2;AF=0.030;AN=66;BaseQ          |
| 45032 | chrY | 22487873 | . | C | A   | 47.01    | my_snp_filter | AC=2;AF=0.030;AN=66;BaseQ          |
| 45033 | chrY | 22488046 | . | C | G   | 59.75    | PASS          | AC=2;AF=0.036;AN=56;BaseQRankSum=  |
| 45034 | chrY | 22488154 | . | A | T   | 35.52    | my_snp_filter | AC=2;AF=0.032;AN=62;BaseQ          |
| 45035 | chrY | 22488155 | . | A | T   | 35.91    | my_snp_filter | AC=2;AF=0.032;AN=62;BaseQ          |
| 45036 | chrY | 22488156 | . | G | T   | 35.79    | my_snp_filter | AC=2;AF=0.033;AN=60;BaseQ          |
| 45037 | chrY | 22488169 | . | G | A   | 115.57   | my_snp_filter | AC=3;AF=0.058;AN=52;BaseQ          |
| 45038 | chrY | 22488170 | . | G | A   | 321.52   | my_snp_filter | AC=7;AF=0.135;AN=52;BaseQ          |
| 45039 | chrY | 22488186 | . | T | A   | 89.66    | my_snp_filter | AC=2;AF=0.037;AN=54;BaseQ          |
| 45040 | chrY | 22489215 | . | G | C   | 584.72   | PASS          | AC=4;AF=0.069;AN=58;BaseQRankSum=  |
| 45041 | chrY | 22489228 | . | G | C   | 751.73   | PASS          | AC=6;AF=0.103;AN=58;DP=204;FS=0.0  |
| 45042 | chrY | 22489347 | . | C | G   | 92.28    | PASS          | AC=2;AF=0.042;AN=48;DP=92;FS=0.00  |
| 45043 | chrY | 22489364 | . | C | A   | 1534.88  | PASS          | AC=14;AF=0.700;AN=20;BaseQRankSum= |
| 45044 | chrY | 22489376 | . | T | C   | 1156.32  | my_snp_filter | AC=12;AF=0.600;AN=20;BaseQ         |
| 45045 | chrY | 22489378 | . | G | T,* | 1071.50  | my_snp_filter | AC=9,1;AF=0.450,0.050;AN=          |
| 45046 | chrY | 22489382 | . | G | T   | 528.46   | PASS          | AC=5;AF=0.167;AN=30;BaseQRankSum=  |
| 45047 | chrY | 22489387 | . | G | A   | 563.47   | PASS          | AC=6;AF=0.273;AN=22;BaseQRankSum=  |
| 45048 | chrY | 22489394 | . | G | T   | 651.54   | PASS          | AC=6;AF=0.429;AN=14;BaseQRankSum=  |
| 45049 | chrY | 22489397 | . | T | G   | 166.10   | PASS          | AC=1;AF=0.063;AN=16;BaseQRankSum=  |
| 45050 | chrY | 22489404 | . | A | C   | 93.90    | my_snp_filter | AC=1;AF=0.036;AN=28;BaseQ          |
| 45051 | chrY | 22489405 | . | A | G   | 297.36   | my_snp_filter | AC=2;AF=0.077;AN=26;BaseQ          |
| 45052 | chrY | 22489406 | . | G | T   | 83.44    | my_snp_filter | AC=1;AF=0.033;AN=30;BaseQ          |
| 45053 | chrY | 22489507 | . | T | G   | 58.10    | my_snp_filter | AC=2;AF=0.036;AN=56;BaseQ          |
| 45054 | chrY | 22489589 | . | T | A   | 54       | PASS          | AC=2;AF=0.030;AN=66;BaseQRankSum=  |
| 45055 | chrY | 22489690 | . | A | G   | 37.20    | PASS          | AC=1;AF=0.014;AN=70;BaseQRankSum=  |
| 45056 | chrY | 22489712 | . | A | T   | 34.26    | PASS          | AC=1;AF=0.015;AN=66;BaseQRankSum=  |
| 45057 | chrY | 22489714 | . | A | C   | 98.37    | PASS          | AC=3;AF=0.045;AN=66;BaseQRankSum=  |
| 45058 | chrY | 22489715 | . | G | C   | 4695.80  | PASS          | AC=32;AF=0.533;AN=60;BaseQRankSum= |
| 45059 | chrY | 22489803 | . | G | A   | 1836.95  | PASS          | AC=6;AF=0.100;AN=60;BaseQRankSum=  |
| 45060 | chrY | 22489987 | . | A | T   | 34.68    | my_snp_filter | AC=1;AF=0.056;AN=18;BaseQ          |
| 45061 | chrY | 22489992 | . | G | T   | 32.52    | my_snp_filter | AC=1;AF=0.063;AN=16;BaseQ          |
| 45062 | chrY | 22490003 | . | G | T   | 31.26    | my_snp_filter | AC=1;AF=0.063;AN=16;BaseQ          |
| 45063 | chrY | 22490023 | . | C | A   | 122.94   | my_snp_filter | AC=5;AF=0.313;AN=16;BaseQ          |
| 45064 | chrY | 22490399 | . | T | A   | 3657.23  | PASS          | AC=40;AF=1.00;AN=40;DP=143;FS=0.0  |
| 45065 | chrY | 22490457 | . | G | T   | 64.49    | PASS          | AC=1;AF=0.019;AN=52;BaseQRankSum=  |
| 45066 | chrY | 22490472 | . | T | C   | 55.62    | PASS          | AC=1;AF=0.018;AN=56;BaseQRankSum=  |
| 45067 | chrY | 22490530 | . | A | G   | 543.29   | PASS          | AC=4;AF=0.069;AN=58;BaseQRankSum=  |
| 45068 | chrY | 22490531 | . | G | C   | 147.17   | my_snp_filter | AC=4;AF=0.069;AN=58;BaseQ          |

|       |      |          |   |   |   |        |               |                                    |
|-------|------|----------|---|---|---|--------|---------------|------------------------------------|
| 45069 | chrY | 22490553 | . | G | A | 287.11 | PASS          | AC=2;AF=0.037;AN=54;BaseQRankSum=  |
| 45070 | chrY | 22490560 | . | G | T | 332.46 | PASS          | AC=2;AF=0.037;AN=54;BaseQRankSum=  |
| 45071 | chrY | 22490572 | . | T | A | 439.24 | my_snp_filter | AC=4;AF=0.091;AN=44;BaseQ          |
| 45072 | chrY | 22490574 | . | A | T | 59.55  | my_snp_filter | AC=1;AF=0.020;AN=50;BaseQ          |
| 45073 | chrY | 22490585 | . | C | A | 327.90 | PASS          | AC=2;AF=0.040;AN=50;BaseQRankSum=  |
| 45074 | chrY | 22490598 | . | C | A | 331.83 | PASS          | AC=2;AF=0.040;AN=50;BaseQRankSum=  |
| 45075 | chrY | 22490613 | . | G | T | 63.43  | my_snp_filter | AC=1;AF=0.022;AN=46;BaseQ          |
| 45076 | chrY | 22490614 | . | A | T | 69.55  | my_snp_filter | AC=1;AF=0.022;AN=46;BaseQ          |
| 45077 | chrY | 22490620 | . | T | C | 67.22  | my_snp_filter | AC=1;AF=0.024;AN=42;BaseQ          |
| 45078 | chrY | 22490651 | . | T | G | 55.12  | my_snp_filter | AC=1;AF=0.021;AN=48;BaseQ          |
| 45079 | chrY | 22490655 | . | C | G | 62.56  | my_snp_filter | AC=1;AF=0.023;AN=44;BaseQ          |
| 45080 | chrY | 22490659 | . | T | A | 182.05 | my_snp_filter | AC=7;AF=0.167;AN=42;BaseQ          |
| 45081 | chrY | 22490660 | . | G | T | 50.91  | my_snp_filter | AC=2;AF=0.050;AN=40;DP=12          |
| 45082 | chrY | 22490664 | . | C | T | 51.65  | my_snp_filter | AC=2;AF=0.053;AN=38;DP=12          |
| 45083 | chrY | 22490679 | . | G | T | 74.07  | PASS          | AC=2;AF=0.100;AN=20;BaseQRankSum=  |
| 45084 | chrY | 22490680 | . | T | G | 76.27  | PASS          | AC=2;AF=0.100;AN=20;BaseQRankSum=  |
| 45085 | chrY | 22490686 | . | T | C | 78.55  | my_snp_filter | AC=1;AF=0.050;AN=20;BaseQ          |
| 45086 | chrY | 22490691 | . | G | A | 78.70  | my_snp_filter | AC=1;AF=0.050;AN=20;BaseQ          |
| 45087 | chrY | 22491041 | . | A | G | 870.09 | my_snp_filter | AC=12;AF=1.00;AN=12;DP=51          |
| 45088 | chrY | 22491163 | . | G | C | 297.38 | my_snp_filter | AC=4;AF=0.083;AN=48;BaseQ          |
| 45089 | chrY | 22491379 | . | A | G | 41.84  | my_snp_filter | AC=2;AF=1.00;AN=2;DP=3;FS          |
| 45090 | chrY | 22491395 | . | C | G | 41.84  | my_snp_filter | AC=2;AF=1.00;AN=2;DP=3;FS          |
| 45091 | chrY | 22498673 | . | A | T | 121.29 | my_snp_filter | AC=3;AF=0.063;AN=48;BaseQ          |
| 45092 | chrY | 22499843 | . | A | T | 54.14  | PASS          | AC=2;AF=0.333;AN=6;DP=8;FS=0.000;  |
| 45093 | chrY | 22499865 | . | T | G | 57.51  | PASS          | AC=2;AF=0.167;AN=12;DP=12;FS=0.00  |
| 45094 | chrY | 22499881 | . | G | C | 57.54  | PASS          | AC=2;AF=0.167;AN=12;DP=12;FS=0.00  |
| 45095 | chrY | 22499885 | . | C | A | 150.91 | PASS          | AC=4;AF=0.400;AN=10;DP=12;FS=0.00  |
| 45096 | chrY | 22499902 | . | T | A | 57.44  | PASS          | AC=2;AF=0.200;AN=10;DP=13;FS=0.00  |
| 45097 | chrY | 22499903 | . | T | C | 57     | PASS          | AC=2;AF=0.167;AN=12;DP=13;FS=0.00  |
| 45098 | chrY | 22502169 | . | C | T | 42.63  | my_snp_filter | AC=1;AF=0.042;AN=24;BaseQ          |
| 45099 | chrY | 22502171 | . | G | T | 435.06 | my_snp_filter | AC=5;AF=0.313;AN=16;BaseQ          |
| 45100 | chrY | 22502181 | . | A | T | 43.71  | my_snp_filter | AC=1;AF=0.042;AN=24;BaseQ          |
| 45101 | chrY | 22502198 | . | G | T | 331.82 | my_snp_filter | AC=5;AF=0.167;AN=30;BaseQ          |
| 45102 | chrY | 22502210 | . | A | T | 43.58  | my_snp_filter | AC=1;AF=0.031;AN=32;BaseQ          |
| 45103 | chrY | 22502217 | . | G | T | 42.81  | my_snp_filter | AC=1;AF=0.033;AN=30;BaseQ          |
| 45104 | chrY | 22502435 | . | G | A | 59.75  | my_snp_filter | AC=3;AF=0.188;AN=16;BaseQ          |
| 45105 | chrY | 22502514 | . | C | A | 36.93  | my_snp_filter | AC=1;AF=0.056;AN=18;BaseQ          |
| 45106 | chrY | 22502545 | . | A | T | 324.32 | my_snp_filter | AC=6;AF=0.750;AN=8;BaseQR          |
| 45107 | chrY | 22502563 | . | G | T | 243.98 | my_snp_filter | AC=6;AF=0.333;AN=18;BaseQ          |
| 45108 | chrY | 22502642 | . | C | T | 254.45 | my_snp_filter | AC=2;AF=0.167;AN=12;BaseQ          |
| 45109 | chrY | 22502655 | . | A | T | 303.36 | my_snp_filter | AC=3;AF=0.150;AN=20;BaseQ          |
| 45110 | chrY | 22502673 | . | G | T | 54.80  | PASS          | AC=1;AF=0.042;AN=24;BaseQRankSum=  |
| 45111 | chrY | 22502688 | . | G | C | 66.47  | PASS          | AC=2;AF=0.250;AN=8;DP=66;FS=0.000  |
| 45112 | chrY | 22502690 | . | A | C | 133.86 | my_snp_filter | AC=1;AF=0.056;AN=18;DP=61          |
| 45113 | chrY | 22502692 | . | G | T | 274.46 | PASS          | AC=4;AF=1.00;AN=4;DP=61;FS=0.000;  |
| 45114 | chrY | 22502697 | . | G | A | 58.35  | PASS          | AC=2;AF=0.111;AN=18;DP=73;FS=0.00  |
| 45115 | chrY | 22502698 | . | G | C | 136.14 | my_snp_filter | AC=1;AF=0.038;AN=26;BaseQ          |
| 45116 | chrY | 22502705 | . | G | C | 134.15 | my_snp_filter | AC=1;AF=0.038;AN=26;BaseQ          |
| 45117 | chrY | 22502716 | . | G | T | 67.32  | my_snp_filter | AC=1;AF=0.031;AN=32;BaseQ          |
| 45118 | chrY | 22502739 | . | G | T | 175.49 | my_snp_filter | AC=1;AF=0.023;AN=44;BaseQ          |
| 45119 | chrY | 22502748 | . | C | T | 173.46 | my_snp_filter | AC=1;AF=0.023;AN=44;BaseQ          |
| 45120 | chrY | 22502794 | . | C | A | 77.80  | my_snp_filter | AC=1;AF=0.025;AN=40;BaseQ          |
| 45121 | chrY | 22502804 | . | A | T | 212.82 | my_snp_filter | AC=4;AF=0.083;AN=48;DP=12          |
| 45122 | chrY | 22502819 | . | T | A | 780.01 | my_snp_filter | AC=16;AF=1.00;AN=16;DP=98          |
| 45123 | chrY | 22502823 | . | G | T | 132.10 | my_snp_filter | AC=4;AF=0.095;AN=42;DP=10          |
| 45124 | chrY | 22502832 | . | G | C | 479.03 | my_snp_filter | AC=8;AF=0.444;AN=18;DP=11          |
| 45125 | chrY | 22502841 | . | C | G | 54.98  | my_snp_filter | AC=2;AF=0.053;AN=38;DP=11          |
| 45126 | chrY | 22502842 | . | T | C | 52.02  | my_snp_filter | AC=2;AF=0.048;AN=42;DP=11          |
| 45127 | chrY | 22502926 | . | T | G | 42.63  | my_snp_filter | AC=2;AF=0.091;AN=22;DP=81          |
| 45128 | chrY | 22502989 | . | G | T | 106.73 | PASS          | AC=2;AF=0.200;AN=10;DP=100;FS=0.00 |
| 45129 | chrY | 22502993 | . | T | G | 105.10 | PASS          | AC=2;AF=0.250;AN=8;DP=97;FS=0.000  |
| 45130 | chrY | 22502994 | . | T | C | 35.33  | my_snp_filter | AC=1;AF=0.167;AN=6;BaseQR          |
| 45131 | chrY | 22502999 | . | T | A | 30.16  | my_snp_filter | AC=1;AF=0.036;AN=28;BaseQ          |
| 45132 | chrY | 22503048 | . | C | G | 136.89 | PASS          | AC=4;AF=0.200;AN=20;DP=109;FS=0.0  |
| 45133 | chrY | 22503073 | . | G | C | 121.40 | my_snp_filter | AC=1;AF=0.031;AN=32;BaseQ          |
| 45134 | chrY | 22503075 | . | G | A | 188.62 | my_snp_filter | AC=2;AF=0.067;AN=30;BaseQ          |
| 45135 | chrY | 22503088 | . | A | T | 510.31 | PASS          | AC=3;AF=0.167;AN=18;BaseQRankSum=  |
| 45136 | chrY | 22503091 | . | T | G | 40.80  | PASS          | AC=1;AF=0.056;AN=18;BaseQRankSum=  |
| 45137 | chrY | 22503103 | . | G | T | 55.58  | PASS          | AC=2;AF=0.125;AN=16;DP=36;FS=0.00  |
| 45138 | chrY | 22503111 | . | G | C | 59.27  | PASS          | AC=2;AF=0.167;AN=12;DP=31;FS=0.00  |
| 45139 | chrY | 22503128 | . | A | T | 55.31  | PASS          | AC=2;AF=0.143;AN=14;DP=24;FS=0.00  |
| 45140 | chrY | 22503291 | . | G | C | 54.59  | my_snp_filter | AC=2;AF=0.083;AN=24;BaseQ          |
| 45141 | chrY | 22503312 | . | A | G | 46.79  | my_snp_filter | AC=1;AF=0.045;AN=22;BaseQ          |
| 45142 | chrY | 22503330 | . | A | T | 64.90  | my_snp_filter | AC=2;AF=0.500;AN=4;DP=12;          |
| 45143 | chrY | 22504950 | . | T | G | 35.39  | my_snp_filter | AC=1;AF=0.250;AN=4;BaseQR          |
| 45144 | chrY | 22505317 | . | A | T | 40.21  | my_snp_filter | AC=1;AF=0.045;AN=22;BaseQ          |

|       |      |          |   |   |   |         |               |                                    |
|-------|------|----------|---|---|---|---------|---------------|------------------------------------|
| 45145 | chrY | 22505325 | . | G | T | 40.22   | my_snp_filter | AC=1;AF=0.045;AN=22;BaseQ          |
| 45146 | chrY | 22505634 | . | T | G | 165.03  | my_snp_filter | AC=4;AF=0.063;AN=64;BaseQ          |
| 45147 | chrY | 22505641 | . | C | G | 160.37  | my_snp_filter | AC=4;AF=0.061;AN=66;BaseQ          |
| 45148 | chrY | 22505680 | . | G | T | 37.43   | PASS          | AC=1;AF=0.015;AN=66;BaseQRankSum=  |
| 45149 | chrY | 22505681 | . | A | T | 170.32  | PASS          | AC=6;AF=0.091;AN=66;BaseQRankSum=  |
| 45150 | chrY | 22505700 | . | C | G | 60.62   | PASS          | AC=1;AF=0.015;AN=66;BaseQRankSum=  |
| 45151 | chrY | 22505713 | . | A | T | 39.16   | PASS          | AC=1;AF=0.015;AN=68;BaseQRankSum=  |
| 45152 | chrY | 22505719 | . | T | A | 233.39  | PASS          | AC=7;AF=0.103;AN=68;BaseQRankSum=  |
| 45153 | chrY | 22505733 | . | T | G | 103.07  | PASS          | AC=4;AF=0.059;AN=68;BaseQRankSum=  |
| 45154 | chrY | 22505984 | . | C | G | 35.84   | my_snp_filter | AC=1;AF=0.016;AN=64;BaseQ          |
| 45155 | chrY | 22506045 | . | C | A | 2272.78 | PASS          | AC=30;AF=0.556;AN=54;BaseQRankSum= |
| 45156 | chrY | 22506149 | . | G | A | 4268.42 | my_snp_filter | AC=40;AF=1.00;AN=40;BaseQ          |
| 45157 | chrY | 22506170 | . | A | C | 106.75  | my_snp_filter | AC=2;AF=0.036;AN=56;BaseQ          |
| 45158 | chrY | 22506292 | . | A | C | 45.76   | PASS          | AC=1;AF=0.016;AN=62;BaseQRankSum=  |
| 45159 | chrY | 22506300 | . | C | G | 45.96   | PASS          | AC=1;AF=0.017;AN=58;BaseQRankSum=  |
| 45160 | chrY | 22506302 | . | A | G | 46      | PASS          | AC=1;AF=0.017;AN=58;BaseQRankSum=  |
| 45161 | chrY | 22506455 | . | A | T | 36.68   | my_snp_filter | AC=1;AF=0.023;AN=44;BaseQ          |
| 45162 | chrY | 22506458 | . | T | C | 35.02   | my_snp_filter | AC=1;AF=0.023;AN=44;BaseQ          |
| 45163 | chrY | 22506465 | . | T | A | 35.01   | my_snp_filter | AC=1;AF=0.024;AN=42;BaseQ          |
| 45164 | chrY | 22506466 | . | T | C | 34.64   | my_snp_filter | AC=1;AF=0.025;AN=40;BaseQ          |
| 45165 | chrY | 22506493 | . | A | C | 168.98  | PASS          | AC=6;AF=0.130;AN=46;BaseQRankSum=  |
| 45166 | chrY | 22506788 | . | C | G | 778.90  | PASS          | AC=5;AF=0.076;AN=66;BaseQRankSum=  |
| 45167 | chrY | 22506807 | . | G | C | 81.61   | PASS          | AC=1;AF=0.015;AN=66;BaseQRankSum=  |
| 45168 | chrY | 22506824 | . | G | A | 77.13   | PASS          | AC=1;AF=0.015;AN=66;BaseQRankSum=  |
| 45169 | chrY | 22506851 | . | T | A | 163.62  | PASS          | AC=1;AF=0.015;AN=66;BaseQRankSum=  |
| 45170 | chrY | 22506957 | . | G | A | 326.90  | PASS          | AC=3;AF=0.044;AN=68;BaseQRankSum=  |
| 45171 | chrY | 22506976 | . | T | A | 548.37  | PASS          | AC=3;AF=0.045;AN=66;BaseQRankSum=  |
| 45172 | chrY | 22506983 | . | T | C | 40.70   | my_snp_filter | AC=2;AF=0.029;AN=68;BaseQ          |
| 45173 | chrY | 22506988 | . | G | A | 364.32  | PASS          | AC=3;AF=0.044;AN=68;BaseQRankSum=  |
| 45174 | chrY | 22507010 | . | C | T | 49.38   | my_snp_filter | AC=2;AF=0.029;AN=68;BaseQ          |
| 45175 | chrY | 22507014 | . | T | G | 458.64  | PASS          | AC=3;AF=0.044;AN=68;BaseQRankSum=  |
| 45176 | chrY | 22507037 | . | G | C | 730.55  | PASS          | AC=5;AF=0.071;AN=70;BaseQRankSum=  |
| 45177 | chrY | 22507262 | . | G | C | 236.83  | PASS          | AC=2;AF=0.029;AN=70;DP=326;FS=0.0  |
| 45178 | chrY | 22507746 | . | C | T | 197.60  | PASS          | AC=2;AF=0.030;AN=66;BaseQRankSum=  |
| 45179 | chrY | 22507755 | . | G | C | 197.47  | PASS          | AC=2;AF=0.032;AN=62;BaseQRankSum=  |
| 45180 | chrY | 22507757 | . | T | G | 140.59  | my_snp_filter | AC=3;AF=0.050;AN=60;BaseQ          |
| 45181 | chrY | 22507762 | . | G | A | 152.68  | my_snp_filter | AC=3;AF=0.050;AN=60;BaseQ          |
| 45182 | chrY | 22507800 | . | C | T | 503.71  | PASS          | AC=7;AF=0.109;AN=64;BaseQRankSum=  |
| 45183 | chrY | 22507851 | . | T | G | 88.77   | my_snp_filter | AC=2;AF=0.033;AN=60;BaseQ          |
| 45184 | chrY | 22507865 | . | T | C | 34.85   | my_snp_filter | AC=2;AF=0.030;AN=66;DP=43          |
| 45185 | chrY | 22507909 | . | A | G | 167.12  | my_snp_filter | AC=4;AF=0.061;AN=66;BaseQ          |
| 45186 | chrY | 22507919 | . | C | G | 387.67  | my_snp_filter | AC=11;AF=0.162;AN=68;BaseQ         |
| 45187 | chrY | 22507920 | . | T | C | 49.90   | PASS          | AC=2;AF=0.030;AN=66;BaseQRankSum=  |
| 45188 | chrY | 22507924 | . | G | A | 52.20   | PASS          | AC=2;AF=0.031;AN=64;BaseQRankSum=  |
| 45189 | chrY | 22507933 | . | G | T | 46.24   | my_snp_filter | AC=2;AF=0.030;AN=66;DP=67          |
| 45190 | chrY | 22507939 | . | G | T | 47.91   | my_snp_filter | AC=2;AF=0.030;AN=66;DP=68          |
| 45191 | chrY | 22507975 | . | A | T | 141.18  | PASS          | AC=4;AF=0.061;AN=66;BaseQRankSum=  |
| 45192 | chrY | 22507980 | . | T | G | 143.41  | PASS          | AC=4;AF=0.061;AN=66;BaseQRankSum=  |
| 45193 | chrY | 22507990 | . | T | A | 939.94  | my_snp_filter | AC=7;AF=0.106;AN=66;BaseQ          |
| 45194 | chrY | 22508009 | . | G | C | 1670.85 | PASS          | AC=8;AF=0.125;AN=64;BaseQRankSum=  |
| 45195 | chrY | 22508012 | . | T | G | 1637.15 | PASS          | AC=8;AF=0.125;AN=64;BaseQRankSum=  |
| 45196 | chrY | 22508036 | . | G | T | 670.81  | my_snp_filter | AC=6;AF=0.091;AN=66;BaseQ          |
| 45197 | chrY | 22508045 | . | C | A | 44.39   | my_snp_filter | AC=1;AF=0.016;AN=64;BaseQ          |
| 45198 | chrY | 22508074 | . | C | G | 365.33  | PASS          | AC=4;AF=0.069;AN=58;BaseQRankSum=  |
| 45199 | chrY | 22508077 | . | T | A | 201.26  | my_snp_filter | AC=4;AF=0.069;AN=58;BaseQ          |
| 45200 | chrY | 22508081 | . | G | T | 61.41   | PASS          | AC=1;AF=0.017;AN=58;BaseQRankSum=  |
| 45201 | chrY | 22508085 | . | A | T | 53.07   | my_snp_filter | AC=2;AF=0.034;AN=58;BaseQ          |
| 45202 | chrY | 22508324 | . | G | T | 419.77  | PASS          | AC=3;AF=0.045;AN=66;BaseQRankSum=  |
| 45203 | chrY | 22508347 | . | G | T | 1434.67 | PASS          | AC=8;AF=0.167;AN=48;BaseQRankSum=  |
| 45204 | chrY | 22508367 | . | C | A | 38.79   | my_snp_filter | AC=1;AF=0.015;AN=66;BaseQ          |
| 45205 | chrY | 22508372 | . | T | G | 152.84  | PASS          | AC=2;AF=0.030;AN=66;DP=653;FS=0.0  |
| 45206 | chrY | 22508397 | . | A | C | 39.84   | my_snp_filter | AC=1;AF=0.015;AN=68;BaseQ          |
| 45207 | chrY | 22508407 | . | T | A | 350.69  | PASS          | AC=4;AF=0.059;AN=68;BaseQRankSum=  |
| 45208 | chrY | 22508420 | . | C | A | 90.45   | my_snp_filter | AC=1;AF=0.014;AN=70;BaseQ          |
| 45209 | chrY | 22508422 | . | T | C | 258.51  | my_snp_filter | AC=3;AF=0.043;AN=70;BaseQ          |
| 45210 | chrY | 22508426 | . | G | A | 300.98  | PASS          | AC=1;AF=0.015;AN=68;BaseQRankSum=  |
| 45211 | chrY | 22508427 | . | G | T | 425.54  | PASS          | AC=4;AF=0.063;AN=64;BaseQRankSum=  |
| 45212 | chrY | 22508430 | . | A | T | 153.26  | PASS          | AC=2;AF=0.030;AN=66;BaseQRankSum=  |
| 45213 | chrY | 22508440 | . | T | C | 3137.24 | PASS          | AC=14;AF=0.500;AN=28;BaseQRankSum= |
| 45214 | chrY | 22508445 | . | A | C | 257.01  | PASS          | AC=1;AF=0.015;AN=68;BaseQRankSum=  |
| 45215 | chrY | 22508467 | . | G | C | 1234.94 | PASS          | AC=6;AF=0.091;AN=66;BaseQRankSum=  |
| 45216 | chrY | 22508474 | . | G | C | 2158.20 | PASS          | AC=10;AF=0.278;AN=36;BaseQRankSum= |
| 45217 | chrY | 22508488 | . | G | A | 633.25  | PASS          | AC=7;AF=0.100;AN=70;BaseQRankSum=  |
| 45218 | chrY | 22508492 | . | C | T | 197.45  | PASS          | AC=1;AF=0.014;AN=70;BaseQRankSum=  |
| 45219 | chrY | 22508496 | . | C | T | 194.01  | PASS          | AC=1;AF=0.014;AN=70;BaseQRankSum=  |
| 45220 | chrY | 22508513 | . | G | A | 377.68  | PASS          | AC=3;AF=0.044;AN=68;BaseQRankSum=  |

|       |      |          |   |   |     |         |               |                                    |
|-------|------|----------|---|---|-----|---------|---------------|------------------------------------|
| 45221 | chrY | 22508517 | . | T | G   | 146.36  | PASS          | AC=3;AF=0.043;AN=70;BaseQRankSum=  |
| 45222 | chrY | 22508522 | . | A | T   | 182.46  | PASS          | AC=2;AF=0.029;AN=70;BaseQRankSum=  |
| 45223 | chrY | 22508528 | . | A | G   | 140.56  | PASS          | AC=2;AF=0.029;AN=70;BaseQRankSum=  |
| 45224 | chrY | 22508533 | . | T | G   | 145.26  | PASS          | AC=2;AF=0.029;AN=70;BaseQRankSum=  |
| 45225 | chrY | 22508539 | . | G | A   | 533.78  | PASS          | AC=7;AF=0.100;AN=70;BaseQRankSum=  |
| 45226 | chrY | 22508544 | . | C | T   | 513.26  | PASS          | AC=7;AF=0.100;AN=70;BaseQRankSum=  |
| 45227 | chrY | 22508548 | . | A | G   | 463.26  | PASS          | AC=4;AF=0.057;AN=70;BaseQRankSum=  |
| 45228 | chrY | 22508553 | . | T | A   | 831.59  | PASS          | AC=3;AF=0.043;AN=70;BaseQRankSum=  |
| 45229 | chrY | 22508554 | . | G | A   | 1316.46 | PASS          | AC=13;AF=0.186;AN=70;BaseQRankSum= |
| 45230 | chrY | 22508556 | . | G | C   | 857.73  | PASS          | AC=7;AF=0.103;AN=68;BaseQRankSum=  |
| 45231 | chrY | 22508564 | . | C | G,A | 8084.29 | PASS          | AC=28,2;AF=0.467,0.033;AN=60;BaseQ |
| 45232 | chrY | 22508568 | . | T | G,A | 1692.28 | PASS          | AC=12,2;AF=0.176,0.029;AN=68;BaseQ |
| 45233 | chrY | 22508571 | . | A | T   | 711.66  | PASS          | AC=5;AF=0.071;AN=70;BaseQRankSum=  |
| 45234 | chrY | 22508574 | . | T | G   | 5694.36 | PASS          | AC=22;AF=0.423;AN=52;BaseQRankSum= |
| 45235 | chrY | 22508580 | . | T | G   | 436.60  | PASS          | AC=3;AF=0.044;AN=68;BaseQRankSum=  |
| 45236 | chrY | 22508588 | . | G | A   | 116.52  | PASS          | AC=2;AF=0.030;AN=66;DP=803;FS=0.0  |
| 45237 | chrY | 22508592 | . | G | T   | 145.92  | PASS          | AC=1;AF=0.016;AN=64;BaseQRankSum=  |
| 45238 | chrY | 22508601 | . | C | A   | 266.26  | PASS          | AC=4;AF=0.095;AN=42;BaseQRankSum=  |
| 45239 | chrY | 22508606 | . | T | G   | 140.89  | PASS          | AC=2;AF=0.031;AN=64;BaseQRankSum=  |
| 45240 | chrY | 22508621 | . | C | T   | 107.75  | PASS          | AC=1;AF=0.015;AN=66;BaseQRankSum=  |
| 45241 | chrY | 22508684 | . | T | C   | 35.27   | my_snp_filter | AC=2;AF=0.030;AN=66;BaseQ          |
| 45242 | chrY | 22508691 | . | A | C   | 1342.26 | my_snp_filter | AC=14;AF=0.212;AN=66;BaseQ         |
| 45243 | chrY | 22508693 | . | T | G   | 295.06  | PASS          | AC=1;AF=0.014;AN=70;BaseQRankSum=  |
| 45244 | chrY | 22508698 | . | G | T   | 104.14  | my_snp_filter | AC=2;AF=0.029;AN=70;BaseQ          |
| 45245 | chrY | 22508699 | . | G | T   | 49.85   | my_snp_filter | AC=2;AF=0.029;AN=70;BaseQ          |
| 45246 | chrY | 22508701 | . | G | A   | 49.55   | my_snp_filter | AC=4;AF=0.057;AN=70;BaseQ          |
| 45247 | chrY | 22508703 | . | T | G   | 558.81  | PASS          | AC=7;AF=0.100;AN=70;BaseQRankSum=  |
| 45248 | chrY | 22508710 | . | A | T   | 169.78  | PASS          | AC=7;AF=0.100;AN=70;BaseQRankSum=  |
| 45249 | chrY | 22508717 | . | G | C,* | 690.38  | PASS          | AC=2,9;AF=0.029,0.129;AN=70;BaseQ  |
| 45250 | chrY | 22508720 | . | T | C   | 115.18  | my_snp_filter | AC=4;AF=0.057;AN=70;BaseQ          |
| 45251 | chrY | 22508730 | . | T | A   | 53.21   | my_snp_filter | AC=4;AF=0.057;AN=70;BaseQ          |
| 45252 | chrY | 22508734 | . | C | T   | 146.64  | PASS          | AC=3;AF=0.043;AN=70;BaseQRankSum=  |
| 45253 | chrY | 22508738 | . | G | A,C | 316.03  | PASS          | AC=4,2;AF=0.057,0.029;AN=70;BaseQ  |
| 45254 | chrY | 22508740 | . | T | A   | 320.02  | PASS          | AC=4;AF=0.057;AN=70;BaseQRankSum=  |
| 45255 | chrY | 22508751 | . | G | A   | 124.16  | PASS          | AC=2;AF=0.029;AN=70;BaseQRankSum=  |
| 45256 | chrY | 22508752 | . | G | T   | 48.25   | my_snp_filter | AC=3;AF=0.044;AN=68;BaseQ          |
| 45257 | chrY | 22508799 | . | C | A   | 453.42  | PASS          | AC=4;AF=0.061;AN=66;BaseQRankSum=  |
| 45258 | chrY | 22508801 | . | G | A   | 220.81  | PASS          | AC=5;AF=0.074;AN=68;BaseQRankSum=  |
| 45259 | chrY | 22508821 | . | T | A   | 486.37  | PASS          | AC=3;AF=0.052;AN=58;BaseQRankSum=  |
| 45260 | chrY | 22508823 | . | G | T   | 206.68  | PASS          | AC=2;AF=0.031;AN=64;BaseQRankSum=  |
| 45261 | chrY | 22508824 | . | T | G   | 211.34  | PASS          | AC=2;AF=0.031;AN=64;BaseQRankSum=  |
| 45262 | chrY | 22508850 | . | G | A   | 315.30  | PASS          | AC=4;AF=0.071;AN=56;BaseQRankSum=  |
| 45263 | chrY | 22508956 | . | G | A   | 236.63  | my_snp_filter | AC=4;AF=0.057;AN=70;BaseQ          |
| 45264 | chrY | 22508967 | . | G | T   | 888.23  | my_snp_filter | AC=7;AF=0.100;AN=70;BaseQ          |
| 45265 | chrY | 22508982 | . | T | C   | 468.40  | PASS          | AC=5;AF=0.071;AN=70;BaseQRankSum=  |
| 45266 | chrY | 22508987 | . | G | A   | 109.41  | PASS          | AC=2;AF=0.031;AN=64;BaseQRankSum=  |
| 45267 | chrY | 22508988 | . | G | T   | 214.88  | my_snp_filter | AC=1;AF=0.014;AN=70;BaseQ          |
| 45268 | chrY | 22509006 | . | G | A,T | 2573.38 | PASS          | AC=15,1;AF=0.214,0.014;AN=70;BaseQ |
| 45269 | chrY | 22509009 | . | C | T   | 549.54  | PASS          | AC=3;AF=0.043;AN=70;BaseQRankSum=  |
| 45270 | chrY | 22509031 | . | A | T   | 408.45  | my_snp_filter | AC=6;AF=0.086;AN=70;BaseQ          |
| 45271 | chrY | 22509043 | . | A | T   | 176.66  | my_snp_filter | AC=3;AF=0.043;AN=70;BaseQ          |
| 45272 | chrY | 22509044 | . | C | G   | 316.01  | PASS          | AC=1;AF=0.014;AN=70;BaseQRankSum=  |
| 45273 | chrY | 22509045 | . | C | A   | 406.74  | PASS          | AC=7;AF=0.100;AN=70;BaseQRankSum=  |
| 45274 | chrY | 22509049 | . | G | A   | 556.75  | PASS          | AC=5;AF=0.074;AN=68;BaseQRankSum=  |
| 45275 | chrY | 22509051 | . | G | A   | 148.54  | my_snp_filter | AC=1;AF=0.014;AN=70;BaseQ          |
| 45276 | chrY | 22509056 | . | G | A   | 204.60  | my_snp_filter | AC=2;AF=0.029;AN=68;BaseQ          |
| 45277 | chrY | 22509064 | . | G | T   | 250.95  | PASS          | AC=2;AF=0.029;AN=70;BaseQRankSum=  |
| 45278 | chrY | 22509067 | . | C | G   | 598.27  | PASS          | AC=4;AF=0.057;AN=70;BaseQRankSum=  |
| 45279 | chrY | 22509072 | . | A | T   | 186.32  | PASS          | AC=2;AF=0.029;AN=70;BaseQRankSum=  |
| 45280 | chrY | 22509073 | . | G | T   | 95.62   | my_snp_filter | AC=1;AF=0.014;AN=70;BaseQ          |
| 45281 | chrY | 22509074 | . | G | T,C | 873.06  | PASS          | AC=6,4;AF=0.086,0.057;AN=70;BaseQ  |
| 45282 | chrY | 22509077 | . | T | A   | 420.24  | PASS          | AC=3;AF=0.043;AN=70;BaseQRankSum=  |
| 45283 | chrY | 22509080 | . | T | A   | 50.34   | my_snp_filter | AC=1;AF=0.014;AN=70;BaseQ          |
| 45284 | chrY | 22509088 | . | G | C   | 87.16   | my_snp_filter | AC=3;AF=0.043;AN=70;BaseQ          |
| 45285 | chrY | 22509089 | . | T | A   | 80.51   | my_snp_filter | AC=4;AF=0.057;AN=70;BaseQ          |
| 45286 | chrY | 22509092 | . | T | G   | 85.80   | my_snp_filter | AC=3;AF=0.043;AN=70;BaseQ          |
| 45287 | chrY | 22509104 | . | A | T,G | 880.94  | PASS          | AC=2,8;AF=0.038,0.154;AN=52;BaseQ  |
| 45288 | chrY | 22509109 | . | C | T   | 131.76  | PASS          | AC=2;AF=0.029;AN=70;BaseQRankSum=  |
| 45289 | chrY | 22509113 | . | G | A   | 65.98   | my_snp_filter | AC=2;AF=0.029;AN=70;BaseQ          |
| 45290 | chrY | 22509124 | . | G | C   | 1542.42 | PASS          | AC=8;AF=0.267;AN=30;BaseQRankSum=  |
| 45291 | chrY | 22509140 | . | C | G   | 42.38   | my_snp_filter | AC=3;AF=0.044;AN=68;BaseQ          |
| 45292 | chrY | 22509145 | . | T | A   | 72.65   | my_snp_filter | AC=1;AF=0.014;AN=70;BaseQ          |
| 45293 | chrY | 22509170 | . | C | T   | 58.47   | my_snp_filter | AC=4;AF=0.059;AN=68;BaseQ          |
| 45294 | chrY | 22509179 | . | G | T   | 685.74  | PASS          | AC=7;AF=0.100;AN=70;BaseQRankSum=  |
| 45295 | chrY | 22509198 | . | G | A   | 121.02  | my_snp_filter | AC=3;AF=0.043;AN=70;BaseQ          |
| 45296 | chrY | 22509202 | . | T | A   | 502.92  | PASS          | AC=5;AF=0.071;AN=70;BaseQRankSum=  |

|       |      |          |   |   |     |          |               |                                    |
|-------|------|----------|---|---|-----|----------|---------------|------------------------------------|
| 45297 | chrY | 22509206 | . | A | C,G | 3995.05  | PASS          | AC=17,3;AF=0.250,0.044;AN=68;BaseQ |
| 45298 | chrY | 22509213 | . | G | A   | 657.88   | my_snp_filter | AC=8;AF=0.114;AN=70;BaseQ          |
| 45299 | chrY | 22509228 | . | T | A   | 190.65   | my_snp_filter | AC=4;AF=0.059;AN=68;BaseQ          |
| 45300 | chrY | 22509229 | . | G | A   | 108.03   | my_snp_filter | AC=1;AF=0.014;AN=70;BaseQ          |
| 45301 | chrY | 22509272 | . | A | C   | 42.87    | my_snp_filter | AC=3;AF=0.043;AN=70;BaseQ          |
| 45302 | chrY | 22509279 | . | G | C   | 41.66    | my_snp_filter | AC=1;AF=0.015;AN=68;BaseQ          |
| 45303 | chrY | 22509319 | . | T | A   | 113.50   | PASS          | AC=4;AF=0.061;AN=66;BaseQRankSum=  |
| 45304 | chrY | 22509321 | . | C | A   | 608.02   | PASS          | AC=9;AF=0.155;AN=58;BaseQRankSum=  |
| 45305 | chrY | 22509329 | . | G | A   | 282.34   | PASS          | AC=3;AF=0.052;AN=58;BaseQRankSum=  |
| 45306 | chrY | 22509402 | . | C | T   | 57.67    | PASS          | AC=1;AF=0.017;AN=60;BaseQRankSum=  |
| 45307 | chrY | 22509424 | . | C | A   | 57.65    | PASS          | AC=1;AF=0.017;AN=60;BaseQRankSum=  |
| 45308 | chrY | 22509425 | . | C | T   | 199.33   | PASS          | AC=3;AF=0.060;AN=50;BaseQRankSum=  |
| 45309 | chrY | 22509479 | . | G | A   | 40.21    | my_snp_filter | AC=1;AF=0.015;AN=66;BaseQ          |
| 45310 | chrY | 22509487 | . | T | G   | 62.57    | my_snp_filter | AC=1;AF=0.014;AN=70;BaseQ          |
| 45311 | chrY | 22509502 | . | G | T   | 39.56    | my_snp_filter | AC=1;AF=0.014;AN=70;BaseQ          |
| 45312 | chrY | 22509529 | . | G | T   | 131.49   | my_snp_filter | AC=3;AF=0.044;AN=68;BaseQ          |
| 45313 | chrY | 22509542 | . | G | A   | 156.87   | PASS          | AC=5;AF=0.074;AN=68;BaseQRankSum=  |
| 45314 | chrY | 22509546 | . | T | A   | 73.71    | PASS          | AC=3;AF=0.044;AN=68;BaseQRankSum=  |
| 45315 | chrY | 22509551 | . | G | T   | 46.86    | my_snp_filter | AC=1;AF=0.015;AN=68;BaseQ          |
| 45316 | chrY | 22509552 | . | G | T   | 54.08    | my_snp_filter | AC=2;AF=0.029;AN=68;BaseQ          |
| 45317 | chrY | 22509554 | . | G | T   | 751.83   | PASS          | AC=9;AF=0.132;AN=68;BaseQRankSum=  |
| 45318 | chrY | 22509555 | . | A | T   | 699.02   | PASS          | AC=10;AF=0.147;AN=68;BaseQRankSum= |
| 45319 | chrY | 22509559 | . | T | A   | 185.47   | PASS          | AC=3;AF=0.044;AN=68;BaseQRankSum=  |
| 45320 | chrY | 22509574 | . | C | G   | 499.74   | PASS          | AC=6;AF=0.088;AN=68;BaseQRankSum=  |
| 45321 | chrY | 22509587 | . | A | T   | 256.15   | PASS          | AC=3;AF=0.045;AN=66;BaseQRankSum=  |
| 45322 | chrY | 22509593 | . | T | A   | 58.33    | PASS          | AC=2;AF=0.029;AN=68;BaseQRankSum=  |
| 45323 | chrY | 22509600 | . | G | A   | 1199.70  | PASS          | AC=9;AF=0.167;AN=54;BaseQRankSum=  |
| 45324 | chrY | 22509615 | . | T | A   | 32.19    | my_snp_filter | AC=1;AF=0.016;AN=62;BaseQ          |
| 45325 | chrY | 22509674 | . | A | C   | 741.57   | PASS          | AC=3;AF=0.048;AN=62;BaseQRankSum=  |
| 45326 | chrY | 22509746 | . | T | C   | 445.43   | PASS          | AC=2;AF=0.036;AN=56;BaseQRankSum=  |
| 45327 | chrY | 22509779 | . | G | C   | 158.14   | PASS          | AC=1;AF=0.019;AN=54;BaseQRankSum=  |
| 45328 | chrY | 22509795 | . | A | C   | 539.63   | PASS          | AC=2;AF=0.045;AN=44;BaseQRankSum=  |
| 45329 | chrY | 22509799 | . | C | A   | 123.04   | PASS          | AC=1;AF=0.022;AN=46;BaseQRankSum=  |
| 45330 | chrY | 22509801 | . | G | A   | 80.86    | my_snp_filter | AC=1;AF=0.021;AN=48;BaseQ          |
| 45331 | chrY | 22509808 | . | G | T   | 67.97    | my_snp_filter | AC=1;AF=0.023;AN=44;BaseQ          |
| 45332 | chrY | 22509823 | . | T | G,C | 2246.76  | my_snp_filter | AC=17,1;AF=0.567,0.033;AN          |
| 45333 | chrY | 22509833 | . | C | A   | 52.23    | my_snp_filter | AC=1;AF=0.021;AN=48;BaseQ          |
| 45334 | chrY | 22509842 | . | G | T   | 192.73   | my_snp_filter | AC=1;AF=0.020;AN=50;BaseQ          |
| 45335 | chrY | 22509845 | . | C | A   | 162.54   | my_snp_filter | AC=6;AF=0.176;AN=34;DP=39          |
| 45336 | chrY | 22509846 | . | C | A   | 166.91   | my_snp_filter | AC=7;AF=0.206;AN=34;BaseQ          |
| 45337 | chrY | 22509847 | . | C | T   | 374.80   | PASS          | AC=2;AF=0.067;AN=30;BaseQRankSum=  |
| 45338 | chrY | 22509859 | . | C | T   | 35.63    | my_snp_filter | AC=1;AF=0.019;AN=54;BaseQ          |
| 45339 | chrY | 22509865 | . | G | T   | 51.56    | PASS          | AC=1;AF=0.019;AN=52;BaseQRankSum=  |
| 45340 | chrY | 22509871 | . | C | T   | 49.27    | my_snp_filter | AC=1;AF=0.019;AN=52;BaseQ          |
| 45341 | chrY | 22509907 | . | T | A   | 177.31   | PASS          | AC=1;AF=0.017;AN=58;BaseQRankSum=  |
| 45342 | chrY | 22509918 | . | G | A   | 924.42   | PASS          | AC=3;AF=0.100;AN=30;BaseQRankSum=  |
| 45343 | chrY | 22509927 | . | G | T   | 207.85   | PASS          | AC=1;AF=0.016;AN=62;BaseQRankSum=  |
| 45344 | chrY | 22509940 | . | T | C   | 1047.54  | PASS          | AC=3;AF=0.250;AN=12;BaseQRankSum=  |
| 45345 | chrY | 22509967 | . | G | C   | 666.68   | PASS          | AC=4;AF=0.065;AN=62;BaseQRankSum=  |
| 45346 | chrY | 22509970 | . | C | T   | 238      | PASS          | AC=1;AF=0.016;AN=64;BaseQRankSum=  |
| 45347 | chrY | 22510009 | . | C | T   | 378.84   | PASS          | AC=4;AF=0.065;AN=62;BaseQRankSum=  |
| 45348 | chrY | 22510026 | . | C | T   | 1259.41  | PASS          | AC=9;AF=0.136;AN=66;BaseQRankSum=  |
| 45349 | chrY | 22510035 | . | T | A   | 9344.30  | PASS          | AC=15;AF=0.469;AN=32;BaseQRankSum= |
| 45350 | chrY | 22510036 | . | G | C   | 665.66   | PASS          | AC=4;AF=0.061;AN=66;BaseQRankSum=  |
| 45351 | chrY | 22510049 | . | G | C   | 1579.65  | PASS          | AC=5;AF=0.076;AN=66;BaseQRankSum=  |
| 45352 | chrY | 22510051 | . | T | G   | 8796.01  | PASS          | AC=11;AF=0.344;AN=32;BaseQRankSum= |
| 45353 | chrY | 22510052 | . | C | G   | 10714.57 | PASS          | AC=12;AF=0.400;AN=30;BaseQ         |
| 45354 | chrY | 22510054 | . | G | A   | 1221.70  | PASS          | AC=6;AF=0.088;AN=68;BaseQRankSum=  |
| 45355 | chrY | 22510056 | . | G | C   | 1421.79  | PASS          | AC=5;AF=0.074;AN=68;BaseQRankSum=  |
| 45356 | chrY | 22510061 | . | A | T   | 227.54   | PASS          | AC=1;AF=0.017;AN=58;BaseQRankSum=  |
| 45357 | chrY | 22510062 | . | T | C,A | 9017.43  | PASS          | AC=8,5;AF=0.286,0.179;AN=28;BaseQ  |
| 45358 | chrY | 22510063 | . | A | G   | 1390.79  | PASS          | AC=8;AF=0.174;AN=46;BaseQRankSum=  |
| 45359 | chrY | 22510068 | . | T | G   | 3804.91  | PASS          | AC=5;AF=0.074;AN=68;BaseQRankSum=  |
| 45360 | chrY | 22510071 | . | A | T   | 1212.47  | PASS          | AC=4;AF=0.061;AN=66;BaseQRankSum=  |
| 45361 | chrY | 22510079 | . | A | G   | 527.78   | PASS          | AC=3;AF=0.043;AN=70;BaseQRankSum=  |
| 45362 | chrY | 22510080 | . | T | G   | 153.81   | my_snp_filter | AC=2;AF=0.029;AN=70;BaseQ          |
| 45363 | chrY | 22510088 | . | G | A   | 882.12   | PASS          | AC=5;AF=0.074;AN=68;BaseQRankSum=  |
| 45364 | chrY | 22510092 | . | G | T   | 1062.98  | PASS          | AC=6;AF=0.088;AN=68;BaseQRankSum=  |
| 45365 | chrY | 22510093 | . | T | C   | 1563.18  | PASS          | AC=7;AF=0.103;AN=68;BaseQRankSum=  |
| 45366 | chrY | 22510114 | . | T | G   | 88.81    | my_snp_filter | AC=1;AF=0.014;AN=70;BaseQ          |
| 45367 | chrY | 22510127 | . | G | A   | 2127.25  | PASS          | AC=18;AF=0.257;AN=70;BaseQRankSum= |
| 45368 | chrY | 22510131 | . | G | A   | 83.29    | my_snp_filter | AC=3;AF=0.043;AN=70;BaseQ          |
| 45369 | chrY | 22510137 | . | G | A   | 1180.60  | PASS          | AC=6;AF=0.086;AN=70;BaseQRankSum=  |
| 45370 | chrY | 22510138 | . | G | C   | 733.38   | my_snp_filter | AC=7;AF=0.100;AN=70;BaseQ          |
| 45371 | chrY | 22510141 | . | T | A   | 44.45    | my_snp_filter | AC=1;AF=0.014;AN=70;BaseQ          |
| 45372 | chrY | 22510148 | . | C | A   | 3541.44  | PASS          | AC=16;AF=0.229;AN=70;BaseQRankSum= |

|       |      |          |   |   |     |         |               |                                   |
|-------|------|----------|---|---|-----|---------|---------------|-----------------------------------|
| 45373 | chrY | 22510157 | . | T | C   | 251.07  | my_snp_filter | AC=4;AF=0.057;AN=70;BaseQ         |
| 45374 | chrY | 22510171 | . | T | A   | 3078.87 | PASS          | AC=14;AF=0.200;AN=70;BaseQRankSum |
| 45375 | chrY | 22510199 | . | C | T   | 65.32   | my_snp_filter | AC=1;AF=0.014;AN=70;BaseQ         |
| 45376 | chrY | 22510208 | . | C | G   | 286.72  | PASS          | AC=3;AF=0.043;AN=70;BaseQRankSum  |
| 45377 | chrY | 22510211 | . | G | C   | 45.19   | my_snp_filter | AC=1;AF=0.014;AN=70;BaseQ         |
| 45378 | chrY | 22510212 | . | A | C   | 1363.66 | PASS          | AC=13;AF=0.186;AN=70;BaseQRankSum |
| 45379 | chrY | 22510217 | . | G | T   | 84      | my_snp_filter | AC=3;AF=0.045;AN=66;BaseQ         |
| 45380 | chrY | 22510223 | . | T | C   | 94.74   | my_snp_filter | AC=3;AF=0.045;AN=66;BaseQ         |
| 45381 | chrY | 22510227 | . | G | A   | 2425.73 | PASS          | AC=11;AF=0.196;AN=56;BaseQRankSum |
| 45382 | chrY | 22510229 | . | A | G   | 299.11  | PASS          | AC=2;AF=0.031;AN=64;BaseQRankSum  |
| 45383 | chrY | 22510257 | . | T | C   | 635.62  | PASS          | AC=6;AF=0.100;AN=60;BaseQRankSum  |
| 45384 | chrY | 22510268 | . | C | G   | 797.90  | PASS          | AC=4;AF=0.071;AN=56;BaseQRankSum  |
| 45385 | chrY | 22510271 | . | C | A   | 704.38  | PASS          | AC=4;AF=0.069;AN=58;BaseQRankSum  |
| 45386 | chrY | 22510278 | . | T | A   | 797.55  | PASS          | AC=4;AF=0.095;AN=42;BaseQRankSum  |
| 45387 | chrY | 22510291 | . | C | A   | 1040.03 | my_snp_filter | AC=5;AF=0.109;AN=46;BaseQ         |
| 45388 | chrY | 22510309 | . | T | C   | 58.01   | my_snp_filter | AC=1;AF=0.016;AN=64;BaseQ         |
| 45389 | chrY | 22510337 | . | A | G   | 534.08  | PASS          | AC=5;AF=0.086;AN=58;BaseQRankSum  |
| 45390 | chrY | 22510345 | . | T | C   | 475.49  | PASS          | AC=6;AF=0.103;AN=58;BaseQRankSum  |
| 45391 | chrY | 22510363 | . | G | A   | 99.09   | my_snp_filter | AC=5;AF=0.078;AN=64;BaseQ         |
| 45392 | chrY | 22510376 | . | G | A,T | 245.43  | my_snp_filter | AC=3,2;AF=0.048,0.032;AN=         |
| 45393 | chrY | 22510419 | . | C | A   | 1329.72 | PASS          | AC=6;AF=0.097;AN=62;BaseQRankSum  |
| 45394 | chrY | 22510424 | . | C | A   | 1381.69 | PASS          | AC=5;AF=0.081;AN=62;BaseQRankSum  |
| 45395 | chrY | 22510426 | . | G | A   | 77.92   | my_snp_filter | AC=2;AF=0.032;AN=62;BaseQ         |
| 45396 | chrY | 22510448 | . | G | T   | 62.66   | my_snp_filter | AC=2;AF=0.031;AN=64;BaseQ         |
| 45397 | chrY | 22510449 | . | T | G   | 2389.13 | PASS          | AC=6;AF=0.097;AN=62;BaseQRankSum  |
| 45398 | chrY | 22510450 | . | T | G   | 1966.17 | PASS          | AC=6;AF=0.097;AN=62;BaseQRankSum  |
| 45399 | chrY | 22510461 | . | C | G   | 838.11  | PASS          | AC=4;AF=0.065;AN=62;BaseQRankSum  |
| 45400 | chrY | 22510463 | . | G | T   | 64.88   | PASS          | AC=1;AF=0.016;AN=62;BaseQRankSum  |
| 45401 | chrY | 22510475 | . | G | A   | 2965.88 | PASS          | AC=6;AF=0.103;AN=58;BaseQRankSum  |
| 45402 | chrY | 22510476 | . | G | T   | 1814.40 | PASS          | AC=6;AF=0.103;AN=58;BaseQRankSum  |
| 45403 | chrY | 22510483 | . | C | G   | 50.02   | my_snp_filter | AC=1;AF=0.016;AN=62;BaseQ         |
| 45404 | chrY | 22510486 | . | G | T   | 1748.46 | PASS          | AC=6;AF=0.097;AN=62;BaseQRankSum  |
| 45405 | chrY | 22510487 | . | A | T   | 1777.09 | PASS          | AC=6;AF=0.097;AN=62;BaseQRankSum  |
| 45406 | chrY | 22510493 | . | T | C   | 1705.03 | PASS          | AC=6;AF=0.097;AN=62;BaseQRankSum  |
| 45407 | chrY | 22510496 | . | C | A   | 51.18   | my_snp_filter | AC=1;AF=0.016;AN=62;BaseQ         |
| 45408 | chrY | 22510502 | . | G | A   | 389.03  | PASS          | AC=2;AF=0.032;AN=62;BaseQRankSum  |
| 45409 | chrY | 22510519 | . | C | T   | 71.01   | PASS          | AC=1;AF=0.016;AN=62;BaseQRankSum  |
| 45410 | chrY | 22510524 | . | T | G   | 64.33   | my_snp_filter | AC=3;AF=0.048;AN=62;BaseQ         |
| 45411 | chrY | 22510527 | . | A | G   | 70.67   | PASS          | AC=1;AF=0.016;AN=62;BaseQRankSum  |
| 45412 | chrY | 22510528 | . | C | G   | 67.51   | my_snp_filter | AC=3;AF=0.048;AN=62;BaseQ         |
| 45413 | chrY | 22510552 | . | G | T   | 43.39   | my_snp_filter | AC=2;AF=0.031;AN=64;BaseQ         |
| 45414 | chrY | 22510558 | . | G | C   | 84.49   | PASS          | AC=1;AF=0.016;AN=64;BaseQRankSum  |
| 45415 | chrY | 22510565 | . | C | T   | 92.85   | PASS          | AC=1;AF=0.016;AN=64;BaseQRankSum  |
| 45416 | chrY | 22510576 | . | G | A   | 53.20   | PASS          | AC=1;AF=0.016;AN=62;BaseQRankSum  |
| 45417 | chrY | 22510581 | . | G | A   | 716.68  | PASS          | AC=4;AF=0.063;AN=64;BaseQRankSum  |
| 45418 | chrY | 22510592 | . | G | T   | 937.51  | PASS          | AC=4;AF=0.065;AN=62;BaseQRankSum  |
| 45419 | chrY | 22510630 | . | T | G   | 647.07  | PASS          | AC=5;AF=0.083;AN=60;BaseQRankSum  |
| 45420 | chrY | 22510642 | . | T | C   | 90.38   | PASS          | AC=1;AF=0.015;AN=66;BaseQRankSum  |
| 45421 | chrY | 22510666 | . | C | A   | 85.30   | PASS          | AC=2;AF=0.030;AN=66;BaseQRankSum  |
| 45422 | chrY | 22510674 | . | G | A   | 132.96  | PASS          | AC=1;AF=0.015;AN=66;BaseQRankSum  |
| 45423 | chrY | 22510687 | . | C | G   | 3176.49 | PASS          | AC=31;AF=0.517;AN=60;BaseQRankSum |
| 45424 | chrY | 22510692 | . | C | G   | 85.57   | PASS          | AC=1;AF=0.016;AN=64;BaseQRankSum  |
| 45425 | chrY | 22510699 | . | G | C   | 86.60   | PASS          | AC=1;AF=0.015;AN=66;BaseQRankSum  |
| 45426 | chrY | 22510702 | . | T | A   | 91.35   | PASS          | AC=1;AF=0.015;AN=66;BaseQRankSum  |
| 45427 | chrY | 22510713 | . | G | C   | 340.77  | PASS          | AC=2;AF=0.031;AN=64;BaseQRankSum  |
| 45428 | chrY | 22510717 | . | T | G   | 438.25  | PASS          | AC=3;AF=0.048;AN=62;BaseQRankSum  |
| 45429 | chrY | 22510729 | . | A | G   | 473.31  | PASS          | AC=5;AF=0.083;AN=60;BaseQRankSum  |
| 45430 | chrY | 22510745 | . | C | A   | 139.61  | PASS          | AC=2;AF=0.031;AN=64;BaseQRankSum  |
| 45431 | chrY | 22510747 | . | T | C   | 336.48  | PASS          | AC=4;AF=0.063;AN=64;BaseQRankSum  |
| 45432 | chrY | 22510752 | . | G | A   | 978.82  | PASS          | AC=4;AF=0.063;AN=64;BaseQRankSum  |
| 45433 | chrY | 22510756 | . | A | G   | 867.85  | PASS          | AC=7;AF=0.125;AN=56;BaseQRankSum  |
| 45434 | chrY | 22510762 | . | G | C   | 37.45   | my_snp_filter | AC=2;AF=0.031;AN=64;BaseQ         |
| 45435 | chrY | 22510763 | . | G | A   | 164.75  | PASS          | AC=2;AF=0.031;AN=64;BaseQRankSum  |
| 45436 | chrY | 22510765 | . | C | G   | 126.38  | my_snp_filter | AC=5;AF=0.081;AN=62;BaseQ         |
| 45437 | chrY | 22510768 | . | G | T   | 157.90  | PASS          | AC=2;AF=0.032;AN=62;BaseQRankSum  |
| 45438 | chrY | 22510781 | . | A | G   | 112.95  | PASS          | AC=2;AF=0.032;AN=62;BaseQRankSum  |
| 45439 | chrY | 22510812 | . | A | C   | 142.49  | PASS          | AC=2;AF=0.033;AN=60;BaseQRankSum  |
| 45440 | chrY | 22510831 | . | A | C,G | 270.74  | PASS          | AC=2,2;AF=0.031,0.031;AN=64;BaseQ |
| 45441 | chrY | 22510842 | . | G | T   | 98.56   | PASS          | AC=1;AF=0.015;AN=66;BaseQRankSum  |
| 45442 | chrY | 22510850 | . | G | A   | 305.47  | PASS          | AC=4;AF=0.063;AN=64;BaseQRankSum  |
| 45443 | chrY | 22510893 | . | A | G   | 360.97  | PASS          | AC=3;AF=0.050;AN=60;BaseQRankSum  |
| 45444 | chrY | 22510949 | . | T | G   | 9484.40 | my_snp_filter | AC=50;AF=0.962;AN=52;BaseQ        |
| 45445 | chrY | 22510967 | . | G | T   | 70.54   | PASS          | AC=1;AF=0.015;AN=66;BaseQRankSum  |
| 45446 | chrY | 22510984 | . | C | A   | 35.83   | my_snp_filter | AC=1;AF=0.016;AN=62;BaseQ         |
| 45447 | chrY | 22510996 | . | C | T   | 46.13   | my_snp_filter | AC=1;AF=0.016;AN=62;BaseQ         |
| 45448 | chrY | 22511005 | . | G | C   | 45.15   | my_snp_filter | AC=1;AF=0.016;AN=64;BaseQ         |

|       |      |          |   |   |   |         |               |                                   |
|-------|------|----------|---|---|---|---------|---------------|-----------------------------------|
| 45449 | chrY | 22511007 | . | T | G | 41.52   | my_snp_filter | AC=1;AF=0.016;AN=64;BaseQ         |
| 45450 | chrY | 22511010 | . | G | C | 50.69   | my_snp_filter | AC=2;AF=0.032;AN=62;BaseQ         |
| 45451 | chrY | 22511012 | . | G | A | 40.66   | my_snp_filter | AC=1;AF=0.016;AN=64;BaseQ         |
| 45452 | chrY | 22511034 | . | A | T | 77.76   | my_snp_filter | AC=3;AF=0.052;AN=58;BaseQ         |
| 45453 | chrY | 22511044 | . | C | T | 30.41   | my_snp_filter | AC=3;AF=0.047;AN=64;BaseQ         |
| 45454 | chrY | 22511048 | . | A | C | 724.26  | PASS          | AC=5;AF=0.078;AN=64;BaseQRankSum= |
| 45455 | chrY | 22511050 | . | C | T | 1276.26 | PASS          | AC=6;AF=0.103;AN=58;BaseQRankSum= |
| 45456 | chrY | 22511063 | . | A | G | 58.97   | PASS          | AC=1;AF=0.016;AN=64;BaseQRankSum= |
| 45457 | chrY | 22511085 | . | A | T | 47.20   | PASS          | AC=1;AF=0.017;AN=60;BaseQRankSum= |
| 45458 | chrY | 22511089 | . | G | T | 225.32  | PASS          | AC=3;AF=0.054;AN=56;BaseQRankSum= |
| 45459 | chrY | 22511112 | . | T | A | 60.83   | PASS          | AC=1;AF=0.016;AN=64;BaseQRankSum= |
| 45460 | chrY | 22511115 | . | T | G | 50.75   | PASS          | AC=1;AF=0.016;AN=62;BaseQRankSum= |
| 45461 | chrY | 22511221 | . | C | A | 46.28   | PASS          | AC=1;AF=0.015;AN=68;BaseQRankSum= |
| 45462 | chrY | 22511234 | . | C | T | 41.80   | my_snp_filter | AC=1;AF=0.014;AN=70;BaseQ         |
| 45463 | chrY | 22511237 | . | T | G | 44.66   | my_snp_filter | AC=1;AF=0.019;AN=54;BaseQ         |
| 45464 | chrY | 22511238 | . | C | G | 266.13  | PASS          | AC=2;AF=0.040;AN=50;BaseQRankSum= |
| 45465 | chrY | 22511246 | . | C | T | 42.26   | my_snp_filter | AC=1;AF=0.014;AN=70;BaseQ         |
| 45466 | chrY | 22511288 | . | T | A | 261.84  | PASS          | AC=5;AF=0.071;AN=70;BaseQRankSum= |
| 45467 | chrY | 22511323 | . | A | G | 228.47  | PASS          | AC=4;AF=0.063;AN=64;BaseQRankSum= |
| 45468 | chrY | 22511324 | . | C | G | 69.74   | PASS          | AC=2;AF=0.030;AN=66;BaseQRankSum= |
| 45469 | chrY | 22511402 | . | T | C | 83.45   | my_snp_filter | AC=3;AF=0.054;AN=56;BaseQ         |
| 45470 | chrY | 22511427 | . | G | A | 239.62  | PASS          | AC=6;AF=0.111;AN=54;BaseQRankSum= |
| 45471 | chrY | 22511471 | . | T | C | 199.45  | PASS          | AC=3;AF=0.056;AN=54;BaseQRankSum= |
| 45472 | chrY | 22511545 | . | A | C | 31.85   | my_snp_filter | AC=1;AF=0.015;AN=66;BaseQ         |
| 45473 | chrY | 22511582 | . | T | C | 567.78  | PASS          | AC=3;AF=0.047;AN=64;BaseQRankSum= |
| 45474 | chrY | 22511595 | . | C | A | 507.83  | my_snp_filter | AC=4;AF=0.063;AN=64;BaseQ         |
| 45475 | chrY | 22511596 | . | C | A | 507.57  | my_snp_filter | AC=4;AF=0.063;AN=64;BaseQ         |
| 45476 | chrY | 22511597 | . | C | T | 148.78  | PASS          | AC=2;AF=0.032;AN=62;BaseQRankSum= |
| 45477 | chrY | 22511611 | . | G | T | 70.38   | my_snp_filter | AC=2;AF=0.031;AN=64;BaseQ         |
| 45478 | chrY | 22511612 | . | A | T | 71.61   | my_snp_filter | AC=2;AF=0.031;AN=64;BaseQ         |
| 45479 | chrY | 22511690 | . | T | C | 75.79   | PASS          | AC=1;AF=0.019;AN=54;BaseQRankSum= |
| 45480 | chrY | 22511703 | . | T | G | 40.84   | PASS          | AC=1;AF=0.016;AN=64;BaseQRankSum= |
| 45481 | chrY | 22511720 | . | C | T | 34.89   | my_snp_filter | AC=1;AF=0.016;AN=64;BaseQ         |
| 45482 | chrY | 22511730 | . | C | T | 34.39   | my_snp_filter | AC=1;AF=0.016;AN=64;BaseQ         |
| 45483 | chrY | 22511740 | . | T | A | 30.94   | my_snp_filter | AC=1;AF=0.015;AN=66;BaseQ         |
| 45484 | chrY | 22511744 | . | T | A | 631.69  | PASS          | AC=5;AF=0.089;AN=56;BaseQRankSum= |
| 45485 | chrY | 22511751 | . | G | C | 553.60  | PASS          | AC=4;AF=0.061;AN=66;BaseQRankSum= |
| 45486 | chrY | 22511752 | . | G | T | 531.61  | PASS          | AC=4;AF=0.061;AN=66;BaseQRankSum= |
| 45487 | chrY | 22511765 | . | G | C | 478.82  | PASS          | AC=4;AF=0.063;AN=64;BaseQRankSum= |
| 45488 | chrY | 22511769 | . | C | G | 385.60  | PASS          | AC=4;AF=0.067;AN=60;BaseQRankSum= |
| 45489 | chrY | 22511787 | . | C | G | 263.74  | PASS          | AC=3;AF=0.050;AN=60;BaseQRankSum= |
| 45490 | chrY | 22511792 | . | G | C | 254.57  | PASS          | AC=3;AF=0.044;AN=68;BaseQRankSum= |
| 45491 | chrY | 22511793 | . | A | G | 252.53  | PASS          | AC=3;AF=0.044;AN=68;BaseQRankSum= |
| 45492 | chrY | 22511799 | . | C | G | 218.40  | PASS          | AC=3;AF=0.047;AN=64;BaseQRankSum= |
| 45493 | chrY | 22511802 | . | G | A | 149.11  | PASS          | AC=2;AF=0.029;AN=68;BaseQRankSum= |
| 45494 | chrY | 22511963 | . | G | A | 918.30  | PASS          | AC=6;AF=0.091;AN=66;BaseQRankSum= |
| 45495 | chrY | 22512029 | . | G | C | 98.26   | PASS          | AC=2;AF=0.030;AN=66;BaseQRankSum= |
| 45496 | chrY | 22512064 | . | G | A | 89.54   | my_snp_filter | AC=3;AF=0.043;AN=70;BaseQ         |
| 45497 | chrY | 22512092 | . | G | A | 98.34   | my_snp_filter | AC=3;AF=0.044;AN=68;BaseQ         |
| 45498 | chrY | 22512104 | . | A | G | 439.19  | PASS          | AC=9;AF=0.155;AN=58;BaseQRankSum= |
| 45499 | chrY | 22512106 | . | G | T | 71.46   | PASS          | AC=1;AF=0.015;AN=68;BaseQRankSum= |
| 45500 | chrY | 22512112 | . | A | T | 111.12  | PASS          | AC=2;AF=0.029;AN=68;BaseQRankSum= |
| 45501 | chrY | 22512115 | . | G | T | 263.67  | PASS          | AC=4;AF=0.059;AN=68;BaseQRankSum= |
| 45502 | chrY | 22512118 | . | T | C | 114.30  | my_snp_filter | AC=3;AF=0.044;AN=68;BaseQ         |
| 45503 | chrY | 22512128 | . | C | A | 80.86   | PASS          | AC=2;AF=0.029;AN=68;BaseQRankSum= |
| 45504 | chrY | 22512132 | . | T | A | 112.70  | PASS          | AC=3;AF=0.044;AN=68;BaseQRankSum= |
| 45505 | chrY | 22512162 | . | G | C | 214.36  | PASS          | AC=3;AF=0.047;AN=64;BaseQRankSum= |
| 45506 | chrY | 22512393 | . | G | T | 42.02   | my_snp_filter | AC=2;AF=0.031;AN=64;BaseQ         |
| 45507 | chrY | 22512401 | . | T | C | 40.68   | my_snp_filter | AC=2;AF=0.032;AN=62;BaseQ         |
| 45508 | chrY | 22512519 | . | T | C | 706.21  | PASS          | AC=8;AF=0.125;AN=64;BaseQRankSum= |
| 45509 | chrY | 22512537 | . | C | G | 89.52   | PASS          | AC=1;AF=0.015;AN=66;BaseQRankSum= |
| 45510 | chrY | 22512549 | . | G | C | 462.88  | PASS          | AC=4;AF=0.063;AN=64;BaseQRankSum= |
| 45511 | chrY | 22512552 | . | G | T | 35.85   | PASS          | AC=1;AF=0.015;AN=66;BaseQRankSum= |
| 45512 | chrY | 22512573 | . | G | A | 595.34  | PASS          | AC=2;AF=0.029;AN=68;BaseQRankSum= |
| 45513 | chrY | 22512574 | . | G | C | 594.93  | PASS          | AC=2;AF=0.029;AN=68;BaseQRankSum= |
| 45514 | chrY | 22512588 | . | G | C | 162.66  | PASS          | AC=6;AF=0.091;AN=66;BaseQRankSum= |
| 45515 | chrY | 22512604 | . | G | A | 138.51  | PASS          | AC=2;AF=0.032;AN=62;BaseQRankSum= |
| 45516 | chrY | 22512606 | . | G | T | 796.53  | PASS          | AC=3;AF=0.047;AN=64;BaseQRankSum= |
| 45517 | chrY | 22512613 | . | A | G | 909.01  | PASS          | AC=5;AF=0.081;AN=62;BaseQRankSum= |
| 45518 | chrY | 22512628 | . | A | C | 414.24  | PASS          | AC=3;AF=0.052;AN=58;BaseQRankSum= |
| 45519 | chrY | 22512634 | . | C | A | 32.71   | PASS          | AC=1;AF=0.017;AN=60;BaseQRankSum= |
| 45520 | chrY | 22512635 | . | G | A | 33.36   | PASS          | AC=1;AF=0.017;AN=60;BaseQRankSum= |
| 45521 | chrY | 22512638 | . | G | C | 35.78   | PASS          | AC=1;AF=0.017;AN=60;BaseQRankSum= |
| 45522 | chrY | 22512739 | . | G | T | 206.35  | PASS          | AC=3;AF=0.044;AN=68;BaseQRankSum= |
| 45523 | chrY | 22512760 | . | C | A | 186.66  | PASS          | AC=3;AF=0.044;AN=68;BaseQRankSum= |
| 45524 | chrY | 22512764 | . | G | C | 200.45  | PASS          | AC=3;AF=0.044;AN=68;BaseQRankSum= |

|       |      |          |   |   |   |          |               |                                    |
|-------|------|----------|---|---|---|----------|---------------|------------------------------------|
| 45525 | chrY | 22512769 | . | T | G | 75.72    | PASS          | AC=1;AF=0.014;AN=70;BaseQRankSum=  |
| 45526 | chrY | 22512770 | . | C | T | 75.20    | PASS          | AC=1;AF=0.014;AN=70;BaseQRankSum=  |
| 45527 | chrY | 22512777 | . | C | T | 44.02    | PASS          | AC=1;AF=0.014;AN=70;BaseQRankSum=  |
| 45528 | chrY | 22512780 | . | G | C | 102.24   | PASS          | AC=2;AF=0.029;AN=70;BaseQRankSum=  |
| 45529 | chrY | 22512947 | . | A | T | 20506.04 | PASS          | AC=52;AF=0.743;AN=70;DP=8          |
| 45530 | chrY | 22513463 | . | G | A | 430.67   | PASS          | AC=2;AF=0.029;AN=70;DP=364;FS=0.0  |
| 45531 | chrY | 22513464 | . | G | C | 430.69   | PASS          | AC=2;AF=0.029;AN=70;DP=366;FS=0.0  |
| 45532 | chrY | 22514013 | . | A | T | 3391.26  | PASS          | AC=44;AF=0.710;AN=62;DP=279;FS=0.0 |
| 45533 | chrY | 22514081 | . | T | G | 7410.09  | PASS          | AC=58;AF=1.00;AN=58;DP=265;FS=0.0  |
| 45534 | chrY | 22517413 | . | A | C | 338.24   | PASS          | AC=4;AF=0.200;AN=20;BaseQRankSum=  |
| 45535 | chrY | 22520131 | . | T | G | 40.81    | PASS          | AC=1;AF=0.016;AN=64;BaseQRankSum=  |
| 45536 | chrY | 22520132 | . | T | C | 40.81    | PASS          | AC=1;AF=0.016;AN=64;BaseQRankSum=  |
| 45537 | chrY | 22523027 | . | G | A | 1330.21  | PASS          | AC=6;AF=0.086;AN=70;DP=434;FS=0.0  |
| 45538 | chrY | 22524111 | . | A | T | 2196.57  | PASS          | AC=32;AF=0.516;AN=62;DP=212;FS=0.0 |
| 45539 | chrY | 22529438 | . | T | C | 1913.33  | PASS          | AC=12;AF=0.316;AN=38;DP=180;FS=0.0 |
| 45540 | chrY | 22530830 | . | T | C | 2611.86  | PASS          | AC=18;AF=1.00;AN=18;DP=164;FS=0.0  |
| 45541 | chrY | 22531740 | . | C | T | 61.24    | PASS          | AC=1;AF=0.056;AN=18;BaseQRankSum=  |
| 45542 | chrY | 22532827 | . | T | G | 275.03   | PASS          | AC=2;AF=0.111;AN=18;DP=162;FS=0.0  |
| 45543 | chrY | 22534494 | . | T | C | 3732.86  | PASS          | AC=18;AF=1.00;AN=18;DP=168;FS=0.0  |
| 45544 | chrY | 22534816 | . | C | T | 1040.74  | PASS          | AC=6;AF=0.333;AN=18;BaseQRankSum=  |
| 45545 | chrY | 22535291 | . | T | G | 3452.45  | PASS          | AC=17;AF=0.850;AN=20;BaseQRankSum= |
| 45546 | chrY | 22535399 | . | A | G | 32.05    | my_snp_filter | AC=2;AF=0.111;AN=18;BaseQ          |
| 45547 | chrY | 22542059 | . | T | C | 951.63   | PASS          | AC=6;AF=0.273;AN=22;DP=171;FS=0.0  |
| 45548 | chrY | 22542418 | . | C | T | 384.02   | PASS          | AC=2;AF=0.111;AN=18;DP=141;FS=0.0  |
| 45549 | chrY | 22544997 | . | A | G | 261.56   | PASS          | AC=4;AF=0.063;AN=64;DP=262;FS=0.0  |
| 45550 | chrY | 22545697 | . | C | T | 43.29    | PASS          | AC=3;AF=0.125;AN=24;BaseQRankSum=  |
| 45551 | chrY | 22545709 | . | A | G | 31.69    | PASS          | AC=2;AF=0.100;AN=20;DP=190;FS=0.0  |
| 45552 | chrY | 22555918 | . | A | G | 624.85   | PASS          | AC=6;AF=0.086;AN=70;DP=356;FS=0.0  |
| 45553 | chrY | 22559001 | . | C | T | 1277.18  | PASS          | AC=6;AF=0.091;AN=66;DP=273;FS=0.0  |
| 45554 | chrY | 22561754 | . | T | C | 186.04   | PASS          | AC=2;AF=0.029;AN=68;DP=334;FS=0.0  |
| 45555 | chrY | 22562370 | . | T | C | 640.32   | PASS          | AC=6;AF=0.125;AN=48;DP=172;FS=0.0  |
| 45556 | chrY | 22571221 | . | C | T | 1618.33  | PASS          | AC=6;AF=0.086;AN=70;DP=568;FS=0.0  |
| 45557 | chrY | 22571892 | . | A | G | 1080.53  | PASS          | AC=6;AF=0.086;AN=70;DP=356;FS=0.0  |
| 45558 | chrY | 22575539 | . | A | G | 3884.64  | PASS          | AC=46;AF=0.719;AN=64;DP=316;FS=0.0 |
| 45559 | chrY | 22576141 | . | T | C | 811.40   | PASS          | AC=6;AF=0.088;AN=68;DP=364;FS=0.0  |
| 45560 | chrY | 22576525 | . | T | C | 170.53   | PASS          | AC=6;AF=0.107;AN=56;DP=169;FS=0.0  |
| 45561 | chrY | 22577650 | . | G | T | 1976.95  | PASS          | AC=41;AF=0.683;AN=60;BaseQRankSum= |
| 45562 | chrY | 22582305 | . | A | G | 566.26   | PASS          | AC=6;AF=0.086;AN=70;DP=480;FS=0.0  |
| 45563 | chrY | 22584021 | . | C | T | 1117.09  | PASS          | AC=6;AF=0.091;AN=66;DP=311;FS=0.0  |
| 45564 | chrY | 22586243 | . | A | T | 5008.44  | PASS          | AC=44;AF=0.647;AN=68;DP=321;FS=0.0 |
| 45565 | chrY | 22586506 | . | A | G | 707.42   | PASS          | AC=6;AF=0.086;AN=70;DP=300;FS=0.0  |
| 45566 | chrY | 22590593 | . | C | T | 633.01   | PASS          | AC=6;AF=0.103;AN=58;DP=222;FS=0.0  |
| 45567 | chrY | 22591468 | . | C | T | 3141.97  | PASS          | AC=20;AF=1.00;AN=20;BaseQRankSum=  |
| 45568 | chrY | 22593311 | . | A | C | 886.75   | PASS          | AC=6;AF=0.300;AN=20;DP=202;FS=0.0  |
| 45569 | chrY | 22601068 | . | C | T | 5528.26  | PASS          | AC=56;AF=1.00;AN=56;DP=212;FS=0.0  |
| 45570 | chrY | 22605460 | . | A | T | 41.72    | PASS          | AC=1;AF=0.015;AN=68;BaseQRankSum=  |
| 45571 | chrY | 22605469 | . | A | T | 41.48    | PASS          | AC=1;AF=0.015;AN=68;BaseQRankSum=  |
| 45572 | chrY | 22605604 | . | A | T | 706.72   | PASS          | AC=6;AF=0.100;AN=60;BaseQRankSum=  |
| 45573 | chrY | 22607404 | . | G | A | 5336.72  | PASS          | AC=50;AF=0.735;AN=68;DP=342;FS=0.0 |
| 45574 | chrY | 22610139 | . | C | A | 237.35   | PASS          | AC=2;AF=0.029;AN=68;DP=338;FS=0.0  |
| 45575 | chrY | 22610289 | . | C | T | 1256.52  | PASS          | AC=6;AF=0.086;AN=70;DP=337;FS=0.0  |
| 45576 | chrY | 22613137 | . | A | G | 477.34   | PASS          | AC=6;AF=0.086;AN=70;DP=406;FS=0.0  |
| 45577 | chrY | 22615443 | . | T | A | 831.36   | PASS          | AC=2;AF=0.029;AN=70;BaseQRankSum=  |
| 45578 | chrY | 22621843 | . | T | G | 4521.06  | PASS          | AC=22;AF=1.00;AN=22;BaseQRankSum=  |
| 45579 | chrY | 22623275 | . | C | T | 44.69    | PASS          | AC=2;AF=0.100;AN=20;DP=207;FS=0.0  |
| 45580 | chrY | 22624781 | . | G | A | 1035.04  | PASS          | AC=6;AF=0.086;AN=70;DP=469;FS=0.0  |
| 45581 | chrY | 22625398 | . | G | A | 1263.60  | PASS          | AC=6;AF=0.088;AN=68;DP=337;FS=0.0  |
| 45582 | chrY | 22629676 | . | C | T | 412.41   | PASS          | AC=2;AF=0.030;AN=66;DP=357;FS=0.0  |
| 45583 | chrY | 22631393 | . | A | G | 1088.17  | PASS          | AC=6;AF=0.088;AN=68;DP=510;FS=0.0  |
| 45584 | chrY | 22632849 | . | C | A | 311.54   | PASS          | AC=2;AF=0.029;AN=70;DP=420;FS=0.0  |
| 45585 | chrY | 22633178 | . | G | A | 979.43   | PASS          | AC=6;AF=0.088;AN=68;DP=325;FS=0.0  |
| 45586 | chrY | 22634108 | . | G | A | 85.03    | PASS          | AC=2;AF=0.029;AN=68;DP=283;FS=0.0  |
| 45587 | chrY | 22635285 | . | G | C | 99.66    | my_snp_filter | AC=2;AF=0.111;AN=18;BaseQ          |
| 45588 | chrY | 22635289 | . | A | G | 100.63   | my_snp_filter | AC=2;AF=0.111;AN=18;BaseQ          |
| 45589 | chrY | 22635291 | . | C | T | 100.50   | my_snp_filter | AC=2;AF=0.111;AN=18;BaseQ          |
| 45590 | chrY | 22635296 | . | T | C | 57.45    | my_snp_filter | AC=1;AF=0.056;AN=18;BaseQ          |
| 45591 | chrY | 22635342 | . | C | T | 41.42    | my_snp_filter | AC=1;AF=0.056;AN=18;BaseQ          |
| 45592 | chrY | 22635526 | . | C | T | 93.49    | my_snp_filter | AC=2;AF=0.111;AN=18;BaseQ          |
| 45593 | chrY | 22635854 | . | C | T | 706.78   | my_snp_filter | AC=3;AF=0.167;AN=18;BaseQ          |
| 45594 | chrY | 22636048 | . | A | T | 31.57    | my_snp_filter | AC=1;AF=0.056;AN=18;BaseQ          |
| 45595 | chrY | 22637056 | . | C | T | 718.10   | my_snp_filter | AC=6;AF=0.333;AN=18;DP=14          |
| 45596 | chrY | 22653363 | . | T | C | 6803.62  | PASS          | AC=38;AF=0.559;AN=68;DP=443;FS=0.0 |
| 45597 | chrY | 22663747 | . | G | A | 701.28   | PASS          | AC=6;AF=0.086;AN=70;DP=474;FS=0.0  |
| 45598 | chrY | 22665224 | . | G | C | 5060.39  | PASS          | AC=44;AF=0.710;AN=62;DP=314;FS=0.0 |
| 45599 | chrY | 22665262 | . | A | G | 2464.76  | PASS          | AC=12;AF=0.182;AN=66;DP=424;FS=0.0 |
| 45600 | chrY | 22668273 | . | A | G | 1386.95  | PASS          | AC=6;AF=0.300;AN=20;DP=177;FS=0.0  |



|       |      |          |   |   |   |          |      |                                    |
|-------|------|----------|---|---|---|----------|------|------------------------------------|
| 45601 | chrY | 22669502 | . | T | C | 3024.41  | PASS | AC=38;AF=0.679;AN=56;DP=258;FS=0.0 |
| 45602 | chrY | 22672686 | . | C | T | 464.27   | PASS | AC=2;AF=0.029;AN=70;DP=518;FS=0.0  |
| 45603 | chrY | 22673903 | . | G | T | 7085.20  | PASS | AC=54;AF=0.818;AN=66;DP=337;FS=0.0 |
| 45604 | chrY | 22676997 | . | A | T | 759.68   | PASS | AC=2;AF=0.029;AN=68;DP=499;FS=0.0  |
| 45605 | chrY | 22679601 | . | C | G | 978.32   | PASS | AC=6;AF=0.086;AN=70;DP=403;FS=0.0  |
| 45606 | chrY | 22680249 | . | C | T | 451.66   | PASS | AC=6;AF=0.088;AN=68;DP=407;FS=0.0  |
| 45607 | chrY | 22686897 | . | A | G | 6070.42  | PASS | AC=40;AF=0.571;AN=70;DP=414;FS=0.0 |
| 45608 | chrY | 22687547 | . | T | A | 12783.93 | PASS | AC=66;AF=1.00;AN=66;BaseQ          |
| 45609 | chrY | 22695953 | . | C | G | 1292.19  | PASS | AC=6;AF=0.333;AN=18;DP=176;FS=0.0  |
| 45610 | chrY | 22701340 | . | C | T | 252.80   | PASS | AC=2;AF=0.029;AN=70;DP=417;FS=0.0  |
| 45611 | chrY | 22707285 | . | G | T | 262.84   | PASS | AC=2;AF=0.029;AN=70;DP=363;FS=0.0  |
| 45612 | chrY | 22707685 | . | C | T | 1380.76  | PASS | AC=6;AF=0.100;AN=60;BaseQRankSum=  |
| 45613 | chrY | 22711460 | . | T | A | 7807.08  | PASS | AC=68;AF=1.00;AN=68;BaseQRankSum=  |
| 45614 | chrY | 22711592 | . | A | G | 3138.65  | PASS | AC=40;AF=0.625;AN=64;DP=252;FS=0.0 |
| 45615 | chrY | 22712146 | . | T | C | 249.21   | PASS | AC=2;AF=0.029;AN=70;DP=303;FS=0.0  |
| 45616 | chrY | 22713870 | . | T | C | 65       | PASS | AC=1;AF=0.026;AN=38;BaseQRankSum=  |
| 45617 | chrY | 22713879 | . | C | T | 60.01    | PASS | AC=1;AF=0.024;AN=42;BaseQRankSum=  |
| 45618 | chrY | 22713884 | . | A | G | 58.92    | PASS | AC=1;AF=0.020;AN=50;BaseQRankSum=  |
| 45619 | chrY | 22714457 | . | C | T | 1036.51  | PASS | AC=6;AF=0.094;AN=64;DP=263;FS=0.0  |
| 45620 | chrY | 22714533 | . | G | A | 11395.58 | PASS | AC=47;AF=0.712;AN=66;BaseQ         |
| 45621 | chrY | 22721522 | . | T | C | 1066.14  | PASS | AC=6;AF=0.088;AN=68;DP=520;FS=0.0  |
| 45622 | chrY | 22722580 | . | C | T | 7484.11  | PASS | AC=62;AF=1.00;AN=62;DP=241;FS=0.0  |
| 45623 | chrY | 22724508 | . | C | T | 5023.30  | PASS | AC=42;AF=0.636;AN=66;DP=334;FS=0.0 |
| 45624 | chrY | 22724652 | . | G | A | 45.80    | PASS | AC=1;AF=0.014;AN=70;BaseQRankSum=  |
| 45625 | chrY | 22726491 | . | C | T | 3447.57  | PASS | AC=46;AF=0.719;AN=64;DP=263;FS=0.0 |
| 45626 | chrY | 22731750 | . | C | T | 41.52    | PASS | AC=1;AF=0.016;AN=62;BaseQRankSum=  |
| 45627 | chrY | 22731751 | . | G | T | 41.56    | PASS | AC=1;AF=0.016;AN=62;BaseQRankSum=  |
| 45628 | chrY | 22732173 | . | A | G | 30.72    | PASS | AC=1;AF=0.015;AN=68;BaseQRankSum=  |
| 45629 | chrY | 22733000 | . | T | G | 255.46   | PASS | AC=2;AF=0.029;AN=70;DP=539;FS=0.0  |
| 45630 | chrY | 22733758 | . | G | C | 14925.91 | PASS | AC=68;AF=1.00;AN=68;DP=52          |
| 45631 | chrY | 22734966 | . | T | C | 30.60    | PASS | AC=1;AF=0.014;AN=70;BaseQRankSum=  |
| 45632 | chrY | 22739301 | . | A | G | 920.21   | PASS | AC=6;AF=0.086;AN=70;DP=340;FS=0.0  |
| 45633 | chrY | 22739367 | . | C | T | 7981.19  | PASS | AC=63;AF=0.984;AN=64;BaseQRankSum= |
| 45634 | chrY | 22746189 | . | T | C | 468.71   | PASS | AC=6;AF=0.088;AN=68;DP=466;FS=0.0  |
| 45635 | chrY | 22750583 | . | A | C | 7005.01  | PASS | AC=64;AF=1.00;AN=64;DP=321;FS=0.0  |
| 45636 | chrY | 22755855 | . | G | A | 5341.93  | PASS | AC=50;AF=0.806;AN=62;DP=247;FS=0.0 |
| 45637 | chrY | 22757027 | . | T | A | 1618.18  | PASS | AC=6;AF=0.333;AN=18;DP=177;FS=0.0  |
| 45638 | chrY | 22760568 | . | T | C | 40.71    | PASS | AC=1;AF=0.015;AN=66;BaseQRankSum=  |
| 45639 | chrY | 22761041 | . | C | T | 5327.34  | PASS | AC=34;AF=0.531;AN=64;DP=397;FS=0.0 |
| 45640 | chrY | 22762746 | . | A | G | 355.10   | PASS | AC=6;AF=0.086;AN=70;DP=278;FS=0.0  |
| 45641 | chrY | 22766040 | . | A | C | 40.27    | PASS | AC=1;AF=0.015;AN=66;BaseQRankSum=  |
| 45642 | chrY | 22766048 | . | A | T | 40.09    | PASS | AC=1;AF=0.015;AN=66;BaseQRankSum=  |
| 45643 | chrY | 22771827 | . | C | G | 763.45   | PASS | AC=4;AF=0.059;AN=68;DP=423;FS=0.0  |
| 45644 | chrY | 22775162 | . | C | A | 1780.76  | PASS | AC=30;AF=0.625;AN=48;DP=181;FS=0.0 |
| 45645 | chrY | 22777196 | . | G | A | 1178.09  | PASS | AC=6;AF=0.250;AN=24;DP=167;FS=0.0  |
| 45646 | chrY | 22790643 | . | A | G | 310.43   | PASS | AC=2;AF=0.100;AN=20;DP=166;FS=0.0  |
| 45647 | chrY | 22795491 | . | T | C | 310.58   | PASS | AC=2;AF=0.029;AN=70;DP=452;FS=0.0  |
| 45648 | chrY | 22796697 | . | C | T | 13968.94 | PASS | AC=68;AF=1.00;AN=68;DP=46          |
| 45649 | chrY | 22801607 | . | T | C | 925.51   | PASS | AC=6;AF=0.086;AN=70;DP=371;FS=0.0  |
| 45650 | chrY | 22802310 | . | T | C | 247.74   | PASS | AC=2;AF=0.029;AN=68;DP=339;FS=0.0  |
| 45651 | chrY | 22803996 | . | T | A | 273.59   | PASS | AC=2;AF=0.100;AN=20;DP=125;FS=0.0  |
| 45652 | chrY | 22804447 | . | A | T | 504.17   | PASS | AC=6;AF=0.097;AN=62;DP=198;FS=0.0  |
| 45653 | chrY | 22808192 | . | T | C | 407.99   | PASS | AC=2;AF=0.029;AN=70;DP=540;FS=0.0  |
| 45654 | chrY | 22808370 | . | T | C | 13207.89 | PASS | AC=65;AF=0.985;AN=66;BaseQ         |
| 45655 | chrY | 22808725 | . | G | A | 590.84   | PASS | AC=6;AF=0.086;AN=70;DP=393;FS=0.0  |
| 45656 | chrY | 22811080 | . | C | G | 98.24    | PASS | AC=2;AF=0.029;AN=70;BaseQRankSum=  |
| 45657 | chrY | 22811086 | . | G | C | 95.40    | PASS | AC=2;AF=0.029;AN=70;BaseQRankSum=  |
| 45658 | chrY | 22811094 | . | A | G | 54       | PASS | AC=2;AF=0.029;AN=70;BaseQRankSum=  |
| 45659 | chrY | 22812328 | . | G | A | 37.02    | PASS | AC=1;AF=0.015;AN=68;BaseQRankSum=  |
| 45660 | chrY | 22812816 | . | C | T | 508.22   | PASS | AC=6;AF=0.086;AN=70;DP=349;FS=0.0  |
| 45661 | chrY | 22813126 | . | A | G | 30.94    | PASS | AC=1;AF=0.015;AN=68;BaseQRankSum=  |
| 45662 | chrY | 22813130 | . | T | C | 31.19    | PASS | AC=1;AF=0.015;AN=68;BaseQRankSum=  |
| 45663 | chrY | 22813138 | . | G | T | 34.20    | PASS | AC=1;AF=0.015;AN=68;BaseQRankSum=  |
| 45664 | chrY | 22813143 | . | A | G | 34.16    | PASS | AC=1;AF=0.015;AN=68;BaseQRankSum=  |
| 45665 | chrY | 22815525 | . | T | A | 286.71   | PASS | AC=4;AF=0.286;AN=14;DP=101;FS=0.0  |
| 45666 | chrY | 22818009 | . | G | A | 1381.76  | PASS | AC=6;AF=0.086;AN=70;DP=646;FS=0.0  |
| 45667 | chrY | 22818257 | . | A | G | 126.10   | PASS | AC=2;AF=0.029;AN=70;DP=469;FS=0.0  |
| 45668 | chrY | 22818334 | . | T | C | 15520.92 | PASS | AC=70;AF=1.00;AN=70;DP=52          |
| 45669 | chrY | 22829376 | . | G | A | 1606.80  | PASS | AC=6;AF=0.091;AN=66;DP=292;FS=0.0  |
| 45670 | chrY | 22832145 | . | C | T | 153.41   | PASS | AC=2;AF=0.029;AN=70;DP=366;FS=0.0  |
| 45671 | chrY | 22840002 | . | G | A | 97.63    | PASS | AC=2;AF=0.029;AN=70;DP=397;FS=0.0  |
| 45672 | chrY | 22840561 | . | C | T | 492.75   | PASS | AC=2;AF=0.100;AN=20;DP=177;FS=0.0  |
| 45673 | chrY | 22843909 | . | A | G | 954.23   | PASS | AC=6;AF=0.125;AN=48;DP=155;FS=0.0  |
| 45674 | chrY | 22847061 | . | G | A | 5786.26  | PASS | AC=44;AF=0.647;AN=68;DP=374;FS=0.0 |
| 45675 | chrY | 22851850 | . | T | G | 1623.24  | PASS | AC=6;AF=0.333;AN=18;DP=155;FS=0.0  |
| 45676 | chrY | 22857384 | . | G | A | 304.44   | PASS | AC=2;AF=0.029;AN=70;DP=603;FS=0.0  |

|       |      |          |   |   |   |          |               |                                    |
|-------|------|----------|---|---|---|----------|---------------|------------------------------------|
| 45677 | chrY | 22859357 | . | G | T | 477.17   | PASS          | AC=2;AF=0.029;AN=70;DP=643;FS=0.0  |
| 45678 | chrY | 22866703 | . | C | G | 2352.71  | PASS          | AC=26;AF=0.684;AN=38;DP=196;FS=0.  |
| 45679 | chrY | 22868272 | . | C | G | 117.03   | PASS          | AC=6;AF=0.120;AN=50;DP=101;FS=0.0  |
| 45680 | chrY | 22868386 | . | G | A | 886.33   | PASS          | AC=6;AF=0.086;AN=70;DP=379;FS=0.0  |
| 45681 | chrY | 22872115 | . | A | G | 612.43   | PASS          | AC=6;AF=0.333;AN=18;DP=149;FS=0.0  |
| 45682 | chrY | 22872345 | . | C | T | 973.91   | PASS          | AC=6;AF=0.086;AN=70;DP=406;FS=0.0  |
| 45683 | chrY | 22872584 | . | G | A | 57.86    | PASS          | AC=2;AF=0.038;AN=52;DP=189;FS=0.0  |
| 45684 | chrY | 22878613 | . | T | C | 147.40   | PASS          | AC=2;AF=0.040;AN=50;DP=205;FS=0.0  |
| 45685 | chrY | 22879633 | . | T | G | 1187.18  | PASS          | AC=6;AF=0.091;AN=66;DP=349;FS=0.0  |
| 45686 | chrY | 22879666 | . | T | C | 433.38   | PASS          | AC=2;AF=0.030;AN=66;DP=342;FS=0.0  |
| 45687 | chrY | 22880173 | . | A | G | 863.94   | PASS          | AC=6;AF=0.086;AN=70;DP=274;FS=0.0  |
| 45688 | chrY | 22881230 | . | G | A | 432.87   | PASS          | AC=2;AF=0.063;AN=32;DP=138;FS=0.0  |
| 45689 | chrY | 22889018 | . | A | G | 14166.01 | PASS          | AC=68;AF=1.00;AN=68;DP=45          |
| 45690 | chrY | 22896829 | . | T | G | 698.42   | PASS          | AC=6;AF=0.088;AN=68;DP=369;FS=0.0  |
| 45691 | chrY | 22898216 | . | T | A | 2809.76  | PASS          | AC=12;AF=0.171;AN=70;DP=387;FS=0.  |
| 45692 | chrY | 22899557 | . | C | T | 1096.35  | PASS          | AC=6;AF=0.086;AN=70;DP=641;FS=0.0  |
| 45693 | chrY | 22905919 | . | C | T | 13404.22 | PASS          | AC=40;AF=0.571;AN=70;DP=6          |
| 45694 | chrY | 22908145 | . | A | G | 30.74    | PASS          | AC=1;AF=0.014;AN=70;BaseQRankSum=  |
| 45695 | chrY | 22908153 | . | A | G | 30.74    | PASS          | AC=1;AF=0.014;AN=70;BaseQRankSum=  |
| 45696 | chrY | 22913918 | . | A | G | 5959.89  | PASS          | AC=38;AF=0.559;AN=68;DP=421;FS=0.  |
| 45697 | chrY | 22919926 | . | T | C | 902.04   | PASS          | AC=6;AF=0.088;AN=68;DP=381;FS=0.0  |
| 45698 | chrY | 22920347 | . | T | C | 392.58   | PASS          | AC=1;AF=0.014;AN=70;BaseQRankSum=  |
| 45699 | chrY | 22921768 | . | G | A | 907.14   | PASS          | AC=6;AF=0.086;AN=70;DP=614;FS=0.0  |
| 45700 | chrY | 22922653 | . | C | T | 176.59   | PASS          | AC=2;AF=0.030;AN=66;DP=304;FS=0.0  |
| 45701 | chrY | 22922771 | . | T | G | 128.01   | PASS          | AC=4;AF=0.065;AN=62;BaseQRankSum=  |
| 45702 | chrY | 22923622 | . | G | A | 10893.84 | PASS          | AC=52;AF=0.743;AN=70;DP=4          |
| 45703 | chrY | 22932680 | . | C | A | 358.13   | PASS          | AC=2;AF=0.029;AN=70;DP=662;FS=0.0  |
| 45704 | chrY | 22934109 | . | G | A | 4338.16  | PASS          | AC=26;AF=1.00;AN=26;DP=173;FS=0.0  |
| 45705 | chrY | 22937380 | . | C | A | 4194.54  | PASS          | AC=42;AF=0.700;AN=60;DP=291;FS=0.  |
| 45706 | chrY | 22961662 | . | G | T | 40.99    | PASS          | AC=1;AF=0.014;AN=70;BaseQRankSum=  |
| 45707 | chrY | 22961805 | . | T | A | 39.96    | PASS          | AC=1;AF=0.014;AN=70;BaseQRankSum=  |
| 45708 | chrY | 22961809 | . | T | A | 37.20    | PASS          | AC=1;AF=0.014;AN=70;BaseQRankSum=  |
| 45709 | chrY | 22961834 | . | T | A | 33.80    | PASS          | AC=1;AF=0.015;AN=68;BaseQRankSum=  |
| 45710 | chrY | 22961844 | . | T | A | 33.74    | PASS          | AC=1;AF=0.015;AN=68;BaseQRankSum=  |
| 45711 | chrY | 22961902 | . | G | A | 339.73   | PASS          | AC=4;AF=0.059;AN=68;DP=363;FS=0.0  |
| 45712 | chrY | 22962800 | . | A | G | 478.64   | PASS          | AC=6;AF=0.091;AN=66;DP=235;FS=0.0  |
| 45713 | chrY | 22963137 | . | G | T | 1273.01  | PASS          | AC=6;AF=0.086;AN=70;DP=599;FS=0.0  |
| 45714 | chrY | 22965855 | . | A | G | 36.57    | PASS          | AC=1;AF=0.014;AN=70;BaseQRankSum=  |
| 45715 | chrY | 22965856 | . | T | C | 36.57    | PASS          | AC=1;AF=0.014;AN=70;BaseQRankSum=  |
| 45716 | chrY | 22968083 | . | C | T | 1274.47  | PASS          | AC=6;AF=0.103;AN=58;DP=206;FS=0.0  |
| 45717 | chrY | 22969002 | . | G | A | 1728.99  | PASS          | AC=6;AF=0.130;AN=46;DP=212;FS=0.0  |
| 45718 | chrY | 22969654 | . | C | T | 1162.92  | PASS          | AC=6;AF=0.086;AN=70;DP=575;FS=0.0  |
| 45719 | chrY | 22971697 | . | A | T | 1337.20  | PASS          | AC=6;AF=0.333;AN=18;DP=187;FS=0.0  |
| 45720 | chrY | 22972047 | . | A | T | 81.32    | PASS          | AC=1;AF=0.050;AN=20;BaseQRankSum=  |
| 45721 | chrY | 22972057 | . | G | C | 78.35    | PASS          | AC=1;AF=0.056;AN=18;BaseQRankSum=  |
| 45722 | chrY | 22972064 | . | A | G | 81.31    | PASS          | AC=1;AF=0.050;AN=20;BaseQRankSum=  |
| 45723 | chrY | 22972112 | . | T | A | 51.33    | PASS          | AC=1;AF=0.056;AN=18;BaseQRankSum=  |
| 45724 | chrY | 22972117 | . | C | T | 51.37    | PASS          | AC=1;AF=0.056;AN=18;BaseQRankSum=  |
| 45725 | chrY | 22972428 | . | T | C | 311.56   | PASS          | AC=6;AF=0.300;AN=20;BaseQRankSum=  |
| 45726 | chrY | 22972724 | . | A | G | 284.49   | PASS          | AC=3;AF=0.136;AN=22;BaseQRankSum=  |
| 45727 | chrY | 22972726 | . | C | T | 284.45   | PASS          | AC=3;AF=0.136;AN=22;BaseQRankSum=  |
| 45728 | chrY | 22972738 | . | C | G | 116.41   | PASS          | AC=2;AF=0.091;AN=22;BaseQRankSum=  |
| 45729 | chrY | 22976194 | . | C | T | 1158.14  | PASS          | AC=6;AF=0.086;AN=70;DP=525;FS=0.0  |
| 45730 | chrY | 22978346 | . | T | G | 2125.13  | PASS          | AC=38;AF=0.679;AN=56;DP=223;FS=0.  |
| 45731 | chrY | 22978713 | . | C | T | 1996.35  | PASS          | AC=26;AF=0.684;AN=38;DP=192;FS=0.0 |
| 45732 | chrY | 22980532 | . | G | A | 361.60   | PASS          | AC=2;AF=0.029;AN=68;DP=527;FS=0.0  |
| 45733 | chrY | 22984334 | . | C | T | 3032.79  | PASS          | AC=12;AF=0.545;AN=22;DP=189;FS=0.  |
| 45734 | chrY | 22986822 | . | C | G | 3951.86  | PASS          | AC=18;AF=1.00;AN=18;DP=155;FS=0.0  |
| 45735 | chrY | 23002348 | . | G | A | 521.38   | PASS          | AC=6;AF=0.100;AN=60;DP=134;FS=0.0  |
| 45736 | chrY | 23004857 | . | G | T | 365.76   | PASS          | AC=2;AF=0.063;AN=32;DP=189;FS=0.0  |
| 45737 | chrY | 23017569 | . | G | A | 40.12    | my_snp_filter | AC=1;AF=0.045;AN=22;BaseQ          |
| 45738 | chrY | 23018063 | . | C | T | 31.22    | my_snp_filter | AC=1;AF=0.045;AN=22;BaseQ          |
| 45739 | chrY | 23018071 | . | G | C | 65.46    | PASS          | AC=1;AF=0.056;AN=18;BaseQRankSum=  |
| 45740 | chrY | 23018861 | . | G | C | 1035.79  | PASS          | AC=6;AF=0.091;AN=66;DP=247;FS=0.0  |
| 45741 | chrY | 23020085 | . | A | T | 12463.92 | PASS          | AC=50;AF=0.735;AN=68;DP=5          |
| 45742 | chrY | 23022822 | . | C | T | 47.46    | PASS          | AC=2;AF=0.029;AN=70;DP=273;FS=0.0  |
| 45743 | chrY | 23022826 | . | T | A | 47.11    | PASS          | AC=2;AF=0.030;AN=66;DP=265;FS=0.0  |
| 45744 | chrY | 23025804 | . | G | A | 1567.40  | PASS          | AC=6;AF=0.086;AN=70;DP=589;FS=0.0  |
| 45745 | chrY | 23031841 | . | G | A | 12337.75 | PASS          | AC=48;AF=0.727;AN=66;DP=5          |
| 45746 | chrY | 23033704 | . | C | T | 4571.15  | PASS          | AC=40;AF=0.690;AN=58;BaseQRankSum= |
| 45747 | chrY | 23035132 | . | A | G | 7782.19  | PASS          | AC=66;AF=1.00;AN=66;DP=272;FS=0.0  |
| 45748 | chrY | 23037631 | . | T | C | 198.99   | PASS          | AC=2;AF=0.029;AN=70;DP=329;FS=0.0  |
| 45749 | chrY | 23039152 | . | G | A | 714.04   | PASS          | AC=6;AF=0.188;AN=32;BaseQRankSum=  |
| 45750 | chrY | 23039883 | . | C | T | 96.93    | PASS          | AC=2;AF=0.029;AN=70;DP=389;FS=0.0  |
| 45751 | chrY | 23039960 | . | G | A | 386.18   | PASS          | AC=2;AF=0.029;AN=70;DP=629;FS=0.0  |
| 45752 | chrY | 23040647 | . | G | T | 9835.17  | PASS          | AC=56;AF=0.824;AN=68;DP=412;FS=0.  |

|       |      |          |   |   |   |          |               |                                    |
|-------|------|----------|---|---|---|----------|---------------|------------------------------------|
| 45753 | chrY | 23040950 | . | C | G | 541.47   | PASS          | AC=6;AF=0.107;AN=56;DP=167;FS=0.0  |
| 45754 | chrY | 23048169 | . | G | A | 512.44   | PASS          | AC=2;AF=0.029;AN=68;DP=524;FS=0.0  |
| 45755 | chrY | 23048289 | . | C | T | 158.01   | PASS          | AC=4;AF=0.074;AN=54;DP=195;FS=0.0  |
| 45756 | chrY | 23048312 | . | C | T | 1084.65  | PASS          | AC=6;AF=0.143;AN=42;DP=181;FS=0.0  |
| 45757 | chrY | 23050063 | . | C | T | 1730.67  | PASS          | AC=6;AF=0.086;AN=70;DP=648;FS=0.0  |
| 45758 | chrY | 23050456 | . | G | A | 1230.18  | PASS          | AC=6;AF=0.333;AN=18;DP=165;FS=0.0  |
| 45759 | chrY | 23053201 | . | C | T | 31.40    | PASS          | AC=1;AF=0.015;AN=66;BaseQRankSum=  |
| 45760 | chrY | 23059222 | . | C | T | 1257.12  | PASS          | AC=6;AF=0.086;AN=70;DP=564;FS=0.0  |
| 45761 | chrY | 23060037 | . | G | C | 43.64    | PASS          | AC=1;AF=0.015;AN=66;BaseQRankSum=  |
| 45762 | chrY | 23060043 | . | T | C | 43.43    | PASS          | AC=1;AF=0.015;AN=66;BaseQRankSum=  |
| 45763 | chrY | 23060044 | . | G | A | 43.42    | PASS          | AC=1;AF=0.015;AN=66;BaseQRankSum=  |
| 45764 | chrY | 23063131 | . | C | T | 869.29   | PASS          | AC=6;AF=0.086;AN=70;DP=338;FS=0.0  |
| 45765 | chrY | 23065012 | . | G | C | 42.73    | PASS          | AC=1;AF=0.019;AN=54;BaseQRankSum=  |
| 45766 | chrY | 23065013 | . | A | G | 42.73    | PASS          | AC=1;AF=0.019;AN=54;BaseQRankSum=  |
| 45767 | chrY | 23067165 | . | C | G | 508.20   | PASS          | AC=2;AF=0.029;AN=70;DP=531;FS=0.0  |
| 45768 | chrY | 23067494 | . | C | T | 891.06   | PASS          | AC=6;AF=0.100;AN=60;DP=223;FS=0.0  |
| 45769 | chrY | 23067770 | . | A | G | 8198.87  | PASS          | AC=50;AF=0.735;AN=68;DP=404;FS=0.0 |
| 45770 | chrY | 23069732 | . | T | A | 1115.24  | PASS          | AC=6;AF=0.086;AN=70;DP=257;FS=0.0  |
| 45771 | chrY | 23070802 | . | G | T | 64.72    | PASS          | AC=2;AF=0.077;AN=26;BaseQRankSum=  |
| 45772 | chrY | 23070804 | . | A | T | 63.02    | PASS          | AC=2;AF=0.059;AN=34;BaseQRankSum=  |
| 45773 | chrY | 23070852 | . | C | T | 611      | PASS          | AC=6;AF=0.100;AN=60;DP=150;FS=0.0  |
| 45774 | chrY | 23074232 | . | G | A | 376.40   | PASS          | AC=2;AF=0.029;AN=70;DP=463;FS=0.0  |
| 45775 | chrY | 23076279 | . | T | C | 1439.99  | PASS          | AC=18;AF=1.00;AN=18;BaseQRankSum=  |
| 45776 | chrY | 23076374 | . | A | C | 62.49    | my_snp_filter | AC=3;AF=0.167;AN=18;BaseQ          |
| 45777 | chrY | 23076481 | . | T | C | 102.51   | PASS          | AC=2;AF=0.111;AN=18;BaseQRankSum=  |
| 45778 | chrY | 23076597 | . | C | A | 299.22   | PASS          | AC=3;AF=0.167;AN=18;BaseQRankSum=  |
| 45779 | chrY | 23076600 | . | T | C | 300.04   | PASS          | AC=3;AF=0.167;AN=18;BaseQRankSum=  |
| 45780 | chrY | 23076634 | . | A | G | 207.30   | PASS          | AC=2;AF=0.100;AN=20;BaseQRankSum=  |
| 45781 | chrY | 23076638 | . | C | T | 208.52   | PASS          | AC=2;AF=0.100;AN=20;BaseQRankSum=  |
| 45782 | chrY | 23076653 | . | T | C | 207.77   | PASS          | AC=2;AF=0.100;AN=20;BaseQRankSum=  |
| 45783 | chrY | 23076655 | . | T | G | 213.07   | PASS          | AC=2;AF=0.100;AN=20;BaseQRankSum=  |
| 45784 | chrY | 23080679 | . | C | T | 8653.84  | PASS          | AC=48;AF=0.727;AN=66;DP=386;FS=0.0 |
| 45785 | chrY | 23081795 | . | T | A | 127.05   | PASS          | AC=2;AF=0.029;AN=68;DP=309;FS=0.0  |
| 45786 | chrY | 23083518 | . | G | T | 444.02   | PASS          | AC=2;AF=0.111;AN=18;DP=171;FS=0.0  |
| 45787 | chrY | 23084724 | . | G | T | 130.94   | PASS          | AC=2;AF=0.125;AN=16;BaseQRankSum=  |
| 45788 | chrY | 23084726 | . | C | T | 42.78    | PASS          | AC=1;AF=0.063;AN=16;BaseQRankSum=  |
| 45789 | chrY | 23084728 | . | C | T | 43.06    | PASS          | AC=1;AF=0.063;AN=16;BaseQRankSum=  |
| 45790 | chrY | 23084730 | . | A | T | 104.82   | PASS          | AC=2;AF=0.125;AN=16;BaseQRankSum=  |
| 45791 | chrY | 23084734 | . | C | T | 127.43   | PASS          | AC=1;AF=0.056;AN=18;BaseQRankSum=  |
| 45792 | chrY | 23085361 | . | T | G | 1168.21  | PASS          | AC=6;AF=0.333;AN=18;DP=140;FS=0.0  |
| 45793 | chrY | 23085375 | . | G | C | 3480.87  | PASS          | AC=18;AF=1.00;AN=18;BaseQRankSum=  |
| 45794 | chrY | 23093654 | . | C | A | 497.75   | PASS          | AC=2;AF=0.100;AN=20;DP=181;FS=0.0  |
| 45795 | chrY | 23094357 | . | G | A | 516.27   | PASS          | AC=2;AF=0.032;AN=62;DP=224;FS=0.0  |
| 45796 | chrY | 23095826 | . | T | A | 294.76   | PASS          | AC=2;AF=0.100;AN=20;DP=157;FS=0.0  |
| 45797 | chrY | 23096006 | . | C | A | 1123.50  | PASS          | AC=6;AF=0.300;AN=20;DP=162;FS=0.0  |
| 45798 | chrY | 23099672 | . | T | G | 90.43    | PASS          | AC=2;AF=0.030;AN=66;DP=230;FS=0.0  |
| 45799 | chrY | 23099744 | . | A | C | 2552.97  | PASS          | AC=20;AF=1.00;AN=20;DP=137;FS=0.0  |
| 45800 | chrY | 23100153 | . | T | C | 832.18   | PASS          | AC=6;AF=0.333;AN=18;BaseQRankSum=  |
| 45801 | chrY | 23100301 | . | C | T | 51.64    | PASS          | AC=2;AF=0.091;AN=22;DP=158;FS=0.0  |
| 45802 | chrY | 23100309 | . | G | A | 51.67    | PASS          | AC=2;AF=0.091;AN=22;DP=154;FS=0.0  |
| 45803 | chrY | 23101591 | . | G | A | 1427.18  | PASS          | AC=6;AF=0.333;AN=18;DP=167;FS=0.0  |
| 45804 | chrY | 23104079 | . | C | T | 4601.97  | PASS          | AC=20;AF=1.00;AN=20;BaseQRankSum=  |
| 45805 | chrY | 23104376 | . | T | C | 79.31    | PASS          | AC=2;AF=0.029;AN=70;DP=299;FS=0.0  |
| 45806 | chrY | 23105677 | . | G | T | 640.96   | PASS          | AC=6;AF=0.088;AN=68;DP=372;FS=0.0  |
| 45807 | chrY | 23108694 | . | A | C | 4377.86  | PASS          | AC=18;AF=1.00;AN=18;DP=173;FS=0.0  |
| 45808 | chrY | 23109543 | . | T | C | 652.54   | PASS          | AC=6;AF=0.300;AN=20;DP=151;FS=0.0  |
| 45809 | chrY | 23111098 | . | C | G | 1040.75  | PASS          | AC=6;AF=0.300;AN=20;DP=151;FS=0.0  |
| 45810 | chrY | 23112844 | . | G | A | 1141.27  | PASS          | AC=6;AF=0.086;AN=70;DP=556;FS=0.0  |
| 45811 | chrY | 23115653 | . | G | A | 1855.11  | PASS          | AC=6;AF=0.086;AN=70;DP=514;FS=0.0  |
| 45812 | chrY | 23119372 | . | T | C | 1287.97  | PASS          | AC=6;AF=0.086;AN=70;DP=318;FS=0.0  |
| 45813 | chrY | 23122114 | . | G | T | 1350.57  | PASS          | AC=6;AF=0.086;AN=70;BaseQRankSum=  |
| 45814 | chrY | 23123286 | . | T | C | 40.57    | PASS          | AC=1;AF=0.015;AN=68;BaseQRankSum=  |
| 45815 | chrY | 23123295 | . | A | G | 37.44    | PASS          | AC=1;AF=0.015;AN=68;BaseQRankSum=  |
| 45816 | chrY | 23123316 | . | G | A | 34.54    | PASS          | AC=1;AF=0.015;AN=66;BaseQRankSum=  |
| 45817 | chrY | 23123319 | . | G | T | 31.30    | PASS          | AC=1;AF=0.015;AN=66;BaseQRankSum=  |
| 45818 | chrY | 23123320 | . | T | C | 31.68    | PASS          | AC=1;AF=0.015;AN=66;BaseQRankSum=  |
| 45819 | chrY | 23123327 | . | T | C | 32.07    | PASS          | AC=1;AF=0.016;AN=64;BaseQRankSum=  |
| 45820 | chrY | 23123333 | . | T | C | 31.79    | PASS          | AC=1;AF=0.016;AN=64;BaseQRankSum=  |
| 45821 | chrY | 23124367 | . | T | G | 15873.95 | PASS          | AC=66;AF=1.00;AN=66;DP=52          |
| 45822 | chrY | 23124396 | . | A | G | 11536.84 | PASS          | AC=48;AF=0.727;AN=66;BaseQ         |
| 45823 | chrY | 23124403 | . | T | C | 43.01    | PASS          | AC=1;AF=0.015;AN=68;BaseQRankSum=  |
| 45824 | chrY | 23127578 | . | A | T | 2250.76  | PASS          | AC=34;AF=0.739;AN=46;DP=162;FS=0.0 |
| 45825 | chrY | 23134510 | . | G | A | 939.32   | PASS          | AC=6;AF=0.086;AN=70;DP=553;FS=0.0  |
| 45826 | chrY | 23134896 | . | T | C | 16394.90 | PASS          | AC=70;AF=1.00;AN=70;BaseQ          |
| 45827 | chrY | 23135044 | . | C | G | 727.18   | PASS          | AC=6;AF=0.086;AN=70;DP=480;FS=0.0  |
| 45828 | chrY | 23135484 | . | G | A | 829.77   | PASS          | AC=6;AF=0.086;AN=70;DP=295;FS=0.0  |

|       |      |          |   |   |   |          |               |                                    |
|-------|------|----------|---|---|---|----------|---------------|------------------------------------|
| 45829 | chrY | 23137792 | . | C | G | 1021.79  | PASS          | AC=6;AF=0.086;AN=70;DP=302;FS=0.0  |
| 45830 | chrY | 23139617 | . | G | T | 2478.20  | PASS          | AC=6;AF=0.086;AN=70;DP=450;FS=0.0  |
| 45831 | chrY | 23139618 | . | G | T | 2478.67  | PASS          | AC=6;AF=0.088;AN=68;DP=443;FS=0.0  |
| 45832 | chrY | 23140567 | . | C | T | 254      | PASS          | AC=2;AF=0.029;AN=68;DP=324;FS=0.0  |
| 45833 | chrY | 23144558 | . | T | A | 8050.06  | PASS          | AC=46;AF=0.657;AN=70;BaseQRankSum  |
| 45834 | chrY | 23145908 | . | A | C | 1638.58  | PASS          | AC=6;AF=0.086;AN=70;DP=387;FS=0.0  |
| 45835 | chrY | 23148259 | . | G | T | 5388.29  | PASS          | AC=42;AF=0.636;AN=66;DP=354;FS=0.0 |
| 45836 | chrY | 23150167 | . | A | G | 10962.76 | PASS          | AC=50;AF=0.735;AN=68;DP=5          |
| 45837 | chrY | 23153798 | . | A | G | 1061.62  | PASS          | AC=6;AF=0.088;AN=68;DP=286;FS=0.0  |
| 45838 | chrY | 23154209 | . | A | G | 2888.66  | PASS          | AC=12;AF=0.171;AN=70;DP=360;FS=0.0 |
| 45839 | chrY | 23154882 | . | A | G | 31.04    | PASS          | AC=1;AF=0.015;AN=68;BaseQRankSum   |
| 45840 | chrY | 23158264 | . | C | G | 14381.26 | PASS          | AC=52;AF=0.743;AN=70;DP=6          |
| 45841 | chrY | 23158619 | . | T | C | 905.83   | PASS          | AC=6;AF=0.086;AN=70;DP=493;FS=0.0  |
| 45842 | chrY | 23158930 | . | C | T | 1280.71  | PASS          | AC=6;AF=0.091;AN=66;DP=344;FS=0.0  |
| 45843 | chrY | 23159113 | . | T | C | 1251.89  | PASS          | AC=6;AF=0.086;AN=70;DP=316;FS=0.0  |
| 45844 | chrY | 23162853 | . | C | A | 752.53   | PASS          | AC=2;AF=0.029;AN=70;DP=589;FS=0.0  |
| 45845 | chrY | 23163723 | . | A | G | 1324.88  | PASS          | AC=12;AF=0.171;AN=70;BaseQRankSum  |
| 45846 | chrY | 23165423 | . | C | A | 1182.01  | PASS          | AC=6;AF=0.086;AN=70;BaseQRankSum   |
| 45847 | chrY | 23168047 | . | G | A | 829.66   | PASS          | AC=6;AF=0.300;AN=20;DP=134;FS=0.0  |
| 45848 | chrY | 23170963 | . | C | T | 1163.07  | my_snp_filter | AC=6;AF=0.333;AN=18;DP=17          |
| 45849 | chrY | 23172091 | . | A | G | 2038.07  | my_snp_filter | AC=16;AF=0.889;AN=18;Base          |
| 45850 | chrY | 23185557 | . | T | C | 30.60    | PASS          | AC=1;AF=0.014;AN=70;BaseQRankSum   |
| 45851 | chrY | 23185632 | . | A | G | 18483.73 | PASS          | AC=52;AF=0.743;AN=70;DP=7          |
| 45852 | chrY | 23185774 | . | G | A | 1311.35  | PASS          | AC=6;AF=0.086;AN=70;DP=384;FS=0.0  |
| 45853 | chrY | 23186892 | . | T | C | 1193.69  | PASS          | AC=6;AF=0.086;AN=70;DP=543;FS=0.0  |
| 45854 | chrY | 23188390 | . | C | G | 1291.34  | PASS          | AC=6;AF=0.086;AN=70;DP=352;FS=0.0  |
| 45855 | chrY | 23189290 | . | C | T | 1147.80  | PASS          | AC=6;AF=0.086;AN=70;DP=659;FS=0.0  |
| 45856 | chrY | 23190007 | . | G | C | 2792.72  | PASS          | AC=30;AF=0.500;AN=60;DP=304;FS=0.0 |
| 45857 | chrY | 23190611 | . | C | A | 2108.98  | PASS          | AC=4;AF=0.057;AN=70;BaseQRankSum   |
| 45858 | chrY | 23192199 | . | G | T | 275.23   | PASS          | AC=2;AF=0.111;AN=18;BaseQRankSum   |
| 45859 | chrY | 23192205 | . | T | C | 269.23   | PASS          | AC=2;AF=0.111;AN=18;BaseQRankSum   |
| 45860 | chrY | 23192208 | . | G | A | 274.90   | PASS          | AC=2;AF=0.111;AN=18;BaseQRankSum   |
| 45861 | chrY | 23195635 | . | G | T | 339.41   | PASS          | AC=4;AF=0.063;AN=64;DP=220;FS=0.0  |
| 45862 | chrY | 23196355 | . | T | C | 1663.04  | PASS          | AC=12;AF=0.188;AN=64;DP=177;FS=0.0 |
| 45863 | chrY | 23200606 | . | G | A | 1639.17  | PASS          | AC=6;AF=0.086;AN=70;DP=475;FS=0.0  |
| 45864 | chrY | 23202551 | . | G | C | 3977.97  | PASS          | AC=20;AF=1.00;AN=20;DP=171;FS=0.0  |
| 45865 | chrY | 23204221 | . | G | A | 13333.77 | PASS          | AC=46;AF=0.657;AN=70;DP=6          |
| 45866 | chrY | 23206909 | . | C | G | 650.46   | PASS          | AC=2;AF=0.029;AN=68;DP=331;FS=0.0  |
| 45867 | chrY | 23206915 | . | A | G | 650.61   | PASS          | AC=2;AF=0.029;AN=68;DP=302;FS=0.0  |
| 45868 | chrY | 23208284 | . | G | A | 1561.45  | PASS          | AC=12;AF=0.214;AN=56;DP=149;FS=0.0 |
| 45869 | chrY | 23211770 | . | T | G | 4342.86  | PASS          | AC=18;AF=1.00;AN=18;BaseQRankSum   |
| 45870 | chrY | 23212043 | . | T | G | 2622.18  | PASS          | AC=6;AF=0.333;AN=18;DP=171;FS=0.0  |
| 45871 | chrY | 23212048 | . | C | G | 2712.21  | PASS          | AC=6;AF=0.333;AN=18;DP=174;FS=0.0  |
| 45872 | chrY | 23212049 | . | T | G | 2712.21  | PASS          | AC=6;AF=0.333;AN=18;DP=175;FS=0.0  |
| 45873 | chrY | 23225335 | . | T | C | 309.17   | PASS          | AC=2;AF=0.029;AN=70;DP=741;FS=0.0  |
| 45874 | chrY | 23228218 | . | C | A | 972.94   | my_snp_filter | AC=6;AF=0.300;AN=20;DP=11          |
| 45875 | chrY | 23229198 | . | G | A | 1225.10  | PASS          | AC=6;AF=0.250;AN=24;DP=148;FS=0.0  |
| 45876 | chrY | 23230053 | . | C | G | 629.19   | PASS          | AC=6;AF=0.333;AN=18;DP=158;FS=0.0  |
| 45877 | chrY | 23230641 | . | G | C | 1152.18  | PASS          | AC=6;AF=0.333;AN=18;DP=164;FS=0.0  |
| 45878 | chrY | 23231258 | . | G | A | 601.05   | PASS          | AC=2;AF=0.111;AN=18;DP=165;FS=0.0  |
| 45879 | chrY | 23233272 | . | A | T | 819.47   | PASS          | AC=6;AF=0.088;AN=68;DP=355;FS=0.0  |
| 45880 | chrY | 23237055 | . | T | C | 996.36   | PASS          | AC=4;AF=0.057;AN=70;DP=700;FS=0.0  |
| 45881 | chrY | 23238985 | . | C | G | 13129.08 | PASS          | AC=58;AF=0.829;AN=70;DP=5          |
| 45882 | chrY | 23239861 | . | C | G | 907.32   | PASS          | AC=6;AF=0.086;AN=70;DP=671;FS=0.0  |
| 45883 | chrY | 23242935 | . | C | G | 17949.88 | PASS          | AC=70;AF=1.00;AN=70;DP=61          |
| 45884 | chrY | 23249196 | . | A | G | 913.96   | PASS          | AC=6;AF=0.086;AN=70;DP=468;FS=0.0  |
| 45885 | chrY | 23254299 | . | C | T | 1550.76  | PASS          | AC=6;AF=0.086;AN=70;DP=696;FS=0.0  |
| 45886 | chrY | 23254960 | . | G | A | 1318.38  | PASS          | AC=6;AF=0.088;AN=68;DP=522;FS=0.0  |
| 45887 | chrY | 23257819 | . | T | G | 6070.24  | PASS          | AC=56;AF=1.00;AN=56;BaseQRankSum   |
| 45888 | chrY | 23258051 | . | G | T | 57.54    | PASS          | AC=4;AF=0.061;AN=66;DP=233;FS=0.0  |
| 45889 | chrY | 23258160 | . | A | T | 1695.39  | PASS          | AC=6;AF=0.091;AN=66;DP=214;FS=0.0  |
| 45890 | chrY | 23265651 | . | G | T | 668.69   | PASS          | AC=6;AF=0.097;AN=62;DP=225;FS=0.0  |
| 45891 | chrY | 23268915 | . | A | G | 1124.01  | PASS          | AC=6;AF=0.086;AN=70;DP=327;FS=0.0  |
| 45892 | chrY | 23283239 | . | G | A | 36.98    | PASS          | AC=1;AF=0.015;AN=68;BaseQRankSum   |
| 45893 | chrY | 23286394 | . | T | C | 732.18   | PASS          | AC=6;AF=0.333;AN=18;DP=149;FS=0.0  |
| 45894 | chrY | 23292231 | . | C | T | 493.11   | PASS          | AC=6;AF=0.088;AN=68;DP=339;FS=0.0  |
| 45895 | chrY | 23294247 | . | G | C | 5255.13  | PASS          | AC=44;AF=0.786;AN=56;DP=295;FS=0.0 |
| 45896 | chrY | 23294948 | . | T | C | 11497.91 | PASS          | AC=52;AF=0.743;AN=70;DP=5          |
| 45897 | chrY | 23295435 | . | A | G | 7176.15  | PASS          | AC=50;AF=0.806;AN=62;DP=322;FS=0.0 |
| 45898 | chrY | 23299538 | . | C | T | 101.26   | PASS          | AC=4;AF=0.286;AN=14;DP=195;FS=0.0  |
| 45899 | chrY | 23299542 | . | T | A | 99.47    | PASS          | AC=4;AF=0.118;AN=34;DP=194;FS=0.0  |
| 45900 | chrY | 23299545 | . | C | T | 52.85    | PASS          | AC=4;AF=0.105;AN=38;DP=191;FS=0.0  |
| 45901 | chrY | 23299547 | . | C | G | 52.21    | PASS          | AC=4;AF=0.111;AN=36;DP=187;FS=0.0  |
| 45902 | chrY | 23299549 | . | C | T | 49.19    | PASS          | AC=4;AF=0.118;AN=34;DP=183;FS=0.0  |
| 45903 | chrY | 23301174 | . | C | T | 1111.60  | PASS          | AC=6;AF=0.086;AN=70;DP=517;FS=0.0  |
| 45904 | chrY | 23311265 | . | T | C | 97.16    | PASS          | AC=2;AF=0.143;AN=14;DP=62;FS=0.0   |

|       |      |          |   |   |     |          |               |                                    |
|-------|------|----------|---|---|-----|----------|---------------|------------------------------------|
| 45905 | chrY | 23314471 | . | C | A   | 1333.40  | PASS          | AC=6;AF=0.086;AN=70;DP=383;FS=0.0  |
| 45906 | chrY | 23315961 | . | C | T   | 323.84   | PASS          | AC=4;AF=0.222;AN=18;DP=76;FS=0.00  |
| 45907 | chrY | 23319226 | . | A | G   | 663.01   | PASS          | AC=4;AF=0.222;AN=18;DP=166;FS=0.0  |
| 45908 | chrY | 23328431 | . | A | G   | 1079.37  | PASS          | AC=6;AF=0.086;AN=70;DP=714;FS=0.0  |
| 45909 | chrY | 23336162 | . | T | A   | 265.36   | PASS          | AC=2;AF=0.029;AN=70;DP=515;FS=0.0  |
| 45910 | chrY | 23342709 | . | A | C   | 12608.91 | PASS          | AC=66;AF=1.00;AN=66;DP=41          |
| 45911 | chrY | 23354909 | . | A | C   | 12486.43 | PASS          | AC=69;AF=0.986;AN=70;Base          |
| 45912 | chrY | 23357626 | . | A | G   | 308.11   | PASS          | AC=2;AF=0.029;AN=70;DP=672;FS=0.0  |
| 45913 | chrY | 23379254 | . | A | G   | 19358.97 | PASS          | AC=68;AF=1.00;AN=68;DP=64          |
| 45914 | chrY | 23381961 | . | G | C   | 1160.83  | PASS          | AC=6;AF=0.158;AN=38;DP=195;FS=0.0  |
| 45915 | chrY | 23382337 | . | A | C   | 1109.75  | PASS          | AC=6;AF=0.115;AN=52;DP=180;FS=0.0  |
| 45916 | chrY | 23388830 | . | T | A   | 10210.46 | PASS          | AC=48;AF=0.727;AN=66;DP=5          |
| 45917 | chrY | 23389596 | . | C | T   | 71.17    | PASS          | AC=2;AF=0.045;AN=44;DP=135;FS=0.0  |
| 45918 | chrY | 23398533 | . | A | G   | 788.71   | PASS          | AC=6;AF=0.167;AN=36;DP=168;FS=0.0  |
| 45919 | chrY | 23403749 | . | A | G   | 12715.93 | PASS          | AC=70;AF=1.00;AN=70;BaseQ          |
| 45920 | chrY | 23406293 | . | C | A   | 768.89   | PASS          | AC=6;AF=0.086;AN=70;DP=470;FS=0.0  |
| 45921 | chrY | 23412275 | . | T | C   | 156.16   | PASS          | AC=2;AF=0.029;AN=68;DP=402;FS=0.0  |
| 45922 | chrY | 23423267 | . | C | T   | 1071.37  | PASS          | AC=6;AF=0.086;AN=70;DP=589;FS=0.0  |
| 45923 | chrY | 23428833 | . | G | T   | 449.96   | PASS          | AC=4;AF=0.059;AN=68;DP=528;FS=0.0  |
| 45924 | chrY | 23430285 | . | C | T   | 7157.49  | PASS          | AC=52;AF=0.813;AN=64;DP=339;FS=0.0 |
| 45925 | chrY | 23431541 | . | G | A   | 4081.33  | PASS          | AC=32;AF=1.00;AN=32;DP=159;FS=0.0  |
| 45926 | chrY | 23445426 | . | C | T   | 1208.23  | PASS          | AC=26;AF=0.591;AN=44;DP=170;FS=0.0 |
| 45927 | chrY | 23452965 | . | C | T   | 5663.21  | PASS          | AC=54;AF=1.00;AN=54;BaseQRankSum=  |
| 45928 | chrY | 23459693 | . | G | C   | 66.22    | PASS          | AC=2;AF=0.031;AN=64;DP=214;FS=0.0  |
| 45929 | chrY | 23461630 | . | A | T   | 591.67   | PASS          | AC=4;AF=0.059;AN=68;DP=342;FS=0.0  |
| 45930 | chrY | 23462665 | . | T | C   | 15344.72 | PASS          | AC=52;AF=0.743;AN=70;DP=6          |
| 45931 | chrY | 23463736 | . | G | T   | 31.28    | PASS          | AC=1;AF=0.015;AN=68;BaseQRankSum=  |
| 45932 | chrY | 23464235 | . | A | G   | 295.62   | PASS          | AC=2;AF=0.029;AN=70;DP=377;FS=0.0  |
| 45933 | chrY | 23467316 | . | G | T   | 505.25   | PASS          | AC=2;AF=0.029;AN=70;DP=643;FS=0.0  |
| 45934 | chrY | 23468987 | . | T | C   | 3780.66  | PASS          | AC=26;AF=0.371;AN=70;DP=426;FS=0.0 |
| 45935 | chrY | 23476015 | . | T | G   | 161.87   | PASS          | AC=6;AF=0.111;AN=54;DP=195;FS=0.0  |
| 45936 | chrY | 23476034 | . | T | G   | 97.79    | PASS          | AC=2;AF=0.048;AN=42;BaseQRankSum=  |
| 45937 | chrY | 23476936 | . | T | G,A | 22161.96 | PASS          | AC=62,6;AF=0.912,0.088;AN          |
| 45938 | chrY | 23477687 | . | C | T   | 320.81   | PASS          | AC=4;AF=0.061;AN=66;DP=301;FS=0.0  |
| 45939 | chrY | 23478898 | . | C | T   | 151.52   | PASS          | AC=1;AF=0.014;AN=70;BaseQRankSum=  |
| 45940 | chrY | 23479535 | . | T | C   | 747.83   | PASS          | AC=6;AF=0.086;AN=70;DP=498;FS=0.0  |
| 45941 | chrY | 23481449 | . | C | T   | 4474.84  | PASS          | AC=36;AF=0.545;AN=66;DP=361;FS=0.0 |
| 45942 | chrY | 23488146 | . | A | G   | 41.01    | PASS          | AC=1;AF=0.015;AN=66;BaseQRankSum=  |
| 45943 | chrY | 23488169 | . | T | C   | 41.22    | PASS          | AC=1;AF=0.017;AN=60;BaseQRankSum=  |
| 45944 | chrY | 23489203 | . | T | C   | 25840.90 | PASS          | AC=70;AF=1.00;AN=70;BaseQ          |
| 45945 | chrY | 23490290 | . | C | T   | 1354.82  | PASS          | AC=6;AF=0.088;AN=68;DP=607;FS=0.0  |
| 45946 | chrY | 23494307 | . | G | A   | 1314.84  | PASS          | AC=6;AF=0.086;AN=70;DP=416;FS=0.0  |
| 45947 | chrY | 23497113 | . | T | C   | 115.51   | PASS          | AC=2;AF=0.029;AN=70;DP=565;FS=0.0  |
| 45948 | chrY | 23497646 | . | A | C   | 823.49   | PASS          | AC=6;AF=0.088;AN=68;DP=422;FS=0.0  |
| 45949 | chrY | 23501736 | . | C | T   | 182.20   | PASS          | AC=2;AF=0.029;AN=70;DP=843;FS=0.0  |
| 45950 | chrY | 23511453 | . | A | G   | 34.01    | PASS          | AC=1;AF=0.015;AN=66;BaseQRankSum=  |
| 45951 | chrY | 23512530 | . | C | T   | 142.34   | PASS          | AC=8;AF=0.308;AN=26;DP=148;FS=0.0  |
| 45952 | chrY | 23514275 | . | G | C   | 1536.87  | PASS          | AC=6;AF=0.107;AN=56;DP=213;FS=0.0  |
| 45953 | chrY | 23514526 | . | T | A   | 1057.03  | PASS          | AC=6;AF=0.086;AN=70;DP=483;FS=0.0  |
| 45954 | chrY | 23515071 | . | A | G   | 3573.60  | PASS          | AC=42;AF=0.636;AN=66;DP=278;FS=0.0 |
| 45955 | chrY | 23516532 | . | C | G   | 53.90    | PASS          | AC=2;AF=0.067;AN=30;DP=179;FS=0.0  |
| 45956 | chrY | 23516548 | . | G | C   | 50.67    | PASS          | AC=2;AF=0.059;AN=34;DP=187;FS=0.0  |
| 45957 | chrY | 23520037 | . | G | C   | 356.87   | PASS          | AC=7;AF=0.350;AN=20;BaseQRankSum=  |
| 45958 | chrY | 23520057 | . | C | A   | 153.98   | my_snp_filter | AC=4;AF=0.200;AN=20;BaseQ          |
| 45959 | chrY | 23521336 | . | A | G   | 1522.18  | PASS          | AC=6;AF=0.333;AN=18;DP=191;FS=0.0  |
| 45960 | chrY | 23530416 | . | T | C   | 201.49   | PASS          | AC=4;AF=0.063;AN=64;DP=226;FS=0.0  |
| 45961 | chrY | 23533739 | . | C | A   | 352.82   | PASS          | AC=2;AF=0.029;AN=70;DP=303;FS=0.0  |
| 45962 | chrY | 23545476 | . | T | G   | 8466.53  | PASS          | AC=31;AF=0.500;AN=62;BaseQRankSum= |
| 45963 | chrY | 23545477 | . | A | G   | 8759.80  | PASS          | AC=31;AF=0.500;AN=62;BaseQRankSum= |
| 45964 | chrY | 23547020 | . | G | A   | 410.66   | PASS          | AC=2;AF=0.029;AN=70;DP=661;FS=0.0  |
| 45965 | chrY | 23550924 | . | C | A   | 7843.95  | PASS          | AC=54;AF=0.818;AN=66;BaseQRankSum= |
| 45966 | chrY | 23552740 | . | A | C   | 889.69   | PASS          | AC=19;AF=0.500;AN=38;BaseQRankSum= |
| 45967 | chrY | 23553006 | . | C | T   | 28666.22 | PASS          | AC=52;AF=0.743;AN=70;DP=1          |
| 45968 | chrY | 23554711 | . | C | T   | 3588.78  | PASS          | AC=42;AF=0.700;AN=60;DP=266;FS=0.0 |
| 45969 | chrY | 23560169 | . | G | C   | 8166.77  | PASS          | AC=46;AF=0.657;AN=70;DP=419;FS=0.0 |
| 45970 | chrY | 23566654 | . | G | T   | 839.83   | PASS          | AC=6;AF=0.088;AN=68;DP=393;FS=0.0  |
| 45971 | chrY | 23566954 | . | T | C   | 1121.18  | PASS          | AC=6;AF=0.086;AN=70;DP=552;FS=0.0  |
| 45972 | chrY | 23568995 | . | A | G   | 3982.37  | PASS          | AC=34;AF=1.00;AN=34;DP=148;FS=0.0  |
| 45973 | chrY | 23570975 | . | C | T   | 1713.96  | PASS          | AC=5;AF=0.071;AN=70;BaseQRankSum=  |
| 45974 | chrY | 23570978 | . | G | C   | 1714.03  | PASS          | AC=5;AF=0.071;AN=70;BaseQRankSum=  |
| 45975 | chrY | 23573825 | . | G | C   | 1451.10  | PASS          | AC=6;AF=0.086;AN=70;DP=512;FS=0.0  |
| 45976 | chrY | 23581979 | . | A | T   | 37.11    | PASS          | AC=1;AF=0.014;AN=70;BaseQRankSum=  |
| 45977 | chrY | 23581987 | . | G | A   | 37.22    | PASS          | AC=1;AF=0.014;AN=70;BaseQRankSum=  |
| 45978 | chrY | 23581991 | . | T | G   | 37.18    | PASS          | AC=1;AF=0.015;AN=68;BaseQRankSum=  |
| 45979 | chrY | 23582264 | . | T | G   | 163.38   | PASS          | AC=2;AF=0.029;AN=70;DP=429;FS=0.0  |
| 45980 | chrY | 23582451 | . | T | C   | 394.77   | PASS          | AC=2;AF=0.029;AN=68;DP=377;FS=0.0  |

|       |      |          |   |   |   |          |               |                                   |
|-------|------|----------|---|---|---|----------|---------------|-----------------------------------|
| 45981 | chrY | 23584070 | . | A | G | 30.52    | PASS          | AC=1;AF=0.014;AN=70;BaseQRankSum= |
| 45982 | chrY | 23590198 | . | G | A | 403.33   | PASS          | AC=2;AF=0.029;AN=70;BaseQRankSum= |
| 45983 | chrY | 23591456 | . | T | A | 2275.45  | PASS          | AC=12;AF=0.171;AN=70;DP=599;FS=0. |
| 45984 | chrY | 23594099 | . | G | C | 361.73   | PASS          | AC=2;AF=0.029;AN=70;DP=510;FS=0.0 |
| 45985 | chrY | 23595017 | . | C | G | 848.42   | PASS          | AC=6;AF=0.086;AN=70;BaseQRankSum= |
| 45986 | chrY | 23596923 | . | T | G | 874.31   | PASS          | AC=6;AF=0.167;AN=36;DP=163;FS=0.0 |
| 45987 | chrY | 23600700 | . | T | C | 1225.28  | PASS          | AC=10;AF=0.455;AN=22;DP=138;FS=0. |
| 45988 | chrY | 23605622 | . | C | T | 1145.64  | PASS          | AC=6;AF=0.086;AN=70;DP=510;FS=0.0 |
| 45989 | chrY | 23608341 | . | G | C | 326.24   | PASS          | AC=2;AF=0.029;AN=70;DP=432;FS=0.0 |
| 45990 | chrY | 23617006 | . | G | A | 2668.55  | PASS          | AC=12;AF=0.171;AN=70;DP=662;FS=0  |
| 45991 | chrY | 23617893 | . | T | G | 1039.55  | PASS          | AC=6;AF=0.086;AN=70;DP=516;FS=0.0 |
| 45992 | chrY | 23621548 | . | C | T | 818.46   | PASS          | AC=6;AF=0.086;AN=70;DP=437;FS=0.0 |
| 45993 | chrY | 23627363 | . | G | A | 1420.11  | PASS          | AC=6;AF=0.086;AN=70;DP=706;FS=0.0 |
| 45994 | chrY | 23627949 | . | T | C | 900.44   | PASS          | AC=6;AF=0.086;AN=70;DP=393;FS=0.0 |
| 45995 | chrY | 23629298 | . | G | A | 957.73   | PASS          | AC=6;AF=0.094;AN=64;DP=286;FS=0.0 |
| 45996 | chrY | 23631629 | . | A | C | 25589.89 | PASS          | AC=70;AF=1.00;AN=70;BaseQ         |
| 45997 | chrY | 23634362 | . | G | A | 1532.49  | PASS          | AC=6;AF=0.086;AN=70;DP=591;FS=0.0 |
| 45998 | chrY | 23636750 | . | C | T | 13997.07 | PASS          | AC=52;AF=0.743;AN=70;DP=5         |
| 45999 | chrY | 23637491 | . | G | A | 12014.31 | PASS          | AC=46;AF=0.657;AN=70;DP=5         |
| 46000 | chrY | 23639224 | . | G | A | 1202.06  | my_snp_filter | AC=6;AF=0.120;AN=50;DP=18         |
| 46001 | chrY | 23648856 | . | C | T | 780.54   | PASS          | AC=6;AF=0.088;AN=68;DP=348;FS=0.0 |
| 46002 | chrY | 23650701 | . | A | C | 1118.06  | PASS          | AC=6;AF=0.088;AN=68;DP=292;FS=0.0 |
| 46003 | chrY | 23655112 | . | A | G | 15133.90 | PASS          | AC=70;AF=1.00;AN=70;DP=47         |
| 46004 | chrY | 23655813 | . | G | C | 791.91   | my_snp_filter | AC=14;AF=0.538;AN=26;DP=7         |
| 46005 | chrY | 23672302 | . | A | C | 153.94   | my_snp_filter | AC=4;AF=0.400;AN=10;BaseQ         |
| 46006 | chrY | 23672310 | . | G | C | 240.56   | my_snp_filter | AC=1;AF=0.125;AN=8;BaseQR         |
| 46007 | chrY | 23702825 | . | A | G | 415.78   | my_snp_filter | AC=3;AF=0.115;AN=26;BaseQ         |
| 46008 | chrY | 23710001 | . | G | A | 45.28    | my_snp_filter | AC=2;AF=0.056;AN=36;DP=11         |
| 46009 | chrY | 23729951 | . | T | C | 16448.70 | PASS          | AC=58;AF=0.829;AN=70;DP=6         |
| 46010 | chrY | 23732148 | . | G | A | 184.82   | PASS          | AC=2;AF=0.029;AN=70;DP=583;FS=0.0 |
| 46011 | chrY | 23736615 | . | A | T | 1282.87  | PASS          | AC=6;AF=0.086;AN=70;DP=378;FS=0.0 |
| 46012 | chrY | 23740943 | . | C | T | 1292.80  | PASS          | AC=6;AF=0.086;AN=70;DP=716;FS=0.0 |
| 46013 | chrY | 23741141 | . | A | T | 1688.01  | PASS          | AC=6;AF=0.086;AN=70;DP=668;FS=0.0 |
| 46014 | chrY | 23749005 | . | C | T | 763      | PASS          | AC=6;AF=0.086;AN=70;DP=821;FS=0.0 |
| 46015 | chrY | 23754859 | . | C | T | 779.36   | PASS          | AC=2;AF=0.029;AN=68;DP=736;FS=0.0 |
| 46016 | chrY | 23755132 | . | G | A | 1408.91  | PASS          | AC=6;AF=0.086;AN=70;DP=760;FS=0.0 |
| 46017 | chrY | 23761675 | . | A | C | 6629.76  | PASS          | AC=20;AF=0.400;AN=50;DP=576;FS=0. |
| 46018 | chrY | 23764923 | . | C | A | 1471.29  | PASS          | AC=6;AF=0.086;AN=70;DP=709;FS=0.0 |
| 46019 | chrY | 23765556 | . | A | G | 2436.96  | PASS          | AC=12;AF=0.171;AN=70;DP=783;FS=0. |
| 46020 | chrY | 23767955 | . | G | A | 1669.23  | PASS          | AC=6;AF=0.086;AN=70;DP=634;FS=0.0 |
| 46021 | chrY | 23768077 | . | G | T | 2311.92  | PASS          | AC=6;AF=0.086;AN=70;DP=758;FS=0.0 |
| 46022 | chrY | 23768635 | . | G | T | 20255.18 | PASS          | AC=46;AF=0.657;AN=70;Base         |
| 46023 | chrY | 23769373 | . | A | G | 15728.01 | PASS          | AC=50;AF=0.735;AN=68;Base         |
| 46024 | chrY | 23778216 | . | A | G | 50.91    | PASS          | AC=2;AF=0.063;AN=32;DP=148;FS=0.0 |
| 46025 | chrY | 23785261 | . | C | G | 3399.83  | PASS          | AC=38;AF=0.559;AN=68;DP=307;FS=0. |
| 46026 | chrY | 23791459 | . | T | C | 623.44   | PASS          | AC=6;AF=0.086;AN=70;DP=438;FS=0.0 |
| 46027 | chrY | 23791591 | . | A | G | 31.68    | my_snp_filter | AC=1;AF=0.014;AN=70;BaseQ         |
| 46028 | chrY | 23791592 | . | T | G | 31.66    | my_snp_filter | AC=1;AF=0.014;AN=70;BaseQ         |
| 46029 | chrY | 23791596 | . | C | T | 31.86    | my_snp_filter | AC=1;AF=0.014;AN=70;BaseQ         |
| 46030 | chrY | 23791602 | . | A | G | 31.75    | my_snp_filter | AC=1;AF=0.014;AN=70;BaseQ         |
| 46031 | chrY | 23791604 | . | G | C | 31.75    | my_snp_filter | AC=1;AF=0.014;AN=70;BaseQ         |
| 46032 | chrY | 23791605 | . | C | A | 32.03    | my_snp_filter | AC=1;AF=0.014;AN=70;BaseQ         |
| 46033 | chrY | 23791628 | . | T | G | 43.67    | PASS          | AC=1;AF=0.015;AN=68;BaseQRankSum= |
| 46034 | chrY | 23791631 | . | C | T | 40.92    | PASS          | AC=1;AF=0.015;AN=68;BaseQRankSum= |
| 46035 | chrY | 23791645 | . | T | C | 43.63    | PASS          | AC=1;AF=0.015;AN=68;BaseQRankSum= |
| 46036 | chrY | 23791649 | . | C | T | 46.91    | PASS          | AC=1;AF=0.015;AN=68;BaseQRankSum= |
| 46037 | chrY | 23791655 | . | G | T | 49.85    | PASS          | AC=1;AF=0.015;AN=66;BaseQRankSum= |
| 46038 | chrY | 23791658 | . | T | C | 49.95    | PASS          | AC=1;AF=0.015;AN=66;BaseQRankSum= |
| 46039 | chrY | 23791674 | . | G | A | 49.91    | PASS          | AC=1;AF=0.015;AN=66;BaseQRankSum= |
| 46040 | chrY | 23791682 | . | G | A | 46.68    | PASS          | AC=1;AF=0.015;AN=68;BaseQRankSum= |
| 46041 | chrY | 23791690 | . | G | C | 40.66    | PASS          | AC=1;AF=0.015;AN=68;BaseQRankSum= |
| 46042 | chrY | 23791698 | . | C | G | 37.46    | my_snp_filter | AC=1;AF=0.015;AN=68;BaseQ         |
| 46043 | chrY | 23792820 | . | A | T | 316.67   | PASS          | AC=2;AF=0.029;AN=70;DP=405;FS=0.0 |
| 46044 | chrY | 23793562 | . | T | A | 3619.34  | PASS          | AC=36;AF=0.545;AN=66;DP=316;FS=6. |
| 46045 | chrY | 23793568 | . | C | T | 30.52    | my_snp_filter | AC=2;AF=0.029;AN=68;BaseQ         |
| 46046 | chrY | 23793571 | . | G | A | 30.18    | my_snp_filter | AC=2;AF=0.029;AN=68;BaseQ         |
| 46047 | chrY | 23793612 | . | C | T | 111.45   | my_snp_filter | AC=4;AF=0.057;AN=70;BaseQ         |
| 46048 | chrY | 23793620 | . | A | G | 117.94   | my_snp_filter | AC=4;AF=0.059;AN=68;BaseQ         |
| 46049 | chrY | 23793653 | . | A | G | 114.08   | PASS          | AC=3;AF=0.044;AN=68;BaseQRankSum= |
| 46050 | chrY | 23793654 | . | C | G | 112.25   | PASS          | AC=3;AF=0.044;AN=68;BaseQRankSum= |
| 46051 | chrY | 23793655 | . | A | G | 112.36   | PASS          | AC=3;AF=0.044;AN=68;BaseQRankSum= |
| 46052 | chrY | 23793657 | . | T | G | 113.14   | PASS          | AC=3;AF=0.044;AN=68;BaseQRankSum= |
| 46053 | chrY | 23793658 | . | C | T | 114.77   | PASS          | AC=3;AF=0.044;AN=68;BaseQRankSum= |
| 46054 | chrY | 23793667 | . | A | G | 114.27   | PASS          | AC=3;AF=0.043;AN=70;BaseQRankSum= |
| 46055 | chrY | 23793669 | . | T | G | 115.13   | PASS          | AC=3;AF=0.043;AN=70;BaseQRankSum= |
| 46056 | chrY | 23793682 | . | G | T | 115.40   | my_snp_filter | AC=4;AF=0.059;AN=68;BaseQ         |

|       |      |          |   |   |   |          |               |                                    |
|-------|------|----------|---|---|---|----------|---------------|------------------------------------|
| 46057 | chrY | 23793688 | . | A | G | 112.95   | my_snp_filter | AC=4;AF=0.059;AN=68;BaseQ          |
| 46058 | chrY | 23793696 | . | C | A | 101.44   | my_snp_filter | AC=4;AF=0.059;AN=68;BaseQ          |
| 46059 | chrY | 23793697 | . | T | A | 104.59   | my_snp_filter | AC=4;AF=0.059;AN=68;BaseQ          |
| 46060 | chrY | 23793701 | . | C | T | 100.28   | my_snp_filter | AC=3;AF=0.043;AN=70;BaseQ          |
| 46061 | chrY | 23793716 | . | C | A | 54.35    | my_snp_filter | AC=2;AF=0.029;AN=70;BaseQ          |
| 46062 | chrY | 23793718 | . | C | T | 54.71    | my_snp_filter | AC=2;AF=0.029;AN=70;BaseQ          |
| 46063 | chrY | 23793749 | . | A | C | 97.18    | PASS          | AC=2;AF=0.029;AN=70;BaseQRankSum=  |
| 46064 | chrY | 23793757 | . | C | T | 52.70    | PASS          | AC=1;AF=0.014;AN=70;BaseQRankSum=  |
| 46065 | chrY | 23793848 | . | T | C | 36.07    | my_snp_filter | AC=1;AF=0.014;AN=70;BaseQ          |
| 46066 | chrY | 23793862 | . | G | A | 49.23    | my_snp_filter | AC=2;AF=0.029;AN=68;BaseQ          |
| 46067 | chrY | 23793873 | . | G | C | 143.19   | my_snp_filter | AC=5;AF=0.071;AN=70;BaseQ          |
| 46068 | chrY | 23793876 | . | T | C | 134.66   | my_snp_filter | AC=5;AF=0.071;AN=70;BaseQ          |
| 46069 | chrY | 23793898 | . | C | A | 341.51   | PASS          | AC=5;AF=0.071;AN=70;BaseQRankSum=  |
| 46070 | chrY | 23793906 | . | T | G | 367.14   | PASS          | AC=6;AF=0.086;AN=70;BaseQRankSum=  |
| 46071 | chrY | 23793910 | . | T | C | 408.69   | PASS          | AC=4;AF=0.057;AN=70;BaseQRankSum=  |
| 46072 | chrY | 23793919 | . | C | T | 61.52    | my_snp_filter | AC=2;AF=0.029;AN=70;DP=47          |
| 46073 | chrY | 23800808 | . | A | G | 8898.36  | PASS          | AC=48;AF=0.727;AN=66;DP=490;FS=0.  |
| 46074 | chrY | 23804795 | . | C | T | 420.86   | PASS          | AC=6;AF=0.097;AN=62;DP=217;FS=0.0  |
| 46075 | chrY | 23808440 | . | G | A | 298.36   | PASS          | AC=2;AF=0.029;AN=70;DP=574;FS=0.0  |
| 46076 | chrY | 23811761 | . | G | T | 14460.37 | PASS          | AC=69;AF=0.986;AN=70;BaseQ         |
| 46077 | chrY | 23813856 | . | A | G | 12404.02 | my_snp_filter | AC=70;AF=1.00;AN=                  |
| 46078 | chrY | 23813973 | . | C | T | 487.11   | PASS          | AC=2;AF=0.029;AN=70;DP=601;FS=0.0  |
| 46079 | chrY | 23818600 | . | T | C | 737.32   | PASS          | AC=6;AF=0.100;AN=60;BaseQRankSum=  |
| 46080 | chrY | 23821790 | . | C | T | 11722.50 | PASS          | AC=56;AF=0.824;AN=68;DP=5          |
| 46081 | chrY | 23824207 | . | T | A | 921.63   | PASS          | AC=6;AF=0.120;AN=50;DP=165;FS=0.0  |
| 46082 | chrY | 23826024 | . | A | T | 89.42    | PASS          | AC=2;AF=0.029;AN=70;DP=610;FS=0.0  |
| 46083 | chrY | 23830627 | . | G | T | 8698.18  | PASS          | AC=46;AF=0.657;AN=70;DP=446;FS=0.  |
| 46084 | chrY | 23832815 | . | T | C | 477.15   | PASS          | AC=8;AF=0.667;AN=12;DP=34;FS=0.00  |
| 46085 | chrY | 23832820 | . | T | C | 322.61   | PASS          | AC=6;AF=0.375;AN=16;DP=29;FS=0.00  |
| 46086 | chrY | 23832825 | . | T | C | 105.91   | PASS          | AC=2;AF=0.167;AN=12;DP=24;FS=0.00  |
| 46087 | chrY | 23835014 | . | T | A | 7699.13  | PASS          | AC=56;AF=0.824;AN=68;DP=365;FS=0.  |
| 46088 | chrY | 23842109 | . | C | T | 1402.12  | PASS          | AC=26;AF=0.591;AN=44;DP=214;FS=0.  |
| 46089 | chrY | 23845409 | . | C | T | 13967.92 | PASS          | AC=68;AF=1.00;AN=68;DP=45          |
| 46090 | chrY | 23850545 | . | C | G | 214.27   | PASS          | AC=2;AF=0.029;AN=70;DP=519;FS=0.0  |
| 46091 | chrY | 23856842 | . | G | A | 2973.51  | PASS          | AC=36;AF=0.600;AN=60;DP=235;FS=0.  |
| 46092 | chrY | 23857504 | . | T | C | 534.67   | PASS          | AC=6;AF=0.086;AN=70;DP=415;FS=0.0  |
| 46093 | chrY | 23858398 | . | C | T | 1985.59  | PASS          | AC=6;AF=0.086;AN=70;DP=690;FS=0.0  |
| 46094 | chrY | 23860481 | . | T | A | 91.97    | PASS          | AC=2;AF=0.042;AN=48;DP=173;FS=0.0  |
| 46095 | chrY | 23867279 | . | A | G | 7183.61  | PASS          | AC=46;AF=0.657;AN=70;DP=445;FS=0.  |
| 46096 | chrY | 23870139 | . | C | G | 23981.75 | PASS          | AC=58;AF=0.829;AN=70;BaseQ         |
| 46097 | chrY | 23872560 | . | A | G | 8678.07  | PASS          | AC=44;AF=0.647;AN=68;DP=485;FS=0.  |
| 46098 | chrY | 23876105 | . | C | G | 1258.25  | PASS          | AC=6;AF=0.086;AN=70;DP=416;FS=0.0  |
| 46099 | chrY | 23881784 | . | G | A | 921.30   | PASS          | AC=6;AF=0.091;AN=66;DP=272;FS=0.0  |
| 46100 | chrY | 23888931 | . | C | T | 1813.54  | PASS          | AC=26;AF=0.591;AN=44;DP=202;FS=0.  |
| 46101 | chrY | 23889060 | . | G | A | 1261.81  | PASS          | AC=6;AF=0.097;AN=62;DP=221;FS=0.0  |
| 46102 | chrY | 23889996 | . | G | T | 1262.90  | PASS          | AC=6;AF=0.086;AN=70;DP=396;FS=0.0  |
| 46103 | chrY | 23890429 | . | A | T | 884.56   | PASS          | AC=6;AF=0.086;AN=70;DP=535;FS=0.0  |
| 46104 | chrY | 23893846 | . | T | A | 10047.53 | my_snp_filter | AC=50;AF=0.735;AN=                 |
| 46105 | chrY | 23896971 | . | T | C | 211.47   | PASS          | AC=4;AF=0.125;AN=32;BaseQRankSum=  |
| 46106 | chrY | 23897027 | . | G | A | 3671.78  | PASS          | AC=14;AF=0.269;AN=52;BaseQRankSum= |
| 46107 | chrY | 23897031 | . | G | T | 3722.08  | PASS          | AC=14;AF=0.259;AN=54;BaseQRankSum= |
| 46108 | chrY | 23897087 | . | C | T | 4604.07  | PASS          | AC=27;AF=0.409;AN=66;BaseQRankSum= |
| 46109 | chrY | 23897175 | . | G | C | 9640.28  | PASS          | AC=30;AF=0.441;AN=68;BaseQRankSum= |
| 46110 | chrY | 23897195 | . | G | A | 10467.63 | PASS          | AC=30;AF=0.429;AN=70;BaseQ         |
| 46111 | chrY | 23897203 | . | T | A | 10402.78 | PASS          | AC=30;AF=0.429;AN=70;BaseQ         |
| 46112 | chrY | 23897221 | . | G | C | 9374.77  | PASS          | AC=29;AF=0.426;AN=68;BaseQRankSum= |
| 46113 | chrY | 23897261 | . | T | C | 7433.47  | PASS          | AC=28;AF=0.400;AN=70;BaseQRankSum= |
| 46114 | chrY | 23897294 | . | T | C | 54.85    | PASS          | AC=3;AF=0.045;AN=66;BaseQRankSum=  |
| 46115 | chrY | 23897295 | . | A | G | 52.86    | PASS          | AC=3;AF=0.045;AN=66;BaseQRankSum=  |
| 46116 | chrY | 23897320 | . | G | A | 5408.56  | PASS          | AC=15;AF=0.214;AN=70;BaseQRankSum= |
| 46117 | chrY | 23897322 | . | T | A | 5414.19  | PASS          | AC=15;AF=0.214;AN=70;BaseQRankSum= |
| 46118 | chrY | 23897324 | . | G | A | 5461.81  | PASS          | AC=15;AF=0.214;AN=70;BaseQRankSum= |
| 46119 | chrY | 23897358 | . | C | A | 4629.44  | PASS          | AC=27;AF=0.386;AN=70;BaseQRankSum= |
| 46120 | chrY | 23897407 | . | G | A | 13396.77 | PASS          | AC=32;AF=0.457;AN=70;BaseQ         |
| 46121 | chrY | 23897458 | . | A | G | 16784.81 | PASS          | AC=32;AF=0.471;AN=68;BaseQ         |
| 46122 | chrY | 23897501 | . | G | A | 286.44   | PASS          | AC=1;AF=0.014;AN=70;BaseQRankSum=  |
| 46123 | chrY | 23897532 | . | G | T | 11484.79 | PASS          | AC=33;AF=0.485;AN=68;BaseQ         |
| 46124 | chrY | 23897553 | . | C | G | 10418.38 | PASS          | AC=33;AF=0.471;AN=70;BaseQ         |
| 46125 | chrY | 23897564 | . | T | C | 11848.49 | PASS          | AC=29;AF=0.414;AN=70;BaseQ         |
| 46126 | chrY | 23897567 | . | A | G | 11947.20 | PASS          | AC=29;AF=0.414;AN=70;BaseQ         |
| 46127 | chrY | 23897572 | . | C | T | 11928.15 | PASS          | AC=29;AF=0.414;AN=70;BaseQ         |
| 46128 | chrY | 23897597 | . | G | C | 9198.69  | PASS          | AC=29;AF=0.414;AN=70;BaseQRankSum= |
| 46129 | chrY | 23897611 | . | C | A | 8844.59  | PASS          | AC=29;AF=0.414;AN=70;BaseQRankSum= |
| 46130 | chrY | 23897633 | . | T | G | 9875.40  | PASS          | AC=26;AF=0.382;AN=68;BaseQRankSum= |
| 46131 | chrY | 23897634 | . | T | A | 9911.88  | PASS          | AC=26;AF=0.382;AN=68;BaseQRankSum= |
| 46132 | chrY | 23897635 | . | T | C | 9813.88  | PASS          | AC=26;AF=0.382;AN=68;BaseQRankSum= |

|       |      |          |   |   |   |          |      |                                        |
|-------|------|----------|---|---|---|----------|------|----------------------------------------|
| 46133 | chrY | 23897659 | . | C | A | 8659.81  | PASS | AC=25;AF=0.368;AN=68;BaseQRankSum      |
| 46134 | chrY | 23897668 | . | G | A | 8884.88  | PASS | AC=25;AF=0.368;AN=68;BaseQRankSum      |
| 46135 | chrY | 23897670 | . | G | A | 8886.88  | PASS | AC=25;AF=0.368;AN=68;BaseQRankSum      |
| 46136 | chrY | 23897672 | . | T | C | 8733.72  | PASS | AC=24;AF=0.353;AN=68;BaseQRankSum      |
| 46137 | chrY | 23897698 | . | C | T | 9298.59  | PASS | AC=28;AF=0.400;AN=70;BaseQRankSum      |
| 46138 | chrY | 23897700 | . | G | A | 9591.40  | PASS | AC=29;AF=0.414;AN=70;BaseQRankSum      |
| 46139 | chrY | 23897701 | . | T | C | 9588.59  | PASS | AC=29;AF=0.414;AN=70;BaseQRankSum      |
| 46140 | chrY | 23897703 | . | A | G | 9529.66  | PASS | AC=29;AF=0.414;AN=70;BaseQRankSum      |
| 46141 | chrY | 23897724 | . | A | C | 9530.10  | PASS | AC=32;AF=0.457;AN=70;BaseQRankSum      |
| 46142 | chrY | 23897728 | . | T | G | 9687.10  | PASS | AC=32;AF=0.457;AN=70;BaseQRankSum      |
| 46143 | chrY | 23897729 | . | C | T | 9711.10  | PASS | AC=32;AF=0.457;AN=70;BaseQRankSum      |
| 46144 | chrY | 23897738 | . | T | G | 10130.59 | PASS | PASS AC=31;AF=0.443;AN=70;BaseQRankSum |
| 46145 | chrY | 23897750 | . | C | T | 9127.61  | PASS | AC=31;AF=0.443;AN=70;BaseQRankSum      |
| 46146 | chrY | 23897770 | . | C | T | 9048.32  | PASS | AC=32;AF=0.457;AN=70;BaseQRankSum      |
| 46147 | chrY | 23897819 | . | C | T | 5506.55  | PASS | AC=30;AF=0.429;AN=70;BaseQRankSum      |
| 46148 | chrY | 23897840 | . | A | G | 67.05    | PASS | AC=1;AF=0.014;AN=70;BaseQRankSum       |
| 46149 | chrY | 23897872 | . | C | G | 6293.05  | PASS | AC=18;AF=0.265;AN=68;BaseQRankSum      |
| 46150 | chrY | 23897880 | . | G | T | 6337.95  | PASS | AC=18;AF=0.265;AN=68;BaseQRankSum      |
| 46151 | chrY | 23897885 | . | A | T | 6293.64  | PASS | AC=18;AF=0.265;AN=68;BaseQRankSum      |
| 46152 | chrY | 23897901 | . | G | C | 5767.83  | PASS | AC=17;AF=0.250;AN=68;BaseQRankSum      |
| 46153 | chrY | 23897903 | . | A | C | 5807.04  | PASS | AC=17;AF=0.250;AN=68;BaseQRankSum      |
| 46154 | chrY | 23897924 | . | A | C | 5016.35  | PASS | AC=15;AF=0.214;AN=70;BaseQRankSum      |
| 46155 | chrY | 23897941 | . | C | T | 5454.39  | PASS | AC=16;AF=0.229;AN=70;BaseQRankSum      |
| 46156 | chrY | 23897953 | . | T | G | 5988.85  | PASS | AC=18;AF=0.257;AN=70;BaseQRankSum      |
| 46157 | chrY | 23897965 | . | G | A | 5906.45  | PASS | AC=23;AF=0.329;AN=70;BaseQRankSum      |
| 46158 | chrY | 23898004 | . | T | A | 709.79   | PASS | AC=3;AF=0.058;AN=52;BaseQRankSum       |
| 46159 | chrY | 23898108 | . | A | G | 8959.22  | PASS | AC=32;AF=0.457;AN=70;BaseQRankSum      |
| 46160 | chrY | 23898115 | . | C | A | 8982.60  | PASS | AC=32;AF=0.457;AN=70;BaseQRankSum      |
| 46161 | chrY | 23898129 | . | C | T | 7560.91  | PASS | AC=33;AF=0.471;AN=70;BaseQRankSum      |
| 46162 | chrY | 23898172 | . | A | G | 7561.53  | PASS | AC=25;AF=0.368;AN=68;BaseQRankSum      |
| 46163 | chrY | 23898183 | . | G | C | 7490.31  | PASS | AC=22;AF=0.324;AN=68;BaseQRankSum      |
| 46164 | chrY | 23898199 | . | C | A | 8527.68  | PASS | AC=22;AF=0.324;AN=68;BaseQRankSum      |
| 46165 | chrY | 23898233 | . | A | G | 8877.06  | PASS | AC=22;AF=0.324;AN=68;BaseQRankSum      |
| 46166 | chrY | 23898256 | . | C | T | 8796.30  | PASS | AC=23;AF=0.348;AN=66;BaseQRankSum      |
| 46167 | chrY | 23898258 | . | G | A | 8778.90  | PASS | AC=23;AF=0.348;AN=66;BaseQRankSum      |
| 46168 | chrY | 23898259 | . | T | C | 8682.54  | PASS | AC=23;AF=0.348;AN=66;BaseQRankSum      |
| 46169 | chrY | 23898285 | . | G | C | 9500.87  | PASS | AC=27;AF=0.386;AN=70;BaseQRankSum      |
| 46170 | chrY | 23898294 | . | A | C | 9999.57  | PASS | AC=28;AF=0.400;AN=70;BaseQRankSum      |
| 46171 | chrY | 23898298 | . | A | C | 9942.14  | PASS | AC=28;AF=0.400;AN=70;BaseQRankSum      |
| 46172 | chrY | 23898302 | . | G | C | 9928.69  | PASS | AC=29;AF=0.414;AN=70;BaseQRankSum      |
| 46173 | chrY | 23898319 | . | T | C | 9263.52  | PASS | AC=29;AF=0.414;AN=70;BaseQRankSum      |
| 46174 | chrY | 23898395 | . | A | G | 9523.68  | PASS | AC=30;AF=0.441;AN=68;BaseQRankSum      |
| 46175 | chrY | 23898402 | . | A | T | 8953.67  | PASS | AC=30;AF=0.441;AN=68;BaseQRankSum      |
| 46176 | chrY | 23898427 | . | T | C | 7354.02  | PASS | AC=32;AF=0.471;AN=68;BaseQRankSum      |
| 46177 | chrY | 23898428 | . | T | G | 7367.02  | PASS | AC=32;AF=0.471;AN=68;BaseQRankSum      |
| 46178 | chrY | 23898438 | . | A | G | 6993.83  | PASS | AC=30;AF=0.429;AN=70;BaseQRankSum      |
| 46179 | chrY | 23898441 | . | C | T | 6609.62  | PASS | AC=28;AF=0.400;AN=70;BaseQRankSum      |
| 46180 | chrY | 23898479 | . | C | T | 2841.32  | PASS | AC=17;AF=0.243;AN=70;BaseQRankSum      |
| 46181 | chrY | 23898498 | . | T | C | 4281.37  | PASS | AC=18;AF=0.257;AN=70;BaseQRankSum      |
| 46182 | chrY | 23898506 | . | C | T | 4155.22  | PASS | AC=17;AF=0.243;AN=70;BaseQRankSum      |
| 46183 | chrY | 23898510 | . | G | A | 4062.77  | PASS | AC=17;AF=0.243;AN=70;BaseQRankSum      |
| 46184 | chrY | 23898535 | . | G | A | 1920.45  | PASS | AC=10;AF=0.147;AN=68;BaseQRankSum      |
| 46185 | chrY | 23898559 | . | C | A | 1201.05  | PASS | AC=8;AF=0.121;AN=66;BaseQRankSum       |
| 46186 | chrY | 23898566 | . | T | C | 1200.88  | PASS | AC=8;AF=0.118;AN=68;BaseQRankSum       |
| 46187 | chrY | 23898599 | . | C | T | 199.38   | PASS | AC=3;AF=0.043;AN=70;BaseQRankSum       |
| 46188 | chrY | 23898611 | . | T | A | 114.09   | PASS | AC=2;AF=0.029;AN=70;BaseQRankSum       |
| 46189 | chrY | 23898612 | . | C | T | 114.09   | PASS | AC=2;AF=0.029;AN=70;BaseQRankSum       |
| 46190 | chrY | 23898785 | . | G | A | 1845.51  | PASS | AC=14;AF=0.226;AN=62;BaseQRankSum      |
| 46191 | chrY | 23898787 | . | G | C | 2043.28  | PASS | AC=14;AF=0.226;AN=62;BaseQRankSum      |
| 46192 | chrY | 23898798 | . | C | A | 2103.32  | PASS | AC=13;AF=0.217;AN=60;BaseQRankSum      |
| 46193 | chrY | 23898814 | . | G | A | 2199.13  | PASS | AC=13;AF=0.203;AN=64;BaseQRankSum      |
| 46194 | chrY | 23898854 | . | G | A | 2998.96  | PASS | AC=19;AF=0.288;AN=66;BaseQRankSum      |
| 46195 | chrY | 23898868 | . | T | C | 3274.80  | PASS | AC=18;AF=0.265;AN=68;BaseQRankSum      |
| 46196 | chrY | 23898870 | . | C | G | 3390.40  | PASS | AC=18;AF=0.273;AN=66;BaseQRankSum      |
| 46197 | chrY | 23898875 | . | A | G | 3393.15  | PASS | AC=18;AF=0.281;AN=64;BaseQRankSum      |
| 46198 | chrY | 23898898 | . | C | A | 3504.38  | PASS | AC=20;AF=0.303;AN=66;BaseQRankSum      |
| 46199 | chrY | 23898941 | . | T | G | 4554.62  | PASS | AC=22;AF=0.333;AN=66;BaseQRankSum      |
| 46200 | chrY | 23899004 | . | G | T | 5844.39  | PASS | AC=26;AF=0.371;AN=70;BaseQRankSum      |
| 46201 | chrY | 23899014 | . | G | C | 6281.21  | PASS | AC=26;AF=0.371;AN=70;BaseQRankSum      |
| 46202 | chrY | 23899026 | . | A | G | 57.50    | PASS | AC=1;AF=0.014;AN=70;BaseQRankSum       |
| 46203 | chrY | 23899033 | . | G | T | 7093.07  | PASS | AC=25;AF=0.357;AN=70;BaseQRankSum      |
| 46204 | chrY | 23899034 | . | A | G | 7099.07  | PASS | AC=25;AF=0.357;AN=70;BaseQRankSum      |
| 46205 | chrY | 23899102 | . | T | C | 9725.59  | PASS | AC=32;AF=0.457;AN=70;BaseQRankSum      |
| 46206 | chrY | 23899125 | . | C | T | 10689.30 | PASS | PASS AC=31;AF=0.443;AN=70;BaseQRankSum |
| 46207 | chrY | 23899143 | . | G | T | 10636.23 | PASS | PASS AC=28;AF=0.412;AN=68;BaseQRankSum |
| 46208 | chrY | 23899170 | . | C | T | 10736.06 | PASS | PASS AC=26;AF=0.382;AN=68;BaseQRankSum |



|       |      |          |   |   |     |          |      |                                            |
|-------|------|----------|---|---|-----|----------|------|--------------------------------------------|
| 46209 | chrY | 23899184 | . | C | T   | 10267.79 | PASS | AC=26;AF=0.419;AN=62;BaseQRankSum=         |
| 46210 | chrY | 23899208 | . | A | G   | 10771.14 | PASS | AC=26;AF=0.419;AN=62;BaseQRankSum=         |
| 46211 | chrY | 23899216 | . | A | G   | 10840.54 | PASS | AC=26;AF=0.419;AN=62;BaseQRankSum=         |
| 46212 | chrY | 23899234 | . | C | T   | 10500.25 | PASS | AC=26;AF=0.406;AN=64;BaseQRankSum=         |
| 46213 | chrY | 23899235 | . | C | T   | 10485.25 | PASS | AC=26;AF=0.406;AN=64;BaseQRankSum=         |
| 46214 | chrY | 23899260 | . | A | G   | 11833.85 | PASS | AC=25;AF=0.417;AN=60;BaseQRankSum=         |
| 46215 | chrY | 23899266 | . | A | C   | 12223.87 | PASS | AC=25;AF=0.403;AN=62;BaseQRankSum=         |
| 46216 | chrY | 23899283 | . | A | G   | 12975.29 | PASS | AC=25;AF=0.391;AN=64;BaseQRankSum=         |
| 46217 | chrY | 23899286 | . | T | C   | 13158.42 | PASS | AC=25;AF=0.379;AN=66;BaseQRankSum=         |
| 46218 | chrY | 23899296 | . | G | T   | 12247.29 | PASS | AC=25;AF=0.391;AN=64;BaseQRankSum=         |
| 46219 | chrY | 23899386 | . | A | G   | 3209.92  | PASS | AC=14;AF=0.269;AN=52;BaseQRankSum=         |
| 46220 | chrY | 23899388 | . | T | C   | 3209.92  | PASS | AC=14;AF=0.269;AN=52;BaseQRankSum=         |
| 46221 | chrY | 23899395 | . | T | C   | 2749.73  | PASS | AC=13;AF=0.250;AN=52;BaseQRankSum=         |
| 46222 | chrY | 23899396 | . | G | A   | 2668.75  | PASS | AC=13;AF=0.250;AN=52;BaseQRankSum=         |
| 46223 | chrY | 23899402 | . | G | T,* | 2316.66  | PASS | AC=10,4;AF=0.200,0.080;AN=50;BaseQRankSum= |
| 46224 | chrY | 23899414 | . | G | C   | 1830.67  | PASS | AC=10;AF=0.179;AN=56;BaseQRankSum=         |
| 46225 | chrY | 23899416 | . | G | T   | 1599.92  | PASS | AC=8;AF=0.143;AN=56;BaseQRankSum=          |
| 46226 | chrY | 23899469 | . | C | T   | 562.46   | PASS | AC=6;AF=0.130;AN=46;BaseQRankSum=          |
| 46227 | chrY | 23899485 | . | A | C   | 209.23   | PASS | AC=6;AF=0.136;AN=44;BaseQRankSum=          |
| 46228 | chrY | 23899488 | . | G | A   | 125.36   | PASS | AC=6;AF=0.176;AN=34;BaseQRankSum=          |
| 46229 | chrY | 23899624 | . | A | G   | 255.31   | PASS | AC=4;AF=0.087;AN=46;BaseQRankSum=          |
| 46230 | chrY | 23899631 | . | C | A   | 256.03   | PASS | AC=4;AF=0.087;AN=46;BaseQRankSum=          |
| 46231 | chrY | 23899636 | . | T | C   | 276.43   | PASS | AC=4;AF=0.095;AN=42;BaseQRankSum=          |
| 46232 | chrY | 23899665 | . | A | T   | 6349.22  | PASS | AC=11;AF=0.212;AN=52;BaseQRankSum=         |
| 46233 | chrY | 23899683 | . | T | C   | 6282.98  | PASS | AC=9;AF=0.167;AN=54;BaseQRankSum=          |
| 46234 | chrY | 23899694 | . | T | A   | 6250.20  | PASS | AC=9;AF=0.161;AN=56;BaseQRankSum=          |
| 46235 | chrY | 23899733 | . | T | C   | 5875.98  | PASS | AC=9;AF=0.141;AN=64;BaseQRankSum=          |
| 46236 | chrY | 23899738 | . | G | A   | 6022.85  | PASS | AC=9;AF=0.136;AN=66;BaseQRankSum=          |
| 46237 | chrY | 23899752 | . | T | G   | 6374.67  | PASS | AC=9;AF=0.150;AN=60;BaseQRankSum=          |
| 46238 | chrY | 23899764 | . | A | T   | 5881.74  | PASS | AC=9;AF=0.173;AN=52;BaseQRankSum=          |
| 46239 | chrY | 23899769 | . | G | A   | 5834.46  | PASS | AC=9;AF=0.173;AN=52;BaseQRankSum=          |
| 46240 | chrY | 23899780 | . | A | C   | 5975.49  | PASS | AC=9;AF=0.155;AN=58;BaseQRankSum=          |
| 46241 | chrY | 23899799 | . | T | A   | 5973.28  | PASS | AC=9;AF=0.167;AN=54;BaseQRankSum=          |
| 46242 | chrY | 23899801 | . | C | A   | 5932.45  | PASS | AC=9;AF=0.167;AN=54;BaseQRankSum=          |
| 46243 | chrY | 23899806 | . | A | C   | 5880.46  | PASS | AC=9;AF=0.155;AN=58;BaseQRankSum=          |
| 46244 | chrY | 23899807 | . | G | A   | 5891.28  | PASS | AC=9;AF=0.161;AN=56;BaseQRankSum=          |
| 46245 | chrY | 23899812 | . | A | G   | 5926.86  | PASS | AC=9;AF=0.150;AN=60;BaseQRankSum=          |
| 46246 | chrY | 23899819 | . | T | A   | 6059.57  | PASS | AC=9;AF=0.150;AN=60;BaseQRankSum=          |
| 46247 | chrY | 23899838 | . | A | C   | 6320.18  | PASS | AC=9;AF=0.136;AN=66;BaseQRankSum=          |
| 46248 | chrY | 23899866 | . | C | T   | 6492.87  | PASS | AC=11;AF=0.167;AN=66;BaseQRankSum=         |
| 46249 | chrY | 23899893 | . | A | T   | 7283.72  | PASS | AC=24;AF=0.343;AN=70;BaseQRankSum=         |
| 46250 | chrY | 23899906 | . | A | T   | 7707.53  | PASS | AC=24;AF=0.343;AN=70;BaseQRankSum=         |
| 46251 | chrY | 23899961 | . | T | C   | 7577.01  | PASS | AC=24;AF=0.343;AN=70;BaseQRankSum=         |
| 46252 | chrY | 23899975 | . | A | G   | 7244.13  | PASS | AC=24;AF=0.343;AN=70;BaseQRankSum=         |
| 46253 | chrY | 23899988 | . | C | T   | 7401.39  | PASS | AC=25;AF=0.379;AN=66;BaseQRankSum=         |
| 46254 | chrY | 23900003 | . | G | A   | 6311.60  | PASS | AC=24;AF=0.375;AN=64;BaseQRankSum=         |
| 46255 | chrY | 23900035 | . | T | G   | 5132.58  | PASS | AC=27;AF=0.397;AN=68;BaseQRankSum=         |
| 46256 | chrY | 23900125 | . | T | C   | 6910.64  | PASS | AC=19;AF=0.306;AN=62;BaseQRankSum=         |
| 46257 | chrY | 23900126 | . | G | A   | 6895.64  | PASS | AC=19;AF=0.306;AN=62;BaseQRankSum=         |
| 46258 | chrY | 23900170 | . | A | G   | 5232.59  | PASS | AC=17;AF=0.293;AN=58;BaseQRankSum=         |
| 46259 | chrY | 23900178 | . | T | C   | 5064.56  | PASS | AC=17;AF=0.283;AN=60;BaseQRankSum=         |
| 46260 | chrY | 23900185 | . | C | T   | 4980.89  | PASS | AC=15;AF=0.242;AN=62;BaseQRankSum=         |
| 46261 | chrY | 23900195 | . | A | T   | 5091.83  | PASS | AC=15;AF=0.259;AN=58;BaseQRankSum=         |
| 46262 | chrY | 23900199 | . | T | A   | 5036.70  | PASS | AC=15;AF=0.250;AN=60;BaseQRankSum=         |
| 46263 | chrY | 23900254 | . | A | G   | 6529.55  | PASS | AC=22;AF=0.333;AN=66;BaseQRankSum=         |
| 46264 | chrY | 23900267 | . | G | A   | 7086.53  | PASS | AC=22;AF=0.324;AN=68;BaseQRankSum=         |
| 46265 | chrY | 23900279 | . | T | C   | 7564.28  | PASS | AC=22;AF=0.314;AN=70;BaseQRankSum=         |
| 46266 | chrY | 23900298 | . | C | T   | 7352.89  | PASS | AC=22;AF=0.324;AN=68;BaseQRankSum=         |
| 46267 | chrY | 23900360 | . | A | G   | 7464.20  | PASS | AC=29;AF=0.414;AN=70;BaseQRankSum=         |
| 46268 | chrY | 23900383 | . | T | C   | 8936.51  | PASS | AC=30;AF=0.441;AN=68;BaseQRankSum=         |
| 46269 | chrY | 23900390 | . | C | G   | 8606.64  | PASS | AC=30;AF=0.429;AN=70;BaseQRankSum=         |
| 46270 | chrY | 23900433 | . | T | C   | 8345.80  | PASS | AC=31;AF=0.470;AN=66;BaseQRankSum=         |
| 46271 | chrY | 23900460 | . | T | C   | 8768.71  | PASS | AC=28;AF=0.412;AN=68;BaseQRankSum=         |
| 46272 | chrY | 23900464 | . | A | C   | 8849.99  | PASS | AC=28;AF=0.424;AN=66;BaseQRankSum=         |
| 46273 | chrY | 23900467 | . | C | G   | 8858.63  | PASS | AC=28;AF=0.412;AN=68;BaseQRankSum=         |
| 46274 | chrY | 23900474 | . | T | C   | 8178.84  | PASS | AC=29;AF=0.468;AN=62;BaseQRankSum=         |
| 46275 | chrY | 23900565 | . | A | G   | 8240.54  | PASS | AC=29;AF=0.414;AN=70;BaseQRankSum=         |
| 46276 | chrY | 23900579 | . | G | C   | 8049.38  | PASS | AC=25;AF=0.357;AN=70;BaseQRankSum=         |
| 46277 | chrY | 23900594 | . | T | C   | 7013.80  | PASS | AC=24;AF=0.364;AN=66;BaseQRankSum=         |
| 46278 | chrY | 23900645 | . | A | G   | 5651.51  | PASS | AC=18;AF=0.300;AN=60;BaseQRankSum=         |
| 46279 | chrY | 23900676 | . | T | A   | 5338.65  | PASS | AC=14;AF=0.269;AN=52;BaseQRankSum=         |
| 46280 | chrY | 23900680 | . | T | A   | 5270.60  | PASS | AC=14;AF=0.269;AN=52;BaseQRankSum=         |
| 46281 | chrY | 23900714 | . | T | C   | 4962.61  | PASS | AC=15;AF=0.288;AN=52;BaseQRankSum=         |
| 46282 | chrY | 23900736 | . | T | C   | 5314.05  | PASS | AC=14;AF=0.304;AN=46;BaseQRankSum=         |
| 46283 | chrY | 23900760 | . | C | A   | 5391.14  | PASS | AC=14;AF=0.280;AN=50;BaseQRankSum=         |
| 46284 | chrY | 23900763 | . | C | T   | 5444.68  | PASS | AC=14;AF=0.280;AN=50;BaseQRankSum=         |

|       |      |          |   |   |   |          |               |                                   |
|-------|------|----------|---|---|---|----------|---------------|-----------------------------------|
| 46285 | chrY | 23900768 | . | A | G | 5520.12  | PASS          | AC=12;AF=0.240;AN=50;BaseQRankSum |
| 46286 | chrY | 23900772 | . | T | A | 5614.90  | PASS          | AC=12;AF=0.240;AN=50;BaseQRankSum |
| 46287 | chrY | 23900796 | . | T | C | 5504.71  | PASS          | AC=11;AF=0.229;AN=48;BaseQRankSum |
| 46288 | chrY | 23900813 | . | T | C | 4943.77  | PASS          | AC=9;AF=0.188;AN=48;BaseQRankSum  |
| 46289 | chrY | 23900831 | . | T | C | 4874.17  | PASS          | AC=9;AF=0.196;AN=46;BaseQRankSum  |
| 46290 | chrY | 23900860 | . | A | T | 4965.18  | PASS          | AC=9;AF=0.188;AN=48;BaseQRankSum  |
| 46291 | chrY | 23900874 | . | T | A | 4989.90  | PASS          | AC=9;AF=0.205;AN=44;BaseQRankSum  |
| 46292 | chrY | 23900881 | . | T | C | 5000.03  | PASS          | AC=9;AF=0.205;AN=44;BaseQRankSum  |
| 46293 | chrY | 23900886 | . | T | C | 4920.31  | PASS          | AC=9;AF=0.214;AN=42;BaseQRankSum  |
| 46294 | chrY | 23900888 | . | A | G | 4906.26  | PASS          | AC=9;AF=0.205;AN=44;BaseQRankSum  |
| 46295 | chrY | 23900900 | . | G | C | 4895.20  | PASS          | AC=9;AF=0.214;AN=42;BaseQRankSum  |
| 46296 | chrY | 23900901 | . | C | T | 4924.20  | PASS          | AC=9;AF=0.214;AN=42;BaseQRankSum  |
| 46297 | chrY | 23900918 | . | T | A | 4648.56  | PASS          | AC=9;AF=0.188;AN=48;BaseQRankSum  |
| 46298 | chrY | 23900952 | . | A | T | 2495.51  | PASS          | AC=10;AF=0.200;AN=50;BaseQRankSum |
| 46299 | chrY | 23900993 | . | T | C | 5073.25  | PASS          | AC=10;AF=0.192;AN=52;BaseQRankSum |
| 46300 | chrY | 23901041 | . | T | C | 5108     | PASS          | AC=11;AF=0.196;AN=56;BaseQRankSum |
| 46301 | chrY | 23901044 | . | T | C | 5151.69  | PASS          | AC=11;AF=0.190;AN=58;BaseQRankSum |
| 46302 | chrY | 23901052 | . | A | G | 5075.79  | PASS          | AC=11;AF=0.183;AN=60;BaseQRankSum |
| 46303 | chrY | 23901106 | . | T | C | 5626.92  | PASS          | AC=16;AF=0.229;AN=70;BaseQRankSum |
| 46304 | chrY | 23901110 | . | C | A | 5682.58  | PASS          | AC=16;AF=0.229;AN=70;BaseQRankSum |
| 46305 | chrY | 23901117 | . | C | A | 5766.91  | PASS          | AC=16;AF=0.235;AN=68;BaseQRankSum |
| 46306 | chrY | 23901132 | . | C | T | 5566.18  | PASS          | AC=15;AF=0.221;AN=68;BaseQRankSum |
| 46307 | chrY | 23901133 | . | A | G | 5646.99  | PASS          | AC=15;AF=0.221;AN=68;BaseQRankSum |
| 46308 | chrY | 23901140 | . | T | C | 5406.30  | PASS          | AC=16;AF=0.242;AN=66;BaseQRankSum |
| 46309 | chrY | 23901158 | . | C | T | 3699     | PASS          | AC=17;AF=0.243;AN=70;BaseQRankSum |
| 46310 | chrY | 23901186 | . | A | T | 4266.27  | PASS          | AC=19;AF=0.279;AN=68;BaseQRankSum |
| 46311 | chrY | 23901206 | . | G | A | 6298.07  | PASS          | AC=19;AF=0.279;AN=68;BaseQRankSum |
| 46312 | chrY | 23901210 | . | G | T | 6499.89  | PASS          | AC=19;AF=0.279;AN=68;BaseQRankSum |
| 46313 | chrY | 23901217 | . | A | T | 6470.96  | PASS          | AC=19;AF=0.279;AN=68;BaseQRankSum |
| 46314 | chrY | 23901226 | . | C | T | 6413.18  | PASS          | AC=18;AF=0.257;AN=70;BaseQRankSum |
| 46315 | chrY | 23901231 | . | T | G | 6371.01  | PASS          | AC=17;AF=0.243;AN=70;BaseQRankSum |
| 46316 | chrY | 23901239 | . | A | G | 6237.82  | PASS          | AC=17;AF=0.250;AN=68;BaseQRankSum |
| 46317 | chrY | 23901241 | . | A | C | 6163.30  | PASS          | AC=17;AF=0.250;AN=68;BaseQRankSum |
| 46318 | chrY | 23901284 | . | A | T | 110.96   | PASS          | AC=2;AF=0.043;AN=46;BaseQRankSum  |
| 46319 | chrY | 23952135 | . | C | A | 656.13   | PASS          | AC=6;AF=0.097;AN=62;BaseQRankSum  |
| 46320 | chrY | 23954861 | . | A | G | 14580.69 | PASS          | AC=58;AF=0.829;AN=70;DP=6         |
| 46321 | chrY | 23955255 | . | C | T | 1324.03  | PASS          | AC=6;AF=0.088;AN=68;DP=346;FS=0.0 |
| 46322 | chrY | 23961979 | . | G | A | 86.64    | PASS          | AC=2;AF=0.071;AN=28;DP=44;FS=0.00 |
| 46323 | chrY | 23963405 | . | C | T | 1053.22  | PASS          | AC=6;AF=0.086;AN=70;DP=725;FS=0.0 |
| 46324 | chrY | 23966519 | . | T | C | 975.68   | PASS          | AC=6;AF=0.086;AN=70;DP=589;FS=0.0 |
| 46325 | chrY | 23967699 | . | C | T | 1143.91  | PASS          | AC=6;AF=0.086;AN=70;DP=790;FS=0.0 |
| 46326 | chrY | 23971687 | . | A | C | 20856.44 | PASS          | AC=52;AF=0.743;AN=70;DP=7         |
| 46327 | chrY | 23973594 | . | G | T | 20171.97 | PASS          | AC=68;AF=1.00;AN=68;DP=66         |
| 46328 | chrY | 23974800 | . | A | G | 20087.85 | PASS          | AC=58;AF=0.829;AN=70;DP=7         |
| 46329 | chrY | 23975319 | . | C | A | 1648.24  | PASS          | AC=6;AF=0.086;AN=70;BaseQRankSum  |
| 46330 | chrY | 23978653 | . | C | G | 1407.11  | PASS          | AC=6;AF=0.086;AN=70;DP=747;FS=0.0 |
| 46331 | chrY | 23979899 | . | T | C | 30660.90 | PASS          | AC=70;AF=1.00;AN=70;BaseQ         |
| 46332 | chrY | 23979920 | . | G | A | 39.57    | my_snp_filter | AC=1;AF=0.014;AN=70;BaseQ         |
| 46333 | chrY | 23979922 | . | T | A | 39.57    | my_snp_filter | AC=1;AF=0.014;AN=70;BaseQ         |
| 46334 | chrY | 23982331 | . | C | A | 1703.47  | PASS          | AC=4;AF=0.057;AN=70;DP=623;FS=0.0 |
| 46335 | chrY | 23984056 | . | A | G | 20269.87 | PASS          | AC=70;AF=1.00;AN=70;DP=62         |
| 46336 | chrY | 23984749 | . | G | A | 201.25   | PASS          | AC=2;AF=0.029;AN=70;DP=591;FS=0.0 |
| 46337 | chrY | 23987793 | . | G | A | 1366.83  | PASS          | AC=6;AF=0.086;AN=70;DP=695;FS=0.0 |
| 46338 | chrY | 23990058 | . | A | C | 2171.01  | PASS          | AC=6;AF=0.086;AN=70;DP=731;FS=0.0 |
| 46339 | chrY | 23990069 | . | T | G | 2306.95  | PASS          | AC=6;AF=0.086;AN=70;DP=767;FS=0.0 |
| 46340 | chrY | 23990072 | . | T | A | 2370.90  | PASS          | AC=6;AF=0.086;AN=70;DP=774;FS=0.0 |
| 46341 | chrY | 23990078 | . | C | T | 2370.90  | PASS          | AC=6;AF=0.086;AN=70;DP=783;FS=0.0 |
| 46342 | chrY | 23990199 | . | A | G | 565.31   | PASS          | AC=2;AF=0.029;AN=70;DP=852;FS=0.0 |
| 46343 | chrY | 23990205 | . | A | G | 558.43   | PASS          | AC=2;AF=0.029;AN=68;DP=850;FS=0.0 |
| 46344 | chrY | 23992762 | . | A | C | 9670.99  | PASS          | AC=64;AF=1.00;AN=64;DP=333;FS=0.0 |
| 46345 | chrY | 23993156 | . | C | A | 17404.88 | PASS          | AC=70;AF=1.00;AN=70;DP=56         |
| 46346 | chrY | 23993901 | . | G | A | 1299.88  | PASS          | AC=6;AF=0.086;AN=70;DP=909;FS=0.0 |
| 46347 | chrY | 23998442 | . | C | T | 505.32   | PASS          | AC=2;AF=0.029;AN=70;DP=533;FS=0.0 |
| 46348 | chrY | 23998943 | . | C | A | 162.23   | PASS          | AC=2;AF=0.029;AN=70;DP=670;FS=0.0 |
| 46349 | chrY | 24001146 | . | G | A | 1963.03  | PASS          | AC=6;AF=0.086;AN=70;DP=746;FS=0.0 |
| 46350 | chrY | 24001207 | . | G | A | 1121.90  | PASS          | AC=6;AF=0.086;AN=70;DP=772;FS=0.0 |
| 46351 | chrY | 24002578 | . | C | T | 1416.56  | PASS          | AC=6;AF=0.086;AN=70;DP=535;FS=0.0 |
| 46352 | chrY | 24007354 | . | C | T | 1315.43  | PASS          | AC=6;AF=0.086;AN=70;DP=642;FS=0.0 |
| 46353 | chrY | 24047582 | . | A | G | 477.76   | my_snp_filter | AC=9;AF=0.167;AN=54;BaseQ         |
| 46354 | chrY | 24052303 | . | C | T | 826      | my_snp_filter | AC=14;AF=0.778;AN=18;DP=4         |
| 46355 | chrY | 24052771 | . | C | G | 615.33   | my_snp_filter | AC=14;AF=1.00;AN=14;DP=26         |
| 46356 | chrY | 24070105 | . | G | T | 303.72   | my_snp_filter | AC=8;AF=0.308;AN=26;DP=16         |
| 46357 | chrY | 24070231 | . | T | C | 3385.78  | my_snp_filter | AC=45;AF=0.804;AN=56;Base         |
| 46358 | chrY | 24078788 | . | G | T | 416.31   | my_snp_filter | AC=6;AF=0.333;AN=18;DP=60         |
| 46359 | chrY | 24107682 | . | G | A | 100.17   | PASS          | AC=3;AF=0.052;AN=58;BaseQRankSum  |
| 46360 | chrY | 24107685 | . | T | A | 90.50    | PASS          | AC=3;AF=0.048;AN=62;BaseQRankSum  |

|       |      |          |   |   |   |          |               |                                    |
|-------|------|----------|---|---|---|----------|---------------|------------------------------------|
| 46361 | chrY | 24109132 | . | G | A | 1668.54  | my_snp_filter | AC=34;AF=1.00;AN=34;DP=73          |
| 46362 | chrY | 24109486 | . | A | C | 829.54   | my_snp_filter | AC=3;AF=0.043;AN=70;BaseQ          |
| 46363 | chrY | 24126768 | . | G | T | 157.46   | my_snp_filter | AC=4;AF=0.095;AN=42;DP=65          |
| 46364 | chrY | 24127253 | . | C | A | 270.96   | my_snp_filter | AC=2;AF=0.083;AN=24;DP=70          |
| 46365 | chrY | 24225411 | . | C | A | 366.87   | my_snp_filter | AC=7;AF=0.194;AN=36;BaseQ          |
| 46366 | chrY | 24225417 | . | A | G | 369.77   | my_snp_filter | AC=7;AF=0.184;AN=38;BaseQ          |
| 46367 | chrY | 24225420 | . | A | G | 328.15   | my_snp_filter | AC=6;AF=0.158;AN=38;BaseQ          |
| 46368 | chrY | 24225437 | . | C | T | 349.88   | my_snp_filter | AC=6;AF=0.150;AN=40;BaseQ          |
| 46369 | chrY | 24225438 | . | A | G | 349.88   | my_snp_filter | AC=6;AF=0.150;AN=40;BaseQ          |
| 46370 | chrY | 24225447 | . | G | A | 177.82   | my_snp_filter | AC=2;AF=0.053;AN=38;BaseQ          |
| 46371 | chrY | 24225451 | . | G | A | 182.18   | my_snp_filter | AC=2;AF=0.063;AN=32;BaseQ          |
| 46372 | chrY | 24225457 | . | T | G | 172.72   | my_snp_filter | AC=1;AF=0.031;AN=32;BaseQ          |
| 46373 | chrY | 24225461 | . | C | T | 123.15   | my_snp_filter | AC=1;AF=0.029;AN=34;BaseQ          |
| 46374 | chrY | 24253461 | . | G | A | 4061.88  | my_snp_filter | AC=23;AF=0.348;AN=66;BaseQ         |
| 46375 | chrY | 24278171 | . | C | T | 57.38    | my_snp_filter | AC=2;AF=0.033;AN=60;DP=20          |
| 46376 | chrY | 24290751 | . | A | G | 171.65   | my_snp_filter | AC=2;AF=0.063;AN=32;BaseQ          |
| 46377 | chrY | 24312012 | . | C | A | 66.98    | my_snp_filter | AC=4;AF=1.00;AN=4;DP=10;FS=0.0     |
| 46378 | chrY | 24339651 | . | G | A | 598.26   | my_snp_filter | AC=6;AF=0.333;AN=18;BaseQ          |
| 46379 | chrY | 24355494 | . | G | A | 398.60   | PASS          | AC=6;AF=0.088;AN=68;DP=238;FS=0.0  |
| 46380 | chrY | 24357953 | . | G | C | 887.84   | PASS          | AC=6;AF=0.086;AN=70;DP=282;FS=0.0  |
| 46381 | chrY | 24359931 | . | C | T | 9628.96  | PASS          | AC=58;AF=0.829;AN=70;DP=392;FS=0.0 |
| 46382 | chrY | 24360964 | . | A | G | 13605.90 | PASS          | AC=70;AF=1.00;AN=70;DP=51          |
| 46383 | chrY | 24364899 | . | G | C | 1118.07  | PASS          | AC=6;AF=0.086;AN=70;DP=667;FS=0.0  |
| 46384 | chrY | 24367224 | . | G | T | 263.47   | PASS          | AC=4;AF=0.061;AN=66;DP=362;FS=0.0  |
| 46385 | chrY | 24368527 | . | T | C | 399.44   | PASS          | AC=2;AF=0.029;AN=70;DP=473;FS=0.0  |
| 46386 | chrY | 24370605 | . | G | A | 13830.93 | PASS          | AC=70;AF=1.00;AN=70;BaseQ          |
| 46387 | chrY | 24373422 | . | T | C | 870.19   | PASS          | AC=6;AF=0.333;AN=18;DP=149;FS=0.0  |
| 46388 | chrY | 24383087 | . | T | C | 5892.09  | PASS          | AC=46;AF=0.657;AN=70;DP=348;FS=0.0 |
| 46389 | chrY | 24383184 | . | C | T | 159.30   | PASS          | AC=2;AF=0.029;AN=70;DP=390;FS=0.0  |
| 46390 | chrY | 24383525 | . | C | A | 35.61    | PASS          | AC=1;AF=0.028;AN=36;BaseQRankSum=  |
| 46391 | chrY | 24390651 | . | G | C | 633.37   | PASS          | AC=6;AF=0.086;AN=70;DP=670;FS=0.0  |
| 46392 | chrY | 24391891 | . | A | T | 1291.71  | PASS          | AC=6;AF=0.091;AN=66;DP=240;FS=0.0  |
| 46393 | chrY | 24392082 | . | T | C | 3247.63  | PASS          | AC=42;AF=0.778;AN=54;DP=203;FS=0.0 |
| 46394 | chrY | 24392653 | . | C | G | 1021.77  | PASS          | AC=6;AF=0.088;AN=68;DP=378;FS=0.0  |
| 46395 | chrY | 24393811 | . | G | T | 6829.08  | PASS          | AC=36;AF=0.545;AN=66;DP=448;FS=0.0 |
| 46396 | chrY | 24393984 | . | A | T | 1441.06  | PASS          | AC=6;AF=0.086;AN=70;DP=604;FS=0.0  |
| 46397 | chrY | 24394612 | . | A | G | 13233.97 | PASS          | AC=68;AF=1.00;AN=68;DP=44          |
| 46398 | chrY | 24396667 | . | T | C | 8804.10  | PASS          | AC=50;AF=0.735;AN=68;DP=454;FS=0.0 |
| 46399 | chrY | 24397413 | . | C | T | 109.06   | PASS          | AC=2;AF=0.029;AN=70;BaseQRankSum=  |
| 46400 | chrY | 24397418 | . | G | A | 109.10   | PASS          | AC=2;AF=0.029;AN=70;BaseQRankSum=  |
| 46401 | chrY | 24397428 | . | C | G | 106.10   | PASS          | AC=2;AF=0.029;AN=68;BaseQRankSum=  |
| 46402 | chrY | 24397435 | . | A | T | 109.24   | PASS          | AC=2;AF=0.029;AN=68;BaseQRankSum=  |
| 46403 | chrY | 24401768 | . | C | T | 1303.88  | PASS          | AC=6;AF=0.086;AN=70;DP=700;FS=0.0  |
| 46404 | chrY | 24405862 | . | T | C | 17644.91 | PASS          | AC=68;AF=1.00;AN=68;DP=66          |
| 46405 | chrY | 24406606 | . | G | A | 11114.07 | PASS          | AC=70;AF=1.00;AN=70;DP=36          |
| 46406 | chrY | 24418076 | . | C | T | 9021.44  | PASS          | AC=46;AF=0.657;AN=70;DP=495;FS=0.0 |
| 46407 | chrY | 24420336 | . | A | G | 311.20   | PASS          | AC=2;AF=0.029;AN=70;DP=416;FS=0.0  |
| 46408 | chrY | 24420879 | . | A | T | 452.15   | PASS          | AC=5;AF=0.227;AN=22;BaseQRankSum=  |
| 46409 | chrY | 24422830 | . | C | T | 1453.13  | PASS          | AC=6;AF=0.086;AN=70;DP=517;FS=0.0  |
| 46410 | chrY | 24435392 | . | T | C | 59.29    | PASS          | AC=1;AF=0.050;AN=20;BaseQRankSum=  |
| 46411 | chrY | 24435424 | . | C | G | 54.51    | PASS          | AC=1;AF=0.071;AN=14;BaseQRankSum=  |
| 46412 | chrY | 24435448 | . | G | T | 38.26    | PASS          | AC=1;AF=0.071;AN=14;BaseQRankSum=  |
| 46413 | chrY | 24435624 | . | T | G | 326.85   | PASS          | AC=10;AF=0.357;AN=28;DP=126;FS=0.0 |
| 46414 | chrY | 24443836 | . | T | G | 16733.95 | PASS          | AC=68;AF=1.00;AN=68;DP=55          |
| 46415 | chrY | 24444622 | . | T | C | 19489.91 | PASS          | AC=70;AF=1.00;AN=70;BaseQ          |
| 46416 | chrY | 24445181 | . | G | T | 2058.39  | PASS          | AC=6;AF=0.086;AN=70;DP=742;FS=0.0  |
| 46417 | chrY | 24447989 | . | A | C | 11958.94 | PASS          | AC=68;AF=1.00;AN=68;DP=42          |
| 46418 | chrY | 24451187 | . | A | G | 563.54   | PASS          | AC=6;AF=0.086;AN=70;DP=504;FS=0.0  |
| 46419 | chrY | 24453507 | . | C | T | 18581.27 | PASS          | AC=52;AF=0.743;AN=70;DP=7          |
| 46420 | chrY | 24453842 | . | G | T | 12689.94 | PASS          | AC=60;AF=1.00;AN=60;BaseQ          |
| 46421 | chrY | 24453952 | . | T | G | 1298.07  | PASS          | AC=4;AF=0.059;AN=68;DP=591;FS=0.0  |
| 46422 | chrY | 24456796 | . | C | T | 1254.14  | PASS          | AC=6;AF=0.086;AN=70;DP=320;FS=0.0  |
| 46423 | chrY | 24457860 | . | A | G | 113.79   | PASS          | AC=2;AF=0.030;AN=66;DP=231;FS=0.0  |
| 46424 | chrY | 24461802 | . | C | T | 1210.42  | PASS          | AC=6;AF=0.273;AN=22;DP=135;FS=0.0  |
| 46425 | chrY | 24465309 | . | T | G | 21177.70 | PASS          | AC=46;AF=0.657;AN=70;BaseQ         |
| 46426 | chrY | 24466715 | . | G | A | 873.84   | PASS          | AC=6;AF=0.086;AN=70;DP=486;FS=0.0  |
| 46427 | chrY | 24468533 | . | C | T | 826.56   | PASS          | AC=6;AF=0.086;AN=70;DP=403;FS=0.0  |
| 46428 | chrY | 24480245 | . | G | A | 439.18   | PASS          | AC=2;AF=0.029;AN=70;BaseQRankSum=  |
| 46429 | chrY | 24480987 | . | A | C | 259.58   | PASS          | AC=2;AF=0.031;AN=64;DP=204;FS=0.0  |
| 46430 | chrY | 24485562 | . | A | G | 8276.99  | PASS          | AC=62;AF=1.00;AN=62;DP=271;FS=0.0  |
| 46431 | chrY | 24485659 | . | A | G | 85.85    | PASS          | AC=4;AF=0.069;AN=58;DP=146;FS=0.0  |
| 46432 | chrY | 24488835 | . | G | A | 574.52   | PASS          | AC=3;AF=0.167;AN=18;BaseQRankSum=  |
| 46433 | chrY | 24490535 | . | C | T | 535.40   | PASS          | AC=4;AF=0.222;AN=18;BaseQRankSum=  |
| 46434 | chrY | 24490553 | . | G | A | 538.45   | PASS          | AC=4;AF=0.222;AN=18;BaseQRankSum=  |
| 46435 | chrY | 24490594 | . | G | A | 391.57   | PASS          | AC=5;AF=0.278;AN=18;BaseQRankSum=  |
| 46436 | chrY | 24490654 | . | T | A | 191.25   | PASS          | AC=1;AF=0.056;AN=18;BaseQRankSum=  |

|       |      |          |   |   |   |          |               |                                   |
|-------|------|----------|---|---|---|----------|---------------|-----------------------------------|
| 46437 | chrY | 24490657 | . | T | C | 191.25   | PASS          | AC=1;AF=0.056;AN=18;BaseQRankSum= |
| 46438 | chrY | 24490710 | . | A | G | 67.07    | my_snp_filter | AC=1;AF=0.056;AN=18;BaseQ         |
| 46439 | chrY | 24490720 | . | G | A | 460.71   | PASS          | AC=6;AF=0.333;AN=18;BaseQRankSum= |
| 46440 | chrY | 24490723 | . | G | C | 60.49    | my_snp_filter | AC=1;AF=0.056;AN=18;BaseQ         |
| 46441 | chrY | 24490731 | . | T | G | 60.59    | my_snp_filter | AC=1;AF=0.056;AN=18;BaseQ         |
| 46442 | chrY | 24490741 | . | G | T | 2078.15  | my_snp_filter | AC=8;AF=0.444;AN=18;BaseQ         |
| 46443 | chrY | 24490762 | . | G | C | 1862.88  | my_snp_filter | AC=8;AF=0.444;AN=18;BaseQ         |
| 46444 | chrY | 24490780 | . | C | T | 2084.09  | my_snp_filter | AC=9;AF=0.500;AN=18;BaseQ         |
| 46445 | chrY | 24490816 | . | G | A | 1169.15  | my_snp_filter | AC=9;AF=0.500;AN=18;BaseQ         |
| 46446 | chrY | 24490839 | . | C | T | 895.09   | my_snp_filter | AC=7;AF=0.389;AN=18;BaseQ         |
| 46447 | chrY | 24490845 | . | G | T | 580.91   | my_snp_filter | AC=7;AF=0.389;AN=18;BaseQ         |
| 46448 | chrY | 24490980 | . | A | T | 3828.09  | my_snp_filter | AC=9;AF=0.500;AN=18;BaseQ         |
| 46449 | chrY | 24490992 | . | C | A | 3801.09  | my_snp_filter | AC=9;AF=0.500;AN=18;BaseQ         |
| 46450 | chrY | 24491041 | . | G | A | 2280.82  | my_snp_filter | AC=7;AF=0.389;AN=18;BaseQ         |
| 46451 | chrY | 24491043 | . | C | A | 2280.82  | my_snp_filter | AC=7;AF=0.389;AN=18;BaseQ         |
| 46452 | chrY | 24491076 | . | C | T | 432.55   | PASS          | AC=5;AF=0.250;AN=20;BaseQRankSum= |
| 46453 | chrY | 24491077 | . | A | G | 462.31   | PASS          | AC=6;AF=0.300;AN=20;BaseQRankSum= |
| 46454 | chrY | 24491633 | . | G | A | 51.31    | PASS          | AC=2;AF=0.077;AN=26;DP=154;FS=0.0 |
| 46455 | chrY | 24491636 | . | C | A | 51.26    | PASS          | AC=2;AF=0.071;AN=28;DP=152;FS=0.0 |
| 46456 | chrY | 24495962 | . | C | A | 1152.29  | PASS          | AC=6;AF=0.086;AN=70;DP=555;FS=0.0 |
| 46457 | chrY | 24498879 | . | A | G | 930.50   | PASS          | AC=6;AF=0.086;AN=70;DP=394;FS=0.0 |
| 46458 | chrY | 24502231 | . | C | T | 1684.69  | PASS          | AC=6;AF=0.250;AN=24;DP=182;FS=0.0 |
| 46459 | chrY | 24505364 | . | C | T | 518.23   | PASS          | AC=2;AF=0.029;AN=70;DP=440;FS=0.0 |
| 46460 | chrY | 24511620 | . | G | A | 9626.40  | PASS          | AC=52;AF=0.743;AN=70;DP=471;FS=0. |
| 46461 | chrY | 24515239 | . | A | G | 47.44    | PASS          | AC=2;AF=0.033;AN=60;DP=229;FS=0.0 |
| 46462 | chrY | 24515245 | . | A | G | 47.37    | PASS          | AC=2;AF=0.032;AN=62;DP=242;FS=0.0 |
| 46463 | chrY | 24517335 | . | T | A | 308.55   | PASS          | AC=2;AF=0.030;AN=66;DP=235;FS=0.0 |
| 46464 | chrY | 24535247 | . | A | C | 93.22    | my_snp_filter | AC=1;AF=0.017;AN=60;BaseQ         |
| 46465 | chrY | 24535250 | . | T | C | 91.56    | my_snp_filter | AC=1;AF=0.016;AN=62;BaseQ         |
| 46466 | chrY | 24553539 | . | C | G | 192.30   | PASS          | AC=6;AF=0.188;AN=32;DP=329;FS=0.0 |
| 46467 | chrY | 24553995 | . | T | C | 64.98    | my_snp_filter | AC=4;AF=0.286;AN=14;DP=26         |
| 46468 | chrY | 24563277 | . | T | G | 154.11   | my_snp_filter | AC=2;AF=0.100;AN=20;BaseQ         |
| 46469 | chrY | 24573237 | . | C | T | 1155.59  | my_snp_filter | AC=3;AF=0.043;AN=70;BaseQ         |
| 46470 | chrY | 24587965 | . | T | C | 86.11    | PASS          | AC=2;AF=0.034;AN=58;BaseQRankSum= |
| 46471 | chrY | 24587968 | . | G | A | 996.28   | PASS          | AC=7;AF=0.117;AN=60;BaseQRankSum= |
| 46472 | chrY | 24651221 | . | G | T | 936.31   | my_snp_filter | AC=3;AF=0.214;AN=14;BaseQ         |
| 46473 | chrY | 24651293 | . | C | G | 566.97   | my_snp_filter | AC=3;AF=0.188;AN=16;BaseQ         |
| 46474 | chrY | 24653314 | . | A | C | 146.08   | my_snp_filter | AC=6;AF=0.500;AN=12;DP=14         |
| 46475 | chrY | 24665571 | . | A | T | 660.23   | my_snp_filter | AC=5;AF=0.313;AN=16;BaseQ         |
| 46476 | chrY | 24667846 | . | T | C | 90.60    | my_snp_filter | AC=2;AF=0.100;AN=20;BaseQ         |
| 46477 | chrY | 24706319 | . | C | A | 78.38    | PASS          | AC=2;AF=0.034;AN=58;BaseQRankSum= |
| 46478 | chrY | 24706329 | . | G | A | 39.21    | PASS          | AC=3;AF=0.050;AN=60;BaseQRankSum= |
| 46479 | chrY | 24707739 | . | A | G | 507.02   | my_snp_filter | AC=9;AF=0.900;AN=10;BaseQ         |
| 46480 | chrY | 24751436 | . | G | T | 52.15    | my_snp_filter | AC=2;AF=0.029;AN=68;DP=38         |
| 46481 | chrY | 24751525 | . | C | T | 7385.96  | my_snp_filter | AC=13;AF=0.197;AN=66;BaseQ        |
| 46482 | chrY | 24751922 | . | C | A | 53.11    | my_snp_filter | AC=2;AF=0.143;AN=14;BaseQ         |
| 46483 | chrY | 24759095 | . | T | C | 11142.06 | my_snp_filter | AC=23;AF=0.338;AN                 |
| 46484 | chrY | 24782986 | . | G | T | 605.92   | my_snp_filter | AC=6;AF=0.600;AN=10;DP=26         |
| 46485 | chrY | 24874308 | . | A | T | 4261.65  | PASS          | AC=42;AF=0.700;AN=60;DP=263;FS=0. |
| 46486 | chrY | 24874676 | . | T | G | 651.01   | PASS          | AC=4;AF=0.065;AN=62;DP=260;FS=0.0 |
| 46487 | chrY | 24874813 | . | A | T | 8674.16  | PASS          | AC=50;AF=0.806;AN=62;BaseQRankSum |
| 46488 | chrY | 24879137 | . | A | T | 1761.53  | PASS          | AC=6;AF=0.094;AN=64;DP=571;FS=0.0 |
| 46489 | chrY | 24880134 | . | C | G | 907.71   | PASS          | AC=6;AF=0.094;AN=64;DP=234;FS=0.0 |
| 46490 | chrY | 24882657 | . | G | T | 47.69    | my_snp_filter | AC=2;AF=0.032;AN=62;DP=29         |
| 46491 | chrY | 24885995 | . | T | G | 9732.02  | PASS          | AC=34;AF=0.586;AN=58;DP=429;FS=0. |
| 46492 | chrY | 24886659 | . | C | T | 354.42   | PASS          | AC=6;AF=0.107;AN=56;DP=107;FS=0.0 |
| 46493 | chrY | 24886797 | . | A | G | 919.05   | PASS          | AC=6;AF=0.097;AN=62;DP=255;FS=0.0 |
| 46494 | chrY | 24926001 | . | G | A | 1183.64  | my_snp_filter | AC=6;AF=0.600;AN=10;DP=88         |
| 46495 | chrY | 24926385 | . | C | G | 430.88   | my_snp_filter | AC=4;AF=0.400;AN=10;DP=52         |
| 46496 | chrY | 24931679 | . | C | A | 97.17    | my_snp_filter | AC=4;AF=0.077;AN=52;DP=16         |
| 46497 | chrY | 24961157 | . | T | A | 2875.63  | my_snp_filter | AC=12;AF=0.171;AN=70;BaseQ        |
| 46498 | chrY | 24966336 | . | A | G | 202.66   | my_snp_filter | AC=2;AF=0.200;AN=10;BaseQ         |
| 46499 | chrY | 25001836 | . | G | A | 300.54   | my_snp_filter | AC=2;AF=0.333;AN=6;DP=28;         |
| 46500 | chrY | 25020605 | . | T | A | 61.86    | my_snp_filter | AC=1;AF=0.500;AN=2;BaseQR         |
| 46501 | chrY | 25024783 | . | T | C | 282.17   | my_snp_filter | AC=6;AF=0.750;AN=8;DP=16;         |
| 46502 | chrY | 25027102 | . | T | C | 185.79   | my_snp_filter | AC=4;AF=0.400;AN=10;BaseQ         |
| 46503 | chrY | 25029969 | . | T | G | 167.29   | my_snp_filter | AC=4;AF=0.667;AN=6;DP=10;         |
| 46504 | chrY | 25030039 | . | G | A | 369.58   | my_snp_filter | AC=10;AF=1.00;AN=10;DP=20         |
| 46505 | chrY | 25145064 | . | T | C | 745.04   | my_snp_filter | AC=4;AF=0.100;AN=40;DP=87         |
| 46506 | chrY | 25333965 | . | G | A | 32.29    | my_snp_filter | AC=1;AF=0.019;AN=52;BaseQ         |
| 46507 | chrY | 25333967 | . | A | G | 32.29    | my_snp_filter | AC=1;AF=0.019;AN=52;BaseQ         |
| 46508 | chrY | 25511257 | . | C | G | 935.23   | my_snp_filter | AC=13;AF=0.361;AN=36;BaseQ        |
| 46509 | chrY | 25592902 | . | A | C | 312.32   | PASS          | AC=4;AF=0.182;AN=22;DP=46;FS=0.00 |
| 46510 | chrY | 25592904 | . | A | C | 305.47   | PASS          | AC=4;AF=0.182;AN=22;DP=38;FS=0.00 |
| 46511 | chrY | 25592906 | . | A | C | 54.46    | my_snp_filter | AC=2;AF=0.100;AN=20;DP=25         |
| 46512 | chrY | 25617879 | . | A | C | 94.91    | my_snp_filter | AC=1;AF=0.019;AN=52;BaseQ         |

|       |      |          |   |   |     |          |               |                                    |
|-------|------|----------|---|---|-----|----------|---------------|------------------------------------|
| 46513 | chrY | 25866607 | . | C | T   | 295.96   | my_snp_filter | AC=3;AF=0.058;AN=52;BaseQ          |
| 46514 | chrY | 25928622 | . | T | C   | 7823.65  | my_snp_filter | AC=23;AF=0.442;AN=52;Base          |
| 46515 | chrY | 25974224 | . | C | G   | 356.82   | my_snp_filter | AC=3;AF=0.058;AN=52;BaseQ          |
| 46516 | chrY | 25995033 | . | A | C   | 321.47   | my_snp_filter | AC=6;AF=0.600;AN=10;DP=63          |
| 46517 | chrY | 25995035 | . | A | C   | 306.31   | my_snp_filter | AC=6;AF=0.300;AN=20;DP=52          |
| 46518 | chrY | 26134809 | . | T | G   | 1105.18  | my_snp_filter | AC=22;AF=0.917;AN=24;DP=4          |
| 46519 | chrY | 26248184 | . | C | A   | 42       | my_snp_filter | AC=1;AF=0.050;AN=20;BaseQ          |
| 46520 | chrY | 26400695 | . | C | G   | 30.91    | PASS          | AC=1;AF=0.022;AN=46;BaseQRankSum=  |
| 46521 | chrY | 26400702 | . | C | T   | 43.17    | PASS          | AC=2;AF=0.043;AN=46;BaseQRankSum=  |
| 46522 | chrY | 26467198 | . | G | C   | 589.22   | my_snp_filter | AC=10;AF=0.455;AN=22;DP=           |
| 46523 | chrY | 26498621 | . | A | G   | 1302.31  | my_snp_filter | AC=12;AF=0.231;AN=52;Base          |
| 46524 | chrY | 26498663 | . | G | A   | 47.71    | my_snp_filter | AC=1;AF=0.019;AN=52;BaseQ          |
| 46525 | chrY | 26498769 | . | T | G   | 114.26   | my_snp_filter | AC=2;AF=0.038;AN=52;BaseQ          |
| 46526 | chrY | 26500451 | . | A | C   | 470.49   | my_snp_filter | AC=5;AF=0.167;AN=30;BaseQ          |
| 46527 | chrY | 26501077 | . | G | A   | 120.58   | PASS          | AC=3;AF=0.043;AN=70;BaseQRankSum=  |
| 46528 | chrY | 26563185 | . | T | C   | 205.18   | PASS          | AC=4;AF=0.067;AN=60;BaseQRankSum=  |
| 46529 | chrY | 26593138 | . | T | G   | 2693.51  | my_snp_filter | AC=27;AF=0.964;AN=28;Base          |
| 46530 | chrY | 26834796 | . | T | G   | 75.12    | my_snp_filter | AC=3;AF=0.068;AN=44;BaseQ          |
| 46531 | chrY | 26922013 | . | A | T   | 323.17   | my_snp_filter | AC=4;AF=1.00;AN=4;DP=8;FS          |
| 46532 | chrY | 27087630 | . | T | G   | 5294.10  | my_snp_filter | AC=7;AF=0.184;AN=38;BaseQ          |
| 46533 | chrY | 27445257 | . | A | G   | 67.16    | my_snp_filter | AC=3;AF=0.058;AN=52;BaseQ          |
| 46534 | chrY | 27445392 | . | T | C   | 67.73    | my_snp_filter | AC=4;AF=0.077;AN=52;BaseQ          |
| 46535 | chrY | 27495329 | . | A | G   | 996.11   | my_snp_filter | AC=12;AF=1.00;AN=12;DP=36          |
| 46536 | chrY | 27535821 | . | T | C   | 23523.91 | PASS          | AC=52;AF=1.00;AN=52;DP=82          |
| 46537 | chrY | 27535995 | . | C | T   | 114.27   | PASS          | AC=2;AF=0.200;AN=10;BaseQRankSum=  |
| 46538 | chrY | 27546746 | . | T | C   | 690.31   | PASS          | AC=12;AF=0.353;AN=34;BaseQRankSum= |
| 46539 | chrY | 27548398 | . | G | T   | 42.53    | PASS          | AC=2;AF=0.200;AN=10;DP=16;FS=0.00  |
| 46540 | chrY | 27590928 | . | A | T   | 115      | my_snp_filter | AC=2;AF=1.00;AN=2;DP=5;FS          |
| 46541 | chrY | 27603461 | . | A | G   | 35.59    | my_snp_filter | AC=2;AF=0.063;AN=32;DP=41          |
| 46542 | chrY | 27607746 | . | G | A   | 332.31   | my_snp_filter | AC=6;AF=0.158;AN=38;DP=10          |
| 46543 | chrY | 27607813 | . | A | G   | 8565.95  | my_snp_filter | AC=38;AF=0.950;AN=40;DP=3          |
| 46544 | chrY | 27608000 | . | G | A   | 53.14    | my_snp_filter | AC=2;AF=0.333;AN=6;DP=12;          |
| 46545 | chrY | 27653848 | . | C | T   | 123.59   | my_snp_filter | AC=2;AF=0.067;AN=30;DP=34          |
| 46546 | chrY | 27653926 | . | G | A   | 1725.77  | my_snp_filter | AC=17;AF=0.340;AN=50;Base          |
| 46547 | chrY | 27714248 | . | G | T   | 54.33    | my_snp_filter | AC=1;AF=0.167;AN=6;BaseQR          |
| 46548 | chrY | 27810636 | . | C | T   | 96.69    | my_snp_filter | AC=4;AF=1.00;AN=4;DP=6;FS          |
| 46549 | chrY | 27822391 | . | A | G   | 50.18    | my_snp_filter | AC=2;AF=0.083;AN=24;DP=25          |
| 46550 | chrY | 27823594 | . | A | G   | 51.49    | my_snp_filter | AC=2;AF=0.143;AN=14;DP=11          |
| 46551 | chrY | 28030685 | . | G | A   | 62.12    | PASS          | AC=2;AF=0.500;AN=4;DP=7;FS=0.000;  |
| 46552 | chrY | 28030783 | . | C | T   | 361.81   | PASS          | AC=4;AF=0.400;AN=10;DP=20;FS=0.00  |
| 46553 | chrY | 28030787 | . | C | T   | 356.72   | PASS          | AC=4;AF=0.400;AN=10;DP=22;FS=0.00  |
| 46554 | chrY | 28030823 | . | T | C   | 63.14    | PASS          | AC=1;AF=0.100;AN=10;BaseQRankSum=  |
| 46555 | chrY | 28189849 | . | C | A   | 111.54   | my_snp_filter | AC=4;AF=1.00;AN=4;DP=6;FS          |
| 46556 | chrY | 28316056 | . | G | T   | 68.13    | my_snp_filter | AC=4;AF=0.250;AN=16;DP=25          |
| 46557 | chrY | 28374233 | . | A | G   | 449.16   | my_snp_filter | AC=4;AF=0.222;AN=18;BaseQ          |
| 46558 | chrY | 28375656 | . | A | T   | 307.20   | my_snp_filter | AC=6;AF=0.300;AN=20;DP=50          |
| 46559 | chrY | 28402366 | . | C | T   | 665.20   | my_snp_filter | AC=8;AF=1.00;AN=8;DP=26;F          |
| 46560 | chrY | 28432531 | . | G | A   | 61.47    | my_snp_filter | AC=4;AF=0.133;AN=30;DP=13          |
| 46561 | chrY | 28454551 | . | A | G   | 530.60   | PASS          | AC=12;AF=0.194;AN=62;BaseQRankSum= |
| 46562 | chrY | 28457607 | . | G | A   | 543.94   | my_snp_filter | AC=6;AF=0.333;AN=18;BaseQ          |
| 46563 | chrY | 28459738 | . | G | A   | 8984.79  | PASS          | AC=54;AF=0.818;AN=66;DP=395;FS=0.  |
| 46564 | chrY | 28462000 | . | G | A   | 31.73    | PASS          | AC=1;AF=0.015;AN=66;BaseQRankSum=  |
| 46565 | chrY | 28462002 | . | C | T   | 31.57    | PASS          | AC=1;AF=0.015;AN=66;BaseQRankSum=  |
| 46566 | chrY | 28468167 | . | C | T   | 83       | my_snp_filter | AC=5;AF=0.071;AN=70;BaseQ          |
| 46567 | chrY | 28468257 | . | T | C   | 47.83    | PASS          | AC=1;AF=0.020;AN=50;BaseQRankSum=  |
| 46568 | chrY | 28470600 | . | A | C,* | 4097.06  | PASS          | AC=43,10;AF=0.768,0.179;AN=56;Bas  |
| 46569 | chrY | 28470602 | . | A | C,* | 1583.71  | PASS          | AC=22,10;AF=0.379,0.172;AN=58;DP=  |
| 46570 | chrY | 28472208 | . | G | A   | 61.86    | PASS          | AC=2;AF=0.029;AN=68;BaseQRankSum=  |
| 46571 | chrY | 28473327 | . | C | A   | 59.30    | my_snp_filter | AC=2;AF=0.029;AN=68;BaseQ          |
| 46572 | chrY | 28473333 | . | C | T   | 56.43    | my_snp_filter | AC=2;AF=0.029;AN=68;BaseQ          |
| 46573 | chrY | 28473334 | . | A | G   | 56.44    | my_snp_filter | AC=2;AF=0.029;AN=68;BaseQ          |
| 46574 | chrY | 28473352 | . | A | C   | 66.43    | my_snp_filter | AC=2;AF=0.030;AN=66;BaseQ          |
| 46575 | chrY | 28473356 | . | C | T   | 66.42    | my_snp_filter | AC=2;AF=0.030;AN=66;BaseQ          |
| 46576 | chrY | 28473359 | . | A | G   | 66.78    | my_snp_filter | AC=2;AF=0.030;AN=66;BaseQ          |
| 46577 | chrY | 28474319 | . | C | T   | 98.15    | PASS          | AC=1;AF=0.018;AN=56;BaseQRankSum=  |
| 46578 | chrY | 28474321 | . | G | A   | 97.96    | PASS          | AC=1;AF=0.018;AN=56;BaseQRankSum=  |
| 46579 | chrY | 28474332 | . | C | T   | 56.81    | PASS          | AC=1;AF=0.021;AN=48;BaseQRankSum=  |
| 46580 | chrY | 28480076 | . | G | A   | 3634.89  | PASS          | AC=26;AF=0.371;AN=70;DP=339;FS=0.  |
| 46581 | chrY | 28482610 | . | T | C   | 81.07    | my_snp_filter | AC=3;AF=0.043;AN=70;BaseQ          |
| 46582 | chrY | 28482687 | . | T | C   | 421.92   | PASS          | AC=10;AF=0.143;AN=70;BaseQRankSum= |
| 46583 | chrY | 28483033 | . | C | T   | 746.58   | PASS          | AC=6;AF=0.167;AN=36;BaseQRankSum=  |
| 46584 | chrY | 28488091 | . | C | A   | 1160.18  | PASS          | AC=6;AF=0.333;AN=18;DP=168;FS=0.0  |
| 46585 | chrY | 28491229 | . | G | A   | 498.38   | PASS          | AC=6;AF=0.333;AN=18;DP=66;FS=0.00  |
| 46586 | chrY | 28492107 | . | G | A   | 1280.52  | PASS          | AC=12;AF=0.500;AN=24;DP=156;FS=0.  |
| 46587 | chrY | 28501032 | . | C | T   | 221.23   | PASS          | AC=2;AF=0.038;AN=52;DP=136;FS=0.0  |
| 46588 | chrY | 28506397 | . | T | C   | 510.97   | PASS          | AC=6;AF=0.086;AN=70;DP=566;FS=0.0  |

|       |      |          |   |   |     |          |               |                                    |
|-------|------|----------|---|---|-----|----------|---------------|------------------------------------|
| 46589 | chrY | 28507625 | . | C | A   | 1019.77  | PASS          | AC=6;AF=0.300;AN=20;DP=144;FS=0.0  |
| 46590 | chrY | 28508556 | . | T | G   | 1421.79  | PASS          | AC=6;AF=0.086;AN=70;DP=414;FS=0.0  |
| 46591 | chrY | 28508874 | . | C | A   | 576.78   | PASS          | AC=2;AF=0.029;AN=68;DP=431;FS=0.0  |
| 46592 | chrY | 28509077 | . | A | G   | 7223.41  | PASS          | AC=44;AF=0.629;AN=70;BaseQRankSum= |
| 46593 | chrY | 28512755 | . | A | G   | 185.32   | my_snp_filter | AC=6;AF=0.086;AN=70;BaseQ          |
| 46594 | chrY | 28513604 | . | C | T   | 498.96   | PASS          | AC=6;AF=0.088;AN=68;DP=355;FS=0.0  |
| 46595 | chrY | 28518030 | . | A | G   | 205.14   | PASS          | AC=2;AF=0.111;AN=18;DP=117;FS=0.0  |
| 46596 | chrY | 28518620 | . | C | T   | 466.01   | PASS          | AC=9;AF=0.132;AN=68;BaseQRankSum=  |
| 46597 | chrY | 28523022 | . | G | A   | 940.59   | PASS          | AC=6;AF=0.333;AN=18;DP=135;FS=0.0  |
| 46598 | chrY | 28525833 | . | G | A   | 821.31   | PASS          | AC=6;AF=0.086;AN=70;DP=548;FS=0.0  |
| 46599 | chrY | 28526057 | . | A | G   | 813.25   | PASS          | AC=6;AF=0.088;AN=68;DP=450;FS=0.0  |
| 46600 | chrY | 28530489 | . | A | C   | 338.25   | PASS          | AC=2;AF=0.029;AN=70;DP=414;FS=0.0  |
| 46601 | chrY | 28532077 | . | C | T   | 1321.30  | PASS          | AC=6;AF=0.086;AN=70;DP=352;FS=0.0  |
| 46602 | chrY | 28535846 | . | G | A   | 462.10   | PASS          | AC=4;AF=0.057;AN=70;DP=567;FS=0.0  |
| 46603 | chrY | 28543558 | . | T | C   | 546.69   | PASS          | AC=6;AF=0.088;AN=68;DP=235;FS=0.0  |
| 46604 | chrY | 28549172 | . | C | G   | 137.79   | PASS          | AC=1;AF=0.015;AN=66;BaseQRankSum=  |
| 46605 | chrY | 28549179 | . | G | A   | 140.58   | PASS          | AC=1;AF=0.015;AN=66;BaseQRankSum=  |
| 46606 | chrY | 28549230 | . | C | G   | 1437.44  | my_snp_filter | AC=10;AF=0.152;AN=66;BaseQ         |
| 46607 | chrY | 28549246 | . | T | C   | 2189.13  | my_snp_filter | AC=11;AF=0.172;AN=64;BaseQ         |
| 46608 | chrY | 28549247 | . | G | A   | 2165.13  | my_snp_filter | AC=11;AF=0.177;AN=62;BaseQ         |
| 46609 | chrY | 28549346 | . | C | A,* | 10620.27 | PASS          | AC=4,23;AF=0.065,0.371;AN=         |
| 46610 | chrY | 28549364 | . | G | T   | 11255.45 | PASS          | AC=27;AF=0.435;AN=62;BaseQ         |
| 46611 | chrY | 28549443 | . | T | C   | 11387.29 | PASS          | AC=29;AF=0.580;AN=50;BaseQ         |
| 46612 | chrY | 28549459 | . | C | A   | 1666.21  | PASS          | AC=6;AF=0.107;AN=56;BaseQRankSum=  |
| 46613 | chrY | 28549469 | . | G | T   | 1646.37  | PASS          | AC=6;AF=0.125;AN=48;BaseQRankSum=  |
| 46614 | chrY | 28549471 | . | C | A   | 10362.45 | PASS          | AC=21;AF=0.525;AN=40;BaseQ         |
| 46615 | chrY | 28549475 | . | A | T   | 10011.08 | PASS          | AC=21;AF=0.500;AN=42;BaseQ         |
| 46616 | chrY | 28549568 | . | T | G   | 4402.68  | PASS          | AC=13;AF=0.342;AN=38;BaseQRankSum= |
| 46617 | chrY | 28549622 | . | C | A   | 113.48   | my_snp_filter | AC=2;AF=0.038;AN=52;BaseQ          |
| 46618 | chrY | 28549652 | . | T | C   | 2526.38  | PASS          | AC=19;AF=0.452;AN=42;BaseQRankSum= |
| 46619 | chrY | 28549778 | . | G | A   | 4160.88  | my_snp_filter | AC=9;AF=0.136;AN=66;BaseQ          |
| 46620 | chrY | 28549779 | . | C | G   | 85.15    | PASS          | AC=2;AF=0.030;AN=66;BaseQRankSum=  |
| 46621 | chrY | 28549786 | . | C | T   | 4070.96  | my_snp_filter | AC=9;AF=0.141;AN=64;BaseQ          |
| 46622 | chrY | 28549787 | . | G | A   | 84.84    | PASS          | AC=2;AF=0.030;AN=66;BaseQRankSum=  |
| 46623 | chrY | 28549819 | . | G | A   | 1510.43  | my_snp_filter | AC=8;AF=0.118;AN=68;BaseQ          |
| 46624 | chrY | 28549821 | . | C | A   | 2690.46  | my_snp_filter | AC=10;AF=0.147;AN=68;BaseQ         |
| 46625 | chrY | 28549852 | . | G | A   | 538.01   | my_snp_filter | AC=6;AF=0.086;AN=70;BaseQ          |
| 46626 | chrY | 28549853 | . | G | T   | 1482.03  | my_snp_filter | AC=9;AF=0.129;AN=70;BaseQ          |
| 46627 | chrY | 28550029 | . | C | A   | 39.86    | my_snp_filter | AC=1;AF=0.016;AN=62;BaseQ          |
| 46628 | chrY | 28550045 | . | T | G   | 38.93    | my_snp_filter | AC=1;AF=0.019;AN=54;BaseQ          |
| 46629 | chrY | 28550174 | . | A | G   | 187.07   | PASS          | AC=2;AF=0.077;AN=26;BaseQRankSum=  |
| 46630 | chrY | 28550189 | . | G | A   | 186.95   | PASS          | AC=2;AF=0.071;AN=28;BaseQRankSum=  |
| 46631 | chrY | 28550212 | . | G | T   | 51.70    | PASS          | AC=1;AF=0.036;AN=28;BaseQRankSum=  |
| 46632 | chrY | 28550218 | . | T | C   | 49.53    | PASS          | AC=1;AF=0.036;AN=28;BaseQRankSum=  |
| 46633 | chrY | 28550219 | . | G | A   | 48.64    | PASS          | AC=1;AF=0.036;AN=28;BaseQRankSum=  |
| 46634 | chrY | 28550572 | . | G | A   | 194.41   | PASS          | AC=6;AF=0.088;AN=68;BaseQRankSum=  |
| 46635 | chrY | 28550616 | . | G | A   | 69.61    | PASS          | AC=4;AF=0.065;AN=62;BaseQRankSum=  |
| 46636 | chrY | 28552035 | . | G | A   | 385.83   | PASS          | AC=2;AF=0.029;AN=68;DP=506;FS=0.0  |
| 46637 | chrY | 28556500 | . | G | T   | 410.33   | PASS          | AC=6;AF=0.115;AN=52;DP=136;FS=0.0  |
| 46638 | chrY | 28557630 | . | A | G   | 905.39   | PASS          | AC=6;AF=0.115;AN=52;DP=175;FS=0.0  |
| 46639 | chrY | 28558619 | . | A | T   | 953.51   | PASS          | AC=6;AF=0.176;AN=34;BaseQRankSum=  |
| 46640 | chrY | 28561527 | . | G | A   | 129.60   | PASS          | AC=2;AF=0.029;AN=70;DP=389;FS=0.0  |
| 46641 | chrY | 28565153 | . | G | A   | 983.27   | PASS          | AC=6;AF=0.088;AN=68;DP=297;FS=0.0  |
| 46642 | chrY | 28565726 | . | A | G   | 520.49   | PASS          | AC=10;AF=1.00;AN=10;DP=15;FS=0.00  |
| 46643 | chrY | 28567636 | . | T | C   | 1017.06  | PASS          | AC=6;AF=0.086;AN=70;DP=362;FS=0.0  |
| 46644 | chrY | 28569918 | . | C | T   | 6077.09  | PASS          | AC=62;AF=1.00;AN=62;DP=220;FS=0.0  |
| 46645 | chrY | 28572675 | . | A | G   | 580.26   | PASS          | AC=6;AF=0.086;AN=70;DP=446;FS=0.0  |
| 46646 | chrY | 28572884 | . | C | T   | 128.99   | PASS          | AC=4;AF=0.057;AN=70;BaseQRankSum=  |
| 46647 | chrY | 28573108 | . | A | T   | 256.38   | PASS          | AC=6;AF=0.086;AN=70;BaseQRankSum=  |
| 46648 | chrY | 28573166 | . | A | G   | 96.08    | my_snp_filter | AC=4;AF=0.059;AN=68;BaseQ          |
| 46649 | chrY | 28573586 | . | G | A   | 930.17   | PASS          | AC=6;AF=0.094;AN=64;DP=217;FS=0.0  |
| 46650 | chrY | 28574263 | . | A | G   | 286.98   | PASS          | AC=2;AF=0.029;AN=68;DP=348;FS=0.0  |
| 46651 | chrY | 28577664 | . | C | T   | 321.92   | PASS          | AC=3;AF=0.094;AN=32;BaseQRankSum=  |
| 46652 | chrY | 28577682 | . | G | A   | 324.81   | PASS          | AC=3;AF=0.100;AN=30;BaseQRankSum=  |
| 46653 | chrY | 28577695 | . | C | T   | 324.63   | PASS          | AC=3;AF=0.107;AN=28;BaseQRankSum=  |
| 46654 | chrY | 28577801 | . | T | C   | 164.80   | PASS          | AC=2;AF=0.071;AN=28;BaseQRankSum=  |
| 46655 | chrY | 28577805 | . | C | G   | 161.48   | PASS          | AC=2;AF=0.077;AN=26;BaseQRankSum=  |
| 46656 | chrY | 28577821 | . | G | T   | 93.69    | my_snp_filter | AC=3;AF=0.115;AN=26;BaseQ          |
| 46657 | chrY | 28577923 | . | A | G   | 390.39   | PASS          | AC=4;AF=0.167;AN=24;BaseQRankSum=  |
| 46658 | chrY | 28577979 | . | A | G   | 214.28   | PASS          | AC=3;AF=0.150;AN=20;BaseQRankSum=  |
| 46659 | chrY | 28577990 | . | G | A   | 358.26   | PASS          | AC=4;AF=0.200;AN=20;BaseQRankSum=  |
| 46660 | chrY | 28578931 | . | C | T   | 31.69    | my_snp_filter | AC=2;AF=0.100;AN=20;DP=17          |
| 46661 | chrY | 28579946 | . | C | T   | 39.94    | PASS          | AC=4;AF=0.059;AN=68;BaseQRankSum=  |
| 46662 | chrY | 28579969 | . | A | T   | 437.77   | PASS          | AC=8;AF=0.114;AN=70;BaseQRankSum=  |
| 46663 | chrY | 28579995 | . | G | A   | 433.65   | PASS          | AC=9;AF=0.136;AN=66;BaseQRankSum=  |
| 46664 | chrY | 28580001 | . | G | T   | 79.37    | PASS          | AC=1;AF=0.014;AN=70;BaseQRankSum=  |

|       |      |          |   |   |     |          |               |                                    |
|-------|------|----------|---|---|-----|----------|---------------|------------------------------------|
| 46665 | chrY | 28580027 | . | T | A   | 537.45   | PASS          | AC=12;AF=0.207;AN=58;BaseQRankSum= |
| 46666 | chrY | 28580052 | . | A | G   | 173.34   | PASS          | AC=5;AF=0.093;AN=54;BaseQRankSum=  |
| 46667 | chrY | 28580057 | . | G | A   | 210.50   | PASS          | AC=5;AF=0.096;AN=52;BaseQRankSum=  |
| 46668 | chrY | 28580126 | . | C | T   | 591.32   | PASS          | AC=8;AF=0.129;AN=62;BaseQRankSum=  |
| 46669 | chrY | 28580131 | . | A | C   | 569.44   | PASS          | AC=7;AF=0.113;AN=62;BaseQRankSum=  |
| 46670 | chrY | 28580667 | . | T | A   | 38.31    | my_snp_filter | AC=2;AF=0.029;AN=70;BaseQ          |
| 46671 | chrY | 28580683 | . | A | G   | 2062.66  | PASS          | AC=12;AF=0.171;AN=70;BaseQRankSum= |
| 46672 | chrY | 28580684 | . | A | T   | 2064.54  | PASS          | AC=12;AF=0.171;AN=70;BaseQRankSum= |
| 46673 | chrY | 28580721 | . | A | C   | 655.79   | PASS          | AC=6;AF=0.086;AN=70;BaseQRankSum=  |
| 46674 | chrY | 28580722 | . | G | C   | 905.31   | PASS          | AC=8;AF=0.114;AN=70;BaseQRankSum=  |
| 46675 | chrY | 28580779 | . | G | T   | 5675.90  | PASS          | AC=23;AF=0.329;AN=70;BaseQRankSum= |
| 46676 | chrY | 28580784 | . | T | C   | 5135.05  | PASS          | AC=23;AF=0.329;AN=70;BaseQRankSum= |
| 46677 | chrY | 28580806 | . | G | A   | 457.19   | PASS          | AC=7;AF=0.100;AN=70;BaseQRankSum=  |
| 46678 | chrY | 28581875 | . | A | G   | 35.89    | PASS          | AC=1;AF=0.014;AN=70;BaseQRankSum=  |
| 46679 | chrY | 28582274 | . | A | G   | 264.86   | PASS          | AC=2;AF=0.031;AN=64;BaseQRankSum=  |
| 46680 | chrY | 28582275 | . | G | T   | 55.73    | PASS          | AC=1;AF=0.016;AN=64;BaseQRankSum=  |
| 46681 | chrY | 28582279 | . | C | T   | 262.45   | PASS          | AC=2;AF=0.031;AN=64;BaseQRankSum=  |
| 46682 | chrY | 28582280 | . | T | C   | 263.66   | PASS          | AC=2;AF=0.031;AN=64;BaseQRankSum=  |
| 46683 | chrY | 28582303 | . | T | C   | 346.14   | PASS          | AC=5;AF=0.078;AN=64;BaseQRankSum=  |
| 46684 | chrY | 28582359 | . | G | A   | 721.47   | my_snp_filter | AC=10;AF=0.161;AN=62;BaseQ         |
| 46685 | chrY | 28582377 | . | A | G   | 546.67   | my_snp_filter | AC=8;AF=0.129;AN=62;BaseQ          |
| 46686 | chrY | 28582398 | . | G | T   | 262.78   | PASS          | AC=4;AF=0.061;AN=66;BaseQRankSum=  |
| 46687 | chrY | 28582403 | . | T | C   | 654.16   | PASS          | AC=6;AF=0.091;AN=66;BaseQRankSum=  |
| 46688 | chrY | 28582413 | . | G | T   | 1001.08  | PASS          | AC=6;AF=0.088;AN=68;BaseQRankSum=  |
| 46689 | chrY | 28582481 | . | T | A   | 9325     | PASS          | AC=27;AF=0.386;AN=70;BaseQRankSum= |
| 46690 | chrY | 28582492 | . | A | G   | 925.42   | PASS          | AC=13;AF=0.186;AN=70;BaseQRankSum= |
| 46691 | chrY | 28582495 | . | G | A   | 12403.50 | PASS          | AC=27;AF=0.386;AN=70;BaseQ         |
| 46692 | chrY | 28582510 | . | G | C   | 2079.78  | PASS          | AC=22;AF=0.314;AN=70;BaseQRankSum= |
| 46693 | chrY | 28582517 | . | C | G   | 8660.23  | my_snp_filter | AC=11;AF=0.157;AN=70;BaseQ         |
| 46694 | chrY | 28582527 | . | A | G   | 1735.68  | PASS          | AC=7;AF=0.100;AN=70;BaseQRankSum=  |
| 46695 | chrY | 28582545 | . | T | C   | 17066.64 | my_snp_filter | AC=16;AF=0.235;AN=70;BaseQ         |
| 46696 | chrY | 28582547 | . | A | G   | 985.27   | my_snp_filter | AC=14;AF=0.206;AN=68;BaseQ         |
| 46697 | chrY | 28582566 | . | C | G   | 19503.09 | PASS          | AC=27;AF=0.397;AN=68;BaseQ         |
| 46698 | chrY | 28582605 | . | T | A,C | 17638.78 | PASS          | AC=3,33;AF=0.043,0.471;AN=70;BaseQ |
| 46699 | chrY | 28582612 | . | G | A   | 1132.12  | PASS          | AC=13;AF=0.186;AN=70;BaseQRankSum= |
| 46700 | chrY | 28582622 | . | G | A   | 26284.87 | PASS          | AC=36;AF=0.514;AN=70;BaseQRankSum= |
| 46701 | chrY | 28582676 | . | G | A   | 35483.73 | PASS          | AC=35;AF=0.500;AN=70;BaseQRankSum= |
| 46702 | chrY | 28582685 | . | C | A   | 34337.73 | PASS          | AC=35;AF=0.500;AN=70;BaseQRankSum= |
| 46703 | chrY | 28582716 | . | A | G   | 31663.53 | PASS          | AC=34;AF=0.486;AN=70;BaseQRankSum= |
| 46704 | chrY | 28582721 | . | T | C   | 32796.53 | PASS          | AC=34;AF=0.486;AN=70;BaseQRankSum= |
| 46705 | chrY | 28582781 | . | A | C   | 307.33   | my_snp_filter | AC=4;AF=0.057;AN=70;BaseQRankSum=  |
| 46706 | chrY | 28582863 | . | A | G   | 54410.76 | PASS          | AC=35;AF=0.500;AN=70;BaseQRankSum= |
| 46707 | chrY | 28582865 | . | A | G   | 54410.76 | PASS          | AC=35;AF=0.500;AN=70;BaseQRankSum= |
| 46708 | chrY | 28582921 | . | A | G   | 23468.54 | PASS          | AC=34;AF=0.486;AN=70;BaseQRankSum= |
| 46709 | chrY | 28582932 | . | G | A   | 22589.44 | PASS          | AC=32;AF=0.457;AN=70;BaseQRankSum= |
| 46710 | chrY | 28582941 | . | T | C   | 19936.88 | PASS          | AC=29;AF=0.414;AN=70;BaseQRankSum= |
| 46711 | chrY | 28582945 | . | G | T   | 51.01    | my_snp_filter | AC=1;AF=0.014;AN=70;BaseQRankSum=  |
| 46712 | chrY | 28582963 | . | A | T   | 71.41    | PASS          | AC=2;AF=0.029;AN=70;BaseQRankSum=  |
| 46713 | chrY | 28582980 | . | G | A   | 73.13    | my_snp_filter | AC=1;AF=0.014;AN=70;BaseQRankSum=  |
| 46714 | chrY | 28583015 | . | G | T   | 4726.09  | PASS          | AC=19;AF=0.271;AN=70;BaseQRankSum= |
| 46715 | chrY | 28583047 | . | T | C   | 1592.84  | PASS          | AC=16;AF=0.229;AN=70;BaseQRankSum= |
| 46716 | chrY | 28583050 | . | T | C   | 18669.97 | PASS          | AC=35;AF=0.500;AN=70;BaseQRankSum= |
| 46717 | chrY | 28583128 | . | T | C   | 378.28   | my_snp_filter | AC=3;AF=0.043;AN=70;BaseQRankSum=  |
| 46718 | chrY | 28583130 | . | T | G   | 3136.83  | PASS          | AC=15;AF=0.214;AN=70;BaseQRankSum= |
| 46719 | chrY | 28583137 | . | G | A   | 21408.06 | PASS          | AC=32;AF=0.471;AN=68;BaseQRankSum= |
| 46720 | chrY | 28583163 | . | T | C   | 15946.19 | PASS          | AC=29;AF=0.426;AN=68;BaseQRankSum= |
| 46721 | chrY | 28583212 | . | T | C   | 20789.08 | PASS          | AC=35;AF=0.500;AN=70;BaseQRankSum= |
| 46722 | chrY | 28583229 | . | T | C   | 18101.83 | PASS          | AC=32;AF=0.457;AN=70;BaseQRankSum= |
| 46723 | chrY | 28583263 | . | A | C   | 12145.13 | PASS          | AC=24;AF=0.353;AN=68;BaseQRankSum= |
| 46724 | chrY | 28583270 | . | G | A   | 10923.68 | PASS          | AC=18;AF=0.265;AN=68;BaseQRankSum= |
| 46725 | chrY | 28583286 | . | A | T   | 8575.88  | my_snp_filter | AC=15;AF=0.221;AN=68;BaseQRankSum= |
| 46726 | chrY | 28583310 | . | C | T   | 6388.01  | my_snp_filter | AC=11;AF=0.167;AN=66;BaseQRankSum= |
| 46727 | chrY | 28583314 | . | A | G   | 6177.28  | my_snp_filter | AC=11;AF=0.167;AN=66;BaseQRankSum= |
| 46728 | chrY | 28583335 | . | T | C   | 3521.44  | my_snp_filter | AC=10;AF=0.147;AN=68;BaseQRankSum= |
| 46729 | chrY | 28583382 | . | G | C   | 2810.84  | my_snp_filter | AC=15;AF=0.214;AN=70;BaseQRankSum= |
| 46730 | chrY | 28583394 | . | T | C   | 2483.91  | PASS          | AC=16;AF=0.229;AN=70;BaseQRankSum= |
| 46731 | chrY | 28583410 | . | C | G   | 2772.64  | PASS          | AC=15;AF=0.214;AN=70;BaseQRankSum= |
| 46732 | chrY | 28583415 | . | T | C   | 3073.24  | PASS          | AC=15;AF=0.214;AN=70;BaseQRankSum= |
| 46733 | chrY | 28583431 | . | A | T   | 5570.60  | PASS          | AC=17;AF=0.243;AN=70;BaseQRankSum= |
| 46734 | chrY | 28583432 | . | A | G   | 5567.11  | PASS          | AC=17;AF=0.243;AN=70;BaseQRankSum= |
| 46735 | chrY | 28583454 | . | T | A   | 4794.02  | PASS          | AC=18;AF=0.257;AN=70;BaseQRankSum= |
| 46736 | chrY | 28583487 | . | C | T   | 6995.04  | PASS          | AC=26;AF=0.371;AN=70;BaseQRankSum= |
| 46737 | chrY | 28583500 | . | C | T   | 8218.76  | PASS          | AC=28;AF=0.400;AN=70;BaseQRankSum= |
| 46738 | chrY | 28583523 | . | C | T   | 147.43   | my_snp_filter | AC=9;AF=0.129;AN=70;BaseQRankSum=  |
| 46739 | chrY | 28583527 | . | T | C   | 161.56   | my_snp_filter | AC=10;AF=0.143;AN=70;BaseQRankSum= |
| 46740 | chrY | 28583590 | . | A | C   | 15894.84 | PASS          | AC=30;AF=0.441;AN=68;BaseQRankSum= |

|       |      |          |   |   |   |          |               |                                    |
|-------|------|----------|---|---|---|----------|---------------|------------------------------------|
| 46741 | chrY | 28583599 | . | G | C | 6203.95  | PASS          | AC=27;AF=0.386;AN=70;BaseQRankSum= |
| 46742 | chrY | 28583601 | . | G | A | 14073.93 |               | PASS AC=28;AF=0.400;AN=70;Base     |
| 46743 | chrY | 28583617 | . | A | G | 9573.54  | PASS          | AC=24;AF=0.353;AN=68;BaseQRankSum= |
| 46744 | chrY | 28583630 | . | G | A | 630.75   | PASS          | AC=9;AF=0.132;AN=68;BaseQRankSum=  |
| 46745 | chrY | 28583640 | . | G | C | 6897.25  | my_snp_filter | AC=12;AF=0.176;AN=68;Base          |
| 46746 | chrY | 28583682 | . | G | C | 557.12   | PASS          | AC=5;AF=0.076;AN=66;BaseQRankSum=  |
| 46747 | chrY | 28583687 | . | T | C | 825.53   | PASS          | AC=4;AF=0.057;AN=70;BaseQRankSum=  |
| 46748 | chrY | 28583689 | . | G | A | 109.89   | PASS          | AC=2;AF=0.029;AN=70;BaseQRankSum=  |
| 46749 | chrY | 28583694 | . | C | G | 320.07   | PASS          | AC=5;AF=0.071;AN=70;BaseQRankSum=  |
| 46750 | chrY | 28583727 | . | G | A | 12011.54 |               | PASS AC=22;AF=0.314;AN=70;Base     |
| 46751 | chrY | 28583736 | . | C | A | 13381.58 |               | PASS AC=22;AF=0.314;AN=70;Base     |
| 46752 | chrY | 28583822 | . | T | C | 30.70    | my_snp_filter | AC=1;AF=0.014;AN=70;BaseQ          |
| 46753 | chrY | 28583843 | . | A | G | 5796.03  | PASS          | AC=21;AF=0.300;AN=70;BaseQRankSum= |
| 46754 | chrY | 28583844 | . | A | G | 5787.04  | PASS          | AC=21;AF=0.300;AN=70;BaseQRankSum= |
| 46755 | chrY | 28583850 | . | G | A | 29441.82 |               | PASS AC=36;AF=0.514;AN=70;Base     |
| 46756 | chrY | 28583879 | . | G | A | 3978.54  | PASS          | AC=31;AF=0.443;AN=70;BaseQRankSum= |
| 46757 | chrY | 28583892 | . | T | C | 31397.72 |               | PASS AC=35;AF=0.500;AN=70;Base     |
| 46758 | chrY | 28583903 | . | G | A | 44691.86 |               | PASS AC=35;AF=0.500;AN=70;Base     |
| 46759 | chrY | 28583946 | . | A | G | 1419.05  | my_snp_filter | AC=20;AF=0.286;AN=70;Base          |
| 46760 | chrY | 28583948 | . | G | C | 47377.65 |               | PASS AC=37;AF=0.529;AN=70;Base     |
| 46761 | chrY | 28583970 | . | A | G | 535.71   | my_snp_filter | AC=5;AF=0.071;AN=70;BaseQ          |
| 46762 | chrY | 28584003 | . | T | C | 47717.80 |               | PASS AC=40;AF=0.571;AN=70;Base     |
| 46763 | chrY | 28584050 | . | C | A | 219.06   | PASS          | AC=3;AF=0.043;AN=70;BaseQRankSum=  |
| 46764 | chrY | 28584081 | . | T | C | 12440.06 |               | PASS AC=35;AF=0.515;AN=68;Base     |
| 46765 | chrY | 28584105 | . | G | A | 15225.57 |               | PASS AC=25;AF=0.357;AN=70;Base     |
| 46766 | chrY | 28584119 | . | T | A | 290.11   | PASS          | AC=4;AF=0.057;AN=70;BaseQRankSum=  |
| 46767 | chrY | 28584134 | . | C | T | 6193.03  | my_snp_filter | AC=12;AF=0.171;AN=70;Base          |
| 46768 | chrY | 28584202 | . | T | C | 10614.90 | my_snp_filter | AC=14;AF=0.200;AN=                 |
| 46769 | chrY | 28584208 | . | C | T | 10767.29 | my_snp_filter | AC=14;AF=0.206;AN=                 |
| 46770 | chrY | 28584231 | . | A | C | 11386.08 | my_snp_filter | AC=13;AF=0.186;AN=                 |
| 46771 | chrY | 28584235 | . | T | A | 11697.97 | my_snp_filter | AC=13;AF=0.186;AN=                 |
| 46772 | chrY | 28584244 | . | T | G | 872.99   | PASS          | AC=10;AF=0.143;AN=70;BaseQRankSum= |
| 46773 | chrY | 28584250 | . | G | T | 1934.95  | PASS          | AC=10;AF=0.143;AN=70;BaseQRankSum= |
| 46774 | chrY | 28584300 | . | A | G | 2539.16  | my_snp_filter | AC=9;AF=0.141;AN=64;BaseQ          |
| 46775 | chrY | 28584338 | . | T | A | 3088.41  | my_snp_filter | AC=9;AF=0.136;AN=66;BaseQ          |
| 46776 | chrY | 28584340 | . | A | G | 395.04   | my_snp_filter | AC=4;AF=0.061;AN=66;BaseQ          |
| 46777 | chrY | 28584348 | . | T | C | 2870.89  | my_snp_filter | AC=9;AF=0.136;AN=66;BaseQ          |
| 46778 | chrY | 28584370 | . | A | T | 130.26   | my_snp_filter | AC=3;AF=0.045;AN=66;BaseQ          |
| 46779 | chrY | 28584385 | . | A | G | 134.72   | PASS          | AC=3;AF=0.044;AN=68;BaseQRankSum=  |
| 46780 | chrY | 28584393 | . | T | A | 44.02    | PASS          | AC=1;AF=0.014;AN=70;BaseQRankSum=  |
| 46781 | chrY | 28585140 | . | G | A | 43.26    | my_snp_filter | AC=2;AF=0.029;AN=70;BaseQ          |
| 46782 | chrY | 28585143 | . | C | T | 90.40    | my_snp_filter | AC=2;AF=0.029;AN=70;BaseQ          |
| 46783 | chrY | 28585182 | . | A | T | 3096.82  | my_snp_filter | AC=9;AF=0.136;AN=66;BaseQ          |
| 46784 | chrY | 28585183 | . | C | T | 98.98    | my_snp_filter | AC=3;AF=0.045;AN=66;BaseQ          |
| 46785 | chrY | 28585184 | . | A | T | 3102.34  | my_snp_filter | AC=9;AF=0.136;AN=66;BaseQ          |
| 46786 | chrY | 28585213 | . | T | C | 3582.17  | my_snp_filter | AC=9;AF=0.132;AN=68;BaseQ          |
| 46787 | chrY | 28585246 | . | A | T | 9155.10  | my_snp_filter | AC=9;AF=0.129;AN=70;BaseQ          |
| 46788 | chrY | 28585248 | . | A | T | 9155.43  | my_snp_filter | AC=9;AF=0.129;AN=70;BaseQ          |
| 46789 | chrY | 28585305 | . | C | A | 5019.11  | my_snp_filter | AC=9;AF=0.129;AN=70;BaseQ          |
| 46790 | chrY | 28585326 | . | C | G | 5073.88  | my_snp_filter | AC=9;AF=0.132;AN=68;BaseQ          |
| 46791 | chrY | 28585353 | . | C | T | 215.07   | my_snp_filter | AC=6;AF=0.088;AN=68;BaseQ          |
| 46792 | chrY | 28585356 | . | G | A | 5053.01  | my_snp_filter | AC=10;AF=0.147;AN=68;Base          |
| 46793 | chrY | 28585381 | . | T | C | 8761.95  | my_snp_filter | AC=15;AF=0.214;AN=70;Base          |
| 46794 | chrY | 28585388 | . | G | A | 403.05   | PASS          | AC=5;AF=0.071;AN=70;BaseQRankSum=  |
| 46795 | chrY | 28585391 | . | A | G | 8923.12  | my_snp_filter | AC=15;AF=0.221;AN=68;Base          |
| 46796 | chrY | 28585427 | . | T | G | 14125.23 | my_snp_filter | AC=34;AF=0.486;AN=                 |
| 46797 | chrY | 28585441 | . | C | T | 1009.79  | PASS          | AC=11;AF=0.157;AN=70;BaseQRankSum= |
| 46798 | chrY | 28585444 | . | G | C | 17274.68 |               | my_snp_filter AC=34;AF=0.500;AN=   |
| 46799 | chrY | 28585456 | . | C | A | 21583.47 |               | my_snp_filter AC=36;AF=0.514;AN=   |
| 46800 | chrY | 28585528 | . | A | G | 27791.68 |               | PASS AC=37;AF=0.529;AN=70;Base     |
| 46801 | chrY | 28585558 | . | C | T | 42129.68 |               | PASS AC=37;AF=0.529;AN=70;Base     |
| 46802 | chrY | 28585563 | . | T | G | 42004.14 |               | PASS AC=37;AF=0.529;AN=70;Base     |
| 46803 | chrY | 28585573 | . | C | T | 3000.72  | PASS          | AC=17;AF=0.243;AN=70;BaseQRankSum= |
| 46804 | chrY | 28585594 | . | T | C | 28424.19 |               | PASS AC=39;AF=0.557;AN=70;Base     |
| 46805 | chrY | 28585607 | . | G | T | 1639.16  | PASS          | AC=14;AF=0.200;AN=70;BaseQRankSum= |
| 46806 | chrY | 28585640 | . | G | T | 2159.18  | PASS          | AC=13;AF=0.186;AN=70;BaseQRankSum= |
| 46807 | chrY | 28585667 | . | C | G | 29034.58 |               | my_snp_filter AC=31;AF=0.456;AN=   |
| 46808 | chrY | 28585669 | . | G | A | 29020.31 |               | my_snp_filter AC=31;AF=0.456;AN=   |
| 46809 | chrY | 28585694 | . | T | G | 21621.03 |               | my_snp_filter AC=26;AF=0.371;AN=   |
| 46810 | chrY | 28585703 | . | G | A | 20147.78 |               | my_snp_filter AC=24;AF=0.343;AN=   |
| 46811 | chrY | 28585720 | . | G | A | 12415.65 |               | my_snp_filter AC=17;AF=0.243;AN=   |
| 46812 | chrY | 28585743 | . | C | T | 1016.90  | PASS          | AC=9;AF=0.129;AN=70;BaseQRankSum=  |
| 46813 | chrY | 28585750 | . | G | A | 7826.99  | my_snp_filter | AC=21;AF=0.300;AN=70;Base          |
| 46814 | chrY | 28585761 | . | G | A | 143.23   | my_snp_filter | AC=5;AF=0.071;AN=70;BaseQ          |
| 46815 | chrY | 28585762 | . | C | G | 6959.17  | my_snp_filter | AC=21;AF=0.300;AN=70;Base          |
| 46816 | chrY | 28585775 | . | T | C | 5571.22  | PASS          | AC=21;AF=0.300;AN=70;BaseQRankSum= |



|       |      |          |   |   |     |          |               |                                    |
|-------|------|----------|---|---|-----|----------|---------------|------------------------------------|
| 46817 | chrY | 28585826 | . | A | G   | 228.66   | PASS          | AC=7;AF=0.100;AN=70;BaseQRankSum=  |
| 46818 | chrY | 28585827 | . | T | C   | 228.59   | PASS          | AC=7;AF=0.100;AN=70;BaseQRankSum=  |
| 46819 | chrY | 28585828 | . | A | G   | 121.67   | my_snp_filter | AC=4;AF=0.057;AN=70;BaseQ          |
| 46820 | chrY | 28585872 | . | G | A   | 509.31   | PASS          | AC=7;AF=0.100;AN=70;BaseQRankSum=  |
| 46821 | chrY | 28585927 | . | T | G   | 2150.05  | my_snp_filter | AC=15;AF=0.227;AN=66;Base          |
| 46822 | chrY | 28585957 | . | C | A   | 1031.82  | my_snp_filter | AC=10;AF=0.167;AN=60;Base          |
| 46823 | chrY | 28586000 | . | A | G   | 43.07    | PASS          | AC=2;AF=0.034;AN=58;BaseQRankSum=  |
| 46824 | chrY | 28586006 | . | T | A   | 36.18    | PASS          | AC=1;AF=0.018;AN=56;BaseQRankSum=  |
| 46825 | chrY | 28586023 | . | G | A   | 99.69    | my_snp_filter | AC=5;AF=0.093;AN=54;BaseQ          |
| 46826 | chrY | 28586037 | . | T | G   | 1019.38  | PASS          | AC=5;AF=0.104;AN=48;BaseQRankSum=  |
| 46827 | chrY | 28586067 | . | T | C   | 30.53    | PASS          | AC=1;AF=0.017;AN=58;BaseQRankSum=  |
| 46828 | chrY | 28586130 | . | T | A   | 637.06   | PASS          | AC=11;AF=0.177;AN=62;BaseQRankSum= |
| 46829 | chrY | 28586221 | . | A | G   | 6891.32  | PASS          | AC=34;AF=0.486;AN=70;BaseQRankSum= |
| 46830 | chrY | 28586283 | . | C | A   | 86.47    | PASS          | AC=2;AF=0.029;AN=70;BaseQRankSum=  |
| 46831 | chrY | 28586285 | . | T | G   | 696.57   | PASS          | AC=5;AF=0.071;AN=70;BaseQRankSum=  |
| 46832 | chrY | 28586287 | . | G | T   | 622.50   | PASS          | AC=5;AF=0.071;AN=70;BaseQRankSum=  |
| 46833 | chrY | 28586353 | . | A | T   | 51.37    | my_snp_filter | AC=3;AF=0.044;AN=68;BaseQ          |
| 46834 | chrY | 28586366 | . | T | C   | 163.14   | PASS          | AC=3;AF=0.044;AN=68;BaseQRankSum=  |
| 46835 | chrY | 28586376 | . | A | T   | 32.39    | PASS          | AC=1;AF=0.015;AN=68;BaseQRankSum=  |
| 46836 | chrY | 28586399 | . | C | T   | 1595.65  | PASS          | AC=11;AF=0.157;AN=70;BaseQRankSum= |
| 46837 | chrY | 28586411 | . | G | C   | 1174.47  | PASS          | AC=8;AF=0.114;AN=70;BaseQRankSum=  |
| 46838 | chrY | 28586429 | . | T | C   | 2707.25  | PASS          | AC=15;AF=0.214;AN=70;BaseQRankSum= |
| 46839 | chrY | 28586459 | . | A | G,T | 6007.52  | PASS          | AC=7,6;AF=0.100,0.086;AN=70;BaseQ  |
| 46840 | chrY | 28586464 | . | T | C   | 6867.58  | PASS          | AC=13;AF=0.186;AN=70;BaseQRankSum= |
| 46841 | chrY | 28586490 | . | G | T   | 5821.86  | my_snp_filter | AC=10;AF=0.147;AN=68;Base          |
| 46842 | chrY | 28586503 | . | C | T   | 6214.14  | my_snp_filter | AC=9;AF=0.132;AN=68;BaseQ          |
| 46843 | chrY | 28586524 | . | T | A   | 7038.73  | my_snp_filter | AC=10;AF=0.152;AN=66;Base          |
| 46844 | chrY | 28586585 | . | C | A,G | 2644.29  | my_snp_filter | AC=10,8;AF=0.217,0.174;AN=         |
| 46845 | chrY | 28586616 | . | G | A   | 5787.30  | my_snp_filter | AC=19;AF=0.500;AN=38;Base          |
| 46846 | chrY | 28586633 | . | T | G   | 1954.25  | my_snp_filter | AC=14;AF=0.318;AN=44;Base          |
| 46847 | chrY | 28586686 | . | T | G   | 11157.96 | my_snp_filter | AC=26;AF=0.565;AN=                 |
| 46848 | chrY | 28586694 | . | T | C   | 15045.37 | my_snp_filter | AC=25;AF=0.543;AN=                 |
| 46849 | chrY | 28586704 | . | T | C,* | 2618.92  | PASS          | AC=4,3;AF=0.222,0.167;AN=18;BaseQ  |
| 46850 | chrY | 28586711 | . | T | A   | 14331.53 | PASS          | AC=18;AF=0.450;AN=40;Base          |
| 46851 | chrY | 28586714 | . | T | A   | 5549.17  | PASS          | AC=12;AF=0.176;AN=68;BaseQRankSum= |
| 46852 | chrY | 28586722 | . | A | G   | 27132.09 | PASS          | AC=26;AF=0.591;AN=44;Base          |
| 46853 | chrY | 28586729 | . | A | T,* | 9428.26  | PASS          | AC=1,16;AF=0.019,0.296;AN=54;Base  |
| 46854 | chrY | 28586775 | . | C | T   | 89345.09 | PASS          | AC=40;AF=0.571;AN=70;Base          |
| 46855 | chrY | 28586776 | . | A | G   | 89654.05 | PASS          | AC=40;AF=0.571;AN=70;Base          |
| 46856 | chrY | 28586782 | . | G | A   | 89628.99 | PASS          | AC=41;AF=0.586;AN=70;Base          |
| 46857 | chrY | 28586795 | . | T | C   | 4477.15  | PASS          | AC=17;AF=0.243;AN=70;BaseQRankSum= |
| 46858 | chrY | 28586874 | . | G | A   | 29314.94 | PASS          | AC=45;AF=0.643;AN=70;Base          |
| 46859 | chrY | 28586890 | . | A | T   | 3005.18  | PASS          | AC=18;AF=0.257;AN=70;BaseQRankSum= |
| 46860 | chrY | 28586903 | . | T | A   | 22381.18 | PASS          | AC=44;AF=0.629;AN=70;Base          |
| 46861 | chrY | 28586959 | . | T | C   | 16974.85 | PASS          | AC=28;AF=0.483;AN=58;Base          |
| 46862 | chrY | 28586986 | . | T | A   | 486.16   | PASS          | AC=8;AF=0.118;AN=68;BaseQRankSum=  |
| 46863 | chrY | 28587016 | . | C | T   | 2981.05  | PASS          | AC=16;AF=0.229;AN=70;BaseQRankSum= |
| 46864 | chrY | 28587017 | . | A | G   | 36254.26 | PASS          | AC=32;AF=0.457;AN=70;Base          |
| 46865 | chrY | 28587021 | . | A | G   | 32963.26 | PASS          | AC=29;AF=0.414;AN=70;Base          |
| 46866 | chrY | 28587029 | . | A | C   | 32627.97 | PASS          | AC=30;AF=0.429;AN=70;Base          |
| 46867 | chrY | 28587061 | . | T | C   | 5951.36  | PASS          | AC=20;AF=0.286;AN=70;BaseQRankSum= |
| 46868 | chrY | 28587079 | . | A | G   | 4414.03  | PASS          | AC=20;AF=0.286;AN=70;BaseQRankSum= |
| 46869 | chrY | 28587083 | . | C | T   | 7192     | PASS          | AC=21;AF=0.300;AN=70;BaseQRankSum= |
| 46870 | chrY | 28587091 | . | C | T   | 6492.85  | PASS          | AC=18;AF=0.257;AN=70;BaseQRankSum= |
| 46871 | chrY | 28587124 | . | C | T   | 21432.95 | PASS          | AC=16;AF=0.229;AN=70;Base          |
| 46872 | chrY | 28587125 | . | A | G   | 527.65   | PASS          | AC=3;AF=0.043;AN=70;BaseQRankSum=  |
| 46873 | chrY | 28587134 | . | G | A   | 14773.39 | PASS          | AC=31;AF=0.443;AN=70;Base          |
| 46874 | chrY | 28587192 | . | C | T   | 11798.87 | PASS          | AC=32;AF=0.457;AN=70;Base          |
| 46875 | chrY | 28587197 | . | C | T   | 179.06   | my_snp_filter | AC=8;AF=0.114;AN=70;BaseQ          |
| 46876 | chrY | 28587230 | . | A | T   | 128.56   | PASS          | AC=3;AF=0.043;AN=70;BaseQRankSum=  |
| 46877 | chrY | 28587232 | . | T | C   | 29325.97 | PASS          | AC=38;AF=0.543;AN=70;Base          |
| 46878 | chrY | 28587258 | . | T | C   | 8657.24  | PASS          | AC=29;AF=0.414;AN=70;BaseQRankSum= |
| 46879 | chrY | 28587273 | . | G | A   | 1348.74  | PASS          | AC=8;AF=0.114;AN=70;BaseQRankSum=  |
| 46880 | chrY | 28587279 | . | A | G   | 9273.60  | PASS          | AC=19;AF=0.306;AN=62;BaseQRankSum= |
| 46881 | chrY | 28587282 | . | G | T   | 8647.48  | PASS          | AC=18;AF=0.281;AN=64;BaseQRankSum= |
| 46882 | chrY | 28587284 | . | G | A   | 8140.21  | PASS          | AC=16;AF=0.258;AN=62;BaseQRankSum= |
| 46883 | chrY | 28587285 | . | C | T   | 7819.49  | PASS          | AC=16;AF=0.258;AN=62;BaseQRankSum= |
| 46884 | chrY | 28587290 | . | G | A   | 2745.23  | PASS          | AC=8;AF=0.121;AN=66;BaseQRankSum=  |
| 46885 | chrY | 28587295 | . | G | A   | 62.38    | my_snp_filter | AC=2;AF=0.029;AN=70;BaseQ          |
| 46886 | chrY | 28587298 | . | G | T   | 3392.02  | my_snp_filter | AC=9;AF=0.129;AN=70;BaseQ          |
| 46887 | chrY | 28587314 | . | T | C   | 2729.31  | my_snp_filter | AC=15;AF=0.214;AN=70;Base          |
| 46888 | chrY | 28587355 | . | A | G   | 14945.59 | PASS          | AC=28;AF=0.400;AN=70;Base          |
| 46889 | chrY | 28587358 | . | T | C   | 15267.26 | PASS          | AC=28;AF=0.400;AN=70;Base          |
| 46890 | chrY | 28587367 | . | C | T   | 248.13   | my_snp_filter | AC=6;AF=0.086;AN=70;BaseQ          |
| 46891 | chrY | 28587409 | . | A | T   | 359.56   | my_snp_filter | AC=5;AF=0.071;AN=70;BaseQ          |
| 46892 | chrY | 28587418 | . | A | C   | 29773.15 | PASS          | AC=32;AF=0.457;AN=70;Base          |

|       |      |          |   |   |     |          |               |                                             |
|-------|------|----------|---|---|-----|----------|---------------|---------------------------------------------|
| 46893 | chrY | 28587420 | . | C | T   | 29936.15 | PASS          | AC=32;AF=0.457;AN=70;BaseQRankSum=          |
| 46894 | chrY | 28587459 | . | T | C   | 38837.94 | PASS          | AC=35;AF=0.500;AN=70;BaseQRankSum=          |
| 46895 | chrY | 28587483 | . | A | C   | 44812.71 | PASS          | AC=33;AF=0.471;AN=70;BaseQRankSum=          |
| 46896 | chrY | 28587495 | . | C | T   | 53050.14 | PASS          | AC=32;AF=0.457;AN=70;BaseQRankSum=          |
| 46897 | chrY | 28587496 | . | A | G   | 29659.42 | PASS          | AC=31;AF=0.443;AN=70;BaseQRankSum=          |
| 46898 | chrY | 28587511 | . | C | T   | 48026.98 | PASS          | AC=32;AF=0.457;AN=70;BaseQRankSum=          |
| 46899 | chrY | 28587530 | . | C | T   | 54285.44 | PASS          | AC=33;AF=0.471;AN=70;BaseQRankSum=          |
| 46900 | chrY | 28587531 | . | G | A   | 54510.08 | PASS          | AC=34;AF=0.486;AN=70;BaseQRankSum=          |
| 46901 | chrY | 28587559 | . | T | G   | 33307.47 | PASS          | AC=38;AF=0.543;AN=70;BaseQRankSum=          |
| 46902 | chrY | 28587588 | . | G | A   | 1364.16  | PASS          | AC=10;AF=0.143;AN=70;BaseQRankSum=          |
| 46903 | chrY | 28587640 | . | C | G   | 59334.59 | PASS          | AC=35;AF=0.500;AN=70;BaseQRankSum=          |
| 46904 | chrY | 28587646 | . | T | A   | 60453.52 | PASS          | AC=33;AF=0.471;AN=70;BaseQRankSum=          |
| 46905 | chrY | 28587666 | . | A | C   | 58093.25 | PASS          | AC=33;AF=0.471;AN=70;BaseQRankSum=          |
| 46906 | chrY | 28587685 | . | A | C   | 57919.26 | PASS          | AC=33;AF=0.471;AN=70;BaseQRankSum=          |
| 46907 | chrY | 28587697 | . | C | T   | 59024.01 | PASS          | AC=30;AF=0.429;AN=70;BaseQRankSum=          |
| 46908 | chrY | 28587716 | . | C | G   | 11593.48 | PASS          | AC=26;AF=0.371;AN=70;BaseQRankSum=          |
| 46909 | chrY | 28587738 | . | G | C   | 66304.24 | PASS          | AC=36;AF=0.514;AN=70;BaseQRankSum=          |
| 46910 | chrY | 28587749 | . | G | T   | 66454.66 | PASS          | AC=35;AF=0.500;AN=70;BaseQRankSum=          |
| 46911 | chrY | 28587793 | . | T | A   | 790.93   | PASS          | AC=7;AF=0.100;AN=70;BaseQRankSum=           |
| 46912 | chrY | 28587798 | . | G | A   | 10613.29 | PASS          | AC=28;AF=0.400;AN=70;BaseQRankSum=          |
| 46913 | chrY | 28587799 | . | T | G   | 3312.73  | PASS          | AC=19;AF=0.271;AN=70;BaseQRankSum=          |
| 46914 | chrY | 28587804 | . | G | A   | 297.04   | my_snp_filter | AC=6;AF=0.086;AN=70;BaseQRankSum=           |
| 46915 | chrY | 28587818 | . | T | C   | 77725.54 | PASS          | AC=35;AF=0.500;AN=70;BaseQRankSum=          |
| 46916 | chrY | 28587820 | . | T | C   | 78468.54 | PASS          | AC=35;AF=0.500;AN=70;BaseQRankSum=          |
| 46917 | chrY | 28587827 | . | C | T   | 79129.01 | PASS          | AC=35;AF=0.500;AN=70;BaseQRankSum=          |
| 46918 | chrY | 28587830 | . | T | A   | 78191.01 | PASS          | AC=36;AF=0.514;AN=70;BaseQRankSum=          |
| 46919 | chrY | 28587859 | . | G | C   | 50584.37 | PASS          | AC=44;AF=0.629;AN=70;BaseQRankSum=          |
| 46920 | chrY | 28587895 | . | C | T   | 59719.06 | PASS          | AC=46;AF=0.657;AN=70;BaseQRankSum=          |
| 46921 | chrY | 28587897 | . | C | T   | 1001.08  | my_snp_filter | AC=16;AF=0.229;AN=70;BaseQRankSum=          |
| 46922 | chrY | 28587948 | . | G | A   | 112.46   | my_snp_filter | AC=5;AF=0.071;AN=70;BaseQRankSum=           |
| 46923 | chrY | 28587971 | . | G | A   | 37549.47 | PASS          | AC=34;AF=0.486;AN=70;BaseQRankSum=          |
| 46924 | chrY | 28587999 | . | G | T   | 341.94   | PASS          | AC=6;AF=0.086;AN=70;BaseQRankSum=           |
| 46925 | chrY | 28588004 | . | G | A   | 76.12    | my_snp_filter | AC=5;AF=0.071;AN=70;BaseQRankSum=           |
| 46926 | chrY | 28588005 | . | A | G   | 299.58   | PASS          | AC=5;AF=0.071;AN=70;BaseQRankSum=           |
| 46927 | chrY | 28588019 | . | G | C   | 53054.95 | PASS          | AC=34;AF=0.486;AN=70;BaseQRankSum=          |
| 46928 | chrY | 28588026 | . | A | T   | 52666.93 | PASS          | AC=32;AF=0.457;AN=70;BaseQRankSum=          |
| 46929 | chrY | 28588044 | . | C | G   | 151.21   | my_snp_filter | AC=4;AF=0.059;AN=68;BaseQRankSum=           |
| 46930 | chrY | 28588068 | . | T | C   | 44395.97 | PASS          | AC=30;AF=0.429;AN=70;BaseQRankSum=          |
| 46931 | chrY | 28588100 | . | A | G   | 714.07   | PASS          | AC=9;AF=0.136;AN=66;BaseQRankSum=           |
| 46932 | chrY | 28588105 | . | A | T   | 1152.17  | my_snp_filter | AC=10;AF=0.147;AN=68;BaseQRankSum=          |
| 46933 | chrY | 28588116 | . | G | A   | 7100.86  | PASS          | AC=17;AF=0.258;AN=66;BaseQRankSum=          |
| 46934 | chrY | 28588128 | . | G | A   | 34.66    | PASS          | AC=1;AF=0.014;AN=70;BaseQRankSum=           |
| 46935 | chrY | 28588137 | . | T | A   | 106.03   | my_snp_filter | AC=2;AF=0.029;AN=70;BaseQRankSum=           |
| 46936 | chrY | 28588173 | . | C | G   | 32356.12 | PASS          | AC=36;AF=0.514;AN=70;BaseQRankSum=          |
| 46937 | chrY | 28588206 | . | T | C   | 41100.35 | PASS          | AC=34;AF=0.486;AN=70;BaseQRankSum=          |
| 46938 | chrY | 28588215 | . | G | C   | 5298.16  | PASS          | AC=18;AF=0.257;AN=70;BaseQRankSum=          |
| 46939 | chrY | 28588218 | . | A | G   | 39843.86 | PASS          | AC=34;AF=0.486;AN=70;BaseQRankSum=          |
| 46940 | chrY | 28588244 | . | T | C   | 28498.05 | PASS          | AC=29;AF=0.426;AN=68;BaseQRankSum=          |
| 46941 | chrY | 28588249 | . | A | T,G | 22721.85 | PASS          | AC=22,10;AF=0.324,0.147;AN=68;BaseQRankSum= |
| 46942 | chrY | 28588259 | . | A | T   | 25180.21 | PASS          | AC=29;AF=0.426;AN=68;BaseQRankSum=          |
| 46943 | chrY | 28588261 | . | G | A   | 24395.54 | PASS          | AC=29;AF=0.426;AN=68;BaseQRankSum=          |
| 46944 | chrY | 28588269 | . | G | T   | 4522.26  | PASS          | AC=16;AF=0.229;AN=70;BaseQRankSum=          |
| 46945 | chrY | 28588291 | . | A | T   | 653.78   | PASS          | AC=6;AF=0.086;AN=70;BaseQRankSum=           |
| 46946 | chrY | 28588296 | . | A | G   | 11026.83 | my_snp_filter | AC=15;AF=0.214;AN=70;BaseQRankSum=          |
| 46947 | chrY | 28588302 | . | T | C   | 10465.51 | my_snp_filter | AC=13;AF=0.186;AN=70;BaseQRankSum=          |
| 46948 | chrY | 28588304 | . | A | G   | 10339.73 | my_snp_filter | AC=11;AF=0.157;AN=70;BaseQRankSum=          |
| 46949 | chrY | 28588314 | . | A | G,* | 6100.47  | PASS          | AC=9,1;AF=0.129,0.014;AN=70;BaseQRankSum=   |
| 46950 | chrY | 28588320 | . | A | G,* | 6028.13  | PASS          | AC=11,1;AF=0.157,0.014;AN=70;BaseQRankSum=  |
| 46951 | chrY | 28588326 | . | T | A   | 30.46    | my_snp_filter | AC=1;AF=0.014;AN=70;BaseQRankSum=           |
| 46952 | chrY | 28588346 | . | G | A   | 14725.40 | PASS          | AC=28;AF=0.400;AN=70;BaseQRankSum=          |
| 46953 | chrY | 28588355 | . | A | T   | 15017.76 | PASS          | AC=29;AF=0.414;AN=70;BaseQRankSum=          |
| 46954 | chrY | 28588365 | . | C | A   | 258.01   | PASS          | AC=3;AF=0.043;AN=70;BaseQRankSum=           |
| 46955 | chrY | 28588446 | . | G | T   | 8126.46  | my_snp_filter | AC=23;AF=0.329;AN=70;BaseQRankSum=          |
| 46956 | chrY | 28588453 | . | T | C   | 7761.23  | my_snp_filter | AC=22;AF=0.314;AN=70;BaseQRankSum=          |
| 46957 | chrY | 28588477 | . | G | A   | 4670.74  | my_snp_filter | AC=12;AF=0.171;AN=70;BaseQRankSum=          |
| 46958 | chrY | 28588479 | . | T | C   | 4670.32  | my_snp_filter | AC=12;AF=0.171;AN=70;BaseQRankSum=          |
| 46959 | chrY | 28588503 | . | A | G   | 487.07   | PASS          | AC=6;AF=0.086;AN=70;BaseQRankSum=           |
| 46960 | chrY | 28588504 | . | G | C   | 486.17   | PASS          | AC=6;AF=0.086;AN=70;BaseQRankSum=           |
| 46961 | chrY | 28588644 | . | T | C   | 343.27   | PASS          | AC=5;AF=0.074;AN=68;BaseQRankSum=           |
| 46962 | chrY | 28588645 | . | G | A   | 343.96   | PASS          | AC=5;AF=0.074;AN=68;BaseQRankSum=           |
| 46963 | chrY | 28588657 | . | A | G   | 40.56    | my_snp_filter | AC=3;AF=0.043;AN=70;BaseQRankSum=           |
| 46964 | chrY | 28588722 | . | T | C   | 72.47    | PASS          | AC=2;AF=0.029;AN=70;BaseQRankSum=           |
| 46965 | chrY | 28588986 | . | G | T   | 5873.88  | PASS          | AC=50;AF=0.735;AN=68;DP=323;FS=0.0          |
| 46966 | chrY | 28588991 | . | T | G   | 816.28   | PASS          | AC=6;AF=0.086;AN=70;DP=291;FS=0.0           |
| 46967 | chrY | 28590278 | . | A | G   | 11159.94 | PASS          | AC=68;AF=1.00;AN=68;BaseQRankSum=           |
| 46968 | chrY | 28590899 | . | A | T   | 938      | PASS          | AC=6;AF=0.086;AN=70;DP=524;FS=0.0           |

|       |      |          |   |   |   |          |               |                                    |
|-------|------|----------|---|---|---|----------|---------------|------------------------------------|
| 46969 | chrY | 28593083 | . | A | G | 225.27   | PASS          | AC=2;AF=0.032;AN=62;DP=291;FS=0.0  |
| 46970 | chrY | 28596691 | . | G | A | 593.96   | PASS          | AC=6;AF=0.333;AN=18;DP=119;FS=0.0  |
| 46971 | chrY | 28597630 | . | C | T | 149.51   | PASS          | AC=2;AF=0.029;AN=70;BaseQRankSum=  |
| 46972 | chrY | 28598170 | . | A | C | 628.71   | PASS          | AC=11;AF=0.157;AN=70;BaseQRankSum= |
| 46973 | chrY | 28598191 | . | G | A | 2876.39  | PASS          | AC=19;AF=0.271;AN=70;BaseQRankSum= |
| 46974 | chrY | 28598245 | . | A | G | 201.78   | my_snp_filter | AC=8;AF=0.114;AN=70;BaseQ          |
| 46975 | chrY | 28601602 | . | T | C | 67.90    | PASS          | AC=1;AF=0.015;AN=68;BaseQRankSum=  |
| 46976 | chrY | 28601975 | . | A | G | 2741.86  | PASS          | AC=18;AF=1.00;AN=18;DP=123;FS=0.0  |
| 46977 | chrY | 28604414 | . | A | T | 145.23   | PASS          | AC=8;AF=0.148;AN=54;BaseQRankSum=  |
| 46978 | chrY | 28604634 | . | G | T | 377.80   | PASS          | AC=2;AF=0.031;AN=64;DP=217;FS=0.0  |
| 46979 | chrY | 28606269 | . | C | T | 3568.86  | PASS          | AC=18;AF=1.00;AN=18;DP=143;FS=0.0  |
| 46980 | chrY | 28609194 | . | C | T | 1763.50  | PASS          | AC=30;AF=1.00;AN=30;DP=102;FS=0.0  |
| 46981 | chrY | 28611239 | . | C | G | 462.60   | PASS          | AC=6;AF=0.115;AN=52;DP=149;FS=0.0  |
| 46982 | chrY | 28612323 | . | G | A | 9876.94  | PASS          | AC=64;AF=1.00;AN=64;DP=343;FS=0.0  |
| 46983 | chrY | 28613785 | . | T | G | 30.24    | PASS          | AC=2;AF=0.053;AN=38;DP=130;FS=0.0  |
| 46984 | chrY | 28628982 | . | G | C | 879.40   | PASS          | AC=6;AF=0.088;AN=68;DP=363;FS=0.0  |
| 46985 | chrY | 28629677 | . | C | T | 493.76   | PASS          | AC=6;AF=0.088;AN=68;DP=355;FS=0.0  |
| 46986 | chrY | 28630057 | . | T | C | 702.35   | PASS          | AC=8;AF=0.121;AN=66;BaseQRankSum=  |
| 46987 | chrY | 28638522 | . | G | A | 2070.33  | PASS          | AC=20;AF=0.286;AN=70;BaseQRankSum= |
| 46988 | chrY | 28638611 | . | T | C | 52.86    | PASS          | AC=1;AF=0.014;AN=70;BaseQRankSum=  |
| 46989 | chrY | 28638614 | . | T | C | 689.30   | PASS          | AC=6;AF=0.086;AN=70;DP=469;FS=0.0  |
| 46990 | chrY | 28638648 | . | A | C | 1107.33  | PASS          | AC=6;AF=0.086;AN=70;DP=484;FS=0.0  |
| 46991 | chrY | 28638816 | . | T | C | 7217.09  | PASS          | AC=64;AF=1.00;AN=64;DP=265;FS=0.0  |
| 46992 | chrY | 28641658 | . | G | C | 12033    | PASS          | AC=68;AF=1.00;AN=68;DP=398;FS=0.0  |
| 46993 | chrY | 28647622 | . | A | G | 4194.13  | PASS          | AC=46;AF=0.719;AN=64;DP=282;FS=0.0 |
| 46994 | chrY | 28648101 | . | C | A | 471.07   | PASS          | AC=6;AF=0.086;AN=70;DP=423;FS=0.0  |
| 46995 | chrY | 28650343 | . | G | C | 16135.69 | PASS          | AC=58;AF=0.829;AN=70;DP=6          |
| 46996 | chrY | 28651317 | . | T | C | 640.14   | PASS          | AC=6;AF=0.086;AN=70;DP=508;FS=0.0  |
| 46997 | chrY | 28653225 | . | C | T | 866.06   | PASS          | AC=6;AF=0.214;AN=28;DP=134;FS=0.0  |
| 46998 | chrY | 28653544 | . | A | G | 142.75   | PASS          | AC=3;AF=0.043;AN=70;BaseQRankSum=  |
| 46999 | chrY | 28655471 | . | C | A | 7486.05  | PASS          | AC=56;AF=1.00;AN=56;DP=253;FS=0.0  |
| 47000 | chrY | 28656610 | . | A | G | 9448.16  | PASS          | AC=46;AF=0.657;AN=70;DP=515;FS=0.0 |
| 47001 | chrY | 28657436 | . | C | T | 1164.61  | PASS          | AC=6;AF=0.086;AN=70;DP=607;FS=0.0  |
| 47002 | chrY | 28661198 | . | A | G | 9523.11  | PASS          | AC=58;AF=0.829;AN=70;DP=458;FS=0.0 |
| 47003 | chrY | 28661676 | . | T | C | 891.42   | PASS          | AC=6;AF=0.086;AN=70;DP=430;FS=0.0  |
| 47004 | chrY | 28664607 | . | T | C | 2798.30  | PASS          | AC=38;AF=0.760;AN=50;DP=186;FS=0.0 |
| 47005 | chrY | 28669130 | . | C | T | 3023.11  | PASS          | AC=38;AF=0.613;AN=62;DP=294;FS=0.0 |
| 47006 | chrY | 28670117 | . | T | C | 6163.26  | PASS          | AC=56;AF=1.00;AN=56;DP=236;FS=0.0  |
| 47007 | chrY | 28673059 | . | G | A | 656.03   | PASS          | AC=6;AF=0.088;AN=68;DP=386;FS=0.0  |
| 47008 | chrY | 28674360 | . | G | C | 260.30   | PASS          | AC=2;AF=0.029;AN=70;DP=671;FS=0.0  |
| 47009 | chrY | 28677364 | . | A | G | 744.75   | PASS          | AC=6;AF=0.086;AN=70;DP=561;FS=0.0  |
| 47010 | chrY | 28678641 | . | T | C | 6630.17  | PASS          | AC=64;AF=1.00;AN=64;DP=273;FS=0.0  |
| 47011 | chrY | 28679492 | . | A | C | 3986.32  | PASS          | AC=48;AF=0.727;AN=66;DP=241;FS=0.0 |
| 47012 | chrY | 28693346 | . | C | T | 945.83   | PASS          | AC=5;AF=0.074;AN=68;BaseQRankSum=  |
| 47013 | chrY | 28693795 | . | A | G | 987.89   | PASS          | AC=14;AF=0.212;AN=66;BaseQRankSum= |
| 47014 | chrY | 28693850 | . | A | G | 721.76   | PASS          | AC=9;AF=0.145;AN=62;BaseQRankSum=  |
| 47015 | chrY | 28693905 | . | A | G | 193.03   | PASS          | AC=3;AF=0.045;AN=66;BaseQRankSum=  |
| 47016 | chrY | 28695788 | . | C | G | 778.42   | PASS          | AC=6;AF=0.086;AN=70;DP=412;FS=0.0  |
| 47017 | chrY | 28697493 | . | C | G | 1067.71  | PASS          | AC=6;AF=0.088;AN=68;DP=318;FS=0.0  |
| 47018 | chrY | 28698742 | . | G | A | 33.87    | PASS          | AC=1;AF=0.015;AN=68;BaseQRankSum=  |
| 47019 | chrY | 28698745 | . | T | C | 34.11    | PASS          | AC=1;AF=0.014;AN=70;BaseQRankSum=  |
| 47020 | chrY | 28698750 | . | C | T | 36.81    | PASS          | AC=1;AF=0.014;AN=70;BaseQRankSum=  |
| 47021 | chrY | 28699018 | . | G | A | 5700.63  | PASS          | AC=52;AF=0.813;AN=64;DP=273;FS=0.0 |
| 47022 | chrY | 28708402 | . | G | A | 541.25   | PASS          | AC=2;AF=0.029;AN=70;DP=709;FS=0.0  |
| 47023 | chrY | 28708424 | . | G | A | 97.47    | PASS          | AC=1;AF=0.014;AN=70;BaseQRankSum=  |
| 47024 | chrY | 28708573 | . | T | C | 36.66    | my_snp_filter | AC=2;AF=0.029;AN=68;BaseQ          |
| 47025 | chrY | 28709160 | . | T | C | 32.66    | PASS          | AC=1;AF=0.020;AN=50;BaseQRankSum=  |
| 47026 | chrY | 28709228 | . | A | C | 5458.76  | PASS          | AC=34;AF=0.486;AN=70;BaseQRankSum= |
| 47027 | chrY | 28709245 | . | G | T | 787.64   | PASS          | AC=14;AF=0.200;AN=70;BaseQRankSum= |
| 47028 | chrY | 28709251 | . | C | T | 8039.55  | PASS          | AC=33;AF=0.485;AN=68;BaseQRankSum= |
| 47029 | chrY | 28709252 | . | C | A | 8039.55  | PASS          | AC=33;AF=0.485;AN=68;BaseQRankSum= |
| 47030 | chrY | 28709271 | . | C | A | 7351.76  | PASS          | AC=31;AF=0.456;AN=68;BaseQRankSum= |
| 47031 | chrY | 28709273 | . | C | T | 45.54    | PASS          | AC=1;AF=0.014;AN=70;BaseQRankSum=  |
| 47032 | chrY | 28709275 | . | G | C | 7807.87  | PASS          | AC=31;AF=0.456;AN=68;BaseQRankSum= |
| 47033 | chrY | 28709316 | . | A | T | 10868.73 | PASS          | AC=35;AF=0.500;AN=70;BaseQ         |
| 47034 | chrY | 28709338 | . | G | A | 1806.48  | PASS          | AC=17;AF=0.243;AN=70;BaseQRankSum= |
| 47035 | chrY | 28709343 | . | A | G | 12603.81 | PASS          | AC=35;AF=0.500;AN=70;BaseQ         |
| 47036 | chrY | 28709442 | . | C | T | 4437.77  | my_snp_filter | AC=29;AF=0.426;AN=68;BaseQ         |
| 47037 | chrY | 28709481 | . | A | G | 279.84   | PASS          | AC=6;AF=0.088;AN=68;BaseQRankSum=  |
| 47038 | chrY | 28709494 | . | G | A | 82.96    | my_snp_filter | AC=3;AF=0.044;AN=68;BaseQ          |
| 47039 | chrY | 28709497 | . | C | T | 162.90   | my_snp_filter | AC=6;AF=0.088;AN=68;BaseQ          |
| 47040 | chrY | 28709570 | . | T | C | 133.96   | my_snp_filter | AC=5;AF=0.071;AN=70;BaseQ          |
| 47041 | chrY | 28709643 | . | A | G | 153.20   | PASS          | AC=3;AF=0.043;AN=70;BaseQRankSum=  |
| 47042 | chrY | 28715939 | . | A | G | 1365.81  | PASS          | AC=6;AF=0.091;AN=66;DP=265;FS=0.0  |
| 47043 | chrY | 28716516 | . | T | C | 30.81    | my_snp_filter | AC=1;AF=0.015;AN=68;BaseQ          |
| 47044 | chrY | 28720137 | . | T | C | 779.47   | PASS          | AC=14;AF=0.350;AN=40;BaseQRankSum= |

|       |      |          |   |   |   |          |               |                                   |
|-------|------|----------|---|---|---|----------|---------------|-----------------------------------|
| 47045 | chrY | 28720907 | . | A | G | 1177.01  | PASS          | AC=6;AF=0.091;AN=66;DP=311;FS=0.0 |
| 47046 | chrY | 28721750 | . | C | T | 50.56    | PASS          | AC=2;AF=0.059;AN=34;DP=128;FS=0.0 |
| 47047 | chrY | 28722371 | . | A | G | 621.10   | PASS          | AC=6;AF=0.231;AN=26;DP=141;FS=0.0 |
| 47048 | chrY | 28724176 | . | T | G | 34.22    | PASS          | AC=1;AF=0.042;AN=24;BaseQRankSum= |
| 47049 | chrY | 28726414 | . | A | C | 1049.30  | PASS          | AC=6;AF=0.086;AN=70;DP=417;FS=0.0 |
| 47050 | chrY | 28728433 | . | C | A | 1068.65  | PASS          | AC=6;AF=0.086;AN=70;DP=686;FS=0.0 |
| 47051 | chrY | 28731080 | . | C | T | 1051.69  | PASS          | AC=6;AF=0.094;AN=64;DP=286;FS=0.0 |
| 47052 | chrY | 28731210 | . | G | T | 8251.93  | PASS          | AC=52;AF=0.743;AN=70;DP=436;FS=0. |
| 47053 | chrY | 28731917 | . | C | A | 22529.91 | PASS          | AC=70;AF=1.00;AN=70;DP=75         |
| 47054 | chrY | 28733101 | . | G | C | 16180.93 | PASS          | AC=70;AF=1.00;AN=70;DP=55         |
| 47055 | chrY | 28733706 | . | G | A | 3142.22  | PASS          | AC=48;AF=0.706;AN=68;DP=241;FS=0. |
| 47056 | chrY | 28739098 | . | A | G | 9046.19  | PASS          | AC=52;AF=0.743;AN=70;DP=500;FS=0. |
| 47057 | chrY | 28749379 | . | C | T | 1628.18  | PASS          | AC=6;AF=0.333;AN=18;DP=182;FS=0.0 |
| 47058 | chrY | 28750085 | . | T | C | 1117.19  | PASS          | AC=6;AF=0.333;AN=18;DP=158;FS=0.0 |
| 47059 | chrY | 28752346 | . | C | T | 1287.63  | PASS          | AC=6;AF=0.273;AN=22;DP=173;FS=0.0 |
| 47060 | chrY | 28755129 | . | A | G | 51.39    | PASS          | AC=2;AF=0.063;AN=32;DP=186;FS=0.0 |
| 47061 | chrY | 28755137 | . | A | G | 50.46    | PASS          | AC=2;AF=0.045;AN=44;DP=187;FS=0.0 |
| 47062 | chrY | 28757495 | . | A | G | 40.03    | my_snp_filter | AC=2;AF=0.029;AN=70;BaseQ         |
| 47063 | chrY | 28757564 | . | G | T | 180.60   | my_snp_filter | AC=8;AF=0.114;AN=70;BaseQ         |
| 47064 | chrY | 28757590 | . | A | G | 576.41   | PASS          | AC=12;AF=0.171;AN=70;BaseQRankSum |
| 47065 | chrY | 28757608 | . | G | A | 713.80   | PASS          | AC=12;AF=0.171;AN=70;BaseQRankSum |
| 47066 | chrY | 28757611 | . | T | G | 709.98   | PASS          | AC=12;AF=0.171;AN=70;BaseQRankSum |
| 47067 | chrY | 28757649 | . | A | G | 119.94   | PASS          | AC=3;AF=0.044;AN=68;BaseQRankSum= |
| 47068 | chrY | 28757651 | . | G | T | 118.37   | PASS          | AC=3;AF=0.044;AN=68;BaseQRankSum= |
| 47069 | chrY | 28758082 | . | A | G | 486.45   | PASS          | AC=4;AF=0.059;AN=68;DP=251;FS=0.0 |
| 47070 | chrY | 28758193 | . | A | G | 7502.12  | PASS          | AC=62;AF=1.00;AN=62;DP=262;FS=0.0 |
| 47071 | chrY | 28760064 | . | A | T | 1158.74  | PASS          | AC=6;AF=0.086;AN=70;DP=515;FS=0.0 |
| 47072 | chrY | 28760827 | . | C | T | 147.92   | PASS          | AC=4;AF=0.057;AN=70;BaseQRankSum= |
| 47073 | chrY | 28765030 | . | G | A | 1105.26  | PASS          | AC=6;AF=0.086;AN=70;DP=450;FS=0.0 |
| 47074 | chrY | 28765730 | . | C | A | 551.92   | PASS          | AC=6;AF=0.086;AN=70;DP=348;FS=0.0 |
| 47075 | chrY | 28765856 | . | G | A | 1015.76  | PASS          | AC=6;AF=0.086;AN=70;DP=490;FS=0.0 |
| 47076 | chrY | 28766196 | . | G | A | 118.09   | PASS          | AC=4;AF=0.067;AN=60;DP=218;FS=0.0 |
| 47077 | chrY | 28767811 | . | A | G | 33.81    | PASS          | AC=1;AF=0.014;AN=70;BaseQRankSum= |
| 47078 | chrY | 28771116 | . | G | C | 16663.96 | PASS          | AC=68;AF=1.00;AN=68;DP=55         |
| 47079 | chrY | 28773169 | . | G | A | 956.22   | PASS          | AC=6;AF=0.086;AN=70;DP=450;FS=0.0 |
| 47080 | chrY | 28773328 | . | G | T | 268.33   | PASS          | AC=2;AF=0.029;AN=70;DP=318;FS=0.0 |
| 47081 | chrY | 28776352 | . | A | G | 92.90    | my_snp_filter | AC=4;AF=0.059;AN=68;BaseQ         |
| 47082 | chrY | 28776391 | . | G | A | 3346     | PASS          | AC=16;AF=0.229;AN=70;BaseQRankSum |
| 47083 | chrY | 28776400 | . | T | C | 3565.90  | PASS          | AC=16;AF=0.229;AN=70;BaseQRankSum |
| 47084 | chrY | 28776493 | . | G | A | 862.92   | PASS          | AC=11;AF=0.177;AN=62;BaseQRankSum |
| 47085 | chrY | 28776879 | . | T | G | 1091.85  | PASS          | AC=6;AF=0.088;AN=68;DP=305;FS=0.0 |
| 47086 | chrY | 28779301 | . | G | C | 19119.44 | PASS          | AC=46;AF=0.657;AN=70;DP=8         |
| 47087 | chrY | 28779832 | . | G | A | 46.90    | PASS          | AC=2;AF=0.037;AN=54;DP=189;FS=0.0 |
| 47088 | chrY | 28780141 | . | G | C | 921.43   | PASS          | AC=6;AF=0.176;AN=34;DP=148;FS=0.0 |
| 47089 | chrY | 28780459 | . | A | T | 1140.67  | PASS          | AC=6;AF=0.086;AN=70;DP=677;FS=0.0 |
| 47090 | chrY | 28780719 | . | G | A | 224.69   | PASS          | AC=2;AF=0.029;AN=70;DP=451;FS=0.0 |
| 47091 | chrY | 28780767 | . | A | C | 692.66   | PASS          | AC=10;AF=0.143;AN=70;BaseQRankSum |
| 47092 | chrY | 28780823 | . | T | A | 1404.22  | PASS          | AC=16;AF=0.229;AN=70;BaseQRankSum |
| 47093 | chrY | 28780856 | . | T | A | 1465.77  | PASS          | AC=18;AF=0.257;AN=70;BaseQRankSum |
| 47094 | chrY | 28780870 | . | C | A | 1277.64  | PASS          | AC=17;AF=0.243;AN=70;BaseQRankSum |
| 47095 | chrY | 28780883 | . | G | A | 892.86   | PASS          | AC=15;AF=0.214;AN=70;BaseQRankSum |
| 47096 | chrY | 28782419 | . | A | G | 1342     | PASS          | AC=6;AF=0.086;AN=70;DP=337;FS=0.0 |
| 47097 | chrY | 28782777 | . | C | T | 884.90   | PASS          | AC=4;AF=0.057;AN=70;DP=417;FS=0.0 |
| 47098 | chrY | 28784195 | . | A | G | 271.98   | PASS          | AC=6;AF=0.143;AN=42;BaseQRankSum= |
| 47099 | chrY | 28784251 | . | G | T | 97.99    | PASS          | AC=2;AF=0.032;AN=62;BaseQRankSum= |
| 47100 | chrY | 28784393 | . | G | A | 44.74    | PASS          | AC=1;AF=0.015;AN=68;BaseQRankSum= |
| 47101 | chrY | 28784406 | . | T | C | 271.09   | PASS          | AC=3;AF=0.136;AN=22;BaseQRankSum= |
| 47102 | chrY | 28784408 | . | G | A | 190.70   | PASS          | AC=2;AF=0.045;AN=44;BaseQRankSum= |
| 47103 | chrY | 28784418 | . | A | G | 106.86   | PASS          | AC=2;AF=0.029;AN=70;BaseQRankSum= |
| 47104 | chrY | 28784423 | . | A | T | 127.70   | PASS          | AC=2;AF=0.029;AN=68;BaseQRankSum= |
| 47105 | chrY | 28784428 | . | T | A | 338.83   | PASS          | AC=2;AF=0.059;AN=34;BaseQRankSum= |
| 47106 | chrY | 28784448 | . | G | T | 161.07   | PASS          | AC=1;AF=0.014;AN=70;BaseQRankSum= |
| 47107 | chrY | 28784660 | . | G | A | 103.49   | PASS          | AC=2;AF=0.029;AN=70;BaseQRankSum= |
| 47108 | chrY | 28784770 | . | G | A | 71.60    | PASS          | AC=1;AF=0.015;AN=68;BaseQRankSum= |
| 47109 | chrY | 28784773 | . | T | C | 74.31    | PASS          | AC=1;AF=0.015;AN=68;BaseQRankSum= |
| 47110 | chrY | 28784837 | . | G | C | 72.28    | PASS          | AC=1;AF=0.015;AN=66;BaseQRankSum= |
| 47111 | chrY | 28784838 | . | T | A | 58.20    | PASS          | AC=1;AF=0.014;AN=70;BaseQRankSum= |
| 47112 | chrY | 28784840 | . | G | C | 60.55    | PASS          | AC=1;AF=0.014;AN=70;BaseQRankSum= |
| 47113 | chrY | 28784842 | . | A | G | 61.40    | PASS          | AC=1;AF=0.014;AN=70;BaseQRankSum= |
| 47114 | chrY | 28784860 | . | G | T | 60.50    | PASS          | AC=1;AF=0.014;AN=70;BaseQRankSum= |
| 47115 | chrY | 28784877 | . | C | T | 75.55    | PASS          | AC=2;AF=0.036;AN=56;BaseQRankSum= |
| 47116 | chrY | 28784882 | . | A | C | 38.16    | my_snp_filter | AC=2;AF=0.029;AN=68;BaseQ         |
| 47117 | chrY | 28784958 | . | A | T | 79.76    | PASS          | AC=3;AF=0.058;AN=52;BaseQRankSum= |
| 47118 | chrY | 28784959 | . | T | C | 78.30    | PASS          | AC=2;AF=0.038;AN=52;BaseQRankSum= |
| 47119 | chrY | 28784963 | . | C | A | 75.19    | PASS          | AC=2;AF=0.038;AN=52;BaseQRankSum= |
| 47120 | chrY | 28784969 | . | A | C | 45.21    | PASS          | AC=2;AF=0.038;AN=52;BaseQRankSum= |

|       |      |          |   |   |     |          |               |                                   |
|-------|------|----------|---|---|-----|----------|---------------|-----------------------------------|
| 47121 | chrY | 28785127 | . | C | A   | 246.95   | PASS          | AC=4;AF=0.061;AN=66;BaseQRankSum= |
| 47122 | chrY | 28785132 | . | A | T   | 211.72   | PASS          | AC=4;AF=0.077;AN=52;BaseQRankSum= |
| 47123 | chrY | 28785133 | . | G | C   | 215.06   | PASS          | AC=4;AF=0.077;AN=52;BaseQRankSum= |
| 47124 | chrY | 28785146 | . | G | A   | 211.45   | PASS          | AC=4;AF=0.059;AN=68;BaseQRankSum= |
| 47125 | chrY | 28785148 | . | A | G   | 213.44   | PASS          | AC=4;AF=0.069;AN=58;BaseQRankSum= |
| 47126 | chrY | 28785166 | . | A | G   | 42.03    | my_snp_filter | AC=1;AF=0.015;AN=68;BaseQ         |
| 47127 | chrY | 28785463 | . | G | T   | 215.57   | PASS          | AC=1;AF=0.014;AN=70;BaseQRankSum= |
| 47128 | chrY | 28785476 | . | T | A   | 89.13    | my_snp_filter | AC=3;AF=0.043;AN=70;BaseQ         |
| 47129 | chrY | 28785480 | . | T | A   | 87.90    | my_snp_filter | AC=3;AF=0.043;AN=70;BaseQ         |
| 47130 | chrY | 28785563 | . | A | G   | 136.18   | PASS          | AC=1;AF=0.014;AN=70;BaseQRankSum= |
| 47131 | chrY | 28785589 | . | G | A   | 100.98   | PASS          | AC=1;AF=0.019;AN=54;BaseQRankSum= |
| 47132 | chrY | 28785741 | . | G | T   | 35.80    | PASS          | AC=1;AF=0.014;AN=70;BaseQRankSum= |
| 47133 | chrY | 28785742 | . | G | A   | 36.15    | PASS          | AC=1;AF=0.014;AN=70;BaseQRankSum= |
| 47134 | chrY | 28785745 | . | T | A   | 31.66    | PASS          | AC=1;AF=0.014;AN=70;BaseQRankSum= |
| 47135 | chrY | 28785750 | . | T | A   | 102.69   | my_snp_filter | AC=1;AF=0.015;AN=68;BaseQ         |
| 47136 | chrY | 28785752 | . | G | A   | 37.56    | PASS          | AC=1;AF=0.015;AN=68;BaseQRankSum= |
| 47137 | chrY | 28785774 | . | G | C   | 126.05   | PASS          | AC=1;AF=0.015;AN=68;BaseQRankSum= |
| 47138 | chrY | 28785981 | . | G | C   | 287.52   | my_snp_filter | AC=5;AF=0.071;AN=70;BaseQ         |
| 47139 | chrY | 28785991 | . | G | C   | 124.67   | PASS          | AC=1;AF=0.015;AN=68;BaseQRankSum= |
| 47140 | chrY | 28785993 | . | A | G,T | 543.70   | PASS          | AC=5,5;AF=0.104,0.104;AN=48;BaseQ |
| 47141 | chrY | 28786368 | . | T | A   | 252      | PASS          | AC=6;AF=0.086;AN=70;BaseQRankSum= |
| 47142 | chrY | 28786382 | . | A | G   | 209.66   | PASS          | AC=5;AF=0.071;AN=70;BaseQRankSum= |
| 47143 | chrY | 28786400 | . | G | T   | 38.32    | PASS          | AC=2;AF=0.029;AN=70;BaseQRankSum= |
| 47144 | chrY | 28786684 | . | G | C   | 72.08    | PASS          | AC=3;AF=0.043;AN=70;BaseQRankSum= |
| 47145 | chrY | 28786686 | . | A | G   | 173.85   | PASS          | AC=4;AF=0.057;AN=70;BaseQRankSum= |
| 47146 | chrY | 28786688 | . | G | C   | 276.18   | PASS          | AC=1;AF=0.014;AN=70;BaseQRankSum= |
| 47147 | chrY | 28786691 | . | A | T   | 71.52    | PASS          | AC=2;AF=0.029;AN=70;BaseQRankSum= |
| 47148 | chrY | 28786694 | . | G | C   | 37.86    | PASS          | AC=1;AF=0.014;AN=70;BaseQRankSum= |
| 47149 | chrY | 28786696 | . | A | G   | 72.78    | PASS          | AC=3;AF=0.043;AN=70;BaseQRankSum= |
| 47150 | chrY | 28786716 | . | A | T   | 114.61   | PASS          | AC=2;AF=0.031;AN=64;BaseQRankSum= |
| 47151 | chrY | 28786718 | . | T | G   | 319.93   | PASS          | AC=5;AF=0.089;AN=56;BaseQRankSum= |
| 47152 | chrY | 28786721 | . | A | G   | 199.01   | PASS          | AC=1;AF=0.016;AN=64;BaseQRankSum= |
| 47153 | chrY | 28786726 | . | G | A   | 68.26    | PASS          | AC=1;AF=0.015;AN=68;BaseQRankSum= |
| 47154 | chrY | 28786736 | . | A | G   | 41.45    | my_snp_filter | AC=1;AF=0.021;AN=48;BaseQ         |
| 47155 | chrY | 28787017 | . | G | T   | 65.35    | my_snp_filter | AC=4;AF=0.059;AN=68;BaseQ         |
| 47156 | chrY | 28787094 | . | G | A   | 14540.03 | PASS          | AC=58;AF=1.00;AN=58;DP=34         |
| 47157 | chrY | 28787127 | . | G | A   | 16223.03 | PASS          | AC=64;AF=1.00;AN=64;DP=38         |
| 47158 | chrY | 28787141 | . | C | G   | 15243    | PASS          | AC=62;AF=1.00;AN=62;DP=359;FS=0.0 |
| 47159 | chrY | 28787261 | . | A | C   | 44.24    | PASS          | AC=1;AF=0.019;AN=54;BaseQRankSum= |
| 47160 | chrY | 28787265 | . | A | C   | 37.70    | PASS          | AC=1;AF=0.015;AN=68;BaseQRankSum= |
| 47161 | chrY | 28787274 | . | C | G   | 179.27   | PASS          | AC=2;AF=0.063;AN=32;BaseQRankSum= |
| 47162 | chrY | 28787315 | . | C | A   | 413.60   | PASS          | AC=5;AF=0.104;AN=48;BaseQRankSum= |
| 47163 | chrY | 28787324 | . | G | A   | 112.13   | PASS          | AC=1;AF=0.015;AN=68;BaseQRankSum= |
| 47164 | chrY | 28787326 | . | T | A   | 226.27   | PASS          | AC=2;AF=0.040;AN=50;BaseQRankSum= |
| 47165 | chrY | 28787329 | . | G | C   | 110.24   | PASS          | AC=2;AF=0.029;AN=68;BaseQRankSum= |
| 47166 | chrY | 28787336 | . | A | G   | 57.85    | PASS          | AC=2;AF=0.029;AN=70;BaseQRankSum= |
| 47167 | chrY | 28787341 | . | G | A   | 36.07    | PASS          | AC=1;AF=0.014;AN=70;BaseQRankSum= |
| 47168 | chrY | 28787566 | . | A | T,* | 952.36   | PASS          | AC=6,5;AF=0.136,0.114;AN=44;BaseQ |
| 47169 | chrY | 28787585 | . | C | A,* | 479.19   | PASS          | AC=2,2;AF=0.043,0.043;AN=46;BaseQ |
| 47170 | chrY | 28787590 | . | G | A,* | 356.20   | PASS          | AC=2,5;AF=0.029,0.071;AN=70;BaseQ |
| 47171 | chrY | 28787600 | . | T | G   | 178.24   | PASS          | AC=2;AF=0.029;AN=68;BaseQRankSum= |
| 47172 | chrY | 28787611 | . | T | A   | 102.15   | PASS          | AC=2;AF=0.029;AN=70;BaseQRankSum= |
| 47173 | chrY | 28787902 | . | G | A   | 1231.87  | PASS          | AC=6;AF=0.091;AN=66;DP=1013;FS=0. |
| 47174 | chrY | 28788011 | . | T | A   | 43.46    | my_snp_filter | AC=1;AF=0.015;AN=68;BaseQ         |
| 47175 | chrY | 28788013 | . | G | A   | 69.66    | my_snp_filter | AC=1;AF=0.015;AN=68;BaseQ         |
| 47176 | chrY | 28788018 | . | A | G   | 256.23   | PASS          | AC=3;AF=0.045;AN=66;BaseQRankSum= |
| 47177 | chrY | 28788037 | . | G | T   | 68.11    | PASS          | AC=1;AF=0.015;AN=66;BaseQRankSum= |
| 47178 | chrY | 28788043 | . | C | G   | 40.30    | PASS          | AC=1;AF=0.019;AN=52;BaseQRankSum= |
| 47179 | chrY | 28788050 | . | A | G   | 96.36    | PASS          | AC=2;AF=0.029;AN=68;BaseQRankSum= |
| 47180 | chrY | 28788067 | . | A | G   | 101.77   | PASS          | AC=1;AF=0.017;AN=58;BaseQRankSum= |
| 47181 | chrY | 28788306 | . | T | A   | 360.38   | PASS          | AC=4;AF=0.057;AN=70;BaseQRankSum= |
| 47182 | chrY | 28788315 | . | G | T   | 42.98    | my_snp_filter | AC=3;AF=0.043;AN=70;BaseQ         |
| 47183 | chrY | 28788316 | . | A | T   | 42.74    | my_snp_filter | AC=4;AF=0.057;AN=70;BaseQ         |
| 47184 | chrY | 28788317 | . | G | A   | 41.79    | my_snp_filter | AC=3;AF=0.043;AN=70;BaseQ         |
| 47185 | chrY | 28788326 | . | T | A   | 47.50    | my_snp_filter | AC=3;AF=0.043;AN=70;BaseQ         |
| 47186 | chrY | 28788333 | . | T | G   | 147.12   | PASS          | AC=3;AF=0.043;AN=70;BaseQRankSum= |
| 47187 | chrY | 28788491 | . | C | T   | 2427.90  | PASS          | AC=9;AF=0.132;AN=68;BaseQRankSum= |
| 47188 | chrY | 28788495 | . | A | T   | 2883.56  | PASS          | AC=9;AF=0.132;AN=68;BaseQRankSum= |
| 47189 | chrY | 28788501 | . | C | T   | 3066.47  | PASS          | AC=9;AF=0.132;AN=68;BaseQRankSum= |
| 47190 | chrY | 28788507 | . | G | A   | 3549.09  | PASS          | AC=9;AF=0.136;AN=66;BaseQRankSum= |
| 47191 | chrY | 28788521 | . | A | G   | 3629.08  | PASS          | AC=9;AF=0.129;AN=70;BaseQRankSum= |
| 47192 | chrY | 28788526 | . | A | T   | 3647.04  | PASS          | AC=9;AF=0.129;AN=70;BaseQRankSum= |
| 47193 | chrY | 28788556 | . | G | T   | 370.66   | PASS          | AC=2;AF=0.030;AN=66;BaseQRankSum= |
| 47194 | chrY | 28788643 | . | G | T   | 23557.95 | PASS          | AC=66;AF=1.00;AN=66;BaseQ         |
| 47195 | chrY | 28788695 | . | T | A   | 18565.17 | PASS          | AC=63;AF=0.900;AN=70;BaseQ        |
| 47196 | chrY | 28788766 | . | G | C   | 301.30   | PASS          | AC=4;AF=0.063;AN=64;BaseQRankSum= |

|       |      |          |   |   |     |          |               |                                    |
|-------|------|----------|---|---|-----|----------|---------------|------------------------------------|
| 47197 | chrY | 28788767 | . | G | A   | 315.20   | PASS          | AC=4;AF=0.065;AN=62;BaseQRankSum=  |
| 47198 | chrY | 28788771 | . | G | C   | 511.03   | PASS          | AC=4;AF=0.065;AN=62;BaseQRankSum=  |
| 47199 | chrY | 28788774 | . | A | G   | 62.04    | my_snp_filter | AC=2;AF=0.032;AN=62;BaseQ          |
| 47200 | chrY | 28788776 | . | G | T   | 41.66    | PASS          | AC=1;AF=0.016;AN=62;BaseQRankSum=  |
| 47201 | chrY | 28788777 | . | C | G   | 285.01   | PASS          | AC=4;AF=0.065;AN=62;BaseQRankSum=  |
| 47202 | chrY | 28788785 | . | T | A   | 221.65   | PASS          | AC=4;AF=0.061;AN=66;BaseQRankSum=  |
| 47203 | chrY | 28788965 | . | T | G   | 32.21    | PASS          | AC=3;AF=0.045;AN=66;BaseQRankSum=  |
| 47204 | chrY | 28788967 | . | G | T   | 34.97    | PASS          | AC=3;AF=0.045;AN=66;BaseQRankSum=  |
| 47205 | chrY | 28788981 | . | G | T   | 661.79   | PASS          | AC=8;AF=0.154;AN=52;BaseQRankSum=  |
| 47206 | chrY | 28788984 | . | T | A   | 649.43   | PASS          | AC=8;AF=0.190;AN=42;BaseQRankSum=  |
| 47207 | chrY | 28788990 | . | T | A   | 626.75   | PASS          | AC=8;AF=0.129;AN=62;BaseQRankSum=  |
| 47208 | chrY | 28788997 | . | G | A   | 42.72    | my_snp_filter | AC=3;AF=0.047;AN=64;BaseQ          |
| 47209 | chrY | 28789000 | . | T | C   | 619.67   | PASS          | AC=8;AF=0.143;AN=56;BaseQRankSum=  |
| 47210 | chrY | 28789001 | . | G | A   | 639.80   | PASS          | AC=8;AF=0.174;AN=46;BaseQRankSum=  |
| 47211 | chrY | 28789004 | . | G | A   | 731.35   | PASS          | AC=7;AF=0.219;AN=32;BaseQRankSum=  |
| 47212 | chrY | 28789011 | . | T | G   | 567.53   | PASS          | AC=7;AF=0.292;AN=24;BaseQRankSum=  |
| 47213 | chrY | 28789029 | . | G | T   | 396.54   | PASS          | AC=3;AF=0.088;AN=34;BaseQRankSum=  |
| 47214 | chrY | 28789478 | . | G | A   | 1329.98  | PASS          | AC=4;AF=0.057;AN=70;DP=3135;FS=0.  |
| 47215 | chrY | 28789498 | . | G | A   | 537.39   | PASS          | AC=1;AF=0.014;AN=70;BaseQRankSum=  |
| 47216 | chrY | 28789693 | . | T | C   | 112.97   | my_snp_filter | AC=2;AF=0.029;AN=68;BaseQ          |
| 47217 | chrY | 28789765 | . | G | A   | 528.87   | PASS          | AC=3;AF=0.044;AN=68;BaseQRankSum=  |
| 47218 | chrY | 28789771 | . | A | T   | 517.47   | PASS          | AC=3;AF=0.044;AN=68;BaseQRankSum=  |
| 47219 | chrY | 28789778 | . | T | C   | 348.02   | PASS          | AC=1;AF=0.016;AN=64;BaseQRankSum=  |
| 47220 | chrY | 28789874 | . | A | T   | 69.01    | my_snp_filter | AC=2;AF=0.029;AN=68;BaseQ          |
| 47221 | chrY | 28789918 | . | G | A   | 31.19    | my_snp_filter | AC=1;AF=0.016;AN=64;BaseQ          |
| 47222 | chrY | 28790316 | . | G | C   | 765.11   | PASS          | AC=4;AF=0.061;AN=66;BaseQRankSum=  |
| 47223 | chrY | 28790328 | . | A | G   | 468.26   | PASS          | AC=1;AF=0.014;AN=70;BaseQRankSum=  |
| 47224 | chrY | 28790337 | . | A | C   | 250.82   | PASS          | AC=3;AF=0.043;AN=70;BaseQRankSum=  |
| 47225 | chrY | 28790346 | . | C | G   | 2142.24  | PASS          | AC=13;AF=0.186;AN=70;BaseQRankSum= |
| 47226 | chrY | 28790395 | . | G | C   | 3257.70  | my_snp_filter | AC=20;AF=0.286;AN=70;Base          |
| 47227 | chrY | 28790409 | . | A | T   | 13729.53 | my_snp_filter | AC=34;AF=0.486;AN=                 |
| 47228 | chrY | 28790435 | . | G | T   | 3198.46  | PASS          | AC=21;AF=0.300;AN=70;BaseQRankSum= |
| 47229 | chrY | 28790452 | . | A | G   | 3134.62  | my_snp_filter | AC=21;AF=0.300;AN=70;Base          |
| 47230 | chrY | 28790545 | . | G | A   | 720.69   | PASS          | AC=3;AF=0.043;AN=70;BaseQRankSum=  |
| 47231 | chrY | 28790546 | . | A | G   | 2169.80  | my_snp_filter | AC=15;AF=0.214;AN=70;Base          |
| 47232 | chrY | 28790552 | . | A | G   | 216.19   | my_snp_filter | AC=2;AF=0.029;AN=70;BaseQ          |
| 47233 | chrY | 28790555 | . | G | A   | 104.38   | my_snp_filter | AC=2;AF=0.029;AN=70;BaseQ          |
| 47234 | chrY | 28790573 | . | G | C   | 81       | PASS          | AC=1;AF=0.014;AN=70;BaseQRankSum=  |
| 47235 | chrY | 28790576 | . | G | A   | 232.47   | my_snp_filter | AC=3;AF=0.043;AN=70;BaseQ          |
| 47236 | chrY | 28790577 | . | A | T   | 199.94   | my_snp_filter | AC=3;AF=0.043;AN=70;BaseQ          |
| 47237 | chrY | 28790579 | . | T | A   | 82.56    | PASS          | AC=2;AF=0.029;AN=70;BaseQRankSum=  |
| 47238 | chrY | 28790604 | . | C | T   | 5349.87  | PASS          | AC=22;AF=0.314;AN=70;BaseQRankSum= |
| 47239 | chrY | 28790621 | . | G | T   | 3175.02  | PASS          | AC=19;AF=0.271;AN=70;BaseQRankSum= |
| 47240 | chrY | 28790628 | . | A | T   | 70.59    | PASS          | AC=1;AF=0.014;AN=70;BaseQRankSum=  |
| 47241 | chrY | 28790652 | . | T | C   | 3270.92  | PASS          | AC=21;AF=0.318;AN=66;BaseQRankSum= |
| 47242 | chrY | 28790697 | . | A | G   | 4902.64  | my_snp_filter | AC=30;AF=0.500;AN=60;Base          |
| 47243 | chrY | 28790705 | . | C | A   | 4325.32  | my_snp_filter | AC=28;AF=0.483;AN=58;Base          |
| 47244 | chrY | 28790750 | . | G | A   | 1066.66  | my_snp_filter | AC=8;AF=0.114;AN=70;BaseQ          |
| 47245 | chrY | 28790754 | . | T | G   | 918      | my_snp_filter | AC=8;AF=0.118;AN=68;BaseQ          |
| 47246 | chrY | 28790782 | . | G | A   | 239.09   | my_snp_filter | AC=5;AF=0.074;AN=68;BaseQ          |
| 47247 | chrY | 28790812 | . | T | C   | 346.41   | my_snp_filter | AC=5;AF=0.071;AN=70;BaseQ          |
| 47248 | chrY | 28790816 | . | C | T   | 343.65   | my_snp_filter | AC=5;AF=0.074;AN=68;BaseQ          |
| 47249 | chrY | 28790849 | . | C | G   | 259.41   | my_snp_filter | AC=3;AF=0.047;AN=64;BaseQ          |
| 47250 | chrY | 28790857 | . | T | A   | 89.58    | my_snp_filter | AC=2;AF=0.029;AN=70;BaseQ          |
| 47251 | chrY | 28790866 | . | A | G   | 94.97    | my_snp_filter | AC=2;AF=0.029;AN=70;BaseQ          |
| 47252 | chrY | 28790874 | . | T | G   | 95.46    | my_snp_filter | AC=2;AF=0.030;AN=66;BaseQ          |
| 47253 | chrY | 28790878 | . | A | G   | 137.35   | my_snp_filter | AC=2;AF=0.029;AN=68;BaseQ          |
| 47254 | chrY | 28790884 | . | T | G   | 216.34   | my_snp_filter | AC=4;AF=0.061;AN=66;BaseQ          |
| 47255 | chrY | 28790899 | . | G | C   | 236.80   | my_snp_filter | AC=2;AF=0.029;AN=68;BaseQ          |
| 47256 | chrY | 28790904 | . | C | A   | 246.13   | my_snp_filter | AC=2;AF=0.031;AN=64;BaseQ          |
| 47257 | chrY | 28790905 | . | C | T,A | 4979.26  | my_snp_filter | AC=17,4;AF=0.258,0.061;AN=         |
| 47258 | chrY | 28790907 | . | G | C   | 294.84   | my_snp_filter | AC=2;AF=0.029;AN=68;BaseQ          |
| 47259 | chrY | 28790914 | . | C | A   | 290.45   | my_snp_filter | AC=2;AF=0.029;AN=68;BaseQ          |
| 47260 | chrY | 28790919 | . | A | C   | 297.43   | my_snp_filter | AC=2;AF=0.029;AN=68;BaseQ          |
| 47261 | chrY | 28790931 | . | T | A   | 306.89   | my_snp_filter | AC=2;AF=0.031;AN=64;BaseQ          |
| 47262 | chrY | 28790954 | . | G | T   | 285.62   | my_snp_filter | AC=2;AF=0.029;AN=68;BaseQ          |
| 47263 | chrY | 28790962 | . | C | T   | 266.37   | my_snp_filter | AC=2;AF=0.032;AN=62;BaseQ          |
| 47264 | chrY | 28790987 | . | C | T   | 69.83    | my_snp_filter | AC=1;AF=0.016;AN=64;BaseQ          |
| 47265 | chrY | 28791017 | . | A | T   | 305.94   | my_snp_filter | AC=7;AF=0.121;AN=58;BaseQ          |
| 47266 | chrY | 28791061 | . | G | T   | 1214.64  | my_snp_filter | AC=18,3;AF=0.333,0.054;Base        |
| 47267 | chrY | 28791093 | . | G | C,A | 2764.84  | my_snp_filter | AC=27,3;AF=0.450,0.050;AN=         |
| 47268 | chrY | 28791131 | . | T | A   | 4397.43  | my_snp_filter | AC=46;AF=0.742;AN=62;Base          |
| 47269 | chrY | 28791141 | . | T | C   | 590.30   | my_snp_filter | AC=8;AF=0.121;AN=66;BaseQ          |
| 47270 | chrY | 28791216 | . | T | A   | 4882.10  | my_snp_filter | AC=26;AF=0.406;AN=64;Base          |
| 47271 | chrY | 28791221 | . | T | A   | 4751.34  | my_snp_filter | AC=25;AF=0.417;AN=60;Base          |
| 47272 | chrY | 28791231 | . | A | T   | 4193.88  | my_snp_filter | AC=20;AF=0.370;AN=54;Base          |

|       |      |          |   |   |       |          |               |                                            |
|-------|------|----------|---|---|-------|----------|---------------|--------------------------------------------|
| 47273 | chrY | 28791241 | . | T | A     | 4121.46  | my_snp_filter | AC=19;AF=0.339;AN=56;BaseQ                 |
| 47274 | chrY | 28791252 | . | A | G     | 4314.85  | PASS          | AC=17;AF=0.340;AN=50;BaseQRankSum=         |
| 47275 | chrY | 28791271 | . | T | A     | 5271.60  | PASS          | AC=23;AF=0.479;AN=48;BaseQRankSum=         |
| 47276 | chrY | 28791300 | . | G | A     | 4600.79  | PASS          | AC=31;AF=0.534;AN=58;BaseQRankSum=         |
| 47277 | chrY | 28791400 | . | A | T     | 54.90    | my_snp_filter | AC=1;AF=0.021;AN=48;BaseQ                  |
| 47278 | chrY | 28791407 | . | G | C     | 161.24   | my_snp_filter | AC=4;AF=0.080;AN=50;BaseQ                  |
| 47279 | chrY | 28791411 | . | T | C     | 1693.75  | my_snp_filter | AC=6;AF=0.120;AN=50;BaseQ                  |
| 47280 | chrY | 28791436 | . | G | T     | 1313.63  | my_snp_filter | AC=6;AF=0.107;AN=56;BaseQ                  |
| 47281 | chrY | 28791483 | . | G | A     | 771.43   | my_snp_filter | AC=8;AF=0.114;AN=70;BaseQ                  |
| 47282 | chrY | 28791520 | . | A | G     | 332.26   | my_snp_filter | AC=4;AF=0.057;AN=70;BaseQ                  |
| 47283 | chrY | 28791555 | . | T | A     | 102.83   | my_snp_filter | AC=2;AF=0.029;AN=70;BaseQ                  |
| 47284 | chrY | 28791556 | . | T | G     | 90.11    | PASS          | AC=1;AF=0.014;AN=70;BaseQRankSum=          |
| 47285 | chrY | 28791685 | . | G | A     | 710      | PASS          | AC=5;AF=0.071;AN=70;BaseQRankSum=          |
| 47286 | chrY | 28791691 | . | T | G     | 1580.34  | my_snp_filter | AC=6;AF=0.086;AN=70;BaseQ                  |
| 47287 | chrY | 28791702 | . | C | A     | 1622.05  | my_snp_filter | AC=6;AF=0.086;AN=70;BaseQ                  |
| 47288 | chrY | 28791719 | . | T | A     | 303.15   | PASS          | AC=6;AF=0.088;AN=68;BaseQRankSum=          |
| 47289 | chrY | 28791725 | . | A | G     | 992.64   | PASS          | AC=9;AF=0.132;AN=68;BaseQRankSum=          |
| 47290 | chrY | 28791735 | . | G | T     | 928.25   | PASS          | AC=9;AF=0.132;AN=68;BaseQRankSum=          |
| 47291 | chrY | 28791736 | . | G | T     | 793.55   | PASS          | AC=6;AF=0.088;AN=68;BaseQRankSum=          |
| 47292 | chrY | 28791753 | . | C | T     | 5498.42  | PASS          | AC=47;AF=0.734;AN=64;BaseQRankSum=         |
| 47293 | chrY | 28791760 | . | G | C     | 488.10   | my_snp_filter | AC=4;AF=0.063;AN=64;BaseQ                  |
| 47294 | chrY | 28791769 | . | C | T     | 1483.27  | my_snp_filter | AC=6;AF=0.088;AN=68;BaseQ                  |
| 47295 | chrY | 28791776 | . | G | T,C   | 1764.81  | my_snp_filter | AC=2,6;AF=0.030,0.091;AN=                  |
| 47296 | chrY | 28791783 | . | A | C,T   | 5360.71  | my_snp_filter | AC=13,6;AF=0.241,0.111;AN=                 |
| 47297 | chrY | 28791784 | . | T | A     | 83.74    | PASS          | AC=1;AF=0.014;AN=70;BaseQRankSum=          |
| 47298 | chrY | 28791791 | . | C | G     | 815.83   | PASS          | AC=6;AF=0.088;AN=68;BaseQRankSum=          |
| 47299 | chrY | 28791793 | . | A | G     | 5724.75  | my_snp_filter | AC=20;AF=0.400;AN=50;BaseQ                 |
| 47300 | chrY | 28791816 | . | C | G     | 107.15   | my_snp_filter | AC=3;AF=0.043;AN=70;BaseQ                  |
| 47301 | chrY | 28791850 | . | G | C     | 5236.85  | PASS          | AC=22;AF=0.314;AN=70;BaseQRankSum=         |
| 47302 | chrY | 28791875 | . | G | C     | 255.90   | my_snp_filter | AC=4;AF=0.057;AN=70;BaseQ                  |
| 47303 | chrY | 28791876 | . | T | G     | 341      | my_snp_filter | AC=4;AF=0.057;AN=70;BaseQ                  |
| 47304 | chrY | 28791903 | . | G | A     | 34.53    | my_snp_filter | AC=3;AF=0.043;AN=70;BaseQ                  |
| 47305 | chrY | 28792030 | . | T | G     | 89.67    | my_snp_filter | AC=2;AF=0.029;AN=70;BaseQ                  |
| 47306 | chrY | 28792042 | . | G | A     | 154.05   | my_snp_filter | AC=3;AF=0.043;AN=70;BaseQ                  |
| 47307 | chrY | 28792057 | . | G | T     | 640.35   | PASS          | AC=3;AF=0.043;AN=70;BaseQRankSum=          |
| 47308 | chrY | 28792064 | . | G | A     | 308.51   | my_snp_filter | AC=3;AF=0.043;AN=70;BaseQ                  |
| 47309 | chrY | 28792110 | . | C | G     | 28188.64 | PASS          | AC=31;AF=0.443;AN=70;BaseQ                 |
| 47310 | chrY | 28792215 | . | G | C     | 1865.06  | PASS          | AC=2;AF=0.029;AN=70;BaseQRankSum=          |
| 47311 | chrY | 28792220 | . | A | G     | 194.68   | PASS          | AC=2;AF=0.029;AN=70;BaseQRankSum=          |
| 47312 | chrY | 28792265 | . | C | G     | 3920.61  | my_snp_filter | AC=21;AF=0.300;AN=70;BaseQ                 |
| 47313 | chrY | 28792268 | . | T | C     | 30348.30 | my_snp_filter | AC=37;AF=0.529;AN=                         |
| 47314 | chrY | 28792269 | . | G | T     | 151.51   | my_snp_filter | AC=2;AF=0.029;AN=70;BaseQ                  |
| 47315 | chrY | 28792284 | . | C | G     | 106.16   | my_snp_filter | AC=2;AF=0.029;AN=70;BaseQ                  |
| 47316 | chrY | 28792289 | . | C | G     | 56.05    | my_snp_filter | AC=3;AF=0.043;AN=70;BaseQ                  |
| 47317 | chrY | 28792308 | . | T | C     | 36.65    | my_snp_filter | AC=1;AF=0.014;AN=70;BaseQ                  |
| 47318 | chrY | 28792319 | . | C | G,*   | 1388.89  | PASS          | AC=7,4;AF=0.100,0.057;AN=70;BaseQ          |
| 47319 | chrY | 28792344 | . | C | G     | 469.70   | PASS          | AC=6;AF=0.086;AN=70;BaseQRankSum=          |
| 47320 | chrY | 28792406 | . | C | G     | 3334.16  | my_snp_filter | AC=10;AF=0.147;AN=68;BaseQ                 |
| 47321 | chrY | 28792466 | . | T | C     | 284.43   | my_snp_filter | AC=4;AF=0.222;AN=18;BaseQ                  |
| 47322 | chrY | 28792482 | . | T | G     | 19477.47 | my_snp_filter | AC=49;AF=0.766;AN=                         |
| 47323 | chrY | 28792487 | . | C | G     | 19758.33 | my_snp_filter | AC=50;AF=0.758;AN=                         |
| 47324 | chrY | 28792501 | . | A | T     | 477.35   | PASS          | AC=3;AF=0.044;AN=68;BaseQRankSum=          |
| 47325 | chrY | 28792507 | . | G | C     | 598.34   | PASS          | AC=3;AF=0.045;AN=66;BaseQRankSum=          |
| 47326 | chrY | 28792624 | . | C | G     | 22792.86 | PASS          | AC=31;AF=0.443;AN=70;BaseQ                 |
| 47327 | chrY | 28792675 | . | G | A     | 826.39   | my_snp_filter | AC=6;AF=0.086;AN=70;BaseQ                  |
| 47328 | chrY | 28792697 | . | T | C     | 499.05   | my_snp_filter | AC=6;AF=0.086;AN=70;BaseQ                  |
| 47329 | chrY | 28792729 | . | T | A     | 53251.64 | PASS          | AC=34;AF=0.486;AN=70;BaseQ                 |
| 47330 | chrY | 28792735 | . | T | C     | 40986.72 | PASS          | AC=33;AF=0.471;AN=70;BaseQ                 |
| 47331 | chrY | 28792745 | . | T | A     | 77229.53 | PASS          | AC=34;AF=0.486;AN=70;BaseQ                 |
| 47332 | chrY | 28792747 | . | C | T     | 9237.24  | PASS          | AC=26;AF=0.371;AN=70;BaseQRankSum=         |
| 47333 | chrY | 28792777 | . | A | G     | 49606.72 | my_snp_filter | AC=35;AF=0.500;AN=                         |
| 47334 | chrY | 28792783 | . | C | G     | 177.25   | my_snp_filter | AC=3;AF=0.043;AN=70;BaseQ                  |
| 47335 | chrY | 28792786 | . | C | A     | 218.25   | my_snp_filter | AC=3;AF=0.043;AN=70;BaseQ                  |
| 47336 | chrY | 28792807 | . | T | C     | 207.51   | my_snp_filter | AC=3;AF=0.043;AN=70;BaseQ                  |
| 47337 | chrY | 28792815 | . | T | G     | 143.91   | my_snp_filter | AC=1;AF=0.014;AN=70;BaseQ                  |
| 47338 | chrY | 28792816 | . | G | T     | 131.91   | my_snp_filter | AC=1;AF=0.014;AN=70;BaseQ                  |
| 47339 | chrY | 28792820 | . | T | G     | 133.55   | my_snp_filter | AC=4;AF=0.057;AN=70;BaseQ                  |
| 47340 | chrY | 28792829 | . | A | C     | 143.09   | my_snp_filter | AC=4;AF=0.057;AN=70;BaseQ                  |
| 47341 | chrY | 28792830 | . | C | T     | 22307.97 | PASS          | AC=19;AF=0.271;AN=70;BaseQ                 |
| 47342 | chrY | 28792838 | . | A | G     | 18084.93 | PASS          | AC=17;AF=0.243;AN=70;BaseQ                 |
| 47343 | chrY | 28792863 | . | G | A,*   | 3780.30  | PASS          | AC=13,1;AF=0.186,0.014;AN=70;BaseQ         |
| 47344 | chrY | 28792866 | . | C | A,G,* | 20728.72 | PASS          | AC=26,8,1;AF=0.371,0.114,0.014;AN=70;BaseQ |
| 47345 | chrY | 28792869 | . | T | G     | 5175.93  | PASS          | AC=14;AF=0.200;AN=70;BaseQRankSum=         |
| 47346 | chrY | 28792874 | . | G | A     | 157.42   | my_snp_filter | AC=1;AF=0.014;AN=70;BaseQ                  |
| 47347 | chrY | 28792879 | . | C | G     | 45.95    | my_snp_filter | AC=2;AF=0.029;AN=70;BaseQ                  |
| 47348 | chrY | 28792891 | . | A | G     | 10107.50 | PASS          | AC=28;AF=0.400;AN=70;BaseQ                 |

|       |      |          |   |   |     |          |               |                                    |
|-------|------|----------|---|---|-----|----------|---------------|------------------------------------|
| 47349 | chrY | 28792915 | . | T | C   | 138.42   | PASS          | AC=1;AF=0.014;AN=70;BaseQRankSum=  |
| 47350 | chrY | 28792932 | . | T | C   | 33953.78 | my_snp_filter | AC=35;AF=0.500;AN=                 |
| 47351 | chrY | 28792971 | . | G | A   | 6296.39  | PASS          | AC=7;AF=0.106;AN=66;BaseQRankSum=  |
| 47352 | chrY | 28792982 | . | A | C   | 507.96   | my_snp_filter | AC=11;AF=0.157;AN=70;BaseQ         |
| 47353 | chrY | 28793003 | . | C | A   | 12004.79 | PASS          | AC=16;AF=0.229;AN=70;BaseQ         |
| 47354 | chrY | 28793005 | . | T | G   | 3977.40  | my_snp_filter | AC=12;AF=0.171;AN=70;BaseQ         |
| 47355 | chrY | 28793019 | . | T | A   | 6514.94  | PASS          | AC=6;AF=0.091;AN=66;BaseQRankSum=  |
| 47356 | chrY | 28793020 | . | C | G   | 43.09    | my_snp_filter | AC=3;AF=0.043;AN=70;BaseQ          |
| 47357 | chrY | 28793021 | . | G | A   | 3686.49  | my_snp_filter | AC=12;AF=0.171;AN=70;BaseQ         |
| 47358 | chrY | 28793022 | . | G | C   | 6273.39  | my_snp_filter | AC=6;AF=0.091;AN=66;BaseQ          |
| 47359 | chrY | 28793027 | . | A | T   | 42.66    | my_snp_filter | AC=2;AF=0.029;AN=70;BaseQ          |
| 47360 | chrY | 28793028 | . | A | G   | 40.53    | my_snp_filter | AC=2;AF=0.029;AN=70;BaseQ          |
| 47361 | chrY | 28793030 | . | G | C   | 4077.67  | my_snp_filter | AC=12;AF=0.171;AN=70;BaseQ         |
| 47362 | chrY | 28793040 | . | A | C   | 2729.95  | my_snp_filter | AC=10;AF=0.143;AN=70;BaseQ         |
| 47363 | chrY | 28793045 | . | C | A   | 31.76    | my_snp_filter | AC=1;AF=0.014;AN=70;BaseQ          |
| 47364 | chrY | 28793049 | . | T | G,A | 36844.09 | my_snp_filter | AC=44,6;AF=0.629,0.629             |
| 47365 | chrY | 28793052 | . | T | G   | 42368.37 | my_snp_filter | AC=46;AF=0.676;AN=                 |
| 47366 | chrY | 28793057 | . | A | T   | 103.60   | my_snp_filter | AC=1;AF=0.014;AN=70;BaseQ          |
| 47367 | chrY | 28793064 | . | A | T   | 6598.67  | my_snp_filter | AC=6;AF=0.088;AN=68;BaseQ          |
| 47368 | chrY | 28793076 | . | G | A   | 5854.49  | my_snp_filter | AC=6;AF=0.086;AN=70;BaseQ          |
| 47369 | chrY | 28793098 | . | T | G   | 1361.43  | PASS          | AC=7;AF=0.100;AN=70;BaseQRankSum=  |
| 47370 | chrY | 28793106 | . | C | G   | 499.38   | PASS          | AC=4;AF=0.057;AN=70;BaseQRankSum=  |
| 47371 | chrY | 28793108 | . | T | A   | 27852.94 | my_snp_filter | AC=35;AF=0.500;AN=                 |
| 47372 | chrY | 28793132 | . | C | G   | 13030.17 | PASS          | AC=31;AF=0.456;AN=68;BaseQ         |
| 47373 | chrY | 28793166 | . | G | T   | 1034.50  | my_snp_filter | AC=7;AF=0.100;AN=70;BaseQ          |
| 47374 | chrY | 28793171 | . | G | A   | 310.33   | PASS          | AC=1;AF=0.014;AN=70;BaseQRankSum=  |
| 47375 | chrY | 28793189 | . | C | T   | 277.18   | PASS          | AC=1;AF=0.015;AN=68;BaseQRankSum=  |
| 47376 | chrY | 28793190 | . | A | G   | 1095.44  | PASS          | AC=6;AF=0.088;AN=68;BaseQRankSum=  |
| 47377 | chrY | 28793202 | . | A | C   | 274.36   | PASS          | AC=1;AF=0.014;AN=70;BaseQRankSum=  |
| 47378 | chrY | 28793205 | . | G | T   | 109.06   | my_snp_filter | AC=2;AF=0.029;AN=70;BaseQ          |
| 47379 | chrY | 28793206 | . | G | T   | 110.06   | my_snp_filter | AC=2;AF=0.029;AN=70;BaseQ          |
| 47380 | chrY | 28793223 | . | T | G   | 259.49   | PASS          | AC=1;AF=0.015;AN=68;BaseQRankSum=  |
| 47381 | chrY | 28793226 | . | T | G   | 265.12   | PASS          | AC=1;AF=0.015;AN=68;BaseQRankSum=  |
| 47382 | chrY | 28793228 | . | A | G   | 393.57   | PASS          | AC=3;AF=0.044;AN=68;BaseQRankSum=  |
| 47383 | chrY | 28793234 | . | T | A   | 242.58   | PASS          | AC=1;AF=0.014;AN=70;BaseQRankSum=  |
| 47384 | chrY | 28793236 | . | C | G   | 243.38   | PASS          | AC=1;AF=0.015;AN=68;BaseQRankSum=  |
| 47385 | chrY | 28793237 | . | T | A   | 238.18   | PASS          | AC=1;AF=0.015;AN=68;BaseQRankSum=  |
| 47386 | chrY | 28793243 | . | T | A   | 232.18   | PASS          | AC=1;AF=0.015;AN=68;BaseQRankSum=  |
| 47387 | chrY | 28793252 | . | A | G   | 236.42   | PASS          | AC=1;AF=0.014;AN=70;BaseQRankSum=  |
| 47388 | chrY | 28793253 | . | C | G   | 238.18   | PASS          | AC=1;AF=0.015;AN=68;BaseQRankSum=  |
| 47389 | chrY | 28793256 | . | C | G   | 241.18   | PASS          | AC=1;AF=0.015;AN=68;BaseQRankSum=  |
| 47390 | chrY | 28793262 | . | A | G   | 56.42    | my_snp_filter | AC=1;AF=0.014;AN=70;BaseQ          |
| 47391 | chrY | 28793304 | . | G | T   | 149.28   | my_snp_filter | AC=3;AF=0.043;AN=70;BaseQ          |
| 47392 | chrY | 28793319 | . | G | T   | 64.13    | my_snp_filter | AC=2;AF=0.029;AN=70;BaseQ          |
| 47393 | chrY | 28793430 | . | A | G   | 8578.13  | my_snp_filter | AC=23;AF=0.329;AN=70;BaseQ         |
| 47394 | chrY | 28793456 | . | G | C   | 409.31   | my_snp_filter | AC=9;AF=0.129;AN=70;BaseQ          |
| 47395 | chrY | 28793473 | . | G | A   | 103.88   | my_snp_filter | AC=1;AF=0.014;AN=70;BaseQ          |
| 47396 | chrY | 28793491 | . | G | T,* | 5418.43  | PASS          | AC=19,6;AF=0.271,0.086;AN=70;BaseQ |
| 47397 | chrY | 28793555 | . | C | G   | 4598.91  | PASS          | AC=6;AF=0.094;AN=64;BaseQRankSum=  |
| 47398 | chrY | 28793559 | . | T | C   | 3450.33  | PASS          | AC=5;AF=0.071;AN=70;BaseQRankSum=  |
| 47399 | chrY | 28793583 | . | A | G   | 5696.43  | my_snp_filter | AC=15;AF=0.227;AN=66;BaseQ         |
| 47400 | chrY | 28793592 | . | A | G   | 739.55   | my_snp_filter | AC=7;AF=0.100;AN=70;BaseQ          |
| 47401 | chrY | 28793594 | . | G | C   | 4478.87  | my_snp_filter | AC=14;AF=0.206;AN=68;BaseQ         |
| 47402 | chrY | 28793613 | . | T | C   | 1327.33  | my_snp_filter | AC=3;AF=0.043;AN=70;BaseQ          |
| 47403 | chrY | 28793625 | . | A | T   | 445.18   | my_snp_filter | AC=2;AF=0.029;AN=70;BaseQ          |
| 47404 | chrY | 28793660 | . | T | G   | 8776.96  | my_snp_filter | AC=10;AF=0.152;AN=66;BaseQ         |
| 47405 | chrY | 28793661 | . | A | G   | 952.10   | my_snp_filter | AC=3;AF=0.045;AN=66;BaseQ          |
| 47406 | chrY | 28793668 | . | T | G   | 288.54   | PASS          | AC=1;AF=0.015;AN=68;BaseQRankSum=  |
| 47407 | chrY | 28793671 | . | A | T   | 841.98   | my_snp_filter | AC=4;AF=0.061;AN=66;BaseQ          |
| 47408 | chrY | 28793672 | . | G | A   | 2117.71  | my_snp_filter | AC=3;AF=0.045;AN=66;BaseQ          |
| 47409 | chrY | 28793675 | . | G | C   | 919.90   | my_snp_filter | AC=6;AF=0.088;AN=68;BaseQ          |
| 47410 | chrY | 28793702 | . | T | C   | 1069.11  | my_snp_filter | AC=7;AF=0.103;AN=68;BaseQ          |
| 47411 | chrY | 28793706 | . | C | T,A | 5224.02  | my_snp_filter | AC=7,15;AF=0.113,0.242;AN=         |
| 47412 | chrY | 28793712 | . | A | T,G | 3924.65  | my_snp_filter | AC=15,1;AF=0.234,0.016;AN=         |
| 47413 | chrY | 28793741 | . | A | C   | 1164.82  | my_snp_filter | AC=14;AF=0.206;AN=68;BaseQ         |
| 47414 | chrY | 28793753 | . | G | A   | 17215.44 | my_snp_filter | AC=37;AF=0.544;AN=                 |
| 47415 | chrY | 28793765 | . | A | G   | 5770.90  | my_snp_filter | AC=24;AF=0.353;AN=68;BaseQ         |
| 47416 | chrY | 28793774 | . | T | G   | 12614.96 | my_snp_filter | AC=21;AF=0.309;AN=                 |
| 47417 | chrY | 28793776 | . | G | A   | 1352.20  | my_snp_filter | AC=9;AF=0.129;AN=70;BaseQ          |
| 47418 | chrY | 28793782 | . | T | A   | 4257.95  | my_snp_filter | AC=25;AF=0.368;AN=68;BaseQ         |
| 47419 | chrY | 28793797 | . | A | G   | 35700.99 | my_snp_filter | AC=23;AF=0.348;AN=                 |
| 47420 | chrY | 28793799 | . | G | T   | 539.61   | PASS          | AC=3;AF=0.043;AN=70;BaseQRankSum=  |
| 47421 | chrY | 28793801 | . | G | T   | 2406.54  | my_snp_filter | AC=14;AF=0.200;AN=70;BaseQ         |
| 47422 | chrY | 28793828 | . | T | C   | 34.55    | my_snp_filter | AC=1;AF=0.015;AN=66;BaseQ          |
| 47423 | chrY | 28793852 | . | C | T   | 7862.50  | my_snp_filter | AC=19;AF=0.271;AN=70;BaseQ         |
| 47424 | chrY | 28793857 | . | T | A   | 815.43   | my_snp_filter | AC=11;AF=0.157;AN=70;BaseQ         |



|       |      |          |   |   |     |          |               |                                   |
|-------|------|----------|---|---|-----|----------|---------------|-----------------------------------|
| 47425 | chrY | 28793863 | . | G | A   | 6843.66  | PASS          | AC=18;AF=0.257;AN=70;BaseQRankSum |
| 47426 | chrY | 28793898 | . | A | G   | 11747.90 | PASS          | AC=33;AF=0.471;AN=70;BaseQ        |
| 47427 | chrY | 28793911 | . | A | G   | 292.53   | PASS          | AC=3;AF=0.043;AN=70;BaseQRankSum= |
| 47428 | chrY | 28793913 | . | G | C   | 239.84   | my_snp_filter | AC=3;AF=0.043;AN=70;BaseQ         |
| 47429 | chrY | 28793951 | . | G | T   | 69.40    | my_snp_filter | AC=2;AF=0.029;AN=70;BaseQ         |
| 47430 | chrY | 28793969 | . | C | A   | 529.41   | PASS          | AC=3;AF=0.043;AN=70;BaseQRankSum= |
| 47431 | chrY | 28793997 | . | A | T   | 2360.46  | PASS          | AC=17;AF=0.258;AN=66;BaseQRankSum |
| 47432 | chrY | 28794071 | . | A | C   | 32762.70 | my_snp_filter | AC=34;AF=0.486;AN                 |
| 47433 | chrY | 28794072 | . | A | T   | 30504.72 | my_snp_filter | AC=33;AF=0.471;AN                 |
| 47434 | chrY | 28794074 | . | A | C   | 270.94   | my_snp_filter | AC=4;AF=0.057;AN=70;BaseQ         |
| 47435 | chrY | 28794080 | . | A | G   | 46.42    | my_snp_filter | AC=1;AF=0.014;AN=70;BaseQ         |
| 47436 | chrY | 28794086 | . | C | A   | 119.64   | my_snp_filter | AC=1;AF=0.014;AN=70;BaseQ         |
| 47437 | chrY | 28794092 | . | G | A   | 53.29    | my_snp_filter | AC=2;AF=0.029;AN=70;BaseQ         |
| 47438 | chrY | 28794113 | . | G | T   | 108.81   | my_snp_filter | AC=4;AF=0.057;AN=70;BaseQ         |
| 47439 | chrY | 28794121 | . | T | A   | 1079.52  | my_snp_filter | AC=3;AF=0.043;AN=70;BaseQ         |
| 47440 | chrY | 28794141 | . | A | T   | 692.98   | my_snp_filter | AC=5;AF=0.071;AN=70;BaseQ         |
| 47441 | chrY | 28794142 | . | G | T   | 12292.36 | my_snp_filter | AC=30;AF=0.429;AN                 |
| 47442 | chrY | 28794143 | . | G | T   | 11804.56 | my_snp_filter | AC=30;AF=0.429;AN                 |
| 47443 | chrY | 28794150 | . | G | T   | 328.31   | my_snp_filter | AC=4;AF=0.057;AN=70;BaseQ         |
| 47444 | chrY | 28794151 | . | T | A   | 328.70   | my_snp_filter | AC=5;AF=0.071;AN=70;BaseQ         |
| 47445 | chrY | 28794152 | . | G | T   | 293.64   | my_snp_filter | AC=6;AF=0.086;AN=70;BaseQ         |
| 47446 | chrY | 28794160 | . | G | C   | 1635.46  | my_snp_filter | AC=9;AF=0.129;AN=70;BaseQ         |
| 47447 | chrY | 28794161 | . | T | G   | 102.42   | my_snp_filter | AC=1;AF=0.014;AN=70;BaseQ         |
| 47448 | chrY | 28794167 | . | G | A   | 185.85   | my_snp_filter | AC=3;AF=0.043;AN=70;BaseQ         |
| 47449 | chrY | 28794212 | . | G | T   | 133.05   | my_snp_filter | AC=2;AF=0.029;AN=70;BaseQ         |
| 47450 | chrY | 28794222 | . | G | T   | 115.23   | my_snp_filter | AC=3;AF=0.044;AN=68;BaseQ         |
| 47451 | chrY | 28794227 | . | G | A   | 192.18   | my_snp_filter | AC=3;AF=0.044;AN=68;BaseQ         |
| 47452 | chrY | 28794243 | . | C | G   | 60.63    | my_snp_filter | AC=3;AF=0.044;AN=68;BaseQ         |
| 47453 | chrY | 28794262 | . | G | A   | 8285.68  | my_snp_filter | AC=11;AF=0.167;AN=66;BaseQ        |
| 47454 | chrY | 28794291 | . | T | C   | 421.35   | my_snp_filter | AC=10;AF=0.143;AN=70;BaseQ        |
| 47455 | chrY | 28794310 | . | A | T   | 236.43   | my_snp_filter | AC=1;AF=0.014;AN=70;BaseQ         |
| 47456 | chrY | 28794313 | . | T | G,* | 332.20   | my_snp_filter | AC=3,2;AF=0.043,0.029;AN=         |
| 47457 | chrY | 28794316 | . | G | T,* | 301.72   | my_snp_filter | AC=2,2;AF=0.029,0.029;AN=         |
| 47458 | chrY | 28794363 | . | G | A   | 125.47   | my_snp_filter | AC=2;AF=0.029;AN=70;BaseQ         |
| 47459 | chrY | 28794400 | . | A | G   | 68310.17 | my_snp_filter | AC=33;AF=0.471;AN                 |
| 47460 | chrY | 28794404 | . | A | T   | 248.51   | my_snp_filter | AC=3;AF=0.043;AN=70;BaseQ         |
| 47461 | chrY | 28794410 | . | A | T   | 76930.70 | my_snp_filter | AC=33;AF=0.471;AN                 |
| 47462 | chrY | 28794435 | . | T | A   | 67.18    | my_snp_filter | AC=1;AF=0.014;AN=70;BaseQ         |
| 47463 | chrY | 28794503 | . | A | G   | 141.42   | my_snp_filter | AC=1;AF=0.014;AN=70;BaseQ         |
| 47464 | chrY | 28794511 | . | G | A   | 606.06   | my_snp_filter | AC=8;AF=0.114;AN=70;BaseQ         |
| 47465 | chrY | 28794584 | . | T | A   | 4947.71  | my_snp_filter | AC=17;AF=0.243;AN=70;BaseQ        |
| 47466 | chrY | 28794679 | . | T | A   | 33.91    | my_snp_filter | AC=1;AF=0.014;AN=70;BaseQ         |
| 47467 | chrY | 28794735 | . | G | T   | 22050.28 | my_snp_filter | AC=33;AF=0.471;AN                 |
| 47468 | chrY | 28794756 | . | T | G   | 17474.36 | my_snp_filter | AC=33;AF=0.471;AN                 |
| 47469 | chrY | 28794758 | . | A | G   | 440.67   | my_snp_filter | AC=3;AF=0.043;AN=70;BaseQ         |
| 47470 | chrY | 28794768 | . | A | G   | 61.71    | my_snp_filter | AC=4;AF=0.057;AN=70;BaseQ         |
| 47471 | chrY | 28794782 | . | C | A   | 585.24   | my_snp_filter | AC=4;AF=0.057;AN=70;BaseQ         |
| 47472 | chrY | 28794794 | . | T | G   | 967.49   | my_snp_filter | AC=6;AF=0.086;AN=70;BaseQ         |
| 47473 | chrY | 28794796 | . | G | A   | 599.32   | my_snp_filter | AC=6;AF=0.086;AN=70;BaseQ         |
| 47474 | chrY | 28794799 | . | T | G   | 915.93   | my_snp_filter | AC=6;AF=0.088;AN=68;BaseQ         |
| 47475 | chrY | 28794800 | . | T | G   | 1738.27  | my_snp_filter | AC=8;AF=0.118;AN=68;BaseQ         |
| 47476 | chrY | 28794801 | . | G | A   | 572.34   | my_snp_filter | AC=6;AF=0.088;AN=68;BaseQ         |
| 47477 | chrY | 28794807 | . | T | C   | 13364.90 | my_snp_filter | AC=59;AF=0.922;AN                 |
| 47478 | chrY | 28794814 | . | T | G   | 655.17   | my_snp_filter | AC=7;AF=0.109;AN=64;BaseQ         |
| 47479 | chrY | 28794819 | . | C | T   | 648.89   | my_snp_filter | AC=7;AF=0.113;AN=62;BaseQ         |
| 47480 | chrY | 28794830 | . | C | G   | 634.56   | my_snp_filter | AC=7;AF=0.109;AN=64;BaseQ         |
| 47481 | chrY | 28794836 | . | A | G   | 650.51   | my_snp_filter | AC=7;AF=0.113;AN=62;BaseQ         |
| 47482 | chrY | 28794875 | . | T | C   | 224.94   | my_snp_filter | AC=3;AF=0.047;AN=64;BaseQ         |
| 47483 | chrY | 28794883 | . | T | C   | 199.64   | my_snp_filter | AC=3;AF=0.044;AN=68;BaseQ         |
| 47484 | chrY | 28794890 | . | G | A   | 199.44   | my_snp_filter | AC=3;AF=0.045;AN=66;BaseQ         |
| 47485 | chrY | 28794897 | . | A | C   | 153.54   | my_snp_filter | AC=2;AF=0.029;AN=68;BaseQ         |
| 47486 | chrY | 28794900 | . | G | T   | 141.59   | my_snp_filter | AC=2;AF=0.029;AN=70;BaseQ         |
| 47487 | chrY | 28794963 | . | C | G   | 30937.41 | PASS          | AC=58;AF=1.00;AN=58;DP=69         |
| 47488 | chrY | 28794991 | . | C | G   | 20705.77 | my_snp_filter | AC=47;AF=0.810;AN                 |
| 47489 | chrY | 28795063 | . | G | T   | 481.45   | my_snp_filter | AC=11;AF=0.162;AN=68;BaseQ        |
| 47490 | chrY | 28795075 | . | A | G   | 794.50   | my_snp_filter | AC=13;AF=0.197;AN=66;BaseQ        |
| 47491 | chrY | 28795146 | . | C | G   | 2521.11  | my_snp_filter | AC=9;AF=0.129;AN=70;BaseQ         |
| 47492 | chrY | 28795149 | . | C | T   | 2522.28  | my_snp_filter | AC=9;AF=0.129;AN=70;BaseQ         |
| 47493 | chrY | 28795170 | . | C | G   | 130.93   | my_snp_filter | AC=2;AF=0.029;AN=70;BaseQ         |
| 47494 | chrY | 28795200 | . | G | C   | 5067.04  | my_snp_filter | AC=29;AF=0.414;AN=70;BaseQ        |
| 47495 | chrY | 28795249 | . | T | A   | 102.23   | my_snp_filter | AC=5;AF=0.071;AN=70;BaseQ         |
| 47496 | chrY | 28795264 | . | C | G   | 37.75    | my_snp_filter | AC=2;AF=0.029;AN=70;BaseQ         |
| 47497 | chrY | 28795268 | . | C | G   | 9145.06  | my_snp_filter | AC=29;AF=0.414;AN=70;BaseQ        |
| 47498 | chrY | 28795283 | . | C | T   | 3073.92  | my_snp_filter | AC=13;AF=0.186;AN=70;BaseQ        |
| 47499 | chrY | 28795287 | . | G | C,T | 18463.73 | my_snp_filter | AC=34,1;AF=0.486,                 |
| 47500 | chrY | 28795302 | . | G | T   | 46.67    | my_snp_filter | AC=1;AF=0.014;AN=70;BaseQ         |

|       |      |          |   |   |     |          |               |                                   |
|-------|------|----------|---|---|-----|----------|---------------|-----------------------------------|
| 47501 | chrY | 28795328 | . | A | T   | 8611.74  | PASS          | AC=25;AF=0.357;AN=70;BaseQRankSum |
| 47502 | chrY | 28795338 | . | G | A   | 218.31   | my_snp_filter | AC=4;AF=0.057;AN=70;BaseQ         |
| 47503 | chrY | 28795347 | . | T | C   | 15776.85 | PASS          | AC=27;AF=0.386;AN=70;Base         |
| 47504 | chrY | 28795362 | . | T | G   | 16222.99 | PASS          | AC=27;AF=0.386;AN=70;Base         |
| 47505 | chrY | 28795381 | . | A | T   | 13575.66 | PASS          | AC=24;AF=0.343;AN=70;Base         |
| 47506 | chrY | 28795404 | . | G | T   | 107.42   | my_snp_filter | AC=1;AF=0.014;AN=70;BaseQ         |
| 47507 | chrY | 28795420 | . | A | C   | 197.43   | PASS          | AC=1;AF=0.014;AN=70;BaseQRankSum  |
| 47508 | chrY | 28795428 | . | A | G,* | 4860.22  | my_snp_filter | AC=11,1;AF=0.157,0.014;AN         |
| 47509 | chrY | 28795430 | . | T | A,* | 4478.71  | my_snp_filter | AC=11,1;AF=0.157,0.014;AN         |
| 47510 | chrY | 28795439 | . | G | T   | 7891.10  | PASS          | AC=25;AF=0.357;AN=70;BaseQRankSum |
| 47511 | chrY | 28795453 | . | A | G   | 513.59   | my_snp_filter | AC=7;AF=0.100;AN=70;BaseQ         |
| 47512 | chrY | 28795461 | . | A | G   | 70282.82 | PASS          | AC=38;AF=0.543;AN=70;Base         |
| 47513 | chrY | 28795537 | . | T | C   | 1194.51  | PASS          | AC=3;AF=0.043;AN=70;BaseQRankSum  |
| 47514 | chrY | 28795542 | . | T | C   | 26929.84 | PASS          | AC=36;AF=0.514;AN=70;Base         |
| 47515 | chrY | 28795543 | . | G | A   | 340.51   | my_snp_filter | AC=3;AF=0.043;AN=70;BaseQ         |
| 47516 | chrY | 28795552 | . | T | A   | 53290.19 | PASS          | AC=41;AF=0.586;AN=70;Base         |
| 47517 | chrY | 28795556 | . | A | T   | 1060.51  | PASS          | AC=3;AF=0.043;AN=70;BaseQRankSum  |
| 47518 | chrY | 28795597 | . | T | C   | 2145.69  | PASS          | AC=6;AF=0.086;AN=70;BaseQRankSum  |
| 47519 | chrY | 28795617 | . | A | G   | 17837.09 | PASS          | AC=41;AF=0.586;AN=70;Base         |
| 47520 | chrY | 28795657 | . | A | G   | 382.43   | my_snp_filter | AC=7;AF=0.100;AN=70;BaseQ         |
| 47521 | chrY | 28795663 | . | C | G   | 16499.61 | PASS          | AC=36;AF=0.514;AN=70;Base         |
| 47522 | chrY | 28795666 | . | C | A   | 16353.45 | PASS          | AC=36;AF=0.514;AN=70;Base         |
| 47523 | chrY | 28795687 | . | T | C   | 112.17   | my_snp_filter | AC=2;AF=0.029;AN=70;BaseQ         |
| 47524 | chrY | 28795700 | . | T | G   | 106.09   | my_snp_filter | AC=1;AF=0.015;AN=68;BaseQ         |
| 47525 | chrY | 28795710 | . | C | T,* | 283.31   | my_snp_filter | AC=2,1;AF=0.056,0.028;AN=         |
| 47526 | chrY | 28795739 | . | T | A   | 979.67   | my_snp_filter | AC=5;AF=0.071;AN=70;BaseQ         |
| 47527 | chrY | 28795742 | . | G | A   | 444.26   | my_snp_filter | AC=5;AF=0.071;AN=70;BaseQ         |
| 47528 | chrY | 28795745 | . | C | G   | 615.17   | my_snp_filter | AC=5;AF=0.076;AN=66;BaseQ         |
| 47529 | chrY | 28795748 | . | T | G   | 577.19   | my_snp_filter | AC=5;AF=0.076;AN=66;BaseQ         |
| 47530 | chrY | 28795758 | . | C | G   | 1237.88  | my_snp_filter | AC=13;AF=0.186;AN=70;Base         |
| 47531 | chrY | 28795771 | . | G | C   | 153.33   | my_snp_filter | AC=2;AF=0.029;AN=70;BaseQ         |
| 47532 | chrY | 28795809 | . | T | G   | 416.16   | my_snp_filter | AC=4;AF=0.057;AN=70;BaseQ         |
| 47533 | chrY | 28795811 | . | C | T   | 3680.45  | PASS          | AC=22;AF=0.314;AN=70;BaseQRankSum |
| 47534 | chrY | 28795835 | . | T | G   | 7505.94  | PASS          | AC=21;AF=0.300;AN=70;BaseQRankSum |
| 47535 | chrY | 28795850 | . | G | A   | 1277.60  | my_snp_filter | AC=5;AF=0.071;AN=70;BaseQ         |
| 47536 | chrY | 28795855 | . | G | T   | 1280.60  | my_snp_filter | AC=5;AF=0.071;AN=70;BaseQ         |
| 47537 | chrY | 28795884 | . | T | G   | 22496.97 | PASS          | AC=36;AF=0.514;AN=70;Base         |
| 47538 | chrY | 28795898 | . | T | A   | 588.10   | my_snp_filter | AC=3;AF=0.044;AN=68;BaseQ         |
| 47539 | chrY | 28795899 | . | C | G   | 92.81    | my_snp_filter | AC=3;AF=0.043;AN=70;BaseQ         |
| 47540 | chrY | 28795900 | . | A | G   | 632.54   | my_snp_filter | AC=4;AF=0.059;AN=68;BaseQ         |
| 47541 | chrY | 28795901 | . | G | C   | 562.09   | my_snp_filter | AC=3;AF=0.044;AN=68;BaseQ         |
| 47542 | chrY | 28795909 | . | G | C   | 29595.87 | PASS          | AC=36;AF=0.514;AN=70;Base         |
| 47543 | chrY | 28795919 | . | A | C   | 13758.36 | PASS          | AC=33;AF=0.471;AN=70;Base         |
| 47544 | chrY | 28795924 | . | C | A   | 33.96    | my_snp_filter | AC=1;AF=0.014;AN=70;BaseQ         |
| 47545 | chrY | 28795928 | . | T | G   | 42.33    | PASS          | AC=1;AF=0.015;AN=66;BaseQRankSum  |
| 47546 | chrY | 28795931 | . | T | G   | 41.15    | my_snp_filter | AC=1;AF=0.015;AN=68;BaseQ         |
| 47547 | chrY | 28796010 | . | G | C   | 8095.85  | PASS          | AC=28;AF=0.400;AN=70;BaseQRankSum |
| 47548 | chrY | 28796044 | . | G | T   | 1024.53  | PASS          | AC=14;AF=0.200;AN=70;BaseQRankSum |
| 47549 | chrY | 28796049 | . | G | A   | 1417.18  | my_snp_filter | AC=5;AF=0.078;AN=64;BaseQ         |
| 47550 | chrY | 28796067 | . | C | T   | 1902.46  | my_snp_filter | AC=7;AF=0.106;AN=66;BaseQ         |
| 47551 | chrY | 28796068 | . | G | A   | 1536.53  | my_snp_filter | AC=17;AF=0.243;AN=70;Base         |
| 47552 | chrY | 28796070 | . | A | C   | 139.91   | my_snp_filter | AC=3;AF=0.043;AN=70;BaseQ         |
| 47553 | chrY | 28796077 | . | C | A   | 33798.52 | my_snp_filter | AC=62;AF=0.886;AN                 |
| 47554 | chrY | 28796080 | . | A | C   | 1483.57  | my_snp_filter | AC=5;AF=0.076;AN=66;BaseQ         |
| 47555 | chrY | 28796083 | . | G | T   | 3587.37  | my_snp_filter | AC=17;AF=0.243;AN=70;Base         |
| 47556 | chrY | 28796084 | . | G | T   | 3565.27  | my_snp_filter | AC=17;AF=0.243;AN=70;Base         |
| 47557 | chrY | 28796095 | . | G | C   | 1203.01  | my_snp_filter | AC=4;AF=0.059;AN=68;BaseQ         |
| 47558 | chrY | 28796096 | . | G | T   | 1585.09  | my_snp_filter | AC=12;AF=0.171;AN=70;Base         |
| 47559 | chrY | 28796099 | . | A | G   | 349.34   | my_snp_filter | AC=3;AF=0.047;AN=64;BaseQ         |
| 47560 | chrY | 28796104 | . | G | T   | 72.21    | my_snp_filter | AC=2;AF=0.029;AN=70;BaseQ         |
| 47561 | chrY | 28796106 | . | A | G   | 1093.40  | my_snp_filter | AC=4;AF=0.059;AN=68;BaseQ         |
| 47562 | chrY | 28796114 | . | C | G   | 3776.78  | my_snp_filter | AC=11;AF=0.167;AN=66;Base         |
| 47563 | chrY | 28796115 | . | T | A   | 1170.97  | my_snp_filter | AC=4;AF=0.063;AN=64;BaseQ         |
| 47564 | chrY | 28796121 | . | T | A   | 1628.48  | my_snp_filter | AC=4;AF=0.059;AN=68;BaseQ         |
| 47565 | chrY | 28796122 | . | T | C   | 3556.80  | my_snp_filter | AC=11;AF=0.162;AN=68;Base         |
| 47566 | chrY | 28796130 | . | A | G   | 1564.28  | my_snp_filter | AC=4;AF=0.057;AN=70;BaseQ         |
| 47567 | chrY | 28796131 | . | C | G   | 1568.33  | my_snp_filter | AC=4;AF=0.059;AN=68;BaseQ         |
| 47568 | chrY | 28796134 | . | C | G   | 1529.90  | my_snp_filter | AC=4;AF=0.061;AN=66;BaseQ         |
| 47569 | chrY | 28796138 | . | G | C   | 567.74   | my_snp_filter | AC=6;AF=0.086;AN=70;BaseQ         |
| 47570 | chrY | 28796140 | . | A | G   | 438.05   | my_snp_filter | AC=2;AF=0.029;AN=70;BaseQ         |
| 47571 | chrY | 28796169 | . | G | C   | 94.64    | my_snp_filter | AC=3;AF=0.043;AN=70;BaseQ         |
| 47572 | chrY | 28796172 | . | T | G   | 33.95    | my_snp_filter | AC=1;AF=0.014;AN=70;BaseQ         |
| 47573 | chrY | 28796178 | . | G | T   | 2109.46  | my_snp_filter | AC=9;AF=0.129;AN=70;BaseQ         |
| 47574 | chrY | 28796182 | . | T | G   | 1211     | my_snp_filter | AC=3;AF=0.043;AN=70;BaseQ         |
| 47575 | chrY | 28796195 | . | A | G   | 1844.67  | PASS          | AC=8;AF=0.114;AN=70;BaseQRankSum  |
| 47576 | chrY | 28796197 | . | T | G   | 1235.60  | PASS          | AC=3;AF=0.043;AN=70;BaseQRankSum  |

|       |      |          |   |   |     |           |               |                                   |
|-------|------|----------|---|---|-----|-----------|---------------|-----------------------------------|
| 47577 | chrY | 28796216 | . | T | G,* | 1786.41   | PASS          | AC=9,5;AF=0.145,0.081;AN=62;BaseQ |
| 47578 | chrY | 28796239 | . | C | G,* | 1132.41   | PASS          | AC=4,5;AF=0.059,0.074;AN=68;BaseQ |
| 47579 | chrY | 28796271 | . | G | T   | 50.36     | my_snp_filter | AC=2;AF=0.029;AN=70;BaseQ         |
| 47580 | chrY | 28796280 | . | G | A   | 2602.23   | PASS          | AC=9;AF=0.141;AN=64;BaseQRankSum= |
| 47581 | chrY | 28796284 | . | C | G   | 2734.44   | PASS          | AC=9;AF=0.141;AN=64;BaseQRankSum= |
| 47582 | chrY | 28796349 | . | G | T   | 1774.95   | my_snp_filter | AC=16;AF=0.229;AN=70;BaseQ        |
| 47583 | chrY | 28796359 | . | G | T   | 48.35     | my_snp_filter | AC=2;AF=0.029;AN=70;BaseQ         |
| 47584 | chrY | 28796369 | . | C | G,T | 5101.03   | my_snp_filter | AC=21,5;AF=0.309,0.074;AN         |
| 47585 | chrY | 28796370 | . | A | C   | 8980.16   | PASS          | AC=29;AF=0.426;AN=68;BaseQRankSum |
| 47586 | chrY | 28796378 | . | T | G   | 26048.53  | my_snp_filter | AC=38;AF=0.559;AN                 |
| 47587 | chrY | 28796382 | . | T | C   | 1300.67   | PASS          | AC=17;AF=0.250;AN=68;BaseQRankSum |
| 47588 | chrY | 28796394 | . | T | G   | 1509.72   | my_snp_filter | AC=11;AF=0.157;AN=70;BaseQ        |
| 47589 | chrY | 28796403 | . | G | A   | 426.08    | my_snp_filter | AC=5;AF=0.071;AN=70;BaseQ         |
| 47590 | chrY | 28796408 | . | C | T   | 366.31    | my_snp_filter | AC=6;AF=0.086;AN=70;BaseQ         |
| 47591 | chrY | 28796428 | . | C | G   | 670.02    | PASS          | AC=3;AF=0.043;AN=70;BaseQRankSum= |
| 47592 | chrY | 28796467 | . | C | G   | 39.06     | my_snp_filter | AC=2;AF=0.029;AN=70;BaseQ         |
| 47593 | chrY | 28796468 | . | C | A   | 274.97    | my_snp_filter | AC=5;AF=0.071;AN=70;BaseQ         |
| 47594 | chrY | 28796517 | . | T | G   | 1699.75   | my_snp_filter | AC=9;AF=0.129;AN=70;BaseQ         |
| 47595 | chrY | 28796543 | . | G | C   | 266.17    | my_snp_filter | AC=3;AF=0.043;AN=70;BaseQ         |
| 47596 | chrY | 28796612 | . | C | G   | 2505.11   | my_snp_filter | AC=9;AF=0.129;AN=70;BaseQ         |
| 47597 | chrY | 28796626 | . | G | A   | 1635.90   | my_snp_filter | AC=9;AF=0.129;AN=70;BaseQ         |
| 47598 | chrY | 28796750 | . | C | T   | 168.25    | my_snp_filter | AC=2;AF=0.029;AN=68;BaseQ         |
| 47599 | chrY | 28796780 | . | A | T   | 19699.64  | my_snp_filter | AC=14;AF=0.212;AN                 |
| 47600 | chrY | 28796786 | . | C | G   | 16270.60  | my_snp_filter | AC=21;AF=0.362;AN                 |
| 47601 | chrY | 28796824 | . | G | T   | 8677.72   | my_snp_filter | AC=18;AF=0.257;AN=70;BaseQ        |
| 47602 | chrY | 28796841 | . | T | G   | 10533.01  | my_snp_filter | AC=21;AF=0.300;AN                 |
| 47603 | chrY | 28796866 | . | T | G   | 506.28    | my_snp_filter | AC=4;AF=0.057;AN=70;BaseQ         |
| 47604 | chrY | 28796905 | . | G | A   | 25234.17  | my_snp_filter | AC=26;AF=0.371;AN                 |
| 47605 | chrY | 28796906 | . | G | C   | 385.32    | my_snp_filter | AC=1;AF=0.014;AN=70;BaseQ         |
| 47606 | chrY | 28796945 | . | A | T   | 46566.83  | my_snp_filter | AC=33;AF=0.471;AN                 |
| 47607 | chrY | 28796994 | . | A | T   | 26462.32  | my_snp_filter | AC=27;AF=0.386;AN                 |
| 47608 | chrY | 28797015 | . | G | T   | 598.66    | my_snp_filter | AC=3;AF=0.043;AN=70;BaseQ         |
| 47609 | chrY | 28797016 | . | G | T   | 297.44    | my_snp_filter | AC=2;AF=0.029;AN=70;BaseQ         |
| 47610 | chrY | 28797096 | . | G | T   | 54.11     | my_snp_filter | AC=1;AF=0.015;AN=68;BaseQ         |
| 47611 | chrY | 28797135 | . | G | A   | 16889.15  | my_snp_filter | AC=12;AF=0.182;AN                 |
| 47612 | chrY | 28797153 | . | A | T   | 51.86     | my_snp_filter | AC=5;AF=0.076;AN=66;BaseQ         |
| 47613 | chrY | 28797164 | . | T | C   | 12756.08  | my_snp_filter | AC=29;AF=0.426;AN                 |
| 47614 | chrY | 28797186 | . | T | G,* | 7233.63   | my_snp_filter | AC=26,3;AF=0.371,0.043;AN         |
| 47615 | chrY | 28797189 | . | G | T,* | 7555.55   | my_snp_filter | AC=26,3;AF=0.371,0.043;AN         |
| 47616 | chrY | 28797236 | . | G | A   | 11684.12  | my_snp_filter | AC=31;AF=0.443;AN                 |
| 47617 | chrY | 28797251 | . | A | G   | 24938.41  | my_snp_filter | AC=27;AF=0.397;AN                 |
| 47618 | chrY | 28797273 | . | A | G   | 145.18    | my_snp_filter | AC=1;AF=0.014;AN=70;BaseQ         |
| 47619 | chrY | 28797304 | . | C | A   | 199.67    | my_snp_filter | AC=1;AF=0.014;AN=70;BaseQ         |
| 47620 | chrY | 28797308 | . | T | A   | 131934.72 | PASS          | AC=35;AF=0.500;AN=70;BaseQ        |
| 47621 | chrY | 28797309 | . | A | T   | 146070.72 | PASS          | AC=35;AF=0.500;AN=70;BaseQ        |
| 47622 | chrY | 28797319 | . | C | A   | 45.68     | my_snp_filter | AC=1;AF=0.015;AN=66;BaseQ         |
| 47623 | chrY | 28797324 | . | G | A   | 147.03    | my_snp_filter | AC=4;AF=0.061;AN=66;BaseQ         |
| 47624 | chrY | 28797325 | . | A | G   | 8424.49   | PASS          | AC=26;AF=0.382;AN=68;BaseQRankSum |
| 47625 | chrY | 28797331 | . | A | G   | 36.42     | my_snp_filter | AC=1;AF=0.014;AN=70;BaseQ         |
| 47626 | chrY | 28797340 | . | A | T   | 174.67    | my_snp_filter | AC=1;AF=0.014;AN=70;BaseQ         |
| 47627 | chrY | 28797371 | . | A | G   | 65459.72  | PASS          | AC=35;AF=0.500;AN=70;BaseQ        |
| 47628 | chrY | 28797373 | . | C | A   | 87386.72  | PASS          | AC=35;AF=0.500;AN=70;BaseQ        |
| 47629 | chrY | 28797376 | . | A | G   | 1995.17   | my_snp_filter | AC=15;AF=0.214;AN=70;BaseQ        |
| 47630 | chrY | 28797378 | . | A | G   | 101458.93 | PASS          | AC=38;AF=0.543;AN=70;BaseQ        |
| 47631 | chrY | 28797380 | . | A | G   | 6818.04   | PASS          | AC=23;AF=0.329;AN=70;BaseQRankSum |
| 47632 | chrY | 28797383 | . | G | C   | 72654.72  | PASS          | AC=35;AF=0.500;AN=70;BaseQ        |
| 47633 | chrY | 28797387 | . | T | A   | 72333.72  | PASS          | AC=35;AF=0.500;AN=70;BaseQ        |
| 47634 | chrY | 28797422 | . | A | T   | 12663.02  | PASS          | AC=35;AF=0.500;AN=70;BaseQ        |
| 47635 | chrY | 28797427 | . | C | T   | 737.82    | PASS          | AC=6;AF=0.086;AN=70;BaseQRankSum= |
| 47636 | chrY | 28797439 | . | G | A   | 42.64     | my_snp_filter | AC=2;AF=0.029;AN=70;BaseQ         |
| 47637 | chrY | 28797444 | . | T | G   | 745.02    | PASS          | AC=7;AF=0.100;AN=70;BaseQRankSum= |
| 47638 | chrY | 28797455 | . | C | A   | 642.96    | PASS          | AC=6;AF=0.088;AN=68;BaseQRankSum= |
| 47639 | chrY | 28797459 | . | G | T   | 77.46     | my_snp_filter | AC=2;AF=0.029;AN=70;BaseQ         |
| 47640 | chrY | 28797466 | . | G | T   | 10718.52  | PASS          | AC=33;AF=0.485;AN=68;BaseQ        |
| 47641 | chrY | 28797474 | . | G | C   | 90.13     | PASS          | AC=2;AF=0.029;AN=70;BaseQRankSum= |
| 47642 | chrY | 28797488 | . | G | T   | 1495.34   | my_snp_filter | AC=11;AF=0.162;AN=68;BaseQ        |
| 47643 | chrY | 28797489 | . | G | T   | 1494.85   | my_snp_filter | AC=11;AF=0.162;AN=68;BaseQ        |
| 47644 | chrY | 28797506 | . | T | C   | 4388.53   | my_snp_filter | AC=15;AF=0.242;AN=62;BaseQ        |
| 47645 | chrY | 28797508 | . | G | A   | 439.69    | my_snp_filter | AC=3;AF=0.043;AN=70;BaseQ         |
| 47646 | chrY | 28797513 | . | G | A   | 214.33    | PASS          | AC=2;AF=0.029;AN=68;BaseQRankSum= |
| 47647 | chrY | 28797522 | . | C | T   | 4564.85   | my_snp_filter | AC=16;AF=0.258;AN=62;BaseQ        |
| 47648 | chrY | 28797529 | . | G | C   | 4924.36   | my_snp_filter | AC=15;AF=0.227;AN=66;BaseQ        |
| 47649 | chrY | 28797536 | . | C | T   | 4848.39   | my_snp_filter | AC=16;AF=0.250;AN=64;BaseQ        |
| 47650 | chrY | 28797544 | . | C | G   | 5005.36   | my_snp_filter | AC=18;AF=0.265;AN=68;BaseQ        |
| 47651 | chrY | 28797569 | . | C | G   | 4191.45   | PASS          | AC=19;AF=0.279;AN=68;BaseQRankSum |
| 47652 | chrY | 28797587 | . | T | A   | 38.42     | my_snp_filter | AC=1;AF=0.014;AN=70;BaseQ         |

|       |      |          |   |   |         |          |               |                                       |
|-------|------|----------|---|---|---------|----------|---------------|---------------------------------------|
| 47653 | chrY | 28797593 | . | G | T       | 47.46    | my_snp_filter | AC=1;AF=0.014;AN=70;BaseQ             |
| 47654 | chrY | 28797612 | . | A | T       | 29846.92 | PASS          | AC=34;AF=0.486;AN=70;BaseQ            |
| 47655 | chrY | 28797626 | . | T | A       | 35952.53 | PASS          | AC=34;AF=0.486;AN=70;BaseQ            |
| 47656 | chrY | 28797631 | . | A | G       | 370.70   | my_snp_filter | AC=7;AF=0.100;AN=70;BaseQ             |
| 47657 | chrY | 28797642 | . | T | A       | 1297.51  | PASS          | AC=3;AF=0.043;AN=70;BaseQRankSum=     |
| 47658 | chrY | 28797644 | . | G | T       | 42284.53 | PASS          | AC=34;AF=0.486;AN=70;BaseQ            |
| 47659 | chrY | 28797647 | . | A | T       | 39.92    | my_snp_filter | AC=1;AF=0.014;AN=70;BaseQ             |
| 47660 | chrY | 28797654 | . | G | A       | 43605.53 | PASS          | AC=34;AF=0.486;AN=70;BaseQ            |
| 47661 | chrY | 28797729 | . | A | T       | 21763.86 | PASS          | AC=34;AF=0.486;AN=70;BaseQ            |
| 47662 | chrY | 28797735 | . | A | G       | 2317.58  | PASS          | AC=3;AF=0.043;AN=70;BaseQRankSum=     |
| 47663 | chrY | 28797739 | . | A | G       | 2378.65  | PASS          | AC=3;AF=0.043;AN=70;BaseQRankSum=     |
| 47664 | chrY | 28797747 | . | A | C       | 45458.52 | PASS          | AC=67;AF=0.957;AN=70;BaseQ            |
| 47665 | chrY | 28797756 | . | T | G       | 14459.88 | PASS          | AC=33;AF=0.471;AN=70;BaseQ            |
| 47666 | chrY | 28797783 | . | G | T       | 90.90    | my_snp_filter | AC=3;AF=0.043;AN=70;BaseQ             |
| 47667 | chrY | 28797798 | . | A | G       | 16891.71 | my_snp_filter | AC=69;AF=0.986;AN=                    |
| 47668 | chrY | 28797832 | . | G | T       | 7658.81  | my_snp_filter | AC=57;AF=0.864;AN=66;BaseQ            |
| 47669 | chrY | 28797865 | . | G | T       | 3314.47  | my_snp_filter | AC=14;AF=0.467;AN=30;BaseQ            |
| 47670 | chrY | 28797876 | . | T | A       | 181.45   | my_snp_filter | AC=5;AF=0.089;AN=56;BaseQ             |
| 47671 | chrY | 28797890 | . | A | G       | 36.35    | PASS          | AC=1;AF=0.014;AN=70;BaseQRankSum=     |
| 47672 | chrY | 28797910 | . | T | G       | 34.40    | my_snp_filter | AC=3;AF=0.043;AN=70;BaseQ             |
| 47673 | chrY | 28798085 | . | G | A       | 43.38    | my_snp_filter | AC=2;AF=0.029;AN=68;BaseQ             |
| 47674 | chrY | 28798289 | . | A | T       | 90.85    | my_snp_filter | AC=3;AF=0.047;AN=64;BaseQ             |
| 47675 | chrY | 28798707 | . | T | A       | 66.59    | PASS          | AC=1;AF=0.014;AN=70;BaseQRankSum=     |
| 47676 | chrY | 28798877 | . | A | C       | 103.66   | PASS          | AC=1;AF=0.014;AN=70;BaseQRankSum=     |
| 47677 | chrY | 28798886 | . | A | G       | 74.21    | my_snp_filter | AC=3;AF=0.043;AN=70;BaseQ             |
| 47678 | chrY | 28798897 | . | G | A       | 110.97   | my_snp_filter | AC=3;AF=0.044;AN=68;BaseQ             |
| 47679 | chrY | 28798898 | . | A | T       | 233.73   | PASS          | AC=6;AF=0.088;AN=68;BaseQRankSum=     |
| 47680 | chrY | 28798899 | . | G | A       | 95.77    | my_snp_filter | AC=3;AF=0.044;AN=68;BaseQ             |
| 47681 | chrY | 28798900 | . | G | T       | 146.01   | PASS          | AC=3;AF=0.044;AN=68;BaseQRankSum=     |
| 47682 | chrY | 28798910 | . | G | A       | 102.09   | PASS          | AC=1;AF=0.015;AN=66;BaseQRankSum=     |
| 47683 | chrY | 28798913 | . | T | A       | 158.15   | PASS          | AC=3;AF=0.044;AN=68;BaseQRankSum=     |
| 47684 | chrY | 28798915 | . | G | A       | 35.61    | PASS          | AC=1;AF=0.015;AN=68;BaseQRankSum=     |
| 47685 | chrY | 28798916 | . | A | T       | 65.88    | PASS          | AC=1;AF=0.015;AN=68;BaseQRankSum=     |
| 47686 | chrY | 28798920 | . | C | G       | 365.07   | PASS          | AC=5;AF=0.132;AN=38;BaseQRankSum=     |
| 47687 | chrY | 28798926 | . | A | G       | 117.37   | PASS          | AC=1;AF=0.017;AN=58;BaseQRankSum=     |
| 47688 | chrY | 28798940 | . | T | C       | 53.55    | PASS          | AC=1;AF=0.063;AN=16;BaseQRankSum=     |
| 47689 | chrY | 28798942 | . | T | A       | 420.47   | PASS          | AC=2;AF=0.111;AN=18;BaseQRankSum=     |
| 47690 | chrY | 28798945 | . | G | C       | 40.97    | PASS          | AC=1;AF=0.020;AN=50;BaseQRankSum=     |
| 47691 | chrY | 28798949 | . | G | T       | 51.23    | PASS          | AC=1;AF=0.019;AN=54;BaseQRankSum=     |
| 47692 | chrY | 28798952 | . | C | G       | 593.92   | PASS          | AC=3;AF=0.150;AN=20;BaseQRankSum=     |
| 47693 | chrY | 28799184 | . | G | T       | 47.16    | my_snp_filter | AC=1;AF=0.014;AN=70;BaseQ             |
| 47694 | chrY | 28799223 | . | G | C       | 482.60   | PASS          | AC=1;AF=0.019;AN=52;BaseQRankSum=     |
| 47695 | chrY | 28799224 | . | G | T       | 481.69   | PASS          | AC=1;AF=0.021;AN=48;BaseQRankSum=     |
| 47696 | chrY | 28799236 | . | A | T       | 589.09   | PASS          | AC=1;AF=0.029;AN=34;BaseQRankSum=     |
| 47697 | chrY | 28799492 | . | T | A       | 975.18   | PASS          | AC=5;AF=0.081;AN=62;BaseQRankSum=     |
| 47698 | chrY | 28799502 | . | T | A       | 970.30   | PASS          | AC=5;AF=0.083;AN=60;BaseQRankSum=     |
| 47699 | chrY | 28799510 | . | C | A       | 1415.28  | PASS          | AC=8;AF=0.160;AN=50;BaseQRankSum=     |
| 47700 | chrY | 28799513 | . | G | A       | 168.89   | PASS          | AC=3;AF=0.047;AN=64;BaseQRankSum=     |
| 47701 | chrY | 28799524 | . | C | G       | 411.77   | PASS          | AC=4;AF=0.067;AN=60;BaseQRankSum=     |
| 47702 | chrY | 28799531 | . | G | A       | 234.45   | PASS          | AC=5;AF=0.076;AN=66;BaseQRankSum=     |
| 47703 | chrY | 28799537 | . | T | A       | 63.60    | PASS          | AC=2;AF=0.030;AN=66;BaseQRankSum=     |
| 47704 | chrY | 28799543 | . | G | A       | 3373.79  | PASS          | AC=6;AF=0.091;AN=66;BaseQRankSum=     |
| 47705 | chrY | 28799544 | . | G | T       | 3360.68  | PASS          | AC=6;AF=0.091;AN=66;BaseQRankSum=     |
| 47706 | chrY | 28799546 | . | G | A       | 36.61    | PASS          | AC=1;AF=0.015;AN=66;BaseQRankSum=     |
| 47707 | chrY | 28799730 | . | G | A       | 2330.71  | my_snp_filter | AC=16;AF=0.235;AN=68;BaseQ            |
| 47708 | chrY | 28799740 | . | G | T       | 793.95   | PASS          | AC=2;AF=0.029;AN=70;BaseQRankSum=     |
| 47709 | chrY | 28799745 | . | C | A       | 335.26   | PASS          | AC=2;AF=0.034;AN=58;BaseQRankSum=     |
| 47710 | chrY | 28799763 | . | G | A       | 3943.53  | my_snp_filter | AC=21;AF=0.300;AN=70;BaseQ            |
| 47711 | chrY | 28799770 | . | A | C       | 169.76   | PASS          | AC=4;AF=0.057;AN=70;BaseQRankSum=     |
| 47712 | chrY | 28799774 | . | A | C       | 165.17   | PASS          | AC=4;AF=0.057;AN=70;BaseQRankSum=     |
| 47713 | chrY | 28799778 | . | G | C       | 1237.33  | PASS          | AC=12;AF=0.171;AN=70;BaseQRankSum=    |
| 47714 | chrY | 28799781 | . | T | C       | 2421.85  | PASS          | AC=5;AF=0.081;AN=62;BaseQRankSum=     |
| 47715 | chrY | 28799782 | . | A | T       | 4783.50  | PASS          | AC=23;AF=0.442;AN=52;BaseQRankSum=    |
| 47716 | chrY | 28799786 | . | C | A, T    | 337.66   | PASS          | AC=4, 3;AF=0.059, 0.044;AN=68;BaseQ   |
| 47717 | chrY | 28799789 | . | A | C       | 187.70   | PASS          | AC=4;AF=0.059;AN=68;BaseQRankSum=     |
| 47718 | chrY | 28799790 | . | G | T       | 293.24   | PASS          | AC=3;AF=0.044;AN=68;BaseQRankSum=     |
| 47719 | chrY | 28799792 | . | G | A       | 350.12   | PASS          | AC=2;AF=0.029;AN=68;BaseQRankSum=     |
| 47720 | chrY | 28799796 | . | T | G       | 349.17   | PASS          | AC=2;AF=0.029;AN=68;BaseQRankSum=     |
| 47721 | chrY | 28799801 | . | T | A       | 1320.99  | PASS          | AC=11;AF=0.167;AN=66;BaseQRankSum=    |
| 47722 | chrY | 28799805 | . | G | A, *    | 501.65   | PASS          | AC=3, 3;AF=0.060, 0.060;AN=50;BaseQ   |
| 47723 | chrY | 28799808 | . | C | G, *    | 1362.35  | PASS          | AC=4, 4;AF=0.083, 0.083;AN=48;BaseQ   |
| 47724 | chrY | 28799810 | . | G | T       | 191.41   | PASS          | AC=2;AF=0.034;AN=58;BaseQRankSum=     |
| 47725 | chrY | 28799814 | . | C | T, A, * | 1369.67  | PASS          | AC=2, 1, 5;AF=0.059, 0.029, 0.147;AN= |
| 47726 | chrY | 28799815 | . | A | T, *    | 620.05   | PASS          | AC=2, 5;AF=0.059, 0.147;AN=34;BaseQ   |
| 47727 | chrY | 28799818 | . | C | G, *    | 602.32   | PASS          | AC=3, 5;AF=0.083, 0.139;AN=36;BaseQ   |
| 47728 | chrY | 28799821 | . | T | A, *    | 422.02   | PASS          | AC=2, 3;AF=0.045, 0.068;AN=44;BaseQ   |

|       |      |          |   |   |     |         |               |                                    |
|-------|------|----------|---|---|-----|---------|---------------|------------------------------------|
| 47729 | chrY | 28799825 | . | G | T,* | 467.01  | PASS          | AC=2,3;AF=0.038,0.058;AN=52;BaseQ  |
| 47730 | chrY | 28799830 | . | G | A,* | 446.08  | PASS          | AC=2,3;AF=0.038,0.058;AN=52;BaseQ  |
| 47731 | chrY | 28799837 | . | A | G   | 341.22  | PASS          | AC=3;AF=0.115;AN=26;BaseQRankSum=  |
| 47732 | chrY | 28799859 | . | C | A   | 44.97   | PASS          | AC=1;AF=0.033;AN=30;BaseQRankSum=  |
| 47733 | chrY | 28800024 | . | A | G   | 302.90  | PASS          | AC=2;AF=0.038;AN=52;DP=1163;FS=0.  |
| 47734 | chrY | 28800249 | . | A | G   | 296.86  | my_snp_filter | AC=3;AF=0.044;AN=68;BaseQ          |
| 47735 | chrY | 28800286 | . | A | T   | 169.58  | PASS          | AC=1;AF=0.017;AN=60;BaseQRankSum=  |
| 47736 | chrY | 28800295 | . | A | T   | 147.32  | PASS          | AC=2;AF=0.037;AN=54;BaseQRankSum=  |
| 47737 | chrY | 28800299 | . | A | G   | 57.27   | PASS          | AC=1;AF=0.015;AN=68;BaseQRankSum=  |
| 47738 | chrY | 28800409 | . | T | A   | 1288.55 | PASS          | AC=10;AF=0.147;AN=68;BaseQRankSum= |
| 47739 | chrY | 28800418 | . | A | G   | 1280.89 | PASS          | AC=9;AF=0.141;AN=64;BaseQRankSum=  |
| 47740 | chrY | 28800419 | . | C | T   | 1289.96 | PASS          | AC=9;AF=0.141;AN=64;BaseQRankSum=  |
| 47741 | chrY | 28800421 | . | C | A   | 1189.11 | PASS          | AC=9;AF=0.141;AN=64;BaseQRankSum=  |
| 47742 | chrY | 28800435 | . | A | G   | 918.78  | PASS          | AC=8;AF=0.129;AN=62;BaseQRankSum=  |
| 47743 | chrY | 28800436 | . | G | T   | 833.68  | PASS          | AC=8;AF=0.129;AN=62;BaseQRankSum=  |
| 47744 | chrY | 28800441 | . | T | C   | 819.72  | PASS          | AC=8;AF=0.114;AN=70;BaseQRankSum=  |
| 47745 | chrY | 28800450 | . | G | A   | 646.94  | PASS          | AC=8;AF=0.114;AN=70;BaseQRankSum=  |
| 47746 | chrY | 28800456 | . | A | G   | 631.42  | PASS          | AC=9;AF=0.129;AN=70;BaseQRankSum=  |
| 47747 | chrY | 28800464 | . | C | T   | 442.14  | PASS          | AC=5;AF=0.083;AN=60;BaseQRankSum=  |
| 47748 | chrY | 28800468 | . | A | G   | 424.66  | PASS          | AC=5;AF=0.071;AN=70;BaseQRankSum=  |
| 47749 | chrY | 28800498 | . | G | A   | 88.06   | PASS          | AC=1;AF=0.015;AN=68;BaseQRankSum=  |
| 47750 | chrY | 28800502 | . | A | G   | 37.87   | my_snp_filter | AC=1;AF=0.014;AN=70;BaseQ          |
| 47751 | chrY | 28801096 | . | G | T   | 43.85   | PASS          | AC=1;AF=0.014;AN=70;BaseQRankSum=  |
| 47752 | chrY | 28801110 | . | A | G   | 48.60   | PASS          | AC=4;AF=0.057;AN=70;BaseQRankSum=  |
| 47753 | chrY | 28801208 | . | T | G   | 41.07   | PASS          | AC=1;AF=0.017;AN=58;BaseQRankSum=  |
| 47754 | chrY | 28801222 | . | A | C   | 129.62  | PASS          | AC=1;AF=0.018;AN=56;BaseQRankSum=  |
| 47755 | chrY | 28801230 | . | A | T   | 172.57  | PASS          | AC=1;AF=0.014;AN=70;BaseQRankSum=  |
| 47756 | chrY | 28801235 | . | C | T   | 169.58  | PASS          | AC=1;AF=0.019;AN=54;BaseQRankSum=  |
| 47757 | chrY | 28801237 | . | T | C   | 170.23  | PASS          | AC=1;AF=0.018;AN=56;BaseQRankSum=  |
| 47758 | chrY | 28801253 | . | T | A   | 212.72  | PASS          | AC=1;AF=0.019;AN=54;BaseQRankSum=  |
| 47759 | chrY | 28801261 | . | A | T   | 254.94  | PASS          | AC=1;AF=0.019;AN=54;BaseQRankSum=  |
| 47760 | chrY | 28801267 | . | G | C   | 256.59  | PASS          | AC=1;AF=0.014;AN=70;BaseQRankSum=  |
| 47761 | chrY | 28801269 | . | A | G   | 257.47  | PASS          | AC=1;AF=0.014;AN=70;BaseQRankSum=  |
| 47762 | chrY | 28801277 | . | A | G   | 297.56  | PASS          | AC=1;AF=0.015;AN=68;BaseQRankSum=  |
| 47763 | chrY | 28801300 | . | G | A   | 377.68  | PASS          | AC=2;AF=0.029;AN=68;BaseQRankSum=  |
| 47764 | chrY | 28801328 | . | G | A   | 87.13   | PASS          | AC=4;AF=0.059;AN=68;BaseQRankSum=  |
| 47765 | chrY | 28801347 | . | A | G   | 76.36   | PASS          | AC=2;AF=0.042;AN=48;BaseQRankSum=  |
| 47766 | chrY | 28801348 | . | A | G   | 103.98  | PASS          | AC=2;AF=0.038;AN=52;BaseQRankSum=  |
| 47767 | chrY | 28801378 | . | G | C   | 81.43   | PASS          | AC=1;AF=0.016;AN=64;BaseQRankSum=  |
| 47768 | chrY | 28801418 | . | C | G   | 345.64  | PASS          | AC=5;AF=0.089;AN=56;BaseQRankSum=  |
| 47769 | chrY | 28801703 | . | A | G   | 72.69   | my_snp_filter | AC=2;AF=0.030;AN=66;BaseQ          |
| 47770 | chrY | 28801706 | . | A | G   | 90.49   | my_snp_filter | AC=4;AF=0.061;AN=66;BaseQ          |
| 47771 | chrY | 28801722 | . | T | G   | 67.32   | PASS          | AC=1;AF=0.019;AN=54;BaseQRankSum=  |
| 47772 | chrY | 28801724 | . | C | G   | 34.81   | my_snp_filter | AC=2;AF=0.036;AN=56;BaseQ          |
| 47773 | chrY | 28801937 | . | G | A   | 216.95  | PASS          | AC=3;AF=0.044;AN=68;BaseQRankSum=  |
| 47774 | chrY | 28801940 | . | G | T   | 216.59  | PASS          | AC=3;AF=0.048;AN=62;BaseQRankSum=  |
| 47775 | chrY | 28801942 | . | C | A   | 231.40  | PASS          | AC=2;AF=0.034;AN=58;BaseQRankSum=  |
| 47776 | chrY | 28801945 | . | T | G   | 241.45  | PASS          | AC=3;AF=0.052;AN=58;BaseQRankSum=  |
| 47777 | chrY | 28801947 | . | G | T   | 195.28  | PASS          | AC=2;AF=0.033;AN=60;BaseQRankSum=  |
| 47778 | chrY | 28801948 | . | A | T   | 384.21  | PASS          | AC=5;AF=0.083;AN=60;BaseQRankSum=  |
| 47779 | chrY | 28801967 | . | A | G   | 33.62   | PASS          | AC=1;AF=0.016;AN=64;BaseQRankSum=  |
| 47780 | chrY | 28801968 | . | G | T   | 226.37  | PASS          | AC=3;AF=0.052;AN=58;BaseQRankSum=  |
| 47781 | chrY | 28801978 | . | A | T   | 106.39  | PASS          | AC=1;AF=0.014;AN=70;BaseQRankSum=  |
| 47782 | chrY | 28802088 | . | T | A   | 610.48  | PASS          | AC=4;AF=0.057;AN=70;BaseQRankSum=  |
| 47783 | chrY | 28802231 | . | A | G   | 109.01  | my_snp_filter | AC=3;AF=0.043;AN=70;BaseQ          |
| 47784 | chrY | 28802450 | . | G | C   | 33.42   | my_snp_filter | AC=1;AF=0.014;AN=70;BaseQ          |
| 47785 | chrY | 28802513 | . | G | T   | 74.54   | PASS          | AC=2;AF=0.029;AN=68;BaseQRankSum=  |
| 47786 | chrY | 28802524 | . | C | G,* | 7062.52 | my_snp_filter | AC=14,14;AF=0.259,0.259;A          |
| 47787 | chrY | 28802525 | . | G | A   | 2183.05 | my_snp_filter | AC=14;AF=0.368;AN=38;Base          |
| 47788 | chrY | 28802536 | . | G | A,* | 5095.27 | my_snp_filter | AC=3,13;AF=0.052,0.224;AN          |
| 47789 | chrY | 28802539 | . | C | A,* | 5098.59 | my_snp_filter | AC=3,13;AF=0.054,0.232;AN          |
| 47790 | chrY | 28802541 | . | T | A   | 907.40  | PASS          | AC=11;AF=0.177;AN=62;BaseQRankSum= |
| 47791 | chrY | 28802542 | . | T | G   | 4165.63 | my_snp_filter | AC=13;AF=0.186;AN=70;Base          |
| 47792 | chrY | 28802543 | . | G | T   | 861.07  | PASS          | AC=11;AF=0.183;AN=60;BaseQRankSum= |
| 47793 | chrY | 28802547 | . | C | T,* | 3170.29 | my_snp_filter | AC=2,9;AF=0.042,0.188;AN=          |
| 47794 | chrY | 28802569 | . | T | C,* | 2668.77 | my_snp_filter | AC=4,7;AF=0.057,0.100;AN=          |
| 47795 | chrY | 28802574 | . | G | C   | 1176.06 | my_snp_filter | AC=6;AF=0.086;AN=70;BaseQ          |
| 47796 | chrY | 28802577 | . | T | C   | 623.36  | my_snp_filter | AC=2;AF=0.029;AN=70;BaseQ          |
| 47797 | chrY | 28802578 | . | T | G   | 571.69  | my_snp_filter | AC=2;AF=0.029;AN=70;BaseQ          |
| 47798 | chrY | 28802581 | . | A | G   | 380.93  | my_snp_filter | AC=2;AF=0.029;AN=70;BaseQ          |
| 47799 | chrY | 28802582 | . | T | C   | 686.20  | my_snp_filter | AC=6;AF=0.086;AN=70;BaseQ          |
| 47800 | chrY | 28802589 | . | G | T   | 138.25  | my_snp_filter | AC=1;AF=0.014;AN=70;BaseQ          |
| 47801 | chrY | 28802592 | . | T | A,* | 590.05  | PASS          | AC=2,4;AF=0.040,0.080;AN=50;BaseQ  |
| 47802 | chrY | 28802596 | . | T | G,* | 727.28  | my_snp_filter | AC=5,4;AF=0.100,0.080;AN=          |
| 47803 | chrY | 28802597 | . | T | A   | 48.12   | my_snp_filter | AC=3;AF=0.060;AN=50;BaseQ          |
| 47804 | chrY | 28802599 | . | G | C,T | 826.71  | my_snp_filter | AC=3,8;AF=0.044,0.118;AN=          |

|       |      |          |   |   |     |          |               |                                    |
|-------|------|----------|---|---|-----|----------|---------------|------------------------------------|
| 47805 | chrY | 28802603 | . | G | C   | 36.39    | my_snp_filter | AC=2;AF=0.029;AN=70;BaseQ          |
| 47806 | chrY | 28802604 | . | G | A   | 555.54   | my_snp_filter | AC=5;AF=0.076;AN=66;BaseQ          |
| 47807 | chrY | 28802607 | . | T | G   | 161.73   | my_snp_filter | AC=1;AF=0.014;AN=70;BaseQ          |
| 47808 | chrY | 28802613 | . | G | T   | 76.18    | my_snp_filter | AC=1;AF=0.014;AN=70;BaseQ          |
| 47809 | chrY | 28802614 | . | G | C   | 76.52    | my_snp_filter | AC=1;AF=0.014;AN=70;BaseQ          |
| 47810 | chrY | 28802622 | . | C | T   | 11622.74 | my_snp_filter | AC=27;AF=0.422;AN                  |
| 47811 | chrY | 28802625 | . | A | C   | 10984.51 | my_snp_filter | AC=26;AF=0.371;AN                  |
| 47812 | chrY | 28802635 | . | A | C   | 135.43   | my_snp_filter | AC=2;AF=0.030;AN=66;BaseQ          |
| 47813 | chrY | 28802638 | . | G | T   | 5545.30  | my_snp_filter | AC=16;AF=0.229;AN=70;Base          |
| 47814 | chrY | 28802639 | . | G | T   | 3041.71  | my_snp_filter | AC=14;AF=0.200;AN=70;Base          |
| 47815 | chrY | 28802648 | . | G | T   | 312.72   | my_snp_filter | AC=5;AF=0.071;AN=70;BaseQ          |
| 47816 | chrY | 28802651 | . | G | T   | 16805.77 | my_snp_filter | AC=29;AF=0.426;AN                  |
| 47817 | chrY | 28802656 | . | T | G   | 17115.14 | my_snp_filter | AC=29;AF=0.453;AN                  |
| 47818 | chrY | 28802669 | . | C | G   | 16220.81 | my_snp_filter | AC=28;AF=0.438;AN                  |
| 47819 | chrY | 28802677 | . | T | C   | 15229.77 | my_snp_filter | AC=29;AF=0.453;AN                  |
| 47820 | chrY | 28802688 | . | G | T   | 36.50    | my_snp_filter | AC=1;AF=0.018;AN=56;BaseQ          |
| 47821 | chrY | 28802727 | . | T | G   | 182.84   | my_snp_filter | AC=3;AF=0.045;AN=66;BaseQ          |
| 47822 | chrY | 28802733 | . | G | T   | 757.04   | my_snp_filter | AC=7;AF=0.184;AN=38;BaseQ          |
| 47823 | chrY | 28802784 | . | A | G   | 238.93   | PASS          | AC=1;AF=0.029;AN=34;BaseQRankSum=  |
| 47824 | chrY | 28802796 | . | C | G   | 109.88   | PASS          | AC=2;AF=0.071;AN=28;BaseQRankSum=  |
| 47825 | chrY | 28802797 | . | A | T   | 33.07    | PASS          | AC=1;AF=0.036;AN=28;BaseQRankSum=  |
| 47826 | chrY | 28802798 | . | T | G   | 64.33    | PASS          | AC=2;AF=0.067;AN=30;BaseQRankSum=  |
| 47827 | chrY | 28802805 | . | A | G   | 123.69   | PASS          | AC=4;AF=0.100;AN=40;BaseQRankSum=  |
| 47828 | chrY | 28802841 | . | T | G   | 39.65    | my_snp_filter | AC=1;AF=0.050;AN=20;BaseQ          |
| 47829 | chrY | 28802854 | . | T | A,* | 378.63   | PASS          | AC=2,2;AF=0.050,0.050;AN=40;BaseQ  |
| 47830 | chrY | 28802885 | . | C | A   | 75.69    | PASS          | AC=1;AF=0.018;AN=56;BaseQRankSum=  |
| 47831 | chrY | 28802886 | . | T | G   | 89.68    | PASS          | AC=1;AF=0.018;AN=56;BaseQRankSum=  |
| 47832 | chrY | 28802953 | . | C | G   | 644.33   | PASS          | AC=3;AF=0.048;AN=62;BaseQRankSum=  |
| 47833 | chrY | 28802957 | . | T | C   | 361.68   | PASS          | AC=3;AF=0.047;AN=64;BaseQRankSum=  |
| 47834 | chrY | 28802976 | . | A | C   | 167.42   | PASS          | AC=2;AF=0.031;AN=64;BaseQRankSum=  |
| 47835 | chrY | 28802981 | . | A | G   | 1182.66  | PASS          | AC=8;AF=0.121;AN=66;BaseQRankSum=  |
| 47836 | chrY | 28802990 | . | A | G   | 111.92   | my_snp_filter | AC=2;AF=0.030;AN=66;BaseQ          |
| 47837 | chrY | 28803011 | . | T | C   | 345.96   | PASS          | AC=1;AF=0.015;AN=66;BaseQRankSum=  |
| 47838 | chrY | 28803023 | . | A | T   | 370.79   | PASS          | AC=1;AF=0.016;AN=64;BaseQRankSum=  |
| 47839 | chrY | 28803059 | . | A | G   | 621.87   | PASS          | AC=5;AF=0.086;AN=58;BaseQRankSum=  |
| 47840 | chrY | 28803063 | . | C | G   | 113.43   | PASS          | AC=2;AF=0.037;AN=54;BaseQRankSum=  |
| 47841 | chrY | 28803070 | . | G | A   | 153.98   | PASS          | AC=5;AF=0.089;AN=56;BaseQRankSum=  |
| 47842 | chrY | 28803104 | . | T | A   | 489.97   | PASS          | AC=7;AF=0.103;AN=68;BaseQRankSum=  |
| 47843 | chrY | 28803110 | . | A | G,T | 485.32   | PASS          | AC=5,2;AF=0.074,0.029;AN=68;BaseQ  |
| 47844 | chrY | 28803142 | . | G | A   | 90.71    | PASS          | AC=1;AF=0.014;AN=70;BaseQRankSum=  |
| 47845 | chrY | 28803151 | . | G | A   | 92.71    | PASS          | AC=1;AF=0.014;AN=70;BaseQRankSum=  |
| 47846 | chrY | 28803154 | . | A | C   | 50.48    | PASS          | AC=1;AF=0.014;AN=70;BaseQRankSum=  |
| 47847 | chrY | 28803167 | . | A | G   | 16137.75 | PASS          | AC=65;AF=0.985;AN=66;BaseQ         |
| 47848 | chrY | 28803182 | . | G | T   | 42.59    | PASS          | AC=1;AF=0.014;AN=70;BaseQRankSum=  |
| 47849 | chrY | 28803198 | . | T | A   | 169.21   | PASS          | AC=2;AF=0.029;AN=70;BaseQRankSum=  |
| 47850 | chrY | 28803250 | . | C | T   | 6344.92  | PASS          | AC=29;AF=0.439;AN=66;BaseQRankSum= |
| 47851 | chrY | 28803261 | . | G | A   | 6679.26  | my_snp_filter | AC=29;AF=0.426;AN=68;BaseQ         |
| 47852 | chrY | 28803263 | . | A | G   | 96.43    | PASS          | AC=2;AF=0.029;AN=70;BaseQRankSum=  |
| 47853 | chrY | 28803267 | . | G | A   | 99.43    | PASS          | AC=2;AF=0.029;AN=70;BaseQRankSum=  |
| 47854 | chrY | 28803275 | . | T | A   | 792.41   | PASS          | AC=11;AF=0.157;AN=70;BaseQRankSum= |
| 47855 | chrY | 28803295 | . | T | C   | 62.64    | my_snp_filter | AC=3;AF=0.043;AN=70;BaseQ          |
| 47856 | chrY | 28803326 | . | A | G   | 364.79   | PASS          | AC=7;AF=0.100;AN=70;BaseQRankSum=  |
| 47857 | chrY | 28803334 | . | A | G   | 48.86    | PASS          | AC=1;AF=0.014;AN=70;BaseQRankSum=  |
| 47858 | chrY | 28803335 | . | T | G   | 48.81    | PASS          | AC=1;AF=0.014;AN=70;BaseQRankSum=  |
| 47859 | chrY | 28803345 | . | A | G   | 1504.68  | my_snp_filter | AC=15;AF=0.221;AN=68;BaseQ         |
| 47860 | chrY | 28803347 | . | A | T   | 343.63   | PASS          | AC=6;AF=0.086;AN=70;BaseQRankSum=  |
| 47861 | chrY | 28803361 | . | A | C   | 283.93   | PASS          | AC=4;AF=0.057;AN=70;BaseQRankSum=  |
| 47862 | chrY | 28803366 | . | T | G   | 480.44   | PASS          | AC=5;AF=0.071;AN=70;BaseQRankSum=  |
| 47863 | chrY | 28803377 | . | C | A   | 253.32   | PASS          | AC=4;AF=0.057;AN=70;BaseQRankSum=  |
| 47864 | chrY | 28803430 | . | G | A   | 53.54    | my_snp_filter | AC=3;AF=0.043;AN=70;BaseQ          |
| 47865 | chrY | 28803462 | . | G | T   | 472.71   | PASS          | AC=2;AF=0.030;AN=66;BaseQRankSum=  |
| 47866 | chrY | 28803464 | . | T | C   | 79.68    | my_snp_filter | AC=3;AF=0.044;AN=68;BaseQ          |
| 47867 | chrY | 28803469 | . | G | C   | 99.91    | PASS          | AC=3;AF=0.044;AN=68;BaseQRankSum=  |
| 47868 | chrY | 28803470 | . | A | T   | 100.09   | PASS          | AC=3;AF=0.044;AN=68;BaseQRankSum=  |
| 47869 | chrY | 28803490 | . | G | A   | 170.90   | PASS          | AC=4;AF=0.061;AN=66;BaseQRankSum=  |
| 47870 | chrY | 28803519 | . | A | T   | 255.67   | PASS          | AC=7;AF=0.106;AN=66;BaseQRankSum=  |
| 47871 | chrY | 28803534 | . | T | A   | 143.34   | PASS          | AC=3;AF=0.047;AN=64;BaseQRankSum=  |
| 47872 | chrY | 28803539 | . | A | T   | 146.16   | PASS          | AC=3;AF=0.047;AN=64;BaseQRankSum=  |
| 47873 | chrY | 28803544 | . | A | T   | 301.74   | PASS          | AC=4;AF=0.063;AN=64;BaseQRankSum=  |
| 47874 | chrY | 28803583 | . | G | A   | 46.94    | PASS          | AC=1;AF=0.015;AN=66;BaseQRankSum=  |
| 47875 | chrY | 28803585 | . | C | G   | 653.99   | PASS          | AC=8;AF=0.133;AN=60;BaseQRankSum=  |
| 47876 | chrY | 28803595 | . | G | A   | 1985.68  | PASS          | AC=7;AF=0.109;AN=64;BaseQRankSum=  |
| 47877 | chrY | 28803600 | . | G | T   | 1970.07  | PASS          | AC=7;AF=0.106;AN=66;BaseQRankSum=  |
| 47878 | chrY | 28803606 | . | G | T   | 50.10    | PASS          | AC=1;AF=0.016;AN=64;BaseQRankSum=  |
| 47879 | chrY | 28803608 | . | T | G   | 2128.76  | PASS          | AC=7;AF=0.109;AN=64;BaseQRankSum=  |
| 47880 | chrY | 28803618 | . | A | T   | 57.62    | PASS          | AC=1;AF=0.016;AN=62;BaseQRankSum=  |

|       |      |          |   |   |     |          |               |                                    |
|-------|------|----------|---|---|-----|----------|---------------|------------------------------------|
| 47881 | chrY | 28803623 | . | G | A   | 75.82    | PASS          | AC=1;AF=0.017;AN=60;BaseQRankSum=  |
| 47882 | chrY | 28803624 | . | T | A   | 91.50    | PASS          | AC=1;AF=0.016;AN=62;BaseQRankSum=  |
| 47883 | chrY | 28803626 | . | C | G   | 76.16    | PASS          | AC=1;AF=0.017;AN=58;BaseQRankSum=  |
| 47884 | chrY | 28803629 | . | A | T   | 75.85    | PASS          | AC=1;AF=0.017;AN=60;BaseQRankSum=  |
| 47885 | chrY | 28803663 | . | A | T   | 48.40    | PASS          | AC=1;AF=0.017;AN=60;BaseQRankSum=  |
| 47886 | chrY | 28803674 | . | T | C   | 250.55   | PASS          | AC=5;AF=0.083;AN=60;BaseQRankSum=  |
| 47887 | chrY | 28803696 | . | T | G   | 137.36   | PASS          | AC=3;AF=0.050;AN=60;BaseQRankSum=  |
| 47888 | chrY | 28803699 | . | G | T   | 154.05   | PASS          | AC=3;AF=0.048;AN=62;BaseQRankSum=  |
| 47889 | chrY | 28803745 | . | C | G   | 713.70   | my_snp_filter | AC=6;AF=0.086;AN=70;DP=40          |
| 47890 | chrY | 28803746 | . | G | A   | 68.14    | my_snp_filter | AC=5;AF=0.071;AN=70;BaseQ          |
| 47891 | chrY | 28803845 | . | A | T   | 90.16    | PASS          | AC=2;AF=0.029;AN=70;BaseQRankSum=  |
| 47892 | chrY | 28803846 | . | G | A   | 90.83    | PASS          | AC=2;AF=0.029;AN=70;BaseQRankSum=  |
| 47893 | chrY | 28803858 | . | T | G   | 76.56    | my_snp_filter | AC=2;AF=0.029;AN=70;BaseQ          |
| 47894 | chrY | 28803981 | . | G | C   | 561.14   | PASS          | AC=7;AF=0.103;AN=68;BaseQRankSum=  |
| 47895 | chrY | 28803990 | . | A | C   | 31.39    | PASS          | AC=1;AF=0.015;AN=68;BaseQRankSum=  |
| 47896 | chrY | 28803993 | . | G | T   | 563.11   | PASS          | AC=7;AF=0.103;AN=68;BaseQRankSum=  |
| 47897 | chrY | 28803997 | . | T | C   | 79.64    | my_snp_filter | AC=2;AF=0.029;AN=68;BaseQ          |
| 47898 | chrY | 28803998 | . | G | T   | 2751.51  | PASS          | AC=18;AF=0.290;AN=62;BaseQRankSum= |
| 47899 | chrY | 28803999 | . | G | T   | 2735.24  | PASS          | AC=17;AF=0.274;AN=62;BaseQRankSum= |
| 47900 | chrY | 28804012 | . | T | C   | 34.69    | my_snp_filter | AC=1;AF=0.014;AN=70;BaseQ          |
| 47901 | chrY | 28804016 | . | T | C   | 3971.49  | PASS          | AC=17;AF=0.274;AN=62;BaseQRankSum= |
| 47902 | chrY | 28804018 | . | G | A   | 148.04   | my_snp_filter | AC=4;AF=0.057;AN=70;BaseQ          |
| 47903 | chrY | 28804024 | . | G | C   | 36.01    | my_snp_filter | AC=2;AF=0.030;AN=66;BaseQ          |
| 47904 | chrY | 28804032 | . | C | T   | 4042.50  | PASS          | AC=15;AF=0.259;AN=58;BaseQRankSum= |
| 47905 | chrY | 28804036 | . | G | T   | 71.57    | my_snp_filter | AC=2;AF=0.031;AN=64;BaseQ          |
| 47906 | chrY | 28804039 | . | G | C   | 4150.79  | PASS          | AC=15;AF=0.242;AN=62;BaseQRankSum= |
| 47907 | chrY | 28804041 | . | G | C   | 167.43   | my_snp_filter | AC=5;AF=0.076;AN=66;BaseQ          |
| 47908 | chrY | 28804046 | . | C | T   | 4242.97  | PASS          | AC=14;AF=0.233;AN=60;BaseQRankSum= |
| 47909 | chrY | 28804054 | . | C | G   | 4597.09  | PASS          | AC=17;AF=0.304;AN=56;BaseQRankSum= |
| 47910 | chrY | 28804079 | . | C | G   | 5122.82  | PASS          | AC=20;AF=0.294;AN=68;BaseQRankSum= |
| 47911 | chrY | 28804082 | . | T | C   | 44.24    | my_snp_filter | AC=1;AF=0.014;AN=70;BaseQ          |
| 47912 | chrY | 28804131 | . | A | G   | 9317.22  | PASS          | AC=29;AF=0.439;AN=66;BaseQRankSum= |
| 47913 | chrY | 28804141 | . | A | G   | 7728.97  | PASS          | AC=29;AF=0.414;AN=70;BaseQRankSum= |
| 47914 | chrY | 28804147 | . | T | A   | 13374.63 | PASS          | AC=27;AF=0.386;AN=70;BaseQ         |
| 47915 | chrY | 28804165 | . | C | A   | 7901.66  | PASS          | AC=29;AF=0.414;AN=70;BaseQRankSum= |
| 47916 | chrY | 28804166 | . | G | A   | 198.70   | my_snp_filter | AC=4;AF=0.057;AN=70;BaseQ          |
| 47917 | chrY | 28804169 | . | G | A   | 216.66   | my_snp_filter | AC=5;AF=0.071;AN=70;BaseQ          |
| 47918 | chrY | 28804170 | . | A | G   | 46.85    | PASS          | AC=1;AF=0.014;AN=70;BaseQRankSum=  |
| 47919 | chrY | 28804179 | . | G | C   | 130.81   | PASS          | AC=1;AF=0.014;AN=70;BaseQRankSum=  |
| 47920 | chrY | 28804188 | . | C | T   | 31.55    | my_snp_filter | AC=1;AF=0.014;AN=70;BaseQ          |
| 47921 | chrY | 28804197 | . | T | G   | 595.31   | PASS          | AC=7;AF=0.103;AN=68;BaseQRankSum=  |
| 47922 | chrY | 28804209 | . | A | C   | 304.11   | PASS          | AC=3;AF=0.043;AN=70;BaseQRankSum=  |
| 47923 | chrY | 28804213 | . | C | G   | 335.69   | PASS          | AC=4;AF=0.059;AN=68;BaseQRankSum=  |
| 47924 | chrY | 28804214 | . | A | G   | 317.87   | PASS          | AC=5;AF=0.074;AN=68;BaseQRankSum=  |
| 47925 | chrY | 28804222 | . | C | T   | 1748.21  | PASS          | AC=6;AF=0.086;AN=70;BaseQRankSum=  |
| 47926 | chrY | 28804230 | . | A | T   | 60.83    | PASS          | AC=1;AF=0.014;AN=70;BaseQRankSum=  |
| 47927 | chrY | 28804238 | . | C | A   | 68.92    | PASS          | AC=1;AF=0.014;AN=70;BaseQRankSum=  |
| 47928 | chrY | 28804258 | . | T | C   | 64.76    | PASS          | AC=1;AF=0.014;AN=70;BaseQRankSum=  |
| 47929 | chrY | 28804266 | . | T | C   | 63.69    | PASS          | AC=1;AF=0.014;AN=70;BaseQRankSum=  |
| 47930 | chrY | 28804308 | . | A | G   | 75.89    | my_snp_filter | AC=3;AF=0.043;AN=70;BaseQ          |
| 47931 | chrY | 28804312 | . | G | A   | 82.66    | my_snp_filter | AC=2;AF=0.029;AN=70;BaseQ          |
| 47932 | chrY | 28804337 | . | G | A   | 124.14   | my_snp_filter | AC=3;AF=0.043;AN=70;BaseQ          |
| 47933 | chrY | 28804342 | . | G | T   | 1254.75  | PASS          | AC=6;AF=0.086;AN=70;DP=557;FS=0.0  |
| 47934 | chrY | 28804383 | . | A | G   | 16325.95 | PASS          | AC=66;AF=1.00;AN=66;DP=36          |
| 47935 | chrY | 28804418 | . | G | A   | 324.15   | PASS          | AC=3;AF=0.045;AN=66;BaseQRankSum=  |
| 47936 | chrY | 28804452 | . | C | T   | 67.95    | PASS          | AC=2;AF=0.040;AN=50;BaseQRankSum=  |
| 47937 | chrY | 28804468 | . | C | G   | 693.02   | PASS          | AC=14;AF=1.00;AN=14;DP=29;FS=0.00  |
| 47938 | chrY | 28804469 | . | C | G   | 693.02   | PASS          | AC=14;AF=1.00;AN=14;DP=28;FS=0.00  |
| 47939 | chrY | 28804474 | . | A | G   | 338.19   | PASS          | AC=8;AF=1.00;AN=8;DP=20;FS=0.000   |
| 47940 | chrY | 28804655 | . | C | G   | 132.05   | PASS          | AC=3;AF=0.043;AN=70;BaseQRankSum=  |
| 47941 | chrY | 28804670 | . | C | T   | 156.34   | PASS          | AC=4;AF=0.057;AN=70;BaseQRankSum=  |
| 47942 | chrY | 28804682 | . | T | G   | 157.39   | PASS          | AC=4;AF=0.057;AN=70;BaseQRankSum=  |
| 47943 | chrY | 28804825 | . | A | G   | 162.03   | PASS          | AC=2;AF=0.029;AN=70;BaseQRankSum=  |
| 47944 | chrY | 28804848 | . | G | A   | 154.60   | my_snp_filter | AC=2;AF=0.029;AN=70;BaseQ          |
| 47945 | chrY | 28804880 | . | T | G   | 4237.22  | PASS          | AC=18;AF=0.257;AN=70;BaseQRankSum= |
| 47946 | chrY | 28804902 | . | A | T   | 65.96    | PASS          | AC=1;AF=0.014;AN=70;BaseQRankSum=  |
| 47947 | chrY | 28804909 | . | G | T   | 792.36   | PASS          | AC=6;AF=0.094;AN=64;BaseQRankSum=  |
| 47948 | chrY | 28804914 | . | T | C   | 181.59   | PASS          | AC=1;AF=0.015;AN=68;BaseQRankSum=  |
| 47949 | chrY | 28805012 | . | T | A   | 890.52   | PASS          | AC=2;AF=0.050;AN=40;BaseQRankSum=  |
| 47950 | chrY | 28805044 | . | A | G   | 1036.29  | PASS          | AC=1;AF=0.023;AN=44;BaseQRankSum=  |
| 47951 | chrY | 28805067 | . | T | A   | 873.17   | PASS          | AC=1;AF=0.021;AN=48;BaseQRankSum=  |
| 47952 | chrY | 28805136 | . | T | G   | 191.72   | PASS          | AC=1;AF=0.050;AN=20;BaseQRankSum=  |
| 47953 | chrY | 28805189 | . | G | C   | 53.62    | my_snp_filter | AC=3;AF=0.043;AN=70;BaseQ          |
| 47954 | chrY | 28805197 | . | T | G   | 297.52   | my_snp_filter | AC=6;AF=0.086;AN=70;BaseQ          |
| 47955 | chrY | 28805206 | . | G | T   | 141.02   | my_snp_filter | AC=2;AF=0.029;AN=70;BaseQ          |
| 47956 | chrY | 28805247 | . | T | C,* | 1660.10  | PASS          | AC=5,5;AF=0.071,0.071;AN=70;BaseQ  |

|       |      |          |   |   |     |           |               |                                   |
|-------|------|----------|---|---|-----|-----------|---------------|-----------------------------------|
| 47957 | chrY | 28805248 | . | G | A,* | 1216.14   | PASS          | AC=2,4;AF=0.029,0.057;AN=70;BaseQ |
| 47958 | chrY | 28805257 | . | T | C   | 5125.93   | PASS          | AC=25;AF=0.357;AN=70;BaseQRankSum |
| 47959 | chrY | 28805258 | . | G | T   | 1667.92   | PASS          | AC=5;AF=0.071;AN=70;BaseQRankSum  |
| 47960 | chrY | 28805263 | . | C | G,* | 206.30    | my_snp_filter | AC=1,3;AF=0.014,0.043;AN=         |
| 47961 | chrY | 28805264 | . | A | C,G | 179.08    | PASS          | AC=2,1;AF=0.029,0.014;AN=70;BaseQ |
| 47962 | chrY | 28805270 | . | A | T   | 687.43    | PASS          | AC=27;AF=0.386;AN=70;BaseQRankSum |
| 47963 | chrY | 28805271 | . | A | T   | 390.81    | PASS          | AC=4;AF=0.057;AN=70;BaseQRankSum  |
| 47964 | chrY | 28805275 | . | A | T   | 127.05    | my_snp_filter | AC=3;AF=0.043;AN=70;BaseQ         |
| 47965 | chrY | 28805283 | . | C | T   | 673.59    | PASS          | AC=8;AF=0.114;AN=70;BaseQRankSum  |
| 47966 | chrY | 28805301 | . | T | A   | 8311.29   | PASS          | AC=16;AF=0.250;AN=64;BaseQRankSum |
| 47967 | chrY | 28805304 | . | G | C   | 3534.14   | my_snp_filter | AC=7;AF=0.100;AN=70;BaseQ         |
| 47968 | chrY | 28805327 | . | C | A   | 237.90    | my_snp_filter | AC=6;AF=0.086;AN=70;BaseQ         |
| 47969 | chrY | 28805331 | . | T | G,A | 10105.47  | PASS          | AC=9,14;AF=0.145,0.226;AN         |
| 47970 | chrY | 28805339 | . | A | T   | 74.19     | my_snp_filter | AC=2;AF=0.029;AN=70;BaseQ         |
| 47971 | chrY | 28805345 | . | C | A,* | 12256.57  | PASS          | AC=23,4;AF=0.359,0.063;AN         |
| 47972 | chrY | 28805346 | . | A | T   | 7309.21   | PASS          | AC=13;AF=0.203;AN=64;BaseQRankSum |
| 47973 | chrY | 28805358 | . | G | A   | 2647.35   | my_snp_filter | AC=7;AF=0.100;AN=70;BaseQ         |
| 47974 | chrY | 28805380 | . | T | G   | 6539.59   | PASS          | AC=13;AF=0.186;AN=70;BaseQRankSum |
| 47975 | chrY | 28805388 | . | C | G   | 4494.65   | PASS          | AC=11;AF=0.157;AN=70;BaseQRankSum |
| 47976 | chrY | 28805437 | . | A | G   | 648.69    | PASS          | AC=11;AF=0.196;AN=56;BaseQRankSum |
| 47977 | chrY | 28805448 | . | G | T   | 440.77    | PASS          | AC=7;AF=0.100;AN=70;BaseQRankSum  |
| 47978 | chrY | 28805470 | . | G | A   | 139.08    | my_snp_filter | AC=5;AF=0.089;AN=56;BaseQ         |
| 47979 | chrY | 28805487 | . | G | T   | 115.54    | PASS          | AC=2;AF=0.029;AN=70;BaseQRankSum  |
| 47980 | chrY | 28805488 | . | G | T   | 115.54    | PASS          | AC=2;AF=0.029;AN=70;BaseQRankSum  |
| 47981 | chrY | 28805521 | . | C | T   | 347.37    | PASS          | AC=4;AF=0.067;AN=60;BaseQRankSum  |
| 47982 | chrY | 28805529 | . | G | A   | 540.26    | PASS          | AC=4;AF=0.067;AN=60;BaseQRankSum  |
| 47983 | chrY | 28805542 | . | G | C   | 86.64     | PASS          | AC=1;AF=0.014;AN=70;BaseQRankSum  |
| 47984 | chrY | 28805547 | . | A | G   | 2659.98   | my_snp_filter | AC=12;AF=0.200;AN=60;Base         |
| 47985 | chrY | 28805582 | . | G | T   | 59.46     | my_snp_filter | AC=2;AF=0.029;AN=70;BaseQ         |
| 47986 | chrY | 28805597 | . | G | T   | 82.52     | my_snp_filter | AC=2;AF=0.029;AN=70;BaseQ         |
| 47987 | chrY | 28805599 | . | A | G   | 1280.83   | my_snp_filter | AC=10;AF=0.143;AN=70;Base         |
| 47988 | chrY | 28805661 | . | T | A   | 113.07    | my_snp_filter | AC=3;AF=0.043;AN=70;BaseQ         |
| 47989 | chrY | 28805688 | . | G | C   | 232.05    | my_snp_filter | AC=2;AF=0.029;AN=70;BaseQ         |
| 47990 | chrY | 28805690 | . | G | A   | 276.31    | my_snp_filter | AC=2;AF=0.029;AN=68;BaseQ         |
| 47991 | chrY | 28805733 | . | G | T   | 172.11    | my_snp_filter | AC=2;AF=0.029;AN=70;BaseQ         |
| 47992 | chrY | 28805738 | . | G | C   | 33.52     | my_snp_filter | AC=1;AF=0.014;AN=70;BaseQ         |
| 47993 | chrY | 28805763 | . | G | T   | 10860.47  | my_snp_filter | AC=24;AF=0.343;AN                 |
| 47994 | chrY | 28805768 | . | T | G   | 181.87    | my_snp_filter | AC=3;AF=0.043;AN=70;BaseQ         |
| 47995 | chrY | 28805773 | . | G | C,T | 19786.67  | my_snp_filter | AC=29,4;AF=0.414,                 |
| 47996 | chrY | 28805774 | . | A | C   | 1778.66   | my_snp_filter | AC=12;AF=0.171;AN=70;Base         |
| 47997 | chrY | 28805777 | . | G | T   | 506.79    | my_snp_filter | AC=8;AF=0.114;AN=70;BaseQ         |
| 47998 | chrY | 28805778 | . | G | T   | 528.72    | my_snp_filter | AC=8;AF=0.114;AN=70;BaseQ         |
| 47999 | chrY | 28805782 | . | G | T   | 206.43    | my_snp_filter | AC=1;AF=0.014;AN=70;BaseQ         |
| 48000 | chrY | 28805786 | . | T | C   | 44.02     | my_snp_filter | AC=3;AF=0.043;AN=70;BaseQ         |
| 48001 | chrY | 28805790 | . | A | G   | 15723.84  | my_snp_filter | AC=34;AF=0.486;AN                 |
| 48002 | chrY | 28805796 | . | C | T   | 132963.12 | my_snp_filter | AC=68;AF=0.971;AN                 |
| 48003 | chrY | 28805798 | . | T | G   | 71113.77  | my_snp_filter | AC=35;AF=0.500;AN                 |
| 48004 | chrY | 28805806 | . | T | A   | 102.66    | my_snp_filter | AC=4;AF=0.057;AN=70;BaseQ         |
| 48005 | chrY | 28805807 | . | G | A   | 216.96    | my_snp_filter | AC=5;AF=0.071;AN=70;BaseQ         |
| 48006 | chrY | 28805812 | . | C | T   | 133.71    | my_snp_filter | AC=3;AF=0.043;AN=70;BaseQ         |
| 48007 | chrY | 28805832 | . | C | G   | 1856.08   | my_snp_filter | AC=8;AF=0.118;AN=68;BaseQ         |
| 48008 | chrY | 28805836 | . | T | C   | 1888.12   | my_snp_filter | AC=8;AF=0.114;AN=70;BaseQ         |
| 48009 | chrY | 28805838 | . | G | A   | 58.10     | my_snp_filter | AC=2;AF=0.029;AN=70;BaseQ         |
| 48010 | chrY | 28805860 | . | A | G   | 3881.36   | my_snp_filter | AC=16;AF=0.258;AN=62;Base         |
| 48011 | chrY | 28805864 | . | A | G   | 141.59    | my_snp_filter | AC=5;AF=0.071;AN=70;BaseQ         |
| 48012 | chrY | 28805866 | . | G | T   | 51.78     | my_snp_filter | AC=2;AF=0.029;AN=68;BaseQ         |
| 48013 | chrY | 28805869 | . | A | G   | 895.45    | my_snp_filter | AC=9;AF=0.129;AN=70;BaseQ         |
| 48014 | chrY | 28805871 | . | C | G   | 4868.13   | my_snp_filter | AC=12;AF=0.176;AN=68;Base         |
| 48015 | chrY | 28805890 | . | T | C   | 2337.23   | my_snp_filter | AC=12;AF=0.176;AN=68;Base         |
| 48016 | chrY | 28805902 | . | A | T   | 2431      | my_snp_filter | AC=11;AF=0.162;AN=68;Base         |
| 48017 | chrY | 28805916 | . | C | G   | 89.12     | my_snp_filter | AC=2;AF=0.029;AN=68;BaseQ         |
| 48018 | chrY | 28805917 | . | G | A   | 254.23    | my_snp_filter | AC=7;AF=0.103;AN=68;BaseQ         |
| 48019 | chrY | 28805921 | . | G | A   | 530.35    | my_snp_filter | AC=3;AF=0.044;AN=68;BaseQ         |
| 48020 | chrY | 28805938 | . | A | G   | 2347.09   | my_snp_filter | AC=15;AF=0.227;AN=66;Base         |
| 48021 | chrY | 28805943 | . | A | T   | 38.13     | my_snp_filter | AC=2;AF=0.029;AN=68;BaseQ         |
| 48022 | chrY | 28805949 | . | A | G   | 555.08    | my_snp_filter | AC=6;AF=0.088;AN=68;BaseQ         |
| 48023 | chrY | 28805983 | . | C | A   | 482.94    | my_snp_filter | AC=7;AF=0.109;AN=64;BaseQ         |
| 48024 | chrY | 28805989 | . | A | T   | 399.46    | my_snp_filter | AC=5;AF=0.074;AN=68;BaseQ         |
| 48025 | chrY | 28805992 | . | T | A   | 611.52    | my_snp_filter | AC=9;AF=0.132;AN=68;BaseQ         |
| 48026 | chrY | 28806051 | . | T | G   | 56.52     | my_snp_filter | AC=2;AF=0.031;AN=64;BaseQ         |
| 48027 | chrY | 28806094 | . | T | A   | 800.28    | my_snp_filter | AC=9;AF=0.145;AN=62;BaseQ         |
| 48028 | chrY | 28806129 | . | C | T   | 791.98    | PASS          | AC=8;AF=0.121;AN=66;BaseQRankSum  |
| 48029 | chrY | 28806134 | . | A | T   | 1403.75   | PASS          | AC=9;AF=0.136;AN=66;BaseQRankSum  |
| 48030 | chrY | 28806140 | . | G | A   | 962.90    | PASS          | AC=8;AF=0.121;AN=66;BaseQRankSum  |
| 48031 | chrY | 28806190 | . | C | G   | 50.04     | PASS          | AC=1;AF=0.014;AN=70;BaseQRankSum  |
| 48032 | chrY | 28806296 | . | A | G   | 97.94     | my_snp_filter | AC=1;AF=0.015;AN=66;BaseQ         |



|       |      |          |   |   |     |          |               |                                    |
|-------|------|----------|---|---|-----|----------|---------------|------------------------------------|
| 48033 | chrY | 28806297 | . | T | A   | 116.73   | my_snp_filter | AC=3;AF=0.045;AN=66;BaseQ          |
| 48034 | chrY | 28806307 | . | C | T   | 111.91   | my_snp_filter | AC=2;AF=0.029;AN=68;BaseQ          |
| 48035 | chrY | 28806308 | . | G | A   | 883.03   | my_snp_filter | AC=16;AF=0.242;AN=66;BaseQ         |
| 48036 | chrY | 28806309 | . | G | C   | 56.03    | my_snp_filter | AC=4;AF=0.059;AN=68;BaseQ          |
| 48037 | chrY | 28806347 | . | C | G   | 1655.43  | my_snp_filter | AC=9;AF=0.136;AN=66;BaseQ          |
| 48038 | chrY | 28806348 | . | A | T   | 1604     | my_snp_filter | AC=14;AF=0.250;AN=56;BaseQ         |
| 48039 | chrY | 28806350 | . | A | C   | 40.01    | my_snp_filter | AC=1;AF=0.015;AN=66;BaseQ          |
| 48040 | chrY | 28806362 | . | C | A   | 46.58    | my_snp_filter | AC=1;AF=0.015;AN=68;BaseQ          |
| 48041 | chrY | 28806366 | . | T | G   | 9261.17  | my_snp_filter | AC=44;AF=0.917;AN=48;DP=2          |
| 48042 | chrY | 28806368 | . | G | A   | 1803.75  | my_snp_filter | AC=9;AF=0.132;AN=68;BaseQ          |
| 48043 | chrY | 28806379 | . | G | T   | 2066.36  | my_snp_filter | AC=27;AF=0.409;AN=66;BaseQ         |
| 48044 | chrY | 28806418 | . | G | T   | 331.49   | my_snp_filter | AC=6;AF=0.094;AN=64;BaseQ          |
| 48045 | chrY | 28806419 | . | G | T   | 330.37   | my_snp_filter | AC=6;AF=0.094;AN=64;BaseQ          |
| 48046 | chrY | 28806428 | . | A | T,G | 1618.28  | my_snp_filter | AC=9,9;AF=0.167,0.167;AN=          |
| 48047 | chrY | 28806443 | . | G | A   | 71.33    | my_snp_filter | AC=3;AF=0.048;AN=62;BaseQ          |
| 48048 | chrY | 28806535 | . | G | A   | 994.79   | my_snp_filter | AC=9;AF=0.167;AN=54;BaseQ          |
| 48049 | chrY | 28806567 | . | T | C   | 1010.36  | my_snp_filter | AC=8;AF=0.125;AN=64;BaseQ          |
| 48050 | chrY | 28806589 | . | T | G   | 908.05   | my_snp_filter | AC=7;AF=0.109;AN=64;BaseQ          |
| 48051 | chrY | 28806592 | . | G | T   | 904.15   | my_snp_filter | AC=7;AF=0.109;AN=64;BaseQ          |
| 48052 | chrY | 28806633 | . | G | A   | 97.75    | my_snp_filter | AC=3;AF=0.043;AN=70;BaseQ          |
| 48053 | chrY | 28806639 | . | G | A   | 92.55    | my_snp_filter | AC=3;AF=0.043;AN=70;BaseQ          |
| 48054 | chrY | 28806818 | . | A | T   | 799.57   | PASS          | AC=13;AF=0.186;AN=70;BaseQRankSum  |
| 48055 | chrY | 28806834 | . | T | A   | 88.69    | PASS          | AC=1;AF=0.014;AN=70;BaseQRankSum   |
| 48056 | chrY | 28806847 | . | T | G   | 14861    | PASS          | AC=32;AF=0.471;AN=68;BaseQRankSum  |
| 48057 | chrY | 28806849 | . | G | T   | 11194.11 | PASS          | AC=31;AF=0.443;AN=70;BaseQ         |
| 48058 | chrY | 28806856 | . | A | G   | 2303.83  | PASS          | AC=14;AF=0.200;AN=70;BaseQRankSum  |
| 48059 | chrY | 28806891 | . | G | T   | 1301.33  | PASS          | AC=10;AF=0.179;AN=56;BaseQRankSum  |
| 48060 | chrY | 28806892 | . | G | T   | 1298.33  | PASS          | AC=10;AF=0.179;AN=56;BaseQRankSum  |
| 48061 | chrY | 28806900 | . | T | C   | 597.35   | PASS          | AC=5;AF=0.074;AN=68;BaseQRankSum   |
| 48062 | chrY | 28806909 | . | T | C   | 746.13   | PASS          | AC=8;AF=0.143;AN=56;BaseQRankSum   |
| 48063 | chrY | 28806925 | . | C | T   | 294.71   | PASS          | AC=3;AF=0.050;AN=60;BaseQRankSum   |
| 48064 | chrY | 28806929 | . | G | T   | 204.91   | PASS          | AC=3;AF=0.045;AN=66;BaseQRankSum   |
| 48065 | chrY | 28806932 | . | G | C   | 168.44   | PASS          | AC=3;AF=0.047;AN=64;BaseQRankSum   |
| 48066 | chrY | 28806939 | . | C | T   | 121.65   | PASS          | AC=3;AF=0.047;AN=64;BaseQRankSum   |
| 48067 | chrY | 28806947 | . | C | G   | 44.33    | PASS          | AC=1;AF=0.015;AN=66;BaseQRankSum   |
| 48068 | chrY | 28807052 | . | C | G   | 1607.13  | PASS          | AC=6;AF=0.086;AN=70;DP=989;FS=0.0  |
| 48069 | chrY | 28807082 | . | A | G   | 37.54    | my_snp_filter | AC=2;AF=0.031;AN=64;BaseQ          |
| 48070 | chrY | 28807090 | . | T | G   | 265.12   | PASS          | AC=4;AF=0.065;AN=62;BaseQRankSum   |
| 48071 | chrY | 28807106 | . | C | G   | 264.35   | PASS          | AC=4;AF=0.071;AN=56;BaseQRankSum   |
| 48072 | chrY | 28807128 | . | A | G   | 822.01   | PASS          | AC=3;AF=0.043;AN=70;BaseQRankSum   |
| 48073 | chrY | 28807141 | . | G | C   | 5484.63  | PASS          | AC=27;AF=0.386;AN=70;BaseQRankSum  |
| 48074 | chrY | 28807151 | . | T | C   | 1672.30  | PASS          | AC=12;AF=0.171;AN=70;BaseQRankSum  |
| 48075 | chrY | 28807159 | . | T | C,A | 1416.12  | PASS          | AC=10,1;AF=0.143,0.014;AN=70;BaseQ |
| 48076 | chrY | 28807171 | . | A | G   | 1061.45  | PASS          | AC=12;AF=0.171;AN=70;BaseQRankSum  |
| 48077 | chrY | 28807173 | . | A | C   | 131.94   | my_snp_filter | AC=2;AF=0.029;AN=70;BaseQ          |
| 48078 | chrY | 28807176 | . | G | T   | 701.69   | PASS          | AC=8;AF=0.114;AN=70;BaseQRankSum   |
| 48079 | chrY | 28807192 | . | A | T   | 257.63   | my_snp_filter | AC=6;AF=0.086;AN=70;BaseQ          |
| 48080 | chrY | 28807205 | . | G | A   | 6994.60  | PASS          | AC=30;AF=0.429;AN=70;BaseQRankSum  |
| 48081 | chrY | 28807206 | . | G | C   | 57.44    | my_snp_filter | AC=1;AF=0.014;AN=70;BaseQ          |
| 48082 | chrY | 28807218 | . | A | T   | 1324.12  | PASS          | AC=10;AF=0.143;AN=70;BaseQRankSum  |
| 48083 | chrY | 28807230 | . | G | A   | 5562.52  | PASS          | AC=27;AF=0.386;AN=70;BaseQRankSum  |
| 48084 | chrY | 28807233 | . | C | A   | 2445.52  | PASS          | AC=10;AF=0.143;AN=70;BaseQRankSum  |
| 48085 | chrY | 28807236 | . | A | G   | 7930.22  | PASS          | AC=25;AF=0.357;AN=70;BaseQRankSum  |
| 48086 | chrY | 28807250 | . | T | A   | 3273.86  | PASS          | AC=8;AF=0.114;AN=70;BaseQRankSum   |
| 48087 | chrY | 28807251 | . | C | T   | 4698.67  | PASS          | AC=23;AF=0.329;AN=70;BaseQRankSum  |
| 48088 | chrY | 28807257 | . | A | G,* | 2930.26  | PASS          | AC=3,6;AF=0.048,0.097;AN=62;BaseQ  |
| 48089 | chrY | 28807259 | . | A | T,* | 2543.10  | PASS          | AC=4,5;AF=0.065,0.081;AN=62;BaseQ  |
| 48090 | chrY | 28807261 | . | G | A,* | 2486.02  | PASS          | AC=3,5;AF=0.043,0.071;AN=70;BaseQ  |
| 48091 | chrY | 28807269 | . | T | C,* | 2135.61  | PASS          | AC=4,5;AF=0.057,0.071;AN=70;BaseQ  |
| 48092 | chrY | 28807274 | . | T | C,* | 2258.09  | PASS          | AC=5,7;AF=0.071,0.100;AN=70;BaseQ  |
| 48093 | chrY | 28807275 | . | G | T,* | 2133.21  | PASS          | AC=3,5;AF=0.043,0.071;AN=70;BaseQ  |
| 48094 | chrY | 28807280 | . | G | A,* | 1274.95  | PASS          | AC=1,3;AF=0.014,0.043;AN=70;BaseQ  |
| 48095 | chrY | 28807284 | . | T | C,* | 1254.57  | my_snp_filter | AC=5,3;AF=0.071,0.043;AN=          |
| 48096 | chrY | 28807293 | . | G | C,* | 2377.12  | PASS          | AC=15,2;AF=0.214,0.029;AN=70;BaseQ |
| 48097 | chrY | 28807296 | . | C | G,* | 1562.51  | PASS          | AC=4,1;AF=0.057,0.014;AN=70;BaseQ  |
| 48098 | chrY | 28807301 | . | G | A,* | 1472.01  | my_snp_filter | AC=4,1;AF=0.057,0.014;AN=          |
| 48099 | chrY | 28807304 | . | T | A,* | 2260.57  | my_snp_filter | AC=15,2;AF=0.214,0.029;AN=         |
| 48100 | chrY | 28807309 | . | T | C   | 506.65   | my_snp_filter | AC=5;AF=0.071;AN=70;BaseQ          |
| 48101 | chrY | 28807310 | . | G | A   | 824.58   | PASS          | AC=4;AF=0.057;AN=70;BaseQRankSum   |
| 48102 | chrY | 28807330 | . | G | A   | 261.14   | my_snp_filter | AC=7;AF=0.100;AN=70;BaseQ          |
| 48103 | chrY | 28807336 | . | G | T,C | 13645.52 | PASS          | AC=27,1;AF=0.409,0.015;AN=         |
| 48104 | chrY | 28807343 | . | T | A   | 463.80   | PASS          | AC=3;AF=0.043;AN=70;BaseQRankSum   |
| 48105 | chrY | 28807344 | . | C | T   | 538.66   | PASS          | AC=3;AF=0.043;AN=70;BaseQRankSum   |
| 48106 | chrY | 28807345 | . | G | A   | 57.90    | PASS          | AC=1;AF=0.014;AN=70;BaseQRankSum   |
| 48107 | chrY | 28807349 | . | A | T   | 52671.58 | PASS          | AC=30;AF=0.500;AN=60;BaseQ         |
| 48108 | chrY | 28807351 | . | G | T   | 2087.75  | my_snp_filter | AC=16;AF=0.229;AN=70;BaseQ         |

|       |      |          |   |   |     |          |               |                                    |
|-------|------|----------|---|---|-----|----------|---------------|------------------------------------|
| 48109 | chrY | 28807356 | . | C | G   | 173.95   | PASS          | AC=3;AF=0.043;AN=70;BaseQRankSum=  |
| 48110 | chrY | 28807357 | . | C | T   | 14220.58 | PASS          | AC=21;AF=0.300;AN=70;BaseQ         |
| 48111 | chrY | 28807361 | . | G | T   | 48.44    | PASS          | AC=1;AF=0.014;AN=70;BaseQRankSum=  |
| 48112 | chrY | 28807368 | . | C | G   | 378.37   | PASS          | AC=3;AF=0.043;AN=70;BaseQRankSum=  |
| 48113 | chrY | 28807375 | . | G | A   | 99.18    | my_snp_filter | AC=5;AF=0.071;AN=70;BaseQ          |
| 48114 | chrY | 28807378 | . | G | T   | 494.93   | PASS          | AC=4;AF=0.057;AN=70;BaseQRankSum=  |
| 48115 | chrY | 28807382 | . | A | G   | 749.87   | PASS          | AC=4;AF=0.057;AN=70;BaseQRankSum=  |
| 48116 | chrY | 28807391 | . | C | G   | 743.87   | PASS          | AC=4;AF=0.057;AN=70;BaseQRankSum=  |
| 48117 | chrY | 28807400 | . | G | A   | 556.37   | PASS          | AC=4;AF=0.057;AN=70;BaseQRankSum=  |
| 48118 | chrY | 28807405 | . | G | A   | 763.75   | PASS          | AC=4;AF=0.057;AN=70;BaseQRankSum=  |
| 48119 | chrY | 28807408 | . | G | A   | 318.68   | my_snp_filter | AC=4;AF=0.057;AN=70;BaseQ          |
| 48120 | chrY | 28807409 | . | T | C   | 323.55   | my_snp_filter | AC=4;AF=0.057;AN=70;BaseQ          |
| 48121 | chrY | 28807416 | . | G | C   | 1147.31  | PASS          | AC=5;AF=0.076;AN=66;BaseQRankSum=  |
| 48122 | chrY | 28807417 | . | G | A   | 905.76   | PASS          | AC=3;AF=0.048;AN=62;BaseQRankSum=  |
| 48123 | chrY | 28807418 | . | C | G   | 9340.85  | PASS          | AC=17;AF=0.425;AN=40;BaseQRankSum= |
| 48124 | chrY | 28807420 | . | G | T   | 352.46   | PASS          | AC=2;AF=0.029;AN=70;BaseQRankSum=  |
| 48125 | chrY | 28807421 | . | G | T   | 692.39   | PASS          | AC=3;AF=0.043;AN=70;BaseQRankSum=  |
| 48126 | chrY | 28807423 | . | A | G   | 40.43    | my_snp_filter | AC=1;AF=0.014;AN=70;BaseQ          |
| 48127 | chrY | 28807428 | . | A | T   | 291.87   | PASS          | AC=2;AF=0.029;AN=70;BaseQRankSum=  |
| 48128 | chrY | 28807429 | . | T | A   | 488.18   | PASS          | AC=5;AF=0.071;AN=70;BaseQRankSum=  |
| 48129 | chrY | 28807436 | . | G | A   | 168.85   | my_snp_filter | AC=5;AF=0.078;AN=64;BaseQ          |
| 48130 | chrY | 28807437 | . | A | T,C | 2665.60  | my_snp_filter | AC=4,6;AF=0.105,0.158;AN=          |
| 48131 | chrY | 28807446 | . | G | A   | 588.02   | PASS          | AC=4;AF=0.057;AN=70;BaseQRankSum=  |
| 48132 | chrY | 28807460 | . | G | C,* | 527.28   | PASS          | AC=7,1;AF=0.106,0.015;AN=66;BaseQ  |
| 48133 | chrY | 28807465 | . | G | C   | 269.42   | PASS          | AC=3;AF=0.043;AN=70;BaseQRankSum=  |
| 48134 | chrY | 28807475 | . | A | C,* | 814.31   | PASS          | AC=3,3;AF=0.043,0.043;AN=70;BaseQ  |
| 48135 | chrY | 28807485 | . | T | A   | 567.58   | PASS          | AC=3;AF=0.043;AN=70;BaseQRankSum=  |
| 48136 | chrY | 28807494 | . | C | T   | 666.80   | PASS          | AC=3;AF=0.043;AN=70;BaseQRankSum=  |
| 48137 | chrY | 28807498 | . | G | T   | 736.59   | PASS          | AC=3;AF=0.043;AN=70;BaseQRankSum=  |
| 48138 | chrY | 28807514 | . | C | G   | 667.38   | PASS          | AC=3;AF=0.043;AN=70;BaseQRankSum=  |
| 48139 | chrY | 28807543 | . | C | G   | 506.82   | my_snp_filter | AC=12;AF=0.171;AN=70;BaseQ         |
| 48140 | chrY | 28807549 | . | A | G   | 1159.37  | PASS          | AC=14;AF=0.200;AN=70;BaseQRankSum= |
| 48141 | chrY | 28807553 | . | T | C   | 78.96    | PASS          | AC=1;AF=0.014;AN=70;BaseQRankSum=  |
| 48142 | chrY | 28807558 | . | C | T   | 76.89    | my_snp_filter | AC=4;AF=0.057;AN=70;BaseQ          |
| 48143 | chrY | 28807625 | . | A | G   | 1824.30  | PASS          | AC=6;AF=0.086;AN=70;BaseQRankSum=  |
| 48144 | chrY | 28807630 | . | T | C   | 101.75   | my_snp_filter | AC=7;AF=0.100;AN=70;BaseQ          |
| 48145 | chrY | 28807841 | . | A | G   | 410.67   | my_snp_filter | AC=15;AF=0.221;AN=68;BaseQ         |
| 48146 | chrY | 28807843 | . | T | C   | 20439.89 | my_snp_filter | AC=34;AF=0.500;AN=                 |
| 48147 | chrY | 28807845 | . | C | T   | 136.93   | my_snp_filter | AC=7;AF=0.103;AN=68;BaseQ          |
| 48148 | chrY | 28807852 | . | T | C   | 3835.20  | PASS          | AC=26;AF=0.371;AN=70;BaseQRankSum= |
| 48149 | chrY | 28807863 | . | C | G   | 101.06   | my_snp_filter | AC=4;AF=0.057;AN=70;BaseQ          |
| 48150 | chrY | 28807874 | . | A | G   | 30.67    | PASS          | AC=1;AF=0.014;AN=70;BaseQRankSum=  |
| 48151 | chrY | 28807890 | . | T | C   | 37907.84 | PASS          | AC=34;AF=0.486;AN=70;BaseQ         |
| 48152 | chrY | 28807900 | . | T | A   | 50366.72 | PASS          | AC=35;AF=0.500;AN=70;BaseQ         |
| 48153 | chrY | 28807910 | . | T | C   | 666.14   | my_snp_filter | AC=8;AF=0.114;AN=70;BaseQ          |
| 48154 | chrY | 28807932 | . | A | G   | 46920.53 | PASS          | AC=34;AF=0.486;AN=70;BaseQ         |
| 48155 | chrY | 28807955 | . | T | A   | 37410.53 | PASS          | AC=34;AF=0.486;AN=70;BaseQ         |
| 48156 | chrY | 28807964 | . | G | T   | 5849.09  | PASS          | AC=29;AF=0.414;AN=70;BaseQRankSum= |
| 48157 | chrY | 28807974 | . | G | A   | 56.57    | my_snp_filter | AC=4;AF=0.057;AN=70;BaseQ          |
| 48158 | chrY | 28807975 | . | T | G   | 7005.89  | PASS          | AC=23;AF=0.329;AN=70;BaseQRankSum= |
| 48159 | chrY | 28807984 | . | A | C   | 12096.54 | PASS          | AC=27;AF=0.397;AN=68;BaseQ         |
| 48160 | chrY | 28807985 | . | C | T   | 17258.25 | PASS          | AC=28;AF=0.412;AN=68;BaseQ         |
| 48161 | chrY | 28808002 | . | T | A   | 19691.05 | PASS          | AC=31;AF=0.470;AN=66;BaseQ         |
| 48162 | chrY | 28808022 | . | T | A,* | 5485     | PASS          | AC=25,2;AF=0.379,0.030;AN=66;BaseQ |
| 48163 | chrY | 28808049 | . | C | T   | 289.09   | my_snp_filter | AC=8;AF=0.114;AN=70;BaseQ          |
| 48164 | chrY | 28808063 | . | A | G   | 833.24   | PASS          | AC=7;AF=0.100;AN=70;BaseQRankSum=  |
| 48165 | chrY | 28808070 | . | G | A   | 1223.05  | my_snp_filter | AC=11;AF=0.157;AN=70;BaseQ         |
| 48166 | chrY | 28808073 | . | A | G   | 843.50   | PASS          | AC=8;AF=0.114;AN=70;BaseQRankSum=  |
| 48167 | chrY | 28808140 | . | T | A   | 230.40   | PASS          | AC=4;AF=0.057;AN=70;BaseQRankSum=  |
| 48168 | chrY | 28808150 | . | C | G   | 344.55   | PASS          | AC=1;AF=0.014;AN=70;BaseQRankSum=  |
| 48169 | chrY | 28808154 | . | C | T   | 135.75   | my_snp_filter | AC=3;AF=0.043;AN=70;BaseQ          |
| 48170 | chrY | 28808168 | . | G | A   | 35.69    | my_snp_filter | AC=1;AF=0.014;AN=70;BaseQ          |
| 48171 | chrY | 28808174 | . | T | G   | 89.96    | PASS          | AC=2;AF=0.029;AN=70;BaseQRankSum=  |
| 48172 | chrY | 28808204 | . | T | C   | 708.78   | PASS          | AC=8;AF=0.114;AN=70;BaseQRankSum=  |
| 48173 | chrY | 28808210 | . | A | G   | 690.46   | PASS          | AC=8;AF=0.114;AN=70;BaseQRankSum=  |
| 48174 | chrY | 28808237 | . | G | A   | 2111.26  | PASS          | AC=25;AF=0.357;AN=70;BaseQRankSum= |
| 48175 | chrY | 28808252 | . | C | T   | 2366.19  | PASS          | AC=25;AF=0.357;AN=70;BaseQRankSum= |
| 48176 | chrY | 28808315 | . | G | A   | 75.44    | my_snp_filter | AC=2;AF=0.029;AN=70;BaseQ          |
| 48177 | chrY | 28808333 | . | C | T   | 84.03    | my_snp_filter | AC=2;AF=0.029;AN=70;BaseQ          |
| 48178 | chrY | 28808344 | . | C | G   | 87.48    | PASS          | AC=2;AF=0.029;AN=70;BaseQRankSum=  |
| 48179 | chrY | 28808346 | . | A | C   | 89.48    | PASS          | AC=2;AF=0.029;AN=70;BaseQRankSum=  |
| 48180 | chrY | 28808365 | . | A | G   | 128.66   | PASS          | AC=2;AF=0.029;AN=70;BaseQRankSum=  |
| 48181 | chrY | 28808367 | . | T | G   | 131.56   | PASS          | AC=2;AF=0.029;AN=70;BaseQRankSum=  |
| 48182 | chrY | 28808378 | . | T | A   | 152.09   | PASS          | AC=3;AF=0.043;AN=70;BaseQRankSum=  |
| 48183 | chrY | 28808380 | . | C | G   | 161.68   | PASS          | AC=3;AF=0.043;AN=70;BaseQRankSum=  |
| 48184 | chrY | 28808381 | . | T | A   | 158.54   | PASS          | AC=3;AF=0.043;AN=70;BaseQRankSum=  |

|       |      |          |   |   |     |          |               |                                    |
|-------|------|----------|---|---|-----|----------|---------------|------------------------------------|
| 48185 | chrY | 28808387 | . | T | A   | 240.75   | PASS          | AC=3;AF=0.043;AN=70;BaseQRankSum=  |
| 48186 | chrY | 28808392 | . | A | G   | 281.68   | PASS          | AC=3;AF=0.043;AN=70;BaseQRankSum=  |
| 48187 | chrY | 28808396 | . | A | G   | 281.66   | PASS          | AC=3;AF=0.043;AN=70;BaseQRankSum=  |
| 48188 | chrY | 28808679 | . | C | G   | 190.39   | my_snp_filter | AC=1;AF=0.033;AN=30;BaseQ          |
| 48189 | chrY | 28808683 | . | T | C   | 190.48   | my_snp_filter | AC=1;AF=0.029;AN=34;BaseQ          |
| 48190 | chrY | 28808685 | . | A | G   | 193.36   | my_snp_filter | AC=1;AF=0.029;AN=34;BaseQ          |
| 48191 | chrY | 28808707 | . | A | G   | 409.89   | my_snp_filter | AC=6;AF=0.150;AN=40;BaseQ          |
| 48192 | chrY | 28808737 | . | T | C   | 1340.10  | my_snp_filter | AC=10;AF=0.192;AN=52;Base          |
| 48193 | chrY | 28808749 | . | A | T   | 1289.19  | my_snp_filter | AC=10;AF=0.208;AN=48;Base          |
| 48194 | chrY | 28808785 | . | A | G   | 1032.72  | my_snp_filter | AC=15;AF=0.250;AN=60;Base          |
| 48195 | chrY | 28808818 | . | A | G   | 430.07   | PASS          | AC=4;AF=0.065;AN=62;BaseQRankSum=  |
| 48196 | chrY | 28808830 | . | C | A   | 526.29   | PASS          | AC=5;AF=0.081;AN=62;BaseQRankSum=  |
| 48197 | chrY | 28808836 | . | A | T   | 526.74   | PASS          | AC=5;AF=0.081;AN=62;BaseQRankSum=  |
| 48198 | chrY | 28808898 | . | T | G   | 206.91   | PASS          | AC=6;AF=0.100;AN=60;BaseQRankSum=  |
| 48199 | chrY | 28808976 | . | C | T   | 3559.63  | PASS          | AC=19;AF=0.328;AN=58;BaseQRankSum= |
| 48200 | chrY | 28808987 | . | G | A   | 3456.31  | PASS          | AC=18;AF=0.300;AN=60;BaseQRankSum= |
| 48201 | chrY | 28809001 | . | T | A   | 494.31   | PASS          | AC=9;AF=0.136;AN=66;BaseQRankSum=  |
| 48202 | chrY | 28809033 | . | A | G   | 927.39   | PASS          | AC=11;AF=0.167;AN=66;BaseQRankSum= |
| 48203 | chrY | 28809058 | . | A | T   | 49.38    | PASS          | AC=1;AF=0.014;AN=70;BaseQRankSum=  |
| 48204 | chrY | 28809076 | . | G | C   | 436.14   | PASS          | AC=8;AF=0.114;AN=70;BaseQRankSum=  |
| 48205 | chrY | 28809092 | . | T | C   | 218.58   | my_snp_filter | AC=4;AF=0.059;AN=68;BaseQ          |
| 48206 | chrY | 28809142 | . | C | T   | 299.10   | PASS          | AC=2;AF=0.029;AN=70;DP=660;FS=0.0  |
| 48207 | chrY | 28809196 | . | A | T   | 108.97   | PASS          | AC=1;AF=0.014;AN=70;BaseQRankSum=  |
| 48208 | chrY | 28809216 | . | A | G   | 148.59   | PASS          | AC=1;AF=0.014;AN=70;BaseQRankSum=  |
| 48209 | chrY | 28809237 | . | G | T   | 241.03   | PASS          | AC=1;AF=0.014;AN=70;BaseQRankSum=  |
| 48210 | chrY | 28809241 | . | G | A   | 220      | PASS          | AC=1;AF=0.014;AN=70;BaseQRankSum=  |
| 48211 | chrY | 28809247 | . | G | T   | 171.81   | PASS          | AC=1;AF=0.014;AN=70;BaseQRankSum=  |
| 48212 | chrY | 28809404 | . | A | T   | 44.87    | my_snp_filter | AC=2;AF=0.031;AN=64;BaseQ          |
| 48213 | chrY | 28809415 | . | T | C   | 116.52   | PASS          | AC=2;AF=0.031;AN=64;BaseQRankSum=  |
| 48214 | chrY | 28809437 | . | T | G   | 201.29   | PASS          | AC=3;AF=0.045;AN=66;BaseQRankSum=  |
| 48215 | chrY | 28809440 | . | G | T   | 193.72   | PASS          | AC=4;AF=0.059;AN=68;BaseQRankSum=  |
| 48216 | chrY | 28809587 | . | G | A   | 47.24    | PASS          | AC=1;AF=0.014;AN=70;BaseQRankSum=  |
| 48217 | chrY | 28809590 | . | A | C   | 45.88    | PASS          | AC=1;AF=0.014;AN=70;BaseQRankSum=  |
| 48218 | chrY | 28809622 | . | A | T   | 219.84   | PASS          | AC=3;AF=0.043;AN=70;BaseQRankSum=  |
| 48219 | chrY | 28809624 | . | C | A   | 261.99   | PASS          | AC=3;AF=0.043;AN=70;BaseQRankSum=  |
| 48220 | chrY | 28809633 | . | C | T   | 1136.56  | PASS          | AC=5;AF=0.071;AN=70;BaseQRankSum=  |
| 48221 | chrY | 28809634 | . | G | C   | 1136.13  | PASS          | AC=5;AF=0.071;AN=70;BaseQRankSum=  |
| 48222 | chrY | 28809636 | . | C | A   | 568.48   | PASS          | AC=4;AF=0.057;AN=70;BaseQRankSum=  |
| 48223 | chrY | 28809643 | . | G | A   | 430.29   | PASS          | AC=4;AF=0.057;AN=70;BaseQRankSum=  |
| 48224 | chrY | 28809645 | . | C | T   | 622.77   | PASS          | AC=4;AF=0.057;AN=70;BaseQRankSum=  |
| 48225 | chrY | 28809669 | . | A | G   | 724.32   | PASS          | AC=3;AF=0.043;AN=70;BaseQRankSum=  |
| 48226 | chrY | 28809680 | . | A | C,G | 592.85   | PASS          | AC=3,1;AF=0.043,0.014;AN=70;BaseQ  |
| 48227 | chrY | 28809705 | . | G | T   | 158.07   | PASS          | AC=2;AF=0.029;AN=70;BaseQRankSum=  |
| 48228 | chrY | 28809708 | . | T | A   | 64.01    | PASS          | AC=1;AF=0.014;AN=70;BaseQRankSum=  |
| 48229 | chrY | 28809714 | . | C | A   | 1059.44  | PASS          | AC=6;AF=0.094;AN=64;BaseQRankSum=  |
| 48230 | chrY | 28809715 | . | T | C,G | 5427.63  | my_snp_filter | AC=16,2;AF=0.258,0.032;AN          |
| 48231 | chrY | 28809722 | . | G | C   | 350.71   | my_snp_filter | AC=6;AF=0.086;AN=70;BaseQ          |
| 48232 | chrY | 28809733 | . | T | A   | 1410.07  | PASS          | AC=7;AF=0.103;AN=68;BaseQRankSum=  |
| 48233 | chrY | 28809734 | . | G | T   | 303.76   | my_snp_filter | AC=6;AF=0.088;AN=68;BaseQ          |
| 48234 | chrY | 28809739 | . | G | T   | 3783.76  | PASS          | AC=16;AF=0.250;AN=64;BaseQRankSum= |
| 48235 | chrY | 28809740 | . | G | T   | 3746.55  | PASS          | AC=16;AF=0.250;AN=64;BaseQRankSum= |
| 48236 | chrY | 28809747 | . | A | T   | 58.65    | my_snp_filter | AC=1;AF=0.014;AN=70;BaseQ          |
| 48237 | chrY | 28809753 | . | T | C   | 382.01   | PASS          | AC=7;AF=0.100;AN=70;BaseQRankSum=  |
| 48238 | chrY | 28809754 | . | A | G   | 1208.56  | PASS          | AC=7;AF=0.100;AN=70;BaseQRankSum=  |
| 48239 | chrY | 28809757 | . | T | C   | 6622.58  | PASS          | AC=19;AF=0.328;AN=58;BaseQRankSum= |
| 48240 | chrY | 28809759 | . | G | A   | 107.27   | PASS          | AC=3;AF=0.043;AN=70;BaseQRankSum=  |
| 48241 | chrY | 28809760 | . | G | C   | 1016.31  | PASS          | AC=7;AF=0.100;AN=70;BaseQRankSum=  |
| 48242 | chrY | 28809762 | . | T | G   | 1083.04  | PASS          | AC=7;AF=0.100;AN=70;BaseQRankSum=  |
| 48243 | chrY | 28809765 | . | G | C   | 94.25    | my_snp_filter | AC=3;AF=0.043;AN=70;BaseQ          |
| 48244 | chrY | 28809769 | . | G | T   | 390.22   | PASS          | AC=7;AF=0.100;AN=70;BaseQRankSum=  |
| 48245 | chrY | 28809773 | . | C | T   | 7748.10  | PASS          | AC=19;AF=0.365;AN=52;BaseQRankSum= |
| 48246 | chrY | 28809774 | . | A | C   | 387.94   | PASS          | AC=5;AF=0.071;AN=70;BaseQRankSum=  |
| 48247 | chrY | 28809777 | . | G | T   | 172.56   | PASS          | AC=3;AF=0.043;AN=70;BaseQRankSum=  |
| 48248 | chrY | 28809780 | . | G | C   | 7945.59  | PASS          | AC=19;AF=0.396;AN=48;BaseQRankSum= |
| 48249 | chrY | 28809782 | . | G | C   | 194.12   | PASS          | AC=4;AF=0.057;AN=70;BaseQRankSum=  |
| 48250 | chrY | 28809787 | . | C | T   | 7708.69  | PASS          | AC=19;AF=0.380;AN=50;BaseQRankSum= |
| 48251 | chrY | 28809792 | . | G | T   | 502.74   | PASS          | AC=7;AF=0.100;AN=70;BaseQRankSum=  |
| 48252 | chrY | 28809795 | . | C | G   | 12812.43 | PASS          | AC=28;AF=0.467;AN=60;Base          |
| 48253 | chrY | 28809816 | . | A | T   | 382.17   | PASS          | AC=6;AF=0.086;AN=70;BaseQRankSum=  |
| 48254 | chrY | 28809824 | . | T | G   | 84.76    | my_snp_filter | AC=2;AF=0.029;AN=70;BaseQ          |
| 48255 | chrY | 28809840 | . | G | A   | 515.99   | PASS          | AC=7;AF=0.100;AN=70;BaseQRankSum=  |
| 48256 | chrY | 28809845 | . | T | G,A | 15276.46 | PASS          | AC=32,1;AF=0.471,0.015;AN          |
| 48257 | chrY | 28809848 | . | C | T   | 259.64   | my_snp_filter | AC=6;AF=0.086;AN=70;BaseQ          |
| 48258 | chrY | 28809849 | . | A | G   | 257.06   | my_snp_filter | AC=6;AF=0.086;AN=70;BaseQ          |
| 48259 | chrY | 28809859 | . | T | A,G | 13747.08 | PASS          | AC=3,28;AF=0.044,0.412;AN          |
| 48260 | chrY | 28809881 | . | T | A   | 1260.93  | PASS          | AC=5;AF=0.074;AN=68;BaseQRankSum=  |

|       |      |          |   |   |       |          |               |                                    |
|-------|------|----------|---|---|-------|----------|---------------|------------------------------------|
| 48261 | chrY | 28809882 | . | A | G     | 18246.60 | PASS          | AC=31;AF=0.456;AN=68;BaseQ         |
| 48262 | chrY | 28809890 | . | G | C     | 1446.51  | PASS          | AC=3;AF=0.043;AN=70;BaseQRankSum=  |
| 48263 | chrY | 28809909 | . | G | A     | 154.68   | my_snp_filter | AC=1;AF=0.014;AN=70;BaseQ          |
| 48264 | chrY | 28809911 | . | A | G     | 50.23    | my_snp_filter | AC=2;AF=0.029;AN=70;BaseQ          |
| 48265 | chrY | 28809929 | . | C | A     | 1682.99  | PASS          | AC=5;AF=0.071;AN=70;BaseQRankSum=  |
| 48266 | chrY | 28809934 | . | A | G     | 34829.13 | PASS          | AC=27;AF=0.482;AN=56;BaseQ         |
| 48267 | chrY | 28809938 | . | T | G     | 32772.41 | PASS          | AC=24;AF=0.414;AN=58;BaseQ         |
| 48268 | chrY | 28809941 | . | T | A     | 1397.97  | PASS          | AC=5;AF=0.071;AN=70;BaseQRankSum=  |
| 48269 | chrY | 28809945 | . | A | G     | 1142.20  | PASS          | AC=4;AF=0.057;AN=70;BaseQRankSum=  |
| 48270 | chrY | 28809950 | . | A | C     | 691.05   | PASS          | AC=7;AF=0.100;AN=70;BaseQRankSum=  |
| 48271 | chrY | 28809954 | . | C | G     | 28231.99 | PASS          | AC=25;AF=0.481;AN=52;BaseQ         |
| 48272 | chrY | 28809959 | . | C | G     | 392.58   | PASS          | AC=3;AF=0.043;AN=70;BaseQRankSum=  |
| 48273 | chrY | 28809960 | . | G | C     | 951.93   | PASS          | AC=5;AF=0.071;AN=70;BaseQRankSum=  |
| 48274 | chrY | 28809968 | . | A | C     | 35.14    | my_snp_filter | AC=1;AF=0.014;AN=70;BaseQ          |
| 48275 | chrY | 28809970 | . | T | C     | 371.43   | PASS          | AC=3;AF=0.043;AN=70;BaseQRankSum=  |
| 48276 | chrY | 28809979 | . | C | A     | 620.73   | PASS          | AC=4;AF=0.057;AN=70;BaseQRankSum=  |
| 48277 | chrY | 28809984 | . | G | T     | 36.44    | my_snp_filter | AC=2;AF=0.029;AN=68;BaseQ          |
| 48278 | chrY | 28809986 | . | G | A     | 767.16   | PASS          | AC=7;AF=0.103;AN=68;BaseQRankSum=  |
| 48279 | chrY | 28809987 | . | T | A     | 2749.34  | PASS          | AC=12;AF=0.176;AN=68;DP=981;FS=0.  |
| 48280 | chrY | 28809990 | . | G | A     | 692.73   | PASS          | AC=7;AF=0.100;AN=70;BaseQRankSum=  |
| 48281 | chrY | 28809992 | . | A | T     | 605.86   | PASS          | AC=6;AF=0.086;AN=70;BaseQRankSum=  |
| 48282 | chrY | 28809998 | . | A | C     | 816.36   | PASS          | AC=5;AF=0.071;AN=70;BaseQRankSum=  |
| 48283 | chrY | 28809999 | . | T | C     | 865.97   | PASS          | AC=5;AF=0.071;AN=70;BaseQRankSum=  |
| 48284 | chrY | 28810003 | . | G | T     | 725.06   | PASS          | AC=5;AF=0.071;AN=70;BaseQRankSum=  |
| 48285 | chrY | 28810006 | . | A | G     | 838.94   | PASS          | AC=5;AF=0.071;AN=70;BaseQRankSum=  |
| 48286 | chrY | 28810011 | . | T | G     | 16961.81 | PASS          | AC=52;AF=0.743;AN=70;BaseQ         |
| 48287 | chrY | 28810017 | . | A | T     | 1146.47  | PASS          | AC=6;AF=0.086;AN=70;BaseQRankSum=  |
| 48288 | chrY | 28810019 | . | A | G     | 1265.09  | PASS          | AC=6;AF=0.088;AN=68;BaseQRankSum=  |
| 48289 | chrY | 28810025 | . | A | C     | 1363.60  | PASS          | AC=6;AF=0.086;AN=70;BaseQRankSum=  |
| 48290 | chrY | 28810031 | . | A | G     | 1449.36  | PASS          | AC=6;AF=0.086;AN=70;BaseQRankSum=  |
| 48291 | chrY | 28810040 | . | A | T     | 37.61    | PASS          | AC=1;AF=0.015;AN=68;BaseQRankSum=  |
| 48292 | chrY | 28810045 | . | A | G     | 1713.87  | PASS          | AC=6;AF=0.086;AN=70;BaseQRankSum=  |
| 48293 | chrY | 28810070 | . | T | A     | 1563.57  | PASS          | AC=6;AF=0.088;AN=68;BaseQRankSum=  |
| 48294 | chrY | 28810073 | . | A | G     | 1526.53  | PASS          | AC=6;AF=0.088;AN=68;BaseQRankSum=  |
| 48295 | chrY | 28810076 | . | G | T     | 1516.81  | PASS          | AC=6;AF=0.086;AN=70;BaseQRankSum=  |
| 48296 | chrY | 28810079 | . | A | G     | 1502.75  | PASS          | AC=6;AF=0.086;AN=70;BaseQRankSum=  |
| 48297 | chrY | 28810081 | . | C | A     | 19547.31 | PASS          | AC=27;AF=0.409;AN=66;BaseQ         |
| 48298 | chrY | 28810087 | . | T | C     | 799.36   | PASS          | AC=7;AF=0.100;AN=70;BaseQRankSum=  |
| 48299 | chrY | 28810097 | . | C | T     | 1840.54  | PASS          | AC=7;AF=0.100;AN=70;BaseQRankSum=  |
| 48300 | chrY | 28810098 | . | T | A     | 27150.76 | PASS          | AC=23;AF=0.329;AN=70;BaseQ         |
| 48301 | chrY | 28810099 | . | C | T     | 173.51   | my_snp_filter | AC=4;AF=0.057;AN=70;BaseQ          |
| 48302 | chrY | 28810105 | . | A | C,*   | 19725.74 | PASS          | AC=1,16;AF=0.014,0.229;AN=         |
| 48303 | chrY | 28810107 | . | A | G,T,* | 19510.04 | PASS          | AC=1,7,15;AF=0.015,0.106,          |
| 48304 | chrY | 28810117 | . | T | C,*   | 21397.49 | PASS          | AC=3,19;AF=0.043,0.271;AN=         |
| 48305 | chrY | 28810122 | . | T | C,*   | 22946.05 | PASS          | AC=4,21;AF=0.057,0.300;AN=         |
| 48306 | chrY | 28810132 | . | T | C,*   | 21549.79 | PASS          | AC=4,18;AF=0.057,0.257;AN=         |
| 48307 | chrY | 28810149 | . | G | A,*   | 16543.32 | PASS          | AC=6,16;AF=0.088,0.235;AN=         |
| 48308 | chrY | 28810158 | . | G | A,*   | 15920.17 | PASS          | AC=5,15;AF=0.071,0.214;AN=         |
| 48309 | chrY | 28810161 | . | T | G,*   | 3510.42  | PASS          | AC=13,4;AF=0.203,0.063;AN=64;BaseQ |
| 48310 | chrY | 28810173 | . | G | A     | 211.73   | my_snp_filter | AC=3;AF=0.043;AN=70;BaseQ          |
| 48311 | chrY | 28810184 | . | G | T     | 32996.01 | PASS          | AC=26;AF=0.448;AN=58;BaseQ         |
| 48312 | chrY | 28810212 | . | G | T     | 32792.51 | PASS          | AC=31;AF=0.500;AN=62;BaseQ         |
| 48313 | chrY | 28810223 | . | G | A     | 364.49   | my_snp_filter | AC=6;AF=0.086;AN=70;BaseQ          |
| 48314 | chrY | 28810229 | . | G | T     | 254.64   | my_snp_filter | AC=4;AF=0.057;AN=70;BaseQ          |
| 48315 | chrY | 28810260 | . | C | A,T   | 30156.76 | PASS          | AC=31,3;AF=0.500,0.048;AN=         |
| 48316 | chrY | 28810261 | . | G | C     | 1312.68  | PASS          | AC=10;AF=0.147;AN=68;BaseQRankSum= |
| 48317 | chrY | 28810277 | . | T | A     | 511.97   | my_snp_filter | AC=5;AF=0.071;AN=70;BaseQ          |
| 48318 | chrY | 28810285 | . | G | C     | 26527.43 | PASS          | AC=28;AF=0.424;AN=66;BaseQ         |
| 48319 | chrY | 28810293 | . | C | G     | 2372.70  | PASS          | AC=11;AF=0.157;AN=70;BaseQRankSum= |
| 48320 | chrY | 28810306 | . | A | G     | 2555.07  | PASS          | AC=20;AF=0.286;AN=70;BaseQRankSum= |
| 48321 | chrY | 28810308 | . | G | C     | 30207.87 | my_snp_filter | AC=16;AF=0.229;AN=                 |
| 48322 | chrY | 28810339 | . | A | T     | 66.45    | PASS          | AC=1;AF=0.014;AN=70;BaseQRankSum=  |
| 48323 | chrY | 28810347 | . | G | A     | 109.47   | my_snp_filter | AC=2;AF=0.029;AN=70;BaseQ          |
| 48324 | chrY | 28810371 | . | C | A     | 518.59   | PASS          | AC=5;AF=0.071;AN=70;BaseQRankSum=  |
| 48325 | chrY | 28810372 | . | A | T     | 51054.29 | PASS          | AC=32;AF=0.457;AN=70;BaseQ         |
| 48326 | chrY | 28810379 | . | A | T     | 145.02   | my_snp_filter | AC=4;AF=0.057;AN=70;BaseQ          |
| 48327 | chrY | 28810387 | . | C | G     | 53.94    | my_snp_filter | AC=1;AF=0.014;AN=70;BaseQ          |
| 48328 | chrY | 28810391 | . | C | G     | 42170.59 | PASS          | AC=31;AF=0.443;AN=70;BaseQ         |
| 48329 | chrY | 28810397 | . | G | C     | 30.43    | my_snp_filter | AC=1;AF=0.014;AN=70;BaseQ          |
| 48330 | chrY | 28810406 | . | T | C     | 314.83   | my_snp_filter | AC=4;AF=0.057;AN=70;BaseQ          |
| 48331 | chrY | 28810410 | . | G | T     | 91.06    | my_snp_filter | AC=2;AF=0.029;AN=70;BaseQ          |
| 48332 | chrY | 28810439 | . | T | G     | 47734.20 | PASS          | AC=33;AF=0.471;AN=70;BaseQ         |
| 48333 | chrY | 28810468 | . | A | G     | 33.26    | my_snp_filter | AC=3;AF=0.043;AN=70;BaseQ          |
| 48334 | chrY | 28810469 | . | G | T     | 243.16   | my_snp_filter | AC=3;AF=0.043;AN=70;BaseQ          |
| 48335 | chrY | 28810476 | . | T | G     | 18406.90 | PASS          | AC=32;AF=0.471;AN=68;BaseQ         |
| 48336 | chrY | 28810503 | . | A | G     | 475.23   | my_snp_filter | AC=7;AF=0.100;AN=70;BaseQ          |

|       |      |          |   |   |     |           |               |                                   |
|-------|------|----------|---|---|-----|-----------|---------------|-----------------------------------|
| 48337 | chrY | 28810515 | . | T | A   | 49.45     | my_snp_filter | AC=2;AF=0.029;AN=70;BaseQ         |
| 48338 | chrY | 28810524 | . | G | T   | 170.19    | my_snp_filter | AC=2;AF=0.029;AN=70;BaseQ         |
| 48339 | chrY | 28810527 | . | G | T   | 123.49    | PASS          | AC=1;AF=0.014;AN=70;BaseQRankSum= |
| 48340 | chrY | 28810533 | . | G | A   | 78.64     | my_snp_filter | AC=1;AF=0.167;AN=6;BaseQR         |
| 48341 | chrY | 28810536 | . | A | G,* | 145840.90 | PASS          | AC=1,32;AF=0.014,0.457;AN         |
| 48342 | chrY | 28810551 | . | A | G   | 197821.67 | PASS          | AC=34;AF=0.500;AN=68;Base         |
| 48343 | chrY | 28810553 | . | T | A   | 198041.67 | PASS          | AC=34;AF=0.500;AN=68;Base         |
| 48344 | chrY | 28810584 | . | G | A   | 30.31     | my_snp_filter | AC=1;AF=0.014;AN=70;BaseQ         |
| 48345 | chrY | 28810607 | . | G | C   | 91.55     | my_snp_filter | AC=1;AF=0.014;AN=70;BaseQ         |
| 48346 | chrY | 28810612 | . | C | T   | 149776.72 | PASS          | AC=35;AF=0.500;AN=70;Base         |
| 48347 | chrY | 28810613 | . | G | A   | 415.36    | my_snp_filter | AC=2;AF=0.029;AN=70;BaseQ         |
| 48348 | chrY | 28810627 | . | G | C   | 2140.98   | my_snp_filter | AC=10;AF=0.143;AN=70;Base         |
| 48349 | chrY | 28810632 | . | A | G,T | 179837.89 | PASS          | AC=37,1;AF=0.529,0.014;AN         |
| 48350 | chrY | 28810633 | . | A | T   | 207.89    | my_snp_filter | AC=3;AF=0.043;AN=70;BaseQ         |
| 48351 | chrY | 28810647 | . | G | C   | 533.87    | my_snp_filter | AC=5;AF=0.071;AN=70;BaseQ         |
| 48352 | chrY | 28810665 | . | C | T   | 68.85     | my_snp_filter | AC=3;AF=0.043;AN=70;BaseQ         |
| 48353 | chrY | 28810689 | . | A | G   | 2947.37   | my_snp_filter | AC=23;AF=0.329;AN=70;Base         |
| 48354 | chrY | 28810700 | . | T | C   | 15313.46  | PASS          | AC=28;AF=0.412;AN=68;Base         |
| 48355 | chrY | 28810702 | . | A | G   | 55533.06  | PASS          | AC=37;AF=0.544;AN=68;Base         |
| 48356 | chrY | 28810721 | . | T | A   | 30.59     | my_snp_filter | AC=1;AF=0.014;AN=70;BaseQ         |
| 48357 | chrY | 28810738 | . | T | C   | 5120.55   | PASS          | AC=17;AF=0.266;AN=64;BaseQRankSum |
| 48358 | chrY | 28810748 | . | T | A   | 3178.47   | PASS          | AC=14;AF=0.219;AN=64;BaseQRankSum |
| 48359 | chrY | 28810768 | . | A | C   | 1288.59   | PASS          | AC=6;AF=0.091;AN=66;BaseQRankSum= |
| 48360 | chrY | 28810780 | . | A | G   | 645.14    | PASS          | AC=4;AF=0.057;AN=70;BaseQRankSum= |
| 48361 | chrY | 28810784 | . | C | G   | 457.09    | PASS          | AC=2;AF=0.029;AN=68;BaseQRankSum= |
| 48362 | chrY | 28810788 | . | A | T   | 742.67    | PASS          | AC=4;AF=0.057;AN=70;BaseQRankSum= |
| 48363 | chrY | 28810803 | . | T | A   | 1112.85   | PASS          | AC=4;AF=0.061;AN=66;BaseQRankSum= |
| 48364 | chrY | 28810812 | . | G | T   | 225.48    | my_snp_filter | AC=7;AF=0.100;AN=70;BaseQ         |
| 48365 | chrY | 28810823 | . | T | G   | 616.02    | PASS          | AC=3;AF=0.043;AN=70;BaseQRankSum= |
| 48366 | chrY | 28810832 | . | A | C   | 1603.25   | PASS          | AC=5;AF=0.093;AN=54;BaseQRankSum= |
| 48367 | chrY | 28810833 | . | C | T   | 2406.21   | PASS          | AC=9;AF=0.167;AN=54;BaseQRankSum= |
| 48368 | chrY | 28810848 | . | G | T   | 23197.53  | PASS          | AC=34;AF=0.486;AN=70;Base         |
| 48369 | chrY | 28810859 | . | A | G   | 29369.72  | PASS          | AC=34;AF=0.486;AN=70;Base         |
| 48370 | chrY | 28810872 | . | T | G   | 20289.43  | PASS          | AC=22;AF=0.314;AN=70;Base         |
| 48371 | chrY | 28810898 | . | C | T   | 22921.22  | PASS          | AC=25;AF=0.357;AN=70;Base         |
| 48372 | chrY | 28810954 | . | G | A   | 52.43     | my_snp_filter | AC=2;AF=0.029;AN=70;BaseQ         |
| 48373 | chrY | 28810982 | . | A | G   | 12805.36  | PASS          | AC=33;AF=0.471;AN=70;Base         |
| 48374 | chrY | 28810989 | . | T | A   | 10743.73  | PASS          | AC=33;AF=0.471;AN=70;Base         |
| 48375 | chrY | 28810999 | . | C | G   | 233.45    | my_snp_filter | AC=4;AF=0.057;AN=70;BaseQ         |
| 48376 | chrY | 28811010 | . | G | A   | 199.89    | my_snp_filter | AC=2;AF=0.029;AN=70;BaseQ         |
| 48377 | chrY | 28811012 | . | T | A   | 38229.37  | PASS          | AC=27;AF=0.409;AN=66;Base         |
| 48378 | chrY | 28811013 | . | C | T   | 559.11    | my_snp_filter | AC=7;AF=0.106;AN=66;BaseQ         |
| 48379 | chrY | 28811015 | . | G | C   | 35038.97  | PASS          | AC=27;AF=0.397;AN=68;Base         |
| 48380 | chrY | 28811042 | . | T | A   | 31872.03  | PASS          | AC=27;AF=0.409;AN=66;Base         |
| 48381 | chrY | 28811050 | . | A | T   | 234.98    | my_snp_filter | AC=6;AF=0.086;AN=70;BaseQ         |
| 48382 | chrY | 28811068 | . | G | A   | 20761.44  | my_snp_filter | AC=27;AF=0.397;AN                 |
| 48383 | chrY | 28811085 | . | G | A   | 661.25    | my_snp_filter | AC=11;AF=0.157;AN=70;Base         |
| 48384 | chrY | 28811092 | . | T | G   | 15952.08  | my_snp_filter | AC=30;AF=0.429;AN                 |
| 48385 | chrY | 28811098 | . | C | G   | 10708.99  | my_snp_filter | AC=27;AF=0.397;AN                 |
| 48386 | chrY | 28811106 | . | T | C   | 44.12     | my_snp_filter | AC=4;AF=0.057;AN=70;BaseQ         |
| 48387 | chrY | 28811121 | . | T | A   | 673.73    | my_snp_filter | AC=12;AF=0.171;AN=70;Base         |
| 48388 | chrY | 28811123 | . | G | T   | 252.92    | my_snp_filter | AC=5;AF=0.071;AN=70;BaseQ         |
| 48389 | chrY | 28811127 | . | G | A   | 1124.62   | PASS          | AC=11;AF=0.157;AN=70;BaseQRankSum |
| 48390 | chrY | 28811148 | . | G | T,C | 820.74    | PASS          | AC=10,1;AF=0.143,0.014;AN=70;Base |
| 48391 | chrY | 28811163 | . | G | A   | 1509.20   | PASS          | AC=16;AF=0.229;AN=70;BaseQRankSum |
| 48392 | chrY | 28811172 | . | G | T   | 261.79    | my_snp_filter | AC=8;AF=0.114;AN=70;BaseQ         |
| 48393 | chrY | 28811173 | . | G | C   | 198.84    | my_snp_filter | AC=8;AF=0.114;AN=70;BaseQ         |
| 48394 | chrY | 28811176 | . | A | T   | 272.36    | my_snp_filter | AC=8;AF=0.121;AN=66;BaseQ         |
| 48395 | chrY | 28811181 | . | C | T   | 141.26    | my_snp_filter | AC=6;AF=0.088;AN=68;BaseQ         |
| 48396 | chrY | 28811226 | . | T | A   | 295.67    | PASS          | AC=1;AF=0.014;AN=70;BaseQRankSum= |
| 48397 | chrY | 28811228 | . | C | G   | 558.24    | PASS          | AC=2;AF=0.029;AN=70;BaseQRankSum= |
| 48398 | chrY | 28811229 | . | T | A   | 557.39    | PASS          | AC=2;AF=0.029;AN=70;BaseQRankSum= |
| 48399 | chrY | 28811235 | . | T | A   | 1108.42   | PASS          | AC=3;AF=0.043;AN=70;BaseQRankSum= |
| 48400 | chrY | 28811244 | . | A | G   | 869.26    | PASS          | AC=3;AF=0.043;AN=70;BaseQRankSum= |
| 48401 | chrY | 28811245 | . | C | G   | 909.96    | PASS          | AC=3;AF=0.045;AN=66;BaseQRankSum= |
| 48402 | chrY | 28811248 | . | C | G   | 729.06    | PASS          | AC=3;AF=0.045;AN=66;BaseQRankSum= |
| 48403 | chrY | 28811255 | . | A | G   | 26532.24  | PASS          | AC=68;AF=0.971;AN=70;Base         |
| 48404 | chrY | 28811286 | . | T | C   | 708.40    | PASS          | AC=3;AF=0.048;AN=62;BaseQRankSum= |
| 48405 | chrY | 28811311 | . | C | T   | 266.83    | PASS          | AC=5;AF=0.071;AN=70;BaseQRankSum= |
| 48406 | chrY | 28811353 | . | G | A   | 424.17    | PASS          | AC=3;AF=0.045;AN=66;BaseQRankSum= |
| 48407 | chrY | 28811360 | . | A | G   | 418.80    | PASS          | AC=3;AF=0.045;AN=66;BaseQRankSum= |
| 48408 | chrY | 28811362 | . | T | G   | 422.18    | PASS          | AC=3;AF=0.045;AN=66;BaseQRankSum= |
| 48409 | chrY | 28811500 | . | G | A   | 469.95    | PASS          | AC=8;AF=0.114;AN=70;BaseQRankSum= |
| 48410 | chrY | 28811516 | . | T | C   | 1072.73   | PASS          | AC=6;AF=0.086;AN=70;DP=549;FS=0.0 |
| 48411 | chrY | 28811567 | . | A | G   | 607.30    | PASS          | AC=2;AF=0.029;AN=70;DP=490;FS=0.0 |
| 48412 | chrY | 28811572 | . | C | A   | 636       | PASS          | AC=2;AF=0.029;AN=70;DP=480;FS=0.0 |

|       |      |          |   |   |       |          |               |                                    |
|-------|------|----------|---|---|-------|----------|---------------|------------------------------------|
| 48413 | chrY | 28811590 | . | T | A     | 1220.43  | PASS          | AC=6;AF=0.086;AN=70;DP=460;FS=0.0  |
| 48414 | chrY | 28811621 | . | G | T     | 375.29   | PASS          | AC=2;AF=0.029;AN=70;BaseQRankSum=  |
| 48415 | chrY | 28811805 | . | T | C     | 251.93   | my_snp_filter | AC=6;AF=0.086;AN=70;BaseQ          |
| 48416 | chrY | 28811829 | . | C | T     | 1617.89  | my_snp_filter | AC=13;AF=0.186;AN=70;Base          |
| 48417 | chrY | 28811840 | . | G | A     | 1625.69  | my_snp_filter | AC=14;AF=0.200;AN=70;Base          |
| 48418 | chrY | 28811854 | . | T | A     | 105.65   | my_snp_filter | AC=4;AF=0.059;AN=68;BaseQ          |
| 48419 | chrY | 28811874 | . | T | C     | 46.67    | PASS          | AC=1;AF=0.015;AN=68;BaseQRankSum=  |
| 48420 | chrY | 28811884 | . | A | T     | 469.22   | my_snp_filter | AC=5;AF=0.074;AN=68;BaseQ          |
| 48421 | chrY | 28811890 | . | C | G     | 184.37   | PASS          | AC=3;AF=0.044;AN=68;BaseQRankSum=  |
| 48422 | chrY | 28811945 | . | T | G     | 32.36    | my_snp_filter | AC=2;AF=0.029;AN=68;BaseQ          |
| 48423 | chrY | 28811948 | . | C | T     | 2669.24  | PASS          | AC=22;AF=0.324;AN=68;BaseQRankSum= |
| 48424 | chrY | 28811970 | . | T | G     | 35.24    | my_snp_filter | AC=4;AF=0.059;AN=68;BaseQ          |
| 48425 | chrY | 28812009 | . | G | A     | 312.36   | my_snp_filter | AC=9;AF=0.136;AN=66;BaseQ          |
| 48426 | chrY | 28812010 | . | G | C     | 85.20    | my_snp_filter | AC=3;AF=0.045;AN=66;BaseQ          |
| 48427 | chrY | 28812048 | . | G | C     | 651.27   | my_snp_filter | AC=5;AF=0.074;AN=68;BaseQ          |
| 48428 | chrY | 28812067 | . | T | G     | 589.95   | PASS          | AC=5;AF=0.074;AN=68;BaseQRankSum=  |
| 48429 | chrY | 28812130 | . | C | T     | 567.47   | my_snp_filter | AC=3;AF=0.045;AN=66;BaseQ          |
| 48430 | chrY | 28812239 | . | G | A     | 424.46   | my_snp_filter | AC=3;AF=0.088;AN=34;BaseQ          |
| 48431 | chrY | 28812259 | . | A | G     | 1688.55  | my_snp_filter | AC=9;AF=0.321;AN=28;BaseQ          |
| 48432 | chrY | 28812268 | . | T | C     | 652.46   | my_snp_filter | AC=2;AF=0.031;AN=64;BaseQ          |
| 48433 | chrY | 28812287 | . | A | T,*   | 414.65   | my_snp_filter | AC=6,1;AF=0.086,0.014;AN=          |
| 48434 | chrY | 28812290 | . | T | G,*   | 8007.23  | my_snp_filter | AC=9,1;AF=0.132,0.015;AN=          |
| 48435 | chrY | 28812293 | . | G | A,T,* | 7605.27  | my_snp_filter | AC=2,7,1;AF=0.029,0.103,0          |
| 48436 | chrY | 28812340 | . | G | A     | 15950.76 | my_snp_filter | AC=28;AF=0.400;AN=                 |
| 48437 | chrY | 28812373 | . | T | A     | 2087.06  | my_snp_filter | AC=10;AF=0.143;AN=70;Base          |
| 48438 | chrY | 28812377 | . | A | G     | 20586.97 | my_snp_filter | AC=3;AF=0.429;AN=                  |
| 48439 | chrY | 28812412 | . | T | A     | 74965.72 | my_snp_filter | AC=35;AF=0.500;AN=                 |
| 48440 | chrY | 28812440 | . | G | A     | 67189.72 | my_snp_filter | AC=35;AF=0.500;AN=                 |
| 48441 | chrY | 28812443 | . | A | C     | 31167.45 | my_snp_filter | AC=28;AF=0.400;AN=                 |
| 48442 | chrY | 28812452 | . | C | G     | 142.74   | my_snp_filter | AC=3;AF=0.043;AN=70;BaseQ          |
| 48443 | chrY | 28812459 | . | A | T     | 448.94   | my_snp_filter | AC=3;AF=0.043;AN=70;BaseQ          |
| 48444 | chrY | 28812467 | . | T | G     | 435.69   | my_snp_filter | AC=1;AF=0.014;AN=70;BaseQ          |
| 48445 | chrY | 28812471 | . | T | A     | 46.08    | my_snp_filter | AC=2;AF=0.029;AN=70;BaseQ          |
| 48446 | chrY | 28812475 | . | A | T,G   | 45664.72 | my_snp_filter | AC=1,34;AF=0.014,                  |
| 48447 | chrY | 28812477 | . | C | A     | 84405.72 | my_snp_filter | AC=35;AF=0.500;AN=                 |
| 48448 | chrY | 28812484 | . | A | G     | 581.58   | my_snp_filter | AC=6;AF=0.086;AN=70;BaseQ          |
| 48449 | chrY | 28812487 | . | G | C     | 82831.72 | my_snp_filter | AC=35;AF=0.500;AN=                 |
| 48450 | chrY | 28812488 | . | G | A     | 5934.89  | my_snp_filter | AC=28;AF=0.400;AN=70;Base          |
| 48451 | chrY | 28812491 | . | T | A     | 61436.72 | my_snp_filter | AC=35;AF=0.500;AN=                 |
| 48452 | chrY | 28812547 | . | G | A     | 30.26    | my_snp_filter | AC=3;AF=0.043;AN=70;BaseQ          |
| 48453 | chrY | 28812548 | . | T | G     | 79686.72 | my_snp_filter | AC=35;AF=0.500;AN=                 |
| 48454 | chrY | 28812550 | . | G | T     | 1653.86  | my_snp_filter | AC=16;AF=0.229;AN=70;Base          |
| 48455 | chrY | 28812551 | . | T | C     | 279.81   | my_snp_filter | AC=7;AF=0.100;AN=70;BaseQ          |
| 48456 | chrY | 28812557 | . | G | A     | 51.90    | my_snp_filter | AC=2;AF=0.029;AN=70;BaseQ          |
| 48457 | chrY | 28812558 | . | G | T     | 94.76    | my_snp_filter | AC=6;AF=0.086;AN=70;BaseQ          |
| 48458 | chrY | 28812559 | . | C | A     | 83880.72 | my_snp_filter | AC=35;AF=0.500;AN=                 |
| 48459 | chrY | 28812592 | . | G | T     | 64569.20 | my_snp_filter | AC=30;AF=0.469;AN=                 |
| 48460 | chrY | 28812593 | . | G | T     | 42709.89 | my_snp_filter | AC=18;AF=0.281;AN=                 |
| 48461 | chrY | 28812610 | . | T | C     | 48718.47 | my_snp_filter | AC=21;AF=0.300;AN=                 |
| 48462 | chrY | 28812612 | . | G | C,A   | 6460.71  | my_snp_filter | AC=25,3;AF=0.379,0.045;AN=         |
| 48463 | chrY | 28812613 | . | G | T     | 5688.22  | my_snp_filter | AC=26;AF=0.394;AN=66;Base          |
| 48464 | chrY | 28812617 | . | G | C     | 4955.70  | my_snp_filter | AC=25;AF=0.357;AN=70;Base          |
| 48465 | chrY | 28812618 | . | G | C     | 328.84   | my_snp_filter | AC=3;AF=0.043;AN=70;BaseQ          |
| 48466 | chrY | 28812622 | . | G | T     | 62.91    | my_snp_filter | AC=3;AF=0.043;AN=70;BaseQ          |
| 48467 | chrY | 28812626 | . | C | T     | 44441.93 | my_snp_filter | AC=17;AF=0.250;AN=                 |
| 48468 | chrY | 28812630 | . | G | T     | 1045.81  | my_snp_filter | AC=9;AF=0.129;AN=70;BaseQ          |
| 48469 | chrY | 28812633 | . | G | T,C   | 44743.47 | my_snp_filter | AC=7,15;AF=0.106,                  |
| 48470 | chrY | 28812635 | . | G | C     | 1871.06  | my_snp_filter | AC=9;AF=0.132;AN=68;BaseQ          |
| 48471 | chrY | 28812640 | . | C | T     | 43955.96 | my_snp_filter | AC=14;AF=0.212;AN=                 |
| 48472 | chrY | 28812645 | . | G | T     | 300.53   | my_snp_filter | AC=2;AF=0.029;AN=70;BaseQ          |
| 48473 | chrY | 28812648 | . | C | G     | 56020.80 | my_snp_filter | AC=19;AF=0.306;AN=                 |
| 48474 | chrY | 28812673 | . | C | G     | 48102.46 | my_snp_filter | AC=20;AF=0.313;AN=                 |
| 48475 | chrY | 28812716 | . | A | G     | 66.66    | my_snp_filter | AC=1;AF=0.014;AN=70;BaseQ          |
| 48476 | chrY | 28812732 | . | G | C,T   | 296.86   | my_snp_filter | AC=2,1;AF=0.029,0.014;AN=          |
| 48477 | chrY | 28812733 | . | T | G     | 56523.97 | PASS          | AC=17;AF=0.243;AN=70;Base          |
| 48478 | chrY | 28812735 | . | A | G     | 41370.87 | PASS          | AC=26;AF=0.371;AN=70;Base          |
| 48479 | chrY | 28812759 | . | C | A     | 82809.05 | PASS          | AC=29;AF=0.414;AN=70;Base          |
| 48480 | chrY | 28812760 | . | G | A     | 57.59    | my_snp_filter | AC=2;AF=0.029;AN=70;BaseQ          |
| 48481 | chrY | 28812763 | . | G | A     | 51.50    | my_snp_filter | AC=2;AF=0.029;AN=70;BaseQ          |
| 48482 | chrY | 28812791 | . | T | G,C   | 77550.81 | PASS          | AC=23,5;AF=0.329,0.071;AN=         |
| 48483 | chrY | 28812796 | . | C | T     | 77287.65 | PASS          | AC=23;AF=0.329;AN=70;Base          |
| 48484 | chrY | 28812803 | . | A | C     | 9420.92  | my_snp_filter | AC=10;AF=0.143;AN=70;Base          |
| 48485 | chrY | 28812807 | . | C | G     | 71863.60 | PASS          | AC=22;AF=0.314;AN=70;Base          |
| 48486 | chrY | 28812813 | . | A | G     | 68379.93 | PASS          | AC=20;AF=0.286;AN=70;Base          |
| 48487 | chrY | 28812833 | . | A | T     | 3761.63  | PASS          | AC=24;AF=0.343;AN=70;BaseQRankSum= |
| 48488 | chrY | 28812839 | . | A | G     | 30.43    | PASS          | AC=1;AF=0.014;AN=70;BaseQRankSum=  |

|       |      |          |   |   |       |           |               |                                             |
|-------|------|----------|---|---|-------|-----------|---------------|---------------------------------------------|
| 48489 | chrY | 28812842 | . | G | A     | 5334.99   | my_snp_filter | AC=9;AF=0.129;AN=70;BaseQ                   |
| 48490 | chrY | 28812846 | . | G | A     | 151.90    | my_snp_filter | AC=1;AF=0.014;AN=70;BaseQ                   |
| 48491 | chrY | 28812852 | . | T | C     | 43229.80  | PASS          | AC=13;AF=0.186;AN=70;BaseQ                  |
| 48492 | chrY | 28812860 | . | T | G,C   | 34724.75  | PASS          | AC=24,11;AF=0.343,0.157;AN=70;BaseQ         |
| 48493 | chrY | 28812871 | . | G | T     | 26117.19  | PASS          | AC=33;AF=0.471;AN=70;BaseQ                  |
| 48494 | chrY | 28812874 | . | A | C     | 8044.73   | PASS          | AC=9;AF=0.129;AN=70;BaseQRankSum=           |
| 48495 | chrY | 28812877 | . | G | T     | 33088.98  | PASS          | AC=12;AF=0.171;AN=70;BaseQ                  |
| 48496 | chrY | 28812893 | . | A | T     | 14781.31  | PASS          | AC=11;AF=0.157;AN=70;BaseQ                  |
| 48497 | chrY | 28812894 | . | A | G     | 1259.02   | PASS          | AC=5;AF=0.071;AN=70;BaseQRankSum=           |
| 48498 | chrY | 28812907 | . | G | C     | 825.79    | my_snp_filter | AC=6;AF=0.086;AN=70;BaseQ                   |
| 48499 | chrY | 28812919 | . | A | T     | 7803.27   | PASS          | AC=12;AF=0.171;AN=70;BaseQRankSum=          |
| 48500 | chrY | 28812921 | . | A | G     | 59315.99  | PASS          | AC=38;AF=0.543;AN=70;BaseQ                  |
| 48501 | chrY | 28812934 | . | C | A     | 12300.97  | PASS          | AC=12;AF=0.171;AN=70;BaseQ                  |
| 48502 | chrY | 28812936 | . | T | G     | 13250.93  | PASS          | AC=12;AF=0.171;AN=70;BaseQ                  |
| 48503 | chrY | 28812951 | . | T | A     | 17803.98  | PASS          | AC=12;AF=0.171;AN=70;BaseQ                  |
| 48504 | chrY | 28812958 | . | A | G,*   | 3906.78   | PASS          | AC=3,4;AF=0.043,0.057;AN=70;BaseQ           |
| 48505 | chrY | 28812960 | . | A | T,*   | 4027.54   | PASS          | AC=3,4;AF=0.043,0.057;AN=70;BaseQ           |
| 48506 | chrY | 28812970 | . | T | C,*   | 4100.32   | PASS          | AC=3,5;AF=0.043,0.071;AN=70;BaseQ           |
| 48507 | chrY | 28812980 | . | T | A,*   | 25829.84  | PASS          | AC=33,1;AF=0.471,0.014;AN=70;BaseQ          |
| 48508 | chrY | 28812984 | . | G | T     | 101.76    | my_snp_filter | AC=2;AF=0.029;AN=70;BaseQ                   |
| 48509 | chrY | 28812994 | . | G | C,*   | 5398.68   | PASS          | AC=5,6;AF=0.071,0.086;AN=70;BaseQ           |
| 48510 | chrY | 28813005 | . | T | A     | 1361.40   | my_snp_filter | AC=7;AF=0.100;AN=70;BaseQ                   |
| 48511 | chrY | 28813021 | . | G | A,*   | 5218.45   | PASS          | AC=1,9;AF=0.014,0.129;AN=70;BaseQ           |
| 48512 | chrY | 28813037 | . | G | T     | 18713.42  | PASS          | AC=10;AF=0.167;AN=60;BaseQ                  |
| 48513 | chrY | 28813052 | . | G | T     | 237.92    | my_snp_filter | AC=1;AF=0.014;AN=70;BaseQ                   |
| 48514 | chrY | 28813058 | . | C | T     | 2788.89   | my_snp_filter | AC=13;AF=0.186;AN=70;BaseQ                  |
| 48515 | chrY | 28813069 | . | C | G     | 290.42    | PASS          | AC=1;AF=0.014;AN=70;BaseQRankSum=           |
| 48516 | chrY | 28813077 | . | A | G     | 36219.20  | PASS          | AC=33;AF=0.471;AN=70;BaseQ                  |
| 48517 | chrY | 28813083 | . | A | G     | 113.43    | my_snp_filter | AC=1;AF=0.014;AN=70;BaseQ                   |
| 48518 | chrY | 28813086 | . | A | G     | 129155.89 | PASS          | AC=41;AF=0.586;AN=70;BaseQ                  |
| 48519 | chrY | 28813091 | . | G | A     | 20028.98  | my_snp_filter | AC=32;AF=0.457;AN=70;BaseQ                  |
| 48520 | chrY | 28813092 | . | C | G     | 35.55     | my_snp_filter | AC=1;AF=0.014;AN=70;BaseQ                   |
| 48521 | chrY | 28813117 | . | G | C     | 385.05    | my_snp_filter | AC=3;AF=0.043;AN=70;BaseQ                   |
| 48522 | chrY | 28813122 | . | C | G     | 90527.61  | my_snp_filter | AC=36;AF=0.514;AN=70;BaseQ                  |
| 48523 | chrY | 28813125 | . | T | C     | 4100.21   | my_snp_filter | AC=15;AF=0.214;AN=70;BaseQ                  |
| 48524 | chrY | 28813130 | . | T | A     | 308.06    | my_snp_filter | AC=2;AF=0.029;AN=70;BaseQ                   |
| 48525 | chrY | 28813138 | . | C | T     | 196.87    | my_snp_filter | AC=2;AF=0.029;AN=70;BaseQ                   |
| 48526 | chrY | 28813146 | . | C | G     | 11643.89  | my_snp_filter | AC=26;AF=0.371;AN=70;BaseQ                  |
| 48527 | chrY | 28813166 | . | G | T     | 103.46    | my_snp_filter | AC=2;AF=0.029;AN=70;BaseQ                   |
| 48528 | chrY | 28813176 | . | G | C,*   | 502.77    | my_snp_filter | AC=3,3;AF=0.043,0.043;AN=70;BaseQ           |
| 48529 | chrY | 28813200 | . | G | A     | 405.56    | my_snp_filter | AC=6;AF=0.086;AN=70;BaseQ                   |
| 48530 | chrY | 28813201 | . | C | G     | 134.75    | my_snp_filter | AC=2;AF=0.029;AN=70;BaseQ                   |
| 48531 | chrY | 28813204 | . | A | T     | 34.08     | my_snp_filter | AC=3;AF=0.043;AN=70;BaseQ                   |
| 48532 | chrY | 28813240 | . | C | G     | 89.23     | my_snp_filter | AC=3;AF=0.043;AN=70;BaseQ                   |
| 48533 | chrY | 28813244 | . | C | G     | 39840.72  | my_snp_filter | AC=35;AF=0.500;AN=70;BaseQ                  |
| 48534 | chrY | 28813259 | . | C | T     | 31556.72  | my_snp_filter | AC=35;AF=0.500;AN=70;BaseQ                  |
| 48535 | chrY | 28813304 | . | A | T     | 15798.59  | my_snp_filter | AC=31;AF=0.443;AN=70;BaseQ                  |
| 48536 | chrY | 28813323 | . | T | C     | 122.75    | my_snp_filter | AC=3;AF=0.043;AN=70;BaseQ                   |
| 48537 | chrY | 28813338 | . | T | G     | 4280.98   | PASS          | AC=19;AF=0.271;AN=70;BaseQRankSum=          |
| 48538 | chrY | 28813343 | . | T | C     | 3165.05   | PASS          | AC=18;AF=0.257;AN=70;BaseQRankSum=          |
| 48539 | chrY | 28813357 | . | A | T     | 149.95    | my_snp_filter | AC=4;AF=0.057;AN=70;BaseQ                   |
| 48540 | chrY | 28813363 | . | G | C     | 272.51    | PASS          | AC=4;AF=0.057;AN=70;BaseQRankSum=           |
| 48541 | chrY | 28813372 | . | T | G     | 574.40    | my_snp_filter | AC=4;AF=0.057;AN=70;BaseQ                   |
| 48542 | chrY | 28813430 | . | G | C     | 2003.73   | PASS          | AC=6;AF=0.086;AN=70;DP=844;FS=0.0           |
| 48543 | chrY | 28813531 | . | G | A     | 104.15    | my_snp_filter | AC=3;AF=0.043;AN=70;BaseQ                   |
| 48544 | chrY | 28813553 | . | T | C     | 107.74    | PASS          | AC=4;AF=0.057;AN=70;BaseQRankSum=           |
| 48545 | chrY | 28813592 | . | T | C     | 95.25     | my_snp_filter | AC=2;AF=0.029;AN=70;BaseQ                   |
| 48546 | chrY | 28813594 | . | G | A     | 261.32    | PASS          | AC=3;AF=0.043;AN=70;BaseQRankSum=           |
| 48547 | chrY | 28813602 | . | T | A     | 252.78    | PASS          | AC=4;AF=0.057;AN=70;BaseQRankSum=           |
| 48548 | chrY | 28813604 | . | T | C     | 262.53    | PASS          | AC=4;AF=0.057;AN=70;BaseQRankSum=           |
| 48549 | chrY | 28813634 | . | A | G     | 5226.36   | my_snp_filter | AC=17;AF=0.293;AN=58;BaseQ                  |
| 48550 | chrY | 28813640 | . | C | G     | 8886.37   | my_snp_filter | AC=30;AF=0.429;AN=70;BaseQ                  |
| 48551 | chrY | 28813643 | . | C | A     | 8909.52   | my_snp_filter | AC=30;AF=0.429;AN=70;BaseQ                  |
| 48552 | chrY | 28813664 | . | T | C     | 178.76    | my_snp_filter | AC=3;AF=0.043;AN=70;BaseQ                   |
| 48553 | chrY | 28813672 | . | T | G     | 1200.50   | my_snp_filter | AC=6;AF=0.086;AN=70;BaseQ                   |
| 48554 | chrY | 28813673 | . | G | T     | 1192      | my_snp_filter | AC=6;AF=0.086;AN=70;BaseQ                   |
| 48555 | chrY | 28813677 | . | T | G     | 30.97     | my_snp_filter | AC=2;AF=0.029;AN=70;BaseQ                   |
| 48556 | chrY | 28813681 | . | G | A     | 15866.57  | my_snp_filter | AC=23;AF=0.329;AN=70;BaseQ                  |
| 48557 | chrY | 28813686 | . | A | C     | 362.41    | my_snp_filter | AC=6;AF=0.103;AN=58;BaseQ                   |
| 48558 | chrY | 28813687 | . | C | T     | 16441.88  | my_snp_filter | AC=20;AF=0.357;AN=70;BaseQ                  |
| 48559 | chrY | 28813695 | . | A | G     | 16670.16  | my_snp_filter | AC=20;AF=0.357;AN=70;BaseQ                  |
| 48560 | chrY | 28813708 | . | T | A     | 511.47    | my_snp_filter | AC=5;AF=0.071;AN=70;BaseQ                   |
| 48561 | chrY | 28813720 | . | G | A,*   | 6979.21   | my_snp_filter | AC=17,4;AF=0.250,0.059;AN=70;BaseQ          |
| 48562 | chrY | 28813723 | . | C | A,G,* | 7314.23   | PASS          | AC=11,15,2;AF=0.157,0.214,0.029;AN=70;BaseQ |
| 48563 | chrY | 28813726 | . | T | G     | 16104.53  | PASS          | AC=20;AF=0.294;AN=68;BaseQ                  |
| 48564 | chrY | 28813748 | . | G | A     | 51.37     | my_snp_filter | AC=2;AF=0.029;AN=70;BaseQ                   |

|       |      |          |   |   |     |          |               |                                    |
|-------|------|----------|---|---|-----|----------|---------------|------------------------------------|
| 48565 | chrY | 28813749 | . | C | G   | 22776.17 | PASS          | AC=31;AF=0.456;AN=68;BaseQ         |
| 48566 | chrY | 28813779 | . | G | C   | 168.40   | PASS          | AC=1;AF=0.014;AN=70;BaseQRankSum=  |
| 48567 | chrY | 28813787 | . | T | G   | 1391.38  | my_snp_filter | AC=14;AF=0.200;AN=70;BaseQ         |
| 48568 | chrY | 28813789 | . | C | T   | 539.94   | my_snp_filter | AC=7;AF=0.100;AN=70;BaseQ          |
| 48569 | chrY | 28813828 | . | G | A   | 35386.29 | PASS          | AC=29;AF=0.414;AN=70;BaseQ         |
| 48570 | chrY | 28813833 | . | G | T   | 41435.58 | PASS          | AC=30;AF=0.429;AN=70;BaseQ         |
| 48571 | chrY | 28813839 | . | A | C   | 889.08   | my_snp_filter | AC=8;AF=0.114;AN=70;BaseQ          |
| 48572 | chrY | 28813845 | . | A | T   | 635.72   | PASS          | AC=4;AF=0.057;AN=70;BaseQRankSum=  |
| 48573 | chrY | 28813849 | . | G | A   | 1426.51  | PASS          | AC=3;AF=0.043;AN=70;BaseQRankSum=  |
| 48574 | chrY | 28813862 | . | T | G   | 10586.84 | PASS          | AC=34;AF=0.486;AN=70;BaseQ         |
| 48575 | chrY | 28813876 | . | T | A   | 394.26   | PASS          | AC=3;AF=0.056;AN=54;BaseQRankSum=  |
| 48576 | chrY | 28813877 | . | C | T   | 132.49   | PASS          | AC=1;AF=0.016;AN=62;BaseQRankSum=  |
| 48577 | chrY | 28813878 | . | G | A   | 12410.90 | PASS          | AC=34;AF=0.486;AN=70;BaseQ         |
| 48578 | chrY | 28813879 | . | G | C   | 320.11   | PASS          | AC=3;AF=0.054;AN=56;BaseQRankSum=  |
| 48579 | chrY | 28813887 | . | C | G   | 1365.39  | PASS          | AC=14;AF=0.212;AN=66;BaseQRankSum= |
| 48580 | chrY | 28813897 | . | A | C   | 3040.65  | PASS          | AC=28;AF=0.400;AN=70;BaseQRankSum= |
| 48581 | chrY | 28813902 | . | C | A   | 3690.13  | PASS          | AC=13;AF=0.186;AN=70;BaseQRankSum= |
| 48582 | chrY | 28813906 | . | T | G   | 3992.93  | PASS          | AC=14;AF=0.226;AN=62;BaseQRankSum= |
| 48583 | chrY | 28813909 | . | T | G   | 4074.92  | PASS          | AC=15;AF=0.242;AN=62;BaseQRankSum= |
| 48584 | chrY | 28813933 | . | G | A   | 202.65   | PASS          | AC=1;AF=0.014;AN=70;BaseQRankSum=  |
| 48585 | chrY | 28813954 | . | T | G   | 502.58   | PASS          | AC=1;AF=0.016;AN=64;BaseQRankSum=  |
| 48586 | chrY | 28813962 | . | C | G   | 705.09   | PASS          | AC=1;AF=0.017;AN=58;BaseQRankSum=  |
| 48587 | chrY | 28813974 | . | G | T   | 152.94   | PASS          | AC=1;AF=0.014;AN=70;BaseQRankSum=  |
| 48588 | chrY | 28813987 | . | A | G,T | 3142.97  | PASS          | AC=20,1;AF=0.323,0.016;AN=62;BaseQ |
| 48589 | chrY | 28814022 | . | G | T   | 1502.27  | PASS          | AC=20;AF=0.286;AN=70;BaseQRankSum= |
| 48590 | chrY | 28814027 | . | G | A   | 1819.31  | PASS          | AC=6;AF=0.103;AN=58;BaseQRankSum=  |
| 48591 | chrY | 28814045 | . | C | T,A | 2709.75  | my_snp_filter | AC=11,1;AF=0.196,0.018;AN=         |
| 48592 | chrY | 28814048 | . | A | C   | 389.66   | my_snp_filter | AC=5;AF=0.071;AN=70;BaseQ          |
| 48593 | chrY | 28814051 | . | G | T   | 125.67   | my_snp_filter | AC=1;AF=0.014;AN=70;BaseQ          |
| 48594 | chrY | 28814057 | . | G | A   | 94.08    | my_snp_filter | AC=1;AF=0.014;AN=70;BaseQ          |
| 48595 | chrY | 28814058 | . | A | C   | 1702.77  | PASS          | AC=1;AF=0.016;AN=64;BaseQRankSum=  |
| 48596 | chrY | 28814061 | . | G | T   | 38.54    | my_snp_filter | AC=3;AF=0.043;AN=70;BaseQ          |
| 48597 | chrY | 28814062 | . | G | T   | 37.98    | my_snp_filter | AC=3;AF=0.043;AN=70;BaseQ          |
| 48598 | chrY | 28814071 | . | G | T   | 116.70   | PASS          | AC=1;AF=0.014;AN=70;BaseQRankSum=  |
| 48599 | chrY | 28814074 | . | G | T   | 574.49   | my_snp_filter | AC=8;AF=0.114;AN=70;BaseQ          |
| 48600 | chrY | 28814077 | . | A | G   | 1490.86  | my_snp_filter | AC=1;AF=0.016;AN=64;BaseQ          |
| 48601 | chrY | 28814079 | . | T | G   | 1858.87  | my_snp_filter | AC=6;AF=0.097;AN=62;BaseQ          |
| 48602 | chrY | 28814090 | . | T | A   | 1316.46  | my_snp_filter | AC=1;AF=0.014;AN=70;BaseQ          |
| 48603 | chrY | 28814092 | . | C | G   | 1501.23  | my_snp_filter | AC=3;AF=0.048;AN=62;BaseQ          |
| 48604 | chrY | 28814093 | . | T | A   | 1275.62  | my_snp_filter | AC=1;AF=0.016;AN=62;BaseQ          |
| 48605 | chrY | 28814099 | . | T | A   | 1257.10  | my_snp_filter | AC=1;AF=0.015;AN=66;BaseQ          |
| 48606 | chrY | 28814100 | . | T | C   | 222.97   | my_snp_filter | AC=2;AF=0.029;AN=70;BaseQ          |
| 48607 | chrY | 28814116 | . | C | G   | 232.23   | my_snp_filter | AC=4;AF=0.059;AN=68;BaseQ          |
| 48608 | chrY | 28814184 | . | A | G   | 110.14   | my_snp_filter | AC=2;AF=0.029;AN=70;BaseQ          |
| 48609 | chrY | 28814189 | . | G | A   | 135.10   | my_snp_filter | AC=2;AF=0.029;AN=70;BaseQ          |
| 48610 | chrY | 28814194 | . | T | G,* | 270.07   | my_snp_filter | AC=5,1;AF=0.074,0.015;AN=          |
| 48611 | chrY | 28814217 | . | G | C   | 50.28    | my_snp_filter | AC=2;AF=0.029;AN=70;BaseQ          |
| 48612 | chrY | 28814230 | . | A | T   | 28736.51 | PASS          | AC=69;AF=0.986;AN=70;BaseQ         |
| 48613 | chrY | 28814249 | . | T | G   | 682.44   | my_snp_filter | AC=9;AF=0.150;AN=60;BaseQ          |
| 48614 | chrY | 28814258 | . | G | A   | 236.13   | PASS          | AC=3;AF=0.044;AN=68;BaseQRankSum=  |
| 48615 | chrY | 28814264 | . | G | A   | 219.22   | PASS          | AC=3;AF=0.047;AN=64;BaseQRankSum=  |
| 48616 | chrY | 28814307 | . | G | T   | 1476.86  | PASS          | AC=13;AF=0.186;AN=70;BaseQRankSum= |
| 48617 | chrY | 28814342 | . | T | G   | 1980.26  | PASS          | AC=13;AF=0.186;AN=70;BaseQRankSum= |
| 48618 | chrY | 28814356 | . | T | G   | 509.17   | PASS          | AC=6;AF=0.086;AN=70;BaseQRankSum=  |
| 48619 | chrY | 28814381 | . | A | G   | 7558.53  | PASS          | AC=20;AF=0.286;AN=70;BaseQRankSum= |
| 48620 | chrY | 28814386 | . | T | C   | 7047.11  | PASS          | AC=19;AF=0.271;AN=70;BaseQRankSum= |
| 48621 | chrY | 28814393 | . | C | G   | 6280.06  | PASS          | AC=20;AF=0.286;AN=70;BaseQRankSum= |
| 48622 | chrY | 28814398 | . | G | A   | 11879.56 | my_snp_filter | AC=47;AF=0.691;AN=                 |
| 48623 | chrY | 28814425 | . | A | T   | 3444.52  | my_snp_filter | AC=27;AF=0.482;AN=56;BaseQ         |
| 48624 | chrY | 28814439 | . | A | T   | 1556.35  | my_snp_filter | AC=14;AF=0.250;AN=56;BaseQ         |
| 48625 | chrY | 28814440 | . | A | G   | 1509.23  | my_snp_filter | AC=14;AF=0.250;AN=56;BaseQ         |
| 48626 | chrY | 28814445 | . | C | G   | 33.47    | PASS          | AC=1;AF=0.017;AN=60;BaseQRankSum=  |
| 48627 | chrY | 28814477 | . | T | C   | 65.30    | my_snp_filter | AC=3;AF=0.048;AN=62;BaseQ          |
| 48628 | chrY | 28814490 | . | T | C   | 237.16   | PASS          | AC=2;AF=0.032;AN=62;BaseQRankSum=  |
| 48629 | chrY | 28814512 | . | A | G   | 459.79   | PASS          | AC=3;AF=0.058;AN=52;BaseQRankSum=  |
| 48630 | chrY | 28814557 | . | C | A   | 7065.42  | my_snp_filter | AC=11;AF=0.212;AN=52;BaseQ         |
| 48631 | chrY | 28814563 | . | A | T   | 6350.83  | my_snp_filter | AC=11;AF=0.196;AN=56;BaseQ         |
| 48632 | chrY | 28814590 | . | T | G   | 7158.12  | my_snp_filter | AC=10;AF=0.208;AN=48;BaseQ         |
| 48633 | chrY | 28814591 | . | C | A   | 7256.56  | my_snp_filter | AC=10;AF=0.208;AN=48;BaseQ         |
| 48634 | chrY | 28814592 | . | A | C   | 1163.24  | my_snp_filter | AC=10;AF=0.200;AN=50;BaseQ         |
| 48635 | chrY | 28814603 | . | A | C   | 7625.22  | my_snp_filter | AC=13;AF=0.283;AN=46;BaseQ         |
| 48636 | chrY | 28814625 | . | T | G   | 7893.31  | my_snp_filter | AC=14;AF=0.318;AN=44;BaseQ         |
| 48637 | chrY | 28814668 | . | T | A   | 3057.28  | my_snp_filter | AC=24;AF=0.375;AN=64;BaseQ         |
| 48638 | chrY | 28814703 | . | C | T   | 18823.97 | PASS          | AC=14;AF=0.467;AN=30;BaseQ         |
| 48639 | chrY | 28814714 | . | G | A   | 23685.97 | PASS          | AC=14;AF=0.500;AN=28;BaseQ         |
| 48640 | chrY | 28814728 | . | T | A   | 7265.14  | PASS          | AC=10;AF=0.143;AN=70;BaseQRankSum= |



|       |      |          |   |   |     |           |               |                                   |
|-------|------|----------|---|---|-----|-----------|---------------|-----------------------------------|
| 48641 | chrY | 28814748 | . | T | C   | 8974.77   | PASS          | AC=26;AF=0.371;AN=70;BaseQRankSum |
| 48642 | chrY | 28814779 | . | A | G   | 317.21    | my_snp_filter | AC=4;AF=0.057;AN=70;BaseQ         |
| 48643 | chrY | 28814785 | . | A | T,C | 3885.21   | my_snp_filter | AC=19,5;AF=0.271,0.071;AN         |
| 48644 | chrY | 28814800 | . | A | T   | 1230.90   | my_snp_filter | AC=9;AF=0.129;AN=70;BaseQ         |
| 48645 | chrY | 28814814 | . | G | C   | 75.06     | my_snp_filter | AC=2;AF=0.029;AN=70;BaseQ         |
| 48646 | chrY | 28814819 | . | T | G   | 296990.82 | PASS          | AC=60;AF=0.857;AN=70;Base         |
| 48647 | chrY | 28814844 | . | T | G   | 103511.72 | my_snp_filter | AC=35;AF=0.500;AN                 |
| 48648 | chrY | 28814862 | . | T | A   | 113.42    | my_snp_filter | AC=1;AF=0.014;AN=70;BaseQ         |
| 48649 | chrY | 28814871 | . | A | G   | 2905.82   | my_snp_filter | AC=14;AF=0.200;AN=70;Base         |
| 48650 | chrY | 28814876 | . | G | A   | 381.10    | my_snp_filter | AC=3;AF=0.043;AN=70;BaseQ         |
| 48651 | chrY | 28814883 | . | G | A   | 51197.72  | my_snp_filter | AC=34;AF=0.486;AN                 |
| 48652 | chrY | 28814884 | . | G | C   | 28942.72  | my_snp_filter | AC=35;AF=0.500;AN                 |
| 48653 | chrY | 28814894 | . | G | T   | 33.42     | my_snp_filter | AC=1;AF=0.014;AN=70;BaseQ         |
| 48654 | chrY | 28814917 | . | T | C   | 149.97    | my_snp_filter | AC=2;AF=0.029;AN=70;BaseQ         |
| 48655 | chrY | 28814922 | . | G | C   | 4055.44   | my_snp_filter | AC=17;AF=0.567;AN=30;Base         |
| 48656 | chrY | 28814923 | . | A | T   | 3883.44   | my_snp_filter | AC=17;AF=0.567;AN=30;Base         |
| 48657 | chrY | 28814941 | . | T | G   | 2840.35   | my_snp_filter | AC=28;AF=1.00;AN=28;DP=12         |
| 48658 | chrY | 28814943 | . | G | A   | 2201.27   | my_snp_filter | AC=23;AF=0.639;AN=36;Base         |
| 48659 | chrY | 28814963 | . | T | G   | 1475.26   | my_snp_filter | AC=15;AF=0.938;AN=16;Base         |
| 48660 | chrY | 28814992 | . | T | A   | 100.93    | my_snp_filter | AC=2;AF=0.029;AN=70;BaseQ         |
| 48661 | chrY | 28815006 | . | T | G   | 165.34    | my_snp_filter | AC=4;AF=0.063;AN=64;BaseQ         |
| 48662 | chrY | 28815009 | . | T | C   | 159.99    | my_snp_filter | AC=4;AF=0.063;AN=64;BaseQ         |
| 48663 | chrY | 28815016 | . | C | T   | 149.21    | my_snp_filter | AC=4;AF=0.061;AN=66;BaseQ         |
| 48664 | chrY | 28815024 | . | G | A   | 146.05    | my_snp_filter | AC=3;AF=0.044;AN=68;BaseQ         |
| 48665 | chrY | 28815032 | . | C | T   | 148.94    | my_snp_filter | AC=2;AF=0.032;AN=62;BaseQ         |
| 48666 | chrY | 28815073 | . | T | C   | 342.54    | my_snp_filter | AC=4;AF=0.059;AN=68;BaseQ         |
| 48667 | chrY | 28815086 | . | C | T   | 2273.45   | my_snp_filter | AC=12;AF=0.171;AN=70;Base         |
| 48668 | chrY | 28815092 | . | A | T   | 3238.37   | my_snp_filter | AC=12;AF=0.171;AN=70;Base         |
| 48669 | chrY | 28815103 | . | G | C   | 1109.43   | my_snp_filter | AC=2;AF=0.029;AN=68;BaseQ         |
| 48670 | chrY | 28815107 | . | C | T   | 7111.48   | my_snp_filter | AC=12;AF=0.171;AN=70;Base         |
| 48671 | chrY | 28815126 | . | G | C   | 27753.24  | my_snp_filter | AC=47;AF=0.671;AN                 |
| 48672 | chrY | 28815151 | . | A | G   | 117.83    | my_snp_filter | AC=4;AF=0.057;AN=70;BaseQ         |
| 48673 | chrY | 28815160 | . | A | G   | 16929.46  | my_snp_filter | AC=26;AF=0.371;AN                 |
| 48674 | chrY | 28815162 | . | C | T   | 51648.88  | PASS          | AC=70;AF=1.00;AN=70;BaseQ         |
| 48675 | chrY | 28815253 | . | G | A   | 421.80    | my_snp_filter | AC=3;AF=0.043;AN=70;BaseQ         |
| 48676 | chrY | 28815261 | . | G | A   | 545.26    | my_snp_filter | AC=4;AF=0.057;AN=70;BaseQ         |
| 48677 | chrY | 28815270 | . | C | A   | 159475.86 | my_snp_filter | AC=70;AF=1.00;AN=                 |
| 48678 | chrY | 28815292 | . | T | A   | 260.67    | my_snp_filter | AC=1;AF=0.014;AN=70;BaseQ         |
| 48679 | chrY | 28815312 | . | T | A   | 5311.71   | my_snp_filter | AC=19;AF=0.271;AN=70;Base         |
| 48680 | chrY | 28815324 | . | G | T   | 12565.93  | PASS          | AC=22;AF=0.314;AN=70;Base         |
| 48681 | chrY | 28815334 | . | G | C,T | 1118.45   | my_snp_filter | AC=4,7;AF=0.057,0.100;AN=         |
| 48682 | chrY | 28815336 | . | A | T   | 3815.20   | my_snp_filter | AC=20;AF=0.286;AN=70;Base         |
| 48683 | chrY | 28815339 | . | G | T   | 421.75    | my_snp_filter | AC=3;AF=0.043;AN=70;BaseQ         |
| 48684 | chrY | 28815341 | . | A | G   | 145.35    | my_snp_filter | AC=2;AF=0.029;AN=70;BaseQ         |
| 48685 | chrY | 28815348 | . | G | A   | 297.12    | my_snp_filter | AC=2;AF=0.029;AN=70;BaseQ         |
| 48686 | chrY | 28815411 | . | A | G   | 220.39    | my_snp_filter | AC=1;AF=0.014;AN=70;BaseQ         |
| 48687 | chrY | 28815422 | . | G | C   | 2283.36   | my_snp_filter | AC=5;AF=0.071;AN=70;BaseQ         |
| 48688 | chrY | 28815440 | . | A | G   | 53.76     | my_snp_filter | AC=3;AF=0.043;AN=70;BaseQ         |
| 48689 | chrY | 28815453 | . | A | T   | 287.97    | my_snp_filter | AC=2;AF=0.029;AN=70;BaseQ         |
| 48690 | chrY | 28815489 | . | A | G   | 4037.76   | my_snp_filter | AC=13;AF=0.186;AN=70;Base         |
| 48691 | chrY | 28815499 | . | A | T   | 11843.11  | my_snp_filter | AC=25;AF=0.357;AN                 |
| 48692 | chrY | 28815500 | . | G | A   | 7097.73   | my_snp_filter | AC=14;AF=0.200;AN=70;Base         |
| 48693 | chrY | 28815503 | . | G | C   | 28212.30  | my_snp_filter | AC=30;AF=0.429;AN                 |
| 48694 | chrY | 28815523 | . | A | G   | 640.55    | my_snp_filter | AC=3;AF=0.043;AN=70;BaseQ         |
| 48695 | chrY | 28815534 | . | C | A   | 17309.28  | my_snp_filter | AC=16;AF=0.229;AN                 |
| 48696 | chrY | 28815540 | . | A | T   | 15472.99  | my_snp_filter | AC=17;AF=0.243;AN                 |
| 48697 | chrY | 28815569 | . | A | C   | 2790.47   | my_snp_filter | AC=8;AF=0.114;AN=70;BaseQ         |
| 48698 | chrY | 28815581 | . | G | A   | 79424.84  | my_snp_filter | AC=27;AF=0.386;AN                 |
| 48699 | chrY | 28815602 | . | T | G   | 82519.45  | my_snp_filter | AC=28;AF=0.400;AN                 |
| 48700 | chrY | 28815656 | . | T | C   | 42548.38  | my_snp_filter | AC=34;AF=0.486;AN                 |
| 48701 | chrY | 28815680 | . | C | T   | 33099.32  | my_snp_filter | AC=28;AF=0.400;AN                 |
| 48702 | chrY | 28815691 | . | G | A   | 27455.69  | my_snp_filter | AC=28;AF=0.400;AN                 |
| 48703 | chrY | 28815765 | . | A | T   | 136169.84 | PASS          | AC=36;AF=0.514;AN=70;Base         |
| 48704 | chrY | 28815820 | . | G | A   | 56.44     | my_snp_filter | AC=1;AF=0.014;AN=70;BaseQ         |
| 48705 | chrY | 28815829 | . | A | T   | 61532.46  | PASS          | AC=23;AF=0.329;AN=70;Base         |
| 48706 | chrY | 28815853 | . | G | A   | 548.71    | my_snp_filter | AC=3;AF=0.045;AN=66;BaseQ         |
| 48707 | chrY | 28815864 | . | C | T   | 137013.12 | my_snp_filter | AC=64;AF=1.00;AN=                 |
| 48708 | chrY | 28815900 | . | A | T   | 89.18     | my_snp_filter | AC=2;AF=0.031;AN=64;BaseQ         |
| 48709 | chrY | 28816090 | . | G | A   | 6659.51   | my_snp_filter | AC=29;AF=0.426;AN=68;Base         |
| 48710 | chrY | 28816120 | . | G | T   | 83.76     | my_snp_filter | AC=2;AF=0.029;AN=70;BaseQ         |
| 48711 | chrY | 28816178 | . | G | A   | 48105.72  | PASS          | AC=35;AF=0.500;AN=70;Base         |
| 48712 | chrY | 28816191 | . | A | G   | 25078.20  | PASS          | AC=33;AF=0.471;AN=70;Base         |
| 48713 | chrY | 28816268 | . | T | A   | 1519.78   | my_snp_filter | AC=11;AF=0.157;AN=70;Base         |
| 48714 | chrY | 28816353 | . | G | A   | 11304.16  | my_snp_filter | AC=35;AF=0.500;AN                 |
| 48715 | chrY | 28816451 | . | G | A   | 89.67     | PASS          | AC=1;AF=0.014;AN=70;BaseQRankSum= |
| 48716 | chrY | 28816457 | . | C | T   | 416.27    | my_snp_filter | AC=2;AF=0.029;AN=70;BaseQ         |

|       |      |          |   |   |     |            |               |                           |
|-------|------|----------|---|---|-----|------------|---------------|---------------------------|
| 48717 | chrY | 28816464 | . | G | C   | 606.76     | my_snp_filter | AC=3;AF=0.043;AN=70;BaseQ |
| 48718 | chrY | 28816471 | . | C | T   | 623.19     | my_snp_filter | AC=2;AF=0.029;AN=70;BaseQ |
| 48719 | chrY | 28816479 | . | C | G   | 2872.24    | my_snp_filter | AC=3;AF=0.043;AN=70;BaseQ |
| 48720 | chrY | 28816504 | . | C | G   | 959.80     | my_snp_filter | AC=2;AF=0.029;AN=70;BaseQ |
| 48721 | chrY | 28816543 | . | T | G   | 953.86     | my_snp_filter | AC=2;AF=0.029;AN=70;BaseQ |
| 48722 | chrY | 28816566 | . | A | G   | 1432.02    | my_snp_filter | AC=3;AF=0.043;AN=70;BaseQ |
| 48723 | chrY | 28816576 | . | A | G   | 3832.72    | my_snp_filter | AC=8;AF=0.114;AN=70;BaseQ |
| 48724 | chrY | 28816590 | . | C | A   | 588.27     | my_snp_filter | AC=2;AF=0.029;AN=70;BaseQ |
| 48725 | chrY | 28816602 | . | T | A,G | 156880.72  | PASS          | AC=3,32;AF=0.043,0.457;AN |
| 48726 | chrY | 28816607 | . | T | G   | 229045.72  | PASS          | AC=35;AF=0.500;AN=70;Base |
| 48727 | chrY | 28816628 | . | G | C   | 242.89     | my_snp_filter | AC=3;AF=0.043;AN=70;BaseQ |
| 48728 | chrY | 28816638 | . | C | T   | 160960.72  | PASS          | AC=35;AF=0.500;AN=70;Base |
| 48729 | chrY | 28816643 | . | T | C   | 520.50     | my_snp_filter | AC=5;AF=0.071;AN=70;BaseQ |
| 48730 | chrY | 28816683 | . | T | C   | 1956.30    | my_snp_filter | AC=7;AF=0.100;AN=70;BaseQ |
| 48731 | chrY | 28816691 | . | T | C   | 2333.41    | my_snp_filter | AC=7;AF=0.100;AN=70;BaseQ |
| 48732 | chrY | 28816703 | . | G | A   | 126357.72  | PASS          | AC=35;AF=0.500;AN=70;Base |
| 48733 | chrY | 28816708 | . | G | T   | 12200.77   | my_snp_filter | AC=13;AF=0.186;AN         |
| 48734 | chrY | 28816724 | . | A | T   | 13814.48   | my_snp_filter | AC=12;AF=0.171;AN         |
| 48735 | chrY | 28816755 | . | A | T   | 33975.53   | PASS          | AC=16;AF=0.229;AN=70;Base |
| 48736 | chrY | 28816770 | . | C | A   | 28138.51   | PASS          | AC=15;AF=0.214;AN=70;Base |
| 48737 | chrY | 28816787 | . | T | A   | 14526.87   | PASS          | AC=10;AF=0.143;AN=70;Base |
| 48738 | chrY | 28816831 | . | C | T   | 357299.72  | PASS          | AC=35;AF=0.500;AN=70;Base |
| 48739 | chrY | 28816846 | . | T | C   | 8455.98    | my_snp_filter | AC=19;AF=0.271;AN=70;Base |
| 48740 | chrY | 28816870 | . | T | G   | 749957.66  | PASS          | AC=46;AF=0.657;AN=70;Base |
| 48741 | chrY | 28816873 | . | G | C,* | 31886.12   | my_snp_filter | AC=23,5;AF=0.329,         |
| 48742 | chrY | 28816878 | . | C | G   | 459484.72  | PASS          | AC=35;AF=0.500;AN=70;Base |
| 48743 | chrY | 28816894 | . | T | C   | 4439.46    | my_snp_filter | AC=15;AF=0.214;AN=70;Base |
| 48744 | chrY | 28816927 | . | G | A   | 7762.69    | my_snp_filter | AC=17;AF=0.243;AN=70;Base |
| 48745 | chrY | 28816935 | . | G | A   | 1963.30    | my_snp_filter | AC=4;AF=0.057;AN=70;BaseQ |
| 48746 | chrY | 28816948 | . | C | G   | 843079.86  | PASS          | AC=70;AF=1.00;AN=70;BaseQ |
| 48747 | chrY | 28816962 | . | G | T   | 7191.70    | my_snp_filter | AC=17;AF=0.243;AN=70;Base |
| 48748 | chrY | 28816999 | . | G | A   | 851515.86  | PASS          | AC=70;AF=1.00;AN=70;BaseQ |
| 48749 | chrY | 28817000 | . | C | A   | 848878.86  | PASS          | AC=70;AF=1.00;AN=70;BaseQ |
| 48750 | chrY | 28817022 | . | T | A   | 2349.09    | my_snp_filter | AC=5;AF=0.071;AN=70;BaseQ |
| 48751 | chrY | 28817028 | . | A | T   | 255.67     | my_snp_filter | AC=1;AF=0.014;AN=70;BaseQ |
| 48752 | chrY | 28817031 | . | C | T   | 14032.26   | my_snp_filter | AC=21;AF=0.300;AN         |
| 48753 | chrY | 28817058 | . | C | T   | 109.51     | my_snp_filter | AC=3;AF=0.043;AN=70;BaseQ |
| 48754 | chrY | 28817079 | . | G | A   | 25403.06   | my_snp_filter | AC=23;AF=0.329;AN         |
| 48755 | chrY | 28817084 | . | A | C   | 3427.68    | my_snp_filter | AC=9;AF=0.129;AN=70;BaseQ |
| 48756 | chrY | 28817109 | . | A | G   | 127268.72  | my_snp_filter | AC=35;AF=0.500;AN         |
| 48757 | chrY | 28817189 | . | T | A   | 748.78     | my_snp_filter | AC=5;AF=0.071;AN=70;BaseQ |
| 48758 | chrY | 28817191 | . | G | T   | 24663.68   | my_snp_filter | AC=29;AF=0.414;AN         |
| 48759 | chrY | 28817211 | . | G | C   | 4758.28    | my_snp_filter | AC=4;AF=0.057;AN=70;BaseQ |
| 48760 | chrY | 28817222 | . | G | A   | 181608.72  | my_snp_filter | AC=35;AF=0.500;AN         |
| 48761 | chrY | 28817223 | . | G | A   | 445.42     | my_snp_filter | AC=2;AF=0.029;AN=70;BaseQ |
| 48762 | chrY | 28817225 | . | A | G   | 182086.72  | my_snp_filter | AC=35;AF=0.500;AN         |
| 48763 | chrY | 28817238 | . | G | A,T | 193596.84  | PASS          | AC=20,16;AF=0.286,0.229;A |
| 48764 | chrY | 28817240 | . | A | G   | 165329.72  | my_snp_filter | AC=35;AF=0.500;AN         |
| 48765 | chrY | 28817248 | . | G | C   | 1003.46    | my_snp_filter | AC=6;AF=0.086;AN=70;BaseQ |
| 48766 | chrY | 28817276 | . | T | G   | 38473.45   | my_snp_filter | AC=22;AF=0.314;AN         |
| 48767 | chrY | 28817286 | . | T | G   | 83303.17   | my_snp_filter | AC=32;AF=0.457;AN         |
| 48768 | chrY | 28817301 | . | C | T   | 89714.72   | my_snp_filter | AC=35;AF=0.500;AN         |
| 48769 | chrY | 28817389 | . | T | C   | 48206.72   | my_snp_filter | AC=35;AF=0.500;AN         |
| 48770 | chrY | 28817420 | . | C | G   | 534911.72  | PASS          | AC=35;AF=0.500;AN=70;Base |
| 48771 | chrY | 28817427 | . | T | C   | 71862.86   | my_snp_filter | AC=31;AF=0.443;AN         |
| 48772 | chrY | 28817458 | . | C | A   | 2373.16    | my_snp_filter | AC=7;AF=0.100;AN=70;BaseQ |
| 48773 | chrY | 28817459 | . | T | A   | 117298.72  | my_snp_filter | AC=35;AF=0.500;AN         |
| 48774 | chrY | 28817469 | . | A | G   | 128805.72  | my_snp_filter | AC=35;AF=0.500;AN         |
| 48775 | chrY | 28817482 | . | A | T   | 139506.72  | my_snp_filter | AC=35;AF=0.500;AN         |
| 48776 | chrY | 28817492 | . | T | A   | 139730.53  | my_snp_filter | AC=34;AF=0.486;AN         |
| 48777 | chrY | 28817494 | . | A | T   | 110637.77  | PASS          | AC=31;AF=0.443;AN=70;Base |
| 48778 | chrY | 28817531 | . | G | T   | 26807.50   | my_snp_filter | AC=25;AF=0.357;AN         |
| 48779 | chrY | 28817559 | . | T | G   | 1025504.86 | PASS          | AC=70;AF=1.00;AN=70;BaseQ |
| 48780 | chrY | 28817561 | . | T | G   | 12730.85   | my_snp_filter | AC=8;AF=0.114;AN=         |
| 48781 | chrY | 28817587 | . | C | T   | 8674.34    | my_snp_filter | AC=7;AF=0.100;AN=70;BaseQ |
| 48782 | chrY | 28817594 | . | C | T   | 103839.72  | PASS          | AC=35;AF=0.500;AN=70;Base |
| 48783 | chrY | 28817599 | . | G | C   | 4490.21    | my_snp_filter | AC=12;AF=0.171;AN=70;Base |
| 48784 | chrY | 28817611 | . | A | C   | 2070.13    | my_snp_filter | AC=7;AF=0.100;AN=70;BaseQ |
| 48785 | chrY | 28817612 | . | T | C   | 9764.92    | my_snp_filter | AC=17;AF=0.243;AN=70;Base |
| 48786 | chrY | 28817614 | . | C | G   | 787        | my_snp_filter | AC=1;AF=0.014;AN=70;BaseQ |
| 48787 | chrY | 28817629 | . | C | T   | 1505.14    | my_snp_filter | AC=7;AF=0.100;AN=70;BaseQ |
| 48788 | chrY | 28817630 | . | A | T   | 765.51     | my_snp_filter | AC=3;AF=0.043;AN=70;BaseQ |
| 48789 | chrY | 28817636 | . | G | A   | 542587.72  | PASS          | AC=35;AF=0.500;AN=70;Base |
| 48790 | chrY | 28817702 | . | T | A   | 167.92     | my_snp_filter | AC=1;AF=0.014;AN=70;BaseQ |
| 48791 | chrY | 28817703 | . | C | G   | 56938.76   | PASS          | AC=28;AF=0.400;AN=70;Base |
| 48792 | chrY | 28817739 | . | G | T   | 111.42     | my_snp_filter | AC=1;AF=0.014;AN=70;BaseQ |

|       |      |          |   |   |     |           |               |                                    |
|-------|------|----------|---|---|-----|-----------|---------------|------------------------------------|
| 48793 | chrY | 28817742 | . | C | T   | 302.67    | my_snp_filter | AC=1;AF=0.014;AN=70;BaseQ          |
| 48794 | chrY | 28817743 | . | G | A   | 239.42    | my_snp_filter | AC=1;AF=0.014;AN=70;BaseQ          |
| 48795 | chrY | 28817812 | . | C | A   | 55546.84  | my_snp_filter | AC=34;AF=0.486;AN                  |
| 48796 | chrY | 28817842 | . | G | T   | 23536.98  | my_snp_filter | AC=20;AF=0.286;AN                  |
| 48797 | chrY | 28817856 | . | A | G   | 1105.45   | my_snp_filter | AC=2;AF=0.029;AN=70;BaseQ          |
| 48798 | chrY | 28817873 | . | A | C   | 462.51    | my_snp_filter | AC=3;AF=0.043;AN=70;BaseQ          |
| 48799 | chrY | 28817892 | . | G | A   | 998.16    | my_snp_filter | AC=2;AF=0.029;AN=70;BaseQ          |
| 48800 | chrY | 28817910 | . | C | A   | 27273.21  | my_snp_filter | AC=31;AF=0.443;AN                  |
| 48801 | chrY | 28817916 | . | G | T   | 370.92    | my_snp_filter | AC=4;AF=0.057;AN=70;BaseQ          |
| 48802 | chrY | 28817936 | . | G | T   | 28840.21  | my_snp_filter | AC=33;AF=0.471;AN                  |
| 48803 | chrY | 28817939 | . | G | T   | 49509.66  | my_snp_filter | AC=27;AF=0.386;AN                  |
| 48804 | chrY | 28817981 | . | C | G   | 433.29    | my_snp_filter | AC=2;AF=0.029;AN=70;BaseQ          |
| 48805 | chrY | 28817992 | . | G | C   | 345.73    | my_snp_filter | AC=4;AF=0.057;AN=70;BaseQ          |
| 48806 | chrY | 28818012 | . | G | C   | 78.05     | my_snp_filter | AC=2;AF=0.029;AN=70;BaseQ          |
| 48807 | chrY | 28818057 | . | T | G   | 182091.86 | my_snp_filter | AC=70;AF=1.00;AN=                  |
| 48808 | chrY | 28818100 | . | T | A   | 285.94    | my_snp_filter | AC=7;AF=0.100;AN=70;BaseQ          |
| 48809 | chrY | 28818131 | . | A | G   | 18421.78  | my_snp_filter | AC=32;AF=0.615;AN                  |
| 48810 | chrY | 28818135 | . | C | T   | 28310.89  | my_snp_filter | AC=52;AF=1.00;AN=                  |
| 48811 | chrY | 28818139 | . | G | A   | 2856.09   | my_snp_filter | AC=17;AF=0.304;AN=56;Base          |
| 48812 | chrY | 28818170 | . | T | A   | 1747.83   | my_snp_filter | AC=12;AF=0.231;AN=52;Base          |
| 48813 | chrY | 28818177 | . | G | C   | 62.47     | my_snp_filter | AC=2;AF=0.043;AN=46;BaseQ          |
| 48814 | chrY | 28818197 | . | G | T   | 219.84    | my_snp_filter | AC=3;AF=0.136;AN=22;BaseQ          |
| 48815 | chrY | 28818207 | . | G | T   | 1036.71   | my_snp_filter | AC=7;AF=0.318;AN=22;BaseQ          |
| 48816 | chrY | 28818212 | . | G | T   | 885.05    | my_snp_filter | AC=9;AF=0.450;AN=20;BaseQ          |
| 48817 | chrY | 28818224 | . | G | A   | 430.94    | my_snp_filter | AC=5;AF=0.357;AN=14;BaseQ          |
| 48818 | chrY | 28818227 | . | G | A   | 45.19     | my_snp_filter | AC=1;AF=0.038;AN=26;BaseQ          |
| 48819 | chrY | 28818236 | . | C | G   | 134.19    | PASS          | AC=3;AF=0.250;AN=12;BaseQRankSum=  |
| 48820 | chrY | 28818237 | . | A | G,T | 691.84    | my_snp_filter | AC=4,3;AF=0.333,0.250;AN=          |
| 48821 | chrY | 28818260 | . | T | C   | 39.08     | my_snp_filter | AC=1;AF=0.250;AN=4;BaseQR          |
| 48822 | chrY | 28818262 | . | A | G   | 719.24    | my_snp_filter | AC=6;AF=1.00;AN=6;DP=621;          |
| 48823 | chrY | 28818284 | . | A | G   | 179.15    | my_snp_filter | AC=2;AF=0.077;AN=26;BaseQ          |
| 48824 | chrY | 28818295 | . | C | G   | 2281.37   | my_snp_filter | AC=12;AF=0.261;AN=46;Base          |
| 48825 | chrY | 28818326 | . | A | T   | 205.15    | my_snp_filter | AC=3;AF=0.088;AN=34;BaseQ          |
| 48826 | chrY | 28818341 | . | G | A   | 318.60    | my_snp_filter | AC=4;AF=0.057;AN=70;BaseQ          |
| 48827 | chrY | 28818349 | . | T | A   | 45.76     | my_snp_filter | AC=1;AF=0.014;AN=70;BaseQ          |
| 48828 | chrY | 28818362 | . | A | G   | 3763.44   | my_snp_filter | AC=32;AF=0.500;AN=64;Base          |
| 48829 | chrY | 28818367 | . | A | T   | 63.08     | my_snp_filter | AC=2;AF=0.029;AN=70;BaseQ          |
| 48830 | chrY | 28818373 | . | A | G   | 2461.30   | my_snp_filter | AC=8;AF=0.114;AN=70;BaseQ          |
| 48831 | chrY | 28818403 | . | T | G   | 357.47    | my_snp_filter | AC=5;AF=0.071;AN=70;BaseQ          |
| 48832 | chrY | 28818407 | . | C | A   | 4556.63   | my_snp_filter | AC=21;AF=0.339;AN=62;Base          |
| 48833 | chrY | 28818413 | . | A | T   | 4442.82   | my_snp_filter | AC=18;AF=0.310;AN=58;Base          |
| 48834 | chrY | 28818440 | . | T | G   | 734.22    | my_snp_filter | AC=7;AF=0.109;AN=64;BaseQ          |
| 48835 | chrY | 28818441 | . | C | A   | 628.51    | my_snp_filter | AC=7;AF=0.109;AN=64;BaseQ          |
| 48836 | chrY | 28818442 | . | A | C   | 124.03    | my_snp_filter | AC=3;AF=0.047;AN=64;BaseQ          |
| 48837 | chrY | 28818453 | . | A | C   | 186.57    | my_snp_filter | AC=3;AF=0.045;AN=66;BaseQ          |
| 48838 | chrY | 28818465 | . | T | C   | 319.11    | my_snp_filter | AC=3;AF=0.044;AN=68;BaseQ          |
| 48839 | chrY | 28818475 | . | T | G   | 203       | my_snp_filter | AC=3;AF=0.045;AN=66;BaseQ          |
| 48840 | chrY | 28818550 | . | G | T   | 978.80    | PASS          | AC=9;AF=0.129;AN=70;BaseQRankSum=  |
| 48841 | chrY | 28818553 | . | C | T   | 2109.64   | PASS          | AC=7;AF=0.100;AN=70;BaseQRankSum=  |
| 48842 | chrY | 28818558 | . | A | T   | 3122.24   | PASS          | AC=7;AF=0.103;AN=68;BaseQRankSum=  |
| 48843 | chrY | 28818564 | . | G | A   | 3519.58   | PASS          | AC=7;AF=0.100;AN=70;BaseQRankSum=  |
| 48844 | chrY | 28818578 | . | T | A   | 103.71    | PASS          | AC=1;AF=0.014;AN=70;BaseQRankSum=  |
| 48845 | chrY | 28818598 | . | T | C   | 474.80    | my_snp_filter | AC=5;AF=0.071;AN=70;BaseQ          |
| 48846 | chrY | 28818635 | . | A | T   | 213.28    | my_snp_filter | AC=2;AF=0.029;AN=70;BaseQ          |
| 48847 | chrY | 28818669 | . | C | A   | 166.29    | PASS          | AC=1;AF=0.014;AN=70;BaseQRankSum=  |
| 48848 | chrY | 28818677 | . | G | C   | 9204.28   | PASS          | AC=17;AF=0.243;AN=70;BaseQRankSum= |
| 48849 | chrY | 28818693 | . | T | G   | 4279.72   | PASS          | AC=14;AF=0.200;AN=70;BaseQRankSum= |
| 48850 | chrY | 28818720 | . | A | G   | 106.42    | my_snp_filter | AC=2;AF=0.029;AN=70;BaseQ          |
| 48851 | chrY | 28818732 | . | G | A   | 1587.39   | PASS          | AC=9;AF=0.129;AN=70;BaseQRankSum=  |
| 48852 | chrY | 28818733 | . | G | C   | 581.29    | my_snp_filter | AC=13;AF=0.186;AN=70;Base          |
| 48853 | chrY | 28818735 | . | G | C   | 85.32     | my_snp_filter | AC=2;AF=0.029;AN=70;BaseQ          |
| 48854 | chrY | 28818740 | . | G | T   | 1436.38   | PASS          | AC=6;AF=0.086;AN=70;BaseQRankSum=  |
| 48855 | chrY | 28818745 | . | A | C   | 12271.36  | PASS          | AC=25;AF=0.357;AN=70;Base          |
| 48856 | chrY | 28818772 | . | A | T   | 2314.64   | PASS          | AC=8;AF=0.114;AN=70;BaseQRankSum=  |
| 48857 | chrY | 28818784 | . | T | A   | 2960.78   | PASS          | AC=13;AF=0.186;AN=70;BaseQRankSum= |
| 48858 | chrY | 28818803 | . | T | G   | 1360.04   | PASS          | AC=7;AF=0.100;AN=70;BaseQRankSum=  |
| 48859 | chrY | 28818842 | . | G | T   | 1087.68   | my_snp_filter | AC=3;AF=0.043;AN=70;BaseQ          |
| 48860 | chrY | 28818843 | . | G | T   | 1087.92   | my_snp_filter | AC=3;AF=0.043;AN=70;BaseQ          |
| 48861 | chrY | 28818849 | . | C | T   | 60.01     | my_snp_filter | AC=2;AF=0.029;AN=70;BaseQ          |
| 48862 | chrY | 28818850 | . | G | T   | 34.22     | my_snp_filter | AC=1;AF=0.014;AN=70;BaseQ          |
| 48863 | chrY | 28818851 | . | T | A   | 33.74     | my_snp_filter | AC=1;AF=0.014;AN=70;BaseQ          |
| 48864 | chrY | 28818852 | . | G | A,T | 473.84    | my_snp_filter | AC=4,3;AF=0.057,0.043;AN=          |
| 48865 | chrY | 28818867 | . | G | A   | 65.81     | my_snp_filter | AC=1;AF=0.014;AN=70;BaseQ          |
| 48866 | chrY | 28818981 | . | T | A   | 353.34    | my_snp_filter | AC=2;AF=0.056;AN=36;BaseQ          |
| 48867 | chrY | 28818991 | . | T | C   | 4944.40   | my_snp_filter | AC=8;AF=0.211;AN=38;BaseQ          |
| 48868 | chrY | 28819013 | . | T | G   | 3547.60   | my_snp_filter | AC=8;AF=0.308;AN=26;BaseQ          |

|       |      |          |   |   |     |          |               |                                   |
|-------|------|----------|---|---|-----|----------|---------------|-----------------------------------|
| 48869 | chrY | 28819016 | . | G | T   | 2490.60  | my_snp_filter | AC=8;AF=0.308;AN=26;BaseQ         |
| 48870 | chrY | 28819056 | . | T | C   | 1195.23  | my_snp_filter | AC=22;AF=0.500;AN=44;Base         |
| 48871 | chrY | 28819063 | . | G | A   | 7715.32  | my_snp_filter | AC=37;AF=0.804;AN=46;Base         |
| 48872 | chrY | 28819115 | . | T | C   | 173.72   | my_snp_filter | AC=4;AF=0.059;AN=68;DP=63         |
| 48873 | chrY | 28819135 | . | T | A   | 7180.40  | my_snp_filter | AC=53;AF=0.883;AN=60;Base         |
| 48874 | chrY | 28819146 | . | C | A   | 95.53    | my_snp_filter | AC=1;AF=0.015;AN=66;BaseQ         |
| 48875 | chrY | 28819152 | . | A | G   | 907.51   | my_snp_filter | AC=6;AF=0.091;AN=66;BaseQ         |
| 48876 | chrY | 28819159 | . | A | T   | 1130.94  | my_snp_filter | AC=7;AF=0.109;AN=64;BaseQ         |
| 48877 | chrY | 28819162 | . | A | T   | 4618.30  | my_snp_filter | AC=34;AF=0.895;AN=38;Base         |
| 48878 | chrY | 28819163 | . | G | A   | 6138.27  | my_snp_filter | AC=42;AF=1.00;AN=42;BaseQ         |
| 48879 | chrY | 28819166 | . | A | C   | 746.88   | my_snp_filter | AC=7;AF=0.106;AN=66;BaseQ         |
| 48880 | chrY | 28819175 | . | T | G,C | 4826.84  | my_snp_filter | AC=34,5;AF=0.810,0.119;AN         |
| 48881 | chrY | 28819176 | . | G | C   | 125.58   | my_snp_filter | AC=2;AF=0.030;AN=66;BaseQ         |
| 48882 | chrY | 28819189 | . | T | A   | 135.58   | my_snp_filter | AC=2;AF=0.033;AN=60;BaseQ         |
| 48883 | chrY | 28819190 | . | T | G   | 138.79   | my_snp_filter | AC=2;AF=0.033;AN=60;BaseQ         |
| 48884 | chrY | 28819198 | . | A | G,* | 1995.44  | my_snp_filter | AC=21,1;AF=0.700,0.033;AN         |
| 48885 | chrY | 28819200 | . | C | A   | 1764.07  | my_snp_filter | AC=20;AF=0.714;AN=28;Base         |
| 48886 | chrY | 28819205 | . | G | T   | 427.73   | my_snp_filter | AC=3;AF=0.075;AN=40;BaseQ         |
| 48887 | chrY | 28819210 | . | G | C   | 1322.52  | my_snp_filter | AC=12;AF=0.750;AN=16;Base         |
| 48888 | chrY | 28819214 | . | T | A   | 887.57   | my_snp_filter | AC=11;AF=0.786;AN=14;Base         |
| 48889 | chrY | 28819238 | . | A | G   | 65.33    | my_snp_filter | AC=2;AF=0.333;AN=6;DP=17;         |
| 48890 | chrY | 58819717 | . | A | G   | 22674.82 | my_snp_filter | AC=11;AF=0.500;AN=18;             |
| 48891 | chrY | 58819787 | . | A | G   | 166.67   | my_snp_filter | AC=1;AF=0.056;AN=18;BaseQ         |
| 48892 | chrY | 58819795 | . | C | T   | 277.50   | my_snp_filter | AC=1;AF=0.056;AN=18;BaseQ         |
| 48893 | chrY | 58819801 | . | C | T   | 302.37   | my_snp_filter | AC=1;AF=0.056;AN=18;BaseQ         |
| 48894 | chrY | 58819868 | . | A | G   | 43.96    | my_snp_filter | AC=1;AF=0.063;AN=16;BaseQ         |
| 48895 | chrY | 58819898 | . | G | C   | 80.24    | my_snp_filter | AC=1;AF=0.083;AN=12;BaseQ         |
| 48896 | chrY | 58819983 | . | A | G   | 1001.20  | my_snp_filter | AC=4;AF=0.333;AN=12;BaseQ         |
| 48897 | chrY | 58820079 | . | A | C   | 3172.82  | PASS          | AC=12;AF=0.375;AN=32;BaseQRankSum |
| 48898 | chrY | 58820106 | . | C | T   | 3886.49  | my_snp_filter | AC=13;AF=0.406;AN=32;Base         |
| 48899 | chrY | 58820185 | . | G | T   | 1466.45  | my_snp_filter | AC=4;AF=0.500;AN=8;BaseQR         |
| 48900 | chrY | 58820187 | . | A | C   | 1466.45  | my_snp_filter | AC=4;AF=0.400;AN=10;BaseQ         |
| 48901 | chrY | 58820214 | . | C | A   | 907.46   | my_snp_filter | AC=4;AF=0.500;AN=8;BaseQR         |
| 48902 | chrY | 58820252 | . | T | A   | 444.23   | my_snp_filter | AC=4;AF=0.667;AN=6;BaseQR         |
| 48903 | chrY | 58820253 | . | G | T   | 444.23   | my_snp_filter | AC=4;AF=0.667;AN=6;BaseQR         |
| 48904 | chrY | 58820272 | . | C | T   | 32.32    | my_snp_filter | AC=1;AF=0.167;AN=6;BaseQR         |
| 48905 | chrY | 58820337 | . | A | C   | 221.17   | my_snp_filter | AC=4;AF=1.00;AN=4;DP=17;F         |
| 48906 | chrY | 58820950 | . | C | A   | 60.11    | my_snp_filter | AC=1;AF=0.167;AN=6;BaseQR         |
| 48907 | chrY | 58820951 | . | C | A   | 60.11    | my_snp_filter | AC=1;AF=0.167;AN=6;BaseQR         |
| 48908 | chrY | 58821321 | . | C | G   | 257.12   | my_snp_filter | AC=2;AF=0.333;AN=6;BaseQR         |
| 48909 | chrY | 58824987 | . | C | G   | 58.57    | PASS          | AC=2;AF=0.200;AN=10;DP=9;FS=0.000 |
| 48910 | chrY | 58825004 | . | T | C   | 58       | PASS          | AC=2;AF=0.167;AN=12;DP=12;FS=0.00 |
| 48911 | chrY | 58825021 | . | C | A   | 58.01    | PASS          | AC=2;AF=0.167;AN=12;DP=11;FS=0.00 |
| 48912 | chrY | 58825044 | . | T | C   | 58.63    | PASS          | AC=2;AF=0.200;AN=10;DP=9;FS=0.000 |
| 48913 | chrY | 58827243 | . | C | T   | 671.26   | my_snp_filter | AC=10;AF=1.00;AN=10;DP=48         |
| 48914 | chrY | 58827271 | . | A | G   | 1376.92  | PASS          | AC=7;AF=0.117;AN=60;BaseQRankSum= |
| 48915 | chrY | 58827289 | . | C | G   | 128      | my_snp_filter | AC=1;AF=0.014;AN=70;BaseQ         |
| 48916 | chrY | 58827389 | . | T | G,A | 10167.76 | my_snp_filter | AC=2,25;AF=0.029,0.029            |
| 48917 | chrY | 58827390 | . | G | T   | 1009.04  | my_snp_filter | AC=16;AF=0.229;AN=70;Base         |
| 48918 | chrY | 58827400 | . | A | G   | 33.82    | my_snp_filter | AC=2;AF=0.029;AN=70;BaseQ         |
| 48919 | chrY | 58829308 | . | C | T   | 58.87    | PASS          | AC=2;AF=0.200;AN=10;DP=13;FS=0.00 |
| 48920 | chrY | 58829317 | . | T | G   | 57.69    | PASS          | AC=2;AF=0.143;AN=14;DP=12;FS=0.00 |
| 48921 | chrY | 58833894 | . | A | T   | 1455.21  | my_snp_filter | AC=7;AF=0.219;AN=32;BaseQ         |
| 48922 | chrY | 58833975 | . | T | C   | 101.40   | PASS          | AC=3;AF=0.054;AN=56;BaseQRankSum= |
| 48923 | chrY | 58833986 | . | C | T   | 44.17    | PASS          | AC=1;AF=0.020;AN=50;BaseQRankSum= |
| 48924 | chrY | 58833988 | . | C | G   | 138.77   | my_snp_filter | AC=2;AF=0.040;AN=50;BaseQ         |
| 48925 | chrY | 58833997 | . | C | G   | 129.57   | my_snp_filter | AC=2;AF=0.040;AN=50;BaseQ         |
| 48926 | chrY | 58834002 | . | C | G   | 41506.85 | my_snp_filter | AC=19;AF=0.339;AN=19              |
| 48927 | chrY | 58834007 | . | C | G   | 26516.94 | my_snp_filter | AC=11;AF=0.196;AN=11              |
| 48928 | chrY | 58834017 | . | C | G   | 9047.25  | my_snp_filter | AC=7;AF=0.135;AN=52;BaseQ         |
| 48929 | chrY | 58834027 | . | G | C   | 39       | my_snp_filter | AC=1;AF=0.017;AN=58;BaseQ         |
| 48930 | chrY | 58834036 | . | T | A   | 45.45    | PASS          | AC=1;AF=0.019;AN=52;BaseQRankSum= |
| 48931 | chrY | 58834038 | . | C | T   | 45.55    | PASS          | AC=1;AF=0.019;AN=52;BaseQRankSum= |
| 48932 | chrY | 58834061 | . | C | T   | 27331.38 | my_snp_filter | AC=10;AF=0.278;AN=10              |
| 48933 | chrY | 58834115 | . | T | C   | 481.06   | my_snp_filter | AC=4;AF=0.133;AN=30;BaseQ         |
| 48934 | chrY | 58836274 | . | T | G   | 31.27    | my_snp_filter | AC=2;AF=0.200;AN=10;DP=11         |
| 48935 | chrY | 58836708 | . | A | T   | 36.32    | PASS          | AC=3;AF=0.075;AN=40;BaseQRankSum= |
| 48936 | chrY | 58836868 | . | A | T   | 33.91    | PASS          | AC=2;AF=0.077;AN=26;DP=24;FS=0.00 |
| 48937 | chrY | 58836906 | . | G | T   | 50.93    | PASS          | AC=4;AF=0.167;AN=24;DP=28;FS=0.00 |
| 48938 | chrY | 58838630 | . | G | T   | 96.84    | PASS          | AC=1;AF=0.056;AN=18;BaseQRankSum= |
| 48939 | chrY | 58838631 | . | A | T   | 90.49    | PASS          | AC=1;AF=0.050;AN=20;BaseQRankSum= |
| 48940 | chrY | 58838634 | . | G | T   | 167.08   | PASS          | AC=1;AF=0.050;AN=20;BaseQRankSum= |
| 48941 | chrY | 58838710 | . | C | A   | 92.04    | PASS          | AC=1;AF=0.045;AN=22;BaseQRankSum= |
| 48942 | chrY | 58838721 | . | A | T   | 92.18    | PASS          | AC=1;AF=0.042;AN=24;BaseQRankSum= |
| 48943 | chrY | 58840792 | . | C | A   | 876.86   | my_snp_filter | AC=2;AF=1.00;AN=2;DP=53;F         |
| 48944 | chrY | 58840834 | . | G | T,* | 1495.24  | my_snp_filter | AC=5,2;AF=0.500,0.200;AN=         |

|       |      |          |   |   |     |         |               |                                   |
|-------|------|----------|---|---|-----|---------|---------------|-----------------------------------|
| 48945 | chrY | 58840857 | . | G | A   | 1552.49 | my_snp_filter | AC=8;AF=1.00;AN=8;DP=668;         |
| 48946 | chrY | 58840861 | . | C | T   | 1167.94 | my_snp_filter | AC=2;AF=0.040;AN=50;DP=66         |
| 48947 | chrY | 58840885 | . | C | T   | 95.57   | my_snp_filter | AC=1;AF=0.021;AN=48;BaseQ         |
| 48948 | chrY | 58840890 | . | C | T   | 945.27  | my_snp_filter | AC=2;AF=0.071;AN=28;DP=51         |
| 48949 | chrY | 58840930 | . | T | G   | 130.46  | PASS          | AC=5;AF=0.179;AN=28;BaseQRankSum= |
| 48950 | chrY | 58840945 | . | C | A   | 52.12   | my_snp_filter | AC=1;AF=0.042;AN=24;BaseQ         |
| 48951 | chrY | 58842671 | . | G | A   | 9185.21 | my_snp_filter | AC=9;AF=0.450;AN=20;BaseQ         |
| 48952 | chrY | 58842744 | . | T | G   | 368.02  | my_snp_filter | AC=1;AF=0.042;AN=24;BaseQ         |
| 48953 | chrY | 58843069 | . | C | G   | 51.52   | PASS          | AC=2;AF=0.063;AN=32;DP=52;FS=0.00 |
| 48954 | chrY | 58843076 | . | G | A   | 52.02   | PASS          | AC=2;AF=0.071;AN=28;DP=50;FS=0.00 |
| 48955 | chrY | 58843077 | . | T | C   | 46.04   | PASS          | AC=1;AF=0.033;AN=30;BaseQRankSum= |
| 48956 | chrY | 58843097 | . | G | T   | 221.48  | PASS          | AC=4;AF=0.250;AN=16;BaseQRankSum= |
| 48957 | chrY | 58843310 | . | T | G   | 123.86  | PASS          | AC=4;AF=0.182;AN=22;DP=30;FS=0.00 |
| 48958 | chrY | 58843332 | . | C | G   | 148.94  | PASS          | AC=4;AF=0.182;AN=22;DP=36;FS=0.00 |
| 48959 | chrY | 58843384 | . | T | G   | 213.95  | PASS          | AC=2;AF=0.100;AN=20;DP=35;FS=0.00 |
| 48960 | chrY | 58843385 | . | G | A   | 227.15  | PASS          | AC=2;AF=0.100;AN=20;DP=35;FS=0.00 |
| 48961 | chrY | 58843388 | . | G | T   | 227.30  | PASS          | AC=2;AF=0.100;AN=20;DP=35;FS=0.00 |
| 48962 | chrY | 58843421 | . | A | G   | 43.81   | PASS          | AC=2;AF=0.250;AN=8;DP=7;FS=0.000; |
| 48963 | chrY | 58848073 | . | A | C   | 2136.27 | my_snp_filter | AC=13;AF=0.650;AN=20;BaseQ        |
| 48964 | chrY | 58848116 | . | A | T   | 117.76  | PASS          | AC=2;AF=0.034;AN=58;BaseQRankSum= |
| 48965 | chrY | 58848138 | . | A | C   | 149.46  | my_snp_filter | AC=2;AF=0.033;AN=60;BaseQ         |
| 48966 | chrY | 58848152 | . | T | A   | 89.17   | PASS          | AC=1;AF=0.016;AN=64;BaseQRankSum= |
| 48967 | chrY | 58848196 | . | A | G   | 82.12   | PASS          | AC=1;AF=0.017;AN=58;BaseQRankSum= |
| 48968 | chrY | 58848201 | . | A | G   | 85.41   | PASS          | AC=1;AF=0.017;AN=58;BaseQRankSum= |
| 48969 | chrY | 58848206 | . | A | G   | 45.02   | PASS          | AC=1;AF=0.017;AN=58;BaseQRankSum= |
| 48970 | chrY | 58848209 | . | G | C   | 49.21   | PASS          | AC=1;AF=0.019;AN=52;BaseQRankSum= |
| 48971 | chrY | 58854621 | . | T | C   | 3401.15 | PASS          | AC=5;AF=0.250;AN=20;BaseQRankSum= |
| 48972 | chrY | 58854637 | . | C | G   | 283.89  | PASS          | AC=2;AF=0.091;AN=22;BaseQRankSum= |
| 48973 | chrY | 58854638 | . | G | C   | 283.89  | PASS          | AC=2;AF=0.091;AN=22;BaseQRankSum= |
| 48974 | chrY | 58854641 | . | G | T   | 288.89  | PASS          | AC=2;AF=0.091;AN=22;BaseQRankSum= |
| 48975 | chrY | 58855291 | . | T | C   | 44.06   | PASS          | AC=2;AF=0.111;AN=18;DP=169;FS=0.0 |
| 48976 | chrY | 58856038 | . | G | A   | 188.93  | my_snp_filter | AC=2;AF=0.100;AN=20;DP=56         |
| 48977 | chrY | 58856075 | . | T | C   | 66.55   | PASS          | AC=3;AF=0.063;AN=48;BaseQRankSum= |
| 48978 | chrY | 58856082 | . | G | C   | 54.39   | PASS          | AC=2;AF=0.045;AN=44;BaseQRankSum= |
| 48979 | chrY | 58856083 | . | A | G   | 48.80   | PASS          | AC=2;AF=0.045;AN=44;DP=1304;FS=0. |
| 48980 | chrY | 58856089 | . | C | A   | 96.28   | my_snp_filter | AC=2;AF=0.045;AN=44;BaseQ         |
| 48981 | chrY | 58856090 | . | G | C   | 132.99  | my_snp_filter | AC=4;AF=0.095;AN=42;BaseQ         |
| 48982 | chrY | 58856098 | . | T | A   | 63.54   | PASS          | AC=2;AF=0.050;AN=40;DP=1185;FS=0. |
| 48983 | chrY | 58856100 | . | T | A   | 106.17  | my_snp_filter | AC=2;AF=0.050;AN=40;BaseQ         |
| 48984 | chrY | 58856104 | . | C | T   | 42.82   | PASS          | AC=1;AF=0.026;AN=38;BaseQRankSum= |
| 48985 | chrY | 58856105 | . | G | A   | 49.17   | PASS          | AC=2;AF=0.053;AN=38;DP=815;FS=0.0 |
| 48986 | chrY | 58856125 | . | T | C   | 331.78  | my_snp_filter | AC=1;AF=0.033;AN=30;BaseQ         |
| 48987 | chrY | 58856126 | . | A | C   | 307.87  | my_snp_filter | AC=1;AF=0.029;AN=34;BaseQ         |
| 48988 | chrY | 58856130 | . | T | C   | 183.29  | my_snp_filter | AC=2;AF=0.063;AN=32;DP=23         |
| 48989 | chrY | 58856136 | . | C | A   | 103.78  | my_snp_filter | AC=2;AF=0.077;AN=26;DP=20         |
| 48990 | chrY | 58856396 | . | G | C   | 61.28   | my_snp_filter | AC=2;AF=0.050;AN=40;BaseQ         |
| 48991 | chrY | 58856410 | . | C | T   | 46.44   | PASS          | AC=1;AF=0.033;AN=30;BaseQRankSum= |
| 48992 | chrY | 58856669 | . | T | A   | 68.37   | my_snp_filter | AC=3;AF=0.136;AN=22;BaseQ         |
| 48993 | chrY | 58856696 | . | G | C   | 63.73   | my_snp_filter | AC=3;AF=0.214;AN=14;BaseQ         |
| 48994 | chrY | 58856706 | . | G | C   | 108.33  | my_snp_filter | AC=4;AF=0.286;AN=14;BaseQ         |
| 48995 | chrY | 58856711 | . | A | G   | 54.32   | my_snp_filter | AC=3;AF=0.188;AN=16;BaseQ         |
| 48996 | chrY | 58856957 | . | G | C   | 39.97   | PASS          | AC=1;AF=0.500;AN=2;BaseQRankSum=- |
| 48997 | chrY | 58857352 | . | G | T   | 52.71   | PASS          | AC=2;AF=0.083;AN=24;DP=124;FS=0.0 |
| 48998 | chrY | 58857368 | . | G | A   | 60.86   | PASS          | AC=2;AF=0.250;AN=8;DP=8;FS=0.000; |
| 48999 | chrY | 58857389 | . | G | T   | 72.51   | PASS          | AC=4;AF=1.00;AN=4;DP=5;FS=0.000;M |
| 49000 | chrY | 58858870 | . | T | C   | 1418.09 | my_snp_filter | AC=3;AF=0.100;AN=30;BaseQ         |
| 49001 | chrY | 58858916 | . | G | C   | 67.08   | my_snp_filter | AC=1;AF=0.029;AN=34;BaseQ         |
| 49002 | chrY | 58858927 | . | C | T   | 2303.91 | my_snp_filter | AC=7;AF=0.219;AN=32;BaseQ         |
| 49003 | chrY | 58858956 | . | C | T   | 38.37   | my_snp_filter | AC=1;AF=0.045;AN=22;BaseQ         |
| 49004 | chrY | 58862319 | . | C | A   | 142.50  | my_snp_filter | AC=2;AF=0.091;AN=22;BaseQ         |
| 49005 | chrY | 58862366 | . | T | G   | 8151.34 | my_snp_filter | AC=11;AF=0.550;AN=20;BaseQ        |
| 49006 | chrY | 58862633 | . | C | G   | 57.07   | my_snp_filter | AC=2;AF=0.100;AN=20;DP=82         |
| 49007 | chrY | 58862655 | . | G | A   | 499.99  | my_snp_filter | AC=8;AF=0.571;AN=14;BaseQ         |
| 49008 | chrY | 58862678 | . | G | C   | 315.60  | my_snp_filter | AC=10;AF=0.185;AN=54;BaseQ        |
| 49009 | chrY | 58862685 | . | A | G   | 235.73  | my_snp_filter | AC=5;AF=0.089;AN=56;BaseQ         |
| 49010 | chrY | 58862713 | . | C | A   | 279.50  | PASS          | AC=8;AF=0.143;AN=56;BaseQRankSum= |
| 49011 | chrY | 58862748 | . | C | A   | 257.58  | PASS          | AC=4;AF=0.087;AN=46;BaseQRankSum= |
| 49012 | chrY | 58862754 | . | C | A   | 90.12   | PASS          | AC=1;AF=0.025;AN=40;BaseQRankSum= |
| 49013 | chrY | 58862760 | . | C | G,A | 1268.84 | PASS          | AC=9,7;AF=0.375,0.292;AN=24;BaseQ |
| 49014 | chrY | 58862994 | . | G | C   | 162.93  | PASS          | AC=3;AF=0.125;AN=24;BaseQRankSum= |
| 49015 | chrY | 58862998 | . | T | A   | 182.31  | PASS          | AC=3;AF=0.167;AN=18;BaseQRankSum= |
| 49016 | chrY | 58862999 | . | G | T   | 173.17  | PASS          | AC=3;AF=0.167;AN=18;BaseQRankSum= |
| 49017 | chrY | 58863010 | . | T | C   | 86.52   | PASS          | AC=4;AF=0.125;AN=32;DP=82;FS=0.00 |
| 49018 | chrY | 58863023 | . | A | T   | 174.91  | PASS          | AC=3;AF=0.100;AN=30;BaseQRankSum= |
| 49019 | chrY | 58863062 | . | C | G   | 73.15   | PASS          | AC=3;AF=0.107;AN=28;BaseQRankSum= |
| 49020 | chrY | 58863077 | . | C | G   | 49.81   | PASS          | AC=1;AF=0.036;AN=28;BaseQRankSum= |

|       |      |          |   |   |     |           |               |                                    |
|-------|------|----------|---|---|-----|-----------|---------------|------------------------------------|
| 49021 | chrY | 58866066 | . | T | A   | 47.04     | my_snp_filter | AC=1;AF=0.021;AN=48;BaseQ          |
| 49022 | chrY | 58866078 | . | C | A   | 250.59    | my_snp_filter | AC=3;AF=0.060;AN=50;BaseQ          |
| 49023 | chrY | 58866088 | . | C | A,T | 716.61    | my_snp_filter | AC=3,1;AF=0.063,0.021;AN=          |
| 49024 | chrY | 58866099 | . | A | C   | 398.65    | my_snp_filter | AC=3;AF=0.065;AN=46;BaseQ          |
| 49025 | chrY | 58866115 | . | C | T   | 62.08     | my_snp_filter | AC=1;AF=0.024;AN=42;BaseQ          |
| 49026 | chrY | 58866149 | . | A | G   | 173.06    | my_snp_filter | AC=3;AF=0.167;AN=18;BaseQ          |
| 49027 | chrY | 58866702 | . | C | A   | 141.51    | PASS          | AC=4;AF=0.250;AN=16;DP=13;FS=0.00  |
| 49028 | chrY | 58866712 | . | C | T   | 141.51    | PASS          | AC=4;AF=0.250;AN=16;DP=13;FS=0.00  |
| 49029 | chrY | 58866750 | . | T | C   | 149.71    | my_snp_filter | AC=5;AF=0.208;AN=24;BaseQ          |
| 49030 | chrY | 58866781 | . | C | G   | 259.02    | my_snp_filter | AC=4;AF=0.200;AN=20;BaseQ          |
| 49031 | chrY | 58866802 | . | G | A   | 203.83    | PASS          | AC=3;AF=0.188;AN=16;BaseQRankSum=  |
| 49032 | chrY | 58866826 | . | T | C   | 98.08     | my_snp_filter | AC=1;AF=0.071;AN=14;BaseQ          |
| 49033 | chrY | 58872552 | . | A | G   | 476.15    | PASS          | AC=5;AF=0.167;AN=30;BaseQRankSum=  |
| 49034 | chrY | 58876460 | . | T | C   | 770.87    | my_snp_filter | AC=6;AF=1.00;AN=6;DP=32;F          |
| 49035 | chrY | 58876589 | . | C | G   | 1575.56   | my_snp_filter | AC=5;AF=0.625;AN=8;BaseQR          |
| 49036 | chrY | 58876596 | . | G | A   | 1801.87   | my_snp_filter | AC=6;AF=1.00;AN=6;DP=49;F          |
| 49037 | chrY | 58876789 | . | G | C   | 47.04     | my_snp_filter | AC=1;AF=0.056;AN=18;BaseQ          |
| 49038 | chrY | 58880048 | . | C | A   | 63        | PASS          | AC=2;AF=0.333;AN=6;DP=4;FS=0.000;  |
| 49039 | chrY | 58880049 | . | T | C   | 67.84     | PASS          | AC=2;AF=1.00;AN=2;DP=4;FS=0.000;M  |
| 49040 | chrY | 58880388 | . | C | A   | 103.26    | my_snp_filter | AC=4;AF=0.286;AN=14;DP=15          |
| 49041 | chrY | 58883594 | . | A | T   | 113.96    | PASS          | AC=1;AF=0.016;AN=62;BaseQRankSum=  |
| 49042 | chrY | 58883603 | . | A | C,T | 594845.02 | my_snp_filter | AC=14,25;AF=0.259                  |
| 49043 | chrY | 58883610 | . | C | T   | 34.47     | PASS          | AC=1;AF=0.015;AN=66;BaseQRankSum=  |
| 49044 | chrY | 58883612 | . | G | C   | 34.63     | PASS          | AC=1;AF=0.015;AN=66;BaseQRankSum=  |
| 49045 | chrY | 58883622 | . | T | C   | 110.44    | PASS          | AC=1;AF=0.015;AN=66;BaseQRankSum=  |
| 49046 | chrY | 58883625 | . | C | T   | 146.66    | PASS          | AC=2;AF=0.030;AN=66;BaseQRankSum=  |
| 49047 | chrY | 58883692 | . | A | C   | 14466.57  | my_snp_filter | AC=9;AF=0.141;AN=                  |
| 49048 | chrY | 58883724 | . | G | A   | 224394.19 | my_snp_filter | AC=13;AF=0.241;AN=                 |
| 49049 | chrY | 58883744 | . | A | T   | 45.10     | PASS          | AC=1;AF=0.017;AN=60;BaseQRankSum=  |
| 49050 | chrY | 58883773 | . | C | T   | 89.17     | PASS          | AC=2;AF=0.034;AN=58;BaseQRankSum=  |
| 49051 | chrY | 58883784 | . | T | A   | 82.56     | PASS          | AC=2;AF=0.045;AN=44;BaseQRankSum=  |
| 49052 | chrY | 58883840 | . | A | G   | 242.87    | my_snp_filter | AC=2;AF=0.034;AN=58;BaseQ          |
| 49053 | chrY | 58883850 | . | T | C   | 329.60    | my_snp_filter | AC=6;AF=0.107;AN=56;BaseQ          |
| 49054 | chrY | 58883867 | . | C | G   | 196.81    | my_snp_filter | AC=6;AF=0.103;AN=58;BaseQ          |
| 49055 | chrY | 58883868 | . | C | A   | 38.59     | my_snp_filter | AC=1;AF=0.017;AN=58;BaseQ          |
| 49056 | chrY | 58883878 | . | C | T   | 32.68     | my_snp_filter | AC=1;AF=0.019;AN=54;BaseQ          |
| 49057 | chrY | 58883882 | . | C | A   | 44.69     | my_snp_filter | AC=1;AF=0.019;AN=54;BaseQ          |
| 49058 | chrY | 58883883 | . | C | A   | 2731.65   | my_snp_filter | AC=7;AF=0.130;AN=54;BaseQ          |
| 49059 | chrY | 58883887 | . | G | C   | 29676.83  | my_snp_filter | AC=11;AF=0.204;AN=                 |
| 49060 | chrY | 58883892 | . | C | G,A | 8110.18   | my_snp_filter | AC=7,3;AF=0.130,0.056;AN=          |
| 49061 | chrY | 58883893 | . | C | A   | 3252.99   | my_snp_filter | AC=5;AF=0.093;AN=54;BaseQ          |
| 49062 | chrY | 58883917 | . | G | A   | 605.32    | my_snp_filter | AC=3;AF=0.071;AN=42;BaseQ          |
| 49063 | chrY | 58883920 | . | C | G   | 572.04    | my_snp_filter | AC=1;AF=0.025;AN=40;BaseQ          |
| 49064 | chrY | 58883940 | . | C | T   | 2985.15   | my_snp_filter | AC=4;AF=0.133;AN=30;BaseQ          |
| 49065 | chrY | 58883942 | . | C | T   | 78.90     | my_snp_filter | AC=1;AF=0.036;AN=28;BaseQ          |
| 49066 | chrY | 58883950 | . | G | T   | 108.82    | my_snp_filter | AC=2;AF=0.077;AN=26;BaseQ          |
| 49067 | chrY | 58883954 | . | A | G   | 143.95    | my_snp_filter | AC=2;AF=0.077;AN=26;BaseQ          |
| 49068 | chrY | 58883955 | . | T | A   | 214.60    | my_snp_filter | AC=1;AF=0.038;AN=26;BaseQ          |
| 49069 | chrY | 58884213 | . | G | C   | 152.05    | PASS          | AC=4;AF=0.074;AN=54;BaseQRankSum=  |
| 49070 | chrY | 58884221 | . | T | C   | 763.86    | PASS          | AC=14;AF=0.333;AN=42;BaseQRankSum= |
| 49071 | chrY | 58884231 | . | G | T   | 45.23     | PASS          | AC=3;AF=0.050;AN=60;BaseQRankSum=  |
| 49072 | chrY | 58884251 | . | C | T   | 1029.53   | PASS          | AC=21;AF=0.500;AN=42;BaseQRankSum= |
| 49073 | chrY | 58884622 | . | A | T   | 350.12    | my_snp_filter | AC=9;AF=0.281;AN=32;BaseQ          |
| 49074 | chrY | 58884631 | . | T | C   | 331.52    | PASS          | AC=7;AF=0.233;AN=30;BaseQRankSum=  |
| 49075 | chrY | 58884655 | . | T | A   | 147.13    | PASS          | AC=3;AF=0.107;AN=28;BaseQRankSum=  |
| 49076 | chrY | 58884866 | . | G | A   | 70.82     | my_snp_filter | AC=2;AF=0.053;AN=38;BaseQ          |
| 49077 | chrY | 58884883 | . | T | A   | 50.38     | PASS          | AC=2;AF=0.050;AN=40;DP=499;FS=0.0  |
| 49078 | chrY | 58884885 | . | A | C   | 5436.43   | my_snp_filter | AC=9;AF=0.225;AN=40;BaseQ          |
| 49079 | chrY | 58884906 | . | A | T   | 6043.68   | my_snp_filter | AC=13;AF=0.283;AN=46;BaseQ         |
| 49080 | chrY | 58884932 | . | A | G   | 17731.10  | my_snp_filter | AC=16;AF=0.421;AN=                 |
| 49081 | chrY | 58884940 | . | G | C   | 9932.94   | my_snp_filter | AC=18;AF=0.429;AN=42;BaseQ         |
| 49082 | chrY | 58885141 | . | C | T   | 54.43     | PASS          | AC=2;AF=0.091;AN=22;DP=33;FS=0.00  |
| 49083 | chrY | 58885152 | . | C | A   | 53.50     | PASS          | AC=2;AF=0.100;AN=20;DP=36;FS=0.00  |
| 49084 | chrY | 58885163 | . | A | C   | 114.64    | PASS          | AC=3;AF=0.167;AN=18;BaseQRankSum=  |
| 49085 | chrY | 58890128 | . | T | C   | 117.65    | PASS          | AC=2;AF=0.067;AN=30;BaseQRankSum=  |
| 49086 | chrY | 58890143 | . | T | C   | 45.87     | PASS          | AC=1;AF=0.036;AN=28;BaseQRankSum=  |
| 49087 | chrY | 58890174 | . | T | C   | 125.66    | my_snp_filter | AC=2;AF=0.100;AN=20;BaseQ          |
| 49088 | chrY | 58890180 | . | A | G   | 129.07    | my_snp_filter | AC=2;AF=0.111;AN=18;BaseQ          |
| 49089 | chrY | 58890852 | . | G | A   | 475.09    | my_snp_filter | AC=4;AF=0.286;AN=14;BaseQ          |
| 49090 | chrY | 58890917 | . | T | A   | 335.62    | my_snp_filter | AC=2;AF=0.071;AN=28;BaseQ          |
| 49091 | chrY | 58890978 | . | T | C   | 5372.37   | my_snp_filter | AC=5;AF=0.192;AN=26;BaseQ          |
| 49092 | chrY | 58891038 | . | T | C   | 48.26     | my_snp_filter | AC=1;AF=0.045;AN=22;BaseQ          |
| 49093 | chrY | 58891040 | . | C | G   | 102.19    | my_snp_filter | AC=1;AF=0.045;AN=22;BaseQ          |
| 49094 | chrY | 58891043 | . | T | C   | 102.23    | my_snp_filter | AC=1;AF=0.038;AN=26;BaseQ          |
| 49095 | chrY | 58891052 | . | A | G   | 209.93    | my_snp_filter | AC=1;AF=0.038;AN=26;BaseQ          |
| 49096 | chrY | 58891068 | . | C | T   | 237.30    | my_snp_filter | AC=1;AF=0.083;AN=12;BaseQ          |

|       |      |          |   |   |     |          |               |                                   |
|-------|------|----------|---|---|-----|----------|---------------|-----------------------------------|
| 49097 | chrY | 58891080 | . | A | C   | 250.67   | my_snp_filter | AC=1;AF=0.100;AN=10;BaseQ         |
| 49098 | chrY | 58891088 | . | C | T   | 258.06   | my_snp_filter | AC=1;AF=0.100;AN=10;BaseQ         |
| 49099 | chrY | 58891091 | . | T | C   | 134.58   | my_snp_filter | AC=1;AF=0.071;AN=14;BaseQ         |
| 49100 | chrY | 58891094 | . | C | T   | 139.66   | my_snp_filter | AC=1;AF=0.125;AN=8;BaseQR         |
| 49101 | chrY | 58891095 | . | T | C   | 139.07   | PASS          | AC=1;AF=0.100;AN=10;DP=55;FS=0.00 |
| 49102 | chrY | 58891342 | . | A | G   | 58.03    | PASS          | AC=4;AF=0.250;AN=16;DP=19;FS=0.00 |
| 49103 | chrY | 58891399 | . | C | T   | 65.41    | my_snp_filter | AC=2;AF=0.500;AN=4;DP=4;F         |
| 49104 | chrY | 58891402 | . | A | G   | 63.36    | my_snp_filter | AC=2;AF=0.333;AN=6;DP=4;F         |
| 49105 | chrY | 58891406 | . | C | T   | 63.36    | my_snp_filter | AC=2;AF=0.333;AN=6;DP=4;F         |
| 49106 | chrY | 58893627 | . | A | T   | 628.11   | my_snp_filter | AC=11;AF=0.917;AN=12;Base         |
| 49107 | chrY | 58893666 | . | G | A   | 42.13    | PASS          | AC=4;AF=0.080;AN=50;DP=211;FS=0.0 |
| 49108 | chrY | 58893690 | . | C | G   | 71.19    | my_snp_filter | AC=5;AF=0.119;AN=42;BaseQ         |
| 49109 | chrY | 58903907 | . | G | C   | 61.22    | my_snp_filter | AC=2;AF=0.250;AN=8;DP=13;         |
| 49110 | chrY | 58903922 | . | C | A   | 59.90    | my_snp_filter | AC=2;AF=0.167;AN=12;DP=10         |
| 49111 | chrY | 58905188 | . | T | A   | 350.48   | my_snp_filter | AC=1;AF=0.019;AN=54;BaseQ         |
| 49112 | chrY | 58905191 | . | G | C   | 1067.87  | my_snp_filter | AC=3;AF=0.056;AN=54;BaseQ         |
| 49113 | chrY | 58905259 | . | A | C   | 30.21    | my_snp_filter | AC=3;AF=0.044;AN=68;BaseQ         |
| 49114 | chrY | 58905268 | . | T | C   | 31.34    | PASS          | AC=1;AF=0.014;AN=70;BaseQRankSum= |
| 49115 | chrY | 58905279 | . | T | C   | 43.99    | PASS          | AC=1;AF=0.014;AN=70;BaseQRankSum= |
| 49116 | chrY | 58905297 | . | A | T   | 241.94   | my_snp_filter | AC=2;AF=0.029;AN=68;BaseQ         |
| 49117 | chrY | 58905306 | . | C | A   | 27950.70 | my_snp_filter | AC=13;AF=0.191;AN                 |
| 49118 | chrY | 58905316 | . | C | A   | 145.10   | PASS          | AC=3;AF=0.043;AN=70;BaseQRankSum= |
| 49119 | chrY | 58906772 | . | C | T   | 102      | PASS          | AC=4;AF=0.200;AN=20;DP=31;FS=0.00 |
| 49120 | chrY | 58906775 | . | A | G   | 53.12    | PASS          | AC=2;AF=0.083;AN=24;DP=31;FS=0.00 |
| 49121 | chrY | 58908833 | . | A | C   | 260.70   | my_snp_filter | AC=1;AF=0.056;AN=18;BaseQ         |
| 49122 | chrY | 58908843 | . | C | A   | 144.11   | my_snp_filter | AC=3;AF=0.125;AN=24;BaseQ         |
| 49123 | chrY | 58908845 | . | C | T   | 257.63   | my_snp_filter | AC=1;AF=0.045;AN=22;BaseQ         |
| 49124 | chrY | 58908848 | . | T | C   | 1469.51  | my_snp_filter | AC=6;AF=0.429;AN=14;BaseQ         |
| 49125 | chrY | 58908853 | . | T | C   | 921.15   | my_snp_filter | AC=3;AF=0.125;AN=24;BaseQ         |
| 49126 | chrY | 58908899 | . | C | G   | 94.56    | my_snp_filter | AC=1;AF=0.036;AN=28;BaseQ         |
| 49127 | chrY | 58908915 | . | C | T   | 177.73   | my_snp_filter | AC=3;AF=0.115;AN=26;BaseQ         |
| 49128 | chrY | 58908921 | . | A | G   | 153.56   | my_snp_filter | AC=2;AF=0.077;AN=26;BaseQ         |
| 49129 | chrY | 58908930 | . | C | A   | 391.23   | my_snp_filter | AC=3;AF=0.125;AN=24;BaseQ         |
| 49130 | chrY | 58908943 | . | T | G   | 770.19   | my_snp_filter | AC=6;AF=0.333;AN=18;BaseQ         |
| 49131 | chrY | 58908955 | . | G | A   | 349.45   | my_snp_filter | AC=3;AF=0.136;AN=22;BaseQ         |
| 49132 | chrY | 58908961 | . | A | G   | 180.23   | my_snp_filter | AC=3;AF=0.167;AN=18;BaseQ         |
| 49133 | chrY | 58910884 | . | G | A   | 105.32   | my_snp_filter | AC=1;AF=0.056;AN=18;BaseQ         |
| 49134 | chrY | 58910986 | . | T | A   | 131.17   | my_snp_filter | AC=1;AF=0.050;AN=20;BaseQ         |
| 49135 | chrY | 58912431 | . | T | C   | 231.70   | my_snp_filter | AC=2;AF=0.167;AN=12;DP=81         |
| 49136 | chrY | 58912436 | . | T | C   | 97.70    | my_snp_filter | AC=6;AF=0.333;AN=18;BaseQ         |
| 49137 | chrY | 58912654 | . | A | G   | 70.71    | my_snp_filter | AC=1;AF=0.083;AN=12;BaseQ         |
| 49138 | chrY | 58912662 | . | C | A   | 41.59    | my_snp_filter | AC=1;AF=0.083;AN=12;BaseQ         |
| 49139 | chrY | 58912666 | . | T | G   | 41.59    | my_snp_filter | AC=1;AF=0.083;AN=12;BaseQ         |
| 49140 | chrY | 58912667 | . | G | C   | 236.69   | my_snp_filter | AC=2;AF=0.200;AN=10;BaseQ         |
| 49141 | chrY | 58912718 | . | A | G   | 611.28   | my_snp_filter | AC=12;AF=1.00;AN=12;DP=26         |
| 49142 | chrY | 58912841 | . | C | T   | 814.34   | my_snp_filter | AC=15;AF=0.750;AN=20;Base         |
| 49143 | chrY | 58912878 | . | G | C   | 284.58   | my_snp_filter | AC=3;AF=0.075;AN=40;BaseQ         |
| 49144 | chrY | 58912883 | . | C | T   | 111.99   | my_snp_filter | AC=1;AF=0.024;AN=42;BaseQ         |
| 49145 | chrY | 58912893 | . | T | C   | 226.04   | my_snp_filter | AC=2;AF=0.053;AN=38;BaseQ         |
| 49146 | chrY | 58912895 | . | T | A   | 108.99   | my_snp_filter | AC=6;AF=0.143;AN=42;BaseQ         |
| 49147 | chrY | 58912897 | . | C | T   | 54.82    | my_snp_filter | AC=2;AF=0.071;AN=28;DP=23         |
| 49148 | chrY | 58912898 | . | C | A   | 132.24   | my_snp_filter | AC=4;AF=0.133;AN=30;BaseQ         |
| 49149 | chrY | 58912907 | . | G | C   | 161.31   | my_snp_filter | AC=5;AF=0.313;AN=16;BaseQ         |
| 49150 | chrY | 58912909 | . | A | C   | 48.72    | my_snp_filter | AC=1;AF=0.045;AN=22;BaseQ         |
| 49151 | chrY | 58912910 | . | T | A   | 162.38   | my_snp_filter | AC=5;AF=0.278;AN=18;BaseQ         |
| 49152 | chrY | 58912945 | . | G | T   | 66.29    | my_snp_filter | AC=3;AF=0.750;AN=4;BaseQR         |
| 49153 | chrY | 58916072 | . | G | C   | 53.70    | my_snp_filter | AC=1;AF=0.100;AN=10;BaseQ         |
| 49154 | chrY | 58916136 | . | T | C   | 417.44   | my_snp_filter | AC=2;AF=0.200;AN=10;BaseQ         |
| 49155 | chrY | 58916153 | . | C | A   | 432.22   | my_snp_filter | AC=2;AF=0.250;AN=8;BaseQR         |
| 49156 | chrY | 58916176 | . | T | C   | 448.22   | my_snp_filter | AC=2;AF=0.333;AN=6;BaseQR         |
| 49157 | chrY | 58916184 | . | T | G,* | 582.74   | my_snp_filter | AC=1,1;AF=0.167,0.167;AN=         |
| 49158 | chrY | 58916324 | . | T | C   | 223.66   | my_snp_filter | AC=4;AF=0.154;AN=26;BaseQ         |
| 49159 | chrY | 58916336 | . | C | G   | 431.46   | my_snp_filter | AC=3;AF=0.115;AN=26;BaseQ         |
| 49160 | chrY | 58916340 | . | T | C   | 386.46   | my_snp_filter | AC=4;AF=0.143;AN=28;BaseQ         |
| 49161 | chrY | 58916343 | . | T | C   | 407.46   | my_snp_filter | AC=3;AF=0.115;AN=26;BaseQ         |
| 49162 | chrY | 58916353 | . | T | A   | 424.94   | PASS          | AC=3;AF=0.107;AN=28;BaseQRankSum= |
| 49163 | chrY | 58916367 | . | C | T   | 252.12   | my_snp_filter | AC=3;AF=0.107;AN=28;BaseQ         |
| 49164 | chrY | 58916377 | . | G | C   | 44.46    | my_snp_filter | AC=1;AF=0.036;AN=28;BaseQ         |
| 49165 | chrY | 58916381 | . | C | T   | 183.52   | my_snp_filter | AC=8;AF=0.286;AN=28;BaseQ         |
| 49166 | chrY | 58916422 | . | G | A   | 33.55    | my_snp_filter | AC=1;AF=0.045;AN=22;BaseQ         |
| 49167 | chrY | 58916461 | . | C | T   | 85.48    | my_snp_filter | AC=1;AF=0.100;AN=10;BaseQ         |
| 49168 | chrY | 58916504 | . | G | T   | 160.90   | my_snp_filter | AC=2;AF=1.00;AN=2;DP=12;F         |
| 49169 | chrY | 58916908 | . | A | C   | 71.75    | my_snp_filter | AC=2;AF=0.250;AN=8;BaseQR         |
| 49170 | chrY | 58967742 | . | C | T   | 378.86   | PASS          | AC=1;AF=0.500;AN=2;BaseQRankSum=2 |
| 49171 | chrY | 58967813 | . | A | G   | 11561.66 | PASS          | AC=3;AF=0.056;AN=54;BaseQ         |
| 49172 | chrY | 58967865 | . | T | C   | 64270.22 | PASS          | AC=31;AF=0.674;AN=46;Base         |

|       |      |          |   |   |     |           |               |                                             |
|-------|------|----------|---|---|-----|-----------|---------------|---------------------------------------------|
| 49173 | chrY | 58967937 | . | A | C   | 19060.67  | PASS          | AC=31;AF=0.443;AN=70;BaseQRankSum=          |
| 49174 | chrY | 58967994 | . | G | C   | 3320.05   | PASS          | AC=19;AF=0.271;AN=70;BaseQRankSum=          |
| 49175 | chrY | 58968006 | . | A | T   | 16396.65  | PASS          | AC=31;AF=0.443;AN=70;BaseQRankSum=          |
| 49176 | chrY | 58968013 | . | T | C   | 64849.73  | PASS          | AC=51;AF=0.729;AN=70;BaseQRankSum=          |
| 49177 | chrY | 58968061 | . | A | T   | 2292.76   | PASS          | AC=11;AF=0.157;AN=70;BaseQRankSum=          |
| 49178 | chrY | 58968064 | . | C | T   | 4976.96   | PASS          | AC=17;AF=0.243;AN=70;BaseQRankSum=          |
| 49179 | chrY | 58968074 | . | G | A   | 41923.72  | PASS          | AC=35;AF=0.500;AN=70;BaseQRankSum=          |
| 49180 | chrY | 58968109 | . | A | T   | 1109.73   | my_snp_filter | AC=13;AF=0.186;AN=70;BaseQRankSum=          |
| 49181 | chrY | 58968129 | . | G | A   | 18475.21  | PASS          | AC=31;AF=0.443;AN=70;BaseQRankSum=          |
| 49182 | chrY | 58968384 | . | A | T   | 520.12    | my_snp_filter | AC=5;AF=0.071;AN=70;BaseQRankSum=           |
| 49183 | chrY | 58968466 | . | C | T   | 27778.78  | PASS          | AC=33;AF=0.471;AN=70;BaseQRankSum=          |
| 49184 | chrY | 58968504 | . | T | A   | 97420.17  | PASS          | AC=47;AF=0.671;AN=70;BaseQRankSum=          |
| 49185 | chrY | 58968535 | . | C | T   | 91.42     | my_snp_filter | AC=1;AF=0.014;AN=70;BaseQRankSum=           |
| 49186 | chrY | 58968546 | . | C | T   | 49803.73  | PASS          | AC=35;AF=0.500;AN=70;BaseQRankSum=          |
| 49187 | chrY | 58968570 | . | C | A   | 27452.17  | PASS          | AC=32;AF=0.457;AN=70;BaseQRankSum=          |
| 49188 | chrY | 58968589 | . | C | A   | 123893.90 | PASS          | AC=47;AF=0.671;AN=70;BaseQRankSum=          |
| 49189 | chrY | 58968625 | . | G | A   | 2085.49   | my_snp_filter | AC=7;AF=0.100;AN=70;BaseQRankSum=           |
| 49190 | chrY | 58968660 | . | G | T   | 112368.15 | PASS          | AC=44;AF=0.629;AN=70;BaseQRankSum=          |
| 49191 | chrY | 58968687 | . | T | A   | 20105.84  | PASS          | AC=34;AF=0.486;AN=70;BaseQRankSum=          |
| 49192 | chrY | 58968689 | . | T | G   | 103064.84 | PASS          | AC=36;AF=0.514;AN=70;BaseQRankSum=          |
| 49193 | chrY | 58968724 | . | T | C   | 89702.09  | PASS          | AC=41;AF=0.586;AN=70;BaseQRankSum=          |
| 49194 | chrY | 58968744 | . | T | C   | 36.42     | my_snp_filter | AC=1;AF=0.014;AN=70;BaseQRankSum=           |
| 49195 | chrY | 58968784 | . | T | C   | 69325.84  | PASS          | AC=36;AF=0.514;AN=70;BaseQRankSum=          |
| 49196 | chrY | 58968789 | . | T | C   | 25360.72  | PASS          | AC=35;AF=0.500;AN=70;BaseQRankSum=          |
| 49197 | chrY | 58968816 | . | T | G   | 76737.43  | PASS          | AC=40;AF=0.571;AN=70;BaseQRankSum=          |
| 49198 | chrY | 58968874 | . | T | C   | 434.52    | my_snp_filter | AC=3;AF=0.043;AN=70;BaseQRankSum=           |
| 49199 | chrY | 58968888 | . | A | G   | 107783.52 | PASS          | AC=48;AF=0.686;AN=70;BaseQRankSum=          |
| 49200 | chrY | 58968913 | . | A | G   | 569.22    | my_snp_filter | AC=5;AF=0.071;AN=70;BaseQRankSum=           |
| 49201 | chrY | 58968939 | . | G | A   | 91433.81  | PASS          | AC=45;AF=0.643;AN=70;BaseQRankSum=          |
| 49202 | chrY | 58968949 | . | C | T   | 135.42    | my_snp_filter | AC=1;AF=0.014;AN=70;BaseQRankSum=           |
| 49203 | chrY | 58969085 | . | A | G   | 63.42     | my_snp_filter | AC=1;AF=0.014;AN=70;BaseQRankSum=           |
| 49204 | chrY | 58969089 | . | T | C   | 13565.95  | PASS          | AC=31;AF=0.443;AN=70;BaseQRankSum=          |
| 49205 | chrY | 58969118 | . | A | G   | 47301.85  | PASS          | AC=24;AF=0.462;AN=52;BaseQRankSum=          |
| 49206 | chrY | 58969120 | . | C | G   | 1699.54   | PASS          | AC=7;AF=0.100;AN=70;BaseQRankSum=           |
| 49207 | chrY | 58969121 | . | T | G   | 1519.42   | PASS          | AC=6;AF=0.086;AN=70;BaseQRankSum=           |
| 49208 | chrY | 58969124 | . | T | C   | 47771.60  | PASS          | AC=24;AF=0.444;AN=54;BaseQRankSum=          |
| 49209 | chrY | 58969133 | . | G | A   | 16973.56  | PASS          | AC=19;AF=0.271;AN=70;BaseQRankSum=          |
| 49210 | chrY | 58969145 | . | T | G   | 42332.60  | PASS          | AC=18;AF=0.265;AN=68;BaseQRankSum=          |
| 49211 | chrY | 58969146 | . | C | T   | 41836.60  | PASS          | AC=18;AF=0.265;AN=68;BaseQRankSum=          |
| 49212 | chrY | 58969186 | . | T | C   | 289.90    | PASS          | AC=4;AF=0.057;AN=70;BaseQRankSum=           |
| 49213 | chrY | 58969294 | . | G | T   | 82973.32  | PASS          | AC=47;AF=0.671;AN=70;BaseQRankSum=          |
| 49214 | chrY | 58969307 | . | A | T   | 954.75    | my_snp_filter | AC=6;AF=0.086;AN=70;BaseQRankSum=           |
| 49215 | chrY | 58969309 | . | C | T   | 28723.84  | PASS          | AC=34;AF=0.486;AN=70;BaseQRankSum=          |
| 49216 | chrY | 58969322 | . | A | C   | 660.11    | my_snp_filter | AC=6;AF=0.086;AN=70;BaseQRankSum=           |
| 49217 | chrY | 58969346 | . | C | T   | 245.42    | PASS          | AC=1;AF=0.014;AN=70;BaseQRankSum=           |
| 49218 | chrY | 58969352 | . | G | T   | 2130.11   | PASS          | AC=11;AF=0.157;AN=70;BaseQRankSum=          |
| 49219 | chrY | 58969357 | . | G | A   | 15567.33  | PASS          | AC=30;AF=0.429;AN=70;BaseQRankSum=          |
| 49220 | chrY | 58969385 | . | A | G   | 66172.50  | PASS          | AC=53;AF=0.757;AN=70;BaseQRankSum=          |
| 49221 | chrY | 58969409 | . | T | A   | 25819.72  | PASS          | AC=35;AF=0.500;AN=70;BaseQRankSum=          |
| 49222 | chrY | 58969452 | . | C | T,* | 62812.52  | PASS          | AC=4,32;AF=0.057,0.457;AN=70;BaseQRankSum=  |
| 49223 | chrY | 58969644 | . | G | C   | 125832.97 | PASS          | AC=46;AF=0.657;AN=70;BaseQRankSum=          |
| 49224 | chrY | 58969655 | . | G | A   | 43772.72  | PASS          | AC=35;AF=0.500;AN=70;BaseQRankSum=          |
| 49225 | chrY | 58969664 | . | C | T   | 607.76    | my_snp_filter | AC=6;AF=0.086;AN=70;BaseQRankSum=           |
| 49226 | chrY | 58969711 | . | G | T   | 16611.85  | PASS          | AC=30;AF=0.429;AN=70;BaseQRankSum=          |
| 49227 | chrY | 58969716 | . | T | A   | 98.42     | my_snp_filter | AC=1;AF=0.014;AN=70;BaseQRankSum=           |
| 49228 | chrY | 58969735 | . | G | A   | 72687.71  | PASS          | AC=34;AF=0.500;AN=68;BaseQRankSum=          |
| 49229 | chrY | 58969750 | . | T | A   | 62684.22  | PASS          | AC=35;AF=0.500;AN=70;BaseQRankSum=          |
| 49230 | chrY | 58969803 | . | T | C   | 4880.95   | PASS          | AC=23;AF=0.329;AN=70;BaseQRankSum=          |
| 49231 | chrY | 58969833 | . | C | T   | 15864.47  | PASS          | AC=25;AF=0.357;AN=70;BaseQRankSum=          |
| 49232 | chrY | 58969846 | . | C | G   | 77181.29  | PASS          | AC=39;AF=0.557;AN=70;BaseQRankSum=          |
| 49233 | chrY | 58969854 | . | G | A   | 71857.93  | PASS          | AC=37;AF=0.529;AN=70;BaseQRankSum=          |
| 49234 | chrY | 58969859 | . | C | A   | 413.49    | PASS          | AC=1;AF=0.014;AN=70;BaseQRankSum=           |
| 49235 | chrY | 58969865 | . | C | T   | 20732.20  | PASS          | AC=29;AF=0.414;AN=70;BaseQRankSum=          |
| 49236 | chrY | 58969889 | . | T | A   | 1733.59   | PASS          | AC=15;AF=0.214;AN=70;BaseQRankSum=          |
| 49237 | chrY | 58969891 | . | A | T   | 1728.49   | PASS          | AC=15;AF=0.214;AN=70;BaseQRankSum=          |
| 49238 | chrY | 58969912 | . | G | A   | 23666.40  | PASS          | AC=32;AF=0.457;AN=70;BaseQRankSum=          |
| 49239 | chrY | 58969954 | . | A | G   | 212.67    | my_snp_filter | AC=3;AF=0.043;AN=70;BaseQRankSum=           |
| 49240 | chrY | 58969977 | . | T | C   | 35199.72  | PASS          | AC=35;AF=0.500;AN=70;BaseQRankSum=          |
| 49241 | chrY | 58969992 | . | A | G   | 6896.51   | PASS          | AC=28;AF=0.400;AN=70;BaseQRankSum=          |
| 49242 | chrY | 58970108 | . | G | T   | 27498.84  | PASS          | AC=34;AF=0.486;AN=70;BaseQRankSum=          |
| 49243 | chrY | 58970175 | . | A | T,* | 44406     | PASS          | AC=16,21;AF=0.229,0.300;AN=70;BaseQRankSum= |
| 49244 | chrY | 58970176 | . | A | T,* | 7174.70   | PASS          | AC=4,2;AF=0.200,0.100;AN=20;BaseQRankSum=   |
| 49245 | chrY | 58970180 | . | A | G   | 3935.26   | PASS          | AC=14;AF=0.200;AN=70;BaseQRankSum=          |
| 49246 | chrY | 58970194 | . | A | C   | 56096.72  | PASS          | AC=35;AF=0.500;AN=70;BaseQRankSum=          |
| 49247 | chrY | 58970226 | . | G | A   | 2566.09   | my_snp_filter | AC=11;AF=0.157;AN=70;BaseQRankSum=          |
| 49248 | chrY | 58970248 | . | T | C   | 100453.81 | PASS          | AC=54;AF=0.771;AN=70;BaseQRankSum=          |



|       |      |          |   |   |     |           |               |                                             |
|-------|------|----------|---|---|-----|-----------|---------------|---------------------------------------------|
| 49249 | chrY | 58970300 | . | G | A   | 76780.67  | PASS          | AC=50;AF=0.714;AN=70;BaseQRankSum=          |
| 49250 | chrY | 58970308 | . | G | A   | 1951.47   | PASS          | AC=12;AF=0.171;AN=70;BaseQRankSum=          |
| 49251 | chrY | 58970351 | . | T | G   | 41733.77  | PASS          | AC=49;AF=0.700;AN=70;BaseQRankSum=          |
| 49252 | chrY | 58970395 | . | A | G   | 2978.45   | PASS          | AC=13;AF=0.186;AN=70;BaseQRankSum=          |
| 49253 | chrY | 58970406 | . | T | G   | 65729.22  | PASS          | AC=45;AF=0.662;AN=68;BaseQRankSum=          |
| 49254 | chrY | 58970425 | . | G | A   | 81.07     | my_snp_filter | AC=2;AF=0.029;AN=70;BaseQRankSum=           |
| 49255 | chrY | 58970429 | . | T | C   | 17841.65  | PASS          | AC=30;AF=0.441;AN=68;BaseQRankSum=          |
| 49256 | chrY | 58970482 | . | G | A   | 7877.20   | PASS          | AC=14;AF=0.200;AN=70;BaseQRankSum=          |
| 49257 | chrY | 58970483 | . | T | C   | 122271.65 | PASS          | AC=52;AF=0.743;AN=70;BaseQRankSum=          |
| 49258 | chrY | 58970491 | . | A | T   | 9961.77   | PASS          | AC=22;AF=0.314;AN=70;BaseQRankSum=          |
| 49259 | chrY | 58970507 | . | T | A   | 883.09    | my_snp_filter | AC=5;AF=0.071;AN=70;BaseQRankSum=           |
| 49260 | chrY | 58970515 | . | C | T   | 2859.82   | my_snp_filter | AC=9;AF=0.129;AN=70;BaseQRankSum=           |
| 49261 | chrY | 58970536 | . | T | A   | 2960.82   | PASS          | AC=9;AF=0.129;AN=70;BaseQRankSum=           |
| 49262 | chrY | 58970542 | . | A | G   | 41170.72  | PASS          | AC=35;AF=0.500;AN=70;BaseQRankSum=          |
| 49263 | chrY | 58970570 | . | G | A   | 31393.84  | PASS          | AC=34;AF=0.486;AN=70;BaseQRankSum=          |
| 49264 | chrY | 58970576 | . | G | T   | 301.42    | PASS          | AC=1;AF=0.014;AN=70;BaseQRankSum=           |
| 49265 | chrY | 58970609 | . | C | T   | 286.95    | my_snp_filter | AC=4;AF=0.057;AN=70;BaseQRankSum=           |
| 49266 | chrY | 58970819 | . | T | G   | 6339.32   | PASS          | AC=6;AF=0.250;AN=24;BaseQRankSum=           |
| 49267 | chrY | 58970913 | . | C | A   | 20748.11  | PASS          | AC=9;AF=0.409;AN=22;BaseQRankSum=           |
| 49268 | chrY | 58970931 | . | G | A   | 20904.54  | PASS          | AC=11;AF=0.458;AN=24;BaseQRankSum=          |
| 49269 | chrY | 58970942 | . | G | A   | 8223.19   | PASS          | AC=6;AF=0.200;AN=30;BaseQRankSum=           |
| 49270 | chrY | 58970956 | . | A | C   | 35542.02  | PASS          | AC=15;AF=0.536;AN=28;BaseQRankSum=          |
| 49271 | chrY | 58971026 | . | T | C   | 16177.72  | PASS          | AC=13;AF=0.406;AN=32;BaseQRankSum=          |
| 49272 | chrY | 58971182 | . | A | T   | 30507.25  | PASS          | AC=14;AF=0.700;AN=20;BaseQRankSum=          |
| 49273 | chrY | 58971261 | . | A | G   | 1981.40   | PASS          | AC=5;AF=0.139;AN=36;BaseQRankSum=           |
| 49274 | chrY | 58971268 | . | T | C   | 49.73     | PASS          | AC=2;AF=0.050;AN=40;DP=1519;FS=0.0          |
| 49275 | chrY | 58971282 | . | T | G   | 28820.14  | PASS          | AC=28;AF=0.824;AN=34;BaseQRankSum=          |
| 49276 | chrY | 58971298 | . | T | A   | 6444.78   | PASS          | AC=8;AF=0.235;AN=34;BaseQRankSum=           |
| 49277 | chrY | 58971316 | . | G | A   | 14564.18  | PASS          | AC=13;AF=0.433;AN=30;BaseQRankSum=          |
| 49278 | chrY | 58971360 | . | G | A   | 15945.14  | PASS          | AC=11;AF=0.423;AN=26;BaseQRankSum=          |
| 49279 | chrY | 58971404 | . | T | G   | 105.48    | my_snp_filter | AC=4;AF=0.105;AN=38;BaseQRankSum=           |
| 49280 | chrY | 58971460 | . | G | C   | 50.39     | my_snp_filter | AC=1;AF=0.029;AN=34;BaseQRankSum=           |
| 49281 | chrY | 58971564 | . | T | A   | 26772.68  | PASS          | AC=16;AF=0.800;AN=20;BaseQRankSum=          |
| 49282 | chrY | 58971628 | . | C | G   | 5398.12   | PASS          | AC=10;AF=0.357;AN=28;BaseQRankSum=          |
| 49283 | chrY | 58971672 | . | C | T   | 15127.22  | PASS          | AC=11;AF=0.344;AN=32;BaseQRankSum=          |
| 49284 | chrY | 58971674 | . | T | C   | 37414.25  | PASS          | AC=19;AF=0.731;AN=26;BaseQRankSum=          |
| 49285 | chrY | 58971788 | . | C | T   | 205.33    | my_snp_filter | AC=1;AF=0.025;AN=40;BaseQRankSum=           |
| 49286 | chrY | 58971799 | . | G | C   | 16380.97  | PASS          | AC=12;AF=0.429;AN=28;BaseQRankSum=          |
| 49287 | chrY | 58971913 | . | G | A   | 29286.04  | PASS          | AC=13;AF=0.650;AN=20;BaseQRankSum=          |
| 49288 | chrY | 58971953 | . | A | G   | 26004.98  | PASS          | AC=17;AF=0.405;AN=42;BaseQRankSum=          |
| 49289 | chrY | 58971975 | . | T | G   | 23752.87  | PASS          | AC=11;AF=0.239;AN=46;BaseQRankSum=          |
| 49290 | chrY | 58971989 | . | G | C   | 24739.20  | PASS          | AC=12;AF=0.240;AN=50;BaseQRankSum=          |
| 49291 | chrY | 58972026 | . | C | A   | 18351.10  | PASS          | AC=7;AF=0.121;AN=58;BaseQRankSum=           |
| 49292 | chrY | 58972027 | . | C | T   | 18308.69  | PASS          | AC=7;AF=0.121;AN=58;BaseQRankSum=           |
| 49293 | chrY | 58972033 | . | A | G   | 373.44    | my_snp_filter | AC=2;AF=0.032;AN=62;BaseQRankSum=           |
| 49294 | chrY | 58972058 | . | A | C,* | 2789.82   | PASS          | AC=2,2;AF=0.032,0.032;AN=62;BaseQRankSum=   |
| 49295 | chrY | 58972081 | . | T | G,* | 1536.77   | PASS          | AC=2,1;AF=0.053,0.026;AN=38;BaseQRankSum=   |
| 49296 | chrY | 58972082 | . | C | A   | 10210.39  | PASS          | AC=20;AF=0.385;AN=52;BaseQRankSum=          |
| 49297 | chrY | 58972092 | . | A | G   | 22776.68  | PASS          | AC=16;AF=0.381;AN=42;BaseQRankSum=          |
| 49298 | chrY | 58972106 | . | A | C   | 36695.52  | PASS          | AC=16;AF=0.333;AN=48;BaseQRankSum=          |
| 49299 | chrY | 58972132 | . | C | T,* | 2662.02   | PASS          | AC=3,22;AF=0.045,0.333;AN=66;BaseQRankSum=  |
| 49300 | chrY | 58972139 | . | G | T,* | 20579.40  | PASS          | AC=9,18;AF=0.161,0.321;AN=36;BaseQRankSum=  |
| 49301 | chrY | 58972141 | . | T | G,* | 15883.70  | PASS          | AC=9,19;AF=0.167,0.352;AN=36;BaseQRankSum=  |
| 49302 | chrY | 58972156 | . | T | G,* | 3542.94   | PASS          | AC=5,22;AF=0.100,0.440;AN=50;BaseQRankSum=  |
| 49303 | chrY | 58972169 | . | G | T,* | 12777.98  | PASS          | AC=9,19;AF=0.188,0.396;AN=36;BaseQRankSum=  |
| 49304 | chrY | 58972171 | . | T | G,* | 19674.75  | PASS          | AC=9,19;AF=0.196,0.413;AN=36;BaseQRankSum=  |
| 49305 | chrY | 58972206 | . | C | G   | 165.39    | PASS          | AC=1;AF=0.016;AN=62;BaseQRankSum=           |
| 49306 | chrY | 58972207 | . | C | T   | 159.68    | PASS          | AC=1;AF=0.016;AN=64;BaseQRankSum=           |
| 49307 | chrY | 58972211 | . | C | A   | 2356.61   | PASS          | AC=10;AF=0.192;AN=52;BaseQRankSum=          |
| 49308 | chrY | 58972212 | . | G | A   | 115.80    | PASS          | AC=1;AF=0.016;AN=64;BaseQRankSum=           |
| 49309 | chrY | 58972214 | . | G | T   | 158.61    | PASS          | AC=1;AF=0.015;AN=66;BaseQRankSum=           |
| 49310 | chrY | 58972217 | . | C | T   | 116.47    | PASS          | AC=1;AF=0.016;AN=62;BaseQRankSum=           |
| 49311 | chrY | 58972240 | . | G | A   | 2485.17   | PASS          | AC=7;AF=0.159;AN=44;BaseQRankSum=           |
| 49312 | chrY | 58972245 | . | C | T   | 2599.17   | PASS          | AC=7;AF=0.146;AN=48;BaseQRankSum=           |
| 49313 | chrY | 58972247 | . | T | C   | 99.73     | PASS          | AC=1;AF=0.019;AN=54;BaseQRankSum=           |
| 49314 | chrY | 58972305 | . | C | T,* | 839.62    | PASS          | AC=1,2;AF=0.014,0.029;AN=70;BaseQRankSum=   |
| 49315 | chrY | 58972314 | . | C | G   | 46021.72  | PASS          | AC=35;AF=0.500;AN=70;BaseQRankSum=          |
| 49316 | chrY | 58972364 | . | C | T   | 159.10    | my_snp_filter | AC=1;AF=0.014;AN=70;BaseQRankSum=           |
| 49317 | chrY | 58972395 | . | C | T   | 47.43     | my_snp_filter | AC=1;AF=0.014;AN=70;BaseQRankSum=           |
| 49318 | chrY | 58972521 | . | A | G   | 51102.53  | PASS          | AC=34;AF=0.486;AN=70;BaseQRankSum=          |
| 49319 | chrY | 58972526 | . | A | C   | 461.83    | my_snp_filter | AC=5;AF=0.071;AN=70;BaseQRankSum=           |
| 49320 | chrY | 58972530 | . | G | T,C | 38239.80  | PASS          | AC=23,12;AF=0.338,0.176;AN=35;BaseQRankSum= |
| 49321 | chrY | 58972550 | . | C | T   | 41960.53  | PASS          | AC=34;AF=0.486;AN=70;BaseQRankSum=          |
| 49322 | chrY | 58972575 | . | C | A   | 147.07    | PASS          | AC=2;AF=0.030;AN=66;BaseQRankSum=           |
| 49323 | chrY | 58972649 | . | C | T,* | 542.69    | PASS          | AC=4,2;AF=0.059,0.029;AN=68;BaseQRankSum=   |
| 49324 | chrY | 58972652 | . | G | T,* | 767.75    | PASS          | AC=5,2;AF=0.074,0.029;AN=68;BaseQRankSum=   |

|       |      |          |   |   |     |           |               |                                   |
|-------|------|----------|---|---|-----|-----------|---------------|-----------------------------------|
| 49325 | chrY | 58972658 | . | T | C,* | 509.42    | PASS          | AC=4,2;AF=0.061,0.030;AN=66;BaseQ |
| 49326 | chrY | 58972661 | . | A | G,* | 569.30    | PASS          | AC=4,2;AF=0.111,0.056;AN=36;BaseQ |
| 49327 | chrY | 58972674 | . | T | C,* | 19519.23  | PASS          | AC=22,1;AF=0.379,0.017;AN         |
| 49328 | chrY | 58972680 | . | C | G,* | 335.59    | PASS          | AC=2,1;AF=0.030,0.015;AN=66;BaseQ |
| 49329 | chrY | 58972692 | . | T | A,* | 321.04    | PASS          | AC=1,2;AF=0.016,0.031;AN=64;BaseQ |
| 49330 | chrY | 58972701 | . | C | A,* | 39687.31  | PASS          | AC=6,13;AF=0.167,0.361;AN         |
| 49331 | chrY | 58972724 | . | C | T,* | 238.97    | PASS          | AC=3,1;AF=0.058,0.019;AN=52;BaseQ |
| 49332 | chrY | 58972789 | . | G | C,* | 44575.98  | PASS          | AC=13,2;AF=0.464,0.071;AN         |
| 49333 | chrY | 58972791 | . | A | T,* | 2466.21   | my_snp_filter | AC=8,3;AF=0.118,0.044;AN=         |
| 49334 | chrY | 58972804 | . | G | A,* | 8623.89   | PASS          | AC=11,2;AF=0.196,0.036;AN=56;Base |
| 49335 | chrY | 58972853 | . | C | A   | 8041.14   | PASS          | AC=17;AF=0.283;AN=60;BaseQRankSum |
| 49336 | chrY | 58972854 | . | A | T   | 20289.90  | PASS          | AC=34;AF=0.586;AN=58;Base         |
| 49337 | chrY | 58972893 | . | C | T   | 9929.10   | PASS          | AC=13;AF=0.203;AN=64;BaseQRankSum |
| 49338 | chrY | 58972918 | . | C | T,* | 4837.99   | PASS          | AC=14,4;AF=0.212,0.061;AN=66;Base |
| 49339 | chrY | 58972923 | . | C | T   | 331.03    | PASS          | AC=2;AF=0.029;AN=68;BaseQRankSum= |
| 49340 | chrY | 58972947 | . | T | C   | 4421.96   | PASS          | AC=12;AF=0.171;AN=70;BaseQRankSum |
| 49341 | chrY | 58972948 | . | C | T   | 481.86    | PASS          | AC=7;AF=0.109;AN=64;BaseQRankSum= |
| 49342 | chrY | 58972969 | . | C | A   | 158.32    | my_snp_filter | AC=5;AF=0.074;AN=68;BaseQ         |
| 49343 | chrY | 58972979 | . | G | C   | 52.36     | PASS          | AC=4;AF=0.067;AN=60;DP=7781;FS=0. |
| 49344 | chrY | 58972983 | . | C | A,* | 6248.67   | PASS          | AC=3,7;AF=0.045,0.106;AN=66;BaseQ |
| 49345 | chrY | 58972984 | . | G | G,* | 6260.08   | PASS          | AC=3,7;AF=0.047,0.109;AN=64;BaseQ |
| 49346 | chrY | 58973009 | . | A | G,* | 6795.33   | PASS          | AC=1,9;AF=0.042,0.375;AN=24;BaseQ |
| 49347 | chrY | 58973014 | . | C | G,* | 5164.96   | PASS          | AC=7,3;AF=0.194,0.083;AN=36;BaseQ |
| 49348 | chrY | 58973068 | . | A | C   | 22987.64  | PASS          | AC=13;AF=0.361;AN=36;Base         |
| 49349 | chrY | 58973094 | . | C | G   | 33.35     | my_snp_filter | AC=2;AF=0.038;AN=52;BaseQ         |
| 49350 | chrY | 58973104 | . | C | G   | 10823.29  | PASS          | AC=8;AF=0.182;AN=44;BaseQ         |
| 49351 | chrY | 58973114 | . | G | T   | 11037.43  | PASS          | AC=8;AF=0.364;AN=22;BaseQ         |
| 49352 | chrY | 58973145 | . | T | G   | 31772.07  | PASS          | AC=17;AF=0.607;AN=28;Base         |
| 49353 | chrY | 58973155 | . | C | T   | 152.50    | my_snp_filter | AC=1;AF=0.023;AN=44;BaseQ         |
| 49354 | chrY | 58973169 | . | C | T   | 302.29    | my_snp_filter | AC=2;AF=0.036;AN=56;BaseQ         |
| 49355 | chrY | 58973209 | . | G | C   | 9379.47   | PASS          | AC=12;AF=0.250;AN=48;BaseQRankSum |
| 49356 | chrY | 58973211 | . | G | A   | 1348.99   | PASS          | AC=4;AF=0.074;AN=54;BaseQRankSum= |
| 49357 | chrY | 58973288 | . | C | T   | 771.08    | my_snp_filter | AC=6;AF=0.097;AN=62;BaseQ         |
| 49358 | chrY | 58973308 | . | C | A   | 1820.74   | PASS          | AC=6;AF=0.111;AN=54;BaseQRankSum= |
| 49359 | chrY | 58973313 | . | G | A   | 1809.47   | PASS          | AC=6;AF=0.091;AN=66;BaseQRankSum= |
| 49360 | chrY | 58973328 | . | C | T   | 673.82    | my_snp_filter | AC=7;AF=0.100;AN=70;BaseQ         |
| 49361 | chrY | 58973358 | . | C | A   | 682.86    | my_snp_filter | AC=7;AF=0.100;AN=70;BaseQ         |
| 49362 | chrY | 58973359 | . | G | A   | 1235.20   | PASS          | AC=5;AF=0.071;AN=70;BaseQRankSum= |
| 49363 | chrY | 58973363 | . | C | A   | 69864.75  | PASS          | AC=44;AF=0.647;AN=68;Base         |
| 49364 | chrY | 58973373 | . | A | C   | 14753.25  | PASS          | AC=28;AF=0.400;AN=70;Base         |
| 49365 | chrY | 58973376 | . | C | T   | 74416.36  | PASS          | AC=45;AF=0.662;AN=68;Base         |
| 49366 | chrY | 58973428 | . | T | C   | 102970.49 | PASS          | AC=49;AF=0.700;AN=70;Base         |
| 49367 | chrY | 58973438 | . | G | T   | 32583.19  | PASS          | AC=33;AF=0.471;AN=70;Base         |
| 49368 | chrY | 58973455 | . | G | A   | 167.24    | my_snp_filter | AC=2;AF=0.029;AN=70;BaseQ         |
| 49369 | chrY | 58973459 | . | G | A   | 3163.80   | my_snp_filter | AC=13;AF=0.186;AN=70;Base         |
| 49370 | chrY | 58973463 | . | A | C   | 198.51    | my_snp_filter | AC=3;AF=0.043;AN=70;BaseQ         |
| 49371 | chrY | 58973507 | . | T | C   | 15079.32  | PASS          | AC=16;AF=0.229;AN=70;Base         |
| 49372 | chrY | 58973513 | . | C | A   | 70811.17  | PASS          | AC=32;AF=0.457;AN=70;Base         |
| 49373 | chrY | 58973581 | . | T | C   | 90448.72  | PASS          | AC=35;AF=0.500;AN=70;Base         |
| 49374 | chrY | 58973597 | . | T | C   | 354.08    | my_snp_filter | AC=2;AF=0.029;AN=70;BaseQ         |
| 49375 | chrY | 58973608 | . | C | G,* | 1462.93   | my_snp_filter | AC=6,1;AF=0.086,0.014;AN=         |
| 49376 | chrY | 58973618 | . | C | T,* | 834.09    | my_snp_filter | AC=4,1;AF=0.057,0.014;AN=         |
| 49377 | chrY | 58973625 | . | G | A,* | 8478.37   | PASS          | AC=11,1;AF=0.157,0.014;AN=70;Base |
| 49378 | chrY | 58973634 | . | G | A   | 182257.81 | PASS          | AC=43;AF=0.614;AN=70;Base         |
| 49379 | chrY | 58973645 | . | A | G   | 14290.12  | PASS          | AC=19;AF=0.271;AN=70;Base         |
| 49380 | chrY | 58973695 | . | T | A,* | 16729.34  | PASS          | AC=30,1;AF=0.429,0.014;AN         |
| 49381 | chrY | 58973697 | . | T | G   | 15542.31  | PASS          | AC=29;AF=0.414;AN=70;Base         |
| 49382 | chrY | 58973699 | . | C | G   | 15488.99  | PASS          | AC=28;AF=0.400;AN=70;Base         |
| 49383 | chrY | 58973701 | . | T | G   | 15446.09  | PASS          | AC=28;AF=0.400;AN=70;Base         |
| 49384 | chrY | 58973713 | . | C | T   | 1370.52   | PASS          | AC=3;AF=0.043;AN=70;BaseQRankSum= |
| 49385 | chrY | 58973714 | . | G | A   | 7128.77   | PASS          | AC=13;AF=0.186;AN=70;BaseQRankSum |
| 49386 | chrY | 58973728 | . | C | T   | 48005.84  | PASS          | AC=34;AF=0.486;AN=70;Base         |
| 49387 | chrY | 58973791 | . | G | A   | 9715.62   | PASS          | AC=11;AF=0.157;AN=70;BaseQRankSum |
| 49388 | chrY | 58973800 | . | G | A   | 102450.72 | PASS          | AC=35;AF=0.500;AN=70;Base         |
| 49389 | chrY | 58973804 | . | G | A,* | 406.76    | my_snp_filter | AC=1,1;AF=0.014,0.014;AN=         |
| 49390 | chrY | 58973814 | . | C | T   | 102622.72 | PASS          | AC=35;AF=0.500;AN=70;Base         |
| 49391 | chrY | 58973829 | . | C | T   | 356.92    | my_snp_filter | AC=1;AF=0.014;AN=70;BaseQ         |
| 49392 | chrY | 58973838 | . | T | C   | 6173.72   | PASS          | AC=11;AF=0.157;AN=70;BaseQRankSum |
| 49393 | chrY | 58973851 | . | A | C   | 2891.49   | PASS          | AC=6;AF=0.086;AN=70;BaseQRankSum= |
| 49394 | chrY | 58973861 | . | A | G   | 47818.72  | PASS          | AC=35;AF=0.500;AN=70;Base         |
| 49395 | chrY | 58973864 | . | T | C   | 180578.54 | PASS          | AC=37;AF=0.529;AN=70;Base         |
| 49396 | chrY | 58973885 | . | C | A   | 2012.96   | PASS          | AC=7;AF=0.100;AN=70;BaseQRankSum= |
| 49397 | chrY | 58973942 | . | A | T,* | 16168.32  | PASS          | AC=29,2;AF=0.414,0.029;AN         |
| 49398 | chrY | 58973945 | . | C | T,* | 41977.21  | PASS          | AC=29,1;AF=0.426,0.015;AN         |
| 49399 | chrY | 58973948 | . | G | A   | 40550.92  | PASS          | AC=29;AF=0.426;AN=68;Base         |
| 49400 | chrY | 58973971 | . | C | T   | 33040.91  | PASS          | AC=27;AF=0.397;AN=68;Base         |

|       |      |          |   |   |       |          |               |                                    |
|-------|------|----------|---|---|-------|----------|---------------|------------------------------------|
| 49401 | chrY | 58974018 | . | T | G     | 8005.44  | PASS          | AC=20;AF=0.303;AN=66;BaseQRankSum= |
| 49402 | chrY | 58974146 | . | A | C     | 4948.38  | PASS          | AC=7;AF=0.500;AN=14;BaseQRankSum=  |
| 49403 | chrY | 58974160 | . | C | T     | 861.65   | PASS          | AC=5;AF=0.167;AN=30;BaseQRankSum=  |
| 49404 | chrY | 58974375 | . | C | T     | 122.40   | my_snp_filter | AC=4;AF=0.154;AN=26;BaseQ          |
| 49405 | chrY | 58974415 | . | T | C     | 5172.09  | PASS          | AC=8;AF=0.333;AN=24;BaseQRankSum=  |
| 49406 | chrY | 58974421 | . | C | A     | 326.44   | PASS          | AC=2;AF=0.059;AN=34;BaseQRankSum=  |
| 49407 | chrY | 58974426 | . | A | C     | 333.50   | PASS          | AC=2;AF=0.143;AN=14;BaseQRankSum=  |
| 49408 | chrY | 58974427 | . | A | T     | 322.70   | PASS          | AC=2;AF=0.077;AN=26;BaseQRankSum=  |
| 49409 | chrY | 58974441 | . | G | T     | 4864.26  | PASS          | AC=5;AF=0.167;AN=30;BaseQRankSum=  |
| 49410 | chrY | 58974455 | . | C | T     | 6775     | PASS          | AC=6;AF=0.150;AN=40;BaseQRankSum=  |
| 49411 | chrY | 58974456 | . | A | G,T   | 13452.56 | PASS          | AC=6,5;AF=0.273,0.227;AN=          |
| 49412 | chrY | 58974458 | . | A | T     | 16131.59 | PASS          | AC=8;AF=0.400;AN=20;BaseQ          |
| 49413 | chrY | 58974461 | . | A | T,C   | 15390.56 | PASS          | AC=6,5;AF=0.273,0.227;AN=          |
| 49414 | chrY | 58974476 | . | T | C     | 21227.83 | PASS          | AC=8;AF=0.190;AN=42;BaseQ          |
| 49415 | chrY | 58974491 | . | A | C     | 28148.33 | PASS          | AC=10;AF=0.556;AN=18;Base          |
| 49416 | chrY | 58974517 | . | C | A     | 32373.67 | PASS          | AC=22;AF=0.733;AN=30;Base          |
| 49417 | chrY | 58974553 | . | G | A     | 362.65   | PASS          | AC=3;AF=0.060;AN=50;BaseQRankSum=  |
| 49418 | chrY | 58974599 | . | T | A     | 34.30    | PASS          | AC=1;AF=0.019;AN=54;BaseQRankSum=  |
| 49419 | chrY | 58974612 | . | A | C     | 12821.30 | PASS          | AC=12;AF=0.240;AN=50;Base          |
| 49420 | chrY | 58974630 | . | A | C,*   | 934.32   | my_snp_filter | AC=4,1;AF=0.074,0.019;AN=          |
| 49421 | chrY | 58974636 | . | G | A     | 8536.56  | PASS          | AC=10;AF=0.200;AN=50;BaseQRankSum= |
| 49422 | chrY | 58974648 | . | T | C     | 103.81   | my_snp_filter | AC=1;AF=0.017;AN=60;BaseQ          |
| 49423 | chrY | 58974652 | . | A | C     | 85.34    | my_snp_filter | AC=1;AF=0.017;AN=58;BaseQ          |
| 49424 | chrY | 58974699 | . | T | G     | 7862.14  | PASS          | AC=16;AF=0.276;AN=58;BaseQRankSum= |
| 49425 | chrY | 58974711 | . | G | A     | 4669.42  | PASS          | AC=14;AF=0.269;AN=52;BaseQRankSum= |
| 49426 | chrY | 58974830 | . | C | T     | 275.90   | my_snp_filter | AC=1;AF=0.015;AN=68;BaseQ          |
| 49427 | chrY | 58974836 | . | A | T     | 145.01   | my_snp_filter | AC=1;AF=0.014;AN=70;BaseQ          |
| 49428 | chrY | 58974847 | . | T | A     | 65.63    | my_snp_filter | AC=1;AF=0.015;AN=68;BaseQ          |
| 49429 | chrY | 58974852 | . | A | T     | 5138.72  | my_snp_filter | AC=1;AF=0.050;AN=20;BaseQ          |
| 49430 | chrY | 58974862 | . | A | T     | 100.65   | my_snp_filter | AC=1;AF=0.017;AN=60;BaseQ          |
| 49431 | chrY | 58974865 | . | T | C     | 116.77   | my_snp_filter | AC=1;AF=0.019;AN=54;BaseQ          |
| 49432 | chrY | 58974868 | . | G | T     | 483.37   | my_snp_filter | AC=3;AF=0.107;AN=28;BaseQ          |
| 49433 | chrY | 58974926 | . | C | T     | 6881.05  | PASS          | AC=10;AF=0.217;AN=46;BaseQRankSum= |
| 49434 | chrY | 58974951 | . | G | A     | 594.93   | PASS          | AC=2;AF=0.071;AN=28;BaseQRankSum=  |
| 49435 | chrY | 58974965 | . | G | C     | 35218.55 | PASS          | AC=13;AF=0.342;AN=38;Base          |
| 49436 | chrY | 58974991 | . | G | C     | 45.96    | PASS          | AC=2;AF=0.100;AN=20;DP=4048;FS=0.  |
| 49437 | chrY | 58975046 | . | G | A     | 3541.55  | PASS          | AC=3;AF=0.088;AN=34;BaseQRankSum=  |
| 49438 | chrY | 58975128 | . | A | T     | 102.22   | my_snp_filter | AC=1;AF=0.029;AN=34;BaseQ          |
| 49439 | chrY | 58975147 | . | G | A     | 126.46   | my_snp_filter | AC=1;AF=0.056;AN=18;BaseQ          |
| 49440 | chrY | 58975161 | . | G | C     | 39.66    | my_snp_filter | AC=1;AF=0.019;AN=54;BaseQ          |
| 49441 | chrY | 58975167 | . | A | T     | 13926.44 | PASS          | AC=15;AF=0.313;AN=48;Base          |
| 49442 | chrY | 58975176 | . | G | T     | 1112.25  | PASS          | AC=1;AF=0.020;AN=50;BaseQRankSum=  |
| 49443 | chrY | 58975213 | . | T | C     | 869.25   | PASS          | AC=1;AF=0.017;AN=60;BaseQRankSum=  |
| 49444 | chrY | 58975245 | . | T | C     | 1363.84  | PASS          | AC=2;AF=0.077;AN=26;BaseQRankSum=  |
| 49445 | chrY | 58975258 | . | C | T     | 1477.18  | PASS          | AC=2;AF=0.059;AN=34;BaseQRankSum=  |
| 49446 | chrY | 58975261 | . | G | A     | 1156.71  | PASS          | AC=2;AF=0.040;AN=50;BaseQRankSum=  |
| 49447 | chrY | 58975263 | . | G | T     | 2174.86  | PASS          | AC=2;AF=0.053;AN=38;BaseQRankSum=  |
| 49448 | chrY | 58975266 | . | C | A     | 314.81   | my_snp_filter | AC=1;AF=0.017;AN=58;BaseQ          |
| 49449 | chrY | 58975272 | . | A | T     | 153.16   | my_snp_filter | AC=2;AF=0.034;AN=58;BaseQ          |
| 49450 | chrY | 58975276 | . | A | G     | 1739.76  | PASS          | AC=1;AF=0.022;AN=46;BaseQRankSum=  |
| 49451 | chrY | 58975278 | . | G | T     | 1703.26  | PASS          | AC=1;AF=0.029;AN=34;BaseQRankSum=  |
| 49452 | chrY | 58975288 | . | T | C     | 1410.37  | PASS          | AC=1;AF=0.020;AN=50;BaseQRankSum=  |
| 49453 | chrY | 58975295 | . | C | T     | 57.72    | my_snp_filter | AC=1;AF=0.020;AN=50;BaseQ          |
| 49454 | chrY | 58975302 | . | T | A     | 53820.52 | PASS          | AC=33;AF=0.786;AN=42;Base          |
| 49455 | chrY | 58975306 | . | G | A     | 11838.89 | PASS          | AC=12;AF=0.273;AN=44;Base          |
| 49456 | chrY | 58975312 | . | A | G     | 52960.74 | PASS          | AC=31;AF=0.596;AN=52;Base          |
| 49457 | chrY | 58975321 | . | T | C,*   | 41807.60 | PASS          | AC=6,23;AF=0.136,0.523;AN=         |
| 49458 | chrY | 58975339 | . | T | C     | 85.86    | PASS          | AC=1;AF=0.016;AN=64;BaseQRankSum=  |
| 49459 | chrY | 58975345 | . | C | T     | 13877.49 | PASS          | AC=11;AF=0.183;AN=60;Base          |
| 49460 | chrY | 58975346 | . | G | A     | 1143.40  | PASS          | AC=1;AF=0.023;AN=44;BaseQRankSum=  |
| 49461 | chrY | 58975360 | . | A | C     | 9988.92  | PASS          | AC=3;AF=0.079;AN=38;BaseQRankSum=  |
| 49462 | chrY | 58975368 | . | T | G     | 2147.75  | PASS          | AC=2;AF=0.030;AN=66;BaseQRankSum=  |
| 49463 | chrY | 58975375 | . | T | C     | 13217.76 | PASS          | AC=3;AF=0.068;AN=44;BaseQ          |
| 49464 | chrY | 58975416 | . | C | T     | 17925.99 | PASS          | AC=3;AF=0.052;AN=58;BaseQ          |
| 49465 | chrY | 58975417 | . | A | G     | 18101.18 | PASS          | AC=3;AF=0.052;AN=58;BaseQ          |
| 49466 | chrY | 58975427 | . | A | T     | 4209.11  | PASS          | AC=3;AF=0.044;AN=68;BaseQRankSum=  |
| 49467 | chrY | 58975439 | . | T | C     | 46.85    | PASS          | AC=2;AF=0.029;AN=70;DP=6936;FS=0.  |
| 49468 | chrY | 58975440 | . | G | C     | 51.87    | PASS          | AC=2;AF=0.029;AN=68;DP=6972;FS=0.  |
| 49469 | chrY | 58975442 | . | C | A     | 22578.09 | PASS          | AC=6;AF=0.158;AN=38;BaseQ          |
| 49470 | chrY | 58975451 | . | C | G     | 802.19   | my_snp_filter | AC=8;AF=0.121;AN=66;BaseQ          |
| 49471 | chrY | 58975453 | . | G | T     | 51.56    | PASS          | AC=2;AF=0.029;AN=70;BaseQRankSum=  |
| 49472 | chrY | 58975477 | . | G | A     | 37860.90 | PASS          | AC=36;AF=0.667;AN=54;Base          |
| 49473 | chrY | 58975482 | . | C | T     | 45.05    | PASS          | AC=1;AF=0.017;AN=58;BaseQRankSum=  |
| 49474 | chrY | 58975502 | . | C | T,*   | 4480.34  | PASS          | AC=1,16;AF=0.017,0.276;AN=58;Base  |
| 49475 | chrY | 58975503 | . | T | A,*   | 29265.93 | PASS          | AC=17,10;AF=0.283,0.167;A          |
| 49476 | chrY | 58975536 | . | G | C,A,* | 45889.19 | PASS          | AC=6,1,18;AF=0.115,0.019,          |

|       |      |          |   |   |       |           |               |                                    |
|-------|------|----------|---|---|-------|-----------|---------------|------------------------------------|
| 49477 | chrY | 58975537 | . | C | T,*   | 45813.51  | PASS          | AC=5,18;AF=0.100,0.360;AN          |
| 49478 | chrY | 58975541 | . | C | T,*   | 15744.03  | PASS          | AC=1,25;AF=0.017,0.417;AN          |
| 49479 | chrY | 58975546 | . | C | T,A,* | 47982.81  | PASS          | AC=5,1,20;AF=0.089,0.018,          |
| 49480 | chrY | 58975552 | . | C | T,*   | 16225.36  | PASS          | AC=5,21;AF=0.086,0.362;AN          |
| 49481 | chrY | 58975553 | . | A | G,*   | 16260.78  | PASS          | AC=5,21;AF=0.081,0.339;AN          |
| 49482 | chrY | 58975556 | . | C | G,T,* | 44704.45  | PASS          | AC=6,1,7;AF=0.136,0.023,0          |
| 49483 | chrY | 58975562 | . | G | C,*   | 26530.24  | PASS          | AC=4,8;AF=0.061,0.121;AN=          |
| 49484 | chrY | 58975566 | . | C | A,*   | 8135.34   | PASS          | AC=15,12;AF=0.214,0.171;AN=70;Bas  |
| 49485 | chrY | 58975577 | . | T | C,*   | 73659.26  | PASS          | AC=23,4;AF=0.426,0.074;AN          |
| 49486 | chrY | 58975579 | . | A | T,*   | 49733.63  | PASS          | AC=6,15;AF=0.115,0.288;AN          |
| 49487 | chrY | 58975592 | . | G | T,A   | 2361.44   | PASS          | AC=5,2;AF=0.074,0.029;AN=68;BaseQ  |
| 49488 | chrY | 58975594 | . | G | T     | 17896.89  | PASS          | AC=5;AF=0.071;AN=70;BaseQ          |
| 49489 | chrY | 58975607 | . | T | G     | 118546.85 | PASS          | AC=34;AF=0.607;AN=56;Base          |
| 49490 | chrY | 58975613 | . | A | C,*   | 21683.10  | PASS          | AC=5,1;AF=0.071,0.014;AN=          |
| 49491 | chrY | 58975636 | . | T | C,*   | 12512.94  | PASS          | AC=2,1;AF=0.034,0.017;AN=          |
| 49492 | chrY | 58975652 | . | G | C     | 2977.37   | PASS          | AC=2;AF=0.029;AN=70;BaseQRankSum=  |
| 49493 | chrY | 58975657 | . | C | T,*   | 3647.91   | PASS          | AC=2,9;AF=0.029,0.129;AN=70;BaseQ  |
| 49494 | chrY | 58975669 | . | T | A     | 4078.05   | PASS          | AC=2;AF=0.029;AN=70;BaseQRankSum=  |
| 49495 | chrY | 58975693 | . | A | T     | 26590.57  | PASS          | AC=33;AF=0.471;AN=70;Base          |
| 49496 | chrY | 58975694 | . | T | C     | 24452.82  | PASS          | AC=6;AF=0.086;AN=70;BaseQ          |
| 49497 | chrY | 58975706 | . | A | C     | 128741.47 | PASS          | AC=25;AF=0.379;AN=66;Base          |
| 49498 | chrY | 58975708 | . | A | G     | 1442.92   | my_snp_filter | AC=5;AF=0.074;AN=68;BaseQ          |
| 49499 | chrY | 58975713 | . | C | T     | 34854.95  | PASS          | AC=30;AF=0.455;AN=66;Base          |
| 49500 | chrY | 58975718 | . | C | T     | 142693.47 | PASS          | AC=25;AF=0.379;AN=66;Base          |
| 49501 | chrY | 58975725 | . | C | T     | 29995.05  | PASS          | AC=16;AF=0.242;AN=66;Base          |
| 49502 | chrY | 58975729 | . | A | G     | 5675.52   | PASS          | AC=4;AF=0.057;AN=70;BaseQRankSum=  |
| 49503 | chrY | 58975736 | . | T | C     | 2957.04   | my_snp_filter | AC=8;AF=0.114;AN=70;BaseQ          |
| 49504 | chrY | 58975737 | . | C | A     | 345418.47 | PASS          | AC=42;AF=0.600;AN=70;Base          |
| 49505 | chrY | 58975740 | . | T | C     | 156803.94 | PASS          | AC=26;AF=0.394;AN=66;Base          |
| 49506 | chrY | 58975752 | . | A | G     | 13105.81  | PASS          | AC=5;AF=0.071;AN=70;BaseQ          |
| 49507 | chrY | 58975760 | . | T | C     | 104365.97 | PASS          | AC=22;AF=0.355;AN=62;Base          |
| 49508 | chrY | 58975764 | . | G | A     | 281952.95 | PASS          | AC=41;AF=0.603;AN=68;Base          |
| 49509 | chrY | 58975770 | . | C | T     | 105369.26 | PASS          | AC=22;AF=0.355;AN=62;Base          |
| 49510 | chrY | 58975771 | . | T | G     | 105098.03 | PASS          | AC=22;AF=0.355;AN=62;Base          |
| 49511 | chrY | 58975773 | . | C | T     | 281.42    | my_snp_filter | AC=1;AF=0.014;AN=70;BaseQ          |
| 49512 | chrY | 58975774 | . | A | G     | 1408.51   | my_snp_filter | AC=3;AF=0.043;AN=70;BaseQ          |
| 49513 | chrY | 58975777 | . | C | G     | 4337.81   | PASS          | AC=2;AF=0.029;AN=70;BaseQRankSum=  |
| 49514 | chrY | 58975782 | . | C | A     | 429.68    | my_snp_filter | AC=1;AF=0.014;AN=70;BaseQ          |
| 49515 | chrY | 58975785 | . | C | T     | 2041.42   | PASS          | AC=1;AF=0.014;AN=70;BaseQRankSum=  |
| 49516 | chrY | 58975788 | . | C | G     | 35008.82  | PASS          | AC=30;AF=0.429;AN=70;Base          |
| 49517 | chrY | 58975792 | . | C | G     | 101827.26 | PASS          | AC=22;AF=0.355;AN=62;Base          |
| 49518 | chrY | 58975801 | . | T | C     | 101.42    | my_snp_filter | AC=1;AF=0.014;AN=70;BaseQ          |
| 49519 | chrY | 58975806 | . | T | A,*   | 97721.14  | PASS          | AC=22,1;AF=0.344,0.016;AN          |
| 49520 | chrY | 58975809 | . | A | G,C   | 71044.94  | PASS          | AC=3,19;AF=0.043,0.271;AN          |
| 49521 | chrY | 58975820 | . | C | G     | 211.60    | my_snp_filter | AC=2;AF=0.029;AN=70;BaseQ          |
| 49522 | chrY | 58975833 | . | C | T     | 3815.57   | my_snp_filter | AC=8;AF=0.014;AN=70;BaseQ          |
| 49523 | chrY | 58975846 | . | T | C     | 576.42    | PASS          | AC=1;AF=0.014;AN=70;BaseQRankSum=  |
| 49524 | chrY | 58975848 | . | C | A     | 3085.69   | PASS          | AC=4;AF=0.057;AN=70;BaseQRankSum=  |
| 49525 | chrY | 58975851 | . | T | G     | 3501.95   | PASS          | AC=4;AF=0.057;AN=70;BaseQRankSum=  |
| 49526 | chrY | 58975855 | . | A | C     | 1069.20   | PASS          | AC=2;AF=0.029;AN=70;BaseQRankSum=  |
| 49527 | chrY | 58975858 | . | C | T     | 41493.05  | PASS          | AC=22;AF=0.355;AN=62;Base          |
| 49528 | chrY | 58975859 | . | A | T     | 41638.65  | PASS          | AC=22;AF=0.355;AN=62;Base          |
| 49529 | chrY | 58975866 | . | C | A     | 4349.80   | PASS          | AC=4;AF=0.057;AN=70;BaseQRankSum=  |
| 49530 | chrY | 58975868 | . | C | A     | 4347.96   | PASS          | AC=4;AF=0.057;AN=70;BaseQRankSum=  |
| 49531 | chrY | 58975877 | . | C | A     | 8214.34   | PASS          | AC=13;AF=0.186;AN=70;BaseQRankSum= |
| 49532 | chrY | 58975896 | . | T | C     | 84268.72  | PASS          | AC=35;AF=0.500;AN=70;Base          |
| 49533 | chrY | 58975902 | . | C | T     | 149.44    | my_snp_filter | AC=1;AF=0.014;AN=70;BaseQ          |
| 49534 | chrY | 58975908 | . | C | T     | 10836.84  | PASS          | AC=12;AF=0.171;AN=70;Base          |
| 49535 | chrY | 58975923 | . | C | A     | 4580.66   | PASS          | AC=3;AF=0.043;AN=70;BaseQRankSum=  |
| 49536 | chrY | 58975928 | . | C | A     | 33394.36  | PASS          | AC=9;AF=0.136;AN=66;BaseQ          |
| 49537 | chrY | 58975935 | . | C | A     | 6726.93   | PASS          | AC=4;AF=0.057;AN=70;BaseQRankSum=  |
| 49538 | chrY | 58975942 | . | T | C     | 32375.93  | PASS          | AC=9;AF=0.150;AN=60;BaseQ          |
| 49539 | chrY | 58975947 | . | C | G     | 22265.71  | PASS          | AC=25;AF=0.357;AN=70;Base          |
| 49540 | chrY | 58975949 | . | A | T     | 31923.69  | PASS          | AC=9;AF=0.150;AN=60;BaseQ          |
| 49541 | chrY | 58975950 | . | C | A     | 8754.90   | my_snp_filter | AC=12;AF=0.176;AN=68;Base          |
| 49542 | chrY | 58975955 | . | C | T     | 452.42    | my_snp_filter | AC=1;AF=0.014;AN=70;BaseQ          |
| 49543 | chrY | 58975957 | . | C | T     | 30914.38  | PASS          | AC=8;AF=0.133;AN=60;BaseQ          |
| 49544 | chrY | 58975958 | . | T | C     | 31146.88  | PASS          | AC=8;AF=0.133;AN=60;BaseQ          |
| 49545 | chrY | 58975973 | . | C | G     | 9719.21   | PASS          | AC=7;AF=0.106;AN=66;BaseQRankSum=  |
| 49546 | chrY | 58975983 | . | G | C     | 14416.02  | PASS          | AC=5;AF=0.086;AN=58;BaseQ          |
| 49547 | chrY | 58975987 | . | C | T,*   | 5293.55   | PASS          | AC=1,3;AF=0.014,0.043;AN=70;BaseQ  |
| 49548 | chrY | 58975989 | . | A | C     | 1456.91   | PASS          | AC=1;AF=0.014;AN=70;BaseQRankSum=  |
| 49549 | chrY | 58976000 | . | C | T     | 9419.98   | PASS          | AC=3;AF=0.052;AN=58;BaseQRankSum=  |
| 49550 | chrY | 58976004 | . | A | T     | 405.72    | my_snp_filter | AC=1;AF=0.014;AN=70;BaseQ          |
| 49551 | chrY | 58976012 | . | C | G     | 437.45    | my_snp_filter | AC=1;AF=0.014;AN=70;BaseQ          |
| 49552 | chrY | 58976017 | . | A | G     | 5635.48   | my_snp_filter | AC=1;AF=0.017;AN=58;BaseQ          |

|       |      |          |   |   |       |           |               |                                    |
|-------|------|----------|---|---|-------|-----------|---------------|------------------------------------|
| 49553 | chrY | 58976020 | . | A | C     | 69640.53  | PASS          | AC=34;AF=0.486;AN=70;BaseQ         |
| 49554 | chrY | 58976025 | . | C | G     | 1799.97   | PASS          | AC=6;AF=0.086;AN=70;BaseQRankSum=  |
| 49555 | chrY | 58976033 | . | G | A     | 2968.50   | my_snp_filter | AC=1;AF=0.014;AN=70;BaseQ          |
| 49556 | chrY | 58976040 | . | T | A     | 6068.34   | my_snp_filter | AC=1;AF=0.019;AN=54;BaseQ          |
| 49557 | chrY | 58976049 | . | C | T     | 79543.67  | PASS          | AC=34;AF=0.500;AN=68;BaseQ         |
| 49558 | chrY | 58976050 | . | A | G     | 5618.51   | my_snp_filter | AC=1;AF=0.019;AN=54;BaseQ          |
| 49559 | chrY | 58976056 | . | G | A     | 646.99    | PASS          | AC=1;AF=0.015;AN=66;BaseQRankSum=  |
| 49560 | chrY | 58976058 | . | A | T     | 74449.89  | PASS          | AC=34;AF=0.500;AN=68;BaseQ         |
| 49561 | chrY | 58976059 | . | C | G     | 2359.80   | my_snp_filter | AC=1;AF=0.015;AN=68;BaseQ          |
| 49562 | chrY | 58976137 | . | C | A     | 37892.84  | PASS          | AC=34;AF=0.486;AN=70;BaseQ         |
| 49563 | chrY | 58976142 | . | G | T     | 44813.72  | PASS          | AC=35;AF=0.500;AN=70;BaseQ         |
| 49564 | chrY | 58976174 | . | C | A     | 31519.45  | PASS          | AC=31;AF=0.443;AN=70;BaseQ         |
| 49565 | chrY | 58976176 | . | A | T,*   | 52320.76  | PASS          | AC=5,24;AF=0.071,0.343;AN=         |
| 49566 | chrY | 58976239 | . | C | G     | 17185.91  | PASS          | AC=21;AF=0.309;AN=68;BaseQ         |
| 49567 | chrY | 58976256 | . | A | G     | 209867.13 | PASS          | AC=39;AF=0.557;AN=70;BaseQ         |
| 49568 | chrY | 58976274 | . | G | A     | 2202.86   | my_snp_filter | AC=4;AF=0.061;AN=66;BaseQ          |
| 49569 | chrY | 58976275 | . | C | T     | 7180.85   | PASS          | AC=11;AF=0.167;AN=66;BaseQRankSum= |
| 49570 | chrY | 58976292 | . | C | T     | 2080.01   | PASS          | AC=4;AF=0.057;AN=70;BaseQRankSum=  |
| 49571 | chrY | 58976332 | . | T | C     | 159722.36 | PASS          | AC=36;AF=0.545;AN=66;BaseQ         |
| 49572 | chrY | 58976362 | . | T | C     | 51.78     | my_snp_filter | AC=1;AF=0.015;AN=68;BaseQ          |
| 49573 | chrY | 58976367 | . | T | C     | 44.70     | my_snp_filter | AC=1;AF=0.015;AN=68;BaseQ          |
| 49574 | chrY | 58976376 | . | A | T     | 37259.19  | PASS          | AC=30;AF=0.441;AN=68;BaseQ         |
| 49575 | chrY | 58976381 | . | A | G     | 4503.84   | PASS          | AC=20;AF=0.294;AN=68;BaseQRankSum= |
| 49576 | chrY | 58976384 | . | A | C     | 69649.41  | PASS          | AC=37;AF=0.561;AN=66;BaseQ         |
| 49577 | chrY | 58976410 | . | C | T,*   | 23735.28  | PASS          | AC=26,3;AF=0.382,0.044;AN=         |
| 49578 | chrY | 58976414 | . | C | A,*   | 1350.80   | my_snp_filter | AC=2,15;AF=0.029,0.214;AN=         |
| 49579 | chrY | 58976437 | . | T | C     | 1271.50   | PASS          | AC=5;AF=0.074;AN=68;BaseQRankSum=  |
| 49580 | chrY | 58976457 | . | T | C,*   | 5483.51   | PASS          | AC=5,16;AF=0.081,0.258;AN=62;BaseQ |
| 49581 | chrY | 58976458 | . | G | T,*   | 4456.67   | PASS          | AC=6,11;AF=0.100,0.183;AN=60;BaseQ |
| 49582 | chrY | 58976505 | . | C | T     | 422.76    | PASS          | AC=3;AF=0.044;AN=68;BaseQRankSum=  |
| 49583 | chrY | 58976507 | . | T | C     | 32861.81  | PASS          | AC=35;AF=0.603;AN=58;BaseQ         |
| 49584 | chrY | 58976510 | . | T | C     | 255.71    | PASS          | AC=2;AF=0.045;AN=44;BaseQRankSum=  |
| 49585 | chrY | 58976536 | . | C | A,T   | 15592.92  | PASS          | AC=20,6;AF=0.385,0.115;AN=         |
| 49586 | chrY | 58976542 | . | T | C     | 634.35    | PASS          | AC=7;AF=0.103;AN=68;BaseQRankSum=  |
| 49587 | chrY | 58976552 | . | C | T     | 858.16    | PASS          | AC=11;AF=0.229;AN=48;BaseQRankSum= |
| 49588 | chrY | 58976577 | . | T | C     | 8287.87   | PASS          | AC=22;AF=0.314;AN=70;BaseQRankSum= |
| 49589 | chrY | 58976579 | . | C | G     | 14713.93  | PASS          | AC=34;AF=0.486;AN=70;BaseQ         |
| 49590 | chrY | 58976583 | . | C | T     | 862.51    | my_snp_filter | AC=10;AF=0.143;AN=70;BaseQ         |
| 49591 | chrY | 58976588 | . | G | C     | 35141.27  | PASS          | AC=15;AF=0.234;AN=64;BaseQ         |
| 49592 | chrY | 58976589 | . | G | T     | 35091.22  | PASS          | AC=14;AF=0.219;AN=64;BaseQ         |
| 49593 | chrY | 58976605 | . | C | T     | 28312.12  | PASS          | AC=14;AF=0.212;AN=66;BaseQ         |
| 49594 | chrY | 58976616 | . | T | A     | 23544.50  | PASS          | AC=13;AF=0.197;AN=66;BaseQ         |
| 49595 | chrY | 58976628 | . | A | G     | 19144.60  | PASS          | AC=12;AF=0.182;AN=66;BaseQ         |
| 49596 | chrY | 58976631 | . | T | C     | 209.96    | my_snp_filter | AC=1;AF=0.014;AN=70;BaseQ          |
| 49597 | chrY | 58976648 | . | T | A     | 12957.82  | PASS          | AC=9;AF=0.136;AN=66;BaseQ          |
| 49598 | chrY | 58976671 | . | C | A     | 1113.69   | PASS          | AC=5;AF=0.071;AN=70;BaseQRankSum=  |
| 49599 | chrY | 58976702 | . | C | A,*   | 33522.11  | PASS          | AC=10,22;AF=0.143,0.314;A          |
| 49600 | chrY | 58976712 | . | C | A     | 69393.53  | PASS          | AC=34;AF=0.486;AN=70;BaseQ         |
| 49601 | chrY | 58976743 | . | A | T     | 57810.22  | PASS          | AC=32;AF=0.457;AN=70;BaseQ         |
| 49602 | chrY | 58976772 | . | T | C     | 4583.88   | PASS          | AC=2;AF=0.033;AN=60;BaseQRankSum=  |
| 49603 | chrY | 58976776 | . | A | T     | 2665.16   | my_snp_filter | AC=8;AF=0.133;AN=60;BaseQ          |
| 49604 | chrY | 58976782 | . | A | G     | 210145.84 | PASS          | AC=36;AF=0.514;AN=70;BaseQ         |
| 49605 | chrY | 58976804 | . | T | C     | 222672.72 | PASS          | AC=35;AF=0.500;AN=70;BaseQ         |
| 49606 | chrY | 58976808 | . | A | C     | 4136.49   | PASS          | AC=2;AF=0.029;AN=68;BaseQRankSum=  |
| 49607 | chrY | 58976811 | . | G | T     | 38948.46  | PASS          | AC=30;AF=0.429;AN=70;BaseQ         |
| 49608 | chrY | 58976814 | . | C | T     | 7839.98   | PASS          | AC=12;AF=0.176;AN=68;BaseQRankSum= |
| 49609 | chrY | 58976817 | . | C | T     | 7416.72   | PASS          | AC=2;AF=0.036;AN=56;BaseQRankSum=  |
| 49610 | chrY | 58976818 | . | C | A     | 4973.10   | PASS          | AC=2;AF=0.036;AN=56;BaseQRankSum=  |
| 49611 | chrY | 58976837 | . | T | C     | 176261.19 | PASS          | AC=37;AF=0.529;AN=70;BaseQ         |
| 49612 | chrY | 58976852 | . | C | T,*   | 9058.76   | PASS          | AC=1,12;AF=0.014,0.171;AN=70;BaseQ |
| 49613 | chrY | 58976853 | . | A | G,*   | 12361.42  | PASS          | AC=1,12;AF=0.014,0.171;AN=         |
| 49614 | chrY | 58976856 | . | C | G     | 3310.46   | PASS          | AC=5;AF=0.071;AN=70;BaseQRankSum=  |
| 49615 | chrY | 58976868 | . | A | T     | 540.42    | PASS          | AC=2;AF=0.029;AN=70;BaseQRankSum=  |
| 49616 | chrY | 58976871 | . | C | T     | 372.42    | PASS          | AC=1;AF=0.014;AN=70;BaseQRankSum=  |
| 49617 | chrY | 58976873 | . | G | C     | 836.10    | PASS          | AC=1;AF=0.016;AN=64;BaseQRankSum=  |
| 49618 | chrY | 58976878 | . | A | T     | 53.17     | my_snp_filter | AC=2;AF=0.029;AN=70;BaseQ          |
| 49619 | chrY | 58976886 | . | T | C     | 105436.44 | PASS          | AC=40;AF=0.571;AN=70;BaseQ         |
| 49620 | chrY | 58976894 | . | C | G     | 264.47    | my_snp_filter | AC=4;AF=0.057;AN=70;BaseQ          |
| 49621 | chrY | 58976897 | . | C | T     | 1351.52   | my_snp_filter | AC=2;AF=0.029;AN=70;BaseQ          |
| 49622 | chrY | 58976902 | . | C | A,G,* | 5484.42   | PASS          | AC=7,2,11;AF=0.100,0.029,0.157;AN= |
| 49623 | chrY | 58976908 | . | A | T,*   | 4310.39   | my_snp_filter | AC=10,13;AF=0.143,0.186;A          |
| 49624 | chrY | 58976912 | . | T | C,*   | 13288.54  | PASS          | AC=23,7;AF=0.329,0.100;AN=         |
| 49625 | chrY | 58976921 | . | C | G     | 618.21    | my_snp_filter | AC=5;AF=0.071;AN=70;BaseQ          |
| 49626 | chrY | 58976932 | . | C | T     | 521.51    | my_snp_filter | AC=3;AF=0.043;AN=70;BaseQ          |
| 49627 | chrY | 58976939 | . | C | A     | 121.76    | PASS          | AC=2;AF=0.029;AN=70;BaseQRankSum=  |
| 49628 | chrY | 58976947 | . | C | T     | 185.34    | PASS          | AC=3;AF=0.043;AN=70;BaseQRankSum=  |

|       |      |          |   |   |     |           |               |                                   |
|-------|------|----------|---|---|-----|-----------|---------------|-----------------------------------|
| 49629 | chrY | 58976949 | . | C | G   | 86.01     | PASS          | AC=2;AF=0.029;AN=70;BaseQRankSum= |
| 49630 | chrY | 58976953 | . | A | C,* | 17856.63  | PASS          | AC=2,28;AF=0.029,0.400;AN         |
| 49631 | chrY | 58976955 | . | T | C,* | 18320.16  | PASS          | AC=1,31;AF=0.014,0.443;AN         |
| 49632 | chrY | 58976956 | . | C | T,* | 32240.02  | PASS          | AC=28,4;AF=0.400,0.057;AN         |
| 49633 | chrY | 58976958 | . | A | T,* | 18595.19  | PASS          | AC=1,32;AF=0.014,0.457;AN         |
| 49634 | chrY | 58976962 | . | C | G,* | 25184.59  | PASS          | AC=1,29;AF=0.014,0.414;AN         |
| 49635 | chrY | 58976964 | . | C | A,* | 2960.87   | PASS          | AC=9,2;AF=0.129,0.029;AN=70;BaseQ |
| 49636 | chrY | 58976967 | . | C | T,* | 34399.91  | PASS          | AC=28,1;AF=0.400,0.014;AN         |
| 49637 | chrY | 58976969 | . | C | G   | 43677.69  | PASS          | AC=30;AF=0.429;AN=70;Base         |
| 49638 | chrY | 58976974 | . | C | G   | 2638.32   | my_snp_filter | AC=9;AF=0.129;AN=70;BaseQ         |
| 49639 | chrY | 58976979 | . | G | T   | 54689.97  | PASS          | AC=32;AF=0.457;AN=70;Base         |
| 49640 | chrY | 58976984 | . | C | A,T | 55876.92  | PASS          | AC=29,2;AF=0.414,0.029;AN         |
| 49641 | chrY | 58976994 | . | T | C   | 255.23    | PASS          | AC=1;AF=0.014;AN=70;BaseQRankSum= |
| 49642 | chrY | 58976996 | . | C | G   | 331.95    | PASS          | AC=1;AF=0.014;AN=70;BaseQRankSum= |
| 49643 | chrY | 58977001 | . | G | A   | 13669.49  | PASS          | AC=23;AF=0.329;AN=70;Base         |
| 49644 | chrY | 58977008 | . | A | T   | 32791.72  | PASS          | AC=35;AF=0.500;AN=70;Base         |
| 49645 | chrY | 58977013 | . | T | A   | 97387.70  | PASS          | AC=32;AF=0.457;AN=70;Base         |
| 49646 | chrY | 58977025 | . | T | C   | 113868.74 | PASS          | AC=32;AF=0.457;AN=70;Base         |
| 49647 | chrY | 58977029 | . | A | T   | 7829.34   | PASS          | AC=15;AF=0.214;AN=70;BaseQRankSum |
| 49648 | chrY | 58977034 | . | C | T   | 84060.81  | PASS          | AC=30;AF=0.429;AN=70;Base         |
| 49649 | chrY | 58977039 | . | T | C   | 1749.60   | my_snp_filter | AC=4;AF=0.057;AN=70;BaseQ         |
| 49650 | chrY | 58977041 | . | C | T   | 46029.58  | PASS          | AC=24;AF=0.343;AN=70;Base         |
| 49651 | chrY | 58977042 | . | A | G   | 88550.37  | PASS          | AC=31;AF=0.443;AN=70;Base         |
| 49652 | chrY | 58977086 | . | C | A   | 38103.14  | PASS          | AC=19;AF=0.271;AN=70;Base         |
| 49653 | chrY | 58977087 | . | G | A   | 454440.63 | PASS          | AC=59;AF=0.843;AN=70;Base         |
| 49654 | chrY | 58977110 | . | A | G   | 193945.92 | PASS          | AC=24;AF=0.480;AN=50;Base         |
| 49655 | chrY | 58977111 | . | A | T   | 216351.32 | PASS          | AC=24;AF=0.480;AN=50;Base         |
| 49656 | chrY | 58977115 | . | A | G   | 44.42     | my_snp_filter | AC=1;AF=0.014;AN=70;BaseQ         |
| 49657 | chrY | 58977116 | . | T | C   | 64025.72  | PASS          | AC=35;AF=0.500;AN=70;Base         |
| 49658 | chrY | 58977129 | . | C | T   | 196177.32 | PASS          | AC=24;AF=0.480;AN=50;Base         |
| 49659 | chrY | 58977135 | . | A | T   | 32.42     | my_snp_filter | AC=1;AF=0.014;AN=70;BaseQ         |
| 49660 | chrY | 58977146 | . | C | T   | 132295.32 | PASS          | AC=24;AF=0.480;AN=50;Base         |
| 49661 | chrY | 58977151 | . | A | G   | 1207.96   | my_snp_filter | AC=3;AF=0.043;AN=70;BaseQ         |
| 49662 | chrY | 58977203 | . | C | G   | 14180.52  | PASS          | AC=6;AF=0.100;AN=60;BaseQ         |
| 49663 | chrY | 58977223 | . | G | C   | 11324.52  | PASS          | AC=7;AF=0.233;AN=30;BaseQ         |
| 49664 | chrY | 58977228 | . | C | A   | 562.68    | my_snp_filter | AC=6;AF=0.086;AN=70;BaseQ         |
| 49665 | chrY | 58977236 | . | C | T   | 106.09    | my_snp_filter | AC=1;AF=0.014;AN=70;BaseQ         |
| 49666 | chrY | 58977239 | . | C | A   | 2804.52   | PASS          | AC=11;AF=0.157;AN=70;BaseQRankSum |
| 49667 | chrY | 58977263 | . | C | G,A | 3136.21   | PASS          | AC=8,2;AF=0.190,0.048;AN=42;BaseQ |
| 49668 | chrY | 58977274 | . | T | A,G | 2537.06   | PASS          | AC=6,3;AF=0.136,0.068;AN=44;BaseQ |
| 49669 | chrY | 58977280 | . | C | G   | 2593.48   | PASS          | AC=8;AF=0.114;AN=70;BaseQRankSum= |
| 49670 | chrY | 58977281 | . | A | G   | 33.67     | my_snp_filter | AC=1;AF=0.014;AN=70;BaseQ         |
| 49671 | chrY | 58977299 | . | C | T   | 2756.85   | PASS          | AC=12;AF=0.171;AN=70;BaseQRankSum |
| 49672 | chrY | 58977305 | . | T | A   | 7136.99   | PASS          | AC=15;AF=0.300;AN=50;BaseQRankSum |
| 49673 | chrY | 58977314 | . | T | G   | 8418.24   | PASS          | AC=15;AF=0.341;AN=44;BaseQRankSum |
| 49674 | chrY | 58977317 | . | G | A   | 25003.66  | PASS          | AC=32;AF=0.457;AN=70;Base         |
| 49675 | chrY | 58977328 | . | G | A   | 3291.27   | PASS          | AC=13;AF=0.191;AN=68;BaseQRankSum |
| 49676 | chrY | 58977333 | . | C | T   | 13008.57  | PASS          | AC=16;AF=0.381;AN=42;Base         |
| 49677 | chrY | 58977340 | . | T | A   | 9899.32   | PASS          | AC=30;AF=0.429;AN=70;BaseQRankSum |
| 49678 | chrY | 58977357 | . | A | T   | 37525.02  | PASS          | AC=13;AF=0.295;AN=44;Base         |
| 49679 | chrY | 58977371 | . | T | C   | 50676.78  | PASS          | AC=16;AF=0.348;AN=46;Base         |
| 49680 | chrY | 58977382 | . | A | T   | 9866.19   | PASS          | AC=14;AF=0.200;AN=70;BaseQRankSum |
| 49681 | chrY | 58977385 | . | C | A   | 701.60    | my_snp_filter | AC=6;AF=0.086;AN=70;BaseQ         |
| 49682 | chrY | 58977398 | . | G | C   | 47138.12  | PASS          | AC=17;AF=0.386;AN=44;Base         |
| 49683 | chrY | 58977415 | . | C | A   | 3492.73   | PASS          | AC=3;AF=0.043;AN=70;BaseQRankSum= |
| 49684 | chrY | 58977427 | . | A | G   | 69068.92  | PASS          | AC=13;AF=0.310;AN=42;Base         |
| 49685 | chrY | 58977429 | . | T | G   | 70394.07  | PASS          | AC=13;AF=0.310;AN=42;Base         |
| 49686 | chrY | 58977447 | . | A | G   | 20611.14  | PASS          | AC=26;AF=0.371;AN=70;Base         |
| 49687 | chrY | 58977450 | . | G | C   | 76731.05  | PASS          | AC=12;AF=0.286;AN=42;Base         |
| 49688 | chrY | 58977455 | . | C | A   | 13669.36  | PASS          | AC=12;AF=0.171;AN=70;Base         |
| 49689 | chrY | 58977464 | . | C | T   | 78268.68  | PASS          | AC=12;AF=0.273;AN=44;Base         |
| 49690 | chrY | 58977465 | . | G | A   | 53459.04  | PASS          | AC=34;AF=0.486;AN=70;Base         |
| 49691 | chrY | 58977469 | . | G | A   | 77273.68  | PASS          | AC=12;AF=0.273;AN=44;Base         |
| 49692 | chrY | 58977488 | . | G | A   | 1016.26   | my_snp_filter | AC=5;AF=0.071;AN=70;BaseQ         |
| 49693 | chrY | 58977492 | . | C | T   | 64312.36  | PASS          | AC=12;AF=0.261;AN=46;Base         |
| 49694 | chrY | 58977495 | . | C | T   | 11302.80  | PASS          | AC=8;AF=0.114;AN=70;BaseQ         |
| 49695 | chrY | 58977503 | . | C | G   | 21252.17  | PASS          | AC=10;AF=0.143;AN=70;Base         |
| 49696 | chrY | 58977523 | . | C | A   | 24958.47  | PASS          | AC=30;AF=0.429;AN=70;Base         |
| 49697 | chrY | 58977540 | . | C | T   | 3477.72   | my_snp_filter | AC=9;AF=0.129;AN=70;BaseQ         |
| 49698 | chrY | 58977547 | . | G | A,T | 9013.07   | PASS          | AC=12,6;AF=0.200,0.100;AN=60;Base |
| 49699 | chrY | 58977556 | . | T | C   | 3431.35   | PASS          | AC=11;AF=0.212;AN=52;BaseQRankSum |
| 49700 | chrY | 58977565 | . | C | G   | 1064.50   | PASS          | AC=1;AF=0.014;AN=70;BaseQRankSum= |
| 49701 | chrY | 58977600 | . | C | A   | 1325.42   | PASS          | AC=1;AF=0.014;AN=70;BaseQRankSum= |
| 49702 | chrY | 58977608 | . | C | T   | 31605.74  | PASS          | AC=27;AF=0.386;AN=70;Base         |
| 49703 | chrY | 58977621 | . | C | A,* | 17263.08  | PASS          | AC=18,5;AF=0.257,0.071;AN         |
| 49704 | chrY | 58977622 | . | A | T,* | 26820.94  | PASS          | AC=26,4;AF=0.371,0.057;AN         |

|       |      |          |   |   |       |           |               |                                    |
|-------|------|----------|---|---|-------|-----------|---------------|------------------------------------|
| 49705 | chrY | 58977623 | . | C | T     | 1916.36   | PASS          | AC=2;AF=0.029;AN=70;BaseQRankSum=  |
| 49706 | chrY | 58977632 | . | C | A     | 1201.81   | PASS          | AC=2;AF=0.036;AN=56;BaseQRankSum=  |
| 49707 | chrY | 58977644 | . | G | T     | 432.42    | my_snp_filter | AC=2;AF=0.036;AN=56;BaseQ          |
| 49708 | chrY | 58977652 | . | G | T     | 198.64    | my_snp_filter | AC=1;AF=0.018;AN=56;BaseQ          |
| 49709 | chrY | 58977659 | . | C | T     | 114719.91 | PASS          | AC=38;AF=0.543;AN=70;Base          |
| 49710 | chrY | 58977673 | . | G | C     | 184031.42 | PASS          | AC=69;AF=0.986;AN=70;Base          |
| 49711 | chrY | 58977687 | . | T | G     | 1953.44   | PASS          | AC=3;AF=0.056;AN=54;BaseQRankSum=  |
| 49712 | chrY | 58977694 | . | G | C     | 459.15    | my_snp_filter | AC=3;AF=0.043;AN=70;BaseQ          |
| 49713 | chrY | 58977713 | . | C | T     | 835.52    | my_snp_filter | AC=3;AF=0.043;AN=70;BaseQ          |
| 49714 | chrY | 58977723 | . | T | C     | 98.44     | my_snp_filter | AC=1;AF=0.014;AN=70;BaseQ          |
| 49715 | chrY | 58977725 | . | C | A     | 757.16    | my_snp_filter | AC=3;AF=0.043;AN=70;BaseQ          |
| 49716 | chrY | 58977729 | . | C | T     | 114812.22 | PASS          | AC=44;AF=0.629;AN=70;Base          |
| 49717 | chrY | 58977735 | . | T | A     | 276.42    | PASS          | AC=1;AF=0.014;AN=70;BaseQRankSum=  |
| 49718 | chrY | 58977738 | . | C | A     | 6335.16   | PASS          | AC=16;AF=0.229;AN=70;BaseQRankSum= |
| 49719 | chrY | 58977739 | . | A | T     | 1162.60   | my_snp_filter | AC=3;AF=0.043;AN=70;BaseQ          |
| 49720 | chrY | 58977742 | . | G | A,C   | 15493.74  | PASS          | AC=10,10;AF=0.172,0.172;A          |
| 49721 | chrY | 58977744 | . | A | G     | 1386.67   | my_snp_filter | AC=6;AF=0.086;AN=70;BaseQ          |
| 49722 | chrY | 58977745 | . | T | C     | 225.42    | PASS          | AC=1;AF=0.014;AN=70;BaseQRankSum=  |
| 49723 | chrY | 58977750 | . | T | C     | 3247.18   | PASS          | AC=1;AF=0.014;AN=70;BaseQRankSum=  |
| 49724 | chrY | 58977765 | . | T | C     | 166.72    | my_snp_filter | AC=1;AF=0.014;AN=70;BaseQ          |
| 49725 | chrY | 58977785 | . | C | G     | 29686.62  | PASS          | AC=9;AF=0.129;AN=70;BaseQ          |
| 49726 | chrY | 58977788 | . | G | C     | 250784.82 | PASS          | AC=37;AF=0.529;AN=70;Base          |
| 49727 | chrY | 58977796 | . | T | C     | 579.32    | my_snp_filter | AC=6;AF=0.086;AN=70;BaseQ          |
| 49728 | chrY | 58977797 | . | C | G     | 33590.82  | PASS          | AC=9;AF=0.129;AN=70;BaseQ          |
| 49729 | chrY | 58977805 | . | G | C,T,* | 21021.53  | PASS          | AC=1,2,6;AF=0.014,0.029,0          |
| 49730 | chrY | 58977808 | . | G | A     | 34382.27  | PASS          | AC=9;AF=0.129;AN=70;BaseQ          |
| 49731 | chrY | 58977810 | . | C | T     | 308.66    | my_snp_filter | AC=1;AF=0.014;AN=70;BaseQ          |
| 49732 | chrY | 58977814 | . | A | T     | 2887.28   | my_snp_filter | AC=7;AF=0.100;AN=70;BaseQ          |
| 49733 | chrY | 58977817 | . | C | G     | 68606.09  | PASS          | AC=29;AF=0.414;AN=70;Base          |
| 49734 | chrY | 58977828 | . | G | C     | 217481.19 | PASS          | AC=37;AF=0.529;AN=70;Base          |
| 49735 | chrY | 58977830 | . | C | T     | 55466.10  | PASS          | AC=27;AF=0.386;AN=70;Base          |
| 49736 | chrY | 58977834 | . | A | C     | 58977.63  | PASS          | AC=27;AF=0.386;AN=70;Base          |
| 49737 | chrY | 58977835 | . | C | A     | 990.88    | my_snp_filter | AC=2;AF=0.029;AN=70;BaseQ          |
| 49738 | chrY | 58977838 | . | A | C     | 59311.81  | PASS          | AC=27;AF=0.386;AN=70;Base          |
| 49739 | chrY | 58977839 | . | A | T     | 37785.32  | PASS          | AC=24;AF=0.343;AN=70;Base          |
| 49740 | chrY | 58977840 | . | C | A     | 58040.15  | PASS          | AC=15;AF=0.214;AN=70;Base          |
| 49741 | chrY | 58977843 | . | C | A     | 55343.69  | PASS          | AC=26;AF=0.371;AN=70;Base          |
| 49742 | chrY | 58977844 | . | A | C     | 5860.63   | PASS          | AC=11;AF=0.157;AN=70;BaseQRankSum= |
| 49743 | chrY | 58977853 | . | C | A,T   | 55762.72  | PASS          | AC=16,18;AF=0.229,0.257;A          |
| 49744 | chrY | 58977854 | . | A | G     | 7810.47   | PASS          | AC=5;AF=0.071;AN=70;BaseQRankSum=  |
| 49745 | chrY | 58977855 | . | T | C     | 123.42    | my_snp_filter | AC=1;AF=0.014;AN=70;BaseQ          |
| 49746 | chrY | 58977862 | . | C | A     | 149681.01 | PASS          | AC=29;AF=0.414;AN=70;Base          |
| 49747 | chrY | 58977873 | . | C | T     | 2022.62   | my_snp_filter | AC=3;AF=0.043;AN=70;BaseQ          |
| 49748 | chrY | 58977876 | . | T | G     | 3111.83   | my_snp_filter | AC=9;AF=0.129;AN=70;BaseQ          |
| 49749 | chrY | 58977877 | . | G | A     | 2165.33   | PASS          | AC=5;AF=0.071;AN=70;BaseQRankSum=  |
| 49750 | chrY | 58977892 | . | T | C     | 270371.27 | PASS          | AC=40;AF=0.588;AN=68;Base          |
| 49751 | chrY | 58977900 | . | A | T     | 177412.11 | PASS          | AC=33;AF=0.485;AN=68;Base          |
| 49752 | chrY | 58977902 | . | T | G     | 24826.31  | PASS          | AC=12;AF=0.171;AN=70;Base          |
| 49753 | chrY | 58977905 | . | A | G     | 21431.95  | PASS          | AC=22;AF=0.314;AN=70;Base          |
| 49754 | chrY | 58977907 | . | C | G     | 9787.60   | PASS          | AC=24;AF=0.343;AN=70;BaseQRankSum= |
| 49755 | chrY | 58977908 | . | A | T     | 1963.45   | my_snp_filter | AC=7;AF=0.100;AN=70;BaseQ          |
| 49756 | chrY | 58977909 | . | T | C,A   | 275268.75 | PASS          | AC=35,22;AF=0.515,0.324;A          |
| 49757 | chrY | 58977910 | . | G | T,C   | 191886.39 | PASS          | AC=33,2;AF=0.485,0.029;AN          |
| 49758 | chrY | 58977911 | . | G | A     | 7153.43   | PASS          | AC=9;AF=0.132;AN=68;BaseQRankSum=  |
| 49759 | chrY | 58977923 | . | C | G     | 14014.22  | PASS          | AC=12;AF=0.171;AN=70;Base          |
| 49760 | chrY | 58977925 | . | G | T     | 185761.48 | PASS          | AC=33;AF=0.485;AN=68;Base          |
| 49761 | chrY | 58977928 | . | G | C     | 1224.53   | my_snp_filter | AC=5;AF=0.071;AN=70;BaseQ          |
| 49762 | chrY | 58977936 | . | G | A     | 9691.96   | PASS          | AC=12;AF=0.171;AN=70;BaseQRankSum= |
| 49763 | chrY | 58977952 | . | T | C     | 11532.87  | PASS          | AC=11;AF=0.157;AN=70;Base          |
| 49764 | chrY | 58977953 | . | A | C     | 281.37    | PASS          | AC=3;AF=0.043;AN=70;BaseQRankSum=  |
| 49765 | chrY | 58977958 | . | A | G     | 1576.30   | PASS          | AC=6;AF=0.086;AN=70;BaseQRankSum=  |
| 49766 | chrY | 58977964 | . | A | G     | 382.19    | my_snp_filter | AC=3;AF=0.043;AN=70;BaseQ          |
| 49767 | chrY | 58977971 | . | A | G     | 1714.72   | PASS          | AC=8;AF=0.114;AN=70;BaseQRankSum=  |
| 49768 | chrY | 58977974 | . | G | T     | 34525.82  | PASS          | AC=28;AF=0.400;AN=70;Base          |
| 49769 | chrY | 58977976 | . | A | T     | 6525.74   | PASS          | AC=7;AF=0.100;AN=70;BaseQRankSum=  |
| 49770 | chrY | 58977994 | . | A | G     | 84133.25  | PASS          | AC=29;AF=0.483;AN=60;Base          |
| 49771 | chrY | 58977999 | . | C | A     | 37227.39  | PASS          | AC=27;AF=0.386;AN=70;Base          |
| 49772 | chrY | 58978009 | . | C | G     | 926.14    | PASS          | AC=3;AF=0.043;AN=70;BaseQRankSum=  |
| 49773 | chrY | 58978014 | . | C | T,G   | 1293.78   | my_snp_filter | AC=8,1;AF=0.114,0.014;AN=          |
| 49774 | chrY | 58978021 | . | A | T     | 27071.13  | PASS          | AC=24;AF=0.364;AN=66;Base          |
| 49775 | chrY | 58978024 | . | G | A     | 153138.03 | PASS          | AC=31;AF=0.517;AN=60;Base          |
| 49776 | chrY | 58978031 | . | A | T     | 93023.90  | PASS          | AC=29;AF=0.414;AN=70;Base          |
| 49777 | chrY | 58978051 | . | A | C,*   | 176249.31 | PASS          | AC=31,6;AF=0.443,0.086;AN          |
| 49778 | chrY | 58978055 | . | C | T     | 1126.90   | my_snp_filter | AC=9;AF=0.129;AN=70;BaseQ          |
| 49779 | chrY | 58978066 | . | G | A,T   | 7517.21   | PASS          | AC=3,16;AF=0.043,0.229;AN=70;Base  |
| 49780 | chrY | 58978081 | . | A | T     | 3191.60   | PASS          | AC=3;AF=0.058;AN=52;BaseQRankSum=  |

|       |      |          |   |   |     |           |               |                                             |
|-------|------|----------|---|---|-----|-----------|---------------|---------------------------------------------|
| 49781 | chrY | 58978087 | . | T | C,* | 30838.33  | PASS          | AC=22,1;AF=0.423,0.019;AN=70;BaseQRankSum=  |
| 49782 | chrY | 58978109 | . | C | T   | 345.37    | my_snp_filter | AC=3;AF=0.043;AN=70;BaseQRankSum=           |
| 49783 | chrY | 58978110 | . | G | A   | 984.54    | PASS          | AC=1;AF=0.014;AN=70;BaseQRankSum=           |
| 49784 | chrY | 58978124 | . | C | A   | 14873.92  | PASS          | AC=5;AF=0.083;AN=60;BaseQRankSum=           |
| 49785 | chrY | 58978139 | . | G | C   | 125113.36 | PASS          | AC=43;AF=0.614;AN=70;BaseQRankSum=          |
| 49786 | chrY | 58978141 | . | A | T   | 943.94    | PASS          | AC=2;AF=0.029;AN=70;BaseQRankSum=           |
| 49787 | chrY | 58978149 | . | G | C   | 8915.29   | PASS          | AC=3;AF=0.063;AN=48;BaseQRankSum=           |
| 49788 | chrY | 58978150 | . | C | T   | 42031.72  | PASS          | AC=35;AF=0.500;AN=70;BaseQRankSum=          |
| 49789 | chrY | 58978154 | . | C | A   | 53.42     | my_snp_filter | AC=1;AF=0.014;AN=70;BaseQRankSum=           |
| 49790 | chrY | 58978159 | . | C | G   | 3799.93   | PASS          | AC=1;AF=0.014;AN=70;BaseQRankSum=           |
| 49791 | chrY | 58978164 | . | C | T   | 86.43     | my_snp_filter | AC=1;AF=0.014;AN=70;BaseQRankSum=           |
| 49792 | chrY | 58978167 | . | C | T   | 3509.27   | PASS          | AC=1;AF=0.014;AN=70;BaseQRankSum=           |
| 49793 | chrY | 58978173 | . | C | T   | 255.12    | my_snp_filter | AC=1;AF=0.014;AN=70;BaseQRankSum=           |
| 49794 | chrY | 58978177 | . | T | A   | 6696.44   | PASS          | AC=1;AF=0.014;AN=70;BaseQRankSum=           |
| 49795 | chrY | 58978185 | . | C | A   | 34501.80  | PASS          | AC=32;AF=0.457;AN=70;BaseQRankSum=          |
| 49796 | chrY | 58978187 | . | T | C   | 171286.87 | PASS          | AC=36;AF=0.514;AN=70;BaseQRankSum=          |
| 49797 | chrY | 58978204 | . | C | T,* | 70737.72  | PASS          | AC=1,34;AF=0.014,0.486;AN=70;BaseQRankSum=  |
| 49798 | chrY | 58978206 | . | A | C,* | 70611.72  | PASS          | AC=1,34;AF=0.014,0.486;AN=70;BaseQRankSum=  |
| 49799 | chrY | 58978212 | . | C | G,* | 66437.94  | PASS          | AC=1,32;AF=0.015,0.471;AN=70;BaseQRankSum=  |
| 49800 | chrY | 58978216 | . | A | T   | 339.47    | my_snp_filter | AC=1;AF=0.015;AN=68;BaseQRankSum=           |
| 49801 | chrY | 58978217 | . | C | A   | 164.89    | PASS          | AC=1;AF=0.015;AN=68;BaseQRankSum=           |
| 49802 | chrY | 58978235 | . | T | C,G | 194958.28 | PASS          | AC=34,32;AF=0.486,0.457;AN=70;BaseQRankSum= |
| 49803 | chrY | 58978258 | . | G | T   | 266787.19 | PASS          | AC=37;AF=0.529;AN=70;BaseQRankSum=          |
| 49804 | chrY | 58978278 | . | T | C   | 420.91    | my_snp_filter | AC=1;AF=0.014;AN=70;BaseQRankSum=           |
| 49805 | chrY | 58978285 | . | C | T   | 175.64    | my_snp_filter | AC=2;AF=0.029;AN=70;BaseQRankSum=           |
| 49806 | chrY | 58978301 | . | G | A   | 191284.54 | PASS          | AC=34;AF=0.607;AN=56;BaseQRankSum=          |
| 49807 | chrY | 58978302 | . | T | C   | 3041.01   | my_snp_filter | AC=1;AF=0.018;AN=56;BaseQRankSum=           |
| 49808 | chrY | 58978305 | . | T | C   | 3084.03   | my_snp_filter | AC=1;AF=0.018;AN=56;BaseQRankSum=           |
| 49809 | chrY | 58978307 | . | T | C   | 3206.91   | PASS          | AC=1;AF=0.018;AN=56;BaseQRankSum=           |
| 49810 | chrY | 58978312 | . | T | C   | 3552.15   | PASS          | AC=1;AF=0.017;AN=58;BaseQRankSum=           |
| 49811 | chrY | 58978314 | . | A | C   | 2725.82   | PASS          | AC=1;AF=0.017;AN=58;BaseQRankSum=           |
| 49812 | chrY | 58978317 | . | T | C   | 3684.31   | PASS          | AC=1;AF=0.018;AN=56;BaseQRankSum=           |
| 49813 | chrY | 58978319 | . | A | C   | 827.68    | PASS          | AC=1;AF=0.018;AN=56;BaseQRankSum=           |
| 49814 | chrY | 58978322 | . | T | C   | 2481.25   | PASS          | AC=1;AF=0.014;AN=70;BaseQRankSum=           |
| 49815 | chrY | 58978329 | . | G | C   | 3327.10   | PASS          | AC=1;AF=0.018;AN=56;BaseQRankSum=           |
| 49816 | chrY | 58978332 | . | T | C   | 1938.10   | PASS          | AC=1;AF=0.018;AN=56;BaseQRankSum=           |
| 49817 | chrY | 58978350 | . | C | T   | 4553.37   | PASS          | AC=2;AF=0.029;AN=70;BaseQRankSum=           |
| 49818 | chrY | 58978351 | . | T | C   | 1397.29   | PASS          | AC=1;AF=0.014;AN=70;BaseQRankSum=           |
| 49819 | chrY | 58978359 | . | G | A   | 1729.59   | PASS          | AC=2;AF=0.029;AN=70;BaseQRankSum=           |
| 49820 | chrY | 58978386 | . | T | C   | 4072.89   | my_snp_filter | AC=13;AF=0.186;AN=70;BaseQRankSum=          |
| 49821 | chrY | 58978392 | . | G | C   | 1996.78   | my_snp_filter | AC=10;AF=0.143;AN=70;BaseQRankSum=          |
| 49822 | chrY | 58978410 | . | C | T   | 7342.98   | PASS          | AC=12;AF=0.171;AN=70;BaseQRankSum=          |
| 49823 | chrY | 58978433 | . | A | T   | 77300.17  | PASS          | AC=21;AF=0.309;AN=68;BaseQRankSum=          |
| 49824 | chrY | 58978447 | . | C | T   | 14286.12  | PASS          | AC=13;AF=0.186;AN=70;BaseQRankSum=          |
| 49825 | chrY | 58978457 | . | C | G   | 3802.98   | PASS          | AC=9;AF=0.129;AN=70;BaseQRankSum=           |
| 49826 | chrY | 58978462 | . | C | A   | 291.58    | PASS          | AC=2;AF=0.029;AN=70;BaseQRankSum=           |
| 49827 | chrY | 58978463 | . | A | G   | 218.08    | PASS          | AC=2;AF=0.029;AN=70;BaseQRankSum=           |
| 49828 | chrY | 58978474 | . | T | C   | 147.14    | PASS          | AC=1;AF=0.015;AN=68;BaseQRankSum=           |
| 49829 | chrY | 58978479 | . | G | T,A | 11101.42  | PASS          | AC=11,2;AF=0.229,0.042;AN=70;BaseQRankSum=  |
| 49830 | chrY | 58978481 | . | C | G   | 159.93    | PASS          | AC=2;AF=0.029;AN=70;BaseQRankSum=           |
| 49831 | chrY | 58978508 | . | A | C   | 33.45     | PASS          | AC=1;AF=0.014;AN=70;BaseQRankSum=           |
| 49832 | chrY | 58978509 | . | C | G   | 45.14     | PASS          | AC=1;AF=0.014;AN=70;BaseQRankSum=           |
| 49833 | chrY | 58978518 | . | A | G   | 104.35    | my_snp_filter | AC=2;AF=0.029;AN=70;BaseQRankSum=           |
| 49834 | chrY | 58978532 | . | C | T   | 42601.95  | PASS          | AC=20;AF=0.303;AN=66;BaseQRankSum=          |
| 49835 | chrY | 58978538 | . | T | A   | 2119.15   | PASS          | AC=8;AF=0.118;AN=68;BaseQRankSum=           |
| 49836 | chrY | 58978548 | . | C | T   | 3501.32   | PASS          | AC=13;AF=0.295;AN=44;BaseQRankSum=          |
| 49837 | chrY | 58978549 | . | A | G   | 45056.27  | PASS          | AC=20;AF=0.455;AN=44;BaseQRankSum=          |
| 49838 | chrY | 58978568 | . | C | A   | 312.68    | PASS          | AC=2;AF=0.029;AN=70;BaseQRankSum=           |
| 49839 | chrY | 58978582 | . | G | C   | 3867.94   | PASS          | AC=10;AF=0.143;AN=70;BaseQRankSum=          |
| 49840 | chrY | 58978601 | . | C | T   | 136943.43 | PASS          | AC=32;AF=0.500;AN=64;BaseQRankSum=          |
| 49841 | chrY | 58978613 | . | C | A   | 34.67     | my_snp_filter | AC=1;AF=0.014;AN=70;BaseQRankSum=           |
| 49842 | chrY | 58978616 | . | T | C   | 102.43    | PASS          | AC=1;AF=0.014;AN=70;BaseQRankSum=           |
| 49843 | chrY | 58978618 | . | C | T   | 57624.74  | PASS          | AC=24;AF=0.343;AN=70;BaseQRankSum=          |
| 49844 | chrY | 58978626 | . | T | G   | 128544.83 | PASS          | AC=31;AF=0.470;AN=66;BaseQRankSum=          |
| 49845 | chrY | 58978641 | . | C | G,* | 49667.72  | PASS          | AC=27,8;AF=0.386,0.114;AN=70;BaseQRankSum=  |
| 49846 | chrY | 58978645 | . | A | G   | 37664.02  | PASS          | AC=27;AF=0.386;AN=70;BaseQRankSum=          |
| 49847 | chrY | 58978648 | . | C | G   | 18275.68  | PASS          | AC=24;AF=0.343;AN=70;BaseQRankSum=          |
| 49848 | chrY | 58978656 | . | C | T   | 3901.29   | PASS          | AC=7;AF=0.100;AN=70;BaseQRankSum=           |
| 49849 | chrY | 58978671 | . | T | C   | 5778.64   | PASS          | AC=9;AF=0.129;AN=70;BaseQRankSum=           |
| 49850 | chrY | 58978676 | . | C | T   | 81.76     | my_snp_filter | AC=1;AF=0.014;AN=70;BaseQRankSum=           |
| 49851 | chrY | 58978681 | . | G | C,A | 262359.10 | PASS          | AC=40,10;AF=0.571,0.143;AN=70;BaseQRankSum= |
| 49852 | chrY | 58978702 | . | T | G   | 51625.11  | PASS          | AC=31;AF=0.443;AN=70;BaseQRankSum=          |
| 49853 | chrY | 58978712 | . | T | A   | 85472.03  | PASS          | AC=29;AF=0.439;AN=66;BaseQRankSum=          |
| 49854 | chrY | 58978714 | . | A | C   | 397002.67 | PASS          | AC=53;AF=0.803;AN=66;BaseQRankSum=          |
| 49855 | chrY | 58978716 | . | T | C   | 6447.13   | PASS          | AC=7;AF=0.100;AN=70;BaseQRankSum=           |
| 49856 | chrY | 58978729 | . | C | T   | 276338.44 | PASS          | AC=30;AF=0.500;AN=60;BaseQRankSum=          |



|       |      |          |   |   |     |           |               |                                    |
|-------|------|----------|---|---|-----|-----------|---------------|------------------------------------|
| 49857 | chrY | 58978732 | . | C | T   | 272810.44 | PASS          | AC=30;AF=0.500;AN=60;BaseQ         |
| 49858 | chrY | 58978733 | . | A | G   | 281198.44 | PASS          | AC=30;AF=0.500;AN=60;BaseQ         |
| 49859 | chrY | 58978735 | . | A | C   | 272332.38 | PASS          | AC=29;AF=0.500;AN=58;BaseQ         |
| 49860 | chrY | 58978743 | . | C | T   | 4904.70   | my_snp_filter | AC=9;AF=0.129;AN=70;BaseQ          |
| 49861 | chrY | 58978744 | . | C | T   | 6714.99   | PASS          | AC=6;AF=0.086;AN=70;BaseQRankSum=  |
| 49862 | chrY | 58978762 | . | T | C   | 47043.47  | PASS          | AC=20;AF=0.286;AN=70;BaseQ         |
| 49863 | chrY | 58978804 | . | T | A   | 22187.73  | PASS          | AC=13;AF=0.186;AN=70;BaseQ         |
| 49864 | chrY | 58978806 | . | C | G   | 840.72    | my_snp_filter | AC=4;AF=0.057;AN=70;BaseQ          |
| 49865 | chrY | 58978807 | . | A | C   | 1093.60   | PASS          | AC=3;AF=0.043;AN=70;BaseQRankSum=  |
| 49866 | chrY | 58978816 | . | C | T   | 12511.34  | PASS          | AC=26;AF=0.371;AN=70;BaseQ         |
| 49867 | chrY | 58978823 | . | C | T   | 7706.05   | PASS          | AC=11;AF=0.157;AN=70;BaseQRankSum= |
| 49868 | chrY | 58978832 | . | A | T   | 265.30    | PASS          | AC=3;AF=0.043;AN=70;BaseQRankSum=  |
| 49869 | chrY | 58978850 | . | C | G   | 2942.87   | PASS          | AC=9;AF=0.129;AN=70;BaseQRankSum=  |
| 49870 | chrY | 58978858 | . | G | C   | 55779.96  | PASS          | AC=43;AF=0.632;AN=68;BaseQ         |
| 49871 | chrY | 58978860 | . | C | G   | 114.79    | PASS          | AC=1;AF=0.016;AN=62;BaseQRankSum=  |
| 49872 | chrY | 58978862 | . | T | A   | 2355.54   | PASS          | AC=8;AF=0.133;AN=60;BaseQRankSum=  |
| 49873 | chrY | 58978863 | . | C | T   | 543.55    | PASS          | AC=3;AF=0.050;AN=60;BaseQRankSum=  |
| 49874 | chrY | 58978872 | . | A | C   | 2437.63   | PASS          | AC=9;AF=0.129;AN=70;BaseQRankSum=  |
| 49875 | chrY | 58978899 | . | G | T   | 295.61    | PASS          | AC=1;AF=0.014;AN=70;BaseQRankSum=  |
| 49876 | chrY | 58978903 | . | C | T   | 5289.11   | PASS          | AC=18;AF=0.257;AN=70;BaseQRankSum= |
| 49877 | chrY | 58978907 | . | A | T   | 137.27    | PASS          | AC=3;AF=0.045;AN=66;BaseQRankSum=  |
| 49878 | chrY | 58978909 | . | G | T   | 37917.49  | PASS          | AC=39;AF=0.629;AN=62;BaseQ         |
| 49879 | chrY | 58978913 | . | A | C   | 37219.56  | PASS          | AC=37;AF=0.617;AN=60;BaseQ         |
| 49880 | chrY | 58979041 | . | A | C,* | 571.08    | my_snp_filter | AC=2,3;AF=0.029,0.043;AN=          |
| 49881 | chrY | 58979055 | . | C | T,* | 1077.37   | PASS          | AC=1,8;AF=0.014,0.114;AN=70;BaseQ  |
| 49882 | chrY | 58979060 | . | C | A,* | 15774.18  | PASS          | AC=1,28;AF=0.016,0.438;AN=         |
| 49883 | chrY | 58979087 | . | C | A,* | 316.81    | PASS          | AC=1,1;AF=0.019,0.019;AN=54;BaseQ  |
| 49884 | chrY | 58979098 | . | T | C   | 66.47     | PASS          | AC=1;AF=0.016;AN=64;BaseQRankSum=  |
| 49885 | chrY | 58979116 | . | C | A   | 89.49     | PASS          | AC=1;AF=0.014;AN=70;BaseQRankSum=  |
| 49886 | chrY | 58979119 | . | T | C   | 2415.09   | PASS          | AC=9;AF=0.129;AN=70;BaseQRankSum=  |
| 49887 | chrY | 58979137 | . | T | C   | 2627.93   | PASS          | AC=9;AF=0.129;AN=70;BaseQRankSum=  |
| 49888 | chrY | 58979138 | . | C | T   | 242.05    | PASS          | AC=3;AF=0.043;AN=70;BaseQRankSum=  |
| 49889 | chrY | 58979142 | . | C | T   | 487.89    | PASS          | AC=5;AF=0.071;AN=70;BaseQRankSum=  |
| 49890 | chrY | 58979152 | . | A | G   | 412.43    | PASS          | AC=4;AF=0.069;AN=58;BaseQRankSum=  |
| 49891 | chrY | 58979154 | . | G | A   | 3135.37   | PASS          | AC=13;AF=0.250;AN=52;BaseQRankSum= |
| 49892 | chrY | 58979190 | . | A | C   | 130408.09 | PASS          | AC=41;AF=0.586;AN=70;BaseQ         |
| 49893 | chrY | 58979204 | . | A | T   | 4633.72   | PASS          | AC=4;AF=0.057;AN=70;BaseQRankSum=  |
| 49894 | chrY | 58979206 | . | T | A   | 30.84     | my_snp_filter | AC=1;AF=0.014;AN=70;BaseQ          |
| 49895 | chrY | 58979208 | . | C | T   | 30.98     | my_snp_filter | AC=1;AF=0.014;AN=70;BaseQ          |
| 49896 | chrY | 58979209 | . | G | A   | 136024.57 | PASS          | AC=38;AF=0.543;AN=70;BaseQ         |
| 49897 | chrY | 58979212 | . | C | A   | 400.78    | PASS          | AC=2;AF=0.029;AN=70;BaseQRankSum=  |
| 49898 | chrY | 58979228 | . | T | C   | 3296.46   | PASS          | AC=6;AF=0.103;AN=58;BaseQRankSum=  |
| 49899 | chrY | 58979234 | . | A | T   | 2424.16   | PASS          | AC=4;AF=0.057;AN=70;BaseQRankSum=  |
| 49900 | chrY | 58979237 | . | A | C   | 113136.05 | PASS          | AC=37;AF=0.529;AN=70;BaseQ         |
| 49901 | chrY | 58979272 | . | C | G   | 2567.26   | PASS          | AC=6;AF=0.086;AN=70;BaseQRankSum=  |
| 49902 | chrY | 58979317 | . | C | G   | 32110.51  | PASS          | AC=30;AF=0.429;AN=70;BaseQ         |
| 49903 | chrY | 58979364 | . | C | A   | 16650.02  | PASS          | AC=32;AF=0.640;AN=50;BaseQ         |
| 49904 | chrY | 58979405 | . | T | C   | 84.14     | PASS          | AC=2;AF=0.029;AN=70;BaseQRankSum=  |
| 49905 | chrY | 58979420 | . | T | C,* | 416.91    | PASS          | AC=5,4;AF=0.071,0.057;AN=70;BaseQ  |
| 49906 | chrY | 58979434 | . | A | T,* | 246.26    | my_snp_filter | AC=3,1;AF=0.043,0.014;AN=          |
| 49907 | chrY | 58979440 | . | T | C,* | 358.49    | PASS          | AC=3,2;AF=0.043,0.029;AN=70;BaseQ  |
| 49908 | chrY | 58979443 | . | C | T,* | 285.99    | PASS          | AC=3,2;AF=0.043,0.029;AN=70;BaseQ  |
| 49909 | chrY | 58979450 | . | T | C,* | 11109.65  | PASS          | AC=19,2;AF=0.279,0.029;AN=         |
| 49910 | chrY | 58979456 | . | G | A,* | 1099      | PASS          | AC=3,2;AF=0.167,0.111;AN=18;BaseQ  |
| 49911 | chrY | 58979488 | . | T | C,* | 283.99    | PASS          | AC=2,1;AF=0.091,0.045;AN=22;DP=22  |
| 49912 | chrY | 58979493 | . | C | T   | 2114.21   | my_snp_filter | AC=7;AF=0.109;AN=64;BaseQ          |
| 49913 | chrY | 58979502 | . | C | G   | 37916.90  | PASS          | AC=9;AF=0.136;AN=66;BaseQ          |
| 49914 | chrY | 58979505 | . | C | T   | 5624.99   | PASS          | AC=2;AF=0.063;AN=32;BaseQRankSum=  |
| 49915 | chrY | 58979531 | . | G | A   | 5155      | PASS          | AC=2;AF=0.038;AN=52;BaseQRankSum=  |
| 49916 | chrY | 58979543 | . | A | G   | 4925.22   | PASS          | AC=2;AF=0.053;AN=38;BaseQRankSum=  |
| 49917 | chrY | 58979615 | . | C | A   | 1378      | PASS          | AC=1;AF=0.014;AN=70;BaseQRankSum=  |
| 49918 | chrY | 58979621 | . | A | G   | 160.81    | my_snp_filter | AC=3;AF=0.043;AN=70;BaseQ          |
| 49919 | chrY | 58979624 | . | A | C   | 129261.51 | PASS          | AC=69;AF=0.986;AN=70;BaseQ         |
| 49920 | chrY | 58979626 | . | C | A   | 146157.49 | PASS          | AC=69;AF=0.986;AN=70;BaseQ         |
| 49921 | chrY | 58979631 | . | G | A   | 15606.92  | PASS          | AC=15;AF=0.234;AN=64;BaseQ         |
| 49922 | chrY | 58979633 | . | T | A,* | 7970.86   | PASS          | AC=1,14;AF=0.014,0.200;AN=70;BaseQ |
| 49923 | chrY | 58979654 | . | A | T   | 67036.40  | PASS          | AC=26;AF=0.481;AN=54;BaseQ         |
| 49924 | chrY | 58979661 | . | T | A   | 69448.07  | PASS          | AC=26;AF=0.481;AN=54;BaseQ         |
| 49925 | chrY | 58979665 | . | C | T   | 15277.21  | PASS          | AC=13;AF=0.186;AN=70;BaseQ         |
| 49926 | chrY | 58979673 | . | T | G   | 14628.91  | PASS          | AC=13;AF=0.186;AN=70;BaseQ         |
| 49927 | chrY | 58979676 | . | A | T   | 21561.31  | PASS          | AC=26;AF=0.371;AN=70;BaseQ         |
| 49928 | chrY | 58979705 | . | C | G   | 722.62    | my_snp_filter | AC=6;AF=0.086;AN=70;BaseQ          |
| 49929 | chrY | 58979714 | . | T | C   | 98882.02  | PASS          | AC=55;AF=0.786;AN=70;BaseQ         |
| 49930 | chrY | 58979735 | . | C | T   | 282.34    | my_snp_filter | AC=4;AF=0.057;AN=70;BaseQ          |
| 49931 | chrY | 58979740 | . | C | T   | 78309.22  | PASS          | AC=44;AF=0.629;AN=70;BaseQ         |
| 49932 | chrY | 58979761 | . | A | C   | 3867.62   | PASS          | AC=9;AF=0.173;AN=52;BaseQRankSum=  |

|       |      |          |   |   |     |           |               |                                    |
|-------|------|----------|---|---|-----|-----------|---------------|------------------------------------|
| 49933 | chrY | 58979780 | . | C | T   | 1125.06   | PASS          | AC=6;AF=0.091;AN=66;BaseQRankSum=  |
| 49934 | chrY | 58979781 | . | A | G   | 106.58    | my_snp_filter | AC=2;AF=0.030;AN=66;BaseQ          |
| 49935 | chrY | 58979782 | . | C | T   | 1983.37   | PASS          | AC=7;AF=0.135;AN=52;BaseQRankSum=  |
| 49936 | chrY | 58979825 | . | C | A,T | 339.58    | my_snp_filter | AC=1,1;AF=0.014,0.014;AN=          |
| 49937 | chrY | 58979830 | . | C | A   | 598.45    | my_snp_filter | AC=2;AF=0.029;AN=70;BaseQ          |
| 49938 | chrY | 58979835 | . | C | T   | 763.45    | PASS          | AC=2;AF=0.029;AN=70;BaseQRankSum=  |
| 49939 | chrY | 58979854 | . | C | G   | 963.70    | PASS          | AC=7;AF=0.100;AN=70;BaseQRankSum=  |
| 49940 | chrY | 58979857 | . | T | G   | 1024.45   | PASS          | AC=7;AF=0.100;AN=70;BaseQRankSum=  |
| 49941 | chrY | 58979860 | . | C | G   | 1777.95   | PASS          | AC=3;AF=0.043;AN=70;BaseQRankSum=  |
| 49942 | chrY | 58979862 | . | T | C   | 1719.68   | PASS          | AC=9;AF=0.188;AN=48;BaseQRankSum=  |
| 49943 | chrY | 58979863 | . | G | T   | 8752.59   | PASS          | AC=12;AF=0.222;AN=54;BaseQRankSum= |
| 49944 | chrY | 58979874 | . | C | T   | 1919.52   | PASS          | AC=3;AF=0.043;AN=70;BaseQRankSum=  |
| 49945 | chrY | 58979876 | . | A | C   | 1964.09   | PASS          | AC=3;AF=0.043;AN=70;BaseQRankSum=  |
| 49946 | chrY | 58979885 | . | C | T,* | 9556.94   | PASS          | AC=3,5;AF=0.044,0.074;AN=68;BaseQ  |
| 49947 | chrY | 58979894 | . | C | G   | 114.89    | my_snp_filter | AC=5;AF=0.071;AN=70;BaseQ          |
| 49948 | chrY | 58979899 | . | C | G   | 790.85    | PASS          | AC=8;AF=0.114;AN=70;BaseQRankSum=  |
| 49949 | chrY | 58979903 | . | T | C   | 7080.79   | my_snp_filter | AC=3;AF=0.044;AN=68;BaseQ          |
| 49950 | chrY | 58979909 | . | T | A   | 1358.08   | PASS          | AC=8;AF=0.154;AN=52;BaseQRankSum=  |
| 49951 | chrY | 58979933 | . | G | C   | 203.88    | PASS          | AC=3;AF=0.045;AN=66;BaseQRankSum=  |
| 49952 | chrY | 58979943 | . | G | A   | 263.62    | PASS          | AC=4;AF=0.083;AN=48;BaseQRankSum=  |
| 49953 | chrY | 58979971 | . | C | T   | 106.95    | PASS          | AC=2;AF=0.030;AN=66;BaseQRankSum=  |
| 49954 | chrY | 58979994 | . | C | T,* | 17927.59  | PASS          | AC=1,22;AF=0.017,0.367;AN=         |
| 49955 | chrY | 58979995 | . | T | C,* | 9673.47   | PASS          | AC=1,17;AF=0.017,0.283;AN=60;Base  |
| 49956 | chrY | 58980003 | . | A | G   | 57.70     | PASS          | AC=1;AF=0.014;AN=70;BaseQRankSum=  |
| 49957 | chrY | 58980014 | . | A | C,T | 5973      | PASS          | AC=10,1;AF=0.156,0.016;AN=64;Base  |
| 49958 | chrY | 58980019 | . | T | C   | 1411.92   | PASS          | AC=4;AF=0.059;AN=68;BaseQRankSum=  |
| 49959 | chrY | 58980024 | . | C | T   | 1159.48   | PASS          | AC=9;AF=0.141;AN=64;BaseQRankSum=  |
| 49960 | chrY | 58980034 | . | C | T   | 291.13    | PASS          | AC=1;AF=0.014;AN=70;BaseQRankSum=  |
| 49961 | chrY | 58980049 | . | G | T   | 296.15    | PASS          | AC=1;AF=0.015;AN=66;BaseQRankSum=  |
| 49962 | chrY | 58980091 | . | C | A   | 29243.68  | PASS          | AC=33;AF=0.471;AN=70;Base          |
| 49963 | chrY | 58980097 | . | C | T   | 5327.39   | PASS          | AC=11;AF=0.157;AN=70;BaseQRankSum= |
| 49964 | chrY | 58980153 | . | C | A   | 23653.31  | PASS          | AC=5;AF=0.071;AN=70;BaseQ          |
| 49965 | chrY | 58980159 | . | G | T,* | 17232.64  | PASS          | AC=3,3;AF=0.043,0.043;AN=          |
| 49966 | chrY | 58980171 | . | T | C   | 31506.75  | PASS          | AC=12;AF=0.500;AN=24;Base          |
| 49967 | chrY | 58980175 | . | G | A   | 25598.07  | PASS          | AC=11;AF=0.157;AN=70;Base          |
| 49968 | chrY | 58980184 | . | C | T   | 826.47    | my_snp_filter | AC=2;AF=0.029;AN=70;BaseQ          |
| 49969 | chrY | 58980186 | . | C | T   | 11484.64  | PASS          | AC=9;AF=0.129;AN=70;BaseQ          |
| 49970 | chrY | 58980187 | . | A | G   | 5782.52   | PASS          | AC=9;AF=0.129;AN=70;BaseQRankSum=  |
| 49971 | chrY | 58980191 | . | C | T   | 30301.67  | PASS          | AC=13;AF=0.186;AN=70;Base          |
| 49972 | chrY | 58980194 | . | T | A   | 954.54    | my_snp_filter | AC=2;AF=0.029;AN=70;BaseQ          |
| 49973 | chrY | 58980198 | . | C | G,* | 44827.08  | PASS          | AC=17,14;AF=0.283,0.233;A          |
| 49974 | chrY | 58980203 | . | C | T   | 37137.26  | PASS          | AC=18;AF=0.273;AN=66;Base          |
| 49975 | chrY | 58980220 | . | A | G   | 178.75    | my_snp_filter | AC=4;AF=0.057;AN=70;BaseQ          |
| 49976 | chrY | 58980223 | . | C | A   | 10832.16  | PASS          | AC=5;AF=0.071;AN=70;BaseQ          |
| 49977 | chrY | 58980243 | . | C | G   | 21512.91  | PASS          | AC=16;AF=0.235;AN=68;Base          |
| 49978 | chrY | 58980249 | . | G | T   | 22857.35  | PASS          | AC=16;AF=0.258;AN=62;Base          |
| 49979 | chrY | 58980261 | . | C | G   | 28688.10  | PASS          | AC=18;AF=0.346;AN=52;Base          |
| 49980 | chrY | 58980268 | . | C | T   | 31224.17  | PASS          | AC=17;AF=0.258;AN=66;Base          |
| 49981 | chrY | 58980284 | . | C | T   | 7741.64   | PASS          | AC=13;AF=0.186;AN=70;BaseQRankSum= |
| 49982 | chrY | 58980289 | . | C | A   | 43.33     | my_snp_filter | AC=1;AF=0.014;AN=70;BaseQ          |
| 49983 | chrY | 58980293 | . | T | C   | 52530.24  | PASS          | AC=16;AF=0.500;AN=32;Base          |
| 49984 | chrY | 58980296 | . | C | T   | 50740.93  | PASS          | AC=43;AF=0.614;AN=70;Base          |
| 49985 | chrY | 58980297 | . | T | G   | 23445.70  | PASS          | AC=12;AF=0.171;AN=70;Base          |
| 49986 | chrY | 58980298 | . | C | G   | 531       | PASS          | AC=1;AF=0.014;AN=70;BaseQRankSum=  |
| 49987 | chrY | 58980307 | . | C | T   | 1574.71   | PASS          | AC=3;AF=0.043;AN=70;BaseQRankSum=  |
| 49988 | chrY | 58980322 | . | C | G   | 3476.02   | PASS          | AC=8;AF=0.114;AN=70;BaseQRankSum=  |
| 49989 | chrY | 58980331 | . | A | G   | 17280.60  | PASS          | AC=8;AF=0.121;AN=66;BaseQ          |
| 49990 | chrY | 58980334 | . | T | C   | 18689.26  | PASS          | AC=21;AF=0.438;AN=48;Base          |
| 49991 | chrY | 58980343 | . | G | T   | 37354.30  | PASS          | AC=23;AF=0.442;AN=52;Base          |
| 49992 | chrY | 58980345 | . | G | T   | 18684.64  | PASS          | AC=11;AF=0.220;AN=50;Base          |
| 49993 | chrY | 58980346 | . | A | G   | 73966.33  | PASS          | AC=24;AF=0.480;AN=50;Base          |
| 49994 | chrY | 58980351 | . | A | G   | 40817.97  | PASS          | AC=23;AF=0.359;AN=64;Base          |
| 49995 | chrY | 58980358 | . | C | T   | 294.87    | my_snp_filter | AC=1;AF=0.014;AN=70;BaseQ          |
| 49996 | chrY | 58980361 | . | A | T   | 3883.56   | PASS          | AC=9;AF=0.129;AN=70;BaseQRankSum=  |
| 49997 | chrY | 58980366 | . | T | C   | 43374.60  | PASS          | AC=22;AF=0.314;AN=70;Base          |
| 49998 | chrY | 58980370 | . | T | G   | 9218.96   | PASS          | AC=19;AF=0.271;AN=70;BaseQRankSum= |
| 49999 | chrY | 58980394 | . | C | T,* | 11608.87  | PASS          | AC=2,13;AF=0.030,0.197;AN=         |
| 50000 | chrY | 58980415 | . | C | T   | 140582.05 | PASS          | AC=30;AF=0.429;AN=70;Base          |
| 50001 | chrY | 58980419 | . | A | C   | 2513.16   | my_snp_filter | AC=8;AF=0.114;AN=70;BaseQ          |
| 50002 | chrY | 58980421 | . | A | C,* | 447.05    | my_snp_filter | AC=1,1;AF=0.014,0.014;AN=          |
| 50003 | chrY | 58980422 | . | C | A   | 55502.60  | PASS          | AC=22;AF=0.314;AN=70;Base          |
| 50004 | chrY | 58980424 | . | C | A,T | 199512.12 | PASS          | AC=29,16;AF=0.500,0.276;A          |
| 50005 | chrY | 58980429 | . | C | G   | 103533.99 | PASS          | AC=28;AF=0.400;AN=70;Base          |
| 50006 | chrY | 58980435 | . | C | T   | 72.94     | my_snp_filter | AC=3;AF=0.043;AN=70;BaseQ          |
| 50007 | chrY | 58980436 | . | A | T   | 21819.48  | PASS          | AC=16;AF=0.229;AN=70;Base          |
| 50008 | chrY | 58980442 | . | T | A   | 23281.05  | PASS          | AC=21;AF=0.300;AN=70;Base          |

|       |      |          |   |   |       |           |               |                                    |
|-------|------|----------|---|---|-------|-----------|---------------|------------------------------------|
| 50009 | chrY | 58980446 | . | A | T     | 699.94    | my_snp_filter | AC=4;AF=0.057;AN=70;BaseQ          |
| 50010 | chrY | 58980449 | . | C | A,T   | 142281.80 | PASS          | AC=19,10;AF=0.339,0.179;A          |
| 50011 | chrY | 58980450 | . | C | T     | 22908.48  | PASS          | AC=20;AF=0.323;AN=62;Base          |
| 50012 | chrY | 58980452 | . | C | A     | 8369.41   | my_snp_filter | AC=12;AF=0.171;AN=70;Base          |
| 50013 | chrY | 58980454 | . | C | A     | 63938.32  | PASS          | AC=24;AF=0.343;AN=70;Base          |
| 50014 | chrY | 58980464 | . | C | G     | 36043.58  | PASS          | AC=19;AF=0.271;AN=70;Base          |
| 50015 | chrY | 58980467 | . | C | A     | 128.92    | my_snp_filter | AC=1;AF=0.014;AN=70;BaseQ          |
| 50016 | chrY | 58980480 | . | C | T     | 637.18    | my_snp_filter | AC=1;AF=0.014;AN=70;BaseQ          |
| 50017 | chrY | 58980486 | . | A | G     | 10968.55  | PASS          | AC=7;AF=0.117;AN=60;BaseQ          |
| 50018 | chrY | 58980488 | . | C | T     | 74466.75  | PASS          | AC=17;AF=0.354;AN=48;Base          |
| 50019 | chrY | 58980489 | . | A | G     | 23741.84  | PASS          | AC=9;AF=0.188;AN=48;BaseQ          |
| 50020 | chrY | 58980500 | . | C | T     | 21316.67  | PASS          | AC=24;AF=0.343;AN=70;Base          |
| 50021 | chrY | 58980521 | . | A | G     | 67.41     | my_snp_filter | AC=1;AF=0.014;AN=70;BaseQ          |
| 50022 | chrY | 58980522 | . | C | A     | 8832.65   | PASS          | AC=7;AF=0.100;AN=70;BaseQRankSum=  |
| 50023 | chrY | 58980525 | . | T | C     | 41292.86  | PASS          | AC=18;AF=0.290;AN=62;Base          |
| 50024 | chrY | 58980535 | . | C | A     | 1833.44   | PASS          | AC=5;AF=0.071;AN=70;BaseQRankSum=  |
| 50025 | chrY | 58980541 | . | A | T,*   | 1564.78   | PASS          | AC=2,2;AF=0.029,0.029;AN=70;BaseQ  |
| 50026 | chrY | 58980546 | . | T | A     | 765.26    | PASS          | AC=1;AF=0.167;AN=6;BaseQRankSum=0  |
| 50027 | chrY | 58980552 | . | C | T,*   | 953.52    | PASS          | AC=1,2;AF=0.019,0.038;AN=52;BaseQ  |
| 50028 | chrY | 58980560 | . | C | T,*   | 537.30    | my_snp_filter | AC=3,1;AF=0.043,0.014;AN=          |
| 50029 | chrY | 58980561 | . | A | T,*   | 303       | my_snp_filter | AC=1,1;AF=0.015,0.015;AN=          |
| 50030 | chrY | 58980562 | . | T | C,*   | 393.20    | my_snp_filter | AC=2,1;AF=0.031,0.016;AN=          |
| 50031 | chrY | 58980565 | . | C | A,*   | 6682.18   | PASS          | AC=13,1;AF=0.186,0.014;AN=70;Base  |
| 50032 | chrY | 58980581 | . | A | C     | 15521.68  | PASS          | AC=26;AF=0.394;AN=66;Base          |
| 50033 | chrY | 58980582 | . | C | T     | 18313.24  | PASS          | AC=26;AF=0.394;AN=66;Base          |
| 50034 | chrY | 58980587 | . | T | C     | 389.93    | PASS          | AC=2;AF=0.034;AN=58;BaseQRankSum=  |
| 50035 | chrY | 58980589 | . | C | T     | 107.68    | PASS          | AC=1;AF=0.017;AN=58;BaseQRankSum=  |
| 50036 | chrY | 58980594 | . | C | T     | 90.28     | my_snp_filter | AC=1;AF=0.019;AN=52;BaseQ          |
| 50037 | chrY | 58980595 | . | C | T     | 179.39    | PASS          | AC=2;AF=0.038;AN=52;BaseQRankSum=  |
| 50038 | chrY | 58980596 | . | C | A,T   | 518.66    | PASS          | AC=3,2;AF=0.058,0.038;AN=52;BaseQ  |
| 50039 | chrY | 58980602 | . | T | C     | 108.04    | PASS          | AC=2;AF=0.029;AN=70;BaseQRankSum=  |
| 50040 | chrY | 58980611 | . | C | T     | 829.65    | PASS          | AC=8;AF=0.121;AN=66;BaseQRankSum=  |
| 50041 | chrY | 58980615 | . | C | A     | 658.54    | PASS          | AC=7;AF=0.103;AN=68;BaseQRankSum=  |
| 50042 | chrY | 58980616 | . | A | C     | 2746.86   | PASS          | AC=9;AF=0.132;AN=68;BaseQRankSum=  |
| 50043 | chrY | 58980619 | . | A | C     | 2540.21   | PASS          | AC=10;AF=0.179;AN=56;BaseQRankSum= |
| 50044 | chrY | 58980625 | . | C | T     | 45.57     | PASS          | AC=1;AF=0.015;AN=68;BaseQRankSum=  |
| 50045 | chrY | 58980629 | . | C | T     | 72.22     | PASS          | AC=2;AF=0.042;AN=48;BaseQRankSum=  |
| 50046 | chrY | 58980630 | . | G | C     | 1610.26   | PASS          | AC=8;AF=0.200;AN=40;BaseQRankSum=  |
| 50047 | chrY | 58980655 | . | C | A     | 783.72    | PASS          | AC=7;AF=0.100;AN=70;BaseQRankSum=  |
| 50048 | chrY | 58980656 | . | A | T,G   | 708.87    | PASS          | AC=3,3;AF=0.043,0.043;AN=70;BaseQ  |
| 50049 | chrY | 58980659 | . | C | A     | 168.61    | PASS          | AC=3;AF=0.043;AN=70;BaseQRankSum=  |
| 50050 | chrY | 58980664 | . | C | T,*   | 1281.79   | PASS          | AC=3,4;AF=0.043,0.057;AN=70;BaseQ  |
| 50051 | chrY | 58980666 | . | A | C,*   | 1904.82   | PASS          | AC=8,4;AF=0.114,0.057;AN=70;BaseQ  |
| 50052 | chrY | 58980672 | . | T | C,*   | 1817.26   | PASS          | AC=8,4;AF=0.114,0.057;AN=70;BaseQ  |
| 50053 | chrY | 58980674 | . | C | A,*   | 1198.65   | PASS          | AC=2,4;AF=0.029,0.057;AN=70;BaseQ  |
| 50054 | chrY | 58980680 | . | C | T     | 7531.97   | PASS          | AC=14;AF=0.200;AN=70;BaseQRankSum= |
| 50055 | chrY | 58980681 | . | A | G     | 53.92     | PASS          | AC=2;AF=0.029;AN=70;BaseQRankSum=  |
| 50056 | chrY | 58980685 | . | C | A     | 584.75    | PASS          | AC=7;AF=0.113;AN=62;BaseQRankSum=  |
| 50057 | chrY | 58980691 | . | A | T     | 540.45    | my_snp_filter | AC=9;AF=0.237;AN=38;BaseQ          |
| 50058 | chrY | 58980693 | . | A | G,T,* | 1773.96   | PASS          | AC=7,5,3;AF=0.206,0.147,0.088;AN=  |
| 50059 | chrY | 58980696 | . | A | G     | 7227.90   | PASS          | AC=11;AF=0.177;AN=62;BaseQRankSum= |
| 50060 | chrY | 58980700 | . | C | T,*   | 1146.70   | PASS          | AC=1,3;AF=0.015,0.045;AN=66;BaseQ  |
| 50061 | chrY | 58980721 | . | A | T,*   | 443.27    | PASS          | AC=3,2;AF=0.043,0.029;AN=70;BaseQ  |
| 50062 | chrY | 58980728 | . | T | G     | 91.69     | PASS          | AC=1;AF=0.015;AN=68;BaseQRankSum=  |
| 50063 | chrY | 58980732 | . | T | A     | 301.57    | PASS          | AC=2;AF=0.029;AN=68;BaseQRankSum=  |
| 50064 | chrY | 58980755 | . | C | T     | 76.32     | PASS          | AC=1;AF=0.014;AN=70;BaseQRankSum=  |
| 50065 | chrY | 58980756 | . | A | G     | 76.75     | PASS          | AC=1;AF=0.014;AN=70;BaseQRankSum=  |
| 50066 | chrY | 58980779 | . | T | C,*   | 13971.97  | PASS          | AC=3,16;AF=0.075,0.400;AN=         |
| 50067 | chrY | 58980808 | . | T | C     | 1802.69   | PASS          | AC=3;AF=0.083;AN=36;BaseQRankSum=  |
| 50068 | chrY | 58980809 | . | G | A,*   | 1795.25   | PASS          | AC=2,2;AF=0.056,0.056;AN=36;BaseQ  |
| 50069 | chrY | 58980815 | . | A | G     | 264.21    | PASS          | AC=4;AF=0.077;AN=52;BaseQRankSum=  |
| 50070 | chrY | 58980821 | . | C | T     | 226.90    | PASS          | AC=3;AF=0.050;AN=60;BaseQRankSum=  |
| 50071 | chrY | 58980830 | . | C | T     | 197.68    | PASS          | AC=2;AF=0.029;AN=68;BaseQRankSum=  |
| 50072 | chrY | 58980831 | . | C | G     | 1009.59   | PASS          | AC=6;AF=0.088;AN=68;BaseQRankSum=  |
| 50073 | chrY | 58980852 | . | A | T     | 666.32    | PASS          | AC=5;AF=0.100;AN=50;BaseQRankSum=  |
| 50074 | chrY | 58980860 | . | C | T     | 10217.21  | PASS          | AC=16;AF=0.296;AN=54;Base          |
| 50075 | chrY | 58980878 | . | T | A     | 7669.07   | PASS          | AC=8;AF=0.121;AN=66;BaseQRankSum=  |
| 50076 | chrY | 58980883 | . | T | A     | 30145.98  | PASS          | AC=19;AF=0.413;AN=46;Base          |
| 50077 | chrY | 58980904 | . | T | A     | 4928.80   | PASS          | AC=10;AF=0.143;AN=70;BaseQRankSum= |
| 50078 | chrY | 58980917 | . | C | T     | 32.37     | PASS          | AC=2;AF=0.038;AN=52;BaseQRankSum=  |
| 50079 | chrY | 58980928 | . | A | G     | 103.97    | PASS          | AC=2;AF=0.029;AN=68;BaseQRankSum=  |
| 50080 | chrY | 58980939 | . | T | G     | 266.44    | PASS          | AC=5;AF=0.074;AN=68;BaseQRankSum=  |
| 50081 | chrY | 58980949 | . | C | T     | 149.95    | PASS          | AC=2;AF=0.029;AN=70;BaseQRankSum=  |
| 50082 | chrY | 58980959 | . | C | T     | 880.32    | PASS          | AC=1;AF=0.014;AN=70;BaseQRankSum=  |
| 50083 | chrY | 58980975 | . | A | G     | 868.01    | PASS          | AC=6;AF=0.088;AN=68;BaseQRankSum=  |
| 50084 | chrY | 58980983 | . | G | T     | 16371.68  | PASS          | AC=11;AF=0.275;AN=40;Base          |

|       |      |          |   |   |       |           |               |                                            |
|-------|------|----------|---|---|-------|-----------|---------------|--------------------------------------------|
| 50085 | chrY | 58981025 | . | G | C     | 577.91    | PASS          | AC=10;AF=0.143;AN=70;BaseQRankSum=         |
| 50086 | chrY | 58981039 | . | A | T     | 3202.14   | PASS          | AC=4;AF=0.125;AN=32;BaseQRankSum=          |
| 50087 | chrY | 58981044 | . | C | T     | 456.48    | PASS          | AC=9;AF=0.129;AN=70;BaseQRankSum=          |
| 50088 | chrY | 58981047 | . | G | C     | 21413.85  | PASS          | AC=20;AF=0.500;AN=40;BaseQRankSum=         |
| 50089 | chrY | 58981057 | . | A | T,*   | 5154.78   | my_snp_filter | AC=2,5;AF=0.029,0.074;AN=                  |
| 50090 | chrY | 58981059 | . | G | T,*   | 5006.30   | my_snp_filter | AC=2,4;AF=0.029,0.057;AN=                  |
| 50091 | chrY | 58981063 | . | A | C,*   | 4699.95   | PASS          | AC=2,3;AF=0.029,0.043;AN=70;BaseQRankSum=  |
| 50092 | chrY | 58981065 | . | T | A,*   | 4502.90   | PASS          | AC=2,3;AF=0.029,0.043;AN=70;BaseQRankSum=  |
| 50093 | chrY | 58981069 | . | C | T,*   | 11502.01  | PASS          | AC=4,2;AF=0.182,0.091;AN=                  |
| 50094 | chrY | 58981073 | . | T | G     | 779.57    | PASS          | AC=1;AF=0.016;AN=64;BaseQRankSum=          |
| 50095 | chrY | 58981075 | . | T | A     | 734.35    | PASS          | AC=2;AF=0.029;AN=70;BaseQRankSum=          |
| 50096 | chrY | 58981088 | . | G | C,*   | 3591.64   | PASS          | AC=1,3;AF=0.014,0.043;AN=70;BaseQRankSum=  |
| 50097 | chrY | 58981093 | . | C | G,*   | 1508.33   | PASS          | AC=1,1;AF=0.014,0.014;AN=70;BaseQRankSum=  |
| 50098 | chrY | 58981100 | . | T | A,*   | 1680.96   | PASS          | AC=1,1;AF=0.015,0.015;AN=66;BaseQRankSum=  |
| 50099 | chrY | 58981103 | . | C | G,*   | 2601.84   | PASS          | AC=1,2;AF=0.016,0.031;AN=64;BaseQRankSum=  |
| 50100 | chrY | 58981108 | . | A | C,G,* | 2543.58   | PASS          | AC=3,1,1;AF=0.047,0.016,0.016;AN=          |
| 50101 | chrY | 58981160 | . | A | G     | 984.95    | PASS          | AC=2;AF=0.029;AN=70;BaseQRankSum=          |
| 50102 | chrY | 58981162 | . | A | C     | 824.13    | my_snp_filter | AC=7;AF=0.100;AN=70;BaseQRankSum=          |
| 50103 | chrY | 58981165 | . | C | T,*   | 633.68    | my_snp_filter | AC=3,2;AF=0.050,0.033;AN=                  |
| 50104 | chrY | 58981166 | . | T | A,G,* | 3842.02   | my_snp_filter | AC=7,6,2;AF=0.117,0.100,0.100              |
| 50105 | chrY | 58981180 | . | C | A,*   | 792.74    | my_snp_filter | AC=3,2;AF=0.043,0.029;AN=                  |
| 50106 | chrY | 58981181 | . | T | C,*   | 845.26    | my_snp_filter | AC=3,2;AF=0.043,0.029;AN=                  |
| 50107 | chrY | 58981191 | . | C | G,*   | 6734.68   | PASS          | AC=14,1;AF=0.200,0.014;AN=70;BaseQRankSum= |
| 50108 | chrY | 58981198 | . | C | T,*   | 1058.36   | my_snp_filter | AC=4,2;AF=0.057,0.029;AN=                  |
| 50109 | chrY | 58981199 | . | T | A     | 553.63    | my_snp_filter | AC=6;AF=0.086;AN=70;BaseQRankSum=          |
| 50110 | chrY | 58981201 | . | C | A,*   | 1151.67   | my_snp_filter | AC=4,2;AF=0.057,0.029;AN=                  |
| 50111 | chrY | 58981221 | . | C | T     | 108.42    | my_snp_filter | AC=1;AF=0.014;AN=70;BaseQRankSum=          |
| 50112 | chrY | 58981226 | . | C | A     | 123.67    | my_snp_filter | AC=1;AF=0.014;AN=70;BaseQRankSum=          |
| 50113 | chrY | 58981238 | . | T | A     | 1729.31   | PASS          | AC=2;AF=0.029;AN=70;BaseQRankSum=          |
| 50114 | chrY | 58981247 | . | T | G     | 32654.45  | PASS          | AC=29;AF=0.439;AN=66;BaseQRankSum=         |
| 50115 | chrY | 58981256 | . | G | C     | 591.67    | PASS          | AC=1;AF=0.015;AN=66;BaseQRankSum=          |
| 50116 | chrY | 58981257 | . | G | A,T   | 34219.48  | PASS          | AC=28,1;AF=0.424,0.015;AN=                 |
| 50117 | chrY | 58981258 | . | C | T     | 198.51    | PASS          | AC=1;AF=0.015;AN=68;BaseQRankSum=          |
| 50118 | chrY | 58981274 | . | C | T,*   | 31114.18  | PASS          | AC=1,28;AF=0.014,0.400;AN=                 |
| 50119 | chrY | 58981282 | . | A | T     | 5527.26   | PASS          | AC=19;AF=0.271;AN=70;BaseQRankSum=         |
| 50120 | chrY | 58981290 | . | G | C     | 33583.84  | PASS          | AC=30;AF=0.455;AN=66;BaseQRankSum=         |
| 50121 | chrY | 58981305 | . | T | C     | 311.77    | my_snp_filter | AC=2;AF=0.029;AN=70;BaseQRankSum=          |
| 50122 | chrY | 58981315 | . | C | A     | 28971.02  | PASS          | AC=31;AF=0.443;AN=70;BaseQRankSum=         |
| 50123 | chrY | 58981316 | . | A | G,C   | 85620.57  | PASS          | AC=36,31;AF=0.514,0.443;AN=                |
| 50124 | chrY | 58981317 | . | T | C     | 438.36    | my_snp_filter | AC=2;AF=0.029;AN=70;BaseQRankSum=          |
| 50125 | chrY | 58981342 | . | A | T     | 279.34    | my_snp_filter | AC=2;AF=0.029;AN=70;BaseQRankSum=          |
| 50126 | chrY | 58981347 | . | A | G     | 1235.94   | PASS          | AC=2;AF=0.029;AN=70;BaseQRankSum=          |
| 50127 | chrY | 58981348 | . | C | G     | 1240.02   | PASS          | AC=2;AF=0.029;AN=70;BaseQRankSum=          |
| 50128 | chrY | 58981360 | . | G | C     | 22220.40  | PASS          | AC=26;AF=0.448;AN=58;BaseQRankSum=         |
| 50129 | chrY | 58981365 | . | C | T     | 1181.89   | PASS          | AC=2;AF=0.029;AN=70;BaseQRankSum=          |
| 50130 | chrY | 58981380 | . | A | C     | 1241.19   | PASS          | AC=4;AF=0.057;AN=70;BaseQRankSum=          |
| 50131 | chrY | 58981383 | . | C | T     | 67.53     | PASS          | AC=2;AF=0.029;AN=70;BaseQRankSum=          |
| 50132 | chrY | 58981397 | . | A | T     | 117.36    | my_snp_filter | AC=3;AF=0.043;AN=70;BaseQRankSum=          |
| 50133 | chrY | 58981401 | . | C | T     | 936.44    | PASS          | AC=2;AF=0.029;AN=70;BaseQRankSum=          |
| 50134 | chrY | 58981410 | . | A | G     | 3168.37   | PASS          | AC=15;AF=0.259;AN=58;BaseQRankSum=         |
| 50135 | chrY | 58981443 | . | G | A     | 1573.79   | PASS          | AC=7;AF=0.100;AN=70;BaseQRankSum=          |
| 50136 | chrY | 58981449 | . | G | A     | 62485.41  | PASS          | AC=38;AF=0.576;AN=66;BaseQRankSum=         |
| 50137 | chrY | 58981482 | . | C | T     | 69570.45  | PASS          | AC=32;AF=0.552;AN=58;BaseQRankSum=         |
| 50138 | chrY | 58981590 | . | G | T     | 17967.74  | PASS          | AC=28;AF=0.400;AN=70;BaseQRankSum=         |
| 50139 | chrY | 58981677 | . | A | C     | 36495.32  | PASS          | AC=14;AF=0.212;AN=66;BaseQRankSum=         |
| 50140 | chrY | 58981682 | . | C | G     | 107.95    | my_snp_filter | AC=1;AF=0.014;AN=70;BaseQRankSum=          |
| 50141 | chrY | 58981699 | . | T | C     | 346.79    | my_snp_filter | AC=2;AF=0.029;AN=70;BaseQRankSum=          |
| 50142 | chrY | 58981701 | . | C | T     | 33972.19  | PASS          | AC=19;AF=0.288;AN=66;BaseQRankSum=         |
| 50143 | chrY | 58981708 | . | G | A     | 31516.18  | PASS          | AC=19;AF=0.288;AN=66;BaseQRankSum=         |
| 50144 | chrY | 58981712 | . | C | A     | 31045.30  | PASS          | AC=20;AF=0.294;AN=68;BaseQRankSum=         |
| 50145 | chrY | 58981713 | . | T | C     | 31233.53  | PASS          | AC=20;AF=0.294;AN=68;BaseQRankSum=         |
| 50146 | chrY | 58981721 | . | G | A     | 214.57    | my_snp_filter | AC=3;AF=0.044;AN=68;BaseQRankSum=          |
| 50147 | chrY | 58981723 | . | G | A     | 29032.55  | PASS          | AC=19;AF=0.279;AN=68;BaseQRankSum=         |
| 50148 | chrY | 58981750 | . | A | T,G   | 24325.91  | PASS          | AC=13,11;AF=0.191,0.162;AN=                |
| 50149 | chrY | 58981759 | . | T | C     | 152948.82 | PASS          | AC=49;AF=0.700;AN=70;BaseQRankSum=         |
| 50150 | chrY | 58981760 | . | C | T     | 2570.24   | my_snp_filter | AC=10;AF=0.143;AN=70;BaseQRankSum=         |
| 50151 | chrY | 58981769 | . | C | A,*   | 60089.66  | PASS          | AC=2,29;AF=0.029,0.414;AN=                 |
| 50152 | chrY | 58981770 | . | C | T,*   | 60092.65  | PASS          | AC=2,29;AF=0.029,0.414;AN=                 |
| 50153 | chrY | 58981786 | . | A | G     | 96.49     | my_snp_filter | AC=1;AF=0.014;AN=70;BaseQRankSum=          |
| 50154 | chrY | 58981789 | . | G | C     | 56.69     | my_snp_filter | AC=1;AF=0.014;AN=70;BaseQRankSum=          |
| 50155 | chrY | 58981812 | . | C | T     | 66518.06  | PASS          | AC=28;AF=0.400;AN=70;BaseQRankSum=         |
| 50156 | chrY | 58981820 | . | T | C     | 41945.02  | PASS          | AC=26;AF=0.371;AN=70;BaseQRankSum=         |
| 50157 | chrY | 58981843 | . | T | G     | 183.96    | my_snp_filter | AC=2;AF=0.029;AN=70;BaseQRankSum=          |
| 50158 | chrY | 58981851 | . | C | A     | 7556.43   | my_snp_filter | AC=17;AF=0.243;AN=70;BaseQRankSum=         |
| 50159 | chrY | 58981854 | . | C | A     | 7416.31   | PASS          | AC=6;AF=0.086;AN=70;BaseQRankSum=          |
| 50160 | chrY | 58981855 | . | C | T     | 70255.87  | PASS          | AC=26;AF=0.371;AN=70;BaseQRankSum=         |

|       |      |          |   |   |     |           |               |                                    |
|-------|------|----------|---|---|-----|-----------|---------------|------------------------------------|
| 50161 | chrY | 58981856 | . | A | T   | 186.42    | my_snp_filter | AC=1;AF=0.014;AN=70;BaseQ          |
| 50162 | chrY | 58981857 | . | T | C   | 19664.79  | PASS          | AC=22;AF=0.314;AN=70;Base          |
| 50163 | chrY | 58981861 | . | A | T   | 207.42    | my_snp_filter | AC=1;AF=0.014;AN=70;BaseQ          |
| 50164 | chrY | 58981864 | . | C | G   | 611.05    | my_snp_filter | AC=2;AF=0.029;AN=70;BaseQ          |
| 50165 | chrY | 58981865 | . | C | A   | 67008.25  | PASS          | AC=25;AF=0.357;AN=70;Base          |
| 50166 | chrY | 58981873 | . | T | C   | 114441.02 | PASS          | AC=27;AF=0.386;AN=70;Base          |
| 50167 | chrY | 58981874 | . | G | A   | 113779.75 | PASS          | AC=27;AF=0.386;AN=70;Base          |
| 50168 | chrY | 58981880 | . | A | G   | 20279.39  | PASS          | AC=16;AF=0.229;AN=70;Base          |
| 50169 | chrY | 58981886 | . | C | T   | 44265.81  | PASS          | AC=27;AF=0.386;AN=70;Base          |
| 50170 | chrY | 58981901 | . | C | A   | 81.50     | my_snp_filter | AC=1;AF=0.014;AN=70;BaseQ          |
| 50171 | chrY | 58981921 | . | T | A,* | 2303.25   | my_snp_filter | AC=2,3;AF=0.029,0.043;AN           |
| 50172 | chrY | 58981954 | . | G | C,* | 57597.86  | PASS          | AC=27,2;AF=0.643,0.048;AN          |
| 50173 | chrY | 58982012 | . | G | A   | 17317.22  | PASS          | AC=13;AF=0.500;AN=26;Base          |
| 50174 | chrY | 58982015 | . | C | T   | 2197.72   | PASS          | AC=2;AF=0.125;AN=16;BaseQRankSum=  |
| 50175 | chrY | 58982018 | . | C | A   | 1952.95   | PASS          | AC=1;AF=0.017;AN=60;BaseQRankSum=  |
| 50176 | chrY | 58982023 | . | T | C   | 265.98    | PASS          | AC=1;AF=0.014;AN=70;BaseQRankSum=  |
| 50177 | chrY | 58982029 | . | T | G   | 190.42    | PASS          | AC=1;AF=0.014;AN=70;BaseQRankSum=  |
| 50178 | chrY | 58982045 | . | C | A   | 2087.94   | PASS          | AC=2;AF=0.029;AN=70;BaseQRankSum=  |
| 50179 | chrY | 58982074 | . | T | G   | 888.60    | PASS          | AC=3;AF=0.043;AN=70;BaseQRankSum=  |
| 50180 | chrY | 58982081 | . | A | C   | 685.10    | PASS          | AC=2;AF=0.500;AN=4;BaseQRankSum=2  |
| 50181 | chrY | 58982096 | . | C | T   | 161.52    | PASS          | AC=2;AF=0.029;AN=70;BaseQRankSum=  |
| 50182 | chrY | 58982108 | . | T | C   | 32.55     | PASS          | AC=2;AF=0.036;AN=56;BaseQRankSum=  |
| 50183 | chrY | 58982110 | . | G | C   | 37.05     | PASS          | AC=2;AF=0.200;AN=10;BaseQRankSum=  |
| 50184 | chrY | 58982127 | . | G | A   | 20655.58  | PASS          | AC=22;AF=0.579;AN=38;Base          |
| 50185 | chrY | 58982150 | . | G | A   | 1400.57   | PASS          | AC=5;AF=0.071;AN=70;BaseQRankSum=  |
| 50186 | chrY | 58982160 | . | G | T   | 22545.68  | PASS          | AC=22;AF=0.611;AN=36;Base          |
| 50187 | chrY | 58982178 | . | G | A   | 70.18     | my_snp_filter | AC=2;AF=0.029;AN=70;BaseQ          |
| 50188 | chrY | 58982232 | . | C | G   | 704.36    | my_snp_filter | AC=7;AF=0.100;AN=70;BaseQ          |
| 50189 | chrY | 58982238 | . | C | T   | 6718.02   | PASS          | AC=18;AF=0.257;AN=70;BaseQRankSum= |
| 50190 | chrY | 58982239 | . | A | T   | 396.06    | my_snp_filter | AC=2;AF=0.029;AN=70;BaseQ          |
| 50191 | chrY | 58982244 | . | A | T   | 1781.65   | PASS          | AC=8;AF=0.114;AN=70;BaseQRankSum=  |
| 50192 | chrY | 58982250 | . | C | T   | 10926.95  | PASS          | AC=26;AF=0.371;AN=70;Base          |
| 50193 | chrY | 58982252 | . | G | C   | 52490.27  | PASS          | AC=25;AF=0.463;AN=54;Base          |
| 50194 | chrY | 58982266 | . | T | C   | 3633.96   | PASS          | AC=14;AF=0.200;AN=70;BaseQRankSum= |
| 50195 | chrY | 58982267 | . | C | A   | 304.07    | my_snp_filter | AC=5;AF=0.071;AN=70;BaseQ          |
| 50196 | chrY | 58982278 | . | C | A   | 146.65    | PASS          | AC=2;AF=0.031;AN=64;BaseQRankSum=  |
| 50197 | chrY | 58982279 | . | G | A   | 51359.20  | PASS          | AC=31;AF=0.500;AN=62;Base          |
| 50198 | chrY | 58982285 | . | C | T   | 30.97     | PASS          | AC=1;AF=0.015;AN=68;BaseQRankSum=  |
| 50199 | chrY | 58982289 | . | A | T   | 39192.54  | PASS          | AC=23;AF=0.359;AN=64;Base          |
| 50200 | chrY | 58982291 | . | G | C   | 99525.59  | PASS          | AC=39;AF=0.629;AN=62;Base          |
| 50201 | chrY | 58982294 | . | A | T   | 37551.71  | PASS          | AC=23;AF=0.348;AN=66;Base          |
| 50202 | chrY | 58982304 | . | A | G,* | 13054.90  | PASS          | AC=20,1;AF=0.286,0.014;AN          |
| 50203 | chrY | 58982308 | . | C | A   | 367.88    | my_snp_filter | AC=5;AF=0.071;AN=70;BaseQ          |
| 50204 | chrY | 58982324 | . | T | A   | 100831.46 | PASS          | AC=38;AF=0.613;AN=62;Base          |
| 50205 | chrY | 58982327 | . | C | A   | 8329.24   | PASS          | AC=21;AF=0.300;AN=70;BaseQRankSum= |
| 50206 | chrY | 58982333 | . | C | A   | 46446.43  | PASS          | AC=23;AF=0.329;AN=70;Base          |
| 50207 | chrY | 58982338 | . | C | T   | 48145.86  | PASS          | AC=23;AF=0.329;AN=70;Base          |
| 50208 | chrY | 58982341 | . | C | T   | 53336.73  | PASS          | AC=30;AF=0.517;AN=58;Base          |
| 50209 | chrY | 58982342 | . | G | A   | 49144.57  | PASS          | AC=23;AF=0.383;AN=60;Base          |
| 50210 | chrY | 58982346 | . | G | T   | 562.23    | PASS          | AC=4;AF=0.059;AN=68;BaseQRankSum=  |
| 50211 | chrY | 58982348 | . | A | T   | 68.29     | PASS          | AC=1;AF=0.015;AN=68;BaseQRankSum=  |
| 50212 | chrY | 58982353 | . | T | A   | 114789.20 | PASS          | AC=43;AF=0.694;AN=62;Base          |
| 50213 | chrY | 58982356 | . | G | T   | 256.81    | my_snp_filter | AC=6;AF=0.086;AN=70;BaseQ          |
| 50214 | chrY | 58982360 | . | C | T   | 13397.65  | PASS          | AC=14;AF=0.200;AN=70;Base          |
| 50215 | chrY | 58982362 | . | C | A   | 2970.30   | PASS          | AC=8;AF=0.118;AN=68;BaseQRankSum=  |
| 50216 | chrY | 58982371 | . | G | C,T | 24832.61  | PASS          | AC=16,6;AF=0.229,0.086;AN          |
| 50217 | chrY | 58982398 | . | A | G   | 19308.44  | PASS          | AC=26;AF=0.371;AN=70;Base          |
| 50218 | chrY | 58982414 | . | C | A   | 39.68     | my_snp_filter | AC=1;AF=0.014;AN=70;BaseQ          |
| 50219 | chrY | 58982416 | . | A | T   | 684.24    | my_snp_filter | AC=4;AF=0.057;AN=70;BaseQ          |
| 50220 | chrY | 58982420 | . | C | T   | 81.20     | my_snp_filter | AC=2;AF=0.029;AN=70;BaseQ          |
| 50221 | chrY | 58982421 | . | G | A,T | 1191.40   | my_snp_filter | AC=3,5;AF=0.043,0.071;AN=          |
| 50222 | chrY | 58982429 | . | C | G   | 107.96    | my_snp_filter | AC=3;AF=0.043;AN=70;BaseQ          |
| 50223 | chrY | 58982441 | . | A | T   | 2527.58   | PASS          | AC=10;AF=0.143;AN=70;BaseQRankSum= |
| 50224 | chrY | 58982467 | . | T | A   | 110.88    | my_snp_filter | AC=1;AF=0.014;AN=70;BaseQ          |
| 50225 | chrY | 58982471 | . | G | A   | 209827.45 | PASS          | AC=42;AF=0.600;AN=70;Base          |
| 50226 | chrY | 58982490 | . | T | C   | 55016.27  | PASS          | AC=19;AF=0.352;AN=54;Base          |
| 50227 | chrY | 58982512 | . | C | T   | 914.84    | my_snp_filter | AC=3;AF=0.043;AN=70;BaseQ          |
| 50228 | chrY | 58982524 | . | C | G   | 115107.96 | PASS          | AC=24;AF=0.414;AN=58;Base          |
| 50229 | chrY | 58982529 | . | G | T   | 197.26    | my_snp_filter | AC=2;AF=0.029;AN=70;BaseQ          |
| 50230 | chrY | 58982547 | . | T | C   | 116545.21 | PASS          | AC=24;AF=0.400;AN=60;Base          |
| 50231 | chrY | 58982549 | . | C | A   | 501.85    | my_snp_filter | AC=4;AF=0.057;AN=70;Base           |
| 50232 | chrY | 58982553 | . | T | C   | 111943.47 | PASS          | AC=24;AF=0.387;AN=62;Base          |
| 50233 | chrY | 58982559 | . | A | C   | 224182.84 | PASS          | AC=36;AF=0.514;AN=70;Base          |
| 50234 | chrY | 58982572 | . | G | T   | 423.30    | my_snp_filter | AC=3;AF=0.048;AN=62;BaseQ          |
| 50235 | chrY | 58982573 | . | T | C   | 94456.47  | PASS          | AC=24;AF=0.387;AN=62;Base          |
| 50236 | chrY | 58982577 | . | C | G   | 62048.64  | PASS          | AC=31;AF=0.443;AN=70;Base          |

|       |      |          |   |   |     |           |               |                                   |
|-------|------|----------|---|---|-----|-----------|---------------|-----------------------------------|
| 50237 | chrY | 58982587 | . | G | A,C | 272334.98 | PASS          | AC=36,24;AF=0.514,0.343;A         |
| 50238 | chrY | 58982595 | . | C | G   | 6814.75   | PASS          | AC=10;AF=0.143;AN=70;BaseQRankSum |
| 50239 | chrY | 58982605 | . | C | T   | 68247.96  | PASS          | AC=23;AF=0.348;AN=66;Base         |
| 50240 | chrY | 58982609 | . | C | G   | 206.52    | my_snp_filter | AC=3;AF=0.043;AN=70;BaseQ         |
| 50241 | chrY | 58982612 | . | C | A   | 63285.57  | PASS          | AC=22;AF=0.355;AN=62;Base         |
| 50242 | chrY | 58982616 | . | A | G   | 5312.30   | my_snp_filter | AC=14;AF=0.200;AN=70;Base         |
| 50243 | chrY | 58982621 | . | G | A   | 61042.17  | PASS          | AC=21;AF=0.350;AN=60;Base         |
| 50244 | chrY | 58982626 | . | A | T   | 4819.48   | my_snp_filter | AC=11;AF=0.157;AN=70;Base         |
| 50245 | chrY | 58982638 | . | C | A   | 48952.39  | PASS          | AC=18;AF=0.300;AN=60;Base         |
| 50246 | chrY | 58982661 | . | T | A   | 40271.31  | PASS          | AC=18;AF=0.290;AN=62;Base         |
| 50247 | chrY | 58982696 | . | C | T   | 29535.69  | PASS          | AC=14;AF=0.233;AN=60;Base         |
| 50248 | chrY | 58982712 | . | T | C   | 898.06    | my_snp_filter | AC=2;AF=0.029;AN=70;BaseQ         |
| 50249 | chrY | 58982713 | . | T | C   | 27910.18  | PASS          | AC=14;AF=0.233;AN=60;Base         |
| 50250 | chrY | 58982716 | . | T | C   | 337.85    | PASS          | AC=1;AF=0.014;AN=70;BaseQRankSum= |
| 50251 | chrY | 58982719 | . | C | T   | 89426.53  | PASS          | AC=34;AF=0.486;AN=70;Base         |
| 50252 | chrY | 58982724 | . | C | T   | 29458.05  | PASS          | AC=14;AF=0.219;AN=64;Base         |
| 50253 | chrY | 58982726 | . | A | C   | 31357.17  | PASS          | AC=15;AF=0.250;AN=60;Base         |
| 50254 | chrY | 58982752 | . | T | A,* | 31121.49  | PASS          | AC=8,7;AF=0.114,0.100;AN=         |
| 50255 | chrY | 58982797 | . | A | T,C | 131903.30 | PASS          | AC=15,12;AF=0.214,0.171;A         |
| 50256 | chrY | 58982820 | . | A | C   | 166095.22 | PASS          | AC=30;AF=0.429;AN=70;Base         |
| 50257 | chrY | 58982821 | . | A | T,G | 616.43    | my_snp_filter | AC=2,1;AF=0.029,0.014;AN=         |
| 50258 | chrY | 58982823 | . | C | A   | 16386.84  | PASS          | AC=26;AF=0.371;AN=70;Base         |
| 50259 | chrY | 58982830 | . | T | C   | 132884.40 | PASS          | AC=30;AF=0.429;AN=70;Base         |
| 50260 | chrY | 58982831 | . | G | A   | 361.85    | my_snp_filter | AC=3;AF=0.043;AN=70;BaseQ         |
| 50261 | chrY | 58982840 | . | C | G   | 164609.11 | PASS          | AC=31;AF=0.443;AN=70;Base         |
| 50262 | chrY | 58982876 | . | C | T   | 48763.55  | PASS          | AC=34;AF=0.486;AN=70;Base         |
| 50263 | chrY | 58982898 | . | C | A   | 88.57     | PASS          | AC=1;AF=0.014;AN=70;BaseQRankSum= |
| 50264 | chrY | 58982916 | . | C | A   | 128.26    | PASS          | AC=1;AF=0.014;AN=70;BaseQRankSum= |
| 50265 | chrY | 58982922 | . | A | T   | 34972.76  | PASS          | AC=33;AF=0.471;AN=70;Base         |
| 50266 | chrY | 58982933 | . | C | A   | 43346.56  | PASS          | AC=24;AF=0.343;AN=70;Base         |
| 50267 | chrY | 58982934 | . | T | C   | 70155.93  | PASS          | AC=28;AF=0.400;AN=70;Base         |
| 50268 | chrY | 58982937 | . | A | G   | 130.76    | my_snp_filter | AC=1;AF=0.014;AN=70;BaseQ         |
| 50269 | chrY | 58982938 | . | T | G   | 68206.07  | PASS          | AC=28;AF=0.412;AN=68;Base         |
| 50270 | chrY | 58982939 | . | T | C   | 15810.73  | PASS          | AC=24;AF=0.353;AN=68;Base         |
| 50271 | chrY | 58982940 | . | C | A   | 94.44     | my_snp_filter | AC=1;AF=0.014;AN=70;BaseQ         |
| 50272 | chrY | 58982943 | . | G | A   | 45847.70  | PASS          | AC=24;AF=0.343;AN=70;Base         |
| 50273 | chrY | 58982952 | . | A | T   | 11377.30  | PASS          | AC=24;AF=0.343;AN=70;Base         |
| 50274 | chrY | 58982960 | . | C | T   | 64686.03  | PASS          | AC=27;AF=0.386;AN=70;Base         |
| 50275 | chrY | 58982962 | . | A | T   | 63367.12  | PASS          | AC=27;AF=0.397;AN=68;Base         |
| 50276 | chrY | 58982967 | . | A | T   | 3823.36   | PASS          | AC=4;AF=0.057;AN=70;BaseQRankSum= |
| 50277 | chrY | 58982975 | . | C | T   | 102.27    | my_snp_filter | AC=2;AF=0.029;AN=70;BaseQ         |
| 50278 | chrY | 58982991 | . | T | C   | 100.60    | PASS          | AC=2;AF=0.029;AN=70;BaseQRankSum= |
| 50279 | chrY | 58983002 | . | A | C   | 62.49     | PASS          | AC=1;AF=0.014;AN=70;BaseQRankSum= |
| 50280 | chrY | 58983005 | . | G | T   | 2222.11   | my_snp_filter | AC=7;AF=0.117;AN=60;BaseQ         |
| 50281 | chrY | 58983007 | . | T | A   | 35.04     | PASS          | AC=1;AF=0.014;AN=70;BaseQRankSum= |
| 50282 | chrY | 58983008 | . | C | T   | 1671.39   | my_snp_filter | AC=4;AF=0.057;AN=70;BaseQ         |
| 50283 | chrY | 58983013 | . | C | T   | 1058.13   | my_snp_filter | AC=4;AF=0.057;AN=70;BaseQ         |
| 50284 | chrY | 58983063 | . | T | A   | 2290.80   | PASS          | AC=9;AF=0.180;AN=50;BaseQRankSum= |
| 50285 | chrY | 58983072 | . | C | G   | 1035.60   | PASS          | AC=7;AF=0.100;AN=70;BaseQRankSum= |
| 50286 | chrY | 58983075 | . | T | A   | 36.42     | my_snp_filter | AC=1;AF=0.014;AN=70;BaseQ         |
| 50287 | chrY | 58983082 | . | C | A   | 1787.46   | PASS          | AC=10;AF=0.143;AN=70;BaseQRankSum |
| 50288 | chrY | 58983088 | . | G | A   | 274.33    | my_snp_filter | AC=8;AF=0.114;AN=70;BaseQ         |
| 50289 | chrY | 58983094 | . | C | T   | 90.42     | PASS          | AC=1;AF=0.014;AN=70;BaseQRankSum= |
| 50290 | chrY | 58983113 | . | C | G   | 385.97    | my_snp_filter | AC=6;AF=0.088;AN=68;BaseQ         |
| 50291 | chrY | 58983116 | . | A | T   | 5995.40   | PASS          | AC=18;AF=0.346;AN=52;BaseQRankSum |
| 50292 | chrY | 58983127 | . | C | G   | 1105.14   | PASS          | AC=6;AF=0.088;AN=68;BaseQRankSum= |
| 50293 | chrY | 58983128 | . | C | T   | 4131.99   | PASS          | AC=14;AF=0.206;AN=68;BaseQRankSum |
| 50294 | chrY | 58983140 | . | T | G,* | 29595.53  | PASS          | AC=2,22;AF=0.029,0.314;AN         |
| 50295 | chrY | 58983147 | . | C | G   | 33864.30  | PASS          | AC=28;AF=0.400;AN=70;Base         |
| 50296 | chrY | 58983157 | . | G | C   | 125127.73 | PASS          | AC=33;AF=0.550;AN=60;Base         |
| 50297 | chrY | 58983180 | . | C | A   | 42.42     | my_snp_filter | AC=1;AF=0.014;AN=70;BaseQ         |
| 50298 | chrY | 58983182 | . | C | G   | 13528.57  | PASS          | AC=16;AF=0.308;AN=52;Base         |
| 50299 | chrY | 58983183 | . | T | C   | 14204.79  | PASS          | AC=16;AF=0.308;AN=52;Base         |
| 50300 | chrY | 58983185 | . | C | T   | 14721.26  | PASS          | AC=16;AF=0.229;AN=70;Base         |
| 50301 | chrY | 58983193 | . | C | T   | 27827.41  | PASS          | AC=26;AF=0.433;AN=60;Base         |
| 50302 | chrY | 58983194 | . | G | A   | 18896.16  | PASS          | AC=16;AF=0.308;AN=52;Base         |
| 50303 | chrY | 58983207 | . | T | C   | 25598.73  | PASS          | AC=16;AF=0.308;AN=52;Base         |
| 50304 | chrY | 58983222 | . | C | G   | 78.42     | my_snp_filter | AC=1;AF=0.014;AN=70;BaseQ         |
| 50305 | chrY | 58983227 | . | C | A   | 47344.82  | PASS          | AC=30;AF=0.429;AN=70;Base         |
| 50306 | chrY | 58983232 | . | C | A   | 2876.12   | my_snp_filter | AC=10;AF=0.143;AN=70;Base         |
| 50307 | chrY | 58983237 | . | G | A   | 47061.38  | PASS          | AC=23;AF=0.411;AN=56;Base         |
| 50308 | chrY | 58983238 | . | A | T   | 947.99    | my_snp_filter | AC=6;AF=0.088;AN=68;BaseQ         |
| 50309 | chrY | 58983247 | . | C | T   | 255.42    | my_snp_filter | AC=1;AF=0.014;AN=70;BaseQ         |
| 50310 | chrY | 58983249 | . | C | A   | 4214.07   | PASS          | AC=11;AF=0.157;AN=70;BaseQRankSum |
| 50311 | chrY | 58983283 | . | C | A   | 37442.76  | PASS          | AC=30;AF=0.429;AN=70;Base         |
| 50312 | chrY | 58983294 | . | T | G   | 79158.53  | PASS          | AC=34;AF=0.486;AN=70;Base         |

|       |      |          |   |   |     |           |               |                                    |
|-------|------|----------|---|---|-----|-----------|---------------|------------------------------------|
| 50313 | chrY | 58983295 | . | C | A   | 30243.74  | PASS          | AC=32;AF=0.457;AN=70;Base          |
| 50314 | chrY | 58983306 | . | G | T   | 39281.74  | PASS          | AC=30;AF=0.429;AN=70;Base          |
| 50315 | chrY | 58983314 | . | T | G   | 208034.35 | PASS          | AC=54;AF=0.771;AN=70;Base          |
| 50316 | chrY | 58983334 | . | T | C   | 907.59    | PASS          | AC=2;AF=0.029;AN=70;BaseQRankSum=  |
| 50317 | chrY | 58983341 | . | A | G   | 3774.74   | PASS          | AC=4;AF=0.069;AN=58;BaseQRankSum=  |
| 50318 | chrY | 58983348 | . | T | G   | 248.06    | PASS          | AC=2;AF=0.029;AN=70;BaseQRankSum=  |
| 50319 | chrY | 58983349 | . | A | G   | 248.06    | PASS          | AC=2;AF=0.029;AN=70;BaseQRankSum=  |
| 50320 | chrY | 58983352 | . | A | T   | 243.56    | PASS          | AC=2;AF=0.029;AN=70;BaseQRankSum=  |
| 50321 | chrY | 58983353 | . | C | T   | 174.24    | PASS          | AC=2;AF=0.029;AN=70;BaseQRankSum=  |
| 50322 | chrY | 58983357 | . | A | T   | 52967.72  | PASS          | AC=35;AF=0.500;AN=70;Base          |
| 50323 | chrY | 58983412 | . | G | A   | 3223.52   | PASS          | AC=8;AF=0.114;AN=70;BaseQRankSum=  |
| 50324 | chrY | 58983442 | . | T | C   | 374.19    | PASS          | AC=2;AF=0.029;AN=70;BaseQRankSum=  |
| 50325 | chrY | 58983541 | . | C | A   | 1015      | PASS          | AC=6;AF=0.086;AN=70;BaseQRankSum=  |
| 50326 | chrY | 58983593 | . | A | C   | 7216.70   | PASS          | AC=21;AF=0.318;AN=66;BaseQRankSum= |
| 50327 | chrY | 58983602 | . | G | C   | 49162.62  | PASS          | AC=42;AF=0.677;AN=62;Base          |
| 50328 | chrY | 58983604 | . | A | G   | 49053.60  | PASS          | AC=42;AF=0.677;AN=62;Base          |
| 50329 | chrY | 58983620 | . | T | G   | 6230.74   | PASS          | AC=20;AF=0.286;AN=70;BaseQRankSum= |
| 50330 | chrY | 58983659 | . | T | C   | 524.53    | PASS          | AC=6;AF=0.100;AN=60;BaseQRankSum=  |
| 50331 | chrY | 58983664 | . | C | A   | 1515.39   | PASS          | AC=6;AF=0.086;AN=70;BaseQRankSum=  |
| 50332 | chrY | 58983665 | . | T | C   | 102.75    | PASS          | AC=3;AF=0.043;AN=70;BaseQRankSum=  |
| 50333 | chrY | 58983674 | . | A | C   | 1508.48   | PASS          | AC=7;AF=0.100;AN=70;BaseQRankSum=  |
| 50334 | chrY | 58983680 | . | C | G   | 79.80     | my_snp_filter | AC=4;AF=0.057;AN=70;BaseQ          |
| 50335 | chrY | 58983704 | . | T | C   | 41799.75  | PASS          | AC=49;AF=0.700;AN=70;Base          |
| 50336 | chrY | 58983809 | . | A | G   | 112946.03 | PASS          | AC=50;AF=0.714;AN=70;Base          |
| 50337 | chrY | 58983840 | . | C | A   | 34945.19  | PASS          | AC=33;AF=0.471;AN=70;Base          |
| 50338 | chrY | 58983923 | . | G | T   | 51019.96  | PASS          | AC=31;AF=0.443;AN=70;Base          |
| 50339 | chrY | 58983933 | . | A | G   | 46715.19  | PASS          | AC=33;AF=0.471;AN=70;Base          |
| 50340 | chrY | 58983936 | . | A | C   | 7573.07   | PASS          | AC=12;AF=0.171;AN=70;BaseQRankSum= |
| 50341 | chrY | 58983964 | . | A | C   | 31410.80  | PASS          | AC=32;AF=0.457;AN=70;Base          |
| 50342 | chrY | 58984051 | . | T | C   | 6852.33   | PASS          | AC=27;AF=0.386;AN=70;BaseQRankSum= |
| 50343 | chrY | 58984057 | . | G | A   | 43662.72  | PASS          | AC=35;AF=0.500;AN=70;Base          |
| 50344 | chrY | 58984089 | . | G | A,* | 575.44    | my_snp_filter | AC=4,1;AF=0.057,0.014;AN=          |
| 50345 | chrY | 58984091 | . | C | G   | 82521.53  | PASS          | AC=45;AF=0.643;AN=70;Base          |
| 50346 | chrY | 58984106 | . | C | G   | 511.23    | PASS          | AC=4;AF=0.057;AN=70;BaseQRankSum=  |
| 50347 | chrY | 58984127 | . | C | T   | 564.84    | my_snp_filter | AC=5;AF=0.071;AN=70;BaseQ          |
| 50348 | chrY | 58984146 | . | G | A,T | 107077.51 | PASS          | AC=35,32;AF=0.500,0.457;A          |
| 50349 | chrY | 58984156 | . | C | T   | 1258.15   | my_snp_filter | AC=7;AF=0.100;AN=70;BaseQ          |
| 50350 | chrY | 58984174 | . | T | A   | 54833.72  | PASS          | AC=35;AF=0.500;AN=70;Base          |
| 50351 | chrY | 58984176 | . | T | C   | 101.42    | my_snp_filter | AC=1;AF=0.014;AN=70;BaseQ          |
| 50352 | chrY | 58984197 | . | G | A   | 451.69    | my_snp_filter | AC=4;AF=0.057;AN=70;BaseQ          |
| 50353 | chrY | 58984206 | . | C | T   | 62622.72  | PASS          | AC=35;AF=0.500;AN=70;Base          |
| 50354 | chrY | 58984233 | . | A | G   | 191466.34 | PASS          | AC=50;AF=0.714;AN=70;Base          |
| 50355 | chrY | 58984239 | . | C | T   | 28068.72  | PASS          | AC=35;AF=0.500;AN=70;Base          |
| 50356 | chrY | 58984292 | . | C | T   | 1160.30   | my_snp_filter | AC=4;AF=0.057;AN=70;BaseQ          |
| 50357 | chrY | 58984293 | . | G | A   | 959.21    | my_snp_filter | AC=5;AF=0.071;AN=70;BaseQ          |
| 50358 | chrY | 58984308 | . | C | T   | 173305.30 | PASS          | AC=50;AF=0.714;AN=70;Base          |
| 50359 | chrY | 58984310 | . | G | A   | 46656.72  | PASS          | AC=35;AF=0.500;AN=70;Base          |
| 50360 | chrY | 58984371 | . | T | C   | 5357.59   | PASS          | AC=17;AF=0.243;AN=70;BaseQRankSum= |
| 50361 | chrY | 58984375 | . | C | T   | 3635.87   | my_snp_filter | AC=16;AF=0.229;AN=70;Base          |
| 50362 | chrY | 58984376 | . | C | T   | 24400.84  | PASS          | AC=35;AF=0.500;AN=70;Base          |
| 50363 | chrY | 58984379 | . | G | C   | 2202.40   | my_snp_filter | AC=10;AF=0.143;AN=70;Base          |
| 50364 | chrY | 58984386 | . | A | T   | 495.51    | my_snp_filter | AC=3;AF=0.043;AN=70;BaseQ          |
| 50365 | chrY | 58984388 | . | C | T   | 312.44    | my_snp_filter | AC=2;AF=0.029;AN=70;BaseQ          |
| 50366 | chrY | 58984406 | . | G | C   | 158.45    | my_snp_filter | AC=1;AF=0.014;AN=70;BaseQ          |
| 50367 | chrY | 58984422 | . | C | A   | 54651.23  | PASS          | AC=37;AF=0.529;AN=70;Base          |
| 50368 | chrY | 58984423 | . | T | C   | 6715.71   | PASS          | AC=14;AF=0.200;AN=70;BaseQRankSum= |
| 50369 | chrY | 58984459 | . | G | A   | 23471.85  | PASS          | AC=36;AF=0.514;AN=70;Base          |
| 50370 | chrY | 58984604 | . | G | A   | 35.72     | PASS          | AC=1;AF=0.014;AN=70;BaseQRankSum=  |
| 50371 | chrY | 58984626 | . | G | T   | 166.65    | PASS          | AC=2;AF=0.029;AN=70;BaseQRankSum=  |
| 50372 | chrY | 58984647 | . | A | C   | 199       | PASS          | AC=1;AF=0.014;AN=70;BaseQRankSum=  |
| 50373 | chrY | 58984663 | . | C | T   | 20908.35  | PASS          | AC=37;AF=0.529;AN=70;Base          |
| 50374 | chrY | 58984671 | . | G | T   | 124.79    | PASS          | AC=3;AF=0.043;AN=70;BaseQRankSum=  |
| 50375 | chrY | 58984673 | . | G | A   | 383.27    | PASS          | AC=3;AF=0.045;AN=66;BaseQRankSum=  |
| 50376 | chrY | 58984674 | . | T | C   | 520.46    | PASS          | AC=6;AF=0.091;AN=66;BaseQRankSum=  |
| 50377 | chrY | 58984686 | . | T | C   | 151.99    | PASS          | AC=3;AF=0.043;AN=70;BaseQRankSum=  |
| 50378 | chrY | 58984691 | . | G | A   | 92.18     | my_snp_filter | AC=3;AF=0.043;AN=70;BaseQ          |
| 50379 | chrY | 58984712 | . | T | C   | 94.37     | PASS          | AC=1;AF=0.014;AN=70;BaseQRankSum=  |
| 50380 | chrY | 58984721 | . | T | G   | 90.72     | PASS          | AC=1;AF=0.014;AN=70;BaseQRankSum=  |
| 50381 | chrY | 58984724 | . | G | C   | 50.11     | PASS          | AC=1;AF=0.014;AN=70;BaseQRankSum=  |
| 50382 | chrY | 58984725 | . | C | T   | 52.71     | PASS          | AC=1;AF=0.014;AN=70;BaseQRankSum=  |
| 50383 | chrY | 58984738 | . | G | T   | 1058.65   | PASS          | AC=5;AF=0.071;AN=70;BaseQRankSum=  |
| 50384 | chrY | 58984740 | . | C | T   | 38.15     | my_snp_filter | AC=2;AF=0.029;AN=70;BaseQ          |
| 50385 | chrY | 58984744 | . | G | A   | 905.88    | PASS          | AC=4;AF=0.057;AN=70;BaseQRankSum=  |
| 50386 | chrY | 58984771 | . | G | A   | 1172.69   | PASS          | AC=5;AF=0.071;AN=70;BaseQRankSum=  |
| 50387 | chrY | 58984773 | . | G | A   | 170.43    | my_snp_filter | AC=2;AF=0.029;AN=70;BaseQ          |
| 50388 | chrY | 58984788 | . | C | T   | 1068.75   | PASS          | AC=5;AF=0.071;AN=70;BaseQRankSum=  |

|       |      |          |   |   |     |          |               |                                    |
|-------|------|----------|---|---|-----|----------|---------------|------------------------------------|
| 50389 | chrY | 58984804 | . | A | G   | 863.51   | PASS          | AC=5;AF=0.071;AN=70;BaseQRankSum=  |
| 50390 | chrY | 58984813 | . | T | G   | 739.01   | PASS          | AC=4;AF=0.057;AN=70;BaseQRankSum=  |
| 50391 | chrY | 58984832 | . | A | C   | 331.43   | PASS          | AC=2;AF=0.029;AN=70;BaseQRankSum=  |
| 50392 | chrY | 58984850 | . | C | T   | 133.43   | my_snp_filter | AC=1;AF=0.014;AN=70;BaseQ          |
| 50393 | chrY | 58984854 | . | G | T   | 31.01    | my_snp_filter | AC=1;AF=0.014;AN=70;BaseQ          |
| 50394 | chrY | 58984866 | . | T | G   | 59838.72 | PASS          | AC=35;AF=0.500;AN=70;Base          |
| 50395 | chrY | 58984897 | . | A | C   | 51303.73 | PASS          | AC=35;AF=0.500;AN=70;Base          |
| 50396 | chrY | 58984907 | . | C | A   | 118.44   | my_snp_filter | AC=1;AF=0.014;AN=70;BaseQ          |
| 50397 | chrY | 58984910 | . | T | G   | 73594.10 | PASS          | AC=36;AF=0.514;AN=70;Base          |
| 50398 | chrY | 58984937 | . | T | C   | 58959.85 | PASS          | AC=36;AF=0.514;AN=70;Base          |
| 50399 | chrY | 58985013 | . | G | A   | 1305.71  | PASS          | AC=3;AF=0.043;AN=70;BaseQRankSum=  |
| 50400 | chrY | 58985031 | . | G | T   | 82.91    | PASS          | AC=1;AF=0.014;AN=70;BaseQRankSum=  |
| 50401 | chrY | 58985071 | . | G | A   | 406.30   | PASS          | AC=6;AF=0.088;AN=68;BaseQRankSum=  |
| 50402 | chrY | 58985083 | . | G | T   | 71.74    | my_snp_filter | AC=3;AF=0.044;AN=68;BaseQ          |
| 50403 | chrY | 58985088 | . | G | C   | 382.42   | my_snp_filter | AC=3;AF=0.047;AN=64;BaseQ          |
| 50404 | chrY | 58985091 | . | A | G   | 374.80   | PASS          | AC=7;AF=0.103;AN=68;BaseQRankSum=  |
| 50405 | chrY | 58985097 | . | C | T   | 796.94   | PASS          | AC=3;AF=0.044;AN=68;BaseQRankSum=  |
| 50406 | chrY | 58985099 | . | G | A   | 797.83   | PASS          | AC=3;AF=0.044;AN=68;BaseQRankSum=  |
| 50407 | chrY | 58985109 | . | C | G   | 180.21   | my_snp_filter | AC=3;AF=0.044;AN=68;BaseQ          |
| 50408 | chrY | 58985113 | . | A | G   | 1053.81  | my_snp_filter | AC=7;AF=0.103;AN=68;BaseQ          |
| 50409 | chrY | 58985147 | . | G | A   | 8134.22  | PASS          | AC=10;AF=0.143;AN=70;BaseQRankSum= |
| 50410 | chrY | 58985191 | . | A | T   | 47358    | PASS          | AC=33;AF=0.471;AN=70;BaseQRankSum= |
| 50411 | chrY | 58985198 | . | T | C   | 51023.93 | PASS          | AC=33;AF=0.485;AN=68;Base          |
| 50412 | chrY | 58985215 | . | A | G   | 170.38   | my_snp_filter | AC=1;AF=0.014;AN=70;BaseQ          |
| 50413 | chrY | 58985216 | . | A | G,* | 896.67   | my_snp_filter | AC=1,3;AF=0.014,0.043;AN=          |
| 50414 | chrY | 58985217 | . | C | G,* | 980.53   | my_snp_filter | AC=2,3;AF=0.029,0.043;AN=          |
| 50415 | chrY | 58985382 | . | T | A   | 48974.84 | PASS          | AC=36;AF=0.514;AN=70;Base          |
| 50416 | chrY | 58985455 | . | A | G   | 40300.98 | PASS          | AC=39;AF=0.557;AN=70;Base          |
| 50417 | chrY | 58985458 | . | A | T   | 12248.36 | PASS          | AC=33;AF=0.471;AN=70;Base          |
| 50418 | chrY | 58985460 | . | G | A   | 2406.35  | PASS          | AC=13;AF=0.186;AN=70;BaseQRankSum= |
| 50419 | chrY | 58985694 | . | T | G   | 76508.72 | PASS          | AC=35;AF=0.500;AN=70;Base          |
| 50420 | chrY | 58985696 | . | T | A   | 76908.72 | PASS          | AC=35;AF=0.500;AN=70;Base          |
| 50421 | chrY | 58985712 | . | T | G   | 70157.63 | PASS          | AC=34;AF=0.486;AN=70;Base          |
| 50422 | chrY | 58985784 | . | T | C   | 15992.46 | PASS          | AC=34;AF=0.500;AN=68;Base          |
| 50423 | chrY | 58985793 | . | G | C   | 779.97   | PASS          | AC=10;AF=0.143;AN=70;BaseQRankSum= |
| 50424 | chrY | 58985842 | . | A | T   | 6937.17  | PASS          | AC=25;AF=0.379;AN=66;BaseQRankSum= |
| 50425 | chrY | 58985862 | . | C | G   | 199.17   | my_snp_filter | AC=4;AF=0.057;AN=70;BaseQ          |
| 50426 | chrY | 58985926 | . | C | G   | 236.58   | PASS          | AC=3;AF=0.043;AN=70;BaseQRankSum=  |
| 50427 | chrY | 58985947 | . | T | G   | 3657.33  | PASS          | AC=15;AF=0.214;AN=70;BaseQRankSum= |
| 50428 | chrY | 58985998 | . | T | G   | 54687.83 | PASS          | AC=42;AF=0.600;AN=70;Base          |
| 50429 | chrY | 58986029 | . | G | A   | 17868.36 | PASS          | AC=33;AF=0.471;AN=70;Base          |
| 50430 | chrY | 58986126 | . | C | A   | 511.05   | PASS          | AC=3;AF=0.043;AN=70;BaseQRankSum=  |
| 50431 | chrY | 58986135 | . | C | T   | 8377.56  | PASS          | AC=27;AF=0.386;AN=70;BaseQRankSum= |
| 50432 | chrY | 58986164 | . | G | A   | 46100.60 | PASS          | AC=35;AF=0.500;AN=70;Base          |
| 50433 | chrY | 58986166 | . | C | T   | 45893.60 | PASS          | AC=35;AF=0.500;AN=70;Base          |
| 50434 | chrY | 58986167 | . | T | A   | 233.10   | my_snp_filter | AC=7;AF=0.100;AN=70;BaseQ          |
| 50435 | chrY | 58986184 | . | C | A   | 454.49   | my_snp_filter | AC=9;AF=0.129;AN=70;BaseQ          |
| 50436 | chrY | 58986189 | . | C | G   | 629.27   | my_snp_filter | AC=11;AF=0.157;AN=70;Base          |
| 50437 | chrY | 58986190 | . | T | C   | 703.89   | my_snp_filter | AC=11;AF=0.157;AN=70;Base          |
| 50438 | chrY | 58986204 | . | A | G,C | 14577.23 | PASS          | AC=30,2;AF=0.429,0.029;AN=         |
| 50439 | chrY | 58986236 | . | A | G   | 2175.52  | PASS          | AC=10;AF=0.143;AN=70;BaseQRankSum= |
| 50440 | chrY | 58986250 | . | A | C   | 53235.39 | PASS          | AC=37;AF=0.529;AN=70;Base          |
| 50441 | chrY | 58986277 | . | T | G   | 2873.93  | PASS          | AC=15;AF=0.214;AN=70;BaseQRankSum= |
| 50442 | chrY | 58986296 | . | C | G   | 2710.80  | PASS          | AC=15;AF=0.214;AN=70;BaseQRankSum= |
| 50443 | chrY | 58986330 | . | C | G   | 1718.19  | my_snp_filter | AC=13;AF=0.186;AN=70;Base          |
| 50444 | chrY | 58986334 | . | G | T   | 1499.15  | my_snp_filter | AC=12;AF=0.171;AN=70;Base          |
| 50445 | chrY | 58986342 | . | A | C   | 39235.76 | PASS          | AC=35;AF=0.500;AN=70;Base          |
| 50446 | chrY | 58986347 | . | G | A   | 1059.21  | my_snp_filter | AC=9;AF=0.129;AN=70;BaseQ          |
| 50447 | chrY | 58986369 | . | T | G   | 330.54   | my_snp_filter | AC=6;AF=0.086;AN=70;BaseQ          |
| 50448 | chrY | 58986370 | . | C | A   | 11086.62 | PASS          | AC=32;AF=0.457;AN=70;Base          |
| 50449 | chrY | 58986371 | . | T | C   | 226.72   | my_snp_filter | AC=5;AF=0.071;AN=70;BaseQ          |
| 50450 | chrY | 58986378 | . | G | T   | 42681.73 | PASS          | AC=35;AF=0.500;AN=70;Base          |
| 50451 | chrY | 58986418 | . | T | G   | 43004.03 | PASS          | AC=36;AF=0.514;AN=70;Base          |
| 50452 | chrY | 58986429 | . | C | T   | 56.94    | my_snp_filter | AC=1;AF=0.014;AN=70;BaseQ          |
| 50453 | chrY | 58986442 | . | A | G   | 349.75   | PASS          | AC=2;AF=0.029;AN=70;BaseQRankSum=  |
| 50454 | chrY | 58986453 | . | C | T   | 792.46   | PASS          | AC=3;AF=0.043;AN=70;BaseQRankSum=  |
| 50455 | chrY | 58986457 | . | A | T   | 47427.77 | PASS          | AC=35;AF=0.500;AN=70;Base          |
| 50456 | chrY | 58986458 | . | C | A   | 183.32   | my_snp_filter | AC=2;AF=0.029;AN=70;BaseQ          |
| 50457 | chrY | 58986459 | . | A | T   | 191.83   | my_snp_filter | AC=1;AF=0.014;AN=70;BaseQ          |
| 50458 | chrY | 58986463 | . | C | A   | 186.77   | my_snp_filter | AC=2;AF=0.029;AN=70;BaseQ          |
| 50459 | chrY | 58986466 | . | T | C   | 363.59   | PASS          | AC=2;AF=0.029;AN=70;BaseQRankSum=  |
| 50460 | chrY | 58986467 | . | G | T   | 402.60   | PASS          | AC=2;AF=0.029;AN=70;BaseQRankSum=  |
| 50461 | chrY | 58986472 | . | G | A   | 325.36   | PASS          | AC=2;AF=0.029;AN=70;BaseQRankSum=  |
| 50462 | chrY | 58986474 | . | T | A   | 326.61   | PASS          | AC=2;AF=0.029;AN=70;BaseQRankSum=  |
| 50463 | chrY | 58986475 | . | C | A   | 189.22   | my_snp_filter | AC=2;AF=0.029;AN=70;BaseQ          |
| 50464 | chrY | 58986479 | . | A | C   | 762.02   | PASS          | AC=4;AF=0.057;AN=70;BaseQRankSum=  |



|       |      |          |   |   |     |          |               |                                   |
|-------|------|----------|---|---|-----|----------|---------------|-----------------------------------|
| 50465 | chrY | 58986486 | . | T | A   | 312.13   | PASS          | AC=1;AF=0.014;AN=70;BaseQRankSum= |
| 50466 | chrY | 58986492 | . | T | A   | 199.45   | my_snp_filter | AC=2;AF=0.029;AN=70;BaseQ         |
| 50467 | chrY | 58986494 | . | T | A   | 52791.29 | PASS          | AC=37;AF=0.529;AN=70;Base         |
| 50468 | chrY | 58986505 | . | C | G   | 876.56   | PASS          | AC=3;AF=0.043;AN=70;BaseQRankSum= |
| 50469 | chrY | 58986519 | . | A | T   | 369.67   | PASS          | AC=2;AF=0.029;AN=70;BaseQRankSum= |
| 50470 | chrY | 58986520 | . | T | C   | 317.27   | PASS          | AC=1;AF=0.014;AN=70;BaseQRankSum= |
| 50471 | chrY | 58986530 | . | C | T,* | 501.90   | PASS          | AC=1,1;AF=0.014,0.014;AN=70;BaseQ |
| 50472 | chrY | 58986545 | . | C | T   | 339.89   | PASS          | AC=2;AF=0.029;AN=70;BaseQRankSum= |
| 50473 | chrY | 58986547 | . | G | C   | 340.21   | PASS          | AC=2;AF=0.029;AN=70;BaseQRankSum= |
| 50474 | chrY | 58986549 | . | G | A   | 250      | PASS          | AC=1;AF=0.014;AN=70;BaseQRankSum= |
| 50475 | chrY | 58986559 | . | A | C   | 1245.19  | PASS          | AC=4;AF=0.057;AN=70;BaseQRankSum= |
| 50476 | chrY | 58986571 | . | C | T   | 255.92   | my_snp_filter | AC=2;AF=0.029;AN=70;BaseQ         |
| 50477 | chrY | 58986574 | . | T | C   | 256.13   | PASS          | AC=1;AF=0.014;AN=70;BaseQRankSum= |
| 50478 | chrY | 58986590 | . | G | T   | 1429.15  | PASS          | AC=6;AF=0.086;AN=70;BaseQRankSum= |
| 50479 | chrY | 58986602 | . | T | A   | 704.91   | my_snp_filter | AC=5;AF=0.071;AN=70;BaseQ         |
| 50480 | chrY | 58986603 | . | G | T   | 741.52   | my_snp_filter | AC=5;AF=0.071;AN=70;BaseQ         |
| 50481 | chrY | 58986604 | . | C | T   | 823.94   | my_snp_filter | AC=5;AF=0.071;AN=70;BaseQ         |
| 50482 | chrY | 58986606 | . | C | A   | 108.67   | my_snp_filter | AC=1;AF=0.014;AN=70;BaseQ         |
| 50483 | chrY | 58986617 | . | G | A   | 1077.39  | my_snp_filter | AC=6;AF=0.086;AN=70;BaseQ         |
| 50484 | chrY | 58986620 | . | G | T   | 1091.40  | my_snp_filter | AC=6;AF=0.086;AN=70;BaseQ         |
| 50485 | chrY | 58986624 | . | C | T   | 4463.18  | PASS          | AC=8;AF=0.114;AN=70;BaseQRankSum= |
| 50486 | chrY | 58986630 | . | C | T   | 3281.02  | PASS          | AC=8;AF=0.114;AN=70;BaseQRankSum= |
| 50487 | chrY | 58986635 | . | T | A   | 672.23   | my_snp_filter | AC=4;AF=0.057;AN=70;BaseQ         |
| 50488 | chrY | 58986639 | . | C | G   | 936.31   | PASS          | AC=4;AF=0.057;AN=70;BaseQRankSum= |
| 50489 | chrY | 58986660 | . | T | C   | 3641.71  | PASS          | AC=6;AF=0.086;AN=70;BaseQRankSum= |
| 50490 | chrY | 58986666 | . | C | G   | 532.02   | my_snp_filter | AC=3;AF=0.043;AN=70;BaseQ         |
| 50491 | chrY | 58986670 | . | A | G   | 3288.36  | PASS          | AC=6;AF=0.086;AN=70;BaseQRankSum= |
| 50492 | chrY | 58986673 | . | G | C   | 3114.13  | PASS          | AC=5;AF=0.071;AN=70;BaseQRankSum= |
| 50493 | chrY | 58986682 | . | C | T   | 565.67   | my_snp_filter | AC=3;AF=0.043;AN=70;BaseQ         |
| 50494 | chrY | 58986688 | . | A | G   | 324.29   | my_snp_filter | AC=3;AF=0.043;AN=70;BaseQ         |
| 50495 | chrY | 58986690 | . | G | A   | 494.53   | my_snp_filter | AC=3;AF=0.043;AN=70;BaseQ         |
| 50496 | chrY | 58986694 | . | C | T   | 440.45   | my_snp_filter | AC=3;AF=0.043;AN=70;BaseQ         |
| 50497 | chrY | 58986695 | . | C | A   | 890.80   | PASS          | AC=3;AF=0.043;AN=70;BaseQRankSum= |
| 50498 | chrY | 58986697 | . | A | T   | 2557.25  | PASS          | AC=5;AF=0.071;AN=70;BaseQRankSum= |
| 50499 | chrY | 58986700 | . | T | C   | 476.82   | my_snp_filter | AC=3;AF=0.043;AN=70;BaseQ         |
| 50500 | chrY | 58986701 | . | C | T   | 1905.01  | PASS          | AC=9;AF=0.129;AN=70;BaseQRankSum= |
| 50501 | chrY | 58986703 | . | A | G   | 189.03   | my_snp_filter | AC=3;AF=0.043;AN=70;BaseQ         |
| 50502 | chrY | 58986706 | . | C | T   | 500.90   | my_snp_filter | AC=3;AF=0.043;AN=70;BaseQ         |
| 50503 | chrY | 58986710 | . | G | T   | 315.11   | my_snp_filter | AC=3;AF=0.043;AN=70;BaseQ         |
| 50504 | chrY | 58986718 | . | G | C   | 218.54   | my_snp_filter | AC=3;AF=0.043;AN=70;BaseQ         |
| 50505 | chrY | 58986720 | . | G | A   | 108.33   | my_snp_filter | AC=2;AF=0.029;AN=70;BaseQ         |
| 50506 | chrY | 58986722 | . | A | G   | 117.82   | my_snp_filter | AC=2;AF=0.029;AN=70;BaseQ         |
| 50507 | chrY | 58986764 | . | C | T   | 86.67    | my_snp_filter | AC=1;AF=0.014;AN=70;BaseQ         |
| 50508 | chrY | 58986769 | . | T | C   | 153.16   | my_snp_filter | AC=1;AF=0.014;AN=70;BaseQ         |
| 50509 | chrY | 58986771 | . | A | G   | 170.42   | my_snp_filter | AC=1;AF=0.014;AN=70;BaseQ         |
| 50510 | chrY | 58986774 | . | G | C   | 151.05   | my_snp_filter | AC=2;AF=0.029;AN=70;BaseQ         |
| 50511 | chrY | 58986785 | . | G | T   | 197.42   | my_snp_filter | AC=1;AF=0.014;AN=70;BaseQ         |
| 50512 | chrY | 58986788 | . | G | A   | 83716.85 | PASS          | AC=36;AF=0.514;AN=70;Base         |
| 50513 | chrY | 58986789 | . | G | T   | 158.52   | my_snp_filter | AC=1;AF=0.014;AN=70;BaseQ         |
| 50514 | chrY | 58986790 | . | C | T   | 64921.73 | PASS          | AC=35;AF=0.500;AN=70;Base         |
| 50515 | chrY | 58986799 | . | G | A   | 166.87   | my_snp_filter | AC=2;AF=0.029;AN=70;BaseQ         |
| 50516 | chrY | 58986802 | . | C | T   | 113.77   | my_snp_filter | AC=1;AF=0.014;AN=70;BaseQ         |
| 50517 | chrY | 58986808 | . | C | A   | 1154.83  | PASS          | AC=9;AF=0.129;AN=70;BaseQRankSum= |
| 50518 | chrY | 58986814 | . | T | C   | 107.48   | my_snp_filter | AC=1;AF=0.014;AN=70;BaseQ         |
| 50519 | chrY | 58986823 | . | C | G,T | 6359.76  | PASS          | AC=14,1;AF=0.200,0.014;AN=70;Base |
| 50520 | chrY | 58986827 | . | A | G   | 168.23   | my_snp_filter | AC=1;AF=0.014;AN=70;BaseQ         |
| 50521 | chrY | 58986843 | . | C | T   | 46026.61 | PASS          | AC=36;AF=0.514;AN=70;Base         |
| 50522 | chrY | 58986847 | . | G | T   | 113.67   | my_snp_filter | AC=1;AF=0.014;AN=70;BaseQ         |
| 50523 | chrY | 58986851 | . | T | G   | 126.74   | my_snp_filter | AC=2;AF=0.029;AN=70;BaseQ         |
| 50524 | chrY | 58986856 | . | G | A   | 83.98    | my_snp_filter | AC=1;AF=0.014;AN=70;BaseQ         |
| 50525 | chrY | 58986863 | . | G | A   | 171.50   | my_snp_filter | AC=2;AF=0.029;AN=70;BaseQ         |
| 50526 | chrY | 58986887 | . | C | T   | 71.67    | my_snp_filter | AC=1;AF=0.014;AN=70;BaseQ         |
| 50527 | chrY | 58986888 | . | C | G   | 74.45    | my_snp_filter | AC=1;AF=0.014;AN=70;BaseQ         |
| 50528 | chrY | 58986894 | . | A | G   | 74.42    | my_snp_filter | AC=1;AF=0.014;AN=70;BaseQ         |
| 50529 | chrY | 58986905 | . | T | G   | 74.42    | my_snp_filter | AC=1;AF=0.014;AN=70;BaseQ         |
| 50530 | chrY | 58986911 | . | T | G   | 62.67    | my_snp_filter | AC=1;AF=0.014;AN=70;BaseQ         |
| 50531 | chrY | 58986914 | . | C | A   | 71.42    | my_snp_filter | AC=1;AF=0.014;AN=70;BaseQ         |
| 50532 | chrY | 58986935 | . | C | T   | 93406.53 | PASS          | AC=35;AF=0.500;AN=70;Base         |
| 50533 | chrY | 58986936 | . | T | A   | 93973.53 | PASS          | AC=35;AF=0.500;AN=70;Base         |
| 50534 | chrY | 58987021 | . | A | C   | 50993.83 | PASS          | AC=39;AF=0.557;AN=70;Base         |
| 50535 | chrY | 58987058 | . | A | G   | 44748.86 | PASS          | AC=37;AF=0.529;AN=70;Base         |
| 50536 | chrY | 58987084 | . | C | T   | 41636.11 | PASS          | AC=41;AF=0.586;AN=70;Base         |
| 50537 | chrY | 58987116 | . | C | T   | 114.43   | my_snp_filter | AC=1;AF=0.014;AN=70;BaseQ         |
| 50538 | chrY | 58987164 | . | A | C   | 11731.42 | PASS          | AC=31;AF=0.443;AN=70;Base         |
| 50539 | chrY | 58987205 | . | T | A   | 42310.72 | PASS          | AC=33;AF=0.471;AN=70;Base         |
| 50540 | chrY | 58987211 | . | A | T   | 42693.72 | PASS          | AC=33;AF=0.471;AN=70;Base         |

|       |      |          |   |   |     |           |               |                                    |
|-------|------|----------|---|---|-----|-----------|---------------|------------------------------------|
| 50541 | chrY | 58987215 | . | C | T   | 52315.56  | PASS          | AC=35;AF=0.500;AN=70;BaseQ         |
| 50542 | chrY | 58987237 | . | A | G   | 47128.92  | PASS          | AC=34;AF=0.486;AN=70;BaseQ         |
| 50543 | chrY | 58987280 | . | T | C   | 22451.83  | PASS          | AC=28;AF=0.412;AN=68;BaseQ         |
| 50544 | chrY | 58987302 | . | A | G   | 31467.59  | PASS          | AC=28;AF=0.412;AN=68;BaseQ         |
| 50545 | chrY | 58987332 | . | G | A   | 94.54     | my_snp_filter | AC=2;AF=0.029;AN=70;BaseQ          |
| 50546 | chrY | 58987337 | . | C | A   | 31582.94  | PASS          | AC=30;AF=0.441;AN=68;BaseQ         |
| 50547 | chrY | 58987349 | . | T | C   | 23993.77  | PASS          | AC=32;AF=0.500;AN=64;BaseQ         |
| 50548 | chrY | 58987404 | . | T | A   | 16713.76  | PASS          | AC=33;AF=0.471;AN=70;BaseQ         |
| 50549 | chrY | 58987482 | . | C | G   | 61483.48  | PASS          | AC=42;AF=0.600;AN=70;BaseQ         |
| 50550 | chrY | 58987548 | . | G | A   | 1364.28   | PASS          | AC=4;AF=0.057;AN=70;BaseQRankSum=  |
| 50551 | chrY | 58987557 | . | T | C   | 93380.73  | PASS          | AC=35;AF=0.500;AN=70;BaseQ         |
| 50552 | chrY | 58987559 | . | G | A   | 95.10     | my_snp_filter | AC=2;AF=0.029;AN=70;BaseQ          |
| 50553 | chrY | 58987560 | . | T | C   | 93437.73  | PASS          | AC=35;AF=0.500;AN=70;BaseQ         |
| 50554 | chrY | 58987571 | . | C | T   | 2414.83   | PASS          | AC=9;AF=0.129;AN=70;BaseQRankSum=  |
| 50555 | chrY | 58987632 | . | T | C   | 46029.49  | PASS          | AC=36;AF=0.514;AN=70;BaseQ         |
| 50556 | chrY | 58987664 | . | C | T   | 18563.34  | PASS          | AC=33;AF=0.471;AN=70;BaseQ         |
| 50557 | chrY | 58987712 | . | C | T   | 44579.82  | PASS          | AC=41;AF=0.586;AN=70;BaseQ         |
| 50558 | chrY | 58987875 | . | A | G   | 219.44    | my_snp_filter | AC=5;AF=0.074;AN=68;BaseQ          |
| 50559 | chrY | 58987881 | . | A | G   | 31149.95  | PASS          | AC=35;AF=0.547;AN=64;BaseQ         |
| 50560 | chrY | 58987904 | . | G | A   | 26851.95  | PASS          | AC=34;AF=0.515;AN=66;BaseQ         |
| 50561 | chrY | 58987977 | . | C | A   | 78.07     | my_snp_filter | AC=2;AF=0.029;AN=70;BaseQ          |
| 50562 | chrY | 58987993 | . | T | A,G | 27326.48  | PASS          | AC=9,37;AF=0.129,0.529;AN=         |
| 50563 | chrY | 58988045 | . | C | T   | 56159.72  | PASS          | AC=35;AF=0.500;AN=70;BaseQ         |
| 50564 | chrY | 58988049 | . | G | A   | 215.42    | PASS          | AC=1;AF=0.014;AN=70;BaseQRankSum=  |
| 50565 | chrY | 58988071 | . | T | C   | 84468.87  | PASS          | AC=36;AF=0.514;AN=70;BaseQ         |
| 50566 | chrY | 58988129 | . | T | C   | 70862.01  | PASS          | AC=38;AF=0.543;AN=70;BaseQ         |
| 50567 | chrY | 58988134 | . | C | T   | 109.42    | my_snp_filter | AC=1;AF=0.014;AN=70;BaseQ          |
| 50568 | chrY | 58988174 | . | T | C   | 58087.91  | PASS          | AC=36;AF=0.514;AN=70;BaseQ         |
| 50569 | chrY | 58988240 | . | T | C   | 69180.73  | PASS          | AC=38;AF=0.543;AN=70;BaseQ         |
| 50570 | chrY | 58988280 | . | C | T   | 71774.72  | PASS          | AC=35;AF=0.500;AN=70;BaseQ         |
| 50571 | chrY | 58988302 | . | T | C   | 102049.62 | PASS          | AC=37;AF=0.529;AN=70;BaseQ         |
| 50572 | chrY | 58988354 | . | G | A   | 7011.09   | PASS          | AC=14;AF=0.200;AN=70;BaseQRankSum= |
| 50573 | chrY | 58988399 | . | T | A   | 56.33     | my_snp_filter | AC=3;AF=0.043;AN=70;BaseQ          |
| 50574 | chrY | 58988450 | . | G | C,T | 2333.45   | PASS          | AC=12,4;AF=0.194,0.065;AN=62;BaseQ |
| 50575 | chrY | 58988459 | . | G | A   | 393.30    | PASS          | AC=3;AF=0.043;AN=70;BaseQRankSum=  |
| 50576 | chrY | 58988480 | . | C | T   | 97.80     | my_snp_filter | AC=3;AF=0.043;AN=70;BaseQ          |
| 50577 | chrY | 58988482 | . | G | A   | 745.06    | my_snp_filter | AC=6;AF=0.086;AN=70;BaseQ          |
| 50578 | chrY | 58988483 | . | C | T   | 1389.22   | PASS          | AC=15;AF=0.214;AN=70;BaseQRankSum= |
| 50579 | chrY | 58988484 | . | C | T   | 643.07    | PASS          | AC=5;AF=0.074;AN=68;BaseQRankSum=  |
| 50580 | chrY | 58988488 | . | T | A   | 753.88    | PASS          | AC=5;AF=0.078;AN=64;BaseQRankSum=  |
| 50581 | chrY | 58988498 | . | T | G   | 911.73    | my_snp_filter | AC=6;AF=0.086;AN=70;BaseQ          |
| 50582 | chrY | 58988510 | . | G | T   | 2801.92   | PASS          | AC=15;AF=0.214;AN=70;BaseQRankSum= |
| 50583 | chrY | 58988513 | . | T | G   | 658.37    | my_snp_filter | AC=4;AF=0.057;AN=70;BaseQ          |
| 50584 | chrY | 58988514 | . | T | A   | 863.14    | PASS          | AC=4;AF=0.057;AN=70;BaseQRankSum=  |
| 50585 | chrY | 58988522 | . | G | A   | 730.55    | PASS          | AC=4;AF=0.057;AN=70;BaseQRankSum=  |
| 50586 | chrY | 58988536 | . | G | C   | 856.32    | my_snp_filter | AC=9;AF=0.129;AN=70;BaseQ          |
| 50587 | chrY | 58988537 | . | T | A   | 93.18     | PASS          | AC=2;AF=0.029;AN=70;BaseQRankSum=  |
| 50588 | chrY | 58988539 | . | G | C   | 448.15    | my_snp_filter | AC=4;AF=0.057;AN=70;BaseQ          |
| 50589 | chrY | 58988544 | . | G | T   | 324.55    | my_snp_filter | AC=2;AF=0.029;AN=70;BaseQ          |
| 50590 | chrY | 58988552 | . | C | G   | 332.21    | my_snp_filter | AC=2;AF=0.029;AN=70;BaseQ          |
| 50591 | chrY | 58988561 | . | G | T   | 106.38    | PASS          | AC=3;AF=0.043;AN=70;BaseQRankSum=  |
| 50592 | chrY | 58988562 | . | C | T   | 7445.21   | PASS          | AC=26;AF=0.371;AN=70;BaseQRankSum= |
| 50593 | chrY | 58988563 | . | C | T   | 150.99    | my_snp_filter | AC=3;AF=0.043;AN=70;BaseQ          |
| 50594 | chrY | 58988574 | . | C | T   | 68337.47  | PASS          | AC=43;AF=0.614;AN=70;BaseQ         |
| 50595 | chrY | 58988579 | . | G | C   | 49204.36  | PASS          | AC=33;AF=0.471;AN=70;BaseQ         |
| 50596 | chrY | 58988583 | . | T | C   | 60.14     | my_snp_filter | AC=2;AF=0.029;AN=70;BaseQ          |
| 50597 | chrY | 58988587 | . | C | G   | 57.45     | PASS          | AC=1;AF=0.014;AN=70;BaseQRankSum=  |
| 50598 | chrY | 58988590 | . | C | G   | 101.86    | PASS          | AC=2;AF=0.029;AN=70;BaseQRankSum=  |
| 50599 | chrY | 58988593 | . | G | C   | 63.68     | PASS          | AC=1;AF=0.014;AN=70;BaseQRankSum=  |
| 50600 | chrY | 58988597 | . | A | C   | 110.16    | PASS          | AC=1;AF=0.014;AN=70;BaseQRankSum=  |
| 50601 | chrY | 58988599 | . | G | A   | 82.64     | my_snp_filter | AC=1;AF=0.014;AN=70;BaseQ          |
| 50602 | chrY | 58988697 | . | G | A   | 730.42    | PASS          | AC=1;AF=0.014;AN=70;BaseQRankSum=  |
| 50603 | chrY | 58988728 | . | T | C   | 54683.65  | PASS          | AC=40;AF=0.571;AN=70;BaseQ         |
| 50604 | chrY | 58988765 | . | G | A   | 244.51    | PASS          | AC=4;AF=0.057;AN=70;BaseQRankSum=  |
| 50605 | chrY | 58988811 | . | C | T   | 30141.65  | PASS          | AC=41;AF=0.586;AN=70;BaseQ         |
| 50606 | chrY | 58988877 | . | T | C   | 156.13    | my_snp_filter | AC=3;AF=0.043;AN=70;BaseQ          |
| 50607 | chrY | 58988906 | . | C | T   | 211.62    | PASS          | AC=1;AF=0.014;AN=70;BaseQRankSum=  |
| 50608 | chrY | 58988929 | . | A | G   | 68.78     | PASS          | AC=1;AF=0.014;AN=70;BaseQRankSum=  |
| 50609 | chrY | 58988945 | . | C | T   | 77.50     | my_snp_filter | AC=1;AF=0.014;AN=70;BaseQ          |
| 50610 | chrY | 58988946 | . | A | G   | 70.23     | my_snp_filter | AC=1;AF=0.014;AN=70;BaseQ          |
| 50611 | chrY | 58989015 | . | T | C   | 54179.85  | PASS          | AC=36;AF=0.514;AN=70;BaseQ         |
| 50612 | chrY | 58989017 | . | G | C   | 235.07    | my_snp_filter | AC=1;AF=0.014;AN=70;BaseQ          |
| 50613 | chrY | 58989072 | . | C | G   | 110900.64 | PASS          | AC=38;AF=0.543;AN=70;BaseQ         |
| 50614 | chrY | 58989104 | . | G | C   | 1745.11   | my_snp_filter | AC=8;AF=0.114;AN=70;BaseQ          |
| 50615 | chrY | 58989150 | . | C | T   | 11589.30  | PASS          | AC=19;AF=0.271;AN=70;BaseQ         |
| 50616 | chrY | 58989161 | . | C | T   | 1170.30   | my_snp_filter | AC=4;AF=0.057;AN=70;BaseQ          |

|       |      |          |   |   |     |           |               |                                    |
|-------|------|----------|---|---|-----|-----------|---------------|------------------------------------|
| 50617 | chrY | 58989209 | . | G | A   | 48.42     | my_snp_filter | AC=1;AF=0.014;AN=70;BaseQ          |
| 50618 | chrY | 58989221 | . | T | C   | 388.28    | my_snp_filter | AC=7;AF=0.100;AN=70;BaseQ          |
| 50619 | chrY | 58989287 | . | T | A   | 145.46    | PASS          | AC=1;AF=0.014;AN=70;BaseQRankSum=  |
| 50620 | chrY | 58989309 | . | G | A   | 2485.13   | PASS          | AC=14;AF=0.200;AN=70;BaseQRankSum= |
| 50621 | chrY | 58989352 | . | C | T   | 147.34    | my_snp_filter | AC=2;AF=0.029;AN=68;BaseQ          |
| 50622 | chrY | 58989359 | . | C | A   | 106.67    | my_snp_filter | AC=1;AF=0.015;AN=66;BaseQ          |
| 50623 | chrY | 58989377 | . | A | G   | 104.41    | my_snp_filter | AC=1;AF=0.016;AN=64;BaseQ          |
| 50624 | chrY | 58989379 | . | G | T   | 25511.99  | PASS          | AC=33;AF=0.516;AN=64;Base          |
| 50625 | chrY | 58989388 | . | A | C   | 100.80    | my_snp_filter | AC=1;AF=0.015;AN=66;BaseQ          |
| 50626 | chrY | 58989402 | . | C | A   | 102.79    | my_snp_filter | AC=1;AF=0.015;AN=66;BaseQ          |
| 50627 | chrY | 58989404 | . | C | T   | 10009.35  | PASS          | AC=25;AF=0.403;AN=62;Base          |
| 50628 | chrY | 58989475 | . | C | T   | 768.70    | PASS          | AC=4;AF=0.061;AN=66;BaseQRankSum=  |
| 50629 | chrY | 58989515 | . | G | A   | 19634.90  | PASS          | AC=36;AF=0.514;AN=70;Base          |
| 50630 | chrY | 58989573 | . | C | G   | 18911.20  | PASS          | AC=39;AF=0.557;AN=70;Base          |
| 50631 | chrY | 58989590 | . | C | G   | 325.77    | my_snp_filter | AC=4;AF=0.057;AN=70;BaseQ          |
| 50632 | chrY | 58989688 | . | A | G   | 36162.84  | PASS          | AC=36;AF=0.514;AN=70;Base          |
| 50633 | chrY | 58989734 | . | T | C   | 37551.04  | PASS          | AC=37;AF=0.544;AN=68;Base          |
| 50634 | chrY | 58989794 | . | A | C   | 20277.04  | PASS          | AC=34;AF=0.486;AN=70;Base          |
| 50635 | chrY | 58989899 | . | T | C   | 2050.22   | PASS          | AC=10;AF=0.147;AN=68;BaseQRankSum= |
| 50636 | chrY | 58989923 | . | G | T   | 1861.18   | PASS          | AC=9;AF=0.136;AN=66;BaseQRankSum=  |
| 50637 | chrY | 58989992 | . | A | T   | 1314.08   | PASS          | AC=11;AF=0.157;AN=70;BaseQRankSum= |
| 50638 | chrY | 58989994 | . | T | C,* | 380.88    | PASS          | AC=5,3;AF=0.071,0.043;AN=70;BaseQ  |
| 50639 | chrY | 58990003 | . | T | G,* | 1096.33   | PASS          | AC=10,1;AF=0.143,0.014;AN=70;Base  |
| 50640 | chrY | 58990004 | . | C | A,* | 1105.95   | PASS          | AC=3,1;AF=0.043,0.014;AN=70;BaseQ  |
| 50641 | chrY | 58990012 | . | G | T,* | 741.09    | PASS          | AC=7,1;AF=0.103,0.015;AN=68;BaseQ  |
| 50642 | chrY | 58990021 | . | A | G   | 264.48    | PASS          | AC=2;AF=0.029;AN=70;BaseQRankSum=  |
| 50643 | chrY | 58990054 | . | G | A   | 3966.61   | PASS          | AC=13;AF=0.186;AN=70;BaseQRankSum= |
| 50644 | chrY | 58990057 | . | C | T   | 48392.72  | PASS          | AC=35;AF=0.500;AN=70;Base          |
| 50645 | chrY | 58990060 | . | T | C   | 56341.72  | PASS          | AC=35;AF=0.500;AN=70;Base          |
| 50646 | chrY | 58990080 | . | C | T   | 4198.49   | PASS          | AC=12;AF=0.171;AN=70;BaseQRankSum= |
| 50647 | chrY | 58990085 | . | C | T   | 86.09     | PASS          | AC=1;AF=0.014;AN=70;BaseQRankSum=  |
| 50648 | chrY | 58990119 | . | T | C   | 35029.85  | PASS          | AC=36;AF=0.514;AN=70;Base          |
| 50649 | chrY | 58990160 | . | G | C   | 2399.22   | PASS          | AC=12;AF=0.171;AN=70;BaseQRankSum= |
| 50650 | chrY | 58990179 | . | A | G   | 337.53    | my_snp_filter | AC=2;AF=0.029;AN=70;BaseQ          |
| 50651 | chrY | 58990185 | . | G | T   | 104.43    | PASS          | AC=1;AF=0.014;AN=70;BaseQRankSum=  |
| 50652 | chrY | 58990264 | . | G | T   | 76082.50  | PASS          | AC=36;AF=0.529;AN=68;Base          |
| 50653 | chrY | 58990316 | . | A | C   | 98928.19  | PASS          | AC=35;AF=0.530;AN=66;Base          |
| 50654 | chrY | 58990318 | . | C | T   | 26247.73  | PASS          | AC=33;AF=0.471;AN=70;Base          |
| 50655 | chrY | 58990368 | . | A | G   | 69528.21  | PASS          | AC=36;AF=0.529;AN=68;Base          |
| 50656 | chrY | 58990426 | . | T | C,* | 18995.18  | PASS          | AC=34,1;AF=0.515,0.015;AN          |
| 50657 | chrY | 58990462 | . | G | A   | 302.24    | PASS          | AC=3;AF=0.044;AN=68;BaseQRankSum=  |
| 50658 | chrY | 58990464 | . | G | T   | 3289.12   | PASS          | AC=12;AF=0.171;AN=70;BaseQRankSum= |
| 50659 | chrY | 58990465 | . | T | G   | 323.24    | PASS          | AC=4;AF=0.057;AN=70;BaseQRankSum=  |
| 50660 | chrY | 58990497 | . | C | G   | 111.07    | my_snp_filter | AC=3;AF=0.043;AN=70;BaseQ          |
| 50661 | chrY | 58990577 | . | T | A   | 112888.64 | PASS          | AC=44;AF=0.629;AN=70;Base          |
| 50662 | chrY | 58990589 | . | G | A   | 113.55    | my_snp_filter | AC=2;AF=0.029;AN=70;BaseQ          |
| 50663 | chrY | 58990590 | . | C | G   | 108.93    | PASS          | AC=1;AF=0.014;AN=70;BaseQRankSum=  |
| 50664 | chrY | 58990607 | . | T | G   | 45.69     | my_snp_filter | AC=1;AF=0.014;AN=70;BaseQ          |
| 50665 | chrY | 58990620 | . | C | T   | 591.37    | my_snp_filter | AC=5;AF=0.071;AN=70;BaseQ          |
| 50666 | chrY | 58990648 | . | C | G   | 77254.72  | PASS          | AC=35;AF=0.500;AN=70;Base          |
| 50667 | chrY | 58990651 | . | C | G   | 77760.72  | PASS          | AC=35;AF=0.500;AN=70;Base          |
| 50668 | chrY | 58990652 | . | C | T,A | 159096.86 | PASS          | AC=35,35;AF=0.500,0.500;A          |
| 50669 | chrY | 58990713 | . | T | A   | 15832.50  | PASS          | AC=20;AF=0.286;AN=70;Base          |
| 50670 | chrY | 58990720 | . | G | C   | 14664.95  | PASS          | AC=20;AF=0.286;AN=70;Base          |
| 50671 | chrY | 58990733 | . | C | T   | 96.43     | my_snp_filter | AC=1;AF=0.014;AN=70;BaseQ          |
| 50672 | chrY | 58990744 | . | G | A   | 6243.28   | PASS          | AC=16;AF=0.229;AN=70;BaseQRankSum= |
| 50673 | chrY | 58990785 | . | C | T   | 138.26    | my_snp_filter | AC=3;AF=0.043;AN=70;BaseQ          |
| 50674 | chrY | 58990786 | . | A | C   | 140.38    | my_snp_filter | AC=3;AF=0.043;AN=70;BaseQ          |
| 50675 | chrY | 58990793 | . | G | A   | 29411.51  | PASS          | AC=34;AF=0.500;AN=68;Base          |
| 50676 | chrY | 58990828 | . | G | A   | 815.72    | PASS          | AC=7;AF=0.100;AN=70;BaseQRankSum=  |
| 50677 | chrY | 58990870 | . | T | C   | 18724.34  | PASS          | AC=33;AF=0.471;AN=70;Base          |
| 50678 | chrY | 58990876 | . | G | A   | 39437.53  | PASS          | AC=34;AF=0.486;AN=70;Base          |
| 50679 | chrY | 58990908 | . | G | A   | 909.22    | PASS          | AC=5;AF=0.071;AN=70;BaseQRankSum=  |
| 50680 | chrY | 58990925 | . | C | G   | 1047.76   | PASS          | AC=6;AF=0.086;AN=70;BaseQRankSum=  |
| 50681 | chrY | 58990945 | . | A | T   | 218.52    | PASS          | AC=2;AF=0.029;AN=70;BaseQRankSum=  |
| 50682 | chrY | 58990946 | . | C | T   | 781.38    | PASS          | AC=6;AF=0.086;AN=70;BaseQRankSum=  |
| 50683 | chrY | 58990965 | . | A | T   | 4396.24   | PASS          | AC=23;AF=0.359;AN=64;BaseQRankSum= |
| 50684 | chrY | 58990975 | . | C | T   | 101.10    | my_snp_filter | AC=3;AF=0.043;AN=70;BaseQ          |
| 50685 | chrY | 58990986 | . | C | T   | 371.91    | PASS          | AC=2;AF=0.056;AN=36;BaseQRankSum=  |
| 50686 | chrY | 58990993 | . | T | A   | 1075.42   | PASS          | AC=4;AF=0.057;AN=70;BaseQRankSum=  |
| 50687 | chrY | 58990998 | . | A | G   | 1690.32   | PASS          | AC=9;AF=0.129;AN=70;BaseQRankSum=  |
| 50688 | chrY | 58991002 | . | A | T   | 751.82    | PASS          | AC=5;AF=0.071;AN=70;BaseQRankSum=  |
| 50689 | chrY | 58991003 | . | T | C   | 620.12    | my_snp_filter | AC=5;AF=0.071;AN=70;BaseQ          |
| 50690 | chrY | 58991005 | . | G | C   | 343.60    | my_snp_filter | AC=4;AF=0.057;AN=70;BaseQ          |
| 50691 | chrY | 58991085 | . | G | T   | 2835.36   | PASS          | AC=10;AF=0.143;AN=70;BaseQRankSum= |
| 50692 | chrY | 58991106 | . | G | C   | 90476.55  | PASS          | AC=42;AF=0.600;AN=70;Base          |

|       |      |          |   |   |       |          |               |                                    |
|-------|------|----------|---|---|-------|----------|---------------|------------------------------------|
| 50693 | chrY | 58991133 | . | C | T     | 18918.86 | PASS          | AC=30;AF=0.429;AN=70;Base          |
| 50694 | chrY | 58991146 | . | C | T,*   | 7244.50  | PASS          | AC=17,5;AF=0.243,0.071;AN=70;Base  |
| 50695 | chrY | 58991149 | . | G | A,*   | 6811.66  | PASS          | AC=17,5;AF=0.250,0.074;AN=68;Base  |
| 50696 | chrY | 58991150 | . | C | T,*   | 6606.66  | PASS          | AC=17,5;AF=0.250,0.074;AN=68;Base  |
| 50697 | chrY | 58991157 | . | G | A,*   | 13162.51 | PASS          | AC=3,10;AF=0.043,0.143;AN          |
| 50698 | chrY | 58991170 | . | G | A     | 35062.22 | PASS          | AC=32;AF=0.457;AN=70;Base          |
| 50699 | chrY | 58991215 | . | T | G,C,* | 14495.69 | PASS          | AC=10,3,17;AF=0.161,0.048          |
| 50700 | chrY | 58991235 | . | T | A,*   | 12160.89 | PASS          | AC=7,11;AF=0.106,0.167;AN          |
| 50701 | chrY | 58991271 | . | G | A,*   | 11242.51 | PASS          | AC=7,10;AF=0.146,0.208;AN          |
| 50702 | chrY | 58991283 | . | C | G     | 1167.03  | PASS          | AC=7;AF=0.103;AN=68;BaseQRankSum=  |
| 50703 | chrY | 58991288 | . | G | A     | 114.02   | my_snp_filter | AC=1;AF=0.015;AN=68;BaseQ          |
| 50704 | chrY | 58991382 | . | T | A     | 6527.12  | PASS          | AC=11;AF=0.167;AN=66;BaseQRankSum= |
| 50705 | chrY | 58991412 | . | T | C     | 43.46    | PASS          | AC=1;AF=0.015;AN=68;BaseQRankSum=  |
| 50706 | chrY | 58991415 | . | C | G     | 42015.19 | PASS          | AC=34;AF=0.708;AN=48;Base          |
| 50707 | chrY | 58991417 | . | T | C     | 37680.52 | PASS          | AC=31;AF=0.674;AN=46;Base          |
| 50708 | chrY | 58991432 | . | G | A     | 1217.67  | PASS          | AC=7;AF=0.106;AN=66;BaseQRankSum=  |
| 50709 | chrY | 58991465 | . | G | A     | 39277.56 | PASS          | AC=30;AF=0.625;AN=48;Base          |
| 50710 | chrY | 58991544 | . | G | A     | 49972.18 | PASS          | AC=32;AF=0.533;AN=60;Base          |
| 50711 | chrY | 58991576 | . | C | G     | 18087.60 | PASS          | AC=22;AF=0.333;AN=66;Base          |
| 50712 | chrY | 58991580 | . | C | T     | 35225.73 | PASS          | AC=28;AF=0.424;AN=66;Base          |
| 50713 | chrY | 58991603 | . | T | C     | 86526.52 | PASS          | AC=37;AF=0.617;AN=60;Base          |
| 50714 | chrY | 58991667 | . | G | A     | 75.45    | my_snp_filter | AC=3;AF=0.043;AN=70;BaseQ          |
| 50715 | chrY | 58991696 | . | G | A     | 38119.72 | PASS          | AC=35;AF=0.500;AN=70;Base          |
| 50716 | chrY | 58991713 | . | A | T     | 90992.33 | PASS          | AC=38;AF=0.543;AN=70;Base          |
| 50717 | chrY | 58991721 | . | T | C     | 20454.80 | PASS          | AC=32;AF=0.457;AN=70;Base          |
| 50718 | chrY | 58991754 | . | A | G     | 77653.65 | PASS          | AC=39;AF=0.557;AN=70;Base          |
| 50719 | chrY | 58991812 | . | C | T     | 80661.87 | PASS          | AC=45;AF=0.643;AN=70;Base          |
| 50720 | chrY | 58991857 | . | A | C     | 4100.33  | PASS          | AC=12;AF=0.171;AN=70;BaseQRankSum= |
| 50721 | chrY | 58991871 | . | G | A     | 3735.07  | PASS          | AC=13;AF=0.186;AN=70;BaseQRankSum= |
| 50722 | chrY | 58991884 | . | G | C     | 4040.64  | PASS          | AC=11;AF=0.157;AN=70;BaseQRankSum= |
| 50723 | chrY | 58991942 | . | T | A     | 30341.53 | PASS          | AC=34;AF=0.486;AN=70;Base          |
| 50724 | chrY | 58991992 | . | C | T     | 93.42    | PASS          | AC=1;AF=0.014;AN=70;BaseQRankSum=  |
| 50725 | chrY | 58991999 | . | C | T     | 5510.64  | PASS          | AC=17;AF=0.243;AN=70;BaseQRankSum= |
| 50726 | chrY | 58992000 | . | G | C     | 65011.86 | PASS          | AC=51;AF=0.773;AN=66;Base          |
| 50727 | chrY | 58992052 | . | C | G     | 28402.87 | PASS          | AC=31;AF=0.456;AN=68;Base          |
| 50728 | chrY | 58992073 | . | C | A     | 311.34   | my_snp_filter | AC=2;AF=0.029;AN=70;BaseQ          |
| 50729 | chrY | 58992082 | . | G | C     | 73567.27 | PASS          | AC=34;AF=0.548;AN=62;Base          |
| 50730 | chrY | 58992091 | . | G | C     | 73639.06 | PASS          | AC=31;AF=0.517;AN=60;Base          |
| 50731 | chrY | 58992107 | . | G | C     | 15804.46 | PASS          | AC=26;AF=0.371;AN=70;Base          |
| 50732 | chrY | 58992113 | . | T | C     | 29601.09 | PASS          | AC=29;AF=0.439;AN=66;Base          |
| 50733 | chrY | 58992138 | . | C | A     | 68280.82 | PASS          | AC=37;AF=0.597;AN=62;Base          |
| 50734 | chrY | 58992145 | . | G | C     | 5211.04  | PASS          | AC=19;AF=0.271;AN=70;BaseQRankSum= |
| 50735 | chrY | 58992216 | . | A | T     | 38208.78 | PASS          | AC=33;AF=0.589;AN=56;Base          |
| 50736 | chrY | 58992250 | . | G | A     | 19001.89 | PASS          | AC=21;AF=0.309;AN=68;Base          |
| 50737 | chrY | 58992269 | . | A | T     | 78.42    | PASS          | AC=1;AF=0.014;AN=70;BaseQRankSum=  |
| 50738 | chrY | 58992273 | . | C | A     | 448.42   | PASS          | AC=1;AF=0.014;AN=70;BaseQRankSum=  |
| 50739 | chrY | 58992283 | . | G | A     | 24127.16 | PASS          | AC=23;AF=0.329;AN=70;Base          |
| 50740 | chrY | 58992369 | . | C | T     | 1549.95  | my_snp_filter | AC=8;AF=0.114;AN=70;BaseQ          |
| 50741 | chrY | 58992387 | . | G | A     | 6790.51  | PASS          | AC=20;AF=0.286;AN=70;BaseQRankSum= |
| 50742 | chrY | 58992427 | . | C | T     | 41221.57 | PASS          | AC=47;AF=0.691;AN=68;Base          |
| 50743 | chrY | 58992474 | . | A | G     | 114.81   | PASS          | AC=1;AF=0.014;AN=70;BaseQRankSum=  |
| 50744 | chrY | 58992483 | . | G | C     | 2016.33  | PASS          | AC=10;AF=0.147;AN=68;BaseQRankSum= |
| 50745 | chrY | 58992519 | . | G | A     | 53.38    | PASS          | AC=1;AF=0.014;AN=70;BaseQRankSum=  |
| 50746 | chrY | 58992534 | . | T | C     | 37.38    | my_snp_filter | AC=2;AF=0.029;AN=70;BaseQ          |
| 50747 | chrY | 58992539 | . | C | T     | 16085.32 | PASS          | AC=32;AF=0.471;AN=68;Base          |
| 50748 | chrY | 58992578 | . | C | T     | 288.96   | my_snp_filter | AC=4;AF=0.057;AN=70;BaseQ          |
| 50749 | chrY | 58992589 | . | C | T     | 1390.75  | PASS          | AC=6;AF=0.086;AN=70;BaseQRankSum=  |
| 50750 | chrY | 58992608 | . | A | T     | 13544.42 | PASS          | AC=23;AF=0.329;AN=70;Base          |
| 50751 | chrY | 58992639 | . | G | T     | 88779.62 | PASS          | AC=38;AF=0.559;AN=68;Base          |
| 50752 | chrY | 58992652 | . | G | T     | 3374.58  | PASS          | AC=15;AF=0.214;AN=70;BaseQRankSum= |
| 50753 | chrY | 58992661 | . | A | C     | 96823.85 | PASS          | AC=37;AF=0.578;AN=64;Base          |
| 50754 | chrY | 58992701 | . | G | C     | 1438.73  | PASS          | AC=4;AF=0.057;AN=70;BaseQRankSum=  |
| 50755 | chrY | 58992715 | . | T | G     | 98677    | PASS          | AC=38;AF=0.594;AN=64;BaseQRankSum= |
| 50756 | chrY | 58992727 | . | A | C     | 97244.37 | PASS          | AC=38;AF=0.594;AN=64;Base          |
| 50757 | chrY | 58992739 | . | G | A     | 5235.62  | PASS          | AC=24;AF=0.343;AN=70;BaseQRankSum= |
| 50758 | chrY | 58992756 | . | C | A     | 17350.84 | PASS          | AC=28;AF=0.400;AN=70;Base          |
| 50759 | chrY | 58992784 | . | G | C     | 19309.48 | PASS          | AC=26;AF=0.371;AN=70;Base          |
| 50760 | chrY | 58992791 | . | A | C,G   | 46456.90 | PASS          | AC=25,36;AF=0.357,0.514;A          |
| 50761 | chrY | 58992807 | . | C | T     | 14354.78 | PASS          | AC=21;AF=0.300;AN=70;Base          |
| 50762 | chrY | 58992808 | . | G | A     | 757.44   | PASS          | AC=4;AF=0.057;AN=70;BaseQRankSum=  |
| 50763 | chrY | 58992820 | . | C | T     | 13246.18 | PASS          | AC=19;AF=0.288;AN=66;Base          |
| 50764 | chrY | 58992849 | . | C | T     | 838.32   | my_snp_filter | AC=6;AF=0.086;AN=70;BaseQ          |
| 50765 | chrY | 58992965 | . | G | C     | 40.50    | my_snp_filter | AC=2;AF=0.029;AN=70;BaseQ          |
| 50766 | chrY | 58992976 | . | A | T     | 91946.97 | PASS          | AC=46;AF=0.657;AN=70;Base          |
| 50767 | chrY | 58992997 | . | T | C     | 4999.19  | PASS          | AC=14;AF=0.200;AN=70;BaseQRankSum= |
| 50768 | chrY | 58993040 | . | C | T     | 28048.19 | PASS          | AC=33;AF=0.471;AN=70;Base          |

|       |      |          |   |   |     |           |               |                                   |
|-------|------|----------|---|---|-----|-----------|---------------|-----------------------------------|
| 50769 | chrY | 58993041 | . | G | A   | 44786.72  | PASS          | AC=35;AF=0.500;AN=70;BaseQ        |
| 50770 | chrY | 58993081 | . | C | T   | 160.42    | my_snp_filter | AC=1;AF=0.014;AN=70;BaseQ         |
| 50771 | chrY | 58993115 | . | A | G   | 93664.03  | PASS          | AC=46;AF=0.657;AN=70;BaseQ        |
| 50772 | chrY | 58993116 | . | T | C   | 327.33    | my_snp_filter | AC=5;AF=0.071;AN=70;BaseQ         |
| 50773 | chrY | 58993136 | . | C | T   | 114.58    | my_snp_filter | AC=1;AF=0.014;AN=70;BaseQ         |
| 50774 | chrY | 58993139 | . | C | T   | 5355.99   | PASS          | AC=13;AF=0.186;AN=70;BaseQRankSum |
| 50775 | chrY | 58993187 | . | A | T   | 397.07    | PASS          | AC=2;AF=0.029;AN=70;BaseQRankSum  |
| 50776 | chrY | 58993202 | . | C | T   | 662.51    | PASS          | AC=3;AF=0.043;AN=70;BaseQRankSum  |
| 50777 | chrY | 58993231 | . | A | C   | 103050.32 | PASS          | AC=37;AF=0.529;AN=70;BaseQ        |
| 50778 | chrY | 58993266 | . | C | A   | 13686.15  | PASS          | AC=30;AF=0.429;AN=70;BaseQ        |
| 50779 | chrY | 58993267 | . | A | G   | 85189.75  | PASS          | AC=35;AF=0.500;AN=70;BaseQ        |
| 50780 | chrY | 58993334 | . | A | G   | 19288.41  | PASS          | AC=31;AF=0.443;AN=70;BaseQ        |
| 50781 | chrY | 58993336 | . | G | T   | 18503.88  | PASS          | AC=30;AF=0.429;AN=70;BaseQ        |
| 50782 | chrY | 58993342 | . | C | T   | 94.42     | PASS          | AC=1;AF=0.014;AN=70;BaseQRankSum  |
| 50783 | chrY | 58993369 | . | A | G   | 249.44    | my_snp_filter | AC=1;AF=0.014;AN=70;BaseQ         |
| 50784 | chrY | 58993407 | . | C | A   | 198.67    | my_snp_filter | AC=4;AF=0.057;AN=70;BaseQ         |
| 50785 | chrY | 58993444 | . | T | C   | 41563.72  | PASS          | AC=35;AF=0.500;AN=70;BaseQ        |
| 50786 | chrY | 58993461 | . | C | T   | 48.08     | my_snp_filter | AC=2;AF=0.029;AN=70;BaseQ         |
| 50787 | chrY | 58993471 | . | C | T   | 10805.82  | PASS          | AC=31;AF=0.443;AN=70;BaseQ        |
| 50788 | chrY | 58993483 | . | A | T   | 52470.72  | PASS          | AC=35;AF=0.500;AN=70;BaseQ        |
| 50789 | chrY | 58993501 | . | A | C   | 114757.03 | PASS          | AC=48;AF=0.686;AN=70;BaseQ        |
| 50790 | chrY | 58993520 | . | G | A   | 77.01     | my_snp_filter | AC=2;AF=0.029;AN=70;BaseQ         |
| 50791 | chrY | 58993533 | . | T | G   | 4351.97   | PASS          | AC=11;AF=0.157;AN=70;BaseQRankSum |
| 50792 | chrY | 58993538 | . | G | A   | 121.05    | my_snp_filter | AC=2;AF=0.029;AN=70;BaseQ         |
| 50793 | chrY | 58993561 | . | G | C   | 4422.18   | PASS          | AC=20;AF=0.286;AN=70;BaseQRankSum |
| 50794 | chrY | 58993574 | . | A | G   | 67516.85  | PASS          | AC=43;AF=0.614;AN=70;BaseQ        |
| 50795 | chrY | 58993616 | . | C | T   | 4254.45   | PASS          | AC=19;AF=0.271;AN=70;BaseQRankSum |
| 50796 | chrY | 58993619 | . | A | C   | 65966.59  | PASS          | AC=43;AF=0.614;AN=70;BaseQ        |
| 50797 | chrY | 58993663 | . | A | T   | 74795.59  | PASS          | AC=43;AF=0.614;AN=70;BaseQ        |
| 50798 | chrY | 58993701 | . | A | G   | 4798.97   | PASS          | AC=13;AF=0.186;AN=70;BaseQRankSum |
| 50799 | chrY | 58993825 | . | T | G   | 97278.28  | PASS          | AC=41;AF=0.586;AN=70;BaseQ        |
| 50800 | chrY | 58993862 | . | G | A   | 464.55    | my_snp_filter | AC=6;AF=0.086;AN=70;BaseQ         |
| 50801 | chrY | 58993874 | . | T | C   | 17289.48  | PASS          | AC=33;AF=0.471;AN=70;BaseQ        |
| 50802 | chrY | 58993896 | . | A | G   | 39.23     | my_snp_filter | AC=1;AF=0.014;AN=70;BaseQ         |
| 50803 | chrY | 58993939 | . | T | A   | 43610.72  | PASS          | AC=35;AF=0.500;AN=70;BaseQ        |
| 50804 | chrY | 58993952 | . | C | T   | 41461.72  | PASS          | AC=35;AF=0.500;AN=70;BaseQ        |
| 50805 | chrY | 58993961 | . | C | T   | 57.06     | my_snp_filter | AC=1;AF=0.014;AN=70;BaseQ         |
| 50806 | chrY | 58993998 | . | G | T   | 17913.69  | PASS          | AC=30;AF=0.429;AN=70;BaseQ        |
| 50807 | chrY | 58994017 | . | C | A   | 212.83    | my_snp_filter | AC=3;AF=0.044;AN=68;BaseQ         |
| 50808 | chrY | 58994045 | . | C | T   | 8237.69   | PASS          | AC=23;AF=0.348;AN=66;BaseQRankSum |
| 50809 | chrY | 58994075 | . | T | C   | 47361.51  | PASS          | AC=46;AF=0.719;AN=64;BaseQ        |
| 50810 | chrY | 58994096 | . | G | A   | 15673.69  | PASS          | AC=29;AF=0.426;AN=68;BaseQ        |
| 50811 | chrY | 58994137 | . | G | A   | 482.37    | my_snp_filter | AC=4;AF=0.059;AN=68;BaseQ         |
| 50812 | chrY | 58994176 | . | C | T   | 57.42     | PASS          | AC=1;AF=0.014;AN=70;BaseQRankSum  |
| 50813 | chrY | 58994218 | . | A | G   | 791.51    | PASS          | AC=5;AF=0.071;AN=70;BaseQRankSum  |
| 50814 | chrY | 58994234 | . | G | C   | 27762.05  | PASS          | AC=29;AF=0.414;AN=70;BaseQ        |
| 50815 | chrY | 58994250 | . | G | C,T | 62147.59  | PASS          | AC=34,6;AF=0.515,0.091;AN=        |
| 50816 | chrY | 58994251 | . | C | G   | 25359.28  | PASS          | AC=32;AF=0.485;AN=66;BaseQ        |
| 50817 | chrY | 58994259 | . | T | G   | 66371.07  | PASS          | AC=34;AF=0.515;AN=66;BaseQ        |
| 50818 | chrY | 58994303 | . | A | G   | 57208.03  | PASS          | AC=39;AF=0.557;AN=70;BaseQ        |
| 50819 | chrY | 58994390 | . | G | T   | 3242.23   | PASS          | AC=13;AF=0.186;AN=70;BaseQRankSum |
| 50820 | chrY | 58994392 | . | T | A   | 96375.07  | PASS          | AC=46;AF=0.657;AN=70;BaseQ        |
| 50821 | chrY | 58994438 | . | G | T   | 3888.72   | PASS          | AC=12;AF=0.171;AN=70;BaseQRankSum |
| 50822 | chrY | 58994449 | . | C | T   | 56972.84  | PASS          | AC=36;AF=0.514;AN=70;BaseQ        |
| 50823 | chrY | 58994473 | . | G | T   | 39.42     | my_snp_filter | AC=1;AF=0.014;AN=70;BaseQ         |
| 50824 | chrY | 58994479 | . | G | A   | 337.29    | my_snp_filter | AC=6;AF=0.086;AN=70;BaseQ         |
| 50825 | chrY | 58994560 | . | C | T   | 42493.72  | PASS          | AC=35;AF=0.500;AN=70;BaseQ        |
| 50826 | chrY | 58994577 | . | A | G   | 60773.84  | PASS          | AC=36;AF=0.514;AN=70;BaseQ        |
| 50827 | chrY | 58994612 | . | T | A   | 307.42    | PASS          | AC=1;AF=0.014;AN=70;BaseQRankSum  |
| 50828 | chrY | 58994657 | . | C | T   | 122.42    | PASS          | AC=1;AF=0.014;AN=70;BaseQRankSum  |
| 50829 | chrY | 58994666 | . | G | T   | 3395.17   | PASS          | AC=7;AF=0.100;AN=70;BaseQRankSum  |
| 50830 | chrY | 58994686 | . | T | C   | 56537.72  | PASS          | AC=33;AF=0.471;AN=70;BaseQ        |
| 50831 | chrY | 58994777 | . | G | T   | 1282.09   | my_snp_filter | AC=5;AF=0.071;AN=70;BaseQ         |
| 50832 | chrY | 58994783 | . | G | A   | 1379.82   | my_snp_filter | AC=5;AF=0.071;AN=70;BaseQ         |
| 50833 | chrY | 58994787 | . | T | C   | 1564.33   | my_snp_filter | AC=6;AF=0.086;AN=70;BaseQ         |
| 50834 | chrY | 58994804 | . | C | T   | 12963     | PASS          | AC=28;AF=0.412;AN=68;BaseQRankSum |
| 50835 | chrY | 58994811 | . | G | A   | 3307.30   | PASS          | AC=8;AF=0.114;AN=70;BaseQRankSum  |
| 50836 | chrY | 58994814 | . | G | A   | 59.42     | PASS          | AC=1;AF=0.014;AN=70;BaseQRankSum  |
| 50837 | chrY | 58994815 | . | T | A   | 1905.27   | PASS          | AC=5;AF=0.071;AN=70;BaseQRankSum  |
| 50838 | chrY | 58994817 | . | G | A   | 2045.70   | PASS          | AC=5;AF=0.071;AN=70;BaseQRankSum  |
| 50839 | chrY | 58994825 | . | C | T   | 76575.72  | PASS          | AC=41;AF=0.621;AN=66;BaseQ        |
| 50840 | chrY | 58994828 | . | C | T   | 2238.77   | PASS          | AC=5;AF=0.071;AN=70;BaseQRankSum  |
| 50841 | chrY | 58994857 | . | C | G   | 3320.21   | PASS          | AC=22;AF=0.314;AN=70;BaseQRankSum |
| 50842 | chrY | 58994859 | . | T | C   | 57141.22  | PASS          | AC=33;AF=0.500;AN=66;BaseQ        |
| 50843 | chrY | 58994877 | . | C | A   | 494.96    | my_snp_filter | AC=5;AF=0.071;AN=70;BaseQ         |
| 50844 | chrY | 58994879 | . | A | G   | 944.60    | PASS          | AC=6;AF=0.086;AN=70;BaseQRankSum  |

|       |      |          |   |   |     |           |               |                                    |
|-------|------|----------|---|---|-----|-----------|---------------|------------------------------------|
| 50845 | chrY | 58994882 | . | T | C   | 28971.51  | PASS          | AC=33;AF=0.485;AN=68;BaseQ         |
| 50846 | chrY | 58994892 | . | G | C   | 679.45    | my_snp_filter | AC=7;AF=0.100;AN=70;BaseQ          |
| 50847 | chrY | 58994901 | . | G | T   | 263.31    | my_snp_filter | AC=7;AF=0.100;AN=70;BaseQ          |
| 50848 | chrY | 58994906 | . | G | A   | 202.25    | PASS          | AC=5;AF=0.071;AN=70;BaseQRankSum=  |
| 50849 | chrY | 58994967 | . | G | A   | 62.07     | PASS          | AC=1;AF=0.014;AN=70;BaseQRankSum=  |
| 50850 | chrY | 58995039 | . | A | T   | 34525.24  | PASS          | AC=24;AF=0.375;AN=64;BaseQ         |
| 50851 | chrY | 58995050 | . | G | A   | 10737.09  | PASS          | AC=19;AF=0.279;AN=68;BaseQ         |
| 50852 | chrY | 58995119 | . | A | G   | 21332.70  | PASS          | AC=16;AF=0.235;AN=68;BaseQ         |
| 50853 | chrY | 58995120 | . | G | A   | 579.05    | my_snp_filter | AC=3;AF=0.043;AN=70;BaseQ          |
| 50854 | chrY | 58995123 | . | A | G,T | 16270.34  | PASS          | AC=12,3;AF=0.171,0.043;AN=         |
| 50855 | chrY | 58995130 | . | T | C   | 20592.47  | PASS          | AC=14;AF=0.200;AN=70;BaseQ         |
| 50856 | chrY | 58995131 | . | G | A   | 5938.08   | PASS          | AC=9;AF=0.129;AN=70;BaseQRankSum=  |
| 50857 | chrY | 58995146 | . | C | T   | 19404.54  | PASS          | AC=13;AF=0.186;AN=70;BaseQ         |
| 50858 | chrY | 58995191 | . | T | A   | 11797.90  | PASS          | AC=9;AF=0.129;AN=70;BaseQ          |
| 50859 | chrY | 58995193 | . | T | C   | 3683.27   | PASS          | AC=8;AF=0.114;AN=70;BaseQRankSum=  |
| 50860 | chrY | 58995194 | . | G | C,* | 4067.22   | PASS          | AC=8,1;AF=0.114,0.014;AN=70;BaseQ  |
| 50861 | chrY | 58995228 | . | T | C   | 10750.13  | PASS          | AC=10;AF=0.179;AN=56;BaseQ         |
| 50862 | chrY | 58995230 | . | A | G   | 8810.89   | PASS          | AC=9;AF=0.132;AN=68;BaseQRankSum=  |
| 50863 | chrY | 58995240 | . | G | A   | 13408.33  | PASS          | AC=13;AF=0.433;AN=30;BaseQ         |
| 50864 | chrY | 58995256 | . | G | A   | 974.30    | PASS          | AC=2;AF=0.029;AN=70;BaseQRankSum=  |
| 50865 | chrY | 58995257 | . | G | A   | 120.02    | my_snp_filter | AC=1;AF=0.014;AN=70;BaseQ          |
| 50866 | chrY | 58995301 | . | T | C   | 810.58    | my_snp_filter | AC=4;AF=0.057;AN=70;BaseQ          |
| 50867 | chrY | 58995320 | . | A | G   | 817.52    | my_snp_filter | AC=4;AF=0.057;AN=70;BaseQ          |
| 50868 | chrY | 58995395 | . | T | C   | 148172.20 | PASS          | AC=37;AF=0.529;AN=70;BaseQ         |
| 50869 | chrY | 58995396 | . | C | A   | 151608.20 | PASS          | AC=37;AF=0.529;AN=70;BaseQ         |
| 50870 | chrY | 58995406 | . | T | A   | 146314.64 | PASS          | AC=38;AF=0.543;AN=70;BaseQ         |
| 50871 | chrY | 58995481 | . | G | A   | 30338.72  | PASS          | AC=35;AF=0.500;AN=70;BaseQ         |
| 50872 | chrY | 58995488 | . | T | A   | 1275.15   | my_snp_filter | AC=9;AF=0.129;AN=70;BaseQ          |
| 50873 | chrY | 58995514 | . | A | C   | 68.42     | my_snp_filter | AC=1;AF=0.014;AN=70;BaseQ          |
| 50874 | chrY | 58995532 | . | G | A   | 173.51    | my_snp_filter | AC=3;AF=0.043;AN=70;BaseQ          |
| 50875 | chrY | 58995560 | . | C | T   | 3443.01   | PASS          | AC=11;AF=0.157;AN=70;BaseQRankSum= |
| 50876 | chrY | 58995584 | . | C | T   | 27653.19  | PASS          | AC=33;AF=0.471;AN=70;BaseQ         |
| 50877 | chrY | 58995619 | . | G | T   | 798.45    | my_snp_filter | AC=6;AF=0.086;AN=70;BaseQ          |
| 50878 | chrY | 58995637 | . | T | A   | 134406.72 | PASS          | AC=50;AF=0.714;AN=70;BaseQ         |
| 50879 | chrY | 58995687 | . | C | T   | 6710.01   | PASS          | AC=10;AF=0.143;AN=70;BaseQRankSum= |
| 50880 | chrY | 58995698 | . | T | C   | 163.42    | my_snp_filter | AC=1;AF=0.014;AN=70;BaseQ          |
| 50881 | chrY | 58995714 | . | T | A   | 51.42     | my_snp_filter | AC=1;AF=0.014;AN=70;BaseQ          |
| 50882 | chrY | 58995720 | . | T | A   | 169648.03 | PASS          | AC=44;AF=0.629;AN=70;BaseQ         |
| 50883 | chrY | 58995738 | . | C | G   | 30662.54  | PASS          | AC=32;AF=0.457;AN=70;BaseQ         |
| 50884 | chrY | 58995754 | . | C | T   | 176535.61 | PASS          | AC=41;AF=0.586;AN=70;BaseQ         |
| 50885 | chrY | 58995774 | . | G | C   | 102820.40 | PASS          | AC=36;AF=0.514;AN=70;BaseQ         |
| 50886 | chrY | 58995775 | . | G | A   | 5972.78   | PASS          | AC=18;AF=0.257;AN=70;BaseQRankSum= |
| 50887 | chrY | 58995849 | . | A | T   | 1958.21   | my_snp_filter | AC=8;AF=0.114;AN=70;BaseQ          |
| 50888 | chrY | 58995859 | . | A | G   | 2511.98   | PASS          | AC=10;AF=0.143;AN=70;BaseQRankSum= |
| 50889 | chrY | 58995866 | . | T | C   | 98890.63  | PASS          | AC=43;AF=0.614;AN=70;BaseQ         |
| 50890 | chrY | 58995907 | . | G | T   | 1592.84   | PASS          | AC=9;AF=0.129;AN=70;BaseQRankSum=  |
| 50891 | chrY | 58995921 | . | T | G   | 59146.55  | PASS          | AC=41;AF=0.586;AN=70;BaseQ         |
| 50892 | chrY | 58995970 | . | A | C   | 36644.48  | PASS          | AC=38;AF=0.543;AN=70;BaseQ         |
| 50893 | chrY | 58995983 | . | A | T,* | 622.69    | my_snp_filter | AC=1,4;AF=0.014,0.057;AN=          |
| 50894 | chrY | 58996011 | . | G | A   | 291.13    | my_snp_filter | AC=5;AF=0.071;AN=70;BaseQ          |
| 50895 | chrY | 58996099 | . | T | C   | 3440.52   | my_snp_filter | AC=15;AF=0.250;AN=60;BaseQ         |
| 50896 | chrY | 58996164 | . | T | C   | 3663.70   | PASS          | AC=9;AF=0.450;AN=20;BaseQRankSum=  |
| 50897 | chrY | 58996217 | . | G | A   | 230.71    | PASS          | AC=1;AF=0.014;AN=70;BaseQRankSum=  |
| 50898 | chrY | 58996230 | . | G | A   | 91350.03  | PASS          | AC=31;AF=0.500;AN=62;BaseQ         |
| 50899 | chrY | 58996233 | . | T | C   | 1389.89   | PASS          | AC=4;AF=0.057;AN=70;BaseQRankSum=  |
| 50900 | chrY | 58996237 | . | C | T   | 13384.70  | PASS          | AC=21;AF=0.300;AN=70;BaseQ         |
| 50901 | chrY | 58996244 | . | A | C   | 2064.03   | PASS          | AC=3;AF=0.043;AN=70;BaseQRankSum=  |
| 50902 | chrY | 58996247 | . | C | T   | 2063.13   | PASS          | AC=3;AF=0.043;AN=70;BaseQRankSum=  |
| 50903 | chrY | 58996262 | . | C | A   | 76668.66  | PASS          | AC=31;AF=0.500;AN=62;BaseQ         |
| 50904 | chrY | 58996305 | . | C | T   | 99.43     | PASS          | AC=1;AF=0.014;AN=70;BaseQRankSum=  |
| 50905 | chrY | 58996306 | . | A | C   | 13541.98  | PASS          | AC=23;AF=0.371;AN=62;BaseQ         |
| 50906 | chrY | 58996326 | . | A | G   | 387       | PASS          | AC=3;AF=0.043;AN=70;BaseQRankSum=  |
| 50907 | chrY | 58996384 | . | A | C   | 33437.85  | PASS          | AC=37;AF=0.529;AN=70;BaseQ         |
| 50908 | chrY | 58996402 | . | G | T   | 571.62    | PASS          | AC=8;AF=0.114;AN=70;BaseQRankSum=  |
| 50909 | chrY | 58996427 | . | T | G   | 17363.78  | PASS          | AC=30;AF=0.441;AN=68;BaseQ         |
| 50910 | chrY | 58996430 | . | G | C   | 7554.21   | PASS          | AC=21;AF=0.300;AN=70;BaseQRankSum= |
| 50911 | chrY | 58996436 | . | A | T   | 31901.51  | PASS          | AC=45;AF=0.682;AN=66;BaseQ         |
| 50912 | chrY | 58996461 | . | G | C,* | 691.72    | PASS          | AC=6,1;AF=0.086,0.014;AN=70;BaseQ  |
| 50913 | chrY | 58996514 | . | T | C   | 1547.32   | PASS          | AC=12;AF=0.176;AN=68;BaseQRankSum= |
| 50914 | chrY | 58996521 | . | T | C   | 9500.10   | PASS          | AC=7;AF=0.250;AN=28;BaseQRankSum=  |
| 50915 | chrY | 58996536 | . | C | A   | 927.30    | my_snp_filter | AC=10;AF=0.152;AN=66;BaseQ         |
| 50916 | chrY | 58996543 | . | A | T   | 513.52    | PASS          | AC=8;AF=0.114;AN=70;BaseQRankSum=  |
| 50917 | chrY | 58996552 | . | C | T   | 123.30    | my_snp_filter | AC=3;AF=0.044;AN=68;BaseQ          |
| 50918 | chrY | 58996567 | . | T | A   | 3068.20   | PASS          | AC=16;AF=0.235;AN=68;BaseQRankSum= |
| 50919 | chrY | 58996578 | . | T | C   | 58.80     | my_snp_filter | AC=1;AF=0.015;AN=68;BaseQ          |
| 50920 | chrY | 58996608 | . | G | A,T | 17504.76  | PASS          | AC=30,2;AF=0.429,0.029;AN=         |

|       |      |          |   |   |     |           |               |                                   |
|-------|------|----------|---|---|-----|-----------|---------------|-----------------------------------|
| 50921 | chrY | 58996613 | . | G | T   | 1791      | PASS          | AC=7;AF=0.100;AN=70;BaseQRankSum= |
| 50922 | chrY | 58996629 | . | A | G   | 52087.92  | PASS          | AC=36;AF=0.514;AN=70;Base         |
| 50923 | chrY | 58996685 | . | G | C   | 4623.21   | PASS          | AC=18;AF=0.257;AN=70;BaseQRankSum |
| 50924 | chrY | 58996716 | . | T | C   | 72679.74  | PASS          | AC=46;AF=0.657;AN=70;Base         |
| 50925 | chrY | 58996823 | . | G | A   | 67.20     | my_snp_filter | AC=2;AF=0.029;AN=70;BaseQ         |
| 50926 | chrY | 58996861 | . | C | T   | 10138.44  | PASS          | AC=15;AF=0.214;AN=70;Base         |
| 50927 | chrY | 58996863 | . | A | G   | 127354.65 | PASS          | AC=52;AF=0.743;AN=70;Base         |
| 50928 | chrY | 58996875 | . | C | G   | 3742.54   | PASS          | AC=13;AF=0.186;AN=70;BaseQRankSum |
| 50929 | chrY | 58996880 | . | C | T   | 7918.86   | PASS          | AC=22;AF=0.314;AN=70;BaseQRankSum |
| 50930 | chrY | 58996883 | . | G | A   | 9032.23   | PASS          | AC=16;AF=0.229;AN=70;BaseQRankSum |
| 50931 | chrY | 58996968 | . | G | A   | 325.06    | my_snp_filter | AC=6;AF=0.086;AN=70;BaseQ         |
| 50932 | chrY | 58996974 | . | C | T   | 3030.94   | PASS          | AC=16;AF=0.229;AN=70;BaseQRankSum |
| 50933 | chrY | 58996976 | . | A | T   | 46.09     | my_snp_filter | AC=2;AF=0.029;AN=70;BaseQ         |
| 50934 | chrY | 58996978 | . | G | A   | 140.95    | PASS          | AC=2;AF=0.029;AN=70;BaseQRankSum= |
| 50935 | chrY | 58996987 | . | C | T   | 123.51    | PASS          | AC=2;AF=0.029;AN=70;BaseQRankSum= |
| 50936 | chrY | 58996989 | . | C | T   | 157.60    | PASS          | AC=4;AF=0.057;AN=70;BaseQRankSum= |
| 50937 | chrY | 58996993 | . | T | C   | 132.95    | my_snp_filter | AC=5;AF=0.071;AN=70;BaseQ         |
| 50938 | chrY | 58996994 | . | C | A   | 180.88    | my_snp_filter | AC=4;AF=0.057;AN=70;BaseQ         |
| 50939 | chrY | 58996995 | . | A | T   | 117.81    | my_snp_filter | AC=3;AF=0.043;AN=70;BaseQ         |
| 50940 | chrY | 58997001 | . | G | T   | 33.46     | my_snp_filter | AC=1;AF=0.014;AN=70;BaseQ         |
| 50941 | chrY | 58997006 | . | G | A   | 184.69    | my_snp_filter | AC=4;AF=0.057;AN=70;BaseQ         |
| 50942 | chrY | 58997011 | . | T | A   | 2291.13   | PASS          | AC=15;AF=0.214;AN=70;BaseQRankSum |
| 50943 | chrY | 58997022 | . | C | A   | 87.65     | my_snp_filter | AC=2;AF=0.029;AN=70;BaseQ         |
| 50944 | chrY | 58997031 | . | C | T   | 113.65    | my_snp_filter | AC=2;AF=0.029;AN=70;BaseQ         |
| 50945 | chrY | 58997034 | . | T | A   | 139.94    | my_snp_filter | AC=1;AF=0.014;AN=70;BaseQ         |
| 50946 | chrY | 58997050 | . | C | T   | 251.82    | my_snp_filter | AC=2;AF=0.029;AN=70;BaseQ         |
| 50947 | chrY | 58997056 | . | C | A   | 30348.25  | PASS          | AC=34;AF=0.486;AN=70;Base         |
| 50948 | chrY | 58997059 | . | G | A   | 357.94    | PASS          | AC=1;AF=0.014;AN=70;BaseQRankSum= |
| 50949 | chrY | 58997064 | . | A | T   | 6535.72   | PASS          | AC=11;AF=0.157;AN=70;BaseQRankSum |
| 50950 | chrY | 58997068 | . | G | A   | 4766.27   | PASS          | AC=10;AF=0.143;AN=70;BaseQRankSum |
| 50951 | chrY | 58997069 | . | G | T   | 386.42    | PASS          | AC=1;AF=0.014;AN=70;BaseQRankSum= |
| 50952 | chrY | 58997123 | . | C | T   | 361.55    | PASS          | AC=1;AF=0.015;AN=68;BaseQRankSum= |
| 50953 | chrY | 58997124 | . | A | C   | 361.43    | PASS          | AC=1;AF=0.014;AN=70;BaseQRankSum= |
| 50954 | chrY | 58997130 | . | T | A   | 277.17    | PASS          | AC=1;AF=0.015;AN=68;BaseQRankSum= |
| 50955 | chrY | 58997142 | . | G | A   | 2319      | PASS          | AC=11;AF=0.157;AN=70;BaseQRankSum |
| 50956 | chrY | 58997143 | . | T | G,A | 102411.23 | PASS          | AC=34,1;AF=0.500,0.015;AN         |
| 50957 | chrY | 58997151 | . | T | A   | 69.71     | PASS          | AC=1;AF=0.014;AN=70;BaseQRankSum= |
| 50958 | chrY | 58997178 | . | T | C   | 20842.26  | PASS          | AC=32;AF=0.457;AN=70;Base         |
| 50959 | chrY | 58997180 | . | A | G   | 3033.73   | PASS          | AC=10;AF=0.143;AN=70;BaseQRankSum |
| 50960 | chrY | 58997192 | . | C | A   | 113600.77 | PASS          | AC=34;AF=0.515;AN=66;Base         |
| 50961 | chrY | 58997194 | . | T | G   | 114107.65 | PASS          | AC=33;AF=0.500;AN=66;Base         |
| 50962 | chrY | 58997209 | . | T | C   | 104545.62 | PASS          | AC=33;AF=0.500;AN=66;Base         |
| 50963 | chrY | 58997225 | . | G | A,T | 1997.70   | PASS          | AC=10,2;AF=0.143,0.029;AN=70;Base |
| 50964 | chrY | 58997231 | . | C | A   | 84276.76  | PASS          | AC=34;AF=0.515;AN=66;Base         |
| 50965 | chrY | 58997249 | . | A | G   | 2096.38   | PASS          | AC=15;AF=0.214;AN=70;BaseQRankSum |
| 50966 | chrY | 58997323 | . | G | C   | 45255.31  | PASS          | AC=39;AF=0.557;AN=70;Base         |
| 50967 | chrY | 58997335 | . | C | A   | 182.35    | my_snp_filter | AC=4;AF=0.057;AN=70;BaseQ         |
| 50968 | chrY | 58997365 | . | G | C   | 1674.22   | PASS          | AC=7;AF=0.100;AN=70;BaseQRankSum= |
| 50969 | chrY | 58997366 | . | C | T   | 674.96    | PASS          | AC=4;AF=0.057;AN=70;BaseQRankSum= |
| 50970 | chrY | 58997373 | . | T | G   | 66925.51  | PASS          | AC=36;AF=0.514;AN=70;Base         |
| 50971 | chrY | 58997374 | . | G | A   | 308.44    | PASS          | AC=1;AF=0.014;AN=70;BaseQRankSum= |
| 50972 | chrY | 58997398 | . | G | T   | 61511.08  | PASS          | AC=36;AF=0.514;AN=70;Base         |
| 50973 | chrY | 58997405 | . | C | T   | 1120.95   | PASS          | AC=5;AF=0.071;AN=70;BaseQRankSum= |
| 50974 | chrY | 58997447 | . | T | A   | 153.59    | PASS          | AC=1;AF=0.014;AN=70;BaseQRankSum= |
| 50975 | chrY | 58997506 | . | G | A   | 1053.27   | my_snp_filter | AC=8;AF=0.114;AN=70;BaseQ         |
| 50976 | chrY | 58997530 | . | G | A   | 248.55    | my_snp_filter | AC=5;AF=0.071;AN=70;BaseQ         |
| 50977 | chrY | 58997561 | . | C | A   | 5607.40   | PASS          | AC=22;AF=0.314;AN=70;BaseQRankSum |
| 50978 | chrY | 58997577 | . | G | A   | 197.61    | my_snp_filter | AC=6;AF=0.086;AN=70;BaseQ         |
| 50979 | chrY | 58997614 | . | G | T   | 86446.20  | PASS          | AC=36;AF=0.514;AN=70;Base         |
| 50980 | chrY | 58997638 | . | T | A   | 31436.53  | PASS          | AC=34;AF=0.486;AN=70;Base         |
| 50981 | chrY | 58997662 | . | C | T   | 101.52    | my_snp_filter | AC=3;AF=0.043;AN=70;BaseQ         |
| 50982 | chrY | 58997667 | . | A | C   | 112692.76 | PASS          | AC=35;AF=0.500;AN=70;Base         |
| 50983 | chrY | 58997679 | . | C | G   | 109427.72 | PASS          | AC=35;AF=0.500;AN=70;Base         |
| 50984 | chrY | 58997705 | . | C | T   | 164.55    | my_snp_filter | AC=3;AF=0.043;AN=70;BaseQ         |
| 50985 | chrY | 58997744 | . | A | C   | 47728.28  | PASS          | AC=38;AF=0.543;AN=70;Base         |
| 50986 | chrY | 58997864 | . | A | G   | 9901.89   | PASS          | AC=14;AF=0.250;AN=56;BaseQRankSum |
| 50987 | chrY | 58997870 | . | C | G   | 576.14    | PASS          | AC=3;AF=0.047;AN=64;BaseQRankSum= |
| 50988 | chrY | 58997968 | . | G | A   | 8297.47   | PASS          | AC=11;AF=0.367;AN=30;BaseQRankSum |
| 50989 | chrY | 58997988 | . | C | T   | 41572.22  | PASS          | AC=18;AF=0.750;AN=24;Base         |
| 50990 | chrY | 58998007 | . | C | T   | 43616.25  | PASS          | AC=17;AF=0.773;AN=22;Base         |
| 50991 | chrY | 58998026 | . | A | C   | 39810.31  | PASS          | AC=20;AF=0.833;AN=24;Base         |
| 50992 | chrY | 58998055 | . | T | C   | 13626.54  | PASS          | AC=11;AF=0.458;AN=24;Base         |
| 50993 | chrY | 58998110 | . | G | T   | 35047.16  | PASS          | AC=26;AF=1.00;AN=26;BaseQ         |
| 50994 | chrY | 58998125 | . | A | G   | 555.20    | my_snp_filter | AC=2;AF=0.059;AN=34;BaseQ         |
| 50995 | chrY | 58998189 | . | T | C   | 35.49     | my_snp_filter | AC=2;AF=0.059;AN=34;BaseQ         |
| 50996 | chrY | 58998216 | . | G | A   | 7668.11   | PASS          | AC=9;AF=0.300;AN=30;BaseQRankSum= |

|       |      |          |   |   |   |          |               |                                   |
|-------|------|----------|---|---|---|----------|---------------|-----------------------------------|
| 50997 | chrY | 58998283 | . | A | G | 13844.52 | PASS          | AC=9;AF=0.450;AN=20;BaseQ         |
| 50998 | chrY | 58998351 | . | C | T | 13699.09 | PASS          | AC=9;AF=0.500;AN=18;BaseQ         |
| 50999 | chrY | 58998370 | . | G | C | 45.30    | my_snp_filter | AC=2;AF=0.100;AN=20;BaseQ         |
| 51000 | chrY | 58998387 | . | A | G | 1018.24  | PASS          | AC=3;AF=0.150;AN=20;BaseQRankSum= |
| 51001 | chrY | 58998404 | . | A | C | 40993.95 | PASS          | AC=14;AF=0.778;AN=18;Base         |
| 51002 | chrY | 58998447 | . | G | A | 257.32   | PASS          | AC=1;AF=0.056;AN=18;BaseQRankSum= |
| 51003 | chrY | 58998467 | . | T | C | 39153.09 | PASS          | AC=9;AF=0.500;AN=18;BaseQ         |
| 51004 | chrY | 58998482 | . | C | T | 42924.07 | PASS          | AC=9;AF=0.450;AN=20;BaseQ         |
| 51005 | chrY | 58998532 | . | A | G | 27753.05 | PASS          | AC=13;AF=0.650;AN=20;Base         |
| 51006 | chrY | 58998560 | . | A | C | 537.26   | PASS          | AC=1;AF=0.045;AN=22;BaseQRankSum= |
| 51007 | chrY | 58998596 | . | C | T | 20408.09 | PASS          | AC=9;AF=0.500;AN=18;BaseQ         |
| 51008 | chrY | 58998597 | . | A | G | 45264.69 | PASS          | AC=12;AF=0.667;AN=18;Base         |
| 51009 | chrY | 58998616 | . | T | C | 8113.56  | PASS          | AC=8;AF=0.364;AN=22;BaseQRankSum= |
| 51010 | chrY | 58998661 | . | A | T | 28071.44 | PASS          | AC=14;AF=0.700;AN=20;Base         |
| 51011 | chrY | 58998746 | . | G | T | 1821.50  | PASS          | AC=3;AF=0.079;AN=38;BaseQRankSum= |
| 51012 | chrY | 58998752 | . | A | G | 260.16   | my_snp_filter | AC=2;AF=0.048;AN=42;BaseQ         |
| 51013 | chrY | 58998782 | . | C | A | 27178.19 | PASS          | AC=11;AF=0.393;AN=28;Base         |
| 51014 | chrY | 58998803 | . | G | A | 26961.29 | PASS          | AC=12;AF=0.375;AN=32;Base         |
| 51015 | chrY | 58998828 | . | T | C | 52114.06 | PASS          | AC=29;AF=0.967;AN=30;Base         |
| 51016 | chrY | 58998911 | . | T | A | 31367.79 | PASS          | AC=21;AF=0.875;AN=24;Base         |
| 51017 | chrY | 58998959 | . | A | G | 458.41   | PASS          | AC=1;AF=0.036;AN=28;BaseQRankSum= |
| 51018 | chrY | 58999075 | . | T | C | 1428.69  | PASS          | AC=4;AF=0.167;AN=24;BaseQRankSum= |
| 51019 | chrY | 58999106 | . | T | A | 42147.35 | PASS          | AC=13;AF=0.591;AN=22;Base         |
| 51020 | chrY | 58999110 | . | A | G | 9502.44  | PASS          | AC=9;AF=0.300;AN=30;BaseQRankSum= |
| 51021 | chrY | 58999130 | . | A | C | 503      | my_snp_filter | AC=3;AF=0.107;AN=28;BaseQ         |
| 51022 | chrY | 58999137 | . | G | A | 57.90    | my_snp_filter | AC=1;AF=0.036;AN=28;BaseQ         |
| 51023 | chrY | 58999155 | . | G | A | 3124.70  | PASS          | AC=7;AF=0.250;AN=28;BaseQRankSum= |
| 51024 | chrY | 58999168 | . | A | T | 36174.18 | PASS          | AC=15;AF=0.682;AN=22;Base         |
| 51025 | chrY | 58999215 | . | C | G | 11907.52 | PASS          | AC=9;AF=0.450;AN=20;BaseQ         |
| 51026 | chrY | 58999265 | . | A | C | 527.90   | my_snp_filter | AC=2;AF=0.067;AN=30;BaseQ         |
| 51027 | chrY | 58999272 | . | A | C | 6474.27  | PASS          | AC=7;AF=0.233;AN=30;BaseQRankSum= |
| 51028 | chrY | 58999284 | . | G | A | 6882.50  | PASS          | AC=9;AF=0.346;AN=26;BaseQRankSum= |
| 51029 | chrY | 58999300 | . | T | C | 3737.87  | PASS          | AC=4;AF=0.143;AN=28;BaseQRankSum= |
| 51030 | chrY | 58999301 | . | G | T | 3743.75  | PASS          | AC=4;AF=0.143;AN=28;BaseQRankSum= |
| 51031 | chrY | 58999396 | . | G | T | 16651.04 | PASS          | AC=13;AF=0.500;AN=26;Base         |
| 51032 | chrY | 58999470 | . | A | T | 15453.19 | PASS          | AC=9;AF=0.321;AN=28;BaseQ         |
| 51033 | chrY | 58999540 | . | T | G | 475.06   | PASS          | AC=1;AF=0.031;AN=32;BaseQRankSum= |
| 51034 | chrY | 58999569 | . | A | G | 1876.30  | my_snp_filter | AC=6;AF=0.188;AN=32;BaseQ         |
| 51035 | chrY | 58999570 | . | A | G | 1120.24  | PASS          | AC=3;AF=0.088;AN=34;BaseQRankSum= |
| 51036 | chrY | 58999578 | . | C | A | 1165.74  | PASS          | AC=3;AF=0.079;AN=38;BaseQRankSum= |
| 51037 | chrY | 58999661 | . | G | A | 82.55    | my_snp_filter | AC=1;AF=0.036;AN=28;BaseQ         |
| 51038 | chrY | 58999713 | . | C | A | 14071.84 | PASS          | AC=9;AF=0.375;AN=24;BaseQ         |
| 51039 | chrY | 58999753 | . | G | T | 5981.71  | PASS          | AC=9;AF=0.346;AN=26;BaseQRankSum= |
| 51040 | chrY | 58999765 | . | C | T | 52811.52 | PASS          | AC=9;AF=0.450;AN=20;BaseQ         |
| 51041 | chrY | 58999773 | . | G | A | 52934.52 | PASS          | AC=9;AF=0.450;AN=20;BaseQ         |
| 51042 | chrY | 58999830 | . | C | T | 6363.68  | PASS          | AC=9;AF=0.321;AN=28;BaseQRankSum= |
| 51043 | chrY | 58999876 | . | T | G | 28198.94 | PASS          | AC=13;AF=0.500;AN=26;Base         |
| 51044 | chrY | 58999877 | . | C | A | 28201.97 | PASS          | AC=13;AF=0.542;AN=24;Base         |
| 51045 | chrY | 58999883 | . | G | C | 43654.89 | PASS          | AC=21;AF=0.875;AN=24;Base         |
| 51046 | chrY | 58999937 | . | T | A | 29255.95 | PASS          | AC=15;AF=0.469;AN=32;Base         |
| 51047 | chrY | 58999939 | . | G | C | 29258.95 | PASS          | AC=15;AF=0.469;AN=32;Base         |
| 51048 | chrY | 59000025 | . | G | A | 873.80   | my_snp_filter | AC=4;AF=0.143;AN=28;BaseQ         |
| 51049 | chrY | 59000043 | . | C | T | 3408.70  | PASS          | AC=9;AF=0.346;AN=26;BaseQRankSum= |
| 51050 | chrY | 59000064 | . | C | T | 41.78    | my_snp_filter | AC=1;AF=0.038;AN=26;BaseQ         |
| 51051 | chrY | 59000107 | . | A | G | 395.42   | PASS          | AC=1;AF=0.042;AN=24;BaseQRankSum= |
| 51052 | chrY | 59000116 | . | G | A | 14075.70 | PASS          | AC=9;AF=0.346;AN=26;BaseQ         |
| 51053 | chrY | 59000168 | . | G | T | 30186.27 | PASS          | AC=10;AF=0.455;AN=22;Base         |
| 51054 | chrY | 59000230 | . | A | C | 5273.19  | PASS          | AC=8;AF=0.308;AN=26;BaseQRankSum= |
| 51055 | chrY | 59000265 | . | A | C | 36466.57 | PASS          | AC=14;AF=0.636;AN=22;Base         |
| 51056 | chrY | 59000266 | . | C | T | 861.93   | PASS          | AC=2;AF=0.083;AN=24;BaseQRankSum= |
| 51057 | chrY | 59000277 | . | C | A | 827.39   | PASS          | AC=2;AF=0.077;AN=26;BaseQRankSum= |
| 51058 | chrY | 59000333 | . | C | T | 116.30   | my_snp_filter | AC=1;AF=0.050;AN=20;BaseQ         |
| 51059 | chrY | 59000344 | . | G | A | 2167.82  | PASS          | AC=5;AF=0.250;AN=20;BaseQRankSum= |
| 51060 | chrY | 59000347 | . | G | A | 52013.19 | PASS          | AC=14;AF=0.700;AN=20;Base         |
| 51061 | chrY | 59000349 | . | A | T | 15475.19 | PASS          | AC=10;AF=0.500;AN=20;Base         |
| 51062 | chrY | 59000354 | . | A | C | 27994.89 | PASS          | AC=9;AF=0.409;AN=22;BaseQ         |
| 51063 | chrY | 59000362 | . | G | A | 5768.94  | PASS          | AC=9;AF=0.409;AN=22;BaseQRankSum= |
| 51064 | chrY | 59000369 | . | G | T | 27324.73 | PASS          | AC=9;AF=0.375;AN=24;BaseQ         |
| 51065 | chrY | 59000453 | . | T | G | 117.52   | my_snp_filter | AC=2;AF=0.083;AN=24;BaseQ         |
| 51066 | chrY | 59000468 | . | C | T | 1329.19  | PASS          | AC=2;AF=0.091;AN=22;BaseQRankSum= |
| 51067 | chrY | 59000473 | . | A | G | 37594.12 | PASS          | AC=15;AF=0.750;AN=20;Base         |
| 51068 | chrY | 59000479 | . | G | C | 1327.82  | my_snp_filter | AC=6;AF=0.250;AN=24;BaseQ         |
| 51069 | chrY | 59000538 | . | C | A | 358.96   | PASS          | AC=1;AF=0.038;AN=26;BaseQRankSum= |
| 51070 | chrY | 59000554 | . | G | C | 295.84   | my_snp_filter | AC=1;AF=0.033;AN=30;BaseQ         |
| 51071 | chrY | 59000648 | . | C | T | 2226.83  | PASS          | AC=7;AF=0.219;AN=32;BaseQRankSum= |
| 51072 | chrY | 59000675 | . | C | T | 29887.35 | PASS          | AC=21;AF=0.808;AN=26;Base         |



|       |      |          |   |   |     |           |               |                                    |
|-------|------|----------|---|---|-----|-----------|---------------|------------------------------------|
| 51073 | chrY | 59000701 | . | G | A   | 13599.99  | PASS          | AC=9;AF=0.409;AN=22;BaseQ          |
| 51074 | chrY | 59000744 | . | A | G   | 27069.28  | PASS          | AC=12;AF=0.600;AN=20;Base          |
| 51075 | chrY | 59000777 | . | T | G   | 3616.98   | PASS          | AC=6;AF=0.300;AN=20;BaseQRankSum=  |
| 51076 | chrY | 59000802 | . | A | C   | 21087.74  | PASS          | AC=12;AF=0.600;AN=20;Base          |
| 51077 | chrY | 59000814 | . | G | A   | 7954.59   | PASS          | AC=9;AF=0.450;AN=20;BaseQRankSum=  |
| 51078 | chrY | 59000886 | . | A | T   | 14241.09  | PASS          | AC=9;AF=0.500;AN=18;BaseQ          |
| 51079 | chrY | 59000922 | . | A | G   | 34829.09  | PASS          | AC=9;AF=0.500;AN=18;BaseQ          |
| 51080 | chrY | 59000924 | . | A | G   | 5636.24   | PASS          | AC=6;AF=0.333;AN=18;BaseQRankSum=  |
| 51081 | chrY | 59000935 | . | T | G   | 35996.53  | PASS          | AC=10;AF=0.556;AN=18;Base          |
| 51082 | chrY | 59000966 | . | C | T   | 439.64    | my_snp_filter | AC=2;AF=0.063;AN=32;BaseQ          |
| 51083 | chrY | 59000972 | . | A | T   | 14045.67  | PASS          | AC=13;AF=0.500;AN=26;Base          |
| 51084 | chrY | 59000983 | . | G | A   | 40074.61  | PASS          | AC=23;AF=0.885;AN=26;Base          |
| 51085 | chrY | 59000986 | . | G | A   | 512.11    | my_snp_filter | AC=2;AF=0.067;AN=30;BaseQ          |
| 51086 | chrY | 59001054 | . | C | A   | 2724.28   | my_snp_filter | AC=7;AF=0.233;AN=30;BaseQ          |
| 51087 | chrY | 59001055 | . | G | T   | 13800.21  | PASS          | AC=12;AF=0.375;AN=32;Base          |
| 51088 | chrY | 59001061 | . | G | A   | 16028.55  | PASS          | AC=13;AF=0.382;AN=34;Base          |
| 51089 | chrY | 59001068 | . | G | T   | 1820.84   | PASS          | AC=8;AF=0.222;AN=36;BaseQRankSum=  |
| 51090 | chrY | 59001069 | . | T | C   | 13626.53  | PASS          | AC=12;AF=0.333;AN=36;Base          |
| 51091 | chrY | 59001077 | . | T | C   | 57215.41  | PASS          | AC=18;AF=0.692;AN=26;Base          |
| 51092 | chrY | 59001095 | . | C | A   | 54275.94  | PASS          | AC=17;AF=0.708;AN=24;Base          |
| 51093 | chrY | 59001114 | . | C | T   | 73.49     | my_snp_filter | AC=4;AF=0.133;AN=30;BaseQ          |
| 51094 | chrY | 59001115 | . | G | A   | 326.17    | my_snp_filter | AC=2;AF=0.063;AN=32;BaseQ          |
| 51095 | chrY | 59001134 | . | C | A   | 10163.79  | PASS          | AC=12;AF=0.353;AN=34;Base          |
| 51096 | chrY | 59001211 | . | A | G   | 31123.93  | PASS          | AC=21;AF=0.875;AN=24;Base          |
| 51097 | chrY | 59001276 | . | C | T   | 143.65    | my_snp_filter | AC=1;AF=0.019;AN=54;BaseQ          |
| 51098 | chrY | 59001292 | . | A | G   | 33196.62  | PASS          | AC=39;AF=0.929;AN=42;Base          |
| 51099 | chrY | 59001332 | . | T | G   | 35354.93  | PASS          | AC=41;AF=0.759;AN=54;Base          |
| 51100 | chrY | 59001381 | . | A | T   | 69485.85  | PASS          | AC=37;AF=0.561;AN=66;Base          |
| 51101 | chrY | 59001383 | . | A | T   | 52093.91  | PASS          | AC=31;AF=0.484;AN=64;Base          |
| 51102 | chrY | 59001384 | . | A | T   | 38465.64  | PASS          | AC=31;AF=0.484;AN=64;Base          |
| 51103 | chrY | 59001406 | . | A | G   | 200.98    | my_snp_filter | AC=3;AF=0.043;AN=70;BaseQ          |
| 51104 | chrY | 59001429 | . | G | A   | 46884.21  | PASS          | AC=33;AF=0.471;AN=70;Base          |
| 51105 | chrY | 59001437 | . | C | G   | 9635.82   | PASS          | AC=21;AF=0.300;AN=70;BaseQRankSum= |
| 51106 | chrY | 59001438 | . | A | G   | 9895.94   | PASS          | AC=21;AF=0.300;AN=70;BaseQRankSum= |
| 51107 | chrY | 59001440 | . | T | A   | 10569.94  | PASS          | AC=21;AF=0.300;AN=70;Base          |
| 51108 | chrY | 59001450 | . | G | A   | 48652.19  | PASS          | AC=33;AF=0.471;AN=70;Base          |
| 51109 | chrY | 59001455 | . | C | A   | 11988.94  | PASS          | AC=21;AF=0.300;AN=70;Base          |
| 51110 | chrY | 59001467 | . | T | G   | 13020.94  | PASS          | AC=21;AF=0.300;AN=70;Base          |
| 51111 | chrY | 59001472 | . | G | A,T | 15638.34  | PASS          | AC=9,19;AF=0.129,0.271;AN          |
| 51112 | chrY | 59001482 | . | C | G   | 13190.94  | PASS          | AC=21;AF=0.300;AN=70;Base          |
| 51113 | chrY | 59001494 | . | T | C   | 5537.27   | PASS          | AC=16;AF=0.229;AN=70;BaseQRankSum= |
| 51114 | chrY | 59001500 | . | C | A   | 605.65    | my_snp_filter | AC=5;AF=0.071;AN=70;BaseQ          |
| 51115 | chrY | 59001501 | . | G | A   | 11661.09  | PASS          | AC=19;AF=0.271;AN=70;Base          |
| 51116 | chrY | 59001513 | . | G | A   | 2587.46   | my_snp_filter | AC=12;AF=0.171;AN=70;Base          |
| 51117 | chrY | 59001515 | . | T | C,* | 3897.01   | my_snp_filter | AC=2,13;AF=0.029,0.186;AN          |
| 51118 | chrY | 59001527 | . | G | A   | 7730.95   | PASS          | AC=20;AF=0.286;AN=70;BaseQRankSum= |
| 51119 | chrY | 59001533 | . | C | T   | 842.22    | my_snp_filter | AC=5;AF=0.071;AN=70;BaseQ          |
| 51120 | chrY | 59001534 | . | A | G   | 9954.34   | PASS          | AC=19;AF=0.271;AN=70;BaseQRankSum= |
| 51121 | chrY | 59001543 | . | C | T   | 731.29    | my_snp_filter | AC=4;AF=0.057;AN=70;BaseQ          |
| 51122 | chrY | 59001546 | . | C | A   | 8779.76   | PASS          | AC=17;AF=0.243;AN=70;BaseQRankSum= |
| 51123 | chrY | 59001552 | . | G | C   | 2969.59   | my_snp_filter | AC=13;AF=0.186;AN=70;Base          |
| 51124 | chrY | 59001559 | . | G | A   | 1559.82   | PASS          | AC=7;AF=0.100;AN=70;BaseQRankSum=  |
| 51125 | chrY | 59001564 | . | T | C   | 340.12    | my_snp_filter | AC=3;AF=0.043;AN=70;BaseQ          |
| 51126 | chrY | 59001565 | . | A | C   | 4187.46   | PASS          | AC=14;AF=0.200;AN=70;BaseQRankSum= |
| 51127 | chrY | 59001575 | . | C | A   | 195.28    | my_snp_filter | AC=3;AF=0.043;AN=70;BaseQ          |
| 51128 | chrY | 59001576 | . | G | A   | 2175.32   | my_snp_filter | AC=8;AF=0.114;AN=70;BaseQ          |
| 51129 | chrY | 59001595 | . | A | T   | 786.11    | my_snp_filter | AC=3;AF=0.043;AN=70;BaseQ          |
| 51130 | chrY | 59001599 | . | T | A   | 647.25    | my_snp_filter | AC=3;AF=0.043;AN=70;BaseQ          |
| 51131 | chrY | 59001604 | . | G | A   | 3738.90   | my_snp_filter | AC=20;AF=0.286;AN=70;Base          |
| 51132 | chrY | 59001606 | . | G | A   | 36.24     | my_snp_filter | AC=2;AF=0.029;AN=70;BaseQ          |
| 51133 | chrY | 59001608 | . | C | T   | 18736.77  | PASS          | AC=35;AF=0.500;AN=70;Base          |
| 51134 | chrY | 59001610 | . | A | T   | 437.51    | PASS          | AC=3;AF=0.043;AN=70;BaseQRankSum=  |
| 51135 | chrY | 59001620 | . | A | C   | 112267.85 | PASS          | AC=51;AF=0.729;AN=70;Base          |
| 51136 | chrY | 59001630 | . | A | T   | 5724.83   | PASS          | AC=9;AF=0.129;AN=70;BaseQRankSum=  |
| 51137 | chrY | 59001635 | . | G | A   | 7251.82   | PASS          | AC=9;AF=0.129;AN=70;BaseQRankSum=  |
| 51138 | chrY | 59001636 | . | T | C   | 7433.82   | PASS          | AC=9;AF=0.129;AN=70;BaseQRankSum=  |
| 51139 | chrY | 59001639 | . | T | A   | 8030.82   | PASS          | AC=9;AF=0.129;AN=70;BaseQRankSum=  |
| 51140 | chrY | 59001647 | . | G | A   | 45426.72  | PASS          | AC=35;AF=0.500;AN=70;Base          |
| 51141 | chrY | 59001661 | . | T | C   | 15122.24  | PASS          | AC=9;AF=0.129;AN=70;BaseQ          |
| 51142 | chrY | 59001662 | . | T | A   | 15143.53  | PASS          | AC=9;AF=0.129;AN=70;BaseQ          |
| 51143 | chrY | 59001672 | . | G | T   | 16885.94  | PASS          | AC=9;AF=0.129;AN=70;BaseQ          |
| 51144 | chrY | 59001673 | . | G | T   | 16966.10  | PASS          | AC=9;AF=0.129;AN=70;BaseQ          |
| 51145 | chrY | 59001677 | . | C | A,G | 17942.73  | PASS          | AC=3,9;AF=0.043,0.129;AN=          |
| 51146 | chrY | 59001685 | . | G | C   | 7300.64   | PASS          | AC=26;AF=0.371;AN=70;BaseQRankSum= |
| 51147 | chrY | 59001697 | . | T | C   | 20628.12  | PASS          | AC=9;AF=0.129;AN=70;BaseQ          |
| 51148 | chrY | 59001698 | . | G | A   | 20634.96  | PASS          | AC=9;AF=0.129;AN=70;BaseQ          |

|       |      |          |   |   |     |           |               |                                    |
|-------|------|----------|---|---|-----|-----------|---------------|------------------------------------|
| 51149 | chrY | 59001722 | . | G | A   | 22942.84  | PASS          | AC=34;AF=0.486;AN=70;BaseQ         |
| 51150 | chrY | 59001753 | . | T | C   | 139867.72 | PASS          | AC=44;AF=0.629;AN=70;BaseQ         |
| 51151 | chrY | 59001758 | . | A | G   | 14894.70  | PASS          | AC=10;AF=0.143;AN=70;BaseQ         |
| 51152 | chrY | 59001760 | . | G | T   | 14580.65  | PASS          | AC=11;AF=0.157;AN=70;BaseQ         |
| 51153 | chrY | 59001766 | . | G | C   | 549.98    | my_snp_filter | AC=3;AF=0.043;AN=70;BaseQ          |
| 51154 | chrY | 59001773 | . | A | C   | 35827.72  | PASS          | AC=35;AF=0.500;AN=70;BaseQ         |
| 51155 | chrY | 59001777 | . | A | G   | 12409.53  | PASS          | AC=9;AF=0.129;AN=70;BaseQ          |
| 51156 | chrY | 59001787 | . | G | A   | 338.05    | PASS          | AC=3;AF=0.043;AN=70;BaseQRankSum=  |
| 51157 | chrY | 59001791 | . | G | A   | 11551.01  | PASS          | AC=10;AF=0.143;AN=70;BaseQ         |
| 51158 | chrY | 59001792 | . | T | C   | 160632.88 | PASS          | AC=38;AF=0.543;AN=70;BaseQ         |
| 51159 | chrY | 59001795 | . | A | C   | 133.41    | my_snp_filter | AC=2;AF=0.029;AN=70;BaseQ          |
| 51160 | chrY | 59001802 | . | T | C   | 31456.86  | PASS          | AC=35;AF=0.500;AN=70;BaseQ         |
| 51161 | chrY | 59001808 | . | T | C   | 10533.24  | PASS          | AC=9;AF=0.129;AN=70;BaseQ          |
| 51162 | chrY | 59001833 | . | G | A   | 9524.76   | PASS          | AC=9;AF=0.129;AN=70;BaseQRankSum=  |
| 51163 | chrY | 59001842 | . | A | G   | 295.92    | my_snp_filter | AC=3;AF=0.043;AN=70;BaseQ          |
| 51164 | chrY | 59001848 | . | G | C   | 10272.53  | PASS          | AC=9;AF=0.129;AN=70;BaseQ          |
| 51165 | chrY | 59001853 | . | G | A   | 10794.57  | PASS          | AC=7;AF=0.100;AN=70;BaseQ          |
| 51166 | chrY | 59001865 | . | G | A   | 11837.77  | PASS          | AC=7;AF=0.100;AN=70;BaseQ          |
| 51167 | chrY | 59001872 | . | A | T   | 12273.76  | PASS          | AC=7;AF=0.100;AN=70;BaseQ          |
| 51168 | chrY | 59001873 | . | A | C   | 38108.19  | PASS          | AC=33;AF=0.471;AN=70;BaseQ         |
| 51169 | chrY | 59001874 | . | G | A   | 33040.64  | PASS          | AC=31;AF=0.443;AN=70;BaseQ         |
| 51170 | chrY | 59001887 | . | G | A   | 24142.65  | PASS          | AC=31;AF=0.443;AN=70;BaseQ         |
| 51171 | chrY | 59001889 | . | G | A   | 10768.39  | PASS          | AC=6;AF=0.086;AN=70;BaseQ          |
| 51172 | chrY | 59001906 | . | A | G   | 12840.14  | PASS          | AC=6;AF=0.086;AN=70;BaseQ          |
| 51173 | chrY | 59001911 | . | G | C   | 18971.84  | PASS          | AC=9;AF=0.129;AN=70;BaseQ          |
| 51174 | chrY | 59001913 | . | A | C   | 687.54    | my_snp_filter | AC=5;AF=0.071;AN=70;BaseQ          |
| 51175 | chrY | 59001925 | . | A | G   | 3353.10   | PASS          | AC=4;AF=0.057;AN=70;BaseQRankSum=  |
| 51176 | chrY | 59001950 | . | A | T   | 10701.94  | PASS          | AC=19;AF=0.271;AN=70;BaseQ         |
| 51177 | chrY | 59001955 | . | C | A   | 74442.72  | PASS          | AC=35;AF=0.500;AN=70;BaseQ         |
| 51178 | chrY | 59001960 | . | T | A   | 4790.59   | PASS          | AC=6;AF=0.086;AN=70;BaseQRankSum=  |
| 51179 | chrY | 59001979 | . | G | A   | 31211.72  | PASS          | AC=35;AF=0.500;AN=70;BaseQ         |
| 51180 | chrY | 59002029 | . | C | G   | 26393.36  | PASS          | AC=33;AF=0.471;AN=70;BaseQ         |
| 51181 | chrY | 59002047 | . | C | G   | 27598.19  | PASS          | AC=33;AF=0.471;AN=70;BaseQ         |
| 51182 | chrY | 59002067 | . | T | A   | 11324.37  | PASS          | AC=25;AF=0.357;AN=70;BaseQ         |
| 51183 | chrY | 59002073 | . | C | T   | 10132.64  | PASS          | AC=21;AF=0.300;AN=70;BaseQ         |
| 51184 | chrY | 59002093 | . | T | C   | 9028.23   | PASS          | AC=24;AF=0.343;AN=70;BaseQRankSum= |
| 51185 | chrY | 59002101 | . | T | C   | 2781.99   | PASS          | AC=10;AF=0.143;AN=70;BaseQRankSum= |
| 51186 | chrY | 59002102 | . | G | A   | 38303.72  | PASS          | AC=35;AF=0.500;AN=70;BaseQ         |
| 51187 | chrY | 59002114 | . | A | G   | 159501.13 | PASS          | AC=61;AF=0.871;AN=70;BaseQ         |
| 51188 | chrY | 59002122 | . | G | A   | 6156.19   | PASS          | AC=13;AF=0.186;AN=70;BaseQRankSum= |
| 51189 | chrY | 59002139 | . | G | T,A | 64034.19  | PASS          | AC=36,5;AF=0.514,0.071;AN=         |
| 51190 | chrY | 59002144 | . | G | A   | 5925.19   | PASS          | AC=11;AF=0.157;AN=70;BaseQRankSum= |
| 51191 | chrY | 59002161 | . | G | A   | 121.29    | my_snp_filter | AC=2;AF=0.029;AN=70;BaseQ          |
| 51192 | chrY | 59002163 | . | C | T   | 101.01    | my_snp_filter | AC=4;AF=0.057;AN=70;BaseQ          |
| 51193 | chrY | 59002171 | . | C | A   | 6826.09   | PASS          | AC=26;AF=0.371;AN=70;BaseQRankSum= |
| 51194 | chrY | 59002202 | . | G | A   | 6697.27   | PASS          | AC=9;AF=0.129;AN=70;BaseQRankSum=  |
| 51195 | chrY | 59002208 | . | T | A,C | 14354.51  | PASS          | AC=28,3;AF=0.400,0.043;AN=         |
| 51196 | chrY | 59002215 | . | G | T   | 300.57    | my_snp_filter | AC=4;AF=0.057;AN=70;BaseQ          |
| 51197 | chrY | 59002232 | . | A | T   | 4666.45   | PASS          | AC=7;AF=0.100;AN=70;BaseQRankSum=  |
| 51198 | chrY | 59002242 | . | C | T   | 2692.18   | PASS          | AC=3;AF=0.044;AN=68;BaseQRankSum=  |
| 51199 | chrY | 59002243 | . | G | A   | 195.46    | PASS          | AC=1;AF=0.015;AN=68;BaseQRankSum=  |
| 51200 | chrY | 59002264 | . | A | G   | 54164.42  | PASS          | AC=51;AF=0.750;AN=68;BaseQ         |
| 51201 | chrY | 59002266 | . | A | T   | 93.66     | my_snp_filter | AC=4;AF=0.057;AN=70;BaseQ          |
| 51202 | chrY | 59002269 | . | A | G   | 66.51     | PASS          | AC=1;AF=0.014;AN=70;BaseQRankSum=  |
| 51203 | chrY | 59002282 | . | A | C   | 458.43    | my_snp_filter | AC=2;AF=0.029;AN=70;BaseQ          |
| 51204 | chrY | 59002284 | . | C | T   | 1802.78   | PASS          | AC=17;AF=0.243;AN=70;BaseQRankSum= |
| 51205 | chrY | 59002298 | . | A | G   | 333.58    | PASS          | AC=1;AF=0.014;AN=70;BaseQRankSum=  |
| 51206 | chrY | 59002299 | . | A | T   | 285.68    | PASS          | AC=1;AF=0.014;AN=70;BaseQRankSum=  |
| 51207 | chrY | 59002320 | . | G | A   | 3337.31   | PASS          | AC=19;AF=0.271;AN=70;BaseQRankSum= |
| 51208 | chrY | 59002336 | . | G | T   | 57.19     | my_snp_filter | AC=1;AF=0.014;AN=70;BaseQ          |
| 51209 | chrY | 59002342 | . | A | G   | 51.06     | my_snp_filter | AC=2;AF=0.029;AN=70;BaseQ          |
| 51210 | chrY | 59002358 | . | A | C   | 72.12     | my_snp_filter | AC=3;AF=0.043;AN=70;BaseQ          |
| 51211 | chrY | 59002362 | . | C | T   | 18791.52  | PASS          | AC=28;AF=0.400;AN=70;BaseQ         |
| 51212 | chrY | 59002408 | . | G | A   | 98921.87  | PASS          | AC=37;AF=0.529;AN=70;BaseQ         |
| 51213 | chrY | 59002435 | . | C | G   | 16522.06  | PASS          | AC=34;AF=0.486;AN=70;BaseQ         |
| 51214 | chrY | 59002439 | . | T | C   | 4032.43   | PASS          | AC=14;AF=0.200;AN=70;BaseQRankSum= |
| 51215 | chrY | 59002455 | . | C | T   | 4698.13   | PASS          | AC=14;AF=0.200;AN=70;BaseQRankSum= |
| 51216 | chrY | 59002462 | . | A | C   | 1136.99   | PASS          | AC=6;AF=0.086;AN=70;BaseQRankSum=  |
| 51217 | chrY | 59002478 | . | C | T   | 107.42    | my_snp_filter | AC=1;AF=0.014;AN=70;BaseQ          |
| 51218 | chrY | 59002484 | . | A | G   | 5058.82   | PASS          | AC=14;AF=0.200;AN=70;BaseQRankSum= |
| 51219 | chrY | 59002506 | . | A | C   | 4321.69   | PASS          | AC=14;AF=0.200;AN=70;BaseQRankSum= |
| 51220 | chrY | 59002522 | . | T | A   | 14037.55  | PASS          | AC=27;AF=0.386;AN=70;BaseQ         |
| 51221 | chrY | 59002526 | . | T | G   | 17306.64  | PASS          | AC=32;AF=0.457;AN=70;BaseQ         |
| 51222 | chrY | 59002536 | . | C | A,T | 13515.44  | PASS          | AC=25,4;AF=0.357,0.057;AN=         |
| 51223 | chrY | 59002537 | . | C | A   | 2315.32   | PASS          | AC=7;AF=0.100;AN=70;BaseQRankSum=  |
| 51224 | chrY | 59002539 | . | A | C   | 3169.60   | PASS          | AC=14;AF=0.200;AN=70;BaseQRankSum= |

|       |      |          |   |   |     |          |               |                                    |
|-------|------|----------|---|---|-----|----------|---------------|------------------------------------|
| 51225 | chrY | 59002542 | . | T | A   | 2255.68  | PASS          | AC=6;AF=0.086;AN=70;BaseQRankSum=  |
| 51226 | chrY | 59002553 | . | G | A   | 1661.11  | PASS          | AC=5;AF=0.071;AN=70;BaseQRankSum=  |
| 51227 | chrY | 59002570 | . | G | A   | 963.69   | PASS          | AC=4;AF=0.057;AN=70;BaseQRankSum=  |
| 51228 | chrY | 59002573 | . | C | T   | 779.72   | PASS          | AC=2;AF=0.029;AN=70;BaseQRankSum=  |
| 51229 | chrY | 59002593 | . | T | A   | 580.14   | PASS          | AC=2;AF=0.029;AN=70;BaseQRankSum=  |
| 51230 | chrY | 59002595 | . | C | T   | 719.97   | PASS          | AC=3;AF=0.043;AN=70;BaseQRankSum=  |
| 51231 | chrY | 59002611 | . | A | G   | 367.35   | PASS          | AC=5;AF=0.119;AN=42;BaseQRankSum=  |
| 51232 | chrY | 59002614 | . | G | T   | 32.71    | my_snp_filter | AC=1;AF=0.014;AN=70;BaseQ          |
| 51233 | chrY | 59002627 | . | G | T   | 9930.33  | my_snp_filter | AC=14;AF=0.219;AN=64;Base          |
| 51234 | chrY | 59002632 | . | G | A   | 10214.73 | my_snp_filter | AC=16;AF=0.235;AN                  |
| 51235 | chrY | 59002655 | . | G | A   | 186.77   | PASS          | AC=1;AF=0.014;AN=70;BaseQRankSum=  |
| 51236 | chrY | 59002657 | . | C | G   | 204.55   | my_snp_filter | AC=2;AF=0.029;AN=70;BaseQ          |
| 51237 | chrY | 59002659 | . | A | C   | 2099.46  | PASS          | AC=9;AF=0.132;AN=68;BaseQRankSum=  |
| 51238 | chrY | 59002664 | . | A | G   | 2073.64  | PASS          | AC=9;AF=0.132;AN=68;BaseQRankSum=  |
| 51239 | chrY | 59002667 | . | A | T   | 388.40   | PASS          | AC=2;AF=0.029;AN=68;BaseQRankSum=  |
| 51240 | chrY | 59002668 | . | C | T   | 73.94    | my_snp_filter | AC=1;AF=0.015;AN=68;BaseQ          |
| 51241 | chrY | 59002701 | . | T | G   | 1599.88  | PASS          | AC=16;AF=0.229;AN=70;BaseQRankSum= |
| 51242 | chrY | 59002708 | . | A | G   | 203.74   | my_snp_filter | AC=5;AF=0.074;AN=68;BaseQ          |
| 51243 | chrY | 59002713 | . | C | G   | 5175.86  | PASS          | AC=12;AF=0.171;AN=70;BaseQRankSum= |
| 51244 | chrY | 59002718 | . | G | A   | 5191.58  | PASS          | AC=12;AF=0.171;AN=70;BaseQRankSum= |
| 51245 | chrY | 59002728 | . | G | A   | 11688.75 | PASS          | AC=21;AF=0.300;AN=70;Base          |
| 51246 | chrY | 59002730 | . | G | A   | 870.47   | my_snp_filter | AC=12;AF=0.171;AN=70;Base          |
| 51247 | chrY | 59002734 | . | A | C   | 24495.71 | PASS          | AC=30;AF=0.441;AN=68;Base          |
| 51248 | chrY | 59002761 | . | A | C   | 326.94   | PASS          | AC=4;AF=0.057;AN=70;BaseQRankSum=  |
| 51249 | chrY | 59002800 | . | A | G   | 8795.95  | PASS          | AC=15;AF=0.214;AN=70;BaseQRankSum= |
| 51250 | chrY | 59002815 | . | A | G   | 29781.12 | PASS          | AC=16;AF=0.308;AN=52;Base          |
| 51251 | chrY | 59002817 | . | G | T   | 29638.89 | PASS          | AC=16;AF=0.296;AN=54;Base          |
| 51252 | chrY | 59002822 | . | T | G   | 8025.41  | PASS          | AC=11;AF=0.162;AN=68;BaseQRankSum= |
| 51253 | chrY | 59002835 | . | G | A   | 7959.31  | PASS          | AC=12;AF=0.182;AN=66;BaseQRankSum= |
| 51254 | chrY | 59002850 | . | T | G   | 7865.28  | PASS          | AC=12;AF=0.182;AN=66;BaseQRankSum= |
| 51255 | chrY | 59002903 | . | A | G   | 7503.34  | PASS          | AC=31;AF=0.456;AN=68;BaseQRankSum= |
| 51256 | chrY | 59002917 | . | C | T   | 1923.34  | PASS          | AC=6;AF=0.088;AN=68;BaseQRankSum=  |
| 51257 | chrY | 59002930 | . | C | T,G | 3873.65  | PASS          | AC=12,5;AF=0.214,0.089;AN=56;Base  |
| 51258 | chrY | 59002935 | . | C | T   | 1397.78  | PASS          | AC=5;AF=0.089;AN=56;BaseQRankSum=  |
| 51259 | chrY | 59002945 | . | T | A   | 85.86    | PASS          | AC=1;AF=0.025;AN=40;BaseQRankSum=  |
| 51260 | chrY | 59002947 | . | G | T,* | 211.04   | PASS          | AC=1,1;AF=0.021,0.021;AN=48;BaseQ  |
| 51261 | chrY | 59002952 | . | T | C   | 977.66   | PASS          | AC=4;AF=0.071;AN=56;BaseQRankSum=  |
| 51262 | chrY | 59002954 | . | C | T   | 895.23   | PASS          | AC=3;AF=0.048;AN=62;BaseQRankSum=  |
| 51263 | chrY | 59002969 | . | C | T   | 1166.71  | my_snp_filter | AC=3;AF=0.047;AN=64;BaseQ          |
| 51264 | chrY | 59002975 | . | C | G   | 1342.94  | my_snp_filter | AC=3;AF=0.047;AN=64;BaseQ          |
| 51265 | chrY | 59002978 | . | G | A   | 1933.79  | my_snp_filter | AC=17;AF=0.274;AN=62;Base          |
| 51266 | chrY | 59002989 | . | A | T   | 1316.11  | my_snp_filter | AC=3;AF=0.045;AN=66;BaseQ          |
| 51267 | chrY | 59002995 | . | A | G   | 1334.16  | my_snp_filter | AC=3;AF=0.045;AN=66;BaseQ          |
| 51268 | chrY | 59003002 | . | A | G   | 1302.20  | my_snp_filter | AC=3;AF=0.044;AN=68;BaseQ          |
| 51269 | chrY | 59003006 | . | A | G   | 1609.51  | my_snp_filter | AC=5;AF=0.076;AN=66;BaseQ          |
| 51270 | chrY | 59003012 | . | A | G   | 1339.65  | my_snp_filter | AC=3;AF=0.044;AN=68;BaseQ          |
| 51271 | chrY | 59003020 | . | C | A   | 317.99   | PASS          | AC=2;AF=0.029;AN=68;BaseQRankSum=  |
| 51272 | chrY | 59003031 | . | C | T   | 1244.16  | my_snp_filter | AC=3;AF=0.044;AN=68;BaseQ          |
| 51273 | chrY | 59003032 | . | C | G   | 278.76   | my_snp_filter | AC=3;AF=0.044;AN=68;BaseQ          |
| 51274 | chrY | 59003033 | . | A | G   | 1270.19  | my_snp_filter | AC=3;AF=0.044;AN=68;BaseQ          |
| 51275 | chrY | 59003040 | . | A | G   | 1220.01  | my_snp_filter | AC=3;AF=0.044;AN=68;BaseQ          |
| 51276 | chrY | 59003048 | . | G | A   | 945.80   | my_snp_filter | AC=2;AF=0.029;AN=68;BaseQ          |
| 51277 | chrY | 59003056 | . | A | G   | 897.35   | my_snp_filter | AC=2;AF=0.029;AN=68;BaseQ          |
| 51278 | chrY | 59003059 | . | T | A   | 24944.69 | PASS          | AC=40;AF=0.588;AN=68;Base          |
| 51279 | chrY | 59003069 | . | G | C   | 933.54   | my_snp_filter | AC=2;AF=0.029;AN=68;BaseQ          |
| 51280 | chrY | 59003075 | . | A | C   | 1297.32  | PASS          | AC=3;AF=0.044;AN=68;BaseQRankSum=  |
| 51281 | chrY | 59003080 | . | C | T   | 805.58   | my_snp_filter | AC=2;AF=0.029;AN=68;BaseQ          |
| 51282 | chrY | 59003083 | . | C | G   | 808.60   | my_snp_filter | AC=2;AF=0.029;AN=68;BaseQ          |
| 51283 | chrY | 59003090 | . | G | A   | 490.84   | PASS          | AC=3;AF=0.045;AN=66;BaseQRankSum=  |
| 51284 | chrY | 59003094 | . | T | C   | 5824.64  | PASS          | AC=28;AF=0.424;AN=66;BaseQRankSum= |
| 51285 | chrY | 59003119 | . | C | A   | 31.35    | PASS          | AC=1;AF=0.015;AN=66;BaseQRankSum=  |
| 51286 | chrY | 59003133 | . | G | C   | 598.58   | PASS          | AC=2;AF=0.029;AN=68;BaseQRankSum=  |
| 51287 | chrY | 59003142 | . | G | A   | 569.65   | PASS          | AC=2;AF=0.029;AN=68;BaseQRankSum=  |
| 51288 | chrY | 59003159 | . | T | A   | 569.60   | PASS          | AC=2;AF=0.030;AN=66;BaseQRankSum=  |
| 51289 | chrY | 59003160 | . | A | G   | 623.47   | my_snp_filter | AC=7;AF=0.106;AN=66;BaseQ          |
| 51290 | chrY | 59003165 | . | G | T   | 500.80   | PASS          | AC=2;AF=0.031;AN=64;BaseQRankSum=  |
| 51291 | chrY | 59003189 | . | A | G   | 354.27   | PASS          | AC=2;AF=0.030;AN=66;BaseQRankSum=  |
| 51292 | chrY | 59003194 | . | T | A   | 295.76   | my_snp_filter | AC=2;AF=0.034;AN=58;BaseQ          |
| 51293 | chrY | 59003222 | . | A | G,* | 855.70   | PASS          | AC=1,2;AF=0.015,0.029;AN=68;BaseQ  |
| 51294 | chrY | 59003250 | . | G | T   | 268.83   | my_snp_filter | AC=2;AF=0.029;AN=70;BaseQ          |
| 51295 | chrY | 59003252 | . | G | A   | 430.20   | PASS          | AC=4;AF=0.057;AN=70;BaseQRankSum=  |
| 51296 | chrY | 59003270 | . | T | A   | 359.71   | my_snp_filter | AC=2;AF=0.029;AN=70;BaseQ          |
| 51297 | chrY | 59003276 | . | G | C   | 54150.95 | PASS          | AC=47;AF=0.671;AN=70;Base          |
| 51298 | chrY | 59003285 | . | A | G   | 287.30   | my_snp_filter | AC=2;AF=0.029;AN=70;BaseQ          |
| 51299 | chrY | 59003293 | . | G | A   | 17549.46 | PASS          | AC=30;AF=0.441;AN=68;Base          |
| 51300 | chrY | 59003305 | . | A | C   | 185.30   | my_snp_filter | AC=2;AF=0.029;AN=70;BaseQ          |

|       |      |          |   |   |     |           |               |                                     |
|-------|------|----------|---|---|-----|-----------|---------------|-------------------------------------|
| 51301 | chrY | 59003308 | . | A | C   | 55354.54  | PASS          | AC=43;AF=0.614;AN=70;BaseQ          |
| 51302 | chrY | 59003330 | . | C | G   | 367.91    | PASS          | AC=1;AF=0.014;AN=70;BaseQRankSum=   |
| 51303 | chrY | 59003346 | . | T | C   | 398.28    | PASS          | AC=1;AF=0.014;AN=70;BaseQRankSum=   |
| 51304 | chrY | 59003383 | . | T | C   | 23816.59  | PASS          | AC=33;AF=0.471;AN=70;BaseQ          |
| 51305 | chrY | 59003393 | . | T | A   | 115.42    | my_snp_filter | AC=3;AF=0.043;AN=70;BaseQ           |
| 51306 | chrY | 59003405 | . | T | C   | 25773.12  | PASS          | AC=33;AF=0.471;AN=70;BaseQ          |
| 51307 | chrY | 59003415 | . | G | C   | 99.80     | my_snp_filter | AC=3;AF=0.043;AN=70;BaseQ           |
| 51308 | chrY | 59003424 | . | C | A   | 1526.95   | PASS          | AC=7;AF=0.100;AN=70;BaseQRankSum=   |
| 51309 | chrY | 59003429 | . | T | C   | 62.11     | my_snp_filter | AC=2;AF=0.029;AN=70;BaseQ           |
| 51310 | chrY | 59003444 | . | T | C   | 332.19    | my_snp_filter | AC=2;AF=0.029;AN=70;BaseQ           |
| 51311 | chrY | 59003446 | . | T | C   | 1610.62   | PASS          | AC=6;AF=0.086;AN=70;BaseQRankSum=   |
| 51312 | chrY | 59003453 | . | T | G   | 1301.61   | PASS          | AC=6;AF=0.086;AN=70;BaseQRankSum=   |
| 51313 | chrY | 59003458 | . | A | C   | 215.69    | my_snp_filter | AC=2;AF=0.029;AN=70;BaseQ           |
| 51314 | chrY | 59003467 | . | T | C   | 68662     | PASS          | AC=54;AF=0.771;AN=70;BaseQRankSum=  |
| 51315 | chrY | 59003482 | . | G | T   | 403.51    | my_snp_filter | AC=3;AF=0.043;AN=70;BaseQ           |
| 51316 | chrY | 59003487 | . | T | A   | 545.23    | my_snp_filter | AC=4;AF=0.057;AN=70;BaseQ           |
| 51317 | chrY | 59003506 | . | A | G   | 797.87    | my_snp_filter | AC=5;AF=0.071;AN=70;BaseQ           |
| 51318 | chrY | 59003519 | . | T | C   | 412.51    | my_snp_filter | AC=3;AF=0.043;AN=70;BaseQ           |
| 51319 | chrY | 59003531 | . | C | A   | 420.44    | my_snp_filter | AC=2;AF=0.029;AN=70;BaseQ           |
| 51320 | chrY | 59003562 | . | C | T   | 575.05    | my_snp_filter | AC=9;AF=0.129;AN=70;BaseQ           |
| 51321 | chrY | 59003568 | . | G | T   | 17171.20  | PASS          | AC=33;AF=0.471;AN=70;BaseQ          |
| 51322 | chrY | 59003592 | . | A | G,T | 70945.22  | PASS          | AC=36,32;AF=0.514,0.457;AN=70;BaseQ |
| 51323 | chrY | 59003608 | . | G | T   | 686.77    | PASS          | AC=6;AF=0.086;AN=70;BaseQRankSum=   |
| 51324 | chrY | 59003613 | . | A | T   | 341.52    | my_snp_filter | AC=3;AF=0.043;AN=70;BaseQ           |
| 51325 | chrY | 59003647 | . | A | T   | 233.92    | my_snp_filter | AC=5;AF=0.071;AN=70;BaseQ           |
| 51326 | chrY | 59003695 | . | G | T   | 114625.48 | PASS          | AC=45;AF=0.643;AN=70;BaseQ          |
| 51327 | chrY | 59003696 | . | C | T   | 44.42     | my_snp_filter | AC=1;AF=0.014;AN=70;BaseQ           |
| 51328 | chrY | 59003711 | . | G | A   | 107276.55 | PASS          | AC=41;AF=0.586;AN=70;BaseQ          |
| 51329 | chrY | 59003782 | . | C | T   | 2099.50   | PASS          | AC=17;AF=0.243;AN=70;BaseQRankSum=  |
| 51330 | chrY | 59003815 | . | A | G   | 38.64     | PASS          | AC=1;AF=0.014;AN=70;BaseQRankSum=   |
| 51331 | chrY | 59003822 | . | G | T   | 5639.39   | PASS          | AC=24;AF=0.343;AN=70;BaseQRankSum=  |
| 51332 | chrY | 59003824 | . | A | T   | 12551.85  | PASS          | AC=19;AF=0.271;AN=70;BaseQ          |
| 51333 | chrY | 59003837 | . | C | T   | 14513.42  | PASS          | AC=21;AF=0.300;AN=70;BaseQ          |
| 51334 | chrY | 59003852 | . | A | G   | 1410.95   | PASS          | AC=10;AF=0.143;AN=70;BaseQRankSum=  |
| 51335 | chrY | 59003855 | . | G | A   | 16146.52  | PASS          | AC=20;AF=0.286;AN=70;BaseQ          |
| 51336 | chrY | 59003880 | . | C | T   | 1230.64   | my_snp_filter | AC=11;AF=0.157;AN=70;BaseQ          |
| 51337 | chrY | 59003917 | . | C | G   | 19295.97  | PASS          | AC=34;AF=0.486;AN=70;BaseQ          |
| 51338 | chrY | 59003980 | . | C | T   | 1271.21   | my_snp_filter | AC=7;AF=0.100;AN=70;BaseQ           |
| 51339 | chrY | 59003993 | . | A | C   | 876.28    | PASS          | AC=4;AF=0.057;AN=70;BaseQRankSum=   |
| 51340 | chrY | 59003997 | . | G | A   | 422.28    | my_snp_filter | AC=4;AF=0.057;AN=70;BaseQ           |
| 51341 | chrY | 59004037 | . | T | G   | 179527.30 | PASS          | AC=59;AF=0.843;AN=70;BaseQ          |
| 51342 | chrY | 59004088 | . | G | A   | 1268.82   | my_snp_filter | AC=5;AF=0.071;AN=70;BaseQ           |
| 51343 | chrY | 59004092 | . | A | G   | 32730.72  | PASS          | AC=35;AF=0.500;AN=70;BaseQ          |
| 51344 | chrY | 59004125 | . | G | C   | 200368.12 | PASS          | AC=52;AF=0.743;AN=70;BaseQ          |
| 51345 | chrY | 59004144 | . | C | A   | 682.82    | my_snp_filter | AC=5;AF=0.071;AN=70;BaseQ           |
| 51346 | chrY | 59004146 | . | G | C   | 171743.98 | PASS          | AC=52;AF=0.743;AN=70;BaseQ          |
| 51347 | chrY | 59004150 | . | T | G   | 312.77    | my_snp_filter | AC=3;AF=0.043;AN=70;BaseQ           |
| 51348 | chrY | 59004156 | . | A | G   | 24371.72  | PASS          | AC=35;AF=0.500;AN=70;BaseQ          |
| 51349 | chrY | 59004184 | . | C | A   | 17920.21  | PASS          | AC=33;AF=0.471;AN=70;BaseQ          |
| 51350 | chrY | 59004185 | . | G | A   | 53.06     | my_snp_filter | AC=2;AF=0.029;AN=70;BaseQ           |
| 51351 | chrY | 59004192 | . | G | T   | 27082.99  | PASS          | AC=31;AF=0.443;AN=70;BaseQ          |
| 51352 | chrY | 59004218 | . | T | C   | 18450.03  | PASS          | AC=32;AF=0.457;AN=70;BaseQ          |
| 51353 | chrY | 59004228 | . | C | T   | 33.47     | my_snp_filter | AC=1;AF=0.014;AN=70;BaseQ           |
| 51354 | chrY | 59004235 | . | G | A   | 1347.92   | my_snp_filter | AC=14;AF=0.200;AN=70;BaseQ          |
| 51355 | chrY | 59004244 | . | C | T   | 2679.85   | PASS          | AC=18;AF=0.257;AN=70;BaseQRankSum=  |
| 51356 | chrY | 59004271 | . | C | T   | 23555.91  | PASS          | AC=20;AF=0.303;AN=66;BaseQ          |
| 51357 | chrY | 59004273 | . | A | G   | 24476.61  | PASS          | AC=23;AF=0.348;AN=66;BaseQ          |
| 51358 | chrY | 59004283 | . | T | C   | 24053.06  | PASS          | AC=17;AF=0.258;AN=66;BaseQ          |
| 51359 | chrY | 59004294 | . | C | A   | 22047.12  | PASS          | AC=14;AF=0.241;AN=58;BaseQ          |
| 51360 | chrY | 59004331 | . | C | G   | 12330.38  | PASS          | AC=14;AF=0.292;AN=48;BaseQ          |
| 51361 | chrY | 59004407 | . | C | T   | 1785.03   | PASS          | AC=5;AF=0.083;AN=60;BaseQRankSum=   |
| 51362 | chrY | 59004451 | . | A | G   | 341.36    | PASS          | AC=4;AF=0.105;AN=38;BaseQRankSum=   |
| 51363 | chrY | 59004631 | . | A | G,* | 1116.83   | my_snp_filter | AC=1,4;AF=0.028,0.111;AN=38         |
| 51364 | chrY | 59004635 | . | A | G,* | 978.74    | my_snp_filter | AC=1,4;AF=0.022,0.087;AN=38         |
| 51365 | chrY | 59004695 | . | A | T,* | 19850.78  | PASS          | AC=2,9;AF=0.083,0.375;AN=38         |
| 51366 | chrY | 59004719 | . | C | A   | 5213.71   | PASS          | AC=15;AF=0.214;AN=70;BaseQRankSum=  |
| 51367 | chrY | 59004720 | . | C | A   | 246.42    | PASS          | AC=1;AF=0.014;AN=70;BaseQRankSum=   |
| 51368 | chrY | 59004743 | . | T | C   | 80.92     | my_snp_filter | AC=1;AF=0.014;AN=70;BaseQ           |
| 51369 | chrY | 59004794 | . | A | G   | 71607.72  | PASS          | AC=35;AF=0.500;AN=70;BaseQ          |
| 51370 | chrY | 59004833 | . | C | A   | 19975.20  | PASS          | AC=33;AF=0.471;AN=70;BaseQ          |
| 51371 | chrY | 59004836 | . | T | A   | 988.75    | my_snp_filter | AC=6;AF=0.086;AN=70;BaseQ           |
| 51372 | chrY | 59004862 | . | G | A   | 2827.64   | my_snp_filter | AC=18;AF=0.257;AN=70;BaseQ          |
| 51373 | chrY | 59004891 | . | T | C   | 41323.72  | PASS          | AC=35;AF=0.500;AN=70;BaseQ          |
| 51374 | chrY | 59004900 | . | C | T   | 328.95    | my_snp_filter | AC=5;AF=0.071;AN=70;BaseQ           |
| 51375 | chrY | 59004901 | . | G | A   | 159.34    | my_snp_filter | AC=2;AF=0.029;AN=70;BaseQ           |
| 51376 | chrY | 59004934 | . | G | A   | 53285.72  | PASS          | AC=35;AF=0.500;AN=70;BaseQ          |

|       |      |          |   |   |     |          |               |                                   |
|-------|------|----------|---|---|-----|----------|---------------|-----------------------------------|
| 51377 | chrY | 59004990 | . | G | C   | 5212.38  | PASS          | AC=24;AF=0.343;AN=70;BaseQRankSum |
| 51378 | chrY | 59005020 | . | T | C   | 32430    | PASS          | AC=34;AF=0.486;AN=70;BaseQRankSum |
| 51379 | chrY | 59005078 | . | G | A   | 104.78   | my_snp_filter | AC=5;AF=0.071;AN=70;BaseQ         |
| 51380 | chrY | 59005093 | . | C | T   | 2172.60  | my_snp_filter | AC=23;AF=0.329;AN=70;Base         |
| 51381 | chrY | 59005095 | . | G | A   | 4540.05  | PASS          | AC=26;AF=0.371;AN=70;BaseQRankSum |
| 51382 | chrY | 59005144 | . | G | A   | 21280.72 | PASS          | AC=35;AF=0.500;AN=70;Base         |
| 51383 | chrY | 59005150 | . | C | T   | 84.42    | my_snp_filter | AC=1;AF=0.014;AN=70;BaseQ         |
| 51384 | chrY | 59005153 | . | G | A   | 74694.72 | PASS          | AC=35;AF=0.500;AN=70;Base         |
| 51385 | chrY | 59005164 | . | C | A   | 30656.12 | PASS          | AC=35;AF=0.500;AN=70;Base         |
| 51386 | chrY | 59005179 | . | C | A,T | 7508.26  | PASS          | AC=19,1;AF=0.271,0.014;AN=70;Base |
| 51387 | chrY | 59005195 | . | C | A   | 44.15    | my_snp_filter | AC=2;AF=0.029;AN=70;BaseQ         |
| 51388 | chrY | 59005196 | . | A | G   | 44.15    | my_snp_filter | AC=2;AF=0.029;AN=70;BaseQ         |
| 51389 | chrY | 59005198 | . | G | A   | 30175.72 | PASS          | AC=35;AF=0.500;AN=70;Base         |
| 51390 | chrY | 59005320 | . | C | T   | 46.07    | my_snp_filter | AC=2;AF=0.029;AN=70;BaseQ         |
| 51391 | chrY | 59005321 | . | G | A   | 9237.90  | PASS          | AC=30;AF=0.429;AN=70;BaseQRankSum |
| 51392 | chrY | 59005350 | . | C | T   | 61244.76 | PASS          | AC=40;AF=0.571;AN=70;Base         |
| 51393 | chrY | 59005376 | . | C | T   | 7093.62  | PASS          | AC=27;AF=0.386;AN=70;BaseQRankSum |
| 51394 | chrY | 59005390 | . | T | G   | 54.42    | my_snp_filter | AC=2;AF=0.029;AN=70;BaseQ         |
| 51395 | chrY | 59005398 | . | G | A   | 24936.33 | PASS          | AC=31;AF=0.443;AN=70;Base         |
| 51396 | chrY | 59005424 | . | G | A   | 1217.39  | PASS          | AC=4;AF=0.057;AN=70;BaseQRankSum  |
| 51397 | chrY | 59005431 | . | G | A   | 146.87   | my_snp_filter | AC=4;AF=0.061;AN=66;BaseQ         |
| 51398 | chrY | 59005435 | . | T | C   | 21745.78 | PASS          | AC=18;AF=0.273;AN=66;Base         |
| 51399 | chrY | 59005482 | . | C | T   | 466.41   | PASS          | AC=1;AF=0.015;AN=68;BaseQRankSum  |
| 51400 | chrY | 59005498 | . | G | C   | 427.98   | PASS          | AC=1;AF=0.016;AN=64;BaseQRankSum  |
| 51401 | chrY | 59005514 | . | T | C   | 2043.26  | PASS          | AC=4;AF=0.061;AN=66;BaseQRankSum  |
| 51402 | chrY | 59005534 | . | G | A   | 2212.06  | PASS          | AC=4;AF=0.059;AN=68;BaseQRankSum  |
| 51403 | chrY | 59005579 | . | A | C   | 209.52   | my_snp_filter | AC=1;AF=0.014;AN=70;BaseQ         |
| 51404 | chrY | 59005581 | . | T | C   | 2007.58  | PASS          | AC=9;AF=0.129;AN=70;BaseQRankSum  |
| 51405 | chrY | 59005601 | . | A | T   | 484.13   | my_snp_filter | AC=7;AF=0.100;AN=70;BaseQ         |
| 51406 | chrY | 59005629 | . | C | G   | 27088.86 | PASS          | AC=33;AF=0.471;AN=70;Base         |
| 51407 | chrY | 59005642 | . | A | G   | 113.48   | PASS          | AC=2;AF=0.029;AN=70;BaseQRankSum  |
| 51408 | chrY | 59005646 | . | G | A   | 18921.15 | PASS          | AC=30;AF=0.429;AN=70;Base         |
| 51409 | chrY | 59005650 | . | C | T   | 18982.43 | PASS          | AC=30;AF=0.429;AN=70;Base         |
| 51410 | chrY | 59005687 | . | A | T   | 401.59   | my_snp_filter | AC=8;AF=0.114;AN=70;BaseQ         |
| 51411 | chrY | 59005698 | . | T | G   | 52374.72 | PASS          | AC=35;AF=0.500;AN=70;Base         |
| 51412 | chrY | 59005702 | . | A | G   | 52288.72 | PASS          | AC=35;AF=0.500;AN=70;Base         |
| 51413 | chrY | 59005706 | . | A | T   | 70304.07 | PASS          | AC=41;AF=0.586;AN=70;Base         |
| 51414 | chrY | 59005736 | . | T | C   | 62373.92 | PASS          | AC=45;AF=0.643;AN=70;Base         |
| 51415 | chrY | 59005746 | . | A | G   | 2611.87  | PASS          | AC=18;AF=0.257;AN=70;BaseQRankSum |
| 51416 | chrY | 59005752 | . | C | A   | 3090.10  | PASS          | AC=10;AF=0.143;AN=70;BaseQRankSum |
| 51417 | chrY | 59005777 | . | G | A   | 31.58    | my_snp_filter | AC=1;AF=0.014;AN=70;BaseQ         |
| 51418 | chrY | 59005783 | . | G | A   | 352.92   | my_snp_filter | AC=4;AF=0.057;AN=70;BaseQ         |
| 51419 | chrY | 59005842 | . | C | G   | 61411.54 | PASS          | AC=34;AF=0.486;AN=70;Base         |
| 51420 | chrY | 59005847 | . | A | G   | 61955.04 | PASS          | AC=34;AF=0.486;AN=70;Base         |
| 51421 | chrY | 59005861 | . | G | C   | 190.51   | my_snp_filter | AC=7;AF=0.100;AN=70;BaseQ         |
| 51422 | chrY | 59005870 | . | A | G   | 49165.79 | PASS          | AC=34;AF=0.486;AN=70;Base         |
| 51423 | chrY | 59005888 | . | G | A   | 879.89   | my_snp_filter | AC=5;AF=0.071;AN=70;BaseQ         |
| 51424 | chrY | 59005909 | . | C | A   | 47349.39 | PASS          | AC=44;AF=0.629;AN=70;Base         |
| 51425 | chrY | 59005928 | . | C | A   | 2098.01  | PASS          | AC=18;AF=0.257;AN=70;BaseQRankSum |
| 51426 | chrY | 59005929 | . | C | T   | 79.06    | my_snp_filter | AC=2;AF=0.029;AN=70;BaseQ         |
| 51427 | chrY | 59005962 | . | C | A   | 4564.71  | PASS          | AC=23;AF=0.329;AN=70;BaseQRankSum |
| 51428 | chrY | 59005980 | . | C | T   | 80.42    | my_snp_filter | AC=4;AF=0.057;AN=70;BaseQ         |
| 51429 | chrY | 59006009 | . | C | G   | 62.63    | my_snp_filter | AC=3;AF=0.043;AN=70;BaseQ         |
| 51430 | chrY | 59006120 | . | G | A   | 292.52   | my_snp_filter | AC=3;AF=0.043;AN=70;BaseQ         |
| 51431 | chrY | 59006131 | . | A | G   | 141.08   | my_snp_filter | AC=2;AF=0.029;AN=70;BaseQ         |
| 51432 | chrY | 59006135 | . | T | C   | 20788.73 | PASS          | AC=35;AF=0.500;AN=70;Base         |
| 51433 | chrY | 59006193 | . | G | A   | 187.32   | my_snp_filter | AC=6;AF=0.086;AN=70;BaseQ         |
| 51434 | chrY | 59006194 | . | C | A   | 1366.43  | my_snp_filter | AC=10;AF=0.143;AN=70;Base         |
| 51435 | chrY | 59006203 | . | A | G   | 18848.72 | PASS          | AC=35;AF=0.500;AN=70;Base         |
| 51436 | chrY | 59006211 | . | G | A   | 245.51   | my_snp_filter | AC=3;AF=0.043;AN=70;BaseQ         |
| 51437 | chrY | 59006232 | . | A | G   | 149.87   | my_snp_filter | AC=5;AF=0.071;AN=70;BaseQ         |
| 51438 | chrY | 59006260 | . | A | G   | 1060.79  | my_snp_filter | AC=13;AF=0.191;AN=68;Base         |
| 51439 | chrY | 59006268 | . | A | T   | 207.90   | PASS          | AC=3;AF=0.043;AN=70;BaseQRankSum  |
| 51440 | chrY | 59006272 | . | C | T   | 175.75   | PASS          | AC=3;AF=0.043;AN=70;BaseQRankSum  |
| 51441 | chrY | 59006299 | . | G | T   | 35.31    | my_snp_filter | AC=1;AF=0.014;AN=70;BaseQ         |
| 51442 | chrY | 59006308 | . | A | T   | 2259.51  | my_snp_filter | AC=18;AF=0.257;AN=70;Base         |
| 51443 | chrY | 59006310 | . | C | T   | 1058.25  | my_snp_filter | AC=11;AF=0.157;AN=70;Base         |
| 51444 | chrY | 59006394 | . | C | T   | 42260.72 | PASS          | AC=35;AF=0.500;AN=70;Base         |
| 51445 | chrY | 59006428 | . | C | T   | 1134.17  | PASS          | AC=7;AF=0.100;AN=70;BaseQRankSum  |
| 51446 | chrY | 59006432 | . | G | A   | 1265.20  | PASS          | AC=7;AF=0.100;AN=70;BaseQRankSum  |
| 51447 | chrY | 59006438 | . | C | T   | 1257.15  | PASS          | AC=7;AF=0.100;AN=70;BaseQRankSum  |
| 51448 | chrY | 59006440 | . | A | G   | 74387.77 | PASS          | AC=53;AF=0.757;AN=70;Base         |
| 51449 | chrY | 59006448 | . | T | C   | 1241.78  | PASS          | AC=7;AF=0.100;AN=70;BaseQRankSum  |
| 51450 | chrY | 59006552 | . | T | C   | 66007.40 | PASS          | AC=51;AF=0.729;AN=70;Base         |
| 51451 | chrY | 59006555 | . | A | G   | 24072.46 | PASS          | AC=30;AF=0.429;AN=70;Base         |
| 51452 | chrY | 59006561 | . | C | T   | 3028.75  | PASS          | AC=18;AF=0.257;AN=70;BaseQRankSum |

|       |      |          |   |   |     |          |               |                                   |
|-------|------|----------|---|---|-----|----------|---------------|-----------------------------------|
| 51453 | chrY | 59006570 | . | C | T   | 4658.95  | PASS          | AC=22;AF=0.314;AN=70;BaseQRankSum |
| 51454 | chrY | 59006573 | . | G | T   | 25443.43 | PASS          | AC=28;AF=0.400;AN=70;BaseQ        |
| 51455 | chrY | 59006579 | . | C | A   | 2411.84  | my_snp_filter | AC=16;AF=0.229;AN=70;BaseQ        |
| 51456 | chrY | 59006617 | . | G | A   | 57.23    | my_snp_filter | AC=2;AF=0.029;AN=70;BaseQ         |
| 51457 | chrY | 59006618 | . | A | G   | 142.41   | PASS          | AC=3;AF=0.043;AN=70;BaseQRankSum= |
| 51458 | chrY | 59006625 | . | G | A   | 30882.88 | PASS          | AC=35;AF=0.500;AN=70;BaseQ        |
| 51459 | chrY | 59006710 | . | C | G   | 2185.06  | PASS          | AC=15;AF=0.221;AN=68;BaseQRankSum |
| 51460 | chrY | 59006761 | . | A | G   | 18658.30 | PASS          | AC=26;AF=0.448;AN=58;BaseQ        |
| 51461 | chrY | 59006771 | . | T | A   | 7208.56  | PASS          | AC=9;AF=0.141;AN=64;BaseQRankSum= |
| 51462 | chrY | 59006776 | . | C | T   | 9222.06  | PASS          | AC=10;AF=0.156;AN=64;BaseQRankSum |
| 51463 | chrY | 59006804 | . | T | G   | 10581.82 | PASS          | AC=12;AF=0.200;AN=60;BaseQ        |
| 51464 | chrY | 59006825 | . | A | C   | 7915.97  | PASS          | AC=9;AF=0.150;AN=60;BaseQRankSum= |
| 51465 | chrY | 59006835 | . | C | T,* | 1785.79  | PASS          | AC=3,2;AF=0.047,0.031;AN=64;BaseQ |
| 51466 | chrY | 59006873 | . | T | C   | 25684.92 | PASS          | AC=14;AF=0.206;AN=68;BaseQ        |
| 51467 | chrY | 59006887 | . | C | T   | 26527.07 | PASS          | AC=12;AF=0.182;AN=66;BaseQ        |
| 51468 | chrY | 59006974 | . | G | A   | 14507.34 | PASS          | AC=13;AF=0.191;AN=68;BaseQ        |
| 51469 | chrY | 59007112 | . | G | A   | 603.54   | my_snp_filter | AC=5;AF=0.071;AN=70;BaseQ         |
| 51470 | chrY | 59007141 | . | G | A   | 680.18   | my_snp_filter | AC=5;AF=0.071;AN=70;BaseQ         |
| 51471 | chrY | 59007143 | . | C | A   | 14482.87 | PASS          | AC=33;AF=0.471;AN=70;BaseQ        |
| 51472 | chrY | 59007145 | . | A | C   | 17097.29 | PASS          | AC=33;AF=0.471;AN=70;BaseQ        |
| 51473 | chrY | 59007174 | . | A | G   | 15193.24 | PASS          | AC=34;AF=0.486;AN=70;BaseQ        |
| 51474 | chrY | 59007229 | . | T | C   | 5477.55  | PASS          | AC=27;AF=0.386;AN=70;BaseQRankSum |
| 51475 | chrY | 59007236 | . | G | A   | 2812.49  | PASS          | AC=14;AF=0.200;AN=70;BaseQRankSum |
| 51476 | chrY | 59007350 | . | A | C   | 13396.43 | PASS          | AC=33;AF=0.471;AN=70;BaseQ        |
| 51477 | chrY | 59007383 | . | T | A   | 38535.53 | PASS          | AC=37;AF=0.529;AN=70;BaseQ        |
| 51478 | chrY | 59007407 | . | C | A   | 6951.39  | PASS          | AC=25;AF=0.357;AN=70;BaseQRankSum |
| 51479 | chrY | 59007412 | . | C | T   | 824      | PASS          | AC=10;AF=0.143;AN=70;BaseQRankSum |
| 51480 | chrY | 59007436 | . | T | A   | 397.66   | PASS          | AC=6;AF=0.097;AN=62;BaseQRankSum= |
| 51481 | chrY | 59007442 | . | T | A   | 38.97    | PASS          | AC=1;AF=0.015;AN=66;BaseQRankSum= |
| 51482 | chrY | 59007460 | . | T | C   | 44.18    | PASS          | AC=1;AF=0.015;AN=66;BaseQRankSum= |
| 51483 | chrY | 59007477 | . | G | A   | 629.34   | PASS          | AC=8;AF=0.138;AN=58;BaseQRankSum= |
| 51484 | chrY | 59007481 | . | A | G   | 21108.66 | PASS          | AC=46;AF=0.767;AN=60;BaseQ        |
| 51485 | chrY | 59007543 | . | A | T   | 12628    | PASS          | AC=25;AF=0.368;AN=68;BaseQRankSum |
| 51486 | chrY | 59007555 | . | T | C   | 34290.39 | PASS          | AC=35;AF=0.515;AN=68;BaseQ        |
| 51487 | chrY | 59007560 | . | A | T   | 207.24   | PASS          | AC=2;AF=0.029;AN=70;BaseQRankSum= |
| 51488 | chrY | 59007574 | . | G | T   | 483.48   | my_snp_filter | AC=7;AF=0.100;AN=70;BaseQ         |
| 51489 | chrY | 59007587 | . | C | T   | 2073.69  | PASS          | AC=20;AF=0.286;AN=70;BaseQRankSum |
| 51490 | chrY | 59007588 | . | A | G   | 8981.36  | PASS          | AC=26;AF=0.371;AN=70;BaseQRankSum |
| 51491 | chrY | 59007598 | . | T | A   | 5015.86  | PASS          | AC=22;AF=0.314;AN=70;BaseQRankSum |
| 51492 | chrY | 59007611 | . | T | A   | 644.84   | PASS          | AC=5;AF=0.071;AN=70;BaseQRankSum= |
| 51493 | chrY | 59007631 | . | C | T   | 8133.47  | PASS          | AC=25;AF=0.357;AN=70;BaseQRankSum |
| 51494 | chrY | 59007642 | . | G | A   | 25447.81 | PASS          | AC=33;AF=0.471;AN=70;BaseQ        |
| 51495 | chrY | 59007644 | . | C | A   | 12660.78 | PASS          | AC=24;AF=0.343;AN=70;BaseQ        |
| 51496 | chrY | 59007683 | . | G | T   | 83.42    | my_snp_filter | AC=1;AF=0.014;AN=70;BaseQ         |
| 51497 | chrY | 59007692 | . | G | A   | 70823.88 | PASS          | AC=40;AF=0.571;AN=70;BaseQ        |
| 51498 | chrY | 59007709 | . | C | T   | 109.42   | my_snp_filter | AC=1;AF=0.014;AN=70;BaseQ         |
| 51499 | chrY | 59007710 | . | G | A   | 11791.86 | PASS          | AC=31;AF=0.443;AN=70;BaseQ        |
| 51500 | chrY | 59007713 | . | C | T   | 8441.66  | PASS          | AC=11;AF=0.157;AN=70;BaseQRankSum |
| 51501 | chrY | 59007725 | . | A | C   | 15920.74 | PASS          | AC=29;AF=0.414;AN=70;BaseQ        |
| 51502 | chrY | 59007728 | . | A | C   | 7788.44  | PASS          | AC=9;AF=0.129;AN=70;BaseQRankSum= |
| 51503 | chrY | 59007754 | . | G | A   | 3647.45  | PASS          | AC=8;AF=0.114;AN=70;BaseQRankSum= |
| 51504 | chrY | 59007779 | . | T | A   | 38894.10 | PASS          | AC=43;AF=0.614;AN=70;BaseQ        |
| 51505 | chrY | 59007816 | . | T | A   | 937.18   | PASS          | AC=5;AF=0.076;AN=66;BaseQRankSum= |
| 51506 | chrY | 59007854 | . | C | T   | 55.08    | my_snp_filter | AC=2;AF=0.033;AN=60;BaseQ         |
| 51507 | chrY | 59007855 | . | A | G   | 18761.17 | PASS          | AC=25;AF=0.521;AN=48;BaseQ        |
| 51508 | chrY | 59007879 | . | G | T   | 4534     | PASS          | AC=16;AF=0.333;AN=48;BaseQRankSum |
| 51509 | chrY | 59007887 | . | G | T   | 12112.72 | PASS          | AC=19;AF=0.380;AN=50;BaseQ        |
| 51510 | chrY | 59007951 | . | C | T   | 14272.05 | PASS          | AC=10;AF=0.250;AN=40;BaseQ        |
| 51511 | chrY | 59007973 | . | A | C   | 9974.23  | PASS          | AC=9;AF=0.188;AN=48;BaseQRankSum= |
| 51512 | chrY | 59007976 | . | A | G   | 171.34   | PASS          | AC=1;AF=0.024;AN=42;BaseQRankSum= |
| 51513 | chrY | 59007977 | . | A | C   | 4579.02  | PASS          | AC=9;AF=0.188;AN=48;BaseQRankSum= |
| 51514 | chrY | 59007989 | . | G | A   | 20994.18 | PASS          | AC=14;AF=0.389;AN=36;BaseQ        |
| 51515 | chrY | 59008002 | . | C | T   | 23139.98 | PASS          | AC=17;AF=0.607;AN=28;BaseQ        |
| 51516 | chrY | 59008112 | . | G | T   | 12119.83 | PASS          | AC=9;AF=0.129;AN=70;BaseQ         |
| 51517 | chrY | 59008115 | . | C | T   | 13523.49 | PASS          | AC=9;AF=0.129;AN=70;BaseQ         |
| 51518 | chrY | 59008148 | . | C | T   | 14895.44 | PASS          | AC=12;AF=0.171;AN=70;BaseQ        |
| 51519 | chrY | 59008154 | . | C | T   | 49370.72 | PASS          | AC=35;AF=0.500;AN=70;BaseQ        |
| 51520 | chrY | 59008161 | . | G | T   | 49213.72 | PASS          | AC=35;AF=0.500;AN=70;BaseQ        |
| 51521 | chrY | 59008170 | . | T | C   | 66948.72 | PASS          | AC=35;AF=0.500;AN=70;BaseQ        |
| 51522 | chrY | 59008212 | . | A | G   | 954.33   | PASS          | AC=5;AF=0.071;AN=70;BaseQRankSum= |
| 51523 | chrY | 59008226 | . | T | G   | 6538.62  | PASS          | AC=21;AF=0.300;AN=70;BaseQRankSum |
| 51524 | chrY | 59008264 | . | T | A   | 1504.70  | PASS          | AC=7;AF=0.100;AN=70;BaseQRankSum= |
| 51525 | chrY | 59008269 | . | T | A   | 793.90   | my_snp_filter | AC=4;AF=0.057;AN=70;BaseQ         |
| 51526 | chrY | 59008282 | . | T | C   | 9750.73  | PASS          | AC=29;AF=0.414;AN=70;BaseQRankSum |
| 51527 | chrY | 59008339 | . | G | A   | 457.39   | my_snp_filter | AC=4;AF=0.057;AN=70;BaseQ         |
| 51528 | chrY | 59008348 | . | C | A   | 43559.58 | PASS          | AC=35;AF=0.500;AN=70;BaseQ        |

|       |      |          |   |   |      |          |               |                                    |
|-------|------|----------|---|---|------|----------|---------------|------------------------------------|
| 51529 | chrY | 59008385 | . | A | T    | 21541.84 | PASS          | AC=34;AF=0.486;AN=70;BaseQRankSum= |
| 51530 | chrY | 59008408 | . | C | T    | 3672.60  | my_snp_filter | AC=19;AF=0.271;AN=70;BaseQRankSum= |
| 51531 | chrY | 59008426 | . | T | A    | 55.09    | my_snp_filter | AC=2;AF=0.029;AN=70;BaseQRankSum=  |
| 51532 | chrY | 59008434 | . | A | T    | 3720.46  | my_snp_filter | AC=26;AF=0.371;AN=70;BaseQRankSum= |
| 51533 | chrY | 59008522 | . | C | T    | 2783.07  | PASS          | AC=16;AF=0.235;AN=68;BaseQRankSum= |
| 51534 | chrY | 59008525 | . | G | A    | 248.96   | my_snp_filter | AC=2;AF=0.029;AN=68;BaseQRankSum=  |
| 51535 | chrY | 59008560 | . | G | T    | 8767.17  | PASS          | AC=12;AF=0.194;AN=62;BaseQRankSum= |
| 51536 | chrY | 59008567 | . | G | A    | 8014.28  | PASS          | AC=12;AF=0.188;AN=64;BaseQRankSum= |
| 51537 | chrY | 59008601 | . | A | C    | 12195.98 | PASS          | AC=37;AF=0.617;AN=60;BaseQRankSum= |
| 51538 | chrY | 59008638 | . | C | G    | 32931.30 | PASS          | AC=35;AF=0.565;AN=62;BaseQRankSum= |
| 51539 | chrY | 59008647 | . | T | G    | 15880.20 | PASS          | AC=19;AF=0.317;AN=60;BaseQRankSum= |
| 51540 | chrY | 59008652 | . | A | C    | 34271.21 | PASS          | AC=35;AF=0.583;AN=60;BaseQRankSum= |
| 51541 | chrY | 59008673 | . | G | A    | 260      | PASS          | AC=4;AF=0.059;AN=68;BaseQRankSum=  |
| 51542 | chrY | 59008693 | . | C | T    | 1126.48  | PASS          | AC=8;AF=0.114;AN=70;BaseQRankSum=  |
| 51543 | chrY | 59008741 | . | A | G    | 11333.28 | PASS          | AC=30;AF=0.429;AN=70;BaseQRankSum= |
| 51544 | chrY | 59008760 | . | T | C    | 35.44    | my_snp_filter | AC=1;AF=0.014;AN=70;BaseQRankSum=  |
| 51545 | chrY | 59008766 | . | A | C    | 1232.48  | PASS          | AC=13;AF=0.186;AN=70;BaseQRankSum= |
| 51546 | chrY | 59008767 | . | T | C    | 75.73    | PASS          | AC=1;AF=0.014;AN=70;BaseQRankSum=  |
| 51547 | chrY | 59008782 | . | T | G    | 12137.89 | PASS          | AC=32;AF=0.457;AN=70;BaseQRankSum= |
| 51548 | chrY | 59008823 | . | G | A    | 5111.83  | PASS          | AC=21;AF=0.309;AN=68;BaseQRankSum= |
| 51549 | chrY | 59008848 | . | C | T    | 9108.07  | PASS          | AC=32;AF=0.471;AN=68;BaseQRankSum= |
| 51550 | chrY | 59008913 | . | G | A, T | 19961.03 | PASS          | AC=39, 9;AF=0.750, 0.173;AN=70     |
| 51551 | chrY | 59008918 | . | C | T    | 3490.79  | PASS          | AC=16;AF=0.286;AN=56;BaseQRankSum= |
| 51552 | chrY | 59008974 | . | G | A    | 6123.74  | PASS          | AC=8;AF=0.121;AN=66;BaseQRankSum=  |
| 51553 | chrY | 59008979 | . | G | C    | 2551.36  | PASS          | AC=6;AF=0.088;AN=68;BaseQRankSum=  |
| 51554 | chrY | 59008980 | . | T | C    | 78.61    | PASS          | AC=2;AF=0.029;AN=68;BaseQRankSum=  |
| 51555 | chrY | 59009026 | . | A | T    | 2843.60  | PASS          | AC=17;AF=0.258;AN=66;BaseQRankSum= |
| 51556 | chrY | 59009057 | . | C | T    | 878.70   | PASS          | AC=2;AF=0.029;AN=68;BaseQRankSum=  |
| 51557 | chrY | 59009065 | . | G | C    | 654.11   | my_snp_filter | AC=4;AF=0.059;AN=68;BaseQRankSum=  |
| 51558 | chrY | 59009102 | . | C | A    | 20855.34 | PASS          | AC=39;AF=0.591;AN=66;BaseQRankSum= |
| 51559 | chrY | 59009108 | . | T | C    | 649.90   | PASS          | AC=8;AF=0.121;AN=66;BaseQRankSum=  |
| 51560 | chrY | 59009148 | . | C | A    | 12784.97 | PASS          | AC=14;AF=0.233;AN=60;BaseQRankSum= |
| 51561 | chrY | 59009156 | . | T | A    | 13171.60 | PASS          | AC=14;AF=0.241;AN=58;BaseQRankSum= |
| 51562 | chrY | 59009175 | . | G | C    | 8180.59  | PASS          | AC=10;AF=0.167;AN=60;BaseQRankSum= |
| 51563 | chrY | 59009176 | . | T | C    | 8180.50  | PASS          | AC=10;AF=0.167;AN=60;BaseQRankSum= |
| 51564 | chrY | 59009230 | . | C | T    | 191.75   | my_snp_filter | AC=4;AF=0.057;AN=70;BaseQRankSum=  |
| 51565 | chrY | 59009237 | . | A | C, * | 435.12   | my_snp_filter | AC=3, 4;AF=0.043, 0.057;AN=70      |
| 51566 | chrY | 59009238 | . | C | T    | 193.95   | my_snp_filter | AC=3;AF=0.043;AN=70;BaseQRankSum=  |
| 51567 | chrY | 59009279 | . | C | A    | 6296.60  | PASS          | AC=22;AF=0.314;AN=70;BaseQRankSum= |
| 51568 | chrY | 59009290 | . | C | T    | 7210.73  | PASS          | AC=21;AF=0.300;AN=70;BaseQRankSum= |
| 51569 | chrY | 59009310 | . | G | T    | 10719.37 | PASS          | AC=33;AF=0.471;AN=70;BaseQRankSum= |
| 51570 | chrY | 59009355 | . | G | T    | 15802.31 | PASS          | AC=17;AF=0.243;AN=70;BaseQRankSum= |
| 51571 | chrY | 59009372 | . | G | A    | 66612.62 | PASS          | AC=47;AF=0.671;AN=70;BaseQRankSum= |
| 51572 | chrY | 59009375 | . | G | A    | 16372.67 | PASS          | AC=17;AF=0.243;AN=70;BaseQRankSum= |
| 51573 | chrY | 59009392 | . | G | A    | 22101.16 | PASS          | AC=22;AF=0.314;AN=70;BaseQRankSum= |
| 51574 | chrY | 59009432 | . | G | T    | 14301.45 | PASS          | AC=20;AF=0.286;AN=70;BaseQRankSum= |
| 51575 | chrY | 59009465 | . | G | A    | 218.92   | PASS          | AC=6;AF=0.088;AN=68;BaseQRankSum=  |
| 51576 | chrY | 59009531 | . | C | A    | 14219.86 | PASS          | AC=15;AF=0.268;AN=56;BaseQRankSum= |
| 51577 | chrY | 59009594 | . | G | A    | 18659.62 | PASS          | AC=26;AF=0.382;AN=68;BaseQRankSum= |
| 51578 | chrY | 59009672 | . | G | A    | 32556.37 | PASS          | AC=34;AF=0.486;AN=70;BaseQRankSum= |
| 51579 | chrY | 59009693 | . | C | T    | 35443.87 | PASS          | AC=34;AF=0.486;AN=70;BaseQRankSum= |
| 51580 | chrY | 59009727 | . | C | T    | 320.08   | my_snp_filter | AC=2;AF=0.029;AN=70;BaseQRankSum=  |
| 51581 | chrY | 59009731 | . | C | T    | 2332.13  | my_snp_filter | AC=14;AF=0.200;AN=70;BaseQRankSum= |
| 51582 | chrY | 59009735 | . | G | A    | 9202.59  | PASS          | AC=23;AF=0.329;AN=70;BaseQRankSum= |
| 51583 | chrY | 59009743 | . | C | T    | 11890.31 | PASS          | AC=29;AF=0.414;AN=70;BaseQRankSum= |
| 51584 | chrY | 59009765 | . | T | C    | 33096.72 | PASS          | AC=35;AF=0.500;AN=70;BaseQRankSum= |
| 51585 | chrY | 59009769 | . | C | A    | 83.57    | my_snp_filter | AC=3;AF=0.043;AN=70;BaseQRankSum=  |
| 51586 | chrY | 59009771 | . | G | A    | 256.80   | my_snp_filter | AC=6;AF=0.086;AN=70;BaseQRankSum=  |
| 51587 | chrY | 59009819 | . | C | T    | 11649.64 | PASS          | AC=31;AF=0.443;AN=70;BaseQRankSum= |
| 51588 | chrY | 59009823 | . | G | C    | 97.42    | my_snp_filter | AC=1;AF=0.014;AN=70;BaseQRankSum=  |
| 51589 | chrY | 59009827 | . | T | C    | 2956.82  | my_snp_filter | AC=9;AF=0.129;AN=70;BaseQRankSum=  |
| 51590 | chrY | 59009831 | . | A | T    | 52625.84 | PASS          | AC=36;AF=0.514;AN=70;BaseQRankSum= |
| 51591 | chrY | 59009892 | . | T | G    | 66.72    | my_snp_filter | AC=3;AF=0.043;AN=70;BaseQRankSum=  |
| 51592 | chrY | 59009896 | . | G | A    | 184.03   | PASS          | AC=3;AF=0.043;AN=70;BaseQRankSum=  |
| 51593 | chrY | 59009936 | . | G | A    | 35815.94 | PASS          | AC=29;AF=0.414;AN=70;BaseQRankSum= |
| 51594 | chrY | 59009998 | . | T | C    | 404.32   | my_snp_filter | AC=3;AF=0.056;AN=54;BaseQRankSum=  |
| 51595 | chrY | 59010007 | . | T | C    | 9733.83  | PASS          | AC=12;AF=0.240;AN=50;BaseQRankSum= |
| 51596 | chrY | 59010023 | . | A | C    | 1802.14  | my_snp_filter | AC=10;AF=0.200;AN=50;BaseQRankSum= |
| 51597 | chrY | 59010041 | . | T | C    | 4229.16  | PASS          | AC=7;AF=0.159;AN=44;BaseQRankSum=  |
| 51598 | chrY | 59010083 | . | A | G    | 10188.52 | PASS          | AC=9;AF=0.450;AN=20;BaseQRankSum=  |
| 51599 | chrY | 59010096 | . | C | G    | 191.49   | my_snp_filter | AC=2;AF=0.091;AN=22;BaseQRankSum=  |
| 51600 | chrY | 59010149 | . | G | T    | 2779.49  | my_snp_filter | AC=8;AF=0.364;AN=22;BaseQRankSum=  |
| 51601 | chrY | 59010161 | . | A | T    | 17851.85 | PASS          | AC=9;AF=0.375;AN=24;BaseQRankSum=  |
| 51602 | chrY | 59010184 | . | T | C    | 6491.84  | PASS          | AC=9;AF=0.375;AN=24;BaseQRankSum=  |
| 51603 | chrY | 59010238 | . | A | T    | 68.26    | my_snp_filter | AC=1;AF=0.045;AN=22;BaseQRankSum=  |
| 51604 | chrY | 59010280 | . | A | G    | 595.82   | my_snp_filter | AC=3;AF=0.125;AN=24;BaseQRankSum=  |

|       |      |          |   |   |     |           |               |                                     |
|-------|------|----------|---|---|-----|-----------|---------------|-------------------------------------|
| 51605 | chrY | 59010319 | . | G | T   | 12034.78  | PASS          | AC=9;AF=0.375;AN=24;BaseQ           |
| 51606 | chrY | 59010417 | . | A | G   | 1013.85   | my_snp_filter | AC=3;AF=0.136;AN=22;BaseQ           |
| 51607 | chrY | 59010486 | . | C | G   | 969.66    | my_snp_filter | AC=3;AF=0.150;AN=20;BaseQ           |
| 51608 | chrY | 59010535 | . | A | G   | 11002.20  | PASS          | AC=11;AF=0.423;AN=26;BaseQ          |
| 51609 | chrY | 59010599 | . | A | G   | 22967.75  | PASS          | AC=12;AF=0.400;AN=30;BaseQ          |
| 51610 | chrY | 59010654 | . | T | A   | 58.58     | my_snp_filter | AC=2;AF=0.031;AN=64;BaseQ           |
| 51611 | chrY | 59010655 | . | G | C   | 19883.06  | PASS          | AC=19;AF=0.306;AN=62;BaseQ          |
| 51612 | chrY | 59010749 | . | A | C   | 1852.82   | PASS          | AC=11;AF=0.157;AN=70;BaseQRankSum   |
| 51613 | chrY | 59010751 | . | T | C   | 2468.95   | my_snp_filter | AC=15;AF=0.214;AN=70;BaseQ          |
| 51614 | chrY | 59010794 | . | T | C   | 9047.26   | PASS          | AC=30;AF=0.429;AN=70;BaseQRankSum   |
| 51615 | chrY | 59010820 | . | C | A   | 29192.72  | PASS          | AC=35;AF=0.500;AN=70;BaseQ          |
| 51616 | chrY | 59011009 | . | T | C   | 703.21    | my_snp_filter | AC=12;AF=0.171;AN=70;BaseQ          |
| 51617 | chrY | 59011022 | . | T | A   | 25456.53  | PASS          | AC=34;AF=0.486;AN=70;BaseQ          |
| 51618 | chrY | 59011061 | . | T | A   | 13008.68  | PASS          | AC=28;AF=0.412;AN=68;BaseQ          |
| 51619 | chrY | 59011099 | . | T | C   | 1041.02   | my_snp_filter | AC=6;AF=0.103;AN=58;BaseQ           |
| 51620 | chrY | 59011244 | . | G | A   | 14647     | PASS          | AC=9;AF=0.173;AN=52;BaseQRankSum    |
| 51621 | chrY | 59011253 | . | A | G   | 39714.05  | PASS          | AC=17;AF=0.293;AN=58;BaseQ          |
| 51622 | chrY | 59011281 | . | A | T   | 2501.91   | PASS          | AC=5;AF=0.074;AN=68;BaseQRankSum    |
| 51623 | chrY | 59011347 | . | A | C   | 2542.35   | PASS          | AC=7;AF=0.100;AN=70;BaseQRankSum    |
| 51624 | chrY | 59011358 | . | A | G   | 826.15    | my_snp_filter | AC=5;AF=0.071;AN=70;BaseQ           |
| 51625 | chrY | 59011367 | . | T | A   | 8636.93   | PASS          | AC=13;AF=0.186;AN=70;BaseQRankSum   |
| 51626 | chrY | 59011368 | . | G | A   | 2045.42   | PASS          | AC=5;AF=0.071;AN=70;BaseQRankSum    |
| 51627 | chrY | 59011372 | . | C | A   | 41783.38  | PASS          | AC=29;AF=0.414;AN=70;BaseQ          |
| 51628 | chrY | 59011383 | . | T | C   | 39372.19  | PASS          | AC=31;AF=0.443;AN=70;BaseQ          |
| 51629 | chrY | 59011417 | . | C | T   | 30888.75  | PASS          | AC=39;AF=0.557;AN=70;BaseQ          |
| 51630 | chrY | 59011484 | . | C | T   | 696.41    | my_snp_filter | AC=5;AF=0.071;AN=70;BaseQ           |
| 51631 | chrY | 59011488 | . | C | A   | 991.50    | my_snp_filter | AC=8;AF=0.114;AN=70;BaseQ           |
| 51632 | chrY | 59011499 | . | A | T   | 711.12    | my_snp_filter | AC=3;AF=0.043;AN=70;BaseQ           |
| 51633 | chrY | 59011508 | . | C | A   | 5823.07   | PASS          | AC=19;AF=0.271;AN=70;BaseQRankSum   |
| 51634 | chrY | 59011509 | . | A | G   | 1694.19   | my_snp_filter | AC=12;AF=0.171;AN=70;BaseQ          |
| 51635 | chrY | 59011532 | . | C | T   | 271.42    | my_snp_filter | AC=1;AF=0.014;AN=70;BaseQ           |
| 51636 | chrY | 59011580 | . | A | G   | 51.46     | my_snp_filter | AC=2;AF=0.029;AN=70;BaseQ           |
| 51637 | chrY | 59011593 | . | C | T   | 11161.46  | PASS          | AC=31;AF=0.443;AN=70;BaseQ          |
| 51638 | chrY | 59011613 | . | C | A,T | 59284.02  | PASS          | AC=27,25;AF=0.386,0.357;AN=70;BaseQ |
| 51639 | chrY | 59011615 | . | C | T   | 502.12    | my_snp_filter | AC=7;AF=0.100;AN=70;BaseQ           |
| 51640 | chrY | 59011627 | . | A | G   | 283.05    | PASS          | AC=3;AF=0.043;AN=70;BaseQRankSum    |
| 51641 | chrY | 59011650 | . | A | G   | 1301.32   | PASS          | AC=8;AF=0.114;AN=70;BaseQRankSum    |
| 51642 | chrY | 59011654 | . | C | G   | 28756.72  | PASS          | AC=35;AF=0.500;AN=70;BaseQ          |
| 51643 | chrY | 59011687 | . | T | A   | 176.06    | my_snp_filter | AC=2;AF=0.029;AN=70;BaseQ           |
| 51644 | chrY | 59011731 | . | C | A   | 21915.72  | PASS          | AC=35;AF=0.500;AN=70;BaseQ          |
| 51645 | chrY | 59011736 | . | A | T   | 84.42     | my_snp_filter | AC=1;AF=0.014;AN=70;BaseQ           |
| 51646 | chrY | 59011768 | . | A | T   | 2274.33   | my_snp_filter | AC=12;AF=0.171;AN=70;BaseQ          |
| 51647 | chrY | 59011821 | . | A | T   | 44637.72  | PASS          | AC=35;AF=0.500;AN=70;BaseQ          |
| 51648 | chrY | 59011890 | . | G | T   | 391.09    | my_snp_filter | AC=3;AF=0.043;AN=70;BaseQ           |
| 51649 | chrY | 59011897 | . | C | A   | 270.36    | my_snp_filter | AC=3;AF=0.043;AN=70;BaseQ           |
| 51650 | chrY | 59011914 | . | T | G   | 736.28    | PASS          | AC=4;AF=0.057;AN=70;BaseQRankSum    |
| 51651 | chrY | 59011960 | . | T | C   | 51975.72  | PASS          | AC=35;AF=0.500;AN=70;BaseQ          |
| 51652 | chrY | 59011965 | . | G | A   | 51355.72  | PASS          | AC=35;AF=0.500;AN=70;BaseQ          |
| 51653 | chrY | 59011983 | . | A | G   | 75586.53  | PASS          | AC=59;AF=0.843;AN=70;BaseQ          |
| 51654 | chrY | 59012007 | . | G | C   | 47309.73  | PASS          | AC=42;AF=0.600;AN=70;BaseQ          |
| 51655 | chrY | 59012085 | . | T | C   | 10693.31  | PASS          | AC=17;AF=0.266;AN=64;BaseQ          |
| 51656 | chrY | 59012157 | . | C | T   | 97.97     | my_snp_filter | AC=1;AF=0.015;AN=66;BaseQ           |
| 51657 | chrY | 59012162 | . | G | A   | 17949.28  | PASS          | AC=25;AF=0.379;AN=66;BaseQ          |
| 51658 | chrY | 59012198 | . | A | G   | 2193.04   | PASS          | AC=8;AF=0.121;AN=66;BaseQRankSum    |
| 51659 | chrY | 59012205 | . | T | A   | 3486.08   | PASS          | AC=15;AF=0.221;AN=68;BaseQRankSum   |
| 51660 | chrY | 59012208 | . | A | T   | 6368.07   | PASS          | AC=24;AF=0.343;AN=70;BaseQRankSum   |
| 51661 | chrY | 59012211 | . | G | A   | 2222.19   | PASS          | AC=7;AF=0.103;AN=68;BaseQRankSum    |
| 51662 | chrY | 59012221 | . | G | C   | 60.56     | PASS          | AC=1;AF=0.014;AN=70;BaseQRankSum    |
| 51663 | chrY | 59012316 | . | C | T   | 148.20    | my_snp_filter | AC=2;AF=0.029;AN=70;BaseQ           |
| 51664 | chrY | 59012354 | . | T | C   | 90352.14  | PASS          | AC=41;AF=0.586;AN=70;BaseQ          |
| 51665 | chrY | 59012364 | . | A | T   | 25276.49  | PASS          | AC=31;AF=0.443;AN=70;BaseQ          |
| 51666 | chrY | 59012367 | . | T | G   | 25444.82  | PASS          | AC=31;AF=0.443;AN=70;BaseQ          |
| 51667 | chrY | 59012382 | . | G | C   | 8334.18   | PASS          | AC=26;AF=0.371;AN=70;BaseQRankSum   |
| 51668 | chrY | 59012419 | . | A | C   | 48278.71  | PASS          | AC=15;AF=0.221;AN=68;BaseQ          |
| 51669 | chrY | 59012420 | . | T | A   | 48233.77  | PASS          | AC=13;AF=0.191;AN=68;BaseQ          |
| 51670 | chrY | 59012511 | . | C | G   | 58.43     | PASS          | AC=1;AF=0.014;AN=70;BaseQRankSum    |
| 51671 | chrY | 59012514 | . | G | A   | 1654.53   | my_snp_filter | AC=10;AF=0.143;AN=70;BaseQ          |
| 51672 | chrY | 59012522 | . | G | C   | 17010.73  | PASS          | AC=35;AF=0.500;AN=70;BaseQ          |
| 51673 | chrY | 59012541 | . | G | A   | 5355.92   | PASS          | AC=22;AF=0.314;AN=70;BaseQRankSum   |
| 51674 | chrY | 59012574 | . | G | A,C | 389.51    | PASS          | AC=2,1;AF=0.029,0.014;AN=70;BaseQ   |
| 51675 | chrY | 59012590 | . | T | G   | 850.39    | PASS          | AC=3;AF=0.043;AN=70;BaseQRankSum    |
| 51676 | chrY | 59012638 | . | C | A   | 1803.34   | my_snp_filter | AC=11;AF=0.157;AN=70;BaseQ          |
| 51677 | chrY | 59012645 | . | G | T   | 29611.71  | PASS          | AC=32;AF=0.457;AN=70;BaseQ          |
| 51678 | chrY | 59012659 | . | G | A   | 1003.13   | my_snp_filter | AC=6;AF=0.086;AN=70;BaseQ           |
| 51679 | chrY | 59012660 | . | C | A,G | 1164.50   | my_snp_filter | AC=6,2;AF=0.086,0.029;AN=70;BaseQ   |
| 51680 | chrY | 59012700 | . | A | T   | 117727.72 | PASS          | AC=35;AF=0.500;AN=70;BaseQ          |



|       |      |          |   |   |     |           |               |                                   |
|-------|------|----------|---|---|-----|-----------|---------------|-----------------------------------|
| 51681 | chrY | 59012707 | . | T | G   | 119933.72 | PASS          | AC=35;AF=0.500;AN=70;Base         |
| 51682 | chrY | 59012708 | . | G | T   | 14689.31  | PASS          | AC=28;AF=0.400;AN=70;Base         |
| 51683 | chrY | 59012740 | . | G | C   | 35284.72  | PASS          | AC=35;AF=0.500;AN=70;Base         |
| 51684 | chrY | 59012742 | . | A | C   | 27980.36  | PASS          | AC=33;AF=0.471;AN=70;Base         |
| 51685 | chrY | 59012773 | . | A | G   | 5597.02   | PASS          | AC=12;AF=0.171;AN=70;BaseQRankSum |
| 51686 | chrY | 59012778 | . | G | C   | 105541.26 | PASS          | AC=42;AF=0.600;AN=70;Base         |
| 51687 | chrY | 59012792 | . | A | T   | 65789.72  | PASS          | AC=35;AF=0.500;AN=70;Base         |
| 51688 | chrY | 59012817 | . | C | G   | 6079.34   | PASS          | AC=14;AF=0.200;AN=70;BaseQRankSum |
| 51689 | chrY | 59012825 | . | C | G   | 101.57    | PASS          | AC=1;AF=0.014;AN=70;BaseQRankSum  |
| 51690 | chrY | 59012826 | . | A | C   | 6284.46   | PASS          | AC=10;AF=0.143;AN=70;BaseQRankSum |
| 51691 | chrY | 59012828 | . | G | A   | 29861.38  | PASS          | AC=26;AF=0.371;AN=70;Base         |
| 51692 | chrY | 59012833 | . | G | A   | 290.09    | PASS          | AC=3;AF=0.043;AN=70;BaseQRankSum  |
| 51693 | chrY | 59012841 | . | C | G   | 5860.78   | PASS          | AC=7;AF=0.103;AN=68;BaseQRankSum  |
| 51694 | chrY | 59012859 | . | C | G   | 204.71    | my_snp_filter | AC=1;AF=0.015;AN=68;BaseQ         |
| 51695 | chrY | 59012870 | . | C | T   | 1173.97   | PASS          | AC=7;AF=0.106;AN=66;BaseQRankSum  |
| 51696 | chrY | 59012875 | . | T | G   | 30642.23  | PASS          | AC=30;AF=0.455;AN=66;Base         |
| 51697 | chrY | 59012878 | . | G | A   | 2836.83   | PASS          | AC=12;AF=0.194;AN=62;BaseQRankSum |
| 51698 | chrY | 59012897 | . | C | T   | 3068.04   | PASS          | AC=11;AF=0.177;AN=62;BaseQRankSum |
| 51699 | chrY | 59012923 | . | A | G   | 18421.90  | PASS          | AC=13;AF=0.224;AN=58;Base         |
| 51700 | chrY | 59012937 | . | C | T   | 3835.30   | PASS          | AC=6;AF=0.143;AN=42;BaseQRankSum  |
| 51701 | chrY | 59012939 | . | A | G   | 18083.75  | PASS          | AC=13;AF=0.241;AN=54;Base         |
| 51702 | chrY | 59012980 | . | T | C   | 25548.88  | PASS          | AC=12;AF=0.400;AN=30;Base         |
| 51703 | chrY | 59012994 | . | A | C   | 8234.01   | PASS          | AC=14;AF=0.389;AN=36;BaseQRankSum |
| 51704 | chrY | 59013006 | . | C | T   | 13604.42  | PASS          | AC=10;AF=0.227;AN=44;Base         |
| 51705 | chrY | 59013026 | . | A | T   | 75.20     | my_snp_filter | AC=1;AF=0.017;AN=58;BaseQ         |
| 51706 | chrY | 59013076 | . | C | T   | 40309.03  | PASS          | AC=45;AF=0.643;AN=70;Base         |
| 51707 | chrY | 59013098 | . | G | A   | 62.72     | my_snp_filter | AC=3;AF=0.043;AN=70;BaseQ         |
| 51708 | chrY | 59013106 | . | A | T   | 71.10     | my_snp_filter | AC=3;AF=0.043;AN=70;BaseQ         |
| 51709 | chrY | 59013133 | . | C | T   | 25725.72  | PASS          | AC=35;AF=0.500;AN=70;Base         |
| 51710 | chrY | 59013179 | . | G | T   | 18176.43  | PASS          | AC=32;AF=0.457;AN=70;Base         |
| 51711 | chrY | 59013191 | . | A | G   | 64891.72  | PASS          | AC=35;AF=0.500;AN=70;Base         |
| 51712 | chrY | 59013197 | . | A | G   | 66618.72  | PASS          | AC=35;AF=0.500;AN=70;Base         |
| 51713 | chrY | 59013228 | . | C | G   | 33466.72  | PASS          | AC=34;AF=0.486;AN=70;Base         |
| 51714 | chrY | 59013265 | . | G | T   | 2906.21   | PASS          | AC=7;AF=0.100;AN=70;BaseQRankSum  |
| 51715 | chrY | 59013267 | . | C | T   | 2900.15   | PASS          | AC=7;AF=0.100;AN=70;BaseQRankSum  |
| 51716 | chrY | 59013283 | . | C | T   | 5676.66   | my_snp_filter | AC=21;AF=0.300;AN=70;Base         |
| 51717 | chrY | 59013334 | . | T | C   | 2036.08   | PASS          | AC=8;AF=0.114;AN=70;BaseQRankSum  |
| 51718 | chrY | 59013336 | . | C | T   | 4796.75   | PASS          | AC=20;AF=0.286;AN=70;BaseQRankSum |
| 51719 | chrY | 59013371 | . | C | T   | 861.94    | my_snp_filter | AC=8;AF=0.114;AN=70;BaseQ         |
| 51720 | chrY | 59013388 | . | C | T   | 198.04    | my_snp_filter | AC=6;AF=0.086;AN=70;BaseQ         |
| 51721 | chrY | 59013390 | . | A | C   | 1758.08   | PASS          | AC=9;AF=0.132;AN=68;BaseQRankSum  |
| 51722 | chrY | 59013392 | . | C | G   | 1756.46   | PASS          | AC=9;AF=0.129;AN=70;BaseQRankSum  |
| 51723 | chrY | 59013438 | . | T | C   | 1082.81   | PASS          | AC=10;AF=0.143;AN=70;BaseQRankSum |
| 51724 | chrY | 59013459 | . | T | G   | 73.42     | my_snp_filter | AC=1;AF=0.014;AN=70;BaseQ         |
| 51725 | chrY | 59013500 | . | T | C   | 11890.72  | PASS          | AC=35;AF=0.500;AN=70;Base         |
| 51726 | chrY | 59013541 | . | G | A   | 48898.15  | PASS          | AC=32;AF=0.552;AN=58;Base         |
| 51727 | chrY | 59013581 | . | T | C   | 36754.60  | PASS          | AC=31;AF=0.554;AN=56;Base         |
| 51728 | chrY | 59013617 | . | T | A   | 3517.05   | PASS          | AC=17;AF=0.607;AN=28;BaseQRankSum |
| 51729 | chrY | 59013629 | . | T | A,* | 995.95    | PASS          | AC=8,2;AF=0.333,0.083;AN=24;BaseQ |
| 51730 | chrY | 59013631 | . | T | A,* | 921.51    | PASS          | AC=7,1;AF=0.350,0.050;AN=20;BaseQ |
| 51731 | chrY | 59013633 | . | A | A,* | 698       | PASS          | AC=2,1;AF=0.143,0.071;AN=14;BaseQ |
| 51732 | chrY | 59013641 | . | T | A,* | 1736.34   | PASS          | AC=2,5;AF=0.143,0.357;AN=14;BaseQ |
| 51733 | chrY | 59013643 | . | T | A,* | 1652.34   | PASS          | AC=2,5;AF=0.143,0.357;AN=14;BaseQ |
| 51734 | chrY | 59013645 | . | T | A   | 1931.71   | PASS          | AC=8;AF=0.571;AN=14;BaseQRankSum  |
| 51735 | chrY | 59013647 | . | T | A   | 652.56    | PASS          | AC=5;AF=0.227;AN=22;BaseQRankSum  |
| 51736 | chrY | 59013799 | . | G | T   | 20668.72  | PASS          | AC=35;AF=0.500;AN=70;Base         |
| 51737 | chrY | 59013831 | . | G | A   | 18060.72  | PASS          | AC=35;AF=0.500;AN=70;Base         |
| 51738 | chrY | 59013874 | . | C | T   | 139.02    | my_snp_filter | AC=5;AF=0.071;AN=70;BaseQ         |
| 51739 | chrY | 59013880 | . | C | T   | 32.44     | my_snp_filter | AC=1;AF=0.014;AN=70;BaseQ         |
| 51740 | chrY | 59013889 | . | T | C   | 44.49     | my_snp_filter | AC=1;AF=0.014;AN=70;BaseQ         |
| 51741 | chrY | 59013938 | . | G | T   | 43356.43  | PASS          | AC=38;AF=0.543;AN=70;Base         |
| 51742 | chrY | 59013962 | . | A | G   | 153.53    | my_snp_filter | AC=2;AF=0.029;AN=70;BaseQ         |
| 51743 | chrY | 59013964 | . | C | A   | 750.85    | my_snp_filter | AC=12;AF=0.171;AN=70;Base         |
| 51744 | chrY | 59013986 | . | T | C   | 3424.37   | PASS          | AC=29;AF=0.414;AN=70;BaseQRankSum |
| 51745 | chrY | 59014013 | . | G | A   | 6035      | PASS          | AC=24;AF=0.343;AN=70;BaseQRankSum |
| 51746 | chrY | 59014024 | . | A | G   | 2297.61   | PASS          | AC=18;AF=0.257;AN=70;BaseQRankSum |
| 51747 | chrY | 59014106 | . | T | C   | 9871.07   | PASS          | AC=13;AF=0.217;AN=60;BaseQRankSum |
| 51748 | chrY | 59014116 | . | A | G   | 10282     | PASS          | AC=14;AF=0.233;AN=60;BaseQRankSum |
| 51749 | chrY | 59014168 | . | C | T,A | 16795.35  | PASS          | AC=30,1;AF=0.536,0.018;AN         |
| 51750 | chrY | 59014206 | . | A | C   | 3851.27   | PASS          | AC=10;AF=0.147;AN=68;BaseQRankSum |
| 51751 | chrY | 59014213 | . | C | T   | 14543.45  | PASS          | AC=28;AF=0.424;AN=66;Base         |
| 51752 | chrY | 59014226 | . | C | T   | 4081.98   | PASS          | AC=11;AF=0.157;AN=70;BaseQRankSum |
| 51753 | chrY | 59014251 | . | A | G   | 3959.11   | PASS          | AC=12;AF=0.171;AN=70;BaseQRankSum |
| 51754 | chrY | 59014379 | . | G | A   | 4405.01   | PASS          | AC=22;AF=0.314;AN=70;BaseQRankSum |
| 51755 | chrY | 59014387 | . | T | G   | 65852.07  | PASS          | AC=45;AF=0.643;AN=70;Base         |
| 51756 | chrY | 59014416 | . | G | T   | 25830.84  | PASS          | AC=35;AF=0.500;AN=70;Base         |

|       |      |          |   |   |     |           |               |                                   |
|-------|------|----------|---|---|-----|-----------|---------------|-----------------------------------|
| 51757 | chrY | 59014490 | . | C | T   | 4447.28   | PASS          | AC=22;AF=0.314;AN=70;BaseQRankSum |
| 51758 | chrY | 59014536 | . | A | G   | 3266.07   | PASS          | AC=22;AF=0.314;AN=70;BaseQRankSum |
| 51759 | chrY | 59014546 | . | G | T   | 28328.72  | PASS          | AC=35;AF=0.500;AN=70;BaseQ        |
| 51760 | chrY | 59014599 | . | C | T   | 34.48     | my_snp_filter | AC=1;AF=0.014;AN=70;BaseQ         |
| 51761 | chrY | 59014657 | . | G | A   | 283.51    | my_snp_filter | AC=3;AF=0.043;AN=70;BaseQ         |
| 51762 | chrY | 59014659 | . | G | A   | 7284.35   | PASS          | AC=24;AF=0.343;AN=70;BaseQRankSum |
| 51763 | chrY | 59014673 | . | A | G   | 26672.13  | PASS          | AC=34;AF=0.486;AN=70;BaseQ        |
| 51764 | chrY | 59014716 | . | A | C   | 34352.72  | PASS          | AC=35;AF=0.500;AN=70;BaseQ        |
| 51765 | chrY | 59014761 | . | T | G   | 2954.78   | my_snp_filter | AC=19;AF=0.271;AN=70;BaseQ        |
| 51766 | chrY | 59014835 | . | T | C   | 12894.96  | PASS          | AC=31;AF=0.443;AN=70;BaseQ        |
| 51767 | chrY | 59014844 | . | T | C   | 616.76    | my_snp_filter | AC=6;AF=0.086;AN=70;BaseQ         |
| 51768 | chrY | 59014924 | . | A | G   | 2078.45   | PASS          | AC=8;AF=0.114;AN=70;BaseQRankSum  |
| 51769 | chrY | 59014977 | . | G | A   | 72190.26  | PASS          | AC=37;AF=0.529;AN=70;BaseQ        |
| 51770 | chrY | 59014996 | . | A | G   | 101848.96 | PASS          | AC=44;AF=0.629;AN=70;BaseQ        |
| 51771 | chrY | 59015026 | . | G | A   | 95193.51  | PASS          | AC=47;AF=0.671;AN=70;BaseQ        |
| 51772 | chrY | 59015049 | . | C | T   | 33342.72  | PASS          | AC=35;AF=0.500;AN=70;BaseQ        |
| 51773 | chrY | 59015055 | . | G | A   | 2319.87   | my_snp_filter | AC=15;AF=0.214;AN=70;BaseQ        |
| 51774 | chrY | 59015105 | . | A | C   | 112956.33 | PASS          | AC=56;AF=0.800;AN=70;BaseQ        |
| 51775 | chrY | 59015119 | . | T | C   | 33121.73  | PASS          | AC=35;AF=0.500;AN=70;BaseQ        |
| 51776 | chrY | 59015137 | . | A | G   | 3950.98   | my_snp_filter | AC=12;AF=0.171;AN=70;BaseQ        |
| 51777 | chrY | 59015143 | . | C | G   | 39731.02  | PASS          | AC=33;AF=0.471;AN=70;BaseQ        |
| 51778 | chrY | 59015146 | . | A | G   | 134281.47 | PASS          | AC=55;AF=0.786;AN=70;BaseQ        |
| 51779 | chrY | 59015147 | . | G | T   | 5050.96   | my_snp_filter | AC=15;AF=0.214;AN=70;BaseQ        |
| 51780 | chrY | 59015153 | . | C | T   | 6273.71   | my_snp_filter | AC=21;AF=0.300;AN=70;BaseQ        |
| 51781 | chrY | 59015173 | . | C | G,T | 40011.16  | PASS          | AC=30,6;AF=0.429,0.086;AN         |
| 51782 | chrY | 59015176 | . | C | T   | 299.05    | PASS          | AC=2;AF=0.029;AN=70;BaseQRankSum  |
| 51783 | chrY | 59015181 | . | C | T   | 60.42     | my_snp_filter | AC=1;AF=0.014;AN=70;BaseQ         |
| 51784 | chrY | 59015185 | . | C | T   | 15303.52  | PASS          | AC=26;AF=0.371;AN=70;BaseQ        |
| 51785 | chrY | 59015193 | . | C | A   | 3764.29   | my_snp_filter | AC=16;AF=0.229;AN=70;BaseQ        |
| 51786 | chrY | 59015230 | . | A | T   | 4798.71   | my_snp_filter | AC=17;AF=0.243;AN=70;BaseQ        |
| 51787 | chrY | 59015256 | . | T | A   | 167888.14 | PASS          | AC=60;AF=0.857;AN=70;BaseQ        |
| 51788 | chrY | 59015341 | . | T | C   | 136.42    | PASS          | AC=1;AF=0.014;AN=70;BaseQRankSum  |
| 51789 | chrY | 59015360 | . | T | C   | 2884.92   | my_snp_filter | AC=14;AF=0.200;AN=70;BaseQ        |
| 51790 | chrY | 59015498 | . | C | T   | 2925.26   | PASS          | AC=15;AF=0.214;AN=70;BaseQRankSum |
| 51791 | chrY | 59015529 | . | T | C   | 23507.91  | PASS          | AC=31;AF=0.443;AN=70;BaseQ        |
| 51792 | chrY | 59015542 | . | T | G   | 6000.07   | PASS          | AC=18;AF=0.257;AN=70;BaseQRankSum |
| 51793 | chrY | 59015547 | . | C | T   | 28428.72  | PASS          | AC=33;AF=0.471;AN=70;BaseQ        |
| 51794 | chrY | 59015574 | . | A | G   | 19404.87  | PASS          | AC=34;AF=0.486;AN=70;BaseQ        |
| 51795 | chrY | 59015606 | . | C | T   | 10041.38  | PASS          | AC=20;AF=0.286;AN=70;BaseQ        |
| 51796 | chrY | 59015627 | . | T | C   | 101712.65 | PASS          | AC=39;AF=0.557;AN=70;BaseQ        |
| 51797 | chrY | 59015633 | . | A | G   | 29335.72  | PASS          | AC=35;AF=0.500;AN=70;BaseQ        |
| 51798 | chrY | 59015673 | . | C | A   | 5219.69   | PASS          | AC=13;AF=0.186;AN=70;BaseQRankSum |
| 51799 | chrY | 59015690 | . | C | T   | 165.42    | my_snp_filter | AC=1;AF=0.014;AN=70;BaseQ         |
| 51800 | chrY | 59015739 | . | T | A   | 3502.69   | PASS          | AC=11;AF=0.157;AN=70;BaseQRankSum |
| 51801 | chrY | 59015745 | . | G | T   | 350.86    | my_snp_filter | AC=3;AF=0.043;AN=70;BaseQ         |
| 51802 | chrY | 59015764 | . | G | C   | 5319.71   | PASS          | AC=18;AF=0.257;AN=70;BaseQRankSum |
| 51803 | chrY | 59015765 | . | T | C   | 37170.81  | PASS          | AC=35;AF=0.500;AN=70;BaseQ        |
| 51804 | chrY | 59015785 | . | G | A   | 3880.57   | PASS          | AC=11;AF=0.157;AN=70;BaseQRankSum |
| 51805 | chrY | 59015792 | . | C | T   | 9801.04   | PASS          | AC=24;AF=0.343;AN=70;BaseQRankSum |
| 51806 | chrY | 59015800 | . | T | C   | 29886.36  | PASS          | AC=33;AF=0.471;AN=70;BaseQ        |
| 51807 | chrY | 59015803 | . | C | T   | 10793.57  | PASS          | AC=25;AF=0.357;AN=70;BaseQ        |
| 51808 | chrY | 59015804 | . | A | G   | 86898.92  | PASS          | AC=41;AF=0.586;AN=70;BaseQ        |
| 51809 | chrY | 59015812 | . | G | C   | 10643.60  | PASS          | AC=26;AF=0.371;AN=70;BaseQ        |
| 51810 | chrY | 59015836 | . | A | G   | 2315.02   | PASS          | AC=15;AF=0.214;AN=70;BaseQRankSum |
| 51811 | chrY | 59015846 | . | C | G   | 68.47     | PASS          | AC=1;AF=0.014;AN=70;BaseQRankSum  |
| 51812 | chrY | 59015862 | . | T | C   | 6024.03   | PASS          | AC=27;AF=0.386;AN=70;BaseQRankSum |
| 51813 | chrY | 59015887 | . | C | T   | 2196.72   | my_snp_filter | AC=16;AF=0.242;AN=66;BaseQ        |
| 51814 | chrY | 59015892 | . | A | C   | 55.42     | PASS          | AC=1;AF=0.015;AN=68;BaseQRankSum  |
| 51815 | chrY | 59015902 | . | C | T   | 13018.34  | PASS          | AC=29;AF=0.426;AN=68;BaseQ        |
| 51816 | chrY | 59015991 | . | T | C   | 73751.07  | PASS          | AC=59;AF=0.843;AN=70;BaseQ        |
| 51817 | chrY | 59016010 | . | G | T   | 31197.18  | PASS          | AC=34;AF=0.486;AN=70;BaseQ        |
| 51818 | chrY | 59016011 | . | A | T   | 31204.60  | PASS          | AC=34;AF=0.486;AN=70;BaseQ        |
| 51819 | chrY | 59016067 | . | C | T   | 23679.97  | PASS          | AC=31;AF=0.443;AN=70;BaseQ        |
| 51820 | chrY | 59016135 | . | T | G   | 37348.72  | PASS          | AC=35;AF=0.500;AN=70;BaseQ        |
| 51821 | chrY | 59016141 | . | A | G   | 74841.72  | PASS          | AC=35;AF=0.500;AN=70;BaseQ        |
| 51822 | chrY | 59016147 | . | C | G   | 74640.72  | PASS          | AC=35;AF=0.500;AN=70;BaseQ        |
| 51823 | chrY | 59016160 | . | A | G   | 63960.72  | PASS          | AC=35;AF=0.500;AN=70;BaseQ        |
| 51824 | chrY | 59016167 | . | C | T,A | 317.71    | my_snp_filter | AC=2,1;AF=0.029,0.014;AN=         |
| 51825 | chrY | 59016175 | . | T | C   | 7197.07   | PASS          | AC=17;AF=0.243;AN=70;BaseQRankSum |
| 51826 | chrY | 59016188 | . | G | A   | 130245.11 | PASS          | AC=41;AF=0.586;AN=70;BaseQ        |
| 51827 | chrY | 59016205 | . | A | G   | 4563.63   | my_snp_filter | AC=21;AF=0.300;AN=70;BaseQ        |
| 51828 | chrY | 59016245 | . | T | C   | 105.42    | my_snp_filter | AC=1;AF=0.014;AN=70;BaseQ         |
| 51829 | chrY | 59016335 | . | A | G   | 36.91     | my_snp_filter | AC=2;AF=0.029;AN=70;BaseQ         |
| 51830 | chrY | 59016351 | . | C | T   | 2767.20   | my_snp_filter | AC=13;AF=0.186;AN=70;BaseQ        |
| 51831 | chrY | 59016375 | . | C | T   | 344.86    | my_snp_filter | AC=4;AF=0.057;AN=70;BaseQ         |
| 51832 | chrY | 59016394 | . | C | G   | 22091.24  | PASS          | AC=31;AF=0.443;AN=70;BaseQ        |

|       |      |          |   |   |     |           |               |                                    |
|-------|------|----------|---|---|-----|-----------|---------------|------------------------------------|
| 51833 | chrY | 59016404 | . | G | A   | 2328.57   | PASS          | AC=11;AF=0.157;AN=70;BaseQRankSum= |
| 51834 | chrY | 59016416 | . | G | C   | 1936.42   | PASS          | AC=9;AF=0.132;AN=68;BaseQRankSum=  |
| 51835 | chrY | 59016422 | . | A | G   | 141.75    | my_snp_filter | AC=3;AF=0.043;AN=70;BaseQ          |
| 51836 | chrY | 59016450 | . | T | C   | 69979.99  | PASS          | AC=46;AF=0.676;AN=68;Base          |
| 51837 | chrY | 59016451 | . | G | A   | 5002.28   | PASS          | AC=20;AF=0.294;AN=68;BaseQRankSum  |
| 51838 | chrY | 59016454 | . | C | A   | 39907.54  | PASS          | AC=36;AF=0.514;AN=70;Base          |
| 51839 | chrY | 59016468 | . | A | T   | 6560.12   | PASS          | AC=9;AF=0.129;AN=70;BaseQRankSum=  |
| 51840 | chrY | 59016487 | . | T | C   | 22182.30  | PASS          | AC=34;AF=0.486;AN=70;Base          |
| 51841 | chrY | 59016510 | . | A | C   | 1342.19   | my_snp_filter | AC=7;AF=0.100;AN=70;BaseQ          |
| 51842 | chrY | 59016530 | . | G | C   | 68443.74  | PASS          | AC=46;AF=0.657;AN=70;Base          |
| 51843 | chrY | 59016539 | . | G | A   | 3517.76   | PASS          | AC=13;AF=0.186;AN=70;BaseQRankSum  |
| 51844 | chrY | 59016544 | . | C | A   | 145.52    | my_snp_filter | AC=1;AF=0.014;AN=70;BaseQ          |
| 51845 | chrY | 59016621 | . | T | C   | 64266.69  | PASS          | AC=46;AF=0.657;AN=70;Base          |
| 51846 | chrY | 59016713 | . | A | G   | 1823.43   | my_snp_filter | AC=16;AF=0.229;AN=70;Base          |
| 51847 | chrY | 59016725 | . | C | T   | 31946.72  | PASS          | AC=35;AF=0.500;AN=70;Base          |
| 51848 | chrY | 59016753 | . | T | G   | 64.42     | my_snp_filter | AC=1;AF=0.014;AN=70;BaseQ          |
| 51849 | chrY | 59016773 | . | C | T   | 19211.86  | PASS          | AC=34;AF=0.486;AN=70;Base          |
| 51850 | chrY | 59016803 | . | C | T   | 24156.70  | PASS          | AC=31;AF=0.443;AN=70;Base          |
| 51851 | chrY | 59016816 | . | A | G   | 24689.25  | PASS          | AC=30;AF=0.429;AN=70;Base          |
| 51852 | chrY | 59016855 | . | T | C   | 67.42     | my_snp_filter | AC=1;AF=0.014;AN=70;BaseQ          |
| 51853 | chrY | 59016878 | . | C | T   | 46557.25  | PASS          | AC=35;AF=0.500;AN=70;Base          |
| 51854 | chrY | 59016919 | . | C | T   | 39581.72  | PASS          | AC=35;AF=0.500;AN=70;Base          |
| 51855 | chrY | 59016927 | . | C | T   | 69839.72  | PASS          | AC=35;AF=0.500;AN=70;Base          |
| 51856 | chrY | 59016928 | . | A | G   | 134064.85 | PASS          | AC=44;AF=0.629;AN=70;Base          |
| 51857 | chrY | 59016936 | . | T | C   | 12937.03  | PASS          | AC=32;AF=0.457;AN=70;Base          |
| 51858 | chrY | 59016946 | . | A | G   | 19938.84  | PASS          | AC=34;AF=0.486;AN=70;Base          |
| 51859 | chrY | 59016951 | . | T | G   | 140804.27 | PASS          | AC=44;AF=0.629;AN=70;Base          |
| 51860 | chrY | 59016952 | . | T | A   | 139942.74 | PASS          | AC=43;AF=0.614;AN=70;Base          |
| 51861 | chrY | 59016975 | . | T | A   | 81.77     | my_snp_filter | AC=3;AF=0.043;AN=70;BaseQ          |
| 51862 | chrY | 59016989 | . | C | T   | 5746.88   | PASS          | AC=22;AF=0.314;AN=70;BaseQRankSum  |
| 51863 | chrY | 59017005 | . | A | G   | 53586.72  | PASS          | AC=35;AF=0.500;AN=70;Base          |
| 51864 | chrY | 59017019 | . | G | C   | 259.43    | PASS          | AC=2;AF=0.029;AN=70;BaseQRankSum=  |
| 51865 | chrY | 59017050 | . | C | T   | 46.50     | my_snp_filter | AC=1;AF=0.014;AN=70;BaseQ          |
| 51866 | chrY | 59017052 | . | G | C   | 1052.67   | PASS          | AC=1;AF=0.014;AN=70;BaseQRankSum=  |
| 51867 | chrY | 59017065 | . | G | A   | 1712.80   | my_snp_filter | AC=8;AF=0.114;AN=70;BaseQ          |
| 51868 | chrY | 59017131 | . | G | A   | 39710.72  | PASS          | AC=35;AF=0.500;AN=70;Base          |
| 51869 | chrY | 59017181 | . | T | A   | 5467.59   | PASS          | AC=16;AF=0.229;AN=70;BaseQRankSum  |
| 51870 | chrY | 59017205 | . | C | T   | 35039.72  | PASS          | AC=35;AF=0.500;AN=70;Base          |
| 51871 | chrY | 59017206 | . | A | G   | 111169.50 | PASS          | AC=40;AF=0.571;AN=70;Base          |
| 51872 | chrY | 59017238 | . | A | G   | 14857.73  | PASS          | AC=31;AF=0.443;AN=70;Base          |
| 51873 | chrY | 59017244 | . | C | T   | 1440.94   | my_snp_filter | AC=10;AF=0.143;AN=70;Base          |
| 51874 | chrY | 59017250 | . | C | T   | 33490.72  | PASS          | AC=35;AF=0.500;AN=70;Base          |
| 51875 | chrY | 59017272 | . | C | A   | 15489.45  | PASS          | AC=31;AF=0.443;AN=70;Base          |
| 51876 | chrY | 59017324 | . | A | T   | 11908.91  | PASS          | AC=30;AF=0.429;AN=70;Base          |
| 51877 | chrY | 59017328 | . | A | G   | 11946.12  | PASS          | AC=30;AF=0.429;AN=70;Base          |
| 51878 | chrY | 59017340 | . | G | T   | 10340.93  | PASS          | AC=31;AF=0.443;AN=70;Base          |
| 51879 | chrY | 59017346 | . | A | G   | 3430.27   | PASS          | AC=14;AF=0.200;AN=70;BaseQRankSum  |
| 51880 | chrY | 59017378 | . | T | G   | 113864.93 | PASS          | AC=70;AF=1.00;AN=70;BaseQ          |
| 51881 | chrY | 59017392 | . | T | C   | 5795.31   | PASS          | AC=19;AF=0.271;AN=70;BaseQRankSum  |
| 51882 | chrY | 59017393 | . | G | A   | 5795.50   | PASS          | AC=19;AF=0.271;AN=70;BaseQRankSum  |
| 51883 | chrY | 59017468 | . | G | C   | 6768.22   | PASS          | AC=18;AF=0.257;AN=70;BaseQRankSum  |
| 51884 | chrY | 59017525 | . | C | T   | 439.53    | my_snp_filter | AC=2;AF=0.029;AN=70;BaseQ          |
| 51885 | chrY | 59017579 | . | C | A   | 55.42     | my_snp_filter | AC=1;AF=0.014;AN=70;BaseQ          |
| 51886 | chrY | 59017585 | . | T | C   | 209.42    | my_snp_filter | AC=1;AF=0.014;AN=70;BaseQ          |
| 51887 | chrY | 59017594 | . | A | G   | 206.42    | my_snp_filter | AC=1;AF=0.014;AN=70;BaseQ          |
| 51888 | chrY | 59017634 | . | G | A   | 1699.20   | my_snp_filter | AC=8;AF=0.114;AN=70;BaseQ          |
| 51889 | chrY | 59017641 | . | G | T   | 1893.57   | my_snp_filter | AC=7;AF=0.100;AN=70;BaseQ          |
| 51890 | chrY | 59017649 | . | C | T   | 423.28    | my_snp_filter | AC=4;AF=0.057;AN=70;BaseQ          |
| 51891 | chrY | 59017650 | . | G | A   | 27373.72  | PASS          | AC=35;AF=0.500;AN=70;Base          |
| 51892 | chrY | 59017720 | . | C | T   | 1556.06   | PASS          | AC=10;AF=0.143;AN=70;BaseQRankSum  |
| 51893 | chrY | 59017742 | . | C | T   | 16447.92  | PASS          | AC=27;AF=0.386;AN=70;Base          |
| 51894 | chrY | 59017748 | . | A | G   | 1734.78   | PASS          | AC=9;AF=0.129;AN=70;BaseQRankSum=  |
| 51895 | chrY | 59017751 | . | A | T   | 14786.98  | PASS          | AC=27;AF=0.386;AN=70;Base          |
| 51896 | chrY | 59017756 | . | G | A   | 13153.75  | PASS          | AC=26;AF=0.371;AN=70;Base          |
| 51897 | chrY | 59017757 | . | G | T   | 7541.05   | PASS          | AC=14;AF=0.226;AN=62;BaseQRankSum  |
| 51898 | chrY | 59017759 | . | T | C   | 15191.68  | PASS          | AC=27;AF=0.397;AN=68;Base          |
| 51899 | chrY | 59017762 | . | T | A   | 5961.08   | PASS          | AC=15;AF=0.221;AN=68;BaseQRankSum  |
| 51900 | chrY | 59017776 | . | A | T   | 64.61     | PASS          | AC=1;AF=0.033;AN=30;BaseQRankSum=  |
| 51901 | chrY | 59017780 | . | T | A   | 588.14    | PASS          | AC=7;AF=0.233;AN=30;BaseQRankSum=  |
| 51902 | chrY | 59017802 | . | A | T,* | 1793.49   | PASS          | AC=1,2;AF=0.031,0.063;AN=32;BaseQ  |
| 51903 | chrY | 59017806 | . | A | T   | 1215.79   | PASS          | AC=7;AF=0.121;AN=58;BaseQRankSum=  |
| 51904 | chrY | 59017813 | . | G | A   | 1143.75   | PASS          | AC=14;AF=0.200;AN=70;BaseQRankSum  |
| 51905 | chrY | 59017817 | . | C | T   | 1212.15   | PASS          | AC=8;AF=0.114;AN=70;BaseQRankSum=  |
| 51906 | chrY | 59017854 | . | C | T   | 888.84    | PASS          | AC=10;AF=0.143;AN=70;BaseQRankSum  |
| 51907 | chrY | 59017886 | . | C | T   | 5586.67   | PASS          | AC=18;AF=0.257;AN=70;BaseQRankSum  |
| 51908 | chrY | 59017896 | . | A | C   | 5836.76   | PASS          | AC=18;AF=0.257;AN=70;BaseQRankSum  |

|       |      |          |   |   |     |           |               |                                            |
|-------|------|----------|---|---|-----|-----------|---------------|--------------------------------------------|
| 51909 | chrY | 59017912 | . | A | T   | 2315.14   | PASS          | AC=11;AF=0.157;AN=70;BaseQRankSum          |
| 51910 | chrY | 59017917 | . | T | G   | 3117.24   | PASS          | AC=12;AF=0.171;AN=70;BaseQRankSum          |
| 51911 | chrY | 59017919 | . | G | T   | 11691.88  | PASS          | AC=20;AF=0.286;AN=70;BaseQRankSum          |
| 51912 | chrY | 59017984 | . | C | T   | 14232.77  | PASS          | AC=16;AF=0.229;AN=70;BaseQRankSum          |
| 51913 | chrY | 59017991 | . | G | A   | 4226.06   | PASS          | AC=11;AF=0.157;AN=70;BaseQRankSum          |
| 51914 | chrY | 59018069 | . | G | A   | 6489.33   | PASS          | AC=25;AF=0.357;AN=70;BaseQRankSum          |
| 51915 | chrY | 59018074 | . | A | G   | 10320.90  | PASS          | AC=27;AF=0.386;AN=70;BaseQRankSum          |
| 51916 | chrY | 59018111 | . | C | T   | 433.36    | PASS          | AC=4;AF=0.057;AN=70;BaseQRankSum           |
| 51917 | chrY | 59018114 | . | T | G   | 11575.90  | PASS          | AC=30;AF=0.429;AN=70;BaseQRankSum          |
| 51918 | chrY | 59018121 | . | T | C   | 6270.53   | PASS          | AC=16;AF=0.229;AN=70;BaseQRankSum          |
| 51919 | chrY | 59018122 | . | T | G   | 214.77    | my_snp_filter | AC=4;AF=0.057;AN=70;BaseQRankSum           |
| 51920 | chrY | 59018128 | . | G | A   | 30412.71  | my_snp_filter | AC=33;AF=0.471;AN=70;BaseQRankSum          |
| 51921 | chrY | 59018176 | . | T | C   | 30113.72  | PASS          | AC=35;AF=0.500;AN=70;BaseQRankSum          |
| 51922 | chrY | 59018177 | . | G | A   | 153.97    | my_snp_filter | AC=5;AF=0.071;AN=70;BaseQRankSum           |
| 51923 | chrY | 59018227 | . | C | G   | 37111.72  | PASS          | AC=35;AF=0.500;AN=70;BaseQRankSum          |
| 51924 | chrY | 59018242 | . | A | T   | 40653.72  | PASS          | AC=35;AF=0.500;AN=70;BaseQRankSum          |
| 51925 | chrY | 59018283 | . | C | G   | 64.06     | my_snp_filter | AC=2;AF=0.029;AN=70;BaseQRankSum           |
| 51926 | chrY | 59018289 | . | A | C   | 208.46    | my_snp_filter | AC=3;AF=0.043;AN=70;BaseQRankSum           |
| 51927 | chrY | 59018331 | . | G | A   | 191.42    | my_snp_filter | AC=1;AF=0.014;AN=70;BaseQRankSum           |
| 51928 | chrY | 59018335 | . | G | C   | 3845.38   | PASS          | AC=17;AF=0.243;AN=70;BaseQRankSum          |
| 51929 | chrY | 59018341 | . | C | G   | 46543.72  | PASS          | AC=35;AF=0.500;AN=70;BaseQRankSum          |
| 51930 | chrY | 59018377 | . | G | C   | 4341.92   | PASS          | AC=14;AF=0.200;AN=70;BaseQRankSum          |
| 51931 | chrY | 59018388 | . | C | A   | 214.42    | PASS          | AC=1;AF=0.014;AN=70;BaseQRankSum           |
| 51932 | chrY | 59018406 | . | T | A   | 14973.72  | PASS          | AC=22;AF=0.314;AN=70;BaseQRankSum          |
| 51933 | chrY | 59018418 | . | T | A   | 35645.31  | PASS          | AC=34;AF=0.486;AN=70;BaseQRankSum          |
| 51934 | chrY | 59018423 | . | C | A   | 372.51    | my_snp_filter | AC=3;AF=0.043;AN=70;BaseQRankSum           |
| 51935 | chrY | 59018426 | . | A | T   | 16117.17  | PASS          | AC=23;AF=0.329;AN=70;BaseQRankSum          |
| 51936 | chrY | 59018433 | . | A | C   | 92630.80  | PASS          | AC=38;AF=0.543;AN=70;BaseQRankSum          |
| 51937 | chrY | 59018472 | . | G | A,T | 94037.72  | PASS          | AC=38,16;AF=0.543,0.229;AN=70;BaseQRankSum |
| 51938 | chrY | 59018502 | . | C | T   | 7049.54   | PASS          | AC=21;AF=0.300;AN=70;BaseQRankSum          |
| 51939 | chrY | 59018536 | . | A | G   | 12696.78  | PASS          | AC=35;AF=0.500;AN=70;BaseQRankSum          |
| 51940 | chrY | 59018550 | . | G | A   | 56276.63  | PASS          | AC=36;AF=0.514;AN=70;BaseQRankSum          |
| 51941 | chrY | 59018568 | . | C | A   | 29648.72  | PASS          | AC=35;AF=0.500;AN=70;BaseQRankSum          |
| 51942 | chrY | 59018569 | . | G | T   | 2771      | PASS          | AC=11;AF=0.157;AN=70;BaseQRankSum          |
| 51943 | chrY | 59018588 | . | G | A   | 11700.73  | PASS          | AC=28;AF=0.400;AN=70;BaseQRankSum          |
| 51944 | chrY | 59018599 | . | T | C   | 2428.62   | PASS          | AC=11;AF=0.157;AN=70;BaseQRankSum          |
| 51945 | chrY | 59018641 | . | G | A   | 33652.72  | PASS          | AC=35;AF=0.500;AN=70;BaseQRankSum          |
| 51946 | chrY | 59018652 | . | C | T   | 3952.95   | PASS          | AC=14;AF=0.200;AN=70;BaseQRankSum          |
| 51947 | chrY | 59018676 | . | C | T   | 7179.24   | PASS          | AC=23;AF=0.329;AN=70;BaseQRankSum          |
| 51948 | chrY | 59018683 | . | G | A   | 29145.21  | PASS          | AC=35;AF=0.500;AN=70;BaseQRankSum          |
| 51949 | chrY | 59018689 | . | C | A   | 47256.72  | PASS          | AC=35;AF=0.500;AN=70;BaseQRankSum          |
| 51950 | chrY | 59018698 | . | C | T   | 31198.72  | PASS          | AC=35;AF=0.500;AN=70;BaseQRankSum          |
| 51951 | chrY | 59018716 | . | G | A   | 25471.72  | PASS          | AC=35;AF=0.500;AN=70;BaseQRankSum          |
| 51952 | chrY | 59018723 | . | C | T,G | 16715.83  | PASS          | AC=26,9;AF=0.371,0.129;AN=70;BaseQRankSum  |
| 51953 | chrY | 59018763 | . | G | A   | 62189.85  | PASS          | AC=36;AF=0.514;AN=70;BaseQRankSum          |
| 51954 | chrY | 59018786 | . | C | T   | 47679.32  | PASS          | AC=36;AF=0.514;AN=70;BaseQRankSum          |
| 51955 | chrY | 59018822 | . | T | G   | 33970.07  | PASS          | AC=30;AF=0.429;AN=70;BaseQRankSum          |
| 51956 | chrY | 59018834 | . | A | C   | 165.44    | my_snp_filter | AC=1;AF=0.014;AN=70;BaseQRankSum           |
| 51957 | chrY | 59018842 | . | C | A   | 22328.40  | PASS          | AC=27;AF=0.386;AN=70;BaseQRankSum          |
| 51958 | chrY | 59018847 | . | C | G   | 3688.61   | PASS          | AC=18;AF=0.257;AN=70;BaseQRankSum          |
| 51959 | chrY | 59018876 | . | G | A   | 37393.78  | PASS          | AC=38;AF=0.543;AN=70;BaseQRankSum          |
| 51960 | chrY | 59018910 | . | C | T   | 27349.53  | PASS          | AC=34;AF=0.486;AN=70;BaseQRankSum          |
| 51961 | chrY | 59018915 | . | T | A   | 174.05    | my_snp_filter | AC=2;AF=0.029;AN=70;BaseQRankSum           |
| 51962 | chrY | 59018933 | . | C | T   | 89846.62  | PASS          | AC=45;AF=0.643;AN=70;BaseQRankSum          |
| 51963 | chrY | 59018989 | . | A | C   | 1925.52   | PASS          | AC=3;AF=0.043;AN=70;BaseQRankSum           |
| 51964 | chrY | 59018994 | . | T | G   | 149.73    | my_snp_filter | AC=1;AF=0.014;AN=70;BaseQRankSum           |
| 51965 | chrY | 59019030 | . | A | G   | 165691.57 | PASS          | AC=56;AF=0.800;AN=70;BaseQRankSum          |
| 51966 | chrY | 59019037 | . | C | T   | 90.42     | my_snp_filter | AC=1;AF=0.014;AN=70;BaseQRankSum           |
| 51967 | chrY | 59019076 | . | C | A,T | 99729.78  | PASS          | AC=33,27;AF=0.471,0.386;AN=70;BaseQRankSum |
| 51968 | chrY | 59019078 | . | C | T   | 1739.88   | my_snp_filter | AC=9;AF=0.129;AN=70;BaseQRankSum           |
| 51969 | chrY | 59019088 | . | C | T   | 17654.24  | PASS          | AC=29;AF=0.414;AN=70;BaseQRankSum          |
| 51970 | chrY | 59019091 | . | G | C   | 43791.72  | PASS          | AC=35;AF=0.500;AN=70;BaseQRankSum          |
| 51971 | chrY | 59019107 | . | T | C   | 379.51    | my_snp_filter | AC=3;AF=0.043;AN=70;BaseQRankSum           |
| 51972 | chrY | 59019162 | . | C | G   | 5598.96   | PASS          | AC=25;AF=0.357;AN=70;BaseQRankSum          |
| 51973 | chrY | 59019171 | . | T | C   | 281.42    | my_snp_filter | AC=5;AF=0.071;AN=70;BaseQRankSum           |
| 51974 | chrY | 59019180 | . | G | A   | 32755.53  | PASS          | AC=34;AF=0.486;AN=70;BaseQRankSum          |
| 51975 | chrY | 59019208 | . | C | A   | 3356.97   | PASS          | AC=18;AF=0.265;AN=68;BaseQRankSum          |
| 51976 | chrY | 59019260 | . | G | A   | 6121.51   | PASS          | AC=9;AF=0.141;AN=64;BaseQRankSum           |
| 51977 | chrY | 59019267 | . | A | G   | 49469.34  | PASS          | AC=43;AF=0.768;AN=56;BaseQRankSum          |
| 51978 | chrY | 59019273 | . | A | T   | 46.93     | PASS          | AC=2;AF=0.030;AN=66;DP=1869;FS=0.0         |
| 51979 | chrY | 59019415 | . | A | G   | 59460.05  | PASS          | AC=33;AF=0.500;AN=66;BaseQRankSum          |
| 51980 | chrY | 59019425 | . | T | A   | 5491.03   | PASS          | AC=15;AF=0.214;AN=70;BaseQRankSum          |
| 51981 | chrY | 59019426 | . | A | G   | 218.02    | my_snp_filter | AC=2;AF=0.029;AN=70;BaseQRankSum           |
| 51982 | chrY | 59019432 | . | C | G   | 52026     | PASS          | AC=34;AF=0.500;AN=68;BaseQRankSum          |
| 51983 | chrY | 59019460 | . | G | A   | 537.01    | my_snp_filter | AC=6;AF=0.086;AN=70;BaseQRankSum           |
| 51984 | chrY | 59019562 | . | G | A   | 2418.13   | PASS          | AC=8;AF=0.114;AN=70;BaseQRankSum           |

|       |      |          |   |   |     |           |               |                                   |
|-------|------|----------|---|---|-----|-----------|---------------|-----------------------------------|
| 51985 | chrY | 59019600 | . | G | T   | 191.42    | PASS          | AC=1;AF=0.014;AN=70;BaseQRankSum= |
| 51986 | chrY | 59019609 | . | A | G   | 64354.01  | PASS          | AC=43;AF=0.614;AN=70;Base         |
| 51987 | chrY | 59019670 | . | T | C   | 1109.78   | my_snp_filter | AC=8;AF=0.114;AN=70;BaseQ         |
| 51988 | chrY | 59019689 | . | T | C   | 96414.91  | PASS          | AC=42;AF=0.600;AN=70;Base         |
| 51989 | chrY | 59019735 | . | G | A   | 82703.22  | PASS          | AC=37;AF=0.529;AN=70;Base         |
| 51990 | chrY | 59019782 | . | G | A   | 3712.15   | my_snp_filter | AC=19;AF=0.271;AN=70;Base         |
| 51991 | chrY | 59019791 | . | C | A   | 12560.68  | PASS          | AC=24;AF=0.343;AN=70;Base         |
| 51992 | chrY | 59019857 | . | T | C   | 131848.45 | PASS          | AC=55;AF=0.786;AN=70;Base         |
| 51993 | chrY | 59019861 | . | C | T   | 1036.91   | my_snp_filter | AC=7;AF=0.100;AN=70;BaseQ         |
| 51994 | chrY | 59019880 | . | G | A   | 326.66    | my_snp_filter | AC=4;AF=0.057;AN=70;BaseQ         |
| 51995 | chrY | 59019889 | . | C | T   | 166.07    | my_snp_filter | AC=2;AF=0.029;AN=70;BaseQ         |
| 51996 | chrY | 59019910 | . | G | T   | 8272.57   | PASS          | AC=23;AF=0.329;AN=70;BaseQRankSum |
| 51997 | chrY | 59019919 | . | A | G   | 3779.82   | PASS          | AC=9;AF=0.129;AN=70;BaseQRankSum  |
| 51998 | chrY | 59019927 | . | G | A,C | 5401.69   | my_snp_filter | AC=20,2;AF=0.286,0.029;AN         |
| 51999 | chrY | 59019977 | . | T | C   | 4677      | PASS          | AC=13;AF=0.186;AN=70;BaseQRankSum |
| 52000 | chrY | 59019978 | . | G | C   | 28491.72  | PASS          | AC=35;AF=0.500;AN=70;Base         |
| 52001 | chrY | 59019990 | . | G | C   | 331.32    | my_snp_filter | AC=4;AF=0.057;AN=70;BaseQ         |
| 52002 | chrY | 59020046 | . | C | G   | 33902.72  | PASS          | AC=35;AF=0.500;AN=70;Base         |
| 52003 | chrY | 59020058 | . | G | A   | 22352.64  | PASS          | AC=31;AF=0.443;AN=70;Base         |
| 52004 | chrY | 59020068 | . | T | C   | 7993      | PASS          | AC=20;AF=0.286;AN=70;BaseQRankSum |
| 52005 | chrY | 59020070 | . | G | A   | 8464.01   | PASS          | AC=20;AF=0.286;AN=70;BaseQRankSum |
| 52006 | chrY | 59020166 | . | A | G   | 81727.44  | PASS          | AC=57;AF=0.814;AN=70;Base         |
| 52007 | chrY | 59020168 | . | A | G   | 7966.12   | PASS          | AC=31;AF=0.443;AN=70;BaseQRankSum |
| 52008 | chrY | 59020172 | . | C | T   | 369.44    | my_snp_filter | AC=4;AF=0.057;AN=70;BaseQ         |
| 52009 | chrY | 59020187 | . | T | C   | 65.29     | my_snp_filter | AC=2;AF=0.029;AN=70;BaseQ         |
| 52010 | chrY | 59020193 | . | T | C   | 4767.37   | PASS          | AC=24;AF=0.343;AN=70;BaseQRankSum |
| 52011 | chrY | 59020258 | . | G | A   | 1371.64   | my_snp_filter | AC=10;AF=0.143;AN=70;Base         |
| 52012 | chrY | 59020299 | . | G | C   | 9830.22   | PASS          | AC=26;AF=0.371;AN=70;BaseQRankSum |
| 52013 | chrY | 59020330 | . | C | T   | 29422.72  | PASS          | AC=35;AF=0.500;AN=70;Base         |
| 52014 | chrY | 59020338 | . | C | T   | 186.52    | my_snp_filter | AC=3;AF=0.043;AN=70;BaseQ         |
| 52015 | chrY | 59020363 | . | G | A   | 3906.95   | my_snp_filter | AC=22;AF=0.314;AN=70;Base         |
| 52016 | chrY | 59020401 | . | C | T   | 110259.38 | PASS          | AC=51;AF=0.729;AN=70;Base         |
| 52017 | chrY | 59020424 | . | T | C   | 1701.22   | PASS          | AC=6;AF=0.086;AN=70;BaseQRankSum  |
| 52018 | chrY | 59020455 | . | A | G   | 5198.75   | my_snp_filter | AC=22;AF=0.314;AN=70;Base         |
| 52019 | chrY | 59020586 | . | A | G   | 24460.18  | PASS          | AC=32;AF=0.457;AN=70;Base         |
| 52020 | chrY | 59020595 | . | G | T   | 156.42    | my_snp_filter | AC=1;AF=0.014;AN=70;BaseQ         |
| 52021 | chrY | 59020611 | . | C | T   | 4417.63   | my_snp_filter | AC=22;AF=0.314;AN=70;Base         |
| 52022 | chrY | 59020633 | . | A | G   | 692.48    | my_snp_filter | AC=5;AF=0.071;AN=70;BaseQ         |
| 52023 | chrY | 59020641 | . | G | C   | 648.25    | my_snp_filter | AC=5;AF=0.071;AN=70;BaseQ         |
| 52024 | chrY | 59020650 | . | G | C   | 2402.30   | my_snp_filter | AC=8;AF=0.114;AN=70;BaseQ         |
| 52025 | chrY | 59020658 | . | C | T   | 206362.42 | PASS          | AC=69;AF=0.986;AN=70;Base         |
| 52026 | chrY | 59020676 | . | C | T   | 32.42     | my_snp_filter | AC=1;AF=0.014;AN=70;BaseQ         |
| 52027 | chrY | 59020693 | . | C | T   | 87.42     | my_snp_filter | AC=1;AF=0.014;AN=70;BaseQ         |
| 52028 | chrY | 59020712 | . | C | T   | 1450.09   | my_snp_filter | AC=5;AF=0.071;AN=70;BaseQ         |
| 52029 | chrY | 59020728 | . | A | G   | 180846.87 | PASS          | AC=57;AF=0.814;AN=70;Base         |
| 52030 | chrY | 59020736 | . | G | T   | 62.08     | my_snp_filter | AC=2;AF=0.029;AN=70;BaseQ         |
| 52031 | chrY | 59020808 | . | T | C   | 97.42     | my_snp_filter | AC=1;AF=0.014;AN=70;BaseQ         |
| 52032 | chrY | 59020818 | . | T | C   | 70146.72  | PASS          | AC=35;AF=0.500;AN=70;Base         |
| 52033 | chrY | 59020835 | . | T | C   | 1572.84   | PASS          | AC=5;AF=0.071;AN=70;BaseQRankSum  |
| 52034 | chrY | 59020875 | . | G | C   | 93.24     | my_snp_filter | AC=2;AF=0.029;AN=70;BaseQ         |
| 52035 | chrY | 59020879 | . | C | A   | 933.33    | PASS          | AC=6;AF=0.086;AN=70;BaseQRankSum  |
| 52036 | chrY | 59020900 | . | T | C   | 19086.72  | PASS          | AC=35;AF=0.500;AN=70;Base         |
| 52037 | chrY | 59020916 | . | G | C   | 3883.82   | PASS          | AC=21;AF=0.300;AN=70;BaseQRankSum |
| 52038 | chrY | 59020928 | . | G | A   | 51.74     | PASS          | AC=1;AF=0.014;AN=70;BaseQRankSum  |
| 52039 | chrY | 59020955 | . | T | C   | 9077.33   | PASS          | AC=9;AF=0.150;AN=60;BaseQRankSum  |
| 52040 | chrY | 59020996 | . | C | T   | 871.93    | PASS          | AC=6;AF=0.091;AN=66;BaseQRankSum  |
| 52041 | chrY | 59020997 | . | T | G   | 18916.83  | PASS          | AC=14;AF=0.219;AN=64;Base         |
| 52042 | chrY | 59021020 | . | C | T   | 22315.85  | PASS          | AC=10;AF=0.200;AN=50;Base         |
| 52043 | chrY | 59021041 | . | C | T   | 54.16     | my_snp_filter | AC=1;AF=0.017;AN=60;BaseQ         |
| 52044 | chrY | 59021073 | . | G | A   | 46.44     | PASS          | AC=2;AF=0.031;AN=64;BaseQRankSum  |
| 52045 | chrY | 59021086 | . | C | T   | 3402.78   | PASS          | AC=14;AF=0.212;AN=66;BaseQRankSum |
| 52046 | chrY | 59021120 | . | C | G   | 44955.44  | PASS          | AC=56;AF=0.800;AN=70;Base         |
| 52047 | chrY | 59021170 | . | G | A   | 638.27    | my_snp_filter | AC=5;AF=0.071;AN=70;BaseQ         |
| 52048 | chrY | 59021173 | . | C | T   | 109.05    | my_snp_filter | AC=2;AF=0.029;AN=70;BaseQ         |
| 52049 | chrY | 59021174 | . | A | G   | 109.05    | my_snp_filter | AC=2;AF=0.029;AN=70;BaseQ         |
| 52050 | chrY | 59021176 | . | C | T   | 239.42    | PASS          | AC=1;AF=0.014;AN=70;BaseQRankSum  |
| 52051 | chrY | 59021191 | . | T | A   | 22474.84  | PASS          | AC=34;AF=0.486;AN=70;Base         |
| 52052 | chrY | 59021197 | . | G | A   | 133.42    | my_snp_filter | AC=1;AF=0.014;AN=70;BaseQ         |
| 52053 | chrY | 59021207 | . | T | G   | 17819.89  | PASS          | AC=25;AF=0.357;AN=70;Base         |
| 52054 | chrY | 59021209 | . | G | A   | 12339.99  | PASS          | AC=25;AF=0.357;AN=70;Base         |
| 52055 | chrY | 59021218 | . | C | T   | 697.09    | my_snp_filter | AC=5;AF=0.071;AN=70;BaseQ         |
| 52056 | chrY | 59021219 | . | T | G   | 1357.76   | my_snp_filter | AC=6;AF=0.086;AN=70;BaseQ         |
| 52057 | chrY | 59021222 | . | C | T   | 4821.35   | PASS          | AC=16;AF=0.229;AN=70;BaseQRankSum |
| 52058 | chrY | 59021223 | . | G | A   | 2444.56   | my_snp_filter | AC=12;AF=0.171;AN=70;Base         |
| 52059 | chrY | 59021246 | . | G | A   | 16552.86  | PASS          | AC=21;AF=0.300;AN=70;Base         |
| 52060 | chrY | 59021247 | . | C | A   | 30218.84  | PASS          | AC=34;AF=0.486;AN=70;Base         |

|       |      |          |   |   |     |           |               |                                     |
|-------|------|----------|---|---|-----|-----------|---------------|-------------------------------------|
| 52061 | chrY | 59021264 | . | C | T   | 15529.02  | PASS          | AC=20;AF=0.286;AN=70;BaseQ          |
| 52062 | chrY | 59021300 | . | A | C   | 6775.37   | PASS          | AC=14;AF=0.200;AN=70;BaseQRankSum   |
| 52063 | chrY | 59021311 | . | C | A   | 79240.39  | PASS          | AC=48;AF=0.686;AN=70;BaseQ          |
| 52064 | chrY | 59021463 | . | A | G   | 476.76    | my_snp_filter | AC=6;AF=0.086;AN=70;BaseQ           |
| 52065 | chrY | 59021474 | . | T | C   | 49.24     | my_snp_filter | AC=2;AF=0.029;AN=70;BaseQ           |
| 52066 | chrY | 59021500 | . | A | G   | 1060.17   | my_snp_filter | AC=13;AF=0.186;AN=70;BaseQ          |
| 52067 | chrY | 59021552 | . | C | T   | 1621.56   | my_snp_filter | AC=24;AF=0.343;AN=70;BaseQ          |
| 52068 | chrY | 59021583 | . | A | G   | 22263.72  | PASS          | AC=35;AF=0.500;AN=70;BaseQ          |
| 52069 | chrY | 59021661 | . | G | C,* | 10054.36  | PASS          | AC=11,16;AF=0.157,0.229;AN=70;BaseQ |
| 52070 | chrY | 59021701 | . | T | A   | 5069.26   | PASS          | AC=7;AF=0.100;AN=70;BaseQRankSum    |
| 52071 | chrY | 59021703 | . | C | T   | 122.56    | my_snp_filter | AC=6;AF=0.086;AN=70;BaseQ           |
| 52072 | chrY | 59021711 | . | A | G   | 4991.46   | PASS          | AC=7;AF=0.100;AN=70;BaseQRankSum    |
| 52073 | chrY | 59021725 | . | A | G   | 33.42     | my_snp_filter | AC=1;AF=0.014;AN=70;BaseQ           |
| 52074 | chrY | 59021736 | . | A | G   | 5806.58   | PASS          | AC=29;AF=0.414;AN=70;BaseQRankSum   |
| 52075 | chrY | 59021744 | . | A | C   | 2966.22   | PASS          | AC=14;AF=0.200;AN=70;BaseQRankSum   |
| 52076 | chrY | 59021806 | . | A | G,* | 9271.42   | PASS          | AC=24,6;AF=0.343,0.086;AN=70;BaseQ  |
| 52077 | chrY | 59021840 | . | C | G   | 54.06     | my_snp_filter | AC=2;AF=0.029;AN=70;BaseQ           |
| 52078 | chrY | 59021849 | . | G | A   | 718.30    | my_snp_filter | AC=12;AF=0.171;AN=70;BaseQ          |
| 52079 | chrY | 59021876 | . | G | T   | 514.15    | PASS          | AC=8;AF=0.114;AN=70;BaseQRankSum    |
| 52080 | chrY | 59021925 | . | C | G   | 19651.02  | PASS          | AC=35;AF=0.500;AN=70;BaseQ          |
| 52081 | chrY | 59021950 | . | G | C   | 8897.37   | PASS          | AC=34;AF=0.486;AN=70;BaseQRankSum   |
| 52082 | chrY | 59021983 | . | C | T   | 12225.84  | PASS          | AC=34;AF=0.486;AN=70;BaseQ          |
| 52083 | chrY | 59021988 | . | T | C   | 12782.84  | PASS          | AC=34;AF=0.486;AN=70;BaseQ          |
| 52084 | chrY | 59021997 | . | T | G   | 184.51    | PASS          | AC=3;AF=0.043;AN=70;BaseQRankSum    |
| 52085 | chrY | 59022101 | . | T | A   | 450.73    | my_snp_filter | AC=6;AF=0.086;AN=70;BaseQ           |
| 52086 | chrY | 59022204 | . | G | A   | 7359.58   | PASS          | AC=10;AF=0.192;AN=52;BaseQRankSum   |
| 52087 | chrY | 59022205 | . | G | A   | 3347.12   | PASS          | AC=12;AF=0.214;AN=56;BaseQRankSum   |
| 52088 | chrY | 59022257 | . | G | A   | 5794.45   | PASS          | AC=7;AF=0.184;AN=38;BaseQRankSum    |
| 52089 | chrY | 59022328 | . | G | T   | 332.43    | PASS          | AC=3;AF=0.068;AN=44;BaseQRankSum    |
| 52090 | chrY | 59022350 | . | G | A   | 585.34    | my_snp_filter | AC=4;AF=0.074;AN=54;BaseQ           |
| 52091 | chrY | 59022404 | . | A | C   | 16119.97  | PASS          | AC=16;AF=0.320;AN=50;BaseQ          |
| 52092 | chrY | 59022426 | . | T | C   | 47.11     | my_snp_filter | AC=2;AF=0.029;AN=68;BaseQ           |
| 52093 | chrY | 59022470 | . | G | A   | 6476.96   | PASS          | AC=23;AF=0.348;AN=66;BaseQRankSum   |
| 52094 | chrY | 59022509 | . | T | A   | 2338.87   | my_snp_filter | AC=6;AF=0.086;AN=70;BaseQ           |
| 52095 | chrY | 59022703 | . | C | T   | 3054.48   | PASS          | AC=13;AF=0.186;AN=70;BaseQRankSum   |
| 52096 | chrY | 59022705 | . | C | G   | 979.75    | my_snp_filter | AC=6;AF=0.086;AN=70;BaseQ           |
| 52097 | chrY | 59022708 | . | A | G   | 8724.77   | PASS          | AC=12;AF=0.171;AN=70;BaseQRankSum   |
| 52098 | chrY | 59022718 | . | A | G   | 55824.34  | PASS          | AC=36;AF=0.514;AN=70;BaseQ          |
| 52099 | chrY | 59022723 | . | C | T   | 56494.38  | PASS          | AC=35;AF=0.500;AN=70;BaseQ          |
| 52100 | chrY | 59022734 | . | C | T   | 23608.73  | PASS          | AC=35;AF=0.500;AN=70;BaseQ          |
| 52101 | chrY | 59022768 | . | A | G   | 46565.48  | PASS          | AC=41;AF=0.586;AN=70;BaseQ          |
| 52102 | chrY | 59022782 | . | A | G   | 8363.30   | PASS          | AC=23;AF=0.329;AN=70;BaseQRankSum   |
| 52103 | chrY | 59022785 | . | A | G   | 529.30    | my_snp_filter | AC=4;AF=0.057;AN=70;BaseQ           |
| 52104 | chrY | 59022800 | . | C | T   | 8695.92   | PASS          | AC=25;AF=0.357;AN=70;BaseQRankSum   |
| 52105 | chrY | 59022839 | . | G | T   | 5380.72   | PASS          | AC=26;AF=0.371;AN=70;BaseQRankSum   |
| 52106 | chrY | 59022922 | . | G | C   | 57029.02  | PASS          | AC=40;AF=0.571;AN=70;BaseQ          |
| 52107 | chrY | 59022924 | . | C | T   | 5998.91   | PASS          | AC=25;AF=0.357;AN=70;BaseQRankSum   |
| 52108 | chrY | 59022938 | . | G | A   | 461.29    | my_snp_filter | AC=4;AF=0.057;AN=70;BaseQ           |
| 52109 | chrY | 59022943 | . | G | A,C | 8225.41   | PASS          | AC=20,11;AF=0.286,0.157;AN=70;BaseQ |
| 52110 | chrY | 59022991 | . | T | C   | 74592.87  | PASS          | AC=44;AF=0.629;AN=70;BaseQ          |
| 52111 | chrY | 59023079 | . | A | C   | 72514.11  | PASS          | AC=46;AF=0.657;AN=70;BaseQ          |
| 52112 | chrY | 59023115 | . | C | T   | 22479.73  | PASS          | AC=35;AF=0.500;AN=70;BaseQ          |
| 52113 | chrY | 59023230 | . | T | G   | 35441.24  | PASS          | AC=50;AF=0.714;AN=70;BaseQ          |
| 52114 | chrY | 59023281 | . | G | A   | 52.97     | PASS          | AC=1;AF=0.015;AN=66;BaseQRankSum    |
| 52115 | chrY | 59023284 | . | G | A   | 42.04     | PASS          | AC=1;AF=0.016;AN=64;BaseQRankSum    |
| 52116 | chrY | 59023288 | . | A | C,T | 10234.08  | PASS          | AC=16,1;AF=0.258,0.016;AN=70;BaseQ  |
| 52117 | chrY | 59023316 | . | C | A   | 136.12    | my_snp_filter | AC=3;AF=0.048;AN=62;BaseQ           |
| 52118 | chrY | 59023374 | . | C | T   | 27406.15  | PASS          | AC=9;AF=0.205;AN=44;BaseQ           |
| 52119 | chrY | 59023382 | . | G | T   | 27396.17  | PASS          | AC=9;AF=0.214;AN=42;BaseQ           |
| 52120 | chrY | 59023402 | . | C | T   | 427.98    | my_snp_filter | AC=3;AF=0.056;AN=54;BaseQ           |
| 52121 | chrY | 59023473 | . | T | G   | 316.91    | my_snp_filter | AC=4;AF=0.057;AN=70;BaseQ           |
| 52122 | chrY | 59023487 | . | G | A   | 17448.30  | PASS          | AC=27;AF=0.386;AN=70;BaseQ          |
| 52123 | chrY | 59023528 | . | A | C   | 18974.22  | PASS          | AC=33;AF=0.471;AN=70;BaseQ          |
| 52124 | chrY | 59023541 | . | A | T   | 3842.61   | PASS          | AC=22;AF=0.314;AN=70;BaseQRankSum   |
| 52125 | chrY | 59023580 | . | T | C   | 35.99     | my_snp_filter | AC=5;AF=0.071;AN=70;BaseQ           |
| 52126 | chrY | 59023587 | . | T | C   | 77727.91  | PASS          | AC=45;AF=0.643;AN=70;BaseQ          |
| 52127 | chrY | 59023612 | . | A | G   | 420.42    | PASS          | AC=1;AF=0.014;AN=70;BaseQRankSum    |
| 52128 | chrY | 59023618 | . | C | A   | 415.43    | PASS          | AC=1;AF=0.014;AN=70;BaseQRankSum    |
| 52129 | chrY | 59023633 | . | G | T   | 34737.72  | PASS          | AC=35;AF=0.500;AN=70;BaseQ          |
| 52130 | chrY | 59023728 | . | T | G   | 111103.86 | PASS          | AC=70;AF=1.00;AN=70;BaseQ           |
| 52131 | chrY | 59023729 | . | T | C   | 27307.73  | PASS          | AC=35;AF=0.500;AN=70;BaseQ          |
| 52132 | chrY | 59023770 | . | G | A   | 27313.98  | PASS          | AC=33;AF=0.471;AN=70;BaseQ          |
| 52133 | chrY | 59023917 | . | T | C   | 10745.91  | PASS          | AC=23;AF=0.411;AN=56;BaseQ          |
| 52134 | chrY | 59023958 | . | G | A   | 16389.86  | PASS          | AC=30;AF=0.429;AN=70;BaseQ          |
| 52135 | chrY | 59023962 | . | C | A   | 250.80    | my_snp_filter | AC=3;AF=0.043;AN=70;BaseQ           |
| 52136 | chrY | 59024009 | . | A | C,* | 14503.62  | PASS          | AC=21,1;AF=0.350,0.017;AN=70;BaseQ  |

|       |      |          |   |   |     |           |               |                                    |
|-------|------|----------|---|---|-----|-----------|---------------|------------------------------------|
| 52137 | chrY | 59024010 | . | A | C   | 313.04    | PASS          | AC=4;AF=0.069;AN=58;BaseQRankSum=  |
| 52138 | chrY | 59024019 | . | A | G   | 48694.01  | PASS          | AC=37;AF=0.561;AN=66;Base          |
| 52139 | chrY | 59024032 | . | C | G   | 13023.23  | PASS          | AC=23;AF=0.348;AN=66;Base          |
| 52140 | chrY | 59024042 | . | G | C   | 65912.32  | PASS          | AC=37;AF=0.638;AN=58;Base          |
| 52141 | chrY | 59024097 | . | A | C   | 132.42    | PASS          | AC=1;AF=0.014;AN=70;BaseQRankSum=  |
| 52142 | chrY | 59024125 | . | T | C,A | 67130.54  | PASS          | AC=42,1;AF=0.600,0.014;AN          |
| 52143 | chrY | 59024176 | . | T | C   | 51689.44  | PASS          | AC=40;AF=0.571;AN=70;Base          |
| 52144 | chrY | 59024202 | . | A | C   | 13394.86  | PASS          | AC=33;AF=0.471;AN=70;Base          |
| 52145 | chrY | 59024222 | . | G | T   | 256.54    | my_snp_filter | AC=3;AF=0.043;AN=70;BaseQ          |
| 52146 | chrY | 59024223 | . | C | T   | 1496.47   | PASS          | AC=8;AF=0.114;AN=70;BaseQRankSum=  |
| 52147 | chrY | 59024253 | . | C | A   | 12740.36  | PASS          | AC=33;AF=0.471;AN=70;Base          |
| 52148 | chrY | 59024255 | . | T | C   | 1708.75   | PASS          | AC=10;AF=0.143;AN=70;BaseQRankSum= |
| 52149 | chrY | 59024259 | . | G | A   | 62.42     | my_snp_filter | AC=1;AF=0.014;AN=70;BaseQ          |
| 52150 | chrY | 59024265 | . | C | T   | 35.43     | my_snp_filter | AC=1;AF=0.014;AN=70;BaseQ          |
| 52151 | chrY | 59024399 | . | T | C   | 35237.73  | PASS          | AC=35;AF=0.500;AN=70;Base          |
| 52152 | chrY | 59024419 | . | T | C   | 40767.72  | PASS          | AC=35;AF=0.500;AN=70;Base          |
| 52153 | chrY | 59024423 | . | A | C   | 450.31    | my_snp_filter | AC=3;AF=0.043;AN=70;BaseQ          |
| 52154 | chrY | 59024426 | . | G | T   | 2839.77   | PASS          | AC=9;AF=0.129;AN=70;BaseQRankSum=  |
| 52155 | chrY | 59024427 | . | G | A   | 458.31    | my_snp_filter | AC=3;AF=0.043;AN=70;BaseQ          |
| 52156 | chrY | 59024436 | . | C | A   | 161.44    | my_snp_filter | AC=1;AF=0.014;AN=70;BaseQ          |
| 52157 | chrY | 59024438 | . | C | T   | 3630.60   | PASS          | AC=17;AF=0.243;AN=70;BaseQRankSum= |
| 52158 | chrY | 59024485 | . | T | A   | 79174.07  | PASS          | AC=48;AF=0.686;AN=70;Base          |
| 52159 | chrY | 59024487 | . | T | C   | 9210.31   | PASS          | AC=30;AF=0.429;AN=70;BaseQRankSum= |
| 52160 | chrY | 59024488 | . | C | T   | 9450.31   | PASS          | AC=30;AF=0.429;AN=70;BaseQRankSum= |
| 52161 | chrY | 59024505 | . | A | T   | 56.09     | my_snp_filter | AC=2;AF=0.029;AN=70;BaseQ          |
| 52162 | chrY | 59024534 | . | A | G   | 8799.66   | PASS          | AC=24;AF=0.343;AN=70;BaseQRankSum= |
| 52163 | chrY | 59024547 | . | A | T   | 2353.82   | PASS          | AC=11;AF=0.157;AN=70;BaseQRankSum= |
| 52164 | chrY | 59024563 | . | T | C   | 25384.73  | PASS          | AC=35;AF=0.500;AN=70;Base          |
| 52165 | chrY | 59024573 | . | G | A   | 20944.19  | PASS          | AC=33;AF=0.471;AN=70;Base          |
| 52166 | chrY | 59024628 | . | A | T   | 14352.84  | PASS          | AC=34;AF=0.486;AN=70;Base          |
| 52167 | chrY | 59024657 | . | C | T   | 16166.78  | PASS          | AC=31;AF=0.443;AN=70;Base          |
| 52168 | chrY | 59024664 | . | T | C   | 2056.07   | PASS          | AC=10;AF=0.143;AN=70;BaseQRankSum= |
| 52169 | chrY | 59024675 | . | G | A   | 1066.29   | my_snp_filter | AC=8;AF=0.114;AN=70;BaseQ          |
| 52170 | chrY | 59024715 | . | T | C   | 25257.72  | PASS          | AC=35;AF=0.500;AN=70;Base          |
| 52171 | chrY | 59024744 | . | C | G   | 68486.96  | PASS          | AC=50;AF=0.714;AN=70;Base          |
| 52172 | chrY | 59024765 | . | C | T   | 483.27    | my_snp_filter | AC=8;AF=0.114;AN=70;BaseQ          |
| 52173 | chrY | 59024836 | . | G | T   | 7130.76   | PASS          | AC=22;AF=0.314;AN=70;BaseQRankSum= |
| 52174 | chrY | 59024845 | . | G | A   | 6143.86   | PASS          | AC=21;AF=0.300;AN=70;BaseQRankSum= |
| 52175 | chrY | 59024852 | . | G | A   | 4996.55   | PASS          | AC=17;AF=0.243;AN=70;BaseQRankSum= |
| 52176 | chrY | 59024856 | . | T | C   | 24771.84  | PASS          | AC=34;AF=0.486;AN=70;Base          |
| 52177 | chrY | 59024875 | . | A | G   | 582.06    | PASS          | AC=2;AF=0.029;AN=70;BaseQRankSum=  |
| 52178 | chrY | 59024889 | . | C | G   | 106932.39 | PASS          | AC=46;AF=0.657;AN=70;Base          |
| 52179 | chrY | 59024892 | . | T | C   | 2369.64   | PASS          | AC=10;AF=0.143;AN=70;BaseQRankSum= |
| 52180 | chrY | 59024895 | . | C | T   | 2346.28   | my_snp_filter | AC=11;AF=0.157;AN=70;Base          |
| 52181 | chrY | 59024905 | . | G | T   | 8331.08   | PASS          | AC=25;AF=0.357;AN=70;BaseQRankSum= |
| 52182 | chrY | 59024923 | . | A | T   | 356.02    | my_snp_filter | AC=5;AF=0.071;AN=70;BaseQ          |
| 52183 | chrY | 59024948 | . | T | C   | 42459.19  | PASS          | AC=33;AF=0.471;AN=70;Base          |
| 52184 | chrY | 59024971 | . | G | A   | 105819.87 | PASS          | AC=47;AF=0.671;AN=70;Base          |
| 52185 | chrY | 59024972 | . | A | G   | 404.49    | my_snp_filter | AC=7;AF=0.100;AN=70;BaseQ          |
| 52186 | chrY | 59025007 | . | A | G   | 1650.41   | my_snp_filter | AC=16;AF=0.229;AN=70;BaseQ         |
| 52187 | chrY | 59025087 | . | G | A   | 74.45     | my_snp_filter | AC=1;AF=0.014;AN=70;BaseQ          |
| 52188 | chrY | 59025134 | . | A | G   | 2082.02   | PASS          | AC=18;AF=0.257;AN=70;BaseQRankSum= |
| 52189 | chrY | 59025184 | . | C | G   | 268.05    | PASS          | AC=2;AF=0.029;AN=70;BaseQRankSum=  |
| 52190 | chrY | 59025220 | . | G | A   | 20672.22  | PASS          | AC=33;AF=0.471;AN=70;Base          |
| 52191 | chrY | 59025246 | . | A | C   | 64004.43  | PASS          | AC=40;AF=0.571;AN=70;Base          |
| 52192 | chrY | 59025248 | . | C | A   | 74.42     | my_snp_filter | AC=1;AF=0.014;AN=70;BaseQ          |
| 52193 | chrY | 59025250 | . | G | A   | 74.42     | my_snp_filter | AC=1;AF=0.014;AN=70;BaseQ          |
| 52194 | chrY | 59025293 | . | C | A   | 15102.22  | PASS          | AC=32;AF=0.457;AN=70;Base          |
| 52195 | chrY | 59025339 | . | A | G,T | 12741.02  | PASS          | AC=28,17;AF=0.424,0.258;A          |
| 52196 | chrY | 59025373 | . | A | G   | 18207.50  | PASS          | AC=22;AF=0.407;AN=54;Base          |
| 52197 | chrY | 59025396 | . | G | A   | 16546.38  | PASS          | AC=14;AF=0.304;AN=46;Base          |
| 52198 | chrY | 59025397 | . | T | A   | 544.30    | PASS          | AC=5;AF=0.100;AN=50;BaseQRankSum=  |
| 52199 | chrY | 59025553 | . | C | A   | 8500.08   | PASS          | AC=10;AF=0.333;AN=30;BaseQRankSum= |
| 52200 | chrY | 59025573 | . | G | T   | 6641.04   | PASS          | AC=10;AF=0.227;AN=44;BaseQRankSum= |
| 52201 | chrY | 59025580 | . | C | G   | 641.24    | PASS          | AC=3;AF=0.056;AN=54;BaseQRankSum=  |
| 52202 | chrY | 59025631 | . | G | A   | 117.67    | my_snp_filter | AC=1;AF=0.014;AN=70;BaseQ          |
| 52203 | chrY | 59025663 | . | C | T   | 16170.86  | PASS          | AC=32;AF=0.457;AN=70;Base          |
| 52204 | chrY | 59025668 | . | C | G   | 50782     | PASS          | AC=38;AF=0.543;AN=70;BaseQRankSum= |
| 52205 | chrY | 59025678 | . | T | G   | 54620.45  | PASS          | AC=38;AF=0.543;AN=70;Base          |
| 52206 | chrY | 59025687 | . | G | A   | 948.46    | PASS          | AC=7;AF=0.100;AN=70;BaseQRankSum=  |
| 52207 | chrY | 59025699 | . | C | G   | 6221.42   | PASS          | AC=22;AF=0.314;AN=70;BaseQRankSum= |
| 52208 | chrY | 59025760 | . | G | T   | 3183.34   | my_snp_filter | AC=12;AF=0.171;AN=70;Base          |
| 52209 | chrY | 59025774 | . | C | T   | 16030.46  | PASS          | AC=28;AF=0.400;AN=70;Base          |
| 52210 | chrY | 59025792 | . | A | T   | 23041.46  | PASS          | AC=30;AF=0.429;AN=70;Base          |
| 52211 | chrY | 59025844 | . | T | C   | 9859.11   | PASS          | AC=11;AF=0.157;AN=70;BaseQRankSum= |
| 52212 | chrY | 59025909 | . | G | T   | 516.42    | my_snp_filter | AC=1;AF=0.014;AN=70;BaseQ          |

|       |      |          |   |   |     |          |               |                                   |
|-------|------|----------|---|---|-----|----------|---------------|-----------------------------------|
| 52213 | chrY | 59025921 | . | T | C   | 15780.72 | PASS          | AC=34;AF=0.486;AN=70;BaseQ        |
| 52214 | chrY | 59025960 | . | C | G   | 1043.46  | PASS          | AC=7;AF=0.100;AN=70;BaseQRankSum= |
| 52215 | chrY | 59025977 | . | G | C,* | 179.74   | my_snp_filter | AC=1,2;AF=0.014,0.029;AN=         |
| 52216 | chrY | 59025998 | . | T | C   | 74801.72 | PASS          | AC=35;AF=0.500;AN=70;BaseQ        |
| 52217 | chrY | 59026001 | . | T | C   | 39.31    | my_snp_filter | AC=2;AF=0.029;AN=70;BaseQ         |
| 52218 | chrY | 59026010 | . | C | T   | 23494.16 | PASS          | AC=27;AF=0.386;AN=70;BaseQ        |
| 52219 | chrY | 59026044 | . | T | C   | 2919.09  | PASS          | AC=10;AF=0.143;AN=70;BaseQRankSum |
| 52220 | chrY | 59026070 | . | C | T   | 2092.79  | PASS          | AC=8;AF=0.114;AN=70;BaseQRankSum= |
| 52221 | chrY | 59026101 | . | A | G   | 29065.50 | PASS          | AC=38;AF=0.576;AN=66;BaseQ        |
| 52222 | chrY | 59026107 | . | C | T   | 1936.51  | PASS          | AC=11;AF=0.172;AN=64;BaseQRankSum |
| 52223 | chrY | 59026117 | . | C | T   | 5570.10  | my_snp_filter | AC=10;AF=0.161;AN=62;BaseQ        |
| 52224 | chrY | 59026118 | . | G | A   | 202.28   | my_snp_filter | AC=4;AF=0.065;AN=62;BaseQ         |
| 52225 | chrY | 59026125 | . | G | A   | 189.27   | my_snp_filter | AC=3;AF=0.048;AN=62;BaseQ         |
| 52226 | chrY | 59026175 | . | A | G   | 29182.12 | PASS          | AC=29;AF=0.558;AN=52;BaseQ        |
| 52227 | chrY | 59026192 | . | C | T   | 717.92   | PASS          | AC=3;AF=0.058;AN=52;BaseQRankSum= |
| 52228 | chrY | 59026202 | . | G | T   | 29163.71 | PASS          | AC=22;AF=0.550;AN=40;BaseQ        |
| 52229 | chrY | 59026229 | . | G | A,T | 14743.73 | PASS          | AC=14,2;AF=0.292,0.042;AN=        |
| 52230 | chrY | 59026236 | . | T | C   | 32294.91 | PASS          | AC=31;AF=0.620;AN=50;BaseQ        |
| 52231 | chrY | 59026239 | . | C | T   | 7162.23  | PASS          | AC=11;AF=0.177;AN=62;BaseQRankSum |
| 52232 | chrY | 59026245 | . | A | C   | 2589.61  | PASS          | AC=7;AF=0.103;AN=68;BaseQRankSum= |
| 52233 | chrY | 59026251 | . | G | A   | 414.96   | PASS          | AC=1;AF=0.014;AN=70;BaseQRankSum= |
| 52234 | chrY | 59026259 | . | C | T   | 3107.48  | PASS          | AC=7;AF=0.113;AN=62;BaseQRankSum= |
| 52235 | chrY | 59026265 | . | C | T   | 925.37   | PASS          | AC=7;AF=0.100;AN=70;BaseQRankSum= |
| 52236 | chrY | 59026268 | . | C | G   | 15300.21 | PASS          | AC=17;AF=0.266;AN=64;BaseQ        |
| 52237 | chrY | 59026286 | . | C | A   | 3403.79  | PASS          | AC=13;AF=0.197;AN=66;BaseQRankSum |
| 52238 | chrY | 59026317 | . | T | C   | 13497.57 | PASS          | AC=28;AF=0.400;AN=70;BaseQ        |
| 52239 | chrY | 59026329 | . | C | G   | 2998.40  | PASS          | AC=17;AF=0.243;AN=70;BaseQRankSum |
| 52240 | chrY | 59026374 | . | C | T   | 18605.72 | PASS          | AC=35;AF=0.500;AN=70;BaseQ        |
| 52241 | chrY | 59026375 | . | C | T   | 40.43    | my_snp_filter | AC=1;AF=0.014;AN=70;BaseQ         |
| 52242 | chrY | 59026383 | . | G | T   | 58959.73 | PASS          | AC=44;AF=0.629;AN=70;BaseQ        |
| 52243 | chrY | 59026457 | . | A | G   | 187.16   | my_snp_filter | AC=3;AF=0.043;AN=70;BaseQ         |
| 52244 | chrY | 59026469 | . | A | C   | 42.81    | my_snp_filter | AC=1;AF=0.014;AN=70;BaseQ         |
| 52245 | chrY | 59026508 | . | G | A   | 262.42   | my_snp_filter | AC=1;AF=0.014;AN=70;BaseQ         |
| 52246 | chrY | 59026511 | . | A | G   | 247.42   | my_snp_filter | AC=1;AF=0.014;AN=70;BaseQ         |
| 52247 | chrY | 59026513 | . | A | G   | 67294.79 | PASS          | AC=47;AF=0.671;AN=70;BaseQ        |
| 52248 | chrY | 59026553 | . | G | T   | 105.42   | my_snp_filter | AC=1;AF=0.014;AN=70;BaseQ         |
| 52249 | chrY | 59026600 | . | T | C   | 1015.83  | PASS          | AC=9;AF=0.129;AN=70;BaseQRankSum= |
| 52250 | chrY | 59026601 | . | C | T   | 148.64   | my_snp_filter | AC=3;AF=0.043;AN=70;BaseQ         |
| 52251 | chrY | 59026630 | . | T | G   | 20005.72 | PASS          | AC=35;AF=0.500;AN=70;BaseQ        |
| 52252 | chrY | 59026666 | . | C | A   | 414.84   | my_snp_filter | AC=6;AF=0.086;AN=70;BaseQ         |
| 52253 | chrY | 59026667 | . | G | A   | 3869.74  | PASS          | AC=23;AF=0.329;AN=70;BaseQRankSum |
| 52254 | chrY | 59026775 | . | G | A   | 28937.32 | PASS          | AC=36;AF=0.529;AN=68;BaseQ        |
| 52255 | chrY | 59026779 | . | T | C   | 6536.26  | PASS          | AC=24;AF=0.353;AN=68;BaseQRankSum |
| 52256 | chrY | 59026840 | . | T | G   | 837.07   | PASS          | AC=7;AF=0.100;AN=70;BaseQRankSum= |
| 52257 | chrY | 59026862 | . | C | G   | 34445.42 | PASS          | AC=31;AF=0.443;AN=70;BaseQ        |
| 52258 | chrY | 59026881 | . | A | G   | 7617.50  | PASS          | AC=9;AF=0.129;AN=70;BaseQRankSum= |
| 52259 | chrY | 59026893 | . | T | C   | 3334.35  | PASS          | AC=16;AF=0.235;AN=68;BaseQRankSum |
| 52260 | chrY | 59026894 | . | A | G   | 24867.86 | PASS          | AC=31;AF=0.456;AN=68;BaseQ        |
| 52261 | chrY | 59026910 | . | G | A   | 33058.69 | PASS          | AC=33;AF=0.485;AN=68;BaseQ        |
| 52262 | chrY | 59026916 | . | T | G   | 6614.40  | PASS          | AC=10;AF=0.143;AN=70;BaseQRankSum |
| 52263 | chrY | 59026970 | . | A | T   | 1845.28  | PASS          | AC=6;AF=0.088;AN=68;BaseQRankSum= |
| 52264 | chrY | 59026971 | . | A | T   | 964.92   | PASS          | AC=5;AF=0.071;AN=70;BaseQRankSum= |
| 52265 | chrY | 59027039 | . | G | A   | 15380.49 | PASS          | AC=22;AF=0.314;AN=70;BaseQ        |
| 52266 | chrY | 59027040 | . | A | C   | 32227.08 | PASS          | AC=26;AF=0.371;AN=70;BaseQ        |
| 52267 | chrY | 59027055 | . | G | T   | 12343.88 | PASS          | AC=17;AF=0.243;AN=70;BaseQ        |
| 52268 | chrY | 59027058 | . | A | G   | 29975.84 | PASS          | AC=23;AF=0.348;AN=66;BaseQ        |
| 52269 | chrY | 59027063 | . | G | A   | 11567.64 | PASS          | AC=16;AF=0.229;AN=70;BaseQ        |
| 52270 | chrY | 59027100 | . | G | C   | 854.93   | PASS          | AC=3;AF=0.044;AN=68;BaseQRankSum= |
| 52271 | chrY | 59027107 | . | C | A   | 1503.59  | PASS          | AC=7;AF=0.103;AN=68;BaseQRankSum= |
| 52272 | chrY | 59027111 | . | G | A   | 7299.61  | PASS          | AC=17;AF=0.250;AN=68;BaseQRankSum |
| 52273 | chrY | 59027191 | . | T | C   | 1186.81  | PASS          | AC=5;AF=0.081;AN=62;BaseQRankSum= |
| 52274 | chrY | 59027223 | . | C | T   | 5486.69  | PASS          | AC=15;AF=0.259;AN=58;BaseQRankSum |
| 52275 | chrY | 59027229 | . | G | A   | 856.17   | PASS          | AC=4;AF=0.069;AN=58;BaseQRankSum= |
| 52276 | chrY | 59027277 | . | C | T   | 9817.01  | PASS          | AC=21;AF=0.339;AN=62;BaseQRankSum |
| 52277 | chrY | 59027358 | . | G | A   | 13113.77 | PASS          | AC=33;AF=0.471;AN=70;BaseQ        |
| 52278 | chrY | 59027384 | . | A | C   | 14573.88 | PASS          | AC=34;AF=0.486;AN=70;BaseQ        |
| 52279 | chrY | 59027420 | . | C | G   | 12837.84 | PASS          | AC=34;AF=0.486;AN=70;BaseQ        |
| 52280 | chrY | 59027434 | . | G | C   | 30690.88 | PASS          | AC=45;AF=0.643;AN=70;BaseQ        |
| 52281 | chrY | 59027512 | . | C | G   | 5100     | PASS          | AC=10;AF=0.200;AN=50;BaseQRankSum |
| 52282 | chrY | 59027513 | . | G | A   | 5203.25  | PASS          | AC=10;AF=0.192;AN=52;BaseQRankSum |
| 52283 | chrY | 59027525 | . | A | G   | 24003.97 | PASS          | AC=30;AF=0.429;AN=70;BaseQ        |
| 52284 | chrY | 59027543 | . | T | C   | 443.99   | PASS          | AC=7;AF=0.100;AN=70;BaseQRankSum= |
| 52285 | chrY | 59027549 | . | C | T   | 29728.12 | PASS          | AC=29;AF=0.453;AN=64;BaseQ        |
| 52286 | chrY | 59027554 | . | A | T   | 10181.24 | PASS          | AC=29;AF=0.414;AN=70;BaseQ        |
| 52287 | chrY | 59027559 | . | T | C   | 10628.91 | PASS          | AC=29;AF=0.414;AN=70;BaseQ        |
| 52288 | chrY | 59027562 | . | C | T   | 31839.96 | PASS          | AC=29;AF=0.453;AN=64;BaseQ        |



|       |      |          |   |   |   |           |               |                                   |
|-------|------|----------|---|---|---|-----------|---------------|-----------------------------------|
| 52289 | chrY | 59027575 | . | G | C | 53955.50  | PASS          | AC=36;AF=0.529;AN=68;BaseQ        |
| 52290 | chrY | 59027629 | . | C | T | 23764.36  | PASS          | AC=33;AF=0.471;AN=70;BaseQ        |
| 52291 | chrY | 59027648 | . | G | C | 91.13     | my_snp_filter | AC=2;AF=0.029;AN=70;BaseQ         |
| 52292 | chrY | 59027650 | . | A | G | 11049.59  | PASS          | AC=25;AF=0.357;AN=70;BaseQ        |
| 52293 | chrY | 59027655 | . | G | T | 26115.36  | PASS          | AC=33;AF=0.471;AN=70;BaseQ        |
| 52294 | chrY | 59027700 | . | A | C | 79535.22  | PASS          | AC=42;AF=0.600;AN=70;BaseQ        |
| 52295 | chrY | 59027721 | . | C | A | 749.52    | my_snp_filter | AC=5;AF=0.071;AN=70;BaseQ         |
| 52296 | chrY | 59027744 | . | G | A | 52175.73  | PASS          | AC=33;AF=0.471;AN=70;BaseQ        |
| 52297 | chrY | 59027750 | . | G | A | 63.38     | my_snp_filter | AC=2;AF=0.029;AN=70;BaseQ         |
| 52298 | chrY | 59027751 | . | G | A | 8067.98   | PASS          | AC=20;AF=0.286;AN=70;BaseQRankSum |
| 52299 | chrY | 59027752 | . | G | A | 24452.86  | PASS          | AC=31;AF=0.443;AN=70;BaseQ        |
| 52300 | chrY | 59027776 | . | T | C | 32322.68  | PASS          | AC=32;AF=0.457;AN=70;BaseQ        |
| 52301 | chrY | 59027809 | . | G | A | 38794.74  | PASS          | AC=33;AF=0.471;AN=70;BaseQ        |
| 52302 | chrY | 59027810 | . | C | T | 35663.53  | PASS          | AC=34;AF=0.486;AN=70;BaseQ        |
| 52303 | chrY | 59027882 | . | T | G | 38451.60  | PASS          | AC=34;AF=0.486;AN=70;BaseQ        |
| 52304 | chrY | 59027886 | . | G | A | 13936.79  | PASS          | AC=33;AF=0.471;AN=70;BaseQ        |
| 52305 | chrY | 59027910 | . | G | A | 62624.77  | PASS          | AC=37;AF=0.529;AN=70;BaseQ        |
| 52306 | chrY | 59027918 | . | G | A | 10538.94  | PASS          | AC=26;AF=0.371;AN=70;BaseQ        |
| 52307 | chrY | 59027920 | . | T | C | 397.12    | my_snp_filter | AC=4;AF=0.057;AN=70;BaseQ         |
| 52308 | chrY | 59027996 | . | G | A | 3250.59   | PASS          | AC=9;AF=0.129;AN=70;BaseQRankSum  |
| 52309 | chrY | 59028011 | . | G | A | 37.43     | my_snp_filter | AC=1;AF=0.014;AN=70;BaseQ         |
| 52310 | chrY | 59028022 | . | G | A | 6245.97   | PASS          | AC=10;AF=0.143;AN=70;BaseQRankSum |
| 52311 | chrY | 59028027 | . | C | G | 230.42    | PASS          | AC=1;AF=0.014;AN=70;BaseQRankSum  |
| 52312 | chrY | 59028030 | . | C | T | 42.67     | PASS          | AC=1;AF=0.014;AN=70;BaseQRankSum  |
| 52313 | chrY | 59028036 | . | G | C | 3691.86   | PASS          | AC=9;AF=0.129;AN=70;BaseQRankSum  |
| 52314 | chrY | 59028076 | . | G | A | 923.52    | PASS          | AC=3;AF=0.043;AN=70;BaseQRankSum  |
| 52315 | chrY | 59028091 | . | T | C | 62681.01  | PASS          | AC=37;AF=0.529;AN=70;BaseQ        |
| 52316 | chrY | 59028098 | . | C | T | 37335.11  | PASS          | AC=37;AF=0.529;AN=70;BaseQ        |
| 52317 | chrY | 59028171 | . | A | C | 16693.59  | PASS          | AC=35;AF=0.500;AN=70;BaseQ        |
| 52318 | chrY | 59028174 | . | G | A | 31.43     | my_snp_filter | AC=1;AF=0.014;AN=70;BaseQ         |
| 52319 | chrY | 59028192 | . | G | T | 13107.12  | PASS          | AC=32;AF=0.457;AN=70;BaseQ        |
| 52320 | chrY | 59028201 | . | T | A | 42628.35  | PASS          | AC=41;AF=0.586;AN=70;BaseQ        |
| 52321 | chrY | 59028283 | . | T | C | 17768.04  | PASS          | AC=38;AF=0.576;AN=66;BaseQ        |
| 52322 | chrY | 59028357 | . | A | C | 24311.60  | PASS          | AC=43;AF=0.614;AN=70;BaseQ        |
| 52323 | chrY | 59028390 | . | A | G | 12686.46  | PASS          | AC=34;AF=0.486;AN=70;BaseQ        |
| 52324 | chrY | 59028440 | . | G | A | 13059.73  | PASS          | AC=35;AF=0.500;AN=70;BaseQ        |
| 52325 | chrY | 59028442 | . | G | A | 87.44     | PASS          | AC=1;AF=0.014;AN=70;BaseQRankSum  |
| 52326 | chrY | 59028446 | . | C | G | 47346.68  | PASS          | AC=42;AF=0.600;AN=70;BaseQ        |
| 52327 | chrY | 59028447 | . | C | T | 394.40    | my_snp_filter | AC=7;AF=0.100;AN=70;BaseQ         |
| 52328 | chrY | 59028468 | . | A | T | 3191.35   | PASS          | AC=19;AF=0.271;AN=70;BaseQRankSum |
| 52329 | chrY | 59028502 | . | A | G | 44770.74  | PASS          | AC=35;AF=0.500;AN=70;BaseQ        |
| 52330 | chrY | 59028503 | . | A | G | 74.44     | my_snp_filter | AC=1;AF=0.014;AN=70;BaseQ         |
| 52331 | chrY | 59028509 | . | T | G | 14689.60  | PASS          | AC=25;AF=0.357;AN=70;BaseQ        |
| 52332 | chrY | 59028517 | . | C | T | 19009.02  | PASS          | AC=34;AF=0.486;AN=70;BaseQ        |
| 52333 | chrY | 59028522 | . | A | C | 43996.72  | PASS          | AC=35;AF=0.500;AN=70;BaseQ        |
| 52334 | chrY | 59028548 | . | C | G | 8142.38   | PASS          | AC=25;AF=0.357;AN=70;BaseQRankSum |
| 52335 | chrY | 59028567 | . | T | C | 48259.03  | PASS          | AC=35;AF=0.500;AN=70;BaseQ        |
| 52336 | chrY | 59028583 | . | C | A | 3252.73   | PASS          | AC=19;AF=0.271;AN=70;BaseQRankSum |
| 52337 | chrY | 59028597 | . | A | G | 1518.52   | my_snp_filter | AC=12;AF=0.171;AN=70;BaseQ        |
| 52338 | chrY | 59028610 | . | T | C | 55784.71  | PASS          | AC=39;AF=0.557;AN=70;BaseQ        |
| 52339 | chrY | 59028615 | . | T | C | 150.29    | my_snp_filter | AC=5;AF=0.071;AN=70;BaseQ         |
| 52340 | chrY | 59028653 | . | C | T | 603.26    | my_snp_filter | AC=7;AF=0.100;AN=70;BaseQ         |
| 52341 | chrY | 59028663 | . | A | T | 112629.72 | PASS          | AC=35;AF=0.500;AN=70;BaseQ        |
| 52342 | chrY | 59028671 | . | C | T | 118593.72 | PASS          | AC=35;AF=0.500;AN=70;BaseQ        |
| 52343 | chrY | 59028684 | . | A | G | 117383.76 | PASS          | AC=35;AF=0.500;AN=70;BaseQ        |
| 52344 | chrY | 59028736 | . | G | A | 34896.72  | PASS          | AC=35;AF=0.500;AN=70;BaseQ        |
| 52345 | chrY | 59028740 | . | A | C | 69395.72  | PASS          | AC=35;AF=0.500;AN=70;BaseQ        |
| 52346 | chrY | 59028778 | . | T | A | 6265.89   | PASS          | AC=22;AF=0.314;AN=70;BaseQRankSum |
| 52347 | chrY | 59028807 | . | A | G | 62295.72  | PASS          | AC=35;AF=0.500;AN=70;BaseQ        |
| 52348 | chrY | 59028825 | . | G | A | 4021.24   | PASS          | AC=13;AF=0.186;AN=70;BaseQRankSum |
| 52349 | chrY | 59028833 | . | G | T | 2856.48   | my_snp_filter | AC=17;AF=0.243;AN=70;BaseQ        |
| 52350 | chrY | 59028906 | . | A | T | 62.30     | PASS          | AC=1;AF=0.015;AN=66;BaseQRankSum  |
| 52351 | chrY | 59028919 | . | C | A | 1401.37   | my_snp_filter | AC=8;AF=0.133;AN=60;BaseQ         |
| 52352 | chrY | 59028921 | . | T | C | 18863.14  | PASS          | AC=18;AF=0.321;AN=56;BaseQ        |
| 52353 | chrY | 59028941 | . | C | G | 18290.18  | PASS          | AC=14;AF=0.318;AN=44;BaseQ        |
| 52354 | chrY | 59028959 | . | C | T | 20454.33  | PASS          | AC=15;AF=0.375;AN=40;BaseQ        |
| 52355 | chrY | 59028960 | . | G | A | 841.49    | PASS          | AC=5;AF=0.119;AN=42;BaseQRankSum  |
| 52356 | chrY | 59028981 | . | C | T | 4940.77   | PASS          | AC=12;AF=0.316;AN=38;BaseQRankSum |
| 52357 | chrY | 59029022 | . | A | G | 200.55    | my_snp_filter | AC=3;AF=0.107;AN=28;BaseQ         |
| 52358 | chrY | 59029028 | . | T | C | 12713.91  | my_snp_filter | AC=13;AF=0.591;AN=70;BaseQ        |
| 52359 | chrY | 59029057 | . | C | G | 15951.61  | PASS          | AC=15;AF=0.577;AN=26;BaseQ        |
| 52360 | chrY | 59029062 | . | C | T | 4870.69   | PASS          | AC=12;AF=0.429;AN=28;BaseQRankSum |
| 52361 | chrY | 59029089 | . | C | T | 669.02    | PASS          | AC=5;AF=0.132;AN=38;BaseQRankSum  |
| 52362 | chrY | 59029090 | . | G | A | 121.36    | my_snp_filter | AC=1;AF=0.028;AN=36;BaseQ         |
| 52363 | chrY | 59029106 | . | T | C | 25145.42  | PASS          | AC=19;AF=0.679;AN=28;BaseQ        |
| 52364 | chrY | 59029123 | . | A | C | 17202.25  | PASS          | AC=11;AF=0.324;AN=34;BaseQ        |

|       |      |          |   |   |     |           |               |                                    |
|-------|------|----------|---|---|-----|-----------|---------------|------------------------------------|
| 52365 | chrY | 59029137 | . | G | C   | 34766.42  | PASS          | AC=18;AF=0.600;AN=30;BaseQ         |
| 52366 | chrY | 59029208 | . | T | G   | 78.85     | my_snp_filter | AC=1;AF=0.021;AN=48;BaseQ          |
| 52367 | chrY | 59029216 | . | T | C   | 4116.01   | PASS          | AC=8;AF=0.174;AN=46;BaseQRankSum=  |
| 52368 | chrY | 59029225 | . | G | A   | 2487.56   | PASS          | AC=11;AF=0.229;AN=48;BaseQRankSum= |
| 52369 | chrY | 59029265 | . | C | T   | 4266.09   | PASS          | AC=11;AF=0.172;AN=64;BaseQRankSum= |
| 52370 | chrY | 59029294 | . | T | C   | 34910.90  | PASS          | AC=53;AF=0.803;AN=66;BaseQ         |
| 52371 | chrY | 59029311 | . | G | T   | 297.41    | PASS          | AC=4;AF=0.057;AN=70;BaseQRankSum=  |
| 52372 | chrY | 59029354 | . | G | A   | 4666.23   | PASS          | AC=20;AF=0.286;AN=70;BaseQRankSum= |
| 52373 | chrY | 59029363 | . | T | C   | 2418.26   | my_snp_filter | AC=19;AF=0.271;AN=70;BaseQ         |
| 52374 | chrY | 59029364 | . | G | A   | 58332.09  | PASS          | AC=49;AF=0.700;AN=70;BaseQ         |
| 52375 | chrY | 59029406 | . | G | A   | 2321.45   | my_snp_filter | AC=17;AF=0.243;AN=70;BaseQ         |
| 52376 | chrY | 59029429 | . | G | A   | 229.74    | my_snp_filter | AC=6;AF=0.086;AN=70;BaseQ          |
| 52377 | chrY | 59029507 | . | A | G   | 44781.85  | PASS          | AC=42;AF=0.600;AN=70;BaseQ         |
| 52378 | chrY | 59029513 | . | C | G   | 3507.78   | PASS          | AC=26;AF=0.371;AN=70;BaseQRankSum= |
| 52379 | chrY | 59029543 | . | T | C   | 34073.49  | PASS          | AC=40;AF=0.571;AN=70;BaseQ         |
| 52380 | chrY | 59029604 | . | C | T   | 669.89    | my_snp_filter | AC=6;AF=0.086;AN=70;BaseQ          |
| 52381 | chrY | 59029638 | . | G | A   | 946.97    | my_snp_filter | AC=8;AF=0.114;AN=70;BaseQ          |
| 52382 | chrY | 59029642 | . | C | T   | 5720.90   | PASS          | AC=25;AF=0.357;AN=70;BaseQRankSum= |
| 52383 | chrY | 59029652 | . | G | A   | 20984.84  | PASS          | AC=34;AF=0.486;AN=70;BaseQ         |
| 52384 | chrY | 59029675 | . | G | A   | 1884.56   | PASS          | AC=7;AF=0.100;AN=70;BaseQRankSum=  |
| 52385 | chrY | 59029676 | . | C | A   | 975.79    | my_snp_filter | AC=4;AF=0.057;AN=70;BaseQ          |
| 52386 | chrY | 59029686 | . | A | C   | 678.44    | PASS          | AC=7;AF=0.100;AN=70;BaseQRankSum=  |
| 52387 | chrY | 59029701 | . | A | T   | 2433.92   | PASS          | AC=11;AF=0.157;AN=70;BaseQRankSum= |
| 52388 | chrY | 59029728 | . | C | T   | 52192.28  | PASS          | AC=42;AF=0.600;AN=70;BaseQ         |
| 52389 | chrY | 59029783 | . | A | G   | 34002.72  | PASS          | AC=35;AF=0.500;AN=70;BaseQ         |
| 52390 | chrY | 59029819 | . | C | T   | 131962.11 | PASS          | AC=41;AF=0.586;AN=70;BaseQ         |
| 52391 | chrY | 59029825 | . | T | C   | 79000.72  | PASS          | AC=35;AF=0.500;AN=70;BaseQ         |
| 52392 | chrY | 59029871 | . | G | A   | 13662.26  | PASS          | AC=28;AF=0.400;AN=70;BaseQ         |
| 52393 | chrY | 59029881 | . | G | A   | 75.42     | my_snp_filter | AC=1;AF=0.014;AN=70;BaseQ          |
| 52394 | chrY | 59029908 | . | C | A   | 197.49    | my_snp_filter | AC=1;AF=0.014;AN=70;BaseQ          |
| 52395 | chrY | 59029911 | . | A | T   | 45376.73  | PASS          | AC=35;AF=0.500;AN=70;BaseQ         |
| 52396 | chrY | 59029945 | . | G | T   | 45114.72  | PASS          | AC=33;AF=0.471;AN=70;BaseQ         |
| 52397 | chrY | 59029976 | . | G | A   | 5676.28   | PASS          | AC=11;AF=0.157;AN=70;BaseQRankSum= |
| 52398 | chrY | 59029984 | . | C | T   | 116.42    | my_snp_filter | AC=2;AF=0.029;AN=70;BaseQ          |
| 52399 | chrY | 59029992 | . | C | G   | 4910.19   | PASS          | AC=11;AF=0.157;AN=70;BaseQRankSum= |
| 52400 | chrY | 59030008 | . | A | T   | 43517.53  | PASS          | AC=34;AF=0.486;AN=70;BaseQ         |
| 52401 | chrY | 59030023 | . | C | T   | 258.99    | my_snp_filter | AC=5;AF=0.071;AN=70;BaseQ          |
| 52402 | chrY | 59030027 | . | A | C   | 36262.84  | PASS          | AC=34;AF=0.486;AN=70;BaseQ         |
| 52403 | chrY | 59030044 | . | T | C   | 35643.72  | PASS          | AC=35;AF=0.500;AN=70;BaseQ         |
| 52404 | chrY | 59030061 | . | A | G   | 57038.72  | PASS          | AC=35;AF=0.500;AN=70;BaseQ         |
| 52405 | chrY | 59030077 | . | T | C   | 54073.72  | PASS          | AC=35;AF=0.500;AN=70;BaseQ         |
| 52406 | chrY | 59030091 | . | C | G   | 432.51    | my_snp_filter | AC=4;AF=0.057;AN=70;BaseQ          |
| 52407 | chrY | 59030113 | . | G | C   | 10999.30  | PASS          | AC=28;AF=0.400;AN=70;BaseQ         |
| 52408 | chrY | 59030119 | . | C | T   | 1203.19   | PASS          | AC=10;AF=0.143;AN=70;BaseQRankSum= |
| 52409 | chrY | 59030171 | . | A | G   | 2779.43   | PASS          | AC=10;AF=0.172;AN=58;BaseQRankSum= |
| 52410 | chrY | 59030174 | . | T | G,* | 10884.23  | PASS          | AC=10,13;AF=0.185,0.241;A          |
| 52411 | chrY | 59030175 | . | G | A   | 67.57     | PASS          | AC=1;AF=0.020;AN=50;BaseQRankSum=  |
| 52412 | chrY | 59030178 | . | G | A   | 2532      | PASS          | AC=8;AF=0.114;AN=70;BaseQRankSum=  |
| 52413 | chrY | 59030195 | . | G | A   | 3467.18   | PASS          | AC=9;AF=0.145;AN=62;BaseQRankSum=  |
| 52414 | chrY | 59030225 | . | T | C   | 713.81    | PASS          | AC=1;AF=0.016;AN=62;BaseQRankSum=  |
| 52415 | chrY | 59030251 | . | A | T   | 213.93    | my_snp_filter | AC=2;AF=0.040;AN=50;BaseQ          |
| 52416 | chrY | 59030257 | . | G | C   | 1335.94   | my_snp_filter | AC=6;AF=0.125;AN=48;BaseQ          |
| 52417 | chrY | 59030260 | . | C | G   | 19307.97  | PASS          | AC=13;AF=0.310;AN=42;BaseQ         |
| 52418 | chrY | 59030268 | . | C | T   | 115.79    | my_snp_filter | AC=1;AF=0.025;AN=40;BaseQ          |
| 52419 | chrY | 59030274 | . | C | A   | 166.72    | my_snp_filter | AC=1;AF=0.025;AN=40;BaseQ          |
| 52420 | chrY | 59030280 | . | G | A   | 666.42    | PASS          | AC=2;AF=0.050;AN=40;BaseQRankSum=  |
| 52421 | chrY | 59030288 | . | C | T   | 15445.37  | PASS          | AC=11;AF=0.344;AN=32;BaseQ         |
| 52422 | chrY | 59030292 | . | G | A   | 364.41    | my_snp_filter | AC=2;AF=0.053;AN=38;BaseQ          |
| 52423 | chrY | 59030298 | . | C | T   | 157.42    | my_snp_filter | AC=2;AF=0.067;AN=30;BaseQ          |
| 52424 | chrY | 59030329 | . | C | A   | 8958.75   | PASS          | AC=9;AF=0.265;AN=34;BaseQRankSum=  |
| 52425 | chrY | 59030337 | . | T | C   | 24511.36  | PASS          | AC=22;AF=0.688;AN=32;BaseQ         |
| 52426 | chrY | 59030365 | . | A | G   | 48.22     | PASS          | AC=2;AF=0.032;AN=62;DP=1189;FS=0.  |
| 52427 | chrY | 59030383 | . | C | T   | 595.02    | my_snp_filter | AC=5;AF=0.083;AN=60;BaseQ          |
| 52428 | chrY | 59030384 | . | G | A   | 6209.22   | PASS          | AC=16;AF=0.267;AN=60;BaseQRankSum= |
| 52429 | chrY | 59030401 | . | G | A   | 4316.26   | PASS          | AC=9;AF=0.141;AN=64;BaseQRankSum=  |
| 52430 | chrY | 59030405 | . | G | T   | 1117.50   | PASS          | AC=6;AF=0.088;AN=68;BaseQRankSum=  |
| 52431 | chrY | 59030426 | . | G | A   | 9180.54   | PASS          | AC=22;AF=0.314;AN=70;BaseQRankSum= |
| 52432 | chrY | 59030445 | . | G | T   | 9140.93   | PASS          | AC=23;AF=0.329;AN=70;BaseQRankSum= |
| 52433 | chrY | 59030452 | . | A | G   | 16904.03  | PASS          | AC=22;AF=0.333;AN=66;BaseQ         |
| 52434 | chrY | 59030511 | . | A | G   | 36.84     | my_snp_filter | AC=2;AF=0.029;AN=70;BaseQ          |
| 52435 | chrY | 59030518 | . | C | T   | 801.07    | PASS          | AC=12;AF=0.171;AN=70;BaseQRankSum= |
| 52436 | chrY | 59030539 | . | G | A   | 826.31    | PASS          | AC=6;AF=0.086;AN=70;BaseQRankSum=  |
| 52437 | chrY | 59030542 | . | C | T   | 9325.11   | PASS          | AC=28;AF=0.400;AN=70;BaseQRankSum= |
| 52438 | chrY | 59030573 | . | T | A   | 30.32     | my_snp_filter | AC=1;AF=0.019;AN=54;BaseQ          |
| 52439 | chrY | 59030589 | . | G | T,A | 7081.49   | PASS          | AC=4,12;AF=0.069,0.207;AN=58;BaseQ |
| 52440 | chrY | 59030625 | . | C | T   | 4613.83   | PASS          | AC=25;AF=0.357;AN=70;BaseQRankSum= |

|       |      |          |   |   |     |          |               |                                             |
|-------|------|----------|---|---|-----|----------|---------------|---------------------------------------------|
| 52441 | chrY | 59030637 | . | T | A   | 1356.13  | PASS          | AC=10;AF=0.143;AN=70;BaseQRankSum=          |
| 52442 | chrY | 59030666 | . | A | C   | 10839.30 | PASS          | AC=33;AF=0.471;AN=70;BaseQRankSum=          |
| 52443 | chrY | 59030673 | . | G | A   | 46058.13 | PASS          | AC=47;AF=0.671;AN=70;BaseQRankSum=          |
| 52444 | chrY | 59030688 | . | T | C   | 55.42    | my_snp_filter | AC=1;AF=0.014;AN=70;BaseQRankSum=           |
| 52445 | chrY | 59030697 | . | T | A   | 135.37   | my_snp_filter | AC=5;AF=0.071;AN=70;BaseQRankSum=           |
| 52446 | chrY | 59030801 | . | A | G   | 153.92   | my_snp_filter | AC=4;AF=0.057;AN=70;BaseQRankSum=           |
| 52447 | chrY | 59030876 | . | C | T   | 4014.17  | PASS          | AC=18;AF=0.257;AN=70;BaseQRankSum=          |
| 52448 | chrY | 59030877 | . | T | G   | 4017.75  | PASS          | AC=18;AF=0.257;AN=70;BaseQRankSum=          |
| 52449 | chrY | 59030899 | . | T | G   | 46564.72 | PASS          | AC=38;AF=0.543;AN=70;BaseQRankSum=          |
| 52450 | chrY | 59030907 | . | G | A   | 1340.68  | PASS          | AC=8;AF=0.114;AN=70;BaseQRankSum=           |
| 52451 | chrY | 59030909 | . | C | T   | 156.43   | my_snp_filter | AC=2;AF=0.029;AN=70;BaseQRankSum=           |
| 52452 | chrY | 59030910 | . | G | T   | 5934.19  | PASS          | AC=16;AF=0.229;AN=70;BaseQRankSum=          |
| 52453 | chrY | 59030915 | . | T | A   | 26019.55 | PASS          | AC=22;AF=0.314;AN=70;BaseQRankSum=          |
| 52454 | chrY | 59030916 | . | G | A   | 429.95   | PASS          | AC=7;AF=0.100;AN=70;BaseQRankSum=           |
| 52455 | chrY | 59030922 | . | A | G   | 43013.87 | PASS          | AC=36;AF=0.514;AN=70;BaseQRankSum=          |
| 52456 | chrY | 59030954 | . | G | A   | 394.62   | my_snp_filter | AC=5;AF=0.071;AN=70;BaseQRankSum=           |
| 52457 | chrY | 59030975 | . | G | T   | 1134.65  | my_snp_filter | AC=7;AF=0.100;AN=70;BaseQRankSum=           |
| 52458 | chrY | 59030978 | . | G | A,C | 30969.53 | PASS          | AC=14,26;AF=0.200,0.371;AN=70;BaseQRankSum= |
| 52459 | chrY | 59030983 | . | C | T   | 7364.38  | PASS          | AC=22;AF=0.314;AN=70;BaseQRankSum=          |
| 52460 | chrY | 59030994 | . | A | C   | 230.51   | PASS          | AC=3;AF=0.043;AN=70;BaseQRankSum=           |
| 52461 | chrY | 59031025 | . | G | C   | 43.42    | my_snp_filter | AC=1;AF=0.014;AN=70;BaseQRankSum=           |
| 52462 | chrY | 59031039 | . | G | A   | 84.99    | my_snp_filter | AC=5;AF=0.071;AN=70;BaseQRankSum=           |
| 52463 | chrY | 59031043 | . | C | A   | 1118.76  | PASS          | AC=6;AF=0.086;AN=70;BaseQRankSum=           |
| 52464 | chrY | 59031064 | . | C | T   | 971.35   | PASS          | AC=7;AF=0.100;AN=70;BaseQRankSum=           |
| 52465 | chrY | 59031081 | . | A | T   | 3064.83  | my_snp_filter | AC=9;AF=0.129;AN=70;BaseQRankSum=           |
| 52466 | chrY | 59031098 | . | T | C   | 9435.14  | PASS          | AC=21;AF=0.300;AN=70;BaseQRankSum=          |
| 52467 | chrY | 59031148 | . | G | A   | 3170.91  | PASS          | AC=21;AF=0.300;AN=70;BaseQRankSum=          |
| 52468 | chrY | 59031165 | . | G | C   | 10565.04 | PASS          | AC=31;AF=0.443;AN=70;BaseQRankSum=          |
| 52469 | chrY | 59031238 | . | T | C   | 62.43    | my_snp_filter | AC=1;AF=0.014;AN=70;BaseQRankSum=           |
| 52470 | chrY | 59031246 | . | C | A   | 2189.78  | my_snp_filter | AC=22;AF=0.314;AN=70;BaseQRankSum=          |
| 52471 | chrY | 59031248 | . | T | A   | 15238.60 | PASS          | AC=32;AF=0.457;AN=70;BaseQRankSum=          |
| 52472 | chrY | 59031266 | . | G | T   | 113.42   | my_snp_filter | AC=1;AF=0.014;AN=70;BaseQRankSum=           |
| 52473 | chrY | 59031282 | . | C | G   | 11218.31 | PASS          | AC=28;AF=0.400;AN=70;BaseQRankSum=          |
| 52474 | chrY | 59031297 | . | A | G   | 256.09   | my_snp_filter | AC=2;AF=0.029;AN=70;BaseQRankSum=           |
| 52475 | chrY | 59031319 | . | T | C   | 4780.92  | PASS          | AC=18;AF=0.257;AN=70;BaseQRankSum=          |
| 52476 | chrY | 59031328 | . | A | G   | 16938.04 | PASS          | AC=30;AF=0.429;AN=70;BaseQRankSum=          |
| 52477 | chrY | 59031393 | . | A | G   | 3308.69  | PASS          | AC=14;AF=0.200;AN=70;BaseQRankSum=          |
| 52478 | chrY | 59031395 | . | T | A   | 23188.72 | PASS          | AC=35;AF=0.500;AN=70;BaseQRankSum=          |
| 52479 | chrY | 59031439 | . | T | A   | 3062.43  | PASS          | AC=10;AF=0.143;AN=70;BaseQRankSum=          |
| 52480 | chrY | 59031468 | . | A | G   | 1616.06  | my_snp_filter | AC=13;AF=0.186;AN=70;BaseQRankSum=          |
| 52481 | chrY | 59031474 | . | G | A   | 1162.84  | my_snp_filter | AC=11;AF=0.157;AN=70;BaseQRankSum=          |
| 52482 | chrY | 59031480 | . | A | G   | 1783.66  | my_snp_filter | AC=10;AF=0.143;AN=70;BaseQRankSum=          |
| 52483 | chrY | 59031497 | . | G | C   | 82.43    | PASS          | AC=1;AF=0.014;AN=70;BaseQRankSum=           |
| 52484 | chrY | 59031513 | . | C | G   | 60983.72 | PASS          | AC=35;AF=0.500;AN=70;BaseQRankSum=          |
| 52485 | chrY | 59031514 | . | C | G   | 60978.72 | PASS          | AC=35;AF=0.500;AN=70;BaseQRankSum=          |
| 52486 | chrY | 59031547 | . | A | C   | 49268.73 | PASS          | AC=40;AF=0.571;AN=70;BaseQRankSum=          |
| 52487 | chrY | 59031566 | . | T | A   | 1710.46  | PASS          | AC=12;AF=0.171;AN=70;BaseQRankSum=          |
| 52488 | chrY | 59031582 | . | G | A   | 696.96   | my_snp_filter | AC=6;AF=0.086;AN=70;BaseQRankSum=           |
| 52489 | chrY | 59031595 | . | C | T   | 19518.87 | PASS          | AC=30;AF=0.429;AN=70;BaseQRankSum=          |
| 52490 | chrY | 59031625 | . | A | G   | 39.80    | my_snp_filter | AC=1;AF=0.014;AN=70;BaseQRankSum=           |
| 52491 | chrY | 59031629 | . | T | G   | 14635.78 | PASS          | AC=30;AF=0.429;AN=70;BaseQRankSum=          |
| 52492 | chrY | 59031636 | . | G | T   | 1125.31  | PASS          | AC=7;AF=0.100;AN=70;BaseQRankSum=           |
| 52493 | chrY | 59031660 | . | T | C   | 49097.80 | PASS          | AC=35;AF=0.500;AN=70;BaseQRankSum=          |
| 52494 | chrY | 59031664 | . | T | C   | 48580.87 | PASS          | AC=35;AF=0.500;AN=70;BaseQRankSum=          |
| 52495 | chrY | 59031665 | . | G | A   | 11159.03 | PASS          | AC=23;AF=0.329;AN=70;BaseQRankSum=          |
| 52496 | chrY | 59031692 | . | C | T   | 15063.64 | PASS          | AC=23;AF=0.329;AN=70;BaseQRankSum=          |
| 52497 | chrY | 59031708 | . | C | T   | 1999.32  | PASS          | AC=9;AF=0.129;AN=70;BaseQRankSum=           |
| 52498 | chrY | 59031714 | . | G | T   | 15236.48 | PASS          | AC=21;AF=0.300;AN=70;BaseQRankSum=          |
| 52499 | chrY | 59031720 | . | C | T   | 2468.85  | PASS          | AC=10;AF=0.143;AN=70;BaseQRankSum=          |
| 52500 | chrY | 59031721 | . | A | G   | 19468.45 | PASS          | AC=24;AF=0.343;AN=70;BaseQRankSum=          |
| 52501 | chrY | 59031761 | . | T | C   | 10758.03 | PASS          | AC=26;AF=0.382;AN=68;BaseQRankSum=          |
| 52502 | chrY | 59031800 | . | G | T   | 4873.03  | PASS          | AC=16;AF=0.242;AN=66;BaseQRankSum=          |
| 52503 | chrY | 59031814 | . | A | T   | 1819.28  | PASS          | AC=6;AF=0.100;AN=60;BaseQRankSum=           |
| 52504 | chrY | 59031829 | . | C | T   | 43.03    | PASS          | AC=1;AF=0.017;AN=60;BaseQRankSum=           |
| 52505 | chrY | 59031833 | . | T | C   | 2274.57  | PASS          | AC=7;AF=0.125;AN=56;BaseQRankSum=           |
| 52506 | chrY | 59031861 | . | T | G   | 34421.99 | PASS          | AC=20;AF=0.625;AN=32;BaseQRankSum=          |
| 52507 | chrY | 59031879 | . | C | T   | 10383.57 | PASS          | AC=10;AF=0.313;AN=32;BaseQRankSum=          |
| 52508 | chrY | 59031883 | . | C | T   | 1019.46  | PASS          | AC=3;AF=0.075;AN=40;BaseQRankSum=           |
| 52509 | chrY | 59031944 | . | T | C   | 34293.53 | PASS          | AC=10;AF=0.556;AN=18;BaseQRankSum=          |
| 52510 | chrY | 59031945 | . | G | A   | 1289.59  | PASS          | AC=5;AF=0.278;AN=18;BaseQRankSum=           |
| 52511 | chrY | 59031959 | . | T | C   | 35278.53 | PASS          | AC=10;AF=0.556;AN=18;BaseQRankSum=          |
| 52512 | chrY | 59031972 | . | T | A   | 14279.09 | PASS          | AC=9;AF=0.500;AN=18;BaseQRankSum=           |
| 52513 | chrY | 59031979 | . | T | C   | 33900.01 | PASS          | AC=10;AF=0.556;AN=18;BaseQRankSum=          |
| 52514 | chrY | 59031986 | . | G | C   | 549.02   | PASS          | AC=1;AF=0.042;AN=24;BaseQRankSum=           |
| 52515 | chrY | 59032008 | . | G | A   | 3392.69  | PASS          | AC=6;AF=0.273;AN=22;BaseQRankSum=           |
| 52516 | chrY | 59032040 | . | C | T   | 2697.17  | PASS          | AC=7;AF=0.318;AN=22;BaseQRankSum=           |

|       |      |          |   |   |     |           |               |                                    |
|-------|------|----------|---|---|-----|-----------|---------------|------------------------------------|
| 52517 | chrY | 59032042 | . | C | A   | 2523.15   | PASS          | AC=6;AF=0.250;AN=24;BaseQRankSum=  |
| 52518 | chrY | 59032064 | . | A | G   | 26736.50  |               | PASS AC=12;AF=0.600;AN=20;Base     |
| 52519 | chrY | 59032089 | . | A | G   | 13532.37  |               | PASS AC=9;AF=0.300;AN=30;BaseQ     |
| 52520 | chrY | 59032098 | . | C | A   | 3587.12   | PASS          | AC=9;AF=0.250;AN=36;BaseQRankSum=  |
| 52521 | chrY | 59032171 | . | A | G   | 1379.42   | PASS          | AC=4;AF=0.074;AN=54;BaseQRankSum=  |
| 52522 | chrY | 59032175 | . | T | C   | 13911.20  |               | PASS AC=10;AF=0.192;AN=52;Base     |
| 52523 | chrY | 59032176 | . | G | A   | 1498.42   | PASS          | AC=4;AF=0.080;AN=50;BaseQRankSum=  |
| 52524 | chrY | 59032197 | . | T | C   | 12601.12  |               | PASS AC=12;AF=0.250;AN=48;Base     |
| 52525 | chrY | 59032234 | . | C | T   | 1203.24   | PASS          | AC=5;AF=0.104;AN=48;BaseQRankSum=  |
| 52526 | chrY | 59032331 | . | T | C   | 22578.32  |               | PASS AC=25;AF=0.357;AN=70;Base     |
| 52527 | chrY | 59032340 | . | T | C   | 23838.42  |               | PASS AC=26;AF=0.394;AN=66;Base     |
| 52528 | chrY | 59032364 | . | C | T   | 6663.49   | PASS          | AC=27;AF=0.386;AN=70;BaseQRankSum= |
| 52529 | chrY | 59032399 | . | A | G   | 950.33    | PASS          | AC=12;AF=0.171;AN=70;BaseQRankSum= |
| 52530 | chrY | 59032417 | . | A | T   | 419.09    | my_snp_filter | AC=5;AF=0.071;AN=70;BaseQ          |
| 52531 | chrY | 59032457 | . | T | C   | 71310.58  |               | PASS AC=40;AF=0.571;AN=70;Base     |
| 52532 | chrY | 59032459 | . | G | A   | 2069.74   | my_snp_filter | AC=15;AF=0.214;AN=70;Base          |
| 52533 | chrY | 59032481 | . | A | C   | 17339.92  |               | PASS AC=30;AF=0.429;AN=70;Base     |
| 52534 | chrY | 59032483 | . | T | C   | 14132.83  |               | PASS AC=30;AF=0.429;AN=70;Base     |
| 52535 | chrY | 59032498 | . | T | A   | 14799.69  |               | PASS AC=28;AF=0.400;AN=70;Base     |
| 52536 | chrY | 59032555 | . | C | T   | 97081.95  |               | PASS AC=44;AF=0.629;AN=70;Base     |
| 52537 | chrY | 59032561 | . | C | A   | 32687.72  |               | PASS AC=35;AF=0.500;AN=70;Base     |
| 52538 | chrY | 59032602 | . | A | C   | 24376.72  |               | PASS AC=35;AF=0.500;AN=70;Base     |
| 52539 | chrY | 59032665 | . | A | G   | 52302.80  |               | PASS AC=38;AF=0.543;AN=70;Base     |
| 52540 | chrY | 59032685 | . | A | C   | 10335.18  |               | PASS AC=19;AF=0.271;AN=70;Base     |
| 52541 | chrY | 59032750 | . | G | C   | 16931.80  |               | PASS AC=32;AF=0.457;AN=70;Base     |
| 52542 | chrY | 59032761 | . | G | A   | 40973.72  |               | PASS AC=35;AF=0.500;AN=70;Base     |
| 52543 | chrY | 59032785 | . | A | G   | 32881.72  |               | PASS AC=35;AF=0.500;AN=70;Base     |
| 52544 | chrY | 59032788 | . | C | G   | 1522.37   | PASS          | AC=4;AF=0.057;AN=70;BaseQRankSum=  |
| 52545 | chrY | 59032809 | . | A | C   | 108230.86 |               | PASS AC=42;AF=0.600;AN=70;Base     |
| 52546 | chrY | 59032816 | . | C | A   | 5097.11   | PASS          | AC=21;AF=0.300;AN=70;BaseQRankSum= |
| 52547 | chrY | 59032844 | . | C | A   | 27014.72  |               | PASS AC=35;AF=0.500;AN=70;Base     |
| 52548 | chrY | 59032848 | . | A | C   | 1052.61   | my_snp_filter | AC=10;AF=0.143;AN=70;Base          |
| 52549 | chrY | 59032861 | . | T | G   | 2647.06   | my_snp_filter | AC=15;AF=0.214;AN=70;Base          |
| 52550 | chrY | 59032871 | . | C | A   | 287.16    | my_snp_filter | AC=3;AF=0.043;AN=70;BaseQ          |
| 52551 | chrY | 59032893 | . | A | G   | 302.77    | my_snp_filter | AC=3;AF=0.043;AN=70;BaseQ          |
| 52552 | chrY | 59032938 | . | T | A   | 3155.08   | PASS          | AC=19;AF=0.271;AN=70;BaseQRankSum= |
| 52553 | chrY | 59032945 | . | T | C   | 3622.06   | PASS          | AC=24;AF=0.364;AN=66;BaseQRankSum= |
| 52554 | chrY | 59032946 | . | T | C   | 2283.67   | PASS          | AC=17;AF=0.243;AN=70;BaseQRankSum= |
| 52555 | chrY | 59032971 | . | G | A   | 156.33    | my_snp_filter | AC=2;AF=0.029;AN=70;BaseQ          |
| 52556 | chrY | 59033001 | . | C | T   | 252.92    | my_snp_filter | AC=2;AF=0.029;AN=70;BaseQ          |
| 52557 | chrY | 59033016 | . | G | T   | 502.45    | my_snp_filter | AC=4;AF=0.061;AN=66;BaseQ          |
| 52558 | chrY | 59033024 | . | C | G   | 455.99    | my_snp_filter | AC=3;AF=0.047;AN=64;BaseQ          |
| 52559 | chrY | 59033029 | . | C | T   | 124.55    | my_snp_filter | AC=1;AF=0.017;AN=60;BaseQ          |
| 52560 | chrY | 59033032 | . | G | A   | 40.34     | my_snp_filter | AC=2;AF=0.032;AN=62;BaseQ          |
| 52561 | chrY | 59033046 | . | C | T   | 9930.19   | PASS          | AC=14;AF=0.280;AN=50;BaseQRankSum= |
| 52562 | chrY | 59033052 | . | C | T   | 6219.16   | PASS          | AC=11;AF=0.183;AN=60;BaseQRankSum= |
| 52563 | chrY | 59033091 | . | C | T   | 12938.11  |               | PASS AC=13;AF=0.310;AN=42;Base     |
| 52564 | chrY | 59033092 | . | G | A   | 957.14    | my_snp_filter | AC=5;AF=0.100;AN=50;BaseQ          |
| 52565 | chrY | 59033093 | . | T | C   | 11676.88  |               | PASS AC=14;AF=0.412;AN=34;Base     |
| 52566 | chrY | 59033099 | . | T | A,C | 25414.11  |               | PASS AC=11,12;AF=0.423,0.462;A     |
| 52567 | chrY | 59033101 | . | C | T   | 1701.41   | PASS          | AC=7;AF=0.219;AN=32;BaseQRankSum=  |
| 52568 | chrY | 59033108 | . | T | C,* | 3335.65   | PASS          | AC=6,2;AF=0.273,0.091;AN=22;BaseQ  |
| 52569 | chrY | 59033110 | . | A | T,C | 18142.33  |               | PASS AC=14,3;AF=0.583,0.125;AN=    |
| 52570 | chrY | 59033130 | . | A | T   | 12805.67  |               | my_snp_filter AC=9;AF=0.321;AN=    |
| 52571 | chrY | 59033139 | . | T | C   | 10146.08  |               | PASS AC=13;AF=0.464;AN=28;Base     |
| 52572 | chrY | 59033159 | . | A | G   | 10343.09  |               | my_snp_filter AC=11;AF=0.324;AN=   |
| 52573 | chrY | 59033172 | . | C | T   | 344.41    | my_snp_filter | AC=3;AF=0.075;AN=40;BaseQ          |
| 52574 | chrY | 59033175 | . | T | C   | 707.91    | my_snp_filter | AC=6;AF=0.158;AN=38;BaseQ          |
| 52575 | chrY | 59033183 | . | T | C   | 342.07    | my_snp_filter | AC=3;AF=0.071;AN=42;BaseQ          |
| 52576 | chrY | 59033190 | . | C | T   | 1015.02   | PASS          | AC=5;AF=0.139;AN=36;BaseQRankSum=  |
| 52577 | chrY | 59033249 | . | G | T   | 447.91    | PASS          | AC=2;AF=0.063;AN=32;BaseQRankSum=  |
| 52578 | chrY | 59033300 | . | C | T   | 10418.09  |               | PASS AC=9;AF=0.500;AN=18;BaseQ     |
| 52579 | chrY | 59033357 | . | A | C   | 4089.09   | PASS          | AC=9;AF=0.500;AN=18;BaseQRankSum=  |
| 52580 | chrY | 59033361 | . | G | A   | 184.74    | my_snp_filter | AC=5;AF=0.278;AN=18;BaseQ          |
| 52581 | chrY | 59033375 | . | T | C   | 3530.09   | PASS          | AC=9;AF=0.500;AN=18;BaseQRankSum=  |
| 52582 | chrY | 59033432 | . | A | C   | 301.48    | PASS          | AC=4;AF=0.222;AN=18;BaseQRankSum=  |
| 52583 | chrY | 59033463 | . | G | A   | 703.72    | PASS          | AC=5;AF=0.278;AN=18;BaseQRankSum=  |
| 52584 | chrY | 59033610 | . | C | A   | 542.58    | PASS          | AC=5;AF=0.250;AN=20;BaseQRankSum=  |
| 52585 | chrY | 59033638 | . | C | A   | 163.49    | PASS          | AC=4;AF=0.200;AN=20;BaseQRankSum=  |
| 52586 | chrY | 59033730 | . | G | A   | 3441.86   | PASS          | AC=18;AF=1.00;AN=18;DP=133;FS=0.0  |
| 52587 | chrY | 59063221 | . | C | T   | 55.98     | PASS          | AC=4;AF=1.00;AN=4;DP=8;FS=0.000;M  |
| 52588 |      |          |   |   |     |           |               |                                    |
